# Supplementary material
Source: MDPI journal article supplement (https://www.mdpi.com/2073-4352/13/7/1043)
Supplement: s1 [file s1]

Table S1. Crystal data and structure refinement for Ce(OAc)2Br·x\_3H2O.

|                                   |                                                                              |
|-----------------------------------|------------------------------------------------------------------------------|
| Identification code               | HR2021_51_0m_a                                                               |
| Empirical formula                 | C4 H12 Br Ce O7                                                              |
| Formula weight                    | 392.17                                                                       |
| Temperature                       | 100(2) K                                                                     |
| Wavelength                        | 0.71073 Å                                                                    |
| Crystal system, space group       | Monoclinic, P2(1)/n                                                          |
| Unit cell dimensions              | a = 7.9597(3) Å<br>b = 8.0442(3) Å    β = 96.732(2) deg.<br>c = 18.0642(8) Å |
| Volume                            | 1148.67(8) Å <sup>3</sup>                                                    |
| Z, Calculated density             | 4, 2.268 Mg/m <sup>3</sup>                                                   |
| Absorption coefficient            | 7.446 mm <sup>-1</sup>                                                       |
| F(000)                            | 740                                                                          |
| Crystal size                      | 0.465 x 0.120 x 0.074 mm                                                     |
| Theta range for data collection   | 2.691 to 27.995 deg.                                                         |
| Limiting indices                  | -10 ≤ h ≤ 10, -10 ≤ k ≤ 10, -23 ≤ l ≤ 23                                     |
| Reflections collected / unique    | 113305 / 2770 [R(int) = 0.0572]                                              |
| Completeness to theta = 25.242    | 100.0 %                                                                      |
| Absorption correction             | Semi-empirical from equivalents                                              |
| Max. and min. transmission        | 0.748 and 0.505                                                              |
| Refinement method                 | Full-matrix least-squares on F <sup>2</sup>                                  |
| Data / restraints / parameters    | 2770 / 0 / 125                                                               |
| Goodness-of-fit on F <sup>2</sup> | 1.071                                                                        |
| Final R indices [I > 2σ(I)]       | R1 = 0.0142, wR2 = 0.0310                                                    |
| R indices (all data)              | R1 = 0.0173, wR2 = 0.0320                                                    |
| Extinction coefficient            | n/a                                                                          |
| Largest diff. peak and hole       | 0.603 and -0.312 e.Å <sup>-3</sup>                                           |

Table S2. Atomic coordinates ( $\times 10^4$ ) and equivalent isotropic displacement parameters ( $\text{\AA}^2 \times 10^3$ ) for  $\text{Ce}(\text{OAc})_2\text{Br}\cdot 3\text{H}_2\text{O}$ .  $U(\text{eq})$  is defined as one third of the trace of the orthogonalized  $U_{ij}$  tensor.

|        | x         | y        | z        | U (eq) |
|--------|-----------|----------|----------|--------|
| Ce (1) | 2604 (1)  | 4591 (1) | 5369 (1) | 11 (1) |
| Br (1) | 3952 (1)  | 9590 (1) | 6884 (1) | 19 (1) |
| O (11) | -168 (2)  | 3346 (2) | 5332 (1) | 17 (1) |
| O (12) | -2815 (2) | 2563 (2) | 5218 (1) | 19 (1) |
| C (11) | -1289 (2) | 2286 (2) | 5456 (1) | 15 (1) |
| C (12) | -813 (3)  | 744 (3)  | 5888 (1) | 26 (1) |
| O (21) | 5477 (2)  | 5544 (2) | 5744 (1) | 15 (1) |
| O (22) | 8132 (2)  | 6245 (2) | 5986 (1) | 18 (1) |
| C (21) | 6756 (2)  | 5875 (2) | 6218 (1) | 14 (1) |
| C (22) | 6608 (3)  | 5784 (3) | 7031 (1) | 23 (1) |
| O (1W) | 3925 (2)  | 1740 (2) | 5347 (1) | 17 (1) |
| O (2W) | 1544 (2)  | 6544 (2) | 6277 (1) | 18 (1) |
| O (3W) | 2850 (2)  | 3408 (2) | 6651 (1) | 22 (1) |

Table S3. Bond lengths [Å] and angles [deg] for Ce(OAc)<sub>2</sub>Br·x<sub>3</sub>H<sub>2</sub>O.

---

|                       |            |
|-----------------------|------------|
| Ce(1)-O(11)           | 2.417(1)   |
| Ce(1)-O(21)           | 2.431(1)   |
| Ce(1)-O(2W)           | 2.489(1)   |
| Ce(1)-O(3W)           | 2.490(2)   |
| Ce(1)-O(1W)           | 2.526(1)   |
| Ce(1)-O(12)#1         | 2.536(1)   |
| Ce(1)-O(22)#2         | 2.539(1)   |
| Ce(1)-O(21)#2         | 2.666(1)   |
| Ce(1)-O(11)#1         | 2.746(1)   |
|                       |            |
| Ce(1)-Ce(1)#2         | 4.2361(3)  |
| Ce(1)-Ce(1)#1         | 4.2549(3)  |
|                       |            |
| O(11)-C(11)           | 1.273(2)   |
| O(12)-C(11)           | 1.260(2)   |
| C(11)-C(12)           | 1.491(3)   |
|                       |            |
| O(21)-C(21)           | 1.280(2)   |
| O(22)-C(21)           | 1.254(2)   |
| C(21)-C(22)           | 1.488(3)   |
|                       |            |
| O(11)-Ce(1)-O(21)     | 164.58(5)  |
| O(11)-Ce(1)-O(2W)     | 84.29(5)   |
| O(21)-Ce(1)-O(2W)     | 89.88(5)   |
| O(11)-Ce(1)-O(3W)     | 80.74(5)   |
| O(21)-Ce(1)-O(3W)     | 83.84(5)   |
| O(2W)-Ce(1)-O(3W)     | 67.90(5)   |
| O(11)-Ce(1)-O(1W)     | 90.21(5)   |
| O(21)-Ce(1)-O(1W)     | 84.91(5)   |
| O(2W)-Ce(1)-O(1W)     | 139.24(5)  |
| O(3W)-Ce(1)-O(1W)     | 71.36(5)   |
| O(11)-Ce(1)-O(12)#1   | 117.86(5)  |
| O(21)-Ce(1)-O(12)#1   | 74.09(5)   |
| O(2W)-Ce(1)-O(12)#1   | 75.53(5)   |
| O(3W)-Ce(1)-O(12)#1   | 137.03(5)  |
| O(1W)-Ce(1)-O(12)#1   | 139.92(4)  |
| O(11)-Ce(1)-O(22)#2   | 75.93(5)   |
| O(21)-Ce(1)-O(22)#2   | 117.09(4)  |
| O(2W)-Ce(1)-O(22)#2   | 138.13(5)  |
| O(3W)-Ce(1)-O(22)#2   | 141.17(5)  |
| O(1W)-Ce(1)-O(22)#2   | 78.07(5)   |
| O(12)#1-Ce(1)-O(22)#2 | 81.70(5)   |
| O(11)-Ce(1)-O(21)#2   | 124.35(4)  |
| O(21)-Ce(1)-O(21)#2   | 67.65(5)   |
| O(2W)-Ce(1)-O(21)#2   | 142.33(5)  |
| O(3W)-Ce(1)-O(21)#2   | 134.13(5)  |
| O(1W)-Ce(1)-O(21)#2   | 71.00(4)   |
| O(12)#1-Ce(1)-O(21)#2 | 69.53(5)   |
| O(22)#2-Ce(1)-O(21)#2 | 49.48(4)   |
| O(11)-Ce(1)-O(11)#1   | 69.18(5)   |
| O(21)-Ce(1)-O(11)#1   | 121.88(4)  |
| O(2W)-Ce(1)-O(11)#1   | 69.35(4)   |
| O(3W)-Ce(1)-O(11)#1   | 129.35(4)  |
| O(1W)-Ce(1)-O(11)#1   | 144.49(4)  |
| O(12)#1-Ce(1)-O(11)#1 | 48.68(4)   |
| O(22)#2-Ce(1)-O(11)#1 | 69.19(4)   |
| O(21)#2-Ce(1)-O(11)#1 | 96.48(4)   |
|                       |            |
| Ce(1)#2-Ce(1)-Ce(1)#1 | 139.248(6) |

|                         |           |
|-------------------------|-----------|
| C (11)-O (11)-Ce (1)    | 158.3 (1) |
| C (11)-O (11)-Ce (1) #1 | 90.8 (1)  |
| Ce (1)-O (11)-Ce (1) #1 | 110.8 (1) |
| C (11)-O (12)-Ce (1) #1 | 101.2 (1) |
| O (12)-C (11)-O (11)    | 119.3 (2) |
| O (12)-C (11)-C (12)    | 120.1 (2) |
| O (11)-C (11)-C (12)    | 120.6 (2) |
| C (21)-O (21)-Ce (1)    | 154.2 (1) |
| C (21)-O (21)-Ce (1) #2 | 91.9 (1)  |
| Ce (1)-O (21)-Ce (1) #2 | 112.4 (1) |
| C (21)-O (22)-Ce (1) #2 | 98.5 (1)  |
| O (22)-C (21)-O (21)    | 118.8 (2) |
| O (22)-C (21)-C (22)    | 121.1 (2) |
| O (21)-C (21)-C (22)    | 120.1 (2) |

---

Symmetry transformations used to generate equivalent atoms:  
 #1 -x,-y+1,-z+1      #2 -x+1,-y+1,-z+1

Table S4. Anisotropic displacement parameters ( $\text{\AA}^2 \times 10^3$ ) for  
 $\text{Ce}(\text{OAc})_2\text{Br} \cdot x_3\text{H}_2\text{O}$ .

The anisotropic displacement factor exponent takes the form:  
 $-2 \pi^2 [ h^2 a^{*2} U_{11} + \dots + 2 h k a^* b^* U_{12} ]$

|       | U <sub>11</sub> | U <sub>22</sub> | U <sub>33</sub> | U <sub>23</sub> | U <sub>13</sub> | U <sub>12</sub> |
|-------|-----------------|-----------------|-----------------|-----------------|-----------------|-----------------|
| Ce(1) | 7(1)            | 13(1)           | 14(1)           | 1(1)            | 2(1)            | -1(1)           |
| Br(1) | 21(1)           | 16(1)           | 19(1)           | 2(1)            | 1(1)            | -3(1)           |
| O(11) | 11(1)           | 17(1)           | 22(1)           | 3(1)            | 2(1)            | -4(1)           |
| O(12) | 9(1)            | 19(1)           | 29(1)           | 6(1)            | 3(1)            | -2(1)           |
| C(11) | 12(1)           | 15(1)           | 17(1)           | 1(1)            | 3(1)            | -1(1)           |
| C(12) | 23(1)           | 21(1)           | 33(1)           | 11(1)           | -1(1)           | -1(1)           |
| O(21) | 11(1)           | 20(1)           | 14(1)           | 0(1)            | 0(1)            | -2(1)           |
| O(22) | 10(1)           | 26(1)           | 19(1)           | -2(1)           | 1(1)            | -3(1)           |
| C(21) | 12(1)           | 14(1)           | 16(1)           | -2(1)           | 0(1)            | 2(1)            |
| C(22) | 17(1)           | 37(1)           | 16(1)           | 0(1)            | 0(1)            | 3(1)            |
| O(1W) | 13(1)           | 16(1)           | 21(1)           | 3(1)            | 5(1)            | -1(1)           |
| O(2W) | 13(1)           | 17(1)           | 23(1)           | -4(1)           | 1(1)            | 0(1)            |
| O(3W) | 29(1)           | 19(1)           | 18(1)           | 3(1)            | 7(1)            | 6(1)            |

Table S5. Hydrogen coordinates ( $\times 10^4$ ) and isotropic displacement parameters ( $\text{\AA}^2 \times 10^3$ ) for  $\text{Ce}(\text{OAc})_2\text{Br}\cdot 3\text{H}_2\text{O}$ .

|        | x     | y    | z    | U (eq) |
|--------|-------|------|------|--------|
| H(12A) | -780  | 976  | 6422 | 82 (7) |
| H(12B) | 304   | 369  | 5781 | 82 (7) |
| H(12C) | -1651 | -126 | 5746 | 82 (7) |
| H(22A) | 7726  | 5580 | 7305 | 37 (6) |
| H(22B) | 5842  | 4875 | 7126 | 37 (6) |
| H(22C) | 6157  | 6836 | 7197 | 37 (6) |
| H(22D) | 5395  | 5859 | 7076 | 37 (6) |
| H(22E) | 7182  | 6777 | 7249 | 37 (6) |
| H(22F) | 7078  | 4792 | 7294 | 37 (6) |
| H(11W) | 3920  | 958  | 5748 | 51 (6) |
| H(12W) | 5091  | 1829 | 5263 | 51 (6) |
| H(21W) | 362   | 6689 | 6320 | 59 (7) |
| H(22W) | 2067  | 7563 | 6459 | 59 (7) |
| H(31W) | 2304  | 3869 | 7051 | 61 (7) |
| H(32W) | 3168  | 2302 | 6810 | 61 (7) |

Table S6. Hydrogen bonds for Ce(OAc)<sub>2</sub>Br·x<sub>3</sub>H<sub>2</sub>O [Å and deg.].

| D-H...A                | d(D-H) | d(H...A) | d(D...A) | <(DHA) |
|------------------------|--------|----------|----------|--------|
| O(1W)-H(11W)...Br(1)#3 | 0.96   | 2.33     | 3.269(1) | 167.3  |
| O(1W)-H(12W)...O(12)#4 | 0.96   | 1.78     | 2.714(2) | 163.7  |
| O(2W)-H(21W)...O(22)#5 | 0.96   | 1.84     | 2.716(2) | 150.0  |
| O(2W)-H(22W)...Br(1)   | 0.96   | 2.29     | 3.222(1) | 164.8  |
| O(3W)-H(31W)...Br(1)#6 | 0.96   | 2.34     | 3.295(2) | 171.1  |
| O(3W)-H(32W)...Br(1)#3 | 0.96   | 2.27     | 3.209(2) | 165.9  |

Symmetry transformations used to generate equivalent atoms:

#1 -x,-y+1,-z+1      #2 -x+1,-y+1,-z+1      #3 x,y-1,z  
#4 x+1,y,z      #5 x-1,y,z      #6 -x+1/2,y-1/2,-z+3/2
