# Supplementary material
Source: MDPI journal article supplement (https://www.mdpi.com/2073-4352/13/7/1043)
Supplement: s1 [file s1]

Table S1. Crystal data and structure refinement for Yb(OAc)2Br·x\_3H2O.

|                                   |                                                                              |
|-----------------------------------|------------------------------------------------------------------------------|
| Identification code               | Ha2019_99j_0m_a                                                              |
| Empirical formula                 | C4 H12 Br O7 Yb                                                              |
| Formula weight                    | 425.09                                                                       |
| Temperature                       | 100(2) K                                                                     |
| Wavelength                        | 0.71073 Å                                                                    |
| Crystal system, space group       | Monoclinic, P2(1)/n                                                          |
| Unit cell dimensions              | a = 7.7854(3) Å<br>b = 8.0625(3) Å    β = 96.142(2) deg.<br>c = 17.3573(7) Å |
| Volume                            | 1083.26(7) Å <sup>3</sup>                                                    |
| Z, Calculated density             | 4, 2.606 Mg/m <sup>3</sup>                                                   |
| Absorption coefficient            | 12.326 mm <sup>-1</sup>                                                      |
| F(000)                            | 788                                                                          |
| Crystal size                      | 0.487 x 0.172 x 0.070 mm                                                     |
| Theta range for data collection   | 2.766 to 27.999 deg.                                                         |
| Limiting indices                  | -10 ≤ h ≤ 10, -10 ≤ k ≤ 10, -22 ≤ l ≤ 22                                     |
| Reflections collected / unique    | 120213 / 2616 [R(int) = 0.0460]                                              |
| Completeness to theta = 25.242    | 99.9 %                                                                       |
| Absorption correction             | Semi-empirical from equivalents                                              |
| Max. and min. transmission        | 0.742 and 0.349                                                              |
| Refinement method                 | Full-matrix least-squares on F <sup>2</sup>                                  |
| Data / restraints / parameters    | 2616 / 0 / 125                                                               |
| Goodness-of-fit on F <sup>2</sup> | 1.073                                                                        |
| Final R indices [I > 2σ(I)]       | R1 = 0.0121, wR2 = 0.0261                                                    |
| R indices (all data)              | R1 = 0.0141, wR2 = 0.0266                                                    |
| Extinction coefficient            | n/a                                                                          |
| Largest diff. peak and hole       | 0.460 and -0.581 e.Å <sup>-3</sup>                                           |

Table S2. Atomic coordinates ( $\times 10^4$ ) and equivalent isotropic displacement parameters ( $\text{\AA}^2 \times 10^3$ ) for  $\text{Yb}(\text{OAc})_2\text{Br}\cdot 3\text{H}_2\text{O}$ .  $U(\text{eq})$  is defined as one third of the trace of the orthogonalized  $U_{ij}$  tensor.

|       | x        | y       | z       | U (eq) |
|-------|----------|---------|---------|--------|
| Yb(1) | 2751(1)  | 4444(1) | 5404(1) | 9(1)   |
| Br(1) | 3809(1)  | 9470(1) | 6790(1) | 16(1)  |
| O(11) | 235(2)   | 3208(2) | 5419(1) | 17(1)  |
| O(12) | -2594(2) | 2990(2) | 5220(1) | 13(1)  |
| C(11) | -1131(3) | 2413(3) | 5479(1) | 11(1)  |
| C(12) | -1066(3) | 741(3)  | 5858(2) | 20(1)  |
| O(21) | 5375(2)  | 5557(2) | 5745(1) | 12(1)  |
| O(22) | 8088(2)  | 6241(2) | 5902(1) | 14(1)  |
| C(21) | 6724(3)  | 5899(3) | 6199(1) | 11(1)  |
| C(22) | 6699(3)  | 5864(3) | 7058(1) | 19(1)  |
| O(1W) | 4144(2)  | 1913(2) | 5325(1) | 14(1)  |
| O(2W) | 1554(2)  | 6228(2) | 6246(1) | 13(1)  |
| O(3W) | 3160(2)  | 3401(2) | 6671(1) | 16(1)  |

Table S3. Bond lengths [Å] and angles [deg] for Yb(OAc)2Br\_x\_3H2O.

---

|                       |            |
|-----------------------|------------|
| Yb(1)-O(11)           | 2.201(2)   |
| Yb(1)-O(21)           | 2.251(1)   |
| Yb(1)-O(2W)           | 2.316(2)   |
| Yb(1)-O(1W)           | 2.322(2)   |
| Yb(1)-O(12)#1         | 2.333(2)   |
| Yb(1)-O(3W)           | 2.344(2)   |
| Yb(1)-O(22)#2         | 2.358(2)   |
| Yb(1)-O(21)#2         | 2.594(2)   |
| Yb(1)-O(11)#1         | 3.213(2)   |
|                       |            |
| Yb(1)-Yb(1)#2         | 4.0107(2)  |
| Yb(1)-Yb(1)#1         | 4.4540(2)  |
|                       |            |
| O(11)-C(11)           | 1.255(3)   |
| O(12)-C(11)           | 1.267(2)   |
| C(11)-C(12)           | 1.498(3)   |
|                       |            |
| O(21)-C(21)           | 1.275(2)   |
| O(22)-C(21)           | 1.259(3)   |
| C(21)-C(22)           | 1.493(3)   |
|                       |            |
| O(11)-Yb(1)-O(21)     | 164.01(6)  |
| O(11)-Yb(1)-O(2W)     | 81.67(6)   |
| O(21)-Yb(1)-O(2W)     | 90.11(5)   |
| O(11)-Yb(1)-O(1W)     | 91.40(6)   |
| O(21)-Yb(1)-O(1W)     | 87.11(5)   |
| O(2W)-Yb(1)-O(1W)     | 143.63(5)  |
| O(11)-Yb(1)-O(12)#1   | 113.88(6)  |
| O(21)-Yb(1)-O(12)#1   | 76.66(5)   |
| O(2W)-Yb(1)-O(12)#1   | 74.81(5)   |
| O(1W)-Yb(1)-O(12)#1   | 138.88(5)  |
| O(11)-Yb(1)-O(3W)     | 81.84(6)   |
| O(21)-Yb(1)-O(3W)     | 82.45(5)   |
| O(2W)-Yb(1)-O(3W)     | 69.77(6)   |
| O(1W)-Yb(1)-O(3W)     | 73.91(6)   |
| O(12)#1-Yb(1)-O(3W)   | 138.54(6)  |
| O(11)-Yb(1)-O(22)#2   | 75.51(6)   |
| O(21)-Yb(1)-O(22)#2   | 119.74(5)  |
| O(2W)-Yb(1)-O(22)#2   | 131.58(5)  |
| O(1W)-Yb(1)-O(22)#2   | 79.64(5)   |
| O(12)#1-Yb(1)-O(22)#2 | 76.42(5)   |
| O(3W)-Yb(1)-O(22)#2   | 144.51(6)  |
| O(11)-Yb(1)-O(21)#2   | 125.69(5)  |
| O(21)-Yb(1)-O(21)#2   | 68.46(6)   |
| O(2W)-Yb(1)-O(21)#2   | 141.52(5)  |
| O(1W)-Yb(1)-O(21)#2   | 69.46(5)   |
| O(12)#1-Yb(1)-O(21)#2 | 69.44(5)   |
| O(3W)-Yb(1)-O(21)#2   | 133.63(5)  |
| O(22)#2-Yb(1)-O(21)#2 | 51.76(5)   |
| O(11)-Yb(1)-O(11)#1   | 70.70(6)   |
| O(21)-Yb(1)-O(11)#1   | 118.35(5)  |
| O(2W)-Yb(1)-O(11)#1   | 66.04(5)   |
| O(1W)-Yb(1)-O(11)#1   | 144.28(5)  |
| O(12)#1-Yb(1)-O(11)#1 | 43.22(4)   |
| O(3W)-Yb(1)-O(11)#1   | 130.39(5)  |
| O(22)#2-Yb(1)-O(11)#1 | 66.25(5)   |
| O(21)#2-Yb(1)-O(11)#1 | 95.63(4)   |
|                       |            |
| Yb(1)#2-Yb(1)-Yb(1)#1 | 133.712(5) |

|                         |           |
|-------------------------|-----------|
| C (11)-O (11)-Yb (1)    | 174.4 (2) |
| C (11)-O (12)-Yb (1) #1 | 119.4 (1) |
| O (11)-C (11)-O (12)    | 121.4 (2) |
| O (11)-C (11)-C (12)    | 120.4 (2) |
| O (12)-C (11)-C (12)    | 118.2 (2) |
|                         |           |
| C (21)-O (21)-Yb (1)    | 156.0 (1) |
| C (21)-O (21)-Yb (1) #2 | 88.9 (1)  |
| Yb (1)-O (21)-Yb (1) #2 | 111.5 (1) |
| C (21)-O (22)-Yb (1) #2 | 100.5 (1) |
|                         |           |
| O (22)-C (21)-O (21)    | 118.0 (2) |
| O (22)-C (21)-C (22)    | 120.9 (2) |
| O (21)-C (21)-C (22)    | 121.0 (2) |

---

Symmetry transformations used to generate equivalent atoms:  
 #1 -x,-y+1,-z+1      #2 -x+1,-y+1,-z+1

Table S4. Anisotropic displacement parameters ( $\text{\AA}^2 \times 10^3$ ) for  
 $\text{Yb}(\text{OAc})_2\text{Br} \cdot 3\text{H}_2\text{O}$ .

The anisotropic displacement factor exponent takes the form:  
 $-2 \pi^2 [ h^2 a^{*2} U_{11} + \dots + 2 h k a^* b^* U_{12} ]$

|       | U <sub>11</sub> | U <sub>22</sub> | U <sub>33</sub> | U <sub>23</sub> | U <sub>13</sub> | U <sub>12</sub> |
|-------|-----------------|-----------------|-----------------|-----------------|-----------------|-----------------|
| Yb(1) | 6(1)            | 11(1)           | 11(1)           | 0(1)            | 0(1)            | -1(1)           |
| Br(1) | 20(1)           | 12(1)           | 16(1)           | 1(1)            | 2(1)            | -2(1)           |
| O(11) | 10(1)           | 20(1)           | 21(1)           | -4(1)           | 5(1)            | -6(1)           |
| O(12) | 8(1)            | 15(1)           | 17(1)           | 2(1)            | 2(1)            | 1(1)            |
| C(11) | 11(1)           | 13(1)           | 10(1)           | -2(1)           | 2(1)            | -1(1)           |
| C(12) | 17(1)           | 18(1)           | 26(1)           | 7(1)            | 1(1)            | 2(1)            |
| O(21) | 7(1)            | 14(1)           | 13(1)           | 0(1)            | -1(1)           | -1(1)           |
| O(22) | 8(1)            | 18(1)           | 15(1)           | 0(1)            | -1(1)           | -1(1)           |
| C(21) | 11(1)           | 10(1)           | 12(1)           | -1(1)           | 0(1)            | 2(1)            |
| C(22) | 16(1)           | 29(1)           | 12(1)           | 0(1)            | 0(1)            | 1(1)            |
| O(1W) | 11(1)           | 14(1)           | 16(1)           | 2(1)            | 3(1)            | 1(1)            |
| O(2W) | 10(1)           | 13(1)           | 16(1)           | -2(1)           | 1(1)            | 0(1)            |
| O(3W) | 21(1)           | 14(1)           | 16(1)           | 1(1)            | 5(1)            | 3(1)            |

Table S5. Hydrogen coordinates ( $\times 10^4$ ) and isotropic displacement parameters ( $\text{\AA}^2 \times 10^3$ ) for  $\text{Yb}(\text{OAc})_2\text{Br}\cdot 3\text{H}_2\text{O}$ .

|        | x     | y    | z    | U (eq) |
|--------|-------|------|------|--------|
| H(12A) | 105   | 532  | 6105 | 57 (7) |
| H(12B) | -1380 | -113 | 5466 | 57 (7) |
| H(12C) | -1882 | 712  | 6250 | 57 (7) |
| H(22A) | 7865  | 5635 | 7307 | 88 (9) |
| H(22B) | 5909  | 4993 | 7196 | 88 (9) |
| H(22C) | 6307  | 6940 | 7234 | 88 (9) |
| H(11W) | 4117  | 1011 | 5684 | 51 (8) |
| H(12W) | 5342  | 2044 | 5252 | 51 (8) |
| H(21W) | 331   | 6379 | 6246 | 50 (7) |
| H(22W) | 2045  | 7306 | 6354 | 50 (7) |
| H(31W) | 2554  | 3871 | 7072 | 49 (7) |
| H(32W) | 3360  | 2265 | 6820 | 49 (7) |

Table S6. Hydrogen bonds for Yb(OAc)2Br\_x\_3H2O [A and deg.].

| D-H...A                | d(D-H) | d(H...A) | d(D...A) | <(DHA) |
|------------------------|--------|----------|----------|--------|
| O(1W)-H(11W)...Br(1)#3 | 0.96   | 2.32     | 3.249(2) | 162.7  |
| O(1W)-H(12W)...O(12)#4 | 0.96   | 1.78     | 2.708(2) | 160.2  |
| O(2W)-H(21W)...O(22)#5 | 0.96   | 1.79     | 2.701(2) | 157.8  |
| O(2W)-H(22W)...Br(1)   | 0.96   | 2.30     | 3.233(2) | 164.4  |
| O(3W)-H(31W)...Br(1)#6 | 0.96   | 2.39     | 3.333(2) | 167.3  |
| O(3W)-H(32W)...Br(1)#3 | 0.96   | 2.28     | 3.213(2) | 163.0  |

Symmetry transformations used to generate equivalent atoms:

#1 -x,-y+1,-z+1      #2 -x+1,-y+1,-z+1      #3 x,y-1,z  
#4 x+1,y,z      #5 x-1,y,z      #6 -x+1/2,y-1/2,-z+3/2
