# Supplementary material
Source: MDPI journal article supplement (https://www.mdpi.com/2073-4352/13/7/1043)
Supplement: s1 [file s1]

Table S1. Crystal data and structure refinement for Er(OAc)2Cl\_x\_3H2O.

|                                   |                                                                              |
|-----------------------------------|------------------------------------------------------------------------------|
| Identification code               | Ha2019_54_0m_a                                                               |
| Empirical formula                 | C4 H12 Cl Er O7                                                              |
| Formula weight                    | 374.85                                                                       |
| Temperature                       | 100(2) K                                                                     |
| Wavelength                        | 0.71073 Å                                                                    |
| Crystal system, space group       | Monoclinic, P2(1)/n                                                          |
| Unit cell dimensions              | a = 7.7927(3) Å<br>b = 7.8301(3) Å    β = 97.695(2) deg.<br>c = 17.1904(7) Å |
| Volume                            | 1039.47(7) Å <sup>3</sup>                                                    |
| Z, Calculated density             | 4, 2.395 Mg/m <sup>3</sup>                                                   |
| Absorption coefficient            | 8.335 mm <sup>-1</sup>                                                       |
| F(000)                            | 708                                                                          |
| Crystal size                      | 0.486 x 0.220 x 0.162 mm                                                     |
| Theta range for data collection   | 2.746 to 27.996 deg.                                                         |
| Limiting indices                  | -10 ≤ h ≤ 10, -10 ≤ k ≤ 10, -22 ≤ l ≤ 22                                     |
| Reflections collected / unique    | 93617 / 2514 [R(int) = 0.0305]                                               |
| Completeness to theta = 25.242    | 99.9 %                                                                       |
| Absorption correction             | Semi-empirical from equivalents                                              |
| Max. and min. transmission        | 0.738 and 0.256                                                              |
| Refinement method                 | Full-matrix least-squares on F <sup>2</sup>                                  |
| Data / restraints / parameters    | 2514 / 0 / 126                                                               |
| Goodness-of-fit on F <sup>2</sup> | 1.415                                                                        |
| Final R indices [I > 2σ(I)]       | R1 = 0.0135, wR2 = 0.0292                                                    |
| R indices (all data)              | R1 = 0.0135, wR2 = 0.0292                                                    |
| Extinction coefficient            | 0.00115(9)                                                                   |
| Largest diff. peak and hole       | 0.524 and -0.603 e.Å <sup>-3</sup>                                           |

Table S2. Atomic coordinates ( $\times 10^4$ ) and equivalent isotropic displacement parameters ( $\text{\AA}^2 \times 10^3$ ) for  $\text{Er}(\text{OAc})_2\text{Cl}\cdot 3\text{H}_2\text{O}$ .  $U(\text{eq})$  is defined as one third of the trace of the orthogonalized  $U_{ij}$  tensor.

|       | x        | y       | z       | U (eq) |
|-------|----------|---------|---------|--------|
| Er(1) | 2742(1)  | 4493(1) | 5409(1) | 8(1)   |
| Cl(1) | 3771(1)  | 9583(1) | 6847(1) | 15(1)  |
| O(11) | 175(2)   | 3237(2) | 5424(1) | 18(1)  |
| O(12) | -2635(2) | 2865(2) | 5257(1) | 12(1)  |
| C(11) | -1129(3) | 2347(3) | 5509(1) | 10(1)  |
| C(12) | -925(3)  | 644(3)  | 5905(2) | 20(1)  |
| O(21) | 5435(2)  | 5627(2) | 5742(1) | 10(1)  |
| O(22) | 8164(2)  | 6312(2) | 5922(1) | 12(1)  |
| C(21) | 6795(3)  | 6002(3) | 6212(1) | 10(1)  |
| C(22) | 6760(3)  | 6053(4) | 7075(1) | 16(1)  |
| O(1W) | 4100(2)  | 1823(2) | 5378(1) | 12(1)  |
| O(2W) | 1648(2)  | 6420(2) | 6251(1) | 13(1)  |
| O(3W) | 3179(2)  | 3459(2) | 6717(1) | 16(1)  |

Table S3. Bond lengths [Å] and angles [deg] for Er(OAc)2Cl\_x\_3H2O.

---

|                       |            |
|-----------------------|------------|
| Er(1)-O(11)           | 2.232(2)   |
| Er(1)-O(21)           | 2.280(2)   |
| Er(1)-O(2W)           | 2.331(2)   |
| Er(1)-O(1W)           | 2.346(2)   |
| Er(1)-O(12)#1         | 2.362(2)   |
| Er(1)-O(3W)           | 2.372(2)   |
| Er(1)-O(22)#2         | 2.386(2)   |
| Er(1)-O(21)#2         | 2.588(2)   |
| Er(1)-O(11)#1         | 3.083(2)   |
| Er(1)-Er(1)#2         | 4.0390(2)  |
| Er(1)-Er(1)#1         | 4.3894(2)  |
| O(11)-C(11)           | 1.257(3)   |
| O(12)-C(11)           | 1.262(3)   |
| C(11)-C(12)           | 1.495(3)   |
| O(21)-C(21)           | 1.278(3)   |
| O(22)-C(21)           | 1.260(3)   |
| C(21)-C(22)           | 1.487(3)   |
| O(11)-Er(1)-O(21)     | 164.74(6)  |
| O(11)-Er(1)-O(2W)     | 82.83(6)   |
| O(21)-Er(1)-O(2W)     | 89.57(6)   |
| O(11)-Er(1)-O(1W)     | 90.89(6)   |
| O(21)-Er(1)-O(1W)     | 87.15(6)   |
| O(2W)-Er(1)-O(1W)     | 142.62(6)  |
| O(11)-Er(1)-O(12)#1   | 114.71(6)  |
| O(21)-Er(1)-O(12)#1   | 75.64(6)   |
| O(2W)-Er(1)-O(12)#1   | 75.01(6)   |
| O(1W)-Er(1)-O(12)#1   | 139.16(6)  |
| O(11)-Er(1)-O(3W)     | 81.61(6)   |
| O(21)-Er(1)-O(3W)     | 83.35(6)   |
| O(2W)-Er(1)-O(3W)     | 69.52(6)   |
| O(1W)-Er(1)-O(3W)     | 73.12(6)   |
| O(12)#1-Er(1)-O(3W)   | 138.61(6)  |
| O(11)-Er(1)-O(22)#2   | 75.17(6)   |
| O(21)-Er(1)-O(22)#2   | 119.22(6)  |
| O(2W)-Er(1)-O(22)#2   | 132.87(6)  |
| O(1W)-Er(1)-O(22)#2   | 79.60(6)   |
| O(12)#1-Er(1)-O(22)#2 | 77.29(6)   |
| O(3W)-Er(1)-O(22)#2   | 143.64(6)  |
| O(11)-Er(1)-O(21)#2   | 125.25(6)  |
| O(21)-Er(1)-O(21)#2   | 68.02(6)   |
| O(2W)-Er(1)-O(21)#2   | 141.50(6)  |
| O(1W)-Er(1)-O(21)#2   | 69.81(5)   |
| O(12)#1-Er(1)-O(21)#2 | 69.42(5)   |
| O(3W)-Er(1)-O(21)#2   | 133.56(5)  |
| O(22)#2-Er(1)-O(21)#2 | 51.65(5)   |
| O(11)-Er(1)-O(11)#1   | 69.69(7)   |
| O(21)-Er(1)-O(11)#1   | 119.25(5)  |
| O(2W)-Er(1)-O(11)#1   | 66.82(5)   |
| O(1W)-Er(1)-O(11)#1   | 144.07(5)  |
| O(12)#1-Er(1)-O(11)#1 | 45.05(5)   |
| O(3W)-Er(1)-O(11)#1   | 129.82(5)  |
| O(22)#2-Er(1)-O(11)#1 | 66.56(5)   |
| O(21)#2-Er(1)-O(11)#1 | 96.43(5)   |
| Er(1)#2-Er(1)-Er(1)#1 | 135.170(5) |

|                     |          |
|---------------------|----------|
| C(11)-O(11)-Er(1)   | 170.2(2) |
| C(11)-O(12)-Er(1)#1 | 114.8(1) |
| O(11)-C(11)-O(12)   | 120.7(2) |
| O(11)-C(11)-C(12)   | 120.6(2) |
| O(12)-C(11)-C(12)   | 118.7(2) |
| C(21)-O(21)-Er(1)   | 155.0(2) |
| C(21)-O(21)-Er(1)#2 | 89.9(1)  |
| Er(1)-O(21)-Er(1)#2 | 112.0(1) |
| C(21)-O(22)-Er(1)#2 | 99.9(1)  |
| O(22)-C(21)-O(21)   | 117.9(2) |
| O(22)-C(21)-C(22)   | 121.3(2) |
| O(21)-C(21)-C(22)   | 120.8(2) |

---

Symmetry transformations used to generate equivalent atoms:  
 #1 -x,-y+1,-z+1      #2 -x+1,-y+1,-z+1

Table S4. Anisotropic displacement parameters ( $\text{\AA}^2 \times 10^3$ ) for  
 $\text{Er}(\text{OAc})_2\text{Cl}_x \cdot 3\text{H}_2\text{O}$ .

The anisotropic displacement factor exponent takes the form:  
 $-2 \pi^2 [ h^2 a^{*2} U_{11} + \dots + 2 h k a^* b^* U_{12} ]$

|       | U11   | U22   | U33   | U23   | U13  | U12   |
|-------|-------|-------|-------|-------|------|-------|
| Er(1) | 6(1)  | 8(1)  | 10(1) | 0(1)  | 2(1) | -2(1) |
| Cl(1) | 18(1) | 11(1) | 15(1) | 1(1)  | 2(1) | -2(1) |
| O(11) | 13(1) | 20(1) | 21(1) | -6(1) | 7(1) | -8(1) |
| O(12) | 7(1)  | 13(1) | 17(1) | 3(1)  | 2(1) | 1(1)  |
| C(11) | 10(1) | 10(1) | 10(1) | -2(1) | 3(1) | -1(1) |
| C(12) | 23(1) | 15(1) | 21(1) | 6(1)  | 1(1) | 3(1)  |
| O(21) | 7(1)  | 12(1) | 12(1) | 0(1)  | 0(1) | -2(1) |
| O(22) | 7(1)  | 14(1) | 15(1) | -1(1) | 2(1) | -2(1) |
| C(21) | 10(1) | 7(1)  | 12(1) | 0(1)  | 1(1) | 1(1)  |
| C(22) | 14(1) | 26(1) | 10(1) | -1(1) | 1(1) | 1(1)  |
| O(1W) | 12(1) | 11(1) | 15(1) | 2(1)  | 5(1) | 1(1)  |
| O(2W) | 10(1) | 12(1) | 16(1) | -3(1) | 2(1) | -1(1) |
| O(3W) | 23(1) | 12(1) | 13(1) | 2(1)  | 6(1) | 4(1)  |

Table S5. Hydrogen coordinates ( $\times 10^4$ ) and isotropic displacement parameters ( $\text{\AA}^2 \times 10^3$ ) for  $\text{Er}(\text{OAc})_2\text{Cl}\cdot 3\text{H}_2\text{O}$ .

|        | x     | y    | z    | U (eq) |
|--------|-------|------|------|--------|
| H(12A) | -1746 | 550  | 6287 | 60 (8) |
| H(12B) | 260   | 530  | 6175 | 60 (8) |
| H(12C) | -1154 | -262 | 5511 | 60 (8) |
| H(22A) | 7942  | 5939 | 7348 | 45 (6) |
| H(22B) | 6047  | 5111 | 7228 | 45 (6) |
| H(22C) | 6268  | 7143 | 7218 | 45 (6) |
| H(11W) | 4066  | 930  | 5758 | 47 (8) |
| H(12W) | 5302  | 1940 | 5318 | 47 (8) |
| H(21W) | 427   | 6589 | 6249 | 44 (8) |
| H(22W) | 2166  | 7500 | 6408 | 44 (8) |
| H(31W) | 2678  | 4003 | 7133 | 49 (8) |
| H(32W) | 3310  | 2282 | 6871 | 49 (8) |

Table S6. Hydrogen bonds for Er(OAc)<sub>2</sub>Cl\_x\_3H<sub>2</sub>O [Å and deg.].

| D-H...A                | d(D-H) | d(H...A) | d(D...A) | <(DHA) |
|------------------------|--------|----------|----------|--------|
| O(1W)-H(11W)...Cl(1)#3 | 0.96   | 2.19     | 3.113(2) | 161.7  |
| O(1W)-H(12W)...O(12)#4 | 0.96   | 1.78     | 2.706(2) | 161.3  |
| O(2W)-H(21W)...O(22)#5 | 0.96   | 1.79     | 2.700(2) | 156.6  |
| O(2W)-H(22W)...Cl(1)   | 0.96   | 2.13     | 3.077(2) | 168.1  |
| O(3W)-H(31W)...Cl(1)#6 | 0.96   | 2.26     | 3.192(2) | 164.9  |
| O(3W)-H(32W)...Cl(1)#3 | 0.96   | 2.15     | 3.073(2) | 162.1  |

Symmetry transformations used to generate equivalent atoms:

#1 -x,-y+1,-z+1      #2 -x+1,-y+1,-z+1      #3 x,y-1,z  
#4 x+1,y,z      #5 x-1,y,z      #6 -x+1/2,y-1/2,-z+3/2
