# Supplementary material
Source: MDPI journal article supplement (https://www.mdpi.com/2073-4352/13/7/1043)
Supplement: s1 [file s1]

Table S1. Crystal data and structure refinement for Tm(OAc)2Br·x\_3H2O.

|                                   |                                                                              |
|-----------------------------------|------------------------------------------------------------------------------|
| Identification code               | Ha2019_99b_0m_a                                                              |
| Empirical formula                 | C4 H12 Br O7 Tm                                                              |
| Formula weight                    | 420.98                                                                       |
| Temperature                       | 100(2) K                                                                     |
| Wavelength                        | 0.71073 Å                                                                    |
| Crystal system, space group       | Monoclinic, P2(1)/n                                                          |
| Unit cell dimensions              | a = 7.7868(5) Å<br>b = 8.0675(5) Å    β = 96.154(2) deg.<br>c = 17.3994(7) Å |
| Volume                            | 1086.73(11) Å <sup>3</sup>                                                   |
| Z, Calculated density             | 4, 2.573 Mg/m <sup>3</sup>                                                   |
| Absorption coefficient            | 11.845 mm <sup>-1</sup>                                                      |
| F(000)                            | 784                                                                          |
| Crystal size                      | 0.187 x 0.084 x 0.058 mm                                                     |
| Theta range for data collection   | 2.765 to 27.999 deg.                                                         |
| Limiting indices                  | -10 ≤ h ≤ 10, -10 ≤ k ≤ 10, -22 ≤ l ≤ 22                                     |
| Reflections collected / unique    | 112602 / 2626 [R(int) = 0.0488]                                              |
| Completeness to theta = 25.242    | 99.9 %                                                                       |
| Absorption correction             | Semi-empirical from equivalents                                              |
| Max. and min. transmission        | 0.746 and 0.374                                                              |
| Refinement method                 | Full-matrix least-squares on F <sup>2</sup>                                  |
| Data / restraints / parameters    | 2626 / 0 / 125                                                               |
| Goodness-of-fit on F <sup>2</sup> | 1.086                                                                        |
| Final R indices [I > 2σ(I)]       | R1 = 0.0118, wR2 = 0.0265                                                    |
| R indices (all data)              | R1 = 0.0141, wR2 = 0.0272                                                    |
| Extinction coefficient            | n/a                                                                          |
| Largest diff. peak and hole       | 0.383 and -0.336 e.Å <sup>-3</sup>                                           |

Table S2. Atomic coordinates ( $\times 10^4$ ) and equivalent isotropic displacement parameters ( $\text{\AA}^2 \times 10^3$ ) for  $\text{Tm}(\text{OAc})_2\text{Br} \cdot 3\text{H}_2\text{O}$ .  $U(\text{eq})$  is defined as one third of the trace of the orthogonalized  $U_{ij}$  tensor.

|       | x         | y        | z        | U (eq) |
|-------|-----------|----------|----------|--------|
| Tm(1) | 2737 (1)  | 4459 (1) | 5396 (1) | 10 (1) |
| Br(1) | 3823 (1)  | 9489 (1) | 6799 (1) | 16 (1) |
| O(11) | 201 (2)   | 3222 (2) | 5411 (1) | 18 (1) |
| O(12) | -2620 (2) | 2963 (2) | 5226 (1) | 14 (1) |
| C(11) | -1143 (3) | 2406 (3) | 5480 (1) | 12 (1) |
| C(12) | -1044 (3) | 737 (3)  | 5862 (1) | 21 (1) |
| O(21) | 5382 (2)  | 5566 (2) | 5742 (1) | 12 (1) |
| O(22) | 8102 (2)  | 6239 (2) | 5912 (1) | 14 (1) |
| C(21) | 6728 (3)  | 5902 (3) | 6201 (1) | 12 (1) |
| C(22) | 6681 (3)  | 5859 (3) | 7056 (1) | 20 (1) |
| O(1W) | 4107 (2)  | 1898 (2) | 5322 (1) | 14 (1) |
| O(2W) | 1568 (2)  | 6260 (2) | 6244 (1) | 14 (1) |
| O(3W) | 3131 (2)  | 3411 (2) | 6665 (1) | 17 (1) |

Table S3. Bond lengths [Å] and angles [deg] for Tm(OAc)2Br\_x\_3H2O.

---

|                       |            |
|-----------------------|------------|
| Tm(1)-O(11)           | 2.216(2)   |
| Tm(1)-O(21)           | 2.266(1)   |
| Tm(1)-O(2W)           | 2.325(2)   |
| Tm(1)-O(1W)           | 2.336(2)   |
| Tm(1)-O(12)#1         | 2.342(2)   |
| Tm(1)-O(3W)           | 2.353(2)   |
| Tm(1)-O(22)#2         | 2.368(2)   |
| Tm(1)-O(21)#2         | 2.587(2)   |
| Tm(1)-O(11)#1         | 3.165(2)   |
|                       |            |
| Tm(1)-Tm(1)#2         | 4.0162(3)  |
| Tm(1)-Tm(1)#1         | 4.4237(3)  |
|                       |            |
| O(11)-C(11)           | 1.253(3)   |
| O(12)-C(11)           | 1.270(3)   |
| C(11)-C(12)           | 1.500(3)   |
|                       |            |
| O(21)-C(21)           | 1.277(3)   |
| O(22)-C(21)           | 1.260(3)   |
| C(21)-C(22)           | 1.493(3)   |
|                       |            |
| O(11)-Tm(1)-O(21)     | 163.84(6)  |
| O(11)-Tm(1)-O(2W)     | 82.20(6)   |
| O(21)-Tm(1)-O(2W)     | 89.54(5)   |
| O(11)-Tm(1)-O(1W)     | 90.85(6)   |
| O(21)-Tm(1)-O(1W)     | 87.46(5)   |
| O(2W)-Tm(1)-O(1W)     | 143.17(5)  |
| O(11)-Tm(1)-O(12)#1   | 114.53(6)  |
| O(21)-Tm(1)-O(12)#1   | 76.22(5)   |
| O(2W)-Tm(1)-O(12)#1   | 74.92(5)   |
| O(1W)-Tm(1)-O(12)#1   | 139.06(5)  |
| O(11)-Tm(1)-O(3W)     | 81.62(6)   |
| O(21)-Tm(1)-O(3W)     | 82.48(5)   |
| O(2W)-Tm(1)-O(3W)     | 69.51(5)   |
| O(1W)-Tm(1)-O(3W)     | 73.71(5)   |
| O(12)#1-Tm(1)-O(3W)   | 138.38(6)  |
| O(11)-Tm(1)-O(22)#2   | 75.49(5)   |
| O(21)-Tm(1)-O(22)#2   | 119.86(5)  |
| O(2W)-Tm(1)-O(22)#2   | 132.24(5)  |
| O(1W)-Tm(1)-O(22)#2   | 79.46(5)   |
| O(12)#1-Tm(1)-O(22)#2 | 76.92(5)   |
| O(3W)-Tm(1)-O(22)#2   | 144.22(6)  |
| O(11)-Tm(1)-O(21)#2   | 125.73(5)  |
| O(21)-Tm(1)-O(21)#2   | 68.47(6)   |
| O(2W)-Tm(1)-O(21)#2   | 141.55(5)  |
| O(1W)-Tm(1)-O(21)#2   | 69.59(5)   |
| O(12)#1-Tm(1)-O(21)#2 | 69.51(5)   |
| O(3W)-Tm(1)-O(21)#2   | 133.45(5)  |
| O(22)#2-Tm(1)-O(21)#2 | 51.87(5)   |
| O(11)-Tm(1)-O(11)#1   | 70.66(6)   |
| O(21)-Tm(1)-O(11)#1   | 118.55(5)  |
| O(2W)-Tm(1)-O(11)#1   | 66.33(5)   |
| O(1W)-Tm(1)-O(11)#1   | 144.21(5)  |
| O(12)#1-Tm(1)-O(11)#1 | 43.90(4)   |
| O(3W)-Tm(1)-O(11)#1   | 130.12(5)  |
| O(22)#2-Tm(1)-O(11)#1 | 66.55(5)   |
| O(21)#2-Tm(1)-O(11)#1 | 96.11(4)   |
|                       |            |
| Tm(1)#2-Tm(1)-Tm(1)#1 | 134.568(5) |

|                         |           |
|-------------------------|-----------|
| C (11)-O (11)-Tm (1)    | 173.0 (2) |
| C (11)-O (11)-Tm (1) #1 | 77.4 (1)  |
| Tm (1)-O (11)-Tm (1) #1 | 109.3 (1) |
| C (11)-O (12)-Tm (1) #1 | 117.7 (1) |
| O (11)-C (11)-O (12)    | 121.0 (2) |
| O (11)-C (11)-C (12)    | 120.7 (2) |
| O (12)-C (11)-C (12)    | 118.3 (2) |
| C (21)-O (21)-Tm (1)    | 155.7 (1) |
| C (21)-O (21)-Tm (1) #2 | 89.2 (1)  |
| Tm (1)-O (21)-Tm (1) #2 | 111.5 (1) |
| C (21)-O (22)-Tm (1) #2 | 100.0 (1) |
| O (22)-C (21)-O (21)    | 118.1 (2) |
| O (22)-C (21)-C (22)    | 121.1 (2) |
| O (21)-C (21)-C (22)    | 120.8 (2) |

---

Symmetry transformations used to generate equivalent atoms:  
 #1 -x,-y+1,-z+1      #2 -x+1,-y+1,-z+1

Table S4. Anisotropic displacement parameters ( $\text{\AA}^2 \times 10^3$ ) for  
 $\text{Tm}(\text{OAc})_2\text{Br} \cdot x_3\text{H}_2\text{O}$ .

The anisotropic displacement factor exponent takes the form:  
 $-2 \pi^2 [ h^2 a^{*2} U_{11} + \dots + 2 h k a^* b^* U_{12} ]$

|       | U <sub>11</sub> | U <sub>22</sub> | U <sub>33</sub> | U <sub>23</sub> | U <sub>13</sub> | U <sub>12</sub> |
|-------|-----------------|-----------------|-----------------|-----------------|-----------------|-----------------|
| Tm(1) | 6 (1)           | 11 (1)          | 12 (1)          | 0 (1)           | 1 (1)           | -1 (1)          |
| Br(1) | 20 (1)          | 13 (1)          | 17 (1)          | 1 (1)           | 2 (1)           | -3 (1)          |
| O(11) | 11 (1)          | 22 (1)          | 21 (1)          | -4 (1)          | 5 (1)           | -6 (1)          |
| O(12) | 8 (1)           | 17 (1)          | 16 (1)          | 2 (1)           | 2 (1)           | 1 (1)           |
| C(11) | 12 (1)          | 13 (1)          | 10 (1)          | -2 (1)          | 4 (1)           | -1 (1)          |
| C(12) | 18 (1)          | 19 (1)          | 25 (1)          | 6 (1)           | 0 (1)           | 2 (1)           |
| O(21) | 9 (1)           | 15 (1)          | 12 (1)          | -1 (1)          | 0 (1)           | -1 (1)          |
| O(22) | 8 (1)           | 18 (1)          | 16 (1)          | -1 (1)          | 1 (1)           | -1 (1)          |
| C(21) | 10 (1)          | 11 (1)          | 15 (1)          | 0 (1)           | 0 (1)           | 2 (1)           |
| C(22) | 16 (1)          | 31 (1)          | 12 (1)          | -1 (1)          | -1 (1)          | 3 (1)           |
| O(1W) | 13 (1)          | 15 (1)          | 17 (1)          | 3 (1)           | 5 (1)           | 2 (1)           |
| O(2W) | 10 (1)          | 14 (1)          | 17 (1)          | -2 (1)          | 1 (1)           | -1 (1)          |
| O(3W) | 22 (1)          | 14 (1)          | 17 (1)          | 2 (1)           | 7 (1)           | 3 (1)           |

Table S5. Hydrogen coordinates ( $\times 10^4$ ) and isotropic displacement parameters ( $\text{\AA}^2 \times 10^3$ ) for  $\text{Tm}(\text{OAc})_2\text{Br}\cdot 3\text{H}_2\text{O}$ .

|        | x     | y    | z    | U (eq) |
|--------|-------|------|------|--------|
| H(12A) | 118   | 568  | 6126 | 60 (7) |
| H(12B) | -1296 | -128 | 5470 | 60 (7) |
| H(12C) | -1891 | 679  | 6239 | 60 (7) |
| H(22A) | 7852  | 5684 | 7311 | 84 (9) |
| H(22B) | 5932  | 4950 | 7190 | 84 (9) |
| H(22C) | 6229  | 6913 | 7229 | 84 (9) |
| H(11W) | 4081  | 1037 | 5702 | 54 (7) |
| H(12W) | 5302  | 2008 | 5242 | 54 (7) |
| H(21W) | 344   | 6393 | 6248 | 56 (8) |
| H(22W) | 2046  | 7334 | 6375 | 56 (8) |
| H(31W) | 2520  | 3885 | 7062 | 48 (7) |
| H(32W) | 3302  | 2270 | 6810 | 48 (7) |

Table S6. Hydrogen bonds for Tm(OAc)<sub>2</sub>Br·x<sub>3</sub>H<sub>2</sub>O [Å and deg.].

| D-H...A                | d(D-H) | d(H...A) | d(D...A) | <(DHA) |
|------------------------|--------|----------|----------|--------|
| O(1W)-H(11W)...Br(1)#3 | 0.96   | 2.31     | 3.249(2) | 166.1  |
| O(1W)-H(12W)...O(12)#4 | 0.96   | 1.79     | 2.712(2) | 158.7  |
| O(2W)-H(21W)...O(22)#5 | 0.96   | 1.78     | 2.699(2) | 157.9  |
| O(2W)-H(22W)...Br(1)   | 0.96   | 2.29     | 3.230(2) | 164.8  |
| O(3W)-H(31W)...Br(1)#6 | 0.96   | 2.39     | 3.329(2) | 166.9  |
| O(3W)-H(32W)...Br(1)#3 | 0.96   | 2.28     | 3.214(2) | 164.0  |

Symmetry transformations used to generate equivalent atoms:

#1 -x,-y+1,-z+1    #2 -x+1,-y+1,-z+1    #3 x,y-1,z  
#4 x+1,y,z    #5 x-1,y,z    #6 -x+1/2,y-1/2,-z+3/2
