# Supplementary material
Source: MDPI journal article supplement (https://www.mdpi.com/2073-4352/13/7/1043)
Supplement: s1 [file s1]

Table S1. Crystal data and structure refinement for Gd(OAc)2Br·x\_3H2O.

|                                   |                                                                              |
|-----------------------------------|------------------------------------------------------------------------------|
| Identification code               | Ha2020_2_0m_a                                                                |
| Empirical formula                 | C4 H12 Br Gd O7                                                              |
| Formula weight                    | 409.30                                                                       |
| Temperature                       | 100(2) K                                                                     |
| Wavelength                        | 0.71073 Å                                                                    |
| Crystal system, space group       | Monoclinic, P2(1)/n                                                          |
| Unit cell dimensions              | a = 7.8191(2) Å<br>b = 8.0130(2) Å    β = 95.929(2) deg.<br>c = 17.7804(6) Å |
| Volume                            | 1108.06(5) Å <sup>3</sup>                                                    |
| Z, Calculated density             | 4, 2.453 Mg/m <sup>3</sup>                                                   |
| Absorption coefficient            | 9.595 mm <sup>-1</sup>                                                       |
| F(000)                            | 764                                                                          |
| Crystal size                      | 0.418 x 0.112 x 0.078 mm                                                     |
| Theta range for data collection   | 2.750 to 27.999 deg.                                                         |
| Limiting indices                  | -10 ≤ h ≤ 10, -10 ≤ k ≤ 10, -23 ≤ l ≤ 23                                     |
| Reflections collected / unique    | 132199 / 2690 [R(int) = 0.0410]                                              |
| Completeness to theta = 25.242    | 100.0 %                                                                      |
| Absorption correction             | Semi-empirical from equivalents                                              |
| Max. and min. transmission        | 0.714 and 0.333                                                              |
| Refinement method                 | Full-matrix least-squares on F <sup>2</sup>                                  |
| Data / restraints / parameters    | 2690 / 0 / 125                                                               |
| Goodness-of-fit on F <sup>2</sup> | 1.134                                                                        |
| Final R indices [I > 2σ(I)]       | R1 = 0.0155, wR2 = 0.0403                                                    |
| R indices (all data)              | R1 = 0.0168, wR2 = 0.0410                                                    |
| Extinction coefficient            | n/a                                                                          |
| Largest diff. peak and hole       | 0.695 and -0.977 e.Å <sup>-3</sup>                                           |

Table S2. Atomic coordinates ( $\times 10^4$ ) and equivalent isotropic displacement parameters ( $\text{\AA}^2 \times 10^3$ ) for  $\text{Gd}(\text{OAc})_2\text{Br}\cdot 3\text{H}_2\text{O}$ .  $U(\text{eq})$  is defined as one third of the trace of the orthogonalized  $U_{ij}$  tensor.

|       | x         | y        | z        | U (eq) |
|-------|-----------|----------|----------|--------|
| Gd(1) | 2604 (1)  | 4596 (1) | 5355 (1) | 10 (1) |
| Br(1) | 3937 (1)  | 9611 (1) | 6858 (1) | 17 (1) |
| O(11) | -98 (2)   | 3379 (2) | 5333 (1) | 16 (1) |
| O(12) | -2803 (2) | 2664 (2) | 5227 (1) | 16 (1) |
| C(11) | -1264 (3) | 2345 (3) | 5460 (1) | 13 (1) |
| C(12) | -822 (3)  | 762 (3)  | 5888 (2) | 22 (1) |
| O(21) | 5400 (2)  | 5533 (2) | 5731 (1) | 13 (1) |
| O(22) | 8114 (2)  | 6178 (2) | 5972 (1) | 16 (1) |
| C(21) | 6698 (3)  | 5839 (3) | 6215 (1) | 12 (1) |
| C(22) | 6536 (3)  | 5761 (4) | 7046 (1) | 21 (1) |
| O(1W) | 3869 (2)  | 1838 (2) | 5309 (1) | 15 (1) |
| O(2W) | 1568 (2)  | 6495 (2) | 6246 (1) | 16 (1) |
| O(3W) | 2836 (2)  | 3443 (2) | 6614 (1) | 19 (1) |

Table S3. Bond lengths [Å] and angles [deg] for Gd(OAc)<sub>2</sub>Br<sub>x</sub>·3H<sub>2</sub>O.

---

|                       |            |
|-----------------------|------------|
| Gd(1)-O(11)           | 2.324(2)   |
| Gd(1)-O(21)           | 2.343(2)   |
| Gd(1)-O(2W)           | 2.398(2)   |
| Gd(1)-O(3W)           | 2.412(2)   |
| Gd(1)-O(1W)           | 2.426(2)   |
| Gd(1)-O(12)#1         | 2.439(2)   |
| Gd(1)-O(22)#2         | 2.447(2)   |
| Gd(1)-O(21)#2         | 2.608(2)   |
| Gd(1)-O(11)#1         | 2.733(2)   |
|                       |            |
| Gd(1)-Gd(1)#2         | 4.1265(2)  |
| Gd(1)-Gd(1)#1         | 4.1863(2)  |
|                       |            |
| O(11)-C(11)           | 1.269(3)   |
| O(12)-C(11)           | 1.258(3)   |
| C(11)-C(12)           | 1.501(3)   |
|                       |            |
| O(21)-C(21)           | 1.285(3)   |
| O(22)-C(21)           | 1.259(3)   |
| C(21)-C(22)           | 1.497(3)   |
|                       |            |
| O(11)-Gd(1)-O(21)     | 163.54(6)  |
| O(11)-Gd(1)-O(2W)     | 84.75(6)   |
| O(21)-Gd(1)-O(2W)     | 88.67(6)   |
| O(11)-Gd(1)-O(3W)     | 80.52(6)   |
| O(21)-Gd(1)-O(3W)     | 83.03(6)   |
| O(2W)-Gd(1)-O(3W)     | 68.14(6)   |
| O(11)-Gd(1)-O(1W)     | 89.44(6)   |
| O(21)-Gd(1)-O(1W)     | 85.96(5)   |
| O(2W)-Gd(1)-O(1W)     | 140.08(6)  |
| O(3W)-Gd(1)-O(1W)     | 71.94(5)   |
| O(11)-Gd(1)-O(12)#1   | 117.96(6)  |
| O(21)-Gd(1)-O(12)#1   | 74.60(5)   |
| O(2W)-Gd(1)-O(12)#1   | 75.51(6)   |
| O(3W)-Gd(1)-O(12)#1   | 137.46(6)  |
| O(1W)-Gd(1)-O(12)#1   | 139.62(5)  |
| O(11)-Gd(1)-O(22)#2   | 76.12(5)   |
| O(21)-Gd(1)-O(22)#2   | 118.12(5)  |
| O(2W)-Gd(1)-O(22)#2   | 137.61(5)  |
| O(3W)-Gd(1)-O(22)#2   | 141.74(6)  |
| O(1W)-Gd(1)-O(22)#2   | 77.90(6)   |
| O(12)#1-Gd(1)-O(22)#2 | 80.68(6)   |
| O(11)-Gd(1)-O(21)#2   | 125.74(5)  |
| O(21)-Gd(1)-O(21)#2   | 67.18(6)   |
| O(2W)-Gd(1)-O(21)#2   | 141.60(5)  |
| O(3W)-Gd(1)-O(21)#2   | 132.76(5)  |
| O(1W)-Gd(1)-O(21)#2   | 70.23(5)   |
| O(12)#1-Gd(1)-O(21)#2 | 69.65(5)   |
| O(22)#2-Gd(1)-O(21)#2 | 51.07(5)   |
| O(11)-Gd(1)-O(11)#1   | 68.49(6)   |
| O(21)-Gd(1)-O(11)#1   | 122.86(5)  |
| O(2W)-Gd(1)-O(11)#1   | 69.12(5)   |
| O(3W)-Gd(1)-O(11)#1   | 128.65(5)  |
| O(1W)-Gd(1)-O(11)#1   | 143.29(5)  |
| O(12)#1-Gd(1)-O(11)#1 | 49.47(5)   |
| O(22)#2-Gd(1)-O(11)#1 | 68.71(5)   |
| O(21)#2-Gd(1)-O(11)#1 | 98.54(5)   |
|                       |            |
| Gd(1)#2-Gd(1)-Gd(1)#1 | 140.308(5) |

|                         |           |
|-------------------------|-----------|
| C (11)-O (11)-Gd (1)    | 160.0 (2) |
| C (11)-O (11)-Gd (1) #1 | 88.4 (1)  |
| Gd (1)-O (11)-Gd (1) #1 | 111.5 (1) |
| C (11)-O (12)-Gd (1) #1 | 102.8 (1) |
| O (12)-C (11)-O (11)    | 119.3 (2) |
| O (12)-C (11)-C (12)    | 120.1 (2) |
| O (11)-C (11)-C (12)    | 120.7 (2) |
| C (21)-O (21)-Gd (1)    | 154.5 (2) |
| C (21)-O (21)-Gd (1) #2 | 90.6 (2)  |
| Gd (1)-O (21)-Gd (1) #2 | 112.8 (2) |
| C (21)-O (22)-Gd (1) #2 | 98.9 (1)  |
| O (22)-C (21)-O (21)    | 118.3 (2) |
| O (22)-C (21)-C (22)    | 121.0 (2) |
| O (21)-C (21)-C (22)    | 120.7 (2) |

---

Symmetry transformations used to generate equivalent atoms:  
 #1 -x,-y+1,-z+1      #2 -x+1,-y+1,-z+1

Table S4. Anisotropic displacement parameters ( $\text{\AA}^2 \times 10^3$ ) for Gd(OAc)<sub>2</sub>Br·x\_3H<sub>2</sub>O.

The anisotropic displacement factor exponent takes the form:  
 $-2 \pi^2 [ h^2 a^{*2} U_{11} + \dots + 2 h k a^* b^* U_{12} ]$

|       | U <sub>11</sub> | U <sub>22</sub> | U <sub>33</sub> | U <sub>23</sub> | U <sub>13</sub> | U <sub>12</sub> |
|-------|-----------------|-----------------|-----------------|-----------------|-----------------|-----------------|
| Gd(1) | 6(1)            | 13(1)           | 12(1)           | 0(1)            | 1(1)            | -1(1)           |
| Br(1) | 19(1)           | 15(1)           | 17(1)           | 2(1)            | 0(1)            | -2(1)           |
| O(11) | 10(1)           | 18(1)           | 19(1)           | 1(1)            | 3(1)            | -4(1)           |
| O(12) | 9(1)            | 19(1)           | 21(1)           | 4(1)            | 2(1)            | -1(1)           |
| C(11) | 10(1)           | 16(1)           | 14(1)           | -1(1)           | 3(1)            | -1(1)           |
| C(12) | 20(1)           | 20(1)           | 25(1)           | 8(1)            | 0(1)            | 1(1)            |
| O(21) | 9(1)            | 18(1)           | 13(1)           | 0(1)            | -1(1)           | -1(1)           |
| O(22) | 9(1)            | 22(1)           | 16(1)           | -2(1)           | 1(1)            | -3(1)           |
| C(21) | 10(1)           | 12(1)           | 14(1)           | -1(1)           | 0(1)            | 0(1)            |
| C(22) | 15(1)           | 33(1)           | 13(1)           | 0(1)            | 1(1)            | 4(1)            |
| O(1W) | 12(1)           | 15(1)           | 18(1)           | 2(1)            | 4(1)            | 0(1)            |
| O(2W) | 10(1)           | 17(1)           | 19(1)           | -3(1)           | 1(1)            | 0(1)            |
| O(3W) | 25(1)           | 17(1)           | 15(1)           | 3(1)            | 6(1)            | 4(1)            |

Table S5. Hydrogen coordinates ( $\times 10^4$ ) and isotropic displacement parameters ( $\text{\AA}^2 \times 10^3$ ) for  $\text{Gd}(\text{OAc})_2\text{Br}\cdot 3\text{H}_2\text{O}$ .

|        | x     | y    | z    | U (eq) |
|--------|-------|------|------|--------|
| H(12A) | -608  | 1010 | 6429 | 37 (8) |
| H(12B) | 212   | 267  | 5712 | 37 (8) |
| H(12C) | -1781 | -26  | 5802 | 37 (8) |
| H(12D) | 283   | 727  | 6203 | 37 (8) |
| H(12E) | -1760 | 603  | 6206 | 37 (8) |
| H(12F) | -858  | -126 | 5508 | 37 (8) |
| H(22A) | 7667  | 5549 | 7320 | 80 (9) |
| H(22B) | 5746  | 4859 | 7148 | 80 (9) |
| H(22C) | 6087  | 6826 | 7213 | 80 (9) |
| H(11W) | 3850  | 1063 | 5720 | 47 (7) |
| H(12W) | 5044  | 1859 | 5198 | 47 (7) |
| H(21W) | 366   | 6666 | 6287 | 30 (6) |
| H(22W) | 2119  | 7494 | 6447 | 30 (6) |
| H(31W) | 2378  | 3941 | 7041 | 40 (7) |
| H(32W) | 3143  | 2327 | 6771 | 40 (7) |

Table S6. Hydrogen bonds for Gd(OAc)<sub>2</sub>Br·x<sub>3</sub>H<sub>2</sub>O [Å and deg.].

| D-H...A                | d(D-H) | d(H...A) | d(D...A) | <(DHA) |
|------------------------|--------|----------|----------|--------|
| O(1W)-H(11W)...Br(1)#3 | 0.96   | 2.33     | 3.278(2) | 169.3  |
| O(1W)-H(12W)...O(12)#4 | 0.96   | 1.80     | 2.703(2) | 155.9  |
| O(2W)-H(21W)...O(22)#5 | 0.96   | 1.83     | 2.706(2) | 149.6  |
| O(2W)-H(22W)...Br(1)   | 0.96   | 2.28     | 3.230(2) | 168.1  |
| O(3W)-H(31W)...Br(1)#6 | 0.96   | 2.36     | 3.311(2) | 168.4  |
| O(3W)-H(32W)...Br(1)#3 | 0.96   | 2.26     | 3.207(2) | 166.9  |

Symmetry transformations used to generate equivalent atoms:

#1 -x,-y+1,-z+1      #2 -x+1,-y+1,-z+1      #3 x,y-1,z  
#4 x+1,y,z      #5 x-1,y,z      #6 -x+1/2,y-1/2,-z+3/2
