# Supplementary material
Source: MDPI journal article supplement (https://www.mdpi.com/2073-4352/13/7/1043)
Supplement: s1 [file s1]

Table S1. Crystal data and structure refinement for Lu(OAc)2Br·x·3H2O.

|                                   |                                                                              |
|-----------------------------------|------------------------------------------------------------------------------|
| Identification code               | Ha2019_69_0m_a                                                               |
| Empirical formula                 | C4 H12 Br Lu O7                                                              |
| Formula weight                    | 427.02                                                                       |
| Temperature                       | 100(2) K                                                                     |
| Wavelength                        | 0.71073 Å                                                                    |
| Crystal system, space group       | Monoclinic, P2(1)/n                                                          |
| Unit cell dimensions              | a = 7.7611(3) Å<br>b = 8.0702(3) Å    β = 96.098(2) deg.<br>c = 17.2952(6) Å |
| Volume                            | 1077.13(7) Å <sup>3</sup>                                                    |
| Z, Calculated density             | 4, 2.633 Mg/m <sup>3</sup>                                                   |
| Absorption coefficient            | 12.879 mm <sup>-1</sup>                                                      |
| F(000)                            | 792                                                                          |
| Crystal size                      | 0.408 x 0.071 x 0.054 mm                                                     |
| Theta range for data collection   | 2.776 to 27.998 deg.                                                         |
| Limiting indices                  | -10 ≤ h ≤ 10, -10 ≤ k ≤ 10, -22 ≤ l ≤ 22                                     |
| Reflections collected / unique    | 103545 / 2596 [R(int) = 0.0735]                                              |
| Completeness to theta = 25.242    | 99.8 %                                                                       |
| Absorption correction             | Semi-empirical from equivalents                                              |
| Max. and min. transmission        | 0.741 and 0.326                                                              |
| Refinement method                 | Full-matrix least-squares on F <sup>2</sup>                                  |
| Data / restraints / parameters    | 2596 / 0 / 125                                                               |
| Goodness-of-fit on F <sup>2</sup> | 1.055                                                                        |
| Final R indices [I > 2σ(I)]       | R1 = 0.0184, wR2 = 0.0417                                                    |
| R indices (all data)              | R1 = 0.0233, wR2 = 0.0438                                                    |
| Extinction coefficient            | n/a                                                                          |
| Largest diff. peak and hole       | 1.131 and -1.209 e.Å <sup>-3</sup>                                           |

Table S2. Atomic coordinates ( $\times 10^4$ ) and equivalent isotropic displacement parameters ( $\text{\AA}^2 \times 10^3$ ) for  $\text{Lu}(\text{OAc})_2\text{Br}\cdot 3\text{H}_2\text{O}$ .  $U(\text{eq})$  is defined as one third of the trace of the orthogonalized  $U_{ij}$  tensor.

|        | x         | y        | z        | U (eq) |
|--------|-----------|----------|----------|--------|
| Lu (1) | 2764 (1)  | 4435 (1) | 5406 (1) | 10 (1) |
| Br (1) | 3805 (1)  | 9462 (1) | 6781 (1) | 17 (1) |
| O (11) | 256 (3)   | 3207 (3) | 5430 (1) | 18 (1) |
| O (12) | -2583 (3) | 3012 (3) | 5218 (1) | 13 (1) |
| C (11) | -1123 (4) | 2425 (4) | 5479 (2) | 13 (1) |
| C (12) | -1081 (5) | 743 (5)  | 5846 (2) | 21 (1) |
| O (21) | 5375 (3)  | 5552 (3) | 5742 (1) | 13 (1) |
| O (22) | 8096 (3)  | 6249 (3) | 5899 (1) | 14 (1) |
| C (21) | 6732 (4)  | 5909 (4) | 6197 (2) | 12 (1) |
| C (22) | 6700 (5)  | 5868 (5) | 7059 (2) | 20 (1) |
| O (1W) | 4158 (3)  | 1928 (3) | 5326 (1) | 15 (1) |
| O (2W) | 1567 (3)  | 6209 (3) | 6247 (1) | 14 (1) |
| O (3W) | 3181 (3)  | 3398 (3) | 6674 (1) | 17 (1) |

Table S3. Bond lengths [Å] and angles [deg] for Lu(OAc)<sub>2</sub>Br·x<sub>3</sub>H<sub>2</sub>O.

---

|                       |            |
|-----------------------|------------|
| Lu(1)-O(11)           | 2.188(2)   |
| Lu(1)-O(21)           | 2.238(2)   |
| Lu(1)-O(2W)           | 2.305(2)   |
| Lu(1)-O(1W)           | 2.306(2)   |
| Lu(1)-O(12)#1         | 2.323(2)   |
| Lu(1)-O(3W)           | 2.338(2)   |
| Lu(1)-O(22)#2         | 2.350(2)   |
| Lu(1)-O(21)#2         | 2.577(2)   |
| Lu(1)-O(11)#1         | 3.238(3)   |
| Lu(1)-Lu(1)#2         | 3.9862(3)  |
| Lu(1)-Lu(1)#1         | 4.4638(3)  |
| O(11)-C(11)           | 1.253(4)   |
| O(12)-C(11)           | 1.266(4)   |
| C(11)-C(12)           | 1.498(5)   |
| O(21)-C(21)           | 1.278(4)   |
| O(22)-C(21)           | 1.255(4)   |
| C(21)-C(22)           | 1.495(5)   |
| O(11)-Lu(1)-O(21)     | 163.82(9)  |
| O(11)-Lu(1)-O(2W)     | 81.43(9)   |
| O(21)-Lu(1)-O(2W)     | 90.02(9)   |
| O(11)-Lu(1)-O(1W)     | 91.57(9)   |
| O(21)-Lu(1)-O(1W)     | 87.21(9)   |
| O(2W)-Lu(1)-O(1W)     | 143.68(8)  |
| O(11)-Lu(1)-O(12)#1   | 113.61(9)  |
| O(21)-Lu(1)-O(12)#1   | 76.80(8)   |
| O(2W)-Lu(1)-O(12)#1   | 74.57(8)   |
| O(1W)-Lu(1)-O(12)#1   | 139.13(8)  |
| O(11)-Lu(1)-O(3W)     | 81.67(9)   |
| O(21)-Lu(1)-O(3W)     | 82.49(8)   |
| O(2W)-Lu(1)-O(3W)     | 69.84(9)   |
| O(1W)-Lu(1)-O(3W)     | 73.90(9)   |
| O(12)#1-Lu(1)-O(3W)   | 138.50(9)  |
| O(11)-Lu(1)-O(22)#2   | 75.48(9)   |
| O(21)-Lu(1)-O(22)#2   | 120.05(8)  |
| O(2W)-Lu(1)-O(22)#2   | 131.26(8)  |
| O(1W)-Lu(1)-O(22)#2   | 79.85(8)   |
| O(12)#1-Lu(1)-O(22)#2 | 76.41(8)   |
| O(3W)-Lu(1)-O(22)#2   | 144.47(9)  |
| O(11)-Lu(1)-O(21)#2   | 126.06(8)  |
| O(21)-Lu(1)-O(21)#2   | 68.41(9)   |
| O(2W)-Lu(1)-O(21)#2   | 141.28(8)  |
| O(1W)-Lu(1)-O(21)#2   | 69.66(8)   |
| O(12)#1-Lu(1)-O(21)#2 | 69.49(8)   |
| O(3W)-Lu(1)-O(21)#2   | 133.73(8)  |
| O(22)#2-Lu(1)-O(21)#2 | 52.12(7)   |
| O(11)-Lu(1)-O(11)#1   | 70.82(10)  |
| O(21)-Lu(1)-O(11)#1   | 118.16(8)  |
| O(2W)-Lu(1)-O(11)#1   | 66.15(7)   |
| O(1W)-Lu(1)-O(11)#1   | 144.21(7)  |
| O(12)#1-Lu(1)-O(11)#1 | 42.81(7)   |
| O(3W)-Lu(1)-O(11)#1   | 130.60(7)  |
| O(22)#2-Lu(1)-O(11)#1 | 65.87(7)   |
| O(21)#2-Lu(1)-O(11)#1 | 95.29(7)   |
| Lu(1)#2-Lu(1)-Lu(1)#1 | 133.329(7) |

|                         |           |
|-------------------------|-----------|
| C (11)-O (11)-Lu (1)    | 175.6 (3) |
| C (11)-O (12)-Lu (1) #1 | 120.3 (2) |
| O (11)-C (11)-O (12)    | 121.7 (3) |
| O (11)-C (11)-C (12)    | 120.3 (3) |
| O (12)-C (11)-C (12)    | 117.9 (3) |
|                         |           |
| C (21)-O (21)-Lu (1)    | 156.2 (2) |
| C (21)-O (21)-Lu (1) #2 | 88.9 (2)  |
| Lu (1)-O (21)-Lu (1) #2 | 111.6 (1) |
| C (21)-O (22)-Lu (1) #2 | 100.2 (2) |
|                         |           |
| O (22)-C (21)-O (21)    | 118.2 (3) |
| O (22)-C (21)-C (22)    | 121.2 (3) |
| O (21)-C (21)-C (22)    | 120.6 (3) |

---

Symmetry transformations used to generate equivalent atoms:  
 #1 -x,-y+1,-z+1      #2 -x+1,-y+1,-z+1

Table S4. Anisotropic displacement parameters ( $\text{\AA}^2 \times 10^3$ ) for  
Lu(OAc)<sub>2</sub>Br·x\_3H<sub>2</sub>O.

The anisotropic displacement factor exponent takes the form:  
 $-2 \pi^2 [ h^2 a^{*2} U_{11} + \dots + 2 h k a^* b^* U_{12} ]$

|       | U <sub>11</sub> | U <sub>22</sub> | U <sub>33</sub> | U <sub>23</sub> | U <sub>13</sub> | U <sub>12</sub> |
|-------|-----------------|-----------------|-----------------|-----------------|-----------------|-----------------|
| Lu(1) | 8(1)            | 13(1)           | 10(1)           | 0(1)            | 1(1)            | -1(1)           |
| Br(1) | 22(1)           | 14(1)           | 16(1)           | 1(1)            | 2(1)            | -3(1)           |
| O(11) | 14(1)           | 20(1)           | 20(1)           | -3(1)           | 6(1)            | -6(1)           |
| O(12) | 10(1)           | 13(1)           | 16(1)           | 2(1)            | 3(1)            | 0(1)            |
| C(11) | 12(1)           | 14(2)           | 12(2)           | -1(1)           | 3(1)            | -2(1)           |
| C(12) | 17(2)           | 20(2)           | 25(2)           | 6(2)            | 2(1)            | 1(2)            |
| O(21) | 9(1)            | 17(1)           | 12(1)           | 0(1)            | 0(1)            | -1(1)           |
| O(22) | 10(1)           | 19(1)           | 13(1)           | 1(1)            | -1(1)           | -1(1)           |
| C(21) | 13(2)           | 10(2)           | 14(2)           | 0(1)            | 1(1)            | 2(1)            |
| C(22) | 20(2)           | 30(2)           | 9(2)            | 0(1)            | -1(1)           | 2(2)            |
| O(1W) | 13(1)           | 17(1)           | 15(1)           | 4(1)            | 3(1)            | 1(1)            |
| O(2W) | 12(1)           | 15(1)           | 15(1)           | -2(1)           | 0(1)            | 0(1)            |
| O(3W) | 21(1)           | 19(1)           | 13(1)           | 2(1)            | 5(1)            | 2(1)            |

Table S5. Hydrogen coordinates ( $\times 10^4$ ) and isotropic displacement parameters ( $\text{\AA}^2 \times 10^3$ ) for  $\text{Lu}(\text{OAc})_2\text{Br}\cdot 3\text{H}_2\text{O}$ .

|        | x     | y    | z    | U (eq)  |
|--------|-------|------|------|---------|
| H(12A) | -1873 | 720  | 6251 | 55 (10) |
| H(12B) | 99    | 498  | 6078 | 55 (10) |
| H(12C) | -1443 | -91  | 5450 | 55 (10) |
| H(22A) | 7883  | 5735 | 7312 | 91 (15) |
| H(22B) | 5986  | 4936 | 7199 | 91 (15) |
| H(22C) | 6211  | 6907 | 7232 | 91 (15) |
| H(11W) | 4113  | 1088 | 5717 | 55 (12) |
| H(12W) | 5338  | 1932 | 5208 | 55 (12) |
| H(21W) | 361   | 6435 | 6274 | 46 (11) |
| H(22W) | 2157  | 7204 | 6428 | 46 (11) |
| H(31W) | 2672  | 3875 | 7105 | 55 (12) |
| H(32W) | 3485  | 2288 | 6835 | 55 (12) |

Table S6. Hydrogen bonds for Lu(OAc)<sub>2</sub>Br\_x\_3H<sub>2</sub>O [Å and deg.].

| D-H...A                | d(D-H) | d(H...A) | d(D...A) | <(DHA) |
|------------------------|--------|----------|----------|--------|
| O(1W)-H(11W)...Br(1)#3 | 0.96   | 2.29     | 3.242(2) | 169.4  |
| O(1W)-H(12W)...O(12)#4 | 0.96   | 1.83     | 2.702(3) | 149.2  |
| O(2W)-H(21W)...O(22)#5 | 0.96   | 1.81     | 2.698(3) | 151.6  |
| O(2W)-H(22W)...Br(1)   | 0.96   | 2.27     | 3.228(2) | 173.4  |
| O(3W)-H(31W)...Br(1)#6 | 0.96   | 2.39     | 3.336(2) | 167.6  |
| O(3W)-H(32W)...Br(1)#3 | 0.96   | 2.30     | 3.216(3) | 159.9  |

Symmetry transformations used to generate equivalent atoms:

#1 -x,-y+1,-z+1    #2 -x+1,-y+1,-z+1    #3 x,y-1,z  
#4 x+1,y,z    #5 x-1,y,z    #6 -x+1/2,y-1/2,-z+3/2
