# Supplementary material
Source: MDPI journal article supplement (https://www.mdpi.com/2073-4352/13/7/1043)
Supplement: s1 [file s1]

Table S1. Crystal data and structure refinement for Tb(OAc)2Cl·x·3H2O.

|                                   |                                                                              |
|-----------------------------------|------------------------------------------------------------------------------|
| Identification code               | Ha2019_98_0m_a                                                               |
| Empirical formula                 | C4 H12 Cl O7 Tb                                                              |
| Formula weight                    | 366.51                                                                       |
| Temperature                       | 100(2) K                                                                     |
| Wavelength                        | 0.71073 Å                                                                    |
| Crystal system, space group       | Monoclinic, P2(1)/n                                                          |
| Unit cell dimensions              | a = 7.8003(2) Å<br>b = 7.8539(2) Å    β = 98.075(2) deg.<br>c = 17.3942(5) Å |
| Volume                            | 1055.05(5) Å <sup>3</sup>                                                    |
| Z, Calculated density             | 4, 2.307 Mg/m <sup>3</sup>                                                   |
| Absorption coefficient            | 6.960 mm <sup>-1</sup>                                                       |
| F(000)                            | 696                                                                          |
| Crystal size                      | 0.325 x 0.102 x 0.050 mm                                                     |
| Theta range for data collection   | 2.735 to 27.995 deg.                                                         |
| Limiting indices                  | -10 ≤ h ≤ 10, -10 ≤ k ≤ 10, -22 ≤ l ≤ 22                                     |
| Reflections collected / unique    | 126109 / 2551 [R(int) = 0.0517]                                              |
| Completeness to theta = 25.242    | 99.9 %                                                                       |
| Absorption correction             | Semi-empirical from equivalents                                              |
| Max. and min. transmission        | 0.761 and 0.486                                                              |
| Refinement method                 | Full-matrix least-squares on F <sup>2</sup>                                  |
| Data / restraints / parameters    | 2551 / 0 / 125                                                               |
| Goodness-of-fit on F <sup>2</sup> | 1.054                                                                        |
| Final R indices [I > 2σ(I)]       | R1 = 0.0108, wR2 = 0.0245                                                    |
| R indices (all data)              | R1 = 0.0131, wR2 = 0.0253                                                    |
| Extinction coefficient            | n/a                                                                          |
| Largest diff. peak and hole       | 0.486 and -0.392 e.Å <sup>-3</sup>                                           |

Table S2. Atomic coordinates ( $\times 10^4$ ) and equivalent isotropic displacement parameters ( $\text{\AA}^2 \times 10^3$ ) for  $\text{Tb}(\text{OAc})_2\text{Cl}\cdot 3\text{H}_2\text{O}$ .  $U(\text{eq})$  is defined as one third of the trace of the orthogonalized  $U_{ij}$  tensor.

|       | x        | y       | z       | U (eq) |
|-------|----------|---------|---------|--------|
| Tb(1) | 2663(1)  | 4580(1) | 5383(1) | 9(1)   |
| Cl(1) | 3814(1)  | 9679(1) | 6885(1) | 16(1)  |
| O(11) | -1(2)    | 3336(2) | 5373(1) | 17(1)  |
| O(12) | -2748(2) | 2708(2) | 5262(1) | 15(1)  |
| C(11) | -1197(2) | 2325(2) | 5497(1) | 12(1)  |
| C(12) | -792(3)  | 684(3)  | 5917(1) | 22(1)  |
| O(21) | 5449(2)  | 5618(2) | 5741(1) | 12(1)  |
| O(22) | 8186(2)  | 6281(2) | 5957(1) | 14(1)  |
| C(21) | 6792(2)  | 5989(2) | 6222(1) | 12(1)  |
| C(22) | 6700(2)  | 6059(3) | 7071(1) | 18(1)  |
| O(1W) | 3948(2)  | 1799(2) | 5372(1) | 14(1)  |
| O(2W) | 1680(2)  | 6561(2) | 6252(1) | 14(1)  |
| O(3W) | 3036(2)  | 3500(2) | 6688(1) | 18(1)  |

Table S3. Bond lengths [Å] and angles [deg] for Tb(OAc)2Cl\_x\_3H2O.

---

|                       |            |
|-----------------------|------------|
| Tb(1)-O(11)           | 2.294(1)   |
| Tb(1)-O(21)           | 2.323(1)   |
| Tb(1)-O(2W)           | 2.371(1)   |
| Tb(1)-O(3W)           | 2.403(1)   |
| Tb(1)-O(1W)           | 2.404(1)   |
| Tb(1)-O(12)#1         | 2.413(1)   |
| Tb(1)-O(22)#2         | 2.428(1)   |
| Tb(1)-O(21)#2         | 2.612(1)   |
| Tb(1)-O(11)#1         | 2.820(1)   |
|                       |            |
| Tb(1)-Tb(1)#2         | 4.1064(2)  |
| Tb(1)-Tb(1)#1         | 4.2324(2)  |
|                       |            |
| O(11)-C(11)           | 1.267(2)   |
| O(12)-C(11)           | 1.258(2)   |
| C(11)-C(12)           | 1.493(3)   |
|                       |            |
| O(21)-C(21)           | 1.278(2)   |
| O(22)-C(21)           | 1.259(2)   |
| C(21)-C(22)           | 1.490(2)   |
|                       |            |
| O(11)-Tb(1)-O(21)     | 164.52(5)  |
| O(11)-Tb(1)-O(2W)     | 84.87(4)   |
| O(21)-Tb(1)-O(2W)     | 88.40(4)   |
| O(11)-Tb(1)-O(3W)     | 81.14(5)   |
| O(21)-Tb(1)-O(3W)     | 83.43(4)   |
| O(2W)-Tb(1)-O(3W)     | 68.66(4)   |
| O(11)-Tb(1)-O(1W)     | 89.51(4)   |
| O(21)-Tb(1)-O(1W)     | 86.88(4)   |
| O(2W)-Tb(1)-O(1W)     | 140.68(4)  |
| O(3W)-Tb(1)-O(1W)     | 72.02(4)   |
| O(11)-Tb(1)-O(12)#1   | 117.17(4)  |
| O(21)-Tb(1)-O(12)#1   | 74.27(4)   |
| O(2W)-Tb(1)-O(12)#1   | 75.49(4)   |
| O(3W)-Tb(1)-O(12)#1   | 138.01(5)  |
| O(1W)-Tb(1)-O(12)#1   | 139.44(4)  |
| O(11)-Tb(1)-O(22)#2   | 75.51(4)   |
| O(21)-Tb(1)-O(22)#2   | 118.32(4)  |
| O(2W)-Tb(1)-O(22)#2   | 136.56(4)  |
| O(3W)-Tb(1)-O(22)#2   | 142.13(5)  |
| O(1W)-Tb(1)-O(22)#2   | 78.32(4)   |
| O(12)#1-Tb(1)-O(22)#2 | 79.71(5)   |
| O(11)-Tb(1)-O(21)#2   | 125.07(4)  |
| O(21)-Tb(1)-O(21)#2   | 67.51(5)   |
| O(2W)-Tb(1)-O(21)#2   | 141.54(4)  |
| O(3W)-Tb(1)-O(21)#2   | 132.84(4)  |
| O(1W)-Tb(1)-O(21)#2   | 70.16(4)   |
| O(12)#1-Tb(1)-O(21)#2 | 69.48(4)   |
| O(22)#2-Tb(1)-O(21)#2 | 51.05(4)   |
| O(11)-Tb(1)-O(11)#1   | 68.70(5)   |
| O(21)-Tb(1)-O(11)#1   | 121.41(4)  |
| O(2W)-Tb(1)-O(11)#1   | 68.50(4)   |
| O(3W)-Tb(1)-O(11)#1   | 128.96(4)  |
| O(1W)-Tb(1)-O(11)#1   | 143.54(4)  |
| O(12)#1-Tb(1)-O(11)#1 | 48.51(4)   |
| O(22)#2-Tb(1)-O(11)#1 | 68.32(4)   |
| O(21)#2-Tb(1)-O(11)#1 | 98.13(4)   |
|                       |            |
| Tb(1)#2-Tb(1)-Tb(1)#1 | 138.586(5) |

|                         |           |
|-------------------------|-----------|
| C (11)-O (11)-Tb (1)    | 162.5 (1) |
| C (11)-O (11)-Tb (1) #1 | 86.1 (1)  |
| Tb (1)-O (11)-Tb (1) #1 | 111.3 (1) |
| C (11)-O (12)-Tb (1) #1 | 105.9 (1) |
| O (12)-C (11)-O (11)    | 119.5 (2) |
| O (12)-C (11)-C (12)    | 119.6 (2) |
| O (11)-C (11)-C (12)    | 120.9 (2) |
| C (21)-O (21)-Tb (1)    | 154.9 (1) |
| C (21)-O (21)-Tb (1) #2 | 90.4 (1)  |
| Tb (1)-O (21)-Tb (1) #2 | 112.5 (1) |
| C (21)-O (22)-Tb (1) #2 | 99.6 (1)  |
| O (22)-C (21)-O (21)    | 118.3 (2) |
| O (22)-C (21)-C (22)    | 121.3 (2) |
| O (21)-C (21)-C (22)    | 120.5 (2) |

---

Symmetry transformations used to generate equivalent atoms:  
 #1 -x,-y+1,-z+1      #2 -x+1,-y+1,-z+1

Table S4. Anisotropic displacement parameters ( $\text{\AA}^2 \times 10^3$ ) for Tb(OAc)<sub>2</sub>Cl<sub>2</sub>·3H<sub>2</sub>O.

The anisotropic displacement factor exponent takes the form:  
 $-2 \pi^2 [ h^2 a^{*2} U_{11} + \dots + 2 h k a^* b^* U_{12} ]$

|       | U <sub>11</sub> | U <sub>22</sub> | U <sub>33</sub> | U <sub>23</sub> | U <sub>13</sub> | U <sub>12</sub> |
|-------|-----------------|-----------------|-----------------|-----------------|-----------------|-----------------|
| Tb(1) | 7(1)            | 10(1)           | 12(1)           | 0(1)            | 2(1)            | -2(1)           |
| Cl(1) | 18(1)           | 12(1)           | 17(1)           | 1(1)            | 2(1)            | -1(1)           |
| O(11) | 12(1)           | 18(1)           | 21(1)           | -3(1)           | 5(1)            | -5(1)           |
| O(12) | 9(1)            | 16(1)           | 22(1)           | 4(1)            | 3(1)            | 1(1)            |
| C(11) | 11(1)           | 12(1)           | 13(1)           | -1(1)           | 3(1)            | -1(1)           |
| C(12) | 25(1)           | 17(1)           | 22(1)           | 5(1)            | 0(1)            | 4(1)            |
| O(21) | 9(1)            | 14(1)           | 13(1)           | 0(1)            | 0(1)            | -1(1)           |
| O(22) | 9(1)            | 17(1)           | 17(1)           | -2(1)           | 2(1)            | -2(1)           |
| C(21) | 11(1)           | 9(1)            | 15(1)           | -1(1)           | 1(1)            | 2(1)            |
| C(22) | 16(1)           | 27(1)           | 12(1)           | -1(1)           | 1(1)            | 2(1)            |
| O(1W) | 12(1)           | 12(1)           | 17(1)           | 2(1)            | 5(1)            | 0(1)            |
| O(2W) | 11(1)           | 13(1)           | 19(1)           | -4(1)           | 2(1)            | 0(1)            |
| O(3W) | 24(1)           | 13(1)           | 16(1)           | 2(1)            | 8(1)            | 4(1)            |

Table S5. Hydrogen coordinates ( $\times 10^4$ ) and isotropic displacement parameters ( $\text{\AA}^2 \times 10^3$ ) for  $\text{Tb}(\text{OAc})_2\text{Cl}\cdot 3\text{H}_2\text{O}$ .

|        | x     | y    | z    | U (eq) |
|--------|-------|------|------|--------|
| H(12A) | -1340 | -257 | 5603 | 33 (6) |
| H(12B) | -1236 | 717  | 6417 | 33 (6) |
| H(12C) | 464   | 514  | 6006 | 33 (6) |
| H(12D) | -1832 | 126  | 6055 | 33 (6) |
| H(12E) | -6    | 955  | 6392 | 33 (6) |
| H(12F) | -210  | -83  | 5592 | 33 (6) |
| H(22A) | 7858  | 5884 | 7359 | 45 (5) |
| H(22B) | 5920  | 5166 | 7208 | 45 (5) |
| H(22C) | 6260  | 7175 | 7203 | 45 (5) |
| H(11W) | 3912  | 999  | 5787 | 49 (6) |
| H(12W) | 5147  | 1865 | 5305 | 49 (6) |
| H(21W) | 474   | 6696 | 6293 | 39 (5) |
| H(22W) | 2216  | 7596 | 6459 | 39 (5) |
| H(31W) | 2484  | 3990 | 7095 | 50 (6) |
| H(32W) | 3245  | 2334 | 6838 | 50 (6) |

Table S6. Hydrogen bonds for Tb(OAc)<sub>2</sub>Cl·x<sub>3</sub>H<sub>2</sub>O [Å and deg.].

| D-H...A                | d(D-H) | d(H...A) | d(D...A) | <(DHA) |
|------------------------|--------|----------|----------|--------|
| O(1W)-H(11W)...Cl(1)#3 | 0.96   | 2.18     | 3.129(1) | 167.4  |
| O(1W)-H(12W)...O(12)#4 | 0.96   | 1.78     | 2.706(2) | 160.8  |
| O(2W)-H(21W)...O(22)#5 | 0.96   | 1.83     | 2.711(2) | 151.7  |
| O(2W)-H(22W)...Cl(1)   | 0.96   | 2.13     | 3.076(1) | 170.0  |
| O(3W)-H(31W)...Cl(1)#6 | 0.96   | 2.23     | 3.179(1) | 170.3  |
| O(3W)-H(32W)...Cl(1)#3 | 0.96   | 2.13     | 3.072(1) | 166.1  |

Symmetry transformations used to generate equivalent atoms:

#1 -x,-y+1,-z+1      #2 -x+1,-y+1,-z+1      #3 x,y-1,z  
#4 x+1,y,z      #5 x-1,y,z      #6 -x+1/2,y-1/2,-z+3/2
