# Supplementary material
Source: MDPI journal article supplement (https://www.mdpi.com/2073-4352/13/7/1043)
Supplement: s1 [file s1]

Table S1. Crystal data and structure refinement for Eu(OAc)2Br·x·3H2O.

|                                   |                                                                              |
|-----------------------------------|------------------------------------------------------------------------------|
| Identification code               | Ha2019_96_0m_a                                                               |
| Empirical formula                 | C4 H12 Br Eu O7                                                              |
| Formula weight                    | 404.01                                                                       |
| Temperature                       | 100(2) K                                                                     |
| Wavelength                        | 0.71073 Å                                                                    |
| Crystal system, space group       | Monoclinic, P2(1)/n                                                          |
| Unit cell dimensions              | a = 7.8318(3) Å<br>b = 8.0121(3) Å    β = 95.972(2) deg.<br>c = 17.8214(7) Å |
| Volume                            | 1112.21(7) Å <sup>3</sup>                                                    |
| Z, Calculated density             | 4, 2.413 Mg/m <sup>3</sup>                                                   |
| Absorption coefficient            | 9.236 mm <sup>-1</sup>                                                       |
| F(000)                            | 760                                                                          |
| Crystal size                      | 0.243 x 0.067 x 0.050 mm                                                     |
| Theta range for data collection   | 2.745 to 27.993 deg.                                                         |
| Limiting indices                  | -10 ≤ h ≤ 10, -10 ≤ k ≤ 10, -23 ≤ l ≤ 23                                     |
| Reflections collected / unique    | 118192 / 2696 [R(int) = 0.0516]                                              |
| Completeness to theta = 25.242    | 100.0 %                                                                      |
| Absorption correction             | Semi-empirical from equivalents                                              |
| Max. and min. transmission        | 0.792 and 0.484                                                              |
| Refinement method                 | Full-matrix least-squares on F <sup>2</sup>                                  |
| Data / restraints / parameters    | 2696 / 0 / 125                                                               |
| Goodness-of-fit on F <sup>2</sup> | 1.100                                                                        |
| Final R indices [I > 2σ(I)]       | R1 = 0.0131, wR2 = 0.0300                                                    |
| R indices (all data)              | R1 = 0.0157, wR2 = 0.0309                                                    |
| Extinction coefficient            | n/a                                                                          |
| Largest diff. peak and hole       | 0.408 and -0.408 e.Å <sup>-3</sup>                                           |

Table S2. Atomic coordinates ( $\times 10^4$ ) and equivalent isotropic displacement parameters ( $\text{\AA}^2 \times 10^3$ ) for  $\text{Eu}(\text{OAc})_2\text{Br}\cdot 3\text{H}_2\text{O}$ .  $U(\text{eq})$  is defined as one third of the trace of the orthogonalized  $U_{ij}$  tensor.

|        | x         | y        | z        | U (eq) |
|--------|-----------|----------|----------|--------|
| Eu (1) | 2599 (1)  | 4601 (1) | 5354 (1) | 10 (1) |
| Br (1) | 3944 (1)  | 9617 (1) | 6863 (1) | 17 (1) |
| O (11) | -116 (2)  | 3379 (2) | 5331 (1) | 16 (1) |
| O (12) | -2809 (2) | 2643 (2) | 5225 (1) | 16 (1) |
| C (11) | -1272 (3) | 2335 (3) | 5459 (1) | 13 (1) |
| C (12) | -822 (3)  | 760 (3)  | 5886 (1) | 22 (1) |
| O (21) | 5408 (2)  | 5535 (2) | 5734 (1) | 13 (1) |
| O (22) | 8113 (2)  | 6185 (2) | 5976 (1) | 16 (1) |
| C (21) | 6703 (3)  | 5846 (3) | 6216 (1) | 13 (1) |
| C (22) | 6531 (3)  | 5762 (3) | 7040 (1) | 21 (1) |
| O (1W) | 3863 (2)  | 1820 (2) | 5312 (1) | 15 (1) |
| O (2W) | 1567 (2)  | 6507 (2) | 6250 (1) | 16 (1) |
| O (3W) | 2829 (2)  | 3441 (2) | 6615 (1) | 19 (1) |

Table S3. Bond lengths [Å] and angles [deg] for Eu(OAc)2Br\_x\_3H2O.

---

|                       |            |
|-----------------------|------------|
| Eu(1)-O(11)           | 2.338(1)   |
| Eu(1)-O(21)           | 2.356(1)   |
| Eu(1)-O(2W)           | 2.409(2)   |
| Eu(1)-O(3W)           | 2.420(2)   |
| Eu(1)-O(1W)           | 2.442(2)   |
| Eu(1)-O(12)#1         | 2.450(2)   |
| Eu(1)-O(22)#2         | 2.459(2)   |
| Eu(1)-O(21)#2         | 2.615(1)   |
| Eu(1)-O(11)#1         | 2.720(2)   |
|                       |            |
| Eu(1)-Eu(1)#2         | 4.1387(2)  |
| Eu(1)-Eu(1)#1         | 4.1847(2)  |
|                       |            |
| O(11)-C(11)           | 1.270(2)   |
| O(12)-C(11)           | 1.257(2)   |
| C(11)-C(12)           | 1.497(3)   |
|                       |            |
| O(21)-C(21)           | 1.283(2)   |
| O(22)-C(21)           | 1.256(3)   |
| C(21)-C(22)           | 1.489(3)   |
|                       |            |
| O(11)-Eu(1)-O(21)     | 163.49(5)  |
| O(11)-Eu(1)-O(2W)     | 84.81(5)   |
| O(21)-Eu(1)-O(2W)     | 88.60(5)   |
| O(11)-Eu(1)-O(3W)     | 80.50(5)   |
| O(21)-Eu(1)-O(3W)     | 83.00(5)   |
| O(2W)-Eu(1)-O(3W)     | 68.04(5)   |
| O(11)-Eu(1)-O(1W)     | 89.33(5)   |
| O(21)-Eu(1)-O(1W)     | 85.96(5)   |
| O(2W)-Eu(1)-O(1W)     | 139.79(5)  |
| O(3W)-Eu(1)-O(1W)     | 71.75(5)   |
| O(11)-Eu(1)-O(12)#1   | 118.08(5)  |
| O(21)-Eu(1)-O(12)#1   | 74.53(5)   |
| O(2W)-Eu(1)-O(12)#1   | 75.48(5)   |
| O(3W)-Eu(1)-O(12)#1   | 137.31(5)  |
| O(1W)-Eu(1)-O(12)#1   | 139.85(5)  |
| O(11)-Eu(1)-O(22)#2   | 76.19(5)   |
| O(21)-Eu(1)-O(22)#2   | 118.04(5)  |
| O(2W)-Eu(1)-O(22)#2   | 137.95(5)  |
| O(3W)-Eu(1)-O(22)#2   | 141.58(6)  |
| O(1W)-Eu(1)-O(22)#2   | 77.83(5)   |
| O(12)#1-Eu(1)-O(22)#2 | 81.00(5)   |
| O(11)-Eu(1)-O(21)#2   | 125.57(5)  |
| O(21)-Eu(1)-O(21)#2   | 67.37(6)   |
| O(2W)-Eu(1)-O(21)#2   | 141.73(5)  |
| O(3W)-Eu(1)-O(21)#2   | 132.85(5)  |
| O(1W)-Eu(1)-O(21)#2   | 70.40(5)   |
| O(12)#1-Eu(1)-O(21)#2 | 69.76(5)   |
| O(22)#2-Eu(1)-O(21)#2 | 50.78(4)   |
| O(11)-Eu(1)-O(11)#1   | 68.57(6)   |
| O(21)-Eu(1)-O(11)#1   | 122.87(5)  |
| O(2W)-Eu(1)-O(11)#1   | 69.31(5)   |
| O(3W)-Eu(1)-O(11)#1   | 128.74(5)  |
| O(1W)-Eu(1)-O(11)#1   | 143.34(5)  |
| O(12)#1-Eu(1)-O(11)#1 | 49.51(4)   |
| O(22)#2-Eu(1)-O(11)#1 | 68.88(5)   |
| O(21)#2-Eu(1)-O(11)#1 | 98.37(5)   |
|                       |            |
| Eu(1)#2-Eu(1)-Eu(1)#1 | 140.418(5) |

|                         |           |
|-------------------------|-----------|
| C (11)-O (11)-Eu (1)    | 159.5 (1) |
| C (11)-O (11)-Eu (1) #1 | 89.0 (1)  |
| Eu (1)-O (11)-Eu (1) #1 | 111.4 (1) |
| C (11)-O (12)-Eu (1) #1 | 102.3 (1) |
| O (12)-C (11)-O (11)    | 119.2 (2) |
| O (12)-C (11)-C (12)    | 120.1 (2) |
| O (11)-C (11)-C (12)    | 120.8 (2) |
| C (21)-O (21)-Eu (1)    | 154.6 (1) |
| C (21)-O (21)-Eu (1) #2 | 90.8 (1)  |
| Eu (1)-O (21)-Eu (1) #2 | 112.6 (1) |
| C (21)-O (22)-Eu (1) #2 | 98.9 (1)  |
| O (22)-C (21)-O (21)    | 118.3 (2) |
| O (22)-C (21)-C (22)    | 121.3 (2) |
| O (21)-C (21)-C (22)    | 120.3 (2) |

---

Symmetry transformations used to generate equivalent atoms:  
 #1 -x,-y+1,-z+1      #2 -x+1,-y+1,-z+1

Table S4. Anisotropic displacement parameters ( $\text{\AA}^2 \times 10^3$ ) for  
Eu(OAc)<sub>2</sub>Br·x·3H<sub>2</sub>O.

The anisotropic displacement factor exponent takes the form:  
 $-2 \pi^2 [ h^2 a^{*2} U_{11} + \dots + 2 h k a^* b^* U_{12} ]$

|       | U <sub>11</sub> | U <sub>22</sub> | U <sub>33</sub> | U <sub>23</sub> | U <sub>13</sub> | U <sub>12</sub> |
|-------|-----------------|-----------------|-----------------|-----------------|-----------------|-----------------|
| Eu(1) | 7(1)            | 13(1)           | 12(1)           | 0(1)            | 1(1)            | -1(1)           |
| Br(1) | 20(1)           | 15(1)           | 17(1)           | 2(1)            | 0(1)            | -2(1)           |
| O(11) | 11(1)           | 18(1)           | 19(1)           | 2(1)            | 3(1)            | -3(1)           |
| O(12) | 9(1)            | 18(1)           | 23(1)           | 5(1)            | 2(1)            | 0(1)            |
| C(11) | 12(1)           | 14(1)           | 14(1)           | -2(1)           | 4(1)            | -1(1)           |
| C(12) | 22(1)           | 20(1)           | 25(1)           | 7(1)            | 0(1)            | 0(1)            |
| O(21) | 9(1)            | 16(1)           | 14(1)           | 0(1)            | 0(1)            | -1(1)           |
| O(22) | 10(1)           | 23(1)           | 16(1)           | -1(1)           | 0(1)            | -2(1)           |
| C(21) | 11(1)           | 14(1)           | 14(1)           | -1(1)           | -1(1)           | 2(1)            |
| C(22) | 16(1)           | 33(1)           | 13(1)           | 0(1)            | 1(1)            | 3(1)            |
| O(1W) | 11(1)           | 15(1)           | 18(1)           | 2(1)            | 4(1)            | 0(1)            |
| O(2W) | 12(1)           | 17(1)           | 19(1)           | -3(1)           | 1(1)            | 0(1)            |
| O(3W) | 26(1)           | 17(1)           | 16(1)           | 2(1)            | 7(1)            | 4(1)            |

Table S5. Hydrogen coordinates ( $\times 10^4$ ) and isotropic displacement parameters ( $\text{\AA}^2 \times 10^3$ ) for  $\text{Eu}(\text{OAc})_2\text{Br}\cdot 3\text{H}_2\text{O}$ .

|        | x     | y    | z    | U (eq) |
|--------|-------|------|------|--------|
| H(12A) | -870  | 956  | 6426 | 87 (9) |
| H(12B) | 340   | 410  | 5799 | 87 (9) |
| H(12C) | -1641 | -118 | 5713 | 87 (9) |
| H(22A) | 7661  | 5565 | 7316 | 45 (7) |
| H(22B) | 5755  | 4847 | 7139 | 45 (7) |
| H(22C) | 6063  | 6819 | 7206 | 45 (7) |
| H(22D) | 7548  | 6191 | 7347 | 45 (7) |
| H(22E) | 5501  | 6312 | 7190 | 45 (7) |
| H(22F) | 6442  | 4555 | 7115 | 45 (7) |
| H(11W) | 3826  | 1002 | 5704 | 50 (7) |
| H(12W) | 5039  | 1842 | 5206 | 50 (7) |
| H(21W) | 373   | 6689 | 6300 | 47 (7) |
| H(22W) | 2135  | 7499 | 6448 | 47 (7) |
| H(31W) | 2338  | 3927 | 7035 | 44 (6) |
| H(32W) | 3158  | 2333 | 6776 | 44 (6) |

Table S6. Hydrogen bonds for Eu(OAc)<sub>2</sub>Br·x<sub>3</sub>H<sub>2</sub>O [Å and deg.].

| D-H...A                | d(D-H) | d(H...A) | d(D...A) | <(DHA) |
|------------------------|--------|----------|----------|--------|
| O(1W)-H(11W)...Br(1)#3 | 0.96   | 2.34     | 3.274(2) | 164.7  |
| O(1W)-H(12W)...O(12)#4 | 0.96   | 1.80     | 2.709(2) | 156.7  |
| O(2W)-H(21W)...O(22)#5 | 0.96   | 1.85     | 2.711(2) | 148.0  |
| O(2W)-H(22W)...Br(1)   | 0.96   | 2.28     | 3.231(2) | 169.2  |
| O(3W)-H(31W)...Br(1)#6 | 0.96   | 2.36     | 3.310(2) | 169.6  |
| O(3W)-H(32W)...Br(1)#3 | 0.96   | 2.26     | 3.204(2) | 166.5  |

Symmetry transformations used to generate equivalent atoms:

#1 -x,-y+1,-z+1      #2 -x+1,-y+1,-z+1      #3 x,y-1,z  
#4 x+1,y,z      #5 x-1,y,z      #6 -x+1/2,y-1/2,-z+3/2
