# Supplementary material
Source: MDPI journal article supplement (https://www.mdpi.com/2073-4352/13/7/1043)
Supplement: s1 [file s1]

Table S1. Crystal data and structure refinement for Er(OAc)2Br·x\_3H2O.

|                                   |                                                                              |
|-----------------------------------|------------------------------------------------------------------------------|
| Identification code               | Ha2019_79_0m_a                                                               |
| Empirical formula                 | C4 H12 Br Er O7                                                              |
| Formula weight                    | 419.31                                                                       |
| Temperature                       | 100(2) K                                                                     |
| Wavelength                        | 0.71073 Å                                                                    |
| Crystal system, space group       | Monoclinic, P2(1)/n                                                          |
| Unit cell dimensions              | a = 7.8069(3) Å<br>b = 8.0529(3) Å    β = 96.154(2) deg.<br>c = 17.4494(7) Å |
| Volume                            | 1090.69(7) Å <sup>3</sup>                                                    |
| Z, Calculated density             | 4, 2.554 Mg/m <sup>3</sup>                                                   |
| Absorption coefficient            | 11.362 mm <sup>-1</sup>                                                      |
| F(000)                            | 780                                                                          |
| Crystal size                      | 0.362 x 0.162 x 0.144 mm                                                     |
| Theta range for data collection   | 2.758 to 27.998 deg.                                                         |
| Limiting indices                  | -10 ≤ h ≤ 10, -10 ≤ k ≤ 10, -23 ≤ l ≤ 23                                     |
| Reflections collected / unique    | 121468 / 2636 [R(int) = 0.0413]                                              |
| Completeness to theta = 25.242    | 99.8 %                                                                       |
| Absorption correction             | Mutli-scan                                                                   |
| Max. and min. transmission        | 0.683 and 0.267                                                              |
| Refinement method                 | Full-matrix least-squares on F <sup>2</sup>                                  |
| Data / restraints / parameters    | 2636 / 0 / 126                                                               |
| Goodness-of-fit on F <sup>2</sup> | 1.181                                                                        |
| Final R indices [I > 2σ(I)]       | R1 = 0.0114, wR2 = 0.0253                                                    |
| R indices (all data)              | R1 = 0.0123, wR2 = 0.0255                                                    |
| Extinction coefficient            | 0.00082(5)                                                                   |
| Largest diff. peak and hole       | 0.364 and -0.467 e.Å <sup>-3</sup>                                           |

Table S2. Atomic coordinates ( $\times 10^4$ ) and equivalent isotropic displacement parameters ( $\text{\AA}^2 \times 10^3$ ) for  $\text{Er}(\text{OAc})_2\text{Br}\cdot 3\text{H}_2\text{O}$ .  $U(\text{eq})$  is defined as one third of the trace of the orthogonalized  $U_{ij}$  tensor.

|       | x        | y       | z       | U (eq) |
|-------|----------|---------|---------|--------|
| Er(1) | 2728(1)  | 4468(1) | 5393(1) | 10(1)  |
| Br(1) | 3842(1)  | 9488(1) | 6807(1) | 16(1)  |
| O(11) | 172(2)   | 3238(2) | 5403(1) | 19(1)  |
| O(12) | -2632(2) | 2923(2) | 5227(1) | 14(1)  |
| C(11) | -1153(2) | 2395(3) | 5479(1) | 12(1)  |
| C(12) | -1012(3) | 735(3)  | 5867(1) | 22(1)  |
| O(21) | 5396(2)  | 5555(2) | 5738(1) | 12(1)  |
| O(22) | 8106(2)  | 6236(2) | 5919(1) | 14(1)  |
| C(21) | 6731(2)  | 5890(2) | 6202(1) | 12(1)  |
| C(22) | 6677(3)  | 5837(3) | 7054(1) | 19(1)  |
| O(1W) | 4103(2)  | 1889(2) | 5326(1) | 14(1)  |
| O(2W) | 1559(2)  | 6284(2) | 6244(1) | 14(1)  |
| O(3W) | 3112(2)  | 3407(2) | 6664(1) | 18(1)  |

Table S3. Bond lengths [Å] and angles [deg] for Er(OAc)2Br\_x\_3H2O.

---

|                       |            |
|-----------------------|------------|
| Er(1)-O(11)           | 2.229(1)   |
| Er(1)-O(21)           | 2.280(1)   |
| Er(1)-O(2W)           | 2.338(1)   |
| Er(1)-O(1W)           | 2.347(2)   |
| Er(1)-O(12)#1         | 2.360(2)   |
| Er(1)-O(3W)           | 2.365(2)   |
| Er(1)-O(22)#2         | 2.382(1)   |
| Er(1)-O(21)#2         | 2.582(1)   |
| Er(1)-O(11)#1         | 3.129(2)   |
| Er(1)-Er(1)#2         | 4.0312(2)  |
| Er(1)-Er(1)#1         | 4.4158(2)  |
| O(11)-C(11)           | 1.256(2)   |
| O(12)-C(11)           | 1.264(2)   |
| C(11)-C(12)           | 1.497(3)   |
| O(21)-C(21)           | 1.278(2)   |
| O(22)-C(21)           | 1.259(2)   |
| C(21)-C(22)           | 1.493(3)   |
| O(11)-Er(1)-O(21)     | 164.05(5)  |
| O(11)-Er(1)-O(2W)     | 82.09(5)   |
| O(21)-Er(1)-O(2W)     | 89.99(5)   |
| O(11)-Er(1)-O(1W)     | 91.24(6)   |
| O(21)-Er(1)-O(1W)     | 86.73(5)   |
| O(2W)-Er(1)-O(1W)     | 142.83(5)  |
| O(11)-Er(1)-O(12)#1   | 114.50(5)  |
| O(21)-Er(1)-O(12)#1   | 76.28(5)   |
| O(2W)-Er(1)-O(12)#1   | 74.89(5)   |
| O(1W)-Er(1)-O(12)#1   | 139.20(5)  |
| O(11)-Er(1)-O(3W)     | 81.70(6)   |
| O(21)-Er(1)-O(3W)     | 82.55(5)   |
| O(2W)-Er(1)-O(3W)     | 69.47(5)   |
| O(1W)-Er(1)-O(3W)     | 73.40(5)   |
| O(12)#1-Er(1)-O(3W)   | 138.23(5)  |
| O(11)-Er(1)-O(22)#2   | 75.49(5)   |
| O(21)-Er(1)-O(22)#2   | 119.55(5)  |
| O(2W)-Er(1)-O(22)#2   | 132.47(5)  |
| O(1W)-Er(1)-O(22)#2   | 79.64(5)   |
| O(12)#1-Er(1)-O(22)#2 | 77.25(5)   |
| O(3W)-Er(1)-O(22)#2   | 144.05(5)  |
| O(11)-Er(1)-O(21)#2   | 125.77(5)  |
| O(21)-Er(1)-O(21)#2   | 68.14(5)   |
| O(2W)-Er(1)-O(21)#2   | 141.48(5)  |
| O(1W)-Er(1)-O(21)#2   | 69.83(5)   |
| O(12)#1-Er(1)-O(21)#2 | 69.43(5)   |
| O(3W)-Er(1)-O(21)#2   | 133.55(5)  |
| O(22)#2-Er(1)-O(21)#2 | 51.80(4)   |
| O(11)-Er(1)-O(11)#1   | 70.15(6)   |
| O(21)-Er(1)-O(11)#1   | 119.20(5)  |
| O(2W)-Er(1)-O(11)#1   | 66.44(5)   |
| O(1W)-Er(1)-O(11)#1   | 144.40(5)  |
| O(12)#1-Er(1)-O(11)#1 | 44.38(4)   |
| O(3W)-Er(1)-O(11)#1   | 130.00(5)  |
| O(22)#2-Er(1)-O(11)#1 | 66.64(4)   |
| O(21)#2-Er(1)-O(11)#1 | 96.16(4)   |
| Er(1)#2-Er(1)-Er(1)#1 | 135.053(5) |

|                     |          |
|---------------------|----------|
| C(11)-O(11)-Er(1)   | 171.5(2) |
| C(11)-O(12)-Er(1)#1 | 116.2(1) |
| O(11)-C(11)-O(12)   | 120.9(2) |
| O(11)-C(11)-C(12)   | 120.6(2) |
| O(12)-C(11)-C(12)   | 118.5(2) |
| C(21)-O(21)-Er(1)   | 155.3(1) |
| C(21)-O(21)-Er(1)#2 | 89.7(1)  |
| Er(1)-O(21)-Er(1)#2 | 111.9(1) |
| C(21)-O(22)-Er(1)#2 | 99.7(1)  |
| O(22)-C(21)-O(21)   | 118.1(2) |
| O(22)-C(21)-C(22)   | 120.8(2) |
| O(21)-C(21)-C(22)   | 121.1(2) |

---

Symmetry transformations used to generate equivalent atoms:  
 #1 -x,-y+1,-z+1      #2 -x+1,-y+1,-z+1

Table S4. Anisotropic displacement parameters ( $\text{\AA}^2 \times 10^3$ ) for  
 $\text{Er}(\text{OAc})_2\text{Br} \cdot x_3\text{H}_2\text{O}$ .

The anisotropic displacement factor exponent takes the form:  
 $-2 \pi^2 [ h^2 a^{*2} U_{11} + \dots + 2 h k a^* b^* U_{12} ]$

|       | U11   | U22   | U33   | U23   | U13  | U12   |
|-------|-------|-------|-------|-------|------|-------|
| Er(1) | 7(1)  | 11(1) | 11(1) | 0(1)  | 2(1) | -2(1) |
| Br(1) | 20(1) | 12(1) | 16(1) | 1(1)  | 2(1) | -2(1) |
| O(11) | 13(1) | 23(1) | 22(1) | -6(1) | 7(1) | -8(1) |
| O(12) | 9(1)  | 16(1) | 17(1) | 2(1)  | 1(1) | 1(1)  |
| C(11) | 11(1) | 13(1) | 11(1) | -2(1) | 3(1) | 0(1)  |
| C(12) | 21(1) | 19(1) | 24(1) | 7(1)  | 1(1) | 3(1)  |
| O(21) | 8(1)  | 15(1) | 12(1) | 0(1)  | 1(1) | 0(1)  |
| O(22) | 9(1)  | 18(1) | 16(1) | -1(1) | 1(1) | -2(1) |
| C(21) | 11(1) | 10(1) | 15(1) | -1(1) | 1(1) | 1(1)  |
| C(22) | 17(1) | 29(1) | 11(1) | 0(1)  | 0(1) | 2(1)  |
| O(1W) | 12(1) | 15(1) | 16(1) | 2(1)  | 5(1) | 0(1)  |
| O(2W) | 11(1) | 14(1) | 18(1) | -2(1) | 1(1) | 0(1)  |
| O(3W) | 24(1) | 15(1) | 15(1) | 2(1)  | 7(1) | 4(1)  |

Table S5. Hydrogen coordinates ( $\times 10^4$ ) and isotropic displacement parameters ( $\text{\AA}^2 \times 10^3$ ) for  $\text{Er}(\text{OAc})_2\text{Br}\cdot 3\text{H}_2\text{O}$ .

|        | x     | y    | z    | U (eq) |
|--------|-------|------|------|--------|
| H(12A) | -1808 | 687  | 6264 | 71 (7) |
| H(12B) | 170   | 570  | 6105 | 71 (7) |
| H(12C) | -1307 | -139 | 5484 | 71 (7) |
| H(22A) | 7847  | 5688 | 7310 | 73 (7) |
| H(22B) | 5952  | 4908 | 7185 | 73 (7) |
| H(22C) | 6198  | 6880 | 7227 | 73 (7) |
| H(11W) | 4085  | 1049 | 5716 | 50 (7) |
| H(12W) | 5295  | 2005 | 5247 | 50 (7) |
| H(21W) | 343   | 6441 | 6253 | 58 (8) |
| H(22W) | 2060  | 7352 | 6368 | 58 (8) |
| H(31W) | 2514  | 3860 | 7069 | 48 (7) |
| H(32W) | 3316  | 2265 | 6803 | 48 (7) |

Table S6. Hydrogen bonds for Er(OAc)<sub>2</sub>Br·x·3H<sub>2</sub>O [Å and deg.].

| D-H...A                | d(D-H) | d(H...A) | d(D...A) | <(DHA) |
|------------------------|--------|----------|----------|--------|
| O(1W)-H(11W)...Br(1)#3 | 0.96   | 2.31     | 3.252(2) | 167.8  |
| O(1W)-H(12W)...O(12)#4 | 0.96   | 1.78     | 2.705(2) | 160.0  |
| O(2W)-H(21W)...O(22)#5 | 0.96   | 1.79     | 2.695(2) | 156.4  |
| O(2W)-H(22W)...Br(1)   | 0.96   | 2.29     | 3.229(2) | 165.0  |
| O(3W)-H(31W)...Br(1)#6 | 0.96   | 2.38     | 3.327(1) | 169.0  |
| O(3W)-H(32W)...Br(1)#3 | 0.96   | 2.27     | 3.212(2) | 165.4  |

Symmetry transformations used to generate equivalent atoms:

#1 -x,-y+1,-z+1      #2 -x+1,-y+1,-z+1      #3 x,y-1,z  
#4 x+1,y,z      #5 x-1,y,z      #6 -x+1/2,y-1/2,-z+3/2
