# Supplementary material
Source: MDPI journal article supplement (https://www.mdpi.com/2073-4352/13/7/1043)
Supplement: s1 [file s1]

Table S1. Crystal data and structure refinement for Dy(OAc)2Cl\_x\_3H2O.

|                                   |                                                                              |
|-----------------------------------|------------------------------------------------------------------------------|
| Identification code               | Ha2019_77_0m_a                                                               |
| Empirical formula                 | C4 H12 Cl Dy O7                                                              |
| Formula weight                    | 370.09                                                                       |
| Temperature                       | 100(2) K                                                                     |
| Wavelength                        | 0.71073 Å                                                                    |
| Crystal system, space group       | Monoclinic, P2(1)/n                                                          |
| Unit cell dimensions              | a = 7.8106(4) Å<br>b = 7.8433(4) Å    β = 97.978(3) deg.<br>c = 17.3400(8) Å |
| Volume                            | 1051.98(9) Å <sup>3</sup>                                                    |
| Z, Calculated density             | 4, 2.337 Mg/m <sup>3</sup>                                                   |
| Absorption coefficient            | 7.361 mm <sup>-1</sup>                                                       |
| F(000)                            | 700                                                                          |
| Crystal size                      | 0.448 x 0.112 x 0.076 mm                                                     |
| Theta range for data collection   | 2.734 to 27.996 deg.                                                         |
| Limiting indices                  | -10 ≤ h ≤ 10, -10 ≤ k ≤ 10, -22 ≤ l ≤ 22                                     |
| Reflections collected / unique    | 49237 / 2547 [R(int) = 0.0328]                                               |
| Completeness to theta = 25.242    | 99.9 %                                                                       |
| Absorption correction             | Semi-empirical from equivalents                                              |
| Max. and min. transmission        | 0.783 and 0.625                                                              |
| Refinement method                 | Full-matrix least-squares on F <sup>2</sup>                                  |
| Data / restraints / parameters    | 2547 / 0 / 126                                                               |
| Goodness-of-fit on F <sup>2</sup> | 1.187                                                                        |
| Final R indices [I > 2σ(I)]       | R1 = 0.0127, wR2 = 0.0265                                                    |
| R indices (all data)              | R1 = 0.0131, wR2 = 0.0267                                                    |
| Extinction coefficient            | 0.00450(11)                                                                  |
| Largest diff. peak and hole       | 0.489 and -0.652 e.Å <sup>-3</sup>                                           |

Table S2. Atomic coordinates ( $\times 10^4$ ) and equivalent isotropic displacement parameters ( $\text{\AA}^2 \times 10^3$ ) for  $\text{Dy}(\text{OAc})_2\text{Cl} \cdot 3\text{H}_2\text{O}$ .  $U(\text{eq})$  is defined as one third of the trace of the orthogonalized  $U_{ij}$  tensor.

|        | x         | y        | z        | U (eq) |
|--------|-----------|----------|----------|--------|
| Dy (1) | 2689 (1)  | 4549 (1) | 5391 (1) | 9 (1)  |
| Cl (1) | 3800 (1)  | 9642 (1) | 6875 (1) | 15 (1) |
| O (11) | 56 (2)    | 3309 (2) | 5388 (1) | 18 (1) |
| O (12) | -2709 (2) | 2760 (2) | 5262 (1) | 15 (1) |
| C (11) | -1172 (3) | 2331 (3) | 5504 (1) | 11 (1) |
| C (12) | -829 (3)  | 670 (3)  | 5915 (1) | 22 (1) |
| O (21) | 5445 (2)  | 5622 (2) | 5740 (1) | 11 (1) |
| O (22) | 8178 (2)  | 6288 (2) | 5947 (1) | 13 (1) |
| C (21) | 6794 (3)  | 5989 (3) | 6217 (1) | 11 (1) |
| C (22) | 6723 (3)  | 6048 (3) | 7073 (1) | 17 (1) |
| O (1W) | 4006 (2)  | 1804 (2) | 5374 (1) | 14 (1) |
| O (2W) | 1663 (2)  | 6516 (2) | 6251 (1) | 14 (1) |
| O (3W) | 3086 (2)  | 3485 (2) | 6696 (1) | 17 (1) |

Table S3. Bond lengths [Å] and angles [deg] for Dy(OAc)2Cl\_x\_3H2O.

---

|                       |            |
|-----------------------|------------|
| Dy(1)-O(11)           | 2.274(1)   |
| Dy(1)-O(21)           | 2.312(1)   |
| Dy(1)-O(2W)           | 2.361(2)   |
| Dy(1)-O(1W)           | 2.388(1)   |
| Dy(1)-O(3W)           | 2.392(2)   |
| Dy(1)-O(12)#1         | 2.396(2)   |
| Dy(1)-O(22)#2         | 2.416(1)   |
| Dy(1)-O(21)#2         | 2.604(1)   |
| Dy(1)-O(11)#1         | 2.905(2)   |
|                       |            |
| Dy(1)-Dy(1)#2         | 4.0899(3)  |
| Dy(1)-Dy(1)#1         | 4.2898(3)  |
|                       |            |
| O(11)-C(11)           | 1.265(2)   |
| O(12)-C(11)           | 1.261(2)   |
| C(11)-C(12)           | 1.492(3)   |
|                       |            |
| O(21)-C(21)           | 1.279(2)   |
| O(22)-C(21)           | 1.258(2)   |
| C(21)-C(22)           | 1.494(3)   |
|                       |            |
| O(11)-Dy(1)-O(21)     | 164.76(5)  |
| O(11)-Dy(1)-O(2W)     | 83.96(5)   |
| O(21)-Dy(1)-O(2W)     | 88.99(5)   |
| O(11)-Dy(1)-O(1W)     | 90.29(5)   |
| O(21)-Dy(1)-O(1W)     | 86.80(5)   |
| O(2W)-Dy(1)-O(1W)     | 141.35(5)  |
| O(11)-Dy(1)-O(3W)     | 81.44(6)   |
| O(21)-Dy(1)-O(3W)     | 83.43(5)   |
| O(2W)-Dy(1)-O(3W)     | 68.96(5)   |
| O(1W)-Dy(1)-O(3W)     | 72.39(5)   |
| O(11)-Dy(1)-O(12)#1   | 116.16(5)  |
| O(21)-Dy(1)-O(12)#1   | 74.72(5)   |
| O(2W)-Dy(1)-O(12)#1   | 75.43(5)   |
| O(1W)-Dy(1)-O(12)#1   | 139.22(5)  |
| O(3W)-Dy(1)-O(12)#1   | 138.26(5)  |
| O(11)-Dy(1)-O(22)#2   | 75.45(5)   |
| O(21)-Dy(1)-O(22)#2   | 118.49(5)  |
| O(2W)-Dy(1)-O(22)#2   | 135.20(5)  |
| O(1W)-Dy(1)-O(22)#2   | 78.87(5)   |
| O(3W)-Dy(1)-O(22)#2   | 142.76(5)  |
| O(12)#1-Dy(1)-O(22)#2 | 78.74(5)   |
| O(11)-Dy(1)-O(21)#2   | 125.22(5)  |
| O(21)-Dy(1)-O(21)#2   | 67.53(5)   |
| O(2W)-Dy(1)-O(21)#2   | 141.59(5)  |
| O(1W)-Dy(1)-O(21)#2   | 69.97(5)   |
| O(3W)-Dy(1)-O(21)#2   | 133.01(5)  |
| O(12)#1-Dy(1)-O(21)#2 | 69.41(5)   |
| O(22)#2-Dy(1)-O(21)#2 | 51.27(4)   |
| O(11)-Dy(1)-O(11)#1   | 68.75(6)   |
| O(21)-Dy(1)-O(11)#1   | 120.77(5)  |
| O(2W)-Dy(1)-O(11)#1   | 67.83(5)   |
| O(1W)-Dy(1)-O(11)#1   | 143.81(5)  |
| O(3W)-Dy(1)-O(11)#1   | 129.20(5)  |
| O(12)#1-Dy(1)-O(11)#1 | 47.45(4)   |
| O(22)#2-Dy(1)-O(11)#1 | 67.69(5)   |
| O(21)#2-Dy(1)-O(11)#1 | 97.68(4)   |
|                       |            |
| Dy(1)#2-Dy(1)-Dy(1)#1 | 137.511(5) |

|                         |           |
|-------------------------|-----------|
| C (11)-O (11)-Dy (1)    | 164.6 (2) |
| C (11)-O (11)-Dy (1) #1 | 84.1 (1)  |
| Dy (1)-O (11)-Dy (1) #1 | 111.3 (1) |
| C (11)-O (12)-Dy (1) #1 | 108.9 (1) |
| O (12)-C (11)-O (11)    | 119.6 (2) |
| O (12)-C (11)-C (12)    | 119.4 (2) |
| O (11)-C (11)-C (12)    | 121.0 (2) |
| C (21)-O (21)-Dy (1)    | 154.8 (1) |
| C (21)-O (21)-Dy (1) #2 | 90.1 (1)  |
| Dy (1)-O (21)-Dy (1) #2 | 112.5 (1) |
| C (21)-O (22)-Dy (1) #2 | 99.5 (1)  |
| O (22)-C (21)-O (21)    | 118.3 (2) |
| O (22)-C (21)-C (22)    | 121.1 (2) |
| O (21)-C (21)-C (22)    | 120.6 (2) |

---

Symmetry transformations used to generate equivalent atoms:  
 #1 -x,-y+1,-z+1      #2 -x+1,-y+1,-z+1

Table S4. Anisotropic displacement parameters ( $\text{\AA}^2 \times 10^3$ ) for Dy(OAc)<sub>2</sub>Cl<sub>2</sub>·3H<sub>2</sub>O.

The anisotropic displacement factor exponent takes the form:  
 $-2 \pi^2 [ h^2 a^{*2} U_{11} + \dots + 2 h k a^* b^* U_{12} ]$

|       | U <sub>11</sub> | U <sub>22</sub> | U <sub>33</sub> | U <sub>23</sub> | U <sub>13</sub> | U <sub>12</sub> |
|-------|-----------------|-----------------|-----------------|-----------------|-----------------|-----------------|
| Dy(1) | 7(1)            | 10(1)           | 10(1)           | 0(1)            | 2(1)            | -2(1)           |
| Cl(1) | 18(1)           | 12(1)           | 16(1)           | 1(1)            | 2(1)            | -1(1)           |
| O(11) | 13(1)           | 22(1)           | 20(1)           | -5(1)           | 7(1)            | -8(1)           |
| O(12) | 9(1)            | 17(1)           | 18(1)           | 3(1)            | 2(1)            | 1(1)            |
| C(11) | 11(1)           | 12(1)           | 12(1)           | -2(1)           | 4(1)            | 0(1)            |
| C(12) | 26(1)           | 17(1)           | 23(1)           | 6(1)            | 1(1)            | 5(1)            |
| O(21) | 8(1)            | 13(1)           | 12(1)           | -1(1)           | 0(1)            | -2(1)           |
| O(22) | 9(1)            | 17(1)           | 15(1)           | -1(1)           | 2(1)            | -1(1)           |
| C(21) | 11(1)           | 8(1)            | 14(1)           | 0(1)            | 0(1)            | 1(1)            |
| C(22) | 14(1)           | 27(1)           | 10(1)           | -2(1)           | 1(1)            | 2(1)            |
| O(1W) | 12(1)           | 13(1)           | 17(1)           | 2(1)            | 5(1)            | 0(1)            |
| O(2W) | 11(1)           | 14(1)           | 17(1)           | -3(1)           | 1(1)            | -1(1)           |
| O(3W) | 24(1)           | 13(1)           | 16(1)           | 2(1)            | 8(1)            | 4(1)            |

Table S5. Hydrogen coordinates ( $\times 10^4$ ) and isotropic displacement parameters ( $\text{\AA}^2 \times 10^3$ ) for  $\text{Dy}(\text{OAc})_2\text{Cl}\cdot 3\text{H}_2\text{O}$ .

|        | x     | y    | z    | U (eq) |
|--------|-------|------|------|--------|
| H(12A) | -1030 | -266 | 5539 | 81 (8) |
| H(12B) | -1606 | 545  | 6310 | 81 (8) |
| H(12C) | 373   | 637  | 6168 | 81 (8) |
| H(22A) | 7896  | 5951 | 7356 | 48 (6) |
| H(22B) | 6016  | 5100 | 7219 | 48 (6) |
| H(22C) | 6211  | 7131 | 7206 | 48 (6) |
| H(11W) | 3938  | 955  | 5768 | 50 (7) |
| H(12W) | 5216  | 1905 | 5336 | 50 (7) |
| H(21W) | 452   | 6720 | 6253 | 50 (7) |
| H(22W) | 2221  | 7559 | 6433 | 50 (7) |
| H(31W) | 2562  | 4024 | 7102 | 52 (7) |
| H(32W) | 3238  | 2316 | 6855 | 52 (7) |

Table S6. Hydrogen bonds for Dy(OAc)<sub>2</sub>Cl<sub>x</sub>·3H<sub>2</sub>O [Å and deg.].

| D-H...A                | d(D-H) | d(H...A) | d(D...A) | <(DHA) |
|------------------------|--------|----------|----------|--------|
| O(1W)-H(11W)...Cl(1)#3 | 0.96   | 2.19     | 3.128(2) | 164.0  |
| O(1W)-H(12W)...O(12)#4 | 0.96   | 1.77     | 2.706(2) | 162.5  |
| O(2W)-H(21W)...O(22)#5 | 0.96   | 1.81     | 2.706(2) | 153.3  |
| O(2W)-H(22W)...Cl(1)   | 0.96   | 2.12     | 3.077(2) | 171.3  |
| O(3W)-H(31W)...Cl(1)#6 | 0.96   | 2.24     | 3.186(2) | 166.3  |
| O(3W)-H(32W)...Cl(1)#3 | 0.96   | 2.14     | 3.073(2) | 163.1  |

Symmetry transformations used to generate equivalent atoms:

#1 -x,-y+1,-z+1      #2 -x+1,-y+1,-z+1      #3 x,y-1,z  
#4 x+1,y,z      #5 x-1,y,z      #6 -x+1/2,y-1/2,-z+3/2
