# Supplementary material
Source: MDPI journal article supplement (https://www.mdpi.com/2073-4352/13/7/1043)
Supplement: s1 [file s1]

Table S1. Crystal data and structure refinement for Eu(OAc)2Cl\_x\_3H2O.

|                                   |                                                                              |
|-----------------------------------|------------------------------------------------------------------------------|
| Identification code               | Ha2019_37_0m_a                                                               |
| Empirical formula                 | C4 H12 Cl Eu O7                                                              |
| Formula weight                    | 359.55                                                                       |
| Temperature                       | 100(2) K                                                                     |
| Wavelength                        | 0.71073 Å                                                                    |
| Crystal system, space group       | Monoclinic, P2(1)/n                                                          |
| Unit cell dimensions              | a = 7.8412(2) Å<br>b = 7.8769(2) Å    β = 98.354(1) deg.<br>c = 17.4901(5) Å |
| Volume                            | 1068.80(5) Å <sup>3</sup>                                                    |
| Z, Calculated density             | 4, 2.234 Mg/m <sup>3</sup>                                                   |
| Absorption coefficient            | 6.122 mm <sup>-1</sup>                                                       |
| F(000)                            | 688                                                                          |
| Crystal size                      | 0.462 x 0.163 x 0.034 mm                                                     |
| Theta range for data collection   | 2.717 to 28.000 deg.                                                         |
| Limiting indices                  | -10 ≤ h ≤ 10, -10 ≤ k ≤ 10, -23 ≤ l ≤ 23                                     |
| Reflections collected / unique    | 79828 / 2587 [R(int) = 0.0399]                                               |
| Completeness to theta = 25.242    | 99.9 %                                                                       |
| Absorption correction             | Semi-empirical from equivalents                                              |
| Max. and min. transmission        | 0.781 and 0.436                                                              |
| Refinement method                 | Full-matrix least-squares on F <sup>2</sup>                                  |
| Data / restraints / parameters    | 2587 / 0 / 125                                                               |
| Goodness-of-fit on F <sup>2</sup> | 1.099                                                                        |
| Final R indices [I > 2σ(I)]       | R1 = 0.0131, wR2 = 0.0327                                                    |
| R indices (all data)              | R1 = 0.0137, wR2 = 0.0330                                                    |
| Extinction coefficient            | n/a                                                                          |
| Largest diff. peak and hole       | 0.470 and -0.703 e.Å <sup>-3</sup>                                           |

Table S2. Atomic coordinates ( $\times 10^4$ ) and equivalent isotropic displacement parameters ( $\text{\AA}^2 \times 10^3$ ) for  $\text{Eu}(\text{OAc})_2\text{Cl}\cdot 3\text{H}_2\text{O}$ .  $U(\text{eq})$  is defined as one third of the trace of the orthogonalized  $U_{ij}$  tensor.

|        | x         | y        | z        | U (eq) |
|--------|-----------|----------|----------|--------|
| Eu (1) | 2641 (1)  | 4609 (1) | 5374 (1) | 9 (1)  |
| Cl (1) | 3836 (1)  | 9708 (1) | 6902 (1) | 15 (1) |
| O (11) | -80 (2)   | 3376 (2) | 5358 (1) | 14 (1) |
| O (12) | -2784 (2) | 2634 (2) | 5262 (1) | 15 (1) |
| C (11) | -1222 (2) | 2314 (2) | 5492 (1) | 11 (1) |
| C (12) | -720 (3)  | 703 (3)  | 5918 (1) | 21 (1) |
| O (21) | 5480 (2)  | 5611 (2) | 5740 (1) | 12 (1) |
| O (22) | 8204 (2)  | 6287 (2) | 5977 (1) | 14 (1) |
| C (21) | 6807 (2)  | 5986 (2) | 6228 (1) | 11 (1) |
| C (22) | 6689 (3)  | 6065 (3) | 7069 (1) | 19 (1) |
| O (1W) | 3918 (2)  | 1779 (2) | 5376 (1) | 14 (1) |
| O (2W) | 1686 (2)  | 6612 (2) | 6261 (1) | 14 (1) |
| O (3W) | 2995 (2)  | 3508 (2) | 6683 (1) | 17 (1) |

Table S3. Bond lengths [Å] and angles [deg] for Eu(OAc)2Cl\_x\_3H2O.

---

|                       |            |
|-----------------------|------------|
| Eu(1)-O(11)           | 2.341(1)   |
| Eu(1)-O(21)           | 2.362(1)   |
| Eu(1)-O(2W)           | 2.407(1)   |
| Eu(1)-O(3W)           | 2.427(1)   |
| Eu(1)-O(1W)           | 2.444(1)   |
| Eu(1)-O(12)#1         | 2.450(1)   |
| Eu(1)-O(22)#2         | 2.462(1)   |
| Eu(1)-O(21)#2         | 2.613(1)   |
| Eu(1)-O(11)#1         | 2.728(1)   |
|                       |            |
| Eu(1)-Eu(1)#2         | 4.1455(2)  |
| Eu(1)-Eu(1)#1         | 4.2027(2)  |
|                       |            |
| O(11)-C(11)           | 1.272(2)   |
| O(12)-C(11)           | 1.258(2)   |
| C(11)-C(12)           | 1.495(3)   |
|                       |            |
| O(21)-C(21)           | 1.281(2)   |
| O(22)-C(21)           | 1.260(2)   |
| C(21)-C(22)           | 1.489(3)   |
|                       |            |
| O(11)-Eu(1)-O(21)     | 164.54(5)  |
| O(11)-Eu(1)-O(2W)     | 84.91(5)   |
| O(21)-Eu(1)-O(2W)     | 88.59(5)   |
| O(11)-Eu(1)-O(3W)     | 80.90(5)   |
| O(21)-Eu(1)-O(3W)     | 83.67(5)   |
| O(2W)-Eu(1)-O(3W)     | 68.25(5)   |
| O(11)-Eu(1)-O(1W)     | 89.68(5)   |
| O(21)-Eu(1)-O(1W)     | 86.23(5)   |
| O(2W)-Eu(1)-O(1W)     | 139.69(5)  |
| O(3W)-Eu(1)-O(1W)     | 71.45(5)   |
| O(11)-Eu(1)-O(12)#1   | 117.68(5)  |
| O(21)-Eu(1)-O(12)#1   | 73.91(5)   |
| O(2W)-Eu(1)-O(12)#1   | 75.58(5)   |
| O(3W)-Eu(1)-O(12)#1   | 137.63(5)  |
| O(1W)-Eu(1)-O(12)#1   | 139.76(5)  |
| O(11)-Eu(1)-O(22)#2   | 75.65(5)   |
| O(21)-Eu(1)-O(22)#2   | 117.87(5)  |
| O(2W)-Eu(1)-O(22)#2   | 137.81(5)  |
| O(3W)-Eu(1)-O(22)#2   | 141.34(5)  |
| O(1W)-Eu(1)-O(22)#2   | 78.05(5)   |
| O(12)#1-Eu(1)-O(22)#2 | 80.92(5)   |
| O(11)-Eu(1)-O(21)#2   | 125.13(5)  |
| O(21)-Eu(1)-O(21)#2   | 67.20(5)   |
| O(2W)-Eu(1)-O(21)#2   | 141.80(4)  |
| O(3W)-Eu(1)-O(21)#2   | 132.84(5)  |
| O(1W)-Eu(1)-O(21)#2   | 70.42(4)   |
| O(12)#1-Eu(1)-O(21)#2 | 69.66(4)   |
| O(22)#2-Eu(1)-O(21)#2 | 50.82(4)   |
| O(11)-Eu(1)-O(11)#1   | 68.19(5)   |
| O(21)-Eu(1)-O(11)#1   | 122.24(4)  |
| O(2W)-Eu(1)-O(11)#1   | 69.19(4)   |
| O(3W)-Eu(1)-O(11)#1   | 128.77(4)  |
| O(1W)-Eu(1)-O(11)#1   | 143.61(4)  |
| O(12)#1-Eu(1)-O(11)#1 | 49.50(4)   |
| O(22)#2-Eu(1)-O(11)#1 | 68.87(4)   |
| O(21)#2-Eu(1)-O(11)#1 | 98.35(4)   |
|                       |            |
| Eu(1)#2-Eu(1)-Eu(1)#1 | 139.857(5) |

|                         |           |
|-------------------------|-----------|
| C (11)-O (11)-Eu (1)    | 159.3 (1) |
| C (11)-O (11)-Eu (1) #1 | 88.8 (1)  |
| Eu (1)-O (11)-Eu (1) #1 | 111.8 (1) |
| C (11)-O (12)-Eu (1) #1 | 102.5 (1) |

|                      |           |
|----------------------|-----------|
| O (12)-C (11)-O (11) | 119.2 (2) |
| O (12)-C (11)-C (12) | 120.2 (2) |
| O (11)-C (11)-C (12) | 120.6 (2) |

|                         |           |
|-------------------------|-----------|
| C (21)-O (21)-Eu (1)    | 154.2 (1) |
| C (21)-O (21)-Eu (1) #2 | 91.2 (1)  |
| Eu (1)-O (21)-Eu (1) #2 | 112.8 (1) |
| C (21)-O (22)-Eu (1) #2 | 98.9 (1)  |

|                      |           |
|----------------------|-----------|
| O (22)-C (21)-O (21) | 118.3 (2) |
| O (22)-C (21)-C (22) | 121.2 (2) |
| O (21)-C (21)-C (22) | 120.5 (2) |

---

Symmetry transformations used to generate equivalent atoms:  
 #1 -x,-y+1,-z+1      #2 -x+1,-y+1,-z+1

Table S4. Anisotropic displacement parameters ( $\text{\AA}^2 \times 10^3$ ) for  
Eu(OAc)<sub>2</sub>Cl<sub>3</sub>·3H<sub>2</sub>O.

The anisotropic displacement factor exponent takes the form:  
 $-2 \pi^2 [ h^2 a^{*2} U_{11} + \dots + 2 h k a^* b^* U_{12} ]$

|       | U <sub>11</sub> | U <sub>22</sub> | U <sub>33</sub> | U <sub>23</sub> | U <sub>13</sub> | U <sub>12</sub> |
|-------|-----------------|-----------------|-----------------|-----------------|-----------------|-----------------|
| Eu(1) | 6(1)            | 10(1)           | 11(1)           | 0(1)            | 2(1)            | -1(1)           |
| Cl(1) | 17(1)           | 12(1)           | 15(1)           | 2(1)            | 2(1)            | -2(1)           |
| O(11) | 10(1)           | 15(1)           | 18(1)           | 0(1)            | 4(1)            | -3(1)           |
| O(12) | 8(1)            | 16(1)           | 22(1)           | 5(1)            | 3(1)            | 0(1)            |
| C(11) | 11(1)           | 12(1)           | 13(1)           | -1(1)           | 4(1)            | 1(1)            |
| C(12) | 21(1)           | 17(1)           | 24(1)           | 8(1)            | 1(1)            | 2(1)            |
| O(21) | 9(1)            | 15(1)           | 13(1)           | -1(1)           | 2(1)            | -2(1)           |
| O(22) | 8(1)            | 19(1)           | 16(1)           | -2(1)           | 2(1)            | -2(1)           |
| C(21) | 10(1)           | 10(1)           | 13(1)           | -1(1)           | 0(1)            | 1(1)            |
| C(22) | 14(1)           | 31(1)           | 10(1)           | 0(1)            | 0(1)            | 2(1)            |
| O(1W) | 11(1)           | 13(1)           | 17(1)           | 2(1)            | 4(1)            | 1(1)            |
| O(2W) | 10(1)           | 14(1)           | 18(1)           | -4(1)           | 2(1)            | 0(1)            |
| O(3W) | 24(1)           | 14(1)           | 15(1)           | 2(1)            | 6(1)            | 4(1)            |

Table S5. Hydrogen coordinates ( $\times 10^4$ ) and isotropic displacement parameters ( $\text{\AA}^2 \times 10^3$ ) for  $\text{Eu}(\text{OAc})_2\text{Cl}\cdot 3\text{H}_2\text{O}$ .

|        | x     | y    | z    | U (eq) |
|--------|-------|------|------|--------|
| H(12A) | -1550 | -190 | 5736 | 85 (8) |
| H(12B) | -714  | 885  | 6473 | 85 (8) |
| H(12C) | 433   | 360  | 5825 | 85 (8) |
| H(22A) | 7840  | 5921 | 7365 | 53 (6) |
| H(22B) | 5931  | 5157 | 7203 | 53 (6) |
| H(22C) | 6219  | 7168 | 7192 | 53 (6) |
| H(11W) | 3884  | 958  | 5779 | 41 (6) |
| H(12W) | 5097  | 1794 | 5286 | 41 (6) |
| H(21W) | 501   | 6743 | 6329 | 41 (6) |
| H(22W) | 2240  | 7639 | 6462 | 41 (6) |
| H(31W) | 2517  | 4026 | 7101 | 52 (7) |
| H(32W) | 3263  | 2366 | 6851 | 52 (7) |

Table S6. Hydrogen bonds for Eu(OAc)<sub>2</sub>Cl<sub>x</sub>·3H<sub>2</sub>O [Å and deg.].

| D-H...A                | d(D-H) | d(H...A) | d(D...A) | <(DHA) |
|------------------------|--------|----------|----------|--------|
| O(1W)-H(11W)...Cl(1)#3 | 0.96   | 2.20     | 3.137(1) | 164.2  |
| O(1W)-H(12W)...O(12)#4 | 0.96   | 1.79     | 2.707(2) | 157.7  |
| O(2W)-H(21W)...O(22)#5 | 0.96   | 1.85     | 2.715(2) | 148.3  |
| O(2W)-H(22W)...Cl(1)   | 0.96   | 2.13     | 3.081(1) | 171.0  |
| O(3W)-H(31W)...Cl(1)#6 | 0.96   | 2.23     | 3.180(2) | 168.2  |
| O(3W)-H(32W)...Cl(1)#3 | 0.96   | 2.14     | 3.077(2) | 164.7  |

Symmetry transformations used to generate equivalent atoms:

#1 -x,-y+1,-z+1      #2 -x+1,-y+1,-z+1      #3 x,y-1,z  
#4 x+1,y,z      #5 x-1,y,z      #6 -x+1/2,y-1/2,-z+3/2
