# Supplementary material
Source: MDPI journal article supplement (https://www.mdpi.com/2073-4352/13/7/1043)
Supplement: s1 [file s1]

Table S1. Crystal data and structure refinement for Tm(OAc)2Cl·x\_3H2O.

|                                   |                                                                              |
|-----------------------------------|------------------------------------------------------------------------------|
| Identification code               | Ha2019_92_0m_a                                                               |
| Empirical formula                 | C4 H12 Cl O7 Tm                                                              |
| Formula weight                    | 376.52                                                                       |
| Temperature                       | 100(2) K                                                                     |
| Wavelength                        | 0.71073 Å                                                                    |
| Crystal system, space group       | Monoclinic, P2(1)/n                                                          |
| Unit cell dimensions              | a = 7.7747(2) Å<br>b = 7.8392(2) Å    β = 97.552(1) deg.<br>c = 17.1517(5) Å |
| Volume                            | 1036.28(5) Å <sup>3</sup>                                                    |
| Z, Calculated density             | 4, 2.413 Mg/m <sup>3</sup>                                                   |
| Absorption coefficient            | 8.823 mm <sup>-1</sup>                                                       |
| F(000)                            | 712                                                                          |
| Crystal size                      | 0.465 x 0.120 x 0.074 mm                                                     |
| Theta range for data collection   | 2.755 to 27.994 deg.                                                         |
| Limiting indices                  | -10 ≤ h ≤ 10, -10 ≤ k ≤ 10, -22 ≤ l ≤ 22                                     |
| Reflections collected / unique    | 108715 / 2504 [R(int) = 0.0397]                                              |
| Completeness to theta = 25.242    | 99.9 %                                                                       |
| Absorption correction             | Semi-empirical from equivalents                                              |
| Max. and min. transmission        | 0.753 and 0.389                                                              |
| Refinement method                 | Full-matrix least-squares on F <sup>2</sup>                                  |
| Data / restraints / parameters    | 2504 / 0 / 126                                                               |
| Goodness-of-fit on F <sup>2</sup> | 1.132                                                                        |
| Final R indices [I > 2σ(I)]       | R1 = 0.0108, wR2 = 0.0240                                                    |
| R indices (all data)              | R1 = 0.0113, wR2 = 0.0241                                                    |
| Extinction coefficient            | n/a                                                                          |
| Largest diff. peak and hole       | 0.386 and -0.579 e.Å <sup>-3</sup>                                           |

Table S2. Atomic coordinates ( $\times 10^4$ ) and equivalent isotropic displacement parameters ( $\text{\AA}^2 \times 10^3$ ) for  $\text{Tm}(\text{OAc})_2\text{Cl} \cdot 3\text{H}_2\text{O}$ .  $U(\text{eq})$  is defined as one third of the trace of the orthogonalized  $U_{ij}$  tensor.

|       | x        | y       | z       | U (eq) |
|-------|----------|---------|---------|--------|
| Tm(1) | 2752(1)  | 4481(1) | 5413(1) | 8(1)   |
| Cl(1) | 3757(1)  | 9578(1) | 6839(1) | 15(1)  |
| O(11) | 207(2)   | 3216(2) | 5434(1) | 17(1)  |
| O(12) | -2622(2) | 2902(2) | 5255(1) | 13(1)  |
| C(11) | -1125(2) | 2358(2) | 5511(1) | 10(1)  |
| C(12) | -962(3)  | 646(3)  | 5900(1) | 19(1)  |
| O(21) | 5419(2)  | 5634(2) | 5745(1) | 11(1)  |
| O(22) | 8153(2)  | 6319(2) | 5911(1) | 12(1)  |
| C(21) | 6789(2)  | 6010(2) | 6209(1) | 10(1)  |
| C(22) | 6766(3)  | 6067(3) | 7075(1) | 17(1)  |
| O(1W) | 4106(2)  | 1824(2) | 5374(1) | 13(1)  |
| O(2W) | 1650(2)  | 6399(2) | 6251(1) | 12(1)  |
| O(3W) | 3197(2)  | 3458(2) | 6718(1) | 16(1)  |

Table S3. Bond lengths [Å] and angles [deg] for Tm(OAc)2Cl\_x\_3H2O.

---

|                       |            |
|-----------------------|------------|
| Tm(1)-O(11)           | 2.218(1)   |
| Tm(1)-O(21)           | 2.265(1)   |
| Tm(1)-O(2W)           | 2.320(1)   |
| Tm(1)-O(1W)           | 2.339(1)   |
| Tm(1)-O(12)#1         | 2.346(1)   |
| Tm(1)-O(3W)           | 2.360(1)   |
| Tm(1)-O(22)#2         | 2.373(1)   |
| Tm(1)-O(21)#2         | 2.592(1)   |
| Tm(1)-O(11)#1         | 3.128(2)   |
|                       |            |
| Tm(1)-Tm(1)#2         | 4.0237(2)  |
| Tm(1)-Tm(1)#1         | 4.4037(2)  |
|                       |            |
| O(11)-C(11)           | 1.257(2)   |
| O(12)-C(11)           | 1.263(2)   |
| C(11)-C(12)           | 1.497(3)   |
|                       |            |
| O(21)-C(21)           | 1.278(2)   |
| O(22)-C(21)           | 1.260(2)   |
| C(21)-C(22)           | 1.487(3)   |
|                       |            |
| O(11)-Tm(1)-O(21)     | 164.53(5)  |
| O(11)-Tm(1)-O(2W)     | 82.94(5)   |
| O(21)-Tm(1)-O(2W)     | 89.22(5)   |
| O(11)-Tm(1)-O(1W)     | 90.45(5)   |
| O(21)-Tm(1)-O(1W)     | 87.83(5)   |
| O(2W)-Tm(1)-O(1W)     | 143.07(5)  |
| O(11)-Tm(1)-O(12)#1   | 114.67(5)  |
| O(21)-Tm(1)-O(12)#1   | 75.71(5)   |
| O(2W)-Tm(1)-O(12)#1   | 74.94(5)   |
| O(1W)-Tm(1)-O(12)#1   | 139.07(5)  |
| O(11)-Tm(1)-O(3W)     | 81.55(5)   |
| O(21)-Tm(1)-O(3W)     | 83.23(5)   |
| O(2W)-Tm(1)-O(3W)     | 69.70(5)   |
| O(1W)-Tm(1)-O(3W)     | 73.40(5)   |
| O(12)#1-Tm(1)-O(3W)   | 138.80(5)  |
| O(11)-Tm(1)-O(22)#2   | 75.15(5)   |
| O(21)-Tm(1)-O(22)#2   | 119.51(4)  |
| O(2W)-Tm(1)-O(22)#2   | 132.61(5)  |
| O(1W)-Tm(1)-O(22)#2   | 79.32(5)   |
| O(12)#1-Tm(1)-O(22)#2 | 76.99(5)   |
| O(3W)-Tm(1)-O(22)#2   | 143.73(5)  |
| O(11)-Tm(1)-O(21)#2   | 125.23(5)  |
| O(21)-Tm(1)-O(21)#2   | 68.29(5)   |
| O(2W)-Tm(1)-O(21)#2   | 141.41(4)  |
| O(1W)-Tm(1)-O(21)#2   | 69.68(4)   |
| O(12)#1-Tm(1)-O(21)#2 | 69.43(4)   |
| O(3W)-Tm(1)-O(21)#2   | 133.49(4)  |
| O(22)#2-Tm(1)-O(21)#2 | 51.72(4)   |
| O(11)-Tm(1)-O(11)#1   | 70.25(5)   |
| O(21)-Tm(1)-O(11)#1   | 118.66(4)  |
| O(2W)-Tm(1)-O(11)#1   | 66.69(4)   |
| O(1W)-Tm(1)-O(11)#1   | 143.80(4)  |
| O(12)#1-Tm(1)-O(11)#1 | 44.47(4)   |
| O(3W)-Tm(1)-O(11)#1   | 130.07(4)  |
| O(22)#2-Tm(1)-O(11)#1 | 66.46(4)   |
| O(21)#2-Tm(1)-O(11)#1 | 96.22(4)   |
|                       |            |
| Tm(1)#2-Tm(1)-Tm(1)#1 | 134.557(4) |

|                         |           |
|-------------------------|-----------|
| C (11)-O (11)-Tm (1)    | 172.1 (1) |
| C (11)-O (12)-Tm (1) #1 | 116.4 (1) |
| O (11)-C (11)-O (12)    | 121.1 (2) |
| O (11)-C (11)-C (12)    | 120.3 (2) |
| O (12)-C (11)-C (12)    | 118.6 (2) |
| C (21)-O (21)-Tm (1)    | 155.4 (1) |
| C (21)-O (21)-Tm (1) #2 | 89.4 (1)  |
| Tm (1)-O (21)-Tm (1) #2 | 111.7 (1) |
| C (21)-O (22)-Tm (1) #2 | 100.3 (1) |
| O (22)-C (21)-O (21)    | 117.9 (2) |
| O (22)-C (21)-C (22)    | 121.4 (2) |
| O (21)-C (21)-C (22)    | 120.7 (2) |

---

Symmetry transformations used to generate equivalent atoms:  
#1 -x,-y+1,-z+1      #2 -x+1,-y+1,-z+1

Table S4. Anisotropic displacement parameters ( $\text{\AA}^2 \times 10^3$ ) for Tm(OAc)<sub>2</sub>Cl<sub>2</sub>·3H<sub>2</sub>O.

The anisotropic displacement factor exponent takes the form:  
 $-2 \pi^2 [ h^2 a^{*2} U_{11} + \dots + 2 h k a^* b^* U_{12} ]$

|       | U <sub>11</sub> | U <sub>22</sub> | U <sub>33</sub> | U <sub>23</sub> | U <sub>13</sub> | U <sub>12</sub> |
|-------|-----------------|-----------------|-----------------|-----------------|-----------------|-----------------|
| Tm(1) | 6(1)            | 9(1)            | 10(1)           | 0(1)            | 1(1)            | -1(1)           |
| Cl(1) | 18(1)           | 12(1)           | 16(1)           | 1(1)            | 2(1)            | -2(1)           |
| O(11) | 12(1)           | 19(1)           | 20(1)           | -5(1)           | 6(1)            | -6(1)           |
| O(12) | 8(1)            | 14(1)           | 16(1)           | 3(1)            | 2(1)            | 1(1)            |
| C(11) | 9(1)            | 12(1)           | 9(1)            | -2(1)           | 2(1)            | 0(1)            |
| C(12) | 19(1)           | 15(1)           | 22(1)           | 6(1)            | 1(1)            | 3(1)            |
| O(21) | 6(1)            | 13(1)           | 12(1)           | 0(1)            | 0(1)            | -1(1)           |
| O(22) | 7(1)            | 15(1)           | 14(1)           | 0(1)            | 1(1)            | -1(1)           |
| C(21) | 10(1)           | 7(1)            | 14(1)           | 0(1)            | 1(1)            | 2(1)            |
| C(22) | 15(1)           | 24(1)           | 12(1)           | -1(1)           | 1(1)            | 2(1)            |
| O(1W) | 12(1)           | 12(1)           | 15(1)           | 2(1)            | 4(1)            | 2(1)            |
| O(2W) | 10(1)           | 12(1)           | 16(1)           | -2(1)           | 1(1)            | -1(1)           |
| O(3W) | 21(1)           | 13(1)           | 14(1)           | 2(1)            | 6(1)            | 3(1)            |

Table S5. Hydrogen coordinates ( $\times 10^4$ ) and isotropic displacement parameters ( $\text{\AA}^2 \times 10^3$ ) for  $\text{Tm}(\text{OAc})_2\text{Cl} \cdot 3\text{H}_2\text{O}$ .

|        | x     | y    | z    | U (eq) |
|--------|-------|------|------|--------|
| H(12A) | 201   | 527  | 6194 | 52 (6) |
| H(12B) | -1149 | -250 | 5500 | 52 (6) |
| H(12C) | -1832 | 541  | 6262 | 52 (6) |
| H(22A) | 7947  | 5910 | 7344 | 52 (5) |
| H(22B) | 6018  | 5155 | 7229 | 52 (5) |
| H(22C) | 6317  | 7174 | 7221 | 52 (5) |
| H(11W) | 4110  | 990  | 5784 | 44 (6) |
| H(12W) | 5290  | 1895 | 5275 | 44 (6) |
| H(21W) | 427   | 6539 | 6263 | 40 (6) |
| H(22W) | 2154  | 7475 | 6423 | 40 (6) |
| H(31W) | 2623  | 3934 | 7130 | 46 (6) |
| H(32W) | 3415  | 2289 | 6867 | 46 (6) |

Table S6. Hydrogen bonds for Tm(OAc)<sub>2</sub>Cl\_x\_3H<sub>2</sub>O [Å and deg.].

| D-H...A                | d(D-H) | d(H...A) | d(D...A) | <(DHA) |
|------------------------|--------|----------|----------|--------|
| O(1W)-H(11W)...Cl(1)#3 | 0.96   | 2.17     | 3.109(1) | 165.9  |
| O(1W)-H(12W)...O(12)#4 | 0.96   | 1.81     | 2.714(2) | 155.8  |
| O(2W)-H(21W)...O(22)#5 | 0.96   | 1.80     | 2.705(2) | 156.1  |
| O(2W)-H(22W)...Cl(1)   | 0.96   | 2.13     | 3.079(1) | 168.3  |
| O(3W)-H(31W)...Cl(1)#6 | 0.96   | 2.24     | 3.193(1) | 170.1  |
| O(3W)-H(32W)...Cl(1)#3 | 0.96   | 2.14     | 3.076(2) | 163.4  |

Symmetry transformations used to generate equivalent atoms:

#1 -x,-y+1,-z+1      #2 -x+1,-y+1,-z+1      #3 x,y-1,z  
#4 x+1,y,z      #5 x-1,y,z      #6 -x+1/2,y-1/2,-z+3/2
