# Supplementary material
Source: MDPI journal article supplement (https://www.mdpi.com/2073-4352/13/7/1043)
Supplement: s1 [file s1]

Table S1. Crystal data and structure refinement for Yb(OAc)2Cl·x·3H2O.

|                                   |                                                                              |
|-----------------------------------|------------------------------------------------------------------------------|
| Identification code               | Ha2019_57_0m_a                                                               |
| Empirical formula                 | C4 H12 Cl O7 Yb                                                              |
| Formula weight                    | 380.63                                                                       |
| Temperature                       | 100(2) K                                                                     |
| Wavelength                        | 0.71073 Å                                                                    |
| Crystal system, space group       | Monoclinic, P2(1)/n                                                          |
| Unit cell dimensions              | a = 7.7710(3) Å<br>b = 7.8224(3) Å    β = 97.422(2) deg.<br>c = 17.1055(8) Å |
| Volume                            | 1031.09(7) Å <sup>3</sup>                                                    |
| Z, Calculated density             | 4, 2.452 Mg/m <sup>3</sup>                                                   |
| Absorption coefficient            | 9.333 mm <sup>-1</sup>                                                       |
| F(000)                            | 716                                                                          |
| Crystal size                      | 0.316 x 0.092 x 0.048 mm                                                     |
| Theta range for data collection   | 2.868 to 27.999 deg.                                                         |
| Limiting indices                  | -10 ≤ h ≤ 10, -10 ≤ k ≤ 10, -22 ≤ l ≤ 22                                     |
| Reflections collected / unique    | 70583 / 2491 [R(int) = 0.0721]                                               |
| Completeness to theta = 25.242    | 99.9 %                                                                       |
| Absorption correction             | Semi-empirical from equivalents                                              |
| Max. and min. transmission        | 0.742 and 0.498                                                              |
| Refinement method                 | Full-matrix least-squares on F <sup>2</sup>                                  |
| Data / restraints / parameters    | 2491 / 0 / 125                                                               |
| Goodness-of-fit on F <sup>2</sup> | 1.061                                                                        |
| Final R indices [I > 2σ(I)]       | R1 = 0.0162, wR2 = 0.0302                                                    |
| R indices (all data)              | R1 = 0.0217, wR2 = 0.0318                                                    |
| Extinction coefficient            | n/a                                                                          |
| Largest diff. peak and hole       | 0.522 and -0.480 e.Å <sup>-3</sup>                                           |

Table S2. Atomic coordinates ( $\times 10^4$ ) and equivalent isotropic displacement parameters ( $\text{\AA}^2 \times 10^3$ ) for  $\text{Yb}(\text{OAc})_2\text{Cl} \cdot 3\text{H}_2\text{O}$ .  $U(\text{eq})$  is defined as one third of the trace of the orthogonalized  $U_{ij}$  tensor.

|       | x        | y       | z       | U (eq) |
|-------|----------|---------|---------|--------|
| Yb(1) | 2767(1)  | 4465(1) | 5422(1) | 9(1)   |
| Cl(1) | 3744(1)  | 9556(1) | 6827(1) | 16(1)  |
| O(11) | 243(2)   | 3202(3) | 5444(1) | 16(1)  |
| O(12) | -2595(2) | 2931(3) | 5249(1) | 12(1)  |
| C(11) | -1107(4) | 2361(4) | 5512(2) | 11(1)  |
| C(12) | -986(4)  | 644(4)  | 5895(2) | 19(1)  |
| O(21) | 5405(2)  | 5623(3) | 5748(1) | 12(1)  |
| O(22) | 8137(2)  | 6323(3) | 5898(1) | 13(1)  |
| C(21) | 6788(4)  | 6003(4) | 6209(2) | 11(1)  |
| C(22) | 6777(4)  | 6062(4) | 7075(2) | 18(1)  |
| O(1W) | 4141(2)  | 1842(3) | 5375(1) | 13(1)  |
| O(2W) | 1631(2)  | 6364(3) | 6256(1) | 12(1)  |
| O(3W) | 3223(3)  | 3449(3) | 6724(1) | 15(1)  |

Table S3. Bond lengths [Å] and angles [deg] for Yb(OAc)2Cl\_x\_3H2O.

---

|                       |            |
|-----------------------|------------|
| Yb(1)-O(11)           | 2.201(2)   |
| Yb(1)-O(21)           | 2.246(2)   |
| Yb(1)-O(2W)           | 2.312(2)   |
| Yb(1)-O(1W)           | 2.320(2)   |
| Yb(1)-O(12)#1         | 2.334(2)   |
| Yb(1)-O(3W)           | 2.347(2)   |
| Yb(1)-O(22)#2         | 2.359(2)   |
| Yb(1)-O(21)#2         | 2.601(2)   |
| Yb(1)-O(11)#1         | 3.178(2)   |
|                       |            |
| Yb(1)-Yb(1)#2         | 4.0169(3)  |
| Yb(1)-Yb(1)#1         | 4.4352(3)  |
|                       |            |
| O(11)-C(11)           | 1.256(3)   |
| O(12)-C(11)           | 1.267(3)   |
| C(11)-C(12)           | 1.492(4)   |
|                       |            |
| O(21)-C(21)           | 1.283(3)   |
| O(22)-C(21)           | 1.260(3)   |
| C(21)-C(22)           | 1.483(4)   |
|                       |            |
| O(11)-Yb(1)-O(21)     | 164.65(8)  |
| O(11)-Yb(1)-O(2W)     | 82.28(7)   |
| O(21)-Yb(1)-O(2W)     | 89.82(7)   |
| O(11)-Yb(1)-O(1W)     | 91.10(7)   |
| O(21)-Yb(1)-O(1W)     | 87.46(7)   |
| O(2W)-Yb(1)-O(1W)     | 143.53(7)  |
| O(11)-Yb(1)-O(12)#1   | 113.94(7)  |
| O(21)-Yb(1)-O(12)#1   | 76.24(7)   |
| O(2W)-Yb(1)-O(12)#1   | 74.98(7)   |
| O(1W)-Yb(1)-O(12)#1   | 138.77(7)  |
| O(11)-Yb(1)-O(3W)     | 81.82(8)   |
| O(21)-Yb(1)-O(3W)     | 83.11(7)   |
| O(2W)-Yb(1)-O(3W)     | 69.83(7)   |
| O(1W)-Yb(1)-O(3W)     | 73.74(7)   |
| O(12)#1-Yb(1)-O(3W)   | 138.97(7)  |
| O(11)-Yb(1)-O(22)#2   | 75.15(7)   |
| O(21)-Yb(1)-O(22)#2   | 119.48(7)  |
| O(2W)-Yb(1)-O(22)#2   | 131.96(7)  |
| O(1W)-Yb(1)-O(22)#2   | 79.44(7)   |
| O(12)#1-Yb(1)-O(22)#2 | 76.45(7)   |
| O(3W)-Yb(1)-O(22)#2   | 144.06(7)  |
| O(11)-Yb(1)-O(21)#2   | 125.31(7)  |
| O(21)-Yb(1)-O(21)#2   | 68.26(8)   |
| O(2W)-Yb(1)-O(21)#2   | 141.43(7)  |
| O(1W)-Yb(1)-O(21)#2   | 69.50(7)   |
| O(12)#1-Yb(1)-O(21)#2 | 69.29(7)   |
| O(3W)-Yb(1)-O(21)#2   | 133.66(7)  |
| O(22)#2-Yb(1)-O(21)#2 | 51.72(6)   |
| O(11)-Yb(1)-O(11)#1   | 70.24(8)   |
| O(21)-Yb(1)-O(11)#1   | 118.51(6)  |
| O(2W)-Yb(1)-O(11)#1   | 66.58(6)   |
| O(1W)-Yb(1)-O(11)#1   | 143.70(6)  |
| O(12)#1-Yb(1)-O(11)#1 | 43.73(6)   |
| O(3W)-Yb(1)-O(11)#1   | 130.45(6)  |
| O(22)#2-Yb(1)-O(11)#1 | 66.00(6)   |
| O(21)#2-Yb(1)-O(11)#1 | 95.63(6)   |
|                       |            |
| Yb(1)#2-Yb(1)-Yb(1)#1 | 133.619(7) |

|                         |           |
|-------------------------|-----------|
| C (11)-O (11)-Yb (1)    | 173.3 (2) |
| C (11)-O (12)-Yb (1) #1 | 118.3 (2) |
| O (11)-C (11)-O (12)    | 121.1 (3) |
| O (11)-C (11)-C (12)    | 120.4 (3) |
| O (12)-C (11)-C (12)    | 118.4 (3) |
| C (21)-O (21)-Yb (1)    | 155.7 (2) |
| C (21)-O (21)-Yb (1) #2 | 89.0 (2)  |
| Yb (1)-O (21)-Yb (1) #2 | 111.7 (1) |
| C (21)-O (22)-Yb (1) #2 | 101.0 (2) |
| O (22)-C (21)-O (21)    | 117.6 (3) |
| O (22)-C (21)-C (22)    | 121.8 (3) |
| O (21)-C (21)-C (22)    | 120.6 (3) |

---

Symmetry transformations used to generate equivalent atoms:  
 #1 -x,-y+1,-z+1      #2 -x+1,-y+1,-z+1

Table S4. Anisotropic displacement parameters ( $\text{\AA}^2 \times 10^3$ ) for Yb(OAc)<sub>2</sub>Cl<sub>2</sub>·3H<sub>2</sub>O.

The anisotropic displacement factor exponent takes the form:  
 $-2 \pi^2 [ h^2 a^{*2} U_{11} + \dots + 2 h k a^* b^* U_{12} ]$

|       | U <sub>11</sub> | U <sub>22</sub> | U <sub>33</sub> | U <sub>23</sub> | U <sub>13</sub> | U <sub>12</sub> |
|-------|-----------------|-----------------|-----------------|-----------------|-----------------|-----------------|
| Yb(1) | 6(1)            | 8(1)            | 12(1)           | 0(1)            | 1(1)            | -1(1)           |
| Cl(1) | 18(1)           | 11(1)           | 17(1)           | 1(1)            | 3(1)            | -2(1)           |
| O(11) | 11(1)           | 17(1)           | 20(1)           | -5(1)           | 5(1)            | -6(1)           |
| O(12) | 8(1)            | 14(1)           | 14(1)           | 2(1)            | 2(1)            | 2(1)            |
| C(11) | 10(1)           | 12(2)           | 12(1)           | -3(1)           | 4(1)            | -2(1)           |
| C(12) | 18(2)           | 16(2)           | 23(2)           | 5(2)            | 3(1)            | 2(1)            |
| O(21) | 8(1)            | 11(1)           | 15(1)           | -1(1)           | 0(1)            | 0(1)            |
| O(22) | 7(1)            | 13(1)           | 18(1)           | 1(1)            | 1(1)            | 0(1)            |
| C(21) | 10(1)           | 8(1)            | 14(2)           | 0(1)            | -1(1)           | 3(1)            |
| C(22) | 15(2)           | 24(2)           | 13(2)           | -1(1)           | 0(1)            | 2(1)            |
| O(1W) | 11(1)           | 11(1)           | 19(1)           | 2(1)            | 5(1)            | 1(1)            |
| O(2W) | 10(1)           | 11(1)           | 16(1)           | -3(1)           | 2(1)            | 0(1)            |
| O(3W) | 19(1)           | 12(1)           | 15(1)           | 2(1)            | 7(1)            | 4(1)            |

Table S5. Hydrogen coordinates ( $\times 10^4$ ) and isotropic displacement parameters ( $\text{\AA}^2 \times 10^3$ ) for  $\text{Yb}(\text{OAc})_2\text{Cl}\cdot 3\text{H}_2\text{O}$ .

|        | x     | y    | z    | U (eq) |
|--------|-------|------|------|--------|
| H(12A) | -1909 | 526  | 6232 | 50 (8) |
| H(12B) | 146   | 525  | 6217 | 50 (8) |
| H(12C) | -1116 | -246 | 5489 | 50 (8) |
| H(22A) | 7961  | 5903 | 7341 | 48 (8) |
| H(22B) | 6030  | 5149 | 7233 | 48 (8) |
| H(22C) | 6332  | 7172 | 7223 | 48 (8) |
| H(11W) | 4095  | 955  | 5760 | 51 (9) |
| H(12W) | 5343  | 1921 | 5302 | 51 (9) |
| H(21W) | 401   | 6550 | 6213 | 44 (9) |
| H(22W) | 2140  | 7461 | 6388 | 44 (9) |
| H(31W) | 2682  | 3956 | 7141 | 43 (9) |
| H(32W) | 3302  | 2253 | 6849 | 43 (9) |

Table S6. Hydrogen bonds for Yb(OAc)<sub>2</sub>Cl<sub>x</sub>·3H<sub>2</sub>O [Å and deg.].

| D-H...A                | d(D-H) | d(H...A) | d(D...A) | <(DHA) |
|------------------------|--------|----------|----------|--------|
| O(1W)-H(11W)...Cl(1)#3 | 0.96   | 2.18     | 3.108(2) | 163.4  |
| O(1W)-H(12W)...O(12)#4 | 0.96   | 1.80     | 2.710(3) | 157.3  |
| O(2W)-H(21W)...O(22)#5 | 0.96   | 1.78     | 2.706(3) | 160.6  |
| O(2W)-H(22W)...Cl(1)   | 0.96   | 2.14     | 3.078(2) | 166.7  |
| O(3W)-H(31W)...Cl(1)#6 | 0.96   | 2.25     | 3.195(2) | 167.5  |
| O(3W)-H(32W)...Cl(1)#3 | 0.96   | 2.14     | 3.074(2) | 164.4  |

Symmetry transformations used to generate equivalent atoms:

#1 -x,-y+1,-z+1      #2 -x+1,-y+1,-z+1      #3 x,y-1,z  
#4 x+1,y,z      #5 x-1,y,z      #6 -x+1/2,y-1/2,-z+3/2
