# Supplementary material
Source: MDPI journal article supplement (https://www.mdpi.com/2073-4352/13/7/1043)
Supplement: s1 [file s1]

Table S1. Crystal data and structure refinement for Gd(OAc)2Cl\_x\_3H2O.

|                                   |                                                                              |
|-----------------------------------|------------------------------------------------------------------------------|
| Identification code               | Ha2019_99h_0m_a                                                              |
| Empirical formula                 | C4 H12 Cl Gd O7                                                              |
| Formula weight                    | 364.84                                                                       |
| Temperature                       | 100(2) K                                                                     |
| Wavelength                        | 0.71073 Å                                                                    |
| Crystal system, space group       | Monoclinic, P2(1)/n                                                          |
| Unit cell dimensions              | a = 7.8219(4) Å<br>b = 7.8592(4) Å    β = 98.265(2) deg.<br>c = 17.4434(8) Å |
| Volume                            | 1061.18(9) Å <sup>3</sup>                                                    |
| Z, Calculated density             | 4, 2.284 Mg/m <sup>3</sup>                                                   |
| Absorption coefficient            | 6.506 mm <sup>-1</sup>                                                       |
| F(000)                            | 692                                                                          |
| Crystal size                      | 0.368 x 0.096 x 0.041 mm                                                     |
| Theta range for data collection   | 2.725 to 27.998 deg.                                                         |
| Limiting indices                  | -10 ≤ h ≤ 10, -10 ≤ k ≤ 10, -23 ≤ l ≤ 23                                     |
| Reflections collected / unique    | 122742 / 2569 [R(int) = 0.0358]                                              |
| Completeness to theta = 25.242    | 99.9 %                                                                       |
| Absorption correction             | Semi-empirical from equivalents                                              |
| Max. and min. transmission        | 0.746 and 0.443                                                              |
| Refinement method                 | Full-matrix least-squares on F <sup>2</sup>                                  |
| Data / restraints / parameters    | 2569 / 0 / 126                                                               |
| Goodness-of-fit on F <sup>2</sup> | 1.090                                                                        |
| Final R indices [I > 2σ(I)]       | R1 = 0.0094, wR2 = 0.0206                                                    |
| R indices (all data)              | R1 = 0.0100, wR2 = 0.0208                                                    |
| Extinction coefficient            | 0.00122(7)                                                                   |
| Largest diff. peak and hole       | 0.348 and -0.474 e.Å <sup>-3</sup>                                           |

Table S2. Atomic coordinates ( $\times 10^4$ ) and equivalent isotropic displacement parameters ( $\text{\AA}^2 \times 10^3$ ) for  $\text{Gd}(\text{OAc})_2\text{Cl}\cdot 3\text{H}_2\text{O}$ .  $U(\text{eq})$  is defined as one third of the trace of the orthogonalized  $U_{ij}$  tensor.

|       | x        | y       | z       | U (eq) |
|-------|----------|---------|---------|--------|
| Gd(1) | 2645(1)  | 4604(1) | 5374(1) | 9(1)   |
| Cl(1) | 3828(1)  | 9701(1) | 6896(1) | 16(1)  |
| O(11) | -62(1)   | 3374(1) | 5361(1) | 15(1)  |
| O(12) | -2775(1) | 2649(1) | 5262(1) | 15(1)  |
| C(11) | -1212(2) | 2317(2) | 5493(1) | 12(1)  |
| C(12) | -731(2)  | 702(2)  | 5920(1) | 21(1)  |
| O(21) | 5469(1)  | 5608(1) | 5739(1) | 12(1)  |
| O(22) | 8200(1)  | 6283(1) | 5972(1) | 14(1)  |
| C(21) | 6800(2)  | 5984(2) | 6225(1) | 12(1)  |
| C(22) | 6691(2)  | 6059(2) | 7070(1) | 19(1)  |
| O(1W) | 3921(1)  | 1792(1) | 5373(1) | 14(1)  |
| O(2W) | 1687(1)  | 6600(1) | 6257(1) | 14(1)  |
| O(3W) | 3002(1)  | 3508(1) | 6683(1) | 17(1)  |

Table S3. Bond lengths [Å] and angles [deg] for Gd(OAc)2Cl\_x\_3H2O.

---

|                       |            |
|-----------------------|------------|
| Gd(1)-O(11)           | 2.325(1)   |
| Gd(1)-O(21)           | 2.346(1)   |
| Gd(1)-O(2W)           | 2.393(1)   |
| Gd(1)-O(3W)           | 2.418(1)   |
| Gd(1)-O(1W)           | 2.425(1)   |
| Gd(1)-O(12)#1         | 2.436(1)   |
| Gd(1)-O(22)#2         | 2.449(1)   |
| Gd(1)-O(21)#2         | 2.607(1)   |
| Gd(1)-O(11)#1         | 2.740(1)   |
|                       |            |
| Gd(1)-Gd(1)#2         | 4.1291(2)  |
| Gd(1)-Gd(1)#1         | 4.2028(2)  |
|                       |            |
| O(11)-C(11)           | 1.270(2)   |
| O(12)-C(11)           | 1.258(2)   |
| C(11)-C(12)           | 1.492(2)   |
|                       |            |
| O(21)-C(21)           | 1.279(2)   |
| O(22)-C(21)           | 1.260(2)   |
| C(21)-C(22)           | 1.491(2)   |
|                       |            |
| O(11)-Gd(1)-O(21)     | 164.48(4)  |
| O(11)-Gd(1)-O(2W)     | 84.84(4)   |
| O(21)-Gd(1)-O(2W)     | 88.58(4)   |
| O(11)-Gd(1)-O(3W)     | 80.96(4)   |
| O(21)-Gd(1)-O(3W)     | 83.56(4)   |
| O(2W)-Gd(1)-O(3W)     | 68.30(4)   |
| O(11)-Gd(1)-O(1W)     | 89.72(4)   |
| O(21)-Gd(1)-O(1W)     | 86.29(4)   |
| O(2W)-Gd(1)-O(1W)     | 139.92(4)  |
| O(3W)-Gd(1)-O(1W)     | 71.63(4)   |
| O(11)-Gd(1)-O(12)#1   | 117.48(4)  |
| O(21)-Gd(1)-O(12)#1   | 74.10(4)   |
| O(2W)-Gd(1)-O(12)#1   | 75.51(4)   |
| O(3W)-Gd(1)-O(12)#1   | 137.65(4)  |
| O(1W)-Gd(1)-O(12)#1   | 139.73(3)  |
| O(11)-Gd(1)-O(22)#2   | 75.64(4)   |
| O(21)-Gd(1)-O(22)#2   | 118.00(3)  |
| O(2W)-Gd(1)-O(22)#2   | 137.53(4)  |
| O(3W)-Gd(1)-O(22)#2   | 141.53(4)  |
| O(1W)-Gd(1)-O(22)#2   | 78.10(4)   |
| O(12)#1-Gd(1)-O(22)#2 | 80.69(4)   |
| O(11)-Gd(1)-O(21)#2   | 125.29(4)  |
| O(21)-Gd(1)-O(21)#2   | 67.16(4)   |
| O(2W)-Gd(1)-O(21)#2   | 141.66(3)  |
| O(3W)-Gd(1)-O(21)#2   | 132.80(3)  |
| O(1W)-Gd(1)-O(21)#2   | 70.37(3)   |
| O(12)#1-Gd(1)-O(21)#2 | 69.65(3)   |
| O(22)#2-Gd(1)-O(21)#2 | 51.01(3)   |
| O(11)-Gd(1)-O(11)#1   | 68.11(4)   |
| O(21)-Gd(1)-O(11)#1   | 122.28(3)  |
| O(2W)-Gd(1)-O(11)#1   | 69.08(3)   |
| O(3W)-Gd(1)-O(11)#1   | 128.74(3)  |
| O(1W)-Gd(1)-O(11)#1   | 143.50(3)  |
| O(12)#1-Gd(1)-O(11)#1 | 49.39(3)   |
| O(22)#2-Gd(1)-O(11)#1 | 68.70(3)   |
| O(21)#2-Gd(1)-O(11)#1 | 98.42(3)   |
|                       |            |
| Gd(1)#2-Gd(1)-Gd(1)#1 | 139.698(4) |

|                         |           |
|-------------------------|-----------|
| C (11)-O (11)-Gd (1)    | 159.8 (1) |
| C (11)-O (11)-Gd (1) #1 | 88.3 (1)  |
| Gd (1)-O (11)-Gd (1) #1 | 111.9 (1) |
| C (11)-O (12)-Gd (1) #1 | 103.2 (1) |
| O (12)-C (11)-O (11)    | 119.2 (1) |
| O (12)-C (11)-C (12)    | 120.0 (1) |
| O (11)-C (11)-C (12)    | 120.8 (1) |
| C (21)-O (21)-Gd (1)    | 154.4 (1) |
| C (21)-O (21)-Gd (1) #2 | 90.9 (1)  |
| Gd (1)-O (21)-Gd (1) #2 | 112.8 (1) |
| C (21)-O (22)-Gd (1) #2 | 98.8 (1)  |
| O (22)-C (21)-O (21)    | 118.5 (1) |
| O (22)-C (21)-C (22)    | 121.0 (1) |
| O (21)-C (21)-C (22)    | 120.6 (1) |

---

Symmetry transformations used to generate equivalent atoms:  
#1 -x,-y+1,-z+1      #2 -x+1,-y+1,-z+1

Table S4. Anisotropic displacement parameters ( $\text{\AA}^2 \times 10^3$ ) for Gd(OAc)<sub>2</sub>Cl<sub>2</sub>·3H<sub>2</sub>O.

The anisotropic displacement factor exponent takes the form:  
 $-2 \pi^2 [ h^2 a^{*2} U_{11} + \dots + 2 h k a^* b^* U_{12} ]$

|       | U <sub>11</sub> | U <sub>22</sub> | U <sub>33</sub> | U <sub>23</sub> | U <sub>13</sub> | U <sub>12</sub> |
|-------|-----------------|-----------------|-----------------|-----------------|-----------------|-----------------|
| Gd(1) | 6(1)            | 10(1)           | 11(1)           | 0(1)            | 2(1)            | -1(1)           |
| Cl(1) | 17(1)           | 13(1)           | 17(1)           | 1(1)            | 2(1)            | -1(1)           |
| O(11) | 11(1)           | 17(1)           | 18(1)           | 0(1)            | 4(1)            | -4(1)           |
| O(12) | 9(1)            | 17(1)           | 21(1)           | 5(1)            | 3(1)            | 0(1)            |
| C(11) | 11(1)           | 14(1)           | 12(1)           | -1(1)           | 3(1)            | 0(1)            |
| C(12) | 23(1)           | 17(1)           | 23(1)           | 7(1)            | 1(1)            | 2(1)            |
| O(21) | 9(1)            | 15(1)           | 13(1)           | 0(1)            | 1(1)            | -1(1)           |
| O(22) | 9(1)            | 19(1)           | 15(1)           | -1(1)           | 2(1)            | -2(1)           |
| C(21) | 11(1)           | 11(1)           | 14(1)           | 0(1)            | 1(1)            | 1(1)            |
| C(22) | 15(1)           | 29(1)           | 12(1)           | -1(1)           | 1(1)            | 2(1)            |
| O(1W) | 12(1)           | 14(1)           | 16(1)           | 2(1)            | 5(1)            | 0(1)            |
| O(2W) | 11(1)           | 14(1)           | 18(1)           | -4(1)           | 2(1)            | 0(1)            |
| O(3W) | 24(1)           | 14(1)           | 15(1)           | 2(1)            | 7(1)            | 4(1)            |

Table S5. Hydrogen coordinates ( $\times 10^4$ ) and isotropic displacement parameters ( $\text{\AA}^2 \times 10^3$ ) for  $\text{Gd}(\text{OAc})_2\text{Cl}\cdot 3\text{H}_2\text{O}$ .

|        | x     | y    | z    | U (eq) |
|--------|-------|------|------|--------|
| H(12A) | -1517 | -208 | 5708 | 33 (5) |
| H(12B) | -817  | 858  | 6470 | 33 (5) |
| H(12C) | 457   | 394  | 5861 | 33 (5) |
| H(12D) | 288   | 812  | 6315 | 33 (5) |
| H(12E) | -489  | -115 | 5525 | 33 (5) |
| H(12F) | -1711 | 297  | 6162 | 33 (5) |
| H(22A) | 7843  | 5888 | 7364 | 52 (4) |
| H(22B) | 5912  | 5165 | 7204 | 52 (4) |
| H(22C) | 6247  | 7174 | 7198 | 52 (4) |
| H(11W) | 3898  | 994  | 5788 | 49 (5) |
| H(12W) | 5112  | 1853 | 5298 | 49 (5) |
| H(21W) | 491   | 6726 | 6316 | 44 (5) |
| H(22W) | 2230  | 7631 | 6463 | 44 (5) |
| H(31W) | 2462  | 4009 | 7089 | 54 (5) |
| H(32W) | 3197  | 2342 | 6834 | 54 (5) |

Table S6. Hydrogen bonds for Gd(OAc)<sub>2</sub>Cl\_x\_3H<sub>2</sub>O [Å and deg.].

| D-H...A                | d(D-H) | d(H...A) | d(D...A) | <(DHA) |
|------------------------|--------|----------|----------|--------|
| O(1W)-H(11W)...Cl(1)#3 | 0.96   | 2.19     | 3.134(1) | 166.8  |
| O(1W)-H(12W)...O(12)#4 | 0.96   | 1.78     | 2.705(1) | 161.5  |
| O(2W)-H(21W)...O(22)#5 | 0.96   | 1.84     | 2.712(1) | 149.7  |
| O(2W)-H(22W)...Cl(1)   | 0.96   | 2.12     | 3.074(1) | 170.3  |
| O(3W)-H(31W)...Cl(1)#6 | 0.96   | 2.23     | 3.176(1) | 169.9  |
| O(3W)-H(32W)...Cl(1)#3 | 0.96   | 2.13     | 3.072(1) | 165.9  |

Symmetry transformations used to generate equivalent atoms:

#1 -x,-y+1,-z+1      #2 -x+1,-y+1,-z+1      #3 x,y-1,z  
#4 x+1,y,z      #5 x-1,y,z      #6 -x+1/2,y-1/2,-z+3/2
