# Supplementary material
Source: MDPI journal article supplement (https://www.mdpi.com/2073-4352/13/7/1043)
Supplement: s1 [file s1]

Table S1. Crystal data and structure refinement for Sm(OAc)2Br·x\_3H2O.

|                                   |                                                                              |
|-----------------------------------|------------------------------------------------------------------------------|
| Identification code               | Ha2019_80_0m_a                                                               |
| Empirical formula                 | C4 H12 Br O7 Sm                                                              |
| Formula weight                    | 402.40                                                                       |
| Temperature                       | 100(2) K                                                                     |
| Wavelength                        | 0.71073 Å                                                                    |
| Crystal system, space group       | Monoclinic, P2(1)/n                                                          |
| Unit cell dimensions              | a = 7.8473(3) Å<br>b = 8.0230(3) Å    β = 95.987(2) deg.<br>c = 17.8722(7) Å |
| Volume                            | 1119.08(7) Å <sup>3</sup>                                                    |
| Z, Calculated density             | 4, 2.388 Mg/m <sup>3</sup>                                                   |
| Absorption coefficient            | 8.822 mm <sup>-1</sup>                                                       |
| F(000)                            | 756                                                                          |
| Crystal size                      | 0.210 x 0.050 x 0.045 mm                                                     |
| Theta range for data collection   | 2.739 to 27.986 deg.                                                         |
| Limiting indices                  | -10 ≤ h ≤ 10, -10 ≤ k ≤ 10, -23 ≤ l ≤ 23                                     |
| Reflections collected / unique    | 113760 / 2708 [R(int) = 0.0701]                                              |
| Completeness to theta = 25.242    | 100.0 %                                                                      |
| Absorption correction             | Semi-empirical from equivalents                                              |
| Max. and min. transmission        | 0.746 and 0.471                                                              |
| Refinement method                 | Full-matrix least-squares on F <sup>2</sup>                                  |
| Data / restraints / parameters    | 2708 / 0 / 125                                                               |
| Goodness-of-fit on F <sup>2</sup> | 1.084                                                                        |
| Final R indices [I > 2σ(I)]       | R1 = 0.0150, wR2 = 0.0305                                                    |
| R indices (all data)              | R1 = 0.0201, wR2 = 0.0321                                                    |
| Extinction coefficient            | n/a                                                                          |
| Largest diff. peak and hole       | 0.442 and -0.443 e.Å <sup>-3</sup>                                           |

Table S2. Atomic coordinates ( $\times 10^4$ ) and equivalent isotropic displacement parameters ( $\text{\AA}^2 \times 10^3$ ) for  $\text{Sm}(\text{OAc})_2\text{Br} \cdot 3\text{H}_2\text{O}$ .  $U(\text{eq})$  is defined as one third of the trace of the orthogonalized  $U_{ij}$  tensor.

|       | x        | y       | z       | U (eq) |
|-------|----------|---------|---------|--------|
| Sm(1) | 2598(1)  | 4602(1) | 5355(1) | 11(1)  |
| Br(1) | 3946(1)  | 9623(1) | 6868(1) | 18(1)  |
| O(11) | -124(2)  | 3373(2) | 5330(1) | 16(1)  |
| O(12) | -2815(2) | 2629(2) | 5227(1) | 17(1)  |
| C(11) | -1277(3) | 2327(3) | 5457(1) | 13(1)  |
| C(12) | -826(3)  | 762(3)  | 5885(2) | 23(1)  |
| O(21) | 5418(2)  | 5541(2) | 5737(1) | 14(1)  |
| O(22) | 8119(2)  | 6189(2) | 5977(1) | 17(1)  |
| C(21) | 6706(3)  | 5853(3) | 6214(1) | 14(1)  |
| C(22) | 6543(3)  | 5773(4) | 7036(1) | 22(1)  |
| O(1W) | 3866(2)  | 1805(2) | 5316(1) | 15(1)  |
| O(2W) | 1570(2)  | 6525(2) | 6254(1) | 17(1)  |
| O(3W) | 2826(2)  | 3444(2) | 6618(1) | 19(1)  |

Table S3. Bond lengths [Å] and angles [deg] for Sm(OAc)<sub>2</sub>Br·x·3H<sub>2</sub>O.

---

|                       |            |
|-----------------------|------------|
| Sm(1)-O(11)           | 2.349(2)   |
| Sm(1)-O(21)           | 2.370(2)   |
| Sm(1)-O(2W)           | 2.425(2)   |
| Sm(1)-O(3W)           | 2.431(2)   |
| Sm(1)-O(1W)           | 2.459(2)   |
| Sm(1)-O(12)#1         | 2.466(2)   |
| Sm(1)-O(22)#2         | 2.471(2)   |
| Sm(1)-O(21)#2         | 2.623(2)   |
| Sm(1)-O(11)#1         | 2.722(2)   |
|                       |            |
| Sm(1)-Sm(1)#2         | 4.1510(3)  |
| Sm(1)-Sm(1)#1         | 4.1911(3)  |
|                       |            |
| O(11)-C(11)           | 1.272(3)   |
| O(12)-C(11)           | 1.258(3)   |
| C(11)-C(12)           | 1.494(3)   |
|                       |            |
| O(21)-C(21)           | 1.277(3)   |
| O(22)-C(21)           | 1.257(3)   |
| C(21)-C(22)           | 1.491(3)   |
|                       |            |
| O(11)-Sm(1)-O(21)     | 163.58(6)  |
| O(11)-Sm(1)-O(2W)     | 85.13(6)   |
| O(21)-Sm(1)-O(2W)     | 88.45(6)   |
| O(11)-Sm(1)-O(3W)     | 80.58(6)   |
| O(21)-Sm(1)-O(3W)     | 83.00(6)   |
| O(2W)-Sm(1)-O(3W)     | 68.00(6)   |
| O(11)-Sm(1)-O(1W)     | 89.20(6)   |
| O(21)-Sm(1)-O(1W)     | 85.96(6)   |
| O(2W)-Sm(1)-O(1W)     | 139.73(6)  |
| O(3W)-Sm(1)-O(1W)     | 71.74(6)   |
| O(11)-Sm(1)-O(12)#1   | 118.21(6)  |
| O(21)-Sm(1)-O(12)#1   | 74.44(6)   |
| O(2W)-Sm(1)-O(12)#1   | 75.48(6)   |
| O(3W)-Sm(1)-O(12)#1   | 137.28(6)  |
| O(1W)-Sm(1)-O(12)#1   | 139.81(6)  |
| O(11)-Sm(1)-O(22)#2   | 76.00(6)   |
| O(21)-Sm(1)-O(22)#2   | 118.08(5)  |
| O(2W)-Sm(1)-O(22)#2   | 138.02(6)  |
| O(3W)-Sm(1)-O(22)#2   | 141.60(6)  |
| O(1W)-Sm(1)-O(22)#2   | 77.88(6)   |
| O(12)#1-Sm(1)-O(22)#2 | 81.01(6)   |
| O(11)-Sm(1)-O(21)#2   | 125.19(6)  |
| O(21)-Sm(1)-O(21)#2   | 67.60(6)   |
| O(2W)-Sm(1)-O(21)#2   | 141.73(6)  |
| O(3W)-Sm(1)-O(21)#2   | 133.03(5)  |
| O(1W)-Sm(1)-O(21)#2   | 70.46(5)   |
| O(12)#1-Sm(1)-O(21)#2 | 69.68(6)   |
| O(22)#2-Sm(1)-O(21)#2 | 50.59(5)   |
| O(11)-Sm(1)-O(11)#1   | 68.74(6)   |
| O(21)-Sm(1)-O(11)#1   | 122.74(5)  |
| O(2W)-Sm(1)-O(11)#1   | 69.36(5)   |
| O(3W)-Sm(1)-O(11)#1   | 128.76(5)  |
| O(1W)-Sm(1)-O(11)#1   | 143.45(5)  |
| O(12)#1-Sm(1)-O(11)#1 | 49.49(5)   |
| O(22)#2-Sm(1)-O(11)#1 | 68.90(6)   |
| O(21)#2-Sm(1)-O(11)#1 | 98.17(5)   |
|                       |            |
| Sm(1)#2-Sm(1)-Sm(1)#1 | 140.334(7) |

|                         |           |
|-------------------------|-----------|
| C (11)-O (11)-Sm (1)    | 159.4 (2) |
| C (11)-O (11)-Sm (1) #1 | 89.3 (1)  |
| Sm (1)-O (11)-Sm (1) #1 | 111.3 (1) |
| C (11)-O (12)-Sm (1) #1 | 101.9 (1) |
| O (12)-C (11)-O (11)    | 119.4 (2) |
| O (12)-C (11)-C (12)    | 119.8 (2) |
| O (11)-C (11)-C (12)    | 120.8 (2) |
| C (21)-O (21)-Sm (1)    | 154.8 (2) |
| C (21)-O (21)-Sm (1) #2 | 90.9 (1)  |
| Sm (1)-O (21)-Sm (1) #2 | 112.4 (1) |
| C (21)-O (22)-Sm (1) #2 | 98.6 (1)  |
| O (22)-C (21)-O (21)    | 118.8 (2) |
| O (22)-C (21)-C (22)    | 120.8 (2) |
| O (21)-C (21)-C (22)    | 120.4 (2) |

---

Symmetry transformations used to generate equivalent atoms:  
 #1 -x,-y+1,-z+1      #2 -x+1,-y+1,-z+1

Table S4. Anisotropic displacement parameters ( $\text{\AA}^2 \times 10^3$ ) for Sm(OAc)<sub>2</sub>Br·x·3H<sub>2</sub>O.

The anisotropic displacement factor exponent takes the form:  
 $-2 \pi^2 [ h^2 a^{*2} U_{11} + \dots + 2 h k a^* b^* U_{12} ]$

|       | U <sub>11</sub> | U <sub>22</sub> | U <sub>33</sub> | U <sub>23</sub> | U <sub>13</sub> | U <sub>12</sub> |
|-------|-----------------|-----------------|-----------------|-----------------|-----------------|-----------------|
| Sm(1) | 7(1)            | 13(1)           | 12(1)           | 1(1)            | 1(1)            | -1(1)           |
| Br(1) | 21(1)           | 15(1)           | 18(1)           | 2(1)            | 1(1)            | -3(1)           |
| O(11) | 11(1)           | 19(1)           | 19(1)           | 2(1)            | 3(1)            | -3(1)           |
| O(12) | 9(1)            | 19(1)           | 23(1)           | 5(1)            | 2(1)            | -1(1)           |
| C(11) | 12(1)           | 14(1)           | 13(1)           | 0(1)            | 3(1)            | 0(1)            |
| C(12) | 22(1)           | 20(1)           | 26(1)           | 8(1)            | 0(1)            | 0(1)            |
| O(21) | 9(1)            | 18(1)           | 14(1)           | 0(1)            | 0(1)            | -2(1)           |
| O(22) | 9(1)            | 25(1)           | 16(1)           | -2(1)           | 1(1)            | -3(1)           |
| C(21) | 12(1)           | 13(1)           | 15(1)           | -2(1)           | 1(1)            | 2(1)            |
| C(22) | 18(1)           | 33(2)           | 14(1)           | 1(1)            | 2(1)            | 3(1)            |
| O(1W) | 13(1)           | 16(1)           | 18(1)           | 3(1)            | 4(1)            | 0(1)            |
| O(2W) | 13(1)           | 16(1)           | 21(1)           | -4(1)           | 2(1)            | 0(1)            |
| O(3W) | 26(1)           | 16(1)           | 16(1)           | 1(1)            | 6(1)            | 5(1)            |

Table S5. Hydrogen coordinates ( $\times 10^4$ ) and isotropic displacement parameters ( $\text{\AA}^2 \times 10^3$ ) for  $\text{Sm}(\text{OAc})_2\text{Br}\cdot 3\text{H}_2\text{O}$ .

|        | x     | y    | z    | U (eq) |
|--------|-------|------|------|--------|
| H(12A) | -949  | 941  | 6420 | 82 (9) |
| H(12B) | 360   | 454  | 5826 | 82 (9) |
| H(12C) | -1595 | -137 | 5691 | 82 (9) |
| H(22A) | 7684  | 5686 | 7314 | 31 (8) |
| H(22B) | 5860  | 4796 | 7144 | 31 (8) |
| H(22C) | 5976  | 6785 | 7192 | 31 (8) |
| H(22D) | 5313  | 5833 | 7087 | 31 (8) |
| H(22E) | 7112  | 6770 | 7259 | 31 (8) |
| H(22F) | 7028  | 4778 | 7296 | 31 (8) |
| H(11W) | 3868  | 1026 | 5724 | 58 (8) |
| H(12W) | 5036  | 1859 | 5206 | 58 (8) |
| H(21W) | 358   | 6638 | 6277 | 61 (9) |
| H(22W) | 2053  | 7554 | 6450 | 61 (9) |
| H(31W) | 2291  | 3903 | 7031 | 64 (9) |
| H(32W) | 3090  | 2312 | 6761 | 64 (9) |

Table S6. Hydrogen bonds for Sm(OAc)<sub>2</sub>Br·x·3H<sub>2</sub>O [Å and deg.].

| D-H...A                | d(D-H) | d(H...A) | d(D...A) | <(DHA) |
|------------------------|--------|----------|----------|--------|
| O(1W)-H(11W)...Br(1)#3 | 0.96   | 2.33     | 3.276(2) | 168.2  |
| O(1W)-H(12W)...O(12)#4 | 0.96   | 1.79     | 2.708(2) | 158.3  |
| O(2W)-H(21W)...O(22)#5 | 0.96   | 1.82     | 2.715(2) | 154.0  |
| O(2W)-H(22W)...Br(1)   | 0.96   | 2.30     | 3.230(2) | 163.2  |
| O(3W)-H(31W)...Br(1)#6 | 0.96   | 2.35     | 3.306(2) | 171.1  |
| O(3W)-H(32W)...Br(1)#3 | 0.96   | 2.26     | 3.207(2) | 168.2  |

Symmetry transformations used to generate equivalent atoms:

#1 -x,-y+1,-z+1      #2 -x+1,-y+1,-z+1      #3 x,y-1,z  
#4 x+1,y,z      #5 x-1,y,z      #6 -x+1/2,y-1/2,-z+3/2
