# Supplementary material
Source: MDPI journal article supplement (https://www.mdpi.com/2073-4352/13/7/1043)
Supplement: s1 [file s1]

Table S1. Crystal data and structure refinement for Nd(OAc)2Br·x·3H2O.

|                                   |                                                                              |
|-----------------------------------|------------------------------------------------------------------------------|
| Identification code               | Ha2019_63_0m_a                                                               |
| Empirical formula                 | C4 H12 Br Nd O7                                                              |
| Formula weight                    | 396.29                                                                       |
| Temperature                       | 100(2) K                                                                     |
| Wavelength                        | 0.71073 Å                                                                    |
| Crystal system, space group       | Monoclinic, P2(1)/n                                                          |
| Unit cell dimensions              | a = 7.9027(3) Å<br>b = 8.0349(3) Å    β = 96.414(2) deg.<br>c = 17.9481(6) Å |
| Volume                            | 1132.52(7) Å <sup>3</sup>                                                    |
| Z, Calculated density             | 4, 2.324 Mg/m <sup>3</sup>                                                   |
| Absorption coefficient            | 8.117 mm <sup>-1</sup>                                                       |
| F(000)                            | 748                                                                          |
| Crystal size                      | 0.314 x 0.236 x 0.176 mm                                                     |
| Theta range for data collection   | 2.715 to 27.995 deg.                                                         |
| Limiting indices                  | -10 ≤ h ≤ 10, -10 ≤ k ≤ 10, -23 ≤ l ≤ 23                                     |
| Reflections collected / unique    | 132337 / 2735 [R(int) = 0.0553]                                              |
| Completeness to theta = 25.242    | 100.0 %                                                                      |
| Absorption correction             | Semi-empirical from equivalents                                              |
| Max. and min. transmission        | 0.746 and 0.414                                                              |
| Refinement method                 | Full-matrix least-squares on F <sup>2</sup>                                  |
| Data / restraints / parameters    | 2735 / 0 / 125                                                               |
| Goodness-of-fit on F <sup>2</sup> | 1.055                                                                        |
| Final R indices [I > 2σ(I)]       | R1 = 0.0129, wR2 = 0.0300                                                    |
| R indices (all data)              | R1 = 0.0154, wR2 = 0.0306                                                    |
| Extinction coefficient            | n/a                                                                          |
| Largest diff. peak and hole       | 0.402 and -0.415 e.Å <sup>-3</sup>                                           |

Table S2. Atomic coordinates ( $\times 10^4$ ) and equivalent isotropic displacement parameters ( $\text{\AA}^2 \times 10^3$ ) for  $\text{Nd}(\text{OAc})_2\text{Br}\cdot 3\text{H}_2\text{O}$ .  $U(\text{eq})$  is defined as one third of the trace of the orthogonalized  $U_{ij}$  tensor.

|       | x        | y       | z       | U (eq) |
|-------|----------|---------|---------|--------|
| Nd(1) | 2598(1)  | 4603(1) | 5359(1) | 10(1)  |
| Br(1) | 3953(1)  | 9613(1) | 6876(1) | 18(1)  |
| O(11) | -159(2)  | 3373(2) | 5328(1) | 15(1)  |
| O(12) | -2818(2) | 2587(2) | 5220(1) | 17(1)  |
| C(11) | -1287(2) | 2308(2) | 5454(1) | 14(1)  |
| C(12) | -803(3)  | 756(3)  | 5886(1) | 23(1)  |
| O(21) | 5453(2)  | 5540(2) | 5736(1) | 14(1)  |
| O(22) | 8129(2)  | 6221(2) | 5984(1) | 18(1)  |
| C(21) | 6732(2)  | 5863(2) | 6217(1) | 14(1)  |
| C(22) | 6564(3)  | 5779(3) | 7036(1) | 22(1)  |
| O(1W) | 3885(2)  | 1779(2) | 5328(1) | 15(1)  |
| O(2W) | 1560(2)  | 6537(2) | 6266(1) | 17(1)  |
| O(3W) | 2835(2)  | 3426(2) | 6632(1) | 20(1)  |

Table S3. Bond lengths [Å] and angles [deg] for Nd(OAc)<sub>2</sub>Br·x<sub>3</sub>H<sub>2</sub>O.

---

|                       |            |
|-----------------------|------------|
| Nd(1)-O(11)           | 2.388(1)   |
| Nd(1)-O(21)           | 2.403(1)   |
| Nd(1)-O(2W)           | 2.457(1)   |
| Nd(1)-O(3W)           | 2.461(1)   |
| Nd(1)-O(1W)           | 2.490(1)   |
| Nd(1)-O(12)#1         | 2.499(1)   |
| Nd(1)-O(22)#2         | 2.504(1)   |
| Nd(1)-O(21)#2         | 2.632(1)   |
| Nd(1)-O(11)#1         | 2.711(1)   |
|                       |            |
| Nd(1)-Nd(1)#2         | 4.1920(2)  |
| Nd(1)-Nd(1)#1         | 4.2124(2)  |
|                       |            |
| O(11)-C(11)           | 1.274(2)   |
| O(12)-C(11)           | 1.256(2)   |
| C(11)-C(12)           | 1.495(3)   |
|                       |            |
| O(21)-C(21)           | 1.280(2)   |
| O(22)-C(21)           | 1.257(2)   |
| C(21)-C(22)           | 1.492(3)   |
|                       |            |
| O(11)-Nd(1)-O(21)     | 164.11(5)  |
| O(11)-Nd(1)-O(2W)     | 84.60(5)   |
| O(21)-Nd(1)-O(2W)     | 89.27(5)   |
| O(11)-Nd(1)-O(3W)     | 80.61(5)   |
| O(21)-Nd(1)-O(3W)     | 83.50(5)   |
| O(2W)-Nd(1)-O(3W)     | 67.92(5)   |
| O(11)-Nd(1)-O(1W)     | 89.78(5)   |
| O(21)-Nd(1)-O(1W)     | 85.35(4)   |
| O(2W)-Nd(1)-O(1W)     | 139.36(5)  |
| O(3W)-Nd(1)-O(1W)     | 71.45(5)   |
| O(11)-Nd(1)-O(12)#1   | 118.05(4)  |
| O(21)-Nd(1)-O(12)#1   | 74.18(4)   |
| O(2W)-Nd(1)-O(12)#1   | 75.38(5)   |
| O(3W)-Nd(1)-O(12)#1   | 136.99(5)  |
| O(1W)-Nd(1)-O(12)#1   | 140.04(4)  |
| O(11)-Nd(1)-O(22)#2   | 75.98(4)   |
| O(21)-Nd(1)-O(22)#2   | 117.49(4)  |
| O(2W)-Nd(1)-O(22)#2   | 138.39(5)  |
| O(3W)-Nd(1)-O(22)#2   | 141.06(5)  |
| O(1W)-Nd(1)-O(22)#2   | 77.74(5)   |
| O(12)#1-Nd(1)-O(22)#2 | 81.85(5)   |
| O(11)-Nd(1)-O(21)#2   | 124.98(4)  |
| O(21)-Nd(1)-O(21)#2   | 67.36(5)   |
| O(2W)-Nd(1)-O(21)#2   | 142.11(5)  |
| O(3W)-Nd(1)-O(21)#2   | 133.37(4)  |
| O(1W)-Nd(1)-O(21)#2   | 70.65(4)   |
| O(12)#1-Nd(1)-O(21)#2 | 69.86(4)   |
| O(22)#2-Nd(1)-O(21)#2 | 50.19(4)   |
| O(11)-Nd(1)-O(11)#1   | 68.74(5)   |
| O(21)-Nd(1)-O(11)#1   | 122.52(4)  |
| O(2W)-Nd(1)-O(11)#1   | 69.46(4)   |
| O(3W)-Nd(1)-O(11)#1   | 129.01(4)  |
| O(1W)-Nd(1)-O(11)#1   | 143.90(4)  |
| O(12)#1-Nd(1)-O(11)#1 | 49.30(4)   |
| O(22)#2-Nd(1)-O(11)#1 | 69.26(4)   |
| O(21)#2-Nd(1)-O(11)#1 | 97.59(4)   |
|                       |            |
| Nd(1)#2-Nd(1)-Nd(1)#1 | 140.204(6) |

|                         |           |
|-------------------------|-----------|
| C (11)-O (11)-Nd (1)    | 158.3 (1) |
| C (11)-O (11)-Nd (1) #1 | 90.4 (1)  |
| Nd (1)-O (11)-Nd (1) #1 | 111.3 (1) |
| C (11)-O (12)-Nd (1) #1 | 101.0 (1) |
| O (12)-C (11)-O (11)    | 119.2 (2) |
| O (12)-C (11)-C (12)    | 120.2 (2) |
| O (11)-C (11)-C (12)    | 120.6 (2) |
| C (21)-O (21)-Nd (1)    | 154.1 (1) |
| C (21)-O (21)-Nd (1) #2 | 91.6 (1)  |
| Nd (1)-O (21)-Nd (1) #2 | 112.6 (1) |
| C (21)-O (22)-Nd (1) #2 | 98.3 (1)  |
| O (22)-C (21)-O (21)    | 118.6 (2) |
| O (22)-C (21)-C (22)    | 121.1 (2) |
| O (21)-C (21)-C (22)    | 120.3 (2) |

---

Symmetry transformations used to generate equivalent atoms:  
 #1 -x,-y+1,-z+1      #2 -x+1,-y+1,-z+1

Table S4. Anisotropic displacement parameters ( $\text{\AA}^2 \times 10^3$ ) for Nd(OAc)<sub>2</sub>Br·x·3H<sub>2</sub>O.

The anisotropic displacement factor exponent takes the form:  
 $-2 \pi^2 [ h^2 a^{*2} U_{11} + \dots + 2 h k a^* b^* U_{12} ]$

|       | U <sub>11</sub> | U <sub>22</sub> | U <sub>33</sub> | U <sub>23</sub> | U <sub>13</sub> | U <sub>12</sub> |
|-------|-----------------|-----------------|-----------------|-----------------|-----------------|-----------------|
| Nd(1) | 6(1)            | 13(1)           | 12(1)           | 1(1)            | 1(1)            | -1(1)           |
| Br(1) | 20(1)           | 15(1)           | 17(1)           | 2(1)            | 1(1)            | -3(1)           |
| O(11) | 10(1)           | 18(1)           | 19(1)           | 3(1)            | 2(1)            | -3(1)           |
| O(12) | 9(1)            | 18(1)           | 23(1)           | 6(1)            | 2(1)            | -1(1)           |
| C(11) | 12(1)           | 16(1)           | 14(1)           | 0(1)            | 3(1)            | 0(1)            |
| C(12) | 21(1)           | 20(1)           | 28(1)           | 9(1)            | 1(1)            | -1(1)           |
| O(21) | 8(1)            | 19(1)           | 14(1)           | 0(1)            | 0(1)            | -1(1)           |
| O(22) | 9(1)            | 25(1)           | 18(1)           | -2(1)           | 1(1)            | -3(1)           |
| C(21) | 12(1)           | 12(1)           | 16(1)           | -1(1)           | -1(1)           | 2(1)            |
| C(22) | 17(1)           | 36(1)           | 14(1)           | 1(1)            | 1(1)            | 4(1)            |
| O(1W) | 12(1)           | 16(1)           | 18(1)           | 2(1)            | 4(1)            | 0(1)            |
| O(2W) | 12(1)           | 17(1)           | 20(1)           | -4(1)           | 1(1)            | -1(1)           |
| O(3W) | 28(1)           | 17(1)           | 15(1)           | 2(1)            | 7(1)            | 5(1)            |

Table S5. Hydrogen coordinates ( $\times 10^4$ ) and isotropic displacement parameters ( $\text{\AA}^2 \times 10^3$ ) for Nd(OAc)<sub>2</sub>Br·x\_3H<sub>2</sub>O.

|        | x     | y    | z    | U (eq) |
|--------|-------|------|------|--------|
| H(12A) | -728  | 992  | 6424 | 77 (7) |
| H(12B) | 304   | 362  | 5760 | 77 (7) |
| H(12C) | -1667 | -102 | 5756 | 77 (7) |
| H(22A) | 7676  | 5528 | 7312 | 75 (7) |
| H(22B) | 5752  | 4902 | 7129 | 75 (7) |
| H(22C) | 6154  | 6851 | 7204 | 75 (7) |
| H(11W) | 3860  | 973  | 5721 | 49 (6) |
| H(12W) | 5053  | 1821 | 5229 | 49 (6) |
| H(21W) | 364   | 6674 | 6298 | 54 (7) |
| H(22W) | 2069  | 7566 | 6447 | 54 (7) |
| H(31W) | 2320  | 3895 | 7044 | 53 (6) |
| H(32W) | 3158  | 2318 | 6790 | 53 (6) |

Table S6. Hydrogen bonds for Nd(OAc)<sub>2</sub>Br·x<sub>3</sub>H<sub>2</sub>O [Å and deg.].

| D-H...A                | d(D-H) | d(H...A) | d(D...A) | <(DHA) |
|------------------------|--------|----------|----------|--------|
| O(1W)-H(11W)...Br(1)#3 | 0.96   | 2.34     | 3.274(1) | 165.1  |
| O(1W)-H(12W)...O(12)#4 | 0.96   | 1.79     | 2.713(2) | 159.4  |
| O(2W)-H(21W)...O(22)#5 | 0.96   | 1.83     | 2.715(2) | 151.9  |
| O(2W)-H(22W)...Br(1)   | 0.96   | 2.29     | 3.227(1) | 164.3  |
| O(3W)-H(31W)...Br(1)#6 | 0.96   | 2.35     | 3.304(1) | 171.0  |
| O(3W)-H(32W)...Br(1)#3 | 0.96   | 2.26     | 3.206(2) | 166.8  |

Symmetry transformations used to generate equivalent atoms:

#1 -x,-y+1,-z+1      #2 -x+1,-y+1,-z+1      #3 x,y-1,z  
#4 x+1,y,z      #5 x-1,y,z      #6 -x+1/2,y-1/2,-z+3/2
