# Supplementary material
Source: MDPI journal article supplement (https://www.mdpi.com/2073-4352/13/7/1043)
Supplement: s1 [file s1]

Table S1. Crystal data and structure refinement for Dy(OAc)2Br·x\_3H2O.

|                                   |                                                                              |
|-----------------------------------|------------------------------------------------------------------------------|
| Identification code               | Ha2019_78_0m_a                                                               |
| Empirical formula                 | C4 H12 Br Dy O7                                                              |
| Formula weight                    | 414.55                                                                       |
| Temperature                       | 100(2) K                                                                     |
| Wavelength                        | 0.71073 Å                                                                    |
| Crystal system, space group       | Monoclinic, P2(1)/n                                                          |
| Unit cell dimensions              | a = 7.8038(3) Å<br>b = 8.0288(3) Å    β = 96.034(2) deg.<br>c = 17.6550(7) Å |
| Volume                            | 1100.05(7) Å <sup>3</sup>                                                    |
| Z, Calculated density             | 4, 2.503 Mg/m <sup>3</sup>                                                   |
| Absorption coefficient            | 10.429 mm <sup>-1</sup>                                                      |
| F(000)                            | 772                                                                          |
| Crystal size                      | 0.484 x 0.123 x 0.077 mm                                                     |
| Theta range for data collection   | 2.790 to 27.995 deg.                                                         |
| Limiting indices                  | -10 ≤ h ≤ 10, -10 ≤ k ≤ 10, -23 ≤ l ≤ 23                                     |
| Reflections collected / unique    | 101683 / 2666 [R(int) = 0.0444]                                              |
| Completeness to theta = 25.242    | 99.8 %                                                                       |
| Absorption correction             | Semi-empirical from equivalents                                              |
| Max. and min. transmission        | 0.734 and 0.267                                                              |
| Refinement method                 | Full-matrix least-squares on F <sup>2</sup>                                  |
| Data / restraints / parameters    | 2666 / 0 / 126                                                               |
| Goodness-of-fit on F <sup>2</sup> | 1.118                                                                        |
| Final R indices [I > 2σ(I)]       | R1 = 0.0129, wR2 = 0.0321                                                    |
| R indices (all data)              | R1 = 0.0140, wR2 = 0.0325                                                    |
| Extinction coefficient            | 0.00126(9)                                                                   |
| Largest diff. peak and hole       | 0.779 and -0.601 e.Å <sup>-3</sup>                                           |

Table S2. Atomic coordinates ( $\times 10^4$ ) and equivalent isotropic displacement parameters ( $\text{\AA}^2 \times 10^3$ ) for  $\text{Dy}(\text{OAc})_2\text{Br} \cdot 3\text{H}_2\text{O}$ .  $U(\text{eq})$  is defined as one third of the trace of the orthogonalized  $U_{ij}$  tensor.

|        | x         | y        | z        | U (eq) |
|--------|-----------|----------|----------|--------|
| Dy (1) | 2659 (1)  | 4535 (1) | 5373 (1) | 10 (1) |
| Br (1) | 3891 (1)  | 9551 (1) | 6837 (1) | 17 (1) |
| O (11) | 34 (2)    | 3315 (2) | 5364 (1) | 19 (1) |
| O (12) | -2722 (2) | 2796 (2) | 5229 (1) | 16 (1) |
| C (11) | -1207 (2) | 2373 (3) | 5470 (1) | 13 (1) |
| C (12) | -914 (3)  | 749 (3)  | 5881 (1) | 24 (1) |
| O (21) | 5388 (2)  | 5548 (2) | 5734 (1) | 13 (1) |
| O (22) | 8104 (2)  | 6194 (2) | 5945 (1) | 15 (1) |
| C (21) | 6709 (3)  | 5861 (2) | 6208 (1) | 13 (1) |
| C (22) | 6598 (3)  | 5792 (3) | 7044 (1) | 21 (1) |
| O (1W) | 3978 (2)  | 1860 (2) | 5318 (1) | 15 (1) |
| O (2W) | 1557 (2)  | 6397 (2) | 6240 (1) | 15 (1) |
| O (3W) | 2968 (2)  | 3430 (2) | 6634 (1) | 20 (1) |

Table S3. Bond lengths [Å] and angles [deg] for Dy(OAc)<sub>2</sub>Br·x<sub>3</sub>H<sub>2</sub>O.

---

|                       |            |
|-----------------------|------------|
| Dy(1)-O(11)           | 2.269(1)   |
| Dy(1)-O(21)           | 2.307(1)   |
| Dy(1)-O(2W)           | 2.365(1)   |
| Dy(1)-O(3W)           | 2.386(2)   |
| Dy(1)-O(1W)           | 2.389(1)   |
| Dy(1)-O(12)#1         | 2.395(2)   |
| Dy(1)-O(22)#2         | 2.412(2)   |
| Dy(1)-O(21)#2         | 2.603(1)   |
| Dy(1)-O(11)#1         | 2.917(2)   |
|                       |            |
| Dy(1)-Dy(1)#2         | 4.0809(2)  |
| Dy(1)-Dy(1)#1         | 4.2848(2)  |
|                       |            |
| O(11)-C(11)           | 1.258(2)   |
| O(12)-C(11)           | 1.260(2)   |
| C(11)-C(12)           | 1.497(3)   |
|                       |            |
| O(21)-C(21)           | 1.281(2)   |
| O(22)-C(21)           | 1.256(2)   |
| C(21)-C(22)           | 1.490(3)   |
|                       |            |
| O(11)-Dy(1)-O(21)     | 163.91(5)  |
| O(11)-Dy(1)-O(2W)     | 83.57(5)   |
| O(21)-Dy(1)-O(2W)     | 89.20(5)   |
| O(11)-Dy(1)-O(3W)     | 81.29(6)   |
| O(21)-Dy(1)-O(3W)     | 82.70(5)   |
| O(2W)-Dy(1)-O(3W)     | 68.82(5)   |
| O(11)-Dy(1)-O(1W)     | 90.24(5)   |
| O(21)-Dy(1)-O(1W)     | 86.49(5)   |
| O(2W)-Dy(1)-O(1W)     | 141.45(5)  |
| O(3W)-Dy(1)-O(1W)     | 72.64(5)   |
| O(11)-Dy(1)-O(12)#1   | 116.35(5)  |
| O(21)-Dy(1)-O(12)#1   | 75.28(5)   |
| O(2W)-Dy(1)-O(12)#1   | 75.39(5)   |
| O(3W)-Dy(1)-O(12)#1   | 137.93(5)  |
| O(1W)-Dy(1)-O(12)#1   | 139.26(5)  |
| O(11)-Dy(1)-O(22)#2   | 75.97(5)   |
| O(21)-Dy(1)-O(22)#2   | 118.66(5)  |
| O(2W)-Dy(1)-O(22)#2   | 135.09(5)  |
| O(3W)-Dy(1)-O(22)#2   | 143.18(5)  |
| O(1W)-Dy(1)-O(22)#2   | 78.83(5)   |
| O(12)#1-Dy(1)-O(22)#2 | 78.67(5)   |
| O(11)-Dy(1)-O(21)#2   | 125.67(5)  |
| O(21)-Dy(1)-O(21)#2   | 67.68(6)   |
| O(2W)-Dy(1)-O(21)#2   | 141.61(5)  |
| O(3W)-Dy(1)-O(21)#2   | 132.98(5)  |
| O(1W)-Dy(1)-O(21)#2   | 69.98(5)   |
| O(12)#1-Dy(1)-O(21)#2 | 69.43(5)   |
| O(22)#2-Dy(1)-O(21)#2 | 51.24(4)   |
| O(11)-Dy(1)-O(11)#1   | 69.20(6)   |
| O(21)-Dy(1)-O(11)#1   | 121.05(5)  |
| O(2W)-Dy(1)-O(11)#1   | 67.73(5)   |
| O(3W)-Dy(1)-O(11)#1   | 129.31(5)  |
| O(1W)-Dy(1)-O(11)#1   | 143.84(5)  |
| O(12)#1-Dy(1)-O(11)#1 | 47.18(4)   |
| O(22)#2-Dy(1)-O(11)#1 | 67.70(5)   |
| O(21)#2-Dy(1)-O(11)#1 | 97.56(4)   |
|                       |            |
| Dy(1)#2-Dy(1)-Dy(1)#1 | 137.751(5) |

|                         |           |
|-------------------------|-----------|
| C (11)-O (11)-Dy (1)    | 165.2 (2) |
| C (11)-O (12)-Dy (1) #1 | 109.2 (1) |
| O (11)-C (11)-O (12)    | 119.8 (2) |
| O (11)-C (11)-C (12)    | 121.0 (2) |
| O (12)-C (11)-C (12)    | 119.2 (2) |
| C (21)-O (21)-Dy (1)    | 154.9 (1) |
| C (21)-O (21)-Dy (1) #2 | 90.0 (1)  |
| Dy (1)-O (21)-Dy (1) #2 | 112.3 (1) |
| C (21)-O (22)-Dy (1) #2 | 99.7 (1)  |
| O (22)-C (21)-O (21)    | 118.0 (2) |
| O (22)-C (21)-C (22)    | 121.1 (2) |
| O (21)-C (21)-C (22)    | 120.9 (2) |

---

Symmetry transformations used to generate equivalent atoms:  
 #1 -x,-y+1,-z+1      #2 -x+1,-y+1,-z+1

Table S4. Anisotropic displacement parameters ( $\text{\AA}^2 \times 10^3$ ) for  
 $\text{Dy}(\text{OAc})_2\text{Br} \cdot x_3\text{H}_2\text{O}$ .

The anisotropic displacement factor exponent takes the form:  
 $-2 \pi^2 [ h^2 a^{*2} U_{11} + \dots + 2 h k a^* b^* U_{12} ]$

|       | U <sub>11</sub> | U <sub>22</sub> | U <sub>33</sub> | U <sub>23</sub> | U <sub>13</sub> | U <sub>12</sub> |
|-------|-----------------|-----------------|-----------------|-----------------|-----------------|-----------------|
| Dy(1) | 8 (1)           | 13 (1)          | 11 (1)          | 0 (1)           | 2 (1)           | -2 (1)          |
| Br(1) | 21 (1)          | 14 (1)          | 16 (1)          | 1 (1)           | 1 (1)           | -2 (1)          |
| O(11) | 14 (1)          | 25 (1)          | 21 (1)          | -5 (1)          | 6 (1)           | -7 (1)          |
| O(12) | 10 (1)          | 20 (1)          | 18 (1)          | 3 (1)           | 2 (1)           | 1 (1)           |
| C(11) | 12 (1)          | 15 (1)          | 11 (1)          | -1 (1)          | 2 (1)           | -1 (1)          |
| C(12) | 26 (1)          | 21 (1)          | 24 (1)          | 8 (1)           | 1 (1)           | 5 (1)           |
| O(21) | 10 (1)          | 16 (1)          | 13 (1)          | -1 (1)          | 0 (1)           | -1 (1)          |
| O(22) | 9 (1)           | 21 (1)          | 16 (1)          | -2 (1)          | 1 (1)           | -2 (1)          |
| C(21) | 13 (1)          | 11 (1)          | 14 (1)          | -1 (1)          | 0 (1)           | 2 (1)           |
| C(22) | 16 (1)          | 33 (1)          | 12 (1)          | 0 (1)           | -1 (1)          | 3 (1)           |
| O(1W) | 13 (1)          | 16 (1)          | 17 (1)          | 2 (1)           | 5 (1)           | 0 (1)           |
| O(2W) | 11 (1)          | 16 (1)          | 18 (1)          | -2 (1)          | 1 (1)           | 0 (1)           |
| O(3W) | 27 (1)          | 17 (1)          | 15 (1)          | 2 (1)           | 8 (1)           | 4 (1)           |

Table S5. Hydrogen coordinates ( $\times 10^4$ ) and isotropic displacement parameters ( $\text{\AA}^2 \times 10^3$ ) for  $\text{Dy}(\text{OAc})_2\text{Br}\cdot 3\text{H}_2\text{O}$ .

|        | x     | y    | z    | U (eq)  |
|--------|-------|------|------|---------|
| H(12A) | -1424 | 795  | 6364 | 92 (9)  |
| H(12B) | 327   | 541  | 5981 | 92 (9)  |
| H(12C) | -1452 | -152 | 5565 | 92 (9)  |
| H(22A) | 7762  | 5731 | 7312 | 94 (10) |
| H(22B) | 5941  | 4805 | 7166 | 94 (10) |
| H(22C) | 6019  | 6796 | 7205 | 94 (10) |
| H(11W) | 3911  | 1035 | 5707 | 45 (6)  |
| H(12W) | 5174  | 1900 | 5236 | 45 (6)  |
| H(21W) | 351   | 6552 | 6283 | 46 (7)  |
| H(22W) | 2090  | 7424 | 6415 | 46 (7)  |
| H(31W) | 2459  | 3937 | 7049 | 54 (7)  |
| H(32W) | 3243  | 2315 | 6801 | 54 (7)  |

Table S6. Hydrogen bonds for Dy(OAc)<sub>2</sub>Br·x<sub>3</sub>H<sub>2</sub>O [Å and deg.].

| D-H...A                | d(D-H) | d(H...A) | d(D...A) | <(DHA) |
|------------------------|--------|----------|----------|--------|
| O(1W)-H(11W)...Br(1)#3 | 0.96   | 2.33     | 3.267(2) | 166.8  |
| O(1W)-H(12W)...O(12)#4 | 0.96   | 1.79     | 2.703(2) | 156.9  |
| O(2W)-H(21W)...O(22)#5 | 0.96   | 1.81     | 2.695(2) | 151.0  |
| O(2W)-H(22W)...Br(1)   | 0.96   | 2.29     | 3.231(1) | 167.8  |
| O(3W)-H(31W)...Br(1)#6 | 0.96   | 2.38     | 3.320(2) | 166.9  |
| O(3W)-H(32W)...Br(1)#3 | 0.96   | 2.28     | 3.209(2) | 163.8  |

Symmetry transformations used to generate equivalent atoms:

#1 -x,-y+1,-z+1      #2 -x+1,-y+1,-z+1      #3 x,y-1,z  
#4 x+1,y,z      #5 x-1,y,z      #6 -x+1/2,y-1/2,-z+3/2
