# Supplementary material
Source: MDPI journal article supplement (https://www.mdpi.com/2073-4352/13/7/1043)
Supplement: s1 [file s1]

Archive with 78 entries (78 files):
- 1 Ce Ha2019_72_0m_a.cif
- 1 Ce HR2021_51_0m_a.cif
- 1 Ce(OAc)2Br x 3H2O_checkcif.pdf
- 1 Ce(OAc)2Br x 3H2O_Tabellen.pdf
- 1 Ce(OAc)2Cl x 3H2O_checkcif.pdf
- 1 Ce(OAc)2Cl x 3H2O_Tabellen.pdf
- 10 Ho Ha2019_84_0m_a.cif
- 10 Ho Ha2019_86_0m_a.cif
- 10 Ho(OAc)2Br x 3H2O_checkcif.pdf
- 10 Ho(OAc)2Br x 3H2O_Tabellen.pdf
- 10 Ho(OAc)2Cl x 3H2O_checkcif.pdf
- 10 Ho(OAc)2Cl x 3H2O_Tabellen.pdf
- 11 Er Ha2019_54_0m_a.cif
- 11 Er Ha2019_79_0m_a.cif
- 11 Er(OAc)2Br x 3H2O_checkcif.pdf
- 11 Er(OAc)2Br x 3H2O_Tabellen.pdf
- 11 Er(OAc)2Cl x 3H2O_checkcif.pdf
- 11 Er(OAc)2Cl x 3H2O_Tabellen.pdf
- 12 Tm Ha2019_92_0m_a.cif
- 12 Tm Ha2019_99b_0m_a.cif
- 12 Tm(OAc)2Br x 3H2O_checkcif.pdf
- 12 Tm(OAc)2Br x 3H2O_Tabellen.pdf
- 12 Tm(OAc)2Cl x 3H2O_checkcif.pdf
- 12 Tm(OAc)2Cl x 3H2O_Tabellen.pdf
- 13 Yb Ha2019_57_0m_a.cif
- 13 Yb Ha2019_99j_0m_a.cif
- 13 Yb(OAc)2Br x 3H2O_checkcif.pdf
- 13 Yb(OAc)2Br x 3H2O_Tabellen.pdf
- 13 Yb(OAc)2Cl x 3H2O_checkcif.pdf
- 13 Yb(OAc)2Cl x 3H2O_Tabellen.pdf
- 14 Lu Ha2019_67_0m_a.cif
- 14 Lu Ha2019_69_0m_a.cif
- 14 Lu(OAc)2Br x 3H2O_checkcif.pdf
- 14 Lu(OAc)2Br x 3H2O_Tabellen.pdf
- 14 Lu(OAc)2Cl x 3H2O_checkcif.pdf
- 14 Lu(OAc)2Cl x 3H2O_Tabellen.pdf
- 2 Pr Ha2019_59_0m_a.cif
- 2 Pr Ha2019_64_0m_a.cif
- 2 Pr(OAc)2Br x 3H2O_checkcif.pdf
- 2 Pr(OAc)2Br x 3H2O_Tabellen.pdf
- 2 Pr(OAc)2Cl x 3H2O_checkcif.pdf
- 2 Pr(OAc)2Cl x 3H2O_Tabellen.pdf
- 3 Nd Ha2019_58_0m_a.cif
- 3 Nd Ha2019_63_0m_a.cif
- 3 Nd(OAc)2Br x 3H2O_checkcif.pdf
- 3 Nd(OAc)2Br x 3H2O_Tabellen.pdf
- 3 Nd(OAc)2Cl x 3H2O_checkcif.pdf
- 3 Nd(OAc)2Cl x 3H2O_Tabellen.pdf
- 5 Sm Ha2019_80_0m_a.cif
- 5 Sm Ha2019_99g_0m_a.cif
- 5 Sm(OAc)2Br x 3H2O_checkcif.pdf
- 5 Sm(OAc)2Br x 3H2O_Tabellen.pdf
- 5 Sm(OAc)2Cl x 3H2O_checkcif.pdf
- 5 Sm(OAc)2Cl x 3H2O_Tabellen.pdf
- 6 Eu Ha2019_37_0m_a.cif
- 6 Eu Ha2019_96_0m_a.cif
- 6 Eu(OAc)2Br x 3H2O_checkcif.pdf
- 6 Eu(OAc)2Br x 3H2O_Tabellen.pdf
- 6 Eu(OAc)2Cl x 3H2O_checkcif.pdf
- 6 Eu(OAc)2Cl x 3H2O_Tabellen.pdf
- 7 Gd Ha2019_99h_0m_a.cif
- 7 Gd Ha2020_2_0m_a.cif
- 7 Gd(OAc)2Br x 3H2O_checkcif.pdf
- 7 Gd(OAc)2Br x 3H2O_Tabellen.pdf
- 7 Gd(OAc)2Cl x 3H2O_checkcif.pdf
- 7 Gd(OAc)2Cl x 3H2O_Tabellen.pdf
- 8 Tb Ha2019_98_0m_a.cif
- 8 Tb Ha2019_99o_0m_a.cif
- 8 Tb(OAc)2Br x 3H2O_checkcif.pdf
- 8 Tb(OAc)2Br x 3H2O_Tabellen.pdf
- 8 Tb(OAc)2Cl x 3H2O_checkcif.pdf
- 8 Tb(OAc92Cl x 3H2O_Tabellen.pdf
- 9 Dy Ha2019_77_0m_a.cif
- 9 Dy Ha2019_78_0m_a.cif
- 9 Dy(OAc)2Br x 3H2O_checkcif.pdf
- 9 Dy(OAc)2Br x 3H2O_Tabellen.pdf
- 9 Dy(OAc)2Cl x 3H2O_checkcif.pdf
- 9 Dy(OAc)2Cl x 3H2O_Tabellen.pdf
