# Supplementary material
Source: MDPI journal article supplement (https://www.mdpi.com/2073-4352/13/7/1043)
Supplement: s1 [file s1 › 1 Ce Ha2019_72_0m_a.cif]

 
data_Ha2019_72_0m_a 
  
_audit_creation_method            'SHELXL-2014/7' 
_shelx_SHELXL_version_number      '2014/7' 
_chemical_name_systematic         ? 
_chemical_name_common             ? 
_chemical_melting_point           ? 
_chemical_formula_moiety          ? 
_chemical_formula_sum 
 'C4 H12 Ce Cl O7' 
_chemical_formula_weight          347.71 
  
loop_ 
 _atom_type_symbol 
 _atom_type_description 
 _atom_type_scat_dispersion_real 
 _atom_type_scat_dispersion_imag 
 _atom_type_scat_source 
 'C'  'C'   0.0033   0.0016 
 'International Tables Vol C Tables 4.2.6.8 and 6.1.1.4' 
 'H'  'H'   0.0000   0.0000 
 'International Tables Vol C Tables 4.2.6.8 and 6.1.1.4' 
 'O'  'O'   0.0106   0.0060 
 'International Tables Vol C Tables 4.2.6.8 and 6.1.1.4' 
 'Cl'  'Cl'   0.1484   0.1585 
 'International Tables Vol C Tables 4.2.6.8 and 6.1.1.4' 
 'Ce'  'Ce'  -0.2486   2.6331 
 'International Tables Vol C Tables 4.2.6.8 and 6.1.1.4' 
  
_space_group_crystal_system       monoclinic 
_space_group_IT_number            14 
_space_group_name_H-M_alt         'P 21/n' 
_space_group_name_Hall            '-P 2yn' 
  
_shelx_space_group_comment 
; 
The symmetry employed for this shelxl refinement is uniquely defined 
by the following loop, which should always be used as a source of 
symmetry information in preference to the above space-group names. 
They are only intended as comments. 
; 
  
loop_ 
 _space_group_symop_operation_xyz 
 'x, y, z' 
 '-x+1/2, y+1/2, -z+1/2' 
 '-x, -y, -z' 
 'x-1/2, -y-1/2, z-1/2' 
  
_cell_length_a                    7.9625(3) 
_cell_length_b                    7.9276(3) 
_cell_length_c                    17.6973(6) 
_cell_angle_alpha                 90 
_cell_angle_beta                  99.122(2) 
_cell_angle_gamma                 90 
_cell_volume                      1102.99(7) 
_cell_formula_units_Z             4 
_cell_measurement_temperature     100(2) 
_cell_measurement_reflns_used     9941 
_cell_measurement_theta_min       2.33 
_cell_measurement_theta_max       28.32 
  
_exptl_crystal_description        plate 
_exptl_crystal_colour             colourless 
_exptl_crystal_density_meas       ? 
_exptl_crystal_density_method     ? 
_exptl_crystal_density_diffrn     2.094 
_exptl_crystal_F_000              668 
_exptl_transmission_factor_min    ? 
_exptl_transmission_factor_max    ? 
_exptl_crystal_size_max           0.250 
_exptl_crystal_size_mid           0.139 
_exptl_crystal_size_min           0.040 
_exptl_absorpt_coefficient_mu     4.373 
_shelx_estimated_absorpt_T_min    0.408 
_shelx_estimated_absorpt_T_max    0.844 
_exptl_absorpt_correction_type    multi-scan 
_exptl_absorpt_correction_T_min   0.518 
_exptl_absorpt_correction_T_max   0.762 
_exptl_absorpt_process_details    'Bruker SADABS'
_exptl_absorpt_special_details    ? 
_diffrn_ambient_temperature       100(2) 
_diffrn_radiation_wavelength      0.71073 
_diffrn_radiation_type            MoK\a 
_diffrn_source                    ? 
_diffrn_measurement_device_type   'Bruker APEX-II CCD' 
_diffrn_measurement_method        '\f and \w scans' 
_diffrn_detector_area_resol_mean  ? 
_diffrn_reflns_number             101277 
_diffrn_reflns_av_unetI/netI      0.0108 
_diffrn_reflns_av_R_equivalents   0.0460 
_diffrn_reflns_limit_h_min        -10 
_diffrn_reflns_limit_h_max        10 
_diffrn_reflns_limit_k_min        -10 
_diffrn_reflns_limit_k_max        10 
_diffrn_reflns_limit_l_min        -23 
_diffrn_reflns_limit_l_max        23 
_diffrn_reflns_theta_min          2.667 
_diffrn_reflns_theta_max          27.994 
_diffrn_reflns_theta_full         25.242 
_diffrn_measured_fraction_theta_max   0.999 
_diffrn_measured_fraction_theta_full  0.999 
_diffrn_reflns_Laue_measured_fraction_max    0.999 
_diffrn_reflns_Laue_measured_fraction_full   0.999 
_diffrn_reflns_point_group_measured_fraction_max   0.999 
_diffrn_reflns_point_group_measured_fraction_full  0.999 
_reflns_number_total              2664 
_reflns_number_gt                 2590 
_reflns_threshold_expression      'I > 2\s(I)' 
_reflns_Friedel_coverage          0.000 
_reflns_Friedel_fraction_max      . 
_reflns_Friedel_fraction_full     . 
  
_reflns_special_details 
; 
 Reflections were merged by SHELXL according to the crystal 
 class for the calculation of statistics and refinement. 
  
 _reflns_Friedel_fraction is defined as the number of unique 
 Friedel pairs measured divided by the number that would be 
 possible theoretically, ignoring centric projections and 
 systematic absences. 
; 
  
_computing_data_collection        'Bruker APEX2' 
_computing_cell_refinement        'Bruker SAINT' 
_computing_data_reduction         'Bruker SAINT' 
_computing_structure_solution     'SHELXS-97 (Sheldrick 2008)' 
_computing_structure_refinement 'SHELXL-2014/7 (Sheldrick, 2014)' 
_computing_molecular_graphics     'Bruker SHELXTL' 
_computing_publication_material   'Bruker SHELXTL' 
_refine_special_details           ? 
_refine_ls_structure_factor_coef  Fsqd 
_refine_ls_matrix_type            full 
_refine_ls_weighting_scheme       calc 
_refine_ls_weighting_details 
'w=1/[\s^2^(Fo^2^)+(0.0087P)^2^+1.8185P] where P=(Fo^2^+2Fc^2^)/3' 
_atom_sites_solution_primary      direct 
_atom_sites_solution_secondary    ? 
_atom_sites_solution_hydrogens    mixed 
_refine_ls_hydrogen_treatment     constr
_refine_ls_extinction_method      none 
_refine_ls_extinction_coef        . 
_refine_ls_number_reflns          2664 
_refine_ls_number_parameters      125 
_refine_ls_number_restraints      0 
_refine_ls_R_factor_all           0.0186 
_refine_ls_R_factor_gt            0.0177 
_refine_ls_wR_factor_ref          0.0357 
_refine_ls_wR_factor_gt           0.0355 
_refine_ls_goodness_of_fit_ref    1.225 
_refine_ls_restrained_S_all       1.225 
_refine_ls_shift/su_max           0.001 
_refine_ls_shift/su_mean          0.000 
  
loop_ 
 _atom_site_label 
 _atom_site_type_symbol 
 _atom_site_fract_x 
 _atom_site_fract_y 
 _atom_site_fract_z 
 _atom_site_U_iso_or_equiv 
 _atom_site_adp_type 
 _atom_site_occupancy 
 _atom_site_site_symmetry_order 
 _atom_site_calc_flag 
 _atom_site_refinement_flags_posn 
 _atom_site_refinement_flags_adp 
 _atom_site_refinement_flags_occupancy 
 _atom_site_disorder_assembly 
 _atom_site_disorder_group 
Ce1 Ce 0.26450(2) 0.46034(2) 0.53879(2) 0.00981(4) Uani 1 1 d . . . . . 
Cl1 Cl 0.38467(7) 0.97003(7) 0.69207(3) 0.01667(11) Uani 1 1 d . . . . . 
O11 O -0.01413(19) 0.3353(2) 0.53554(9) 0.0151(3) Uani 1 1 d . . . . . 
O12 O -0.2794(2) 0.2554(2) 0.52558(10) 0.0176(3) Uani 1 1 d . . . . . 
C11 C -0.1244(3) 0.2276(3) 0.54880(13) 0.0130(4) Uani 1 1 d . . . . . 
C12 C -0.0707(3) 0.0701(3) 0.59223(15) 0.0223(5) Uani 1 1 d . . . . . 
H12A H -0.1527 -0.0200 0.5757 0.035(7) Uiso 0.69(4) 1 d R U P . . 
H12B H -0.0665 0.0906 0.6471 0.035(7) Uiso 0.69(4) 1 d R U P . . 
H12C H 0.0422 0.0361 0.5824 0.035(7) Uiso 0.69(4) 1 d R U P . . 
H12D H -0.0378 -0.0240 0.5618 0.035(7) Uiso 0.31(4) 1 d R U P . . 
H12E H -0.1773 0.0426 0.6105 0.035(7) Uiso 0.31(4) 1 d R U P . . 
H12F H 0.0189 0.0901 0.6361 0.035(7) Uiso 0.31(4) 1 d R U P . . 
O21 O 0.55474(19) 0.5633(2) 0.57526(9) 0.0136(3) Uani 1 1 d . . . . . 
O22 O 0.82305(19) 0.6344(2) 0.59944(9) 0.0163(3) Uani 1 1 d . . . . . 
C21 C 0.6866(3) 0.6022(3) 0.62351(12) 0.0128(4) Uani 1 1 d . . . . . 
C22 C 0.6751(3) 0.6099(4) 0.70683(13) 0.0208(5) Uani 1 1 d . . . . . 
H22A H 0.7887 0.5950 0.7368 0.057(7) Uiso 1 1 calc R U . . . 
H22B H 0.5999 0.5201 0.7196 0.057(7) Uiso 1 1 calc R U . . . 
H22C H 0.6293 0.7197 0.7188 0.057(7) Uiso 1 1 calc R U . . . 
O1W O 0.3973(2) 0.1709(2) 0.54079(9) 0.0149(3) Uani 1 1 d . . . . . 
H11W H 0.3928 0.0915 0.5814 0.045(7) Uiso 1 1 d R U . . . 
H12W H 0.5142 0.1723 0.5336 0.045(7) Uiso 1 1 d R U . . . 
O2W O 0.1686(2) 0.6655(2) 0.62926(9) 0.0162(3) Uani 1 1 d . . . . . 
H21W H 0.0504 0.6796 0.6329 0.043(7) Uiso 1 1 d R U . . . 
H22W H 0.2217 0.7692 0.6482 0.043(7) Uiso 1 1 d R U . . . 
O3W O 0.3005(2) 0.3476(2) 0.67224(9) 0.0187(3) Uani 1 1 d . . . . . 
H31W H 0.2482 0.3962 0.7124 0.066(9) Uiso 1 1 d R U . . . 
H32W H 0.3186 0.2313 0.6863 0.066(9) Uiso 1 1 d R U . . . 
  
loop_ 
 _atom_site_aniso_label 
 _atom_site_aniso_U_11 
 _atom_site_aniso_U_22 
 _atom_site_aniso_U_33 
 _atom_site_aniso_U_23 
 _atom_site_aniso_U_13 
 _atom_site_aniso_U_12 
Ce1 0.00646(6) 0.01072(6) 0.01257(6) 0.00095(5) 0.00245(4) -0.00076(5) 
Cl1 0.0176(2) 0.0141(2) 0.0183(3) 0.0014(2) 0.0029(2) -0.0019(2) 
O11 0.0103(7) 0.0157(8) 0.0197(8) 0.0022(6) 0.0039(6) -0.0030(6) 
O12 0.0086(7) 0.0172(8) 0.0273(9) 0.0065(7) 0.0038(6) -0.0012(6) 
C11 0.0111(10) 0.0132(10) 0.0156(10) 0.0000(8) 0.0046(8) -0.0005(8) 
C12 0.0205(12) 0.0156(11) 0.0301(14) 0.0079(10) 0.0014(10) 0.0015(9) 
O21 0.0100(7) 0.0161(8) 0.0144(7) -0.0001(6) 0.0011(6) -0.0015(6) 
O22 0.0093(7) 0.0214(8) 0.0183(8) -0.0018(7) 0.0023(6) -0.0021(6) 
C21 0.0115(10) 0.0119(10) 0.0146(10) 0.0002(8) 0.0007(8) 0.0005(8) 
C22 0.0163(11) 0.0319(14) 0.0139(11) -0.0020(10) 0.0016(9) 0.0022(10) 
O1W 0.0128(7) 0.0131(7) 0.0201(8) 0.0030(6) 0.0069(6) 0.0011(6) 
O2W 0.0126(7) 0.0143(8) 0.0217(8) -0.0039(6) 0.0027(6) -0.0006(6) 
O3W 0.0265(9) 0.0144(8) 0.0168(8) 0.0020(6) 0.0080(7) 0.0052(7) 
  
_geom_special_details 
; 
 All esds (except the esd in the dihedral angle between two l.s. planes) 
 are estimated using the full covariance matrix.  The cell esds are taken 
 into account individually in the estimation of esds in distances, angles 
 and torsion angles; correlations between esds in cell parameters are only 
 used when they are defined by crystal symmetry.  An approximate (isotropic) 
 treatment of cell esds is used for estimating esds involving l.s. planes. 
; 
  
loop_ 
 _geom_bond_atom_site_label_1 
 _geom_bond_atom_site_label_2 
 _geom_bond_distance 
 _geom_bond_site_symmetry_2 
 _geom_bond_publ_flag 
Ce1 O11 2.4223(15) . ? 
Ce1 O21 2.4395(15) . ? 
Ce1 O2W 2.4859(16) . ? 
Ce1 O3W 2.4987(16) . ? 
Ce1 O1W 2.5242(16) . ? 
Ce1 O12 2.5362(16) 3_566 ? 
Ce1 O22 2.5481(16) 3_666 ? 
Ce1 O21 2.6650(15) 3_666 ? 
Ce1 O11 2.7383(16) 3_566 ? 
O11 C11 1.273(3) . ? 
O12 C11 1.257(3) . ? 
C11 C12 1.493(3) . ? 
C12 H12A 0.9800 . ? 
C12 H12B 0.9800 . ? 
C12 H12C 0.9800 . ? 
C12 H12D 0.9800 . ? 
C12 H12E 0.9800 . ? 
C12 H12F 0.9800 . ? 
O21 C21 1.282(3) . ? 
O22 C21 1.254(3) . ? 
C21 C22 1.493(3) . ? 
C22 H22A 0.9800 . ? 
C22 H22B 0.9800 . ? 
C22 H22C 0.9800 . ? 
O1W H11W 0.9600 . ? 
O1W H12W 0.9600 . ? 
O2W H21W 0.9600 . ? 
O2W H22W 0.9600 . ? 
O3W H31W 0.9600 . ? 
O3W H32W 0.9600 . ? 
  
loop_ 
 _geom_angle_atom_site_label_1 
 _geom_angle_atom_site_label_2 
 _geom_angle_atom_site_label_3 
 _geom_angle 
 _geom_angle_site_symmetry_1 
 _geom_angle_site_symmetry_3 
 _geom_angle_publ_flag 
O11 Ce1 O21 165.68(5) . . ? 
O11 Ce1 O2W 84.80(5) . . ? 
O21 Ce1 O2W 89.17(5) . . ? 
O11 Ce1 O3W 81.00(6) . . ? 
O21 Ce1 O3W 84.70(5) . . ? 
O2W Ce1 O3W 68.05(5) . . ? 
O11 Ce1 O1W 90.47(5) . . ? 
O21 Ce1 O1W 85.60(5) . . ? 
O2W Ce1 O1W 139.16(5) . . ? 
O3W Ce1 O1W 71.13(5) . . ? 
O11 Ce1 O12 117.45(5) . 3_566 ? 
O21 Ce1 O12 73.24(5) . 3_566 ? 
O2W Ce1 O12 75.46(5) . 3_566 ? 
O3W Ce1 O12 137.37(6) . 3_566 ? 
O1W Ce1 O12 139.87(5) . 3_566 ? 
O11 Ce1 O22 75.31(5) . 3_666 ? 
O21 Ce1 O22 117.14(5) . 3_666 ? 
O2W Ce1 O22 138.23(5) . 3_666 ? 
O3W Ce1 O22 140.80(6) . 3_666 ? 
O1W Ce1 O22 78.22(5) . 3_666 ? 
O12 Ce1 O22 81.70(6) 3_566 3_666 ? 
O11 Ce1 O21 123.77(5) . 3_666 ? 
O21 Ce1 O21 67.74(6) . 3_666 ? 
O2W Ce1 O21 142.35(5) . 3_666 ? 
O3W Ce1 O21 134.10(5) . 3_666 ? 
O1W Ce1 O21 70.82(5) . 3_666 ? 
O12 Ce1 O21 69.69(5) 3_566 3_666 ? 
O22 Ce1 O21 49.50(5) 3_666 3_666 ? 
O11 Ce1 O11 68.68(6) . 3_566 ? 
O21 Ce1 O11 121.08(5) . 3_566 ? 
O2W Ce1 O11 69.37(5) . 3_566 ? 
O3W Ce1 O11 129.15(5) . 3_566 ? 
O1W Ce1 O11 144.68(5) . 3_566 ? 
O12 Ce1 O11 48.77(5) 3_566 3_566 ? 
O22 Ce1 O11 69.24(5) 3_666 3_566 ? 
O21 Ce1 O11 96.73(5) 3_666 3_566 ? 
Ce1 Ce1 Ce1 138.852(7) 3_666 3_566 ? 
C11 O11 Ce1 157.83(15) . . ? 
C11 O11 Ce1 90.83(13) . 3_566 ? 
Ce1 O11 Ce1 111.32(6) . 3_566 ? 
C11 O12 Ce1 100.92(13) . 3_566 ? 
O12 C11 O11 119.5(2) . . ? 
O12 C11 C12 120.1(2) . . ? 
O11 C11 C12 120.4(2) . . ? 
C11 C12 H12A 109.4 . . ? 
C11 C12 H12B 109.5 . . ? 
H12A C12 H12B 109.5 . . ? 
C11 C12 H12C 109.5 . . ? 
H12A C12 H12C 109.5 . . ? 
H12B C12 H12C 109.5 . . ? 
C11 C12 H12D 115.6 . . ? 
C11 C12 H12E 99.4 . . ? 
H12D C12 H12E 109.5 . . ? 
C11 C12 H12F 112.6 . . ? 
H12D C12 H12F 109.5 . . ? 
H12E C12 H12F 109.5 . . ? 
C21 O21 Ce1 153.97(14) . . ? 
C21 O21 Ce1 92.16(12) . 3_666 ? 
Ce1 O21 Ce1 112.26(6) . 3_666 ? 
C21 O22 Ce1 98.42(13) . 3_666 ? 
O22 C21 O21 119.0(2) . . ? 
O22 C21 C22 121.3(2) . . ? 
O21 C21 C22 119.72(19) . . ? 
C21 C22 H22A 109.5 . . ? 
C21 C22 H22B 109.5 . . ? 
H22A C22 H22B 109.5 . . ? 
C21 C22 H22C 109.5 . . ? 
H22A C22 H22C 109.5 . . ? 
H22B C22 H22C 109.5 . . ? 
Ce1 O1W H11W 122.8 . . ? 
Ce1 O1W H12W 113.6 . . ? 
H11W O1W H12W 105.0 . . ? 
Ce1 O2W H21W 121.6 . . ? 
Ce1 O2W H22W 128.4 . . ? 
H21W O2W H22W 105.0 . . ? 
Ce1 O3W H31W 124.0 . . ? 
Ce1 O3W H32W 125.3 . . ? 
H31W O3W H32W 105.0 . . ? 
  
loop_ 
 _geom_hbond_atom_site_label_D 
 _geom_hbond_atom_site_label_H 
 _geom_hbond_atom_site_label_A 
 _geom_hbond_distance_DH 
 _geom_hbond_distance_HA 
 _geom_hbond_distance_DA 
 _geom_hbond_angle_DHA 
 _geom_hbond_site_symmetry_A 
O1W H11W Cl1  0.96 2.19 3.1304(17) 165.0 1_545 
O1W H12W O12  0.96 1.80 2.715(2) 159.0 1_655 
O2W H21W O22  0.96 1.85 2.729(2) 151.2 1_455 
O2W H22W Cl1  0.96 2.12 3.0686(17) 168.5 . 
O3W H31W Cl1  0.96 2.21 3.1631(17) 171.6 2_546 
O3W H32W Cl1  0.96 2.14 3.0753(17) 165.9 1_545 
  
_refine_diff_density_max    0.532 
_refine_diff_density_min   -0.811 
_refine_diff_density_rms    0.081 
  
_shelx_res_file 
; 
  
    Ha2019_72_0m_a.res created by SHELXL-2014/7 
  
  
TITL Ha2019_72_0m_a.res in P2(1)/n 
CELL  0.71073   7.9625   7.9276  17.6973   90.000   99.122   90.000 
ZERR    4.000   0.0003   0.0003   0.0006    0.000    0.002    0.000 
LATT 1 
SYMM 1/2-X, 1/2+Y, 1/2-Z 
SFAC C  H  O  Cl Ce 
UNIT 16 48 28 4 4 
LIST 4 ! automatically inserted. Change 6 to 4 for CHECKCIF!! 
OMIT 0 0 2 
OMIT 1 0 1 
OMIT -3 56 
  
rem DFIX 0.96  0.0001 O1w H11w O1w H12w O2w H21w O2w H22w O3w H31w O3w H32w 
rem dfix 1.523  0.0001 H11w H12w H21w H22w H31w H32w 
FREE Ce1 C21_$6 
FREE Ce1 C11_$7 
EQIV $6 1-x, 1-y, 1-z 
BIND Ce1 Ce1_$6 
BIND Ce1 Ce1_$7 
EQIV $7 -x,1-y,1-z 
BIND Ce1 O11_$7 
ACTA 
HTAB 
L.S. 10 
EQIV $1 -x+3/2, y-1/2, -z+3/2 
EQIV $2 x, y-1, z 
HTAB O1W Cl1_$2 
EQIV $3 x+1, y, z 
HTAB O1W O12_$3 
EQIV $4 x-1, y, z 
HTAB O2W O22_$4 
HTAB O2W Cl1 
EQIV $5 -x+1/2, y-1/2, -z+3/2 
HTAB O3W Cl1_$5 
HTAB O3W Cl1_$2 
SIZE 0.040  0.139  0.250 
BOND $H 
rem dfix 0.98  0.0001 C12 H12d C12 H12e C12 H12f 
rem dfix 1.601  0.0001 H12d H12e H12d H12f H12e H12f 
FMAP 2 
PLAN 15 
TEMP -173 
WGHT    0.008700    1.818500 
FVAR       0.36172   0.03477   0.05717   0.04455   0.04345   0.06620   0.68872 
CE1   5    0.264496    0.460343    0.538792    11.00000    0.00646    0.01072 = 
         0.01257    0.00095    0.00245   -0.00076 
CL1   4    0.384667    0.970029    0.692072    11.00000    0.01758    0.01410 = 
         0.01835    0.00141    0.00287   -0.00192 
O11   3   -0.014125    0.335290    0.535541    11.00000    0.01030    0.01569 = 
         0.01972    0.00217    0.00387   -0.00301 
O12   3   -0.279423    0.255428    0.525584    11.00000    0.00859    0.01715 = 
         0.02726    0.00652    0.00376   -0.00124 
C11   1   -0.124396    0.227566    0.548797    11.00000    0.01107    0.01315 = 
         0.01555    0.00004    0.00463   -0.00053 
C12   1   -0.070713    0.070068    0.592235    11.00000    0.02046    0.01564 = 
         0.03005    0.00794    0.00136    0.00146 
AFIX   3 
H12A  2   -0.152678   -0.019973    0.575722    71.00000   21.00000 
H12B  2   -0.066455    0.090613    0.647112    71.00000   21.00000 
H12C  2    0.042176    0.036146    0.582381    71.00000   21.00000 
  
H12D  2   -0.037776   -0.023970    0.561753   -71.00000   21.00000 
H12E  2   -0.177342    0.042606    0.610539   -71.00000   21.00000 
H12F  2    0.018872    0.090134    0.636066   -71.00000   21.00000 
AFIX   0 
O21   3    0.554742    0.563304    0.575263    11.00000    0.00997    0.01610 = 
         0.01436   -0.00014    0.00109   -0.00154 
O22   3    0.823054    0.634351    0.599435    11.00000    0.00931    0.02136 = 
         0.01827   -0.00184    0.00232   -0.00215 
C21   1    0.686614    0.602226    0.623509    11.00000    0.01150    0.01186 = 
         0.01458    0.00015    0.00071    0.00052 
C22   1    0.675128    0.609941    0.706834    11.00000    0.01630    0.03190 = 
         0.01387   -0.00196    0.00156    0.00224 
AFIX 137 
H22A  2    0.788687    0.595044    0.736775    11.00000   31.00000 
H22B  2    0.599861    0.520099    0.719598    11.00000   31.00000 
H22C  2    0.629297    0.719742    0.718818    11.00000   31.00000 
AFIX   0 
O1W   3    0.397259    0.170912    0.540789    11.00000    0.01281    0.01308 = 
         0.02006    0.00300    0.00689    0.00107 
AFIX   3 
H11W  2    0.392781    0.091467    0.581362    11.00000   41.00000 
H12W  2    0.514245    0.172285    0.533600    11.00000   41.00000 
AFIX   0 
O2W   3    0.168605    0.665529    0.629257    11.00000    0.01256    0.01432 = 
         0.02169   -0.00391    0.00268   -0.00064 
AFIX   3 
H21W  2    0.050433    0.679632    0.632944    11.00000   51.00000 
H22W  2    0.221656    0.769244    0.648162    11.00000   51.00000 
AFIX   0 
O3W   3    0.300513    0.347608    0.672240    11.00000    0.02649    0.01442 = 
         0.01676    0.00199    0.00801    0.00515 
AFIX   3 
H31W  2    0.248174    0.396162    0.712426    11.00000   61.00000 
H32W  2    0.318628    0.231284    0.686283    11.00000   61.00000 
AFIX   0 
HKLF 4 
  
REM  Ha2019_72_0m_a.res in P2(1)/n 
REM R1 =  0.0177 for    2590 Fo > 4sig(Fo)  and  0.0186 for all    2664 data 
REM    125 parameters refined using      0 restraints 
  
END 
  
WGHT      0.0087      1.8185 
  
REM Instructions for potential hydrogen bonds 
HTAB C22 Cl1_$1 
HTAB C22 Cl1 
HTAB O1W Cl1_$2 
HTAB O1W O12_$3 
HTAB O2W O22_$4 
HTAB O2W Cl1 
HTAB O3W Cl1_$5 
HTAB O3W Cl1_$2 
  
REM Highest difference peak  0.532,  deepest hole -0.811,  1-sigma level  0.081 
Q1    1   0.3133  0.4661  0.5922  11.00000  0.05    0.53 
Q2    1   0.2642  0.3047  0.5346  11.00000  0.05    0.50 
Q3    1   0.6739  0.6113  0.6631  11.00000  0.05    0.48 
Q4    1   0.2232  0.4507  0.4825  11.00000  0.05    0.46 
Q5    1  -0.2043  0.3693  0.6137  11.00000  0.05    0.45 
Q6    1  -0.2916  0.3026  0.4728  11.00000  0.05    0.43 
Q7    1   0.8002  0.6575  0.5537  11.00000  0.05    0.36 
Q8    1   0.3249  0.4474  0.6936  11.00000  0.05    0.32 
Q9    1   0.7694  0.6161  0.6145  11.00000  0.05    0.31 
Q10   1   0.3353 -0.0120  0.5375  11.00000  0.05    0.30 
Q11   1   0.3242  0.2706  0.6821  11.00000  0.05    0.28 
Q12   1   0.2933  0.5581  0.5287  11.00000  0.05    0.28 
Q13   1   0.3194  0.3649  0.6348  11.00000  0.05    0.27 
Q14   1  -0.1132  0.1507  0.5766  11.00000  0.05    0.27 
Q15   1   0.0572  0.4800  0.6521  11.00000  0.05    0.27 
; 
_shelx_res_checksum   97031 
  
_shelx_hkl_file 
; 
   1   0   0    6.70    1.70 
   1   0   0    0.20    0.90 
   1   0   0    2.10    1.00 
   1   0   0   -0.30    0.90 
   1   0   0   -0.40    0.70 
   1   0   0   -0.10    0.80 
   1   0   0    2.80    1.50 
  -1   0   0    4.50    1.50 
  -1   0   0    5.70    1.70 
  -1   0   0   -0.10    0.70 
   1   0   0   -0.50    0.60 
   1   0   0   -0.70    0.70 
   1   0   0   -0.20    0.80 
   1   0   0    0.30    0.70 
   1   0   0    0.60    1.30 
  -1   0   0    5.00    1.50 
  -1   0   0    5.50    1.60 
  -1   0   0    6.00    1.70 
  -1   0   0    1.80    1.30 
  -1   0   0    7.60    1.50 
  -1   0   0    7.60    1.80 
  -1   0   0    5.10    1.20 
  -1   0   0    3.90    1.30 
  -1   0   0    7.50    1.70 
  -1   0   0    0.60    1.00 
  -1   0   0    9.20    1.70 
  -1   0   0    1.90    1.20 
  -1   0   0   -0.50    0.70 
  -1   0   0    5.00    1.40 
  -1   0   0    2.50    1.00 
  -1   0   0    0.30    1.30 
  -1   0   0    6.90    1.40 
  -1   0   0    6.70    1.60 
  -1   0   0    5.30    1.60 
  -1   0   0    5.10    1.40 
  -1   0   0    3.00    1.20 
  -1   0   0    5.10    1.30 
   2   0   0 6859.91  216.68 
   2   0   0 6839.82  214.58 
   2   0   0 6465.15  215.98 
  -2   0   0 6810.72  217.38 
  -2   0   0 7311.87  219.68 
  -2   0   0 6786.82  214.08 
  -2   0   0 6788.32  214.28 
  -2   0   0 6937.21  214.78 
  -2   0   0 6850.61  215.68 
  -2   0   0 6916.41  215.38 
  -2   0   0 6900.01  216.58 
  -2   0   0 7005.70  214.28 
  -2   0   0 6950.40  216.78 
   2   0   0 7086.29  216.98 
   2   0   0 7407.86  214.68 
   2   0   0 6824.42  217.68 
  -2   0   0 6940.51  214.78 
  -2   0   0 6884.31  214.78 
   2   0   0 7087.19  216.48 
   2   0   0 6997.20  216.58 
   2   0   0 6970.10  216.88 
  -2   0   0 6789.22  216.38 
   2   0   0 6967.90  216.08 
   2   0   0 6832.82  213.98 
   2   0   0 7119.89  214.98 
   2   0   0 7110.29  217.08 
   2   0   0 7135.99  216.58 
   2   0   0 6980.70  217.28 
  -2   0   0 6882.51  216.98 
  -2   0   0 6907.71  215.38 
  -2   0   0 7012.20  214.48 
  -2   0   0 6866.81  214.28 
  -2   0   0 6659.83  218.38 
   2   0   0 7036.20  214.38 
   2   0   0 6935.71  213.98 
   2   0   0 6697.93  219.08 
   2   0   0 7081.09  214.88 
  -2   0   0 6750.92  216.08 
  -2   0   0 6780.92  215.28 
  -2   0   0 7270.77  216.98 
  -2   0   0 6982.10  216.18 
  -2   0   0 6914.31  214.18 
  -2   0   0 6762.82  214.78 
  -2   0   0 7026.50  216.98 
  -3   0   0    1.30    2.00 
   3   0   0    0.70    4.40 
  -3   0   0   -1.00    2.20 
  -3   0   0   -0.20    2.40 
   3   0   0   -1.00    2.10 
  -3   0   0    3.80    4.20 
  -3   0   0    1.50    2.40 
  -3   0   0    2.80    2.80 
  -3   0   0    1.10    2.50 
  -3   0   0    4.10    2.30 
   3   0   0    3.50    3.30 
  -3   0   0   -1.60    2.80 
  -3   0   0   -1.00    2.10 
  -3   0   0   -0.20    2.50 
   3   0   0    2.80    3.10 
  -3   0   0    3.60    2.50 
  -3   0   0   -1.60    2.10 
  -3   0   0   -0.20    2.60 
  -3   0   0    3.40    2.70 
  -3   0   0    0.10    2.70 
  -3   0   0   -3.00    2.10 
  -3   0   0   -0.50    2.50 
  -3   0   0    2.60    2.00 
   3   0   0    2.40    3.00 
  -3   0   0    2.10    2.50 
  -3   0   0    3.10    3.50 
   3   0   0    3.90    2.90 
   3   0   0    1.20    2.60 
   3   0   0    4.30    3.20 
   3   0   0   -1.70    1.60 
   3   0   0    5.50    3.20 
   3   0   0   -1.80    3.00 
   3   0   0    6.20    3.70 
   3   0   0    5.00    3.60 
   3   0   0    1.00    2.90 
   3   0   0    0.20    3.10 
  -3   0   0    1.70    3.10 
   3   0   0   -0.20    1.90 
   3   0   0   -2.50    2.70 
  -3   0   0    2.30    3.10 
  -3   0   0   -1.40    1.70 
  -4   0   0 1592.24   60.89 
  -4   0   0 1607.54   56.79 
  -4   0   0 1790.72   57.69 
   4   0   0 1648.94   60.69 
  -4   0   0 1623.54   57.59 
  -4   0   0 1588.04   57.69 
  -4   0   0 1663.03   60.09 
  -4   0   0 1607.04   56.79 
  -4   0   0 1553.24   57.39 
  -4   0   0 1604.74   61.49 
  -4   0   0 1637.14   58.19 
  -4   0   0 1643.94   58.09 
  -4   0   0 1647.14   61.29 
   4   0   0 1692.13   62.09 
   4   0   0 1646.84   63.09 
   4   0   0 1666.63   66.39 
   4   0   0 1654.73   57.79 
   4   0   0 1611.34   56.09 
   4   0   0 1702.13   58.19 
  -4   0   0 1615.14   57.19 
  -4   0   0 1593.84   56.99 
  -4   0   0 1651.13   57.19 
   4   0   0 1648.44   61.39 
   4   0   0 1666.13   61.29 
   4   0   0 1562.64   59.49 
   4   0   0 1714.73   62.09 
  -5   0   0   -1.90    3.00 
  -5   0   0    4.20    3.50 
  -5   0   0    3.70    4.70 
  -5   0   0    6.30    4.80 
   5   0   0   -0.30    2.80 
   5   0   0   -5.60    3.20 
   5   0   0   -2.70    3.00 
   5   0   0    3.60    6.10 
   5   0   0    0.10    2.60 
   5   0   0    1.60    2.90 
  -5   0   0   -0.20    3.10 
   5   0   0   -1.00    3.40 
   5   0   0    1.80    3.80 
   5   0   0    5.40    4.70 
  -5   0   0    2.80    3.30 
  -5   0   0    3.20    3.20 
  -5   0   0    6.00    3.80 
  -5   0   0    0.10    2.90 
   5   0   0    4.30    4.20 
   5   0   0    2.20    4.40 
  -5   0   0   -2.50    3.20 
  -5   0   0   -3.20    2.00 
  -5   0   0   -2.30    3.00 
  -5   0   0    2.90    3.30 
  -5   0   0   -1.20    3.60 
   6   0   0 1402.06   60.19 
  -6   0   0 1385.06   59.69 
  -6   0   0 1372.66   53.69 
  -6   0   0 1443.06   62.99 
   6   0   0 1249.77   60.49 
  -6   0   0 1451.25   58.09 
  -6   0   0 1385.86   54.49 
   6   0   0 1439.16   60.49 
   6   0   0 1400.46   59.29 
  -6   0   0 1378.56   53.59 
  -6   0   0 1411.36   50.59 
  -6   0   0 1382.26   58.99 
  -6   0   0 1366.46   53.39 
  -6   0   0 1371.56   58.69 
   6   0   0 1409.46   58.79 
  -6   0   0 1388.56   53.49 
   6   0   0 1405.56   51.69 
   6   0   0 1458.75   54.99 
   6   0   0 1395.86   58.39 
  -6   0   0 1414.16   53.69 
   6   0   0 1431.96   65.79 
   7   0   0   -1.30    6.90 
   7   0   0   -0.60    3.60 
   7   0   0   -4.10    4.80 
  -7   0   0    1.30    4.60 
  -7   0   0   -3.20    5.80 
  -7   0   0   -1.20    5.00 
  -7   0   0   -2.30    4.50 
  -7   0   0   -2.90    3.90 
   7   0   0   -1.60    4.60 
   7   0   0    2.60    4.00 
   7   0   0    2.20    5.20 
   7   0   0    5.50    6.00 
  -7   0   0   -0.70    3.10 
   7   0   0   -0.40    5.00 
  -7   0   0   -0.80    4.30 
  -7   0   0   -1.50    4.90 
  -7   0   0    2.60    4.80 
   7   0   0    1.00    6.20 
  -7   0   0    5.80    5.00 
  -7   0   0    2.40    5.00 
   8   0   0  706.23   37.40 
   8   0   0  814.42   46.10 
  -8   0   0  712.43   42.60 
  -8   0   0  715.93   46.10 
   8   0   0  801.82   48.30 
   8   0   0  770.72   50.69 
  -8   0   0  751.72   44.00 
  -8   0   0  819.22   43.00 
   8   0   0  719.13   42.20 
  -8   0   0  797.02   38.00 
   8   0   0  800.72   41.10 
  -8   0   0  776.02   37.20 
  -8   0   0  815.62   44.80 
  -8   0   0  758.72   37.90 
   8   0   0  760.42   44.90 
  -8   0   0  853.81   39.60 
  -9   0   0   11.30    6.80 
  -9   0   0    2.00    7.30 
  -9   0   0   12.90    9.10 
  -9   0   0    3.90    6.60 
   9   0   0    0.50    6.60 
   9   0   0    0.40   10.70 
  -9   0   0    5.80    7.50 
   9   0   0   -1.60    6.50 
   9   0   0   -1.20    5.60 
   9   0   0    2.20    6.40 
   9   0   0    9.10    8.80 
  -9   0   0    4.90    8.20 
  -9   0   0   -4.80    6.70 
 -10   0   0  169.58   28.40 
 -10   0   0  162.78   20.70 
  10   0   0  192.28   28.60 
 -10   0   0  140.89   22.60 
  10   0   0   98.39   21.60 
  10   0   0  159.48   29.30 
 -10   0   0  192.98   28.10 
  10   0   0  158.68   26.50 
 -10   0   0  159.88   25.80 
  10   0   0  184.78   27.60 
 -10   0   0  173.18   27.60 
 -10   0   0  186.18   23.10 
   0  -1   0   -0.10    0.90 
   0  -1   0   -0.80    0.80 
   0  -1   0   -0.90    0.80 
   0  -1   0    0.60    0.90 
   0  -1   0    1.40    0.80 
   0  -1   0   -0.30    0.80 
   0  -1   0    1.80    1.30 
   0  -1   0    1.10    1.10 
   0  -1   0    2.10    1.00 
   0  -1   0    1.60    1.30 
   0  -1   0    4.50    1.50 
   0  -1   0    4.80    1.50 
   0  -1   0    4.20    1.50 
   0  -1   0    0.20    0.90 
   0  -1   0    7.40    1.70 
   0  -1   0    2.90    1.30 
   0  -1   0    3.90    1.30 
   0  -1   0    6.00    1.20 
   0  -1   0   -0.20    0.70 
   0  -1   0   -0.40    0.70 
   0  -1   0    0.70    0.80 
   0  -1   0    2.50    1.50 
   0   1   0   -0.20    0.70 
   0   1   0    0.90    1.10 
   0   1   0   -1.30    0.60 
   0   1   0    2.70    1.20 
   0   1   0   -0.70    0.50 
   0   1   0   -0.30    0.70 
   0   1   0   -0.30    0.70 
   0   1   0    0.10    0.80 
   0   1   0   -0.10    0.80 
   0   1   0    0.80    1.00 
   0   1   0    2.90    1.40 
   0   1   0   -0.90    0.70 
   0   1   0    0.00    0.90 
   0   1   0    0.40    0.60 
   0   1   0    2.00    1.10 
   0   1   0   -0.30    0.80 
   1  -1   0    2.20    1.80 
  -1  -1   0    3.90    1.90 
  -1  -1   0    0.50    1.70 
  -1  -1   0    3.60    1.90 
  -1  -1   0    4.20    2.30 
   1  -1   0    1.10    1.40 
  -1  -1   0    0.70    1.40 
  -1  -1   0    5.10    2.20 
  -1  -1   0    1.50    1.20 
  -1  -1   0   -0.50    1.10 
   1  -1   0    3.30    1.70 
   1  -1   0    4.30    2.10 
   1  -1   0    1.10    1.80 
   1  -1   0   -0.40    1.60 
  -1  -1   0    4.20    1.80 
  -1  -1   0    4.90    2.70 
   1  -1   0   -0.20    1.10 
   1  -1   0    2.10    2.00 
   1  -1   0    0.20    1.40 
  -1  -1   0    3.30    1.80 
   1  -1   0    1.10    1.50 
   1  -1   0    1.90    1.90 
   1  -1   0    1.40    2.00 
   1  -1   0    3.40    1.70 
   1  -1   0   -0.10    1.00 
   1  -1   0    1.30    1.20 
  -1  -1   0    4.50    2.10 
  -1  -1   0    0.30    1.40 
  -1  -1   0    0.80    1.50 
   1  -1   0    1.90    1.60 
   1  -1   0    0.90    1.70 
   1  -1   0    0.40    1.80 
   1  -1   0    2.40    1.60 
   1  -1   0    0.30    1.30 
  -1  -1   0    3.40    1.50 
   1  -1   0    2.20    1.80 
  -1  -1   0    0.00    1.30 
  -1  -1   0    3.90    1.90 
  -1  -1   0    6.60    1.70 
   1  -1   0   -0.60    1.20 
  -1  -1   0   -1.30    1.30 
   1  -1   0    0.00    1.60 
  -1  -1   0    0.90    1.80 
  -1  -1   0    3.20    1.70 
  -1   1   0    2.30    1.90 
   1   1   0    0.00    1.20 
   1   1   0   -0.30    1.00 
  -1   1   0    0.60    1.70 
  -1   1   0    0.30    1.60 
  -1   1   0    0.50    1.40 
   1   1   0    2.20    1.20 
   1   1   0    0.30    1.20 
  -1   1   0    1.60    1.80 
  -1   1   0    0.80    1.60 
   1   1   0    5.60    2.10 
   1   1   0    2.20    1.80 
  -1   1   0    1.40    1.40 
  -1   1   0    1.80    1.50 
  -1   1   0    0.40    1.40 
   1   1   0   -1.20    1.60 
  -1   1   0   -1.40    1.60 
  -1   1   0    1.60    1.60 
  -1   1   0    2.80    1.70 
  -1   1   0    0.00    1.70 
   1   1   0    0.10    1.40 
   1   1   0    1.60    2.10 
   1   1   0    2.70    2.20 
   1   1   0    1.00    1.80 
  -1   1   0    2.30    1.30 
   1   1   0    1.50    1.80 
   1   1   0    3.70    1.50 
  -1   1   0   -0.20    1.80 
  -1   1   0    1.90    1.90 
  -1   1   0    4.00    1.90 
   1   1   0    0.50    1.50 
   1   1   0    1.00    1.50 
   1   1   0   -0.50    1.00 
  -1   1   0    2.60    1.80 
  -1   1   0    2.00    1.80 
  -1   1   0   -0.70    1.40 
  -1   1   0    1.20    1.30 
  -1   1   0    0.90    1.80 
   1   1   0    0.70    1.00 
  -1   1   0    2.30    1.90 
   1   1   0    2.50    1.60 
  -1   1   0    0.80    1.30 
  -2  -1   0 1007.60   34.20 
   2  -1   0  976.10   36.10 
  -2  -1   0  918.31   35.30 
   2  -1   0  933.01   36.60 
  -2  -1   0 1029.50   34.70 
  -2  -1   0  950.70   33.20 
  -2  -1   0  940.21   36.40 
  -2  -1   0  949.60   34.00 
  -2  -1   0  964.00   35.00 
   2  -1   0  936.61   34.70 
   2  -1   0  947.41   35.80 
  -2  -1   0 1009.20   35.50 
  -2  -1   0  935.11   34.30 
  -2  -1   0  980.00   36.50 
  -2  -1   0  967.00   35.10 
  -2  -1   0  926.31   36.80 
  -2  -1   0  986.30   35.00 
   2  -1   0  992.60   35.40 
   2  -1   0  988.00   35.50 
   2  -1   0  976.20   35.10 
   2  -1   0  971.60   35.50 
   2  -1   0  927.91   33.10 
   2  -1   0  981.50   35.30 
   2  -1   0  992.40   35.30 
   2  -1   0  945.71   32.70 
  -2  -1   0  955.90   35.20 
   2  -1   0  969.90   35.50 
   2  -1   0 1010.30   36.30 
   2  -1   0  954.40   36.00 
   2  -1   0  964.70   33.40 
   2  -1   0  961.30   34.40 
   2  -1   0  972.30   34.50 
   2  -1   0  986.90   37.90 
  -2  -1   0  946.71   35.40 
   2  -1   0  959.00   34.80 
  -2  -1   0  966.50   34.50 
  -2  -1   0  965.40   37.60 
  -2  -1   0  934.31   33.20 
  -2  -1   0  968.70   34.40 
   2  -1   0  965.50   34.00 
  -2  -1   0  993.90   35.30 
  -2  -1   0 1113.89   38.70 
   2  -1   0  931.01   34.60 
   2  -1   0  968.70   35.20 
  -2   1   0  928.31   35.60 
   2   1   0  985.60   35.40 
  -2   1   0  960.50   36.50 
  -2   1   0  944.81   35.30 
   2   1   0  924.91   34.30 
  -2   1   0  989.10   33.80 
  -2   1   0  966.60   34.90 
   2   1   0 1048.60   38.40 
   2   1   0 1017.80   35.90 
  -2   1   0  993.80   35.60 
  -2   1   0  986.40   35.00 
  -2   1   0  960.60   37.00 
  -2   1   0  944.11   34.80 
  -2   1   0  939.41   35.70 
   2   1   0  967.80   34.50 
  -2   1   0  943.01   32.30 
   2   1   0 1002.50   35.30 
  -2   1   0  787.62   35.70 
   2   1   0  923.11   34.40 
  -2   1   0  974.70   35.00 
  -2   1   0  979.30   35.00 
  -2   1   0  951.70   34.70 
  -2   1   0 1015.10   37.70 
   2   1   0  971.50   36.60 
   2   1   0  960.00   35.60 
  -2   1   0  938.01   36.00 
  -2   1   0  940.21   35.50 
   2   1   0  983.80   33.50 
   2   1   0  984.70   34.20 
  -2   1   0  944.51   34.20 
   2   1   0  942.51   33.30 
   2   1   0  923.21   37.20 
   2   1   0  957.70   37.20 
  -2   1   0  954.20   35.70 
  -2   1   0  943.81   33.50 
  -2   1   0  942.01   35.70 
  -2   1   0  924.31   34.90 
  -2   1   0  953.00   33.20 
   2   1   0  941.51   33.80 
   2   1   0  970.40   35.90 
  -2   1   0  937.71   34.80 
  -3  -1   0   62.19    5.00 
   3  -1   0   62.19    7.80 
  -3  -1   0   84.59    9.60 
  -3  -1   0   70.99    9.30 
  -3  -1   0   77.29    8.60 
   3  -1   0   88.39   11.60 
   3  -1   0   60.29   10.00 
   3  -1   0   56.79    7.80 
   3  -1   0   76.59    6.80 
   3  -1   0   61.89    8.00 
   3  -1   0   79.79    9.30 
   3  -1   0   75.29    9.20 
  -3  -1   0   81.39   11.90 
   3  -1   0   76.89    9.60 
  -3  -1   0   72.09    8.70 
   3  -1   0   95.29   10.30 
  -3  -1   0   65.09    8.60 
   3  -1   0   78.09    9.80 
  -3  -1   0   86.29    9.90 
  -3  -1   0  100.69   10.50 
  -3  -1   0   89.99    8.50 
  -3  -1   0   71.89    9.40 
   3  -1   0   67.49    7.50 
  -3  -1   0   71.49    7.90 
  -3  -1   0   71.89    8.50 
  -3  -1   0   61.09    6.60 
   3  -1   0   66.09    6.70 
   3  -1   0   83.39    8.70 
  -3  -1   0   67.79    8.70 
   3  -1   0   54.29    7.60 
   3  -1   0   66.39    7.90 
   3  -1   0   63.49    8.80 
  -3  -1   0   66.69    7.60 
  -3  -1   0   70.79    9.70 
  -3  -1   0   83.49    9.00 
   3  -1   0   61.99    8.90 
  -3   1   0   54.59    8.90 
  -3   1   0   64.79    8.70 
  -3   1   0   67.59    8.50 
   3   1   0   74.69    8.60 
   3   1   0   96.79   12.50 
  -3   1   0   60.89    7.60 
  -3   1   0   56.59    8.20 
  -3   1   0   72.69    8.80 
   3   1   0   73.59    9.70 
  -3   1   0   67.69    8.70 
  -3   1   0   51.19    7.90 
   3   1   0   59.09    7.30 
  -3   1   0   56.59    7.50 
   3   1   0   64.59    8.90 
  -3   1   0   56.89    7.60 
  -3   1   0   57.79    8.60 
  -3   1   0   62.49    7.80 
  -3   1   0   67.59    8.40 
  -3   1   0   71.79    6.10 
  -3   1   0   67.09    8.10 
  -3   1   0   60.69    8.20 
   3   1   0   87.49    8.10 
   3   1   0   84.69    9.00 
   3   1   0   69.19    9.00 
   3   1   0   68.19    9.20 
   3   1   0   68.69    8.90 
   3   1   0   96.69    9.40 
  -3   1   0   62.69    7.10 
   3   1   0   82.79    9.10 
  -3   1   0   68.09    6.50 
  -3   1   0   68.89    9.40 
   3   1   0   97.19    9.00 
   4  -1   0    9.10    5.80 
   4  -1   0   13.30    4.50 
   4  -1   0    1.20    3.50 
  -4  -1   0    5.80    4.60 
   4  -1   0    4.30    3.90 
   4  -1   0    0.60    4.00 
  -4  -1   0   -0.80    2.80 
  -4  -1   0    3.80    4.00 
  -4  -1   0    7.20    3.20 
  -4  -1   0    1.40    3.50 
   4  -1   0    3.70    4.30 
   4  -1   0    9.60    4.20 
   4  -1   0   -3.40    3.50 
   4  -1   0    5.70    4.80 
   4  -1   0   10.40    5.20 
   4  -1   0    4.30    3.70 
   4  -1   0    0.90    3.90 
  -4  -1   0    2.50    4.20 
   4  -1   0    6.00    4.60 
  -4  -1   0    4.00    3.30 
   4  -1   0    4.70    3.10 
  -4  -1   0    5.90    2.90 
  -4  -1   0    2.00    2.80 
  -4  -1   0    3.80    3.20 
  -4  -1   0    7.20    4.00 
   4  -1   0    2.00    2.70 
  -4  -1   0    2.40    3.70 
   4   1   0    7.30    4.30 
  -4   1   0    0.70    3.80 
   4   1   0    4.30    2.80 
  -4   1   0   -1.40    2.80 
  -4   1   0    4.60    2.90 
  -4   1   0    4.70    4.00 
  -4   1   0    8.20    5.10 
  -4   1   0   -0.80    3.50 
   4   1   0    8.00    4.20 
   4   1   0    7.20    4.20 
   4   1   0    7.50    4.20 
   4   1   0    8.30    4.80 
  -4   1   0    0.80    2.90 
  -4   1   0   13.40    5.20 
  -4   1   0    0.10    3.10 
  -4   1   0    5.00    5.00 
  -4   1   0    7.40    3.30 
   4   1   0    9.60    4.00 
  -4   1   0    0.50    3.40 
   4   1   0    3.30    4.20 
  -4   1   0   11.20    5.00 
   4   1   0    0.30    4.30 
   4   1   0    4.80    5.80 
   4   1   0    9.70    4.30 
   4   1   0    4.20    4.10 
  -4   1   0   14.90    5.00 
  -5  -1   0 1044.20   42.60 
   5  -1   0 1048.40   43.80 
   5  -1   0 1060.19   43.70 
   5  -1   0 1101.19   46.50 
   5  -1   0 1019.50   41.20 
   5  -1   0 1097.19   46.20 
   5  -1   0 1129.89   40.70 
  -5  -1   0 1025.00   40.10 
   5  -1   0 1083.29   46.80 
   5  -1   0 1040.30   43.70 
  -5  -1   0 1065.79   40.40 
   5  -1   0 1079.59   48.20 
  -5  -1   0 1078.39   43.50 
   5  -1   0 1051.59   38.60 
  -5  -1   0 1025.20   46.00 
  -5  -1   0 1056.39   39.00 
   5  -1   0  974.30   45.90 
  -5  -1   0 1064.09   44.10 
  -5  -1   0 1094.99   45.40 
   5  -1   0 1048.50   50.59 
  -5  -1   0 1029.60   45.40 
   5  -1   0 1063.09   42.50 
  -5  -1   0 1048.10   43.90 
  -5  -1   0 1070.59   39.50 
   5   1   0 1000.70   47.20 
  -5   1   0 1062.79   45.40 
   5   1   0 1083.19   46.50 
  -5   1   0 1048.30   46.50 
  -5   1   0 1063.99   44.10 
  -5   1   0 1031.50   46.00 
  -5   1   0 1094.69   43.10 
   5   1   0 1081.69   46.90 
   5   1   0 1046.40   46.60 
  -5   1   0  999.40   42.30 
   5   1   0 1042.50   50.79 
  -5   1   0 1066.59   43.40 
  -5   1   0 1064.89   45.70 
  -5   1   0 1048.60   43.00 
   5   1   0 1056.39   41.50 
   5   1   0 1114.39   44.50 
   5   1   0 1048.10   44.90 
  -5   1   0 1068.29   43.10 
  -5   1   0 1103.89   39.20 
   5   1   0 1018.80   41.50 
   5   1   0 1063.29   40.50 
   5   1   0 1080.29   44.20 
  -5   1   0 1045.60   49.00 
  -5   1   0 1037.00   40.90 
  -6  -1   0   36.60    9.20 
   6  -1   0   41.30    6.60 
   6  -1   0   41.80   11.00 
   6  -1   0   54.69   14.00 
   6  -1   0   55.09   12.90 
   6  -1   0   35.60    6.00 
   6  -1   0   38.50    8.80 
  -6  -1   0   47.80   10.60 
  -6  -1   0   43.10    7.30 
  -6  -1   0   57.59   10.50 
  -6  -1   0   41.20    7.10 
  -6  -1   0   52.19    9.90 
   6  -1   0   51.79   11.50 
   6  -1   0   47.10   11.30 
   6  -1   0   40.70    9.40 
   6  -1   0   28.20    8.80 
  -6  -1   0   53.69   11.90 
   6  -1   0   40.20   10.10 
  -6  -1   0   57.59   11.60 
  -6  -1   0   60.49   10.10 
  -6  -1   0   39.90    6.90 
  -6   1   0   42.10    8.30 
   6   1   0   46.30   10.60 
  -6   1   0   40.10    8.30 
   6   1   0   44.20    8.90 
  -6   1   0   30.80    7.00 
   6   1   0   32.20    8.60 
   6   1   0   59.89   11.80 
   6   1   0   44.30   11.40 
   6   1   0   31.00    8.80 
  -6   1   0   39.20    9.40 
  -6   1   0   50.79    7.00 
  -6   1   0   37.80    7.90 
  -6   1   0   38.20    8.80 
  -6   1   0   46.90   10.20 
  -6   1   0   56.89   13.10 
  -6   1   0   49.40    9.30 
  -6   1   0   44.30   10.60 
   6   1   0   47.20    8.70 
   6   1   0   31.40    7.10 
   6   1   0   55.39   14.40 
  -6   1   0   42.10   10.40 
   7  -1   0 1113.49   55.29 
   7  -1   0 1181.78   59.19 
   7  -1   0 1236.58   56.89 
  -7  -1   0 1185.78   47.90 
   7  -1   0 1132.29   54.69 
  -7  -1   0 1171.28   54.29 
  -7  -1   0 1282.67   59.39 
  -7  -1   0 1172.38   47.40 
   7  -1   0 1212.08   57.29 
   7  -1   0 1226.78   56.79 
   7  -1   0 1223.88   63.89 
  -7  -1   0 1230.08   48.20 
  -7  -1   0 1186.78   49.10 
   7  -1   0 1182.08   51.99 
  -7  -1   0 1184.88   56.39 
   7  -1   0 1161.38   44.70 
  -7  -1   0 1198.58   52.99 
   7  -1   0 1253.67   52.89 
  -7  -1   0 1250.27   48.00 
  -7  -1   0 1223.98   55.79 
  -7   1   0 1182.08   47.50 
   7   1   0 1157.08   61.19 
  -7   1   0 1184.78   56.09 
   7   1   0 1222.18   57.69 
   7   1   0 1190.98   48.60 
   7   1   0 1110.29   55.89 
   7   1   0 1263.57   52.09 
  -7   1   0 1252.77   60.59 
  -7   1   0 1212.38   52.59 
   7   1   0 1191.68   54.79 
  -7   1   0 1179.18   54.69 
  -7   1   0 1136.49   56.09 
   7   1   0 1265.77   54.29 
   7   1   0 1202.78   59.09 
   7   1   0 1228.98   48.70 
  -7   1   0 1129.99   50.29 
  -7   1   0 1149.98   54.99 
  -7   1   0 1222.28   50.49 
  -7   1   0 1183.08   51.59 
   8  -1   0    4.20    6.90 
   8  -1   0    5.40    9.70 
  -8  -1   0   27.60   11.70 
  -8  -1   0    5.50    5.50 
  -8  -1   0    6.10    7.00 
   8  -1   0    4.70    6.90 
   8  -1   0    5.00    6.80 
   8  -1   0    8.60    7.70 
  -8  -1   0   12.60    7.70 
   8  -1   0   -2.30    4.60 
  -8  -1   0    9.20    7.70 
   8  -1   0    2.40    9.00 
  -8  -1   0   15.30    6.50 
  -8  -1   0   -1.90    5.30 
  -8   1   0    4.90    7.30 
   8   1   0   -0.60    9.60 
   8   1   0   10.50    5.90 
  -8   1   0   12.80    7.10 
   8   1   0   11.80    6.00 
  -8   1   0    8.40    7.40 
  -8   1   0   11.10    8.00 
  -8   1   0   11.80    8.40 
  -8   1   0    8.00    6.90 
   8   1   0   -0.90    5.70 
   8   1   0   13.90    9.60 
   8   1   0   20.80    9.60 
   8   1   0    1.00    4.60 
   8   1   0    7.90    7.80 
   8   1   0    6.10    6.10 
  -8   1   0    3.40    5.90 
  -8   1   0    4.80    7.30 
  -8   1   0   11.90    9.10 
   9  -1   0  233.08   28.50 
   9  -1   0  274.97   37.80 
  -9  -1   0  255.97   19.70 
  -9  -1   0  203.48   25.80 
  -9  -1   0  226.38   30.30 
  -9  -1   0  190.08   25.80 
   9  -1   0  189.08   22.70 
   9  -1   0  218.88   29.30 
  -9  -1   0  209.38   25.20 
  -9  -1   0  239.78   29.30 
   9  -1   0  168.98   26.60 
   9  -1   0  178.78   26.20 
   9   1   0  163.38   23.00 
   9   1   0  174.18   25.80 
  -9   1   0  255.87   30.70 
  -9   1   0  230.28   30.90 
   9   1   0  253.57   34.50 
  -9   1   0  230.38   24.20 
  -9   1   0  227.68   28.10 
  -9   1   0  270.97   27.20 
   9   1   0  250.07   30.40 
  -9   1   0  266.07   28.00 
  -9   1   0  236.08   24.90 
   9   1   0  178.98   27.70 
 -10  -1   0   26.10   11.60 
  10  -1   0    7.50   11.00 
  10  -1   0    7.80   15.90 
 -10  -1   0   36.00   10.30 
 -10  -1   0   29.70   13.30 
 -10  -1   0   33.00   12.90 
  10  -1   0   15.20   10.40 
 -10  -1   0    4.00    8.40 
  10  -1   0    5.60   11.20 
 -10  -1   0   13.60   11.30 
  10  -1   0   19.80   11.30 
  10   1   0   16.50   11.00 
 -10   1   0   14.10    8.80 
  10   1   0   16.40   17.10 
 -10   1   0   16.70   13.00 
 -10   1   0    6.60    8.80 
  10   1   0   19.80    9.70 
 -10   1   0   41.10   14.10 
  10   1   0   10.10   10.50 
  10   1   0   10.10   10.40 
 -10   1   0   24.60   12.90 
 -10   1   0   12.00   10.50 
   0  -2   0 3920.61  122.99 
   0  -2   0 3866.51  122.89 
   0  -2   0 3862.41  120.59 
   0  -2   0 3854.51  122.59 
   0  -2   0 3871.71  122.69 
   0  -2   0 3607.84  122.89 
   0  -2   0 3861.11  122.49 
   0  -2   0 3917.71  121.89 
   0  -2   0 3950.70  124.59 
   0  -2   0 3844.92  122.69 
   0  -2   0 3964.00  122.19 
   0  -2   0 3852.21  124.89 
   0  -2   0 3747.12  123.29 
   0  -2   0 3681.03  120.39 
   0  -2   0 3916.01  123.59 
   0  -2   0 3977.20  121.89 
   0  -2   0 3886.61  123.89 
   0  -2   0 3963.00  122.39 
   0  -2   0 3936.51  122.49 
   0  -2   0 4056.39  123.29 
   0  -2   0 3907.51  121.89 
   0   2   0 3965.90  121.79 
   0   2   0 3936.11  122.99 
   0   2   0 3800.22  122.89 
   0   2   0 3868.11  123.39 
   0   2   0 3716.73  123.19 
   0   2   0 3798.32  122.89 
   0   2   0 3874.01  124.69 
   0   2   0 3550.04  122.79 
   0   2   0 3888.71  123.19 
   0   2   0 3829.62  119.99 
   0   2   0 3906.71  120.89 
   0   2   0 3859.01  120.49 
   0   2   0 3964.80  122.39 
   0   2   0 3754.12  120.39 
   0   2   0 3933.21  122.79 
   0   2   0 3928.31  122.39 
   0   2   0 4039.40  124.19 
   0   2   0 3804.72  123.49 
   0   2   0 3802.12  124.89 
   0   2   0 3912.31  121.59 
   0   2   0 3953.60  122.89 
   0   2   0 3880.01  122.79 
  -1  -2   0 3712.23  115.39 
  -1  -2   0 3592.54  115.69 
   1  -2   0 3493.55  115.39 
  -1  -2   0 3626.34  115.39 
   1  -2   0 3528.45  115.49 
   1  -2   0 3657.43  116.69 
   1  -2   0 3552.54  115.89 
   1  -2   0 3468.45  115.69 
   1  -2   0 3705.23  115.99 
  -1  -2   0 3589.64  117.09 
  -1  -2   0 3829.12  115.59 
  -1  -2   0 3386.66  113.29 
  -1  -2   0 3638.94  114.09 
  -1  -2   0 3625.14  114.79 
   1  -2   0 3293.77  114.99 
  -1  -2   0 3738.73  117.79 
   1  -2   0 3609.24  116.29 
  -1  -2   0 3629.64  115.99 
  -1  -2   0 3614.64  115.09 
  -1  -2   0 3626.14  116.19 
  -1  -2   0 3630.74  114.09 
   1  -2   0 3598.64  114.79 
   1  -2   0 3632.64  115.79 
   1  -2   0 3592.94  113.29 
  -1  -2   0 3288.37  114.99 
   1  -2   0 3515.95  114.49 
   1  -2   0 3732.73  115.59 
   1  -2   0 3711.33  112.79 
   1  -2   0 3668.73  116.59 
   1  -2   0 3689.03  117.29 
   1  -2   0 3522.75  115.69 
  -1  -2   0 3511.55  117.79 
   1  -2   0 3668.13  117.99 
   1  -2   0 3520.15  115.89 
   1  -2   0 3609.04  114.29 
  -1  -2   0 3511.75  114.59 
  -1  -2   0 3650.73  117.79 
   1  -2   0 3497.65  114.99 
   1  -2   0 3597.64  115.89 
  -1  -2   0 3626.04  116.29 
  -1  -2   0 3689.23  113.99 
  -1  -2   0 3599.64  115.09 
   1  -2   0 3559.84  115.39 
  -1  -2   0 3667.43  116.09 
   1  -2   0 3590.54  114.09 
  -1  -2   0 3690.93  114.79 
  -1   2   0 3614.44  112.79 
   1   2   0 3666.93  114.29 
  -1   2   0 3625.34  116.49 
  -1   2   0 3587.44  115.99 
  -1   2   0 3595.14  113.19 
   1   2   0 3695.53  115.89 
   1   2   0 3592.94  114.89 
  -1   2   0 3630.64  115.79 
  -1   2   0 3632.34  115.29 
  -1   2   0 3558.84  115.39 
  -1   2   0 3727.03  117.39 
  -1   2   0 3629.44  116.49 
  -1   2   0 3662.13  116.39 
  -1   2   0 3763.62  115.79 
  -1   2   0 3570.44  114.99 
   1   2   0 3480.75  114.79 
   1   2   0 3769.42  114.59 
   1   2   0 3629.44  114.09 
   1   2   0 3685.13  117.49 
   1   2   0 3693.73  116.49 
  -1   2   0 3553.74  117.69 
  -1   2   0 3547.25  114.39 
  -1   2   0 3603.04  115.59 
   1   2   0 3570.94  114.49 
  -1   2   0 3628.34  116.09 
   1   2   0 3584.24  116.49 
  -1   2   0 3607.24  115.69 
  -1   2   0 3419.86  115.19 
  -1   2   0 3690.43  115.79 
  -1   2   0 3595.04  114.79 
   1   2   0 3754.72  117.89 
  -1   2   0 3600.44  116.09 
  -1   2   0 3609.74  115.09 
   1   2   0 3675.03  115.69 
   1   2   0 3627.54  115.29 
   1   2   0 3609.14  114.09 
  -1   2   0 3624.14  117.69 
   1   2   0 3438.46  118.69 
   2  -2   0 1810.02   62.49 
   2  -2   0 1765.72   61.49 
  -2  -2   0 1846.42   59.49 
   2  -2   0 1764.62   59.49 
  -2  -2   0 1708.73   58.99 
   2  -2   0 1754.22   59.29 
  -2  -2   0 1740.33   63.89 
   2  -2   0 1766.52   61.59 
   2  -2   0 1783.52   59.89 
  -2  -2   0 1770.32   61.99 
   2  -2   0 1772.62   60.49 
  -2  -2   0 1736.93   60.99 
  -2  -2   0 1709.03   65.49 
   2  -2   0 1736.23   60.69 
  -2  -2   0 1742.73   60.59 
   2  -2   0 1731.23   60.39 
  -2  -2   0 1797.82   60.49 
  -2  -2   0 1731.33   64.29 
  -2  -2   0 1808.02   61.79 
  -2  -2   0 1788.72   57.99 
  -2  -2   0 1806.32   60.69 
  -2  -2   0 1848.62   59.59 
   2  -2   0 1769.12   61.39 
   2  -2   0 1785.32   62.69 
  -2  -2   0 1753.32   61.49 
  -2  -2   0 1793.02   61.59 
   2  -2   0 1783.42   62.29 
   2  -2   0 1761.02   62.49 
   2  -2   0 1802.02   61.99 
   2  -2   0 1775.52   64.59 
   2  -2   0 1731.33   61.69 
  -2  -2   0 1879.71   63.39 
  -2  -2   0 1793.42   61.59 
  -2  -2   0 1692.73   58.49 
   2  -2   0 1723.13   60.99 
   2  -2   0 1783.02   60.79 
   2  -2   0 1684.93   61.79 
  -2  -2   0 1868.21   60.19 
  -2  -2   0 1773.32   61.79 
   2  -2   0 1745.83   62.59 
   2  -2   0 1782.92   62.49 
   2   2   0 1822.72   60.99 
   2   2   0 1764.22   61.49 
   2   2   0 1807.72   60.39 
   2   2   0 1760.62   61.39 
   2   2   0 1748.82   63.29 
   2   2   0 1829.82   61.99 
  -2   2   0 1829.32   61.99 
   2   2   0 1846.02   58.59 
  -2   2   0 1806.12   61.89 
  -2   2   0 1731.93   60.79 
  -2   2   0 1792.22   63.29 
   2   2   0 1821.32   59.89 
  -2   2   0 1708.83   60.59 
  -2   2   0 1773.22   59.19 
   2   2   0 1772.32   60.99 
  -2   2   0 1793.92   59.99 
  -2   2   0 1805.22   59.59 
  -2   2   0 1723.13   63.79 
   2   2   0 1908.41   63.89 
  -2   2   0 1741.53   62.19 
   2   2   0 1800.82   63.59 
   2   2   0 1898.61   63.99 
  -2   2   0 1756.02   61.49 
   2   2   0 1868.51   63.59 
  -2   2   0 1721.43   62.09 
  -2   2   0 1783.42   61.99 
  -2   2   0 1776.12   60.99 
   2   2   0 1773.52   57.79 
   2   2   0 1885.21   61.09 
  -2   2   0 1833.12   63.09 
  -2   2   0 1756.22   60.39 
  -2   2   0 1786.52   62.29 
   2   2   0 1777.72   62.09 
   2   2   0 1764.62   58.39 
  -2   2   0 1768.42   62.49 
  -2   2   0 1790.12   61.89 
  -2   2   0 1746.33   60.69 
   2   2   0 1804.12   61.59 
  -2   2   0 1665.83   61.49 
   3  -2   0  952.30   37.80 
  -3  -2   0  888.61   36.70 
  -3  -2   0  955.30   38.50 
  -3  -2   0  951.50   40.60 
  -3  -2   0  963.40   36.70 
  -3  -2   0  944.61   35.60 
   3  -2   0  897.01   38.50 
   3  -2   0  953.60   40.10 
  -3  -2   0  956.10   37.10 
  -3  -2   0  911.71   39.00 
   3  -2   0  971.20   38.10 
   3  -2   0  893.21   38.80 
   3  -2   0  965.40   38.80 
   3  -2   0  934.91   38.00 
  -3  -2   0  948.31   36.90 
   3  -2   0  950.10   38.90 
   3  -2   0  946.61   35.80 
   3  -2   0  968.90   38.50 
   3  -2   0  961.00   35.20 
  -3  -2   0  933.01   37.80 
  -3  -2   0 1014.00   37.40 
   3  -2   0 1024.00   42.70 
   3  -2   0  925.51   37.40 
   3  -2   0  900.81   38.40 
   3  -2   0  942.21   37.80 
  -3  -2   0  958.90   38.00 
   3  -2   0  933.31   36.60 
   3  -2   0  913.01   40.00 
  -3  -2   0  956.70   33.70 
  -3  -2   0  903.31   33.60 
  -3  -2   0  876.11   35.00 
   3   2   0  979.60   39.70 
  -3   2   0  977.10   39.10 
  -3   2   0  935.11   36.10 
   3   2   0  981.30   37.40 
  -3   2   0  931.01   37.00 
  -3   2   0 1002.20   41.00 
  -3   2   0  908.61   37.50 
   3   2   0  956.40   40.60 
  -3   2   0  937.51   37.80 
  -3   2   0  904.11   37.80 
   3   2   0  992.70   38.90 
   3   2   0  860.11   36.80 
   3   2   0  934.51   36.50 
  -3   2   0  951.50   35.80 
   3   2   0  972.20   38.50 
   3   2   0 1055.09   36.10 
   3   2   0  932.21   36.00 
   3   2   0 1014.50   40.60 
   3   2   0  977.00   41.80 
  -3   2   0  949.60   37.80 
   3   2   0  938.41   38.20 
   3   2   0  887.51   37.00 
  -3   2   0  960.90   39.50 
   3   2   0  931.41   37.90 
  -3   2   0  918.61   38.20 
  -3   2   0  949.01   37.10 
  -3   2   0  927.51   38.60 
  -3   2   0  934.41   33.90 
   4  -2   0 1155.78   46.70 
   4  -2   0 1152.78   42.10 
  -4  -2   0 1130.29   46.30 
   4  -2   0 1062.29   41.50 
   4  -2   0 1172.48   48.40 
   4  -2   0 1196.88   50.59 
   4  -2   0 1155.28   48.20 
  -4  -2   0 1174.98   46.40 
  -4  -2   0 1165.38   42.80 
   4  -2   0 1203.58   47.40 
   4  -2   0 1150.88   46.10 
   4  -2   0 1222.78   52.29 
  -4  -2   0 1251.67   47.50 
   4  -2   0 1136.59   47.20 
  -4  -2   0 1113.19   47.20 
  -4  -2   0 1166.68   44.70 
   4  -2   0 1168.28   46.00 
  -4  -2   0 1139.79   45.90 
   4  -2   0 1156.28   46.80 
   4  -2   0 1206.18   47.70 
  -4  -2   0 1167.68   46.20 
   4  -2   0 1101.39   43.30 
   4  -2   0 1114.29   47.90 
  -4  -2   0 1238.58   45.30 
   4   2   0 1234.08   48.80 
   4   2   0 1162.08   47.60 
  -4   2   0 1040.60   46.20 
  -4   2   0 1095.39   45.80 
   4   2   0 1163.68   44.60 
  -4   2   0 1176.98   46.20 
   4   2   0 1162.98   46.50 
   4   2   0 1173.98   45.60 
  -4   2   0 1169.78   43.60 
  -4   2   0 1222.18   46.70 
  -4   2   0 1108.79   48.10 
  -4   2   0 1204.78   41.20 
   4   2   0 1170.38   43.20 
  -4   2   0 1174.58   46.40 
   4   2   0 1167.08   50.79 
  -4   2   0 1184.78   47.90 
   4   2   0 1076.99   45.20 
   4   2   0 1188.38   43.90 
   4   2   0 1152.08   44.90 
   4   2   0 1201.58   48.10 
  -4   2   0 1122.29   43.30 
  -4   2   0 1149.29   44.90 
  -4   2   0 1036.30   48.90 
  -4   2   0 1210.88   43.10 
  -5  -2   0  402.66   21.50 
  -5  -2   0  389.26   24.70 
   5  -2   0  385.86   25.40 
   5  -2   0  410.26   24.60 
  -5  -2   0  391.56   24.20 
   5  -2   0  396.76   22.60 
   5  -2   0  421.26   25.70 
   5  -2   0  379.46   22.50 
  -5  -2   0  424.96   24.00 
   5  -2   0  372.76   18.10 
  -5  -2   0  434.26   24.10 
  -5  -2   0  410.16   22.60 
  -5  -2   0  395.86   23.70 
   5  -2   0  395.06   25.20 
   5  -2   0  461.75   25.60 
   5  -2   0  410.36   28.10 
   5  -2   0  412.46   24.50 
   5  -2   0  416.16   23.90 
   5  -2   0  424.26   29.40 
   5  -2   0  377.56   23.70 
   5   2   0  442.96   28.70 
  -5   2   0  387.86   21.70 
   5   2   0  433.96   23.20 
  -5   2   0  453.55   28.20 
   5   2   0  421.46   24.50 
  -5   2   0  407.26   20.70 
  -5   2   0  413.86   20.20 
   5   2   0  425.86   25.50 
  -5   2   0  420.56   19.80 
   5   2   0  392.86   24.30 
   5   2   0  359.46   22.50 
   5   2   0  454.25   23.10 
   5   2   0  366.96   21.30 
  -5   2   0  431.86   24.90 
   5   2   0  413.96   25.80 
  -5   2   0  381.86   23.00 
  -5   2   0  379.96   24.20 
  -5   2   0  403.76   23.30 
  -5   2   0  341.17   24.20 
  -5   2   0  426.36   24.40 
   5   2   0  406.76   21.60 
  -5   2   0  454.15   24.20 
   6  -2   0 1713.93   67.19 
   6  -2   0 1765.72   75.39 
   6  -2   0 1664.73   62.19 
  -6  -2   0 1643.04   68.79 
  -6  -2   0 1592.34   65.79 
   6  -2   0 1593.94   56.99 
   6  -2   0 1631.64   66.29 
   6  -2   0 1661.33   70.89 
   6  -2   0 1670.83   67.09 
   6  -2   0 1636.74   64.49 
   6  -2   0 1596.54   63.19 
   6  -2   0 1611.54   69.29 
  -6  -2   0 1562.84   68.39 
  -6  -2   0 1608.84   62.09 
  -6  -2   0 1594.24   65.29 
  -6  -2   0 1761.72   67.59 
  -6  -2   0 1594.94   66.89 
  -6  -2   0 1616.74   64.69 
   6  -2   0 1695.73   68.29 
   6  -2   0 1645.34   67.99 
   6   2   0 1626.94   67.49 
   6   2   0 1775.22   69.99 
   6   2   0 1685.93   64.09 
  -6   2   0 1697.53   63.19 
   6   2   0 1621.24   63.29 
  -6   2   0 1631.84   66.39 
  -6   2   0 1807.02   66.39 
   6   2   0 1615.64   69.99 
   6   2   0 1701.13   69.29 
  -6   2   0 1641.04   60.09 
  -6   2   0 1775.02   69.19 
  -6   2   0 1604.94   65.29 
  -6   2   0 1576.04   68.69 
   6   2   0 1662.03   63.39 
  -6   2   0 1671.63   72.59 
   6   2   0 1655.83   65.29 
   6   2   0 1654.53   73.79 
  -6   2   0 1568.64   64.79 
  -6   2   0 1620.04   67.09 
  -7  -2   0  126.89   18.20 
  -7  -2   0  128.79   16.50 
   7  -2   0  148.19   16.90 
   7  -2   0  182.68   26.20 
  -7  -2   0  139.59   18.40 
  -7  -2   0  136.99   19.70 
   7  -2   0  113.79   18.70 
   7  -2   0  133.09   17.30 
   7  -2   0   98.49   17.80 
   7  -2   0   86.29   15.60 
  -7  -2   0  135.99   15.40 
   7  -2   0  140.49   21.40 
  -7  -2   0  157.18   18.30 
   7  -2   0  122.99   17.40 
   7  -2   0  117.69   17.80 
  -7  -2   0  147.39   21.10 
  -7  -2   0  118.49   17.20 
  -7   2   0   89.69   16.00 
   7   2   0  115.99   16.30 
  -7   2   0   98.89   18.40 
  -7   2   0  158.78   21.30 
  -7   2   0  151.18   18.00 
   7   2   0  132.89   18.00 
   7   2   0  121.69   18.90 
  -7   2   0  142.69   13.90 
   7   2   0  115.49   14.80 
   7   2   0  116.19   15.10 
   7   2   0  124.29   20.00 
   7   2   0  159.08   21.40 
  -7   2   0  117.59   17.50 
  -7   2   0  105.49   16.50 
  -7   2   0  146.99   15.70 
   7   2   0  139.19   23.10 
  -7   2   0  119.89   16.50 
   8  -2   0  641.84   39.80 
  -8  -2   0  661.33   39.50 
   8  -2   0  665.93   41.70 
   8  -2   0  583.04   41.60 
   8  -2   0  662.23   40.60 
  -8  -2   0  623.04   40.20 
  -8  -2   0  657.83   36.70 
   8  -2   0  682.43   42.20 
   8  -2   0  634.64   33.50 
  -8  -2   0  664.33   38.40 
   8  -2   0  612.14   46.60 
   8  -2   0  620.34   36.80 
  -8  -2   0  689.43   42.30 
   8   2   0  622.04   35.70 
  -8   2   0  660.83   36.70 
  -8   2   0  664.93   37.50 
   8   2   0  663.73   37.90 
   8   2   0  595.14   39.40 
  -8   2   0  699.13   42.00 
  -8   2   0  611.14   32.80 
  -8   2   0  617.54   38.90 
   8   2   0  584.64   39.50 
   8   2   0  572.14   40.70 
   8   2   0  632.64   37.10 
  -8   2   0  680.93   44.60 
   8   2   0  601.94   33.20 
  -8   2   0  695.53   40.60 
  -8   2   0  598.74   36.70 
   8   2   0  697.53   46.80 
   9  -2   0   42.60   14.30 
  -9  -2   0   21.70   12.00 
   9  -2   0   40.10   15.60 
  -9  -2   0   17.00   10.30 
  -9  -2   0   42.00   12.00 
  -9  -2   0   28.00   10.80 
   9  -2   0   36.70   13.70 
   9  -2   0   49.60   14.70 
  -9  -2   0   15.90    8.70 
   9  -2   0   41.40   13.90 
   9  -2   0   40.60   11.80 
   9   2   0   35.00   11.60 
  -9   2   0   32.40   11.60 
  -9   2   0   32.30   12.40 
  -9   2   0   38.50   11.20 
  -9   2   0   36.80   14.10 
   9   2   0   58.39   17.90 
  -9   2   0   21.50    9.50 
  -9   2   0   36.70   12.50 
   9   2   0   33.10   10.80 
   9   2   0   60.09   17.40 
  -9   2   0   54.89   17.10 
   9   2   0   21.70   10.60 
  10  -2   0  265.47   32.70 
  10  -2   0  269.97   36.20 
 -10  -2   0  389.56   42.90 
 -10  -2   0  224.28   29.20 
 -10  -2   0  320.57   34.20 
  10  -2   0  200.88   25.90 
 -10  -2   0  295.27   34.70 
  10  -2   0  339.17   36.60 
  10  -2   0  273.47   40.30 
 -10  -2   0  310.07   37.50 
  10  -2   0  220.78   30.60 
 -10  -2   0  339.57   33.10 
 -10   2   0  309.47   30.40 
  10   2   0  317.87   41.60 
  10   2   0  284.77   35.20 
 -10   2   0  357.96   42.70 
 -10   2   0  262.07   32.00 
 -10   2   0  309.87   32.70 
  10   2   0  274.97   35.80 
 -10   2   0  317.37   35.80 
  10   2   0  256.37   34.50 
 -10   2   0  369.26   37.40 
 -10   2   0  356.86   33.80 
   0  -3   0    2.90    2.90 
   0  -3   0   -3.10    2.20 
   0  -3   0   -2.80    2.40 
   0  -3   0    2.10    2.90 
   0  -3   0    3.90    3.20 
   0  -3   0   -2.60    2.40 
   0  -3   0    0.60    2.70 
   0  -3   0   -1.40    2.40 
   0  -3   0   -0.40    2.60 
   0  -3   0    3.50    3.60 
   0  -3   0   -0.20    1.70 
   0  -3   0    4.20    3.30 
   0  -3   0   -3.50    2.40 
   0  -3   0    0.20    2.30 
   0  -3   0   -2.20    2.60 
   0  -3   0   -0.10    2.90 
   0  -3   0   -0.20    2.70 
   0  -3   0    0.90    2.50 
   0   3   0   -0.80    2.50 
   0   3   0    2.80    2.10 
   0   3   0    0.00    3.10 
   0   3   0    4.80    3.40 
   0   3   0   -1.60    2.70 
   0   3   0    2.70    3.90 
   0   3   0    2.40    1.80 
   0   3   0   -1.80    2.80 
   0   3   0   -0.70    1.30 
   0   3   0   -0.30    2.50 
   0   3   0    1.70    2.80 
   0   3   0   -0.90    2.20 
   0   3   0   -0.30    2.30 
   0   3   0    6.90    3.90 
   0   3   0    0.30    2.90 
   0   3   0    0.70    2.10 
   0   3   0    6.00    3.60 
   0   3   0    0.80    2.80 
   0   3   0    2.70    3.20 
   0   3   0   -3.50    2.50 
   0   3   0   -3.60    2.30 
  -1  -3   0  218.98   12.90 
  -1  -3   0  223.48   12.00 
   1  -3   0  249.58   15.20 
  -1  -3   0  225.58   13.60 
  -1  -3   0  244.28   13.70 
   1  -3   0  270.67   15.50 
   1  -3   0  229.48   14.00 
   1  -3   0  260.87   16.50 
  -1  -3   0  266.17   16.10 
  -1  -3   0  252.47   14.70 
  -1  -3   0  258.27   13.60 
  -1  -3   0  218.98   11.70 
  -1  -3   0  252.17   13.40 
   1  -3   0  264.07   14.30 
  -1  -3   0  202.38   13.70 
  -1  -3   0  229.78   10.40 
   1  -3   0  258.07   14.60 
   1  -3   0  255.37   14.80 
  -1  -3   0  247.38   12.60 
  -1  -3   0  228.98   11.60 
   1  -3   0  252.77   12.90 
   1  -3   0  273.97   13.20 
   1  -3   0  253.47   16.20 
  -1  -3   0  230.68   11.50 
  -1  -3   0  208.78   13.70 
  -1  -3   0  255.97   13.10 
  -1  -3   0  234.38   14.40 
   1  -3   0  235.98   14.10 
   1  -3   0  218.68   12.80 
   1  -3   0  218.58   13.20 
   1  -3   0  241.38   13.50 
   1  -3   0  275.97   14.80 
   1  -3   0  239.18   15.10 
  -1  -3   0  227.28   15.00 
  -1   3   0  231.28   12.90 
  -1   3   0  279.57   16.30 
  -1   3   0  230.98   13.70 
   1   3   0  224.68   14.10 
   1   3   0  224.88   12.60 
  -1   3   0  236.08   14.70 
  -1   3   0  254.97   14.20 
  -1   3   0  235.18   14.50 
   1   3   0  249.18   16.00 
   1   3   0  252.77   14.00 
   1   3   0  220.78   11.90 
  -1   3   0  245.68   13.90 
  -1   3   0  231.38   13.80 
  -1   3   0  233.48   13.60 
  -1   3   0  251.27   13.20 
  -1   3   0  270.77   15.00 
   1   3   0  241.88   14.50 
  -1   3   0  267.87   16.60 
   1   3   0  260.87   13.80 
   1   3   0  231.88   12.80 
   1   3   0  257.77   15.30 
  -1   3   0  249.08   14.90 
  -1   3   0  226.98   14.10 
   1   3   0  243.78   14.60 
  -1   3   0  253.17   14.90 
   1   3   0  208.08   14.40 
   1   3   0  243.58   13.30 
   1   3   0  246.38   17.70 
  -1   3   0  242.08   13.20 
  -1   3   0  229.68   14.70 
   1   3   0  230.88   12.80 
  -2  -3   0   78.19    8.90 
  -2  -3   0   85.99    8.10 
  -2  -3   0   87.09   10.60 
  -2  -3   0   84.19    9.80 
  -2  -3   0   86.29   10.20 
   2  -3   0   70.09    8.10 
   2  -3   0   68.49    9.70 
   2  -3   0   75.99    8.70 
  -2  -3   0  125.29   11.50 
   2  -3   0   74.59    9.60 
   2  -3   0   79.29   10.70 
  -2  -3   0   78.29   10.20 
   2  -3   0   74.29    8.20 
  -2  -3   0   89.89    8.30 
   2  -3   0   86.09   11.30 
   2  -3   0   77.99    7.60 
  -2  -3   0   80.79    6.90 
   2  -3   0   68.49    9.10 
  -2  -3   0   80.79    6.90 
   2  -3   0   61.49    7.10 
  -2  -3   0   90.39   12.40 
   2  -3   0   69.59    9.70 
   2  -3   0   66.29    8.70 
   2  -3   0   72.39    8.20 
   2  -3   0   94.99   11.10 
  -2  -3   0   83.59    9.00 
  -2  -3   0   83.99   11.30 
  -2  -3   0   83.09    8.00 
   2   3   0   92.99    9.30 
  -2   3   0   59.29    8.40 
  -2   3   0   78.49    9.90 
   2   3   0  105.49    9.10 
  -2   3   0   68.89    8.00 
   2   3   0   74.59    9.90 
   2   3   0   88.19   12.10 
   2   3   0   91.99    9.50 
  -2   3   0   74.49    9.50 
   2   3   0   67.59    8.90 
  -2   3   0  117.39   13.40 
  -2   3   0   71.39    8.00 
   2   3   0   79.19    9.70 
  -2   3   0   65.89    9.10 
   2   3   0   68.79    7.90 
   2   3   0   60.19    9.30 
  -2   3   0  102.29   11.60 
  -2   3   0   79.19    7.20 
  -2   3   0   82.69   10.30 
  -2   3   0   93.89   10.50 
  -2   3   0   86.59   10.30 
  -2   3   0   76.49    8.70 
   2   3   0   93.19    9.70 
   2   3   0   84.69   10.10 
  -2   3   0   81.89   10.30 
   2   3   0  108.39   12.50 
   2   3   0  107.49    9.10 
   2   3   0   82.69   10.70 
  -2   3   0   94.89   10.80 
  -2   3   0   70.69    9.20 
  -2   3   0   91.89   11.70 
   2   3   0   56.29    7.80 
  -2   3   0   91.69    7.30 
  -3  -3   0    1.90    3.20 
   3  -3   0    3.70    4.00 
   3  -3   0    6.90    5.10 
  -3  -3   0    0.50    2.50 
  -3  -3   0    1.90    3.20 
   3  -3   0    2.60    3.10 
   3  -3   0    4.70    4.20 
   3  -3   0    1.80    3.50 
  -3  -3   0   -2.20    3.20 
  -3  -3   0   12.00    5.20 
   3  -3   0    3.80    3.90 
   3  -3   0   10.50    5.40 
   3  -3   0    3.10    3.50 
  -3  -3   0   -4.00    3.10 
  -3  -3   0    6.20    4.20 
   3  -3   0    3.10    4.20 
  -3  -3   0    7.00    4.50 
  -3  -3   0    1.80    3.10 
   3  -3   0   -0.50    3.80 
   3  -3   0    4.20    4.40 
   3  -3   0    5.80    4.70 
   3  -3   0    0.30    3.40 
   3   3   0    5.50    4.60 
  -3   3   0   -1.00    3.40 
  -3   3   0    4.40    3.90 
  -3   3   0    6.50    3.30 
   3   3   0    6.80    3.60 
   3   3   0    4.40    4.10 
   3   3   0    3.70    3.40 
  -3   3   0    8.50    4.60 
   3   3   0    7.90    3.90 
  -3   3   0    2.20    3.90 
  -3   3   0   10.60    5.00 
   3   3   0   -2.80    3.40 
  -3   3   0    2.60    4.00 
  -3   3   0    4.20    3.20 
   3   3   0    6.40    4.40 
   3   3   0    0.00    3.10 
   3   3   0    6.20    5.50 
   3   3   0    8.30    4.80 
  -3   3   0    6.80    3.90 
   3   3   0    6.90    4.40 
  -3   3   0    8.60    4.60 
  -3   3   0    3.70    3.90 
   3   3   0    0.90    2.70 
  -3   3   0   12.60    6.00 
  -3   3   0    0.20    3.80 
   3   3   0    5.90    4.30 
  -3   3   0    6.40    3.90 
  -3   3   0    2.30    3.90 
   4  -3   0  184.38   15.00 
   4  -3   0  179.18   15.10 
  -4  -3   0  193.58   14.10 
  -4  -3   0  195.58   12.90 
   4  -3   0  166.08   16.80 
   4  -3   0  202.78   19.90 
  -4  -3   0  184.18   14.60 
   4  -3   0  207.78   22.60 
  -4  -3   0  196.78   15.00 
   4  -3   0  199.18   13.70 
   4  -3   0  188.68   12.70 
  -4  -3   0  185.98   14.20 
   4  -3   0  223.08   17.10 
   4  -3   0  176.28   19.20 
  -4  -3   0  211.48   15.90 
   4  -3   0  153.38   14.40 
   4  -3   0  202.18   16.70 
   4  -3   0  191.28   15.60 
   4  -3   0  203.08   20.20 
  -4  -3   0  189.08   13.30 
  -4  -3   0  185.68   15.40 
  -4   3   0  188.08   14.30 
   4   3   0  214.38   23.20 
   4   3   0  170.28   14.70 
  -4   3   0  217.68   16.20 
  -4   3   0  197.18   15.70 
  -4   3   0  204.18   14.20 
  -4   3   0  210.48   16.50 
   4   3   0  208.08   16.30 
   4   3   0  215.28   16.00 
   4   3   0  193.58   14.10 
   4   3   0  178.08   15.80 
  -4   3   0  187.98   12.10 
   4   3   0  213.58   15.10 
   4   3   0  195.68   19.00 
  -4   3   0  225.88   17.80 
  -4   3   0  212.78   15.80 
  -4   3   0  184.68   15.10 
   4   3   0  190.68   15.20 
   4   3   0  229.98   18.70 
   4   3   0  177.58   12.20 
  -4   3   0  197.38   16.50 
   4   3   0  192.18   15.40 
  -4   3   0  186.38   14.20 
  -4   3   0  201.38   17.50 
   4   3   0  207.48   17.50 
   4   3   0  207.28   14.60 
   4   3   0  214.68   13.40 
  -5  -3   0  473.75   22.70 
   5  -3   0  476.25   29.00 
   5  -3   0  481.15   30.00 
   5  -3   0  513.95   29.20 
   5  -3   0  505.55   32.40 
   5  -3   0  526.55   24.80 
   5  -3   0  495.15   33.10 
   5  -3   0  515.45   30.30 
  -5  -3   0  516.15   26.90 
   5  -3   0  451.05   28.20 
  -5  -3   0  524.85   29.50 
   5  -3   0  570.44   30.90 
  -5  -3   0  497.25   27.70 
   5  -3   0  522.55   28.40 
  -5  -3   0  536.45   29.70 
   5  -3   0  503.75   28.10 
  -5  -3   0  485.45   27.20 
  -5  -3   0  587.34   29.00 
   5  -3   0  485.75   23.70 
  -5  -3   0  536.25   26.70 
   5  -3   0  507.45   28.40 
  -5   3   0  523.05   27.90 
   5   3   0  568.74   30.90 
  -5   3   0  481.05   22.50 
   5   3   0  524.05   25.70 
  -5   3   0  516.05   28.40 
   5   3   0  492.45   23.50 
  -5   3   0  529.65   32.30 
  -5   3   0  524.55   25.40 
   5   3   0  547.15   32.70 
  -5   3   0  507.35   29.50 
  -5   3   0  487.75   27.10 
   5   3   0  528.15   30.00 
  -5   3   0  470.35   27.90 
   5   3   0  484.85   26.00 
  -5   3   0  467.85   29.00 
  -5   3   0  532.25   31.10 
   5   3   0  503.75   28.10 
  -5   3   0  475.95   27.90 
   5   3   0  505.65   27.80 
   5   3   0  515.65   26.30 
   5   3   0  530.45   29.80 
  -5   3   0  466.75   25.40 
   5   3   0  488.75   27.40 
  -6  -3   0  993.00   43.60 
  -6  -3   0  997.50   43.60 
  -6  -3   0 1112.09   48.20 
  -6  -3   0  918.41   46.90 
  -6  -3   0  979.30   44.90 
   6  -3   0  917.31   48.10 
   6  -3   0  935.11   46.90 
  -6  -3   0 1025.90   46.90 
   6  -3   0  976.30   45.10 
   6  -3   0  940.61   51.59 
   6  -3   0  908.91   36.60 
  -6  -3   0  987.30   48.00 
   6  -3   0 1068.09   50.39 
   6  -3   0  923.71   52.89 
   6  -3   0  995.70   47.80 
  -6  -3   0  966.00   45.50 
  -6  -3   0  990.30   47.00 
   6  -3   0  961.50   46.90 
   6  -3   0  986.10   46.70 
   6  -3   0  946.91   48.50 
   6  -3   0  895.21   44.90 
   6   3   0  990.00   45.80 
  -6   3   0  909.01   50.19 
  -6   3   0  976.70   46.20 
   6   3   0  947.71   47.60 
   6   3   0  889.81   49.60 
  -6   3   0  947.41   40.00 
  -6   3   0  999.50   41.80 
   6   3   0  963.50   44.40 
   6   3   0  947.01   42.30 
  -6   3   0  965.60   43.70 
  -6   3   0  947.41   45.30 
   6   3   0  948.31   40.60 
  -6   3   0  965.10   45.20 
  -6   3   0  928.91   48.00 
   6   3   0  967.80   48.30 
  -6   3   0  945.31   46.80 
   6   3   0  968.10   43.00 
   6   3   0 1016.60   48.60 
   6   3   0 1014.10   46.50 
  -6   3   0  964.60   47.60 
   7  -3   0  276.47   26.80 
  -7  -3   0  278.07   23.60 
  -7  -3   0  281.37   23.60 
   7  -3   0  317.67   24.70 
  -7  -3   0  280.17   21.00 
   7  -3   0  258.57   29.50 
  -7  -3   0  311.07   25.00 
   7  -3   0  296.67   28.30 
  -7  -3   0  322.17   31.30 
  -7  -3   0  285.97   23.00 
  -7  -3   0  272.57   20.60 
  -7  -3   0  263.07   21.70 
   7  -3   0  253.87   24.80 
  -7  -3   0  304.77   30.70 
   7  -3   0  272.87   32.60 
   7  -3   0  240.68   27.90 
   7  -3   0  243.98   26.80 
  -7   3   0  273.17   27.50 
  -7   3   0  269.77   20.80 
   7   3   0  273.47   29.20 
   7   3   0  321.07   31.40 
   7   3   0  264.97   21.10 
   7   3   0  261.97   19.00 
   7   3   0  281.77   19.90 
   7   3   0  274.07   32.40 
  -7   3   0  280.17   22.70 
  -7   3   0  282.07   28.60 
   7   3   0  251.87   20.60 
  -7   3   0  274.07   31.40 
  -7   3   0  248.58   25.30 
  -7   3   0  245.48   25.50 
  -7   3   0  278.07   19.30 
   7   3   0  268.87   29.70 
   7   3   0  301.67   29.60 
  -7   3   0  308.97   31.20 
   8  -3   0  238.28   25.30 
   8  -3   0  248.68   29.80 
  -8  -3   0  275.47   30.10 
  -8  -3   0  248.98   28.80 
   8  -3   0  238.48   26.90 
   8  -3   0  283.07   29.90 
  -8  -3   0  310.87   32.00 
  -8  -3   0  296.27   22.80 
   8  -3   0  293.97   37.00 
   8  -3   0  319.67   33.70 
  -8  -3   0  307.27   33.70 
   8  -3   0  246.18   34.60 
   8  -3   0  196.08   28.50 
   8  -3   0  269.57   29.50 
  -8  -3   0  264.57   21.10 
  -8  -3   0  268.97   28.00 
   8   3   0  290.97   22.80 
   8   3   0  285.57   33.40 
   8   3   0  258.67   30.30 
   8   3   0  265.07   22.30 
  -8   3   0  257.77   32.50 
  -8   3   0  233.18   27.70 
  -8   3   0  310.57   29.60 
  -8   3   0  255.67   28.40 
   8   3   0  243.98   20.00 
  -8   3   0  321.97   30.00 
   8   3   0  287.47   35.20 
   8   3   0  316.27   33.20 
  -8   3   0  263.07   24.20 
  -8   3   0  231.08   26.90 
  -8   3   0  317.07   33.00 
   9  -3   0  145.49   22.90 
  -9  -3   0  133.29   21.80 
  -9  -3   0  155.98   25.60 
   9  -3   0  148.89   25.60 
  -9  -3   0  122.39   19.60 
  -9  -3   0  126.59   22.20 
   9  -3   0   92.49   18.30 
   9  -3   0  151.18   24.50 
   9  -3   0   84.09   23.70 
  -9  -3   0  111.89   20.80 
   9  -3   0   99.89   21.20 
  -9  -3   0  151.78   20.50 
   9   3   0  159.08   28.70 
  -9   3   0  125.99   21.60 
  -9   3   0  118.99   19.50 
   9   3   0  125.89   22.60 
   9   3   0  144.09   23.50 
  -9   3   0   87.99   17.10 
  -9   3   0   83.29   18.80 
  -9   3   0  143.39   24.10 
  -9   3   0  122.79   23.70 
  -9   3   0   99.69   19.70 
   9   3   0  131.99   24.30 
 -10  -3   0  125.49   23.30 
  10  -3   0  111.09   22.60 
 -10  -3   0  120.69   23.20 
  10  -3   0  112.49   20.70 
 -10  -3   0  146.59   25.60 
  10  -3   0  127.39   24.20 
 -10  -3   0  151.28   22.70 
 -10  -3   0  134.79   26.60 
  10  -3   0  128.09   27.90 
  10  -3   0  109.49   24.70 
  10  -3   0  133.69   24.70 
 -10   3   0  155.68   23.00 
  10   3   0  131.59   25.80 
 -10   3   0  118.49   20.90 
  10   3   0  187.98   31.80 
  10   3   0  122.99   23.70 
 -10   3   0  128.19   23.20 
  10   3   0  153.68   29.50 
 -10   3   0  132.99   23.00 
 -10   3   0  137.69   24.00 
 -10   3   0  153.18   27.80 
 -10   3   0  174.98   28.00 
   0  -4   0  571.54   29.50 
   0  -4   0  568.04   27.50 
   0  -4   0  588.24   27.90 
   0  -4   0  579.74   25.50 
   0  -4   0  578.54   26.90 
   0  -4   0  491.45   21.80 
   0  -4   0  597.74   25.40 
   0  -4   0  610.44   26.60 
   0  -4   0  567.94   25.30 
   0  -4   0  561.14   25.50 
   0  -4   0  574.34   24.80 
   0   4   0  582.44   26.50 
   0   4   0  546.65   23.80 
   0   4   0  577.14   25.90 
   0   4   0  548.35   27.10 
   0   4   0  580.44   24.50 
   0   4   0  594.14   27.00 
   0   4   0  552.94   23.70 
   0   4   0  543.35   23.00 
   0   4   0  578.84   30.30 
   0   4   0  551.14   27.90 
   0   4   0  575.04   26.90 
   0   4   0  565.24   26.70 
   0   4   0  544.85   27.20 
   0   4   0  567.24   22.70 
   0   4   0  548.75   24.80 
   0   4   0  573.94   25.90 
   1  -4   0 4190.68  135.59 
   1  -4   0 4014.00  135.99 
   1  -4   0 4298.87  137.09 
  -1  -4   0 4227.18  134.49 
  -1  -4   0 3914.91  131.79 
  -1  -4   0 4100.79  130.39 
   1  -4   0 4173.18  133.49 
  -1  -4   0 3964.70  133.99 
  -1  -4   0 4193.28  131.89 
   1  -4   0 4011.60  134.99 
   1  -4   0 4087.79  138.99 
  -1  -4   0 3873.01  136.49 
  -1  -4   0 4100.59  136.29 
   1  -4   0 4140.59  140.19 
   1  -4   0 4107.69  132.09 
  -1  -4   0 4216.98  132.89 
  -1  -4   0 3950.40  128.29 
   1  -4   0 4062.79  136.89 
  -1  -4   0 4078.49  132.09 
  -1  -4   0 4147.58  131.59 
   1  -4   0 4117.49  134.89 
   1  -4   0 4063.29  132.29 
   1  -4   0 4072.59  136.79 
   1  -4   0 3645.44  132.09 
  -1  -4   0 4247.67  139.79 
   1   4   0 4225.28  139.59 
   1   4   0 3855.21  130.09 
   1   4   0 4177.38  143.09 
   1   4   0 4044.50  137.09 
  -1   4   0 4021.30  132.79 
   1   4   0 4158.28  134.59 
  -1   4   0 4057.69  130.19 
   1   4   0 4044.90  132.69 
   1   4   0 3987.50  134.39 
  -1   4   0 4280.47  134.89 
   1   4   0 4096.29  132.79 
   1   4   0 4210.38  137.79 
   1   4   0 4085.99  135.99 
   1   4   0 4053.99  133.79 
   1   4   0 4075.29  136.19 
  -1   4   0 4187.68  132.99 
  -1   4   0 4032.80  134.59 
   1   4   0 4254.67  136.29 
  -1   4   0 4016.80  136.59 
  -1   4   0 4110.59  132.99 
  -1   4   0 4100.39  129.89 
  -1   4   0 4257.97  140.69 
   1   4   0 4050.19  134.29 
  -1   4   0 4189.58  136.29 
  -1   4   0 4147.39  136.29 
  -1   4   0 4191.38  145.09 
  -1   4   0 4254.17  136.59 
  -1   4   0 4110.89  135.19 
  -1   4   0 4000.00  137.89 
  -1   4   0 4056.69  136.29 
  -1   4   0 4102.39  136.49 
  -2  -4   0  740.93   30.40 
   2  -4   0  701.03   33.50 
   2  -4   0  693.93   29.20 
  -2  -4   0  675.73   34.20 
   2  -4   0  681.33   33.00 
   2  -4   0  668.63   35.00 
  -2  -4   0  632.44   29.40 
   2  -4   0  746.53   32.70 
  -2  -4   0  731.03   29.30 
   2  -4   0  702.33   32.20 
  -2  -4   0  711.73   31.50 
   2  -4   0  683.73   31.30 
  -2  -4   0  753.32   32.60 
   2  -4   0  711.53   32.40 
  -2  -4   0  684.83   26.90 
   2  -4   0  644.84   31.00 
   2  -4   0  665.03   30.70 
   2   4   0  682.03   29.30 
  -2   4   0  660.83   31.30 
   2   4   0  705.93   31.70 
   2   4   0  720.33   32.40 
  -2   4   0  691.93   30.40 
   2   4   0  673.43   33.50 
  -2   4   0  674.03   32.80 
  -2   4   0  697.33   32.50 
   2   4   0  715.43   28.90 
   2   4   0  667.93   30.10 
  -2   4   0  692.43   31.40 
   2   4   0  707.43   29.60 
  -2   4   0  687.73   31.50 
  -2   4   0  674.93   32.50 
   2   4   0  756.92   36.90 
   2   4   0  641.64   32.30 
  -2   4   0  679.73   32.60 
  -2   4   0  680.33   35.00 
  -2   4   0  693.33   32.00 
   2   4   0  676.53   29.30 
   2   4   0  670.13   31.60 
   2   4   0  678.83   30.10 
  -2   4   0  661.23   26.80 
   2   4   0  708.33   33.50 
  -2   4   0  722.03   34.40 
  -2   4   0  669.73   32.00 
   3  -4   0  504.65   28.20 
  -3  -4   0  509.55   27.90 
   3  -4   0  640.84   33.90 
  -3  -4   0  610.14   24.70 
  -3  -4   0  571.04   29.30 
   3  -4   0  538.05   27.70 
  -3  -4   0  600.54   32.10 
   3  -4   0  565.74   29.80 
   3  -4   0  591.24   30.80 
   3  -4   0  565.64   29.30 
   3  -4   0  523.65   26.20 
   3  -4   0  542.75   29.00 
  -3  -4   0  557.94   25.50 
  -3  -4   0  564.74   28.80 
  -3  -4   0  572.74   25.20 
   3  -4   0  572.34   30.50 
   3  -4   0  503.75   26.10 
  -3  -4   0  591.24   27.20 
   3  -4   0  581.34   26.90 
  -3   4   0  539.25   29.40 
   3   4   0  591.04   27.60 
  -3   4   0  578.84   28.70 
  -3   4   0  573.94   26.50 
  -3   4   0  521.45   29.30 
   3   4   0  526.65   27.40 
  -3   4   0  583.74   31.50 
   3   4   0  565.34   26.10 
   3   4   0  576.54   25.40 
   3   4   0  542.65   29.30 
  -3   4   0  578.64   29.40 
  -3   4   0  512.35   25.60 
  -3   4   0  562.24   28.40 
   3   4   0  581.64   26.20 
  -3   4   0  549.35   30.00 
  -3   4   0  578.24   28.90 
   3   4   0  615.64   31.80 
  -3   4   0  549.05   32.10 
   3   4   0  561.84   29.00 
   3   4   0  611.04   31.70 
   3   4   0  572.14   24.80 
  -3   4   0  558.44   28.90 
  -3   4   0  587.04   30.10 
   3   4   0  569.94   28.50 
   3   4   0  560.14   31.10 
  -3   4   0  588.44   25.70 
   4  -4   0  357.66   21.70 
  -4  -4   0  423.16   21.60 
   4  -4   0  383.46   22.20 
   4  -4   0  390.96   25.30 
   4  -4   0  382.76   24.00 
   4  -4   0  348.37   22.80 
   4  -4   0  349.27   22.20 
  -4  -4   0  347.97   22.80 
  -4  -4   0  377.66   20.20 
  -4  -4   0  380.26   26.30 
   4  -4   0  378.96   25.20 
   4  -4   0  342.07   20.10 
   4  -4   0  370.26   26.20 
   4  -4   0  326.97   23.70 
  -4  -4   0  374.76   23.30 
  -4  -4   0  360.16   22.40 
   4  -4   0  397.26   27.70 
   4  -4   0  346.87   23.30 
   4  -4   0  341.47   23.70 
   4   4   0  419.76   22.10 
  -4   4   0  340.87   22.20 
   4   4   0  372.26   25.60 
  -4   4   0  357.76   23.10 
   4   4   0  369.86   24.10 
   4   4   0  365.26   22.20 
  -4   4   0  363.66   19.90 
   4   4   0  375.26   23.60 
  -4   4   0  365.36   25.50 
  -4   4   0  354.26   22.90 
   4   4   0  323.87   21.00 
   4   4   0  366.56   22.80 
  -4   4   0  376.56   25.00 
   4   4   0  366.36   26.40 
  -4   4   0  370.46   23.80 
   4   4   0  344.27   23.00 
  -4   4   0  360.36   24.10 
   4   4   0  369.96   25.40 
  -4   4   0  361.36   24.80 
  -4   4   0  358.86   20.70 
   4   4   0  334.87   19.80 
  -4   4   0  322.57   24.00 
   4   4   0  365.06   23.90 
  -4   4   0  397.86   22.60 
   5  -4   0 1274.87   54.89 
  -5  -4   0 1309.97   55.69 
   5  -4   0 1236.78   55.99 
  -5  -4   0 1223.08   45.70 
   5  -4   0 1263.47   52.99 
   5  -4   0 1288.57   55.49 
   5  -4   0 1294.87   62.09 
  -5  -4   0 1231.08   51.69 
   5  -4   0 1187.68   55.79 
   5  -4   0 1193.78   54.19 
  -5  -4   0 1237.48   52.99 
  -5  -4   0 1275.97   51.59 
  -5  -4   0 1317.77   53.99 
   5  -4   0 1232.58   50.59 
   5  -4   0 1218.08   56.29 
  -5  -4   0 1268.27   53.89 
   5  -4   0 1198.98   56.39 
   5  -4   0 1181.48   58.19 
   5  -4   0 1247.48   55.59 
   5   4   0 1223.68   55.99 
   5   4   0 1312.87   54.89 
   5   4   0 1265.67   48.80 
   5   4   0 1241.98   51.79 
  -5   4   0 1139.59   54.79 
  -5   4   0 1189.78   58.09 
  -5   4   0 1269.97   54.09 
  -5   4   0 1228.38   51.89 
  -5   4   0 1153.58   56.79 
  -5   4   0 1219.58   56.69 
   5   4   0 1245.78   59.49 
   5   4   0 1269.07   54.59 
  -5   4   0 1277.27   48.20 
   5   4   0 1278.87   48.60 
  -5   4   0 1264.37   55.39 
  -5   4   0 1251.07   52.19 
   5   4   0 1353.66   59.09 
   5   4   0 1322.37   59.19 
  -5   4   0 1238.38   56.29 
   5   4   0 1255.27   52.19 
  -5   4   0 1228.68   54.09 
   5   4   0 1240.48   53.99 
  -5   4   0 1261.47   51.59 
   6  -4   0  855.61   47.10 
  -6  -4   0  885.11   42.30 
  -6  -4   0  912.11   44.10 
  -6  -4   0  990.70   45.30 
   6  -4   0 1004.10   41.70 
   6  -4   0 1036.90   46.70 
  -6  -4   0 1034.10   49.99 
  -6  -4   0  968.90   39.10 
   6  -4   0  940.11   53.69 
   6  -4   0  925.71   51.79 
   6  -4   0  838.62   46.70 
   6  -4   0 1071.59   51.79 
   6  -4   0  978.20   48.70 
  -6  -4   0  908.31   47.20 
  -6  -4   0 1006.50   45.60 
   6  -4   0  912.71   38.80 
  -6  -4   0  953.60   44.90 
  -6  -4   0  990.40   46.90 
   6  -4   0  936.41   48.30 
   6  -4   0  967.70   47.60 
   6  -4   0  984.10   46.70 
   6   4   0  964.20   45.00 
   6   4   0  928.91   46.30 
  -6   4   0  848.62   45.30 
   6   4   0  911.81   45.40 
  -6   4   0  930.01   47.00 
   6   4   0  911.11   47.70 
  -6   4   0  917.91   44.90 
  -6   4   0  940.31   49.40 
   6   4   0  909.21   50.09 
   6   4   0  969.90   41.40 
   6   4   0  993.70   47.90 
  -6   4   0  934.11   41.90 
  -6   4   0  849.52   37.70 
  -6   4   0  981.30   43.70 
  -6   4   0  948.51   51.69 
  -6   4   0  866.11   47.10 
  -6   4   0  878.61   47.20 
   6   4   0  908.11   42.90 
  -6   4   0  935.31   44.90 
  -7  -4   0  633.54   40.70 
   7  -4   0  649.74   40.90 
  -7  -4   0  797.72   43.30 
   7  -4   0  653.43   38.60 
   7  -4   0  684.73   40.70 
   7  -4   0  692.23   43.40 
   7  -4   0  646.74   41.80 
   7  -4   0  703.73   42.00 
  -7  -4   0  654.23   40.70 
  -7  -4   0  726.63   39.30 
  -7  -4   0  713.53   36.70 
  -7  -4   0  626.44   36.40 
   7  -4   0  691.33   39.30 
  -7  -4   0  759.42   39.30 
  -7  -4   0  719.73   41.20 
  -7  -4   0  709.83   33.90 
   7  -4   0  731.33   42.80 
  -7  -4   0  712.93   39.60 
   7  -4   0  765.72   40.40 
   7  -4   0  654.33   47.40 
   7  -4   0  644.54   45.50 
   7   4   0  696.43   39.90 
   7   4   0  653.23   41.20 
  -7   4   0  629.84   40.00 
  -7   4   0  668.63   42.50 
   7   4   0  681.03   44.60 
  -7   4   0  669.03   44.90 
   7   4   0  671.73   35.10 
  -7   4   0  719.03   39.70 
  -7   4   0  684.33   39.80 
   7   4   0  685.23   41.40 
   7   4   0  720.23   39.00 
  -7   4   0  674.93   35.50 
  -7   4   0  717.33   38.40 
  -7   4   0  710.83   40.90 
  -7   4   0  716.53   34.60 
   7   4   0  683.53   38.50 
  -7   4   0  632.34   40.70 
  -8  -4   0  605.64   41.10 
   8  -4   0  605.84   41.70 
   8  -4   0  646.54   43.50 
  -8  -4   0  590.34   37.00 
  -8  -4   0  577.74   41.10 
   8  -4   0  643.14   41.50 
   8  -4   0  650.23   40.70 
  -8  -4   0  629.34   39.00 
  -8  -4   0  604.64   36.40 
  -8  -4   0  651.83   36.60 
  -8  -4   0  671.73   40.60 
   8  -4   0  679.13   49.60 
   8  -4   0  626.94   43.20 
   8  -4   0  621.54   40.00 
   8  -4   0  596.64   37.60 
  -8   4   0  702.23   36.50 
   8   4   0  598.64   44.60 
   8   4   0  634.94   35.80 
  -8   4   0  625.34   41.80 
  -8   4   0  584.64   38.60 
  -8   4   0  709.23   41.20 
   8   4   0  574.74   40.50 
  -8   4   0  690.63   45.10 
   8   4   0  652.13   38.60 
   8   4   0  665.53   43.20 
  -8   4   0  676.73   46.10 
  -8   4   0  620.64   37.20 
  -8   4   0  662.53   42.40 
  -8   4   0  667.93   41.30 
  -9  -4   0  295.17   34.20 
   9  -4   0  380.06   47.60 
  -9  -4   0  347.47   31.20 
  -9  -4   0  340.37   36.00 
   9  -4   0  316.17   38.00 
  -9  -4   0  282.07   30.50 
   9  -4   0  267.17   34.50 
   9  -4   0  232.48   29.90 
  -9  -4   0  309.17   37.30 
   9  -4   0  367.86   36.20 
   9  -4   0  328.77   31.90 
   9  -4   0  285.37   36.70 
   9   4   0  338.37   38.20 
   9   4   0  262.57   37.10 
   9   4   0  312.17   37.40 
  -9   4   0  315.17   38.50 
   9   4   0  326.07   43.70 
  -9   4   0  303.97   34.40 
  -9   4   0  335.77   34.20 
  -9   4   0  298.77   36.10 
  -9   4   0  314.97   39.90 
  -9   4   0  285.57   33.70 
  -9   4   0  334.97   34.30 
  -9   4   0  279.77   32.10 
   0  -5   0    4.50    4.80 
   0  -5   0    4.70    5.10 
   0  -5   0   -1.00    2.50 
   0  -5   0    6.20    4.50 
   0  -5   0   -0.40    3.80 
   0  -5   0    2.50    4.10 
   0  -5   0   -0.90    3.30 
   0  -5   0    3.00    3.80 
   0  -5   0   -0.60    4.20 
   0  -5   0    1.70    4.20 
   0  -5   0    3.20    4.00 
   0   5   0    2.70    4.50 
   0   5   0   16.80    6.10 
   0   5   0    0.40    3.90 
   0   5   0   -1.90    3.80 
   0   5   0    0.00    4.30 
   0   5   0    7.00    4.70 
   0   5   0   -1.90    3.20 
   0   5   0   -1.10    3.80 
   0   5   0    4.10    5.40 
   0   5   0   -0.20    2.60 
   0   5   0    2.80    3.00 
   0   5   0    6.10    5.10 
   0   5   0    2.20    3.50 
  -1  -5   0  195.08   19.50 
   1  -5   0  168.08   13.70 
   1  -5   0  142.59   15.60 
  -1  -5   0  142.99    8.50 
   1  -5   0  148.49   12.10 
  -1  -5   0  165.08   10.50 
  -1  -5   0  166.78   13.00 
  -1  -5   0  155.08   15.60 
   1  -5   0  143.19   11.80 
   1  -5   0  188.78   19.80 
  -1  -5   0  191.68   15.10 
  -1  -5   0  157.58   11.90 
  -1  -5   0  209.38   21.80 
   1  -5   0  152.08   16.70 
   1  -5   0  155.88   11.90 
  -1  -5   0  156.98   12.20 
  -1  -5   0  149.09   17.40 
  -1  -5   0  178.88   12.70 
   1  -5   0  138.69   16.40 
  -1  -5   0  146.19   12.00 
   1  -5   0  173.28   17.70 
   1  -5   0  144.79   17.60 
   1  -5   0  162.68   16.80 
  -1   5   0  139.69   14.00 
   1   5   0  147.29   15.70 
   1   5   0  169.58   17.80 
   1   5   0  132.39   11.30 
   1   5   0  158.58   20.90 
  -1   5   0  127.49   11.10 
  -1   5   0  169.88   17.70 
  -1   5   0  144.39    9.90 
   1   5   0  176.78   19.80 
   1   5   0  188.68   19.90 
   1   5   0  159.48   10.80 
  -1   5   0  127.99   14.60 
  -1   5   0  179.88   17.80 
  -1   5   0  165.18   16.50 
  -1   5   0  166.78   18.90 
  -1   5   0  156.88   18.20 
   1   5   0  192.38   18.90 
   1   5   0  148.59   11.70 
  -1   5   0  139.59   16.60 
  -1   5   0  157.68   13.00 
  -1   5   0  202.48   16.30 
   1   5   0  157.28   16.50 
  -1   5   0  156.28   16.70 
   1   5   0  179.18   14.50 
   1   5   0  153.68   17.30 
   1   5   0  166.18   13.80 
  -1   5   0  187.38   18.00 
   2  -5   0   12.20    6.00 
   2  -5   0   12.70    6.40 
   2  -5   0   14.60    5.80 
   2  -5   0   10.70    6.40 
  -2  -5   0    6.40    2.60 
  -2  -5   0   20.60    7.40 
   2  -5   0   15.00    6.10 
  -2  -5   0    6.80    6.00 
   2  -5   0    6.90    5.40 
   2  -5   0   14.60    6.50 
  -2  -5   0   20.60    6.20 
   2  -5   0   16.00    7.50 
  -2  -5   0    8.80    4.30 
   2  -5   0    2.30    5.40 
   2  -5   0   12.40    5.60 
  -2  -5   0   15.40    5.30 
   2  -5   0   14.30    5.50 
  -2  -5   0   15.20    6.70 
  -2   5   0   11.20    5.60 
   2   5   0   17.30    6.80 
  -2   5   0   15.30    4.30 
   2   5   0   26.30    7.80 
  -2   5   0   17.90    8.40 
  -2   5   0   19.80    7.60 
   2   5   0   15.80    6.20 
  -2   5   0   11.90    5.40 
  -2   5   0   17.90    7.30 
  -2   5   0    4.40    4.20 
   2   5   0   13.30    5.10 
   2   5   0   12.50    6.40 
  -2   5   0   12.40    6.60 
  -2   5   0   14.60    6.20 
   2   5   0   12.90    6.70 
   2   5   0   29.70   10.60 
   2   5   0    3.50    5.50 
  -2   5   0   15.80    7.40 
  -2   5   0    7.10    5.80 
   2   5   0    9.90    4.40 
   2   5   0   14.80    5.60 
  -2   5   0    9.20    5.50 
   2   5   0   19.30    6.10 
  -2   5   0   17.50    7.30 
  -2   5   0    7.90    3.30 
   3  -5   0    3.50    5.20 
   3  -5   0   -1.10    4.20 
   3  -5   0   -1.10    5.00 
   3  -5   0    4.10    5.40 
   3  -5   0   -2.80    4.90 
  -3  -5   0    2.50    5.00 
  -3  -5   0    6.00    5.20 
   3  -5   0    0.00    4.60 
   3  -5   0    4.20    4.60 
   3  -5   0    4.50    4.80 
  -3  -5   0    4.30    5.20 
   3  -5   0    5.80    6.60 
  -3  -5   0    3.10    3.60 
  -3  -5   0    2.20    5.20 
   3  -5   0    5.90    4.50 
  -3  -5   0    4.40    3.60 
   3  -5   0    4.10    5.20 
  -3  -5   0    0.10    3.20 
  -3   5   0    7.60    4.90 
  -3   5   0   -3.60    4.60 
  -3   5   0    5.00    5.40 
  -3   5   0    5.80    5.30 
  -3   5   0    6.00    5.10 
  -3   5   0    7.10    5.10 
   3   5   0   -0.20    3.80 
   3   5   0    1.00    4.00 
   3   5   0    1.30    4.00 
  -3   5   0    0.80    4.70 
  -3   5   0    7.00    4.50 
   3   5   0    4.70    4.30 
  -3   5   0    2.40    3.70 
   3   5   0    6.40    5.60 
  -3   5   0   -5.90    4.40 
   3   5   0    3.10    5.30 
  -3   5   0    2.90    6.50 
   3   5   0    9.60    5.70 
  -3   5   0   -0.70    4.90 
  -3   5   0   11.00    6.20 
  -3   5   0   -1.70    4.90 
   3   5   0   11.30    7.10 
   3   5   0   -4.20    4.50 
   3   5   0    4.80    5.30 
   3   5   0    1.20    5.30 
  -4  -5   0   88.29   11.40 
  -4  -5   0   81.89   13.60 
   4  -5   0  103.69   17.00 
   4  -5   0   90.89   12.60 
   4  -5   0  108.99   14.70 
   4  -5   0   83.39   14.30 
   4  -5   0  106.29   16.50 
   4  -5   0   95.09   15.60 
  -4  -5   0   84.19   13.80 
   4  -5   0  106.39   15.70 
  -4  -5   0   83.19   11.80 
   4  -5   0   60.69   13.60 
  -4  -5   0   80.19   14.10 
  -4  -5   0   97.39   13.20 
   4  -5   0   79.49   13.20 
   4  -5   0   75.19   14.10 
  -4  -5   0   99.79   16.50 
   4  -5   0  103.79   17.30 
   4  -5   0  123.09   18.70 
  -4   5   0   99.89   17.20 
   4   5   0   64.19   11.80 
   4   5   0   91.39   17.00 
   4   5   0   95.59   11.00 
  -4   5   0   53.39   11.40 
  -4   5   0  107.99   15.30 
  -4   5   0   96.39   12.60 
   4   5   0  107.79   13.50 
  -4   5   0   73.89   13.50 
   4   5   0   91.59   15.30 
   4   5   0  104.89   13.90 
   4   5   0   90.49   12.10 
  -4   5   0   76.89   13.90 
   4   5   0   75.39   14.40 
  -4   5   0   74.49   12.50 
   4   5   0   95.29   14.10 
   4   5   0   97.09   15.90 
  -4   5   0   69.89   13.40 
  -4   5   0  100.49   12.10 
  -4   5   0   74.49   12.60 
  -4   5   0   87.69   14.10 
   4   5   0   68.99   12.70 
  -4   5   0  117.29   17.20 
   4   5   0   87.79   11.70 
  -4   5   0   99.69   17.30 
   5  -5   0   64.19   12.00 
   5  -5   0   56.59   13.40 
   5  -5   0   66.09   12.50 
   5  -5   0   54.89   10.70 
   5  -5   0   73.29   14.20 
  -5  -5   0   84.69   14.30 
   5  -5   0   48.40   14.00 
  -5  -5   0   61.59   12.90 
  -5  -5   0   50.39   10.20 
   5  -5   0   58.89   14.50 
  -5  -5   0   57.49   13.20 
   5  -5   0   63.39   14.00 
  -5  -5   0   74.89   12.60 
  -5  -5   0   55.99   12.60 
   5  -5   0   56.89   14.40 
   5  -5   0   81.09   15.60 
  -5  -5   0   62.39   10.40 
   5  -5   0   72.89   14.60 
   5  -5   0   74.29   15.60 
   5  -5   0   51.29   12.00 
   5   5   0   77.09   13.50 
  -5   5   0   58.79   11.90 
   5   5   0   74.89   14.30 
  -5   5   0   42.90   11.30 
  -5   5   0   55.99   11.20 
   5   5   0   65.29   11.40 
  -5   5   0   58.59   13.60 
  -5   5   0   73.19   15.30 
  -5   5   0   45.80   10.40 
  -5   5   0   61.19   13.60 
  -5   5   0   64.99   13.40 
  -5   5   0   57.69   11.80 
  -5   5   0   82.09   11.70 
   5   5   0   53.89   13.70 
   5   5   0   61.49   16.30 
   5   5   0   75.49   13.40 
   5   5   0   46.40   11.60 
   5   5   0   71.09   12.40 
   5   5   0   70.79   14.60 
  -5   5   0   67.69   13.90 
  -5   5   0   63.59   13.30 
   5   5   0   58.09   10.60 
   6  -5   0  534.75   32.20 
  -6  -5   0  562.44   30.20 
  -6  -5   0  477.05   30.70 
   6  -5   0  491.95   32.60 
   6  -5   0  576.44   41.00 
   6  -5   0  520.65   29.40 
   6  -5   0  513.35   35.30 
  -6  -5   0  507.05   36.60 
  -6  -5   0  517.55   32.30 
  -6  -5   0  481.55   32.90 
   6  -5   0  463.65   32.10 
   6  -5   0  533.35   35.60 
  -6  -5   0  536.95   29.90 
   6  -5   0  475.65   33.50 
   6  -5   0  534.95   34.20 
  -6  -5   0  515.45   30.00 
   6  -5   0  513.55   35.40 
  -6  -5   0  539.25   32.70 
   6  -5   0  441.26   35.90 
   6   5   0  529.65   36.40 
  -6   5   0  455.25   34.70 
   6   5   0  493.25   32.90 
  -6   5   0  563.84   37.40 
  -6   5   0  440.16   29.50 
   6   5   0  490.65   34.20 
  -6   5   0  486.35   32.90 
   6   5   0  540.05   33.80 
   6   5   0  502.75   35.70 
   6   5   0  510.25   30.90 
  -6   5   0  502.85   30.50 
  -6   5   0  500.35   34.80 
  -6   5   0  517.75   34.80 
  -6   5   0  469.85   34.50 
   6   5   0  444.56   30.40 
  -6   5   0  492.45   26.50 
   6   5   0  496.25   29.80 
  -6   5   0  530.45   30.40 
  -6   5   0  476.55   31.70 
  -6   5   0  473.15   32.60 
  -7  -5   0   44.70   13.50 
   7  -5   0   70.49   17.30 
  -7  -5   0   57.09   14.50 
  -7  -5   0   50.39   11.50 
   7  -5   0   49.10   17.40 
   7  -5   0   24.20    8.90 
   7  -5   0   58.89   14.40 
  -7  -5   0   41.50   10.30 
  -7  -5   0   42.80   13.10 
  -7  -5   0   78.19   20.20 
   7  -5   0   45.70   14.30 
   7  -5   0   81.09   18.90 
  -7  -5   0   44.00   12.00 
  -7  -5   0   50.59   12.30 
   7  -5   0   42.60   14.50 
   7  -5   0   47.60   14.60 
   7  -5   0   42.80   14.40 
  -7  -5   0   61.69   14.20 
  -7  -5   0   57.99   15.80 
   7  -5   0   34.30   11.10 
   7  -5   0   86.89   20.50 
   7   5   0   97.59   17.80 
  -7   5   0   58.29   13.70 
  -7   5   0   80.39   19.80 
  -7   5   0   61.79   16.50 
  -7   5   0   74.79   15.70 
   7   5   0   54.29   15.60 
  -7   5   0   45.30   11.30 
  -7   5   0   50.69   13.00 
   7   5   0   64.49   13.60 
   7   5   0   66.09   15.60 
   7   5   0   75.89   14.90 
  -7   5   0   40.60   12.90 
  -7   5   0   62.39   16.40 
   7   5   0   42.70   11.80 
  -7   5   0   63.09   14.00 
  -7   5   0   47.60   13.80 
  -7   5   0   40.50   12.90 
  -8  -5   0  289.47   28.90 
  -8  -5   0  290.37   34.80 
  -8  -5   0  285.07   36.60 
   8  -5   0  262.37   38.60 
   8  -5   0  213.78   29.30 
   8  -5   0  209.68   26.50 
  -8  -5   0  244.18   27.30 
   8  -5   0  244.08   31.80 
  -8  -5   0  213.98   27.50 
   8  -5   0  253.17   33.40 
   8  -5   0  203.28   28.50 
  -8  -5   0  224.98   26.50 
   8  -5   0  250.37   27.90 
   8  -5   0  240.38   31.50 
   8  -5   0  231.28   32.20 
   8   5   0  231.28   27.40 
   8   5   0  215.08   28.30 
   8   5   0  218.08   30.90 
  -8   5   0  221.88   26.90 
  -8   5   0  249.68   33.20 
  -8   5   0  228.28   31.50 
  -8   5   0  257.77   31.10 
  -8   5   0  223.58   29.30 
  -8   5   0  244.38   26.10 
  -8   5   0  317.27   33.90 
   8   5   0  259.07   29.50 
  -8   5   0  224.98   26.40 
   8   5   0  258.57   32.40 
  -8   5   0  222.98   28.40 
  -8   5   0  342.57   38.20 
  -9  -5   0   40.30   12.80 
   9  -5   0   34.90   13.70 
  -9  -5   0   30.40   14.10 
   9  -5   0   67.09   17.60 
   9  -5   0   32.60   16.00 
   9  -5   0   75.89   22.40 
  -9  -5   0   53.39   18.60 
  -9  -5   0   34.60   14.00 
   9  -5   0   22.50   12.10 
   9  -5   0   43.10   17.40 
  -9   5   0   42.50   14.50 
   9   5   0   41.30   14.90 
  -9   5   0   14.70   11.90 
  -9   5   0   44.90   16.90 
  -9   5   0   34.00   14.80 
  -9   5   0   42.60   16.70 
  -9   5   0   50.89   14.80 
  -9   5   0   51.99   16.80 
   9   5   0   46.40   14.80 
   9   5   0   28.60   13.30 
  -9   5   0   55.79   19.50 
  -9   5   0   65.89   18.20 
   9   5   0   40.10   14.70 
   0  -6   0   99.39   15.50 
   0  -6   0  139.99   17.20 
   0  -6   0  111.49   12.40 
   0  -6   0  108.09   14.50 
   0  -6   0  118.19   14.60 
   0  -6   0   92.29   14.80 
   0  -6   0  137.19   15.40 
   0  -6   0  100.49   16.20 
   0  -6   0  100.39   14.50 
   0   6   0  124.79   13.60 
   0   6   0  119.19   14.80 
   0   6   0  103.59    8.20 
   0   6   0  101.69   15.60 
   0   6   0  121.09   16.10 
   0   6   0  119.29   12.70 
   0   6   0  100.49   17.30 
   0   6   0  107.89   11.30 
   0   6   0  118.59   11.50 
   0   6   0  142.99   16.70 
   0   6   0  112.89   14.00 
   0   6   0  111.89   19.10 
   0   6   0  133.09   15.70 
   0   6   0  138.29   18.10 
   0   6   0  113.99   16.20 
   1  -6   0 2066.49   84.39 
  -1  -6   0 2058.59   74.89 
  -1  -6   0 2021.90   75.19 
   1  -6   0 2063.99   74.19 
  -1  -6   0 2121.09   75.09 
  -1  -6   0 2011.00   75.99 
  -1  -6   0 2020.20   73.99 
   1  -6   0 2021.60   76.89 
  -1  -6   0 2015.60   74.49 
   1  -6   0 2032.40   79.89 
  -1  -6   0 2057.69   81.19 
   1  -6   0 1976.20   79.19 
  -1  -6   0 2112.79   84.39 
   1  -6   0 2049.20   78.09 
   1  -6   0 2035.50   78.99 
   1  -6   0 2017.00   80.09 
  -1  -6   0 2020.30   76.99 
   1  -6   0 2044.70   77.89 
  -1  -6   0 2096.79   80.29 
   1  -6   0 2039.50   73.29 
   1  -6   0 2105.69   73.59 
  -1   6   0 2136.89   79.09 
   1   6   0 1965.90   88.09 
   1   6   0 2041.30   73.69 
   1   6   0 2118.39   78.89 
  -1   6   0 1997.10   78.09 
   1   6   0 2133.49   78.59 
  -1   6   0 2049.40   75.39 
  -1   6   0 2039.40   82.39 
   1   6   0 2142.69   78.29 
   1   6   0 2092.19   80.59 
   1   6   0 2057.19   74.39 
  -1   6   0 2117.09   79.89 
  -1   6   0 2097.59   86.09 
  -1   6   0 2156.98   79.79 
   1   6   0 2102.99   83.89 
  -1   6   0 2093.09   80.79 
   1   6   0 2001.00   78.99 
  -1   6   0 2080.69   73.09 
  -1   6   0 1936.21   78.79 
   1   6   0 1965.80   75.79 
  -1   6   0 2015.00   76.79 
  -1   6   0 2034.50   80.29 
  -1   6   0 2015.20   70.29 
   1   6   0 2050.09   71.59 
   1   6   0 2048.59   81.59 
   2  -6   0    6.30    5.70 
   2  -6   0   -2.20    4.80 
  -2  -6   0    8.60    7.70 
  -2  -6   0    0.20    4.90 
  -2  -6   0   -4.50    4.50 
  -2  -6   0    0.50    3.80 
   2  -6   0   -0.70    4.40 
  -2  -6   0    4.10    5.30 
  -2  -6   0    4.60    5.50 
  -2  -6   0    7.40    5.60 
   2  -6   0    5.50    5.50 
  -2  -6   0    6.40    6.50 
   2  -6   0   -1.80    4.60 
  -2  -6   0   -1.20    3.80 
   2  -6   0   -1.70    5.00 
  -2  -6   0    5.70    4.20 
   2  -6   0    3.80    6.30 
   2  -6   0   10.70    7.20 
   2  -6   0   -3.20    5.40 
   2  -6   0   -4.30    4.40 
   2  -6   0   -2.80    4.20 
  -2   6   0   -3.80    5.00 
  -2   6   0    3.70    6.00 
  -2   6   0    8.30    5.70 
  -2   6   0    3.20    5.70 
  -2   6   0    7.30    5.80 
   2   6   0   -1.40    4.00 
   2   6   0    2.00    5.50 
   2   6   0    3.60    5.00 
   2   6   0    2.90    6.30 
   2   6   0    0.90    5.90 
  -2   6   0    3.70    2.50 
   2   6   0  -10.60    6.90 
  -2   6   0    1.30    6.90 
  -2   6   0    3.80    3.00 
   2   6   0    7.50    6.50 
  -2   6   0    1.00    4.40 
   2   6   0    5.30    6.50 
   2   6   0   -0.30    5.50 
  -2   6   0   -1.40    5.20 
  -2   6   0    2.90    5.40 
  -2   6   0    3.50    6.00 
  -2   6   0    2.90    4.60 
  -2   6   0   12.90    7.60 
  -2   6   0    2.40    4.90 
   2   6   0    5.80    5.50 
   2   6   0    1.20    4.50 
   3  -6   0  740.63   38.10 
   3  -6   0  658.13   37.50 
  -3  -6   0  713.03   39.90 
   3  -6   0  663.03   37.70 
   3  -6   0  800.12   38.30 
   3  -6   0  734.63   38.90 
   3  -6   0  713.13   43.30 
  -3  -6   0  741.63   33.70 
   3  -6   0  711.43   40.40 
  -3  -6   0  699.23   40.00 
   3  -6   0  799.72   40.00 
  -3  -6   0  702.33   36.90 
   3  -6   0  752.42   40.60 
  -3  -6   0  820.42   43.60 
   3  -6   0  709.83   33.90 
  -3  -6   0  679.23   38.70 
   3   6   0  704.83   34.60 
   3   6   0  720.33   32.70 
  -3   6   0  741.53   37.70 
   3   6   0  713.93   38.40 
   3   6   0  733.13   38.80 
   3   6   0  714.13   36.10 
   3   6   0  740.43   38.20 
  -3   6   0  721.43   36.10 
  -3   6   0  720.23   29.00 
  -3   6   0  722.13   39.90 
  -3   6   0  842.82   41.20 
  -3   6   0  698.93   39.10 
  -3   6   0  747.93   38.10 
  -3   6   0  715.63   37.50 
  -3   6   0  720.83   41.30 
   3   6   0  730.23   34.90 
   3   6   0  763.72   40.70 
  -3   6   0  772.42   44.80 
   3   6   0  757.12   41.70 
  -3   6   0  801.92   39.70 
  -3   6   0  773.52   39.90 
  -3   6   0  772.82   40.70 
   3   6   0  740.23   43.30 
   3   6   0  717.63   40.40 
  -4  -6   0    5.60    6.50 
   4  -6   0   -2.30    7.00 
   4  -6   0   -0.80    6.70 
  -4  -6   0    5.40    4.50 
   4  -6   0    3.50    5.90 
   4  -6   0   -4.70    4.70 
   4  -6   0   -9.00    5.90 
   4  -6   0    0.40    7.00 
  -4  -6   0   -1.10    5.40 
   4  -6   0    3.50    5.40 
  -4  -6   0    6.50    7.30 
   4  -6   0    7.60    7.20 
   4  -6   0    0.30    6.90 
  -4  -6   0   -0.10    5.10 
   4  -6   0    9.30    7.30 
  -4  -6   0    4.40    7.10 
   4  -6   0   -4.80    6.10 
   4   6   0    4.70    7.00 
   4   6   0    6.40    6.90 
   4   6   0   -0.50    6.00 
   4   6   0    7.10    6.50 
  -4   6   0    4.20    6.40 
  -4   6   0   -0.10    7.10 
  -4   6   0   -1.80    5.90 
  -4   6   0    8.90    7.40 
  -4   6   0    4.20    5.40 
  -4   6   0    2.50    8.30 
   4   6   0    1.30    6.50 
   4   6   0    9.00    6.60 
   4   6   0    5.50    7.50 
   4   6   0   11.20    8.20 
   4   6   0    5.40    5.20 
  -4   6   0   -2.30    5.70 
  -4   6   0   -0.10    6.30 
  -4   6   0    0.80    5.70 
  -4   6   0    2.50    5.50 
  -4   6   0    5.10    5.80 
   4   6   0    2.10    4.40 
  -4   6   0    0.60    5.60 
  -4   6   0    2.60    6.70 
   4   6   0    2.90    4.90 
  -5  -6   0 1258.77   58.49 
   5  -6   0 1251.77   60.99 
   5  -6   0 1124.59   56.89 
   5  -6   0 1189.78   52.39 
   5  -6   0 1134.69   59.09 
   5  -6   0 1269.47   63.09 
   5  -6   0 1261.47   60.19 
   5  -6   0 1221.68   64.39 
  -5  -6   0 1286.37   51.19 
   5  -6   0 1189.58   54.99 
  -5  -6   0 1198.68   61.79 
  -5  -6   0 1282.17   57.79 
  -5  -6   0 1224.58   57.99 
  -5  -6   0 1244.18   52.59 
   5  -6   0 1285.27   58.79 
   5  -6   0 1226.88   59.29 
   5  -6   0 1258.07   53.79 
   5  -6   0 1116.49   58.79 
   5  -6   0 1269.07   54.49 
   5   6   0 1157.88   55.09 
   5   6   0 1162.58   59.69 
  -5   6   0 1174.68   60.89 
   5   6   0 1195.78   53.09 
  -5   6   0 1325.47   61.39 
  -5   6   0 1187.48   57.29 
   5   6   0 1107.99   50.29 
  -5   6   0 1219.08   57.79 
  -5   6   0 1191.88   56.09 
   5   6   0 1290.17   59.39 
  -5   6   0 1252.37   60.49 
   5   6   0 1156.88   62.69 
   5   6   0 1218.98   58.49 
  -5   6   0 1198.18   51.39 
  -5   6   0 1173.18   63.89 
  -5   6   0 1192.38   51.49 
   5   6   0 1216.08   57.49 
  -5   6   0 1153.78   58.49 
  -5   6   0 1239.58   56.19 
  -5   6   0 1094.79   56.19 
  -5   6   0 1105.19   58.49 
   5   6   0 1186.78   51.99 
   6  -6   0    8.10    9.40 
  -6  -6   0   -0.80    5.90 
   6  -6   0    2.70    7.50 
   6  -6   0   19.40    9.90 
  -6  -6   0   -9.60    6.40 
   6  -6   0   -1.00    7.50 
   6  -6   0   10.50    8.30 
  -6  -6   0    7.30    8.50 
   6  -6   0    5.90    8.00 
  -6  -6   0   12.00    7.30 
   6  -6   0    9.90    7.80 
   6  -6   0   -2.70    8.80 
   6  -6   0    1.60    8.70 
  -6  -6   0   11.00    7.40 
   6  -6   0    9.90    7.40 
  -6  -6   0    9.10    6.00 
   6  -6   0    6.90    9.40 
  -6  -6   0    4.70    7.80 
  -6  -6   0    5.40    6.30 
   6   6   0   10.50    9.20 
  -6   6   0    0.40    8.00 
  -6   6   0    9.20    8.10 
   6   6   0   25.30   13.10 
  -6   6   0    0.30    6.20 
   6   6   0   11.00    6.50 
  -6   6   0   -0.70    6.70 
  -6   6   0   14.50    9.80 
  -6   6   0    9.40    7.70 
  -6   6   0    5.30    9.00 
   6   6   0   -0.80    7.80 
   6   6   0   -4.10    6.30 
   6   6   0    7.80    5.90 
  -6   6   0    3.40    9.60 
   6   6   0    9.50    8.10 
  -6   6   0    1.20   10.30 
  -6   6   0    4.90    6.40 
  -6   6   0   -2.20    6.70 
  -6   6   0    3.70    7.80 
  -6   6   0   -0.80    6.90 
   6   6   0   13.00    7.40 
   7  -6   0 1192.68   68.99 
  -7  -6   0 1326.57   58.19 
   7  -6   0 1258.37   63.19 
  -7  -6   0 1160.08   57.39 
  -7  -6   0 1394.06   69.79 
   7  -6   0 1319.37   65.49 
   7  -6   0 1155.58   55.89 
   7  -6   0 1272.57   66.59 
  -7  -6   0 1176.38   62.89 
   7  -6   0 1270.77   72.29 
   7  -6   0 1228.18   65.09 
   7  -6   0 1330.67   63.49 
   7  -6   0 1304.57   67.59 
   7  -6   0 1325.77   59.99 
  -7  -6   0 1253.77   61.69 
   7  -6   0 1194.38   64.89 
  -7  -6   0 1191.48   67.09 
  -7   6   0 1339.27   70.59 
   7   6   0 1270.77   59.79 
  -7   6   0 1102.59   64.89 
   7   6   0 1171.08   59.49 
  -7   6   0 1246.28   66.59 
  -7   6   0 1255.77   70.39 
   7   6   0 1262.27   66.39 
  -7   6   0 1176.08   58.69 
  -7   6   0 1262.67   58.69 
   7   6   0 1291.27   60.59 
  -7   6   0 1229.58   64.59 
  -7   6   0 1264.47   62.09 
  -7   6   0 1133.49   61.19 
  -7   6   0 1226.08   58.59 
   7   6   0 1241.98   62.79 
  -7   6   0 1346.97   69.59 
   7   6   0 1174.58   61.99 
  -7   6   0 1253.27   65.69 
  -8  -6   0   67.09   16.50 
  -8  -6   0   44.10   12.40 
   8  -6   0   64.59   19.20 
   8  -6   0   22.50   13.40 
  -8  -6   0   42.90   13.70 
   8  -6   0   63.59   17.20 
   8  -6   0   49.10   17.40 
  -8  -6   0   68.29   16.20 
  -8  -6   0   96.69   22.40 
  -8  -6   0   59.29   18.50 
   8  -6   0   30.90   13.70 
   8  -6   0   40.00   13.50 
   8  -6   0   61.59   20.20 
   8  -6   0   61.89   14.80 
   8  -6   0   52.99   17.20 
   8  -6   0   15.30   12.90 
  -8   6   0   61.19   16.40 
   8   6   0   63.79   15.90 
  -8   6   0   47.60   17.90 
   8   6   0   48.70   15.90 
  -8   6   0   64.79   19.70 
  -8   6   0   42.70   13.90 
   8   6   0   22.60   11.30 
  -8   6   0   53.99   17.50 
  -8   6   0   73.89   19.30 
  -8   6   0   34.20   13.70 
   8   6   0   51.09   17.30 
  -8   6   0   55.39   18.30 
  -8   6   0   38.40   15.70 
   0  -7   0    4.40    5.90 
   0  -7   0    0.40    5.60 
   0  -7   0    1.20    4.90 
   0  -7   0   -2.00    5.00 
   0  -7   0   -5.70    4.90 
   0  -7   0   -3.50    5.50 
   0  -7   0    1.50    6.00 
   0  -7   0   -4.30    6.40 
   0   7   0   -1.30    3.60 
   0   7   0   -3.00    6.00 
   0   7   0   -4.40    5.80 
   0   7   0    0.20    5.00 
   0   7   0   -0.60    5.50 
   0   7   0    1.10    5.00 
   0   7   0   -5.80    5.00 
   0   7   0    0.50    6.50 
   0   7   0   -2.50    4.60 
   0   7   0   -6.00    6.50 
   0   7   0    0.30    5.90 
   0   7   0   17.20   11.10 
   0   7   0    1.30    7.40 
   0   7   0    1.50    3.40 
  -1  -7   0  151.68   17.50 
  -1  -7   0  166.18   17.00 
  -1  -7   0  175.68   20.50 
   1  -7   0  165.58   16.50 
   1  -7   0  120.79   17.30 
  -1  -7   0  150.08   21.30 
  -1  -7   0  114.39   17.60 
  -1  -7   0  112.79   18.90 
  -1  -7   0  104.29   16.80 
  -1  -7   0  146.29   17.40 
   1  -7   0  135.19   14.80 
   1  -7   0  223.98   26.10 
   1  -7   0  122.29   19.90 
   1  -7   0  133.09   18.10 
   1  -7   0  106.79   19.10 
  -1  -7   0  163.48   18.40 
  -1  -7   0  147.89   17.70 
   1  -7   0  170.98   18.50 
   1  -7   0  137.79   20.60 
   1  -7   0  138.89   17.80 
  -1   7   0  156.68   20.10 
  -1   7   0  131.79   18.80 
   1   7   0  167.48   23.20 
  -1   7   0  186.68   25.40 
  -1   7   0  121.39   19.40 
   1   7   0  178.98   18.40 
  -1   7   0  173.68   19.50 
   1   7   0  112.09   17.90 
   1   7   0  176.68   27.30 
   1   7   0  137.99   18.10 
  -1   7   0  151.78   15.00 
  -1   7   0  145.39   17.00 
  -1   7   0  136.99   19.60 
   1   7   0  139.19   21.10 
  -1   7   0  156.18   19.00 
   1   7   0  136.79   17.30 
   1   7   0  166.98   20.20 
  -1   7   0  168.18   18.60 
   1   7   0  153.68   22.10 
   1   7   0  170.58   20.70 
  -1   7   0  157.98   20.80 
  -1   7   0  151.58   11.90 
   1   7   0  144.09   15.30 
   2  -7   0   15.10    9.00 
  -2  -7   0   18.40    8.30 
   2  -7   0    4.30    7.00 
  -2  -7   0   10.70    6.30 
  -2  -7   0   14.70    9.20 
  -2  -7   0   11.50    7.10 
  -2  -7   0   -2.00    5.80 
   2  -7   0    8.30    8.60 
   2  -7   0    2.00    7.20 
  -2  -7   0   -2.10    5.50 
   2  -7   0   11.50    6.50 
   2  -7   0    7.60    8.10 
  -2  -7   0    3.30    5.30 
   2  -7   0    6.20    7.10 
  -2  -7   0    1.40    6.50 
  -2  -7   0    4.60    6.00 
   2  -7   0    8.40    5.70 
   2  -7   0   13.40    8.00 
   2  -7   0    0.70    4.90 
  -2   7   0   -0.70    8.10 
  -2   7   0    4.00    5.80 
   2   7   0   -3.10    6.10 
  -2   7   0    9.30    7.90 
  -2   7   0    1.20    6.10 
  -2   7   0   20.30    9.40 
  -2   7   0    5.50    5.80 
   2   7   0  -11.90    5.40 
   2   7   0   12.10    8.40 
  -2   7   0   11.00    8.10 
  -2   7   0    2.60    6.60 
   2   7   0   16.00    9.50 
  -2   7   0   -3.50    6.00 
  -2   7   0    8.40    7.40 
  -2   7   0    6.70    7.60 
   2   7   0   -0.20    6.10 
   2   7   0    3.60    7.20 
  -2   7   0    4.90    7.90 
   2   7   0   14.20    7.60 
   2   7   0   15.40    6.90 
   2   7   0   19.80   13.50 
  -3  -7   0   23.70    9.90 
   3  -7   0   27.30   10.10 
   3  -7   0   26.60    7.80 
   3  -7   0   32.60   10.70 
  -3  -7   0   30.00    8.40 
  -3  -7   0   26.80   10.30 
   3  -7   0   37.90   12.50 
  -3  -7   0   10.90    7.30 
   3  -7   0   23.30   11.00 
  -3  -7   0   21.90   10.30 
   3  -7   0   21.20    8.60 
   3  -7   0    2.20    7.10 
  -3  -7   0   21.30    9.50 
   3  -7   0   17.30   10.50 
   3  -7   0   29.00   10.90 
   3  -7   0   25.20   10.10 
  -3  -7   0   23.90   10.30 
  -3   7   0   35.00   10.50 
   3   7   0   36.80   12.50 
   3   7   0   29.10   11.00 
   3   7   0   24.30    8.60 
   3   7   0   25.40   10.30 
  -3   7   0   21.40   10.30 
   3   7   0    7.00    7.70 
  -3   7   0   25.30   11.00 
   3   7   0   26.00   12.80 
   3   7   0   37.00   11.40 
  -3   7   0    9.90    7.70 
  -3   7   0   21.40    9.60 
  -3   7   0   23.70    8.90 
  -3   7   0   31.90   11.70 
   3   7   0   28.70    9.10 
  -3   7   0   26.60    9.80 
  -3   7   0   19.60    9.20 
  -3   7   0    1.60    7.50 
   3   7   0   41.50    9.30 
   3   7   0   20.00    8.40 
  -3   7   0   18.50    9.40 
  -4  -7   0  191.88   24.20 
   4  -7   0  162.08   23.10 
   4  -7   0  180.08   22.80 
   4  -7   0  210.48   26.00 
  -4  -7   0  172.18   22.10 
   4  -7   0  227.38   21.60 
   4  -7   0  210.38   25.10 
  -4  -7   0  193.48   20.20 
  -4  -7   0  188.58   25.40 
   4  -7   0  153.48   22.10 
  -4  -7   0  193.18   24.20 
   4  -7   0  181.18   25.30 
   4  -7   0  217.08   26.20 
   4  -7   0  235.48   28.60 
   4  -7   0  169.88   28.40 
  -4  -7   0  177.88   25.10 
  -4  -7   0  209.08   26.20 
   4   7   0  168.68   19.50 
   4   7   0  167.68   17.80 
  -4   7   0  145.59   19.60 
   4   7   0  163.28   23.90 
   4   7   0  210.58   24.90 
  -4   7   0  153.58   21.30 
  -4   7   0  158.48   23.60 
  -4   7   0  226.48   27.80 
  -4   7   0  229.98   28.50 
   4   7   0  170.48   20.20 
   4   7   0  164.48   23.10 
  -4   7   0  176.18   24.20 
   4   7   0  282.97   28.70 
  -4   7   0  134.79   22.30 
   4   7   0  179.58   22.90 
  -4   7   0  165.18   22.40 
   4   7   0  213.08   28.80 
  -4   7   0  213.58   24.80 
  -4   7   0  142.49   24.70 
   4   7   0  199.28   19.90 
  -4   7   0  162.18   21.70 
   4   7   0  199.88   25.90 
   5  -7   0   25.40   12.80 
   5  -7   0   -0.40    8.80 
   5  -7   0   10.60    7.50 
   5  -7   0    7.70    7.90 
   5  -7   0    1.00    7.80 
   5  -7   0   16.10    9.80 
  -5  -7   0    3.90    9.00 
   5  -7   0    1.70    7.70 
  -5  -7   0    9.60    8.80 
   5  -7   0   10.10    9.20 
  -5  -7   0   14.00    9.60 
  -5  -7   0   10.50    8.40 
   5  -7   0   -0.70    9.60 
   5  -7   0    0.50    9.10 
   5  -7   0    5.50    8.40 
  -5  -7   0    3.60    8.20 
  -5  -7   0   15.80    8.20 
  -5   7   0   12.30   10.00 
  -5   7   0   17.90   12.60 
   5   7   0    9.70    7.90 
  -5   7   0   -3.90    8.60 
  -5   7   0   18.90   10.30 
  -5   7   0    7.00    8.10 
   5   7   0    3.10    7.90 
  -5   7   0   -0.10    8.30 
   5   7   0   10.20    9.50 
   5   7   0   25.10    9.10 
  -5   7   0    5.80    8.20 
  -5   7   0   11.80    9.80 
  -5   7   0    8.90    8.20 
   5   7   0   -4.40    8.70 
   5   7   0    9.50    9.00 
  -5   7   0   16.30    7.80 
  -5   7   0    9.80    8.00 
   5   7   0   16.50   10.10 
   6  -7   0  537.35   44.80 
   6  -7   0  561.44   39.80 
   6  -7   0  625.64   43.50 
   6  -7   0  614.54   42.20 
   6  -7   0  586.44   44.50 
  -6  -7   0  651.63   45.10 
  -6  -7   0  483.85   35.20 
   6  -7   0  642.84   38.30 
   6  -7   0  606.44   41.50 
   6  -7   0  553.24   34.50 
  -6  -7   0  591.24   40.80 
  -6  -7   0  536.35   38.40 
   6  -7   0  537.65   40.90 
  -6  -7   0  601.04   39.30 
   6  -7   0  603.54   42.70 
  -6  -7   0  571.84   40.30 
   6   7   0  545.05   39.10 
   6   7   0  600.44   42.70 
   6   7   0  563.14   39.20 
  -6   7   0  601.64   39.00 
  -6   7   0  533.05   39.20 
   6   7   0  655.53   48.70 
  -6   7   0  610.04   41.00 
  -6   7   0  476.55   42.80 
  -6   7   0  617.14   43.90 
   6   7   0  583.64   39.50 
  -6   7   0  550.44   39.80 
  -6   7   0  587.34   44.00 
  -6   7   0  548.85   40.60 
  -6   7   0  577.54   38.10 
  -6   7   0  565.24   40.60 
  -6   7   0  604.54   40.30 
   6   7   0  528.55   36.40 
   7  -7   0   19.80   12.60 
   7  -7   0   23.80   14.10 
   7  -7   0    2.10    9.70 
   7  -7   0    2.40   11.30 
  -7  -7   0   27.20   12.60 
   7  -7   0    5.70   11.10 
   7  -7   0    0.30   10.80 
   7  -7   0   19.60   14.60 
  -7  -7   0    6.20   11.60 
   7  -7   0   28.20   13.90 
  -7  -7   0   21.90   12.20 
   7  -7   0    7.50   10.50 
  -7  -7   0    8.30    9.20 
   7  -7   0   13.80   14.60 
  -7  -7   0   18.70   12.20 
  -7   7   0   34.80   14.70 
   7   7   0    4.60    9.70 
   7   7   0   10.90    8.50 
  -7   7   0   19.70   11.00 
  -7   7   0   10.50   11.20 
  -7   7   0    6.60    9.30 
  -7   7   0   11.20    9.70 
   7   7   0   21.90   11.60 
  -7   7   0    2.30   10.40 
  -7   7   0    2.30   12.90 
  -7   7   0    7.90   11.90 
  -7   7   0   21.20   11.70 
  -7   7   0    5.00    9.40 
   0  -8   0  244.38   29.60 
   0  -8   0  176.08   24.50 
   0  -8   0  265.77   29.00 
   0  -8   0  257.97   25.20 
   0  -8   0  227.88   17.80 
   0  -8   0  222.08   26.80 
   0  -8   0  191.48   27.20 
   0  -8   0  209.38   23.90 
   0  -8   0  244.28   26.20 
   0  -8   0  246.68   27.50 
   0   8   0  235.88   16.70 
   0   8   0  211.18   24.80 
   0   8   0  186.58   23.60 
   0   8   0  180.58   23.80 
   0   8   0  233.48   28.20 
   0   8   0  266.27   36.40 
   0   8   0  222.78   29.20 
   0   8   0  223.88   29.30 
   0   8   0  211.98   24.60 
   0   8   0  212.18   23.80 
   1  -8   0 1181.58   57.09 
  -1  -8   0 1097.89   57.09 
   1  -8   0 1179.78   56.09 
  -1  -8   0 1221.88   56.19 
   1  -8   0 1125.69   55.99 
   1  -8   0 1209.48   49.90 
  -1  -8   0 1240.68   51.29 
   1  -8   0 1204.38   59.19 
  -1  -8   0 1202.08   52.79 
  -1  -8   0 1187.58   53.59 
   1  -8   0 1121.29   58.59 
   1  -8   0 1178.48   56.19 
   1  -8   0 1147.19   62.79 
   1  -8   0 1168.18   58.49 
  -1  -8   0 1317.27   54.69 
  -1  -8   0 1187.08   62.39 
  -1  -8   0 1132.59   58.09 
  -1  -8   0 1211.58   51.29 
   1  -8   0 1223.48   49.70 
   1  -8   0 1115.69   49.30 
  -1  -8   0 1146.69   59.59 
   1  -8   0 1188.98   54.89 
  -1   8   0 1229.38   58.89 
   1   8   0 1160.48   61.69 
   1   8   0 1184.28   49.90 
  -1   8   0 1189.58   55.29 
   1   8   0 1217.78   59.39 
   1   8   0 1164.28   57.49 
  -1   8   0 1281.87   57.89 
  -1   8   0 1162.48   56.59 
   1   8   0 1142.59   56.19 
  -1   8   0 1172.68   51.09 
   1   8   0 1123.29   67.39 
  -1   8   0 1180.38   60.39 
   1   8   0 1197.68   56.79 
  -1   8   0 1200.28   57.79 
  -1   8   0 1135.29   65.49 
  -1   8   0 1173.48   59.59 
   1   8   0 1149.19   59.89 
   1   8   0 1107.39   54.79 
  -1   8   0 1126.09   53.79 
  -2  -8   0   34.20   11.10 
  -2  -8   0   25.30   10.70 
   2  -8   0   31.80   11.30 
   2  -8   0   35.50   12.30 
   2  -8   0   55.59   15.40 
  -2  -8   0   25.00   11.00 
   2  -8   0   28.00    8.50 
  -2  -8   0   24.10    9.70 
   2  -8   0   29.90   12.00 
  -2  -8   0   43.10   11.30 
   2  -8   0   54.29   16.20 
   2  -8   0   20.50    9.40 
   2  -8   0   32.50   10.90 
  -2  -8   0   34.60   10.50 
  -2  -8   0   41.60   10.60 
   2  -8   0   39.80   13.40 
  -2  -8   0   39.40   13.20 
   2  -8   0   42.80   12.00 
  -2  -8   0   19.90   10.20 
   2  -8   0   46.10   14.80 
  -2   8   0   21.90   10.70 
   2   8   0   36.30   16.50 
   2   8   0   47.70   13.40 
   2   8   0   58.09   15.20 
  -2   8   0   35.10   12.90 
  -2   8   0   20.20   12.20 
  -2   8   0   27.50   10.80 
   2   8   0   38.40   13.60 
  -2   8   0   26.00   10.50 
   2   8   0   32.30    9.00 
   2   8   0   22.20   12.20 
  -2   8   0   34.70   15.50 
   2   8   0   38.60   12.30 
  -2   8   0   16.60   10.10 
  -2   8   0   32.50   11.30 
   2   8   0   39.80   11.30 
   2   8   0   25.50   11.30 
  -2   8   0   44.70   12.40 
  -2   8   0   26.40   10.30 
   3  -8   0  816.52   48.10 
   3  -8   0  867.61   50.19 
  -3  -8   0  828.92   45.70 
   3  -8   0  733.33   41.60 
  -3  -8   0  756.42   37.20 
   3  -8   0  781.82   46.00 
  -3  -8   0  772.32   50.09 
   3  -8   0  837.92   53.09 
   3  -8   0  868.21   47.10 
   3  -8   0  777.32   46.20 
   3  -8   0  806.32   45.40 
  -3  -8   0  824.42   49.30 
   3  -8   0  864.81   47.40 
  -3  -8   0  947.81   49.90 
   3  -8   0  810.92   43.60 
  -3  -8   0  824.82   40.90 
  -3  -8   0  828.62   45.80 
  -3   8   0  744.03   46.40 
  -3   8   0  827.42   44.00 
  -3   8   0  770.32   46.60 
   3   8   0  852.61   53.59 
  -3   8   0  770.02   46.90 
   3   8   0  786.92   46.10 
   3   8   0  839.52   49.70 
  -3   8   0  805.82   42.00 
   3   8   0  892.21   43.80 
   3   8   0  804.92   46.10 
   3   8   0  802.12   41.50 
  -3   8   0  844.52   49.99 
  -3   8   0  816.82   46.70 
  -3   8   0  819.62   42.10 
  -3   8   0  727.13   42.70 
  -3   8   0  762.12   52.09 
  -3   8   0  702.53   45.70 
   3   8   0  821.72   46.40 
  -3   8   0  844.52   47.70 
   3   8   0  753.52   48.60 
   3   8   0  872.71   43.80 
  -4  -8   0  151.68   24.50 
   4  -8   0  154.88   25.90 
  -4  -8   0  162.38   22.00 
   4  -8   0  131.59   24.00 
   4  -8   0  157.78   21.10 
   4  -8   0  144.59   24.70 
  -4  -8   0  162.68   24.80 
  -4  -8   0  169.38   25.60 
  -4  -8   0  166.08   25.10 
  -4  -8   0  118.09   22.20 
   4  -8   0  177.38   24.00 
   4  -8   0  173.78   27.70 
   4  -8   0  125.49   20.80 
   4  -8   0  205.18   30.80 
   4  -8   0  119.79   24.10 
   4  -8   0  140.49   22.80 
  -4   8   0  191.98   27.50 
  -4   8   0  157.18   22.30 
   4   8   0  219.38   29.60 
  -4   8   0  151.38   28.50 
   4   8   0  166.28   24.90 
   4   8   0  126.89   22.40 
  -4   8   0  125.29   22.80 
  -4   8   0  147.59   26.30 
  -4   8   0  133.49   22.70 
  -4   8   0  196.48   29.30 
  -4   8   0  141.59   18.70 
  -4   8   0  175.38   23.10 
  -4   8   0  148.69   25.20 
  -4   8   0  106.29   19.20 
   4   8   0  138.89   25.20 
  -4   8   0  144.29   21.60 
   4   8   0  119.09   17.90 
   4   8   0  200.58   26.40 
   4   8   0  155.38   19.60 
   4   8   0  161.58   22.60 
  -5  -8   0  588.04   41.50 
  -5  -8   0  620.54   41.90 
   5  -8   0  591.74   41.10 
   5  -8   0  515.25   42.10 
   5  -8   0  567.54   44.40 
  -5  -8   0  611.34   37.80 
   5  -8   0  576.84   41.40 
   5  -8   0  601.54   45.00 
   5  -8   0  583.94   45.40 
   5  -8   0  664.53   45.10 
  -5  -8   0  601.84   44.80 
   5  -8   0  571.14   40.70 
   5  -8   0  534.05   39.20 
  -5  -8   0  643.24   46.00 
  -5  -8   0  578.84   41.40 
   5  -8   0  553.44   44.80 
  -5   8   0  599.74   43.40 
  -5   8   0  580.84   47.60 
   5   8   0  647.04   44.80 
   5   8   0  542.25   45.00 
   5   8   0  607.84   39.20 
  -5   8   0  549.35   35.40 
   5   8   0  591.54   39.90 
   5   8   0  612.14   41.70 
  -5   8   0  513.15   38.90 
   5   8   0  632.24   42.60 
  -5   8   0  517.55   39.70 
  -5   8   0  516.75   41.80 
  -5   8   0  637.24   42.80 
  -5   8   0  600.84   42.30 
  -5   8   0  662.63   43.10 
  -5   8   0  600.44   40.30 
   5   8   0  588.54   41.60 
  -5   8   0  541.15   38.70 
  -6  -8   0  218.18   29.60 
   6  -8   0  200.38   29.10 
   6  -8   0  151.68   26.40 
  -6  -8   0  164.18   28.60 
   6  -8   0  197.28   34.70 
  -6  -8   0  156.38   25.80 
  -6  -8   0  161.88   27.50 
   6  -8   0  196.88   32.40 
   6  -8   0  203.58   31.20 
   6  -8   0  149.29   26.40 
  -6  -8   0  153.78   25.10 
   6  -8   0  158.88   26.20 
   6  -8   0  142.79   29.30 
   6  -8   0  156.78   24.90 
  -6   8   0  211.38   31.80 
  -6   8   0  213.48   29.40 
  -6   8   0  223.68   36.50 
  -6   8   0  144.89   24.40 
   6   8   0  272.97   34.00 
  -6   8   0  181.48   30.80 
  -6   8   0  199.98   29.10 
  -6   8   0  214.48   27.40 
  -6   8   0  107.19   20.90 
   6   8   0  144.19   28.00 
   6   8   0  203.28   30.10 
   6   8   0  169.48   24.60 
  -6   8   0  177.48   29.80 
  -6   8   0  118.19   30.10 
   6   8   0  206.98   30.60 
   0  -9   0   -5.30    7.30 
   0  -9   0   -0.10    7.40 
   0  -9   0    1.90    9.20 
   0  -9   0    6.60    9.80 
   0  -9   0   -4.80    7.90 
   0  -9   0    3.90    8.80 
   0  -9   0    7.20    8.00 
   0  -9   0    3.40    8.60 
   0  -9   0   -0.10    8.40 
   0   9   0   -0.90    7.40 
   0   9   0   12.50   15.20 
   0   9   0   16.30    9.60 
   0   9   0   -0.80    9.10 
   0   9   0    9.10   10.30 
   0   9   0    8.80   11.50 
   0   9   0   -2.00    9.50 
   0   9   0   10.80   10.10 
   1  -9   0    8.20   11.00 
   1  -9   0   20.40   10.50 
  -1  -9   0   12.80    8.40 
   1  -9   0   24.00   12.60 
  -1  -9   0   10.50    9.40 
   1  -9   0   10.60    9.60 
   1  -9   0    1.20    9.10 
  -1  -9   0   18.60    9.10 
   1  -9   0    7.40    9.30 
  -1  -9   0   15.40   10.80 
  -1  -9   0   22.90   11.60 
   1  -9   0   13.20    9.50 
  -1  -9   0    7.50   10.70 
   1  -9   0   18.10   10.80 
   1  -9   0    7.00    8.50 
  -1  -9   0   21.00   10.40 
  -1  -9   0    3.20    9.30 
  -1  -9   0   12.80   10.30 
  -1   9   0   -7.50   10.40 
  -1   9   0    8.30    9.20 
   1   9   0    2.40   10.20 
  -1   9   0   21.40   10.10 
   1   9   0    5.40   10.10 
   1   9   0    3.40   10.90 
   1   9   0   -1.90    8.60 
  -1   9   0   15.90   13.70 
   1   9   0    8.50   14.90 
  -1   9   0    9.60    8.20 
  -1   9   0    6.80   10.60 
  -1   9   0    3.60    7.50 
   1   9   0    8.20   10.00 
  -1   9   0   11.00    9.40 
  -1   9   0   12.10   10.60 
   1   9   0   23.40   11.70 
   1   9   0   19.80   10.30 
   2  -9   0   38.40   15.00 
   2  -9   0   52.59   18.20 
   2  -9   0   10.30   10.90 
  -2  -9   0   49.70   14.20 
  -2  -9   0   19.80   13.10 
  -2  -9   0   20.40    9.90 
   2  -9   0   27.30   13.40 
   2  -9   0   36.80   14.00 
   2  -9   0   23.40   11.60 
   2  -9   0   34.80   13.20 
   2  -9   0   19.10   12.20 
  -2  -9   0   20.60   12.60 
   2  -9   0   77.49   17.90 
  -2  -9   0   31.00   12.90 
  -2  -9   0   12.20   11.60 
  -2   9   0   19.20   10.20 
   2   9   0   31.90   17.30 
   2   9   0   22.50   11.40 
  -2   9   0   21.20   10.60 
   2   9   0   30.50   13.40 
  -2   9   0   29.30   12.50 
  -2   9   0   39.90   12.90 
  -2   9   0   52.19   18.80 
  -2   9   0    9.40    9.80 
  -2   9   0   24.40   12.40 
  -2   9   0   35.30   14.80 
   2   9   0   28.40   13.20 
   2   9   0   15.50   11.30 
   2   9   0   36.50   15.30 
   2   9   0   35.60   13.70 
   2   9   0   36.90   12.50 
   2   9   0   24.40   14.90 
   3  -9   0    3.70    8.90 
   3  -9   0    4.70   11.80 
   3  -9   0    8.90   11.00 
  -3  -9   0   -6.20    6.40 
   3  -9   0   -1.10    9.60 
   3  -9   0   20.90   13.20 
  -3  -9   0    4.70   11.50 
   3  -9   0    3.60    9.40 
  -3  -9   0    3.40    8.30 
  -3  -9   0    7.40   10.90 
   3  -9   0    3.10    9.80 
  -3  -9   0   19.30   11.40 
   3  -9   0   25.20   11.60 
   3  -9   0   14.60   10.60 
   3  -9   0   -0.20   11.80 
   3   9   0   34.10   12.60 
   3   9   0   10.70    9.50 
  -3   9   0    5.90   11.10 
   3   9   0   -5.90   12.00 
  -3   9   0   19.00   10.70 
   3   9   0   18.70    9.30 
   3   9   0   -2.20    9.70 
  -3   9   0   14.60    9.40 
  -3   9   0    3.00    8.40 
  -3   9   0    9.10    9.90 
   3   9   0   16.00   10.80 
   3   9   0   13.30   11.60 
  -3   9   0   23.40   14.00 
  -3   9   0    8.20   12.70 
  -3   9   0   17.10   11.20 
  -3   9   0    2.80    8.90 
  -3   9   0    8.00   10.20 
  -3   9   0   10.90    9.10 
   3   9   0   -2.00    9.70 
   4  -9   0   83.49   21.50 
   4  -9   0  101.39   20.90 
  -4  -9   0   93.79   20.20 
   4  -9   0  102.59   22.60 
  -4  -9   0   77.69   19.90 
  -4  -9   0   96.69   22.40 
   4  -9   0   48.40   17.10 
   4  -9   0   97.79   22.10 
   4  -9   0  116.89   24.70 
   4  -9   0   50.39   17.00 
   4  -9   0   59.89   15.70 
  -4  -9   0   92.19   20.80 
   4  -9   0   82.99   18.80 
  -4  -9   0  103.59   21.60 
  -4   9   0   73.19   17.70 
  -4   9   0   64.39   20.00 
  -4   9   0   55.99   16.70 
  -4   9   0   86.49   21.40 
  -4   9   0   86.99   21.00 
  -4   9   0   92.89   20.40 
   4   9   0  117.39   25.90 
   4   9   0   68.79   24.70 
  -4   9   0   86.29   20.50 
   4   9   0   96.39   19.80 
  -4   9   0   81.89   21.40 
  -4   9   0   87.29   20.30 
  -4   9   0   89.69   19.10 
   4   9   0   81.09   20.20 
   4   9   0  101.09   20.30 
  -4   9   0   99.99   19.30 
   4   9   0   86.99   20.20 
   5  -9   0   64.79   18.90 
  -5  -9   0   85.49   21.70 
   5  -9   0   26.90   16.00 
   5  -9   0   49.00   18.20 
   5  -9   0  101.39   22.80 
  -5  -9   0   48.90   17.50 
   5  -9   0   41.10   15.20 
   5  -9   0   86.69   23.10 
   5  -9   0   59.59   20.20 
  -5  -9   0   68.69   18.90 
  -5  -9   0   42.30   16.30 
  -5  -9   0   68.59   16.10 
   5  -9   0   52.09   19.60 
   5  -9   0   66.79   20.40 
  -5   9   0   76.69   19.50 
  -5   9   0   62.29   18.60 
   5   9   0   50.69   17.40 
  -5   9   0   30.80   13.70 
  -5   9   0   43.10   19.40 
  -5   9   0   63.19   19.50 
  -5   9   0   99.49   23.30 
   5   9   0   63.59   18.00 
  -5   9   0   90.39   22.40 
   5   9   0   40.00   13.80 
  -5   9   0   63.49   19.10 
   5   9   0   48.30   17.80 
   5   9   0   77.59   18.90 
  -5   9   0   80.99   19.90 
  -5   9   0   59.89   17.00 
   0 -10   0  898.81   51.99 
   0 -10   0  913.91   53.29 
   0 -10   0  868.21   55.29 
   0 -10   0  970.40   58.09 
   0 -10   0  850.71   50.19 
   0 -10   0  881.91   53.49 
   0 -10   0  904.31   60.19 
   0 -10   0  900.11   50.49 
   0  10   0  872.31   53.29 
   0  10   0  829.02   52.59 
   0  10   0  914.01   57.89 
   0  10   0  892.51   67.19 
   0  10   0  965.30   54.29 
   0  10   0  873.51   51.79 
   0  10   0  813.32   54.79 
   0  10   0  894.71   59.09 
   1 -10   0  579.84   40.20 
   1 -10   0  506.35   41.00 
   1 -10   0  503.05   41.40 
  -1 -10   0  545.55   37.60 
  -1 -10   0  654.13   42.10 
   1 -10   0  523.75   42.70 
   1 -10   0  559.14   42.30 
  -1 -10   0  592.64   44.50 
   1 -10   0  524.85   39.50 
   1 -10   0  544.35   38.60 
  -1 -10   0  580.14   42.70 
   1 -10   0  493.45   43.80 
  -1 -10   0  558.54   45.90 
  -1 -10   0  567.04   42.10 
   1 -10   0  478.75   38.70 
  -1 -10   0  625.04   38.00 
   1  10   0  553.14   42.80 
  -1  10   0  540.25   44.20 
  -1  10   0  511.95   45.80 
   1  10   0  463.75   40.50 
   1  10   0  528.65   44.60 
   1  10   0  581.24   41.70 
  -1  10   0  558.94   51.79 
  -1  10   0  536.95   40.60 
   1  10   0  558.34   43.40 
  -1  10   0  617.94   41.10 
  -1  10   0  519.95   42.40 
  -1  10   0  448.76   39.00 
   1  10   0  510.25   39.20 
   1  10   0  509.05   57.19 
  -1  10   0  594.84   42.80 
   1  10   0  542.75   40.40 
   2 -10   0  399.96   46.60 
   2 -10   0  402.16   42.60 
   2 -10   0  400.06   41.30 
  -2 -10   0  482.15   47.70 
   2 -10   0  438.46   47.60 
  -2 -10   0  429.76   44.40 
   2 -10   0  466.65   36.20 
   2 -10   0  473.85   49.30 
   2 -10   0  474.45   47.30 
   2 -10   0  461.25   47.20 
   2 -10   0  392.36   39.30 
  -2 -10   0  543.05   53.99 
  -2 -10   0  463.95   41.50 
  -2 -10   0  425.76   31.00 
   2  10   0  500.95   39.30 
   2  10   0  405.66   47.50 
   2  10   0  463.75   40.50 
  -2  10   0  506.65   39.90 
   2  10   0  374.16   38.80 
  -2  10   0  418.36   42.10 
   2  10   0  394.96   40.30 
  -2  10   0  455.65   50.09 
   2  10   0  392.26   43.60 
  -2  10   0  488.55   38.70 
   2  10   0  414.36   42.80 
  -2  10   0  315.17   43.40 
   2  10   0  462.05   43.50 
  -2  10   0  369.96   40.10 
  -2  10   0  393.06   42.60 
  -2  10   0  472.05   40.50 
  -2  10   0  455.15   41.00 
  -3 -10   0  113.99   25.20 
   3 -10   0   96.09   20.10 
   3 -10   0  111.99   24.70 
   3 -10   0   53.69   17.10 
   3 -10   0  101.69   21.50 
   3 -10   0  135.29   24.80 
   3 -10   0   79.99   23.70 
   3 -10   0  105.79   26.30 
   3 -10   0   87.39   24.00 
  -3 -10   0  122.99   26.40 
   3 -10   0   85.99   22.00 
  -3 -10   0  103.99   22.30 
  -3 -10   0  109.79   23.40 
  -3 -10   0   69.19   14.10 
   3  10   0   99.59   22.40 
   3  10   0  108.99   23.30 
   3  10   0   94.69   21.90 
  -3  10   0   92.99   19.70 
  -3  10   0  137.89   30.20 
  -3  10   0  131.79   26.30 
   3  10   0   64.29   17.20 
  -3  10   0  103.29   20.10 
  -3  10   0   70.89   19.50 
  -3  10   0   84.99   17.80 
   3  10   0  126.39   23.60 
   3  10   0   87.59   21.80 
  -3  10   0  103.49   25.20 
 -10   0   1   -6.90    6.20 
 -10   0   1   -8.50    7.40 
 -10   0   1   59.49   18.20 
  10   0  -1   -9.70    6.70 
  10   0  -1    2.80    7.50 
 -10   0   1   13.30   10.50 
  10   0  -1    5.00    8.50 
  10   0  -1    4.50   12.60 
  10   0  -1   -1.50    9.00 
 -10   0   1    0.90    6.90 
  -9   0   1  460.55   33.40 
   9   0  -1  470.15   36.00 
  -9   0   1  474.25   34.80 
   9   0  -1  466.65   29.70 
   9   0  -1  469.95   34.20 
   9   0  -1  543.45   52.29 
  -9   0   1  432.76   28.00 
  -9   0   1  440.26   29.10 
  -9   0   1  488.75   34.70 
  -9   0   1  469.65   37.60 
  -9   0   1  497.05   36.90 
   9   0  -1  429.46   36.60 
   9   0  -1  490.05   36.50 
   8   0  -1   -3.80    3.90 
  -8   0   1    2.70    5.20 
  -8   0   1   -1.60    5.40 
  -8   0   1   -3.20    5.40 
  -8   0   1    1.60    5.80 
  -8   0   1   10.70    8.80 
   8   0  -1    3.80    6.90 
   8   0  -1    4.40    6.90 
   8   0  -1   -8.30    7.60 
  -8   0   1    7.60    6.00 
  -8   0   1    8.70    5.90 
  -8   0   1    2.90    6.50 
   8   0  -1    0.30    5.00 
   8   0  -1   -3.50    7.00 
   8   0  -1    3.90    6.40 
   7   0  -1  240.18   14.80 
  -7   0   1  303.77   29.00 
  -7   0   1  246.08   15.90 
   7   0  -1  223.18   26.40 
   7   0  -1  197.18   27.80 
  -7   0   1  231.68   17.20 
   7   0  -1  278.67   26.90 
  -7   0   1  250.57   24.60 
  -7   0   1  248.28   27.10 
   7   0  -1  305.67   24.40 
  -7   0   1  215.48   16.70 
  -7   0   1  258.47   18.80 
  -7   0   1  245.78   24.30 
   7   0  -1  262.27   26.10 
  -7   0   1  198.48   16.30 
   7   0  -1  259.87   18.60 
  -7   0   1  258.77   25.60 
   7   0  -1  258.07   26.40 
  -6   0   1   -3.20    5.00 
  -6   0   1    4.00    3.70 
  -6   0   1    0.00    3.60 
  -6   0   1    5.50    4.80 
   6   0  -1    5.20    4.90 
  -6   0   1    4.90    4.90 
  -6   0   1    0.40    3.00 
   6   0  -1   -1.90    3.20 
   6   0  -1   -2.10    4.30 
   6   0  -1    1.20    5.40 
  -6   0   1    2.80    3.80 
   6   0  -1   -3.60    5.60 
  -6   0   1    0.40    3.80 
  -6   0   1    0.30    5.20 
   6   0  -1   -2.30    4.10 
   6   0  -1    0.80    4.00 
  -6   0   1    4.00    3.60 
   6   0  -1    0.50    4.10 
  -6   0   1   -2.80    4.00 
   6   0  -1    4.40    3.30 
  -6   0   1    5.00    4.80 
   5   0  -1  136.69   17.30 
  -5   0   1  155.78   17.00 
  -5   0   1  139.59   15.40 
  -5   0   1  147.19   11.10 
   5   0  -1  133.09   10.90 
  -5   0   1  133.29   10.70 
  -5   0   1  156.38   18.00 
  -5   0   1  133.79   10.20 
  -5   0   1  124.99   10.50 
  -5   0   1  129.49   10.70 
  -5   0   1  140.29   15.30 
  -5   0   1  152.08   11.90 
  -5   0   1  112.89    9.50 
   5   0  -1  157.78   16.90 
   5   0  -1  175.38   18.40 
   5   0  -1  157.58   17.00 
   5   0  -1  159.88   17.80 
   5   0  -1  165.88   17.50 
   5   0  -1  139.29    9.50 
   5   0  -1  144.99   11.60 
   5   0  -1  151.18   19.60 
  -5   0   1  170.18   16.80 
  -5   0   1  140.89   11.70 
  -4   0   1    6.30    4.40 
   4   0  -1    3.70    4.50 
  -4   0   1   -2.80    2.30 
  -4   0   1   -1.80    2.90 
   4   0  -1   -0.10    3.70 
   4   0  -1   -0.10    2.10 
  -4   0   1    2.40    2.50 
   4   0  -1    0.70    3.60 
   4   0  -1    4.60    3.60 
  -4   0   1    2.30    2.70 
  -4   0   1    0.50    3.00 
  -4   0   1    0.00    3.10 
   4   0  -1    1.60    2.70 
  -4   0   1    1.90    3.50 
   4   0  -1   -1.10    2.60 
   4   0  -1    2.00    3.90 
   4   0  -1   -1.80    2.70 
   4   0  -1    2.50    4.00 
   4   0  -1   -3.40    2.80 
  -4   0   1   -3.30    2.80 
  -4   0   1   -6.80    2.60 
  -4   0   1    1.60    2.70 
  -4   0   1    2.50    2.70 
   4   0  -1   -2.90    2.30 
  -4   0   1   -3.00    2.20 
  -3   0   1  280.47   14.30 
  -3   0   1  278.97   16.20 
  -3   0   1  273.47   12.10 
  -3   0   1  280.17   15.50 
  -3   0   1  233.08   14.30 
   3   0  -1  252.17   14.70 
  -3   0   1  277.57   13.20 
  -3   0   1  296.67   16.20 
  -3   0   1  281.67   15.70 
   3   0  -1  285.07   12.80 
  -3   0   1  303.87   17.20 
  -3   0   1  272.97   13.40 
   3   0  -1  290.57   13.60 
  -3   0   1  263.47   14.70 
   3   0  -1  264.77   15.30 
  -3   0   1  229.08   15.60 
   3   0  -1  293.47   14.80 
   3   0  -1  298.27   17.00 
   3   0  -1  304.07   18.60 
  -3   0   1  268.57   13.40 
   3   0  -1  282.37   15.70 
   3   0  -1  271.67   15.40 
  -3   0   1  253.17   12.70 
  -3   0   1  256.07   12.90 
   3   0  -1  297.07   16.10 
  -3   0   1  296.67   15.60 
  -3   0   1  284.87   13.30 
  -3   0   1  275.97   14.10 
   3   0  -1  276.97   12.00 
   3   0  -1  254.07   17.20 
   3   0  -1  261.47   14.90 
  -3   0   1  300.77   15.90 
   3   0  -1  287.37   15.50 
  -3   0   1  275.57   15.60 
  -3   0   1  296.67   17.40 
  -3   0   1  279.37   15.60 
  -3   0   1  271.17   13.60 
  -3   0   1  275.17   15.20 
   3   0  -1  250.37   15.90 
   3   0  -1  285.87   14.20 
  -2   0   1    3.90    2.20 
   2   0  -1    5.40    2.20 
  -2   0   1   -0.10    2.20 
  -2   0   1    2.80    2.70 
   2   0  -1    8.70    3.60 
  -2   0   1    2.90    2.20 
  -2   0   1    2.80    2.50 
  -2   0   1    0.60    2.40 
   2   0  -1    7.10    3.00 
  -2   0   1    5.70    2.70 
   2   0  -1    2.60    2.30 
   2   0  -1    3.40    1.80 
  -2   0   1    2.80    2.60 
  -2   0   1    5.00    3.00 
  -2   0   1    1.50    1.90 
  -2   0   1    1.90    2.00 
  -2   0   1    2.10    1.90 
   2   0  -1    5.20    2.70 
  -2   0   1    4.90    2.40 
   2   0  -1    3.40    1.60 
   2   0  -1   11.90    4.10 
   2   0  -1    4.40    2.40 
  -2   0   1    7.20    3.00 
  -2   0   1    3.30    2.20 
   2   0  -1    2.80    2.40 
   2   0  -1    4.20    2.90 
  -2   0   1   10.70    3.60 
  -2   0   1    4.20    1.60 
   2   0  -1    9.50    3.20 
   2   0  -1    5.70    2.70 
   2   0  -1    5.70    2.90 
  -2   0   1    2.00    1.90 
   2   0  -1    5.70    2.70 
  -2   0   1    8.50    2.70 
  -2   0   1    1.70    2.50 
   2   0  -1   -1.20    1.80 
  -2   0   1    8.60    3.40 
  -2   0   1    3.80    2.20 
   2   0  -1    3.50    3.10 
   2   0  -1    2.00    2.80 
   2   0  -1    1.50    2.20 
  -2   0   1    2.20    2.50 
  -2   0   1    3.00    2.50 
  -1   0   1  387.66   14.50 
  -1   0   1  379.96   13.90 
  -1   0   1  388.26   14.70 
  -1   0   1  350.96   14.30 
  -1   0   1  415.96   13.60 
  -1   0   1  383.36   14.20 
  -1   0   1  348.47   13.80 
  -1   0   1  383.96   14.60 
   1   0  -1  409.96   14.20 
  -1   0   1  392.56   12.70 
  -1   0   1  430.56   16.40 
  -1   0   1  369.36   13.30 
  -1   0   1  406.66   13.80 
  -1   0   1  407.16   13.50 
  -1   0   1  407.76   15.60 
  -1   0   1  300.77   14.40 
   1   0   1  642.14   21.10 
  -1   0  -1  583.74   22.20 
  -2   0  -1    4.60    2.70 
  -2   0  -1    5.00    2.40 
   2   0   1    5.40    2.60 
   2   0   1    2.20    1.90 
   2   0   1    4.70    3.70 
   2   0   1    2.00    2.90 
  -2   0  -1    4.10    2.60 
  -2   0  -1    0.70    1.60 
   2   0   1    2.70    1.90 
   2   0   1    1.60    2.30 
   2   0   1    0.70    2.80 
  -2   0  -1   -2.50    2.10 
  -2   0  -1    1.50    2.00 
  -2   0  -1    2.10    2.30 
  -2   0  -1    2.90    3.10 
   2   0   1    5.10    2.90 
   2   0   1    1.90    2.10 
   2   0   1    1.40    2.10 
   2   0   1    3.90    2.60 
   2   0   1    2.20    2.30 
  -2   0  -1    4.30    2.40 
   2   0   1   -0.60    2.00 
  -2   0  -1    2.50    2.60 
  -2   0  -1    1.80    3.00 
   2   0   1    2.20    1.80 
   2   0   1    4.70    2.40 
  -2   0  -1    1.80    2.40 
  -2   0  -1    4.30    2.00 
   2   0   1   -0.10    2.00 
  -2   0  -1    2.50    2.40 
  -2   0  -1    1.90    2.10 
  -2   0  -1   -0.70    2.40 
  -2   0  -1    4.20    2.30 
  -2   0  -1    4.70    2.10 
   2   0   1    3.00    3.00 
   2   0   1    3.90    2.40 
   2   0   1    3.00    2.90 
  -2   0  -1   -0.30    2.30 
  -2   0  -1    2.80    2.40 
  -2   0  -1    6.40    3.50 
   2   0   1    2.90    2.20 
  -2   0  -1   -0.40    2.00 
   2   0   1    3.60    2.70 
  -2   0  -1    2.20    2.20 
   3   0   1 1175.78   43.60 
  -3   0  -1 1214.78   44.80 
   3   0   1 1189.88   44.20 
  -3   0  -1 1166.38   40.20 
   3   0   1 1136.49   40.70 
  -3   0  -1 1149.48   43.00 
  -3   0  -1 1150.78   41.50 
  -3   0  -1 1144.59   40.90 
   3   0   1 1134.09   42.00 
  -3   0  -1 1129.69   41.60 
   3   0   1 1135.59   42.30 
   3   0   1 1193.98   41.20 
   3   0   1 1151.48   44.60 
  -3   0  -1 1185.18   40.90 
   3   0   1 1217.48   41.30 
   3   0   1 1140.79   44.40 
  -3   0  -1 1234.28   44.70 
  -3   0  -1 1136.29   41.70 
  -3   0  -1 1143.19   40.30 
   3   0   1 1165.98   48.10 
   3   0   1 1164.88   45.20 
   3   0   1 1187.48   44.20 
   3   0   1 1189.28   44.40 
  -3   0  -1 1111.19   41.00 
  -3   0  -1 1142.49   42.30 
   3   0   1 1126.89   44.30 
   3   0   1 1183.48   39.70 
  -3   0  -1 1194.18   43.70 
  -3   0  -1 1152.58   43.70 
  -3   0  -1 1134.19   44.80 
  -3   0  -1 1111.79   44.10 
  -3   0  -1 1112.39   40.40 
  -3   0  -1 1164.58   41.30 
  -3   0  -1 1156.38   41.60 
   3   0   1 1119.89   40.50 
  -3   0  -1 1126.79   40.20 
   3   0   1 1119.09   41.00 
   3   0   1 1126.79   39.50 
  -3   0  -1 1152.08   43.60 
   3   0   1 1200.58   42.10 
  -4   0  -1    5.20    3.80 
  -4   0  -1    1.20    3.00 
   4   0   1    1.70    3.00 
  -4   0  -1    5.20    3.90 
   4   0   1    3.60    3.50 
  -4   0  -1    5.30    3.70 
  -4   0  -1    0.00    2.80 
  -4   0  -1    0.10    2.70 
  -4   0  -1   -0.90    3.00 
  -4   0  -1   -0.80    2.70 
  -4   0  -1    4.90    4.30 
  -4   0  -1   -0.50    2.50 
   4   0   1    6.90    3.40 
   4   0   1    2.00    5.30 
  -4   0  -1    7.20    3.80 
  -4   0  -1    5.90    3.90 
  -4   0  -1    2.90    2.70 
   4   0   1    2.00    3.60 
   4   0   1    6.00    4.60 
   4   0   1    1.00    3.90 
   4   0   1    1.20    3.60 
   4   0   1    3.00    3.90 
  -4   0  -1    4.40    3.60 
   4   0   1    0.40    2.80 
  -4   0  -1    2.60    2.10 
   4   0   1   -0.80    3.40 
   4   0   1   -0.70    2.70 
  -4   0  -1    0.50    2.60 
   5   0   1  447.66   25.80 
  -5   0  -1  443.86   24.20 
  -5   0  -1  447.06   22.50 
   5   0   1  489.05   24.80 
  -5   0  -1  457.35   22.20 
   5   0   1  423.56   25.60 
   5   0   1  431.36   27.00 
  -5   0  -1  450.15   23.70 
   5   0   1  441.06   26.00 
  -5   0  -1  460.25   26.10 
  -5   0  -1  451.85   23.70 
   5   0   1  453.05   22.20 
   5   0   1  441.96   29.90 
  -5   0  -1  453.15   22.40 
   5   0   1  446.06   25.00 
  -5   0  -1  380.96   23.50 
  -5   0  -1  449.66   21.70 
   5   0   1  467.15   21.60 
   5   0   1  429.16   26.00 
  -5   0  -1  423.46   25.10 
  -5   0  -1  398.86   24.80 
  -5   0  -1  472.55   23.30 
  -5   0  -1  458.75   22.60 
   5   0   1  453.95   21.70 
   6   0   1    2.70    3.60 
  -6   0  -1   -0.60    4.20 
   6   0   1   -1.10    3.70 
  -6   0  -1   -2.00    4.00 
   6   0   1   12.40    8.50 
   6   0   1   -0.60    3.30 
   6   0   1   -4.30    4.70 
  -6   0  -1   -2.20    4.80 
  -6   0  -1   -3.70    4.00 
  -6   0  -1    1.30    5.40 
  -6   0  -1   -0.50    3.90 
  -6   0  -1    5.50    5.60 
   6   0   1    3.30    4.90 
   6   0   1    2.10    3.90 
   6   0   1   -5.40    3.60 
  -6   0  -1    2.00    4.40 
   6   0   1   -1.40    5.30 
  -6   0  -1   -1.70    3.70 
   6   0   1    3.80    4.80 
  -6   0  -1    0.70    3.90 
  -6   0  -1    0.90    4.00 
  -7   0  -1 2752.32  100.09 
   7   0   1 2768.42  110.39 
  -7   0  -1 2787.22   99.49 
   7   0   1 2763.22  114.39 
  -7   0  -1 2686.93   99.69 
   7   0   1 2754.82  106.39 
  -7   0  -1 2812.62  100.69 
   7   0   1 2738.03   99.09 
   7   0   1 2801.22   96.99 
  -7   0  -1 2802.72  105.99 
   7   0   1 2729.33  107.09 
   7   0   1 2750.52  100.99 
  -7   0  -1 2693.43  102.79 
   7   0   1 2951.20  103.89 
  -7   0  -1 2858.01   99.39 
   7   0   1 2799.02  105.59 
  -7   0  -1 2779.12  106.19 
  -7   0  -1 3048.50  112.99 
   7   0   1 2788.72  107.29 
  -7   0  -1 2696.83  106.49 
   8   0   1   -1.00    5.80 
   8   0   1    5.10    7.70 
   8   0   1   -6.80    5.10 
  -8   0  -1   -4.80    4.90 
   8   0   1   -3.50    6.60 
  -8   0  -1    6.70    6.00 
  -8   0  -1   -1.80    4.90 
  -8   0  -1    5.40    8.00 
   8   0   1    0.10    6.20 
   8   0   1    2.30    5.50 
  -8   0  -1    0.80    5.90 
   8   0   1    6.20    8.20 
  -8   0  -1   -1.80    5.00 
   8   0   1  -11.00    7.70 
   8   0   1    3.00    6.20 
  -8   0  -1   -0.90    5.60 
  -8   0  -1   -3.90    5.00 
  -8   0  -1    9.70    6.50 
  -9   0  -1 1305.77   65.69 
   9   0   1 1292.77   64.49 
  -9   0  -1 1334.67   68.49 
  -9   0  -1 1359.76   62.99 
  -9   0  -1 1321.17   70.39 
   9   0   1 1314.17   66.99 
  -9   0  -1 1295.87   66.49 
   9   0   1 1303.27   70.29 
  -9   0  -1 1338.07   58.59 
   9   0   1 1372.06   69.09 
  -9   0  -1 1366.56   66.09 
  -9   0  -1 1240.88   58.49 
   9   0   1 1363.06   75.69 
  10   0   1    8.10   12.90 
 -10   0  -1   -2.10    7.00 
 -10   0  -1   -4.50    7.80 
  10   0   1    7.60   11.00 
  10   0   1   -2.40    9.80 
 -10   0  -1   12.50   11.20 
 -10   0  -1    1.70    9.50 
  10   0   1   -3.10    7.30 
 -10   0  -1    0.10    9.20 
 -10   0  -1   -4.80    9.50 
  10   0   1   -3.50    7.30 
 -10   0  -1    4.00    9.00 
  10  -1  -1  527.75   41.80 
  10  -1  -1  507.15   41.90 
 -10  -1   1  604.54   33.50 
 -10  -1   1  529.65   40.30 
  10  -1  -1  648.64   62.59 
 -10  -1   1  542.45   44.20 
 -10  -1   1  581.94   42.60 
 -10  -1   1  519.75   38.60 
  10  -1  -1  625.14   47.30 
 -10  -1   1  632.04   40.90 
  10  -1  -1  553.34   41.30 
  10   1  -1  558.64   54.09 
  10   1  -1  627.84   44.00 
  10   1  -1  519.55   43.10 
 -10   1   1  572.14   35.90 
 -10   1   1  600.04   41.50 
  10   1  -1  544.05   38.50 
 -10   1   1  542.95   40.80 
 -10   1   1  639.04   38.30 
 -10   1   1  589.44   47.00 
  10   1  -1  487.85   40.40 
 -10   1   1  559.34   41.30 
  -9  -1   1    5.50    6.90 
   9  -1  -1    8.20    6.60 
   9  -1  -1   -2.90    8.40 
  -9  -1   1    2.40    6.70 
  -9  -1   1    7.40    8.00 
   9  -1  -1   -0.60    7.70 
  -9  -1   1    4.90    8.40 
  -9  -1   1   -2.70    5.20 
  -9  -1   1   12.40    8.30 
   9  -1  -1   13.60   11.60 
   9  -1  -1   13.20   10.00 
   9  -1  -1   -3.10    5.90 
  -9   1   1    4.30    7.80 
  -9   1   1    3.40    7.40 
   9   1  -1   11.60    9.10 
  -9   1   1    9.60    8.30 
   9   1  -1   -0.30    8.20 
   9   1  -1   -2.10    6.00 
  -9   1   1    0.70    7.80 
   9   1  -1    2.40    7.00 
   9   1  -1    0.70    6.50 
  -9   1   1    3.60    6.90 
  -9   1   1    7.60    7.60 
  -9   1   1   11.90    9.70 
  -8  -1   1  622.04   38.40 
   8  -1  -1  580.44   33.90 
   8  -1  -1  586.04   40.60 
   8  -1  -1  565.04   36.90 
  -8  -1   1  615.24   30.60 
   8  -1  -1  537.15   36.50 
  -8  -1   1  589.14   35.70 
  -8  -1   1  576.34   34.90 
  -8  -1   1  594.54   29.80 
   8  -1  -1  631.74   39.30 
  -8  -1   1  572.94   38.80 
  -8  -1   1  589.54   36.90 
   8  -1  -1  593.64   43.90 
   8  -1  -1  621.24   38.70 
   8   1  -1  615.84   43.00 
   8   1  -1  555.34   39.10 
  -8   1   1  563.14   36.50 
   8   1  -1  597.04   31.00 
  -8   1   1  602.14   34.00 
  -8   1   1  511.75   35.10 
  -8   1   1  616.94   41.30 
   8   1  -1  597.04   29.60 
  -8   1   1  571.64   29.50 
   8   1  -1  549.54   37.70 
   8   1  -1  515.75   33.90 
  -8   1   1  532.95   35.90 
  -8   1   1  636.84   34.30 
   8   1  -1  579.24   37.90 
  -8   1   1  593.64   32.70 
   8   1  -1  586.04   33.80 
  -7  -1   1  111.89   16.00 
  -7  -1   1  127.59   17.60 
  -7  -1   1  112.49   18.20 
  -7  -1   1  117.29   12.80 
   7  -1  -1   86.09   15.30 
   7  -1  -1  119.39   15.60 
  -7  -1   1  135.89   13.70 
   7  -1  -1  114.39   15.10 
   7  -1  -1  118.49   17.90 
   7  -1  -1  100.49   16.70 
  -7  -1   1   87.79   15.90 
   7  -1  -1   99.89   17.30 
  -7  -1   1   97.59   17.00 
  -7  -1   1  123.59   15.10 
   7  -1  -1   82.29   18.20 
   7  -1  -1  103.19    8.60 
  -7  -1   1  139.99   13.40 
   7  -1  -1  156.08   22.70 
   7   1  -1  108.29   15.50 
  -7   1   1  119.49   19.10 
  -7   1   1  111.29   12.80 
  -7   1   1  119.09   14.70 
   7   1  -1  119.09   20.40 
  -7   1   1   92.79   15.00 
  -7   1   1  102.49   16.70 
  -7   1   1  126.59   16.60 
  -7   1   1  106.39   16.10 
   7   1  -1  128.09   19.30 
  -7   1   1  115.49   12.00 
   7   1  -1  106.59   13.50 
   7   1  -1  106.29   18.30 
   7   1  -1  132.59   14.00 
  -7   1   1   88.79   14.60 
   7   1  -1  150.58   19.10 
   7   1  -1  117.69   16.80 
  -7   1   1  109.19   14.50 
   7   1  -1  106.99   17.50 
  -6  -1   1 1984.70   74.49 
  -6  -1   1 1868.61   74.69 
   6  -1  -1 1914.41   75.69 
  -6  -1   1 1862.31   66.49 
   6  -1  -1 1850.21   75.59 
  -6  -1   1 2011.20   77.99 
   6  -1  -1 1957.20   68.89 
   6  -1  -1 1882.31   69.49 
   6  -1  -1 2041.60   77.69 
  -6  -1   1 1844.52   75.59 
   6  -1  -1 1833.42   75.39 
   6  -1  -1 1920.91   71.79 
   6  -1  -1 1932.31   72.49 
  -6  -1   1 1826.42   72.79 
  -6  -1   1 1843.92   72.89 
   6  -1  -1 1874.91   78.29 
   6  -1  -1 1883.71   81.29 
  -6   1   1 1832.32   70.79 
   6   1  -1 1948.80   78.59 
   6   1  -1 1897.91   67.89 
  -6   1   1 1817.52   74.39 
  -6   1   1 1880.11   70.89 
  -6   1   1 1801.12   74.69 
   6   1  -1 1900.51   76.09 
  -6   1   1 2012.10   75.49 
   6   1  -1 1964.90   73.39 
  -6   1   1 1828.02   70.39 
   6   1  -1 1882.61   80.49 
  -6   1   1 1974.60   79.79 
   6   1  -1 1907.51   73.59 
  -6   1   1 1925.11   68.89 
   6   1  -1 1947.41   69.09 
  -6   1   1 1880.51   70.49 
  -6   1   1 1878.91   67.39 
  -6   1   1 1918.51   72.09 
   6   1  -1 1900.11   76.09 
   6   1  -1 1911.11   74.19 
  -6   1   1 1807.22   75.59 
   5  -1  -1  268.27   17.00 
  -5  -1   1  290.07   19.70 
   5  -1  -1  265.07   19.20 
   5  -1  -1  297.47   20.40 
  -5  -1   1  276.97   18.50 
   5  -1  -1  238.78   15.90 
  -5  -1   1  274.57   18.40 
   5  -1  -1  284.27   20.80 
   5  -1  -1  290.47   15.70 
   5  -1  -1  283.27   18.00 
   5  -1  -1  249.58   18.80 
   5  -1  -1  285.17   18.00 
   5  -1  -1  249.18   17.00 
   5  -1  -1  256.37   19.10 
  -5  -1   1  268.67   15.80 
   5  -1  -1  270.77   22.30 
  -5  -1   1  305.57   19.70 
  -5  -1   1  298.77   15.10 
  -5  -1   1  281.07   20.20 
   5  -1  -1  251.97   12.50 
   5  -1  -1  285.57   16.20 
  -5  -1   1  245.58   18.80 
   5   1  -1  271.97   20.30 
   5   1  -1  259.27   19.20 
  -5   1   1  278.17   16.50 
  -5   1   1  282.97   17.30 
   5   1  -1  259.97   18.50 
   5   1  -1  305.47   20.60 
  -5   1   1  267.27   16.10 
   5   1  -1  281.77   17.90 
   5   1  -1  276.37   22.50 
  -5   1   1  274.27   17.10 
   5   1  -1  278.87   15.80 
  -5   1   1  245.68   18.20 
  -5   1   1  274.47   15.70 
  -5   1   1  280.27   17.60 
  -5   1   1  286.97   18.00 
  -5   1   1  288.57   19.50 
  -5   1   1  283.67   21.40 
  -5   1   1  291.27   19.80 
  -5   1   1  271.77   17.40 
   5   1  -1  279.37   18.40 
   5   1  -1  256.97   15.40 
  -5   1   1  284.47   20.10 
  -4  -1   1 5255.57  187.38 
  -4  -1   1 6065.69  186.68 
   4  -1  -1 5766.22  186.48 
   4  -1  -1 5555.44  181.98 
   4  -1  -1 5633.64  185.98 
  -4  -1   1 5827.12  184.88 
   4  -1  -1 5613.24  186.58 
  -4  -1   1 5688.53  180.78 
   4  -1  -1 5656.23  187.98 
   4  -1  -1 5679.03  182.68 
  -4  -1   1 5712.13  180.38 
  -4  -1   1 5735.53  180.48 
  -4  -1   1 5791.32  185.68 
  -4  -1   1 6040.80  187.38 
  -4  -1   1 5693.53  186.48 
   4  -1  -1 5750.92  184.38 
  -4  -1   1 5631.94  181.38 
   4  -1  -1 5641.24  183.88 
  -4  -1   1 5844.92  184.48 
   4  -1  -1 5593.94  186.18 
  -4  -1   1 5692.33  185.78 
   4  -1  -1 5583.54  189.08 
   4  -1  -1 5582.14  181.28 
   4  -1  -1 5783.62  185.58 
  -4  -1   1 5698.93  181.58 
   4  -1  -1 5550.44  182.58 
  -4  -1   1 5641.64  183.08 
  -4   1   1 5523.85  188.68 
   4   1  -1 5988.30  181.38 
  -4   1   1 5762.22  182.08 
  -4   1   1 5786.42  184.18 
   4   1  -1 5789.82  183.88 
  -4   1   1 5869.71  182.18 
  -4   1   1 5584.64  186.58 
   4   1  -1 5745.62  189.98 
   4   1  -1 5713.33  181.48 
  -4   1   1 5444.76  183.88 
   4   1  -1 5782.22  186.18 
  -4   1   1 5771.92  186.08 
  -4   1   1 5720.03  183.18 
  -4   1   1 5695.93  186.38 
   4   1  -1 5700.73  188.38 
  -4   1   1 5755.32  183.08 
  -4   1   1 5701.43  183.18 
  -4   1   1 5657.03  179.88 
   4   1  -1 5672.83  185.38 
  -4   1   1 5552.34  183.48 
   4   1  -1 5772.42  186.68 
   4   1  -1 5877.01  184.38 
   4   1  -1 5837.32  188.28 
   4   1  -1 5833.32  186.68 
   4   1  -1 5906.21  191.98 
  -4   1   1 5656.63  185.38 
   3  -1  -1  457.95   22.50 
  -3  -1   1  435.46   22.90 
   3  -1  -1  430.06   19.90 
  -3  -1   1  425.56   21.30 
  -3  -1   1  486.15   23.50 
   3  -1  -1  474.15   24.00 
  -3  -1   1  476.55   20.20 
  -3  -1   1  455.15   24.40 
   3  -1  -1  459.95   20.20 
   3  -1  -1  446.46   21.40 
  -3  -1   1  498.45   21.40 
   3  -1  -1  418.86   21.70 
   3  -1  -1  485.35   24.90 
   3  -1  -1  479.35   23.00 
   3  -1  -1  483.15   22.40 
  -3  -1   1  471.05   20.50 
  -3  -1   1  484.55   20.00 
  -3  -1   1  508.65   22.60 
   3  -1  -1  488.25   23.60 
  -3  -1   1  489.75   24.10 
   3  -1  -1  489.15   20.90 
  -3  -1   1  518.45   23.20 
  -3  -1   1  466.35   18.90 
  -3  -1   1  442.46   21.30 
   3  -1  -1  476.65   21.90 
   3  -1  -1  481.75   22.30 
   3  -1  -1  455.25   22.10 
  -3  -1   1  517.65   24.60 
  -3  -1   1  537.05   23.20 
   3  -1  -1  463.75   22.50 
  -3  -1   1  471.85   19.60 
  -3  -1   1  529.75   23.30 
  -3  -1   1  452.95   20.70 
  -3  -1   1  499.35   23.10 
   3   1  -1  486.25   19.40 
  -3   1   1  494.95   19.80 
  -3   1   1  489.55   20.90 
   3   1  -1  498.05   25.60 
  -3   1   1  454.15   22.40 
  -3   1   1  502.55   24.50 
  -3   1   1  452.25   21.70 
   3   1  -1  480.45   20.30 
  -3   1   1  481.85   22.60 
   3   1  -1  520.15   22.40 
   3   1  -1  477.25   20.80 
  -3   1   1  465.55   21.70 
  -3   1   1  464.45   22.40 
  -3   1   1  495.45   27.90 
  -3   1   1  506.55   23.10 
  -3   1   1  470.25   21.60 
   3   1  -1  490.95   23.20 
  -3   1   1  462.25   21.10 
  -3   1   1  450.55   20.80 
  -3   1   1  471.85   21.10 
   3   1  -1  499.95   22.40 
   3   1  -1  485.05   22.70 
  -3   1   1  485.95   22.00 
   3   1  -1  459.05   21.40 
  -3   1   1  444.26   19.80 
   3   1  -1  461.85   22.40 
  -3   1   1  438.46   22.00 
  -3   1   1  458.85   22.70 
  -3   1   1  470.65   19.30 
   3   1  -1  482.25   21.00 
  -3   1   1  465.85   21.80 
   3   1  -1  458.45   23.00 
   3   1  -1  471.55   24.10 
  -3   1   1  494.25   24.20 
  -3   1   1  423.46   21.90 
  -2  -1   1 2029.70   67.89 
  -2  -1   1 2143.19   69.19 
   2  -1  -1 2098.29   70.69 
  -2  -1   1 2113.69   68.69 
  -2  -1   1 2104.49   70.19 
   2  -1  -1 2092.09   70.69 
   2  -1  -1 1861.81   71.59 
   2  -1  -1 2142.89   69.79 
  -2  -1   1 2082.79   69.69 
  -2  -1   1 2109.59   67.89 
   2  -1  -1 2105.99   70.99 
  -2  -1   1 2151.78   68.89 
   2  -1  -1 2107.39   69.89 
  -2  -1   1 2181.58   73.19 
   2  -1  -1 2112.19   70.39 
   2  -1  -1 2204.58   71.39 
   2  -1  -1 2067.39   71.49 
  -2  -1   1 2218.48   71.19 
   2  -1  -1 2148.29   70.59 
  -2  -1   1 2071.09   69.09 
   2  -1  -1 2102.39   69.59 
  -2  -1   1 2058.09   71.99 
  -2  -1   1 2192.18   68.19 
  -2  -1   1 2113.79   70.29 
   2  -1  -1 2155.58   72.29 
  -2  -1   1 2194.88   71.19 
  -2  -1   1 2282.87   70.59 
  -2  -1   1 2169.68   73.19 
   2  -1  -1 2077.99   70.99 
  -2  -1   1 2102.49   69.19 
   2  -1  -1 2093.29   71.39 
   2  -1  -1 2088.09   69.29 
   2  -1  -1 2057.69   70.69 
   2  -1  -1 2122.79   68.29 
   2  -1  -1 2121.79   70.69 
  -2  -1   1 2083.59   72.09 
  -2  -1   1 2097.19   70.29 
  -2  -1   1 2094.09   68.69 
  -2  -1   1 2113.89   70.89 
   2  -1  -1 2166.18   71.59 
   2  -1  -1 2127.39   68.99 
  -2  -1   1 2372.46   72.49 
   2  -1  -1 2119.49   72.49 
   2  -1  -1 2181.48   70.99 
  -2  -1   1 2113.39   70.49 
  -2  -1   1 2003.60   71.89 
   2   1  -1 2042.80   72.09 
   2   1  -1 2209.18   68.99 
  -2   1   1 2044.80   70.89 
  -2   1   1 2145.39   71.99 
  -2   1   1 2072.09   69.99 
   2   1  -1 2153.28   71.09 
  -2   1   1 2099.69   69.89 
  -2   1   1 2069.09   70.49 
   2   1  -1 2195.08   71.29 
  -2   1   1 2136.19   70.89 
  -2   1   1 2086.09   71.09 
   2   1  -1 2253.17   73.99 
  -2   1   1 2102.29   69.99 
  -2   1   1 2114.59   69.99 
  -2   1   1 2062.79   68.09 
   2   1  -1 2260.47   71.79 
   2   1  -1 2275.67   73.39 
  -2   1   1 2061.49   67.99 
  -2   1   1 2060.59   70.69 
  -2   1   1 2043.70   69.89 
  -2   1   1 2086.09   70.99 
   2   1  -1 2003.10   70.29 
  -2   1   1 2089.99   70.39 
  -2   1   1 2094.49   68.99 
  -2   1   1 2140.39   69.09 
   2   1  -1 2226.38   71.69 
   2   1  -1 2194.78   69.89 
   2   1  -1 2124.39   69.39 
   2   1  -1 2046.60   69.19 
  -2   1   1 2225.08   72.69 
   2   1  -1 2088.69   71.89 
   2   1  -1 2045.00   70.19 
  -2   1   1 2129.49   70.59 
  -2   1   1 2082.89   70.99 
   2   1  -1 2128.89   68.89 
   2   1  -1 2144.09   68.29 
  -2   1   1 2224.78   71.49 
  -2   1   1 2162.88   70.49 
  -2   1   1 2088.99   70.49 
   2   1  -1 2125.49   70.59 
  -2   1   1 1908.31   71.69 
   1  -1  -1  166.18    8.90 
  -1  -1   1  170.08    7.50 
  -1  -1   1  177.28    8.30 
  -1  -1   1  160.38    8.30 
  -1  -1   1  169.48    8.40 
  -1  -1   1  161.88    7.90 
  -1  -1   1  173.08    8.20 
  -1  -1   1  178.08    8.90 
  -1  -1   1  172.48    7.90 
  -1  -1   1  155.28    8.80 
   1  -1  -1  167.18    8.70 
  -1  -1   1  170.58    7.70 
  -1  -1   1  168.68    8.70 
   1  -1  -1  166.88    8.60 
   1  -1  -1  136.19    7.90 
   1  -1  -1  163.28    9.10 
   1  -1  -1  161.38    8.40 
  -1  -1   1  170.98   10.30 
  -1  -1   1  187.38    9.30 
  -1  -1   1  174.78    9.40 
   1  -1  -1  171.68    8.60 
   1  -1  -1  147.59    6.90 
   1  -1  -1  165.88    8.40 
   1  -1  -1  177.88    8.80 
  -1  -1   1  175.18    7.10 
   1  -1  -1  165.38    8.20 
   1  -1  -1  163.48    8.20 
  -1  -1   1  168.08    7.10 
  -1  -1   1  182.48    8.30 
   1  -1  -1  121.39    7.60 
   1  -1  -1  122.99    7.70 
  -1  -1   1  164.98    8.30 
  -1  -1   1  170.38    8.30 
   1  -1  -1  143.49    8.60 
   1  -1  -1  143.19    7.80 
   1  -1  -1  166.98    8.60 
   1  -1  -1  169.28    8.80 
  -1  -1   1  157.08    7.80 
  -1  -1   1  179.08    7.30 
   1  -1  -1  167.18    8.80 
   1   1  -1  174.58    8.60 
  -1   1   1  166.78    8.30 
   1   1  -1  159.08    7.80 
  -1   1   1  160.88    8.10 
  -1   1   1  160.88    8.30 
   1   1  -1  194.98    9.60 
   1   1  -1  176.48    8.20 
  -1   1   1  176.18    8.50 
  -1   1   1  167.88    8.50 
  -1   1   1  174.18    9.20 
   1   1  -1  173.58    8.40 
  -1   1   1  124.09    7.70 
  -1   1   1  174.08    8.60 
  -1   1   1  172.88    8.90 
   1   1  -1  156.18    6.80 
  -1   1   1  170.88    8.70 
  -1   1   1  175.18    8.60 
   1   1  -1  158.98    8.00 
   1   1  -1  181.58    8.70 
  -1   1   1  167.58    8.50 
   1   1  -1  148.89    8.60 
  -1   1   1  165.68    8.10 
  -1   1   1  178.18    9.10 
  -1   1   1  169.18    8.60 
   1   1  -1  173.28    7.50 
  -1   1   1  159.88    8.00 
  -1   1   1  180.18    9.10 
   1   1  -1  161.48    8.60 
  -1   1   1  154.38    8.50 
  -1   1   1  156.78    8.30 
   1   1  -1  168.08    9.30 
  -1   1   1  160.48    8.70 
   1   1  -1  160.88    8.30 
   1   1  -1  161.18    8.40 
  -1   1   1  153.68    8.80 
   0  -1  -1 6756.82  207.08 
   0  -1  -1 7268.17  207.48 
   0  -1  -1 7152.28  208.08 
   0  -1   1 6963.20  208.78 
   0  -1  -1 6961.50  208.08 
   0  -1   1 6927.21  208.78 
   0  -1   1 6251.57  208.18 
   0  -1   1 6677.53  208.78 
   0  -1   1 6252.47  208.68 
   0  -1   1 7295.87  207.98 
   0  -1  -1 6625.14  208.18 
   0  -1  -1 6554.34  209.78 
   0  -1  -1 7152.98  208.38 
   0  -1   1 7098.09  208.28 
   0  -1  -1 7069.39  208.08 
   0  -1   1 7375.66  208.38 
   0  -1   1 5795.72  207.48 
   0  -1   1 6937.81  213.58 
   0  -1   1 7077.59  207.98 
   0  -1  -1 7001.90  207.98 
   0  -1  -1 7113.59  208.48 
   0  -1  -1 6978.20  208.18 
   0  -1  -1 6921.71  207.58 
   0  -1  -1 6589.34  208.98 
   0  -1   1 6922.51  208.38 
   0  -1   1 6509.75  208.48 
   0   1   1 6446.96  208.28 
   0   1   1 6812.42  208.48 
   0   1   1 6728.83  209.68 
   0   1  -1 6100.89  208.18 
   0   1   1 6145.29  208.38 
   0   1  -1 6081.69  208.28 
   0   1  -1 6242.58  209.88 
   0   1  -1 7030.30  208.98 
   0   1   1 6579.34  208.38 
   0   1  -1 6768.62  208.18 
   0   1  -1 6944.51  207.68 
   1  -1   1  295.07   12.40 
   1  -1   1  306.27   12.90 
  -1  -1  -1  323.47   14.50 
   1  -1   1  327.17   13.60 
  -1  -1  -1  309.07   13.70 
  -1  -1  -1  331.87   12.50 
   1  -1   1  275.87   12.20 
  -1  -1  -1  337.67   13.70 
  -1  -1  -1  303.67   13.40 
  -1  -1  -1  303.67   12.20 
   1  -1   1  317.27   13.40 
  -1  -1  -1  334.27   13.10 
  -1  -1  -1  319.27   12.00 
   1  -1   1  295.37   12.80 
  -1  -1  -1  316.17   13.50 
   1  -1   1  305.27   13.70 
   1  -1   1  320.67   13.70 
   1  -1   1  316.47   13.70 
  -1  -1  -1  323.57   13.30 
  -1  -1  -1  303.47   12.80 
  -1  -1  -1  309.87   12.40 
   1  -1   1  305.37   12.80 
  -1  -1  -1  306.77   13.60 
   1  -1   1  304.07   13.50 
   1  -1   1  328.27   14.50 
  -1  -1  -1  307.37   12.10 
   1  -1   1  316.47   13.20 
   1  -1   1  320.77   13.90 
   1  -1   1  314.87   12.40 
   1  -1   1  316.07   13.50 
   1  -1   1  320.87   13.70 
   1  -1   1  305.87   12.30 
   1  -1   1  304.67   13.20 
   1  -1   1  311.97   12.70 
   1  -1   1  283.67   14.20 
  -1  -1  -1  296.67   12.80 
  -1  -1  -1  314.77   13.10 
  -1  -1  -1  305.47   11.40 
   1  -1   1  317.47   13.20 
  -1  -1  -1  306.87   13.40 
  -1  -1  -1  325.57   14.70 
  -1  -1  -1  310.97   12.70 
   1  -1   1  252.47   11.20 
  -1  -1  -1  324.77   13.80 
  -1   1  -1  305.27   13.10 
  -1   1  -1  302.47   13.40 
  -1   1  -1  325.97   13.90 
  -1   1  -1  311.17   13.30 
  -1   1  -1  313.57   13.30 
   1   1   1  315.37   12.90 
  -1   1  -1  288.57   14.20 
  -1   1  -1  314.17   13.60 
  -1   1  -1  303.27   13.30 
   1   1   1  314.37   12.70 
  -1   1  -1  320.37   13.00 
   1   1   1  311.67   12.40 
   1   1   1  302.67   11.90 
   1   1   1  299.37   13.40 
   1   1   1  316.37   12.10 
  -1   1  -1  314.27   11.70 
   1   1   1  261.07   12.30 
   1   1   1  288.37   12.70 
  -1   1  -1  312.37   12.90 
  -1   1  -1  296.37   13.60 
  -1   1  -1  297.47   13.20 
   1   1   1  330.57   13.70 
  -1   1  -1  324.27   14.20 
  -1   1  -1  340.67   13.70 
   1   1   1  315.97   13.00 
   1   1   1  338.37   13.70 
  -1   1  -1  322.47   12.90 
  -1   1  -1  300.57   12.60 
  -1   1  -1  294.27   12.90 
   1   1   1  301.67   13.30 
   1   1   1  306.37   12.30 
   1   1   1  322.17   14.70 
   1   1   1  289.27   13.00 
   1   1   1  315.77   14.80 
  -1   1  -1  306.37   13.50 
   2  -1   1 9456.15  292.57 
   2  -1   1 9441.86  294.57 
  -2  -1  -1 9607.74  295.57 
  -2  -1  -1 9495.15  295.37 
   2  -1   1 9521.95  293.17 
  -2  -1  -1 9931.11  294.67 
   2  -1   1 9675.93  293.97 
   2  -1   1 9697.13  295.27 
   2  -1   1 9854.51  294.87 
  -2  -1  -1 9279.27  298.67 
   2  -1   1 9035.80  292.37 
   2  -1   1 9755.72  292.47 
   2  -1   1 8361.96  295.57 
  -2  -1  -1 9594.14  296.67 
  -2  -1  -1 9920.21  295.27 
  -2  -1  -1 9605.24  295.97 
   2  -1   1 9494.35  297.17 
  -2  -1  -1 9497.65  295.97 
  -2  -1  -1 9967.40  298.57 
  -2  -1  -1 9483.15  292.47 
   2  -1   1 9439.36  295.27 
  -2  -1  -1 9572.94  293.27 
   2  -1   1 9465.35  297.77 
   2  -1   1 9693.93  295.87 
  -2  -1  -1 9194.08  294.47 
  -2  -1  -1 9294.87  293.87 
   2  -1   1 9672.53  295.27 
   2  -1   1 9017.20  294.57 
   2  -1   1 9839.62  295.47 
   2  -1   1 9529.55  294.87 
  -2  -1  -1 9252.67  295.57 
  -2  -1  -1 9106.89  292.87 
   2  -1   1 9252.07  295.57 
  -2  -1  -1 9464.35  293.97 
   2  -1   1 9424.96  296.27 
  -2  -1  -1 9522.55  294.97 
   2  -1   1 9477.85  296.37 
   2  -1   1 9470.85  296.37 
  -2  -1  -1 9264.37  295.47 
   2  -1   1 9286.97  295.27 
  -2  -1  -1 9195.28  298.57 
   2  -1   1 9453.25  294.77 
   2  -1   1 9519.05  298.87 
  -2  -1  -1 9478.25  295.07 
   2   1   1 9490.75  295.97 
  -2   1  -1 9385.96  292.57 
  -2   1  -1 9773.72  295.77 
   2   1   1 9664.63  294.37 
  -2   1  -1 9508.75  295.07 
  -2   1  -1 9147.79  295.87 
   2   1   1 9999.00  295.87 
   2   1   1 9274.37  294.97 
  -2   1  -1 9720.53  295.97 
   2   1   1 9947.60  296.27 
  -2   1  -1 9372.46  295.57 
   2   1   1 9846.92  295.37 
   2   1   1 9288.47  298.77 
  -2   1  -1 9740.93  298.67 
   2   1   1 9712.13  293.27 
   2   1   1 9867.51  294.97 
   2   1   1 9266.57  298.47 
   2   1   1 9325.57  294.07 
  -2   1  -1 9539.25  293.87 
   2   1   1 9538.75  292.77 
  -2   1  -1 9325.47  294.77 
  -2   1  -1 9741.92  294.97 
  -2   1  -1 9344.07  296.07 
  -2   1  -1 9358.46  294.97 
  -2   1  -1 9483.35  295.17 
  -2   1  -1 9327.97  295.97 
  -2   1  -1 9526.85  294.97 
  -2   1  -1 9763.52  295.77 
  -2   1  -1 9388.26  293.77 
  -2   1  -1 9448.75  296.07 
  -2   1  -1 9450.75  297.37 
   2   1   1 9747.33  295.97 
   2   1   1 9926.81  294.97 
  -2   1  -1 9474.75  295.07 
  -2   1  -1 9595.44  293.17 
   2   1   1 9463.05  292.87 
  -2   1  -1 9568.44  296.57 
  -2   1  -1 9563.84  295.07 
   3  -1   1    1.50    3.10 
   3  -1   1    3.30    2.10 
   3  -1   1    5.00    3.80 
   3  -1   1    5.80    3.40 
   3  -1   1    4.50    3.40 
   3  -1   1    3.00    3.50 
  -3  -1  -1    0.50    3.10 
   3  -1   1    0.80    2.90 
  -3  -1  -1    1.90    2.70 
   3  -1   1    2.20    3.50 
  -3  -1  -1    2.60    4.40 
  -3  -1  -1    6.50    3.50 
   3  -1   1    0.20    2.70 
  -3  -1  -1    1.40    2.70 
  -3  -1  -1    0.90    2.50 
   3  -1   1   -0.30    2.30 
  -3  -1  -1   -1.50    3.10 
   3  -1   1    2.20    3.70 
  -3  -1  -1    3.30    3.80 
   3  -1   1    0.50    2.20 
  -3  -1  -1    2.20    2.70 
   3  -1   1    4.20    4.50 
  -3  -1  -1    0.90    2.50 
  -3  -1  -1    0.50    2.40 
  -3  -1  -1    0.70    2.10 
  -3  -1  -1   -2.50    2.60 
  -3  -1  -1    6.50    3.60 
   3  -1   1    5.20    3.10 
  -3  -1  -1    0.00    2.40 
   3  -1   1    1.80    2.90 
   3  -1   1    0.20    2.90 
   3  -1   1    0.10    3.00 
   3  -1   1   -1.20    3.60 
  -3  -1  -1    1.90    2.40 
   3   1   1    1.30    2.60 
   3   1   1    0.90    3.10 
  -3   1  -1    4.70    2.90 
   3   1   1   -0.20    3.20 
  -3   1  -1   -0.40    2.90 
   3   1   1    3.80    2.90 
   3   1   1    0.20    2.90 
   3   1   1    5.50    2.80 
  -3   1  -1    5.20    3.40 
  -3   1  -1    5.10    3.30 
  -3   1  -1    2.70    3.30 
   3   1   1   -0.20    2.70 
   3   1   1    5.80    3.50 
   3   1   1    3.20    4.40 
  -3   1  -1    1.40    2.90 
  -3   1  -1    3.60    3.30 
   3   1   1    0.50    3.00 
  -3   1  -1    3.50    2.80 
   3   1   1    1.90    2.30 
  -3   1  -1    1.20    3.40 
  -3   1  -1    6.30    3.30 
  -3   1  -1   -2.40    2.60 
   3   1   1   -0.10    2.70 
  -3   1  -1    1.90    2.70 
   3   1   1    1.50    3.70 
  -3   1  -1   -1.20    2.90 
  -3   1  -1    4.10    2.10 
  -3   1  -1    1.60    3.20 
  -3   1  -1    3.00    2.20 
  -3   1  -1    1.50    3.20 
   3   1   1    3.30    3.00 
  -4  -1  -1 2580.14   91.39 
   4  -1   1 2481.15   84.89 
   4  -1   1 2592.74   93.49 
   4  -1   1 2671.83   88.79 
   4  -1   1 2610.44   96.29 
   4  -1   1 2563.44   86.69 
   4  -1   1 2786.82   85.69 
  -4  -1  -1 2477.35   88.29 
   4  -1   1 2620.94   89.49 
   4  -1   1 2555.74   87.59 
   4  -1   1 2658.33   89.89 
   4  -1   1 2720.83   89.99 
   4  -1   1 2603.24   91.29 
  -4  -1  -1 2596.44   87.49 
  -4  -1  -1 2596.24   92.19 
   4  -1   1 2561.44   90.09 
  -4  -1  -1 2768.52   88.09 
  -4  -1  -1 2672.63   92.49 
  -4  -1  -1 2572.54   91.09 
  -4  -1  -1 2583.04   85.69 
  -4  -1  -1 2630.94   88.89 
   4  -1   1 2543.85   92.39 
  -4  -1  -1 2591.04   87.39 
   4  -1   1 2591.94   86.49 
   4  -1   1 2698.23   89.39 
   4  -1   1 2655.93   92.59 
   4  -1   1 2580.34   91.29 
  -4  -1  -1 2534.15   84.49 
  -4   1  -1 2664.43   83.69 
   4   1   1 2601.94   91.89 
   4   1   1 2710.03   87.99 
   4   1   1 2595.24   96.99 
  -4   1  -1 2550.94   89.59 
   4   1   1 2647.04   89.19 
  -4   1  -1 2618.84   89.99 
  -4   1  -1 2619.24   90.29 
   4   1   1 2653.23   88.89 
  -4   1  -1 2601.14   89.09 
  -4   1  -1 2510.65   87.09 
  -4   1  -1 2541.45   89.19 
   4   1   1 2720.63   85.59 
  -4   1  -1 2539.25   91.29 
  -4   1  -1 2650.73   91.49 
  -4   1  -1 2586.84   89.29 
   4   1   1 2569.14   91.99 
   4   1   1 2678.63   92.79 
  -4   1  -1 2456.85   91.89 
  -4   1  -1 2621.44   90.79 
  -4   1  -1 2604.84   86.79 
   4   1   1 2659.53   91.09 
   4   1   1 2656.73   88.79 
  -4   1  -1 2523.85   85.49 
   4   1   1 2572.64   93.19 
   4   1   1 2620.64   89.69 
   5  -1   1    5.20    4.40 
  -5  -1  -1   -0.40    3.20 
  -5  -1  -1    8.20    4.80 
  -5  -1  -1   -0.70    3.20 
  -5  -1  -1    3.10    4.00 
  -5  -1  -1    1.80    3.30 
   5  -1   1    0.80    5.70 
   5  -1   1   -0.60    3.90 
  -5  -1  -1    1.10    3.30 
   5  -1   1    4.20    3.80 
  -5  -1  -1    4.10    3.40 
   5  -1   1    1.80    4.00 
   5  -1   1    7.70    5.10 
   5  -1   1   -0.20    4.20 
   5  -1   1    6.30    4.20 
   5  -1   1    0.80    3.10 
  -5  -1  -1    2.70    3.20 
  -5  -1  -1    0.60    3.10 
   5  -1   1    2.50    4.20 
  -5  -1  -1   -0.50    3.70 
  -5  -1  -1   -0.70    3.00 
   5  -1   1    1.50    4.20 
  -5   1  -1    1.60    4.20 
  -5   1  -1   -2.00    3.70 
   5   1   1    7.90    5.20 
   5   1   1   -2.20    5.50 
   5   1   1   -0.40    2.90 
   5   1   1    2.50    3.70 
  -5   1  -1    3.10    4.70 
  -5   1  -1   -3.60    3.10 
   5   1   1    4.20    2.80 
   5   1   1    2.90    3.70 
  -5   1  -1    3.40    4.30 
  -5   1  -1    2.60    4.40 
   5   1   1    0.80    3.80 
   5   1   1    4.00    4.30 
  -5   1  -1    7.40    5.60 
  -5   1  -1    4.80    4.40 
  -5   1  -1    5.30    4.30 
  -5   1  -1   -2.40    3.10 
  -5   1  -1    1.20    4.10 
   5   1   1   -1.60    3.10 
  -5   1  -1    6.00    3.70 
   5   1   1    5.50    4.60 
   6  -1   1  200.98   17.20 
   6  -1   1  225.18   16.20 
   6  -1   1  251.27   22.00 
   6  -1   1  212.78   21.30 
  -6  -1  -1  226.08   19.10 
  -6  -1  -1  230.18   17.40 
  -6  -1  -1  234.88   18.10 
   6  -1   1  214.48   27.10 
   6  -1   1  263.07   26.00 
  -6  -1  -1  226.68   14.90 
  -6  -1  -1  238.08   19.50 
  -6  -1  -1  220.38   14.90 
   6  -1   1  225.48   24.10 
   6  -1   1  229.68   14.50 
  -6  -1  -1  211.48   15.00 
   6  -1   1  237.48   17.80 
   6  -1   1  224.98   19.40 
  -6  -1  -1  223.48   15.00 
  -6  -1  -1  197.98   21.30 
   6  -1   1  239.48   18.80 
  -6  -1  -1  232.58   15.30 
  -6  -1  -1  236.68   19.40 
   6   1   1  216.58   22.80 
  -6   1  -1  290.47   21.90 
  -6   1  -1  233.98   19.50 
  -6   1  -1  277.87   23.20 
  -6   1  -1  244.48   17.50 
  -6   1  -1  257.77   18.30 
   6   1   1  254.27   16.80 
   6   1   1  204.98   14.30 
  -6   1  -1  240.88   19.00 
  -6   1  -1  294.47   20.00 
   6   1   1  228.28   16.00 
   6   1   1  239.88   24.60 
   6   1   1  230.58   24.60 
   6   1   1  255.07   25.10 
   6   1   1  250.77   28.60 
  -6   1  -1  251.37   19.90 
   6   1   1  223.08   17.80 
  -6   1  -1  220.28   16.90 
  -6   1  -1  220.88   17.50 
  -6   1  -1  221.28   14.80 
   6   1   1  234.38   19.00 
   7  -1   1    5.60    7.70 
   7  -1   1   35.20   14.60 
  -7  -1  -1   -0.20    5.90 
  -7  -1  -1   12.30    8.50 
   7  -1   1   14.20    7.80 
   7  -1   1   11.20    5.00 
  -7  -1  -1   20.60    7.70 
  -7  -1  -1    6.50    7.00 
  -7  -1  -1   24.50    8.90 
  -7  -1  -1   16.00    5.70 
   7  -1   1   10.80    6.80 
  -7  -1  -1   14.30    5.70 
   7  -1   1   16.10    7.60 
   7  -1   1    4.90    7.30 
   7  -1   1    7.70    6.70 
  -7  -1  -1   18.40    6.20 
  -7  -1  -1   12.30    5.70 
   7  -1   1   12.40    6.00 
  -7   1  -1    7.10    6.30 
  -7   1  -1    9.10    6.60 
  -7   1  -1   13.40    7.80 
   7   1   1    8.30    5.40 
  -7   1  -1   25.30    7.60 
   7   1   1    9.00    8.90 
  -7   1  -1    7.50    5.30 
   7   1   1    6.40    6.10 
  -7   1  -1   16.90    8.60 
   7   1   1    9.10    5.90 
   7   1   1   19.20    9.40 
  -7   1  -1    5.20    6.10 
   7   1   1   12.60    6.80 
   7   1   1    9.00    4.60 
   7   1   1   16.40    7.00 
  -7   1  -1   11.40    5.60 
  -7   1  -1   16.40    7.30 
   7   1   1   19.70    9.10 
  -7   1  -1   16.40    7.40 
   8  -1   1  208.08   30.90 
   8  -1   1  243.38   28.60 
   8  -1   1  230.58   29.60 
   8  -1   1  276.27   23.00 
  -8  -1  -1  275.27   31.10 
   8  -1   1  208.18   22.20 
  -8  -1  -1  243.58   20.50 
  -8  -1  -1  286.27   19.80 
  -8  -1  -1  261.07   27.90 
   8  -1   1  311.57   32.10 
  -8  -1  -1  288.17   29.60 
  -8  -1  -1  250.57   19.20 
  -8  -1  -1  318.47   23.60 
   8  -1   1  300.97   31.10 
  -8  -1  -1  251.57   28.60 
   8  -1   1  225.58   26.50 
  -8   1  -1  257.07   21.40 
  -8   1  -1  262.27   27.60 
   8   1   1  236.38   32.40 
   8   1   1  253.27   22.00 
   8   1   1  279.17   30.00 
   8   1   1  319.57   32.20 
  -8   1  -1  258.37   21.00 
  -8   1  -1  255.77   20.80 
   8   1   1  336.77   32.40 
  -8   1  -1  264.57   27.00 
   8   1   1  251.57   18.30 
  -8   1  -1  306.47   34.20 
  -8   1  -1  295.07   30.00 
  -8   1  -1  302.77   31.40 
   8   1   1  253.77   19.30 
   8   1   1  248.38   30.80 
  -8   1  -1  302.37   23.90 
   9  -1   1    4.30    6.00 
  -9  -1  -1    6.30    7.50 
  -9  -1  -1   11.00    8.90 
   9  -1   1    6.20    8.50 
   9  -1   1    5.70    7.20 
   9  -1   1   25.50   14.20 
  -9  -1  -1   -2.10    7.20 
   9  -1   1    5.60    7.90 
   9  -1   1    9.30    8.60 
  -9  -1  -1    3.50    8.20 
  -9  -1  -1    5.20    6.60 
  -9  -1  -1   13.50    8.30 
   9   1   1    3.40    9.90 
  -9   1  -1    5.50    7.60 
  -9   1  -1    0.90    9.00 
   9   1   1   -0.80    8.10 
  -9   1  -1    0.10    8.40 
  -9   1  -1   10.40    8.20 
   9   1   1    7.00    8.30 
   9   1   1    1.80    7.10 
   9   1   1   22.10   10.40 
  -9   1  -1   -3.90    7.10 
  -9   1  -1    4.80    8.10 
  -9   1  -1    8.50    7.10 
   9   1   1    6.70    6.30 
 -10  -1  -1  239.88   30.20 
  10  -1   1  214.58   28.70 
  10  -1   1  283.57   35.20 
  10  -1   1  186.48   27.90 
 -10  -1  -1  175.58   27.30 
 -10  -1  -1  213.78   28.70 
  10  -1   1  262.87   38.20 
  10  -1   1  199.18   31.90 
 -10  -1  -1  286.27   35.80 
 -10  -1  -1  246.48   27.80 
 -10  -1  -1  245.98   23.70 
 -10   1  -1  235.58   34.10 
  10   1   1  254.37   39.20 
 -10   1  -1  229.78   31.20 
  10   1   1  207.68   31.80 
 -10   1  -1  245.98   28.40 
  10   1   1  206.28   27.80 
 -10   1  -1  231.38   28.70 
 -10   1  -1  306.47   30.10 
 -10   1  -1  262.07   33.00 
  10   1   1  250.67   33.70 
  10   1   1  258.57   33.00 
 -10  -2   1  132.59   25.20 
  10  -2  -1  167.58   26.40 
 -10  -2   1  189.48   26.40 
 -10  -2   1  176.88   27.30 
  10  -2  -1  190.08   34.30 
 -10  -2   1  134.59   21.70 
 -10  -2   1  143.69   25.00 
  10  -2  -1  192.78   28.40 
  10  -2  -1  130.49   24.10 
  10  -2  -1  167.28   28.60 
  10  -2  -1  113.69   19.70 
  10   2  -1  129.59   25.70 
 -10   2   1  144.59   27.20 
  10   2  -1  162.78   25.90 
 -10   2   1  103.19   20.70 
 -10   2   1  172.08   22.90 
 -10   2   1  181.28   23.50 
  10   2  -1  123.29   22.70 
 -10   2   1  146.39   25.90 
 -10   2   1  170.58   24.30 
  10   2  -1  162.38   29.70 
 -10   2   1  132.69   23.60 
   9  -2  -1  177.78   26.90 
  -9  -2   1  159.38   23.10 
   9  -2  -1  137.59   27.60 
  -9  -2   1  125.39   19.30 
   9  -2  -1  114.09   22.90 
   9  -2  -1  137.79   23.20 
  -9  -2   1  171.88   26.00 
  -9  -2   1  189.08   24.00 
   9  -2  -1  111.49   22.90 
  -9  -2   1  207.88   26.80 
   9  -2  -1   82.89   16.00 
   9  -2  -1  184.98   26.10 
   9   2  -1  126.69   24.80 
   9   2  -1  134.89   22.50 
  -9   2   1  115.79   21.60 
   9   2  -1  151.88   21.20 
  -9   2   1  170.88   24.20 
  -9   2   1  133.19   25.40 
   9   2  -1  129.69   22.50 
   9   2  -1  135.79   23.60 
  -9   2   1  145.79   23.00 
  -9   2   1  174.78   21.90 
  -9   2   1  143.29   20.20 
  -9   2   1  167.88   22.40 
   8  -2  -1    0.70    7.40 
   8  -2  -1   13.40    8.20 
  -8  -2   1    2.40    5.70 
   8  -2  -1   23.40   10.10 
  -8  -2   1   -0.50    5.60 
   8  -2  -1   -6.60    7.00 
  -8  -2   1   13.90    8.20 
   8  -2  -1   13.60    9.50 
  -8  -2   1    8.40    7.60 
   8  -2  -1    4.70   11.80 
  -8  -2   1   22.00    8.80 
   8  -2  -1   -3.00    7.60 
   8   2  -1   10.20    6.90 
   8   2  -1   15.00    7.80 
  -8   2   1   15.90    8.10 
   8   2  -1   22.40   11.80 
   8   2  -1   -2.20    4.70 
  -8   2   1   14.30    9.30 
  -8   2   1    1.90    6.00 
   8   2  -1    2.20    4.90 
  -8   2   1   -2.10    7.50 
  -8   2   1   10.80    8.20 
   8   2  -1   13.80    8.70 
  -8   2   1    5.00    7.10 
  -8   2   1    6.20    7.20 
  -8   2   1   -0.90    6.10 
   8   2  -1    8.30    7.70 
  -7  -2   1    1.80    5.10 
   7  -2  -1   21.20   10.30 
   7  -2  -1   -4.20    5.50 
   7  -2  -1    2.70    6.60 
  -7  -2   1    9.50    7.70 
  -7  -2   1    8.90    6.30 
   7  -2  -1   19.00    7.80 
  -7  -2   1    5.60    5.10 
  -7  -2   1    5.20    5.50 
   7  -2  -1    9.80    7.30 
   7  -2  -1    3.80    5.10 
   7  -2  -1   17.70    6.60 
  -7  -2   1   15.80    8.20 
  -7  -2   1    7.30    5.20 
   7  -2  -1    5.00    7.00 
   7  -2  -1    5.40    7.70 
   7   2  -1   12.30    6.70 
  -7   2   1   13.90    6.60 
   7   2  -1   -1.00    5.00 
  -7   2   1    9.00    5.30 
   7   2  -1   14.90    8.90 
   7   2  -1    0.50    4.10 
  -7   2   1    4.30    6.30 
   7   2  -1    7.50    6.80 
   7   2  -1   16.70    8.70 
  -7   2   1    7.70    5.50 
  -7   2   1    3.10    7.40 
  -7   2   1    4.60    7.00 
  -7   2   1    7.20    6.40 
   7   2  -1   14.20    6.80 
  -7   2   1    2.70    6.10 
  -7   2   1   11.30    7.50 
  -7   2   1    4.80    4.80 
   7   2  -1   10.00    5.80 
   6  -2  -1   53.69   10.20 
   6  -2  -1   53.99   13.80 
   6  -2  -1   65.59   13.20 
   6  -2  -1   63.79   13.00 
  -6  -2   1   65.99   12.00 
  -6  -2   1   84.39   14.20 
   6  -2  -1   39.70   10.10 
  -6  -2   1   73.29   10.90 
   6  -2  -1   36.00   10.80 
   6  -2  -1   63.89   12.50 
  -6  -2   1   76.29   12.10 
   6  -2  -1   76.09   11.60 
   6  -2  -1   57.79   11.20 
  -6  -2   1   64.59   12.30 
  -6  -2   1   62.39   12.50 
  -6  -2   1   61.19   11.20 
  -6   2   1   77.79   12.60 
   6   2  -1   73.89   12.10 
  -6   2   1   55.19   12.60 
  -6   2   1   63.19   11.50 
  -6   2   1   61.99   12.90 
   6   2  -1   58.99   12.90 
  -6   2   1   59.49   10.80 
   6   2  -1   88.89   14.10 
   6   2  -1   69.99   10.50 
   6   2  -1   37.50    8.60 
  -6   2   1   71.09   10.40 
   6   2  -1   85.19   13.70 
  -6   2   1   78.89   13.00 
   6   2  -1   68.09   12.90 
  -6   2   1   66.29    9.30 
  -6   2   1   51.49   11.10 
  -6   2   1   84.49   12.30 
  -6   2   1   53.79    8.50 
   6   2  -1   70.09   15.10 
   5  -2  -1  141.09   16.50 
  -5  -2   1  139.89   16.60 
   5  -2  -1  145.99   16.40 
  -5  -2   1  139.49   13.90 
   5  -2  -1  158.98   17.60 
   5  -2  -1  127.09   13.90 
  -5  -2   1  147.79   15.60 
   5  -2  -1  125.69   16.30 
   5  -2  -1  151.38   17.40 
  -5  -2   1  135.49   16.30 
   5  -2  -1  143.79   17.00 
  -5  -2   1  155.18   16.20 
   5  -2  -1  135.09   15.40 
   5  -2  -1  123.79   17.60 
  -5  -2   1  181.28   19.10 
   5  -2  -1  135.09   19.10 
  -5  -2   1  127.79   15.30 
   5  -2  -1  137.79   16.10 
   5   2  -1  163.58   18.50 
  -5   2   1  120.79   14.10 
   5   2  -1  162.38   20.10 
  -5   2   1  153.88   15.70 
  -5   2   1  120.19   14.80 
  -5   2   1  148.79   11.80 
   5   2  -1  173.28   17.70 
  -5   2   1  141.79   14.20 
   5   2  -1  141.29   14.70 
   5   2  -1  141.59   15.30 
  -5   2   1  122.89   14.50 
  -5   2   1  122.69    9.70 
  -5   2   1  124.29   16.90 
   5   2  -1  160.68   18.10 
   5   2  -1  146.09   15.80 
  -5   2   1  123.89   14.40 
  -5   2   1  106.19   13.10 
  -5   2   1  145.29   17.60 
   5   2  -1  152.98   18.70 
  -5   2   1  125.79   12.30 
  -5   2   1  116.29   10.20 
   5   2  -1  131.59   14.90 
   5   2  -1  132.99   14.50 
   4  -2  -1   12.20    3.30 
   4  -2  -1    2.90    4.20 
  -4  -2   1    7.70    4.20 
  -4  -2   1    8.20    4.40 
  -4  -2   1    8.80    4.70 
   4  -2  -1    3.40    4.40 
   4  -2  -1   14.10    5.70 
  -4  -2   1   10.30    4.30 
  -4  -2   1   12.10    5.60 
   4  -2  -1   10.00    5.60 
   4  -2  -1   11.30    5.30 
   4  -2  -1   13.40    6.40 
   4  -2  -1    2.60    3.00 
  -4  -2   1    4.30    4.30 
  -4  -2   1    5.20    5.40 
  -4  -2   1    3.70    4.10 
   4  -2  -1   12.20    5.40 
  -4  -2   1   16.20    5.90 
   4  -2  -1    8.10    5.20 
  -4  -2   1    8.70    4.60 
   4  -2  -1    6.20    4.50 
   4  -2  -1   12.70    5.40 
  -4  -2   1    7.90    3.60 
   4  -2  -1    4.70    4.10 
   4  -2  -1    2.10    4.20 
   4  -2  -1    4.80    3.60 
   4   2  -1    6.90    4.60 
  -4   2   1    9.70    3.70 
   4   2  -1    6.60    4.00 
  -4   2   1   13.40    4.80 
  -4   2   1   10.90    4.40 
   4   2  -1    2.50    3.60 
   4   2  -1   13.20    6.20 
  -4   2   1    6.40    4.70 
   4   2  -1    7.80    4.70 
  -4   2   1    5.70    3.90 
   4   2  -1   11.40    6.00 
   4   2  -1   12.90    5.60 
   4   2  -1    8.70    4.60 
  -4   2   1    3.30    3.80 
  -4   2   1    1.50    4.00 
  -4   2   1    3.70    4.40 
   4   2  -1    8.70    3.90 
  -4   2   1   11.00    5.00 
  -4   2   1    4.20    4.60 
  -4   2   1    9.00    4.70 
   4   2  -1   16.20    5.30 
   4   2  -1   13.50    5.50 
   4   2  -1   21.20    6.30 
   4   2  -1    6.30    4.00 
  -4   2   1    4.70    4.80 
  -4   2   1   10.50    4.70 
   3  -2  -1   97.69   11.20 
   3  -2  -1   97.79   10.70 
   3  -2  -1   64.59    7.70 
  -3  -2   1   77.69    6.60 
  -3  -2   1   68.59    6.00 
  -3  -2   1   89.39   10.10 
   3  -2  -1   80.59   11.60 
   3  -2  -1   81.89   10.50 
   3  -2  -1   75.69    9.10 
  -3  -2   1   89.79    9.90 
  -3  -2   1   84.19    6.80 
   3  -2  -1   80.99    9.80 
  -3  -2   1  101.29   11.30 
  -3  -2   1   82.69    7.80 
   3  -2  -1   74.39   10.80 
   3  -2  -1   93.29   11.70 
  -3  -2   1   81.59    6.40 
  -3  -2   1   97.99   11.10 
  -3  -2   1   98.99   10.80 
   3  -2  -1   91.59   11.10 
  -3  -2   1   89.09   10.40 
   3  -2  -1   91.59   10.20 
   3  -2  -1   73.89    9.90 
  -3  -2   1  117.89   13.40 
  -3  -2   1   74.89    8.60 
   3  -2  -1   63.29    9.10 
   3  -2  -1   81.79    8.80 
   3  -2  -1   67.59    9.50 
  -3   2   1   75.89    8.70 
   3   2  -1   86.29   12.00 
   3   2  -1   71.69    9.40 
   3   2  -1   88.49   10.50 
   3   2  -1   91.69   10.90 
  -3   2   1   77.79    7.90 
   3   2  -1   77.89    7.60 
   3   2  -1  115.09   12.00 
  -3   2   1   82.99    9.80 
   3   2  -1   76.89   10.10 
  -3   2   1   83.59    8.70 
  -3   2   1   93.49   10.70 
  -3   2   1   77.69    8.50 
   3   2  -1   92.59   12.00 
   3   2  -1   92.29    9.90 
  -3   2   1   86.89   11.40 
  -3   2   1   69.49    9.30 
   3   2  -1   86.69   11.80 
  -3   2   1   99.09   12.30 
  -3   2   1   70.49    9.30 
  -3   2   1   64.99   10.40 
   3   2  -1   94.79   10.20 
  -3   2   1   59.29    8.10 
  -3   2   1   87.69   10.10 
   3   2  -1   86.59    8.50 
   3   2  -1   78.89    7.80 
  -3   2   1   77.49    9.60 
   3   2  -1   78.69   10.90 
  -3   2   1   66.49    8.60 
   3   2  -1   74.49    9.90 
  -3   2   1   81.19   10.20 
  -3   2   1   75.09    8.80 
   3   2  -1   97.49    9.20 
   3   2  -1  105.19   10.70 
   3   2  -1   69.29   10.60 
  -2  -2   1   10.90    2.90 
   2  -2  -1    6.00    3.70 
   2  -2  -1    5.50    3.40 
  -2  -2   1    5.50    2.70 
  -2  -2   1    0.80    2.40 
   2  -2  -1    0.80    3.20 
   2  -2  -1    2.40    1.80 
   2  -2  -1    9.70    3.60 
   2  -2  -1    3.10    3.00 
   2  -2  -1    4.80    3.30 
   2  -2  -1    3.70    3.60 
  -2  -2   1    7.70    3.80 
  -2  -2   1   11.10    4.00 
  -2  -2   1    7.30    3.70 
  -2  -2   1    4.20    2.30 
  -2  -2   1    8.70    3.60 
   2  -2  -1   10.30    3.70 
   2  -2  -1    3.70    3.30 
  -2  -2   1    7.50    3.00 
  -2  -2   1    2.30    2.20 
   2  -2  -1    3.30    4.10 
   2  -2  -1    4.00    3.20 
  -2  -2   1    3.20    2.50 
   2  -2  -1   -0.40    2.80 
  -2  -2   1    1.20    2.90 
   2  -2  -1    5.30    3.30 
   2  -2  -1    4.70    3.40 
   2  -2  -1    8.80    3.80 
  -2  -2   1    6.30    4.30 
   2  -2  -1    3.30    3.40 
  -2  -2   1    3.10    2.30 
  -2  -2   1    2.60    3.40 
  -2  -2   1    6.80    2.90 
   2  -2  -1    8.00    3.20 
  -2  -2   1    6.80    2.30 
   2  -2  -1    4.10    3.10 
  -2  -2   1    4.30    2.80 
   2  -2  -1    6.90    2.70 
   2  -2  -1    5.20    3.60 
  -2   2   1    5.30    2.70 
  -2   2   1    7.50    3.80 
  -2   2   1    5.30    3.70 
   2   2  -1    6.00    3.60 
   2   2  -1    2.80    2.90 
   2   2  -1    3.30    2.80 
   2   2  -1   -0.70    2.50 
   2   2  -1    3.60    3.50 
   2   2  -1    3.80    3.00 
  -2   2   1    5.40    3.50 
  -2   2   1    5.40    3.50 
  -2   2   1    8.20    3.70 
  -2   2   1    3.50    3.20 
   2   2  -1    5.80    3.00 
   2   2  -1   10.50    2.90 
   2   2  -1    4.70    3.40 
   2   2  -1    3.70    3.60 
  -2   2   1    7.40    3.40 
  -2   2   1    7.50    4.10 
   2   2  -1    4.20    2.80 
  -2   2   1    5.50    3.90 
  -2   2   1    3.10    2.90 
  -2   2   1    5.90    3.80 
   2   2  -1    6.00    3.90 
  -2   2   1    3.40    2.80 
  -2   2   1    4.80    3.50 
  -2   2   1    6.00    3.10 
  -2   2   1    5.90    3.70 
  -2   2   1    4.40    2.90 
  -2   2   1    4.70    3.30 
   2   2  -1   12.40    3.30 
  -2   2   1    4.90    3.20 
  -2   2   1    1.30    2.60 
   2   2  -1    7.30    3.40 
  -2   2   1    4.90    2.80 
   2   2  -1    2.10    2.70 
   2   2  -1   10.30    4.60 
   2   2  -1    5.20    3.40 
   2   2  -1    4.70    3.00 
  -2   2   1    6.60    3.50 
  -2   2   1    2.50    3.30 
  -2   2   1    1.80    2.70 
  -2   2   1    4.90    3.50 
   1  -2  -1    6.10    2.80 
   1  -2  -1    3.90    3.00 
   1  -2  -1    7.10    3.60 
  -1  -2   1    5.50    3.10 
   1  -2  -1    2.30    3.10 
  -1  -2   1    5.80    3.50 
   1  -2  -1    5.80    3.00 
   1  -2  -1   -0.40    2.30 
  -1  -2   1    2.10    2.30 
  -1  -2   1    5.80    3.20 
   1  -2  -1    2.00    2.60 
  -1  -2   1    2.30    2.50 
   1  -2  -1    1.30    2.00 
  -1  -2   1    4.20    2.60 
   1  -2  -1    3.60    2.80 
   1  -2  -1    3.90    2.70 
  -1  -2   1    4.10    2.60 
  -1  -2   1    6.50    2.50 
   1  -2  -1    4.30    2.60 
  -1  -2   1    4.20    2.50 
  -1  -2   1    3.00    2.40 
   1  -2  -1    1.60    2.20 
  -1  -2   1    2.70    3.50 
   1  -2  -1    3.60    2.70 
  -1  -2   1    2.10    2.40 
  -1  -2   1    4.60    2.90 
  -1  -2   1    6.30    3.10 
  -1  -2   1    2.60    2.40 
   1  -2  -1    2.10    2.70 
  -1  -2   1    5.90    3.00 
   1  -2  -1    2.30    2.60 
  -1  -2   1    0.80    1.80 
   1  -2  -1    2.80    2.80 
  -1  -2   1    4.60    2.70 
   1  -2  -1    0.20    2.50 
   1  -2  -1   -0.90    2.00 
   1  -2  -1    1.40    2.30 
   1  -2  -1    1.10    2.40 
   1  -2  -1    1.20    2.90 
   1  -2  -1    1.50    2.20 
   1  -2  -1   -0.90    2.80 
  -1  -2   1    2.40    2.20 
   1  -2  -1    1.50    3.00 
  -1   2   1    4.40    2.60 
  -1   2   1   -2.70    2.10 
  -1   2   1    5.00    3.10 
  -1   2   1    2.80    2.40 
  -1   2   1    4.10    3.10 
  -1   2   1    4.80    2.00 
  -1   2   1    5.50    2.60 
  -1   2   1    5.10    3.00 
   1   2  -1    1.90    2.20 
  -1   2   1    4.10    3.00 
  -1   2   1    2.00    2.90 
  -1   2   1    0.00    3.10 
  -1   2   1   -0.20    2.60 
   1   2  -1    5.10    3.10 
  -1   2   1    2.10    2.70 
  -1   2   1    0.60    3.00 
   1   2  -1    3.60    2.90 
   1   2  -1    8.80    3.10 
   1   2  -1    5.00    3.00 
   1   2  -1    2.70    2.30 
   1   2  -1    0.70    2.80 
   1   2  -1    2.50    3.20 
  -1   2   1    2.70    2.90 
  -1   2   1    1.20    2.50 
   1   2  -1    1.50    2.30 
  -1   2   1    0.20    3.00 
  -1   2   1    1.00    2.90 
   1   2  -1    5.80    2.60 
   1   2  -1    5.80    3.10 
  -1   2   1   -0.50    2.00 
   1   2  -1    7.40    3.20 
  -1   2   1    4.00    2.60 
  -1   2   1    1.70    2.70 
   1   2  -1    9.00    4.80 
   1   2  -1    4.70    2.90 
   0  -2   1   48.40    5.90 
   0  -2  -1   62.29    5.10 
   0  -2   1   65.99    5.10 
   0  -2   1   65.49    6.10 
   0  -2   1   53.79    6.50 
   0  -2   1   71.69    5.70 
   0  -2   1   76.39    8.60 
   0  -2   1   61.89    6.60 
   0  -2   1   57.69    6.30 
   0  -2  -1   64.49    6.40 
   0  -2   1   77.69    7.50 
   0  -2   1   69.29    7.50 
   0  -2  -1   69.59    5.50 
   0  -2   1   68.09    7.60 
   0  -2  -1   65.29    6.70 
   0  -2   1   64.29    7.10 
   0  -2  -1   74.19    7.10 
   0  -2  -1   65.09    6.00 
   0  -2  -1   83.79    6.00 
   0  -2  -1   59.99    6.30 
   0  -2   1   78.09    7.60 
   0  -2   1   77.29    7.70 
   0  -2   1   66.09    6.60 
   0  -2   1   67.09    5.60 
   0  -2   1   76.39    6.00 
   0  -2   1   73.89    4.90 
   0  -2  -1   64.39    6.60 
   0  -2   1   60.69    6.60 
   0  -2  -1   88.39    8.80 
   0  -2  -1   64.09    6.70 
   0  -2  -1   62.59    7.40 
   0  -2   1   75.19    6.90 
   0  -2  -1   64.19    6.20 
   0  -2  -1   82.59    8.20 
   0  -2  -1   74.49    7.30 
   0  -2   1   71.99    7.10 
   0  -2  -1   65.89    6.90 
   0  -2  -1   84.49    7.60 
   0  -2  -1   68.19    6.40 
   0  -2  -1   62.79    4.50 
   0  -2   1   62.89    6.60 
   0  -2  -1   65.79    6.60 
   0   2  -1   74.79    7.40 
   0   2  -1   72.89    5.90 
   0   2   1   61.79    6.30 
   0   2  -1   67.39    5.50 
   0   2  -1   75.49    5.60 
   0   2  -1   77.19    7.30 
   0   2   1   62.29    7.10 
   0   2   1   84.99    8.90 
   0   2   1   56.39    6.40 
   0   2   1   64.19    7.20 
   0   2   1   73.09    7.60 
   0   2   1   88.99    7.70 
   0   2  -1   68.69    5.20 
   0   2  -1   60.89    6.90 
   0   2   1   72.09    5.80 
   0   2   1   63.29    6.20 
   0   2  -1   75.49    7.40 
   0   2  -1   66.49    6.20 
   0   2   1   75.09    6.90 
   0   2   1   72.39    6.40 
   0   2   1   60.19    4.40 
   0   2   1   71.39    6.00 
   0   2  -1   63.29    5.30 
   0   2   1   66.79    5.40 
   0   2  -1   77.69    6.90 
   0   2  -1   71.89    7.30 
   0   2  -1   59.59    6.50 
   0   2  -1   73.89    7.30 
   0   2  -1   63.19    6.30 
   0   2  -1   67.69    4.60 
   0   2  -1   88.79    7.40 
   0   2  -1   86.79    8.50 
   0   2   1   73.99    8.00 
   0   2   1   65.49    5.50 
   0   2  -1   65.79    6.90 
   0   2   1   74.59    7.10 
   0   2   1   73.89    7.60 
   0   2   1   70.59    7.10 
   0   2  -1   66.99    5.40 
   0   2  -1   70.09    5.60 
   0   2   1   69.79    6.50 
   0   2  -1   67.69    8.40 
  -1  -2  -1 1137.09   41.50 
  -1  -2  -1 1136.19   41.80 
  -1  -2  -1 1076.99   41.70 
   1  -2   1 1156.98   41.90 
   1  -2   1 1121.29   41.10 
   1  -2   1 1168.78   41.00 
  -1  -2  -1 1141.79   41.80 
   1  -2   1 1093.19   40.70 
  -1  -2  -1 1092.59   41.10 
   1  -2   1 1165.58   38.70 
   1  -2   1 1074.59   40.40 
   1  -2   1 1180.98   42.10 
  -1  -2  -1 1141.19   38.20 
   1  -2   1 1100.39   41.10 
  -1  -2  -1 1064.49   40.50 
  -1  -2  -1 1085.69   39.90 
  -1  -2  -1 1196.68   43.40 
   1  -2   1 1136.09   40.60 
  -1  -2  -1 1198.68   37.90 
  -1  -2  -1 1142.79   38.20 
  -1  -2  -1 1112.39   40.10 
   1  -2   1 1143.69   39.60 
  -1  -2  -1 1171.88   38.80 
   1  -2   1 1107.59   40.50 
   1  -2   1 1126.49   40.70 
   1  -2   1 1117.89   38.30 
   1  -2   1 1146.39   40.90 
  -1  -2  -1 1209.28   40.00 
   1  -2   1 1142.29   41.00 
  -1  -2  -1 1139.19   40.30 
   1  -2   1 1111.59   40.60 
  -1  -2  -1 1184.38   40.50 
   1  -2   1 1173.38   41.20 
   1  -2   1 1149.98   40.90 
   1  -2   1 1125.39   38.90 
  -1  -2  -1 1140.29   39.00 
  -1  -2  -1 1188.68   41.50 
  -1  -2  -1 1198.08   40.00 
   1  -2   1 1134.59   41.50 
  -1  -2  -1 1180.18   41.60 
   1  -2   1 1189.48   41.10 
   1  -2   1 1126.09   42.90 
  -1  -2  -1 1168.88   42.50 
   1   2   1 1094.29   42.10 
   1   2   1 1187.38   42.40 
  -1   2  -1 1149.19   40.60 
   1   2   1 1171.48   39.20 
   1   2   1 1151.18   40.20 
  -1   2  -1 1168.58   38.50 
  -1   2  -1 1154.28   40.90 
  -1   2  -1 1055.39   39.20 
  -1   2  -1 1164.58   40.80 
   1   2   1 1142.99   38.80 
  -1   2  -1 1165.58   43.30 
  -1   2  -1 1130.49   39.00 
   1   2   1 1165.68   41.40 
  -1   2  -1 1120.79   42.50 
  -1   2  -1 1197.68   41.00 
  -1   2  -1 1125.49   39.90 
  -1   2  -1 1117.49   41.50 
   1   2   1 1125.69   40.40 
  -1   2  -1 1140.99   38.80 
   1   2   1 1127.49   38.30 
   1   2   1 1199.48   41.70 
   1   2   1 1165.58   41.70 
  -1   2  -1 1117.09   40.80 
   1   2   1 1128.59   40.70 
  -1   2  -1 1140.89   41.50 
  -1   2  -1 1008.60   39.90 
   1   2   1 1161.48   40.30 
   1   2   1 1182.38   39.90 
   1   2   1 1154.68   39.80 
  -1   2  -1 1119.79   40.70 
  -1   2  -1 1217.68   42.40 
  -1   2  -1 1150.48   41.50 
  -1   2  -1 1151.18   40.70 
  -1   2  -1 1165.58   41.20 
  -1   2  -1 1109.39   38.50 
  -1   2  -1 1155.18   40.80 
  -1   2  -1 1118.79   41.00 
   1   2   1 1183.98   41.00 
   2  -2   1  123.89   10.20 
  -2  -2  -1  133.29   14.70 
   2  -2   1  120.79   10.00 
  -2  -2  -1  135.79    9.40 
  -2  -2  -1  132.59    8.70 
  -2  -2  -1  139.89    8.00 
   2  -2   1  133.09   10.40 
  -2  -2  -1  133.49    8.70 
  -2  -2  -1  127.39    8.40 
  -2  -2  -1  128.19   10.10 
   2  -2   1  130.09    8.00 
   2  -2   1  113.19    7.50 
   2  -2   1  129.49    9.20 
   2  -2   1  110.59    8.70 
   2  -2   1  124.79    9.00 
  -2  -2  -1  130.29    8.90 
  -2  -2  -1  143.59   10.30 
   2  -2   1  138.79   11.60 
   2  -2   1  130.09   10.30 
   2  -2   1  123.39    8.90 
   2  -2   1  133.59   10.30 
   2  -2   1  134.19    9.80 
   2  -2   1  119.99    9.90 
   2  -2   1  122.99    8.90 
  -2  -2  -1  152.28    9.60 
   2  -2   1  140.99    9.00 
  -2  -2  -1  136.39   10.50 
  -2  -2  -1  142.99   10.80 
  -2  -2  -1  120.79    9.50 
  -2  -2  -1  116.49    7.90 
   2  -2   1  108.79    9.10 
   2  -2   1  132.29    9.20 
   2  -2   1  126.39   10.50 
  -2  -2  -1  108.79   10.10 
  -2  -2  -1  111.19    9.10 
  -2  -2  -1  128.29   10.50 
  -2  -2  -1  123.19    9.50 
  -2  -2  -1  133.09   10.20 
   2  -2   1  114.49   11.20 
   2  -2   1  136.79   11.60 
  -2  -2  -1  120.29    6.60 
   2  -2   1  122.19    9.20 
   2  -2   1  125.29    8.90 
   2  -2   1  147.59   10.80 
  -2  -2  -1  127.39    8.60 
   2  -2   1  126.69    9.00 
   2  -2   1  135.69   10.10 
  -2   2  -1  138.19    9.50 
   2   2   1  129.49   10.00 
   2   2   1  115.69   10.90 
   2   2   1  139.69   10.00 
  -2   2  -1  125.89   10.40 
   2   2   1  117.19    9.50 
  -2   2  -1  111.19    9.10 
   2   2   1  110.49    9.20 
  -2   2  -1  113.19    9.20 
   2   2   1  130.19    9.50 
  -2   2  -1  122.39   10.40 
  -2   2  -1  124.09   10.30 
  -2   2  -1  128.39    9.60 
   2   2   1  125.39   12.80 
   2   2   1  129.19    9.00 
  -2   2  -1  119.99    9.80 
   2   2   1  121.49   10.10 
  -2   2  -1  131.59   10.00 
  -2   2  -1  126.79    7.90 
  -2   2  -1  136.89    9.20 
  -2   2  -1  129.19    9.90 
  -2   2  -1  123.79    9.10 
  -2   2  -1  117.79    9.60 
  -2   2  -1  132.99   10.40 
   2   2   1  125.59    9.20 
   2   2   1  138.59    8.60 
   2   2   1  119.89    8.00 
  -2   2  -1  127.09   10.10 
  -2   2  -1  134.59    9.10 
   2   2   1  139.79    8.40 
  -2   2  -1  127.29    9.70 
   2   2   1  131.59   13.30 
  -2   2  -1  133.59   10.30 
  -3  -2  -1  308.57   15.40 
   3  -2   1  293.77   17.90 
   3  -2   1  276.97   16.30 
   3  -2   1  288.57   15.10 
   3  -2   1  290.57   14.90 
  -3  -2  -1  278.17   16.60 
   3  -2   1  296.17   17.50 
  -3  -2  -1  278.97   15.30 
   3  -2   1  277.27   16.90 
   3  -2   1  284.07   14.80 
   3  -2   1  301.17   17.20 
  -3  -2  -1  308.97   15.00 
   3  -2   1  326.47   19.90 
  -3  -2  -1  289.37   13.70 
   3  -2   1  296.77   17.70 
   3  -2   1  309.07   15.30 
   3  -2   1  276.17   15.50 
  -3  -2  -1  316.27   17.50 
   3  -2   1  290.97   20.00 
   3  -2   1  299.07   17.90 
  -3  -2  -1  295.67   19.00 
  -3  -2  -1  298.67   16.90 
  -3  -2  -1  331.77   17.10 
   3  -2   1  298.47   18.20 
   3  -2   1  350.36   19.40 
  -3  -2  -1  309.97   16.40 
  -3  -2  -1  324.87   18.90 
  -3  -2  -1  323.77   18.10 
  -3  -2  -1  283.27   16.70 
   3  -2   1  333.77   17.90 
   3  -2   1  303.17   16.80 
   3   2   1  305.17   16.70 
   3   2   1  296.67   18.20 
  -3   2  -1  283.17   15.50 
   3   2   1  279.47   20.10 
  -3   2  -1  281.07   18.70 
   3   2   1  304.57   15.90 
  -3   2  -1  314.47   18.20 
  -3   2  -1  269.27   17.70 
   3   2   1  307.27   15.30 
  -3   2  -1  289.07   16.20 
  -3   2  -1  287.17   15.00 
  -3   2  -1  286.67   16.50 
   3   2   1  301.07   15.30 
   3   2   1  309.27   17.30 
  -3   2  -1  285.97   17.40 
  -3   2  -1  299.67   13.40 
  -3   2  -1  291.67   14.80 
   3   2   1  332.07   18.10 
   3   2   1  284.97   16.90 
  -3   2  -1  312.27   18.00 
  -3   2  -1  303.57   17.00 
  -3   2  -1  284.77   17.10 
   3   2   1  271.27   17.10 
   3   2   1  356.06   18.60 
  -3   2  -1  234.28   17.50 
  -3   2  -1  296.77   17.20 
   3   2   1  284.87   19.60 
  -4  -2  -1  463.75   24.80 
  -4  -2  -1  470.65   24.90 
   4  -2   1  463.25   24.00 
   4  -2   1  447.96   20.20 
   4  -2   1  456.35   21.70 
  -4  -2  -1  435.16   20.30 
   4  -2   1  446.96   23.50 
   4  -2   1  488.65   24.20 
  -4  -2  -1  431.36   22.10 
   4  -2   1  503.05   25.30 
  -4  -2  -1  453.15   23.50 
  -4  -2  -1  422.76   23.20 
   4  -2   1  434.76   28.00 
   4  -2   1  436.66   23.00 
   4  -2   1  450.65   25.40 
   4  -2   1  454.95   27.10 
   4  -2   1  394.46   21.70 
   4  -2   1  477.65   24.50 
   4  -2   1  410.26   19.80 
   4  -2   1  405.26   19.30 
  -4  -2  -1  432.76   21.50 
   4  -2   1  439.06   25.00 
   4  -2   1  449.36   23.50 
   4  -2   1  454.55   25.30 
   4   2   1  420.16   24.40 
  -4   2  -1  437.56   23.70 
  -4   2  -1  453.45   24.60 
   4   2   1  431.76   20.90 
  -4   2  -1  421.36   24.00 
  -4   2  -1  502.95   27.80 
  -4   2  -1  456.35   23.60 
  -4   2  -1  438.76   22.10 
  -4   2  -1  446.76   20.30 
   4   2   1  426.76   22.30 
  -4   2  -1  430.16   25.10 
   4   2   1  423.86   22.60 
  -4   2  -1  477.85   24.10 
   4   2   1  466.75   21.00 
   4   2   1  460.55   21.10 
  -4   2  -1  431.66   23.70 
  -4   2  -1  388.36   22.50 
   4   2   1  476.05   28.10 
   4   2   1  467.75   23.50 
  -4   2  -1  443.56   21.00 
   4   2   1  418.96   24.40 
  -4   2  -1  437.16   20.20 
   4   2   1  445.76   24.00 
   4   2   1  430.86   24.00 
  -5  -2  -1  456.25   23.40 
   5  -2   1  390.66   28.60 
   5  -2   1  452.05   22.40 
   5  -2   1  396.16   26.30 
  -5  -2  -1  427.36   23.40 
   5  -2   1  398.76   24.70 
  -5  -2  -1  430.56   23.00 
   5  -2   1  454.35   26.00 
  -5  -2  -1  467.05   25.60 
   5  -2   1  408.06   24.40 
  -5  -2  -1  467.75   24.30 
   5  -2   1  456.25   25.70 
   5  -2   1  454.65   27.50 
  -5  -2  -1  452.95   26.00 
  -5  -2  -1  441.26   26.60 
  -5  -2  -1  427.16   26.50 
   5  -2   1  433.46   24.00 
   5  -2   1  449.46   21.10 
   5  -2   1  449.76   25.30 
   5  -2   1  355.36   24.90 
   5   2   1  408.66   21.60 
  -5   2  -1  484.55   23.50 
  -5   2  -1  442.86   25.90 
   5   2   1  426.16   24.10 
  -5   2  -1  432.76   24.50 
  -5   2  -1  464.05   27.60 
  -5   2  -1  427.16   25.50 
  -5   2  -1  427.56   24.60 
   5   2   1  464.95   30.70 
   5   2   1  413.76   26.30 
  -5   2  -1  412.46   24.30 
   5   2   1  431.06   24.00 
   5   2   1  432.46   26.30 
  -5   2  -1  417.46   24.60 
  -5   2  -1  421.76   24.90 
   5   2   1  428.76   24.00 
  -5   2  -1  448.96   28.90 
   5   2   1  443.96   22.80 
  -5   2  -1  410.56   21.10 
   5   2   1  458.55   26.60 
   5   2   1  425.86   25.60 
   6  -2   1  741.33   31.10 
  -6  -2  -1  693.63   33.70 
   6  -2   1  705.93   40.40 
  -6  -2  -1  699.13   37.80 
   6  -2   1  772.22   40.20 
  -6  -2  -1  736.73   37.80 
   6  -2   1  730.53   37.30 
   6  -2   1  756.22   44.20 
  -6  -2  -1  804.22   36.90 
   6  -2   1  746.73   30.90 
  -6  -2  -1  683.53   37.20 
   6  -2   1  723.93   37.30 
  -6  -2  -1  758.02   35.50 
   6  -2   1  746.83   37.80 
   6  -2   1  724.33   36.80 
   6  -2   1  817.02   36.50 
   6  -2   1  742.73   36.20 
   6  -2   1  765.92   38.70 
  -6  -2  -1  734.23   39.50 
   6  -2   1  712.43   39.60 
   6   2   1  738.53   38.90 
  -6   2  -1  722.03   36.40 
  -6   2  -1  760.32   32.10 
  -6   2  -1  749.42   37.20 
  -6   2  -1  766.42   36.90 
  -6   2  -1  744.53   37.90 
   6   2   1  697.13   38.70 
  -6   2  -1  771.92   34.60 
  -6   2  -1  716.83   37.80 
   6   2   1  753.82   33.40 
  -6   2  -1  711.33   39.60 
   6   2   1  734.93   35.10 
  -6   2  -1  725.23   36.30 
  -6   2  -1  700.63   37.90 
   6   2   1  708.13   43.70 
   6   2   1  787.52   36.20 
  -6   2  -1  756.72   42.70 
   6   2   1  757.02   41.00 
   6   2   1  792.22   40.50 
   6   2   1  785.42   37.70 
   7  -2   1  944.81   49.60 
  -7  -2  -1  958.80   49.99 
  -7  -2  -1  930.01   43.90 
   7  -2   1  944.41   47.30 
   7  -2   1  991.30   47.20 
   7  -2   1  906.31   50.49 
   7  -2   1  943.91   49.50 
  -7  -2  -1  919.41   47.00 
  -7  -2  -1  929.01   48.40 
   7  -2   1  921.21   37.50 
  -7  -2  -1  871.51   45.70 
   7  -2   1  914.41   45.30 
   7  -2   1  965.90   48.30 
   7  -2   1  905.81   53.69 
  -7  -2  -1  961.30   41.90 
  -7  -2  -1  892.51   43.00 
  -7  -2  -1  893.81   44.90 
   7  -2   1  803.62   41.30 
   7   2   1  964.50   48.70 
   7   2   1 1022.90   44.40 
   7   2   1  997.90   46.80 
  -7   2  -1  936.11   44.90 
   7   2   1 1008.50   50.19 
  -7   2  -1  942.61   49.20 
  -7   2  -1  990.40   46.20 
   7   2   1  930.01   43.70 
   7   2   1  964.50   49.40 
  -7   2  -1  893.61   46.80 
   7   2   1  912.51   53.99 
   7   2   1  893.31   40.30 
  -7   2  -1  996.90   41.90 
   7   2   1  995.60   51.39 
  -7   2  -1  881.81   46.50 
  -7   2  -1  959.80   52.39 
  -7   2  -1  976.30   46.90 
  -8  -2  -1  300.47   25.60 
  -8  -2  -1  312.37   33.40 
   8  -2   1  275.37   29.80 
  -8  -2  -1  302.47   32.80 
  -8  -2  -1  297.67   29.60 
   8  -2   1  317.47   35.20 
   8  -2   1  345.17   29.00 
   8  -2   1  416.66   44.40 
   8  -2   1  301.97   22.30 
  -8  -2  -1  363.36   25.00 
   8  -2   1  290.77   25.50 
  -8  -2  -1  401.76   39.60 
   8  -2   1  290.87   24.00 
   8  -2   1  307.07   31.60 
  -8  -2  -1  334.97   33.10 
  -8   2  -1  327.67   21.90 
   8   2   1  314.17   32.70 
  -8   2  -1  308.17   35.30 
  -8   2  -1  298.67   29.30 
   8   2   1  260.07   34.30 
  -8   2  -1  339.47   32.70 
   8   2   1  276.67   31.00 
   8   2   1  290.37   24.80 
   8   2   1  320.87   24.10 
  -8   2  -1  310.87   24.90 
   8   2   1  316.77   22.70 
  -8   2  -1  285.57   31.40 
  -8   2  -1  282.47   23.70 
  -8   2  -1  295.27   25.10 
   8   2   1  293.57   33.30 
   9  -2   1  729.33   46.30 
   9  -2   1  732.33   47.40 
  -9  -2  -1  698.83   47.30 
  -9  -2  -1  730.03   41.40 
  -9  -2  -1  707.53   46.10 
   9  -2   1  819.12   49.20 
   9  -2   1  756.62   50.69 
   9  -2   1  792.82   55.69 
  -9  -2  -1  748.93   45.70 
   9  -2   1  705.43   42.10 
  -9  -2  -1  725.63   47.50 
  -9  -2  -1  756.72   44.90 
  -9   2  -1  708.43   41.60 
   9   2   1  665.93   42.50 
  -9   2  -1  774.92   52.09 
  -9   2  -1  720.73   43.40 
   9   2   1  775.62   42.80 
   9   2   1  714.93   48.80 
  -9   2  -1  762.82   43.20 
   9   2   1  759.82   48.20 
  -9   2  -1  689.03   46.30 
   9   2   1  696.93   46.30 
   9   2   1  743.73   52.79 
  -9   2  -1  815.92   47.40 
  -9   2  -1  788.82   46.60 
  10  -2   1  207.78   34.40 
  10  -2   1  123.89   25.00 
  10  -2   1   87.99   17.20 
 -10  -2  -1  113.99   23.50 
 -10  -2  -1  130.39   25.60 
  10  -2   1  132.19   23.60 
  10  -2   1  198.48   28.20 
 -10  -2  -1  153.98   24.50 
 -10  -2  -1  139.49   25.00 
 -10  -2  -1  157.08   26.30 
  10  -2   1   87.69   19.60 
 -10   2  -1  136.49   24.50 
 -10   2  -1  125.89   21.70 
  10   2   1  132.79   23.30 
  10   2   1  165.98   31.90 
  10   2   1  132.29   24.40 
 -10   2  -1  125.09   21.80 
 -10   2  -1  103.89   20.70 
 -10   2  -1  128.29   26.30 
 -10   2  -1  156.48   23.00 
  10   2   1   98.69   21.40 
 -10   2  -1  166.28   25.10 
 -10  -3   1  216.18   32.10 
 -10  -3   1  225.58   43.80 
  10  -3  -1  203.58   31.30 
  10  -3  -1  227.08   31.80 
  10  -3  -1  186.68   26.10 
  10  -3  -1  210.18   30.90 
  10  -3  -1  212.28   30.50 
 -10  -3   1  213.58   28.50 
 -10  -3   1  220.98   32.10 
  10  -3  -1  235.98   39.80 
 -10  -3   1  230.78   30.00 
 -10   3   1  269.27   30.20 
 -10   3   1  272.67   30.20 
 -10   3   1  241.18   29.80 
 -10   3   1  292.67   38.80 
  10   3  -1  181.68   29.30 
  10   3  -1  236.88   33.00 
 -10   3   1  229.88   30.60 
 -10   3   1  212.58   30.40 
  10   3  -1  191.68   30.00 
  10   3  -1  216.58   33.90 
 -10   3   1  239.88   31.00 
  -9  -3   1  318.47   32.10 
  -9  -3   1  340.47   37.00 
   9  -3  -1  377.16   47.50 
   9  -3  -1  227.68   30.70 
  -9  -3   1  335.97   36.50 
  -9  -3   1  320.67   34.90 
  -9  -3   1  318.57   27.00 
   9  -3  -1  293.57   34.50 
  -9  -3   1  299.47   33.70 
   9  -3  -1  300.07   32.90 
   9  -3  -1  275.77   31.40 
   9  -3  -1  352.06   39.60 
   9  -3  -1  276.07   32.70 
  -9  -3   1  303.17   25.40 
  -9   3   1  284.07   32.10 
   9   3  -1  348.97   39.00 
  -9   3   1  288.27   30.00 
  -9   3   1  288.57   30.50 
  -9   3   1  311.67   37.60 
   9   3  -1  317.77   39.60 
   9   3  -1  311.77   35.10 
  -9   3   1  304.07   34.60 
  -9   3   1  308.67   33.20 
  -9   3   1  328.17   33.40 
   9   3  -1  387.46   40.70 
   8  -3  -1  481.15   34.20 
  -8  -3   1  429.56   32.10 
  -8  -3   1  405.76   30.70 
   8  -3  -1  436.86   34.10 
   8  -3  -1  462.05   35.20 
   8  -3  -1  420.66   31.10 
  -8  -3   1  519.45   31.70 
  -8  -3   1  445.96   30.20 
   8  -3  -1  430.56   28.80 
  -8  -3   1  455.05   33.60 
  -8  -3   1  467.75   33.90 
   8  -3  -1  449.76   35.80 
   8  -3  -1  459.05   35.10 
   8  -3  -1  488.65   45.00 
  -8  -3   1  460.95   27.80 
   8  -3  -1  482.85   39.80 
  -8   3   1  509.05   32.50 
   8   3  -1  441.66   36.00 
  -8   3   1  454.45   34.00 
  -8   3   1  467.55   37.30 
   8   3  -1  439.36   33.90 
   8   3  -1  410.46   32.60 
  -8   3   1  508.55   33.00 
  -8   3   1  511.15   30.50 
   8   3  -1  473.55   35.40 
  -8   3   1  517.15   36.50 
   8   3  -1  464.15   28.80 
   8   3  -1  443.86   28.80 
   8   3  -1  439.76   27.90 
  -8   3   1  436.16   32.10 
  -8   3   1  417.76   31.60 
  -8   3   1  415.46   31.30 
  -7  -3   1  378.06   25.40 
  -7  -3   1  425.06   29.90 
  -7  -3   1  375.76   25.60 
  -7  -3   1  415.76   24.90 
   7  -3  -1  405.76   28.90 
   7  -3  -1  388.36   28.40 
   7  -3  -1  423.76   30.60 
  -7  -3   1  380.76   28.50 
  -7  -3   1  399.16   27.80 
  -7  -3   1  408.06   28.30 
   7  -3  -1  378.86   27.60 
   7  -3  -1  410.26   26.50 
   7  -3  -1  375.26   30.00 
   7  -3  -1  418.06   31.00 
   7  -3  -1  488.15   36.30 
   7   3  -1  386.86   23.80 
  -7   3   1  377.56   28.10 
   7   3  -1  386.56   29.10 
  -7   3   1  409.06   26.40 
  -7   3   1  401.66   27.90 
  -7   3   1  401.76   23.70 
   7   3  -1  341.37   28.20 
  -7   3   1  352.86   25.90 
   7   3  -1  381.96   30.90 
  -7   3   1  375.46   27.40 
   7   3  -1  379.96   29.40 
   7   3  -1  415.06   26.00 
  -7   3   1  406.06   30.60 
  -7   3   1  393.66   22.10 
  -7   3   1  409.96   29.70 
   7   3  -1  381.26   25.10 
  -7   3   1  421.76   33.10 
   7   3  -1  397.56   25.30 
   6  -3  -1 1963.50   80.99 
  -6  -3   1 2010.10   74.29 
  -6  -3   1 1936.91   75.39 
   6  -3  -1 1839.82   85.19 
   6  -3  -1 1926.41   83.49 
   6  -3  -1 1968.60   80.89 
   6  -3  -1 2026.30   80.59 
  -6  -3   1 1923.41   74.79 
   6  -3  -1 1918.51   78.39 
   6  -3  -1 2001.60   86.59 
  -6  -3   1 1894.21   78.69 
  -6  -3   1 1870.21   75.49 
   6  -3  -1 1904.51   78.89 
   6  -3  -1 1948.11   77.89 
  -6  -3   1 2095.29   80.69 
   6  -3  -1 1965.70   78.59 
  -6  -3   1 1950.10   76.89 
   6  -3  -1 1962.20   75.79 
  -6  -3   1 2046.90   77.79 
  -6   3   1 1782.52   75.49 
   6   3  -1 1977.70   79.49 
   6   3  -1 1964.70   76.59 
   6   3  -1 2026.70   80.69 
  -6   3   1 1926.91   72.69 
   6   3  -1 2011.50   75.59 
   6   3  -1 1921.91   81.79 
   6   3  -1 1940.71   73.39 
  -6   3   1 1916.91   68.99 
   6   3  -1 1966.20   71.99 
  -6   3   1 1911.61   71.19 
  -6   3   1 2042.50   81.39 
   6   3  -1 1918.11   79.79 
   6   3  -1 2040.20   75.69 
  -6   3   1 1989.70   84.19 
  -6   3   1 2042.80   77.79 
  -6   3   1 1963.00   78.59 
   6   3  -1 2009.10   77.49 
  -6   3   1 2043.50   77.69 
  -6   3   1 1995.20   75.39 
  -6   3   1 1968.80   79.79 
   5  -3  -1 1424.76   63.39 
  -5  -3   1 1462.75   55.49 
   5  -3  -1 1336.47   58.29 
   5  -3  -1 1431.86   58.49 
   5  -3  -1 1385.86   56.39 
  -5  -3   1 1240.68   49.90 
  -5  -3   1 1380.56   54.79 
   5  -3  -1 1469.85   57.69 
   5  -3  -1 1370.56   58.69 
  -5  -3   1 1499.05   56.49 
   5  -3  -1 1411.66   61.69 
   5  -3  -1 1429.96   52.19 
   5  -3  -1 1305.87   56.89 
   5  -3  -1 1356.56   58.29 
   5  -3  -1 1352.86   56.09 
   5  -3  -1 1387.46   59.59 
  -5  -3   1 1437.56   59.59 
  -5  -3   1 1397.66   55.19 
  -5  -3   1 1372.76   54.59 
  -5  -3   1 1388.16   55.89 
  -5  -3   1 1360.36   57.69 
   5   3  -1 1384.96   55.39 
  -5   3   1 1411.56   53.89 
   5   3  -1 1376.06   52.39 
   5   3  -1 1334.87   57.29 
   5   3  -1 1421.76   57.39 
  -5   3   1 1300.67   52.59 
   5   3  -1 1343.27   55.29 
   5   3  -1 1388.46   55.49 
  -5   3   1 1329.37   57.49 
   5   3  -1 1381.16   58.09 
  -5   3   1 1367.26   56.79 
   5   3  -1 1386.16   60.19 
  -5   3   1 1405.66   50.99 
   5   3  -1 1359.46   58.39 
  -5   3   1 1163.08   59.09 
   5   3  -1 1431.76   57.19 
  -5   3   1 1371.46   56.79 
  -5   3   1 1382.46   55.89 
  -5   3   1 1361.96   56.39 
  -5   3   1 1490.05   60.19 
   5   3  -1 1336.27   50.89 
  -5   3   1 1302.87   57.79 
  -5   3   1 1406.06   55.79 
   5   3  -1 1357.36   54.09 
  -4  -3   1 1379.36   48.30 
  -4  -3   1 1319.37   51.09 
   4  -3  -1 1375.56   58.89 
  -4  -3   1 1315.77   48.70 
  -4  -3   1 1333.57   52.19 
  -4  -3   1 1287.97   48.30 
  -4  -3   1 1285.87   52.79 
   4  -3  -1 1345.57   56.89 
   4  -3  -1 1371.56   54.29 
   4  -3  -1 1316.87   46.10 
  -4  -3   1 1310.57   51.09 
   4  -3  -1 1333.07   55.09 
   4  -3  -1 1287.77   52.69 
  -4  -3   1 1306.37   48.30 
   4  -3  -1 1361.96   50.59 
  -4  -3   1 1351.56   51.79 
   4  -3  -1 1314.27   54.69 
   4  -3  -1 1317.77   54.09 
   4  -3  -1 1425.06   53.89 
   4  -3  -1 1335.57   54.59 
  -4  -3   1 1393.66   47.80 
   4  -3  -1 1344.97   55.49 
  -4  -3   1 1324.47   52.19 
   4  -3  -1 1280.97   52.39 
  -4   3   1 1298.87   50.99 
   4   3  -1 1383.86   53.79 
  -4   3   1 1182.68   55.59 
  -4   3   1 1281.97   54.29 
  -4   3   1 1375.46   53.19 
   4   3  -1 1280.27   56.29 
  -4   3   1 1309.57   55.19 
   4   3  -1 1355.76   53.59 
   4   3  -1 1335.67   52.59 
   4   3  -1 1307.67   51.39 
  -4   3   1 1315.37   49.00 
   4   3  -1 1375.86   56.29 
  -4   3   1 1328.27   53.49 
   4   3  -1 1414.06   57.69 
   4   3  -1 1298.97   54.29 
  -4   3   1 1266.17   51.19 
  -4   3   1 1306.97   51.39 
   4   3  -1 1313.97   53.49 
  -4   3   1 1255.07   52.79 
  -4   3   1 1263.97   54.09 
   4   3  -1 1362.46   48.60 
   4   3  -1 1277.07   53.19 
   4   3  -1 1348.47   52.89 
   4   3  -1 1519.05   59.59 
   4   3  -1 1458.55   57.49 
   4   3  -1 1344.07   49.40 
   4   3  -1 1362.96   51.29 
  -4   3   1 1316.97   53.49 
  -3  -3   1 1696.53   60.79 
  -3  -3   1 1735.53   60.39 
  -3  -3   1 1771.12   61.09 
  -3  -3   1 1801.62   57.49 
   3  -3  -1 1686.93   65.09 
   3  -3  -1 1681.23   63.09 
  -3  -3   1 1739.13   59.49 
  -3  -3   1 1874.21   67.79 
   3  -3  -1 1764.72   68.39 
   3  -3  -1 1676.33   59.99 
  -3  -3   1 1748.63   58.69 
  -3  -3   1 1694.83   63.09 
   3  -3  -1 1736.33   65.69 
  -3  -3   1 1676.03   63.09 
   3  -3  -1 1772.82   65.99 
   3  -3  -1 1818.52   62.99 
   3  -3  -1 1681.83   65.29 
  -3  -3   1 1703.43   61.69 
   3  -3  -1 1681.53   64.09 
   3  -3  -1 1781.32   64.59 
  -3  -3   1 1726.43   62.09 
   3  -3  -1 1780.52   63.39 
   3  -3  -1 1643.34   58.59 
  -3   3   1 1725.13   64.09 
  -3   3   1 1819.12   65.59 
   3   3  -1 1743.43   64.39 
   3   3  -1 1718.43   64.29 
   3   3  -1 1772.32   61.89 
   3   3  -1 1751.52   63.29 
  -3   3   1 1740.43   64.39 
   3   3  -1 1751.52   65.49 
  -3   3   1 1776.92   66.89 
  -3   3   1 1637.24   63.59 
  -3   3   1 1710.83   65.89 
   3   3  -1 1791.02   61.19 
  -3   3   1 1841.12   63.89 
   3   3  -1 1745.73   63.49 
   3   3  -1 1833.52   66.99 
  -3   3   1 1595.34   63.39 
   3   3  -1 1711.03   58.99 
  -3   3   1 1645.84   62.29 
  -3   3   1 1698.63   65.49 
   3   3  -1 1822.22   66.89 
   3   3  -1 1783.22   67.39 
   3   3  -1 1728.33   65.79 
   3   3  -1 1887.01   68.59 
   3   3  -1 1740.13   61.09 
  -3   3   1 1664.63   63.99 
  -3   3   1 1754.02   61.39 
  -3   3   1 1749.43   63.29 
   3   3  -1 1824.72   63.29 
  -3   3   1 1779.52   61.59 
   3   3  -1 1699.83   63.79 
   3   3  -1 1722.93   63.89 
  -3   3   1 1768.92   66.59 
  -2  -3   1  850.61   32.70 
  -2  -3   1  841.12   32.10 
  -2  -3   1  823.52   30.90 
  -2  -3   1  790.82   32.20 
  -2  -3   1  852.61   34.20 
   2  -3  -1  787.82   33.70 
  -2  -3   1  839.12   31.50 
   2  -3  -1  754.72   31.50 
   2  -3  -1  829.32   31.50 
   2  -3  -1  833.62   36.90 
  -2  -3   1  833.82   32.80 
   2  -3  -1  817.12   34.30 
  -2  -3   1  803.42   35.30 
  -2  -3   1  845.42   33.40 
  -2  -3   1  820.22   34.80 
   2  -3  -1  830.12   35.10 
  -2  -3   1  875.31   32.00 
   2  -3  -1  840.32   33.80 
   2  -3  -1  789.12   34.80 
   2  -3  -1  825.72   33.00 
  -2  -3   1  805.02   32.00 
   2  -3  -1  817.52   34.00 
  -2  -3   1  797.42   30.80 
   2  -3  -1  689.83   32.90 
   2  -3  -1  828.22   33.60 
   2  -3  -1  821.52   32.70 
   2   3  -1  819.92   30.90 
   2   3  -1  877.11   36.80 
  -2   3   1  846.12   34.90 
  -2   3   1  857.91   35.70 
  -2   3   1  676.53   30.60 
   2   3  -1  829.02   34.20 
   2   3  -1  742.03   33.10 
   2   3  -1  833.42   31.30 
  -2   3   1  766.32   32.20 
  -2   3   1  770.02   33.50 
  -2   3   1  791.32   33.40 
   2   3  -1  815.72   34.30 
  -2   3   1  780.52   34.90 
  -2   3   1  766.62   33.60 
   2   3  -1  851.31   34.10 
  -2   3   1  847.92   34.10 
  -2   3   1  827.02   33.70 
   2   3  -1  828.72   31.90 
  -2   3   1  860.21   34.60 
  -2   3   1  805.52   34.20 
  -2   3   1  825.02   35.00 
   2   3  -1  812.32   33.20 
  -2   3   1  803.92   35.50 
   2   3  -1  833.52   34.20 
  -2   3   1  790.32   33.30 
  -2   3   1  796.02   31.00 
  -2   3   1  776.32   34.40 
  -2   3   1  755.62   33.20 
   2   3  -1  865.81   38.50 
  -2   3   1  866.51   30.40 
   2   3  -1  810.42   33.20 
   1  -3  -1 2026.50   76.29 
   1  -3  -1 2151.88   77.79 
  -1  -3   1 2189.78   76.19 
  -1  -3   1 2229.38   75.29 
   1  -3  -1 2247.28   75.39 
  -1  -3   1 2353.16   76.09 
   1  -3  -1 2270.57   76.29 
   1  -3  -1 1843.52   74.29 
   1  -3  -1 2217.48   76.19 
  -1  -3   1 2246.38   77.89 
  -1  -3   1 2275.87   74.49 
  -1  -3   1 2272.47   72.79 
  -1  -3   1 2253.97   73.79 
  -1  -3   1 2225.28   77.99 
  -1  -3   1 2336.87   77.09 
   1  -3  -1 2225.18   75.99 
   1  -3  -1 2198.08   75.09 
   1  -3  -1 2185.88   76.29 
  -1  -3   1 2265.07   75.19 
   1  -3  -1 2257.87   75.29 
   1  -3  -1 2231.48   76.39 
  -1  -3   1 2306.97   74.69 
  -1  -3   1 2240.58   76.49 
   1  -3  -1 2252.97   77.09 
   1  -3  -1 2216.48   79.29 
  -1  -3   1 2279.47   73.19 
  -1  -3   1 2256.27   72.69 
  -1  -3   1 2200.78   77.49 
   1  -3  -1 2258.17   77.29 
  -1  -3   1 2303.67   72.99 
  -1  -3   1 2245.08   78.59 
  -1  -3   1 2218.98   80.19 
  -1  -3   1 2311.37   77.89 
   1  -3  -1 2188.08   77.19 
   1  -3  -1 2296.27   77.29 
  -1   3   1 2311.67   75.89 
   1   3  -1 2265.47   77.69 
  -1   3   1 2196.58   75.59 
   1   3  -1 2207.88   74.99 
  -1   3   1 2240.08   76.19 
   1   3  -1 2199.18   76.29 
   1   3  -1 2290.37   76.89 
   1   3  -1 2304.17   75.69 
  -1   3   1 2074.39   75.19 
   1   3  -1 2302.17   80.29 
  -1   3   1 2225.58   75.89 
  -1   3   1 2231.98   75.89 
  -1   3   1 2274.87   76.79 
  -1   3   1 2207.98   76.89 
   1   3  -1 2281.87   75.99 
   1   3  -1 2240.88   73.39 
   1   3  -1 2264.07   77.09 
   1   3  -1 2168.28   82.49 
   1   3  -1 2328.07   77.09 
   1   3  -1 2188.08   75.69 
  -1   3   1 2253.57   76.79 
  -1   3   1 2214.38   77.09 
  -1   3   1 2166.28   76.79 
  -1   3   1 2284.47   77.69 
   1   3  -1 2197.18   74.39 
  -1   3   1 2377.36   77.89 
   1   3  -1 2405.36   80.59 
  -1   3   1 2275.07   78.59 
  -1   3   1 2264.37   77.29 
  -1   3   1 2239.08   78.99 
  -1   3   1 2291.97   75.99 
  -1   3   1 2272.37   75.09 
  -1   3   1 2213.38   76.19 
   0  -3   1  713.23   27.40 
   0  -3   1  705.83   31.30 
   0  -3   1  708.93   29.90 
   0  -3   1  710.53   27.80 
   0  -3   1  680.13   27.10 
   0  -3  -1  746.23   28.70 
   0  -3  -1  723.93   29.30 
   0  -3  -1  696.83   27.90 
   0  -3  -1  737.33   27.70 
   0  -3  -1  677.03   29.60 
   0  -3   1  719.43   30.90 
   0  -3   1  650.53   28.60 
   0  -3   1  631.64   28.60 
   0  -3  -1  717.13   27.70 
   0  -3  -1  698.93   27.50 
   0  -3  -1  744.03   29.90 
   0  -3  -1  680.63   28.50 
   0  -3  -1  688.33   28.20 
   0  -3  -1  709.93   27.70 
   0  -3   1  714.13   26.20 
   0  -3   1  631.44   28.80 
   0  -3  -1  641.54   26.00 
   0  -3  -1  719.13   31.50 
   0  -3  -1  673.13   29.10 
   0  -3   1  654.43   28.60 
   0  -3   1  716.93   27.60 
   0  -3   1  731.33   29.60 
   0  -3   1  734.43   26.00 
   0  -3   1  706.03   28.30 
   0  -3   1  685.03   27.80 
   0  -3  -1  697.33   27.70 
   0  -3   1  693.33   27.70 
   0  -3  -1  702.53   25.40 
   0   3   1  631.84   28.60 
   0   3  -1  732.93   29.90 
   0   3   1  716.23   30.70 
   0   3   1  680.63   26.70 
   0   3  -1  710.43   28.10 
   0   3   1  707.93   26.80 
   0   3  -1  705.13   27.00 
   0   3   1  707.23   29.00 
   0   3   1  709.43   30.10 
   0   3   1  730.23   30.50 
   0   3  -1  689.63   31.10 
   0   3   1  702.33   28.60 
   0   3  -1  655.53   27.70 
   0   3   1  749.73   28.80 
   0   3   1  754.62   27.40 
   0   3   1  694.93   28.50 
   0   3  -1  654.23   24.40 
   0   3   1  734.33   27.10 
   0   3  -1  683.93   25.60 
   0   3  -1  660.73   28.40 
   0   3  -1  699.03   26.80 
   0   3  -1  681.73   26.60 
   0   3  -1  700.23   28.00 
   0   3   1  710.83   28.50 
   0   3   1  720.73   28.30 
   0   3   1  647.54   29.00 
   0   3  -1  755.72   32.90 
   0   3  -1  724.23   29.00 
   0   3  -1  689.83   29.00 
   0   3  -1  724.53   26.80 
   0   3  -1  692.33   26.80 
   0   3  -1  684.63   25.10 
   0   3   1  686.13   28.20 
   0   3  -1  690.53   28.90 
   0   3   1  653.13   28.80 
   0   3  -1  710.33   29.70 
  -1  -3  -1 5115.39  160.08 
  -1  -3  -1 5039.20  161.58 
   1  -3   1 5129.59  163.18 
  -1  -3  -1 5172.48  165.88 
  -1  -3  -1 5025.50  160.58 
  -1  -3  -1 5134.69  164.78 
   1  -3   1 5199.68  163.78 
  -1  -3  -1 5009.70  166.78 
   1  -3   1 4918.91  163.88 
   1  -3   1 5083.19  162.78 
  -1  -3  -1 5006.10  160.68 
   1  -3   1 5138.39  159.98 
  -1  -3  -1 4999.60  163.98 
  -1  -3  -1 5004.20  162.98 
   1  -3   1 4944.41  163.88 
  -1  -3  -1 4994.30  164.78 
  -1  -3  -1 5170.68  161.48 
   1  -3   1 5045.40  163.18 
   1  -3   1 5236.28  165.48 
   1  -3   1 5249.37  159.38 
  -1  -3  -1 5260.07  160.38 
   1  -3   1 5040.30  164.08 
   1  -3   1 5164.18  164.68 
  -1  -3  -1 5264.17  160.78 
  -1  -3  -1 5165.18  163.78 
  -1  -3  -1 5225.38  162.18 
   1  -3   1 5004.50  160.18 
  -1  -3  -1 4936.11  162.78 
  -1  -3  -1 5248.57  160.38 
  -1  -3  -1 4954.40  161.38 
   1  -3   1 5199.98  164.58 
   1  -3   1 5024.70  166.68 
   1  -3   1 5319.57  164.18 
   1  -3   1 5145.89  162.88 
  -1  -3  -1 5241.28  161.38 
  -1  -3  -1 5045.50  160.18 
   1  -3   1 5043.40  163.28 
  -1   3  -1 5278.47  165.88 
   1   3   1 5176.68  161.38 
  -1   3  -1 4976.10  162.38 
  -1   3  -1 5205.08  164.18 
  -1   3  -1 5084.59  164.68 
  -1   3  -1 5065.59  161.58 
   1   3   1 5202.08  160.88 
  -1   3  -1 5122.99  164.38 
   1   3   1 5188.28  165.38 
  -1   3  -1 5101.09  167.08 
  -1   3  -1 5023.40  162.98 
  -1   3  -1 5145.58  162.58 
   1   3   1 5073.39  161.58 
  -1   3  -1 4993.10  162.88 
  -1   3  -1 5231.68  164.08 
  -1   3  -1 5266.77  164.68 
   1   3   1 5032.50  164.48 
  -1   3  -1 4830.22  160.38 
   1   3   1 5153.98  162.08 
  -1   3  -1 5114.19  163.88 
  -1   3  -1 5064.69  162.88 
   1   3   1 5066.39  163.78 
  -1   3  -1 5189.98  167.78 
   1   3   1 5084.79  161.88 
   1   3   1 5041.40  164.88 
   1   3   1 5078.79  163.38 
   1   3   1 5217.48  165.88 
   1   3   1 5118.39  163.38 
  -1   3  -1 4944.41  164.18 
   1   3   1 5060.49  163.58 
   1   3   1 4780.12  166.98 
   1   3   1 5029.00  163.48 
  -2  -3  -1 1871.21   69.99 
   2  -3   1 2047.20   74.09 
  -2  -3  -1 2106.99   68.89 
   2  -3   1 1972.30   69.69 
  -2  -3  -1 2068.29   71.09 
   2  -3   1 2126.29   72.79 
   2  -3   1 2008.40   72.79 
  -2  -3  -1 2066.79   74.39 
  -2  -3  -1 2148.58   73.59 
   2  -3   1 2072.19   69.59 
  -2  -3  -1 1992.90   71.59 
  -2  -3  -1 2139.59   76.59 
   2  -3   1 2063.69   69.39 
   2  -3   1 2033.00   71.69 
  -2  -3  -1 2153.98   72.39 
   2  -3   1 2034.90   70.19 
  -2  -3  -1 2044.40   69.39 
   2  -3   1 2094.49   73.09 
  -2  -3  -1 1985.80   71.89 
  -2  -3  -1 1999.50   68.19 
   2  -3   1 2149.08   73.49 
   2  -3   1 2062.69   73.69 
  -2  -3  -1 2084.59   73.39 
  -2  -3  -1 2042.50   70.49 
  -2  -3  -1 2164.38   68.89 
  -2  -3  -1 1974.50   73.39 
   2  -3   1 2069.19   74.29 
  -2  -3  -1 2168.48   71.49 
   2  -3   1 2019.20   76.29 
   2  -3   1 2053.69   72.29 
  -2   3  -1 2021.70   69.99 
  -2   3  -1 1995.20   72.49 
   2   3   1 2178.38   74.29 
  -2   3  -1 2070.59   72.49 
  -2   3  -1 2034.10   74.79 
   2   3   1 2096.69   68.99 
  -2   3  -1 2076.39   72.39 
  -2   3  -1 2127.19   72.69 
  -2   3  -1 2091.19   74.09 
   2   3   1 2129.59   69.79 
  -2   3  -1 1893.91   69.09 
   2   3   1 2063.79   73.49 
  -2   3  -1 2149.08   73.29 
  -2   3  -1 2000.80   71.69 
   2   3   1 2058.19   70.89 
   2   3   1 2111.39   75.19 
  -2   3  -1 2065.09   69.69 
  -2   3  -1 2069.19   73.59 
  -2   3  -1 1984.90   72.49 
  -2   3  -1 2090.19   73.39 
   2   3   1 2148.39   71.59 
   2   3   1 2060.29   71.69 
  -2   3  -1 2012.90   69.89 
   2   3   1 2091.59   68.89 
  -2   3  -1 2152.48   71.89 
  -2   3  -1 2030.60   76.09 
   2   3   1 2118.99   73.69 
  -2   3  -1 2041.40   69.99 
  -2   3  -1 2043.30   73.49 
   2   3   1 2191.68   74.59 
   2   3   1 2033.10   72.39 
   2   3   1 2102.79   72.09 
   2   3   1 2029.40   70.69 
   3  -3   1 1854.01   68.69 
   3  -3   1 1845.12   66.49 
   3  -3   1 1872.91   71.89 
  -3  -3  -1 1793.52   65.19 
   3  -3   1 1819.52   70.09 
  -3  -3  -1 1846.72   66.59 
   3  -3   1 1822.22   67.79 
  -3  -3  -1 1713.93   66.99 
  -3  -3  -1 1776.32   64.29 
  -3  -3  -1 1886.31   67.49 
   3  -3   1 1850.81   64.89 
  -3  -3  -1 1838.22   63.49 
   3  -3   1 1800.92   68.59 
   3  -3   1 1793.92   62.39 
  -3  -3  -1 1847.22   62.89 
   3  -3   1 1851.81   64.89 
  -3  -3  -1 1841.52   67.19 
  -3  -3  -1 1760.72   69.39 
   3  -3   1 1799.32   67.29 
   3  -3   1 1766.62   62.59 
  -3  -3  -1 1811.82   59.89 
   3  -3   1 1765.22   67.19 
   3  -3   1 1860.61   67.29 
  -3  -3  -1 1870.81   64.49 
   3  -3   1 1815.32   68.59 
  -3  -3  -1 1813.52   65.19 
   3  -3   1 1820.12   65.09 
  -3   3  -1 1718.93   66.19 
   3   3   1 1867.81   71.99 
   3   3   1 1835.32   67.19 
   3   3   1 1877.01   66.99 
   3   3   1 1902.31   68.09 
   3   3   1 1822.72   62.99 
   3   3   1 1884.01   65.99 
  -3   3  -1 1861.71   65.09 
  -3   3  -1 1712.43   68.49 
  -3   3  -1 1776.02   68.39 
   3   3   1 1877.01   67.89 
  -3   3  -1 1719.43   65.09 
   3   3   1 1866.31   65.59 
   3   3   1 1889.51   69.39 
  -3   3  -1 1809.12   67.39 
   3   3   1 1811.82   65.79 
   3   3   1 1902.51   63.89 
  -3   3  -1 1741.33   66.49 
  -3   3  -1 1882.01   66.09 
  -3   3  -1 1910.81   69.09 
  -3   3  -1 1873.51   68.59 
   3   3   1 1801.52   70.29 
  -3   3  -1 1870.91   62.79 
  -4  -3  -1  691.53   30.70 
  -4  -3  -1  614.24   28.30 
   4  -3   1  636.44   31.60 
   4  -3   1  639.44   29.10 
   4  -3   1  648.74   33.20 
   4  -3   1  623.34   31.90 
   4  -3   1  658.63   32.40 
   4  -3   1  628.54   32.60 
   4  -3   1  597.14   35.50 
  -4  -3  -1  561.44   31.10 
  -4  -3  -1  651.23   31.40 
   4  -3   1  664.73   32.50 
  -4  -3  -1  650.63   30.90 
   4  -3   1  730.63   41.40 
   4  -3   1  659.23   28.90 
   4  -3   1  595.14   33.90 
   4  -3   1  625.64   33.20 
   4  -3   1  636.84   31.50 
   4  -3   1  679.33   30.90 
   4  -3   1  671.83   33.20 
  -4  -3  -1  631.24   41.30 
  -4   3  -1  644.44   30.80 
  -4   3  -1  658.23   32.10 
  -4   3  -1  631.34   33.00 
  -4   3  -1  674.23   33.00 
  -4   3  -1  672.63   29.30 
  -4   3  -1  644.94   26.30 
  -4   3  -1  652.63   30.50 
   4   3   1  629.64   36.20 
   4   3   1  726.83   36.50 
   4   3   1  695.23   31.70 
   4   3   1  682.93   31.80 
   4   3   1  630.84   31.40 
   4   3   1  647.14   33.60 
  -4   3  -1  647.94   33.00 
   4   3   1  670.43   32.00 
  -4   3  -1  633.84   29.60 
  -4   3  -1  540.95   32.60 
   4   3   1  586.84   28.60 
  -4   3  -1  631.64   31.40 
   4   3   1  660.53   32.60 
  -4   3  -1  626.04   31.50 
   4   3   1  645.74   28.70 
   5  -3   1  489.15   29.70 
   5  -3   1  476.25   26.00 
  -5  -3  -1  510.95   27.40 
   5  -3   1  480.25   30.10 
  -5  -3  -1  525.65   29.40 
   5  -3   1  509.55   28.90 
   5  -3   1  490.95   24.30 
   5  -3   1  553.14   29.70 
   5  -3   1  502.95   33.80 
   5  -3   1  506.25   29.50 
  -5  -3  -1  539.05   29.80 
  -5  -3  -1  482.45   25.40 
   5  -3   1  515.25   28.50 
  -5  -3  -1  497.35   29.50 
   5  -3   1  457.45   28.70 
  -5  -3  -1  488.35   23.10 
   5  -3   1  498.75   28.00 
   5  -3   1  509.75   27.80 
   5  -3   1  548.75   33.50 
   5  -3   1  499.45   25.40 
  -5  -3  -1  497.55   27.40 
   5  -3   1  479.05   29.80 
  -5   3  -1  546.95   29.60 
   5   3   1  475.45   25.00 
  -5   3  -1  529.85   28.90 
   5   3   1  464.65   28.80 
  -5   3  -1  556.74   29.70 
   5   3   1  485.85   32.00 
  -5   3  -1  515.35   32.10 
   5   3   1  497.45   29.50 
  -5   3  -1  535.45   25.10 
   5   3   1  523.65   28.50 
  -5   3  -1  526.25   31.00 
   5   3   1  480.45   28.00 
  -5   3  -1  531.85   29.90 
   5   3   1  527.65   28.50 
  -5   3  -1  523.65   26.20 
   5   3   1  479.05   25.90 
  -5   3  -1  486.65   29.50 
  -5   3  -1  468.55   27.50 
   5   3   1  499.05   29.60 
  -5   3  -1  542.65   27.80 
   6  -3   1  845.92   43.50 
  -6  -3  -1  797.32   41.00 
   6  -3   1  883.61   43.70 
  -6  -3  -1  879.81   44.70 
   6  -3   1  803.02   44.30 
   6  -3   1  818.82   49.40 
   6  -3   1  887.31   47.20 
  -6  -3  -1  800.22   43.50 
   6  -3   1  889.51   49.30 
   6  -3   1  837.82   35.50 
   6  -3   1  836.82   42.40 
   6  -3   1  800.62   44.00 
   6  -3   1  887.21   41.70 
  -6  -3  -1  821.62   39.60 
   6  -3   1  842.72   42.20 
  -6  -3  -1  936.01   42.90 
   6  -3   1  909.91   43.70 
  -6  -3  -1  853.81   38.90 
  -6  -3  -1  831.12   42.10 
  -6  -3  -1  817.82   43.40 
  -6   3  -1  855.21   42.30 
   6   3   1  922.71   41.90 
   6   3   1  890.21   44.60 
   6   3   1  832.92   47.50 
  -6   3  -1  804.42   46.30 
   6   3   1  813.22   41.00 
  -6   3  -1  863.81   43.80 
   6   3   1  850.91   44.30 
  -6   3  -1  834.12   39.60 
  -6   3  -1  912.81   42.90 
   6   3   1  839.12   37.70 
  -6   3  -1  865.21   43.50 
   6   3   1  842.52   37.10 
  -6   3  -1  872.61   36.60 
   6   3   1  917.21   40.70 
   6   3   1  931.41   45.80 
  -6   3  -1  799.12   41.70 
   6   3   1  805.42   41.90 
  -6   3  -1  850.01   37.80 
  -6   3  -1  777.02   43.80 
  -7  -3  -1  246.88   26.90 
   7  -3   1  238.48   30.00 
  -7  -3  -1  221.78   21.00 
   7  -3   1  178.18   21.70 
  -7  -3  -1  196.38   24.30 
  -7  -3  -1  214.88   24.00 
   7  -3   1  211.88   26.70 
  -7  -3  -1  196.78   22.60 
  -7  -3  -1  192.08   20.50 
  -7  -3  -1  196.48   24.50 
   7  -3   1  211.48   24.80 
   7  -3   1  213.18   24.90 
  -7  -3  -1  171.48   21.70 
   7  -3   1  164.28   23.70 
   7  -3   1  175.28   21.60 
  -7  -3  -1  195.08   25.00 
   7  -3   1  200.58   23.20 
   7  -3   1  231.48   23.80 
  -7   3  -1  217.48   28.10 
   7   3   1  216.18   16.80 
  -7   3  -1  196.18   25.00 
   7   3   1  203.68   16.70 
   7   3   1  209.78   24.30 
  -7   3  -1  218.98   20.00 
   7   3   1  219.78   27.00 
   7   3   1  219.28   22.90 
  -7   3  -1  223.08   21.10 
   7   3   1  241.78   24.10 
  -7   3  -1  184.28   22.10 
   7   3   1  211.08   28.60 
   7   3   1  184.48   23.40 
   7   3   1  207.38   25.30 
  -7   3  -1  195.18   24.00 
  -7   3  -1  207.18   23.30 
  -7   3  -1  209.18   22.50 
  -7   3  -1  203.18   22.80 
   8  -3   1  342.07   29.80 
  -8  -3  -1  383.96   26.30 
  -8  -3  -1  431.26   32.80 
   8  -3   1  373.86   32.10 
  -8  -3  -1  377.86   38.10 
   8  -3   1  408.96   30.00 
   8  -3   1  407.26   34.00 
  -8  -3  -1  328.27   27.60 
  -8  -3  -1  370.06   28.90 
  -8  -3  -1  336.67   34.30 
   8  -3   1  413.06   54.79 
   8  -3   1  386.56   30.50 
   8  -3   1  365.36   27.20 
  -8  -3  -1  396.96   26.60 
   8  -3   1  484.45   40.50 
   8   3   1  432.06   32.50 
   8   3   1  286.87   32.20 
  -8   3  -1  390.16   30.70 
  -8   3  -1  357.36   29.60 
   8   3   1  346.17   27.30 
   8   3   1  391.26   32.60 
  -8   3  -1  405.16   26.80 
  -8   3  -1  368.26   29.20 
  -8   3  -1  406.96   32.70 
   8   3   1  396.06   25.70 
  -8   3  -1  356.16   28.20 
  -8   3  -1  355.16   38.40 
   8   3   1  439.26   44.40 
  -8   3  -1  422.46   31.00 
   8   3   1  440.36   28.90 
   9  -3   1  137.89   28.50 
  -9  -3  -1  121.49   22.60 
  -9  -3  -1  156.48   26.60 
   9  -3   1  156.08   24.00 
   9  -3   1  123.49   23.60 
  -9  -3  -1  112.99   19.80 
   9  -3   1  110.49   22.30 
  -9  -3  -1  119.39   22.20 
  -9  -3  -1  160.08   27.10 
   9  -3   1  127.39   23.30 
  -9  -3  -1   92.69   18.80 
   9  -3   1   86.39   16.90 
   9   3   1  157.88   28.20 
   9   3   1  139.99   21.40 
  -9   3  -1  102.29   17.80 
   9   3   1  147.69   24.20 
  -9   3  -1   94.69   18.90 
   9   3   1  148.89   25.20 
   9   3   1  126.59   23.30 
  -9   3  -1  126.39   22.80 
  -9   3  -1  103.69   20.10 
  -9   3  -1  100.29   19.10 
  -9   3  -1  138.59   21.60 
  -9   3  -1  116.59   23.00 
 -10  -3  -1  208.08   30.60 
 -10   3  -1  209.28   43.20 
 -10   3  -1  223.98   29.50 
  -9  -4   1  152.18   26.90 
  -9  -4   1   96.19   19.70 
   9  -4  -1   98.09   21.40 
  -9  -4   1  107.39   20.50 
   9  -4  -1   77.39   18.80 
   9  -4  -1  109.19   22.00 
  -9  -4   1   94.79   16.60 
  -9  -4   1   81.69   18.10 
   9  -4  -1   97.29   20.50 
   9  -4  -1  103.69   18.30 
   9  -4  -1  124.09   26.00 
   9  -4  -1   78.89   16.90 
   9  -4  -1   90.49   19.00 
  -9  -4   1   92.79   19.50 
  -9   4   1  105.19   19.80 
   9   4  -1   96.19   20.10 
  -9   4   1  132.49   22.80 
  -9   4   1  129.19   21.40 
  -9   4   1   69.89   19.80 
  -9   4   1  111.09   22.50 
  -9   4   1   86.09   16.60 
  -9   4   1  127.49   21.40 
   9   4  -1  129.49   22.90 
  -9   4   1  114.49   23.50 
  -9   4   1  136.29   23.90 
   9   4  -1   84.19   20.20 
  -8  -4   1   82.79   19.20 
  -8  -4   1  139.49   20.70 
   8  -4  -1  103.39   19.50 
   8  -4  -1  118.99   21.00 
  -8  -4   1  126.99   18.60 
  -8  -4   1  105.69   17.50 
  -8  -4   1  143.29   19.60 
  -8  -4   1  147.79   21.30 
   8  -4  -1  104.79   20.90 
  -8  -4   1  154.58   23.60 
   8  -4  -1  137.99   20.30 
   8  -4  -1  134.09   20.60 
   8  -4  -1   87.59   17.00 
   8  -4  -1  138.69   22.30 
   8  -4  -1  127.29   24.80 
   8   4  -1  149.09   23.20 
  -8   4   1   85.59   14.00 
  -8   4   1  116.29   18.20 
   8   4  -1  121.39   18.60 
  -8   4   1  158.18   24.90 
  -8   4   1  128.39   20.50 
  -8   4   1  132.19   23.60 
   8   4  -1  146.69   23.80 
  -8   4   1  117.19   19.50 
  -8   4   1  134.39   21.80 
   8   4  -1  121.79   20.00 
  -8   4   1  143.99   22.00 
  -8   4   1   99.49   19.10 
   8   4  -1   95.59   20.60 
  -8   4   1   98.49   19.30 
  -7  -4   1   54.09   13.10 
  -7  -4   1   58.69   12.70 
   7  -4  -1   39.60   11.80 
   7  -4  -1   42.20   12.90 
   7  -4  -1   21.90   12.10 
  -7  -4   1   53.69   11.70 
   7  -4  -1   46.50    9.50 
  -7  -4   1   35.50    9.90 
  -7  -4   1   37.20   10.40 
   7  -4  -1   21.10   11.50 
  -7  -4   1   42.20   10.70 
   7  -4  -1   31.60   12.50 
  -7  -4   1   51.29   10.00 
  -7  -4   1   49.90   13.60 
   7  -4  -1   31.80   11.60 
  -7  -4   1   51.49   13.40 
   7  -4  -1   48.40   12.50 
   7  -4  -1   56.39   13.50 
  -7  -4   1   28.90    9.80 
   7  -4  -1   36.60   14.20 
   7  -4  -1   60.09   16.10 
  -7   4   1   53.39   12.40 
  -7   4   1   53.99   16.00 
   7   4  -1   53.89   12.40 
  -7   4   1   58.99   15.90 
  -7   4   1   54.99   13.70 
   7   4  -1   18.50    9.00 
  -7   4   1   36.10    9.10 
  -7   4   1   29.50   10.00 
  -7   4   1   61.79   14.10 
   7   4  -1   34.00   11.60 
  -7   4   1   31.60   12.20 
  -7   4   1   38.70   11.80 
  -7   4   1   48.80   12.80 
   7   4  -1   50.99   13.30 
  -7   4   1   36.10    9.60 
   7   4  -1   42.60   10.90 
   7   4  -1   52.19   11.70 
   7   4  -1   32.30   12.00 
  -7   4   1   49.60   13.30 
   6  -4  -1   35.00   11.30 
  -6  -4   1   41.60   11.00 
   6  -4  -1   68.09   14.50 
  -6  -4   1   36.00   10.50 
  -6  -4   1   11.40    6.80 
   6  -4  -1   33.90   12.30 
   6  -4  -1   42.60   13.50 
   6  -4  -1   43.80   11.10 
   6  -4  -1   64.29   14.60 
   6  -4  -1   47.60   12.40 
  -6  -4   1   33.10    6.90 
  -6  -4   1   46.90   12.10 
  -6  -4   1   27.40    8.00 
   6  -4  -1   43.80   11.40 
  -6  -4   1   26.50    8.30 
   6  -4  -1   36.40    8.30 
   6  -4  -1   20.60    9.80 
  -6  -4   1   43.40    9.70 
  -6  -4   1   31.50    9.80 
   6  -4  -1   34.20   13.20 
  -6  -4   1   16.90    6.80 
  -6   4   1   42.50   11.70 
  -6   4   1   41.20   12.20 
   6   4  -1   53.49   10.70 
  -6   4   1   39.20   11.20 
   6   4  -1   36.50    9.40 
  -6   4   1   43.50    9.10 
  -6   4   1   24.20    9.80 
   6   4  -1   27.60    9.70 
   6   4  -1   24.30    8.90 
  -6   4   1   25.20    9.30 
   6   4  -1   27.20    9.40 
  -6   4   1   37.30   11.20 
   6   4  -1   39.60   11.10 
  -6   4   1   39.00    9.70 
   6   4  -1   30.50    9.20 
   6   4  -1   29.80    7.50 
   6   4  -1   34.10   10.70 
  -6   4   1   36.80   10.10 
  -6   4   1   22.50    8.50 
  -6   4   1   35.90   11.50 
   6   4  -1   41.70   10.00 
  -6   4   1   33.10    7.50 
   5  -4  -1  218.68   23.70 
   5  -4  -1  209.58   16.20 
  -5  -4   1  216.08   22.00 
   5  -4  -1  170.88   20.50 
   5  -4  -1  194.58   20.80 
   5  -4  -1  196.28   21.10 
  -5  -4   1  207.68   23.70 
   5  -4  -1  193.48   19.70 
  -5  -4   1  186.78   13.80 
   5  -4  -1  194.98   22.10 
  -5  -4   1  191.98   12.50 
  -5  -4   1  194.58   16.30 
   5  -4  -1  213.98   23.10 
   5  -4  -1  181.18   21.50 
   5  -4  -1  197.68   22.60 
  -5  -4   1  183.48   16.50 
   5  -4  -1  193.68   23.60 
  -5  -4   1  213.18   16.00 
  -5  -4   1  198.38   20.30 
  -5  -4   1  189.08   16.10 
   5  -4  -1  199.68   24.20 
  -5   4   1  201.48   15.20 
   5   4  -1  213.78   18.30 
   5   4  -1  226.98   22.30 
  -5   4   1  200.08   20.90 
   5   4  -1  212.78   23.90 
   5   4  -1  228.38   16.80 
   5   4  -1  205.08   24.40 
   5   4  -1  190.48   20.50 
   5   4  -1  232.48   25.30 
  -5   4   1  176.68   20.40 
  -5   4   1  219.78   21.80 
  -5   4   1  202.48   22.50 
  -5   4   1  200.38   21.20 
  -5   4   1  170.98   21.50 
  -5   4   1  205.38   19.70 
  -5   4   1  189.18   20.70 
  -5   4   1  212.58   16.90 
  -5   4   1  209.48   24.30 
   5   4  -1  207.08   22.80 
   5   4  -1  190.98   21.20 
   5   4  -1  210.48   17.10 
   5   4  -1  164.68   14.10 
   5   4  -1  185.58   20.40 
  -5   4   1  219.68   17.10 
  -4  -4   1  140.09   10.70 
   4  -4  -1  120.89   16.20 
   4  -4  -1  199.98   20.50 
  -4  -4   1  162.38   17.30 
   4  -4  -1  155.78   12.20 
  -4  -4   1  138.49   17.30 
   4  -4  -1  151.38   19.00 
  -4  -4   1  153.08   16.60 
  -4  -4   1  159.58   13.00 
   4  -4  -1  127.39   17.50 
  -4  -4   1  154.48   12.40 
   4  -4  -1  137.19   16.00 
   4  -4  -1  124.89   16.20 
   4  -4  -1  131.29   17.60 
   4  -4  -1  143.29   15.60 
   4  -4  -1  176.68   20.40 
   4  -4  -1  123.39   14.80 
   4  -4  -1  129.69   16.10 
  -4  -4   1  150.88   16.10 
   4  -4  -1  166.28   19.60 
  -4   4   1  141.29   17.80 
  -4   4   1  112.69   15.00 
   4   4  -1  153.58   17.00 
   4   4  -1  133.59   17.10 
   4   4  -1  161.98   12.60 
  -4   4   1  178.58   19.20 
   4   4  -1  193.88   21.90 
   4   4  -1  146.09   16.90 
   4   4  -1  146.09   14.80 
   4   4  -1  150.48   19.80 
   4   4  -1  135.79   16.40 
  -4   4   1  149.39   17.30 
   4   4  -1  167.38   16.90 
  -4   4   1  138.89   13.50 
  -4   4   1  109.89   13.60 
  -4   4   1  130.59   16.60 
   4   4  -1  144.29   12.30 
   4   4  -1  171.98   19.20 
   4   4  -1  143.09   15.80 
   4   4  -1  156.68   18.90 
  -4   4   1  155.78   14.70 
   4   4  -1  135.59   17.50 
  -4   4   1  153.38   18.10 
  -4   4   1  148.09   19.80 
  -4   4   1  144.79   18.30 
  -4   4   1  122.19   14.60 
   3  -4  -1   40.90    9.60 
  -3  -4   1   50.99    7.90 
  -3  -4   1   70.69    9.10 
   3  -4  -1   59.79    9.90 
   3  -4  -1   56.39   11.10 
   3  -4  -1   80.19   14.10 
  -3  -4   1   73.89   11.00 
   3  -4  -1   65.89   10.60 
   3  -4  -1   58.69    9.00 
   3  -4  -1   66.99   11.40 
  -3  -4   1   74.79   10.70 
   3  -4  -1   64.19   10.60 
  -3  -4   1   56.09   10.30 
  -3  -4   1   57.09    8.40 
  -3  -4   1   63.29    9.50 
   3  -4  -1   55.79   10.30 
   3  -4  -1   54.99    9.20 
   3  -4  -1   68.39    9.70 
  -3   4   1   75.49   10.00 
  -3   4   1   52.59    9.10 
   3   4  -1   83.29   11.00 
   3   4  -1   66.19   12.70 
  -3   4   1   80.49   12.90 
  -3   4   1   70.19   11.00 
  -3   4   1   52.99   10.10 
  -3   4   1   59.09   10.80 
   3   4  -1   68.09    9.30 
   3   4  -1   60.69   10.60 
   3   4  -1   54.09    9.30 
   3   4  -1   74.29   11.60 
  -3   4   1   58.59   10.20 
   3   4  -1   66.39    8.50 
   3   4  -1   65.59   12.20 
   3   4  -1   87.49   13.30 
  -3   4   1   85.19   12.50 
  -3   4   1   73.79   12.90 
   3   4  -1   89.59   12.50 
  -3   4   1   67.49    9.60 
  -3   4   1   91.49   12.90 
   3   4  -1   59.19    8.80 
   3   4  -1   87.49    9.40 
  -3   4   1   61.59    8.30 
   3   4  -1   59.99   10.10 
  -3   4   1   48.40    9.00 
   2  -4  -1   20.90    6.30 
   2  -4  -1   24.10    7.30 
   2  -4  -1   29.00    7.10 
   2  -4  -1   21.70    5.90 
   2  -4  -1   34.00    8.40 
   2  -4  -1   35.30    8.20 
   2  -4  -1   41.40    8.50 
  -2  -4   1   24.20    6.70 
  -2  -4   1   32.60    6.20 
   2  -4  -1   38.50    8.70 
   2  -4  -1   34.10    6.60 
   2  -4  -1   22.50    6.20 
  -2  -4   1   30.50    7.20 
   2  -4  -1   37.10    7.90 
   2  -4  -1   22.00    6.10 
  -2  -4   1   21.30    5.80 
  -2  -4   1   31.30    6.60 
   2   4  -1   38.40   10.20 
  -2   4   1   27.80    6.90 
   2   4  -1   27.90    6.50 
  -2   4   1   41.60    8.90 
  -2   4   1   22.40    6.40 
   2   4  -1   43.30    7.70 
   2   4  -1   30.20    8.30 
  -2   4   1   42.80    9.50 
   2   4  -1   23.00    6.90 
  -2   4   1   35.10    7.90 
  -2   4   1   21.90    4.90 
   2   4  -1   43.60    8.30 
   2   4  -1   25.40    6.10 
   2   4  -1   33.20    7.30 
   2   4  -1   19.20    6.00 
  -2   4   1   29.60    7.70 
  -2   4   1   24.90    7.20 
  -2   4   1   36.70    7.60 
   2   4  -1   24.40    6.60 
  -2   4   1   32.60    8.20 
  -2   4   1   37.10    7.30 
   2   4  -1   29.70    7.20 
   2   4  -1   39.10    7.00 
  -2   4   1   31.70    7.50 
  -2   4   1   23.80    6.80 
  -1  -4   1   40.10    8.40 
  -1  -4   1   57.29    7.70 
  -1  -4   1   63.09    8.10 
  -1  -4   1   54.09    6.80 
  -1  -4   1   56.99    8.90 
  -1  -4   1   49.60    6.90 
   1  -4  -1   57.49    9.40 
  -1  -4   1   64.59    9.30 
   1  -4  -1   61.19    7.90 
  -1  -4   1   54.69    7.50 
   1  -4  -1   92.49   10.00 
  -1  -4   1   44.30    8.40 
   1  -4  -1   59.59    9.10 
   1  -4  -1   53.79    8.80 
  -1  -4   1   47.20    8.70 
   1  -4  -1   45.80    9.30 
   1  -4  -1   42.40    6.90 
  -1  -4   1   49.90    7.10 
   1  -4  -1   49.00    7.00 
   1  -4  -1   59.19    8.70 
   1  -4  -1   55.89    8.60 
   1  -4  -1   54.19    9.00 
   1  -4  -1   53.39    9.50 
  -1  -4   1   58.09    7.60 
  -1   4   1   58.29    9.00 
   1   4  -1   68.99    9.00 
   1   4  -1   51.49    7.00 
  -1   4   1   68.59    9.50 
  -1   4   1   72.89    5.40 
   1   4  -1   33.00    5.90 
  -1   4   1   67.69   10.50 
   1   4  -1   78.19   10.50 
  -1   4   1   67.49    9.80 
   1   4  -1   54.39    6.80 
  -1   4   1   71.79    8.70 
   1   4  -1   32.20    8.20 
   1   4  -1   51.89    9.40 
  -1   4   1   73.69   11.20 
   1   4  -1   43.40    6.70 
  -1   4   1   60.89    8.50 
   1   4  -1   60.69    9.40 
   1   4  -1   54.39    8.40 
   1   4  -1   68.49   13.30 
   1   4  -1   66.09    9.40 
  -1   4   1   54.69    7.70 
  -1   4   1   54.89    9.40 
  -1   4   1   67.49   10.10 
  -1   4   1   81.99   10.60 
   1   4  -1   58.69   11.00 
  -1   4   1   78.59   10.30 
   1   4  -1   60.09   10.00 
  -1   4   1   75.79   11.10 
   0  -4  -1  195.68   13.60 
   0  -4  -1  213.18   13.90 
   0  -4   1  184.18   14.90 
   0  -4  -1  215.28   14.50 
   0  -4  -1  242.68   14.10 
   0  -4  -1  252.87   15.40 
   0  -4   1  193.18   13.60 
   0  -4   1  214.68   13.80 
   0  -4   1  225.78   16.80 
   0  -4  -1  209.28   15.20 
   0  -4  -1  202.18   16.50 
   0  -4   1  233.58   12.50 
   0  -4   1  220.48   14.10 
   0  -4  -1  206.28   12.10 
   0  -4  -1  220.58   14.00 
   0  -4  -1  224.38   15.00 
   0  -4   1  241.08   12.50 
   0  -4   1  236.58   15.70 
   0  -4   1  217.88   15.60 
   0  -4   1  237.88   14.00 
   0  -4   1  218.98   13.90 
   0  -4   1  233.98   14.70 
   0   4   1  222.38   13.20 
   0   4   1  216.88   14.60 
   0   4  -1  221.38   14.90 
   0   4  -1  241.08   18.70 
   0   4  -1  231.28   14.70 
   0   4   1  210.18   15.10 
   0   4  -1  205.98   14.30 
   0   4  -1  222.98   10.90 
   0   4   1  230.18   14.90 
   0   4   1  224.48   15.80 
   0   4  -1  243.38   13.50 
   0   4  -1  209.38   11.10 
   0   4   1  210.78   15.10 
   0   4   1  215.78   11.60 
   0   4  -1  237.68   11.40 
   0   4  -1  242.48   13.40 
   0   4   1  227.28   16.40 
   0   4   1  242.98   13.70 
   0   4   1  230.98   15.90 
   0   4   1  209.38   14.70 
   0   4  -1  213.88   12.60 
   0   4   1  220.68   14.70 
   0   4   1  220.08   15.10 
   0   4  -1  206.88   14.80 
   0   4  -1  202.58   12.70 
   0   4   1  206.28   12.70 
   0   4   1  260.07   18.00 
   0   4  -1  208.08   14.80 
   0   4  -1  211.38   15.60 
   0   4  -1  212.78   15.60 
   0   4  -1  226.48   14.30 
   0   4   1  243.68   14.50 
   0   4   1  208.48   12.50 
   1  -4   1  444.46   21.20 
   1  -4   1  440.96   23.00 
   1  -4   1  438.06   25.40 
   1  -4   1  436.06   28.80 
   1  -4   1  433.86   23.80 
   1  -4   1  436.96   19.10 
   1  -4   1  411.06   22.00 
   1  -4   1  411.66   22.80 
   1  -4   1  454.55   22.20 
  -1  -4  -1  383.66   19.60 
  -1  -4  -1  414.16   20.50 
  -1  -4  -1  424.16   24.90 
  -1  -4  -1  386.66   22.00 
  -1  -4  -1  425.36   24.80 
  -1  -4  -1  426.86   18.20 
   1  -4   1  432.26   19.20 
  -1  -4  -1  444.36   19.90 
   1  -4   1  399.16   21.90 
  -1  -4  -1  450.65   20.80 
  -1  -4  -1  417.56   17.80 
  -1  -4  -1  420.26   19.70 
   1  -4   1  461.25   23.50 
  -1  -4  -1  445.66   23.50 
  -1   4  -1  427.86   23.10 
  -1   4  -1  412.76   23.00 
  -1   4  -1  404.36   20.30 
   1   4   1  398.06   18.20 
  -1   4  -1  402.06   20.50 
  -1   4  -1  420.36   22.50 
   1   4   1  426.96   21.20 
   1   4   1  454.45   26.90 
   1   4   1  438.06   24.30 
   1   4   1  418.16   19.90 
  -1   4  -1  465.15   22.00 
  -1   4  -1  440.16   25.90 
   1   4   1  458.15   23.30 
  -1   4  -1  388.06   21.90 
  -1   4  -1  433.86   21.00 
   1   4   1  414.56   23.10 
   1   4   1  436.86   20.90 
  -1   4  -1  449.76   24.40 
   1   4   1  417.06   22.40 
   1   4   1  431.76   21.40 
  -1   4  -1  432.06   22.60 
   1   4   1  447.86   22.90 
   1   4   1  416.26   23.00 
   1   4   1  415.26   19.80 
  -1   4  -1  402.46   21.60 
  -1   4  -1  416.26   20.00 
  -1   4  -1  420.56   23.10 
  -1   4  -1  414.26   19.80 
  -1   4  -1  408.26   20.60 
   1   4   1  457.95   24.50 
   2  -4   1  829.02   36.20 
  -2  -4  -1  828.82   39.30 
   2  -4   1  815.72   31.20 
   2  -4   1  819.32   35.60 
   2  -4   1  775.52   34.90 
  -2  -4  -1  830.22   31.90 
   2  -4   1  801.32   36.00 
   2  -4   1  845.32   36.50 
  -2  -4  -1  793.22   32.70 
  -2  -4  -1  726.63   34.60 
  -2  -4  -1  782.72   36.50 
   2  -4   1  829.22   32.00 
   2  -4   1  805.72   32.20 
   2  -4   1  819.12   39.80 
   2  -4   1  803.42   35.50 
  -2  -4  -1  814.52   37.10 
   2  -4   1  790.02   37.30 
   2  -4   1  843.32   37.60 
  -2  -4  -1  848.32   34.00 
  -2  -4  -1  848.62   35.40 
  -2   4  -1  815.02   31.60 
   2   4   1  777.72   33.80 
   2   4   1  864.21   39.20 
  -2   4  -1  804.22   36.30 
  -2   4  -1  751.92   34.60 
   2   4   1  805.22   32.80 
  -2   4  -1  826.62   35.70 
   2   4   1  869.51   35.60 
   2   4   1  802.02   37.50 
   2   4   1  824.72   32.40 
  -2   4  -1  781.12   31.60 
  -2   4  -1  819.82   36.20 
  -2   4  -1  821.42   36.90 
   2   4   1  839.42   36.00 
   2   4   1  804.92   37.00 
  -2   4  -1  773.12   35.90 
   2   4   1  823.72   34.30 
  -2   4  -1  797.12   35.60 
  -2   4  -1  789.62   35.10 
  -2   4  -1  798.92   39.30 
  -2   4  -1  765.12   34.80 
   2   4   1  828.32   32.80 
   2   4   1  818.22   37.20 
   2   4   1  800.62   35.40 
  -2   4  -1  789.12   37.70 
  -2   4  -1  807.72   33.80 
   3  -4   1   73.39   12.30 
  -3  -4  -1   67.89   12.00 
   3  -4   1   65.09   12.80 
   3  -4   1   57.09   10.80 
   3  -4   1   91.19   14.10 
   3  -4   1   73.89   11.30 
  -3  -4  -1   96.99   13.10 
   3  -4   1   78.39    9.90 
  -3  -4  -1   78.49   11.90 
  -3  -4  -1   70.29    9.90 
  -3  -4  -1   74.39    8.90 
  -3  -4  -1   68.99    9.30 
   3  -4   1   59.09    9.40 
  -3  -4  -1   73.29   10.10 
   3  -4   1   61.19   10.80 
   3  -4   1   53.29   10.70 
   3  -4   1   51.99    8.80 
  -3  -4  -1   65.09   10.90 
  -3  -4  -1   70.09    8.90 
   3   4   1   59.79    9.10 
   3   4   1   46.10    8.80 
   3   4   1   49.99    9.60 
   3   4   1   75.09   12.40 
  -3   4  -1   76.99   12.90 
  -3   4  -1   63.19   12.20 
   3   4   1   69.59    8.30 
  -3   4  -1   46.20    9.10 
   3   4   1   79.69    8.90 
  -3   4  -1   84.29   13.30 
  -3   4  -1   77.09   12.10 
   3   4   1   77.99   13.40 
  -3   4  -1   59.39   10.10 
  -3   4  -1   77.49   11.50 
   3   4   1   57.79   10.50 
  -3   4  -1   45.50    7.60 
   3   4   1   83.99   12.70 
  -3   4  -1   70.69   12.00 
   3   4   1   57.29    8.80 
  -3   4  -1   56.29    8.40 
   3   4   1   79.89   10.90 
  -3   4  -1   70.99   11.20 
  -3   4  -1   73.39   11.70 
   3   4   1   69.69   11.60 
  -3   4  -1   92.79   14.40 
   3   4   1   62.99   10.10 
   4  -4   1   74.59   11.20 
   4  -4   1   66.89   11.50 
  -4  -4  -1  100.29   11.60 
   4  -4   1  100.79   15.50 
   4  -4   1  114.89   17.60 
  -4  -4  -1   67.19   12.20 
  -4  -4  -1   64.09   11.20 
   4  -4   1   75.89   12.60 
   4  -4   1   79.79   11.30 
   4  -4   1   78.79   13.70 
  -4  -4  -1  104.59   11.60 
  -4  -4  -1   80.49   10.70 
   4  -4   1   84.69   13.60 
  -4  -4  -1   94.69   13.40 
   4  -4   1   94.29   14.20 
  -4  -4  -1   65.99   13.90 
   4  -4   1   77.99   11.50 
   4  -4   1   90.29   15.00 
  -4  -4  -1  105.39   14.60 
   4  -4   1   83.79    9.10 
   4  -4   1   72.29   13.50 
  -4   4  -1   72.59   12.30 
   4   4   1   88.99   13.60 
  -4   4  -1   57.49   10.20 
  -4   4  -1   60.29   12.10 
  -4   4  -1   75.19   11.10 
  -4   4  -1   86.69   13.70 
  -4   4  -1   68.19   12.80 
   4   4   1   75.39   11.90 
   4   4   1  106.79   13.20 
   4   4   1   84.49   15.20 
  -4   4  -1   80.29   12.50 
   4   4   1   91.99   10.80 
   4   4   1   92.79   12.90 
   4   4   1   68.59   10.70 
   4   4   1   67.49   13.10 
  -4   4  -1   86.79   12.40 
   4   4   1   63.99   12.50 
  -4   4  -1   67.39    9.10 
   4   4   1   77.19   12.10 
  -4   4  -1   81.79   13.70 
  -4   4  -1   53.89   12.10 
  -4   4  -1   69.69   10.40 
   4   4   1   90.19   11.30 
  -5  -4  -1  277.77   20.40 
   5  -4   1  250.57   20.70 
   5  -4   1  253.27   20.50 
   5  -4   1  212.18   26.70 
   5  -4   1  247.28   24.50 
   5  -4   1  235.28   20.30 
   5  -4   1  252.57   21.20 
  -5  -4  -1  218.98   16.60 
   5  -4   1  323.47   32.00 
   5  -4   1  237.38   24.20 
  -5  -4  -1  257.67   18.40 
  -5  -4  -1  237.28   24.00 
   5  -4   1  239.88   24.60 
  -5  -4  -1  250.17   24.80 
   5  -4   1  256.77   18.10 
   5  -4   1  235.98   18.10 
   5  -4   1  234.08   18.80 
   5  -4   1  254.17   26.30 
  -5  -4  -1  254.37   20.40 
  -5   4  -1  264.87   20.00 
  -5   4  -1  257.77   22.70 
  -5   4  -1  228.18   22.50 
   5   4   1  247.28   18.20 
   5   4   1  260.47   23.80 
  -5   4  -1  272.77   29.00 
  -5   4  -1  257.97   19.50 
   5   4   1  264.07   17.20 
  -5   4  -1  258.07   18.30 
   5   4   1  220.08   25.80 
   5   4   1  220.18   23.00 
  -5   4  -1  275.87   22.60 
   5   4   1  230.28   18.50 
   5   4   1  249.97   20.10 
  -5   4  -1  219.88   23.00 
   5   4   1  302.17   31.50 
   5   4   1  278.87   21.90 
  -5   4  -1  238.28   15.50 
   5   4   1  267.47   22.70 
  -5   4  -1  257.57   19.00 
  -5   4  -1  260.47   21.20 
   6  -4   1  485.15   32.70 
  -6  -4  -1  467.35   31.10 
   6  -4   1  447.06   36.10 
   6  -4   1  452.25   28.80 
   6  -4   1  433.06   34.60 
   6  -4   1  435.96   31.20 
  -6  -4  -1  476.55   31.10 
   6  -4   1  490.15   33.30 
  -6  -4  -1  476.05   31.70 
  -6  -4  -1  568.94   31.30 
  -6  -4  -1  517.55   27.50 
  -6  -4  -1  497.05   29.20 
   6  -4   1  447.36   25.40 
   6  -4   1  518.55   32.20 
   6  -4   1  455.15   31.30 
   6  -4   1  451.65   25.80 
   6  -4   1  431.66   30.40 
  -6  -4  -1  518.45   30.80 
   6  -4   1  476.15   30.90 
  -6   4  -1  480.75   29.70 
  -6   4  -1  430.16   32.90 
  -6   4  -1  479.45   27.80 
  -6   4  -1  474.95   29.30 
  -6   4  -1  496.45   23.20 
   6   4   1  485.85   34.90 
   6   4   1  462.95   29.90 
   6   4   1  418.06   30.30 
   6   4   1  493.95   28.20 
  -6   4  -1  440.56   29.60 
  -6   4  -1  456.15   26.40 
  -6   4  -1  565.64   34.10 
  -6   4  -1  489.85   32.40 
  -6   4  -1  490.55   31.20 
   6   4   1  477.25   30.30 
   6   4   1  462.05   30.70 
  -6   4  -1  448.26   32.10 
   6   4   1  435.16   25.80 
   6   4   1  524.35   30.60 
  -7  -4  -1  315.47   32.20 
   7  -4   1  311.17   33.00 
  -7  -4  -1  342.87   28.70 
   7  -4   1  281.17   35.70 
   7  -4   1  329.87   28.40 
   7  -4   1  279.77   32.20 
  -7  -4  -1  308.77   22.40 
   7  -4   1  334.77   39.00 
   7  -4   1  330.47   31.40 
   7  -4   1  291.77   26.00 
   7  -4   1  296.57   30.50 
  -7  -4  -1  320.37   32.20 
   7  -4   1  345.47   26.60 
  -7  -4  -1  316.67   25.20 
   7  -4   1  356.96   27.60 
  -7  -4  -1  321.07   26.50 
  -7  -4  -1  284.47   23.70 
  -7  -4  -1  321.27   24.60 
  -7  -4  -1  309.37   25.70 
  -7   4  -1  305.67   29.20 
   7   4   1  295.07   35.00 
   7   4   1  300.07   31.30 
  -7   4  -1  364.86   29.90 
   7   4   1  293.97   22.10 
   7   4   1  282.07   26.00 
  -7   4  -1  312.17   25.80 
  -7   4  -1  298.97   30.10 
   7   4   1  329.27   30.30 
  -7   4  -1  304.67   22.30 
  -7   4  -1  315.17   34.60 
  -7   4  -1  351.76   27.20 
  -7   4  -1  309.17   20.80 
   7   4   1  344.47   25.90 
   7   4   1  275.07   23.90 
  -7   4  -1  316.47   31.60 
  -7   4  -1  313.27   24.50 
   8  -4   1 1053.59   59.39 
  -8  -4  -1 1036.40   57.39 
   8  -4   1 1032.90   53.99 
   8  -4   1 1104.09   59.89 
   8  -4   1 1067.59   64.39 
   8  -4   1 1014.80   52.39 
  -8  -4  -1 1133.89   55.09 
   8  -4   1 1071.99   57.19 
   8  -4   1  992.70   54.69 
   8  -4   1 1035.60   55.99 
  -8  -4  -1 1123.79   52.59 
  -8  -4  -1 1102.59   56.79 
  -8  -4  -1 1002.20   57.19 
  -8  -4  -1 1099.39   54.19 
  -8  -4  -1 1043.90   49.50 
   8  -4   1 1089.49   57.19 
  -8   4  -1 1100.69   52.19 
  -8   4  -1  969.10   55.09 
   8   4   1 1113.49   59.49 
  -8   4  -1 1135.59   59.99 
  -8   4  -1 1091.39   55.19 
  -8   4  -1  929.51   52.79 
   8   4   1 1047.30   54.69 
   8   4   1 1044.20   50.79 
   8   4   1 1063.49   57.59 
  -8   4  -1 1050.19   56.99 
   8   4   1 1065.09   62.39 
  -8   4  -1  795.62   58.79 
   8   4   1 1101.69   53.39 
  -8   4  -1  974.40   53.69 
  -8   4  -1 1090.59   62.39 
   9  -4   1  234.28   28.10 
  -9  -4  -1  246.08   29.50 
   9  -4   1  240.98   32.50 
   9  -4   1  226.58   28.30 
  -9  -4  -1  240.08   31.10 
  -9  -4  -1  226.48   29.90 
  -9  -4  -1  227.78   32.20 
   9  -4   1  187.58   28.00 
  -9  -4  -1  262.17   31.00 
   9  -4   1  218.28   28.60 
   9  -4   1  213.68   32.60 
   9  -4   1  186.88   31.30 
  -9   4  -1  256.87   34.90 
  -9   4  -1  244.28   28.80 
   9   4   1  229.18   31.60 
   9   4   1  290.17   31.80 
  -9   4  -1  263.47   35.30 
   9   4   1  278.77   38.00 
   9   4   1  220.48   31.60 
  -9   4  -1  266.57   30.20 
  -9   4  -1  202.88   28.00 
  -9   4  -1  270.37   32.30 
  -9   4  -1  233.48   29.50 
  -9  -5   1  601.24   47.90 
   9  -5  -1  635.04   43.90 
   9  -5  -1  637.84   52.29 
   9  -5  -1  489.75   50.69 
  -9  -5   1  514.15   41.10 
   9  -5  -1  558.74   39.50 
   9  -5  -1  565.04   45.70 
  -9  -5   1  632.84   45.60 
   9  -5  -1  577.64   42.10 
   9  -5  -1  610.34   46.20 
  -9  -5   1  589.64   39.90 
  -9   5   1  640.94   46.20 
  -9   5   1  608.14   41.90 
   9   5  -1  632.34   45.80 
  -9   5   1  534.65   42.40 
  -9   5   1  651.83   43.70 
   9   5  -1  571.94   42.40 
  -9   5   1  665.03   41.50 
  -9   5   1  564.64   45.70 
  -9   5   1  542.25   41.60 
  -9   5   1  633.44   48.90 
   9   5  -1  672.23   43.60 
   9   5  -1  554.64   45.10 
  -9   5   1  635.84   47.60 
  -8  -5   1   54.79   13.50 
  -8  -5   1   53.79   16.60 
  -8  -5   1   40.00   13.20 
  -8  -5   1  102.69   22.40 
   8  -5  -1   74.99   20.30 
   8  -5  -1   49.60   18.20 
   8  -5  -1  102.19   21.40 
   8  -5  -1   61.19   17.10 
   8  -5  -1   54.69   20.40 
   8  -5  -1   48.10   14.70 
  -8  -5   1   61.49   15.30 
  -8  -5   1   80.49   15.00 
   8  -5  -1   55.19   15.00 
   8  -5  -1   55.89   16.40 
  -8  -5   1   57.09   15.60 
   8  -5  -1   63.29   15.80 
  -8  -5   1   73.09   15.80 
  -8   5   1   58.49   17.50 
  -8   5   1   78.79   17.30 
  -8   5   1   56.59   16.30 
  -8   5   1   60.89   16.10 
  -8   5   1   62.09   15.30 
   8   5  -1   51.79   15.80 
   8   5  -1   67.39   16.10 
  -8   5   1   79.99   19.50 
  -8   5   1   59.69   17.60 
  -8   5   1   64.49   14.90 
  -8   5   1   83.59   16.90 
  -8   5   1   59.19   14.70 
   8   5  -1   63.39   16.40 
   8   5  -1   39.20   12.60 
   7  -5  -1  642.64   38.70 
  -7  -5   1  535.65   33.20 
  -7  -5   1  604.94   34.90 
   7  -5  -1  590.64   33.00 
  -7  -5   1  567.34   41.40 
  -7  -5   1  579.44   38.70 
  -7  -5   1  641.54   35.00 
  -7  -5   1  587.24   36.20 
   7  -5  -1  569.64   39.70 
   7  -5  -1  588.84   38.90 
   7  -5  -1  669.63   42.80 
  -7  -5   1  663.03   45.40 
   7  -5  -1  641.04   40.90 
  -7  -5   1  706.83   43.50 
  -7  -5   1  594.14   35.20 
   7  -5  -1  615.74   37.50 
   7  -5  -1  630.94   46.30 
   7  -5  -1  584.64   39.10 
  -7  -5   1  568.34   38.30 
   7  -5  -1  489.95   40.70 
   7  -5  -1  618.84   41.20 
   7   5  -1  573.74   39.40 
  -7   5   1  615.44   42.30 
   7   5  -1  546.15   39.60 
  -7   5   1  549.35   39.10 
   7   5  -1  635.84   38.20 
   7   5  -1  578.24   36.90 
  -7   5   1  605.84   42.10 
  -7   5   1  673.43   37.70 
  -7   5   1  553.74   39.10 
  -7   5   1  590.24   35.10 
  -7   5   1  613.04   37.60 
  -7   5   1  592.74   38.70 
  -7   5   1  622.04   38.70 
  -7   5   1  518.95   32.50 
   7   5  -1  599.54   38.40 
  -7   5   1  670.13   43.50 
   6  -5  -1  346.77   23.40 
  -6  -5   1  355.76   22.50 
  -6  -5   1  360.26   24.30 
  -6  -5   1  347.87   29.10 
   6  -5  -1  336.37   28.00 
   6  -5  -1  285.57   32.60 
   6  -5  -1  301.77   31.80 
  -6  -5   1  327.47   20.30 
  -6  -5   1  367.66   24.00 
  -6  -5   1  342.57   25.90 
   6  -5  -1  315.97   27.40 
   6  -5  -1  321.07   26.70 
   6  -5  -1  339.67   28.40 
   6  -5  -1  337.47   35.60 
   6  -5  -1  300.77   25.20 
   6  -5  -1  292.97   25.40 
  -6  -5   1  332.87   23.90 
  -6  -5   1  350.86   25.20 
  -6  -5   1  363.56   29.50 
   6  -5  -1  352.06   25.70 
  -6  -5   1  298.07   25.00 
  -6   5   1  358.86   37.30 
  -6   5   1  350.46   28.40 
   6   5  -1  310.67   21.90 
  -6   5   1  307.97   23.20 
  -6   5   1  324.87   24.10 
  -6   5   1  322.57   34.50 
   6   5  -1  362.86   27.40 
   6   5  -1  306.27   24.20 
   6   5  -1  314.87   25.30 
  -6   5   1  373.06   29.60 
  -6   5   1  336.87   27.20 
  -6   5   1  265.07   27.30 
   6   5  -1  369.46   35.20 
  -6   5   1  294.37   30.20 
  -6   5   1  302.07   20.80 
   6   5  -1  341.27   25.10 
   6   5  -1  288.57   21.90 
  -6   5   1  377.76   26.90 
   6   5  -1  338.47   34.60 
  -6   5   1  331.37   23.90 
   6   5  -1  331.77   27.90 
  -5  -5   1 2254.97   79.89 
  -5  -5   1 2217.78   85.59 
   5  -5  -1 2072.09   78.49 
  -5  -5   1 2162.68   83.59 
   5  -5  -1 2144.99   85.49 
   5  -5  -1 2126.49   85.49 
   5  -5  -1 2242.68   89.49 
  -5  -5   1 2170.28   78.09 
   5  -5  -1 2209.38   93.39 
   5  -5  -1 2316.67   92.09 
   5  -5  -1 2214.68   82.89 
   5  -5  -1 2181.78   87.89 
  -5  -5   1 2163.98   82.89 
   5  -5  -1 2254.77   84.59 
   5  -5  -1 2052.59   87.09 
   5  -5  -1 2188.48   83.19 
   5  -5  -1 2118.39   88.19 
  -5  -5   1 2064.29   84.59 
  -5  -5   1 2160.68   89.39 
  -5  -5   1 2227.58   81.09 
   5  -5  -1 2108.79   86.39 
  -5  -5   1 2183.98   82.69 
  -5   5   1 2181.78   84.39 
   5   5  -1 2169.38   82.39 
   5   5  -1 2223.38   90.39 
  -5   5   1 2075.79   86.99 
  -5   5   1 2279.57   80.29 
  -5   5   1 2209.78   80.99 
  -5   5   1 2110.69   87.09 
   5   5  -1 2220.98   81.09 
  -5   5   1 2145.99   85.59 
   5   5  -1 2169.08   88.19 
   5   5  -1 2259.67   84.19 
  -5   5   1 2107.79   88.09 
   5   5  -1 2130.99   90.99 
   5   5  -1 2201.88   80.19 
  -5   5   1 2147.39   89.79 
   5   5  -1 2204.98   85.99 
  -5   5   1 2014.10   88.09 
   5   5  -1 2180.68   88.69 
  -5   5   1 2166.28   86.19 
  -5   5   1 2131.79   85.39 
   5   5  -1 2198.78   85.29 
  -5   5   1 2173.78   83.29 
   5   5  -1 2162.58   86.09 
   4  -5  -1  460.45   29.30 
  -4  -5   1  514.15   30.10 
  -4  -5   1  482.65   31.70 
   4  -5  -1  496.85   31.30 
   4  -5  -1  489.85   30.60 
  -4  -5   1  509.85   23.20 
  -4  -5   1  507.15   25.60 
  -4  -5   1  506.65   29.30 
   4  -5  -1  517.75   28.20 
  -4  -5   1  503.35   29.20 
  -4  -5   1  502.45   24.80 
   4  -5  -1  474.15   29.50 
   4  -5  -1  495.15   34.20 
   4  -5  -1  469.85   30.70 
  -4  -5   1  537.85   26.30 
   4  -5  -1  478.65   25.90 
   4  -5  -1  563.84   29.90 
   4  -5  -1  494.15   27.40 
   4  -5  -1  466.45   29.90 
   4  -5  -1  557.44   33.30 
  -4  -5   1  541.95   27.80 
  -4   5   1  539.05   31.60 
   4   5  -1  543.45   33.40 
  -4   5   1  467.85   29.60 
  -4   5   1  512.35   32.60 
   4   5  -1  510.85   29.10 
  -4   5   1  496.15   29.10 
  -4   5   1  545.75   27.80 
   4   5  -1  515.25   24.90 
   4   5  -1  494.65   26.50 
  -4   5   1  479.95   28.90 
  -4   5   1  532.05   32.20 
  -4   5   1  513.95   31.50 
   4   5  -1  563.24   34.00 
   4   5  -1  516.35   26.70 
   4   5  -1  476.85   24.80 
  -4   5   1  552.94   32.50 
   4   5  -1  468.85   29.80 
   4   5  -1  507.75   27.90 
  -4   5   1  535.45   30.20 
   4   5  -1  516.25   33.00 
  -4   5   1  512.85   30.20 
   4   5  -1  504.35   29.20 
  -4   5   1  484.65   25.40 
   4   5  -1  522.05   30.60 
  -4   5   1  536.85   34.70 
   3  -5  -1 1168.28   54.69 
  -3  -5   1 1124.99   48.10 
  -3  -5   1 1091.69   47.00 
  -3  -5   1 1175.28   42.90 
   3  -5  -1 1078.99   50.49 
   3  -5  -1 1182.18   51.29 
   3  -5  -1 1128.09   49.20 
  -3  -5   1 1086.19   44.10 
   3  -5  -1 1096.29   49.00 
   3  -5  -1 1028.50   45.70 
  -3  -5   1 1103.69   50.29 
  -3  -5   1 1082.79   39.60 
   3  -5  -1 1127.89   45.90 
  -3  -5   1 1097.39   51.59 
   3  -5  -1 1105.09   49.00 
   3  -5  -1 1107.49   48.60 
   3  -5  -1 1147.29   49.10 
   3   5  -1 1057.29   49.70 
  -3   5   1  994.90   47.40 
  -3   5   1 1159.68   50.09 
  -3   5   1 1081.09   48.50 
   3   5  -1 1113.09   48.50 
   3   5  -1 1102.49   45.50 
  -3   5   1 1114.69   51.99 
  -3   5   1 1145.99   50.59 
  -3   5   1 1118.39   42.00 
  -3   5   1 1159.48   50.29 
  -3   5   1 1129.99   50.59 
  -3   5   1 1101.49   48.40 
   3   5  -1 1131.69   47.60 
   3   5  -1 1205.18   55.39 
   3   5  -1 1121.99   42.70 
   3   5  -1 1156.08   45.00 
   3   5  -1 1086.49   48.50 
  -3   5   1 1073.59   52.79 
  -3   5   1 1122.79   46.60 
   3   5  -1 1093.29   47.90 
   3   5  -1 1132.99   50.39 
   3   5  -1 1145.99   52.49 
   3   5  -1 1075.29   47.30 
  -3   5   1 1079.49   48.70 
   2  -5  -1   75.19   10.10 
   2  -5  -1   69.89   12.40 
   2  -5  -1   75.09   12.80 
   2  -5  -1   85.39   14.00 
   2  -5  -1   70.79   10.80 
  -2  -5   1   49.60   10.40 
  -2  -5   1   73.79   12.20 
   2  -5  -1   62.49   12.00 
   2  -5  -1   77.09   12.10 
   2  -5  -1   61.69   10.30 
  -2  -5   1   65.69   11.10 
   2  -5  -1   62.89   11.40 
   2  -5  -1   56.99    8.70 
   2  -5  -1   78.79   13.30 
   2  -5  -1   70.39   12.40 
  -2  -5   1   77.49    9.90 
  -2  -5   1   65.39   12.30 
  -2  -5   1   69.49   10.30 
   2   5  -1   66.89   10.10 
  -2   5   1   60.79   11.60 
  -2   5   1   87.89   11.60 
  -2   5   1   67.39   11.30 
  -2   5   1   59.19   10.50 
   2   5  -1   76.39   12.50 
   2   5  -1   73.49   15.50 
  -2   5   1   56.99    6.80 
  -2   5   1   63.79   12.10 
   2   5  -1   88.29   11.40 
   2   5  -1   67.49   11.60 
   2   5  -1   71.79   10.10 
  -2   5   1   64.09   11.90 
  -2   5   1   60.49   10.60 
  -2   5   1   77.19   12.10 
  -2   5   1   73.39   12.20 
   2   5  -1   81.69   14.60 
   2   5  -1   70.69   10.00 
  -2   5   1   69.59   11.00 
  -2   5   1   64.39   10.90 
  -2   5   1   43.60    9.50 
   2   5  -1   88.69   13.30 
   2   5  -1   70.99   11.10 
   2   5  -1   68.59   11.90 
   1  -5  -1  451.85   25.60 
   1  -5  -1  472.95   22.80 
   1  -5  -1  455.05   23.10 
  -1  -5   1  438.76   22.20 
  -1  -5   1  520.35   24.40 
   1  -5  -1  460.15   26.20 
   1  -5  -1  444.66   24.70 
   1  -5  -1  446.66   24.70 
  -1  -5   1  437.36   25.60 
   1  -5  -1  441.16   25.70 
  -1  -5   1  441.26   26.30 
   1  -5  -1  468.25   23.60 
   1  -5  -1  483.75   24.80 
  -1  -5   1  490.85   22.70 
  -1  -5   1  418.46   24.10 
  -1  -5   1  483.55   22.30 
  -1  -5   1  467.75   22.90 
   1  -5  -1  462.15   28.30 
  -1  -5   1  462.65   27.80 
   1  -5  -1  440.96   25.40 
  -1  -5   1  489.15   22.90 
  -1  -5   1  467.35   22.20 
   1  -5  -1  404.06   21.90 
   1   5  -1  505.25   26.30 
  -1   5   1  442.46   25.70 
   1   5  -1  415.56   25.50 
   1   5  -1  398.96   22.10 
   1   5  -1  403.46   19.90 
   1   5  -1  462.35   26.20 
  -1   5   1  423.26   22.30 
   1   5  -1  458.95   24.60 
  -1   5   1  479.35   26.10 
   1   5  -1  460.15   22.80 
  -1   5   1  464.05   26.40 
   1   5  -1  493.15   22.70 
  -1   5   1  451.85   23.80 
  -1   5   1  455.95   28.70 
  -1   5   1  470.95   25.50 
   1   5  -1  494.25   30.00 
  -1   5   1  432.16   25.00 
  -1   5   1  458.95   18.90 
   1   5  -1  462.15   24.80 
  -1   5   1  452.75   25.50 
  -1   5   1  473.35   25.90 
   1   5  -1  486.35   25.40 
  -1   5   1  437.26   21.90 
   1   5  -1  431.76   31.00 
  -1   5   1  467.15   27.90 
   0  -5   1   75.79   12.80 
   0  -5  -1   77.69   11.40 
   0  -5   1   63.79   10.20 
   0  -5   1   61.19   11.10 
   0  -5   1   68.49    8.40 
   0  -5  -1   67.19    9.80 
   0  -5  -1   64.89   10.40 
   0  -5   1   64.29    8.00 
   0  -5  -1   84.79   13.60 
   0  -5   1   81.09   11.10 
   0  -5  -1   79.29   10.70 
   0  -5  -1   79.59   11.70 
   0  -5  -1   74.99   11.40 
   0  -5  -1   40.40    9.50 
   0  -5   1   62.09   10.30 
   0  -5  -1   85.39   12.20 
   0  -5   1   69.59   10.40 
   0  -5   1   67.29   11.70 
   0  -5  -1   57.49   10.50 
   0  -5   1   90.49   13.00 
   0  -5   1   60.69    9.60 
   0  -5  -1   59.79    7.70 
   0   5  -1   70.89   12.10 
   0   5  -1   75.79    9.80 
   0   5  -1   54.09   11.80 
   0   5   1   71.99   12.70 
   0   5  -1   63.09    8.30 
   0   5  -1   56.39    9.70 
   0   5   1   68.49    8.00 
   0   5   1   86.49   11.90 
   0   5   1   65.19   12.50 
   0   5  -1   62.89    6.70 
   0   5  -1   72.29   10.60 
   0   5  -1   84.29   11.20 
   0   5  -1   78.89   14.00 
   0   5   1  108.39   13.60 
   0   5   1   72.79   10.80 
   0   5   1   75.59   12.40 
   0   5   1   64.39   11.40 
   0   5  -1   79.19   11.50 
   0   5   1   71.39    9.30 
   0   5   1   80.69   11.30 
   0   5   1   77.19    9.00 
   0   5  -1   57.69    5.50 
   0   5   1   59.99   10.30 
   0   5  -1   91.39   13.60 
   0   5  -1   48.10    8.90 
   0   5   1   85.49   12.00 
   0   5   1   57.69    6.60 
   0   5  -1   75.99    9.90 
   0   5  -1   69.39    8.50 
   0   5  -1   68.49    9.00 
   0   5   1   59.09    8.70 
   0   5  -1   79.99    7.50 
   0   5   1   70.49   12.30 
  -1  -5  -1 2132.59   71.49 
  -1  -5  -1 2194.18   76.39 
  -1  -5  -1 2166.38   81.69 
   1  -5   1 2194.28   74.69 
  -1  -5  -1 2208.38   78.19 
   1  -5   1 2214.58   81.39 
   1  -5   1 2204.68   81.09 
   1  -5   1 2274.47   77.59 
   1  -5   1 2268.37   79.49 
  -1  -5  -1 2300.57   77.39 
  -1  -5  -1 2185.18   81.09 
   1  -5   1 2143.19   81.49 
  -1  -5  -1 2146.39   73.09 
  -1  -5  -1 2172.68   76.79 
  -1  -5  -1 2168.68   76.69 
   1  -5   1 2029.10   84.09 
  -1  -5  -1 2227.58   77.39 
  -1  -5  -1 2157.58   81.59 
   1  -5   1 2227.18   80.19 
  -1  -5  -1 2206.08   85.09 
   1  -5   1 2149.19   74.69 
   1  -5   1 2221.08   82.19 
   1  -5   1 2228.48   80.09 
   1   5   1 2237.38   74.39 
   1   5   1 2253.47   76.99 
  -1   5  -1 2122.09   75.39 
   1   5   1 1972.40   79.69 
  -1   5  -1 2109.29   82.49 
  -1   5  -1 2126.99   80.79 
  -1   5  -1 2264.47   74.69 
   1   5   1 2339.97   81.69 
  -1   5  -1 2108.69   72.99 
   1   5   1 2160.58   87.09 
  -1   5  -1 2256.07   80.99 
   1   5   1 2117.09   80.69 
  -1   5  -1 2146.49   80.19 
   1   5   1 2267.67   79.39 
  -1   5  -1 2338.37   80.59 
  -1   5  -1 2088.89   80.29 
   1   5   1 2241.88   79.29 
   1   5   1 2211.38   83.29 
  -1   5  -1 2265.17   78.49 
  -1   5  -1 2297.57   78.79 
   1   5   1 2186.48   83.29 
   1   5   1 2274.97   80.89 
  -1   5  -1 2244.18   82.39 
  -1   5  -1 2198.68   81.89 
  -1   5  -1 2141.19   78.49 
   1   5   1 2112.19   81.49 
  -1   5  -1 2211.88   75.89 
  -1   5  -1 2226.38   86.39 
   1   5   1 2180.08   76.09 
  -2  -5  -1  284.57   22.30 
   2  -5   1  319.97   20.70 
   2  -5   1  282.57   23.00 
  -2  -5  -1  335.17   22.40 
   2  -5   1  316.67   21.40 
   2  -5   1  324.37   21.30 
  -2  -5  -1  350.56   24.40 
  -2  -5  -1  330.67   18.20 
   2  -5   1  266.47   20.10 
  -2  -5  -1  294.87   20.40 
   2  -5   1  340.47   23.10 
   2  -5   1  347.07   23.00 
  -2  -5  -1  313.07   15.70 
   2  -5   1  324.47   20.60 
  -2  -5  -1  334.87   17.40 
  -2  -5  -1  318.67   16.90 
  -2  -5  -1  315.77   17.70 
   2  -5   1  289.47   20.70 
   2  -5   1  344.97   18.00 
   2   5   1  318.57   19.30 
   2   5   1  341.77   21.80 
  -2   5  -1  324.37   22.20 
  -2   5  -1  343.57   21.10 
  -2   5  -1  294.97   20.10 
   2   5   1  347.87   19.50 
  -2   5  -1  316.67   19.80 
   2   5   1  321.87   19.20 
   2   5   1  307.07   22.00 
  -2   5  -1  287.17   20.50 
   2   5   1  328.37   22.60 
   2   5   1  312.77   21.00 
   2   5   1  305.77   18.70 
  -2   5  -1  351.06   22.20 
  -2   5  -1  304.57   18.70 
  -2   5  -1  276.47   21.50 
   2   5   1  344.97   21.60 
   2   5   1  342.27   25.30 
  -2   5  -1  330.17   21.90 
  -2   5  -1  332.07   20.20 
  -2   5  -1  320.87   21.80 
   2   5   1  310.37   22.40 
  -2   5  -1  308.87   21.60 
  -2   5  -1  297.77   24.30 
  -3  -5  -1 2346.47   89.49 
   3  -5   1 2337.97   83.39 
   3  -5   1 2354.66   88.69 
   3  -5   1 2428.46   95.29 
   3  -5   1 2458.85   87.69 
   3  -5   1 2475.55   90.09 
   3  -5   1 2384.46   83.79 
  -3  -5  -1 2442.66   90.79 
  -3  -5  -1 2323.87   93.49 
   3  -5   1 2394.96   89.09 
  -3  -5  -1 2300.17   83.79 
   3  -5   1 2359.96   91.49 
   3  -5   1 2375.76   89.29 
  -3  -5  -1 2420.66   86.99 
  -3  -5  -1 2408.86   81.09 
   3  -5   1 2515.35   92.09 
   3   5   1 2298.27   90.39 
  -3   5  -1 2347.17   82.69 
  -3   5  -1 2346.17   90.09 
   3   5   1 2370.56   86.69 
   3   5   1 2384.56   88.79 
  -3   5  -1 2412.36   90.99 
   3   5   1 2345.47   90.39 
  -3   5  -1 2246.58   88.09 
  -3   5  -1 2473.05   95.49 
  -3   5  -1 2368.56   88.39 
  -3   5  -1 2418.66   88.89 
  -3   5  -1 2458.05   88.79 
  -3   5  -1 2462.95   89.89 
  -3   5  -1 2312.27   88.19 
   3   5   1 2331.37   83.19 
   3   5   1 2416.16   91.29 
  -3   5  -1 2300.27   91.69 
   3   5   1 2419.96   84.89 
  -3   5  -1 2381.06   85.09 
   3   5   1 2430.06   83.69 
   3   5   1 2475.75   87.19 
   3   5   1 2440.26   93.19 
   3   5   1 2422.76   88.29 
  -3   5  -1 2414.26   90.49 
  -4  -5  -1  285.77   22.20 
  -4  -5  -1  283.77   22.30 
   4  -5   1  292.57   19.50 
   4  -5   1  262.37   22.00 
   4  -5   1  309.77   22.90 
   4  -5   1  315.17   24.40 
   4  -5   1  278.67   22.30 
   4  -5   1  276.57   20.50 
   4  -5   1  295.47   29.80 
   4  -5   1  285.17   22.30 
  -4  -5  -1  297.97   19.70 
   4  -5   1  289.97   23.40 
   4  -5   1  299.87   20.30 
   4  -5   1  219.68   26.30 
  -4  -5  -1  300.97   22.80 
   4  -5   1  270.57   19.60 
  -4  -5  -1  282.57   17.80 
  -4  -5  -1  217.38   24.80 
   4   5   1  272.97   25.60 
  -4   5  -1  299.87   22.30 
   4   5   1  287.37   19.50 
   4   5   1  285.17   16.80 
   4   5   1  314.67   23.30 
   4   5   1  292.77   21.80 
  -4   5  -1  268.97   24.90 
  -4   5  -1  277.97   23.90 
   4   5   1  275.27   19.00 
  -4   5  -1  288.97   22.10 
  -4   5  -1  255.87   20.90 
  -4   5  -1  308.07   23.50 
  -4   5  -1  283.77   23.30 
  -4   5  -1  277.07   22.60 
   4   5   1  314.17   26.30 
  -4   5  -1  287.97   21.10 
  -4   5  -1  307.67   21.90 
  -4   5  -1  268.27   22.50 
   4   5   1  298.97   23.60 
   4   5   1  284.67   21.00 
   4   5   1  252.37   18.40 
  -4   5  -1  295.27   19.20 
  -4   5  -1  299.57   18.90 
   5  -5   1  800.12   42.10 
  -5  -5  -1  782.12   37.30 
  -5  -5  -1  923.41   48.80 
   5  -5   1  789.32   43.50 
   5  -5   1  785.72   38.10 
  -5  -5  -1  714.13   40.20 
  -5  -5  -1  853.21   36.90 
   5  -5   1  822.52   44.50 
   5  -5   1  827.92   42.70 
   5  -5   1  746.93   42.70 
   5  -5   1  788.52   40.70 
  -5  -5  -1  780.62   42.50 
   5  -5   1  812.92   39.80 
   5  -5   1  746.93   43.00 
   5  -5   1  770.22   45.50 
   5  -5   1  820.22   43.10 
  -5  -5  -1  793.52   37.10 
  -5  -5  -1  800.72   41.80 
   5  -5   1  756.02   38.00 
   5  -5   1  788.72   48.10 
   5   5   1  811.62   36.70 
   5   5   1  766.72   38.30 
  -5   5  -1  760.42   39.10 
   5   5   1  840.22   42.20 
   5   5   1  836.72   46.00 
   5   5   1  762.62   39.10 
  -5   5  -1  843.72   40.90 
   5   5   1  816.12   44.40 
  -5   5  -1  897.11   43.50 
   5   5   1  831.52   42.80 
  -5   5  -1  720.13   34.60 
  -5   5  -1  864.71   39.60 
   5   5   1  782.32   39.30 
  -5   5  -1  854.41   45.40 
   5   5   1  852.61   44.40 
  -5   5  -1  757.42   44.70 
  -5   5  -1  798.92   42.00 
   5   5   1  845.02   48.90 
  -5   5  -1  809.92   41.70 
  -5   5  -1  754.42   43.00 
   5   5   1  799.12   41.60 
  -5   5  -1  793.82   43.10 
  -5   5  -1  737.93   43.20 
  -5   5  -1  795.82   47.00 
   6  -5   1    4.40    6.30 
   6  -5   1   -6.60    7.00 
   6  -5   1   16.80    9.10 
  -6  -5  -1    5.80    7.10 
   6  -5   1   12.80   10.80 
   6  -5   1    7.40    7.80 
  -6  -5  -1   -4.00    5.80 
   6  -5   1    4.70    7.60 
   6  -5   1    3.50    6.70 
   6  -5   1    3.20    7.60 
   6  -5   1    7.70    8.30 
  -6  -5  -1    2.00    6.80 
  -6  -5  -1    6.30    5.30 
  -6  -5  -1   20.30   12.20 
   6  -5   1   -0.40    5.70 
  -6  -5  -1    3.20    5.70 
   6  -5   1    4.80    7.90 
   6  -5   1   14.70   11.20 
  -6  -5  -1    5.80    6.10 
   6   5   1   -1.90    7.00 
  -6   5  -1   10.50    8.30 
  -6   5  -1    3.80    7.20 
   6   5   1   16.80    8.50 
   6   5   1    7.60    7.80 
   6   5   1    4.40    6.60 
   6   5   1   -8.40    5.00 
  -6   5  -1    7.70    8.10 
  -6   5  -1    6.90    6.80 
   6   5   1    1.50    6.90 
  -6   5  -1    9.60    6.90 
  -6   5  -1    7.80    8.50 
   6   5   1    1.60    6.00 
  -6   5  -1   -1.10    6.80 
  -6   5  -1    1.20    6.90 
  -6   5  -1    9.90    6.20 
   6   5   1    3.10    5.30 
  -6   5  -1    8.30    6.90 
   6   5   1    2.80    4.60 
  -6   5  -1    3.80    7.80 
  -6   5  -1   -0.30    5.90 
  -7  -5  -1  241.58   28.20 
   7  -5   1  208.08   27.80 
  -7  -5  -1  190.28   20.00 
   7  -5   1  225.78   30.20 
  -7  -5  -1  229.38   28.70 
   7  -5   1  151.58   26.30 
  -7  -5  -1  288.97   35.80 
  -7  -5  -1  184.48   25.70 
   7  -5   1  195.68   25.90 
   7  -5   1  233.48   29.60 
   7  -5   1  203.38   24.10 
  -7  -5  -1  238.38   28.70 
  -7  -5  -1  193.08   24.00 
  -7  -5  -1  191.78   25.10 
   7  -5   1  228.88   28.70 
  -7  -5  -1  202.78   23.40 
   7  -5   1  214.98   31.30 
  -7  -5  -1  198.68   22.50 
   7  -5   1  270.57   30.40 
   7  -5   1  214.28   27.80 
   7  -5   1  194.88   27.00 
   7   5   1  217.18   23.50 
  -7   5  -1  210.48   26.80 
   7   5   1  147.69   24.50 
  -7   5  -1  180.28   24.20 
  -7   5  -1  194.68   27.80 
  -7   5  -1  228.38   27.30 
   7   5   1  192.78   24.30 
  -7   5  -1  223.78   24.60 
  -7   5  -1  230.28   25.80 
  -7   5  -1  219.08   28.80 
  -7   5  -1  230.48   29.60 
   7   5   1  219.88   25.00 
   7   5   1  259.17   28.00 
  -7   5  -1  190.08   22.70 
   7   5   1  219.88   28.00 
  -7   5  -1  183.78   26.80 
   7   5   1  257.27   28.30 
  -7   5  -1  226.28   24.50 
   8  -5   1   83.69   18.80 
  -8  -5  -1   59.49   14.50 
   8  -5   1   55.99   18.60 
  -8  -5  -1   52.89   13.90 
   8  -5   1   43.40   14.50 
   8  -5   1   47.30   18.40 
   8  -5   1   57.59   15.50 
  -8  -5  -1   73.79   21.10 
  -8  -5  -1   82.89   16.50 
  -8  -5  -1   54.39   16.10 
   8  -5   1   44.10   15.10 
   8  -5   1   74.79   16.70 
   8  -5   1   40.40   13.00 
  -8  -5  -1   39.60   14.20 
   8  -5   1   57.29   16.50 
   8   5   1   43.30   13.60 
  -8   5  -1   63.69   16.30 
  -8   5  -1   65.59   15.10 
   8   5   1   63.09   16.00 
   8   5   1   78.99   18.90 
   8   5   1   71.79   20.00 
  -8   5  -1   66.69   18.00 
  -8   5  -1   61.59   16.10 
  -8   5  -1   72.09   16.10 
   8   5   1   67.49   16.60 
  -8   5  -1   34.50   14.60 
  -8   5  -1   66.59   17.50 
  -8   5  -1   46.70   13.10 
  -8   5  -1   53.59   16.10 
   8   5   1   52.59   15.40 
  -8   5  -1   50.59   13.00 
  -9  -5  -1  316.07   40.80 
  -9  -5  -1  248.58   32.90 
   9  -5   1  283.17   39.00 
   9  -5   1  319.77   34.90 
  -9  -5  -1  328.17   39.80 
   9  -5   1  347.47   46.00 
   9  -5   1  287.17   32.20 
  -9  -5  -1  251.07   29.90 
   9  -5   1  287.47   34.80 
   9  -5   1  310.77   38.60 
  -9   5  -1  307.37   38.70 
   9   5   1  339.07   35.20 
  -9   5  -1  300.47   38.40 
  -9   5  -1  345.97   35.00 
  -9   5  -1  283.07   35.70 
   9   5   1  354.16   41.80 
  -9   5  -1  341.27   42.00 
  -9   5  -1  326.27   43.90 
  -9   5  -1  335.97   36.50 
   9   5   1  309.87   38.80 
   9   5   1  289.47   34.30 
  -9   5  -1  282.97   34.70 
  -9   5  -1  287.47   34.70 
   8  -6  -1  154.68   25.50 
  -8  -6   1  129.59   21.80 
   8  -6  -1  110.69   23.90 
   8  -6  -1   93.09   20.40 
  -8  -6   1  132.39   20.10 
   8  -6  -1  123.89   23.90 
  -8  -6   1   93.29   20.20 
   8  -6  -1  109.39   20.10 
   8  -6  -1  108.59   26.30 
  -8  -6   1  101.49   19.20 
   8  -6  -1   91.89   20.60 
   8  -6  -1  109.09   23.60 
  -8  -6   1  126.09   24.80 
   8  -6  -1  124.19   27.00 
   8  -6  -1  139.39   27.00 
  -8  -6   1  105.99   20.10 
  -8   6   1   81.79   19.20 
  -8   6   1  110.29   22.80 
  -8   6   1  112.49   22.70 
  -8   6   1  138.59   21.90 
  -8   6   1   97.09   23.70 
  -8   6   1  146.59   24.40 
   8   6  -1  110.79   23.20 
  -8   6   1  129.99   23.90 
   8   6  -1  102.49   19.60 
   8   6  -1  129.89   21.80 
  -8   6   1  127.49   25.70 
  -8   6   1  107.49   18.80 
   8   6  -1  124.69   21.30 
   7  -6  -1    1.50    8.80 
   7  -6  -1    8.00    8.50 
  -7  -6   1   -3.50    5.60 
  -7  -6   1    6.70    8.00 
  -7  -6   1   13.40    9.20 
   7  -6  -1   10.50    7.50 
   7  -6  -1    4.60    9.40 
  -7  -6   1   11.40    8.50 
  -7  -6   1   15.00   10.80 
  -7  -6   1   -3.50    6.20 
   7  -6  -1   43.00   14.50 
  -7  -6   1    8.60    8.60 
   7  -6  -1   14.90   10.00 
   7  -6  -1    2.10   10.10 
   7  -6  -1    9.30    9.60 
   7  -6  -1    4.80   10.40 
   7  -6  -1   10.40   10.40 
   7  -6  -1   20.30   12.80 
  -7  -6   1    3.90    8.50 
  -7   6   1   -1.50    8.40 
  -7   6   1    9.30   10.30 
  -7   6   1    6.10    8.00 
  -7   6   1   -9.90    9.10 
  -7   6   1   -2.80    7.60 
  -7   6   1   11.00    9.20 
  -7   6   1    9.00   10.30 
   7   6  -1   -1.10    6.20 
  -7   6   1    2.40    8.20 
  -7   6   1   10.90    9.20 
  -7   6   1    3.40    7.20 
   7   6  -1    5.90    8.70 
  -7   6   1    4.10    7.90 
   7   6  -1    3.30    7.60 
  -7   6   1    2.60    8.90 
   7   6  -1    5.60    8.00 
   6  -6  -1   84.29   17.20 
  -6  -6   1  176.08   20.50 
  -6  -6   1  109.09   18.90 
   6  -6  -1  127.39   18.70 
   6  -6  -1  132.09   18.70 
   6  -6  -1  131.29   23.50 
  -6  -6   1  100.89   18.40 
  -6  -6   1  116.09   16.20 
  -6  -6   1  133.69   17.60 
   6  -6  -1  101.29   21.60 
   6  -6  -1  129.79   19.80 
   6  -6  -1  111.39   20.80 
   6  -6  -1  111.59   20.00 
   6  -6  -1  103.09   20.90 
  -6  -6   1  132.79   19.10 
  -6  -6   1  102.69   19.60 
   6  -6  -1  150.88   23.50 
   6  -6  -1  101.69   21.70 
  -6  -6   1   94.79   17.50 
  -6  -6   1  108.29   14.70 
  -6   6   1   74.19   16.30 
   6   6  -1  105.09   19.80 
   6   6  -1   77.29   16.40 
  -6   6   1   78.19   17.40 
   6   6  -1  122.09   20.90 
  -6   6   1  108.19   19.80 
  -6   6   1  105.69   16.90 
  -6   6   1   90.09   17.00 
  -6   6   1  127.89   18.80 
  -6   6   1  116.59   15.90 
   6   6  -1   95.99   20.60 
   6   6  -1  122.19   16.90 
  -6   6   1  111.49   19.40 
   6   6  -1  130.69   17.90 
  -6   6   1   87.19   19.60 
   6   6  -1  110.79   19.70 
  -6   6   1  132.49   23.90 
   6   6  -1  135.19   19.70 
  -6   6   1  124.99   16.30 
  -6   6   1  123.49   21.10 
  -6   6   1  121.69   20.70 
   6   6  -1   99.29   14.50 
   5  -6  -1   75.09   16.70 
  -5  -6   1   73.69   14.20 
   5  -6  -1   84.39   18.20 
   5  -6  -1   62.09   15.50 
  -5  -6   1   70.69   13.40 
  -5  -6   1   71.39   15.00 
   5  -6  -1   96.09   19.40 
   5  -6  -1   73.99   17.60 
   5  -6  -1   72.19   15.80 
  -5  -6   1   69.49   11.20 
   5  -6  -1   59.29   16.20 
   5  -6  -1   80.39   15.20 
   5  -6  -1   68.29   13.90 
   5  -6  -1   61.69   16.20 
   5  -6  -1   52.59   13.70 
   5  -6  -1   48.50   10.40 
  -5  -6   1   65.29   14.80 
  -5  -6   1   69.69   12.80 
   5  -6  -1   64.49   12.70 
  -5  -6   1   73.79   15.50 
  -5   6   1   89.09   16.50 
   5   6  -1   72.49   15.50 
   5   6  -1   62.09   13.90 
  -5   6   1   51.49   12.80 
   5   6  -1   56.49   10.20 
  -5   6   1   83.19   17.20 
  -5   6   1   73.29   15.50 
  -5   6   1   56.09   11.50 
   5   6  -1   73.49   15.00 
   5   6  -1   79.09   14.00 
   5   6  -1   87.79   18.30 
  -5   6   1   39.60   11.80 
   5   6  -1   80.39   18.10 
   5   6  -1   78.99   13.90 
  -5   6   1   64.29   14.10 
   5   6  -1   72.79   16.10 
  -5   6   1   73.99   15.20 
  -5   6   1   62.69   11.50 
  -5   6   1   53.29   13.50 
   5   6  -1   82.09   13.50 
  -5   6   1   61.19   14.30 
  -5   6   1   82.89   18.60 
  -4  -6   1  104.49   17.40 
   4  -6  -1  121.29   18.70 
   4  -6  -1  105.39   13.70 
   4  -6  -1  120.09   18.50 
   4  -6  -1  118.49   16.40 
   4  -6  -1  120.79   20.10 
  -4  -6   1  130.19   14.80 
   4  -6  -1  100.59   14.00 
  -4  -6   1  112.99   18.60 
   4  -6  -1  113.59   14.20 
   4  -6  -1  192.78   24.70 
  -4  -6   1  102.79   16.00 
   4  -6  -1  131.09   19.30 
  -4  -6   1  108.19   17.20 
   4  -6  -1  106.29   19.30 
   4  -6  -1   97.49   17.60 
   4  -6  -1  108.99   17.70 
  -4  -6   1  105.49   14.90 
  -4  -6   1  128.29   13.60 
  -4   6   1  139.49   16.30 
   4   6  -1  138.59   18.30 
   4   6  -1  127.29   17.10 
   4   6  -1  157.78   20.10 
   4   6  -1  140.29   15.70 
  -4   6   1  121.09   13.20 
  -4   6   1  131.39   18.30 
  -4   6   1  125.29   20.40 
   4   6  -1  154.18   17.50 
  -4   6   1  113.39   17.30 
   4   6  -1  102.39   16.60 
   4   6  -1  125.19   13.10 
  -4   6   1  106.39   17.50 
   4   6  -1  129.49   19.40 
  -4   6   1  112.19   18.60 
  -4   6   1  107.39   18.60 
   4   6  -1  124.59   19.60 
   4   6  -1  106.79   19.30 
  -4   6   1  107.89   17.70 
  -4   6   1  117.89   20.10 
  -4   6   1   75.69   14.20 
   4   6  -1  107.49   18.90 
  -4   6   1  146.69   20.50 
  -4   6   1   98.59   15.90 
  -3  -6   1   33.60    9.40 
   3  -6  -1   36.80   12.00 
   3  -6  -1   14.50    9.00 
   3  -6  -1   21.20    8.20 
   3  -6  -1   13.80    7.40 
  -3  -6   1   28.20    9.00 
  -3  -6   1   25.70    9.20 
   3  -6  -1   24.50    9.70 
   3  -6  -1   32.20   10.00 
   3  -6  -1   31.60    8.40 
  -3  -6   1   28.70    7.40 
   3  -6  -1   19.60    8.70 
  -3  -6   1   46.90   11.10 
   3  -6  -1   28.00    9.20 
  -3  -6   1   42.90   11.50 
   3  -6  -1   37.40   10.60 
   3   6  -1   20.50    7.90 
  -3   6   1   23.80    9.20 
   3   6  -1   48.10    9.40 
  -3   6   1   27.80    8.60 
   3   6  -1   51.49   12.20 
  -3   6   1   29.50    9.20 
  -3   6   1   28.90    9.80 
  -3   6   1   15.90    8.00 
  -3   6   1   20.10    8.10 
   3   6  -1   33.50    9.60 
  -3   6   1    4.00    6.30 
  -3   6   1   15.90    7.60 
  -3   6   1   20.60    9.50 
  -3   6   1   21.80    9.40 
   3   6  -1   27.40    9.70 
   3   6  -1   21.90    8.90 
  -3   6   1   20.60    7.90 
   3   6  -1   18.30    8.60 
   3   6  -1   30.50   11.30 
   3   6  -1   46.00    9.70 
   3   6  -1   42.40    9.30 
  -3   6   1   28.60   10.00 
   2  -6  -1    9.20    6.70 
   2  -6  -1   24.90    9.30 
   2  -6  -1    1.60    5.10 
  -2  -6   1    9.30    6.90 
  -2  -6   1    1.30    4.20 
   2  -6  -1    3.00    5.20 
  -2  -6   1    4.90    5.20 
   2  -6  -1   16.40    8.10 
  -2  -6   1   25.50    8.70 
  -2  -6   1   11.20    5.20 
   2  -6  -1   -0.40    4.60 
  -2  -6   1   14.60    7.70 
   2  -6  -1   12.20    6.20 
  -2  -6   1   15.80    7.50 
   2  -6  -1   14.40    7.00 
  -2  -6   1    9.00    5.60 
   2  -6  -1    2.20    6.00 
   2  -6  -1   11.10    5.70 
   2  -6  -1    2.20    6.40 
  -2  -6   1    8.10    4.70 
   2  -6  -1   12.40    6.00 
  -2   6   1   10.20    6.50 
   2   6  -1   12.90    6.20 
  -2   6   1   13.30    7.20 
  -2   6   1    6.40    5.10 
   2   6  -1   10.90    9.70 
   2   6  -1   15.40    6.60 
   2   6  -1    7.40    4.10 
  -2   6   1   18.30    8.40 
  -2   6   1   13.90    8.10 
   2   6  -1    8.00    7.20 
   2   6  -1    1.50    5.60 
   2   6  -1    9.50    6.30 
  -2   6   1    6.20    6.70 
  -2   6   1   -4.10    5.40 
   2   6  -1    9.60    5.10 
  -2   6   1   13.90    8.80 
  -2   6   1    8.70    7.10 
  -2   6   1   15.30    6.70 
  -2   6   1   17.20    7.00 
   2   6  -1   13.70    6.80 
  -2   6   1   12.70    8.40 
   2   6  -1    3.10    5.60 
   1  -6  -1  187.88   22.20 
  -1  -6   1  204.48   15.70 
  -1  -6   1  201.28   17.40 
   1  -6  -1  171.08   18.50 
   1  -6  -1  203.08   22.00 
  -1  -6   1  142.59   18.50 
   1  -6  -1  174.28   14.80 
  -1  -6   1  217.18   15.50 
  -1  -6   1  195.88   16.00 
   1  -6  -1  208.18   15.80 
  -1  -6   1  170.18   20.90 
  -1  -6   1  163.78   14.30 
  -1  -6   1  187.78   14.60 
   1  -6  -1  220.18   21.70 
   1  -6  -1  181.88   21.30 
   1  -6  -1  199.38   20.40 
   1  -6  -1  197.98   21.00 
  -1  -6   1  178.68   14.90 
   1  -6  -1  202.58   14.90 
  -1  -6   1  222.58   23.60 
   1  -6  -1  199.38   20.00 
   1  -6  -1  222.48   18.70 
   1   6  -1  210.08   15.40 
   1   6  -1  230.88   19.30 
  -1   6   1  206.58   15.70 
   1   6  -1  206.28   19.90 
   1   6  -1  202.28   20.10 
   1   6  -1  209.38   15.60 
  -1   6   1  188.88   20.60 
  -1   6   1  184.78   18.70 
  -1   6   1  177.08   11.30 
   1   6  -1  178.28   11.40 
  -1   6   1  248.88   26.40 
  -1   6   1  178.58   20.60 
  -1   6   1  233.88   22.60 
  -1   6   1  186.38   20.10 
   1   6  -1  247.48   25.00 
   1   6  -1  227.38   22.50 
   1   6  -1  164.78   18.50 
  -1   6   1  206.08   17.40 
   1   6  -1  197.18   23.20 
  -1   6   1  218.28   21.00 
   1   6  -1  194.38   13.90 
  -1   6   1  214.08   15.30 
   1   6  -1  244.08   29.90 
  -1   6   1  218.38   24.20 
   0  -6  -1  428.96   26.40 
   0  -6   1  405.56   24.70 
   0  -6   1  407.26   26.70 
   0  -6  -1  430.86   23.90 
   0  -6   1  384.36   27.80 
   0  -6  -1  388.16   20.10 
   0  -6   1  435.36   21.60 
   0  -6   1  412.16   27.00 
   0  -6   1  386.86   23.80 
   0  -6  -1  412.46   24.30 
   0  -6  -1  436.46   24.70 
   0  -6   1  397.66   24.00 
   0  -6   1  399.56   23.20 
   0  -6  -1  410.16   23.60 
   0  -6  -1  418.66   25.10 
   0  -6  -1  412.56   26.70 
   0  -6  -1  392.96   26.20 
   0  -6  -1  476.55   26.60 
   0  -6   1  384.56   25.40 
   0  -6  -1  390.66   28.30 
   0   6  -1  416.26   25.30 
   0   6   1  413.36   21.70 
   0   6   1  421.86   18.50 
   0   6   1  401.46   22.40 
   0   6  -1  437.96   26.60 
   0   6  -1  378.26   23.60 
   0   6  -1  425.66   21.60 
   0   6  -1  441.16   32.50 
   0   6  -1  446.56   24.00 
   0   6   1  438.16   26.10 
   0   6   1  475.45   26.70 
   0   6  -1  408.76   22.20 
   0   6   1  424.36   20.30 
   0   6  -1  389.26   26.90 
   0   6   1  434.06   24.60 
   0   6   1  406.86   25.20 
   0   6   1  441.96   31.40 
   0   6   1  420.16   27.80 
   0   6   1  388.16   29.00 
   0   6  -1  403.36   19.00 
   0   6  -1  454.25   32.40 
   0   6  -1  382.16   25.00 
   0   6   1  424.16   25.70 
   0   6  -1  380.26   26.20 
   0   6   1  415.06   26.10 
   0   6   1  465.15   27.80 
   0   6  -1  389.26   25.50 
   0   6   1  430.96   22.60 
   0   6  -1  423.36   21.80 
   1  -6   1   90.89   14.50 
  -1  -6  -1  119.39   18.10 
   1  -6   1   86.09   15.70 
   1  -6   1  104.99   15.50 
   1  -6   1  112.09   15.40 
  -1  -6  -1  120.29   14.60 
   1  -6   1  127.09   15.30 
   1  -6   1   75.39   13.70 
  -1  -6  -1   89.59   15.10 
  -1  -6  -1   93.49    8.50 
  -1  -6  -1  105.99   13.50 
   1  -6   1   95.99   14.40 
  -1  -6  -1   95.89   15.80 
   1  -6   1  119.09   12.10 
   1  -6   1  139.89   11.40 
  -1  -6  -1  126.79   14.70 
  -1  -6  -1  119.59   14.60 
  -1  -6  -1  118.69   15.20 
   1  -6   1  123.29   14.50 
   1  -6   1  120.59   16.50 
  -1  -6  -1  125.09   14.50 
  -1  -6  -1  141.99   19.10 
  -1  -6  -1   85.39   12.40 
   1   6   1  132.29   16.70 
   1   6   1  164.08   18.70 
  -1   6  -1  123.39   16.50 
  -1   6  -1   93.59   14.50 
  -1   6  -1   96.79   14.50 
  -1   6  -1  150.18   19.90 
  -1   6  -1  123.29   14.50 
  -1   6  -1  105.69   15.50 
  -1   6  -1  125.99   19.70 
   1   6   1  103.49   14.50 
  -1   6  -1  135.89   18.30 
  -1   6  -1  119.89   11.90 
   1   6   1  132.99   20.70 
  -1   6  -1  128.49   14.60 
   1   6   1  115.79   12.80 
   1   6   1  134.49   18.00 
   1   6   1  134.29   17.20 
  -1   6  -1  120.59   12.10 
   1   6   1   99.19   15.80 
   1   6   1  100.99   11.30 
  -1   6  -1  108.99   15.40 
   1   6   1  119.59   17.90 
   1   6   1  131.89   14.40 
   1   6   1  140.69   16.30 
  -1   6  -1  119.09   16.70 
   1   6   1  131.09   16.00 
  -2  -6  -1  408.86   29.90 
   2  -6   1  491.05   30.80 
  -2  -6  -1  495.35   24.60 
   2  -6   1  445.66   32.00 
   2  -6   1  487.65   30.00 
  -2  -6  -1  495.85   25.00 
  -2  -6  -1  512.05   26.10 
   2  -6   1  483.25   24.00 
  -2  -6  -1  472.75   22.50 
   2  -6   1  526.95   27.80 
   2  -6   1  501.45   30.40 
   2  -6   1  517.65   29.90 
   2  -6   1  467.05   28.70 
  -2  -6  -1  495.55   30.10 
   2  -6   1  483.05   29.20 
  -2  -6  -1  488.75   24.20 
  -2  -6  -1  467.55   20.60 
  -2  -6  -1  459.15   28.60 
  -2  -6  -1  401.86   30.00 
   2  -6   1  452.05   27.90 
  -2   6  -1  476.15   30.90 
  -2   6  -1  514.95   34.50 
   2   6   1  527.95   29.90 
   2   6   1  479.15   26.90 
  -2   6  -1  453.15   29.00 
  -2   6  -1  479.15   29.10 
   2   6   1  575.94   36.60 
   2   6   1  497.95   27.20 
  -2   6  -1  471.05   24.10 
  -2   6  -1  462.95   27.40 
  -2   6  -1  466.65   25.80 
  -2   6  -1  462.45   29.70 
  -2   6  -1  484.75   29.70 
   2   6   1  529.45   31.80 
   2   6   1  545.65   30.70 
  -2   6  -1  491.85   27.80 
   2   6   1  451.95   29.80 
  -2   6  -1  521.95   31.10 
   2   6   1  467.85   30.60 
   2   6   1  430.46   25.30 
  -2   6  -1  473.85   27.40 
  -2   6  -1  487.15   22.40 
   2   6   1  500.65   26.30 
  -2   6  -1  460.75   25.90 
  -2   6  -1  480.25   29.20 
   2   6   1  441.76   28.40 
   3  -6   1    3.70    4.50 
  -3  -6  -1   -1.10    4.40 
  -3  -6  -1    4.90    6.80 
   3  -6   1    3.10    6.20 
  -3  -6  -1    7.20    6.60 
   3  -6   1    1.80    5.50 
  -3  -6  -1    1.40    5.00 
   3  -6   1   11.30    7.40 
   3  -6   1   -3.90    5.20 
   3  -6   1    0.30    6.90 
  -3  -6  -1    9.20    7.40 
   3  -6   1    2.60    6.10 
   3  -6   1   -0.70    6.20 
   3  -6   1    1.80    5.90 
   3   6   1   -0.40    5.80 
   3   6   1    3.20    6.10 
  -3   6  -1   -1.30    5.30 
   3   6   1   -2.30    4.30 
  -3   6  -1    4.90    5.60 
   3   6   1    7.40    6.20 
   3   6   1   -2.00    5.60 
   3   6   1    4.90    5.60 
   3   6   1    2.40    5.30 
  -3   6  -1    2.40    5.20 
   3   6   1   -1.40    6.40 
  -3   6  -1    7.10    5.80 
  -3   6  -1    0.90    5.30 
  -3   6  -1    1.50    5.70 
   3   6   1   10.60    7.20 
  -3   6  -1    5.10    5.60 
   3   6   1    7.70    5.60 
  -3   6  -1   -0.40    5.90 
  -3   6  -1    7.10    7.20 
  -3   6  -1   15.40    8.50 
   3   6   1    2.80    4.40 
  -3   6  -1   11.80    9.40 
  -3   6  -1   -1.90    4.60 
  -3   6  -1    4.70    5.80 
  -3   6  -1    4.90    5.90 
   4  -6   1  132.29   20.60 
   4  -6   1  153.98   22.70 
   4  -6   1  194.18   18.90 
   4  -6   1  186.68   22.60 
   4  -6   1  188.28   24.00 
   4  -6   1  180.88   21.30 
  -4  -6  -1  173.48   19.50 
   4  -6   1  248.28   27.90 
   4  -6   1  220.68   25.30 
   4  -6   1  189.18   24.10 
   4  -6   1  167.98   18.50 
  -4  -6  -1  202.88   14.30 
   4  -6   1  174.58   24.50 
  -4  -6  -1  171.88   22.00 
  -4  -6  -1  187.88   22.60 
  -4  -6  -1  165.68   22.00 
   4  -6   1  186.98   23.10 
  -4  -6  -1  165.38   22.50 
  -4   6  -1  168.98   23.40 
   4   6   1  194.78   22.50 
  -4   6  -1  151.68   23.20 
  -4   6  -1  156.18   20.30 
  -4   6  -1  190.78   15.60 
   4   6   1  174.08   24.90 
   4   6   1  206.48   23.80 
  -4   6  -1  194.18   23.20 
   4   6   1  184.38   23.30 
  -4   6  -1  129.49   18.50 
  -4   6  -1  160.48   20.00 
   4   6   1  158.48   17.30 
  -4   6  -1  144.19   17.10 
  -4   6  -1  184.38   24.60 
   4   6   1  215.18   22.70 
  -4   6  -1  197.28   25.20 
   4   6   1  176.28   17.50 
  -4   6  -1  154.78   21.00 
   4   6   1  160.28   16.00 
   4   6   1  197.38   20.60 
   4   6   1  209.58   24.20 
  -4   6  -1  149.69   19.30 
   5  -6   1  151.78   20.00 
  -5  -6  -1  133.49   19.80 
   5  -6   1  188.78   21.00 
   5  -6   1  156.68   22.40 
   5  -6   1  114.79   19.50 
  -5  -6  -1  138.69   17.10 
   5  -6   1  174.28   24.00 
   5  -6   1  142.19   21.90 
  -5  -6  -1  167.98   22.00 
   5  -6   1  141.49   19.80 
   5  -6   1  167.88   22.80 
   5  -6   1  115.89   21.90 
  -5  -6  -1  161.28   23.60 
   5  -6   1  107.59   18.00 
  -5  -6  -1  160.38   16.60 
   5  -6   1  172.18   19.00 
  -5  -6  -1  176.28   22.70 
   5  -6   1  159.28   24.80 
  -5  -6  -1  158.58   17.40 
   5  -6   1  156.28   23.60 
  -5   6  -1  104.49   17.40 
  -5   6  -1  142.19   22.40 
  -5   6  -1  150.98   20.30 
  -5   6  -1  131.09   20.80 
  -5   6  -1  118.29   22.80 
   5   6   1  146.49   20.90 
   5   6   1  156.08   23.00 
  -5   6  -1  158.28   22.50 
   5   6   1  137.09   18.90 
  -5   6  -1  144.99   20.30 
   5   6   1  126.89   23.20 
   5   6   1  114.29   19.00 
  -5   6  -1  155.58   22.30 
   5   6   1  128.09   16.30 
  -5   6  -1  148.09   20.80 
   5   6   1  196.28   23.20 
  -5   6  -1  173.88   25.70 
   5   6   1  133.09   16.80 
  -5   6  -1  128.39   16.30 
  -5   6  -1  164.18   18.40 
   5   6   1  166.38   19.10 
  -5   6  -1  148.49   23.40 
  -6  -6  -1  489.05   33.60 
   6  -6   1  511.85   36.20 
   6  -6   1  505.05   40.20 
   6  -6   1  464.65   36.20 
  -6  -6  -1  537.65   30.70 
  -6  -6  -1  497.85   35.90 
   6  -6   1  523.25   32.70 
   6  -6   1  515.45   36.90 
   6  -6   1  613.74   38.10 
  -6  -6  -1  551.14   35.70 
   6  -6   1  474.15   36.40 
   6  -6   1  550.04   43.00 
   6  -6   1  577.54   39.40 
  -6  -6  -1  565.94   30.90 
   6  -6   1  540.45   34.50 
  -6  -6  -1  493.65   38.90 
  -6  -6  -1  541.55   35.70 
   6  -6   1  531.15   32.10 
  -6   6  -1  509.95   38.80 
   6   6   1  500.05   35.40 
  -6   6  -1  540.95   32.50 
  -6   6  -1  465.55   36.10 
   6   6   1  498.15   32.50 
  -6   6  -1  525.75   34.00 
   6   6   1  461.05   36.10 
  -6   6  -1  436.86   31.50 
  -6   6  -1  487.05   35.10 
  -6   6  -1  534.55   32.50 
  -6   6  -1  537.15   35.60 
  -6   6  -1  544.55   35.80 
   6   6   1  534.95   32.70 
  -6   6  -1  514.25   40.70 
  -6   6  -1  533.65   37.50 
  -6   6  -1  518.15   37.40 
   6   6   1  460.75   33.90 
   6   6   1  448.46   39.30 
   6   6   1  493.75   30.80 
  -6   6  -1  571.74   39.30 
   7  -6   1    7.20    8.50 
   7  -6   1   -0.90    6.30 
   7  -6   1    7.00    9.90 
   7  -6   1   15.80    9.80 
   7  -6   1    0.70    8.90 
  -7  -6  -1    9.90   10.90 
   7  -6   1   13.00   10.50 
  -7  -6  -1    7.70    9.00 
   7  -6   1   15.60   10.60 
   7  -6   1   -6.00    8.10 
  -7  -6  -1   -4.20    9.00 
  -7  -6  -1   -2.90    6.50 
   7  -6   1   18.90   13.30 
  -7  -6  -1   14.60   10.20 
   7  -6   1    7.80   12.20 
  -7  -6  -1    5.60    8.70 
  -7  -6  -1   -4.70    6.60 
  -7   6  -1   -0.20    8.20 
  -7   6  -1   17.50    9.10 
  -7   6  -1    4.40    9.20 
  -7   6  -1    7.10    9.40 
  -7   6  -1    1.90    8.20 
   7   6   1    3.70    7.10 
  -7   6  -1    7.50    9.90 
  -7   6  -1    7.20    8.40 
   7   6   1    2.20    7.90 
  -7   6  -1    6.30   11.30 
   7   6   1    9.90   10.50 
  -7   6  -1    9.60   11.20 
   7   6   1    8.40    9.30 
   7   6   1   23.20    8.80 
  -7   6  -1   26.80   10.10 
  -7   6  -1   15.60    9.90 
   7   6   1   14.50    9.20 
  -8  -6  -1  636.84   46.50 
   8  -6   1  705.23   50.09 
   8  -6   1  642.24   46.30 
   8  -6   1  728.23   47.50 
   8  -6   1  784.32   50.09 
   8  -6   1  681.83   53.19 
   8  -6   1  661.93   42.20 
   8  -6   1  637.34   44.20 
   8  -6   1  692.13   55.59 
  -8  -6  -1  703.73   47.70 
  -8  -6  -1  754.12   46.40 
  -8  -6  -1  636.14   49.99 
   8  -6   1  704.53   48.40 
  -8  -6  -1  712.43   42.10 
   8  -6   1  659.13   47.30 
  -8   6  -1  702.73   49.80 
   8   6   1  661.63   45.30 
  -8   6  -1  735.13   50.09 
  -8   6  -1  704.73   43.90 
   8   6   1  713.83   49.00 
  -8   6  -1  745.53   45.70 
   8   6   1  672.43   44.40 
  -8   6  -1  726.13   54.69 
  -8   6  -1  753.72   43.60 
  -8   6  -1  642.44   47.00 
   8   6   1  739.43   46.50 
  -8   6  -1  690.03   48.10 
  -8   6  -1  670.03   46.40 
  -8   6  -1  705.53   51.39 
   7  -7  -1 1057.19   54.49 
   7  -7  -1 1061.79   60.49 
   7  -7  -1  946.41   62.49 
   7  -7  -1  983.40   58.49 
  -7  -7   1 1179.88   67.19 
   7  -7  -1 1008.60   60.99 
  -7  -7   1 1057.19   58.19 
  -7  -7   1 1014.30   56.89 
  -7  -7   1 1003.80   57.89 
  -7  -7   1 1021.30   56.79 
   7  -7  -1 1011.40   61.39 
   7  -7  -1 1012.30   57.69 
  -7  -7   1 1039.60   61.69 
   7  -7  -1 1067.59   61.69 
   7  -7  -1  999.70   65.79 
   7  -7  -1 1029.50   53.49 
  -7   7   1 1024.50   61.09 
   7   7  -1 1005.90   55.19 
  -7   7   1 1090.59   61.79 
  -7   7   1  937.41   63.49 
  -7   7   1 1005.70   54.99 
  -7   7   1 1167.58   60.19 
  -7   7   1 1029.10   60.09 
   7   7  -1  943.11   56.29 
   7   7  -1 1052.59   58.09 
  -7   7   1 1117.59   64.49 
  -7   7   1 1146.09   63.29 
  -7   7   1 1044.00   57.99 
  -7   7   1  997.10   54.89 
   7   7  -1 1013.00   61.49 
   6  -7  -1   10.80   10.10 
   6  -7  -1   18.10   13.10 
   6  -7  -1   15.60    9.60 
  -6  -7   1   20.90    9.80 
  -6  -7   1   18.80   10.80 
  -6  -7   1   22.60   12.10 
   6  -7  -1   21.30   10.90 
  -6  -7   1   28.00   12.40 
  -6  -7   1   34.60   12.60 
   6  -7  -1   12.70    9.30 
   6  -7  -1   21.40   12.30 
   6  -7  -1   49.80   15.30 
   6  -7  -1   11.50   12.40 
  -6  -7   1   17.30   10.90 
   6  -7  -1   22.70   12.30 
   6  -7  -1   19.30   11.90 
   6   7  -1    8.50   11.90 
  -6   7   1   10.70   13.10 
  -6   7   1   24.10   11.60 
  -6   7   1   15.70   11.40 
  -6   7   1   32.80   12.90 
   6   7  -1   21.60   10.20 
   6   7  -1   13.50   10.80 
  -6   7   1    9.00    8.20 
  -6   7   1    9.30   10.20 
   6   7  -1   11.50    9.00 
  -6   7   1   18.10   11.10 
  -6   7   1    0.00    8.80 
   6   7  -1   21.50   10.90 
   6   7  -1   27.20   11.40 
  -6   7   1   20.30   11.80 
  -6   7   1   19.70   12.30 
  -6   7   1   27.60   13.30 
  -5  -7   1 1999.80   89.09 
   5  -7  -1 2033.30   89.39 
  -5  -7   1 1937.61   85.09 
   5  -7  -1 1877.11   91.49 
   5  -7  -1 2182.68   85.09 
   5  -7  -1 1904.11   85.19 
  -5  -7   1 1961.60   85.09 
   5  -7  -1 1981.80   88.19 
  -5  -7   1 2027.20   84.29 
   5  -7  -1 1978.90   85.99 
  -5  -7   1 2059.49   80.29 
   5  -7  -1 1861.51   78.09 
  -5  -7   1 1989.70   86.09 
   5  -7  -1 1956.90   89.99 
   5  -7  -1 2042.40   86.09 
   5  -7  -1 2005.80   79.39 
   5  -7  -1 2070.29   89.79 
   5   7  -1 2050.09   88.59 
  -5   7   1 2014.90   88.29 
  -5   7   1 1950.50   86.09 
   5   7  -1 2084.59   90.49 
  -5   7   1 2054.09   84.39 
  -5   7   1 1831.22   84.19 
  -5   7   1 2120.79   80.09 
  -5   7   1 1702.73   83.09 
  -5   7   1 1924.81   89.69 
   5   7  -1 2039.60   81.99 
   5   7  -1 2056.39   82.99 
   5   7  -1 1905.11   90.19 
  -5   7   1 1882.41   83.29 
  -5   7   1 1973.40   87.79 
   5   7  -1 1925.91   84.19 
   5   7  -1 1945.61   86.09 
  -5   7   1 1933.21   83.39 
   5   7  -1 2003.30   83.29 
  -5   7   1 1847.32   90.99 
  -4  -7   1   27.40   10.70 
   4  -7  -1   13.90    9.90 
   4  -7  -1   40.60   12.10 
   4  -7  -1   36.40   13.80 
   4  -7  -1   32.50    9.80 
   4  -7  -1   37.80   12.90 
   4  -7  -1   29.30   13.00 
  -4  -7   1   45.50   13.50 
  -4  -7   1   46.50   12.40 
  -4  -7   1   41.00   10.10 
   4  -7  -1   46.00   12.90 
  -4  -7   1   26.10   11.00 
   4  -7  -1   54.89   13.20 
   4  -7  -1   44.30   14.00 
   4  -7  -1   39.90   12.50 
   4  -7  -1   41.80   10.30 
  -4  -7   1   35.80   13.10 
  -4   7   1   34.60   13.00 
   4   7  -1   34.20    9.80 
  -4   7   1   41.00   14.50 
  -4   7   1   18.10   10.30 
  -4   7   1   48.70   13.30 
   4   7  -1   48.90   13.20 
   4   7  -1   33.30    9.10 
   4   7  -1   27.60    9.80 
   4   7  -1   27.10   10.80 
   4   7  -1   22.00   12.00 
  -4   7   1   54.59   15.00 
  -4   7   1   37.50   11.20 
   4   7  -1   64.29   17.60 
   4   7  -1   46.20   14.80 
  -4   7   1   50.79   13.50 
   4   7  -1   15.90   10.30 
  -4   7   1   35.40   10.90 
   4   7  -1   53.49   14.10 
  -4   7   1   23.70   10.30 
  -4   7   1   50.59   14.40 
  -4   7   1   64.59   15.60 
   3  -7  -1 1581.64   66.99 
   3  -7  -1 1426.76   73.09 
   3  -7  -1 1580.34   70.19 
  -3  -7   1 1529.75   68.59 
   3  -7  -1 1486.95   70.49 
  -3  -7   1 1596.84   67.19 
   3  -7  -1 1584.44   68.49 
   3  -7  -1 1617.24   69.29 
   3  -7  -1 1482.45   63.49 
   3  -7  -1 1511.65   67.99 
   3  -7  -1 1586.04   66.09 
  -3  -7   1 1571.84   72.69 
  -3  -7   1 1571.34   70.89 
   3  -7  -1 1617.24   62.69 
  -3  -7   1 1553.04   62.79 
  -3  -7   1 1566.14   69.69 
   3  -7  -1 1528.45   67.79 
  -3   7   1 1511.25   68.69 
   3   7  -1 1583.84   76.99 
   3   7  -1 1583.84   70.79 
  -3   7   1 1513.95   64.79 
  -3   7   1 1630.44   66.89 
  -3   7   1 1512.95   69.09 
   3   7  -1 1535.25   67.99 
   3   7  -1 1553.94   68.09 
  -3   7   1 1518.05   74.69 
   3   7  -1 1730.53   74.49 
   3   7  -1 1655.43   65.49 
   3   7  -1 1654.53   64.79 
  -3   7   1 1433.46   68.39 
  -3   7   1 1518.25   67.69 
  -3   7   1 1469.65   67.99 
   3   7  -1 1577.74   68.19 
  -3   7   1 1522.45   71.79 
  -3   7   1 1481.15   68.29 
   3   7  -1 1524.35   64.59 
  -3   7   1 1548.84   65.59 
   2  -7  -1   17.70    8.90 
   2  -7  -1   16.30    8.80 
  -2  -7   1   11.10    7.80 
  -2  -7   1    5.50    5.80 
  -2  -7   1    8.40    7.90 
   2  -7  -1    7.00    8.00 
   2  -7  -1   22.70    8.80 
  -2  -7   1    6.60    6.90 
   2  -7  -1    9.20    7.60 
   2  -7  -1   22.80    9.00 
   2  -7  -1   17.20    8.20 
  -2  -7   1   11.30    8.70 
  -2  -7   1    7.90    5.70 
  -2  -7   1   15.00    7.90 
  -2  -7   1   11.40    7.80 
   2  -7  -1   10.50    7.40 
   2  -7  -1    7.10    8.10 
   2  -7  -1   10.00    6.60 
   2  -7  -1   28.40   11.20 
   2  -7  -1   11.20    6.70 
   2   7  -1   17.70    6.90 
  -2   7   1    8.90    7.50 
  -2   7   1   12.10    9.90 
   2   7  -1   15.80    7.70 
   2   7  -1   13.20    7.40 
  -2   7   1   13.70    7.90 
  -2   7   1   24.50    9.20 
   2   7  -1   18.30    9.20 
  -2   7   1   10.20    6.50 
  -2   7   1   28.30   10.70 
   2   7  -1   23.90   13.70 
   2   7  -1    9.40    7.20 
   2   7  -1   13.40    9.10 
  -2   7   1   10.30    8.30 
  -2   7   1   13.50    8.20 
  -2   7   1    5.60    7.70 
  -2   7   1   19.00    8.40 
   2   7  -1    8.20    8.20 
  -2   7   1   17.00    9.20 
  -2   7   1   14.00    7.50 
   2   7  -1   13.50    8.50 
   1  -7  -1 1145.69   54.19 
   1  -7  -1 1260.47   49.30 
   1  -7  -1 1171.38   49.70 
  -1  -7   1 1200.68   56.39 
  -1  -7   1 1180.08   58.99 
   1  -7  -1 1234.38   61.19 
  -1  -7   1 1156.78   51.69 
   1  -7  -1 1199.38   56.79 
   1  -7  -1 1191.98   55.99 
   1  -7  -1 1199.38   50.09 
   1  -7  -1 1238.18   54.09 
  -1  -7   1 1233.58   54.29 
  -1  -7   1 1204.18   48.70 
  -1  -7   1 1076.09   55.89 
   1  -7  -1 1080.69   52.89 
  -1  -7   1 1223.88   50.99 
  -1  -7   1 1244.98   51.29 
  -1  -7   1 1138.09   50.69 
   1  -7  -1 1231.28   54.59 
   1  -7  -1 1305.77   56.79 
   1  -7  -1 1265.57   53.59 
  -1   7   1 1272.37   54.29 
  -1   7   1 1287.37   59.39 
   1   7  -1 1210.88   49.80 
  -1   7   1 1148.29   44.00 
  -1   7   1 1177.98   54.69 
  -1   7   1 1209.58   54.89 
   1   7  -1 1219.48   54.69 
  -1   7   1 1163.48   52.89 
  -1   7   1 1267.27   57.39 
   1   7  -1 1172.38   65.89 
   1   7  -1 1210.58   60.89 
   1   7  -1 1233.58   55.89 
   1   7  -1 1117.79   55.89 
  -1   7   1 1150.68   48.90 
   1   7  -1 1186.18   56.39 
  -1   7   1 1196.58   55.39 
   1   7  -1 1234.78   54.79 
  -1   7   1 1230.08   62.59 
  -1   7   1 1219.98   50.69 
   1   7  -1 1249.97   54.59 
   1   7  -1 1270.17   50.79 
  -1   7   1 1152.78   53.89 
   0  -7  -1    3.40    6.50 
   0  -7  -1    6.30    6.20 
   0  -7   1    6.70    6.30 
   0  -7   1   14.50    7.70 
   0  -7   1    7.30    7.00 
   0  -7  -1   -1.50    6.20 
   0  -7   1    7.80    6.70 
   0  -7  -1   11.60    6.60 
   0  -7  -1   14.30    8.50 
   0  -7   1    8.90    6.80 
   0  -7   1    5.70    7.00 
   0  -7  -1   -0.70    5.80 
   0  -7   1    9.20    5.40 
   0  -7  -1    9.10    6.80 
   0  -7   1   -3.20    5.90 
   0  -7  -1   -1.00    5.80 
   0  -7  -1    0.70    5.50 
   0  -7  -1   11.50    7.00 
   0   7  -1    2.60    6.00 
   0   7   1   16.50    7.60 
   0   7   1   11.30    9.80 
   0   7  -1   15.60   10.50 
   0   7   1    7.10    6.80 
   0   7   1    0.60    7.00 
   0   7  -1    4.40    7.50 
   0   7   1    1.10    7.40 
   0   7   1    5.20    4.50 
   0   7  -1    5.30    6.90 
   0   7  -1    8.30    7.30 
   0   7   1    7.00    7.30 
   0   7  -1   14.90   11.30 
   0   7   1   -1.20    4.70 
   0   7   1    6.80    7.30 
   0   7  -1    4.30    4.90 
   0   7   1    3.60    6.30 
   0   7  -1    8.60    6.70 
   0   7   1    7.20    7.00 
   0   7  -1    2.00    9.90 
   0   7  -1   -0.20    4.70 
   0   7   1    6.50    8.40 
   0   7  -1    5.10    7.60 
   0   7   1   13.80    8.40 
   1  -7   1 1772.52   66.49 
   1  -7   1 1676.93   73.09 
   1  -7   1 1723.23   73.99 
  -1  -7  -1 1719.83   73.29 
   1  -7   1 1676.23   77.59 
  -1  -7  -1 1743.93   68.59 
  -1  -7  -1 1760.42   69.79 
  -1  -7  -1 1806.62   66.29 
  -1  -7  -1 1832.82   68.99 
  -1  -7  -1 1752.42   69.79 
  -1  -7  -1 1656.23   77.19 
   1  -7   1 1797.92   74.39 
   1  -7   1 1803.52   71.49 
  -1  -7  -1 1823.72   68.49 
   1  -7   1 1557.64   70.49 
   1  -7   1 1719.83   63.89 
   1  -7   1 1726.73   63.79 
  -1  -7  -1 1703.23   73.29 
  -1  -7  -1 1793.02   75.29 
   1  -7   1 1819.92   71.49 
  -1   7  -1 1722.83   75.19 
   1   7   1 1666.63   75.19 
  -1   7  -1 1723.63   72.89 
  -1   7  -1 1874.71   72.69 
   1   7   1 1614.34   69.09 
   1   7   1 1814.82   76.79 
   1   7   1 1722.93   72.59 
  -1   7  -1 1729.53   74.59 
  -1   7  -1 1721.43   67.19 
   1   7   1 1700.33   70.49 
  -1   7  -1 1766.32   63.39 
  -1   7  -1 1785.32   71.89 
  -1   7  -1 1635.34   63.09 
   1   7   1 1760.02   73.89 
  -1   7  -1 1721.93   80.59 
  -1   7  -1 1835.92   73.39 
   1   7   1 1785.12   71.39 
   1   7   1 1744.73   67.29 
  -1   7  -1 1701.53   67.49 
   1   7   1 1724.93   82.39 
  -1   7  -1 1734.43   69.49 
   1   7   1 1772.22   65.29 
   1   7   1 1699.03   71.79 
   2  -7   1   30.20    7.60 
  -2  -7  -1   40.70   12.00 
   2  -7   1   38.40   11.40 
  -2  -7  -1   23.10   10.70 
   2  -7   1   31.00   10.30 
   2  -7   1   34.60   10.90 
   2  -7   1   32.90   13.00 
   2  -7   1   20.30    9.90 
  -2  -7  -1   32.90   12.20 
  -2  -7  -1   52.49   12.50 
   2  -7   1   31.60   11.40 
  -2  -7  -1   38.40    9.70 
  -2  -7  -1   40.10    9.90 
  -2  -7  -1   38.80    8.10 
   2  -7   1   38.70   11.30 
  -2  -7  -1   32.30    8.00 
  -2  -7  -1   45.10    9.90 
   2  -7   1   36.80   10.30 
  -2  -7  -1   33.60   10.50 
  -2   7  -1   29.90    8.90 
   2   7   1   30.20   13.40 
  -2   7  -1   39.20   10.50 
  -2   7  -1   58.69   15.10 
  -2   7  -1   41.80   11.30 
   2   7   1   37.40   11.60 
  -2   7  -1   40.00   14.30 
   2   7   1   57.19   14.10 
  -2   7  -1   41.10    7.80 
   2   7   1   42.80    9.80 
  -2   7  -1   39.40   12.20 
  -2   7  -1   39.60   11.10 
   2   7   1   62.39   14.80 
   2   7   1   26.70    7.70 
   2   7   1   44.70   12.70 
   2   7   1   42.70   13.10 
  -2   7  -1   34.00   11.50 
   2   7   1   30.10    9.60 
  -2   7  -1   40.30   12.20 
  -2   7  -1   31.10   11.60 
   2   7   1   52.29   12.20 
  -2   7  -1   46.70   12.40 
  -2   7  -1   54.39    9.60 
   2   7   1   32.50   10.90 
   3  -7   1 1119.29   51.59 
  -3  -7  -1 1092.29   56.59 
  -3  -7  -1 1113.29   45.20 
   3  -7   1  943.51   56.49 
  -3  -7  -1 1036.30   53.19 
   3  -7   1 1050.69   52.39 
   3  -7   1 1036.10   52.39 
  -3  -7  -1 1133.19   46.20 
   3  -7   1 1075.29   54.69 
   3  -7   1 1089.29   52.09 
  -3  -7  -1 1155.68   52.39 
  -3  -7  -1 1038.50   56.59 
   3  -7   1 1096.89   52.69 
  -3  -7  -1 1062.29   43.90 
   3  -7   1 1110.59   53.29 
   3  -7   1 1035.60   44.20 
   3  -7   1 1043.40   54.69 
  -3  -7  -1  993.70   53.79 
  -3   7  -1 1067.29   50.79 
   3   7   1 1013.60   51.89 
  -3   7  -1 1069.59   51.89 
   3   7   1 1098.59   54.99 
  -3   7  -1 1094.19   53.09 
   3   7   1 1120.19   52.79 
  -3   7  -1 1091.49   55.89 
   3   7   1  957.50   46.80 
   3   7   1 1038.70   45.50 
  -3   7  -1 1073.19   53.09 
  -3   7  -1 1100.19   49.90 
   3   7   1 1048.60   55.29 
   3   7   1 1014.70   53.89 
   3   7   1 1015.30   47.30 
   3   7   1 1085.99   52.69 
  -3   7  -1 1101.69   47.70 
  -3   7  -1 1057.19   58.89 
   3   7   1 1087.49   57.39 
  -3   7  -1 1113.59   54.19 
  -3   7  -1 1044.80   53.79 
  -3   7  -1 1033.30   53.09 
  -3   7  -1 1068.89   49.40 
  -3   7  -1 1095.69   54.29 
  -4  -7  -1   32.40   12.50 
  -4  -7  -1   32.10   10.80 
   4  -7   1   49.30   14.70 
   4  -7   1   44.50   12.70 
   4  -7   1   18.90    9.40 
   4  -7   1   27.90   11.80 
   4  -7   1   41.30   11.70 
   4  -7   1   52.09   16.80 
   4  -7   1   30.10   12.70 
   4  -7   1   37.60    9.70 
  -4  -7  -1   34.10   12.70 
  -4  -7  -1   41.40   14.20 
  -4  -7  -1   28.10   11.30 
   4  -7   1   42.00   13.20 
   4  -7   1   18.60   11.50 
   4   7   1   45.80    9.70 
  -4   7  -1   22.30    9.80 
   4   7   1   36.40    9.70 
   4   7   1   42.50   14.70 
  -4   7  -1   35.80   12.50 
  -4   7  -1   17.60   10.10 
  -4   7  -1   36.30   10.70 
  -4   7  -1   29.80    9.10 
   4   7   1   42.10   11.90 
   4   7   1   35.80   12.20 
  -4   7  -1   37.80   12.10 
   4   7   1   47.80   13.80 
  -4   7  -1   39.70   12.90 
  -4   7  -1   43.30   12.90 
  -4   7  -1   44.60   12.90 
   4   7   1   51.39   13.80 
   4   7   1   69.19   15.30 
  -4   7  -1   25.10   12.80 
  -4   7  -1   44.90   13.90 
   4   7   1   40.70   12.80 
   4   7   1   58.29   11.20 
  -4   7  -1   30.10   10.20 
   5  -7   1  452.15   28.70 
   5  -7   1  554.74   38.50 
   5  -7   1  523.85   37.10 
   5  -7   1  421.86   37.70 
  -5  -7  -1  544.45   38.40 
   5  -7   1  417.36   35.60 
   5  -7   1  505.15   38.90 
  -5  -7  -1  537.25   36.90 
  -5  -7  -1  499.05   35.10 
   5  -7   1  441.56   31.00 
   5  -7   1  407.36   31.30 
   5  -7   1  523.05   36.60 
   5  -7   1  510.65   36.60 
   5  -7   1  483.05   36.50 
  -5  -7  -1  417.26   36.70 
  -5  -7  -1  501.85   31.20 
   5   7   1  520.05   37.40 
  -5   7  -1  539.55   35.60 
  -5   7  -1  493.35   36.40 
  -5   7  -1  465.65   34.10 
  -5   7  -1  499.65   33.60 
  -5   7  -1  437.16   33.10 
   5   7   1  518.75   32.20 
  -5   7  -1  448.66   39.10 
  -5   7  -1  450.85   34.00 
   5   7   1  482.15   33.90 
   5   7   1  504.55   40.00 
  -5   7  -1  533.65   38.00 
  -5   7  -1  495.85   30.20 
   5   7   1  449.16   32.70 
   5   7   1  457.85   34.70 
  -5   7  -1  459.55   35.50 
   5   7   1  435.36   34.10 
  -5   7  -1  475.55   37.00 
  -5   7  -1  492.35   33.90 
  -6  -7  -1   97.99   18.70 
  -6  -7  -1  113.19   20.40 
  -6  -7  -1  146.69   23.50 
   6  -7   1  136.69   22.70 
  -6  -7  -1  112.29   22.40 
  -6  -7  -1  124.19   22.00 
   6  -7   1  115.99   23.50 
   6  -7   1  131.19   21.70 
   6  -7   1  147.89   27.40 
   6  -7   1  126.09   21.30 
   6  -7   1  112.79   24.20 
   6  -7   1  133.99   24.60 
   6  -7   1   97.09   21.30 
   6  -7   1  121.09   21.00 
   6  -7   1  115.49   22.70 
  -6   7  -1  123.79   22.00 
   6   7   1  129.79   22.70 
  -6   7  -1   83.09   19.60 
  -6   7  -1   96.49   19.50 
  -6   7  -1  292.47   38.10 
  -6   7  -1   89.49   19.00 
  -6   7  -1  106.19   20.10 
  -6   7  -1   71.09   15.90 
  -6   7  -1  109.39   25.70 
  -6   7  -1  128.99   21.10 
  -6   7  -1  109.79   23.20 
   6   7   1   81.19   18.80 
   6   7   1  125.19   22.10 
   6   7   1  107.19   25.20 
   6   7   1  115.29   19.50 
   7  -7   1  439.06   43.30 
   7  -7   1  409.66   42.90 
   7  -7   1  383.76   44.20 
  -7  -7  -1  477.95   36.40 
   7  -7   1  390.46   44.10 
   7  -7   1  445.96   50.69 
  -7  -7  -1  457.45   46.80 
   7  -7   1  365.46   44.50 
   7  -7   1  400.56   42.20 
  -7  -7  -1  394.66   40.80 
  -7  -7  -1  368.46   40.20 
   7  -7   1  379.96   40.70 
   7   7   1  451.45   36.10 
  -7   7  -1  362.66   31.80 
  -7   7  -1  468.65   37.50 
  -7   7  -1  518.95   40.70 
   7   7   1  413.06   39.00 
  -7   7  -1  434.46   35.80 
  -7   7  -1  398.76   46.60 
  -7   7  -1  418.76   33.70 
  -7   7  -1  463.45   45.50 
  -7   7  -1  449.66   47.30 
   7   7   1  473.45   36.70 
  -7   7  -1  451.65   49.30 
  -7   7  -1  348.17   39.30 
   6  -8  -1   29.10   14.00 
   6  -8  -1   46.20   18.90 
  -6  -8   1   13.00   12.60 
   6  -8  -1   24.30   14.30 
   6  -8  -1   12.90   16.20 
  -6  -8   1   20.90   13.20 
   6  -8  -1   38.90   14.70 
   6  -8  -1   -1.90   11.50 
   6  -8  -1   14.40   16.20 
  -6  -8   1   49.60   16.30 
   6  -8  -1   26.20   13.60 
   6  -8  -1   28.20   12.90 
  -6  -8   1   31.10   14.00 
  -6   8   1   26.60   13.20 
  -6   8   1   13.50   13.80 
   6   8  -1   37.00   18.70 
  -6   8   1   21.50   13.50 
  -6   8   1   26.50   14.90 
   6   8  -1   49.00   16.90 
  -6   8   1   22.90   16.10 
  -6   8   1   32.00   15.90 
   6   8  -1   29.30   14.20 
  -6   8   1   23.60   12.00 
  -6   8   1   28.80   12.90 
  -6   8   1   20.70   11.40 
  -6   8   1   26.10   13.50 
   6   8  -1   13.90   11.20 
  -5  -8   1    7.30    9.70 
   5  -8  -1   16.80   11.70 
   5  -8  -1   16.70   10.30 
  -5  -8   1    9.00    8.10 
  -5  -8   1   19.70   11.60 
   5  -8  -1    7.70   11.80 
  -5  -8   1  -20.80    8.20 
   5  -8  -1   22.30   12.20 
   5  -8  -1    0.40    9.90 
  -5  -8   1   30.00   12.70 
   5  -8  -1   10.50   10.20 
   5  -8  -1   15.50   10.90 
   5  -8  -1   15.20   12.20 
   5  -8  -1   25.40   12.30 
  -5   8   1    4.30    8.90 
  -5   8   1   30.90   16.00 
  -5   8   1   -3.20    8.50 
  -5   8   1    5.80    8.90 
   5   8  -1   25.60   11.50 
  -5   8   1    4.90    9.70 
  -5   8   1   25.20   11.80 
   5   8  -1   21.70   11.80 
   5   8  -1   20.30   10.80 
  -5   8   1   13.70   11.60 
   5   8  -1   15.60   13.70 
  -5   8   1    4.00   10.50 
   5   8  -1    5.40    9.20 
  -5   8   1   14.40   11.70 
  -5   8   1   27.00   12.70 
   5   8  -1   26.10   12.60 
  -5   8   1   20.10   10.40 
  -4  -8   1   66.99   15.20 
   4  -8  -1  123.39   21.80 
   4  -8  -1   68.99   14.20 
   4  -8  -1   59.89   18.20 
   4  -8  -1   24.80   11.70 
   4  -8  -1   52.29   14.00 
   4  -8  -1   55.49   16.80 
  -4  -8   1   55.49   18.30 
   4  -8  -1  106.59   21.40 
  -4  -8   1   91.19   19.50 
   4  -8  -1   97.59   19.20 
   4  -8  -1   42.60   16.20 
   4  -8  -1   71.19   19.40 
  -4  -8   1   43.10   14.70 
   4  -8  -1   50.79   12.80 
  -4  -8   1   57.69   14.60 
   4   8  -1   48.60   14.00 
  -4   8   1   81.39   19.10 
  -4   8   1   53.89   15.80 
   4   8  -1   71.09   18.60 
  -4   8   1   47.30   13.40 
  -4   8   1   67.19   15.70 
  -4   8   1   75.19   14.90 
   4   8  -1   98.39   16.80 
   4   8  -1   62.69   14.60 
  -4   8   1   85.99   19.30 
   4   8  -1   71.89   16.50 
  -4   8   1   60.09   15.80 
   4   8  -1   67.49   13.80 
  -4   8   1   46.50   13.10 
  -4   8   1   72.59   17.30 
   4   8  -1   73.89   17.90 
  -4   8   1   65.79   19.70 
  -4   8   1   74.09   16.80 
  -4   8   1   59.79   19.00 
   4   8  -1   77.09   19.30 
   4   8  -1   89.29   19.30 
   3  -8  -1   14.90    8.60 
  -3  -8   1   14.10    9.40 
  -3  -8   1    9.80    9.20 
   3  -8  -1    6.00    7.30 
  -3  -8   1    7.90    8.30 
   3  -8  -1   18.40   10.80 
   3  -8  -1   12.10    8.70 
  -3  -8   1    5.00    5.90 
   3  -8  -1    0.20    8.60 
  -3  -8   1   13.90    8.00 
  -3  -8   1    9.90    9.50 
   3  -8  -1    3.60    8.40 
   3  -8  -1    9.40    9.30 
   3  -8  -1   24.60   11.50 
   3  -8  -1   20.80    8.50 
  -3  -8   1   13.60    9.40 
   3  -8  -1   10.50    8.20 
   3  -8  -1   19.70   11.00 
  -3   8   1   20.60    8.90 
  -3   8   1   12.10    8.90 
   3   8  -1    9.80    7.80 
  -3   8   1   19.40    9.20 
   3   8  -1   24.90   10.40 
   3   8  -1   12.10    8.40 
  -3   8   1   19.10   10.30 
  -3   8   1    7.00    7.90 
   3   8  -1   13.60    9.30 
  -3   8   1    8.20    8.00 
  -3   8   1   10.70    8.70 
   3   8  -1   33.60   16.30 
  -3   8   1   -2.10    8.80 
  -3   8   1    8.00    7.80 
   3   8  -1    6.30    8.30 
   3   8  -1   -5.80    6.80 
   3   8  -1    5.20    8.00 
  -3   8   1   38.70   15.00 
  -3   8   1    6.50    8.10 
   3   8  -1   39.00   12.80 
  -3   8   1   19.00    8.80 
  -2  -8   1    9.60    8.90 
   2  -8  -1    4.70    9.10 
  -2  -8   1    1.20    6.70 
  -2  -8   1   -0.20    6.90 
  -2  -8   1   10.50    9.70 
   2  -8  -1    8.00    9.60 
  -2  -8   1   12.50    7.60 
   2  -8  -1    3.90    7.30 
  -2  -8   1    5.30    8.30 
   2  -8  -1    7.80    9.20 
  -2  -8   1    3.50    8.00 
   2  -8  -1   19.10    9.70 
   2  -8  -1    9.10    6.70 
  -2  -8   1   -5.50    4.50 
   2  -8  -1   -7.10    7.30 
   2  -8  -1   -3.30    6.50 
   2  -8  -1   -6.00    6.20 
   2  -8  -1    2.90    8.00 
   2  -8  -1    0.40    6.10 
   2  -8  -1   11.00    7.60 
   2   8  -1    9.80    8.60 
  -2   8   1   11.10    9.50 
   2   8  -1    0.10    7.80 
  -2   8   1    9.00    9.20 
   2   8  -1    2.80    7.20 
  -2   8   1   10.10    8.90 
   2   8  -1   10.20    9.40 
   2   8  -1    6.50    8.10 
   2   8  -1   -9.30   12.20 
   2   8  -1    3.10    9.20 
  -2   8   1   12.40    8.90 
   2   8  -1    7.70    6.40 
  -2   8   1   -4.10    7.80 
  -2   8   1   -5.20    6.20 
  -2   8   1    0.10    8.90 
  -2   8   1    7.70    7.70 
  -2   8   1   -3.40    6.20 
  -2   8   1    5.60    9.30 
  -2   8   1    5.70   10.60 
  -2   8   1    3.80    8.70 
   2   8  -1    9.20    7.90 
   1  -8  -1   15.70    7.60 
   1  -8  -1   12.90    9.20 
   1  -8  -1   21.80    9.80 
  -1  -8   1   12.80    8.70 
   1  -8  -1   24.20    8.00 
   1  -8  -1   36.90   10.80 
  -1  -8   1   26.10    9.20 
  -1  -8   1   18.80   10.20 
  -1  -8   1   11.20    8.80 
   1  -8  -1   21.10    9.10 
  -1  -8   1   11.00    7.50 
   1  -8  -1   13.30    9.40 
   1  -8  -1    9.50    7.80 
   1  -8  -1   15.20    8.40 
  -1  -8   1    8.20    8.40 
   1  -8  -1   13.90    7.70 
  -1  -8   1   27.20   12.10 
  -1  -8   1   18.40    8.40 
   1  -8  -1   21.40   10.20 
   1  -8  -1   20.00   11.10 
   1   8  -1   13.40    7.20 
   1   8  -1   20.00   14.00 
   1   8  -1   31.50   11.00 
   1   8  -1   -1.50    6.70 
  -1   8   1   14.10   12.20 
   1   8  -1    6.50    8.60 
  -1   8   1   11.70    9.10 
   1   8  -1   31.40   12.30 
  -1   8   1    9.80    9.80 
  -1   8   1   15.40    8.70 
  -1   8   1   20.50    8.60 
   1   8  -1    2.20    7.30 
  -1   8   1    1.00    8.40 
  -1   8   1   11.80    9.10 
  -1   8   1   20.40   10.10 
  -1   8   1    1.90    9.70 
   1   8  -1   11.80    8.30 
  -1   8   1   24.20    9.20 
  -1   8   1    5.60    8.50 
   1   8  -1   21.50   12.70 
   0  -8   1  347.27   25.90 
   0  -8  -1  302.87   22.20 
   0  -8  -1  342.67   36.20 
   0  -8  -1  318.97   26.70 
   0  -8   1  352.36   22.50 
   0  -8   1  305.07   24.50 
   0  -8   1  376.66   38.40 
   0  -8   1  283.57   33.10 
   0  -8  -1  374.56   37.40 
   0  -8  -1  314.17   25.70 
   0  -8  -1  305.87   23.40 
   0  -8  -1  322.97   24.90 
   0  -8  -1  327.77   28.40 
   0  -8  -1  361.46   26.70 
   0  -8   1  310.27   27.00 
   0  -8   1  325.37   28.30 
   0  -8  -1  305.97   25.60 
   0  -8   1  346.67   26.60 
   0   8   1  356.76   27.40 
   0   8  -1  328.87   36.60 
   0   8   1  412.06   42.20 
   0   8  -1  358.86   29.40 
   0   8  -1  341.77   27.10 
   0   8   1  359.36   36.80 
   0   8  -1  370.16   40.90 
   0   8  -1  315.57   27.90 
   0   8   1  362.36   29.60 
   0   8  -1  332.17   26.10 
   0   8   1  355.66   27.80 
   0   8  -1  329.47   32.90 
   0   8   1  336.47   35.10 
   0   8   1  426.46   39.00 
   0   8   1  349.37   27.20 
   0   8  -1  356.46   21.90 
   0   8   1  301.17   26.50 
   0   8  -1  387.56   28.90 
   0   8   1  324.87   23.90 
  -1  -8  -1   68.59   13.00 
  -1  -8  -1   99.79   19.20 
   1  -8   1   63.09   15.70 
  -1  -8  -1   73.79   12.90 
   1  -8   1   87.49   19.80 
  -1  -8  -1   75.99   14.60 
   1  -8   1   63.29   14.00 
   1  -8   1   73.39   17.10 
  -1  -8  -1  104.59   17.80 
   1  -8   1   79.29   16.00 
  -1  -8  -1   81.29   15.30 
  -1  -8  -1  107.59   20.00 
   1  -8   1   87.89   18.60 
   1  -8   1  104.19   20.50 
   1  -8   1   67.09   12.20 
  -1  -8  -1  100.39   16.20 
  -1  -8  -1   64.89   16.00 
  -1  -8  -1   69.09   17.20 
   1  -8   1   49.20   13.40 
   1   8   1   65.29   19.00 
   1   8   1   66.59   15.40 
   1   8   1   51.69   13.60 
  -1   8  -1   76.79   20.10 
   1   8   1   81.69   16.00 
  -1   8  -1   85.99   15.10 
  -1   8  -1   47.30   13.50 
   1   8   1   61.99   13.70 
   1   8   1   69.59   14.00 
  -1   8  -1   47.50   13.20 
  -1   8  -1   72.39   12.30 
   1   8   1   51.09   10.10 
  -1   8  -1   78.39   14.40 
   1   8   1   61.89   14.50 
  -1   8  -1  103.29   20.70 
   1   8   1   64.89   14.90 
  -1   8  -1   62.59   15.30 
   1   8   1   42.50   14.10 
  -1   8  -1   63.49   15.20 
  -1   8  -1   53.19   13.40 
   2  -8   1  288.47   31.00 
  -2  -8  -1  292.07   22.10 
   2  -8   1  329.87   24.30 
  -2  -8  -1  299.47   28.30 
  -2  -8  -1  307.97   23.20 
   2  -8   1  364.26   35.40 
  -2  -8  -1  294.87   30.70 
  -2  -8  -1  316.07   22.10 
   2  -8   1  288.17   31.40 
  -2  -8  -1  267.77   29.60 
   2  -8   1  263.87   29.60 
   2  -8   1  231.68   30.30 
   2  -8   1  319.07   33.80 
  -2  -8  -1  275.57   22.20 
   2  -8   1  272.47   29.10 
  -2  -8  -1  224.28   29.10 
   2  -8   1  268.97   31.00 
  -2  -8  -1  314.87   33.20 
   2   8   1  354.96   30.20 
   2   8   1  323.87   31.80 
  -2   8  -1  299.37   23.80 
  -2   8  -1  274.37   30.40 
   2   8   1  324.17   25.40 
  -2   8  -1  341.47   38.80 
  -2   8  -1  292.87   30.90 
   2   8   1  245.58   28.20 
   2   8   1  285.87   21.30 
  -2   8  -1  273.07   32.40 
  -2   8  -1  276.47   30.10 
   2   8   1  282.07   33.20 
  -2   8  -1  232.38   28.50 
  -2   8  -1  291.17   30.90 
   2   8   1  294.87   31.30 
  -2   8  -1  275.57   27.80 
   2   8   1  254.87   27.20 
  -2   8  -1  320.37   24.20 
   2   8   1  268.67   34.70 
  -3  -8  -1   98.79   18.70 
   3  -8   1  104.29   19.90 
   3  -8   1  102.29   20.20 
   3  -8   1  122.99   23.10 
  -3  -8  -1   43.40   14.20 
   3  -8   1   96.39   21.00 
  -3  -8  -1  114.09   20.50 
   3  -8   1   47.40   13.60 
  -3  -8  -1   78.69   12.80 
   3  -8   1   89.19   18.00 
  -3  -8  -1  112.09   22.00 
  -3  -8  -1   78.59   18.70 
   3  -8   1  111.59   22.00 
   3  -8   1   48.10   14.80 
   3  -8   1   94.29   20.80 
  -3  -8  -1  101.99   18.80 
  -3   8  -1  101.79   20.60 
   3   8   1   71.89   16.60 
  -3   8  -1   83.69   19.20 
  -3   8  -1  103.59   20.70 
   3   8   1   44.90   12.20 
   3   8   1   61.29   16.80 
   3   8   1  103.79   21.30 
   3   8   1   73.59   16.90 
  -3   8  -1   71.79   15.20 
   3   8   1   70.19   16.90 
  -3   8  -1  107.09   18.60 
  -3   8  -1   84.89   18.90 
  -3   8  -1   89.19   19.30 
  -3   8  -1   65.49   13.50 
  -3   8  -1   73.89   15.90 
  -3   8  -1   94.79   19.90 
   3   8   1  102.79   19.20 
   3   8   1   70.69   14.10 
  -3   8  -1   87.79   18.30 
  -3   8  -1   81.79   15.50 
   3   8   1   66.29   18.10 
  -4  -8  -1   90.39   18.40 
   4  -8   1  112.19   23.50 
   4  -8   1  146.99   24.80 
   4  -8   1  112.79   21.00 
  -4  -8  -1   70.39   18.10 
   4  -8   1  126.49   24.10 
   4  -8   1  131.29   22.40 
   4  -8   1  118.69   20.30 
   4  -8   1   91.39   19.10 
  -4  -8  -1  107.89   21.20 
  -4  -8  -1  179.78   27.80 
  -4  -8  -1  140.79   24.30 
   4  -8   1  147.89   24.30 
   4  -8   1  129.29   24.70 
  -4  -8  -1  118.29   21.80 
   4   8   1  129.39   21.90 
  -4   8  -1  106.19   21.00 
  -4   8  -1   83.29   18.50 
   4   8   1  162.38   22.80 
  -4   8  -1  108.49   25.30 
  -4   8  -1  114.99   18.90 
   4   8   1  108.09   20.70 
  -4   8  -1  135.39   20.80 
  -4   8  -1  119.99   22.00 
   4   8   1  155.28   24.50 
  -4   8  -1  128.39   23.00 
   4   8   1  119.59   17.30 
  -4   8  -1  117.89   22.60 
   4   8   1  151.28   23.30 
  -4   8  -1  150.18   18.30 
  -4   8  -1  110.89   22.90 
  -4   8  -1  129.29   20.30 
  -4   8  -1  159.28   23.90 
   4   8   1   88.99   21.20 
   4   8   1  126.19   20.40 
   5  -8   1    4.80    9.40 
  -5  -8  -1    7.00    9.30 
  -5  -8  -1   14.70   13.40 
  -5  -8  -1   17.30   12.10 
  -5  -8  -1   -0.90    9.00 
  -5  -8  -1   11.70    9.90 
   5  -8   1    5.50    9.80 
   5  -8   1   23.10   14.70 
  -5  -8  -1    9.80    9.30 
   5  -8   1   -2.40   10.80 
   5  -8   1    3.50   10.10 
   5  -8   1    2.10   11.50 
   5  -8   1   19.90   10.30 
   5  -8   1   20.80   15.50 
   5  -8   1   11.30   12.00 
   5  -8   1   -2.40    9.00 
   5   8   1    9.00   10.80 
  -5   8  -1   12.70   10.80 
  -5   8  -1   17.60   11.70 
  -5   8  -1   18.80   11.10 
   5   8   1   -7.30    8.20 
   5   8   1    6.10   11.50 
  -5   8  -1   23.70   14.30 
  -5   8  -1    5.50    9.30 
   5   8   1   17.80   10.40 
  -5   8  -1   11.70   10.90 
  -5   8  -1   22.20   13.60 
   5   8   1   13.40    9.60 
  -5   8  -1    8.30    8.90 
   5   8   1   27.10   10.80 
  -5   8  -1    3.60    9.00 
  -5   8  -1    8.70    9.90 
  -5   8  -1    8.50   10.10 
  -6  -8  -1  383.16   42.20 
   6  -8   1  382.76   45.30 
   6  -8   1  333.57   38.10 
  -6  -8  -1  355.06   38.20 
   6  -8   1  383.96   42.80 
  -6  -8  -1  371.96   38.50 
   6  -8   1  386.86   42.90 
  -6  -8  -1  377.26   42.80 
   6  -8   1  320.67   35.30 
   6  -8   1  286.77   36.60 
   6  -8   1  332.27   40.40 
   6  -8   1  409.06   46.30 
   6  -8   1  304.77   42.00 
  -6  -8  -1  327.07   38.60 
  -6   8  -1  411.66   43.90 
  -6   8  -1  306.17   34.00 
  -6   8  -1  339.37   36.50 
   6   8   1  321.67   43.70 
  -6   8  -1  384.76   33.40 
  -6   8  -1  376.66   43.30 
   6   8   1  331.77   37.80 
   6   8   1  357.06   38.60 
  -6   8  -1  296.77   34.80 
   6   8   1  372.36   41.00 
  -6   8  -1  295.67   35.90 
  -6   8  -1  332.47   44.90 
  -6   8  -1  401.16   47.00 
   6   8   1  343.67   35.40 
  -6   8  -1  316.07   40.40 
  -5  -9   1  786.62   54.39 
   5  -9  -1  767.22   53.99 
   5  -9  -1  779.72   51.49 
  -5  -9   1  764.42   50.69 
   5  -9  -1  811.32   55.29 
   5  -9  -1  750.12   54.29 
   5  -9  -1  804.52   54.39 
  -5  -9   1  692.73   49.20 
  -5  -9   1  769.72   46.90 
   5  -9  -1  861.71   52.79 
   5  -9  -1  663.93   52.89 
   5  -9  -1  637.24   46.40 
  -5  -9   1  807.32   52.89 
   5  -9  -1  755.92   49.80 
  -5   9   1  696.23   49.90 
  -5   9   1  727.43   47.90 
  -5   9   1  743.83   51.59 
  -5   9   1  714.83   49.99 
  -5   9   1  683.13   50.39 
  -5   9   1  751.32   45.50 
  -5   9   1  738.63   50.99 
   5   9  -1  820.92   54.09 
  -5   9   1  675.93   56.69 
   5   9  -1  748.13   48.30 
  -5   9   1  798.82   54.09 
  -5   9   1  751.62   50.09 
   5   9  -1  784.02   48.50 
   5   9  -1  790.02   49.99 
   5   9  -1  695.53   53.69 
   4  -9  -1  491.75   38.30 
   4  -9  -1  496.25   36.20 
   4  -9  -1  454.35   45.70 
   4  -9  -1  471.55   42.60 
  -4  -9   1  509.15   37.60 
   4  -9  -1  507.65   41.80 
  -4  -9   1  518.35   40.30 
   4  -9  -1  493.15   37.90 
  -4  -9   1  471.35   39.60 
   4  -9  -1  491.95   41.30 
   4  -9  -1  487.15   36.20 
   4  -9  -1  480.55   40.00 
  -4  -9   1  547.35   42.90 
  -4   9   1  507.75   39.70 
  -4   9   1  564.94   41.00 
   4   9  -1  492.25   42.90 
   4   9  -1  472.65   41.40 
  -4   9   1  530.55   37.50 
  -4   9   1  490.65   40.00 
   4   9  -1  491.15   39.00 
  -4   9   1  451.85   35.00 
   4   9  -1  528.25   35.60 
  -4   9   1  416.86   44.00 
   4   9  -1  506.95   42.70 
  -4   9   1  457.95   40.00 
   4   9  -1  501.85   38.50 
  -4   9   1  380.56   44.80 
  -4   9   1  453.25   38.50 
  -4   9   1  461.95   38.20 
  -4   9   1  459.25   33.50 
   4   9  -1  475.55   37.50 
  -3  -9   1  556.94   31.50 
   3  -9  -1  562.94   41.30 
  -3  -9   1  522.45   38.40 
   3  -9  -1  593.54   46.30 
   3  -9  -1  548.55   39.20 
   3  -9  -1  583.64   39.80 
   3  -9  -1  526.95   35.70 
  -3  -9   1  526.85   41.60 
  -3  -9   1  566.84   43.60 
  -3  -9   1  509.55   39.10 
   3  -9  -1  599.94   42.60 
   3  -9  -1  535.55   39.70 
   3  -9  -1  455.35   37.20 
   3  -9  -1  487.05   38.80 
  -3   9   1  584.84   46.70 
  -3   9   1  534.55   41.80 
  -3   9   1  584.84   36.80 
  -3   9   1  527.85   40.30 
  -3   9   1  560.54   41.40 
  -3   9   1  570.44   40.80 
   3   9  -1  589.94   44.20 
  -3   9   1  507.95   36.90 
   3   9  -1  582.24   35.40 
   3   9  -1  556.64   39.70 
   3   9  -1  627.74   49.90 
   3   9  -1  530.75   37.10 
  -3   9   1  536.05   36.20 
   3   9  -1  542.25   36.80 
  -3   9   1  466.75   37.90 
   3   9  -1  555.44   38.70 
   3   9  -1  513.65   39.00 
  -3   9   1  537.55   40.70 
   3   9  -1  598.44   43.10 
   2  -9  -1  253.17   29.30 
   2  -9  -1  252.97   35.40 
  -2  -9   1  278.97   33.40 
   2  -9  -1  259.27   29.50 
   2  -9  -1  308.27   34.40 
   2  -9  -1  286.37   32.50 
  -2  -9   1  243.18   28.10 
  -2  -9   1  240.58   30.90 
   2  -9  -1  289.47   33.90 
   2  -9  -1  254.27   31.60 
  -2  -9   1  276.77   27.00 
  -2  -9   1  262.07   31.90 
   2  -9  -1  335.27   37.60 
   2  -9  -1  276.57   34.00 
  -2  -9   1  161.28   26.60 
   2   9  -1  230.48   27.40 
  -2   9   1  278.77   29.50 
   2   9  -1  313.57   36.80 
  -2   9   1  228.28   25.70 
  -2   9   1  286.37   28.90 
   2   9  -1  182.28   25.20 
  -2   9   1  218.68   29.40 
  -2   9   1  289.27   37.40 
  -2   9   1  215.48   29.60 
   2   9  -1  228.68   32.10 
  -2   9   1  341.77   39.80 
   2   9  -1  272.47   22.50 
  -2   9   1  248.58   36.40 
   2   9  -1  246.58   31.60 
   2   9  -1  318.17   35.60 
   2   9  -1  270.77   39.70 
   2   9  -1  291.97   31.10 
  -1  -9   1  315.17   34.30 
   1  -9  -1  380.06   41.70 
   1  -9  -1  395.76   41.90 
  -1  -9   1  356.56   27.80 
  -1  -9   1  415.66   42.10 
  -1  -9   1  304.97   25.40 
   1  -9  -1  346.47   29.30 
   1  -9  -1  367.86   28.80 
   1  -9  -1  371.26   38.60 
  -1  -9   1  347.07   29.80 
  -1  -9   1  363.76   38.50 
   1  -9  -1  308.77   33.70 
   1  -9  -1  283.87   33.70 
  -1  -9   1  371.36   28.20 
   1  -9  -1  325.87   33.30 
  -1  -9   1  322.77   37.40 
  -1  -9   1  389.66   26.80 
   1  -9  -1  352.36   35.70 
  -1   9   1  335.57   39.00 
  -1   9   1  361.06   33.90 
  -1   9   1  386.06   42.80 
   1   9  -1  373.76   47.00 
  -1   9   1  324.27   24.10 
  -1   9   1  374.16   37.50 
  -1   9   1  384.26   31.50 
  -1   9   1  386.16   37.40 
   1   9  -1  375.76   37.50 
   1   9  -1  302.07   35.70 
   1   9  -1  390.06   35.60 
  -1   9   1  323.17   40.60 
  -1   9   1  345.97   39.20 
   1   9  -1  371.26   41.00 
   1   9  -1  309.87   33.70 
   1   9  -1  391.06   33.00 
   1   9  -1  387.26   38.10 
   0  -9   1  435.36   35.60 
   0  -9  -1  429.16   33.00 
   0  -9  -1  373.86   30.10 
   0  -9   1  410.56   33.10 
   0  -9  -1  465.65   31.00 
   0  -9  -1  460.25   33.90 
   0  -9   1  409.46   31.30 
   0  -9  -1  452.05   33.10 
   0  -9   1  356.96   38.70 
   0  -9   1  412.96   45.40 
   0  -9  -1  414.76   37.40 
   0  -9   1  423.36   31.90 
   0  -9   1  463.45   30.70 
   0  -9  -1  469.45   35.90 
   0  -9  -1  453.05   35.40 
   0  -9   1  435.76   31.20 
   0  -9  -1  367.36   30.60 
   0  -9   1  386.96   32.40 
   0   9  -1  439.76   34.10 
   0   9   1  436.06   33.10 
   0   9  -1  360.46   36.90 
   0   9  -1  413.86   34.40 
   0   9  -1  422.76   35.20 
   0   9   1  476.75   50.59 
   0   9   1  399.56   39.80 
   0   9  -1  379.46   46.60 
   0   9   1  484.85   38.80 
   0   9   1  462.95   34.40 
   0   9   1  409.86   35.70 
   0   9   1  390.16   35.60 
   0   9   1  425.56   35.30 
   0   9  -1  403.36   44.70 
   0   9  -1  357.96   36.00 
   0   9  -1  423.16   32.10 
  -1  -9  -1  599.74   40.50 
  -1  -9  -1  547.05   38.50 
   1  -9   1  529.05   37.20 
   1  -9   1  555.74   37.90 
  -1  -9  -1  534.15   42.30 
   1  -9   1  526.05   39.90 
  -1  -9  -1  542.25   35.60 
   1  -9   1  551.74   37.20 
   1  -9   1  530.75   39.50 
   1  -9   1  574.84   40.70 
  -1  -9  -1  540.65   36.20 
   1  -9   1  555.44   36.20 
  -1  -9  -1  525.45   35.60 
  -1  -9  -1  524.05   34.00 
   1  -9   1  511.95   37.10 
  -1  -9  -1  560.64   41.40 
   1  -9   1  528.75   42.10 
  -1   9  -1  575.64   36.80 
   1   9   1  630.84   50.09 
   1   9   1  551.84   38.50 
   1   9   1  593.84   40.50 
  -1   9  -1  523.05   37.40 
   1   9   1  548.25   40.60 
  -1   9  -1  568.14   48.20 
  -1   9  -1  474.15   38.50 
   1   9   1  546.95   41.50 
   1   9   1  602.94   38.50 
  -1   9  -1  590.54   39.30 
  -1   9  -1  581.94   39.40 
  -1   9  -1  521.85   45.70 
   1   9   1  657.03   39.30 
   1   9   1  551.34   39.50 
  -1   9  -1  535.45   31.80 
   2  -9   1  215.08   32.50 
   2  -9   1  280.67   36.30 
   2  -9   1  245.38   29.30 
   2  -9   1  282.77   32.10 
   2  -9   1  327.87   38.80 
  -2  -9  -1  246.68   32.20 
   2  -9   1  288.87   31.00 
   2  -9   1  260.07   31.10 
  -2  -9  -1  262.27   34.00 
  -2  -9  -1  302.17   30.50 
   2  -9   1  340.47   36.80 
  -2  -9  -1  262.07   26.90 
  -2  -9  -1  226.48   32.30 
   2  -9   1  263.87   33.00 
  -2  -9  -1  237.38   29.90 
   2   9   1  255.27   32.10 
  -2   9  -1  264.27   34.40 
  -2   9  -1  262.27   34.20 
  -2   9  -1  243.68   35.40 
  -2   9  -1  274.87   27.70 
   2   9   1  267.17   29.40 
   2   9   1  209.68   30.10 
   2   9   1  273.87   32.50 
  -2   9  -1  244.88   28.60 
  -2   9  -1  254.57   27.90 
   2   9   1  250.07   28.90 
  -2   9  -1  251.57   32.20 
   2   9   1  229.58   33.90 
   2   9   1  231.38   31.20 
   2   9   1  265.07   33.30 
  -2   9  -1  348.47   39.60 
   3  -9   1  510.15   35.50 
  -3  -9  -1  518.85   31.00 
   3  -9   1  561.04   40.10 
  -3  -9  -1  545.95   41.50 
   3  -9   1  500.55   43.50 
   3  -9   1  451.75   37.70 
  -3  -9  -1  521.15   42.30 
  -3  -9  -1  575.44   39.70 
   3  -9   1  569.74   37.40 
   3  -9   1  540.55   38.70 
   3  -9   1  493.35   38.00 
   3  -9   1  454.65   38.00 
   3  -9   1  473.95   40.40 
   3  -9   1  483.85   37.90 
  -3  -9  -1  553.54   40.40 
   3   9   1  511.25   38.90 
  -3   9  -1  567.84   42.60 
   3   9   1  490.25   34.70 
  -3   9  -1  510.65   47.10 
  -3   9  -1  457.25   33.50 
   3   9   1  496.55   40.60 
  -3   9  -1  492.85   39.50 
   3   9   1  519.75   38.70 
   3   9   1  604.84   42.60 
   3   9   1  560.64   35.70 
  -3   9  -1  536.95   39.60 
  -3   9  -1  516.35   38.40 
  -3   9  -1  558.44   37.50 
   3   9   1  493.25   37.70 
  -3   9  -1  553.24   39.80 
  -3   9  -1  556.44   41.10 
   3   9   1  527.65   44.30 
  -3   9  -1  484.65   34.50 
   4  -9   1  153.98   26.40 
   4  -9   1  170.78   25.70 
  -4  -9  -1  252.57   36.00 
   4  -9   1  241.68   31.80 
  -4  -9  -1  172.88   27.80 
   4  -9   1  210.98   33.80 
   4  -9   1  168.48   26.60 
   4  -9   1  176.98   28.10 
  -4  -9  -1  256.47   34.30 
   4  -9   1  172.28   29.80 
   4  -9   1  172.88   29.00 
  -4  -9  -1  165.68   27.30 
  -4  -9  -1  170.68   25.10 
   4  -9   1  179.28   30.20 
   4   9   1  160.78   26.70 
  -4   9  -1  184.78   31.10 
  -4   9  -1  166.18   27.30 
  -4   9  -1  158.08   26.50 
   4   9   1  145.59   23.40 
  -4   9  -1  203.88   30.40 
  -4   9  -1  231.88   30.10 
  -4   9  -1  145.69   24.80 
  -4   9  -1  127.99   23.20 
  -4   9  -1  179.58   29.10 
  -4   9  -1  221.08   28.40 
  -4   9  -1  163.18   30.60 
   4   9   1  176.58   27.40 
   4   9   1  140.29   24.20 
   4   9   1  125.09   26.00 
   5  -9   1   85.59   22.00 
   5  -9   1   84.49   22.50 
   5  -9   1   78.99   20.60 
   5  -9   1   47.90   18.50 
  -5  -9  -1   84.59   21.10 
   5  -9   1  129.89   26.50 
   5  -9   1  120.09   27.60 
  -5  -9  -1   83.89   20.60 
  -5  -9  -1   97.99   21.90 
  -5  -9  -1   89.79   19.20 
  -5  -9  -1   86.29   20.10 
   5  -9   1  104.39   20.90 
   5  -9   1   91.79   24.30 
   5  -9   1  115.09   23.70 
   5   9   1   78.79   18.50 
   5   9   1   80.19   19.70 
   5   9   1   83.79   20.70 
   5   9   1  111.29   27.30 
  -5   9  -1  134.99   26.20 
  -5   9  -1  127.29   25.20 
  -5   9  -1  110.69   25.70 
   5   9   1   61.19   17.40 
  -5   9  -1  106.89   25.40 
  -5   9  -1  111.79   24.80 
  -5   9  -1   56.09   18.10 
  -5   9  -1   93.89   25.60 
  -5   9  -1   76.49   18.70 
  -5   9  -1   60.29   20.60 
  -5   9  -1   86.49   21.10 
  -3 -10   1   28.00   13.80 
  -3 -10   1    0.00   10.90 
   3 -10  -1   -1.00    9.90 
   3 -10  -1    3.60   12.30 
   3 -10  -1   11.50   12.60 
   3 -10  -1    1.50   12.40 
  -3 -10   1   -5.50    7.00 
  -3 -10   1    5.00   12.20 
  -3 -10   1    1.70   11.60 
   3 -10  -1   -6.30   11.70 
   3 -10  -1  -10.60   10.80 
   3 -10  -1    4.80   11.10 
   3 -10  -1    6.00   11.40 
   3 -10  -1    4.60   10.60 
  -3  10   1   -2.30   11.60 
   3  10  -1    5.00   10.80 
   3  10  -1    3.90   10.90 
  -3  10   1   -6.70   10.20 
  -3  10   1   23.40   17.10 
  -3  10   1   18.30   15.00 
   3  10  -1   29.10   13.60 
  -3  10   1    2.00   10.60 
  -3  10   1    5.00   11.30 
   3  10  -1  -11.50   10.60 
  -3  10   1    5.50   10.80 
   3  10  -1    3.60   16.80 
   3  10  -1    9.50   12.30 
   3  10  -1   13.10   14.20 
  -3  10   1   16.00   10.60 
   3  10  -1   -3.20    8.90 
   2 -10  -1    4.50   11.10 
  -2 -10   1   21.80   12.20 
   2 -10  -1    6.30   11.00 
  -2 -10   1   -4.40   10.20 
   2 -10  -1   20.70   12.30 
   2 -10  -1   -2.70   10.50 
   2 -10  -1    9.60   11.00 
  -2 -10   1    9.60    9.30 
  -2 -10   1   17.70   13.20 
   2 -10  -1    1.80   12.70 
  -2 -10   1    5.80   11.20 
  -2 -10   1   29.80   14.30 
   2 -10  -1    6.60   11.60 
   2 -10  -1   14.90   11.70 
   2 -10  -1    2.60   11.60 
  -2  10   1   -8.50   15.20 
   2  10  -1   -6.30    9.30 
  -2  10   1    2.90   10.20 
  -2  10   1   18.70   14.80 
   2  10  -1    7.40   12.90 
   2  10  -1   10.40   11.60 
  -2  10   1   12.90   11.30 
   2  10  -1    7.40   16.10 
  -2  10   1    4.50    9.60 
   2  10  -1    1.70   10.50 
  -2  10   1    9.40   10.40 
   2  10  -1  -10.60    8.80 
  -2  10   1   17.20   16.70 
   2  10  -1   17.70   12.70 
  -2  10   1   12.30   11.30 
  -2  10   1   -1.50   10.00 
   2  10  -1   17.40   11.70 
   1 -10  -1   86.39   21.30 
   1 -10  -1   64.39   19.00 
  -1 -10   1   54.69   16.80 
   1 -10  -1   22.50   12.40 
  -1 -10   1   80.59   17.30 
  -1 -10   1   85.89   20.70 
  -1 -10   1   78.19   19.20 
   1 -10  -1   48.30   15.80 
   1 -10  -1   63.69   18.00 
   1 -10  -1   63.69   20.60 
  -1 -10   1   61.19   18.00 
   1 -10  -1   55.19   18.60 
   1 -10  -1   75.79   19.30 
  -1 -10   1   61.39   17.00 
  -1 -10   1   38.60   15.80 
   1 -10  -1   68.79   17.30 
  -1  10   1   49.40   16.60 
  -1  10   1   50.99   17.90 
  -1  10   1   38.10   15.10 
   1  10  -1   57.59   17.00 
   1  10  -1   68.99   17.60 
  -1  10   1   87.99   26.40 
   1  10  -1   50.99   18.40 
   1  10  -1   73.99   18.10 
   1  10  -1   30.50   14.30 
  -1  10   1   74.49   19.50 
  -1  10   1   53.39   16.60 
  -1  10   1   43.00   16.70 
   1  10  -1   45.70   16.30 
   1  10  -1   51.69   18.40 
  -1  10   1   48.20   17.20 
   1  10  -1   47.50   23.70 
   0 -10  -1  115.59   23.60 
   0 -10   1   83.79   18.40 
   0 -10  -1   83.29   19.40 
   0 -10  -1  127.99   21.90 
   0 -10  -1  106.59   24.40 
   0 -10  -1  106.39   21.40 
   0 -10   1   88.39   22.80 
   0 -10   1  134.39   25.30 
   0 -10   1  111.49   20.20 
   0 -10   1  109.09   22.20 
   0 -10   1   99.29   22.60 
   0 -10   1  112.19   20.40 
   0 -10  -1   62.39   19.60 
   0 -10  -1  119.59   22.80 
   0 -10   1  133.89   25.40 
   0 -10   1   83.39   20.90 
   0 -10  -1  138.59   24.10 
   0  10   1   88.69   20.90 
   0  10   1  131.79   25.30 
   0  10   1  124.29   30.10 
   0  10  -1  122.19   21.80 
   0  10   1  157.28   25.30 
   0  10   1  113.99   23.10 
   0  10  -1  145.59   33.10 
   0  10  -1  106.29   25.90 
   0  10   1  101.39   23.60 
   0  10  -1   98.89   21.90 
   0  10   1  152.18   26.00 
   0  10  -1   81.69   19.40 
   0  10  -1  133.89   23.10 
   0  10  -1  156.38   28.30 
   0  10  -1   82.79   20.80 
   0  10   1  133.49   25.70 
   1 -10   1  122.39   23.20 
   1 -10   1  145.69   24.00 
   1 -10   1  105.89   20.20 
   1 -10   1   98.59   20.70 
  -1 -10  -1   91.39   21.10 
  -1 -10  -1  113.09   24.50 
   1 -10   1  113.79   22.30 
  -1 -10  -1  173.88   29.30 
  -1 -10  -1   93.79   18.60 
   1 -10   1  120.39   27.50 
  -1 -10  -1  124.09   22.90 
  -1 -10  -1   85.29   20.00 
   1 -10   1  162.98   26.50 
   1 -10   1   76.89   23.00 
   1 -10   1  124.99   24.60 
  -1 -10  -1  107.79   21.50 
  -1  10  -1   93.99   22.30 
  -1  10  -1  140.89   23.70 
   1  10   1  128.69   21.70 
   1  10   1  119.49   23.90 
   1  10   1   89.79   20.30 
  -1  10  -1  180.98   29.90 
  -1  10  -1  119.99   24.30 
   1  10   1  106.29   23.90 
   1  10   1  112.59   21.60 
  -1  10  -1  101.99   25.70 
   1  10   1  129.49   30.80 
  -1  10  -1  144.99   31.00 
   1  10   1  139.59   26.10 
   1  10   1   98.99   23.00 
  -1  10  -1  106.89   27.10 
  -1  10  -1  115.09   23.30 
   2 -10   1   31.60   16.60 
  -2 -10  -1   45.90   14.00 
  -2 -10  -1   36.60   15.50 
  -2 -10  -1   41.40   16.20 
   2 -10   1   46.80   17.70 
  -2 -10  -1   14.70   10.40 
   2 -10   1   40.30   16.10 
  -2 -10  -1   47.70   15.30 
   2 -10   1   22.20   13.90 
   2 -10   1   62.99   17.60 
   2 -10   1   30.00   14.40 
   2 -10   1   66.49   20.40 
   2 -10   1   35.70   17.30 
   2 -10   1   43.70   17.60 
   2  10   1   40.30   17.30 
  -2  10  -1   29.50   15.70 
  -2  10  -1   45.70   20.20 
  -2  10  -1   40.10   14.70 
   2  10   1   44.70   17.70 
   2  10   1   36.50   14.30 
  -2  10  -1   42.30   17.80 
  -2  10  -1   51.19   22.90 
   2  10   1   24.90   13.00 
   2  10   1   62.29   17.00 
   2  10   1   28.80   12.70 
  -2  10  -1   49.30   19.90 
  -2  10  -1   41.80   14.20 
  -2  10  -1   26.30   14.40 
   2  10   1   27.20   14.90 
   3 -10   1   92.09   23.40 
   3 -10   1  146.19   28.30 
   3 -10   1  108.19   23.80 
  -3 -10  -1  143.59   27.70 
   3 -10   1  103.19   23.70 
  -3 -10  -1  114.69   23.00 
   3 -10   1  113.69   26.10 
   3 -10   1   78.69   22.60 
   3 -10   1   90.79   21.40 
   3 -10   1  120.59   22.40 
  -3 -10  -1  119.89   20.30 
  -3 -10  -1   86.29   23.00 
   3 -10   1  132.69   25.30 
  -3 -10  -1  104.39   24.30 
  -3  10  -1   67.69   23.30 
   3  10   1  104.09   22.40 
  -3  10  -1  101.79   19.20 
  -3  10  -1  107.59   22.40 
   3  10   1  147.99   26.70 
   3  10   1   87.49   20.70 
  -3  10  -1   96.19   25.10 
  -3  10  -1  147.89   28.10 
   3  10   1   53.69   16.60 
  -3  10  -1  124.79   25.20 
  -3  10  -1  108.59   23.20 
   3  10   1   77.39   22.00 
   3  10   1  130.79   25.40 
 -10   0   2 1237.18   68.99 
  10   0  -2 1217.28   71.49 
 -10   0   2 1259.97   63.79 
  10   0  -2 1171.38   63.09 
  10   0  -2 1140.09   64.79 
  10   0  -2 1240.08   69.79 
 -10   0   2 1229.28   55.59 
 -10   0   2 1191.68   64.19 
  10   0  -2 1221.98   66.79 
 -10   0   2 1169.58   62.69 
  -9   0   2   -2.00    7.20 
  -9   0   2    6.80    7.40 
   9   0  -2  -11.60    5.80 
   9   0  -2   14.10   11.80 
  -9   0   2    1.10    6.70 
   9   0  -2    1.40    6.80 
   9   0  -2    5.70    9.30 
   9   0  -2    0.30    5.90 
   9   0  -2   -4.50    4.80 
   9   0  -2   -4.30    5.90 
  -9   0   2   -2.20    6.10 
  -9   0   2   -1.10    5.20 
  -9   0   2    6.90    7.90 
   8   0  -2 1894.81   86.99 
  -8   0   2 1922.21   79.39 
   8   0  -2 1886.91   80.39 
  -8   0   2 1894.71   80.19 
   8   0  -2 1836.52   80.99 
   8   0  -2 1848.81   81.19 
  -8   0   2 1781.72   71.39 
   8   0  -2 1862.01   84.19 
  -8   0   2 1946.21   84.09 
  -8   0   2 1811.72   77.69 
  -8   0   2 1791.92   71.09 
   8   0  -2 1978.10   80.79 
  -8   0   2 1871.81   72.49 
  -8   0   2 1904.01   81.79 
  -8   0   2 1849.61   68.59 
   8   0  -2 1770.22   73.29 
   7   0  -2    6.50    6.40 
   7   0  -2    7.70    7.90 
  -7   0   2   -3.60    3.80 
  -7   0   2    4.00    5.50 
   7   0  -2   -1.70    5.00 
  -7   0   2    1.30    5.60 
   7   0  -2    0.70    2.90 
  -7   0   2    0.00    4.90 
  -7   0   2    1.70    3.90 
  -7   0   2   -1.50    4.80 
   7   0  -2   10.00    5.20 
   7   0  -2    5.70    5.80 
  -7   0   2   -0.20    3.90 
  -7   0   2   -3.50    3.70 
   7   0  -2    2.50    5.40 
  -7   0   2    6.60    5.70 
  -7   0   2    0.80    4.30 
   7   0  -2   -7.80    4.30 
   6   0  -2 1719.03   72.29 
   6   0  -2 1569.14   55.79 
  -6   0   2 1528.15   59.49 
   6   0  -2 1522.85   64.69 
   6   0  -2 1663.23   67.19 
  -6   0   2 1569.44   64.59 
  -6   0   2 1606.04   59.79 
   6   0  -2 1617.74   68.49 
  -6   0   2 1637.94   64.79 
  -6   0   2 1603.34   60.49 
  -6   0   2 1611.74   66.39 
  -6   0   2 1670.43   68.89 
  -6   0   2 1557.74   59.39 
   6   0  -2 1557.54   59.89 
   6   0  -2 1562.74   65.99 
   6   0  -2 1689.33   69.79 
  -6   0   2 1613.04   65.79 
   6   0  -2 1668.33   62.59 
  -6   0   2 1575.44   59.59 
  -6   0   2 1689.93   62.99 
  -6   0   2 1697.43   57.89 
  -5   0   2   -2.50    2.90 
  -5   0   2   -1.90    3.00 
   5   0  -2    3.80    5.50 
  -5   0   2    3.90    2.80 
   5   0  -2    1.80    3.40 
  -5   0   2   -0.90    3.80 
   5   0  -2    3.90    4.10 
  -5   0   2   -1.70    2.70 
  -5   0   2    1.10    3.40 
  -5   0   2    1.70    3.20 
   5   0  -2   -1.20    4.70 
   5   0  -2    4.30    4.90 
  -5   0   2    6.20    4.80 
  -5   0   2    3.50    3.60 
  -5   0   2    1.60    3.10 
   5   0  -2    3.80    2.40 
  -5   0   2    3.20    4.10 
   5   0  -2   -1.70    3.40 
   5   0  -2   -2.60    2.30 
   5   0  -2    0.90    3.00 
  -5   0   2    3.40    4.10 
   5   0  -2    2.30    3.40 
  -4   0   2 4596.34  151.48 
  -4   0   2 4058.99  156.48 
  -4   0   2 4764.52  155.28 
   4   0  -2 4775.52  148.89 
  -4   0   2 4731.83  150.58 
  -4   0   2 4534.95  152.28 
   4   0  -2 4691.83  154.28 
  -4   0   2 4785.62  150.08 
   4   0  -2 4863.41  158.08 
  -4   0   2 4732.83  147.49 
  -4   0   2 4862.81  155.98 
   4   0  -2 4897.01  152.58 
  -4   0   2 4600.34  149.49 
   4   0  -2 4555.74  154.58 
  -4   0   2 4717.43  154.68 
   4   0  -2 4692.23  150.18 
  -4   0   2 4669.73  149.69 
  -4   0   2 5005.90  157.58 
   4   0  -2 4582.44  154.48 
  -4   0   2 4635.64  154.38 
   4   0  -2 4951.70  160.98 
  -4   0   2 4907.71  153.88 
   4   0  -2 4569.84  146.99 
   4   0  -2 4968.70  154.38 
   4   0  -2 4555.14  157.98 
   4   0  -2 4681.73  157.08 
  -4   0   2 4388.26  153.68 
  -4   0   2 4620.94  150.18 
  -3   0   2    5.70    3.70 
   3   0  -2   -1.00    3.00 
  -3   0   2    1.00    3.00 
  -3   0   2    0.00    3.50 
   3   0  -2    3.00    3.40 
  -3   0   2   -0.20    2.10 
  -3   0   2    4.10    3.20 
   3   0  -2    3.30    3.50 
  -3   0   2   -0.20    2.50 
   3   0  -2    2.60    4.00 
  -3   0   2    1.00    2.40 
  -3   0   2    1.00    2.30 
  -3   0   2    1.80    3.40 
  -3   0   2    4.50    2.80 
   3   0  -2    2.10    2.80 
   3   0  -2    1.30    1.70 
   3   0  -2    6.40    3.20 
  -3   0   2    3.30    3.30 
   3   0  -2    1.80    2.40 
  -3   0   2    2.20    1.50 
  -3   0   2    6.00    3.70 
   3   0  -2    4.30    3.20 
   3   0  -2   -1.00    2.60 
   3   0  -2    4.50    2.80 
  -3   0   2    3.50    3.20 
  -3   0   2    3.10    2.40 
   3   0  -2    1.10    2.00 
  -3   0   2    3.30    2.80 
  -3   0   2    6.90    3.80 
   3   0  -2    2.10    2.90 
   3   0  -2    5.50    3.30 
   3   0  -2    3.20    3.20 
  -3   0   2    5.00    2.60 
  -3   0   2   -0.20    2.50 
   3   0  -2    7.00    3.60 
  -3   0   2    2.00    2.60 
  -3   0   2    3.20    2.80 
   3   0  -2    1.60    3.20 
   2   0  -2 5552.04  168.78 
  -2   0   2 5245.08  169.38 
  -2   0   2 5246.58  166.08 
  -2   0   2 5119.69  167.98 
   2   0  -2 5326.47  166.68 
  -2   0   2 5293.77  166.38 
  -2   0   2 5453.85  168.98 
   2   0  -2 5493.95  171.48 
   2   0  -2 5167.08  166.88 
  -2   0   2 5570.74  167.68 
  -2   0   2 5176.98  167.28 
  -2   0   2 5253.87  169.08 
  -2   0   2 5220.68  166.68 
  -2   0   2 5246.88  166.78 
  -2   0   2 5304.47  164.68 
   2   0  -2 5535.45  169.88 
   2   0  -2 5428.76  170.08 
   2   0  -2 5290.97  166.08 
   2   0  -2 5376.36  166.08 
  -2   0   2 5350.06  166.38 
   2   0  -2 5775.62  172.08 
   2   0  -2 5297.47  168.08 
  -2   0   2 5302.77  168.28 
  -2   0   2 5404.26  170.58 
  -2   0   2 5719.83  170.28 
  -2   0   2 5381.96  166.48 
   2   0  -2 5384.66  167.48 
   2   0  -2 5076.89  166.48 
   2   0  -2 5276.17  167.58 
   2   0  -2 5018.50  168.88 
   2   0  -2 5500.35  168.28 
  -2   0   2 5332.27  166.18 
   2   0  -2 5425.96  168.98 
   2   0  -2 5439.96  169.08 
  -2   0   2 5583.84  171.88 
  -2   0   2 5210.98  168.48 
   2   0  -2 5291.77  169.08 
  -2   0   2 5386.86  168.98 
   2   0  -2 5555.64  172.08 
  -2   0   2 5596.94  168.78 
  -2   0   2 5392.96  169.98 
  -2   0   2 5113.69  167.08 
  -2   0   2 5250.17  168.68 
  -2   0   2 5412.06  172.18 
  -2   0   2 5243.98  167.88 
   2   0  -2 5364.76  168.98 
   1   0  -2    0.50    0.90 
   1   0  -2    4.50    1.70 
   1   0  -2    0.50    1.70 
  -1   0   2    1.10    1.80 
   1   0  -2    1.20    0.90 
  -1   0   2   -0.90    1.40 
   1   0  -2    2.00    1.40 
   1   0  -2   -1.00    1.00 
  -1   0   2   -1.20    0.90 
   1   0  -2   -0.40    1.10 
   1   0  -2   -1.80    0.80 
  -1   0   2    1.80    1.30 
   1   0  -2    0.30    1.50 
  -1   0   2   -0.20    1.30 
  -1   0   2    2.00    1.70 
   1   0  -2   -0.30    1.10 
  -1   0   2    0.60    2.50 
   1   0  -2   -0.40    1.30 
   1   0  -2    0.50    1.30 
  -1   0   2    1.20    1.60 
  -1   0   2   -1.20    0.90 
  -1   0   2    0.70    1.50 
  -1   0   2    3.10    1.70 
   1   0  -2    3.10    1.60 
  -1   0   2    0.60    1.10 
  -1   0   2    1.60    1.10 
  -1   0   2    0.60    1.10 
   1   0  -2    0.40    1.50 
   1   0  -2   -0.10    0.90 
   1   0  -2    1.20    1.10 
   1   0  -2   -1.40    0.80 
  -1   0   2    1.10    1.60 
  -1   0   2    1.50    1.40 
   1   0  -2    1.80    1.60 
  -1   0   2    1.80    1.60 
   1   0  -2   -0.80    1.50 
  -1   0   2    1.20    1.50 
  -1   0   2   -0.20    1.30 
   1   0  -2    1.80    1.40 
  -1   0   2    2.90    1.60 
   1   0  -2   -0.10    0.80 
  -1   0   2    1.90    1.70 
  -1   0   2   -1.20    1.60 
   1   0  -2    1.20    1.40 
  -1   0   2    2.60    2.10 
  -1   0   2    0.90    1.60 
  -1   0   2    1.30    1.10 
  -1   0   2    0.50    1.20 
   1   0  -2    1.50    1.90 
   1   0  -2   -0.70    1.20 
   1   0  -2    2.60    1.60 
   0   0  -2  508.85   19.30 
  -1   0  -2    0.20    1.80 
  -1   0  -2   -0.40    2.00 
   1   0   2   -0.10    0.80 
  -1   0  -2    1.10    2.00 
  -1   0  -2    2.50    2.00 
   1   0   2    1.30    1.20 
  -1   0  -2   -0.70    1.60 
  -1   0  -2    0.20    1.30 
  -1   0  -2   -0.30    1.80 
   1   0   2    1.40    2.10 
  -1   0  -2    2.30    2.20 
   1   0   2   -1.10    1.50 
   1   0   2    1.10    1.60 
  -1   0  -2    1.50    2.00 
  -1   0  -2    3.80    1.90 
  -1   0  -2    2.20    2.00 
   1   0   2    0.10    1.60 
   1   0   2    1.30    1.90 
   1   0   2   -1.30    1.50 
   1   0   2    2.10    1.40 
   1   0   2    0.20    1.90 
  -1   0  -2   -1.20    1.40 
  -1   0  -2   -0.10    1.60 
  -1   0  -2    1.90    1.90 
  -1   0  -2    3.00    1.50 
  -1   0  -2    3.40    1.50 
   1   0   2    2.20    1.90 
   1   0   2    0.00    2.10 
  -1   0  -2    1.40    2.00 
   1   0   2   -0.50    2.00 
   1   0   2   -1.90    1.90 
  -1   0  -2    2.20    1.90 
  -1   0  -2    1.40    1.40 
   1   0   2    1.20    1.70 
  -1   0  -2    0.60    1.80 
  -1   0  -2    0.90    2.60 
   1   0   2    2.50    1.90 
  -1   0  -2    1.50    1.60 
   1   0   2    1.60    1.70 
   1   0   2    0.00    1.00 
   1   0   2    0.30    1.80 
   1   0   2   -0.80    2.70 
   1   0   2   -0.30    1.90 
  -2   0  -2  547.15   19.40 
   2   0   2  553.24   22.70 
   2   0   2  587.94   21.00 
   2   0   2  521.75   21.00 
  -2   0  -2  550.44   22.10 
   2   0   2  544.55   23.90 
   2   0   2  536.05   21.00 
  -2   0  -2  513.05   23.20 
  -2   0  -2  554.04   24.70 
  -2   0  -2  559.24   23.40 
   2   0   2  564.24   23.30 
   2   0   2  540.95   21.60 
  -2   0  -2  534.25   22.20 
  -2   0  -2  561.54   23.10 
  -2   0  -2  526.55   21.30 
   2   0   2  553.54   22.80 
   2   0   2  519.25   21.80 
  -2   0  -2  526.35   22.20 
  -2   0  -2  569.64   23.20 
   2   0   2  512.55   19.50 
   2   0   2  546.15   20.20 
   2   0   2  570.34   26.20 
   2   0   2  533.45   22.40 
   2   0   2  519.55   21.90 
   2   0   2  573.74   21.20 
  -2   0  -2  561.44   21.90 
  -2   0  -2  527.05   21.60 
  -2   0  -2  578.04   24.00 
  -2   0  -2  530.15   21.30 
   2   0   2  520.75   23.30 
  -2   0  -2  556.74   22.00 
   2   0   2  540.05   23.50 
   2   0   2  559.44   22.70 
   2   0   2  553.14   24.90 
   2   0   2  579.14   22.00 
  -2   0  -2  538.55   22.70 
   2   0   2  558.14   22.50 
  -2   0  -2  535.15   22.50 
  -2   0  -2  521.05   20.10 
  -2   0  -2  554.44   21.10 
  -3   0  -2   -0.60    2.60 
  -3   0  -2    0.20    2.30 
   3   0   2    1.20    2.60 
  -3   0  -2   -1.80    2.90 
  -3   0  -2   -1.80    2.30 
   3   0   2    0.40    2.70 
  -3   0  -2    1.60    2.20 
   3   0   2    1.40    3.60 
  -3   0  -2   -3.10    2.20 
   3   0   2   -2.30    3.00 
  -3   0  -2   -0.10    2.40 
   3   0   2   -0.30    3.50 
   3   0   2    3.00    3.20 
  -3   0  -2   -2.20    2.60 
   3   0   2   -0.70    2.90 
   3   0   2    0.90    3.10 
  -3   0  -2   -1.40    2.30 
  -3   0  -2   -6.80    2.70 
   3   0   2    6.10    4.10 
  -3   0  -2    1.60    2.90 
  -3   0  -2   -0.30    1.70 
   3   0   2    2.10    3.10 
   3   0   2    0.10    2.90 
   3   0   2    3.40    3.50 
  -3   0  -2   -3.10    2.50 
   3   0   2   -0.30    2.30 
  -3   0  -2   -1.60    2.60 
  -3   0  -2    0.30    2.90 
   3   0   2   -2.70    3.90 
   3   0   2    0.60    2.10 
  -3   0  -2    0.70    2.10 
   3   0   2    1.60    2.40 
  -3   0  -2    1.90    2.90 
  -3   0  -2    0.60    3.20 
  -3   0  -2    0.20    3.00 
   3   0   2    1.20    2.20 
   4   0   2 2998.60  109.89 
   4   0   2 2894.41  105.69 
  -4   0  -2 3096.99  104.29 
   4   0   2 3022.30  103.39 
  -4   0  -2 3019.70   99.49 
  -4   0  -2 2952.30  102.19 
   4   0   2 3026.60   99.79 
  -4   0  -2 2973.40  100.99 
   4   0   2 3063.69  104.39 
  -4   0  -2 3068.69  100.99 
   4   0   2 2943.71  105.29 
  -4   0  -2 3030.40   99.99 
   4   0   2 2927.91  104.89 
  -4   0  -2 2969.80  103.59 
   4   0   2 3074.39  100.19 
   4   0   2 3086.19   99.69 
   4   0   2 2932.61  104.09 
  -4   0  -2 2946.81   97.39 
   4   0   2 3020.60  101.29 
   4   0   2 3119.59  100.79 
  -4   0  -2 3043.30   97.99 
  -4   0  -2 2929.41   98.59 
  -4   0  -2 3000.50  104.19 
   4   0   2 3188.18   99.69 
  -4   0  -2 3110.19  101.59 
  -4   0  -2 3013.40  100.39 
  -4   0  -2 2889.61  104.39 
   4   0   2 2902.61  104.29 
  -4   0  -2 2956.20   99.89 
   4   0   2 2967.10   98.09 
   5   0   2    3.20    3.60 
  -5   0  -2    1.10    3.60 
  -5   0  -2   -4.20    2.90 
  -5   0  -2    0.40    2.90 
   5   0   2   -0.60    2.70 
  -5   0  -2    1.90    4.90 
  -5   0  -2    4.80    3.70 
   5   0   2    3.80    4.20 
  -5   0  -2    7.10    4.30 
   5   0   2   -4.20    3.40 
   5   0   2    6.90    6.60 
   5   0   2    3.60    3.70 
  -5   0  -2    0.40    3.20 
   5   0   2    3.20    4.30 
   5   0   2   -2.10    3.80 
  -5   0  -2   -0.40    3.20 
  -5   0  -2    0.90    2.90 
  -5   0  -2    4.60    3.80 
   5   0   2    4.70    4.70 
   5   0   2    3.70    4.20 
  -5   0  -2    1.40    3.40 
   5   0   2    0.90    3.70 
   5   0   2   -1.40    4.40 
  -5   0  -2    2.40    4.30 
   5   0   2    0.00    3.20 
  -6   0  -2 1242.58   51.59 
   6   0   2 1286.17   57.39 
   6   0   2 1344.27   57.39 
   6   0   2 1219.08   56.29 
   6   0   2 1227.18   54.39 
  -6   0  -2 1173.48   55.29 
   6   0   2 1324.77   63.19 
  -6   0  -2 1309.27   55.79 
   6   0   2 1331.87   51.39 
  -6   0  -2 1254.37   53.19 
  -6   0  -2 1262.67   50.59 
   6   0   2 1207.48   49.50 
  -6   0  -2 1327.57   51.59 
  -6   0  -2 1252.07   52.89 
   6   0   2 1232.78   58.19 
   6   0   2 1230.08   49.90 
   6   0   2 1275.67   51.79 
  -6   0  -2 1315.57   51.19 
  -6   0  -2 1223.78   55.69 
  -6   0  -2 1259.47   50.69 
   6   0   2 1310.37   56.79 
   6   0   2 1298.17   50.19 
   7   0   2    0.10    5.20 
  -7   0  -2    6.40    6.30 
  -7   0  -2   -1.20    5.50 
   7   0   2    1.10    6.90 
   7   0   2    5.90    6.50 
   7   0   2   -2.70    4.20 
   7   0   2    3.40    5.10 
   7   0   2    6.10    7.50 
  -7   0  -2   12.40    7.20 
   7   0   2   -4.10    4.60 
   7   0   2    1.00    4.30 
   7   0   2    8.50    9.40 
  -7   0  -2    8.60    6.30 
  -7   0  -2    1.30    5.80 
  -7   0  -2    0.20    5.00 
  -7   0  -2   -3.60    4.60 
   7   0   2    2.90    5.70 
  -7   0  -2    5.40    7.30 
  -7   0  -2   -5.80    5.20 
  -8   0  -2   45.00   10.40 
   8   0   2   37.40    8.90 
  -8   0  -2   58.89   12.60 
   8   0   2   56.79   15.10 
  -8   0  -2   23.20   10.10 
   8   0   2   52.19   14.30 
  -8   0  -2   33.70   12.30 
   8   0   2   47.80   16.20 
   8   0   2   48.20    9.90 
   8   0   2   17.40   10.20 
   8   0   2   36.10   11.60 
  -8   0  -2   49.70   13.30 
  -8   0  -2   67.29   12.80 
  -8   0  -2   49.70   11.70 
  -8   0  -2   47.00   10.40 
   8   0   2   43.30   12.30 
  -8   0  -2   58.19   14.50 
  -9   0  -2   -7.10    7.70 
  -9   0  -2    3.20    6.90 
   9   0   2    0.70    6.90 
  -9   0  -2   14.50    9.20 
  -9   0  -2   -3.00    8.40 
  -9   0  -2   -4.10    6.70 
   9   0   2   16.10   10.50 
  -9   0  -2   -0.10    6.80 
   9   0   2    6.10    7.50 
   9   0   2   -5.60   11.60 
   9   0   2    1.80    8.90 
   9   0   2   -3.40    6.50 
  -9   0  -2    5.20    7.90 
  -9   0  -2    7.40    7.80 
  10   0   2   -2.10    6.80 
 -10   0  -2   13.00   10.30 
 -10   0  -2    8.90   11.80 
  10   0   2    5.40   10.60 
  10   0   2    0.30   11.80 
  10   0   2  -18.80    8.50 
 -10   0  -2    1.20    7.00 
 -10   0  -2    5.40    9.40 
 -10   0  -2    2.50    8.70 
  10   0   2    5.20    9.70 
 -10   0  -2   -3.50    7.10 
 -10   0  -2    4.40    8.20 
 -10  -1   2   72.09   18.40 
  10  -1  -2   42.50   12.80 
  10  -1  -2   33.10   14.10 
 -10  -1   2   80.19   17.30 
  10  -1  -2   90.59   23.30 
 -10  -1   2   75.99   13.30 
  10  -1  -2   63.89   18.50 
  10  -1  -2   58.39   16.70 
  10  -1  -2   52.39   15.00 
 -10  -1   2   67.89   16.70 
 -10  -1   2   46.20   13.90 
 -10  -1   2   58.29   16.90 
 -10   1   2   77.79   15.60 
 -10   1   2   81.29   18.50 
 -10   1   2   57.99   16.50 
 -10   1   2   58.29   19.00 
  10   1  -2   60.79   15.10 
  10   1  -2   50.29   14.90 
  10   1  -2   65.29   17.60 
 -10   1   2   58.59   13.30 
  10   1  -2   31.90   13.20 
 -10   1   2   81.59   17.70 
  10   1  -2   36.40   16.60 
   9  -1  -2  189.88   26.30 
   9  -1  -2  237.78   29.80 
   9  -1  -2  249.97   30.40 
   9  -1  -2  176.78   27.10 
  -9  -1   2  279.27   33.10 
   9  -1  -2  181.28   23.00 
   9  -1  -2  255.17   34.60 
  -9  -1   2  214.88   26.40 
  -9  -1   2  216.08   20.30 
  -9  -1   2  250.37   30.40 
  -9  -1   2  201.58   25.50 
  -9  -1   2  257.67   29.30 
   9  -1  -2  212.78   27.50 
  -9   1   2  239.08   25.50 
   9   1  -2  189.68   24.70 
   9   1  -2  190.48   26.60 
  -9   1   2  232.38   27.90 
  -9   1   2  203.58   25.80 
  -9   1   2  202.78   26.20 
  -9   1   2  251.97   24.50 
   9   1  -2  207.58   30.50 
   9   1  -2  200.48   29.60 
  -9   1   2  236.98   31.50 
  -9   1   2  196.18   22.50 
   9   1  -2  202.98   27.90 
   8  -1  -2   34.60   11.60 
   8  -1  -2    8.60    9.50 
   8  -1  -2   26.90   10.40 
  -8  -1   2   17.00    6.60 
   8  -1  -2   16.80    9.30 
   8  -1  -2   23.40   13.30 
   8  -1  -2   30.80   10.60 
  -8  -1   2   26.70    7.30 
  -8  -1   2   21.00    9.30 
  -8  -1   2   15.10    9.20 
  -8  -1   2   12.70    8.00 
  -8  -1   2   17.00    9.00 
   8  -1  -2   32.60    9.30 
  -8  -1   2   17.10    9.80 
  -8   1   2   27.30   10.50 
  -8   1   2    9.50    7.60 
   8   1  -2   16.10    8.30 
  -8   1   2   24.20    8.20 
  -8   1   2   41.30   13.90 
   8   1  -2   11.90    7.10 
  -8   1   2   37.90   10.40 
  -8   1   2   20.70   10.20 
   8   1  -2   36.40   12.90 
   8   1  -2   20.40   10.80 
   8   1  -2   15.60    8.30 
  -8   1   2   45.20   10.00 
   8   1  -2   20.70    7.50 
  -8   1   2   30.50    8.70 
   8   1  -2   15.80    9.00 
   7  -1  -2   71.89   14.50 
  -7  -1   2   79.69   10.50 
   7  -1  -2  106.29   20.60 
  -7  -1   2   81.09   10.50 
  -7  -1   2   80.69   13.70 
   7  -1  -2   73.49   14.20 
   7  -1  -2   52.29   11.60 
   7  -1  -2   54.39   14.20 
  -7  -1   2   92.39   16.20 
   7  -1  -2   79.59   14.50 
  -7  -1   2   74.09   14.00 
   7  -1  -2   67.19   12.30 
  -7  -1   2   68.99   12.90 
  -7  -1   2   69.99   12.90 
   7  -1  -2   90.09   16.20 
  -7  -1   2   87.89   14.50 
  -7   1   2   89.29   12.90 
   7   1  -2   72.89   12.00 
   7   1  -2   77.79   10.60 
  -7   1   2   79.09   14.50 
  -7   1   2   69.09   15.00 
  -7   1   2   86.69   11.70 
  -7   1   2   89.29   13.90 
   7   1  -2   87.79   15.60 
   7   1  -2   86.89   15.40 
   7   1  -2  102.49   19.00 
  -7   1   2   72.19   14.10 
  -7   1   2   71.09   11.40 
   7   1  -2   65.09   12.80 
   7   1  -2   75.79   14.80 
  -7   1   2   87.49   11.80 
  -7   1   2   88.19   14.90 
   7   1  -2   80.99   16.20 
  -6  -1   2  249.58   20.60 
  -6  -1   2  242.98   19.10 
   6  -1  -2  217.28   24.90 
   6  -1  -2  255.07   18.60 
   6  -1  -2  270.47   21.30 
  -6  -1   2  264.97   19.00 
   6  -1  -2  255.67   25.80 
  -6  -1   2  271.97   21.10 
   6  -1  -2  214.48   23.00 
   6  -1  -2  239.38   18.00 
  -6  -1   2  216.98   23.10 
   6  -1  -2  259.37   20.90 
  -6  -1   2  245.08   19.70 
   6  -1  -2  233.38   20.70 
   6  -1  -2  215.78   16.30 
  -6   1   2  278.07   20.80 
  -6   1   2  233.78   16.40 
  -6   1   2  212.88   16.80 
   6   1  -2  246.48   20.50 
  -6   1   2  241.68   17.80 
   6   1  -2  231.48   20.90 
  -6   1   2  244.98   17.30 
   6   1  -2  251.37   20.10 
   6   1  -2  269.47   19.10 
  -6   1   2  233.98   19.20 
  -6   1   2  221.88   16.60 
  -6   1   2  238.58   21.50 
  -6   1   2  222.08   17.30 
   6   1  -2  288.57   28.90 
   6   1  -2  249.08   15.20 
   6   1  -2  230.18   15.90 
  -6   1   2  238.78   23.10 
   6   1  -2  310.17   27.80 
  -5  -1   2  255.67   19.10 
  -5  -1   2  264.77   18.10 
  -5  -1   2  256.97   19.20 
   5  -1  -2  251.37   16.90 
  -5  -1   2  269.97   16.60 
   5  -1  -2  271.67   17.90 
   5  -1  -2  271.47   15.10 
   5  -1  -2  323.07   22.00 
  -5  -1   2  268.47   17.60 
   5  -1  -2  261.27   15.70 
   5  -1  -2  268.57   16.30 
   5  -1  -2  281.77   20.50 
  -5  -1   2  256.07   18.00 
   5  -1  -2  294.57   19.90 
   5  -1  -2  287.67   20.10 
  -5  -1   2  261.17   18.60 
   5  -1  -2  277.37   19.60 
   5  -1  -2  273.17   18.90 
  -5  -1   2  282.67   20.80 
   5  -1  -2  285.67   22.30 
  -5   1   2  285.27   17.20 
  -5   1   2  301.27   19.80 
  -5   1   2  264.57   17.60 
   5   1  -2  267.27   15.10 
  -5   1   2  289.87   21.50 
   5   1  -2  259.17   15.80 
   5   1  -2  267.97   19.30 
  -5   1   2  292.97   19.30 
  -5   1   2  263.97   14.40 
   5   1  -2  313.27   20.20 
   5   1  -2  282.37   22.80 
  -5   1   2  250.07   17.00 
   5   1  -2  270.87   19.80 
   5   1  -2  272.57   20.20 
  -5   1   2  262.27   17.00 
  -5   1   2  266.47   16.80 
  -5   1   2  265.57   16.70 
  -5   1   2  260.27   18.80 
   5   1  -2  245.38   17.30 
   5   1  -2  284.17   21.60 
  -5   1   2  274.07   14.80 
   4  -1  -2  614.84   31.00 
   4  -1  -2  665.53   29.40 
  -4  -1   2  642.54   28.50 
   4  -1  -2  632.84   30.20 
  -4  -1   2  636.64   28.10 
  -4  -1   2  636.94   25.50 
   4  -1  -2  684.63   33.70 
   4  -1  -2  668.83   27.40 
  -4  -1   2  630.04   26.30 
  -4  -1   2  694.93   31.10 
  -4  -1   2  634.94   30.20 
   4  -1  -2  641.64   27.50 
  -4  -1   2  703.43   32.40 
  -4  -1   2  611.24   29.20 
  -4  -1   2  627.84   30.50 
   4  -1  -2  638.34   31.70 
   4  -1  -2  614.34   26.30 
  -4  -1   2  623.04   29.90 
  -4  -1   2  568.04   30.10 
   4  -1  -2  594.44   31.50 
   4  -1  -2  657.43   28.70 
  -4  -1   2  560.94   26.80 
   4  -1  -2  701.43   32.20 
  -4  -1   2  677.93   30.70 
  -4  -1   2  601.44   25.80 
   4  -1  -2  637.04   30.60 
  -4   1   2  642.14   28.80 
   4   1  -2  676.03   28.90 
   4   1  -2  658.43   31.80 
   4   1  -2  641.54   30.30 
   4   1  -2  651.83   29.70 
   4   1  -2  647.84   31.60 
   4   1  -2  642.54   33.90 
  -4   1   2  648.94   28.10 
  -4   1   2  620.44   28.40 
  -4   1   2  640.54   30.10 
  -4   1   2  657.63   32.50 
  -4   1   2  622.14   25.80 
   4   1  -2  644.64   28.50 
  -4   1   2  642.94   26.00 
  -4   1   2  620.34   29.80 
  -4   1   2  610.94   28.10 
   4   1  -2  653.43   26.30 
   4   1  -2  614.04   31.50 
  -4   1   2  653.43   28.20 
   4   1  -2  655.83   28.40 
  -4   1   2  622.84   29.40 
   4   1  -2  635.54   30.20 
  -4   1   2  612.64   27.80 
   4   1  -2  652.13   27.00 
   3  -1  -2  634.34   29.00 
  -3  -1   2  594.34   25.90 
  -3  -1   2  640.04   29.70 
  -3  -1   2  646.04   28.00 
   3  -1  -2  659.63   28.00 
   3  -1  -2  715.93   30.00 
   3  -1  -2  637.44   27.10 
  -3  -1   2  623.24   25.50 
  -3  -1   2  682.33   29.30 
  -3  -1   2  666.63   25.70 
  -3  -1   2  613.64   26.40 
   3  -1  -2  603.24   27.90 
   3  -1  -2  675.33   29.00 
   3  -1  -2  652.83   30.20 
   3  -1  -2  610.54   23.80 
   3  -1  -2  610.14   24.30 
  -3  -1   2  599.84   25.40 
  -3  -1   2  643.04   27.60 
   3  -1  -2  639.04   29.20 
  -3  -1   2  632.74   24.80 
  -3  -1   2  612.54   24.60 
   3  -1  -2  663.93   28.90 
   3  -1  -2  662.83   29.00 
   3  -1  -2  610.34   26.50 
  -3  -1   2  588.24   26.90 
  -3  -1   2  657.53   26.10 
   3  -1  -2  563.14   26.80 
  -3  -1   2  638.94   27.40 
   3  -1  -2  651.83   25.90 
  -3  -1   2  578.74   28.20 
   3  -1  -2  622.74   27.10 
  -3  -1   2  697.03   28.10 
   3  -1  -2  601.04   25.10 
  -3  -1   2  604.84   27.80 
  -3   1   2  611.44   26.50 
   3   1  -2  625.24   29.10 
   3   1  -2  652.83   25.30 
   3   1  -2  634.24   27.70 
  -3   1   2  649.93   27.60 
  -3   1   2  580.04   31.10 
  -3   1   2  663.63   29.90 
  -3   1   2  590.94   27.70 
  -3   1   2  592.44   27.40 
  -3   1   2  610.64   27.10 
  -3   1   2  625.34   26.70 
  -3   1   2  682.23   28.90 
  -3   1   2  603.44   23.60 
  -3   1   2  596.34   27.10 
   3   1  -2  628.34   24.80 
  -3   1   2  652.23   27.30 
  -3   1   2  596.14   27.10 
  -3   1   2  647.84   27.90 
  -3   1   2  644.84   27.90 
   3   1  -2  633.54   26.10 
  -3   1   2  609.24   25.80 
   3   1  -2  640.44   28.60 
   3   1  -2  644.64   31.00 
   3   1  -2  636.64   27.50 
   3   1  -2  658.53   28.60 
  -3   1   2  641.54   25.20 
   3   1  -2  634.04   27.00 
   3   1  -2  631.84   25.70 
  -3   1   2  673.53   27.80 
   3   1  -2  675.83   29.70 
  -3   1   2  631.34   26.80 
  -3   1   2  669.13   26.50 
  -3   1   2  645.84   25.10 
  -3   1   2  607.44   24.50 
  -3   1   2  579.14   27.10 
  -3   1   2  660.43   26.50 
  -2  -1   2  101.39    7.70 
   2  -1  -2   91.19    7.50 
  -2  -1   2  105.19    6.90 
   2  -1  -2   88.69    7.50 
   2  -1  -2   87.59    7.40 
  -2  -1   2  109.19    7.00 
  -2  -1   2   99.49    7.40 
  -2  -1   2   93.39   10.50 
  -2  -1   2  108.69    7.50 
  -2  -1   2   88.19    6.10 
   2  -1  -2  105.79    7.30 
   2  -1  -2  107.99    7.60 
  -2  -1   2   94.39    7.10 
  -2  -1   2   97.09    6.30 
  -2  -1   2   91.99    6.90 
  -2  -1   2   88.49    7.50 
  -2  -1   2  101.89    8.40 
   2  -1  -2  101.49    8.80 
   2  -1  -2   96.79    8.60 
   2  -1  -2  115.19    8.40 
  -2  -1   2   98.19    7.00 
   2  -1  -2   93.89    6.80 
  -2  -1   2  104.79   10.00 
   2  -1  -2   89.49    8.00 
  -2  -1   2  103.29    6.30 
   2  -1  -2  105.59    8.40 
   2  -1  -2   85.89    7.90 
  -2  -1   2   97.19    7.60 
  -2  -1   2   97.89    7.00 
   2  -1  -2   80.89    8.00 
  -2  -1   2   97.59    7.80 
   2  -1  -2   90.99    7.70 
   2  -1  -2   93.29    8.00 
  -2  -1   2   99.29    8.70 
  -2  -1   2   96.19    6.60 
  -2  -1   2   96.39   10.80 
  -2  -1   2  103.19    7.60 
   2  -1  -2   93.79    9.30 
  -2  -1   2  101.29    6.90 
  -2  -1   2   96.09    7.00 
  -2  -1   2  105.09    9.00 
  -2  -1   2   98.49    6.70 
   2  -1  -2  106.39    9.50 
   2  -1  -2  105.99   10.10 
  -2  -1   2   96.89    7.90 
  -2   1   2   97.29    9.00 
  -2   1   2   95.39    7.60 
   2   1  -2   89.49    7.90 
   2   1  -2   86.99    6.80 
   2   1  -2   98.29    7.60 
  -2   1   2   97.59    7.70 
  -2   1   2  100.29    7.80 
   2   1  -2  110.39   11.00 
  -2   1   2   93.99    7.90 
   2   1  -2  102.79   11.10 
   2   1  -2   94.39    9.10 
  -2   1   2  100.69    9.80 
   2   1  -2   92.59    8.80 
  -2   1   2   83.99    6.90 
  -2   1   2  109.19    8.50 
  -2   1   2  101.89    8.40 
  -2   1   2   97.79    7.60 
  -2   1   2   89.79    7.70 
  -2   1   2   97.69    8.00 
   2   1  -2  100.89    9.30 
  -2   1   2   94.29    7.40 
   2   1  -2  102.39    7.90 
  -2   1   2   82.59    5.70 
   2   1  -2  100.69    8.00 
   2   1  -2   96.89    7.20 
   2   1  -2  114.29    9.40 
   2   1  -2   88.59    6.80 
  -2   1   2   89.69    6.50 
  -2   1   2   87.39    7.60 
  -2   1   2   93.99    7.50 
  -2   1   2   89.39    9.40 
   2   1  -2  101.69    7.00 
  -2   1   2   99.09    7.50 
  -2   1   2  120.89    9.50 
  -2   1   2   97.29    8.00 
  -2   1   2   90.29    8.50 
  -2   1   2   95.69    8.90 
  -1  -1   2   44.60    4.80 
  -1  -1   2   52.99    4.70 
  -1  -1   2   38.50    4.60 
   1  -1  -2   34.90    4.80 
   1  -1  -2   34.60    4.30 
  -1  -1   2   38.50    5.90 
  -1  -1   2   36.00    4.60 
   1  -1  -2   45.60    4.90 
   1  -1  -2   33.00    4.60 
  -1  -1   2   41.30    4.90 
  -1  -1   2   34.80    5.20 
  -1  -1   2   42.40    5.80 
  -1  -1   2   37.80    4.40 
   1  -1  -2   37.00    4.40 
  -1  -1   2   31.90    4.30 
  -1  -1   2   51.69    7.20 
   1  -1  -2   32.70    4.30 
  -1  -1   2   39.70    5.00 
   1  -1  -2   32.20    4.90 
   1  -1  -2   45.50    5.30 
   1  -1  -2   35.80    4.50 
  -1  -1   2   50.99    6.00 
   1  -1  -2   38.70    4.60 
   1  -1  -2   39.90    5.00 
  -1  -1   2   58.79    6.00 
   1  -1  -2   34.70    3.40 
   1  -1  -2   44.40    5.50 
   1  -1  -2   41.90    5.00 
   1  -1  -2   42.00    5.00 
   1  -1  -2   38.00    4.50 
   1  -1  -2   39.20    5.00 
  -1  -1   2   40.10    4.00 
   1  -1  -2   41.10    5.20 
  -1  -1   2   40.10    4.80 
  -1  -1   2   44.40    4.10 
   1  -1  -2   37.50    4.60 
  -1  -1   2   41.70    3.80 
   1  -1  -2   42.10    5.00 
  -1  -1   2   43.70    3.00 
  -1  -1   2   42.20    5.60 
   1  -1  -2   35.10    2.80 
  -1  -1   2   52.39    4.80 
   1  -1  -2   24.10    3.80 
   1   1  -2   40.20    4.60 
   1   1  -2   49.90    5.60 
   1   1  -2   46.20    5.80 
  -1   1   2   29.40    4.10 
   1   1  -2   42.10    5.50 
  -1   1   2   36.20    4.60 
  -1   1   2   38.10    4.60 
  -1   1   2   30.20    4.00 
   1   1  -2   49.60    7.00 
   1   1  -2   47.50    5.40 
  -1   1   2   35.40    4.30 
   1   1  -2   52.19    5.70 
  -1   1   2   27.90    4.20 
   1   1  -2   43.00    4.70 
  -1   1   2   38.20    4.70 
  -1   1   2   44.00    5.10 
   1   1  -2   44.40    4.90 
   1   1  -2   30.00    2.70 
  -1   1   2   28.20    3.80 
  -1   1   2   37.00    4.90 
   1   1  -2   39.00    3.90 
   1   1  -2   48.00    5.80 
  -1   1   2   30.60    4.50 
  -1   1   2   37.00    4.80 
  -1   1   2   44.40    5.00 
   1   1  -2   45.20    5.20 
   1   1  -2   34.10    3.10 
  -1   1   2   27.30    3.30 
  -1   1   2   33.70    4.70 
   1   1  -2   40.00    5.60 
  -1   1   2   32.30    4.40 
  -1   1   2   45.00    5.00 
  -1   1   2   37.00    4.70 
   1   1  -2   40.10    4.70 
  -1   1   2   37.40    4.70 
   1   1  -2   67.49    6.70 
  -1   1   2   32.80    4.30 
   1   1  -2   45.40    4.50 
  -1   1   2   39.10    4.90 
  -1   1   2   41.20    4.60 
  -1   1   2   44.20    5.90 
   0  -1   2   37.70    5.00 
   0  -1   2   31.70    4.20 
   0  -1   2   21.80    3.40 
   0  -1   2   34.70    3.90 
   0  -1   2   27.70    4.20 
   0  -1   2   29.80    3.90 
   0  -1   2   35.20    4.40 
   0  -1  -2   34.40    5.50 
   0  -1   2   23.30    3.40 
   0  -1   2   26.00    3.90 
   0  -1   2   30.00    4.60 
   0  -1  -2   31.00    4.30 
   0  -1  -2   34.50    3.90 
   0  -1  -2   26.40    3.80 
   0  -1  -2   29.60    3.30 
   0  -1  -2   29.20    3.90 
   0  -1  -2   24.60    3.70 
   0  -1   2   28.00    3.60 
   0  -1   2   35.00    4.30 
   0  -1  -2   35.50    4.80 
   0  -1  -2   25.90    3.90 
   0  -1   2   28.60    2.90 
   0  -1  -2   33.10    2.70 
   0  -1   2   32.80    3.80 
   0  -1  -2   25.50    3.50 
   0  -1  -2   19.90    3.20 
   0  -1   2   25.10    3.30 
   0  -1   2   29.10    3.70 
   0  -1   2   26.80    3.60 
   0  -1  -2   30.20    3.70 
   0  -1   2   33.20    3.10 
   0  -1   2   34.10    5.80 
   0  -1  -2   29.10    4.00 
   0  -1  -2   29.70    3.90 
   0  -1  -2   30.40    3.70 
   0  -1   2   25.50    3.50 
   0  -1  -2   31.20    3.80 
   0  -1  -2   35.10    4.00 
   0  -1   2   31.20    3.70 
   0   1   2   29.10    3.80 
   0   1   2   19.50    2.70 
   0   1   2   33.80    4.10 
   0   1   2   37.40    4.50 
   0   1   2   31.50    4.40 
   0   1  -2   27.90    3.80 
   0   1  -2   37.90    5.70 
   0   1   2   26.60    3.60 
   0   1  -2   31.00    3.80 
   0   1   2   22.00    4.40 
   0   1  -2   22.60    3.10 
   0   1  -2   23.70    3.70 
   0   1   2   25.30    3.40 
   0   1   2   30.80    3.90 
   0   1  -2   34.40    4.10 
   0   1   2   20.20    3.70 
   0   1   2   26.20    3.70 
   0   1  -2   35.10    4.40 
   0   1   2   22.60    3.40 
   0   1  -2   25.10    3.40 
   0   1   2   31.40    4.00 
   0   1  -2   32.40    4.20 
   0   1  -2   25.50    3.60 
   0   1  -2   30.80    3.70 
   0   1  -2   16.80    2.90 
   0   1   2   22.90    2.80 
   0   1  -2   34.40    5.20 
   0   1  -2   24.90    2.80 
   0   1   2   31.30    3.30 
   0   1  -2   23.70    2.80 
   0   1  -2   35.40    4.50 
   0   1  -2   24.40    3.30 
   0   1  -2   45.40    5.70 
   0   1   2   26.10    3.90 
   0   1   2   29.50    3.80 
   1  -1   2 1029.40   37.00 
  -1  -1  -2 1052.09   35.00 
  -1  -1  -2 1067.29   37.20 
  -1  -1  -2 1014.30   35.00 
   1  -1   2 1062.29   36.40 
  -1  -1  -2 1028.00   37.40 
   1  -1   2 1069.29   36.40 
  -1  -1  -2 1014.30   35.90 
  -1  -1  -2 1008.70   36.60 
   1  -1   2 1037.40   35.40 
   1  -1   2 1049.20   36.50 
  -1  -1  -2 1029.70   34.40 
  -1  -1  -2 1042.10   34.20 
  -1  -1  -2  984.90   34.50 
   1  -1   2 1000.20   36.30 
   1  -1   2  997.60   34.10 
   1  -1   2 1018.50   36.50 
   1  -1   2 1035.00   36.30 
  -1  -1  -2 1055.19   35.00 
  -1  -1  -2 1023.60   36.90 
  -1  -1  -2  975.70   37.80 
   1  -1   2  987.10   35.40 
   1  -1   2  992.70   33.40 
  -1  -1  -2 1055.49   35.70 
   1  -1   2 1025.20   35.60 
  -1  -1  -2 1026.80   35.90 
   1  -1   2 1014.90   35.80 
   1  -1   2 1053.29   34.30 
  -1  -1  -2  979.70   35.20 
   1  -1   2  988.60   35.00 
  -1  -1  -2 1012.90   35.80 
   1  -1   2 1036.30   36.50 
   1  -1   2 1032.50   36.60 
  -1  -1  -2 1013.80   34.30 
   1  -1   2 1042.30   37.00 
   1  -1   2 1036.10   36.00 
   1  -1   2 1038.40   36.30 
  -1  -1  -2  967.80   34.30 
  -1  -1  -2 1020.10   37.70 
   1  -1   2 1034.70   35.90 
  -1  -1  -2 1044.10   34.80 
  -1  -1  -2 1029.00   36.30 
  -1  -1  -2 1045.00   36.30 
   1  -1   2  879.31   37.00 
  -1  -1  -2 1035.70   33.90 
   1  -1   2 1053.89   35.20 
  -1  -1  -2 1004.60   35.80 
   1  -1   2 1010.60   35.20 
  -1   1  -2  926.31   37.10 
   1   1   2  988.80   35.10 
   1   1   2 1053.19   38.60 
   1   1   2 1030.40   36.00 
  -1   1  -2  984.50   33.40 
  -1   1  -2 1002.40   37.00 
  -1   1  -2 1045.40   35.20 
   1   1   2 1096.59   36.20 
  -1   1  -2 1008.00   35.80 
  -1   1  -2 1098.49   36.50 
  -1   1  -2 1053.49   36.30 
   1   1   2 1041.10   36.60 
   1   1   2 1043.10   34.30 
  -1   1  -2  996.70   35.30 
  -1   1  -2 1001.10   35.60 
  -1   1  -2 1011.70   36.20 
   1   1   2 1085.79   37.60 
  -1   1  -2 1032.70   36.00 
   1   1   2 1035.10   33.90 
   1   1   2 1057.49   36.80 
  -1   1  -2 1025.60   35.60 
  -1   1  -2 1041.80   36.10 
   1   1   2  994.20   36.00 
   1   1   2 1015.80   34.40 
   1   1   2 1052.69   34.90 
  -1   1  -2  987.70   35.60 
   1   1   2  981.30   36.60 
  -1   1  -2 1022.20   36.10 
   1   1   2 1048.30   34.40 
   1   1   2 1031.90   35.00 
  -1   1  -2 1034.80   37.20 
   1   1   2 1024.80   36.30 
   1   1   2 1062.69   35.50 
  -1   1  -2 1010.70   36.40 
   1   1   2 1049.79   38.00 
   1   1   2  973.20   34.40 
  -1   1  -2 1033.10   35.50 
   1   1   2 1044.80   34.80 
  -1   1  -2 1077.59   36.80 
   1   1   2 1018.20   34.00 
  -1   1  -2 1007.90   36.50 
   1   1   2 1031.00   35.30 
  -1   1  -2 1059.59   36.30 
  -1   1  -2 1026.70   36.00 
  -1   1  -2 1045.90   34.20 
  -1   1  -2 1031.00   35.10 
  -1   1  -2 1039.10   36.10 
   2  -1   2   82.29    9.30 
  -2  -1  -2   72.19    5.90 
   2  -1   2   76.59    8.20 
   2  -1   2   77.79    8.10 
   2  -1   2   62.49    6.10 
   2  -1   2   74.19    7.40 
   2  -1   2   76.99    8.60 
  -2  -1  -2   80.29    6.80 
   2  -1   2   67.09    5.40 
  -2  -1  -2  100.89   11.50 
   2  -1   2   81.59    9.10 
   2  -1   2   67.29    6.50 
   2  -1   2   76.59    7.60 
  -2  -1  -2   75.79   10.40 
  -2  -1  -2   79.69    7.70 
  -2  -1  -2   70.19    5.50 
  -2  -1  -2   76.19    6.20 
   2  -1   2   94.79    8.70 
  -2  -1  -2   75.09    7.00 
   2  -1   2   71.39    7.90 
   2  -1   2   83.19    9.20 
  -2  -1  -2   94.39    9.20 
  -2  -1  -2   79.99    8.90 
   2  -1   2   70.49    7.30 
  -2  -1  -2   75.79    8.80 
  -2  -1  -2   86.79    9.80 
   2  -1   2   73.39    8.00 
   2  -1   2   80.89    6.40 
  -2  -1  -2   66.89    6.30 
  -2  -1  -2   84.49    8.70 
  -2  -1  -2   94.19    9.40 
  -2  -1  -2   69.99    7.70 
   2  -1   2   76.49    7.70 
   2  -1   2   58.39    7.70 
   2  -1   2   69.39    9.60 
   2  -1   2   61.79    6.80 
  -2  -1  -2   72.19    7.50 
   2  -1   2   63.39    8.20 
  -2  -1  -2   83.09    8.90 
   2  -1   2   80.99    8.40 
   2  -1   2   83.79    9.10 
   2  -1   2   67.09    7.90 
  -2  -1  -2   71.89    7.60 
  -2  -1  -2   87.69    7.90 
   2  -1   2   68.79    4.70 
   2  -1   2   75.09    8.50 
  -2  -1  -2   85.29    6.50 
  -2  -1  -2   69.39    5.20 
   2   1   2   76.49    8.00 
   2   1   2   93.99    9.40 
  -2   1  -2   75.09    7.90 
  -2   1  -2   80.59    8.60 
  -2   1  -2   78.39    6.30 
  -2   1  -2   70.09    8.10 
  -2   1  -2   83.29    8.20 
   2   1   2   72.49    5.70 
   2   1   2   91.59    7.80 
   2   1   2   75.49    5.60 
   2   1   2   60.59    9.00 
  -2   1  -2   75.99    9.30 
   2   1   2   72.99    8.50 
  -2   1  -2   53.79    6.90 
  -2   1  -2   79.09    8.70 
  -2   1  -2   76.09    8.20 
  -2   1  -2   74.19    8.30 
  -2   1  -2   81.19    8.10 
  -2   1  -2   95.69    8.80 
   2   1   2   72.89   10.40 
  -2   1  -2   81.19    7.70 
   2   1   2   82.89    8.50 
  -2   1  -2   64.09    7.60 
   2   1   2   97.29   10.00 
  -2   1  -2   65.79    7.10 
  -2   1  -2   73.59    5.80 
  -2   1  -2   67.09    6.60 
  -2   1  -2   88.49   10.50 
   2   1   2   91.29    8.50 
  -2   1  -2   84.49    9.20 
  -2   1  -2   69.59    8.90 
   2   1   2   81.19    8.70 
  -2   1  -2   74.19    8.70 
  -2   1  -2   88.49    7.20 
   2   1   2   84.99    7.50 
  -2   1  -2   91.29    7.70 
   2   1   2   79.09    8.40 
  -2   1  -2   88.79    7.20 
   2   1   2   86.49    8.40 
  -3  -1  -2 2872.51   99.39 
  -3  -1  -2 2891.11   96.29 
   3  -1   2 2851.41   99.49 
  -3  -1  -2 2886.61   97.69 
   3  -1   2 2959.60  100.39 
  -3  -1  -2 2976.80   98.29 
   3  -1   2 3075.89   97.99 
   3  -1   2 3033.20  102.29 
  -3  -1  -2 3003.90  100.29 
   3  -1   2 3191.68  105.39 
   3  -1   2 2953.80  101.69 
  -3  -1  -2 3036.30  103.39 
  -3  -1  -2 3035.60   98.89 
  -3  -1  -2 2983.90   94.99 
   3  -1   2 2881.11   99.09 
   3  -1   2 2954.70  101.79 
   3  -1   2 3048.99   98.79 
  -3  -1  -2 2981.60   96.89 
  -3  -1  -2 3073.49   97.49 
   3  -1   2 3019.60  101.89 
   3  -1   2 2992.70   96.29 
  -3  -1  -2 3061.39   96.39 
  -3  -1  -2 2920.51   97.49 
   3  -1   2 2879.81   99.19 
   3  -1   2 3135.29   99.59 
   3  -1   2 3088.99  102.89 
   3  -1   2 2908.51   99.69 
  -3  -1  -2 3018.00   97.09 
  -3  -1  -2 2980.70  102.09 
  -3  -1  -2 3059.59   96.19 
  -3  -1  -2 2974.80  109.29 
  -3  -1  -2 2959.10  102.09 
  -3  -1  -2 3302.67  110.19 
  -3  -1  -2 2872.71   99.89 
   3  -1   2 2959.10   97.09 
  -3   1  -2 2948.80   97.49 
   3   1   2 2983.50   95.39 
  -3   1  -2 3005.40  101.39 
  -3   1  -2 3052.69  102.29 
  -3   1  -2 2890.21   99.29 
   3   1   2 3108.79   98.09 
  -3   1  -2 3031.70  100.59 
   3   1   2 3031.50  100.89 
   3   1   2 3048.29  105.89 
   3   1   2 2940.61  101.29 
  -3   1  -2 2890.61   98.99 
  -3   1  -2 2972.90   97.09 
  -3   1  -2 2925.61  100.49 
  -3   1  -2 2844.92   99.09 
   3   1   2 3021.10  101.89 
   3   1   2 2919.41  100.99 
  -3   1  -2 3008.90   99.89 
  -3   1  -2 3033.80  100.19 
   3   1   2 3076.29  102.39 
  -3   1  -2 3055.19   94.69 
   3   1   2 3013.10   99.89 
   3   1   2 3134.69   98.89 
   3   1   2 3056.29   98.59 
   3   1   2 2933.41   97.89 
  -3   1  -2 2880.41   98.69 
  -3   1  -2 2959.90  100.19 
   3   1   2 3036.10  100.49 
  -3   1  -2 3034.80  100.39 
  -3   1  -2 3017.10   96.39 
   4  -1   2    1.80    3.30 
   4  -1   2    5.70    4.80 
  -4  -1  -2    3.80    2.70 
  -4  -1  -2    2.70    2.80 
   4  -1   2    6.00    4.60 
  -4  -1  -2    3.80    3.10 
   4  -1   2    6.60    4.00 
  -4  -1  -2    0.40    3.10 
  -4  -1  -2   -1.40    3.30 
  -4  -1  -2    0.20    3.90 
   4  -1   2    0.20    3.20 
   4  -1   2    0.10    3.50 
  -4  -1  -2    1.10    2.70 
   4  -1   2    5.10    5.70 
  -4  -1  -2    1.00    2.60 
   4  -1   2    1.50    3.90 
   4  -1   2    2.10    4.70 
  -4  -1  -2   -1.40    2.40 
  -4  -1  -2    1.90    2.80 
   4  -1   2    0.60    3.60 
   4  -1   2    5.90    3.70 
  -4  -1  -2   -2.90    3.90 
   4  -1   2    3.50    3.30 
  -4   1  -2    2.80    2.60 
  -4   1  -2   -1.10    2.90 
  -4   1  -2    0.00    3.70 
   4   1   2    0.40    3.30 
  -4   1  -2   -3.40    3.90 
   4   1   2    4.50    4.50 
  -4   1  -2    3.60    3.80 
  -4   1  -2   -2.40    3.50 
   4   1   2   -0.90    3.50 
   4   1   2   -1.90    3.20 
   4   1   2    2.90    5.60 
  -4   1  -2    1.90    3.70 
   4   1   2   -1.10    3.90 
   4   1   2    5.60    3.60 
  -4   1  -2    6.60    4.50 
   4   1   2   -1.80    3.80 
   4   1   2   -1.70    2.50 
  -4   1  -2   -3.60    2.70 
  -4   1  -2    2.00    2.60 
   4   1   2   -1.90    3.30 
  -4   1  -2   -0.80    3.00 
   4   1   2   -1.80    3.10 
  -4   1  -2    4.10    3.80 
  -4   1  -2    1.20    3.40 
  -4   1  -2    0.90    2.50 
   4   1   2   -0.90    2.50 
  -4   1  -2    0.40    3.00 
  -5  -1  -2 1021.60   38.70 
   5  -1   2 1070.49   42.70 
   5  -1   2 1055.59   42.40 
   5  -1   2  983.50   39.70 
   5  -1   2  966.10   49.40 
  -5  -1  -2 1065.99   41.70 
  -5  -1  -2  993.60   40.10 
   5  -1   2  948.81   40.70 
  -5  -1  -2  987.10   44.10 
  -5  -1  -2  990.10   39.00 
   5  -1   2  969.00   45.40 
  -5  -1  -2  962.70   45.00 
  -5  -1  -2 1074.99   45.80 
   5  -1   2 1018.40   42.00 
  -5  -1  -2 1009.20   38.90 
  -5  -1  -2 1018.60   40.20 
   5  -1   2 1010.90   43.40 
   5  -1   2  969.90   44.10 
   5  -1   2 1009.50   45.30 
  -5  -1  -2  916.51   44.10 
  -5  -1  -2 1040.60   38.20 
  -5  -1  -2 1007.60   39.20 
   5  -1   2 1004.90   47.00 
   5  -1   2  987.60   41.30 
   5   1   2 1025.10   38.10 
  -5   1  -2 1000.30   43.30 
  -5   1  -2 1026.60   43.40 
   5   1   2 1021.20   45.50 
  -5   1  -2  972.10   44.20 
  -5   1  -2  967.30   44.20 
   5   1   2 1039.00   42.90 
  -5   1  -2 1021.30   42.00 
   5   1   2 1117.09   52.29 
   5   1   2  966.20   45.10 
   5   1   2  958.20   38.10 
   5   1   2 1011.90   44.40 
   5   1   2  954.10   46.00 
  -5   1  -2  984.20   38.40 
  -5   1  -2  990.80   43.30 
  -5   1  -2 1006.70   42.30 
  -5   1  -2 1000.30   42.20 
   5   1   2 1001.90   45.00 
  -5   1  -2  975.30   42.00 
  -5   1  -2 1025.90   46.00 
   5   1   2  985.70   41.60 
  -6  -1  -2   92.59   14.90 
   6  -1   2   91.99   15.40 
   6  -1   2   74.79   12.20 
   6  -1   2   64.39   12.10 
  -6  -1  -2   88.09   11.70 
   6  -1   2   75.19   13.90 
   6  -1   2  106.19   15.20 
   6  -1   2   80.19   15.40 
  -6  -1  -2   80.29   10.40 
   6  -1   2  112.89   13.30 
   6  -1   2   73.89   10.20 
  -6  -1  -2   76.29   13.10 
   6  -1   2  101.89   13.80 
   6  -1   2   68.39   11.00 
  -6  -1  -2  100.89   13.20 
  -6  -1  -2   86.49   14.30 
   6  -1   2   62.59   15.70 
  -6  -1  -2   89.19   10.90 
  -6  -1  -2   87.69   10.30 
  -6  -1  -2   73.29   12.80 
  -6  -1  -2   87.39   10.80 
   6   1   2   96.09   10.70 
  -6   1  -2   90.19   12.40 
  -6   1  -2   47.90   10.00 
   6   1   2   87.19   12.10 
   6   1   2   69.99   14.20 
   6   1   2   79.89   12.80 
  -6   1  -2   93.19   14.80 
  -6   1  -2   86.19   13.20 
   6   1   2   81.09   10.10 
  -6   1  -2   79.59   14.60 
   6   1   2   88.29   17.60 
  -6   1  -2   77.59   11.50 
  -6   1  -2   81.49   12.10 
  -6   1  -2   88.89   10.10 
   6   1   2   63.29   12.40 
   6   1   2   90.89   15.10 
   6   1   2   78.29   13.50 
  -6   1  -2   94.99   16.10 
  -6   1  -2   86.49   13.50 
  -6   1  -2   76.59   13.00 
   6   1   2   81.99   14.20 
   7  -1   2 1279.07   61.89 
   7  -1   2 1165.48   64.49 
   7  -1   2 1264.27   53.39 
   7  -1   2 1320.77   49.99 
  -7  -1  -2 1162.28   57.19 
  -7  -1  -2 1224.38   54.59 
  -7  -1  -2 1268.97   53.79 
   7  -1   2 1179.38   58.39 
  -7  -1  -2 1202.18   56.99 
  -7  -1  -2 1240.28   50.39 
  -7  -1  -2 1308.47   50.99 
   7  -1   2 1250.97   59.79 
  -7  -1  -2 1206.18   50.39 
   7  -1   2 1252.77   58.39 
   7  -1   2 1278.97   58.69 
  -7  -1  -2 1182.08   57.99 
  -7  -1  -2 1250.67   50.69 
   7  -1   2 1272.77   54.59 
   7   1   2 1244.48   61.09 
   7   1   2 1236.38   49.10 
  -7   1  -2 1256.07   62.69 
  -7   1  -2 1217.78   53.39 
  -7   1  -2 1289.07   55.49 
   7   1   2 1220.48   55.29 
  -7   1  -2 1229.68   57.99 
  -7   1  -2 1248.58   59.09 
   7   1   2 1228.68   59.19 
   7   1   2 1243.08   48.90 
   7   1   2 1148.59   56.59 
  -7   1  -2 1293.77   58.49 
  -7   1  -2 1212.98   54.29 
  -7   1  -2 1261.07   53.99 
   7   1   2 1254.77   65.39 
   7   1   2 1292.17   59.79 
   7   1   2 1277.17   59.59 
  -7   1  -2 1204.88   55.39 
   7   1   2 1261.67   52.39 
   8  -1   2  146.49   26.80 
  -8  -1  -2  168.48   23.70 
   8  -1   2  146.99   22.10 
   8  -1   2  190.88   25.30 
  -8  -1  -2  200.28   19.70 
  -8  -1  -2  165.78   20.20 
   8  -1   2  153.68   24.20 
   8  -1   2  144.59   21.40 
  -8  -1  -2  178.48   20.60 
  -8  -1  -2  182.28   18.10 
  -8  -1  -2  158.48   22.30 
   8  -1   2  197.58   24.40 
   8  -1   2  173.58   19.90 
  -8  -1  -2  191.98   27.30 
  -8  -1  -2  182.48   24.40 
  -8   1  -2  220.88   22.80 
  -8   1  -2  183.38   21.50 
   8   1   2  153.38   22.00 
  -8   1  -2  165.88   19.60 
   8   1   2  156.18   22.60 
  -8   1  -2  189.18   27.10 
  -8   1  -2  160.98   22.80 
  -8   1  -2  125.29   20.30 
   8   1   2  207.78   30.60 
   8   1   2  140.69   23.00 
   8   1   2  143.09   19.70 
  -8   1  -2  136.79   19.10 
  -8   1  -2  203.48   25.90 
   8   1   2  202.08   20.20 
   8   1   2  165.68   23.70 
  -8   1  -2  155.28   19.10 
   9  -1   2 1203.88   62.29 
  -9  -1  -2 1098.09   59.09 
  -9  -1  -2 1319.37   67.79 
  -9  -1  -2 1184.38   55.49 
  -9  -1  -2 1106.59   60.39 
   9  -1   2 1161.88   65.09 
   9  -1   2 1148.59   69.09 
  -9  -1  -2 1181.48   61.79 
  -9  -1  -2 1072.49   58.29 
  -9  -1  -2 1192.38   51.29 
   9  -1   2 1015.40   52.09 
   9  -1   2 1157.48   60.69 
   9  -1   2 1093.69   59.69 
   9  -1   2 1026.50   59.89 
  -9   1  -2 1151.98   65.49 
   9   1   2 1110.69   58.89 
  -9   1  -2 1238.68   57.19 
   9   1   2 1086.79   60.69 
   9   1   2 1079.79   56.19 
  -9   1  -2 1162.38   55.39 
   9   1   2 1154.18   68.09 
  -9   1  -2 1112.59   61.19 
   9   1   2 1176.38   62.59 
  -9   1  -2 1091.89   56.69 
  -9   1  -2  978.50   52.09 
  -9   1  -2 1037.30   58.99 
   9   1   2  952.10   60.39 
  -9   1  -2 1105.39   58.99 
 -10  -1  -2   47.10   15.20 
  10  -1   2   39.00   16.10 
 -10  -1  -2   67.29   13.60 
 -10  -1  -2   82.79   20.10 
 -10  -1  -2   56.49   16.80 
 -10  -1  -2   20.60   13.90 
  10  -1   2   47.30   19.10 
  10  -1   2   23.20   13.80 
  10  -1   2   51.79   16.60 
 -10  -1  -2   33.90   13.60 
  10  -1   2   32.60   14.10 
 -10  -1  -2   89.49   20.60 
 -10   1  -2   48.90   15.40 
 -10   1  -2   55.09   16.50 
  10   1   2   40.30   13.30 
 -10   1  -2   48.90   14.20 
  10   1   2   65.79   18.50 
 -10   1  -2   70.89   15.60 
  10   1   2   39.80   16.10 
  10   1   2   51.99   19.50 
 -10   1  -2   64.39   18.90 
  10   1   2   43.40   13.20 
 -10   1  -2   48.30   16.00 
  10  -2  -2  878.91   56.29 
  10  -2  -2  906.71   63.79 
 -10  -2   2  895.71   55.49 
 -10  -2   2  922.51   52.69 
 -10  -2   2 1061.59   60.49 
 -10  -2   2 1008.20   56.89 
  10  -2  -2 1004.70   58.49 
 -10  -2   2  910.91   51.89 
  10  -2  -2  885.81   51.49 
  10  -2  -2 1024.70   62.49 
 -10  -2   2 1012.40   54.39 
  10  -2  -2  851.61   55.49 
 -10   2   2 1004.80   51.69 
  10   2  -2  958.80   61.39 
  10   2  -2  990.00   58.79 
 -10   2   2  974.80   56.69 
  10   2  -2  967.90   62.49 
 -10   2   2  975.90   52.79 
 -10   2   2 1010.20   53.69 
 -10   2   2  960.70   56.09 
 -10   2   2  964.70   61.89 
  10   2  -2  925.01   59.39 
  10   2  -2 1043.00   59.19 
 -10   2   2  933.81   56.09 
  -9  -2   2  242.68   27.70 
  -9  -2   2  219.38   27.80 
   9  -2  -2  201.88   28.00 
   9  -2  -2  189.48   25.90 
   9  -2  -2  207.38   28.10 
  -9  -2   2  197.48   24.70 
   9  -2  -2  257.77   36.50 
  -9  -2   2  214.38   26.60 
   9  -2  -2  218.28   30.30 
  -9  -2   2  238.28   29.60 
  -9  -2   2  205.48   25.10 
   9  -2  -2  248.98   27.70 
   9  -2  -2  194.58   27.70 
  -9   2   2  224.18   28.70 
   9   2  -2  224.38   28.10 
   9   2  -2  190.08   24.50 
  -9   2   2  222.08   25.50 
   9   2  -2  202.38   31.30 
  -9   2   2  251.47   29.40 
  -9   2   2  238.68   26.20 
   9   2  -2  202.58   27.10 
   9   2  -2  195.28   29.00 
  -9   2   2  216.48   23.80 
  -9   2   2  167.88   24.30 
  -9   2   2  216.68   30.20 
   8  -2  -2  690.63   43.20 
   8  -2  -2  641.44   46.90 
   8  -2  -2  623.64   40.70 
   8  -2  -2  706.43   44.50 
  -8  -2   2  620.24   38.80 
   8  -2  -2  708.43   39.10 
  -8  -2   2  681.83   41.20 
  -8  -2   2  743.83   38.60 
  -8  -2   2  740.83   42.50 
   8  -2  -2  623.04   40.10 
   8  -2  -2  624.34   40.40 
  -8  -2   2  643.44   37.80 
  -8   2   2  676.63   40.80 
   8   2  -2  636.54   43.50 
  -8   2   2  689.53   35.20 
   8   2  -2  667.33   33.30 
  -8   2   2  746.53   42.50 
   8   2  -2  638.04   36.40 
  -8   2   2  666.13   36.70 
  -8   2   2  632.84   39.40 
   8   2  -2  625.34   36.90 
   8   2  -2  621.54   42.00 
  -8   2   2  694.23   45.20 
   8   2  -2  579.94   39.80 
  -8   2   2  664.73   37.20 
   8   2  -2  663.13   37.50 
  -8   2   2  659.53   38.00 
   8   2  -2  668.13   41.20 
   7  -2  -2  303.67   23.00 
   7  -2  -2  292.87   30.50 
   7  -2  -2  300.37   25.00 
   7  -2  -2  329.47   26.80 
  -7  -2   2  326.17   31.10 
   7  -2  -2  347.67   26.00 
  -7  -2   2  357.66   26.00 
  -7  -2   2  322.57   19.20 
  -7  -2   2  310.77   26.10 
   7  -2  -2  308.27   23.30 
   7  -2  -2  339.87   34.40 
  -7  -2   2  270.57   21.20 
  -7  -2   2  279.57   23.00 
  -7  -2   2  274.27   22.00 
   7  -2  -2  310.07   20.50 
   7  -2  -2  309.87   29.60 
   7   2  -2  295.57   24.20 
  -7   2   2  295.97   17.90 
   7   2  -2  314.17   22.90 
   7   2  -2  300.27   30.10 
  -7   2   2  275.37   26.70 
   7   2  -2  313.27   21.70 
  -7   2   2  284.27   30.00 
  -7   2   2  334.77   25.60 
  -7   2   2  291.87   19.40 
  -7   2   2  278.37   18.20 
  -7   2   2  319.67   25.30 
   7   2  -2  273.27   18.70 
   7   2  -2  265.07   24.40 
  -7   2   2  271.57   20.50 
  -7   2   2  251.87   21.90 
  -7   2   2  308.37   22.00 
   7   2  -2  322.97   27.30 
   7   2  -2  309.17   20.00 
  -7   2   2  287.07   22.10 
  -6  -2   2 1094.69   49.60 
   6  -2  -2 1005.10   45.50 
  -6  -2   2 1179.88   52.79 
   6  -2  -2 1096.49   48.40 
   6  -2  -2 1002.50   49.99 
   6  -2  -2 1104.69   45.60 
  -6  -2   2 1029.70   49.30 
   6  -2  -2 1055.89   53.59 
  -6  -2   2 1104.89   48.30 
   6  -2  -2 1084.69   48.50 
   6  -2  -2 1021.30   50.69 
   6  -2  -2 1103.59   52.29 
  -6  -2   2 1076.69   46.50 
  -6  -2   2 1077.29   48.90 
  -6  -2   2 1052.69   43.30 
   6  -2  -2 1148.89   50.69 
   6   2  -2 1023.20   47.80 
  -6   2   2 1027.70   48.20 
  -6   2   2 1133.49   54.49 
   6   2  -2 1149.48   51.29 
  -6   2   2 1077.29   47.10 
  -6   2   2 1120.89   50.69 
   6   2  -2 1065.19   43.30 
   6   2  -2 1095.49   50.49 
  -6   2   2 1090.69   45.30 
  -6   2   2 1141.19   51.09 
  -6   2   2 1078.89   42.70 
   6   2  -2 1133.29   46.60 
   6   2  -2 1092.59   44.70 
   6   2  -2 1068.89   52.39 
  -6   2   2 1039.70   42.90 
  -6   2   2 1096.29   47.20 
  -6   2   2 1102.69   48.40 
  -6   2   2 1048.60   45.70 
  -6   2   2 1052.99   47.10 
  -6   2   2 1078.29   42.10 
   6   2  -2 1069.59   51.59 
  -5  -2   2  861.01   39.40 
  -5  -2   2  837.12   33.40 
  -5  -2   2  788.32   39.30 
  -5  -2   2  871.81   39.30 
   5  -2  -2  890.11   42.00 
   5  -2  -2  844.02   37.10 
   5  -2  -2  841.32   40.90 
  -5  -2   2  874.21   35.80 
   5  -2  -2  844.72   39.10 
   5  -2  -2  802.12   38.30 
   5  -2  -2  918.31   43.80 
  -5  -2   2  870.01   37.00 
   5  -2  -2  860.91   41.10 
  -5  -2   2  835.12   38.20 
   5  -2  -2  861.91   44.20 
  -5  -2   2  931.01   42.00 
   5  -2  -2  857.01   40.00 
  -5   2   2  871.71   34.60 
   5   2  -2  925.71   37.20 
  -5   2   2  874.11   37.40 
   5   2  -2  916.51   40.90 
   5   2  -2  827.72   39.20 
   5   2  -2  926.21   37.30 
   5   2  -2  922.51   45.80 
  -5   2   2  837.22   38.80 
  -5   2   2  830.92   34.90 
   5   2  -2  788.92   39.50 
  -5   2   2  871.41   38.10 
  -5   2   2  832.02   38.00 
  -5   2   2  785.02   39.60 
  -5   2   2  775.12   37.40 
   5   2  -2  888.51   39.70 
   5   2  -2  877.81   42.20 
  -5   2   2  868.71   40.70 
  -5   2   2  818.82   42.70 
   5   2  -2  891.21   36.70 
   5   2  -2  826.82   40.90 
   5   2  -2  882.51   35.20 
  -5   2   2  856.01   35.40 
  -5   2   2  845.62   37.60 
  -5   2   2  838.32   38.90 
   4  -2  -2 3576.44  118.59 
  -4  -2   2 3433.46  119.99 
  -4  -2   2 3585.34  114.29 
   4  -2  -2 3485.25  120.29 
   4  -2  -2 3459.55  121.79 
   4  -2  -2 3491.85  120.09 
   4  -2  -2 3646.94  115.59 
  -4  -2   2 3675.03  122.79 
   4  -2  -2 3338.57  116.69 
  -4  -2   2 3496.75  119.19 
   4  -2  -2 3567.94  121.89 
  -4  -2   2 3526.75  115.99 
   4  -2  -2 3331.77  121.79 
  -4  -2   2 3505.35  119.59 
   4  -2  -2 3484.15  119.99 
   4  -2  -2 3744.83  125.39 
  -4  -2   2 3597.84  115.19 
   4  -2  -2 3458.85  120.99 
  -4  -2   2 3499.75  114.69 
  -4  -2   2 3669.63  119.49 
  -4  -2   2 3559.94  116.79 
   4  -2  -2 3509.45  121.69 
  -4  -2   2 3520.95  116.19 
  -4   2   2 3401.66  118.59 
   4   2  -2 3732.13  116.99 
  -4   2   2 3509.95  116.79 
   4   2  -2 3358.76  115.49 
   4   2  -2 3460.95  120.69 
   4   2  -2 3605.54  120.29 
   4   2  -2 3691.83  122.09 
  -4   2   2 3593.64  124.29 
  -4   2   2 3454.45  118.89 
  -4   2   2 3571.54  121.29 
  -4   2   2 3427.56  118.29 
   4   2  -2 3621.34  120.49 
   4   2  -2 3572.64  116.19 
   4   2  -2 3651.53  122.39 
  -4   2   2 3521.95  120.19 
   4   2  -2 3620.34  121.09 
   4   2  -2 3457.85  119.39 
  -4   2   2 3413.26  114.59 
  -4   2   2 3611.54  119.49 
   4   2  -2 3610.94  117.89 
  -4   2   2 3480.95  118.79 
  -4   2   2 3495.65  116.59 
  -4   2   2 3538.85  121.29 
   4   2  -2 3628.14  125.79 
   4   2  -2 3465.55  123.09 
  -4   2   2 3582.34  119.09 
  -4   2   2 3526.45  115.69 
   3  -2  -2 2355.26   81.59 
  -3  -2   2 2664.63   86.49 
  -3  -2   2 2556.64   80.89 
   3  -2  -2 2332.27   82.29 
  -3  -2   2 2326.07   80.19 
   3  -2  -2 2400.56   79.79 
   3  -2  -2 2363.26   80.69 
  -3  -2   2 2503.45   78.89 
  -3  -2   2 2396.86   85.19 
  -3  -2   2 2325.07   77.89 
   3  -2  -2 2300.07   81.49 
   3  -2  -2 2282.97   82.59 
  -3  -2   2 2379.76   78.39 
  -3  -2   2 2321.07   78.99 
  -3  -2   2 2384.86   78.09 
   3  -2  -2 2431.36   84.19 
  -3  -2   2 2323.27   79.69 
   3  -2  -2 2378.76   82.99 
  -3  -2   2 2365.26   78.99 
   3  -2  -2 2374.06   82.69 
  -3  -2   2 2443.96   79.59 
   3  -2  -2 2431.36   83.89 
  -3  -2   2 2435.36   79.09 
   3  -2  -2 2375.86   85.09 
   3  -2  -2 2500.45   84.09 
  -3  -2   2 2360.86   82.19 
   3  -2  -2 2349.56   83.69 
   3  -2  -2 2358.46   83.89 
   3   2  -2 2202.18   79.19 
   3   2  -2 2359.26   82.29 
  -3   2   2 2344.27   81.79 
  -3   2   2 2271.57   80.49 
  -3   2   2 2354.86   81.99 
   3   2  -2 2440.96   81.49 
   3   2  -2 2447.06   82.09 
  -3   2   2 2346.17   81.59 
  -3   2   2 2454.05   83.49 
  -3   2   2 2338.47   80.69 
   3   2  -2 2409.96   85.39 
  -3   2   2 2427.96   83.59 
  -3   2   2 2416.76   85.29 
  -3   2   2 2301.67   77.09 
   3   2  -2 2283.87   80.89 
  -3   2   2 2344.77   82.69 
  -3   2   2 2461.65   83.09 
   3   2  -2 2442.56   82.99 
   3   2  -2 2355.06   82.19 
   3   2  -2 2445.86   86.19 
   3   2  -2 2350.06   79.99 
   3   2  -2 2403.26   78.99 
   3   2  -2 2516.65   83.29 
   3   2  -2 2587.44   87.19 
   3   2  -2 2361.46   83.09 
  -3   2   2 2273.07   80.59 
   3   2  -2 2422.66   83.49 
  -3   2   2 2364.76   79.79 
   3   2  -2 2390.36   78.79 
  -3   2   2 2057.89   82.59 
  -3   2   2 2360.86   82.29 
   3   2  -2 2500.15   78.39 
   3   2  -2 2379.46   82.89 
  -3   2   2 2284.67   79.19 
   3   2  -2 2382.66   81.09 
  -3   2   2 2341.27   83.19 
  -3   2   2 2420.26   83.09 
   3   2  -2 2353.16   79.99 
   2  -2  -2 3447.16  114.59 
   2  -2  -2 3439.16  114.39 
   2  -2  -2 3410.36  114.89 
  -2  -2   2 3481.35  114.19 
   2  -2  -2 3494.05  116.09 
   2  -2  -2 3573.24  116.09 
  -2  -2   2 3508.35  113.39 
   2  -2  -2 3391.66  113.89 
  -2  -2   2 3744.23  111.09
[truncated: 2,857,188 more chars]
