# Supplementary material
Source: MDPI journal article supplement (https://www.mdpi.com/2073-4352/13/7/1043)
Supplement: s1 [file s1 › 1 Ce HR2021_51_0m_a.cif]

 
data_HR2021_51_0m_a 
  
_audit_creation_method            'SHELXL-2014/7' 
_shelx_SHELXL_version_number      '2014/7' 
_chemical_name_systematic         ? 
_chemical_name_common             ? 
_chemical_melting_point           ? 
_chemical_formula_moiety          ? 
_chemical_formula_sum 
 'C4 H12 Br Ce O7' 
_chemical_formula_weight          392.17 
  
loop_ 
 _atom_type_symbol 
 _atom_type_description 
 _atom_type_scat_dispersion_real 
 _atom_type_scat_dispersion_imag 
 _atom_type_scat_source 
 'C'  'C'   0.0033   0.0016 
 'International Tables Vol C Tables 4.2.6.8 and 6.1.1.4' 
 'H'  'H'   0.0000   0.0000 
 'International Tables Vol C Tables 4.2.6.8 and 6.1.1.4' 
 'O'  'O'   0.0106   0.0060 
 'International Tables Vol C Tables 4.2.6.8 and 6.1.1.4' 
 'Br'  'Br'  -0.2901   2.4595 
 'International Tables Vol C Tables 4.2.6.8 and 6.1.1.4' 
 'Ce'  'Ce'  -0.2486   2.6331 
 'International Tables Vol C Tables 4.2.6.8 and 6.1.1.4' 
  
_space_group_crystal_system       monoclinic 
_space_group_IT_number            14 
_space_group_name_H-M_alt         'P 21/n' 
_space_group_name_Hall            '-P 2yn' 
  
_shelx_space_group_comment 
; 
The symmetry employed for this shelxl refinement is uniquely defined 
by the following loop, which should always be used as a source of 
symmetry information in preference to the above space-group names. 
They are only intended as comments. 
; 
  
loop_ 
 _space_group_symop_operation_xyz 
 'x, y, z' 
 '-x+1/2, y+1/2, -z+1/2' 
 '-x, -y, -z' 
 'x-1/2, -y-1/2, z-1/2' 
  
_cell_length_a                    7.9597(3) 
_cell_length_b                    8.0442(3) 
_cell_length_c                    18.0642(8) 
_cell_angle_alpha                 90 
_cell_angle_beta                  96.732(2) 
_cell_angle_gamma                 90 
_cell_volume                      1148.67(8) 
_cell_formula_units_Z             4 
_cell_measurement_temperature     100(2) 
_cell_measurement_reflns_used     9928 
_cell_measurement_theta_min       2.27 
_cell_measurement_theta_max       28.78 
  
_exptl_crystal_description        plate 
_exptl_crystal_colour             colourless 
_exptl_crystal_density_meas       ? 
_exptl_crystal_density_method     ? 
_exptl_crystal_density_diffrn     2.268 
_exptl_crystal_F_000              740 
_exptl_transmission_factor_min    ? 
_exptl_transmission_factor_max    ? 
_exptl_crystal_size_max           0.465 
_exptl_crystal_size_mid           0.120 
_exptl_crystal_size_min           0.074 
_exptl_absorpt_coefficient_mu     7.446 
_shelx_estimated_absorpt_T_min    0.129 
_shelx_estimated_absorpt_T_max    0.609 
_exptl_absorpt_correction_type    multi-scan 
_exptl_absorpt_correction_T_min   0.505 
_exptl_absorpt_correction_T_max   0.748 
_exptl_absorpt_process_details    'Bruker SADABS' 
_exptl_absorpt_special_details    ? 
_diffrn_ambient_temperature       100(2) 
_diffrn_radiation_wavelength      0.71073 
_diffrn_radiation_type            MoK\a 
_diffrn_source                    ? 
_diffrn_measurement_device_type   'Bruker APEX-II CCD' 
_diffrn_measurement_method        '\f and \w scans' 
_diffrn_detector_area_resol_mean  ? 
_diffrn_reflns_number             113305 
_diffrn_reflns_av_unetI/netI      0.0132 
_diffrn_reflns_av_R_equivalents   0.0572 
_diffrn_reflns_limit_h_min        -10 
_diffrn_reflns_limit_h_max        10 
_diffrn_reflns_limit_k_min        -10 
_diffrn_reflns_limit_k_max        10 
_diffrn_reflns_limit_l_min        -23 
_diffrn_reflns_limit_l_max        23 
_diffrn_reflns_theta_min          2.691 
_diffrn_reflns_theta_max          27.995 
_diffrn_reflns_theta_full         25.242 
_diffrn_measured_fraction_theta_max   1.000 
_diffrn_measured_fraction_theta_full  1.000 
_diffrn_reflns_Laue_measured_fraction_max    1.000 
_diffrn_reflns_Laue_measured_fraction_full   1.000 
_diffrn_reflns_point_group_measured_fraction_max   1.000 
_diffrn_reflns_point_group_measured_fraction_full  1.000 
_reflns_number_total              2770 
_reflns_number_gt                 2527 
_reflns_threshold_expression      'I > 2\s(I)' 
_reflns_Friedel_coverage          0.000 
_reflns_Friedel_fraction_max      . 
_reflns_Friedel_fraction_full     . 
  
_reflns_special_details 
; 
 Reflections were merged by SHELXL according to the crystal 
 class for the calculation of statistics and refinement. 
  
 _reflns_Friedel_fraction is defined as the number of unique 
 Friedel pairs measured divided by the number that would be 
 possible theoretically, ignoring centric projections and 
 systematic absences. 
; 
  
_computing_data_collection        'Bruker APEX2' 
_computing_cell_refinement        'Bruker SAINT' 
_computing_data_reduction         'Bruker SAINT' 
_computing_structure_solution     'SHELXS-97 (Sheldrick 2008)' 
_computing_structure_refinement 'SHELXL-2014/7 (Sheldrick, 2014)' 
_computing_molecular_graphics     'Bruker SHELXTL' 
_computing_publication_material   'Bruker SHELXTL' 
_refine_special_details           ? 
_refine_ls_structure_factor_coef  Fsqd 
_refine_ls_matrix_type            full 
_refine_ls_weighting_scheme       calc 
_refine_ls_weighting_details 
'w=1/[\s^2^(Fo^2^)+(0.0120P)^2^+1.1025P] where P=(Fo^2^+2Fc^2^)/3' 
_atom_sites_solution_primary      direct 
_atom_sites_solution_secondary    ? 
_atom_sites_solution_hydrogens    mixed 
_refine_ls_hydrogen_treatment     constr 
_refine_ls_extinction_method      none 
_refine_ls_extinction_coef        . 
_refine_ls_number_reflns          2770 
_refine_ls_number_parameters      125 
_refine_ls_number_restraints      0 
_refine_ls_R_factor_all           0.0173 
_refine_ls_R_factor_gt            0.0142 
_refine_ls_wR_factor_ref          0.0320 
_refine_ls_wR_factor_gt           0.0310 
_refine_ls_goodness_of_fit_ref    1.071 
_refine_ls_restrained_S_all       1.071 
_refine_ls_shift/su_max           0.003 
_refine_ls_shift/su_mean          0.000 
  
loop_ 
 _atom_site_label 
 _atom_site_type_symbol 
 _atom_site_fract_x 
 _atom_site_fract_y 
 _atom_site_fract_z 
 _atom_site_U_iso_or_equiv 
 _atom_site_adp_type 
 _atom_site_occupancy 
 _atom_site_site_symmetry_order 
 _atom_site_calc_flag 
 _atom_site_refinement_flags_posn 
 _atom_site_refinement_flags_adp 
 _atom_site_refinement_flags_occupancy 
 _atom_site_disorder_assembly 
 _atom_site_disorder_group 
Ce1 Ce 0.26044(2) 0.45915(2) 0.53690(2) 0.01132(4) Uani 1 1 d . . . . . 
Br1 Br 0.39516(3) 0.95896(3) 0.68836(2) 0.01891(5) Uani 1 1 d . . . . . 
O11 O -0.01681(16) 0.33463(17) 0.53323(8) 0.0166(3) Uani 1 1 d . . . . . 
O12 O -0.28148(17) 0.25627(18) 0.52176(8) 0.0188(3) Uani 1 1 d . . . . . 
C11 C -0.1289(2) 0.2286(2) 0.54561(11) 0.0146(4) Uani 1 1 d . . . . . 
C12 C -0.0813(3) 0.0744(3) 0.58883(14) 0.0259(5) Uani 1 1 d . . . . . 
H12A H -0.0780 0.0976 0.6422 0.082(7) Uiso 1 1 calc R U . . . 
H12B H 0.0304 0.0369 0.5781 0.082(7) Uiso 1 1 calc R U . . . 
H12C H -0.1651 -0.0126 0.5746 0.082(7) Uiso 1 1 calc R U . . . 
O21 O 0.54768(16) 0.55444(18) 0.57439(8) 0.0153(3) Uani 1 1 d . . . . . 
O22 O 0.81319(17) 0.62452(19) 0.59855(8) 0.0185(3) Uani 1 1 d . . . . . 
C21 C 0.6756(2) 0.5875(2) 0.62184(11) 0.0145(4) Uani 1 1 d . . . . . 
C22 C 0.6608(3) 0.5784(3) 0.70311(12) 0.0234(5) Uani 1 1 d . . . . . 
H22A H 0.7726 0.5580 0.7305 0.037(6) Uiso 0.72(3) 1 d R U P . . 
H22B H 0.5842 0.4875 0.7126 0.037(6) Uiso 0.72(3) 1 d R U P . . 
H22C H 0.6157 0.6836 0.7197 0.037(6) Uiso 0.72(3) 1 d R U P . . 
H22D H 0.5395 0.5859 0.7076 0.037(6) Uiso 0.28(3) 1 d R U P . . 
H22E H 0.7182 0.6777 0.7249 0.037(6) Uiso 0.28(3) 1 d R U P . . 
H22F H 0.7078 0.4792 0.7294 0.037(6) Uiso 0.28(3) 1 d R U P . . 
O1W O 0.39253(17) 0.17395(17) 0.53467(8) 0.0166(3) Uani 1 1 d . . . . . 
H11W H 0.3920 0.0958 0.5748 0.051(6) Uiso 1 1 d R U . . . 
H12W H 0.5091 0.1829 0.5263 0.051(6) Uiso 1 1 d R U . . . 
O2W O 0.15442(17) 0.65435(18) 0.62773(8) 0.0177(3) Uani 1 1 d . . . . . 
H21W H 0.0362 0.6689 0.6320 0.059(7) Uiso 1 1 d R U . . . 
H22W H 0.2067 0.7563 0.6459 0.059(7) Uiso 1 1 d R U . . . 
O3W O 0.28500(19) 0.34084(19) 0.66510(8) 0.0217(3) Uani 1 1 d . . . . . 
H31W H 0.2304 0.3869 0.7051 0.061(7) Uiso 1 1 d R U . . . 
H32W H 0.3168 0.2302 0.6810 0.061(7) Uiso 1 1 d R U . . . 
  
loop_ 
 _atom_site_aniso_label 
 _atom_site_aniso_U_11 
 _atom_site_aniso_U_22 
 _atom_site_aniso_U_33 
 _atom_site_aniso_U_23 
 _atom_site_aniso_U_13 
 _atom_site_aniso_U_12 
Ce1 0.00691(5) 0.01302(6) 0.01411(6) 0.00121(4) 0.00151(4) -0.00095(4) 
Br1 0.02110(10) 0.01585(10) 0.01946(10) 0.00208(8) 0.00097(8) -0.00299(8) 
O11 0.0106(6) 0.0171(7) 0.0222(7) 0.0026(6) 0.0024(5) -0.0040(5) 
O12 0.0089(6) 0.0190(7) 0.0287(8) 0.0060(6) 0.0027(6) -0.0015(6) 
C11 0.0121(8) 0.0148(9) 0.0172(10) 0.0006(8) 0.0034(7) -0.0011(8) 
C12 0.0232(11) 0.0208(11) 0.0327(13) 0.0106(10) -0.0012(9) -0.0006(9) 
O21 0.0107(6) 0.0203(7) 0.0144(7) -0.0002(6) -0.0002(5) -0.0015(6) 
O22 0.0101(6) 0.0259(8) 0.0191(7) -0.0025(6) 0.0005(5) -0.0032(6) 
C21 0.0122(9) 0.0145(9) 0.0161(9) -0.0018(8) -0.0004(7) 0.0019(7) 
C22 0.0167(10) 0.0370(14) 0.0159(10) 0.0001(9) -0.0004(8) 0.0030(9) 
O1W 0.0131(6) 0.0162(7) 0.0213(7) 0.0028(6) 0.0054(6) -0.0005(6) 
O2W 0.0131(6) 0.0167(7) 0.0230(8) -0.0045(6) 0.0010(6) 0.0004(6) 
O3W 0.0289(8) 0.0188(8) 0.0184(7) 0.0033(6) 0.0072(6) 0.0062(7) 
  
_geom_special_details 
; 
 All esds (except the esd in the dihedral angle between two l.s. planes) 
 are estimated using the full covariance matrix.  The cell esds are taken 
 into account individually in the estimation of esds in distances, angles 
 and torsion angles; correlations between esds in cell parameters are only 
 used when they are defined by crystal symmetry.  An approximate (isotropic) 
 treatment of cell esds is used for estimating esds involving l.s. planes. 
; 
  
loop_ 
 _geom_bond_atom_site_label_1 
 _geom_bond_atom_site_label_2 
 _geom_bond_distance 
 _geom_bond_site_symmetry_2 
 _geom_bond_publ_flag 
Ce1 O11 2.4173(13) . ? 
Ce1 O21 2.4311(13) . ? 
Ce1 O2W 2.4889(14) . ? 
Ce1 O3W 2.4901(15) . ? 
Ce1 O1W 2.5259(14) . ? 
Ce1 O12 2.5364(14) 3_566 ? 
Ce1 O22 2.5391(14) 3_666 ? 
Ce1 O21 2.6658(13) 3_666 ? 
Ce1 O11 2.7462(14) 3_566 ? 
O11 C11 1.273(2) . ? 
O12 C11 1.260(2) . ? 
C11 C12 1.491(3) . ? 
C12 H12A 0.9800 . ? 
C12 H12B 0.9800 . ? 
C12 H12C 0.9800 . ? 
O21 C21 1.280(2) . ? 
O22 C21 1.254(2) . ? 
C21 C22 1.488(3) . ? 
C22 H22A 0.9800 . ? 
C22 H22B 0.9800 . ? 
C22 H22C 0.9800 . ? 
C22 H22D 0.9800 . ? 
C22 H22E 0.9800 . ? 
C22 H22F 0.9800 . ? 
O1W H11W 0.9600 . ? 
O1W H12W 0.9600 . ? 
O2W H21W 0.9600 . ? 
O2W H22W 0.9600 . ? 
O3W H31W 0.9600 . ? 
O3W H32W 0.9600 . ? 
  
loop_ 
 _geom_angle_atom_site_label_1 
 _geom_angle_atom_site_label_2 
 _geom_angle_atom_site_label_3 
 _geom_angle 
 _geom_angle_site_symmetry_1 
 _geom_angle_site_symmetry_3 
 _geom_angle_publ_flag 
O11 Ce1 O21 164.58(5) . . ? 
O11 Ce1 O2W 84.29(5) . . ? 
O21 Ce1 O2W 89.88(5) . . ? 
O11 Ce1 O3W 80.74(5) . . ? 
O21 Ce1 O3W 83.84(5) . . ? 
O2W Ce1 O3W 67.90(5) . . ? 
O11 Ce1 O1W 90.21(5) . . ? 
O21 Ce1 O1W 84.91(5) . . ? 
O2W Ce1 O1W 139.24(5) . . ? 
O3W Ce1 O1W 71.36(5) . . ? 
O11 Ce1 O12 117.86(5) . 3_566 ? 
O21 Ce1 O12 74.09(5) . 3_566 ? 
O2W Ce1 O12 75.53(5) . 3_566 ? 
O3W Ce1 O12 137.03(5) . 3_566 ? 
O1W Ce1 O12 139.92(4) . 3_566 ? 
O11 Ce1 O22 75.93(5) . 3_666 ? 
O21 Ce1 O22 117.09(4) . 3_666 ? 
O2W Ce1 O22 138.13(5) . 3_666 ? 
O3W Ce1 O22 141.17(5) . 3_666 ? 
O1W Ce1 O22 78.07(5) . 3_666 ? 
O12 Ce1 O22 81.70(5) 3_566 3_666 ? 
O11 Ce1 O21 124.35(4) . 3_666 ? 
O21 Ce1 O21 67.65(5) . 3_666 ? 
O2W Ce1 O21 142.33(5) . 3_666 ? 
O3W Ce1 O21 134.13(5) . 3_666 ? 
O1W Ce1 O21 71.00(4) . 3_666 ? 
O12 Ce1 O21 69.53(5) 3_566 3_666 ? 
O22 Ce1 O21 49.48(4) 3_666 3_666 ? 
O11 Ce1 O11 69.18(5) . 3_566 ? 
O21 Ce1 O11 121.88(4) . 3_566 ? 
O2W Ce1 O11 69.35(4) . 3_566 ? 
O3W Ce1 O11 129.35(4) . 3_566 ? 
O1W Ce1 O11 144.49(4) . 3_566 ? 
O12 Ce1 O11 48.68(4) 3_566 3_566 ? 
O22 Ce1 O11 69.19(4) 3_666 3_566 ? 
O21 Ce1 O11 96.48(4) 3_666 3_566 ? 
Ce1 Ce1 Ce1 139.248(6) 3_666 3_566 ? 
C11 O11 Ce1 158.32(13) . . ? 
C11 O11 Ce1 90.81(11) . 3_566 ? 
Ce1 O11 Ce1 110.82(5) . 3_566 ? 
C11 O12 Ce1 101.19(12) . 3_566 ? 
O12 C11 O11 119.27(18) . . ? 
O12 C11 C12 120.11(18) . . ? 
O11 C11 C12 120.62(18) . . ?  
C11 C12 H12A 109.5 . . ? 
C11 C12 H12B 109.5 . . ? 
H12A C12 H12B 109.5 . . ? 
C11 C12 H12C 109.5 . . ? 
H12A C12 H12C 109.5 . . ? 
H12B C12 H12C 109.5 . . ? 
C21 O21 Ce1 154.24(13) . . ? 
C21 O21 Ce1 91.86(11) . 3_666 ? 
Ce1 O21 Ce1 112.35(5) . 3_666 ? 
C21 O22 Ce1 98.54(12) . 3_666 ? 
O22 C21 O21 118.83(18) . . ? 
O22 C21 C22 121.08(18) . . ? 
O21 C21 C22 120.08(18) . . ? 
C21 C22 H22A 109.5 . . ? 
C21 C22 H22B 109.5 . . ? 
H22A C22 H22B 109.5 . . ? 
C21 C22 H22C 109.5 . . ? 
H22A C22 H22C 109.5 . . ? 
H22B C22 H22C 109.5 . . ? 
C21 C22 H22D 105.8 . . ? 
C21 C22 H22E 105.6 . . ? 
H22D C22 H22E 109.5 . . ? 
C21 C22 H22F 116.6 . . ? 
H22D C22 H22F 109.5 . . ? 
H22E C22 H22F 109.5 . . ? 
Ce1 O1W H11W 123.0 . . ? 
Ce1 O1W H12W 110.2 . . ? 
H11W O1W H12W 105.0 . . ? 
Ce1 O2W H21W 122.8 . . ? 
Ce1 O2W H22W 126.7 . . ? 
H21W O2W H22W 105.0 . . ? 
Ce1 O3W H31W 124.0 . . ? 
Ce1 O3W H32W 128.5 . . ? 
H31W O3W H32W 105.0 . . ? 
  
loop_ 
 _geom_hbond_atom_site_label_D 
 _geom_hbond_atom_site_label_H 
 _geom_hbond_atom_site_label_A 
 _geom_hbond_distance_DH 
 _geom_hbond_distance_HA 
 _geom_hbond_distance_DA 
 _geom_hbond_angle_DHA 
 _geom_hbond_site_symmetry_A 
O1W H11W Br1  0.96 2.33 3.2689(14) 167.3 1_545 
O1W H12W O12  0.96 1.78 2.7143(19) 163.7 1_655 
O2W H21W O22  0.96 1.84 2.7160(19) 150.0 1_455 
O2W H22W Br1  0.96 2.29 3.2223(14) 164.8 . 
O3W H31W Br1  0.96 2.34 3.2950(15) 171.1 2_546 
O3W H32W Br1  0.96 2.27 3.2087(15) 165.9 1_545 
O1W H11W Br1  0.96 2.33 3.2689(14) 167.3 1_545 
O1W H12W O12  0.96 1.78 2.7143(19) 163.7 1_655 
O2W H21W O22  0.96 1.84 2.7160(19) 150.0 1_455 
O2W H22W Br1  0.96 2.29 3.2223(14) 164.8 . 
O3W H31W Br1  0.96 2.34 3.2950(15) 171.1 2_546 
O3W H32W Br1  0.96 2.27 3.2087(15) 165.9 1_545 
  
_refine_diff_density_max    0.603 
_refine_diff_density_min   -0.312 
_refine_diff_density_rms    0.078 
  
_shelx_res_file 
; 
  
    HR2021_51_0m_a.res created by SHELXL-2014/7 
  
  
TITL HR2021_51_0m_a.res in P2(1)/n 
CELL  0.71073   7.9597   8.0442  18.0642   90.000   96.732   90.000 
ZERR    4.000   0.0003   0.0003   0.0008    0.000    0.002    0.000 
LATT 1 
SYMM 1/2-X, 1/2+Y, 1/2-Z 
SFAC C  H  O  Br Ce 
UNIT 16 48 28 4 4 
LIST 4 ! automatically inserted. Change 6 to 4 for CHECKCIF!! 
OMIT -3 56 
OMIT 0 0 2 
L.S. 10 
ACTA 
BOND $H 
FMAP 2 
PLAN 6 
TEMP -173 
SIZE  0.125  0.185  0.252 
  
rem DFIX 0.96  0.0001 O1w H11w O1w H12w O2w H21w O2w H22w O3w H31w O3w H32w 
rem dfix 1.523  0.0001 H11w H12w H21w H22w H31w H32w 
FREE Ce1 C21_$6 
FREE Ce1 C11_$7 
EQIV $6 1-x, 1-y, 1-z 
BIND Ce1 Ce1_$6 
BIND Ce1 Ce1_$7 
EQIV $7 -x,1-y,1-z 
BIND Ce1 O11_$7 
ACTA 
HTAB 
EQIV $1 -x+3/2, y-1/2, -z+3/2 
EQIV $2 x, y-1, z 
HTAB O1W Br1_$2 
EQIV $3 x+1, y, z 
HTAB O1W O12_$3 
EQIV $4 x-1, y, z 
HTAB O2W O22_$4 
HTAB O2W Br1 
EQIV $5 -x+1/2, y-1/2, -z+3/2 
HTAB O3W Br1_$5 
HTAB O3W Br1_$2 
SIZE 0.074  0.120  0.465 
BOND $H 
EQIV $6   -x+1, -y+1, -z+1 
EQIV $7 -x, 1-y, 1-z 
BIND Ce1 Ce1_$6 
BIND Ce1 Ce1_$7 
FREE Ce1 C11_$7 
FMAP 2 
  
rem DFIX 0.96  0.0001 O1w H11w O1w H12w O2w H21w O2w H22w O3w H31w O3w H32w 
rem dfix 1.523  0.0001 H11w H12w H21w H22w H31w H32w 
rem ACTA 
HTAB 
EQIV $1 -x+3/2, y-1/2, -z+3/2 
EQIV $2 x, y-1, z 
HTAB O1W Br1_$2 
EQIV $3 x+1, y, z 
HTAB O1W O12_$3 
EQIV $4 x-1, y, z 
HTAB O2W O22_$4 
HTAB O2W Br1 
EQIV $5 -x+1/2, y-1/2, -z+3/2 
HTAB O3W Br1_$5 
HTAB O3W Br1_$2 
rem DFIX 0.98  0.0001 C22 H22d C22 H22e C22 H22f 
rem dfix 1.601 0.0001 H22d H22e H22d H22f H22e H22f 
PLAN 15 
TEMP -173 
WGHT    0.012000    1.102500 
FVAR       0.28543   0.08159   0.03673   0.05060   0.05866   0.06080   0.71966 
CE1   5    0.260444    0.459145    0.536902    11.00000    0.00691    0.01302 = 
         0.01411    0.00121    0.00151   -0.00095 
BR1   4    0.395157    0.958960    0.688355    11.00000    0.02110    0.01585 = 
         0.01946    0.00208    0.00097   -0.00299 
O11   3   -0.016809    0.334634    0.533232    11.00000    0.01059    0.01707 = 
         0.02224    0.00263    0.00236   -0.00396 
O12   3   -0.281481    0.256270    0.521762    11.00000    0.00894    0.01901 = 
         0.02871    0.00596    0.00267   -0.00152 
C11   1   -0.128899    0.228599    0.545609    11.00000    0.01209    0.01481 = 
         0.01723    0.00061    0.00340   -0.00106 
C12   1   -0.081323    0.074423    0.588827    11.00000    0.02319    0.02076 = 
         0.03274    0.01059   -0.00118   -0.00059 
AFIX 137 
H12A  2   -0.078013    0.097584    0.642239    11.00000   21.00000 
H12B  2    0.030419    0.036892    0.578080    11.00000   21.00000 
H12C  2   -0.165093   -0.012575    0.574575    11.00000   21.00000 
AFIX   0 
O21   3    0.547677    0.554441    0.574391    11.00000    0.01067    0.02034 = 
         0.01435   -0.00019   -0.00018   -0.00155 
O22   3    0.813194    0.624517    0.598552    11.00000    0.01008    0.02591 = 
         0.01909   -0.00253    0.00051   -0.00324 
C21   1    0.675620    0.587538    0.621844    11.00000    0.01222    0.01452 = 
         0.01613   -0.00179   -0.00038    0.00186 
C22   1    0.660753    0.578375    0.703107    11.00000    0.01669    0.03696 = 
         0.01595    0.00008   -0.00036    0.00297 
AFIX   3 
H22A  2    0.772583    0.558018    0.730476    71.00000   31.00000 
H22B  2    0.584198    0.487466    0.712645    71.00000   31.00000 
H22C  2    0.615690    0.683607    0.719709    71.00000   31.00000 
H22D  2    0.539484    0.585872    0.707610   -71.00000   31.00000 
H22E  2    0.718243    0.677650    0.724942   -71.00000   31.00000 
H22F  2    0.707843    0.479200    0.729375   -71.00000   31.00000 
AFIX   0 
O1W   3    0.392528    0.173950    0.534666    11.00000    0.01310    0.01617 = 
         0.02129    0.00284    0.00536   -0.00048 
AFIX   3 
H11W  2    0.391988    0.095759    0.574786    11.00000   41.00000 
H12W  2    0.509063    0.182915    0.526267    11.00000   41.00000 
AFIX   0 
O2W   3    0.154416    0.654348    0.627733    11.00000    0.01312    0.01669 = 
         0.02296   -0.00450    0.00099    0.00036 
AFIX   3 
H21W  2    0.036237    0.668881    0.632020    11.00000   51.00000 
H22W  2    0.206746    0.756301    0.645885    11.00000   51.00000 
AFIX   0 
O3W   3    0.285000    0.340842    0.665097    11.00000    0.02890    0.01884 = 
         0.01837    0.00333    0.00716    0.00620 
AFIX   3 
H31W  2    0.230390    0.386853    0.705094    11.00000   61.00000 
H32W  2    0.316778    0.230219    0.681027    11.00000   61.00000 
AFIX   0 
HKLF 4 
  
REM  HR2021_51_0m_a.res in P2(1)/n 
REM R1 =  0.0142 for    2527 Fo > 4sig(Fo)  and  0.0173 for all    2770 data 
REM    125 parameters refined using      0 restraints 
  
END 
  
WGHT      0.0120      1.1025 
  
REM Instructions for potential hydrogen bonds 
HTAB C22 Br1_$1 
HTAB C22 Br1 
HTAB O1W Br1_$2 
HTAB O1W O12_$3 
HTAB O2W O22_$4 
HTAB O2W Br1 
HTAB O3W Br1_$5 
HTAB O3W Br1_$2 
  
REM Highest difference peak  0.603,  deepest hole -0.312,  1-sigma level  0.078 
Q1    1   0.2619  0.4444  0.5887  11.00000  0.05    0.60 
Q2    1   0.2545  0.4429  0.4868  11.00000  0.05    0.60 
Q3    1  -0.1896  0.0586  0.6256  11.00000  0.05    0.36 
Q4    1   0.2540  0.3729  0.6885  11.00000  0.05    0.32 
Q5    1   0.0555  0.0662  0.6119  11.00000  0.05    0.32 
Q6    1   0.3692  0.9459  0.6378  11.00000  0.05    0.32 
Q7    1   0.6702  0.5629  0.6588  11.00000  0.05    0.32 
Q8    1   0.4328  0.9239  0.7397  11.00000  0.05    0.30 
Q9    1   0.8356  0.5624  0.5629  11.00000  0.05    0.30 
Q10   1   0.4016  0.9509  0.7464  11.00000  0.05    0.29 
Q11   1  -0.0767 -0.0319  0.5389  11.00000  0.05    0.29 
Q12   1   0.5517  0.5546  0.5386  11.00000  0.05    0.28 
Q13   1  -0.1047  0.1492  0.5645  11.00000  0.05    0.28 
Q14   1   0.6144  0.5722  0.5963  11.00000  0.05    0.28 
Q15   1   0.7735  0.5851  0.6113  11.00000  0.05    0.27 
; 
_shelx_res_checksum    3652 
  
_shelx_hkl_file 
; 
  -1   0   0    2.00    1.10 
  -1   0   0    3.30    1.10 
  -1   0   0    2.60    1.10 
  -1   0   0    3.90    1.20 
  -1   0   0    5.00    1.20 
  -1   0   0    8.50    1.90 
  -1   0   0    2.20    0.90 
   1   0   0    7.90    1.80 
   1   0   0    1.80    0.90 
   1   0   0    2.80    1.00 
   1   0   0    3.50    1.10 
   1   0   0    0.00    0.60 
   1   0   0    4.00    1.40 
   1   0   0    6.00    1.30 
   1   0   0    2.30    1.10 
   1   0   0    5.60    1.50 
   1   0   0    1.70    0.80 
   1   0   0    3.80    1.10 
   1   0   0    1.10    0.70 
   1   0   0    2.70    1.10 
   1   0   0    1.60    0.70 
   1   0   0    1.10    0.60 
   1   0   0    2.00    1.00 
  -1   0   0    3.10    1.40 
  -1   0   0    3.90    1.30 
  -1   0   0    4.20    1.50 
  -1   0   0    2.20    1.00 
  -1   0   0    5.30    1.30 
  -1   0   0    4.10    1.20 
  -1   0   0    1.00    0.80 
  -1   0   0    3.70    1.20 
  -1   0   0    0.70    0.60 
  -1   0   0    5.90    1.40 
  -1   0   0    0.30    0.60 
  -1   0   0    2.60    1.10 
  -2   0   0 3424.96  143.99 
   2   0   0 3536.45  143.49 
   2   0   0 3519.55  143.39 
   2   0   0 3408.56  144.59 
  -2   0   0 3604.04  144.49 
  -2   0   0 3508.75  144.59 
  -2   0   0 3384.06  143.19 
  -2   0   0 3451.65  143.89 
  -2   0   0 3458.65  144.19 
  -2   0   0 3495.55  143.49 
  -2   0   0 3400.56  143.79 
  -2   0   0 3453.35  142.99 
  -2   0   0 3507.85  142.69 
  -2   0   0 3545.45  144.39 
   2   0   0 3414.36  143.49 
   2   0   0 3490.45  143.19 
   2   0   0 3595.44  143.39 
  -2   0   0 3590.34  142.39 
  -2   0   0 3408.06  143.89 
  -2   0   0 3410.86  143.39 
  -2   0   0 3336.17  144.19 
  -2   0   0 3499.95  143.59 
  -2   0   0 3509.05  143.19 
  -2   0   0 3547.15  145.09 
  -2   0   0 3395.16  143.09 
   2   0   0 3458.65  144.59 
   2   0   0 3506.55  143.79 
   2   0   0 3484.95  143.29 
   2   0   0 3524.95  144.29 
   2   0   0 3403.06  143.19 
   2   0   0 3352.26  143.79 
   2   0   0 3413.86  144.09 
   2   0   0 3526.75  143.19 
   2   0   0 3643.14  144.49 
   2   0   0 3313.47  144.09 
   2   0   0 3575.44  144.59 
   2   0   0 3470.05  142.49 
   2   0   0 3414.36  143.19 
   2   0   0 3420.36  144.29 
  -2   0   0 3479.05  144.69 
  -2   0   0 3334.97  143.89 
  -2   0   0 3342.67  144.19 
  -2   0   0 3491.05  143.99 
  -2   0   0 3533.95  143.39 
   3   0   0    1.00    2.70 
   3   0   0   -1.10    1.90 
   3   0   0    3.60    2.30 
   3   0   0    2.50    2.30 
   3   0   0    4.90    2.50 
   3   0   0    3.20    3.60 
  -3   0   0    0.20    2.10 
  -3   0   0    2.10    2.60 
   3   0   0    0.30    2.30 
   3   0   0   -0.10    2.70 
   3   0   0    2.70    3.40 
   3   0   0    1.90    2.00 
  -3   0   0    2.30    2.20 
  -3   0   0    2.20    2.60 
  -3   0   0    3.70    2.50 
  -3   0   0    0.00    1.90 
  -3   0   0    2.10    2.10 
  -3   0   0    1.70    2.80 
  -3   0   0   -0.60    2.30 
  -3   0   0    0.20    1.70 
   3   0   0    0.00    2.80 
   3   0   0   -1.00    2.10 
   3   0   0    0.50    2.40 
   3   0   0    5.50    3.10 
   3   0   0    1.20    2.20 
   3   0   0   -1.30    2.10 
   3   0   0    0.80    2.40 
  -3   0   0   -0.60    2.30 
  -3   0   0    3.60    3.40 
  -3   0   0    0.70    3.90 
  -3   0   0   -0.20    1.50 
   3   0   0    1.50    2.20 
   3   0   0    0.40    2.10 
  -3   0   0    1.20    2.20 
  -3   0   0    3.20    2.20 
  -3   0   0   -1.30    1.80 
  -3   0   0    1.20    2.50 
  -3   0   0    6.60    3.10 
  -3   0   0   -0.60    2.40 
  -4   0   0  446.56   23.10 
  -4   0   0  426.96   23.50 
   4   0   0  463.65   24.20 
  -4   0   0  451.35   25.20 
  -4   0   0  433.56   25.00 
   4   0   0  433.96   24.30 
   4   0   0  404.56   23.40 
   4   0   0  455.05   25.70 
   4   0   0  444.96   23.80 
   4   0   0  406.86   24.90 
   4   0   0  429.46   26.60 
   4   0   0  380.26   25.30 
   4   0   0  475.45   25.90 
   4   0   0  418.76   25.80 
   4   0   0  419.16   23.80 
  -4   0   0  481.75   24.80 
  -4   0   0  412.26   23.90 
  -4   0   0  429.06   26.00 
  -4   0   0  439.36   22.00 
  -4   0   0  425.66   23.40 
  -4   0   0  422.36   25.80 
  -4   0   0  402.66   25.90 
  -4   0   0  454.65   25.90 
   4   0   0  401.16   23.60 
   4   0   0  401.46   25.80 
   4   0   0  402.56   23.50 
  -4   0   0  455.25   25.10 
   4   0   0  420.86   24.20 
  -4   0   0  430.46   24.20 
   5   0   0    0.00    3.00 
   5   0   0    2.60    4.60 
   5   0   0    0.90    3.10 
  -5   0   0    0.70    4.10 
  -5   0   0   -1.60    3.90 
  -5   0   0   -2.50    3.90 
  -5   0   0   -0.10    3.60 
  -5   0   0    2.20    3.30 
  -5   0   0    1.00    3.60 
  -5   0   0    4.20    4.10 
  -5   0   0    5.40    4.10 
   5   0   0    3.60    3.80 
  -5   0   0   -1.00    3.30 
  -5   0   0   -1.30    3.50 
   5   0   0    8.80    4.80 
   5   0   0   -1.30    4.00 
   5   0   0    5.20    5.40 
   5   0   0    2.90    4.10 
   5   0   0    6.00    5.50 
  -5   0   0    0.90    4.50 
   5   0   0    2.60    3.20 
   5   0   0   -2.60    4.50 
   5   0   0   -4.70    3.90 
   6   0   0 1855.41   84.39 
   6   0   0 1788.42   89.19 
  -6   0   0 1712.43   88.39 
  -6   0   0 1869.81   83.59 
   6   0   0 1835.72   85.29 
   6   0   0 1753.52   84.99 
   6   0   0 1878.81   87.79 
  -6   0   0 1932.51   87.69 
  -6   0   0 1945.11   88.79 
  -6   0   0 1979.60   86.29 
  -6   0   0 1870.51   82.29 
  -6   0   0 1882.71   85.69 
  -6   0   0 1791.72   88.79 
  -6   0   0 1790.52   89.89 
   6   0   0 1855.51   88.49 
   6   0   0 1693.33   88.99 
   6   0   0 1850.11   84.89 
   6   0   0 1750.72   89.19 
   6   0   0 1845.82   86.09 
  -6   0   0 1854.51   87.19 
   6   0   0 1742.83   87.29 
   6   0   0 1813.92   84.19 
  -6   0   0 1881.21   86.39 
  -6   0   0 1879.51   86.09 
   7   0   0   -1.70    6.00 
   7   0   0    4.80    6.20 
   7   0   0   12.10    6.20 
   7   0   0   -5.30    7.70 
  -7   0   0   -4.30    4.70 
  -7   0   0    6.30    6.20 
   7   0   0   -2.10    6.30 
   7   0   0    1.20    5.60 
   7   0   0    3.60    6.70 
  -7   0   0   11.00    7.80 
   7   0   0    6.20    6.80 
   7   0   0    1.60    8.80 
  -7   0   0    2.30    4.80 
  -7   0   0    1.30    5.50 
  -7   0   0   -1.10    4.30 
   7   0   0    5.40    6.60 
   7   0   0   11.90    8.20 
  -7   0   0   14.10    7.10 
  -7   0   0    9.10    7.00 
  -7   0   0   12.60    7.90 
  -7   0   0    1.60    6.20 
  -7   0   0    2.80    6.00 
  -7   0   0   10.00    7.60 
   7   0   0    3.80    5.40 
  -8   0   0  977.30   52.19 
  -8   0   0  987.70   55.09 
   8   0   0  891.11   48.40 
  -8   0   0 1036.80   60.09 
  -8   0   0  970.70   54.59 
   8   0   0  887.61   54.49 
  -8   0   0  970.10   60.39 
   8   0   0 1039.20   58.79 
   8   0   0  959.60   54.19 
   8   0   0  970.20   60.79 
   8   0   0  971.90   52.49 
   8   0   0  975.60   57.49 
   8   0   0  960.60   53.99 
  -8   0   0 1041.50   54.49 
  -8   0   0  986.70   59.99 
  -8   0   0 1041.00   57.09 
  -8   0   0  997.20   57.99 
   8   0   0 1039.10   56.79 
   8   0   0  873.61   55.79 
  -8   0   0  984.40   50.39 
  -8   0   0 1048.10   54.79 
   8   0   0  908.51   58.69 
   8   0   0  965.90   61.09 
  -8   0   0  916.71   55.89 
  -9   0   0    0.30    8.40 
  -9   0   0   11.50    9.10 
  -9   0   0    7.70    9.20 
  -9   0   0    7.50   10.00 
  -9   0   0  -12.20    7.50 
  -9   0   0   -4.80    7.70 
   9   0   0   -3.70    8.40 
   9   0   0   -2.80    6.80 
  -9   0   0    6.40    9.40 
  -9   0   0    6.50    9.60 
   9   0   0    5.30   12.30 
   9   0   0    0.90    7.20 
  -9   0   0   -2.80    6.20 
  -9   0   0    4.00    6.70 
   9   0   0   21.80   13.70 
   9   0   0   23.60   14.90 
   9   0   0   -6.90    5.60 
   9   0   0   -3.80    8.20 
   9   0   0   -8.30    5.80 
   9   0   0   -6.40    9.20 
  -9   0   0   -4.40    7.40 
 -10   0   0   97.09   22.90 
 -10   0   0  116.59   20.00 
 -10   0   0  106.69   19.80 
 -10   0   0   40.50   16.20 
  10   0   0  107.79   20.40 
  10   0   0  107.59   27.10 
  10   0   0  104.59   22.50 
  10   0   0   89.69   20.20 
  10   0   0  117.09   20.60 
 -10   0   0  145.49   24.60 
 -10   0   0   79.39   21.80 
  10   0   0   86.79   23.30 
  10   0   0  136.09   29.60 
 -10   0   0  134.59   22.90 
  10   0   0  102.09   18.00 
 -10   0   0  135.29   24.30 
   0  -1   0    5.30    1.40 
   0  -1   0    4.30    0.90 
   0  -1   0    8.70    2.10 
   0  -1   0    2.70    1.00 
   0  -1   0    6.70    1.60 
   0  -1   0    4.40    1.20 
   0  -1   0    4.60    1.40 
   0  -1   0    4.90    1.40 
   0  -1   0    3.20    1.10 
   0  -1   0    4.80    1.30 
   0  -1   0    6.20    1.80 
   0  -1   0    2.80    1.00 
   0  -1   0    5.80    1.50 
   0  -1   0    3.30    1.10 
   0  -1   0    4.60    0.90 
   0  -1   0    4.70    1.20 
   0  -1   0    7.10    1.60 
   0  -1   0    3.80    1.30 
   0  -1   0    7.60    1.80 
   0  -1   0    6.50    1.40 
   0   1   0    0.30    0.60 
   0   1   0    0.70    0.60 
   0   1   0    3.40    1.10 
   1  -1   0  306.57   15.30 
   1  -1   0  301.67   14.20 
   1  -1   0  282.57   14.60 
  -1  -1   0  259.67   14.00 
  -1  -1   0  262.07   14.70 
   1  -1   0  273.87   15.00 
   1  -1   0  278.57   14.30 
  -1  -1   0  268.27   13.60 
   1  -1   0  285.87   14.90 
  -1  -1   0  275.67   13.00 
  -1  -1   0  238.68   13.70 
  -1  -1   0  287.47   14.00 
  -1  -1   0  293.67   14.20 
  -1  -1   0  281.47   14.60 
  -1  -1   0  243.88   14.40 
  -1  -1   0  275.37   14.10 
   1  -1   0  294.97   14.60 
   1  -1   0  300.17   13.40 
   1  -1   0  299.27   13.80 
   1  -1   0  298.07   14.30 
  -1  -1   0  261.77   13.40 
   1  -1   0  319.47   15.70 
   1  -1   0  297.67   13.00 
  -1  -1   0  271.67   13.90 
   1  -1   0  303.67   15.40 
  -1  -1   0  278.77   13.60 
   1  -1   0  294.97   15.20 
  -1  -1   0  277.37   12.70 
  -1  -1   0  264.57   12.80 
  -1  -1   0  260.17   12.00 
  -1  -1   0  264.67   14.60 
   1  -1   0  290.87   12.70 
   1  -1   0  273.07   12.70 
  -1  -1   0  254.97   12.80 
  -1  -1   0  267.37   12.40 
   1  -1   0  305.37   14.20 
   1  -1   0  292.67   13.50 
   1  -1   0  272.97   14.50 
   1  -1   0  313.57   14.00 
   1  -1   0  276.47   13.30 
   1  -1   0  307.17   15.30 
   1  -1   0  286.67   15.00 
  -1  -1   0  283.57   16.10 
  -1  -1   0  274.27   14.10 
  -1  -1   0  303.47   14.80 
   1  -1   0  273.67   13.90 
   1  -1   0  281.87   13.80 
   1  -1   0  295.47   15.00 
  -1  -1   0  259.97   13.10 
   1  -1   0  271.37   14.10 
   1   1   0  283.07   12.80 
  -1   1   0  300.97   13.90 
  -1   1   0  284.97   12.90 
  -1   1   0  287.67   14.20 
  -1   1   0  283.57   12.60 
  -1   1   0  293.17   15.10 
  -1   1   0  289.07   14.60 
   1   1   0  260.07   14.70 
   1   1   0  270.37   15.70 
  -1   1   0  280.17   13.20 
   1   1   0  275.77   13.80 
   1   1   0  261.47   14.50 
   1   1   0  258.87   13.20 
  -1   1   0  280.97   14.00 
  -1   1   0  308.07   15.60 
  -1   1   0  311.97   13.70 
  -1   1   0  299.47   15.10 
  -1   1   0  268.67   13.80 
   1   1   0  251.47   13.40 
   1   1   0  284.27   13.90 
   1   1   0  255.67   13.90 
   1   1   0  268.67   13.10 
  -1   1   0  278.97   13.40 
  -1   1   0  281.67   14.40 
   1   1   0  247.58   12.30 
   1   1   0  264.17   13.00 
  -1   1   0  279.77   14.30 
  -1   1   0  284.57   15.00 
   1   1   0  281.87   15.00 
   1   1   0  276.47   12.80 
  -1   1   0  312.07   15.00 
   1   1   0  296.27   15.00 
   1   1   0  269.87   14.80 
  -1   1   0  287.27   13.60 
  -1   1   0  297.57   14.30 
  -1   1   0  292.97   13.90 
  -1   1   0  289.77   13.50 
  -1   1   0  283.87   15.20 
  -1   1   0  303.27   13.50 
  -1   1   0  269.87   14.50 
  -1   1   0  288.97   15.00 
  -1   1   0  307.87   15.50 
   2  -1   0  318.27   17.10 
   2  -1   0  333.07   16.10 
   2  -1   0  339.27   17.20 
   2  -1   0  320.07   14.90 
   2  -1   0  319.37   14.00 
   2  -1   0  320.17   18.30 
  -2  -1   0  304.47   17.40 
   2  -1   0  321.67   17.30 
   2  -1   0  311.17   18.30 
   2  -1   0  328.47   17.70 
   2  -1   0  288.87   17.40 
   2  -1   0  331.97   17.50 
  -2  -1   0  315.87   15.10 
  -2  -1   0  329.57   18.10 
  -2  -1   0  320.87   14.70 
  -2  -1   0  362.16   16.40 
  -2  -1   0  322.17   16.90 
  -2  -1   0  330.37   16.80 
  -2  -1   0  316.67   18.30 
   2  -1   0  293.17   17.80 
   2  -1   0  331.27   17.80 
  -2  -1   0  297.57   16.60 
  -2  -1   0  323.17   17.10 
  -2  -1   0  327.87   16.80 
  -2  -1   0  301.47   17.20 
   2  -1   0  337.57   18.70 
   2  -1   0  325.57   18.30 
   2  -1   0  342.07   17.30 
  -2  -1   0  320.37   16.60 
  -2  -1   0  313.67   17.50 
   2  -1   0  324.77   18.20 
   2  -1   0  331.87   16.40 
   2  -1   0  327.47   18.00 
  -2  -1   0  322.77   16.10 
   2  -1   0  327.07   18.00 
   2  -1   0  326.77   16.80 
   2  -1   0  309.67   17.60 
  -2  -1   0  314.67   16.60 
  -2  -1   0  292.27   15.20 
  -2  -1   0  323.97   18.50 
   2  -1   0  318.87   17.40 
   2  -1   0  332.07   16.30 
  -2  -1   0  306.17   16.80 
  -2  -1   0  326.87   19.00 
  -2  -1   0  304.77   15.20 
   2  -1   0  328.07   18.10 
   2  -1   0  343.27   17.90 
   2   1   0  321.17   17.50 
   2   1   0  342.07   16.60 
  -2   1   0  330.77   18.00 
  -2   1   0  321.87   17.20 
   2   1   0  309.37   15.30 
   2   1   0  289.27   14.60 
   2   1   0  329.67   17.20 
   2   1   0  317.27   17.00 
  -2   1   0  321.47   17.40 
  -2   1   0  323.17   15.60 
   2   1   0  327.07   19.60 
  -2   1   0  319.57   15.20 
   2   1   0  325.27   15.50 
  -2   1   0  338.67   18.50 
  -2   1   0  322.77   17.10 
   2   1   0  303.17   16.90 
  -2   1   0  325.37   14.50 
   2   1   0  307.27   14.60 
  -2   1   0  312.17   16.50 
   2   1   0  320.07   16.60 
  -2   1   0  346.27   17.70 
  -2   1   0  332.77   17.00 
   2   1   0  345.87   18.50 
  -2   1   0  330.87   18.30 
  -2   1   0  340.77   18.30 
  -2   1   0  333.17   16.30 
  -2   1   0  322.27   18.40 
  -2   1   0  315.47   18.70 
  -2   1   0  347.77   17.20 
   2   1   0  311.27   18.00 
   2   1   0  337.27   17.80 
  -2   1   0  337.07   18.60 
   2   1   0  341.67   18.50 
   2   1   0  315.27   18.30 
   2   1   0  301.57   16.50 
   2   1   0  330.27   17.90 
  -2   1   0  342.47   17.70 
  -2   1   0  327.87   18.00 
   2   1   0  311.87   17.80 
  -2   1   0  314.77   16.70 
   2   1   0  314.17   16.40 
   2   1   0  316.87   15.10 
  -2   1   0  357.66   18.80 
  -2   1   0  333.47   18.80 
   2   1   0  311.27   16.30 
  -2   1   0  320.07   18.60 
  -2   1   0  326.97   17.00 
   2   1   0  326.57   15.50 
   2   1   0  324.87   17.80 
   3  -1   0    9.30    4.80 
   3  -1   0   11.00    4.10 
   3  -1   0   -0.70    2.00 
  -3  -1   0    7.30    3.80 
  -3  -1   0    3.70    3.20 
  -3  -1   0   16.60    4.80 
   3  -1   0    7.40    3.10 
   3  -1   0    3.80    3.00 
  -3  -1   0    6.60    2.30 
  -3  -1   0    8.60    3.30 
  -3  -1   0    7.80    3.60 
  -3  -1   0    7.40    2.60 
   3  -1   0    3.10    2.70 
   3  -1   0    5.80    2.40 
   3  -1   0    6.10    4.10 
   3  -1   0    7.40    2.10 
   3  -1   0    0.10    2.40 
  -3  -1   0   10.90    3.60 
  -3  -1   0    7.20    2.50 
   3  -1   0    6.60    3.70 
   3  -1   0    4.30    3.60 
   3  -1   0   10.80    2.50 
  -3  -1   0   16.30    4.80 
  -3  -1   0    1.00    2.20 
  -3  -1   0    7.90    3.00 
   3  -1   0    9.50    3.80 
   3  -1   0    8.90    3.90 
  -3  -1   0    4.90    2.50 
  -3  -1   0    8.50    2.60 
   3  -1   0    3.10    3.00 
  -3  -1   0    4.10    2.60 
  -3  -1   0    7.00    3.40 
   3  -1   0    0.50    2.60 
   3  -1   0    5.90    3.40 
  -3   1   0    2.20    1.90 
   3   1   0    6.40    3.30 
   3   1   0    5.50    4.50 
   3   1   0    6.00    2.30 
  -3   1   0    6.30    2.50 
   3   1   0    2.70    2.90 
   3   1   0    8.30    4.40 
  -3   1   0    5.50    2.80 
  -3   1   0    4.90    3.10 
   3   1   0    9.10    4.50 
   3   1   0    5.80    2.20 
   3   1   0    4.80    5.20 
   3   1   0    3.40    5.80 
   3   1   0    8.40    2.80 
  -3   1   0   11.00    3.80 
  -3   1   0    5.90    1.70 
   3   1   0    9.20    3.70 
  -3   1   0    8.20    3.90 
  -3   1   0    7.40    2.10 
  -3   1   0   11.30    4.30 
  -3   1   0    9.30    4.00 
   3   1   0    6.80    3.40 
   3   1   0    6.30    2.60 
   3   1   0   11.60    4.60 
  -3   1   0    5.70    1.90 
  -3   1   0    2.30    3.10 
   3   1   0    7.30    4.10 
   3   1   0    8.00    2.70 
   3   1   0    6.80    4.00 
   3   1   0   -0.80    3.20 
  -3   1   0    7.80    3.20 
  -3   1   0   11.10    4.20 
  -3   1   0    3.90    2.90 
   3   1   0   11.10    6.40 
  -3   1   0    0.60    2.50 
  -3   1   0    8.50    4.00 
  -3   1   0    5.40    3.20 
  -3   1   0    8.30    3.40 
   3   1   0    6.10    3.50 
  -3   1   0   12.90    4.70 
  -4  -1   0    1.00    3.10 
  -4  -1   0    2.00    2.50 
   4  -1   0    1.00    3.40 
   4  -1   0    1.70    3.20 
   4  -1   0    1.60    4.10 
   4  -1   0   -2.70    3.20 
  -4  -1   0    2.60    3.90 
   4  -1   0   -1.00    4.00 
  -4  -1   0   -0.20    3.70 
  -4  -1   0    3.90    4.00 
   4  -1   0    3.50    4.60 
  -4  -1   0    5.60    3.00 
   4  -1   0    1.00    3.70 
  -4  -1   0   -0.40    2.80 
   4  -1   0    1.90    2.20 
   4  -1   0    3.70    3.70 
   4  -1   0    2.30    2.20 
  -4  -1   0    3.00    2.60 
  -4  -1   0   -1.30    2.60 
   4  -1   0  -10.40    3.40 
  -4  -1   0   -0.90    2.80 
  -4  -1   0   -1.00    3.90 
  -4  -1   0    1.30    4.40 
   4  -1   0   -1.00    4.50 
  -4   1   0    2.60    4.70 
   4   1   0    0.70    4.90 
   4   1   0    3.30    3.70 
   4   1   0    4.50    7.60 
   4   1   0    1.70    3.90 
  -4   1   0    2.60    2.50 
  -4   1   0    1.80    1.90 
  -4   1   0   -1.60    2.90 
   4   1   0   -9.20    3.70 
  -4   1   0    1.70    4.00 
   4   1   0    3.50    4.70 
  -4   1   0   -0.30    3.70 
   4   1   0    3.30    3.90 
   4   1   0    1.40    3.00 
   4   1   0    5.60    5.20 
   4   1   0    0.50    4.00 
   4   1   0    4.40    2.90 
  -4   1   0    2.90    4.60 
   4   1   0    2.90    6.10 
   4   1   0    1.30    2.40 
   4   1   0   -6.20    2.60 
  -4   1   0    4.20    4.00 
  -4   1   0    1.10    3.10 
  -4   1   0   -3.10    2.10 
   4   1   0   -5.80    2.80 
  -4   1   0    7.10    4.90 
   4   1   0   -4.70    5.20 
  -4   1   0   -1.30    3.40 
  -4   1   0    5.20    4.20 
   4   1   0    3.20    2.80 
  -4   1   0    1.20    2.60 
  -5  -1   0 1146.99   54.39 
  -5  -1   0 1110.49   51.99 
   5  -1   0 1171.88   55.59 
   5  -1   0 1084.09   54.79 
  -5  -1   0 1119.59   54.79 
   5  -1   0 1052.09   54.39 
   5  -1   0 1053.19   56.39 
   5  -1   0 1140.39   56.59 
  -5  -1   0 1094.29   54.79 
  -5  -1   0 1052.79   54.09 
  -5  -1   0 1101.49   56.19 
   5  -1   0 1090.19   50.59 
  -5  -1   0 1157.28   55.09 
  -5  -1   0 1120.49   51.49 
   5  -1   0 1141.19   55.49 
  -5  -1   0 1123.59   52.59 
   5  -1   0 1074.79   56.99 
  -5  -1   0 1157.78   57.19 
   5  -1   0 1124.59   56.89 
   5  -1   0 1151.58   53.19 
   5  -1   0 1065.79   56.59 
  -5  -1   0 1159.18   53.59 
   5   1   0 1147.29   56.99 
  -5   1   0 1069.69   50.59 
   5   1   0 1109.69   53.99 
  -5   1   0 1140.19   50.59 
  -5   1   0 1118.49   56.09 
  -5   1   0 1116.39   55.79 
  -5   1   0 1221.28   56.19 
   5   1   0 1192.28   58.79 
   5   1   0 1062.99   51.59 
  -5   1   0 1171.48   58.49 
   5   1   0 1201.08   58.39 
  -5   1   0 1198.18   52.19 
  -5   1   0 1123.59   54.09 
  -5   1   0 1182.18   58.29 
   5   1   0 1039.90   54.89 
   5   1   0 1071.39   52.39 
  -5   1   0 1119.19   56.29 
   5   1   0 1112.09   54.19 
  -5   1   0 1037.50   57.89 
   5   1   0 1100.39   55.09 
   5   1   0 1103.69   52.89 
  -5   1   0 1085.29   48.80 
   5   1   0 1213.18   58.59 
   5   1   0 1173.98   56.99 
   5   1   0 1037.20   55.29 
   5   1   0 1080.89   55.29 
  -5   1   0 1140.09   57.99 
   5   1   0 1099.69   52.89 
  -5   1   0 1183.58   57.19 
   6  -1   0    9.00    6.20 
  -6  -1   0   16.60    7.50 
   6  -1   0    6.10    5.50 
   6  -1   0    4.40    5.40 
  -6  -1   0   11.20    6.50 
   6  -1   0    1.30    6.10 
  -6  -1   0   14.60    6.70 
  -6  -1   0   -3.60    5.00 
  -6  -1   0    5.00    5.20 
   6  -1   0    1.70    5.90 
   6  -1   0   10.70    5.50 
   6  -1   0   -2.00    4.60 
   6  -1   0    6.20    6.60 
  -6  -1   0    0.90    4.60 
   6  -1   0   -1.00    6.00 
  -6  -1   0    7.70    6.50 
  -6  -1   0    3.60    4.70 
  -6  -1   0    5.80    4.70 
   6  -1   0    2.10    5.90 
  -6  -1   0    4.10    4.70 
  -6  -1   0    2.50    5.00 
   6  -1   0    7.30    6.20 
  -6   1   0    5.50    5.50 
   6   1   0    3.80    7.60 
  -6   1   0    4.10    3.80 
  -6   1   0    8.90    6.70 
  -6   1   0   14.20    7.00 
   6   1   0    4.70    5.60 
  -6   1   0    6.70    4.30 
   6   1   0   10.30    7.40 
   6   1   0    4.80    6.50 
   6   1   0  -11.60    8.10 
   6   1   0   -2.60    6.10 
  -6   1   0    1.40    3.30 
  -6   1   0   -1.80    4.80 
  -6   1   0    1.60    5.60 
   6   1   0    5.30    5.20 
   6   1   0    7.50    8.30 
   6   1   0   -9.70    3.60 
   6   1   0    4.60    5.80 
  -6   1   0   -0.70    5.20 
  -6   1   0    5.90    5.30 
  -6   1   0    4.10    5.00 
  -6   1   0   12.40    8.10 
  -6   1   0    8.80    5.90 
   6   1   0    8.60    5.90 
   6   1   0   12.00    6.10 
  -6   1   0   -7.30    4.00 
  -7  -1   0  279.97   28.80 
   7  -1   0  231.08   29.50 
   7  -1   0  292.27   30.60 
   7  -1   0  269.67   27.60 
  -7  -1   0  303.07   29.80 
   7  -1   0  321.87   25.40 
  -7  -1   0  308.07   27.70 
  -7  -1   0  270.57   25.40 
  -7  -1   0  298.47   23.70 
   7  -1   0  276.47   27.00 
  -7  -1   0  259.87   20.20 
  -7  -1   0  243.48   25.50 
  -7  -1   0  211.28   22.10 
  -7  -1   0  260.97   25.60 
  -7  -1   0  283.57   29.60 
   7  -1   0  280.07   28.70 
   7  -1   0  308.37   24.30 
  -7  -1   0  272.57   20.90 
   7  -1   0  334.47   32.90 
  -7  -1   0  287.77   20.30 
   7  -1   0  302.57   23.40 
   7  -1   0  269.17   21.00 
   7  -1   0  280.77   26.50 
   7   1   0  246.58   20.90 
   7   1   0  239.98   27.40 
   7   1   0  276.27   26.40 
  -7   1   0  269.27   25.50 
  -7   1   0  317.57   33.90 
   7   1   0  289.27   24.10 
   7   1   0  267.97   21.20 
   7   1   0  274.27   27.10 
  -7   1   0  300.37   29.00 
  -7   1   0  308.47   19.40 
  -7   1   0  231.78   27.50 
  -7   1   0  294.97   24.30 
   7   1   0  282.37   27.40 
   7   1   0  262.27   21.50 
   7   1   0  302.07   33.20 
   7   1   0  287.37   31.40 
   7   1   0  261.17   29.10 
  -7   1   0  242.28   19.40 
   7   1   0  320.27   32.30 
  -7   1   0  302.77   28.00 
  -7   1   0  301.07   31.00 
  -7   1   0  240.18   25.60 
  -7   1   0  256.47   25.40 
   7   1   0  298.97   27.50 
  -7   1   0  308.47   30.50 
  -8  -1   0    2.80    6.60 
   8  -1   0   10.90    7.40 
   8  -1   0   18.20   10.50 
   8  -1   0    0.20    7.70 
  -8  -1   0    1.60    8.50 
  -8  -1   0    1.20    7.40 
  -8  -1   0    4.80    7.20 
   8  -1   0    3.90    9.20 
   8  -1   0    1.50    7.70 
   8  -1   0   -1.80    7.60 
   8  -1   0   -3.90    6.00 
   8  -1   0   -1.80    7.60 
  -8  -1   0   11.70    7.00 
  -8  -1   0    4.50    8.70 
   8  -1   0   17.70    9.20 
  -8  -1   0    3.20    6.20 
  -8  -1   0   12.00    8.10 
   8  -1   0    4.10    7.60 
   8  -1   0   12.90   11.00 
  -8  -1   0   10.70    8.10 
  -8  -1   0   21.60   10.80 
  -8  -1   0   15.00   10.20 
   8   1   0   25.40   10.40 
   8   1   0   15.60   12.60 
   8   1   0    5.80   11.70 
  -8   1   0   -2.30    7.00 
  -8   1   0    4.30    6.50 
   8   1   0    5.70    8.30 
  -8   1   0   13.60    9.70 
  -8   1   0    8.50    8.90 
   8   1   0   -4.50    6.10 
   8   1   0   17.80    9.40 
   8   1   0    9.90    5.00 
  -8   1   0   -4.60    6.10 
  -8   1   0   15.70    6.50 
  -8   1   0   14.70    9.00 
   8   1   0   -1.00    8.50 
  -8   1   0   10.80   10.10 
  -8   1   0   18.20    7.20 
   8   1   0   18.90    8.70 
   8   1   0   -4.50    5.50 
   8   1   0   10.10   12.00 
   8   1   0    3.20    6.50 
  -8   1   0   26.80   11.20 
   8   1   0   15.90   11.20 
  -8   1   0    8.10    9.00 
  -8   1   0   -6.00    6.80 
   9  -1   0   -5.90    7.00 
  -9  -1   0   12.10    8.20 
   9  -1   0    9.10   12.00 
  -9  -1   0    4.70    9.40 
   9  -1   0   12.90   11.60 
   9  -1   0   -2.20    9.10 
   9  -1   0    9.60    7.80 
  -9  -1   0    9.70    9.50 
  -9  -1   0   -2.10    8.10 
  -9  -1   0   11.10   10.10 
   9  -1   0    5.20   13.10 
   9  -1   0    6.90    8.80 
   9  -1   0   11.10   10.10 
   9  -1   0    1.90    6.70 
  -9  -1   0   -8.90    8.70 
   9  -1   0   21.30    8.40 
   9  -1   0    2.60   12.60 
  -9  -1   0    0.10    6.40 
  -9  -1   0    1.80    7.50 
  -9  -1   0    8.70    9.90 
  -9  -1   0    7.40    8.40 
  -9   1   0    7.20    6.30 
   9   1   0   37.20   16.00 
  -9   1   0    7.00    9.50 
   9   1   0    7.10    9.20 
   9   1   0    4.00   12.50 
  -9   1   0    1.70    9.20 
  -9   1   0   10.90   10.30 
  -9   1   0   26.40   11.30 
   9   1   0   -2.80    6.40 
   9   1   0   -7.50   12.10 
  -9   1   0   -6.30    7.50 
   9   1   0    6.00    9.30 
  -9   1   0   25.60   11.20 
   9   1   0   11.80    8.80 
  -9   1   0    2.70    6.70 
  -9   1   0    2.00    7.90 
  -9   1   0   10.30   10.20 
  -9   1   0   -4.50    7.40 
  -9   1   0    5.30    9.30 
   9   1   0    1.40   10.80 
  -9   1   0    2.90    8.80 
   9   1   0    5.00    7.50 
 -10  -1   0   28.10   11.00 
  10  -1   0   37.50   16.90 
 -10  -1   0   36.10   16.20 
 -10  -1   0   26.30   14.20 
 -10  -1   0   28.00   14.10 
  10  -1   0   17.20   11.60 
  10  -1   0   41.50   14.00 
 -10  -1   0   55.39   15.50 
 -10  -1   0   22.50   14.60 
  10  -1   0   23.60   15.80 
 -10  -1   0   27.40   12.60 
 -10  -1   0   36.50   13.30 
 -10  -1   0   23.90   10.00 
  10  -1   0   25.90   17.90 
  10  -1   0   17.50   10.80 
  10  -1   0   23.70   14.00 
  10  -1   0   -4.70   14.70 
  10  -1   0    6.90    9.20 
  10   1   0    6.30   10.40 
  10   1   0   25.90   12.10 
 -10   1   0    7.90   13.50 
 -10   1   0   35.50   15.90 
  10   1   0   24.20   15.10 
 -10   1   0   20.90   14.40 
 -10   1   0   31.50   15.30 
 -10   1   0   24.40   11.30 
 -10   1   0   11.60   10.80 
 -10   1   0    5.50   10.80 
 -10   1   0   42.60   16.50 
  10   1   0   21.60   16.70 
 -10   1   0   25.10   12.40 
 -10   1   0   51.69   16.20 
  10   1   0   50.49   14.10 
  10   1   0   46.00   21.20 
  10   1   0   16.10   18.40 
  10   1   0   25.30   11.60 
   0  -2   0 4781.22  192.38 
   0  -2   0 4562.04  194.68 
   0  -2   0 4627.04  194.48 
   0  -2   0 4938.71  193.58 
   0  -2   0 4599.14  192.28 
   0  -2   0 4331.27  195.78 
   0  -2   0 4649.63  194.28 
   0  -2   0 4850.01  193.68 
   0  -2   0 4904.41  194.78 
   0  -2   0 4700.33  192.58 
   0  -2   0 4769.32  193.18 
   0  -2   0 4777.72  194.08 
   0  -2   0 4559.74  194.78 
   0  -2   0 4710.73  194.58 
   0  -2   0 4845.82  194.78 
   0  -2   0 4898.21  193.48 
   0  -2   0 4707.13  193.28 
   0  -2   0 4647.23  193.88 
   0  -2   0 4560.54  195.68 
   0  -2   0 4782.12  193.48 
   0  -2   0 4781.12  194.38 
   0  -2   0 4733.73  193.98 
   0  -2   0 4581.74  193.48 
   0  -2   0 4635.84  195.48 
   0  -2   0 4666.33  193.78 
   0  -2   0 4587.74  191.98 
   0   2   0 4723.33  194.38 
   0   2   0 4744.93  195.18 
   0   2   0 4819.62  195.88 
   0   2   0 4656.03  194.08 
   0   2   0 4716.63  194.78 
   0   2   0 4540.75  193.28 
   0   2   0 4766.32  195.08 
   0   2   0 4952.50  194.58 
   0   2   0 4701.03  193.58 
   0   2   0 4543.85  196.28 
   0   2   0 4543.45  193.58 
   0   2   0 4900.91  194.98 
   0   2   0 4794.72  193.98 
   0   2   0 4796.62  194.58 
   0   2   0 4792.92  193.88 
   0   2   0 4915.51  194.58 
   0   2   0 4776.52  193.98 
   0   2   0 4684.53  193.98 
   0   2   0 4640.04  195.48 
  -1  -2   0 2868.41  122.69 
   1  -2   0 2962.20  121.69 
  -1  -2   0 2812.12  117.79 
  -1  -2   0 2812.52  121.29 
  -1  -2   0 2785.12  122.09 
  -1  -2   0 2633.44  122.29 
  -1  -2   0 2858.51  122.39 
  -1  -2   0 3002.60  123.59 
   1  -2   0 2821.62  121.19 
   1  -2   0 2946.71  122.09 
   1  -2   0 3045.60  121.19 
  -1  -2   0 2786.92  122.19 
  -1  -2   0 2756.12  119.79 
   1  -2   0 3001.60  119.19 
   1  -2   0 3128.59  120.99 
   1  -2   0 2970.20  123.19 
   1  -2   0 2929.71  121.49 
  -1  -2   0 2849.31  119.59 
   1  -2   0 2834.82  120.49 
   1  -2   0 3175.58  121.19 
  -1  -2   0 2881.71  119.89 
  -1  -2   0 2691.73  121.69 
   1  -2   0 2932.41  124.59 
  -1  -2   0 2839.52  120.39 
  -1  -2   0 2945.71  120.79 
   1  -2   0 2868.41  119.19 
   1  -2   0 3063.69  121.39 
   1  -2   0 3034.80  119.19 
   1  -2   0 2815.02  119.79 
   1  -2   0 2833.32  121.69 
   1  -2   0 2889.11  122.89 
  -1  -2   0 2789.62  118.99 
   1  -2   0 3052.59  122.99 
   1  -2   0 3045.10  119.59 
   1  -2   0 2951.00  122.49 
   1  -2   0 2911.71  118.89 
   1  -2   0 2894.91  118.09 
   1  -2   0 2943.71  121.39 
  -1  -2   0 2787.02  118.89 
   1  -2   0 2889.91  119.39 
   1  -2   0 2938.31  123.09 
   1  -2   0 3013.00  120.39 
  -1  -2   0 2616.44  118.29 
   1  -2   0 2956.40  120.99 
  -1  -2   0 2871.91  120.99 
   1  -2   0 2951.90  120.39 
  -1  -2   0 2833.52  122.09 
  -1  -2   0 2704.73  118.69 
  -1  -2   0 2860.91  122.59 
   1  -2   0 3018.10  120.79 
   1  -2   0 2988.30  123.39 
  -1  -2   0 2993.30  120.39 
   1  -2   0 2841.12  118.49 
   1  -2   0 3010.20  121.29 
  -1  -2   0 2712.33  121.39 
  -1  -2   0 2800.42  119.79 
   1  -2   0 2963.50  120.49 
  -1  -2   0 2723.53  117.49 
  -1  -2   0 2744.73  121.39 
   1   2   0 2716.63  121.89 
  -1   2   0 3125.69  121.39 
  -1   2   0 2984.00  121.19 
   1   2   0 2772.52  122.69 
  -1   2   0 2980.20  122.59 
   1   2   0 2805.12  122.09 
   1   2   0 2862.91  120.79 
  -1   2   0 2960.00  122.99 
   1   2   0 2838.12  120.89 
   1   2   0 2732.53  122.29 
  -1   2   0 2919.91  120.99 
  -1   2   0 2913.71  117.59 
  -1   2   0 2970.20  125.59 
  -1   2   0 2796.62  119.89 
  -1   2   0 2718.93  122.19 
  -1   2   0 2827.92  119.69 
   1   2   0 2725.43  119.39 
   1   2   0 2726.83  120.69 
  -1   2   0 2982.00  119.89 
  -1   2   0 2984.60  121.29 
  -1   2   0 3055.29  122.39 
  -1   2   0 2933.31  120.79 
  -1   2   0 2948.00  122.09 
  -1   2   0 2899.71  122.79 
  -1   2   0 3000.20  120.29 
  -1   2   0 2896.21  122.69 
  -1   2   0 2983.70  122.99 
  -1   2   0 2920.11  123.59 
  -1   2   0 2949.60  119.39 
   1   2   0 2722.63  121.29 
   1   2   0 2756.82  119.29 
  -1   2   0 2977.30  122.19 
  -1   2   0 2958.20  120.89 
  -1   2   0 2909.21  118.69 
  -1   2   0 2974.20  118.89 
  -1   2   0 2908.91  123.39 
  -1   2   0 2970.60  122.19 
  -1   2   0 2953.00  119.49 
  -1   2   0 2869.11  119.59 
  -1   2   0 3019.50  119.19 
   1   2   0 2837.42  121.69 
  -2  -2   0  823.82   38.40 
   2  -2   0  936.91   41.40 
  -2  -2   0  867.21   42.60 
  -2  -2   0  802.82   40.10 
   2  -2   0  916.91   43.00 
   2  -2   0  857.41   42.10 
   2  -2   0  899.41   37.80 
  -2  -2   0  809.12   38.50 
  -2  -2   0  856.61   36.30 
  -2  -2   0  895.31   40.30 
   2  -2   0  884.01   42.50 
  -2  -2   0  841.22   41.80 
  -2  -2   0  864.21   39.70 
   2  -2   0  869.01   39.00 
   2  -2   0  890.61   37.40 
   2  -2   0  879.91   43.10 
  -2  -2   0  880.31   44.50 
   2  -2   0  941.11   43.20 
  -2  -2   0  860.21   40.20 
  -2  -2   0  901.31   41.60 
   2  -2   0  919.81   41.50 
   2  -2   0  867.71   41.80 
   2  -2   0  940.41   43.70 
   2  -2   0  897.51   39.30 
  -2  -2   0  859.31   39.10 
   2  -2   0  926.41   42.00 
   2  -2   0  872.41   42.40 
   2  -2   0  925.31   43.40 
   2  -2   0  900.71   39.70 
   2  -2   0  858.71   41.50 
   2  -2   0  914.31   38.20 
  -2  -2   0  802.92   39.80 
  -2  -2   0  820.72   40.50 
  -2  -2   0  822.52   40.00 
   2  -2   0  893.41   40.30 
  -2  -2   0  816.22   36.40 
   2  -2   0  891.91   40.60 
  -2  -2   0  832.92   37.30 
  -2  -2   0  854.91   42.40 
  -2  -2   0  880.31   38.80 
  -2  -2   0  772.22   41.80 
   2  -2   0  879.71   42.90 
   2   2   0  869.81   40.50 
  -2   2   0  892.41   39.60 
   2   2   0  848.02   42.70 
   2   2   0  834.32   37.60 
  -2   2   0  904.81   43.80 
  -2   2   0  939.41   38.90 
  -2   2   0  921.01   40.40 
  -2   2   0  902.91   39.40 
  -2   2   0  854.71   41.90 
   2   2   0  896.71   42.70 
  -2   2   0  918.21   42.30 
  -2   2   0  930.51   43.20 
   2   2   0  854.41   37.00 
   2   2   0  815.82   37.80 
   2   2   0  860.31   42.40 
  -2   2   0  899.91   42.30 
  -2   2   0  923.31   40.90 
  -2   2   0  824.52   39.20 
  -2   2   0  878.81   39.70 
  -2   2   0  897.71   41.10 
  -2   2   0  895.31   37.80 
  -2   2   0  924.51   42.00 
   2   2   0  843.52   36.10 
   2   2   0  842.32   36.80 
  -2   2   0  905.61   36.50 
   2   2   0  876.01   41.20 
   2   2   0  910.21   43.10 
  -2   2   0  859.21   39.20 
  -2   2   0  958.90   43.60 
   2   2   0  831.92   37.40 
   2   2   0  812.92   39.90 
   2   2   0  859.41   41.50 
  -2   2   0  913.41   38.60 
   2   2   0  835.42   42.20 
   2   2   0  854.41   38.40 
   2   2   0  819.62   36.20 
  -2   2   0  879.51   40.50 
   2   2   0  803.12   43.00 
  -2   2   0  884.01   41.50 
   2   2   0  758.02   38.70 
  -2   2   0  918.11   43.50 
  -2   2   0  919.81   41.40 
   3  -2   0  388.26   21.10 
  -3  -2   0  346.27   20.70 
   3  -2   0  354.66   22.00 
   3  -2   0  354.66   16.70 
   3  -2   0  367.86   21.30 
   3  -2   0  355.96   22.60 
  -3  -2   0  338.27   17.40 
  -3  -2   0  363.56   19.90 
  -3  -2   0  299.87   19.50 
   3  -2   0  374.76   21.60 
   3  -2   0  383.66   21.60 
   3  -2   0  345.07   20.60 
  -3  -2   0  358.16   24.00 
  -3  -2   0  355.86   21.50 
  -3  -2   0  345.47   19.90 
   3  -2   0  392.86   18.70 
  -3  -2   0  337.87   18.30 
  -3  -2   0  338.37   16.60 
   3  -2   0  343.67   21.40 
  -3  -2   0  335.17   16.90 
  -3  -2   0  367.06   24.40 
  -3  -2   0  351.46   20.00 
  -3  -2   0  347.97   19.50 
   3  -2   0  377.46   19.90 
   3  -2   0  351.46   19.10 
   3  -2   0  341.17   22.40 
  -3   2   0  334.37   23.00 
   3   2   0  339.47   18.10 
  -3   2   0  341.27   20.10 
   3   2   0  307.57   18.40 
  -3   2   0  340.37   19.50 
   3   2   0  358.36   21.90 
  -3   2   0  331.07   18.10 
  -3   2   0  369.96   19.00 
  -3   2   0  390.96   22.70 
  -3   2   0  373.46   18.90 
   3   2   0  340.97   17.40 
  -3   2   0  326.77   22.60 
   3   2   0  336.47   19.10 
   3   2   0  330.57   18.80 
   3   2   0  326.77   19.80 
   3   2   0  331.27   17.00 
  -3   2   0  355.66   15.80 
  -3   2   0  341.77   21.80 
   3   2   0  345.97   20.00 
   3   2   0  311.87   19.80 
   3   2   0  320.97   20.50 
   3   2   0  316.27   22.10 
   3   2   0  352.06   22.50 
   3   2   0  325.27   22.20 
  -3   2   0  368.86   18.40 
   3   2   0  340.87   16.10 
   3   2   0  431.16   24.20 
  -3   2   0  393.76   24.10 
  -3   2   0  386.96   23.40 
  -3   2   0  373.66   20.20 
  -3   2   0  351.46   22.20 
   3   2   0  319.67   17.20 
   3   2   0  347.57   21.20 
  -3   2   0  361.96   21.30 
  -3   2   0  378.46   22.80 
   3   2   0  350.56   22.70 
  -4  -2   0  300.37   18.10 
   4  -2   0  329.07   18.70 
  -4  -2   0  293.57   16.50 
   4  -2   0  302.77   21.70 
  -4  -2   0  318.97   17.10 
   4  -2   0  323.77   15.90 
   4  -2   0  293.97   19.50 
   4  -2   0  351.46   22.50 
   4  -2   0  309.67   20.30 
  -4  -2   0  284.27   16.30 
   4  -2   0  300.17   20.40 
  -4  -2   0  300.67   19.30 
  -4  -2   0  320.57   21.00 
   4  -2   0  316.17   21.00 
  -4  -2   0  296.37   14.80 
  -4  -2   0  259.07   18.40 
  -4  -2   0  291.47   16.20 
  -4  -2   0  284.77   19.60 
   4  -2   0  332.17   22.00 
   4  -2   0  264.67   21.10 
   4  -2   0  348.47   21.70 
  -4  -2   0  340.87   20.00 
   4  -2   0  278.47   20.00 
   4   2   0  299.57   19.80 
   4   2   0  304.67   22.50 
  -4   2   0  325.47   22.50 
   4   2   0  336.47   22.60 
   4   2   0  291.27   16.80 
  -4   2   0  320.27   15.30 
   4   2   0  303.97   17.10 
   4   2   0  280.47   14.90 
  -4   2   0  354.06   18.60 
   4   2   0  271.47   19.80 
   4   2   0  294.37   18.00 
  -4   2   0  333.77   23.60 
   4   2   0  289.57   17.00 
   4   2   0  290.07   15.60 
   4   2   0  316.97   21.00 
   4   2   0  309.17   20.10 
  -4   2   0  316.17   23.10 
  -4   2   0  309.97   18.60 
   4   2   0  307.67   21.90 
  -4   2   0  329.37   20.90 
   4   2   0  296.37   18.90 
  -4   2   0  316.37   22.00 
  -4   2   0  312.97   22.00 
  -4   2   0  291.17   21.10 
  -4   2   0  332.17   23.60 
  -4   2   0  324.77   22.30 
   4   2   0  264.17   19.60 
   4   2   0  310.87   19.50 
   4   2   0  294.27   16.80 
  -4   2   0  343.87   18.30 
   4   2   0  291.97   22.00 
  -4   2   0  303.27   20.10 
  -4   2   0  303.47   17.20 
   5  -2   0  334.77   24.50 
  -5  -2   0  352.16   24.70 
  -5  -2   0  380.66   24.00 
  -5  -2   0  368.66   23.90 
  -5  -2   0  362.96   24.30 
   5  -2   0  397.36   25.30 
  -5  -2   0  368.06   23.60 
   5  -2   0  396.16   22.40 
  -5  -2   0  367.36   19.00 
  -5  -2   0  374.36   20.30 
   5  -2   0  371.76   24.80 
   5  -2   0  378.46   26.00 
  -5  -2   0  373.86   22.60 
  -5  -2   0  337.27   19.90 
  -5  -2   0  355.66   23.00 
   5  -2   0  362.86   26.10 
  -5  -2   0  380.96   25.30 
   5  -2   0  400.96   27.20 
   5  -2   0  377.36   26.10 
  -5  -2   0  398.36   20.70 
   5  -2   0  347.47   25.20 
   5  -2   0  396.06   24.90 
   5   2   0  358.76   23.30 
   5   2   0  351.26   26.60 
  -5   2   0  336.17   18.80 
   5   2   0  338.57   21.00 
   5   2   0  363.76   25.20 
   5   2   0  390.36   21.00 
  -5   2   0  324.27   24.90 
   5   2   0  361.26   21.10 
   5   2   0  370.76   27.10 
   5   2   0  369.66   27.40 
   5   2   0  386.16   21.40 
  -5   2   0  417.66   28.40 
  -5   2   0  367.46   27.40 
   5   2   0  362.36   23.50 
   5   2   0  367.16   24.70 
  -5   2   0  395.56   25.50 
  -5   2   0  375.76   26.70 
  -5   2   0  358.16   25.90 
   5   2   0  370.06   24.00 
  -5   2   0  372.96   26.80 
   5   2   0  377.66   19.60 
   5   2   0  341.97   19.80 
   5   2   0  405.96   25.80 
   5   2   0  404.06   27.10 
   5   2   0  348.87   18.90 
  -5   2   0  390.16   24.90 
  -5   2   0  327.57   25.60 
  -5   2   0  366.06   28.10 
  -5   2   0  416.06   21.60 
  -5   2   0  359.36   22.80 
   6  -2   0 1598.94   78.69 
   6  -2   0 1612.54   77.79 
   6  -2   0 1682.23   79.39 
  -6  -2   0 1597.34   70.59 
  -6  -2   0 1440.56   75.69 
  -6  -2   0 1616.04   75.89 
  -6  -2   0 1684.83   79.29 
  -6  -2   0 1514.75   75.29 
   6  -2   0 1623.44   73.59 
  -6  -2   0 1583.44   71.79 
  -6  -2   0 1611.44   74.69 
   6  -2   0 1649.83   79.79 
   6  -2   0 1578.14   79.59 
   6  -2   0 1625.24   80.89 
  -6  -2   0 1548.25   75.19 
   6  -2   0 1690.73   78.49 
   6  -2   0 1608.24   80.29 
   6  -2   0 1579.94   77.09 
  -6  -2   0 1531.65   77.99 
  -6  -2   0 1450.15   75.69 
  -6   2   0 1531.45   78.29 
  -6   2   0 1709.63   78.29 
   6   2   0 1516.55   69.79 
   6   2   0 1580.74   81.29 
   6   2   0 1617.14   81.79 
  -6   2   0 1650.93   72.59 
   6   2   0 1593.54   76.29 
  -6   2   0 1601.44   82.69 
   6   2   0 1537.05   77.19 
  -6   2   0 1540.45   76.99 
  -6   2   0 1652.73   81.39 
  -6   2   0 1589.04   80.89 
  -6   2   0 1700.03   80.99 
   6   2   0 1602.34   71.89 
  -6   2   0 1621.44   79.79 
  -6   2   0 1674.33   82.29 
   6   2   0 1502.65   70.09 
   6   2   0 1501.15   78.49 
   6   2   0 1593.04   77.19 
  -6   2   0 1605.94   69.79 
   6   2   0 1580.44   72.79 
  -6   2   0 1534.95   74.79 
   6   2   0 1586.84   73.29 
   6   2   0 1486.55   77.39 
   6   2   0 1579.54   71.19 
  -6   2   0 1560.84   81.39 
   6   2   0 1665.23   76.69 
   6   2   0 1619.34   80.99 
   7  -2   0  335.07   22.70 
  -7  -2   0  295.07   24.50 
  -7  -2   0  305.67   30.20 
   7  -2   0  276.87   29.10 
   7  -2   0  287.87   30.60 
   7  -2   0  307.47   29.50 
   7  -2   0  335.47   27.80 
  -7  -2   0  299.27   23.90 
  -7  -2   0  309.67   28.60 
   7  -2   0  268.27   27.70 
  -7  -2   0  303.27   23.60 
   7  -2   0  286.57   29.90 
  -7  -2   0  313.97   30.20 
   7  -2   0  393.26   30.40 
   7  -2   0  282.67   28.70 
  -7  -2   0  311.77   24.10 
   7  -2   0  302.07   24.90 
  -7  -2   0  292.77   23.20 
  -7  -2   0  306.37   20.80 
  -7  -2   0  316.27   30.30 
  -7  -2   0  313.37   23.10 
   7   2   0  318.67   30.80 
   7   2   0  327.37   31.20 
  -7   2   0  326.67   21.70 
   7   2   0  374.16   32.70 
  -7   2   0  323.37   33.10 
   7   2   0  232.58   29.30 
   7   2   0  334.87   34.80 
   7   2   0  321.47   30.30 
   7   2   0  293.07   17.40 
  -7   2   0  315.67   26.20 
  -7   2   0  371.06   32.80 
  -7   2   0  351.36   26.30 
  -7   2   0  333.87   34.50 
  -7   2   0  287.57   33.40 
   7   2   0  262.67   21.10 
   7   2   0  308.57   21.40 
  -7   2   0  293.17   30.50 
  -7   2   0  337.37   34.30 
   7   2   0  322.37   24.40 
   7   2   0  289.27   22.70 
   7   2   0  353.16   25.70 
   7   2   0  414.06   38.30 
  -7   2   0  296.07   30.10 
  -7   2   0  289.67   27.10 
  -7   2   0  320.27   33.80 
   7   2   0  301.27   22.10 
  -7   2   0  303.37   19.10 
  -8  -2   0  542.35   38.30 
  -8  -2   0  534.25   39.30 
   8  -2   0  554.74   38.60 
  -8  -2   0  527.85   39.90 
  -8  -2   0  550.24   37.00 
   8  -2   0  552.14   42.20 
  -8  -2   0  582.04   35.60 
   8  -2   0  557.14   39.20 
  -8  -2   0  534.75   39.50 
  -8  -2   0  559.24   38.10 
   8  -2   0  545.05   38.20 
   8  -2   0  525.05   39.00 
   8  -2   0  550.64   42.10 
   8  -2   0  558.44   40.20 
  -8  -2   0  525.85   36.30 
   8  -2   0  545.55   40.30 
   8  -2   0  579.54   38.80 
   8  -2   0  569.04   34.40 
  -8  -2   0  502.65   35.40 
   8  -2   0  534.25   41.90 
  -8  -2   0  595.84   37.00 
  -8   2   0  587.74   39.80 
  -8   2   0  568.94   30.90 
  -8   2   0  593.94   40.20 
   8   2   0  606.94   38.60 
  -8   2   0  524.35   33.20 
  -8   2   0  558.84   38.50 
  -8   2   0  512.55   39.60 
   8   2   0  608.34   45.60 
   8   2   0  551.64   44.20 
   8   2   0  555.74   34.30 
  -8   2   0  593.94   37.00 
  -8   2   0  504.45   48.00 
  -8   2   0  514.05   41.00 
   8   2   0  557.54   40.40 
  -8   2   0  668.83   42.00 
  -8   2   0  530.45   42.00 
   8   2   0  565.64   39.60 
   8   2   0  562.94   37.20 
   8   2   0  535.25   34.60 
  -8   2   0  605.64   45.40 
  -8   2   0  611.34   43.80 
   8   2   0  547.25   34.30 
   8   2   0  490.55   39.90 
   8   2   0  501.75   41.60 
  -9  -2   0   10.90   11.00 
  -9  -2   0   16.40    9.00 
   9  -2   0   38.90   14.90 
  -9  -2   0   22.20   10.20 
  -9  -2   0    8.20    9.00 
  -9  -2   0   39.10   14.40 
   9  -2   0   17.70   11.90 
   9  -2   0   17.30    8.80 
   9  -2   0   13.10   10.10 
  -9  -2   0   19.70   12.50 
  -9  -2   0   35.50   11.70 
   9  -2   0   15.20   12.80 
   9  -2   0   59.39   19.00 
   9  -2   0   20.70   10.70 
  -9  -2   0   38.30   11.50 
   9  -2   0   42.60   15.30 
   9  -2   0   22.80   12.70 
  -9  -2   0   27.10   12.20 
   9  -2   0   33.60   10.80 
   9  -2   0   47.70   15.80 
   9   2   0   34.30   15.80 
  -9   2   0   49.30   16.40 
  -9   2   0   10.70   11.60 
   9   2   0   11.90   12.80 
  -9   2   0   16.90   11.30 
  -9   2   0    9.10    9.10 
   9   2   0   24.60   15.40 
  -9   2   0   23.00   14.40 
   9   2   0   27.60   10.20 
   9   2   0   27.50   11.90 
  -9   2   0   16.60   12.50 
   9   2   0   33.00   17.60 
  -9   2   0    1.80    8.20 
  -9   2   0   17.70   10.80 
  -9   2   0   10.70    9.70 
   9   2   0   35.30   11.30 
  -9   2   0   28.00   11.80 
  -9   2   0   17.00   12.50 
   9   2   0   12.10    9.20 
   9   2   0   29.40   12.60 
 -10  -2   0  173.28   25.80 
  10  -2   0  138.39   24.30 
 -10  -2   0  126.49   25.00 
 -10  -2   0  144.59   23.40 
 -10  -2   0  153.38   22.60 
  10  -2   0  138.79   28.60 
 -10  -2   0  142.49   26.00 
 -10  -2   0  130.49   25.80 
  10  -2   0  176.58   28.10 
  10  -2   0  143.19   27.10 
  10  -2   0  192.18   29.50 
  10  -2   0  129.19   20.10 
 -10  -2   0  148.39   25.30 
 -10  -2   0  165.88   22.80 
  10  -2   0  105.09   25.90 
  10  -2   0  129.79   27.30 
  10  -2   0  112.59   23.60 
  10  -2   0  151.68   24.90 
 -10   2   0  163.18   30.20 
  10   2   0  144.69   22.60 
 -10   2   0  135.29   28.20 
 -10   2   0  194.08   32.30 
 -10   2   0  148.79   24.50 
  10   2   0  194.18   26.20 
  10   2   0   92.69   26.00 
  10   2   0  121.09   29.70 
 -10   2   0  158.88   25.50 
 -10   2   0  160.78   27.90 
 -10   2   0  149.99   22.70 
 -10   2   0  116.79   25.70 
 -10   2   0  160.18   26.40 
 -10   2   0  147.29   27.70 
   0  -3   0    1.10    2.40 
   0  -3   0    5.40    3.00 
   0  -3   0    6.10    3.10 
   0  -3   0   -2.00    2.20 
   0  -3   0    2.90    2.90 
   0  -3   0   -1.40    1.40 
   0  -3   0    1.70    2.10 
   0  -3   0   -0.10    1.70 
   0  -3   0   -1.10    3.40 
   0  -3   0    0.80    1.90 
   0  -3   0    6.30    2.40 
   0  -3   0    2.30    2.50 
   0  -3   0    0.10    1.90 
   0  -3   0    5.10    2.80 
   0  -3   0   -0.80    2.20 
   0  -3   0    2.30    3.00 
   0  -3   0    1.30    2.00 
   0  -3   0    2.10    2.20 
   0  -3   0   -0.30    1.80 
   0  -3   0   -1.40    1.70 
   0  -3   0    0.10    1.30 
   0  -3   0    0.50    2.10 
   0  -3   0   -1.60    3.10 
   0   3   0   -1.70    2.30 
   0   3   0    0.60    3.60 
   0   3   0    0.20    3.10 
   0   3   0   -1.80    2.00 
   0   3   0   -0.90    2.20 
   0   3   0    1.50    2.60 
   0   3   0    3.50    2.40 
   0   3   0    5.30    3.40 
   0   3   0   -0.20    2.80 
   0   3   0   -2.90    2.00 
   0   3   0    2.80    2.50 
   0   3   0   -3.10    1.70 
   0   3   0    2.70    3.40 
   0   3   0   -0.30    2.10 
   0   3   0    7.20    3.00 
   0   3   0    1.10    2.90 
   0   3   0   11.30    3.90 
   0   3   0   -1.70    1.80 
   0   3   0   -0.70    2.20 
   1  -3   0   29.20    6.00 
   1  -3   0   32.70    7.30 
   1  -3   0   32.20    6.20 
   1  -3   0   32.20    6.70 
   1  -3   0   22.00    5.80 
  -1  -3   0   21.80    4.50 
  -1  -3   0   29.60    6.20 
   1  -3   0   27.50    3.90 
   1  -3   0   29.50    4.30 
   1  -3   0   30.10    5.90 
   1  -3   0   49.60    8.40 
   1  -3   0   26.20    4.40 
   1  -3   0   27.30    5.60 
  -1  -3   0   29.10    5.90 
  -1  -3   0   20.20    5.30 
  -1  -3   0   24.10    3.80 
   1  -3   0   42.40    5.80 
   1  -3   0   35.10    5.30 
   1  -3   0   28.10    3.60 
   1  -3   0   32.60    6.10 
   1  -3   0   36.00    7.70 
   1  -3   0   33.60    5.00 
  -1  -3   0   34.50    7.50 
  -1  -3   0   34.50    6.40 
   1  -3   0   31.30    5.50 
   1  -3   0   24.60    5.80 
  -1  -3   0   36.40    5.40 
   1  -3   0   32.70    3.90 
  -1  -3   0   27.10    4.90 
  -1  -3   0   22.50    4.30 
   1  -3   0   20.00    4.70 
   1  -3   0   29.30    5.00 
  -1  -3   0   36.50    7.00 
   1  -3   0   28.20    4.90 
   1  -3   0   29.70    5.50 
  -1  -3   0   26.30    4.30 
  -1  -3   0   19.70    2.60 
  -1  -3   0   26.80    6.80 
   1  -3   0   32.50    6.50 
  -1  -3   0   35.20    6.50 
  -1  -3   0   28.50    4.30 
   1  -3   0   19.70    4.20 
  -1  -3   0   25.50    5.10 
   1  -3   0   27.10    3.70 
  -1  -3   0   29.30    6.80 
  -1  -3   0   29.10    6.00 
   1  -3   0   27.10    3.70 
  -1  -3   0   24.00    2.40 
   1  -3   0   44.50    9.50 
  -1   3   0   33.20    7.20 
  -1   3   0   25.90    4.50 
  -1   3   0   37.30    6.20 
  -1   3   0   38.80    6.90 
   1   3   0   16.10    4.50 
  -1   3   0   23.80    5.30 
  -1   3   0   27.30    5.40 
   1   3   0   24.10    6.20 
   1   3   0   26.10    5.50 
  -1   3   0   23.00    5.80 
  -1   3   0   28.50    5.90 
   1   3   0   20.00    5.00 
   1   3   0   34.10    6.70 
  -1   3   0   26.50    6.20 
  -1   3   0   32.80    4.60 
  -1   3   0   19.50    6.00 
  -1   3   0   29.00    5.00 
   1   3   0   34.60    5.90 
  -1   3   0   38.70    4.90 
  -1   3   0   26.50    5.30 
  -1   3   0   31.20    6.90 
  -1   3   0   31.30    4.80 
  -1   3   0   25.10    6.00 
   1   3   0   24.80    5.20 
   1   3   0   23.90    4.50 
  -1   3   0   25.60    5.30 
   1   3   0   24.70    5.70 
   1   3   0   31.50    4.80 
   1   3   0   44.80    7.80 
   1   3   0   31.80    6.20 
  -1   3   0   39.90    6.80 
   1   3   0   30.20    6.20 
  -1   3   0   32.90    6.80 
   1   3   0   20.20    5.50 
  -1   3   0   26.00    5.60 
   1   3   0   35.20    5.30 
   1   3   0   29.60    6.00 
   2  -3   0   52.09    7.40 
  -2  -3   0   32.10    7.00 
   2  -3   0   40.60    5.40 
   2  -3   0   49.20    7.80 
  -2  -3   0   49.40    8.60 
   2  -3   0   39.20    8.40 
   2  -3   0   36.20    7.00 
  -2  -3   0   33.70    4.30 
  -2  -3   0   37.00    4.80 
  -2  -3   0   35.30    7.40 
  -2  -3   0   34.70    7.90 
   2  -3   0   34.90    5.80 
  -2  -3   0   42.80    6.90 
  -2  -3   0   35.00    7.60 
   2  -3   0   40.90    7.20 
   2  -3   0   47.70    9.50 
   2  -3   0   43.90    4.70 
  -2  -3   0   38.00    4.50 
   2  -3   0   48.30    9.40 
  -2  -3   0   32.60    5.70 
  -2  -3   0   36.10    7.60 
  -2  -3   0   33.30    6.60 
  -2  -3   0   44.10    6.20 
  -2  -3   0   30.90    5.50 
  -2  -3   0   43.90    4.70 
  -2  -3   0   38.00    4.10 
   2  -3   0   38.20    4.70 
  -2  -3   0   38.80   11.90 
   2  -3   0   41.10    7.00 
   2  -3   0   39.30    4.60 
   2  -3   0   34.70    4.90 
  -2  -3   0   43.20    5.40 
   2  -3   0   37.70    6.20 
   2  -3   0   41.60    8.20 
  -2  -3   0   31.10    7.00 
   2  -3   0   27.20    5.90 
  -2  -3   0   29.70    7.80 
   2  -3   0   39.30    6.00 
   2   3   0   32.00    7.00 
   2   3   0   46.80    6.00 
  -2   3   0   48.90    6.70 
  -2   3   0   39.80    5.50 
  -2   3   0   35.70    8.00 
  -2   3   0   32.50    7.40 
  -2   3   0   46.40    6.30 
  -2   3   0   36.20    7.80 
   2   3   0   53.79    8.90 
  -2   3   0   47.80    5.90 
  -2   3   0   48.60    3.60 
  -2   3   0   40.00    7.80 
  -2   3   0   35.60    7.30 
   2   3   0   40.60    6.90 
  -2   3   0   31.90    7.20 
  -2   3   0   45.00    7.20 
   2   3   0   32.80    4.40 
  -2   3   0   48.90    5.10 
  -2   3   0   32.70    5.40 
  -2   3   0   35.30    6.30 
  -2   3   0   45.10    8.10 
   2   3   0   39.40    6.40 
  -2   3   0   35.60    5.30 
  -2   3   0   41.30    9.20 
   2   3   0   32.70    6.40 
   2   3   0   31.00    8.30 
  -2   3   0   34.70    4.50 
  -2   3   0   38.80    7.80 
  -2   3   0   32.50    6.60 
   2   3   0   40.60    8.70 
   2   3   0   34.20    3.90 
   2   3   0   34.20    6.90 
  -2   3   0   38.60    5.40 
  -3  -3   0   -2.90    3.80 
   3  -3   0    4.10    5.40 
  -3  -3   0    0.10    4.20 
   3  -3   0    8.60    5.50 
   3  -3   0    4.40    3.90 
  -3  -3   0    3.90    1.90 
   3  -3   0    8.60    5.30 
   3  -3   0    2.80    1.90 
  -3  -3   0    4.70    1.80 
  -3  -3   0    4.50    3.40 
  -3  -3   0    7.20    4.40 
  -3  -3   0    3.30    3.50 
   3  -3   0    2.40    2.30 
  -3  -3   0    1.70    5.30 
   3  -3   0    3.40    3.90 
  -3  -3   0   18.10    9.70 
   3  -3   0   -1.50    3.40 
   3  -3   0    7.20    5.40 
   3  -3   0    7.80    4.60 
   3  -3   0    5.70    2.40 
   3  -3   0    6.50    3.20 
  -3  -3   0   10.00    5.80 
  -3  -3   0    7.80    7.60 
  -3  -3   0    0.00    2.60 
   3  -3   0    5.60    3.30 
  -3  -3   0    6.50    6.90 
   3  -3   0   -0.30    3.50 
  -3   3   0    2.10    3.10 
  -3   3   0    8.70    2.80 
   3   3   0    6.50    2.50 
  -3   3   0   -1.00    4.20 
  -3   3   0    1.60    3.90 
  -3   3   0    5.70    3.20 
  -3   3   0    5.60    5.00 
   3   3   0    6.20    3.30 
   3   3   0    0.70    1.40 
  -3   3   0    6.60    5.20 
   3   3   0    9.90    4.80 
   3   3   0    6.10    4.30 
  -3   3   0    5.60    4.50 
   3   3   0    5.70    1.70 
  -3   3   0    3.90    2.80 
  -3   3   0    0.30    3.70 
  -3   3   0    3.60    4.10 
  -3   3   0    3.40    2.50 
   3   3   0    7.40    4.70 
  -3   3   0    2.80    3.00 
  -3   3   0    7.40    5.20 
  -3   3   0    1.40    1.50 
   3   3   0    5.60    2.20 
   3   3   0    5.30    2.80 
  -3   3   0    8.70    5.70 
   3   3   0    3.90    3.20 
   3   3   0    4.40    4.60 
   3   3   0    0.90    2.20 
   3   3   0    2.00    4.30 
  -3   3   0    9.70    3.70 
  -3   3   0    2.60    3.50 
  -3   3   0   13.90    5.50 
   3   3   0   -0.30    5.00 
   3   3   0    6.40    6.80 
   4  -3   0  213.38   11.70 
  -4  -3   0  217.98   24.60 
   4  -3   0  260.07   19.20 
   4  -3   0  201.78   17.10 
   4  -3   0  256.77   25.00 
  -4  -3   0  214.88   12.70 
   4  -3   0  249.18   15.80 
  -4  -3   0  199.18   16.10 
  -4  -3   0  241.88   17.30 
  -4  -3   0  215.18   20.80 
  -4  -3   0  201.78   21.80 
  -4  -3   0  240.28   14.60 
   4  -3   0  234.48   18.10 
  -4  -3   0  215.68   11.60 
   4  -3   0  245.68   18.10 
  -4  -3   0  204.48   17.00 
   4  -3   0  225.68   22.50 
   4  -3   0  235.48   18.30 
  -4  -3   0  215.38   15.50 
   4  -3   0  238.68   16.20 
   4  -3   0  206.58   20.60 
   4  -3   0  229.38   17.30 
   4   3   0  195.48   14.10 
  -4   3   0  270.87   25.20 
  -4   3   0  224.68   22.10 
   4   3   0  245.08   24.50 
  -4   3   0  245.08   14.40 
   4   3   0  212.68   13.40 
   4   3   0  202.68   10.80 
   4   3   0  205.58   21.60 
  -4   3   0  203.28   21.30 
  -4   3   0  204.28   14.20 
  -4   3   0  213.28   23.40 
   4   3   0  231.88   14.40 
   4   3   0  197.18   17.20 
   4   3   0  191.08   12.00 
  -4   3   0  250.37   16.00 
  -4   3   0  229.58   18.70 
   4   3   0  198.08   13.90 
  -4   3   0  269.07   24.30 
  -4   3   0  255.67   18.80 
   4   3   0  232.08   16.80 
  -4   3   0  220.78   23.40 
  -4   3   0  239.18   17.10 
   4   3   0  211.88   13.00 
   4   3   0  240.38   17.50 
   4   3   0  232.28   24.00 
   4   3   0  257.17   23.90 
  -4   3   0  217.88   15.00 
  -4   3   0  231.48   22.50 
  -5  -3   0  495.35   24.20 
  -5  -3   0  469.35   24.80 
   5  -3   0  588.94   29.00 
   5  -3   0  533.15   34.80 
   5  -3   0  495.85   31.80 
   5  -3   0  497.35   31.70 
   5  -3   0  525.65   33.60 
  -5  -3   0  509.25   29.50 
   5  -3   0  546.25   24.20 
   5  -3   0  515.25   32.40 
  -5  -3   0  542.35   31.20 
  -5  -3   0  520.65   30.80 
  -5  -3   0  537.05   26.60 
   5  -3   0  505.25   31.80 
   5  -3   0  493.65   31.10 
   5  -3   0  577.34   35.90 
   5  -3   0  564.04   33.80 
  -5  -3   0  437.36   30.50 
  -5  -3   0  519.75   29.40 
  -5  -3   0  473.55   27.30 
  -5   3   0  562.94   34.50 
  -5   3   0  522.85   23.30 
   5   3   0  483.35   29.30 
  -5   3   0  525.05   31.10 
  -5   3   0  478.65   28.50 
   5   3   0  529.85   30.90 
   5   3   0  497.85   27.00 
  -5   3   0  499.85   35.20 
   5   3   0  491.55   34.10 
  -5   3   0  538.85   32.40 
  -5   3   0  558.34   34.70 
   5   3   0  449.06   34.00 
  -5   3   0  484.45   33.20 
   5   3   0  484.35   33.20 
  -5   3   0  449.76   32.80 
   5   3   0  445.36   27.60 
   5   3   0  441.46   29.70 
  -5   3   0  500.95   34.40 
   5   3   0  471.15   25.30 
   5   3   0  482.95   34.50 
  -5   3   0  540.75   29.00 
   5   3   0  492.75   23.40 
   5   3   0  488.35   35.20 
  -5   3   0  522.95   27.80 
   5   3   0  471.65   22.90 
   5   3   0  467.15   27.50 
   5   3   0  506.05   26.40 
  -5   3   0  475.35   32.80 
  -5   3   0  454.85   34.10 
   6  -3   0  533.15   37.10 
  -6  -3   0  550.24   27.40 
   6  -3   0  621.54   39.60 
   6  -3   0  514.15   36.80 
  -6  -3   0  503.95   30.50 
   6  -3   0  590.24   35.90 
   6  -3   0  592.14   36.70 
   6  -3   0  570.24   31.10 
  -6  -3   0  523.15   33.30 
  -6  -3   0  488.75   32.20 
  -6  -3   0  559.04   35.90 
  -6  -3   0  508.25   31.60 
  -6  -3   0  522.15   33.90 
   6  -3   0  574.74   37.00 
  -6  -3   0  572.44   35.30 
   6  -3   0  551.24   36.50 
   6  -3   0  570.84   36.10 
   6  -3   0  480.45   34.30 
  -6  -3   0  540.35   33.60 
   6   3   0  563.04   32.40 
   6   3   0  588.84   38.70 
  -6   3   0  570.54   39.90 
   6   3   0  534.65   29.10 
   6   3   0  517.05   26.90 
   6   3   0  480.55   34.90 
   6   3   0  558.64   30.50 
  -6   3   0  542.75   39.00 
  -6   3   0  551.24   30.70 
  -6   3   0  592.74   35.70 
   6   3   0  544.25   38.20 
  -6   3   0  535.25   39.20 
  -6   3   0  537.65   37.70 
  -6   3   0  534.65   34.90 
  -6   3   0  638.94   38.80 
  -6   3   0  526.45   37.50 
   6   3   0  554.34   39.60 
   6   3   0  538.55   29.80 
  -6   3   0  565.44   26.30 
   6   3   0  562.74   32.40 
  -6   3   0  565.54   32.40 
   6   3   0  535.25   39.60 
  -6   3   0  536.45   37.60 
   6   3   0  557.44   34.50 
  -6   3   0  519.95   37.30 
   6   3   0  528.25   39.50 
  -6   3   0  521.95   37.00 
  -7  -3   0   42.00   11.70 
   7  -3   0   23.50   10.70 
   7  -3   0   23.50   10.10 
   7  -3   0   41.30   13.20 
  -7  -3   0   33.20    8.40 
  -7  -3   0   17.60    9.00 
   7  -3   0   34.90    8.50 
   7  -3   0   33.80   11.50 
   7  -3   0   41.30   11.20 
   7  -3   0   43.20   12.00 
  -7  -3   0   36.50   10.50 
  -7  -3   0   26.20    8.60 
  -7  -3   0   35.10   10.80 
   7  -3   0   23.60   11.90 
   7  -3   0   33.10   11.10 
  -7  -3   0   18.10    9.00 
  -7  -3   0   24.30    8.10 
   7  -3   0   28.30   10.80 
  -7  -3   0   24.10    9.90 
   7   3   0   12.10   11.20 
  -7   3   0   28.40   11.10 
  -7   3   0   31.70   11.60 
  -7   3   0   24.30   11.10 
   7   3   0   36.50    8.30 
   7   3   0   39.00   14.90 
  -7   3   0   33.10   12.90 
   7   3   0   24.20   11.20 
   7   3   0   15.80    7.40 
   7   3   0   12.30    8.10 
   7   3   0    9.50   13.10 
  -7   3   0   37.30   13.20 
  -7   3   0   25.90    9.50 
  -7   3   0   44.10   12.20 
  -7   3   0   24.30   11.90 
   7   3   0   39.50   13.00 
   7   3   0   47.80   15.30 
  -7   3   0   23.80   10.20 
   7   3   0   22.70    7.10 
  -7   3   0   26.90   10.80 
   7   3   0   42.50    9.40 
   7   3   0   27.20    8.60 
  -7   3   0   32.30    8.90 
  -7   3   0   30.60   12.20 
  -7   3   0   35.50    8.80 
  -8  -3   0   10.10   12.10 
   8  -3   0   -5.20    7.50 
   8  -3   0    1.30    9.30 
  -8  -3   0   11.90    8.20 
   8  -3   0   13.10    7.50 
   8  -3   0   -2.60    5.50 
   8  -3   0    8.10    8.50 
   8  -3   0   16.00   10.50 
  -8  -3   0    6.10    7.30 
   8  -3   0   -3.60    7.70 
  -8  -3   0   10.60    8.70 
  -8  -3   0   32.20   10.50 
  -8  -3   0   -0.70    7.90 
   8  -3   0   -0.80    7.90 
   8  -3   0   -2.80    6.90 
   8  -3   0    4.60    9.50 
  -8  -3   0    5.90    6.40 
   8  -3   0    5.40    8.30 
  -8  -3   0    0.70    6.90 
  -8  -3   0    1.20    7.30 
  -8  -3   0    4.00    8.00 
   8   3   0    0.60   11.00 
  -8   3   0    4.20    8.90 
   8   3   0    5.80   12.80 
   8   3   0    5.20    6.30 
  -8   3   0   10.10    9.70 
  -8   3   0    7.10    9.90 
   8   3   0   -2.10    6.00 
  -8   3   0    7.60    9.10 
   8   3   0    1.00   11.00 
   8   3   0    9.80    9.00 
  -8   3   0   -1.00    8.50 
  -8   3   0   -3.60    6.00 
   8   3   0   -5.40    7.60 
  -8   3   0    5.40    8.80 
  -8   3   0   11.30   10.50 
  -8   3   0   16.30    9.40 
  -8   3   0   -1.30    8.70 
   8   3   0   12.00    7.70 
  -8   3   0    9.80   10.00 
   8   3   0    5.50   11.50 
   9  -3   0   11.60   12.00 
   9  -3   0   18.80   12.30 
   9  -3   0    0.00    8.60 
  -9  -3   0    2.70   10.80 
   9  -3   0   -2.70    7.50 
   9  -3   0    6.40   10.60 
   9  -3   0    4.80    8.40 
  -9  -3   0   -6.50    8.80 
   9  -3   0   19.90   12.60 
  -9  -3   0    6.80    7.90 
   9  -3   0    4.10   10.70 
   9  -3   0    7.60    9.40 
  -9  -3   0   -7.20    8.20 
   9  -3   0  -17.60    8.70 
  -9  -3   0   21.10    9.90 
  -9  -3   0   17.00   11.60 
  -9  -3   0   10.10    9.90 
   9  -3   0    6.90   11.10 
  -9  -3   0   -1.50    7.20 
  -9   3   0   10.80    8.90 
  -9   3   0    3.60    9.70 
   9   3   0    6.40   10.80 
  -9   3   0   14.40   11.70 
   9   3   0    2.90   14.20 
  -9   3   0   10.10    9.20 
  -9   3   0   -5.00    7.40 
   9   3   0    9.10    8.60 
  -9   3   0   -0.50    8.40 
  -9   3   0   -6.70   10.10 
   9   3   0   -4.90   11.60 
  -9   3   0    6.60    9.60 
   9   3   0    3.40    8.30 
  -9   3   0    0.20   11.20 
  -9   3   0   13.10   11.30 
  -9   3   0    4.00    9.90 
  10  -3   0   56.39   18.00 
  10  -3   0   65.79   18.20 
  10  -3   0   64.79   15.50 
 -10  -3   0   55.39   16.20 
  10  -3   0   90.29   21.90 
 -10  -3   0   37.20   14.20 
  10  -3   0   52.19   17.20 
  10  -3   0   59.69   20.00 
 -10  -3   0   53.09   17.30 
 -10  -3   0   45.10   16.20 
 -10  -3   0   30.50   13.90 
 -10  -3   0   63.49   18.90 
  10  -3   0   44.90   19.50 
  10  -3   0   87.09   21.10 
  10  -3   0   20.50   15.80 
  10  -3   0   39.40   18.40 
 -10  -3   0   37.50   13.60 
 -10   3   0   66.89   20.10 
 -10   3   0   64.09   18.00 
  10   3   0   95.89   27.10 
 -10   3   0   66.29   18.20 
 -10   3   0   27.10   15.40 
 -10   3   0  100.89   25.60 
  10   3   0   69.59   16.80 
 -10   3   0   43.50   18.30 
  10   3   0   70.99   15.70 
 -10   3   0   56.59   19.60 
 -10   3   0   20.90   12.20 
 -10   3   0   61.29   22.00 
  10   3   0   78.39   23.60 
 -10   3   0   68.69   20.70 
   0  -4   0  733.63   38.60 
   0  -4   0  693.93   33.60 
   0  -4   0  692.53   32.80 
   0  -4   0  681.43   31.40 
   0  -4   0  715.83   36.80 
   0  -4   0  699.73   35.20 
   0  -4   0  678.63   33.50 
   0  -4   0  629.54   41.40 
   0  -4   0  639.64   31.70 
   0  -4   0  728.83   33.90 
   0  -4   0  681.53   34.70 
   0  -4   0  681.03   33.10 
   0  -4   0  563.44   36.70 
   0  -4   0  633.34   36.20 
   0  -4   0  716.73   33.30 
   0  -4   0  715.73   31.50 
   0  -4   0  728.43   37.40 
   0  -4   0  710.73   36.20 
   0   4   0  666.63   34.70 
   0   4   0  687.73   35.50 
   0   4   0  699.43   38.80 
   0   4   0  674.33   35.30 
   0   4   0  676.33   35.20 
   0   4   0  692.83   36.30 
   0   4   0  731.73   37.00 
   0   4   0  679.33   34.90 
   0   4   0  710.53   35.20 
   0   4   0  669.73   34.50 
   0   4   0  633.84   33.70 
   0   4   0  683.63   38.00 
   0   4   0  703.63   37.60 
   0   4   0  632.94   34.00 
   0   4   0  652.23   35.40 
   0   4   0  683.33   37.10 
   0   4   0  682.93   36.00 
   0   4   0  679.63   34.60 
   0   4   0  711.73   35.80 
  -1  -4   0 3609.14  165.48 
   1  -4   0 4005.70  164.78 
   1  -4   0 4150.58  168.58 
  -1  -4   0 3740.93  160.98 
  -1  -4   0 3904.61  164.28 
  -1  -4   0 3702.03  175.18 
   1  -4   0 3938.31  159.38 
  -1  -4   0 3826.02  164.98 
  -1  -4   0 4010.50  167.38 
  -1  -4   0 3894.41  161.48 
   1  -4   0 4013.10  161.08 
  -1  -4   0 3784.32  158.28 
   1  -4   0 4015.30  162.28 
   1  -4   0 4189.08  169.38 
   1  -4   0 3770.82  163.08 
  -1  -4   0 4008.50  168.38 
   1  -4   0 3912.81  160.38 
   1  -4   0 3944.11  162.58 
   1  -4   0 4052.99  159.68 
   1  -4   0 3877.51  167.48 
   1  -4   0 3871.31  167.78 
   1  -4   0 3856.31  164.08 
   1  -4   0 3944.01  159.98 
  -1  -4   0 3783.42  161.38 
  -1  -4   0 3786.12  162.58 
   1  -4   0 4043.00  162.98 
   1  -4   0 4002.30  166.18 
  -1  -4   0 3785.12  162.18 
  -1  -4   0 3724.83  158.78 
  -1  -4   0 3744.73  162.58 
   1  -4   0 3929.91  163.68 
  -1  -4   0 3883.11  163.88 
   1  -4   0 3839.02  159.78 
   1  -4   0 3623.84  171.68 
  -1  -4   0 3938.21  166.28 
   1  -4   0 3820.32  163.68 
  -1   4   0 4059.69  169.38 
  -1   4   0 3964.10  164.78 
   1   4   0 3801.02  163.98 
  -1   4   0 3920.41  169.28 
  -1   4   0 3878.71  169.38 
  -1   4   0 4019.50  167.78 
   1   4   0 3746.43  164.58 
   1   4   0 3824.62  165.58 
   1   4   0 3797.32  162.68 
  -1   4   0 3823.22  163.88 
  -1   4   0 3885.11  164.88 
   1   4   0 3845.82  162.48 
  -1   4   0 3891.91  162.58 
  -1   4   0 4015.10  164.08 
   1   4   0 3951.70  167.58 
   1   4   0 3877.51  165.58 
  -1   4   0 4018.30  166.18 
  -1   4   0 3694.43  164.58 
   1   4   0 3755.02  163.28 
  -1   4   0 4037.80  165.88 
   1   4   0 3875.51  167.68 
   1   4   0 3788.62  167.48 
   1   4   0 3800.02  165.08 
   1   4   0 3343.77  163.68 
  -1   4   0 3878.71  164.48 
   1   4   0 3923.01  167.58 
   1   4   0 3869.41  165.58 
  -1   4   0 3932.61  166.88 
  -1   4   0 3977.30  166.68 
   1   4   0 3892.31  165.98 
  -1   4   0 4012.10  167.28 
   1   4   0 3882.01  165.38 
   1   4   0 3670.13  164.28 
  -1   4   0 3885.61  162.38 
  -2  -4   0  308.17   18.60 
   2  -4   0  340.47   14.90 
   2  -4   0  330.57   17.70 
   2  -4   0  376.96   21.80 
   2  -4   0  351.36   18.60 
   2  -4   0  353.46   20.50 
  -2  -4   0  319.37   22.20 
   2  -4   0  398.26   26.70 
  -2  -4   0  332.37   19.00 
  -2  -4   0  298.77   18.70 
   2  -4   0  345.17   16.00 
   2  -4   0  354.86   16.80 
  -2  -4   0  332.57   17.90 
  -2  -4   0  313.67   16.30 
   2  -4   0  332.07   24.10 
  -2  -4   0  328.17   19.40 
   2  -4   0  348.87   19.50 
  -2  -4   0  301.77   24.50 
   2  -4   0  377.46   22.20 
  -2  -4   0  325.17   17.80 
  -2  -4   0  331.07   21.50 
   2  -4   0  361.76   25.70 
   2  -4   0  353.16   18.20 
  -2  -4   0  348.77   24.80 
   2  -4   0  368.76   19.00 
   2  -4   0  365.66   24.90 
   2  -4   0  359.86   20.50 
   2  -4   0  337.27   15.00 
  -2  -4   0  348.67   16.90 
  -2  -4   0  328.67   26.00 
   2  -4   0  323.87   21.50 
  -2  -4   0  318.57   22.70 
   2  -4   0  383.36   22.30 
  -2  -4   0  335.87   17.50 
   2  -4   0  339.77   20.60 
   2   4   0  315.97   18.30 
   2   4   0  355.76   23.00 
  -2   4   0  359.36   24.80 
  -2   4   0  346.57   24.50 
   2   4   0  304.77   20.70 
   2   4   0  300.07   20.20 
  -2   4   0  343.17   21.40 
  -2   4   0  330.37   23.70 
   2   4   0  374.06   21.90 
  -2   4   0  351.16   18.80 
   2   4   0  341.77   19.20 
  -2   4   0  359.56   24.10 
   2   4   0  326.37   23.00 
  -2   4   0  338.57   19.60 
  -2   4   0  334.67   21.90 
  -2   4   0  346.57   22.90 
   2   4   0  315.77   22.60 
  -2   4   0  351.16   23.20 
   2   4   0  317.47   24.00 
  -2   4   0  344.77   18.70 
  -2   4   0  368.56   20.00 
  -2   4   0  351.56   16.80 
  -2   4   0  372.36   23.80 
  -2   4   0  348.17   18.40 
  -2   4   0  284.17   22.00 
  -2   4   0  318.37   25.00 
   2   4   0  363.76   23.60 
  -2   4   0  338.17   16.90 
  -3  -4   0   28.00    9.00 
   3  -4   0   38.40   10.40 
  -3  -4   0   40.40    5.80 
   3  -4   0   30.50    5.80 
   3  -4   0   35.10    7.10 
   3  -4   0   26.20    8.50 
   3  -4   0   42.00    5.50 
  -3  -4   0   27.30    8.10 
   3  -4   0   19.10    6.40 
   3  -4   0   34.00    8.00 
  -3  -4   0   28.60    4.00 
   3  -4   0   30.30    9.30 
   3  -4   0   23.60    7.20 
   3  -4   0   30.60    3.80 
   3  -4   0   28.50    5.70 
   3  -4   0   28.20    5.20 
   3  -4   0   21.00    6.20 
   3  -4   0   33.30    7.40 
  -3  -4   0   30.70    6.20 
  -3  -4   0   34.20    4.90 
   3  -4   0   35.70    9.00 
  -3  -4   0   31.90    6.70 
  -3  -4   0   14.40    6.40 
  -3  -4   0   26.70    5.90 
  -3  -4   0   20.20   11.90 
   3  -4   0   31.00    4.90 
  -3  -4   0   25.50    6.10 
  -3  -4   0   29.20    4.40 
  -3  -4   0   24.20    6.30 
   3   4   0   28.50    9.30 
  -3   4   0   30.50    4.30 
  -3   4   0   17.70    6.60 
   3   4   0   29.60    5.50 
  -3   4   0   38.30   10.20 
  -3   4   0   23.00    5.30 
  -3   4   0   29.60    9.40 
  -3   4   0   52.49    9.70 
  -3   4   0   38.50    6.60 
   3   4   0   31.90    8.00 
  -3   4   0   34.10    9.10 
  -3   4   0   22.80    5.90 
   3   4   0   12.00    6.30 
  -3   4   0   29.70    3.40 
  -3   4   0   19.40    7.30 
  -3   4   0   26.90    7.60 
  -3   4   0   37.70    5.90 
   3   4   0   34.00    4.50 
   3   4   0   16.10    7.20 
  -3   4   0   13.20    5.10 
   3   4   0   38.90    8.10 
  -3   4   0   34.20    8.70 
   3   4   0   38.50   10.40 
  -3   4   0   28.10    5.90 
  -3   4   0   34.40    6.20 
   3   4   0   19.60    5.80 
  -3   4   0   40.20   10.50 
  -3   4   0   25.30    8.00 
  -4  -4   0  117.39   12.40 
   4  -4   0  132.89   18.80 
  -4  -4   0  149.49   20.00 
   4  -4   0  125.59   15.70 
   4  -4   0  124.49   14.80 
  -4  -4   0  137.99    7.40 
  -4  -4   0  139.39   14.70 
  -4  -4   0  110.29   14.10 
  -4  -4   0  137.09   20.20 
   4  -4   0  168.08   14.60 
   4  -4   0  147.69   15.00 
   4  -4   0  141.29    8.20 
  -4  -4   0  141.29    7.60 
  -4  -4   0  136.79   17.10 
   4  -4   0  148.39   19.40 
   4  -4   0  110.19   16.30 
   4  -4   0  125.39   16.10 
   4  -4   0  136.89   16.90 
   4  -4   0  109.99   14.60 
  -4  -4   0  141.29    9.70 
   4  -4   0  144.89   16.30 
  -4   4   0  137.39   10.00 
   4   4   0  114.39   14.70 
   4   4   0  126.89   16.60 
   4   4   0  136.09   18.30 
  -4   4   0  145.99   17.40 
  -4   4   0  118.39   18.20 
  -4   4   0  135.09   14.50 
  -4   4   0  132.69   10.30 
  -4   4   0  131.69   17.30 
  -4   4   0  152.48   15.10 
  -4   4   0   97.69   15.80 
  -4   4   0  150.48   19.60 
  -4   4   0  147.79   20.70 
   4   4   0  156.18   16.40 
   4   4   0  129.69    7.80 
  -4   4   0  140.29   16.80 
   4   4   0  125.59   18.60 
  -4   4   0  125.99   17.40 
  -4   4   0  153.08   19.80 
   4   4   0  120.59    8.50 
   4   4   0  149.99   16.20 
   4   4   0   90.89   17.50 
  -4   4   0  124.39   17.20 
  -4   4   0  120.79   12.40 
   4   4   0  129.49   10.60 
  -5  -4   0  705.13   37.80 
   5  -4   0  742.53   37.20 
   5  -4   0  662.23   41.80 
   5  -4   0  671.13   42.30 
   5  -4   0  753.22   46.00 
   5  -4   0  744.83   42.20 
   5  -4   0  725.83   42.10 
   5  -4   0  698.33   38.00 
   5  -4   0  713.33   41.10 
  -5  -4   0  675.33   35.40 
  -5  -4   0  734.93   42.30 
  -5  -4   0  692.53   39.90 
   5  -4   0  681.73   40.60 
  -5  -4   0  697.93   45.60 
   5  -4   0  734.43   45.40 
   5  -4   0  666.63   40.30 
   5  -4   0  731.53   32.20 
  -5  -4   0  699.73   39.70 
   5   4   0  678.53   33.80 
   5   4   0  678.53   38.80 
  -5   4   0  718.23   39.00 
   5   4   0  710.43   46.60 
  -5   4   0  695.03   44.50 
  -5   4   0  718.33   46.90 
  -5   4   0  750.82   36.90 
  -5   4   0  830.22   44.40 
   5   4   0  653.33   31.40 
   5   4   0  675.63   44.90 
  -5   4   0  724.43   39.10 
  -5   4   0  675.73   43.20 
  -5   4   0  724.63   44.10 
  -5   4   0  732.13   33.90 
   5   4   0  762.52   42.30 
  -5   4   0  725.73   41.90 
   5   4   0  661.03   35.10 
  -5   4   0  750.82   46.70 
   5   4   0  686.13   34.80 
  -5   4   0  638.34   42.90 
  -5   4   0  754.72   45.20 
  -5   4   0  734.23   37.50 
  -5   4   0  836.42   46.10 
   5   4   0  730.73   41.10 
   5   4   0  653.63   31.50 
   5   4   0  687.93   34.70 
  -6  -4   0  689.43   40.80 
   6  -4   0  688.13   42.30 
   6  -4   0  669.23   42.20 
   6  -4   0  662.03   42.60 
   6  -4   0  611.14   40.80 
  -6  -4   0  626.64   37.10 
  -6  -4   0  724.23   40.70 
  -6  -4   0  623.34   38.10 
   6  -4   0  682.43   36.40 
   6  -4   0  685.13   42.30 
  -6  -4   0  672.23   40.40 
   6  -4   0  688.73   41.70 
   6  -4   0  681.93   45.10 
  -6  -4   0  634.64   35.10 
   6  -4   0  648.14   44.50 
   6  -4   0  651.63   42.90 
  -6  -4   0  700.93   42.00 
   6   4   0  737.73   47.10 
   6   4   0  640.44   33.90 
  -6   4   0  625.64   40.90 
  -6   4   0  698.73   45.10 
  -6   4   0  660.53   46.50 
   6   4   0  638.94   40.00 
  -6   4   0  689.03   42.90 
   6   4   0  672.53   32.60 
  -6   4   0  673.83   41.50 
  -6   4   0  720.13   45.30 
   6   4   0  630.64   33.30 
  -6   4   0  639.64   39.00 
   6   4   0  577.94   45.90 
  -6   4   0  608.34   43.60 
  -6   4   0  702.33   45.00 
  -6   4   0  728.93   46.20 
  -6   4   0  714.13   38.10 
   6   4   0  719.53   44.40 
  -6   4   0  661.73   44.10 
  -6   4   0  667.93   47.10 
   6   4   0  656.23   35.80 
   6   4   0  668.33   38.30 
   7  -4   0  917.41   55.19 
  -7  -4   0  900.11   51.49 
   7  -4   0  975.90   56.39 
  -7  -4   0  861.71   52.59 
   7  -4   0  894.31   53.59 
  -7  -4   0  830.32   49.60 
   7  -4   0  927.51   55.19 
   7  -4   0  919.01   55.19 
  -7  -4   0  989.80   55.49 
   7  -4   0  972.20   59.39 
   7  -4   0  969.30   58.69 
  -7  -4   0  945.01   50.19 
   7  -4   0  931.61   48.00 
   7  -4   0  988.40   57.69 
   7  -4   0  887.71   54.39 
  -7  -4   0  900.21   52.89 
  -7  -4   0  957.60   48.10 
  -7  -4   0  960.20   52.09 
  -7  -4   0  926.61   52.69 
   7   4   0  931.51   50.09 
  -7   4   0  915.61   60.59 
  -7   4   0  890.11   57.19 
  -7   4   0 1026.10   53.79 
  -7   4   0  935.21   50.19 
   7   4   0  888.61   58.49 
  -7   4   0  995.00   62.29 
  -7   4   0  953.10   58.29 
   7   4   0  909.71   48.70 
  -7   4   0  890.51   54.09 
   7   4   0  821.62   59.69 
  -7   4   0  957.90   58.59 
  -7   4   0 1034.50   59.49 
  -7   4   0  826.72   56.59 
  -7   4   0  936.11   58.19 
   7   4   0  878.31   52.59 
   7   4   0  935.51   58.19 
   8  -4   0  302.67   36.00 
   8  -4   0  327.47   33.40 
  -8  -4   0  333.97   32.70 
   8  -4   0  346.57   27.90 
  -8  -4   0  303.07   32.30 
   8  -4   0  271.57   34.30 
  -8  -4   0  357.56   29.70 
  -8  -4   0  311.77   30.10 
  -8  -4   0  314.67   34.00 
   8  -4   0  347.27   37.30 
   8  -4   0  298.17   35.10 
   8  -4   0  411.26   39.10 
  -8  -4   0  307.67   32.40 
   8  -4   0  354.76   35.90 
   8  -4   0  362.56   36.80 
   8  -4   0  354.76   35.70 
  -8  -4   0  359.36   27.70 
  -8  -4   0  361.46   35.10 
  -8   4   0  391.16   39.90 
  -8   4   0  347.27   27.20 
   8   4   0  360.76   34.10 
   8   4   0  314.07   25.80 
   8   4   0  350.36   26.40 
  -8   4   0  360.86   38.50 
  -8   4   0  356.66   41.80 
   8   4   0  337.27   38.40 
  -8   4   0  360.86   30.10 
  -8   4   0  365.66   42.10 
  -8   4   0  342.27   38.90 
  -8   4   0  319.27   37.70 
  -8   4   0  321.77   33.90 
   8   4   0  284.07   39.20 
  -8   4   0  395.56   42.30 
  -8   4   0  286.87   34.90 
  -9  -4   0  186.38   25.80 
   9  -4   0  214.58   29.40 
   9  -4   0  236.18   33.70 
  -9  -4   0  194.48   27.60 
   9  -4   0  203.58   28.10 
  -9  -4   0  212.48   28.20 
   9  -4   0  202.58   29.60 
  -9  -4   0  257.07   30.20 
   9  -4   0  195.78   26.00 
   9  -4   0  300.87   36.30 
   9  -4   0  232.28   32.60 
   9  -4   0  214.18   30.40 
   9  -4   0  209.88   30.10 
  -9  -4   0  191.68   28.40 
   9  -4   0  205.48   29.60 
  -9  -4   0  224.48   26.90 
  -9  -4   0  243.78   30.10 
  -9   4   0  232.48   34.00 
   9   4   0  220.78   28.40 
  -9   4   0  263.57   37.80 
  -9   4   0  261.87   34.50 
  -9   4   0  169.18   29.20 
   9   4   0  254.57   34.20 
  -9   4   0  233.48   35.80 
  -9   4   0  220.38   31.60 
  -9   4   0  155.68   28.20 
  -9   4   0  267.17   32.00 
  -9   4   0  216.08   28.10 
   9   4   0  212.28   35.70 
  -9   4   0  166.08   22.90 
  -9   4   0  206.78   31.20 
  10  -4   0   26.80   14.30 
  10  -4   0   46.60   17.30 
  10  -4   0   61.89   19.50 
  10  -4   0   47.10   18.20 
  10  -4   0   37.00   17.50 
 -10  -4   0   37.10   17.40 
 -10  -4   0   30.10   14.20 
  10  -4   0   81.29   18.30 
  10  -4   0   34.80   17.20 
  10  -4   0   52.49   16.60 
 -10  -4   0   45.60   15.20 
 -10  -4   0   53.79   17.00 
 -10  -4   0   34.50   14.30 
  10  -4   0   43.40   17.30 
 -10  -4   0   38.60   16.50 
  10  -4   0   15.60   13.10 
 -10   4   0   31.30   16.40 
 -10   4   0   31.10   14.40 
  10   4   0   48.30   22.10 
  10   4   0   65.59   19.30 
  10   4   0   22.70   13.60 
 -10   4   0   46.10   18.90 
 -10   4   0   16.40   17.20 
 -10   4   0   55.19   18.70 
 -10   4   0   22.50   14.90 
 -10   4   0    9.40   14.40 
 -10   4   0   67.49   19.40 
 -10   4   0   29.00   17.40 
   0  -5   0    2.10    3.30 
   0  -5   0    4.90    4.80 
   0  -5   0    0.10    3.20 
   0  -5   0   -2.10    2.60 
   0  -5   0   -0.80    4.40 
   0  -5   0    6.40    6.60 
   0  -5   0    9.10    4.40 
   0  -5   0    4.90    4.70 
   0  -5   0    2.00    2.80 
   0  -5   0    0.40    2.20 
   0  -5   0    4.80    3.60 
   0  -5   0   -3.90    2.20 
   0  -5   0   -2.00    2.70 
   0  -5   0    1.30    2.20 
   0   5   0    5.30    3.50 
   0   5   0   -2.50    3.40 
   0   5   0    2.80    5.20 
   0   5   0    0.60    3.70 
   0   5   0    1.10    4.30 
   0   5   0    5.10    5.20 
   0   5   0    1.90    3.90 
   0   5   0   -0.90    4.60 
   0   5   0    5.80    4.00 
   0   5   0   -1.00    3.60 
   0   5   0    0.30    4.50 
   0   5   0   -4.00    3.20 
   0   5   0   -0.30    5.10 
   0   5   0    4.10    4.00 
   0   5   0   -1.10    3.90 
   0   5   0   -1.20    3.30 
   0   5   0   -4.30    2.60 
   0   5   0    4.10    4.40 
  -1  -5   0  100.89   11.10 
   1  -5   0   88.69   12.00 
   1  -5   0   94.59   10.40 
   1  -5   0  106.59   12.10 
   1  -5   0  112.09   12.90 
   1  -5   0   82.99   17.70 
  -1  -5   0   97.79    9.70 
  -1  -5   0   99.79   10.40 
  -1  -5   0   98.19   10.50 
  -1  -5   0  112.99   16.60 
  -1  -5   0   93.89    6.60 
  -1  -5   0   94.19   14.30 
   1  -5   0   94.79   14.10 
   1  -5   0  105.09   12.20 
   1  -5   0  101.69    7.60 
  -1  -5   0   88.69    9.80 
   1  -5   0   90.29   10.60 
   1  -5   0  109.69    9.70 
   1  -5   0  109.79   11.40 
   1  -5   0  113.79   10.20 
   1  -5   0   82.69   14.70 
  -1  -5   0   91.39   14.70 
   1  -5   0  104.79    7.90 
   1  -5   0  116.29   16.30 
  -1  -5   0   89.09    7.40 
   1  -5   0  133.39   15.10 
   1  -5   0   92.19    7.70 
   1  -5   0  100.39    7.30 
  -1  -5   0  117.69   13.80 
   1   5   0  109.69   13.60 
   1   5   0  107.19   13.10 
  -1   5   0   96.09   16.00 
   1   5   0  111.09   14.00 
  -1   5   0  107.59   16.20 
   1   5   0   84.59   12.70 
  -1   5   0   67.89   11.50 
   1   5   0   96.29   14.90 
  -1   5   0   97.79   14.60 
  -1   5   0   97.89   14.00 
  -1   5   0   92.39   12.10 
   1   5   0  106.19   15.10 
   1   5   0  105.29   14.10 
   1   5   0  109.89   13.80 
   1   5   0  102.89   12.90 
   1   5   0   98.19   12.20 
  -1   5   0  102.59   11.00 
   1   5   0   87.39   14.00 
  -1   5   0  109.39   13.70 
  -1   5   0   97.19   15.70 
  -1   5   0  126.39   12.80 
  -1   5   0   92.49   14.30 
   1   5   0  113.89   14.30 
   1   5   0   67.69   11.30 
  -1   5   0   99.19   12.60 
  -1   5   0   88.69   11.80 
   1   5   0   76.39   10.10 
   1   5   0  114.49   16.20 
   1   5   0  111.99   14.20 
  -1   5   0  100.29   13.30 
  -1   5   0   74.29   11.80 
   2  -5   0  271.17   20.00 
   2  -5   0  343.67   26.80 
  -2  -5   0  291.77   14.50 
   2  -5   0  270.67   14.40 
   2  -5   0  273.97   18.90 
   2  -5   0  279.77   16.10 
   2  -5   0  294.67   17.60 
  -2  -5   0  277.37   17.40 
  -2  -5   0  293.37   18.00 
  -2  -5   0  280.37   16.40 
   2  -5   0  292.57   14.80 
   2  -5   0  265.57   20.60 
  -2  -5   0  257.17   18.00 
   2  -5   0  286.17   13.60 
  -2  -5   0  306.07   16.80 
   2  -5   0  308.77   29.60 
   2  -5   0  289.67   15.40 
  -2  -5   0  281.77   17.70 
  -2  -5   0  272.37   26.50 
   2  -5   0  304.87   20.80 
   2  -5   0  280.67   19.60 
  -2  -5   0  279.27   17.20 
   2  -5   0  277.97   20.20 
   2  -5   0  275.57   17.80 
   2  -5   0  288.27   27.00 
   2  -5   0  307.07   19.20 
  -2  -5   0  267.27   20.20 
  -2  -5   0  252.67   16.60 
   2  -5   0  311.57   19.10 
  -2  -5   0  260.17   29.00 
   2  -5   0  293.57   19.00 
  -2  -5   0  257.77   13.70 
  -2   5   0  295.47   22.40 
   2   5   0  253.67   25.50 
  -2   5   0  279.77   29.10 
   2   5   0  270.27   21.70 
   2   5   0  270.47   21.50 
  -2   5   0  300.27   16.40 
  -2   5   0  309.07   24.20 
  -2   5   0  272.07   21.60 
   2   5   0  267.57   20.10 
   2   5   0  281.67   19.60 
  -2   5   0  265.77   16.90 
  -2   5   0  218.18   22.80 
  -2   5   0  285.77   17.60 
  -2   5   0  314.37   17.10 
   2   5   0  250.27   21.00 
  -2   5   0  300.77   21.30 
  -2   5   0  254.07   17.50 
   2   5   0  253.47   17.20 
  -2   5   0  298.67   24.60 
  -2   5   0  304.37   21.00 
  -2   5   0  300.87   23.10 
  -2   5   0  244.78   19.20 
   2   5   0  249.08   17.40 
   2   5   0  271.77   20.00 
  -2   5   0  336.37   24.90 
   2   5   0  278.47   21.10 
   3  -5   0    5.00    3.60 
  -3  -5   0    1.10    2.60 
  -3  -5   0   -0.20    2.70 
   3  -5   0    6.40    4.70 
   3  -5   0    6.30    6.00 
   3  -5   0   -2.50    5.60 
   3  -5   0   11.10    7.30 
  -3  -5   0    3.10    4.00 
  -3  -5   0   -0.30    6.00 
   3  -5   0    2.10    5.50 
   3  -5   0   -3.40    4.10 
   3  -5   0   -0.20    4.50 
   3  -5   0   -4.10    2.50 
   3  -5   0   -3.50    4.70 
   3  -5   0   -3.40    4.20 
  -3  -5   0   -2.40    3.60 
  -3  -5   0    2.90    5.50 
  -3  -5   0   19.00    9.30 
   3  -5   0   -1.60    1.80 
  -3  -5   0   -1.40    3.60 
  -3  -5   0    0.70   10.00 
   3  -5   0   -1.60    3.80 
  -3  -5   0    0.30    3.20 
   3  -5   0   -5.20    3.10 
  -3  -5   0   -1.10    3.10 
   3  -5   0   -0.80    4.40 
  -3  -5   0    1.90    2.30 
   3  -5   0   -2.70    2.80 
  -3  -5   0    1.00    3.90 
   3   5   0    2.20    4.90 
  -3   5   0   -1.40    3.50 
   3   5   0   -2.50    3.10 
   3   5   0   -6.70    5.50 
  -3   5   0    2.40    4.80 
  -3   5   0   -3.70    2.60 
   3   5   0    2.90    5.90 
  -3   5   0    0.00    4.70 
  -3   5   0    9.60    6.60 
  -3   5   0    4.90    6.30 
  -3   5   0   -1.60    2.90 
  -3   5   0    5.00    3.30 
  -3   5   0    8.50    5.20 
  -3   5   0   -4.30    2.50 
  -3   5   0    1.80    5.70 
  -3   5   0    9.00    6.10 
   3   5   0    0.80    3.30 
  -3   5   0   13.50    7.80 
  -3   5   0    5.40    5.60 
   3   5   0    2.40    4.50 
   3   5   0   -1.50    5.60 
   3   5   0    6.80    5.50 
  -3   5   0    6.10    6.00 
  -3   5   0    8.90    5.80 
   4  -5   0  194.88   11.90 
   4  -5   0  227.08   25.20 
   4  -5   0  215.78   14.40 
  -4  -5   0  201.68   10.40 
   4  -5   0  229.18   22.40 
   4  -5   0  220.18   21.30 
   4  -5   0  201.38   21.60 
  -4  -5   0  185.18   17.00 
   4  -5   0  202.28   15.00 
   4  -5   0  213.38   26.10 
   4  -5   0  220.58   21.00 
  -4  -5   0  228.38   20.80 
   4  -5   0  243.28   24.30 
  -4  -5   0  224.28   29.80 
  -4  -5   0  199.78   20.60 
  -4  -5   0  247.68   25.40 
   4  -5   0  211.88   17.70 
  -4  -5   0  194.78   11.40 
  -4  -5   0  207.88   22.90 
  -4  -5   0  195.78   10.40 
   4  -5   0  215.88   25.20 
  -4  -5   0  226.18   15.40 
   4  -5   0  210.18   11.70 
  -4   5   0  209.48   24.30 
  -4   5   0  238.08   15.20 
   4   5   0  209.18   21.50 
   4   5   0  184.58   22.80 
  -4   5   0  198.68   23.80 
   4   5   0  197.78   14.50 
   4   5   0  190.68   20.20 
  -4   5   0  237.58   16.60 
  -4   5   0  264.27   26.80 
  -4   5   0  207.78   23.80 
  -4   5   0  204.08   26.20 
   4   5   0  218.88   17.40 
  -4   5   0  226.28   26.00 
  -4   5   0  171.58   22.60 
  -4   5   0  205.38   15.30 
  -4   5   0  215.28   22.60 
   4   5   0  176.18   23.80 
   4   5   0  190.88   24.20 
  -4   5   0  192.78   26.20 
  -4   5   0  220.18   26.10 
   5  -5   0   71.49   14.20 
  -5  -5   0   70.39   13.20 
   5  -5   0   60.49   14.10 
   5  -5   0   61.09   13.70 
  -5  -5   0   88.99   16.50 
  -5  -5   0   83.89   13.20 
   5  -5   0   76.59   11.60 
   5  -5   0   74.89   14.00 
   5  -5   0   57.59   12.30 
   5  -5   0   94.59   15.20 
  -5  -5   0   62.39   17.60 
  -5  -5   0   70.39   11.10 
   5  -5   0   82.09   11.50 
   5  -5   0   44.20   12.10 
  -5  -5   0   81.29    9.60 
   5  -5   0   63.79   15.10 
   5  -5   0   55.39   14.40 
  -5  -5   0   80.59   19.40 
  -5   5   0   72.29   15.40 
  -5   5   0   73.09   11.80 
  -5   5   0   67.69   10.90 
   5   5   0   45.60   10.10 
  -5   5   0   78.99   16.80 
   5   5   0   90.79   15.50 
   5   5   0   64.69    9.00 
   5   5   0   82.29   17.90 
  -5   5   0   73.39   11.30 
  -5   5   0   86.49   17.10 
  -5   5   0   89.99   17.60 
   5   5   0   76.39   12.50 
  -5   5   0   66.09   13.10 
  -5   5   0   64.79   14.40 
  -5   5   0   78.39   16.90 
  -5   5   0  101.79   19.60 
  -5   5   0   73.99   15.70 
  -5   5   0   70.79   16.30 
   5   5   0   89.79   19.60 
  -6  -5   0  431.86   28.30 
  -6  -5   0  414.56   30.60 
   6  -5   0  357.96   30.20 
   6  -5   0  430.86   32.30 
  -6  -5   0  403.66   32.20 
  -6  -5   0  388.26   27.80 
   6  -5   0  462.35   42.00 
  -6  -5   0  388.46   30.20 
   6  -5   0  417.36   31.30 
   6  -5   0  389.46   31.80 
   6  -5   0  458.75   32.60 
   6  -5   0  462.75   27.50 
   6  -5   0  460.65   43.20 
   6  -5   0  446.26   33.60 
   6  -5   0  457.75   34.40 
   6   5   0  470.15   38.00 
   6   5   0  447.06   32.40 
  -6   5   0  472.35   35.40 
   6   5   0  373.76   41.80 
  -6   5   0  411.26   42.70 
   6   5   0  411.56   30.10 
  -6   5   0  453.45   42.20 
  -6   5   0  505.55   37.50 
  -6   5   0  462.85   42.40 
  -6   5   0  446.36   44.50 
  -6   5   0  403.66   28.30 
   6   5   0  389.56   28.70 
  -6   5   0  424.66   27.50 
  -6   5   0  409.86   39.90 
  -6   5   0  488.15   36.80 
  -6   5   0  343.17   34.10 
  -6   5   0  405.36   34.10 
   7  -5   0   20.20   11.70 
   7  -5   0    9.90    8.50 
   7  -5   0   23.10   12.20 
  -7  -5   0   12.60    9.40 
   7  -5   0   24.10   10.70 
  -7  -5   0   27.50   10.20 
   7  -5   0   27.00   13.80 
   7  -5   0    7.40    8.60 
   7  -5   0   46.10   14.40 
  -7  -5   0   27.70    9.80 
   7  -5   0   21.80   11.70 
  -7  -5   0   15.90    8.50 
   7  -5   0   13.20    8.50 
  -7  -5   0   10.20    9.20 
  -7  -5   0   24.80    9.70 
  -7  -5   0   21.60   10.30 
   7  -5   0   24.50   10.60 
  -7   5   0    6.90    6.40 
   7   5   0   21.50    8.70 
  -7   5   0   27.00   11.80 
  -7   5   0   38.10   14.30 
  -7   5   0   25.10   11.20 
  -7   5   0   31.00   12.30 
  -7   5   0   24.90   12.20 
   7   5   0   26.70   10.80 
  -7   5   0   28.40   14.00 
  -7   5   0   24.00   12.00 
  -7   5   0   38.00   15.30 
  -7   5   0   14.50   10.50 
  -7   5   0    4.70    8.40 
   7   5   0    4.20    9.80 
   7   5   0   24.50   16.40 
  -7   5   0   13.20    8.80 
   8  -5   0   11.10   10.30 
   8  -5   0   17.60   11.70 
   8  -5   0   12.90   11.00 
   8  -5   0    9.00    9.50 
   8  -5   0   -3.00    7.60 
   8  -5   0   18.80   12.50 
   8  -5   0   -1.90    9.90 
  -8  -5   0   11.70    8.60 
  -8  -5   0    8.50    8.90 
   8  -5   0   -5.90    8.70 
  -8  -5   0   -0.30    9.20 
   8  -5   0   20.60   12.90 
  -8  -5   0    3.10    7.40 
   8  -5   0   18.10   11.00 
  -8  -5   0    6.90    8.60 
   8   5   0    5.30    9.60 
  -8   5   0   -3.80   10.40 
  -8   5   0  -14.90    9.10 
  -8   5   0   -1.90    9.30 
   8   5   0    0.40    8.50 
  -8   5   0   12.60   11.00 
  -8   5   0    0.90   10.10 
  -8   5   0   -5.60    7.50 
  -8   5   0    4.50   10.20 
   8   5   0   -0.20    6.70 
  -8   5   0  -17.70    7.60 
  -8   5   0    2.10   10.00 
  -8   5   0   -0.70   10.80 
   8   5   0    1.00   15.00 
   9  -5   0   21.00   13.80 
  -9  -5   0    6.60   10.10 
  -9  -5   0   -6.10    8.90 
   9  -5   0   -1.10    8.50 
   9  -5   0  -11.50    8.90 
  -9  -5   0    1.20   10.40 
   9  -5   0    8.20   11.90 
  -9  -5   0    2.60    8.20 
   9  -5   0   -0.40   11.70 
   9  -5   0   17.00   12.30 
   9  -5   0   29.50   15.60 
  -9  -5   0    0.90    9.50 
  -9  -5   0    9.10   10.60 
   9  -5   0    1.10   10.60 
   9  -5   0   17.20   13.60 
   9  -5   0   -2.80    8.70 
  -9   5   0   -3.50    8.70 
   9   5   0  -11.40   12.50 
  -9   5   0    7.70   13.00 
   9   5   0   22.80   12.50 
  -9   5   0   -2.40   13.10 
   9   5   0    3.10   12.70 
  -9   5   0    2.30    9.80 
  -9   5   0    9.70   13.30 
  -9   5   0    7.00   13.40 
  -9   5   0    3.40   10.70 
  -9   5   0    3.00   10.60 
  -9   5   0  -10.50    9.90 
  -9   5   0    3.60   12.20 
   0  -6   0    7.90    4.30 
   0  -6   0    2.20    3.10 
   0  -6   0    1.40    4.50 
   0  -6   0   -0.80    4.10 
   0  -6   0    7.90    6.70 
   0  -6   0    1.80    3.90 
   0  -6   0   -3.60    4.00 
   0  -6   0    4.50    4.50 
   0  -6   0    7.40    3.60 
   0  -6   0    6.20    4.20 
   0  -6   0   14.50    5.00 
   0  -6   0   15.30   10.70 
   0  -6   0    7.90    7.20 
   0  -6   0    5.00    1.80 
   0  -6   0   -1.20    4.00 
   0  -6   0    8.40    2.60 
   0   6   0    6.00    5.70 
   0   6   0    6.50    4.70 
   0   6   0    2.60    5.30 
   0   6   0    3.20    5.00 
   0   6   0    6.80    7.00 
   0   6   0   28.20   10.10 
   0   6   0    6.70    5.30 
   0   6   0    4.50    4.60 
   0   6   0   -0.30    4.50 
   0   6   0    6.40    5.60 
   0   6   0    5.90    6.00 
   0   6   0    7.90    6.70 
   0   6   0    2.90    6.50 
   0   6   0    1.60    5.80 
   0   6   0    7.20    5.70 
   0   6   0    0.90    5.40 
   1  -6   0 2199.18   92.19 
   1  -6   0 2018.30   94.09 
   1  -6   0 2163.28   92.09 
   1  -6   0 2179.38   95.59 
   1  -6   0 2169.88   91.79 
   1  -6   0 2150.38   92.79 
  -1  -6   0 2137.19   99.19 
   1  -6   0 2077.79  105.39 
  -1  -6   0 2043.00  103.29 
   1  -6   0 2165.58   95.09 
  -1  -6   0 1981.00  101.39 
  -1  -6   0 2099.59   94.59 
  -1  -6   0 2122.19   95.39 
  -1  -6   0 2096.89   95.29 
  -1  -6   0 2083.99   94.59 
   1  -6   0 2193.18   91.79 
  -1  -6   0 2084.79   91.29 
   1  -6   0 1948.01  108.29 
  -1  -6   0 2207.98   96.19 
  -1  -6   0 2036.50   89.99 
   1  -6   0 2146.49   97.19 
   1  -6   0 2165.48   97.19 
   1  -6   0 2138.59   90.79 
  -1  -6   0 2151.98   93.09 
  -1  -6   0 2190.78   96.89 
   1  -6   0 2171.58  103.29 
   1  -6   0 2264.57  100.49 
  -1  -6   0 2198.38   95.49 
  -1  -6   0 2148.89  103.29 
  -1  -6   0 2131.69  111.79 
   1  -6   0 2246.38  103.89 
   1  -6   0 2210.08   97.79 
   1   6   0 2137.19   99.59 
  -1   6   0 2207.48  105.59 
  -1   6   0 2233.98  100.29 
  -1   6   0 2170.08   96.99 
   1   6   0 2171.28   99.99 
  -1   6   0 2260.87   98.49 
  -1   6   0 2165.38   98.29 
   1   6   0 2320.47  104.99 
   1   6   0 2134.29   99.99 
   1   6   0 2172.78   98.99 
   1   6   0 2069.49   99.19 
  -1   6   0 2297.07   99.59 
  -1   6   0 2155.48   95.89 
  -1   6   0 2159.18  101.39 
   1   6   0 2192.58   99.89 
  -1   6   0 2202.58  102.89 
  -1   6   0 2097.59  100.09 
   1   6   0 2196.08  100.69 
   1   6   0 2131.49   96.49 
   1   6   0 2139.49   98.99 
   1   6   0 2048.50   98.89 
  -1   6   0 2199.58  103.59 
  -1   6   0 2078.89   99.99 
  -1   6   0 2209.18  103.29 
   1   6   0 2083.69  102.59 
   1   6   0 2093.69  103.29 
  -1   6   0 2071.19   99.19 
   1   6   0 2191.78  103.39 
  -1   6   0 2224.38  106.69 
   2  -6   0    2.40    2.10 
   2  -6   0    7.30    3.90 
   2  -6   0    5.50    6.70 
   2  -6   0    0.80    4.30 
  -2  -6   0    6.80    2.70 
   2  -6   0    2.40    6.70 
   2  -6   0    1.00    4.50 
  -2  -6   0    1.60    1.80 
   2  -6   0    2.70    4.30 
   2  -6   0    0.90    6.10 
   2  -6   0   -1.70    3.80 
   2  -6   0   -4.00    4.50 
  -2  -6   0    4.40    5.00 
  -2  -6   0    7.90    4.60 
   2  -6   0    3.20    7.60 
   2  -6   0    6.40    2.80 
   2  -6   0    2.30    5.50 
   2  -6   0    1.10    2.70 
   2  -6   0    4.30    3.50 
   2  -6   0   24.30    7.20 
  -2  -6   0   -0.60    6.80 
   2  -6   0    1.70    5.70 
  -2  -6   0    3.80    3.70 
   2  -6   0    3.20    2.10 
  -2  -6   0    0.60    3.30 
  -2  -6   0   -5.40    8.60 
  -2  -6   0    6.00    6.00 
  -2  -6   0   -0.40    7.10 
  -2   6   0   -0.80    6.90 
  -2   6   0    3.70    6.00 
   2   6   0    0.60    4.20 
  -2   6   0    4.10    6.90 
  -2   6   0    4.00    4.20 
  -2   6   0   -0.80    4.80 
   2   6   0    1.80    5.10 
   2   6   0    2.50    5.80 
  -2   6   0    0.90    4.50 
   2   6   0    2.30    5.00 
  -2   6   0    1.20    4.20 
  -2   6   0   -3.40    4.70 
   2   6   0   -0.10    3.60 
   2   6   0    5.90    6.20 
  -2   6   0   -4.10    5.30 
  -2   6   0    2.60    3.50 
  -2   6   0    7.00    5.90 
  -2   6   0    5.60    5.80 
  -2   6   0    1.70    6.20 
   2   6   0    0.80    5.80 
   2   6   0   10.70    6.70 
   2   6   0   -1.40    5.40 
  -2   6   0    8.80    5.70 
   3  -6   0  140.39   16.00 
   3  -6   0  129.39   16.20 
  -3  -6   0   90.59   15.50 
  -3  -6   0   97.49   14.20 
  -3  -6   0  125.99   24.80 
   3  -6   0  129.89   11.90 
   3  -6   0  133.89   17.30 
   3  -6   0   93.79   17.30 
  -3  -6   0  104.59    8.90 
  -3  -6   0  108.69   18.60 
   3  -6   0  124.59   15.80 
   3  -6   0  132.19   17.00 
  -3  -6   0  123.69   14.30 
  -3  -6   0  102.79   13.00 
  -3  -6   0  117.99   11.80 
   3  -6   0  125.39   10.00 
   3  -6   0  115.79   14.00 
   3  -6   0  131.89   17.30 
   3  -6   0  155.58   17.40 
   3  -6   0  123.79   19.40 
   3  -6   0  149.39   22.60 
   3  -6   0  149.88   22.80 
  -3  -6   0   95.79   10.20 
  -3   6   0  122.49   19.00 
  -3   6   0  136.99   17.00 
   3   6   0  109.89   16.40 
  -3   6   0   97.49   16.80 
  -3   6   0  114.99   18.10 
  -3   6   0  100.79   16.50 
   3   6   0   98.09   13.40 
  -3   6   0  154.18   20.90 
   3   6   0  129.29   19.10 
   3   6   0  116.59   16.30 
   3   6   0   90.79   16.00 
  -3   6   0  102.29   18.50 
   3   6   0   99.29   19.70 
   3   6   0  104.09   15.60 
  -3   6   0  139.89   21.90 
  -3   6   0  144.69   21.50 
   3   6   0  114.79   13.20 
  -3   6   0  129.19   11.70 
  -3   6   0  151.78   23.50 
  -4  -6   0    0.10    3.60 
  -4  -6   0    0.70    2.80 
   4  -6   0    1.90    5.40 
   4  -6   0   -0.40    3.70 
  -4  -6   0    3.30    9.50 
   4  -6   0    5.30    5.40 
  -4  -6   0    8.20    8.20 
  -4  -6   0   -0.60    4.80 
   4  -6   0    4.00    7.40 
   4  -6   0   -3.60    5.80 
   4  -6   0    3.80    6.20 
  -4  -6   0    4.10   14.00 
   4  -6   0   -3.70    5.70 
   4  -6   0   -1.50    7.20 
   4  -6   0   -1.70    4.30 
   4  -6   0    3.80    6.10 
   4  -6   0   -5.10    4.50 
  -4  -6   0    0.70    5.60 
   4   6   0   11.50    7.00 
  -4   6   0    9.00    8.50 
  -4   6   0    4.20    5.50 
  -4   6   0   -3.00    5.40 
  -4   6   0    0.60    6.10 
   4   6   0   -0.60    7.70 
   4   6   0    6.40    7.90 
  -4   6   0   -3.80    5.00 
  -4   6   0    2.60    7.30 
  -4   6   0   -3.60    6.70 
  -4   6   0    7.80    9.30 
  -4   6   0    5.60    8.30 
   4   6   0    6.50    5.90 
  -4   6   0   -0.40    6.40 
  -4   6   0    3.50    3.40 
  -4   6   0   13.60    8.00 
   4   6   0    1.60    7.30 
   4   6   0    1.80    4.00 
   4   6   0   -1.00    3.80 
  -5  -6   0  631.44   43.40 
   5  -6   0  733.93   44.70 
   5  -6   0  737.33   49.00 
  -5  -6   0  683.23   48.70 
   5  -6   0  735.23   42.90 
  -5  -6   0  645.74   41.40 
   5  -6   0  663.03   41.60 
  -5  -6   0  646.44   36.90 
   5  -6   0  755.92   44.50 
   5  -6   0  763.02   42.80 
  -5  -6   0  768.02   41.90 
   5  -6   0  706.53   41.90 
   5  -6   0  641.84   44.70 
  -5  -6   0  707.53   51.59 
   5  -6   0  652.83   38.30 
   5  -6   0  715.13   37.30 
   5  -6   0  707.53   49.99 
   5  -6   0  651.33   43.30 
  -5   6   0  716.43   47.80 
  -5   6   0  682.33   46.50 
   5   6   0  647.74   38.60 
   5   6   0  621.74   48.10 
  -5   6   0  665.13   49.40 
  -5   6   0  720.23   45.90 
   5   6   0  701.63   48.30 
  -5   6   0  662.73   48.60 
  -5   6   0  596.04   45.30 
   5   6   0  718.33   43.40 
  -5   6   0  683.43   46.50 
  -5   6   0  786.22   49.80 
  -5   6   0  657.03   43.50 
   5   6   0  706.83   41.80 
  -5   6   0  663.43   36.80 
   5   6   0  617.14   34.80 
  -5   6   0  665.93   47.10 
   6  -6   0   -7.40    7.50 
  -6  -6   0    0.80    8.90 
  -6  -6   0    0.20    6.60 
  -6  -6   0   -4.40    5.60 
   6  -6   0    3.10    9.60 
   6  -6   0   -2.00    6.50 
   6  -6   0    0.10    8.10 
   6  -6   0    4.10    7.30 
   6  -6   0   -4.70    8.00 
   6  -6   0   -0.70    7.00 
   6  -6   0   -3.60    6.90 
   6  -6   0    6.40    9.00 
  -6  -6   0    4.20    7.50 
   6  -6   0   -5.00    5.70 
  -6  -6   0    7.40   14.00 
  -6  -6   0    0.80    6.10 
  -6   6   0    6.30    8.80 
  -6   6   0    4.00   10.00 
   6   6   0    9.80   12.90 
  -6   6   0    8.90    9.60 
  -6   6   0  -10.10    6.30 
  -6   6   0    0.60    8.00 
  -6   6   0   16.90   10.90 
  -6   6   0   -6.00    7.50 
  -6   6   0    9.00   14.60 
  -6   6   0    3.60    8.60 
   6   6   0   -9.50    9.20 
   6   6   0   -4.50    5.50 
  -6   6   0    1.00    6.10 
  -6   6   0    4.40    9.20 
   6   6   0   -3.40    6.90 
   7  -6   0 1118.39   68.29 
  -7  -6   0 1194.18   64.29 
   7  -6   0 1256.87   67.99 
   7  -6   0 1096.69   67.49 
  -7  -6   0 1151.58   64.89 
   7  -6   0 1237.88   68.49 
   7  -6   0 1165.68   66.39 
  -7  -6   0 1096.19   64.59 
   7  -6   0 1167.68   67.89 
   7  -6   0 1176.38   66.49 
   7  -6   0 1150.68   64.79 
   7  -6   0 1205.58   73.99 
   7  -6   0 1354.06   75.39 
  -7  -6   0 1126.09   65.99 
  -7   6   0 1180.28   73.19 
   7   6   0 1112.59   75.39 
  -7   6   0 1020.90   69.69 
  -7   6   0 1280.47   62.39 
   7   6   0 1221.68   75.19 
  -7   6   0 1064.69   70.59 
  -7   6   0 1098.39   74.39 
  -7   6   0 1230.28   72.39 
   7   6   0 1080.79   61.39 
  -7   6   0 1235.08   76.69 
  -7   6   0 1135.09   70.79 
  -7   6   0 1057.09   65.79 
   7   6   0  933.31   62.69 
  -7   6   0 1073.19   70.29 
   8  -6   0   35.10   16.40 
  -8  -6   0   22.70   12.00 
   8  -6   0   50.59   16.60 
   8  -6   0   32.80   14.70 
   8  -6   0   25.60   13.80 
   8  -6   0   -2.30   10.70 
   8  -6   0   13.00   13.20 
   8  -6   0   33.90   14.20 
   8  -6   0   31.10   13.20 
  -8  -6   0   17.40   10.40 
  -8  -6   0    5.40   11.60 
   8  -6   0    2.40    9.40 
  -8  -6   0    6.40    8.60 
   8  -6   0   32.70   12.60 
  -8   6   0   43.40   17.40 
   8   6   0    8.20    8.80 
  -8   6   0   38.40   17.70 
   8   6   0   17.50   14.10 
   8   6   0   24.80   17.80 
  -8   6   0   19.90   13.60 
  -8   6   0    7.90   12.50 
  -8   6   0   16.20   11.60 
  -8   6   0   27.00   14.70 
  -8   6   0   36.90   18.00 
  -8   6   0   34.80   16.30 
  -8   6   0   37.70   12.40 
   8   6   0   26.90   13.80 
  -8   6   0   37.30   17.90 
  -9  -6   0  349.77   36.80 
  -9  -6   0  314.67   38.30 
   9  -6   0  287.87   38.70 
  -9  -6   0  272.77   33.70 
   9  -6   0  303.17   36.70 
   9  -6   0  304.97   37.60 
   9  -6   0  424.96   42.60 
  -9  -6   0  370.96   38.90 
   9  -6   0  341.57   43.00 
   9  -6   0  312.07   38.50 
   9  -6   0  298.87   39.90 
   9  -6   0  324.17   40.50 
   9  -6   0  234.48   31.30 
   9  -6   0  198.48   32.20 
  -9   6   0  346.07   39.40 
  -9   6   0  273.47   38.90 
  -9   6   0  351.16   47.60 
   9   6   0  337.57   38.30 
  -9   6   0  273.07   39.80 
  -9   6   0  313.27   41.70 
  -9   6   0  192.08   37.00 
  -9   6   0  330.07   35.60 
  -9   6   0  303.07   42.20 
   9   6   0  252.17   43.40 
  -9   6   0  231.08   39.40 
   9   6   0  345.17   43.70 
  -9   6   0  350.36   45.90 
   0  -7   0    1.70    3.30 
   0  -7   0    1.40    4.10 
   0  -7   0   -0.30    4.40 
   0  -7   0    5.70    7.90 
   0  -7   0    1.40    4.60 
   0  -7   0   -3.60    2.80 
   0  -7   0    0.80    3.90 
   0  -7   0    1.40    4.40 
   0  -7   0   -1.70    2.50 
   0  -7   0    5.30    9.50 
   0  -7   0    2.80    4.90 
   0  -7   0   -2.20    5.20 
   0  -7   0   -0.30    6.20 
   0  -7   0    5.20    4.00 
   0  -7   0   12.70    4.80 
   0  -7   0    4.00    5.00 
   0   7   0    2.30    5.80 
   0   7   0    1.80    5.60 
   0   7   0    1.90    5.80 
   0   7   0   -0.50    7.60 
   0   7   0   -2.80    6.90 
   0   7   0    2.60    5.10 
   0   7   0   -2.50    5.20 
   0   7   0    0.90    5.20 
   0   7   0   -0.40    6.80 
   0   7   0   -2.90    6.40 
   0   7   0    0.40    5.70 
   0   7   0   -2.80    5.20 
   0   7   0   -1.00    6.00 
   0   7   0    0.30    4.80 
   1  -7   0   28.40   12.50 
   1  -7   0   40.10   12.20 
  -1  -7   0   55.49    9.90 
  -1  -7   0   42.90   17.00 
  -1  -7   0   30.40    9.80 
  -1  -7   0   32.50   11.80 
   1  -7   0   36.00    7.70 
   1  -7   0   31.20    6.30 
   1  -7   0   28.70   14.10 
  -1  -7   0   37.80    9.20 
  -1  -7   0   34.30    8.40 
   1  -7   0   32.60    6.30 
   1  -7   0   32.90   10.60 
  -1  -7   0   21.20    6.70 
   1  -7   0   40.10   12.00 
   1  -7   0   35.60    9.50 
   1  -7   0   17.20    6.50 
  -1  -7   0   54.99   14.70 
   1  -7   0   22.60    5.70 
   1  -7   0   37.30    5.50 
  -1  -7   0   32.50    5.20 
   1  -7   0   40.40    9.00 
   1  -7   0   27.70    8.70 
   1  -7   0   27.10    8.90 
   1  -7   0   29.80    6.10 
   1  -7   0   37.50    9.80 
  -1  -7   0   28.80    5.90 
  -1  -7   0   51.69   11.90 
  -1  -7   0   35.40    8.10 
  -1  -7   0   35.60    8.20 
  -1  -7   0   30.00    7.70 
  -1  -7   0   47.30   13.10 
  -1  -7   0   21.50    6.00 
  -1  -7   0   42.10   13.70 
  -1  -7   0   27.10    7.80 
  -1   7   0   29.00   12.00 
   1   7   0   34.20   11.20 
  -1   7   0   21.10    9.20 
   1   7   0   44.40   12.70 
   1   7   0   46.90   10.60 
  -1   7   0   26.20    7.70 
  -1   7   0   36.80    9.40 
   1   7   0   28.70    9.30 
  -1   7   0   34.20   11.60 
  -1   7   0   34.70    9.30 
  -1   7   0   39.80   13.40 
   1   7   0   21.10    9.40 
   1   7   0   45.40   13.10 
  -1   7   0   33.50   10.50 
  -1   7   0   45.90   11.30 
   1   7   0   41.20   10.60 
   1   7   0   14.00    8.30 
  -1   7   0   39.70   10.10 
   1   7   0   40.60   11.20 
   1   7   0   20.00    8.40 
   1   7   0   41.20    9.40 
  -1   7   0   41.60   11.60 
  -1   7   0   43.20   11.30 
   1   7   0   57.39   11.90 
  -1   7   0   22.40    9.20 
  -1   7   0   47.70   13.70 
   1   7   0   45.10   11.30 
  -1   7   0   19.70    9.30 
   2  -7   0   53.69   13.90 
   2  -7   0   53.59   11.80 
  -2  -7   0   80.79   13.40 
   2  -7   0   76.99   10.30 
   2  -7   0   51.59   13.30 
  -2  -7   0   50.19   14.20 
  -2  -7   0   66.59   11.00 
  -2  -7   0   44.60    8.50 
  -2  -7   0   82.19   12.20 
   2  -7   0   75.59   13.60 
  -2  -7   0   62.99   13.10 
   2  -7   0   54.09   10.30 
  -2  -7   0   78.99   11.10 
  -2  -7   0   59.29   15.80 
   2  -7   0   69.19   11.40 
   2  -7   0   61.39   12.10 
   2  -7   0   69.59    8.10 
  -2  -7   0   62.29   12.30 
   2  -7   0   84.89   15.60 
  -2  -7   0   80.99   12.50 
  -2  -7   0   98.79   21.40 
   2  -7   0   70.49    7.20 
   2  -7   0   64.39   11.70 
   2  -7   0   46.30   15.10 
  -2  -7   0   63.39    9.80 
   2  -7   0   41.70   13.50 
  -2   7   0   64.49   16.90 
   2   7   0   59.59   14.40 
  -2   7   0   54.19   14.00 
   2   7   0   70.99   11.50 
   2   7   0   80.49   15.20 
  -2   7   0   59.99   14.10 
   2   7   0   51.19   12.10 
  -2   7   0   46.80   14.30 
  -2   7   0   67.19   12.60 
  -2   7   0   72.29   15.60 
  -2   7   0   71.39   13.80 
   2   7   0   50.09   11.70 
   2   7   0   69.39   13.80 
   2   7   0   51.39   10.70 
  -2   7   0   77.09   10.40 
  -2   7   0   68.59   14.50 
  -2   7   0   66.79   11.70 
  -2   7   0   64.89   11.50 
  -2   7   0   62.69   14.90 
  -2   7   0   68.79   16.70 
   2   7   0   62.39   13.40 
   2   7   0   82.99   15.10 
   3  -7   0   25.40   12.40 
  -3  -7   0   19.00   11.30 
   3  -7   0   23.90    8.60 
   3  -7   0   33.90   10.30 
  -3  -7   0   34.50   12.00 
   3  -7   0   37.50   11.60 
   3  -7   0   21.30   10.30 
  -3  -7   0   16.90    7.10 
   3  -7   0   16.50    7.30 
   3  -7   0   30.00   11.30 
  -3  -7   0   20.50   16.70 
  -3  -7   0   19.50    8.50 
   3  -7   0   16.30    7.40 
   3  -7   0   26.30   11.20 
   3  -7   0    6.90   10.20 
  -3  -7   0   23.70   11.90 
   3  -7   0   26.40    9.90 
   3  -7   0   10.40    8.40 
  -3  -7   0   22.80    5.80 
  -3   7   0   33.60   10.80 
  -3   7   0   22.40   11.40 
   3   7   0   26.30    7.30 
   3   7   0   32.10    8.80 
  -3   7   0   32.60   12.10 
  -3   7   0   10.80   10.00 
  -3   7   0   10.40    8.40 
  -3   7   0   37.20   13.50 
   3   7   0   28.60   10.50 
  -3   7   0   30.20   11.50 
   3   7   0    5.20    9.20 
   3   7   0   21.80    9.60 
  -3   7   0   31.30   13.80 
   3   7   0   28.80    9.40 
  -3   7   0   19.20    7.70 
  -3   7   0   16.30   10.50 
   3   7   0   45.50   12.90 
   4  -7   0  212.68   22.00 
  -4  -7   0  183.28   25.20 
   4  -7   0  205.88   23.80 
   4  -7   0  191.98   22.30 
   4  -7   0  227.18   28.70 
   4  -7   0  127.59   23.60 
   4  -7   0  202.18   28.00 
   4  -7   0  189.08   23.10 
  -4  -7   0  208.48   21.60 
   4  -7   0  202.18   23.10 
  -4  -7   0  192.78   22.80 
  -4  -7   0  173.68   25.10 
  -4  -7   0  183.48   32.20 
   4  -7   0  253.67   33.30 
   4  -7   0  202.58   21.60 
  -4  -7   0  217.38   31.00 
   4  -7   0  198.28   24.30 
  -4   7   0  235.58   29.40 
   4   7   0  205.48   19.00 
   4   7   0  160.28   23.50 
  -4   7   0  199.88   28.50 
   4   7   0  209.28   26.70 
  -4   7   0  181.88   26.30 
   4   7   0  173.68   22.30 
   4   7   0  211.08   21.30 
  -4   7   0  190.18   34.70 
  -4   7   0  183.18   26.10 
  -4   7   0  177.98   28.00 
   4   7   0  174.78   27.50 
   4   7   0  212.98   25.40 
  -4   7   0  197.28   29.70 
  -4   7   0  172.78   25.30 
  -4   7   0  193.88   28.80 
  -4   7   0  182.98   24.10 
  -5  -7   0   36.70   16.60 
   5  -7   0   40.70   12.40 
  -5  -7   0    9.90   10.80 
   5  -7   0   41.80   15.10 
  -5  -7   0   33.30   11.20 
   5  -7   0   44.90   12.10 
  -5  -7   0   44.80   12.00 
   5  -7   0   47.30   16.70 
   5  -7   0   64.89   13.60 
   5  -7   0   36.60   12.10 
   5  -7   0   54.19   14.10 
  -5  -7   0   42.10   10.80 
   5  -7   0   46.30   12.60 
  -5  -7   0   60.19   21.00 
   5  -7   0   65.19   16.70 
   5  -7   0   42.90   11.60 
   5   7   0   43.90   15.80 
  -5   7   0   47.10   15.70 
  -5   7   0   16.10   12.00 
   5   7   0   29.60   13.90 
  -5   7   0   22.40   11.80 
  -5   7   0   51.69   17.20 
  -5   7   0   47.00   16.90 
   5   7   0   28.30   12.20 
   5   7   0   59.29   13.50 
  -5   7   0   50.69   14.50 
  -5   7   0   42.00   15.20 
  -5   7   0   24.10   13.90 
  -5   7   0   43.60   14.20 
   6  -7   0  470.15   34.90 
  -6  -7   0  441.76   49.99 
   6  -7   0  408.56   33.20 
   6  -7   0  472.65   36.80 
   6  -7   0  390.46   38.00 
  -6  -7   0  490.35   34.20 
   6  -7   0  441.96   36.50 
  -6  -7   0  491.25   34.30 
  -6  -7   0  375.46   37.50 
   6  -7   0  395.06   41.00 
   6  -7   0  415.26   46.50 
  -6  -7   0  466.75   43.20 
   6  -7   0  370.36   39.00 
   6  -7   0  382.06   42.70 
   6  -7   0  448.06   34.90 
  -6   7   0  463.25   50.59 
  -6   7   0  496.65   44.50 
   6   7   0  431.16   46.00 
  -6   7   0  517.85   49.40 
  -6   7   0  414.86   43.70 
  -6   7   0  498.15   50.69 
   6   7   0  407.26   32.80 
  -6   7   0  418.86   46.30 
  -6   7   0  431.36   43.90 
  -6   7   0  445.56   46.90 
   6   7   0  484.65   49.40 
   6   7   0  465.85   43.20 
  -6   7   0  445.66   46.40 
  -7  -7   0   -2.70    7.50 
   7  -7   0    5.80   10.40 
   7  -7   0    8.30   10.50 
   7  -7   0   -1.50    8.80 
   7  -7   0   33.50   14.90 
   7  -7   0    3.70    9.00 
   7  -7   0   17.90   14.80 
   7  -7   0   17.50   11.80 
   7  -7   0    2.40    9.80 
  -7  -7   0   11.20    9.00 
   7  -7   0    9.50   11.30 
  -7  -7   0  -10.70    9.70 
  -7  -7   0   14.70   10.60 
   7  -7   0   10.40   11.70 
   7   7   0    1.10   12.80 
  -7   7   0    6.50   12.50 
  -7   7   0    2.20   11.50 
  -7   7   0    0.10   10.80 
  -7   7   0    2.30   11.10 
   7   7   0   24.10   11.70 
  -7   7   0  -10.70    8.10 
   7   7   0   22.50   15.10 
  -7   7   0    9.80   12.80 
   7   7   0   10.70    8.90 
  -7   7   0   27.10   13.60 
  -7   7   0   10.90   11.90 
  -7   7   0    2.80   11.20 
   8  -7   0    9.20   12.30 
   8  -7   0   14.80   13.80 
   8  -7   0   26.80   13.30 
   8  -7   0   20.60   13.10 
  -8  -7   0   41.20   19.70 
   8  -7   0    9.40   13.70 
   8  -7   0   36.30   16.50 
   8  -7   0   21.90   14.20 
   8  -7   0    9.70   14.00 
  -8  -7   0   20.40   14.10 
   8  -7   0    6.60   12.70 
  -8  -7   0   20.50   12.40 
   8  -7   0   42.20   16.10 
  -8  -7   0   24.30   12.80 
  -8  -7   0   35.10   13.80 
  -8   7   0   12.40   15.60 
  -8   7   0   26.00   15.90 
   8   7   0   29.90   20.30 
  -8   7   0   17.10   16.70 
  -8   7   0   -1.20   10.70 
   8   7   0   11.50   15.40 
  -8   7   0   32.30   15.80 
  -8   7   0   31.20   18.70 
  -8   7   0   20.30   16.30 
   8   7   0   19.60   13.40 
  -8   7   0   16.70   17.20 
   0  -8   0  452.75   30.50 
   0  -8   0  463.35   36.40 
   0  -8   0  364.96   47.70 
   0  -8   0  502.55   40.90 
   0  -8   0  490.85   31.70 
   0  -8   0  529.15   28.70 
   0  -8   0  526.15   32.60 
   0  -8   0  569.14   39.50 
   0  -8   0  460.05   28.30 
   0  -8   0  511.65   37.90 
   0  -8   0  497.35   29.50 
   0  -8   0  498.25   31.30 
   0  -8   0  504.25   35.50 
   0   8   0  496.75   36.60 
   0   8   0  495.55   36.20 
   0   8   0  405.46   31.40 
   0   8   0  576.94   41.80 
   0   8   0  450.65   33.90 
   0   8   0  441.26   34.30 
   0   8   0  448.06   35.60 
   0   8   0  433.36   32.10 
   0   8   0  514.85   33.10 
   0   8   0  581.64   42.90 
   0   8   0  524.55   40.90 
   0   8   0  432.86   33.00 
  -1  -8   0  872.31   47.40 
  -1  -8   0  934.11   59.19 
   1  -8   0  850.21   44.10 
   1  -8   0  931.81   48.90 
   1  -8   0  842.62   51.59 
  -1  -8   0  850.51   56.09 
  -1  -8   0  811.82   50.49 
   1  -8   0  886.21   48.20 
   1  -8   0  812.02   44.00 
   1  -8   0  852.21   48.40 
  -1  -8   0  802.92   45.10 
  -1  -8   0  872.71   45.10 
  -1  -8   0  801.02   44.00 
  -1  -8   0  816.12   54.59 
  -1  -8   0  796.42   45.40 
  -1  -8   0  825.12   46.50 
   1  -8   0  869.91   54.79 
   1  -8   0  902.71   43.70 
  -1  -8   0  779.12   48.30 
   1  -8   0  858.41   53.89 
  -1  -8   0  876.71   55.79 
  -1  -8   0  900.81   53.59 
  -1  -8   0  844.62   54.09 
  -1  -8   0  792.72   44.50 
   1  -8   0  831.62   57.79 
  -1  -8   0  887.31   66.99 
  -1  -8   0  926.51   44.80 
  -1  -8   0  848.62   45.40 
   1  -8   0  906.81   46.10 
   1  -8   0  886.91   63.29 
   1  -8   0  810.92   47.30 
  -1   8   0  924.01   56.59 
  -1   8   0  837.82   51.19 
   1   8   0  864.21   50.39 
   1   8   0  827.32   49.60 
  -1   8   0  845.72   49.20 
  -1   8   0  964.00   52.09 
  -1   8   0  904.81   52.39 
  -1   8   0  871.21   51.89 
  -1   8   0  899.51   57.59 
  -1   8   0  901.21   48.30 
  -1   8   0  786.52   56.09 
  -1   8   0  867.61   46.10 
   1   8   0  841.52   49.90 
  -1   8   0  904.51   51.79 
  -1   8   0  846.02   51.89 
   1   8   0  772.52   53.29 
  -1   8   0  966.80   57.89 
   1   8   0  830.02   52.59 
   1   8   0  858.71   50.29 
   1   8   0  786.32   47.40 
   1   8   0  894.71   50.99 
   1   8   0  814.92   50.39 
  -2  -8   0   10.40    7.50 
  -2  -8   0   24.90    8.80 
  -2  -8   0   25.60   11.90 
   2  -8   0   29.70   11.20 
   2  -8   0   16.70    7.20 
  -2  -8   0   27.00    8.00 
   2  -8   0   26.00   11.40 
   2  -8   0   32.10    9.40 
  -2  -8   0   16.40    9.00 
   2  -8   0   41.90   16.10 
  -2  -8   0   34.80    8.20 
  -2  -8   0   17.20    7.70 
  -2  -8   0   36.00    8.70 
  -2  -8   0   19.00    6.70 
   2  -8   0   18.20   11.90 
   2  -8   0   17.70   11.30 
  -2  -8   0   17.70   11.00 
  -2  -8   0   51.39   16.10 
   2  -8   0   25.60    8.20 
  -2  -8   0   25.00    8.40 
   2  -8   0   39.40   10.50 
   2  -8   0   26.80    9.70 
  -2  -8   0   30.60    8.50 
  -2  -8   0   17.30   13.00 
  -2  -8   0   23.10    9.30 
  -2  -8   0   28.80   13.60 
   2  -8   0   29.20    9.70 
   2  -8   0   36.40   11.20 
  -2  -8   0   41.60   19.00 
  -2   8   0   30.00   13.70 
   2   8   0   33.30   11.30 
   2   8   0   49.90   13.30 
  -2   8   0   27.50   11.60 
   2   8   0   26.20   11.20 
   2   8   0   28.00   11.00 
  -2   8   0   -1.60    8.80 
   2   8   0   21.80    9.00 
  -2   8   0   36.80   13.30 
   2   8   0   25.00   10.00 
  -2   8   0   27.70   12.60 
  -2   8   0   46.80   14.10 
  -2   8   0   19.00   13.50 
   2   8   0   47.00   15.00 
  -2   8   0   42.20   13.50 
  -2   8   0   23.90   13.70 
   3  -8   0  264.87   27.30 
  -3  -8   0  260.07   37.50 
   3  -8   0  187.18   21.40 
   3  -8   0  231.08   24.90 
   3  -8   0  239.88   26.30 
   3  -8   0  246.48   31.50 
  -3  -8   0  198.18   23.80 
  -3  -8   0  274.37   25.40 
  -3  -8   0  225.58   27.80 
   3  -8   0  297.67   37.30 
  -3  -8   0  255.57   24.80 
  -3  -8   0  274.97   35.70 
   3  -8   0  196.18   21.20 
   3  -8   0  255.47   28.20 
   3  -8   0  274.77   34.90 
  -3  -8   0  315.47   35.70 
   3  -8   0  223.88   25.40 
   3  -8   0  191.78   27.70 
  -3   8   0  240.48   34.50 
   3   8   0  217.88   26.40 
   3   8   0  258.67   29.00 
  -3   8   0  266.57   31.80 
   3   8   0  253.67   28.10 
  -3   8   0  290.17   33.30 
  -3   8   0  196.48   27.50 
  -3   8   0  244.48   28.70 
  -3   8   0  217.68   30.70 
  -3   8   0  318.27   36.10 
   3   8   0  228.88   25.50 
  -3   8   0  254.87   35.00 
   3   8   0  187.58   29.80 
   3   8   0  246.28   23.50 
  -3   8   0  271.97   32.90 
   3   8   0  210.28   27.10 
  -4  -8   0   28.00   14.40 
   4  -8   0   18.00    8.70 
   4  -8   0   24.00   10.00 
   4  -8   0   31.30   11.60 
   4  -8   0   33.90   14.30 
   4  -8   0   19.50   12.20 
   4  -8   0   33.00   15.80 
   4  -8   0   48.30   12.20 
   4  -8   0   31.70   12.00 
  -4  -8   0   30.30   10.30 
  -4  -8   0   28.00    9.50 
  -4  -8   0   17.10   13.40 
  -4  -8   0   35.80   19.50 
   4  -8   0   33.00   12.00 
  -4  -8   0   19.30    9.20 
  -4  -8   0   33.60   13.90 
   4  -8   0   33.20   13.30 
  -4   8   0   12.90   11.90 
  -4   8   0   17.40   12.60 
  -4   8   0   29.70   12.30 
   4   8   0    2.30    9.40 
   4   8   0   45.90   16.70 
  -4   8   0   44.90   17.30 
   4   8   0   27.90    8.90 
  -4   8   0   35.30   12.60 
  -4   8   0   24.90   12.30 
   4   8   0   27.70   11.40 
   4   8   0   18.90   10.50 
  -4   8   0   15.70   11.00 
  -4   8   0   40.00   15.90 
  -4   8   0   25.90   13.00 
   5  -8   0  458.65   46.00 
  -5  -8   0  415.16   50.39 
  -5  -8   0  498.65   46.00 
  -5  -8   0  492.05   34.10 
  -5  -8   0  543.65   50.49 
  -5  -8   0  471.15   35.00 
   5  -8   0  548.65   38.10 
   5  -8   0  514.05   35.00 
   5  -8   0  404.86   47.60 
   5  -8   0  522.45   37.40 
   5  -8   0  445.16   46.90 
   5  -8   0  505.95   39.30 
  -5  -8   0  456.05   41.40 
   5  -8   0  450.15   36.80 
   5  -8   0  485.45   35.10 
  -5  -8   0  440.76   50.09 
  -5   8   0  506.95   48.70 
  -5   8   0  412.06   44.30 
  -5   8   0  579.74   44.50 
   5   8   0  386.46   45.80 
  -5   8   0  495.15   49.60 
  -5   8   0  407.46   41.70 
  -5   8   0  474.75   50.09 
   5   8   0  427.56   41.20 
   5   8   0  434.76   43.10 
  -5   8   0  478.25   50.09 
   5   8   0  430.16   35.50 
  -5   8   0  454.75   51.19 
  -6  -8   0  256.17   30.40 
   6  -8   0  211.28   30.00 
   6  -8   0  171.38   25.40 
   6  -8   0  219.98   27.00 
   6  -8   0  190.98   28.40 
   6  -8   0  216.68   32.90 
  -6  -8   0  137.49   25.00 
   6  -8   0  188.28   26.20 
  -6  -8   0  178.88   24.30 
   6  -8   0  175.58   31.90 
   6  -8   0  177.18   27.00 
   6  -8   0  237.78   30.10 
  -6  -8   0  212.58   25.20 
  -6  -8   0  171.78   33.60 
  -6  -8   0  202.88   35.60 
  -6   8   0  256.97   37.20 
   6   8   0  199.18   30.30 
  -6   8   0  159.08   30.90 
  -6   8   0  176.18   28.20 
  -6   8   0  150.58   26.60 
  -6   8   0  227.58   34.10 
  -6   8   0  256.07   36.80 
  -6   8   0  236.78   33.40 
   6   8   0  186.58   25.40 
   6   8   0  257.07   37.50 
  -6   8   0  260.57   38.80 
   6   8   0  181.18   28.10 
   7  -8   0  689.43   47.30 
   7  -8   0  645.24   49.40 
  -7  -8   0  668.03   66.09 
   7  -8   0  616.74   45.70 
   7  -8   0  569.14   48.10 
   7  -8   0  674.73   64.69 
   7  -8   0  637.54   49.60 
   7  -8   0  681.13   48.80 
   7  -8   0  576.84   57.09 
   7  -8   0  576.94   45.10 
  -7  -8   0  621.94   46.50 
  -7  -8   0  587.34   60.59 
  -7  -8   0  615.64   44.30 
  -7  -8   0  541.15   50.89 
   7  -8   0  667.53   51.09 
  -7  -8   0  605.74   44.30 
  -7   8   0  621.54   59.99 
  -7   8   0  626.34   47.70 
  -7   8   0  591.24   59.89 
  -7   8   0  628.64   64.19 
   7   8   0  533.25   44.70 
  -7   8   0  774.32   55.99 
  -7   8   0  631.84   62.19 
  -7   8   0  541.45   59.89 
   7   8   0  605.84   43.80 
  -7   8   0  612.14   57.99 
   7   8   0  608.74   61.09 
   7   8   0  570.64   57.19 
   0  -9   0    3.30    6.60 
   0  -9   0   -7.10    6.90 
   0  -9   0    4.20    6.90 
   0  -9   0   -1.90    5.20 
   0  -9   0  -14.70   11.80 
   0  -9   0   10.40   11.60 
   0  -9   0    0.90    9.20 
   0  -9   0    8.60   10.00 
   0  -9   0    2.40    7.30 
   0  -9   0   -9.80    8.70 
   0  -9   0    2.60    9.80 
   0  -9   0   12.50    7.80 
   0  -9   0   18.40   11.10 
   0   9   0   -0.10    9.40 
   0   9   0    6.00    8.70 
   0   9   0   -0.90    8.40 
   0   9   0    8.80    9.30 
   0   9   0   -2.20   11.30 
   0   9   0    1.40    8.70 
   0   9   0    5.50   12.20 
   0   9   0    4.20    8.40 
   1  -9   0   56.49   13.60 
  -1  -9   0   52.39   14.90 
   1  -9   0   70.59   14.30 
  -1  -9   0   85.09   14.50 
   1  -9   0   81.39   15.30 
  -1  -9   0   65.09   18.40 
   1  -9   0   82.19   18.70 
   1  -9   0   57.69   20.50 
   1  -9   0   86.29   16.00 
  -1  -9   0   59.69   15.80 
  -1  -9   0   29.40   14.50 
  -1  -9   0   31.40   15.60 
  -1  -9   0   42.20   16.90 
  -1  -9   0   56.89   11.20 
   1  -9   0   73.59   20.60 
  -1  -9   0   96.79   14.30 
  -1  -9   0   54.49   12.20 
  -1  -9   0   75.69   18.70 
  -1  -9   0  108.59   28.30 
   1  -9   0   50.89   15.80 
   1  -9   0   73.59   16.40 
  -1  -9   0   87.29   20.90 
  -1  -9   0   74.39   20.50 
   1  -9   0   61.69   12.60 
   1  -9   0   84.09   22.10 
   1   9   0   42.20   12.60 
   1   9   0   33.00   13.10 
  -1   9   0   34.10   14.50 
   1   9   0   48.30   16.00 
  -1   9   0   78.89   20.20 
  -1   9   0   56.69   15.20 
   1   9   0   48.00   12.30 
  -1   9   0   48.50   14.70 
  -1   9   0   28.80   13.80 
  -1   9   0   46.80   16.70 
   1   9   0   26.90   10.90 
  -1   9   0   54.49   19.10 
   1   9   0   48.80   15.40 
   2  -9   0   68.19   15.30 
  -2  -9   0   76.69   24.80 
   2  -9   0   87.49   17.30 
   2  -9   0   66.29   15.80 
  -2  -9   0   63.59   17.10 
  -2  -9   0  104.39   17.00 
   2  -9   0   50.89   17.70 
  -2  -9   0  123.69   24.20 
  -2  -9   0   74.19   16.90 
  -2  -9   0   74.69   13.80 
  -2  -9   0   95.29   25.80 
   2  -9   0   53.29   20.00 
   2  -9   0  103.59   24.80 
   2  -9   0   57.09   13.10 
  -2  -9   0   86.89   20.90 
  -2  -9   0   69.59   18.00 
  -2  -9   0   62.39   19.70 
   2  -9   0   68.79   15.10 
   2  -9   0   77.49   14.40 
   2  -9   0   60.59   18.10 
  -2   9   0   38.80   14.90 
  -2   9   0   90.89   21.60 
  -2   9   0   57.39   20.00 
   2   9   0   82.39   17.90 
   2   9   0   65.49   18.00 
   2   9   0   86.69   14.90 
   2   9   0   75.49   17.10 
  -2   9   0   53.19   16.00 
   2   9   0   79.39   16.80 
  -2   9   0   79.49   21.40 
  -2   9   0   89.99   21.20 
  -2   9   0   75.39   18.80 
  -3  -9   0   16.70   15.30 
   3  -9   0   15.40    8.30 
   3  -9   0   10.30    8.80 
   3  -9   0   -4.90    7.10 
   3  -9   0    6.10   11.00 
   3  -9   0   -2.70    8.80 
   3  -9   0    2.90   12.60 
   3  -9   0   14.40   13.20 
  -3  -9   0   11.80    8.80 
  -3  -9   0    0.40   11.30 
   3  -9   0    1.50    8.30 
  -3  -9   0   -5.30    6.00 
  -3  -9   0    7.50   10.10 
   3  -9   0    9.40    7.90 
  -3  -9   0    8.50   16.00 
  -3  -9   0   25.40   14.40 
  -3  -9   0   25.90   13.70 
   3  -9   0   18.30   10.00 
  -3  -9   0    9.80    7.70 
   3   9   0    9.00   10.10 
  -3   9   0   -1.40    9.30 
  -3   9   0   14.00   11.40 
  -3   9   0    9.70   11.10 
   3   9   0   15.70    8.00 
  -3   9   0    9.20   19.20 
  -3   9   0    7.30   11.20 
  -3   9   0   -2.20   10.50 
   3   9   0   14.20   10.20 
  -3   9   0   -1.40    9.90 
   3   9   0   16.20   10.00 
   3   9   0   13.00   11.90 
   4  -9   0   43.20   12.90 
   4  -9   0   37.40   13.50 
   4  -9   0   25.30   15.60 
  -4  -9   0   30.10   11.50 
   4  -9   0   68.69   15.20 
   4  -9   0   44.20   19.70 
   4  -9   0   49.80   17.30 
  -4  -9   0   28.60   16.40 
  -4  -9   0   40.60   13.40 
   4  -9   0   49.40   14.30 
  -4  -9   0   13.70   15.50 
   4  -9   0   37.10   14.00 
   4  -9   0   62.09   16.20 
  -4  -9   0   39.50   21.60 
  -4  -9   0   37.60   15.40 
   4  -9   0   17.20   14.80 
  -4  -9   0   43.00   13.00 
   4   9   0   42.30   15.10 
  -4   9   0   41.70   17.30 
  -4   9   0   41.00   15.00 
   4   9   0   45.20   14.70 
   4   9   0   25.60   16.00 
  -4   9   0   48.20   17.70 
  -4   9   0   27.10   13.90 
  -4   9   0   26.30   15.10 
  -4   9   0   15.50   14.90 
   4   9   0   32.90   12.90 
  -4   9   0   23.50   14.10 
  -5  -9   0  159.28   25.20 
  -5  -9   0  138.89   22.00 
  -5  -9   0  195.08   30.00 
   5  -9   0  195.18   26.50 
   5  -9   0  160.28   28.10 
   5  -9   0  188.78   27.80 
   5  -9   0  239.58   38.10 
   5  -9   0  153.18   24.80 
   5  -9   0  180.68   24.50 
   5  -9   0  186.58   28.70 
  -5  -9   0  144.29   33.10 
  -5  -9   0  190.08   24.70 
   5  -9   0  232.28   33.20 
   5  -9   0  139.19   23.60 
  -5  -9   0  148.79   31.40 
  -5   9   0  132.89   28.90 
   5   9   0  191.88   32.80 
  -5   9   0  165.98   30.50 
  -5   9   0  145.49   27.40 
  -5   9   0  202.48   32.20 
  -5   9   0  160.78   31.50 
  -5   9   0  114.19   23.00 
   5   9   0  165.58   26.10 
   5   9   0  203.78   29.50 
  -5   9   0  171.68   31.00 
   5   9   0  145.59   25.80 
   6  -9   0   90.59   22.00 
  -6  -9   0   67.69   22.00 
   6  -9   0   61.49   17.20 
  -6  -9   0   49.20   16.10 
   6  -9   0   60.09   23.60 
   6  -9   0  102.49   24.70 
   6  -9   0   32.70   15.00 
   6  -9   0  103.59   21.60 
  -6  -9   0   62.09   23.10 
  -6  -9   0   64.49   18.10 
  -6  -9   0   91.79   17.70 
   6  -9   0  128.39   25.70 
   6  -9   0   61.79   17.40 
  -6  -9   0   96.79   28.70 
  -6   9   0   51.59   18.00 
  -6   9   0   77.39   24.80 
  -6   9   0  108.19   26.80 
  -6   9   0  100.09   23.90 
   6   9   0   57.99   18.10 
   6   9   0   38.70   20.20 
   6   9   0  104.79   24.40 
  -6   9   0   86.39   22.00 
  -6   9   0  111.69   28.50 
   6   9   0   61.89   16.80 
   0 -10   0  967.20   56.59 
   0 -10   0  906.61   60.69 
   0 -10   0 1048.50   62.19 
   0 -10   0  652.93   75.39 
   0 -10   0  961.80   64.69 
   0 -10   0  851.51   52.69 
   0 -10   0  888.31   65.39 
   0 -10   0  985.70   67.39 
   0 -10   0  928.51   61.89 
   0  10   0  942.11   60.89 
   0  10   0  784.02   59.39 
   1 -10   0  180.18   24.10 
   1 -10   0  212.48   31.10 
  -1 -10   0  229.28   33.80 
   1 -10   0  240.48   31.80 
  -1 -10   0  251.77   35.70 
  -1 -10   0  233.88   30.80 
   1 -10   0  168.18   30.60 
  -1 -10   0  204.28   36.60 
  -1 -10   0  242.08   31.30 
  -1 -10   0  243.98   34.20 
   1 -10   0  260.37   28.90 
   1 -10   0  231.48   27.40 
  -1 -10   0  243.88   25.80 
   1 -10   0  255.57   33.30 
  -1 -10   0  188.48   31.50 
   1 -10   0  242.18   40.20 
  -1 -10   0  190.38   39.70 
   1  10   0  260.27   28.00 
  -1  10   0  218.68   29.60 
  -1  10   0  211.28   34.20 
  -1  10   0  228.88   32.00 
   1  10   0  140.49   24.90 
   1  10   0  183.98   29.60 
  -2 -10   0  251.47   35.30 
   2 -10   0  268.17   33.30 
  -2 -10   0  148.39   32.00 
   2 -10   0  262.37   29.90 
   2 -10   0  276.77   36.00 
   2 -10   0  184.48   33.40 
   2 -10   0  208.38   31.40 
  -2 -10   0  232.58   24.90 
  -2 -10   0  219.68   34.70 
  -2 -10   0  214.68   43.80 
   2 -10   0  278.67   31.30 
   2 -10   0  222.58   26.80 
   2 -10   0  165.08   34.20 
  -2 -10   0  216.68   33.40 
  -2 -10   0  216.98   35.40 
  -2 -10   0  198.48   30.00 
   2 -10   0  246.78   28.50 
  -2 -10   0  175.18   23.60 
  -2  10   0  246.88   38.50 
   2  10   0  206.78   29.50 
   2  10   0  182.48   30.80 
  -2  10   0  172.98   32.70 
  -2  10   0  154.18   26.20 
   2  10   0  199.68   26.90 
  -2  10   0  261.57   35.70 
  -2  10   0  199.78   29.80 
   2  10   0  202.68   24.70 
   3 -10   0   21.60   12.70 
  -3 -10   0   34.60   11.90 
  -3 -10   0   26.90   22.10 
  -3 -10   0   32.10   15.80 
   3 -10   0    9.00   15.80 
  -3 -10   0   15.80   10.20 
  -3 -10   0   10.80   13.50 
   3 -10   0    1.90    9.80 
   3 -10   0   10.60   16.70 
   3 -10   0   36.60   13.60 
   3 -10   0   -0.50   13.20 
  -3 -10   0    0.70   18.20 
   3 -10   0   -8.70    9.80 
   3 -10   0   28.90   13.40 
  -3 -10   0   40.50   16.70 
  -3 -10   0   32.70   16.60 
  -3 -10   0   15.20   15.30 
   3  10   0   41.50   15.80 
  -3  10   0   19.60   13.40 
  -3  10   0   23.10   14.60 
   3  10   0   41.50   14.90 
   3  10   0   -1.60   12.00 
  -3  10   0    1.80   11.30 
  -3  10   0    4.80   13.70 
  -3  10   0    7.40   16.50 
  -4 -10   0   61.49   27.70 
   4 -10   0  123.39   23.60 
   4 -10   0   85.89   19.90 
   4 -10   0  124.19   26.00 
   4 -10   0  132.59   22.30 
   4 -10   0   89.79   20.10 
  -4 -10   0   74.69   26.00 
   4 -10   0   92.99   26.90 
  -4 -10   0  121.59   19.90 
   4 -10   0  111.59   25.30 
   4 -10   0  129.79   23.80 
  -4 -10   0   53.89   20.90 
  -4 -10   0  102.29   31.00 
  -4 -10   0  116.39   21.20 
   4  10   0   92.69   24.30 
   4  10   0  106.69   22.20 
  -4  10   0  103.59   28.60 
  -4  10   0  108.09   26.10 
  -4  10   0   93.49   26.30 
   4  10   0  135.89   24.60 
   4  10   0   97.19   20.60 
  -4  10   0  112.59   26.30 
  -4  10   0   81.39   22.70 
  -4  10   0  134.89   26.80 
   0 -11   0    8.90   14.20 
   0 -11   0   21.40   15.10 
   0 -11   0    8.50   19.20 
   0 -11   0   17.70   12.40 
   0 -11   0  -10.50   12.30 
   0 -11   0   -7.80   10.40 
   0 -11   0   18.20   19.20 
 -10   0   1   11.00   11.80 
  10   0  -1   -8.50    8.10 
 -10   0   1    0.10    7.10 
 -10   0   1  -11.40    8.90 
  10   0  -1    4.00   11.30 
 -10   0   1    7.20   12.70 
  10   0  -1   10.60   14.40 
  10   0  -1   17.00   12.70 
  10   0  -1    2.10   13.20 
  10   0  -1   -3.30    8.90 
 -10   0   1    1.10   10.50 
 -10   0   1   -2.60    8.40 
 -10   0   1    5.90    9.20 
  10   0  -1   -6.20   15.40 
  10   0  -1    6.10    9.20 
 -10   0   1   -6.00   10.70 
  10   0  -1  -10.60   11.20 
 -10   0   1   15.60   11.50 
 -10   0   1    7.40    8.40 
  -9   0   1  287.87   31.70 
  -9   0   1  292.37   35.60 
  -9   0   1  342.07   37.30 
  -9   0   1  370.46   36.90 
  -9   0   1  363.36   39.00 
  -9   0   1  329.97   35.50 
  -9   0   1  264.87   29.60 
  -9   0   1  327.97   31.80 
   9   0  -1  359.46   39.80 
   9   0  -1  307.57   34.00 
  -9   0   1  283.17   26.20 
   9   0  -1  250.97   36.00 
   9   0  -1  375.56   34.60 
  -9   0   1  351.96   34.60 
   9   0  -1  315.07   30.10 
   9   0  -1  291.37   34.50 
   9   0  -1  377.76   36.80 
   9   0  -1  272.87   30.00 
  -9   0   1  321.37   30.20 
   9   0  -1  256.57   32.90 
   9   0  -1  332.57   38.60 
   8   0  -1   -0.70    8.10 
  -8   0   1   -1.50    6.40 
   8   0  -1   -3.90    7.50 
   8   0  -1    4.40    7.70 
   8   0  -1    2.30   10.20 
   8   0  -1   -2.90   10.30 
  -8   0   1    1.70    7.90 
   8   0  -1   -2.90    5.20 
  -8   0   1   -0.20    6.00 
  -8   0   1    8.70    8.80 
   8   0  -1   12.10   12.00 
  -8   0   1   17.40    9.90 
  -8   0   1    4.80    7.80 
   8   0  -1    4.00    7.10 
   8   0  -1   -0.80    6.90 
   8   0  -1    0.80    7.90 
  -8   0   1    1.30    7.30 
  -8   0   1    7.60    6.00 
  -8   0   1    3.30    8.00 
  -8   0   1    9.80    7.10 
   8   0  -1   20.60    9.60 
   8   0  -1    0.30    9.00 
  -8   0   1   10.20    7.60 
   7   0  -1   13.30   10.40 
   7   0  -1   12.50    7.00 
   7   0  -1   21.00    9.50 
  -7   0   1   24.30    8.40 
   7   0  -1   16.30    7.50 
  -7   0   1   20.10    9.40 
   7   0  -1   21.70    8.10 
   7   0  -1    8.40    7.10 
  -7   0   1   14.40    7.50 
  -7   0   1    2.50    6.10 
  -7   0   1   15.70    6.10 
  -7   0   1   18.60    9.70 
  -7   0   1   18.90    9.20 
   7   0  -1   19.20    8.70 
  -7   0   1   25.90    9.20 
   7   0  -1   16.50   10.00 
   7   0  -1   10.50    7.10 
  -7   0   1   22.90    9.20 
   7   0  -1   17.80    6.20 
  -7   0   1   12.20    6.30 
  -7   0   1    9.10    6.10 
   7   0  -1   26.10   10.40 
  -7   0   1    9.30    6.10 
   7   0  -1   19.20    9.60 
  -6   0   1    6.90    4.60 
  -6   0   1    1.10    4.70 
  -6   0   1    2.90    4.90 
   6   0  -1    5.30    4.60 
  -6   0   1    7.20    5.90 
   6   0  -1    6.70    6.60 
  -6   0   1    4.30    5.20 
   6   0  -1   12.00    7.80 
  -6   0   1    7.00    4.10 
  -6   0   1   -1.20    4.80 
  -6   0   1    3.80    5.50 
  -6   0   1    6.50    5.90 
   6   0  -1    2.60    5.80 
   6   0  -1    4.30    5.60 
   6   0  -1   -0.40    4.10 
   6   0  -1    2.00    4.80 
   6   0  -1    7.40    7.00 
   6   0  -1   18.20    7.70 
  -6   0   1    4.60    4.90 
  -6   0   1   -1.10    4.10 
   6   0  -1    0.20    5.20 
   6   0  -1    6.00    5.40 
   6   0  -1    9.60    5.10 
  -6   0   1    0.50    5.20 
   5   0  -1    5.10    4.00 
   5   0  -1   10.10    5.00 
   5   0  -1   13.40    5.50 
  -5   0   1    1.80    4.00 
  -5   0   1    3.70    4.70 
   5   0  -1    5.60    5.70 
   5   0  -1    5.10    4.80 
   5   0  -1   13.10    6.40 
  -5   0   1    8.70    4.50 
  -5   0   1   17.20    7.00 
  -5   0   1    8.20    4.40 
  -5   0   1    6.80    4.60 
   5   0  -1   11.80    6.30 
   5   0  -1    3.30    3.50 
  -5   0   1    8.60    4.40 
  -5   0   1   10.60    5.70 
  -5   0   1    2.90    3.80 
  -5   0   1    8.50    5.50 
  -5   0   1    5.90    4.30 
  -5   0   1    9.30    4.00 
   5   0  -1    5.30    5.10 
   5   0  -1    5.90    4.30 
   5   0  -1    6.30    6.10 
   5   0  -1    3.40    3.30 
  -4   0   1    0.70    2.90 
   4   0  -1   -0.90    3.40 
  -4   0   1    3.00    3.20 
  -4   0   1   -1.50    2.50 
   4   0  -1   -5.30    4.80 
   4   0  -1   -3.60    2.90 
  -4   0   1   -1.20    2.90 
   4   0  -1   -2.20    3.10 
  -4   0   1    4.30    4.50 
   4   0  -1    2.20    4.70 
   4   0  -1    0.70    2.90 
  -4   0   1    0.00    2.70 
   4   0  -1   -2.40    2.90 
  -4   0   1   -7.00    1.80 
  -4   0   1   -2.00    3.30 
   4   0  -1   -1.30    2.40 
  -4   0   1    0.40    3.20 
   4   0  -1   -3.90    2.20 
  -4   0   1    0.50    2.90 
   4   0  -1   -8.70    3.20 
   4   0  -1   -2.20    2.70 
   4   0  -1    2.50    3.30 
   4   0  -1   -0.60    4.00 
  -4   0   1    0.90    3.30 
  -4   0   1   -1.40    2.60 
   4   0  -1   -1.10    2.50 
   4   0  -1   -2.70    2.80 
  -4   0   1    7.30    4.70 
  -4   0   1   -6.40    2.40 
   3   0  -1  643.04   30.40 
   3   0  -1  600.74   31.50 
  -3   0   1  653.93   31.70 
   3   0  -1  571.04   29.90 
   3   0  -1  638.34   31.40 
   3   0  -1  626.14   28.60 
   3   0  -1  636.64   30.70 
  -3   0   1  613.04   30.70 
  -3   0   1  678.73   31.50 
  -3   0   1  607.34   28.70 
  -3   0   1  598.94   30.80 
   3   0  -1  595.84   29.80 
   3   0  -1  659.43   30.50 
   3   0  -1  620.24   32.10 
  -3   0   1  614.14   30.00 
  -3   0   1  609.34   30.00 
   3   0  -1  626.04   29.20 
  -3   0   1  618.14   29.80 
   3   0  -1  620.04   31.10 
  -3   0   1  633.54   30.30 
  -3   0   1  653.73   30.10 
   3   0  -1  646.24   31.20 
   3   0  -1  601.74   30.00 
   3   0  -1  594.54   31.80 
   3   0  -1  601.94   30.10 
   3   0  -1  604.24   29.80 
  -3   0   1  641.44   31.70 
  -3   0   1  623.84   29.20 
  -3   0   1  598.74   30.90 
  -3   0   1  608.54   31.90 
  -3   0   1  626.14   28.40 
   3   0  -1  602.14   30.20 
   3   0  -1  591.44   30.40 
  -3   0   1  644.94   30.80 
  -3   0   1  609.84   29.50 
  -3   0   1  659.63   30.80 
  -3   0   1  596.74   31.10 
   3   0  -1  615.04   29.10 
  -3   0   1  611.64   31.40 
   3   0  -1  624.84   32.10 
  -2   0   1    5.10    2.00 
  -2   0   1    5.40    2.30 
   2   0  -1    0.40    1.90 
  -2   0   1    1.40    1.60 
   2   0  -1    4.50    1.90 
  -2   0   1    5.20    3.20 
  -2   0   1    0.40    1.80 
  -2   0   1    2.30    2.30 
   2   0  -1    4.90    2.20 
  -2   0   1    6.00    2.10 
   2   0  -1    3.10    1.90 
   2   0  -1    2.50    2.30 
   2   0  -1    3.10    2.10 
  -2   0   1    2.60    2.00 
   2   0  -1    1.60    2.80 
  -2   0   1    4.90    2.10 
  -2   0   1    0.40    1.90 
   2   0  -1    0.40    2.00 
   2   0  -1    1.60    2.20 
   2   0  -1    2.60    2.80 
  -2   0   1    1.40    1.80 
   2   0  -1   -1.40    2.50 
  -2   0   1    2.30    1.90 
   2   0  -1    2.20    1.80 
  -2   0   1    3.50    2.20 
   2   0  -1    3.90    1.60 
   2   0  -1    5.00    2.10 
  -2   0   1    1.00    1.50 
  -2   0   1    3.70    2.20 
  -2   0   1    3.20    2.10 
   2   0  -1    0.60    1.70 
  -2   0   1    1.70    2.10 
  -2   0   1    1.10    1.60 
   2   0  -1    1.10    1.60 
  -2   0   1    3.00    1.50 
   2   0  -1    1.40    1.90 
   2   0  -1    1.30    1.40 
   2   0  -1    1.10    1.90 
  -2   0   1    0.80    1.10 
   2   0  -1    4.10    2.10 
  -2   0   1    3.00    2.20 
  -2   0   1   -0.60    1.40 
  -2   0   1   -2.60    1.50 
   2   0  -1    2.70    2.00 
  -1   0   1  376.16   18.10 
   1   0  -1  396.56   17.90 
  -1   0   1  383.16   16.60 
   1   0  -1  377.86   18.30 
  -1   0   1  402.76   18.40 
   1   0  -1  330.37   17.90 
  -1   0   1  391.56   18.00 
  -1   0   1  413.16   17.70 
  -1   0   1  392.26   17.60 
  -1   0   1  395.76   18.00 
   1   0  -1  379.36   17.90 
   1   0  -1  390.36   17.20 
  -1   0   1  373.16   17.70 
   1   0  -1  391.66   17.50 
   1   0  -1  385.76   17.00 
  -1   0   1  398.26   17.50 
   1   0  -1  392.36   17.80 
  -1   0   1  432.86   17.80 
  -1   0   1  397.26   17.50 
  -1   0   1  359.46   17.40 
  -1   0   1  398.16   18.00 
  -1   0   1  411.86   17.80 
  -1   0   1  389.06   16.90 
   1   0  -1  396.36   17.70 
   1   0  -1  366.06   17.80 
  -1   0  -1 1710.23   72.49 
  -1   0  -1 1823.82   72.59 
   1   0   1 1591.34   71.89 
  -1   0  -1 1731.03   72.19 
   1   0   1 1806.22   72.09 
  -1   0  -1 1777.22   72.39 
  -1   0  -1 1759.12   71.89 
   1   0   1 1759.42   72.59 
   1   0   1 1707.93   72.19 
  -1   0  -1 1760.62   71.49 
  -1   0  -1 1788.42   72.59 
  -1   0  -1 1602.04   71.79 
   1   0   1 1740.33   71.99 
   1   0   1 1701.03   72.19 
  -1   0  -1 1662.93   72.09 
  -1   0  -1 1725.33   71.19 
   1   0   1 1771.22   71.19 
   1   0   1 1730.23   72.69 
  -1   0  -1 1780.92   71.79 
  -1   0  -1 1744.83   72.09 
   1   0   1 1780.72   72.49 
  -1   0  -1 1654.03   71.99 
  -1   0  -1 1823.62   72.29 
   1   0   1 1749.62   72.49 
   1   0   1 1728.43   72.39 
   1   0   1 1701.13   71.79 
   1   0   1 1670.03   72.39 
  -1   0  -1 1724.13   72.59 
  -1   0  -1 1663.23   71.99 
  -1   0  -1 1717.53   72.19 
   1   0   1 1727.33   72.59 
  -1   0  -1 1814.72   72.89 
   1   0   1 1755.62   72.09 
   1   0   1 1733.03   71.89 
  -1   0  -1 1705.13   72.09 
   1   0   1 1764.62   72.19 
   1   0   1 1709.23   72.19 
  -1   0  -1 1766.32   72.19 
  -1   0  -1 1732.63   72.39 
   1   0   1 1557.44   71.99 
  -2   0  -1    1.50    2.30 
   2   0   1    1.80    2.00 
  -2   0  -1    2.10    1.70 
  -2   0  -1    0.30    1.80 
   2   0   1   -0.20    1.80 
  -2   0  -1    6.40    2.50 
   2   0   1    8.30    2.70 
   2   0   1    2.60    2.30 
  -2   0  -1    2.40    2.00 
   2   0   1    4.00    1.80 
   2   0   1    6.60    3.10 
  -2   0  -1    0.60    1.70 
  -2   0  -1    2.60    2.10 
   2   0   1    0.40    1.70 
   2   0   1    6.80    2.50 
  -2   0  -1    5.60    2.20 
  -2   0  -1    1.70    1.80 
   2   0   1    2.50    1.80 
   2   0   1    1.90    2.20 
  -2   0  -1    2.50    1.50 
   2   0   1    3.90    1.90 
  -2   0  -1    2.90    2.40 
   2   0   1    0.80    2.00 
   2   0   1    4.90    2.10 
  -2   0  -1    0.00    1.80 
  -2   0  -1    2.10    1.70 
   2   0   1    0.70    1.70 
   2   0   1    0.10    1.60 
  -2   0  -1    0.20    2.00 
   2   0   1    5.10    2.40 
   2   0   1    3.10    1.90 
  -2   0  -1    2.40    2.00 
   2   0   1    2.20    2.70 
  -2   0  -1    5.60    1.90 
  -2   0  -1    4.80    2.10 
  -2   0  -1    2.30    2.30 
   2   0   1    6.50    2.10 
   2   0   1    1.30    1.60 
   2   0   1    4.90    2.50 
  -2   0  -1    1.50    1.40 
  -2   0  -1    3.20    2.20 
   2   0   1    2.10    2.10 
   2   0   1    1.50    2.00 
  -2   0  -1   -2.30    1.80 
  -2   0  -1    0.50    1.60 
  -2   0  -1    4.40    2.40 
  -3   0  -1   78.89    8.40 
   3   0   1   73.29    9.30 
   3   0   1   85.19    9.40 
  -3   0  -1   91.69    7.20 
  -3   0  -1   79.69    9.70 
  -3   0  -1   94.99    7.00 
  -3   0  -1   84.99    8.60 
  -3   0  -1   81.39    9.00 
   3   0   1   87.89    9.10 
   3   0   1   70.59    9.10 
   3   0   1   88.99    8.70 
   3   0   1   80.99    8.00 
  -3   0  -1   65.99    8.30 
   3   0   1   98.89   10.70 
   3   0   1   84.89    9.70 
  -3   0  -1   68.99    9.00 
   3   0   1   83.99    9.60 
  -3   0  -1   94.09   10.80 
   3   0   1   93.79   11.20 
  -3   0  -1   88.69    9.00 
   3   0   1  112.29   10.20 
   3   0   1   90.49    9.30 
  -3   0  -1  111.79   10.90 
  -3   0  -1   85.39    9.20 
   3   0   1   89.89    8.70 
  -3   0  -1   88.69    9.70 
  -3   0  -1   69.29    9.40 
  -3   0  -1   84.79    6.90 
   3   0   1   94.49   10.20 
   3   0   1   66.29    7.70 
   3   0   1   84.29    9.20 
  -3   0  -1   77.19    8.90 
  -3   0  -1   91.89    8.70 
   3   0   1   70.59    8.90 
   3   0   1   78.69    8.30 
  -4   0  -1    5.80    4.40 
   4   0   1    1.00    3.00 
  -4   0  -1    0.30    2.60 
  -4   0  -1   -1.80    2.70 
   4   0   1   -3.80    4.10 
  -4   0  -1   -0.90    3.00 
  -4   0  -1   -2.80    3.30 
   4   0   1    1.10    4.60 
   4   0   1   -1.00    2.70 
  -4   0  -1    1.40    4.10 
  -4   0  -1   -2.40    2.60 
  -4   0  -1   -0.80    2.60 
   4   0   1   -2.40    2.80 
   4   0   1    7.10    4.40 
  -4   0  -1   -0.70    2.60 
   4   0   1   -2.80    3.00 
   4   0   1   -1.90    2.70 
   4   0   1    1.70    2.90 
  -4   0  -1    1.90    4.10 
   4   0   1    1.00    2.70 
   4   0   1   -0.60    2.50 
  -4   0  -1   -1.10    2.10 
   4   0   1   -1.30    3.80 
   4   0   1   -5.40    3.70 
   4   0   1    1.30    3.30 
   5   0   1  106.59   14.20 
  -5   0  -1   79.89   13.50 
  -5   0  -1   94.99   12.70 
   5   0   1  105.29   12.50 
  -5   0  -1   82.49   11.90 
   5   0   1  118.49   13.50 
   5   0   1   93.69   11.40 
  -5   0  -1   81.49   13.60 
  -5   0  -1   94.89   12.30 
  -5   0  -1   89.69   10.20 
  -5   0  -1   92.49   13.70 
   5   0   1   90.89   11.40 
   5   0   1   94.39   11.40 
   5   0   1   97.29   14.20 
   5   0   1  127.69   15.30 
  -5   0  -1   89.79   13.30 
  -5   0  -1  118.09   13.40 
   5   0   1   94.79   11.50 
  -5   0  -1   83.89   11.60 
   5   0   1  106.39   15.30 
  -5   0  -1   99.19   12.50 
   5   0   1  111.39   14.60 
   5   0   1  102.49   14.80 
  -6   0  -1   -0.60    3.80 
  -6   0  -1    2.20    5.40 
   6   0   1   -2.40    4.70 
   6   0   1   -0.60    4.30 
  -6   0  -1    2.40    4.70 
   6   0   1   -5.20    5.90 
   6   0   1    2.30    5.60 
   6   0   1   -4.70    4.90 
   6   0   1    0.80    6.40 
  -6   0  -1   -5.20    3.50 
  -6   0  -1    2.80    3.80 
   6   0   1    4.70    5.50 
  -6   0  -1   -2.90    5.20 
  -6   0  -1   -4.50    4.30 
   6   0   1    4.70    6.90 
   6   0   1   -3.00    3.80 
   6   0   1   -3.20    4.40 
  -6   0  -1    0.40    3.90 
   6   0   1   -7.00    4.30 
  -6   0  -1    0.40    4.90 
  -6   0  -1   -0.80    4.80 
   6   0   1    4.50    5.70 
  -6   0  -1    1.40    4.90 
   7   0   1 2233.38  104.89 
   7   0   1 2311.47  105.79 
   7   0   1 2229.28  109.79 
   7   0   1 2092.69  109.09 
  -7   0  -1 2325.47  101.19 
  -7   0  -1 2164.48  104.99 
  -7   0  -1 2202.18  106.79 
  -7   0  -1 2187.38  109.59 
   7   0   1 2167.78  104.19 
  -7   0  -1 2174.48  104.59 
   7   0   1 2274.27  103.49 
  -7   0  -1 2224.88  108.69 
   7   0   1 2219.48  107.59 
  -7   0  -1 2265.67  111.49 
  -7   0  -1 2298.77  107.69 
  -7   0  -1 2238.48  105.39 
  -7   0  -1 2292.37  102.29 
  -7   0  -1 2397.66  105.69 
  -7   0  -1 2296.47  110.09 
   7   0   1 2307.87  106.09 
   7   0   1 2266.57  110.89 
   7   0   1 2342.67  108.59 
   7   0   1 2403.76  103.59 
   7   0   1 2299.97  108.79 
   8   0   1    0.00    6.90 
  -8   0  -1   -3.10    4.40 
   8   0   1   -4.40    9.90 
  -8   0  -1   -1.80    5.70 
   8   0   1   -6.80    7.30 
  -8   0  -1   -4.50    6.50 
  -8   0  -1   -1.60    6.20 
  -8   0  -1   -1.30    8.10 
   8   0   1    8.80    6.60 
  -8   0  -1   -4.90    7.40 
  -8   0  -1    4.60    7.80 
   8   0   1    3.80    6.60 
   8   0   1    4.10    8.00 
  -8   0  -1   -4.40    7.40 
  -8   0  -1    1.90    5.60 
   8   0   1   -7.70    4.80 
   8   0   1   -0.70    9.70 
  -8   0  -1   -1.50    6.70 
  -8   0  -1   -8.80    4.90 
   8   0   1    5.30    7.00 
   8   0   1   -3.50    6.70 
   8   0   1  -15.80    7.40 
  -8   0  -1  -10.40    5.90 
  -9   0  -1  470.65   46.10 
  -9   0  -1  465.35   37.70 
  -9   0  -1  537.35   36.60 
  -9   0  -1  525.15   40.20 
   9   0   1  505.15   36.40 
   9   0   1  439.96   46.60 
   9   0   1  532.55   42.10 
  -9   0  -1  531.95   34.10 
  -9   0  -1  497.25   32.30 
   9   0   1  501.45   39.90 
  -9   0  -1  556.14   44.20 
   9   0   1  447.86   47.40 
   9   0   1  468.55   47.10 
  -9   0  -1  484.95   35.30 
   9   0   1  514.85   34.30 
   9   0   1  454.85   34.50 
   9   0   1  468.65   38.00 
  -9   0  -1  460.35   45.90 
  -9   0  -1  446.56   42.20 
   9   0   1  477.65   37.70 
  -9   0  -1  466.75   35.70 
  10   0   1   -9.40   14.20 
  10   0   1  -12.80    6.50 
  10   0   1   10.10   11.70 
 -10   0  -1    1.40    9.20 
  10   0   1   -3.60    9.70 
  10   0   1  -14.50    7.30 
 -10   0  -1   -2.30    8.40 
  10   0   1  -15.00   12.90 
 -10   0  -1   -3.20    9.50 
  10   0   1   15.40   15.80 
  10   0   1  -25.70    8.50 
 -10   0  -1   -8.00    7.90 
 -10   0  -1   -4.10   10.10 
 -10   0  -1   10.90   12.00 
 -10   0  -1    3.40   10.90 
 -10   0  -1   -1.60    9.70 
  10   0   1    8.80    9.70 
  10  -1  -1  667.63   47.00 
 -10  -1   1  663.33   48.30 
 -10  -1   1  733.53   53.19 
 -10  -1   1  552.84   42.40 
 -10  -1   1  669.43   46.20 
  10  -1  -1  700.53   43.90 
  10  -1  -1  622.74   58.49 
  10  -1  -1  644.84   60.99 
 -10  -1   1  613.94   46.50 
  10  -1  -1  682.53   49.80 
 -10  -1   1  702.53   46.10 
  10  -1  -1  723.23   55.79 
 -10  -1   1  675.53   50.89 
  10  -1  -1  696.53   53.99 
 -10  -1   1  534.95   52.89 
  10  -1  -1  632.94   49.90 
 -10  -1   1  714.03   43.10 
  10  -1  -1  684.33   49.40 
  10  -1  -1  601.34   49.50 
  10  -1  -1  686.53   46.90 
 -10   1   1  528.55   55.19 
  10   1  -1  631.44   49.10 
 -10   1   1  699.13   47.50 
 -10   1   1  674.43   48.90 
  10   1  -1  645.64   63.69 
  10   1  -1  703.33   65.69 
  10   1  -1  683.63   53.69 
 -10   1   1  633.64   49.10 
  10   1  -1  638.64   43.80 
 -10   1   1  638.74   51.39 
 -10   1   1  706.83   52.79 
  10   1  -1  670.93   47.80 
 -10   1   1  631.64   47.50 
  10   1  -1  593.64   42.90 
  10   1  -1  656.63   45.00 
 -10   1   1  706.93   48.30 
 -10   1   1  730.93   53.39 
 -10   1   1  629.04   45.50 
  -9  -1   1    0.00    8.10 
   9  -1  -1   12.30    9.40 
  -9  -1   1   10.40    8.50 
   9  -1  -1    5.40    8.40 
   9  -1  -1  -10.40   11.00 
   9  -1  -1   -2.80    8.60 
   9  -1  -1    5.90    8.20 
   9  -1  -1   29.10   12.90 
  -9  -1   1   20.30   11.20 
  -9  -1   1   12.80    7.70 
  -9  -1   1   -4.70    7.80 
   9  -1  -1  -12.70    9.20 
  -9  -1   1    6.60    8.60 
   9  -1  -1    6.00   11.80 
  -9  -1   1    8.10   10.50 
  -9  -1   1   11.30    9.20 
  -9  -1   1    3.10    7.40 
   9  -1  -1   10.20   10.90 
   9  -1  -1   -9.80   10.40 
  -9  -1   1    2.20    8.30 
   9  -1  -1   11.40    6.60 
   9   1  -1    5.30    7.60 
  -9   1   1    2.30    6.90 
  -9   1   1   10.60   10.20 
   9   1  -1    1.50   13.50 
  -9   1   1    1.00    8.50 
  -9   1   1    9.80   11.00 
  -9   1   1   16.80   10.40 
  -9   1   1   10.20    6.60 
   9   1  -1   -5.30   10.00 
  -9   1   1    1.50    8.70 
  -9   1   1    3.50    7.50 
   9   1  -1   -5.70    8.70 
  -9   1   1   19.20   11.50 
   9   1  -1    8.80   13.70 
   9   1  -1   11.80   13.30 
   9   1  -1    0.60    8.40 
  -9   1   1    3.80    9.60 
  -9   1   1    4.50    9.50 
   9   1  -1   -0.30    8.20 
   9   1  -1    6.60    7.60 
  -9   1   1   -1.30    9.10 
   8  -1  -1  220.08   29.40 
   8  -1  -1  231.18   27.30 
  -8  -1   1  222.48   25.30 
  -8  -1   1  260.67   24.10 
  -8  -1   1  227.88   27.90 
  -8  -1   1  246.68   23.00 
   8  -1  -1  227.68   23.20 
   8  -1  -1  249.78   28.80 
  -8  -1   1  217.68   26.70 
   8  -1  -1  274.17   27.80 
   8  -1  -1  262.87   31.30 
  -8  -1   1  258.07   26.50 
  -8  -1   1  223.98   24.90 
   8  -1  -1  266.77   29.80 
   8  -1  -1  235.58   24.70 
   8  -1  -1  280.87   28.60 
  -8  -1   1  242.88   26.10 
  -8  -1   1  276.27   30.60 
  -8  -1   1  211.48   23.30 
   8  -1  -1  216.48   22.10 
   8  -1  -1  199.68   27.20 
   8  -1  -1  207.68   26.10 
  -8  -1   1  216.18   27.70 
  -8   1   1  248.98   29.50 
   8   1  -1  178.38   26.40 
   8   1  -1  271.37   26.80 
   8   1  -1  313.57   31.00 
  -8   1   1  255.37   27.00 
   8   1  -1  242.78   28.80 
  -8   1   1  216.58   20.10 
  -8   1   1  241.78   26.10 
   8   1  -1  220.78   29.90 
  -8   1   1  190.18   26.30 
   8   1  -1  227.38   17.30 
  -8   1   1  191.08   25.50 
  -8   1   1  199.38   27.80 
  -8   1   1  200.48   27.10 
  -8   1   1  233.98   22.70 
   8   1  -1  160.08   26.70 
   8   1  -1  220.48   25.60 
   8   1  -1  250.87   25.10 
  -8   1   1  237.68   27.60 
   8   1  -1  255.87   27.00 
  -8   1   1  278.27   27.60 
  -8   1   1  240.38   30.50 
  -8   1   1  285.77   28.90 
   8   1  -1  244.88   25.50 
  -7  -1   1   64.29   12.80 
   7  -1  -1   65.59   12.30 
   7  -1  -1   59.29   14.20 
   7  -1  -1   58.29   11.60 
  -7  -1   1   88.99   13.40 
  -7  -1   1   80.99   12.00 
  -7  -1   1   33.60   10.10 
   7  -1  -1   54.49   12.70 
   7  -1  -1   66.19   12.60 
   7  -1  -1   44.20   12.00 
  -7  -1   1   58.19   13.10 
   7  -1  -1   65.19   14.00 
  -7  -1   1   66.29   14.30 
  -7  -1   1   53.89   11.50 
   7  -1  -1   85.29   14.80 
  -7  -1   1   54.59   11.30 
  -7  -1   1   90.59   16.30 
   7  -1  -1   64.29   15.80 
  -7  -1   1   71.19   13.80 
   7  -1  -1   46.00    9.60 
   7  -1  -1   62.39   11.60 
  -7  -1   1   54.69   10.50 
   7  -1  -1   69.99   15.30 
  -7   1   1   59.29   13.80 
   7   1  -1   71.59   14.70 
  -7   1   1   65.69   14.40 
  -7   1   1   48.30   12.30 
   7   1  -1   92.79   18.50 
  -7   1   1   56.99   13.20 
   7   1  -1   35.90    9.90 
  -7   1   1   63.89   14.50 
   7   1  -1   62.59   14.50 
  -7   1   1   58.39   12.70 
   7   1  -1   79.49   13.20 
  -7   1   1   74.39   11.50 
  -7   1   1   70.49   13.60 
   7   1  -1   52.69   10.80 
  -7   1   1   44.60   12.60 
   7   1  -1   80.29   18.20 
   7   1  -1   71.79   13.40 
  -7   1   1   61.79   13.30 
  -7   1   1   51.99    8.90 
   7   1  -1   40.50   12.80 
   7   1  -1   68.09   13.30 
  -7   1   1   63.99   13.80 
   7   1  -1   56.69   13.00 
   7   1  -1   60.89    8.70 
   7   1  -1   47.40   11.00 
   6  -1  -1 1490.95   73.29 
   6  -1  -1 1528.15   75.79 
  -6  -1   1 1486.35   74.89 
  -6  -1   1 1544.75   73.69 
  -6  -1   1 1487.05   72.39 
  -6  -1   1 1531.55   72.09 
   6  -1  -1 1575.14   73.59 
   6  -1  -1 1525.65   76.69 
  -6  -1   1 1495.35   73.39 
   6  -1  -1 1509.45   71.39 
   6  -1  -1 1487.05   76.59 
  -6  -1   1 1523.25   70.09 
   6  -1  -1 1508.05   75.89 
  -6  -1   1 1547.85   69.59 
  -6  -1   1 1518.95   72.29 
  -6  -1   1 1487.45   74.69 
   6  -1  -1 1542.05   72.79 
  -6  -1   1 1543.85   70.59 
  -6  -1   1 1434.16   72.69 
   6  -1  -1 1536.15   74.29 
  -6  -1   1 1571.14   76.29 
   6  -1  -1 1547.05   75.39 
   6   1  -1 1496.95   72.19 
   6   1  -1 1590.24   74.39 
  -6   1   1 1560.24   68.49 
   6   1  -1 1556.84   76.59 
   6   1  -1 1522.25   73.89 
  -6   1   1 1537.75   70.39 
  -6   1   1 1523.35   65.79 
  -6   1   1 1477.05   68.29 
  -6   1   1 1539.85   76.99 
   6   1  -1 1494.65   73.39 
   6   1  -1 1484.75   66.89 
   6   1  -1 1429.06   70.79 
   6   1  -1 1546.05   73.99 
   6   1  -1 1521.95   77.79 
  -6   1   1 1564.94   74.59 
   6   1  -1 1475.95   75.29 
   6   1  -1 1497.05   76.49 
   6   1  -1 1384.36   76.09 
  -6   1   1 1481.95   72.49 
   6   1  -1 1529.85   71.49 
   6   1  -1 1547.95   72.89 
  -6   1   1 1450.55   76.19 
  -6   1   1 1500.75   74.89 
  -6   1   1 1580.84   74.59 
  -6   1   1 1578.24   78.59 
  -6   1   1 1551.04   76.19 
  -6   1   1 1494.75   74.09 
  -6   1   1 1526.45   73.89 
   5  -1  -1  318.97   21.80 
   5  -1  -1  355.26   22.40 
  -5  -1   1  332.87   21.30 
  -5  -1   1  313.17   21.60 
  -5  -1   1  349.57   20.10 
  -5  -1   1  292.27   22.10 
   5  -1  -1  383.56   25.50 
  -5  -1   1  334.57   22.20 
  -5  -1   1  321.37   19.30 
   5  -1  -1  316.47   22.20 
   5  -1  -1  341.47   23.50 
   5  -1  -1  355.56   21.40 
   5  -1  -1  335.97   24.20 
   5  -1  -1  303.77   22.90 
   5  -1  -1  302.17   23.40 
  -5  -1   1  335.17   18.30 
  -5  -1   1  350.96   23.70 
  -5  -1   1  332.57   22.80 
  -5  -1   1  312.77   22.20 
   5  -1  -1  323.77   22.40 
  -5  -1   1  303.97   21.10 
  -5  -1   1  343.87   20.50 
  -5  -1   1  313.37   20.80 
   5   1  -1  334.27   19.50 
  -5   1   1  312.17   22.20 
   5   1  -1  352.96   25.30 
   5   1  -1  291.97   22.80 
   5   1  -1  331.57   20.50 
   5   1  -1  275.27   21.70 
  -5   1   1  339.87   18.80 
  -5   1   1  341.17   24.00 
   5   1  -1  296.67   23.30 
  -5   1   1  333.77   22.90 
   5   1  -1  303.97   21.60 
   5   1  -1  327.27   25.20 
  -5   1   1  339.37   24.40 
   5   1  -1  357.16   21.10 
   5   1  -1  315.77   22.30 
  -5   1   1  337.47   18.60 
  -5   1   1  326.27   16.60 
   5   1  -1  341.57   21.80 
  -5   1   1  334.77   24.20 
  -5   1   1  313.67   21.10 
  -5   1   1  351.06   23.40 
   5   1  -1  381.06   25.50 
   5   1  -1  339.97   22.30 
   5   1  -1  296.47   18.80 
   5   1  -1  329.77   24.60 
  -5   1   1  328.37   20.10 
  -5   1   1  356.76   25.50 
  -5   1   1  346.57   23.50 
  -5   1   1  351.86   23.00 
   5   1  -1  337.57   21.90 
  -4  -1   1 5130.49  218.78 
   4  -1  -1 5487.55  223.48 
   4  -1  -1 5318.87  221.68 
  -4  -1   1 5193.68  219.58 
  -4  -1   1 5227.38  218.38 
   4  -1  -1 5265.67  222.48 
   4  -1  -1 5339.57  221.68 
  -4  -1   1 5441.86  222.18 
  -4  -1   1 5321.47  221.18 
   4  -1  -1 5378.96  220.38 
  -4  -1   1 5149.58  221.98 
   4  -1  -1 5382.26  221.88 
   4  -1  -1 5175.08  221.08 
  -4  -1   1 5544.35  220.48 
   4  -1  -1 5248.77  223.28 
   4  -1  -1 5370.26  223.68 
   4  -1  -1 5448.85  217.98 
  -4  -1   1 5228.88  219.88 
  -4  -1   1 5144.39  221.08 
  -4  -1   1 5094.89  217.78 
   4  -1  -1 5327.67  223.28 
  -4  -1   1 5169.48  221.88 
  -4  -1   1 5302.07  216.88 
  -4   1   1 5490.65  217.48 
  -4   1   1 5443.36  222.88 
   4   1  -1 5217.68  223.08 
   4   1  -1 5279.47  221.28 
   4   1  -1 5150.78  219.28 
  -4   1   1 5128.79  217.08 
   4   1  -1 5392.96  223.08 
   4   1  -1 5448.75  222.68 
   4   1  -1 5192.68  219.08 
   4   1  -1 5277.17  219.98 
   4   1  -1 5526.15  224.38 
   4   1  -1 5151.78  217.78 
   4   1  -1 5293.57  220.88 
  -4   1   1 5286.87  218.88 
  -4   1   1 5460.85  224.28 
  -4   1   1 5363.86  215.48 
  -4   1   1 5207.28  223.38 
   4   1  -1 5174.28  222.48 
   4   1  -1 5066.99  219.18 
  -4   1   1 5295.37  222.58 
  -4   1   1 5293.47  223.88 
  -4   1   1 5312.77  222.08 
   4   1  -1 5279.37  220.98 
   4   1  -1 5320.97  223.08 
  -4   1   1 5328.27  222.18 
  -4   1   1 5191.38  221.38 
   4   1  -1 4995.00  220.78 
  -4   1   1 5429.76  225.18 
   4   1  -1 5341.07  218.18 
   4   1  -1 5220.08  223.88 
   4   1  -1 5097.69  219.18 
  -4   1   1 5294.67  220.38 
  -3  -1   1  393.06   17.70 
  -3  -1   1  388.76   21.20 
   3  -1  -1  382.96   22.60 
  -3  -1   1  352.76   19.50 
   3  -1  -1  373.36   21.90 
  -3  -1   1  378.56   19.60 
   3  -1  -1  366.96   19.80 
   3  -1  -1  424.46   22.00 
   3  -1  -1  342.77   21.00 
  -3  -1   1  375.66   20.70 
   3  -1  -1  386.96   22.50 
   3  -1  -1  384.56   22.10 
   3  -1  -1  437.76   22.00 
  -3  -1   1  358.96   21.30 
  -3  -1   1  381.96   19.20 
   3  -1  -1  410.76   21.40 
   3  -1  -1  344.47   21.80 
  -3  -1   1  381.66   21.70 
  -3  -1   1  363.06   20.60 
   3  -1  -1  354.66   21.60 
   3  -1  -1  387.26   20.70 
  -3  -1   1  345.57   18.40 
  -3  -1   1  377.66   19.50 
  -3  -1   1  372.86   19.90 
   3  -1  -1  393.26   21.50 
   3  -1  -1  385.86   18.80 
  -3  -1   1  361.56   18.20 
   3  -1  -1  366.36   21.30 
  -3  -1   1  359.76   20.10 
   3   1  -1  392.86   21.60 
  -3   1   1  396.76   21.20 
   3   1  -1  378.86   20.30 
   3   1  -1  359.06   21.60 
  -3   1   1  380.66   22.50 
  -3   1   1  386.96   22.20 
  -3   1   1  363.66   21.40 
   3   1  -1  355.16   19.10 
   3   1  -1  370.96   22.70 
   3   1  -1  377.96   20.50 
  -3   1   1  393.26   20.50 
   3   1  -1  381.06   22.80 
   3   1  -1  365.66   21.10 
  -3   1   1  375.86   16.70 
  -3   1   1  402.16   18.30 
  -3   1   1  382.76   19.90 
  -3   1   1  377.96   19.40 
   3   1  -1  375.06   19.30 
   3   1  -1  381.46   18.50 
   3   1  -1  360.76   22.00 
   3   1  -1  375.76   19.50 
  -3   1   1  371.76   17.90 
  -3   1   1  389.06   21.30 
  -3   1   1  421.26   23.00 
  -3   1   1  370.16   21.90 
  -3   1   1  381.76   21.60 
  -3   1   1  370.96   20.30 
   3   1  -1  392.16   20.60 
  -3   1   1  376.66   22.00 
   3   1  -1  390.46   20.80 
   3   1  -1  348.67   18.20 
  -3   1   1  386.36   23.10 
  -3   1   1  366.46   22.20 
   3   1  -1  386.06   22.20 
   3   1  -1  421.26   24.40 
   3   1  -1  364.26   22.30 
   3   1  -1  361.86   21.50 
   3   1  -1  380.46   21.00 
   3   1  -1  336.77   19.40 
   2  -1  -1  406.66   20.30 
  -2  -1   1  382.26   18.10 
   2  -1  -1  429.56   21.00 
   2  -1  -1  391.86   18.80 
   2  -1  -1  397.46   21.20 
   2  -1  -1  378.66   20.70 
  -2  -1   1  385.76   18.20 
   2  -1  -1  427.86   20.80 
  -2  -1   1  384.46   19.50 
   2  -1  -1  418.76   20.90 
  -2  -1   1  382.26   19.60 
  -2  -1   1  364.66   17.20 
  -2  -1   1  331.27   18.70 
  -2  -1   1  382.96   19.20 
   2  -1  -1  399.66   19.90 
   2  -1  -1  400.96   21.00 
   2  -1  -1  405.26   18.40 
   2  -1  -1  425.06   19.30 
  -2  -1   1  380.26   19.30 
  -2  -1   1  376.66   17.00 
  -2  -1   1  366.26   19.50 
   2  -1  -1  385.96   20.80 
   2  -1  -1  382.36   20.10 
   2  -1  -1  380.56   20.40 
   2  -1  -1  390.36   21.40 
  -2  -1   1  408.36   19.80 
   2  -1  -1  425.26   20.10 
  -2  -1   1  370.26   19.10 
  -2  -1   1  404.76   18.60 
   2  -1  -1  379.26   20.60 
  -2  -1   1  417.86   20.60 
   2  -1  -1  395.86   21.10 
   2  -1  -1  400.56   21.60 
   2  -1  -1  393.36   17.40 
  -2  -1   1  372.16   18.20 
  -2  -1   1  371.36   17.90 
  -2  -1   1  385.86   20.90 
  -2  -1   1  420.06   19.90 
  -2  -1   1  408.16   19.80 
   2  -1  -1  407.06   20.10 
   2  -1  -1  400.56   19.00 
  -2  -1   1  364.56   20.00 
  -2  -1   1  385.66   20.80 
  -2  -1   1  335.77   19.90 
   2  -1  -1  400.36   20.40 
  -2   1   1  405.56   20.50 
  -2   1   1  369.46   21.30 
  -2   1   1  407.06   21.30 
  -2   1   1  409.36   21.20 
   2   1  -1  415.36   19.90 
  -2   1   1  400.66   21.50 
   2   1  -1  383.56   18.80 
  -2   1   1  389.96   19.30 
   2   1  -1  353.36   17.00 
   2   1  -1  382.26   18.40 
  -2   1   1  365.66   19.50 
   2   1  -1  411.26   21.70 
   2   1  -1  377.16   17.20 
   2   1  -1  366.56   17.90 
  -2   1   1  402.66   21.10 
  -2   1   1  399.36   19.50 
   2   1  -1  367.96   19.00 
  -2   1   1  407.66   20.80 
  -2   1   1  396.96   19.30 
  -2   1   1  379.86   17.50 
   2   1  -1  388.56   18.50 
  -2   1   1  411.96   20.10 
   2   1  -1  389.36   21.40 
   2   1  -1  365.86   19.00 
   2   1  -1  359.46   19.10 
  -2   1   1  373.56   21.40 
  -2   1   1  410.86   19.00 
   2   1  -1  380.26   18.70 
   2   1  -1  385.06   21.30 
   2   1  -1  358.66   16.50 
  -2   1   1  391.86   17.10 
  -2   1   1  430.16   21.70 
  -2   1   1  412.16   20.00 
   2   1  -1  380.06   20.40 
  -2   1   1  391.96   19.10 
   2   1  -1  384.26   20.90 
   2   1  -1  378.36   20.20 
  -2   1   1  399.16   21.20 
  -2   1   1  402.86   20.50 
   2   1  -1  376.96   19.70 
  -2   1   1  399.06   20.00 
   2   1  -1  371.26   19.80 
   2   1  -1  380.06   19.30 
   2   1  -1  354.96   18.20 
  -2   1   1  417.06   21.00 
  -2   1   1  392.26   20.10 
   1  -1  -1   21.40    2.80 
   1  -1  -1   17.70    4.10 
   1  -1  -1   14.60    3.20 
   1  -1  -1   24.10    3.40 
  -1  -1   1   16.40    2.80 
   1  -1  -1   16.70    2.70 
   1  -1  -1   18.50    3.00 
   1  -1  -1   22.30    3.40 
  -1  -1   1   18.80    3.10 
   1  -1  -1   20.00    3.60 
   1  -1  -1   15.60    3.10 
   1  -1  -1   22.00    3.50 
  -1  -1   1   20.60    2.80 
  -1  -1   1   14.70    2.10 
  -1  -1   1   24.10    4.60 
   1  -1  -1   19.40    2.10 
  -1  -1   1   18.50    4.50 
   1  -1  -1   18.70    2.90 
  -1  -1   1   18.70    2.40 
  -1  -1   1   13.10    4.00 
  -1  -1   1   19.90    2.00 
  -1  -1   1   21.10    3.20 
  -1  -1   1   18.60    1.90 
  -1  -1   1   17.20    3.20 
  -1  -1   1   19.80    2.40 
  -1  -1   1   23.60    3.40 
  -1  -1   1   15.10    2.10 
   1  -1  -1   26.70    4.30 
   1  -1  -1   30.80    4.40 
  -1  -1   1   26.50    2.60 
  -1  -1   1   30.40    4.10 
   1  -1  -1   20.80    2.90 
   1  -1  -1   17.40    3.20 
   1  -1  -1   23.70    2.90 
   1  -1  -1   15.20    2.70 
  -1  -1   1   20.50    2.70 
  -1  -1   1   20.30    2.90 
  -1  -1   1   21.20    3.50 
   1  -1  -1   21.00    3.30 
   1  -1  -1   26.40    4.10 
   1  -1  -1   16.70    3.10 
   1  -1  -1   18.60    3.40 
   1  -1  -1   17.90    3.30 
   1  -1  -1   24.90    3.20 
   1  -1  -1   12.60    2.70 
  -1  -1   1   21.30    3.00 
  -1  -1   1   15.70    3.00 
  -1   1   1   19.50    2.80 
  -1   1   1   27.50    3.90 
   1   1  -1   23.60    4.70 
  -1   1   1   25.30    4.10 
   1   1  -1   18.90    3.10 
   1   1  -1   23.50    2.80 
  -1   1   1   20.70    2.60 
  -1   1   1   20.10    3.70 
  -1   1   1   24.90    3.70 
  -1   1   1   18.10    3.00 
   1   1  -1   15.60    2.40 
  -1   1   1   18.60    2.80 
   1   1  -1   22.90    3.70 
  -1   1   1   24.60    3.80 
  -1   1   1   24.00    3.20 
   1   1  -1   18.80    3.00 
  -1   1   1   24.80    4.70 
   1   1  -1   20.90    3.80 
  -1   1   1   14.60    3.30 
  -1   1   1   16.00    2.90 
  -1   1   1   20.80    2.70 
  -1   1   1   19.00    3.60 
  -1   1   1   15.20    3.10 
  -1   1   1   18.70    3.40 
  -1   1   1   10.80    3.10 
  -1   1   1   25.20    3.80 
  -1   1   1   23.70    3.20 
   1   1  -1   20.40    2.50 
  -1   1   1   20.90    2.30 
   1   1  -1   14.80    3.10 
  -1   1   1   13.70    2.40 
  -1   1   1   18.40    2.20 
   1   1  -1   12.60    2.10 
  -1   1   1   18.70    2.70 
   1   1  -1   15.90    2.10 
   1   1  -1   19.30    2.80 
  -1   1   1   19.90    3.50 
   1   1  -1   13.70    3.10 
  -1   1   1   23.50    4.00 
  -1   1   1   28.20    3.80 
  -1   1   1   21.00    2.40 
   1   1  -1   17.10    2.80 
  -1   1   1   25.40    4.10 
   1   1  -1   18.00    2.30 
   0  -1   1 3840.52  152.28 
   0  -1   1 3885.11  152.78 
   0  -1  -1 3822.92  153.38 
   0  -1   1 3692.43  153.68 
   0  -1   1 3709.53  152.18 
   0  -1   1 3785.82  152.08 
   0  -1   1 4000.80  153.08 
   0  -1   1 3621.64  152.98 
   0  -1  -1 3614.84  151.98 
   0  -1  -1 3968.10  153.78 
   0  -1  -1 3682.73  152.58 
   0  -1  -1 3561.04  152.78 
   0  -1   1 3696.93  153.08 
   0  -1  -1 3700.13  153.78 
   0  -1   1 3823.62  154.08 
   0  -1   1 3619.44  152.18 
   0  -1   1 3624.74  151.78 
   0  -1   1 3755.52  152.98 
   0  -1   1 3758.32  152.18 
   0  -1  -1 3825.42  151.88 
   0  -1  -1 3535.65  154.28 
   0  -1  -1 3742.03  151.68 
   0  -1  -1 3953.90  151.58 
   0  -1  -1 3507.05  153.48 
   0  -1  -1 3836.42  151.88 
   0  -1  -1 3680.03  152.98 
   0  -1  -1 3666.23  151.78 
   0  -1   1 3772.12  152.58 
   0  -1   1 3668.23  151.78 
   0  -1   1 3880.71  153.68 
   0  -1  -1 3807.82  152.48 
   0  -1  -1 3502.15  154.98 
   0  -1   1 3718.63  151.78 
   0  -1   1 3745.53  151.98 
   0  -1   1 3791.92  152.28 
   0  -1  -1 3771.62  152.08 
   0  -1   1 3602.24  152.98 
   0  -1  -1 3922.91  153.08 
   0  -1  -1 3794.42  152.58 
   0  -1  -1 3775.32  154.38 
   0  -1  -1 3878.31  153.18 
   0  -1   1 3826.42  151.88 
   0  -1   1 3862.71  152.78 
   0  -1  -1 3734.43  154.18 
   0  -1   1 3714.53  153.18 
   0  -1  -1 3464.75  152.88 
   0  -1  -1 3710.13  154.28 
   0  -1   1 3829.52  151.88 
   0  -1  -1 3633.14  155.08 
   0  -1   1 3729.53  153.48 
   0  -1   1 3752.82  151.78 
   0  -1  -1 3882.91  152.28 
   0  -1   1 3650.53  151.78 
   0  -1  -1 3841.72  152.88 
   0  -1   1 3682.83  152.68 
   0  -1  -1 3756.92  153.18 
   0   1   1 3320.07  152.58 
   0   1   1 3825.52  152.88 
   0   1   1 3642.64  153.48 
   1  -1   1  343.67   16.60 
  -1  -1  -1  327.67   16.60 
   1  -1   1  343.77   17.70 
   1  -1   1  325.37   17.00 
   1  -1   1  314.37   15.80 
   1  -1   1  320.27   15.70 
  -1  -1  -1  328.67   16.80 
  -1  -1  -1  315.17   16.80 
  -1  -1  -1  333.77   16.20 
   1  -1   1  320.07   17.00 
   1  -1   1  307.97   16.50 
  -1  -1  -1  322.77   17.40 
   1  -1   1  333.87   14.20 
  -1  -1  -1  321.47   15.70 
   1  -1   1  324.77   16.40 
  -1  -1  -1  304.87   15.20 
  -1  -1  -1  324.17   15.50 
   1  -1   1  345.57   15.70 
  -1  -1  -1  333.67   17.20 
  -1  -1  -1  346.27   15.40 
  -1  -1  -1  323.37   17.00 
  -1  -1  -1  278.27   14.40 
   1  -1   1  340.87   16.10 
  -1  -1  -1  316.07   14.90 
   1  -1   1  312.47   15.40 
   1  -1   1  329.27   15.10 
   1  -1   1  316.27   15.70 
  -1  -1  -1  302.67   15.60 
  -1  -1  -1  303.47   14.10 
   1  -1   1  319.47   15.70 
   1  -1   1  343.37   16.30 
   1  -1   1  318.77   16.10 
  -1  -1  -1  338.97   15.70 
   1  -1   1  315.47   15.80 
   1  -1   1  320.27   16.90 
  -1  -1  -1  294.37   15.40 
   1  -1   1  356.16   15.70 
  -1  -1  -1  301.17   16.60 
  -1  -1  -1  293.97   16.40 
   1  -1   1  313.57   16.60 
   1  -1   1  356.46   16.80 
  -1  -1  -1  335.17   17.00 
  -1  -1  -1  313.07   16.90 
   1  -1   1  338.87   17.00 
  -1  -1  -1  295.27   18.40 
  -1   1  -1  318.77   15.90 
  -1   1  -1  329.97   17.00 
  -1   1  -1  335.37   16.50 
   1   1   1  307.47   18.30 
   1   1   1  313.47   15.20 
  -1   1  -1  316.17   16.00 
  -1   1  -1  335.47   16.20 
  -1   1  -1  325.97   14.20 
  -1   1  -1  348.77   17.50 
  -1   1  -1  326.67   17.40 
  -1   1  -1  352.86   17.00 
   1   1   1  299.77   15.30 
   1   1   1  319.27   17.30 
   1   1   1  302.07   15.80 
   1   1   1  314.17   16.80 
  -1   1  -1  304.87   15.30 
   1   1   1  317.37   16.40 
   1   1   1  322.37   15.30 
   1   1   1  319.97   15.70 
  -1   1  -1  337.57   16.20 
   1   1   1  295.67   16.90 
   1   1   1  296.07   17.20 
  -1   1  -1  325.97   17.00 
  -1   1  -1  301.67   15.70 
   1   1   1  305.77   14.70 
   1   1   1  298.47   16.70 
  -1   1  -1  321.27   16.20 
  -1   1  -1  324.27   16.80 
   1   1   1  317.47   16.60 
   1   1   1  319.37   17.00 
   1   1   1  303.07   14.80 
  -1   1  -1  323.27   16.70 
  -1   1  -1  342.97   15.50 
   1   1   1  293.97   16.60 
  -1   1  -1  327.97   15.90 
   1   1   1  292.57   16.00 
  -1   1  -1  304.27   16.00 
   1   1   1  311.87   15.00 
  -1   1  -1  330.87   16.70 
  -2  -1  -1 9219.78  387.76 
  -2  -1  -1 8996.70  383.76 
   2  -1   1 9488.85  385.26 
   2  -1   1 9436.76  382.16 
  -2  -1  -1 9219.08  384.36 
  -2  -1  -1 9542.75  385.76 
  -2  -1  -1 9069.99  386.06 
   2  -1   1 9579.34  385.86 
  -2  -1  -1 9175.28  383.26 
  -2  -1  -1 9686.83  384.76 
  -2  -1  -1 9559.04  385.36 
   2  -1   1 9713.33  385.96 
   2  -1   1 9610.64  386.66 
  -2  -1  -1 9361.46  384.76 
  -2  -1  -1 9039.60  386.46 
   2  -1   1 9568.84  386.46 
   2  -1   1 9566.54  386.96 
  -2  -1  -1 9204.18  383.86 
   2  -1   1 9416.96  386.76 
   2  -1   1 9623.14  386.36 
  -2  -1  -1 9327.37  384.76 
   2  -1   1 9599.54  383.46 
   2  -1   1 9329.77  385.66 
  -2  -1  -1 9003.30  383.36 
  -2  -1  -1 9582.44  385.46 
   2  -1   1 9779.72  386.16 
  -2  -1  -1 9363.36  386.86 
   2  -1   1 9719.43  385.06 
  -2  -1  -1 9334.37  386.06 
   2  -1   1 9387.26  386.56 
  -2  -1  -1 9005.10  382.86 
  -2  -1  -1 9830.82  387.66 
   2  -1   1 9724.73  385.16 
   2  -1   1 9378.16  385.16 
   2  -1   1 9766.62  385.56 
  -2  -1  -1 9139.39  384.86 
   2  -1   1 9517.85  384.96 
  -2  -1  -1 9836.12  385.16 
   2  -1   1 9912.21  385.96 
   2  -1   1 9319.57  386.56 
   2  -1   1 9286.57  385.26 
  -2  -1  -1 9304.27  386.06 
  -2  -1  -1 9015.40  385.06 
   2  -1   1 9882.21  385.26 
  -2   1  -1 9882.91  386.96 
  -2   1  -1 9725.53  386.26 
  -2   1  -1 9804.22  387.46 
   2   1   1 9034.00  384.46 
  -2   1  -1 9620.94  385.16 
   2   1   1 8964.20  385.06 
   2   1   1 8961.10  385.96 
  -2   1  -1 9620.04  386.86 
  -2   1  -1 9540.85  386.16 
  -2   1  -1 9991.40  386.66 
   2   1   1 9182.38  382.56 
   2   1   1 9346.76  385.86 
  -2   1  -1 9908.01  386.86 
   2   1   1 9763.72  387.16 
   2   1   1 9332.17  384.56 
   2   1   1 9404.26  386.16 
   2   1   1 9475.65  384.26 
   2   1   1 9317.87  383.26 
  -2   1  -1 9519.35  385.66 
   2   1   1 9416.26  386.66 
   2   1   1 9353.46  383.96 
   2   1   1 9622.74  388.76 
   2   1   1 9223.88  386.36 
  -2   1  -1 9475.55  384.16 
  -2   1  -1 9809.42  383.66 
  -2   1  -1 9524.75  384.86 
   2   1   1 9622.74  387.26 
  -2   1  -1 9671.03  385.56 
  -2   1  -1 9440.46  385.06 
   2   1   1 9050.89  382.86 
  -2   1  -1 9999.00  386.96 
  -2   1  -1 9142.89  387.16 
  -2   1  -1 9604.94  383.56 
  -2   1  -1 9527.45  383.56 
   2   1   1 9064.99  383.96 
  -2   1  -1 9619.64  386.16 
  -2   1  -1 9743.12  387.16 
  -2   1  -1 9542.85  385.36 
   2   1   1 8751.12  386.26 
   2   1   1 8737.53  385.06 
   2   1   1 8660.93  387.06 
  -2   1  -1 9580.24  384.26 
  -2   1  -1 9183.88  384.86 
   2   1   1 9336.67  384.76 
  -2   1  -1 9269.67  385.06 
  -2   1  -1 9639.94  386.76 
  -3  -1  -1   46.90    6.70 
  -3  -1  -1   49.90    7.50 
   3  -1   1   52.99    8.10 
  -3  -1  -1   44.40    6.70 
  -3  -1  -1   49.50    6.50 
   3  -1   1   48.40    7.70 
  -3  -1  -1   48.10    6.70 
  -3  -1  -1   60.69    7.70 
  -3  -1  -1   56.89    6.90 
   3  -1   1   57.09    7.60 
   3  -1   1   55.49    8.00 
   3  -1   1   69.09    8.20 
  -3  -1  -1   52.99    8.30 
   3  -1   1   57.49    5.40 
   3  -1   1   55.89    7.60 
  -3  -1  -1   56.19    5.60 
   3  -1   1   59.59    8.30 
   3  -1   1   50.49    7.90 
   3  -1   1   50.29    6.30 
  -3  -1  -1   48.80    6.00 
   3  -1   1   52.49    8.40 
   3  -1   1   48.30    7.90 
  -3  -1  -1   60.99    7.50 
   3  -1   1   64.89    6.60 
   3  -1   1   41.20    7.30 
  -3  -1  -1   51.19    5.90 
   3  -1   1   67.99    9.20 
  -3  -1  -1   39.80    6.90 
   3   1   1   57.99    7.90 
  -3   1  -1   72.39    7.80 
   3   1   1   64.49    9.20 
  -3   1  -1   53.99    7.80 
  -3   1  -1   52.99    8.90 
   3   1   1   49.99    5.70 
   3   1   1   66.59   10.80 
  -3   1  -1   57.89    8.60 
  -3   1  -1   55.19    7.40 
  -3   1  -1   49.20    7.60 
   3   1   1   41.90    6.90 
  -3   1  -1   57.59    6.50 
  -3   1  -1   53.49    8.70 
  -3   1  -1   58.49    7.10 
  -3   1  -1   63.49    9.30 
   3   1   1   68.29    8.80 
  -3   1  -1   53.29    5.20 
  -3   1  -1   58.79    7.40 
  -3   1  -1   46.30    7.80 
   3   1   1   56.79    6.60 
   3   1   1   53.89   10.80 
   3   1   1   52.39    5.80 
  -3   1  -1   50.39    7.60 
   3   1   1   63.79    6.70 
   3   1   1   49.99    8.30 
   3   1   1   54.99    7.90 
   3   1   1   51.89    7.60 
   3   1   1   53.29    7.70 
   3   1   1   49.10    8.30 
   3   1   1   57.29    6.90 
  -3   1  -1   62.09    7.20 
   3   1   1   47.70    8.90 
   3   1   1   38.20    5.40 
  -3   1  -1   53.99    5.50 
   3   1   1   58.69    6.60 
   4  -1   1 1631.14   75.49 
   4  -1   1 1661.13   76.59 
   4  -1   1 1661.53   74.19 
   4  -1   1 1669.13   76.19 
   4  -1   1 1639.64   76.09 
  -4  -1  -1 1678.33   74.89 
   4  -1   1 1642.14   75.39 
  -4  -1  -1 1601.14   70.69 
   4  -1   1 1605.14   74.09 
   4  -1   1 1616.54   70.69 
  -4  -1  -1 1682.53   76.19 
  -4  -1  -1 1693.33   74.29 
  -4  -1  -1 1676.13   72.49 
   4  -1   1 1625.04   71.79 
  -4  -1  -1 1643.24   73.29 
  -4  -1  -1 1581.54   74.19 
   4  -1   1 1556.54   73.99 
  -4  -1  -1 1697.43   74.39 
  -4  -1  -1 1584.64   71.69 
  -4  -1  -1 1627.14   72.79 
  -4  -1  -1 1656.83   76.19 
   4  -1   1 1599.44   74.99 
   4  -1   1 1658.33   75.49 
  -4  -1  -1 1598.24   72.29 
   4   1   1 1644.44   71.69 
  -4   1  -1 1590.94   70.49 
   4   1   1 1624.54   73.29 
   4   1   1 1660.83   76.89 
  -4   1  -1 1703.93   77.39 
   4   1   1 1670.33   75.79 
   4   1   1 1736.33   75.89 
  -4   1  -1 1673.43   75.09 
  -4   1  -1 1664.73   70.79 
   4   1   1 1568.74   71.79 
   4   1   1 1612.14   76.69 
   4   1   1 1628.14   72.49 
  -4   1  -1 1614.94   76.79 
  -4   1  -1 1774.62   76.69 
  -4   1  -1 1725.63   76.09 
  -4   1  -1 1576.74   73.89 
  -4   1  -1 1601.94   75.29 
   4   1   1 1581.44   71.89 
   4   1   1 1597.44   75.29 
  -4   1  -1 1658.33   75.99 
   4   1   1 1662.83   72.29 
   4   1   1 1644.24   74.89 
   4   1   1 1627.54   71.49 
  -4   1  -1 1590.64   76.79 
   4   1   1 1661.23   74.59 
  -4   1  -1 1702.93   78.09 
   4   1   1 1711.13   79.39 
   4   1   1 1500.65   75.49 
   4   1   1 1575.14   71.99 
  -4   1  -1 1638.84   69.69 
  -4   1  -1 1681.43   73.19 
   5  -1   1   -0.30    4.00 
   5  -1   1   -3.60    3.40 
   5  -1   1   -3.80    4.40 
   5  -1   1    0.40    2.80 
   5  -1   1    1.90    4.50 
   5  -1   1    2.10    4.10 
  -5  -1  -1    3.80    3.90 
  -5  -1  -1    5.60    3.80 
  -5  -1  -1   -1.50    3.20 
  -5  -1  -1    2.30    3.10 
   5  -1   1    2.50    3.50 
  -5  -1  -1    2.20    4.10 
  -5  -1  -1   -4.10    3.10 
   5  -1   1   -0.50    3.50 
  -5  -1  -1    5.80    3.70 
   5  -1   1    1.60    4.50 
   5  -1   1   -1.80    3.00 
   5  -1   1   -4.70    3.90 
  -5  -1  -1   10.30    5.80 
  -5  -1  -1   -5.80    2.80 
  -5  -1  -1   -0.10    4.30 
   5   1   1    7.90    7.30 
   5   1   1   -3.60    2.70 
   5   1   1    7.30    6.10 
   5   1   1   -2.90    3.50 
  -5   1  -1   -3.50    3.40 
  -5   1  -1   -1.10    3.50 
  -5   1  -1    0.50    3.50 
   5   1   1    3.10    3.20 
   5   1   1   -3.30    2.70 
   5   1   1    2.40    5.80 
  -5   1  -1   -0.90    2.60 
   5   1   1   -6.70    3.70 
  -5   1  -1    0.30    2.50 
   5   1   1    1.30    4.60 
  -5   1  -1    0.10    4.20 
   5   1   1   -0.80    3.60 
  -5   1  -1    0.30    4.50 
   5   1   1   -0.10    3.20 
  -5   1  -1   -0.60    4.30 
  -5   1  -1    4.80    2.60 
  -5   1  -1   -2.50    3.00 
  -5   1  -1   -2.30    3.40 
   5   1   1   -8.30    6.20 
  -5   1  -1    4.40    5.30 
   5   1   1   -3.80    3.00 
   5   1   1    1.60    4.40 
  -5   1  -1   -3.80    3.50 
  -6  -1  -1   10.00    5.30 
  -6  -1  -1   20.20    8.20 
   6  -1   1   16.60    8.70 
  -6  -1  -1   17.90    7.20 
  -6  -1  -1   25.40    7.30 
   6  -1   1   24.90    8.40 
  -6  -1  -1   21.60    6.40 
  -6  -1  -1   30.90    9.40 
   6  -1   1   16.70    6.10 
  -6  -1  -1   19.40    7.10 
  -6  -1  -1   20.20    7.00 
   6  -1   1   25.20    7.80 
   6  -1   1   21.90    7.70 
   6  -1   1   17.10    6.70 
   6  -1   1   21.00    9.60 
   6  -1   1   23.60    5.90 
   6  -1   1   19.20    7.80 
  -6  -1  -1    8.40    6.10 
   6  -1   1    5.50    6.40 
   6  -1   1   14.80    7.50 
  -6  -1  -1   16.10    6.10 
   6  -1   1   23.10    8.00 
   6   1   1   40.10   10.70 
   6   1   1   16.40    6.80 
  -6   1  -1   16.80    5.40 
   6   1   1   16.30   11.80 
  -6   1  -1   14.30    5.30 
  -6   1  -1   22.10    8.90 
   6   1   1   26.80    8.80 
  -6   1  -1   19.60    5.00 
   6   1   1   26.30   10.30 
  -6   1  -1   18.50    9.10 
   6   1   1   28.10    8.30 
  -6   1  -1   16.50    7.00 
   6   1   1    6.60    8.10 
  -6   1  -1   13.90    7.50 
   6   1   1   19.20    6.40 
   6   1   1   24.10    9.20 
  -6   1  -1   15.10    8.30 
  -6   1  -1   21.60    7.80 
   6   1   1   19.90    6.80 
  -6   1  -1   26.40    8.50 
   6   1   1   15.80    7.10 
  -6   1  -1   11.90    6.40 
  -6   1  -1   36.70   10.20 
   6   1   1   10.80    6.10 
  -6   1  -1   23.60    7.50 
   7  -1   1   15.50    7.80 
   7  -1   1    1.80    7.10 
   7  -1   1   14.10    6.80 
   7  -1   1   18.80    6.20 
  -7  -1  -1   20.80    7.60 
   7  -1   1   18.70    8.30 
  -7  -1  -1   20.50    9.00 
  -7  -1  -1    3.10    6.00 
  -7  -1  -1    6.30    7.60 
  -7  -1  -1   16.80    7.50 
  -7  -1  -1   10.40    7.00 
   7  -1   1   20.00    8.90 
  -7  -1  -1   18.60    8.70 
  -7  -1  -1   10.40    6.20 
   7  -1   1   13.60    7.80 
  -7  -1  -1   16.40    8.30 
   7  -1   1    6.40    8.60 
   7  -1   1   18.40    9.00 
   7  -1   1    7.90    6.90 
  -7  -1  -1   13.80    6.30 
   7  -1   1   23.70   11.40 
  -7  -1  -1   10.40    7.00 
   7  -1   1   16.50    8.50 
   7   1   1   18.00    8.60 
  -7   1  -1   13.20    5.60 
  -7   1  -1   24.90    9.60 
   7   1   1   11.70    8.10 
  -7   1  -1    5.70    7.50 
   7   1   1   23.60   10.40 
  -7   1  -1   21.90   10.20 
   7   1   1   12.80    6.70 
  -7   1  -1   16.80    7.90 
  -7   1  -1   25.10    9.20 
   7   1   1    9.30   10.50 
  -7   1  -1    4.30    6.80 
  -7   1  -1   20.90    8.70 
   7   1   1   -4.30    5.40 
   7   1   1   14.10    8.40 
  -7   1  -1   22.50   11.10 
   7   1   1   21.50   11.30 
   7   1   1   -1.20    5.30 
  -7   1  -1    8.30    7.90 
  -7   1  -1    5.20    4.70 
   7   1   1   15.40    9.30 
   7   1   1   -5.10   12.50 
   7   1   1    9.30    6.40 
   7   1   1    8.20    9.60 
  -7   1  -1    9.40    8.00 
  -8  -1  -1  570.74   40.30 
   8  -1   1  545.15   37.30 
  -8  -1  -1  509.15   38.60 
   8  -1   1  500.85   32.60 
  -8  -1  -1  491.95   33.40 
   8  -1   1  516.65   41.10 
   8  -1   1  496.85   37.30 
   8  -1   1  535.15   36.90 
  -8  -1  -1  488.95   36.30 
   8  -1   1  551.14   39.70 
   8  -1   1  545.55   41.60 
  -8  -1  -1  544.45   34.70 
   8  -1   1  509.05   35.30 
   8  -1   1  516.25   37.90 
  -8  -1  -1  476.85   36.30 
  -8  -1  -1  503.15   35.50 
  -8  -1  -1  474.85   32.70 
   8  -1   1  513.15   35.90 
  -8  -1  -1  540.15   36.50 
   8  -1   1  486.65   39.30 
  -8  -1  -1  544.85   33.00 
  -8  -1  -1  467.25   34.10 
  -8  -1  -1  451.65   37.90 
  -8   1  -1  641.44   43.40 
   8   1   1  506.65   37.70 
   8   1   1  499.65   40.30 
   8   1   1  513.85   41.60 
  -8   1  -1  505.75   35.00 
  -8   1  -1  545.75   36.40 
  -8   1  -1  509.15   40.00 
  -8   1  -1  482.05   37.40 
   8   1   1  519.45   35.90 
   8   1   1  527.85   37.10 
   8   1   1  529.75   40.20 
   8   1   1  524.05   34.10 
  -8   1  -1  543.95   40.30 
   8   1   1  517.35   40.50 
   8   1   1  530.75   36.60 
  -8   1  -1  493.85   40.50 
  -8   1  -1  543.75   32.30 
   8   1   1  487.75   33.50 
  -8   1  -1  542.35   37.00 
   8   1   1  590.94   40.60 
  -8   1  -1  460.35   35.60 
  -8   1  -1  537.95   30.60 
   8   1   1  531.25   34.60 
  -8   1  -1  474.85   36.30 
   9  -1   1    7.00   11.50 
  -9  -1  -1    6.90    8.50 
   9  -1   1    8.20    9.50 
   9  -1   1   17.10    8.90 
  -9  -1  -1   12.50    9.10 
  -9  -1  -1   18.10   10.70 
   9  -1   1    9.70   11.70 
  -9  -1  -1    0.00    9.40 
  -9  -1  -1    9.80   10.20 
   9  -1   1    6.80   13.20 
   9  -1   1    5.30   10.10 
   9  -1   1    3.60   10.20 
  -9  -1  -1   -1.20    8.80 
   9  -1   1   -9.20    6.70 
  -9  -1  -1   11.20    9.90 
  -9  -1  -1   21.40   10.90 
   9  -1   1    7.90    9.40 
  -9  -1  -1   13.40    9.30 
   9  -1   1    7.00    8.50 
  -9  -1  -1   13.90    8.40 
   9   1   1   -4.80    8.60 
   9   1   1    1.20    8.20 
   9   1   1   -2.00   10.80 
   9   1   1   16.60   10.30 
  -9   1  -1   14.90   10.40 
   9   1   1    8.60    8.00 
  -9   1  -1    1.70    7.50 
  -9   1  -1   10.20    9.10 
  -9   1  -1   10.80   10.00 
  -9   1  -1    4.30    9.70 
  -9   1  -1  161.88   30.90 
   9   1   1    4.00    7.00 
  -9   1  -1    6.40    9.20 
  -9   1  -1    0.80    8.70 
   9   1   1   12.90   15.40 
  -9   1  -1    8.90    9.20 
   9   1   1    6.00   10.60 
  -9   1  -1   16.10    9.50 
  -9   1  -1   12.40    9.50 
   9   1   1    9.50   13.80 
 -10  -1  -1  401.16   40.40 
 -10  -1  -1  476.65   49.70 
  10  -1   1  390.06   48.90 
 -10  -1  -1  485.65   35.00 
 -10  -1  -1  379.96   43.50 
  10  -1   1  353.06   45.20 
  10  -1   1  378.76   41.60 
 -10  -1  -1  375.46   35.50 
  10  -1   1  366.76   44.80 
  10  -1   1  450.85   45.30 
 -10  -1  -1  403.16   45.00 
  10  -1   1  479.55   39.30 
  10  -1   1  440.86   35.60 
  10  -1   1  424.16   35.40 
  10  -1   1  431.56   47.00 
 -10  -1  -1  398.86   31.00 
 -10  -1  -1  429.86   42.90 
 -10  -1  -1  392.66   39.20 
  10   1   1  375.26   48.30 
  10   1   1  363.06   38.70 
 -10   1  -1  456.05   45.90 
 -10   1  -1  419.26   40.40 
 -10   1  -1  467.15   47.30 
 -10   1  -1  437.66   42.90 
  10   1   1  332.97   43.40 
 -10   1  -1  391.66   45.70 
 -10   1  -1  399.26   48.20 
 -10   1  -1  436.66   49.00 
  10   1   1  425.66   33.40 
 -10   1  -1  412.06   45.40 
  10   1   1  406.36   33.30 
  10   1   1  415.16   39.00 
  10   1   1  430.16   45.20 
 -10   1  -1  421.66   40.50 
 -10   1  -1  355.86   37.40 
  10  -2  -1  153.08   26.90 
  10  -2  -1  141.29   29.90 
 -10  -2   1  119.59   25.60 
  10  -2  -1  164.48   28.60 
 -10  -2   1  168.38   25.10 
  10  -2  -1  121.69   23.60 
 -10  -2   1  121.29   22.00 
  10  -2  -1  116.89   22.50 
  10  -2  -1  147.99   24.70 
 -10  -2   1  195.18   28.40 
 -10  -2   1  119.29   20.20 
 -10  -2   1  126.89   20.30 
 -10  -2   1  155.28   25.50 
  10  -2  -1  109.69   24.20 
 -10  -2   1  141.89   25.40 
  10  -2  -1  155.68   26.90 
  10  -2  -1  175.88   32.00 
  10  -2  -1  162.08   22.30 
  10   2  -1  139.29   23.00 
  10   2  -1  152.68   32.50 
 -10   2   1  146.29   26.90 
 -10   2   1  119.79   25.30 
 -10   2   1  194.48   29.70 
  10   2  -1  121.49   26.80 
 -10   2   1  154.18   25.30 
  10   2  -1  144.39   22.60 
 -10   2   1  151.18   28.50 
 -10   2   1   91.49   23.30 
 -10   2   1  145.19   29.60 
 -10   2   1  150.48   24.10 
 -10   2   1  123.89   23.60 
 -10   2   1  130.59   21.70 
   9  -2  -1  119.79   17.60 
   9  -2  -1  134.49   22.10 
   9  -2  -1   93.09   19.50 
   9  -2  -1  105.19   21.40 
  -9  -2   1   93.79   18.00 
  -9  -2   1  104.59   17.20 
  -9  -2   1  112.19   19.30 
   9  -2  -1   96.99   21.90 
  -9  -2   1  122.39   21.60 
   9  -2  -1   97.89   19.10 
   9  -2  -1  120.89   22.10 
   9  -2  -1  168.58   29.30 
  -9  -2   1  109.89   17.30 
  -9  -2   1   65.39   15.50 
  -9  -2   1   92.19   19.20 
  -9  -2   1  107.79   20.40 
   9  -2  -1  138.69   18.50 
   9  -2  -1   86.29   19.20 
  -9  -2   1  117.29   21.10 
   9  -2  -1  121.89   23.10 
   9   2  -1   71.19   14.40 
   9   2  -1   99.29   24.50 
   9   2  -1  157.18   22.70 
  -9   2   1  115.89   20.80 
  -9   2   1   81.29   16.40 
  -9   2   1   73.89   19.20 
   9   2  -1  115.29   17.80 
  -9   2   1  135.49   25.10 
   9   2  -1   86.19   21.80 
  -9   2   1  109.59   20.20 
  -9   2   1  104.89   23.40 
  -9   2   1  107.09   20.10 
  -9   2   1  125.89   24.50 
  -9   2   1  160.48   26.30 
   9   2  -1   74.39   22.00 
  -9   2   1  111.69   22.40 
   9   2  -1  116.29   21.80 
   9   2  -1  134.89   20.80 
  -8  -2   1   16.60    9.70 
   8  -2  -1   22.30   10.90 
   8  -2  -1   18.40   11.40 
   8  -2  -1   31.50   13.20 
  -8  -2   1   25.50   11.00 
  -8  -2   1   27.60   10.90 
  -8  -2   1   16.20    8.90 
  -8  -2   1   32.20   11.40 
   8  -2  -1   23.10   10.70 
   8  -2  -1   25.10   10.70 
  -8  -2   1   20.60    9.70 
   8  -2  -1    9.10    8.30 
   8  -2  -1   18.50    8.40 
   8  -2  -1   21.10    8.90 
  -8  -2   1   28.90   10.20 
   8  -2  -1   18.60   10.90 
  -8  -2   1   10.70    7.10 
   8  -2  -1   15.40    9.90 
   8  -2  -1    7.30    8.00 
  -8  -2   1   13.80    7.80 
   8  -2  -1   14.90   10.70 
  -8  -2   1   20.50   10.70 
  -8   2   1   27.30   11.10 
   8   2  -1    6.10   12.30 
  -8   2   1   15.50    8.00 
   8   2  -1   24.90   10.20 
  -8   2   1   25.90   10.30 
  -8   2   1   14.80    8.60 
  -8   2   1   28.90   10.70 
   8   2  -1   20.60    8.60 
   8   2  -1   14.80    8.10 
  -8   2   1   31.20   12.80 
   8   2  -1   25.20   11.50 
   8   2  -1   16.70    7.20 
   8   2  -1   41.80   16.60 
  -8   2   1   26.40   10.30 
   8   2  -1    9.70   12.10 
  -8   2   1    6.60    9.00 
  -8   2   1   37.90   13.20 
  -8   2   1   38.40   14.20 
   8   2  -1    3.80   10.40 
  -8   2   1   17.50   10.70 
  -8   2   1   10.30    5.40 
   8   2  -1   32.10   13.10 
   8   2  -1   17.10    9.70 
  -8   2   1   34.10   13.60 
   7  -2  -1  138.89   21.80 
  -7  -2   1  156.98   20.60 
   7  -2  -1  166.88   22.40 
   7  -2  -1  151.78   19.30 
  -7  -2   1  193.98   22.60 
  -7  -2   1  178.48   16.40 
   7  -2  -1  157.08   17.50 
  -7  -2   1  137.89   19.90 
   7  -2  -1  165.38   20.70 
  -7  -2   1  197.38   19.80 
   7  -2  -1  131.79   18.50 
  -7  -2   1  158.68   19.20 
  -7  -2   1  154.68   17.40 
   7  -2  -1  169.88   23.20 
  -7  -2   1  141.09   18.70 
  -7  -2   1  160.48   18.30 
  -7  -2   1  170.98   19.90 
   7  -2  -1  138.89   20.10 
   7  -2  -1  150.78   21.60 
   7  -2  -1  205.58   24.20 
   7  -2  -1  167.68   18.00 
  -7  -2   1  142.79   18.90 
  -7   2   1  194.78   23.00 
  -7   2   1  168.08   14.70 
   7   2  -1  124.49   17.90 
  -7   2   1  157.28   18.70 
   7   2  -1  178.68   24.40 
  -7   2   1  143.79   21.70 
  -7   2   1  175.08   21.20 
   7   2  -1  149.29   16.70 
   7   2  -1  176.68   21.10 
   7   2  -1  123.49   17.10 
   7   2  -1  155.38   25.20 
  -7   2   1  160.08   21.50 
  -7   2   1  158.38   22.70 
  -7   2   1  177.58   25.40 
   7   2  -1  159.68   16.70 
  -7   2   1  187.28   18.20 
   7   2  -1  168.38   25.20 
   7   2  -1  172.28   23.20 
   7   2  -1  162.88   11.20 
   7   2  -1  159.68   20.70 
  -7   2   1  149.19   20.00 
  -7   2   1  179.98   25.10 
   7   2  -1  180.08   18.80 
  -7   2   1  193.18   23.50 
  -7   2   1   95.59   19.30 
   7   2  -1  159.58   21.40 
  -6  -2   1   25.40    7.50 
  -6  -2   1   32.10    8.80 
   6  -2  -1   30.00   10.60 
   6  -2  -1   30.50   10.20 
  -6  -2   1   20.50    8.40 
  -6  -2   1   35.50    9.50 
  -6  -2   1   24.50    7.90 
  -6  -2   1   26.00    8.50 
  -6  -2   1   31.60    6.40 
   6  -2  -1   22.30    8.20 
  -6  -2   1   31.10    9.50 
  -6  -2   1   43.30   10.10 
   6  -2  -1   45.30   10.50 
  -6  -2   1   23.50    6.80 
   6  -2  -1   25.60    9.50 
   6  -2  -1   23.70    9.10 
   6  -2  -1   28.60    8.90 
  -6  -2   1   20.20    7.90 
  -6  -2   1   31.30    5.10 
   6  -2  -1   40.20   10.60 
   6  -2  -1   46.20    9.10 
  -6   2   1   36.50   10.60 
   6   2  -1   35.90   11.00 
   6   2  -1   31.50   10.40 
  -6   2   1   33.20   10.10 
   6   2  -1   28.90    5.90 
  -6   2   1   53.59   13.90 
  -6   2   1   23.20    9.50 
   6   2  -1   24.60    7.00 
  -6   2   1   44.40   11.70 
  -6   2   1   33.70   10.20 
  -6   2   1   25.80    9.80 
  -6   2   1   19.30    7.70 
   6   2  -1   17.40    7.30 
   6   2  -1   28.80    7.00 
  -6   2   1   30.00    4.40 
   6   2  -1   31.00    5.30 
   6   2  -1   36.50    4.90 
   6   2  -1   20.30   10.20 
   6   2  -1   17.40   10.30 
   6   2  -1   25.10    7.20 
   6   2  -1   29.40    9.20 
  -6   2   1   21.50    5.30 
   6   2  -1   26.00   11.50 
  -6   2   1   43.10    9.90 
  -6   2   1   31.70    7.30 
   6   2  -1   35.50   10.20 
  -6   2   1   41.00   12.00 
   6   2  -1   29.80    5.80 
  -6   2   1   31.20    9.10 
   6   2  -1   33.10    6.80 
   6   2  -1   35.60    9.00 
   5  -2  -1    3.90    5.30 
  -5  -2   1    3.20    3.40 
   5  -2  -1   15.50    6.60 
  -5  -2   1    2.30    2.30 
  -5  -2   1   -3.80    3.60 
  -5  -2   1    3.70    4.50 
  -5  -2   1   -0.20    4.20 
   5  -2  -1    3.10    4.80 
   5  -2  -1   -0.30    4.60 
  -5  -2   1   -4.70    4.70 
  -5  -2   1    1.30    3.70 
   5  -2  -1    5.30    5.80 
  -5  -2   1    2.20    2.60 
  -5  -2   1    0.50    3.50 
   5  -2  -1   -2.10    3.80 
   5  -2  -1    6.90    4.40 
   5  -2  -1   -0.80    4.50 
   5  -2  -1    6.80    5.70 
   5  -2  -1    4.40    5.90 
  -5  -2   1    0.10    2.80 
   5   2  -1    2.00    1.90 
   5   2  -1    2.40    5.10 
   5   2  -1   23.10    9.10 
   5   2  -1    9.30    7.80 
   5   2  -1    6.50    4.10 
  -5   2   1   -1.50    4.10 
  -5   2   1   26.90    8.90 
  -5   2   1   -5.50    2.80 
  -5   2   1    0.80    1.60 
   5   2  -1   21.80    6.60 
   5   2  -1    2.60    2.80 
   5   2  -1   -0.90    4.00 
  -5   2   1    0.10    4.10 
   5   2  -1    1.90    3.50 
   5   2  -1   10.80    7.10 
   5   2  -1    2.60    2.20 
  -5   2   1    1.90    4.70 
   5   2  -1   -5.80    4.00 
  -5   2   1    4.10    3.50 
   5   2  -1    7.40    6.80 
  -5   2   1   -2.50    1.90 
   5   2  -1    4.80    3.20 
  -5   2   1    7.50    5.50 
   5   2  -1   -0.90    2.80 
  -5   2   1    0.00    4.10 
  -5   2   1    1.90    5.00 
   5   2  -1   -0.90    2.00 
   5   2  -1    6.40    5.50 
  -5   2   1    6.40    3.90 
   5   2  -1    0.70    3.00 
  -5   2   1    0.00    4.30 
  -5   2   1    8.60    5.80 
  -4  -2   1   -0.10    2.60 
   4  -2  -1   -1.30    4.00 
  -4  -2   1    0.30    3.00 
  -4  -2   1    2.90    3.40 
   4  -2  -1   -1.80    3.00 
   4  -2  -1   -7.00    3.30 
   4  -2  -1    7.50    5.50 
   4  -2  -1    5.70    4.50 
  -4  -2   1    0.50    2.50 
  -4  -2   1    1.80    2.90 
   4  -2  -1    1.30    4.30 
   4  -2  -1    1.50    4.00 
  -4  -2   1   -1.40    3.30 
  -4  -2   1    2.70    2.00 
   4  -2  -1    5.20    5.10 
   4  -2  -1   -0.70    4.00 
  -4  -2   1    6.30    4.20 
   4  -2  -1   -1.00    4.30 
  -4  -2   1    1.00    2.30 
  -4  -2   1    1.00    1.70 
   4  -2  -1    4.50    2.40 
  -4  -2   1   -1.60    3.60 
   4   2  -1   -1.10    3.40 
   4   2  -1    7.50    4.70 
  -4   2   1   -0.20    3.10 
  -4   2   1    7.00    4.60 
  -4   2   1   -1.70    3.00 
  -4   2   1    3.20    4.80 
  -4   2   1    3.70    4.40 
   4   2  -1    9.70    4.60 
   4   2  -1   -0.60    5.50 
  -4   2   1   -1.10    3.50 
   4   2  -1    0.70    3.10 
   4   2  -1    2.30    1.30 
   4   2  -1   -0.90    6.00 
   4   2  -1    6.80    6.60 
   4   2  -1   -0.80    1.40 
  -4   2   1    2.00    4.30 
  -4   2   1    8.20    3.50 
  -4   2   1    6.90    4.80 
   4   2  -1    6.70    5.10 
  -4   2   1    5.80    3.80 
   4   2  -1   -0.80    3.70 
   4   2  -1    5.20    2.40 
   4   2  -1   -0.80    5.60 
  -4   2   1   -3.70    2.70 
   4   2  -1   -2.00    4.60 
   4   2  -1   -0.50    1.40 
   4   2  -1    1.20    2.60 
   4   2  -1    3.60    4.10 
  -4   2   1    4.70    2.20 
   4   2  -1   -0.10    2.80 
  -4   2   1    2.60    3.80 
  -4   2   1   -6.00    2.70 
   4   2  -1    1.00    2.90 
   3  -2  -1  268.87   14.70 
  -3  -2   1  284.77   20.30 
   3  -2  -1  291.07   17.40 
  -3  -2   1  252.57   12.20 
   3  -2  -1  277.87   14.20 
  -3  -2   1  226.98   16.80 
   3  -2  -1  277.37   16.80 
   3  -2  -1  282.57   18.40 
   3  -2  -1  270.27   17.50 
   3  -2  -1  263.27   15.00 
  -3  -2   1  247.58   13.90 
   3  -2  -1  272.47   19.00 
  -3  -2   1  239.88   15.40 
   3  -2  -1  289.27   19.30 
  -3  -2   1  250.27   16.20 
   3  -2  -1  249.58   16.80 
   3  -2  -1  263.07   18.80 
  -3  -2   1  272.57   17.00 
  -3  -2   1  233.78   16.50 
  -3  -2   1  273.27   15.20 
  -3  -2   1  264.17   18.40 
  -3  -2   1  269.27   16.50 
  -3  -2   1  258.97   15.60 
  -3  -2   1  256.37   13.60 
  -3  -2   1  234.18   14.80 
   3  -2  -1  280.27   17.30 
   3  -2  -1  259.47   17.40 
   3  -2  -1  279.17   15.80 
   3   2  -1  253.37   14.40 
   3   2  -1  252.77   15.50 
  -3   2   1  278.27   16.00 
   3   2  -1  254.77   14.80 
  -3   2   1  271.97   16.70 
  -3   2   1  264.77   17.40 
   3   2  -1  243.88   23.80 
  -3   2   1  274.27   18.60 
   3   2  -1  252.27   18.00 
   3   2  -1  279.27   17.40 
  -3   2   1  263.77   18.40 
   3   2  -1  232.38   14.80 
   3   2  -1  235.08   15.20 
  -3   2   1  242.18   18.00 
  -3   2   1  286.07   16.70 
  -3   2   1  264.27   15.50 
   3   2  -1  257.57   19.80 
  -3   2   1  311.87   16.40 
   3   2  -1  263.77   17.20 
  -3   2   1  284.17   19.90 
   3   2  -1  269.77   19.00 
   3   2  -1  226.48   13.30 
  -3   2   1  261.47   15.70 
   3   2  -1  234.08   18.80 
  -3   2   1  268.67   12.90 
  -3   2   1  268.07   18.70 
   3   2  -1  261.07   15.20 
   3   2  -1  246.78   20.10 
   3   2  -1  253.47   13.80 
  -3   2   1  264.17   18.10 
  -3   2   1  289.27   18.90 
  -3   2   1  290.27   19.80 
   3   2  -1  247.58   16.50 
   3   2  -1  244.48   13.20 
   3   2  -1  279.87   19.00 
   2  -2  -1   45.40    7.20 
  -2  -2   1   32.40    5.10 
   2  -2  -1   34.90    2.50 
   2  -2  -1   36.70    4.60 
  -2  -2   1   31.30    6.40 
   2  -2  -1   38.60    6.40 
  -2  -2   1   34.30    5.80 
   2  -2  -1   44.90    6.60 
   2  -2  -1   38.20    6.90 
   2  -2  -1   35.70    6.60 
   2  -2  -1   39.20    6.00 
  -2  -2   1   33.10    6.50 
   2  -2  -1   38.00    4.70 
   2  -2  -1   36.90    7.00 
   2  -2  -1   37.80    7.00 
   2  -2  -1   41.80    5.20 
   2  -2  -1   35.10    5.50 
   2  -2  -1   38.30    7.00 
   2  -2  -1   33.20    2.50 
  -2  -2   1   30.60    5.20 
   2  -2  -1   29.10    5.00 
  -2  -2   1   40.30    8.40 
  -2  -2   1   32.80    4.70 
  -2  -2   1   27.60    3.10 
   2  -2  -1   38.00    6.10 
  -2  -2   1   28.70    4.30 
  -2  -2   1   39.50    7.00 
  -2  -2   1   32.40    5.80 
  -2  -2   1   28.90    5.70 
  -2  -2   1   39.00    7.10 
  -2  -2   1   40.40    4.80 
  -2  -2   1   30.40    5.10 
   2  -2  -1   35.60    5.30 
  -2  -2   1   30.20    5.10 
  -2  -2   1   40.50    6.40 
   2  -2  -1   27.20    4.80 
   2  -2  -1   38.00    7.20 
   2  -2  -1   30.70    6.60 
   2  -2  -1   29.60    6.40 
   2  -2  -1   51.39    5.90 
  -2  -2   1   32.20    4.60 
  -2  -2   1   26.60    4.80 
   2  -2  -1   42.20    7.50 
   2  -2  -1   27.50    5.50 
   2   2  -1   39.30    4.50 
   2   2  -1   36.40    7.30 
  -2   2   1   25.20    5.00 
   2   2  -1   37.70    5.90 
   2   2  -1   36.10    7.10 
   2   2  -1   30.70    6.30 
   2   2  -1   31.80    4.20 
  -2   2   1   36.50    4.60 
  -2   2   1   25.40    6.20 
  -2   2   1   31.00    5.10 
  -2   2   1   36.40    4.90 
  -2   2   1   36.80    3.80 
  -2   2   1   32.80    2.60 
   2   2  -1   33.80    5.00 
  -2   2   1   35.30    6.50 
   2   2  -1   32.70    3.70 
  -2   2   1   40.50    7.20 
  -2   2   1   41.10    7.30 
   2   2  -1   31.60    6.10 
   2   2  -1   27.60    5.40 
  -2   2   1   41.30    6.90 
  -2   2   1   38.30    5.80 
  -2   2   1   23.70    6.40 
  -2   2   1   41.50    7.00 
   2   2  -1   27.00    5.80 
  -2   2   1   32.50    5.60 
   2   2  -1   33.90    3.80 
  -2   2   1   44.60    6.10 
  -2   2   1   28.80    5.10 
   2   2  -1   38.40    6.50 
  -2   2   1   33.00    5.60 
  -2   2   1   43.20    7.00 
   2   2  -1   32.90    3.20 
  -2   2   1   34.50    5.20 
  -2   2   1   34.40    5.40 
  -2   2   1   43.30    7.00 
  -2   2   1   33.70    4.50 
  -2   2   1   44.10    7.70 
  -2   2   1   36.60    5.90 
   2   2  -1   27.60    4.10 
   2   2  -1   26.30    3.70 
  -2   2   1   33.40    3.30 
  -2   2   1   42.80    7.40 
   2   2  -1   34.80    5.20 
   1  -2  -1    5.90    3.10 
  -1  -2   1    4.80    2.40 
   1  -2  -1    6.80    2.70 
  -1  -2   1    3.80    2.50 
   1  -2  -1    0.10    2.20 
  -1  -2   1    2.50    1.60 
   1  -2  -1    1.30    1.80 
   1  -2  -1    4.10    2.70 
  -1  -2   1    6.70    2.70 
   1  -2  -1    2.80    2.70 
   1  -2  -1    0.70    2.40 
   1  -2  -1    2.60    1.60 
   1  -2  -1    3.50    1.80 
   1  -2  -1    3.80    1.30 
  -1  -2   1    1.70    1.50 
  -1  -2   1    4.80    2.30 
   1  -2  -1    6.00    3.00 
   1  -2  -1    5.90    1.90 
   1  -2  -1    2.60    1.80 
  -1  -2   1    0.50    2.10 
   1  -2  -1    3.20    1.60 
   1  -2  -1    5.20    2.50 
  -1  -2   1    4.70    2.10 
   1  -2  -1    8.10    2.80 
  -1  -2   1    5.00    1.50 
  -1  -2   1    1.40    2.50 
  -1  -2   1    2.60    1.90 
   1  -2  -1   10.10    3.30 
  -1  -2   1    2.20    2.20 
  -1  -2   1    3.00    1.90 
   1  -2  -1    2.70    2.30 
  -1  -2   1    5.30    1.40 
   1  -2  -1    7.80    2.30 
   1  -2  -1    3.50    2.20 
  -1  -2   1    8.40    3.50 
  -1  -2   1    4.30    2.20 
  -1  -2   1    2.00    2.00 
  -1  -2   1    2.30    1.80 
   1  -2  -1   10.30    2.70 
  -1  -2   1    0.50    1.30 
   1  -2  -1    4.50    3.00 
   1  -2  -1    1.70    2.40 
   1  -2  -1    5.20    3.10 
   1  -2  -1    2.40    2.30 
  -1  -2   1    1.70    1.20 
  -1  -2   1    2.10    2.30 
   1  -2  -1    4.20    1.20 
   1  -2  -1    3.10    2.00 
   1  -2  -1    8.80    2.60 
  -1  -2   1    6.40    1.60 
  -1  -2   1    5.10    3.20 
   1  -2  -1    1.00    2.00 
  -1  -2   1    2.90    0.80 
   1  -2  -1    9.00    3.30 
  -1  -2   1    5.00    1.50 
  -1  -2   1    2.20    1.90 
   1  -2  -1    8.70    4.70 
   1  -2  -1    7.30    3.50 
   1  -2  -1    7.30    2.70 
  -1  -2   1    5.40    2.50 
  -1  -2   1    2.20    3.30 
  -1   2   1    2.70    2.60 
   1   2  -1    2.10    1.50 
  -1   2   1    4.30    2.60 
  -1   2   1    3.10    2.60 
  -1   2   1    5.10    3.00 
   1   2  -1    6.60    1.60 
   1   2  -1    0.50    2.20 
  -1   2   1    2.80    1.50 
   1   2  -1    4.60    2.40 
  -1   2   1    1.70    1.90 
  -1   2   1    2.60    1.50 
  -1   2   1    2.00    2.40 
  -1   2   1    3.20    1.90 
  -1   2   1    5.00    2.10 
   1   2  -1    2.60    2.10 
  -1   2   1    3.60    2.20 
  -1   2   1    3.00    1.90 
   1   2  -1    6.70    2.60 
   1   2  -1   -0.50    1.90 
   1   2  -1    8.00    2.50 
   1   2  -1    1.50    2.10 
  -1   2   1    2.40    3.70 
  -1   2   1    5.00    2.40 
  -1   2   1    5.70    2.10 
   1   2  -1    1.30    1.40 
   1   2  -1    1.40    2.40 
  -1   2   1    1.90    2.40 
  -1   2   1   -0.60    1.70 
  -1   2   1    1.70    3.20 
  -1   2   1    1.50    2.60 
  -1   2   1    2.60    2.80 
  -1   2   1    4.80    2.00 
  -1   2   1    3.60    2.60 
  -1   2   1    4.20    1.40 
  -1   2   1    5.70    2.40 
  -1   2   1    2.10    2.80 
   1   2  -1    4.10    2.30 
  -1   2   1   -1.20    2.10 
  -1   2   1    1.20    2.10 
   1   2  -1    1.50    2.30 
   0  -2  -1   25.90    3.30 
   0  -2   1   24.90    4.80 
   0  -2  -1   27.10    5.20 
   0  -2  -1   22.40    4.70 
   0  -2   1   21.70    4.30 
   0  -2   1   26.40    3.20 
   0  -2   1   30.90    4.70 
   0  -2   1   24.60    3.90 
   0  -2  -1   25.20    6.80 
   0  -2   1   20.30    4.20 
   0  -2   1   19.80    2.80 
   0  -2  -1   24.70    4.40 
   0  -2  -1   24.50    4.10 
   0  -2   1   25.20    3.70 
   0  -2  -1   27.20    4.30 
   0  -2   1   19.10    3.70 
   0  -2  -1   23.00    1.70 
   0  -2  -1   24.50    5.70 
   0  -2   1   19.80    3.30 
   0  -2  -1   30.50    4.00 
   0  -2   1   22.60    3.30 
   0  -2  -1   25.80    3.20 
   0  -2  -1   23.00    5.10 
   0  -2  -1   18.50    3.80 
   0  -2   1   26.30    3.90 
   0  -2  -1   23.10    4.60 
   0  -2   1   26.30    3.70 
   0  -2   1   21.40    4.00 
   0  -2   1   28.60    4.30 
   0  -2  -1   23.10    3.40 
   0  -2   1   23.80    4.20 
   0  -2  -1   25.00    4.00 
   0  -2   1   23.00    4.00 
   0  -2  -1   24.50    2.90 
   0  -2   1   24.60    4.00 
   0  -2   1   26.70    3.80 
   0  -2   1   23.10    3.40 
   0  -2  -1   24.80    3.70 
   0  -2  -1   24.80    4.00 
   0  -2   1   24.70    2.30 
   0  -2  -1   19.30    4.00 
   0  -2  -1   20.70    3.20 
   0  -2   1   24.60    4.10 
   0  -2   1   32.40    5.20 
   0  -2   1   33.20    4.80 
   0  -2  -1   27.70    5.40 
   0  -2  -1   22.10    4.00 
   0  -2   1   21.40    3.60 
   0  -2  -1   23.20    4.00 
   0  -2  -1   37.70    5.90 
   0  -2  -1   22.90    1.80 
   0  -2  -1   19.50    3.90 
   0  -2  -1   26.30    3.30 
   0  -2  -1   34.70    5.00 
   0  -2   1   26.50    4.50 
   0  -2  -1   23.60    5.50 
   0   2  -1   23.10    4.00 
   0   2  -1   24.40    4.10 
   0   2   1   27.40    4.40 
   0   2  -1   19.80    3.50 
   0   2   1   22.30    3.50 
   0   2   1   30.70    4.50 
   0   2   1   21.10    4.70 
   0   2  -1   21.00    4.50 
   0   2   1   25.60    6.00 
   0   2  -1   18.30    4.00 
   0   2   1   27.80    4.70 
   0   2   1   26.40    4.90 
   0   2   1   24.80    4.10 
   0   2   1   18.00    2.50 
   0   2  -1   25.00    4.10 
   0   2  -1   23.80    3.50 
   0   2   1   24.10    3.40 
   0   2  -1   18.90    3.90 
   0   2  -1   23.50    4.50 
   0   2  -1   20.30    3.60 
   0   2  -1   20.80    3.80 
   0   2  -1   27.50    4.30 
   0   2  -1   24.30    3.60 
   0   2   1   24.80    4.60 
   0   2   1   29.00    6.30 
   0   2   1   18.50    4.30 
   0   2  -1   27.60    3.90 
   0   2   1   19.50    2.90 
   0   2   1   25.30    5.10 
   0   2  -1   27.40    4.00 
   0   2  -1   24.50    3.50 
   0   2  -1   20.40    4.50 
   0   2   1   27.30    4.40 
   0   2   1   31.40    4.90 
   0   2   1   24.40    5.10 
   0   2  -1   25.70    4.00 
   0   2  -1   22.10    3.70 
   0   2   1   14.20    3.70 
   0   2   1   35.30    5.00 
  -1  -2  -1 1254.57   58.29 
   1  -2   1 1318.27   56.69 
  -1  -2  -1 1299.87   58.99 
   1  -2   1 1307.27   55.59 
  -1  -2  -1 1305.27   57.09 
   1  -2   1 1326.37   54.89 
   1  -2   1 1324.37   54.99 
  -1  -2  -1 1265.87   58.49 
   1  -2   1 1367.66   56.99 
   1  -2   1 1325.27   58.59 
  -1  -2  -1 1342.57   59.89 
   1  -2   1 1340.17   58.99 
  -1  -2  -1 1314.57   55.79 
  -1  -2  -1 1344.17   59.89 
   1  -2   1 1309.57   59.29 
  -1  -2  -1 1295.07   54.79 
  -1  -2  -1 1207.48   53.59 
   1  -2   1 1291.67   55.99 
   1  -2   1 1355.16   56.09 
   1  -2   1 1365.76   57.69 
  -1  -2  -1 1168.78   54.49 
  -1  -2  -1 1308.07   58.59 
   1  -2   1 1324.87   54.19 
  -1  -2  -1 1273.07   56.89 
   1  -2   1 1277.57   57.99 
   1  -2   1 1324.37   56.39 
   1  -2   1 1271.57   56.89 
   1  -2   1 1234.28   57.89 
   1  -2   1 1331.57   54.69 
   1  -2   1 1309.97   53.09 
   1  -2   1 1352.06   57.09 
   1  -2   1 1316.57   55.09 
   1  -2   1 1324.07   54.59 
   1  -2   1 1328.17   56.79 
  -1  -2  -1 1258.47   56.19 
   1  -2   1 1314.87   55.69 
  -1  -2  -1 1284.57   58.19 
   1  -2   1 1200.18   57.69 
  -1  -2  -1 1175.08   57.99 
   1  -2   1 1344.77   58.49 
  -1  -2  -1 1314.37   54.79 
  -1  -2  -1 1292.77   57.19 
   1  -2   1 1323.67   57.49 
   1  -2   1 1284.87   53.09 
  -1  -2  -1 1216.38   53.69 
  -1  -2  -1 1258.47   58.09 
  -1  -2  -1 1278.57   56.49 
  -1  -2  -1 1230.28   54.39 
   1  -2   1 1294.77   55.29 
  -1  -2  -1 1252.47   54.99 
  -1  -2  -1 1281.87   55.69 
   1  -2   1 1337.57   55.29 
   1  -2   1 1248.68   58.89 
   1  -2   1 1342.97   56.09 
  -1  -2  -1 1244.38   54.19 
  -1  -2  -1 1233.18   59.29 
   1  -2   1 1341.97   56.89 
   1  -2   1 1354.26   58.79 
   1   2   1 1194.48   53.29 
  -1   2  -1 1404.76   58.79 
  -1   2  -1 1322.07   56.99 
   1   2   1 1221.98   58.39 
   1   2   1 1295.47   58.59 
  -1   2  -1 1306.47   58.79 
   1   2   1 1283.37   58.29 
  -1   2  -1 1301.97   57.09 
   1   2   1 1280.77   59.09 
   1   2   1 1219.98   54.79 
   1   2   1 1238.58   58.39 
  -1   2  -1 1259.07   53.49 
  -1   2  -1 1313.97   59.09 
  -1   2  -1 1354.86   55.09 
  -1   2  -1 1282.67   56.69 
   1   2   1 1296.67   55.09 
  -1   2  -1 1328.67   57.99 
   1   2   1 1246.28   54.29 
   1   2   1 1267.97   55.79 
   1   2   1 1215.18   56.09 
  -1   2  -1 1306.67   57.39 
  -1   2  -1 1305.47   58.29 
  -1   2  -1 1323.67   54.59 
   1   2   1 1332.27   58.29 
   1   2   1 1279.97   56.89 
  -1   2  -1 1301.07   53.59 
   1   2   1 1261.17   57.09 
  -1   2  -1 1352.76   57.19 
  -1   2  -1 1341.27   54.49 
  -1   2  -1 1326.87   56.69 
  -1   2  -1 1291.07   56.09 
   1   2   1 1159.98   57.59 
   1   2   1 1325.17   56.79 
   1   2   1 1330.27   58.49 
  -1   2  -1 1345.67   59.89 
  -1   2  -1 1357.46   57.89 
  -1   2  -1 1401.26   59.89 
  -1   2  -1 1280.37   56.59 
  -1   2  -1 1265.97   56.49 
  -1   2  -1 1279.57   54.69 
  -1   2  -1 1296.47   56.89 
  -2  -2  -1   93.19    7.40 
   2  -2   1   95.29    8.00 
  -2  -2  -1   96.29    7.00 
  -2  -2  -1  100.89   13.70 
   2  -2   1  104.79   11.80 
  -2  -2  -1   84.89    9.50 
  -2  -2  -1   81.99    6.90 
  -2  -2  -1   99.39    9.20 
   2  -2   1   85.39    8.70 
  -2  -2  -1   79.19    5.70 
   2  -2   1   94.79    9.90 
   2  -2   1  110.29   10.60 
   2  -2   1  103.39   10.70 
  -2  -2  -1   99.79    7.20 
  -2  -2  -1   82.09    5.30 
  -2  -2  -1   95.39   10.60 
  -2  -2  -1   87.69   10.80 
   2  -2   1  102.09   12.20 
   2  -2   1  115.29   12.50 
   2  -2   1  100.89    7.90 
   2  -2   1   96.59    8.80 
   2  -2   1   83.69    9.10 
  -2  -2  -1   93.89    7.30 
   2  -2   1  104.09   11.30 
   2  -2   1   77.49    9.80 
   2  -2   1  114.79   12.00 
   2  -2   1   79.59    9.00 
   2  -2   1   86.49   11.40 
  -2  -2  -1   92.09    6.50 
  -2  -2  -1   79.19   10.60 
   2  -2   1   86.99    6.00 
  -2  -2  -1   85.29   10.30 
   2  -2   1  106.89   10.30 
  -2  -2  -1   87.19   10.50 
  -2  -2  -1  127.99   11.50 
  -2  -2  -1   84.59   10.30 
   2  -2   1  101.79    5.30 
   2  -2   1   94.29    6.60 
  -2  -2  -1  103.19   11.40 
  -2  -2  -1   88.09   10.80 
   2  -2   1   76.89   10.00 
   2  -2   1   87.19   10.90 
   2  -2   1  104.89   10.80 
  -2  -2  -1  101.09    8.00 
   2  -2   1   99.79    4.70 
   2  -2   1  117.79   12.60 
  -2   2  -1   98.59    7.70 
   2   2   1   80.59    5.10 
   2   2   1  106.99   10.40 
   2   2   1   87.89    9.40 
  -2   2  -1   75.89    9.70 
  -2   2  -1  106.49   12.00 
  -2   2  -1  142.79   14.20 
  -2   2  -1  105.69    5.60 
  -2   2  -1   80.49    9.20 
   2   2   1   86.39   11.20 
   2   2   1  107.29   11.80 
  -2   2  -1   93.69    6.30 
  -2   2  -1   95.69   11.00 
  -2   2  -1   93.69   10.90 
   2   2   1  110.09    8.30 
   2   2   1   94.39   11.90 
  -2   2  -1   96.89   11.20 
  -2   2  -1  103.29   10.20 
  -2   2  -1  101.79    6.00 
   2   2   1   95.29    7.60 
   2   2   1   84.19   10.50 
  -2   2  -1   96.79    7.70 
   2   2   1  114.39   12.30 
   2   2   1   85.09   12.60 
  -2   2  -1   96.49    9.50 
   2   2   1   94.39    7.10 
   2   2   1   93.19    9.20 
  -2   2  -1  103.89   10.00 
   2   2   1   86.59    6.40 
  -2   2  -1  111.09    8.40 
  -2   2  -1   95.59   10.90 
   2   2   1   83.29    5.80 
  -2   2  -1   86.49    9.40 
  -2   2  -1   94.89   10.10 
   2   2   1   89.39    8.70 
  -2   2  -1  117.59   11.70 
  -2   2  -1   98.59   11.80 
  -2   2  -1   94.49    7.80 
  -2   2  -1  114.19    7.60 
   3  -2   1    3.60    3.70 
   3  -2   1    3.90    1.50 
  -3  -2  -1   14.70    6.70 
   3  -2   1    6.60    4.80 
   3  -2   1   15.60    5.50 
   3  -2   1    6.80    4.20 
   3  -2   1    4.50    2.40 
  -3  -2  -1    3.70    1.90 
   3  -2   1   13.00    5.00 
   3  -2   1    6.90    3.90 
   3  -2   1    5.80    2.90 
  -3  -2  -1    4.60    2.30 
  -3  -2  -1    7.20    8.70 
  -3  -2  -1    6.80    3.20 
   3  -2   1    9.80    4.00 
  -3  -2  -1    4.80    1.80 
  -3  -2  -1    7.30    3.70 
  -3  -2  -1    0.30    2.20 
   3  -2   1    0.70    2.50 
  -3  -2  -1    3.30    5.40 
   3  -2   1    8.70    4.90 
  -3  -2  -1    6.10    3.60 
  -3  -2  -1    6.50    8.10 
   3  -2   1    4.70    3.70 
   3   2   1   10.30    3.70 
  -3   2  -1    2.20    2.90 
  -3   2  -1   -1.40    2.70 
  -3   2  -1    5.40    3.20 
   3   2   1    5.00    3.50 
  -3   2  -1    5.90    2.40 
   3   2   1    6.00    5.60 
   3   2   1    5.30    3.70 
  -3   2  -1   -1.70    3.10 
  -3   2  -1    0.40    3.50 
   3   2   1    9.90    5.20 
   3   2   1    3.20    4.00 
  -3   2  -1    2.80    2.70 
  -3   2  -1    4.50    3.70 
   3   2   1    6.90    4.40 
  -3   2  -1    7.80    4.80 
   3   2   1    6.00    4.00 
  -3   2  -1    5.20    1.50 
  -3   2  -1    8.30    2.70 
   3   2   1    5.80    2.30 
   3   2   1   -0.80    4.90 
   3   2   1    4.80    4.20 
   3   2   1   12.70    3.80 
  -3   2  -1    5.80    5.00 
   3   2   1    2.80    5.30 
  -3   2  -1    8.20    2.70 
  -3   2  -1   -1.20    3.00 
  -3   2  -1    5.80    2.60 
   3   2   1    4.30    5.30 
   3   2   1    9.80    5.10 
  -3   2  -1    7.50    4.80 
  -3   2  -1   10.30    4.50 
   3   2   1   10.10    4.90 
   3   2   1    1.80    4.00 
   4  -2   1   46.70    8.60 
   4  -2   1   39.10    8.50 
   4  -2   1   44.00    8.50 
   4  -2   1   56.19    9.80 
   4  -2   1   53.19    7.00 
  -4  -2  -1   42.00    7.20 
  -4  -2  -1   48.40    9.50 
  -4  -2  -1   57.49    8.00 
   4  -2   1   47.50    9.60 
  -4  -2  -1   52.19    5.80 
  -4  -2  -1   49.60    8.30 
   4  -2   1   49.30    8.60 
   4  -2   1   80.29   12.20 
  -4  -2  -1   53.09    8.00 
  -4  -2  -1   49.99    5.60 
  -4  -2  -1   68.99    9.90 
   4  -2   1   60.49    9.20 
  -4  -2  -1   56.29    8.80 
   4  -2   1   45.30    8.70 
   4  -2   1   61.09   10.90 
  -4  -2  -1   64.89    7.40 
  -4  -2  -1   72.69   10.10 
   4   2   1   52.69   10.30 
  -4   2  -1   50.19    9.60 
  -4   2  -1   53.39   10.20 
   4   2   1   59.59   10.70 
  -4   2  -1   43.30    9.50 
   4   2   1   51.59    6.20 
   4   2   1   53.39    8.60 
  -4   2  -1   51.99    9.40 
   4   2   1   54.49   10.30 
  -4   2  -1   86.99   13.70 
  -4   2  -1   81.29    8.20 
  -4   2  -1   59.19   10.60 
  -4   2  -1   36.90    6.50 
   4   2   1   55.59   10.10 
   4   2   1   54.39   10.20 
  -4   2  -1   39.00    9.40 
   4   2   1   41.70    7.80 
  -4   2  -1   53.59    9.20 
   4   2   1   67.09    9.20 
   4   2   1   51.39   10.50 
  -4   2  -1   51.39    7.40 
   4   2   1   35.90    5.60 
   4   2   1   55.69    7.70 
   4   2   1   56.29    5.50 
  -4   2  -1   48.40    4.90 
   4   2   1   47.50    9.40 
  -4   2  -1   57.09   10.20 
   4   2   1   44.20   10.20 
   4   2   1   46.80    6.40 
   4   2   1   56.59    8.50 
  -4   2  -1   46.50    5.80 
   4   2   1   72.69    7.70 
  -5  -2  -1   82.09   11.20 
  -5  -2  -1   98.49    9.10 
   5  -2   1   88.29   12.30 
  -5  -2  -1   70.49   11.10 
   5  -2   1   76.59   13.40 
   5  -2   1   64.39    8.90 
   5  -2   1   68.09   11.90 
  -5  -2  -1   73.59   10.90 
   5  -2   1   85.79   13.10 
   5  -2   1  111.29   16.30 
  -5  -2  -1   85.49   11.60 
  -5  -2  -1   88.99   10.00 
   5  -2   1  102.59   13.40 
  -5  -2  -1   82.09   11.70 
  -5  -2  -1   66.09   10.90 
  -5  -2  -1   80.59    8.40 
   5  -2   1  104.19   13.80 
  -5  -2  -1   88.29   13.40 
   5  -2   1   59.99   11.90 
  -5  -2  -1   78.49   13.40 
   5  -2   1  116.49   14.60 
   5  -2   1   64.09   11.90 
  -5   2  -1  102.89   15.50 
   5   2   1  100.39   14.10 
   5   2   1   94.99   12.30 
   5   2   1   99.69   12.40 
   5   2   1   91.59    8.80 
  -5   2  -1  108.09   15.90 
  -5   2  -1  103.09   15.20 
   5   2   1   81.99   14.50 
  -5   2  -1   79.09    7.70 
   5   2   1   91.99    9.80 
   5   2   1   87.89    9.00 
   5   2   1   91.99   10.20 
   5   2   1   94.19   12.60 
  -5   2  -1   72.09   11.60 
  -5   2  -1   77.69   10.40 
   5   2   1   88.89   15.00 
  -5   2  -1   62.99   12.80 
   5   2   1   83.09   13.60 
  -5   2  -1   89.99   15.20 
   5   2   1   87.09   11.60 
  -5   2  -1   99.79    9.80 
  -5   2  -1   86.29    5.90 
  -5   2  -1  107.69   15.00 
   5   2   1   63.39   12.10 
  -5   2  -1   99.49   13.30 
   5   2   1   82.59   13.50 
   5   2   1   65.99    8.80 
  -5   2  -1   81.09   14.20 
   5   2   1   84.39   11.60 
   5   2   1   65.99   12.50 
  -6  -2  -1  514.95   28.40 
   6  -2   1  518.15   28.80 
  -6  -2  -1  506.05   30.80 
   6  -2   1  518.15   34.70 
   6  -2   1  543.15   33.30 
  -6  -2  -1  476.65   26.40 
  -6  -2  -1  550.24   34.60 
  -6  -2  -1  466.55   31.60 
   6  -2   1  495.05   33.60 
  -6  -2  -1  473.35   31.50 
  -6  -2  -1  493.45   33.70 
   6  -2   1  504.45   33.80 
   6  -2   1  488.35   32.60 
  -6  -2  -1  507.75   30.40 
   6  -2   1  493.65   34.80 
  -6  -2  -1  488.25   30.40 
   6  -2   1  514.65   34.50 
   6  -2   1  492.35   31.80 
   6  -2   1  520.75   33.80 
  -6  -2  -1  498.35   32.00 
  -6   2  -1  551.54   35.30 
   6   2   1  524.65   34.90 
  -6   2  -1  515.85   30.40 
   6   2   1  495.75   28.90 
  -6   2  -1  530.65   36.90 
  -6   2  -1  523.15   24.10 
  -6   2  -1  486.65   32.80 
   6   2   1  504.35   35.90 
   6   2   1  444.86   34.40 
   6   2   1  452.55   33.20 
   6   2   1  518.05   34.10 
   6   2   1  536.65   31.00 
   6   2   1  432.56   33.40 
  -6   2  -1  522.85   35.60 
  -6   2  -1  541.15   33.10 
   6   2   1  508.65   31.10 
  -6   2  -1  495.95   27.30 
  -6   2  -1  477.35   35.10 
   6   2   1  571.74   32.70 
  -6   2  -1  508.85   33.80 
  -6   2  -1  501.05   25.80 
  -6   2  -1  589.54   36.30 
   6   2   1  475.25   28.60 
   6   2   1  545.45   30.00 
  -6   2  -1  455.55   35.40 
   6   2   1  512.25   31.70 
   6   2   1  468.45   35.10 
   7  -2   1  745.93   45.30 
   7  -2   1  813.12   46.20 
  -7  -2  -1  722.33   42.10 
  -7  -2  -1  711.53   37.90 
  -7  -2  -1  722.13   46.70 
  -7  -2  -1  786.02   40.70 
  -7  -2  -1  716.73   44.00 
   7  -2   1  789.12   47.20 
   7  -2   1  700.03   47.70 
   7  -2   1  655.73   46.10 
   7  -2   1  777.42   40.80 
   7  -2   1  797.72   45.80 
  -7  -2  -1  697.93   42.20 
   7  -2   1  667.93   46.60 
   7  -2   1  717.63   47.00 
  -7  -2  -1  775.42   45.00 
  -7  -2  -1  697.03   44.20 
  -7  -2  -1  767.72   43.30 
   7  -2   1  832.82   47.70 
  -7  -2  -1  733.93   46.40 
   7  -2   1  712.43   45.70 
  -7   2  -1  819.42   48.90 
   7   2   1  760.02   49.70 
   7   2   1  834.72   50.29 
   7   2   1  754.02   48.20 
   7   2   1  807.82   47.60 
  -7   2  -1  788.72   37.60 
  -7   2  -1  830.32   40.10 
   7   2   1  687.23   43.30 
   7   2   1  706.53   42.80 
   7   2   1  742.53   41.10 
   7   2   1  738.43   49.10 
  -7   2  -1  800.62   46.70 
  -7   2  -1  802.92   48.00 
  -7   2  -1  761.32   48.80 
  -7   2  -1  759.42   48.90 
  -7   2  -1  798.32   50.39 
  -7   2  -1  765.52   43.00 
  -7   2  -1  854.21   48.50 
  -7   2  -1  744.63   49.20 
   7   2   1  791.72   41.50 
   7   2   1  752.12   41.00 
  -7   2  -1  723.23   49.90 
   7   2   1  777.22   45.20 
  -7   2  -1  730.93   44.30 
   7   2   1  763.02   47.00 
   8  -2   1  152.58   21.00 
  -8  -2  -1  125.89   19.60 
   8  -2   1  115.89   21.90 
  -8  -2  -1  116.99   19.40 
  -8  -2  -1  171.88   22.20 
  -8  -2  -1  155.28   23.60 
  -8  -2  -1  156.58   22.30 
  -8  -2  -1  132.59   18.70 
   8  -2   1  208.38   25.00 
   8  -2   1  118.79   19.50 
   8  -2   1  140.99   22.40 
  -8  -2  -1  112.19   16.00 
   8  -2   1  136.89   22.60 
  -8  -2  -1  122.49   18.10 
   8  -2   1  116.39   23.20 
   8  -2   1  136.59   21.40 
  -8  -2  -1  175.28   20.90 
   8  -2   1  115.59   19.80 
   8  -2   1  166.78   25.40 
   8  -2   1  131.59   16.30 
  -8  -2  -1  135.59   22.70 
  -8   2  -1  187.98   25.90 
  -8   2  -1  148.69   21.60 
   8   2   1  156.38   20.90 
  -8   2  -1  132.69   24.40 
  -8   2  -1  159.98   25.70 
   8   2   1  132.59   18.80 
  -8   2  -1  155.08   25.10 
  -8   2  -1  141.39   19.50 
   8   2   1  158.48   26.70 
  -8   2  -1  128.89   22.00 
  -8   2  -1  151.18   22.10 
   8   2   1  164.58   26.40 
   8   2   1  148.39   23.50 
   8   2   1  135.09   21.00 
   8   2   1  116.79   18.70 
   8   2   1  167.48   19.30 
  -8   2  -1  144.79   23.90 
   8   2   1  129.39   17.00 
   8   2   1   94.89   21.30 
  -8   2  -1  117.19   19.90 
  -8   2  -1  111.29   18.70 
  -9  -2  -1  159.18   25.00 
  -9  -2  -1  245.08   24.60 
   9  -2   1  224.58   28.70 
  -9  -2  -1  185.08   27.40 
   9  -2   1  214.88   28.60 
   9  -2   1  241.68   31.80 
  -9  -2  -1  190.88   28.10 
  -9  -2  -1  180.08   23.50 
  -9  -2  -1  202.58   28.80 
   9  -2   1  186.48   21.20 
   9  -2   1  233.98   42.40 
   9  -2   1  181.18   29.80 
   9  -2   1  202.48   30.00 
   9  -2   1  197.78   27.30 
   9  -2   1  207.78   27.00 
  -9  -2  -1  196.48   23.40 
  -9  -2  -1  195.78   24.70 
   9  -2   1  304.67   36.40 
  -9  -2  -1  206.48   27.00 
   9  -2   1  239.68   28.30 
   9   2   1  171.88   27.40 
   9   2   1  208.68   23.10 
   9   2   1  199.88   32.20 
  -9   2  -1  181.58   28.80 
  -9   2  -1  239.98   33.70 
  -9   2  -1  221.08   28.10 
   9   2   1  169.48   25.00 
   9   2   1  196.08   24.40 
   9   2   1  200.88   23.50 
  -9   2  -1  190.28   28.80 
  -9   2  -1  160.28   27.20 
  -9   2  -1  204.98   25.20 
  -9   2  -1  151.68   27.50 
   9   2   1  218.58   33.10 
   9   2   1  176.08   30.00 
  -9   2  -1  137.09   23.10 
  -9   2  -1  215.48   28.20 
   9   2   1  191.38   25.00 
  -9   2  -1  188.48   25.30 
  -9   2  -1  217.48   32.00 
  10  -2   1   14.20   13.70 
  10  -2   1   28.40   15.90 
 -10  -2  -1   30.40   12.30 
 -10  -2  -1   36.60   19.10 
 -10  -2  -1   45.50   17.40 
  10  -2   1   29.70   17.50 
 -10  -2  -1   27.50   12.60 
  10  -2   1   31.30   17.60 
 -10  -2  -1   28.10   15.00 
 -10  -2  -1   37.70   16.00 
 -10  -2  -1   26.70   10.90 
  10  -2   1   13.30   13.60 
 -10  -2  -1   34.80   15.10 
  10  -2   1   56.39   17.00 
  10  -2   1   28.70   11.50 
  10  -2   1   28.90   15.90 
  10  -2   1   32.10   14.40 
  10  -2   1   33.30   13.20 
 -10   2  -1   43.70   18.10 
  10   2   1   15.40   16.60 
 -10   2  -1   45.70   16.50 
 -10   2  -1   53.39   17.90 
 -10   2  -1   17.90   12.60 
 -10   2  -1   27.80   13.70 
 -10   2  -1   27.20   14.40 
 -10   2  -1    6.60   12.60 
 -10   2  -1   -0.60   10.60 
  10   2   1   31.30   12.20 
 -10   2  -1   40.70   13.10 
 -10   2  -1   36.40   16.90 
 -10   2  -1   13.40   12.40 
  10   2   1   38.90   18.80 
  10   2   1   12.30   17.10 
  10   2   1   30.90   12.80 
 -10  -3   1  237.18   33.70 
  10  -3  -1  209.88   29.80 
 -10  -3   1  218.28   39.50 
 -10  -3   1  249.08   29.30 
 -10  -3   1  248.08   32.90 
 -10  -3   1  228.88   31.40 
  10  -3  -1  222.58   27.50 
  10  -3  -1  245.88   32.90 
  10  -3  -1  203.58   32.20 
  10  -3  -1  221.58   36.70 
 -10  -3   1  201.38   26.90 
 -10  -3   1  210.28   29.20 
  10  -3  -1  311.27   39.10 
  10  -3  -1  204.18   32.30 
  10  -3  -1  228.98   31.40 
  10  -3  -1  236.68   35.50 
  10  -3  -1  244.28   33.80 
 -10  -3   1  224.58   30.50 
 -10   3   1  212.98   34.40 
  10   3  -1  244.48   38.20 
 -10   3   1  201.88   32.00 
 -10   3   1  235.78   33.60 
 -10   3   1  289.37   39.50 
  10   3  -1  259.97   31.10 
 -10   3   1  275.87   31.50 
 -10   3   1  226.18   34.20 
 -10   3   1  261.17   32.40 
 -10   3   1  247.98   37.00 
 -10   3   1  200.38   31.80 
 -10   3   1  227.18   30.50 
  10   3  -1  233.58   27.60 
  -9  -3   1  196.58   27.50 
   9  -3  -1  240.38   24.30 
   9  -3  -1  169.08   27.00 
   9  -3  -1  175.68   28.80 
   9  -3  -1  177.58   27.30 
  -9  -3   1  193.38   26.10 
  -9  -3   1  226.88   29.50 
   9  -3  -1  162.28   26.00 
   9  -3  -1  173.68   23.20 
   9  -3  -1  189.58   26.60 
   9  -3  -1  208.48   28.30 
   9  -3  -1  241.88   34.40 
  -9  -3   1  211.28   25.80 
   9  -3  -1  188.28   28.00 
   9  -3  -1  181.48   25.90 
  -9  -3   1  216.28   27.50 
   9  -3  -1  235.08   31.80 
  -9  -3   1  249.18   30.80 
  -9  -3   1  154.88   22.10 
  -9  -3   1  211.78   25.30 
  -9   3   1  188.78   27.90 
   9   3  -1  190.28   24.30 
  -9   3   1  237.18   29.50 
  -9   3   1  157.68   28.40 
  -9   3   1  219.78   33.20 
  -9   3   1  219.98   30.10 
  -9   3   1  161.88   27.50 
   9   3  -1  205.68   34.40 
  -9   3   1  175.68   25.40 
   9   3  -1  258.47   31.90 
   9   3  -1  215.88   32.50 
  -9   3   1  198.28   30.10 
  -9   3   1  186.58   30.50 
  -9   3   1  177.58   27.20 
  -9   3   1  162.78   22.90 
   9   3  -1  195.68   25.80 
  -8  -3   1  120.69   18.20 
  -8  -3   1   99.49   17.00 
  -8  -3   1  133.69   21.40 
   8  -3  -1  110.89   19.60 
   8  -3  -1  111.79   20.40 
   8  -3  -1  126.39   21.20 
   8  -3  -1  121.89   23.10 
   8  -3  -1  129.19   21.90 
  -8  -3   1  135.99   20.50 
   8  -3  -1   76.89   16.30 
   8  -3  -1  110.09   19.80 
   8  -3  -1  133.19   22.20 
  -8  -3   1  111.39   15.90 
  -8  -3   1  102.29   17.40 
   8  -3  -1  118.49   20.30 
   8  -3  -1  132.79   19.10 
   8  -3  -1  117.79   16.00 
  -8  -3   1  115.49   19.80 
  -8  -3   1   79.69   16.20 
  -8  -3   1  113.89   18.80 
  -8   3   1  101.49   19.60 
  -8   3   1  119.59   22.90 
  -8   3   1  110.49   19.40 
   8   3  -1  137.59   17.30 
   8   3  -1  127.79   18.10 
   8   3  -1  123.99   18.90 
  -8   3   1  134.89   19.10 
   8   3  -1  159.78   28.90 
  -8   3   1  146.29   23.50 
  -8   3   1   95.69   19.60 
   8   3  -1  116.39   22.10 
  -8   3   1  149.88   25.60 
   8   3  -1  152.28   27.80 
  -8   3   1  122.99   22.90 
  -8   3   1   96.69   21.70 
   8   3  -1  161.68   27.40 
   8   3  -1  104.49   14.50 
   8   3  -1  108.99   20.10 
  -8   3   1  107.19   19.70 
  -8   3   1  153.48   22.40 
   7  -3  -1  132.19   15.90 
   7  -3  -1  130.59   20.40 
  -7  -3   1  151.08   20.00 
  -7  -3   1  121.49   18.90 
   7  -3  -1  163.98   19.10 
   7  -3  -1  122.09   19.60 
  -7  -3   1  153.18   16.70 
   7  -3  -1  134.39   20.70 
  -7  -3   1  159.28   18.80 
  -7  -3   1  144.99   17.20 
   7  -3  -1  166.08   23.90 
  -7  -3   1  164.68   19.90 
   7  -3  -1  148.29   21.10 
   7  -3  -1  142.29   19.40 
   7  -3  -1  153.98   21.10 
  -7  -3   1  155.98   20.30 
   7  -3  -1  101.49   17.80 
  -7  -3   1  143.89   19.50 
   7  -3  -1  130.49   20.60 
  -7  -3   1  159.48   20.70 
  -7  -3   1  126.79   18.00 
  -7   3   1  141.09   21.30 
  -7   3   1  131.19   18.80 
  -7   3   1  148.39   22.40 
  -7   3   1  170.88   23.70 
   7   3  -1  132.29   14.70 
  -7   3   1  157.98   23.10 
  -7   3   1  135.39   22.10 
  -7   3   1  127.49   21.20 
   7   3  -1  133.29   21.70 
   7   3  -1  134.99   21.40 
   7   3  -1  166.48   25.50 
   7   3  -1  143.09   17.70 
   7   3  -1  115.29   21.30 
  -7   3   1  164.98   26.00 
  -7   3   1  165.68   19.60 
   7   3  -1  120.19   15.40 
   7   3  -1  177.28   28.30 
   7   3  -1  163.28   17.60 
   7   3  -1  173.28   28.50 
   7   3  -1  137.59   19.00 
  -7   3   1  164.78   21.20 
  -7   3   1  181.48   26.10 
  -7   3   1  139.09   16.90 
   6  -3  -1 1042.20   56.79 
  -6  -3   1  988.80   44.30 
   6  -3  -1 1027.30   54.09 
   6  -3  -1 1035.40   55.69 
  -6  -3   1  968.40   52.19 
   6  -3  -1 1042.40   55.29 
  -6  -3   1  967.20   52.59 
  -6  -3   1  970.80   52.89 
  -6  -3   1  970.70   52.79 
  -6  -3   1  958.00   51.59 
  -6  -3   1 1013.60   50.19 
   6  -3  -1  975.10   54.49 
   6  -3  -1 1015.00   56.39 
   6  -3  -1 1032.40   55.29 
   6  -3  -1 1001.50   56.19 
   6  -3  -1 1089.99   58.59 
  -6  -3   1 1016.10   53.89 
  -6  -3   1  973.30   51.19 
  -6  -3   1  959.40   48.40 
   6  -3  -1  985.90   50.29 
   6   3  -1  956.10   46.00 
  -6   3   1 1021.00   50.59 
   6   3  -1 1021.60   61.19 
  -6   3   1  987.80   59.09 
   6   3  -1 1000.20   55.59 
   6   3  -1  982.30   56.29 
   6   3  -1 1040.40   53.69 
  -6   3   1  963.80   58.09 
   6   3  -1 1003.80   50.59 
   6   3  -1  968.90   49.60 
   6   3  -1  928.41   47.00 
  -6   3   1 1024.40   56.99 
  -6   3   1 1044.50   53.59 
  -6   3   1 1055.39   45.20 
  -6   3   1  978.80   51.09 
  -6   3   1 1052.89   57.99 
   6   3  -1 1020.80   57.79 
   6   3  -1  962.10   47.60 
   6   3  -1 1025.50   58.49 
   6   3  -1  954.00   59.19 
  -6   3   1  988.40   57.19 
  -6   3   1  969.00   54.09 
  -6   3   1  993.70   56.39 
  -6   3   1 1032.80   57.19 
  -6   3   1  954.50   56.99 
   6   3  -1  955.10   48.60 
  -5  -3   1 1556.34   66.69 
  -5  -3   1 1639.14   72.59 
  -5  -3   1 1623.24   68.39 
   5  -3  -1 1701.53   77.59 
   5  -3  -1 1585.14   76.69 
   5  -3  -1 1727.73   73.99 
   5  -3  -1 1673.73   68.99 
   5  -3  -1 1603.84   78.19 
  -5  -3   1 1606.74   74.19 
  -5  -3   1 1526.95   69.29 
   5  -3  -1 1699.63   80.89 
   5  -3  -1 1623.64   79.59 
  -5  -3   1 1650.33   71.19 
  -5  -3   1 1495.15   69.69 
  -5  -3   1 1528.75   74.49 
  -5  -3   1 1565.04   75.09 
   5  -3  -1 1557.24   76.69 
   5  -3  -1 1622.94   76.89 
  -5  -3   1 1603.84   75.99 
  -5  -3   1 1543.65   74.99 
   5  -3  -1 1688.53   76.79 
   5  -3  -1 1601.74   78.79 
   5   3  -1 1557.94   76.19 
  -5   3   1 1748.53   76.09 
   5   3  -1 1508.15   69.39 
   5   3  -1 1435.06   75.89 
   5   3  -1 1577.74   75.59 
  -5   3   1 1692.33   82.69 
   5   3  -1 1471.45   71.79 
  -5   3   1 1694.03   77.59 
  -5   3   1 1635.94   79.79 
   5   3  -1 1411.76   69.39 
   5   3  -1 1513.85   72.99 
  -5   3   1 1578.54   78.79 
  -5   3   1 1649.93   79.79 
   5   3  -1 1584.84   68.99 
  -5   3   1 1527.35   73.09 
  -5   3   1 1625.54   67.79 
   5   3  -1 1550.84   77.19 
   5   3  -1 1569.14   81.99 
  -5   3   1 1728.53   73.89 
  -5   3   1 1629.14   79.99 
   5   3  -1 1566.14   72.89 
  -5   3   1 1653.63   80.09 
   5   3  -1 1476.65   78.79 
  -5   3   1 1624.24   78.99 
   5   3  -1 1515.85   69.49 
  -5   3   1 1547.05   80.89 
   5   3  -1 1576.04   70.89 
  -4  -3   1 1195.18   61.09 
  -4  -3   1 1104.99   56.59 
   4  -3  -1 1256.57   61.99 
   4  -3  -1 1181.18   61.39 
  -4  -3   1 1113.89   55.09 
  -4  -3   1 1114.89   53.19 
   4  -3  -1 1285.87   59.39 
  -4  -3   1 1135.69   58.29 
  -4  -3   1 1101.09   51.39 
   4  -3  -1 1227.08   58.99 
  -4  -3   1 1184.68   56.99 
   4  -3  -1 1335.87   59.19 
  -4  -3   1 1154.98   54.49 
   4  -3  -1 1213.08   57.89 
  -4  -3   1 1176.08   52.89 
   4  -3  -1 1299.07   53.09 
   4  -3  -1 1368.66   60.59 
   4  -3  -1 1241.28   58.29 
  -4  -3   1 1211.48   57.79 
   4  -3  -1 1279.77   52.39 
   4  -3  -1 1254.07   56.69 
   4  -3  -1 1252.57   61.39 
  -4   3   1 1198.18   56.69 
   4   3  -1 1246.98   58.09 
  -4   3   1 1272.17   63.39 
  -4   3   1 1225.38   60.69 
   4   3  -1 1062.79   60.89 
   4   3  -1 1123.79   53.49 
  -4   3   1 1205.78   60.59 
   4   3  -1 1146.29   55.59 
   4   3  -1 1143.99   52.19 
  -4   3   1 1194.88   50.69 
   4   3  -1 1113.99   52.89 
  -4   3   1 1232.68   62.89 
   4   3  -1 1157.08   51.49 
  -4   3   1 1210.98   55.59 
   4   3  -1 1040.80   57.29 
   4   3  -1 1206.48   61.29 
  -4   3   1 1185.48   57.19 
  -4   3   1 1173.38   55.89 
  -4   3   1 1221.68   52.89 
   4   3  -1 1158.48   61.29 
  -4   3   1 1209.78   58.69 
  -4   3   1 1193.48   61.09 
  -4   3   1 1276.57   61.59 
   4   3  -1 1204.48   52.09 
   4   3  -1 1166.88   53.89 
   4   3  -1 1115.79   53.39 
   4   3  -1 1124.79   50.19 
  -4   3   1 1225.68   60.89 
  -4   3   1 1216.58   61.19 
   3  -3  -1 1252.57   63.99 
   3  -3  -1 1334.07   61.49 
  -3  -3   1 1209.18   54.19 
   3  -3  -1 1333.67   64.19 
  -3  -3   1 1172.38   59.89 
   3  -3  -1 1351.56   57.29 
   3  -3  -1 1373.86   60.19 
   3  -3  -1 1338.67   64.19 
  -3  -3   1 1272.67   57.29 
   3  -3  -1 1369.86   61.59 
  -3  -3   1 1191.18   63.69 
  -3  -3   1 1308.17   59.89 
  -3  -3   1 1223.18   58.19 
   3  -3  -1 1366.16   56.49 
  -3  -3   1 1265.17   60.09 
   3  -3  -1 1298.67   60.19 
  -3  -3   1 1299.97   59.29 
   3  -3  -1 1327.97   60.29 
  -3  -3   1 1245.28   58.89 
  -3  -3   1 1334.87   58.19 
  -3  -3   1 1277.17   60.79 
   3  -3  -1 1307.97   56.99 
  -3  -3   1 1208.88   58.49 
   3  -3  -1 1322.17   57.49 
  -3  -3   1 1277.87   57.29 
   3  -3  -1 1383.06   61.49 
   3   3  -1 1221.38   55.99 
  -3   3   1 1314.37   63.29 
  -3   3   1 1362.76   58.19 
   3   3  -1 1247.38   63.39 
  -3   3   1 1352.26   63.29 
  -3   3   1 1292.17   63.59 
  -3   3   1 1369.56   58.89 
  -3   3   1 1371.96   63.19 
   3   3  -1 1095.09   61.19 
   3   3  -1 1193.48   55.19 
  -3   3   1 1362.76   60.89 
  -3   3   1 1259.77   62.59 
   3   3  -1 1402.66   63.29 
   3   3  -1 1337.57   60.59 
   3   3  -1 1205.68   54.99 
  -3   3   1 1339.87   57.99 
  -3   3   1 1302.27   62.69 
   3   3  -1 1221.08   53.79 
  -3   3   1 1346.07   58.39 
  -3   3   1 1342.47   61.29 
  -3   3   1 1355.36   65.29 
  -3   3   1 1375.26   58.79 
  -3   3   1 1292.27   64.49 
   3   3  -1 1215.48   63.39 
  -3   3   1 1326.77   55.19 
  -3   3   1 1324.77   59.59 
   3   3  -1 1240.28   60.99 
   3   3  -1 1252.27   58.69 
  -3   3   1 1342.17   63.69 
   3   3  -1 1232.98   55.59 
   3   3  -1 1242.78   55.99 
   2  -3  -1  203.28   12.00 
  -2  -3   1  210.18   11.50 
  -2  -3   1  208.08   14.90 
   2  -3  -1  221.68   15.10 
  -2  -3   1  196.78    9.80 
  -2  -3   1  219.78   11.70 
  -2  -3   1  250.07   20.30 
  -2  -3   1  175.68   14.20 
   2  -3  -1  224.58   14.60 
  -2  -3   1  184.08   14.60 
  -2  -3   1  196.98   11.70 
  -2  -3   1  188.38   14.90 
  -2  -3   1  204.78   13.90 
  -2  -3   1  197.38   10.40 
   2  -3  -1  196.48   16.10 
   2  -3  -1  210.78   10.20 
  -2  -3   1  195.08   10.50 
  -2  -3   1  194.38   15.70 
  -2  -3   1  204.88   11.30 
  -2  -3   1  191.38   13.60 
   2  -3  -1  222.48   11.70 
   2  -3  -1  202.78   14.40 
   2  -3  -1  215.88   11.70 
   2  -3  -1  204.98   14.60 
   2  -3  -1  204.68   13.50 
   2  -3  -1  208.08   11.70 
  -2  -3   1  188.58   18.90 
  -2  -3   1  213.48   13.10 
  -2  -3   1  191.18   10.30 
   2  -3  -1  224.38   11.40 
   2  -3  -1  219.08   13.70 
  -2  -3   1  204.38   12.90 
   2  -3  -1  184.98   18.10 
   2  -3  -1  218.48   14.30 
   2  -3  -1  222.08   15.50 
   2  -3  -1  246.98   23.00 
  -2  -3   1  215.98   13.40 
  -2  -3   1  217.38   14.20 
   2  -3  -1  226.48   15.60 
   2   3  -1  189.38   15.20 
  -2   3   1  194.48   13.70 
   2   3  -1  202.38   13.90 
  -2   3   1  250.87   18.30 
  -2   3   1  216.08   12.80 
  -2   3   1  214.68   12.50 
   2   3  -1  199.28   16.30 
  -2   3   1  227.58   16.90 
  -2   3   1  214.28   17.40 
   2   3  -1  220.18   14.50 
   2   3  -1  203.08   16.50 
  -2   3   1  219.28   17.00 
   2   3  -1  209.38   12.60 
  -2   3   1  247.28   15.80 
  -2   3   1  202.98   16.70 
  -2   3   1  194.68   15.50 
  -2   3   1  234.08   16.90 
   2   3  -1  182.58   11.60 
  -2   3   1  208.48   14.00 
   2   3  -1  212.08   15.40 
  -2   3   1  238.28   12.50 
  -2   3   1  237.08   12.00 
  -2   3   1  224.38   13.70 
   2   3  -1  210.18   15.30 
  -2   3   1  210.48   14.50 
  -2   3   1  214.68   16.20 
  -2   3   1  230.38   12.70 
  -2   3   1  225.18   15.20 
  -2   3   1  248.38   17.20 
  -1  -3   1  523.05   28.30 
   1  -3  -1  606.34   28.60 
   1  -3  -1  590.54   32.40 
   1  -3  -1  575.94   31.00 
   1  -3  -1  558.94   26.20 
   1  -3  -1  573.24   31.40 
   1  -3  -1  615.74   28.90 
   1  -3  -1  594.54   28.30 
   1  -3  -1  589.94   28.90 
   1  -3  -1  576.34   30.10 
   1  -3  -1  594.84   30.10 
   1  -3  -1  591.64   28.10 
  -1  -3   1  541.65   29.30 
   1  -3  -1  563.64   34.80 
   1  -3  -1  619.14   30.80 
   1  -3  -1  602.84   32.00 
   1  -3  -1  549.15   31.80 
   1  -3  -1  615.04   27.90 
  -1  -3   1  539.75   27.10 
   1  -3  -1  574.14   30.70 
  -1  -3   1  538.75   27.80 
   1  -3  -1  591.64   27.70 
  -1  -3   1  552.74   28.60 
   1  -3  -1  584.04   24.20 
  -1  -3   1  526.35   30.30 
  -1  -3   1  560.74   29.60 
   1  -3  -1  545.65   24.50 
  -1  -3   1  548.15   26.60 
  -1  -3   1  549.54   27.20 
  -1  -3   1  542.05   30.20 
   1  -3  -1  604.54   26.10 
   1  -3  -1  594.04   26.70 
  -1  -3   1  516.75   24.50 
   1  -3  -1  596.94   27.30 
   1  -3  -1  585.34   26.90 
   1  -3  -1  634.94   28.70 
  -1  -3   1  556.84   26.40 
  -1  -3   1  558.44   29.10 
   1  -3  -1  570.54   30.60 
   1  -3  -1  582.84   31.40 
  -1  -3   1  534.75   25.80 
  -1  -3   1  541.55   29.30 
   1  -3  -1  528.35   29.60 
   1  -3  -1  583.84   30.50 
  -1  -3   1  568.44   30.00 
   1  -3  -1  591.44   25.30 
   1  -3  -1  580.14   29.70 
  -1  -3   1  529.15   26.50 
   1   3  -1  553.64   29.60 
   1   3  -1  555.24   29.10 
  -1   3   1  629.44   32.80 
   1   3  -1  561.54   28.50 
   1   3  -1  530.25   26.80 
   1   3  -1  599.44   29.30 
  -1   3   1  571.64   25.40 
  -1   3   1  592.04   30.30 
   1   3  -1  560.14   28.60 
  -1   3   1  602.34   30.80 
  -1   3   1  602.44   28.10 
   1   3  -1  565.54   31.00 
  -1   3   1  619.94   33.70 
   1   3  -1  546.05   29.10 
  -1   3   1  606.84   29.00 
  -1   3   1  558.74   28.30 
   1   3  -1  597.14   29.70 
   1   3  -1  544.85   28.10 
  -1   3   1  605.54   27.60 
   1   3  -1  589.84   27.50 
   1   3  -1  574.24   30.00 
   1   3  -1  572.64   27.30 
  -1   3   1  575.74   30.20 
  -1   3   1  558.74   28.10 
  -1   3   1  562.54   31.20 
   1   3  -1  560.74   26.90 
  -1   3   1  540.05   28.60 
  -1   3   1  602.34   29.40 
  -1   3   1  558.54   28.60 
  -1   3   1  602.04   31.70 
  -1   3   1  555.54   28.60 
  -1   3   1  597.24   27.60 
  -1   3   1  580.94   25.00 
  -1   3   1  604.24   28.80 
   1   3  -1  553.04   29.80 
   1   3  -1  571.24   28.70 
  -1   3   1  603.44   32.40 
  -1   3   1  534.55   30.50 
  -1   3   1  580.54   31.60 
   1   3  -1  552.94   28.30 
   0  -3   1  358.56   19.80 
   0  -3   1  386.76   21.40 
   0  -3  -1  340.57   21.00 
   0  -3   1  371.06   20.60 
   0  -3   1  372.86   19.20 
   0  -3   1  338.17   17.50 
   0  -3  -1  354.56   20.20 
   0  -3   1  321.47   19.10 
   0  -3  -1  358.86   20.30 
   0  -3  -1  338.47   19.70 
   0  -3  -1  354.86   20.10 
   0  -3  -1  394.56   17.50 
   0  -3  -1  348.57   21.10 
   0  -3   1  354.86   17.50 
   0  -3  -1  414.16   26.50 
   0  -3  -1  324.37   22.30 
   0  -3  -1  333.77   18.40 
   0  -3  -1  338.37   20.00 
   0  -3   1  405.06   19.70 
   0  -3  -1  372.06   21.30 
   0  -3   1  387.06   20.60 
   0  -3  -1  352.26   17.80 
   0  -3  -1  336.97   17.70 
   0  -3   1  367.26   19.60 
   0  -3   1  362.26   19.40 
   0  -3  -1  343.77   19.70 
   0  -3   1  349.37   20.70 
   0  -3   1  364.36   20.10 
   0  -3  -1  358.56   21.00 
   0  -3  -1  340.67   15.20 
   0  -3  -1  386.96   17.00 
   0  -3  -1  346.07   21.70 
   0  -3   1  371.06   24.10 
   0  -3   1  353.76   19.10 
   0  -3  -1  349.17   15.30 
   0  -3  -1  403.96   22.50 
   0  -3   1  307.67   20.30 
   0  -3  -1  338.67   18.20 
   0  -3  -1  323.07   22.50 
   0  -3   1  366.96   19.10 
   0  -3   1  342.17   21.20 
   0  -3   1  357.76   20.10 
   0  -3   1  362.06   20.70 
   0  -3  -1  346.57   18.10 
   0  -3  -1  339.97   20.00 
   0  -3   1  378.16   19.50 
   0  -3   1  399.56   18.70 
   0   3   1  336.67   17.50 
   0   3  -1  377.26   19.00 
   0   3  -1  365.66   20.40 
   0   3   1  346.57   19.70 
   0   3  -1  354.36   19.20 
   0   3   1  365.16   20.50 
   0   3   1  350.26   20.10 
   0   3  -1  361.76   19.10 
   0   3  -1  354.36   19.50 
   0   3  -1  337.87   19.40 
   0   3  -1  368.56   19.70 
   0   3   1  372.76   20.60 
   0   3   1  348.27   19.90 
   0   3  -1  349.87   19.50 
   0   3   1  370.76   23.90 
   0   3   1  364.56   19.00 
   0   3  -1  335.47   20.30 
   0   3   1  349.67   17.00 
   0   3   1  338.07   21.80 
   0   3  -1  347.77   20.10 
   0   3  -1  358.46   20.00 
   0   3   1  376.76   20.00 
   0   3   1  292.77   20.90 
   0   3  -1  355.06   18.80 
   0   3  -1  382.06   21.90 
   0   3  -1  368.96   21.50 
   0   3  -1  366.46   21.30 
   0   3  -1  357.36   20.20 
   0   3   1  377.56   19.80 
   0   3   1  370.96   21.10 
   0   3   1  361.86   19.50 
   0   3  -1  363.76   20.90 
   0   3   1  365.96   20.80 
   0   3   1  389.16   22.50 
   0   3  -1  330.57   19.50 
   0   3   1  330.87   22.20 
   0   3   1  350.66   21.10 
   0   3  -1  334.87   18.70 
  -1  -3  -1 4155.98  173.18 
  -1  -3  -1 3895.01  179.18 
  -1  -3  -1 4162.68  177.88 
   1  -3   1 4174.98  173.58 
  -1  -3  -1 4184.18  179.18 
   1  -3   1 4396.16  179.68 
   1  -3   1 4028.30  179.08 
   1  -3   1 4353.56  173.28 
   1  -3   1 4254.07  179.98 
   1  -3   1 4323.97  172.58 
  -1  -3  -1 4312.07  171.48 
  -1  -3  -1 4241.98  175.88 
  -1  -3  -1 3976.30  178.38 
   1  -3   1 4252.07  174.78 
   1  -3   1 4180.58  171.18 
  -1  -3  -1 4201.98  173.78 
  -1  -3  -1 4118.59  171.68 
   1  -3   1 4263.37  175.48 
   1  -3   1 4110.59  173.68 
  -1  -3  -1 4187.88  178.28 
   1  -3   1 4113.89  176.38 
   1  -3   1 4236.88  170.58 
   1  -3   1 4293.87  175.78 
   1  -3   1 4428.86  174.68 
   1  -3   1 4204.28  175.28 
  -1  -3  -1 3939.91  178.68 
   1  -3   1 4251.77  175.78 
  -1  -3  -1 3980.40  170.28 
  -1  -3  -1 4186.88  174.08 
   1  -3   1 4378.06  172.38 
   1  -3   1 4166.98  174.78 
  -1  -3  -1 4136.89  175.28 
  -1  -3  -1 4211.68  175.28 
  -1  -3  -1 4041.50  172.28 
   1  -3   1 4315.77  175.38 
  -1  -3  -1 4059.49  173.08 
  -1  -3  -1 4089.79  173.98 
  -1  -3  -1 4131.09  174.18 
   1  -3   1 4374.16  174.18 
   1  -3   1 4180.88  177.78 
  -1  -3  -1 4014.10  177.28 
   1  -3   1 4441.26  174.48 
   1  -3   1 4224.18  176.58 
  -1  -3  -1 4141.69  178.38 
   1  -3   1 4240.68  173.18 
  -1  -3  -1 4059.79  170.58 
   1  -3   1 4355.86  174.18 
   1  -3   1 4116.09  175.88 
   1  -3   1 4420.76  174.58 
  -1  -3  -1 4036.70  177.88 
  -1   3  -1 4245.98  177.58 
  -1   3  -1 4254.87  176.98 
  -1   3  -1 4252.17  176.08 
   1   3   1 3934.41  174.18 
  -1   3  -1 4355.46  176.98 
  -1   3  -1 4158.78  171.58 
   1   3   1 3946.01  177.48 
   1   3   1 4087.59  178.08 
  -1   3  -1 4323.87  172.38 
   1   3   1 4155.78  178.78 
  -1   3  -1 4343.27  178.38 
  -1   3  -1 4232.28  174.38 
  -1   3  -1 4406.16  174.68 
  -1   3  -1 4220.68  175.28 
   1   3   1 4214.08  174.98 
   1   3   1 4130.59  175.58 
  -1   3  -1 4242.68  177.88 
  -1   3  -1 3876.81  175.98 
  -1   3  -1 4310.77  181.58 
  -1   3  -1 4235.08  176.48 
  -1   3  -1 4458.05  177.98 
  -1   3  -1 4401.66  179.58 
  -1   3  -1 4155.38  174.68 
  -1   3  -1 4201.78  174.78 
  -1   3  -1 4304.47  173.98 
   1   3   1 3976.60  175.68 
   1   3   1 4198.08  176.38 
   1   3   1 4066.69  170.98 
   1   3   1 4262.87  178.08 
  -1   3  -1 4208.68  175.88 
  -1   3  -1 4200.88  182.48 
  -1   3  -1 4268.87  176.38 
   1   3   1 4294.17  177.88 
   1   3   1 4185.98  174.48 
   1   3   1 4328.27  177.88 
   2  -3   1 2279.17   97.39 
  -2  -3  -1 2251.27  104.29 
   2  -3   1 2310.57   92.59 
   2  -3   1 2262.17   93.49 
  -2  -3  -1 2123.19   98.89 
  -2  -3  -1 2194.38   93.59 
  -2  -3  -1 2111.59   92.79 
   2  -3   1 2239.58   97.79 
   2  -3   1 2381.96   94.39 
   2  -3   1 2293.47   96.89 
   2  -3   1 2333.07  101.89 
  -2  -3  -1 2079.89   96.59 
  -2  -3  -1 2151.58   96.19 
  -2  -3  -1 2199.68   96.29 
  -2  -3  -1 2206.38  100.29 
   2  -3   1 2261.17   93.29 
  -2  -3  -1 2099.79   93.99 
  -2  -3  -1 2183.08   97.99 
  -2  -3  -1 2190.38   95.09 
   2  -3   1 2326.97   97.49 
   2  -3   1 2209.08   95.79 
   2  -3   1 2405.56   95.69 
  -2  -3  -1 2196.28   94.29 
  -2  -3  -1 2199.38   93.29 
   2  -3   1 2345.57  101.99 
   2  -3   1 2325.07   95.69 
  -2  -3  -1 2149.58   95.69 
   2  -3   1 2214.28  100.19 
   2  -3   1 2244.08   99.39 
   2  -3   1 2241.08   93.39 
  -2  -3  -1 2217.28  100.69 
  -2  -3  -1 2108.49   94.09 
   2  -3   1 2391.06   98.49 
  -2  -3  -1 2127.69   95.69 
  -2   3  -1 2251.97  100.79 
  -2   3  -1 2324.97   99.69 
  -2   3  -1 2272.77  100.59 
   2   3   1 2142.39   92.69 
   2   3   1 2213.78   95.59 
  -2   3  -1 2208.58   93.09 
  -2   3  -1 2268.97   98.39 
   2   3   1 2109.49   93.59 
  -2   3  -1 2285.67   97.19 
   2   3   1 2128.69   96.19 
   2   3   1 2263.47  100.39 
  -2   3  -1 2296.67   93.89 
  -2   3  -1 2267.97   96.79 
   2   3   1 2270.27   98.89 
  -2   3  -1 2296.77   94.89 
  -2   3  -1 2251.57   98.49 
  -2   3  -1 2319.07   99.29 
   2   3   1 2190.68   97.39 
  -2   3  -1 2328.37   98.19 
  -2   3  -1 2286.07  100.79 
  -2   3  -1 2262.37   93.39 
  -2   3  -1 2301.37   94.69 
  -2   3  -1 2310.17   93.89 
   2   3   1 2257.67  100.39 
   2   3   1 2232.88   97.79 
   2   3   1 2209.68   95.29 
   2   3   1 2194.88  101.69 
  -2   3  -1 2280.87   99.69 
  -2   3  -1 2354.16   98.49 
   2   3   1 2168.08  100.69 
  -2   3  -1 2183.38  101.39 
   3  -3   1 2121.29   89.39 
   3  -3   1 2128.49   88.19 
  -3  -3  -1 1899.11   88.19 
   3  -3   1 2000.20   91.99 
   3  -3   1 2240.08   92.09 
  -3  -3  -1 1986.30   83.79 
   3  -3   1 2066.49   92.49 
  -3  -3  -1 1874.51   86.99 
  -3  -3  -1 2133.29   90.39 
   3  -3   1 2167.18   91.79 
   3  -3   1 2073.09   95.29 
   3  -3   1 2099.49   90.79 
  -3  -3  -1 1959.20   84.99 
   3  -3   1 2096.29   86.19 
   3  -3   1 1995.60   94.09 
   3  -3   1 2119.19   91.89 
  -3  -3  -1 1978.30   86.69 
   3  -3   1 2039.20   89.09 
  -3  -3  -1 2018.10   86.19 
   3  -3   1 2153.18   90.69 
  -3  -3  -1 1979.60   96.89 
   3  -3   1 2093.89   95.59 
  -3  -3  -1 1947.81   83.69 
  -3  -3  -1 2059.59   93.19 
  -3  -3  -1 1872.21   84.59 
   3  -3   1 2128.89   83.69 
  -3  -3  -1 1879.01   93.29 
  -3  -3  -1 2049.79   87.99 
   3   3   1 1876.21   83.99 
   3   3   1 2071.99   89.59 
   3   3   1 2039.70   87.19 
  -3   3  -1 2125.09   95.39 
  -3   3  -1 2158.78   87.29 
   3   3   1 2043.00   94.59 
  -3   3  -1 2194.48   91.09 
  -3   3  -1 2175.48   93.99 
  -3   3  -1 2049.79   87.79 
   3   3   1 1980.20   94.59 
  -3   3  -1 2080.59   89.29 
  -3   3  -1 2040.10   95.89 
   3   3   1 1989.50   90.89 
   3   3   1 2060.39   96.09 
  -3   3  -1 2027.70   92.39 
  -3   3  -1 2075.19   87.99 
   3   3   1 2030.70   88.49 
  -3   3  -1 2093.29   93.89 
   3   3   1 2012.60   90.89 
  -3   3  -1 2134.59   84.99 
  -3   3  -1 2118.49   94.79 
   3   3   1 1940.31   93.79 
  -3   3  -1 2046.80   93.39 
  -3   3  -1 2168.48   92.39 
   3   3   1 1942.91   85.09 
   3   3   1 1950.30   84.19 
   3   3   1 1969.10   84.29 
  -3   3  -1 2172.68   92.19 
   3   3   1 1969.80   86.79 
   3   3   1 2017.10   86.09 
  -3   3  -1 2114.89   84.79 
   4  -3   1  409.46   23.60 
  -4  -3  -1  376.66   25.40 
  -4  -3  -1  309.97   22.10 
   4  -3   1  384.16   20.60 
   4  -3   1  384.36   25.40 
  -4  -3  -1  342.77   18.60 
   4  -3   1  401.16   24.90 
  -4  -3  -1  360.26   21.20 
   4  -3   1  400.66   24.50 
  -4  -3  -1  333.57   17.30 
   4  -3   1  422.96   28.30 
  -4  -3  -1  394.76   23.90 
  -4  -3  -1  370.56   22.00 
   4  -3   1  364.76   26.30 
  -4  -3  -1  407.16   30.00 
   4  -3   1  343.97   23.40 
   4  -3   1  363.36   24.60 
   4  -3   1  398.66   25.10 
   4  -3   1  364.06   22.40 
   4  -3   1  384.46   24.60 
  -4  -3  -1  361.16   27.50 
   4   3   1  338.57   26.10 
  -4   3  -1  368.46   18.90 
   4   3   1  344.87   21.30 
  -4   3  -1  365.16   22.80 
   4   3   1  347.57   26.50 
  -4   3  -1  373.66   19.60 
  -4   3  -1  359.86   26.80 
  -4   3  -1  379.06   25.80 
   4   3   1  343.97   18.20 
  -4   3  -1  339.17   25.30 
   4   3   1  359.66   28.10 
  -4   3  -1  428.06   26.20 
  -4   3  -1  399.36   26.40 
   4   3   1  348.47   21.00 
  -4   3  -1  414.16   21.30 
   4   3   1  352.06   21.60 
   4   3   1  384.86   23.80 
   4   3   1  329.67   18.30 
  -4   3  -1  382.56   28.10 
  -4   3  -1  359.76   20.80 
  -4   3  -1  398.06   20.10 
   4   3   1  364.16   20.40 
  -4   3  -1  374.46   16.10 
  -4   3  -1  410.36   25.00 
   4   3   1  389.56   25.50 
   4   3   1  338.77   23.00 
  -4   3  -1  357.36   26.50 
  -4   3  -1  375.76   26.00 
   4   3   1  330.47   16.60 
   5  -3   1  122.99   15.90 
   5  -3   1   94.49   14.00 
   5  -3   1  123.39   16.20 
   5  -3   1  103.99   16.10 
   5  -3   1   96.69   14.40 
   5  -3   1  115.89   17.10 
  -5  -3  -1  103.39   14.00 
  -5  -3  -1  138.39   15.30 
  -5  -3  -1   95.79   12.10 
   5  -3   1   98.09   13.40 
  -5  -3  -1  109.89   13.50 
  -5  -3  -1  123.19   16.50 
   5  -3   1  102.29   15.90 
  -5  -3  -1   93.49   13.00 
   5  -3   1  102.39   11.30 
  -5  -3  -1  112.69   10.40 
  -5  -3  -1  102.59   13.60 
  -5  -3  -1   99.09    7.80 
   5  -3   1  115.99   15.60 
   5  -3   1   92.29   15.20 
  -5   3  -1   92.59   12.90 
   5   3   1  142.39   20.90 
  -5   3  -1  110.19    7.60 
   5   3   1  102.09   17.10 
  -5   3  -1   95.59   15.80 
   5   3   1  101.99   10.00 
   5   3   1  104.79   13.70 
  -5   3  -1  104.89   11.90 
   5   3   1  115.19   10.80 
  -5   3  -1  118.09   17.10 
   5   3   1  110.59   17.10 
  -5   3  -1  115.79    7.00 
  -5   3  -1   88.29   16.40 
   5   3   1  155.08   19.30 
   5   3   1  118.09   18.20 
  -5   3  -1  118.19   16.80 
  -5   3  -1  131.79   13.00 
  -5   3  -1  101.59   17.60 
   5   3   1  118.49   13.50 
   5   3   1  107.39   14.30 
  -5   3  -1  113.89   16.60 
   5   3   1  123.29    7.80 
   5   3   1  122.49   13.60 
  -5   3  -1  120.39   15.60 
  -5   3  -1   97.79   17.50 
  -5   3  -1  118.89   17.50 
   5   3   1   76.79   15.20 
   5   3   1   96.29   13.50 
  -5   3  -1   68.69   13.80 
   5   3   1  143.99   15.30 
  -5   3  -1  129.39   11.70 
  -6  -3  -1  356.86   24.10 
   6  -3   1  382.16   28.50 
  -6  -3  -1  360.66   28.40 
  -6  -3  -1  361.86   24.70 
  -6  -3  -1  356.56   27.40 
   6  -3   1  386.86   29.40 
  -6  -3  -1  388.26   27.20 
   6  -3   1  369.66   27.70 
  -6  -3  -1  349.77   26.10 
  -6  -3  -1  380.06   26.40 
  -6  -3  -1  366.76   21.20 
   6  -3   1  428.36   31.80 
  -6  -3  -1  347.47   25.50 
   6  -3   1  354.06   27.30 
   6  -3   1  395.76   23.10 
   6  -3   1  351.76   27.30 
   6  -3   1  352.86   28.80 
   6  -3   1  340.17   26.50 
   6  -3   1  369.36   29.70 
  -6   3  -1  372.56   27.20 
   6   3   1  322.27   34.00 
   6   3   1  408.96   26.50 
  -6   3  -1  405.66   39.00 
   6   3   1  367.66   27.20 
   6   3   1  378.06   25.40 
  -6   3  -1  349.47   35.50 
  -6   3  -1  407.96   25.00 
   6   3   1  342.57   34.20 
  -6   3  -1  363.56   34.90 
  -6   3  -1  335.57   32.20 
   6   3   1  327.57   21.30 
  -6   3  -1  366.76   34.50 
   6   3   1  358.96   22.10 
  -6   3  -1  361.96   29.20 
   6   3   1  376.76   30.50 
   6   3   1  345.67   34.90 
  -6   3  -1  430.06   31.10 
  -6   3  -1  371.16   27.40 
  -6   3  -1  400.06   37.80 
   6   3   1  384.86   25.20 
  -6   3  -1  401.66   19.00 
   6   3   1  367.56   34.60 
   6   3   1  344.97   25.80 
  -6   3  -1  373.76   22.20 
   7  -3   1  120.09   18.90 
   7  -3   1   93.99   17.90 
   7  -3   1  113.09   18.30 
  -7  -3  -1  126.09   17.70 
   7  -3   1  115.89   18.80 
  -7  -3  -1  121.79   16.40 
   7  -3   1  110.29   19.40 
  -7  -3  -1  146.29   19.40 
  -7  -3  -1  102.79   14.80 
   7  -3   1   85.59   18.00 
   7  -3   1  132.79   18.90 
  -7  -3  -1  139.99   20.20 
  -7  -3  -1  110.79   18.70 
   7  -3   1  164.18   16.20 
   7  -3   1  113.79   18.20 
  -7  -3  -1  129.39   17.60 
   7  -3   1  128.49   20.20 
  -7  -3  -1  125.99   17.90 
  -7   3  -1  128.29   19.00 
   7   3   1  128.89   17.30 
   7   3   1  114.89   13.90 
  -7   3  -1   93.49   17.60 
   7   3   1  111.49   21.50 
  -7   3  -1  124.99   16.60 
  -7   3  -1   83.29   17.20 
  -7   3  -1  189.88   26.80 
   7   3   1  126.89   17.70 
   7   3   1  169.08   24.80 
  -7   3  -1  104.79   19.40 
   7   3   1  144.89   21.50 
  -7   3  -1   91.99   17.90 
  -7   3  -1  180.68   26.10 
   7   3   1  122.09   16.90 
  -7   3  -1  148.69   20.20 
   7   3   1  131.29   14.20 
   7   3   1  144.49   24.90 
   7   3   1  132.09   24.00 
   7   3   1  145.99   17.90 
  -7   3  -1  150.48   23.90 
  -7   3  -1  115.29   19.90 
  -8  -3  -1  491.85   34.60 
   8  -3   1  471.05   37.00 
  -8  -3  -1  438.16   33.60 
   8  -3   1  535.95   41.10 
  -8  -3  -1  498.35   33.40 
  -8  -3  -1  537.65   39.00 
   8  -3   1  482.35   39.20 
   8  -3   1  502.05   30.50 
  -8  -3  -1  533.75   37.00 
  -8  -3  -1  499.75   38.30 
   8  -3   1  531.45   40.70 
   8  -3   1  481.75   36.60 
  -8  -3  -1  437.16   31.50 
   8  -3   1  518.65   37.50 
  -8  -3  -1  498.75   36.70 
   8  -3   1  468.55   37.90 
  -8  -3  -1  496.55   33.30 
  -8  -3  -1  526.05   38.70 
   8  -3   1  497.75   39.70 
   8  -3   1  496.25   36.20 
   8  -3   1  445.76   35.70 
  -8   3  -1  416.46   43.00 
  -8   3  -1  541.55   43.10 
   8   3   1  422.86   33.30 
  -8   3  -1  602.44   45.80 
  -8   3  -1  503.05   33.60 
  -8   3  -1  517.25   39.10 
   8   3   1  384.46   43.30 
   8   3   1  479.75   47.60 
   8   3   1  481.35   48.90 
  -8   3  -1  485.55   38.30 
   8   3   1  438.66   30.50 
   8   3   1  520.85   47.10 
   8   3   1  497.25   34.10 
  -8   3  -1  533.95   37.30 
  -8   3  -1  419.76   43.50 
   8   3   1  491.05   33.20 
  -8   3  -1  530.55   37.30 
  -8   3  -1  481.15   48.50 
   8   3   1  461.05   38.60 
  -8   3  -1  464.45   44.70 
   9  -3   1  309.07   36.30 
   9  -3   1  317.97   30.70 
  -9  -3  -1  223.88   30.70 
   9  -3   1  324.07   35.30 
   9  -3   1  310.07   37.50 
   9  -3   1  336.37   36.80 
   9  -3   1  365.36   37.80 
  -9  -3  -1  304.27   30.20 
  -9  -3  -1  328.57   32.90 
  -9  -3  -1  361.86   35.80 
  -9  -3  -1  357.86   36.70 
   9  -3   1  244.48   32.10 
   9  -3   1  341.67   40.70 
   9  -3   1  354.06   35.70 
   9  -3   1  307.07   34.90 
  -9  -3  -1  315.47   29.10 
  -9  -3  -1  260.97   32.10 
   9  -3   1  341.27   41.30 
  -9  -3  -1  233.08   32.80 
  -9   3  -1  245.78   33.30 
  -9   3  -1  276.77   29.60 
  -9   3  -1  346.17   35.50 
  -9   3  -1  204.68   32.30 
   9   3   1  267.67   29.90 
   9   3   1  351.96   43.40 
   9   3   1  331.17   31.90 
   9   3   1  338.27   43.60 
  -9   3  -1  229.18   34.70 
  -9   3  -1  373.76   41.30 
  -9   3  -1  382.06   39.80 
  -9   3  -1  294.37   33.50 
   9   3   1  267.87   34.00 
  -9   3  -1  283.57   35.10 
  -9   3  -1  284.87   39.10 
  -9   3  -1  341.17   41.70 
  -9   3  -1  341.97   42.00 
   9   3   1  235.68   35.50 
 -10  -3  -1  269.27   34.20 
 -10  -3  -1  213.38   26.50 
  10  -3   1  268.87   35.60 
 -10  -3  -1  258.97   34.40 
 -10  -3  -1  237.18   31.10 
  10  -3   1  220.98   31.70 
  10  -3   1  291.17   37.90 
 -10  -3  -1  197.58   27.20 
  10  -3   1  303.47   35.00 
  10  -3   1  198.98   25.70 
  10  -3   1  188.88   32.30 
 -10  -3  -1  230.28   34.30 
  10  -3   1  273.17   34.70 
  10  -3   1  230.58   36.30 
  10  -3   1  219.78   34.60 
 -10  -3  -1  237.68   34.30 
  10  -3   1  237.48   32.10 
  10   3   1  210.38   36.60 
 -10   3  -1  252.97   34.50 
 -10   3  -1  245.28   36.00 
 -10   3  -1  266.57   30.80 
 -10   3  -1  182.58   30.40 
 -10   3  -1  298.37   34.00 
  10   3   1  182.58   26.10 
 -10   3  -1  236.48   37.50 
 -10   3  -1  211.48   30.70 
  10   3   1  228.68   37.20 
 -10   3  -1  220.88   31.90 
 -10   3  -1  239.08   37.30 
 -10   3  -1  225.98   34.30 
 -10   3  -1  225.38   35.60 
  10   3   1  291.57   53.59 
  10   3   1  177.58   26.00 
  10  -4  -1  208.18   33.40 
  10  -4  -1  187.08   31.40 
 -10  -4   1  266.07   34.70 
  10  -4  -1  219.68   31.10 
  10  -4  -1  281.27   37.10 
  10  -4  -1  236.18   32.20 
 -10  -4   1  234.58   29.20 
  10  -4  -1  337.97   43.70 
  10  -4  -1  221.58   33.80 
  10  -4  -1  225.88   33.00 
 -10  -4   1  243.08   32.30 
 -10  -4   1  213.88   29.90 
  10  -4  -1  234.88   29.70 
 -10  -4   1  297.77   34.70 
 -10  -4   1  221.98   30.70 
  10  -4  -1  219.98   34.80 
  10   4  -1  232.68   40.00 
 -10   4   1  206.38   34.10 
 -10   4   1  213.98   30.80 
 -10   4   1  198.08   36.20 
 -10   4   1  214.08   35.00 
 -10   4   1  258.17   35.70 
  10   4  -1  227.48   30.90 
 -10   4   1  260.07   37.50 
 -10   4   1  213.48   30.30 
 -10   4   1  232.58   36.60 
 -10   4   1  201.88   34.70 
   9  -4  -1   52.19   15.20 
   9  -4  -1   50.29   16.30 
   9  -4  -1   61.29   18.90 
   9  -4  -1   40.90   15.00 
  -9  -4   1   86.99   18.10 
  -9  -4   1   98.59   17.60 
  -9  -4   1   73.09   16.30 
   9  -4  -1   85.69   19.90 
   9  -4  -1   47.90   17.00 
   9  -4  -1   88.19   21.60 
   9  -4  -1   68.79   19.10 
   9  -4  -1   85.69   19.10 
  -9  -4   1   81.09   18.20 
   9  -4  -1   67.39   18.40 
  -9  -4   1   50.89   17.00 
  -9  -4   1   74.69   17.10 
  -9  -4   1   81.59   18.00 
  -9   4   1   98.09   20.20 
  -9   4   1   69.39   21.50 
  -9   4   1   65.59   19.10 
  -9   4   1   89.29   21.60 
  -9   4   1   52.09   14.20 
  -9   4   1   44.20   16.50 
   9   4  -1   62.89   15.60 
   9   4  -1   83.49   20.80 
  -9   4   1   87.69   19.70 
  -9   4   1   99.19   23.90 
  -9   4   1   90.79   22.10 
  -9   4   1   54.19   19.60 
  -9   4   1   65.09   18.10 
   9   4  -1   96.69   25.70 
   8  -4  -1   24.40    9.80 
   8  -4  -1   10.60    9.50 
   8  -4  -1   24.40   12.10 
   8  -4  -1   35.10   13.50 
  -8  -4   1   15.80   10.70 
   8  -4  -1   19.00   10.50 
   8  -4  -1   31.30   13.50 
   8  -4  -1   12.90   11.10 
  -8  -4   1   11.80    8.70 
  -8  -4   1   17.20   10.00 
  -8  -4   1    6.70    8.10 
  -8  -4   1   13.80    9.70 
   8  -4  -1    6.10   10.50 
  -8  -4   1   11.10    9.20 
   8  -4  -1   24.10   11.60 
   8  -4  -1   17.10   10.10 
   8  -4  -1   17.50    8.50 
  -8  -4   1   18.80    9.30 
  -8  -4   1    9.00    9.60 
  -8   4   1   42.00   15.10 
  -8   4   1   15.40   10.70 
  -8   4   1   21.60   13.80 
  -8   4   1   18.90   11.70 
   8   4  -1    7.70   11.10 
   8   4  -1    6.30    8.60 
   8   4  -1   21.40    8.70 
  -8   4   1   27.50   14.50 
  -8   4   1   12.80   10.00 
   8   4  -1   21.20    8.80 
   8   4  -1    3.30   13.80 
  -8   4   1    7.30   11.00 
  -8   4   1   15.20   11.40 
  -8   4   1   25.10   13.60 
  -8   4   1   13.60    9.20 
  -8   4   1   26.20   12.70 
   7  -4  -1    7.30    7.90 
  -7  -4   1   11.40    7.50 
  -7  -4   1   -2.50    5.30 
  -7  -4   1   -2.50    7.00 
  -7  -4   1    6.60    6.50 
   7  -4  -1   18.00   10.70 
   7  -4  -1    1.10    5.80 
   7  -4  -1    2.60    8.20 
  -7  -4   1   11.20    8.10 
  -7  -4   1   -5.90    5.60 
   7  -4  -1    3.50    6.90 
   7  -4  -1    4.00    7.80 
   7  -4  -1    1.00    7.40 
   7  -4  -1    8.40    8.30 
   7  -4  -1    2.70    6.20 
  -7  -4   1   -1.90    7.10 
   7  -4  -1    6.80    8.20 
   7  -4  -1   -0.30    6.90 
   7   4  -1   14.90    9.20 
   7   4  -1   10.70   11.70 
  -7   4   1   -0.60    7.10 
  -7   4   1   -5.10    5.60 
   7   4  -1    0.60   10.90 
  -7   4   1    0.20    8.20 
   7   4  -1    1.00    5.20 
  -7   4   1    7.40    8.10 
  -7   4   1    0.40    8.30 
  -7   4   1    5.30    7.40 
  -7   4   1   -2.30    5.30 
  -7   4   1   -2.40    6.80 
   7   4  -1  -11.90    6.40 
  -7   4   1   -3.60    7.00 
   7   4  -1   -0.80    5.00 
  -7   4   1    4.80    8.80 
  -7   4   1   10.70    8.60 
  -7   4   1   -5.10    6.20 
   6  -4  -1   66.99   13.80 
   6  -4  -1  120.09   17.80 
  -6  -4   1   90.99   14.70 
  -6  -4   1   72.89    9.90 
   6  -4  -1  102.39   17.70 
  -6  -4   1   79.39   11.80 
  -6  -4   1   91.69   14.20 
   6  -4  -1   94.39   17.00 
   6  -4  -1  120.79   19.50 
  -6  -4   1   93.49   14.00 
   6  -4  -1  107.09   16.70 
   6  -4  -1   84.79   15.50 
  -6  -4   1   92.49   14.60 
   6  -4  -1  103.89   16.30 
   6  -4  -1   79.89   12.50 
  -6  -4   1   89.09   14.90 
   6  -4  -1   78.19   16.10 
  -6  -4   1   90.39   13.60 
   6  -4  -1   87.99   14.20 
   6   4  -1   85.49   18.30 
  -6   4   1   97.09   17.50 
  -6   4   1  123.59   20.30 
  -6   4   1   96.59   13.60 
   6   4  -1   90.19   11.40 
   6   4  -1   77.49   17.80 
  -6   4   1   93.49   18.50 
   6   4  -1   82.19   12.60 
   6   4  -1   95.99   12.10 
   6   4  -1  107.79    9.90 
   6   4  -1  101.89   11.30 
  -6   4   1   97.59   18.20 
  -6   4   1   90.49   14.90 
  -6   4   1   85.99   17.30 
  -6   4   1   93.39   17.10 
  -6   4   1   86.89   16.90 
   6   4  -1   90.39   18.40 
  -6   4   1   95.19   12.70 
   6   4  -1  105.09   16.50 
  -6   4   1   81.09   17.60 
  -6   4   1   88.79   15.00 
  -6   4   1   48.10   13.80 
   5  -4  -1   34.60    8.20 
   5  -4  -1   24.30    8.60 
   5  -4  -1   31.00   10.70 
   5  -4  -1   45.50   10.70 
  -5  -4   1   51.59   11.50 
  -5  -4   1   40.20   13.40 
  -5  -4   1   32.80    8.50 
  -5  -4   1   26.70    7.80 
  -5  -4   1   39.90    6.60 
   5  -4  -1   40.20   10.70 
  -5  -4   1   42.80   10.20 
   5  -4  -1   42.20   11.50 
   5  -4  -1   48.20   12.00 
   5  -4  -1   32.30    9.60 
  -5  -4   1   33.10    8.00 
   5  -4  -1   37.30   10.00 
  -5  -4   1   41.50    6.60 
   5  -4  -1   39.30    5.60 
   5  -4  -1   60.49   13.90 
  -5   4   1   66.49   15.50 
  -5   4   1   20.80    7.70 
  -5   4   1   48.60   11.80 
   5   4  -1   34.80   10.50 
  -5   4   1   41.60    8.40 
   5   4  -1   45.70   14.40 
   5   4  -1   47.30    7.40 
  -5   4   1   32.40   10.30 
   5   4  -1   48.90    6.70 
  -5   4   1   33.80    8.80 
  -5   4   1   38.30   11.10 
  -5   4   1   47.20   10.50 
   5   4  -1   49.80    7.40 
  -5   4   1   43.70    7.90 
  -5   4   1   74.09   14.10 
  -5   4   1   32.20   11.10 
   5   4  -1   36.50    4.40 
  -5   4   1   34.10   10.90 
  -5   4   1   43.90   12.40 
  -5   4   1   29.70   10.70 
   5   4  -1   19.90   10.30 
   5   4  -1   26.40    9.50 
   5   4  -1   37.10    9.40 
   5   4  -1   41.80    7.20 
   5   4  -1   35.20    8.30 
   5   4  -1   37.40    5.20 
  -5   4   1   49.70    7.60 
  -5   4   1   45.20   10.70 
   4  -4  -1  203.08   14.20 
   4  -4  -1  188.88   11.60 
  -4  -4   1  145.99   12.80 
   4  -4  -1  205.78   20.30 
   4  -4  -1  189.28   12.20 
   4  -4  -1  163.08   19.30 
  -4  -4   1  179.68   15.10 
  -4  -4   1  204.18   12.20 
   4  -4  -1  207.08   23.80 
   4  -4  -1  206.78   19.80 
   4  -4  -1  179.08   18.40 
   4  -4  -1  186.48   21.60 
  -4  -4   1  148.99   13.10 
   4  -4  -1  259.77   25.20 
  -4  -4   1  201.38   21.30 
  -4  -4   1  224.48   21.40 
   4  -4  -1  210.88   20.50 
  -4  -4   1  183.38   17.40 
   4  -4  -1  204.78   19.40 
  -4  -4   1  167.78   17.40 
  -4  -4   1  196.58   23.80 
   4  -4  -1  192.38   18.50 
  -4   4   1  192.88   19.00 
   4   4  -1  160.68   11.60 
   4   4  -1  158.48   16.50 
   4   4  -1  187.08   11.00 
  -4   4   1  155.68   20.30 
  -4   4   1  199.68   23.60 
  -4   4   1  197.48   21.70 
  -4   4   1  182.18   11.50 
  -4   4   1  175.58   19.00 
   4   4  -1  165.48   21.20 
   4   4  -1  197.28   20.30 
  -4   4   1  177.78   14.70 
  -4   4   1  232.38   24.80 
  -4   4   1  191.48   22.10 
  -4   4   1  190.28   23.40 
  -4   4   1  181.88   20.90 
   4   4  -1  222.68   17.40 
   4   4  -1  155.68   21.30 
  -4   4   1  240.38   24.40 
   4   4  -1  169.38   19.00 
  -4   4   1  229.68   15.50 
  -4   4   1  197.78   14.50 
  -4   4   1  202.88   22.30 
  -3  -4   1  127.29   15.50 
  -3  -4   1  111.99   13.70 
   3  -4  -1  123.19    9.30 
  -3  -4   1  110.99   13.00 
  -3  -4   1  101.69   18.10 
   3  -4  -1  113.99   13.30 
  -3  -4   1  110.79    9.10 
   3  -4  -1  118.09    9.00 
   3  -4  -1  136.19   14.80 
  -3  -4   1  139.79   15.20 
   3  -4  -1  144.09   13.30 
  -3  -4   1  119.49   13.00 
  -3  -4   1  119.19    6.50 
  -3  -4   1  120.29   14.80 
  -3  -4   1  115.19   12.30 
  -3  -4   1  167.58   16.00 
   3  -4  -1  129.79   13.40 
   3  -4  -1  126.39   16.40 
   3  -4  -1  150.68   19.50 
   3  -4  -1  136.79   12.30 
   3  -4  -1  112.99   16.30 
   3  -4  -1  126.49   17.80 
  -3  -4   1  119.89    7.20 
   3  -4  -1  122.29    8.30 
   3  -4  -1  102.99   12.40 
   3  -4  -1  120.29   14.10 
   3  -4  -1  136.79   15.60 
  -3  -4   1  123.29   10.80 
   3   4  -1  105.59    8.90 
  -3   4   1  141.59   16.90 
  -3   4   1  123.19   11.70 
  -3   4   1  143.19   13.00 
  -3   4   1  135.19   14.50 
  -3   4   1  142.99   18.20 
  -3   4   1  122.39   12.50 
  -3   4   1  114.99   12.40 
   3   4  -1  138.39   14.20 
   3   4  -1   88.09   15.00 
   3   4  -1  113.69   14.90 
  -3   4   1  147.79   14.90 
  -3   4   1  118.59   14.20 
   3   4  -1  143.09   18.00 
  -3   4   1  116.59   15.70 
  -3   4   1  125.49   17.70 
  -3   4   1  134.59   10.70 
   3   4  -1  121.59   15.30 
  -3   4   1  135.39   17.10 
  -3   4   1  122.29   10.00 
  -3   4   1   97.19   15.40 
  -3   4   1  140.19   17.50 
   3   4  -1  120.09    9.10 
   3   4  -1  134.89   14.80 
  -3   4   1  111.29   14.90 
   3   4  -1  108.39   14.00 
  -3   4   1  134.39   16.90 
  -2  -4   1  236.68   17.70 
   2  -4  -1  208.78   15.80 
   2  -4  -1  228.48   16.50 
   2  -4  -1  238.98   12.60 
  -2  -4   1  221.38   16.00 
  -2  -4   1  208.78   12.90 
  -2  -4   1  213.78   13.30 
  -2  -4   1  225.98   12.70 
   2  -4  -1  245.38   16.10 
   2  -4  -1  259.87   17.30 
   2  -4  -1  229.28   17.50 
  -2  -4   1  223.08   11.80 
   2  -4  -1  243.08   18.80 
   2  -4  -1  237.88   17.50 
  -2  -4   1  210.98   15.70 
   2  -4  -1  229.08   12.70 
  -2  -4   1  214.08   12.40 
   2  -4  -1  242.78   13.80 
  -2  -4   1  201.88   20.10 
  -2  -4   1  230.98   15.10 
   2  -4  -1  270.57   23.80 
   2  -4  -1  259.07   17.00 
   2  -4  -1  215.58   14.00 
   2  -4  -1  216.98   12.20 
  -2  -4   1  205.28   11.60 
   2  -4  -1  225.18   14.80 
   2  -4  -1  238.48   13.30 
  -2  -4   1  241.08   13.30 
  -2  -4   1  256.07   17.00 
  -2  -4   1  225.68   15.80 
  -2  -4   1  238.58   14.60 
   2  -4  -1  211.08   14.50 
   2  -4  -1  271.97   26.70 
  -2  -4   1  249.68   24.70 
  -2  -4   1  204.78   22.30 
   2   4  -1  229.98   17.60 
  -2   4   1  210.18   13.50 
  -2   4   1  239.08   17.40 
   2   4  -1  228.68   14.00 
  -2   4   1  207.38   21.40 
   2   4  -1  193.28   15.70 
  -2   4   1  257.07   18.80 
   2   4  -1  203.98   14.30 
  -2   4   1  228.58   12.10 
  -2   4   1  247.18   16.30 
  -2   4   1  185.38   19.80 
  -2   4   1  258.97   16.20 
  -2   4   1  239.58   14.30 
  -2   4   1  262.67   25.20 
  -2   4   1  270.77   20.40 
  -2   4   1  236.88   22.10 
   2   4  -1  199.68   16.80 
  -2   4   1  221.28   16.30 
   2   4  -1  207.58   17.30 
   2   4  -1  210.08   15.90 
   2   4  -1  224.88   16.90 
  -2   4   1  253.47   15.90 
  -2   4   1  236.28   13.00 
  -2   4   1  245.68   17.30 
  -2   4   1  242.68   18.70 
   2   4  -1  218.38   22.10 
  -2   4   1  236.28   18.90 
  -2   4   1  207.58   13.40 
   2   4  -1  206.58   17.10 
  -2   4   1  250.57   24.50 
  -1  -4   1   10.30    6.10 
   1  -4  -1    8.50    5.40 
   1  -4  -1    2.30    2.50 
   1  -4  -1   14.10    3.80 
   1  -4  -1   11.80    2.80 
   1  -4  -1    5.90    3.80 
  -1  -4   1    1.90    3.90 
  -1  -4   1    4.30    2.20 
  -1  -4   1    7.60    2.20 
   1  -4  -1    9.30    2.20 
   1  -4  -1    5.80    3.90 
   1  -4  -1    6.30    2.80 
   1  -4  -1   12.10    5.40 
   1  -4  -1   11.40    5.00 
  -1  -4   1    1.30    2.80 
  -1  -4   1    2.80    4.00 
  -1  -4   1    9.60    3.40 
   1  -4  -1   12.90    4.50 
  -1  -4   1    5.60    2.70 
   1  -4  -1    7.20    6.60 
   1  -4  -1   12.40    5.20 
  -1  -4   1    6.60    3.20 
   1  -4  -1    2.30    3.60 
  -1  -4   1    3.80    3.30 
   1  -4  -1    7.20    3.50 
   1  -4  -1    3.50    4.30 
   1  -4  -1    7.30    3.60 
   1  -4  -1   19.20    7.20 
  -1  -4   1    3.50    4.70 
  -1  -4   1    4.20    3.30 
  -1  -4   1    1.20    3.20 
  -1  -4   1    6.90    3.90 
  -1   4   1   11.90    6.20 
   1   4  -1    3.40    3.50 
  -1   4   1    0.30    5.30 
  -1   4   1    6.60    4.90 
  -1   4   1   12.20    4.70 
  -1   4   1   -1.50    4.10 
   1   4  -1    9.70    5.10 
   1   4  -1    0.90    4.60 
   1   4  -1   10.90    4.80 
   1   4  -1    8.70    4.80 
   1   4  -1    4.80    3.90 
  -1   4   1    1.20    4.50 
  -1   4   1    7.10    5.30 
   1   4  -1    9.00    4.20 
   1   4  -1   12.60    4.70 
  -1   4   1    8.50    6.50 
  -1   4   1    5.80    5.10 
  -1   4   1   10.60    4.90 
   1   4  -1   -3.60    4.40 
  -1   4   1   13.40    5.30 
   1   4  -1    1.90    3.70 
   1   4  -1   12.40    4.80 
   1   4  -1    2.70    4.30 
  -1   4   1   10.00    3.60 
   1   4  -1   -0.60    2.90 
   1   4  -1   10.70    4.70 
  -1   4   1    9.00    4.30 
   1   4  -1    7.50    4.00 
   1   4  -1    4.90    3.50 
  -1   4   1   14.40    5.10 
   1   4  -1    4.60    4.60 
   1   4  -1    9.00    4.30 
   1   4  -1   13.80    5.50 
  -1   4   1   13.60    4.80 
  -1   4   1   -2.10    3.50 
   0  -4   1  448.26   26.60 
   0  -4   1  416.86   26.80 
   0  -4   1  493.25   23.90 
   0  -4  -1  459.15   20.50 
   0  -4  -1  462.35   27.30 
   0  -4  -1  482.45   21.00 
   0  -4   1  457.55   26.10 
   0  -4   1  506.05   26.80 
   0  -4   1  492.15   25.70 
   0  -4   1  475.45   25.70 
   0  -4   1  485.75   23.40 
   0  -4   1  446.76   25.20 
   0  -4  -1  461.05   26.80 
   0  -4  -1  463.05   23.50 
   0  -4   1  509.15   25.80 
   0  -4   1  510.45   25.90 
   0  -4  -1  461.35   23.80 
   0  -4  -1  500.55   23.20 
   0  -4  -1  493.55   25.00 
   0  -4  -1  465.55   25.00 
   0  -4  -1  521.05   31.70 
   0  -4   1  462.05   25.60 
   0  -4   1  466.55   28.20 
   0  -4   1  490.55   26.10 
   0  -4  -1  549.05   35.90 
   0  -4  -1  488.15   28.70 
   0  -4  -1  493.95   28.70 
   0  -4  -1  458.45   22.90 
   0  -4   1  487.05   27.10 
   0  -4   1  447.46   31.90 
   0  -4   1  461.55   21.90 
   0  -4   1  516.95   31.10 
   0  -4  -1  453.55   23.60 
   0  -4  -1  521.95   25.00 
   0  -4   1  454.65   23.40 
   0   4   1  531.95   30.60 
   0   4  -1  502.05   28.70 
   0   4  -1  483.55   27.60 
   0   4  -1  460.35   26.00 
   0   4  -1  480.95   29.10 
   0   4   1  482.85   31.40 
   0   4  -1  472.25   26.00 
   0   4   1  499.65   27.20 
   0   4  -1  517.95   28.30 
   0   4  -1  486.85   27.80 
   0   4   1  466.85   29.20 
   0   4   1  509.45   30.50 
   0   4  -1  460.55   26.90 
   0   4  -1  480.45   28.30 
   0   4  -1  501.15   26.60 
   0   4  -1  469.55   25.50 
   0   4  -1  484.55   25.60 
   0   4   1  500.75   30.10 
   0   4  -1  454.35   25.50 
   0   4  -1  481.65   26.30 
   0   4   1  475.35   27.10 
   0   4   1  474.75   26.20 
   0   4   1  503.05   26.30 
   0   4  -1  489.25   27.00 
   0   4  -1  467.35   25.30 
   0   4   1  454.55   26.40 
   0   4   1  471.95   26.90 
   0   4   1  466.25   26.70 
   0   4  -1  466.75   27.60 
   0   4  -1  462.75   26.60 
   0   4  -1  497.25   26.70 
   0   4   1  437.26   25.60 
   0   4   1  464.25   27.80 
   0   4   1  491.55   28.10 
   1  -4   1  413.96   23.50 
   1  -4   1  416.46   23.10 
   1  -4   1  413.86   22.70 
  -1  -4  -1  451.95   23.70 
   1  -4   1  370.46   27.10 
  -1  -4  -1  428.26   18.60 
  -1  -4  -1  434.86   21.60 
   1  -4   1  432.66   24.50 
  -1  -4  -1  448.76   23.70 
   1  -4   1  441.36   28.70 
  -1  -4  -1  419.96   23.40 
  -1  -4  -1  451.95   24.20 
  -1  -4  -1  414.36   24.90 
   1  -4   1  408.56   24.00 
  -1  -4  -1  403.36   22.00 
   1  -4   1  428.26   26.50 
   1  -4   1  422.86   23.80 
   1  -4   1  419.96   22.80 
   1  -4   1  429.56   22.20 
  -1  -4  -1  434.16   28.50 
  -1  -4  -1  426.06   28.10 
   1  -4   1  394.06   20.30 
   1  -4   1  431.86   25.40 
  -1  -4  -1  437.56   27.70 
   1  -4   1  433.56   23.80 
   1  -4   1  426.26   20.40 
  -1  -4  -1  440.26   23.00 
  -1  -4  -1  451.75   25.20 
   1  -4   1  425.46   19.20 
  -1  -4  -1  417.86   20.30 
   1  -4   1  421.56   23.80 
  -1  -4  -1  408.06   18.20 
   1  -4   1  431.26   20.10 
   1  -4   1  453.45   29.80 
  -1  -4  -1  393.66   27.10 
   1  -4   1  411.66   23.60 
   1  -4   1  408.56   22.50 
   1  -4   1  423.56   21.50 
  -1  -4  -1  407.76   19.00 
   1   4   1  443.96   28.50 
   1   4   1  467.85   24.80 
  -1   4  -1  433.86   21.60 
   1   4   1  438.36   26.50 
   1   4   1  448.16   26.30 
   1   4   1  400.76   27.20 
  -1   4  -1  432.16   23.10 
  -1   4  -1  422.96   27.80 
  -1   4  -1  389.66   24.90 
   1   4   1  415.06   25.40 
  -1   4  -1  409.26   24.90 
   1   4   1  467.05   27.60 
   1   4   1  439.46   24.80 
  -1   4  -1  458.25   27.80 
   1   4   1  412.96   23.40 
  -1   4  -1  438.66   25.60 
   1   4   1  403.76   24.70 
  -1   4  -1  427.56   26.60 
  -1   4  -1  435.66   23.90 
  -1   4  -1  427.76   27.00 
  -1   4  -1  435.76   25.00 
  -1   4  -1  436.96   26.40 
   1   4   1  430.56   26.40 
   1   4   1  410.06   26.00 
   1   4   1  401.56   23.30 
  -1   4  -1  391.46   26.20 
  -1   4  -1  441.26   27.10 
  -1   4  -1  459.75   22.30 
  -1   4  -1  414.06   22.90 
  -1   4  -1  402.36   23.80 
  -1   4  -1  445.96   22.40 
  -1   4  -1  434.56   25.40 
  -2  -4  -1  368.36   24.20 
  -2  -4  -1  348.77   23.40 
   2  -4   1  402.06   23.90 
  -2  -4  -1  370.26   18.80 
   2  -4   1  375.56   20.40 
   2  -4   1  355.66   22.00 
  -2  -4  -1  383.66   20.20 
  -2  -4  -1  382.66   20.30 
  -2  -4  -1  382.86   27.70 
  -2  -4  -1  406.36   21.00 
   2  -4   1  393.96   18.70 
  -2  -4  -1  391.86   18.80 
   2  -4   1  377.46   22.90 
   2  -4   1  384.96   23.80 
  -2  -4  -1  414.66   29.80 
   2  -4   1  452.45   28.50 
  -2  -4  -1  365.66   22.10 
   2  -4   1  403.76   26.40 
  -2  -4  -1  376.66   22.00 
   2  -4   1  396.76   17.70 
   2  -4   1  366.56   26.90 
   2  -4   1  415.66   21.50 
   2  -4   1  378.86   22.70 
  -2  -4  -1  358.96   20.00 
   2  -4   1  443.56   22.80 
  -2  -4  -1  373.26   19.50 
   2  -4   1  385.26   20.60 
   2  -4   1  370.76   20.80 
  -2  -4  -1  369.36   21.80 
   2  -4   1  349.37   20.60 
   2  -4   1  412.96   26.30 
   2   4   1  391.66   25.90 
   2   4   1  343.27   23.00 
  -2   4  -1  409.66   19.10 
   2   4   1  350.26   21.20 
   2   4   1  379.26   25.60 
   2   4   1  354.16   26.00 
  -2   4  -1  383.36   24.80 
   2   4   1  365.46   24.20 
  -2   4  -1  391.56   26.40 
  -2   4  -1  401.46   20.60 
  -2   4  -1  397.86   24.50 
  -2   4  -1  371.26   24.60 
  -2   4  -1  410.26   23.10 
  -2   4  -1  440.06   23.40 
  -2   4  -1  398.26   27.60 
  -2   4  -1  383.56   18.40 
  -2   4  -1  348.27   24.40 
  -2   4  -1  388.86   23.10 
   2   4   1  374.26   26.70 
   2   4   1  395.26   21.90 
   2   4   1  367.96   23.50 
   2   4   1  387.86   25.00 
  -2   4  -1  388.36   24.90 
  -2   4  -1  431.76   27.00 
  -2   4  -1  382.86   17.90 
  -2   4  -1  416.36   26.90 
  -2   4  -1  407.96   19.10 
  -2   4  -1  382.06   25.50 
   3  -4   1    1.90    1.70 
   3  -4   1    5.10    4.40 
   3  -4   1    8.80    6.80 
   3  -4   1    1.50    1.90 
  -3  -4  -1    3.80    4.60 
   3  -4   1    1.30    5.00 
   3  -4   1    3.50    3.50 
   3  -4   1    6.40    4.80 
   3  -4   1    4.10    4.00 
   3  -4   1    0.70    3.30 
  -3  -4  -1    0.30    3.00 
  -3  -4  -1    2.90    3.30 
  -3  -4  -1    0.80    1.50 
  -3  -4  -1   -1.30    5.20 
   3  -4   1    3.90    4.70 
   3  -4   1    1.50    3.90 
  -3  -4  -1    2.50    2.60 
   3  -4   1    3.50    3.20 
  -3  -4  -1   -0.40    9.00 
   3  -4   1    1.70    1.80 
  -3  -4  -1   -3.10    5.30 
  -3  -4  -1    2.30    3.30 
  -3  -4  -1   -1.50    1.90 
   3  -4   1    8.20    5.00 
  -3  -4  -1    1.50    3.80 
  -3  -4  -1    1.10    3.10 
   3  -4   1    0.90    1.40 
   3  -4   1    4.40    4.20 
  -3   4  -1    3.60    2.30 
  -3   4  -1   -1.50    3.60 
   3   4   1   -8.00    6.00 
   3   4   1    3.30    5.00 
  -3   4  -1    8.40    5.30 
  -3   4  -1    2.30    2.30 
  -3   4  -1   -2.60    3.40 
   3   4   1    1.80    3.30 
   3   4   1    1.90    2.10 
   3   4   1   -4.60    3.60 
   3   4   1   -3.90    3.20 
  -3   4  -1    4.00    2.80 
   3   4   1   -3.70    3.00 
   3   4   1   -1.70    2.40 
  -3   4  -1    4.60    4.40 
  -3   4  -1    1.70    4.40 
  -3   4  -1    3.20    3.20 
  -3   4  -1   -1.10    4.50 
  -3   4  -1    0.90    5.30 
  -3   4  -1   -5.80    3.50 
  -3   4  -1    1.70    4.90 
  -3   4  -1   -2.20    1.90 
   3   4   1    0.80    3.80 
  -3   4  -1    1.20    4.50 
  -3   4  -1   -1.80    2.50 
   4  -4   1   52.89   10.50 
   4  -4   1   34.50    9.40 
   4  -4   1   39.60    7.60 
  -4  -4  -1   37.40    7.30 
   4  -4   1   48.00   11.20 
   4  -4   1   43.80    6.00 
  -4  -4  -1   46.00    4.50 
   4  -4   1   52.09   10.40 
   4  -4   1   45.80    8.50 
  -4  -4  -1   41.60   11.20 
   4  -4   1   41.60    7.50 
   4  -4   1   40.80    9.10 
   4  -4   1   36.60    9.90 
  -4  -4  -1   44.60   13.80 
  -4  -4  -1   48.70    8.90 
   4  -4   1   38.00    9.40 
  -4  -4  -1   45.60    6.10 
   4  -4   1   38.90    8.30 
   4  -4   1   38.90   10.70 
  -4  -4  -1   75.19   15.60 
  -4  -4  -1   44.20    5.70 
  -4  -4  -1   30.00    7.70 
  -4   4  -1   24.30    9.70 
  -4   4  -1   43.30    8.20 
  -4   4  -1   35.90   11.10 
  -4   4  -1   34.30   10.30 
  -4   4  -1   49.40    7.60 
   4   4   1   39.00    5.60 
   4   4   1   36.00    5.10 
   4   4   1   33.40   11.80 
  -4   4  -1   46.70   10.80 
  -4   4  -1   25.40    8.20 
   4   4   1   50.49    6.80 
  -4   4  -1   34.90    9.80 
   4   4   1   44.00   11.30 
  -4   4  -1   45.10    7.40 
  -4   4  -1   39.80    4.20 
   4   4   1   32.40    8.30 
   4   4   1   39.50    9.20 
  -4   4  -1   64.89   12.20 
   4   4   1   51.89    8.90 
  -4   4  -1   47.40    7.10 
   4   4   1   37.40   11.50 
  -4   4  -1   33.20    9.80 
  -4   4  -1   40.80    9.00 
   4   4   1   44.90    7.50 
  -4   4  -1   39.00   10.40 
  -5  -4  -1   71.39    7.40 
   5  -4   1   88.09   13.80 
   5  -4   1   87.59   10.60 
   5  -4   1  102.79   15.00 
   5  -4   1   84.69   16.40 
   5  -4   1   87.99   12.30 
   5  -4   1   80.69   14.30 
  -5  -4  -1   85.79   15.70 
  -5  -4  -1   59.59   16.40 
  -5  -4  -1  104.19   14.40 
  -5  -4  -1   76.09   10.30 
   5  -4   1  109.09   15.20 
  -5  -4  -1   76.49    8.80 
  -5  -4  -1   80.49   13.30 
   5  -4   1   65.69   14.10 
  -5  -4  -1   79.99   12.00 
   5  -4   1   85.89   14.70 
   5  -4   1   92.59   14.60 
   5  -4   1   70.99   13.40 
   5   4   1   92.49   13.90 
  -5   4  -1   88.89   14.10 
  -5   4  -1   95.19   16.30 
  -5   4  -1  109.29   18.80 
  -5   4  -1   94.19   11.90 
   5   4   1   98.89   10.70 
  -5   4  -1  106.49   17.30 
   5   4   1   96.29   19.10 
   5   4   1   84.59   10.90 
  -5   4  -1   80.99   13.30 
  -5   4  -1  124.79   18.90 
   5   4   1   86.09   13.30 
   5   4   1   85.39    8.80 
  -5   4  -1   90.89   15.70 
   5   4   1  103.29   14.20 
   5   4   1   82.59    6.70 
  -5   4  -1  106.49   14.00 
   5   4   1  111.09   12.00 
  -5   4  -1   96.89   11.60 
  -5   4  -1   72.09   13.90 
   5   4   1   56.69   14.80 
  -5   4  -1  101.69   18.60 
   5   4   1   86.79   16.60 
  -5   4  -1  113.69   19.30 
   5   4   1   94.79    9.70 
   6  -4   1  425.06   31.70 
  -6  -4  -1  419.66   28.60 
   6  -4   1  482.75   35.40 
   6  -4   1  426.76   31.60 
  -6  -4  -1  408.46   27.20 
  -6  -4  -1  438.56   32.50 
   6  -4   1  461.25   32.60 
   6  -4   1  436.36   31.40 
   6  -4   1  472.95   31.40 
  -6  -4  -1  448.36   29.40 
   6  -4   1  419.16   28.40 
  -6  -4  -1  446.16   30.00 
   6  -4   1  440.46   34.00 
   6  -4   1  462.65   32.50 
  -6  -4  -1  390.06   25.90 
   6  -4   1  388.46   31.40 
   6  -4   1  451.65   25.50 
  -6  -4  -1  379.26   28.70 
  -6   4  -1  427.86   39.40 
   6   4   1  431.96   25.50 
  -6   4  -1  432.46   42.20 
  -6   4  -1  450.45   34.10 
   6   4   1  372.96   21.90 
   6   4   1  405.46   28.50 
   6   4   1  387.56   29.30 
  -6   4  -1  394.56   32.20 
   6   4   1  388.56   23.30 
  -6   4  -1  457.55   37.10 
   6   4   1  416.66   26.30 
   6   4   1  429.96   42.10 
  -6   4  -1  462.75   35.50 
  -6   4  -1  431.86   26.90 
  -6   4  -1  359.46   29.40 
  -6   4  -1  459.15   34.20 
   6   4   1  414.66   31.10 
  -6   4  -1  440.06   29.50 
   6   4   1  442.46   35.80 
  -6   4  -1  423.96   33.90 
   7  -4   1  323.17   33.50 
   7  -4   1  280.07   19.80 
  -7  -4  -1  250.57   27.50 
  -7  -4  -1  244.38   25.10 
   7  -4   1  243.18   28.50 
  -7  -4  -1  227.78   26.00 
  -7  -4  -1  287.57   21.50 
   7  -4   1  214.98   28.90 
   7  -4   1  217.88   27.20 
   7  -4   1  287.67   28.90 
   7  -4   1  274.57   31.80 
  -7  -4  -1  243.28   23.80 
  -7  -4  -1  257.97   27.10 
   7  -4   1  249.08   28.30 
   7  -4   1  298.07   32.50 
   7  -4   1  245.68   27.90 
  -7  -4  -1  285.77   27.90 
  -7  -4  -1  207.28   26.80 
  -7   4  -1  308.87   29.10 
  -7   4  -1  245.18   27.50 
  -7   4  -1  278.37   32.30 
   7   4   1  290.77   37.50 
  -7   4  -1  317.47   34.30 
  -7   4  -1  231.88   29.70 
  -7   4  -1  289.17   32.70 
   7   4   1  229.08   28.90 
  -7   4  -1  265.87   31.50 
   7   4   1  292.67   23.40 
   7   4   1  267.37   21.60 
  -7   4  -1  248.58   32.80 
   7   4   1  252.87   27.20 
  -7   4  -1  277.77   31.90 
  -7   4  -1  298.57   36.30 
   7   4   1  240.78   30.70 
  -7   4  -1  285.17   22.00 
   8  -4   1  761.42   48.40 
   8  -4   1  633.04   45.50 
  -8  -4  -1  729.13   45.00 
  -8  -4  -1  651.73   43.60 
   8  -4   1  606.34   44.70 
   8  -4   1  602.24   47.30 
  -8  -4  -1  598.74   45.50 
   8  -4   1  691.13   46.80 
   8  -4   1  634.24   49.00 
  -8  -4  -1  679.73   45.60 
   8  -4   1  695.23   48.60 
  -8  -4  -1  682.13   45.20 
  -8  -4  -1  672.83   42.60 
  -8  -4  -1  610.44   39.50 
   8  -4   1  753.92   47.70 
   8  -4   1  607.14   47.30 
  -8   4  -1  716.13   42.00 
  -8   4  -1  752.22   50.99 
  -8   4  -1  688.73   48.90 
  -8   4  -1  688.83   45.20 
  -8   4  -1  734.93   50.99 
  -8   4  -1  769.22   54.79 
  -8   4  -1  726.63   53.69 
   8   4   1  649.93   41.20 
  -8   4  -1  595.24   44.00 
  -8   4  -1  628.94   47.70 
   8   4   1  674.53   44.80 
  -8   4  -1  774.52   52.29 
   8   4   1  659.53   53.29 
   8   4   1  656.23   40.80 
  -8   4  -1  704.83   51.19 
   8   4   1  714.43   51.09 
   9  -4   1   80.29   21.80 
  -9  -4  -1   53.59   15.70 
   9  -4   1   73.69   16.80 
   9  -4   1   72.89   17.80 
  -9  -4  -1   75.19   17.80 
   9  -4   1   34.00   15.50 
  -9  -4  -1   49.70   15.70 
   9  -4   1   49.30   14.90 
   9  -4   1   44.50   16.70 
   9  -4   1   80.49   19.40 
   9  -4   1   69.99   18.10 
  -9  -4  -1   42.90   12.60 
  -9  -4  -1   35.20   12.70 
   9  -4   1   49.40   16.90 
  -9  -4  -1   43.40   14.90 
   9  -4   1   40.80   15.80 
   9  -4   1   61.09   18.70 
  -9  -4  -1   63.29   19.10 
  -9   4  -1   59.49   20.10 
  -9   4  -1   58.49   14.30 
  -9   4  -1   37.60   16.30 
  -9   4  -1   62.69   19.10 
  -9   4  -1   35.60   14.80 
   9   4   1   32.60   19.70 
  -9   4  -1   52.69   15.80 
  -9   4  -1   61.59   18.50 
  -9   4  -1   72.79   20.70 
   9   4   1   71.39   19.40 
  -9   4  -1   66.89   20.60 
  -9   4  -1   35.30   16.20 
  -9   4  -1   65.59   16.50 
   9   4   1   59.39   15.80 
 -10  -4  -1   52.79   17.00 
  10  -4   1   85.19   22.60 
 -10  -4  -1   63.79   18.90 
  10  -4   1   62.29   21.80 
 -10  -4  -1   96.69   23.20 
  10  -4   1   71.69   21.80 
  10  -4   1   70.59   20.40 
  10  -4   1   89.29   22.90 
  10  -4   1   68.89   17.40 
 -10  -4  -1   48.90   16.70 
  10  -4   1   72.89   19.40 
 -10  -4  -1  116.99   20.00 
  10  -4   1  115.29   25.30 
 -10  -4  -1   54.99   16.90 
  10  -4   1   99.69   21.70 
  10  -4   1   84.99   22.50 
 -10   4  -1   76.69   21.20 
 -10   4  -1  146.29   30.80 
 -10   4  -1   87.99   21.20 
  10   4   1   72.69   22.00 
 -10   4  -1   88.49   25.30 
  10   4   1   56.99   23.90 
 -10   4  -1   72.69   22.10 
  10   4   1   92.89   20.50 
 -10   4  -1   81.59   22.30 
 -10   4  -1   79.69   21.90 
 -10   4  -1   56.89   17.70 
 -10   4  -1   67.69   22.30 
 -10   4  -1   84.39   22.60 
   9  -5  -1  331.77   39.10 
  -9  -5   1  386.46   39.50 
   9  -5  -1  417.16   43.70 
  -9  -5   1  359.16   38.10 
   9  -5  -1  455.05   46.50 
  -9  -5   1  389.46   37.00 
   9  -5  -1  363.76   37.00 
   9  -5  -1  443.96   45.90 
   9  -5  -1  396.56   43.50 
   9  -5  -1  360.76   41.10 
   9  -5  -1  303.87   40.00 
  -9  -5   1  406.86   39.10 
  -9  -5   1  339.17   37.60 
  -9  -5   1  315.07   34.90 
   9  -5  -1  366.96   39.10 
   9  -5  -1  318.67   37.70 
  -9   5   1  400.46   38.60 
   9   5  -1  252.07   41.60 
  -9   5   1  373.76   44.80 
  -9   5   1  392.96   45.20 
   9   5  -1  316.87   41.80 
  -9   5   1  449.66   47.90 
   9   5  -1  406.66   41.70 
  -9   5   1  418.16   50.89 
  -9   5   1  398.56   47.20 
  -9   5   1  380.96   47.90 
  -9   5   1  358.86   39.70 
  -9   5   1  314.87   40.60 
   8  -5  -1   32.00   12.70 
  -8  -5   1   18.20   10.10 
  -8  -5   1   15.90    9.20 
  -8  -5   1   -0.80    7.40 
   8  -5  -1   36.40   14.10 
   8  -5  -1   11.30   11.70 
  -8  -5   1    2.90   10.10 
   8  -5  -1   -1.10    9.20 
   8  -5  -1   17.50   12.40 
   8  -5  -1    9.40    8.80 
   8  -5  -1    1.50    9.80 
   8  -5  -1    8.30   10.20 
   8  -5  -1   -3.40    9.70 
  -8  -5   1    2.30    8.20 
  -8  -5   1   12.10   10.10 
  -8  -5   1    1.00    8.00 
   8  -5  -1    4.70    9.20 
  -8   5   1   21.60   12.20 
  -8   5   1   18.30   12.70 
  -8   5   1   12.90   12.20 
  -8   5   1   10.30    9.90 
  -8   5   1    4.70   10.00 
  -8   5   1   27.20   14.30 
   8   5  -1    4.70    9.20 
  -8   5   1   18.40   11.50 
  -8   5   1   23.10   14.60 
   8   5  -1   42.40   17.00 
  -8   5   1    6.30    9.10 
  -8   5   1   13.40   13.00 
   8   5  -1   51.29   21.00 
  -8   5   1    3.40   11.10 
  -8   5   1    4.40   10.10 
   7  -5  -1  201.88   25.90 
   7  -5  -1  117.69   22.40 
   7  -5  -1  254.67   29.10 
   7  -5  -1  279.67   28.30 
   7  -5  -1  230.88   28.20 
   7  -5  -1  255.07   23.20 
  -7  -5   1  193.18   25.30 
  -7  -5   1  200.78   22.60 
   7  -5  -1  222.18   30.50 
  -7  -5   1  210.88   24.70 
   7  -5  -1  237.28   28.70 
  -7  -5   1  208.68   23.80 
   7  -5  -1  217.58   29.60 
   7  -5  -1  263.97   31.10 
   7  -5  -1  186.28   25.60 
  -7  -5   1  187.68   23.80 
  -7  -5   1  196.58   23.00 
  -7   5   1  212.08   30.10 
   7   5  -1  192.98   31.70 
  -7   5   1  279.87   34.90 
  -7   5   1  269.77   33.00 
   7   5  -1  185.98   21.20 
  -7   5   1  241.88   31.00 
  -7   5   1  219.68   33.20 
   7   5  -1  164.88   23.50 
  -7   5   1  228.48   30.60 
  -7   5   1  261.67   26.90 
  -7   5   1  221.38   27.90 
  -7   5   1  211.58   23.20 
  -7   5   1  260.97   33.00 
  -7   5   1  248.88   30.60 
  -7   5   1  238.78   33.60 
   7   5  -1  194.08   29.00 
   6  -5  -1  170.58   18.40 
  -6  -5   1  168.48   18.70 
   6  -5  -1  202.78   23.80 
   6  -5  -1  155.78   22.90 
  -6  -5   1  180.98   20.60 
  -6  -5   1  191.18   22.40 
   6  -5  -1  193.28   24.80 
   6  -5  -1  182.48   23.80 
   6  -5  -1  163.78   21.50 
  -6  -5   1  140.19   16.50 
   6  -5  -1  166.28   23.90 
   6  -5  -1  198.48   24.20 
   6  -5  -1  199.28   23.00 
  -6  -5   1  194.58   20.90 
   6  -5  -1  193.98   22.00 
   6  -5  -1  151.58   23.80 
  -6  -5   1  174.68   22.10 
  -6  -5   1  171.18   20.50 
  -6   5   1  207.78   27.20 
  -6   5   1  192.88   25.90 
  -6   5   1  190.68   24.10 
  -6   5   1  165.48   25.10 
   6   5  -1  155.78   18.60 
   6   5  -1  162.18   21.50 
  -6   5   1  176.98   25.90 
  -6   5   1  176.08   26.90 
  -6   5   1  169.88   24.30 
   6   5  -1  161.28   21.70 
  -6   5   1  205.98   28.00 
  -6   5   1  169.48   24.80 
   6   5  -1  197.88   29.30 
  -6   5   1  153.98   26.10 
  -6   5   1  199.88   21.20 
   6   5  -1  129.09   22.50 
  -6   5   1  170.68   25.20 
  -6   5   1  160.28   18.90 
   5  -5  -1 2125.79  105.99 
   5  -5  -1 2240.58  100.49 
  -5  -5   1 2178.98  100.49 
   5  -5  -1 1992.40  100.59 
  -5  -5   1 2087.69   90.69 
  -5  -5   1 2106.49  105.89 
   5  -5  -1 2084.49  101.19 
   5  -5  -1 2143.39  106.99 
   5  -5  -1 2119.99   99.49 
  -5  -5   1 2048.00   99.09 
   5  -5  -1 2125.19   96.99 
   5  -5  -1 2115.09   98.69 
  -5  -5   1 2053.99   94.49 
   5  -5  -1 2161.68  104.59 
   5  -5  -1 2142.39  100.69 
  -5  -5   1 1958.80   97.39 
  -5  -5   1 2005.90   97.69 
  -5  -5   1 1920.51  101.59 
   5  -5  -1 2121.79   98.89 
   5   5  -1 2056.79  105.59 
  -5   5   1 2185.78  106.19 
  -5   5   1 2051.09  107.39 
  -5   5   1 2125.89  105.19 
  -5   5   1 2143.89  104.29 
  -5   5   1 2137.39  101.29 
  -5   5   1 2249.18   98.29 
   5   5  -1 2038.70  105.79 
   5   5  -1 2225.68  102.59 
  -5   5   1 2177.08  104.59 
  -5   5   1 2120.59  105.19 
  -5   5   1 2196.68   96.59 
  -5   5   1 2116.69  107.59 
  -5   5   1 2192.38  105.59 
   5   5  -1 1884.41   98.29 
   5   5  -1 1986.20   99.09 
  -5   5   1 2164.88   95.79 
  -5   5   1 2273.87  106.19 
   5   5  -1 2010.90   90.49 
   5   5  -1 2168.38   97.39 
   4  -5  -1  393.76   25.50 
   4  -5  -1  351.76   24.10 
  -4  -5   1  367.76   27.10 
  -4  -5   1  356.86   24.70 
  -4  -5   1  293.47   21.20 
   4  -5  -1  362.66   20.00 
   4  -5  -1  371.56   25.80 
   4  -5  -1  394.16   30.90 
   4  -5  -1  370.16   19.20 
   4  -5  -1  376.86   26.60 
   4  -5  -1  286.07   23.50 
   4  -5  -1  346.67   26.20 
   4  -5  -1  336.87   23.60 
  -4  -5   1  318.97   20.40 
  -4  -5   1  320.47   35.40 
  -4  -5   1  366.36   23.70 
   4  -5  -1  302.77   30.90 
  -4  -5   1  328.87   20.40 
  -4  -5   1  341.67   26.80 
   4  -5  -1  370.26   29.50 
   4  -5  -1  345.77   20.60 
   4   5  -1  316.67   19.30 
  -4   5   1  307.17   30.80 
  -4   5   1  357.16   23.10 
  -4   5   1  428.16   30.30 
  -4   5   1  352.46   26.20 
   4   5  -1  315.47   32.30 
   4   5  -1  304.87   30.80 
  -4   5   1  409.76   23.80 
  -4   5   1  321.47   32.80 
  -4   5   1  337.37   20.50 
  -4   5   1  319.47   31.00 
  -4   5   1  315.77   31.30 
   4   5  -1  321.57   17.90 
   4   5  -1  287.87   23.30 
   4   5  -1  327.27   23.70 
  -4   5   1  349.67   21.20 
  -4   5   1  330.37   28.10 
  -4   5   1  416.16   32.00 
  -4   5   1  350.16   34.00 
  -4   5   1  360.66   33.90 
   4   5  -1  371.96   25.70 
  -3  -5   1  622.64   29.50 
   3  -5  -1  657.83   39.90 
   3  -5  -1  659.03   42.40 
   3  -5  -1  699.53   36.30 
  -3  -5   1  620.94   30.40 
  -3  -5   1  596.44   30.30 
   3  -5  -1  652.53   36.90 
  -3  -5   1  643.44   31.30 
  -3  -5   1  593.34   28.60 
  -3  -5   1  526.75   36.40 
  -3  -5   1  626.54   28.90 
   3  -5  -1  631.94   35.80 
  -3  -5   1  607.24   33.50 
   3  -5  -1  665.53   41.50 
   3  -5  -1  645.94   34.30 
   3  -5  -1  640.84   31.00 
   3  -5  -1  638.14   30.70 
  -3  -5   1  622.14   36.00 
  -3  -5   1  585.94   38.00 
  -3  -5   1  590.64   35.00 
   3  -5  -1  628.54   42.00 
  -3  -5   1  641.34   34.10 
  -3  -5   1  588.24   42.60 
   3  -5  -1  689.53   36.40 
   3  -5  -1  683.03   35.00 
   3  -5  -1  671.33   30.80 
   3  -5  -1  686.13   36.80 
   3  -5  -1  651.43   37.20 
   3  -5  -1  706.43   35.30 
   3   5  -1  685.73   36.70 
  -3   5   1  679.13   41.00 
  -3   5   1  626.54   41.60 
  -3   5   1  650.83   41.50 
   3   5  -1  626.04   31.90 
  -3   5   1  718.23   38.30 
   3   5  -1  612.04   36.10 
  -3   5   1  680.73   33.80 
   3   5  -1  624.74   36.20 
  -3   5   1  670.93   30.60 
  -3   5   1  642.94   40.20 
   3   5  -1  597.74   37.70 
   3   5  -1  624.94   38.60 
  -3   5   1  653.83   32.90 
  -3   5   1  693.93   40.90 
   3   5  -1  564.64   39.50 
  -3   5   1  594.54   38.30 
   3   5  -1  622.34   37.70 
  -3   5   1  624.04   39.10 
  -3   5   1  633.94   31.20 
   3   5  -1  611.84   31.80 
  -3   5   1  656.43   36.50 
  -3   5   1  635.14   32.80 
  -3   5   1  690.13   42.40 
  -3   5   1  601.04   39.60 
  -2  -5   1    7.50    7.00 
  -2  -5   1   21.30    6.40 
  -2  -5   1   10.60    4.20 
   2  -5  -1   11.90    4.50 
   2  -5  -1   19.50    3.80 
  -2  -5   1   25.40    5.00 
   2  -5  -1   11.70    6.30 
   2  -5  -1   21.20    6.60 
  -2  -5   1   17.90    2.90 
   2  -5  -1   17.00    7.20 
   2  -5  -1    6.30    4.60 
   2  -5  -1   13.10    4.80 
   2  -5  -1   16.60    7.40 
  -2  -5   1   16.90    2.90 
   2  -5  -1   16.30    3.10 
   2  -5  -1   13.90    3.70 
   2  -5  -1   13.80    7.40 
   2  -5  -1   24.60    6.90 
  -2  -5   1   13.40    4.30 
   2  -5  -1   27.40    7.50 
   2  -5  -1   15.00    5.00 
  -2  -5   1   14.90    9.60 
   2  -5  -1   19.80    6.50 
  -2  -5   1   10.60    3.90 
  -2  -5   1    9.80    3.90 
  -2  -5   1   15.50    6.00 
   2  -5  -1   12.70    8.80 
  -2  -5   1   15.30    5.50 
  -2  -5   1   23.60    5.20 
   2  -5  -1   27.00    6.50 
   2   5  -1   12.70    6.00 
   2   5  -1    9.40    5.00 
  -2   5   1   16.70    3.60 
  -2   5   1   19.60    5.40 
   2   5  -1    4.40    4.60 
  -2   5   1   11.40    5.70 
   2   5  -1   13.10    6.10 
   2   5  -1   15.40    4.90 
  -2   5   1   24.70    9.00 
  -2   5   1    7.70    7.20 
  -2   5   1   15.50    7.50 
   2   5  -1   14.60    6.00 
  -2   5   1   23.60    9.20 
  -2   5   1   12.40    6.50 
  -2   5   1   25.10    6.10 
  -2   5   1   10.40    5.30 
  -2   5   1   19.20    6.30 
  -2   5   1   10.40    3.00 
  -2   5   1   15.10    6.60 
   2   5  -1   13.20    4.50 
  -2   5   1   12.80    6.90 
   2   5  -1   15.10    5.90 
   2   5  -1   14.70    6.40 
  -2   5   1   23.60    8.10 
   2   5  -1   10.80    6.20 
  -2   5   1   17.60    7.10 
   1  -5  -1   27.00    6.50 
  -1  -5   1   11.60    4.30 
   1  -5  -1    9.80    9.40 
  -1  -5   1   11.20    3.50 
   1  -5  -1   16.20    3.10 
   1  -5  -1   10.70    4.90 
  -1  -5   1   20.30    5.30 
  -1  -5   1   17.20    4.50 
  -1  -5   1   16.50    3.20 
   1  -5  -1   15.70    4.40 
  -1  -5   1   11.00    4.10 
   1  -5  -1   19.10    5.10 
   1  -5  -1   17.40    6.80 
  -1  -5   1   24.60    8.30 
   1  -5  -1   22.10    7.20 
   1  -5  -1   16.30    4.10 
   1  -5  -1   14.10    5.50 
   1  -5  -1   13.00    4.70 
   1  -5  -1   17.00    2.60 
  -1  -5   1   15.50    3.40 
   1  -5  -1    9.20    3.00 
   1  -5  -1    8.10    6.00 
   1  -5  -1   16.50    4.80 
  -1  -5   1   18.60    5.50 
   1  -5  -1   10.90    5.10 
  -1  -5   1   12.10    4.90 
  -1   5   1   19.70    5.70 
  -1   5   1   20.60    6.20 
   1   5  -1   13.50    6.70 
  -1   5   1    8.70    4.50 
  -1   5   1   10.20    5.80 
  -1   5   1   19.20    6.50 
  -1   5   1   19.70    6.60 
   1   5  -1   13.40    5.60 
  -1   5   1   22.80    9.60 
  -1   5   1   14.20    6.90 
  -1   5   1   28.20    9.30 
  -1   5   1   12.20    5.90 
   1   5  -1   15.20    5.30 
   1   5  -1   11.40    5.00 
  -1   5   1   17.50    8.10 
   1   5  -1   18.60    6.90 
  -1   5   1   24.80    6.50 
   1   5  -1   12.50    5.30 
   1   5  -1   20.40    6.90 
   1   5  -1   15.70    6.10 
  -1   5   1   30.20    8.50 
   1   5  -1   14.10    6.40 
   1   5  -1   12.70    5.40 
   1   5  -1   26.40    7.00 
  -1   5   1   18.30    7.00 
   1   5  -1   19.50    6.00 
   1   5  -1    9.10    6.30 
   1   5  -1   16.40    5.90 
  -1   5   1    6.60    4.80 
   1   5  -1   13.80    4.90 
   1   5  -1   16.10    5.00 
   1   5  -1    1.10    4.60 
   1   5  -1   28.10    8.00 
   1   5  -1   18.40    6.10 
   0  -5  -1   26.20   11.50 
   0  -5   1   30.10    4.00 
   0  -5   1   19.60    4.40 
   0  -5   1   16.10    5.20 
   0  -5   1   18.60    5.40 
   0  -5   1   24.40    5.20 
   0  -5   1   29.50    6.90 
   0  -5   1   34.40    8.60 
   0  -5   1   27.50    9.10 
   0  -5  -1   19.40    7.10 
   0  -5  -1   31.80    5.80 
   0  -5   1   24.10    6.30 
   0  -5   1   17.60    6.20 
   0  -5   1   19.70    6.00 
   0  -5  -1   28.20    5.50 
   0  -5   1   16.50    9.40 
   0  -5  -1   19.00    5.20 
   0  -5  -1   29.70    4.90 
   0  -5   1   20.80    4.60 
   0  -5  -1   18.60    5.70 
   0  -5  -1   16.50    4.90 
   0  -5  -1   18.80    5.00 
   0  -5  -1   21.90    3.70 
   0  -5   1   19.80    4.30 
   0  -5  -1   17.90    4.60 
   0  -5  -1   21.90    2.90 
   0  -5  -1   30.30    5.20 
   0  -5  -1   13.80    6.00 
   0   5   1   27.50    9.20 
   0   5   1   19.10    6.50 
   0   5   1   33.10    7.60 
   0   5  -1   21.60    7.50 
   0   5  -1   14.10    6.20 
   0   5  -1   18.60    5.50 
   0   5  -1   24.20    6.00 
   0   5   1   17.30    5.70 
   0   5  -1    9.90    5.00 
   0   5   1   14.50    5.60 
   0   5   1   20.50    7.60 
   0   5  -1   34.00    7.40 
   0   5  -1   32.20    7.60 
   0   5   1    9.70    5.30 
   0   5   1   11.60    6.00 
   0   5  -1   33.40    9.50 
   0   5   1   22.90    6.70 
   0   5  -1   12.40    6.10 
   0   5  -1   23.10    6.40 
   0   5  -1   21.50    7.30 
   0   5   1   31.50    6.90 
   0   5  -1   20.60    6.10 
   0   5  -1   26.90    7.40 
   0   5   1   21.80    7.90 
   0   5   1   20.10    8.40 
   0   5   1   29.00    7.20 
   0   5  -1   31.60    8.10 
   0   5  -1   24.90    6.90 
   0   5  -1   18.40    6.50 
   0   5   1   20.30    7.50 
   0   5  -1   19.80    6.10 
   0   5   1   30.50    7.70 
   0   5  -1   19.40    6.80 
   0   5  -1   38.90    8.40 
  -1  -5  -1 2141.19  103.89 
   1  -5   1 2238.48  102.59 
   1  -5   1 2362.56  100.79 
  -1  -5  -1 2194.38   97.09 
   1  -5   1 2274.57   99.39 
   1  -5   1 2256.47   99.09 
  -1  -5  -1 2274.77  101.69 
  -1  -5  -1 2224.38   94.99 
  -1  -5  -1 2193.38   93.49 
   1  -5   1 2172.28  106.29 
  -1  -5  -1 2140.69   92.09 
   1  -5   1 2248.97  103.99 
   1  -5   1 2336.77   98.19 
  -1  -5  -1 2212.48  105.89 
   1  -5   1 2271.77   93.59 
   1  -5   1 2265.57   94.89 
  -1  -5  -1 2232.28  105.19 
  -1  -5  -1 2277.67   98.39 
  -1  -5  -1 2145.79   97.29 
   1  -5   1 2357.06   96.59 
   1  -5   1 2267.67   98.59 
   1  -5   1 2323.87  102.49 
   1  -5   1 2299.07   94.59 
  -1  -5  -1 2274.07   92.49 
   1  -5   1 2271.27   97.89 
   1  -5   1 2337.37  100.69 
   1  -5   1 2305.07  109.59 
  -1  -5  -1 2223.28   96.79 
   1  -5   1 2249.38   94.89 
   1  -5   1 2286.87  100.49 
   1  -5   1 2255.77   96.69 
   1  -5   1 2240.58  105.89 
   1   5   1 2169.98  101.49 
   1   5   1 2277.07  100.99 
  -1   5  -1 2192.68  103.79 
  -1   5  -1 2369.06  102.29 
  -1   5  -1 2331.57   99.59 
  -1   5  -1 2370.56  100.79 
   1   5   1 2250.97  104.09 
   1   5   1 2252.67  106.29 
  -1   5  -1 2394.86  106.49 
  -1   5  -1 2255.37   98.79 
   1   5   1 2272.67   99.49 
  -1   5  -1 2251.97  102.19 
  -1   5  -1 2240.48  106.09 
  -1   5  -1 2244.38  103.79 
   1   5   1 2238.28  103.19 
  -1   5  -1 2205.48  103.39 
  -1   5  -1 2260.27  102.99 
   1   5   1 2171.98  100.99 
  -1   5  -1 2288.97  103.59 
   1   5   1 2220.88  102.69 
   1   5   1 2290.37  103.19 
   1   5   1 2210.38  101.49 
  -1   5  -1 2273.67  101.89 
  -1   5  -1 2259.97   97.09 
  -1   5  -1 2226.68  101.79 
   1   5   1 2265.27   99.99 
   1   5   1 2180.48  104.69 
   1   5   1 2203.98  104.69 
  -1   5  -1 2191.88  100.09 
   1   5   1 2203.08  102.99 
   2  -5   1  160.28    8.80 
   2  -5   1  200.58   13.00 
  -2  -5  -1  156.98   20.40 
   2  -5   1  162.48   13.00 
   2  -5   1  223.78   24.40 
   2  -5   1  169.98   12.50 
  -2  -5  -1  123.89   17.10 
  -2  -5  -1  162.58   10.70 
   2  -5   1  170.28   17.10 
  -2  -5  -1  146.99   14.60 
   2  -5   1  171.28   16.70 
   2  -5   1  163.48   16.10 
   2  -5   1  131.19   19.00 
   2  -5   1  169.28   20.90 
   2  -5   1  171.08    8.50 
  -2  -5  -1  163.28   23.00 
   2  -5   1  146.09   14.10 
  -2  -5  -1  160.78   12.30 
   2  -5   1  153.18    9.70 
  -2  -5  -1  156.58   14.60 
   2  -5   1  151.38   16.30 
  -2  -5  -1  146.89   12.10 
  -2  -5  -1  161.98    9.70 
  -2  -5  -1  207.78   23.70 
   2  -5   1  166.88    9.30 
   2  -5   1  177.98   13.80 
  -2  -5  -1  205.98   20.40 
   2  -5   1  175.08   14.50 
  -2  -5  -1  179.68   13.30 
  -2  -5  -1  161.88   10.90 
   2  -5   1  159.08   11.60 
   2  -5   1  146.89   18.80 
  -2  -5  -1  139.09   11.60 
   2   5   1  161.88   17.50 
  -2   5  -1  186.28   19.80 
  -2   5  -1  165.88   13.20 
   2   5   1  145.49   18.70 
   2   5   1  174.18   19.20 
  -2   5  -1  157.58   12.60 
  -2   5  -1  155.58   18.40 
  -2   5  -1  168.08   18.70 
  -2   5  -1  163.38   10.80 
  -2   5  -1  184.68   14.10 
   2   5   1  141.99   14.50 
   2   5   1  183.68   18.20 
  -2   5  -1  182.58   22.40 
   2   5   1  124.79   17.20 
  -2   5  -1  177.88   18.90 
   2   5   1  179.48   20.00 
   2   5   1  176.48   22.00 
  -2   5  -1  175.88   20.80 
  -2   5  -1  180.38   13.20 
   2   5   1  165.98   13.40 
   2   5   1  174.08   18.60 
  -2   5  -1  154.48   19.60 
  -2   5  -1  171.58   20.50 
  -2   5  -1  206.18   21.80 
  -2   5  -1  133.29   17.80 
   3  -5   1 2452.15  104.99 
   3  -5   1 2428.46  110.99 
  -3  -5  -1 2208.38  101.59 
   3  -5   1 2487.45  113.59 
   3  -5   1 2383.36   96.79 
   3  -5   1 2289.37  106.39 
   3  -5   1 2344.27  101.09 
  -3  -5  -1 2264.37   99.49 
   3  -5   1 2370.76   98.99 
  -3  -5  -1 2217.88  100.29 
  -3  -5  -1 2237.78   97.39 
   3  -5   1 2414.66  107.09 
   3  -5   1 2444.36  101.09 
  -3  -5  -1 2171.98  108.89 
  -3  -5  -1 2261.37   98.09 
  -3  -5  -1 2232.08  106.79 
  -3  -5  -1 2290.47  103.29 
  -3  -5  -1 2193.88   98.89 
   3  -5   1 2411.56  104.89 
  -3  -5  -1 2263.87  101.69 
  -3  -5  -1 2142.69  103.39 
   3  -5   1 2344.97   98.39 
  -3  -5  -1 2231.28   99.19 
   3  -5   1 2269.37  111.09 
   3  -5   1 2399.06   99.19 
   3  -5   1 2278.07  108.49 
  -3  -5  -1 2218.38  115.19 
   3  -5   1 2324.57  105.39 
   3  -5   1 2431.96  103.29 
   3   5   1 2208.78  109.79 
  -3   5  -1 2440.96   97.49 
   3   5   1 2105.39  110.29 
  -3   5  -1 2283.27  110.29 
  -3   5  -1 2524.95  106.09 
  -3   5  -1 2393.56   99.69 
  -3   5  -1 2376.46  109.09 
  -3   5  -1 2406.66   98.69 
   3   5   1 2235.28  109.39 
   3   5   1 2369.56  106.59 
  -3   5  -1 2380.96  111.39 
  -3   5  -1 2355.76  108.89 
   3   5   1 2318.17  102.09 
   3   5   1 2214.28  109.39 
   3   5   1 2415.46  102.49 
  -3   5  -1 2365.56  109.39 
  -3   5  -1 2368.26   95.99 
   3   5   1 2212.08  105.29 
  -3   5  -1 2365.06  107.19 
  -3   5  -1 2314.37  109.59 
  -3   5  -1 2385.76  113.19 
  -3   5  -1 2433.56   99.29 
  -3   5  -1 2434.06  109.49 
  -4  -5  -1  194.38   24.30 
  -4  -5  -1  205.68   20.80 
  -4  -5  -1  168.78   17.90 
  -4  -5  -1  157.28   17.00 
   4  -5   1  133.09   20.70 
   4  -5   1  196.08   24.80 
  -4  -5  -1  152.48   20.40 
   4  -5   1  145.29   18.30 
   4  -5   1  181.38   16.80 
   4  -5   1  168.08   18.20 
  -4  -5  -1  175.18   13.70 
  -4  -5  -1  142.89   11.00 
  -4  -5  -1  173.28   10.80 
  -4  -5  -1  148.89    8.90 
  -4  -5  -1  181.58   27.30 
   4  -5   1  179.38   20.80 
  -4  -5  -1  146.79   10.40 
   4  -5   1  158.18   18.20 
   4  -5   1  165.38   18.10 
   4  -5   1  186.88   16.60 
   4  -5   1  205.28   22.90 
   4  -5   1  166.38   19.90 
   4  -5   1  192.18   15.10 
   4  -5   1  161.08   21.40 
  -4   5  -1  162.78   10.40 
  -4   5  -1  175.48   23.10 
   4   5   1  167.68   21.90 
  -4   5  -1  193.18   24.00 
  -4   5  -1  167.98   24.20 
  -4   5  -1  164.58   13.80 
  -4   5  -1  234.08   25.80 
   4   5   1  170.58   15.80 
  -4   5  -1  155.58   21.40 
  -4   5  -1  170.58   13.30 
   4   5   1  175.28   24.30 
   4   5   1  167.18   16.30 
   4   5   1  153.28   23.60 
  -4   5  -1  140.49   18.90 
   4   5   1  163.78   18.80 
  -4   5  -1  159.78   10.30 
  -4   5  -1  165.08   20.20 
  -4   5  -1  169.48   22.90 
  -4   5  -1  202.78   22.90 
   4   5   1  164.38   18.60 
  -4   5  -1  162.88   21.70 
  -5  -5  -1  201.18   15.70 
  -5  -5  -1  214.18   25.60 
   5  -5   1  228.28   25.10 
   5  -5   1  195.08   25.10 
   5  -5   1  168.38   21.10 
   5  -5   1  175.78   20.60 
   5  -5   1  213.98   22.80 
   5  -5   1  226.78   25.00 
  -5  -5  -1  201.88   28.90 
  -5  -5  -1  225.28   22.10 
   5  -5   1  217.38   19.90 
   5  -5   1  275.87   27.40 
   5  -5   1  238.78   28.70 
  -5  -5  -1  185.28   18.40 
  -5  -5  -1  210.78   22.20 
   5  -5   1  196.68   15.80 
   5  -5   1  196.78   22.00 
  -5  -5  -1  194.68   29.00 
   5   5   1  163.98   26.80 
  -5   5  -1  214.58   16.60 
   5   5   1  183.58   21.40 
   5   5   1  139.89   23.20 
  -5   5  -1  192.68   26.10 
  -5   5  -1  185.08   22.30 
  -5   5  -1  228.08   18.00 
  -5   5  -1  201.88   24.80 
  -5   5  -1  293.97   33.20 
  -5   5  -1  196.88   24.80 
  -5   5  -1  221.18   28.10 
  -5   5  -1  219.58   16.20 
   5   5   1  223.88   16.20 
  -5   5  -1  250.07   28.60 
   5   5   1  162.38   23.50 
   5   5   1  203.38   22.00 
  -5   5  -1  242.88   28.10 
  -5   5  -1  256.67   28.80 
   5   5   1  216.98   19.80 
  -5   5  -1  214.28   25.00 
  -6  -5  -1   17.90    7.90 
   6  -5   1   15.20    9.20 
   6  -5   1   29.30   11.80 
   6  -5   1   36.30   11.90 
   6  -5   1   19.00    8.90 
   6  -5   1    5.90    6.60 
   6  -5   1   26.30   10.80 
   6  -5   1   12.40    8.70 
  -6  -5  -1    9.90    7.20 
   6  -5   1   22.40    7.10 
   6  -5   1   16.10    9.50 
   6  -5   1   16.90    9.60 
   6  -5   1   15.60    8.90 
  -6  -5  -1    8.40    7.10 
  -6  -5  -1   30.90    7.70 
  -6  -5  -1   14.50    9.60 
  -6   5  -1    4.50    8.20 
  -6   5  -1    3.90    7.90 
  -6   5  -1    9.90    8.90 
  -6   5  -1   -6.20    6.50 
  -6   5  -1   11.60    8.90 
  -6   5  -1    4.00    7.50 
   6   5   1   16.00    8.50 
   6   5   1   22.90   15.30 
   6   5   1    2.00    7.00 
  -6   5  -1   28.10   12.30 
  -6   5  -1   16.50    8.30 
  -6   5  -1   18.80   11.60 
  -6   5  -1   26.90   11.80 
   6   5   1   24.70   11.90 
  -6   5  -1   11.80    9.00 
  -6   5  -1    9.90    6.00 
   6   5   1   23.70    6.40 
  -7  -5  -1  168.18   22.20 
   7  -5   1  162.78   23.20 
   7  -5   1  147.59   23.90 
   7  -5   1  235.18   30.20 
   7  -5   1  133.69   21.80 
  -7  -5  -1  166.98   24.90 
   7  -5   1  158.98   22.40 
   7  -5   1  149.88   23.40 
  -7  -5  -1  147.79   21.30 
   7  -5   1  145.29   24.60 
  -7  -5  -1  131.19   17.70 
  -7  -5  -1  152.18   20.40 
   7  -5   1  156.28   23.30 
  -7  -5  -1  140.39   20.70 
   7  -5   1  198.08   26.90 
  -7   5  -1   98.99   21.00 
  -7   5  -1  145.49   25.10 
   7   5   1  154.98   30.20 
   7   5   1  124.99   23.00 
  -7   5  -1  162.08   23.70 
  -7   5  -1  138.69   26.00 
  -7   5  -1  136.79   19.80 
  -7   5  -1  147.59   24.90 
   7   5   1  158.68   22.60 
  -7   5  -1  188.68   25.10 
  -7   5  -1  162.38   26.50 
   7   5   1  103.69   17.70 
  -7   5  -1  227.08   33.40 
  -7   5  -1  146.49   24.80 
  -7   5  -1  129.49   23.10 
  -7   5  -1  157.18   24.50 
   8  -5   1   74.69   20.00 
  -8  -5  -1   89.89   18.10 
   8  -5   1   57.39   17.00 
   8  -5   1   32.40   12.30 
  -8  -5  -1   69.49   15.90 
   8  -5   1   72.99   16.90 
   8  -5   1   43.00   12.50 
   8  -5   1   55.49   16.40 
   8  -5   1   53.19   17.80 
  -8  -5  -1   54.79   15.00 
   8  -5   1   67.59   17.90 
  -8  -5  -1   65.09   14.20 
   8  -5   1   40.40   15.30 
   8  -5   1   47.80   15.80 
  -8  -5  -1   73.09   15.90 
  -8  -5  -1   88.09   19.60 
   8   5   1   44.90   15.50 
  -8   5  -1   60.69   16.50 
   8   5   1   45.10   17.60 
  -8   5  -1   92.59   20.80 
  -8   5  -1   43.90   17.20 
   8   5   1   68.39   24.00 
  -8   5  -1   72.99   18.30 
  -8   5  -1   54.39   18.20 
  -8   5  -1   70.59   16.10 
  -8   5  -1   79.29   19.90 
  -8   5  -1   92.39   20.80 
   8   5   1   53.99   13.20 
  -8   5  -1   67.79   19.80 
  -8   5  -1   47.60   16.80 
  -9  -5  -1  577.84   44.60 
  -9  -5  -1  562.24   43.50 
   9  -5   1  580.34   46.90 
   9  -5   1  608.34   56.89 
   9  -5   1  566.84   44.50 
   9  -5   1  555.74   44.00 
   9  -5   1  586.94   55.19 
   9  -5   1  597.64   42.80 
  -9  -5  -1  659.23   43.90 
  -9  -5  -1  570.44   43.40 
  -9  -5  -1  634.84   48.00 
  -9  -5  -1  611.74   45.20 
   9  -5   1  705.23   49.60 
   9  -5   1  579.44   46.10 
   9  -5   1  486.55   52.59 
   9  -5   1  608.64   47.30 
  -9   5  -1  584.64   56.69 
  -9   5  -1  542.55   57.49 
  -9   5  -1  581.14   60.79 
  -9   5  -1  488.85   52.99 
  -9   5  -1  636.64   58.99 
  -9   5  -1  619.44   50.09 
   9   5   1  551.44   43.80 
  -9   5  -1  652.33   49.90 
   9   5   1  629.34   58.49 
   9   5   1  506.95   60.79 
  -9   5  -1  749.33   57.49 
  -9   5  -1  582.04   43.50 
  -9   5  -1  542.95   43.90 
  -9  -6   1    8.80   11.80 
  -9  -6   1    0.20    7.90 
   9  -6  -1    9.00   11.50 
   9  -6  -1   13.30   13.40 
   9  -6  -1   19.00   15.70 
   9  -6  -1    0.30   10.40 
   9  -6  -1   13.70   13.70 
   9  -6  -1    3.30   13.80 
   9  -6  -1   -4.90    9.80 
   9  -6  -1   22.70   14.80 
  -9  -6   1    7.30    9.40 
   9  -6  -1   37.80   14.70 
  -9  -6   1    3.90   10.00 
   9  -6  -1    5.90   13.10 
   9   6  -1    7.10   15.10 
  -9   6   1   11.80   13.40 
  -9   6   1   14.40   14.70 
  -9   6   1    5.20   12.10 
  -9   6   1   15.70   13.40 
   9   6  -1   62.69   26.00 
   9   6  -1    1.80   10.50 
  -9   6   1    7.70   14.50 
  -9   6   1    8.80   10.80 
  -9   6   1    6.30   11.90 
  -9   6   1   -4.80   11.00 
  -9   6   1   -7.90   11.90 
   8  -6  -1   27.70   13.50 
  -8  -6   1   17.80   12.80 
  -8  -6   1    9.70    9.20 
   8  -6  -1   40.90   14.80 
   8  -6  -1   20.80   15.00 
  -8  -6   1   19.80   10.80 
   8  -6  -1   11.40    9.80 
   8  -6  -1   21.70   12.20 
   8  -6  -1   20.80   13.50 
   8  -6  -1   48.00   16.70 
   8  -6  -1   -5.10   11.00 
   8  -6  -1   12.50   12.30 
   8  -6  -1   -1.40    7.90 
  -8  -6   1   16.90   11.50 
  -8   6   1   38.00   17.50 
  -8   6   1   -1.90   11.30 
   8   6  -1   24.20   14.60 
  -8   6   1   26.50   13.40 
  -8   6   1   14.20   14.30 
   8   6  -1   23.00   15.90 
  -8   6   1   33.00   17.20 
  -8   6   1   31.50   16.80 
  -8   6   1    0.80   11.60 
  -8   6   1   21.10   14.40 
   8   6  -1   32.70   13.80 
  -8   6   1    7.50   13.10 
  -8   6   1   20.50   10.90 
   7  -6  -1    0.30    9.10 
   7  -6  -1    8.60   10.30 
  -7  -6   1  -14.60    5.00 
   7  -6  -1    8.00    9.50 
  -7  -6   1    3.10    7.30 
   7  -6  -1   -5.80    7.60 
   7  -6  -1    5.90   11.10 
   7  -6  -1    0.20    7.60 
   7  -6  -1    8.40    9.10 
   7  -6  -1   -7.20    9.20 
   7  -6  -1   13.40   11.60 
  -7  -6   1   13.40   11.00 
  -7  -6   1   -4.40    6.30 
   7  -6  -1    7.20   10.00 
  -7   6   1    2.00    9.40 
  -7   6   1   -2.50    8.20 
   7   6  -1   -4.90    6.20 
  -7   6   1   14.60   11.50 
  -7   6   1   -0.50    7.90 
  -7   6   1    9.00   10.70 
  -7   6   1    2.80    9.20 
   7   6  -1   -4.10    9.90 
  -7   6   1   11.20   11.40 
  -7   6   1    7.70   10.90 
  -7   6   1    5.10    7.90 
  -7   6   1   -7.20    7.80 
   7   6  -1  -16.30   11.50 
   7   6  -1   21.10   10.30 
  -6  -6   1    7.30    8.60 
   6  -6  -1   22.10   12.10 
  -6  -6   1    8.50    7.60 
   6  -6  -1   21.50    9.80 
   6  -6  -1    5.80    8.10 
   6  -6  -1    8.80   10.50 
   6  -6  -1   21.00    9.40 
  -6  -6   1   12.30    7.10 
  -6  -6   1   18.80   15.00 
   6  -6  -1    9.60    7.60 
   6  -6  -1   13.20    9.30 
   6  -6  -1  -10.70    7.00 
   6  -6  -1   27.50   11.00 
  -6  -6   1   -2.70    7.00 
   6  -6  -1   19.10   12.20 
  -6  -6   1   28.50    9.80 
   6  -6  -1   14.40    9.30 
  -6   6   1   27.00   12.80 
   6   6  -1   15.70   13.00 
  -6   6   1    7.30    9.10 
  -6   6   1   19.20   12.00 
  -6   6   1   21.10   12.10 
  -6   6   1    9.10   10.40 
  -6   6   1   11.00    8.90 
  -6   6   1    4.30   10.10 
   6   6  -1    4.70    8.40 
   6   6  -1   21.00   13.90 
  -6   6   1   10.10   10.00 
  -6   6   1   11.20    7.30 
  -6   6   1   20.50   10.60 
  -6   6   1    3.60    7.90 
   6   6  -1   22.00    9.00 
  -5  -6   1   22.80   10.80 
  -5  -6   1   21.10    7.90 
  -5  -6   1   35.50   10.10 
   5  -6  -1   25.80   12.10 
  -5  -6   1   21.50    9.10 
   5  -6  -1   24.40    9.30 
   5  -6  -1   28.00   10.10 
  -5  -6   1   27.80   14.40 
   5  -6  -1   33.10   10.20 
  -5  -6   1   17.40   15.00 
   5  -6  -1   13.30   10.40 
  -5  -6   1   19.90    7.20 
   5  -6  -1   14.00    7.90 
   5  -6  -1   40.20   12.60 
   5  -6  -1   32.70   10.80 
   5  -6  -1   26.90    9.70 
   5  -6  -1   28.90   11.40 
   5  -6  -1   28.50   10.90 
  -5   6   1   41.00   13.50 
  -5   6   1   20.90   10.50 
  -5   6   1   21.40   10.70 
  -5   6   1   19.80   11.00 
  -5   6   1   40.00   12.00 
  -5   6   1   38.50    8.50 
   5   6  -1   26.10    8.60 
   5   6  -1   21.50    5.80 
   5   6  -1   31.50   13.30 
  -5   6   1   24.70   12.10 
  -5   6   1    9.50    7.10 
   5   6  -1   51.99   14.80 
  -5   6   1   22.00   10.80 
   5   6  -1   27.90    9.90 
   5   6  -1   13.30    7.80 
  -5   6   1   28.10   12.60 
  -5   6   1   31.50   12.40 
  -5   6   1   38.00   13.60 
   4  -6  -1  110.89   16.50 
  -4  -6   1  132.19   19.50 
   4  -6  -1  161.18   23.10 
   4  -6  -1  101.39   14.80 
   4  -6  -1  152.08   18.40 
  -4  -6   1  125.79   16.60 
   4  -6  -1  115.99   15.50 
  -4  -6   1  125.69   24.80 
   4  -6  -1  141.69   12.90 
   4  -6  -1  116.79   17.10 
  -4  -6   1  121.69   16.90 
   4  -6  -1  164.58   14.80 
   4  -6  -1  129.99   18.80 
  -4  -6   1  141.29   13.30 
   4  -6  -1  128.09   22.20 
  -4  -6   1  137.09   19.40 
   4  -6  -1  114.29   20.80 
  -4  -6   1  118.89   15.40 
   4  -6  -1  146.59   19.30 
  -4   6   1  161.78   25.30 
  -4   6   1  129.49   20.90 
   4   6  -1  126.49   12.80 
   4   6  -1   91.69   16.50 
  -4   6   1   96.99   17.40 
  -4   6   1  113.59   20.50 
  -4   6   1  118.99   13.20 
   4   6  -1  132.89   20.20 
  -4   6   1  149.19   23.40 
  -4   6   1  177.38   23.40 
   4   6  -1  161.08   23.80 
  -4   6   1  112.69   19.40 
   4   6  -1  107.89   15.70 
  -4   6   1  140.29   10.90 
   4   6  -1  117.39   17.00 
  -4   6   1  144.59   19.90 
  -4   6   1  135.49   20.50 
  -4   6   1  135.69   23.00 
   4   6  -1  100.69   15.00 
   3  -6  -1    5.80    7.90 
   3  -6  -1   13.00    7.80 
   3  -6  -1  -10.10    3.90 
  -3  -6   1   -3.20    4.80 
  -3  -6   1   -3.50    2.40 
   3  -6  -1   -0.10    5.50 
   3  -6  -1    9.00    7.50 
  -3  -6   1   -2.00    3.50 
   3  -6  -1    4.30    6.50 
  -3  -6   1    3.30    7.20 
  -3  -6   1    7.20    8.60 
   3  -6  -1   13.00    9.10 
  -3  -6   1    4.90    6.00 
   3  -6  -1    3.30    3.10 
   3  -6  -1   -1.60    3.70 
   3  -6  -1    5.60    5.60 
  -3  -6   1   -1.00    9.80 
  -3  -6   1    2.30    4.60 
   3  -6  -1   -1.70    4.20 
   3  -6  -1    8.40    6.60 
   3  -6  -1   -2.80    4.60 
  -3   6   1   -6.10    6.20 
   3   6  -1    5.60    4.10 
  -3   6   1    4.50    6.40 
   3   6  -1    0.20    3.80 
  -3   6   1    2.00    7.10 
   3   6  -1    6.10    5.50 
  -3   6   1    3.10    6.80 
   3   6  -1   -1.20    4.70 
  -3   6   1   -1.80    5.70 
  -3   6   1   -1.40    4.90 
   3   6  -1    6.50    6.80 
  -3   6   1   -7.00    5.00 
   3   6  -1   -1.30    4.80 
  -3   6   1   -0.30    6.30 
   3   6  -1    4.60    7.30 
   3   6  -1   -4.30    5.20 
  -3   6   1    9.90    8.10 
   3   6  -1    2.70    7.30 
  -3   6   1    1.30    3.70 
  -3   6   1    0.40    5.80 
  -3   6   1    2.10    6.80 
   2  -6  -1   31.10    8.50 
   2  -6  -1   47.00   14.90 
   2  -6  -1   41.70    4.90 
   2  -6  -1   27.70    5.90 
  -2  -6   1   22.20    3.20 
   2  -6  -1   21.10    6.60 
   2  -6  -1   28.60    9.50 
  -2  -6   1   34.20    3.90 
  -2  -6   1   31.30    7.50 
   2  -6  -1   30.90    7.10 
  -2  -6   1   30.60    9.50 
   2  -6  -1   26.30    7.90 
   2  -6  -1   29.20    7.90 
  -2  -6   1   30.50    6.60 
  -2  -6   1   19.70   11.20 
   2  -6  -1   33.20    4.90 
  -2  -6   1   25.90    6.50 
  -2  -6   1   29.70    6.40 
   2  -6  -1   41.60   11.20 
   2  -6  -1    6.00    7.50 
   2  -6  -1   36.00    5.60 
   2  -6  -1   49.90   11.90 
  -2  -6   1   69.29   15.10 
   2  -6  -1   47.20   10.00 
   2  -6  -1   23.70    5.70 
  -2  -6   1   29.10    6.10 
  -2   6   1   25.60    8.70 
   2   6  -1   28.70    9.00 
   2   6  -1   15.80    6.80 
  -2   6   1   42.90   10.30 
  -2   6   1   34.20   10.80 
  -2   6   1   33.70    8.60 
   2   6  -1   30.00    6.80 
  -2   6   1   37.30   11.00 
   2   6  -1   25.10    8.50 
   2   6  -1   28.60    8.70 
  -2   6   1   38.50    7.90 
  -2   6   1   48.70   11.80 
   2   6  -1   37.20    7.90 
   2   6  -1   34.20    8.80 
  -2   6   1   35.80   12.30 
  -2   6   1   18.30    9.10 
   2   6  -1   29.80    9.20 
  -2   6   1   42.70    9.80 
  -2   6   1   79.39   17.10 
   2   6  -1   31.10   10.80 
  -2   6   1   18.20    8.60 
  -2   6   1   32.80    7.70 
   2   6  -1   41.00    9.60 
  -2   6   1   18.60    8.40 
   1  -6  -1  121.39   12.40 
  -1  -6   1  117.89   13.80 
  -1  -6   1   93.29   13.90 
  -1  -6   1  102.29    9.80 
   1  -6  -1  108.09   10.30 
  -1  -6   1  130.29   23.20 
  -1  -6   1  114.79   10.60 
  -1  -6   1  129.19   13.50 
  -1  -6   1  103.29    8.00 
   1  -6  -1   96.09   12.80 
   1  -6  -1  117.49   14.50 
  -1  -6   1  121.49   18.20 
   1  -6  -1  120.69   17.30 
   1  -6  -1  121.59   23.10 
  -1  -6   1   92.69   11.30 
   1  -6  -1  108.19   13.40 
  -1  -6   1  102.69   12.30 
   1  -6  -1  103.39    9.10 
   1  -6  -1  114.59   17.30 
  -1  -6   1   72.59   10.50 
  -1  -6   1  110.79   14.50 
  -1  -6   1  124.69   14.10 
   1  -6  -1  125.29   13.50 
   1  -6  -1  109.09   11.70 
   1  -6  -1  104.49    6.40 
  -1  -6   1  125.49   18.40 
  -1  -6   1   88.99   12.20 
  -1  -6   1   98.89   14.20 
   1  -6  -1  119.19   17.10 
   1  -6  -1  103.19   13.90 
   1  -6  -1  105.09   11.40 
   1  -6  -1  110.29    8.50 
  -1  -6   1   91.59   11.50 
   1   6  -1  111.99   15.00 
   1   6  -1  121.39   15.20 
   1   6  -1  116.49   15.20 
   1   6  -1  133.19   16.10 
  -1   6   1  111.69   20.40 
  -1   6   1  107.89   16.40 
   1   6  -1  110.99   16.90 
   1   6  -1  101.69   12.80 
  -1   6   1   98.79   14.90 
   1   6  -1  103.89   15.60 
  -1   6   1   99.89   14.90 
   1   6  -1  110.59   14.80 
  -1   6   1  137.29   17.30 
   1   6  -1  139.69   18.70 
  -1   6   1   88.69   16.80 
   1   6  -1  106.29   13.40 
   1   6  -1   88.39   15.80 
  -1   6   1  117.89   14.70 
   1   6  -1   84.49   12.50 
   1   6  -1  100.89   14.60 
  -1   6   1  106.59   15.40 
   1   6  -1   90.59   13.20 
   1   6  -1  138.69   19.40 
  -1   6   1  118.19   18.30 
  -1   6   1  121.19   18.50 
   1   6  -1   96.19   14.90 
  -1   6   1  110.29   17.70 
   1   6  -1  110.79   14.00 
  -1   6   1  130.19   15.90 
  -1   6   1  110.59   14.10 
   1   6  -1   92.49   13.20 
   1   6  -1  115.69   15.80 
  -1   6   1  127.79   16.10 
   0  -6   1  687.63   34.10 
   0  -6  -1  751.82   34.10 
   0  -6   1  698.63   37.70 
   0  -6  -1  720.23   33.90 
   0  -6   1  744.43   37.30 
   0  -6  -1  739.63   42.70 
   0  -6   1  663.93   36.60 
   0  -6   1  662.33   36.80 
   0  -6  -1  690.73   35.20 
   0  -6  -1  739.93   38.00 
   0  -6  -1  679.63   31.00 
   0  -6   1  770.02   42.20 
   0  -6   1  684.13   30.00 
   0  -6   1  734.53   38.30 
   0  -6  -1  729.33   34.10 
   0  -6  -1  688.63   35.10 
   0  -6  -1  721.03   37.50 
   0  -6  -1  733.13   40.60 
   0  -6   1  640.24   37.10 
   0  -6   1  665.33   30.20 
   0  -6   1  695.23   41.30 
   0  -6   1  642.04   34.50 
   0  -6  -1  692.53   35.20 
   0  -6   1  725.63   49.99 
   0  -6   1  717.03   37.80 
   0  -6  -1  684.43   32.60 
   0  -6   1  733.13   35.00 
   0  -6   1  669.73   43.60 
   0  -6  -1  733.23   43.30 
   0  -6   1  711.93   34.90 
   0  -6  -1  760.72   43.30 
   0  -6  -1  655.33   49.90 
   0  -6  -1  718.83   36.70 
   0  -6   1  811.22   46.60 
   0  -6  -1  701.83   37.00 
   0  -6   1  718.73   32.30 
   0   6  -1  737.13   38.00 
   0   6  -1  721.73   41.10 
   0   6  -1  764.72   43.10 
   0   6   1  766.82   45.60 
   0   6  -1  728.33   44.20 
   0   6   1  691.23   44.50 
   0   6   1  703.33   42.30 
   0   6  -1  671.53   38.90 
   0   6   1  764.32   41.10 
   0   6   1  715.93   44.80 
   0   6  -1  665.53   38.30 
   0   6   1  668.83   40.10 
   0   6  -1  618.84   38.80 
   0   6  -1  710.53   38.30 
   0   6  -1  683.03   42.40 
   0   6   1  682.53   38.20 
   0   6  -1  699.73   40.60 
   0   6   1  718.53   39.90 
   0   6   1  684.93   39.80 
   0   6   1  646.14   40.10 
   0   6  -1  720.33   39.70 
   0   6   1  716.93   39.90 
   0   6   1  706.43   44.70 
   0   6  -1  672.43   39.60 
   0   6  -1  694.13   38.30 
   0   6  -1  685.73   38.80 
   0   6   1  700.93   41.50 
   0   6  -1  725.33   41.80 
   0   6  -1  758.42   41.60 
   0   6   1  699.33   39.60 
   1  -6   1   35.10    6.10 
   1  -6   1   56.09    5.30 
   1  -6   1   44.90   11.90 
  -1  -6  -1   51.19    8.10 
   1  -6   1   47.20    6.90 
  -1  -6  -1   55.09    9.20 
  -1  -6  -1   44.90    5.00 
  -1  -6  -1   45.30   10.50 
  -1  -6  -1   46.20    8.00 
   1  -6   1   46.50    6.20 
   1  -6   1   45.40    8.90 
   1  -6   1   78.29   15.40 
   1  -6   1   55.89    4.70 
  -1  -6  -1   37.20   14.00 
  -1  -6  -1   44.40    6.60 
   1  -6   1   42.40    7.60 
   1  -6   1   51.59    8.50 
  -1  -6  -1   29.40    9.50 
   1  -6   1   52.19    7.70 
  -1  -6  -1   58.99   14.10 
   1  -6   1   42.10   13.00 
  -1  -6  -1   56.49    8.40 
  -1  -6  -1   43.80    8.50 
  -1  -6  -1   58.69    9.00 
  -1  -6  -1   48.60    5.70 
  -1  -6  -1   46.80   13.90 
   1  -6   1   49.60    9.80 
   1  -6   1   48.90   10.10 
  -1  -6  -1   44.20    4.40 
   1  -6   1   47.80   10.70 
   1  -6   1   45.80    9.60 
   1  -6   1   47.10    8.60 
  -1  -6  -1   36.10    7.50 
   1  -6   1   39.20   10.20 
   1   6   1   42.60   11.30 
  -1   6  -1   41.60   10.70 
   1   6   1   46.20   10.70 
  -1   6  -1   40.70   10.20 
  -1   6  -1   42.80   10.60 
  -1   6  -1   37.10    8.60 
   1   6   1   42.30   10.10 
   1   6   1   35.90   12.00 
   1   6   1   22.20    8.80 
   1   6   1   48.20   11.10 
   1   6   1   45.20    8.90 
  -1   6  -1   47.60    8.10 
  -1   6  -1   45.40   11.40 
  -1   6  -1   33.20    8.60 
   1   6   1   61.19   11.70 
  -1   6  -1   50.49   12.60 
  -1   6  -1   40.90   10.10 
   1   6   1   38.30   10.80 
  -1   6  -1   42.40   10.30 
  -1   6  -1   42.40    8.40 
   1   6   1   52.69   11.40 
  -1   6  -1   61.59   10.20 
  -1   6  -1   37.70    9.60 
   1   6   1   54.49   12.60 
  -1   6  -1   44.10   11.60 
  -1   6  -1   46.30   11.30 
  -1   6  -1   64.69   12.00 
   2  -6   1  236.68   19.50 
  -2  -6  -1  227.28   12.90 
   2  -6   1  249.18   18.50 
   2  -6   1  237.48   16.00 
   2  -6   1  233.98   17.00 
  -2  -6  -1  246.78   29.90 
  -2  -6  -1  288.97   26.30 
   2  -6   1  226.98   19.10 
   2  -6   1  246.18   12.90 
  -2  -6  -1  227.48   15.20 
   2  -6   1  228.88   13.60 
  -2  -6  -1  222.38   16.10 
   2  -6   1  253.37   28.40 
   2  -6   1  254.47   15.40 
  -2  -6  -1  267.67   18.70 
   2  -6   1  261.57   16.60 
   2  -6   1  254.97   20.20 
  -2  -6  -1  235.48   16.70 
   2  -6   1  273.37   29.30 
   2  -6   1  254.87   26.70 
   2  -6   1  258.17   19.30 
  -2  -6  -1  240.58   17.20 
   2  -6   1  259.57   18.60 
  -2  -6  -1  317.07   31.70 
   2  -6   1  245.18   13.20 
  -2  -6  -1  220.08   27.20 
   2  -6   1  240.28   27.40 
   2   6   1  211.68   17.50 
   2   6   1  257.77   25.80 
   2   6   1  221.58   26.20 
   2   6   1  244.98   24.90 
  -2   6  -1  252.37   25.60 
   2   6   1  274.57   21.40 
  -2   6  -1  287.17   29.70 
  -2   6  -1  254.77   15.30 
  -2   6  -1  204.28   24.00 
   2   6   1  233.38   23.00 
   2   6   1  246.98   18.50 
  -2   6  -1  260.87   27.70 
  -2   6  -1  256.07   29.50 
   2   6   1  230.98   24.80 
  -2   6  -1  256.77   27.50 
  -2   6  -1  245.38   17.80 
  -2   6  -1  241.98   25.00 
  -2   6  -1  232.88   24.60 
   2   6   1  240.78   25.30 
  -2   6  -1  245.08   17.70 
  -2   6  -1  257.97   25.30 
  -3  -6  -1    3.80    8.10 
  -3  -6  -1    1.00    2.80 
   3  -6   1    0.30    4.00 
   3  -6   1    0.60    6.70 
  -3  -6  -1   -1.00    5.40 
   3  -6   1   -8.10    4.10 
  -3  -6  -1    6.00    5.10 
  -3  -6  -1    1.90    5.10 
  -3  -6  -1  -11.60   11.50 
   3  -6   1    0.80    5.00 
  -3  -6  -1    4.80    9.90 
   3  -6   1   -9.00    4.40 
   3  -6   1    1.50    5.70 
   3  -6   1   10.70    9.00 
   3  -6   1   13.80    8.90 
   3  -6   1    6.90    3.70 
   3  -6   1   -6.50    4.60 
  -3  -6  -1   10.30    8.20 
   3  -6   1    7.70    5.60 
  -3  -6  -1    1.80    2.70 
   3  -6   1    1.30    3.60 
   3  -6   1   -3.70    4.20 
  -3   6  -1    0.10    5.20 
  -3   6  -1    1.40    6.40 
  -3   6  -1   -3.70    5.10 
  -3   6  -1   -3.40    5.00 
   3   6   1   16.30    6.90 
   3   6   1   -4.60    6.20 
  -3   6  -1    0.60    5.30 
  -3   6  -1    1.70    6.90 
  -3   6  -1   -1.60    4.30 
  -3   6  -1   -0.80    3.50 
   3   6   1    2.90    7.10 
  -3   6  -1    1.60    5.20 
   3   6   1   -2.20    3.80 
  -3   6  -1   -1.20    6.10 
   3   6   1    9.70    8.30 
   3   6   1    1.20    5.20 
   3   6   1   -3.90    3.00 
  -3   6  -1    0.80    2.00 
  -3   6  -1    2.10    5.50 
   3   6   1   -2.70    5.70 
   4  -6   1   13.50    9.80 
   4  -6   1   -7.10    4.80 
  -4  -6  -1    5.20   10.50 
   4  -6   1    3.70    5.60 
   4  -6   1   10.70    9.00 
   4  -6   1    8.50    7.40 
  -4  -6  -1   10.80   15.10 
   4  -6   1    8.40    6.70 
   4  -6   1   12.30    5.30 
  -4  -6  -1    9.90    5.20 
  -4  -6  -1   16.70    6.70 
  -4  -6  -1   12.10    5.30 
   4  -6   1   12.90    7.20 
   4  -6   1    9.40    8.00 
  -4  -6  -1   20.70   12.10 
   4  -6   1    4.30    5.80 
  -4  -6  -1    1.40    6.00 
   4  -6   1    7.80    5.00 
   4  -6   1   27.90   11.40 
  -4   6  -1   20.50   10.80 
  -4   6  -1   19.60    9.20 
  -4   6  -1   23.40   10.20 
   4   6   1    7.60    9.60 
  -4   6  -1   12.30    9.70 
  -4   6  -1   13.30    4.40 
  -4   6  -1   -4.40    6.50 
   4   6   1   10.50    8.30 
   4   6   1    9.00    7.70 
   4   6   1   16.50    6.30 
  -4   6  -1    5.80    6.60 
  -4   6  -1   12.40    9.20 
  -4   6  -1    7.30    7.60 
  -4   6  -1   18.00    7.70 
  -4   6  -1    6.20    8.50 
   4   6   1   19.10    6.30 
   4   6   1   13.10    7.60 
   4   6   1    3.40    7.00 
  -5  -6  -1   92.99   14.70 
   5  -6   1  122.69   17.60 
   5  -6   1  145.19   15.10 
   5  -6   1   91.49   17.30 
   5  -6   1   91.89   16.50 
  -5  -6  -1   83.99   15.00 
   5  -6   1  130.19   19.90 
  -5  -6  -1  107.19   13.70 
  -5  -6  -1   93.59   23.60 
  -5  -6  -1   96.99   18.60 
   5  -6   1   81.19   16.10 
   5  -6   1  104.69   19.80 
   5  -6   1   97.99   16.50 
   5  -6   1  140.69   19.80 
   5  -6   1  100.59   13.30 
   5  -6   1  106.59   20.90 
  -5  -6  -1   77.99   21.00 
  -5   6  -1   81.89   17.50 
  -5   6  -1  122.79   14.40 
  -5   6  -1  136.89   21.90 
  -5   6  -1   96.69   17.80 
  -5   6  -1   93.79   20.00 
   5   6   1   88.89   18.30 
  -5   6  -1   51.89   14.60 
  -5   6  -1  110.99   20.20 
   5   6   1   86.29   11.80 
   5   6   1  124.89   18.00 
  -5   6  -1   74.89   18.60 
  -5   6  -1   75.69   15.50 
  -5   6  -1  102.29   19.10 
   5   6   1   99.69   17.50 
   5   6   1  102.59   21.60 
   5   6   1   80.29   18.80 
  -5   6  -1  118.19   22.10 
   6  -6   1  459.65   34.90 
  -6  -6  -1  455.55   48.50 
   6  -6   1  528.15   31.80 
   6  -6   1  535.65   36.40 
   6  -6   1  577.34   39.60 
  -6  -6  -1  467.25   31.30 
   6  -6   1  519.35   36.30 
   6  -6   1  594.04   44.40 
  -6  -6  -1  443.06   34.20 
  -6  -6  -1  487.25   37.40 
  -6  -6  -1  541.85   35.60 
   6  -6   1  571.94   39.00 
   6  -6   1  502.65   38.40 
   6  -6   1  430.66   34.90 
   6  -6   1  522.65   41.10 
  -6   6  -1  430.26   47.20 
   6   6   1  426.86   33.00 
  -6   6  -1  553.64   41.40 
  -6   6  -1  430.96   42.80 
   6   6   1  486.35   47.90 
  -6   6  -1  436.96   35.40 
  -6   6  -1  533.35   51.59 
   6   6   1  431.66   34.70 
  -6   6  -1  491.55   31.70 
  -6   6  -1  462.35   45.40 
  -6   6  -1  484.05   40.60 
  -6   6  -1  477.95   45.20 
   6   6   1  431.36   46.90 
  -6   6  -1  480.45   46.60 
   7  -6   1    3.10   10.80 
   7  -6   1   10.60   10.30 
   7  -6   1   14.30   11.60 
   7  -6   1    2.60    8.50 
   7  -6   1   -0.30    8.20 
  -7  -6  -1   -9.50    7.90 
  -7  -6  -1   -1.50    7.00 
   7  -6   1    2.00    9.00 
  -7  -6  -1    3.80    8.10 
   7  -6   1    2.50    8.70 
   7  -6   1   18.90   10.00 
  -7  -6  -1    1.90    7.70 
  -7  -6  -1   -5.00    5.70 
   7  -6   1   -3.20    8.50 
   7  -6   1    4.30    8.60 
  -7   6  -1    3.70    9.10 
   7   6   1   11.10   13.90 
  -7   6  -1    4.80   10.30 
  -7   6  -1    0.90   10.50 
   7   6   1    9.90    8.40 
  -7   6  -1    8.80    8.00 
  -7   6  -1   13.90   10.10 
   7   6   1   19.70   11.00 
  -7   6  -1    7.00   11.30 
  -7   6  -1    9.50   13.30 
  -7   6  -1   -8.20   10.50 
   7   6   1    1.30   10.80 
  -7   6  -1   -7.50    7.70 
  -7   6  -1   -0.60    9.50 
   8  -6   1  510.65   40.80 
   8  -6   1  507.55   49.40 
  -8  -6  -1  502.15   39.00 
  -8  -6  -1  366.66   49.10 
   8  -6   1  483.65   39.90 
   8  -6   1  578.84   42.80 
   8  -6   1  544.15   42.10 
   8  -6   1  487.05   40.60 
   8  -6   1  409.26   40.50 
  -8  -6  -1  494.85   37.50 
  -8  -6  -1  545.65   40.50 
   8  -6   1  492.85   41.20 
  -8  -6  -1  512.95   48.30 
   8  -6   1  475.95   49.50 
   8  -6   1  510.95   51.29 
  -8   6  -1  471.75   51.29 
   8   6   1  490.85   35.90 
   8   6   1  466.25   56.39 
  -8   6  -1  444.36   49.80 
  -8   6  -1  561.84   53.39 
  -8   6  -1  644.14   59.09 
  -8   6  -1  452.75   49.00 
  -8   6  -1  514.35   37.00 
  -8   6  -1  499.35   47.70 
  -8   6  -1  542.05   56.99 
   8   6   1  411.86   42.50 
  -8   6  -1  576.34   60.19 
  -8   6  -1  434.06   49.40 
   9  -6   1   -1.80   14.40 
   9  -6   1    2.40   11.40 
   9  -6   1    8.90   11.50 
   9  -6   1    1.10   12.10 
   9  -6   1    1.00   10.30 
  -9  -6  -1   -2.10   11.90 
   9  -6   1    6.40   13.40 
   9  -6   1    0.60   12.70 
  -9  -6  -1    5.10   10.50 
  -9  -6  -1    7.30   12.00 
  -9  -6  -1   -4.30   13.60 
   9  -6   1    1.20   12.70 
   9  -6   1    2.90   11.50 
   9  -6   1    2.30    9.90 
  -9  -6  -1    1.20    9.00 
   9   6   1   18.40   12.40 
  -9   6  -1   -3.90   13.40 
  -9   6  -1    7.50   15.50 
   9   6   1   -5.90   14.60 
  -9   6  -1   -5.20   14.00 
  -9   6  -1   25.80   15.20 
  -9   6  -1   -6.30   13.70 
  -9   6  -1    5.20   13.10 
  -9   6  -1    5.90   13.50 
  -9   6  -1   -8.70   13.60 
  -9   6  -1    0.50   12.70 
   9   6   1    1.60   17.30 
  -9   6  -1    3.70   12.70 
   8  -7  -1    3.00   11.70 
  -8  -7   1    0.60    8.70 
  -8  -7   1   -6.50   10.40 
   8  -7  -1    8.00   12.50 
   8  -7  -1   11.80   11.70 
   8  -7  -1   -6.20    8.80 
   8  -7  -1  -13.80   11.00 
   8  -7  -1  -17.20   10.80 
  -8  -7   1    3.00    9.00 
   8  -7  -1   -4.50    8.40 
   8  -7  -1   -2.60   12.80 
  -8  -7   1  -10.00    8.30 
   8  -7  -1   -0.60   11.00 
   8  -7  -1   -4.80    8.20 
  -8   7   1   -7.10   11.50 
  -8   7   1  -10.30    9.20 
  -8   7   1    0.30   11.10 
   8   7  -1    9.00   14.20 
  -8   7   1   -6.60   11.60 
  -8   7   1   -1.10    9.80 
  -8   7   1    7.50   13.40 
  -8   7   1   -5.00   14.10 
   8   7  -1   13.80   18.70 
  -8   7   1  -10.10   10.00 
   8   7  -1    2.00   10.50 
   7  -7  -1  468.35   37.30 
  -7  -7   1  429.86   40.80 
   7  -7  -1  469.45   45.30 
   7  -7  -1  445.06   42.50 
   7  -7  -1  401.56   42.30 
  -7  -7   1  415.96   38.60 
   7  -7  -1  449.26   49.80 
   7  -7  -1  466.85   38.50 
  -7  -7   1  473.55   42.50 
   7  -7  -1  402.36   39.50 
   7  -7  -1  350.56   41.70 
   7  -7  -1  475.65   42.70 
  -7  -7   1  305.17   34.10 
   7  -7  -1  436.06   35.20 
  -7   7   1  428.76   47.00 
  -7   7   1  373.06   44.00 
  -7   7   1  503.05   48.90 
  -7   7   1  466.15   51.29 
  -7   7   1  463.35   50.69 
  -7   7   1  464.05   49.40 
  -7   7   1  405.16   46.80 
   7   7  -1  410.26   46.50 
   7   7  -1  407.96   40.60 
  -7   7   1  443.46   43.50 
   7   7  -1  302.87   41.30 
  -7   7   1  397.46   48.20 
   7   7  -1  384.16   31.50 
   6  -7  -1   46.10   16.30 
   6  -7  -1   16.40   10.80 
   6  -7  -1   11.70    9.70 
   6  -7  -1    2.90    8.20 
  -6  -7   1   19.10   12.10 
   6  -7  -1   16.80    9.90 
   6  -7  -1    6.20   11.90 
   6  -7  -1   30.80   12.40 
   6  -7  -1   16.50    9.70 
   6  -7  -1   42.80   15.10 
  -6  -7   1    5.20   15.40 
  -6  -7   1   35.80   12.20 
  -6  -7   1   30.30   11.20 
   6  -7  -1   25.30   10.50 
  -6  -7   1   34.10   11.40 
  -6   7   1   18.00   11.80 
  -6   7   1   13.50   13.30 
  -6   7   1   29.70   13.50 
   6   7  -1   13.80    9.30 
  -6   7   1   29.40   12.60 
  -6   7   1   33.50   16.10 
  -6   7   1   13.90   12.40 
  -6   7   1   52.99   19.20 
   6   7  -1   17.40   12.80 
   6   7  -1   19.90   12.90 
  -6   7   1   42.60   17.00 
   6   7  -1   10.00   10.30 
  -6   7   1   20.90   12.70 
  -5  -7   1 1628.24   84.69 
   5  -7  -1 1513.45   88.79 
   5  -7  -1 1604.54   92.39 
   5  -7  -1 1648.73   80.79 
  -5  -7   1 1594.64   92.09 
   5  -7  -1 1557.64   80.49 
  -5  -7   1 1555.34   80.09 
  -5  -7   1 1502.55   81.69 
   5  -7  -1 1672.43   80.19 
   5  -7  -1 1629.84   82.79 
   5  -7  -1 1568.54   84.29 
  -5  -7   1 1537.05   85.99 
   5  -7  -1 1553.14   81.99 
   5  -7  -1 1778.22   83.29 
  -5  -7   1 1562.74   79.09 
   5  -7  -1 1541.85   87.69 
   5  -7  -1 1600.74   83.79 
   5   7  -1 1601.64   81.39 
  -5   7   1 1531.25   88.49 
  -5   7   1 1720.23   94.59 
  -5   7   1 1638.54   92.49 
  -5   7   1 1695.93   92.99 
  -5   7   1 1708.43   88.89 
   5   7  -1 1469.25   82.19 
   5   7  -1 1668.13   92.09 
  -5   7   1 1595.94   87.89 
  -5   7   1 1745.63   92.39 
   5   7  -1 1561.04   85.39 
  -5   7   1 1625.24   89.39 
  -5   7   1 1586.34   84.59 
   4  -7  -1   75.69   15.00 
  -4  -7   1   55.89   19.40 
  -4  -7   1  101.49   14.80 
   4  -7  -1  104.59   19.20 
   4  -7  -1   88.09   15.70 
   4  -7  -1   72.99   13.30 
  -4  -7   1   94.69   15.10 
   4  -7  -1   82.99   17.90 
   4  -7  -1  130.39   23.30 
  -4  -7   1   75.29   16.70 
   4  -7  -1  109.69   17.70 
   4  -7  -1  104.79   17.70 
   4  -7  -1  125.89   16.60 
   4  -7  -1   99.59   14.60 
   4  -7  -1  150.48   25.00 
  -4  -7   1   73.59   17.10 
  -4  -7   1  111.29   17.00 
  -4   7   1  104.99   19.00 
  -4   7   1   54.09   17.00 
   4   7  -1   88.19   11.90 
   4   7  -1   69.69   14.80 
  -4   7   1   75.69   19.10 
  -4   7   1  118.69   21.40 
  -4   7   1   85.19   18.40 
   4   7  -1   78.69   18.80 
   4   7  -1   71.39   13.40 
  -4   7   1  113.39   21.70 
   4   7  -1   72.09   15.90 
  -4   7   1   84.89   16.00 
  -4   7   1  115.59   22.00 
  -4   7   1   93.19   21.50 
   4   7  -1   72.09   15.50 
  -4   7   1   87.69   16.70 
   4   7  -1   79.59   14.70 
   3  -7  -1  961.30   46.90 
   3  -7  -1  931.71   49.60 
  -3  -7   1  859.61   47.40 
   3  -7  -1  903.11   50.19 
  -3  -7   1  824.92   45.20 
   3  -7  -1  912.21   59.19 
  -3  -7   1  797.52   47.80 
   3  -7  -1  907.41   48.10 
   3  -7  -1  880.21   57.99 
   3  -7  -1  848.32   50.69 
  -3  -7   1  806.22   42.90 
  -3  -7   1  884.81   59.69 
   3  -7  -1  872.61   49.70 
   3  -7  -1  896.81   50.69 
  -3  -7   1  859.21   50.49 
   3  -7  -1  913.81   54.79 
   3  -7  -1  897.31   56.69 
  -3  -7   1  839.42   53.39 
   3  -7  -1  924.01   46.70 
   3   7  -1  806.92   49.70 
  -3   7   1  919.61   51.99 
   3   7  -1  835.72   51.99 
  -3   7   1  935.81   46.90 
   3   7  -1  863.21   50.49 
  -3   7   1  897.11   50.49 
  -3   7   1  870.41   58.29 
   3   7  -1  875.31   56.19 
   3   7  -1  877.41   49.30 
   3   7  -1 1104.29   55.19 
  -3   7   1  917.01   59.79 
  -3   7   1  904.71   55.69 
  -3   7   1  930.31   57.39 
  -3   7   1  981.90   59.99 
  -3   7   1  892.81   53.69 
  -3   7   1  851.31   54.39 
   3   7  -1  872.41   50.09 
   3   7  -1  812.42   44.80 
  -3   7   1  869.11   53.49 
   2  -7  -1    1.90    7.10 
  -2  -7   1    1.90    6.00 
   2  -7  -1    5.30    5.00 
  -2  -7   1   -1.70    3.60 
  -2  -7   1    0.00    4.20 
  -2  -7   1   -3.80    3.40 
  -2  -7   1    5.80    6.00 
  -2  -7   1   -2.60    7.30 
  -2  -7   1    7.10   11.30 
   2  -7  -1    2.50    7.10 
  -2  -7   1   10.40   10.20 
  -2  -7   1    3.30    3.90 
   2  -7  -1    1.10    6.80 
  -2  -7   1   -4.90    3.80 
   2  -7  -1   -1.20    3.50 
  -2  -7   1    0.00    4.70 
  -2  -7   1    3.70    6.80 
  -2  -7   1    3.30    5.00 
  -2  -7   1    2.20    5.10 
   2  -7  -1    6.00    6.20 
   2  -7  -1    6.40    5.90 
  -2  -7   1   15.30    8.30 
   2  -7  -1   -0.30    4.30 
  -2  -7   1    3.50    5.30 
   2  -7  -1    1.40    5.00 
   2  -7  -1    0.00    6.00 
   2  -7  -1   -3.60    2.30 
   2  -7  -1   -0.10    5.60 
   2  -7  -1   -2.00    6.60 
   2  -7  -1    8.20    9.60 
  -2   7   1   -2.10    4.90 
  -2   7   1    0.40    6.50 
  -2   7   1    5.00    9.60 
  -2   7   1    2.50    7.50 
   2   7  -1   -3.70    4.90 
  -2   7   1    9.10    8.30 
  -2   7   1    6.90    8.00 
   2   7  -1   14.30    8.90 
  -2   7   1    3.80    4.80 
  -2   7   1   -7.10    7.20 
   2   7  -1    5.70    6.20 
  -2   7   1    3.10    6.00 
   2   7  -1   -1.50    4.70 
   2   7  -1   -1.20    5.70 
   2   7  -1    7.20    6.80 
  -2   7   1   -3.40    6.40 
  -2   7   1   -0.20    6.50 
  -2   7   1    0.20    4.50 
  -2   7   1    2.80    5.90 
   2   7  -1    0.50    6.30 
   2   7  -1   -1.20    4.30 
  -1  -7   1  266.47   29.30 
  -1  -7   1  257.47   16.70 
  -1  -7   1  287.17   21.50 
  -1  -7   1  258.17   19.60 
   1  -7  -1  292.07   29.40 
  -1  -7   1  260.97   30.70 
  -1  -7   1  268.57   21.60 
   1  -7  -1  327.27   30.90 
   1  -7  -1  306.17   22.60 
  -1  -7   1  306.67   40.00 
  -1  -7   1  287.27   29.90 
   1  -7  -1  278.67   17.10 
  -1  -7   1  267.07   19.20 
  -1  -7   1  262.47   20.10 
  -1  -7   1  317.27   29.30 
  -1  -7   1  276.47   29.80 
  -1  -7   1  269.37   16.50 
   1  -7  -1  256.87   24.10 
  -1  -7   1  308.77   21.30 
  -1  -7   1  290.87   19.50 
   1  -7  -1  291.17   20.20 
   1  -7  -1  252.37   28.80 
   1  -7  -1  283.07   15.70 
  -1  -7   1  261.37   19.40 
  -1  -7   1  261.47   15.40 
   1  -7  -1  301.17   18.80 
  -1  -7   1  320.97   34.50 
   1  -7  -1  240.58   18.40 
   1  -7  -1  286.17   16.50 
   1  -7  -1  265.27   20.70 
   1  -7  -1  248.18   35.90 
  -1  -7   1  258.27   25.70 
  -1  -7   1  277.67   24.90 
  -1  -7   1  274.77   19.80 
   1  -7  -1  245.48   23.70 
   1   7  -1  273.87   22.00 
   1   7  -1  289.97   29.00 
  -1   7   1  241.98   24.90 
   1   7  -1  248.08   25.80 
  -1   7   1  258.77   26.20 
  -1   7   1  331.77   33.20 
  -1   7   1  257.77   20.60 
  -1   7   1  246.58   29.80 
   1   7  -1  259.27   24.60 
   1   7  -1  308.37   31.30 
   1   7  -1  297.07   22.80 
   1   7  -1  367.06   34.20 
   1   7  -1  250.97   20.20 
   1   7  -1  238.18   24.50 
   1   7  -1  220.38   24.00 
  -1   7   1  248.58   25.40 
  -1   7   1  263.47   32.10 
   1   7  -1  298.97   29.90 
  -1   7   1  313.27   29.50 
  -1   7   1  249.28   26.90 
  -1   7   1  317.67   33.30 
  -1   7   1  263.97   31.00 
  -1   7   1  287.37   23.10 
   1   7  -1  258.47   26.80 
  -1   7   1  310.57   28.80 
   1   7  -1  331.17   24.20 
   1   7  -1  260.67   22.00 
   0  -7   1   -2.40    4.00 
   0  -7  -1    4.80    6.20 
   0  -7  -1    5.20    8.00 
   0  -7   1    8.40    5.60 
   0  -7  -1   -0.80    3.20 
   0  -7  -1    5.90    3.30 
   0  -7   1    0.90    2.50 
   0  -7  -1    8.40    5.50 
   0  -7   1    8.60    6.60 
   0  -7   1    5.20    3.90 
   0  -7   1    2.60    3.60 
   0  -7  -1   -4.20    4.40 
   0  -7  -1    0.80    5.70 
   0  -7   1    3.30    4.50 
   0  -7   1   12.80    7.70 
   0  -7  -1    4.20    7.50 
   0  -7   1    8.60    8.50 
   0  -7  -1   -2.20    4.20 
   0  -7  -1    4.80    4.40 
   0  -7  -1   15.70   13.80 
   0  -7   1    5.80    7.90 
   0  -7  -1    9.00    4.10 
   0  -7  -1    3.60    4.60 
   0  -7   1    0.20    4.70 
   0  -7   1    6.90    4.60 
   0  -7   1    1.80    4.10 
   0  -7   1    2.30    4.20 
   0  -7  -1    3.40    4.20 
   0  -7  -1    7.10    5.40 
   0  -7   1    2.50    5.10 
   0  -7   1    4.00   10.40 
   0  -7   1    2.60    3.60 
   0  -7   1    7.30    5.60 
   0   7  -1    3.80    5.50 
   0   7  -1    4.10    6.80 
   0   7   1    2.90    5.80 
   0   7   1    4.30    6.20 
   0   7   1   11.10    9.00 
   0   7  -1   -3.00    4.10 
   0   7  -1    9.80    5.90 
   0   7   1   10.30    7.20 
   0   7  -1   -9.10    6.00 
   0   7   1   -1.90    6.20 
   0   7   1    7.50    6.60 
   0   7  -1    0.10    7.80 
   0   7   1    2.90    8.00 
   0   7  -1   -5.30    4.50 
   0   7  -1    3.50    5.80 
   0   7  -1    5.40    6.60 
   0   7  -1   13.30    8.80 
   0   7   1   10.30    7.20 
   0   7  -1    6.30    8.40 
   0   7   1   -4.40    7.10 
   0   7   1   -2.20    5.20 
   0   7   1   -0.20    5.50 
   0   7   1    4.30    6.90 
   0   7  -1   11.40    7.00 
   0   7  -1   10.40    8.20 
   0   7  -1   -4.70    4.90 
   0   7   1    4.10    5.60 
   0   7  -1   14.60    7.50 
   1  -7   1 1498.25   77.79 
   1  -7   1 1664.93   72.29 
   1  -7   1 1548.55   69.39 
  -1  -7  -1 1551.24   72.19 
  -1  -7  -1 1519.55   82.29 
   1  -7   1 1569.14   69.79 
   1  -7   1 1520.65   75.29 
  -1  -7  -1 1695.93   82.89 
  -1  -7  -1 1525.25   69.79 
   1  -7   1 1560.24   70.89 
   1  -7   1 1663.33   74.69 
  -1  -7  -1 1576.04   71.49 
   1  -7   1 1650.03   74.09 
  -1  -7  -1 1571.24   82.49 
  -1  -7  -1 1499.45   73.59 
  -1  -7  -1 1703.33   80.09 
  -1  -7  -1 1398.66   90.79 
   1  -7   1 1473.65   75.69 
   1  -7   1 1535.55   83.19 
   1  -7   1 1635.74   71.29 
  -1  -7  -1 1521.35   72.59 
  -1  -7  -1 1515.75   84.09 
  -1  -7  -1 1497.75   72.39 
   1  -7   1 1455.95   71.99 
  -1  -7  -1 1554.74   68.49 
   1  -7   1 1506.65   84.49 
  -1  -7  -1 1560.24   74.59 
   1  -7   1 1694.73   77.09 
   1  -7   1 1591.34   81.79 
   1  -7   1 1558.84   88.59 
  -1  -7  -1 1561.84   72.69 
  -1  -7  -1 1674.53   72.49 
  -1  -7  -1 1577.54   73.69 
  -1   7  -1 1593.54   77.99 
  -1   7  -1 1574.04   79.29 
   1   7   1 1679.93   80.59 
  -1   7  -1 1609.84   79.19 
   1   7   1 1507.75   75.19 
  -1   7  -1 1572.54   84.39 
   1   7   1 1638.54   83.29 
  -1   7  -1 1550.34   75.69 
  -1   7  -1 1625.34   80.89 
   1   7   1 1640.24   81.19 
   1   7   1 1649.44   79.99 
  -1   7  -1 1612.04   78.49 
  -1   7  -1 1599.64   82.19 
   1   7   1 1615.14   80.29 
  -1   7  -1 1623.54   82.39 
   1   7   1 1583.34   79.29 
  -1   7  -1 1566.34   74.39 
   1   7   1 1631.14   84.39 
  -1   7  -1 1586.54   82.79 
  -1   7  -1 1544.65   72.69 
   1   7   1 1395.26   77.89 
  -1   7  -1 1623.14   77.09 
  -1   7  -1 1728.33   80.89 
   1   7   1 1624.44   79.69 
   2  -7   1  153.78   21.80 
   2  -7   1  169.98   25.30 
  -2  -7  -1  190.18   28.30 
   2  -7   1  173.48   25.80 
   2  -7   1  184.88   13.50 
  -2  -7  -1  181.88   22.90 
  -2  -7  -1  158.78   16.40 
   2  -7   1  164.08   17.90 
   2  -7   1  177.08   18.80 
   2  -7   1  203.98   22.30 
  -2  -7  -1  175.08   25.50 
   2  -7   1  145.79   18.60 
  -2  -7  -1  150.28   17.50 
  -2  -7  -1  157.88   13.30 
   2  -7   1  160.98   19.60 
  -2  -7  -1  157.98   17.80 
   2  -7   1  177.58   20.60 
   2  -7   1  166.58   15.60 
   2  -7   1  198.38   27.80 
   2  -7   1  140.79   16.00 
  -2  -7  -1  164.08   16.20 
   2  -7   1  149.59   11.70 
  -2  -7  -1  116.99   21.00 
  -2  -7  -1  181.18   16.70 
  -2   7  -1  143.29   20.70 
   2   7   1  161.98   21.90 
  -2   7  -1  153.58   21.70 
   2   7   1  164.08   23.60 
  -2   7  -1  182.18   26.70 
  -2   7  -1  188.68   23.00 
  -2   7  -1  160.08   23.10 
   2   7   1  163.58   22.30 
   2   7   1  140.89   19.80 
  -2   7  -1  201.48   13.50 
  -2   7  -1  111.89   20.30 
  -2   7  -1  138.09   23.10 
  -2   7  -1  164.98   17.20 
   2   7   1  178.48   21.60 
  -2   7  -1  215.18   24.80 
  -2   7  -1  192.58   23.70 
   2   7   1  152.38   20.60 
   2   7   1  164.68   20.60 
  -2   7  -1  202.38   16.90 
   2   7   1  155.58   17.40 
   3  -7   1 1206.28   59.29 
  -3  -7  -1 1170.38   61.19 
  -3  -7  -1 1123.49   63.39 
   3  -7   1 1159.28   66.69 
   3  -7   1 1145.59   59.19 
  -3  -7  -1 1209.28   67.89 
   3  -7   1 1225.98   68.59 
   3  -7   1 1155.58   61.99 
  -3  -7  -1 1139.09   72.89 
   3  -7   1 1098.79   59.99 
   3  -7   1 1091.09   56.39 
   3  -7   1 1167.98   54.09 
  -3  -7  -1 1051.59   67.09 
   3  -7   1 1118.49   61.79 
  -3  -7  -1 1153.78   57.59 
   3  -7   1 1197.78   67.19 
   3  -7   1 1156.48   69.79 
  -3  -7  -1 1116.59   57.99 
   3  -7   1 1188.28   60.79 
  -3  -7  -1 1117.99   58.69 
  -3   7  -1 1127.99   65.89 
  -3   7  -1 1219.08   66.49 
  -3   7  -1 1158.48   67.29 
  -3   7  -1 1151.28   55.79 
  -3   7  -1 1187.38   70.49 
   3   7   1 1165.08   65.69 
  -3   7  -1 1200.58   68.49 
   3   7   1 1040.70   63.69 
  -3   7  -1 1185.78   57.19 
  -3   7  -1 1168.28   63.49 
   3   7   1 1152.48   57.39 
   3   7   1 1124.09   57.29 
  -3   7  -1 1205.68   68.49 
  -3   7  -1 1165.38   64.99 
   3   7   1 1230.58   62.99 
   3   7   1 1045.60   63.29 
   3   7   1 1088.19   67.79 
  -3   7  -1 1190.78   65.99 
   3   7   1 1150.08   61.99 
  -4  -7  -1   65.29   12.30 
   4  -7   1   44.50   14.80 
  -4  -7  -1   38.80   11.40 
   4  -7   1   59.39   13.20 
  -4  -7  -1   25.90   13.00 
   4  -7   1   51.19   11.40 
   4  -7   1   55.79   13.60 
   4  -7   1   48.90   12.80 
  -4  -7  -1   72.59   19.20 
   4  -7   1   51.19   14.20 
   4  -7   1   53.49   12.30 
   4  -7   1   50.59   11.70 
  -4  -7  -1   56.39   16.30 
   4  -7   1   49.40   14.80 
  -4  -7  -1   42.90   20.10 
   4  -7   1   57.09   15.80 
   4  -7   1   43.30   14.00 
  -4   7  -1   36.80   11.80 
  -4   7  -1   35.00   11.90 
  -4   7  -1   25.30   13.10 
  -4   7  -1   34.60   12.60 
   4   7   1    8.70   10.80 
  -4   7  -1   40.50   14.20 
   4   7   1   51.49   12.80 
   4   7   1   30.90   10.90 
  -4   7  -1   27.30   13.40 
   4   7   1   55.29   14.90 
   4   7   1   36.40    8.80 
  -4   7  -1   39.30   13.90 
  -4   7  -1   41.10   13.30 
  -4   7  -1   43.40   15.30 
   4   7   1   19.50   10.50 
   5  -7   1  228.38   24.60 
   5  -7   1  211.88   31.60 
   5  -7   1  164.48   23.50 
  -5  -7  -1  218.68   34.80 
  -5  -7  -1  218.78   25.60 
   5  -7   1  157.48   21.40 
  -5  -7  -1  190.88   26.60 
   5  -7   1  205.98   26.60 
   5  -7   1  191.58   23.90 
  -5  -7  -1  193.88   30.50 
   5  -7   1  152.98   21.20 
   5  -7   1  182.78   24.10 
   5  -7   1  144.19   24.80 
  -5  -7  -1  179.18   21.90 
   5  -7   1  179.88   24.00 
  -5  -7  -1  118.89   25.90 
  -5   7  -1  163.68   27.20 
  -5   7  -1  158.68   26.30 
  -5   7  -1  206.58   29.80 
  -5   7  -1  151.18   27.50 
  -5   7  -1  171.98   28.50 
  -5   7  -1  179.38   27.30 
  -5   7  -1  174.58   25.90 
   5   7   1  213.18   30.60 
   5   7   1  214.18   24.90 
   5   7   1  151.38   22.60 
  -5   7  -1  177.18   27.20 
  -5   7  -1  173.48   24.80 
   5   7   1  159.28   25.00 
   5   7   1  164.38   28.10 
  -6  -7  -1   25.80   16.60 
  -6  -7  -1   17.40   10.90 
   6  -7   1   35.10   12.00 
  -6  -7  -1   27.70   19.70 
   6  -7   1   24.10   13.20 
   6  -7   1   41.20   12.70 
  -6  -7  -1   30.50   14.60 
   6  -7   1   24.40   10.60 
   6  -7   1   29.00   14.00 
   6  -7   1   40.20   12.90 
   6  -7   1   21.00   11.50 
  -6  -7  -1   22.50   10.80 
   6  -7   1   30.20   12.20 
   6  -7   1   37.20   13.60 
   6  -7   1   73.59   19.10 
   6   7   1   29.50   12.20 
   6   7   1   47.10   18.60 
  -6   7  -1   58.59   16.30 
  -6   7  -1    9.80   11.50 
  -6   7  -1   42.00   15.80 
  -6   7  -1   22.90   13.40 
  -6   7  -1   29.60   13.40 
   6   7   1   30.70   11.40 
  -6   7  -1   11.70   12.90 
  -6   7  -1   44.40   15.60 
   6   7   1   29.50   14.30 
  -6   7  -1   35.00   16.00 
  -6   7  -1   18.60   11.70 
   7  -7   1  360.16   36.90 
   7  -7   1  296.77   36.70 
   7  -7   1  341.17   35.80 
  -7  -7  -1  384.16   35.60 
   7  -7   1  316.87   35.60 
   7  -7   1  348.07   43.70 
   7  -7   1  302.07   36.00 
  -7  -7  -1  324.77   44.40 
   7  -7   1  306.37   34.50 
   7  -7   1  320.37   36.10 
   7  -7   1  299.07   38.00 
  -7  -7  -1  315.07   36.50 
  -7  -7  -1  368.86   35.70 
   7  -7   1  357.26   36.80 
  -7  -7  -1  300.27   34.40 
  -7   7  -1  401.06   46.20 
  -7   7  -1  351.56   37.80 
  -7   7  -1  334.97   44.30 
  -7   7  -1  383.76   43.40 
  -7   7  -1  375.06   43.90 
   7   7   1  255.67   38.50 
   7   7   1  363.06   35.20 
  -7   7  -1  386.96   45.70 
  -7   7  -1  273.57   40.00 
  -7   7  -1  373.96   42.70 
   7   7   1  319.97   36.20 
   7   7   1  311.17   41.20 
  -8  -7  -1   10.20   15.10 
  -8  -7  -1   31.60   13.40 
   8  -7   1    8.40   12.30 
   8  -7   1   33.40   18.00 
  -8  -7  -1   26.10   12.10 
  -8  -7  -1   15.00   16.40 
   8  -7   1   38.30   15.50 
   8  -7   1   15.40   11.00 
   8  -7   1   10.50   11.80 
   8  -7   1   37.70   16.40 
   8  -7   1   30.60   14.30 
  -8  -7  -1   -0.30    9.00 
   8  -7   1   22.30   14.90 
   8  -7   1   12.90   12.10 
   8  -7   1   -4.60   10.10 
  -8   7  -1   32.10   17.90 
  -8   7  -1   39.10   20.20 
  -8   7  -1   21.80   16.50 
  -8   7  -1   11.60   12.90 
  -8   7  -1   10.30   14.70 
   8   7   1    5.10   10.90 
  -8   7  -1   32.40   17.50 
  -8   7  -1   15.50   13.90 
   8   7   1   25.80   19.00 
   8   7   1    3.00   10.10 
  -8   7  -1   14.00   14.40 
   8   7   1   26.30   16.40 
  -7  -8   1   -0.80   11.70 
   7  -8  -1    2.20   13.80 
   7  -8  -1    5.70   10.50 
   7  -8  -1    9.10   11.90 
  -7  -8   1    2.50    9.60 
   7  -8  -1   11.80   11.90 
  -7  -8   1   44.70   21.30 
  -7  -8   1   17.70   11.80 
   7  -8  -1   18.90   13.30 
   7  -8  -1   33.40   15.90 
   7  -8  -1   10.20    9.90 
   7  -8  -1   -8.00   10.90 
   7  -8  -1   37.10   16.60 
  -7  -8   1   13.60   10.50 
   7   8  -1   26.00   16.50 
  -7   8   1   31.10   17.20 
   7   8  -1   15.90   10.50 
   7   8  -1   19.60   20.60 
  -7   8   1   -1.00   12.30 
  -7   8   1   -3.20   10.80 
  -7   8   1  -15.70    9.80 
  -7   8   1    7.80   15.30 
  -7   8   1   29.60   16.20 
  -7   8   1    8.40   13.00 
   7   8  -1    4.90   11.20 
  -6  -8   1    1.00   12.20 
   6  -8  -1   26.10   12.20 
   6  -8  -1   33.70   13.60 
   6  -8  -1   25.30   11.80 
  -6  -8   1   13.80    9.30 
   6  -8  -1   29.00   14.00 
  -6  -8   1    8.70   14.60 
   6  -8  -1   11.00   11.70 
  -6  -8   1   23.00   20.00 
  -6  -8   1    2.30    8.50 
   6  -8  -1   -1.20    8.50 
   6  -8  -1   36.70   14.70 
  -6  -8   1   19.80   10.90 
   6  -8  -1    8.60   11.20 
   6  -8  -1   32.50   16.30 
  -6   8   1   16.90   15.30 
  -6   8   1   31.10   15.30 
  -6   8   1   14.10   12.40 
   6   8  -1   11.60   12.10 
   6   8  -1    7.80    9.80 
  -6   8   1   18.60   14.70 
   6   8  -1   14.30   10.40 
  -6   8   1    8.40   11.50 
   6   8  -1   19.10   13.40 
  -6   8   1   20.10   15.90 
  -6   8   1   18.90   12.00 
   5  -8  -1   -0.20    9.20 
   5  -8  -1   17.90   10.40 
   5  -8  -1    1.40    8.10 
   5  -8  -1   18.80   14.20 
  -5  -8   1   -5.00   10.60 
   5  -8  -1    1.00    6.90 
  -5  -8   1   17.70    9.40 
   5  -8  -1    4.10   10.70 
  -5  -8   1   -0.10    7.00 
   5  -8  -1    3.30    8.30 
   5  -8  -1   17.10    9.20 
  -5  -8   1    8.90   11.50 
  -5  -8   1   26.80   18.60 
  -5  -8   1   11.20    9.30 
   5  -8  -1   -6.90    8.90 
   5  -8  -1   10.30    9.30 
  -5   8   1   -5.60    8.60 
  -5   8   1    8.40   12.70 
  -5   8   1   -5.50    7.40 
   5   8  -1    6.50   10.80 
  -5   8   1    1.70   11.10 
   5   8  -1    3.40    8.90 
  -5   8   1    3.50   10.70 
  -5   8   1    3.80    9.90 
  -5   8   1    8.10   11.00 
  -5   8   1   16.60   13.40 
   5   8  -1    3.60    9.00 
   5   8  -1    0.50    9.00 
  -5   8   1    0.30    9.20 
  -4  -8   1   61.69   14.30 
   4  -8  -1   62.69   14.60 
   4  -8  -1   56.99   14.30 
   4  -8  -1   18.80   12.10 
  -4  -8   1   45.60   17.40 
   4  -8  -1   57.89   19.30 
  -4  -8   1   24.40   10.30 
  -4  -8   1   56.19   14.80 
   4  -8  -1   40.40   10.80 
   4  -8  -1   68.19   14.20 
   4  -8  -1   53.99   13.80 
  -4  -8   1   37.70   15.10 
   4  -8  -1   44.90   13.10 
  -4  -8   1   31.60   13.10 
   4  -8  -1   14.60   12.50 
   4  -8  -1   64.29   17.20 
  -4  -8   1   83.09   23.70 
  -4  -8   1   49.50   11.00 
   4  -8  -1   51.79   13.70 
  -4   8   1   28.80   15.70 
  -4   8   1   69.29   19.80 
  -4   8   1   92.09   20.80 
  -4   8   1   32.00   15.50 
   4   8  -1   41.30   13.60 
  -4   8   1   56.19   16.60 
  -4   8   1   40.20   14.90 
  -4   8   1   54.79   15.00 
   4   8  -1   52.49   14.40 
  -4   8   1   45.10   15.30 
   4   8  -1   53.89   14.30 
   4   8  -1   61.19   19.00 
  -4   8   1   38.30   13.60 
  -3  -8   1   71.09   12.20 
   3  -8  -1   49.00   16.80 
   3  -8  -1   56.49   13.20 
  -3  -8   1   63.99   18.20 
  -3  -8   1   61.99   13.00 
   3  -8  -1   78.99   13.80 
  -3  -8   1   61.99   13.30 
  -3  -8   1   13.40   12.30 
   3  -8  -1   66.79   15.20 
   3  -8  -1   68.39   18.80 
  -3  -8   1   66.99   22.40 
   3  -8  -1   93.69   19.80 
   3  -8  -1   52.89   13.20 
  -3  -8   1   52.39   12.20 
   3  -8  -1   61.39   13.90 
  -3  -8   1   76.39   16.20 
  -3  -8   1   59.59   15.40 
  -3  -8   1   35.50   10.90 
  -3  -8   1   67.39   11.60 
   3  -8  -1   53.49   10.50 
   3  -8  -1   69.99   13.80 
  -3  -8   1   60.39   13.40 
   3  -8  -1   37.40   13.70 
  -3   8   1   48.90   15.00 
  -3   8   1   39.90   15.90 
   3   8  -1   43.10   11.40 
  -3   8   1   86.49   17.30 
   3   8  -1   49.20   12.60 
   3   8  -1   34.30    9.80 
  -3   8   1   73.59   19.90 
   3   8  -1   42.10   12.40 
  -3   8   1   42.00   15.50 
  -3   8   1   83.09   18.00 
  -3   8   1   47.40   16.90 
   3   8  -1   30.60   14.70 
   3   8  -1   55.39   13.70 
  -3   8   1   69.39   19.20 
   2  -8  -1   26.80    8.10 
  -2  -8   1   20.70   16.90 
  -2  -8   1   31.70    7.70 
  -2  -8   1   32.60   12.10 
  -2  -8   1   42.40   16.10 
   2  -8  -1   22.90    9.70 
   2  -8  -1   19.10   11.00 
  -2  -8   1   25.90    9.30 
   2  -8  -1   30.40    9.40 
  -2  -8   1   48.00    9.70 
  -2  -8   1   45.40   11.40 
   2  -8  -1   29.40   15.50 
   2  -8  -1   28.50    9.40 
  -2  -8   1   52.89   12.80 
  -2  -8   1   49.60   14.90 
  -2  -8   1   46.50   14.50 
  -2  -8   1   45.80   10.40 
  -2  -8   1   34.30   10.50 
  -2  -8   1   30.40    7.90 
   2  -8  -1   43.90   12.00 
   2  -8  -1   68.99   13.20 
   2  -8  -1   41.80   15.20 
   2  -8  -1   31.80   12.80 
  -2  -8   1   31.90    9.60 
  -2  -8   1   34.80    9.50 
  -2  -8   1   17.50    7.80 
   2  -8  -1   37.60   13.30 
  -2  -8   1   44.90   16.60 
   2  -8  -1   35.00    8.60 
  -2   8   1   13.20   10.50 
   2   8  -1   34.50   11.00 
   2   8  -1   41.20   12.00 
   2   8  -1   25.90    9.00 
  -2   8   1   21.50    9.20 
   2   8  -1   52.99   12.50 
  -2   8   1   44.00   13.30 
  -2   8   1   47.30   15.90 
  -2   8   1   35.30   15.10 
  -2   8   1   38.80   11.80 
   2   8  -1   44.40   11.80 
  -2   8   1   23.50    9.20 
   2   8  -1   40.40   12.90 
  -2   8   1   18.60   14.20 
   2   8  -1   13.90   11.00 
   2   8  -1   45.00   12.60 
  -2   8   1   65.59   15.50 
  -2   8   1   22.40   12.00 
  -2   8   1   12.30   10.20 
   1  -8  -1   25.50   11.60 
   1  -8  -1   18.10   13.80 
  -1  -8   1   12.90    6.80 
  -1  -8   1   29.10    8.60 
   1  -8  -1   21.70   11.00 
   1  -8  -1    4.70    7.10 
  -1  -8   1   17.50    9.30 
  -1  -8   1    9.40   10.90 
  -1  -8   1    7.80    8.80 
   1  -8  -1   13.90    7.30 
   1  -8  -1    7.50    8.80 
   1  -8  -1   11.00    9.10 
  -1  -8   1   17.20    7.50 
   1  -8  -1    6.20    6.70 
  -1  -8   1   11.50   10.80 
  -1  -8   1   22.40    8.20 
  -1  -8   1   22.40    7.80 
   1  -8  -1    6.30    5.50 
   1  -8  -1    7.70    6.80 
  -1  -8   1   36.00    9.10 
   1  -8  -1   10.20    4.90 
   1  -8  -1   12.40    6.60 
  -1  -8   1   23.00    9.30 
  -1  -8   1   14.30   10.30 
  -1  -8   1    7.40   12.80 
  -1  -8   1   18.00    7.80 
  -1  -8   1   13.70   10.00 
   1  -8  -1    6.60    7.10 
  -1  -8   1    4.70    7.80 
  -1  -8   1   17.60    7.00 
  -1   8   1   25.00    9.30 
  -1   8   1    2.60    6.30 
   1   8  -1    7.90    7.50 
  -1   8   1   11.70   10.40 
   1   8  -1    6.70    9.50 
  -1   8   1   12.60    6.80 
  -1   8   1   15.80   10.10 
   1   8  -1    5.90    7.50 
  -1   8   1    7.10    8.20 
  -1   8   1   10.40   11.00 
   1   8  -1   16.80    9.30 
  -1   8   1    7.10    8.40 
   1   8  -1    0.10    8.00 
   1   8  -1   13.00    8.90 
  -1   8   1   -6.10    6.30 
  -1   8   1    6.20   10.20 
  -1   8   1    0.80    7.80 
   1   8  -1   -1.30    6.30 
   1   8  -1   10.90    7.20 
  -1   8   1   -8.10    6.70 
   1   8  -1   19.80   11.10 
  -1   8   1    0.00    9.30 
   0  -8   1  415.16   28.30 
   0  -8   1  396.66   32.40 
   0  -8  -1  375.66   48.00 
   0  -8  -1  380.76   32.70 
   0  -8   1  435.46   26.90 
   0  -8   1  470.75   29.20 
   0  -8  -1  415.16   25.40 
   0  -8  -1  407.06   27.80 
   0  -8  -1  395.56   28.70 
   0  -8  -1  354.06   26.20 
   0  -8   1  410.46   41.50 
   0  -8   1  384.66   26.80 
   0  -8  -1  391.56   33.40 
   0  -8   1  426.36   25.70 
   0  -8  -1  423.66   32.60 
   0  -8   1  402.36   25.10 
   0  -8   1  500.85   38.90 
   0  -8   1  354.46   27.50 
   0  -8   1  394.66   46.80 
   0  -8   1  347.27   34.70 
   0  -8  -1  415.26   27.10 
   0  -8  -1  399.86   28.30 
   0  -8   1  439.06   28.80 
   0  -8  -1  418.96   39.90 
   0   8  -1  430.86   33.70 
   0   8  -1  414.46   30.40 
   0   8   1  458.35   33.80 
   0   8   1  600.14   43.50 
   0   8  -1  451.55   42.20 
   0   8  -1  461.95   29.80 
   0   8  -1  410.56   31.10 
   0   8   1  429.36   33.30 
   0   8   1  407.76   42.60 
   0   8   1  429.46   43.20 
   0   8   1  367.16   30.40 
   0   8  -1  463.15   37.10 
   0   8  -1  362.46   29.60 
   0   8   1  369.96   30.20 
   0   8  -1  405.56   29.30 
   0   8  -1  446.06   34.30 
   0   8   1  394.96   29.90 
   0   8  -1  363.56   39.20 
   0   8   1  429.86   30.60 
   0   8  -1  442.46   30.00 
   0   8   1  409.46   33.90 
   0   8   1  427.66   32.00 
   0   8  -1  416.16   30.80 
   0   8  -1  447.46   32.50 
   0   8  -1  382.16   27.70 
   0   8   1  442.66   34.90 
   1  -8   1   98.49   22.50 
   1  -8   1  164.38   23.70 
   1  -8   1  142.19   15.70 
  -1  -8  -1  111.89   20.80 
  -1  -8  -1  154.68   18.20 
  -1  -8  -1  215.18   21.80 
   1  -8   1  167.38   20.60 
  -1  -8  -1  158.28   33.80 
  -1  -8  -1  127.39   22.70 
   1  -8   1  151.18   19.00 
  -1  -8  -1  142.39   16.20 
   1  -8   1  157.78   15.80 
  -1  -8  -1  132.29   14.20 
  -1  -8  -1  130.09   15.50 
   1  -8   1  136.99   16.80 
   1  -8   1  104.19   16.20 
   1  -8   1  118.29   22.50 
  -1  -8  -1  134.09   21.00 
   1  -8   1  123.19   22.60 
  -1  -8  -1  123.69   24.40 
  -1  -8  -1   87.39   20.30 
   1  -8   1  140.39   16.60 
  -1  -8  -1  199.78   24.60 
   1  -8   1  168.68   22.20 
   1  -8   1  172.18   20.30 
  -1  -8  -1  163.48   16.40 
   1   8   1  103.09   18.70 
   1   8   1  147.29   19.00 
  -1   8  -1  164.98   18.20 
  -1   8  -1  130.59   18.10 
   1   8   1  115.59   18.80 
  -1   8  -1  123.79   21.90 
   1   8   1  152.78   21.80 
  -1   8  -1  118.39   19.90 
  -1   8  -1  150.48   25.30 
  -1   8  -1  149.59   23.00 
  -1   8  -1  153.98   22.00 
   1   8   1  119.59   20.10 
  -1   8  -1  160.48   24.90 
  -1   8  -1  144.19   21.20 
  -1   8  -1  148.69   19.40 
   1   8   1  158.58   22.40 
   1   8   1  145.99   24.00 
   1   8   1  167.98   22.40 
   1   8   1  150.68   22.20 
  -1   8  -1  150.18   21.20 
   2  -8   1  197.48   29.50 
   2  -8   1  214.68   30.60 
   2  -8   1  177.68   25.20 
   2  -8   1  178.88   21.70 
   2  -8   1  204.58   28.10 
  -2  -8  -1  166.28   17.30 
  -2  -8  -1  150.88   27.90 
  -2  -8  -1  193.18   19.60 
  -2  -8  -1  221.28   26.80 
  -2  -8  -1  119.19   22.90 
   2  -8   1  236.58   25.30 
  -2  -8  -1  287.87   32.10 
  -2  -8  -1  163.18   17.30 
   2  -8   1  220.68   23.80 
  -2  -8  -1  207.58   20.80 
   2  -8   1  170.28   18.80 
   2  -8   1  202.48   24.30 
  -2  -8  -1  175.98   20.20 
   2  -8   1  188.88   20.30 
  -2  -8  -1  182.08   17.40 
  -2  -8  -1  210.48   30.00 
  -2  -8  -1  194.28   34.30 
   2  -8   1  144.49   18.00 
  -2   8  -1  205.28   28.00 
  -2   8  -1  194.98   26.60 
  -2   8  -1  176.98   23.00 
   2   8   1  216.68   26.10 
   2   8   1  239.08   28.40 
   2   8   1  180.18   24.00 
  -2   8  -1  142.09   22.10 
  -2   8  -1  228.48   26.90 
   2   8   1  192.48   20.70 
   2   8   1  196.18   25.00 
  -2   8  -1  202.28   26.50 
   2   8   1  220.68   25.70 
  -2   8  -1  198.98   26.70 
  -2   8  -1  193.58   28.60 
  -2   8  -1  117.89   24.60 
   2   8   1  149.39   24.60 
   3  -8   1   31.30   13.30 
  -3  -8  -1    6.00   10.60 
   3  -8   1   10.70    9.80 
   3  -8   1   18.60    8.50 
  -3  -8  -1   25.10   17.00 
   3  -8   1   13.30    8.60 
   3  -8   1   16.20   10.60 
  -3  -8  -1   14.70   10.20 
  -3  -8  -1   -2.80    9.90 
  -3  -8  -1    6.50    7.70 
   3  -8   1    5.30    7.60 
   3  -8   1   13.10    8.80 
   3  -8   1    5.20    9.80 
   3  -8   1   13.60    7.60 
  -3  -8  -1   13.50    7.20 
   3  -8   1   23.20   14.70 
  -3   8  -1   13.30   11.20 
   3   8   1   23.20   10.80 
  -3   8  -1   -5.70    9.20 
   3   8   1   31.10   11.30 
  -3   8  -1    1.30   10.50 
  -3   8  -1   12.20   12.30 
   3   8   1   10.60   10.30 
  -3   8  -1    1.80    8.60 
   3   8   1    3.10    6.20 
   3   8   1    4.60   11.00 
  -3   8  -1    3.70    8.00 
   3   8   1   24.70   11.70 
  -3   8  -1   30.10   13.30 
  -3   8  -1   27.40   12.20 
  -3   8  -1   22.70   11.70 
   4  -8   1   -6.40    6.80 
   4  -8   1    4.00    9.40 
   4  -8   1    6.50   11.90 
  -4  -8  -1    2.70    6.50 
  -4  -8  -1    6.10   10.50 
   4  -8   1   12.00    9.40 
   4  -8   1    4.70    7.40 
  -4  -8  -1    1.20    9.90 
   4  -8   1   11.70    8.90 
  -4  -8  -1    1.40    7.90 
  -4  -8  -1  -19.00    7.40 
   4  -8   1    3.00    8.20 
   4  -8   1    0.80   10.20 
   4  -8   1   12.50    7.40 
  -4  -8  -1    9.70   16.70 
   4  -8   1    7.50    8.20 
   4   8   1   -2.10    6.40 
  -4   8  -1   12.40   10.60 
   4   8   1    1.50    8.40 
  -4   8  -1   -0.50    8.40 
  -4   8  -1  -12.10    7.60 
  -4   8  -1   -4.00    8.90 
  -4   8  -1   -0.60    7.70 
   4   8   1    4.80   10.70 
  -4   8  -1    0.50    9.20 
  -4   8  -1    0.10    9.00 
   4   8   1    5.20    8.70 
   4   8   1    4.80   10.40 
  -4   8  -1    8.90   10.50 
   4   8   1    7.90    6.40 
   5  -8   1   10.90    8.70 
  -5  -8  -1   21.30   19.20 
  -5  -8  -1   14.00   14.30 
   5  -8   1    4.90    8.40 
   5  -8   1    7.70    9.60 
  -5  -8  -1   15.20    8.80 
  -5  -8  -1   13.90    9.90 
   5  -8   1    1.90    9.30 
   5  -8   1   27.20   14.60 
   5  -8   1   11.00    9.30 
  -5  -8  -1    8.00    7.80 
  -5  -8  -1    7.50   16.50 
   5  -8   1    0.00    8.60 
   5  -8   1   16.30   11.90 
  -5  -8  -1    4.70   14.10 
   5  -8   1    1.30   11.80 
  -5   8  -1   15.30   10.20 
   5   8   1   16.10   13.00 
  -5   8  -1    6.50   10.20 
   5   8   1  -10.00   10.80 
  -5   8  -1   26.30   15.30 
   5   8   1    6.30    9.40 
  -5   8  -1   12.60   11.90 
  -5   8  -1   16.60   12.50 
   5   8   1   38.40   13.30 
  -5   8  -1    1.60    9.40 
  -5   8  -1   11.70   12.20 
  -5   8  -1   18.90   10.60 
   6  -8   1  242.08   32.30 
   6  -8   1  204.48   31.70 
  -6  -8  -1  145.29   32.50 
  -6  -8  -1  263.57   28.90 
   6  -8   1  185.68   25.60 
   6  -8   1  240.58   29.30 
  -6  -8  -1  206.38   26.50 
  -6  -8  -1  246.68   30.10 
  -6  -8  -1  198.18   29.80 
   6  -8   1  248.28   37.30 
   6  -8   1  237.38   32.10 
   6  -8   1  246.58   31.20 
   6  -8   1  235.88   29.20 
  -6  -8  -1  192.88   35.10 
   6  -8   1  262.17   32.10 
  -6   8  -1  261.47   39.20 
  -6   8  -1  185.08   32.50 
   6   8   1  187.08   31.20 
  -6   8  -1  169.38   32.90 
  -6   8  -1  211.58   32.60 
   6   8   1  219.98   30.80 
  -6   8  -1  231.98   35.00 
  -6   8  -1  170.08   27.20 
  -6   8  -1  222.58   33.80 
  -6   8  -1  259.97   35.70 
   6   8   1  245.18   36.90 
   6   8   1  251.27   30.40 
  -7  -8  -1  172.58   35.20 
  -7  -8  -1  106.59   22.90 
   7  -8   1  117.69   25.20 
  -7  -8  -1  125.49   22.20 
   7  -8   1  140.59   26.40 
   7  -8   1  152.88   27.70 
   7  -8   1   83.79   24.10 
   7  -8   1   92.39   34.10 
   7  -8   1  116.79   21.80 
   7  -8   1   99.69   20.30 
  -7  -8  -1  122.09   30.30 
  -7  -8  -1   92.29   20.10 
   7  -8   1  119.39   22.60 
  -7  -8  -1  111.79   25.40 
   7  -8   1  133.39   33.40 
   7  -8   1  121.39   23.50 
  -7   8  -1  100.99   26.90 
   7   8   1  109.39   27.20 
  -7   8  -1  152.28   29.40 
  -7   8  -1  116.99   26.70 
   7   8   1   88.29   25.40 
  -7   8  -1   97.19   26.70 
  -7   8  -1  147.79   29.30 
   7   8   1  101.29   19.90 
  -7   8  -1  119.09   22.80 
   7   8   1  170.48   27.20 
  -7   8  -1   92.69   25.90 
  -7   8  -1  111.69   26.90 
   6  -9  -1  198.18   27.80 
  -6  -9   1  199.38   39.00 
   6  -9  -1  212.48   28.70 
   6  -9  -1  212.28   29.90 
   6  -9  -1  124.39   29.70 
  -6  -9   1  206.98   27.40 
  -6  -9   1  185.08   31.30 
   6  -9  -1  163.58   26.10 
   6  -9  -1  169.88   28.00 
  -6  -9   1  162.68   25.90 
   6  -9  -1  212.08   34.10 
   6  -9  -1  202.08   30.50 
   6  -9  -1  171.28   31.20 
  -6  -9   1  162.28   33.30 
  -6   9   1  171.48   30.40 
   6   9  -1  210.98   27.80 
  -6   9   1  158.58   30.50 
  -6   9   1  231.38   33.10 
  -6   9   1  254.57   39.70 
   6   9  -1  150.08   31.20 
  -6   9   1  172.28   32.60 
   6   9  -1  171.38   28.10 
  -6   9   1  180.28   35.40 
  -5  -9   1  644.54   48.40 
   5  -9  -1  634.74   63.49 
   5  -9  -1  627.74   44.90 
  -5  -9   1  585.84   43.60 
  -5  -9   1  574.34   42.10 
   5  -9  -1  629.24   46.00 
   5  -9  -1  665.53   44.10 
   5  -9  -1  682.13   52.69 
  -5  -9   1  680.73   44.00 
   5  -9  -1  523.65   43.00 
   5  -9  -1  635.14   47.30 
   5  -9  -1  682.93   46.10 
  -5  -9   1  607.94   63.79 
  -5  -9   1  622.74   62.09 
   5  -9  -1  568.74   57.39 
  -5   9   1  715.33   66.79 
   5   9  -1  601.94   44.10 
   5   9  -1  524.75   56.49 
   5   9  -1  577.34   44.70 
  -5   9   1  670.43   50.99 
   5   9  -1  649.64   46.90 
  -5   9   1  660.73   64.09 
  -5   9   1  545.55   45.30 
  -5   9   1  596.04   56.49 
  -5   9   1  705.53   65.39 
  -5   9   1  629.94   62.79 
   4  -9  -1  543.45   44.00 
   4  -9  -1  536.15   53.99 
   4  -9  -1  520.45   40.30 
   4  -9  -1  563.04   40.30 
   4  -9  -1  477.95   37.20 
   4  -9  -1  529.55   52.39 
  -4  -9   1  582.94   50.79 
  -4  -9   1  511.55   36.70 
   4  -9  -1  481.15   37.90 
  -4  -9   1  516.25   36.40 
  -4  -9   1  497.75   38.40 
   4  -9  -1  510.35   36.40 
  -4  -9   1  423.86   44.40 
   4  -9  -1  557.54   39.80 
  -4  -9   1  476.85   53.39 
  -4  -9   1  532.15   60.39 
   4  -9  -1  439.76   51.79 
  -4   9   1  465.45   53.89 
  -4   9   1  505.85   41.00 
   4   9  -1  535.65   39.80 
  -4   9   1  545.95   56.29 
  -4   9   1  485.15   47.70 
  -4   9   1  565.04   51.69 
  -4   9   1  569.74   54.79 
   4   9  -1  382.16   46.10 
   4   9  -1  506.65   39.90 
   4   9  -1  553.94   40.30 
  -4   9   1  590.64   59.79 
   3  -9  -1  381.36   36.60 
  -3  -9   1  284.27   43.10 
   3  -9  -1  370.26   29.20 
   3  -9  -1  406.26   37.50 
   3  -9  -1  315.37   38.30 
  -3  -9   1  379.56   28.30 
  -3  -9   1  370.96   37.70 
   3  -9  -1  383.66   45.80 
   3  -9  -1  359.36   38.90 
   3  -9  -1  354.16   44.50 
  -3  -9   1  271.97   44.90 
  -3  -9   1  306.87   39.80 
   3  -9  -1  344.67   33.50 
  -3  -9   1  373.86   34.60 
   3  -9  -1  356.76   34.00 
  -3  -9   1  305.87   35.50 
  -3  -9   1  392.06   42.70 
  -3  -9   1  315.87   29.50 
   3  -9  -1  347.27   27.40 
  -3   9   1  227.98   34.40 
   3   9  -1  308.17   25.30 
  -3   9   1  309.17   36.90 
  -3   9   1  326.27   36.80 
  -3   9   1  334.17   43.00 
  -3   9   1  380.36   40.50 
   3   9  -1  308.57   34.20 
   3   9  -1  363.86   41.90 
   3   9  -1  320.47   34.60 
   3   9  -1  382.96   35.50 
  -3   9   1  309.27   40.50 
  -3   9   1  367.56   45.80 
   2  -9  -1   22.90   10.50 
   2  -9  -1   56.49   14.80 
  -2  -9   1   45.60   17.90 
   2  -9  -1   37.00   13.40 
  -2  -9   1   27.70    9.70 
  -2  -9   1   16.80   14.70 
   2  -9  -1   16.00   14.10 
   2  -9  -1   53.29   16.10 
  -2  -9   1   15.20   15.40 
  -2  -9   1   50.89   14.00 
   2  -9  -1   34.60   11.70 
  -2  -9   1   30.10    9.90 
   2  -9  -1   31.50   11.00 
  -2  -9   1   61.19   16.10 
   2  -9  -1   33.80   18.30 
  -2  -9   1   35.20   13.50 
  -2  -9   1   40.10   16.60 
   2  -9  -1   39.40   11.50 
  -2  -9   1   62.89   20.10 
   2   9  -1   32.70   12.20 
  -2   9   1   20.70   12.90 
  -2   9   1   18.60   11.40 
  -2   9   1   50.09   15.70 
  -2   9   1   26.30   15.60 
   2   9  -1   31.00   10.30 
   2   9  -1   36.40   13.40 
   2   9  -1   39.40   12.30 
  -2   9   1   32.60   12.00 
  -2   9   1   16.00   12.70 
   2   9  -1   42.60   15.90 
  -2   9   1   53.29   19.40 
   1  -9  -1   64.89   18.90 
   1  -9  -1   61.59   16.90 
   1  -9  -1   64.69   22.70 
   1  -9  -1   58.29   12.60 
   1  -9  -1   49.20   12.60 
   1  -9  -1   84.39   18.20 
  -1  -9   1   63.69   16.20 
  -1  -9   1   44.70   10.80 
  -1  -9   1   68.79   12.70 
  -1  -9   1   79.89   20.40 
  -1  -9   1   49.50   11.60 
  -1  -9   1   53.19   13.90 
   1  -9  -1   90.79   19.20 
  -1  -9   1   65.49   23.90 
  -1  -9   1   63.29   12.80 
  -1  -9   1   55.09   17.10 
   1  -9  -1   82.49   16.50 
   1  -9  -1   42.20   15.10 
  -1  -9   1   77.69   13.70 
  -1  -9   1   45.70   18.40 
  -1  -9   1   81.29   19.30 
  -1  -9   1   26.20   12.90 
   1  -9  -1   54.19   13.00 
   1   9  -1   74.59   20.10 
  -1   9   1   73.19   15.20 
  -1   9   1   55.09   18.20 
   1   9  -1   83.89   18.90 
  -1   9   1   88.79   18.20 
  -1   9   1   55.39   14.20 
  -1   9   1   40.10   18.30 
  -1   9   1   51.99   16.90 
   1   9  -1   71.89   17.40 
  -1   9   1   71.49   17.90 
  -1   9   1   69.29   19.90 
  -1   9   1   50.29   16.10 
  -1   9   1   44.40   17.10 
   1   9  -1   50.39   13.00 
   0  -9  -1  219.48   24.80 
   0  -9   1  195.98   27.30 
   0  -9   1  154.98   33.30 
   0  -9  -1  230.68   24.60 
   0  -9  -1  228.68   23.50 
   0  -9   1  231.88   22.30 
   0  -9  -1  291.57   32.30 
   0  -9  -1  203.78   28.30 
   0  -9  -1  277.97   37.70 
   0  -9   1  251.57   25.80 
   0  -9  -1  206.88   38.00 
   0  -9   1  229.28   23.90 
   0  -9   1  202.18   26.60 
   0  -9   1  189.48   22.60 
   0  -9  -1  252.77   32.50 
   0  -9   1  262.17   25.70 
   0  -9  -1  212.38   32.50 
   0  -9  -1  187.98   26.80 
   0  -9  -1  171.98   28.60 
   0  -9  -1  214.38   22.50 
   0  -9   1  212.98   31.10 
   0  -9   1  203.68   29.80 
   0   9  -1  244.18   27.90 
   0   9   1  157.78   27.80 
   0   9  -1  265.37   30.60 
   0   9   1  174.28   26.10 
   0   9  -1  189.38   29.40 
   0   9   1  219.48   32.70 
   0   9  -1  213.38   31.00 
   0   9   1  223.88   29.50 
   0   9  -1  244.98   30.00 
   0   9   1  195.48   24.20 
   0   9   1  253.67   35.50 
   0   9  -1  221.78   29.60 
   0   9   1  235.38   29.80 
   0   9   1  181.68   23.80 
   0   9   1  176.58   24.30 
   0   9   1  164.88   24.60 
   0   9   1  216.58   26.90 
  -1  -9  -1  310.67   23.20 
  -1  -9  -1  362.16   50.29 
  -1  -9  -1  259.87   27.00 
  -1  -9  -1  296.97   36.70 
   1  -9   1  273.87   28.60 
  -1  -9  -1  315.07   38.00 
  -1  -9  -1  286.27   36.80 
   1  -9   1  358.16   31.90 
   1  -9   1  314.07   38.50 
  -1  -9  -1  230.58   30.80 
  -1  -9  -1  313.07   35.00 
   1  -9   1  298.27   29.60 
   1  -9   1  240.88   37.60 
   1  -9   1  292.47   34.20 
  -1  -9  -1  326.27   29.20 
  -1  -9  -1  267.37   32.70 
  -1  -9  -1  344.67   26.20 
  -1  -9  -1  296.57   36.50 
   1  -9   1  260.37   27.40 
   1  -9   1  274.07   37.00 
  -1  -9  -1  299.47   39.60 
  -1   9  -1  363.06   35.20 
   1   9   1  258.47   30.20 
   1   9   1  292.47   33.00 
   1   9   1  281.87   33.70 
  -1   9  -1  269.07   32.50 
  -1   9  -1  328.57   39.00 
  -1   9  -1  296.77   36.40 
   1   9   1  269.07   33.70 
  -1   9  -1  304.77   33.70 
   1   9   1  288.47   31.40 
  -1   9  -1  306.77   38.90 
   1   9   1  342.27   31.40 
   1   9   1  313.17   33.20 
   1   9   1  305.47   32.40 
   1   9   1  282.27   30.60 
   2  -9   1  518.75   34.00 
   2  -9   1  437.26   34.00 
  -2  -9  -1  450.45   58.89 
   2  -9   1  469.55   49.70 
  -2  -9  -1  512.55   50.09 
   2  -9   1  478.45   35.00 
  -2  -9  -1  482.65   34.50 
  -2  -9  -1  501.85   39.00 
   2  -9   1  440.76   30.90 
   2  -9   1  501.55   35.60 
  -2  -9  -1  488.55   49.20 
  -2  -9  -1  516.95   39.30 
  -2  -9  -1  509.75   55.69 
   2  -9   1  421.36   44.80 
   2  -9   1  536.95   48.30 
   2  -9   1  468.95   49.90 
   2  -9   1  482.45   35.90 
  -2  -9  -1  529.15   33.00 
  -2  -9  -1  410.06   44.40 
  -2   9  -1  409.16   41.70 
   2   9   1  405.66   44.50 
   2   9   1  514.25   39.20 
   2   9   1  476.65   33.60 
   2   9   1  451.65   37.30 
  -2   9  -1  426.16   42.20 
  -2   9  -1  505.75   48.80 
  -2   9  -1  490.35   49.00 
  -2   9  -1  540.65   53.29 
  -2   9  -1  424.06   43.00 
   2   9   1  505.85   38.20 
   2   9   1  502.35   37.40 
  -2   9  -1  465.75   43.20 
   3  -9   1  354.16   40.70 
   3  -9   1  309.87   42.20 
  -3  -9  -1  422.06   41.40 
   3  -9   1  344.97   34.80 
   3  -9   1  350.36   35.90 
  -3  -9  -1  311.97   29.60 
   3  -9   1  341.47   28.50 
   3  -9   1  356.96   40.10 
   3  -9   1  324.07   39.40 
  -3  -9  -1  302.47   37.50 
   3  -9   1  370.96   35.30 
   3  -9   1  298.97   28.90 
  -3  -9  -1  323.57   47.70 
   3  -9   1  362.66   34.80 
  -3  -9  -1  353.26   31.20 
  -3  -9  -1  317.67   32.30 
  -3  -9  -1  400.56   46.00 
  -3  -9  -1  320.57   47.20 
  -3   9  -1  317.87   40.10 
  -3   9  -1  409.26   44.50 
   3   9   1  349.96   36.70 
  -3   9  -1  424.26   44.20 
   3   9   1  331.67   37.10 
   3   9   1  314.87   35.90 
   3   9   1  393.76   44.50 
  -3   9  -1  373.46   40.40 
  -3   9  -1  303.47   41.10 
  -3   9  -1  329.77   38.40 
  -3   9  -1  279.07   35.00 
   3   9   1  367.96   37.20 
   3   9   1  330.47   30.50 
  -4  -9  -1  129.39   27.60 
  -4  -9  -1  105.49   18.10 
  -4  -9  -1  159.28   26.60 
   4  -9   1  153.88   28.10 
   4  -9   1  151.88   22.70 
   4  -9   1  114.59   19.10 
  -4  -9  -1  115.99   24.60 
  -4  -9  -1  140.79   22.10 
   4  -9   1  154.08   30.40 
   4  -9   1  168.18   27.80 
   4  -9   1  126.19   22.60 
   4  -9   1   97.49   19.00 
  -4  -9  -1  163.78   22.80 
  -4  -9  -1  168.68   35.50 
   4  -9   1  160.98   27.00 
   4  -9   1  148.29   21.70 
   4  -9   1  174.18   24.80 
  -4   9  -1  143.79   28.90 
   4   9   1  180.38   26.30 
  -4   9  -1  142.59   28.00 
   4   9   1  164.78   26.10 
  -4   9  -1  139.39   25.80 
  -4   9  -1  192.28   30.00 
   4   9   1  172.28   25.80 
  -4   9  -1  223.18   30.80 
  -4   9  -1  136.99   24.90 
  -4   9  -1  137.29   27.00 
   4   9   1  144.99   28.00 
   5  -9   1   59.79   16.80 
  -5  -9  -1   63.19   21.00 
  -5  -9  -1   61.89   14.60 
   5  -9   1   49.60   16.20 
  -5  -9  -1   47.80   13.60 
  -5  -9  -1   45.50   14.90 
   5  -9   1   40.00   13.80 
   5  -9   1   67.19   19.20 
   5  -9   1   33.20   12.40 
   5  -9   1   38.00   18.20 
  -5  -9  -1   89.79   23.10 
  -5  -9  -1   55.29   24.80 
   5  -9   1   42.50   14.80 
   5  -9   1   73.59   27.80 
   5   9   1   51.29   16.10 
  -5   9  -1   16.20   14.40 
  -5   9  -1   16.20   14.50 
  -5   9  -1   66.69   19.10 
   5   9   1   20.10   16.60 
   5   9   1   56.49   18.90 
   5   9   1   48.70   16.50 
  -5   9  -1   24.90   16.00 
  -5   9  -1   48.30   20.20 
  -5   9  -1   50.89   16.90 
  -5   9  -1   26.90   18.50 
  -6  -9  -1   11.50   10.90 
  -6  -9  -1    3.90    9.50 
  -6  -9  -1   -7.90   14.10 
   6  -9   1    8.60   11.90 
   6  -9   1    0.90   10.30 
  -6  -9  -1   24.10   20.80 
   6  -9   1   18.90   13.70 
   6  -9   1  -10.50   13.00 
  -6  -9  -1   10.30   10.90 
  -6  -9  -1   16.30   18.20 
   6  -9   1   25.20   15.80 
   6  -9   1   27.10   15.20 
   6  -9   1   30.20   13.00 
  -6   9  -1    3.70   15.30 
  -6   9  -1    4.90   14.90 
   6   9   1    4.50   10.20 
   6   9   1   10.10   14.90 
   6   9   1   30.70   15.60 
  -6   9  -1    7.00   14.60 
  -6   9  -1    8.90   13.40 
   6   9   1    6.50   11.10 
  -6   9  -1    9.80   12.80 
  -6   9  -1   19.80   16.40 
  -6   9  -1   -5.40   11.80 
  -4 -10   1    3.90   18.40 
   4 -10  -1    4.50   10.60 
  -4 -10   1   25.70   18.50 
   4 -10  -1   20.00   15.90 
   4 -10  -1   23.50   11.70 
  -4 -10   1  -22.20   11.50 
  -4 -10   1   -3.40    7.80 
   4 -10  -1   16.80   11.50 
   4 -10  -1    1.10   11.10 
  -4 -10   1   -1.00    8.10 
   4 -10  -1   12.20   10.50 
  -4 -10   1   23.70   18.80 
   4 -10  -1    5.50   17.40 
   4 -10  -1   34.70   15.00 
  -4  10   1    7.10   15.70 
  -4  10   1    0.30   11.60 
   4  10  -1   26.30   13.90 
  -4  10   1   13.90   15.60 
  -4  10   1    2.00   10.80 
   4  10  -1    4.90   14.00 
  -4  10   1  -11.10   10.40 
   4  10  -1   -3.10    9.00 
  -4  10   1    6.60   12.70 
   3 -10  -1   65.19   16.80 
   3 -10  -1   45.70   15.60 
  -3 -10   1   50.59   23.90 
  -3 -10   1   12.50   18.50 
   3 -10  -1   33.60   20.20 
   3 -10  -1   51.79   18.10 
   3 -10  -1   62.09   16.30 
   3 -10  -1   41.80   13.80 
   3 -10  -1   31.10   19.30 
  -3 -10   1   34.10   11.90 
  -3 -10   1   31.20   12.60 
  -3 -10   1   70.69   19.50 
   3 -10  -1   29.50   15.20 
  -3 -10   1   45.50   17.20 
  -3 -10   1   23.30   14.60 
  -3 -10   1   48.10   18.20 
  -3  10   1   43.30   19.00 
   3  10  -1   37.70   16.10 
  -3  10   1   35.80   17.90 
  -3  10   1   20.80   14.70 
  -3  10   1   43.20   16.90 
  -3  10   1   43.60   19.30 
  -3  10   1   42.90   16.40 
   3  10  -1   23.60   14.80 
   3  10  -1   61.19   16.10 
   3  10  -1   65.29   17.30 
  -2 -10   1    5.50   13.10 
  -2 -10   1   36.60   21.10 
   2 -10  -1   12.20   15.30 
   2 -10  -1  -10.70    7.70 
   2 -10  -1   11.90   11.90 
  -2 -10   1    9.40    9.00 
   2 -10  -1    1.10    8.90 
  -2 -10   1    4.70    9.20 
  -2 -10   1    5.30    7.40 
  -2 -10   1    7.20   17.10 
  -2 -10   1   -8.60    9.20 
  -2 -10   1    5.80   12.60 
   2 -10  -1   -6.20   16.20 
   2 -10  -1   23.00   13.80 
   2 -10  -1    1.70   10.70 
   2 -10  -1   -1.30    7.60 
  -2 -10   1   -4.90   13.10 
  -2  10   1    5.60   13.50 
  -2  10   1    1.10   10.40 
  -2  10   1    3.30   10.50 
   2  10  -1   17.40   13.60 
   2  10  -1   12.80   10.60 
  -2  10   1   20.00   14.70 
  -2  10   1   27.80   16.20 
  -1 -10   1   64.49   22.20 
   1 -10  -1   69.19   15.20 
  -1 -10   1   48.80   17.80 
   1 -10  -1   40.70   22.20 
  -1 -10   1   45.40   18.80 
   1 -10  -1   40.10   15.70 
  -1 -10   1   59.59   17.10 
   1 -10  -1   57.79   18.70 
  -1 -10   1   44.90   18.60 
   1 -10  -1   55.19   14.00 
  -1 -10   1   43.80   15.10 
   1 -10  -1   50.69   14.80 
  -1 -10   1   30.60   21.00 
   1 -10  -1   67.29   18.30 
  -1 -10   1   66.69   20.30 
   1 -10  -1   42.10   17.70 
  -1 -10   1   35.70   11.50 
  -1  10   1   48.20   19.50 
   1  10  -1   84.79   19.80 
  -1  10   1   68.59   18.50 
  -1  10   1   57.39   20.70 
  -1  10   1   61.39   17.60 
   0 -10   1   70.79   25.90 
   0 -10   1  115.49   18.60 
   0 -10  -1   66.99   15.30 
   0 -10  -1   55.99   20.90 
   0 -10   1   77.89   21.00 
   0 -10  -1   86.09   16.90 
   0 -10  -1   86.59   29.30 
   0 -10   1   67.69   19.50 
   0 -10  -1   76.19   19.10 
   0 -10   1  111.09   24.40 
   0 -10   1   92.89   20.70 
   0 -10  -1   72.59   23.80 
   0 -10  -1   67.09   19.90 
   0 -10   1   83.79   16.20 
   0 -10  -1   60.49   18.00 
   0 -10   1   86.29   20.40 
   0 -10   1   60.19   20.70 
   0 -10  -1   86.39   22.90 
   0 -10  -1   83.39   22.70 
   0  10   1   81.79   19.60 
   0  10   1   88.59   17.80 
   0  10   1   52.19   16.30 
   0  10  -1   62.59   20.40 
   0  10   1   86.49   20.60 
   0  10  -1   47.60   17.00 
   1 -10   1  229.68   27.10 
  -1 -10  -1  208.68   30.20 
   1 -10   1  192.68   33.40 
  -1 -10  -1  229.18   33.60 
  -1 -10  -1  212.78   30.60 
  -1 -10  -1  227.18   35.10 
  -1 -10  -1  211.98   31.30 
   1 -10   1  150.38   26.60 
   1 -10   1  204.78   37.20 
   1 -10   1  233.88   26.90 
  -1 -10  -1  191.68   32.70 
  -1 -10  -1  231.78   39.00 
  -1 -10  -1  193.28   38.50 
   1 -10   1  216.28   29.60 
  -1 -10  -1  199.78   23.80 
   1 -10   1  158.88   22.90 
   1 -10   1  181.58   25.40 
   1 -10   1  167.78   28.30 
   1  10   1  172.88   27.50 
   1  10   1  257.77   34.60 
  -1  10  -1  191.88   30.30 
  -1  10  -1  137.39   26.00 
   1  10   1  213.88   26.40 
  -1  10  -1  220.58   35.10 
  -2 -10  -1   22.50   18.00 
   2 -10   1  -19.30   10.80 
   2 -10   1   23.20   12.00 
  -2 -10  -1   31.30   19.20 
  -2 -10  -1   19.80   13.90 
  -2 -10  -1   15.20   13.60 
   2 -10   1    0.60    9.30 
   2 -10   1    4.80   12.40 
   2 -10   1   12.70   11.40 
  -2 -10  -1   11.80    8.70 
  -2 -10  -1   11.10   20.10 
   2 -10   1   17.50   11.00 
  -2 -10  -1    7.50    8.30 
   2 -10   1   -3.50   13.00 
  -2 -10  -1   35.40   14.90 
   2 -10   1   16.30   10.50 
  -2 -10  -1   13.40   15.20 
   2  10   1   22.10   11.50 
  -2  10  -1   14.50   14.90 
  -2  10  -1   29.20   15.90 
   2  10   1    0.10   11.90 
   2  10   1   15.90   12.30 
  -2  10  -1   17.60   12.80 
   2  10   1   11.00   10.90 
   2  10   1   15.50   10.20 
  -2  10  -1   14.40   13.10 
  -3 -10  -1   40.90   22.20 
  -3 -10  -1   -3.50   10.80 
  -3 -10  -1    4.80   17.00 
   3 -10   1   13.60   14.00 
   3 -10   1   -4.10    7.70 
  -3 -10  -1   21.70   14.10 
   3 -10   1    8.30   12.50 
   3 -10   1   -6.50   13.20 
   3 -10   1   26.00   11.80 
  -3 -10  -1   -3.70    7.00 
  -3 -10  -1   -7.50   10.00 
  -3 -10  -1   16.10   15.40 
  -3 -10  -1    8.30   13.90 
   3 -10   1   10.70   10.60 
  -3 -10  -1   -7.40    7.80 
   3 -10   1    4.80   10.10 
  -3  10  -1   -5.70   10.40 
  -3  10  -1   -5.50   10.90 
   3  10   1   12.60   13.40 
  -3  10  -1   -7.20   10.20 
  -3  10  -1   -5.80   13.30 
   3  10   1   16.20   13.10 
  -3  10  -1  -19.10    8.80 
   3  10   1   -5.10   10.30 
  -4 -10  -1    6.70   13.80 
  -4 -10  -1   13.30   16.60 
  -4 -10  -1   12.80   11.10 
   4 -10   1   10.90   11.50 
   4 -10   1   26.50   13.30 
   4 -10   1   32.60   16.80 
   4 -10   1   41.90   19.60 
  -4 -10  -1   28.80   11.70 
  -4 -10  -1    8.20   21.30 
   4 -10   1   -2.20    9.90 
   4 -10   1    8.50   11.80 
   4 -10   1   18.10   11.90 
  -4 -10  -1   20.50   17.30 
  -4 -10  -1   55.39   24.30 
   4 -10   1   -2.10   11.20 
  -4  10  -1   20.20   14.70 
   4  10   1   25.70   14.00 
   4  10   1    9.10   11.80 
   4  10   1   -0.40   12.60 
  -4  10  -1   14.30   13.40 
  -4  10  -1   29.30   17.60 
  -4  10  -1    7.80   15.80 
  -4  10  -1    1.10   12.00 
   4  10   1   18.10   15.30 
   0 -11  -1  227.88   34.40 
   0 -11  -1  178.88   39.30 
   0 -11   1  294.27   43.70 
   0 -11   1  185.38   34.40 
   0 -11  -1  184.68   35.60 
   0 -11  -1  173.18   32.80 
   0 -11   1  182.68   33.40 
   0 -11   1  245.18   33.60 
   0 -11   1  171.98   31.70 
   0 -11  -1  240.68   38.20 
   0  11  -1  156.78   31.90 
 -10   0   2  967.20   60.49 
  10   0  -2  915.31   57.49 
  10   0  -2  989.90   66.49 
  10   0  -2  938.01   65.69 
 -10   0   2 1021.00   62.79 
 -10   0   2  970.90   64.99 
 -10   0   2 1095.19   69.09 
  10   0  -2 1163.78   63.39 
  10   0  -2 1099.89   64.89 
 -10   0   2  966.00   59.79 
 -10   0   2  956.90   66.49 
 -10   0   2 1025.60   59.09 
  10   0  -2  865.61   67.29 
  10   0  -2  986.70   63.09 
 -10   0   2  976.70   64.49 
  10   0  -2  933.11   69.29 
 -10   0   2 1007.60   61.69 
  10   0  -2 1010.60   59.99 
 -10   0   2  980.10   54.69 
   9   0  -2    4.00   11.30 
  -9   0   2   -2.90    6.90 
   9   0  -2   -1.60   10.60 
   9   0  -2    1.90    8.20 
  -9   0   2    0.70    8.00 
   9   0  -2    0.30    7.50 
  -9   0   2    3.80    9.80 
  -9   0   2    2.40    7.80 
   9   0  -2   11.00   13.70 
  -9   0   2    8.70    7.90 
  -9   0   2   -2.50    5.80 
  -9   0   2   -0.70    8.20 
   9   0  -2   -2.50    6.40 
  -9   0   2    0.60    9.70 
  -9   0   2   -6.60    7.70 
   9   0  -2    9.10   10.00 
   9   0  -2  -12.90    9.40 
  -9   0   2    4.80    8.40 
   9   0  -2   -5.20   12.50 
  -9   0   2    3.60    6.60 
  -9   0   2    4.80    8.00 
   9   0  -2    1.00    8.30 
   8   0  -2 1770.92   89.89 
   8   0  -2 1700.73   92.99 
   8   0  -2 1831.62   82.69 
  -8   0   2 1746.03   88.59 
  -8   0   2 1836.72   92.59 
   8   0  -2 1573.54   92.99
[truncated: 3,453,258 more chars]
