# Supplementary material
Source: MDPI journal article supplement (https://www.mdpi.com/2073-4352/13/7/1043)
Supplement: s1 [file s1 › 1 Ce(OAc)2Cl x 3H2O_Tabellen.pdf]

Table S1. Crystal data and structure refinement for Ce(OAc)2Cl\_x\_3H2O.

|                                   |                                                                              |
|-----------------------------------|------------------------------------------------------------------------------|
| Identification code               | Ha2019_72_0m_a                                                               |
| Empirical formula                 | C4 H12 Ce Cl O7                                                              |
| Formula weight                    | 347.71                                                                       |
| Temperature                       | 100(2) K                                                                     |
| Wavelength                        | 0.71073 Å                                                                    |
| Crystal system, space group       | Monoclinic, P2(1)/n                                                          |
| Unit cell dimensions              | a = 7.9625(3) Å<br>b = 7.9276(3) Å    β = 99.122(2) deg.<br>c = 17.6973(6) Å |
| Volume                            | 1102.99(7) Å <sup>3</sup>                                                    |
| Z, Calculated density             | 4, 2.094 Mg/m <sup>3</sup>                                                   |
| Absorption coefficient            | 4.373 mm <sup>-1</sup>                                                       |
| F(000)                            | 668                                                                          |
| Crystal size                      | 0.250 x 0.139 x 0.040 mm                                                     |
| Theta range for data collection   | 2.667 to 27.994 deg.                                                         |
| Limiting indices                  | -10 ≤ h ≤ 10, -10 ≤ k ≤ 10, -23 ≤ l ≤ 23                                     |
| Reflections collected / unique    | 101277 / 2664 [R(int) = 0.0460]                                              |
| Completeness to theta = 25.242    | 99.9 %                                                                       |
| Absorption correction             | Semi-empirical from equivalents                                              |
| Max. and min. transmission        | 0.762 and 0.518                                                              |
| Refinement method                 | Full-matrix least-squares on F <sup>2</sup>                                  |
| Data / restraints / parameters    | 2664 / 0 / 125                                                               |
| Goodness-of-fit on F <sup>2</sup> | 1.225                                                                        |
| Final R indices [I > 2σ(I)]       | R1 = 0.0177, wR2 = 0.0355                                                    |
| R indices (all data)              | R1 = 0.0186, wR2 = 0.0357                                                    |
| Extinction coefficient            | n/a                                                                          |
| Largest diff. peak and hole       | 0.532 and -0.811 e.Å <sup>-3</sup>                                           |

Table S2. Atomic coordinates ( $\times 10^4$ ) and equivalent isotropic displacement parameters ( $\text{\AA}^2 \times 10^3$ ) for  $\text{Ce}(\text{OAc})_2\text{Cl}\cdot 3\text{H}_2\text{O}$ .  $U(\text{eq})$  is defined as one third of the trace of the orthogonalized  $U_{ij}$  tensor.

|        | x         | y        | z        | U (eq) |
|--------|-----------|----------|----------|--------|
| Ce (1) | 2645 (1)  | 4603 (1) | 5388 (1) | 10 (1) |
| Cl (1) | 3847 (1)  | 9700 (1) | 6921 (1) | 17 (1) |
| O (11) | -141 (2)  | 3353 (2) | 5355 (1) | 15 (1) |
| O (12) | -2794 (2) | 2554 (2) | 5256 (1) | 18 (1) |
| C (11) | -1244 (3) | 2276 (3) | 5488 (1) | 13 (1) |
| C (12) | -707 (3)  | 701 (3)  | 5922 (2) | 22 (1) |
| O (21) | 5547 (2)  | 5633 (2) | 5753 (1) | 14 (1) |
| O (22) | 8230 (2)  | 6344 (2) | 5994 (1) | 16 (1) |
| C (21) | 6866 (3)  | 6022 (3) | 6235 (1) | 13 (1) |
| C (22) | 6751 (3)  | 6099 (4) | 7068 (1) | 21 (1) |
| O (1W) | 3973 (2)  | 1709 (2) | 5408 (1) | 15 (1) |
| O (2W) | 1686 (2)  | 6655 (2) | 6293 (1) | 16 (1) |
| O (3W) | 3005 (2)  | 3476 (2) | 6722 (1) | 19 (1) |

Table S3. Bond lengths [Å] and angles [deg] for Ce(OAc)2Cl\_x\_3H2O.

---

|                       |            |
|-----------------------|------------|
| Ce(1)-O(11)           | 2.422(2)   |
| Ce(1)-O(21)           | 2.440(2)   |
| Ce(1)-O(2W)           | 2.486(2)   |
| Ce(1)-O(3W)           | 2.499(2)   |
| Ce(1)-O(1W)           | 2.524(2)   |
| Ce(1)-O(12)#1         | 2.536(2)   |
| Ce(1)-O(22)#2         | 2.548(2)   |
| Ce(1)-O(21)#2         | 2.665(2)   |
| Ce(1)-O(11)#1         | 2.738(2)   |
|                       |            |
| Ce(1)-Ce(1)#2         | 4.2401(3)  |
| Ce(1)-Ce(1)#1         | 4.2648(3)  |
|                       |            |
| O(11)-C(11)           | 1.273(3)   |
| O(12)-C(11)           | 1.257(3)   |
| C(11)-C(12)           | 1.493(3)   |
|                       |            |
| O(21)-C(21)           | 1.282(3)   |
| O(22)-C(21)           | 1.254(3)   |
| C(21)-C(22)           | 1.493(3)   |
|                       |            |
| O(11)-Ce(1)-O(21)     | 165.68(5)  |
| O(11)-Ce(1)-O(2W)     | 84.80(5)   |
| O(21)-Ce(1)-O(2W)     | 89.17(5)   |
| O(11)-Ce(1)-O(3W)     | 81.00(6)   |
| O(21)-Ce(1)-O(3W)     | 84.70(5)   |
| O(2W)-Ce(1)-O(3W)     | 68.05(5)   |
| O(11)-Ce(1)-O(1W)     | 90.47(5)   |
| O(21)-Ce(1)-O(1W)     | 85.60(5)   |
| O(2W)-Ce(1)-O(1W)     | 139.16(5)  |
| O(3W)-Ce(1)-O(1W)     | 71.13(5)   |
| O(11)-Ce(1)-O(12)#1   | 117.45(5)  |
| O(21)-Ce(1)-O(12)#1   | 73.24(5)   |
| O(2W)-Ce(1)-O(12)#1   | 75.46(5)   |
| O(3W)-Ce(1)-O(12)#1   | 137.37(6)  |
| O(1W)-Ce(1)-O(12)#1   | 139.87(5)  |
| O(11)-Ce(1)-O(22)#2   | 75.31(5)   |
| O(21)-Ce(1)-O(22)#2   | 117.14(5)  |
| O(2W)-Ce(1)-O(22)#2   | 138.23(5)  |
| O(3W)-Ce(1)-O(22)#2   | 140.80(6)  |
| O(1W)-Ce(1)-O(22)#2   | 78.22(5)   |
| O(12)#1-Ce(1)-O(22)#2 | 81.70(6)   |
| O(11)-Ce(1)-O(21)#2   | 123.77(5)  |
| O(21)-Ce(1)-O(21)#2   | 67.74(6)   |
| O(2W)-Ce(1)-O(21)#2   | 142.35(5)  |
| O(3W)-Ce(1)-O(21)#2   | 134.10(5)  |
| O(1W)-Ce(1)-O(21)#2   | 70.82(5)   |
| O(12)#1-Ce(1)-O(21)#2 | 69.69(5)   |
| O(22)#2-Ce(1)-O(21)#2 | 49.50(5)   |
| O(11)-Ce(1)-O(11)#1   | 68.68(6)   |
| O(21)-Ce(1)-O(11)#1   | 121.08(5)  |
| O(2W)-Ce(1)-O(11)#1   | 69.37(5)   |
| O(3W)-Ce(1)-O(11)#1   | 129.15(5)  |
| O(1W)-Ce(1)-O(11)#1   | 144.68(5)  |
| O(12)#1-Ce(1)-O(11)#1 | 48.77(5)   |
| O(22)#2-Ce(1)-O(11)#1 | 69.24(5)   |
| O(21)#2-Ce(1)-O(11)#1 | 96.73(5)   |
|                       |            |
| Ce(1)#2-Ce(1)-Ce(1)#1 | 138.852(7) |

|                         |           |
|-------------------------|-----------|
| C (11)-O (11)-Ce (1)    | 157.8 (2) |
| C (11)-O (11)-Ce (1) #1 | 90.8 (1)  |
| Ce (1)-O (11)-Ce (1) #1 | 111.3 (1) |
| C (11)-O (12)-Ce (1) #1 | 100.9 (1) |
| O (12)-C (11)-O (11)    | 119.5 (2) |
| O (12)-C (11)-C (12)    | 120.1 (2) |
| O (11)-C (11)-C (12)    | 120.4 (2) |
| C (21)-O (21)-Ce (1)    | 154.0 (1) |
| C (21)-O (21)-Ce (1) #2 | 92.2 (1)  |
| Ce (1)-O (21)-Ce (1) #2 | 112.3 (1) |
| C (21)-O (22)-Ce (1) #2 | 98.4 (1)  |
| O (22)-C (21)-O (21)    | 119.0 (2) |
| O (22)-C (21)-C (22)    | 121.3 (2) |
| O (21)-C (21)-C (22)    | 119.7 (2) |

---

Symmetry transformations used to generate equivalent atoms:

#1 -x,-y+1,-z+1      #2 -x+1,-y+1,-z+1

Table S4. Anisotropic displacement parameters ( $\text{\AA}^2 \times 10^3$ ) for  
 $\text{Ce}(\text{OAc})_2\text{Cl} \cdot 3\text{H}_2\text{O}$ .

The anisotropic displacement factor exponent takes the form:  
 $-2 \pi^2 [ h^2 a^{*2} U_{11} + \dots + 2 h k a^* b^* U_{12} ]$

|       | U11   | U22   | U33   | U23   | U13  | U12   |
|-------|-------|-------|-------|-------|------|-------|
| Ce(1) | 6(1)  | 11(1) | 13(1) | 1(1)  | 2(1) | -1(1) |
| Cl(1) | 18(1) | 14(1) | 18(1) | 1(1)  | 3(1) | -2(1) |
| O(11) | 10(1) | 16(1) | 20(1) | 2(1)  | 4(1) | -3(1) |
| O(12) | 9(1)  | 17(1) | 27(1) | 6(1)  | 4(1) | -1(1) |
| C(11) | 11(1) | 13(1) | 16(1) | 0(1)  | 5(1) | -1(1) |
| C(12) | 21(1) | 16(1) | 30(1) | 8(1)  | 1(1) | 2(1)  |
| O(21) | 10(1) | 16(1) | 14(1) | 0(1)  | 1(1) | -2(1) |
| O(22) | 9(1)  | 21(1) | 18(1) | -2(1) | 2(1) | -2(1) |
| C(21) | 12(1) | 12(1) | 15(1) | 0(1)  | 1(1) | 1(1)  |
| C(22) | 16(1) | 32(1) | 14(1) | -2(1) | 2(1) | 2(1)  |
| O(1W) | 13(1) | 13(1) | 20(1) | 3(1)  | 7(1) | 1(1)  |
| O(2W) | 13(1) | 14(1) | 22(1) | -4(1) | 3(1) | -1(1) |
| O(3W) | 26(1) | 14(1) | 17(1) | 2(1)  | 8(1) | 5(1)  |

Table S5. Hydrogen coordinates ( $\times 10^4$ ) and isotropic displacement parameters ( $\text{\AA}^2 \times 10^3$ ) for  $\text{Ce}(\text{OAc})_2\text{Cl} \cdot 3\text{H}_2\text{O}$ .

|        | x     | y    | z    | U (eq) |
|--------|-------|------|------|--------|
| H(12A) | -1527 | -200 | 5757 | 35 (7) |
| H(12B) | -665  | 906  | 6471 | 35 (7) |
| H(12C) | 422   | 361  | 5824 | 35 (7) |
| H(12D) | -378  | -240 | 5618 | 35 (7) |
| H(12E) | -1773 | 426  | 6105 | 35 (7) |
| H(12F) | 189   | 901  | 6361 | 35 (7) |
| H(22A) | 7887  | 5950 | 7368 | 57 (7) |
| H(22B) | 5999  | 5201 | 7196 | 57 (7) |
| H(22C) | 6293  | 7197 | 7188 | 57 (7) |
| H(11W) | 3928  | 915  | 5814 | 45 (7) |
| H(12W) | 5142  | 1723 | 5336 | 45 (7) |
| H(21W) | 504   | 6796 | 6329 | 43 (7) |
| H(22W) | 2217  | 7692 | 6482 | 43 (7) |
| H(31W) | 2482  | 3962 | 7124 | 66 (9) |
| H(32W) | 3186  | 2313 | 6863 | 66 (9) |

Table S6. Hydrogen bonds for Ce(OAc)<sub>2</sub>Cl<sub>x</sub>·3H<sub>2</sub>O [Å and deg.].

| D-H...A                | d(D-H) | d(H...A) | d(D...A) | <(DHA) |
|------------------------|--------|----------|----------|--------|
| O(1W)-H(11W)...Cl(1)#3 | 0.96   | 2.19     | 3.130(2) | 165.0  |
| O(1W)-H(12W)...O(12)#4 | 0.96   | 1.80     | 2.715(2) | 159.0  |
| O(2W)-H(21W)...O(22)#5 | 0.96   | 1.85     | 2.729(2) | 151.2  |
| O(2W)-H(22W)...Cl(1)   | 0.96   | 2.12     | 3.069(2) | 168.5  |
| O(3W)-H(31W)...Cl(1)#6 | 0.96   | 2.21     | 3.163(2) | 171.6  |
| O(3W)-H(32W)...Cl(1)#3 | 0.96   | 2.14     | 3.075(2) | 165.9  |

Symmetry transformations used to generate equivalent atoms:

#1 -x,-y+1,-z+1      #2 -x+1,-y+1,-z+1      #3 x,y-1,z  
#4 x+1,y,z      #5 x-1,y,z      #6 -x+1/2,y-1/2,-z+3/2
