# Supplementary material
Source: MDPI journal article supplement (https://www.mdpi.com/2073-4352/13/7/1043)
Supplement: s1 [file s1 › 2 Pr Ha2019_59_0m_a.cif]

 
data_Ha2019_59_0m_a 
  
_audit_creation_method            'SHELXL-2014/7' 
_shelx_SHELXL_version_number      '2014/7' 
_chemical_name_systematic         ? 
_chemical_name_common             ? 
_chemical_melting_point           ? 
_chemical_formula_moiety          ? 
_chemical_formula_sum 
 'C4 H12 Cl O7 Pr' 
_chemical_formula_weight          348.50 
  
loop_ 
 _atom_type_symbol 
 _atom_type_description 
 _atom_type_scat_dispersion_real 
 _atom_type_scat_dispersion_imag 
 _atom_type_scat_source 
 'C'  'C'   0.0033   0.0016 
 'International Tables Vol C Tables 4.2.6.8 and 6.1.1.4' 
 'H'  'H'   0.0000   0.0000 
 'International Tables Vol C Tables 4.2.6.8 and 6.1.1.4' 
 'O'  'O'   0.0106   0.0060 
 'International Tables Vol C Tables 4.2.6.8 and 6.1.1.4' 
 'Cl'  'Cl'   0.1484   0.1585 
 'International Tables Vol C Tables 4.2.6.8 and 6.1.1.4' 
 'Pr'  'Pr'  -0.2180   2.8214 
 'International Tables Vol C Tables 4.2.6.8 and 6.1.1.4' 
  
_space_group_crystal_system       monoclinic 
_space_group_IT_number            14 
_space_group_name_H-M_alt         'P 21/n' 
_space_group_name_Hall            '-P 2yn' 
  
_shelx_space_group_comment 
; 
The symmetry employed for this shelxl refinement is uniquely defined 
by the following loop, which should always be used as a source of 
symmetry information in preference to the above space-group names. 
They are only intended as comments. 
; 
  
loop_ 
 _space_group_symop_operation_xyz 
 'x, y, z' 
 '-x+1/2, y+1/2, -z+1/2' 
 '-x, -y, -z' 
 'x-1/2, -y-1/2, z-1/2' 
  
_cell_length_a                    7.9333(3) 
_cell_length_b                    7.9139(3) 
_cell_length_c                    17.6327(6) 
_cell_angle_alpha                 90 
_cell_angle_beta                  98.947(2) 
_cell_angle_gamma                 90 
_cell_volume                      1093.57(7) 
_cell_formula_units_Z             4 
_cell_measurement_temperature     100(2) 
_cell_measurement_reflns_used     9150 
_cell_measurement_theta_min       2.34 
_cell_measurement_theta_max       28.30 
  
_exptl_crystal_description        prism 
_exptl_crystal_colour             green 
_exptl_crystal_density_meas       ? 
_exptl_crystal_density_method     ? 
_exptl_crystal_density_diffrn     2.117 
_exptl_crystal_F_000              672 
_exptl_transmission_factor_min    ? 
_exptl_transmission_factor_max    ? 
_exptl_crystal_size_max           0.450 
_exptl_crystal_size_mid           0.107 
_exptl_crystal_size_min           0.071 
_exptl_absorpt_coefficient_mu     4.703 
_shelx_estimated_absorpt_T_min    0.226 
_shelx_estimated_absorpt_T_max    0.731 
_exptl_absorpt_correction_type    multi-scan 
_exptl_absorpt_correction_T_min   0.482 
_exptl_absorpt_correction_T_max   0.784 
_exptl_absorpt_process_details    'Bruker SADABS' 
_exptl_absorpt_special_details    ? 
_diffrn_ambient_temperature       100(2) 
_diffrn_radiation_wavelength      0.71073 
_diffrn_radiation_type            MoK\a 
_diffrn_source                    ? 
_diffrn_measurement_device_type   'Bruker APEX-II CCD' 
_diffrn_measurement_method        '\f and \w scans' 
_diffrn_detector_area_resol_mean  ? 
_diffrn_reflns_number             125986 
_diffrn_reflns_av_unetI/netI      0.0085 
_diffrn_reflns_av_R_equivalents   0.0398 
_diffrn_reflns_limit_h_min        -10 
_diffrn_reflns_limit_h_max        10 
_diffrn_reflns_limit_k_min        -10 
_diffrn_reflns_limit_k_max        10 
_diffrn_reflns_limit_l_min        -23 
_diffrn_reflns_limit_l_max        23 
_diffrn_reflns_theta_min          2.679 
_diffrn_reflns_theta_max          28.000 
_diffrn_reflns_theta_full         25.242 
_diffrn_measured_fraction_theta_max   1.000 
_diffrn_measured_fraction_theta_full  0.999 
_diffrn_reflns_Laue_measured_fraction_max    1.000 
_diffrn_reflns_Laue_measured_fraction_full   0.999 
_diffrn_reflns_point_group_measured_fraction_max   1.000 
_diffrn_reflns_point_group_measured_fraction_full  0.999 
_reflns_number_total              2645 
_reflns_number_gt                 2555 
_reflns_threshold_expression      'I > 2\s(I)' 
_reflns_Friedel_coverage          0.000 
_reflns_Friedel_fraction_max      . 
_reflns_Friedel_fraction_full     . 
  
_reflns_special_details 
; 
 Reflections were merged by SHELXL according to the crystal 
 class for the calculation of statistics and refinement. 
  
 _reflns_Friedel_fraction is defined as the number of unique 
 Friedel pairs measured divided by the number that would be 
 possible theoretically, ignoring centric projections and 
 systematic absences. 
; 
  
_computing_data_collection        'Bruker APEX2' 
_computing_cell_refinement        'Bruker SAINT' 
_computing_data_reduction         'Bruker SAINT' 
_computing_structure_solution     'SHELXS-97 (Sheldrick 2008)' 
_computing_structure_refinement 'SHELXL-2014/7 (Sheldrick, 2014)' 
_computing_molecular_graphics     'Bruker SHELXTL' 
_computing_publication_material   'Bruker SHELXTL' 
_refine_special_details           ? 
_refine_ls_structure_factor_coef  Fsqd 
_refine_ls_matrix_type            full 
_refine_ls_weighting_scheme       calc 
_refine_ls_weighting_details 
'w=1/[\s^2^(Fo^2^)+(0.0100P)^2^+1.2772P] where P=(Fo^2^+2Fc^2^)/3' 
_atom_sites_solution_primary      direct 
_atom_sites_solution_secondary    ? 
_atom_sites_solution_hydrogens    mixed 
_refine_ls_hydrogen_treatment     constr 
_refine_ls_extinction_method      none 
_refine_ls_extinction_coef        . 
_refine_ls_number_reflns          2645 
_refine_ls_number_parameters      125 
_refine_ls_number_restraints      0 
_refine_ls_R_factor_all           0.0134 
_refine_ls_R_factor_gt            0.0125 
_refine_ls_wR_factor_ref          0.0283 
_refine_ls_wR_factor_gt           0.0280 
_refine_ls_goodness_of_fit_ref    1.101 
_refine_ls_restrained_S_all       1.101 
_refine_ls_shift/su_max           0.002 
_refine_ls_shift/su_mean          0.000 
  
loop_ 
 _atom_site_label 
 _atom_site_type_symbol 
 _atom_site_fract_x 
 _atom_site_fract_y 
 _atom_site_fract_z 
 _atom_site_U_iso_or_equiv 
 _atom_site_adp_type 
 _atom_site_occupancy 
 _atom_site_site_symmetry_order 
 _atom_site_calc_flag 
 _atom_site_refinement_flags_posn 
 _atom_site_refinement_flags_adp 
 _atom_site_refinement_flags_occupancy 
 _atom_site_disorder_assembly 
 _atom_site_disorder_group 
Pr1 Pr 0.26419(2) 0.46080(2) 0.53834(2) 0.00910(3) Uani 1 1 d . . . . . 
Cl1 Cl 0.38442(5) 0.97058(5) 0.69178(2) 0.01587(8) Uani 1 1 d . . . . . 
O11 O -0.01325(15) 0.33643(16) 0.53546(7) 0.0146(2) Uani 1 1 d . . . . . 
O12 O -0.27933(15) 0.25678(16) 0.52583(7) 0.0168(3) Uani 1 1 d . . . . . 
C11 C -0.1241(2) 0.2286(2) 0.54898(9) 0.0125(3) Uani 1 1 d . . . . . 
C12 C -0.0699(3) 0.0703(2) 0.59228(12) 0.0214(4) Uani 1 1 d . . . . . 
H12A H -0.0601 0.0919 0.6475 0.028(5) Uiso 0.65(3) 1 d R U P . . 
H12B H 0.0409 0.0336 0.5802 0.028(5) Uiso 0.65(3) 1 d R U P . . 
H12C H -0.1549 -0.0184 0.5776 0.028(5) Uiso 0.65(3) 1 d R U P . . 
H12D H 0.0412 0.0753 0.6254 0.028(5) Uiso 0.35(3) 1 d R U P . . 
H12E H -0.1590 0.0451 0.6234 0.028(5) Uiso 0.35(3) 1 d R U P . . 
H12F H -0.0680 -0.0183 0.5536 0.028(5) Uiso 0.35(3) 1 d R U P . . 
O21 O 0.55336(15) 0.56250(15) 0.57487(7) 0.0128(2) Uani 1 1 d . . . . . 
O22 O 0.82260(15) 0.63325(17) 0.59927(7) 0.0154(2) Uani 1 1 d . . . . . 
C21 C 0.6850(2) 0.6017(2) 0.62325(9) 0.0121(3) Uani 1 1 d . . . . . 
C22 C 0.6732(2) 0.6094(3) 0.70698(10) 0.0193(4) Uani 1 1 d . . . . . 
H22A H 0.7867 0.5921 0.7369 0.046(5) Uiso 1 1 calc R U . . . 
H22B H 0.5958 0.5208 0.7196 0.046(5) Uiso 1 1 calc R U . . . 
H22C H 0.6294 0.7202 0.7193 0.046(5) Uiso 1 1 calc R U . . . 
O1W O 0.39543(15) 0.17253(15) 0.53974(7) 0.0140(2) Uani 1 1 d . . . . . 
H11W H 0.3943 0.0935 0.5810 0.050(6) Uiso 1 1 d R U . . . 
H12W H 0.5126 0.1782 0.5322 0.050(6) Uiso 1 1 d R U . . . 
O2W O 0.16868(15) 0.66514(16) 0.62848(7) 0.0155(2) Uani 1 1 d . . . . . 
H21W H 0.0507 0.6782 0.6336 0.053(6) Uiso 1 1 d R U . . . 
H22W H 0.2223 0.7683 0.6481 0.053(6) Uiso 1 1 d R U . . . 
O3W O 0.30033(17) 0.34876(16) 0.67134(7) 0.0180(3) Uani 1 1 d . . . . . 
H31W H 0.2483 0.3970 0.7120 0.053(6) Uiso 1 1 d R U . . . 
H32W H 0.3182 0.2320 0.6850 0.053(6) Uiso 1 1 d R U . . . 
  
loop_ 
 _atom_site_aniso_label 
 _atom_site_aniso_U_11 
 _atom_site_aniso_U_22 
 _atom_site_aniso_U_33 
 _atom_site_aniso_U_23 
 _atom_site_aniso_U_13 
 _atom_site_aniso_U_12 
Pr1 0.00560(5) 0.01016(5) 0.01163(5) 0.00086(3) 0.00167(3) -0.00065(3) 
Cl1 0.0168(2) 0.01322(18) 0.01735(19) 0.00163(15) 0.00209(15) -0.00175(16) 
O11 0.0091(6) 0.0162(6) 0.0188(6) 0.0021(5) 0.0033(5) -0.0026(5) 
O12 0.0082(6) 0.0168(6) 0.0258(7) 0.0071(5) 0.0032(5) -0.0011(5) 
C11 0.0107(8) 0.0135(8) 0.0140(7) -0.0004(6) 0.0038(6) -0.0004(6) 
C12 0.0197(9) 0.0165(9) 0.0273(10) 0.0085(7) 0.0012(8) 0.0020(7) 
O21 0.0089(6) 0.0158(6) 0.0135(5) -0.0001(5) 0.0012(4) -0.0019(5) 
O22 0.0088(6) 0.0213(6) 0.0157(6) -0.0019(5) 0.0008(4) -0.0026(5) 
C21 0.0102(8) 0.0106(7) 0.0150(8) 0.0008(6) 0.0000(6) 0.0010(6) 
C22 0.0136(8) 0.0309(10) 0.0129(8) -0.0016(7) 0.0010(6) 0.0023(8) 
O1W 0.0112(6) 0.0139(6) 0.0179(6) 0.0030(5) 0.0049(5) 0.0007(5) 
O2W 0.0112(6) 0.0142(6) 0.0207(6) -0.0045(5) 0.0016(5) 0.0000(5) 
O3W 0.0254(7) 0.0145(6) 0.0155(6) 0.0019(5) 0.0072(5) 0.0049(5) 
  
_geom_special_details 
; 
 All esds (except the esd in the dihedral angle between two l.s. planes) 
 are estimated using the full covariance matrix.  The cell esds are taken 
 into account individually in the estimation of esds in distances, angles 
 and torsion angles; correlations between esds in cell parameters are only 
 used when they are defined by crystal symmetry.  An approximate (isotropic) 
 treatment of cell esds is used for estimating esds involving l.s. planes. 
; 
  
loop_ 
 _geom_bond_atom_site_label_1 
 _geom_bond_atom_site_label_2 
 _geom_bond_distance 
 _geom_bond_site_symmetry_2 
 _geom_bond_publ_flag 
Pr1 O11 2.4043(12) . ? 
Pr1 O21 2.4219(12) . ? 
Pr1 O2W 2.4677(12) . ? 
Pr1 O3W 2.4818(12) . ? 
Pr1 O1W 2.5062(12) . ? 
Pr1 O12 2.5164(12) 3_566 ? 
Pr1 O22 2.5290(12) 3_666 ? 
Pr1 O21 2.6480(12) 3_666 ? 
Pr1 O11 2.7250(12) 3_566 ? 
O11 C11 1.274(2) . ? 
O12 C11 1.256(2) . ? 
C11 C12 1.495(2) . ? 
C12 H12A 0.9800 . ? 
C12 H12B 0.9800 . ? 
C12 H12C 0.9800 . ? 
C12 H12D 0.9800 . ? 
C12 H12E 0.9800 . ? 
C12 H12F 0.9800 . ? 
O21 C21 1.280(2) . ? 
O22 C21 1.255(2) . ? 
C21 C22 1.495(2) . ? 
C22 H22A 0.9800 . ? 
C22 H22B 0.9800 . ? 
C22 H22C 0.9800 . ? 
O1W H11W 0.9600 . ? 
O1W H12W 0.9600 . ? 
O2W H21W 0.9600 . ? 
O2W H22W 0.9600 . ? 
O3W H31W 0.9600 . ? 
O3W H32W 0.9600 . ? 
  
loop_ 
 _geom_angle_atom_site_label_1 
 _geom_angle_atom_site_label_2 
 _geom_angle_atom_site_label_3 
 _geom_angle 
 _geom_angle_site_symmetry_1 
 _geom_angle_site_symmetry_3 
 _geom_angle_publ_flag 
O11 Pr1 O21 165.41(4) . . ? 
O11 Pr1 O2W 84.84(4) . . ? 
O21 Pr1 O2W 89.08(4) . . ? 
O11 Pr1 O3W 81.06(4) . . ? 
O21 Pr1 O3W 84.37(4) . . ? 
O2W Pr1 O3W 68.12(4) . . ? 
O11 Pr1 O1W 90.29(4) . . ? 
O21 Pr1 O1W 85.70(4) . . ? 
O2W Pr1 O1W 139.36(4) . . ? 
O3W Pr1 O1W 71.26(4) . . ? 
O11 Pr1 O12 117.49(4) . 3_566 ? 
O21 Pr1 O12 73.44(4) . 3_566 ? 
O2W Pr1 O12 75.43(4) . 3_566 ? 
O3W Pr1 O12 137.36(4) . 3_566 ? 
O1W Pr1 O12 139.83(4) . 3_566 ? 
O11 Pr1 O22 75.38(4) . 3_666 ? 
O21 Pr1 O22 117.27(4) . 3_666 ? 
O2W Pr1 O22 138.23(4) . 3_666 ? 
O3W Pr1 O22 140.87(4) . 3_666 ? 
O1W Pr1 O22 78.01(4) . 3_666 ? 
O12 Pr1 O22 81.66(4) 3_566 3_666 ? 
O11 Pr1 O21 124.16(4) . 3_666 ? 
O21 Pr1 O21 67.51(4) . 3_666 ? 
O2W Pr1 O21 142.16(4) . 3_666 ? 
O3W Pr1 O21 133.71(4) . 3_666 ? 
O1W Pr1 O21 70.68(4) . 3_666 ? 
O12 Pr1 O21 69.70(4) 3_566 3_666 ? 
O22 Pr1 O21 49.87(4) 3_666 3_666 ? 
O11 Pr1 O11 68.45(5) . 3_566 ? 
O21 Pr1 O11 121.52(4) . 3_566 ? 
O2W Pr1 O11 69.33(4) . 3_566 ? 
O3W Pr1 O11 129.05(4) . 3_566 ? 
O1W Pr1 O11 144.32(4) . 3_566 ? 
O12 Pr1 O11 49.06(4) 3_566 3_566 ? 
O22 Pr1 O11 69.24(4) 3_666 3_566 ? 
O21 Pr1 O11 97.21(4) 3_666 3_566 ? 
Pr1 Pr1 Pr1 139.267(5) 3_666 3_566 ? 
C11 O11 Pr1 157.87(11) . . ? 
C11 O11 Pr1 90.55(10) . 3_566 ? 
Pr1 O11 Pr1 111.55(4) . 3_566 ? 
C11 O12 Pr1 101.01(10) . 3_566 ? 
O12 C11 O11 119.38(15) . . ? 
O12 C11 C12 120.30(16) . . ? 
O11 C11 C12 120.32(16) . . ? 
C11 C12 H12A 109.5 . . ? 
C11 C12 H12B 109.5 . . ? 
H12A C12 H12B 109.5 . . ? 
C11 C12 H12C 109.5 . . ? 
H12A C12 H12C 109.5 . . ? 
H12B C12 H12C 109.5 . . ? 
C11 C12 H12D 115.5 . . ? 
C11 C12 H12E 106.3 . . ? 
H12D C12 H12E 109.5 . . ? 
C11 C12 H12F 106.2 . . ? 
H12D C12 H12F 109.5 . . ? 
H12E C12 H12F 109.5 . . ? 
C21 O21 Pr1 154.03(11) . . ? 
C21 O21 Pr1 91.96(10) . 3_666 ? 
Pr1 O21 Pr1 112.49(4) . 3_666 ? 
C21 O22 Pr1 98.24(10) . 3_666 ? 
O22 C21 O21 119.08(15) . . ? 
O22 C21 C22 121.05(15) . . ? 
O21 C21 C22 119.87(15) . . ? 
C21 C22 H22A 109.5 . . ? 
C21 C22 H22B 109.5 . . ? 
H22A C22 H22B 109.5 . . ? 
C21 C22 H22C 109.5 . . ? 
H22A C22 H22C 109.5 . . ? 
H22B C22 H22C 109.5 . . ? 
Pr1 O1W H11W 123.2 . . ? 
Pr1 O1W H12W 111.4 . . ? 
H11W O1W H12W 105.0 . . ? 
Pr1 O2W H21W 122.2 . . ? 
Pr1 O2W H22W 128.8 . . ? 
H21W O2W H22W 105.0 . . ? 
Pr1 O3W H31W 124.3 . . ? 
Pr1 O3W H32W 124.9 . . ? 
H31W O3W H32W 105.0 . . ? 
  
loop_ 
 _geom_hbond_atom_site_label_D 
 _geom_hbond_atom_site_label_H 
 _geom_hbond_atom_site_label_A 
 _geom_hbond_distance_DH 
 _geom_hbond_distance_HA 
 _geom_hbond_distance_DA 
 _geom_hbond_angle_DHA 
 _geom_hbond_site_symmetry_A 
O1W H11W Cl1  0.96 2.19 3.1339(12) 165.6 1_545 
O1W H12W O12  0.96 1.78 2.7128(17) 161.9 1_655 
O2W H21W O22  0.96 1.85 2.7253(17) 150.1 1_455 
O2W H22W Cl1  0.96 2.12 3.0699(13) 169.2 . 
O3W H31W Cl1  0.96 2.21 3.1628(13) 171.7 2_546 
O3W H32W Cl1  0.96 2.13 3.0753(13) 166.6 1_545 
  
_refine_diff_density_max    0.457 
_refine_diff_density_min   -0.609 
_refine_diff_density_rms    0.067 
  
_shelx_res_file 
; 
  
    Ha2019_59_0m_a.res created by SHELXL-2014/7 
  
  
TITL Ha2019_59_0m_a.res in P2(1)/n 
CELL  0.71073   7.9333   7.9139  17.6327   90.000   98.947   90.000 
ZERR    4.000   0.0003   0.0003   0.0006    0.000    0.002    0.000 
LATT 1 
SYMM 1/2-X, 1/2+Y, 1/2-Z 
SFAC C  H  O  Cl Pr 
UNIT 16 48 28 4 4 
LIST 4 ! automatically inserted. Change 6 to 4 for CHECKCIF!! 
OMIT -3 56 
L.S. 10 
rem DFIX 0.96  0.0001 O1w H11w O1w H12w O2w H21w O2w H22w O3w H31w O3w H32w 
rem dfix 1.523  0.0001 H11w H12w H21w H22w H31w H32w 
FREE Pr1 C21_$6 
FREE Pr1 C11_$7 
EQIV $6 1-x, 1-y, 1-z 
BIND Pr1 Pr1_$6 
BIND Pr1 Pr1_$7 
EQIV $7 -x,1-y,1-z 
BIND Pr1 O11_$7 
HTAB 
EQIV $1 -x+3/2, y-1/2, -z+3/2 
EQIV $2 x, y-1, z 
HTAB O1W Cl1_$2 
EQIV $3 x+1, y, z 
HTAB O1W O12_$3 
EQIV $4 x-1, y, z 
HTAB O2W O22_$4 
HTAB O2W Cl1 
EQIV $5 -x+1/2, y-1/2, -z+3/2 
HTAB O3W Cl1_$5 
HTAB O3W Cl1_$2 
SIZE 0.063  0.144  0.151 
rem dfix 0.98  0.0001 C12 H12D C12 H12E C12 H12F 
rem dfix 1.601 0.0001 H12D H12E H12D H12F H12E H12F 
FMAP 2 
PLAN 8 
BOND $H 
SIZE 0.071  0.107  0.450 
ACTA 
TEMP -173 
WGHT    0.010000    1.277200 
FVAR       0.35240   0.02758   0.04646   0.04979   0.05317   0.05288   0.64504 
PR1   5    0.264186    0.460803    0.538336    11.00000    0.00560    0.01016 = 
         0.01163    0.00086    0.00167   -0.00065 
CL1   4    0.384419    0.970584    0.691780    11.00000    0.01685    0.01322 = 
         0.01735    0.00163    0.00209   -0.00175 
O11   3   -0.013247    0.336427    0.535456    11.00000    0.00914    0.01624 = 
         0.01876    0.00206    0.00334   -0.00261 
O12   3   -0.279329    0.256784    0.525832    11.00000    0.00815    0.01675 = 
         0.02580    0.00705    0.00316   -0.00107 
C11   1   -0.124093    0.228591    0.548981    11.00000    0.01068    0.01353 = 
         0.01403   -0.00035    0.00380   -0.00042 
C12   1   -0.069893    0.070280    0.592284    11.00000    0.01965    0.01647 = 
         0.02728    0.00853    0.00118    0.00201 
AFIX   3 
H12A  2   -0.060102    0.091896    0.647521    71.00000   21.00000 
H12B  2    0.040855    0.033580    0.580161    71.00000   21.00000 
H12C  2   -0.154907   -0.018402    0.577553    71.00000   21.00000 
  
H12D  2    0.041235    0.075311    0.625446   -71.00000   21.00000 
H12E  2   -0.158968    0.045082    0.623385   -71.00000   21.00000 
H12F  2   -0.067976   -0.018329    0.553603   -71.00000   21.00000 
AFIX   0 
O21   3    0.553358    0.562496    0.574868    11.00000    0.00894    0.01577 = 
         0.01355   -0.00011    0.00116   -0.00194 
O22   3    0.822602    0.633253    0.599273    11.00000    0.00878    0.02128 = 
         0.01566   -0.00186    0.00076   -0.00265 
C21   1    0.685016    0.601735    0.623247    11.00000    0.01023    0.01060 = 
         0.01498    0.00077   -0.00004    0.00097 
C22   1    0.673199    0.609380    0.706976    11.00000    0.01364    0.03093 = 
         0.01294   -0.00156    0.00103    0.00228 
AFIX 137 
H22A  2    0.786685    0.592140    0.736941    11.00000   31.00000 
H22B  2    0.595810    0.520816    0.719615    11.00000   31.00000 
H22C  2    0.629355    0.720196    0.719257    11.00000   31.00000 
AFIX   0 
O1W   3    0.395429    0.172530    0.539745    11.00000    0.01117    0.01387 = 
         0.01790    0.00305    0.00495    0.00067 
AFIX   3 
H11W  2    0.394316    0.093532    0.580981    11.00000   41.00000 
H12W  2    0.512571    0.178249    0.532226    11.00000   41.00000 
AFIX   0 
O2W   3    0.168684    0.665137    0.628476    11.00000    0.01121    0.01420 = 
         0.02070   -0.00450    0.00157   -0.00001 
AFIX   3 
H21W  2    0.050670    0.678199    0.633587    11.00000   51.00000 
H22W  2    0.222295    0.768314    0.648102    11.00000   51.00000 
AFIX   0 
O3W   3    0.300328    0.348764    0.671338    11.00000    0.02543    0.01455 = 
         0.01546    0.00194    0.00724    0.00486 
AFIX   3 
H31W  2    0.248313    0.396979    0.711986    11.00000   61.00000 
H32W  2    0.318225    0.232015    0.685048    11.00000   61.00000 
AFIX   0 
HKLF 4 
  
REM  Ha2019_59_0m_a.res in P2(1)/n 
REM R1 =  0.0125 for    2555 Fo > 4sig(Fo)  and  0.0134 for all    2645 data 
REM    125 parameters refined using      0 restraints 
  
END 
  
WGHT      0.0100      1.2772 
  
REM Instructions for potential hydrogen bonds 
HTAB C12 Cl1_$2 
HTAB C22 Cl1_$1 
HTAB C22 Cl1 
HTAB O1W Cl1_$2 
HTAB O1W O12_$3 
HTAB O2W O22_$4 
HTAB O2W Cl1 
HTAB O3W Cl1_$5 
HTAB O3W Cl1_$2 
  
REM Highest difference peak  0.457,  deepest hole -0.609,  1-sigma level  0.067 
Q1    1   0.6733  0.6109  0.6661  11.00000  0.05    0.46 
Q2    1   0.2573  0.3337  0.5434  11.00000  0.05    0.39 
Q3    1  -0.0932  0.1515  0.5756  11.00000  0.05    0.35 
Q4    1   0.2677  0.5453  0.5603  11.00000  0.05    0.33 
Q5    1   0.3850  0.1092  0.5575  11.00000  0.05    0.31 
Q6    1   0.2415  0.3739  0.6854  11.00000  0.05    0.26 
Q7    1   0.2750  0.4077  0.4954  11.00000  0.05    0.26 
Q8    1  -0.2968  0.3023  0.4784  11.00000  0.05    0.25 
; 
_shelx_res_checksum   67911 
  
_shelx_hkl_file 
; 
  -1   0   0    1.90    0.70 
  -1   0   0    8.80    1.30 
  -1   0   0    6.10    1.20 
  -1   0   0    5.80    0.90 
  -1   0   0    8.60    1.10 
  -1   0   0    7.90    1.50 
  -1   0   0    5.80    1.30 
  -1   0   0    3.30    1.00 
  -1   0   0    4.10    0.90 
  -1   0   0    5.00    1.30 
  -1   0   0    9.20    1.20 
  -1   0   0    7.60    0.90 
  -1   0   0    5.50    1.10 
  -1   0   0    4.60    0.70 
  -1   0   0    6.70    1.00 
  -1   0   0    4.10    0.80 
  -1   0   0    7.30    1.50 
  -1   0   0    7.70    1.00 
  -1   0   0    6.90    0.90 
  -1   0   0    4.50    1.20 
  -1   0   0    3.20    0.90 
  -1   0   0    8.50    1.10 
  -1   0   0    7.40    1.30 
  -1   0   0    3.20    1.00 
  -1   0   0    1.70    0.80 
  -1   0   0    4.90    0.80 
   2   0   0 6899.91  183.58 
   2   0   0 6791.92  182.18 
   2   0   0 6349.36  182.98 
   2   0   0 6814.42  184.78 
   2   0   0 6680.23  184.18 
   2   0   0 6729.03  185.28 
  -2   0   0 6640.54  181.58 
  -2   0   0 6618.04  183.78 
  -2   0   0 6547.24  181.18 
  -2   0   0 6756.02  184.58 
  -2   0   0 6734.73  184.18 
  -2   0   0 6882.21  182.98 
  -2   0   0 6640.54  183.08 
  -2   0   0 6716.03  184.38 
  -2   0   0 6545.05  182.78 
  -2   0   0 6614.14  182.38 
  -2   0   0 6673.93  183.08 
  -2   0   0 6657.63  182.08 
  -2   0   0 6718.43  183.78 
   2   0   0 6774.52  184.58 
  -2   0   0 6846.51  182.78 
  -2   0   0 6589.94  184.28 
  -2   0   0 7132.79  185.68 
  -2   0   0 6728.03  183.48 
  -2   0   0 6804.32  184.98 
  -2   0   0 6685.93  182.38 
  -2   0   0 6626.34  181.38 
  -2   0   0 6747.52  183.98 
  -2   0   0 6558.24  183.18 
  -2   0   0 6542.05  184.48 
  -2   0   0 6871.11  182.48 
  -2   0   0 6621.74  185.18 
  -2   0   0 6729.03  182.98 
   2   0   0 6652.53  184.38 
   2   0   0 6622.74  181.58 
   2   0   0 6604.64  182.78 
   2   0   0 6906.71  184.68 
   2   0   0 6883.91  182.38 
   2   0   0 6583.34  181.68 
  -2   0   0 6558.74  184.08 
   2   0   0 6719.93  184.38 
   2   0   0 6669.33  182.88 
   2   0   0 6625.44  182.58 
   2   0   0 6979.90  185.08 
   3   0   0    2.10    2.30 
   3   0   0    0.70    1.80 
   3   0   0    1.40    1.30 
   3   0   0   -1.00    1.70 
   3   0   0   -0.60    2.00 
   3   0   0   -1.10    1.90 
  -3   0   0    3.30    1.70 
  -3   0   0    0.70    2.10 
  -3   0   0    0.90    2.30 
  -3   0   0    0.30    1.60 
  -3   0   0   -0.60    1.40 
  -3   0   0    0.70    1.70 
  -3   0   0    0.60    1.90 
  -3   0   0    2.00    1.30 
  -3   0   0    3.30    1.60 
  -3   0   0    1.50    2.30 
  -3   0   0    8.10    2.70 
  -3   0   0   -0.70    1.90 
  -3   0   0    1.80    1.60 
  -3   0   0    3.00    2.30 
  -3   0   0    2.70    1.60 
  -3   0   0    0.60    1.10 
   3   0   0    7.00    1.90 
   3   0   0   -0.70    1.50 
   3   0   0   -1.70    1.50 
  -3   0   0    2.70    1.70 
  -3   0   0    0.80    4.00 
  -3   0   0    3.10    2.00 
  -3   0   0    5.10    2.10 
  -3   0   0    2.30    1.60 
  -3   0   0    0.90    2.00 
  -3   0   0    2.10    1.40 
  -3   0   0    1.50    1.90 
   3   0   0    0.80    1.30 
  -3   0   0   -0.90    1.90 
  -3   0   0    2.90    1.50 
   3   0   0    3.40    2.30 
   3   0   0    2.80    1.50 
   3   0   0    9.20    3.10 
   3   0   0    2.10    1.90 
   3   0   0    2.10    1.90 
  -3   0   0    1.20    1.10 
  -3   0   0    0.80    1.30 
  -3   0   0    0.10    1.70 
  -4   0   0 1722.83   54.89 
   4   0   0 1739.43   54.39 
   4   0   0 1724.63   51.39 
  -4   0   0 1675.73   50.89 
  -4   0   0 1664.23   49.40 
  -4   0   0 1643.84   55.49 
  -4   0   0 1701.73   51.29 
  -4   0   0 1742.03   49.90 
   4   0   0 1751.42   55.39 
  -4   0   0 1705.73   51.29 
  -4   0   0 1698.43   49.99 
  -4   0   0 1759.52   55.49 
  -4   0   0 1690.03   56.29 
  -4   0   0 1760.02   55.69 
  -4   0   0 1816.52   51.59 
  -4   0   0 1722.73   51.89 
  -4   0   0 1749.72   49.90 
  -4   0   0 1734.43   55.59 
  -4   0   0 1760.12   52.69 
   4   0   0 1642.44   49.99 
  -4   0   0 1785.02   57.79 
  -4   0   0 1722.83   51.49 
  -4   0   0 1777.02   52.89 
  -4   0   0 1810.72   52.09 
  -4   0   0 1720.43   57.29 
  -4   0   0 1667.83   58.89 
  -4   0   0 1743.43   50.29 
   4   0   0 1711.63   56.69 
   4   0   0 1723.53   50.59 
   4   0   0 1648.34   52.89 
  -4   0   0 1768.32   55.19 
  -4   0   0 1697.03   49.30 
  -4   0   0 1728.03   50.69 
   4   0   0 1692.63   55.49 
   4   0   0 1646.44   50.09 
   4   0   0 1791.62   54.49 
   4   0   0 1704.83   55.99 
   4   0   0 1713.93   51.79 
  -4   0   0 1732.63   52.29 
  -4   0   0 1748.93   53.29 
  -4   0   0 1687.73   53.49 
  -5   0   0    2.40    1.40 
  -5   0   0    0.20    3.60 
  -5   0   0    2.80    1.70 
  -5   0   0   -1.60    1.70 
  -5   0   0    2.20    3.10 
  -5   0   0    4.00    2.40 
  -5   0   0    0.50    1.80 
  -5   0   0    2.30    1.70 
  -5   0   0    0.30    1.10 
  -5   0   0    0.80    1.50 
  -5   0   0    1.40    2.80 
  -5   0   0   -1.10    2.60 
  -5   0   0   -0.20    2.90 
  -5   0   0   -0.40    1.30 
  -5   0   0    1.70    2.90 
  -5   0   0    1.50    2.50 
  -5   0   0    2.10    2.50 
   5   0   0    0.40    1.70 
   5   0   0   -0.30    2.50 
   5   0   0   -1.10    2.80 
  -5   0   0    3.00    2.10 
   5   0   0   -0.40    1.60 
  -5   0   0    1.50    2.20 
  -5   0   0    5.10    2.30 
  -5   0   0    1.90    1.90 
   5   0   0    5.80    2.90 
   5   0   0    0.60    2.50 
  -5   0   0    1.20    1.40 
  -5   0   0   -0.50    1.80 
   5   0   0    0.40    2.10 
   5   0   0    2.20    3.20 
  -5   0   0    2.50    1.60 
  -5   0   0    3.60    2.40 
   5   0   0    2.30    2.90 
   5   0   0    1.20    1.70 
  -5   0   0    4.20    6.20 
  -6   0   0 1474.45   44.00 
  -6   0   0 1409.26   46.70 
   6   0   0 1409.46   42.10 
  -6   0   0 1364.06   50.39 
  -6   0   0 1386.16   41.10 
  -6   0   0 1397.56   42.40 
  -6   0   0 1368.76   44.50 
  -6   0   0 1428.46   45.10 
  -6   0   0 1400.86   43.20 
  -6   0   0 1373.96   42.10 
  -6   0   0 1412.16   42.00 
  -6   0   0 1426.46   50.49 
  -6   0   0 1411.76   45.60 
   6   0   0 1441.86   50.59 
   6   0   0 1434.36   53.49 
  -6   0   0 1411.66   41.90 
   6   0   0 1451.35   51.99 
   6   0   0 1422.76   50.49 
  -6   0   0 1379.36   56.39 
   6   0   0 1346.17   51.89 
   6   0   0 1421.06   45.90 
  -6   0   0 1408.36   44.10 
  -6   0   0 1410.96   49.20 
  -6   0   0 1359.26   52.89 
  -6   0   0 1320.77   44.00 
  -6   0   0 1329.57   53.39 
  -6   0   0 1384.06   45.50 
  -6   0   0 1439.96   42.60 
  -6   0   0 1473.65   42.40 
   7   0   0   -1.20    3.10 
   7   0   0   -1.30    4.90 
   7   0   0    1.10    4.20 
   7   0   0   -4.10    2.80 
  -7   0   0   -4.60    3.50 
  -7   0   0   -0.40    8.20 
  -7   0   0   -1.20    3.70 
  -7   0   0    3.90    3.50 
  -7   0   0    6.10    4.00 
  -7   0   0   -1.10    4.20 
  -7   0   0    1.60    5.00 
  -7   0   0   -1.20    3.80 
  -7   0   0    1.90    2.70 
   7   0   0    3.10    4.90 
  -7   0   0    3.40    3.90 
   7   0   0    2.00    4.10 
  -8   0   0  842.72   38.00 
  -8   0   0  787.72   41.50 
  -8   0   0  847.82   33.80 
   8   0   0  856.71   38.80 
   8   0   0  818.72   37.70 
   8   0   0  940.61   41.30 
  -8   0   0  902.01   38.30 
   8   0   0  849.22   42.20 
   8   0   0  875.41   33.10 
   8   0   0  798.32   40.30 
  -8   0   0  845.62   45.80 
  -8   0   0  880.21   39.50 
  -8   0   0  845.52   41.00 
   9   0   0   -1.50    4.50 
  -9   0   0   -1.90    4.70 
   9   0   0    1.40    4.80 
  -9   0   0   -0.70    4.50 
  -9   0   0    0.30    5.50 
  -9   0   0   -0.30    6.50 
  -9   0   0    4.90    5.50 
  -9   0   0   -1.70    5.10 
   9   0   0    4.90    5.00 
 -10   0   0  211.38   24.60 
  10   0   0  256.17   27.10 
  10   0   0  241.48   26.40 
 -10   0   0  150.38   22.40 
 -10   0   0  178.58   27.30 
 -10   0   0  192.28   22.90 
   0  -1   0    2.80    1.20 
   0  -1   0   -0.40    0.40 
   0  -1   0    2.70    1.20 
   0  -1   0    3.40    1.30 
   0  -1   0   -0.50    0.50 
   0  -1   0   -0.30    0.40 
   0  -1   0   -0.60    0.40 
   0  -1   0   -1.20    0.60 
   0  -1   0    2.90    1.30 
   0  -1   0    4.30    1.50 
   0  -1   0   -0.50    0.60 
   0  -1   0    2.90    4.30 
   0  -1   0    4.30    1.50 
   0  -1   0    0.30    1.00 
   0  -1   0   -0.30    0.40 
   0  -1   0    2.00    1.00 
   0  -1   0    0.00    0.40 
   0  -1   0    0.90    1.30 
   0  -1   0    0.10    0.60 
   0  -1   0    3.90    1.10 
   0  -1   0    4.20    1.30 
   0  -1   0   -0.20    0.40 
   0  -1   0    0.70    0.80 
   0   1   0    6.90    1.80 
   0   1   0   -0.20    0.50 
   0   1   0    0.90    1.20 
   0   1   0    3.40    1.40 
   0   1   0   -0.20    0.50 
   0   1   0    0.40    0.60 
   0   1   0    1.80    0.90 
   0   1   0   -0.30    0.50 
   0   1   0    0.90    0.70 
   0   1   0    3.20    1.00 
   0   1   0    0.10    0.80 
   0   1   0    3.50    1.00 
   0   1   0   -0.40    0.50 
   0   1   0   -0.40    0.40 
   0   1   0    4.50    1.30 
   0   1   0    1.00    0.80 
   0   1   0    0.90    0.90 
   0   1   0    1.50    1.20 
   0   1   0   -0.10    0.50 
   0   1   0   -0.80    1.80 
   1  -1   0    2.50    1.30 
   1  -1   0    2.30    1.60 
   1  -1   0    3.80    1.90 
   1  -1   0    3.40    1.50 
  -1  -1   0    8.00    2.00 
  -1  -1   0    4.50    1.60 
   1  -1   0    2.50    1.00 
  -1  -1   0    5.00    2.20 
  -1  -1   0    1.20    1.20 
  -1  -1   0    4.40    2.00 
  -1  -1   0   10.30    2.60 
   1  -1   0    4.80    1.90 
  -1  -1   0    1.60    1.90 
  -1  -1   0    2.00    1.10 
   1  -1   0    2.30    1.60 
   1  -1   0    1.80    3.60 
   1  -1   0    1.60    1.50 
  -1  -1   0    0.30    1.10 
  -1  -1   0    1.80    1.10 
  -1  -1   0    1.50    1.10 
   1  -1   0    4.90    2.10 
  -1  -1   0    4.10    1.70 
   1  -1   0    2.40    1.60 
   1  -1   0    3.60    1.80 
  -1  -1   0    6.40    2.30 
  -1  -1   0    5.50    2.20 
  -1  -1   0    0.70    6.20 
  -1  -1   0    2.40    1.70 
  -1  -1   0    0.60    1.40 
   1  -1   0    5.40    2.00 
  -1  -1   0    2.20    1.70 
  -1  -1   0    3.20    1.80 
  -1  -1   0    2.70    1.50 
  -1  -1   0    6.00    1.70 
   1  -1   0    5.40    1.60 
  -1  -1   0    1.70    1.80 
   1  -1   0    4.50    2.00 
  -1  -1   0    2.20    1.30 
  -1  -1   0    0.80    1.10 
   1  -1   0    2.60    1.60 
  -1  -1   0    6.60    2.30 
  -1  -1   0    2.30    1.40 
  -1  -1   0    1.70    1.20 
   1   1   0    1.60    1.70 
  -1   1   0    5.80    2.00 
   1   1   0    2.20    1.30 
  -1   1   0    4.50    2.20 
  -1   1   0    3.40    1.60 
  -1   1   0    2.70    1.70 
   1   1   0    1.80    1.60 
  -1   1   0    4.80    1.10 
  -1   1   0    2.00    1.80 
  -1   1   0    3.50    4.50 
  -1   1   0    4.30    1.60 
   1   1   0    2.40    2.00 
  -1   1   0    3.60    1.00 
   1   1   0    4.60    1.50 
   1   1   0    1.20    1.20 
  -1   1   0    4.30    1.20 
  -1   1   0    0.50    1.50 
  -1   1   0    0.90    1.40 
  -1   1   0    6.10    2.20 
  -1   1   0    1.80    1.50 
   1   1   0    1.60    1.20 
   1   1   0    0.20    1.80 
   1   1   0   -0.50    1.20 
  -1   1   0    2.80    1.90 
  -1   1   0    2.50    1.10 
   1   1   0    0.20    1.40 
   1   1   0    6.90    2.20 
  -1   1   0    3.30    1.20 
  -1   1   0    1.80    1.40 
  -1   1   0    1.70    0.70 
  -1   1   0    2.80    0.90 
  -1   1   0    3.40    1.40 
  -1   1   0    1.90    0.90 
  -1   1   0    6.30    2.00 
  -1   1   0    4.40    1.90 
  -1   1   0   -0.70    1.30 
  -1   1   0    3.20    1.20 
  -1   1   0    2.00    1.40 
   1   1   0    4.30    2.10 
   1   1   0    2.80    2.10 
   1   1   0    3.10    1.80 
   1   1   0    2.70    1.50 
  -1   1   0   -0.80    1.10 
   1   1   0    9.90    2.70 
  -2  -1   0  958.10   30.40 
  -2  -1   0  950.90   30.40 
  -2  -1   0  921.21   32.20 
  -2  -1   0  968.10   31.50 
  -2  -1   0  905.31   29.50 
   2  -1   0 1050.09   29.10 
   2  -1   0 1008.70   28.30 
  -2  -1   0  890.21   31.70 
  -2  -1   0  899.41   29.00 
  -2  -1   0  864.31   30.50 
  -2  -1   0  929.91   28.50 
  -2  -1   0  937.51   28.40 
  -2  -1   0  947.61   33.20 
  -2  -1   0  940.41   30.60 
   2  -1   0 1051.79   29.10 
  -2  -1   0  944.51   32.80 
  -2  -1   0  933.31   32.10 
   2  -1   0  942.01   31.00 
   2  -1   0 1039.80   27.70 
  -2  -1   0  957.50   31.40 
  -2  -1   0  940.41   28.00 
  -2  -1   0  951.60   27.10 
  -2  -1   0  927.41   30.10 
   2  -1   0  964.70   31.10 
   2  -1   0 1105.59   27.90 
   2  -1   0  928.91   30.80 
  -2  -1   0  970.70   31.50 
  -2  -1   0  938.01   32.60 
  -2  -1   0  963.30   30.50 
   2  -1   0  929.61   28.40 
   2  -1   0  933.51   28.10 
   2  -1   0  949.90   28.70 
   2  -1   0  991.50   31.80 
   2  -1   0  935.01   30.00 
   2  -1   0 1150.38   32.70 
   2  -1   0 1105.49   29.00 
  -2  -1   0  952.90   30.30 
   2  -1   0  930.31   31.00 
   2  -1   0  954.00   27.90 
  -2  -1   0  948.51   31.40 
  -2   1   0  962.10   31.50 
   2   1   0  906.61   27.10 
  -2   1   0  884.71   27.20 
  -2   1   0  958.60   29.00 
  -2   1   0  961.00   31.40 
   2   1   0  951.60   31.90 
  -2   1   0  948.11   27.90 
  -2   1   0  932.61   30.90 
   2   1   0  937.11   28.50 
  -2   1   0  948.21   29.00 
  -2   1   0  916.31   28.20 
  -2   1   0  946.61   31.50 
  -2   1   0  943.11   28.30 
  -2   1   0  989.90   28.50 
  -2   1   0  948.01   31.40 
  -2   1   0  952.50   27.80 
  -2   1   0  935.81   29.10 
  -2   1   0  945.01   31.20 
  -2   1   0  913.51   30.20 
  -2   1   0  943.61   27.20 
   2   1   0  948.11   30.40 
  -2   1   0  983.50   28.20 
  -2   1   0  927.31   27.00 
  -2   1   0 1002.30   27.60 
  -2   1   0  986.20   27.60 
   2   1   0  915.01   27.20 
   2   1   0  949.21   30.70 
  -2   1   0  971.90   28.20 
   2   1   0  946.91   31.50 
   2   1   0  937.91   28.40 
   2   1   0 1005.10   33.30 
   2   1   0  948.51   30.10 
   2   1   0 1044.60   33.10 
   2   1   0 1085.89   33.20 
   2   1   0  889.91   30.50 
  -2   1   0  890.31   27.50 
  -2   1   0  931.11   28.00 
   2   1   0  985.70   27.20 
  -2   1   0  973.60   31.70 
   2   1   0  950.90   30.10 
   2   1   0  915.71   27.80 
  -2   1   0  895.81   30.30 
   2   1   0  958.30   30.30 
  -2   1   0  961.30   31.00 
  -2   1   0  912.01   31.20 
  -2   1   0  950.50   28.50 
  -2   1   0  941.41   30.40 
  -2   1   0  918.61   31.30 
   2   1   0  943.61   31.10 
  -2   1   0  962.50   41.40 
   2   1   0  985.80   32.80 
  -2   1   0  945.41   30.60 
  -3  -1   0   43.10    5.90 
  -3  -1   0   62.49    6.50 
  -3  -1   0   51.99    7.50 
  -3  -1   0   59.69    4.20 
  -3  -1   0   60.79    7.40 
  -3  -1   0   47.70    6.10 
  -3  -1   0   71.89    7.20 
  -3  -1   0   49.99    6.20 
  -3  -1   0   60.49    7.30 
   3  -1   0   66.19    4.30 
   3  -1   0   50.39    6.30 
  -3  -1   0   52.49    3.80 
  -3  -1   0   64.99    8.30 
  -3  -1   0   56.09    5.30 
   3  -1   0   46.60    6.10 
   3  -1   0   58.39    7.00 
   3  -1   0   66.19    7.10 
   3  -1   0   54.69    3.60 
   3  -1   0   69.59    5.10 
   3  -1   0   58.69    6.80 
  -3  -1   0   61.79    6.90 
   3  -1   0   67.89    5.00 
  -3  -1   0   81.99    6.70 
   3  -1   0   52.69    6.80 
  -3  -1   0   49.70    6.10 
   3  -1   0   63.79    6.80 
  -3  -1   0   39.80    4.80 
  -3  -1   0   61.99    3.90 
  -3  -1   0   57.39    4.10 
   3  -1   0   63.59    6.50 
   3  -1   0   63.09    4.60 
  -3  -1   0   59.29    8.00 
  -3  -1   0   55.89    8.30 
  -3  -1   0   60.29    3.60 
  -3  -1   0   45.80    6.90 
   3  -1   0   62.89    5.10 
  -3  -1   0   60.29    5.00 
   3  -1   0   60.49    5.90 
   3  -1   0   63.29    6.90 
   3  -1   0   54.99    5.60 
  -3  -1   0   55.09    3.00 
  -3   1   0   68.59    5.30 
  -3   1   0   59.19    4.30 
  -3   1   0   61.59    4.60 
  -3   1   0   70.89    6.80 
   3   1   0   59.29    6.40 
  -3   1   0   55.09    6.30 
  -3   1   0   67.59    7.60 
  -3   1   0   58.69    3.80 
   3   1   0   58.29    6.50 
  -3   1   0   44.80    6.30 
  -3   1   0   59.19    6.60 
  -3   1   0   53.29    5.40 
  -3   1   0   50.39    6.60 
  -3   1   0   63.99   10.90 
  -3   1   0   52.19    6.40 
  -3   1   0   58.99    5.70 
  -3   1   0   63.59    6.80 
  -3   1   0   66.29    7.10 
  -3   1   0   58.99    4.90 
  -3   1   0   65.29    6.90 
  -3   1   0   63.79    4.80 
  -3   1   0   57.09    7.60 
   3   1   0   58.99    6.00 
  -3   1   0   60.09    4.00 
  -3   1   0   53.89    3.80 
  -3   1   0   69.49    4.90 
   3   1   0   53.19    7.00 
  -3   1   0   58.39    4.10 
  -3   1   0   63.59    4.60 
  -3   1   0   48.30    5.00 
  -3   1   0   62.49    6.20 
   3   1   0   59.99    4.00 
   3   1   0   59.19    4.10 
   3   1   0   54.49    7.50 
  -3   1   0   61.39    4.80 
   3   1   0   53.69    5.50 
  -3   1   0   63.99    7.50 
   3   1   0   67.99    8.20 
  -3   1   0   65.09    4.60 
  -3   1   0   64.29    4.90 
   3   1   0   53.89    6.60 
  -3   1   0   70.19    5.80 
   3   1   0   61.99    2.80 
  -3   1   0   56.39    3.90 
   3   1   0   65.69    6.80 
   3   1   0   63.39    7.00 
   4  -1   0    6.90    3.50 
   4  -1   0    6.70    2.90 
   4  -1   0    6.20    3.90 
  -4  -1   0    2.30    2.80 
   4  -1   0    2.10    3.10 
  -4  -1   0    4.90    2.50 
  -4  -1   0    4.50    2.30 
  -4  -1   0    1.60    3.60 
  -4  -1   0    1.70    1.60 
  -4  -1   0    1.90    1.90 
  -4  -1   0   14.30    4.30 
  -4  -1   0    6.60    2.30 
   4  -1   0    5.40    3.30 
  -4  -1   0    4.10    3.30 
   4  -1   0    4.80    3.50 
  -4  -1   0    5.70    2.70 
   4  -1   0    7.30    3.50 
   4  -1   0    4.50    3.90 
   4  -1   0   -0.30    2.40 
   4  -1   0    4.40    2.20 
   4  -1   0    1.90    2.70 
  -4  -1   0    8.30    3.60 
  -4  -1   0   -1.60    7.60 
   4  -1   0    2.80    1.90 
  -4  -1   0   10.60    4.60 
  -4  -1   0   13.00    5.20 
  -4  -1   0    5.50    2.00 
  -4  -1   0    5.60    3.10 
  -4  -1   0    8.80    3.20 
  -4  -1   0    5.60    4.20 
   4  -1   0    4.00    2.70 
   4  -1   0    6.70    3.30 
  -4  -1   0    6.40    1.70 
   4  -1   0    5.40    3.70 
  -4  -1   0    7.40    3.40 
  -4   1   0    9.80    3.80 
  -4   1   0    8.20    2.60 
  -4   1   0    6.90    2.60 
  -4   1   0   -4.20    2.60 
  -4   1   0    7.20    2.40 
  -4   1   0    8.50    2.90 
  -4   1   0    4.70    2.90 
  -4   1   0    2.80    2.20 
   4   1   0   21.80    5.80 
  -4   1   0    4.30    6.10 
  -4   1   0    2.40    2.60 
  -4   1   0    2.60    3.50 
  -4   1   0    9.40    3.60 
   4   1   0    6.20    3.30 
   4   1   0    3.20    3.30 
   4   1   0    3.60    2.20 
  -4   1   0    5.00    2.80 
  -4   1   0    5.40    1.70 
  -4   1   0    0.40    2.60 
  -4   1   0    3.40    3.10 
  -4   1   0    7.70    2.40 
  -4   1   0    3.60    3.10 
  -4   1   0    3.30    2.70 
  -4   1   0    4.00    2.90 
  -4   1   0    4.20    2.00 
  -4   1   0    5.50    2.50 
  -4   1   0   10.50    3.10 
  -4   1   0    4.70    2.20 
  -4   1   0    4.60    3.60 
  -4   1   0    9.30    3.50 
   4   1   0    5.00    3.50 
  -4   1   0    7.80    3.50 
  -4   1   0    4.90    2.90 
  -4   1   0    6.90    3.30 
  -4   1   0    5.60    2.20 
   4   1   0    3.80    2.30 
   4   1   0    2.70    3.80 
  -4   1   0    8.20    2.80 
   4   1   0    6.00    1.90 
  -4   1   0   -0.20    3.00 
   5  -1   0 1006.00   32.50 
   5  -1   0 1029.90   40.40 
  -5  -1   0  993.00   31.70 
  -5  -1   0 1041.50   35.50 
  -5  -1   0 1033.60   40.20 
  -5  -1   0 1052.69   38.50 
   5  -1   0  971.70   39.00 
   5  -1   0 1031.70   35.80 
  -5  -1   0 1029.60   36.00 
  -5  -1   0 1033.10   34.40 
  -5  -1   0  988.30   31.30 
   5  -1   0  984.90   40.00 
   5  -1   0 1016.70   36.30 
  -5  -1   0 1041.10   40.80 
   5  -1   0  976.80   38.70 
  -5  -1   0 1036.30   33.10 
  -5  -1   0 1058.19   32.10 
  -5  -1   0 1012.90   42.90 
   5  -1   0 1013.20   35.60 
   5  -1   0 1037.20   34.00 
  -5  -1   0 1018.20   42.80 
  -5  -1   0 1084.89   39.40 
  -5  -1   0 1047.10   32.50 
  -5  -1   0 1045.10   30.40 
   5  -1   0 1082.39   36.20 
  -5   1   0 1059.59   33.50 
  -5   1   0 1089.09   33.70 
  -5   1   0 1021.90   33.50 
  -5   1   0 1057.79   35.40 
   5   1   0 1017.10   33.90 
   5   1   0 1038.50   32.20 
  -5   1   0 1028.10   34.00 
  -5   1   0 1037.60   37.30 
  -5   1   0 1083.49   36.30 
  -5   1   0 1033.30   32.80 
  -5   1   0 1004.30   36.30 
  -5   1   0  995.00   32.30 
  -5   1   0 1012.40   34.50 
   5   1   0 1041.70   38.70 
  -5   1   0  913.61   40.60 
  -5   1   0 1034.70   33.30 
  -5   1   0 1038.10   37.00 
   5   1   0 1049.70   36.40 
  -5   1   0 1006.10   35.00 
  -5   1   0 1053.39   38.60 
  -5   1   0  993.40   35.80 
  -5   1   0 1003.10   35.90 
  -5   1   0 1033.80   37.50 
  -5   1   0 1031.80   34.70 
   5   1   0 1064.99   40.10 
  -5   1   0 1016.70   34.60 
   5   1   0 1043.70   35.30 
  -5   1   0 1051.69   34.00 
  -5   1   0 1095.79   52.49 
  -5   1   0 1034.70   39.80 
  -5   1   0  993.20   34.40 
  -5   1   0  976.10   36.00 
  -5   1   0 1084.19   37.50 
  -5   1   0 1021.40   35.70 
   5   1   0 1042.60   40.30 
  -5   1   0 1040.20   33.40 
  -5   1   0 1036.20   35.80 
   6  -1   0   37.60    5.50 
  -6  -1   0   40.50    4.50 
   6  -1   0   35.00    6.30 
  -6  -1   0   27.70    5.90 
   6  -1   0   33.00    8.70 
   6  -1   0   35.80    7.80 
  -6  -1   0   34.90    8.10 
  -6  -1   0   28.10    7.60 
  -6  -1   0   38.60    6.20 
  -6  -1   0   29.40    6.90 
   6  -1   0   26.30    5.90 
  -6  -1   0   31.80    5.60 
  -6  -1   0   27.40    8.30 
  -6  -1   0   39.60    4.50 
  -6  -1   0   25.30    7.60 
  -6  -1   0   44.40   10.20 
  -6  -1   0   42.50    5.80 
  -6  -1   0   41.50    5.20 
   6  -1   0   36.00    7.00 
   6  -1   0   32.70    7.40 
   6  -1   0   23.60    5.50 
  -6  -1   0   38.00    3.80 
   6  -1   0   29.50    4.80 
   6   1   0   44.40    6.50 
  -6   1   0   44.50    6.60 
  -6   1   0   32.40    6.60 
  -6   1   0   40.90    6.00 
  -6   1   0   35.80    5.50 
  -6   1   0   35.20    5.90 
  -6   1   0   39.20    5.10 
   6   1   0   32.10    7.90 
  -6   1   0   26.50    7.50 
  -6   1   0   34.40    7.00 
  -6   1   0   33.10    5.00 
  -6   1   0   28.70    5.90 
  -6   1   0   36.80    7.60 
  -6   1   0   31.90    5.00 
  -6   1   0   40.00   12.80 
  -6   1   0   31.80    6.40 
  -6   1   0   45.30    6.00 
  -6   1   0   32.90    4.80 
   6   1   0   28.80    6.70 
   6   1   0   36.30    8.20 
   6   1   0   27.60    6.30 
   6   1   0   38.50    8.70 
  -6   1   0   39.30    6.30 
  -6   1   0   35.90   12.70 
  -6   1   0   27.50    5.90 
   6   1   0   38.30    6.10 
  -6   1   0   32.70    5.30 
  -6   1   0   36.10    4.70 
  -6   1   0   39.10    7.00 
  -6   1   0   34.80    5.30 
  -6   1   0   47.20    9.10 
   7  -1   0 1185.38   38.60 
   7  -1   0 1182.08   40.50 
   7  -1   0 1152.38   48.00 
   7  -1   0 1170.48   38.60 
  -7  -1   0 1149.39   48.30 
  -7  -1   0 1189.58   49.30 
   7  -1   0 1224.58   43.60 
   7  -1   0 1189.18   48.20 
  -7  -1   0 1108.19   51.99 
  -7  -1   0 1139.19   42.20 
  -7  -1   0 1213.28   46.90 
   7  -1   0 1210.18   44.40 
  -7  -1   0 1135.29   46.50 
  -7  -1   0 1187.58   39.30 
  -7  -1   0 1126.39   51.09 
   7  -1   0 1122.39   49.00 
  -7   1   0 1139.49   45.10 
  -7   1   0 1195.38   43.90 
  -7   1   0 1085.99   46.00 
   7   1   0 1236.28   47.80 
  -7   1   0 1151.78   52.99 
  -7   1   0 1213.68   40.10 
  -7   1   0 1182.58   41.40 
  -7   1   0 1116.59   39.50 
   7   1   0 1208.28   43.00 
  -7   1   0 1194.68   39.70 
  -7   1   0 1131.59   41.80 
   7   1   0 1214.08   48.60 
  -7   1   0 1111.09   42.80 
  -7   1   0 1208.48   38.70 
   7   1   0 1208.88   49.40 
  -7   1   0 1210.68   38.90 
   7   1   0 1082.79   47.00 
  -7   1   0 1127.69   47.70 
  -7   1   0 1169.78   51.09 
  -7   1   0 1103.99   41.20 
   7   1   0 1197.68   40.90 
   8  -1   0   16.40    7.60 
  -8  -1   0    9.20    7.50 
   8  -1   0   11.40    5.80 
   8  -1   0   11.90    6.70 
   8  -1   0   -0.40    4.10 
  -8  -1   0    3.40    5.20 
  -8  -1   0   14.80    7.70 
   8  -1   0    9.70    5.40 
  -8  -1   0    7.30    6.00 
  -8  -1   0   17.10    8.10 
  -8  -1   0    2.40    7.60 
  -8  -1   0    6.40    6.20 
  -8   1   0   10.00    5.60 
  -8   1   0   13.70    6.10 
   8   1   0   -4.20    5.50 
  -8   1   0    7.00    4.70 
   8   1   0   14.20    6.70 
   8   1   0    9.30    4.80 
  -8   1   0    8.60    7.90 
  -8   1   0    0.50    4.60 
  -8   1   0    6.70    6.50 
   8   1   0    9.80    6.50 
  -8   1   0   10.50    5.80 
   8   1   0    6.00    5.60 
   9  -1   0  269.37   27.10 
  -9  -1   0  199.28   21.90 
  -9  -1   0  222.48   28.70 
  -9  -1   0  232.38   27.20 
  -9  -1   0  250.87   25.30 
   9  -1   0  235.38   26.80 
  -9  -1   0  226.08   25.00 
  -9  -1   0  244.08   26.10 
   9  -1   0  245.68   21.00 
   9   1   0  242.78   25.90 
  -9   1   0  224.38   24.40 
  -9   1   0  199.08   27.40 
   9   1   0  228.88   23.90 
  -9   1   0  256.67   28.70 
   9   1   0  262.67   21.10 
   9   1   0  211.18   23.70 
  -9   1   0  199.48   21.90 
  10  -1   0   11.70    8.50 
  10  -1   0    7.60    7.50 
 -10  -1   0    9.50    9.20 
 -10  -1   0    2.70    7.50 
 -10  -1   0   16.90    9.20 
  10  -1   0   13.90    8.20 
 -10  -1   0   21.00    9.70 
  10   1   0   30.00   10.50 
 -10   1   0   23.10    9.50 
 -10   1   0   28.10    9.70 
 -10   1   0   15.40   10.50 
  10   1   0   16.50    9.00 
 -10   1   0   23.90   10.50 
   0  -2   0 3953.10  116.09 
   0  -2   0 3825.72  111.89 
   0  -2   0 3879.01  111.29 
   0  -2   0 4016.70  113.09 
   0  -2   0 3759.92  114.19 
   0  -2   0 4047.40  113.79 
   0  -2   0 3663.83  120.29 
   0  -2   0 3890.71  114.09 
   0  -2   0 4146.59  114.89 
   0  -2   0 4029.20  111.39 
   0  -2   0 4094.79  111.89 
   0  -2   0 4105.29  113.39 
   0  -2   0 3760.42  114.09 
   0  -2   0 3997.60  112.89 
   0  -2   0 3870.11  114.99 
   0  -2   0 3952.00  111.09 
   0  -2   0 4097.39  134.49 
   0  -2   0 3939.41  111.79 
   0  -2   0 3995.80  111.99 
   0  -2   0 3962.60  112.09 
   0  -2   0 3844.12  113.19 
   0  -2   0 4090.59  113.69 
   0  -2   0 4284.17  113.69 
   0  -2   0 3652.43  117.39 
   0  -2   0 3772.42  112.99 
   0  -2   0 3960.00  115.29 
   0  -2   0 3868.31  115.79 
   0  -2   0 3881.11  111.99 
   0  -2   0 4104.79  113.69 
   0   2   0 4013.50  111.39 
   0   2   0 3917.61  116.59 
   0   2   0 4142.99  113.49 
   0   2   0 3995.10  112.79 
   0   2   0 3823.42  114.59 
   0   2   0 3931.51  114.49 
   0   2   0 4034.60  111.79 
   0   2   0 3999.40  112.29 
   0   2   0 4192.28  113.09 
   0   2   0 3968.10  114.09 
   0   2   0 3879.31  112.99 
   0   2   0 4155.28  111.79 
   0   2   0 3924.31  116.39 
   0   2   0 4290.57  115.19 
   0   2   0 4077.69  112.19 
   0   2   0 4168.98  113.49 
   0   2   0 3961.70  111.39 
   0   2   0 4180.58  114.29 
   0   2   0 4276.07  114.89 
   0   2   0 3767.22  115.09 
   0   2   0 4044.60  111.99 
   0   2   0 4025.40  113.49 
   0   2   0 4035.00  116.19 
   0   2   0 4160.58  113.79 
   1  -2   0 3541.05  100.29 
   1  -2   0 3470.25   95.59 
   1  -2   0 3415.26  122.99 
   1  -2   0 3465.65   96.29 
  -1  -2   0 3355.56   99.89 
   1  -2   0 3496.45   96.19 
  -1  -2   0 3486.05  100.19 
  -1  -2   0 3375.66  101.39 
   1  -2   0 3586.84   96.49 
   1  -2   0 3563.84   97.99 
   1  -2   0 3546.45  101.59 
  -1  -2   0 3467.65  100.19 
   1  -2   0 3611.34   99.69 
  -1  -2   0 3476.95   99.99 
   1  -2   0 3359.46  102.29 
   1  -2   0 3434.86  100.89 
  -1  -2   0 3547.25  103.49 
   1  -2   0 3459.35   96.09 
   1  -2   0 3550.34   97.49 
  -1  -2   0 3442.26   98.79 
  -1  -2   0 3455.95  101.29 
  -1  -2   0 3520.75  100.39 
  -1  -2   0 3486.65  102.19 
   1  -2   0 3370.86   97.09 
  -1  -2   0 3708.83  102.29 
   1  -2   0 3499.65  101.69 
   1  -2   0 3465.65   98.39 
   1  -2   0 3564.94  102.69 
   1  -2   0 3479.05  101.09 
   1  -2   0 3486.95   96.99 
   1  -2   0 3474.85   98.39 
  -1  -2   0 3415.26  100.59 
  -1  -2   0 3514.55  100.79 
  -1  -2   0 3376.36  100.69 
   1  -2   0 3548.94  101.49 
   1  -2   0 3490.35  101.39 
  -1  -2   0 3583.84  100.99 
  -1  -2   0 3592.74  100.69 
   1  -2   0 3331.47  100.89 
  -1  -2   0 3628.24  101.29 
  -1  -2   0 3667.13  101.19 
   1  -2   0 3537.15   98.69 
   1  -2   0 3499.25   96.89 
   1  -2   0 3405.06  101.19 
  -1  -2   0 3420.76  101.29 
  -1  -2   0 3465.55   99.09 
  -1  -2   0 3728.33  101.49 
  -1  -2   0 3586.44  101.09 
   1  -2   0 3410.86  100.29 
  -1  -2   0 3525.15  100.29 
   1  -2   0 3364.66   99.39 
  -1  -2   0 3462.75   99.19 
   1  -2   0 3528.05   98.99 
  -1  -2   0 3544.15  100.19 
   1  -2   0 3444.06   95.79 
   1  -2   0 3418.86  101.29 
  -1   2   0 3562.34   99.29 
  -1   2   0 3369.46   96.79 
  -1   2   0 3466.85  100.39 
  -1   2   0 3407.16   97.99 
  -1   2   0 3326.27  100.59 
   1   2   0 3492.35   97.19 
   1   2   0 3753.22  100.69 
  -1   2   0 3402.26  101.79 
  -1   2   0 3676.93  100.59 
   1   2   0 3502.35  101.59 
   1   2   0 3519.85  101.09 
  -1   2   0 3384.16  100.59 
   1   2   0 3655.33  101.69 
  -1   2   0 3396.56   95.69 
  -1   2   0 3531.85  101.09 
  -1   2   0 3392.26   99.59 
  -1   2   0 3618.64   96.39 
  -1   2   0 3454.95  101.09 
  -1   2   0 3498.55  121.29 
  -1   2   0 3533.55  101.39 
   1   2   0 3606.94  101.29 
  -1   2   0 3480.15  102.59 
   1   2   0 3571.84  100.29 
   1   2   0 3646.94  102.89 
   1   2   0 3373.96  100.69 
   1   2   0 3465.75  102.79 
  -1   2   0 3261.07  100.49 
   1   2   0 3313.97  100.19 
  -1   2   0 3431.26   97.69 
  -1   2   0 3425.26  102.89 
  -1   2   0 3540.75  102.09 
  -1   2   0 3490.45   98.99 
   1   2   0 3520.05  100.29 
   1   2   0 3462.25   99.39 
  -1   2   0 3504.75  101.39 
   1   2   0 3499.85   98.79 
   1   2   0 3686.73  101.89 
   1   2   0 3453.35   99.99 
   1   2   0 3535.25   99.49 
   1   2   0 3589.24  101.09 
  -1   2   0 3428.26   98.19 
   1   2   0 3351.96   98.49 
  -1   2   0 3545.45   96.79 
   1   2   0 3636.24   99.69 
   1   2   0 3604.84  100.39 
   1   2   0 3488.45   99.79 
   1   2   0 3427.26  100.59 
   1   2   0 3620.44  100.99 
  -2  -2   0 1852.51   58.59 
  -2  -2   0 1952.10   57.79 
   2  -2   0 1781.72   52.69 
  -2  -2   0 1915.71   58.39 
  -2  -2   0 1875.21   55.39 
  -2  -2   0 1899.71   59.69 
  -2  -2   0 1878.31   55.89 
   2  -2   0 1895.01   57.79 
   2  -2   0 1808.72   57.59 
  -2  -2   0 1842.02   53.79 
  -2  -2   0 1895.01   56.69 
  -2  -2   0 1859.81   55.39 
  -2  -2   0 1850.81   53.99 
   2  -2   0 1829.92   59.19 
  -2  -2   0 1887.71   58.59 
  -2  -2   0 1844.32   59.69 
  -2  -2   0 1891.51   56.79 
   2  -2   0 1915.11   58.79 
  -2  -2   0 1786.72   59.79 
   2  -2   0 1886.01   57.99 
   2  -2   0 1800.52   55.79 
  -2  -2   0 1826.52   57.79 
  -2  -2   0 1816.12   57.89 
   2  -2   0 1832.72   53.89 
   2  -2   0 1850.91   53.49 
   2  -2   0 1854.11   55.89 
  -2  -2   0 1796.62   56.89 
   2  -2   0 1854.31   51.99 
   2  -2   0 1838.12   54.49 
   2  -2   0 1808.82   51.39 
  -2  -2   0 1858.31   55.69 
   2  -2   0 1845.42   59.39 
   2  -2   0 1813.02   53.29 
   2  -2   0 1773.72   57.89 
   2  -2   0 1784.82   54.49 
  -2  -2   0 1959.90   57.09 
  -2  -2   0 1840.02   56.19 
  -2  -2   0 1938.01   56.79 
   2  -2   0 1838.12   58.29 
  -2  -2   0 1874.71   60.09 
   2  -2   0 1874.61   58.39 
  -2  -2   0 1923.01   57.79 
   2  -2   0 1890.61   77.99 
   2  -2   0 1917.31   52.99 
   2  -2   0 1828.02   56.89 
   2  -2   0 1888.01   51.89 
  -2  -2   0 1860.31   56.59 
  -2   2   0 1828.62   58.79 
  -2   2   0 1868.41   54.09 
  -2   2   0 1809.22   53.79 
   2   2   0 1887.51   55.19 
   2   2   0 1835.82   53.19 
   2   2   0 1978.30   58.69 
   2   2   0 1815.72   59.49 
   2   2   0 1908.61   59.09 
   2   2   0 1963.30   56.49 
   2   2   0 1896.91   54.89 
   2   2   0 1783.62   55.19 
  -2   2   0 1891.71   56.89 
   2   2   0 1823.72   55.29 
   2   2   0 1861.81   53.99 
  -2   2   0 1889.91   57.89 
  -2   2   0 1899.41   59.19 
   2   2   0 1766.32   58.49 
   2   2   0 1824.72   53.79 
   2   2   0 1834.42   56.29 
  -2   2   0 1850.51   57.79 
  -2   2   0 1775.52   57.79 
  -2   2   0 1838.32   53.29 
  -2   2   0 1831.02   52.39 
   2   2   0 1842.92   53.49 
  -2   2   0 1833.52   51.59 
  -2   2   0 1826.92   58.09 
  -2   2   0 1906.31   58.09 
  -2   2   0 1892.91   57.79 
  -2   2   0 1902.21   58.49 
  -2   2   0 1906.41   59.69 
  -2   2   0 1911.81   56.69 
  -2   2   0 1753.12   52.69 
  -2   2   0 1784.92   51.79 
  -2   2   0 1862.11   56.59 
  -2   2   0 1839.42   55.49 
  -2   2   0 1831.02   51.19 
   2   2   0 1962.80   56.79 
   2   2   0 1787.72   54.19 
  -2   2   0 1842.42   57.69 
   2   2   0 1837.92   56.89 
   2   2   0 1854.71   56.79 
  -2   2   0 1834.32   77.39 
   2   2   0 1800.52   56.19 
  -2   2   0 1764.52   54.69 
  -2   2   0 1875.11   58.29 
   2   2   0 1931.81   57.49 
  -2   2   0 1834.42   58.49 
   3  -2   0  938.51   34.30 
   3  -2   0  908.31   34.30 
  -3  -2   0  851.71   35.70 
   3  -2   0  895.81   28.90 
   3  -2   0  934.91   34.70 
   3  -2   0  943.91   34.60 
   3  -2   0  893.21   30.60 
   3  -2   0  945.51   30.80 
   3  -2   0  922.41   28.40 
  -3  -2   0  944.01   30.50 
  -3  -2   0  932.51   27.00 
   3  -2   0  939.41   29.70 
   3  -2   0  942.91   35.00 
  -3  -2   0  935.31   27.00 
  -3  -2   0  935.51   34.60 
  -3  -2   0  909.11   31.90 
   3  -2   0  940.71   27.60 
   3  -2   0  930.21   33.10 
   3  -2   0  912.41   28.20 
  -3  -2   0  924.51   32.80 
   3  -2   0  902.01   34.20 
  -3  -2   0  946.81   33.10 
  -3  -2   0  929.01   33.10 
  -3  -2   0  971.00   29.90 
   3  -2   0  948.61   33.00 
   3  -2   0  935.21   34.30 
  -3  -2   0  975.10   36.50 
  -3  -2   0  888.11   30.30 
  -3  -2   0  939.71   35.80 
  -3  -2   0  948.21   32.90 
  -3  -2   0  921.11   37.20 
  -3   2   0  948.71   51.79 
  -3   2   0  962.50   31.30 
  -3   2   0  949.60   26.70 
   3   2   0  893.11   29.20 
   3   2   0  982.60   33.60 
  -3   2   0  969.50   31.60 
  -3   2   0  910.71   27.80 
   3   2   0  892.51   27.30 
   3   2   0  948.11   28.30 
   3   2   0  902.91   26.40 
   3   2   0  959.90   30.20 
   3   2   0  951.90   27.20 
  -3   2   0  910.21   28.50 
  -3   2   0  954.60   34.30 
  -3   2   0 1010.90   28.90 
   3   2   0  882.41   26.40 
  -3   2   0  923.31   27.80 
  -3   2   0  861.51   33.30 
  -3   2   0  883.11   33.10 
  -3   2   0  914.51   32.90 
  -3   2   0  944.71   26.80 
  -3   2   0  889.31   26.40 
   3   2   0  924.31   28.40 
  -3   2   0  893.41   34.20 
  -3   2   0  904.71   28.20 
   3   2   0  941.81   35.20 
  -3   2   0  941.11   26.70 
  -3   2   0  921.11   27.90 
  -3   2   0  881.51   29.20 
  -3   2   0  909.01   34.60 
  -3   2   0  917.91   35.20 
   3   2   0  903.01   32.80 
   3   2   0  960.40   35.90 
   3   2   0  934.01   32.80 
   3   2   0  930.81   32.60 
   3   2   0  901.41   27.20 
  -3   2   0  845.82   31.10 
   3   2   0  928.31   30.10 
  -3   2   0  926.31   27.60 
  -3   2   0  955.80   29.90 
  -3   2   0  913.91   29.10 
   3   2   0  886.71   32.30 
  -4  -2   0 1257.27   47.50 
   4  -2   0 1189.18   44.80 
   4  -2   0 1248.68   41.90 
  -4  -2   0 1158.38   42.40 
  -4  -2   0 1219.38   37.80 
   4  -2   0 1260.17   45.60 
   4  -2   0 1157.98   36.60 
  -4  -2   0 1238.58   47.30 
  -4  -2   0 1024.10   60.79 
   4  -2   0 1246.58   45.00 
  -4  -2   0 1264.57   45.20 
  -4  -2   0 1266.87   44.00 
   4  -2   0 1244.48   44.20 
  -4  -2   0 1212.38   42.90 
  -4  -2   0 1283.57   41.60 
   4  -2   0 1303.17   38.80 
  -4  -2   0 1196.38   39.00 
   4  -2   0 1249.07   39.10 
   4  -2   0 1216.88   37.00 
   4  -2   0 1292.07   44.40 
   4  -2   0 1300.17   37.50 
  -4  -2   0 1257.07   39.00 
   4  -2   0 1233.08   45.40 
   4  -2   0 1329.77   39.80 
   4  -2   0 1215.98   43.40 
   4  -2   0 1277.67   39.70 
   4  -2   0 1311.37   39.80 
  -4  -2   0 1236.08   42.40 
  -4  -2   0 1202.68   48.10 
  -4  -2   0 1263.57   39.20 
   4   2   0 1227.98   36.20 
  -4   2   0 1218.48   37.00 
   4   2   0 1231.68   42.20 
  -4   2   0 1286.17   39.20 
   4   2   0 1269.47   45.60 
  -4   2   0 1282.17   40.90 
  -4   2   0 1235.48   39.00 
  -4   2   0 1209.48   43.50 
  -4   2   0 1294.57   38.10 
  -4   2   0 1194.68   44.90 
  -4   2   0 1224.38   47.10 
  -4   2   0 1569.44   95.49 
  -4   2   0 1208.08   36.10 
  -4   2   0 1223.58   36.90 
   4   2   0 1200.08   46.10 
  -4   2   0 1222.48   37.50 
   4   2   0 1257.27   45.90 
  -4   2   0 1222.78   43.90 
   4   2   0 1258.47   43.60 
   4   2   0 1236.08   38.20 
   4   2   0 1226.38   37.50 
   4   2   0 1236.68   35.40 
   4   2   0 1214.68   36.00 
  -4   2   0 1293.77   37.50 
  -4   2   0 1355.46   40.60 
  -4   2   0 1225.68   44.90 
   4   2   0 1252.67   38.90 
  -4   2   0 1230.48   39.50 
  -4   2   0 1245.68   40.60 
  -4   2   0 1255.97   38.60 
  -4   2   0 1207.48   35.80 
  -4   2   0 1349.16   36.90 
  -4   2   0 1229.38   37.60 
  -4   2   0 1265.27   38.10 
  -4   2   0 1229.68   36.40 
   4   2   0 1247.78   43.00 
  -4   2   0 1224.08   36.00 
  -4   2   0 1246.38   38.60 
  -4   2   0 1324.47   40.60 
  -5  -2   0  452.35   26.30 
  -5  -2   0  443.86   24.90 
   5  -2   0  434.86   17.40 
  -5  -2   0  417.36   16.20 
  -5  -2   0  422.96   22.10 
  -5  -2   0  393.56   20.80 
   5  -2   0  418.26   23.10 
   5  -2   0  443.06   22.50 
  -5  -2   0  452.25   17.10 
   5  -2   0  421.26   21.60 
   5  -2   0  389.46   22.50 
   5  -2   0  421.36   22.60 
   5  -2   0  438.36   19.40 
  -5  -2   0  407.56   16.70 
  -5  -2   0  400.86   22.50 
   5  -2   0  417.46   22.40 
   5  -2   0  438.26   17.80 
  -5  -2   0  378.96   19.90 
  -5  -2   0  428.06   25.00 
  -5  -2   0  421.16   15.00 
   5  -2   0  421.16   16.40 
   5  -2   0  425.46   18.30 
  -5   2   0  423.76   16.70 
  -5   2   0  420.96   15.40 
  -5   2   0  453.75   16.10 
  -5   2   0  419.66   16.50 
  -5   2   0  480.55   18.50 
   5   2   0  435.96   23.40 
   5   2   0  386.36   19.20 
  -5   2   0  436.46   19.00 
  -5   2   0  418.76   21.80 
   5   2   0  401.86   21.00 
  -5   2   0  404.36   16.40 
  -5   2   0  470.95   25.80 
  -5   2   0  425.56   16.60 
  -5   2   0  427.76   17.40 
  -5   2   0  418.06   15.40 
  -5   2   0  405.16   22.50 
  -5   2   0  429.56   17.30 
   5   2   0  409.46   22.60 
   5   2   0  409.86   15.10 
   5   2   0  439.26   16.70 
  -5   2   0  416.16   17.80 
  -5   2   0  429.66   15.20 
  -5   2   0  399.66   14.70 
  -5   2   0  436.66   18.40 
  -5   2   0  421.26   15.10 
  -5   2   0  415.96   21.40 
   5   2   0  401.76   14.50 
   5   2   0  445.86   24.10 
  -5   2   0  400.36   15.40 
  -5   2   0  411.86   17.10 
  -5   2   0  439.16   17.70 
  -5   2   0  430.86   16.50 
   5   2   0  419.46   14.70 
  -5   2   0  439.86   21.00 
  -5   2   0  420.46   17.00 
  -5   2   0  398.06   16.00 
  -5   2   0  423.96   18.60 
   5   2   0  434.16   21.00 
   6  -2   0 1657.93   57.39 
  -6  -2   0 1583.04   56.19 
   6  -2   0 1605.94   53.49 
  -6  -2   0 1657.93   62.99 
  -6  -2   0 1665.13   50.99 
   6  -2   0 1667.33   59.69 
   6  -2   0 1673.23   51.69 
   6  -2   0 1652.43   51.29 
  -6  -2   0 1676.83   65.89 
  -6  -2   0 1868.41   61.79 
  -6  -2   0 1721.83   58.69 
  -6  -2   0 1591.94   48.60 
  -6  -2   0 1582.74   48.30 
  -6  -2   0 1695.23   50.49 
   6  -2   0 1715.93   53.29 
   6  -2   0 1628.74   61.49 
   6  -2   0 1660.93   60.69 
  -6  -2   0 1621.44   48.30 
  -6  -2   0 1545.95   59.49 
  -6  -2   0 1732.53   65.49 
   6  -2   0 1624.74   61.19 
  -6   2   0 1711.63   49.20 
  -6   2   0 1643.44   52.89 
  -6   2   0 1669.33   52.29 
   6   2   0 1597.44   60.69 
  -6   2   0 1626.34   51.79 
  -6   2   0 1627.44   54.09 
   6   2   0 1631.04   54.89 
  -6   2   0 1624.84   49.80 
  -6   2   0 1617.74   51.29 
  -6   2   0 1632.34   52.99 
  -6   2   0 1545.65   51.59 
   6   2   0 1539.25   60.39 
  -6   2   0 1648.94   60.79 
  -6   2   0 1719.23   55.49 
  -6   2   0 1670.53   57.89 
   6   2   0 1622.94   50.09 
  -6   2   0 1574.84   52.39 
   6   2   0 1692.23   56.89 
  -6   2   0 1612.04   57.79 
   6   2   0 1637.64   61.89 
   6   2   0 1622.94   51.09 
  -6   2   0 1651.03   51.99 
  -6   2   0 1610.84   50.09 
  -6   2   0 1607.44   49.90 
  -6   2   0 1596.74   48.40 
  -6   2   0 1659.63   50.09 
  -6   2   0 1698.93   56.59 
  -6   2   0 1640.64   49.99 
  -6   2   0 1710.03   49.90 
  -6   2   0 1644.54   48.90 
  -6   2   0 1656.73   48.90 
   6   2   0 1734.83   59.29 
  -6   2   0 1583.34   63.19 
   7  -2   0  116.99   10.00 
   7  -2   0  129.29    9.80 
  -7  -2   0  105.79   17.40 
   7  -2   0  125.69   16.20 
  -7  -2   0  130.39   16.10 
  -7  -2   0  130.99   17.60 
  -7  -2   0  100.29   16.80 
   7  -2   0  143.79   13.50 
   7  -2   0  105.19   15.50 
   7  -2   0  144.09   15.10 
   7  -2   0  125.79   15.70 
  -7  -2   0  111.19   13.60 
  -7  -2   0   84.99   14.20 
  -7  -2   0  120.49   14.90 
   7  -2   0  140.19   18.00 
  -7   2   0  126.69   13.10 
   7   2   0  104.29   11.30 
   7   2   0  126.89   15.70 
  -7   2   0  121.19   11.50 
   7   2   0  106.69   13.30 
   7   2   0  125.89   17.30 
  -7   2   0  134.19   15.10 
   7   2   0  117.09   16.20 
  -7   2   0  129.69   10.40 
  -7   2   0  128.99   16.20 
   7   2   0  122.79   14.50 
  -7   2   0  148.19   14.00 
  -7   2   0  136.19   15.90 
  -7   2   0  112.59   16.10 
  -7   2   0  118.59   10.30 
  -7   2   0  150.28   15.60 
  -8  -2   0  696.03   36.60 
  -8  -2   0  681.73   40.30 
  -8  -2   0  653.93   31.40 
   8  -2   0  693.33   36.60 
  -8  -2   0  637.64   35.70 
  -8  -2   0  721.13   35.30 
  -8  -2   0  718.33   41.60 
   8  -2   0  625.84   34.80 
   8  -2   0  668.43   37.40 
  -8  -2   0  684.23   37.80 
  -8   2   0  682.63   32.90 
  -8   2   0  674.03   41.20 
  -8   2   0  623.14   38.10 
   8   2   0  696.83   37.40 
   8   2   0  693.73   32.00 
   8   2   0  699.93   37.50 
   8   2   0  680.83   36.50 
   8   2   0  672.33   34.60 
  -8   2   0  687.43   36.90 
  -8   2   0  726.83   36.10 
   9  -2   0   52.39   12.10 
  -9  -2   0   47.20   12.80 
  -9  -2   0   58.19   15.40 
  -9  -2   0   37.30   10.40 
  -9  -2   0   27.30   11.70 
  -9  -2   0   41.60   11.40 
  -9  -2   0   57.79   13.40 
   9  -2   0   32.90   11.30 
   9  -2   0   56.19   12.70 
   9   2   0   46.30   13.40 
   9   2   0   51.99   13.20 
  -9   2   0   61.39   14.70 
  -9   2   0   61.39   13.10 
   9   2   0   40.00   11.60 
  -9   2   0   60.99   15.80 
   9   2   0   50.49   10.30 
  -9   2   0   54.39   12.50 
  -9   2   0   61.19   14.00 
   9   2   0   54.79   11.80 
  -9   2   0   40.70    9.80 
  10  -2   0  333.37   34.50 
  10  -2   0  301.17   26.50 
 -10  -2   0  337.17   26.30 
  10  -2   0  342.07   27.70 
 -10  -2   0  343.47   32.40 
 -10  -2   0  370.76   37.80 
 -10  -2   0  338.47   27.80 
 -10   2   0  352.76   27.90 
 -10   2   0  355.56   40.70 
 -10   2   0  325.97   35.50 
  10   2   0  323.07   32.10 
  10   2   0  328.97   39.30 
 -10   2   0  351.76   29.20 
 -10   2   0  353.56   27.40 
   0  -3   0   10.20    5.40 
   0  -3   0   -0.60    2.60 
   0  -3   0    3.00    7.90 
   0  -3   0   -1.90    2.60 
   0  -3   0   -2.80    2.30 
   0  -3   0   -2.00    2.00 
   0  -3   0   -2.40    2.50 
   0  -3   0   -0.10    2.30 
   0  -3   0    2.50    2.90 
   0  -3   0    1.80    2.60 
   0  -3   0    2.70    2.10 
   0  -3   0    0.00    2.20 
   0  -3   0    4.60    2.80 
   0  -3   0   -1.60    3.60 
   0  -3   0    0.10    2.40 
   0  -3   0   -1.30    1.80 
   0  -3   0   -2.60    3.00 
   0  -3   0    0.50    3.20 
   0  -3   0   -3.90    2.30 
   0  -3   0    1.30    2.90 
   0  -3   0   -2.80    1.40 
   0  -3   0    2.10    2.40 
   0  -3   0    1.40    2.50 
   0  -3   0    1.10    2.40 
   0  -3   0    0.10    2.00 
   0   3   0   -0.10    1.80 
   0   3   0    9.20    4.10 
   0   3   0    1.80    3.60 
   0   3   0    1.90    3.20 
   0   3   0   -2.30    2.10 
   0   3   0    1.90    2.70 
   0   3   0    1.00    3.00 
   0   3   0   -0.60    2.30 
   0   3   0   -1.30    2.50 
   0   3   0    0.30    2.50 
   0   3   0    1.10    3.20 
   0   3   0    1.70    3.00 
   0   3   0    0.90    2.00 
   0   3   0    2.00    2.90 
   0   3   0    1.90    2.60 
   0   3   0    0.10    2.60 
   0   3   0    3.20    2.80 
   0   3   0    2.40    2.20 
   0   3   0    1.90    3.30 
   0   3   0   -0.20    2.20 
   1  -3   0  209.98   13.80 
  -1  -3   0  221.08   14.30 
   1  -3   0  238.98   14.00 
   1  -3   0  237.28   13.70 
   1  -3   0  241.58   29.20 
   1  -3   0  227.28   10.70 
  -1  -3   0  247.08   14.20 
   1  -3   0  226.88   11.70 
   1  -3   0  257.37   11.00 
  -1  -3   0  207.18   13.10 
  -1  -3   0  232.48   12.70 
   1  -3   0  238.68   15.30 
  -1  -3   0  225.38   13.30 
   1  -3   0  199.08   12.20 
   1  -3   0  227.18   14.40 
  -1  -3   0  228.08   13.90 
  -1  -3   0  262.47   32.20 
   1  -3   0  227.48   15.50 
  -1  -3   0  232.08   17.40 
  -1  -3   0  245.38   13.30 
   1  -3   0  251.57   11.90 
  -1  -3   0  229.68   12.60 
   1  -3   0  225.08   10.50 
   1  -3   0  230.78   11.30 
   1  -3   0  236.58   13.90 
  -1  -3   0  222.98   13.80 
   1  -3   0  222.58    9.90 
   1  -3   0  236.08   13.00 
   1  -3   0  238.28   12.80 
  -1  -3   0  204.28   13.20 
  -1  -3   0  233.78   15.30 
  -1  -3   0  229.18   14.70 
  -1  -3   0  198.88   13.10 
   1  -3   0  206.98   13.00 
   1  -3   0  253.77   11.40 
  -1  -3   0  235.18   13.10 
   1  -3   0  229.28   12.10 
   1  -3   0  212.68   14.10 
  -1  -3   0  216.68   13.30 
  -1  -3   0  235.98   14.20 
   1  -3   0  238.28   14.30 
   1  -3   0  254.57   15.50 
   1  -3   0  242.28   12.70 
   1  -3   0  220.68   10.00 
  -1  -3   0  231.18   14.90 
  -1  -3   0  202.78   13.30 
   1  -3   0  249.88   15.60 
  -1  -3   0  223.28   13.80 
  -1  -3   0  230.48   13.70 
   1   3   0  233.28   14.10 
  -1   3   0  240.48   14.90 
  -1   3   0  231.98   15.40 
  -1   3   0  230.78   13.80 
  -1   3   0  240.18   12.10 
  -1   3   0  224.88   10.00 
  -1   3   0  222.58   13.50 
  -1   3   0  228.38   11.00 
  -1   3   0  204.98   15.40 
  -1   3   0  233.98   12.70 
   1   3   0  229.78   15.90 
   1   3   0  208.88   12.80 
   1   3   0  216.98   13.70 
  -1   3   0  228.18   10.80 
  -1   3   0  240.78   11.80 
   1   3   0  247.28   15.10 
  -1   3   0  228.68   13.80 
   1   3   0  237.98   14.20 
  -1   3   0  222.18   14.30 
   1   3   0  220.68   12.40 
  -1   3   0  200.68   12.50 
   1   3   0  223.88   13.20 
   1   3   0  243.48   14.10 
   1   3   0  238.18   11.30 
  -1   3   0  215.58   14.50 
  -1   3   0  225.98   14.10 
  -1   3   0  251.97   14.70 
   1   3   0  220.98   14.90 
  -1   3   0  223.28   12.00 
   1   3   0  193.88   13.60 
   1   3   0  213.78   12.40 
  -1   3   0  216.48   13.60 
   1   3   0  246.48   14.10 
  -1   3   0  222.28   10.60 
  -1   3   0  202.28   13.80 
   1   3   0  234.38   12.60 
  -1   3   0  217.38   11.90 
   1   3   0  224.48   14.10 
   1   3   0  254.17   13.60 
   1   3   0  232.48   14.10 
  -1   3   0  223.08   13.40 
   1   3   0  242.48   16.70 
   1   3   0  182.98   14.10 
   2  -3   0   72.39    3.90 
  -2  -3   0   77.89    9.90 
   2  -3   0   55.79   17.20 
   2  -3   0   69.09    4.20 
  -2  -3   0   91.09   10.80 
   2  -3   0   58.79    8.90 
   2  -3   0   65.89   10.00 
   2  -3   0   75.39    6.00 
  -2  -3   0   72.69    8.30 
  -2  -3   0   84.29   10.00 
   2  -3   0   71.99    6.00 
  -2  -3   0   70.09    8.40 
  -2  -3   0   64.09   10.10 
   2  -3   0   64.29    3.70 
  -2  -3   0   80.89    8.50 
  -2  -3   0   70.39    8.10 
   2  -3   0   81.99    6.10 
   2  -3   0   60.49    6.70 
   2  -3   0   63.79    8.00 
   2  -3   0   80.19   10.30 
   2  -3   0   69.79    3.60 
   2  -3   0   65.99    6.70 
  -2  -3   0   74.89    7.70 
   2  -3   0   70.49    8.70 
  -2  -3   0   64.79    8.60 
  -2  -3   0   70.99    9.50 
  -2  -3   0   68.59    8.40 
   2  -3   0   70.89    8.90 
   2  -3   0   70.39    3.60 
   2   3   0   76.59    9.60 
   2   3   0   75.99    7.80 
  -2   3   0   69.99    5.40 
   2   3   0   78.69    7.60 
  -2   3   0   92.59    7.00 
   2   3   0   89.09   10.30 
  -2   3   0   65.29    5.70 
   2   3   0   75.49    7.80 
   2   3   0   70.49    7.20 
   2   3   0   66.39    8.90 
  -2   3   0   71.99    5.30 
  -2   3   0   87.49    8.80 
  -2   3   0   77.49    6.40 
  -2   3   0   67.49    8.10 
  -2   3   0   69.19    4.90 
   2   3   0   77.29    9.20 
   2   3   0   55.19    7.70 
  -2   3   0   80.49   11.10 
  -2   3   0   65.19    7.00 
  -2   3   0   82.69    9.50 
  -2   3   0   59.79    8.20 
   2   3   0   76.69    9.80 
   2   3   0   83.09    9.40 
   2   3   0   76.79    9.80 
   2   3   0   79.99   10.20 
   2   3   0   65.69    8.20 
   2   3   0   75.99    8.00 
  -2   3   0   79.29    9.60 
   2   3   0   85.79    8.90 
  -2   3   0   68.79    9.60 
   2   3   0   78.09    6.90 
   2   3   0   91.79   11.80 
   2   3   0   68.29    9.40 
   2   3   0   90.99    7.90 
  -2   3   0   98.89   11.70 
   2   3   0   58.49    5.50 
   3  -3   0    5.60    4.10 
  -3  -3   0    7.80    4.70 
  -3  -3   0   -2.00    4.10 
   3  -3   0    6.60    3.00 
   3  -3   0    6.20    4.80 
  -3  -3   0    0.50    2.40 
   3  -3   0    3.80    3.80 
   3  -3   0    2.00    3.00 
  -3  -3   0    3.80    2.50 
  -3  -3   0    0.10    4.70 
   3  -3   0    7.40    2.50 
   3  -3   0    2.10    1.30 
   3  -3   0    4.50    2.20 
  -3  -3   0    5.70    2.80 
  -3  -3   0    3.30    2.70 
   3  -3   0    3.40    2.20 
  -3  -3   0    3.70    4.10 
  -3  -3   0    1.10    2.70 
  -3  -3   0    4.60    3.70 
  -3  -3   0    3.40    2.90 
   3  -3   0    5.10    3.50 
   3  -3   0    9.50    3.00 
   3  -3   0    6.90    4.30 
   3  -3   0    9.50    2.60 
   3  -3   0    3.90    3.40 
   3  -3   0    1.00    7.30 
  -3  -3   0   -2.30   14.10 
   3  -3   0    1.60    2.00 
  -3  -3   0    2.00    4.00 
   3  -3   0   10.20    2.20 
   3  -3   0   12.30    4.80 
   3  -3   0    1.60    3.10 
   3   3   0    3.00    4.00 
  -3   3   0    7.90    4.30 
   3   3   0    5.90    3.20 
  -3   3   0    4.10    3.30 
   3   3   0    1.80    2.20 
  -3   3   0    3.90    3.10 
   3   3   0   -0.90    1.80 
   3   3   0    2.60    4.60 
   3   3   0   -0.70    4.30 
  -3   3   0   11.60    3.30 
   3   3   0   -2.50    4.20 
   3   3   0    5.80    3.80 
   3   3   0    1.30    1.40 
  -3   3   0    5.60    2.70 
  -3   3   0   11.40    5.30 
   3   3   0    5.20    2.50 
   3   3   0    1.80    2.60 
   3   3   0    3.70    3.60 
  -3   3   0    4.20    3.50 
  -3   3   0    6.10    2.10 
   3   3   0    6.60    3.00 
  -3   3   0    7.80    4.30 
  -3   3   0    8.00    4.40 
  -3   3   0    6.40    1.70 
   3   3   0    1.20    2.30 
  -3   3   0    1.10    1.60 
  -3   3   0    9.40    4.40 
   3   3   0    5.70    3.50 
  -3   3   0    7.10    5.30 
   3   3   0    2.00    2.40 
   3   3   0    1.10    2.80 
  -3   3   0    2.70    1.90 
  -3   3   0    8.90    2.90 
   3   3   0    1.50    2.30 
   3   3   0    4.30    2.20 
   3   3   0    3.00    1.20 
  -4  -3   0  164.18   13.00 
  -4  -3   0  185.08    8.00 
   4  -3   0  198.08    9.70 
  -4  -3   0  160.18   28.50 
   4  -3   0  208.38   15.20 
   4  -3   0  196.58   14.90 
   4  -3   0  186.68    9.00 
   4  -3   0  183.28   14.30 
   4  -3   0  189.48    9.30 
  -4  -3   0  157.88   10.80 
  -4  -3   0  203.08   13.40 
  -4  -3   0  170.28   16.90 
   4  -3   0  196.28   11.60 
  -4  -3   0  210.68   12.40 
  -4  -3   0  194.48   16.50 
  -4  -3   0  173.08   15.30 
  -4  -3   0  169.18   18.40 
  -4  -3   0  197.38   13.50 
   4  -3   0  193.78   13.60 
   4  -3   0  195.78    8.10 
  -4  -3   0  205.68   11.30 
   4  -3   0  196.48   10.50 
   4  -3   0  214.88   15.50 
   4  -3   0  187.88   12.70 
   4  -3   0  187.08    8.50 
   4  -3   0  210.68   14.30 
   4   3   0  197.28   13.70 
   4   3   0  185.28    8.20 
   4   3   0  168.98    7.80 
  -4   3   0  177.98   12.60 
  -4   3   0  192.28   10.00 
   4   3   0  201.28   10.40 
   4   3   0  197.08    9.50 
  -4   3   0  170.38   14.10 
  -4   3   0  166.78   14.60 
  -4   3   0  199.28   12.50 
  -4   3   0  198.68   11.40 
  -4   3   0  174.88   13.90 
  -4   3   0  175.88    7.90 
   4   3   0  168.28   16.90 
   4   3   0  178.08    9.40 
  -4   3   0  173.68    7.20 
  -4   3   0  187.18   12.30 
   4   3   0  186.28    8.50 
  -4   3   0  184.98   14.60 
   4   3   0  204.28   11.20 
  -4   3   0  189.28    9.70 
   4   3   0  217.38   14.00 
   4   3   0  195.78    8.20 
  -4   3   0  172.68    9.90 
  -4   3   0  175.18    8.90 
   4   3   0  178.88   12.80 
  -4   3   0  193.08   14.50 
   4   3   0  188.98   15.40 
   4   3   0  193.68   11.10 
  -5  -3   0  497.45   25.00 
   5  -3   0  477.05   26.20 
  -5  -3   0  531.05   27.70 
  -5  -3   0  492.75   24.60 
   5  -3   0  464.05   26.30 
   5  -3   0  513.75   20.60 
   5  -3   0  497.25   18.40 
  -5  -3   0  491.65   20.80 
   5  -3   0  526.65   27.30 
  -5  -3   0  511.75   25.10 
   5  -3   0  523.75   26.70 
  -5  -3   0  500.15   28.60 
   5  -3   0  507.85   24.10 
  -5  -3   0  466.05   27.90 
   5  -3   0  507.65   19.20 
  -5  -3   0  555.34   31.30 
   5  -3   0  510.25   18.00 
   5  -3   0  534.45   26.00 
  -5  -3   0  483.05   19.60 
   5  -3   0  528.45   21.40 
  -5   3   0  550.34   24.90 
  -5   3   0  483.15   26.70 
   5   3   0  490.65   24.50 
  -5   3   0  486.95   19.80 
  -5   3   0  566.44   27.00 
  -5   3   0  499.95   21.60 
   5   3   0  481.75   16.20 
   5   3   0  478.85   20.20 
  -5   3   0  503.55   17.80 
   5   3   0  510.75   20.20 
  -5   3   0  465.65   20.00 
  -5   3   0  495.55   23.00 
   5   3   0  497.05   27.60 
   5   3   0  512.85   25.00 
  -5   3   0  475.95   26.30 
  -5   3   0  499.35   18.80 
  -5   3   0  474.15   26.30 
  -5   3   0  525.75   26.40 
   5   3   0  472.05   18.60 
  -5   3   0  538.15   29.50 
  -5   3   0  475.15   18.00 
   5   3   0  486.05   17.30 
  -5   3   0  521.75   23.00 
   5   3   0  488.45   23.90 
   5   3   0  492.15   27.90 
  -5   3   0  512.25   19.60 
  -5   3   0  491.95   17.10 
   5   3   0  506.95   16.10 
  -6  -3   0  863.61   38.10 
   6  -3   0  927.31   40.00 
  -6  -3   0  991.50   39.90 
   6  -3   0  895.91   36.40 
  -6  -3   0  886.51   43.90 
  -6  -3   0  910.01   29.80 
   6  -3   0  893.41   41.40 
   6  -3   0  925.21   32.00 
  -6  -3   0  825.22   44.30 
   6  -3   0  974.10   33.30 
  -6  -3   0  845.32   65.09 
  -6  -3   0  954.30   42.20 
   6  -3   0  852.11   40.00 
  -6  -3   0  902.61   39.20 
   6  -3   0  900.21   41.00 
   6  -3   0  939.91   40.30 
   6  -3   0  878.91   41.50 
  -6  -3   0  880.41   43.30 
   6   3   0  981.30   39.70 
  -6   3   0 1000.30   45.80 
   6   3   0  976.00   32.60 
  -6   3   0  946.91   29.30 
   6   3   0  980.10   44.10 
  -6   3   0  904.31   39.70 
  -6   3   0  924.01   28.10 
   6   3   0  905.11   30.10 
   6   3   0  878.01   41.70 
  -6   3   0  935.51   32.40 
  -6   3   0  911.11   36.00 
  -6   3   0  920.61   28.30 
  -6   3   0  915.21   35.40 
   6   3   0  968.30   37.70 
  -6   3   0  896.21   38.60 
   6   3   0  926.31   38.70 
  -6   3   0  835.72   41.20 
  -6   3   0  911.81   41.40 
  -6   3   0  932.31   30.70 
  -6   3   0  938.41   33.10 
  -6   3   0  916.71   40.50 
  -6   3   0  917.51   30.10 
   7  -3   0  250.27   20.80 
  -7  -3   0  266.47   19.90 
  -7  -3   0  249.68   25.10 
   7  -3   0  235.98   16.00 
   7  -3   0  238.08   19.10 
  -7  -3   0  296.67   30.40 
   7  -3   0  244.98   20.90 
   7  -3   0  285.27   21.30 
  -7  -3   0  241.48   18.60 
   7  -3   0  280.07   19.90 
  -7  -3   0  229.18   18.40 
  -7  -3   0  270.17   23.40 
  -7  -3   0  301.67   24.20 
  -7   3   0  266.07   17.40 
  -7   3   0  277.17   20.60 
   7   3   0  264.27   26.70 
  -7   3   0  289.07   23.60 
  -7   3   0  228.28   19.90 
   7   3   0  279.17   19.70 
   7   3   0  257.27   25.90 
  -7   3   0  283.47   20.40 
  -7   3   0  225.98   18.80 
   7   3   0  258.07   17.20 
  -7   3   0  212.38   18.00 
   7   3   0  259.67   18.50 
  -7   3   0  294.57   19.30 
  -7   3   0  243.58   20.70 
  -8  -3   0  264.07   21.20 
   8  -3   0  198.48   21.70 
   8  -3   0  239.58   26.00 
   8  -3   0  271.77   28.90 
  -8  -3   0  200.68   26.30 
  -8  -3   0  207.68   25.20 
  -8  -3   0  249.48   28.90 
  -8  -3   0  260.17   27.30 
  -8  -3   0  250.27   20.40 
  -8  -3   0  235.08   19.00 
   8  -3   0  235.68   25.80 
   8   3   0  266.27   28.20 
  -8   3   0  248.98   20.10 
  -8   3   0  249.48   26.60 
   8   3   0  250.77   19.90 
  -8   3   0  231.98   24.50 
   8   3   0  227.58   25.60 
   8   3   0  232.58   22.10 
  -8   3   0  246.18   23.90 
  -8   3   0  240.88   27.70 
  -8   3   0  273.67   19.20 
   9  -3   0  122.29   20.10 
  -9  -3   0  116.59   19.80 
  -9  -3   0  118.79   20.00 
  -9  -3   0  134.69   19.30 
   9  -3   0  136.79   19.40 
  -9  -3   0  132.49   23.30 
  -9  -3   0  140.09   23.50 
  -9  -3   0  139.79   19.20 
  -9   3   0  145.39   24.90 
  -9   3   0  136.39   19.10 
   9   3   0  124.89   20.90 
  -9   3   0  124.69   19.80 
   9   3   0  164.58   19.20 
  -9   3   0  139.79   22.40 
   9   3   0  125.09   18.50 
   9   3   0  164.88   23.50 
  -9   3   0  123.39   17.00 
  -9   3   0  204.38   26.00 
 -10  -3   0  159.58   27.50 
  10  -3   0  127.59   19.90 
  10  -3   0  145.49   23.80 
 -10  -3   0  150.38   24.60 
 -10  -3   0   95.59   20.00 
 -10  -3   0  185.38   28.60 
 -10  -3   0  138.09   20.50 
 -10   3   0  135.89   20.80 
  10   3   0  172.68   25.40 
  10   3   0  139.09   23.80 
 -10   3   0  134.79   21.30 
 -10   3   0  147.19   24.80 
 -10   3   0  170.88   28.50 
 -10   3   0  170.58   25.70 
   0  -4   0  617.44   24.80 
   0  -4   0  648.54   26.20 
   0  -4   0  614.14   27.70 
   0  -4   0  624.84   30.90 
   0  -4   0  698.73   37.00 
   0  -4   0  667.83   29.40 
   0  -4   0  619.74   30.00 
   0  -4   0  623.84   26.20 
   0  -4   0  618.74   27.70 
   0  -4   0  566.04   25.40 
   0  -4   0  667.23   33.30 
   0  -4   0  542.45   27.90 
   0  -4   0  592.54   28.30 
   0  -4   0  630.34   51.69 
   0  -4   0  628.14   32.70 
   0  -4   0  595.24   26.30 
   0  -4   0  629.84   28.00 
   0  -4   0  594.24   25.70 
   0  -4   0  647.64   30.00 
   0   4   0  663.93   30.10 
   0   4   0  645.24   26.60 
   0   4   0  591.74   27.40 
   0   4   0  611.44   27.40 
   0   4   0  643.54   31.30 
   0   4   0  623.24   25.00 
   0   4   0  632.64   27.30 
   0   4   0  620.54   25.40 
   0   4   0  563.44   28.60 
   0   4   0  673.43   32.50 
   0   4   0  631.54   29.10 
   0   4   0  647.84   25.10 
   0   4   0  646.64   26.00 
   0   4   0  670.93   28.40 
   1  -4   0 4291.37  118.89 
   1  -4   0 3854.41  128.79 
  -1  -4   0 4083.49  124.79 
   1  -4   0 4196.08  119.29 
  -1  -4   0 4005.50  123.49 
  -1  -4   0 4132.79  124.99 
  -1  -4   0 4123.09  123.99 
   1  -4   0 3997.80  124.29 
   1  -4   0 4048.50  125.29 
   1  -4   0 4296.17  123.69 
   1  -4   0 4079.39  118.29 
   1  -4   0 4164.18  118.59 
  -1  -4   0 4112.09  126.19 
  -1  -4   0 4262.67  122.69 
  -1  -4   0 4055.59  123.59 
   1  -4   0 4054.99  117.29 
  -1  -4   0 4616.64  171.28 
   1  -4   0 4168.88  118.99 
   1  -4   0 4042.10  125.49 
   1  -4   0 4185.18  118.59 
  -1  -4   0 4219.98  123.99 
  -1  -4   0 4142.89  127.69 
   1  -4   0 4149.58  125.99 
   1  -4   0 4147.58  122.59 
  -1  -4   0 4103.59  122.79 
   1  -4   0 4159.08  117.09 
   1  -4   0 4194.38  127.89 
   1  -4   0 4034.20  164.38 
   1  -4   0 4257.77  121.19 
  -1  -4   0 3852.31  134.19 
   1  -4   0 3939.91  126.69 
   1  -4   0 4245.68  135.49 
   1  -4   0 4196.48  122.29 
   1  -4   0 4168.58  122.49 
   1  -4   0 4111.89  119.29 
  -1  -4   0 4155.38  124.59 
  -1   4   0 4224.28  122.79 
   1   4   0 3895.01  127.99 
   1   4   0 4061.49  125.09 
  -1   4   0 4155.88  119.99 
  -1   4   0 4327.67  127.79 
   1   4   0 4327.77  119.49 
  -1   4   0 4044.90  126.49 
  -1   4   0 4153.18  118.09 
   1   4   0 3902.91  124.69 
  -1   4   0 4198.68  125.69 
  -1   4   0 4171.18  124.89 
   1   4   0 4261.17  124.69 
   1   4   0 4068.89  121.09 
   1   4   0 4139.79  130.49 
   1   4   0 4140.19  122.19 
  -1   4   0 4039.50  124.19 
  -1   4   0 4118.89  117.39 
  -1   4   0 4204.98  120.29 
   1   4   0 4045.70  123.09 
   1   4   0 4237.78  122.69 
  -1   4   0 4221.88  124.09 
   1   4   0 4062.29  124.79 
  -1   4   0 4152.58  120.69 
  -1   4   0 4165.28  122.09 
   1   4   0 4062.39  122.99 
  -1   4   0 4021.80  127.19 
   1   4   0 3622.64  129.59 
  -1   4   0 4093.49  118.19 
   1   4   0 4037.60  123.79 
   1   4   0 4157.58  127.09 
  -2  -4   0  682.03   30.70 
   2  -4   0  703.93   32.20 
   2  -4   0  696.43   23.80 
   2  -4   0  694.23   25.20 
   2  -4   0  714.43   23.20 
  -2  -4   0  725.63   32.00 
  -2  -4   0  693.03   31.50 
  -2  -4   0  700.03   32.50 
  -2  -4   0  727.33   31.20 
   2  -4   0  741.63   28.50 
   2  -4   0  752.62   58.09 
  -2  -4   0  767.22   29.40 
   2  -4   0  741.33   27.50 
   2  -4   0  741.23   29.90 
   2  -4   0  748.33   24.40 
   2  -4   0  763.62   23.30 
   2  -4   0  664.13   31.40 
   2  -4   0  722.23   28.60 
   2  -4   0  733.13   33.30 
   2  -4   0  710.43   27.70 
  -2  -4   0  762.52   32.90 
  -2  -4   0  674.13   32.10 
   2  -4   0  699.53   23.60 
  -2  -4   0  690.23   30.00 
   2  -4   0  689.83   28.20 
  -2  -4   0  720.03   28.60 
   2  -4   0  761.12   25.20 
   2  -4   0  730.83   33.50 
   2  -4   0  695.63   25.80 
   2  -4   0  710.33   23.40 
  -2  -4   0  701.53   30.30 
  -2  -4   0  790.22   57.99 
   2  -4   0  606.14   25.90 
  -2  -4   0  679.73   30.30 
   2  -4   0  697.33   33.80 
   2  -4   0  752.02   32.90 
  -2  -4   0  778.62   37.20 
   2  -4   0  669.43   31.80 
   2  -4   0  677.93   31.30 
  -2   4   0  675.83   30.40 
   2   4   0  697.33   29.00 
   2   4   0  704.73   31.30 
  -2   4   0  727.63   24.50 
  -2   4   0  686.73   32.20 
   2   4   0  747.23   30.10 
  -2   4   0  704.03   26.90 
   2   4   0  750.72   31.20 
   2   4   0  733.53   29.90 
   2   4   0  739.53   33.00 
  -2   4   0  707.23   33.70 
  -2   4   0  706.53   22.90 
   2   4   0  697.23   31.00 
   2   4   0  701.53   25.40 
  -2   4   0  697.53   28.00 
   2   4   0  706.93   31.90 
  -2   4   0  738.03   31.90 
  -2   4   0  701.83   31.80 
  -2   4   0  667.13   30.00 
   2   4   0  750.42   31.40 
  -2   4   0  680.63   30.40 
   2   4   0  731.43   28.30 
  -2   4   0  719.73   33.00 
  -2   4   0  733.63   25.20 
  -2   4   0  738.83   28.00 
   2   4   0  731.83   32.40 
  -2   4   0  687.13   24.60 
   2   4   0  768.92   34.70 
   2   4   0  758.02   32.70 
   2   4   0  743.23   32.50 
  -3  -4   0  618.54   24.80 
  -3  -4   0  582.44   28.30 
   3  -4   0  583.14   23.70 
   3  -4   0  595.04   29.30 
   3  -4   0  615.24   30.10 
  -3  -4   0  605.94   29.20 
   3  -4   0  592.84   51.89 
   3  -4   0  611.44   25.70 
   3  -4   0  576.84   24.20 
  -3  -4   0  597.64   31.80 
   3  -4   0  603.34   23.00 
   3  -4   0  604.34   23.30 
  -3  -4   0  604.74   26.80 
   3  -4   0  595.74   30.00 
   3  -4   0  613.84   22.50 
  -3  -4   0  619.44   31.60 
   3  -4   0  615.54   22.40 
  -3  -4   0  584.74   30.50 
  -3  -4   0  694.73   29.50 
   3  -4   0  609.14   27.60 
   3  -4   0  632.54   20.70 
  -3  -4   0  629.14   27.10 
   3  -4   0  611.34   29.90 
   3  -4   0  559.64   30.50 
   3  -4   0  617.74   28.70 
  -3  -4   0  592.34   28.30 
   3  -4   0  642.24   21.60 
   3  -4   0  596.44   30.00 
   3  -4   0  593.04   23.90 
  -3  -4   0  611.34   24.60 
  -3   4   0  597.14   23.20 
   3   4   0  578.74   29.00 
  -3   4   0  591.34   27.40 
  -3   4   0  650.13   29.20 
  -3   4   0  595.14   28.80 
   3   4   0  578.94   30.50 
  -3   4   0  603.24   19.80 
   3   4   0  634.54   25.10 
   3   4   0  608.94   23.70 
  -3   4   0  618.44   30.30 
   3   4   0  612.54   27.40 
   3   4   0  629.74   29.20 
   3   4   0  654.73   27.30 
   3   4   0  624.44   25.50 
  -3   4   0  608.94   24.40 
   3   4   0  642.04   29.30 
   3   4   0  607.94   27.30 
  -3   4   0  608.04   31.10 
  -3   4   0  597.34   24.10 
  -3   4   0  609.54   27.50 
   3   4   0  593.64   27.60 
   3   4   0  606.24   29.60 
  -3   4   0  594.64   19.70 
  -3   4   0  630.14   30.30 
   3   4   0  594.14   25.80 
   3   4   0  630.14   21.00 
   3   4   0  590.24   29.20 
  -3   4   0  582.84   20.60 
  -3   4   0  639.14   30.30 
  -4  -4   0  408.86   20.40 
  -4  -4   0  375.06   16.30 
   4  -4   0  373.46   14.70 
  -4  -4   0  411.06   24.00 
   4  -4   0  412.66   24.00 
  -4  -4   0  368.06   19.30 
   4  -4   0  392.76   15.50 
   4  -4   0  400.46   24.10 
  -4  -4   0  404.96   25.70 
  -4  -4   0  399.16   16.80 
   4  -4   0  370.66   16.10 
  -4  -4   0  404.66   25.50 
  -4  -4   0  397.36   25.70 
  -4  -4   0  342.17   21.20 
   4  -4   0  378.66   16.00 
   4  -4   0  353.96   19.50 
   4  -4   0  346.87   16.80 
   4  -4   0  384.26   23.70 
   4  -4   0  401.46   22.20 
   4  -4   0  364.26   13.00 
   4  -4   0  358.66   22.40 
  -4  -4   0  374.36   21.60 
  -4  -4   0  283.77   40.60 
  -4  -4   0  406.56   21.90 
   4  -4   0  375.56   22.30 
   4  -4   0  365.36   15.30 
   4   4   0  380.46   15.50 
  -4   4   0  337.47   23.30 
  -4   4   0  372.36   15.00 
   4   4   0  377.76   16.20 
   4   4   0  391.46   19.50 
  -4   4   0  371.46   20.60 
   4   4   0  376.56   23.50 
  -4   4   0  381.96   16.70 
  -4   4   0  350.26   16.20 
   4   4   0  390.66   17.20 
   4   4   0  368.76   18.60 
  -4   4   0  353.06   22.70 
  -4   4   0  374.96   23.10 
   4   4   0  357.86   16.50 
  -4   4   0  388.86   17.40 
  -4   4   0  370.36   20.40 
  -4   4   0  378.56   20.40 
   4   4   0  395.06   17.40 
   4   4   0  375.86   21.60 
  -4   4   0  371.46   22.40 
   4   4   0  368.16   18.80 
   4   4   0  360.46   20.90 
   4   4   0  409.76   24.00 
  -4   4   0  380.06   23.50 
   4   4   0  375.66   20.20 
  -5  -4   0 1259.47   51.19 
   5  -4   0 1208.28   41.20 
  -5  -4   0 1225.68   45.10 
  -5  -4   0 1235.48   54.89 
  -5  -4   0 1272.27   48.20 
   5  -4   0 1173.28   50.29 
   5  -4   0 1154.68   49.70 
   5  -4   0 1123.29   49.80 
   5  -4   0 1242.78   44.00 
   5  -4   0 1200.38   40.60 
   5  -4   0 1194.28   49.99 
  -5  -4   0 1157.68   81.09 
   5  -4   0 1205.08   38.60 
  -5  -4   0 1208.28   53.19 
   5  -4   0 1172.48   47.60 
   5  -4   0 1186.78   47.90 
  -5  -4   0 1245.28   47.70 
  -5  -4   0 1213.98   36.30 
  -5  -4   0 1302.07   54.59 
  -5  -4   0 1159.38   47.80 
  -5  -4   0 1199.18   42.70 
   5  -4   0 1204.88   38.80 
   5   4   0 1183.78   51.59 
  -5   4   0 1195.68   44.70 
  -5   4   0 1244.28   46.00 
   5   4   0 1263.57   43.20 
   5   4   0 1195.38   36.30 
   5   4   0 1284.97   51.99 
   5   4   0 1280.07   39.60 
   5   4   0 1188.58   39.30 
   5   4   0 1261.87   41.90 
   5   4   0 1244.58   36.70 
   5   4   0 1247.18   43.40 
  -5   4   0 1263.67   39.80 
  -5   4   0 1267.77   40.10 
  -5   4   0 1267.17   39.10 
  -5   4   0 1168.78   49.99 
   5   4   0 1223.08   39.10 
  -5   4   0 1181.48   49.20 
  -5   4   0 1220.38   49.99 
   5   4   0 1142.49   47.10 
  -5   4   0 1280.87   51.99 
  -5   4   0 1191.88   45.30 
   5   4   0 1218.28   39.40 
   5   4   0 1190.88   47.40 
   5   4   0 1230.78   37.30 
   5   4   0 1203.38   47.50 
  -5   4   0 1204.18   51.29 
  -6  -4   0 1058.59   51.39 
   6  -4   0 1028.30   46.70 
  -6  -4   0 1028.00   40.00 
  -6  -4   0  990.80   38.10 
   6  -4   0  961.30   45.20 
   6  -4   0  932.61   43.90 
  -6  -4   0 1019.40   49.10 
  -6  -4   0 1025.40   43.00 
   6  -4   0  986.20   41.80 
  -6  -4   0  921.91   72.59 
  -6  -4   0  988.40   42.70 
   6  -4   0 1030.20   44.20 
  -6  -4   0 1034.50   46.40 
  -6  -4   0 1027.20   36.40 
   6  -4   0  938.61   45.50 
  -6  -4   0  959.80   48.30 
  -6  -4   0 1098.29   44.50 
   6  -4   0 1014.70   37.00 
   6   4   0  925.41   36.00 
  -6   4   0  948.81   48.00 
   6   4   0 1101.69   48.80 
  -6   4   0 1022.80   44.80 
  -6   4   0  925.11   38.80 
  -6   4   0  990.10   34.00 
  -6   4   0 1034.30   44.50 
  -6   4   0 1007.20   45.50 
   6   4   0 1000.70   35.90 
  -6   4   0 1033.80   38.70 
  -6   4   0  963.80   46.00 
   6   4   0  967.50   42.80 
  -6   4   0  974.60   45.50 
  -6   4   0  967.70   39.90 
   6   4   0  996.00   42.50 
   6   4   0  974.00   41.50 
   6   4   0 1044.80   47.40 
  -7  -4   0  681.23   42.60 
   7  -4   0  705.93   38.40 
  -7  -4   0  660.23   34.80 
   7  -4   0  730.73   33.40 
  -7  -4   0  672.63   38.70 
  -7  -4   0  695.23   35.40 
  -7  -4   0  647.24   34.50 
   7  -4   0  687.53   38.40 
  -7  -4   0  706.83   32.30 
   7  -4   0  726.43   37.00 
  -7  -4   0  618.54   39.10 
  -7  -4   0  740.23   42.30 
   7  -4   0  702.93   36.70 
  -7   4   0  710.13   32.70 
  -7   4   0  678.33   36.20 
  -7   4   0  677.43   38.40 
  -7   4   0  669.43   35.10 
   7   4   0  758.22   41.20 
   7   4   0  724.03   39.40 
   7   4   0  700.33   34.90 
  -7   4   0  738.53   42.00 
  -7   4   0  682.73   37.70 
   7   4   0  670.33   33.10 
  -7   4   0  689.73   36.60 
   7   4   0  684.83   34.60 
  -8  -4   0  657.33   35.70 
  -8  -4   0  592.94   40.30 
  -8  -4   0  619.54   35.20 
  -8  -4   0  712.13   36.50 
   8  -4   0  694.93   36.90 
  -8  -4   0  658.93   43.40 
  -8  -4   0  629.64   40.50 
  -8  -4   0  706.23   40.30 
   8  -4   0  677.83   39.40 
   8  -4   0  575.44   37.30 
   8  -4   0  685.43   37.30 
  -8   4   0  666.63   39.90 
  -8   4   0  638.34   38.10 
   8   4   0  666.93   39.50 
   8   4   0  607.04   34.00 
   8   4   0  632.44   34.50 
  -8   4   0  595.54   33.60 
  -8   4   0  675.13   37.10 
   8   4   0  663.63   40.10 
  -8   4   0  652.13   41.50 
   9  -4   0  347.07   35.60 
  -9  -4   0  291.97   29.20 
   9  -4   0  267.67   30.60 
  -9  -4   0  328.17   36.50 
  -9  -4   0  384.96   38.80 
  -9  -4   0  294.07   34.90 
  -9  -4   0  299.77   35.30 
   9  -4   0  356.86   27.40 
  -9   4   0  347.47   27.50 
   9   4   0  331.37   34.70 
   9   4   0  298.97   24.00 
  -9   4   0  409.76   33.60 
   9   4   0  351.96   35.40 
  -9   4   0  332.07   27.80 
  -9   4   0  379.06   30.70 
   9   4   0  332.67   24.90 
  -9   4   0  268.67   27.60 
   0  -5   0    2.80    4.60 
   0  -5   0   -1.00    4.10 
   0  -5   0    0.70    3.60 
   0  -5   0   -4.00    7.20 
   0  -5   0    3.40    3.70 
   0  -5   0    2.90    4.50 
   0  -5   0    7.10    7.10 
   0  -5   0    0.90    4.00 
   0  -5   0   -2.80    3.40 
   0  -5   0   -0.70    2.60 
   0  -5   0   11.30    5.50 
   0  -5   0    0.30    3.60 
   0  -5   0    4.10    3.60 
   0  -5   0    0.90    4.30 
   0   5   0   -1.90    3.10 
   0   5   0    5.20    3.80 
   0   5   0   -0.10    3.70 
   0   5   0   -1.70    3.30 
   0   5   0   -0.70    3.20 
   0   5   0   -0.40    4.40 
   0   5   0   -1.40    2.80 
   0   5   0    0.60    3.60 
   0   5   0   -3.60    3.60 
   0   5   0    8.30    5.80 
   0   5   0   -3.60    3.50 
   0   5   0    0.50    4.40 
   0   5   0   -0.10    3.20 
   0   5   0   -1.80    3.40 
   1  -5   0  145.39   34.30 
   1  -5   0  144.39   12.30 
  -1  -5   0  108.59   13.90 
   1  -5   0  129.89   15.40 
  -1  -5   0  154.08   36.90 
   1  -5   0  120.29   17.20 
   1  -5   0  173.18   19.70 
   1  -5   0  181.28   14.80 
   1  -5   0  137.89   21.00 
  -1  -5   0  140.39   14.70 
   1  -5   0  139.39   10.90 
   1  -5   0  145.29   16.40 
  -1  -5   0  180.68   17.50 
  -1  -5   0  162.68   17.20 
   1  -5   0  147.39   17.20 
  -1  -5   0  144.59   16.40 
   1  -5   0  142.59   15.40 
   1  -5   0  157.28   17.00 
  -1  -5   0  162.18   18.60 
   1  -5   0  147.49   10.80 
  -1  -5   0  144.99   21.30 
  -1  -5   0  148.29   15.30 
   1  -5   0  117.79   12.30 
   1  -5   0  115.89   14.40 
  -1  -5   0  142.09   16.80 
  -1  -5   0  159.98   16.30 
   1  -5   0  142.79   11.00 
   1  -5   0  145.59   10.10 
  -1  -5   0  140.99   14.90 
  -1  -5   0  151.08   15.70 
  -1   5   0  179.08   18.10 
  -1   5   0  139.09   14.00 
  -1   5   0  144.79   10.70 
   1   5   0  163.68   17.20 
  -1   5   0  151.78   16.50 
  -1   5   0  145.89   10.90 
   1   5   0  113.69   15.90 
  -1   5   0   97.69   14.30 
  -1   5   0  106.99   12.50 
   1   5   0  143.79   16.30 
   1   5   0  155.78   15.00 
   1   5   0  134.29   15.50 
  -1   5   0  186.38   13.90 
  -1   5   0  137.29   16.40 
   1   5   0  155.28   16.40 
  -1   5   0  138.79   15.70 
   1   5   0  113.89   13.40 
  -1   5   0  159.28   17.10 
   1   5   0  148.99   15.90 
   1   5   0  174.48   20.60 
   1   5   0  148.29   11.10 
  -1   5   0  155.28   10.50 
  -1   5   0  154.18   18.50 
   1   5   0  118.19   12.70 
  -1   5   0  182.48   13.10 
   1   5   0  147.79   17.40 
  -1   5   0  134.99   15.40 
   1   5   0  145.39   15.10 
   1   5   0  139.79   14.50 
   2  -5   0   10.90    3.30 
   2  -5   0   11.10    3.20 
   2  -5   0   13.10    5.00 
   2  -5   0   19.30    7.90 
  -2  -5   0    4.60    5.30 
  -2  -5   0   17.90    6.80 
  -2  -5   0    9.30    6.20 
   2  -5   0    8.80    4.80 
   2  -5   0   11.10    5.50 
   2  -5   0   12.80    6.20 
  -2  -5   0   15.00    5.90 
   2  -5   0    4.90    4.00 
  -2  -5   0    5.70    4.80 
   2  -5   0   20.40    7.40 
   2  -5   0   14.90    3.60 
   2  -5   0   18.20    4.50 
   2  -5   0   33.30    9.20 
   2  -5   0    8.60    3.80 
   2  -5   0   18.50    4.20 
   2  -5   0   14.60    6.00 
  -2  -5   0    4.60    3.80 
   2  -5   0   13.30   13.10 
   2  -5   0    6.90    3.30 
   2  -5   0    8.50    4.30 
  -2  -5   0   17.10    6.80 
  -2  -5   0   -0.20    5.60 
  -2  -5   0   15.00    6.60 
  -2  -5   0   11.90    5.80 
   2  -5   0   16.10    3.50 
   2  -5   0    6.80    4.10 
   2  -5   0   11.00    5.00 
  -2  -5   0   12.20    6.10 
   2  -5   0   18.80    5.20 
   2  -5   0    8.40    5.60 
  -2  -5   0   17.00   16.40 
   2  -5   0    6.50    5.20 
  -2  -5   0   16.00    5.60 
   2   5   0    6.40    5.90 
  -2   5   0    6.60    4.90 
  -2   5   0    7.10    4.30 
   2   5   0   10.00    4.70 
   2   5   0   12.60    6.50 
   2   5   0   16.30    6.10 
   2   5   0    4.00    4.20 
   2   5   0   13.50    5.30 
  -2   5   0    7.70    3.50 
   2   5   0   10.20    5.30 
  -2   5   0    9.00    3.00 
   2   5   0    3.30    5.10 
  -2   5   0   15.90    6.50 
  -2   5   0   12.70    6.40 
  -2   5   0   24.60    7.80 
   2   5   0    5.20    3.30 
  -2   5   0    9.90    4.80 
   2   5   0    0.80    5.30 
   2   5   0   22.00    7.80 
  -2   5   0    8.10    3.60 
   2   5   0   11.70    6.20 
  -2   5   0   16.70    6.40 
   2   5   0   12.20    5.30 
   2   5   0    2.50    4.10 
  -2   5   0    6.50    5.00 
  -2   5   0    7.70    5.00 
  -2   5   0    3.10    4.20 
  -3  -5   0    2.40    5.70 
  -3  -5   0    2.80    4.10 
   3  -5   0    0.90    2.70 
  -3  -5   0    2.10    3.80 
   3  -5   0    1.40    2.40 
  -3  -5   0   -4.90    3.70 
  -3  -5   0   -1.50    5.10 
   3  -5   0   -5.30    3.90 
   3  -5   0    6.10    3.90 
  -3  -5   0    3.40    5.20 
   3  -5   0    2.10    2.70 
   3  -5   0   11.30    4.30 
  -3  -5   0    4.20    5.70 
   3  -5   0    7.00    2.90 
   3  -5   0    6.00    2.70 
   3  -5   0    4.20    5.10 
   3  -5   0    7.50    6.20 
   3  -5   0    3.60    4.40 
   3  -5   0   -5.70    4.00 
   3  -5   0    5.50    4.60 
   3  -5   0   -4.70    2.30 
  -3  -5   0   -1.90    4.30 
   3  -5   0    5.30    4.70 
  -3  -5   0    0.30    3.90 
  -3  -5   0    3.90    4.90 
   3  -5   0    1.60    3.50 
   3  -5   0   -0.60    4.70 
  -3  -5   0   -0.30    3.90 
  -3  -5   0   -0.30    3.80 
   3  -5   0    1.10    4.50 
   3  -5   0    1.80   10.40 
   3  -5   0    2.20    2.90 
  -3  -5   0   -3.90   14.60 
   3   5   0  -11.80    4.70 
   3   5   0   -0.50    3.70 
   3   5   0    2.00    3.50 
  -3   5   0    2.60    3.00 
   3   5   0    4.60    6.20 
  -3   5   0   -5.60    4.50 
  -3   5   0    2.10    3.20 
  -3   5   0    4.60    4.50 
   3   5   0   -4.70    3.80 
   3   5   0   -5.20    2.30 
   3   5   0   -0.70    3.90 
  -3   5   0   -1.00    4.10 
   3   5   0    8.30    4.40 
  -3   5   0    1.70    4.60 
  -3   5   0    0.50    4.50 
  -3   5   0   -2.70    3.90 
   3   5   0    1.40    2.30 
  -3   5   0    7.70    3.90 
   3   5   0    1.20    4.00 
   3   5   0   -0.60    3.60 
  -3   5   0   13.10    5.70 
  -3   5   0    2.70    3.70 
   3   5   0    0.50    5.20 
   3   5   0   -0.30    4.10 
  -3   5   0    1.90    3.70 
   3   5   0    2.30    3.90 
   3   5   0    0.20    4.40 
  -4  -5   0  116.19   33.80 
  -4  -5   0   83.79   11.30 
   4  -5   0   83.09    5.30 
  -4  -5   0   88.99   10.60 
   4  -5   0   71.59   11.20 
   4  -5   0   91.69    9.70 
   4  -5   0  107.49   10.50 
   4  -5   0   94.69   10.90 
   4  -5   0   84.09    8.40 
  -4  -5   0   73.09   12.80 
   4  -5   0   89.19   15.10 
  -4  -5   0  101.59   14.70 
   4  -5   0   88.59   10.10 
   4  -5   0   78.89    5.20 
  -4  -5   0   82.29   15.10 
  -4  -5   0   91.49   12.20 
   4  -5   0   63.89   12.30 
   4  -5   0   70.69    7.80 
   4  -5   0  112.09   16.00 
  -4  -5   0   75.99   11.60 
   4  -5   0   99.59   14.40 
   4  -5   0   74.59   10.50 
  -4  -5   0   60.59   12.40 
  -4  -5   0   75.89   14.60 
   4  -5   0   85.09   14.50 
  -4  -5   0   76.59   12.00 
   4  -5   0   77.19   13.40 
   4  -5   0   73.09   25.30 
  -4  -5   0   65.49   12.70 
   4   5   0   77.69   12.50 
   4   5   0   63.09   12.00 
  -4   5   0   68.99   13.10 
   4   5   0   72.79   11.20 
  -4   5   0   78.99   11.80 
   4   5   0   78.19   10.50 
  -4   5   0   72.09    8.90 
  -4   5   0   75.59   12.00 
   4   5   0   86.79   13.20 
  -4   5   0   69.89   11.80 
  -4   5   0   65.19   11.50 
  -4   5   0   76.39    8.80 
   4   5   0   84.99    9.20 
  -4   5   0   65.69   12.10 
   4   5   0   89.29    5.60 
   4   5   0   74.89   11.40 
   4   5   0   84.19   13.40 
   4   5   0   75.29   13.00 
  -4   5   0   72.49   13.40 
  -4   5   0   92.49   15.40 
   4   5   0  103.89   13.60 
  -4   5   0   81.69   12.30 
   4   5   0   85.09   10.40 
   4   5   0   76.39    5.30 
  -4   5   0   85.09    5.80 
   5  -5   0   59.89   12.30 
  -5  -5   0   78.29   12.40 
   5  -5   0   77.49   12.80 
  -5  -5   0   84.29   15.00 
  -5  -5   0   59.09   10.70 
  -5  -5   0   87.79   17.30 
   5  -5   0   99.29   12.80 
   5  -5   0   75.39    8.80 
   5  -5   0   74.39   13.20 
   5  -5   0   63.89   13.30 
  -5  -5   0   86.49   31.00 
   5  -5   0   62.89    7.50 
   5  -5   0   83.79   14.00 
  -5  -5   0   78.99   11.50 
  -5  -5   0   59.29    9.70 
   5  -5   0   78.19    9.90 
  -5  -5   0   60.19   13.10 
   5  -5   0   56.99   12.50 
  -5  -5   0   77.09   13.10 
  -5  -5   0   82.09    8.70 
  -5  -5   0   67.19   12.00 
  -5  -5   0   41.90   11.80 
  -5   5   0   54.09   11.40 
   5   5   0   68.49    8.80 
  -5   5   0   77.79   12.40 
  -5   5   0   43.70   11.70 
   5   5   0   87.79   12.00 
   5   5   0   53.59    6.50 
   5   5   0   66.79   11.90 
   5   5   0   80.29   13.60 
  -5   5   0   52.79   10.70 
   5   5   0   68.79    9.10 
   5   5   0   71.89   14.10 
   5   5   0   69.19   12.50 
   5   5   0   74.89   14.30 
  -5   5   0   75.09   14.60 
   5   5   0   74.69    7.80 
   5   5   0   69.89   10.00 
  -5   5   0   77.49    8.50 
  -5   5   0   60.99   12.70 
  -5   5   0   81.79    8.40 
  -5   5   0   61.19   11.10 
  -5   5   0   64.79   12.90 
   5   5   0   71.49   10.10 
  -5   5   0   69.69   11.90 
  -6  -5   0  482.85   33.60 
  -6  -5   0  480.35   28.40 
   6  -5   0  514.85   32.40 
  -6  -5   0  469.55   25.60 
  -6  -5   0  430.36   30.90 
  -6  -5   0  472.05   52.99 
  -6  -5   0  535.25   30.90 
   6  -5   0  496.45   29.30 
   6  -5   0  487.55   31.20 
   6  -5   0  482.55   30.60 
  -6  -5   0  493.15   26.60 
   6  -5   0  468.85   28.90 
   6  -5   0  545.65   32.90 
  -6  -5   0  508.15   29.80 
  -6  -5   0  502.85   34.80 
   6  -5   0  444.86   30.80 
   6  -5   0  468.75   24.80 
  -6  -5   0  470.35   33.00 
   6   5   0  503.75   24.70 
  -6   5   0  440.56   30.60 
   6   5   0  503.65   28.90 
   6   5   0  487.45   32.20 
   6   5   0  448.56   28.50 
  -6   5   0  502.85   28.10 
  -6   5   0  485.35   31.60 
  -6   5   0  454.35   29.60 
   6   5   0  513.55   24.60 
  -6   5   0  501.55   26.90 
   6   5   0  510.05   32.10 
   6   5   0  526.65   22.80 
  -6   5   0  481.35   30.40 
   6   5   0  494.75   28.40 
  -6   5   0  445.06   30.40 
  -6   5   0  530.15   26.80 
  -6   5   0  473.55   33.20 
  -6   5   0  541.35   28.00 
  -7  -5   0   65.49   13.20 
   7  -5   0   63.49   12.50 
  -7  -5   0   37.60   20.50 
   7  -5   0   85.89   16.60 
   7  -5   0   68.89   13.60 
  -7  -5   0   58.29   14.60 
   7  -5   0   73.59   15.90 
   7  -5   0   66.19   14.30 
  -7  -5   0   45.50   11.00 
  -7  -5   0   77.79   17.10 
  -7  -5   0   60.99   13.10 
   7  -5   0   89.59   16.80 
  -7  -5   0   89.09   19.00 
  -7  -5   0   60.69   16.20 
  -7   5   0   53.79   13.70 
  -7   5   0   48.90   13.10 
   7   5   0   55.49   13.90 
  -7   5   0   59.29   12.10 
   7   5   0   66.69   12.50 
  -7   5   0   60.39   14.40 
  -7   5   0   33.80   12.10 
   7   5   0   66.09   15.30 
   7   5   0   59.59   13.40 
  -7   5   0   50.19   12.30 
   7   5   0   64.19   12.10 
  -7   5   0   62.19   14.40 
   8  -5   0  180.28   24.50 
   8  -5   0  209.38   27.40 
  -8  -5   0  254.57   31.70 
  -8  -5   0  277.97   28.30 
   8  -5   0  266.57   28.30 
  -8  -5   0  214.78   24.40 
   8  -5   0  246.38   26.20 
  -8  -5   0  252.17   30.80 
  -8  -5   0  257.57   30.80 
  -8  -5   0  213.18   30.40 
  -8   5   0  272.87   32.80 
  -8   5   0  279.67   28.10 
  -8   5   0  222.68   26.30 
   8   5   0  183.58   26.60 
   8   5   0  240.08   26.00 
  -8   5   0  279.97   31.50 
  -8   5   0  308.27   31.40 
   8   5   0  211.38   27.50 
   8   5   0  238.18   24.60 
  -9  -5   0   39.30   15.40 
  -9  -5   0   38.30   14.80 
  -9  -5   0   70.19   18.40 
   9  -5   0   36.80   13.50 
  -9  -5   0   35.90   11.60 
  -9  -5   0   50.79   16.10 
   9  -5   0   28.90   11.80 
   9  -5   0   36.60   11.80 
   9   5   0   48.10   15.10 
  -9   5   0   50.09   15.40 
   9   5   0   40.70   14.90 
   9   5   0   53.79   13.50 
  -9   5   0   63.09   16.10 
  -9   5   0   52.29   15.50 
  -9   5   0   56.19   14.10 
   0  -6   0  124.89   16.50 
   0  -6   0  164.88   21.80 
   0  -6   0  118.39   16.00 
   0  -6   0  110.89   15.20 
   0  -6   0  136.09   19.00 
   0  -6   0  112.79   16.20 
   0  -6   0  152.78   17.20 
   0  -6   0  134.39   16.60 
   0  -6   0  131.39   15.30 
   0  -6   0  110.29   16.30 
   0  -6   0  132.09   14.50 
   0  -6   0  123.59   14.20 
   0  -6   0  131.79   21.20 
   0  -6   0  120.99   16.90 
   0  -6   0  128.99   35.70 
   0   6   0  126.39   15.20 
   0   6   0  106.69   12.10 
   0   6   0   91.09   13.70 
   0   6   0   84.99   12.90 
   0   6   0  115.69   17.20 
   0   6   0  117.79   17.40 
   0   6   0  126.49   15.00 
   0   6   0   95.49   15.20 
   0   6   0  162.68   21.10 
   0   6   0  153.68   15.60 
   0   6   0  146.99   18.50 
   0   6   0   96.99   13.40 
   0   6   0  126.69   16.30 
   0   6   0  116.69   13.50 
   1  -6   0 2068.29  120.69 
  -1  -6   0 2021.90   71.09 
   1  -6   0 1912.61   78.89 
   1  -6   0 2027.10   73.79 
  -1  -6   0 1995.90   71.19 
   1  -6   0 1968.70   77.09 
   1  -6   0 1998.50   66.79 
   1  -6   0 1964.30   73.59 
   1  -6   0 2019.60   85.59 
  -1  -6   0 2132.59   85.29 
   1  -6   0 1940.41   66.29 
  -1  -6   0 2007.10   71.49 
   1  -6   0 1971.90   74.59 
   1  -6   0 1959.40   74.39 
  -1  -6   0 2041.50   72.69 
  -1  -6   0 2065.69   73.29 
  -1  -6   0 2019.20  117.79 
   1  -6   0 1951.00   70.89 
  -1  -6   0 1986.40   70.19 
  -1  -6   0 2001.30   73.79 
   1  -6   0 1914.21   70.59 
  -1  -6   0 1796.52   72.69 
  -1  -6   0 2018.10   73.09 
   1  -6   0 1844.42   68.59 
  -1  -6   0 2047.00   76.49 
   1  -6   0 2052.69   76.89 
  -1  -6   0 1980.10   72.99 
   1  -6   0 1986.60   66.09 
  -1  -6   0 2069.99   76.29 
  -1  -6   0 1946.61   77.89 
   1   6   0 2056.69   68.69 
   1   6   0 1983.50   74.79 
   1   6   0 1902.71   73.89 
   1   6   0 2016.40   72.89 
  -1   6   0 2033.70   70.39 
   1   6   0 2058.19   69.89 
   1   6   0 1891.21   69.69 
   1   6   0 1943.71   72.69 
  -1   6   0 1980.40   73.39 
   1   6   0 1976.80   70.69 
  -1   6   0 1955.40   67.79 
  -1   6   0 2003.20   65.39 
   1   6   0 2111.79   75.79 
   1   6   0 2063.09   72.59 
  -1   6   0 1919.81   72.09 
   1   6   0 2099.09   80.19 
  -1   6   0 1853.31   75.29 
   1   6   0 1986.20   77.49 
  -1   6   0 2121.59   69.39 
  -1   6   0 1979.30   70.39 
   1   6   0 1974.10   66.29 
  -1   6   0 2015.50   64.79 
   1   6   0 2037.00   71.89 
  -1   6   0 1902.81   71.99 
  -1   6   0 2030.50   74.69 
  -1   6   0 2024.10   76.99 
  -1   6   0 1971.50   72.79 
  -1   6   0 1992.70   77.79 
   2  -6   0   -0.40    4.00 
  -2  -6   0    9.60    6.90 
   2  -6   0    2.20    4.70 
   2  -6   0   10.60    7.00 
   2  -6   0    8.80    4.10 
   2  -6   0    2.80    5.00 
  -2  -6   0    4.90    5.70 
   2  -6   0    1.40    2.80 
  -2  -6   0    7.60    6.10 
   2  -6   0    9.80    7.30 
  -2  -6   0   -4.00    4.50 
   2  -6   0   -2.40    4.20 
  -2  -6   0    9.10    5.80 
   2  -6   0    8.30   12.90 
  -2  -6   0    1.10    3.70 
   2  -6   0    2.60    5.60 
   2  -6   0    4.20    5.00 
   2  -6   0    9.50    6.10 
   2  -6   0   15.10    4.80 
   2  -6   0   13.50    6.00 
   2  -6   0    7.40    3.60 
   2  -6   0    2.20    3.00 
  -2  -6   0   -8.90    4.60 
  -2  -6   0    6.60    5.50 
   2  -6   0   -0.20    4.80 
  -2  -6   0    6.40    5.90 
  -2  -6   0    9.60    6.50 
   2  -6   0    1.00    4.30 
   2  -6   0   -1.00    3.60 
  -2  -6   0    9.20    9.00 
   2  -6   0   -5.00    2.90 
   2  -6   0   11.70    7.60 
  -2  -6   0    8.70    5.60 
  -2  -6   0    3.20   12.90 
  -2   6   0    8.80    7.00 
  -2   6   0   -2.30    5.30 
   2   6   0    7.30    5.70 
  -2   6   0    9.70    5.60 
   2   6   0    2.20    6.30 
   2   6   0    0.20    4.80 
  -2   6   0    7.60    5.10 
   2   6   0    6.40    4.10 
  -2   6   0    8.30    5.60 
  -2   6   0    0.40    3.40 
   2   6   0    3.60    4.80 
   2   6   0   11.80    6.90 
  -2   6   0   -0.40    4.10 
   2   6   0    3.40    5.30 
  -2   6   0    7.60    7.90 
   2   6   0    5.30    5.40 
  -2   6   0   11.50    6.90 
   2   6   0    4.00    7.00 
  -2   6   0    3.10    2.90 
  -2   6   0    9.90    6.60 
   2   6   0    8.30    5.80 
   2   6   0    4.10    6.80 
  -2   6   0   -1.30    3.30 
   2   6   0    3.00    4.60 
   2   6   0    0.70    5.00 
  -2   6   0    3.90    5.20 
   2   6   0    9.20    5.70 
   3  -6   0  756.12   32.70 
  -3  -6   0  765.02   37.10 
   3  -6   0  787.32   42.30 
  -3  -6   0  794.42   36.40 
   3  -6   0  760.92   41.10 
  -3  -6   0  821.22   39.40 
   3  -6   0  756.62   28.60 
  -3  -6   0  731.43   68.09 
  -3  -6   0  696.63   36.10 
  -3  -6   0  859.61   41.20 
   3  -6   0  757.52   24.90 
   3  -6   0  783.52   39.80 
   3  -6   0  774.02   34.40 
   3  -6   0  708.13   26.20 
  -3  -6   0  815.02   41.00 
   3  -6   0  802.22   28.80 
   3  -6   0  781.22   38.50 
  -3  -6   0  776.82   34.30 
  -3  -6   0  697.13   45.10 
  -3  -6   0  763.92   39.30 
   3  -6   0  749.13   39.00 
   3  -6   0  720.73   32.10 
   3  -6   0  750.12   34.90 
  -3  -6   0  758.72   39.10 
  -3  -6   0  806.52   41.10 
   3  -6   0  787.32   35.40 
   3  -6   0  741.73   40.10 
   3  -6   0  724.93   70.39 
  -3  -6   0  824.42   39.10 
   3  -6   0  755.42   25.50 
   3  -6   0  780.72   43.20 
   3   6   0  756.92   37.90 
   3   6   0  774.82   40.00 
  -3   6   0  734.53   32.70 
  -3   6   0  732.03   37.40 
  -3   6   0  748.13   40.80 
  -3   6   0  754.72   39.20 
   3   6   0  791.42   35.00 
   3   6   0  755.82   39.90 
   3   6   0  808.32   40.80 
   3   6   0  770.62   36.30 
   3   6   0  761.62   38.20 
  -3   6   0  770.12   40.70 
  -3   6   0  802.22   32.20 
   3   6   0  742.73   33.20 
  -3   6   0  680.63   39.50 
   3   6   0  823.72   38.40 
  -3   6   0  797.22   38.40 
   3   6   0  760.32   39.10 
  -3   6   0  709.73   36.90 
  -3   6   0  722.83   36.90 
   3   6   0  744.73   37.60 
  -3   6   0  723.33   28.10 
   3   6   0  727.23   35.20 
   3   6   0  792.72   43.40 
  -3   6   0  742.63   36.70 
   3   6   0  788.12   29.10 
   3   6   0  724.33   41.10 
   4  -6   0   -3.90    5.70 
   4  -6   0   -0.60    5.40 
  -4  -6   0    5.30    6.40 
   4  -6   0   -0.60   10.20 
  -4  -6   0    5.30    7.20 
   4  -6   0   -3.30    4.20 
   4  -6   0    2.20    4.10 
  -4  -6   0   -6.70    4.40 
  -4  -6   0    0.50    4.50 
   4  -6   0   -1.10    4.00 
  -4  -6   0    2.10    5.60 
   4  -6   0    7.20    4.20 
   4  -6   0    1.80    6.20 
   4  -6   0    5.20    4.90 
  -4  -6   0   11.00    6.40 
  -4  -6   0    1.70    5.80 
  -4  -6   0   -1.80    6.10 
  -4  -6   0    0.70    4.10 
   4  -6   0    5.80    6.90 
   4  -6   0    9.70    6.30 
  -4  -6   0    0.50    4.70 
  -4  -6   0   -0.30    5.70 
  -4  -6   0    3.70   16.40 
   4  -6   0    0.00    5.60 
   4  -6   0    6.30    3.70 
  -4  -6   0  -13.40    5.60 
   4   6   0    2.10    4.00 
   4   6   0    5.00    6.60 
  -4   6   0   -3.30    4.90 
  -4   6   0   -1.40    4.20 
   4   6   0   13.90    7.30 
  -4   6   0    6.10    5.40 
   4   6   0   -2.90    4.30 
   4   6   0   -3.00    3.40 
  -4   6   0    2.00    4.00 
  -4   6   0   -1.90    2.40 
   4   6   0   -4.90    4.20 
  -4   6   0    4.00    5.60 
   4   6   0    2.30    4.90 
   4   6   0    0.00    4.60 
   4   6   0    0.50    4.70 
   4   6   0   -0.20    3.60 
  -4   6   0    2.80    6.80 
   4   6   0    4.80    6.50 
   4   6   0    8.70    6.60 
  -4   6   0   -1.70    5.30 
  -4   6   0    6.10    4.80 
  -4   6   0   -2.70    6.40 
  -4   6   0    6.00    5.60 
  -4   6   0   -5.30    4.30 
   5  -6   0 1205.48   57.89 
   5  -6   0 1303.87   57.39 
   5  -6   0 1221.38   58.59 
   5  -6   0 1246.48   46.60 
   5  -6   0 1279.27   58.69 
  -5  -6   0 1268.37   54.59 
  -5  -6   0 1308.17   57.19 
  -5  -6   0 1271.67   58.29 
  -5  -6   0 1264.77   56.69 
  -5  -6   0 1291.97   55.59 
  -5  -6   0 1302.37   63.39 
  -5  -6   0 1227.68   51.19 
  -5  -6   0 1256.67   59.89 
   5  -6   0 1326.17   48.30 
  -5  -6   0 1281.07   50.99 
  -5  -6   0 1223.58   54.99 
  -5  -6   0 1224.18   90.29 
   5  -6   0 1260.47   51.79 
  -5  -6   0 1243.48   50.99 
   5  -6   0 1256.67   55.29 
   5  -6   0 1314.07   56.59 
   5   6   0 1201.38   51.39 
  -5   6   0 1263.77   51.79 
  -5   6   0 1209.48   57.39 
   5   6   0 1250.47   50.59 
   5   6   0 1274.37   49.90 
  -5   6   0 1184.28   52.09 
   5   6   0 1238.58   46.40 
  -5   6   0 1192.68   57.49 
   5   6   0 1279.37   57.79 
   5   6   0 1194.98   53.89 
  -5   6   0 1234.88   53.19 
   5   6   0 1243.38   54.89 
  -5   6   0 1137.69   56.49 
  -5   6   0 1305.97   53.09 
  -5   6   0 1238.98   56.29 
   5   6   0 1283.57   56.69 
   5   6   0 1206.08   48.90 
   5   6   0 1314.67   54.29 
  -5   6   0 1233.88   55.49 
   6  -6   0    8.40    7.80 
  -6  -6   0    3.60    5.20 
  -6  -6   0    0.20    6.10 
   6  -6   0    2.80    6.30 
  -6  -6   0    0.30    7.70 
   6  -6   0    5.10    6.10 
  -6  -6   0    5.00   17.60 
  -6  -6   0   -1.00    4.60 
   6  -6   0    5.50    5.50 
  -6  -6   0   10.80    9.50 
  -6  -6   0    0.50    5.90 
  -6  -6   0   -0.50    5.70 
   6  -6   0   -0.60    6.20 
  -6  -6   0    3.60    5.90 
  -6  -6   0   -6.00    5.80 
   6  -6   0    3.00    5.70 
  -6   6   0   -1.50    4.60 
  -6   6   0    8.30    6.80 
   6   6   0    6.70    6.40 
   6   6   0   -0.30    4.90 
  -6   6   0    2.40    6.20 
   6   6   0    0.80    6.80 
  -6   6   0    2.70    5.00 
   6   6   0   11.10    9.30 
  -6   6   0   -3.50    4.50 
  -6   6   0   -6.30    5.10 
  -6   6   0   -0.20    5.20 
   6   6   0   -2.90    3.30 
   6   6   0    2.10    6.90 
  -6   6   0    2.50    5.20 
  -6   6   0   -2.80    7.20 
  -6   6   0    3.40    6.30 
  -6   6   0   -3.00    4.80 
   6   6   0   -5.10    4.20 
   6   6   0   -1.40    5.00 
   7  -6   0 1281.87   62.59 
  -7  -6   0 1278.57   66.09 
   7  -6   0 1278.17   57.19 
  -7  -6   0 1105.39   60.09 
  -7  -6   0 1259.17   58.19 
   7  -6   0 1269.87   58.69 
  -7  -6   0 1263.27   60.79 
   7  -6   0 1292.17   61.99 
  -7  -6   0 1267.97   65.79 
  -7  -6   0 1281.07   58.29 
   7  -6   0 1235.18   58.99 
   7  -6   0 1227.48   61.69 
  -7   6   0 1335.37   55.99 
   7   6   0 1237.18   56.59 
   7   6   0 1214.98   60.89 
  -7   6   0 1274.87   65.29 
   7   6   0 1249.47   55.99 
  -7   6   0 1305.57   61.09 
  -7   6   0 1275.77   58.99 
   7   6   0 1298.87   60.69 
  -7   6   0 1196.58   58.39 
  -7   6   0 1288.67   61.99 
  -7   6   0 1281.57   55.59 
  -7   6   0 1338.77   63.49 
   7   6   0 1236.98   55.99 
   8  -6   0   58.39   15.50 
   8  -6   0   81.79   17.80 
   8  -6   0   53.69   15.50 
  -8  -6   0   44.10   15.50 
  -8  -6   0   36.00   13.30 
  -8  -6   0   56.29   15.40 
  -8  -6   0   77.99   16.10 
  -8  -6   0   53.79   16.10 
  -8  -6   0   82.19   19.70 
   8  -6   0   94.09   17.70 
  -8   6   0   48.80   15.20 
  -8   6   0   48.70   15.90 
   8   6   0   54.59   14.60 
   8   6   0   44.30   14.00 
  -8   6   0   39.40   14.60 
   8   6   0   51.39   16.00 
   8   6   0   63.49   14.00 
  -8   6   0   32.20   12.30 
  -8   6   0   55.79   14.50 
   0  -7   0    5.60    7.20 
   0  -7   0   -1.80    4.30 
   0  -7   0   -3.30    4.20 
   0  -7   0    9.50    6.80 
   0  -7   0   -2.20    5.70 
   0  -7   0    0.30   13.80 
   0  -7   0   -9.10    4.70 
   0  -7   0   -3.70    4.90 
   0  -7   0   -0.40    6.50 
   0  -7   0   -7.00    5.30 
   0  -7   0   -1.30    5.40 
   0  -7   0    2.30    7.20 
   0  -7   0    0.80    4.80 
   0  -7   0   -2.60    3.70 
   0  -7   0    5.70    5.80 
   0   7   0   -4.90    3.80 
   0   7   0   -2.10    4.50 
   0   7   0   -2.10    4.40 
   0   7   0    0.50    6.50 
   0   7   0    2.60    4.80 
   0   7   0   -7.40    4.30 
   0   7   0    7.40    6.50 
   0   7   0    1.60    5.50 
   0   7   0    1.50    5.00 
   0   7   0    0.70    5.20 
   0   7   0    3.60    4.80 
   0   7   0   -8.70    5.80 
   0   7   0    2.40    4.70 
   0   7   0   -3.10    3.60 
   1  -7   0  161.28   18.50 
  -1  -7   0  173.18   45.50 
   1  -7   0  133.29   39.50 
   1  -7   0  137.39   15.10 
  -1  -7   0  156.08   20.80 
  -1  -7   0  106.19   16.90 
  -1  -7   0   95.29   15.50 
   1  -7   0  163.48   21.50 
  -1  -7   0  115.79   16.20 
   1  -7   0  135.49   19.30 
   1  -7   0  167.58   16.80 
  -1  -7   0  142.39   19.50 
   1  -7   0  114.69   21.10 
   1  -7   0  124.29   17.80 
  -1  -7   0  122.99   17.40 
   1  -7   0  152.38   19.60 
   1  -7   0  140.39   15.40 
  -1  -7   0  161.58   25.80 
  -1  -7   0  144.69   18.30 
   1  -7   0  117.89   19.20 
  -1  -7   0  143.59   20.20 
  -1  -7   0  108.99   15.70 
   1  -7   0  136.29   17.40 
   1  -7   0  139.89   16.30 
   1  -7   0  151.58   19.90 
   1  -7   0  142.09   19.30 
   1  -7   0  142.99   21.30 
  -1  -7   0  127.99   17.40 
  -1  -7   0  122.99   18.80 
  -1  -7   0  144.49   22.20 
  -1  -7   0  148.79   18.90 
  -1   7   0  128.89   20.30 
   1   7   0  112.49   15.40 
  -1   7   0  144.09   14.30 
   1   7   0  131.89   17.50 
  -1   7   0  147.09   19.90 
   1   7   0  132.89   18.00 
  -1   7   0  132.49   16.00 
  -1   7   0  126.69   17.80 
   1   7   0  111.29   16.50 
   1   7   0  172.18   18.30 
   1   7   0  134.69   19.40 
  -1   7   0  113.79   17.10 
   1   7   0  156.98   20.60 
  -1   7   0  128.39   14.60 
  -1   7   0  117.69   15.60 
  -1   7   0  142.29   19.50 
  -1   7   0  145.49   21.60 
   1   7   0  137.99   15.50 
   1   7   0  170.08   21.70 
   1   7   0  149.59   21.50 
   1   7   0  123.39   17.20 
  -1   7   0  126.49   17.50 
  -1   7   0   96.49   15.20 
   1   7   0  148.79   21.30 
   1   7   0  110.59   19.00 
  -1   7   0   98.09   17.90 
   1   7   0  125.69   17.30 
   2  -7   0    7.00    7.10 
  -2  -7   0    1.90    7.70 
   2  -7   0    7.90    6.60 
  -2  -7   0   -0.60    6.50 
   2  -7   0   11.10    8.40 
  -2  -7   0   12.60    6.50 
   2  -7   0   -3.40    4.90 
  -2  -7   0    2.30    5.70 
   2  -7   0   16.60    7.20 
  -2  -7   0    9.30    8.00 
   2  -7   0    3.50    5.10 
  -2  -7   0   10.40    8.80 
   2  -7   0    2.50    3.80 
   2  -7   0   17.60    9.40 
   2  -7   0    9.40    5.50 
  -2  -7   0    1.10    5.80 
   2  -7   0   10.70    6.80 
  -2  -7   0    7.50    6.80 
   2  -7   0    1.80    6.10 
   2  -7   0    1.60    5.60 
   2  -7   0   25.60   18.70 
  -2  -7   0    6.50    6.60 
  -2  -7   0   11.90    8.50 
   2  -7   0    9.00    6.10 
  -2  -7   0    6.00    6.40 
   2  -7   0    7.30    5.20 
  -2  -7   0    5.20   15.40 
  -2  -7   0    8.70    7.90 
  -2  -7   0   10.10    7.50 
   2  -7   0    6.20    8.40 
   2  -7   0   17.80    8.30 
   2  -7   0    4.20    6.70 
  -2  -7   0    7.90    6.20 
  -2   7   0    6.10    4.00 
   2   7   0   12.80    7.20 
   2   7   0    1.20    5.80 
   2   7   0    5.20    6.00 
  -2   7   0   12.90    7.40 
   2   7   0    3.30    8.10 
   2   7   0   11.70    7.40 
   2   7   0    8.40    6.30 
  -2   7   0   17.60    8.30 
   2   7   0    4.60    5.00 
   2   7   0    1.20    6.10 
   2   7   0   12.70    9.80 
   2   7   0    2.80    5.70 
  -2   7   0   11.00    5.60 
  -2   7   0    3.60    5.20 
  -2   7   0    8.80    6.50 
  -2   7   0    9.60    8.00 
   2   7   0   11.00    5.10 
  -2   7   0   -0.80    6.10 
   2   7   0    4.00    6.10 
   2   7   0   10.50    7.60 
   2   7   0    5.00    6.40 
  -2   7   0    6.90    7.30 
  -2   7   0    2.90    4.30 
  -2   7   0    1.80    5.00 
  -2   7   0    8.20    6.20 
  -2   7   0   14.50    8.50 
  -3  -7   0   16.80    9.30 
  -3  -7   0   20.00    9.40 
   3  -7   0   30.60   11.50 
   3  -7   0   14.90   17.90 
   3  -7   0   20.40    7.70 
   3  -7   0   16.10    7.20 
  -3  -7   0   12.00    8.20 
  -3  -7   0   20.40    9.60 
   3  -7   0    7.80    7.80 
   3  -7   0   13.80    7.60 
   3  -7   0    8.50    7.50 
   3  -7   0   16.50    8.70 
  -3  -7   0   12.60    8.40 
   3  -7   0   38.80   14.00 
  -3  -7   0   16.50    6.60 
   3  -7   0   14.30    7.90 
  -3  -7   0    9.90    9.10 
   3  -7   0    9.60    6.40 
  -3  -7   0   19.10    8.40 
   3  -7   0    7.00    6.00 
  -3  -7   0   24.80   10.70 
  -3  -7   0   22.60    9.30 
   3  -7   0   25.70    9.90 
  -3  -7   0   29.50   11.90 
  -3  -7   0   14.10    7.20 
   3  -7   0   14.90    8.80 
   3  -7   0   21.80    7.40 
  -3  -7   0    6.30    7.00 
  -3  -7   0   30.20   21.80 
  -3   7   0   31.40   11.00 
   3   7   0   12.30   10.50 
   3   7   0   27.70    9.40 
   3   7   0    6.60    7.50 
  -3   7   0   32.10   10.00 
   3   7   0   15.60    5.30 
  -3   7   0   16.50    5.30 
   3   7   0   25.70   10.50 
   3   7   0   13.60    9.60 
   3   7   0   22.90    8.20 
   3   7   0    5.80    6.40 
   3   7   0   12.90    7.00 
   3   7   0   16.20    9.20 
  -3   7   0   16.90    7.80 
   3   7   0   11.90    8.20 
   3   7   0   14.00    7.90 
   3   7   0    7.50    5.90 
  -3   7   0   17.60    9.30 
   3   7   0   18.60   11.30 
  -3   7   0   10.90    7.70 
  -3   7   0   18.70    7.80 
  -3   7   0    5.60    6.00 
  -3   7   0   20.50    8.50 
  -3   7   0   16.70    8.70 
  -3   7   0   49.20    9.70 
  -3   7   0   16.00    6.80 
  -3   7   0   22.70    9.40 
   3   7   0   10.50    7.10 
  -4  -7   0  223.98   52.09 
   4  -7   0  162.88   44.20 
  -4  -7   0  169.78   23.10 
  -4  -7   0  173.38   23.10 
   4  -7   0  195.08   24.40 
   4  -7   0  183.78   21.10 
  -4  -7   0  181.18   23.80 
  -4  -7   0  152.98   26.90 
  -4  -7   0  196.38   21.20 
   4  -7   0  183.98   27.50 
   4  -7   0  222.58   26.20 
  -4  -7   0  170.18   20.70 
   4  -7   0  181.08   25.90 
   4  -7   0  196.68   23.00 
  -4  -7   0  200.68   25.10 
  -4  -7   0  145.69   20.70 
   4  -7   0  198.48   21.30 
   4  -7   0  163.58   19.00 
   4  -7   0  202.18   26.80 
  -4  -7   0  202.98   20.00 
  -4  -7   0  162.68   19.70 
  -4  -7   0  172.98   22.90 
   4  -7   0  148.99   23.40 
  -4  -7   0  167.18   23.00 
   4   7   0  178.58   23.20 
   4   7   0  172.48   22.90 
   4   7   0  169.48   22.70 
  -4   7   0  148.69   22.10 
   4   7   0  172.08   19.70 
   4   7   0  192.88   19.40 
  -4   7   0  199.78   21.80 
  -4   7   0  190.88   25.60 
   4   7   0  144.39   22.20 
   4   7   0  157.58   21.00 
  -4   7   0  159.58   20.40 
   4   7   0  189.58   23.80 
   4   7   0  143.29   19.30 
   4   7   0  164.18   20.70 
  -4   7   0  190.08   22.20 
  -4   7   0  175.78   23.10 
   4   7   0  160.48   20.30 
  -4   7   0  192.28   22.20 
  -4   7   0  175.48   14.50 
  -4   7   0  170.58   21.50 
   4   7   0  184.18   15.30 
  -4   7   0  198.58   22.90 
  -4   7   0  237.58   25.70 
  -4   7   0  150.78   22.70 
   4   7   0  133.19   19.40 
  -5  -7   0   -6.10    4.70 
  -5  -7   0   16.60    8.80 
   5  -7   0    2.40    7.20 
  -5  -7   0    8.10    5.80 
  -5  -7   0    2.50    7.30 
  -5  -7   0    0.90    7.60 
  -5  -7   0    8.60    9.20 
  -5  -7   0   -1.00    6.70 
   5  -7   0    6.70    6.70 
   5  -7   0    1.40    7.00 
   5  -7   0   16.30    9.40 
  -5  -7   0   -1.30    5.40 
   5  -7   0   -5.10    5.20 
   5  -7   0   10.40    8.40 
  -5  -7   0   -1.50    6.10 
   5  -7   0   -1.00    5.70 
  -5  -7   0   11.30   17.40 
  -5  -7   0    9.40    7.20 
  -5  -7   0    4.20    7.70 
  -5   7   0    7.80    8.10 
  -5   7   0    4.00    6.80 
   5   7   0   11.70    8.40 
  -5   7   0    1.40    7.60 
  -5   7   0    3.30    6.10 
  -5   7   0    0.20    5.70 
   5   7   0    4.80    7.50 
  -5   7   0   -0.70    7.50 
  -5   7   0   -2.80    5.30 
   5   7   0    7.30    6.10 
   5   7   0    8.80    6.70 
  -5   7   0   -5.40    5.10 
  -5   7   0   -1.20    6.80 
   5   7   0    0.40    5.80 
   5   7   0    1.10    5.80 
   5   7   0   -0.10    6.10 
   5   7   0   -4.00    5.70 
  -5   7   0    5.60    7.50 
   5   7   0   -0.30    6.20 
   5   7   0    4.20    6.90 
   6  -7   0  632.34   41.70 
  -6  -7   0  580.64   41.70 
  -6  -7   0  622.84   40.90 
  -6  -7   0  610.54   39.50 
  -6  -7   0  575.44   68.39 
  -6  -7   0  578.54   44.60 
  -6  -7   0  627.54   40.50 
   6  -7   0  635.74   40.10 
   6  -7   0  623.04   42.90 
   6  -7   0  559.24   37.80 
   6  -7   0  585.84   37.40 
  -6  -7   0  617.84   39.10 
   6  -7   0  644.84   43.20 
  -6  -7   0  576.94   37.50 
  -6  -7   0  577.14   34.00 
  -6  -7   0  537.05   38.10 
   6   7   0  587.24   37.10 
   6   7   0  615.74   38.00 
  -6   7   0  579.44   34.70 
   6   7   0  658.03   33.30 
  -6   7   0  576.34   38.50 
   6   7   0  550.54   38.40 
  -6   7   0  565.74   39.80 
   6   7   0  604.64   33.30 
  -6   7   0  584.94   39.90 
  -6   7   0  559.64   33.40 
  -6   7   0  568.14   35.30 
  -6   7   0  592.54   41.10 
  -6   7   0  561.34   36.50 
   6   7   0  574.44   37.20 
   6   7   0  573.64   32.30 
   6   7   0  614.74   38.70 
  -6   7   0  614.84   38.40 
  -6   7   0  589.64   34.90 
   7  -7   0   14.10    8.80 
  -7  -7   0   11.50    9.20 
  -7  -7   0   -2.20    8.70 
   7  -7   0   -1.60    6.00 
   7  -7   0   14.70    9.30 
   7  -7   0    2.80    8.60 
   7  -7   0    5.80    8.00 
  -7  -7   0   25.10   12.90 
   7  -7   0   -1.30    6.60 
  -7  -7   0   18.30   10.00 
  -7  -7   0   -8.50    5.90 
  -7  -7   0   11.00   11.20 
  -7  -7   0   35.30   13.30 
  -7  -7   0   19.60   10.50 
   7   7   0    6.30    9.90 
   7   7   0   19.80    8.90 
   7   7   0   10.70    8.30 
  -7   7   0   13.60    8.60 
  -7   7   0   10.40    8.90 
  -7   7   0    8.50    9.80 
   7   7   0   15.50   10.40 
  -7   7   0   14.10    8.60 
  -7   7   0    8.30    8.20 
  -7   7   0   -5.50    7.20 
   7   7   0   15.00    8.60 
  -7   7   0    5.50    7.70 
  -7   7   0    6.60    8.60 
   0  -8   0  183.48   25.40 
   0  -8   0  186.08   20.90 
   0  -8   0  196.28   52.59 
   0  -8   0  180.88   22.70 
   0  -8   0  208.68   29.50 
   0  -8   0  214.98   26.00 
   0  -8   0  155.18   21.40 
   0  -8   0  159.88   23.90 
   0  -8   0  195.08   25.50 
   0  -8   0  183.48   23.80 
   0  -8   0  171.68   22.20 
   0  -8   0  229.08   24.60 
   0  -8   0  181.98   23.10 
   0  -8   0  198.68   20.90 
   0  -8   0  194.68   22.10 
   0   8   0  154.08   19.30 
   0   8   0  147.09   17.80 
   0   8   0  210.08   17.30 
   0   8   0  201.18   24.40 
   0   8   0  163.58   20.90 
   0   8   0  188.08   20.00 
   0   8   0  165.78   24.40 
   0   8   0  221.38   25.40 
   0   8   0  205.28   26.40 
   0   8   0  226.38   23.20 
   0   8   0  219.18   26.70 
   0   8   0  177.18   22.60 
   0   8   0  163.58   22.70 
   1  -8   0 1284.67   49.70 
  -1  -8   0 1153.48   59.29 
  -1  -8   0 1247.48   54.09 
  -1  -8   0 1207.88   57.09 
   1  -8   0 1364.96   63.99 
   1  -8   0 1259.87   50.19 
   1  -8   0 1298.87   58.29 
  -1  -8   0 1277.37   56.59 
  -1  -8   0 1245.68   59.09 
  -1  -8   0 1332.47   66.69 
  -1  -8   0 1272.77   59.19 
  -1  -8   0 1182.68  103.29 
   1  -8   0 1139.29  101.49 
   1  -8   0 1257.67   60.59 
  -1  -8   0 1291.37   56.59 
   1  -8   0 1170.68   56.59 
  -1  -8   0 1285.07   56.59 
  -1  -8   0 1219.58   56.79 
   1  -8   0 1173.48   49.20 
   1  -8   0 1262.97   60.99 
  -1  -8   0 1222.68   54.29 
  -1  -8   0 1226.18   55.19 
   1  -8   0 1236.18   53.69 
  -1  -8   0 1171.68   58.69 
   1  -8   0 1300.47   49.60 
   1  -8   0 1292.27   55.89 
   1  -8   0 1127.69   56.29 
   1  -8   0 1341.47   60.39 
   1  -8   0 1167.28   52.19 
   1  -8   0 1242.18   55.29 
  -1  -8   0 1223.48   53.29 
  -1   8   0 1192.78   53.69 
  -1   8   0 1231.48   56.59 
  -1   8   0 1201.28   60.69 
  -1   8   0 1204.38   56.29 
   1   8   0 1189.58   61.39 
   1   8   0 1386.56   62.79 
   1   8   0 1207.68   50.89 
   1   8   0 1203.48   53.09 
   1   8   0 1201.28   55.49 
  -1   8   0 1234.38   58.09 
   1   8   0 1233.48   52.39 
  -1   8   0 1162.08   47.10 
  -1   8   0 1213.98   57.29 
   1   8   0 1215.78   59.09 
  -1   8   0 1262.27   60.49 
   1   8   0 1183.58   49.20 
   1   8   0 1226.18   55.09 
   1   8   0 1209.28   54.99 
   1   8   0 1146.19   56.19 
   1   8   0 1206.78   55.79 
  -1   8   0 1213.18   52.59 
  -1   8   0 1301.07   52.59 
   1   8   0 1191.38   58.29 
  -1   8   0 1270.17   56.59 
  -1   8   0 1083.19   57.89 
   1   8   0 1158.88   55.99 
  -1   8   0 1218.68   48.10 
   2  -8   0   39.70   12.70 
  -2  -8   0   23.00    9.20 
  -2  -8   0   42.80   12.10 
  -2  -8   0   43.20   12.20 
  -2  -8   0   40.40   26.50 
   2  -8   0   25.20   11.80 
   2  -8   0   23.30    9.20 
   2  -8   0   18.60    9.20 
  -2  -8   0   39.10   12.00 
   2  -8   0   29.70   23.00 
  -2  -8   0   34.30   12.80 
  -2  -8   0   37.60   11.80 
   2  -8   0   34.80   12.10 
   2  -8   0   18.80   10.00 
   2  -8   0   25.00    9.80 
  -2  -8   0   39.80   12.30 
   2  -8   0   32.30    8.20 
   2  -8   0   25.70    8.80 
  -2  -8   0   23.70   10.30 
  -2  -8   0   29.70   13.80 
  -2  -8   0   32.90   10.50 
   2  -8   0   31.10   11.80 
  -2  -8   0   13.20    8.70 
   2  -8   0   11.40    7.40 
   2  -8   0   33.00    9.10 
  -2  -8   0   17.70    9.70 
  -2  -8   0   43.50   12.30 
  -2  -8   0   34.20   11.50 
   2  -8   0   31.30   12.00 
  -2  -8   0   19.50   11.20 
   2  -8   0   31.20   11.60 
   2   8   0   34.10   12.40 
   2   8   0   17.00    9.60 
  -2   8   0   26.90    9.90 
  -2   8   0   43.90   12.50 
   2   8   0   35.90   11.80 
   2   8   0    8.40    9.60 
   2   8   0   27.70   10.30 
  -2   8   0   52.99   14.30 
  -2   8   0   40.80   10.10 
   2   8   0   26.10   11.00 
  -2   8   0   35.70   10.60 
  -2   8   0   28.20    9.40 
  -2   8   0   24.50   10.00 
   2   8   0   35.40    8.20 
  -2   8   0   51.99   12.90 
   2   8   0   22.30    9.40 
   2   8   0   27.80   11.20 
  -2   8   0   13.00    7.90 
  -2   8   0   47.20   13.10 
   2   8   0   40.50   10.60 
  -2   8   0   33.10   10.80 
   2   8   0   32.70    9.90 
   2   8   0   54.19   13.90 
  -2   8   0   25.90    7.80 
   2   8   0   33.00   10.30 
   2   8   0   22.90   11.30 
   2   8   0   28.90   10.90 
  -2   8   0   25.50   10.70 
   3  -8   0  827.12   39.00 
   3  -8   0  783.72   47.00 
  -3  -8   0  843.72   41.20 
   3  -8   0  747.83   48.70 
   3  -8   0  831.92   86.89 
  -3  -8   0  845.22   45.40 
   3  -8   0  765.62   50.89 
  -3  -8   0  853.21   45.60 
   3  -8   0  852.21   43.60 
   3  -8   0  872.11   51.59 
  -3  -8   0  889.91   50.89 
  -3  -8   0  823.72   55.59 
  -3  -8   0  771.92   45.60 
  -3  -8   0  801.02   44.40 
   3  -8   0  855.91   42.00 
   3  -8   0  903.41   48.10 
   3  -8   0  810.72   45.90 
  -3  -8   0  744.43   83.29 
  -3  -8   0  832.42   45.90 
   3  -8   0  821.52   45.00 
  -3  -8   0  868.01   47.20 
   3  -8   0  803.12   41.40 
  -3  -8   0  811.02   42.00 
  -3  -8   0  881.01   46.10 
  -3  -8   0  834.72   46.50 
  -3  -8   0  887.31   46.20 
   3   8   0  813.72   41.90 
  -3   8   0  892.81   46.40 
   3   8   0  878.71   46.80 
   3   8   0  808.82   43.00 
   3   8   0  960.90   47.80 
  -3   8   0  869.51   44.50 
  -3   8   0  771.32   44.00 
   3   8   0  883.01   45.00 
   3   8   0  835.12   42.30 
   3   8   0  869.81   47.00 
  -3   8   0  873.71   51.69 
   3   8   0  739.63   47.70 
   3   8   0  878.71   45.00 
   3   8   0  901.01   41.70 
  -3   8   0  869.51   47.00 
  -3   8   0  855.61   38.20 
   3   8   0  787.32   47.10 
  -3   8   0  961.10   51.89 
  -3   8   0  884.31   45.00 
  -3   8   0  865.71   40.40 
   3   8   0  757.22   48.90 
   3   8   0  886.11   48.50 
   3   8   0  830.92   51.89 
  -3   8   0  797.42   45.40 
   3   8   0  818.52   44.30 
  -3   8   0  765.62   48.40 
  -3   8   0  769.82   44.00 
  -4  -8   0  136.49   28.10 
   4  -8   0  103.89   22.20 
   4  -8   0  141.29   23.80 
  -4  -8   0  127.69   21.10 
  -4  -8   0  156.28   22.70 
   4  -8   0  114.69   19.40 
   4  -8   0  137.69   43.50 
  -4  -8   0  159.58   22.30 
  -4  -8   0  133.09   17.80 
  -4  -8   0  159.28   20.10 
  -4  -8   0  135.29   21.90 
   4  -8   0  142.29   26.30 
  -4  -8   0  119.19   41.20 
  -4  -8   0   96.89   18.90 
   4  -8   0  171.88   20.90 
   4  -8   0  107.19   17.80 
  -4  -8   0  112.19   21.30 
  -4  -8   0  148.69   20.60 
   4  -8   0  127.09   21.90 
  -4  -8   0  163.78   23.90 
   4  -8   0  154.18   23.00 
  -4  -8   0  119.49   20.60 
   4  -8   0  139.39   25.20 
  -4  -8   0  101.19   18.00 
   4  -8   0  139.29   20.60 
  -4   8   0  163.88   25.90 
   4   8   0  180.28   23.50 
  -4   8   0  101.79   17.30 
  -4   8   0  132.99   22.10 
   4   8   0  164.88   21.20 
   4   8   0  133.99   19.70 
  -4   8   0   96.39   17.00 
   4   8   0  161.88   26.80 
   4   8   0  160.58   23.70 
  -4   8   0  107.99   20.40 
  -4   8   0  155.58   24.20 
   4   8   0  119.69   19.10 
   4   8   0  149.09   21.80 
  -4   8   0   90.29   16.50 
   4   8   0  142.79   21.80 
  -4   8   0  157.58   24.40 
   4   8   0  143.59   23.20 
   4   8   0  140.29   18.70 
   4   8   0  151.28   19.50 
  -4   8   0  167.88   22.40 
  -4   8   0  155.78   21.60 
   4   8   0  106.19   20.30 
   5  -8   0  574.84   42.20 
  -5  -8   0  663.73   42.80 
  -5  -8   0  705.73   43.10 
   5  -8   0  627.54   40.70 
   5  -8   0  619.44   45.40 
   5  -8   0  675.93   44.90 
  -5  -8   0  697.83   53.89 
   5  -8   0  640.84   42.10 
  -5  -8   0  746.93   44.30 
  -5  -8   0  567.74   36.80 
  -5  -8   0  698.53   45.60 
  -5  -8   0  687.43   45.10 
  -5  -8   0  589.24   39.50 
  -5  -8   0  622.34   76.89 
  -5  -8   0  614.14   41.00 
   5  -8   0  633.64   46.70 
  -5  -8   0  628.34   42.00 
   5  -8   0  740.43   41.00 
  -5   8   0  676.83   40.30 
   5   8   0  662.53   44.80 
  -5   8   0  589.34   39.90 
   5   8   0  651.33   37.80 
   5   8   0  604.64   39.60 
   5   8   0  693.33   42.60 
  -5   8   0  652.23   43.70 
  -5   8   0  729.83   42.50 
  -5   8   0  645.84   44.70 
  -5   8   0  605.84   38.60 
   5   8   0  608.74   36.40 
  -5   8   0  649.64   38.80 
   5   8   0  674.93   39.50 
  -5   8   0  604.44   41.50 
  -5   8   0  648.64   37.70 
   5   8   0  643.74   40.00 
   5   8   0  603.04   40.10 
   5   8   0  708.43   42.30 
  -5   8   0  616.24   43.20 
  -6  -8   0  125.19   27.10 
   6  -8   0  183.28   28.90 
  -6  -8   0  189.18   28.80 
   6  -8   0  172.78   30.30 
   6  -8   0  140.59   28.00 
  -6  -8   0  222.38   58.59 
  -6  -8   0  161.48   25.20 
   6  -8   0  201.58   27.40 
  -6  -8   0  125.29   22.50 
   6  -8   0  178.38   25.60 
  -6  -8   0  143.19   23.10 
  -6  -8   0  149.88   23.00 
  -6  -8   0  128.59   22.60 
  -6  -8   0  129.09   23.60 
  -6  -8   0  202.98   29.90 
   6  -8   0  151.38   25.10 
  -6   8   0  206.88   27.00 
  -6   8   0  138.09   21.30 
   6   8   0  144.59   23.40 
  -6   8   0  203.78   28.00 
  -6   8   0  164.28   22.90 
   6   8   0  169.18   25.30 
  -6   8   0  207.28   29.20 
  -6   8   0  215.38   28.10 
   6   8   0  194.28   28.00 
   6   8   0  163.68   24.20 
   6   8   0  254.87   31.30 
  -6   8   0  105.49   22.20 
  -6   8   0  199.98   31.70 
  -6   8   0  172.58   27.70 
   0  -9   0    9.80    9.70 
   0  -9   0   -2.40    6.80 
   0  -9   0   -1.80    5.30 
   0  -9   0    0.10    6.10 
   0  -9   0    6.40   17.00 
   0  -9   0    2.50    8.50 
   0  -9   0    4.30    8.10 
   0  -9   0   -5.40    7.10 
   0  -9   0   -3.90    5.30 
   0  -9   0   -2.10    5.10 
   0  -9   0   -4.00    7.40 
   0  -9   0   22.80    9.80 
   0  -9   0   -0.30    5.70 
   0  -9   0   -1.60    6.50 
   0  -9   0    3.80    7.50 
   0  -9   0   -2.20    5.90 
   0  -9   0   -2.90    7.20 
   0   9   0    0.00    5.60 
   0   9   0   -3.20    4.90 
   0   9   0   -0.70    6.50 
   0   9   0   -0.40    6.50 
   0   9   0   -0.90    6.00 
   0   9   0    0.10    7.20 
   0   9   0   -9.30    7.60 
   0   9   0    0.40    6.20 
   0   9   0    4.80    7.60 
   0   9   0   -2.50    4.80 
   0   9   0    2.70    7.10 
   0   9   0   -4.50    7.80 
   0   9   0   -1.50    5.90 
   0   9   0    7.50    7.50 
   0   9   0    0.60    9.10 
   1  -9   0    5.20    8.40 
   1  -9   0   21.50   10.80 
   1  -9   0    3.40    7.80 
  -1  -9   0    3.90    7.00 
  -1  -9   0   -3.50    8.00 
  -1  -9   0    7.10    8.30 
  -1  -9   0    6.20    7.80 
   1  -9   0   22.00   11.60 
  -1  -9   0   19.00   10.80 
  -1  -9   0    6.90    8.00 
   1  -9   0    3.40    7.40 
  -1  -9   0   -4.30    6.80 
   1  -9   0   12.50    9.30 
  -1  -9   0    4.90    8.70 
  -1  -9   0   12.50    8.10 
  -1  -9   0    9.20   10.80 
  -1  -9   0   11.80    8.40 
  -1  -9   0    4.80    6.40 
   1  -9   0    7.40    7.20 
   1  -9   0   -0.80    7.30 
   1  -9   0   12.40    7.60 
  -1  -9   0    3.90    6.30 
   1  -9   0    3.60    7.20 
   1  -9   0    1.60    6.10 
  -1  -9   0    4.60    7.90 
  -1  -9   0   -3.10   15.30 
   1  -9   0   14.60    8.40 
   1  -9   0  -10.90    6.10 
   1  -9   0   13.90   20.50 
  -1   9   0    7.40    7.90 
   1   9   0   -3.40    7.50 
   1   9   0    1.90    7.10 
   1   9   0   15.40    7.70 
   1   9   0    1.50    5.50 
  -1   9   0   -4.00    5.40 
   1   9   0    3.60    9.00 
  -1   9   0   10.50    8.60 
   1   9   0    2.30    7.60 
   1   9   0   10.00    8.10 
  -1   9   0    1.60    7.50 
  -1   9   0    5.70    8.50 
  -1   9   0   11.80    9.00 
   1   9   0    6.20    7.40 
   1   9   0   12.80   10.40 
  -1   9   0   -3.20    7.00 
  -1   9   0   12.10    9.10 
  -1   9   0    5.90    9.10 
  -1   9   0    2.70    5.90 
   1   9   0    5.10    8.70 
   1   9   0    1.40    6.80 
   1   9   0   -0.40    6.20 
   1   9   0    4.60    6.90 
  -1   9   0   -1.90    7.30 
   1   9   0    4.90    7.90 
   1   9   0    9.00    7.80 
  -1   9   0    6.20    6.80 
  -2  -9   0   33.40   29.10 
  -2  -9   0   23.30   11.20 
   2  -9   0   27.00    9.60 
  -2  -9   0   21.30   10.10 
  -2  -9   0   21.90    9.70 
   2  -9   0   45.80   14.50 
  -2  -9   0   39.60   13.70 
   2  -9   0   23.90   10.30 
  -2  -9   0   11.10    8.10 
   2  -9   0    9.70    8.30 
   2  -9   0   27.60   12.10 
   2  -9   0   32.00   13.40 
  -2  -9   0   42.60   15.60 
  -2  -9   0   26.30    9.60 
   2  -9   0   25.30   10.80 
   2  -9   0   16.00    9.40 
  -2  -9   0   45.10   14.00 
   2  -9   0   35.60   14.30 
  -2  -9   0   33.80   10.80 
  -2  -9   0   37.00   13.30 
  -2  -9   0   27.50   11.30 
  -2  -9   0    9.90   10.40 
   2  -9   0   33.00   12.70 
  -2  -9   0   10.40   10.20 
   2  -9   0   14.10    9.20 
  -2  -9   0   10.20    8.30 
   2  -9   0   49.80   30.10 
   2   9   0   23.80   10.00 
   2   9   0   48.70   13.90 
  -2   9   0   18.80    8.40 
   2   9   0   21.80   11.00 
   2   9   0   28.60   10.50 
  -2   9   0   22.80    9.90 
  -2   9   0   31.10   12.00 
  -2   9   0   11.10    7.90 
   2   9   0   21.50   12.00 
   2   9   0   49.70   14.30 
   2   9   0   26.80   10.50 
   2   9   0   17.70    9.40 
  -2   9   0   37.50   12.40 
  -2   9   0   18.20    8.80 
   2   9   0   22.60    9.50 
   2   9   0   23.10   12.10 
   2   9   0   11.40    9.30 
  -2   9   0   24.00   11.90 
   2   9   0   48.70   13.80 
  -2   9   0   32.20   10.60 
  -2   9   0   10.80   10.10 
   2   9   0   23.00   10.00 
   2   9   0   12.50    8.30 
  -2   9   0   24.80   10.50 
  -2   9   0   14.10   10.30 
  -3  -9   0    1.90    7.20 
  -3  -9   0   -6.90    7.00 
   3  -9   0   -4.80    7.60 
  -3  -9   0    6.70    8.50 
   3  -9   0    8.60    7.00 
  -3  -9   0   15.70   21.60 
  -3  -9   0   10.60   10.70 
   3  -9   0   -1.90    6.10 
  -3  -9   0  -15.80    7.70 
  -3  -9   0    7.90    8.60 
   3  -9   0    1.80    9.40 
   3  -9   0    0.90   17.30 
   3  -9   0    3.30    8.00 
   3  -9   0    5.00    8.30 
  -3  -9   0   -6.40    6.00 
  -3  -9   0   10.50    8.00 
  -3  -9   0    8.20    7.90 
   3  -9   0   -1.10    6.40 
  -3  -9   0    5.90    8.30 
  -3  -9   0    5.00    9.00 
  -3  -9   0   -6.50    8.60 
  -3  -9   0    1.80    7.50 
   3  -9   0    3.60    7.70 
   3  -9   0    0.10    7.30 
   3  -9   0    4.90    7.10 
  -3  -9   0    0.20    6.10 
  -3  -9   0   -2.90    6.60 
  -3   9   0    1.00    8.30 
   3   9   0    9.90   10.00 
   3   9   0    7.90    9.20 
   3   9   0   17.00   11.80 
   3   9   0   -7.70    6.50 
   3   9   0   11.90   10.20 
   3   9   0   -4.30    6.30 
   3   9   0   34.40   14.20 
  -3   9   0    6.80    7.40 
   3   9   0    3.10    7.10 
   3   9   0   -1.20    5.20 
  -3   9   0   22.90   11.40 
  -3   9   0    8.70    7.50 
   3   9   0   -7.00    7.00 
  -3   9   0    8.00    8.80 
   3   9   0    9.90    9.20 
   3   9   0   -3.10    7.60 
  -3   9   0    9.70    9.00 
   3   9   0    9.80    8.10 
  -3   9   0   27.40   12.40 
  -3   9   0    3.10    7.80 
  -3   9   0   -1.60    6.80 
   3   9   0    2.20    7.70 
  -3   9   0    7.10    7.60 
   4  -9   0   80.69   15.50 
  -4  -9   0  109.49   43.10 
   4  -9   0   78.49   17.90 
   4  -9   0   67.79   34.50 
  -4  -9   0  103.09   22.60 
   4  -9   0  136.99   23.20 
   4  -9   0  108.89   20.60 
  -4  -9   0   97.99   26.00 
  -4  -9   0   77.49   19.70 
  -4  -9   0   56.69   14.80 
  -4  -9   0  104.79   19.70 
  -4  -9   0   81.19   17.60 
  -4  -9   0   58.59   16.30 
   4  -9   0   57.49   16.90 
  -4  -9   0  120.49   21.60 
  -4  -9   0   73.19   18.10 
   4  -9   0   85.59   20.00 
   4  -9   0  100.39   23.60 
   4  -9   0   89.59   21.60 
  -4  -9   0   92.49   19.10 
  -4  -9   0   87.69   19.40 
  -4   9   0   94.89   18.10 
   4   9   0   67.29   17.30 
   4   9   0  113.29   20.20 
  -4   9   0   77.19   15.90 
  -4   9   0   74.19   17.00 
   4   9   0   57.69   17.50 
   4   9   0   77.39   17.70 
   4   9   0   82.09   17.00 
   4   9   0   60.79   17.10 
   4   9   0   67.99   16.70 
   4   9   0  117.69   21.10 
  -4   9   0   69.99   18.10 
  -4   9   0  105.39   21.10 
  -4   9   0  100.69   19.30 
   4   9   0   77.09   16.40 
  -4   9   0   83.39   18.10 
   4   9   0   64.99   15.20 
   4   9   0   85.59   17.00 
  -4   9   0  101.19   21.10 
  -4   9   0   72.29   18.80 
  -4   9   0  107.69   23.10 
   5  -9   0   48.20   15.50 
   5  -9   0   48.60   16.60 
  -5  -9   0   37.40   18.20 
  -5  -9   0   65.89   17.90 
  -5  -9   0   41.10   16.70 
  -5  -9   0   39.50   15.50 
   5  -9   0   62.29   16.60 
  -5  -9   0   63.59   16.50 
  -5  -9   0   34.80   13.40 
  -5  -9   0   42.20   14.50 
   5  -9   0   17.20   13.00 
   5  -9   0   18.00   12.40 
  -5  -9   0   46.90   14.90 
   5  -9   0   48.20   15.40 
  -5  -9   0   50.89   15.70 
  -5  -9   0   56.89   33.30 
  -5  -9   0   32.60   13.40 
   5   9   0   57.49   15.90 
  -5   9   0   45.70   15.60 
  -5   9   0   43.60   14.50 
  -5   9   0   48.10   15.30 
   5   9   0   40.00   14.90 
   5   9   0   59.09   16.10 
  -5   9   0   33.90   13.70 
  -5   9   0   39.20   12.40 
   5   9   0   70.49   17.90 
   5   9   0   75.99   21.00 
  -5   9   0   58.49   17.00 
   5   9   0   31.70   15.20 
   5   9   0   49.30   13.40 
  -5   9   0   10.90    9.50 
  -5   9   0   13.30   11.80 
  -5   9   0   45.50   12.70 
  -5   9   0   49.99   13.90 
   5   9   0   38.60   13.10 
   0 -10   0  871.61   48.60 
   0 -10   0  872.21   46.60 
   0 -10   0  960.70   50.19 
   0 -10   0  836.22   48.80 
   0 -10   0  828.32   51.99 
   0 -10   0  820.82   51.09 
   0 -10   0  784.72   49.40 
   0 -10   0  864.91   44.80 
   0 -10   0  819.82   48.60 
   0 -10   0  775.72   47.90 
   0 -10   0  908.71   49.10 
   0 -10   0  758.52   49.80 
   0 -10   0  918.81  101.99 
   0  10   0  885.41   50.69 
   0  10   0  959.80   51.69 
   0  10   0  870.51   42.70 
   0  10   0  862.31   49.30 
   0  10   0  758.92   42.50 
   0  10   0  845.02   49.10 
   0  10   0  888.51   54.69 
   0  10   0  835.72   49.30 
   0  10   0  845.42   53.19 
   0  10   0  949.60   53.59 
   0  10   0  918.51   48.40 
   0  10   0  792.32   48.90 
   0  10   0  813.92   50.79 
   1 -10   0  665.93   87.29 
   1 -10   0  588.04   37.20 
  -1 -10   0  571.04   43.70 
   1 -10   0  572.94   38.30 
  -1 -10   0  586.14   46.50 
  -1 -10   0  611.74   40.00 
   1 -10   0  564.34   38.40 
  -1 -10   0  574.64   41.20 
   1 -10   0  594.14   42.70 
  -1 -10   0  587.34   38.80 
  -1 -10   0  562.64   41.60 
   1 -10   0  623.84   42.30 
   1 -10   0  568.54   38.90 
   1 -10   0  565.94   41.40 
  -1 -10   0  586.04   83.69 
   1 -10   0  652.53   45.80 
  -1 -10   0  623.54   40.50 
  -1 -10   0  653.63   42.10 
   1 -10   0  612.24   42.90 
  -1 -10   0  564.84   36.40 
   1 -10   0  579.74   42.70 
  -1 -10   0  656.23   39.40 
  -1 -10   0  606.34   42.00 
  -1 -10   0  549.85   38.20 
  -1 -10   0  584.64   38.90 
   1 -10   0  574.74   40.70 
  -1 -10   0  534.55   38.90 
  -1  10   0  601.04   41.40 
   1  10   0  581.14   39.70 
  -1  10   0  642.34   45.70 
  -1  10   0  625.54   44.90 
  -1  10   0  645.34   44.40 
  -1  10   0  599.04   38.10 
   1  10   0  657.03   43.70 
  -1  10   0  550.04   40.40 
  -1  10   0  547.15   39.20 
   1  10   0  582.44   42.10 
   1  10   0  605.34   41.10 
   1  10   0  593.34   40.80 
   1  10   0  655.43   42.10 
   1  10   0  645.14   42.10 
  -1  10   0  635.34   43.40 
   1  10   0  619.24   41.20 
  -1  10   0  693.33   43.30 
   1  10   0  613.74   35.80 
  -1  10   0  509.75   39.40 
  -1  10   0  590.14   36.80 
   1  10   0  570.44   42.60 
  -1  10   0  568.94   39.60 
   1  10   0  590.84   37.50 
   1  10   0  660.63   44.20 
   1  10   0  564.74   38.30 
   1  10   0  653.73   45.50 
  -2 -10   0  369.96   38.00 
   2 -10   0  423.46   32.40 
  -2 -10   0  426.36   32.80 
  -2 -10   0  410.76   33.80 
   2 -10   0  446.86   72.79 
  -2 -10   0  426.46   32.40 
  -2 -10   0  394.66   31.20 
   2 -10   0  479.15   36.70 
   2 -10   0  445.96   37.50 
   2 -10   0  409.46   40.00 
   2 -10   0  421.16   42.00 
  -2 -10   0  396.56   82.49 
  -2 -10   0  451.55   43.50 
   2 -10   0  455.95   33.80 
   2 -10   0  441.36   37.90 
  -2 -10   0  424.26   37.40 
  -2 -10   0  390.86   33.70 
  -2 -10   0  410.76   48.50 
   2 -10   0  365.96   42.00 
  -2 -10   0  417.26   32.80 
   2 -10   0  472.35   37.40 
  -2 -10   0  455.05   37.10 
  -2 -10   0  517.05   35.60 
   2 -10   0  454.45   33.80 
  -2 -10   0  476.65   36.10 
  -2  10   0  407.16   31.70 
   2  10   0  415.16   39.00 
  -2  10   0  427.36   34.90 
  -2  10   0  425.46   45.80 
   2  10   0  495.85   35.70 
  -2  10   0  374.76   38.10 
   2  10   0  413.16   35.40 
  -2  10   0  390.26   33.00 
   2  10   0  444.86   47.20 
   2  10   0  462.25   35.90 
   2  10   0  423.36   30.80 
   2  10   0  430.46   36.50 
   2  10   0  500.95   38.60 
   2  10   0  423.76   32.30 
  -2  10   0  419.36   41.40 
   2  10   0  418.76   34.20 
  -2  10   0  430.86   36.90 
  -2  10   0  451.15   38.50 
   2  10   0  478.45   32.80 
  -2  10   0  366.06   38.20 
  -2  10   0  476.95   38.70 
   2  10   0  424.66   34.20 
   2  10   0  496.55   38.40 
  -2  10   0  482.85   36.90 
  -3 -10   0  102.39   19.60 
  -3 -10   0  114.19   21.40 
  -3 -10   0  110.99   25.70 
  -3 -10   0  146.89   24.40 
  -3 -10   0  115.99   22.40 
   3 -10   0   97.69   23.70 
   3 -10   0   69.39   18.20 
  -3 -10   0  136.99   22.80 
   3 -10   0  125.19   21.30 
   3 -10   0  101.89   22.80 
   3 -10   0  143.99   24.40 
  -3 -10   0  100.09   22.50 
   3 -10   0  112.79   46.30 
  -3 -10   0  117.79   22.10 
   3 -10   0   95.79   21.20 
  -3 -10   0   68.49   19.20 
  -3 -10   0  160.98   53.29 
  -3 -10   0  146.59   23.40 
  -3 -10   0  116.19   24.50 
   3 -10   0  126.39   23.60 
  -3 -10   0  119.79   21.90 
   3 -10   0  140.29   21.50 
   3  10   0  139.39   21.90 
   3  10   0   92.89   21.00 
   3  10   0  130.59   22.00 
   3  10   0  122.59   21.70 
  -3  10   0  124.79   25.40 
   3  10   0   94.79   20.00 
  -3  10   0  115.39   21.60 
  -3  10   0  115.79   20.80 
   3  10   0  123.89   21.70 
   3  10   0   79.69   20.10 
  -3  10   0  123.79   25.20 
  -3  10   0  139.49   25.00 
  -3  10   0  138.89   24.20 
   3  10   0  110.99   22.40 
   3  10   0  140.59   22.60 
  -3  10   0  111.49   19.70 
   3  10   0  124.99   24.50 
  -3  10   0   78.29   19.50 
   3  10   0  168.68   29.40 
   3  10   0  130.29   24.50 
  -3  10   0   97.89   20.30 
  -3  10   0   78.29   18.50 
   3  10   0  123.39   21.70 
 -10   0   1    0.90    6.90 
  10   0  -1    9.60    6.80 
 -10   0   1    8.90    8.80 
  10   0  -1    1.20    5.00 
 -10   0   1    1.80    5.90 
 -10   0   1   11.50    8.50 
  -9   0   1  471.15   32.20 
  -9   0   1  474.45   35.00 
   9   0  -1  450.15   30.30 
  -9   0   1  467.35   27.70 
   9   0  -1  477.65   30.10 
   9   0  -1  517.25   28.80 
  -9   0   1  452.75   29.50 
   9   0  -1  436.56   28.10 
  -9   0   1  510.75   31.10 
  -9   0   1  454.85   28.90 
  -8   0   1   -3.30    4.00 
   8   0  -1   -5.00    3.50 
  -8   0   1    1.60    6.10 
  -8   0   1    3.00    4.70 
   8   0  -1   -2.00    3.30 
   8   0  -1   -2.10    5.30 
  -8   0   1    2.90    4.80 
  -8   0   1    4.70    4.60 
   8   0  -1    3.40    4.90 
   8   0  -1    4.60    5.10 
  -8   0   1   -0.20    5.60 
  -8   0   1   -0.90    3.10 
   8   0  -1   -1.20    4.30 
   7   0  -1  214.88   16.20 
  -7   0   1  214.38   10.40 
  -7   0   1  208.78    9.80 
  -7   0   1  200.88   12.00 
   7   0  -1  197.38   19.30 
  -7   0   1  210.18   19.50 
  -7   0   1  177.88   15.10 
  -7   0   1  194.48   16.80 
  -7   0   1  191.88   18.60 
  -7   0   1  204.98   13.20 
   7   0  -1  164.48   17.60 
   7   0  -1  198.08   16.50 
   7   0  -1  206.48   21.20 
  -7   0   1  218.18   15.70 
   7   0  -1  197.88   12.40 
  -7   0   1  197.08   20.90 
   6   0  -1   -1.20    2.30 
  -6   0   1   -1.30    1.50 
   6   0  -1   -1.10    3.50 
  -6   0   1   -1.40    1.20 
   6   0  -1    2.10    3.50 
  -6   0   1   -3.90    3.10 
  -6   0   1    0.80    2.20 
   6   0  -1   -1.60    3.00 
  -6   0   1   -0.20    2.00 
  -6   0   1   -1.80    1.60 
  -6   0   1   -2.40    2.70 
  -6   0   1   -0.60    2.60 
   6   0  -1    2.40    3.80 
   6   0  -1   -2.40    3.90 
  -6   0   1   -1.80    4.80 
  -6   0   1   -1.10    1.10 
  -6   0   1    0.90    3.80 
  -6   0   1    0.60    2.10 
  -6   0   1    0.40    1.70 
  -6   0   1    6.20    3.70 
  -6   0   1    0.60    1.70 
  -6   0   1    2.70    2.10 
  -6   0   1    0.50    1.50 
  -6   0   1   -0.30    2.00 
  -6   0   1   -0.40    3.50 
  -6   0   1    2.30    2.40 
  -6   0   1   -2.10    3.30 
  -6   0   1   -1.00    1.50 
  -6   0   1   -0.60    1.40 
  -6   0   1    0.60    2.30 
   6   0  -1    3.90    2.50 
  -5   0   1  120.19    6.00 
  -5   0   1  128.89    9.10 
  -5   0   1  131.79    5.90 
   5   0  -1  139.89    8.60 
  -5   0   1  137.89   15.90 
   5   0  -1  124.39    7.60 
  -5   0   1  129.69    7.30 
  -5   0   1  109.79   11.20 
  -5   0   1  131.19   10.80 
   5   0  -1  132.09   13.90 
  -5   0   1  132.49   13.40 
  -5   0   1  127.69    7.70 
  -5   0   1  119.89   13.30 
   5   0  -1  134.59    7.30 
   5   0  -1  128.29   12.60 
  -5   0   1  123.89    6.50 
  -5   0   1  130.89    9.10 
   5   0  -1  159.08   15.00 
  -5   0   1  137.59    9.20 
   5   0  -1  133.79   10.70 
  -5   0   1  124.69    6.80 
   5   0  -1  145.49   11.60 
   5   0  -1  102.59   11.20 
  -5   0   1  123.09   12.50 
  -5   0   1  127.79    8.70 
  -5   0   1  123.69    6.90 
   5   0  -1  127.69    7.10 
  -5   0   1  116.69    6.60 
  -5   0   1  118.49   11.90 
  -5   0   1  130.19    7.90 
  -5   0   1  118.29    6.70 
  -5   0   1  119.29    6.50 
  -5   0   1  128.19    7.30 
  -5   0   1  130.49    7.40 
  -4   0   1   -2.70    3.40 
   4   0  -1   -0.30    1.40 
  -4   0   1    1.60    1.90 
  -4   0   1    1.70    2.90 
  -4   0   1    2.80    1.80 
  -4   0   1    0.70    1.70 
   4   0  -1    4.10    2.30 
   4   0  -1   -0.60    2.30 
  -4   0   1    3.30    3.30 
  -4   0   1    0.70    2.10 
   4   0  -1    4.30    3.30 
  -4   0   1    0.20    5.10 
  -4   0   1    1.30    2.40 
  -4   0   1    1.10    2.70 
  -4   0   1    1.50    1.10 
   4   0  -1    3.50    2.80 
  -4   0   1   -1.30    2.40 
  -4   0   1   -1.30    2.00 
  -4   0   1   -4.10    2.50 
   4   0  -1    2.10    3.00 
  -4   0   1    1.40    2.80 
   4   0  -1   -0.50    2.80 
  -4   0   1   -0.50    2.30 
  -4   0   1    0.90    2.70 
   4   0  -1    1.10    2.00 
  -4   0   1    0.80    1.40 
  -4   0   1   -1.20    3.10 
   4   0  -1   -2.40    2.70 
   4   0  -1    0.40    2.50 
  -4   0   1   -0.20    2.40 
  -4   0   1   -0.60    1.40 
   4   0  -1   -1.80    3.00 
   4   0  -1    1.60    1.50 
  -4   0   1    6.90    3.60 
  -4   0   1   -5.30    2.60 
   4   0  -1    3.20    2.10 
  -4   0   1    0.40    1.70 
  -4   0   1    1.00    1.60 
  -4   0   1    1.30    1.60 
  -4   0   1    1.40    3.30 
  -4   0   1    4.80    2.40 
  -4   0   1    0.90    1.60 
  -4   0   1   -0.10    1.60 
  -4   0   1   -0.50    3.00 
  -4   0   1    2.00    4.20 
  -4   0   1   -1.10    1.60 
  -3   0   1  275.97   11.40 
   3   0  -1  270.67   13.10 
   3   0  -1  271.57   11.50 
  -3   0   1  241.08   12.30 
  -3   0   1  254.07   13.10 
  -3   0   1  260.97   10.00 
  -3   0   1  250.67   11.70 
  -3   0   1  250.07    9.20 
   3   0  -1  250.37   13.50 
  -3   0   1  254.97    9.50 
   3   0  -1  269.67   12.30 
  -3   0   1  273.47   15.70 
  -3   0   1  253.37    8.80 
   3   0  -1  242.28    9.90 
  -3   0   1  249.38    8.10 
  -3   0   1  264.67   11.90 
  -3   0   1  250.27    9.30 
   3   0  -1  257.77    9.40 
   3   0  -1  245.08   10.00 
   3   0  -1  258.47    8.20 
  -3   0   1  259.07   13.80 
  -3   0   1  248.08   13.10 
  -3   0   1  250.37    8.50 
  -3   0   1  258.97   13.50 
  -3   0   1  241.88    9.90 
  -3   0   1  249.97    9.30 
  -3   0   1  253.07   12.60 
  -3   0   1  265.57    9.10 
   3   0  -1  256.37   11.30 
  -3   0   1  268.47   10.30 
  -3   0   1  223.48    9.40 
  -3   0   1  260.47   12.60 
  -3   0   1  245.78   11.60 
   3   0  -1  251.67   10.30 
  -3   0   1  235.78   12.70 
  -3   0   1  263.07   14.50 
  -3   0   1  262.27    9.80 
  -3   0   1  264.87    9.70 
  -3   0   1  265.57   11.20 
  -3   0   1  231.18   12.10 
  -3   0   1  265.77   10.90 
  -3   0   1  253.27   12.70 
   3   0  -1  251.77   10.50 
  -3   0   1  254.77   12.90 
   3   0  -1  253.77   12.70 
   3   0  -1  251.77   13.00 
  -3   0   1  272.77   11.20 
   3   0  -1  254.67   13.30 
   3   0  -1  250.87    8.70 
   3   0  -1  270.57   13.50 
   3   0  -1  269.87   13.30 
  -3   0   1  261.87   10.80 
  -3   0   1  239.38   12.30 
   2   0  -1    2.10    1.70 
   2   0  -1    7.30    1.50 
   2   0  -1    1.30    1.60 
  -2   0   1    2.50    1.40 
  -2   0   1    2.00    1.80 
   2   0  -1    3.10    1.20 
  -2   0   1    3.20    1.20 
  -2   0   1    6.10    2.50 
  -2   0   1    2.30    0.60 
  -2   0   1    4.20    1.00 
   2   0  -1    5.60    1.70 
  -2   0   1    4.60    1.40 
  -2   0   1    1.60    1.80 
   2   0  -1    2.70    1.40 
   2   0  -1    5.00    1.00 
   2   0  -1    2.90    1.90 
   2   0  -1   -0.10    2.00 
  -2   0   1    2.10    1.80 
  -2   0   1    1.60    1.80 
  -2   0   1    1.30    1.50 
  -2   0   1    2.20    2.20 
  -2   0   1    2.40    2.30 
  -2   0   1    2.10    1.10 
   2   0  -1    6.20    2.50 
   2   0  -1    3.20    1.00 
  -2   0   1    2.70    1.80 
   2   0  -1    2.20    1.20 
  -2   0   1    5.00    1.10 
  -2   0   1    1.20    1.40 
  -2   0   1    4.10    1.30 
   2   0  -1    2.40    1.70 
  -2   0   1    2.80    2.10 
  -2   0   1    6.00    2.50 
   2   0  -1    2.90    0.90 
   2   0  -1    1.90    1.20 
   2   0  -1    1.70    2.00 
  -2   0   1    2.10    1.80 
  -2   0   1    2.30    1.70 
  -2   0   1    4.80    1.40 
   2   0  -1    4.00    2.10 
  -2   0   1    3.40    1.00 
  -2   0   1    6.70    1.30 
  -2   0   1    2.50    1.20 
  -2   0   1    1.30    1.70 
  -2   0   1    3.70    1.40 
  -1   0   1  314.47   10.50 
  -1   0   1  363.16   11.00 
  -1   0   1  368.76   10.90 
  -1   0   1  354.06   10.00 
  -1   0   1  344.67   11.20 
  -1   0   1  347.57    9.90 
  -1   0   1  307.27   10.50 
  -1   0   1  363.36   11.90 
  -1   0   1  330.97   10.40 
  -1   0   1  338.47   11.60 
  -1   0   1  363.96   11.30 
  -1   0   1  295.17   10.80 
  -1   0   1  368.46   10.20 
  -1   0   1  361.16   12.00 
  -1   0   1  307.47   10.30 
  -1   0   1  362.36   11.70 
  -1   0   1  337.27   11.40 
  -1   0   1  332.37   10.00 
  -1   0   1  343.17   11.70 
  -1   0   1  286.87   10.60 
  -1   0   1  367.66   11.90 
  -1   0   1  330.37   11.20 
   0   0  -1   -0.10    0.10 
   0   0  -1    0.00    0.10 
   0   0  -1    0.10    0.20 
  -1   0  -1 1151.78   33.00 
  -1   0  -1 1123.99   31.90 
  -1   0  -1 1149.19   31.40 
  -1   0  -1 1160.88   32.50 
  -1   0  -1 1024.20   32.60 
  -1   0  -1 1170.68   32.60 
  -1   0  -1 1158.28   33.00 
  -1   0  -1 1189.18   32.90 
  -1   0  -1 1155.28   32.70 
  -1   0  -1 1152.78   32.20 
  -1   0  -1 1174.48   32.30 
  -1   0  -1 1164.08   32.50 
  -1   0  -1 1177.68   32.00 
  -1   0  -1  983.80   32.60 
  -1   0  -1 1161.18   32.40 
  -1   0  -1 1128.09   32.30 
  -1   0  -1 1060.09   32.90 
  -1   0  -1 1117.39   32.80 
  -1   0  -1 1194.38   32.00 
  -1   0  -1 1089.19   32.60 
  -1   0  -1 1066.69   32.60 
  -1   0  -1 1163.28   32.50 
  -1   0  -1 1125.59   32.50 
  -2   0  -1    3.70    2.00 
   2   0   1    1.30    1.50 
  -2   0  -1    1.30    1.30 
   2   0   1    3.00    1.70 
  -2   0  -1    3.90    1.70 
   2   0   1    3.00    1.50 
   2   0   1    5.60    1.80 
   2   0   1    4.40    2.00 
  -2   0  -1    5.20    2.20 
   2   0   1    3.80    1.60 
  -2   0  -1    2.10    1.40 
  -2   0  -1    2.50    0.70 
  -2   0  -1    6.80    1.60 
  -2   0  -1    0.10    1.10 
  -2   0  -1    0.40    1.20 
  -2   0  -1    2.60    1.70 
  -2   0  -1    4.20    1.20 
  -2   0  -1    2.80    1.50 
  -2   0  -1    6.50    2.00 
   2   0   1    1.00    1.30 
   2   0   1    0.30    1.10 
  -2   0  -1    1.10    1.20 
   2   0   1    3.60    1.60 
   2   0   1    1.80    1.20 
  -2   0  -1    3.70    1.50 
  -2   0  -1    0.20    1.40 
  -2   0  -1    1.00    1.60 
  -2   0  -1    2.80    1.60 
  -2   0  -1    1.30    1.30 
   2   0   1    3.30    1.20 
  -2   0  -1    1.70    1.40 
  -2   0  -1    2.20    1.60 
   2   0   1    0.70    1.30 
  -2   0  -1    2.10    1.10 
   2   0   1    3.70    1.60 
  -2   0  -1   10.30    2.60 
  -2   0  -1    4.00    2.00 
   2   0   1    3.80    1.90 
   2   0   1    6.00    2.10 
  -2   0  -1    5.90    1.70 
  -2   0  -1    3.20    1.80 
  -2   0  -1    1.90    1.70 
   2   0   1    2.00    1.40 
  -2   0  -1    5.10    2.20 
  -2   0  -1    5.60    2.10 
  -2   0  -1    1.90    1.10 
  -3   0  -1 1184.28   36.90 
   3   0   1 1192.98   37.10 
  -3   0  -1 1182.68   36.70 
  -3   0  -1 1192.58   38.90 
  -3   0  -1 1161.48   35.40 
  -3   0  -1 1189.98   37.40 
   3   0   1 1229.78   36.70 
  -3   0  -1 1175.88   38.80 
  -3   0  -1 1162.48   35.80 
  -3   0  -1 1196.88   37.80 
  -3   0  -1 1197.08   34.50 
  -3   0  -1 1156.68   34.80 
  -3   0  -1 1162.98   36.70 
  -3   0  -1 1166.28   37.80 
  -3   0  -1 1172.68   38.10 
   3   0   1 1205.28   39.30 
   3   0   1 1188.18   37.20 
  -3   0  -1 1236.08   38.40 
   3   0   1 1161.18   36.20 
  -3   0  -1 1208.18   38.00 
  -3   0  -1 1213.68   35.90 
   3   0   1 1236.48   39.80 
   3   0   1 1226.48   36.30 
   3   0   1 1236.28   38.60 
  -3   0  -1 1208.08   38.70 
  -3   0  -1 1219.98   36.80 
   3   0   1 1186.08   38.80 
  -3   0  -1 1189.58   36.40 
  -3   0  -1 1172.78   38.90 
  -3   0  -1 1199.58   36.10 
  -3   0  -1 1192.28   40.00 
  -3   0  -1 1260.47   37.70 
  -3   0  -1 1170.78   37.00 
   3   0   1 1175.98   37.40 
   3   0   1 1107.69   38.00 
   3   0   1 1165.48   35.00 
  -3   0  -1 1152.78   38.50 
   3   0   1 1217.78   39.10 
  -3   0  -1 1151.88   35.30 
  -3   0  -1 1189.98   37.00 
  -3   0  -1 1180.08   34.90 
  -3   0  -1 1184.58   38.30 
  -3   0  -1 1220.88   40.30 
   3   0   1 1240.08   38.20 
  -3   0  -1 1131.89   39.00 
  -3   0  -1 1208.48   38.10 
  -4   0  -1    0.50    1.50 
  -4   0  -1    2.50    1.90 
  -4   0  -1    4.10    3.10 
   4   0   1    4.20    1.80 
  -4   0  -1    2.00    3.20 
   4   0   1   -2.70    2.60 
   4   0   1   -0.60    2.80 
   4   0   1   -1.60    2.30 
  -4   0  -1   -1.20    2.20 
  -4   0  -1   -1.60    2.00 
  -4   0  -1    0.70    2.30 
  -4   0  -1   -0.50    1.90 
  -4   0  -1    0.00    1.30 
  -4   0  -1   -1.70    2.50 
  -4   0  -1    1.20    1.50 
   4   0   1    2.60    2.80 
   4   0   1    2.10    2.50 
   4   0   1    4.70    2.60 
  -4   0  -1   -0.80    2.50 
  -4   0  -1   -0.10    1.90 
  -4   0  -1    0.60    3.30 
  -4   0  -1    1.20    1.90 
  -4   0  -1   -0.60    1.90 
  -4   0  -1   -0.50    1.40 
  -4   0  -1    3.40    3.00 
   4   0   1    0.80    1.80 
  -4   0  -1    1.20    2.00 
  -4   0  -1   -6.60    4.80 
  -4   0  -1   -0.80    2.30 
  -4   0  -1    2.20    1.70 
   4   0   1    1.50    2.20 
  -4   0  -1   -2.00    2.40 
  -4   0  -1    0.30    1.90 
  -4   0  -1    0.80    2.00 
  -4   0  -1   -0.70    1.40 
  -4   0  -1    6.10    3.40 
   4   0   1   -0.20    1.80 
  -5   0  -1  486.55   25.90 
  -5   0  -1  453.55   18.90 
  -5   0  -1  459.05   19.40 
   5   0   1  422.46   15.80 
  -5   0  -1  455.95   18.30 
  -5   0  -1  424.56   19.90 
   5   0   1  437.96   21.50 
  -5   0  -1  474.45   18.70 
  -5   0  -1  451.55   17.10 
  -5   0  -1  476.45   18.10 
  -5   0  -1  420.26   18.10 
   5   0   1  469.45   23.10 
  -5   0  -1  454.55   19.00 
  -5   0  -1  473.45   19.30 
   5   0   1  451.05   19.00 
   5   0   1  447.56   18.70 
  -5   0  -1  498.55   22.30 
   5   0   1  482.95   22.70 
  -5   0  -1  449.46   15.60 
  -5   0  -1  435.26   18.70 
  -5   0  -1  461.15   21.30 
  -5   0  -1  454.85   23.40 
  -5   0  -1  455.75   15.50 
   5   0   1  453.65   17.80 
  -5   0  -1  465.85   16.70 
  -5   0  -1  428.66   16.30 
   5   0   1  442.26   19.90 
   5   0   1  471.15   21.70 
  -5   0  -1  454.05   17.30 
  -5   0  -1  461.55   16.80 
  -5   0  -1  447.26   20.60 
  -5   0  -1  464.75   23.50 
   5   0   1  482.25   21.50 
   6   0   1   -0.90    1.90 
  -6   0  -1   -2.70    1.70 
   6   0   1   -0.30    2.60 
   6   0   1    7.70    4.70 
  -6   0  -1   -0.10    1.70 
   6   0   1   -0.40    2.90 
  -6   0  -1    0.40    1.30 
  -6   0  -1    7.20    3.40 
  -6   0  -1   -1.70    2.20 
  -6   0  -1    1.90    2.40 
  -6   0  -1   -1.50    1.80 
  -6   0  -1    0.40    2.20 
  -6   0  -1    1.30    1.50 
  -6   0  -1   -1.70    3.40 
   6   0   1    1.90    3.70 
  -6   0  -1   -0.10    2.50 
  -6   0  -1   -3.50    6.20 
  -6   0  -1    5.20    5.10 
  -6   0  -1    6.10    3.80 
   6   0   1   -0.70    1.50 
  -6   0  -1   -2.10    1.60 
  -6   0  -1    2.30    2.90 
   6   0   1    0.90    2.70 
  -6   0  -1    0.50    3.60 
   6   0   1    1.20    3.50 
  -6   0  -1   -0.20    1.60 
  -6   0  -1    1.50    3.60 
  -6   0  -1    2.60    4.00 
  -6   0  -1    4.10    2.20 
  -6   0  -1    0.70    2.40 
  -6   0  -1    3.90    2.00 
  -7   0  -1 2649.14   86.79 
   7   0   1 2765.12   82.89 
   7   0   1 2747.12   89.69 
  -7   0  -1 2677.93   82.89 
  -7   0  -1 2745.23   92.69 
  -7   0  -1 2753.02   81.79 
   7   0   1 2770.92   88.09 
   7   0   1 2792.32   88.39 
   7   0   1 2663.33   91.89 
  -7   0  -1 2734.93   78.99 
  -7   0  -1 2662.93   82.09 
   7   0   1 2661.93   90.59 
  -7   0  -1 2637.34   87.99 
  -7   0  -1 2659.53   96.49 
  -7   0  -1 2605.04   92.29 
  -7   0  -1 2726.83   87.99 
  -7   0  -1 2691.83   82.89 
   8   0   1    7.20    5.00 
   8   0   1    0.70    4.30 
   8   0   1   -0.80    3.80 
  -8   0  -1    1.50    3.90 
   8   0   1   -4.00    4.10 
  -8   0  -1   -2.10    4.70 
   8   0   1    4.50    5.60 
  -8   0  -1    0.80    4.20 
  -8   0  -1   -2.60    3.70 
  -8   0  -1    3.00    5.10 
  -8   0  -1   -0.90    3.20 
  -8   0  -1    2.90    4.20 
  -8   0  -1   -1.80    3.30 
   8   0   1    2.40    3.90 
  -9   0  -1 1297.77   57.49 
   9   0   1 1290.47   57.39 
  -9   0  -1 1339.97   55.29 
  -9   0  -1 1396.46   57.09 
   9   0   1 1333.87   54.79 
  -9   0  -1 1355.56   64.59 
   9   0   1 1308.47   55.79 
  -9   0  -1 1268.37   58.59 
  10   0   1    5.50    6.20 
 -10   0  -1    1.00    5.80 
 -10   0  -1    2.30    6.40 
 -10   0  -1   -2.70    5.60 
 -10   0  -1    0.90    6.20 
  10   0   1   -4.30    5.40 
 -10  -1   1  600.34   43.70 
 -10  -1   1  636.94   36.70 
  10  -1  -1  647.54   39.10 
  10  -1  -1  645.34   40.50 
 -10  -1   1  664.13   42.90 
 -10  -1   1  583.24   38.60 
 -10  -1   1  629.54   43.70 
  10  -1  -1  644.34   38.50 
 -10   1   1  658.13   45.30 
 -10   1   1  614.64   36.80 
  10   1  -1  604.24   38.70 
  10   1  -1  622.34   60.59 
  10   1  -1  584.64   36.10 
 -10   1   1  603.14   37.80 
 -10   1   1  670.93   42.00 
  -9  -1   1    9.80    7.80 
   9  -1  -1   -0.80    4.50 
   9  -1  -1    2.00    5.10 
  -9  -1   1    3.20    5.60 
   9  -1  -1   -0.10    5.80 
  -9  -1   1    5.90    5.60 
  -9  -1   1    7.20    7.00 
  -9  -1   1   -1.80    5.60 
  -9  -1   1   14.60    7.20 
  -9   1   1    7.90    5.80 
  -9   1   1    3.30    6.80 
  -9   1   1    0.30    7.50 
  -9   1   1    5.50    6.30 
   9   1  -1    7.80    6.10 
  -9   1   1    5.40    4.80 
   9   1  -1    9.20    8.20 
   9   1  -1    5.50    5.90 
   9   1  -1   15.40    6.80 
  -8  -1   1  615.44   33.10 
  -8  -1   1  623.24   36.50 
   8  -1  -1  656.93   30.10 
  -8  -1   1  605.44   33.30 
   8  -1  -1  637.04   31.30 
  -8  -1   1  591.54   37.80 
  -8  -1   1  637.04   33.10 
   8  -1  -1  627.64   34.30 
  -8  -1   1  677.93   36.50 
   8  -1  -1  590.44   33.70 
   8  -1  -1  693.03   37.10 
   8   1  -1  691.73   35.40 
  -8   1   1  690.33   30.00 
  -8   1   1  702.93   41.00 
   8   1  -1  696.93   36.40 
  -8   1   1  633.74   34.60 
  -8   1   1  669.53   30.60 
  -8   1   1  664.03   32.10 
   8   1  -1  655.93   34.20 
  -8   1   1  645.94   37.70 
   8   1  -1  679.63   29.10 
  -8   1   1  665.63   34.20 
  -8   1   1  709.63   31.40 
   8   1  -1  633.54   34.20 
  -7  -1   1   99.79   14.30 
  -7  -1   1  104.69   11.40 
  -7  -1   1  111.19   15.30 
  -7  -1   1  107.99    8.80 
  -7  -1   1  108.99   16.50 
   7  -1  -1   80.09   13.00 
  -7  -1   1  124.09   15.50 
   7  -1  -1  128.99   12.20 
  -7  -1   1   88.99   12.70 
   7  -1  -1  119.79   14.90 
   7  -1  -1  109.69   12.10 
   7  -1  -1  118.99    7.70 
   7  -1  -1  102.79   14.30 
   7  -1  -1  114.59    8.20 
  -7  -1   1  110.99   17.10 
   7  -1  -1  124.19   13.60 
  -7   1   1  100.09   12.50 
  -7   1   1  119.49   12.20 
   7   1  -1  108.89   12.00 
  -7   1   1   92.49   13.60 
   7   1  -1   88.39   13.10 
   7   1  -1   92.79   12.90 
  -7   1   1  113.09    8.10 
  -7   1   1  114.09    8.90 
  -7   1   1  119.79   16.70 
  -7   1   1  103.49    7.80 
  -7   1   1  109.89    7.60 
  -7   1   1  108.39   16.60 
  -7   1   1  113.89   12.20 
   7   1  -1  129.19    8.90 
   7   1  -1   94.19   13.60 
  -7   1   1  124.89   13.10 
   7   1  -1   89.89   13.80 
  -7   1   1  121.79   15.00 
  -7   1   1  121.89    8.90 
  -7   1   1  104.49    7.90 
  -7   1   1  138.99    9.80 
  -7   1   1  112.89   12.60 
   6  -1  -1 1891.41   61.09 
  -6  -1   1 1906.01   67.79 
  -6  -1   1 1865.31   58.69 
  -6  -1   1 1947.61   65.89 
   6  -1  -1 1935.81   67.49 
   6  -1  -1 1939.41   68.89 
  -6  -1   1 2007.30   60.19 
  -6  -1   1 1889.61   65.59 
  -6  -1   1 1827.42   60.79 
  -6  -1   1 1930.01   59.19 
   6  -1  -1 1941.41   57.39 
  -6  -1   1 1948.80   54.59 
  -6  -1   1 1988.30   68.89 
   6  -1  -1 1873.81   61.79 
   6  -1  -1 1958.60   62.69 
  -6  -1   1 1974.50   71.09 
   6  -1  -1 1925.41   67.59 
   6  -1  -1 1981.70   57.79 
  -6  -1   1 1876.81   71.59 
   6  -1  -1 1956.10   63.19 
  -6  -1   1 1933.11   55.29 
  -6   1   1 1941.71   57.29 
   6   1  -1 1933.81   67.09 
  -6   1   1 1950.01   59.19 
  -6   1   1 1948.41   60.29 
  -6   1   1 1905.21   58.69 
   6   1  -1 1934.61   60.49 
  -6   1   1 1955.60   60.19 
  -6   1   1 2004.20   62.99 
  -6   1   1 1875.71   56.69 
  -6   1   1 2030.50   70.99 
  -6   1   1 1834.42   71.19 
  -6   1   1 1921.71   58.19 
  -6   1   1 1923.51   59.19 
  -6   1   1 1871.41   63.09 
  -6   1   1 1951.50   67.69 
  -6   1   1 1999.80   58.29 
  -6   1   1 1915.31   76.89 
  -6   1   1 1914.71   56.89 
  -6   1   1 1936.11   64.19 
  -6   1   1 1897.61   65.69 
  -6   1   1 1932.81   58.89 
  -6   1   1 1871.51   60.49 
   6   1  -1 1982.60   67.09 
   6   1  -1 1844.22   67.49 
  -6   1   1 1957.00   62.89 
   6   1  -1 1887.21   61.79 
  -6   1   1 1924.91   57.19 
  -6   1   1 2001.80   60.09 
  -6   1   1 1950.50   61.69 
   6   1  -1 1937.51   59.39 
  -6   1   1 1933.31   56.79 
   6   1  -1 2006.60   68.29 
  -5  -1   1  260.77   17.00 
   5  -1  -1  249.88   16.90 
  -5  -1   1  289.47   13.30 
  -5  -1   1  264.07   17.30 
   5  -1  -1  282.87   17.00 
   5  -1  -1  262.77   11.20 
  -5  -1   1  280.17   18.90 
   5  -1  -1  247.08   16.20 
   5  -1  -1  274.37   14.40 
  -5  -1   1  286.07   10.20 
  -5  -1   1  263.77   12.30 
  -5  -1   1  285.57   19.10 
  -5  -1   1  276.67   10.30 
  -5  -1   1  273.27   16.50 
   5  -1  -1  270.87   14.40 
  -5  -1   1  292.17   16.50 
  -5  -1   1  303.97   20.10 
   5  -1  -1  241.78   11.50 
   5  -1  -1  281.37   14.50 
  -5  -1   1  296.17   12.80 
   5  -1  -1  266.17   17.40 
  -5  -1   1  276.37   14.00 
   5  -1  -1  278.77   14.60 
   5   1  -1  242.98   16.60 
   5   1  -1  279.37   10.50 
   5   1  -1  275.17   14.50 
  -5   1   1  272.27   12.20 
  -5   1   1  268.97   11.50 
  -5   1   1  260.17   10.80 
  -5   1   1  275.37   14.00 
  -5   1   1  258.57   12.80 
  -5   1   1  279.07   14.60 
   5   1  -1  286.17   16.70 
  -5   1   1  268.17   12.10 
  -5   1   1  261.47   13.60 
  -5   1   1  279.17   11.50 
  -5   1   1  303.17   14.00 
  -5   1   1  266.47   14.00 
  -5   1   1  256.97   14.80 
   5   1  -1  216.88   11.90 
  -5   1   1  260.17   13.00 
  -5   1   1  252.27   11.10 
  -5   1   1  239.18   16.10 
  -5   1   1  254.47   15.70 
  -5   1   1  250.97   13.70 
  -5   1   1  269.67   12.30 
  -5   1   1  261.47   14.90 
  -5   1   1  285.77   14.90 
  -5   1   1  264.37   13.40 
   5   1  -1  248.18   16.50 
  -5   1   1  262.87   11.00 
  -5   1   1  265.07   17.90 
   5   1  -1  269.87   12.90 
  -5   1   1  258.37   11.30 
  -5   1   1  262.67   22.50 
   5   1  -1  295.97   17.40 
  -5   1   1  263.87   12.50 
  -5   1   1  289.47   14.10 
  -5   1   1  264.37    9.50 
  -5   1   1  267.47   13.70 
  -4  -1   1 5737.83  167.38 
  -4  -1   1 5686.73  157.38 
  -4  -1   1 5750.92  162.18 
  -4  -1   1 5854.21  155.38 
  -4  -1   1 5867.41  162.78 
  -4  -1   1 5632.94  155.28 
   4  -1  -1 5569.14  158.88 
  -4  -1   1 5582.44  164.68 
   4  -1  -1 5715.33  164.08 
   4  -1  -1 5646.63  155.68 
  -4  -1   1 5477.55  164.08 
  -4  -1   1 5686.33  162.98 
  -4  -1   1 5906.31  159.88 
  -4  -1   1 5708.13  154.58 
   4  -1  -1 5565.04  157.48 
  -4  -1   1 5836.92  155.78 
  -4  -1   1 5576.04  157.88 
   4  -1  -1 5701.43  164.48 
  -4  -1   1 5766.32  166.18 
   4  -1  -1 5756.62  160.88 
  -4  -1   1 5653.23  159.68 
   4  -1  -1 5731.63  156.18 
   4  -1  -1 5717.03  163.48 
   4  -1  -1 5713.43  158.28 
   4  -1  -1 5522.35  164.08 
  -4  -1   1 5715.33  158.78 
   4  -1  -1 5809.72  159.78 
  -4  -1   1 5541.15  161.08 
   4  -1  -1 5698.63  160.98 
   4  -1  -1 5708.93  159.78 
   4  -1  -1 5660.83  160.48 
  -4  -1   1 5522.55  166.88 
  -4  -1   1 5616.34  160.78 
   4  -1  -1 5838.82  160.78 
   4   1  -1 5819.42  163.58 
  -4   1   1 5752.72  156.08 
  -4   1   1 5836.72  160.08 
   4   1  -1 5572.34  154.28 
  -4   1   1 5632.04  158.78 
   4   1  -1 5727.23  155.18 
  -4   1   1 5694.03  159.58 
  -4   1   1 5527.45  159.78 
  -4   1   1 5776.32  160.68 
  -4   1   1 5603.34  158.68 
  -4   1   1 5642.74  156.38 
  -4   1   1 5797.62  159.48 
  -4   1   1 5457.85  155.28 
   4   1  -1 5624.94  158.78 
  -4   1   1 5662.53  159.68 
   4   1  -1 5788.92  164.48 
  -4   1   1 5645.84  174.68 
  -4   1   1 5727.23  159.98 
   4   1  -1 5711.03  155.68 
  -4   1   1 5652.43  156.48 
  -4   1   1 5705.43  159.88 
  -4   1   1 5645.04  155.68 
  -4   1   1 5681.73  158.18 
   4   1  -1 5792.52  164.98 
  -4   1   1 5708.33  156.28 
  -4   1   1 5615.54  157.38 
  -4   1   1 5669.23  159.28 
  -4   1   1 5658.63  157.58 
  -4   1   1 5640.94  159.28 
   4   1  -1 5794.12  163.28 
   4   1  -1 5604.84  160.18 
  -4   1   1 5758.12  157.18 
  -4   1   1 5724.93  166.28 
  -4   1   1 5815.22  156.28 
  -4   1   1 5641.54  160.08 
  -4   1   1 5724.73  156.58 
   4   1  -1 5628.04  157.68 
   4   1  -1 5760.42  158.58 
  -4   1   1 5723.13  160.28 
  -4   1   1 5931.91  159.98 
  -4   1   1 5882.31  161.78 
  -3  -1   1  465.05   14.60 
  -3  -1   1  454.85   17.10 
   3  -1  -1  437.36   14.20 
  -3  -1   1  478.25   15.00 
  -3  -1   1  478.45   21.70 
   3  -1  -1  485.15   18.50 
  -3  -1   1  488.65   18.00 
   3  -1  -1  474.25   20.20 
   3  -1  -1  476.35   17.20 
  -3  -1   1  465.15   27.70 
  -3  -1   1  451.45   19.50 
  -3  -1   1  454.35   14.80 
   3  -1  -1  482.25   20.10 
   3  -1  -1  467.55   16.40 
  -3  -1   1  485.15   17.50 
   3  -1  -1  458.35   17.60 
   3  -1  -1  491.35   17.90 
  -3  -1   1  470.15   21.10 
  -3  -1   1  483.35   19.10 
  -3  -1   1  481.35   21.60 
  -3  -1   1  472.85   15.80 
   3  -1  -1  478.35   20.20 
   3  -1  -1  480.95   19.70 
   3  -1  -1  450.95   17.10 
  -3  -1   1  457.25   19.60 
   3  -1  -1  502.95   18.90 
  -3  -1   1  480.75   20.10 
  -3  -1   1  447.96   20.40 
  -3  -1   1  473.65   16.70 
   3  -1  -1  457.35   18.70 
   3  -1  -1  478.95   17.60 
   3  -1  -1  499.35   18.30 
   3  -1  -1  462.75   17.90 
  -3  -1   1  451.85   19.00 
  -3  -1   1  444.76   14.30 
   3  -1  -1  459.95   16.70 
   3  -1  -1  443.66   14.90 
  -3  -1   1  492.15   19.40 
  -3  -1   1  453.15   18.30 
  -3  -1   1  491.55   15.50 
   3  -1  -1  459.15   18.20 
  -3  -1   1  480.55   20.70 
  -3  -1   1  499.35   20.10 
  -3  -1   1  478.25   19.10 
  -3  -1   1  486.55   20.30 
  -3  -1   1  476.25   21.80 
   3   1  -1  454.65   14.00 
   3   1  -1  468.75   17.00 
  -3   1   1  449.56   15.90 
  -3   1   1  467.85   19.70 
  -3   1   1  461.75   16.90 
  -3   1   1  427.16   25.80 
  -3   1   1  444.26   19.00 
  -3   1   1  455.55   14.50 
   3   1  -1  447.76   20.30 
  -3   1   1  462.05   17.80 
   3   1  -1  465.35   18.90 
   3   1  -1  482.25   19.90 
   3   1  -1  439.66   20.70 
   3   1  -1  455.25   15.20 
   3   1  -1  443.96   14.90 
   3   1  -1  468.85   19.90 
  -3   1   1  488.85   15.50 
  -3   1   1  456.65   16.70 
   3   1  -1  445.76   19.80 
  -3   1   1  484.15   17.50 
  -3   1   1  452.25   18.20 
  -3   1   1  452.95   17.20 
  -3   1   1  461.85   15.80 
  -3   1   1  454.75   18.70 
  -3   1   1  476.55   21.10 
  -3   1   1  487.15   17.40 
   3   1  -1  461.85   19.30 
  -3   1   1  468.05   17.40 
   3   1  -1  461.45   18.20 
   3   1  -1  464.55   16.50 
  -3   1   1  462.35   15.20 
  -3   1   1  471.05   18.50 
  -3   1   1  449.95   14.50 
  -3   1   1  469.95   14.80 
  -3   1   1  440.76   19.70 
  -3   1   1  434.76   17.00 
  -3   1   1  430.06   15.90 
  -3   1   1  470.35   19.90 
  -3   1   1  449.86   15.60 
   3   1  -1  447.86   14.60 
   3   1  -1  441.36   15.80 
  -3   1   1  459.75   15.50 
   3   1  -1  482.35   20.30 
   3   1  -1  476.15   17.40 
  -3   1   1  453.95   18.00 
  -3   1   1  438.86   17.80 
  -3   1   1  449.16   17.30 
  -3   1   1  439.46   16.90 
  -2  -1   1 2210.68   63.39 
   2  -1  -1 2138.69   61.79 
  -2  -1   1 2374.56   76.19 
  -2  -1   1 2190.28   63.59 
  -2  -1   1 2082.49   63.89 
  -2  -1   1 2119.39   60.19 
   2  -1  -1 2194.68   63.79 
  -2  -1   1 2161.58   61.79 
  -2  -1   1 2171.98   62.39 
  -2  -1   1 2177.78   65.89 
  -2  -1   1 2107.99   63.99 
   2  -1  -1 2107.49   63.99 
   2  -1  -1 2086.79   62.99 
  -2  -1   1 2162.78   64.09 
   2  -1  -1 2128.59   63.19 
  -2  -1   1 2179.08   60.29 
   2  -1  -1 2155.78   60.39 
   2  -1  -1 2128.79   63.59 
  -2  -1   1 2149.28   62.19 
   2  -1  -1 2220.18   64.29 
  -2  -1   1 2160.48   65.19 
   2  -1  -1 2161.38   60.89 
  -2  -1   1 2111.89   59.69 
  -2  -1   1 2108.19   62.59 
   2  -1  -1 2148.19   61.29 
   2  -1  -1 2157.28   63.19 
   2  -1  -1 2139.09   63.89 
  -2  -1   1 2142.29   63.69 
   2  -1  -1 2199.08   64.39 
   2  -1  -1 2186.18   64.49 
  -2  -1   1 2154.18   66.29 
  -2  -1   1 2130.99   65.49 
   2  -1  -1 2194.58   63.49 
   2  -1  -1 2165.68   73.09 
   2  -1  -1 2236.18   61.99 
  -2  -1   1 2218.08   64.09 
  -2  -1   1 2140.69   62.99 
   2  -1  -1 2206.38   61.49 
   2  -1  -1 2140.29   60.99 
   2  -1  -1 2218.68   60.99 
   2  -1  -1 2162.38   61.59 
  -2  -1   1 2131.09   59.59 
  -2  -1   1 2159.68   63.79 
   2  -1  -1 2246.98   60.09 
   2  -1  -1 2091.59   62.19 
  -2  -1   1 2181.88   65.09 
   2  -1  -1 2108.49   63.39 
  -2  -1   1 2140.69   65.79 
  -2  -1   1 2176.88   64.29 
  -2  -1   1 2114.19   60.29 
  -2   1   1 2140.19   73.29 
  -2   1   1 2134.39   61.29 
  -2   1   1 2143.19   63.99 
   2   1  -1 2222.18   63.99 
   2   1  -1 2151.68   63.99 
  -2   1   1 2137.79   61.19 
  -2   1   1 2129.99   61.59 
   2   1  -1 2156.28   63.89 
   2   1  -1 2088.89   59.09 
   2   1  -1 2168.68   62.39 
   2   1  -1 2177.38   64.29 
   2   1  -1 2196.38   65.99 
   2   1  -1 2138.89   65.59 
  -2   1   1 2138.89   59.49 
   2   1  -1 2161.28   62.09 
   2   1  -1 2165.58   59.79 
  -2   1   1 2078.29   60.79 
  -2   1   1 2203.38   63.39 
  -2   1   1 2133.09   62.89 
  -2   1   1 2190.58   63.09 
  -2   1   1 2095.89   64.09 
   2   1  -1 2245.28   64.29 
  -2   1   1 2147.59   63.99 
  -2   1   1 2138.19   62.19 
  -2   1   1 2185.38   63.69 
  -2   1   1 2136.59   60.99 
  -2   1   1 2108.29   61.99 
   2   1  -1 2169.08   60.59 
  -2   1   1 2113.39   61.19 
  -2   1   1 2194.98   60.39 
   2   1  -1 2143.49   63.79 
   2   1  -1 2103.89   61.39 
  -2   1   1 2049.99   64.99 
   2   1  -1 2147.29   65.39 
   2   1  -1 2207.38   59.89 
  -2   1   1 2131.79   64.19 
  -2   1   1 2264.57   63.39 
  -2   1   1 2228.38   63.69 
  -2   1   1 2177.18   64.19 
   2   1  -1 2168.48   65.09 
  -2   1   1 2095.39   61.59 
   2   1  -1 2136.89   58.99 
   2   1  -1 2178.18   59.19 
   2   1  -1 2192.38   59.39 
   2   1  -1 2144.59   59.99 
   2   1  -1 2087.19   60.19 
   2   1  -1 2175.28   62.99 
   2   1  -1 2102.19   61.69 
  -2   1   1 2148.89   63.39 
  -2   1   1 2192.18   60.89 
   2   1  -1 2256.67   65.59 
   2   1  -1 2168.08   60.09 
  -2   1   1 2319.77   60.59 
  -1  -1   1  159.38    8.60 
  -1  -1   1  170.78    9.10 
  -1  -1   1  164.78    8.10 
  -1  -1   1  169.68    8.00 
  -1  -1   1  164.18    7.70 
   1  -1  -1  171.58    8.10 
  -1  -1   1  163.08    7.40 
   1  -1  -1  166.28    7.90 
  -1  -1   1  162.18    7.70 
  -1  -1   1  175.68    8.80 
  -1  -1   1  169.28    8.10 
  -1  -1   1  165.48    8.50 
  -1  -1   1  173.38    8.00 
   1  -1  -1  179.88    7.40 
  -1  -1   1  163.48    8.40 
  -1  -1   1  177.88    7.40 
   1  -1  -1  165.08    7.90 
   1  -1  -1  160.78    8.10 
   1  -1  -1  164.88    8.30 
  -1  -1   1  168.08    6.90 
  -1  -1   1  175.78    8.10 
  -1  -1   1  164.48    6.60 
  -1  -1   1  166.68    8.00 
   1  -1  -1  174.18    7.80 
   1  -1  -1  171.28    8.00 
   1  -1  -1  168.48    7.90 
  -1  -1   1  178.08    8.10 
  -1  -1   1  180.08    8.30 
   1  -1  -1  157.78    8.00 
  -1  -1   1  167.88    7.10 
  -1  -1   1  165.38    8.00 
   1  -1  -1  180.28    8.20 
   1  -1  -1  152.38    6.40 
  -1  -1   1  158.68    7.50 
   1  -1  -1  157.38    7.80 
  -1  -1   1  168.38   14.30 
  -1  -1   1  168.58    8.50 
  -1  -1   1  167.28    7.20 
  -1   1   1  167.18    7.20 
  -1   1   1  159.38    5.80 
  -1   1   1  171.48    7.00 
  -1   1   1  185.48    8.20 
   1   1  -1  170.78    8.00 
  -1   1   1  170.08    5.50 
   1   1  -1  166.68    7.00 
   1   1  -1  170.68    8.00 
  -1   1   1  178.98    8.10 
  -1   1   1  161.38    7.90 
   1   1  -1  176.18    7.70 
  -1   1   1  166.38    7.10 
  -1   1   1  166.38    6.50 
   1   1  -1  163.38    8.40 
   1   1  -1  157.38    8.30 
  -1   1   1  172.68    6.10 
   1   1  -1  172.18    7.70 
   1   1  -1  170.08    8.20 
  -1   1   1  154.28    7.60 
  -1   1   1  157.48    7.00 
  -1   1   1  167.88    5.20 
   1   1  -1  167.88    7.90 
  -1   1   1  166.08    5.80 
  -1   1   1  162.28    7.80 
  -1   1   1  169.58    8.20 
  -1   1   1  160.98    8.10 
   1   1  -1  162.08    8.70 
  -1   1   1  176.38    8.10 
  -1   1   1  167.48    7.10 
  -1   1   1  162.08    6.60 
  -1   1   1  175.08    7.60 
   1   1  -1  163.48    8.40 
  -1   1   1  172.18    7.50 
  -1   1   1  160.08    7.70 
   1   1  -1  182.08    8.10 
   1   1  -1  183.38    8.30 
   1   1  -1  154.88    8.80 
  -1   1   1  172.68    6.40 
   1   1  -1  167.58    6.80 
  -1   1   1  153.18    6.80 
   0  -1   1 7303.17  188.18 
   0  -1  -1 6758.42  186.78 
   0  -1  -1 7035.40  187.08 
   0  -1  -1 6933.91  187.38 
   0  -1  -1 6241.08  186.88 
   0  -1   1 6781.02  187.28 
   0  -1  -1 6874.91  187.88 
   0  -1   1 7125.69  187.58 
   0  -1   1 7084.49  187.48 
   0  -1   1 7130.59  200.68 
   0  -1  -1 6896.81  186.48 
   0  -1   1 7177.48  187.48 
   0  -1  -1 6685.13  186.58 
   0  -1  -1 7299.87  186.98 
   0  -1  -1 6699.33  186.68 
   0  -1  -1 7125.09  187.28 
   0   1  -1 6708.63  188.28 
   0   1  -1 7181.48  186.28 
   0   1   1 6637.54  186.28 
   0   1  -1 6361.76  188.98 
   0   1   1 6520.15  185.68 
   0   1   1 6980.50  187.08 
   0   1   1 6585.64  186.78 
   0   1  -1 6700.03  187.28 
   0   1   1 6614.84  186.88 
   0   1   1 7247.97  186.78 
   0   1   1 6730.23  186.08 
   0   1  -1 6539.85  189.08 
   0   1   1 6547.75  187.08 
   0   1  -1 7325.17  186.88 
   0   1  -1 7244.28  187.78 
   0   1  -1 7211.88  186.68 
   0   1   1 6830.92  186.18 
   0   1  -1 6193.18  188.08 
   0   1   1 6669.43  185.98 
   0   1  -1 7189.08  186.38 
   0   1  -1 6728.53  187.68 
   1  -1   1  277.37   11.40 
  -1  -1  -1  317.17   11.50 
  -1  -1  -1  328.97   11.10 
  -1  -1  -1  342.57   11.80 
  -1  -1  -1  312.87   13.20 
   1  -1   1  315.87   11.30 
  -1  -1  -1  317.97   10.60 
  -1  -1  -1  325.87   12.30 
   1  -1   1  306.17   11.90 
  -1  -1  -1  329.57   13.00 
  -1  -1  -1  309.27   12.60 
  -1  -1  -1  327.07   11.20 
  -1  -1  -1  304.07   12.30 
   1  -1   1  312.47   12.60 
   1  -1   1  324.97   13.20 
  -1  -1  -1  327.27   12.10 
   1  -1   1  328.77   12.90 
   1  -1   1  320.47   12.90 
  -1  -1  -1  329.57   11.00 
   1  -1   1  313.17   11.00 
  -1  -1  -1  307.37   11.50 
   1  -1   1  328.27   12.30 
  -1  -1  -1  337.27   11.10 
   1  -1   1  312.77   12.90 
  -1  -1  -1  307.67   11.80 
  -1  -1  -1  346.57   12.00 
   1  -1   1  315.27   12.50 
  -1  -1  -1  316.27   11.70 
  -1  -1  -1  303.47   12.00 
  -1  -1  -1  320.97   12.60 
   1  -1   1  314.17   12.40 
  -1  -1  -1  338.87   10.70 
   1  -1   1  310.27   12.80 
  -1  -1  -1  331.97   12.60 
  -1  -1  -1  339.67   13.20 
  -1  -1  -1  334.57   12.90 
   1  -1   1  318.77   12.30 
   1  -1   1  346.67   11.30 
   1   1   1  298.07   12.30 
   1   1   1  318.67   11.40 
  -1   1  -1  317.27   12.10 
   1   1   1  337.07   10.90 
  -1   1  -1  337.87    9.70 
   1   1   1  315.07   12.80 
  -1   1  -1  318.17   12.90 
  -1   1  -1  329.07   13.00 
   1   1   1  302.17   11.10 
  -1   1  -1  311.87   12.60 
   1   1   1  324.07   12.40 
  -1   1  -1  313.27   12.50 
  -1   1  -1  334.17   10.10 
   1   1   1  300.37   13.20 
  -1   1  -1  301.77    9.90 
  -1   1  -1  339.37   12.70 
  -1   1  -1  349.57   11.30 
   1   1   1  326.57   11.50 
   1   1   1  324.87   12.90 
   1   1   1  329.87   11.00 
  -1   1  -1  339.77   11.70 
   1   1   1  326.07   11.70 
   1   1   1  302.47   12.30 
  -1   1  -1  323.67    9.20 
   1   1   1  317.87   11.80 
  -1   1  -1  337.77   21.10 
  -1   1  -1  314.47   12.30 
   1   1   1  311.87   13.20 
   1   1   1  312.67   12.60 
  -1   1  -1  321.37   11.10 
   1   1   1  338.97   12.60 
   1   1   1  295.07   13.00 
  -1   1  -1  309.27   12.80 
  -1   1  -1  325.27   12.10 
  -1   1  -1  304.57   11.40 
   1   1   1  313.67   12.10 
  -1   1  -1  321.67   13.00 
  -1   1  -1  304.57   13.00 
  -1   1  -1  327.57   10.50 
  -1   1  -1  316.37   13.30 
  -1   1  -1  322.07   11.20 
  -1   1  -1  336.27   11.60 
  -1   1  -1  311.47   10.00 
  -2  -1  -1 9251.07  257.27 
   2  -1   1 9210.98  253.17 
  -2  -1  -1 9843.02  252.97 
   2  -1   1 9051.89  255.97 
  -2  -1  -1 9223.68  258.17 
   2  -1   1 9116.59  255.77 
   2  -1   1 9409.26  253.17 
  -2  -1  -1 9288.07  252.87 
   2  -1   1 9498.25  256.17 
  -2  -1  -1 9536.95  256.67 
   2  -1   1 9105.59  255.97 
  -2  -1  -1 9365.56  255.87 
  -2  -1  -1 9647.63  256.17 
  -2  -1  -1 9266.67  251.57 
  -2  -1  -1 9295.37  256.57 
  -2  -1  -1 9623.84  255.57 
   2  -1   1 9218.58  255.07 
  -2  -1  -1 9183.78  256.47 
   2  -1   1 9309.37  256.27 
  -2  -1  -1 9296.67  255.27 
  -2  -1  -1 9745.92  254.77 
  -2  -1  -1 9505.75  253.87 
  -2  -1  -1 9213.58  254.07 
  -2  -1  -1 9206.08  257.17 
  -2  -1  -1 9416.46  252.77 
  -2  -1  -1 9451.35  255.17 
   2  -1   1 9257.17  256.07 
  -2  -1  -1 9965.70  255.67 
  -2  -1  -1 9441.36  257.17 
  -2  -1  -1 9431.06  257.47 
   2  -1   1 9254.57  255.67 
  -2  -1  -1 9503.85  252.67 
   2  -1   1 9471.35  256.47 
   2  -1   1 8818.72  257.37 
   2  -1   1 9321.57  253.57 
   2  -1   1 8728.93  253.37 
   2  -1   1 9999.00  256.87 
  -2  -1  -1 9722.33  256.67 
   2  -1   1 9373.26  254.17 
  -2  -1  -1 9193.38  257.97 
   2  -1   1 9280.67  255.67 
   2  -1   1 9364.76  254.67 
  -2  -1  -1 9221.28  254.67 
   2  -1   1 9281.57  254.87 
  -2  -1  -1 9536.95  254.67 
  -2  -1  -1 9253.07  255.97 
   2   1   1 9921.71  258.37 
  -2   1  -1 8957.80  254.67 
  -2   1  -1 9306.57  256.17 
   2   1   1 9533.05  252.67 
  -2   1  -1 8954.30  256.27 
  -2   1  -1 9458.45  256.27 
   2   1   1 9451.75  257.27 
   2   1   1 9399.16  256.27 
  -2   1  -1 8945.21  252.97 
   2   1   1 9307.47  254.67 
   2   1   1 9327.17  251.17 
   2   1   1 9427.56  253.97 
   2   1   1 8622.64  254.87 
   2   1   1 9699.83  257.37 
  -2   1  -1 8924.61  252.17 
  -2   1  -1 9081.89  255.17 
  -2   1  -1 9276.97  256.27 
   2   1   1 9100.59  257.37 
  -2   1  -1 8904.81  252.37 
  -2   1  -1 9724.53  256.87 
   2   1   1 9527.45  252.57 
  -2   1  -1 9549.74  253.17 
  -2   1  -1 9621.44  252.57 
  -2   1  -1 9396.46  253.37 
   2   1   1 9515.65  255.37 
  -2   1  -1 9659.23  254.57 
   2   1   1 9377.36  255.47 
   2   1   1 9424.46  256.87 
  -2   1  -1 9375.06  255.77 
   2   1   1 9470.45  255.07 
  -2   1  -1 9478.95  256.47 
   2   1   1 9341.46  255.67 
  -2   1  -1 9289.67  255.77 
  -2   1  -1 9847.92  254.77 
  -2   1  -1 9119.29  252.77 
  -2   1  -1 9159.58  254.37 
  -2   1  -1 8943.91  254.57 
  -2   1  -1 9349.56  252.37 
  -2   1  -1 9025.00  255.87 
  -2   1  -1 8963.80  255.77 
   2   1   1 9392.36  254.37 
  -2   1  -1 9223.88  254.07 
  -2   1  -1 9568.34  255.37 
   2   1   1 8953.30  254.37 
   2   1   1 9401.56  253.77 
  -3  -1  -1    2.10    3.30 
  -3  -1  -1    1.10    2.10 
  -3  -1  -1    3.90    1.80 
   3  -1   1   -0.10    2.00 
   3  -1   1    2.20    1.80 
  -3  -1  -1    3.30    3.10 
   3  -1   1    1.40    1.70 
  -3  -1  -1   -1.10    1.60 
   3  -1   1    1.40    1.70 
  -3  -1  -1    2.10    1.90 
  -3  -1  -1   -0.40    2.10 
  -3  -1  -1   -1.30    1.10 
  -3  -1  -1    1.90    6.60 
   3  -1   1    6.50    2.30 
   3  -1   1    0.80    1.50 
   3  -1   1    2.70    2.70 
  -3  -1  -1    1.30    1.40 
  -3  -1  -1    2.70    0.90 
  -3  -1  -1    3.80    1.40 
   3  -1   1    0.90    2.00 
  -3  -1  -1   -0.20    2.10 
  -3  -1  -1    1.90    2.00 
  -3  -1  -1    8.60    2.90 
   3  -1   1    0.80    2.00 
   3  -1   1    3.50    2.50 
  -3  -1  -1    4.90    3.50 
  -3  -1  -1    0.70    1.80 
  -3  -1  -1    2.90    1.60 
  -3  -1  -1    2.80    2.00 
  -3  -1  -1    9.10    3.50 
  -3  -1  -1   -0.30    2.50 
  -3  -1  -1    3.30    2.30 
   3  -1   1    0.00    1.30 
   3  -1   1   -1.20    2.00 
   3  -1   1    3.80    2.70 
   3  -1   1    0.80    2.20 
  -3  -1  -1    3.10    2.20 
   3  -1   1    2.90    2.50 
  -3  -1  -1    5.00    3.00 
   3  -1   1    0.40    2.10 
  -3   1  -1    2.90    1.60 
   3   1   1   16.50    2.40 
   3   1   1    3.50    3.20 
  -3   1  -1    3.20    2.40 
  -3   1  -1    3.00    2.20 
  -3   1  -1    3.90    2.70 
  -3   1  -1    1.70    2.60 
  -3   1  -1    2.90    2.30 
  -3   1  -1    0.80    1.90 
  -3   1  -1    3.70    2.10 
  -3   1  -1    7.00    2.10 
  -3   1  -1    1.80    2.60 
  -3   1  -1    1.60    2.70 
  -3   1  -1    4.20    1.90 
   3   1   1    5.50    2.60 
   3   1   1    1.50    2.90 
  -3   1  -1    6.50    2.20 
   3   1   1    1.20    2.40 
   3   1   1    2.00    1.60 
  -3   1  -1    0.60    2.10 
   3   1   1    1.30    1.90 
  -3   1  -1    0.20    1.40 
  -3   1  -1    0.40    1.50 
  -3   1  -1    0.60    1.80 
   3   1   1    2.80    1.60 
  -3   1  -1    7.60    2.80 
  -3   1  -1    4.90    2.10 
   3   1   1    2.30    2.50 
  -3   1  -1    1.20    1.90 
  -3   1  -1    3.20    1.90 
  -3   1  -1    4.90    2.30 
   3   1   1    1.10    2.20 
   3   1   1    1.80    5.50 
  -3   1  -1    0.30    1.60 
  -3   1  -1    3.10    2.30 
   3   1   1    2.90    2.30 
  -3   1  -1    0.20    2.30 
  -3   1  -1    0.40    1.60 
  -3   1  -1   -2.10    1.90 
  -3   1  -1    2.30    2.40 
  -3   1  -1   -0.30    2.00 
   3   1   1    3.30    2.20 
  -3   1  -1    2.70    2.10 
  -3   1  -1   -1.90    1.70 
   3   1   1    3.80    1.20 
  -3   1  -1   -0.60    2.20 
  -3   1  -1    1.70    1.10 
  -3   1  -1    3.80    2.80 
   3   1   1    0.30    2.10 
   4  -1   1 2720.43   79.39 
  -4  -1  -1 2689.53   85.39 
   4  -1   1 2752.02   82.79 
   4  -1   1 2696.33   79.69 
  -4  -1  -1 2804.12   80.99 
   4  -1   1 2829.22   86.09 
   4  -1   1 2714.43   79.69 
   4  -1   1 2737.33   78.99 
   4  -1   1 2757.02   83.19 
  -4  -1  -1 2682.63   81.59 
   4  -1   1 2664.13   80.99 
   4  -1   1 2745.03   83.99 
   4  -1   1 2723.43   80.19 
  -4  -1  -1 2721.93   86.79 
  -4  -1  -1 2705.73   77.89 
  -4  -1  -1 2659.03   86.59 
  -4  -1  -1 2822.82   80.69 
   4  -1   1 2753.92   80.99 
   4  -1   1 2769.62   77.59 
  -4  -1  -1 2698.53   80.99 
  -4  -1  -1 2698.63   83.29 
  -4  -1  -1 2803.52   77.59 
   4  -1   1 2684.93   84.09 
  -4  -1  -1 2640.24   75.89 
   4  -1   1 2705.63   83.09 
  -4  -1  -1 2725.03   78.39 
  -4  -1  -1 2783.92   78.19 
  -4  -1  -1 2761.92   83.19 
  -4  -1  -1 2696.23   76.69 
  -4   1  -1 2716.23   80.19 
  -4   1  -1 2597.94   85.49 
  -4   1  -1 2609.34   77.59 
   4   1   1 2781.62   78.39 
  -4   1  -1 2637.24   79.19 
   4   1   1 2735.13   83.89 
  -4   1  -1 2721.13   75.69 
   4   1   1 2739.03   81.09 
  -4   1  -1 2823.32   79.89 
  -4   1  -1 2788.72   82.19 
  -4   1  -1 2667.53   75.79 
  -4   1  -1 2653.23   79.49 
  -4   1  -1 2702.93   78.69 
  -4   1  -1 2799.92   79.79 
  -4   1  -1 2760.22   79.29 
  -4   1  -1 2766.22   79.29 
  -4   1  -1 2727.73   77.99 
  -4   1  -1 2860.01   79.69 
  -4   1  -1 2662.03   82.29 
  -4   1  -1 2594.84   79.69 
   4   1   1 2732.43   83.79 
  -4   1  -1 2730.13   80.49 
  -4   1  -1 2800.12   82.59 
  -4   1  -1 2722.23   78.79 
  -4   1  -1 2678.63   80.99 
  -4   1  -1 2754.82   79.59 
  -4   1  -1 2737.93   80.39 
   4   1   1 2702.13   81.99 
  -4   1  -1 2658.43   81.19 
   4   1   1 2763.62   84.59 
  -4   1  -1 2696.53   81.89 
  -4   1  -1 2714.93   78.59 
  -4   1  -1 2615.24   82.89 
   4   1   1 2664.43   76.29 
   4   1   1 2687.63   80.79 
  -4   1  -1 2798.92   79.19 
  -4   1  -1 2640.34   79.79 
   4   1   1 2701.73   77.69 
  -4   1  -1 2738.33   78.99 
   4   1   1 2890.81   83.79 
  -4   1  -1 2663.13   79.99 
  -5  -1  -1    1.40    1.70 
   5  -1   1    0.60    2.60 
   5  -1   1    0.80    1.70 
  -5  -1  -1    0.30    3.50 
  -5  -1  -1    3.30    1.70 
   5  -1   1    3.30    2.70 
   5  -1   1   -2.10    2.60 
  -5  -1  -1    4.50    2.50 
  -5  -1  -1    1.10    1.90 
  -5  -1  -1   -0.60    7.50 
  -5  -1  -1    0.90    2.40 
   5  -1   1    0.50    2.80 
  -5  -1  -1    1.10    2.60 
   5  -1   1   -0.20    2.60 
  -5  -1  -1    0.20    1.70 
  -5  -1  -1    2.20    2.60 
   5  -1   1    0.60    2.20 
  -5  -1  -1    3.90    1.70 
  -5  -1  -1    3.00    3.00 
   5  -1   1    3.50    2.30 
  -5  -1  -1    2.80    4.00 
   5  -1   1    1.70    2.90 
   5  -1   1   -1.00    2.40 
  -5  -1  -1    0.50    3.40 
  -5  -1  -1    6.10    3.20 
  -5  -1  -1    2.00    3.60 
   5  -1   1    0.90    2.40 
  -5   1  -1    4.30    2.20 
  -5   1  -1    0.30    2.50 
  -5   1  -1    6.80    3.10 
  -5   1  -1   -1.00    2.50 
   5   1   1    0.90    2.60 
  -5   1  -1    4.20    2.40 
  -5   1  -1    1.50    3.00 
  -5   1  -1    1.70    2.60 
   5   1   1    0.60    2.00 
  -5   1  -1   -0.10    2.90 
  -5   1  -1    0.80    2.70 
   5   1   1    4.40    3.60 
  -5   1  -1    2.30    3.50 
  -5   1  -1    2.20    2.30 
  -5   1  -1    1.60    2.90 
  -5   1  -1    2.80    1.70 
   5   1   1    3.90    3.90 
  -5   1  -1    0.70    2.30 
   5   1   1    2.80    3.10 
   5   1   1    0.70    1.90 
  -5   1  -1    1.00    1.90 
  -5   1  -1    8.70    3.20 
  -5   1  -1    0.90    2.90 
  -5   1  -1    2.40    3.50 
  -5   1  -1   -2.00    2.30 
  -5   1  -1    0.30    2.80 
  -5   1  -1   -1.70    2.50 
  -5   1  -1   -0.10    1.60 
  -5   1  -1    0.20    2.30 
  -5   1  -1    2.10    2.30 
  -5   1  -1    2.40    3.10 
  -5   1  -1    1.20    2.10 
   5   1   1    5.50    3.40 
  -5   1  -1    3.10    2.20 
   5   1   1    1.00    1.60 
  -5   1  -1    0.90    2.30 
  -6  -1  -1  243.38   11.90 
   6  -1   1  259.67   14.00 
   6  -1   1  300.07   18.30 
  -6  -1  -1  273.37   17.70 
   6  -1   1  261.97   18.00 
  -6  -1  -1  246.48   15.00 
  -6  -1  -1  234.28   19.30 
  -6  -1  -1  268.47   11.00 
  -6  -1  -1  236.08   17.70 
   6  -1   1  228.78   17.70 
   6  -1   1  263.17   15.30 
  -6  -1  -1  251.07   12.40 
   6  -1   1  265.07   15.00 
   6  -1   1  267.47   12.80 
  -6  -1  -1  236.48   15.80 
  -6  -1  -1  245.88   11.60 
  -6  -1  -1  238.18   11.90 
   6  -1   1  281.67   17.90 
  -6  -1  -1  240.88   17.30 
  -6  -1  -1  220.58   19.10 
   6  -1   1  228.88   12.90 
   6   1   1  228.98   14.50 
  -6   1  -1  275.77   16.70 
  -6   1  -1  245.88   12.70 
  -6   1  -1  277.77   16.40 
  -6   1  -1  266.87   13.50 
  -6   1  -1  261.27   11.00 
  -6   1  -1  259.57   25.30 
  -6   1  -1  267.77   13.70 
  -6   1  -1  259.77   13.20 
  -6   1  -1  245.08   14.10 
  -6   1  -1  254.47   16.50 
  -6   1  -1  250.17   16.10 
  -6   1  -1  242.58   17.10 
  -6   1  -1  253.87   13.10 
  -6   1  -1  269.07   13.70 
   6   1   1  241.98   17.60 
  -6   1  -1  249.68   13.80 
  -6   1  -1  268.77   13.70 
   6   1   1  254.37   16.50 
  -6   1  -1  262.37   13.20 
  -6   1  -1  273.87   17.60 
  -6   1  -1  272.07   16.00 
   6   1   1  258.57   17.90 
  -6   1  -1  254.77   14.50 
  -6   1  -1  280.17   19.60 
   6   1   1  247.78   14.30 
  -6   1  -1  220.58   14.00 
   6   1   1  249.18   17.80 
  -6   1  -1  257.57   13.50 
  -7  -1  -1   12.90    5.90 
   7  -1   1   11.80    4.30 
  -7  -1  -1    7.30    3.30 
   7  -1   1   16.60    6.20 
  -7  -1  -1   11.50    5.10 
  -7  -1  -1    6.30    5.00 
  -7  -1  -1    8.80    6.10 
   7  -1   1   16.10    4.50 
  -7  -1  -1    0.70    5.20 
   7  -1   1   17.10    7.10 
   7  -1   1   13.10    5.60 
   7  -1   1    7.00    4.50 
   7  -1   1   11.90    4.00 
  -7  -1  -1   10.50    6.30 
   7  -1   1   13.10    5.80 
  -7  -1  -1   11.80    6.80 
  -7   1  -1    7.70    4.60 
  -7   1  -1   12.50    4.70 
   7   1   1   13.40    6.20 
  -7   1  -1    9.60    3.80 
  -7   1  -1   13.80    5.70 
  -7   1  -1   11.10    4.10 
  -7   1  -1   16.00    6.20 
   7   1   1   17.30    5.70 
   7   1   1   12.50    5.60 
  -7   1  -1   16.80    5.90 
  -7   1  -1   21.00    7.00 
  -7   1  -1   18.20    4.80 
  -7   1  -1   13.90    4.30 
  -7   1  -1   18.30    5.80 
  -7   1  -1    5.00    4.70 
   7   1   1   15.00    4.70 
  -7   1  -1   -9.20    7.40 
   7   1   1    5.80    6.20 
   7   1   1    8.10    5.50 
  -7   1  -1   12.40    5.20 
  -7   1  -1    6.40    5.80 
  -8  -1  -1  292.57   21.20 
  -8  -1  -1  260.57   17.40 
   8  -1   1  273.97   21.10 
  -8  -1  -1  326.57   23.10 
  -8  -1  -1  278.87   21.30 
  -8  -1  -1  334.97   26.40 
   8  -1   1  317.87   18.60 
   8  -1   1  233.08   19.50 
   8  -1   1  249.08   21.50 
  -8  -1  -1  262.17   27.60 
  -8  -1  -1  299.07   20.60 
   8   1   1  273.87   21.10 
  -8   1  -1  267.87   24.40 
   8   1   1  258.47   20.70 
   8   1   1  288.37   22.20 
  -8   1  -1  286.17   21.30 
  -8   1  -1  320.47   24.70 
   8   1   1  285.27   17.70 
  -8   1  -1  271.37   17.70 
   8   1   1  271.37   19.80 
  -8   1  -1  246.58   17.40 
  -8   1  -1  270.17   19.50 
  -8   1  -1  308.67   21.40 
  -9  -1  -1   -1.00    5.60 
  -9  -1  -1   -4.40    4.20 
  -9  -1  -1    7.50    7.20 
   9  -1   1    4.30    6.00 
  -9  -1  -1   -2.00    6.70 
   9  -1   1   -1.90    5.20 
  -9  -1  -1    9.40    5.70 
   9  -1   1    4.10    6.90 
  -9  -1  -1    3.70    5.30 
  -9   1  -1    4.00    5.90 
  -9   1  -1    0.60    8.10 
   9   1   1    3.20    6.40 
  -9   1  -1   -1.20    4.30 
  -9   1  -1   -2.70    4.60 
   9   1   1    5.20    5.60 
   9   1   1    4.50    5.70 
   9   1   1    4.20    5.60 
  10  -1   1  274.87   30.60 
 -10  -1  -1  278.57   29.30 
 -10  -1  -1  264.07   26.80 
  10  -1   1  245.18   27.00 
  10  -1   1  299.47   25.00 
 -10  -1  -1  279.97   34.20 
 -10   1  -1  283.77   31.70 
 -10   1  -1  341.67   33.90 
  10   1   1  255.47   28.40 
 -10   1  -1  276.07   28.30 
 -10   1  -1  259.77   33.10 
 -10   1  -1  276.17   27.80 
  10  -2  -1  192.78   24.60 
 -10  -2   1  129.79   20.10 
 -10  -2   1  119.99   23.60 
  10  -2  -1  139.59   23.10 
  10  -2  -1  181.68   24.10 
 -10  -2   1  157.68   24.70 
 -10  -2   1  128.09   19.30 
 -10  -2   1  171.78   24.10 
  10   2  -1  122.89   21.40 
  10   2  -1  149.79   20.60 
 -10   2   1  179.78   28.30 
 -10   2   1  154.58   23.50 
  10   2  -1  152.88   21.90 
 -10   2   1  149.39   21.50 
 -10   2   1  166.68   25.00 
 -10   2   1  162.58   22.90 
  10   2  -1  166.88   23.90 
  -9  -2   1  140.09   18.60 
  -9  -2   1  125.29   18.80 
  -9  -2   1  150.78   24.00 
  -9  -2   1  143.69   20.60 
   9  -2  -1  159.18   20.60 
   9  -2  -1  189.48   24.70 
   9  -2  -1  146.99   19.80 
  -9  -2   1  159.98   21.50 
  -9  -2   1  159.98   23.60 
   9   2  -1  131.49   19.30 
  -9   2   1   89.49   19.00 
   9   2  -1  146.99   17.00 
  -9   2   1  148.89   17.60 
   9   2  -1  153.28   20.80 
  -9   2   1  147.49   20.60 
  -9   2   1  110.99   19.60 
   9   2  -1  138.99   18.50 
  -9   2   1  151.38   19.90 
   9   2  -1  108.39   18.40 
  -8  -2   1   13.20    8.40 
   8  -2  -1   16.60    6.90 
   8  -2  -1   14.40    7.10 
  -8  -2   1   -5.60    3.80 
  -8  -2   1    7.90    6.50 
   8  -2  -1   12.70    7.70 
  -8  -2   1    3.70    5.40 
  -8  -2   1   12.30    7.80 
  -8  -2   1   19.80    7.50 
  -8  -2   1    3.00    4.90 
   8   2  -1    5.00    5.10 
  -8   2   1    8.30    5.80 
   8   2  -1   13.80    6.60 
   8   2  -1    7.60    5.10 
  -8   2   1    7.50    6.30 
   8   2  -1   -0.30    4.90 
  -8   2   1    4.10    6.80 
  -8   2   1   10.90    7.10 
  -8   2   1   -1.40    5.20 
  -8   2   1    5.60    5.80 
   8   2  -1    7.10    6.80 
   7  -2  -1    7.60    5.10 
  -7  -2   1    7.90    5.30 
  -7  -2   1    8.60    4.70 
  -7  -2   1   -4.10   14.00 
   7  -2  -1    3.30    4.30 
  -7  -2   1   10.50    5.90 
  -7  -2   1    0.90    2.10 
  -7  -2   1   17.40    8.40 
   7  -2  -1    0.10    3.00 
   7  -2  -1    6.60    5.50 
  -7  -2   1    4.60    6.50 
   7  -2  -1    9.00    3.50 
   7  -2  -1   12.20    6.70 
  -7  -2   1   10.30    6.50 
   7  -2  -1    4.60    4.40 
  -7  -2   1    1.00    5.50 
   7  -2  -1    4.20    5.80 
   7   2  -1    4.10    3.40 
  -7   2   1    5.50    5.10 
   7   2  -1   16.40    6.40 
   7   2  -1   -0.20    4.10 
  -7   2   1   17.30    6.50 
  -7   2   1   13.30    4.90 
  -7   2   1    8.70    3.90 
  -7   2   1    2.50    3.50 
  -7   2   1    8.50    5.90 
  -7   2   1    2.10    4.60 
   7   2  -1    1.00    4.10 
  -7   2   1    9.90    4.70 
   7   2  -1    3.60    6.30 
   7   2  -1   13.80    6.60 
  -7   2   1    8.70    6.60 
  -6  -2   1   52.99   10.60 
  -6  -2   1   69.39   13.40 
   6  -2  -1   46.30    8.40 
   6  -2  -1   59.19   10.10 
   6  -2  -1   57.59    8.10 
   6  -2  -1   70.09    8.40 
   6  -2  -1   44.60    9.60 
   6  -2  -1   54.59    6.80 
  -6  -2   1   67.89    6.00 
  -6  -2   1   61.09   10.30 
  -6  -2   1   17.10   13.80 
   6  -2  -1   49.80    9.20 
   6  -2  -1   25.50    7.80 
  -6  -2   1   51.99    8.60 
  -6  -2   1   64.29    6.10 
  -6  -2   1   48.90   11.70 
  -6  -2   1   54.89    9.40 
  -6  -2   1   44.50    9.90 
  -6   2   1   59.49    5.60 
  -6   2   1   53.39    6.20 
  -6   2   1   53.39   10.90 
   6   2  -1   42.00    9.40 
   6   2  -1   56.99    6.50 
  -6   2   1   61.49    4.30 
   6   2  -1   48.10    7.20 
  -6   2   1   60.89    7.00 
  -6   2   1   56.79    6.00 
  -6   2   1   49.80    4.90 
   6   2  -1   56.39    9.60 
  -6   2   1   49.70    8.60 
   6   2  -1   46.80   10.20 
   6   2  -1   42.10    8.30 
  -6   2   1   72.19    7.10 
   6   2  -1   42.90    9.00 
  -6   2   1   55.39    4.80 
   6   2  -1   46.80    4.70 
  -6   2   1   46.70    8.60 
  -6   2   1   65.29    7.40 
  -6   2   1   56.29    7.10 
  -6   2   1   62.09    7.80 
  -6   2   1   65.59    6.10 
  -6   2   1   52.09    4.40 
  -6   2   1   69.49    6.70 
  -6   2   1   49.99    6.60 
  -6   2   1   52.99    8.20 
  -6   2   1   70.89    9.50 
  -6   2   1   59.69    5.40 
  -6   2   1   50.79    5.40 
  -6   2   1   52.89    9.70 
  -6   2   1   60.69    4.00 
   5  -2  -1  120.49    7.80 
  -5  -2   1  116.49   13.20 
   5  -2  -1  123.29    9.50 
   5  -2  -1  112.39   12.50 
   5  -2  -1  124.59    7.20 
  -5  -2   1  133.59    6.70 
   5  -2  -1  126.99    9.20 
  -5  -2   1  129.69    7.30 
  -5  -2   1  117.59   12.40 
  -5  -2   1   79.49   17.00 
  -5  -2   1  149.69   14.00 
  -5  -2   1  134.19    9.70 
   5  -2  -1  135.69    8.10 
  -5  -2   1  116.09   14.10 
   5  -2  -1  128.59   10.20 
  -5  -2   1  111.99    9.40 
   5  -2  -1  128.39    9.30 
   5  -2  -1  145.09   13.90 
  -5  -2   1  134.49   15.30 
  -5  -2   1  136.39   13.00 
  -5  -2   1  106.89   14.10 
   5  -2  -1  117.69   13.50 
   5  -2  -1  123.49   13.00 
   5  -2  -1  130.09   14.80 
   5  -2  -1  124.69    8.20 
   5   2  -1  135.59   13.10 
  -5   2   1  136.79    7.90 
  -5   2   1  172.58   29.20 
  -5   2   1  116.89    6.80 
   5   2  -1  110.99    6.70 
  -5   2   1  112.39    8.20 
  -5   2   1  121.19    5.80 
  -5   2   1  134.09    8.40 
   5   2  -1  116.19   14.20 
   5   2  -1  120.49    5.60 
  -5   2   1  142.99   11.00 
  -5   2   1  103.69    8.30 
  -5   2   1  124.99   13.80 
  -5   2   1  109.79    5.70 
   5   2  -1  116.49    7.00 
   5   2  -1  131.59   14.20 
  -5   2   1  137.09   13.50 
   5   2  -1  106.79   11.90 
  -5   2   1  116.09    7.40 
  -5   2   1   85.99   12.50 
  -5   2   1  129.79    8.90 
  -5   2   1  127.09   10.90 
  -5   2   1  112.69    7.20 
  -5   2   1  117.99    8.60 
  -5   2   1  125.19    9.90 
  -5   2   1  121.69    6.20 
  -5   2   1  127.19    6.00 
  -5   2   1  123.19    5.30 
  -5   2   1  113.19    7.50 
  -5   2   1  120.09    8.50 
  -5   2   1  126.19    6.90 
   5   2  -1  113.59   14.00 
  -5   2   1  132.09    8.10 
   5   2  -1  123.99    9.20 
   5   2  -1  132.09    6.80 
  -4  -2   1    9.40    2.60 
  -4  -2   1   12.80    2.50 
  -4  -2   1   16.20    6.30 
   4  -2  -1    9.40    4.20 
   4  -2  -1    2.80    3.40 
   4  -2  -1    4.10    3.70 
   4  -2  -1    5.10    2.40 
  -4  -2   1    8.20    3.30 
  -4  -2   1    5.60    3.10 
   4  -2  -1   13.20    3.50 
   4  -2  -1    1.10    3.30 
   4  -2  -1    9.70    3.00 
   4  -2  -1   14.50    3.10 
   4  -2  -1    6.10    3.40 
   4  -2  -1    4.90    2.60 
  -4  -2   1    4.20    3.40 
  -4  -2   1   -1.40    2.40 
   4  -2  -1    8.40    4.30 
   4  -2  -1    9.10    4.50 
  -4  -2   1   -0.40   11.00 
   4  -2  -1    5.60    2.20 
   4  -2  -1   15.40    3.00 
  -4  -2   1   13.50    5.60 
  -4  -2   1   10.60    3.90 
  -4  -2   1    5.60    4.20 
   4  -2  -1    3.50    2.40 
   4  -2  -1    3.20    3.60 
   4  -2  -1    4.10    2.70 
  -4  -2   1    3.10    4.50 
  -4   2   1    8.10    2.70 
  -4   2   1    8.20    2.70 
   4   2  -1   10.30    5.20 
  -4   2   1    3.70    3.50 
  -4   2   1    5.20    3.70 
   4   2  -1    3.40    2.50 
   4   2  -1    2.80    4.50 
   4   2  -1    8.10    4.20 
  -4   2   1    9.10    3.00 
   4   2  -1    4.30    3.30 
  -4   2   1    3.70    2.60 
  -4   2   1    4.40    1.80 
  -4   2   1    5.00    1.40 
   4   2  -1    5.70    2.90 
   4   2  -1    6.10    1.70 
  -4   2   1    4.20    3.00 
   4   2  -1    6.40    2.10 
   4   2  -1    5.70    2.10 
  -4   2   1    7.10    2.40 
  -4   2   1    1.40    1.70 
  -4   2   1    8.60    4.20 
  -4   2   1    5.00    1.70 
  -4   2   1    4.10    3.30 
  -4   2   1    0.80    2.20 
  -4   2   1   -0.40   10.40 
  -4   2   1    7.80    2.70 
   4   2  -1   10.30    4.30 
   4   2  -1   -1.70    5.70 
   4   2  -1    6.90    1.90 
  -4   2   1    2.40    3.30 
  -4   2   1    4.80    4.20 
  -4   2   1    3.90    2.40 
  -4   2   1    2.80    1.90 
  -4   2   1    6.80    3.10 
   4   2  -1    4.60    1.20 
  -4   2   1    6.40    2.20 
  -4   2   1   -1.30    2.70 
  -3  -2   1   78.09    9.50 
   3  -2  -1   64.69    8.60 
   3  -2  -1   48.30    7.20 
   3  -2  -1   74.79    8.90 
  -3  -2   1   72.49    8.10 
   3  -2  -1   63.99    8.30 
  -3  -2   1   59.99    8.80 
  -3  -2   1   68.69    8.90 
   3  -2  -1   72.09    6.90 
   3  -2  -1   58.99    5.30 
   3  -2  -1   69.29    8.10 
  -3  -2   1   67.39    8.20 
   3  -2  -1   68.29    5.80 
  -3  -2   1   71.69   17.90 
   3  -2  -1   64.89    8.70 
  -3  -2   1   62.19    4.30 
  -3  -2   1   65.49    9.80 
   3  -2  -1   65.19    6.50 
  -3  -2   1   77.09   10.00 
  -3  -2   1   70.29    5.40 
   3  -2  -1   61.69   14.70 
   3  -2  -1   71.09    5.40 
   3  -2  -1   62.09    8.40 
  -3  -2   1   61.99    7.20 
   3  -2  -1   67.99    8.70 
   3  -2  -1   58.29    6.20 
   3  -2  -1   64.49    4.30 
  -3  -2   1   62.29    7.30 
   3  -2  -1   65.59    8.20 
   3  -2  -1   71.89    4.60 
   3  -2  -1   64.99    5.20 
  -3  -2   1   63.19    7.60 
  -3  -2   1   61.79    8.30 
   3  -2  -1   62.19    8.40 
  -3  -2   1   63.99    6.30 
   3  -2  -1   73.19    5.40 
   3   2  -1   63.79    4.40 
  -3   2   1   63.59    5.20 
  -3   2   1   63.29    3.20 
   3   2  -1   61.99    4.40 
  -3   2   1   59.29    8.50 
   3   2  -1   71.19    8.20 
   3   2  -1   78.89    7.40 
  -3   2   1   52.79    6.60 
   3   2  -1   64.59    5.20 
  -3   2   1   66.99    4.10 
  -3   2   1   75.09   19.70 
  -3   2   1   73.89    8.20 
  -3   2   1   80.09    7.90 
   3   2  -1   79.69    8.80 
   3   2  -1   71.99    5.40 
  -3   2   1   62.19    4.20 
   3   2  -1   66.09    4.10 
   3   2  -1   53.49    8.10 
  -3   2   1   63.79    5.00 
  -3   2   1   60.59    6.40 
   3   2  -1   77.89    9.90 
  -3   2   1   56.39    7.50 
   3   2  -1   63.69    4.10 
  -3   2   1   54.69    8.00 
  -3   2   1   59.99    4.80 
   3   2  -1   64.39    7.10 
  -3   2   1   63.39    5.30 
  -3   2   1   65.09    5.00 
   3   2  -1   73.29    8.40 
   3   2  -1   63.29    4.90 
  -3   2   1   79.79    7.30 
   3   2  -1   73.59    7.60 
  -3   2   1   76.99    9.30 
   3   2  -1   63.19    4.60 
   3   2  -1   60.89    3.80 
  -3   2   1   68.39    4.00 
  -3   2   1   74.29    9.00 
   3   2  -1   65.99    4.70 
  -3   2   1   62.09    7.70 
   3   2  -1   71.59    4.30 
  -3   2   1   73.59    6.10 
  -3   2   1   69.19    5.70 
  -3   2   1   70.09    6.50 
   2  -2  -1    4.90    2.30 
  -2  -2   1    3.30    2.90 
  -2  -2   1    3.40    2.40 
  -2  -2   1    5.00    2.60 
  -2  -2   1    6.80    3.40 
  -2  -2   1    2.60    2.70 
   2  -2  -1    3.20    2.40 
  -2  -2   1    5.70    2.30 
  -2  -2   1   -1.30    1.70 
  -2  -2   1   12.20    4.00 
   2  -2  -1    5.50    6.60 
   2  -2  -1    7.30    3.50 
  -2  -2   1    2.00    2.30 
  -2  -2   1    2.80    2.80 
  -2  -2   1    2.00    2.50 
  -2  -2   1    6.50    3.00 
  -2  -2   1    3.10    2.40 
  -2  -2   1    1.90    2.90 
   2  -2  -1    1.30    1.90 
  -2  -2   1    2.40    1.90 
   2  -2  -1    2.40    2.20 
  -2  -2   1    2.20   10.30 
   2  -2  -1    2.70    2.00 
  -2  -2   1    9.00    2.90 
   2  -2  -1    3.70    2.20 
   2  -2  -1    5.70    3.10 
   2  -2  -1    6.00    2.00 
   2  -2  -1    5.50    2.10 
   2  -2  -1    2.00    2.50 
   2  -2  -1    9.10    2.10 
  -2  -2   1    4.90    3.20 
  -2  -2   1    5.30    3.20 
  -2  -2   1    6.10    2.10 
   2  -2  -1    4.00    1.00 
   2  -2  -1    2.30    2.20 
   2  -2  -1    8.00    3.50 
   2  -2  -1   -0.70    1.80 
  -2  -2   1    2.90    1.70 
   2  -2  -1    3.40    1.80 
   2  -2  -1    2.70    2.70 
  -2  -2   1    8.20    2.80 
   2  -2  -1    2.20    1.90 
  -2  -2   1    5.20    2.70 
  -2  -2   1    3.50    2.80 
  -2  -2   1    6.00    3.20 
  -2  -2   1    6.40    2.50 
   2  -2  -1    2.30    2.70 
   2  -2  -1    3.70    2.70 
  -2   2   1    3.10    1.70 
  -2   2   1    3.40    2.50 
   2   2  -1    6.80    2.30 
   2   2  -1    4.50    3.00 
   2   2  -1    3.30    2.30 
  -2   2   1    6.10    3.30 
  -2   2   1    3.20    1.90 
   2   2  -1    6.00    2.50 
   2   2  -1    3.10    2.80 
  -2   2   1    1.90    2.70 
  -2   2   1    2.30    2.00 
  -2   2   1    4.70    3.30 
  -2   2   1    2.50    1.40 
  -2   2   1    2.80    2.40 
   2   2  -1    3.40    2.40 
  -2   2   1    5.70    2.10 
   2   2  -1    2.70    2.30 
  -2   2   1    1.80    2.30 
  -2   2   1    4.80    2.60 
   2   2  -1    0.60    2.80 
  -2   2   1    2.30    2.10 
  -2   2   1   -1.10    2.30 
   2   2  -1    4.30    2.80 
   2   2  -1    1.60    2.10 
  -2   2   1    3.30    2.10 
  -2   2   1    6.20    2.80 
  -2   2   1    2.10    2.60 
   2   2  -1    6.20    2.70 
  -2   2   1    5.40    2.20 
  -2   2   1    2.40    2.00 
   2   2  -1    1.20    1.80 
  -2   2   1    3.10    2.80 
   2   2  -1    5.00    2.00 
   2   2  -1    6.80    2.90 
  -2   2   1    6.10    3.00 
  -2   2   1    1.60    2.00 
  -2   2   1    5.90    2.70 
   2   2  -1    2.70    2.60 
   2   2  -1    6.00    3.10 
  -2   2   1    4.40    1.20 
  -2   2   1    2.20    1.40 
  -2   2   1    2.20    2.80 
  -1  -2   1    9.30    3.30 
  -1  -2   1    9.00    3.20 
  -1  -2   1    7.90    2.90 
  -1  -2   1    2.10    2.40 
  -1  -2   1   10.60    3.10 
  -1  -2   1   10.20    3.40 
   1  -2  -1    7.50    1.90 
   1  -2  -1   10.40    3.00 
   1  -2  -1    6.60    3.10 
   1  -2  -1    4.60    2.70 
  -1  -2   1    9.00    3.00 
   1  -2  -1    5.00    1.50 
  -1  -2   1    2.80    2.60 
  -1  -2   1   12.70    3.60 
   1  -2  -1    2.70    7.00 
  -1  -2   1    8.10    2.80 
   1  -2  -1    5.30    2.70 
  -1  -2   1    5.50    2.70 
   1  -2  -1    5.20    1.50 
   1  -2  -1    5.70    2.30 
  -1  -2   1    1.30    2.20 
   1  -2  -1    3.60    1.80 
  -1  -2   1   16.80    9.60 
   1  -2  -1    2.30    2.30 
   1  -2  -1    2.30    2.40 
   1  -2  -1    2.80    1.90 
  -1  -2   1    6.90    3.60 
   1  -2  -1    4.70    1.70 
   1  -2  -1    5.70    2.70 
   1  -2  -1    5.10    1.50 
  -1  -2   1    9.20    3.20 
   1  -2  -1    6.60    2.60 
   1  -2  -1    3.40    2.10 
   1  -2  -1    8.90    2.50 
   1  -2  -1    5.00    2.50 
  -1  -2   1   11.20    3.60 
  -1  -2   1    4.40    2.60 
   1  -2  -1    5.80    2.30 
   1  -2  -1    3.20    1.60 
  -1  -2   1    6.80    2.60 
   1  -2  -1    6.50    2.70 
   1  -2  -1    5.70    2.70 
  -1  -2   1    7.90    3.30 
   1  -2  -1    5.40    1.70 
  -1  -2   1    9.50    3.10 
   1  -2  -1    5.20    2.20 
   1  -2  -1    7.00    2.70 
   1  -2  -1   10.20    2.50 
   1  -2  -1    2.30    1.80 
   1  -2  -1    6.00    1.90 
   1   2  -1   12.00    3.50 
  -1   2   1    4.20    1.90 
   1   2  -1    6.60    3.00 
  -1   2   1    2.80    1.90 
   1   2  -1    5.10    3.20 
   1   2  -1   10.00    3.20 
   1   2  -1    9.10    3.00 
  -1   2   1    3.60    2.40 
   1   2  -1    8.00    3.40 
   1   2  -1    9.80    2.90 
  -1   2   1   10.90    3.00 
   1   2  -1    7.90    3.00 
  -1   2   1    3.20    1.60 
  -1   2   1    3.70    2.30 
  -1   2   1    5.60    2.50 
   1   2  -1    6.50    3.20 
  -1   2   1    8.90    2.80 
  -1   2   1    4.90    2.60 
   1   2  -1    8.20    2.70 
  -1   2   1    0.90    2.60 
  -1   2   1    3.30    2.40 
  -1   2   1    6.20    2.60 
  -1   2   1    6.00    2.40 
  -1   2   1    7.40    2.70 
   1   2  -1    7.70    3.40 
  -1   2   1    5.50    2.90 
  -1   2   1    7.10    1.80 
   1   2  -1    6.70    2.70 
   1   2  -1    4.80    2.40 
   1   2  -1   12.30    3.80 
  -1   2   1    4.30    1.80 
   1   2  -1   11.70    3.50 
  -1   2   1    3.20    2.20 
  -1   2   1    8.20    2.40 
   1   2  -1    3.20    2.60 
  -1   2   1    6.70    2.70 
  -1   2   1    6.50    2.90 
  -1   2   1    1.90    1.60 
  -1   2   1   -1.10    9.10 
   1   2  -1   11.80    3.80 
  -1   2   1    5.50    2.10 
   1   2  -1    5.10    2.40 
   1   2  -1    9.00    2.90 
  -1   2   1    7.80    1.70 
  -1   2   1    5.60    2.20 
   1   2  -1    9.70    3.30 
  -1   2   1    5.50    2.40 
   1   2  -1   10.80    3.20 
  -1   2   1    2.80    1.40 
   1   2  -1   10.10    3.30 
   0  -2  -1   76.19    6.60 
   0  -2   1   75.39    5.50 
   0  -2  -1   74.39    5.20 
   0  -2  -1   68.59    6.10 
   0  -2  -1   71.09    6.00 
   0  -2  -1   83.69    8.70 
   0  -2   1   53.69    6.10 
   0  -2   1   57.59    6.90 
   0  -2  -1   66.79    7.50 
   0  -2   1   72.79    6.80 
   0  -2   1   76.59    7.80 
   0  -2  -1   72.39    5.00 
   0  -2   1   72.19    5.60 
   0  -2  -1   60.99    6.30 
   0  -2   1   88.79    5.70 
   0  -2  -1   71.49    7.50 
   0  -2  -1   74.69    5.90 
   0  -2  -1   76.09    9.30 
   0  -2  -1   61.49    6.30 
   0  -2   1   67.19    7.60 
   0  -2  -1   73.79    5.80 
   0  -2   1   65.99    8.70 
   0  -2   1   44.80    5.90 
   0  -2   1   73.89    8.50 
   0  -2  -1   67.19    4.90 
   0  -2   1   62.59    5.40 
   0  -2   1   71.89    7.80 
   0  -2   1   71.49    5.70 
   0  -2   1   60.69    7.80 
   0  -2   1   49.30    6.20 
   0  -2  -1   72.79    6.00 
   0  -2  -1   65.79    5.50 
   0  -2  -1   57.59    9.30 
   0  -2  -1   72.69    6.00 
   0  -2  -1   70.39    7.70 
   0  -2   1   58.99   10.10 
   0  -2   1   65.99    7.00 
   0  -2  -1   60.69    6.30 
   0  -2  -1   64.39    6.50 
   0  -2  -1   72.09    5.20 
   0  -2  -1   64.19    6.40 
   0  -2  -1   60.29    6.40 
   0  -2  -1   70.79    5.60 
   0  -2   1   82.79    6.00 
   0  -2   1   62.99    7.90 
   0  -2  -1   59.19    5.20 
   0  -2   1   75.09    8.20 
   0  -2   1   64.89    6.90 
   0  -2   1   73.09   16.00 
   0  -2   1   92.89    9.50 
   0  -2  -1   75.89    6.20 
   0  -2   1   71.49    5.60 
   0  -2  -1   73.09    5.30 
   0  -2   1   64.69    6.90 
   0  -2  -1   72.49    5.60 
   0  -2  -1   62.89    6.70 
   0  -2   1   66.99    7.10 
   0   2   1   69.29    6.20 
   0   2  -1   64.99    5.20 
   0   2   1   74.89    7.70 
   0   2  -1   64.39    6.70 
   0   2  -1   62.39    7.60 
   0   2   1   64.29    6.60 
   0   2   1   74.69    5.80 
   0   2  -1   75.59    7.60 
   0   2   1   79.39    5.90 
   0   2  -1   63.79    5.10 
   0   2  -1   71.59    7.70 
   0   2   1   54.99    5.30 
   0   2   1   69.39    7.80 
   0   2   1   70.59    5.20 
   0   2  -1   63.79   10.70 
   0   2  -1   94.89    6.40 
   0   2  -1   61.69    6.00 
   0   2   1   59.29    6.00 
   0   2  -1   74.69    7.80 
   0   2  -1   59.09    6.60 
   0   2   1   51.39    5.50 
   0   2   1   77.19    5.90 
   0   2  -1   68.49    7.00 
   0   2  -1   60.39    8.20 
   0   2  -1   61.79    6.80 
   0   2   1   72.59    6.00 
   0   2   1   75.09    6.10 
   0   2   1   64.69    5.00 
   0   2   1   66.29    5.60 
   0   2  -1   49.80    5.90 
   0   2  -1   96.49   19.40 
   0   2   1   69.29    6.90 
   0   2  -1   73.09    8.70 
   0   2   1   57.59    6.00 
   0   2  -1   69.99    8.50 
   0   2  -1   56.39    6.30 
   0   2   1   71.89    5.80 
   0   2   1   68.09    5.20 
   0   2  -1   88.99    7.50 
   0   2   1   76.09    8.30 
   0   2  -1   84.19    5.70 
   0   2   1   55.99    9.80 
   0   2   1   66.79    7.70 
   0   2   1   58.89    6.20 
   0   2   1   76.39    6.50 
   0   2  -1   67.39    6.50 
   0   2  -1   56.59    6.60 
   0   2   1   52.09    5.00 
  -1  -2  -1 1132.49   37.30 
   1  -2   1 1087.49   55.09 
  -1  -2  -1 1153.18   36.50 
   1  -2   1 1081.39   37.70 
  -1  -2  -1 1148.79   37.30 
  -1  -2  -1 1162.28   36.80 
   1  -2   1 1148.19   34.00 
  -1  -2  -1 1178.78   36.60 
  -1  -2  -1 1083.99   37.50 
   1  -2   1 1084.09   32.70 
  -1  -2  -1 1109.09   35.90 
   1  -2   1 1091.99   33.30 
  -1  -2  -1 1183.58   37.90 
   1  -2   1  991.40   36.70 
   1  -2   1 1139.69   38.40 
  -1  -2  -1 1175.58   37.00 
  -1  -2  -1 1137.49   36.50 
  -1  -2  -1 1127.69   35.50 
  -1  -2  -1 1107.59   37.20 
   1  -2   1 1093.09   38.60 
   1  -2   1 1135.69   35.70 
  -1  -2  -1 1119.99   35.70 
   1  -2   1 1161.08   35.40 
   1  -2   1 1103.99   35.40 
   1  -2   1 1122.09   37.70 
  -1  -2  -1 1144.29   37.10 
  -1  -2  -1 1116.49   36.60 
   1  -2   1 1125.29   32.70 
   1  -2   1 1190.58   33.20 
   1  -2   1 1125.69   32.30 
   1  -2   1 1200.88   38.90 
   1  -2   1 1155.68   38.40 
   1  -2   1 1104.39   33.70 
   1  -2   1 1159.98   37.00 
  -1  -2  -1 1127.89   36.40 
   1  -2   1 1166.38   34.80 
  -1  -2  -1 1115.49   33.20 
  -1  -2  -1 1149.29   37.30 
   1  -2   1 1159.58   32.50 
   1  -2   1 1111.19   36.10 
   1  -2   1 1172.98   38.40 
   1  -2   1 1027.00   37.70 
  -1  -2  -1 1136.19   35.10 
  -1  -2  -1 1150.08   36.50 
   1  -2   1 1118.09   33.40 
  -1  -2  -1 1110.99   34.90 
  -1  -2  -1 1118.79   37.60 
  -1  -2  -1 1106.99   37.00 
   1  -2   1 1125.49   35.90 
  -1  -2  -1 1162.38   38.30 
  -1  -2  -1 1098.19   36.60 
   1  -2   1 1072.99   32.00 
   1  -2   1 1133.49   33.20 
  -1  -2  -1 1231.88   39.60 
   1   2   1 1130.59   37.50 
   1   2   1 1112.99   38.10 
   1   2   1 1145.69   34.90 
  -1   2  -1 1159.88   36.40 
  -1   2  -1 1116.59   38.50 
  -1   2  -1 1120.39   32.70 
  -1   2  -1 1199.28   39.70 
  -1   2  -1 1107.09   33.20 
   1   2   1 1148.29   37.10 
  -1   2  -1 1118.09   34.00 
   1   2   1 1079.19   36.40 
   1   2   1 1124.59   35.50 
   1   2   1 1043.50   35.70 
  -1   2  -1 1089.79   37.20 
  -1   2  -1 1086.09   35.40 
   1   2   1 1110.19   35.50 
  -1   2  -1 1091.39   33.30 
   1   2   1 1123.49   36.00 
  -1   2  -1 1105.99   36.00 
   1   2   1 1196.98   38.70 
   1   2   1 1104.39   35.90 
   1   2   1 1140.29   37.00 
  -1   2  -1 1053.59   36.90 
   1   2   1 1133.69   33.00 
  -1   2  -1 1089.99   37.00 
  -1   2  -1 1081.29   39.10 
  -1   2  -1 1190.48   56.59 
   1   2   1 1178.68   36.90 
  -1   2  -1 1076.29   38.00 
   1   2   1 1205.78   36.80 
   1   2   1 1175.28   37.50 
   1   2   1 1099.69   37.30 
  -1   2  -1 1073.09   37.90 
  -1   2  -1 1113.19   37.80 
  -1   2  -1 1087.59   37.80 
  -1   2  -1 1131.09   33.90 
   1   2   1 1130.09   35.30 
   1   2   1 1141.29   36.70 
   1   2   1 1134.69   36.30 
   1   2   1 1161.68   36.60 
  -1   2  -1 1096.09   36.20 
  -1   2  -1 1130.79   38.00 
  -1   2  -1 1167.68   34.20 
   1   2   1 1125.79   37.60 
   1   2   1 1138.69   35.80 
  -1   2  -1 1078.79   32.40 
  -1   2  -1 1077.99   37.30 
  -1   2  -1 1123.59   37.50 
  -2  -2  -1  138.19    7.90 
   2  -2   1  126.59    7.00 
   2  -2   1  148.99   11.70 
  -2  -2  -1  129.29    6.70 
  -2  -2  -1  108.39   10.60 
  -2  -2  -1  121.89    7.60 
   2  -2   1  136.59    5.50 
  -2  -2  -1  133.59    8.00 
  -2  -2  -1  129.79    8.40 
   2  -2   1  101.29    7.50 
  -2  -2  -1  123.79    6.90 
  -2  -2  -1  132.19    8.30 
  -2  -2  -1  124.49    6.40 
   2  -2   1  118.89    6.10 
  -2  -2  -1  136.79    8.70 
   2  -2   1  106.79    9.20 
   2  -2   1  124.39    9.00 
   2  -2   1  125.19    9.00 
   2  -2   1  126.89    5.10 
  -2  -2  -1  119.29    8.60 
   2  -2   1  109.79    4.60 
  -2  -2  -1  127.39    9.50 
  -2  -2  -1  123.39   11.80 
   2  -2   1  118.89    8.00 
   2  -2   1  128.89    6.00 
  -2  -2  -1  117.29    8.30 
   2  -2   1  116.89    6.10 
   2  -2   1  111.59    9.00 
  -2  -2  -1  129.59    9.40 
   2  -2   1  131.09    9.40 
   2  -2   1  134.09    9.60 
   2  -2   1  127.39    6.80 
  -2  -2  -1  132.99    7.70 
  -2  -2  -1  116.89    8.10 
  -2  -2  -1  125.49    8.00 
   2  -2   1  117.59    6.50 
  -2  -2  -1  130.19   10.10 
  -2  -2  -1  135.79    8.10 
   2  -2   1  129.19    9.50 
  -2  -2  -1  135.69    9.30 
   2  -2   1  124.59    8.30 
  -2  -2  -1  132.79    7.30 
   2  -2   1  110.99    8.90 
  -2  -2  -1  134.59    9.60 
  -2   2  -1  127.49    6.90 
  -2   2  -1  118.59    5.70 
   2   2   1  119.19    6.20 
   2   2   1  121.79    7.90 
  -2   2  -1  125.09    9.10 
   2   2   1  123.49    7.30 
   2   2   1  123.39    7.90 
  -2   2  -1  137.09    8.40 
  -2   2  -1  121.19    9.70 
   2   2   1  137.19   10.40 
   2   2   1  117.39    8.80 
   2   2   1  138.49    7.80 
  -2   2  -1  112.09   17.00 
   2   2   1  121.29    7.60 
   2   2   1  117.59    9.90 
   2   2   1  118.39    7.70 
  -2   2  -1  122.09    8.50 
  -2   2  -1  125.79    9.10 
  -2   2  -1  122.59    5.10 
  -2   2  -1  115.79    7.00 
   2   2   1  126.49    7.60 
  -2   2  -1  129.99    9.80 
   2   2   1  121.09    9.60 
  -2   2  -1  120.99    9.60 
  -2   2  -1  124.09    9.10 
  -2   2  -1  124.59    6.50 
  -2   2  -1  128.19    6.30 
   2   2   1  117.99    8.30 
  -2   2  -1  116.99    8.90 
   2   2   1  128.19    7.60 
  -2   2  -1  131.99    8.00 
   2   2   1  115.69    8.40 
  -2   2  -1  131.99    6.00 
  -2   2  -1  129.59    9.10 
  -2   2  -1  116.59    8.50 
  -2   2  -1  121.39    9.10 
  -2   2  -1  120.19   10.20 
   2   2   1  136.79    7.30 
   2   2   1  126.89    7.50 
  -2   2  -1  132.09    7.80 
  -2   2  -1  123.19    9.10 
   2   2   1  127.09    6.70 
   3  -2   1  294.17   16.00 
  -3  -2  -1  316.77   14.30 
  -3  -2  -1  309.07   13.80 
  -3  -2  -1  312.97   17.40 
  -3  -2  -1  320.17   17.90 
  -3  -2  -1  284.07   10.50 
  -3  -2  -1  296.97   14.30 
  -3  -2  -1  323.87   18.50 
  -3  -2  -1  295.97   13.00 
   3  -2   1  287.27   14.70 
  -3  -2  -1  312.37   16.60 
  -3  -2  -1  299.17   10.20 
  -3  -2  -1  314.37   15.50 
   3  -2   1  313.57   14.20 
  -3  -2  -1  281.27   13.50 
  -3  -2  -1  286.37   17.70 
   3  -2   1  294.77   16.30 
  -3  -2  -1  311.67   15.60 
  -3  -2  -1  297.47   11.30 
   3  -2   1  296.27   10.60 
   3  -2   1  309.57   16.50 
   3  -2   1  284.77   11.70 
  -3  -2  -1  291.47   14.50 
   3  -2   1  290.87   15.90 
  -3  -2  -1  302.27   13.40 
  -3  -2  -1  299.57   14.70 
   3  -2   1  307.27   16.60 
   3  -2   1  271.67   13.50 
   3  -2   1  313.87   16.50 
   3  -2   1  296.77   10.20 
   3  -2   1  314.07   11.70 
   3  -2   1  307.87   15.40 
   3  -2   1  291.67   10.20 
   3   2   1  295.07   12.60 
  -3   2  -1  279.87   10.40 
  -3   2  -1  291.57   14.10 
  -3   2  -1  303.27   10.70 
  -3   2  -1  280.77    9.90 
   3   2   1  281.37   11.80 
  -3   2  -1  358.16   12.10 
  -3   2  -1  311.67   14.90 
  -3   2  -1  295.67    9.90 
   3   2   1  283.67   14.30 
   3   2   1  295.57   15.10 
  -3   2  -1  305.47   16.30 
  -3   2  -1  320.07   10.00 
  -3   2  -1  296.37   10.10 
   3   2   1  327.57   13.10 
  -3   2  -1  300.27   13.20 
  -3   2  -1  280.57   10.50 
   3   2   1  296.07   10.00 
  -3   2  -1  300.07   16.50 
   3   2   1  295.77   10.70 
   3   2   1  307.47   15.30 
  -3   2  -1  311.77    9.70 
  -3   2  -1  294.37   10.70 
  -3   2  -1  300.77    9.40 
  -3   2  -1  276.97   11.70 
  -3   2  -1  296.27    9.90 
  -3   2  -1  278.27    9.90 
  -3   2  -1  282.67   15.70 
  -3   2  -1  314.97   13.40 
  -3   2  -1  410.46   43.30 
   3   2   1  279.27   10.20 
   3   2   1  268.47   12.80 
  -3   2  -1  294.17   14.50 
  -3   2  -1  279.37   10.90 
  -3   2  -1  296.07   12.40 
   3   2   1  294.87   17.00 
   3   2   1  296.07   16.60 
  -3   2  -1  280.07   16.10 
  -3   2  -1  290.07   11.40 
   3   2   1  284.27   14.20 
  -3   2  -1  300.97   17.20 
   3   2   1  316.27   14.60 
   3   2   1  297.77   10.50 
   3   2   1  280.07   11.80 
   3   2   1  299.47   17.50 
  -4  -2  -1  413.66   23.50 
  -4  -2  -1  435.16   24.00 
  -4  -2  -1  462.15   20.50 
   4  -2   1  440.66   15.80 
   4  -2   1  440.46   18.10 
  -4  -2  -1  425.06   17.50 
   4  -2   1  420.46   16.10 
   4  -2   1  411.86   15.70 
   4  -2   1  462.45   22.10 
   4  -2   1  422.86   19.50 
  -4  -2  -1  409.86   21.40 
  -4  -2  -1  441.26   19.90 
   4  -2   1  440.56   20.50 
   4  -2   1  428.56   21.30 
  -4  -2  -1  482.45   24.10 
   4  -2   1  456.85   18.50 
   4  -2   1  411.56   20.60 
   4  -2   1  462.85   21.60 
   4  -2   1  438.96   21.70 
   4  -2   1  432.86   13.90 
   4  -2   1  415.76   21.60 
  -4  -2  -1  428.16   16.80 
  -4  -2  -1  444.56   17.60 
  -4  -2  -1  420.66   17.60 
   4  -2   1  430.56   14.90 
  -4  -2  -1  410.36   19.90 
  -4   2  -1  429.56   21.30 
  -4   2  -1  423.46   15.00 
   4   2   1  402.46   22.20 
  -4   2  -1  423.46   15.80 
   4   2   1  415.16   20.00 
  -4   2  -1  441.46   16.10 
  -4   2  -1  409.46   18.50 
   4   2   1  425.26   19.70 
   4   2   1  461.85   23.00 
  -4   2  -1  433.16   17.30 
  -4   2  -1  436.26   15.20 
   4   2   1  431.06   19.80 
  -4   2  -1  466.15   21.50 
  -4   2  -1  424.16   15.30 
  -4   2  -1  465.95   18.00 
  -4   2  -1  444.96   16.90 
  -4   2  -1  434.86   18.70 
   4   2   1  430.06   15.90 
  -4   2  -1  422.96   14.80 
  -4   2  -1  423.36   18.40 
  -4   2  -1  436.56   15.60 
  -4   2  -1  437.76   22.40 
  -4   2  -1  425.96   15.70 
  -4   2  -1  418.16   15.70 
  -4   2  -1  440.36   16.30 
  -4   2  -1  437.66   22.20 
  -4   2  -1  417.56   14.70 
  -4   2  -1  423.56   15.60 
  -4   2  -1  427.36   15.90 
  -4   2  -1  433.16   15.30 
  -4   2  -1  481.65   16.40 
   4   2   1  475.25   17.80 
  -4   2  -1  412.76   20.70 
   4   2   1  421.86   15.40 
   4   2   1  408.06   19.60 
  -5  -2  -1  439.36   26.50 
  -5  -2  -1  442.56   21.30 
  -5  -2  -1  418.06   17.50 
   5  -2   1  434.76   16.60 
  -5  -2  -1  429.66   25.00 
  -5  -2  -1  434.26   21.30 
  -5  -2  -1  461.45   25.70 
   5  -2   1  438.36   23.10 
   5  -2   1  460.05   19.20 
   5  -2   1  440.46   23.60 
   5  -2   1  404.46   22.90 
   5  -2   1  409.06   22.30 
  -5  -2  -1  420.06   21.70 
   5  -2   1  453.15   17.50 
   5  -2   1  447.46   22.10 
  -5  -2  -1  456.95   23.50 
  -5  -2  -1  423.16   17.80 
  -5  -2  -1  419.06   16.50 
   5  -2   1  447.46   22.20 
   5  -2   1  454.05   20.30 
  -5   2  -1  422.56   22.80 
  -5   2  -1  453.45   17.70 
   5   2   1  437.16   21.20 
  -5   2  -1  423.46   17.90 
  -5   2  -1  458.85   18.90 
  -5   2  -1  439.06   17.00 
  -5   2  -1  430.86   16.90 
   5   2   1  414.86   20.90 
  -5   2  -1  430.66   24.80 
  -5   2  -1  424.16   16.60 
   5   2   1  449.26   24.20 
   5   2   1  442.96   23.40 
  -5   2  -1  420.26   17.20 
  -5   2  -1  459.25   18.90 
  -5   2  -1  425.66   16.00 
   5   2   1  418.06   15.00 
  -5   2  -1  436.86   17.10 
  -5   2  -1  423.76   17.00 
  -5   2  -1  439.46   17.80 
   5   2   1  439.56   14.80 
   5   2   1  430.46   20.50 
  -5   2  -1  378.66   15.60 
  -5   2  -1  447.76   21.80 
  -5   2  -1  446.96   19.30 
  -5   2  -1  437.46   17.40 
  -5   2  -1  437.56   22.20 
  -5   2  -1  434.36   16.50 
   5   2   1  430.86   17.70 
  -5   2  -1  449.46   17.20 
  -5   2  -1  454.45   23.50 
   5   2   1  374.26   22.60 
  -5   2  -1  449.46   16.90 
  -5   2  -1  450.95   16.90 
  -5   2  -1  442.66   19.40 
   6  -2   1  738.23   34.60 
  -6  -2  -1  712.23   23.90 
   6  -2   1  755.22   26.30 
  -6  -2  -1  701.43   31.40 
  -6  -2  -1  697.23   37.70 
  -6  -2  -1  698.03   32.60 
   6  -2   1  733.53   34.90 
   6  -2   1  758.52   28.00 
   6  -2   1  740.63   27.10 
  -6  -2  -1  697.23   22.40 
   6  -2   1  756.62   33.20 
   6  -2   1  725.23   28.90 
  -6  -2  -1  704.53   30.80 
  -6  -2  -1  697.93   36.60 
  -6  -2  -1  691.23   33.50 
   6  -2   1  689.83   33.10 
  -6  -2  -1  676.63   28.00 
  -6  -2  -1  603.74   33.80 
  -6  -2  -1  721.83   27.70 
   6  -2   1  703.83   30.90 
  -6   2  -1  710.03   26.20 
   6   2   1  723.13   34.40 
  -6   2  -1  757.42   26.20 
  -6   2  -1  786.92   29.90 
   6   2   1  719.53   30.00 
  -6   2  -1  707.93   33.50 
  -6   2  -1  689.33   27.40 
  -6   2  -1  709.73   25.60 
  -6   2  -1  715.13   30.70 
  -6   2  -1  720.73   23.70 
  -6   2  -1  710.93   29.10 
  -6   2  -1  694.93   36.00 
  -6   2  -1  731.73   28.70 
  -6   2  -1  777.32   26.60 
  -6   2  -1  674.43   27.90 
  -6   2  -1  718.53   31.90 
  -6   2  -1  743.43   26.90 
  -6   2  -1  739.13   26.20 
   6   2   1  716.33   31.50 
  -6   2  -1  677.23   25.70 
   6   2   1  752.32   26.50 
   6   2   1  682.03   34.50 
  -6   2  -1  755.62   31.80 
   6   2   1  735.23   34.40 
  -6   2  -1  728.03   27.70 
  -6   2  -1  709.73   32.80 
  -6   2  -1  690.73   25.90 
   6   2   1  727.03   31.00 
  -6   2  -1  723.73   28.40 
  -6   2  -1  749.73   28.30 
   7  -2   1  992.30   44.20 
   7  -2   1  863.21   41.20 
  -7  -2  -1  951.90   41.80 
   7  -2   1  907.91   43.00 
  -7  -2  -1  928.61   40.10 
  -7  -2  -1  952.90   46.60 
   7  -2   1  970.10   34.80 
  -7  -2  -1  976.80   48.00 
   7  -2   1  977.10   42.00 
  -7  -2  -1  969.60   45.00 
   7  -2   1  931.31   37.60 
  -7  -2  -1  885.21   41.50 
  -7  -2  -1  878.01   38.00 
   7  -2   1  968.20   34.00 
   7  -2   1  924.41   35.50 
  -7   2  -1  928.91   33.90 
  -7   2  -1  973.80   42.90 
  -7   2  -1  969.40   46.20 
  -7   2  -1  970.50   40.10 
   7   2   1  984.80   37.90 
  -7   2  -1  913.61   43.10 
  -7   2  -1  912.81   35.20 
   7   2   1  927.51   43.20 
  -7   2  -1  920.81   35.50 
   7   2   1  941.51   42.80 
   7   2   1  988.90   40.70 
   7   2   1  894.11   42.40 
   7   2   1  904.41   33.80 
  -7   2  -1  955.30   41.00 
  -7   2  -1 1006.50   40.50 
   7   2   1  973.90   38.90 
  -7   2  -1  925.91   35.00 
  -7   2  -1  943.51   37.50 
  -7   2  -1  902.51   32.50 
  -7   2  -1 1008.20   35.30 
  -8  -2  -1  263.27   18.90 
  -8  -2  -1  318.27   23.00 
  -8  -2  -1  280.77   25.50 
  -8  -2  -1  293.77   30.60 
  -8  -2  -1  276.07   20.80 
  -8  -2  -1  313.67   23.50 
   8  -2   1  261.17   22.50 
  -8  -2  -1  303.67   24.20 
   8  -2   1  356.76   23.90 
   8  -2   1  333.67   23.50 
   8   2   1  292.37   23.20 
   8   2   1  343.07   20.60 
  -8   2  -1  338.87   28.10 
  -8   2  -1  287.47   20.20 
  -8   2  -1  274.47   23.00 
  -8   2  -1  324.97   22.70 
   8   2   1  327.17   24.70 
   8   2   1  290.47   23.00 
  -8   2  -1  283.87   24.50 
   8   2   1  287.07   20.60 
  -8   2  -1  286.47   22.30 
  -9  -2  -1  861.71   43.50 
   9  -2   1  758.52   40.00 
   9  -2   1  719.83   40.00 
  -9  -2  -1  732.23   45.20 
   9  -2   1  691.73   41.10 
  -9  -2  -1  757.92   40.40 
  -9  -2  -1  672.33   43.50 
  -9  -2  -1  758.32   40.90 
  -9  -2  -1  803.82   39.10 
   9   2   1  725.83   34.80 
  -9   2  -1  713.63   39.80 
  -9   2  -1  765.82   44.50 
   9   2   1  722.23   37.60 
   9   2   1  761.12   40.40 
   9   2   1  714.73   40.50 
  -9   2  -1  812.72   37.40 
  -9   2  -1  750.92   39.50 
  -9   2  -1  753.52   42.10 
  -9   2  -1  747.63   46.60 
 -10  -2  -1  123.79   22.60 
 -10  -2  -1  160.98   20.80 
  10  -2   1  106.79   19.30 
  10  -2   1  119.49   19.00 
 -10  -2  -1  171.78   27.70 
 -10  -2  -1   97.69   18.40 
 -10   2  -1  148.39   26.00 
 -10   2  -1  126.19   18.70 
 -10   2  -1  139.59   22.20 
  10   2   1  153.18   22.20 
 -10   2  -1  158.48   22.10 
 -10   2  -1  117.09   21.80 
 -10  -3   1  210.88   30.50 
  10  -3  -1  187.48   25.80 
 -10  -3   1  260.37   33.30 
  10  -3  -1  207.38   26.60 
 -10  -3   1  193.68   27.70 
 -10  -3   1  238.28   26.20 
 -10  -3   1  192.78   26.40 
 -10  -3   1  240.18   27.90 
 -10   3   1  216.08   32.10 
 -10   3   1  244.58   29.30 
  10   3  -1  228.68   26.10 
 -10   3   1  229.08   26.50 
 -10   3   1  263.17   31.00 
 -10   3   1  217.98   30.00 
 -10   3   1  291.77   28.10 
  10   3  -1  289.57   32.60 
  10   3  -1  235.58   29.40 
  -9  -3   1  347.47   30.70 
  -9  -3   1  345.17   36.80 
   9  -3  -1  355.16   26.90 
  -9  -3   1  290.67   24.00 
  -9  -3   1  342.67   34.70 
   9  -3  -1  337.87   28.40 
  -9  -3   1  343.37   26.60 
   9  -3  -1  345.87   27.00 
  -9  -3   1  342.47   34.70 
  -9   3   1  322.07   28.70 
  -9   3   1  316.47   30.00 
   9   3  -1  367.26   34.90 
  -9   3   1  349.17   24.90 
   9   3  -1  293.77   23.70 
  -9   3   1  314.67   29.90 
  -9   3   1  304.67   26.00 
   9   3  -1  305.77   22.50 
  -9   3   1  307.67   26.40 
   9   3  -1  331.97   32.80 
  -8  -3   1  460.75   27.50 
   8  -3  -1  467.65   30.00 
  -8  -3   1  480.65   33.00 
  -8  -3   1  533.75   30.40 
   8  -3  -1  435.46   30.00 
   8  -3  -1  548.35   33.70 
  -8  -3   1  586.94   37.50 
   8  -3  -1  515.25   28.80 
  -8  -3   1  507.25   32.50 
  -8  -3   1  526.85   31.30 
  -8  -3   1  544.95   37.00 
   8  -3  -1  535.15   33.20 
  -8   3   1  501.65   30.50 
   8   3  -1  498.55   28.00 
   8   3  -1  502.95   32.90 
  -8   3   1  483.35   27.60 
   8   3  -1  499.85   29.60 
  -8   3   1  528.45   35.30 
   8   3  -1  444.16   31.00 
  -8   3   1  491.05   29.10 
  -8   3   1  469.05   31.50 
  -8   3   1  473.65   31.20 
  -8   3   1  507.05   26.90 
   7  -3  -1  395.06   19.50 
  -7  -3   1  420.26   24.20 
  -7  -3   1  418.46   30.60 
  -7  -3   1  359.46   38.30 
   7  -3  -1  368.86   20.00 
  -7  -3   1  403.46   24.50 
  -7  -3   1  436.46   26.30 
   7  -3  -1  405.36   27.20 
   7  -3  -1  402.86   27.00 
   7  -3  -1  402.26   26.30 
  -7  -3   1  376.96   27.80 
   7  -3  -1  420.56   26.00 
  -7  -3   1  415.56   29.50 
   7  -3  -1  389.76   24.30 
  -7  -3   1  388.26   26.70 
  -7   3   1  350.86   25.00 
   7   3  -1  404.06   23.80 
  -7   3   1  400.36   19.70 
  -7   3   1  389.46   24.40 
   7   3  -1  407.46   27.70 
  -7   3   1  413.76   29.20 
  -7   3   1  415.26   23.20 
  -7   3   1  389.16   22.30 
   7   3  -1  441.76   22.10 
   7   3  -1  396.76   24.40 
  -7   3   1  372.06   26.10 
   7   3  -1  346.07   26.20 
  -7   3   1  409.86   23.80 
   6  -3  -1 2009.10   59.69 
   6  -3  -1 1890.61   69.59 
   6  -3  -1 1984.50   61.69 
   6  -3  -1 1970.20   59.29 
  -6  -3   1 2030.80   69.39 
  -6  -3   1 1948.11   69.99 
   6  -3  -1 1820.42   70.39 
   6  -3  -1 1934.61   56.39 
   6  -3  -1 1920.51   72.09 
   6  -3  -1 1913.01   69.19 
  -6  -3   1 1966.60   77.49 
  -6  -3   1 1995.40   75.79 
  -6  -3   1 1875.91   71.19 
   6  -3  -1 1971.50   72.09 
   6  -3  -1 2016.70   65.19 
  -6  -3   1 1977.50   74.59 
  -6  -3   1 1984.80   61.09 
  -6  -3   1 1991.00   68.09 
  -6   3   1 1921.61   71.49 
  -6   3   1 1957.40   62.49 
   6   3  -1 1927.21   72.29 
  -6   3   1 2056.59   75.99 
  -6   3   1 1990.70   60.09 
   6   3  -1 1936.91   73.19 
  -6   3   1 1961.70   67.89 
   6   3  -1 2100.89   59.69 
   6   3  -1 1930.41   59.49 
  -6   3   1 1966.80   59.79 
  -6   3   1 1999.20   62.09 
  -6   3   1 1993.30   69.09 
  -6   3   1 1945.11   69.29 
   6   3  -1 1972.50   65.69 
   6   3  -1 1929.21   68.79 
  -6   3   1 2013.00   65.89 
   6   3  -1 1912.41   67.39 
  -6   3   1 2098.59   73.69 
  -6   3   1 1972.90   57.39 
  -6   3   1 1946.91   61.49 
  -5  -3   1 1327.77   75.69 
  -5  -3   1 1358.26   54.19 
  -5  -3   1 1426.56   50.19 
  -5  -3   1 1400.96   52.49 
   5  -3  -1 1252.97   50.99 
   5  -3  -1 1347.37   43.20 
   5  -3  -1 1296.97   43.70 
   5  -3  -1 1317.27   51.49 
   5  -3  -1 1315.17   43.00 
  -5  -3   1 1337.07   43.80 
   5  -3  -1 1446.46   51.49 
   5  -3  -1 1329.77   42.80 
  -5  -3   1 1346.37   56.19 
  -5  -3   1 1342.87   54.89 
   5  -3  -1 1349.47   42.40 
   5  -3  -1 1322.67   52.19 
   5  -3  -1 1361.06   44.80 
   5  -3  -1 1304.17   50.19 
  -5  -3   1 1416.86   49.80 
  -5  -3   1 1319.37   42.10 
   5  -3  -1 1261.87   51.39 
  -5  -3   1 1412.06   50.89 
   5  -3  -1 1383.86   48.20 
   5   3  -1 1328.77   47.70 
   5   3  -1 1339.57   39.10 
  -5   3   1 1335.57   50.59 
  -5   3   1 1321.87   52.29 
  -5   3   1 1339.87   50.29 
  -5   3   1 1293.47   44.90 
  -5   3   1 1309.47   42.90 
  -5   3   1 1359.06   47.10 
  -5   3   1 1360.26   43.90 
   5   3  -1 1335.87   43.00 
   5   3  -1 1277.27   40.50 
  -5   3   1 1302.57   51.69 
  -5   3   1 1378.56   39.70 
   5   3  -1 1421.56   53.39 
  -5   3   1 1367.06   42.10 
  -5   3   1 1321.37   45.40 
  -5   3   1 1374.86   39.30 
   5   3  -1 1348.67   40.70 
  -5   3   1 1316.07   49.70 
   5   3  -1 1428.86   50.59 
  -5   3   1 1334.17   41.70 
  -5   3   1 1309.67   40.90 
   5   3  -1 1356.66   43.70 
  -5   3   1 1238.88   53.29 
   5   3  -1 1397.26   49.50 
   5   3  -1 1408.46   54.39 
   4  -3  -1 1436.06   43.20 
  -4  -3   1 1299.67   43.40 
   4  -3  -1 1277.47   49.60 
   4  -3  -1 1383.46   41.70 
   4  -3  -1 1281.77   49.30 
  -4  -3   1 1409.76   50.69 
   4  -3  -1 1329.97   43.80 
  -4  -3   1 1361.46   40.20 
   4  -3  -1 1354.06   49.60 
   4  -3  -1 1383.36   44.10 
  -4  -3   1 1471.35   76.99 
  -4  -3   1 1367.86   48.20 
   4  -3  -1 1351.56   47.80 
  -4  -3   1 1397.36   44.80 
   4  -3  -1 1322.57   43.50 
   4  -3  -1 1372.76   42.30 
  -4  -3   1 1377.76   54.19 
  -4  -3   1 1279.17   51.59 
   4  -3  -1 1343.67   48.50 
  -4  -3   1 1374.96   48.30 
   4  -3  -1 1338.67   44.30 
  -4  -3   1 1332.77   48.40 
  -4  -3   1 1326.17   52.29 
   4  -3  -1 1267.97   49.60 
  -4   3   1 1345.27   50.19 
  -4   3   1 1377.96   40.70 
   4   3  -1 1380.06   47.50 
  -4   3   1 1297.87   41.90 
  -4   3   1 1361.86   52.29 
  -4   3   1 1368.26   45.60 
   4   3  -1 1360.46   39.90 
   4   3  -1 1322.47   44.20 
   4   3  -1 1429.76   52.29 
  -4   3   1 1341.57   46.00 
   4   3  -1 1317.87   39.90 
   4   3  -1 1346.37   41.00 
   4   3  -1 1307.07   39.10 
  -4   3   1 1367.36   43.60 
  -4   3   1 1322.47   48.90 
   4   3  -1 1290.67   43.20 
  -4   3   1 1376.86   38.10 
  -4   3   1 1351.86   43.10 
   4   3  -1 1332.27   47.90 
  -4   3   1 1344.17   40.00 
   4   3  -1 1303.27   50.39 
   4   3  -1 1360.76   42.20 
  -4   3   1 1284.67   45.00 
  -4   3   1 1323.97   50.39 
  -4   3   1 1349.86   39.70 
   4   3  -1 1309.67   40.60 
  -4   3   1 1302.67   42.30 
   4   3  -1 1347.57   40.60 
  -4   3   1 1334.87   48.90 
   4   3  -1 1315.27   48.40 
  -4   3   1 1399.46   50.59 
   4   3  -1 1385.66   42.30 
   4   3  -1 1329.87   39.00 
  -3  -3   1 1829.72   53.39 
   3  -3  -1 1815.52   53.69 
   3  -3  -1 1762.82   55.89 
   3  -3  -1 1799.02   59.49 
  -3  -3   1 1702.43   52.59 
   3  -3  -1 1663.33   60.69 
   3  -3  -1 1718.73   54.89 
   3  -3  -1 1472.95   52.49 
   3  -3  -1 1760.62   50.89 
  -3  -3   1 1695.13   62.19 
  -3  -3   1 1681.63   57.99 
  -3  -3   1 1696.33   55.49 
  -3  -3   1 1757.12   59.59 
  -3  -3   1 1811.02   57.09 
   3  -3  -1 1734.63   58.29 
  -3  -3   1 1738.23   61.29 
   3  -3  -1 1776.72   59.49 
   3  -3  -1 1742.33   60.09 
  -3  -3   1 1788.62   62.39 
   3  -3  -1 1714.83   58.59 
  -3  -3   1 1718.33   55.99 
   3  -3  -1 1753.92   51.59 
   3  -3  -1 1695.63   84.39 
   3  -3  -1 1779.22   51.39 
   3  -3  -1 1689.03   59.29 
  -3  -3   1 1791.42   55.49 
  -3  -3   1 1719.53   57.69 
   3  -3  -1 1856.81   56.09 
   3  -3  -1 1821.82   50.39 
   3  -3  -1 1741.53   52.99 
   3  -3  -1 1737.33   54.29 
  -3  -3   1 1781.42   58.49 
   3   3  -1 1815.02   53.29 
  -3   3   1 1719.33   59.49 
   3   3  -1 1783.32   58.49 
  -3   3   1 1770.32   51.79 
  -3   3   1 1767.52   57.19 
  -3   3   1 1774.82   60.59 
  -3   3   1 1742.43   56.39 
   3   3  -1 1707.33   55.79 
  -3   3   1 1775.42   52.59 
  -3   3   1 1703.03   58.99 
  -3   3   1 1721.83   59.69 
  -3   3   1 1697.43   56.09 
   3   3  -1 1793.02   53.39 
   3   3  -1 1726.23   52.39 
   3   3  -1 1770.52   53.29 
  -3   3   1 1719.23   50.19 
  -3   3   1 1780.92   56.69 
   3   3  -1 1742.43   52.99 
   3   3  -1 1770.92   54.89 
  -3   3   1 1703.63   53.79 
   3   3  -1 1763.82   56.99 
   3   3  -1 1843.82   60.59 
  -3   3   1 1723.33   53.39 
   3   3  -1 1825.12   58.89 
   3   3  -1 1749.72   60.69 
   3   3  -1 1829.92   54.49 
  -3   3   1 1748.93   50.99 
   3   3  -1 1693.83   57.59 
   3   3  -1 1803.82   60.59 
   3   3  -1 1679.93   50.39 
  -3   3   1 1811.82   48.70 
   3   3  -1 1767.42   53.79 
   3   3  -1 1725.73   54.99 
   3   3  -1 1738.13   57.49 
  -3   3   1 1790.22   58.89 
  -3   3   1 1729.03   53.59 
   2  -3  -1  822.92   29.50 
  -2  -3   1  943.31   34.40 
   2  -3  -1  892.11   26.50 
   2  -3  -1  838.32   28.90 
   2  -3  -1  854.91   26.00 
   2  -3  -1  894.61   29.90 
   2  -3  -1  842.92   32.60 
   2  -3  -1  860.31   33.70 
  -2  -3   1  936.41   37.10 
  -2  -3   1  885.41   30.60 
  -2  -3   1  898.51   35.20 
   2  -3  -1  857.61   55.69 
  -2  -3   1  891.11   35.70 
   2  -3  -1  882.71   28.10 
   2  -3  -1  885.71   27.70 
   2  -3  -1  877.61   27.00 
   2  -3  -1  899.61   25.50 
   2  -3  -1  873.11   29.10 
   2  -3  -1  941.71   34.20 
  -2  -3   1  883.21   33.90 
   2  -3  -1  837.22   26.30 
   2  -3  -1  871.51   29.50 
   2  -3  -1  886.91   34.30 
   2  -3  -1  863.41   34.10 
  -2  -3   1  859.71   33.00 
   2  -3  -1  823.72   30.70 
   2  -3  -1  802.92   33.30 
   2  -3  -1  890.31   35.60 
   2  -3  -1  852.51   30.00 
   2  -3  -1  885.91   30.60 
  -2  -3   1  807.02   31.60 
  -2  -3   1  898.81   31.00 
   2  -3  -1  852.61   28.30 
   2  -3  -1  886.61   25.90 
  -2  -3   1  806.72   32.10 
  -2  -3   1  881.21   32.20 
   2  -3  -1  852.11   33.90 
   2  -3  -1  863.01   31.30 
   2  -3  -1  858.71   34.90 
   2  -3  -1  855.01   32.30 
  -2  -3   1  921.31   55.09 
  -2  -3   1  881.71   32.60 
  -2  -3   1  857.51   33.30 
   2   3  -1  802.92   34.20 
  -2   3   1  943.11   35.80 
   2   3  -1  872.61   30.30 
  -2   3   1  880.81   34.10 
  -2   3   1  846.52   31.90 
   2   3  -1  895.71   31.70 
  -2   3   1  843.92   33.50 
   2   3  -1  814.32   33.10 
   2   3  -1  874.31   34.00 
  -2   3   1  834.62   29.10 
  -2   3   1  850.71   34.00 
  -2   3   1  872.31   32.90 
   2   3  -1  865.71   32.60 
   2   3  -1  911.51   31.80 
  -2   3   1  853.81   29.00 
  -2   3   1  861.71   30.10 
  -2   3   1  851.91   30.20 
   2   3  -1  874.81   34.10 
  -2   3   1  860.01   26.20 
   2   3  -1  846.42   32.80 
   2   3  -1  920.01   35.00 
  -2   3   1  860.71   29.70 
  -2   3   1  830.92   26.50 
  -2   3   1  835.52   32.40 
  -2   3   1  891.11   32.40 
   2   3  -1  901.21   35.10 
   2   3  -1  930.11   34.20 
  -2   3   1  844.62   26.20 
   2   3  -1  925.31   32.60 
   2   3  -1  830.02   31.00 
   2   3  -1  909.11   32.90 
  -2   3   1  897.91   27.90 
   2   3  -1  890.41   30.80 
   2   3  -1  847.12   30.80 
   2   3  -1  843.02   32.70 
   1  -3  -1 2169.58   64.09 
  -1  -3   1 2224.58   69.49 
  -1  -3   1 2208.98   68.49 
  -1  -3   1 2177.28   70.19 
   1  -3  -1 2103.79   70.79 
  -1  -3   1 2115.89   69.59 
   1  -3  -1 2190.08   69.39 
   1  -3  -1 2157.98   64.09 
  -1  -3   1 2197.98   67.79 
   1  -3  -1 2245.68   64.19 
   1  -3  -1 2264.87   65.39 
   1  -3  -1 2175.88   64.79 
   1  -3  -1 2265.77   69.29 
   1  -3  -1 2202.38   65.99 
  -1  -3   1 2079.29   69.29 
  -1  -3   1 2201.68   69.39 
   1  -3  -1 2276.87   64.79 
   1  -3  -1 2100.59   70.69 
   1  -3  -1 2227.48   70.59 
   1  -3  -1 2321.67   67.69 
  -1  -3   1 2215.78   97.09 
  -1  -3   1 2318.47   70.99 
   1  -3  -1 2249.18   97.19 
   1  -3  -1 2285.57   68.09 
  -1  -3   1 2222.68   68.59 
   1  -3  -1 2288.57   67.39 
   1  -3  -1 2166.68   69.89 
  -1  -3   1 2209.38   71.59 
  -1  -3   1 2210.88   69.59 
   1  -3  -1 2273.67   67.59 
  -1  -3   1 2208.98   69.99 
   1  -3  -1 2240.08   67.99 
   1  -3  -1 2257.17   69.99 
  -1  -3   1 2216.38   68.29 
   1  -3  -1 2227.58   66.89 
  -1  -3   1 2262.47   69.29 
  -1  -3   1 2198.38   72.09 
   1  -3  -1 2234.78   65.59 
  -1  -3   1 2247.38   68.79 
   1  -3  -1 2235.18   67.89 
  -1  -3   1 2213.58   70.79 
   1  -3  -1 2219.78   69.59 
   1  -3  -1 2217.48   64.89 
   1  -3  -1 2330.17   72.39 
  -1  -3   1 2131.59   69.89 
   1  -3  -1 2196.88   70.89 
  -1  -3   1 2218.68   76.59 
  -1   3   1 2128.19   64.19 
   1   3  -1 2177.88   72.59 
  -1   3   1 2189.58   70.79 
  -1   3   1 2050.79   72.69 
   1   3  -1 2176.38   73.39 
  -1   3   1 2255.47   70.29 
  -1   3   1 2301.77   67.39 
  -1   3   1 2159.38   70.69 
  -1   3   1 2148.19   68.99 
   1   3  -1 2184.98   71.09 
   1   3  -1 2306.97   69.39 
   1   3  -1 2100.79   70.49 
   1   3  -1 2212.38   68.09 
  -1   3   1 2216.78   67.29 
  -1   3   1 2176.78   63.99 
   1   3  -1 2267.47   66.59 
  -1   3   1 2288.17   69.39 
   1   3  -1 2289.47   69.19 
  -1   3   1 2134.29   71.09 
   1   3  -1 2380.86   71.39 
   1   3  -1 2203.58   71.59 
  -1   3   1 2285.87   68.39 
   1   3  -1 2342.67   73.39 
   1   3  -1 2225.38   69.89 
   1   3  -1 2259.17   74.19 
  -1   3   1 2139.69   69.79 
   1   3  -1 2100.09   68.49 
   1   3  -1 2221.78   70.59 
  -1   3   1 2197.68   69.59 
  -1   3   1 2230.18   64.59 
   1   3  -1 2203.58   68.69 
  -1   3   1 2327.17   69.79 
  -1   3   1 2197.28   66.99 
   1   3  -1 2197.98   70.89 
  -1   3   1 2297.87   65.39 
   1   3  -1 2116.69   69.69 
  -1   3   1 2274.67   69.59 
  -1   3   1 2232.08   64.39 
  -1   3   1 2222.58   66.99 
   1   3  -1 2445.06   68.89 
   1   3  -1 2223.78   69.69 
   1   3  -1 2311.47   68.29 
   1   3  -1 2132.79   75.09 
  -1   3   1 2091.19   68.99 
  -1   3   1 2252.87   69.09 
   0  -3   1  748.43   27.90 
   0  -3   1  771.12   31.20 
   0  -3   1  753.92   26.80 
   0  -3  -1  800.62   29.70 
   0  -3  -1  783.52   31.30 
   0  -3  -1  705.73   26.60 
   0  -3   1  819.82   30.70 
   0  -3  -1  694.63   28.10 
   0  -3  -1  731.03   35.50 
   0  -3  -1  722.33   29.00 
   0  -3   1  787.32   29.10 
   0  -3  -1  768.02   26.80 
   0  -3   1  770.42   29.90 
   0  -3   1  782.92   27.50 
   0  -3   1  735.13   26.70 
   0  -3  -1  761.82   29.10 
   0  -3  -1  743.43   28.30 
   0  -3  -1  803.12   26.90 
   0  -3  -1  752.62   27.60 
   0  -3  -1  755.72   26.70 
   0  -3  -1  681.83   28.90 
   0  -3   1  738.73   27.30 
   0  -3  -1  762.62   26.80 
   0  -3  -1  771.02   29.00 
   0  -3   1  834.22   33.80 
   0  -3   1  767.32   28.10 
   0  -3   1  798.42   30.40 
   0  -3   1  721.33   29.00 
   0  -3   1  777.92   27.40 
   0  -3   1  756.52   29.70 
   0  -3   1  779.52   26.40 
   0  -3  -1  735.43   28.10 
   0  -3  -1  728.93   32.80 
   0  -3   1  756.22   30.90 
   0  -3  -1  745.93   28.60 
   0  -3   1  717.73   29.30 
   0  -3  -1  719.83   29.70 
   0  -3   1  660.43   30.00 
   0  -3   1  811.92   28.30 
   0  -3  -1  846.92   30.60 
   0  -3   1  750.62   29.60 
   0  -3   1  761.42   34.20 
   0  -3   1  724.93   30.50 
   0  -3  -1  740.83   26.20 
   0  -3  -1  742.53   30.70 
   0  -3   1  798.62   32.00 
   0  -3   1  818.02   38.00 
   0  -3   1  776.52   28.00 
   0  -3  -1  689.23   29.20 
   0  -3  -1  699.43   27.10 
   0  -3   1  805.02   51.99 
   0  -3  -1  748.93   27.50 
   0  -3  -1  776.82   28.60 
   0   3   1  764.12   29.60 
   0   3  -1  724.93   32.30 
   0   3   1  741.83   26.70 
   0   3  -1  769.02   31.10 
   0   3   1  678.83   30.10 
   0   3   1  742.93   27.40 
   0   3   1  798.92   27.20 
   0   3  -1  751.52   26.80 
   0   3  -1  777.52   29.70 
   0   3  -1  813.42   27.80 
   0   3  -1  782.32   27.70 
   0   3   1  732.73   26.40 
   0   3   1  752.72   28.00 
   0   3   1  735.13   26.90 
   0   3   1  734.43   37.00 
   0   3   1  774.32   29.00 
   0   3   1  770.32   26.50 
   0   3  -1  754.12   27.90 
   0   3  -1  793.72   31.30 
   0   3  -1  786.02   38.50 
   0   3  -1  815.62   30.30 
   0   3  -1  764.82   27.40 
   0   3  -1  747.33   29.30 
   0   3  -1  735.63   32.70 
   0   3   1  745.03   28.40 
   0   3  -1  727.03   26.80 
   0   3  -1  813.92   33.30 
   0   3  -1  731.83   31.10 
   0   3  -1  793.92   30.00 
   0   3  -1  739.93   30.50 
   0   3   1  714.63   29.80 
   0   3  -1  726.73   30.30 
   0   3  -1  793.92   28.30 
   0   3   1  708.53   30.40 
   0   3   1  761.12   32.30 
   0   3   1  801.42   29.80 
   0   3   1  725.13   31.30 
   0   3   1  738.73   28.50 
   0   3   1  760.92   30.60 
   0   3   1  809.32   29.20 
  -1  -3  -1 4853.91  142.19 
  -1  -3  -1 4814.32  142.09 
   1  -3   1 5091.89  147.39 
   1  -3   1 4928.91  144.29 
  -1  -3  -1 5003.40  142.99 
   1  -3   1 4814.62  141.99 
   1  -3   1 4621.34  143.49 
   1  -3   1 4924.71  145.29 
  -1  -3  -1 5036.00  142.39 
  -1  -3  -1 4923.91  140.29 
  -1  -3  -1 4986.30  142.99 
   1  -3   1 4939.71  137.09 
  -1  -3  -1 4907.91  143.19 
   1  -3   1 5084.39  141.49 
  -1  -3  -1 5037.10  141.69 
   1  -3   1 4947.00  136.59 
   1  -3   1 4978.40  146.09 
   1  -3   1 4777.92  175.98 
   1  -3   1 4981.00  137.89 
  -1  -3  -1 5109.09  150.68 
  -1  -3  -1 5139.09  143.09 
   1  -3   1 5076.49  137.39 
   1  -3   1 4863.11  138.89 
   1  -3   1 4901.41  138.99 
   1  -3   1 4908.91  142.89 
   1  -3   1 5160.58  147.09 
   1  -3   1 5089.79  139.79 
   1  -3   1 5033.80  143.19 
   1  -3   1 4775.42  146.49 
   1  -3   1 5016.00  141.49 
   1  -3   1 5024.20  138.19 
   1  -3   1 4784.52  141.49 
  -1  -3  -1 5003.30  144.19 
   1  -3   1 4829.22  144.29 
  -1  -3  -1 5018.60  145.59 
   1  -3   1 4849.51  137.69 
   1  -3   1 5047.90  140.79 
   1  -3   1 4803.82  145.49 
   1  -3   1 4948.50  138.39 
   1  -3   1 4932.71  150.98 
  -1  -3  -1 5126.69  141.19 
  -1  -3  -1 4741.53  142.99 
  -1  -3  -1 5186.78  144.19 
  -1  -3  -1 4873.31  143.09 
  -1  -3  -1 4809.42  140.39 
  -1  -3  -1 5064.89  144.79 
  -1  -3  -1 4933.51  144.19 
  -1  -3  -1 5026.20  143.09 
  -1  -3  -1 5123.59  142.49 
   1   3   1 4919.61  142.69 
  -1   3  -1 5253.97  149.99 
   1   3   1 5050.99  142.49 
   1   3   1 5192.28  140.99 
   1   3   1 5077.09  142.79 
   1   3   1 5102.99  140.69 
  -1   3  -1 4880.41  145.59 
   1   3   1 5155.88  142.09 
  -1   3  -1 4917.01  138.59 
   1   3   1 4708.53  144.59 
  -1   3  -1 4792.42  142.69 
   1   3   1 4898.91  141.69 
   1   3   1 4741.63  142.99 
   1   3   1 5053.79  143.49 
  -1   3  -1 4711.13  145.19 
  -1   3  -1 4962.10  142.09 
   1   3   1 5093.69  143.19 
  -1   3  -1 4666.13  142.89 
  -1   3  -1 4869.51  138.49 
   1   3   1 4839.22  144.69 
   1   3   1 5013.10  144.39 
  -1   3  -1 4978.80  143.49 
  -1   3  -1 4949.90  141.29 
  -1   3  -1 5008.00  142.69 
   1   3   1 4918.61  145.19 
  -1   3  -1 5073.89  138.89 
  -1   3  -1 5009.30  137.59 
  -1   3  -1 4876.61  136.99 
   1   3   1 5048.90  140.79 
  -1   3  -1 4879.51  145.89 
  -1   3  -1 4905.11  139.09 
   1   3   1 4943.01  144.09 
   1   3   1 4695.03  147.09 
   1   3   1 5030.70  137.99 
   1   3   1 4821.52  146.89 
  -1   3  -1 4847.61  153.28 
   1   3   1 5019.50  143.99 
   2  -3   1 2026.80   58.89 
  -2  -3  -1 2130.89   65.59 
   2  -3   1 2099.99   61.79 
   2  -3   1 2109.89   63.09 
  -2  -3  -1 2121.09   66.19 
   2  -3   1 2107.29   66.69 
  -2  -3  -1 2265.37   70.29 
   2  -3   1 2150.28   69.59 
   2  -3   1 2091.69   61.19 
   2  -3   1 2096.69   68.59 
  -2  -3  -1 2181.68   66.39 
  -2  -3  -1 2066.59   66.49 
   2  -3   1 2061.69   65.19 
  -2  -3  -1 2285.67   71.49 
   2  -3   1 2002.00   59.49 
  -2  -3  -1 2099.89   63.89 
   2  -3   1 2105.89   63.09 
  -2  -3  -1 2188.98   65.29 
   2  -3   1 2091.19   69.59 
   2  -3   1 2178.38   61.09 
  -2  -3  -1 2284.97   68.19 
   2  -3   1 2025.20   59.59 
  -2  -3  -1 2063.39   67.19 
   2  -3   1 2183.58   69.69 
   2  -3   1 2043.30   63.59 
   2  -3   1 2132.59   64.39 
   2  -3   1 2056.49   68.49 
   2  -3   1 2140.19   61.29 
  -2  -3  -1 2097.99   67.19 
  -2  -3  -1 2007.30   69.29 
   2  -3   1 2032.90   64.49 
   2  -3   1 2049.09   96.59 
  -2  -3  -1 2135.89   64.19 
   2  -3   1 2078.29   67.39 
  -2  -3  -1 2157.68   65.79 
   2  -3   1 2134.99   62.99 
  -2  -3  -1 2203.88   66.79 
   2  -3   1 2208.78   67.49 
   2   3   1 2128.69   65.59 
   2   3   1 2113.89   65.99 
   2   3   1 2129.79   60.29 
   2   3   1 2068.59   66.49 
  -2   3  -1 2039.80   61.39 
   2   3   1 2078.89   66.29 
  -2   3  -1 2082.19   69.49 
   2   3   1 2167.68   64.99 
   2   3   1 2150.78   68.79 
  -2   3  -1 2118.49   66.19 
   2   3   1 2259.77   69.09 
  -2   3  -1 2237.88   71.69 
   2   3   1 2033.00   63.19 
  -2   3  -1 2144.09   61.99 
   2   3   1 2176.68   66.99 
  -2   3  -1 2102.59   61.89 
  -2   3  -1 2262.17   68.39 
   2   3   1 2147.19   68.29 
   2   3   1 2107.79   66.19 
  -2   3  -1 2069.39   62.99 
  -2   3  -1 2098.79   69.09 
  -2   3  -1 2134.49   65.29 
   2   3   1 2205.78   64.59 
  -2   3  -1 2097.19   69.29 
   2   3   1 2123.89   68.69 
   2   3   1 2172.58   69.59 
  -2   3  -1 2211.28   63.89 
   2   3   1 2156.18   64.49 
   2   3   1 2114.89   66.89 
   2   3   1 2130.89   70.19 
   3  -3   1 1805.92   61.89 
   3  -3   1 1799.72   54.19 
  -3  -3  -1 1819.72   59.29 
   3  -3   1 1905.51   54.69 
   3  -3   1 1815.42   53.49 
  -3  -3  -1 1950.60   57.99 
   3  -3   1 1794.52   60.69 
   3  -3   1 1789.12   55.19 
  -3  -3  -1 1747.43   57.99 
  -3  -3  -1 1912.01   61.59 
   3  -3   1 1757.82   60.89 
   3  -3   1 1923.21   53.29 
   3  -3   1 1889.41   59.29 
  -3  -3  -1 1805.22   60.19 
   3  -3   1 1770.92   62.09 
  -3  -3  -1 1958.30   58.09 
  -3  -3  -1 1722.93   54.29 
  -3  -3  -1 1810.12   63.89 
  -3  -3  -1 1868.81   57.09 
   3  -3   1 1804.82   52.29 
  -3  -3  -1 1838.62   54.89 
   3  -3   1 1868.31   51.99 
   3  -3   1 1746.63   59.09 
   3  -3   1 1818.42   62.19 
  -3  -3  -1 1880.51   58.59 
  -3  -3  -1 1909.11   63.99 
  -3  -3  -1 1919.71   65.09 
   3  -3   1 1769.82   55.09 
   3   3   1 1721.13   58.99 
  -3   3  -1 1813.22   54.29 
   3   3   1 1771.52   54.99 
   3   3   1 1737.93   53.49 
  -3   3  -1 1847.72   57.79 
   3   3   1 1807.32   57.29 
   3   3   1 1779.22   63.79 
   3   3   1 1887.71   57.79 
   3   3   1 1750.12   62.09 
  -3   3  -1 1700.23   61.49 
  -3   3  -1 1927.41   63.19 
  -3   3  -1 1779.12   53.99 
   3   3   1 1931.01   57.89 
   3   3   1 1830.22   57.59 
  -3   3  -1 1752.82   63.49 
   3   3   1 1798.02   60.29 
  -3   3  -1 1846.92   53.29 
   3   3   1 1877.81   56.99 
  -3   3  -1 1763.52   52.09 
  -3   3  -1 1823.22   56.19 
  -3   3  -1 1862.81   59.79 
  -3   3  -1 1759.32   60.99 
  -3   3  -1 1734.33   61.39 
   3   3   1 1850.31   62.39 
   3   3   1 1825.02   58.99 
   3   3   1 1784.12   55.39 
  -3   3  -1 1747.13   52.79 
   3   3   1 1748.03   56.09 
   3   3   1 1846.82   54.89 
   3   3   1 1907.71   54.89 
   4  -3   1  691.63   21.70 
   4  -3   1  650.63   26.70 
   4  -3   1  681.43   31.30 
  -4  -3  -1  675.43   27.90 
  -4  -3  -1  693.23   32.70 
  -4  -3  -1  657.53   28.30 
  -4  -3  -1  685.13   25.80 
   4  -3   1  626.44   21.40 
  -4  -3  -1  669.13   26.50 
   4  -3   1  665.13   23.40 
  -4  -3  -1  671.13   21.80 
  -4  -3  -1  658.23   33.30 
   4  -3   1  675.63   31.00 
  -4  -3  -1  690.03   26.30 
  -4  -3  -1  692.03   33.50 
  -4  -3  -1  700.73   29.60 
   4  -3   1  635.74   29.90 
   4  -3   1  678.83   22.90 
   4  -3   1  689.33   28.90 
   4  -3   1  713.33   31.80 
   4  -3   1  710.73   29.60 
  -4  -3  -1  690.33   21.10 
  -4  -3  -1  669.03   30.70 
   4   3   1  699.33   29.40 
   4   3   1  688.43   32.00 
  -4   3  -1  724.23   31.40 
   4   3   1  653.23   23.70 
  -4   3  -1  655.93   24.40 
  -4   3  -1  654.53   22.00 
   4   3   1  662.93   21.30 
   4   3   1  676.43   21.10 
   4   3   1  714.03   32.10 
  -4   3  -1  686.73   21.30 
   4   3   1  719.83   26.40 
  -4   3  -1  665.03   30.50 
  -4   3  -1  668.73   26.50 
   4   3   1  671.13   24.00 
  -4   3  -1  718.43   32.00 
   4   3   1  667.83   22.10 
  -4   3  -1  701.03   32.50 
   4   3   1  682.63   22.00 
  -4   3  -1  660.03   21.10 
  -4   3  -1  612.04   27.40 
   4   3   1  651.73   28.10 
   4   3   1  690.73   25.60 
   4   3   1  640.54   24.80 
  -4   3  -1  668.03   22.40 
  -4   3  -1  667.93   23.40 
  -4   3  -1  658.23   23.40 
   4   3   1  705.43   29.30 
  -4   3  -1  695.93   30.80 
  -5  -3  -1  505.15   22.00 
   5  -3   1  484.65   22.30 
  -5  -3  -1  539.85   21.40 
  -5  -3  -1  519.95   25.00 
  -5  -3  -1  495.35   28.80 
  -5  -3  -1  553.04   28.30 
   5  -3   1  526.25   27.60 
   5  -3   1  504.75   26.70 
  -5  -3  -1  561.44   26.40 
  -5  -3  -1  477.65   24.50 
   5  -3   1  544.85   25.50 
   5  -3   1  558.64   26.50 
  -5  -3  -1  550.44   30.60 
   5  -3   1  523.55   18.60 
  -5  -3  -1  422.16   46.00 
   5  -3   1  500.35   27.30 
   5  -3   1  492.75   27.00 
  -5  -3  -1  532.85   31.00 
   5  -3   1  512.75   18.80 
   5   3   1  568.34   25.80 
  -5   3  -1  512.45   19.60 
  -5   3  -1  550.44   27.50 
  -5   3  -1  536.15   19.20 
  -5   3  -1  536.25   17.60 
   5   3   1  582.64   29.50 
   5   3   1  563.44   25.60 
  -5   3  -1  538.95   27.00 
   5   3   1  575.24   26.50 
  -5   3  -1  559.24   17.40 
   5   3   1  522.45   28.60 
  -5   3  -1  516.95   19.00 
  -5   3  -1  534.25   20.40 
  -5   3  -1  523.45   23.00 
   5   3   1  517.45   20.50 
  -5   3  -1  511.85   28.00 
  -5   3  -1  503.25   22.20 
  -5   3  -1  531.25   24.30 
   5   3   1  551.34   20.80 
  -5   3  -1  524.05   28.20 
   5   3   1  516.55   21.70 
  -5   3  -1  556.74   30.40 
   5   3   1  524.45   19.00 
  -5   3  -1  496.65   18.00 
  -5   3  -1  516.85   27.20 
  -6  -3  -1  868.31   44.60 
  -6  -3  -1  866.41   37.10 
  -6  -3  -1  876.91   43.00 
  -6  -3  -1  905.11   43.30 
  -6  -3  -1  869.21   37.20 
   6  -3   1  868.11   40.20 
  -6  -3  -1  844.32   29.90 
   6  -3   1  873.51   40.00 
   6  -3   1  882.81   29.20 
   6  -3   1  877.71   35.50 
  -6  -3  -1  893.61   40.40 
   6  -3   1  823.72   39.70 
   6  -3   1  824.72   37.60 
  -6  -3  -1  850.81   37.30 
   6  -3   1  918.41   39.00 
   6  -3   1  890.51   33.10 
   6   3   1  874.01   41.80 
   6   3   1  859.31   36.90 
   6   3   1  891.61   28.60 
  -6   3  -1  884.11   34.90 
   6   3   1  866.31   36.80 
  -6   3  -1  847.12   39.50 
  -6   3  -1  849.52   31.50 
  -6   3  -1  780.02   29.30 
  -6   3  -1  844.82   37.90 
   6   3   1  901.31   32.00 
  -6   3  -1  943.11   42.00 
  -6   3  -1  805.12   41.60 
   6   3   1  846.22   40.50 
  -6   3  -1  900.71   39.20 
  -6   3  -1  845.22   39.30 
  -6   3  -1  896.41   34.10 
  -6   3  -1  863.41   28.20 
   6   3   1  975.20   37.70 
  -6   3  -1  861.11   26.40 
  -6   3  -1  858.31   29.50 
  -7  -3  -1  197.28   22.60 
   7  -3   1  176.88   14.20 
  -7  -3  -1  150.88   20.90 
  -7  -3  -1  197.38   20.20 
   7  -3   1  194.58   22.20 
   7  -3   1  189.38   19.20 
  -7  -3  -1  206.48   19.90 
  -7  -3  -1  186.58   16.30 
  -7  -3  -1  194.28   24.80 
   7  -3   1  216.58   17.70 
  -7  -3  -1  221.68   24.70 
   7  -3   1  228.78   19.80 
  -7   3  -1  232.48   25.60 
  -7   3  -1  244.28   22.50 
  -7   3  -1  192.68   16.20 
  -7   3  -1  189.58   14.50 
  -7   3  -1  225.08   19.00 
   7   3   1  175.48   14.80 
  -7   3  -1  225.58   15.40 
  -7   3  -1  205.38   21.40 
   7   3   1  197.48   16.30 
   7   3   1  201.38   22.10 
   7   3   1  207.08   23.00 
  -7   3  -1  235.88   24.40 
   7   3   1  189.98   19.10 
  -8  -3  -1  402.16   31.00 
  -8  -3  -1  395.66   25.30 
   8  -3   1  384.36   28.20 
  -8  -3  -1  423.16   29.10 
   8  -3   1  396.06   28.50 
  -8  -3  -1  457.45   27.70 
   8  -3   1  407.76   26.80 
  -8  -3  -1  409.76   30.50 
  -8  -3  -1  390.96   25.70 
  -8  -3  -1  477.15   34.90 
  -8   3  -1  486.85   28.90 
   8   3   1  360.76   27.50 
  -8   3  -1  410.86   26.70 
   8   3   1  401.36   25.50 
   8   3   1  408.06   29.60 
  -8   3  -1  431.36   31.70 
  -8   3  -1  378.26   28.30 
   8   3   1  410.26   25.20 
  -8   3  -1  400.36   28.20 
  -8   3  -1  441.56   28.80 
   8   3   1  476.05   35.40 
  -9  -3  -1  153.98   19.80 
   9  -3   1  144.29   22.80 
   9  -3   1  113.69   17.70 
  -9  -3  -1  117.99   22.10 
  -9  -3  -1  155.48   23.00 
  -9  -3  -1  148.79   24.20 
  -9  -3  -1  130.29   21.20 
  -9  -3  -1  154.18   19.70 
  -9   3  -1  129.69   18.40 
  -9   3  -1   98.59   16.60 
  -9   3  -1  141.59   24.30 
  -9   3  -1  132.39   21.90 
   9   3   1  122.69   16.60 
   9   3   1  128.99   20.90 
   9   3   1  117.89   19.70 
   9   3   1  149.19   18.80 
  -9   3  -1  116.29   20.10 
  -9   3  -1  119.69   18.80 
   9  -4  -1  118.59   20.80 
   9  -4  -1  107.39   19.70 
  -9  -4   1  122.19   21.90 
  -9  -4   1  121.69   19.10 
   9  -4  -1   73.69   15.20 
  -9  -4   1  146.59   23.40 
  -9  -4   1  115.99   23.30 
  -9  -4   1   96.29   20.80 
  -9  -4   1   89.99   16.10 
   9   4  -1   97.19   16.40 
  -9   4   1  109.39   20.30 
   9   4  -1  131.19   19.10 
  -9   4   1   74.09   16.10 
   9   4  -1  129.29   22.30 
  -9   4   1   82.99   17.60 
   9   4  -1   85.59   17.90 
  -9   4   1  122.39   19.40 
  -9   4   1  111.49   17.90 
  -8  -4   1  138.29   21.80 
  -8  -4   1  102.29   19.00 
   8  -4  -1  129.39   20.40 
   8  -4  -1  103.89   17.10 
   8  -4  -1  123.39   18.30 
  -8  -4   1  115.09   17.00 
  -8  -4   1  116.99   22.00 
  -8  -4   1  118.99   21.00 
   8  -4  -1   90.69   17.00 
  -8  -4   1  123.59   17.50 
  -8  -4   1  114.79   17.10 
  -8  -4   1  122.59   23.50 
  -8   4   1  113.99   19.20 
  -8   4   1   92.39   18.10 
   8   4  -1  117.69   20.20 
   8   4  -1  109.79   16.20 
  -8   4   1  113.59   19.80 
  -8   4   1  106.79   16.80 
   8   4  -1   91.69   15.20 
  -8   4   1  115.09   16.60 
   8   4  -1  135.89   21.10 
  -8   4   1   88.49   16.20 
   7  -4  -1   48.10   11.80 
  -7  -4   1   50.59   13.50 
   7  -4  -1   41.20   10.60 
  -7  -4   1   53.99    9.90 
   7  -4  -1   55.49   10.10 
  -7  -4   1   48.60   13.90 
  -7  -4   1   49.40   13.60 
  -7  -4   1   40.60    9.90 
  -7  -4   1   47.30   13.20 
  -7  -4   1   47.80   10.90 
  -7  -4   1   68.59   28.00 
  -7  -4   1   32.00    8.80 
   7  -4  -1   30.30    9.90 
   7  -4  -1   59.19   12.50 
  -7   4   1   45.40   10.80 
   7   4  -1   48.80   11.10 
  -7   4   1   53.59   12.50 
  -7   4   1   35.60    8.60 
  -7   4   1   42.90   10.70 
  -7   4   1   44.20   12.20 
   7   4  -1   50.59   13.30 
  -7   4   1   35.80    9.20 
   7   4  -1   40.30   11.80 
   7   4  -1   38.00    8.40 
   7   4  -1   55.79   11.40 
  -7   4   1   57.79   13.90 
  -7   4   1   50.69   11.60 
   6  -4  -1   33.60    6.00 
  -6  -4   1   24.30    6.80 
  -6  -4   1   28.10    7.90 
  -6  -4   1   26.80    6.40 
   6  -4  -1   51.19   11.50 
   6  -4  -1   41.30    9.30 
   6  -4  -1   38.60    9.90 
  -6  -4   1   33.00   10.90 
  -6  -4   1   50.29   24.60 
  -6  -4   1   21.20    7.20 
   6  -4  -1   39.30   10.40 
   6  -4  -1   29.30    9.20 
   6  -4  -1   36.20    6.00 
   6  -4  -1   33.80    8.70 
   6  -4  -1   35.70    6.10 
   6  -4  -1   32.30    6.60 
  -6  -4   1   51.59   12.20 
  -6  -4   1   36.80    9.40 
  -6  -4   1   41.50   11.60 
  -6  -4   1   39.80   11.00 
  -6   4   1   44.40    9.20 
  -6   4   1   32.90    9.30 
   6   4  -1   30.40    5.90 
  -6   4   1   32.10    8.60 
  -6   4   1   29.80    8.80 
  -6   4   1   34.10    7.50 
   6   4  -1   27.40    5.50 
  -6   4   1   36.50    7.20 
   6   4  -1   26.40    9.10 
   6   4  -1   27.40    7.50 
   6   4  -1   25.50    8.20 
   6   4  -1   42.60    9.30 
  -6   4   1   23.30    9.40 
  -6   4   1   40.30    6.80 
  -6   4   1   34.10    7.10 
   6   4  -1   30.70    6.30 
  -6   4   1   42.40   10.30 
   6   4  -1   46.90   11.20 
  -6   4   1   46.10   10.80 
   5  -4  -1  214.08   17.70 
   5  -4  -1  222.18   11.80 
   5  -4  -1  229.28   13.40 
   5  -4  -1  204.98   17.50 
   5  -4  -1  196.28   12.90 
   5  -4  -1  164.88   17.30 
  -5  -4   1  203.88   32.80 
   5  -4  -1  210.98   21.60 
   5  -4  -1  181.18   10.90 
  -5  -4   1  216.08   19.80 
  -5  -4   1  224.18   16.80 
  -5  -4   1  199.68   16.50 
   5  -4  -1  211.48   16.80 
  -5  -4   1  181.48   13.50 
  -5  -4   1  166.98   19.20 
  -5  -4   1  192.98   14.50 
  -5  -4   1  199.68   16.10 
  -5  -4   1  160.38   13.00 
   5  -4  -1  210.28   17.90 
  -5  -4   1  250.57   21.30 
   5  -4  -1  203.08   11.80 
  -5  -4   1  221.58   13.30 
  -5  -4   1  190.68    9.30 
  -5  -4   1  174.18   20.60 
   5  -4  -1  210.78   10.30 
   5   4  -1  221.88   13.00 
  -5   4   1  201.98   17.60 
  -5   4   1  224.28   15.90 
  -5   4   1  217.48   18.50 
  -5   4   1  203.48   17.20 
   5   4  -1  200.68   13.20 
  -5   4   1  207.58    9.40 
  -5   4   1  179.48   11.90 
  -5   4   1  182.78   14.00 
  -5   4   1  181.78   13.90 
  -5   4   1  218.68   14.80 
   5   4  -1  185.28    9.60 
   5   4  -1  184.58    9.00 
   5   4  -1  233.28   17.20 
   5   4  -1  211.58   21.80 
  -5   4   1  220.08   18.10 
   5   4  -1  202.98   15.50 
   5   4  -1  191.28    9.10 
   5   4  -1  168.98   19.00 
   5   4  -1  201.98    9.00 
   5   4  -1  236.58   17.30 
  -5   4   1  193.28   21.20 
  -5   4   1  208.68   11.70 
   5   4  -1  185.48   10.30 
  -5   4   1  209.08   16.80 
   5   4  -1  173.78   10.80 
  -5   4   1  201.38    8.60 
  -4  -4   1  113.59   15.70 
  -4  -4   1  140.19   14.90 
   4  -4  -1  128.59    6.60 
  -4  -4   1  134.19   11.50 
   4  -4  -1  139.99   10.20 
   4  -4  -1  133.69    6.60 
  -4  -4   1  132.09   13.20 
  -4  -4   1  147.19   18.70 
   4  -4  -1  122.89   10.90 
   4  -4  -1  129.39    8.80 
   4  -4  -1  124.69   27.70 
  -4  -4   1  117.99   14.10 
   4  -4  -1  122.19   14.30 
   4  -4  -1  125.99    7.50 
   4  -4  -1  135.79   15.90 
  -4  -4   1  147.09    9.40 
  -4  -4   1  145.29   15.90 
   4  -4  -1  135.49   15.90 
   4  -4  -1  111.49   14.10 
  -4  -4   1  144.49   17.30 
   4  -4  -1  111.89    8.70 
   4  -4  -1  102.79   12.90 
  -4  -4   1  204.08   36.60 
   4  -4  -1  129.29    7.80 
   4  -4  -1  135.19   16.20 
  -4  -4   1  152.38   17.50 
  -4  -4   1  138.39    8.80 
  -4  -4   1  125.09   10.70 
   4  -4  -1  159.98    9.80 
  -4   4   1  112.89   13.50 
  -4   4   1  128.99   13.50 
   4   4  -1  126.49   10.40 
  -4   4   1  131.69    8.10 
  -4   4   1  116.79   14.60 
  -4   4   1  137.99    7.40 
  -4   4   1  131.19    9.80 
   4   4  -1  128.19   13.50 
   4   4  -1  148.29   17.10 
   4   4  -1  140.99   15.70 
  -4   4   1  132.49   15.50 
  -4   4   1  152.48   14.70 
   4   4  -1  136.09   11.30 
   4   4  -1  140.59   10.60 
   4   4  -1  160.38    7.70 
   4   4  -1  125.69    9.30 
   4   4  -1  152.68   13.20 
   4   4  -1  140.29    9.60 
  -4   4   1  132.29    8.50 
   4   4  -1  130.39   14.50 
  -4   4   1  131.69   13.50 
  -4   4   1  120.09   13.10 
   4   4  -1  134.19    9.00 
   4   4  -1  105.69   12.90 
   4   4  -1  117.59    8.00 
  -4   4   1  112.99   14.30 
   4   4  -1  145.99   16.80 
   4   4  -1  137.39    9.40 
   4   4  -1  136.59    9.10 
   4   4  -1  118.99    6.40 
  -4   4   1  142.09   16.90 
  -3  -4   1   49.00   10.40 
  -3  -4   1   56.49    7.60 
   3  -4  -1   70.09    6.70 
   3  -4  -1   53.19    9.20 
  -3  -4   1   50.79    9.90 
  -3  -4   1   52.39    9.10 
   3  -4  -1   61.29   10.20 
   3  -4  -1   57.39    4.20 
   3  -4  -1   82.29   11.60 
  -3  -4   1   59.59    8.90 
  -3  -4   1   56.69    9.90 
   3  -4  -1   63.79   10.80 
   3  -4  -1   66.09    6.70 
   3  -4  -1   45.20    9.50 
   3  -4  -1   72.59    9.00 
   3  -4  -1   51.49    5.10 
  -3  -4   1   64.79   10.00 
   3  -4  -1   66.09    9.70 
  -3  -4   1   65.09    9.20 
  -3  -4   1   78.59   10.40 
   3  -4  -1   84.49   12.30 
   3  -4  -1   60.29    7.00 
   3  -4  -1   74.39    8.00 
   3  -4  -1   35.20    8.70 
   3  -4  -1   75.79    9.20 
  -3  -4   1   57.19    7.90 
   3  -4  -1   68.79    7.40 
  -3  -4   1   51.29    9.90 
   3  -4  -1   69.29   21.60 
   3  -4  -1   70.39    8.30 
   3  -4  -1   54.19    4.70 
  -3  -4   1   61.59   10.30 
   3  -4  -1   66.99    6.90 
  -3   4   1   47.70    9.70 
   3   4  -1   73.19    9.10 
   3   4  -1   63.69    6.50 
   3   4  -1   62.79    8.10 
  -3   4   1   71.09   10.20 
   3   4  -1   77.29   11.70 
  -3   4   1   54.29    9.00 
  -3   4   1   68.19   10.30 
   3   4  -1   56.79    9.70 
  -3   4   1   65.19    7.40 
   3   4  -1   65.09   10.30 
   3   4  -1   53.09    9.70 
   3   4  -1   70.79    8.90 
   3   4  -1   59.69    9.70 
   3   4  -1   50.49    8.80 
   3   4  -1   51.59    8.60 
  -3   4   1   57.29   10.00 
   3   4  -1   59.99    7.50 
  -3   4   1   59.59    9.30 
  -3   4   1   60.49   10.20 
  -3   4   1   60.69    4.60 
  -3   4   1   66.49    7.20 
   3   4  -1   58.09    8.90 
   3   4  -1   65.29    9.80 
  -3   4   1   62.39    7.10 
  -3   4   1   65.79    9.70 
  -3   4   1   66.79   10.50 
   3   4  -1   56.59    9.90 
  -3   4   1   71.99    5.60 
   2  -4  -1   34.00    6.30 
  -2  -4   1   21.40    5.80 
   2  -4  -1   21.10    6.70 
   2  -4  -1   25.10   16.20 
  -2  -4   1   27.00    6.40 
  -2  -4   1   22.10    5.50 
   2  -4  -1   39.70    8.90 
   2  -4  -1   27.50    4.10 
  -2  -4   1   24.60    7.20 
  -2  -4   1   31.10    7.90 
   2  -4  -1   25.70    5.00 
  -2  -4   1   26.90    7.60 
   2  -4  -1   26.10    4.00 
   2  -4  -1   36.60    7.10 
   2  -4  -1   26.50    6.10 
   2  -4  -1   18.10    5.90 
   2  -4  -1   15.70    4.40 
  -2  -4   1   30.30    7.50 
  -2  -4   1   29.70    7.70 
  -2  -4   1   28.60    8.70 
   2  -4  -1   28.90    4.00 
  -2  -4   1   34.80    7.90 
  -2  -4   1   28.70    6.90 
   2  -4  -1   27.70    4.90 
   2  -4  -1   27.90    4.90 
   2  -4  -1   23.30    6.90 
   2  -4  -1   28.60    5.50 
  -2  -4   1   32.20    8.20 
   2  -4  -1   24.10    3.70 
  -2  -4   1   19.40    6.00 
  -2  -4   1   42.50   19.00 
   2  -4  -1   24.20    5.20 
   2  -4  -1   19.70    6.50 
   2  -4  -1   16.40    5.40 
   2  -4  -1   32.50    5.80 
   2  -4  -1   24.10    3.60 
   2  -4  -1   20.90    6.60 
   2  -4  -1   29.20    8.10 
   2  -4  -1   22.50    4.80 
   2  -4  -1   18.60    6.40 
   2   4  -1   22.80    6.80 
  -2   4   1   15.90    5.80 
   2   4  -1   22.30    7.40 
   2   4  -1   19.50    5.80 
   2   4  -1   42.90    7.80 
  -2   4   1   22.40    7.00 
   2   4  -1   32.10    7.50 
   2   4  -1   27.10    7.10 
  -2   4   1   28.10    6.60 
  -2   4   1   26.50    7.00 
  -2   4   1   30.70    4.00 
   2   4  -1   34.50    7.90 
   2   4  -1   20.00    6.60 
   2   4  -1   31.70    6.70 
  -2   4   1   25.50    4.60 
  -2   4   1   22.50    5.10 
  -2   4   1   27.50    5.70 
   2   4  -1   35.60    6.90 
  -2   4   1   23.50    6.30 
  -2   4   1   33.30    8.00 
   2   4  -1   33.40    6.00 
  -2   4   1   26.90    4.50 
   2   4  -1   31.90    5.20 
  -2   4   1   19.80    6.20 
  -2   4   1   28.70    7.90 
  -2   4   1   25.90    4.50 
   2   4  -1   28.80    6.70 
   2   4  -1   21.40    7.30 
   1  -4  -1   45.60    9.30 
   1  -4  -1   53.09    8.80 
   1  -4  -1   51.29    7.20 
  -1  -4   1   37.10    7.50 
   1  -4  -1   44.00    8.20 
  -1  -4   1   49.80   12.20 
   1  -4  -1   45.20    6.10 
  -1  -4   1   27.20    6.80 
   1  -4  -1   44.10    5.80 
  -1  -4   1   46.10    8.60 
   1  -4  -1   29.30   16.30 
  -1  -4   1   37.60    8.20 
   1  -4  -1   41.00    8.20 
   1  -4  -1   43.80    8.20 
   1  -4  -1   43.70    8.80 
  -1  -4   1   49.50    9.30 
   1  -4  -1   55.39   12.40 
   1  -4  -1   50.19    6.90 
   1  -4  -1   34.00    6.60 
   1  -4  -1   37.70    6.20 
   1  -4  -1   51.19    7.70 
   1  -4  -1   41.80   10.20 
   1  -4  -1   45.70    7.90 
  -1  -4   1   41.30    8.50 
  -1  -4   1   35.60    8.90 
  -1  -4   1   33.90    8.00 
   1  -4  -1   46.90    6.00 
  -1  -4   1   48.50   19.50 
   1  -4  -1   51.09   10.10 
   1  -4  -1   49.10    9.10 
  -1  -4   1   45.00    9.40 
  -1  -4   1   39.80    7.70 
   1  -4  -1   41.00    6.90 
  -1  -4   1   32.30    7.70 
   1  -4  -1   40.70    8.00 
   1  -4  -1   38.30    5.80 
   1  -4  -1   40.60    6.80 
   1   4  -1   43.40    8.50 
  -1   4   1   27.50    6.70 
   1   4  -1   39.50    8.20 
  -1   4   1   36.80    5.90 
  -1   4   1   42.90    6.30 
   1   4  -1   32.90    8.00 
  -1   4   1   56.89    9.70 
  -1   4   1   50.39    7.80 
   1   4  -1   36.00    8.70 
  -1   4   1   51.09    9.10 
  -1   4   1   58.49    8.00 
   1   4  -1   39.70    8.60 
  -1   4   1   40.40    7.40 
   1   4  -1   45.70    6.80 
  -1   4   1   37.50    8.60 
   1   4  -1   54.69    8.50 
   1   4  -1   47.60    8.00 
  -1   4   1   29.50    7.20 
  -1   4   1   41.40    7.90 
   1   4  -1   45.40    8.40 
   1   4  -1   43.60    8.60 
   1   4  -1   30.80    7.40 
   1   4  -1   38.20    9.20 
  -1   4   1   35.80    5.40 
   1   4  -1   40.00    8.10 
  -1   4   1   32.60    7.30 
   1   4  -1   37.80    8.90 
   1   4  -1   35.00    7.40 
  -1   4   1   43.40    7.30 
  -1   4   1   41.00    8.20 
   0  -4   1  208.08   16.10 
   0  -4   1  201.08   14.30 
   0  -4  -1  201.68   12.30 
   0  -4  -1  199.38   14.80 
   0  -4   1  246.18   18.20 
   0  -4   1  228.38   20.90 
   0  -4  -1  205.38   14.50 
   0  -4  -1  205.78   21.10 
   0  -4   1  228.48   16.20 
   0  -4  -1  192.18   13.10 
   0  -4   1  231.88   33.10 
   0  -4  -1  199.78   14.40 
   0  -4   1  202.98   13.00 
   0  -4   1  222.78   14.60 
   0  -4  -1  205.88   12.40 
   0  -4   1  195.68   13.10 
   0  -4  -1  230.38   14.00 
   0  -4   1  220.88   12.70 
   0  -4  -1  216.38   14.60 
   0  -4  -1  214.48   16.50 
   0  -4  -1  178.78   14.10 
   0  -4   1  203.38   13.20 
   0  -4   1  223.78   16.40 
   0  -4  -1  207.58   17.50 
   0  -4   1  201.58   15.10 
   0  -4   1  225.08   18.90 
   0  -4   1  184.58   15.10 
   0  -4  -1  220.68   13.60 
   0  -4  -1  193.08   14.80 
   0  -4  -1  188.88   14.10 
   0  -4   1  206.68   15.80 
   0  -4   1  192.58   14.50 
   0  -4  -1  242.88   20.90 
   0   4   1  199.48   14.40 
   0   4   1  199.78   13.20 
   0   4  -1  213.38   13.90 
   0   4  -1  231.88   16.50 
   0   4   1  197.38   14.70 
   0   4  -1  222.78   13.20 
   0   4   1  219.38   17.10 
   0   4  -1  189.38   12.10 
   0   4  -1  186.28   13.70 
   0   4  -1  238.38   16.00 
   0   4   1  240.38   15.60 
   0   4   1  198.08   14.10 
   0   4   1  225.78   15.00 
   0   4  -1  214.18   16.40 
   0   4  -1  214.48   13.60 
   0   4   1  223.48   14.20 
   0   4  -1  201.58   13.30 
   0   4   1  205.98   12.90 
   0   4  -1  208.18   17.40 
   0   4   1  210.48   16.30 
   0   4   1  196.48   12.60 
   0   4  -1  222.48   15.10 
   0   4  -1  196.68   14.30 
   0   4   1  194.98   12.40 
   0   4  -1  227.78   16.30 
   0   4   1  210.68   15.60 
   0   4   1  192.88   13.50 
   0   4  -1  195.08   16.70 
   0   4   1  226.18   16.40 
   1  -4   1  436.66   25.50 
   1  -4   1  461.35   25.30 
  -1  -4  -1  422.06   22.20 
   1  -4   1  445.76   21.60 
   1  -4   1  420.26   18.90 
  -1  -4  -1  411.86   21.10 
   1  -4   1  428.66   23.70 
   1  -4   1  431.56   19.90 
   1  -4   1  376.36   23.10 
   1  -4   1  445.66   23.80 
  -1  -4  -1  377.76   27.30 
   1  -4   1  415.56   25.80 
   1  -4   1  463.85   17.50 
  -1  -4  -1  477.45   22.50 
  -1  -4  -1  486.45   23.20 
   1  -4   1  475.05   22.10 
  -1  -4  -1  481.65   24.10 
  -1  -4  -1  474.55   24.20 
   1  -4   1  437.66   18.80 
   1  -4   1  417.76   18.40 
   1  -4   1  434.16   23.80 
   1  -4   1  416.46   43.70 
  -1  -4  -1  401.86   21.50 
  -1  -4  -1  415.56   22.00 
   1  -4   1  447.06   20.00 
  -1  -4  -1  426.96   24.00 
   1  -4   1  448.66   18.30 
   1  -4   1  433.16   18.70 
  -1  -4  -1  430.86   21.30 
  -1  -4  -1  433.26   22.10 
   1  -4   1  438.16   22.40 
   1  -4   1  449.46   18.00 
   1  -4   1  437.26   29.10 
   1  -4   1  466.55   21.70 
  -1   4  -1  429.36   22.80 
  -1   4  -1  456.55   25.40 
   1   4   1  412.06   24.00 
  -1   4  -1  420.86   21.00 
   1   4   1  496.65   24.10 
   1   4   1  435.06   18.60 
  -1   4  -1  442.16   19.40 
   1   4   1  426.66   21.50 
   1   4   1  461.35   23.00 
   1   4   1  398.56   21.00 
  -1   4  -1  435.86   23.30 
   1   4   1  412.86   25.30 
  -1   4  -1  516.25   25.10 
  -1   4  -1  453.15   19.10 
   1   4   1  355.36   22.70 
   1   4   1  431.16   20.70 
   1   4   1  457.35   23.50 
  -1   4  -1  448.76   22.00 
   1   4   1  430.86   22.10 
  -1   4  -1  437.56   17.70 
   1   4   1  426.46   22.70 
  -1   4  -1  439.16   24.80 
  -1   4  -1  368.16   22.00 
  -1   4  -1  451.45   18.40 
   1   4   1  426.86   21.70 
   1   4   1  452.75   20.70 
  -1   4  -1  461.45   22.40 
  -1   4  -1  476.15   20.50 
   1   4   1  429.76   23.90 
   1   4   1  428.26   24.80 
   2  -4   1  768.02   25.00 
   2  -4   1  755.22   25.10 
   2  -4   1  806.62   30.40 
  -2  -4  -1  838.62   32.80 
  -2  -4  -1  806.02   35.20 
  -2  -4  -1  861.91   33.40 
  -2  -4  -1  833.42   33.60 
   2  -4   1  761.32   27.40 
   2  -4   1  790.22   35.00 
   2  -4   1  760.42   26.00 
  -2  -4  -1  773.92   37.80 
   2  -4   1  786.92   60.49 
  -2  -4  -1  773.12   30.20 
   2  -4   1  849.61   36.90 
   2  -4   1  797.82   29.00 
   2  -4   1  818.02   24.50 
   2  -4   1  788.42   32.00 
   2  -4   1  808.92   24.90 
   2  -4   1  767.52   25.70 
   2  -4   1  779.22   25.80 
  -2  -4  -1  796.22   34.90 
   2  -4   1  840.52   35.00 
   2  -4   1  824.62   30.60 
   2  -4   1  777.72   30.80 
  -2  -4  -1  751.42   30.40 
  -2  -4  -1  824.72   35.30 
   2  -4   1  778.02   34.50 
   2  -4   1  801.72   36.30 
   2  -4   1  818.72   35.90 
   2  -4   1  830.62   28.40 
  -2  -4  -1  817.12   33.50 
   2  -4   1  752.92   29.40 
   2  -4   1  719.43   33.20 
   2  -4   1  761.22   26.30 
  -2  -4  -1  782.12   34.60 
  -2  -4  -1  794.82   34.10 
   2  -4   1  778.52   27.70 
  -2   4  -1  819.72   30.00 
   2   4   1  807.92   36.50 
   2   4   1  826.72   30.40 
   2   4   1  789.92   31.80 
  -2   4  -1  794.02   36.60 
  -2   4  -1  774.12   28.40 
   2   4   1  775.32   33.50 
  -2   4  -1  751.22   32.90 
   2   4   1  809.22   32.10 
  -2   4  -1  763.92   32.60 
   2   4   1  780.42   32.70 
   2   4   1  767.62   30.60 
  -2   4  -1  800.52   27.80 
  -2   4  -1  740.63   34.90 
  -2   4  -1  761.02   33.10 
   2   4   1  811.32   26.90 
   2   4   1  813.52   34.30 
  -2   4  -1  801.62   34.90 
  -2   4  -1  774.62   27.40 
   2   4   1  886.01   34.00 
   2   4   1  783.42   32.50 
   2   4   1  845.42   32.40 
  -2   4  -1  764.72   35.30 
   2   4   1  829.02   34.90 
  -2   4  -1  755.02   24.50 
   2   4   1  769.42   33.40 
   2   4   1  789.62   35.10 
  -2   4  -1  792.72   31.20 
   2   4   1  737.03   33.00 
   3  -4   1   71.79   11.90 
  -3  -4  -1   62.79    8.50 
  -3  -4  -1   53.79    9.60 
   3  -4   1   67.99    7.90 
   3  -4   1   60.29   10.80 
   3  -4   1   66.89    6.90 
  -3  -4  -1   62.79    9.80 
   3  -4   1   59.79    7.30 
   3  -4   1   66.99    7.70 
  -3  -4  -1   53.79    9.20 
   3  -4   1   71.19    5.30 
   3  -4   1   58.29   10.20 
  -3  -4  -1   55.69    8.50 
  -3  -4  -1   59.89   11.70 
   3  -4   1   68.79    9.90 
  -3  -4  -1   76.89   12.30 
   3  -4   1   73.79    7.80 
   3  -4   1   70.69    9.00 
   3  -4   1   57.09   10.90 
  -3  -4  -1   68.99   11.30 
   3  -4   1   67.79    9.80 
  -3  -4  -1   63.09    7.90 
  -3  -4  -1   75.29    9.70 
   3  -4   1   71.29    6.00 
   3  -4   1   77.89   23.60 
  -3  -4  -1   62.79    8.00 
   3  -4   1   70.49    6.60 
   3  -4   1   66.49   11.20 
  -3   4  -1   71.59   11.80 
   3   4   1   66.59    8.10 
  -3   4  -1   58.29    9.80 
   3   4   1   58.59    7.60 
   3   4   1   70.09    9.80 
  -3   4  -1   52.49    7.40 
  -3   4  -1   60.59    7.20 
   3   4   1   55.89    9.40 
   3   4   1   59.99    7.10 
  -3   4  -1   50.09    9.40 
   3   4   1   70.79   10.50 
   3   4   1   60.89    8.90 
  -3   4  -1   51.09    9.60 
  -3   4  -1   65.89    6.50 
  -3   4  -1   76.69   11.50 
   3   4   1   56.09    9.50 
   3   4   1   73.79   10.40 
   3   4   1   48.30    9.30 
   3   4   1   52.89    9.60 
  -3   4  -1   59.39    9.30 
   3   4   1   67.79   12.00 
   3   4   1   64.39    4.40 
   3   4   1   54.09    8.20 
  -3   4  -1   53.99    6.20 
   3   4   1   56.49    8.00 
  -3   4  -1   50.29    9.30 
   3   4   1   58.59    8.60 
  -3   4  -1   69.69    7.30 
  -3   4  -1   69.89    6.30 
   4  -4   1   92.39   13.20 
   4  -4   1   79.79    8.20 
  -4  -4  -1   73.89    9.40 
  -4  -4  -1   65.99   11.10 
  -4  -4  -1   90.29   12.70 
  -4  -4  -1   45.30   23.10 
  -4  -4  -1  104.19   14.90 
  -4  -4  -1   88.39   14.40 
  -4  -4  -1   91.09   11.30 
   4  -4   1   90.79   13.20 
  -4  -4  -1   63.49   10.10 
  -4  -4  -1   91.99   10.20 
   4  -4   1   65.49    9.50 
   4  -4   1   76.69    6.20 
  -4  -4  -1   80.19    8.20 
   4  -4   1   73.99   11.40 
   4  -4   1   85.99    6.80 
   4  -4   1   87.29    8.50 
   4  -4   1   87.69   13.10 
   4  -4   1   92.09    5.40 
   4  -4   1   84.49   13.20 
  -4  -4  -1   66.99   12.50 
   4  -4   1   92.39   11.80 
   4  -4   1   70.19    5.50 
  -4  -4  -1   89.49    7.40 
   4  -4   1   74.39    8.20 
  -4   4  -1   78.19    6.40 
   4   4   1   80.69   11.60 
  -4   4  -1   80.49    5.20 
  -4   4  -1   85.19    5.60 
   4   4   1   78.09   10.80 
   4   4   1   81.39   12.50 
  -4   4  -1   88.49   14.10 
  -4   4  -1   81.19   12.60 
   4   4   1   86.29   13.40 
   4   4   1   92.49    8.70 
   4   4   1   81.29   11.20 
   4   4   1   81.39    6.20 
   4   4   1   70.79    7.00 
   4   4   1   90.99   10.40 
  -4   4  -1   80.29   11.40 
  -4   4  -1   86.29    9.20 
  -4   4  -1   71.39    5.50 
  -4   4  -1   81.79    8.30 
  -4   4  -1   64.49   11.40 
   4   4   1   87.19    9.80 
  -4   4  -1   81.09   12.70 
   4   4   1   82.69    6.80 
   4   4   1   77.49    9.20 
   4   4   1   87.99    8.40 
   4   4   1   84.39   10.20 
   4   4   1   82.19   13.90 
   4   4   1   78.39    8.60 
  -4   4  -1   74.79   12.70 
  -4   4  -1   68.29    9.90 
  -5  -4  -1  271.87   17.50 
  -5  -4  -1  258.87   22.00 
  -5  -4  -1  270.87   20.50 
   5  -4   1  281.97   18.40 
   5  -4   1  231.18   12.40 
  -5  -4  -1  298.67   22.60 
   5  -4   1  240.58   11.10 
   5  -4   1  267.67   19.90 
   5  -4   1  220.78   15.20 
   5  -4   1  243.58   18.30 
   5  -4   1  255.87   10.50 
  -5  -4  -1  257.57   15.20 
   5  -4   1  227.98   19.10 
  -5  -4  -1  250.17   15.40 
   5  -4   1  236.98   10.40 
  -5  -4  -1  268.47   19.20 
   5  -4   1  258.27   19.90 
  -5  -4  -1  240.48   17.40 
   5  -4   1  281.87   20.70 
  -5  -4  -1  278.97   22.60 
  -5   4  -1  254.87   19.70 
   5   4   1  273.47   17.70 
   5   4   1  239.78   17.60 
   5   4   1  231.78   10.00 
  -5   4  -1  238.68   11.50 
  -5   4  -1  228.18   16.90 
  -5   4  -1  246.38   13.50 
  -5   4  -1  249.18   19.30 
  -5   4  -1  240.58   20.30 
   5   4   1  225.58   14.20 
  -5   4  -1  238.48   16.50 
   5   4   1  238.58   11.70 
   5   4   1  225.08   12.50 
  -5   4  -1  223.38   19.00 
   5   4   1  237.68   11.10 
   5   4   1  270.27   19.00 
   5   4   1  265.07   21.20 
   5   4   1  251.57   13.20 
   5   4   1  259.47   13.30 
   5   4   1  225.28   22.30 
   5   4   1  233.48   14.70 
  -5   4  -1  252.57   16.70 
  -5   4  -1  212.68   18.50 
   6  -4   1  437.36   26.30 
  -6  -4  -1  471.25   21.50 
   6  -4   1  480.25   29.30 
  -6  -4  -1  505.05   26.40 
  -6  -4  -1  507.85   28.00 
   6  -4   1  415.96   27.10 
  -6  -4  -1  514.25   32.60 
  -6  -4  -1  488.75   33.00 
   6  -4   1  517.35   30.00 
   6  -4   1  474.75   23.00 
  -6  -4  -1  499.25   31.60 
   6  -4   1  494.25   29.50 
  -6  -4  -1  477.15   23.50 
  -6  -4  -1  479.25   26.60 
  -6  -4  -1  368.46   50.89 
   6  -4   1  470.95   26.10 
  -6  -4  -1  481.95   29.80 
  -6   4  -1  511.45   30.20 
   6   4   1  494.15   22.30 
  -6   4  -1  446.66   27.90 
  -6   4  -1  406.36   22.30 
   6   4   1  488.05   26.10 
  -6   4  -1  440.06   24.60 
  -6   4  -1  466.55   28.30 
  -6   4  -1  495.75   24.80 
   6   4   1  436.56   29.40 
   6   4   1  462.45   29.50 
  -6   4  -1  459.55   28.60 
  -6   4  -1  468.55   31.40 
   6   4   1  502.25   26.80 
   6   4   1  468.75   20.70 
  -6   4  -1  439.86   28.70 
   6   4   1  519.45   27.70 
   7  -4   1  309.47   24.80 
  -7  -4  -1  288.37   22.30 
  -7  -4  -1  349.87   27.90 
   7  -4   1  311.47   21.00 
   7  -4   1  324.17   23.20 
  -7  -4  -1  341.17   22.60 
   7  -4   1  276.07   23.30 
  -7  -4  -1  338.07   35.10 
  -7  -4  -1  313.77   32.70 
  -7  -4  -1  358.26   23.50 
  -7  -4  -1  360.96   26.50 
   7  -4   1  331.97   23.90 
   7  -4   1  281.57   23.10 
  -7  -4  -1  337.97   19.80 
  -7   4  -1  322.07   22.60 
  -7   4  -1  313.67   26.90 
   7   4   1  320.17   30.60 
  -7   4  -1  294.67   24.60 
  -7   4  -1  351.66   24.60 
  -7   4  -1  288.37   22.20 
   7   4   1  299.47   20.90 
   7   4   1  293.67   21.00 
  -7   4  -1  312.87   24.20 
   7   4   1  352.36   27.10 
   7   4   1  312.07   22.30 
  -7   4  -1  338.07   25.10 
  -7   4  -1  336.37   20.80 
  -8  -4  -1 1050.59   47.60 
   8  -4   1 1046.80   51.69 
  -8  -4  -1  976.50   46.30 
  -8  -4  -1 1043.60   54.59 
   8  -4   1 1003.50   50.89 
  -8  -4  -1 1020.80   47.20 
  -8  -4  -1  994.80   56.49 
  -8  -4  -1 1051.69   51.79 
  -8  -4  -1 1036.30   54.89 
   8  -4   1 1116.59   48.70 
   8  -4   1 1115.99   49.60 
  -8   4  -1 1024.00   50.59 
  -8   4  -1 1001.00   46.50 
   8   4   1  952.40   51.49 
   8   4   1 1089.59   47.20 
  -8   4  -1 1059.99   52.89 
   8   4   1 1031.60   51.49 
   8   4   1 1028.20   46.30 
  -8   4  -1 1062.09   49.20 
   8   4   1  984.90   45.30 
  -8   4  -1 1106.09   56.19 
  -9  -4  -1  221.88   30.30 
  -9  -4  -1  245.98   25.80 
  -9  -4  -1  287.87   32.30 
   9  -4   1  245.18   25.90 
   9  -4   1  253.47   28.80 
  -9  -4  -1  239.38   32.30 
  -9  -4  -1  205.88   28.70 
   9  -4   1  246.38   29.00 
   9   4   1  201.88   27.00 
   9   4   1  223.58   27.50 
  -9   4  -1  306.07   30.30 
  -9   4  -1  264.57   27.50 
  -9   4  -1  267.67   32.30 
  -9   4  -1  270.67   29.30 
  -9   4  -1  262.67   30.70 
   9   4   1  284.27   27.90 
  -9  -5   1  581.44   44.00 
  -9  -5   1  609.74   37.70 
  -9  -5   1  583.14   42.50 
   9  -5  -1  627.04   41.80 
   9  -5  -1  641.14   39.60 
   9  -5  -1  688.63   43.60 
  -9  -5   1  545.95   40.90 
  -9  -5   1  540.25   43.20 
   9   5  -1  636.94   42.00 
  -9   5   1  714.73   40.80 
  -9   5   1  585.84   40.50 
   9   5  -1  596.54   36.90 
  -9   5   1  610.34   44.30 
  -9   5   1  622.54   42.30 
   9   5  -1  652.93   38.00 
   9   5  -1  642.34   43.40 
   8  -5  -1   67.09   14.60 
  -8  -5   1   64.29   17.10 
  -8  -5   1   54.89   15.50 
  -8  -5   1   57.99   17.00 
  -8  -5   1   46.30   15.00 
   8  -5  -1   89.99   18.40 
  -8  -5   1   73.49   15.40 
   8  -5  -1   54.49   13.50 
  -8  -5   1   62.59   13.90 
  -8  -5   1   61.39   13.80 
   8  -5  -1   52.89   14.10 
  -8   5   1   79.39   16.80 
  -8   5   1   56.49   13.20 
  -8   5   1   61.49   15.80 
   8   5  -1   72.69   14.40 
   8   5  -1   69.79   14.00 
   8   5  -1   52.69   15.10 
   8   5  -1   85.69   17.70 
  -8   5   1   33.80   11.90 
  -8   5   1   53.59   13.50 
  -7  -5   1  607.94   35.10 
   7  -5  -1  700.93   39.10 
  -7  -5   1  613.34   39.70 
   7  -5  -1  587.64   35.70 
  -7  -5   1  590.54   40.40 
   7  -5  -1  582.54   34.70 
   7  -5  -1  573.44   36.50 
  -7  -5   1  652.13   41.90 
  -7  -5   1  673.93   36.10 
   7  -5  -1  577.14   37.10 
  -7  -5   1  596.44   31.50 
   7  -5  -1  634.74   33.70 
  -7  -5   1  583.64   37.60 
  -7  -5   1  698.03   36.80 
  -7   5   1  618.34   40.10 
  -7   5   1  624.44   35.50 
   7   5  -1  581.84   34.40 
   7   5  -1  616.84   37.80 
  -7   5   1  561.84   36.60 
  -7   5   1  612.94   37.50 
  -7   5   1  582.14   35.20 
  -7   5   1  584.24   35.70 
  -7   5   1  619.94   33.00 
  -7   5   1  639.34   32.80 
   7   5  -1  623.94   34.40 
   7   5  -1  603.84   32.60 
   7   5  -1  614.74   38.30 
   6  -5  -1  422.06   27.90 
   6  -5  -1  351.16   24.40 
   6  -5  -1  368.36   27.20 
  -6  -5   1  348.17   44.60 
   6  -5  -1  350.96   24.90 
  -6  -5   1  368.66   29.20 
  -6  -5   1  318.87   24.40 
  -6  -5   1  370.46   24.80 
  -6  -5   1  349.27   27.80 
   6  -5  -1  370.96   26.70 
  -6  -5   1  429.56   31.70 
   6  -5  -1  349.37   19.80 
  -6  -5   1  412.86   23.60 
   6  -5  -1  346.07   19.30 
  -6  -5   1  345.57   27.20 
  -6  -5   1  401.66   26.00 
   6  -5  -1  379.76   27.50 
  -6  -5   1  353.46   21.40 
  -6   5   1  358.86   21.70 
   6   5  -1  385.46   20.00 
  -6   5   1  308.57   25.50 
  -6   5   1  391.96   26.50 
   6   5  -1  374.36   19.70 
  -6   5   1  359.26   23.70 
   6   5  -1  368.56   21.00 
  -6   5   1  365.96   23.80 
   6   5  -1  361.56   24.40 
   6   5  -1  410.56   29.20 
  -6   5   1  374.66   22.20 
  -6   5   1  354.26   26.30 
   6   5  -1  319.97   26.00 
  -6   5   1  370.66   22.40 
   6   5  -1  363.86   23.90 
  -6   5   1  371.46   26.30 
   6   5  -1  369.66   25.00 
  -6   5   1  361.36   26.80 
  -6   5   1  320.37   27.40 
  -5  -5   1 2178.18   72.09 
   5  -5  -1 2258.67   73.39 
  -5  -5   1 2172.18   80.29 
  -5  -5   1 2179.18  115.09 
   5  -5  -1 2122.79   67.99 
  -5  -5   1 2144.09   84.39 
   5  -5  -1 2120.59   80.59 
   5  -5  -1 2073.99   69.89 
  -5  -5   1 2257.97   78.59 
   5  -5  -1 2141.49   78.49 
  -5  -5   1 2201.58   73.79 
  -5  -5   1 2126.99   66.49 
   5  -5  -1 2071.89   80.39 
   5  -5  -1 2220.58   80.39 
   5  -5  -1 2035.70   79.29 
   5  -5  -1 2068.19   66.39 
   5  -5  -1 2238.08   78.49 
  -5  -5   1 2215.78   78.59 
  -5  -5   1 2339.87   76.19 
  -5  -5   1 2252.77   78.39 
  -5  -5   1 2285.47   86.29 
  -5  -5   1 2183.28   82.49 
   5   5  -1 2132.89   79.99 
  -5   5   1 2210.48   76.59 
   5   5  -1 2138.79   76.49 
  -5   5   1 2314.87   82.39 
  -5   5   1 2157.58   78.59 
   5   5  -1 2215.58   70.09 
  -5   5   1 2229.28   68.09 
  -5   5   1 2083.39   79.89 
  -5   5   1 2105.79   80.69 
   5   5  -1 2073.49   80.29 
  -5   5   1 2131.79   74.59 
   5   5  -1 2086.89   70.99 
  -5   5   1 2100.59   73.19 
   5   5  -1 2085.29   71.39 
  -5   5   1 2211.58   74.79 
  -5   5   1 2186.88   75.39 
   5   5  -1 2003.90   76.29 
   5   5  -1 2257.37   64.99 
   5   5  -1 2175.98   67.89 
   5   5  -1 2140.19   77.89 
  -5   5   1 2159.38   79.39 
   4  -5  -1  476.85   29.80 
   4  -5  -1  506.45   53.99 
   4  -5  -1  508.45   29.30 
  -4  -5   1  574.44   33.60 
   4  -5  -1  586.04   25.50 
   4  -5  -1  573.24   31.70 
  -4  -5   1  611.74   32.00 
  -4  -5   1  555.44   27.90 
  -4  -5   1  529.15   52.89 
   4  -5  -1  497.35   26.80 
  -4  -5   1  566.14   30.10 
   4  -5  -1  533.75   20.80 
   4  -5  -1  568.84   30.60 
   4  -5  -1  518.15   30.20 
   4  -5  -1  538.05   24.00 
   4  -5  -1  536.05   22.20 
  -4  -5   1  518.05   33.30 
   4  -5  -1  445.66   29.20 
   4  -5  -1  562.74   23.00 
   4  -5  -1  497.45   19.80 
  -4  -5   1  528.45   27.20 
  -4  -5   1  543.45   30.00 
  -4  -5   1  531.35   31.20 
  -4  -5   1  580.14   30.20 
   4  -5  -1  492.45   24.30 
  -4  -5   1  551.84   24.40 
  -4  -5   1  501.65   26.30 
   4   5  -1  518.45   28.00 
   4   5  -1  537.15   30.40 
  -4   5   1  520.85   27.00 
   4   5  -1  534.45   30.20 
  -4   5   1  551.54   23.60 
   4   5  -1  550.24   20.10 
   4   5  -1  576.44   28.20 
  -4   5   1  544.85   19.10 
   4   5  -1  537.45   23.00 
  -4   5   1  505.25   27.20 
   4   5  -1  543.65   20.00 
   4   5  -1  523.25   26.60 
  -4   5   1  542.45   31.80 
  -4   5   1  495.65   29.50 
   4   5  -1  593.54   26.80 
   4   5  -1  510.35   29.10 
   4   5  -1  528.65   29.70 
  -4   5   1  520.45   30.60 
  -4   5   1  543.75   22.30 
  -4   5   1  516.15   29.10 
  -4   5   1  546.45   28.10 
  -4   5   1  521.55   27.90 
   4   5  -1  508.15   28.10 
   4   5  -1  577.84   29.20 
  -4   5   1  463.45   29.20 
   4   5  -1  539.55   24.50 
   3  -5  -1 1096.69   37.90 
  -3  -5   1 1074.19   44.30 
   3  -5  -1 1125.09   49.00 
   3  -5  -1 1130.69   42.70 
   3  -5  -1 1072.79   36.10 
  -3  -5   1 1052.89   45.70 
   3  -5  -1 1140.19   35.80 
   3  -5  -1 1185.08   50.39 
   3  -5  -1 1150.58   39.80 
  -3  -5   1 1105.39   48.90 
   3  -5  -1 1066.99   32.90 
  -3  -5   1 1122.69   47.00 
  -3  -5   1 1153.68   47.20 
   3  -5  -1 1077.09   37.20 
  -3  -5   1 1035.80   75.39 
   3  -5  -1 1108.09   48.10 
   3  -5  -1 1099.49   48.30 
   3  -5  -1 1117.09   34.00 
  -3  -5   1 1094.09   44.70 
   3  -5  -1 1105.99   40.40 
   3  -5  -1 1202.48   43.40 
   3  -5  -1 1074.99   38.10 
   3  -5  -1 1049.40   47.30 
  -3  -5   1 1124.69   45.30 
   3  -5  -1 1147.29   47.40 
   3  -5  -1 1102.79   41.70 
  -3  -5   1 1158.58   42.50 
   3  -5  -1 1132.89   80.79 
   3  -5  -1 1143.79   47.50 
   3  -5  -1 1106.09   45.30 
  -3  -5   1 1064.19   47.00 
  -3  -5   1 1137.49   48.50 
  -3  -5   1 1134.79   47.40 
   3  -5  -1 1194.48   42.30 
  -3  -5   1 1187.98   54.09 
   3   5  -1 1136.29   44.90 
   3   5  -1 1103.79   46.50 
  -3   5   1 1053.19   45.00 
  -3   5   1 1088.19   48.20 
  -3   5   1 1126.39   36.60 
   3   5  -1 1152.48   45.60 
   3   5  -1 1224.98   50.89 
   3   5  -1 1156.08   38.10 
  -3   5   1 1193.28   48.40 
  -3   5   1 1170.98   46.40 
   3   5  -1 1105.49   41.20 
   3   5  -1 1173.08   42.90 
  -3   5   1 1089.39   44.30 
  -3   5   1 1097.79   45.30 
   3   5  -1 1095.49   47.10 
  -3   5   1 1064.99   39.80 
   3   5  -1 1125.89   46.70 
   3   5  -1 1197.58   49.50 
  -3   5   1 1074.49   45.00 
  -3   5   1 1160.28   48.70 
   3   5  -1 1156.08   49.30 
   3   5  -1 1134.19   47.40 
  -3   5   1 1153.48   49.70 
  -3   5   1 1115.79   45.30 
   3   5  -1 1140.09   43.90 
  -3   5   1 1109.89   35.70 
   3   5  -1 1138.69   46.70 
   3   5  -1 1155.38   46.10 
  -3   5   1 1117.19   40.30 
   2  -5  -1   95.09   10.80 
  -2  -5   1  106.39   14.80 
  -2  -5   1  114.99   14.20 
  -2  -5   1   99.89   13.90 
   2  -5  -1   98.69    9.00 
  -2  -5   1   50.29   13.10 
  -2  -5   1   91.79   12.40 
   2  -5  -1  100.99   10.30 
   2  -5  -1   83.39   26.50 
   2  -5  -1   82.29    8.10 
  -2  -5   1  101.19   14.00 
  -2  -5   1   84.69   25.60 
   2  -5  -1   89.89   14.40 
   2  -5  -1   82.49   13.20 
   2  -5  -1   94.89   12.20 
   2  -5  -1   90.69   11.20 
   2  -5  -1   83.09   12.20 
   2  -5  -1   93.59    9.60 
   2  -5  -1   91.49   10.50 
   2  -5  -1   88.09    7.00 
   2  -5  -1   90.49    7.40 
   2  -5  -1   86.69   12.00 
   2  -5  -1   72.49   10.40 
  -2  -5   1   78.89   12.30 
   2  -5  -1   92.79   13.70 
   2  -5  -1  108.79   16.40 
  -2  -5   1   67.39   11.10 
   2  -5  -1   74.29   11.70 
  -2  -5   1   84.89   12.40 
  -2  -5   1   68.69   10.40 
   2  -5  -1   88.49    9.20 
   2  -5  -1   80.99   11.60 
  -2  -5   1   86.89   13.90 
   2  -5  -1   93.59   14.30 
   2  -5  -1   78.69    7.70 
   2   5  -1   85.59    9.40 
   2   5  -1   85.19   11.60 
   2   5  -1   77.89   13.10 
   2   5  -1   71.09   11.40 
  -2   5   1   89.99   12.70 
   2   5  -1   83.19   11.70 
   2   5  -1   71.59   11.90 
  -2   5   1   79.89   10.10 
   2   5  -1   58.09   10.40 
  -2   5   1  101.49   13.20 
   2   5  -1   85.59   13.60 
   2   5  -1   77.79   11.70 
   2   5  -1   76.59   12.00 
  -2   5   1   68.89   12.10 
   2   5  -1   93.69   11.60 
   2   5  -1   71.49   11.30 
  -2   5   1   75.69   11.40 
  -2   5   1   70.29   11.70 
   2   5  -1   96.49   12.10 
  -2   5   1  107.69   13.30 
  -2   5   1   62.19   11.60 
  -2   5   1   87.99    8.90 
   2   5  -1   93.49   15.80 
  -2   5   1   69.49   10.20 
  -2   5   1   66.49    9.10 
  -2   5   1   71.99   11.90 
  -2   5   1   85.29    8.80 
  -2   5   1   87.49    7.00 
  -1  -5   1  477.35   26.50 
   1  -5  -1  483.15   22.30 
  -1  -5   1  476.45   26.40 
   1  -5  -1  517.65   27.60 
   1  -5  -1  489.35   22.00 
   1  -5  -1  511.45   21.10 
  -1  -5   1  492.55   25.90 
  -1  -5   1  484.65   25.30 
  -1  -5   1  453.95   26.10 
  -1  -5   1  518.95   26.90 
   1  -5  -1  481.75   22.40 
   1  -5  -1  504.15   28.30 
   1  -5  -1  493.45   26.40 
   1  -5  -1  467.25   29.50 
   1  -5  -1  547.45   26.40 
  -1  -5   1  420.66   25.80 
  -1  -5   1  517.25   26.00 
  -1  -5   1  491.05   33.90 
   1  -5  -1  513.95   22.30 
   1  -5  -1  498.05   27.60 
  -1  -5   1  499.25   29.00 
   1  -5  -1  492.45   25.60 
   1  -5  -1  483.55   32.80 
  -1  -5   1  486.35   28.60 
   1  -5  -1  540.55   52.89 
   1  -5  -1  526.95   29.00 
   1  -5  -1  494.05   24.80 
  -1  -5   1  498.25   27.20 
   1  -5  -1  508.45   22.90 
   1  -5  -1  501.55   26.70 
  -1  -5   1  538.35   26.30 
  -1  -5   1  424.76   47.90 
  -1   5   1  472.25   21.20 
  -1   5   1  500.25   28.80 
   1   5  -1  433.26   26.50 
  -1   5   1  437.36   25.70 
  -1   5   1  491.45   21.30 
   1   5  -1  480.95   24.10 
  -1   5   1  421.16   24.90 
   1   5  -1  535.95   29.00 
  -1   5   1  498.55   28.40 
  -1   5   1  489.85   24.20 
   1   5  -1  520.05   25.60 
   1   5  -1  452.75   26.70 
  -1   5   1  487.05   24.20 
  -1   5   1  484.55   24.30 
   1   5  -1  487.55   26.50 
   1   5  -1  490.85   25.20 
   1   5  -1  490.05   29.60 
  -1   5   1  485.75   26.70 
  -1   5   1  502.05   22.10 
   1   5  -1  471.15   22.50 
  -1   5   1  487.55   25.80 
  -1   5   1  523.35   28.30 
   1   5  -1  480.75   26.50 
  -1   5   1  482.45   26.00 
   1   5  -1  488.95   30.50 
   1   5  -1  473.65   25.50 
   1   5  -1  538.55   26.60 
   1   5  -1  475.85   23.70 
   0  -5   1   72.99   12.00 
   0  -5   1   86.59   27.00 
   0  -5  -1   71.89   11.10 
   0  -5   1   81.19   11.10 
   0  -5  -1  116.49   14.00 
   0  -5  -1   97.69   28.70 
   0  -5   1   92.69   15.00 
   0  -5   1   60.69   10.60 
   0  -5  -1   72.09   10.60 
   0  -5   1   99.59   14.80 
   0  -5   1   88.09   10.40 
   0  -5  -1   78.49    9.90 
   0  -5  -1   83.19   11.90 
   0  -5  -1   91.89   16.40 
   0  -5  -1   80.09   11.30 
   0  -5   1   81.89   12.30 
   0  -5   1   73.89   11.20 
   0  -5   1  124.89   20.70 
   0  -5  -1   68.29   11.50 
   0  -5  -1   83.49   10.70 
   0  -5  -1   99.99   15.90 
   0  -5   1   81.19   10.40 
   0  -5   1   68.89   13.20 
   0  -5   1   92.29   12.90 
   0  -5  -1   64.39   10.60 
   0  -5  -1   62.19    9.50 
   0  -5   1   90.19   13.20 
   0  -5   1   66.39   10.50 
   0  -5  -1   90.29   14.00 
   0   5  -1   68.99    9.80 
   0   5   1   74.19   12.20 
   0   5  -1   73.29   12.00 
   0   5   1   80.59    9.80 
   0   5   1   91.39   12.50 
   0   5  -1   87.99   12.10 
   0   5  -1   92.19   13.20 
   0   5  -1   89.39   11.40 
   0   5  -1   65.39    9.90 
   0   5  -1   76.49   12.10 
   0   5  -1   80.49   13.70 
   0   5   1   94.59   11.90 
   0   5   1   78.09   11.70 
   0   5   1   92.09   10.80 
   0   5  -1   85.39   10.70 
   0   5  -1   76.89   12.80 
   0   5  -1  108.19   13.90 
   0   5   1   69.79    9.90 
   0   5   1   79.39   11.50 
   0   5   1   95.69   10.90 
   0   5  -1   84.49   10.00 
   0   5   1   85.89   10.20 
   0   5   1   81.39   13.80 
   0   5   1   74.99   12.20 
   0   5   1  107.09   12.80 
   0   5   1   80.89   11.90 
   0   5  -1   77.29   11.60 
   0   5   1   88.49   11.70 
  -1  -5  -1 2197.18   74.29 
  -1  -5  -1 2161.58   75.89 
  -1  -5  -1 2228.38   75.09 
   1  -5   1 2190.78   69.19 
   1  -5   1 2247.58   69.49 
  -1  -5  -1 2285.57   74.69 
   1  -5   1 2219.28   73.39 
   1  -5   1 2190.98   67.79 
   1  -5   1 2218.78   80.79 
  -1  -5  -1 2100.19   75.69 
   1  -5   1 2197.88   76.69 
   1  -5   1 2084.19   71.09 
   1  -5   1 2418.26   71.09 
   1  -5   1 2204.88   74.39 
  -1  -5  -1 2195.58   76.69 
   1  -5   1 2208.98   76.69 
  -1  -5  -1 2298.17   87.39 
   1  -5   1 2143.19   73.29 
   1  -5   1 2134.59   78.09 
  -1  -5  -1 2274.37   78.39 
   1  -5   1 2125.49   81.69 
   1  -5   1 2056.69   86.09 
  -1  -5  -1 2119.69   80.29 
  -1  -5  -1 2286.67   74.99 
   1  -5   1 2291.47  119.39 
   1  -5   1 2082.79   77.09 
  -1  -5  -1 2173.48   72.69 
  -1  -5  -1 2180.28   74.39 
   1  -5   1 2173.88   68.89 
  -1  -5  -1 2178.38   73.49 
   1   5   1 2281.77   69.59 
  -1   5  -1 2205.68   70.99 
   1   5   1 2236.88   77.99 
   1   5   1 2290.07   74.59 
  -1   5  -1 2208.08   70.49 
  -1   5  -1 2193.98   73.69 
   1   5   1 2165.68   73.39 
  -1   5  -1 2331.37   76.29 
  -1   5  -1 2110.69   75.39 
  -1   5  -1 2208.18   69.19 
  -1   5  -1 2290.97   77.69 
  -1   5  -1 2171.38   78.49 
   1   5   1 2209.48   75.59 
   1   5   1 2103.39   76.09 
   1   5   1 2170.78   76.59 
   1   5   1 2183.38   72.99 
  -1   5  -1 2164.48   67.69 
  -1   5  -1 2288.57   74.29 
   1   5   1 2140.79   71.19 
   1   5   1 2134.09   74.09 
  -1   5  -1 2158.58   79.49 
  -1   5  -1 2207.38   76.19 
  -1   5  -1 2127.49   79.69 
   1   5   1 2312.87   82.49 
   1   5   1 2358.16   80.99 
  -1   5  -1 2152.18   72.99 
   1   5   1 2235.18   75.39 
   1   5   1 2217.68   73.19 
   2  -5   1  408.56   21.20 
   2  -5   1  381.06   23.80 
   2  -5   1  359.96   14.90 
  -2  -5  -1  386.86   22.60 
   2  -5   1  392.56   16.20 
   2  -5   1  363.26   19.40 
   2  -5   1  403.16   15.20 
  -2  -5  -1  373.16   22.30 
  -2  -5  -1  357.76   23.30 
   2  -5   1  384.66   15.70 
   2  -5   1  360.86   16.50 
  -2  -5  -1  299.47   21.40 
  -2  -5  -1  385.46   29.00 
  -2  -5  -1  338.47   21.30 
   2  -5   1  371.86   25.40 
   2  -5   1  365.76   16.30 
   2  -5   1  374.46   18.40 
  -2  -5  -1  340.77   22.60 
  -2  -5  -1  344.07   23.30 
  -2  -5  -1  434.36   51.69 
  -2  -5  -1  365.16   22.20 
   2  -5   1  335.37   15.70 
  -2  -5  -1  380.36   21.40 
   2  -5   1  375.66   18.70 
   2  -5   1  361.56   23.40 
   2  -5   1  346.87   22.60 
   2  -5   1  410.96   25.30 
   2  -5   1  356.36   25.70 
   2  -5   1  359.66   17.70 
   2  -5   1  371.76   20.20 
  -2  -5  -1  371.76   23.20 
  -2  -5  -1  379.76   20.90 
   2  -5   1  375.56   24.90 
   2  -5   1  359.16   21.40 
   2  -5   1  382.36   46.00 
   2   5   1  350.36   22.20 
  -2   5  -1  364.76   22.20 
  -2   5  -1  350.16   22.20 
  -2   5  -1  324.17   22.20 
   2   5   1  358.06   22.30 
   2   5   1  364.56   22.30 
   2   5   1  327.47   20.60 
  -2   5  -1  386.56   20.80 
   2   5   1  386.66   23.90 
  -2   5  -1  335.57   14.70 
   2   5   1  342.77   23.40 
   2   5   1  362.56   20.60 
  -2   5  -1  357.56   17.10 
   2   5   1  395.96   17.20 
  -2   5  -1  373.06   24.60 
  -2   5  -1  344.17   18.90 
  -2   5  -1  356.56   24.10 
   2   5   1  368.46   20.80 
  -2   5  -1  311.37   23.10 
   2   5   1  366.96   24.10 
  -2   5  -1  367.56   23.10 
  -2   5  -1  378.46   22.90 
   2   5   1  345.87   21.70 
  -2   5  -1  406.26   19.00 
   2   5   1  378.96   20.00 
   2   5   1  398.36   24.00 
   2   5   1  359.76   25.60 
   3  -5   1 2310.57   68.19 
  -3  -5  -1 2380.76   78.59 
   3  -5   1 2349.36   70.19 
   3  -5   1 2358.96   84.69 
   3  -5   1 2447.16   75.29 
   3  -5   1 2381.66   66.29 
   3  -5   1 2352.46   82.19 
   3  -5   1 2343.97   74.49 
  -3  -5  -1 2510.75   81.79 
   3  -5   1 2373.76   82.79 
  -3  -5  -1 2399.06   83.59 
  -3  -5  -1 2416.66   81.89 
  -3  -5  -1 2489.65   89.89 
   3  -5   1 2309.67   84.69 
  -3  -5  -1 2400.26   82.99 
   3  -5   1 2308.27   71.19 
   3  -5   1 2314.87   71.09 
   3  -5   1 2391.36   75.49 
  -3  -5  -1 2283.47   78.89 
   3  -5   1 2352.26  125.89 
   3  -5   1 2354.36   68.19 
   3  -5   1 2302.97   80.49 
   3  -5   1 2549.15   73.79 
   3  -5   1 2482.45   84.39 
  -3  -5  -1 2306.97   80.49 
  -3  -5  -1 2426.86   84.09 
   3  -5   1 2334.07   85.29 
  -3  -5  -1 2335.67   84.19 
  -3  -5  -1 2394.46   75.99 
   3  -5   1 2288.87   77.19 
  -3   5  -1 2281.97   82.49 
  -3   5  -1 2205.78   84.19 
  -3   5  -1 2354.46   72.29 
  -3   5  -1 2318.27   69.69 
  -3   5  -1 2306.97   70.49 
  -3   5  -1 2373.56   84.89 
  -3   5  -1 2401.56   81.89 
   3   5   1 2443.56   76.49 
  -3   5  -1 2277.97   72.69 
   3   5   1 2439.56   80.19 
   3   5   1 2310.17   77.79 
   3   5   1 2377.26   79.09 
   3   5   1 2360.96   74.49 
   3   5   1 2426.66   84.69 
   3   5   1 2376.56   82.29 
   3   5   1 2403.86   81.09 
   3   5   1 2412.36   83.49 
   3   5   1 2410.46   69.29 
  -3   5  -1 2315.17   84.19 
  -3   5  -1 2223.28   80.59 
   3   5   1 2369.46   80.09 
  -3   5  -1 2404.06   80.39 
  -3   5  -1 2371.66   79.89 
   3   5   1 2298.37   78.49 
   3   5   1 2450.05   85.09 
   3   5   1 2292.97   81.79 
   3   5   1 2385.06   81.99 
  -3   5  -1 2245.58   75.49 
   4  -5   1  282.67   20.10 
  -4  -5  -1  306.27   24.10 
  -4  -5  -1  355.56   23.40 
   4  -5   1  337.77   24.60 
   4  -5   1  339.07   22.30 
   4  -5   1  347.17   15.90 
   4  -5   1  303.27   23.00 
  -4  -5  -1  352.26   20.70 
  -4  -5  -1  336.37   21.30 
   4  -5   1  337.07   16.50 
  -4  -5  -1  332.57   22.20 
  -4  -5  -1  339.47   24.90 
   4  -5   1  321.57   16.50 
  -4  -5  -1  364.96   20.50 
   4  -5   1  346.77   17.40 
   4  -5   1  297.67   22.10 
  -4  -5  -1  312.97   22.90 
   4  -5   1  311.77   23.70 
  -4  -5  -1  303.67   21.60 
  -4  -5  -1  345.17   17.80 
  -4  -5  -1  316.77   25.40 
   4  -5   1  324.27   13.30 
   4  -5   1  344.97   23.70 
  -4   5  -1  299.37   22.00 
   4   5   1  336.37   20.40 
  -4   5  -1  278.57   22.70 
   4   5   1  341.47   20.40 
   4   5   1  310.87   17.90 
  -4   5  -1  336.97   22.40 
   4   5   1  323.57   23.70 
   4   5   1  351.26   22.80 
  -4   5  -1  344.67   18.00 
   4   5   1  348.87   20.20 
  -4   5  -1  294.27   22.60 
  -4   5  -1  326.47   21.30 
   4   5   1  321.97   21.40 
   4   5   1  333.87   16.40 
  -4   5  -1  271.77   23.10 
   4   5   1  356.06   22.30 
   4   5   1  346.07   19.90 
   4   5   1  294.57   19.10 
  -4   5  -1  301.57   23.20 
  -4   5  -1  306.87   21.00 
   4   5   1  359.06   26.00 
  -4   5  -1  327.67   15.80 
   4   5   1  323.97   23.10 
  -4   5  -1  335.17   13.90 
   5  -5   1  837.52   29.60 
   5  -5   1  828.32   42.60 
   5  -5   1  789.72   31.00 
   5  -5   1  791.02   28.80 
  -5  -5  -1  803.82   42.90 
  -5  -5  -1  889.31   39.10 
  -5  -5  -1  862.71   30.00 
  -5  -5  -1  850.41   44.90 
   5  -5   1  884.11   42.50 
  -5  -5  -1  811.52   39.30 
  -5  -5  -1  725.13   42.40 
   5  -5   1  864.51   39.80 
   5  -5   1  820.52   42.60 
  -5  -5  -1  907.81   40.50 
  -5  -5  -1  893.91   36.60 
   5  -5   1  857.41   37.10 
   5  -5   1  839.42   41.70 
  -5  -5  -1  811.02   41.00 
   5  -5   1  812.92   39.70 
  -5  -5  -1  837.32   35.70 
   5   5   1  889.11   35.90 
  -5   5  -1  850.61   41.80 
   5   5   1  845.52   33.20 
  -5   5  -1  846.22   29.90 
  -5   5  -1  868.11   43.80 
  -5   5  -1  869.91   42.70 
  -5   5  -1  920.51   38.50 
  -5   5  -1  755.52   39.70 
   5   5   1  821.92   29.10 
   5   5   1  827.82   41.60 
   5   5   1  897.31   40.40 
   5   5   1  802.72   34.60 
  -5   5  -1  860.11   43.00 
   5   5   1  848.02   38.50 
  -5   5  -1  795.52   37.20 
   5   5   1  829.52   39.20 
  -5   5  -1  827.62   37.50 
   5   5   1  829.42   42.50 
  -5   5  -1  857.81   32.10 
   5   5   1  805.52   31.90 
   6  -5   1   18.40    7.20 
  -6  -5  -1    2.80    6.50 
  -6  -5  -1   13.00    7.20 
  -6  -5  -1   22.20   10.10 
   6  -5   1    6.90    5.40 
  -6  -5  -1    5.90    6.70 
  -6  -5  -1    7.20    4.80 
   6  -5   1   16.10    6.00 
   6  -5   1   16.10    8.00 
  -6  -5  -1    0.60   18.30 
   6  -5   1   22.30    9.20 
  -6  -5  -1   21.70    7.40 
   6  -5   1   10.80    6.80 
  -6  -5  -1    3.80    6.60 
   6  -5   1   15.10    7.10 
  -6  -5  -1   -0.30    6.10 
  -6  -5  -1   -0.90    4.20 
   6   5   1    6.80    5.40 
   6   5   1    6.70    6.50 
   6   5   1   -0.30    6.20 
   6   5   1    3.20    6.20 
  -6   5  -1    5.70    5.80 
  -6   5  -1   13.80    7.60 
   6   5   1   -0.60    4.10 
  -6   5  -1    8.40    7.10 
   6   5   1   10.70    5.20 
  -6   5  -1    6.00    5.50 
  -6   5  -1    4.10    6.10 
  -6   5  -1    4.10    4.60 
  -6   5  -1   17.30    7.40 
  -6   5  -1   13.20    7.70 
  -6   5  -1   10.90    6.70 
  -6   5  -1    5.60    6.90 
   6   5   1   10.90    4.50 
  -7  -5  -1  226.58   25.00 
   7  -5   1  192.98   23.30 
  -7  -5  -1  201.88   18.50 
   7  -5   1  231.88   23.90 
  -7  -5  -1  229.88   23.80 
  -7  -5  -1  188.18   24.30 
   7  -5   1  254.77   28.20 
   7  -5   1  230.68   27.30 
  -7  -5  -1  196.68   26.50 
  -7  -5  -1  230.88   28.40 
   7  -5   1  234.98   26.80 
   7  -5   1  229.58   23.40 
  -7  -5  -1  224.38   28.70 
  -7   5  -1  234.98   28.50 
   7   5   1  218.08   22.20 
  -7   5  -1  234.98   22.80 
   7   5   1  233.68   24.80 
  -7   5  -1  260.57   26.50 
  -7   5  -1  226.38   25.50 
   7   5   1  286.07   29.80 
  -7   5  -1  210.48   23.60 
   7   5   1  249.78   19.60 
  -7   5  -1  213.28   25.50 
   7   5   1  164.18   22.30 
  -7   5  -1  260.77   27.90 
  -8  -5  -1   49.70   13.00 
  -8  -5  -1   65.09   17.20 
  -8  -5  -1   64.49   13.70 
   8  -5   1   78.29   14.70 
  -8  -5  -1   81.39   19.30 
  -8  -5  -1   74.99   18.90 
  -8  -5  -1   87.19   18.60 
   8  -5   1   99.09   17.70 
   8  -5   1   66.59   16.10 
   8  -5   1   32.60   11.70 
  -8   5  -1   76.19   17.10 
   8   5   1   63.49   14.10 
   8   5   1   77.49   13.90 
  -8   5  -1   74.79   17.80 
  -8   5  -1   65.59   14.20 
  -8   5  -1   38.30   11.80 
   8   5   1   77.49   16.90 
   8   5   1   57.39   15.10 
   8   5   1   58.29   12.20 
  -8   5  -1   62.29   14.90 
  -9  -5  -1  355.76   28.30 
  -9  -5  -1  308.17   35.40 
   9  -5   1  286.27   29.80 
   9  -5   1  312.57   34.20 
  -9  -5  -1  347.47   40.00 
   9  -5   1  386.66   31.80 
  -9  -5  -1  331.67   38.10 
  -9  -5  -1  330.07   45.40 
  -9  -5  -1  367.56   36.10 
  -9  -5  -1  357.26   40.30 
  -9   5  -1  358.26   37.60 
  -9   5  -1  318.17   32.30 
  -9   5  -1  307.67   36.60 
   9   5   1  299.97   33.60 
  -9   5  -1  365.26   31.00 
   9   5   1  333.47   36.90 
   9   5   1  362.46   27.70 
  -8  -6   1  103.39   20.90 
   8  -6  -1   98.49   18.30 
   8  -6  -1  108.89   20.00 
  -8  -6   1  116.59   19.40 
  -8  -6   1  137.69   25.20 
   8  -6  -1   88.39   19.20 
  -8  -6   1  115.59   20.80 
  -8  -6   1  132.99   25.30 
  -8  -6   1  145.59   23.00 
  -8  -6   1  120.89   22.80 
   8  -6  -1  103.09   20.70 
   8   6  -1  106.79   17.70 
   8   6  -1  117.29   20.90 
   8   6  -1   90.79   17.20 
  -8   6   1  134.09   21.70 
  -8   6   1   77.59   18.20 
  -8   6   1  104.89   18.90 
   8   6  -1  128.89   22.30 
  -8   6   1  134.79   23.40 
  -8   6   1   97.99   19.50 
  -7  -6   1   -3.10    5.50 
  -7  -6   1   -4.80    5.80 
  -7  -6   1    7.30    8.60 
  -7  -6   1    5.50    6.50 
  -7  -6   1    0.80    8.70 
   7  -6  -1    5.60    7.20 
   7  -6  -1   -2.60    5.90 
  -7  -6   1    4.50    9.20 
   7  -6  -1    3.00    5.00 
   7  -6  -1    0.30    6.30 
   7  -6  -1    0.40    6.00 
   7  -6  -1    4.10    7.20 
  -7  -6   1   -7.00    7.30 
  -7   6   1    6.70    7.00 
  -7   6   1   -5.20    6.70 
   7   6  -1    0.80    7.40 
  -7   6   1   -2.40    5.60 
   7   6  -1    4.00    5.80 
   7   6  -1   15.70    9.60 
  -7   6   1    8.10    8.20 
  -7   6   1    6.40    6.90 
  -7   6   1   -0.50    5.90 
  -7   6   1    2.90    6.80 
  -7   6   1    2.80    7.50 
   7   6  -1   -3.10    6.60 
   7   6  -1    8.20    6.70 
   6  -6  -1  114.89   17.70 
  -6  -6   1   71.59   15.10 
   6  -6  -1  108.89   19.10 
  -6  -6   1  143.39   22.00 
  -6  -6   1   78.99   13.60 
  -6  -6   1  177.98   45.40 
  -6  -6   1  125.29   19.80 
  -6  -6   1  109.89   20.40 
  -6  -6   1   86.69   19.60 
  -6  -6   1   87.59   17.70 
  -6  -6   1  138.29   17.30 
   6  -6  -1   76.19   16.00 
   6  -6  -1  125.79   19.70 
   6  -6  -1   85.99   17.00 
   6  -6  -1   96.39   16.80 
  -6   6   1   82.09   16.50 
  -6   6   1  123.19   20.00 
  -6   6   1  103.29   16.10 
  -6   6   1  156.48   21.10 
   6   6  -1  100.99   17.60 
  -6   6   1  101.29   17.70 
  -6   6   1  120.39   16.90 
  -6   6   1  146.29   17.70 
   6   6  -1  107.19   14.80 
  -6   6   1   77.29   15.40 
   6   6  -1  105.09   16.70 
  -6   6   1   71.49   15.40 
   6   6  -1  114.99   18.40 
   6   6  -1  149.49   20.30 
  -6   6   1  119.99   16.10 
   6   6  -1  111.19   17.30 
  -6   6   1  109.69   16.10 
   6   6  -1  134.89   15.10 
   6   6  -1  130.09   15.10 
   5  -6  -1   71.09   10.40 
   5  -6  -1   78.99   15.20 
  -5  -6   1   70.09   16.20 
  -5  -6   1   75.09   30.50 
  -5  -6   1   70.19   14.10 
   5  -6  -1   64.29   13.60 
  -5  -6   1   76.99   14.30 
  -5  -6   1   92.09   19.40 
  -5  -6   1   70.99   12.80 
   5  -6  -1   61.09   14.20 
   5  -6  -1   62.99   10.40 
  -5  -6   1   80.09   16.40 
   5  -6  -1   85.99   16.60 
  -5  -6   1   72.09   15.50 
  -5  -6   1   65.89   11.50 
  -5  -6   1   63.69   12.90 
   5  -6  -1   58.09   11.50 
  -5  -6   1   57.29   13.30 
  -5  -6   1   59.49   12.10 
   5  -6  -1   35.30   11.20 
   5  -6  -1   70.99   15.80 
  -5  -6   1   43.80   12.00 
   5   6  -1   55.29   12.60 
  -5   6   1   61.39   14.00 
  -5   6   1   52.19   12.80 
   5   6  -1   88.49   13.80 
   5   6  -1   41.40   12.10 
   5   6  -1   64.09   11.40 
  -5   6   1   54.29   13.50 
  -5   6   1   71.79   13.40 
   5   6  -1   63.89   11.00 
   5   6  -1   42.00   11.50 
  -5   6   1   58.39   12.10 
  -5   6   1   78.79   10.60 
   5   6  -1   70.79   12.90 
   5   6  -1   65.89   10.40 
  -5   6   1   73.19   15.20 
   5   6  -1   34.80   10.60 
  -5   6   1   47.80   12.30 
   5   6  -1   55.49   12.10 
  -5   6   1   70.29   13.70 
  -5   6   1   64.29   12.30 
  -5   6   1   49.30   11.10 
  -4  -6   1  155.08   15.80 
  -4  -6   1   96.99   16.80 
   4  -6  -1  123.79   35.10 
   4  -6  -1  106.49   10.90 
   4  -6  -1  105.79    8.50 
   4  -6  -1  102.39   13.30 
   4  -6  -1  107.39   12.30 
   4  -6  -1   88.79   16.70 
   4  -6  -1   81.29   14.60 
   4  -6  -1  125.19   16.40 
   4  -6  -1   97.19   17.60 
  -4  -6   1  127.79   17.50 
  -4  -6   1   98.79   14.00 
  -4  -6   1  117.99   21.20 
  -4  -6   1  116.29   15.60 
   4  -6  -1  108.79   14.60 
  -4  -6   1  100.19   16.20 
  -4  -6   1   88.19   15.90 
   4  -6  -1  108.49   17.00 
  -4  -6   1  122.09   36.40 
  -4  -6   1   91.79   16.00 
  -4  -6   1  128.19   18.50 
   4  -6  -1  110.39   17.20 
   4  -6  -1  129.19   15.10 
  -4  -6   1   92.69   16.40 
   4  -6  -1  100.69   16.90 
  -4   6   1   96.69   15.60 
   4   6  -1   98.69    8.00 
   4   6  -1  123.19   17.50 
   4   6  -1  128.19   16.50 
  -4   6   1  115.49   16.00 
  -4   6   1  104.59   11.80 
   4   6  -1   98.99   13.00 
   4   6  -1   86.19   11.20 
  -4   6   1   76.29   14.90 
   4   6  -1  111.59   18.20 
  -4   6   1  105.89   17.00 
  -4   6   1  100.59   14.50 
   4   6  -1  112.69   16.90 
  -4   6   1  106.29   16.10 
  -4   6   1  111.59   17.10 
   4   6  -1   99.79   14.80 
  -4   6   1  104.09   15.40 
   4   6  -1   96.19   15.70 
   4   6  -1  123.99   14.80 
  -4   6   1   86.79   13.90 
   4   6  -1   94.49   15.00 
   4   6  -1   91.59   15.00 
  -4   6   1  115.19   16.50 
   4   6  -1   74.19   13.40 
  -4   6   1  135.19   12.80 
   3  -6  -1   27.90    4.10 
   3  -6  -1   31.10   10.00 
  -3  -6   1   24.30    7.80 
   3  -6  -1   36.10    6.70 
  -3  -6   1   26.40    9.90 
   3  -6  -1   21.20    6.70 
   3  -6  -1   20.70    4.90 
   3  -6  -1   41.80   11.20 
   3  -6  -1   28.00    7.90 
   3  -6  -1   32.10    8.60 
   3  -6  -1   36.90   11.20 
  -3  -6   1   47.10   14.50 
  -3  -6   1   18.00    8.40 
   3  -6  -1   15.70    7.90 
  -3  -6   1   34.50   22.40 
  -3  -6   1   20.20    8.30 
   3  -6  -1   29.10    4.50 
   3  -6  -1   22.20    8.90 
   3  -6  -1   40.60   10.90 
  -3  -6   1   19.40    7.90 
   3  -6  -1   23.50    9.90 
  -3  -6   1   28.30    8.00 
  -3  -6   1   36.70   10.10 
   3  -6  -1   31.70   21.00 
   3  -6  -1   26.30    8.10 
   3  -6  -1   23.80    4.50 
  -3  -6   1   27.80    8.60 
  -3  -6   1   12.00    7.70 
  -3  -6   1   20.80    8.20 
   3  -6  -1   26.70    9.10 
   3  -6  -1   19.00    5.80 
  -3  -6   1   46.60   12.50 
   3  -6  -1   31.80    8.00 
  -3   6   1   18.50    8.10 
  -3   6   1    8.90    6.40 
   3   6  -1   19.40    8.60 
   3   6  -1   24.80    6.90 
  -3   6   1   26.40    5.40 
   3   6  -1   18.30    8.10 
   3   6  -1   22.80    6.90 
  -3   6   1   27.20    8.20 
  -3   6   1   13.70    7.60 
  -3   6   1   26.70    6.70 
   3   6  -1   27.40    5.80 
   3   6  -1   25.80    9.00 
   3   6  -1   21.30    9.10 
   3   6  -1   20.50    8.70 
  -3   6   1   41.40   10.80 
  -3   6   1   16.80    7.40 
   3   6  -1   12.50    7.70 
   3   6  -1   33.20    8.70 
   3   6  -1   30.20   10.70 
   3   6  -1   30.30    9.40 
  -3   6   1   21.80    9.60 
  -3   6   1   25.10    8.40 
  -3   6   1   45.40    6.60 
  -3   6   1   33.10   10.20 
  -3   6   1   16.90    7.90 
  -3   6   1   40.50    8.10 
   3   6  -1   29.80    9.10 
  -2  -6   1    9.90    5.40 
   2  -6  -1    9.60    5.80 
  -2  -6   1    9.40    6.80 
   2  -6  -1   13.00    7.10 
   2  -6  -1   12.80    6.90 
   2  -6  -1   16.40   16.80 
   2  -6  -1   19.70    7.20 
   2  -6  -1   19.70    8.20 
   2  -6  -1   19.90    5.60 
   2  -6  -1   17.80    6.90 
  -2  -6   1   -0.20    5.70 
   2  -6  -1   12.40    6.00 
  -2  -6   1   17.00    8.30 
  -2  -6   1    5.20    6.20 
  -2  -6   1   11.90    7.70 
   2  -6  -1   13.30    8.70 
   2  -6  -1   17.50    5.50 
  -2  -6   1   30.60   12.20 
  -2  -6   1    2.60    5.40 
   2  -6  -1   15.80    4.60 
   2  -6  -1    9.00    6.10 
  -2  -6   1   16.00    6.90 
  -2  -6   1   14.20    6.70 
   2  -6  -1   12.80    4.30 
   2  -6  -1    6.30    3.50 
  -2  -6   1    1.80    5.50 
   2  -6  -1    5.80    4.80 
   2  -6  -1    9.80    5.60 
   2  -6  -1    7.50    7.20 
  -2  -6   1   14.90    6.50 
   2  -6  -1   17.00    7.90 
  -2  -6   1   11.00   15.80 
  -2  -6   1    6.20    5.50 
   2  -6  -1    6.20    5.40 
  -2   6   1    6.80    6.10 
   2   6  -1   11.00    5.30 
  -2   6   1   12.10    7.60 
   2   6  -1    3.10    5.90 
   2   6  -1   12.00    7.00 
   2   6  -1    7.40    5.70 
   2   6  -1    8.90    6.20 
  -2   6   1    3.00    6.00 
   2   6  -1    5.60    5.80 
   2   6  -1   13.50    7.10 
  -2   6   1    8.40    6.80 
  -2   6   1    3.90    3.80 
  -2   6   1   12.70    4.10 
  -2   6   1   14.10    5.10 
  -2   6   1   16.70    6.70 
  -2   6   1    7.00    5.80 
  -2   6   1    4.20    4.00 
  -2   6   1   16.60    8.70 
   2   6  -1    4.90    6.90 
  -2   6   1    7.50    5.70 
   2   6  -1    9.50    5.60 
   2   6  -1   -1.20    4.40 
  -2   6   1    7.20    5.80 
   2   6  -1   13.20    7.70 
   2   6  -1    5.20    5.10 
  -2   6   1    7.20    5.60 
  -2   6   1    6.70    5.40 
   2   6  -1   10.40    6.90 
   2   6  -1   16.90    5.40 
  -1  -6   1  186.38   19.10 
   1  -6  -1  246.48   28.60 
  -1  -6   1  220.58   22.50 
   1  -6  -1  266.87   18.60 
  -1  -6   1  209.18   23.20 
  -1  -6   1  185.18   19.90 
  -1  -6   1  200.58   16.90 
  -1  -6   1  237.28   18.60 
   1  -6  -1  229.08   19.10 
   1  -6  -1  185.18   19.70 
   1  -6  -1  228.38   16.00 
  -1  -6   1  205.28   21.50 
   1  -6  -1  213.98   15.60 
   1  -6  -1  227.28   18.30 
   1  -6  -1  236.38   15.30 
   1  -6  -1  192.08   20.70 
  -1  -6   1  238.88   23.00 
   1  -6  -1  213.98   18.40 
   1  -6  -1  169.98   38.90 
  -1  -6   1  268.07   32.00 
   1  -6  -1  226.28   24.50 
  -1  -6   1  157.78   18.10 
  -1  -6   1  216.48   23.30 
  -1  -6   1  179.28   20.70 
   1  -6  -1  179.98   21.00 
  -1  -6   1  161.98   19.00 
  -1  -6   1  159.08   21.30 
   1  -6  -1  219.38   19.40 
   1  -6  -1  210.78   15.40 
  -1  -6   1  161.08   39.50 
   1   6  -1  176.68   17.30 
  -1   6   1  201.38   22.70 
  -1   6   1  159.98   20.10 
  -1   6   1  256.97   20.70 
  -1   6   1  220.68   18.40 
  -1   6   1  196.38   20.60 
   1   6  -1  200.88   15.10 
  -1   6   1  201.68   14.40 
  -1   6   1  220.18   17.00 
  -1   6   1  217.78   14.20 
  -1   6   1  190.88   22.20 
  -1   6   1  149.88   17.40 
   1   6  -1  169.28   22.50 
   1   6  -1  172.88   17.80 
  -1   6   1  215.38   21.50 
   1   6  -1  207.68   17.40 
   1   6  -1  180.78   21.00 
  -1   6   1  218.18   15.20 
   1   6  -1  211.78   16.40 
  -1   6   1  226.58   16.90 
   1   6  -1  171.58   18.90 
   1   6  -1  220.58   19.60 
   1   6  -1  173.08   19.60 
   1   6  -1  144.69   17.40 
  -1   6   1  225.48   17.00 
   1   6  -1  208.68   20.30 
   1   6  -1  196.98   20.60 
   1   6  -1  184.98   22.90 
   0  -6  -1  370.16   26.10 
   0  -6   1  452.55   28.40 
   0  -6   1  453.55   30.00 
   0  -6   1  428.36   23.50 
   0  -6  -1  414.16   22.80 
   0  -6   1  397.96   25.80 
   0  -6   1  395.06   24.20 
   0  -6   1  411.56   28.10 
   0  -6  -1  391.46   31.10 
   0  -6  -1  379.56   24.40 
   0  -6   1  441.36   27.70 
   0  -6   1  380.36   25.50 
   0  -6  -1  352.26   25.20 
   0  -6   1  380.26   24.40 
   0  -6  -1  403.56   24.90 
   0  -6   1  401.76   31.50 
   0  -6   1  412.76   51.89 
   0  -6  -1  356.46   24.10 
   0  -6   1  370.66   21.80 
   0  -6  -1  395.96   24.90 
   0  -6  -1  401.26   23.00 
   0  -6  -1  418.66   23.20 
   0  -6   1  402.86   22.60 
   0  -6   1  436.16   26.00 
   0  -6  -1  341.97   24.70 
   0  -6  -1  380.16   28.00 
   0  -6  -1  400.86   49.80 
   0  -6  -1  422.76   26.00 
   0  -6  -1  452.45   25.80 
   0   6   1  390.06   25.70 
   0   6   1  384.86   23.90 
   0   6   1  391.06   21.80 
   0   6   1  441.46   25.80 
   0   6  -1  438.06   23.40 
   0   6  -1  382.86   21.10 
   0   6  -1  358.86   20.70 
   0   6   1  374.66   24.40 
   0   6  -1  400.76   27.00 
   0   6   1  414.16   23.90 
   0   6   1  365.06   25.60 
   0   6   1  335.47   26.30 
   0   6  -1  390.66   27.40 
   0   6   1  437.26   25.30 
   0   6   1  375.46   20.90 
   0   6  -1  405.16   26.70 
   0   6   1  359.06   23.30 
   0   6  -1  373.46   24.10 
   0   6  -1  400.06   24.90 
   0   6  -1  386.36   22.60 
   0   6  -1  396.56   24.70 
   0   6  -1  389.36   25.20 
   0   6  -1  363.26   25.50 
   0   6  -1  319.77   25.70 
   0   6   1  364.96   26.20 
   0   6   1  346.67   20.60 
   0   6   1  379.26   26.30 
   0   6  -1  398.86   22.90 
   1  -6   1   96.59   15.90 
  -1  -6  -1  120.79   16.10 
   1  -6   1  126.29   15.00 
  -1  -6  -1  149.59   21.50 
  -1  -6  -1  120.09   17.80 
   1  -6   1  110.69   17.80 
   1  -6   1  121.09   21.80 
   1  -6   1   93.49   12.80 
  -1  -6  -1  154.38   17.20 
   1  -6   1  127.99   14.50 
  -1  -6  -1  115.29   15.50 
  -1  -6  -1  143.19   22.50 
   1  -6   1   91.19   15.30 
   1  -6   1  133.39   13.10 
  -1  -6  -1  117.89   15.70 
   1  -6   1  129.29   35.90 
   1  -6   1  117.29   15.60 
   1  -6   1  114.99   12.70 
  -1  -6  -1  143.69   17.90 
  -1  -6  -1  128.49   16.10 
   1  -6   1  147.39   22.60 
  -1  -6  -1   96.59   14.70 
   1  -6   1  108.39   16.30 
   1  -6   1  142.39   17.00 
  -1  -6  -1  124.59   16.20 
  -1  -6  -1   97.19   13.50 
  -1  -6  -1  107.59   15.30 
   1  -6   1  113.49   15.90 
   1  -6   1  130.49   18.30 
  -1  -6  -1  122.59   33.90 
  -1  -6  -1  111.49   14.50 
   1   6   1  154.38   18.90 
   1   6   1  100.19   13.80 
   1   6   1  131.89   15.40 
  -1   6  -1  128.69   15.90 
  -1   6  -1  138.39   11.10 
   1   6   1  131.99   15.80 
   1   6   1  120.49   15.10 
  -1   6  -1  120.59   16.30 
   1   6   1  130.09   14.70 
  -1   6  -1  125.69   14.90 
   1   6   1  123.69   18.60 
   1   6   1  108.99   16.40 
   1   6   1  106.99   14.50 
  -1   6  -1   95.29   16.20 
  -1   6  -1  129.69   14.70 
  -1   6  -1  117.59   18.00 
  -1   6  -1  134.89   14.50 
   1   6   1  153.58   21.10 
  -1   6  -1  111.29   14.90 
  -1   6  -1   94.09   14.80 
   1   6   1  113.99   16.20 
   1   6   1  134.29   17.30 
   1   6   1  139.59   13.30 
  -1   6  -1  117.99   15.80 
  -1   6  -1  114.49   17.50 
   1   6   1  128.19   16.10 
  -1   6  -1  109.09   12.40 
  -1   6  -1   90.49   14.50 
   2  -6   1  457.55   19.00 
   2  -6   1  384.66   30.30 
   2  -6   1  459.15   31.40 
   2  -6   1  469.05   28.60 
   2  -6   1  492.35   20.80 
  -2  -6  -1  447.96   28.40 
   2  -6   1  458.45   20.70 
   2  -6   1  411.66   28.60 
  -2  -6  -1  413.96   34.10 
   2  -6   1  451.45   26.40 
   2  -6   1  373.76   28.50 
   2  -6   1  468.05   19.90 
  -2  -6  -1  442.66   27.60 
   2  -6   1  427.06   53.69 
  -2  -6  -1  520.35   27.10 
   2  -6   1  507.25   29.50 
  -2  -6  -1  523.45   30.50 
   2  -6   1  534.05   30.40 
  -2  -6  -1  429.16   27.30 
  -2  -6  -1  489.75   28.30 
   2  -6   1  495.05   25.60 
  -2  -6  -1  460.55   26.80 
   2  -6   1  425.56   18.90 
  -2  -6  -1  508.95   29.50 
   2  -6   1  504.95   24.50 
  -2  -6  -1  441.56   53.39 
  -2  -6  -1  435.66   27.40 
   2  -6   1  446.36   25.70 
  -2  -6  -1  457.05   25.70 
   2  -6   1  450.55   21.00 
   2  -6   1  478.45   22.70 
  -2  -6  -1  442.76   27.30 
   2   6   1  420.96   26.80 
  -2   6  -1  443.16   30.80 
  -2   6  -1  451.85   19.20 
   2   6   1  466.65   21.40 
   2   6   1  448.16   27.90 
   2   6   1  442.96   25.60 
  -2   6  -1  453.85   23.20 
  -2   6  -1  456.95   26.80 
   2   6   1  451.35   28.10 
  -2   6  -1  440.16   30.00 
   2   6   1  499.45   25.80 
   2   6   1  406.16   29.10 
  -2   6  -1  385.16   26.80 
  -2   6  -1  490.75   29.40 
  -2   6  -1  475.25   30.60 
   2   6   1  507.45   27.80 
   2   6   1  449.95   26.60 
  -2   6  -1  455.85   25.00 
   2   6   1  454.65   29.60 
  -2   6  -1  479.65   27.80 
   2   6   1  451.05   26.90 
   2   6   1  395.46   30.30 
   2   6   1  462.95   28.80 
  -2   6  -1  477.55   21.80 
   2   6   1  435.66   24.80 
  -2   6  -1  467.65   28.60 
   3  -6   1    4.50    5.50 
  -3  -6  -1    1.10    4.30 
  -3  -6  -1    5.80    6.60 
   3  -6   1    2.10    2.60 
   3  -6   1    0.00    4.10 
  -3  -6  -1    5.00    4.80 
  -3  -6  -1    2.50    6.00 
  -3  -6  -1    9.90    6.60 
   3  -6   1    3.10    5.90 
   3  -6   1   -2.00    4.00 
   3  -6   1    6.40    4.30 
  -3  -6  -1   -8.10    4.20 
  -3  -6  -1   -3.70    4.00 
   3  -6   1    0.40    4.80 
  -3  -6  -1    4.00    5.70 
   3  -6   1   10.20    4.60 
   3  -6   1    4.30    6.00 
  -3  -6  -1    1.70    5.80 
   3  -6   1   -1.40    4.90 
   3  -6   1    2.20    6.20 
  -3  -6  -1   -0.30   15.90 
  -3  -6  -1    2.70    6.00 
   3  -6   1    7.70    3.80 
   3  -6   1    3.20    4.10 
  -3  -6  -1   -1.20    5.50 
   3  -6   1    2.50    3.10 
   3  -6   1    5.70   12.10 
   3  -6   1    1.00    5.20 
  -3  -6  -1    1.50    5.60 
   3  -6   1   -0.40    1.60 
  -3   6  -1   -2.60    2.80 
   3   6   1    0.10    3.60 
   3   6   1    3.70    5.20 
   3   6   1    1.90    4.60 
   3   6   1    4.50    5.00 
  -3   6  -1   -1.20    4.40 
   3   6   1   -1.60    7.10 
  -3   6  -1    1.00    3.70 
   3   6   1   -6.80    4.40 
  -3   6  -1    1.20    6.00 
  -3   6  -1   -0.40    4.70 
  -3   6  -1   -0.40    5.10 
   3   6   1    1.70    4.00 
  -3   6  -1   -1.50    6.00 
  -3   6  -1    8.10    5.00 
   3   6   1   15.10    7.90 
   3   6   1   -1.50    5.10 
  -3   6  -1   -4.50    5.00 
   3   6   1   -4.60    5.80 
   3   6   1    0.70    2.70 
   3   6   1    4.10    6.40 
   3   6   1    2.60    5.00 
   3   6   1   -2.10    5.30 
  -3   6  -1   -2.70    4.90 
  -3   6  -1    3.20    5.10 
   3   6   1   -3.70    4.30 
   3   6   1   -2.90    4.50 
  -4  -6  -1  131.89   16.60 
   4  -6   1  145.99   16.60 
  -4  -6  -1  141.49   18.60 
   4  -6   1  174.08   23.60 
  -4  -6  -1  202.18   45.70 
  -4  -6  -1  127.99   19.70 
  -4  -6  -1  174.88   21.70 
   4  -6   1  193.58   22.60 
  -4  -6  -1  143.59   18.50 
  -4  -6  -1  151.58   15.40 
  -4  -6  -1  182.08   23.00 
  -4  -6  -1  181.38   22.50 
  -4  -6  -1  170.98   17.40 
  -4  -6  -1  148.89   19.70 
   4  -6   1  152.48   18.10 
  -4  -6  -1  152.18   17.20 
   4  -6   1  200.48   23.00 
   4  -6   1  165.78   21.00 
   4  -6   1  147.19   21.10 
  -4  -6  -1  162.38   24.60 
   4  -6   1  167.48   12.90 
   4  -6   1  174.38   13.80 
   4  -6   1  202.58   25.80 
   4  -6   1  157.38   16.00 
   4   6   1  149.88   20.40 
  -4   6  -1  168.38   19.20 
   4   6   1  167.38   16.90 
  -4   6  -1  158.98   19.90 
   4   6   1  183.38   20.50 
   4   6   1  170.78   20.40 
  -4   6  -1  158.68   20.70 
   4   6   1  177.68   18.50 
  -4   6  -1  160.18   12.20 
  -4   6  -1  199.88   21.60 
   4   6   1  193.88   21.10 
  -4   6  -1  189.08   21.60 
   4   6   1  186.68   21.90 
  -4   6  -1  166.98   13.50 
   4   6   1  166.38   20.40 
   4   6   1  180.78   19.90 
   4   6   1  160.28   12.90 
  -4   6  -1  172.68   21.90 
   4   6   1  159.88   18.60 
   4   6   1  178.78   18.70 
   4   6   1  186.68   22.40 
  -4   6  -1  175.98   22.00 
  -4   6  -1  179.18   10.60 
  -4   6  -1  192.58   23.50 
   5  -6   1  150.88   17.90 
  -5  -6  -1  139.19   16.30 
   5  -6   1  138.89   21.80 
  -5  -6  -1  118.99   35.90 
  -5  -6  -1  155.88   21.40 
   5  -6   1  128.39   13.30 
   5  -6   1  114.59   18.80 
  -5  -6  -1  158.38   18.80 
  -5  -6  -1  117.69   19.90 
   5  -6   1  170.58   21.20 
  -5  -6  -1  126.79   15.90 
  -5  -6  -1  107.49   18.50 
   5  -6   1  167.38   23.30 
  -5  -6  -1  104.49   16.60 
  -5  -6  -1  145.39   19.60 
  -5  -6  -1  167.08   24.80 
  -5  -6  -1  122.79   19.60 
  -5  -6  -1  147.99   17.50 
  -5  -6  -1  124.99   18.80 
   5  -6   1  137.09   19.20 
   5  -6   1  124.59   18.50 
  -5   6  -1  167.58   21.60 
  -5   6  -1  131.49   17.30 
   5   6   1  124.59   15.20 
   5   6   1  135.39   19.40 
   5   6   1  123.99   17.40 
   5   6   1  158.68   15.20 
   5   6   1  162.58   16.70 
   5   6   1  133.79   16.40 
  -5   6  -1  137.29   18.40 
  -5   6  -1  105.59   17.40 
  -5   6  -1  134.59   18.10 
   5   6   1  118.69   15.60 
  -5   6  -1  130.59   19.30 
  -5   6  -1  129.49   20.70 
  -5   6  -1  117.89   16.40 
  -5   6  -1  126.99   19.50 
   5   6   1  147.09   20.70 
   5   6   1  140.39   20.20 
   5   6   1  144.09   19.30 
   6  -6   1  508.75   35.10 
  -6  -6  -1  531.45   29.80 
   6  -6   1  566.84   37.10 
  -6  -6  -1  543.55   34.10 
   6  -6   1  484.15   28.40 
  -6  -6  -1  449.95   35.30 
   6  -6   1  458.25   31.30 
  -6  -6  -1  463.55   33.60 
   6  -6   1  479.35   33.10 
  -6  -6  -1  523.05   31.20 
  -6  -6  -1  516.55   36.30 
  -6  -6  -1  546.75   33.60 
  -6  -6  -1  538.95   38.90 
  -6  -6  -1  549.65   35.80 
  -6  -6  -1  514.25   60.69 
  -6  -6  -1  545.65   33.60 
   6  -6   1  556.64   33.40 
   6  -6   1  497.45   35.40 
   6   6   1  506.45   34.30 
   6   6   1  498.05   27.40 
   6   6   1  552.24   33.10 
  -6   6  -1  521.25   35.10 
  -6   6  -1  508.65   33.40 
  -6   6  -1  532.65   30.50 
  -6   6  -1  518.15   31.50 
   6   6   1  564.24   36.40 
   6   6   1  506.75   31.00 
  -6   6  -1  546.05   36.40 
  -6   6  -1  506.35   33.70 
   6   6   1  561.74   33.10 
   6   6   1  538.25   28.00 
  -6   6  -1  522.35   30.30 
  -6   6  -1  528.75   35.60 
  -6   6  -1  529.45   31.10 
   7  -6   1    8.30    7.60 
   7  -6   1   -0.40    5.50 
   7  -6   1    8.20    7.70 
  -7  -6  -1    5.80    7.80 
  -7  -6  -1    8.10    9.10 
  -7  -6  -1    0.80    8.10 
   7  -6   1   14.00    8.80 
   7  -6   1    7.10    7.10 
   7  -6   1    3.40    7.40 
  -7  -6  -1    5.40    8.50 
  -7  -6  -1   11.10    9.30 
  -7  -6  -1   -3.00   17.80 
  -7  -6  -1    1.60    7.30 
  -7  -6  -1   -2.70    7.30 
   7   6   1    2.30    5.10 
   7   6   1   11.70    9.40 
  -7   6  -1   17.40    9.60 
  -7   6  -1    4.60    6.80 
  -7   6  -1   13.30    8.80 
   7   6   1   -2.00    6.60 
   7   6   1    1.90    5.20 
   7   6   1    1.70    7.10 
  -7   6  -1    3.20    6.90 
  -7   6  -1    6.00   10.50 
  -7   6  -1   -2.90    6.20 
  -7   6  -1  -12.10    6.90 
  -8  -6  -1  754.22   49.99 
  -8  -6  -1  699.83   41.40 
  -8  -6  -1  679.73   48.40 
  -8  -6  -1  761.72   46.10 
   8  -6   1  739.13   45.80 
  -8  -6  -1  756.32   48.30 
   8  -6   1  668.43   44.90 
   8  -6   1  714.63   42.00 
  -8  -6  -1  662.23   41.40 
  -8  -6  -1  725.33   45.00 
   8  -6   1  618.44   42.70 
   8  -6   1  705.43   41.80 
  -8   6  -1  680.13   44.40 
  -8   6  -1  634.24   41.50 
   8   6   1  696.23   40.50 
  -8   6  -1  624.84   43.90 
  -8   6  -1  787.02   50.59 
   8   6   1  742.73   46.50 
  -8   6  -1  675.13   41.40 
   8   6   1  637.44   39.60 
   8   6   1  671.13   43.70 
  -7  -7   1  962.90   56.59 
   7  -7  -1 1121.09   57.79 
  -7  -7   1 1101.89   61.69 
  -7  -7   1 1150.58   66.29 
   7  -7  -1 1110.99   60.39 
  -7  -7   1 1166.28   59.79 
   7  -7  -1 1070.09   54.19 
  -7  -7   1 1072.69   55.89 
  -7  -7   1 1074.49   57.99 
  -7  -7   1 1130.99   60.09 
   7  -7  -1 1140.69   61.39 
  -7  -7   1 1067.99   55.99 
   7  -7  -1 1035.70   55.79 
  -7  -7   1 1097.29   57.69 
   7  -7  -1 1173.58   61.59 
  -7   7   1 1038.90   55.39 
  -7   7   1 1132.09   62.59 
   7   7  -1 1147.29   57.99 
  -7   7   1 1069.89   53.99 
  -7   7   1 1054.69   58.59 
  -7   7   1 1107.79   57.69 
   7   7  -1 1081.19   57.89 
   7   7  -1 1127.99   54.99 
   7   7  -1 1055.49   53.89 
  -7   7   1 1165.78   60.99 
   7   7  -1 1159.78   56.19 
  -7   7   1 1043.20   51.79 
  -7   7   1 1092.09   56.59 
   6  -7  -1   15.70   10.10 
   6  -7  -1   18.40    9.00 
  -6  -7   1   15.90   11.10 
  -6  -7   1   17.90    8.70 
   6  -7  -1   21.50   11.40 
  -6  -7   1   24.40   10.50 
  -6  -7   1   19.50   10.80 
  -6  -7   1   32.80   26.00 
  -6  -7   1    9.80    9.10 
   6  -7  -1   21.20   10.10 
   6  -7  -1   22.50   10.50 
   6  -7  -1    7.20    7.30 
  -6  -7   1   19.20   11.50 
  -6  -7   1   21.30   10.50 
  -6  -7   1   10.60    9.60 
  -6  -7   1   23.90   12.60 
  -6  -7   1   17.00   10.10 
  -6  -7   1    7.70    8.30 
   6   7  -1   12.90    8.60 
  -6   7   1    1.50    7.40 
   6   7  -1   17.50    7.50 
  -6   7   1    6.10    9.10 
   6   7  -1   18.00    9.60 
  -6   7   1   19.70    8.30 
  -6   7   1   18.10    9.50 
  -6   7   1   20.50   10.10 
   6   7  -1   -2.40    5.80 
  -6   7   1   22.60    9.20 
  -6   7   1    2.50    6.30 
   6   7  -1   24.60    8.30 
   6   7  -1    1.60    7.00 
   6   7  -1   13.90    9.30 
  -6   7   1    5.30    6.60 
  -6   7   1   21.50   10.00 
   6   7  -1   23.60    9.30 
  -6   7   1   12.10    8.60 
  -6   7   1   16.60    9.20 
   5  -7  -1 2039.90   84.99 
  -5  -7   1 1997.30   76.39 
  -5  -7   1 1907.81   91.89 
  -5  -7   1 1987.20   82.59 
  -5  -7   1 2135.09   77.99 
  -5  -7   1 2027.30   84.69 
   5  -7  -1 1944.01   73.19 
   5  -7  -1 1952.10   82.09 
  -5  -7   1 2037.50   86.09 
  -5  -7   1 2050.09   83.89 
  -5  -7   1 2210.98   83.69 
  -5  -7   1 2007.10   81.79 
   5  -7  -1 2011.20   77.09 
   5  -7  -1 2049.89   87.39 
  -5  -7   1 2074.29   81.79 
  -5  -7   1 2066.19   83.29 
  -5  -7   1 2019.80  130.09 
   5  -7  -1 2111.19   85.49 
   5  -7  -1 2035.00   86.59 
   5  -7  -1 2006.60  132.29 
   5  -7  -1 1907.01   79.39 
  -5   7   1 1980.80   78.39 
   5   7  -1 1986.50   71.19 
   5   7  -1 2170.18   76.29 
  -5   7   1 2100.59   78.29 
  -5   7   1 1967.60   77.59 
  -5   7   1 2083.59   76.29 
   5   7  -1 1982.10   77.69 
  -5   7   1 1986.30   83.79 
   5   7  -1 2077.89   84.99 
   5   7  -1 2051.29   81.09 
   5   7  -1 2076.99   82.49 
  -5   7   1 2097.19   83.19 
  -5   7   1 1935.71   78.39 
   5   7  -1 2106.19   76.89 
  -5   7   1 2076.09   80.99 
  -5   7   1 1919.81   83.69 
   5   7  -1 2070.09   80.29 
  -5   7   1 1974.50   84.49 
   5   7  -1 1987.00   76.19 
   5   7  -1 2059.39   81.79 
   5   7  -1 2145.69   79.49 
  -4  -7   1   34.80   12.60 
   4  -7  -1   31.00    9.70 
   4  -7  -1   20.00    9.90 
  -4  -7   1   29.80    8.50 
  -4  -7   1   18.70    9.50 
   4  -7  -1   20.60    8.80 
  -4  -7   1   27.00   10.80 
   4  -7  -1   25.70    8.70 
  -4  -7   1   35.80    9.50 
   4  -7  -1   22.60    9.80 
   4  -7  -1   22.50   21.40 
   4  -7  -1   38.20    9.50 
  -4  -7   1   38.30   15.50 
  -4  -7   1   36.80   12.20 
   4  -7  -1   21.30    9.40 
  -4  -7   1   43.00   12.80 
  -4  -7   1   46.50   11.30 
  -4  -7   1   48.10   27.10 
   4  -7  -1   30.00   10.60 
  -4  -7   1   28.70   11.70 
   4  -7  -1   35.90   11.00 
  -4  -7   1   16.40    9.40 
  -4  -7   1   19.10    9.40 
  -4  -7   1   18.40    8.50 
   4  -7  -1   36.10   13.30 
  -4   7   1   27.70    9.40 
  -4   7   1   27.30    9.60 
   4   7  -1   26.50    9.50 
   4   7  -1   44.60   12.30 
  -4   7   1   29.50   10.10 
   4   7  -1   42.40   11.60 
   4   7  -1   27.90    9.60 
  -4   7   1    9.00    7.10 
  -4   7   1   34.90   10.00 
   4   7  -1   24.50    9.00 
   4   7  -1   28.60   11.00 
   4   7  -1   31.10    8.40 
   4   7  -1   21.90    9.80 
   4   7  -1   24.60   10.90 
   4   7  -1   16.40    8.80 
   4   7  -1   25.60    8.50 
  -4   7   1   23.10    8.60 
  -4   7   1   10.50    7.60 
  -4   7   1   26.00   10.30 
  -4   7   1   31.60   11.10 
  -4   7   1   33.60    8.40 
  -4   7   1   13.50    8.50 
   4   7  -1   26.60    9.80 
  -3  -7   1 1531.45  110.49 
   3  -7  -1 1547.55   67.39 
  -3  -7   1 1565.04   63.29 
   3  -7  -1 1578.94   62.09 
   3  -7  -1 1410.06   57.59 
  -3  -7   1 1591.14   62.69 
   3  -7  -1 1579.14   60.09 
   3  -7  -1 1518.15   68.99 
  -3  -7   1 1454.25   64.19 
   3  -7  -1 1509.15  110.79 
   3  -7  -1 1307.07   66.59 
   3  -7  -1 1630.94   54.99 
  -3  -7   1 1554.54   66.89 
  -3  -7   1 1601.84   64.99 
  -3  -7   1 1521.65   65.89 
   3  -7  -1 1603.14   60.69 
   3  -7  -1 1538.65   63.59 
   3  -7  -1 1579.24   53.19 
  -3  -7   1 1501.75   67.89 
   3  -7  -1 1593.54   65.79 
  -3  -7   1 1535.35   78.09 
   3  -7  -1 1465.95   70.29 
   3  -7  -1 1663.53   57.39 
  -3  -7   1 1570.04   65.49 
  -3  -7   1 1562.54   64.19 
  -3  -7   1 1556.54   63.59 
  -3  -7   1 1495.65   58.79 
  -3  -7   1 1512.35   64.49 
   3  -7  -1 1527.35   65.59 
   3  -7  -1 1603.14   69.09 
  -3   7   1 1476.85   64.39 
   3   7  -1 1481.65   58.39 
  -3   7   1 1597.64   51.39 
   3   7  -1 1567.44   63.49 
   3   7  -1 1336.47   66.69 
   3   7  -1 1465.75   69.49 
  -3   7   1 1558.24   56.89 
  -3   7   1 1482.85   68.29 
   3   7  -1 1524.45   64.19 
   3   7  -1 1509.15   66.09 
  -3   7   1 1568.44   63.79 
   3   7  -1 1567.24   60.09 
  -3   7   1 1463.15   66.89 
   3   7  -1 1592.34   53.59 
  -3   7   1 1580.14   62.99 
  -3   7   1 1508.95   61.49 
   3   7  -1 1584.04   62.49 
  -3   7   1 1514.15   64.19 
  -3   7   1 1512.85   63.39 
  -3   7   1 1571.04   68.29 
   3   7  -1 1442.76   70.19 
   3   7  -1 1494.35   63.89 
   3   7  -1 1428.26   65.49 
   3   7  -1 1585.54   61.49 
  -3   7   1 1627.74   64.49 
   3   7  -1 1577.24   63.39 
   2  -7  -1   16.20    9.10 
  -2  -7   1   20.60    9.30 
  -2  -7   1   26.60   10.40 
  -2  -7   1   14.80    8.10 
  -2  -7   1   20.30    8.50 
  -2  -7   1   11.60    8.60 
  -2  -7   1   16.90    7.90 
   2  -7  -1   14.90    6.20 
  -2  -7   1   26.10    9.20 
  -2  -7   1   19.30    8.70 
   2  -7  -1   24.00    9.50 
   2  -7  -1   18.00    8.00 
   2  -7  -1    9.20    8.00 
   2  -7  -1   26.60    9.00 
   2  -7  -1   13.70    6.90 
  -2  -7   1    7.90    7.70 
   2  -7  -1   17.30    7.40 
  -2  -7   1    4.60    6.30 
   2  -7  -1    9.40    7.20 
  -2  -7   1   31.50    9.30 
   2  -7  -1    7.30    7.40 
  -2  -7   1   13.40   17.40 
   2  -7  -1   16.80    7.30 
   2  -7  -1   11.60    7.20 
   2  -7  -1    8.40    5.40 
   2  -7  -1   34.60   22.80 
   2  -7  -1   18.90    6.90 
  -2  -7   1   10.10    9.60 
  -2  -7   1   22.20    8.00 
   2  -7  -1   15.00    8.90 
   2  -7  -1   20.30    5.90 
   2  -7  -1    6.80    7.00 
   2   7  -1    8.30    5.90 
  -2   7   1    1.90    4.10 
   2   7  -1   14.40    7.30 
   2   7  -1   12.10    7.40 
  -2   7   1   24.00    9.80 
   2   7  -1   19.50    8.10 
   2   7  -1    9.60    9.10 
  -2   7   1   25.00    8.20 
  -2   7   1   18.10    9.00 
  -2   7   1   14.00    4.90 
   2   7  -1    8.40    7.00 
   2   7  -1    7.00    8.00 
   2   7  -1    8.70    5.20 
   2   7  -1    3.60    6.90 
   2   7  -1   11.80    8.00 
  -2   7   1   20.10    8.60 
   2   7  -1   10.90    8.90 
  -2   7   1   17.50    7.90 
  -2   7   1   11.40    6.60 
   2   7  -1    3.70    6.10 
  -2   7   1   16.20    9.10 
  -2   7   1   11.40    5.90 
  -2   7   1    7.20    6.40 
   2   7  -1    0.60    5.00 
   2   7  -1   11.30    6.10 
  -2   7   1   12.90    7.20 
  -2   7   1   14.80    7.90 
  -2   7   1   18.50    7.70 
   1  -7  -1 1168.98   95.99 
   1  -7  -1 1256.07   53.29 
  -1  -7   1 1262.97   54.89 
   1  -7  -1 1332.97   49.30 
  -1  -7   1 1143.79   55.29 
   1  -7  -1 1205.18   54.39 
   1  -7  -1 1200.58   54.69 
  -1  -7   1 1296.57   58.89 
  -1  -7   1 1155.48   54.59 
   1  -7  -1 1277.67   55.09 
   1  -7  -1 1244.88   47.80 
  -1  -7   1 1143.09   55.79 
  -1  -7   1 1194.58   51.69 
  -1  -7   1 1201.88   53.29 
  -1  -7   1 1242.88   53.49 
   1  -7  -1 1265.17   48.30 
   1  -7  -1 1178.68   51.69 
   1  -7  -1 1175.98   58.29 
  -1  -7   1 1229.68   52.69 
  -1  -7   1 1216.38   54.49 
   1  -7  -1 1278.07   52.09 
   1  -7  -1 1342.97   53.69 
  -1  -7   1 1199.78   50.89 
  -1  -7   1 1298.17   99.99 
  -1  -7   1 1201.18   50.89 
   1  -7  -1 1203.98   55.29 
   1  -7  -1 1219.78   47.40 
   1  -7  -1 1152.88   55.99 
  -1  -7   1 1305.77   64.09 
  -1  -7   1 1276.97   55.09 
   1  -7  -1 1159.58   56.19 
   1   7  -1 1211.78   55.59 
  -1   7   1 1240.98   54.99 
  -1   7   1 1250.97   54.39 
  -1   7   1 1262.77   53.29 
   1   7  -1 1262.97   52.89 
  -1   7   1 1229.48   46.00 
   1   7  -1 1289.17   53.09 
   1   7  -1 1222.88   50.99 
  -1   7   1 1120.49   52.29 
  -1   7   1 1237.48   46.30 
  -1   7   1 1053.49   54.29 
   1   7  -1 1228.88   54.29 
   1   7  -1 1207.98   59.29 
   1   7  -1 1188.58   49.50 
  -1   7   1 1208.78   50.09 
  -1   7   1 1204.98   57.89 
  -1   7   1 1262.17   54.39 
  -1   7   1 1176.68   56.39 
   1   7  -1 1196.38   47.70 
   1   7  -1 1262.67   55.79 
   1   7  -1 1178.88   48.70 
   1   7  -1 1210.68   52.99 
   1   7  -1 1242.08   56.09 
  -1   7   1 1152.68   53.89 
   1   7  -1 1150.98   52.79 
  -1   7   1 1231.18   50.39 
   1   7  -1 1344.17   60.19 
   0  -7   1   13.20    6.60 
   0  -7   1    3.50    6.60 
   0  -7   1    9.50    7.30 
   0  -7   1   -0.40    5.90 
   0  -7  -1   -5.60    3.80 
   0  -7   1   22.40    8.30 
   0  -7  -1    6.30    6.80 
   0  -7   1   -0.90    6.20 
   0  -7  -1   -6.60    6.00 
   0  -7   1   13.90   16.90 
   0  -7   1    6.80    5.90 
   0  -7   1    6.10    6.80 
   0  -7   1   15.70    8.10 
   0  -7  -1    3.30    6.90 
   0  -7   1   18.60   11.00 
   0  -7  -1   -0.70    4.60 
   0  -7  -1    4.20    6.00 
   0  -7  -1   -0.70    5.90 
   0  -7  -1    1.50    5.50 
   0  -7   1   12.30    6.80 
   0  -7  -1   -4.50   11.60 
   0  -7   1    7.40    5.30 
   0  -7  -1    1.90    6.70 
   0  -7   1    3.20    6.80 
   0  -7  -1   14.50    8.20 
   0  -7  -1    0.60    5.70 
   0  -7  -1   -2.00    5.70 
   0  -7  -1    0.30    5.00 
   0  -7   1    4.50    6.50 
   0  -7   1   -0.40    6.30 
   0  -7  -1   -0.40    7.20 
   0   7  -1    8.30    5.50 
   0   7   1   -0.80    4.80 
   0   7  -1   12.90    7.20 
   0   7  -1    0.30    4.00 
   0   7   1    4.90    4.90 
   0   7  -1    3.10    6.20 
   0   7   1    5.20    6.10 
   0   7   1    6.70    5.90 
   0   7  -1   -0.30    4.50 
   0   7  -1   19.00    7.60 
   0   7   1    8.90    6.70 
   0   7  -1    4.10    5.50 
   0   7   1    3.00    6.30 
   0   7  -1   23.50    8.70 
   0   7  -1    3.70    7.10 
   0   7  -1    6.60    6.20 
   0   7  -1    8.40    5.80 
   0   7   1    5.70    4.40 
   0   7  -1    4.90    5.50 
   0   7  -1    6.70    5.50 
   0   7  -1    2.20    6.20 
   0   7   1    1.60    5.50 
   0   7   1   11.30    7.00 
   0   7   1    3.60    6.50 
   0   7   1   13.70    7.50 
   0   7   1   -6.50    6.10 
   0   7   1   -0.80    5.10 
   0   7   1   11.70    6.70 
   1  -7   1 1642.24   70.19 
  -1  -7  -1 1716.73   67.19 
   1  -7   1 1806.82   75.99 
  -1  -7  -1 1743.53   66.99 
  -1  -7  -1 1725.43   68.79 
   1  -7   1 1729.93   64.59 
   1  -7   1 1608.54   71.09 
  -1  -7  -1 1763.02   72.59 
  -1  -7  -1 1803.82   69.59 
  -1  -7  -1 1708.43  116.19 
   1  -7   1 1764.52   61.79 
   1  -7   1 1681.03  116.79 
   1  -7   1 1771.42   69.89 
  -1  -7  -1 1723.63   69.29 
  -1  -7  -1 1752.02   71.09 
  -1  -7  -1 1691.73   70.39 
   1  -7   1 1755.22   60.99 
   1  -7   1 1719.13   73.59 
  -1  -7  -1 1780.82   67.29 
   1  -7   1 1725.63   66.09 
  -1  -7  -1 1740.83   68.79 
   1  -7   1 1812.22   67.29 
  -1  -7  -1 1751.12   65.89 
   1  -7   1 1614.14   66.29 
   1  -7   1 1806.72   70.69 
   1  -7   1 1682.63   70.79 
  -1  -7  -1 1811.52   73.79 
  -1  -7  -1 1750.02   78.09 
  -1  -7  -1 1702.73   66.99 
   1  -7   1 1816.42   62.89 
  -1   7  -1 1778.22   70.39 
   1   7   1 1767.62   69.19 
   1   7   1 1694.53   65.99 
  -1   7  -1 1647.84   72.99 
   1   7   1 1738.43   66.79 
  -1   7  -1 1644.54   67.99 
  -1   7  -1 1713.63   60.89 
  -1   7  -1 1770.72   67.09 
   1   7   1 1814.52   62.09 
   1   7   1 1857.61   76.09 
  -1   7  -1 1771.32   73.39 
   1   7   1 1645.74   66.99 
  -1   7  -1 1804.12   71.49 
  -1   7  -1 1799.42   69.69 
  -1   7  -1 1783.32   59.99 
  -1   7  -1 1663.03   65.09 
   1   7   1 1775.42   71.59 
   1   7   1 1918.71   74.69 
  -1   7  -1 1747.53   63.29 
   1   7   1 1727.23   67.59 
  -1   7  -1 1773.12   69.69 
   1   7   1 1772.62   68.89 
   1   7   1 1778.32   63.69 
  -1   7  -1 1769.92   63.39 
   1   7   1 1636.14   70.59 
   1   7   1 1785.22   65.79 
  -1   7  -1 1759.42   73.79 
   1   7   1 1705.33   67.09 
   1   7   1 1783.22   70.69 
  -2  -7  -1   13.10    7.70 
  -2  -7  -1   20.80    8.20 
   2  -7   1   18.90    6.20 
   2  -7   1   30.90   10.40 
  -2  -7  -1   38.30    9.90 
  -2  -7  -1   34.70   11.60 
   2  -7   1   29.60   10.20 
  -2  -7  -1   48.70   12.80 
  -2  -7  -1   37.20   10.40 
   2  -7   1   14.30    8.40 
   2  -7   1   24.00    7.30 
   2  -7   1   36.30   12.20 
   2  -7   1   21.20    8.50 
  -2  -7  -1   44.50   11.30 
  -2  -7  -1   54.89   12.70 
   2  -7   1   39.80   13.40 
   2  -7   1   42.30    9.80 
  -2  -7  -1   45.00   14.00 
   2  -7   1   39.30    7.20 
  -2  -7  -1   29.00    9.50 
  -2  -7  -1    6.90    8.80 
   2  -7   1   29.40    8.70 
  -2  -7  -1   31.00   22.60 
  -2  -7  -1   21.80    8.50 
   2  -7   1   31.70    8.70 
   2  -7   1   43.90   11.60 
   2  -7   1   20.80    8.00 
  -2  -7  -1   29.60   10.40 
   2  -7   1   28.20   20.10 
   2   7   1   36.50    7.80 
  -2   7  -1   32.40    9.10 
  -2   7  -1   19.20    7.80 
  -2   7  -1   18.50    8.80 
   2   7   1   48.50   10.90 
   2   7   1   20.50    8.80 
  -2   7  -1   27.70    9.50 
   2   7   1   28.90    8.60 
   2   7   1   22.40    9.80 
   2   7   1   44.90   10.80 
  -2   7  -1   38.00   11.00 
  -2   7  -1   39.90    9.00 
   2   7   1   23.10    8.70 
  -2   7  -1   42.60    9.80 
   2   7   1   33.70   11.30 
  -2   7  -1   48.50   13.00 
  -2   7  -1   47.60    8.70 
   2   7   1   19.80    7.80 
   2   7   1   23.40    8.70 
  -2   7  -1   31.30    9.60 
  -2   7  -1   26.70   10.00 
  -2   7  -1   29.60    9.80 
   2   7   1   39.10   11.00 
  -2   7  -1   34.80    6.50 
   2   7   1   41.90   13.10 
   2   7   1   32.40   11.10 
   2   7   1   32.50    9.60 
   2   7   1   28.30   10.00 
   3  -7   1 1084.69   54.49 
  -3  -7  -1 1058.89   49.90 
   3  -7   1 1113.29   40.40 
   3  -7   1 1107.49   52.49 
   3  -7   1 1140.79   52.29 
  -3  -7  -1 1170.98   51.19 
   3  -7   1 1110.79   51.19 
   3  -7   1 1058.59   92.89 
  -3  -7  -1 1095.99   91.19 
  -3  -7  -1 1055.09   61.29 
   3  -7   1 1092.09   47.50 
   3  -7   1  956.80   52.99 
  -3  -7  -1 1037.10   50.09 
   3  -7   1 1004.40   42.60 
  -3  -7  -1 1145.99   52.99 
  -3  -7  -1 1085.99   46.20 
  -3  -7  -1 1114.79   50.39 
   3  -7   1 1086.79   44.80 
  -3  -7  -1 1036.10   51.19 
   3  -7   1 1058.19   55.99 
  -3  -7  -1 1166.88   51.69 
  -3  -7  -1 1091.29   51.79 
   3  -7   1  867.21   53.59 
  -3  -7  -1 1101.99   52.59 
   3  -7   1 1041.50   46.90 
  -3  -7  -1 1107.19   47.00 
   3  -7   1 1093.99   46.60 
   3   7   1 1068.69   46.80 
   3   7   1 1038.50   52.49 
   3   7   1  985.00   55.09 
  -3   7  -1 1005.20   48.50 
   3   7   1 1120.79   51.39 
  -3   7  -1 1060.89   39.40 
   3   7   1 1055.49   51.99 
   3   7   1 1012.60   52.09 
  -3   7  -1 1159.78   46.40 
  -3   7  -1 1078.49   50.59 
  -3   7  -1 1083.09   42.00 
   3   7   1 1113.59   50.19 
  -3   7  -1 1049.79   54.59 
   3   7   1 1113.49   51.39 
  -3   7  -1  996.10   54.29 
   3   7   1 1109.59   50.49 
   3   7   1 1017.20   54.79 
   3   7   1 1096.29   39.10 
   3   7   1 1105.59   52.99 
  -3   7  -1 1169.08   53.39 
  -3   7  -1 1071.59   49.70 
  -3   7  -1 1108.59   51.99 
  -3   7  -1 1121.29   50.89 
   3   7   1 1162.28   49.40 
   3   7   1 1049.89   48.50 
   3   7   1 1098.89   45.50 
  -3   7  -1 1094.49   54.79 
   3   7   1 1141.79   48.40 
   4  -7   1   37.70    9.80 
  -4  -7  -1   13.60    8.80 
   4  -7   1   35.60   12.20 
  -4  -7  -1   29.70   13.50 
  -4  -7  -1   38.00   11.40 
   4  -7   1   41.20   11.60 
  -4  -7  -1   35.30    9.10 
   4  -7   1   24.60   10.10 
  -4  -7  -1   26.90    9.80 
   4  -7   1   41.00   12.30 
   4  -7   1   30.40   12.00 
   4  -7   1   32.80   21.20 
   4  -7   1   23.00    9.30 
   4  -7   1   39.60    9.30 
   4  -7   1   50.89   15.30 
  -4  -7  -1   45.50   12.30 
  -4  -7  -1   50.29   13.70 
  -4  -7  -1   25.30   10.90 
  -4  -7  -1   45.60   11.80 
  -4  -7  -1   38.90   12.20 
   4  -7   1   28.90    9.10 
  -4  -7  -1   40.20   27.60 
  -4  -7  -1   37.30   12.20 
  -4  -7  -1   30.40    8.30 
   4   7   1   30.60   10.50 
  -4   7  -1   40.40   11.40 
   4   7   1   44.80   10.90 
  -4   7  -1   39.40   12.70 
  -4   7  -1   21.40   10.10 
   4   7   1   20.70    9.10 
  -4   7  -1   42.60    9.10 
  -4   7  -1   20.20   10.20 
  -4   7  -1   33.50    9.60 
  -4   7  -1   32.40   10.70 
   4   7   1   14.70    9.20 
   4   7   1   30.70   11.40 
   4   7   1   24.70    9.50 
   4   7   1   28.60    9.50 
   4   7   1   28.40   10.50 
   4   7   1   37.30   11.00 
   4   7   1   30.00   11.80 
   4   7   1   51.39   10.10 
  -4   7  -1   30.80   11.50 
   4   7   1   46.20   10.30 
  -4   7  -1   37.80   11.10 
  -4   7  -1   16.60    8.60 
   4   7   1   28.90   11.50 
   5  -7   1  510.85   38.30 
  -5  -7  -1  548.15   42.70 
  -5  -7  -1  579.64   34.80 
   5  -7   1  491.85   33.90 
   5  -7   1  579.74   40.80 
  -5  -7  -1  558.94   35.70 
  -5  -7  -1  483.35   33.80 
   5  -7   1  469.85   36.30 
  -5  -7  -1  514.35   64.09 
  -5  -7  -1  540.05   35.80 
  -5  -7  -1  526.35   35.10 
  -5  -7  -1  444.66   33.80 
   5  -7   1  562.54   36.90 
   5  -7   1  509.75   32.40 
  -5  -7  -1  591.24   33.00 
  -5  -7  -1  527.55   36.20 
  -5  -7  -1  576.64   33.40 
  -5  -7  -1  527.15   37.80 
   5  -7   1  598.64   37.50 
   5   7   1  529.55   35.10 
  -5   7  -1  470.85   31.00 
   5   7   1  546.75   33.70 
  -5   7  -1  551.24   33.50 
   5   7   1  546.95   28.90 
  -5   7  -1  583.94   34.30 
  -5   7  -1  532.65   37.50 
  -5   7  -1  550.64   36.70 
   5   7   1  556.24   31.30 
   5   7   1  612.24   37.90 
   5   7   1  533.35   31.70 
  -5   7  -1  547.65   37.80 
  -5   7  -1  545.35   34.50 
  -5   7  -1  481.25   36.10 
   5   7   1  511.65   34.60 
   5   7   1  506.55   30.80 
   5   7   1  529.75   31.50 
  -5   7  -1  512.05   34.60 
   5   7   1  616.04   37.60 
   6  -7   1   84.89   19.20 
  -6  -7  -1  116.09   17.90 
  -6  -7  -1   91.39   17.90 
  -6  -7  -1  138.39   43.60 
  -6  -7  -1  105.29   23.00 
   6  -7   1   96.59   18.30 
   6  -7   1  110.49   21.90 
  -6  -7  -1  155.08   22.60 
  -6  -7  -1  124.99   21.50 
  -6  -7  -1  114.19   21.00 
  -6  -7  -1   69.99   16.80 
  -6  -7  -1  104.89   20.70 
   6  -7   1  139.59   21.10 
   6  -7   1  123.09   22.20 
  -6  -7  -1  148.59   22.90 
   6  -7   1  120.99   21.20 
   6   7   1   80.49   16.20 
   6   7   1   96.69   15.20 
  -6   7  -1  108.79   17.80 
   6   7   1  126.29   19.50 
  -6   7  -1  102.89   19.80 
  -6   7  -1   94.19   17.90 
  -6   7  -1  107.29   18.20 
   6   7   1  130.29   21.40 
  -6   7  -1  127.89   19.50 
  -6   7  -1  135.69   19.90 
   6   7   1  104.99   18.80 
   6   7   1  117.19   23.40 
  -6   7  -1  124.59   18.60 
  -6   7  -1   92.99   18.60 
   6   7   1   87.49   16.70 
  -6   7  -1   91.39   18.50 
  -6   7  -1  156.38   20.30 
  -7  -7  -1  465.55   36.30 
   7  -7   1  468.85   38.50 
   7  -7   1  466.45   37.30 
  -7  -7  -1  511.65   37.80 
  -7  -7  -1  505.55   35.60 
   7  -7   1  441.06   33.20 
  -7  -7  -1  501.95   35.10 
   7  -7   1  448.06   36.80 
   7  -7   1  462.65   34.30 
  -7  -7  -1  454.25   36.70 
   7  -7   1  468.85   33.70 
  -7  -7  -1  443.66   39.80 
  -7  -7  -1  370.26   31.70 
  -7  -7  -1  429.36   37.10 
   7   7   1  479.45   37.00 
  -7   7  -1  400.86   34.80 
  -7   7  -1  461.25   36.20 
  -7   7  -1  440.36   37.90 
  -7   7  -1  363.06   39.60 
   7   7   1  473.15   32.20 
  -7   7  -1  416.36   33.30 
  -7   7  -1  455.05   34.90 
  -7   7  -1  505.75   33.10 
   7   7   1  480.65   33.80 
  -7   7  -1  395.26   32.00 
   7   7   1  488.95   33.70 
   7   7   1  472.75   35.90 
   6  -8  -1   18.50   13.20 
  -6  -8   1   37.00   13.30 
   6  -8  -1   39.20   14.40 
  -6  -8   1   37.60   14.90 
   6  -8  -1   29.50   11.90 
  -6  -8   1   27.00   11.60 
  -6  -8   1   11.00   10.50 
   6  -8  -1    6.10    8.10 
  -6  -8   1   31.80   15.40 
  -6  -8   1   25.90   16.00 
  -6  -8   1   31.50   13.90 
  -6  -8   1   34.50   13.90 
   6  -8  -1   37.50   14.00 
   6  -8  -1   27.90   13.30 
  -6  -8   1   36.30   27.00 
  -6  -8   1   23.50   11.80 
   6   8  -1   33.80   13.20 
   6   8  -1   42.50   14.90 
   6   8  -1   30.50   13.00 
  -6   8   1   35.30   13.00 
  -6   8   1   24.40   10.80 
  -6   8   1   39.90   12.50 
  -6   8   1   43.70   14.80 
  -6   8   1   45.00   14.40 
   6   8  -1   26.30   12.20 
  -6   8   1   18.90    9.90 
   6   8  -1   58.49   15.90 
  -6   8   1   15.70   10.90 
  -6   8   1   18.50   11.80 
  -6   8   1   37.90   13.50 
   6   8  -1   19.60   11.80 
  -5  -8   1    3.70    7.50 
  -5  -8   1   15.50    9.40 
  -5  -8   1   13.20    9.70 
   5  -8  -1    2.40    8.30 
  -5  -8   1   11.50   10.30 
   5  -8  -1   12.30    8.90 
  -5  -8   1    7.80   11.30 
   5  -8  -1   10.60    8.70 
   5  -8  -1   14.90   11.10 
  -5  -8   1    8.60   18.50 
   5  -8  -1    6.80    9.00 
  -5  -8   1    4.80    8.90 
  -5  -8   1   10.30    9.60 
  -5  -8   1   14.30    9.70 
  -5  -8   1  -10.90    6.90 
   5  -8  -1    8.00    9.40 
  -5  -8   1   16.10    9.30 
   5  -8  -1    6.70   18.00 
   5  -8  -1   22.90   12.60 
  -5  -8   1    4.10    7.10 
   5   8  -1   -6.30    7.00 
  -5   8   1    3.50    7.60 
  -5   8   1    4.90    7.20 
   5   8  -1    7.70    9.50 
  -5   8   1    5.90    8.00 
  -5   8   1   10.50    7.80 
   5   8  -1   13.00    9.80 
  -5   8   1   18.60   10.40 
  -5   8   1    0.50    5.90 
  -5   8   1   12.60    8.50 
  -5   8   1    3.60    6.50 
  -5   8   1    2.30    7.80 
   5   8  -1   10.40    9.20 
   5   8  -1   -1.80    7.30 
   5   8  -1   10.20    8.40 
   5   8  -1   -2.50    6.40 
   5   8  -1    6.00    7.50 
  -5   8   1   -6.00    9.20 
   5   8  -1    3.10    7.70 
   5   8  -1    2.50    6.80 
   4  -8  -1   47.50   15.60 
  -4  -8   1   71.79   16.30 
  -4  -8   1   56.19   15.50 
  -4  -8   1   83.29   17.50 
  -4  -8   1   58.79   14.50 
  -4  -8   1   53.59   13.50 
   4  -8  -1   94.29   17.10 
  -4  -8   1   95.89   25.30 
   4  -8  -1   57.49   16.80 
   4  -8  -1   65.99   14.00 
  -4  -8   1   48.20   14.00 
   4  -8  -1   52.19   16.10 
  -4  -8   1   65.39   13.50 
   4  -8  -1   65.59   13.50 
  -4  -8   1   65.99   16.10 
   4  -8  -1   61.19   30.40 
  -4  -8   1   86.09   18.00 
  -4  -8   1   57.49   15.00 
  -4  -8   1   50.69   28.00 
  -4  -8   1   65.49   12.90 
   4  -8  -1   91.59   17.60 
   4  -8  -1   67.39   14.20 
   4  -8  -1   80.39   17.60 
  -4   8   1   50.49   12.50 
   4   8  -1   59.29   12.70 
   4   8  -1   56.09   11.80 
  -4   8   1   22.50   12.00 
  -4   8   1  105.79   20.40 
  -4   8   1   80.79   17.10 
  -4   8   1   77.89   16.50 
   4   8  -1   40.20   11.80 
  -4   8   1   69.99   16.50 
   4   8  -1   68.19   16.20 
  -4   8   1   68.69   16.60 
   4   8  -1   49.70   13.10 
   4   8  -1   84.09   15.30 
   4   8  -1   34.70   12.40 
   4   8  -1   39.10   11.60 
   4   8  -1   90.19   17.10 
  -4   8   1   71.79   14.80 
  -4   8   1   69.09   14.70 
   4   8  -1   62.09   14.30 
   4   8  -1   65.89   18.30 
   4   8  -1   54.99   14.90 
   4   8  -1   88.29   17.40 
  -4   8   1   84.89   16.60 
   3  -8  -1   13.90   10.50 
   3  -8  -1    1.70    5.70 
  -3  -8   1    6.70    6.50 
  -3  -8   1    1.10    8.40 
  -3  -8   1    5.10    6.80 
   3  -8  -1   -1.80    7.20 
  -3  -8   1   -0.60    5.90 
  -3  -8   1   15.10   10.80 
  -3  -8   1    2.20    9.20 
   3  -8  -1    5.10   14.40 
  -3  -8   1    2.20   15.80 
  -3  -8   1   12.10    7.90 
   3  -8  -1    8.20    8.40 
  -3  -8   1   -2.00    7.50 
   3  -8  -1   16.20    9.00 
  -3  -8   1    3.00    7.20 
   3  -8  -1   10.40    7.20 
  -3  -8   1    3.40    6.10 
   3  -8  -1   10.70    7.70 
  -3  -8   1    4.80    7.20 
  -3  -8   1   -3.90    6.50 
   3  -8  -1   14.30   10.40 
  -3  -8   1   -3.00    8.10 
   3  -8  -1    2.30    7.80 
   3  -8  -1   -2.70    6.30 
   3  -8  -1    9.20    7.90 
   3   8  -1   -0.60    5.70 
   3   8  -1    4.60    8.50 
  -3   8   1    3.10    6.70 
  -3   8   1    7.10    7.80 
  -3   8   1   12.00    9.80 
   3   8  -1   23.60    9.80 
   3   8  -1   14.70    8.80 
  -3   8   1   27.40   11.40 
   3   8  -1   12.10   10.20 
  -3   8   1    8.70    8.50 
   3   8  -1    8.60    7.70 
   3   8  -1   -0.20    6.70 
   3   8  -1   13.10   10.00 
  -3   8   1   -4.20    6.00 
   3   8  -1    4.90    6.30 
  -3   8   1   13.50    9.70 
  -3   8   1   24.30    8.70 
  -3   8   1   19.70    9.80 
   3   8  -1    2.40    6.30 
   3   8  -1    1.40    5.90 
   3   8  -1   -2.90    5.70 
  -3   8   1    2.30    7.00 
  -3   8   1   16.10    8.00 
   3   8  -1   -1.10    5.90 
   2  -8  -1    9.40   10.50 
  -2  -8   1    2.30    7.20 
  -2  -8   1   -2.90    6.40 
   2  -8  -1   -3.30    5.60 
  -2  -8   1    1.00    6.00 
  -2  -8   1    0.60    6.20 
   2  -8  -1   -3.70    5.50 
   2  -8  -1    3.10    5.40 
  -2  -8   1   -0.40   15.10 
   2  -8  -1   11.70    8.40 
   2  -8  -1    0.30    6.50 
   2  -8  -1   13.70    7.70 
   2  -8  -1    5.40    6.40 
  -2  -8   1    9.00    6.90 
   2  -8  -1   11.80   18.60 
  -2  -8   1    4.20    8.40 
  -2  -8   1   -5.00    4.30 
  -2  -8   1    6.90    7.50 
   2  -8  -1    6.80    8.40 
   2  -8  -1    8.10    6.80 
  -2  -8   1    3.70    6.60 
   2  -8  -1    0.00    6.90 
   2  -8  -1   -5.40    5.90 
  -2  -8   1    9.20    9.10 
  -2  -8   1    0.10    5.80 
  -2  -8   1   -1.00    6.00 
   2  -8  -1    1.40    7.60 
  -2  -8   1   15.80    9.70 
   2  -8  -1   10.40    7.10 
   2  -8  -1   -1.60    6.20 
  -2  -8   1    5.70    7.70 
   2   8  -1    1.10    4.80 
  -2   8   1   -8.10    3.70 
  -2   8   1    6.70    7.40 
   2   8  -1    6.20    7.50 
  -2   8   1   -1.40    4.90 
   2   8  -1    4.60    6.60 
   2   8  -1    2.10    7.30 
   2   8  -1   -8.00    6.60 
   2   8  -1    0.90    5.70 
   2   8  -1   -1.20    7.50 
  -2   8   1    9.90    6.70 
   2   8  -1   -2.10    6.20 
  -2   8   1    2.70    6.10 
   2   8  -1    3.60    6.10 
  -2   8   1   -1.60    5.20 
   2   8  -1   -2.20    7.60 
  -2   8   1    5.80    6.40 
   2   8  -1   -0.30    6.40 
   2   8  -1   -2.10    5.20 
  -2   8   1   -1.70    7.00 
  -2   8   1   -1.30    5.50 
  -2   8   1   -0.20    8.00 
  -2   8   1   -0.40    5.30 
   2   8  -1   -2.90    4.80 
  -2   8   1    0.00    6.80 
   2   8  -1    2.40    5.40 
   1  -8  -1   15.50    6.70 
   1  -8  -1    9.80    8.60 
  -1  -8   1   16.40    8.50 
   1  -8  -1   28.00   10.80 
   1  -8  -1    2.80    6.70 
   1  -8  -1   11.60    6.90 
   1  -8  -1    7.50    7.10 
  -1  -8   1   22.50    9.30 
   1  -8  -1   15.30   21.20 
   1  -8  -1    8.40    7.10 
  -1  -8   1   -4.20    8.10 
   1  -8  -1    8.50    8.80 
   1  -8  -1    2.50    6.90 
  -1  -8   1    9.80    7.70 
  -1  -8   1    6.30    7.50 
  -1  -8   1   10.50    8.30 
   1  -8  -1    3.10    5.90 
  -1  -8   1   15.80    8.10 
   1  -8  -1   10.50    8.30 
  -1  -8   1    4.10    8.40 
  -1  -8   1   13.60   19.00 
  -1  -8   1   18.40    8.30 
   1  -8  -1    0.20    7.70 
  -1  -8   1   14.80    8.70 
   1  -8  -1   11.80    7.30 
  -1  -8   1   20.40    8.40 
  -1  -8   1   17.20    9.70 
  -1  -8   1   15.60    8.80 
   1  -8  -1    8.60    7.70 
   1  -8  -1    5.70    6.10 
   1  -8  -1   15.50    8.80 
  -1  -8   1   12.80    7.50 
  -1   8   1    3.40    5.60 
  -1   8   1    7.40    6.50 
  -1   8   1   17.60    9.70 
   1   8  -1   14.40    9.40 
  -1   8   1   22.40    9.10 
  -1   8   1   24.60   10.30 
   1   8  -1   15.80    7.80 
  -1   8   1   10.90    7.20 
   1   8  -1    5.80    6.90 
  -1   8   1   14.40    7.50 
   1   8  -1    5.40    8.70 
   1   8  -1   19.00    8.80 
  -1   8   1    5.90    7.00 
   1   8  -1   18.90    7.40 
   1   8  -1    1.50    5.60 
  -1   8   1    8.20    8.10 
  -1   8   1    9.30    8.60 
   1   8  -1   -3.70    4.80 
  -1   8   1    1.50    4.20 
  -1   8   1    1.70    7.00 
   1   8  -1   19.50    9.20 
  -1   8   1   33.70    9.50 
   1   8  -1    8.10    7.40 
   1   8  -1   15.90    9.40 
   1   8  -1    9.80    6.40 
   1   8  -1   10.80    7.10 
   1   8  -1   32.40   11.00 
   0  -8   1  297.37   24.60 
   0  -8  -1  332.87   28.60 
   0  -8  -1  373.76   33.50 
   0  -8   1  304.07   23.40 
   0  -8   1  357.26   27.50 
   0  -8  -1  350.46   28.50 
   0  -8  -1  338.47   24.10 
   0  -8   1  347.97   26.30 
   0  -8   1  338.57   24.70 
   0  -8  -1  341.37   26.50 
   0  -8  -1  330.37   24.20 
   0  -8   1  319.47   22.80 
   0  -8  -1  321.37   23.20 
   0  -8   1  293.97   31.70 
   0  -8  -1  289.87   22.50 
   0  -8  -1  282.37   29.40 
   0  -8  -1  337.37   28.70 
   0  -8   1  308.77   32.80 
   0  -8  -1  353.86   26.70 
   0  -8   1  316.07   64.89 
   0  -8  -1  345.77   27.10 
   0  -8  -1  395.26   31.40 
   0  -8   1  394.16   34.10 
   0  -8  -1  354.26   57.99 
   0  -8   1  348.97   29.10 
   0  -8  -1  359.56   26.90 
   0  -8   1  352.26   27.40 
   0  -8  -1  400.06   27.30 
   0  -8   1  336.97   26.70 
   0  -8   1  347.87   27.90 
   0  -8   1  321.27   22.90 
   0   8   1  340.67   28.90 
   0   8   1  328.77   27.10 
   0   8   1  330.37   22.30 
   0   8   1  350.36   26.50 
   0   8  -1  354.26   27.10 
   0   8  -1  300.37   29.30 
   0   8   1  306.07   25.50 
   0   8  -1  353.26   22.70 
   0   8   1  351.16   25.80 
   0   8  -1  325.27   28.10 
   0   8   1  323.97   22.60 
   0   8  -1  212.48   27.50 
   0   8  -1  327.97   24.90 
   0   8   1  321.67   26.30 
   0   8  -1  308.07   22.70 
   0   8   1  381.46   29.20 
   0   8   1  322.57   28.20 
   0   8   1  338.27   22.50 
   0   8   1  347.27   28.70 
   0   8  -1  330.57   28.70 
   0   8  -1  360.16   25.20 
   0   8   1  357.66   25.00 
   0   8  -1  307.57   25.10 
   0   8  -1  342.17   28.00 
   0   8   1  266.57   27.00 
   0   8  -1  350.76   28.10 
   0   8   1  300.37   29.10 
   0   8  -1  361.36   27.00 
   0   8  -1  278.97   21.20 
   1  -8   1   54.49   12.50 
  -1  -8  -1   62.59   15.00 
  -1  -8  -1   68.39   13.70 
   1  -8   1   61.29   15.70 
  -1  -8  -1   67.19   14.30 
  -1  -8  -1   58.39   12.70 
  -1  -8  -1   58.89   14.60 
  -1  -8  -1   57.39   13.70 
  -1  -8  -1   63.39   17.70 
   1  -8   1   61.39   16.00 
   1  -8   1   23.50   21.90 
   1  -8   1   34.60   11.90 
  -1  -8  -1   55.09   12.70 
  -1  -8  -1   37.40   11.70 
   1  -8   1   60.39   11.00 
  -1  -8  -1   38.70   12.90 
   1  -8   1   59.49   11.10 
   1  -8   1   81.49   18.10 
  -1  -8  -1   61.39   15.60 
   1  -8   1   51.19   12.90 
   1  -8   1   49.90    9.90 
   1  -8   1   54.29   12.60 
  -1  -8  -1   50.49   12.40 
  -1  -8  -1   44.80   11.80 
   1  -8   1   67.69   13.40 
  -1  -8  -1   56.59   29.40 
   1  -8   1   56.89   14.90 
   1  -8   1   46.60   13.10 
  -1  -8  -1   67.09   17.00 
  -1   8  -1   47.40   12.70 
  -1   8  -1   57.79   10.30 
   1   8   1   44.30   12.90 
  -1   8  -1   57.69   12.40 
   1   8   1   46.50   12.20 
  -1   8  -1   59.39   14.20 
  -1   8  -1   66.99   14.50 
   1   8   1   56.79   12.70 
  -1   8  -1   65.39   14.40 
   1   8   1   44.70   12.80 
  -1   8  -1   63.49   12.70 
   1   8   1   52.99   12.70 
   1   8   1   28.50    8.80 
   1   8   1   59.49   14.00 
   1   8   1   76.09   16.40 
  -1   8  -1   33.80   10.70 
   1   8   1   96.39   19.10 
  -1   8  -1   69.89   16.30 
   1   8   1   40.90   11.10 
  -1   8  -1   45.20   13.40 
   1   8   1   54.49   11.40 
  -1   8  -1   52.99   11.90 
   1   8   1   61.09   14.40 
   1   8   1   64.59   14.90 
  -1   8  -1   57.69   10.90 
   1   8   1   75.39   13.80 
  -1   8  -1   56.79   14.90 
   1   8   1   57.79   14.40 
   2  -8   1  247.08   28.40 
   2  -8   1  355.26   23.90 
   2  -8   1  297.77   26.00 
  -2  -8  -1  306.67   30.10 
  -2  -8  -1  308.07   23.90 
   2  -8   1  387.36   38.40 
  -2  -8  -1  320.67   24.60 
   2  -8   1  306.77   36.20 
   2  -8   1  314.77   23.90 
   2  -8   1  298.57   34.60 
   2  -8   1  250.07   21.10 
  -2  -8  -1  267.57   27.40 
  -2  -8  -1  265.07   29.20 
  -2  -8  -1  307.47   37.80 
   2  -8   1  241.78   27.80 
  -2  -8  -1  348.17   27.60 
   2  -8   1  241.28   54.69 
  -2  -8  -1  278.67   29.70 
  -2  -8  -1  315.47   27.00 
  -2  -8  -1  337.27   27.10 
  -2  -8  -1  246.88   26.90 
   2  -8   1  400.46   22.50 
   2  -8   1  285.17   28.60 
   2  -8   1  304.27   31.70 
  -2  -8  -1  368.36   36.60 
  -2  -8  -1  269.97   60.39 
   2  -8   1  286.67   23.70 
  -2  -8  -1  313.67   25.70 
  -2  -8  -1  351.66   36.00 
  -2  -8  -1  361.66   27.70 
   2   8   1  284.17   30.30 
  -2   8  -1  242.18   26.70 
  -2   8  -1  305.27   21.80 
   2   8   1  311.27   30.50 
  -2   8  -1  303.77   23.90 
   2   8   1  321.67   26.20 
   2   8   1  290.77   29.00 
   2   8   1  317.47   23.60 
   2   8   1  278.27   18.90 
  -2   8  -1  331.87   26.40 
  -2   8  -1  346.07   26.60 
  -2   8  -1  271.47   22.20 
   2   8   1  323.77   24.70 
   2   8   1  305.87   23.10 
  -2   8  -1  315.67   28.50 
  -2   8  -1  280.07   29.20 
  -2   8  -1  293.07   32.70 
   2   8   1  281.07   25.80 
  -2   8  -1  292.37   19.30 
  -2   8  -1  294.67   30.40 
   2   8   1  311.27   27.00 
  -2   8  -1  256.47   30.10 
   2   8   1  358.06   36.60 
   2   8   1  288.97   28.10 
   2   8   1  332.27   36.90 
   2   8   1  321.47   25.70 
   2   8   1  267.57   26.80 
   3  -8   1   88.99   15.50 
   3  -8   1   50.89   13.40 
   3  -8   1   96.59   16.60 
  -3  -8  -1   54.59   15.40 
  -3  -8  -1   53.09   13.70 
   3  -8   1   31.80   13.70 
  -3  -8  -1   74.69   18.60 
  -3  -8  -1   56.69   12.50 
   3  -8   1   71.29   17.20 
   3  -8   1   68.39   32.80 
   3  -8   1   67.19   16.40 
  -3  -8  -1   97.39   36.50 
  -3  -8  -1   64.69   13.50 
  -3  -8  -1   62.09   15.30 
   3  -8   1   72.49   15.20 
   3  -8   1   48.90   15.20 
  -3  -8  -1   48.40   12.60 
   3  -8   1   84.79   13.70 
  -3  -8  -1   79.99   17.60 
  -3  -8  -1  111.19   18.70 
  -3  -8  -1   68.49   15.70 
  -3  -8  -1   76.89   15.80 
  -3  -8  -1   64.59   14.70 
   3  -8   1   69.89   15.30 
   3  -8   1   71.09   13.90 
  -3  -8  -1   76.19   16.40 
  -3  -8  -1   70.09   19.20 
   3   8   1   69.19   16.70 
   3   8   1   57.89   15.80 
  -3   8  -1   68.19   17.20 
   3   8   1   70.89   13.50 
  -3   8  -1   55.49   12.90 
   3   8   1   62.49   17.00 
  -3   8  -1   62.99   15.20 
  -3   8  -1   67.49   14.90 
  -3   8  -1   87.89   17.30 
  -3   8  -1   58.69   14.00 
   3   8   1   63.79   14.60 
   3   8   1   58.99   13.30 
   3   8   1   84.69   17.20 
   3   8   1   61.39   15.20 
  -3   8  -1   73.29   12.70 
   3   8   1   80.39   15.30 
  -3   8  -1   61.29   15.30 
   3   8   1   91.19   17.00 
   3   8   1   56.89   13.70 
  -3   8  -1   77.09   18.60 
   3   8   1   45.80   14.50 
   3   8   1   38.30   11.40 
   3   8   1   77.49   16.90 
  -3   8  -1   80.99   15.30 
   3   8   1   74.19   16.90 
   4  -8   1  111.79   21.50 
   4  -8   1  129.49   20.00 
   4  -8   1   69.69   16.00 
   4  -8   1   97.59   22.90 
  -4  -8  -1  125.99   17.50 
  -4  -8  -1  155.98   22.20 
  -4  -8  -1  134.59   19.90 
  -4  -8  -1  143.99   29.10 
   4  -8   1  135.39   19.20 
  -4  -8  -1   89.29   17.70 
   4  -8   1   99.29   20.00 
  -4  -8  -1  152.88   23.00 
  -4  -8  -1   72.79   16.10 
  -4  -8  -1  156.88   21.60 
   4  -8   1  127.39   43.80 
   4  -8   1  142.49   22.70 
   4  -8   1  104.69   21.70 
  -4  -8  -1  131.49   22.40 
  -4  -8  -1  187.78   28.10 
  -4  -8  -1  114.39   20.20 
  -4  -8  -1  135.09   21.80 
  -4  -8  -1  107.19   40.70 
  -4   8  -1  118.99   21.60 
   4   8   1  121.69   20.90 
   4   8   1  125.69   18.00 
  -4   8  -1  140.09   20.20 
  -4   8  -1  135.79   20.50 
   4   8   1  140.39   22.10 
  -4   8  -1  134.69   21.40 
  -4   8  -1  126.99   21.30 
  -4   8  -1  107.89   19.10 
   4   8   1  148.69   25.10 
  -4   8  -1  129.39   20.20 
   4   8   1   82.59   17.40 
   4   8   1  149.59   20.20 
   4   8   1  125.99   20.40 
  -4   8  -1  110.19   21.70 
   4   8   1  131.89   19.80 
   4   8   1  110.39   18.30 
   4   8   1  111.59   20.20 
  -4   8  -1   98.09   19.80 
   4   8   1  107.29   18.60 
  -4   8  -1  128.99   20.00 
   5  -8   1   11.70   10.60 
  -5  -8  -1    5.10    8.50 
  -5  -8  -1   10.90   10.20 
  -5  -8  -1    0.40    8.70 
   5  -8   1   -0.10    7.80 
  -5  -8  -1   -7.80    8.50 
   5  -8   1   -7.40    7.00 
   5  -8   1   14.70   10.10 
  -5  -8  -1   -0.40    7.00 
  -5  -8  -1    8.30   11.80 
  -5  -8  -1    4.90   14.70 
   5  -8   1    7.30    8.60 
   5  -8   1   -5.40    7.90 
  -5  -8  -1   11.50    8.50 
  -5  -8  -1   -5.70    7.40 
  -5  -8  -1   11.70    8.40 
   5  -8   1   -2.40    7.70 
  -5  -8  -1   10.20    9.20 
  -5   8  -1   13.40    9.50 
   5   8   1   14.50    8.00 
   5   8   1    8.80    7.60 
  -5   8  -1   19.00    9.10 
   5   8   1   13.80    8.90 
   5   8   1   -2.80    5.30 
   5   8   1   10.60   10.20 
  -5   8  -1   12.50   10.00 
  -5   8  -1   12.80   10.00 
  -5   8  -1    6.70    7.40 
  -5   8  -1    7.80    8.90 
  -5   8  -1    7.40    7.50 
   5   8   1    7.30    6.40 
   5   8   1    9.50    9.60 
   5   8   1    2.30    7.90 
   5   8   1   -5.00    6.50 
  -5   8  -1    7.70    7.70 
  -5   8  -1   -0.90    7.70 
  -5   8  -1    2.50   10.10 
  -6  -8  -1  439.26   33.70 
  -6  -8  -1  409.96   33.30 
  -6  -8  -1  427.46   41.70 
   6  -8   1  372.26   31.00 
  -6  -8  -1  343.97   45.90 
   6  -8   1  358.56   41.70 
   6  -8   1  285.57   37.20 
  -6  -8  -1  387.96   40.50 
   6  -8   1  304.07   33.80 
  -6  -8  -1  364.56   39.80 
  -6  -8  -1  323.87   37.30 
  -6  -8  -1  376.86   61.39 
  -6  -8  -1  325.07   35.00 
   6  -8   1  300.17   34.10 
   6  -8   1  359.86   41.70 
  -6   8  -1  384.86   38.60 
  -6   8  -1  346.57   36.10 
  -6   8  -1  377.26   41.70 
   6   8   1  375.66   30.70 
  -6   8  -1  328.77   37.10 
  -6   8  -1  324.17   27.30 
   6   8   1  382.16   38.50 
  -6   8  -1  332.47   33.70 
  -6   8  -1  353.76   35.10 
   6   8   1  284.37   32.40 
  -6   8  -1  412.26   33.90 
   6   8   1  287.97   31.60 
   6   8   1  331.97   35.00 
   6   8   1  397.26   32.30 
  -6   8  -1  382.26   30.10 
  -6   8  -1  304.87   38.10 
  -5  -9   1  905.11   50.59 
  -5  -9   1  851.11   46.50 
  -5  -9   1  708.13   86.19 
  -5  -9   1  963.40   52.29 
   5  -9  -1  562.94   47.30 
   5  -9  -1  702.43   47.30 
  -5  -9   1  764.22   48.60 
  -5  -9   1  716.83   60.29 
   5  -9  -1  721.33   54.09 
  -5  -9   1  818.52   53.29 
  -5  -9   1  789.22   50.49 
  -5  -9   1  821.82   50.49 
   5  -9  -1  827.52   52.99 
   5  -9  -1  824.12   48.70 
   5  -9  -1  790.42   55.09 
  -5  -9   1  905.41   52.39 
  -5  -9   1  849.91   49.99 
   5   9  -1  756.42   47.30 
  -5   9   1  830.82   54.09 
  -5   9   1  828.42   47.80 
  -5   9   1  832.82   45.30 
  -5   9   1  806.12   47.40 
   5   9  -1  821.82   45.40 
   5   9  -1  833.22   46.60 
  -5   9   1  820.02   52.09 
   5   9  -1  804.42   47.60 
  -5   9   1  867.61   51.79 
  -5   9   1  839.92   49.99 
   5   9  -1  708.83   48.30 
   5   9  -1  820.52   46.00 
   5   9  -1  754.12   49.20 
  -5   9   1  832.82   48.50 
  -5   9   1  849.41   51.19 
   5   9  -1  819.42   50.89 
   5   9  -1  685.23   51.29 
  -5   9   1  920.31   56.89 
  -5   9   1  842.72   47.10 
  -4  -9   1  467.85   35.60 
  -4  -9   1  545.65   39.10 
   4  -9  -1  516.85   35.20 
  -4  -9   1  594.34   39.50 
  -4  -9   1  400.86   42.40 
  -4  -9   1  536.85   47.90 
   4  -9  -1  458.75   37.90 
   4  -9  -1  465.35   71.29 
   4  -9  -1  460.55   33.20 
   4  -9  -1  479.05   40.40 
  -4  -9   1  487.45   37.30 
  -4  -9   1  496.45   36.00 
   4  -9  -1  474.45   40.00 
   4  -9  -1  471.75   36.60 
  -4  -9   1  503.15   37.20 
  -4  -9   1  495.65   37.50 
  -4  -9   1  524.95   33.80 
   4  -9  -1  434.06   34.40 
  -4  -9   1  484.85   71.59 
   4  -9  -1  400.26   46.10 
  -4  -9   1  523.95   35.60 
   4   9  -1  460.05   33.60 
   4   9  -1  526.65   39.90 
   4   9  -1  472.85   34.00 
   4   9  -1  566.94   35.50 
  -4   9   1  486.05   37.10 
  -4   9   1  498.15   37.50 
  -4   9   1  496.55   40.70 
  -4   9   1  482.55   34.60 
   4   9  -1  488.55   36.20 
  -4   9   1  485.15   34.60 
   4   9  -1  460.45   33.10 
   4   9  -1  516.55   34.00 
  -4   9   1  422.06   33.90 
   4   9  -1  473.85   37.20 
  -4   9   1  455.35   38.50 
   4   9  -1  456.15   35.60 
  -4   9   1  475.25   38.40 
   4   9  -1  518.85   36.20 
   4   9  -1  508.55   41.80 
  -4   9   1  514.25   36.00 
   4   9  -1  415.06   36.60 
  -4   9   1  450.75   33.10 
   3  -9  -1  611.74   40.90 
  -3  -9   1  665.33   42.10 
   3  -9  -1  609.74   38.60 
  -3  -9   1  642.44   40.10 
   3  -9  -1  665.13   45.80 
   3  -9  -1  611.94   37.60 
   3  -9  -1  522.55   37.20 
  -3  -9   1  590.34   35.90 
  -3  -9   1  573.34   37.90 
  -3  -9   1  667.63   45.50 
  -3  -9   1  625.44   37.90 
  -3  -9   1  531.15   39.10 
   3  -9  -1  536.65   38.70 
  -3  -9   1  672.43   45.50 
   3  -9  -1  522.85   43.40 
   3  -9  -1  685.83   83.39 
  -3  -9   1  583.34   77.59 
  -3  -9   1  608.34   39.60 
  -3  -9   1  565.04   38.90 
   3  -9  -1  601.74   35.80 
   3  -9  -1  633.04   45.30 
  -3  -9   1  638.74   49.40 
  -3  -9   1  593.14   38.90 
   3  -9  -1  599.94   41.60 
  -3  -9   1  623.34   40.00 
   3   9  -1  590.04   38.70 
   3   9  -1  641.84   38.70 
   3   9  -1  588.44   37.40 
   3   9  -1  601.24   36.60 
   3   9  -1  635.34   36.60 
  -3   9   1  583.04   40.00 
   3   9  -1  620.94   44.50 
  -3   9   1  590.74   39.60 
  -3   9   1  644.34   39.00 
   3   9  -1  577.14   39.60 
  -3   9   1  661.93   44.80 
   3   9  -1  536.05   40.10 
   3   9  -1  626.34   42.10 
  -3   9   1  639.64   42.30 
  -3   9   1  620.64   39.80 
   3   9  -1  587.24   39.30 
   3   9  -1  598.74   37.70 
  -3   9   1  564.24   41.90 
   3   9  -1  654.63   47.00 
  -3   9   1  613.64   44.60 
   3   9  -1  624.64   38.90 
  -3   9   1  607.74   37.90 
  -3   9   1  605.14   39.30 
   3   9  -1  692.13   47.10 
  -2  -9   1  231.48   29.60 
  -2  -9   1  287.07   67.19 
   2  -9  -1  187.78   24.70 
   2  -9  -1  265.07   32.40 
  -2  -9   1  255.07   27.20 
  -2  -9   1  184.68   25.20 
   2  -9  -1  246.68   30.50 
   2  -9  -1  256.97   33.30 
  -2  -9   1  199.38   25.90 
   2  -9  -1  269.97   22.00 
   2  -9  -1  220.08   30.60 
  -2  -9   1  260.07   28.40 
  -2  -9   1  216.38   24.80 
  -2  -9   1  263.97   28.50 
   2  -9  -1  238.38   28.40 
  -2  -9   1  264.67   28.50 
  -2  -9   1  216.38   28.70 
  -2  -9   1  254.27   29.90 
   2  -9  -1  241.78   60.79 
  -2  -9   1  268.87   30.50 
  -2  -9   1  277.47   37.60 
   2  -9  -1  273.47   30.60 
   2  -9  -1  219.28   28.00 
  -2  -9   1  196.88   28.50 
   2  -9  -1  227.88   26.70 
   2  -9  -1  230.88   28.40 
  -2   9   1  253.77   30.70 
   2   9  -1  251.67   30.70 
   2   9  -1  246.48   27.00 
   2   9  -1  238.28   29.20 
  -2   9   1  261.37   32.90 
   2   9  -1  278.07   27.80 
   2   9  -1  274.67   27.30 
   2   9  -1  237.78   27.60 
  -2   9   1  277.97   30.40 
  -2   9   1  223.78   31.40 
  -2   9   1  215.78   29.30 
  -2   9   1  231.18   25.80 
  -2   9   1  243.68   28.70 
   2   9  -1  216.38   29.00 
   2   9  -1  262.37   27.90 
   2   9  -1  223.18   26.90 
  -2   9   1  232.98   28.70 
  -2   9   1  257.77   29.40 
  -2   9   1  249.97   29.50 
   2   9  -1  219.78   31.80 
   2   9  -1  242.88   29.30 
  -2   9   1  293.47   23.50 
   2   9  -1  278.77   30.90 
   2   9  -1  242.78   26.30 
  -2   9   1  255.57   29.20 
   1  -9  -1  370.26   36.10 
  -1  -9   1  396.76   27.70 
  -1  -9   1  396.16   29.80 
   1  -9  -1  373.56   27.80 
   1  -9  -1  359.56   31.50 
   1  -9  -1  335.07   24.70 
  -1  -9   1  391.46   31.20 
   1  -9  -1  357.86   27.70 
  -1  -9   1  334.07   27.70 
  -1  -9   1  376.06   27.60 
   1  -9  -1  388.46   32.50 
   1  -9  -1  370.26   31.20 
   1  -9  -1  377.76   40.50 
  -1  -9   1  439.26   30.10 
   1  -9  -1  318.97   70.69 
   1  -9  -1  377.56   29.10 
  -1  -9   1  336.37   35.70 
  -1  -9   1  363.36   28.40 
  -1  -9   1  319.67   66.69 
  -1  -9   1  348.47   42.00 
   1  -9  -1  345.17   29.40 
   1  -9  -1  365.66   31.40 
   1  -9  -1  396.66   29.40 
  -1  -9   1  331.27   36.00 
   1  -9  -1  359.26   25.20 
  -1  -9   1  351.56   35.40 
  -1  -9   1  349.07   28.40 
  -1  -9   1  309.17   31.90 
  -1  -9   1  411.96   32.30 
   1  -9  -1  344.57   34.20 
  -1   9   1  348.47   29.20 
   1   9  -1  351.46   28.30 
  -1   9   1  339.27   26.00 
   1   9  -1  382.06   26.20 
  -1   9   1  332.97   26.00 
  -1   9   1  451.45   32.90 
   1   9  -1  374.76   29.20 
   1   9  -1  385.86   32.20 
   1   9  -1  328.67   25.00 
  -1   9   1  357.86   29.50 
  -1   9   1  368.86   32.50 
   1   9  -1  371.76   31.40 
  -1   9   1  322.27   31.90 
   1   9  -1  385.46   31.20 
   1   9  -1  386.86   30.30 
  -1   9   1  370.06   30.90 
  -1   9   1  383.16   31.30 
   1   9  -1  378.36   25.10 
   1   9  -1  380.06   27.70 
   1   9  -1  388.76   33.30 
   1   9  -1  350.26   28.50 
  -1   9   1  375.36   31.70 
  -1   9   1  350.56   23.50 
   1   9  -1  371.26   31.70 
   1   9  -1  354.56   29.80 
  -1   9   1  353.76   30.80 
  -1   9   1  277.47   33.00 
   0  -9  -1  395.86   27.80 
   0  -9   1  380.36   27.50 
   0  -9   1  447.76   35.00 
   0  -9  -1  546.55   36.60 
   0  -9  -1  360.16   29.20 
   0  -9  -1  418.96   33.00 
   0  -9  -1  422.16   31.90 
   0  -9  -1  442.66   28.70 
   0  -9  -1  358.06   29.60 
   0  -9  -1  377.56   32.60 
   0  -9   1  414.76   32.40 
   0  -9   1  415.86   31.90 
   0  -9   1  404.46   28.60 
   0  -9  -1  357.66   29.10 
   0  -9   1  391.86   26.70 
   0  -9   1  452.05   38.70 
   0  -9  -1  429.16   67.69 
   0  -9   1  378.46   63.19 
   0  -9   1  419.26   31.70 
   0  -9   1  443.96   34.10 
   0  -9   1  427.16   30.60 
   0  -9  -1  435.86   37.40 
   0  -9   1  439.56   34.80 
   0  -9   1  412.56   31.50 
   0  -9  -1  392.46   33.30 
   0  -9  -1  407.86   29.60 
   0  -9  -1  398.56   27.30 
   0  -9   1  365.16   29.30 
   0  -9  -1  407.06   27.80 
   0  -9  -1  363.96   32.00 
   0  -9  -1  419.36   30.90 
   0  -9   1  406.76   27.10 
   0   9  -1  421.26   34.60 
   0   9   1  397.36   30.30 
   0   9  -1  380.76   31.50 
   0   9   1  357.06   29.90 
   0   9   1  389.76   26.60 
   0   9  -1  438.96   28.80 
   0   9  -1  411.96   29.80 
   0   9   1  432.06   33.00 
   0   9   1  371.06   28.90 
   0   9   1  413.76   33.10 
   0   9   1  304.27   34.40 
   0   9  -1  422.66   33.40 
   0   9   1  388.46   33.40 
   0   9   1  413.46   26.80 
   0   9  -1  432.46   31.40 
   0   9   1  438.06   26.90 
   0   9  -1  392.66   25.40 
   0   9  -1  419.76   26.70 
   0   9  -1  413.46   28.00 
   0   9  -1  347.47   31.20 
   0   9  -1  370.16   31.10 
   0   9  -1  383.16   30.70 
   0   9   1  363.46   29.10 
   0   9   1  343.77   30.20 
   0   9  -1  366.36   29.80 
   0   9   1  419.66   31.80 
   0   9   1  415.46   31.50 
  -1  -9  -1  560.04   36.60 
   1  -9   1  542.75   40.40 
  -1  -9  -1  591.34   39.20 
  -1  -9  -1  585.74   40.20 
  -1  -9  -1  587.24   40.30 
   1  -9   1  613.24   79.09 
  -1  -9  -1  537.95   37.50 
  -1  -9  -1  590.04   35.60 
   1  -9   1  631.74   40.60 
   1  -9   1  584.94   39.20 
  -1  -9  -1  606.64   44.10 
  -1  -9  -1  616.24   36.70 
  -1  -9  -1  610.44   42.00 
   1  -9   1  654.93   35.30 
   1  -9   1  572.44   32.20 
  -1  -9  -1  560.34   36.80 
   1  -9   1  541.45   35.00 
  -1  -9  -1  573.44   35.60 
  -1  -9  -1  569.74   36.50 
   1  -9   1  647.44   36.70 
   1  -9   1  630.94   42.00 
  -1  -9  -1  480.35   36.60 
   1  -9   1  523.45   35.50 
  -1  -9  -1  529.15   74.69 
   1  -9   1  530.65   37.30 
   1  -9   1  537.75   39.00 
  -1  -9  -1  612.64   37.20 
   1   9   1  551.34   31.20 
  -1   9  -1  632.94   38.60 
   1   9   1  547.55   33.20 
   1   9   1  622.64   40.90 
  -1   9  -1  634.34   36.10 
   1   9   1  546.45   35.90 
  -1   9  -1  577.04   41.00 
   1   9   1  501.05   35.50 
  -1   9  -1  493.15   35.20 
  -1   9  -1  611.84   31.50 
  -1   9  -1  601.54   36.60 
  -1   9  -1  560.64   38.20 
   1   9   1  589.84   41.90 
  -1   9  -1  577.64   37.80 
   1   9   1  551.04   36.80 
  -1   9  -1  575.54   34.90 
   1   9   1  612.24   41.40 
   1   9   1  534.45   37.10 
   1   9   1  587.34   37.40 
  -1   9  -1  535.85   39.10 
   1   9   1  547.65   37.20 
   1   9   1  611.84   38.70 
  -1   9  -1  608.34   39.90 
   1   9   1  546.45   38.50 
   1   9   1  569.24   35.90 
  -1   9  -1  565.64   40.70 
   1   9   1  617.34   33.90 
   2  -9   1  221.68   27.90 
   2  -9   1  244.98   30.50 
   2  -9   1  233.58   27.20 
   2  -9   1  193.38   25.30 
   2  -9   1  233.28   24.50 
  -2  -9  -1  220.98   26.10 
  -2  -9  -1  214.18   27.90 
   2  -9   1  229.58   31.00 
   2  -9   1  236.68   29.50 
  -2  -9  -1  207.18   26.40 
  -2  -9  -1  263.67   30.00 
   2  -9   1  222.78   25.50 
   2  -9   1  244.98   32.80 
   2  -9   1  211.48   25.50 
  -2  -9  -1  250.67   28.60 
  -2  -9  -1  254.47   62.69 
  -2  -9  -1  283.57   37.20 
  -2  -9  -1  276.27   28.50 
  -2  -9  -1  278.67   28.50 
  -2  -9  -1  342.57   37.00 
  -2  -9  -1  241.68   31.70 
   2  -9   1  207.58   54.89 
   2  -9   1  203.88   27.30 
  -2  -9  -1  226.38   27.50 
  -2  -9  -1  218.38   29.90 
  -2  -9  -1  226.58   27.90 
  -2  -9  -1  239.08   28.30 
   2   9   1  217.98   26.20 
  -2   9  -1  243.18   29.10 
   2   9   1  231.18   25.90 
  -2   9  -1  237.48   29.20 
  -2   9  -1  254.17   28.90 
  -2   9  -1  263.77   26.40 
  -2   9  -1  219.78   27.50 
   2   9   1  211.28   25.50 
   2   9   1  274.47   31.40 
   2   9   1  220.48   27.20 
  -2   9  -1  277.17   28.20 
   2   9   1  209.28   26.40 
   2   9   1  220.28   25.90 
   2   9   1  268.97   28.20 
  -2   9  -1  225.78   30.00 
   2   9   1  227.48   28.80 
   2   9   1  216.48   27.30 
  -2   9  -1  215.58   29.60 
   2   9   1  242.28   26.10 
  -2   9  -1  213.28   26.30 
   2   9   1  200.48   30.40 
  -2   9  -1  216.18   26.70 
  -2   9  -1  258.37   32.90 
   2   9   1  352.36   37.50 
   2   9   1  240.98   29.40 
   3  -9   1  609.34   43.60 
  -3  -9  -1  564.04   77.79 
   3  -9   1  620.94   42.40 
  -3  -9  -1  564.34   41.60 
   3  -9   1  520.95   34.90 
  -3  -9  -1  562.14   34.70 
  -3  -9  -1  555.74   34.30 
  -3  -9  -1  598.34   39.90 
  -3  -9  -1  538.15   37.30 
   3  -9   1  548.25   76.29 
   3  -9   1  563.14   43.40 
  -3  -9  -1  589.54   39.30 
  -3  -9  -1  578.44   39.40 
  -3  -9  -1  557.74   38.40 
   3  -9   1  588.24   39.20 
  -3  -9  -1  528.05   37.40 
  -3  -9  -1  591.64   39.20 
  -3  -9  -1  524.05   44.10 
  -3  -9  -1  593.24   39.00 
  -3  -9  -1  585.84   38.60 
   3  -9   1  665.13   37.70 
   3  -9   1  554.94   39.50 
   3  -9   1  571.44   44.90 
   3  -9   1  575.14   35.30 
  -3  -9  -1  503.75   41.00 
  -3  -9  -1  502.15   38.80 
   3  -9   1  557.24   38.70 
   3   9   1  542.85   35.80 
   3   9   1  541.45   40.40 
  -3   9  -1  630.84   40.90 
  -3   9  -1  627.84   44.20 
   3   9   1  596.14   41.40 
  -3   9  -1  576.44   37.50 
   3   9   1  512.55   41.10 
   3   9   1  577.64   44.20 
   3   9   1  620.14   38.20 
   3   9   1  585.54   37.80 
   3   9   1  512.45   38.40 
  -3   9  -1  572.84   38.50 
   3   9   1  627.74   36.00 
  -3   9  -1  592.74   39.40 
   3   9   1  629.74   38.60 
  -3   9  -1  588.24   41.00 
   3   9   1  569.14   36.20 
  -3   9  -1  526.35   42.00 
   3   9   1  586.14   40.00 
  -3   9  -1  572.84   41.80 
  -3   9  -1  591.64   39.00 
  -3   9  -1  575.84   37.50 
   3   9   1  549.25   39.60 
  -3   9  -1  464.65   54.39 
   3   9   1  568.74   37.40 
  -4  -9  -1  174.98   29.60 
  -4  -9  -1  161.58   24.90 
   4  -9   1  196.58   27.60 
  -4  -9  -1  176.58   29.10 
   4  -9   1  175.48   25.50 
  -4  -9  -1  204.68   26.90 
  -4  -9  -1  199.48   27.60 
  -4  -9  -1  154.88   30.60 
   4  -9   1  152.58   27.50 
   4  -9   1  147.09   25.40 
   4  -9   1  213.28   24.90 
  -4  -9  -1  160.68   25.30 
   4  -9   1  165.68   26.50 
   4  -9   1  179.18   25.10 
  -4  -9  -1  166.98   26.10 
  -4  -9  -1  175.98   26.00 
  -4  -9  -1  173.68   24.40 
   4  -9   1  149.49   29.00 
  -4  -9  -1  147.39   49.70 
  -4  -9  -1  175.28   26.80 
  -4  -9  -1  174.58   24.60 
  -4  -9  -1  170.78   27.00 
  -4   9  -1  174.08   24.20 
   4   9   1  146.49   24.30 
   4   9   1  176.78   23.70 
   4   9   1  213.48   25.40 
  -4   9  -1  144.09   25.80 
   4   9   1  173.38   24.50 
   4   9   1  204.48   26.90 
  -4   9  -1  199.68   26.40 
   4   9   1  172.08   26.50 
   4   9   1  174.28   24.60 
  -4   9  -1  146.79   23.30 
  -4   9  -1  212.28   28.30 
  -4   9  -1  178.28   27.10 
  -4   9  -1  199.68   26.10 
   4   9   1  145.89   23.60 
  -4   9  -1  179.88   28.80 
   4   9   1  195.58   26.70 
  -4   9  -1  167.48   26.10 
   4   9   1  188.38   26.50 
   4   9   1  218.48   33.50 
  -4   9  -1  173.98   25.40 
  -5  -9  -1   81.89   19.70 
   5  -9   1  106.89   25.00 
  -5  -9  -1  117.09   22.50 
  -5  -9  -1  105.69   20.40 
  -5  -9  -1  116.59   22.50 
  -5  -9  -1  120.49   24.00 
   5  -9   1  116.29   24.00 
  -5  -9  -1  102.79   42.50 
  -5  -9  -1  151.18   22.90 
   5  -9   1   90.69   21.00 
   5  -9   1  111.99   23.10 
   5  -9   1   90.29   22.10 
  -5  -9  -1  125.89   25.60 
  -5  -9  -1  112.79   21.40 
   5  -9   1  122.99   22.20 
  -5  -9  -1  126.59   22.90 
  -5  -9  -1   73.79   19.80 
  -5  -9  -1  130.69   29.90 
  -5   9  -1   97.29   18.90 
   5   9   1   76.89   18.00 
  -5   9  -1   85.19   20.20 
  -5   9  -1   85.69   17.50 
  -5   9  -1   89.09   18.60 
   5   9   1  109.79   21.30 
   5   9   1  111.39   21.60 
  -5   9  -1   92.89   19.90 
   5   9   1  145.59   24.30 
  -5   9  -1   97.89   19.70 
  -5   9  -1  108.89   22.60 
  -5   9  -1  105.99   24.00 
   5   9   1   63.49   17.20 
   5   9   1  124.59   24.10 
  -5   9  -1  120.69   23.80 
   5   9   1  117.39   20.30 
  -5   9  -1   73.29   17.00 
   5   9   1  111.19   18.70 
  -3 -10   1   -6.20    8.30 
   3 -10  -1    3.60   11.00 
  -3 -10   1   15.10   10.70 
  -3 -10   1   -1.60    9.80 
   3 -10  -1   -7.10   15.30 
  -3 -10   1    3.30    9.10 
  -3 -10   1  -10.70   16.90 
   3 -10  -1   -5.60    7.50 
  -3 -10   1    4.60    8.00 
   3 -10  -1    4.00   10.10 
  -3 -10   1   10.70   10.50 
  -3 -10   1    0.10   10.60 
  -3 -10   1    7.10    9.80 
   3 -10  -1    7.20   10.90 
  -3 -10   1   -4.00    7.30 
  -3 -10   1   12.20    9.70 
  -3 -10   1   11.10    9.60 
   3 -10  -1   -1.40    8.00 
  -3 -10   1    2.40    9.40 
   3 -10  -1   -8.90    6.80 
   3 -10  -1   -5.60    8.60 
   3 -10  -1    6.80    7.90 
  -3 -10   1    8.00   10.10 
  -3 -10   1   -0.30    9.10 
   3 -10  -1   -7.60    7.00 
   3  10  -1    4.30   11.50 
  -3  10   1   -7.50   10.70 
   3  10  -1   -9.10    7.00 
   3  10  -1   -4.40    8.00 
   3  10  -1    2.40    9.60 
   3  10  -1    2.50    7.10 
   3  10  -1    1.00   10.50 
   3  10  -1    4.80    8.70 
   3  10  -1   -0.10    9.00 
  -3  10   1   -7.60    7.20 
   3  10  -1   -2.20    7.50 
  -3  10   1   -0.20    8.60 
  -3  10   1    4.10    9.10 
   3  10  -1   11.00    7.30 
  -3  10   1    6.60    9.40 
  -3  10   1    0.70    7.50 
   3  10  -1   -5.40   10.20 
   3  10  -1    5.40    8.20 
  -3  10   1   15.50   10.40 
   3  10  -1    7.90    9.30 
  -3  10   1   -5.70    8.50 
   3  10  -1   14.70   10.60 
  -3  10   1   -2.40   10.90 
  -3  10   1    7.20   10.20 
  -3  10   1    3.80    8.90 
   2 -10  -1   15.20   11.50 
  -2 -10   1   -2.50    7.00 
   2 -10  -1   12.90   10.50 
   2 -10  -1   -7.40    7.20 
   2 -10  -1    9.90    9.20 
  -2 -10   1   -4.90    7.90 
  -2 -10   1   -2.80    8.50 
  -2 -10   1    2.90    8.60 
   2 -10  -1   16.50   10.80 
  -2 -10   1    8.50    8.60 
  -2 -10   1   -8.60    6.60 
   2 -10  -1    3.50    8.40 
  -2 -10   1    5.30    7.80 
   2 -10  -1    1.20   18.90 
  -2 -10   1    6.60    9.40 
  -2 -10   1    4.00    7.60 
  -2 -10   1  -16.90    6.90 
   2 -10  -1   -1.20    7.50 
  -2 -10   1    5.10   23.50 
  -2 -10   1   -1.20    7.50 
   2 -10  -1   10.20    7.50 
  -2 -10   1   37.80   12.90 
  -2 -10   1   -3.50    9.30 
   2 -10  -1   19.30   12.00 
   2 -10  -1    3.60    9.70 
  -2 -10   1    4.60    9.30 
   2  10  -1   -7.40    6.90 
  -2  10   1   -6.10    8.80 
   2  10  -1   19.20   11.90 
   2  10  -1    0.30   10.40 
  -2  10   1   -7.80    8.00 
   2  10  -1   10.00    9.60 
   2  10  -1   -4.50    5.10 
  -2  10   1    3.40    8.70 
   2  10  -1   -1.30    8.40 
   2  10  -1   -1.70    7.90 
  -2  10   1    2.50    8.50 
  -2  10   1   12.00   10.30 
  -2  10   1   14.10   11.60 
   2  10  -1   -2.80    6.50 
   2  10  -1    6.10    7.60 
  -2  10   1   -1.60   10.90 
  -2  10   1   -5.90    6.70 
  -2  10   1    2.60    7.90 
   2  10  -1    0.30    8.70 
   2  10  -1    4.50    8.60 
  -2  10   1    6.60    8.80 
   2  10  -1    4.30    8.20 
   2  10  -1   -2.90    7.40 
  -2  10   1   12.70    8.50 
   1 -10  -1   63.19   18.30 
   1 -10  -1   50.19   14.70 
  -1 -10   1   74.69   19.60 
  -1 -10   1   61.19   15.50 
  -1 -10   1   47.20   15.80 
   1 -10  -1   52.79   32.30 
   1 -10  -1   55.59   15.00 
   1 -10  -1   67.99   17.20 
  -1 -10   1   41.20   14.00 
   1 -10  -1   56.19   16.20 
  -1 -10   1   56.89   16.10 
  -1 -10   1   50.99   15.90 
  -1 -10   1   60.59   14.50 
  -1 -10   1   57.09   14.10 
   1 -10  -1   42.90   15.70 
   1 -10  -1   31.10   13.70 
  -1 -10   1   71.99   16.40 
  -1 -10   1   59.29   17.10 
   1 -10  -1   51.39   14.90 
   1 -10  -1   50.69   16.10 
  -1 -10   1   59.59   16.00 
   1 -10  -1   54.39   15.30 
   1 -10  -1   53.39   13.90 
  -1 -10   1   55.49   16.20 
  -1 -10   1   63.79   36.00 
  -1 -10   1   33.10   14.30 
  -1  10   1   70.69   17.70 
  -1  10   1   80.19   17.60 
  -1  10   1   36.00   14.80 
  -1  10   1   42.00   13.60 
   1  10  -1   48.40   14.60 
  -1  10   1   50.79   15.10 
   1  10  -1   53.49   13.10 
   1  10  -1   52.19   16.80 
   1  10  -1   55.09   15.40 
   1  10  -1   55.39   16.50 
  -1  10   1   65.79   16.60 
  -1  10   1   46.40   12.30 
  -1  10   1   71.19   16.80 
   1  10  -1   59.89   17.00 
   1  10  -1   58.99   16.30 
   1  10  -1   85.69   17.50 
   1  10  -1   70.99   16.10 
  -1  10   1   57.79   16.80 
  -1  10   1   44.10   14.90 
   1  10  -1   47.90   14.00 
   1  10  -1   39.10   15.00 
  -1  10   1   66.29   18.30 
   1  10  -1   45.70   14.90 
   1  10  -1   77.39   19.30 
  -1  10   1   40.10   15.00 
   0 -10  -1  107.59   20.50 
   0 -10  -1  105.89   21.70 
   0 -10   1   90.49   20.10 
   0 -10   1   94.39   20.20 
   0 -10  -1  116.19   19.40 
   0 -10  -1  123.99   23.00 
   0 -10   1  142.09   22.60 
   0 -10  -1  118.19   21.60 
   0 -10   1   85.79   17.70 
   0 -10  -1   97.49   20.80 
   0 -10  -1  102.49   18.30 
   0 -10   1  130.09   49.90 
   0 -10  -1  102.19   19.30 
   0 -10   1  129.89   21.80 
   0 -10   1  115.39   21.70 
   0 -10  -1  176.68   26.00 
   0 -10  -1  111.89   19.90 
   0 -10  -1  115.49   21.50 
   0 -10   1  116.59   20.50 
   0 -10   1  115.59   19.20 
   0 -10   1   67.89   15.50 
   0 -10   1   83.99   20.10 
   0 -10  -1  134.39   22.40 
   0 -10  -1  108.49   20.00 
   0 -10  -1  134.39   24.50 
   0 -10  -1  139.39   54.39 
   0 -10   1  137.09   22.70 
   0  10  -1  111.59   21.70 
   0  10  -1  148.69   20.40 
   0  10  -1  114.79   21.20 
   0  10   1  109.69   19.90 
   0  10   1  116.29   21.10 
   0  10   1  123.49   20.70 
   0  10   1   84.39   19.60 
   0  10   1  112.29   21.70 
   0  10  -1  113.89   22.70 
   0  10  -1  143.09   20.30 
   0  10   1   71.59   17.30 
   0  10  -1   85.69   17.20 
   0  10   1  134.79   24.90 
   0  10  -1   85.49   18.90 
   0  10   1   85.39   15.70 
   0  10   1  124.49   21.80 
   0  10   1  145.59   20.50 
   0  10   1  136.79   23.80 
   0  10   1  139.09   23.20 
   0  10  -1   78.29   17.30 
   0  10  -1  112.79   22.30 
   0  10  -1  131.79   25.20 
   0  10  -1   83.59   18.20 
   0  10  -1   95.39   19.20 
   0  10   1   84.79   17.50 
   1 -10   1   78.89   19.30 
  -1 -10  -1  112.59   18.80 
  -1 -10  -1  117.19   20.20 
   1 -10   1  123.99   22.50 
   1 -10   1  118.99   21.10 
   1 -10   1  123.69   21.40 
   1 -10   1   99.49   17.90 
   1 -10   1  152.78   24.10 
  -1 -10  -1  141.59   25.40 
   1 -10   1  118.39   21.00 
  -1 -10  -1   92.19   17.40 
  -1 -10  -1   97.69   19.20 
  -1 -10  -1  105.09   20.90 
  -1 -10  -1  108.59   21.30 
  -1 -10  -1  104.09   20.60 
  -1 -10  -1  103.09   46.50 
   1 -10   1   79.99   39.30 
  -1 -10  -1   94.99   21.00 
   1 -10   1   76.79   18.50 
   1 -10   1   88.49   20.60 
  -1 -10  -1  114.49   24.80 
  -1 -10  -1  115.09   19.50 
  -1 -10  -1   82.19   17.20 
  -1 -10  -1   95.29   21.20 
   1 -10   1  102.79   22.40 
  -1 -10  -1   85.29   17.40 
  -1 -10  -1  112.19   20.50 
   1 -10   1  106.59   20.80 
  -1 -10  -1  102.79   21.20 
   1  10   1   75.49   16.60 
  -1  10  -1  114.29   20.10 
  -1  10  -1   77.09   17.30 
  -1  10  -1  120.59   23.70 
   1  10   1  110.19   22.40 
  -1  10  -1  122.99   23.50 
   1  10   1  109.49   20.80 
  -1  10  -1  152.78   24.60 
   1  10   1   78.29   15.90 
   1  10   1   88.79   18.50 
   1  10   1  108.89   18.10 
  -1  10  -1  113.99   23.30 
   1  10   1  144.49   23.70 
   1  10   1   74.69   17.90 
  -1  10  -1   71.99   17.80 
   1  10   1  118.79   21.40 
   1  10   1  121.79   21.90 
  -1  10  -1  113.09   22.80 
   1  10   1   96.79   20.10 
   1  10   1  110.09   20.50 
  -1  10  -1  107.89   18.60 
   1  10   1   88.09   19.80 
  -1  10  -1  106.99   21.00 
   2 -10   1   31.60   12.30 
   2 -10   1   45.60   14.30 
  -2 -10  -1   36.00   13.00 
  -2 -10  -1   44.20   14.00 
   2 -10   1   46.10   13.90 
   2 -10   1   18.90   11.00 
  -2 -10  -1   38.10   13.50 
   2 -10   1   33.60   12.40 
   2 -10   1   41.90   14.20 
  -2 -10  -1   74.79   38.90 
  -2 -10  -1   31.80   14.80 
  -2 -10  -1   28.10   13.00 
   2 -10   1   20.00   12.70 
   2 -10   1   49.60   30.50 
  -2 -10  -1   28.00   11.70 
  -2 -10  -1   25.10   12.70 
   2 -10   1   47.30   15.20 
   2 -10   1   14.10   10.30 
  -2 -10  -1   34.20   13.60 
  -2 -10  -1   32.20   13.30 
  -2 -10  -1   30.80   13.80 
  -2 -10  -1   25.30   11.50 
   2 -10   1   35.10   15.00 
  -2 -10  -1   19.80   10.30 
  -2 -10  -1   47.40   13.80 
  -2 -10  -1   44.50   14.30 
   2  10   1   28.30   12.00 
  -2  10  -1   39.30   12.90 
   2  10   1   30.90   13.10 
   2  10   1   33.80   14.10 
   2  10   1   32.70   11.80 
   2  10   1   53.39   16.30 
   2  10   1   27.30   13.00 
  -2  10  -1   32.50   13.90 
   2  10   1   31.70   12.70 
  -2  10  -1   26.00   11.30 
  -2  10  -1   39.50   13.90 
   2  10   1   50.29   13.90 
  -2  10  -1   45.10   15.10 
  -2  10  -1   31.10   14.20 
   2  10   1   49.80   14.50 
  -2  10  -1   40.20   15.80 
   2  10   1   50.49   14.90 
   2  10   1   47.70   15.60 
   2  10   1   14.30   12.20 
   2  10   1   31.70   12.90 
  -2  10  -1   31.10   13.40 
   2  10   1   28.90   11.70 
  -2  10  -1   41.10   13.70 
  -2  10  -1   35.90   13.10 
  -3 -10  -1   60.89   18.10 
   3 -10   1  114.29   23.10 
   3 -10   1  113.69   21.60 
  -3 -10  -1   89.39   23.00 
  -3 -10  -1   74.59   19.30 
  -3 -10  -1  121.19   22.50 
   3 -10   1  101.49   23.30 
   3 -10   1  154.18   27.50 
   3 -10   1   91.39   20.70 
  -3 -10  -1   51.19   16.90 
   3 -10   1   96.59   18.40 
   3 -10   1   86.09   18.10 
  -3 -10  -1  129.29   23.70 
  -3 -10  -1  105.79   20.30 
  -3 -10  -1  164.68   26.30 
  -3 -10  -1  134.09   50.49 
  -3 -10  -1   62.59   16.20 
   3 -10   1   94.59   20.60 
   3 -10   1   79.79   39.90 
  -3 -10  -1   97.69   21.00 
  -3 -10  -1  100.59   22.00 
  -3 -10  -1  120.29   22.80 
   3  10   1   84.49   20.90 
  -3  10  -1  119.69   21.40 
   3  10   1  155.98   27.20 
   3  10   1  145.19   25.50 
   3  10   1  141.09   22.90 
  -3  10  -1  121.49   23.40 
   3  10   1   89.39   18.50 
   3  10   1  101.49   22.60 
   3  10   1  101.59   20.40 
   3  10   1  101.29   18.80 
  -3  10  -1   87.19   18.60 
   3  10   1  156.68   24.40 
   3  10   1  110.99   20.60 
   3  10   1  125.39   23.30 
  -3  10  -1  141.89   27.40 
  -3  10  -1  141.99   24.10 
  -3  10  -1   74.69   17.90 
  -3  10  -1  130.99   23.50 
  -3  10  -1  116.99   21.50 
  -3  10  -1   92.69   22.80 
  -3  10  -1   90.89   22.60 
   3  10   1   69.59   17.20 
  10   0  -2 1241.68   59.19 
  10   0  -2 1250.47   57.99 
 -10   0   2 1226.08   56.39 
 -10   0   2 1260.67   58.59 
 -10   0   2 1281.27   61.59 
 -10   0   2 1224.78   64.59 
  -9   0   2    2.50    5.60 
   9   0  -2    1.20    6.90 
  -9   0   2    5.00    7.50 
   9   0  -2   -1.90    4.50 
   9   0  -2    0.90    5.10 
  -9   0   2   -1.70    4.90 
   9   0  -2    0.40    4.40 
  -9   0   2    7.10    5.70 
  -9   0   2   -2.50    4.70 
  -8   0   2 1960.10   71.19 
  -8   0   2 1925.61   78.89 
  -8   0   2 1986.00   75.99 
   8   0  -2 2028.60   73.49 
  -8   0   2 1975.10   69.89 
   8   0  -2 1953.80   69.89 
   8   0  -2 1892.11   73.99 
  -8   0   2 1926.61   71.99 
   8   0  -2 1956.80   70.59 
   8   0  -2 1910.61   73.59 
   8   0  -2 1870.91   61.49 
  -8   0   2 1945.91   64.69 
  -8   0   2 1841.02   66.49 
  -7   0   2    5.10    5.00 
   7   0  -2    6.40    5.40 
  -7   0   2   -4.20    3.20 
   7   0  -2    2.20    4.00 
   7   0  -2   -3.50    2.60 
  -7   0   2    1.90    3.00 
  -7   0   2   -1.50    2.80 
  -7   0   2    3.70    2.20 
   7   0  -2    1.20    4.20 
   7   0  -2    4.10    2.80 
  -7   0   2   -0.30    3.80 
   7   0  -2    3.80    3.90 
  -7   0   2   -2.00    3.50 
  -7   0   2    2.60    4.40 
  -7   0   2   -5.20    2.70 
   7   0  -2    0.30    4.40
[truncated: 3,651,618 more chars]
