# Supplementary material
Source: MDPI journal article supplement (https://www.mdpi.com/2073-4352/13/7/1043)
Supplement: s1 [file s1 › 2 Pr Ha2019_64_0m_a.cif]

 
data_Ha2019_64_0m_a 
  
_audit_creation_method            'SHELXL-2014/7' 
_shelx_SHELXL_version_number      '2014/7' 
_chemical_name_systematic         ? 
_chemical_name_common             ? 
_chemical_melting_point           ? 
_chemical_formula_moiety          ? 
_chemical_formula_sum 
 'C4 H12 Br O7 Pr' 
_chemical_formula_weight          392.96 
  
loop_ 
 _atom_type_symbol 
 _atom_type_description 
 _atom_type_scat_dispersion_real 
 _atom_type_scat_dispersion_imag 
 _atom_type_scat_source 
 'C'  'C'   0.0033   0.0016 
 'International Tables Vol C Tables 4.2.6.8 and 6.1.1.4' 
 'H'  'H'   0.0000   0.0000 
 'International Tables Vol C Tables 4.2.6.8 and 6.1.1.4' 
 'O'  'O'   0.0106   0.0060 
 'International Tables Vol C Tables 4.2.6.8 and 6.1.1.4' 
 'Br'  'Br'  -0.2901   2.4595 
 'International Tables Vol C Tables 4.2.6.8 and 6.1.1.4' 
 'Pr'  'Pr'  -0.2180   2.8214 
 'International Tables Vol C Tables 4.2.6.8 and 6.1.1.4' 
  
_space_group_crystal_system       monoclinic 
_space_group_IT_number            14 
_space_group_name_H-M_alt         'P 21/n' 
_space_group_name_Hall            '-P 2yn' 
  
_shelx_space_group_comment 
; 
The symmetry employed for this shelxl refinement is uniquely defined 
by the following loop, which should always be used as a source of 
symmetry information in preference to the above space-group names. 
They are only intended as comments. 
; 
  
loop_ 
 _space_group_symop_operation_xyz 
 'x, y, z' 
 '-x+1/2, y+1/2, -z+1/2' 
 '-x, -y, -z' 
 'x-1/2, -y-1/2, z-1/2' 
  
_cell_length_a                    7.9293(3) 
_cell_length_b                    8.0327(3) 
_cell_length_c                    18.0186(6) 
_cell_angle_alpha                 90 
_cell_angle_beta                  96.533(2) 
_cell_angle_gamma                 90 
_cell_volume                      1140.22(7) 
_cell_formula_units_Z             4 
_cell_measurement_temperature     100(2) 
_cell_measurement_reflns_used     9972 
_cell_measurement_theta_min       2.70 
_cell_measurement_theta_max       28.17 
  
_exptl_crystal_description        prism 
_exptl_crystal_colour             colorless 
_exptl_crystal_density_meas       ? 
_exptl_crystal_density_method     ? 
_exptl_crystal_density_diffrn     2.289 
_exptl_crystal_F_000              744 
_exptl_transmission_factor_min    ? 
_exptl_transmission_factor_max    ? 
_exptl_crystal_size_max           0.465 
_exptl_crystal_size_mid           0.120 
_exptl_crystal_size_min           0.074 
_exptl_absorpt_coefficient_mu     7.781 
_shelx_estimated_absorpt_T_min    0.123 
_shelx_estimated_absorpt_T_max    0.597 
_exptl_absorpt_correction_type    multi-scan 
_exptl_absorpt_correction_T_min   0.412 
_exptl_absorpt_correction_T_max   0.813 
_exptl_absorpt_process_details    'Bruker SADABS' 
_exptl_absorpt_special_details    ? 
_diffrn_ambient_temperature       100(2) 
_diffrn_radiation_wavelength      0.71073 
_diffrn_radiation_type            MoK\a 
_diffrn_source                    ? 
_diffrn_measurement_device_type   'Bruker APEX-II CCD' 
_diffrn_measurement_method        '\f and \w scans' 
_diffrn_detector_area_resol_mean  ? 
_diffrn_reflns_number             92529 
_diffrn_reflns_av_unetI/netI      0.0132 
_diffrn_reflns_av_R_equivalents   0.0497 
_diffrn_reflns_limit_h_min        -10 
_diffrn_reflns_limit_h_max        10 
_diffrn_reflns_limit_k_min        -10 
_diffrn_reflns_limit_k_max        10 
_diffrn_reflns_limit_l_min        -23 
_diffrn_reflns_limit_l_max        23 
_diffrn_reflns_theta_min          2.275 
_diffrn_reflns_theta_max          27.994 
_diffrn_reflns_theta_full         25.242 
_diffrn_measured_fraction_theta_max   1.000 
_diffrn_measured_fraction_theta_full  1.000 
_diffrn_reflns_Laue_measured_fraction_max    1.000 
_diffrn_reflns_Laue_measured_fraction_full   1.000 
_diffrn_reflns_point_group_measured_fraction_max   1.000 
_diffrn_reflns_point_group_measured_fraction_full  1.000 
_reflns_number_total              2753 
_reflns_number_gt                 2516 
_reflns_threshold_expression      'I > 2\s(I)' 
_reflns_Friedel_coverage          0.000 
_reflns_Friedel_fraction_max      . 
_reflns_Friedel_fraction_full     . 
  
_reflns_special_details 
; 
 Reflections were merged by SHELXL according to the crystal 
 class for the calculation of statistics and refinement. 
  
 _reflns_Friedel_fraction is defined as the number of unique 
 Friedel pairs measured divided by the number that would be 
 possible theoretically, ignoring centric projections and 
 systematic absences. 
; 
  
_computing_data_collection        'Bruker APEX2' 
_computing_cell_refinement        'Bruker SAINT' 
_computing_data_reduction         'Bruker SAINT' 
_computing_structure_solution     'SHELXS-97 (Sheldrick 2008)' 
_computing_structure_refinement 'SHELXL-2014/7 (Sheldrick, 2014)' 
_computing_molecular_graphics     'Bruker SHELXTL' 
_computing_publication_material   'Bruker SHELXTL' 
_refine_special_details           ? 
_refine_ls_structure_factor_coef  Fsqd 
_refine_ls_matrix_type            full 
_refine_ls_weighting_scheme       calc 
_refine_ls_weighting_details 
'w=1/[\s^2^(Fo^2^)+(0.0107P)^2^+1.1228P] where P=(Fo^2^+2Fc^2^)/3' 
_atom_sites_solution_primary      direct 
_atom_sites_solution_secondary    ? 
_atom_sites_solution_hydrogens    mixed 
_refine_ls_hydrogen_treatment     constr
_refine_ls_extinction_method      none 
_refine_ls_extinction_coef        . 
_refine_ls_number_reflns          2753 
_refine_ls_number_parameters      125 
_refine_ls_number_restraints      0 
_refine_ls_R_factor_all           0.0175 
_refine_ls_R_factor_gt            0.0141 
_refine_ls_wR_factor_ref          0.0305 
_refine_ls_wR_factor_gt           0.0295 
_refine_ls_goodness_of_fit_ref    1.080 
_refine_ls_restrained_S_all       1.080 
_refine_ls_shift/su_max           0.003 
_refine_ls_shift/su_mean          0.000 
  
loop_ 
 _atom_site_label 
 _atom_site_type_symbol 
 _atom_site_fract_x 
 _atom_site_fract_y 
 _atom_site_fract_z 
 _atom_site_U_iso_or_equiv 
 _atom_site_adp_type 
 _atom_site_occupancy 
 _atom_site_site_symmetry_order 
 _atom_site_calc_flag 
 _atom_site_refinement_flags_posn 
 _atom_site_refinement_flags_adp 
 _atom_site_refinement_flags_occupancy 
 _atom_site_disorder_assembly 
 _atom_site_disorder_group 
Pr1 Pr 0.26005(2) 0.45964(2) 0.53644(2) 0.01090(3) Uani 1 1 d . . . . . 
Br1 Br 0.39522(3) 0.96026(3) 0.68785(2) 0.01824(5) Uani 1 1 d . . . . . 
O11 O -0.01626(16) 0.33583(18) 0.53303(8) 0.0162(3) Uani 1 1 d . . . . . 
O12 O -0.28167(17) 0.25780(19) 0.52195(8) 0.0183(3) Uani 1 1 d . . . . . 
C11 C -0.1293(2) 0.2299(3) 0.54558(11) 0.0137(4) Uani 1 1 d . . . . . 
C12 C -0.0811(3) 0.0750(3) 0.58845(13) 0.0241(5) Uani 1 1 d . . . . . 
H12A H -0.0848 0.0955 0.6418 0.080(7) Uiso 1 1 calc R U . . . 
H12B H 0.0340 0.0418 0.5799 0.080(7) Uiso 1 1 calc R U . . . 
H12C H -0.1609 -0.0142 0.5718 0.080(7) Uiso 1 1 calc R U . . . 
O21 O 0.54623(16) 0.55430(18) 0.57404(7) 0.0142(3) Uani 1 1 d . . . . . 
O22 O 0.81320(16) 0.6231(2) 0.59870(8) 0.0181(3) Uani 1 1 d . . . . . 
C21 C 0.6742(2) 0.5871(3) 0.62188(11) 0.0141(4) Uani 1 1 d . . . . . 
C22 C 0.6580(3) 0.5780(3) 0.70363(11) 0.0226(5) Uani 1 1 d . . . . . 
H22A H 0.7699 0.5572 0.7312 0.036(6) Uiso 0.64(3) 1 d R U P . . 
H22B H 0.5807 0.4872 0.7131 0.036(6) Uiso 0.64(3) 1 d R U P . . 
H22C H 0.6130 0.6836 0.7202 0.036(6) Uiso 0.64(3) 1 d R U P . . 
H22D H 0.5362 0.5855 0.7081 0.036(6) Uiso 0.36(3) 1 d R U P . . 
H22E H 0.7154 0.6777 0.7253 0.036(6) Uiso 0.36(3) 1 d R U P . . 
H22F H 0.7051 0.4790 0.7302 0.036(6) Uiso 0.36(3) 1 d R U P . . 
O1W O 0.39012(16) 0.17606(18) 0.53333(8) 0.0153(3) Uani 1 1 d . . . . . 
H11W H 0.3925 0.0959 0.5730 0.054(7) Uiso 1 1 d R U . . . 
H12W H 0.5058 0.1854 0.5230 0.054(7) Uiso 1 1 d R U . . . 
O2W O 0.15549(17) 0.65394(19) 0.62718(8) 0.0171(3) Uani 1 1 d . . . . . 
H21W H 0.0368 0.6689 0.6313 0.056(7) Uiso 1 1 d R U . . . 
H22W H 0.2079 0.7564 0.6449 0.056(7) Uiso 1 1 d R U . . . 
O3W O 0.28442(19) 0.34168(19) 0.66416(8) 0.0203(3) Uani 1 1 d . . . . . 
H31W H 0.2343 0.3905 0.7051 0.050(6) Uiso 1 1 d R U . . . 
H32W H 0.3135 0.2302 0.6801 0.050(6) Uiso 1 1 d R U . . . 
  
loop_ 
 _atom_site_aniso_label 
 _atom_site_aniso_U_11 
 _atom_site_aniso_U_22 
 _atom_site_aniso_U_33 
 _atom_site_aniso_U_23 
 _atom_site_aniso_U_13 
 _atom_site_aniso_U_12 
Pr1 0.00681(5) 0.01348(6) 0.01251(5) 0.00102(4) 0.00155(3) -0.00086(4) 
Br1 0.02080(10) 0.01587(10) 0.01778(10) 0.00209(8) 0.00094(7) -0.00264(8) 
O11 0.0112(6) 0.0184(8) 0.0192(7) 0.0027(6) 0.0021(5) -0.0031(6) 
O12 0.0098(6) 0.0191(8) 0.0262(8) 0.0062(6) 0.0029(5) -0.0010(6) 
C11 0.0119(8) 0.0156(10) 0.0140(9) -0.0009(8) 0.0035(7) -0.0005(8) 
C12 0.0229(11) 0.0210(12) 0.0281(12) 0.0095(10) 0.0010(9) 0.0008(9) 
O21 0.0097(6) 0.0192(8) 0.0136(6) -0.0003(6) 0.0004(5) -0.0010(6) 
O22 0.0101(6) 0.0260(8) 0.0182(7) -0.0023(7) 0.0010(5) -0.0025(6) 
C21 0.0111(8) 0.0148(10) 0.0159(9) -0.0010(8) 0.0000(7) 0.0015(7) 
C22 0.0178(10) 0.0358(14) 0.0141(10) 0.0009(9) 0.0005(8) 0.0040(9) 
O1W 0.0126(6) 0.0159(7) 0.0180(7) 0.0029(6) 0.0046(5) -0.0001(6) 
O2W 0.0133(6) 0.0165(8) 0.0215(7) -0.0044(6) 0.0016(5) 0.0000(6) 
O3W 0.0285(8) 0.0177(8) 0.0159(7) 0.0032(6) 0.0071(6) 0.0057(6) 
  
_geom_special_details 
; 
 All esds (except the esd in the dihedral angle between two l.s. planes) 
 are estimated using the full covariance matrix.  The cell esds are taken 
 into account individually in the estimation of esds in distances, angles 
 and torsion angles; correlations between esds in cell parameters are only 
 used when they are defined by crystal symmetry.  An approximate (isotropic) 
 treatment of cell esds is used for estimating esds involving l.s. planes. 
; 
  
loop_ 
 _geom_bond_atom_site_label_1 
 _geom_bond_atom_site_label_2 
 _geom_bond_distance 
 _geom_bond_site_symmetry_2 
 _geom_bond_publ_flag 
Pr1 O11 2.4005(13) . ? 
Pr1 O21 2.4159(13) . ? 
Pr1 O2W 2.4708(14) . ? 
Pr1 O3W 2.4758(14) . ? 
Pr1 O1W 2.5038(14) . ? 
Pr1 O12 2.5158(15) 3_566 ? 
Pr1 O22 2.5273(14) 3_666 ? 
Pr1 O21 2.6515(13) 3_666 ? 
Pr1 O11 2.7299(14) 3_566 ? 
O11 C11 1.274(2) . ? 
O12 C11 1.255(2) . ? 
C11 C12 1.492(3) . ? 
C12 H12A 0.9800 . ? 
C12 H12B 0.9800 . ? 
C12 H12C 0.9800 . ? 
O21 C21 1.282(2) . ? 
O22 C21 1.256(2) . ? 
C21 C22 1.495(3) . ? 
C22 H22A 0.9800 . ? 
C22 H22B 0.9800 . ? 
C22 H22C 0.9800 . ? 
C22 H22D 0.9800 . ? 
C22 H22E 0.9800 . ? 
C22 H22F 0.9800 . ? 
O1W H11W 0.9600 . ? 
O1W H12W 0.9600 . ? 
O2W H21W 0.9600 . ? 
O2W H22W 0.9600 . ? 
O3W H31W 0.9600 . ? 
O3W H32W 0.9600 . ? 
  
loop_ 
 _geom_angle_atom_site_label_1 
 _geom_angle_atom_site_label_2 
 _geom_angle_atom_site_label_3 
 _geom_angle 
 _geom_angle_site_symmetry_1 
 _geom_angle_site_symmetry_3 
 _geom_angle_publ_flag 
O11 Pr1 O21 164.37(5) . . ? 
O11 Pr1 O2W 84.53(5) . . ? 
O21 Pr1 O2W 89.47(5) . . ? 
O11 Pr1 O3W 80.78(5) . . ? 
O21 Pr1 O3W 83.59(5) . . ? 
O2W Pr1 O3W 67.87(5) . . ? 
O11 Pr1 O1W 89.98(5) . . ? 
O21 Pr1 O1W 85.21(5) . . ? 
O2W Pr1 O1W 139.43(5) . . ? 
O3W Pr1 O1W 71.57(5) . . ? 
O11 Pr1 O12 117.94(5) . 3_566 ? 
O21 Pr1 O12 74.14(5) . 3_566 ? 
O2W Pr1 O12 75.57(5) . 3_566 ? 
O3W Pr1 O12 137.07(5) . 3_566 ? 
O1W Pr1 O12 139.78(4) . 3_566 ? 
O11 Pr1 O22 75.96(5) . 3_666 ? 
O21 Pr1 O22 117.29(4) . 3_666 ? 
O2W Pr1 O22 138.26(5) . 3_666 ? 
O3W Pr1 O22 141.26(5) . 3_666 ? 
O1W Pr1 O22 77.83(5) . 3_666 ? 
O12 Pr1 O22 81.58(5) 3_566 3_666 ? 
O11 Pr1 O21 124.63(4) . 3_666 ? 
O21 Pr1 O21 67.54(5) . 3_666 ? 
O2W Pr1 O21 142.20(5) . 3_666 ? 
O3W Pr1 O21 133.71(5) . 3_666 ? 
O1W Pr1 O21 70.70(4) . 3_666 ? 
O12 Pr1 O21 69.59(5) 3_566 3_666 ? 
O22 Pr1 O21 49.82(4) 3_666 3_666 ? 
O11 Pr1 O11 68.96(5) . 3_566 ? 
O21 Pr1 O11 122.19(5) . 3_566 ? 
O2W Pr1 O11 69.50(4) . 3_566 ? 
O3W Pr1 O11 129.26(4) . 3_566 ? 
O1W Pr1 O11 144.03(4) . 3_566 ? 
O12 Pr1 O11 48.98(4) 3_566 3_566 ? 
O22 Pr1 O11 69.11(5) 3_666 3_566 ? 
O21 Pr1 O11 96.99(4) 3_666 3_566 ? 
Pr1 Pr1 Pr1 139.645(6) 3_666 3_566 ? 
C11 O11 Pr1 158.47(13) . . ? 
C11 O11 Pr1 90.44(11) . 3_566 ? 
Pr1 O11 Pr1 111.04(5) . 3_566 ? 
C11 O12 Pr1 101.19(12) . 3_566 ? 
O12 C11 O11 119.35(18) . . ? 
O12 C11 C12 120.30(18) . . ? 
O11 C11 C12 120.35(17) . . ? 
C11 C12 H12A 109.5 . . ? 
C11 C12 H12B 109.5 . . ? 
H12A C12 H12B 109.5 . . ? 
C11 C12 H12C 109.5 . . ? 
H12A C12 H12C 109.5 . . ? 
H12B C12 H12C 109.5 . . ? 
C21 O21 Pr1 154.12(13) . . ? 
C21 O21 Pr1 91.81(11) . 3_666 ? 
Pr1 O21 Pr1 112.46(5) . 3_666 ? 
C21 O22 Pr1 98.38(12) . 3_666 ? 
O22 C21 O21 118.76(18) . . ? 
O22 C21 C22 121.06(18) . . ? 
O21 C21 C22 120.16(18) . . ? 
C21 C22 H22A 109.5 . . ? 
C21 C22 H22B 109.5 . . ? 
H22A C22 H22B 109.5 . . ? 
C21 C22 H22C 109.5 . . ? 
H22A C22 H22C 109.5 . . ? 
H22B C22 H22C 109.5 . . ? 
C21 C22 H22D 105.8 . . ? 
C21 C22 H22E 105.4 . . ? 
H22D C22 H22E 109.5 . . ? 
C21 C22 H22F 116.8 . . ? 
H22D C22 H22F 109.5 . . ? 
H22E C22 H22F 109.5 . . ? 
Pr1 O1W H11W 124.5 . . ? 
Pr1 O1W H12W 109.8 . . ? 
H11W O1W H12W 105.0 . . ? 
Pr1 O2W H21W 122.4 . . ? 
Pr1 O2W H22W 126.6 . . ? 
H21W O2W H22W 105.0 . . ? 
Pr1 O3W H31W 124.2 . . ? 
Pr1 O3W H32W 128.7 . . ? 
H31W O3W H32W 105.0 . . ? 
  
loop_ 
 _geom_hbond_atom_site_label_D 
 _geom_hbond_atom_site_label_H 
 _geom_hbond_atom_site_label_A 
 _geom_hbond_distance_DH 
 _geom_hbond_distance_HA 
 _geom_hbond_distance_DA 
 _geom_hbond_angle_DHA 
 _geom_hbond_site_symmetry_A 
O1W H11W Br1  0.96 2.34 3.2760(14) 165.7 1_545 
O1W H12W O12  0.96 1.78 2.7143(19) 162.2 1_655 
O2W H21W O22  0.96 1.84 2.7155(19) 150.2 1_455 
O2W H22W Br1  0.96 2.29 3.2234(14) 165.2 . 
O3W H31W Br1  0.96 2.35 3.3033(14) 169.6 2_546 
O3W H32W Br1  0.96 2.26 3.2024(15) 165.8 1_545 
  
_refine_diff_density_max    0.441 
_refine_diff_density_min   -0.499 
_refine_diff_density_rms    0.144 
  
_shelx_res_file 
; 
  
    Ha2019_64_0m_a.res created by SHELXL-2014/7 
  
  
TITL Ha2019_64_0m_a.res in P2(1)/n 
CELL  0.71073   7.9293   8.0327  18.0186   90.000   96.533   90.000 
ZERR    4.000   0.0003   0.0003   0.0006    0.000    0.002   0.000 
LATT 1 
SYMM 1/2-X, 1/2+Y, 1/2-Z 
SFAC C  H  O  Br Pr 
UNIT 16 48 28 4 4 
LIST 4 ! automatically inserted. Change 6 to 4 for CHECKCIF!! 
OMIT -3 56 
L.S. 10 
ACTA 
BOND $H 
FMAP 2 
PLAN 5 
  
rem DFIX 0.96  0.0001 O1w H11w O1w H12w O2w H21w O2w H22w O3w H31w O3w H32w 
rem dfix 1.523  0.0001 H11w H12w H21w H22w H31w H32w 
FREE Pr1 C21_$6 
FREE Pr1 C11_$7 
EQIV $6 1-x, 1-y, 1-z 
BIND Pr1 Pr1_$6 
BIND Pr1 Pr1_$7 
EQIV $7 -x,1-y,1-z 
BIND Pr1 O11_$7 
ACTA 
HTAB 
EQIV $1 -x+3/2, y-1/2, -z+3/2 
EQIV $2 x, y-1, z 
HTAB O1W Br1_$2 
EQIV $3 x+1, y, z 
HTAB O1W O12_$3 
EQIV $4 x-1, y, z 
HTAB O2W O22_$4 
HTAB O2W Br1 
EQIV $5 -x+1/2, y-1/2, -z+3/2 
HTAB O3W Br1_$5 
HTAB O3W Br1_$2 
SIZE 0.074  0.120  0.465 
BOND $H 
FMAP 2 
rem DFIX 0.98  0.0001 C22 H22d C22 H22e C22 H22f 
rem dfix 1.601 0.0001 H22d H22e H22d H22f H22e H22f 
PLAN 15 
TEMP -173 
WGHT    0.010700    1.122800 
FVAR       0.28608   0.07954   0.03552   0.05434   0.05648   0.04962   0.64385 
PR1   5    0.260045    0.459640    0.536440    11.00000    0.00681    0.01348 = 
         0.01251    0.00102    0.00155   -0.00086 
BR1   4    0.395223    0.960264    0.687848    11.00000    0.02080    0.01587 = 
         0.01778    0.00209    0.00094   -0.00264 
O11   3   -0.016263    0.335832    0.533031    11.00000    0.01119    0.01841 = 
         0.01917    0.00271    0.00214   -0.00311 
O12   3   -0.281670    0.257797    0.521952    11.00000    0.00978    0.01907 = 
         0.02621    0.00624    0.00292   -0.00096 
C11   1   -0.129274    0.229914    0.545576    11.00000    0.01185    0.01558 = 
         0.01400   -0.00092    0.00352   -0.00054 
C12   1   -0.081126    0.074956    0.588449    11.00000    0.02287    0.02098 = 
         0.02808    0.00955    0.00103    0.00080 
AFIX 137 
H12A  2   -0.084844    0.095517    0.641848    11.00000   21.00000 
H12B  2    0.034004    0.041785    0.579869    11.00000   21.00000 
H12C  2   -0.160903   -0.014246    0.571797    11.00000   21.00000 
AFIX   0 
O21   3    0.546228    0.554302    0.574036    11.00000    0.00970    0.01920 = 
         0.01360   -0.00026    0.00043   -0.00102 
O22   3    0.813199    0.623142    0.598698    11.00000    0.01008    0.02595 = 
         0.01820   -0.00234    0.00101   -0.00248 
C21   1    0.674215    0.587145    0.621880    11.00000    0.01113    0.01481 = 
         0.01587   -0.00096   -0.00004    0.00152 
C22   1    0.658036    0.577990    0.703627    11.00000    0.01776    0.03578 = 
         0.01410    0.00089    0.00051    0.00405 
AFIX   3 
H22A  2    0.769882    0.557231    0.731164    71.00000   31.00000 
H22B  2    0.580704    0.487240    0.713104    71.00000   31.00000 
H22C  2    0.612954    0.683554    0.720210    71.00000   31.00000 
  
H22D  2    0.536228    0.585476    0.708057   -71.00000   31.00000 
H22E  2    0.715406    0.677674    0.725317   -71.00000   31.00000 
H22F  2    0.705145    0.478985    0.730191   -71.00000   31.00000 
AFIX   0 
O1W   3    0.390125    0.176063    0.533334    11.00000    0.01265    0.01595 = 
         0.01796    0.00291    0.00463   -0.00009 
AFIX   3 
H11W  2    0.392548    0.095927    0.572967    11.00000   41.00000 
H12W  2    0.505850    0.185376    0.522959    11.00000   41.00000 
AFIX   0 
O2W   3    0.155492    0.653944    0.627176    11.00000    0.01333    0.01654 = 
         0.02148   -0.00442    0.00158    0.00004 
AFIX   3 
H21W  2    0.036788    0.668904    0.631267    11.00000   51.00000 
H22W  2    0.207907    0.756415    0.644853    11.00000   51.00000 
AFIX   0 
O3W   3    0.284416    0.341678    0.664156    11.00000    0.02846    0.01774 = 
         0.01588    0.00319    0.00710    0.00570 
AFIX   3 
H31W  2    0.234341    0.390537    0.705063    11.00000   61.00000 
H32W  2    0.313532    0.230244    0.680059    11.00000   61.00000 
AFIX   0 
HKLF 4 
  
REM  Ha2019_64_0m_a.res in P2(1)/n 
REM R1 =  0.0141 for    2516 Fo > 4sig(Fo)  and  0.0175 for all    2753 data 
REM    125 parameters refined using      0 restraints 
  
END 
  
WGHT      0.0107      1.1228 
  
REM Instructions for potential hydrogen bonds 
HTAB C22 Br1_$1 
HTAB C22 Br1 
HTAB O1W Br1_$2 
HTAB O1W O12_$3 
HTAB O2W O22_$4 
HTAB O2W Br1 
HTAB O3W Br1_$5 
HTAB O3W Br1_$2 
  
REM Highest difference peak  0.441,  deepest hole -0.499,  1-sigma level  0.144 
Q1    1   0.2448  0.3610  0.6879  11.00000  0.05    0.44 
Q2    1   0.5908  0.3819  0.7259  11.00000  0.05    0.44 
Q3    1   0.6614  0.5706  0.6629  11.00000  0.05    0.42 
Q4    1   0.3393  0.8394  0.6866  11.00000  0.05    0.41 
Q5    1   0.4776  0.8366  0.7136  11.00000  0.05    0.39 
Q6    1   0.8496  0.4509  0.7873  11.00000  0.05    0.37 
Q7    1   0.7481  0.5978  0.7209  11.00000  0.05    0.36 
Q8    1   0.6682  0.7498  0.7208  11.00000  0.05    0.36 
Q9    1   0.2526  0.5591  0.7605  11.00000  0.05    0.35 
Q10   1   0.4588  1.1215  0.7128  11.00000  0.05    0.35 
Q11   1   0.4960  1.0595  0.7391  11.00000  0.05    0.34 
Q12   1   0.2548  1.0431  0.6985  11.00000  0.05    0.34 
Q13   1   0.7111  0.8088  0.7712  11.00000  0.05    0.34 
Q14   1   0.7923  0.4489  0.7323  11.00000  0.05    0.34 
Q15   1   0.4449  0.2547  0.7630  11.00000  0.05    0.34 
; 
_shelx_res_checksum   80750 
  
_shelx_hkl_file 
; 
   1   0   0    4.40    0.90 
   1   0   0    2.60    1.30 
   1   0   0    3.50    1.10 
   1   0   0    2.80    0.90 
   1   0   0    2.30    1.10 
   1   0   0    3.50    1.20 
   1   0   0    3.20    1.20 
   1   0   0    0.60    0.90 
   1   0   0    3.40    1.10 
   1   0   0    7.00    1.90 
   1   0   0    2.10    0.80 
  -1   0   0    0.20    0.80 
  -1   0   0   -0.40    0.70 
  -1   0   0    1.20    1.00 
  -1   0   0    4.40    1.30 
  -1   0   0    0.30    0.60 
  -1   0   0    2.10    1.30 
  -1   0   0    1.50    1.00 
  -1   0   0    0.90    1.10 
  -1   0   0    3.20    1.20 
  -1   0   0    2.60    1.00 
   1   0   0    1.00    1.00 
   1   0   0    2.30    1.10 
   1   0   0    3.70    1.30 
   1   0   0   -0.30    0.80 
   1   0   0    0.10    0.70 
   1   0   0    2.70    1.30 
   1   0   0    2.20    1.00 
   1   0   0    1.00    0.90 
   2   0   0 3578.34  125.99 
   2   0   0 3616.14  123.09 
   2   0   0 3731.93  125.09 
   2   0   0 3288.47  123.69 
   2   0   0 3513.15  123.29 
   2   0   0 3583.54  123.99 
   2   0   0 3684.73  123.69 
   2   0   0 3471.15  123.99 
   2   0   0 3502.05  123.89 
   2   0   0 3643.44  125.49 
   2   0   0 3564.64  121.99 
   2   0   0 3572.24  122.79 
   2   0   0 3570.04  123.19 
   2   0   0 3644.24  123.49 
   2   0   0 3658.63  124.99 
  -2   0   0 3644.44  123.09 
  -2   0   0 3583.24  121.59 
  -2   0   0 3691.73  124.99 
  -2   0   0 3646.74  123.39 
  -2   0   0 3517.45  125.09 
  -2   0   0 3586.34  122.79 
  -2   0   0 3483.55  123.19 
   2   0   0 3597.14  125.39 
   2   0   0 3594.64  122.69 
   2   0   0 3648.44  126.09 
   2   0   0 3545.75  124.09 
   2   0   0 3635.74  121.79 
   2   0   0 3518.05  124.89 
   2   0   0 3506.75  123.19 
   2   0   0 3619.44  125.09 
  -2   0   0 3723.33  124.29 
  -2   0   0 3565.54  123.19 
  -2   0   0 3631.84  124.09 
  -2   0   0 3676.13  123.49 
  -2   0   0 3598.54  126.49 
  -2   0   0 3575.04  122.09 
  -2   0   0 3592.64  124.79 
   2   0   0 3567.84  125.29 
   2   0   0 3673.53  124.19 
  -2   0   0 3458.55  125.29 
  -2   0   0 3559.74  124.89 
  -2   0   0 3679.63  124.39 
  -2   0   0 3573.14  123.99 
  -2   0   0 3549.04  123.79 
  -2   0   0 3550.24  123.49 
  -2   0   0 3630.74  125.49 
  -2   0   0 3674.53  122.99 
  -2   0   0 3669.23  124.49 
  -2   0   0 3613.14  125.19 
   3   0   0    2.80    2.70 
   3   0   0   -0.70    3.30 
   3   0   0    2.30    3.00 
   3   0   0    3.50    3.70 
   3   0   0   -0.60    3.30 
   3   0   0    1.00    2.30 
  -3   0   0   -2.90    3.20 
  -3   0   0    0.80    2.50 
  -3   0   0    1.80    2.50 
  -3   0   0    7.10    4.50 
  -3   0   0    1.70    2.60 
  -3   0   0    1.80    1.60 
  -3   0   0    0.80    2.70 
  -3   0   0   -2.30    2.70 
  -3   0   0    3.20    2.60 
  -3   0   0    2.20    3.20 
  -3   0   0    2.70    3.40 
  -3   0   0    5.10    2.80 
  -3   0   0   -1.00    2.30 
  -3   0   0    1.40    3.50 
  -3   0   0   10.90    4.00 
  -3   0   0   10.60    4.70 
  -3   0   0    8.40    2.40 
  -3   0   0    0.20    2.80 
  -3   0   0    1.00    2.10 
   3   0   0    2.90    3.30 
   3   0   0    2.20    2.50 
   3   0   0   -2.70    2.60 
   3   0   0    2.10    2.40 
   3   0   0    8.70    4.00 
   3   0   0    1.80    2.60 
   3   0   0    1.20    2.30 
   3   0   0    5.60    2.50 
  -3   0   0    0.10    1.30 
   3   0   0    3.40    2.80 
   3   0   0   10.80    3.80 
   3   0   0    3.30    3.80 
   3   0   0    1.40    1.80 
   3   0   0    1.90    3.30 
  -3   0   0    2.00    3.10 
  -3   0   0    3.60    2.40 
   3   0   0    3.10    2.90 
  -3   0   0    5.50    3.40 
   4   0   0  447.26   25.70 
   4   0   0  480.25   25.90 
   4   0   0  481.05   25.60 
   4   0   0  443.36   21.80 
  -4   0   0  502.75   20.60 
  -4   0   0  529.55   24.70 
  -4   0   0  504.45   18.90 
  -4   0   0  486.15   18.10 
  -4   0   0  523.35   24.40 
  -4   0   0  452.65   27.70 
  -4   0   0  488.05   22.40 
  -4   0   0  469.75   19.30 
  -4   0   0  534.25   23.40 
  -4   0   0  505.15   26.30 
  -4   0   0  505.85   21.90 
  -4   0   0  502.75   22.60 
   4   0   0  491.55   20.40 
   4   0   0  456.85   22.50 
   4   0   0  469.05   23.50 
   4   0   0  474.15   22.30 
   4   0   0  487.95   25.60 
  -4   0   0  469.25   24.30 
  -4   0   0  488.05   23.00 
  -4   0   0  469.15   24.80 
  -4   0   0  493.15   24.40 
  -4   0   0  492.65   26.10 
   4   0   0  488.55   25.40 
   4   0   0  497.15   24.40 
  -4   0   0  497.45   22.20 
   4   0   0  490.65   22.10 
   4   0   0  493.25   24.60 
   4   0   0  490.55   23.00 
  -5   0   0   -6.20    4.80 
  -5   0   0    3.80    4.00 
   5   0   0   -4.00    4.60 
   5   0   0    1.10    3.00 
   5   0   0    0.80    5.60 
  -5   0   0   -5.00    3.10 
  -5   0   0    0.40    3.20 
  -5   0   0    3.50    4.90 
  -5   0   0   -6.40    3.60 
  -5   0   0   -0.90    4.90 
  -5   0   0    0.00    2.90 
  -5   0   0    1.20    4.70 
  -5   0   0    0.90    1.60 
  -5   0   0   -0.30    1.30 
  -5   0   0    5.50    4.60 
  -5   0   0   -2.60    4.70 
  -5   0   0   -2.90    2.00 
   5   0   0    0.60    3.80 
  -5   0   0    2.50    3.60 
   5   0   0    1.80    5.20 
   5   0   0    0.30    2.70 
   5   0   0   10.90    5.80 
   5   0   0   -0.90    3.00 
   5   0   0    1.50    5.20 
   5   0   0   -1.10    4.40 
   5   0   0   -0.70    4.20 
   5   0   0   -2.10    3.70 
   5   0   0    3.80    5.60 
   6   0   0 1918.61   74.49 
  -6   0   0 1840.92   76.59 
   6   0   0 1924.71   74.79 
  -6   0   0 1942.51   84.39 
   6   0   0 1893.31   73.99 
  -6   0   0 1988.10   73.19 
  -6   0   0 1954.90   74.69 
  -6   0   0 1865.31   79.59 
  -6   0   0 1946.11   72.09 
   6   0   0 1960.40   80.29 
   6   0   0 1907.91   80.39 
   6   0   0 1885.51   77.09 
  -6   0   0 1954.20   70.09 
  -6   0   0 1834.32   67.49 
  -6   0   0 1913.01   73.49 
   6   0   0 1886.41   79.09 
   6   0   0 1918.51   76.49 
   6   0   0 1865.21   72.79 
  -6   0   0 2010.30   83.29 
  -6   0   0 1818.22   75.49 
   6   0   0 1941.01   75.69 
   6   0   0 1898.91   78.79 
   6   0   0 1946.41   77.99 
   6   0   0 1888.71   85.89 
  -6   0   0 1779.42   77.99 
   6   0   0 1919.61   76.19 
  -6   0   0 1844.12   77.09 
  -6   0   0 1860.81   76.69 
   6   0   0 1935.11   74.39 
   7   0   0    3.80    7.70 
  -7   0   0    3.20    5.40 
  -7   0   0    3.30    6.50 
   7   0   0    0.70    5.90 
   7   0   0    2.30    7.60 
   7   0   0    1.60    5.70 
   7   0   0   -7.50    6.90 
   7   0   0   -2.10    5.20 
  -7   0   0    6.00    5.40 
   7   0   0   -0.70    7.00 
   7   0   0    2.20    7.00 
   7   0   0    2.30    6.70 
  -7   0   0   -3.70    8.70 
  -7   0   0    9.80    8.30 
  -7   0   0   -8.50    5.30 
  -7   0   0   -7.20    5.60 
  -7   0   0    0.40    6.90 
   7   0   0   -2.80    5.30 
  -7   0   0    1.80    4.10 
  -7   0   0   -1.40    6.50 
  -7   0   0   -8.20    5.00 
   7   0   0    5.60    9.30 
   7   0   0    3.90    5.60 
  -7   0   0   -3.50    7.90 
  -7   0   0   -0.60    5.10 
   7   0   0   -2.40    4.50 
   7   0   0    1.70    6.90 
   7   0   0   -5.00    7.30 
   8   0   0 1162.08   65.29 
   8   0   0 1089.29   53.39 
  -8   0   0 1008.10   52.59 
   8   0   0 1058.59   54.39 
  -8   0   0 1088.79   60.49 
   8   0   0 1075.09   52.59 
   8   0   0 1088.49   49.70 
   8   0   0 1091.49   57.99 
  -8   0   0  992.40   60.89 
   8   0   0 1078.09   47.60 
  -8   0   0 1081.19   50.39 
  -8   0   0 1123.39   57.69 
   8   0   0 1121.79   55.99 
  -8   0   0 1073.79   48.00 
  -8   0   0 1012.40   52.79 
  -8   0   0 1033.20   54.19 
  -8   0   0 1046.40   48.70 
   8   0   0 1060.19   51.69 
  -8   0   0 1116.49   52.39 
   8   0   0  980.20   55.49 
   8   0   0 1118.49   49.99 
   8   0   0 1118.19   53.99 
   8   0   0 1086.09   57.39 
   8   0   0 1051.49   50.59 
  -9   0   0   -2.60   10.80 
  -9   0   0   -8.70    9.70 
   9   0   0  -20.90   10.70 
   9   0   0   -7.00   10.60 
  -9   0   0   -4.50    7.10 
   9   0   0    0.60    6.80 
   9   0   0    4.30    8.40 
   9   0   0   -4.80    9.00 
   9   0   0  -11.20    7.70 
   9   0   0   18.30   11.60 
   9   0   0    3.60    9.00 
  -9   0   0   -0.60    6.80 
   9   0   0    8.30    9.20 
   9   0   0    4.80    9.70 
   9   0   0    2.40   11.00 
   9   0   0    8.90    7.70 
  -9   0   0   13.20    9.40 
  -9   0   0   -3.70    8.10 
  -9   0   0   -7.00    9.40 
   9   0   0   -5.10    9.20 
  -9   0   0    0.80    6.20 
   9   0   0    2.30    9.40 
  10   0   0  139.79   24.30 
 -10   0   0  135.79   21.60 
  10   0   0  135.89   29.50 
  10   0   0  156.88   22.00 
  10   0   0  103.29   26.50 
  10   0   0  170.98   25.30 
 -10   0   0  110.59   25.70 
 -10   0   0  143.59   19.60 
 -10   0   0  143.19   25.20 
  10   0   0  126.69   23.10 
 -10   0   0  132.39   21.90 
  10   0   0  141.89   21.30 
  10   0   0  115.99   20.80 
  10   0   0  117.89   22.30 
  10   0   0  115.89   23.00 
  10   0   0  127.79   24.80 
   0  -1   0    0.90    1.20 
   0  -1   0   -1.40    2.10 
   0  -1   0   -1.80    0.90 
   0  -1   0    0.80    0.90 
   0  -1   0   -0.10    0.80 
   0  -1   0   -0.20    1.80 
   0  -1   0    0.00    1.40 
   0  -1   0   -0.30    0.60 
   0   1   0    1.20    0.90 
   0   1   0    5.70    3.40 
   0   1   0    8.30    1.80 
   0   1   0    3.00    1.50 
   0   1   0    7.40    1.90 
   0   1   0    3.20    2.10 
   0   1   0    2.30    1.10 
   0   1   0    5.00    1.80 
   0   1   0    3.20    1.30 
   0   1   0    4.30    2.70 
   1  -1   0  272.47   12.10 
   1  -1   0  258.37   13.80 
   1  -1   0  262.77   10.70 
  -1  -1   0  254.47   11.90 
  -1  -1   0  276.07   12.50 
  -1  -1   0  248.68   10.90 
  -1  -1   0  285.87   11.60 
  -1  -1   0  271.97   12.30 
  -1  -1   0  277.27   12.10 
   1  -1   0  203.58   12.50 
  -1  -1   0  248.88   11.50 
   1  -1   0  217.48   12.90 
  -1  -1   0  219.28   11.30 
  -1  -1   0  270.77   13.60 
  -1  -1   0  271.27   12.10 
   1  -1   0  274.77   11.40 
   1  -1   0  269.27   11.50 
   1  -1   0  272.87   11.40 
  -1  -1   0  279.27   12.60 
   1  -1   0  269.77   11.60 
  -1  -1   0  224.88   11.40 
  -1  -1   0  280.97   12.50 
   1  -1   0  277.67   11.20 
   1  -1   0  255.57   13.70 
   1  -1   0  260.27   11.60 
  -1   1   0  253.27   12.20 
   1   1   0  249.58   11.40 
   1   1   0  243.28   11.50 
  -1   1   0  266.17   12.10 
   1   1   0  270.97   11.30 
   1   1   0  276.67   11.90 
   1   1   0  284.87   12.30 
   1   1   0  275.37   11.60 
   1   1   0  216.98   11.80 
  -1   1   0  287.07   13.30 
  -1   1   0  256.87   11.60 
  -1   1   0  245.08   13.40 
   1   1   0  243.28   11.40 
   1   1   0  262.57   11.60 
   1   1   0  262.77   11.00 
   1   1   0  268.87   11.60 
  -1   1   0  274.77   12.40 
   1   1   0  290.87   13.90 
  -1   1   0  275.17   14.50 
   1   1   0  274.97   11.60 
  -1   1   0  281.47   13.40 
  -1   1   0  260.17   11.90 
  -1   1   0  274.77   11.60 
   1   1   0  281.17   12.60 
  -1   1   0  274.87   13.80 
  -2  -1   0  323.87   14.60 
  -2  -1   0  311.77   14.70 
   2  -1   0  335.67   17.80 
   2  -1   0  302.87   14.40 
   2  -1   0  361.86   16.70 
   2  -1   0  329.47   14.90 
  -2  -1   0  290.97   13.60 
  -2  -1   0  311.67   17.50 
   2  -1   0  325.77   14.00 
   2  -1   0  334.27   15.20 
   2  -1   0  320.57   14.50 
  -2  -1   0  352.36   16.40 
  -2  -1   0  304.27   13.20 
  -2  -1   0  317.67   16.00 
  -2  -1   0  318.17   14.70 
  -2  -1   0  306.97   14.30 
  -2  -1   0  333.47   16.10 
  -2  -1   0  321.17   15.90 
  -2  -1   0  310.67   15.50 
  -2  -1   0  298.97   13.70 
  -2  -1   0  326.57   14.40 
  -2  -1   0  321.87   14.20 
   2  -1   0  304.87   14.20 
   2  -1   0  327.97   18.00 
   2  -1   0  306.07   14.20 
  -2  -1   0  310.37   13.00 
   2  -1   0  322.17   15.70 
   2  -1   0  337.17   17.60 
  -2  -1   0  338.77   15.20 
   2  -1   0  308.57   14.80 
   2  -1   0  326.27   14.90 
   2  -1   0  324.57   13.70 
   2  -1   0  324.77   15.80 
  -2  -1   0  329.07   15.60 
   2  -1   0  321.57   14.80 
   2  -1   0  311.27   14.80 
   2  -1   0  320.57   14.70 
   2  -1   0  311.87   17.30 
  -2  -1   0  309.47   13.80 
   2  -1   0  333.17   17.20 
  -2  -1   0  309.87   15.00 
  -2  -1   0  318.17   14.80 
  -2  -1   0  332.47   14.30 
  -2  -1   0  325.97   15.10 
  -2  -1   0  321.77   15.80 
   2  -1   0  349.07   15.90 
  -2  -1   0  323.77   15.20 
   2   1   0  327.47   15.10 
   2   1   0  351.76   15.70 
   2   1   0  289.77   14.60 
  -2   1   0  347.27   14.70 
  -2   1   0  312.17   14.50 
  -2   1   0  329.17   14.20 
  -2   1   0  295.87   14.10 
   2   1   0  337.87   15.70 
   2   1   0  297.17   14.80 
   2   1   0  319.17   15.20 
   2   1   0  332.07   16.00 
   2   1   0  337.27   16.10 
   2   1   0  322.67   17.40 
  -2   1   0  323.97   15.90 
  -2   1   0  315.87   17.80 
  -2   1   0  333.67   17.00 
  -2   1   0  347.07   15.50 
   2   1   0  331.37   14.90 
  -2   1   0  341.77   13.80 
   2   1   0  347.77   16.30 
  -2   1   0  342.57   15.20 
   2   1   0  318.17   13.30 
  -2   1   0  341.07   16.00 
   2   1   0  321.37   13.70 
   2   1   0  314.97   15.80 
   2   1   0  306.87   14.30 
   2   1   0  316.07   13.30 
  -2   1   0  312.47   17.30 
   2   1   0  285.47   14.10 
   2   1   0  323.37   12.90 
   2   1   0  295.97   14.60 
   2   1   0  321.07   13.40 
  -2   1   0  333.77   17.00 
  -2   1   0  319.57   14.90 
  -2   1   0  339.67   14.90 
   2   1   0  327.37   12.60 
   2   1   0  307.37   12.90 
  -2   1   0  302.07   14.50 
   2   1   0  317.57   16.20 
   2   1   0  320.97   15.50 
  -3  -1   0    5.40    2.70 
   3  -1   0   11.50    4.20 
   3  -1   0   11.10    4.20 
   3  -1   0    8.20    3.40 
   3  -1   0    5.20    3.30 
   3  -1   0   10.50    5.30 
   3  -1   0    3.70    3.50 
   3  -1   0    7.90    3.00 
   3  -1   0    6.10    2.70 
  -3  -1   0    2.10    4.70 
  -3  -1   0    8.50    4.00 
   3  -1   0   17.50    5.60 
   3  -1   0   12.70    4.00 
   3  -1   0    7.40    3.10 
  -3  -1   0   13.60    4.60 
  -3  -1   0    9.40    3.70 
  -3  -1   0   10.10    4.20 
  -3  -1   0    7.30    3.50 
  -3  -1   0    5.80    2.70 
   3  -1   0   10.30    2.90 
   3  -1   0    4.60    3.30 
  -3  -1   0    5.20    2.00 
  -3  -1   0    5.30    3.80 
  -3  -1   0    4.90    3.10 
   3  -1   0   11.30    3.30 
  -3  -1   0    3.80    2.90 
  -3  -1   0    8.50    2.50 
  -3  -1   0    7.30    3.60 
  -3  -1   0    6.60    4.60 
   3  -1   0   15.30    3.90 
  -3  -1   0    8.90    3.80 
   3  -1   0    5.20    4.80 
  -3  -1   0   13.20    3.70 
  -3  -1   0   11.30    4.40 
  -3  -1   0    9.20    3.20 
  -3  -1   0    8.80    3.20 
  -3  -1   0    3.20    3.40 
  -3  -1   0    9.30    4.00 
   3  -1   0   13.30    4.90 
  -3  -1   0   11.30    5.10 
   3  -1   0    8.10    3.60 
   3  -1   0   14.20    4.00 
  -3  -1   0    6.40    3.10 
   3   1   0    6.20    3.60 
   3   1   0   10.00    3.40 
  -3   1   0   12.60    5.90 
   3   1   0    7.60    1.90 
   3   1   0    9.70    3.90 
   3   1   0    5.20    3.20 
  -3   1   0    7.80    4.10 
  -3   1   0   12.50    4.70 
  -3   1   0   14.60    4.50 
   3   1   0    5.00    3.10 
   3   1   0    6.80    2.80 
   3   1   0    7.40    3.70 
  -3   1   0    8.80    3.90 
   3   1   0    5.50    4.00 
  -3   1   0   11.30    3.60 
   3   1   0    5.50    1.90 
   3   1   0    6.50    2.50 
   3   1   0    8.40    4.70 
  -3   1   0   -3.40    4.30 
   3   1   0   10.80    5.20 
  -3   1   0    5.30    3.00 
  -3   1   0    9.00    3.30 
   3   1   0   12.20    3.80 
  -3   1   0   10.60    3.60 
  -3   1   0   19.10    7.20 
  -3   1   0    7.30    4.30 
  -3   1   0   -0.20    3.90 
   3   1   0    4.90    1.60 
   3   1   0   10.50    3.90 
   3   1   0   14.30    3.70 
   3   1   0    9.30    4.80 
   3   1   0    8.40    3.80 
   3   1   0    6.00    3.30 
  -3   1   0    7.90    2.50 
   3   1   0    8.40    4.50 
  -3   1   0   10.70    3.10 
   3   1   0    3.30    2.40 
  -3   1   0   13.50    3.90 
  -3   1   0    9.50    4.10 
  -3   1   0    7.00    3.40 
   3   1   0   14.60    3.90 
   3   1   0    3.20    3.60 
  -4  -1   0    3.70    4.50 
   4  -1   0    6.40    5.30 
   4  -1   0    1.60    5.70 
  -4  -1   0   -2.60    3.20 
   4  -1   0    0.80    3.00 
   4  -1   0    4.50    2.40 
   4  -1   0    4.80    5.20 
   4  -1   0    3.40    2.40 
  -4  -1   0    2.60    4.20 
   4  -1   0    3.10    5.70 
  -4  -1   0    1.10    3.20 
  -4  -1   0    6.10    4.20 
  -4  -1   0    1.40    4.40 
  -4  -1   0    1.60    3.50 
   4  -1   0   -0.80    4.20 
  -4  -1   0   -0.40    4.20 
  -4  -1   0    2.10    2.00 
  -4  -1   0   -0.50    4.00 
  -4  -1   0    9.80    6.60 
   4  -1   0   -4.80    3.40 
   4  -1   0    4.90    4.60 
  -4  -1   0    4.70    5.50 
   4  -1   0    6.00    3.50 
   4  -1   0    3.60    3.20 
  -4  -1   0    3.40    3.60 
   4  -1   0    4.60    4.20 
   4  -1   0    3.50    5.60 
  -4  -1   0    4.70    3.10 
   4  -1   0    2.00    3.20 
  -4  -1   0    4.70    2.70 
   4  -1   0    4.10    4.20 
   4  -1   0    5.70    4.70 
  -4  -1   0   -1.00    4.00 
  -4  -1   0    6.60    3.60 
   4   1   0    8.50    3.30 
  -4   1   0    3.20    2.60 
   4   1   0    9.10    4.40 
   4   1   0    3.50    4.40 
   4   1   0   13.20    5.30 
  -4   1   0    3.00    4.20 
   4   1   0    8.90    3.60 
  -4   1   0   -3.60    6.20 
   4   1   0    3.50    5.60 
  -4   1   0    3.20    2.80 
  -4   1   0    8.30    3.90 
   4   1   0    9.70    5.50 
   4   1   0    1.60    4.80 
   4   1   0    2.00    5.70 
  -4   1   0    0.80    2.70 
   4   1   0   -1.90    4.30 
  -4   1   0    1.70    5.30 
  -4   1   0    4.40    3.40 
   4   1   0    3.20    4.80 
  -4   1   0    5.40    6.50 
   4   1   0   -2.90    4.00 
   4   1   0   -1.70    5.00 
   4   1   0    2.60    4.00 
  -4   1   0    1.00    3.60 
  -4   1   0   10.50    5.00 
   4   1   0    7.10    3.00 
  -4   1   0    5.90    4.40 
  -4   1   0    3.80    3.80 
  -4   1   0    2.70    6.30 
   4   1   0    3.40    3.40 
  -5  -1   0 1054.79   46.90 
  -5  -1   0 1018.20   51.19 
   5  -1   0 1106.19   49.10 
   5  -1   0 1165.68   48.60 
  -5  -1   0 1096.39   47.10 
  -5  -1   0 1120.79   43.90 
  -5  -1   0 1189.48   49.20 
   5  -1   0 1093.39   39.30 
   5  -1   0 1081.59   50.09 
  -5  -1   0 1103.69   45.40 
  -5  -1   0 1079.99   39.10 
  -5  -1   0 1067.09   43.90 
  -5  -1   0 1110.09   40.90 
   5  -1   0 1084.89   46.40 
   5  -1   0 1061.09   50.49 
   5  -1   0 1154.18   47.30 
   5  -1   0 1129.69   55.09 
   5  -1   0 1105.39   46.80 
   5  -1   0 1138.39   46.80 
  -5  -1   0 1137.59   47.90 
   5  -1   0 1132.09   45.60 
   5  -1   0 1097.49   45.30 
  -5  -1   0 1156.58   46.70 
  -5  -1   0 1128.19   50.29 
  -5  -1   0 1110.59   47.90 
  -5  -1   0 1095.79   44.50 
   5  -1   0 1097.19   50.69 
   5   1   0 1092.79   44.50 
   5   1   0 1129.99   47.80 
   5   1   0 1148.09   49.50 
  -5   1   0 1080.39   41.10 
   5   1   0 1106.79   47.10 
  -5   1   0 1066.39   41.30 
  -5   1   0 1122.69   44.80 
  -5   1   0 1106.99   49.50 
   5   1   0 1117.69   49.70 
   5   1   0 1089.89   45.30 
  -5   1   0 1115.89   51.29 
  -5   1   0 1159.18   53.09 
  -5   1   0 1129.69   45.20 
  -5   1   0 1056.49   44.30 
   5   1   0 1054.89   43.00 
   5   1   0 1149.89   49.10 
   5   1   0 1098.29   49.70 
  -5   1   0 1068.59   47.50 
   5   1   0 1138.19   45.90 
  -5   1   0 1076.39   46.70 
  -5   1   0 1088.29   41.00 
   5   1   0 1102.39   46.40 
   5   1   0 1078.39   41.00 
   5   1   0 1064.09   49.40 
  -5   1   0 1098.99   39.10 
  -5   1   0 1126.29   53.89 
  -5   1   0 1078.89   39.10 
  -5   1   0 1072.69   38.70 
  -5   1   0 1087.79   47.70 
   5   1   0 1148.59   46.70 
   6  -1   0    5.50    6.10 
  -6  -1   0   -1.80    3.50 
   6  -1   0   12.00    7.50 
  -6  -1   0    6.40    5.20 
   6  -1   0    8.80    6.30 
   6  -1   0    4.80    6.80 
  -6  -1   0    8.60    6.10 
   6  -1   0   11.20    8.70 
   6  -1   0   13.40    6.90 
   6  -1   0    5.30    4.50 
  -6  -1   0    1.30    5.20 
   6  -1   0    2.60    5.10 
  -6  -1   0    1.50    5.70 
   6  -1   0    8.30    5.30 
   6  -1   0   -5.00    6.10 
  -6  -1   0   11.70    6.10 
   6  -1   0   10.80    7.80 
  -6  -1   0    0.20    5.40 
  -6  -1   0   -8.60    6.30 
   6  -1   0    6.40    5.90 
  -6  -1   0    3.30    4.50 
  -6  -1   0    6.80    3.20 
  -6  -1   0    7.70    4.90 
  -6  -1   0    9.80    7.90 
  -6   1   0    6.00    6.60 
   6   1   0    6.00    6.90 
  -6   1   0   13.30    8.90 
  -6   1   0   -7.00    6.90 
   6   1   0   -1.50    5.70 
  -6   1   0   -0.20    5.60 
  -6   1   0   -4.70    7.80 
   6   1   0   -1.10    7.60 
   6   1   0    0.80    6.30 
   6   1   0   10.90    8.10 
   6   1   0    8.80    7.20 
   6   1   0    7.00    5.90 
  -6   1   0    0.60    5.50 
  -6   1   0    7.50    3.70 
  -6   1   0    7.40    5.60 
   6   1   0    5.10    4.80 
  -6   1   0    4.80    3.50 
   6   1   0   -4.20    5.60 
   6   1   0    2.50    6.50 
  -6   1   0    2.40    2.40 
   6   1   0   11.60    6.30 
   6   1   0    6.40    6.70 
  -6   1   0   -0.40    4.50 
   6   1   0   10.60    5.80 
  -6   1   0    7.60    7.40 
  -6   1   0   -1.40    4.40 
  -7  -1   0  240.98   22.90 
  -7  -1   0  308.77   22.40 
  -7  -1   0  250.67   20.10 
   7  -1   0  237.08   21.70 
   7  -1   0  285.57   22.00 
   7  -1   0  281.37   21.00 
   7  -1   0  234.58   24.90 
  -7  -1   0  260.07   17.80 
  -7  -1   0  233.88   22.90 
  -7  -1   0  241.08   20.80 
  -7  -1   0  233.18   28.50 
   7  -1   0  302.57   19.30 
   7  -1   0  275.27   21.70 
  -7  -1   0  210.08   23.60 
  -7  -1   0  215.88   17.90 
  -7  -1   0  250.97   16.60 
   7  -1   0  291.27   24.10 
   7  -1   0  292.67   20.40 
   7  -1   0  304.87   29.20 
  -7  -1   0  251.17   18.00 
   7  -1   0  263.67   19.20 
   7  -1   0  271.77   27.50 
   7  -1   0  291.67   27.20 
  -7   1   0  264.17   21.50 
  -7   1   0  203.78   23.60 
   7   1   0  237.98   24.60 
   7   1   0  316.87   23.30 
   7   1   0  246.08   25.00 
   7   1   0  272.37   19.50 
  -7   1   0  292.97   27.50 
  -7   1   0  253.67   28.80 
   7   1   0  288.67   28.40 
   7   1   0  282.07   26.90 
   7   1   0  254.07   23.90 
   7   1   0  245.38   19.90 
  -7   1   0  273.47   22.20 
   7   1   0  270.77   19.90 
  -7   1   0  266.97   21.80 
  -7   1   0  260.57   14.30 
  -7   1   0  304.17   19.60 
  -7   1   0  286.17   19.60 
   7   1   0  259.17   25.00 
   7   1   0  266.47   18.80 
  -7   1   0  285.17   19.50 
   7   1   0  267.47   24.00 
   7   1   0  258.77   22.80 
  -8  -1   0    3.80    7.70 
   8  -1   0   10.40    9.50 
   8  -1   0   18.20   11.20 
  -8  -1   0   -2.20    8.00 
  -8  -1   0    3.30    7.60 
  -8  -1   0    0.50    6.90 
   8  -1   0    7.30    6.80 
   8  -1   0    5.50    8.40 
   8  -1   0    9.40    9.40 
   8  -1   0   22.00    9.80 
  -8  -1   0    5.00    7.80 
  -8  -1   0   19.50   12.10 
   8  -1   0    5.10    8.40 
   8  -1   0    7.50    9.60 
  -8  -1   0    8.00    7.60 
  -8  -1   0    5.40    9.20 
  -8  -1   0    1.70    6.10 
   8  -1   0    8.60    7.00 
   8  -1   0    7.40   11.20 
   8  -1   0   14.30    8.00 
  -8  -1   0    9.00    6.40 
   8  -1   0    6.30    8.40 
   8  -1   0    4.40    6.10 
   8  -1   0   16.20    9.10 
  -8  -1   0   11.60   10.60 
  -8   1   0   18.10   11.30 
   8   1   0    3.60    9.00 
  -8   1   0    4.20    9.40 
   8   1   0    8.70    7.50 
   8   1   0    8.70    8.60 
   8   1   0    6.40    6.50 
   8   1   0   19.20   11.70 
   8   1   0    8.20    9.40 
   8   1   0   14.00   11.60 
  -8   1   0   17.30    7.80 
  -8   1   0    3.20    8.10 
   8   1   0   14.20   10.60 
   8   1   0   14.30    8.10 
   8   1   0    3.90    8.80 
  -8   1   0   19.60   11.20 
   8   1   0   17.00   10.60 
  -8   1   0   10.30    8.40 
   8   1   0   13.30   11.10 
   8   1   0   21.80   10.70 
   8   1   0    0.40    7.50 
  -8   1   0   21.70    9.90 
  -8   1   0    6.90    6.60 
  -8   1   0    5.50    7.20 
  -9  -1   0   -6.20   11.50 
   9  -1   0   -2.00    8.20 
  -9  -1   0    6.70    7.60 
   9  -1   0   12.80   11.10 
  -9  -1   0    2.50    8.60 
  -9  -1   0    2.70    8.40 
  -9  -1   0   12.40   12.20 
   9  -1   0   -0.20    9.30 
   9  -1   0   -7.00   10.00 
   9  -1   0    8.10    7.60 
   9  -1   0   -4.30    9.40 
   9  -1   0   -6.60    9.90 
   9  -1   0    7.00    8.10 
   9  -1   0   10.10    9.80 
   9  -1   0   10.40   11.70 
   9  -1   0    3.20   11.90 
   9  -1   0    6.70    8.90 
  -9  -1   0    6.10   12.00 
  -9  -1   0   13.80    9.60 
  -9  -1   0    9.20    8.90 
   9  -1   0    4.80    9.70 
   9   1   0    1.50    9.50 
  -9   1   0    2.10    7.30 
   9   1   0    4.00    9.10 
   9   1   0   -2.50   10.30 
  -9   1   0    3.60   11.70 
  -9   1   0   -8.10    7.00 
  -9   1   0    9.60    8.00 
   9   1   0    2.60   10.00 
  -9   1   0   -3.50    9.00 
   9   1   0   -2.30    9.80 
   9   1   0   17.30   13.00 
   9   1   0    7.70   12.10 
   9   1   0    6.80    7.30 
   9   1   0    4.40    9.20 
   9   1   0   20.60    9.20 
   9   1   0   11.70    9.10 
  -9   1   0   12.10   13.10 
  -9   1   0    2.60    7.10 
   9   1   0   -3.30    9.80 
   9   1   0   -3.70   10.30 
  -9   1   0   19.80   11.10 
   9   1   0   13.70   10.90 
  10  -1   0   20.80   14.80 
 -10  -1   0   21.20   10.60 
  10  -1   0   11.50   13.40 
  10  -1   0   34.60   12.40 
  10  -1   0   16.00   14.80 
  10  -1   0   22.10   17.30 
 -10  -1   0   33.60   16.30 
  10  -1   0    5.20   11.20 
 -10  -1   0   33.90   13.60 
  10  -1   0   19.40   13.20 
  10  -1   0   34.50   14.80 
 -10  -1   0   10.10   10.90 
  10  -1   0   20.00   13.60 
  10  -1   0   32.10   14.70 
 -10  -1   0   25.80   16.40 
 -10  -1   0   18.10   12.10 
 -10  -1   0   27.00   11.00 
  10  -1   0   34.30   15.00 
  10   1   0   12.60   12.30 
 -10   1   0   37.30   17.70 
 -10   1   0   17.20   11.30 
  10   1   0   17.30   14.70 
 -10   1   0   36.70   16.50 
  10   1   0   23.90   17.00 
  10   1   0   24.90   15.10 
  10   1   0   41.10   14.30 
 -10   1   0   13.60   13.30 
 -10   1   0    3.30   10.00 
  10   1   0   32.00   18.30 
  10   1   0   21.30   13.50 
  10   1   0   16.30   13.90 
  10   1   0   22.90   11.70 
  10   1   0   22.80   15.40 
  10   1   0   24.30   14.40 
   0  -2   0 4986.60  165.28 
   0  -2   0 4756.92  168.38 
   0  -2   0 4856.91  164.08 
   0  -2   0 5117.99  165.68 
   0  -2   0 4813.02  164.68 
   0  -2   0 5010.60  163.88 
   0  -2   0 4618.54  168.38 
   0  -2   0 4615.64  166.18 
   0  -2   0 4743.03  165.48 
   0  -2   0 4723.43  171.98 
   0  -2   0 4701.53  168.88 
   0  -2   0 4703.33  164.58 
   0   2   0 4901.41  164.58 
   0   2   0 4777.12  165.38 
   0   2   0 4782.62  164.88 
   0   2   0 4602.24  163.98 
   0   2   0 4814.92  164.18 
   0   2   0 4519.45  168.18 
   0   2   0 4891.71  174.28 
   0   2   0 4771.42  163.68 
   0   2   0 4684.73  164.38 
   0   2   0 4627.34  165.88 
   0   2   0 4897.31  164.88 
  -1  -2   0 2782.62   97.59 
  -1  -2   0 2839.92   98.79 
  -1  -2   0 2771.02   97.39 
  -1  -2   0 2704.23   99.79 
   1  -2   0 2885.61   99.09 
  -1  -2   0 2692.93  101.39 
   1  -2   0 2651.53   96.59 
   1  -2   0 2842.82  103.49 
   1  -2   0 2754.62   98.99 
   1  -2   0 2780.82  101.19 
  -1  -2   0 2684.23   99.79 
  -1  -2   0 2799.62  101.09 
  -1  -2   0 2789.22   97.39 
   1  -2   0 2880.21   99.49 
  -1  -2   0 2792.12   97.99 
  -1  -2   0 2753.22   96.79 
  -1  -2   0 2707.33   94.99 
   1  -2   0 2772.32  100.79 
  -1  -2   0 2823.22  103.39 
   1  -2   0 2722.03   97.09 
  -1  -2   0 2859.21   97.49 
  -1  -2   0 2777.82   97.69 
  -1  -2   0 2830.72   98.39 
  -1  -2   0 2827.42  100.29 
  -1  -2   0 2814.72   97.29 
   1  -2   0 2675.13   98.09 
   1  -2   0 2797.62  101.19 
   1  -2   0 2848.62  103.79 
   1  -2   0 2802.42   98.39 
  -1  -2   0 2767.62   97.99 
   1  -2   0 2827.92   98.99 
   1  -2   0 2714.13   99.49 
  -1   2   0 2811.82   99.09 
   1   2   0 2722.83   97.79 
   1   2   0 2719.13   98.19 
   1   2   0 2662.43   97.19 
  -1   2   0 2868.31   98.89 
  -1   2   0 2778.92   98.29 
  -1   2   0 2788.52   98.99 
  -1   2   0 2931.21  104.39 
  -1   2   0 2947.10   96.89 
   1   2   0 2687.63   97.49 
   1   2   0 2723.93   97.39 
   1   2   0 2667.33   96.99 
  -1   2   0 2799.32   99.79 
  -1   2   0 2754.82  101.29 
   1   2   0 2921.81  100.69 
  -1   2   0 2776.82   97.49 
   1   2   0 2698.53  101.49 
   1   2   0 2912.41  100.89 
  -1   2   0 2746.43  103.39 
  -1   2   0 2702.93   97.69 
   1   2   0 2594.84   97.59 
   1   2   0 2646.44   97.69 
   1   2   0 2802.32   96.69 
  -1   2   0 2792.82   98.79 
   1   2   0 2760.32  100.79 
  -1   2   0 2855.51  101.19 
   1   2   0 2746.53   97.49 
   1   2   0 2818.72   98.39 
  -1   2   0 2771.92   96.99 
   1   2   0 3027.20  103.79 
   1   2   0 2690.83   97.49 
   1   2   0 2702.53   97.49 
   1   2   0 2708.03   97.29 
  -1   2   0 2694.33   98.79 
  -2  -2   0  924.51   36.80 
  -2  -2   0  925.11   38.00 
  -2  -2   0  967.30   37.70 
   2  -2   0  892.41   35.60 
   2  -2   0  948.51   38.40 
   2  -2   0  894.81   36.40 
  -2  -2   0  939.01   36.60 
  -2  -2   0  905.01   36.50 
   2  -2   0  927.81   39.80 
  -2  -2   0  796.22   35.40 
  -2  -2   0  909.61   36.50 
   2  -2   0  921.21   36.50 
   2  -2   0  932.91   43.40 
   2  -2   0  956.50   37.70 
  -2  -2   0  888.21   36.90 
  -2  -2   0  924.71   35.90 
  -2  -2   0  848.22   36.70 
  -2  -2   0  939.91   36.50 
  -2  -2   0  898.91   33.00 
  -2  -2   0  883.61   36.70 
  -2  -2   0  911.01   36.50 
   2  -2   0  897.51   35.10 
  -2  -2   0  897.11   35.20 
   2  -2   0  925.81   37.30 
   2  -2   0  954.20   41.50 
  -2  -2   0  903.21   37.70 
  -2  -2   0  926.11   35.50 
  -2  -2   0  898.51   37.90 
  -2  -2   0  928.11   35.20 
   2  -2   0  891.91   35.90 
   2  -2   0  967.40   39.90 
  -2  -2   0  908.41   36.00 
  -2  -2   0  887.11   36.20 
  -2  -2   0  937.61   40.80 
  -2  -2   0  882.41   37.80 
   2  -2   0  941.11   41.40 
  -2   2   0  914.41   36.60 
  -2   2   0  925.01   36.70 
   2   2   0  924.11   37.40 
   2   2   0  955.90   35.10 
   2   2   0  950.40   38.60 
   2   2   0  902.11   35.30 
  -2   2   0  964.20   34.50 
  -2   2   0  978.00   41.30 
   2   2   0  897.21   35.30 
  -2   2   0  907.21   39.40 
  -2   2   0  959.20   35.50 
   2   2   0  902.71   36.10 
  -2   2   0  924.71   38.80 
   2   2   0  953.40   34.70 
   2   2   0  945.81   41.80 
   2   2   0  937.51   40.20 
   2   2   0  904.01   36.10 
   2   2   0  870.91   35.50 
  -2   2   0  929.31   42.40 
   2   2   0  967.60   38.00 
  -2   2   0  861.91   39.30 
   2   2   0  945.51   36.80 
  -2   2   0  875.21   36.90 
  -2   2   0  926.01   35.30 
   2   2   0  841.52   35.70 
  -2   2   0  914.11   36.10 
   2   2   0  910.61   36.00 
   2   2   0  942.81   37.80 
   2   2   0  937.11   38.10 
  -2   2   0  924.11   35.90 
  -2   2   0  935.11   35.70 
   2   2   0  907.11   35.10 
   2   2   0  913.81   36.30 
   2   2   0  945.21   36.50 
   2   2   0  880.31   36.10 
   2   2   0  915.41   36.30 
   3  -2   0  360.76   22.70 
   3  -2   0  336.17   19.20 
   3  -2   0  330.97   17.40 
   3  -2   0  367.36   19.80 
  -3  -2   0  366.46   18.00 
   3  -2   0  321.27   21.30 
  -3  -2   0  354.96   18.90 
  -3  -2   0  376.16   16.30 
   3  -2   0  373.16   23.70 
  -3  -2   0  343.17   16.50 
   3  -2   0  356.86   20.20 
   3  -2   0  374.46   16.50 
  -3  -2   0  352.56   19.20 
  -3  -2   0  343.47   19.30 
  -3  -2   0  340.77   20.30 
  -3  -2   0  352.16   16.70 
   3  -2   0  354.36   18.20 
   3  -2   0  399.76   21.50 
   3  -2   0  362.26   18.40 
  -3  -2   0  374.86   16.80 
   3  -2   0  338.67   18.70 
   3  -2   0  359.46   18.70 
   3  -2   0  388.76   19.00 
  -3  -2   0  356.26   20.20 
  -3  -2   0  375.76   23.70 
  -3  -2   0  362.16   18.40 
  -3  -2   0  365.86   20.00 
  -3  -2   0  353.46   18.70 
  -3  -2   0  377.16   18.50 
   3  -2   0  341.47   18.00 
  -3  -2   0  372.06   17.20 
  -3  -2   0  370.46   19.20 
   3   2   0  342.97   18.20 
   3   2   0  348.07   16.60 
  -3   2   0  355.66   18.10 
  -3   2   0  381.16   18.00 
  -3   2   0  363.86   18.80 
  -3   2   0  358.66   19.20 
   3   2   0  335.07   15.50 
  -3   2   0  358.16   20.00 
   3   2   0  378.96   18.20 
   3   2   0  338.17   15.10 
   3   2   0  366.46   19.90 
   3   2   0  341.17   20.80 
  -3   2   0  376.06   23.20 
   3   2   0  353.56   16.20 
   3   2   0  335.97   20.60 
  -3   2   0  373.96   16.60 
   3   2   0  365.16   16.40 
  -3   2   0  339.97   22.60 
   3   2   0  360.06   20.30 
   3   2   0  354.96   20.70 
   3   2   0  336.47   16.90 
   3   2   0  314.17   16.60 
  -3   2   0  359.26   18.30 
   3   2   0  338.67   18.50 
   3   2   0  357.26   19.80 
   3   2   0  341.37   18.60 
   3   2   0  354.26   19.60 
  -4  -2   0  358.76   16.40 
  -4  -2   0  359.46   19.70 
  -4  -2   0  362.76   20.90 
   4  -2   0  351.96   21.00 
  -4  -2   0  374.16   17.10 
  -4  -2   0  341.47   20.10 
   4  -2   0  338.07   20.90 
   4  -2   0  348.67   19.70 
   4  -2   0  327.27   19.50 
  -4  -2   0  335.67   17.30 
   4  -2   0  347.77   18.90 
  -4  -2   0  337.17   22.00 
  -4  -2   0  356.46   18.90 
  -4  -2   0  343.17   18.00 
  -4  -2   0  328.97   18.30 
  -4  -2   0  358.46   22.50 
  -4  -2   0  399.16   25.60 
  -4  -2   0  351.86   20.60 
   4  -2   0  331.57   23.30 
   4  -2   0  367.36   24.40 
  -4  -2   0  381.26   20.50 
   4  -2   0  342.57   18.70 
   4  -2   0  336.07   25.00 
  -4  -2   0  320.37   17.50 
   4  -2   0  372.66   17.40 
  -4  -2   0  325.37   19.00 
   4  -2   0  346.17   19.20 
   4  -2   0  364.26   20.00 
   4  -2   0  340.07   18.50 
   4  -2   0  373.06   23.00 
   4  -2   0  332.67   19.30 
   4   2   0  386.46   23.10 
  -4   2   0  339.47   24.00 
   4   2   0  363.56   19.90 
   4   2   0  370.96   15.70 
   4   2   0  361.66   15.20 
  -4   2   0  357.66   21.20 
   4   2   0  344.77   20.50 
   4   2   0  321.27   17.20 
   4   2   0  322.07   21.00 
   4   2   0  362.76   21.60 
   4   2   0  345.87   20.70 
  -4   2   0  344.07   15.70 
  -4   2   0  361.56   18.00 
   4   2   0  382.06   20.90 
   4   2   0  336.37   15.90 
   4   2   0  350.86   19.90 
  -4   2   0  357.76   24.50 
   4   2   0  381.36   22.40 
  -4   2   0  349.77   20.40 
   4   2   0  348.77   16.80 
   4   2   0  354.56   16.40 
  -4   2   0  354.56   17.40 
  -4   2   0  358.16   18.50 
   4   2   0  338.27   18.90 
  -4   2   0  359.36   19.80 
   4   2   0  347.57   17.80 
   4   2   0  351.16   22.40 
  -5  -2   0  386.26   20.50 
  -5  -2   0  405.36   23.70 
  -5  -2   0  416.66   17.90 
   5  -2   0  405.66   27.30 
   5  -2   0  430.76   23.40 
   5  -2   0  375.26   23.30 
   5  -2   0  417.36   22.50 
   5  -2   0  404.26   23.40 
   5  -2   0  407.26   29.30 
  -5  -2   0  393.76   23.80 
  -5  -2   0  398.16   26.40 
   5  -2   0  358.96   21.80 
   5  -2   0  379.26   26.70 
  -5  -2   0  377.46   17.60 
  -5  -2   0  392.86   21.80 
   5  -2   0  420.26   19.70 
  -5  -2   0  379.46   23.00 
  -5  -2   0  386.86   21.10 
  -5  -2   0  389.66   18.50 
  -5  -2   0  360.06   22.30 
  -5  -2   0  368.96   17.20 
  -5  -2   0  412.76   25.80 
   5  -2   0  402.76   20.00 
   5  -2   0  425.56   24.90 
  -5  -2   0  424.06   21.70 
   5  -2   0  398.56   26.10 
   5  -2   0  399.96   22.80 
  -5  -2   0  434.56   22.60 
  -5  -2   0  397.06   16.30 
   5  -2   0  399.96   21.60 
   5   2   0  398.96   23.20 
  -5   2   0  405.06   18.90 
   5   2   0  408.06   24.30 
  -5   2   0  385.46   17.40 
  -5   2   0  395.96   22.80 
   5   2   0  368.06   22.30 
   5   2   0  406.16   18.50 
  -5   2   0  386.36   17.80 
   5   2   0  386.66   15.70 
   5   2   0  393.16   23.00 
  -5   2   0  352.76   23.10 
   5   2   0  347.27   24.30 
   5   2   0  411.36   26.20 
  -5   2   0  431.66   28.20 
   5   2   0  404.76   25.40 
   5   2   0  388.86   20.70 
   5   2   0  404.36   16.30 
   5   2   0  368.86   21.40 
  -5   2   0  410.46   20.30 
  -5   2   0  351.56   24.10 
  -5   2   0  435.06   29.40 
  -5   2   0  382.96   22.10 
   5   2   0  427.56   24.50 
  -5   2   0  370.96   21.40 
   5   2   0  401.56   19.70 
  -5   2   0  359.46   20.40 
   5   2   0  415.96   25.90 
   5   2   0  402.36   25.40 
  -5   2   0  394.66   19.30 
   6  -2   0 1601.44   74.89 
  -6  -2   0 1693.03   73.69 
  -6  -2   0 1615.44   74.79 
  -6  -2   0 1574.64   67.19 
  -6  -2   0 1677.33   70.59 
  -6  -2   0 1639.64   69.99 
   6  -2   0 1708.83   67.39 
   6  -2   0 1652.43   69.79 
   6  -2   0 1692.93   69.39 
   6  -2   0 1675.13   67.99 
  -6  -2   0 1723.93   69.59 
   6  -2   0 1662.53   79.39 
   6  -2   0 1606.34   71.49 
   6  -2   0 1686.63   75.69 
  -6  -2   0 1696.63   66.69 
   6  -2   0 1692.93   68.59 
  -6  -2   0 1691.63   66.69 
  -6  -2   0 1646.34   60.59 
  -6  -2   0 1683.83   62.19 
  -6  -2   0 1681.63   70.09 
   6  -2   0 1699.93   61.29 
  -6  -2   0 1690.53   66.19 
   6  -2   0 1532.15   72.99 
   6  -2   0 1732.03   69.39 
   6  -2   0 1644.04   69.49 
   6  -2   0 1668.33   61.79 
  -6   2   0 1753.02   61.09 
   6   2   0 1736.93   70.89 
   6   2   0 1620.44   68.39 
  -6   2   0 1712.03   67.29 
  -6   2   0 1664.43   77.49 
   6   2   0 1731.83   73.69 
   6   2   0 1652.13   65.69 
   6   2   0 1716.53   73.19 
  -6   2   0 1673.43   60.29 
   6   2   0 1680.43   67.29 
   6   2   0 1693.93   72.59 
  -6   2   0 1730.43   69.19 
  -6   2   0 1743.73   65.89 
  -6   2   0 1639.94   71.99 
  -6   2   0 1703.63   66.39 
   6   2   0 1789.22   74.69 
  -6   2   0 1693.43   70.69 
  -6   2   0 1619.64   62.29 
  -6   2   0 1716.83   70.19 
   6   2   0 1704.03   71.69 
  -6   2   0 1672.03   61.09 
   6   2   0 1674.13   72.99 
   6   2   0 1688.03   61.99 
   6   2   0 1741.73   69.99 
   6   2   0 1678.53   69.09 
  -6   2   0 1646.14   75.09 
  -7  -2   0  380.16   24.70 
   7  -2   0  289.47   22.90 
   7  -2   0  292.97   24.00 
   7  -2   0  310.97   30.50 
  -7  -2   0  337.47   21.80 
  -7  -2   0  285.57   19.70 
  -7  -2   0  357.86   28.60 
   7  -2   0  309.87   23.30 
   7  -2   0  327.37   24.20 
  -7  -2   0  289.27   23.30 
   7  -2   0  357.56   29.40 
  -7  -2   0  302.67   23.60 
  -7  -2   0  333.17   33.00 
   7  -2   0  297.27   21.40 
   7  -2   0  335.87   32.90 
  -7  -2   0  328.77   21.40 
  -7  -2   0  326.37   24.10 
  -7  -2   0  349.77   22.80 
   7  -2   0  309.87   25.90 
   7  -2   0  334.67   22.20 
   7  -2   0  377.26   24.60 
   7  -2   0  299.67   29.20 
  -7   2   0  304.07   24.90 
   7   2   0  305.27   25.10 
   7   2   0  376.16   28.60 
   7   2   0  304.27   28.70 
   7   2   0  317.37   21.80 
   7   2   0  305.87   23.80 
  -7   2   0  269.77   29.30 
   7   2   0  296.17   28.80 
  -7   2   0  302.57   20.50 
   7   2   0  312.67   29.70 
   7   2   0  322.47   27.00 
  -7   2   0  326.97   22.00 
   7   2   0  349.96   22.60 
   7   2   0  318.87   20.80 
  -7   2   0  267.87   22.40 
  -7   2   0  307.77   20.10 
  -7   2   0  281.17   31.30 
   7   2   0  335.47   23.60 
   7   2   0  318.97   24.80 
  -7   2   0  296.87   28.00 
   7   2   0  320.97   23.60 
  -7   2   0  352.36   25.20 
  -8  -2   0  584.24   35.20 
   8  -2   0  670.23   37.20 
  -8  -2   0  600.14   33.70 
   8  -2   0  572.54   45.60 
  -8  -2   0  726.23   46.30 
   8  -2   0  552.64   38.40 
  -8  -2   0  670.53   37.90 
  -8  -2   0  613.04   36.90 
   8  -2   0  577.44   35.70 
   8  -2   0  608.44   37.60 
   8  -2   0  617.84   36.40 
   8  -2   0  597.14   41.40 
   8  -2   0  598.44   32.90 
  -8  -2   0  581.64   31.30 
  -8  -2   0  557.14   36.20 
   8  -2   0  587.34   41.70 
  -8  -2   0  615.04   40.60 
   8  -2   0  581.24   41.50 
   8  -2   0  588.94   34.90 
   8  -2   0  594.04   33.60 
  -8  -2   0  599.24   32.30 
   8   2   0  656.23   41.40 
   8   2   0  573.14   39.90 
   8   2   0  555.74   35.00 
  -8   2   0  694.93   33.60 
  -8   2   0  601.84   45.50 
   8   2   0  601.04   40.60 
   8   2   0  596.04   37.50 
  -8   2   0  620.04   38.30 
   8   2   0  612.24   38.90 
   8   2   0  610.44   40.80 
  -8   2   0  586.14   35.90 
   8   2   0  572.04   35.30 
   8   2   0  557.94   36.50 
   8   2   0  562.74   33.10 
  -8   2   0  609.84   37.30 
  -8   2   0  573.94   33.30 
  -8   2   0  503.45   38.00 
  -8   2   0  627.54   32.70 
  -8   2   0  543.85   40.70 
   8   2   0  599.24   32.10 
   8   2   0  642.04   41.80 
   9  -2   0   34.10   14.40 
   9  -2   0   44.80   14.40 
   9  -2   0    0.20    7.90 
   9  -2   0   43.40   12.80 
   9  -2   0   41.10   12.60 
  -9  -2   0   15.50    9.40 
  -9  -2   0    5.30   13.50 
  -9  -2   0   34.40   12.10 
  -9  -2   0   22.40   11.10 
  -9  -2   0   36.80   13.20 
   9  -2   0   40.30   11.20 
   9  -2   0   24.30   13.10 
  -9  -2   0   -0.10   11.50 
   9  -2   0   40.20   14.30 
   9  -2   0   18.30   12.00 
  -9  -2   0   16.60   10.20 
   9  -2   0   34.30   10.90 
  -9  -2   0   26.10   14.10 
   9  -2   0   15.70   12.10 
   9  -2   0   28.40   15.50 
  -9   2   0   26.40   13.40 
  -9   2   0   38.30   12.80 
   9   2   0   23.60   13.80 
   9   2   0   40.40   12.60 
  -9   2   0   26.30    9.50 
  -9   2   0   35.50   10.30 
   9   2   0   21.80   10.90 
   9   2   0   28.20   14.20 
   9   2   0   21.50   12.90 
  -9   2   0   27.30   14.30 
  -9   2   0   33.60   12.30 
   9   2   0   29.80   11.80 
   9   2   0   37.40   13.10 
  -9   2   0   27.60   10.90 
  -9   2   0   22.20    9.90 
   9   2   0   35.50   12.10 
  -9   2   0   59.89   19.80 
   9   2   0   28.00   14.70 
  10  -2   0  155.58   23.20 
  10  -2   0  154.88   21.20 
 -10  -2   0  194.08   25.70 
  10  -2   0  136.89   25.20 
  10  -2   0  150.08   27.10 
  10  -2   0  173.58   33.00 
 -10  -2   0  175.88   21.90 
  10  -2   0  120.39   20.40 
 -10  -2   0  171.68   24.30 
 -10  -2   0  145.99   22.80 
  10  -2   0  173.18   25.30 
 -10  -2   0  107.89   23.40 
 -10  -2   0  166.88   30.10 
  10  -2   0  158.08   26.00 
  10  -2   0  132.19   22.40 
  10  -2   0  164.48   23.70 
 -10  -2   0  120.39   19.50 
  10  -2   0  151.68   26.30 
 -10  -2   0  168.68   29.10 
  10   2   0  144.69   22.10 
 -10   2   0  220.48   30.00 
  10   2   0  131.79   29.00 
  10   2   0  202.58   29.20 
  10   2   0  125.99   24.50 
  10   2   0  174.28   27.10 
 -10   2   0  185.88   23.70 
  10   2   0  138.59   24.30 
  10   2   0  116.49   24.30 
 -10   2   0  137.49   27.30 
  10   2   0  154.28   23.10 
 -10   2   0  154.68   25.40 
  10   2   0  145.19   23.30 
 -10   2   0  174.88   25.30 
  10   2   0  113.09   29.70 
  10   2   0  156.68   25.40 
   0  -3   0    3.50    3.30 
   0  -3   0    1.50    3.20 
   0  -3   0    0.20    5.40 
   0  -3   0    1.10    2.90 
   0  -3   0   -0.70    4.20 
   0  -3   0    0.60    7.50 
   0  -3   0   -4.60    2.90 
   0  -3   0    1.40    2.90 
   0  -3   0   -0.10    2.70 
   0  -3   0    2.20    2.90 
   0  -3   0    1.50    8.40 
   0  -3   0    9.20    6.40 
   0  -3   0    1.90    4.50 
   0   3   0    0.00    2.50 
   0   3   0    2.40    7.20 
   0   3   0   -1.90    3.70 
   0   3   0   -6.90    3.10 
   0   3   0    7.70    3.80 
   0   3   0    4.00    4.10 
   0   3   0    2.60    2.80 
   0   3   0    4.50    5.80 
   0   3   0   -1.30    2.70 
   0   3   0   -0.90    3.20 
   0   3   0   -2.70    4.40 
   0   3   0   -1.40    3.50 
   1  -3   0   22.70    6.00 
  -1  -3   0   28.70    5.00 
   1  -3   0   21.20    8.80 
   1  -3   0   25.70    6.80 
  -1  -3   0   20.10    4.10 
  -1  -3   0   20.20    6.00 
   1  -3   0   21.50    7.70 
  -1  -3   0   16.30    9.10 
  -1  -3   0   22.00    3.90 
  -1  -3   0   18.60    5.30 
   1  -3   0   18.10    6.30 
   1  -3   0   24.40    6.20 
   1  -3   0   14.50    8.30 
  -1  -3   0   22.40    7.80 
  -1  -3   0   13.20    4.30 
  -1  -3   0   20.20    5.50 
  -1  -3   0   17.80    6.40 
  -1  -3   0   24.10    9.20 
  -1  -3   0   19.50    4.90 
  -1  -3   0    9.90    6.20 
   1  -3   0   22.10    5.50 
  -1  -3   0   11.40    4.20 
   1  -3   0   22.60    6.20 
   1  -3   0   28.70    6.40 
   1  -3   0   24.30    6.10 
  -1  -3   0   14.00    4.80 
  -1  -3   0   18.10    6.80 
  -1  -3   0   17.40    7.00 
  -1   3   0   20.40    7.00 
   1   3   0   17.60    5.10 
   1   3   0   23.50    5.50 
   1   3   0   21.20    8.30 
   1   3   0   15.30    5.20 
   1   3   0   20.00    5.10 
  -1   3   0   17.20    5.70 
   1   3   0   20.60    4.20 
   1   3   0   21.10    9.30 
   1   3   0   27.70    4.20 
  -1   3   0   20.00    5.20 
  -1   3   0   20.30    5.60 
   1   3   0   24.30    5.30 
   1   3   0   29.30    5.90 
   1   3   0   16.50    8.00 
   1   3   0   15.60    5.10 
   1   3   0   22.20    5.00 
   1   3   0   24.80    5.10 
  -1   3   0   20.50    4.90 
  -1   3   0   29.50    6.00 
   1   3   0   25.00    5.10 
  -1   3   0   23.30    6.60 
  -1   3   0   18.30    6.40 
  -1   3   0   24.10    7.00 
  -1   3   0   25.30    6.20 
  -1   3   0   23.30    8.50 
  -1   3   0   20.80    5.30 
  -2  -3   0   37.20    5.70 
   2  -3   0   46.80    8.10 
  -2  -3   0   36.00    4.10 
  -2  -3   0   27.00    5.70 
   2  -3   0   39.60    7.20 
  -2  -3   0   40.00    7.00 
  -2  -3   0   34.60    7.30 
   2  -3   0   32.40    9.50 
  -2  -3   0   39.30    7.20 
  -2  -3   0   32.60    9.30 
  -2  -3   0   24.60    6.30 
   2  -3   0   54.39   10.10 
   2  -3   0   42.90   10.20 
   2  -3   0   32.90    5.80 
  -2  -3   0   29.70    6.40 
   2  -3   0   31.60    6.20 
  -2  -3   0   37.90    8.90 
  -2  -3   0   51.09    7.60 
   2  -3   0   41.90    8.30 
   2  -3   0   42.80    8.70 
   2  -3   0   23.00    6.40 
   2  -3   0   30.30    6.50 
  -2  -3   0   36.60    6.50 
  -2   3   0   36.10    5.80 
   2   3   0   34.20    6.20 
   2   3   0   28.80    8.70 
   2   3   0   37.50   10.70 
   2   3   0   40.70    7.80 
   2   3   0   32.80    6.70 
   2   3   0   38.20    6.10 
  -2   3   0   38.10    5.90 
   2   3   0   37.50    7.10 
  -2   3   0   34.10    6.30 
   2   3   0   41.00    9.10 
   2   3   0   29.80    7.00 
  -2   3   0   32.70    9.50 
  -2   3   0   35.50    7.40 
   2   3   0   36.70    7.00 
   2   3   0   28.30    6.30 
  -2   3   0   37.20    9.60 
   2   3   0   29.10    6.50 
  -2   3   0   45.00    7.90 
  -2   3   0   30.60    7.10 
   2   3   0   30.50    8.30 
   2   3   0   27.80    6.00 
  -2   3   0   45.70    6.50 
  -2   3   0   35.60   10.00 
  -3  -3   0    4.80    5.30 
  -3  -3   0    6.10    2.50 
  -3  -3   0    0.10    2.80 
  -3  -3   0    3.10    4.10 
  -3  -3   0    5.50    2.10 
   3  -3   0    1.50    3.60 
  -3  -3   0    1.90    4.00 
   3  -3   0    2.40    4.40 
   3  -3   0    1.80    4.70 
  -3  -3   0    2.00    4.40 
  -3  -3   0    4.50    3.00 
  -3  -3   0    6.20    5.00 
  -3  -3   0    1.70    3.40 
   3  -3   0    7.40    5.70 
   3  -3   0    1.90    6.20 
  -3  -3   0    5.90    4.30 
   3  -3   0    5.50    6.20 
   3  -3   0    5.80    4.70 
  -3  -3   0    7.00    5.60 
   3  -3   0    7.20    6.50 
  -3  -3   0    3.60    6.50 
   3  -3   0    4.20    4.70 
  -3  -3   0    5.90    5.20 
   3  -3   0   11.60    6.30 
   3   3   0    6.60    5.00 
   3   3   0   -8.70    5.20 
  -3   3   0    6.80    4.20 
   3   3   0    1.40    4.10 
   3   3   0    0.90    5.20 
   3   3   0    2.40    6.30 
   3   3   0    1.80    3.50 
   3   3   0    9.00    4.60 
   3   3   0    4.90    5.60 
   3   3   0   12.60    4.30 
   3   3   0   -2.30    4.00 
   3   3   0    0.30    3.30 
  -3   3   0  -14.40    5.00 
   3   3   0   -0.20    3.80 
  -3   3   0   -0.20    4.20 
   3   3   0    5.30    3.90 
  -3   3   0    5.90    3.60 
  -3   3   0    9.20    5.40 
  -3   3   0    8.00    5.20 
  -3   3   0   10.50    7.20 
   3   3   0    6.40    7.00 
  -3   3   0    7.80    4.40 
   3   3   0    2.20    5.60 
  -4  -3   0  213.38   11.60 
   4  -3   0  219.18   22.00 
   4  -3   0  203.78   12.90 
   4  -3   0  232.48   23.00 
   4  -3   0  219.58   15.50 
   4  -3   0  210.78   17.10 
   4  -3   0  223.28   15.30 
   4  -3   0  203.18   16.50 
   4  -3   0  233.88   21.30 
  -4  -3   0  192.88   16.60 
   4  -3   0  205.58   15.70 
  -4  -3   0  240.68   17.60 
  -4  -3   0  223.38   18.40 
   4  -3   0  231.38   21.00 
  -4  -3   0  237.68   15.80 
   4  -3   0  206.68   14.80 
   4  -3   0  217.58   15.70 
   4  -3   0  192.18   19.30 
  -4  -3   0  203.28   15.70 
  -4  -3   0  239.08   16.80 
  -4  -3   0  195.58   15.00 
  -4  -3   0  237.88   16.50 
  -4  -3   0  231.28   13.90 
  -4  -3   0  229.88   23.70 
  -4  -3   0  224.48   12.20 
  -4   3   0  193.08   20.30 
   4   3   0  226.68   14.00 
  -4   3   0  188.38   21.20 
   4   3   0  240.28   16.00 
  -4   3   0  217.48   13.30 
  -4   3   0  224.48   14.70 
   4   3   0  194.78   15.50 
   4   3   0  209.08   13.80 
   4   3   0  218.68   17.30 
  -4   3   0  193.48   15.70 
   4   3   0  200.28   18.50 
   4   3   0  219.78   12.50 
   4   3   0  221.28   15.70 
   4   3   0  237.78   13.70 
   4   3   0  233.98   21.00 
   4   3   0  196.88   12.70 
  -4   3   0  206.18   16.90 
   4   3   0  203.78   17.90 
  -4   3   0  244.98   13.60 
   4   3   0  236.08   17.20 
   4   3   0  225.68   17.70 
  -5  -3   0  534.55   27.80 
   5  -3   0  509.65   28.40 
   5  -3   0  502.55   33.70 
  -5  -3   0  515.95   28.00 
  -5  -3   0  529.25   24.20 
   5  -3   0  503.05   28.20 
   5  -3   0  486.85   26.80 
  -5  -3   0  518.15   35.00 
  -5  -3   0  503.05   25.70 
   5  -3   0  513.95   35.50 
   5  -3   0  509.25   33.70 
  -5  -3   0  514.95   23.50 
   5  -3   0  553.34   32.90 
   5  -3   0  560.84   31.00 
  -5  -3   0  534.95   25.00 
  -5  -3   0  531.05   30.10 
   5  -3   0  541.45   28.40 
  -5  -3   0  528.25   29.00 
  -5  -3   0  514.65   32.80 
   5  -3   0  539.95   31.00 
  -5  -3   0  579.44   33.10 
   5  -3   0  549.05   28.60 
  -5  -3   0  497.45   30.80 
   5  -3   0  559.64   27.90 
  -5  -3   0  493.45   29.30 
  -5  -3   0  512.15   28.50 
   5  -3   0  570.74   30.00 
  -5  -3   0  515.45   28.60 
  -5   3   0  564.04   28.80 
  -5   3   0  579.14   25.50 
  -5   3   0  515.55   30.30 
   5   3   0  553.14   28.30 
   5   3   0  522.25   25.80 
  -5   3   0  559.14   35.90 
  -5   3   0  518.35   23.00 
   5   3   0  541.45   30.30 
   5   3   0  500.15   29.70 
   5   3   0  547.45   22.90 
   5   3   0  452.25   23.20 
   5   3   0  547.15   31.30 
   5   3   0  560.44   28.90 
  -5   3   0  535.25   26.30 
   5   3   0  567.14   32.30 
  -5   3   0  519.05   26.50 
  -5   3   0  549.95   29.70 
   5   3   0  597.44   31.10 
   5   3   0  558.74   32.80 
   5   3   0  549.15   25.20 
  -5   3   0  532.65   34.40 
   5   3   0  517.75   23.60 
   5   3   0  544.45   29.10 
  -6  -3   0  532.15   31.50 
   6  -3   0  558.54   29.90 
  -6  -3   0  516.25   24.90 
   6  -3   0  537.05   30.20 
   6  -3   0  574.54   31.20 
  -6  -3   0  494.25   33.80 
   6  -3   0  536.25   30.30 
   6  -3   0  535.85   29.30 
   6  -3   0  509.55   31.80 
   6  -3   0  538.25   36.60 
   6  -3   0  523.65   32.70 
  -6  -3   0  549.65   29.80 
  -6  -3   0  563.04   35.20 
  -6  -3   0  503.95   28.60 
  -6  -3   0  531.85   31.80 
   6  -3   0  568.94   31.20 
  -6  -3   0  536.45   29.70 
  -6  -3   0  541.55   25.20 
   6  -3   0  499.95   37.70 
   6  -3   0  468.05   35.00 
   6  -3   0  519.35   34.50 
  -6  -3   0  532.05   31.00 
   6  -3   0  532.15   27.70 
  -6  -3   0  531.35   30.70 
  -6  -3   0  551.54   25.50 
   6   3   0  527.55   27.40 
  -6   3   0  504.95   31.30 
  -6   3   0  538.95   23.30 
   6   3   0  545.25   29.40 
  -6   3   0  506.45   25.90 
  -6   3   0  510.65   29.30 
   6   3   0  563.94   32.70 
   6   3   0  523.85   30.60 
   6   3   0  569.94   33.40 
   6   3   0  520.95   33.50 
   6   3   0  549.85   35.10 
   6   3   0  540.25   22.70 
   6   3   0  520.15   34.10 
  -6   3   0  507.15   29.90 
  -6   3   0  567.74   30.00 
   6   3   0  573.54   25.60 
  -6   3   0  540.05   33.30 
  -6   3   0  476.75   36.10 
   6   3   0  504.35   29.90 
  -6   3   0  533.65   36.90 
  -6   3   0  513.55   26.20 
  -6   3   0  538.85   27.90 
   6   3   0  513.85   31.40 
  -7  -3   0   22.90    8.90 
   7  -3   0   39.50   10.60 
   7  -3   0   30.40   10.70 
   7  -3   0   23.00    8.80 
  -7  -3   0   39.10   12.20 
  -7  -3   0   30.00   10.50 
   7  -3   0    4.30    9.20 
  -7  -3   0    5.40    9.60 
   7  -3   0   13.60    8.70 
   7  -3   0   18.20   12.10 
  -7  -3   0   18.60    9.20 
   7  -3   0   11.80    7.90 
   7  -3   0   26.90   12.70 
   7  -3   0   30.90    9.00 
  -7  -3   0   32.00   10.50 
  -7  -3   0   21.30    7.80 
   7  -3   0   24.50   12.70 
   7  -3   0   13.00    9.00 
   7  -3   0   38.80   10.60 
  -7  -3   0   21.60    9.60 
  -7  -3   0   10.90    6.80 
   7   3   0   36.40   12.20 
  -7   3   0   28.00    9.10 
  -7   3   0    7.50    6.20 
   7   3   0   32.80   12.30 
   7   3   0   23.50   11.30 
   7   3   0   12.40    9.50 
   7   3   0   19.60    8.50 
  -7   3   0   30.50    8.20 
  -7   3   0   24.30   12.90 
   7   3   0   13.80    7.20 
  -7   3   0   37.50   12.80 
   7   3   0   19.30    9.20 
   7   3   0   30.60   10.90 
  -7   3   0    2.80    7.50 
  -7   3   0   34.00    9.70 
  -7   3   0   33.80   13.00 
  -7   3   0   28.80   10.50 
   7   3   0   18.00    9.70 
   7   3   0   39.00   13.20 
  -8  -3   0    8.50    8.70 
  -8  -3   0   17.20    8.80 
   8  -3   0   -8.00    6.90 
   8  -3   0    9.20    9.10 
   8  -3   0   -1.00    7.40 
   8  -3   0   -6.30    7.80 
  -8  -3   0    6.10    8.30 
  -8  -3   0  -15.00    5.80 
  -8  -3   0    1.10    6.50 
   8  -3   0    1.30   10.50 
   8  -3   0   -0.40    9.00 
   8  -3   0    0.00    9.60 
   8  -3   0   -2.40    8.70 
  -8  -3   0    1.50    7.00 
  -8  -3   0   11.00    8.70 
  -8  -3   0   13.10   11.50 
   8  -3   0    1.70    5.80 
   8  -3   0    2.50    7.90 
  -8  -3   0    3.30   10.90 
   8  -3   0    4.70    9.20 
   8  -3   0    8.40   10.10 
   8   3   0    3.60    9.10 
  -8   3   0   -2.50    6.00 
  -8   3   0    2.10    8.80 
   8   3   0   -0.50    6.80 
   8   3   0   13.80   10.40 
  -8   3   0    0.40    7.30 
  -8   3   0   18.70   13.80 
   8   3   0    3.50    9.40 
   8   3   0    2.70   11.40 
  -8   3   0   16.90    8.60 
   8   3   0   -0.90    7.00 
   8   3   0    4.10    9.10 
   8   3   0   13.90   11.10 
  -8   3   0   -1.20   11.50 
   8   3   0  -16.30    9.00 
  -8   3   0   -5.70    5.60 
   8   3   0   -9.10    7.40 
  -8   3   0   11.40    9.30 
  -8   3   0    6.10    9.20 
   9  -3   0    3.60   14.00 
   9  -3   0   -0.40    9.20 
   9  -3   0    9.40   12.30 
  -9  -3   0   -1.60    9.30 
   9  -3   0   10.80    9.00 
   9  -3   0    4.70    9.90 
   9  -3   0    5.70   10.50 
  -9  -3   0    9.00   12.40 
  -9  -3   0    9.30   11.00 
  -9  -3   0   -3.00    7.90 
   9  -3   0   -0.30   10.60 
   9  -3   0   -1.10   11.10 
   9  -3   0    6.50   13.60 
   9  -3   0    1.60   10.80 
   9  -3   0   -1.50   10.20 
  -9  -3   0    7.00   10.10 
  -9  -3   0   12.10   10.40 
   9   3   0   -2.60   10.70 
  -9   3   0   10.50    9.20 
   9   3   0   15.60   12.60 
  -9   3   0   28.20   12.70 
  -9   3   0    0.20   12.20 
  -9   3   0   -1.60    8.90 
  -9   3   0   -2.90   13.80 
   9   3   0   -5.60   10.10 
   9   3   0    2.00    9.60 
   9   3   0   -3.70    8.40 
  -9   3   0    6.10   13.50 
   9   3   0    0.70   11.30 
   9   3   0  -10.40    9.00 
   9   3   0    2.20   12.60 
  -9   3   0   11.90   10.50 
  10  -3   0   78.29   17.60 
  10  -3   0  101.79   19.20 
 -10  -3   0   52.99   20.50 
  10  -3   0    7.50   15.10 
  10  -3   0   66.69   21.60 
  10  -3   0   34.90   19.20 
  10  -3   0   63.69   19.00 
 -10  -3   0   22.90   13.50 
  10  -3   0   59.89   16.70 
  10  -3   0   60.99   19.20 
 -10  -3   0   52.89   15.40 
 -10  -3   0   53.09   17.40 
 -10  -3   0   36.10   13.90 
  10  -3   0   64.19   14.90 
 -10  -3   0   34.10   12.60 
  10   3   0   30.20   16.20 
 -10   3   0   70.89   18.80 
  10   3   0   50.59   18.70 
 -10   3   0   43.30   19.10 
  10   3   0   44.40   26.10 
 -10   3   0   68.19   16.20 
  10   3   0   65.89   16.10 
  10   3   0   67.79   16.60 
  10   3   0   49.70   17.90 
 -10   3   0   71.79   23.90 
 -10   3   0   45.50   16.00 
  10   3   0   26.80   14.50 
 -10   3   0   46.20   14.30 
   0  -4   0  738.23   35.90 
   0  -4   0  707.03   37.50 
   0  -4   0  887.61   56.89 
   0  -4   0  817.72   37.70 
   0  -4   0  721.33   35.30 
   0  -4   0  876.81   51.69 
   0  -4   0  837.92   40.60 
   0  -4   0  791.62   34.40 
   0  -4   0  792.62   41.80 
   0   4   0  763.52   36.00 
   0   4   0  758.42   34.80 
   0   4   0  765.62   33.80 
   0   4   0  795.12   38.80 
   0   4   0  775.52   34.00 
   0   4   0  715.03   36.10 
   0   4   0  800.82   47.90 
   0   4   0  759.12   41.20 
   0   4   0  884.11   39.20 
   0   4   0  742.53   35.90 
   1  -4   0 3367.76  158.78 
  -1  -4   0 3327.97  156.38 
   1  -4   0 3778.12  141.19 
   1  -4   0 3860.11  138.89 
   1  -4   0 3967.20  140.19 
  -1  -4   0 3726.53  157.08 
  -1  -4   0 3889.01  138.89 
  -1  -4   0 4033.00  144.09 
   1  -4   0 4106.69  143.49 
  -1  -4   0 3956.10  138.69 
  -1  -4   0 3924.81  134.79 
  -1  -4   0 3735.93  139.59 
  -1  -4   0 3444.56  133.69 
  -1  -4   0 3801.12  145.79 
  -1  -4   0 4042.20  137.29 
  -1  -4   0 3623.14  140.79 
   1   4   0 3996.30  138.39 
  -1   4   0 3951.10  149.69 
   1   4   0 3904.01  146.09 
   1   4   0 3942.61  138.29 
  -1   4   0 4038.30  138.19 
   1   4   0 3603.94  147.99 
   1   4   0 3905.91  134.29 
   1   4   0 3803.82  139.89 
  -1   4   0 3162.68  137.49 
   1   4   0 4007.80  138.09 
  -1   4   0 3840.62  143.09 
   1   4   0 3909.31  139.39 
  -1   4   0 3790.52  142.79 
  -1   4   0 4018.90  140.19 
  -1   4   0 3996.60  139.99 
  -2  -4   0  394.46   22.80 
  -2  -4   0  359.56   21.00 
  -2  -4   0  355.16   16.60 
  -2  -4   0  440.36   22.50 
   2  -4   0  378.66   24.10 
  -2  -4   0  353.36   25.70 
   2  -4   0  354.36   29.40 
   2  -4   0  334.17   22.60 
  -2  -4   0  350.86   20.40 
   2  -4   0  369.46   25.30 
   2  -4   0  425.96   24.50 
  -2  -4   0  347.37   21.30 
   2  -4   0  341.37   19.90 
   2  -4   0  331.87   21.90 
  -2  -4   0  366.16   25.60 
  -2  -4   0  380.46   17.20 
   2  -4   0  336.67   21.60 
  -2   4   0  386.36   24.10 
   2   4   0  341.17   21.30 
   2   4   0  363.06   26.30 
   2   4   0  394.36   20.60 
  -2   4   0  332.17   24.00 
  -2   4   0  365.76   20.80 
   2   4   0  398.26   22.70 
  -2   4   0  372.86   19.80 
  -2   4   0  342.67   27.30 
   2   4   0  371.46   20.90 
   2   4   0  392.16   26.80 
   2   4   0  371.86   21.50 
  -2   4   0  378.86   26.10 
   2   4   0  404.36   29.80 
   2   4   0  351.06   21.20 
   2   4   0  349.57   21.90 
  -2   4   0  359.16   23.50 
   2   4   0  357.36   21.80 
  -3  -4   0   50.29   11.00 
  -3  -4   0   35.00   10.40 
   3  -4   0   44.60    8.50 
   3  -4   0   59.99   12.10 
   3  -4   0   44.70    9.00 
  -3  -4   0   42.80    4.50 
  -3  -4   0   61.59   10.00 
   3  -4   0   31.10    7.30 
   3  -4   0   57.99   11.10 
  -3  -4   0   31.40    7.30 
   3  -4   0   39.90    9.60 
  -3  -4   0   45.00   10.20 
  -3  -4   0   47.90    9.20 
   3  -4   0   32.50   11.10 
  -3  -4   0   46.80    8.80 
  -3  -4   0   39.60    8.00 
   3  -4   0   36.20    9.00 
   3  -4   0   30.40    9.60 
  -3  -4   0   41.70    5.10 
   3   4   0   35.30   10.20 
   3   4   0   43.30    9.40 
   3   4   0   43.10    8.50 
   3   4   0   53.79   10.10 
   3   4   0   44.00   12.90 
  -3   4   0   44.10   11.60 
   3   4   0   41.80    8.50 
   3   4   0   46.20    7.80 
   3   4   0   33.30    7.80 
  -3   4   0   44.60   11.30 
   3   4   0   41.10   10.30 
  -3   4   0   40.80   12.30 
   3   4   0   38.00    8.00 
  -3   4   0   65.49   10.80 
   3   4   0   27.70    7.20 
  -3   4   0   53.09    7.80 
  -3   4   0   37.70    9.20 
  -3   4   0   37.20    7.10 
  -4  -4   0  119.29   14.10 
  -4  -4   0  124.39    8.00 
   4  -4   0  187.68   19.60 
   4  -4   0  120.49   15.30 
  -4  -4   0  171.18   17.70 
   4  -4   0  131.19   18.20 
   4  -4   0  153.58   14.70 
  -4  -4   0  153.48   15.50 
  -4  -4   0  155.38   17.50 
   4  -4   0  117.29   14.30 
   4  -4   0  110.89   16.60 
   4  -4   0  162.08   22.10 
   4  -4   0  132.49   14.80 
   4  -4   0  114.49   13.30 
  -4  -4   0  144.29    8.70 
  -4  -4   0  138.19   15.10 
  -4  -4   0  114.29   18.60 
  -4  -4   0  165.58   15.30 
  -4  -4   0  125.59   16.30 
   4  -4   0  140.99   17.40 
  -4  -4   0  135.99    7.10 
   4  -4   0  133.49   17.40 
   4   4   0  153.48   18.20 
   4   4   0  153.18   15.40 
  -4   4   0  135.19   10.70 
   4   4   0  120.39   14.30 
   4   4   0  115.39   15.90 
   4   4   0  105.49   11.90 
  -4   4   0  126.59   17.30 
  -4   4   0  146.59   16.00 
   4   4   0  127.59   16.70 
   4   4   0  115.99   19.80 
  -4   4   0  127.09   15.80 
   4   4   0  137.19   14.70 
   4   4   0  147.89   13.50 
   4   4   0  117.49   15.20 
  -4   4   0  123.09   19.20 
  -4   4   0  129.89   13.40 
   4   4   0  162.68   14.80 
   4   4   0  138.39   16.50 
   5  -4   0  681.03   35.60 
  -5  -4   0  730.53   36.60 
  -5  -4   0  725.83   26.90 
  -5  -4   0  759.92   41.50 
  -5  -4   0  701.13   38.90 
  -5  -4   0  674.73   35.30 
  -5  -4   0  731.93   36.60 
   5  -4   0  720.63   39.50 
  -5  -4   0  713.63   38.90 
   5  -4   0  656.43   39.60 
   5  -4   0  754.72   36.50 
  -5  -4   0  757.52   37.60 
   5  -4   0  763.02   39.40 
   5  -4   0  717.73   45.60 
   5  -4   0  614.24   40.70 
   5  -4   0  713.33   40.90 
  -5  -4   0  723.13   38.40 
  -5  -4   0  798.32   46.90 
   5  -4   0  704.03   37.00 
  -5  -4   0  708.03   33.90 
  -5  -4   0  746.53   37.90 
   5  -4   0  709.73   43.30 
   5  -4   0  645.74   37.80 
   5   4   0  733.03   41.00 
  -5   4   0  759.02   36.10 
  -5   4   0  686.23   43.30 
   5   4   0  705.03   33.50 
   5   4   0  726.63   39.80 
   5   4   0  739.43   47.80 
   5   4   0  735.33   36.80 
  -5   4   0  753.32   46.00 
  -5   4   0  697.53   35.00 
   5   4   0  710.83   33.40 
  -5   4   0  744.13   39.20 
  -5   4   0  698.13   34.90 
   5   4   0  768.52   37.50 
   5   4   0  738.93   36.40 
  -5   4   0  739.83   38.00 
   5   4   0  736.13   40.40 
  -5   4   0  721.33   31.90 
   5   4   0  649.64   38.90 
   5   4   0  793.62   38.60 
   5   4   0  770.32   39.70 
  -5   4   0  695.83   37.30 
   5   4   0  702.33   32.60 
   6  -4   0  688.53   37.90 
  -6  -4   0  732.63   38.50 
   6  -4   0  742.73   38.00 
  -6  -4   0  737.33   48.50 
  -6  -4   0  809.12   39.20 
  -6  -4   0  790.32   35.60 
  -6  -4   0  696.43   39.60 
   6  -4   0  768.42   46.80 
   6  -4   0  767.52   49.70 
   6  -4   0  713.03   39.00 
   6  -4   0  759.02   43.10 
   6  -4   0  721.53   37.30 
  -6  -4   0  761.62   40.10 
   6  -4   0  744.83   46.20 
  -6  -4   0  793.82   41.90 
   6  -4   0  734.63   44.00 
  -6  -4   0  759.92   39.90 
   6  -4   0  805.22   42.80 
  -6  -4   0  812.02   45.40 
   6  -4   0  730.13   40.20 
  -6  -4   0  734.43   42.30 
  -6  -4   0  714.03   35.80 
   6  -4   0  748.73   39.20 
   6   4   0  768.22   39.60 
  -6   4   0  782.92   38.80 
   6   4   0  742.73   44.20 
   6   4   0  750.92   42.30 
   6   4   0  726.33   35.50 
  -6   4   0  762.22   42.00 
   6   4   0  864.81   54.49 
   6   4   0  783.02   41.10 
   6   4   0  690.73   41.20 
  -6   4   0  685.13   37.40 
  -6   4   0  716.73   33.70 
  -6   4   0  682.13   45.90 
  -6   4   0  763.52   36.40 
   6   4   0  728.93   32.70 
   6   4   0  703.33   38.50 
  -6   4   0  692.83   31.30 
   6   4   0  772.82   38.50 
  -6   4   0  717.23   39.80 
  -6   4   0  745.33   37.30 
  -6   4   0  698.23   35.90 
   6   4   0  769.42   42.40 
   6   4   0  759.12   44.10 
  -6   4   0  732.23   48.60 
   6   4   0  753.62   34.70 
   7  -4   0  927.71   47.00 
   7  -4   0  958.20   56.39 
   7  -4   0  934.51   46.40 
   7  -4   0  923.41   59.39 
  -7  -4   0  949.80   49.00 
   7  -4   0  992.80   49.10 
  -7  -4   0  923.21   46.50 
  -7  -4   0  938.21   46.50 
   7  -4   0  890.81   50.09 
   7  -4   0  973.20   46.30 
   7  -4   0  969.30   57.09 
  -7  -4   0  997.50   50.19 
   7  -4   0  873.11   50.19 
  -7  -4   0  931.71   46.80 
  -7  -4   0  918.41   52.49 
   7  -4   0  983.70   48.80 
   7  -4   0  931.61   53.79 
  -7  -4   0  899.61   49.10 
  -7  -4   0  884.71   52.79 
   7   4   0  963.20   63.09 
  -7   4   0  944.51   44.20 
  -7   4   0  858.01   45.10 
  -7   4   0  805.62   54.09 
  -7   4   0  966.80   49.99 
  -7   4   0  937.41   41.70 
  -7   4   0  907.41   47.00 
   7   4   0  880.11   50.69 
   7   4   0  944.61   48.00 
   7   4   0  985.00   47.00 
  -7   4   0  922.01   46.30 
   7   4   0  975.10   51.59 
   7   4   0  884.81   49.90 
   7   4   0  970.60   50.29 
   7   4   0 1027.30   44.40 
   7   4   0  913.31   53.29 
  -7   4   0  971.60   58.89 
   7   4   0  875.51   47.10 
   7   4   0  869.81   52.39 
  -7   4   0  945.31   51.19 
   8  -4   0  370.86   38.80 
   8  -4   0  417.06   42.10 
   8  -4   0  360.56   28.50 
  -8  -4   0  392.46   27.20 
   8  -4   0  374.76   28.80 
   8  -4   0  356.46   27.70 
   8  -4   0  339.37   38.90 
  -8  -4   0  397.36   39.20 
   8  -4   0  281.77   30.20 
   8  -4   0  352.16   30.40 
   8  -4   0  398.16   27.90 
   8  -4   0  402.86   39.80 
   8  -4   0  392.66   36.40 
  -8  -4   0  414.26   38.60 
  -8  -4   0  363.26   33.40 
  -8  -4   0  340.37   32.80 
  -8  -4   0  317.87   25.60 
  -8  -4   0  347.77   26.90 
  -8  -4   0  329.97   31.20 
  -8   4   0  378.76   39.40 
  -8   4   0  340.37   26.70 
   8   4   0  360.26   29.10 
   8   4   0  341.37   36.00 
   8   4   0  391.76   35.80 
   8   4   0  372.36   27.50 
   8   4   0  428.46   30.10 
   8   4   0  379.86   34.40 
  -8   4   0  364.56   28.80 
  -8   4   0  390.36   25.70 
   8   4   0  331.57   44.30 
   8   4   0  354.86   36.00 
   8   4   0  363.16   30.70 
  -8   4   0  302.47   37.50 
   8   4   0  338.57   33.00 
  -8   4   0  415.66   28.30 
  -8   4   0  362.66   34.80 
  -8   4   0  383.26   30.70 
   9  -4   0  313.37   35.00 
   9  -4   0  249.28   34.10 
  -9  -4   0  255.07   26.40 
  -9  -4   0  215.18   30.70 
   9  -4   0  229.28   27.50 
   9  -4   0  260.87   25.70 
  -9  -4   0  243.18   29.30 
   9  -4   0  253.07   27.20 
   9  -4   0  239.68   32.80 
  -9  -4   0  153.98   23.70 
  -9  -4   0  230.98   27.90 
  -9  -4   0  202.98   29.80 
   9  -4   0  246.88   37.60 
   9  -4   0  214.68   26.00 
   9  -4   0  225.48   32.80 
   9   4   0  206.78   30.70 
  -9   4   0  244.18   26.50 
  -9   4   0  226.68   34.60 
  -9   4   0  237.18   25.80 
  -9   4   0  244.28   29.00 
  -9   4   0  262.57   31.30 
  -9   4   0  201.28   31.50 
   9   4   0  285.97   44.20 
   9   4   0  202.78   30.20 
   9   4   0  249.38   27.80 
   9   4   0  235.38   29.60 
   9   4   0  251.37   29.70 
   9   4   0  229.18   26.40 
  -9   4   0  247.38   27.30 
   9   4   0  220.78   28.80 
   9   4   0  203.88   28.40 
   0  -5   0    5.30    5.20 
   0  -5   0    3.20    4.90 
   0  -5   0   -4.80    9.90 
   0  -5   0   -0.90    3.60 
   0  -5   0   12.20    6.10 
   0  -5   0    1.20    4.60 
   0  -5   0    6.50    7.10 
   0  -5   0    6.50    8.20 
   0   5   0   -2.00    6.40 
   0   5   0    4.10    5.00 
   0   5   0   -1.40    8.50 
   0   5   0   -2.30    7.20 
   0   5   0    8.30    7.10 
   0   5   0    6.10    7.00 
   0   5   0   -6.70    5.00 
   0   5   0   -3.80    4.50 
  -1  -5   0  115.89   16.80 
  -1  -5   0  141.19   20.20 
   1  -5   0  111.29   13.70 
  -1  -5   0  112.89   11.50 
  -1  -5   0  132.09   15.50 
   1  -5   0   87.39   14.00 
  -1  -5   0  112.89   13.40 
   1  -5   0  127.79   15.80 
  -1  -5   0   63.49   19.70 
  -1  -5   0   95.39   13.80 
   1  -5   0   93.79   22.20 
   1  -5   0  103.49   15.90 
   1  -5   0  109.69   17.40 
  -1  -5   0  129.49   16.50 
   1   5   0  125.69   15.10 
  -1   5   0  105.59   19.20 
   1   5   0  108.89   13.00 
   1   5   0  123.89   21.50 
   1   5   0  137.49   19.50 
  -1   5   0  103.69   14.40 
   1   5   0   88.59   13.30 
  -1   5   0  106.99   16.80 
   1   5   0  112.29   14.40 
   1   5   0   85.99   13.80 
   1   5   0  110.49   11.00 
   1   5   0   76.79   18.60 
  -1   5   0  133.69   17.60 
   1   5   0  130.19   14.10 
  -1   5   0  105.89   14.20 
  -1   5   0   80.59   12.50 
   2  -5   0  279.37   22.40 
  -2  -5   0  295.07   20.20 
   2  -5   0  272.27   21.20 
   2  -5   0  228.18   31.50 
  -2  -5   0  299.57   19.30 
   2  -5   0  279.77   21.40 
  -2  -5   0  278.57   28.60 
  -2  -5   0  288.47   19.90 
   2  -5   0  260.67   20.90 
  -2  -5   0  255.47   19.80 
   2  -5   0  273.47   27.30 
  -2  -5   0  273.37   23.60 
   2  -5   0  304.27   23.90 
  -2  -5   0  281.77   15.00 
  -2   5   0  224.38   21.60 
   2   5   0  268.07   20.90 
  -2   5   0  249.97   21.60 
   2   5   0  241.48   19.30 
   2   5   0  259.77   18.60 
  -2   5   0  256.27   28.90 
  -2   5   0  234.68   24.70 
   2   5   0  279.17   21.10 
   2   5   0  302.57   20.60 
   2   5   0  289.77   29.10 
  -2   5   0  266.67   25.80 
   2   5   0  245.78   26.40 
   2   5   0  322.57   22.40 
  -2   5   0  275.87   18.30 
   2   5   0  270.97   20.20 
   2   5   0  275.47   28.70 
   3  -5   0    4.10    6.20 
   3  -5   0    1.60    8.50 
  -3  -5   0    4.90    5.90 
  -3  -5   0    6.80    5.60 
   3  -5   0  -11.10    4.40 
  -3  -5   0   -2.10    5.00 
   3  -5   0   -7.50    5.20 
   3  -5   0   -3.90    5.70 
  -3  -5   0   -4.60    6.50 
   3  -5   0    5.20    6.40 
  -3  -5   0    6.90    6.00 
  -3  -5   0    3.60    8.30 
  -3  -5   0    7.20    3.40 
  -3  -5   0    4.70    2.80 
   3  -5   0    1.60    6.50 
   3  -5   0   13.60    7.10 
  -3  -5   0    1.40    3.20 
   3   5   0    3.10    5.10 
   3   5   0   -5.70    7.00 
   3   5   0    1.70    5.80 
  -3   5   0    6.40    9.30 
  -3   5   0   -9.10    5.30 
  -3   5   0   -1.50    4.90 
  -3   5   0    1.30    5.10 
   3   5   0   16.00    9.70 
   3   5   0    0.80    6.30 
   3   5   0    1.60    5.90 
   3   5   0   -0.60    8.40 
   3   5   0    4.70    6.40 
  -3   5   0   -5.50    8.00 
  -3   5   0    8.20    9.20 
  -3   5   0    7.10    6.90 
   3   5   0   -0.60    6.00 
   3   5   0    2.50    6.40 
   4  -5   0  195.68   21.70 
  -4  -5   0  209.28   20.50 
  -4  -5   0  193.58   10.30 
  -4  -5   0  188.98   23.10 
   4  -5   0  165.38   17.40 
  -4  -5   0  198.18   19.40 
  -4  -5   0  189.88   22.00 
   4  -5   0  171.98   22.80 
   4  -5   0  210.68   23.20 
   4  -5   0  200.28   20.90 
  -4  -5   0  217.98   27.00 
  -4  -5   0  191.08    9.50 
  -4  -5   0  173.88   18.50 
   4  -5   0  183.98   23.10 
   4  -5   0  241.78   24.50 
  -4  -5   0  219.88   20.00 
   4  -5   0  179.28   26.30 
   4  -5   0  178.38   19.20 
  -4  -5   0  232.28   18.50 
   4   5   0  187.58   17.70 
  -4   5   0  193.58   20.90 
   4   5   0  175.28   22.40 
  -4   5   0  171.58   15.60 
   4   5   0  209.28   18.10 
   4   5   0  202.18   24.10 
   4   5   0  205.68   18.20 
  -4   5   0  149.88   22.20 
   4   5   0  188.38   20.70 
  -4   5   0  148.39   20.80 
   4   5   0  174.08   18.30 
   4   5   0  201.68   21.20 
   4   5   0  206.18   18.40 
   4   5   0  219.98   30.20 
   4   5   0  212.08   20.00 
  -4   5   0  199.38   15.90 
  -4   5   0  194.88   20.60 
  -5  -5   0   83.99   13.80 
  -5  -5   0   99.49   14.50 
   5  -5   0  106.19   16.90 
   5  -5   0   84.99   19.90 
   5  -5   0   82.39   18.10 
   5  -5   0  104.69   16.20 
   5  -5   0   83.79   13.30 
  -5  -5   0   96.99   14.70 
  -5  -5   0   77.29   12.30 
  -5  -5   0   79.49   18.30 
   5  -5   0   88.89   13.90 
   5  -5   0  101.09   17.50 
  -5  -5   0   88.59   15.00 
   5  -5   0   93.29   16.70 
  -5  -5   0   94.99   15.20 
  -5  -5   0  105.19   17.40 
   5  -5   0  107.49   18.40 
   5  -5   0  101.69   19.70 
   5  -5   0   76.59   14.10 
  -5  -5   0   88.79   16.20 
   5  -5   0   96.99   15.30 
   5   5   0   92.19   14.30 
  -5   5   0   78.29   13.80 
  -5   5   0   94.49   19.60 
  -5   5   0   76.99   17.30 
   5   5   0   81.79   20.80 
   5   5   0   92.89   13.90 
   5   5   0   67.39   15.10 
   5   5   0  121.69   19.90 
   5   5   0  134.59   18.70 
  -5   5   0  104.59   14.80 
   5   5   0   88.89   12.60 
  -5   5   0   98.19   15.40 
   5   5   0   89.49   13.80 
  -5   5   0  115.59   17.20 
   5   5   0  114.09   15.80 
   5   5   0  130.49   19.50 
  -5   5   0  103.99   13.60 
   5   5   0   94.79   12.90 
  -5   5   0  110.89   12.10 
   6  -5   0  398.56   30.80 
   6  -5   0  419.06   35.00 
   6  -5   0  466.05   32.70 
   6  -5   0  353.06   26.70 
  -6  -5   0  410.26   30.10 
  -6  -5   0  344.67   26.70 
   6  -5   0  397.26   32.70 
   6  -5   0  373.76   36.40 
  -6  -5   0  382.86   35.90 
   6  -5   0  340.37   33.60 
   6  -5   0  370.66   28.00 
   6  -5   0  427.26   27.80 
  -6  -5   0  384.36   29.50 
  -6  -5   0  409.26   27.70 
  -6  -5   0  429.06   29.20 
  -6  -5   0  353.06   38.50 
   6  -5   0  422.16   29.40 
  -6  -5   0  441.26   31.90 
   6  -5   0  369.26   29.10 
  -6  -5   0  399.76   26.80 
  -6  -5   0  406.66   25.70 
   6  -5   0  377.56   26.00 
   6  -5   0  417.66   34.00 
   6   5   0  435.36   28.80 
   6   5   0  425.46   29.60 
  -6   5   0  403.16   39.20 
   6   5   0  491.25   36.30 
  -6   5   0  414.56   27.40 
   6   5   0  437.96   31.60 
   6   5   0  415.66   32.80 
   6   5   0  410.16   32.40 
   6   5   0  430.36   32.90 
  -6   5   0  403.76   29.60 
  -6   5   0  417.06   22.90 
   6   5   0  377.66   23.50 
  -6   5   0  414.36   30.90 
  -6   5   0  406.26   26.70 
   6   5   0  412.86   25.00 
   6   5   0  428.26   40.60 
  -6   5   0  371.16   38.50 
   6   5   0  406.16   28.10 
   6   5   0  419.56   28.50 
  -6   5   0  448.66   27.80 
   7  -5   0   21.80   13.10 
   7  -5   0   25.60   11.10 
  -7  -5   0   23.30   12.70 
   7  -5   0   30.10   13.00 
  -7  -5   0   27.10   10.10 
   7  -5   0   26.60   11.00 
  -7  -5   0   21.70   14.60 
  -7  -5   0   15.80    9.20 
   7  -5   0   25.40   14.40 
  -7  -5   0   17.50    9.00 
   7  -5   0    8.40    9.20 
  -7  -5   0   10.00    8.70 
   7  -5   0   36.00   10.80 
   7  -5   0    7.60    9.60 
  -7  -5   0   26.30   12.60 
   7  -5   0   11.60   12.60 
   7  -5   0   42.70   11.60 
   7  -5   0   13.50   12.30 
   7  -5   0   15.50   11.50 
   7  -5   0   26.10    9.90 
  -7  -5   0   33.40   12.50 
  -7  -5   0   10.90    9.30 
   7   5   0   42.80   19.70 
   7   5   0  -10.80   10.10 
   7   5   0    3.60    8.60 
   7   5   0    9.30   10.80 
  -7   5   0   36.40   11.90 
  -7   5   0   18.60   13.50 
  -7   5   0   24.30   11.50 
  -7   5   0   25.50   16.80 
   7   5   0   16.00   13.40 
  -7   5   0   22.60   11.60 
   7   5   0   25.70   10.60 
  -7   5   0   37.80   12.10 
   7   5   0    2.30    8.90 
   7   5   0   47.00   16.60 
   7   5   0   20.60   12.00 
   7   5   0   36.50   13.80 
  -7   5   0   19.30    9.70 
  -7   5   0   15.80    8.20 
  -7   5   0   28.60    9.60 
   8  -5   0    7.80    8.60 
   8  -5   0   11.40   13.20 
   8  -5   0   10.90   13.10 
   8  -5   0   14.70   13.40 
  -8  -5   0    7.00    9.00 
   8  -5   0    2.00   10.00 
   8  -5   0   -4.20    8.40 
  -8  -5   0    4.70   12.00 
   8  -5   0   -1.80    9.90 
   8  -5   0   -1.20    8.00 
   8  -5   0    5.80    9.90 
   8  -5   0   14.40   10.70 
   8  -5   0    0.90    9.10 
  -8  -5   0   -1.80    6.80 
  -8  -5   0   -6.70    8.40 
  -8  -5   0    1.20    8.50 
  -8  -5   0   -5.10    7.00 
   8  -5   0   -9.60    8.50 
  -8  -5   0   20.00   13.00 
  -8  -5   0    3.70    8.30 
  -8   5   0    7.20   10.80 
   8   5   0    4.10   10.60 
  -8   5   0   -1.90    7.40 
   8   5   0   -5.70   11.90 
  -8   5   0    9.10   10.50 
   8   5   0  -13.80   12.20 
  -8   5   0   -0.10   15.00 
   8   5   0   -1.60    9.20 
   8   5   0   -3.40    9.50 
   8   5   0   -1.80    8.80 
   8   5   0   -6.20   11.90 
   8   5   0  -16.30    9.90 
  -8   5   0   -7.40    7.30 
  -8   5   0   -2.90    9.30 
   8   5   0    9.50   10.60 
  -8   5   0   18.40   15.50 
   8   5   0   -7.10   15.40 
  -8   5   0   -2.30    7.80 
  -9  -5   0   -1.30    8.60 
  -9  -5   0    4.40   12.00 
   9  -5   0    2.50   10.90 
   9  -5   0    4.40   10.50 
   9  -5   0   -4.70    9.10 
   9  -5   0   11.40   14.60 
   9  -5   0    4.90   13.00 
   9  -5   0  -10.20   10.90 
   9  -5   0   -4.40   13.60 
   9  -5   0   12.50   12.20 
  -9  -5   0   -3.80   10.30 
  -9  -5   0   11.30   14.10 
  -9  -5   0    6.50   10.90 
   9  -5   0    0.70   10.20 
   9   5   0   18.90   14.30 
   9   5   0    7.40   14.00 
  -9   5   0  -10.50   10.30 
  -9   5   0    8.10   11.80 
   9   5   0   15.00   13.80 
  -9   5   0    0.90    9.80 
   9   5   0   -4.10   14.20 
   9   5   0   -2.80   17.80 
  -9   5   0   11.50   12.00 
   9   5   0   -4.00   11.00 
  -9   5   0   -0.10    9.90 
  -9   5   0    9.10   15.60 
   9   5   0   34.10   16.40 
   9   5   0   -6.60   14.30 
   9   5   0    0.60    9.80 
  -9   5   0   14.90   15.50 
   0  -6   0    2.60    5.40 
   0  -6   0   20.00   11.10 
   0  -6   0   -9.60   10.40 
   0  -6   0   12.80    7.90 
   0  -6   0   20.20    9.00 
   0  -6   0   14.80    7.90 
   0  -6   0    8.50    8.10 
   0  -6   0   12.10    9.00 
   0   6   0    9.20   10.20 
   0   6   0    4.00    6.90 
   0   6   0   13.10    7.80 
   0   6   0   22.90   11.40 
   0   6   0    9.60    7.80 
   0   6   0   26.00    9.40 
   0   6   0   14.90    8.20 
   0   6   0    9.50    6.80 
   1  -6   0 2268.37   92.99 
   1  -6   0 2236.58   92.19 
  -1  -6   0 2095.49   88.19 
  -1  -6   0 2079.19   88.59 
   1  -6   0 1863.81  107.09 
  -1  -6   0 2314.17  118.79 
   1  -6   0 2272.17   88.69 
   1  -6   0 2247.08   90.49 
  -1  -6   0 2418.76   98.29 
  -1  -6   0 2156.88   88.09 
  -1  -6   0 2364.66   94.29 
   1  -6   0 2182.78   95.29 
  -1  -6   0 1940.81   88.99 
  -1  -6   0 2135.39   83.19 
   1   6   0 2219.68   89.19 
   1   6   0 2208.08   94.89 
  -1   6   0 2290.47   88.99 
   1   6   0 2170.18   87.29 
  -1   6   0 2237.48   86.19 
  -1   6   0 2017.30   88.99 
   1   6   0 1816.42   89.89 
   1   6   0 2133.59   89.29 
  -1   6   0 2335.77  100.29 
  -1   6   0 1973.50   93.59 
   1   6   0 2192.68   87.49 
  -1   6   0 2211.58   89.19 
  -1   6   0 2249.18   93.89 
   1   6   0 2170.08   88.39 
   1   6   0 1890.61  101.49 
   1   6   0 2294.67   91.09 
  -2  -6   0    5.10    8.00 
  -2  -6   0    2.20    9.50 
  -2  -6   0   -1.50    7.10 
  -2  -6   0   12.00    4.70 
  -2  -6   0    8.10    6.50 
   2  -6   0    0.20    5.60 
   2  -6   0    3.50    6.90 
   2  -6   0   -3.00    6.10 
   2  -6   0    1.60   10.50 
  -2  -6   0    0.20    5.10 
   2  -6   0    0.30    6.70 
   2  -6   0   -1.50    6.70 
  -2  -6   0   -4.80    6.00 
  -2   6   0   -8.60    6.60 
  -2   6   0   12.40   10.80 
  -2   6   0   -3.50    6.30 
  -2   6   0   -5.00    7.60 
  -2   6   0    7.20    7.80 
   2   6   0    9.00    7.70 
   2   6   0   -0.40    6.70 
   2   6   0    9.60   12.90 
   2   6   0    1.00    6.70 
  -2   6   0    8.70   10.00 
   2   6   0    2.00    6.90 
   2   6   0    5.60   12.70 
   2   6   0    2.70   10.70 
   2   6   0    3.20    7.40 
   2   6   0    1.20    7.30 
   2   6   0    1.20    8.10 
  -3  -6   0  125.89   21.30 
   3  -6   0  136.49   19.40 
   3  -6   0  102.19   24.20 
  -3  -6   0  132.29   10.30 
   3  -6   0  113.39   17.30 
   3  -6   0  162.98   20.40 
  -3  -6   0  145.69   18.90 
  -3  -6   0  153.28   17.70 
   3  -6   0  132.59   21.10 
  -3  -6   0  139.19   16.80 
   3  -6   0  145.19   22.50 
  -3  -6   0  133.39   22.30 
   3  -6   0  131.99   19.80 
  -3  -6   0  144.89   19.50 
   3  -6   0  118.49   18.60 
   3   6   0  111.29   16.40 
   3   6   0   96.59   15.30 
  -3   6   0  115.39   17.10 
   3   6   0  128.29   17.90 
  -3   6   0  148.79   15.90 
   3   6   0  123.89   16.50 
  -3   6   0  133.99   24.10 
  -3   6   0  150.68   20.80 
  -3   6   0  159.98   21.50 
  -3   6   0  126.19   16.50 
   3   6   0  128.39   24.80 
   3   6   0  132.19   15.20 
   3   6   0  115.69   21.40 
  -3   6   0  142.99   21.20 
   3   6   0  158.38   19.20 
   3   6   0   98.19   21.50 
   3   6   0  146.09   17.10 
  -3   6   0  133.69   18.60 
   4  -6   0    1.40    7.30 
   4  -6   0    8.30    8.40 
   4  -6   0    2.50   12.50 
  -4  -6   0    5.40    7.30 
  -4  -6   0   -4.50    5.80 
  -4  -6   0   -4.50    9.00 
  -4  -6   0   10.20   10.30 
   4  -6   0   -1.90    6.90 
   4  -6   0   -1.80    8.00 
  -4  -6   0    7.30    7.10 
   4  -6   0    9.40    8.10 
   4  -6   0    0.60    7.60 
   4  -6   0  -14.70    6.00 
  -4  -6   0    5.60    6.70 
  -4  -6   0    5.70    9.30 
  -4  -6   0    3.20    6.40 
   4   6   0    0.40   11.70 
   4   6   0    3.90    8.00 
  -4   6   0   -0.50    9.40 
   4   6   0    2.30   11.70 
   4   6   0    1.00    6.50 
  -4   6   0    1.20    8.90 
  -4   6   0   -5.60    7.70 
  -4   6   0   -3.40    5.90 
  -4   6   0    1.80    8.40 
   4   6   0    4.20    8.00 
   4   6   0   -8.00    6.60 
  -4   6   0    4.20   10.90 
   4   6   0   11.90    9.40 
  -4   6   0   -2.60    7.10 
   4   6   0   13.10    8.70 
   4   6   0    4.70   11.00 
  -4   6   0    4.50    8.00 
  -4   6   0   -0.10    6.00 
   4   6   0    7.70    8.20 
   5  -6   0  712.03   43.50 
   5  -6   0  776.22   43.90 
   5  -6   0  655.03   52.89 
  -5  -6   0  679.63   49.10 
  -5  -6   0  731.93   40.30 
  -5  -6   0  796.72   48.80 
  -5  -6   0  849.72   49.00 
   5  -6   0  702.93   48.00 
  -5  -6   0  840.52   42.30 
   5  -6   0  847.72   49.20 
  -5  -6   0  752.62   41.50 
   5  -6   0  604.24   42.70 
  -5  -6   0  719.53   41.90 
   5  -6   0  747.23   41.90 
  -5  -6   0  723.63   42.00 
   5  -6   0  743.93   47.00 
   5  -6   0  758.82   44.70 
   5  -6   0  722.83   40.20 
  -5   6   0  709.93   49.50 
   5   6   0  757.22   39.40 
   5   6   0  773.82   49.40 
   5   6   0  748.13   41.40 
   5   6   0  755.12   40.90 
   5   6   0  751.92   40.00 
  -5   6   0  676.03   42.00 
   5   6   0  738.03   38.90 
   5   6   0  702.03   48.00 
  -5   6   0  747.63   38.00 
   5   6   0  785.82   56.49 
  -5   6   0  773.72   42.70 
   5   6   0  766.92   45.80 
  -5   6   0  799.02   45.80 
  -5   6   0  704.23   47.70 
   5   6   0  711.03   40.70 
  -5   6   0  746.03   35.80 
  -5   6   0  664.63   42.10 
   6  -6   0    7.40    9.30 
   6  -6   0   -5.30    9.80 
   6  -6   0   12.20    9.00 
  -6  -6   0   -2.20    7.30 
   6  -6   0    7.80    9.30 
  -6  -6   0   -2.30   10.40 
   6  -6   0    5.00    8.10 
  -6  -6   0    0.00    6.80 
  -6  -6   0    4.60   11.00 
   6  -6   0   -5.70    7.30 
  -6  -6   0    1.30    8.10 
  -6  -6   0    1.40    9.10 
   6  -6   0   -3.90    7.20 
  -6  -6   0   -6.40    9.70 
   6  -6   0    8.40    9.90 
  -6  -6   0   -7.40    8.80 
  -6  -6   0   -2.80    7.20 
   6  -6   0   -0.80    9.90 
   6  -6   0  -10.20    8.50 
  -6   6   0   -6.00   12.60 
   6   6   0   -1.00    8.40 
  -6   6   0    1.80   13.00 
   6   6   0   -4.20    7.40 
   6   6   0    4.60    8.50 
   6   6   0   -2.80    7.30 
  -6   6   0    3.90    8.70 
   6   6   0  -13.50   10.40 
   6   6   0    4.30   14.40 
  -6   6   0    8.60    7.40 
  -6   6   0   -2.80    8.40 
   6   6   0   -0.80    7.00 
   6   6   0  -10.10    6.50 
   6   6   0   21.00   13.30 
  -6   6   0    8.20    9.90 
  -6   6   0  -17.30    8.20 
   6   6   0    3.70    9.70 
   6   6   0   10.70   13.80 
  -6   6   0   -5.50    9.50 
   7  -6   0 1088.19   63.09 
  -7  -6   0 1142.09   60.29 
   7  -6   0 1269.27   62.69 
  -7  -6   0 1167.38   64.29 
  -7  -6   0 1179.58   62.59 
   7  -6   0 1198.38   66.69 
  -7  -6   0 1195.68   67.69 
   7  -6   0 1033.70   63.09 
   7  -6   0 1234.18   65.19 
  -7  -6   0 1127.99   71.99 
   7  -6   0 1254.37   69.59 
  -7  -6   0 1239.18   60.89 
   7  -6   0 1183.18   58.79 
  -7  -6   0 1108.59   58.29 
   7  -6   0 1313.07   78.69 
   7  -6   0 1205.58   60.89 
   7  -6   0 1124.09   60.99 
   7  -6   0 1101.19   68.59 
   7   6   0 1127.99   64.59 
  -7   6   0 1098.29   56.09 
   7   6   0 1103.79   58.19 
   7   6   0 1278.37   61.39 
   7   6   0 1124.49   66.39 
  -7   6   0 1083.99   54.89 
   7   6   0 1111.59   58.19 
  -7   6   0 1133.49   61.39 
  -7   6   0 1012.80   65.79 
   7   6   0 1314.47   65.89 
   7   6   0 1232.08   60.09 
  -7   6   0 1145.09   63.79 
  -7   6   0 1168.98   59.39 
   7   6   0 1288.17   70.09 
  -7   6   0 1150.28   72.29 
   7   6   0 1209.58   78.89 
  -7   6   0 1244.78   58.29 
   8  -6   0   50.09   19.30 
   8  -6   0   39.80   20.10 
   8  -6   0   35.80   14.70 
  -8  -6   0   40.80   17.70 
   8  -6   0   22.90   15.50 
   8  -6   0    5.40   11.30 
   8  -6   0   27.40   12.80 
   8  -6   0   26.30   15.10 
  -8  -6   0   37.60   13.00 
  -8  -6   0   13.40   12.10 
   8  -6   0   17.20   12.20 
   8  -6   0   21.90   13.40 
  -8  -6   0   39.40   13.80 
  -8  -6   0   35.80   14.20 
  -8  -6   0   47.20   14.20 
   8   6   0   16.20   16.80 
  -8   6   0   25.00   13.20 
  -8   6   0   55.19   19.90 
   8   6   0   33.80   12.10 
   8   6   0    9.70   10.80 
   8   6   0   32.40   22.30 
  -8   6   0   30.50   13.20 
   8   6   0   12.80   15.00 
  -8   6   0   17.30   13.20 
   8   6   0   37.60   17.30 
   8   6   0   23.40   13.30 
   8   6   0   26.00   17.10 
  -8   6   0   43.20   15.90 
   8   6   0   10.90   17.80 
  -8   6   0   12.10   16.80 
   0  -7   0   14.40   15.30 
   0  -7   0    0.30    6.80 
   0  -7   0   -6.10    4.30 
   0  -7   0   -3.80    6.00 
   0  -7   0   -6.00    6.20 
   0  -7   0   -4.40    8.00 
   0  -7   0   -1.80    6.90 
   0  -7   0   -5.70    5.90 
   0  -7   0   -2.80    6.80 
   0   7   0   -4.50    8.70 
   0   7   0    4.10   11.40 
   0   7   0   10.70    8.40 
   0   7   0   -0.40    6.40 
   0   7   0    2.70   10.00 
   0   7   0   -9.30    6.50 
   0   7   0   -0.60    9.00 
   0   7   0   -0.90    9.10 
   0   7   0  -18.30    8.70 
   0   7   0   -2.60    7.90 
   1  -7   0   48.40   13.50 
  -1  -7   0   31.60   12.50 
   1  -7   0   53.69   22.10 
  -1  -7   0   47.10   12.50 
   1  -7   0   37.40   12.10 
  -1  -7   0   41.20   12.10 
  -1  -7   0   36.80   12.60 
  -1  -7   0   23.30    9.80 
  -1  -7   0   27.20   13.30 
  -1  -7   0   47.70   12.00 
   1  -7   0   28.10   11.80 
  -1  -7   0   25.50    8.70 
   1  -7   0   47.10   13.70 
   1  -7   0   24.70   13.50 
   1  -7   0   21.70    8.70 
  -1  -7   0   26.60   20.50 
  -1  -7   0   35.90   12.00 
   1   7   0   33.30   18.60 
   1   7   0   43.50   13.10 
  -1   7   0   32.20   14.80 
  -1   7   0   32.10    9.90 
   1   7   0   24.70   13.00 
  -1   7   0   43.70   13.10 
   1   7   0   21.70    9.70 
   1   7   0   38.70   12.60 
   1   7   0   42.50   12.60 
   1   7   0   42.00   11.50 
  -1   7   0   26.90   10.90 
   1   7   0   29.10   12.70 
  -1   7   0   46.30   14.70 
  -1   7   0   57.29   17.10 
   1   7   0   43.00   13.90 
   1   7   0   63.99   14.60 
  -1   7   0   22.20    9.70 
  -1   7   0   24.30   12.00 
  -2  -7   0   65.19   14.00 
   2  -7   0   59.49   13.80 
   2  -7   0   66.79   15.70 
   2  -7   0   65.59   15.80 
   2  -7   0   73.19   18.50 
  -2  -7   0   49.60   12.80 
   2  -7   0   56.39   15.00 
  -2  -7   0   56.99   14.90 
   2  -7   0   47.20   20.70 
  -2  -7   0   68.69   15.00 
  -2  -7   0   65.99   13.70 
  -2  -7   0   64.59   10.40 
   2  -7   0   69.89   15.90 
  -2  -7   0   55.29   14.10 
  -2  -7   0   78.09   18.10 
   2   7   0   36.00   12.90 
  -2   7   0   65.89   12.90 
   2   7   0   71.79   14.90 
  -2   7   0   73.09   12.40 
   2   7   0   66.39   23.30 
  -2   7   0   69.89   18.00 
  -2   7   0   49.70   17.40 
   2   7   0   56.99   16.60 
   2   7   0   65.59   15.60 
   2   7   0  102.89   25.70 
  -2   7   0   72.89   16.90 
   2   7   0   65.99   16.20 
  -2   7   0   53.59   14.60 
  -2   7   0   65.99   14.60 
   2   7   0   65.89   13.50 
  -2   7   0   70.79   15.10 
   2   7   0   95.89   16.60 
   2   7   0   59.19   12.80 
   3  -7   0    7.00   10.00 
  -3  -7   0   20.10    9.80 
   3  -7   0   16.90   10.20 
   3  -7   0   13.50    9.40 
   3  -7   0   15.60   10.10 
  -3  -7   0    8.00   11.90 
  -3  -7   0   24.70    9.30 
  -3  -7   0   11.00   10.60 
  -3  -7   0   15.50    9.00 
   3  -7   0   16.00   16.50 
  -3  -7   0   20.40    9.80 
   3  -7   0    8.70    9.70 
  -3  -7   0   43.60   12.70 
   3  -7   0   28.10   11.00 
  -3  -7   0   17.30    9.00 
  -3   7   0   40.50   11.70 
  -3   7   0   20.40   12.60 
   3   7   0   13.40   10.60 
  -3   7   0   17.30   12.40 
  -3   7   0   19.50    9.40 
  -3   7   0   -6.70   10.20 
   3   7   0   15.50   16.30 
   3   7   0   52.29   14.20 
  -3   7   0   23.90   12.70 
   3   7   0   41.30   17.10 
   3   7   0   16.20   10.60 
  -3   7   0   18.20   10.80 
   3   7   0   29.10   12.30 
   3   7   0   29.00   17.90 
   3   7   0   15.60   10.10 
   3   7   0   29.60   12.80 
  -3   7   0   25.20   14.00 
   3   7   0   34.10   11.60 
   3   7   0   21.70    9.10 
  -4  -7   0  207.68   22.00 
   4  -7   0  175.68   24.30 
  -4  -7   0  185.48   26.30 
   4  -7   0  238.08   29.00 
  -4  -7   0  242.68   24.40 
  -4  -7   0  248.48   26.80 
  -4  -7   0  188.28   25.50 
  -4  -7   0  198.48   25.60 
   4  -7   0  195.68   26.90 
  -4  -7   0  168.68   28.70 
  -4  -7   0  176.08   23.10 
   4  -7   0  183.08   34.60 
   4  -7   0  268.07   33.80 
   4  -7   0  205.68   25.50 
   4  -7   0  160.38   23.00 
   4  -7   0  206.28   24.90 
  -4   7   0  180.58   26.20 
   4   7   0  240.98   34.20 
  -4   7   0  211.88   24.40 
   4   7   0  174.68   19.90 
  -4   7   0  165.48   26.80 
   4   7   0  218.88   22.90 
  -4   7   0  192.48   24.30 
   4   7   0  221.08   24.60 
   4   7   0  204.98   24.90 
   4   7   0  201.28   21.60 
  -4   7   0  170.68   23.60 
  -4   7   0  218.88   23.30 
   4   7   0  193.58   22.40 
   4   7   0  194.38   23.80 
  -4   7   0  178.18   30.30 
  -4   7   0  192.98   19.80 
   4   7   0  130.19   29.50 
   4   7   0  217.58   30.80 
  -5  -7   0   67.69   14.50 
   5  -7   0   27.20   12.00 
   5  -7   0   23.80   11.60 
  -5  -7   0   35.50   12.10 
   5  -7   0   22.90   12.40 
  -5  -7   0   41.80   16.40 
   5  -7   0   12.20   11.90 
   5  -7   0   31.80   13.40 
  -5  -7   0   29.10   15.00 
   5  -7   0   19.10   18.30 
  -5  -7   0   45.40   14.20 
   5  -7   0   16.30   10.60 
   5  -7   0   19.60   13.20 
  -5  -7   0   17.20   13.80 
  -5  -7   0   37.40   11.90 
   5  -7   0   35.10   13.80 
   5   7   0   39.60   12.80 
  -5   7   0   11.30   11.60 
  -5   7   0   13.20   12.30 
  -5   7   0   37.90   15.20 
  -5   7   0   42.10   14.20 
   5   7   0   21.50   11.10 
   5   7   0   41.90   12.10 
   5   7   0    9.90   11.50 
  -5   7   0   10.20    9.30 
   5   7   0   13.50   14.70 
  -5   7   0   33.10   15.50 
  -5   7   0   35.60   13.50 
   5   7   0   36.00   19.20 
   5   7   0   28.80   14.80 
   5   7   0   35.10   11.40 
   5   7   0    6.50   16.40 
   5   7   0   31.00   12.80 
  -6  -7   0  401.66   30.10 
   6  -7   0  433.66   42.00 
   6  -7   0  396.56   34.20 
  -6  -7   0  308.97   39.40 
  -6  -7   0  359.46   39.10 
   6  -7   0  389.36   42.60 
  -6  -7   0  520.25   42.00 
  -6  -7   0  429.96   32.90 
   6  -7   0  434.96   34.10 
   6  -7   0  414.96   39.90 
   6  -7   0  480.15   46.70 
  -6  -7   0  417.86   32.90 
   6  -7   0  466.95   37.30 
   6  -7   0  441.56   54.19 
  -6  -7   0  418.76   32.80 
   6  -7   0  407.56   42.20 
  -6   7   0  485.95   43.30 
  -6   7   0  467.65   35.60 
  -6   7   0  492.95   43.20 
  -6   7   0  448.66   30.30 
   6   7   0  402.36   30.20 
   6   7   0  496.85   35.00 
   6   7   0  353.56   29.60 
   6   7   0  416.16   31.20 
   6   7   0  529.85   51.89 
   6   7   0  373.46   42.40 
  -6   7   0  446.56   34.70 
  -6   7   0  472.25   35.40 
   6   7   0  380.36   37.90 
   6   7   0  425.76   45.90 
   6   7   0  384.46   31.10 
   6   7   0  455.35   33.20 
  -6   7   0  490.25   42.70 
  -6   7   0  397.46   37.40 
   7  -7   0   -2.70   11.00 
   7  -7   0   -6.50   11.30 
  -7  -7   0    6.50   11.40 
   7  -7   0   11.50   12.20 
  -7  -7   0   10.90    9.60 
   7  -7   0   21.40   17.00 
  -7  -7   0    8.00   13.10 
   7  -7   0   -0.90   11.20 
  -7  -7   0    4.30   14.00 
  -7  -7   0  -12.60    9.90 
   7  -7   0   22.90   12.80 
   7  -7   0    4.70   12.70 
  -7  -7   0   -6.00    9.20 
   7  -7   0    4.00   11.90 
  -7   7   0    7.80   16.60 
  -7   7   0   14.70   12.50 
  -7   7   0   15.60   12.70 
  -7   7   0  -11.80   13.90 
   7   7   0   18.70   12.20 
   7   7   0   -0.70   15.30 
   7   7   0    8.80   10.80 
   7   7   0   14.90   20.70 
  -7   7   0   -4.50   10.50 
   7   7   0    0.20   15.60 
  -7   7   0   -1.30   12.70 
   7   7   0   17.50   10.40 
   7   7   0   -2.60   13.10 
   8  -7   0   12.10   13.30 
   0  -8   0  413.66   32.60 
   0  -8   0  363.36   31.40 
   0  -8   0  387.06   32.40 
   0  -8   0  400.06   34.60 
   0  -8   0  435.06   37.20 
   0  -8   0  392.56   28.70 
   0  -8   0  428.26   31.40 
   0  -8   0  525.35   51.89 
   0  -8   0  513.35   32.80 
   0   8   0  444.86   36.50 
   0   8   0  438.06   35.10 
   0   8   0  489.55   30.90 
   0   8   0  525.85   39.20 
   0   8   0  436.26   35.00 
   0   8   0  482.25   41.80 
   0   8   0  423.86   29.80 
   0   8   0  418.36   35.50 
   0   8   0  390.76   31.70 
   1  -8   0 1007.50   73.09 
  -1  -8   0 1033.10   52.39 
  -1  -8   0  910.81   52.49 
  -1  -8   0  916.81   55.29 
   1  -8   0  956.90   56.69 
   1  -8   0  891.31   57.19 
  -1  -8   0  949.11   57.99 
   1  -8   0  951.20   54.69 
  -1  -8   0 1066.09   79.59 
  -1  -8   0  936.21   53.99 
   1  -8   0 1015.70   54.99 
  -1  -8   0  953.00   53.49 
  -1  -8   0  903.21   46.10 
   1  -8   0  960.90   54.39 
  -1  -8   0 1038.20   53.79 
   1  -8   0  934.31   50.29 
  -1   8   0 1007.50   56.99 
   1   8   0 1022.50   50.99 
  -1   8   0  841.82   50.59 
   1   8   0 1008.10   51.79 
   1   8   0  922.51   52.79 
   1   8   0  943.41   54.69 
   1   8   0  956.70   56.99 
  -1   8   0  908.21   54.59 
  -1   8   0  933.31   59.49 
   1   8   0  904.11   53.89 
  -1   8   0 1056.99   59.59 
   1   8   0  971.80   51.09 
   1   8   0  908.01   55.79 
   1   8   0  865.91   50.69 
   1   8   0 1010.50   66.29 
  -1   8   0 1001.20   49.10 
  -1   8   0  972.70   48.10 
  -1   8   0  856.21   52.89 
   2  -8   0   24.20   11.30 
   2  -8   0   23.30   12.50 
  -2  -8   0   29.30    9.10 
   2  -8   0   39.60   13.80 
   2  -8   0   41.70   12.80 
  -2  -8   0   32.20   15.10 
  -2  -8   0   15.00    9.20 
   2  -8   0   23.80   19.60 
  -2  -8   0   32.90   13.30 
   2  -8   0   27.60   13.50 
  -2  -8   0   16.60    9.90 
   2  -8   0   24.80   12.90 
  -2  -8   0   17.30   11.60 
  -2  -8   0   33.60   11.90 
  -2  -8   0   30.40   12.70 
   2   8   0   44.80   22.30 
   2   8   0   13.30   10.10 
  -2   8   0   13.30   14.10 
   2   8   0   17.50   13.00 
   2   8   0   23.70   12.10 
  -2   8   0   62.79   15.40 
   2   8   0    9.30   11.80 
  -2   8   0   31.20   10.60 
   2   8   0   36.30   14.20 
   2   8   0   22.90   11.70 
  -2   8   0   18.30   14.00 
   2   8   0   22.40   14.50 
  -2   8   0   41.20   11.40 
   2   8   0   27.70   11.60 
   2   8   0   36.10   14.80 
  -2   8   0   31.10   11.70 
  -2   8   0   -1.50   10.60 
  -2   8   0   35.40   15.20 
   3  -8   0  164.38   37.90 
  -3  -8   0  250.57   33.70 
   3  -8   0  306.77   37.60 
   3  -8   0  217.98   28.10 
  -3  -8   0  202.98   26.20 
   3  -8   0  229.28   30.10 
   3  -8   0  233.58   28.40 
  -3  -8   0  287.47   29.00 
  -3  -8   0  230.78   27.90 
  -3  -8   0  271.77   31.60 
   3  -8   0  272.47   28.20 
  -3  -8   0  282.17   34.20 
   3  -8   0  278.27   30.90 
   3  -8   0  274.87   32.70 
  -3   8   0  323.07   30.90 
  -3   8   0  158.08   26.90 
   3   8   0  277.47   28.90 
   3   8   0  252.57   27.50 
   3   8   0  208.28   38.50 
   3   8   0  220.28   27.90 
   3   8   0  140.39   24.10 
   3   8   0  238.18   27.30 
   3   8   0  235.58   37.90 
   3   8   0  242.58   25.30 
  -3   8   0  282.47   35.90 
   3   8   0  255.17   33.30 
  -3   8   0  271.27   27.00 
  -3   8   0  242.08   28.00 
  -3   8   0  253.77   29.80 
  -3   8   0  222.68   22.80 
   3   8   0  307.47   27.30 
   3   8   0  270.27   28.80 
  -3   8   0  262.37   32.20 
  -4  -8   0   28.10   12.40 
   4  -8   0   70.29   18.20 
   4  -8   0    5.20   10.30 
   4  -8   0   -0.10   14.80 
  -4  -8   0   35.10   15.00 
   4  -8   0    9.30    9.60 
  -4  -8   0   35.70   17.00 
  -4  -8   0   17.10   12.20 
   4  -8   0   50.99   14.30 
  -4  -8   0   24.40   10.80 
   4  -8   0   18.30   11.10 
   4  -8   0   29.40   13.90 
  -4  -8   0   24.10   14.90 
  -4  -8   0   25.50   10.70 
  -4   8   0   43.50   15.70 
   4   8   0   19.40   13.00 
   4   8   0   19.70   21.20 
  -4   8   0   22.50   15.80 
  -4   8   0   29.20   16.10 
  -4   8   0   45.80   14.70 
   4   8   0   31.80   11.50 
   4   8   0   24.50   13.20 
   4   8   0   29.70   15.60 
   4   8   0    4.30   11.60 
   4   8   0   38.70   13.40 
  -4   8   0   41.10   15.40 
   4   8   0   29.30   21.60 
   4   8   0   56.79   15.20 
  -4   8   0   46.00   17.00 
   4   8   0   20.40   13.30 
   5  -8   0  562.94   39.90 
   5  -8   0  532.05   41.40 
  -5  -8   0  524.45   41.60 
   5  -8   0  524.45   41.50 
   5  -8   0  462.95   40.60 
  -5  -8   0  525.65   37.70 
  -5  -8   0  524.25   36.70 
  -5  -8   0  480.35   36.90 
   5  -8   0  491.85   62.79 
  -5  -8   0  511.55   39.10 
  -5  -8   0  410.86   47.80 
   5  -8   0  514.65   53.09 
  -5  -8   0  490.35   43.50 
   5  -8   0  574.94   39.90 
   5   8   0  454.35   47.10 
  -5   8   0  572.64   46.60 
   5   8   0  556.74   36.30 
   5   8   0  493.25   36.60 
  -5   8   0  534.65   41.40 
   5   8   0  497.85   37.40 
  -5   8   0  479.75   38.10 
   5   8   0  478.45   38.80 
  -5   8   0  484.55   37.90 
  -5   8   0  497.55   47.80 
   5   8   0  487.15   54.69 
   5   8   0  497.85   37.40 
   5   8   0  483.75   40.20 
  -6  -8   0  199.88   29.70 
  -6  -8   0  182.58   26.70 
   6  -8   0  131.59   24.40 
  -6  -8   0  171.68   25.00 
  -6  -8   0  170.08   23.40 
  -6  -8   0  179.68   31.10 
   6  -8   0  266.07   36.50 
   6  -8   0  181.58   38.80 
   6  -8   0  196.48   28.50 
   6  -8   0  221.38   34.40 
  -6  -8   0  214.88   34.90 
   6  -8   0  227.58   30.50 
   6  -8   0  161.88   24.90 
   6  -8   0  171.28   29.80 
   6   8   0  125.19   28.70 
  -6   8   0  218.68   31.90 
   6   8   0  184.78   23.40 
   6   8   0  191.28   35.10 
  -6   8   0  131.99   23.10 
   6   8   0  115.89   21.50 
   6   8   0  135.59   25.80 
  -6   8   0  163.68   24.60 
   6   8   0  159.98   22.20 
  -6   8   0  147.69   25.90 
  -6   8   0  166.28   25.10 
   6   8   0  167.28   40.10 
   6   8   0  217.58   28.70 
  -6   8   0  195.98   33.30 
  -7  -8   0  714.43   56.89 
   7  -8   0  700.33   67.29 
   7  -8   0  630.64   51.49 
  -7  -8   0  710.83   53.99 
   7  -8   0  636.74   50.19 
   7  -8   0  761.12   56.39 
   7  -8   0  657.53   51.69 
   7   8   0  642.64   51.19 
   7   8   0  642.64   60.89 
   7   8   0  587.04   61.99 
   7   8   0  694.73   48.30 
  -7   8   0  698.23   56.69 
  -7   8   0  714.53   63.89 
   0  -9   0    1.00    9.40 
   0  -9   0    0.00   14.40 
   0  -9   0  -15.80    7.20 
   0  -9   0    0.70    7.40 
   0  -9   0   -2.50    8.80 
   0  -9   0   20.80   14.20 
   0  -9   0   -6.80    8.70 
   0  -9   0   -4.10    7.10 
   0   9   0    4.80   11.50 
   0   9   0    8.50   12.30 
   0   9   0   11.90   12.90 
   0   9   0   -7.30   12.00 
   0   9   0   17.10   14.20 
   0   9   0   -9.40    9.70 
   0   9   0   -8.10    8.90 
   0   9   0   12.20   14.10 
   1  -9   0   34.70   12.80 
   1  -9   0   36.40   15.30 
   1  -9   0   66.99   16.60 
  -1  -9   0   50.59   18.30 
   1  -9   0   44.70   14.90 
  -1  -9   0   59.39   16.70 
   1  -9   0   58.09   14.90 
  -1  -9   0   48.40   15.80 
  -1  -9   0   64.19   16.10 
  -1  -9   0   29.10   13.50 
   1  -9   0   53.89   17.20 
   1  -9   0   55.39   23.30 
  -1  -9   0   45.90   15.90 
   1  -9   0   61.69   18.60 
  -1   9   0   66.79   19.20 
   1   9   0   78.59   18.90 
   1   9   0   47.00   13.80 
  -1   9   0   65.19   20.70 
   1   9   0   42.60   19.80 
   1   9   0   47.40   17.40 
  -1   9   0   47.00   15.00 
  -1   9   0   72.09   19.40 
  -1   9   0   97.79   22.90 
   1   9   0   29.90   15.80 
  -1   9   0   61.79   17.40 
   1   9   0   48.80   17.60 
   1   9   0   23.40   13.40 
   1   9   0   77.19   16.50 
  -1   9   0   42.50   17.60 
   1   9   0   52.49   17.90 
  -2  -9   0   64.29   18.10 
   2  -9   0   82.09   22.00 
  -2  -9   0   58.69   16.00 
  -2  -9   0   67.79   16.90 
  -2  -9   0   85.69   22.70 
  -2  -9   0   97.69   20.00 
  -2  -9   0   99.19   20.90 
   2  -9   0  116.69   22.90 
   2  -9   0  110.89   18.50 
   2  -9   0   56.69   16.60 
   2  -9   0  106.29   22.80 
   2  -9   0  102.49   20.20 
   2  -9   0   86.59   28.80 
   2  -9   0   59.79   16.30 
   2   9   0   90.49   19.60 
   2   9   0   70.59   17.50 
   2   9   0   65.09   18.80 
   2   9   0   83.99   27.20 
  -2   9   0   85.19   19.50 
  -2   9   0   97.09   23.80 
  -2   9   0   86.39   18.40 
   2   9   0   92.19   21.30 
   2   9   0   89.99   17.10 
  -2   9   0  133.09   23.90 
  -2   9   0   77.29   22.40 
   2   9   0   84.39   19.30 
   2   9   0   71.29   19.70 
  -2   9   0   72.39   18.60 
   2   9   0  103.49   21.10 
   2   9   0   57.09   17.70 
  -3  -9   0    0.70    9.50 
   3  -9   0    0.00   18.90 
   3  -9   0   10.50   10.60 
   3  -9   0   14.70   11.10 
  -3  -9   0   -2.80   12.40 
   3  -9   0    6.00    9.70 
  -3  -9   0   -2.00   10.70 
   3  -9   0   -6.90   12.60 
  -3  -9   0   -3.30    9.40 
   3  -9   0    7.50   10.10 
   3  -9   0    4.10   18.10 
  -3  -9   0    3.50    8.10 
  -3  -9   0    7.70   10.70 
   3  -9   0    5.30    9.30 
  -3   9   0    5.70   10.70 
   3   9   0    4.00   13.10 
   3   9   0    6.80   13.50 
   3   9   0   -6.10   16.30 
   3   9   0    6.10   11.60 
  -3   9   0   13.50   13.30 
  -3   9   0    0.80   13.50 
  -3   9   0   -8.20   11.90 
  -3   9   0   -5.40   10.50 
   3   9   0    2.10   11.00 
   3   9   0    3.00    9.80 
   3   9   0  -14.20   12.50 
   3   9   0    0.10   11.20 
  -3   9   0   25.00   15.00 
   4  -9   0   63.39   18.20 
  -4  -9   0   38.40   19.50 
  -4  -9   0   30.30   12.00 
   4  -9   0   45.40   16.20 
   4  -9   0   48.50   15.50 
   4  -9   0    6.10   19.50 
  -4  -9   0   49.30   15.20 
  -4  -9   0   62.79   17.70 
  -4  -9   0   47.90   15.70 
  -4  -9   0   78.09   19.40 
   4  -9   0   41.30   14.70 
   4  -9   0   60.39   21.20 
  -4  -9   0   76.89   20.70 
   4  -9   0   56.09   15.30 
   4   9   0   78.19   19.70 
  -4   9   0   78.99   17.90 
   4   9   0   43.20   16.60 
   4   9   0   55.59   17.90 
  -4   9   0   36.50   17.90 
   4   9   0   53.39   20.40 
   4   9   0  109.09   29.50 
   4   9   0   71.09   19.60 
  -4   9   0   25.40   15.70 
  -4   9   0   51.99   18.20 
  -4   9   0   67.49   21.10 
   4   9   0   58.79   14.90 
   4   9   0   53.69   16.80 
   4   9   0   11.90   20.50 
  -4   9   0   47.90   19.20 
  -5  -9   0  146.99   24.20 
   5  -9   0   88.59   19.90 
  -5  -9   0  111.79   21.20 
  -5  -9   0  143.49   31.60 
  -5  -9   0  115.79   21.50 
  -5  -9   0  128.89   23.30 
   5  -9   0   57.89   26.10 
   5  -9   0  126.59   26.00 
  -5  -9   0  153.38   28.20 
   5  -9   0  108.89   26.20 
   5  -9   0  132.69   25.60 
   5  -9   0  121.59   22.90 
  -5  -9   0  104.29   23.50 
   5  -9   0   96.89   20.10 
   5   9   0  178.98   33.50 
   5   9   0  133.29   25.10 
  -5   9   0   99.69   25.80 
   5   9   0  125.79   22.20 
   5   9   0  111.89   34.10 
   5   9   0  126.89   24.70 
  -5   9   0  160.58   25.50 
   5   9   0  109.09   19.70 
  -5   9   0  140.29   24.00 
   5   9   0  121.39   34.80 
   5   9   0  186.08   26.50 
  -5   9   0  105.79   22.90 
  -5   9   0  165.38   31.30 
   0 -10   0  994.20   64.39 
   0 -10   0  926.41   59.59 
   0 -10   0 1071.89   65.29 
   0 -10   0  971.10   59.49 
   0 -10   0 1017.60   79.39 
   0 -10   0 1030.20   60.19 
   0  10   0 1011.30   62.59 
   0  10   0  987.70   62.19 
   0  10   0  978.10   62.19 
   0  10   0  983.40   66.79 
   0  10   0  953.20   61.69 
   0  10   0 1021.50   62.79 
   1 -10   0  283.47   37.90 
  -1 -10   0  236.08   32.40 
   1 -10   0  254.87   34.20 
   1 -10   0  266.27   46.80 
  -1 -10   0  192.98   31.00 
   1 -10   0  306.67   32.70 
  -1 -10   0  264.77   34.10 
   1 -10   0  257.27   35.70 
  -1 -10   0  211.18   32.60 
  -1 -10   0  267.27   33.00 
   1 -10   0  226.88   30.50 
  -1  10   0  258.17   35.40 
  -1  10   0  261.57   34.00 
   1  10   0  254.27   34.40 
   1  10   0  255.57   33.20 
   1  10   0  223.28   30.50 
  -1  10   0  204.98   28.20 
   1  10   0  263.37   40.20 
  -1  10   0  287.37   35.40 
  -1  10   0  273.57   34.50 
   1  10   0  235.68   31.00 
  -1  10   0  269.87   37.40 
   1  10   0  233.28   32.80 
  -1  10   0  236.28   31.00 
   1  10   0  241.78   31.40 
   2 -10   0  187.38   27.00 
   2 -10   0  199.38   28.80 
   2 -10   0  238.58   32.90 
  -2 -10   0  206.48   32.60 
  -2 -10   0  153.38   26.60 
   2 -10   0  279.37   47.70 
  -2 -10   0  159.48   26.00 
  -2 -10   0  273.17   34.70 
  -2 -10   0  209.88   32.80 
   2 -10   0  192.58   30.40 
  -2 -10   0  242.98   30.80 
   2 -10   0  243.08   27.50 
   2 -10   0  268.87   37.80 
   2  10   0  169.28   26.70 
  -2  10   0  219.48   28.30 
  -2  10   0  183.28   35.90 
  -2  10   0  181.28   29.70 
   2  10   0  249.18   33.90 
   2  10   0  187.48   29.60 
  -2  10   0  244.48   31.50 
   2  10   0  232.18   32.20 
  -2  10   0  241.88   32.10 
   2  10   0  190.78   28.20 
  -2  10   0  258.97   36.60 
   2  10   0  178.98   29.20 
  -2  10   0  260.47   34.50 
   2  10   0  208.08   38.60 
   2  10   0  234.38   32.90 
   3 -10   0   21.50   13.00 
  -3 -10   0   17.30   14.20 
   3 -10   0   10.40   11.50 
  -3 -10   0   19.60   14.90 
   3 -10   0   17.30   16.60 
  -3 -10   0  -14.40   10.90 
  -3 -10   0    9.10   11.90 
   3 -10   0   10.60   11.70 
   3 -10   0   43.90   25.30 
   3 -10   0   38.80   15.20 
  -3 -10   0   -9.00   12.70 
  -3 -10   0   25.40   15.40 
   3 -10   0    9.80   13.80 
   3  10   0   12.10   14.30 
  -3  10   0   23.00   16.50 
   3  10   0   -2.10   14.70 
   3  10   0   29.10   15.70 
   3  10   0   35.10   15.20 
   3  10   0   11.50   16.30 
  -3  10   0   31.50   17.40 
  -3  10   0   17.50   13.60 
   3  10   0   -1.20   22.10 
   3  10   0    1.70   16.10 
  -3  10   0   30.00   17.00 
  -3  10   0   43.50   18.10 
 -10   0   1   -3.30    7.30 
  10   0  -1   -0.30   12.40 
  10   0  -1   -7.90   11.90 
  10   0  -1    3.20    8.70 
 -10   0   1   -7.60    8.00 
  10   0  -1   -6.00    9.60 
 -10   0   1   13.40   15.50 
  10   0  -1   -0.90   11.80 
 -10   0   1    2.10   10.40 
  10   0  -1    9.90   12.10 
  10   0  -1   -0.50   11.10 
  10   0  -1   19.40   13.30 
  10   0  -1  -12.00    8.10 
  10   0  -1   -3.90   12.60 
 -10   0   1  -12.70    7.90 
  10   0  -1   10.70   14.50 
  10   0  -1    5.00   10.70 
  -9   0   1  303.47   35.00 
   9   0  -1  306.37   27.90 
  -9   0   1  324.07   31.10 
   9   0  -1  303.87   30.00 
  -9   0   1  368.86   29.00 
   9   0  -1  334.77   33.60 
   9   0  -1  296.07   24.50 
  -9   0   1  321.17   30.20 
   9   0  -1  334.67   29.90 
  -9   0   1  293.17   22.50 
   9   0  -1  326.77   31.50 
   9   0  -1  311.07   22.90 
   9   0  -1  333.47   32.90 
   9   0  -1  319.67   29.50 
   9   0  -1  295.97   32.90 
   9   0  -1  333.17   26.50 
  -9   0   1  291.27   23.20 
  -9   0   1  296.47   32.70 
   9   0  -1  310.47   38.70 
   9   0  -1  313.97   31.20 
  -9   0   1  294.27   24.20 
  -8   0   1    0.80   10.10 
   8   0  -1  -10.00    8.20 
   8   0  -1    1.30    6.50 
  -8   0   1   -8.90    6.90 
   8   0  -1   -7.20    8.00 
   8   0  -1   15.70    9.80 
  -8   0   1   -6.80    6.60 
  -8   0   1    3.00    7.00 
   8   0  -1   10.70    8.50 
   8   0  -1   -1.40    6.60 
  -8   0   1   -3.10    7.40 
   8   0  -1    9.50    9.20 
  -8   0   1    0.20    9.00 
   8   0  -1   -0.10    8.90 
  -8   0   1    2.10    5.90 
   8   0  -1    6.00   11.30 
   8   0  -1   -0.10    9.40 
  -8   0   1    2.90    7.70 
   8   0  -1   -3.00    6.10 
   8   0  -1   -7.80    7.50 
   8   0  -1   15.90    9.70 
  -8   0   1   -6.00    6.10 
   7   0  -1   12.50    7.80 
  -7   0   1   16.70   11.00 
   7   0  -1   25.10    8.80 
  -7   0   1   15.90    7.00 
  -7   0   1   19.10    6.50 
   7   0  -1   23.50    9.50 
   7   0  -1   24.50   11.20 
   7   0  -1   19.30    7.50 
  -7   0   1   19.40    7.40 
  -7   0   1   16.20    8.20 
  -7   0   1   17.70    6.50 
  -7   0   1   22.40    5.00 
   7   0  -1   22.70   11.60 
  -7   0   1    6.40   10.10 
   7   0  -1   22.30    9.40 
  -7   0   1   35.80   11.30 
   7   0  -1   -3.00    7.40 
  -7   0   1   25.80    9.70 
   7   0  -1   31.50    9.70 
   7   0  -1   16.40    6.80 
  -7   0   1   17.00    7.90 
   7   0  -1   18.00    6.10 
   7   0  -1    9.20    8.80 
  -7   0   1    8.20    7.80 
   7   0  -1   28.20    7.90 
   7   0  -1   19.70   10.20 
   7   0  -1   23.10    9.90 
   6   0  -1    7.50    8.20 
  -6   0   1    0.30    5.50 
  -6   0   1   -5.50    4.00 
   6   0  -1   -4.10    4.20 
  -6   0   1   -1.90    5.50 
  -6   0   1   -1.30    1.90 
   6   0  -1    3.20    6.30 
   6   0  -1   -6.70    5.30 
   6   0  -1   -6.30    4.00 
  -6   0   1   -3.40    5.40 
  -6   0   1    0.60    4.80 
  -6   0   1   -5.50    6.30 
  -6   0   1   -0.40    3.00 
   6   0  -1   -7.20    5.30 
  -6   0   1   -6.00    6.20 
   6   0  -1   -5.40    7.10 
  -6   0   1    5.20    8.00 
   6   0  -1   -0.30    6.10 
  -6   0   1   -2.10    4.10 
   6   0  -1    0.80    5.70 
   6   0  -1    0.70    6.30 
  -6   0   1    0.80    5.50 
  -6   0   1    5.70    5.30 
   6   0  -1    2.20    2.60 
  -6   0   1    0.00    4.10 
   6   0  -1    0.50    3.70 
   6   0  -1   -1.70    4.70 
   6   0  -1   -3.80    6.50 
   6   0  -1   -2.00    5.80 
  -5   0   1   21.00    8.10 
   5   0  -1    7.00    4.10 
   5   0  -1   12.00    3.30 
  -5   0   1   17.50    6.10 
   5   0  -1   22.80    7.40 
  -5   0   1    9.10    2.20 
   5   0  -1    7.80    5.80 
   5   0  -1   11.50    6.50 
   5   0  -1   11.90    5.40 
  -5   0   1    9.50    5.80 
   5   0  -1    3.30    5.40 
  -5   0   1    2.00    2.50 
  -5   0   1   10.80    4.40 
   5   0  -1    9.50    6.10 
   5   0  -1    8.80    5.50 
   5   0  -1   16.20    6.90 
  -5   0   1    9.30    5.50 
  -5   0   1   12.30    3.50 
   5   0  -1   -0.10    4.10 
  -5   0   1    9.40    5.30 
  -5   0   1   13.90    5.90 
  -5   0   1    7.40    4.00 
  -5   0   1    7.10    6.00 
  -5   0   1    9.20    6.80 
   5   0  -1    8.00    3.40 
   5   0  -1    6.60    4.20 
  -5   0   1    8.80    4.70 
  -5   0   1   11.00    4.90 
  -4   0   1   -5.50    4.60 
  -4   0   1    1.30    3.70 
  -4   0   1   -1.60    1.60 
   4   0  -1   -0.40    4.60 
  -4   0   1   -2.20    3.80 
   4   0  -1    5.70    3.60 
  -4   0   1   -0.20    3.60 
  -4   0   1   -0.10    4.50 
   4   0  -1   -2.00    4.00 
   4   0  -1    3.90    4.00 
   4   0  -1    2.10    3.00 
   4   0  -1    0.10    4.90 
  -4   0   1    0.00    3.20 
  -4   0   1    6.10    2.90 
   4   0  -1    0.50    2.20 
  -4   0   1   -3.10    3.20 
   4   0  -1   -0.10    2.50 
  -4   0   1   11.60    5.10 
   4   0  -1    2.40    3.30 
   4   0  -1   -5.20    4.40 
   4   0  -1    7.70    5.60 
  -4   0   1    3.20    2.60 
  -4   0   1    5.30    3.40 
   4   0  -1    8.30    5.40 
  -4   0   1   -1.20    3.10 
  -4   0   1   -9.30    5.10 
   4   0  -1    4.60    3.60 
   4   0  -1   -0.60    3.00 
  -4   0   1   -3.10    4.10 
  -4   0   1    0.40    2.90 
   4   0  -1   12.90    5.90 
  -4   0   1    9.60    5.10 
  -3   0   1  626.64   26.20 
  -3   0   1  606.54   24.10 
  -3   0   1  581.94   21.50 
  -3   0   1  616.94   29.20 
   3   0  -1  615.34   24.60 
  -3   0   1  616.14   24.90 
   3   0  -1  608.24   26.20 
   3   0  -1  615.24   25.70 
   3   0  -1  625.44   26.50 
  -3   0   1  591.24   25.90 
  -3   0   1  606.14   27.40 
   3   0  -1  607.34   27.40 
   3   0  -1  616.14   24.30 
   3   0  -1  615.44   22.70 
  -3   0   1  558.34   27.00 
  -3   0   1  624.84   27.80 
  -3   0   1  599.74   26.40 
  -3   0   1  614.54   22.80 
  -3   0   1  624.24   24.40 
   3   0  -1  606.04   27.50 
   3   0  -1  618.94   27.20 
   3   0  -1  603.74   24.60 
  -3   0   1  623.74   26.50 
   3   0  -1  586.34   25.80 
  -3   0   1  600.34   25.00 
   3   0  -1  599.54   25.20 
   3   0  -1  592.34   27.60 
  -3   0   1  597.54   26.90 
   3   0  -1  614.44   26.10 
  -3   0   1  587.94   26.40 
  -3   0   1  580.74   24.80 
  -3   0   1  579.94   26.70 
  -3   0   1  599.74   24.10 
  -3   0   1  607.54   26.20 
   3   0  -1  585.84   26.80 
   3   0  -1  619.04   24.00 
  -3   0   1  620.04   25.20 
   3   0  -1  569.54   24.90 
   3   0  -1  598.24   24.70 
  -3   0   1  633.44   24.80 
   3   0  -1  590.44   24.30 
   3   0  -1  603.84   27.30 
  -2   0   1   -4.90    2.30 
   2   0  -1    1.60    1.80 
  -2   0   1    2.50    1.60 
  -2   0   1    0.60    2.00 
   2   0  -1    2.40    2.10 
   2   0  -1    0.20    2.30 
  -2   0   1    2.60    1.30 
  -2   0   1    4.70    2.60 
  -2   0   1    2.90    2.50 
   2   0  -1    2.60    1.70 
   2   0  -1    2.10    2.10 
   2   0  -1    3.00    1.90 
   2   0  -1    1.60    1.70 
  -2   0   1    1.20    2.10 
  -2   0   1    3.70    2.20 
   2   0  -1    1.40    2.00 
  -2   0   1    4.20    2.60 
  -2   0   1    2.90    0.90 
   2   0  -1    1.60    1.70 
   2   0  -1   -0.60    2.40 
   2   0  -1    2.30    2.30 
   2   0  -1    3.90    2.90 
  -2   0   1    1.70    2.10 
   2   0  -1    2.40    1.40 
   2   0  -1    7.10    3.40 
   2   0  -1    5.20    3.10 
  -2   0   1    4.00    2.80 
  -2   0   1    1.00    1.70 
  -2   0   1    2.60    2.00 
  -2   0   1    1.40    1.30 
   2   0  -1    1.50    1.90 
  -2   0   1    2.70    2.30 
  -2   0   1    7.10    2.70 
  -2   0   1    4.80    1.80 
  -2   0   1    4.50    2.30 
  -2   0   1    1.00    2.00 
   2   0  -1   -0.50    1.80 
   2   0  -1    2.50    2.40 
   2   0  -1    3.30    1.30 
  -2   0   1    1.60    1.70 
   2   0  -1    3.50    2.60 
  -2   0   1   -1.40    2.20 
  -2   0   1    4.20    2.50 
   2   0  -1    1.00    2.60 
  -2   0   1    3.70    2.70 
   2   0  -1    8.40    3.50 
   2   0  -1    3.40    3.00 
   1   0  -1  334.47   12.60 
   1   0  -1  379.66   13.30 
   1   0  -1  386.16   13.30 
   1   0  -1  333.67   13.90 
   1   0  -1  395.56   12.80 
   1   0  -1  381.26   12.90 
   1   0  -1  389.96   12.60 
   1   0  -1  299.07   13.60 
   1   0  -1  381.66   12.60 
   1   0  -1  330.17   13.70 
   1   0  -1  348.77   13.70 
   1   0  -1  288.27   13.80 
   1   0  -1  365.26   13.10 
   1   0  -1  287.47   13.70 
   1   0  -1  380.36   12.70 
  -1   0  -1 1758.02   55.29 
   1   0   1 1568.74   56.39 
   1   0   1 1416.76   57.09 
  -1   0  -1 1658.33   58.19 
  -1   0  -1 1755.32   56.59 
  -1   0  -1 1340.47   56.59 
   1   0   1 1732.73   56.49 
   1   0   1 1534.85   56.59 
   1   0   1 1341.27   56.39 
   1   0   1 1570.74   56.69 
  -1   0  -1 1791.92   56.19 
   1   0   1 1613.14   56.99 
  -1   0  -1 1765.42   57.09 
  -1   0  -1 1753.82   57.79 
   1   0   1 1770.22   55.99 
   1   0   1 1625.34   55.99 
  -1   0  -1 1720.33   57.59 
  -1   0  -1 1608.84   57.59 
  -1   0  -1 1710.33   57.39 
  -2   0  -1    8.00    3.10 
  -2   0  -1    4.10    3.40 
  -2   0  -1    6.10    2.40 
  -2   0  -1    4.20    2.60 
  -2   0  -1    1.20    2.00 
   2   0   1    1.50    2.40 
   2   0   1    3.60    1.60 
   2   0   1    1.60    2.40 
  -2   0  -1    4.00    2.30 
  -2   0  -1    0.10    1.50 
  -2   0  -1    3.90    2.30 
  -2   0  -1    0.30    2.70 
   2   0   1    2.40    1.80 
  -2   0  -1    0.20    2.00 
  -2   0  -1    1.00    1.30 
  -2   0  -1    5.70    2.80 
  -2   0  -1    1.00    1.70 
  -2   0  -1    2.20    1.90 
   2   0   1    3.00    2.70 
   2   0   1    4.70    3.30 
  -2   0  -1    4.70    2.60 
   2   0   1    3.20    2.20 
  -2   0  -1    3.60    1.40 
   2   0   1    1.30    2.80 
  -2   0  -1    4.60    2.90 
  -2   0  -1    2.10    2.50 
   2   0   1    2.70    2.10 
   2   0   1    6.30    2.70 
   2   0   1    3.90    2.10 
   2   0   1    5.50    2.70 
  -2   0  -1    8.20    2.50 
   2   0   1    4.20    3.30 
   2   0   1    6.40    2.60 
   2   0   1    7.10    3.30 
   2   0   1    3.30    2.60 
   2   0   1    0.20    2.50 
   2   0   1   10.40    3.40 
  -2   0  -1    2.80    2.10 
   2   0   1    0.80    1.80 
   2   0   1    5.20    3.10 
  -2   0  -1   -1.10    2.20 
   2   0   1    7.30    2.50 
  -2   0  -1    0.00    1.90 
  -2   0  -1   -0.10    1.50 
  -2   0  -1    2.30    1.30 
  -2   0  -1    0.80    2.70 
   2   0   1    5.60    1.40 
  -2   0  -1    1.20    2.60 
  -2   0  -1    1.50    1.60 
   2   0   1    0.10    1.70 
   2   0   1    3.10    2.10 
  -2   0  -1    4.10    3.40 
   3   0   1  101.79    6.70 
  -3   0  -1  100.69    8.00 
  -3   0  -1   95.09    8.20 
  -3   0  -1   87.49    4.90 
   3   0   1   89.29    8.70 
   3   0   1   92.69    6.90 
  -3   0  -1   91.79    5.50 
  -3   0  -1   93.79    9.10 
   3   0   1   94.39    9.70 
  -3   0  -1  109.89    9.10 
   3   0   1   79.69    9.10 
   3   0   1   85.19    9.80 
   3   0   1   95.39   10.00 
  -3   0  -1   97.49    8.70 
   3   0   1   98.69    8.30 
  -3   0  -1  107.49   11.90 
   3   0   1  101.29    8.40 
  -3   0  -1   99.49   10.20 
  -3   0  -1   99.49    6.90 
  -3   0  -1   95.19    6.70 
  -3   0  -1   89.39    8.30 
  -3   0  -1   79.59    9.40 
  -3   0  -1  101.29    9.30 
   3   0   1   98.89    8.80 
   3   0   1  109.59    7.00 
  -3   0  -1   99.89   11.40 
  -3   0  -1  100.89    6.90 
   3   0   1   96.59    5.20 
   3   0   1   96.59    8.50 
   3   0   1   98.69   10.30 
  -3   0  -1  100.89   10.20 
  -3   0  -1   85.59    8.30 
   3   0   1  106.59    9.30 
  -3   0  -1  104.49    5.50 
  -3   0  -1  102.49    8.00 
  -3   0  -1   92.29    9.80 
   3   0   1  116.39    8.80 
   3   0   1   80.39    8.50 
  -3   0  -1  100.79    9.70 
  -3   0  -1   93.29    6.30 
   3   0   1   93.89    7.70 
  -3   0  -1   93.19    7.60 
   3   0   1  124.19   11.60 
   3   0   1   96.39    7.70 
   3   0   1  116.19    8.30 
  -3   0  -1   99.49    8.00 
  -4   0  -1    4.50    4.60 
  -4   0  -1    1.00    2.50 
  -4   0  -1    1.30    2.00 
  -4   0  -1   -2.30    4.30 
   4   0   1   -5.70    4.60 
   4   0   1    5.40    4.90 
  -4   0  -1   -0.80    1.90 
  -4   0  -1    0.70    3.10 
  -4   0  -1    1.80    3.30 
  -4   0  -1    1.40    4.00 
  -4   0  -1    7.50    4.50 
   4   0   1    1.50    2.80 
   4   0   1    3.40    4.10 
  -4   0  -1    0.90    2.10 
   4   0   1    1.50    3.90 
  -4   0  -1   -1.80    2.80 
   4   0   1    1.70    4.80 
   4   0   1    3.20    3.70 
  -4   0  -1   -4.60    5.60 
   4   0   1    1.70    3.10 
   4   0   1   -3.30    3.50 
  -4   0  -1    1.80    5.80 
  -4   0  -1   -1.80    3.50 
  -4   0  -1   -1.20    2.70 
   4   0   1    5.60    5.40 
  -4   0  -1    5.40    4.30 
  -4   0  -1   -5.10    3.90 
  -4   0  -1    1.10    3.40 
   4   0   1    1.80    4.70 
   4   0   1   -3.20    2.50 
   4   0   1   -5.10    3.90 
   4   0   1   -2.60    4.70 
   5   0   1   93.69   10.20 
  -5   0  -1   99.09    7.10 
  -5   0  -1  123.09   12.10 
  -5   0  -1  113.09   14.80 
   5   0   1  124.89   12.90 
  -5   0  -1   94.69    8.90 
   5   0   1  102.19   12.90 
  -5   0  -1  103.39    6.40 
   5   0   1   94.49   15.10 
  -5   0  -1  113.29    9.10 
   5   0   1  105.99   13.70 
  -5   0  -1   94.99   10.30 
   5   0   1   97.49    9.10 
   5   0   1   94.09   12.00 
  -5   0  -1   65.29    9.50 
  -5   0  -1   91.79   12.90 
   5   0   1  108.89   13.30 
   5   0   1  108.89   13.80 
   5   0   1  118.19   11.80 
   5   0   1   92.99   11.30 
  -5   0  -1   89.09    7.80 
  -5   0  -1  105.99   15.50 
  -5   0  -1  123.29   13.70 
   5   0   1  103.59   13.70 
  -5   0  -1  109.29   12.50 
  -5   0  -1  113.29   10.20 
   5   0   1   97.99   10.80 
   5   0   1  112.79   12.30 
  -5   0  -1   94.69   11.50 
   5   0   1  105.49   10.70 
   6   0   1    0.50    5.50 
  -6   0  -1   -3.70    3.60 
   6   0   1   -3.00    4.20 
  -6   0  -1    3.70    5.40 
   6   0   1    6.20    6.40 
   6   0   1   -1.00    3.60 
  -6   0  -1    1.70    5.90 
   6   0   1    3.90    5.50 
  -6   0  -1    5.70    5.60 
  -6   0  -1   -0.70    1.90 
   6   0   1   -0.20    6.50 
   6   0   1   -2.20    5.40 
   6   0   1    1.00    5.20 
   6   0   1    2.00    5.60 
  -6   0  -1   -0.90    3.00 
  -6   0  -1    4.30    4.90 
  -6   0  -1    1.50    2.80 
   6   0   1    2.10    5.10 
  -6   0  -1   -6.70    4.70 
  -6   0  -1   -2.00    5.60 
   6   0   1   -4.70    6.10 
  -6   0  -1    2.80    4.30 
  -6   0  -1   -2.80    3.30 
  -6   0  -1    4.00    8.60 
   6   0   1    2.20    5.70 
  -6   0  -1    3.60    6.70 
  -6   0  -1    0.60    4.90 
   6   0   1    3.80    7.10 
   6   0   1   -0.30    6.10 
   6   0   1   -1.80    4.30 
   7   0   1 2247.38   88.49 
   7   0   1 2201.68   84.69 
   7   0   1 2179.48   91.29 
   7   0   1 2135.19   91.49 
  -7   0  -1 2220.28   85.59 
  -7   0  -1 2241.78   81.39 
   7   0   1 2133.79   92.59 
  -7   0  -1 2167.98   88.79 
   7   0   1 2190.18   89.39 
   7   0   1 2105.69   87.49 
  -7   0  -1 2198.68   98.19 
  -7   0  -1 2210.38   96.39 
   7   0   1 2341.37   86.89 
   7   0   1 2233.38   99.89 
   7   0   1 2148.69   85.29 
  -7   0  -1 2234.48   90.39 
   7   0   1 2134.59   92.49 
   7   0   1 2193.38   84.89 
  -7   0  -1 2160.68   82.99 
   7   0   1 2153.08   89.19 
  -7   0  -1 2234.48   87.59 
  -7   0  -1 2003.20   88.19 
   7   0   1 2243.68   88.09 
  -7   0  -1 2142.59   92.09 
   7   0   1 2157.08   86.69 
  -7   0  -1 2084.69   85.99 
  -7   0  -1 2209.78   92.09 
   8   0   1  -12.20    7.50 
   8   0   1    7.20    8.90 
   8   0   1   -9.90    8.20 
  -8   0  -1   -3.20    6.80 
   8   0   1   -2.80    6.50 
   8   0   1   -0.70   10.40 
  -8   0  -1   12.30    9.10 
  -8   0  -1   -6.30    5.90 
   8   0   1   -9.20    7.20 
  -8   0  -1  -10.30    9.60 
   8   0   1    6.70    7.60 
   8   0   1   -0.60    5.80 
   8   0   1   -0.40    6.90 
  -8   0  -1    2.80    6.20 
  -8   0  -1   -5.50    9.30 
   8   0   1   -3.10    9.30 
  -8   0  -1    5.50    8.30 
  -8   0  -1    4.30    6.60 
  -8   0  -1    0.90    7.10 
   8   0   1   -5.40    6.20 
  -8   0  -1   -0.60    6.90 
  -8   0  -1   -1.80    7.90 
   8   0   1    5.80    9.10 
   8   0   1   -6.90    6.90 
   8   0   1   -0.30    5.00 
   8   0   1    1.70    7.20 
   8   0   1    5.20    9.10 
   9   0   1  467.95   37.40 
  -9   0  -1  487.25   34.50 
   9   0   1  484.35   40.80 
   9   0   1  438.56   30.60 
   9   0   1  483.65   30.30 
  -9   0  -1  455.95   40.60 
  -9   0  -1  522.55   39.10 
  -9   0  -1  573.94   38.10 
  -9   0  -1  454.35   29.90 
   9   0   1  521.55   39.60 
   9   0   1  421.96   34.80 
   9   0   1  485.25   30.90 
   9   0   1  421.76   41.20 
   9   0   1  452.15   33.40 
  -9   0  -1  483.35   31.70 
   9   0   1  541.35   39.50 
   9   0   1  495.25   33.10 
  -9   0  -1  546.65   35.80 
   9   0   1  431.96   34.00 
   9   0   1  524.15   34.30 
   9   0   1  452.55   33.50 
  -9   0  -1  505.55   49.60 
 -10   0  -1    2.30   13.00 
  10   0   1    5.00   10.90 
 -10   0  -1    0.50    8.70 
 -10   0  -1   -8.40    7.10 
  10   0   1  -10.50   12.60 
  10   0   1    5.10   14.30 
  10   0   1   -1.90   11.70 
  10   0   1   -6.30    9.30 
 -10   0  -1   -8.10    8.60 
  10   0   1   -0.40   10.90 
  10   0   1  -14.70   10.20 
  10   0   1   -8.70    8.30 
  10   0   1  -15.80   10.30 
  10   0   1    3.40   10.80 
 -10   0  -1    6.00   10.20 
 -10   0  -1   -9.20   12.80 
 -10  -1   1  684.73   44.10 
  10  -1  -1  654.93   48.20 
 -10  -1   1  694.63   51.69 
  10  -1  -1  612.94   38.60 
 -10  -1   1  650.43   43.10 
 -10  -1   1  780.62   51.29 
  10  -1  -1  620.34   53.99 
  10  -1  -1  654.43   43.30 
  10  -1  -1  660.63   47.70 
  10  -1  -1  674.63   45.10 
 -10  -1   1  652.63   40.40 
  10  -1  -1  675.93   43.40 
  10  -1  -1  644.64   45.10 
 -10  -1   1  777.62   46.00 
  10  -1  -1  638.94   45.40 
  10  -1  -1  621.54   40.10 
  10  -1  -1  610.94   40.50 
  10  -1  -1  667.63   50.19 
 -10   1   1  636.04   51.19 
  10   1  -1  730.53   48.40 
  10   1  -1  627.64   53.69 
  10   1  -1  637.64   43.80 
 -10   1   1  635.54   45.10 
 -10   1   1  547.55   40.90 
  10   1  -1  671.63   43.60 
  10   1  -1  619.84   46.90 
  10   1  -1  671.53   42.10 
  10   1  -1  815.52   49.70 
  10   1  -1  714.03   47.80 
  10   1  -1  659.63   48.90 
  10   1  -1  617.44   46.90 
 -10   1   1  723.23   45.60 
  10   1  -1  646.94   41.60 
 -10   1   1  689.23   48.60 
  10   1  -1  680.33   40.30 
   9  -1  -1   -7.40    9.80 
   9  -1  -1   -8.00    6.80 
  -9  -1   1   -0.90    7.50 
  -9  -1   1    9.00    8.20 
  -9  -1   1    9.60   10.00 
   9  -1  -1   20.20   12.00 
   9  -1  -1   20.80    9.60 
   9  -1  -1   -0.80    8.00 
   9  -1  -1   21.50   11.30 
  -9  -1   1   14.50   13.20 
  -9  -1   1   -2.10    6.70 
   9  -1  -1   11.90    9.70 
   9  -1  -1    5.30    8.80 
   9  -1  -1    0.70   10.20 
   9  -1  -1   15.20   12.90 
  -9  -1   1   16.20   10.70 
   9  -1  -1   16.50   12.10 
  -9  -1   1   29.30   10.20 
  -9  -1   1   -3.60   10.50 
   9  -1  -1   26.00   12.50 
   9  -1  -1   11.20    8.80 
   9   1  -1    0.10   10.00 
  -9   1   1   22.80    9.60 
  -9   1   1    5.00    7.10 
   9   1  -1   19.90   11.40 
  -9   1   1   15.20    8.90 
   9   1  -1    8.20   11.10 
   9   1  -1   24.50   10.50 
  -9   1   1    8.20    9.40 
   9   1  -1   11.50    8.30 
   9   1  -1    4.20   10.00 
  -9   1   1    4.00   10.20 
   9   1  -1    8.50    9.00 
   9   1  -1   20.00   11.40 
  -9   1   1   18.40   11.60 
  -9   1   1    2.90   10.90 
   9   1  -1   10.90   12.10 
   9   1  -1    6.90    9.90 
   9   1  -1   10.00   11.60 
   9   1  -1   -1.20   10.20 
  -9   1   1    3.00    9.10 
  -8  -1   1  258.27   19.40 
  -8  -1   1  268.47   25.80 
   8  -1  -1  266.37   21.10 
   8  -1  -1  242.18   27.10 
   8  -1  -1  227.58   24.20 
  -8  -1   1  273.57   20.30 
   8  -1  -1  309.47   22.00 
  -8  -1   1  270.27   21.80 
   8  -1  -1  257.57   32.90 
   8  -1  -1  251.97   25.40 
  -8  -1   1  258.37   21.90 
   8  -1  -1  290.37   29.20 
  -8  -1   1  318.67   31.00 
  -8  -1   1  204.08   28.30 
   8  -1  -1  232.78   23.10 
  -8  -1   1  275.67   26.10 
  -8  -1   1  269.67   25.90 
   8  -1  -1  269.77   29.40 
   8  -1  -1  234.68   25.20 
   8  -1  -1  301.57   30.20 
   8  -1  -1  273.07   22.30 
   8  -1  -1  270.77   24.80 
  -8  -1   1  255.17   19.80 
   8  -1  -1  293.87   19.50 
  -8  -1   1  252.97   29.30 
  -8   1   1  278.57   21.10 
  -8   1   1  254.07   19.00 
   8   1  -1  269.77   20.80 
   8   1  -1  273.97   19.90 
   8   1  -1  239.88   31.80 
   8   1  -1  277.77   27.70 
   8   1  -1  261.87   24.30 
   8   1  -1  288.87   30.10 
   8   1  -1  257.77   20.50 
  -8   1   1  237.08   30.20 
  -8   1   1  270.27   20.50 
  -8   1   1  256.07   28.00 
   8   1  -1  259.47   28.10 
   8   1  -1  237.98   26.40 
   8   1  -1  277.57   26.70 
  -8   1   1  266.37   26.00 
  -8   1   1  303.57   23.90 
   8   1  -1  293.77   29.50 
  -8   1   1  268.37   28.60 
   8   1  -1  251.47   26.50 
   8   1  -1  296.07   22.90 
   7  -1  -1   96.99   17.10 
   7  -1  -1   53.89   13.60 
  -7  -1   1   65.09   12.70 
   7  -1  -1   57.69   11.60 
   7  -1  -1   74.09   10.20 
  -7  -1   1   84.49   12.90 
  -7  -1   1   61.19   12.20 
  -7  -1   1   80.09   14.60 
   7  -1  -1   69.49   11.80 
  -7  -1   1   68.69   10.40 
  -7  -1   1   74.49   12.80 
   7  -1  -1   99.69   20.10 
  -7  -1   1   50.39   13.80 
  -7  -1   1   59.99   10.40 
   7  -1  -1   34.00   10.70 
   7  -1  -1   60.39   10.80 
  -7  -1   1   66.09    9.00 
   7  -1  -1   60.09   10.50 
  -7  -1   1   56.79   14.60 
  -7  -1   1   68.79   10.80 
   7  -1  -1   55.79   14.00 
   7  -1  -1   73.19   14.00 
   7  -1  -1   86.69   14.00 
  -7  -1   1   53.49   10.50 
  -7   1   1   65.09   10.60 
   7   1  -1   59.09   10.90 
   7   1  -1   56.19   12.60 
   7   1  -1   60.39   13.40 
   7   1  -1   61.69   11.70 
   7   1  -1   70.99   14.50 
   7   1  -1   61.89   14.70 
  -7   1   1   74.59    7.00 
   7   1  -1   63.79   10.30 
  -7   1   1   83.59   13.50 
   7   1  -1   64.09    9.60 
   7   1  -1   69.69   12.10 
  -7   1   1   79.39   16.50 
  -7   1   1   47.20   12.90 
  -7   1   1   80.89   11.80 
   7   1  -1   74.89   14.60 
   7   1  -1   44.50   10.90 
  -7   1   1   74.79   13.50 
  -7   1   1   62.79    9.70 
  -7   1   1   55.79   13.30 
  -7   1   1   63.59   12.10 
   7   1  -1   78.69   14.40 
   7   1  -1   61.39   13.80 
  -6  -1   1 1635.84   67.09 
   6  -1  -1 1624.04   65.09 
   6  -1  -1 1598.34   64.29 
   6  -1  -1 1675.83   70.79 
   6  -1  -1 1627.84   70.49 
   6  -1  -1 1573.64   75.49 
  -6  -1   1 1576.04   64.49 
  -6  -1   1 1603.34   64.89 
  -6  -1   1 1607.74   63.09 
  -6  -1   1 1594.24   63.09 
  -6  -1   1 1523.75   66.09 
  -6  -1   1 1663.93   72.79 
  -6  -1   1 1612.44   56.29 
  -6  -1   1 1661.53   69.99 
   6  -1  -1 1544.35   65.99 
  -6  -1   1 1587.04   60.79 
   6  -1  -1 1509.95   66.69 
   6  -1  -1 1600.04   64.29 
   6  -1  -1 1547.15   65.29 
   6  -1  -1 1617.84   62.29 
  -6  -1   1 1616.34   62.99 
  -6  -1   1 1595.04   66.89 
   6  -1  -1 1551.04   68.49 
   6  -1  -1 1534.25   69.49 
  -6   1   1 1737.43   70.59 
   6   1  -1 1580.64   64.69 
  -6   1   1 1614.44   57.09 
   6   1  -1 1699.23   66.79 
   6   1  -1 1557.74   67.79 
   6   1  -1 1528.55   67.49 
   6   1  -1 1557.64   68.59 
   6   1  -1 1628.74   62.09 
  -6   1   1 1573.74   66.39 
  -6   1   1 1607.14   69.69 
  -6   1   1 1556.04   72.49 
  -6   1   1 1651.33   62.89 
   6   1  -1 1581.14   69.09 
  -6   1   1 1567.34   61.79 
   6   1  -1 1574.14   65.29 
  -6   1   1 1591.94   57.19 
   6   1  -1 1691.13   69.69 
   6   1  -1 1540.55   66.39 
   6   1  -1 1569.74   62.79 
  -6   1   1 1599.14   63.79 
   6   1  -1 1569.24   63.69 
  -6   1   1 1621.04   67.19 
  -6   1   1 1501.95   65.09 
  -5  -1   1  337.77   19.40 
  -5  -1   1  356.76   17.30 
   5  -1  -1  305.27   22.50 
  -5  -1   1  341.87   24.30 
   5  -1  -1  336.27   20.20 
   5  -1  -1  327.77   19.50 
  -5  -1   1  355.06   20.90 
   5  -1  -1  361.96   23.50 
   5  -1  -1  331.37   17.90 
  -5  -1   1  297.57   17.70 
  -5  -1   1  339.37   18.80 
   5  -1  -1  324.17   25.50 
   5  -1  -1  333.87   19.30 
  -5  -1   1  344.27   14.00 
  -5  -1   1  329.57   17.30 
  -5  -1   1  352.56   19.90 
  -5  -1   1  328.27   18.20 
   5  -1  -1  332.67   20.90 
   5  -1  -1  326.37   19.00 
   5  -1  -1  334.07   21.60 
  -5  -1   1  314.17   22.10 
   5  -1  -1  301.27   22.40 
  -5  -1   1  312.27   19.90 
   5  -1  -1  321.67   19.90 
  -5  -1   1  330.07   20.50 
  -5  -1   1  354.96   18.70 
  -5   1   1  320.77   14.10 
   5   1  -1  314.47   18.40 
  -5   1   1  301.27   21.80 
  -5   1   1  318.37   20.40 
  -5   1   1  303.37   14.30 
   5   1  -1  338.97   20.10 
   5   1  -1  322.37   14.00 
  -5   1   1  334.87   18.90 
   5   1  -1  316.87   20.50 
   5   1  -1  321.07   19.00 
  -5   1   1  312.67   19.90 
   5   1  -1  324.77   18.10 
  -5   1   1  337.17   17.50 
  -5   1   1  346.67   17.90 
  -5   1   1  321.47   19.50 
  -5   1   1  322.37   13.50 
   5   1  -1  307.47   16.20 
   5   1  -1  354.96   22.00 
   5   1  -1  324.67   21.80 
   5   1  -1  315.87   21.80 
   5   1  -1  356.56   22.10 
  -5   1   1  350.16   23.10 
   5   1  -1  307.27   17.10 
   5   1  -1  328.67   22.10 
  -5   1   1  320.47   24.00 
   5   1  -1  319.57   20.20 
   4  -1  -1 5399.16  192.08 
   4  -1  -1 5623.84  191.18 
  -4  -1   1 5661.73  190.18 
  -4  -1   1 5554.74  189.28 
   4  -1  -1 5502.05  195.88 
  -4  -1   1 5507.75  191.18 
  -4  -1   1 5537.85  189.18 
   4  -1  -1 5662.93  187.18 
   4  -1  -1 5593.94  191.88 
   4  -1  -1 5469.35  188.88 
  -4  -1   1 5486.15  195.88 
  -4  -1   1 5519.35  189.98 
  -4  -1   1 5549.24  192.58 
  -4  -1   1 5366.16  185.08 
   4  -1  -1 5548.84  186.68 
   4  -1  -1 5413.86  188.58 
  -4  -1   1 5463.55  185.88 
   4  -1  -1 5534.45  199.58 
   4  -1  -1 5547.25  191.58 
  -4  -1   1 5189.98  190.18 
  -4  -1   1 5397.86  190.38 
   4  -1  -1 5548.15  195.78 
   4  -1  -1 5518.35  191.08 
   4  -1  -1 5551.04  193.98 
   4  -1  -1 5282.77  194.48 
  -4  -1   1 5564.54  190.08 
   4  -1  -1 5444.25  189.78 
   4  -1  -1 5618.64  191.58 
  -4  -1   1 5536.85  192.88 
  -4  -1   1 5495.45  191.28 
  -4  -1   1 5485.85  192.48 
  -4  -1   1 5429.16  188.68 
  -4  -1   1 5530.65  194.38 
   4   1  -1 5503.05  193.18 
   4   1  -1 5439.06  185.78 
  -4   1   1 5551.74  188.98 
  -4   1   1 5495.55  185.48 
  -4   1   1 5556.64  185.78 
  -4   1   1 5470.65  186.78 
   4   1  -1 5287.77  191.68 
  -4   1   1 5417.46  194.18 
   4   1  -1 5524.45  188.78 
  -4   1   1 5548.74  188.98 
   4   1  -1 5521.65  190.88 
   4   1  -1 5493.45  191.68 
  -4   1   1 5385.06  186.08 
  -4   1   1 5582.94  185.68 
   4   1  -1 5389.36  193.98 
   4   1  -1 5139.39  191.08 
   4   1  -1 5507.85  193.28 
   4   1  -1 5549.04  189.68 
  -4   1   1 5487.95  197.28 
   4   1  -1 5476.85  194.28 
   4   1  -1 5346.37  188.18 
   4   1  -1 5449.25  189.48 
  -4   1   1 5442.06  192.18 
  -4   1   1 5565.44  190.48 
  -4   1   1 5443.26  191.78 
   4   1  -1 5558.74  190.08 
  -4   1   1 5478.75  191.18 
   4   1  -1 5404.86  190.28 
  -4   1   1 5401.66  195.08 
   4   1  -1 5591.44  192.78 
   4   1  -1 5614.24  194.28 
   3  -1  -1  380.96   18.50 
  -3  -1   1  366.46   19.60 
   3  -1  -1  405.16   20.20 
  -3  -1   1  375.66   14.90 
  -3  -1   1  406.66   19.70 
  -3  -1   1  369.56   20.50 
  -3  -1   1  393.86   18.60 
  -3  -1   1  386.16   17.50 
   3  -1  -1  379.36   21.20 
   3  -1  -1  375.66   18.40 
  -3  -1   1  392.46   15.40 
   3  -1  -1  386.26   18.10 
   3  -1  -1  369.26   18.40 
   3  -1  -1  364.96   18.70 
   3  -1  -1  388.16   21.00 
  -3  -1   1  375.56   17.00 
   3  -1  -1  400.76   16.90 
   3  -1  -1  405.86   23.20 
  -3  -1   1  397.36   17.80 
   3  -1  -1  384.26   18.70 
  -3  -1   1  387.76   17.80 
  -3  -1   1  398.06   20.10 
   3  -1  -1  348.27   17.70 
   3  -1  -1  381.66   17.60 
   3  -1  -1  384.56   16.40 
  -3  -1   1  376.06   15.00 
   3  -1  -1  367.86   23.60 
  -3  -1   1  389.56   15.10 
  -3  -1   1  379.16   18.40 
   3  -1  -1  407.16   21.10 
  -3  -1   1  375.76   19.30 
   3  -1  -1  383.36   18.70 
  -3  -1   1  365.26   20.10 
  -3  -1   1  395.66   19.30 
  -3  -1   1  365.66   16.60 
  -3  -1   1  376.26   19.10 
  -3  -1   1  409.56   17.40 
   3  -1  -1  386.16   16.50 
  -3  -1   1  385.36   19.20 
  -3  -1   1  388.96   16.70 
   3  -1  -1  383.76   17.60 
  -3  -1   1  372.46   17.40 
  -3   1   1  408.56   18.30 
  -3   1   1  357.06   17.30 
   3   1  -1  406.36   17.30 
   3   1  -1  400.56   20.70 
   3   1  -1  412.56   20.30 
  -3   1   1  386.46   16.60 
   3   1  -1  407.66   16.70 
   3   1  -1  383.86   19.40 
   3   1  -1  393.36   19.40 
   3   1  -1  360.36   14.50 
  -3   1   1  381.96   19.10 
  -3   1   1  387.26   20.40 
   3   1  -1  355.66   17.20 
   3   1  -1  398.26   19.10 
   3   1  -1  390.66   15.20 
  -3   1   1  377.66   17.50 
  -3   1   1  377.96   15.60 
   3   1  -1  383.36   14.30 
   3   1  -1  364.16   19.30 
  -3   1   1  390.46   18.60 
  -3   1   1  383.76   20.90 
   3   1  -1  388.26   19.10 
   3   1  -1  383.76   18.00 
  -3   1   1  404.06   21.50 
  -3   1   1  374.26   18.60 
  -3   1   1  386.96   20.20 
   3   1  -1  378.86   17.20 
  -3   1   1  384.66   22.20 
  -3   1   1  388.06   14.60 
   3   1  -1  345.87   17.10 
   3   1  -1  375.96   17.40 
   3   1  -1  380.86   16.80 
  -3   1   1  398.26   20.70 
   3   1  -1  396.96   19.90 
   3   1  -1  370.86   18.60 
  -3   1   1  373.36   15.70 
   3   1  -1  387.36   14.50 
  -3   1   1  412.06   17.10 
   3   1  -1  393.46   20.40 
  -3   1   1  381.96   18.10 
  -3   1   1  380.46   15.30 
   3   1  -1  381.26   18.90 
   3   1  -1  371.56   18.00 
   3   1  -1  362.96   19.00 
  -2  -1   1  444.96   20.20 
  -2  -1   1  432.46   18.10 
  -2  -1   1  451.45   19.70 
   2  -1  -1  401.46   18.10 
   2  -1  -1  430.56   16.80 
  -2  -1   1  438.16   19.10 
   2  -1  -1  464.35   21.40 
   2  -1  -1  440.06   18.00 
  -2  -1   1  432.46   18.00 
   2  -1  -1  446.26   21.90 
   2  -1  -1  404.16   21.80 
  -2  -1   1  428.96   19.00 
   2  -1  -1  440.56   18.80 
   2  -1  -1  465.85   18.30 
  -2  -1   1  444.06   17.50 
  -2  -1   1  493.25   19.30 
  -2  -1   1  424.56   19.70 
   2  -1  -1  437.36   18.80 
  -2  -1   1  445.56   19.90 
  -2  -1   1  423.26   19.40 
  -2  -1   1  433.16   17.10 
   2  -1  -1  461.85   21.30 
   2  -1  -1  449.76   23.40 
   2  -1  -1  438.86   20.00 
  -2  -1   1  444.56   19.20 
   2  -1  -1  434.46   19.20 
   2  -1  -1  422.86   18.40 
  -2  -1   1  437.26   21.40 
   2  -1  -1  457.45   20.70 
   2  -1  -1  432.36   20.80 
  -2  -1   1  418.36   18.20 
  -2  -1   1  422.96   19.40 
   2  -1  -1  447.76   18.40 
  -2  -1   1  432.36   17.70 
  -2  -1   1  437.86   18.20 
  -2  -1   1  435.06   16.80 
  -2  -1   1  427.76   18.80 
  -2  -1   1  447.96   19.40 
   2  -1  -1  414.56   18.20 
  -2  -1   1  431.86   17.10 
  -2  -1   1  478.85   20.20 
  -2  -1   1  438.16   17.00 
   2  -1  -1  446.46   21.50 
  -2  -1   1  435.26   19.20 
  -2   1   1  428.56   17.40 
   2   1  -1  436.26   16.90 
   2   1  -1  440.86   18.90 
   2   1  -1  422.06   18.00 
   2   1  -1  468.85   20.20 
   2   1  -1  436.36   18.00 
   2   1  -1  437.76   19.00 
   2   1  -1  463.75   19.80 
   2   1  -1  434.86   18.40 
  -2   1   1  410.86   16.90 
   2   1  -1  429.16   19.00 
   2   1  -1  444.36   19.20 
   2   1  -1  415.66   18.50 
   2   1  -1  457.95   19.70 
  -2   1   1  442.96   20.30 
  -2   1   1  407.56   21.50 
  -2   1   1  441.26   21.10 
  -2   1   1  446.56   18.30 
   2   1  -1  447.06   16.80 
  -2   1   1  425.16   18.30 
   2   1  -1  469.45   20.20 
  -2   1   1  403.06   19.70 
   2   1  -1  440.56   20.40 
   2   1  -1  431.36   19.20 
  -2   1   1  428.66   17.30 
   2   1  -1  434.66   16.80 
   2   1  -1  441.56   21.20 
  -2   1   1  447.46   20.30 
  -2   1   1  427.16   21.90 
  -2   1   1  419.06   17.90 
  -2   1   1  391.36   20.40 
   2   1  -1  431.16   18.10 
  -2   1   1  438.56   17.40 
  -2   1   1  454.45   18.10 
  -2   1   1  435.26   18.80 
  -2   1   1  449.56   18.50 
   2   1  -1  460.65   19.50 
   2   1  -1  416.06   16.50 
   2   1  -1  452.25   19.70 
   1  -1  -1   20.20    4.00 
  -1  -1   1   16.90    3.00 
   1  -1  -1   17.20    3.60 
   1  -1  -1   21.70    4.40 
   1  -1  -1   21.90    4.00 
   1  -1  -1   24.20    2.50 
   1  -1  -1   22.30    2.90 
   1  -1  -1   21.80    3.20 
  -1  -1   1   18.20    3.80 
   1  -1  -1   24.00    4.80 
   1  -1  -1   25.10    5.40 
  -1  -1   1   19.00    3.40 
  -1  -1   1   16.50    3.00 
   1  -1  -1   18.40    2.60 
  -1  -1   1   20.90    3.50 
  -1  -1   1   23.90    3.40 
   1  -1  -1   19.90    3.60 
  -1  -1   1   22.10    3.70 
  -1  -1   1   29.70    4.00 
  -1  -1   1   29.10    4.40 
   1  -1  -1   13.70    3.60 
   1  -1  -1   24.00    2.60 
  -1  -1   1   21.20    3.30 
  -1  -1   1   16.80    2.70 
   1  -1  -1   21.20    2.40 
   1  -1  -1   26.40    3.30 
   1  -1  -1   22.00    3.10 
  -1  -1   1   18.90    3.30 
   1   1  -1   17.60    2.90 
   1   1  -1   19.90    3.70 
   1   1  -1   16.40    3.20 
   1   1  -1   16.10    2.90 
  -1   1   1   21.40    3.40 
  -1   1   1   22.50    3.00 
   1   1  -1   23.40    3.00 
  -1   1   1   24.00    3.30 
  -1   1   1   22.80    4.40 
  -1   1   1   26.60    3.20 
   1   1  -1   25.20    3.90 
  -1   1   1   19.20    2.90 
   1   1  -1   29.10    3.90 
  -1   1   1   19.60    3.70 
   1   1  -1   21.80    3.00 
   1   1  -1   17.70    3.40 
   1   1  -1   22.50    3.40 
  -1   1   1   20.20    3.10 
  -1   1   1   20.10    3.80 
   1   1  -1   20.50    3.00 
  -1   1   1   15.00    3.60 
  -1   1   1   22.00    5.30 
   1   1  -1   24.70    2.60 
   1   1  -1   22.00    3.00 
   1   1  -1   23.50    3.80 
   1   1  -1   19.70    3.60 
  -1   1   1   10.50    3.00 
   1   1  -1   18.30    2.90 
   1   1  -1   22.40    2.80 
   1   1  -1   20.80    3.00 
  -1   1   1   16.30    4.30 
   0  -1  -1 3792.52  128.39 
   0  -1  -1 3821.02  125.59 
   0  -1  -1 3823.22  125.99 
   0  -1  -1 4049.59  125.89 
   0   1   1 3617.14  127.79 
   0   1  -1 3670.43  127.29 
   0   1   1 4095.19  127.19 
   0   1  -1 3866.21  128.49 
   0   1  -1 3804.12  127.29 
   0   1   1 3262.27  126.29 
   0   1  -1 3798.52  128.09 
   0   1  -1 3691.83  129.19 
   0   1   1 3988.60  126.89 
   0   1  -1 3912.71  127.09 
   0   1   1 3539.25  126.89 
   0   1   1 3105.19  127.59 
   0   1  -1 3332.57  128.59 
   0   1  -1 3405.86  128.99 
   0   1   1 3930.61  126.79 
   0   1   1 3963.00  127.19 
   0   1   1 3968.90  127.09 
   0   1  -1 3906.11  127.99 
   0   1  -1 3534.75  127.09 
   0   1  -1 3481.55  127.29 
  -1  -1  -1  331.77   13.20 
   1  -1   1  333.67   15.10 
   1  -1   1  327.07   13.80 
  -1  -1  -1  318.47   14.50 
  -1  -1  -1  299.27   14.80 
   1  -1   1  323.67   13.90 
  -1  -1  -1  329.97   14.80 
   1  -1   1  258.97   14.40 
  -1  -1  -1  325.77   15.00 
  -1  -1  -1  313.77   14.10 
   1  -1   1  316.47   13.50 
  -1  -1  -1  344.47   13.70 
  -1  -1  -1  338.87   14.50 
  -1  -1  -1  315.67   13.10 
   1  -1   1  294.07   15.00 
  -1  -1  -1  307.77   14.50 
   1  -1   1  314.27   17.70 
  -1  -1  -1  336.77   14.00 
   1  -1   1  345.87   14.70 
   1  -1   1  350.66   15.30 
   1  -1   1  312.47   14.40 
   1  -1   1  338.47   14.00 
  -1  -1  -1  332.47   13.90 
  -1  -1  -1  353.26   16.90 
   1  -1   1  320.67   13.30 
   1  -1   1  326.77   16.00 
  -1  -1  -1  317.57   13.60 
   1  -1   1  318.97   15.60 
  -1  -1  -1  281.17   13.80 
   1  -1   1  345.47   13.60 
  -1  -1  -1  330.97   13.90 
  -1  -1  -1  329.97   13.70 
  -1   1  -1  332.27   14.00 
  -1   1  -1  325.67   14.80 
   1   1   1  332.77   13.40 
   1   1   1  330.77   17.50 
  -1   1  -1  311.17   14.60 
   1   1   1  321.57   16.10 
   1   1   1  340.67   14.40 
  -1   1  -1  323.07   15.80 
  -1   1  -1  326.57   13.60 
  -1   1  -1  318.47   13.80 
  -1   1  -1  328.87   16.20 
  -1   1  -1  330.57   15.60 
  -1   1  -1  322.97   14.50 
   1   1   1  333.67   13.60 
   1   1   1  315.27   13.70 
   1   1   1  335.17   13.90 
   1   1   1  322.27   14.70 
  -1   1  -1  310.07   13.90 
   1   1   1  355.46   14.90 
   1   1   1  312.57   14.60 
   1   1   1  271.97   14.10 
  -1   1  -1  322.27   14.90 
  -1   1  -1  322.97   15.50 
   1   1   1  323.07   13.60 
  -1   1  -1  305.57   15.10 
   1   1   1  324.17   13.70 
   1   1   1  325.67   13.00 
   1   1   1  306.97   13.70 
   1   1   1  333.37   15.10 
   1   1   1  312.57   13.50 
   1   1   1  307.97   16.40 
  -1   1  -1  318.67   13.20 
   1   1   1  320.97   14.30 
  -1   1  -1  301.07   13.70 
   1   1   1  327.67   13.40 
  -2  -1  -1 8989.50  322.97 
  -2  -1  -1 9172.58  321.57 
   2  -1   1 9414.96  322.87 
   2  -1   1 9350.96  319.67 
  -2  -1  -1 9301.67  319.57 
   2  -1   1 9505.95  320.37 
   2  -1   1 9639.14  318.37 
   2  -1   1 9597.74  320.37 
  -2  -1  -1 9727.23  317.67 
   2  -1   1 9504.25  318.77 
   2  -1   1 9529.45  319.77 
  -2  -1  -1 8962.80  318.87 
  -2  -1  -1 9628.34  319.37 
  -2  -1  -1 9390.56  318.37 
   2  -1   1 9233.08  323.27 
   2  -1   1 9662.53  319.57 
   2  -1   1 9273.77  320.47 
  -2  -1  -1 9840.62  321.47 
  -2  -1  -1 9559.14  319.67 
  -2  -1  -1 9149.38  320.87 
  -2  -1  -1 9735.63  320.37 
   2  -1   1 9999.00  320.37 
  -2  -1  -1 9395.16  319.17 
   2  -1   1 9452.65  323.47 
   2  -1   1 9635.64  319.77 
  -2  -1  -1 9368.76  320.77 
  -2  -1  -1 9036.50  319.57 
  -2  -1  -1 9254.07  318.97 
   2  -1   1 9730.53  319.37 
  -2  -1  -1 9459.55  319.57 
  -2  -1  -1 9271.77  319.57 
  -2  -1  -1 8926.81  320.87 
   2  -1   1 9609.04  322.27 
   2  -1   1 9269.07  319.67 
  -2  -1  -1 9705.83  319.37 
  -2  -1  -1 9317.77  320.97 
  -2  -1  -1 9275.27  319.77 
   2  -1   1 9561.94  318.97 
  -2  -1  -1 9130.69  319.47 
  -2  -1  -1 9587.84  319.67 
  -2  -1  -1 9453.25  317.97 
   2  -1   1 9593.74  322.97 
   2  -1   1 9385.06  318.37 
  -2  -1  -1 9685.23  317.37 
   2  -1   1 9754.52  321.27 
   2  -1   1 9630.24  320.97 
  -2  -1  -1 9037.60  321.17 
  -2  -1  -1 9655.83  320.27 
  -2  -1  -1 9700.53  319.67 
   2   1   1 9449.25  317.57 
  -2   1  -1 9347.46  323.07 
   2   1   1 9487.05  319.07 
  -2   1  -1 9374.16  319.57 
  -2   1  -1 9553.64  322.77 
  -2   1  -1 9412.46  320.17 
   2   1   1 9349.86  318.37 
   2   1   1 9427.46  319.87 
   2   1   1 9358.56  320.97 
   2   1   1 9298.07  317.17 
   2   1   1 9179.08  321.07 
   2   1   1 9176.88  319.37 
  -2   1  -1 9799.82  319.77 
   2   1   1 9290.07  320.97 
   2   1   1 9298.67  321.37 
   2   1   1 9647.13  319.87 
   2   1   1 9355.06  321.17 
  -2   1  -1 9378.96  323.07 
  -2   1  -1 9885.01  320.17 
   2   1   1 9340.17  319.87 
  -2   1  -1 9690.63  323.67 
  -2   1  -1 9417.26  320.37 
   2   1   1 9248.38  319.47 
   2   1   1 9332.87  318.97 
   2   1   1 9599.74  320.07 
  -2   1  -1 9243.77  323.47 
   2   1   1 9181.38  319.27 
   2   1   1 9186.38  318.57 
  -2   1  -1 9334.17  319.37 
   2   1   1 9209.18  323.17 
   2   1   1 9367.06  321.17 
  -2   1  -1 9687.13  322.17 
   2   1   1 9275.77  319.67 
   2   1   1 9471.45  319.47 
  -2   1  -1 9927.61  320.27 
  -2   1  -1 9349.66  319.87 
  -2   1  -1 9718.43  319.77 
   2   1   1 9280.57  319.67 
  -2   1  -1 9762.72  320.57 
   2   1   1 9560.54  321.37 
  -2   1  -1 9570.54  320.87 
  -2   1  -1 9811.72  319.57 
   2   1   1 9295.87  317.47 
   2   1   1 8725.93  317.67 
   2   1   1 9348.46  319.37 
  -2   1  -1 9594.34  318.57 
  -2   1  -1 9189.78  320.77 
  -2   1  -1 9459.05  318.87 
   3  -1   1   60.29    5.80 
   3  -1   1   42.80    8.50 
   3  -1   1   52.49    5.90 
  -3  -1  -1   46.50    7.20 
  -3  -1  -1   63.29    8.00 
   3  -1   1   59.19    7.40 
  -3  -1  -1   58.09    6.30 
  -3  -1  -1   53.29    7.10 
   3  -1   1   63.09    6.80 
  -3  -1  -1   52.99    7.30 
  -3  -1  -1   55.89    6.40 
  -3  -1  -1   56.79    4.30 
  -3  -1  -1   53.69    5.00 
  -3  -1  -1   82.49   11.20 
  -3  -1  -1   51.29    7.50 
  -3  -1  -1   45.90    5.80 
  -3  -1  -1   54.49    4.30 
   3  -1   1   48.80    6.10 
   3  -1   1   64.59    7.40 
  -3  -1  -1   57.89    7.10 
   3  -1   1   56.39    6.90 
   3  -1   1   64.59    7.50 
   3  -1   1   60.59    8.40 
  -3  -1  -1   47.30    6.60 
  -3  -1  -1   67.19    7.20 
  -3  -1  -1   55.99    7.00 
   3  -1   1   60.59    9.80 
   3  -1   1   55.69    6.10 
   3  -1   1   62.39    7.80 
  -3  -1  -1   68.09    9.10 
   3  -1   1   46.30    7.00 
   3  -1   1   56.29    8.80 
   3  -1   1   46.10    6.10 
  -3  -1  -1   47.10    7.30 
  -3  -1  -1   53.49    5.30 
   3  -1   1   49.60    5.30 
  -3  -1  -1   59.59    4.70 
  -3  -1  -1   49.99    6.50 
  -3  -1  -1   57.89    7.70 
  -3  -1  -1   56.99    9.00 
  -3  -1  -1   72.59    8.80 
   3  -1   1   52.39    7.20 
  -3  -1  -1   62.59    5.70 
   3  -1   1   63.69    7.30 
  -3  -1  -1   49.70    8.60 
   3  -1   1   60.39    5.50 
   3   1   1   53.29    6.30 
  -3   1  -1   41.20    7.60 
   3   1   1   56.29    6.40 
  -3   1  -1   62.29    7.40 
   3   1   1   51.09    5.30 
   3   1   1   57.19    7.10 
   3   1   1   71.39    9.20 
   3   1   1   59.09    8.50 
  -3   1  -1   57.89   10.20 
   3   1   1   64.29    8.90 
  -3   1  -1   52.79    6.20 
   3   1   1   53.09    6.80 
   3   1   1   65.69    7.50 
  -3   1  -1   58.39    5.50 
   3   1   1   54.39    5.20 
   3   1   1   61.89    6.60 
   3   1   1   62.69    7.10 
   3   1   1   61.89    6.80 
   3   1   1   73.39    8.90 
  -3   1  -1   51.59    9.30 
   3   1   1   59.59    8.10 
  -3   1  -1   48.70    6.60 
  -3   1  -1   52.59    7.80 
   3   1   1   57.49    6.90 
   3   1   1   63.59    8.80 
  -3   1  -1   66.39    6.40 
  -3   1  -1   54.39    6.40 
   3   1   1   55.89    4.00 
   3   1   1   51.69    6.70 
  -3   1  -1   57.09    7.80 
  -3   1  -1   66.39    7.10 
  -3   1  -1   57.29    7.60 
  -3   1  -1   48.10    9.20 
   3   1   1   42.10    6.40 
   3   1   1   44.10    7.70 
   3   1   1   61.39    9.00 
   3   1   1   53.49    4.50 
   3   1   1   66.09    7.10 
   3   1   1   48.00    6.40 
  -4  -1  -1 1775.92   71.89 
  -4  -1  -1 1700.73   66.89 
  -4  -1  -1 1769.52   63.39 
   4  -1   1 1804.52   66.69 
   4  -1   1 1801.22   67.69 
   4  -1   1 1778.82   68.89 
   4  -1   1 1707.63   68.39 
  -4  -1  -1 1678.43   68.49 
  -4  -1  -1 1775.62   65.29 
   4  -1   1 1755.72   70.99 
   4  -1   1 1757.82   62.39 
  -4  -1  -1 1703.93   66.29 
   4  -1   1 1751.12   70.09 
  -4  -1  -1 1795.52   67.39 
  -4  -1  -1 1755.22   66.59 
  -4  -1  -1 1819.62   68.59 
  -4  -1  -1 1864.41   76.39 
   4  -1   1 1760.02   67.09 
   4  -1   1 1800.02   65.39 
  -4  -1  -1 1732.43   67.69 
   4  -1   1 1754.72   62.79 
   4  -1   1 1736.63   67.29 
  -4  -1  -1 1689.93   69.69 
   4  -1   1 1732.43   63.89 
  -4  -1  -1 1743.43   64.79 
   4  -1   1 1755.22   71.39 
   4  -1   1 1739.23   73.69 
  -4  -1  -1 1754.82   64.09 
  -4  -1  -1 1753.52   68.29 
   4  -1   1 1753.22   67.09 
  -4  -1  -1 1710.83   71.89 
  -4  -1  -1 1826.22   67.99 
  -4  -1  -1 1718.03   61.09 
  -4  -1  -1 1728.73   62.29 
   4  -1   1 1772.42   67.79 
   4   1   1 1853.51   70.19 
   4   1   1 1702.13   69.49 
   4   1   1 1706.03   66.79 
  -4   1  -1 1764.12   65.99 
  -4   1  -1 1803.82   64.09 
  -4   1  -1 1776.42   65.69 
  -4   1  -1 1787.02   67.69 
  -4   1  -1 1774.42   72.59 
   4   1   1 1807.72   66.89 
   4   1   1 1712.43   63.39 
   4   1   1 1797.32   67.49 
  -4   1  -1 1796.02   63.49 
  -4   1  -1 1706.63   68.99 
  -4   1  -1 1817.82   65.29 
   4   1   1 1755.72   69.69 
   4   1   1 1797.72   65.09 
   4   1   1 1777.62   65.99 
   4   1   1 1838.22   66.39 
   4   1   1 1750.62   60.99 
  -4   1  -1 1783.42   64.79 
   4   1   1 1765.32   69.99 
   4   1   1 1692.33   69.19 
   4   1   1 1693.33   70.49 
   4   1   1 1748.93   63.59 
  -4   1  -1 1832.32   68.19 
  -4   1  -1 1802.62   68.19 
   4   1   1 1789.82   67.59 
  -4   1  -1 1710.73   72.29 
  -4   1  -1 1716.43   67.49 
   4   1   1 1845.42   66.69 
  -4   1  -1 1755.82   73.19 
   4   1   1 1780.22   68.99 
  -4   1  -1 1740.23   62.39 
   4   1   1 1768.32   66.19 
  -5  -1  -1    3.90    6.30 
   5  -1   1    0.00    3.40 
  -5  -1  -1   -1.20    4.40 
  -5  -1  -1    0.40    4.50 
  -5  -1  -1    3.80    4.30 
  -5  -1  -1    5.20    5.70 
  -5  -1  -1   -3.60    3.20 
  -5  -1  -1    3.40    4.50 
   5  -1   1    2.70    4.70 
  -5  -1  -1   -0.70    2.40 
   5  -1   1    2.40    4.70 
  -5  -1  -1   -1.60    3.20 
   5  -1   1   -4.40    4.40 
  -5  -1  -1   -1.80    4.80 
   5  -1   1   -0.10    5.60 
   5  -1   1    1.80    5.50 
   5  -1   1   -1.90    1.90 
   5  -1   1   -5.90    3.90 
   5  -1   1    0.30    6.00 
   5  -1   1    5.60    6.80 
  -5  -1  -1    0.90    2.20 
  -5  -1  -1    3.20    4.80 
   5  -1   1    1.90    5.40 
  -5  -1  -1    0.50    4.20 
   5  -1   1    1.20    3.60 
  -5  -1  -1    1.90    3.40 
   5  -1   1    2.50    4.40 
   5   1   1   -5.90    5.20 
  -5   1  -1    2.50    2.00 
   5   1   1    2.30    4.50 
  -5   1  -1    0.50    2.90 
  -5   1  -1    3.70    5.00 
   5   1   1    1.40    5.40 
   5   1   1    4.30    4.10 
  -5   1  -1   -2.20    2.80 
  -5   1  -1    6.20    4.20 
   5   1   1    6.80    5.50 
   5   1   1   -0.60    4.10 
   5   1   1   -0.30    5.00 
   5   1   1    2.30    4.10 
  -5   1  -1    0.30    7.00 
   5   1   1    0.60    2.90 
  -5   1  -1   -4.60    3.00 
  -5   1  -1    4.20    5.50 
   5   1   1   -2.70    5.50 
  -5   1  -1   -4.80    4.70 
  -5   1  -1    1.70    3.60 
   5   1   1    2.30    4.80 
  -5   1  -1    3.50    5.60 
  -5   1  -1   -0.20    5.70 
   5   1   1    0.90    5.30 
  -5   1  -1    0.30    3.90 
  -5   1  -1   -0.30    2.60 
   5   1   1    4.70    6.30 
   5   1   1    0.10    3.90 
   5   1   1    4.30    4.50 
   6  -1   1   13.30    7.20 
  -6  -1  -1   30.30    7.60 
   6  -1   1   33.90    8.10 
   6  -1   1   19.50    9.30 
  -6  -1  -1   29.20   10.10 
   6  -1   1   41.30    9.00 
  -6  -1  -1   31.00    8.10 
   6  -1   1   32.40    8.40 
  -6  -1  -1   33.90    8.10 
   6  -1   1   21.70    9.40 
  -6  -1  -1   24.60    8.70 
  -6  -1  -1   22.50    6.20 
   6  -1   1   22.10    8.40 
  -6  -1  -1   12.10    9.20 
   6  -1   1   25.10    6.40 
   6  -1   1   23.80    6.90 
   6  -1   1   21.50    9.60 
  -6  -1  -1   26.30    6.20 
  -6  -1  -1   32.10    8.40 
  -6  -1  -1   32.10    9.20 
   6  -1   1   13.50    8.50 
   6  -1   1   22.50    7.90 
  -6  -1  -1   35.10    6.90 
  -6  -1  -1   27.10    3.80 
  -6  -1  -1   38.70   10.20 
  -6  -1  -1   28.90    5.10 
   6   1   1   24.90    8.10 
  -6   1  -1   43.50    9.70 
   6   1   1   26.40   10.60 
  -6   1  -1   39.00   12.10 
  -6   1  -1   19.00    6.10 
   6   1   1   21.60    7.30 
  -6   1  -1   32.80   11.10 
   6   1   1   29.50    9.80 
   6   1   1   19.20    7.80 
  -6   1  -1   25.40    7.10 
  -6   1  -1   23.60    5.30 
  -6   1  -1   31.10    8.80 
   6   1   1   32.60    9.80 
   6   1   1   26.90    9.50 
   6   1   1   34.40    8.20 
  -6   1  -1   13.30    8.60 
   6   1   1   32.40    9.80 
  -6   1  -1   43.60   11.90 
  -6   1  -1   36.20    9.80 
  -6   1  -1   26.00    5.00 
   6   1   1   22.00    7.00 
   6   1   1   39.70    8.90 
   6   1   1    9.80    8.00 
  -6   1  -1   29.90    7.70 
   6   1   1   15.90    6.20 
   6   1   1   27.90    5.30 
  -7  -1  -1   10.70    9.60 
  -7  -1  -1   25.70    8.90 
  -7  -1  -1   15.40    6.30 
  -7  -1  -1   18.90   11.50 
  -7  -1  -1   16.70    7.50 
   7  -1   1    8.30    5.90 
  -7  -1  -1   12.60    7.10 
  -7  -1  -1    6.90    6.50 
   7  -1   1   21.60    8.60 
  -7  -1  -1   14.90    6.30 
  -7  -1  -1   29.70    9.50 
   7  -1   1    7.90    6.80 
  -7  -1  -1    6.60    7.20 
   7  -1   1   14.80    7.10 
   7  -1   1   23.60    8.80 
   7  -1   1   11.20    8.50 
  -7  -1  -1   16.50    6.40 
   7  -1   1   21.10   10.50 
   7  -1   1   29.10   11.00 
   7  -1   1   21.70    9.60 
   7  -1   1   21.00   11.60 
   7  -1   1   13.60    8.20 
   7  -1   1   15.70    6.90 
   7  -1   1   16.80    9.80 
   7   1   1   10.80   10.00 
  -7   1  -1   21.10    8.00 
   7   1   1    6.00    8.20 
   7   1   1   11.90    7.70 
  -7   1  -1   20.10    9.00 
  -7   1  -1   17.50    8.20 
   7   1   1   18.10   10.00 
  -7   1  -1   19.80   11.30 
  -7   1  -1   26.40    7.60 
   7   1   1   16.50    7.50 
   7   1   1   12.60    9.00 
  -7   1  -1   21.60   10.10 
   7   1   1   18.00    7.30 
   7   1   1   31.10   11.10 
  -7   1  -1   19.00    8.70 
   7   1   1   13.80    9.30 
   7   1   1    8.10    7.20 
  -7   1  -1   13.30   10.20 
  -7   1  -1   23.90   11.00 
   7   1   1   13.20    8.40 
  -7   1  -1   17.10    5.50 
   7   1   1   17.90    7.90 
  -7   1  -1   20.30    6.90 
   7   1   1   15.70    7.80 
  -8  -1  -1  480.25   33.80 
  -8  -1  -1  534.25   28.40 
   8  -1   1  508.65   36.50 
  -8  -1  -1  642.44   40.60 
   8  -1   1  598.14   38.10 
   8  -1   1  598.04   37.00 
   8  -1   1  547.25   31.60 
  -8  -1  -1  532.35   28.80 
  -8  -1  -1  540.45   28.50 
  -8  -1  -1  650.53   34.90 
   8  -1   1  575.04   34.50 
   8  -1   1  576.04   35.70 
   8  -1   1  546.45   34.00 
   8  -1   1  579.54   44.30 
   8  -1   1  577.44   34.70 
   8  -1   1  535.15   31.10 
   8  -1   1  608.74   34.00 
  -8  -1  -1  566.24   43.00 
  -8  -1  -1  557.94   31.80 
  -8  -1  -1  579.24   33.80 
   8  -1   1  523.85   38.50 
   8  -1   1  595.54   40.10 
  -8  -1  -1  583.34   35.20 
   8  -1   1  607.74   31.70 
  -8  -1  -1  578.94   35.90 
  -8   1  -1  515.45   34.60 
  -8   1  -1  533.95   31.60 
  -8   1  -1  526.95   34.60 
  -8   1  -1  529.45   30.90 
   8   1   1  511.15   33.70 
   8   1   1  608.54   34.00 
   8   1   1  574.54   33.10 
  -8   1  -1  551.64   38.70 
   8   1   1  522.15   37.40 
   8   1   1  568.34   44.20 
  -8   1  -1  530.75   40.40 
   8   1   1  528.95   31.70 
  -8   1  -1  546.75   30.40 
   8   1   1  544.35   37.90 
   8   1   1  566.64   39.70 
  -8   1  -1  544.95   38.00 
   8   1   1  505.75   36.60 
  -8   1  -1  620.94   36.60 
   8   1   1  556.14   31.40 
   8   1   1  440.66   35.30 
   8   1   1  586.34   39.40 
   8   1   1  577.54   34.10 
   8   1   1  567.64   35.10 
   9  -1   1    8.00   11.40 
   9  -1   1   12.70    9.30 
  -9  -1  -1   15.00    9.90 
   9  -1   1    6.10    9.80 
   9  -1   1   18.90    9.10 
  -9  -1  -1   28.20   15.80 
  -9  -1  -1   14.80   10.00 
   9  -1   1   14.10   10.10 
  -9  -1  -1    9.30    7.70 
  -9  -1  -1    3.50    9.20 
   9  -1   1    8.70    8.70 
   9  -1   1   13.20   11.20 
  -9  -1  -1    3.70   11.10 
   9  -1   1   20.70   13.50 
   9  -1   1   15.70   11.90 
   9  -1   1    6.60    9.50 
  -9  -1  -1    9.40   11.80 
   9  -1   1    4.30   11.00 
  -9  -1  -1    8.70    9.00 
   9  -1   1   20.60   12.00 
   9  -1   1   48.60   13.10 
  -9   1  -1   20.50    9.20 
  -9   1  -1   17.80    9.30 
   9   1   1   14.70   11.30 
   9   1   1   29.90   14.30 
   9   1   1    8.40    9.20 
  -9   1  -1   -2.20    8.90 
   9   1   1    6.70    9.60 
   9   1   1   36.40   10.40 
  -9   1  -1   12.90   11.60 
  -9   1  -1    3.00    8.30 
   9   1   1   29.80   13.00 
   9   1   1    5.10   11.70 
  -9   1  -1   10.60   12.50 
  -9   1  -1   10.70   10.40 
   9   1   1    7.40   10.80 
   9   1   1   10.50   12.20 
   9   1   1   -0.90   11.40 
  -9   1  -1   16.30   15.70 
   9   1   1   32.40   11.60 
   9   1   1   25.00   13.20 
  -9   1  -1    6.70    9.20 
   9   1   1   17.80    9.70 
   9   1   1   24.50    9.20 
  10  -1   1  424.56   33.50 
  10  -1   1  440.16   43.70 
  10  -1   1  431.86   49.80 
 -10  -1  -1  387.76   31.20 
  10  -1   1  460.75   37.00 
 -10  -1  -1  427.86   33.50 
  10  -1   1  433.36   38.50 
  10  -1   1  451.35   47.40 
 -10  -1  -1  373.06   35.80 
 -10  -1  -1  485.55   44.50 
 -10  -1  -1  413.56   30.70 
  10  -1   1  414.86   36.20 
  10  -1   1  433.56   42.30 
 -10  -1  -1  547.85   54.49 
  10  -1   1  452.45   35.30 
  10  -1   1  422.66   41.30 
 -10  -1  -1  473.95   48.40 
  10  -1   1  433.16   37.50 
  10  -1   1  426.06   32.70 
 -10  -1  -1  423.36   34.90 
  10   1   1  445.16   35.20 
 -10   1  -1  455.35   36.00 
  10   1   1  490.15   41.80 
  10   1   1  451.45   34.40 
  10   1   1  431.96   35.10 
 -10   1  -1  378.86   35.80 
 -10   1  -1  495.75   40.60 
  10   1   1  453.95   38.50 
  10   1   1  477.85   44.00 
  10   1   1  447.06   45.30 
 -10   1  -1  464.55   48.60 
 -10   1  -1  480.65   32.20 
 -10   1  -1  517.85   40.50 
  10   1   1  398.36   40.80 
  10   1   1  338.07   37.60 
 -10  -2   1  132.39   22.10 
  10  -2  -1  116.99   20.40 
 -10  -2   1  153.78   29.40 
  10  -2  -1  116.49   27.90 
  10  -2  -1  149.59   21.80 
  10  -2  -1   88.79   21.30 
  10  -2  -1  100.99   22.50 
  10  -2  -1  145.39   25.90 
  10  -2  -1  123.69   21.80 
  10  -2  -1  131.99   19.80 
  10  -2  -1  126.09   22.40 
  10  -2  -1  100.79   21.20 
  10  -2  -1  108.69   22.10 
 -10  -2   1  144.59   28.00 
 -10  -2   1  132.59   24.00 
 -10  -2   1  129.99   21.60 
 -10  -2   1  135.89   21.50 
  10  -2  -1  100.49   18.00 
  10   2  -1  116.39   18.80 
  10   2  -1  143.39   25.50 
  10   2  -1  106.59   19.40 
  10   2  -1  115.09   23.90 
 -10   2   1  175.38   33.10 
 -10   2   1  134.59   25.60 
  10   2  -1  125.09   28.50 
 -10   2   1  123.69   20.40 
 -10   2   1  134.39   24.30 
  10   2  -1  153.88   22.40 
  10   2  -1  154.68   23.90 
  10   2  -1  142.59   24.90 
 -10   2   1  136.29   23.30 
  10   2  -1  155.28   23.00 
 -10   2   1  116.39   26.20 
  10   2  -1  145.59   25.50 
  10   2  -1  126.49   22.30 
   9  -2  -1  127.79   17.90 
  -9  -2   1  116.69   17.90 
   9  -2  -1  109.89   20.50 
   9  -2  -1  114.49   18.70 
  -9  -2   1  119.99   23.10 
   9  -2  -1  102.79   17.20 
   9  -2  -1  137.19   18.80 
   9  -2  -1  121.09   19.70 
  -9  -2   1  132.49   22.50 
   9  -2  -1  100.99   23.80 
   9  -2  -1  121.09   17.40 
  -9  -2   1  121.19   18.70 
   9  -2  -1   88.59   19.60 
  -9  -2   1  115.69   23.10 
  -9  -2   1  106.59   16.10 
  -9  -2   1  159.88   22.50 
  -9  -2   1  119.19   19.70 
   9  -2  -1  145.89   20.50 
  -9  -2   1  143.89   24.10 
   9  -2  -1   86.19   20.50 
   9  -2  -1  105.39   21.70 
   9   2  -1  121.49   18.90 
  -9   2   1  125.49   24.50 
   9   2  -1  159.98   21.00 
   9   2  -1  101.59   19.00 
   9   2  -1   97.09   19.90 
   9   2  -1  122.29   19.20 
   9   2  -1   81.79   18.70 
   9   2  -1   94.59   20.80 
  -9   2   1  116.39   20.80 
  -9   2   1  106.29   19.00 
   9   2  -1   61.49   16.90 
  -9   2   1  128.19   17.60 
  -9   2   1   78.79   18.50 
   9   2  -1  113.09   20.10 
   9   2  -1   96.89   19.90 
  -9   2   1   83.09   15.40 
  -8  -2   1   22.20   10.10 
   8  -2  -1    9.70   10.60 
   8  -2  -1   15.80    9.00 
   8  -2  -1   27.30   10.90 
  -8  -2   1   16.30    8.40 
   8  -2  -1   22.40    7.70 
   8  -2  -1   14.10   11.30 
  -8  -2   1    5.50    7.40 
  -8  -2   1   15.60    7.20 
  -8  -2   1   14.20    9.60 
  -8  -2   1   14.50    9.70 
   8  -2  -1   19.60   12.80 
  -8  -2   1   21.40    9.80 
  -8  -2   1   67.59   16.70 
  -8  -2   1   33.00   13.10 
   8  -2  -1   12.40    9.60 
   8  -2  -1   30.50   14.20 
   8  -2  -1   26.20    8.90 
   8  -2  -1    3.70    9.20 
   8  -2  -1    9.00   10.70 
   8  -2  -1   22.00    8.90 
  -8   2   1   36.20   11.10 
  -8   2   1   19.90    7.70 
  -8   2   1   22.40   14.00 
   8   2  -1   18.40   10.20 
   8   2  -1   31.40    8.50 
   8   2  -1   31.30   12.80 
   8   2  -1   17.20   10.10 
   8   2  -1   18.90   12.10 
   8   2  -1   19.50   10.10 
  -8   2   1   15.90    8.60 
  -8   2   1   12.10   11.70 
  -8   2   1   23.20   10.20 
   8   2  -1   26.20   12.90 
  -8   2   1   28.30   11.00 
   8   2  -1   15.90   12.50 
   8   2  -1   22.20   10.90 
   8   2  -1   24.50    9.60 
   8   2  -1   17.60    7.80 
  -8   2   1   25.20    8.20 
  -8   2   1   45.70   13.60 
   8   2  -1   25.10   12.60 
   7  -2  -1  180.48   23.40 
  -7  -2   1  152.18   16.20 
  -7  -2   1  141.09   19.70 
   7  -2  -1  203.98   24.10 
   7  -2  -1  185.88   19.30 
  -7  -2   1  194.98   19.60 
   7  -2  -1  186.98   15.60 
   7  -2  -1  162.38   18.50 
   7  -2  -1  181.68   18.70 
   7  -2  -1  136.19   20.30 
  -7  -2   1  150.88   16.40 
   7  -2  -1  168.78   19.40 
  -7  -2   1  173.48   19.60 
   7  -2  -1  141.09   23.40 
  -7  -2   1  169.28   19.60 
  -7  -2   1  177.68   16.50 
   7  -2  -1  154.88   16.60 
  -7  -2   1  174.88   19.00 
   7  -2  -1  145.79   16.40 
  -7  -2   1  176.98   24.00 
  -7  -2   1  155.48   15.40 
   7  -2  -1  163.18   20.50 
   7   2  -1  172.38   15.20 
  -7   2   1  173.78   15.70 
  -7   2   1  192.28   21.70 
   7   2  -1  192.18   21.80 
   7   2  -1  122.79   18.60 
   7   2  -1  176.38   20.50 
  -7   2   1  148.09   15.00 
   7   2  -1  146.99   19.80 
   7   2  -1  182.08   18.70 
   7   2  -1  150.78   20.10 
  -7   2   1  163.28   19.10 
  -7   2   1  168.98   18.30 
   7   2  -1  170.98   18.80 
   7   2  -1  184.18   21.00 
   7   2  -1  165.08   16.60 
  -7   2   1  152.18   22.70 
   7   2  -1  129.79   16.80 
  -7   2   1  135.99   20.30 
   7   2  -1  176.78   21.90 
  -7   2   1  192.88   20.90 
  -7   2   1  200.28   19.30 
  -6  -2   1   15.90    7.70 
   6  -2  -1   31.10    8.60 
   6  -2  -1   19.90    4.80 
   6  -2  -1   26.40    5.30 
  -6  -2   1   30.70    4.00 
  -6  -2   1   27.10    8.80 
  -6  -2   1   54.49   11.10 
   6  -2  -1   32.80    8.00 
  -6  -2   1   21.40    7.70 
   6  -2  -1   21.10    7.50 
   6  -2  -1   39.70   12.50 
   6  -2  -1   22.60    7.60 
   6  -2  -1   26.60    8.20 
  -6  -2   1   54.89   12.50 
   6  -2  -1   28.60   10.30 
   6  -2  -1   22.50    7.70 
   6  -2  -1   35.30    7.80 
   6  -2  -1    9.20    8.40 
  -6  -2   1   38.60    8.20 
  -6  -2   1   31.10    8.70 
   6  -2  -1   22.90    9.00 
  -6  -2   1   30.70    7.30 
  -6  -2   1   21.50    7.40 
  -6  -2   1   35.70    7.20 
   6  -2  -1   26.40   11.10 
   6   2  -1   34.30    7.80 
  -6   2   1   21.80    7.90 
   6   2  -1   36.80    7.30 
  -6   2   1   26.60    9.90 
  -6   2   1   26.40    3.90 
   6   2  -1   30.70    8.00 
   6   2  -1   41.10   10.40 
   6   2  -1   31.00   10.00 
   6   2  -1   18.00    8.00 
  -6   2   1   41.80    7.70 
   6   2  -1   31.60    9.50 
  -6   2   1   29.90    8.70 
  -6   2   1   38.70   11.90 
   6   2  -1   27.20    4.80 
  -6   2   1   19.70    6.10 
   6   2  -1   37.80   10.90 
  -6   2   1   34.90    4.40 
  -6   2   1   12.90   10.50 
   6   2  -1   49.80   11.60 
  -6   2   1   19.90    7.10 
  -6   2   1   20.00    4.40 
   6   2  -1   28.50    9.00 
  -6   2   1   29.90    8.40 
  -6   2   1   27.60    4.90 
   6   2  -1   26.20    9.70 
   6   2  -1   26.20    9.80 
   5  -2  -1    6.00    4.10 
   5  -2  -1    5.60    6.20 
  -5  -2   1    9.90    3.50 
  -5  -2   1    3.50    4.50 
  -5  -2   1    3.40    2.40 
   5  -2  -1    4.60    3.80 
   5  -2  -1    0.40    3.60 
   5  -2  -1   -1.40    6.10 
  -5  -2   1    1.40    3.90 
  -5  -2   1    2.40    2.50 
   5  -2  -1   -5.30    5.00 
   5  -2  -1    1.30    4.50 
   5  -2  -1    6.70    4.80 
   5  -2  -1   -3.80    4.20 
   5  -2  -1   -2.00    3.90 
  -5  -2   1    1.10    3.70 
  -5  -2   1    4.20    4.50 
  -5  -2   1    2.30    4.60 
  -5  -2   1   -0.10    4.80 
   5  -2  -1    3.10    6.80 
  -5  -2   1    7.10    3.80 
  -5  -2   1   -0.80    5.20 
  -5  -2   1   -7.40    5.30 
  -5  -2   1    6.70    3.00 
  -5  -2   1   -3.20    4.10 
   5  -2  -1   -2.40    6.20 
  -5  -2   1    4.90    4.90 
   5  -2  -1    3.30    5.00 
   5  -2  -1    4.60    4.70 
  -5   2   1    2.20    4.60 
   5   2  -1    3.50    4.20 
   5   2  -1    4.00    5.80 
  -5   2   1    1.70    4.80 
   5   2  -1    3.80    3.00 
  -5   2   1   -1.80    3.10 
   5   2  -1   -1.50    4.80 
  -5   2   1    3.70    3.00 
  -5   2   1   -3.70    3.90 
  -5   2   1   -3.60    5.40 
  -5   2   1    0.40    2.20 
  -5   2   1   -5.00    4.00 
   5   2  -1    2.30    5.50 
   5   2  -1   -3.70    5.20 
   5   2  -1    0.20    2.10 
   5   2  -1    4.10    3.90 
  -5   2   1    3.80    2.70 
   5   2  -1    9.60    4.20 
   5   2  -1   19.20    8.10 
  -5   2   1    0.70    6.00 
   5   2  -1   -1.00    5.80 
  -5   2   1   11.20    4.30 
   5   2  -1    2.90    2.00 
   5   2  -1    1.80    5.50 
   5   2  -1    1.60    5.30 
  -5   2   1   10.00    4.40 
   5   2  -1    2.20    5.80 
  -5   2   1    2.70    4.60 
   5   2  -1    3.10    2.30 
   5   2  -1   11.00    6.10 
   4  -2  -1   -0.10    3.70 
  -4  -2   1    5.30    3.90 
  -4  -2   1    3.00    4.40 
   4  -2  -1    1.00    4.00 
   4  -2  -1    2.30    4.00 
   4  -2  -1    0.60    5.90 
  -4  -2   1    3.10    5.10 
   4  -2  -1    3.90    4.20 
   4  -2  -1    5.40    5.70 
   4  -2  -1    2.90    4.70 
   4  -2  -1    0.60    3.50 
  -4  -2   1   -2.40    4.10 
  -4  -2   1    1.40    2.60 
  -4  -2   1    0.70    6.10 
   4  -2  -1    1.00    2.70 
   4  -2  -1   -1.90    4.80 
   4  -2  -1    2.90    3.90 
  -4  -2   1    3.10    4.50 
  -4  -2   1   -4.50    2.80 
  -4  -2   1   -4.30    2.90 
   4  -2  -1   -3.00    3.60 
   4  -2  -1    2.50    3.70 
   4  -2  -1    1.60    4.10 
  -4  -2   1    1.30    4.60 
   4  -2  -1   -1.30    3.60 
  -4  -2   1    4.90    4.70 
  -4  -2   1    3.70    3.00 
  -4  -2   1    0.10    2.50 
  -4  -2   1    6.40    3.00 
  -4  -2   1    1.70    3.90 
   4  -2  -1   -0.80    5.70 
  -4  -2   1    0.50    2.70 
  -4  -2   1    2.60    3.80 
  -4   2   1    0.50    3.90 
   4   2  -1    1.00    2.70 
  -4   2   1    1.60    3.10 
   4   2  -1   -0.20    4.20 
  -4   2   1    4.00    3.10 
   4   2  -1   -4.80    5.40 
  -4   2   1    2.00    3.50 
  -4   2   1   -0.90    3.90 
   4   2  -1    2.30    2.80 
   4   2  -1    0.00    4.50 
  -4   2   1    1.50    2.90 
  -4   2   1    2.10    5.40 
   4   2  -1    2.10    4.30 
   4   2  -1    8.60    5.20 
   4   2  -1    2.40    3.90 
   4   2  -1   -0.80    2.50 
   4   2  -1    3.00    2.80 
  -4   2   1   -0.40    3.90 
   4   2  -1   -0.20    5.10 
  -4   2   1    1.60    2.90 
  -4   2   1   -5.30    3.10 
   4   2  -1   -7.60    3.90 
   4   2  -1   15.20    6.30 
   4   2  -1    2.80    3.00 
   4   2  -1    1.70    4.40 
  -4   2   1    1.70    2.20 
  -4   2   1    0.30    5.90 
   4   2  -1    2.00    2.30 
   4   2  -1    5.70    6.10 
  -4   2   1   -3.90    4.70 
   3  -2  -1  251.67   19.30 
  -3  -2   1  239.38   13.60 
  -3  -2   1  228.98   14.80 
   3  -2  -1  250.67   12.00 
  -3  -2   1  270.17   16.60 
   3  -2  -1  267.07   17.70 
   3  -2  -1  265.07   14.20 
  -3  -2   1  239.88   14.80 
  -3  -2   1  261.97   11.20 
  -3  -2   1  241.18   14.00 
   3  -2  -1  254.07   15.00 
  -3  -2   1  264.57   19.20 
  -3  -2   1  239.58   15.60 
  -3  -2   1  239.48   14.10 
  -3  -2   1  251.77   11.30 
  -3  -2   1  261.47   12.90 
  -3  -2   1  277.57   16.70 
  -3  -2   1  272.37   15.10 
  -3  -2   1  244.98   15.90 
  -3  -2   1  245.68   15.30 
   3  -2  -1  236.88   18.20 
   3  -2  -1  253.17   13.80 
  -3  -2   1  250.67   13.30 
   3  -2  -1  235.28   14.70 
   3  -2  -1  241.78   14.50 
   3  -2  -1  230.38   14.20 
   3  -2  -1  240.68   18.20 
  -3  -2   1  219.98   15.20 
  -3  -2   1  248.28   13.70 
  -3  -2   1  240.48   14.40 
  -3  -2   1  251.17   15.20 
  -3   2   1  243.18   13.80 
   3   2  -1  241.58   10.60 
  -3   2   1  250.67   14.10 
  -3   2   1  260.77   14.20 
   3   2  -1  239.88   12.30 
   3   2  -1  277.37   16.30 
  -3   2   1  272.87   12.50 
  -3   2   1  269.07   12.50 
   3   2  -1  256.07   14.30 
  -3   2   1  256.07   13.00 
   3   2  -1  241.08   14.00 
   3   2  -1  240.98   13.80 
   3   2  -1  247.18   12.80 
  -3   2   1  245.38   13.60 
  -3   2   1  232.78   15.10 
   3   2  -1  245.48   16.00 
  -3   2   1  280.07   13.80 
   3   2  -1  237.48   16.50 
   3   2  -1  271.47   15.60 
   3   2  -1  226.68   12.40 
   3   2  -1  209.38   16.20 
   3   2  -1  229.48   14.40 
   3   2  -1  252.57   14.10 
   3   2  -1  230.78   14.40 
   3   2  -1  260.17   15.30 
  -3   2   1  249.08   19.00 
   3   2  -1  246.88   16.20 
   3   2  -1  258.07   17.40 
  -3   2   1  274.37   18.90 
  -3   2   1  255.07   16.60 
   2  -2  -1   19.20    5.80 
  -2  -2   1   33.70    5.10 
   2  -2  -1   22.90    4.40 
   2  -2  -1   21.60    4.60 
  -2  -2   1   22.10    4.90 
   2  -2  -1   21.00    6.20 
   2  -2  -1   30.60    6.30 
  -2  -2   1   27.10    4.60 
  -2  -2   1   27.80    5.10 
  -2  -2   1   20.80    3.80 
   2  -2  -1   21.60    4.20 
  -2  -2   1   30.60    5.70 
  -2  -2   1   20.60    5.70 
   2  -2  -1   13.80    5.60 
  -2  -2   1   24.60    4.20 
  -2  -2   1   30.30    5.90 
  -2  -2   1   27.00    4.90 
  -2  -2   1   31.60    6.10 
   2  -2  -1   32.60    5.10 
   2  -2  -1   24.90    4.40 
  -2  -2   1   19.50    4.10 
  -2  -2   1   28.20    4.60 
  -2  -2   1   35.80    5.40 
   2  -2  -1   31.10    7.00 
   2  -2  -1   22.80    3.70 
  -2  -2   1   28.40    5.30 
  -2  -2   1   29.30    5.50 
  -2  -2   1   25.80    5.10 
  -2  -2   1   24.40    4.70 
  -2  -2   1   37.10    5.90 
  -2  -2   1   28.60    4.50 
   2  -2  -1   28.30    4.80 
  -2  -2   1   38.80    5.80 
   2  -2  -1   27.20    4.00 
  -2  -2   1   25.30    3.70 
   2  -2  -1   32.90    6.90 
  -2   2   1   24.00    5.50 
   2   2  -1   25.50    5.50 
   2   2  -1   26.30    3.70 
  -2   2   1   24.10    4.20 
  -2   2   1   23.60    6.10 
   2   2  -1   19.20    4.00 
  -2   2   1   23.10    4.00 
   2   2  -1   23.90    5.40 
  -2   2   1   23.50    3.80 
  -2   2   1   17.00    5.40 
   2   2  -1   27.30    4.60 
   2   2  -1   45.60    6.00 
   2   2  -1   31.90    4.90 
   2   2  -1   26.20    4.10 
   2   2  -1   35.50    6.20 
   2   2  -1   28.10    4.90 
  -2   2   1   26.20    4.50 
  -2   2   1   31.40    5.10 
  -2   2   1   30.10    6.10 
  -2   2   1   21.60    3.80 
  -2   2   1   43.80    8.50 
   2   2  -1   27.20    4.40 
   2   2  -1   31.30    5.80 
   2   2  -1   19.90    4.20 
   2   2  -1   31.70    5.20 
   2   2  -1   31.40    4.50 
   2   2  -1   26.80    5.40 
   2   2  -1   28.80    4.80 
   2   2  -1   33.80    5.10 
  -2   2   1   23.50    3.80 
  -2   2   1   19.00    4.70 
  -2   2   1   21.00    3.10 
  -2   2   1   24.60    7.30 
   2   2  -1   19.20    4.40 
   1  -2  -1    8.40    3.30 
  -1  -2   1    2.70    2.00 
  -1  -2   1    2.50    2.10 
   1  -2  -1    3.20    2.80 
   1  -2  -1    3.60    4.40 
  -1  -2   1    6.20    3.20 
  -1  -2   1    3.40    3.50 
  -1  -2   1    0.80    2.30 
  -1  -2   1    6.00    1.80 
   1  -2  -1    7.40    3.50 
   1  -2  -1    5.50    2.20 
  -1  -2   1    7.20    2.80 
   1  -2  -1    8.40    3.50 
  -1  -2   1    4.20    1.80 
  -1  -2   1    7.30    3.70 
  -1  -2   1    2.00    2.50 
   1  -2  -1    3.80    3.40 
  -1  -2   1    4.90    3.00 
   1  -2  -1    5.00    3.20 
  -1  -2   1    6.10    2.60 
  -1  -2   1    5.40    3.10 
  -1  -2   1   11.40    3.70 
   1  -2  -1    2.70    2.30 
   1  -2  -1   17.30    6.80 
  -1  -2   1    2.00    1.90 
   1  -2  -1    5.00    2.40 
  -1  -2   1    2.30    3.30 
  -1  -2   1    1.70    2.50 
   1  -2  -1    6.80    3.90 
   1  -2  -1   13.30    4.70 
   1  -2  -1    4.10    2.70 
   1  -2  -1    8.10    4.10 
   1  -2  -1    4.30    2.70 
   1   2  -1    7.00    4.10 
  -1   2   1    4.70    2.20 
  -1   2   1    4.70    2.00 
   1   2  -1    1.00    2.60 
   1   2  -1    6.30    2.10 
  -1   2   1    4.30    2.70 
  -1   2   1    7.70    3.90 
   1   2  -1    4.10    1.70 
  -1   2   1   -0.70    2.50 
  -1   2   1    3.60    3.80 
   1   2  -1    7.30    2.90 
   1   2  -1    8.60    3.90 
  -1   2   1   12.00    4.80 
   1   2  -1    0.80    3.40 
   1   2  -1    3.80    2.20 
  -1   2   1    9.00    5.90 
   1   2  -1    4.60    2.70 
   1   2  -1    8.70    3.70 
  -1   2   1    4.10    3.20 
  -1   2   1    2.10    4.10 
   1   2  -1    3.60    2.60 
  -1   2   1    5.80    3.20 
  -1   2   1    5.30    4.10 
   1   2  -1    1.20    2.60 
   1   2  -1    7.70    3.80 
   1   2  -1   14.30    3.90 
  -1   2   1    8.20    3.20 
  -1   2   1    7.90    2.40 
   1   2  -1    2.20    2.10 
   1   2  -1   10.10    4.50 
  -1   2   1    5.20    3.00 
  -1   2   1    1.60    2.50 
   1   2  -1    3.60    2.70 
  -1   2   1    7.80    2.10 
   1   2  -1   21.00    5.20 
   1   2  -1    1.40    2.00 
  -1   2   1    5.20    3.50 
  -1   2   1    1.80    3.20 
   0  -2  -1   25.10    5.40 
   0  -2   1   16.90    8.70 
   0  -2  -1   16.80    3.10 
   0  -2   1   16.80    3.90 
   0  -2  -1   18.20    3.80 
   0  -2   1   21.20    4.00 
   0  -2  -1   22.20    4.10 
   0  -2   1   20.80    4.30 
   0  -2  -1   13.00    3.40 
   0  -2   1   12.60    5.70 
   0  -2  -1   15.50    6.20 
   0  -2  -1    4.90    7.90 
   0  -2   1   18.50    5.50 
   0  -2   1   22.60    4.80 
   0  -2   1   19.90    4.10 
   0  -2  -1   18.60    3.50 
   0  -2   1   21.50    5.00 
   0  -2  -1   24.00    7.80 
   0  -2   1   24.60    4.80 
   0  -2   1   26.30    5.50 
   0  -2  -1   15.70    9.10 
   0  -2   1   25.80    5.40 
   0  -2  -1   28.80    6.80 
   0  -2   1   22.30    7.70 
   0  -2   1   22.50    4.40 
   0  -2  -1   15.90    4.10 
   0  -2  -1   20.20    3.90 
   0  -2   1   28.40    7.10 
   0   2  -1   24.10    9.10 
   0   2  -1   19.50    4.20 
   0   2  -1   22.40    4.80 
   0   2   1   19.40    4.00 
   0   2   1   10.30    7.50 
   0   2   1   24.20    4.30 
   0   2  -1   18.00    4.20 
   0   2   1   19.40    4.60 
   0   2   1   15.30    5.60 
   0   2  -1   14.80    4.10 
   0   2   1   17.80    3.70 
   0   2   1   23.50    4.80 
   0   2  -1   25.30    4.50 
   0   2  -1   23.60    7.30 
   0   2   1   22.00    3.70 
   0   2  -1   18.10    5.50 
   0   2   1   27.30    3.90 
   0   2   1   18.50    8.60 
   0   2   1   18.40    3.20 
   0   2  -1   28.50    6.30 
   0   2   1   22.80    3.80 
   0   2  -1   16.40    6.90 
   0   2   1   23.30    4.20 
   0   2   1   16.30    3.80 
   0   2  -1   14.90    7.70 
   0   2  -1   15.80    6.20 
   0   2  -1   19.60    4.50 
   0   2  -1   21.60    3.70 
   0   2   1   19.80    2.90 
   0   2   1   18.70    6.20 
   0   2  -1   24.50    4.30 
  -1  -2  -1 1281.77   51.59 
   1  -2   1 1352.06   48.20 
  -1  -2  -1 1374.66   49.80 
   1  -2   1 1314.07   50.99 
  -1  -2  -1 1201.58   47.80 
  -1  -2  -1 1298.87   47.90 
  -1  -2  -1 1306.37   48.40 
  -1  -2  -1 1181.48   52.29 
   1  -2   1 1223.88   49.30 
  -1  -2  -1 1276.07   47.10 
   1  -2   1 1262.47   48.10 
   1  -2   1 1245.68   48.80 
  -1  -2  -1 1293.67   48.80 
   1  -2   1 1275.07   49.90 
  -1  -2  -1 1323.47   48.10 
   1  -2   1 1302.17   49.30 
  -1  -2  -1 1250.37   50.39 
   1  -2   1 1293.97   50.19 
  -1  -2  -1 1287.87   47.80 
  -1  -2  -1 1261.87   47.40 
  -1  -2  -1 1287.17   46.00 
  -1  -2  -1 1343.47   55.59 
   1  -2   1 1210.78   47.10 
  -1  -2  -1 1307.17   50.19 
  -1  -2  -1 1265.97   50.39 
   1  -2   1 1284.47   48.00 
  -1  -2  -1 1281.67   47.50 
   1  -2   1 1310.87   53.59 
  -1  -2  -1 1260.77   51.09 
   1  -2   1 1295.47   50.29 
   1  -2   1 1313.67   51.29 
   1  -2   1 1324.07   48.50 
   1  -2   1 1264.97   50.29 
  -1  -2  -1 1323.87   47.90 
   1  -2   1 1263.17   49.60 
  -1  -2  -1 1265.27   47.70 
   1  -2   1 1300.57   48.70 
   1   2   1 1323.97   48.00 
   1   2   1 1395.96   52.29 
   1   2   1 1222.28   47.70 
   1   2   1 1215.08   47.40 
   1   2   1 1287.87   47.10 
  -1   2  -1 1228.98   50.09 
   1   2   1 1248.18   48.70 
  -1   2  -1 1271.87   48.10 
   1   2   1 1326.67   47.90 
   1   2   1 1315.77   48.00 
  -1   2  -1 1238.38   49.20 
  -1   2  -1 1353.06   49.30 
   1   2   1 1264.77   47.30 
   1   2   1 1284.17   46.40 
   1   2   1 1162.08   52.29 
  -1   2  -1 1280.47   48.10 
  -1   2  -1 1307.97   51.59 
   1   2   1 1321.37   51.59 
   1   2   1 1349.47   55.19 
   1   2   1 1282.67   47.90 
  -1   2  -1 1262.67   50.79 
   1   2   1 1192.98   47.30 
  -1   2  -1 1282.57   50.09 
   1   2   1 1302.77   53.99 
   1   2   1 1250.97   48.20 
   1   2   1 1225.88   51.29 
  -1   2  -1 1379.76   48.50 
   1   2   1 1312.97   48.80 
   1   2   1 1265.97   47.80 
   1   2   1 1257.27   47.50 
   1   2   1 1266.37   46.90 
  -1   2  -1 1337.17   49.90 
  -1   2  -1 1373.06   49.40 
   2  -2   1  108.19   10.20 
  -2  -2  -1  101.49    7.40 
   2  -2   1  104.59   10.70 
   2  -2   1  110.99   10.50 
   2  -2   1   92.59    7.50 
  -2  -2  -1   64.09    7.70 
   2  -2   1   89.79   10.90 
   2  -2   1   94.99    7.60 
  -2  -2  -1   92.39    9.80 
  -2  -2  -1   94.09    8.40 
   2  -2   1   99.59   12.70 
  -2  -2  -1  102.89   11.00 
   2  -2   1  100.39   10.20 
   2  -2   1   99.09   11.70 
  -2  -2  -1   77.39    8.30 
  -2  -2  -1   78.59    8.70 
  -2  -2  -1   91.79    7.70 
  -2  -2  -1   87.69    8.70 
   2  -2   1  102.79    8.40 
   2  -2   1  109.69   10.50 
   2  -2   1   82.79    7.80 
  -2  -2  -1   91.09    6.30 
  -2  -2  -1   95.39    7.60 
  -2  -2  -1  100.69    9.70 
  -2  -2  -1   80.59    7.90 
  -2  -2  -1   87.49   11.60 
  -2  -2  -1  115.09    7.70 
   2  -2   1  101.39   11.30 
  -2  -2  -1  107.39    8.30 
   2  -2   1  102.29    9.00 
  -2  -2  -1   84.99    7.10 
   2  -2   1   92.89    8.70 
  -2  -2  -1   95.99    7.20 
  -2  -2  -1   89.99    9.30 
  -2  -2  -1   86.59    8.50 
  -2  -2  -1  104.59    8.30 
  -2  -2  -1   85.09    8.70 
  -2  -2  -1  100.59   10.50 
   2   2   1  101.39    7.60 
  -2   2  -1   90.39    7.10 
   2   2   1   95.79    6.70 
   2   2   1   88.39    7.40 
   2   2   1  111.69    9.40 
   2   2   1  101.39    7.60 
   2   2   1  115.39   10.50 
  -2   2  -1   80.39    8.70 
   2   2   1  104.99    8.00 
  -2   2  -1   94.39   11.50 
   2   2   1   81.49    8.70 
   2   2   1  108.09   10.40 
   2   2   1   99.79   10.00 
   2   2   1  111.79   14.00 
  -2   2  -1   95.59    7.80 
  -2   2  -1  103.29    7.70 
   2   2   1   92.69    8.50 
  -2   2  -1   88.49    7.40 
   2   2   1   90.89   10.00 
   2   2   1   93.49    7.50 
  -2   2  -1   91.89    7.70 
   2   2   1   86.99    8.90 
   2   2   1  102.59    7.90 
  -2   2  -1   95.19    8.80 
   2   2   1   88.39    8.70 
  -2   2  -1   97.29   11.60 
   2   2   1   85.69    8.50 
  -2   2  -1  110.99   10.70 
   2   2   1   77.19    7.60 
  -2   2  -1   70.49    9.00 
  -2   2  -1  108.99    8.60 
   2   2   1   90.29    9.30 
   2   2   1   82.59    6.70 
   2   2   1   86.79    8.10 
  -2   2  -1  109.79    8.70 
  -3  -2  -1   12.00    4.60 
   3  -2   1    9.10    4.60 
  -3  -2  -1   10.50    4.50 
  -3  -2  -1   13.30    6.20 
  -3  -2  -1   13.40    4.00 
   3  -2   1    4.50    3.80 
   3  -2   1    7.80    4.00 
   3  -2   1   11.30    6.70 
   3  -2   1    3.90    4.20 
   3  -2   1   11.40    4.90 
  -3  -2  -1   15.70    5.80 
  -3  -2  -1   14.70    5.30 
  -3  -2  -1    3.50    3.80 
   3  -2   1    9.20    4.60 
  -3  -2  -1    4.70    4.40 
   3  -2   1   17.30    8.00 
  -3  -2  -1    6.60    3.40 
   3  -2   1    1.60    3.20 
  -3  -2  -1    7.70    7.30 
  -3  -2  -1    9.00    4.60 
  -3  -2  -1   11.00    3.80 
  -3  -2  -1    6.90    4.70 
  -3  -2  -1    5.80    4.10 
   3  -2   1   10.50    6.40 
   3  -2   1    9.70    3.50 
   3  -2   1    3.50    5.10 
  -3  -2  -1   11.30    3.90 
   3  -2   1    4.60    4.60 
   3  -2   1    9.90    4.90 
  -3  -2  -1    2.00    3.20 
   3  -2   1    9.00    5.10 
   3  -2   1    9.90    4.70 
  -3  -2  -1    5.70    4.00 
  -3   2  -1    3.60    4.30 
  -3   2  -1   16.00    5.40 
   3   2   1    4.10    3.40 
  -3   2  -1    4.70    6.00 
   3   2   1    4.70    4.00 
   3   2   1    5.80    4.90 
   3   2   1    8.90    5.30 
   3   2   1   11.10    4.10 
  -3   2  -1   11.50    4.90 
   3   2   1    8.10    3.20 
   3   2   1    2.50    5.00 
   3   2   1   10.00    3.90 
   3   2   1   -1.80    4.70 
   3   2   1   10.30    3.60 
  -3   2  -1    6.90    3.70 
  -3   2  -1    0.30    3.90 
   3   2   1    9.50    3.50 
   3   2   1   14.60    5.70 
   3   2   1    5.50    3.20 
   3   2   1    5.50    4.40 
  -3   2  -1    3.30    4.50 
  -3   2  -1    3.30    7.30 
   3   2   1   20.60    7.30 
   3   2   1   13.00    6.00 
   3   2   1   11.00    4.70 
   4  -2   1   46.20    9.90 
  -4  -2  -1   52.59    8.00 
   4  -2   1   50.59   10.20 
  -4  -2  -1   40.80   10.20 
  -4  -2  -1   53.89    8.70 
  -4  -2  -1   58.19   10.70 
  -4  -2  -1   66.39    9.00 
  -4  -2  -1   66.99    9.60 
   4  -2   1   47.20    7.70 
   4  -2   1   54.09    8.50 
  -4  -2  -1   52.09    8.20 
   4  -2   1   53.59    9.80 
   4  -2   1   50.79    8.80 
   4  -2   1   60.69    8.00 
   4  -2   1   53.09    8.70 
  -4  -2  -1   46.20    7.30 
   4  -2   1   60.09    8.00 
  -4  -2  -1   53.19    8.00 
   4  -2   1   55.49    7.50 
   4  -2   1   54.39    7.80 
   4  -2   1   73.39    8.60 
  -4  -2  -1   44.60    7.30 
  -4  -2  -1   50.19    6.00 
   4  -2   1   60.09   11.80 
  -4  -2  -1   54.39    8.70 
  -4  -2  -1   38.50    9.00 
   4  -2   1   46.20    7.90 
   4  -2   1   57.09    9.00 
  -4  -2  -1   48.40    7.20 
  -4   2  -1   81.09    9.00 
  -4   2  -1   56.29    7.90 
   4   2   1   38.10    7.80 
   4   2   1   55.59    8.30 
   4   2   1   62.39    7.10 
  -4   2  -1   49.40   11.60 
   4   2   1   49.50    8.30 
   4   2   1   65.69    9.70 
  -4   2  -1   41.10    7.70 
  -4   2  -1   43.40    7.90 
   4   2   1   56.79    9.90 
   4   2   1   66.89    7.90 
  -4   2  -1   57.69    6.50 
   4   2   1   61.79    7.00 
   4   2   1   61.69   10.10 
   4   2   1   61.49   10.10 
   4   2   1   55.19    5.80 
  -4   2  -1   47.40   11.20 
   4   2   1   52.29    8.50 
  -4   2  -1   44.40   10.70 
   4   2   1   46.50    9.40 
   4   2   1   40.50    7.70 
  -4   2  -1   54.79    9.30 
   4   2   1   55.89    6.10 
  -4   2  -1   67.39    7.90 
   4   2   1   58.99    5.50 
   4   2   1   52.49    6.40 
   5  -2   1   94.39   12.00 
  -5  -2  -1   79.79   11.10 
  -5  -2  -1  124.59   13.10 
  -5  -2  -1  102.89   15.50 
  -5  -2  -1   69.29   12.30 
  -5  -2  -1   83.19    8.00 
  -5  -2  -1   96.79   12.10 
  -5  -2  -1   59.09   10.00 
   5  -2   1   80.19   11.80 
   5  -2   1   92.29   11.90 
   5  -2   1   77.49   11.00 
   5  -2   1   81.79   14.50 
  -5  -2  -1  102.89   12.80 
   5  -2   1   88.49    9.10 
  -5  -2  -1   94.99   11.20 
   5  -2   1   98.09   14.10 
   5  -2   1   80.29   11.30 
  -5  -2  -1   93.09    6.70 
   5  -2   1   89.09    9.10 
   5  -2   1   68.69   12.40 
  -5  -2  -1   96.49   10.50 
   5  -2   1  118.19   17.40 
  -5  -2  -1   90.29   14.90 
   5  -2   1   88.59   12.60 
  -5  -2  -1   74.79   10.30 
   5  -2   1   74.39    9.40 
   5  -2   1   75.99   10.00 
  -5  -2  -1  107.19   11.70 
   5   2   1   76.99   11.70 
  -5   2  -1   87.29   10.20 
  -5   2  -1   99.69   11.80 
  -5   2  -1   99.69   13.00 
  -5   2  -1  106.59   11.50 
  -5   2  -1   83.49    9.50 
   5   2   1   94.49   10.20 
   5   2   1   84.19   13.10 
   5   2   1   94.39    9.00 
  -5   2  -1   80.99   10.30 
  -5   2  -1   84.49   14.60 
  -5   2  -1   86.19    8.20 
   5   2   1  100.69   14.00 
   5   2   1  116.99   14.70 
   5   2   1  102.69   14.50 
  -5   2  -1   98.39   12.50 
   5   2   1   80.19   10.80 
  -5   2  -1  110.29   16.60 
   5   2   1   58.19    9.70 
  -5   2  -1   95.39   12.40 
   5   2   1   72.59   10.80 
   5   2   1  105.79   11.60 
   5   2   1   82.79    6.50 
  -5   2  -1   97.69   17.10 
   5   2   1   95.19   12.70 
  -6  -2  -1  531.35   29.60 
  -6  -2  -1  472.15   31.70 
   6  -2   1  511.85   28.80 
   6  -2   1  522.05   33.80 
  -6  -2  -1  498.25   28.50 
   6  -2   1  472.25   30.20 
   6  -2   1  553.04   29.10 
   6  -2   1  458.75   29.00 
   6  -2   1  495.35   36.10 
   6  -2   1  464.05   28.50 
   6  -2   1  500.45   33.50 
   6  -2   1  517.85   28.90 
  -6  -2  -1  510.25   26.10 
   6  -2   1  528.35   28.50 
  -6  -2  -1  489.55   21.70 
  -6  -2  -1  497.25   29.70 
  -6  -2  -1  533.55   34.80 
   6  -2   1  512.05   26.80 
  -6  -2  -1  509.95   26.40 
   6  -2   1  488.35   22.40 
  -6  -2  -1  459.55   28.30 
   6  -2   1  508.15   22.70 
  -6  -2  -1  475.75   27.10 
  -6  -2  -1  506.25   28.30 
   6  -2   1  451.95   31.00 
  -6   2  -1  541.35   30.00 
   6   2   1  535.05   29.00 
  -6   2  -1  477.85   23.90 
   6   2   1  511.55   32.30 
   6   2   1  479.65   31.70 
   6   2   1  506.35   29.90 
  -6   2  -1  528.55   31.40 
   6   2   1  507.45   28.60 
  -6   2  -1  509.75   28.80 
   6   2   1  497.55   31.90 
   6   2   1  510.85   26.60 
  -6   2  -1  498.05   22.40 
   6   2   1  499.65   28.90 
  -6   2  -1  470.75   25.70 
   6   2   1  535.15   31.50 
  -6   2  -1  490.15   29.60 
  -6   2  -1  502.95   23.90 
  -6   2  -1  546.15   36.00 
  -6   2  -1  503.55   22.70 
   6   2   1  503.35   27.90 
   6   2   1  470.25   31.30 
  -6   2  -1  501.95   26.60 
  -6   2  -1  501.85   26.60 
  -6   2  -1  496.85   34.30 
   6   2   1  492.25   23.40 
  -6   2  -1  499.65   22.00 
   7  -2   1  705.23   43.80 
   7  -2   1  728.43   42.10 
   7  -2   1  793.12   39.20 
   7  -2   1  792.82   40.60 
   7  -2   1  793.62   50.29 
  -7  -2  -1  792.92   40.90 
   7  -2   1  783.12   37.20 
  -7  -2  -1  762.42   36.20 
   7  -2   1  753.82   44.80 
   7  -2   1  761.32   41.40 
   7  -2   1  748.13   39.10 
  -7  -2  -1  799.12   39.10 
  -7  -2  -1  793.82   40.30 
  -7  -2  -1  745.43   46.90 
  -7  -2  -1  719.73   43.30 
   7  -2   1  746.83   39.80 
   7  -2   1  708.33   44.50 
   7  -2   1  733.93   39.60 
  -7  -2  -1  716.63   37.70 
  -7  -2  -1  771.62   40.10 
  -7  -2  -1  717.23   40.30 
  -7  -2  -1  737.43   36.10 
   7   2   1  805.82   45.20 
   7   2   1  768.72   38.70 
   7   2   1  858.41   42.20 
  -7   2  -1  733.63   40.60 
   7   2   1  723.13   43.40 
  -7   2  -1  723.23   45.50 
  -7   2  -1  826.62   37.50 
  -7   2  -1  742.83   36.90 
  -7   2  -1  705.43   36.60 
   7   2   1  693.93   38.80 
   7   2   1  799.22   44.40 
  -7   2  -1  771.72   42.80 
   7   2   1  756.32   32.50 
   7   2   1  708.53   36.30 
   7   2   1  764.22   44.20 
   7   2   1  778.42   43.00 
  -7   2  -1  753.82   47.70 
  -7   2  -1  739.33   40.90 
  -7   2  -1  768.32   31.80 
   7   2   1  775.12   39.40 
   7   2   1  775.52   40.60 
  -7   2  -1  703.13   39.20 
   8  -2   1  133.59   16.20 
  -8  -2  -1  170.48   20.60 
   8  -2   1  129.09   18.30 
   8  -2   1  150.38   18.90 
   8  -2   1  104.29   19.70 
   8  -2   1   95.39   18.70 
  -8  -2  -1  121.29   20.20 
  -8  -2  -1  182.28   27.50 
   8  -2   1  133.49   16.70 
  -8  -2  -1  129.69   20.20 
  -8  -2  -1  133.39   15.40 
  -8  -2  -1  145.59   15.60 
   8  -2   1  108.29   16.90 
  -8  -2  -1  142.89   19.20 
   8  -2   1  136.39   19.50 
   8  -2   1  123.89   21.80 
  -8  -2  -1  153.18   19.50 
  -8  -2  -1  136.39   19.50 
   8  -2   1  151.18   21.60 
   8  -2   1  101.79   15.70 
   8  -2   1  146.79   26.00 
  -8  -2  -1   93.79   15.20 
  -8   2  -1  136.89   16.00 
   8   2   1  136.29   18.20 
   8   2   1  107.49   19.70 
  -8   2  -1  118.69   18.00 
   8   2   1  137.59   17.30 
  -8   2  -1  150.78   19.10 
   8   2   1  154.28   19.10 
  -8   2  -1  134.29   24.10 
  -8   2  -1  140.39   20.00 
  -8   2  -1  153.68   17.10 
   8   2   1  111.89   16.70 
  -8   2  -1  114.09   21.60 
   8   2   1  143.59   22.10 
  -8   2  -1  114.99   19.30 
   8   2   1  142.39   21.20 
   8   2   1  124.89   20.30 
   8   2   1  144.59   16.20 
   8   2   1  156.38   21.30 
   8   2   1  111.59   17.80 
  -8   2  -1  153.68   17.50 
  -9  -2  -1  192.28   22.90 
  -9  -2  -1  171.28   21.80 
  -9  -2  -1  234.18   26.40 
  -9  -2  -1  251.47   27.20 
   9  -2   1  186.88   27.40 
   9  -2   1  226.18   22.50 
   9  -2   1  221.18   24.50 
  -9  -2  -1  174.58   20.80 
  -9  -2  -1  186.78   30.00 
   9  -2   1  160.48   20.40 
  -9  -2  -1  170.98   25.20 
   9  -2   1  208.78   32.10 
   9  -2   1  200.28   28.30 
   9  -2   1  182.28   20.10 
   9  -2   1  186.18   23.20 
   9  -2   1  216.78   25.00 
   9  -2   1  204.98   25.40 
   9  -2   1  216.48   28.80 
   9  -2   1  144.79   23.40 
  -9   2  -1  217.58   22.30 
  -9   2  -1  222.98   27.30 
  -9   2  -1  178.18   29.10 
   9   2   1  186.98   27.20 
   9   2   1  209.08   28.30 
   9   2   1  214.68   26.30 
  -9   2  -1  197.58   20.90 
   9   2   1  205.98   21.50 
  -9   2  -1  156.88   26.40 
   9   2   1  199.78   23.50 
  -9   2  -1  159.98   23.70 
  -9   2  -1  186.68   23.20 
   9   2   1  177.18   22.30 
   9   2   1  204.78   24.00 
  -9   2  -1  173.68   20.40 
   9   2   1  203.78   25.20 
   9   2   1  226.08   28.70 
   9   2   1  209.68   22.70 
  -9   2  -1  197.68   25.00 
   9   2   1  183.98   25.90 
  10  -2   1   35.20   16.60 
 -10  -2  -1   -3.00   12.30 
  10  -2   1    9.60   11.40 
 -10  -2  -1   19.40   11.90 
  10  -2   1   13.00   12.20 
  10  -2   1   27.20   15.70 
  10  -2   1   16.70   16.60 
  10  -2   1   12.60   14.40 
  10  -2   1   46.90   17.50 
  10  -2   1   34.50   16.20 
 -10  -2  -1   18.90   10.90 
 -10  -2  -1   23.20   12.60 
 -10  -2  -1   24.40   16.50 
  10  -2   1   14.00   11.90 
 -10  -2  -1   30.10   13.60 
  10  -2   1   33.60   13.20 
 -10  -2  -1   15.50   11.10 
  10  -2   1   19.90   12.00 
 -10  -2  -1   21.50   17.20 
  10   2   1   21.70   12.60 
 -10   2  -1   29.30   12.50 
  10   2   1   33.90   17.20 
  10   2   1   11.80   16.10 
 -10   2  -1   25.30   13.30 
  10   2   1   26.90   13.80 
 -10   2  -1   34.20   14.20 
 -10   2  -1   29.90   15.90 
  10   2   1   17.30   11.90 
  10   2   1   29.30   16.30 
 -10   2  -1   34.70   15.30 
  10   2   1   17.90   14.70 
  10   2   1   30.80   15.60 
 -10   2  -1   15.50   14.90 
 -10  -3   1  247.68   30.00 
  10  -3  -1  227.58   26.60 
  10  -3  -1  240.78   38.20 
  10  -3  -1  258.87   29.70 
  10  -3  -1  236.98   31.70 
 -10  -3   1  268.07   31.00 
 -10  -3   1  219.48   23.90 
  10  -3  -1  250.87   29.00 
 -10  -3   1  289.37   32.10 
  10  -3  -1  299.07   34.70 
  10  -3  -1  224.48   33.90 
 -10  -3   1  283.87   35.10 
  10  -3  -1  232.28   28.30 
  10  -3  -1  254.77   28.80 
  10  -3  -1  315.67   38.80 
  10  -3  -1  283.87   36.20 
  10   3  -1  242.18   31.80 
 -10   3   1  223.88   31.10 
  10   3  -1  263.77   30.00 
  10   3  -1  246.98   32.60 
 -10   3   1  249.97   27.20 
  10   3  -1  252.67   29.40 
 -10   3   1  206.48   28.20 
  10   3  -1  197.88   30.00 
 -10   3   1  273.17   39.00 
  10   3  -1  260.17   30.40 
  10   3  -1  272.37   34.60 
 -10   3   1  293.67   28.60 
  10   3  -1  260.37   31.50 
  -9  -3   1  215.48   23.60 
   9  -3  -1  213.88   23.40 
   9  -3  -1  176.48   26.80 
  -9  -3   1  190.98   28.50 
   9  -3  -1  179.08   21.90 
   9  -3  -1  139.99   25.80 
   9  -3  -1  209.08   25.00 
   9  -3  -1  236.48   26.30 
  -9  -3   1  202.88   25.40 
   9  -3  -1  191.98   23.60 
  -9  -3   1  222.98   26.40 
   9  -3  -1  217.28   27.80 
   9  -3  -1  229.58   31.50 
  -9  -3   1  226.88   27.20 
  -9  -3   1  229.18   28.90 
   9  -3  -1  155.68   30.50 
  -9  -3   1  238.18   23.80 
   9  -3  -1  224.88   25.10 
   9   3  -1  199.88   26.30 
   9   3  -1  174.98   26.40 
  -9   3   1  211.38   23.70 
   9   3  -1  179.88   27.00 
  -9   3   1  199.28   30.60 
  -9   3   1  219.08   25.70 
   9   3  -1  197.78   25.20 
  -9   3   1  208.68   26.30 
   9   3  -1  215.88   26.90 
   9   3  -1  193.08   23.60 
  -9   3   1  232.38   30.80 
   9   3  -1  230.58   25.40 
   9   3  -1  194.08   27.90 
  -9   3   1  226.48   27.70 
  -9   3   1  193.18   22.90 
  -8  -3   1  144.39   22.00 
   8  -3  -1  145.79   21.50 
  -8  -3   1  155.48   24.00 
   8  -3  -1  146.39   22.70 
  -8  -3   1  152.08   18.30 
  -8  -3   1  122.39   16.00 
   8  -3  -1  153.28   27.70 
  -8  -3   1  133.49   17.10 
   8  -3  -1   90.19   20.10 
  -8  -3   1  132.49   19.70 
  -8  -3   1  143.99   20.00 
   8  -3  -1  103.79   16.80 
   8  -3  -1  127.79   17.90 
   8  -3  -1  120.69   16.30 
   8  -3  -1  140.09   17.80 
  -8  -3   1  115.49   18.00 
   8  -3  -1  131.09   18.20 
   8  -3  -1  106.49   17.60 
   8  -3  -1  144.99   19.10 
  -8   3   1  116.69   17.50 
  -8   3   1  115.09   14.90 
   8   3  -1  125.89   20.70 
   8   3  -1  133.39   16.70 
   8   3  -1  123.69   18.60 
  -8   3   1  142.09   15.40 
   8   3  -1  137.09   16.40 
   8   3  -1  110.99   20.20 
   8   3  -1  126.89   21.60 
  -8   3   1  125.89   19.30 
  -8   3   1  145.99   26.00 
  -8   3   1  125.39   17.70 
  -8   3   1  154.18   22.10 
   8   3  -1  125.09   20.20 
  -8   3   1  141.49   22.80 
   8   3  -1  135.09   18.30 
   8   3  -1  112.19   18.70 
   8   3  -1  140.69   20.40 
  -8   3   1  162.68   19.40 
   7  -3  -1  142.69   18.20 
  -7  -3   1  154.78   17.00 
  -7  -3   1  151.58   21.00 
   7  -3  -1  189.78   27.90 
   7  -3  -1  177.98   19.00 
  -7  -3   1  130.09   16.30 
   7  -3  -1  157.28   21.20 
   7  -3  -1  199.28   20.30 
   7  -3  -1  177.58   18.30 
  -7  -3   1  145.99   19.00 
   7  -3  -1  172.58   18.00 
   7  -3  -1  186.88   25.30 
  -7  -3   1  196.88   21.80 
  -7  -3   1  180.78   24.10 
   7  -3  -1  151.18   22.80 
   7  -3  -1  180.78   19.10 
  -7  -3   1  154.78   19.30 
   7  -3  -1  177.98   23.30 
  -7  -3   1  160.08   17.20 
   7  -3  -1  162.18   19.30 
  -7   3   1  178.98   16.70 
   7   3  -1  133.19   19.10 
   7   3  -1  158.78   15.10 
   7   3  -1  186.18   18.50 
   7   3  -1  175.28   21.80 
  -7   3   1  184.28   18.90 
  -7   3   1  175.58   19.70 
  -7   3   1  129.89   22.70 
  -7   3   1  181.08   21.90 
   7   3  -1  142.09   20.40 
  -7   3   1  179.38   19.00 
  -7   3   1  153.38   22.50 
   7   3  -1  165.78   18.70 
   7   3  -1  185.88   21.90 
  -7   3   1  183.68   14.30 
  -7   3   1  195.58   21.60 
   7   3  -1  146.49   19.10 
   7   3  -1  161.38   22.30 
   7   3  -1  147.69   18.30 
  -6  -3   1 1017.80   46.30 
  -6  -3   1 1047.60   47.80 
  -6  -3   1 1044.10   41.10 
  -6  -3   1  944.51   48.20 
   6  -3  -1 1062.09   48.40 
   6  -3  -1 1002.60   47.40 
   6  -3  -1 1051.39   47.70 
  -6  -3   1 1072.79   50.29 
   6  -3  -1 1060.59   45.90 
   6  -3  -1 1048.40   47.20 
  -6  -3   1 1061.79   47.60 
   6  -3  -1 1101.19   48.20 
  -6  -3   1 1099.39   41.10 
   6  -3  -1 1102.09   54.29 
   6  -3  -1 1085.59   51.89 
   6  -3  -1 1112.79   56.49 
  -6  -3   1 1029.60   49.70 
  -6  -3   1 1015.10   52.39 
   6  -3  -1  992.90   57.59 
   6  -3  -1 1046.30   47.50 
  -6  -3   1 1054.39   52.39 
   6  -3  -1 1074.09   50.49 
   6  -3  -1 1011.20   54.99 
  -6  -3   1  954.00   41.70 
   6   3  -1 1041.20   43.90 
  -6   3   1 1092.49   42.90 
   6   3  -1 1076.39   52.69 
   6   3  -1 1084.29   50.69 
   6   3  -1  998.70   49.99 
   6   3  -1 1007.40   39.20 
   6   3  -1 1068.19   49.99 
   6   3  -1 1016.30   52.59 
  -6   3   1 1004.30   44.40 
  -6   3   1  989.20   49.50 
  -6   3   1 1050.29   55.19 
   6   3  -1 1068.29   51.49 
  -6   3   1 1010.10   46.50 
   6   3  -1 1041.40   41.60 
  -6   3   1 1047.70   57.09 
  -6   3   1 1049.20   43.20 
  -6   3   1 1028.80   51.09 
  -6   3   1 1080.49   47.70 
   6   3  -1 1029.70   47.80 
  -6   3   1 1040.60   38.80 
   6   3  -1 1035.40   48.90 
   6   3  -1 1013.90   46.10 
  -6   3   1 1085.59   48.30 
  -5  -3   1 1633.24   67.39 
  -5  -3   1 1616.84   58.29 
  -5  -3   1 1661.33   63.59 
  -5  -3   1 1629.14   66.99 
   5  -3  -1 1623.44   65.79 
  -5  -3   1 1652.03   67.99 
  -5  -3   1 1634.84   65.39 
   5  -3  -1 1552.14   68.69 
   5  -3  -1 1587.94   73.19 
  -5  -3   1 1630.74   70.29 
   5  -3  -1 1618.94   64.99 
   5  -3  -1 1696.53   65.99 
  -5  -3   1 1655.43   74.99 
   5  -3  -1 1657.33   76.39 
  -5  -3   1 1598.74   68.99 
   5  -3  -1 1697.93   69.69 
  -5  -3   1 1597.44   66.29 
  -5  -3   1 1663.93   65.89 
   5  -3  -1 1640.84   71.49 
  -5  -3   1 1541.35   68.09 
   5  -3  -1 1590.64   72.79 
   5  -3  -1 1539.75   65.69 
  -5  -3   1 1607.64   58.59 
  -5  -3   1 1596.54   62.19 
   5  -3  -1 1615.54   65.49 
   5  -3  -1 1636.24   67.09 
   5  -3  -1 1593.04   65.99 
   5   3  -1 1562.14   68.19 
  -5   3   1 1652.03   73.49 
   5   3  -1 1622.34   67.49 
   5   3  -1 1699.73   67.19 
  -5   3   1 1643.44   75.29 
  -5   3   1 1656.73   61.39 
  -5   3   1 1623.34   65.69 
   5   3  -1 1626.14   68.49 
   5   3  -1 1648.73   59.59 
   5   3  -1 1683.43   62.69 
  -5   3   1 1640.14   64.59 
  -5   3   1 1646.54   59.09 
  -5   3   1 1633.44   63.29 
   5   3  -1 1643.44   61.49 
   5   3  -1 1696.23   65.19 
  -5   3   1 1572.14   59.89 
  -5   3   1 1629.34   65.19 
   5   3  -1 1680.03   70.79 
   5   3  -1 1610.24   60.29 
  -5   3   1 1684.33   69.79 
   5   3  -1 1588.54   67.69 
  -5   3   1 1711.83   67.99 
   5   3  -1 1697.23   66.39 
   5   3  -1 1611.14   60.39 
   5   3  -1 1688.13   71.29 
  -5   3   1 1647.44   63.09 
  -4  -3   1 1256.47   53.59 
   4  -3  -1 1369.86   55.79 
  -4  -3   1 1253.27   53.79 
   4  -3  -1 1251.27   60.79 
  -4  -3   1 1292.67   59.69 
   4  -3  -1 1336.37   52.49 
  -4  -3   1 1259.27   54.79 
   4  -3  -1 1207.68   57.49 
  -4  -3   1 1315.47   54.39 
   4  -3  -1 1253.67   52.99 
   4  -3  -1 1242.28   58.79 
   4  -3  -1 1199.28   51.09 
  -4  -3   1 1246.58   50.29 
  -4  -3   1 1200.88   52.79 
   4  -3  -1 1246.28   56.79 
   4  -3  -1 1278.77   53.89 
  -4  -3   1 1284.77   53.09 
   4  -3  -1 1261.67   52.49 
  -4  -3   1 1277.37   52.39 
  -4  -3   1 1258.27   55.49 
  -4  -3   1 1327.17   52.49 
   4  -3  -1 1266.07   50.99 
  -4  -3   1 1308.37   52.39 
  -4   3   1 1253.97   50.89 
  -4   3   1 1303.27   53.99 
  -4   3   1 1357.36   53.99 
   4   3  -1 1364.36   50.09 
  -4   3   1 1250.27   48.30 
   4   3  -1 1277.37   49.50 
   4   3  -1 1329.27   56.59 
   4   3  -1 1273.97   48.90 
   4   3  -1 1297.17   54.19 
   4   3  -1 1279.97   49.50 
  -4   3   1 1271.27   50.89 
   4   3  -1 1193.38   54.09 
   4   3  -1 1257.37   52.39 
   4   3  -1 1316.47   48.50 
  -4   3   1 1258.87   48.10 
  -4   3   1 1214.88   57.99 
  -4   3   1 1200.28   59.79 
   4   3  -1 1350.96   56.59 
   4   3  -1 1273.07   52.79 
  -4   3   1 1283.37   50.49 
   4   3  -1 1291.07   54.79 
   4   3  -1 1289.37   52.99 
  -4   3   1 1326.17   55.39 
   4   3  -1 1267.57   51.59 
   3  -3  -1 1316.07   56.99 
  -3  -3   1 1399.56   53.69 
   3  -3  -1 1258.47   52.99 
  -3  -3   1 1322.57   55.69 
  -3  -3   1 1407.66   59.79 
   3  -3  -1 1336.67   59.19 
  -3  -3   1 1402.46   54.69 
   3  -3  -1 1335.07   52.19 
   3  -3  -1 1290.97   54.99 
  -3  -3   1 1345.77   53.29 
   3  -3  -1 1302.37   50.89 
   3  -3  -1 1377.66   53.99 
  -3  -3   1 1394.96   54.39 
  -3  -3   1 1393.36   54.89 
  -3  -3   1 1375.56   52.79 
  -3  -3   1 1375.86   50.99 
  -3  -3   1 1387.66   54.39 
  -3  -3   1 1344.37   53.89 
  -3  -3   1 1391.26   56.69 
   3  -3  -1 1281.97   60.69 
   3  -3  -1 1354.96   58.09 
   3  -3  -1 1308.27   54.39 
  -3  -3   1 1367.86   52.29 
   3   3  -1 1375.86   53.09 
  -3   3   1 1279.07   52.49 
   3   3  -1 1377.56   56.49 
   3   3  -1 1358.86   51.49 
   3   3  -1 1332.27   53.09 
  -3   3   1 1327.27   49.40 
   3   3  -1 1329.17   51.79 
  -3   3   1 1326.67   53.69 
  -3   3   1 1275.87   59.79 
  -3   3   1 1307.27   63.59 
  -3   3   1 1342.57   58.59 
   3   3  -1 1301.87   56.09 
  -3   3   1 1342.17   50.69 
  -3   3   1 1279.27   50.79 
   3   3  -1 1420.26   56.39 
  -3   3   1 1222.38   54.79 
   3   3  -1 1344.47   60.79 
   3   3  -1 1360.36   53.49 
   3   3  -1 1364.46   54.19 
   3   3  -1 1335.77   52.99 
   3   3  -1 1279.77   55.39 
  -3   3   1 1381.66   51.39 
   3   3  -1 1327.47   51.79 
   2  -3  -1  224.88   14.90 
  -2  -3   1  229.98   16.80 
   2  -3  -1  237.68   15.40 
   2  -3  -1  243.18   20.90 
   2  -3  -1  223.68   12.50 
  -2  -3   1  227.58   18.20 
  -2  -3   1  248.38   15.00 
  -2  -3   1  223.68   10.20 
  -2  -3   1  228.98   13.90 
   2  -3  -1  204.98   17.70 
   2  -3  -1  256.77   16.30 
   2  -3  -1  217.28   15.30 
   2  -3  -1  206.38   16.60 
  -2  -3   1  225.68    9.90 
  -2  -3   1  206.38   14.60 
  -2  -3   1  245.98   15.50 
  -2  -3   1  227.68   13.50 
   2  -3  -1  221.98   13.70 
  -2  -3   1  220.68   12.70 
   2  -3  -1  241.38   20.50 
   2  -3  -1  223.38   16.70 
  -2  -3   1  234.28   14.80 
  -2  -3   1  215.38   13.00 
   2   3  -1  199.88   17.90 
  -2   3   1  234.88   19.60 
  -2   3   1  214.28   20.70 
   2   3  -1  226.58   19.20 
  -2   3   1  212.18   17.30 
  -2   3   1  242.28   14.90 
   2   3  -1  220.18   14.00 
   2   3  -1  234.78   15.00 
  -2   3   1  225.38   15.10 
   2   3  -1  249.08   13.10 
   2   3  -1  224.88   14.70 
   2   3  -1  249.97   16.50 
   2   3  -1  229.58   14.40 
   2   3  -1  205.48   14.40 
  -2   3   1  238.88   13.20 
   2   3  -1  243.68   17.20 
  -2   3   1  231.58   12.50 
   2   3  -1  259.87   14.20 
   2   3  -1  213.08   13.90 
   2   3  -1  237.48   17.40 
  -2   3   1  226.98   12.30 
   2   3  -1  220.38   14.50 
  -2   3   1  215.88   16.30 
  -2   3   1  219.08   12.60 
  -1  -3   1  613.34   26.70 
  -1  -3   1  594.74   24.00 
  -1  -3   1  586.44   29.50 
   1  -3  -1  595.94   30.20 
   1  -3  -1  579.14   27.10 
  -1  -3   1  561.84   25.60 
  -1  -3   1  529.05   30.20 
  -1  -3   1  638.04   38.20 
  -1  -3   1  562.34   27.20 
   1  -3  -1  546.65   35.80 
  -1  -3   1  547.05   29.50 
  -1  -3   1  583.34   24.10 
   1  -3  -1  608.34   27.50 
   1  -3  -1  624.94   31.40 
  -1  -3   1  544.35   28.60 
   1  -3  -1  617.24   32.30 
  -1  -3   1  610.44   27.40 
  -1  -3   1  588.94   31.90 
   1  -3  -1  596.24   36.20 
   1  -3  -1  531.65   28.30 
  -1  -3   1  580.54   27.40 
   1  -3  -1  611.64   26.40 
   1  -3  -1  532.85   27.10 
  -1  -3   1  612.14   29.70 
  -1  -3   1  592.74   26.30 
  -1  -3   1  603.54   26.90 
  -1  -3   1  580.14   25.50 
  -1   3   1  581.14   26.60 
   1   3  -1  502.55   25.90 
   1   3  -1  646.74   31.70 
   1   3  -1  606.64   25.50 
  -1   3   1  583.64   35.70 
  -1   3   1  581.34   31.00 
   1   3  -1  605.54   33.00 
   1   3  -1  578.74   26.80 
   1   3  -1  565.04   30.70 
  -1   3   1  593.34   26.20 
  -1   3   1  547.75   27.10 
   1   3  -1  580.64   23.50 
   1   3  -1  567.54   27.60 
   1   3  -1  601.74   27.20 
   1   3  -1  564.94   26.00 
  -1   3   1  589.94   27.30 
  -1   3   1  570.64   25.50 
  -1   3   1  665.93   25.60 
  -1   3   1  629.94   29.10 
   1   3  -1  634.84   27.30 
  -1   3   1  526.25   29.70 
   1   3  -1  583.84   27.20 
   1   3  -1  613.24   27.00 
  -1   3   1  623.14   30.50 
   0  -3   1  420.06   24.20 
   0  -3   1  398.76   19.50 
   0  -3   1  373.86   23.60 
   0  -3  -1  352.96   21.50 
   0  -3  -1  358.56   18.20 
   0  -3   1  393.16   28.50 
   0  -3  -1  370.06   23.50 
   0  -3   1  380.36   21.90 
   0  -3   1  434.86   25.70 
   0  -3  -1  421.16   34.60 
   0  -3  -1  385.56   18.90 
   0  -3   1  372.76   20.10 
   0  -3  -1  466.15   29.20 
   0  -3   1  380.26   18.90 
   0  -3   1  377.46   32.70 
   0  -3  -1  387.96   19.20 
   0  -3  -1  370.96   24.20 
   0  -3   1  417.66   21.30 
   0  -3  -1  360.76   23.50 
   0  -3  -1  403.26   19.20 
   0  -3  -1  451.75   33.70 
   0  -3   1  401.16   20.90 
   0  -3   1  346.57   20.00 
   0  -3   1  345.77   21.10 
   0  -3   1  381.16   20.30 
   0   3   1  381.56   17.50 
   0   3  -1  357.06   26.10 
   0   3  -1  400.46   20.80 
   0   3  -1  366.36   19.70 
   0   3   1  351.06   22.70 
   0   3  -1  381.26   24.40 
   0   3   1  396.86   18.90 
   0   3   1  370.76   19.40 
   0   3   1  431.86   19.50 
   0   3   1  391.06   19.60 
   0   3  -1  371.26   19.60 
   0   3  -1  379.86   18.60 
   0   3   1  401.96   18.70 
   0   3   1  364.26   21.10 
   0   3   1  423.86   32.10 
   0   3  -1  368.66   21.00 
   0   3   1  381.46   18.10 
   0   3  -1  357.66   19.10 
   0   3  -1  360.66   22.80 
   0   3   1  383.06   20.80 
   0   3  -1  368.06   20.00 
   0   3  -1  356.06   19.20 
  -1  -3  -1 4183.98  146.79 
   1  -3   1 4039.80  145.99 
  -1  -3  -1 3776.32  155.28 
   1  -3   1 4293.97  146.79 
  -1  -3  -1 4115.19  144.49 
  -1  -3  -1 4220.68  144.19 
   1  -3   1 3845.02  144.39 
  -1  -3  -1 4254.67  142.69 
  -1  -3  -1 4067.59  150.78 
  -1  -3  -1 4108.69  143.89 
  -1  -3  -1 3854.31  149.88 
  -1  -3  -1 4275.47  144.09 
  -1  -3  -1 3947.81  147.69 
   1  -3   1 3985.80  151.68 
  -1  -3  -1 3710.63  148.79 
  -1  -3  -1 4038.00  148.19 
   1  -3   1 3924.01  144.89 
   1  -3   1 4196.08  149.19 
  -1  -3  -1 4508.35  160.48 
   1  -3   1 4195.58  147.69 
  -1  -3  -1 3654.03  149.19 
   1  -3   1 3956.20  145.89 
   1  -3   1 4265.37  146.09 
  -1  -3  -1 4034.80  143.19 
   1  -3   1 4048.89  147.19 
   1  -3   1 4080.69  146.49 
  -1  -3  -1 4136.19  143.49 
  -1  -3  -1 4221.38  145.79 
   1  -3   1 3933.21  155.88 
  -1  -3  -1 4167.68  141.19 
   1   3   1 4099.09  144.59 
   1   3   1 3908.61  143.39 
   1   3   1 4164.98  143.59 
  -1   3  -1 4084.89  146.19 
   1   3   1 4198.98  145.89 
  -1   3  -1 4045.10  144.29 
  -1   3  -1 3939.11  145.89 
   1   3   1 4179.48  144.79 
   1   3   1 4040.60  144.09 
   1   3   1 4297.47  153.18 
   1   3   1 4098.89  143.99 
  -1   3  -1 4032.00  145.79 
   1   3   1 3880.81  143.49 
  -1   3  -1 4040.80  150.18 
   1   3   1 4157.28  143.69 
   1   3   1 4202.18  156.58 
   1   3   1 4018.00  150.18 
  -1   3  -1 4044.80  145.69 
   1   3   1 4163.68  142.89 
  -1   3  -1 4179.98  148.49 
   1   3   1 4200.58  143.79 
  -1   3  -1 4097.69  147.29 
  -1   3  -1 3951.50  145.19 
   1   3   1 4110.79  142.09 
  -1   3  -1 4098.39  145.29 
   1   3   1 4093.69  142.99 
  -1   3  -1 4362.46  148.09 
   2  -3   1 2393.76   89.79 
  -2  -3  -1 2316.47   86.59 
  -2  -3  -1 2352.36   88.89 
   2  -3   1 2301.37   90.99 
  -2  -3  -1 2459.15   88.49 
  -2  -3  -1 2392.36   94.39 
   2  -3   1 2310.77   92.69 
  -2  -3  -1 2365.76   86.09 
  -2  -3  -1 2270.87   82.89 
  -2  -3  -1 2369.06   87.39 
  -2  -3  -1 2439.46   86.69 
   2  -3   1 2327.47   90.89 
  -2  -3  -1 2444.96   87.39 
  -2  -3  -1 2297.97   90.89 
   2  -3   1 2413.76   86.49 
   2  -3   1 2424.16   86.99 
   2  -3   1 2334.17   90.49 
   2  -3   1 2385.96   88.79 
   2  -3   1 2310.97   86.39 
   2  -3   1 2341.27   88.19 
   2  -3   1 2400.86   95.29 
   2   3   1 2258.17   87.89 
   2   3   1 2387.56   88.19 
   2   3   1 2360.06   87.69 
   2   3   1 2464.55   97.09 
   2   3   1 2340.47   88.99 
   2   3   1 2337.97   86.59 
  -2   3  -1 2301.37   86.89 
   2   3   1 2331.87   85.99 
   2   3   1 2498.25   91.69 
  -2   3  -1 2254.77   92.09 
  -2   3  -1 2326.77   93.99 
   2   3   1 2458.05   87.09 
   2   3   1 2389.36   85.49 
  -2   3  -1 2318.27   87.49 
  -2   3  -1 2498.45   86.39 
   2   3   1 2380.66   85.59 
   2   3   1 2472.95   91.99 
  -2   3  -1 2357.36   91.49 
  -2   3  -1 2390.66   86.49 
   2   3   1 2398.56   86.79 
  -2   3  -1 2365.86   88.39 
  -2   3  -1 2408.26   86.99 
   2   3   1 2295.17   88.99 
   2   3   1 2383.76   86.99 
  -3  -3  -1 2090.59   79.69 
   3  -3   1 2039.80   79.89 
   3  -3   1 2037.90   77.19 
   3  -3   1 2137.99   78.69 
   3  -3   1 2086.59   80.39 
  -3  -3  -1 2006.10   77.69 
   3  -3   1 2069.19   77.19 
   3  -3   1 2195.58   82.59 
  -3  -3  -1 1998.90   80.89 
   3  -3   1 2018.40   82.79 
   3  -3   1 2078.69   80.79 
  -3  -3  -1 2107.99   77.89 
  -3  -3  -1 2127.59   74.19 
  -3  -3  -1 2005.70   85.29 
  -3  -3  -1 2016.90   77.69 
  -3  -3  -1 2078.09   80.19 
   3  -3   1 2123.89   83.39 
   3  -3   1 2070.89   85.69 
  -3  -3  -1 2091.29   76.49 
  -3  -3  -1 2022.20   77.79 
  -3  -3  -1 2084.99   77.99 
   3   3   1 2059.29   79.99 
   3   3   1 2068.69   74.69 
   3   3   1 1984.00   79.59 
   3   3   1 2032.50   75.49 
   3   3   1 2030.10   81.49 
   3   3   1 2051.89   80.49 
  -3   3  -1 2135.79   77.09 
   3   3   1 2112.19   76.59 
   3   3   1 2026.20   76.09 
   3   3   1 2025.80   75.79 
   3   3   1 2106.49   79.19 
   3   3   1 1990.20   86.99 
   3   3   1 2056.89   76.69 
   3   3   1 1995.50   79.59 
  -3   3  -1 2029.20   83.49 
  -3   3  -1 2060.19   75.19 
   3   3   1 2039.30   78.19 
  -3   3  -1 1970.80   78.19 
  -3   3  -1 1948.71   83.59 
  -3   3  -1 2056.89   78.49 
   3   3   1 2073.29   77.79 
  -4  -3  -1  405.66   25.00 
   4  -3   1  348.47   22.90 
   4  -3   1  395.76   22.50 
   4  -3   1  403.36   21.40 
  -4  -3  -1  400.76   22.30 
   4  -3   1  409.36   23.40 
  -4  -3  -1  407.76   22.40 
  -4  -3  -1  379.36   22.20 
  -4  -3  -1  405.16   20.10 
  -4  -3  -1  352.26   27.40 
   4  -3   1  385.26   26.40 
   4  -3   1  401.86   24.30 
   4  -3   1  404.36   22.30 
  -4  -3  -1  405.06   19.80 
   4  -3   1  379.16   26.50 
  -4  -3  -1  380.06   23.10 
  -4  -3  -1  411.16   25.70 
  -4  -3  -1  375.56   18.80 
   4  -3   1  424.66   25.40 
  -4  -3  -1  380.86   22.40 
  -4  -3  -1  378.06   21.50 
   4  -3   1  393.56   24.70 
   4  -3   1  374.16   27.50 
  -4   3  -1  399.86   28.20 
  -4   3  -1  384.26   21.20 
   4   3   1  392.46   19.40 
   4   3   1  371.46   22.10 
  -4   3  -1  365.56   21.30 
  -4   3  -1  384.16   27.40 
   4   3   1  366.96   19.00 
   4   3   1  371.06   20.30 
  -4   3  -1  389.26   19.70 
   4   3   1  322.17   22.40 
   4   3   1  404.26   23.70 
  -4   3  -1  392.96   23.40 
   4   3   1  372.96   19.90 
   4   3   1  390.36   30.40 
   4   3   1  407.36   22.10 
   4   3   1  405.76   22.50 
   4   3   1  388.46   23.80 
   4   3   1  380.16   18.30 
   4   3   1  410.76   24.90 
   4   3   1  339.97   23.20 
  -4   3  -1  370.16   22.60 
   4   3   1  354.96   24.70 
   5  -3   1  126.09   19.20 
   5  -3   1  110.59   12.00 
  -5  -3  -1  128.69   14.00 
  -5  -3  -1  131.79   17.50 
   5  -3   1  109.99   13.90 
   5  -3   1  136.69   14.90 
  -5  -3  -1  113.89   14.30 
  -5  -3  -1  123.99   14.50 
  -5  -3  -1  124.39   13.90 
   5  -3   1  118.59   16.60 
   5  -3   1  107.39   16.70 
  -5  -3  -1  134.29   15.30 
  -5  -3  -1   91.79   17.00 
  -5  -3  -1  112.09   11.00 
   5  -3   1  156.58   15.20 
   5  -3   1  176.78   21.60 
  -5  -3  -1  129.39   13.00 
   5  -3   1  129.39   15.40 
  -5  -3  -1  126.19   13.80 
   5  -3   1  123.89   13.90 
   5  -3   1  122.59   14.00 
  -5  -3  -1  113.09   11.30 
   5  -3   1  149.88   13.80 
  -5  -3  -1  117.99   14.30 
  -5  -3  -1  142.59   17.80 
   5  -3   1  106.99   14.60 
  -5   3  -1  138.09   13.80 
   5   3   1   89.89   11.20 
   5   3   1  129.39   14.00 
   5   3   1  139.09   14.40 
  -5   3  -1  122.79    9.90 
   5   3   1  121.89   15.70 
   5   3   1  119.69    8.90 
   5   3   1  101.19   14.90 
   5   3   1  126.59   10.10 
  -5   3  -1  127.09   15.20 
   5   3   1  129.39   15.80 
   5   3   1  119.19   11.50 
   5   3   1  141.19   17.50 
   5   3   1  159.28   17.20 
  -5   3  -1  130.79   12.40 
  -5   3  -1  118.49   14.90 
   5   3   1  132.29   15.60 
  -5   3  -1  134.99   18.70 
   5   3   1  111.99   10.30 
  -5   3  -1  103.09   17.00 
  -5   3  -1  167.08   16.20 
   5   3   1   95.69   13.00 
  -6  -3  -1  369.76   23.40 
  -6  -3  -1  371.56   19.60 
  -6  -3  -1  403.66   29.40 
   6  -3   1  331.87   22.60 
   6  -3   1  369.36   26.50 
   6  -3   1  366.46   24.90 
   6  -3   1  399.26   23.30 
  -6  -3  -1  365.26   28.80 
   6  -3   1  377.86   25.10 
  -6  -3  -1  315.87   23.80 
  -6  -3  -1  338.07   22.80 
  -6  -3  -1  405.46   25.90 
  -6  -3  -1  372.86   20.40 
   6  -3   1  362.16   24.70 
   6  -3   1  396.96   32.70 
   6  -3   1  329.07   27.20 
   6  -3   1  344.67   29.30 
   6  -3   1  339.97   25.40 
   6  -3   1  383.56   22.30 
  -6  -3  -1  371.66   24.20 
  -6  -3  -1  381.86   32.40 
  -6  -3  -1  365.66   21.80 
   6  -3   1  312.67   31.40 
   6  -3   1  337.87   24.40 
  -6  -3  -1  381.66   25.00 
  -6  -3  -1  422.26   26.70 
  -6   3  -1  342.77   22.80 
   6   3   1  433.06   30.00 
   6   3   1  348.37   25.60 
   6   3   1  383.86   25.00 
  -6   3  -1  386.16   21.90 
   6   3   1  356.06   27.20 
  -6   3  -1  400.26   27.60 
   6   3   1  365.26   28.00 
   6   3   1  358.76   26.20 
   6   3   1  382.96   25.20 
  -6   3  -1  343.27   24.50 
  -6   3  -1  386.46   31.20 
  -6   3  -1  379.86   26.20 
  -6   3  -1  421.46   33.30 
   6   3   1  427.06   21.20 
   6   3   1  377.56   22.60 
   6   3   1  389.46   29.20 
   6   3   1  423.86   25.10 
   6   3   1  378.56   17.90 
  -6   3  -1  369.66   24.00 
  -6   3  -1  345.47   22.20 
  -6   3  -1  351.46   18.60 
   7  -3   1   98.29   17.70 
  -7  -3  -1  146.59   17.70 
   7  -3   1  113.59   18.30 
   7  -3   1  167.98   19.20 
  -7  -3  -1  123.69   17.60 
   7  -3   1  149.59   16.30 
  -7  -3  -1   91.79   15.10 
   7  -3   1  126.79   21.00 
   7  -3   1  141.49   18.00 
   7  -3   1  109.69   15.10 
  -7  -3  -1  132.99   15.60 
   7  -3   1  120.59   16.40 
   7  -3   1  164.78   24.70 
  -7  -3  -1  144.09   17.20 
   7  -3   1  145.99   18.80 
  -7  -3  -1  128.69   18.00 
  -7  -3  -1  129.39   21.60 
  -7  -3  -1  138.49   18.10 
   7  -3   1  123.29   17.50 
  -7  -3  -1  130.59   20.20 
   7  -3   1  111.29   21.50 
  -7  -3  -1  109.99   14.20 
   7   3   1   95.99   18.20 
  -7   3  -1  144.29   18.80 
   7   3   1  155.08   21.10 
  -7   3  -1  108.09   16.70 
   7   3   1  171.88   19.50 
  -7   3  -1  142.59   15.90 
   7   3   1  150.98   19.10 
   7   3   1  124.09   17.20 
  -7   3  -1  143.89   17.30 
   7   3   1  132.39   18.00 
  -7   3  -1  143.19   16.50 
   7   3   1  143.59   17.00 
   7   3   1   99.19   17.70 
   7   3   1  130.39   14.50 
  -7   3  -1  117.19   21.50 
  -7   3  -1  142.69   19.30 
   7   3   1  131.79   12.50 
  -7   3  -1  125.39   14.40 
  -7   3  -1  119.99   21.00 
   7   3   1  146.19   21.00 
  -8  -3  -1  561.24   35.50 
   8  -3   1  485.85   32.50 
  -8  -3  -1  521.15   35.40 
   8  -3   1  516.55   34.40 
  -8  -3  -1  492.75   34.00 
   8  -3   1  486.55   36.30 
   8  -3   1  543.95   35.30 
  -8  -3  -1  529.15   39.70 
   8  -3   1  509.15   39.20 
   8  -3   1  550.44   36.00 
   8  -3   1  573.54   41.20 
   8  -3   1  573.84   33.90 
   8  -3   1  486.55   43.00 
   8  -3   1  569.04   32.00 
   8  -3   1  566.64   35.50 
  -8  -3  -1  542.55   33.20 
  -8  -3  -1  506.65   34.10 
   8  -3   1  555.34   41.60 
  -8  -3  -1  543.75   31.10 
  -8  -3  -1  513.75   41.60 
  -8  -3  -1  527.85   31.50 
  -8   3  -1  520.25   36.10 
   8   3   1  571.44   39.70 
  -8   3  -1  487.85   34.50 
   8   3   1  553.84   33.70 
   8   3   1  504.45   35.30 
   8   3   1  526.15   39.20 
  -8   3  -1  485.05   36.50 
  -8   3  -1  501.45   29.70 
  -8   3  -1  490.25   41.30 
   8   3   1  518.45   34.10 
   8   3   1  505.65   34.50 
  -8   3  -1  576.84   31.90 
   8   3   1  540.25   30.80 
   8   3   1  557.04   35.80 
   8   3   1  499.15   38.30 
  -8   3  -1  568.74   34.60 
  -8   3  -1  556.34   32.40 
   8   3   1  525.75   38.20 
  -8   3  -1  524.45   43.60 
  -9  -3  -1  287.67   34.00 
  -9  -3  -1  323.17   39.20 
   9  -3   1  319.57   35.40 
  -9  -3  -1  247.98   27.90 
  -9  -3  -1  331.07   30.80 
   9  -3   1  310.47   35.90 
   9  -3   1  386.16   33.10 
   9  -3   1  384.86   30.00 
  -9  -3  -1  294.17   28.00 
  -9  -3  -1  362.06   29.40 
   9  -3   1  367.86   31.00 
   9  -3   1  295.77   29.50 
  -9  -3  -1  360.56   33.90 
   9  -3   1  352.26   43.50 
   9  -3   1  320.67   38.10 
   9  -3   1  315.27   33.90 
   9  -3   1  317.87   30.20 
   9  -3   1  357.96   26.60 
   9   3   1  397.56   28.80 
  -9   3  -1  317.27   31.80 
  -9   3  -1  328.67   32.90 
   9   3   1  307.07   31.60 
   9   3   1  354.96   32.40 
  -9   3  -1  389.66   41.50 
   9   3   1  292.97   34.00 
   9   3   1  334.77   35.50 
   9   3   1  297.67   29.80 
  -9   3  -1  318.17   28.20 
   9   3   1  302.97   33.20 
  -9   3  -1  275.17   28.60 
  -9   3  -1  295.67   24.10 
  -9   3  -1  327.47   41.00 
  -9   3  -1  310.57   33.20 
   9   3   1  398.06   38.50 
   9   3   1  319.77   31.30 
 -10  -3  -1  219.78   31.70 
 -10  -3  -1  251.27   29.30 
  10  -3   1  284.37   31.80 
  10  -3   1  286.07   41.80 
 -10  -3  -1  254.27   30.70 
  10  -3   1  247.88   35.70 
 -10  -3  -1  226.08   29.60 
 -10  -3  -1  236.78   26.70 
  10  -3   1  270.87   30.40 
  10  -3   1  261.67   35.00 
  10  -3   1  244.98   27.30 
  10  -3   1  244.48   32.80 
 -10  -3  -1  202.38   48.50 
  10  -3   1  263.27   28.90 
 -10  -3  -1  235.68   37.60 
 -10   3  -1  270.47   40.90 
 -10   3  -1  317.07   32.80 
  10   3   1  238.68   31.80 
 -10   3  -1  225.58   27.40 
 -10   3  -1  264.87   31.80 
  10   3   1  242.78   30.80 
 -10   3  -1  245.38   35.20 
  10   3   1  241.48   32.60 
  10   3   1  238.88   27.90 
 -10   3  -1  255.87   31.70 
  10   3   1  234.68   33.10 
  10   3   1  263.07   29.90 
  10   3   1  264.67   34.00 
   9  -4  -1   76.19   15.60 
   9  -4  -1   54.49   19.70 
   9  -4  -1   83.39   17.00 
   9  -4  -1   92.99   22.40 
  -9  -4   1   67.69   18.20 
  -9  -4   1   55.09   17.80 
  -9  -4   1   83.59   18.80 
   9  -4  -1   72.29   16.80 
  -9  -4   1   70.49   14.70 
  -9  -4   1   63.39   16.40 
   9  -4  -1   64.49   15.70 
   9  -4  -1   72.19   19.30 
   9  -4  -1   63.49   16.60 
   9  -4  -1   50.59   17.10 
  -9  -4   1   67.69   16.20 
   9  -4  -1   77.89   23.40 
  -9  -4   1   77.79   15.70 
  -9   4   1   68.49   16.10 
  -9   4   1   77.69   19.20 
   9   4  -1   84.89   20.10 
  -9   4   1   84.59   17.10 
   9   4  -1   58.69   17.80 
   9   4  -1   78.99   16.40 
   9   4  -1   40.20   13.40 
   9   4  -1   50.29   23.40 
   9   4  -1   64.19   17.90 
   9   4  -1   36.90   15.80 
   9   4  -1   80.89   20.60 
  -9   4   1   60.09   15.00 
  -9   4   1   79.49   22.30 
  -9   4   1   77.89   23.50 
   9   4  -1   68.59   17.70 
  -9   4   1   68.39   14.80 
   8  -4  -1    5.00    7.90 
  -8  -4   1   26.80   12.60 
   8  -4  -1   15.80   10.20 
  -8  -4   1    5.20    8.60 
   8  -4  -1   16.60   11.00 
   8  -4  -1   36.00   16.50 
   8  -4  -1    7.50    8.80 
   8  -4  -1    7.70   13.40 
   8  -4  -1  -11.30   10.90 
  -8  -4   1   11.50    9.20 
  -8  -4   1   10.80    8.00 
  -8  -4   1    0.30   10.40 
  -8  -4   1   22.20   11.70 
   8  -4  -1   16.20    8.70 
   8  -4  -1   18.10   10.30 
   8  -4  -1   33.30   14.40 
  -8  -4   1   26.50   13.90 
   8  -4  -1   11.90   10.90 
  -8  -4   1    7.30    8.30 
   8   4  -1    7.60   10.30 
  -8   4   1   20.00   14.00 
  -8   4   1   28.40   10.50 
   8   4  -1   25.40   11.20 
   8   4  -1   25.00   12.10 
  -8   4   1   12.40    9.90 
  -8   4   1   -8.60    7.20 
   8   4  -1    4.00   11.90 
  -8   4   1   10.10    8.10 
  -8   4   1   10.40   11.30 
  -8   4   1   -6.20    7.60 
   8   4  -1    4.50   10.30 
   8   4  -1   26.40   13.90 
   8   4  -1   22.20    9.70 
   8   4  -1   37.50   14.40 
  -8   4   1   19.70   16.20 
   8   4  -1   31.10   18.00 
   8   4  -1    5.10   11.00 
  -7  -4   1    2.20    6.60 
  -7  -4   1   -7.60    6.90 
  -7  -4   1   15.30   10.10 
   7  -4  -1  -13.70    6.00 
   7  -4  -1   -3.30    6.20 
   7  -4  -1   -0.10    9.30 
   7  -4  -1   -3.50    6.00 
   7  -4  -1   -8.30    7.50 
   7  -4  -1   10.50    8.70 
  -7  -4   1   -2.90    6.80 
  -7  -4   1    5.20    7.90 
  -7  -4   1    1.40    9.40 
   7  -4  -1    1.20    9.60 
  -7  -4   1   11.10    7.50 
   7  -4  -1    5.90   10.10 
   7  -4  -1   -4.60    9.60 
   7  -4  -1    5.00    7.20 
  -7  -4   1   -5.80    7.30 
   7  -4  -1   -9.70    6.40 
  -7   4   1   10.20   12.40 
   7   4  -1    3.70    8.10 
   7   4  -1    5.50   11.20 
  -7   4   1   -0.80    4.90 
   7   4  -1    7.50    7.50 
   7   4  -1   -7.70    6.80 
   7   4  -1   -2.60   12.40 
   7   4  -1   -6.70    8.50 
  -7   4   1   -2.00    6.80 
  -7   4   1    0.10    8.30 
   7   4  -1    0.50   10.30 
  -7   4   1    2.00   11.10 
   7   4  -1   -0.10    5.80 
  -7   4   1    3.40    6.10 
   7   4  -1    2.00    7.60 
  -7   4   1   -7.80    6.50 
  -7   4   1   20.10   11.50 
   7   4  -1    4.00    9.10 
  -7   4   1   -3.10    6.50 
   7   4  -1    5.40    9.20 
  -7   4   1    1.00    6.90 
   6  -4  -1   73.29   13.00 
  -6  -4   1  118.09   16.70 
   6  -4  -1   96.39   16.20 
  -6  -4   1  104.89   19.40 
   6  -4  -1   87.79   13.30 
  -6  -4   1  122.69   13.80 
   6  -4  -1  118.19   16.40 
  -6  -4   1  116.89   13.10 
   6  -4  -1   93.49   18.60 
   6  -4  -1   86.59   17.30 
  -6  -4   1  103.49   16.70 
  -6  -4   1  100.09   14.30 
   6  -4  -1   98.29   14.70 
   6  -4  -1  101.09   14.50 
   6  -4  -1   77.49   18.10 
  -6  -4   1   89.39   15.60 
  -6  -4   1   92.29   15.10 
   6  -4  -1   83.59   12.80 
   6  -4  -1   87.49   15.90 
   6  -4  -1  106.99   18.10 
  -6  -4   1  113.69   15.80 
  -6  -4   1  122.19   18.30 
  -6  -4   1  109.59   15.40 
  -6   4   1   99.09   12.60 
   6   4  -1   80.29   14.10 
  -6   4   1   90.19   13.80 
  -6   4   1  103.99   13.80 
  -6   4   1   85.89    8.50 
  -6   4   1  114.29   13.50 
   6   4  -1  116.39   17.70 
   6   4  -1  126.49   16.20 
  -6   4   1   94.19   10.70 
   6   4  -1  104.19   22.30 
  -6   4   1   73.69   17.40 
   6   4  -1   99.09   16.80 
  -6   4   1  130.79   17.10 
   6   4  -1   99.69   11.30 
  -6   4   1   89.09   12.40 
   6   4  -1  126.69   19.50 
  -6   4   1   91.59   19.20 
   6   4  -1   88.79   14.70 
   6   4  -1   99.19   17.20 
   6   4  -1   84.89   12.80 
   6   4  -1  127.59   13.30 
   6   4  -1  107.89   10.60 
   6   4  -1  115.29   17.40 
  -6   4   1  117.19   17.40 
  -5  -4   1   27.20    8.00 
   5  -4  -1   48.10   11.70 
   5  -4  -1   41.40    9.40 
  -5  -4   1   38.30    9.00 
  -5  -4   1   35.40   10.80 
   5  -4  -1   35.90    9.10 
   5  -4  -1   28.40    9.00 
   5  -4  -1   19.70   10.80 
  -5  -4   1   30.20    9.20 
   5  -4  -1   16.60    8.00 
   5  -4  -1   41.20   12.70 
  -5  -4   1   56.69   10.80 
   5  -4  -1   37.80   10.20 
  -5  -4   1   31.80    9.20 
  -5  -4   1   62.99   11.70 
  -5  -4   1   26.00   11.00 
   5  -4  -1   31.10   12.80 
   5  -4  -1   27.90    8.00 
  -5  -4   1   37.70    9.90 
  -5  -4   1   26.50    9.90 
  -5  -4   1   32.90    7.70 
   5  -4  -1   43.00   11.70 
   5   4  -1   40.20    9.10 
  -5   4   1   50.89    7.30 
  -5   4   1   41.70    8.60 
   5   4  -1   46.80   11.70 
   5   4  -1   39.60    7.80 
  -5   4   1   34.80   12.10 
   5   4  -1   41.10   15.40 
   5   4  -1   25.00    9.80 
   5   4  -1   43.50    8.00 
   5   4  -1   35.80    9.00 
   5   4  -1   28.40   10.40 
  -5   4   1   34.70    8.80 
  -5   4   1   50.29   14.10 
  -5   4   1   33.50   10.60 
  -5   4   1   37.30    6.80 
  -5   4   1   38.30    8.20 
   5   4  -1   44.30   10.60 
   5   4  -1   40.60    9.80 
   5   4  -1   47.40   12.10 
   5   4  -1   35.10    9.60 
  -5   4   1   40.00   10.10 
  -4  -4   1  162.98   15.60 
  -4  -4   1  184.68   17.80 
  -4  -4   1  198.88   18.10 
   4  -4  -1  178.98   18.70 
   4  -4  -1  144.39   21.00 
   4  -4  -1  158.38   14.90 
   4  -4  -1  193.48   18.10 
   4  -4  -1  154.38   19.20 
   4  -4  -1  151.58   16.40 
   4  -4  -1  203.28   23.30 
   4  -4  -1  160.98   15.80 
  -4  -4   1  151.98   17.60 
   4  -4  -1  185.48   20.30 
   4  -4  -1  157.68   17.00 
  -4  -4   1  185.98   19.40 
  -4  -4   1  158.28   15.80 
  -4  -4   1  187.28   22.70 
  -4  -4   1  161.78   16.40 
  -4  -4   1  166.88   16.90 
  -4   4   1  140.19   15.50 
  -4   4   1  179.58   11.50 
  -4   4   1  172.18   20.80 
   4   4  -1  171.68   19.50 
  -4   4   1  134.79   19.60 
   4   4  -1  162.38   13.30 
   4   4  -1  179.08   15.40 
   4   4  -1  138.29   17.20 
   4   4  -1  184.68   14.30 
   4   4  -1  154.78   18.00 
   4   4  -1  215.68   25.90 
   4   4  -1  175.58   15.90 
   4   4  -1  180.08   17.60 
  -4   4   1  171.38   12.30 
   4   4  -1  174.28   18.60 
   4   4  -1  179.38   16.80 
   4   4  -1  179.28   15.00 
  -4   4   1  160.68   15.70 
  -4   4   1  177.38   13.40 
  -4   4   1  162.68   17.70 
  -3  -4   1  137.09   16.80 
   3  -4  -1  138.89   18.70 
   3  -4  -1  127.59   13.90 
   3  -4  -1  142.29   15.00 
  -3  -4   1  136.99   13.90 
  -3  -4   1  147.89   13.80 
  -3  -4   1  133.49   18.50 
   3  -4  -1  144.99   15.70 
  -3  -4   1  127.39   15.00 
  -3  -4   1  137.69   14.60 
  -3  -4   1  126.69   14.80 
  -3  -4   1  149.49   15.10 
   3  -4  -1  146.09   11.10 
   3  -4  -1  147.89   20.80 
   3  -4  -1  176.08   19.70 
  -3  -4   1  134.49   14.60 
   3  -4  -1  143.49   15.00 
   3  -4  -1  146.59   13.40 
   3  -4  -1  151.28   17.60 
   3   4  -1  156.08   17.40 
  -3   4   1  138.69   14.60 
   3   4  -1  156.88   14.80 
  -3   4   1  155.68   17.70 
   3   4  -1  129.49   13.70 
   3   4  -1  167.88   16.10 
   3   4  -1  127.99   12.80 
  -3   4   1  151.18   10.90 
  -3   4   1  147.09   13.70 
   3   4  -1  151.98   20.90 
  -3   4   1  143.79   11.20 
   3   4  -1  122.39   16.40 
  -3   4   1  126.79   20.60 
  -3   4   1  150.88   15.10 
   3   4  -1  105.59   12.10 
   3   4  -1  130.09   13.20 
  -3   4   1  116.39   17.00 
  -3   4   1  141.99   17.60 
   3   4  -1  136.49   15.60 
   3   4  -1  128.69   15.70 
  -3   4   1  125.69   15.30 
  -2  -4   1  237.68   15.90 
  -2  -4   1  234.28   19.90 
   2  -4  -1  216.58   22.20 
   2  -4  -1  205.18   17.00 
   2  -4  -1  212.48   16.80 
  -2  -4   1  234.08   14.70 
  -2  -4   1  224.78   16.30 
  -2  -4   1  198.38   15.50 
   2  -4  -1  210.58   14.30 
   2  -4  -1  231.68   18.50 
  -2  -4   1  217.08   11.40 
   2  -4  -1  210.38   25.10 
  -2  -4   1  217.88   15.60 
  -2  -4   1  209.68   21.00 
   2  -4  -1  204.78   16.50 
  -2  -4   1  221.58   11.70 
   2   4  -1  212.48   21.80 
  -2   4   1  179.58   18.10 
  -2   4   1  166.78   18.40 
  -2   4   1  190.78   12.80 
   2   4  -1  206.18   20.50 
   2   4  -1  220.48   16.00 
   2   4  -1  206.28   21.30 
   2   4  -1  218.58   16.30 
   2   4  -1  250.67   17.80 
   2   4  -1  227.88   14.70 
  -2   4   1  188.68   17.50 
  -2   4   1  217.18   22.10 
  -2   4   1  231.38   17.00 
  -2   4   1  251.37   17.60 
  -2   4   1  214.98   17.00 
   2   4  -1  211.88   16.00 
  -2   4   1  188.28   13.00 
   2   4  -1  205.68   15.60 
  -2   4   1  204.08   24.60 
  -2   4   1  182.48   13.90 
   1  -4  -1   11.90    7.50 
  -1  -4   1   10.50    6.30 
  -1  -4   1   -2.10    9.20 
  -1  -4   1   11.60    4.40 
   1  -4  -1    7.40    5.50 
  -1  -4   1   12.90    6.60 
  -1  -4   1    6.60    7.40 
   1  -4  -1    4.50    6.20 
  -1  -4   1   -1.60    4.20 
  -1  -4   1    6.60    4.10 
   1  -4  -1    9.80    5.10 
  -1  -4   1    9.60    5.20 
   1  -4  -1   18.30   11.80 
  -1  -4   1    7.50    5.60 
   1  -4  -1    9.30    5.60 
  -1  -4   1    4.50    5.30 
  -1  -4   1    7.50    8.00 
  -1  -4   1   17.80    7.80 
   1   4  -1    7.70    5.50 
   1   4  -1    3.10    5.50 
  -1   4   1    4.80    6.40 
   1   4  -1    5.50    4.70 
  -1   4   1    9.90    4.60 
  -1   4   1    4.90    5.90 
   1   4  -1   10.40    6.20 
  -1   4   1    3.60    5.50 
  -1   4   1    3.10    8.70 
  -1   4   1   12.50    7.20 
   1   4  -1    3.40    8.90 
   1   4  -1   -6.50    7.90 
  -1   4   1   12.90    7.60 
  -1   4   1    8.30    5.80 
   1   4  -1    8.60    4.00 
   1   4  -1   11.70    9.70 
   1   4  -1    5.60    5.40 
   0  -4   1  458.05   25.50 
   0  -4   1  418.36   22.80 
   0  -4   1  494.15   35.30 
   0  -4  -1  417.16   28.80 
   0  -4   1  403.26   38.40 
   0  -4  -1  435.86   24.40 
   0  -4  -1  432.36   27.10 
   0  -4  -1  494.65   24.80 
   0  -4   1  426.46   26.30 
   0  -4  -1  457.85   41.40 
   0  -4   1  433.46   26.70 
   0  -4  -1  490.25   23.20 
   0  -4  -1  451.65   23.60 
   0  -4   1  417.96   28.70 
   0  -4   1  385.96   24.10 
   0  -4   1  495.65   26.10 
   0  -4  -1  417.66   29.00 
   0  -4   1  428.66   24.20 
   0   4  -1  446.26   22.60 
   0   4   1  451.95   36.50 
   0   4   1  453.55   25.40 
   0   4  -1  433.06   32.00 
   0   4  -1  469.15   25.30 
   0   4  -1  436.06   26.10 
   0   4   1  447.86   24.30 
   0   4   1  435.96   22.30 
   0   4   1  380.26   27.70 
   0   4   1  411.86   26.50 
   0   4  -1  465.15   23.90 
   0   4  -1  478.05   30.30 
   0   4  -1  470.55   24.20 
   0   4   1  434.46   22.40 
   0   4  -1  433.16   24.90 
   0   4  -1  452.25   27.40 
   0   4  -1  438.76   23.70 
   0   4   1  474.85   21.70 
   0   4   1  448.46   25.80 
   1  -4   1  461.65   28.30 
  -1  -4  -1  493.05   30.70 
   1  -4   1  447.26   26.40 
  -1  -4  -1  473.35   22.30 
  -1  -4  -1  482.05   28.40 
  -1  -4  -1  467.85   31.10 
   1  -4   1  493.25   26.80 
   1  -4   1  501.35   28.30 
   1  -4   1  331.17   33.30 
  -1  -4  -1  481.95   27.20 
  -1  -4  -1  478.45   23.10 
   1  -4   1  481.35   26.70 
  -1  -4  -1  418.26   38.00 
  -1  -4  -1  474.05   21.90 
   1  -4   1  452.65   27.30 
   1  -4   1  497.35   26.00 
  -1  -4  -1  462.65   24.80 
  -1  -4  -1  480.35   25.10 
   1  -4   1  358.56   30.90 
   1   4   1  469.05   25.60 
   1   4   1  458.15   21.70 
   1   4   1  445.96   24.80 
  -1   4  -1  466.85   29.30 
   1   4   1  415.66   30.10 
   1   4   1  490.25   27.00 
   1   4   1  475.95   23.90 
   1   4   1  405.86   33.50 
  -1   4  -1  506.85   31.50 
   1   4   1  440.06   24.00 
  -1   4  -1  458.95   26.10 
  -1   4  -1  490.65   25.80 
   1   4   1  411.36   35.40 
  -1   4  -1  510.55   28.80 
  -1   4  -1  452.05   26.50 
   1   4   1  475.35   25.70 
   1   4   1  456.65   25.10 
   2  -4   1  398.56   24.40 
   2  -4   1  342.37   22.30 
   2  -4   1  371.56   22.80 
   2  -4   1  383.06   23.70 
  -2  -4  -1  417.36   23.90 
   2  -4   1  436.86   25.40 
  -2  -4  -1  372.16   21.40 
   2  -4   1  387.36   30.70 
  -2  -4  -1  403.46   22.10 
  -2  -4  -1  359.66   20.40 
  -2  -4  -1  362.76   27.30 
   2  -4   1  386.26   22.00 
   2  -4   1  361.06   24.70 
  -2  -4  -1  362.66   26.50 
   2  -4   1  459.05   26.30 
  -2  -4  -1  389.36   22.00 
  -2  -4  -1  353.86   17.40 
   2   4   1  342.17   19.60 
   2   4   1  327.67   26.00 
   2   4   1  389.86   22.20 
   2   4   1  395.76   27.60 
   2   4   1  360.36   22.20 
  -2   4  -1  363.86   24.80 
  -2   4  -1  385.56   24.50 
   2   4   1  357.56   21.60 
   2   4   1  389.36   21.70 
  -2   4  -1  378.96   27.50 
   2   4   1  361.26   21.80 
  -2   4  -1  400.46   26.90 
  -2   4  -1  445.16   22.50 
   2   4   1  372.36   30.30 
   2   4   1  401.66   22.60 
  -2   4  -1  351.16   22.70 
  -3  -4  -1   -5.60    3.80 
   3  -4   1    1.20    5.50 
   3  -4   1    5.80    5.30 
  -3  -4  -1    4.10    5.50 
  -3  -4  -1   -1.00    3.90 
  -3  -4  -1   -0.50    2.10 
  -3  -4  -1   -1.10    2.70 
  -3  -4  -1   14.00    8.60 
  -3  -4  -1    0.00    4.40 
   3  -4   1   -1.80    4.10 
   3  -4   1    1.70    4.00 
   3  -4   1    1.40    4.90 
   3  -4   1    1.20    7.20 
   3  -4   1    4.00    5.60 
  -3  -4  -1    0.80    3.80 
   3  -4   1    5.10    5.80 
   3  -4   1    4.10    5.60 
  -3  -4  -1   -4.00    4.40 
   3   4   1    0.10    4.80 
   3   4   1   -0.40    5.50 
   3   4   1   -2.70    4.40 
   3   4   1    3.20    5.40 
  -3   4  -1   -0.60    6.70 
  -3   4  -1    2.80    4.70 
   3   4   1    8.00    4.70 
   3   4   1   -1.30    4.30 
   3   4   1   -4.20    7.30 
  -3   4  -1   -1.90    4.80 
  -3   4  -1   -4.50    5.60 
  -3   4  -1   -1.00    4.80 
   3   4   1   -2.70    4.80 
  -3   4  -1    0.50    4.50 
   3   4   1   -1.80    4.40 
   3   4   1    5.50    7.40 
   3   4   1   -4.50    5.90 
   4  -4   1   32.10    8.20 
  -4  -4  -1   33.80    8.50 
  -4  -4  -1   36.20    7.70 
  -4  -4  -1   39.10    6.50 
   4  -4   1   29.00    8.30 
  -4  -4  -1   43.00    8.70 
   4  -4   1   35.00    9.90 
   4  -4   1   33.40   10.30 
   4  -4   1   40.70    8.80 
  -4  -4  -1   37.00    9.80 
   4  -4   1   31.20   11.50 
   4  -4   1   52.19   11.60 
  -4  -4  -1   42.00    9.10 
  -4  -4  -1   43.70    5.10 
   4  -4   1   39.90    9.80 
  -4  -4  -1   23.20   10.90 
  -4  -4  -1   32.40    9.70 
   4  -4   1   35.80    9.60 
  -4  -4  -1   55.69   12.00 
   4  -4   1   26.80    8.20 
  -4  -4  -1   42.10    6.10 
   4  -4   1   50.39   12.30 
   4  -4   1   38.10    8.30 
  -4  -4  -1   43.10    8.40 
  -4   4  -1   42.70   12.70 
   4   4   1   30.60    6.90 
   4   4   1    7.80    8.80 
   4   4   1   34.60   10.40 
   4   4   1   31.10   12.60 
   4   4   1   36.80    9.60 
   4   4   1   56.09    9.70 
   4   4   1   32.00   10.30 
   4   4   1   41.30    9.00 
  -4   4  -1   40.40    9.20 
   4   4   1   30.60    7.40 
  -4   4  -1   34.40    8.00 
  -4   4  -1   40.20   11.90 
   4   4   1   38.10    8.60 
   4   4   1   40.60    8.00 
   4   4   1   34.20    9.50 
   4   4   1   29.40    8.10 
  -4   4  -1   43.30    9.60 
  -4   4  -1   27.20    6.60 
   5  -4   1   65.49   13.00 
  -5  -4  -1  118.49   15.30 
  -5  -4  -1   81.69    9.10 
  -5  -4  -1   87.79   15.30 
   5  -4   1   95.59   12.90 
   5  -4   1   73.19   16.30 
   5  -4   1  102.89   12.90 
  -5  -4  -1   68.59   13.80 
  -5  -4  -1   83.19   12.70 
  -5  -4  -1   77.09   10.70 
  -5  -4  -1   99.79   18.80 
   5  -4   1   48.50   11.90 
  -5  -4  -1  109.99   15.20 
  -5  -4  -1   86.29    9.80 
   5  -4   1   87.99   16.00 
   5  -4   1   90.69   13.30 
   5  -4   1  100.19   17.20 
  -5  -4  -1   90.09   13.40 
   5  -4   1   96.29   14.90 
   5  -4   1   55.99   13.40 
  -5  -4  -1   90.29   13.10 
   5  -4   1   76.69   10.70 
   5  -4   1   69.49   12.60 
  -5  -4  -1   97.59   13.40 
  -5   4  -1   87.69   10.70 
   5   4   1   91.59   11.30 
   5   4   1   96.89   13.30 
   5   4   1  100.99   21.20 
   5   4   1   58.89   13.50 
   5   4   1   64.69   13.30 
  -5   4  -1   49.10   13.40 
   5   4   1   68.19   12.40 
   5   4   1   83.29   11.30 
   5   4   1   89.09   15.40 
  -5   4  -1   92.99   12.50 
   5   4   1   83.89   13.10 
  -5   4  -1   85.09   13.70 
  -5   4  -1   57.39   14.80 
  -5   4  -1   88.59   13.90 
   5   4   1  107.19   16.20 
   5   4   1   94.19   10.70 
   5   4   1  106.29   13.10 
  -5   4  -1   86.79   12.50 
   5   4   1   97.59   15.40 
   6  -4   1  462.75   32.60 
  -6  -4  -1  455.55   27.40 
  -6  -4  -1  423.06   24.80 
   6  -4   1  370.56   29.00 
   6  -4   1  412.96   25.10 
  -6  -4  -1  422.16   23.40 
  -6  -4  -1  390.26   34.70 
  -6  -4  -1  469.05   28.20 
  -6  -4  -1  412.66   26.70 
   6  -4   1  369.96   28.20 
  -6  -4  -1  360.16   26.30 
   6  -4   1  431.66   27.50 
  -6  -4  -1  378.96   28.10 
   6  -4   1  386.76   34.80 
   6  -4   1  435.26   28.30 
  -6  -4  -1  389.36   31.30 
   6  -4   1  355.86   35.10 
  -6  -4  -1  461.85   32.00 
  -6  -4  -1  373.26   26.80 
  -6  -4  -1  438.16   28.20 
   6  -4   1  441.86   29.10 
   6  -4   1  380.36   31.70 
   6  -4   1  380.56   25.20 
   6  -4   1  455.05   27.70 
   6   4   1  398.76   24.30 
  -6   4  -1  324.67   27.70 
   6   4   1  430.36   23.70 
   6   4   1  416.16   30.20 
   6   4   1  424.86   38.30 
   6   4   1  391.06   29.10 
  -6   4  -1  346.37   25.70 
  -6   4  -1  442.46   25.70 
   6   4   1  415.26   21.70 
   6   4   1  444.76   27.90 
   6   4   1  410.86   30.40 
   6   4   1  373.16   29.20 
  -6   4  -1  401.06   21.20 
  -6   4  -1  437.06   28.50 
   6   4   1  405.26   27.30 
  -6   4  -1  353.26   24.00 
   6   4   1  403.76   27.10 
  -6   4  -1  384.46   34.00 
  -6   4  -1  424.66   23.40 
  -6   4  -1  436.06   35.00 
   6   4   1  425.66   31.40 
   6   4   1  423.86   32.40 
  -7  -4  -1  241.88   24.90 
   7  -4   1  268.57   31.40 
  -7  -4  -1  277.57   31.10 
   7  -4   1  320.77   37.50 
  -7  -4  -1  318.27   32.20 
   7  -4   1  257.57   31.80 
   7  -4   1  256.57   26.20 
  -7  -4  -1  364.96   26.70 
  -7  -4  -1  282.57   27.30 
  -7  -4  -1  260.77   25.20 
  -7  -4  -1  268.57   22.10 
   7  -4   1  263.07   27.60 
   7  -4   1  278.87   25.70 
   7  -4   1  290.17   26.60 
   7  -4   1  263.37   32.20 
  -7  -4  -1  306.77   23.40 
   7  -4   1  320.07   23.30 
   7  -4   1  301.57   23.10 
   7  -4   1  268.77   28.10 
  -7  -4  -1  276.37   26.90 
  -7   4  -1  282.27   33.70 
   7   4   1  351.86   23.10 
  -7   4  -1  270.17   32.80 
   7   4   1  289.07   30.00 
   7   4   1  259.57   36.90 
   7   4   1  303.87   27.80 
   7   4   1  290.77   26.20 
   7   4   1  279.37   30.00 
  -7   4  -1  308.07   29.00 
   7   4   1  298.57   28.90 
  -7   4  -1  357.86   27.70 
   7   4   1  241.38   27.20 
  -7   4  -1  292.47   21.70 
  -7   4  -1  295.07   23.30 
  -7   4  -1  304.07   24.50 
   7   4   1  261.47   20.80 
   7   4   1  276.47   27.80 
  -7   4  -1  293.77   23.50 
   7   4   1  325.47   30.50 
   7   4   1  281.97   23.30 
  -7   4  -1  274.07   19.70 
   8  -4   1  558.24   35.10 
   8  -4   1  567.14   40.70 
   8  -4   1  658.43   37.50 
  -8  -4  -1  615.94   36.60 
  -8  -4  -1  626.84   39.20 
  -8  -4  -1  685.93   47.30 
  -8  -4  -1  610.44   37.20 
   8  -4   1  601.74   44.70 
   8  -4   1  633.34   46.20 
   8  -4   1  596.44   49.30 
  -8  -4  -1  600.04   44.50 
   8  -4   1  599.74   37.70 
   8  -4   1  667.83   41.90 
  -8  -4  -1  634.44   40.00 
   8  -4   1  582.54   38.20 
  -8  -4  -1  651.23   36.20 
   8  -4   1  578.84   38.40 
  -8  -4  -1  589.94   39.40 
   8   4   1  592.54   34.20 
   8   4   1  633.24   39.70 
  -8   4  -1  625.54   40.30 
  -8   4  -1  622.84   47.50 
   8   4   1  623.74   43.80 
  -8   4  -1  607.54   37.10 
   8   4   1  609.94   42.90 
  -8   4  -1  617.14   39.10 
  -8   4  -1  508.25   45.90 
   8   4   1  691.93   38.50 
   8   4   1  670.03   45.70 
   8   4   1  578.74   40.90 
   8   4   1  616.74   54.69 
   8   4   1  579.34   37.70 
  -8   4  -1  655.23   42.50 
  -8   4  -1  609.44   36.50 
   8   4   1  641.34   41.20 
   8   4   1  668.93   43.10 
  -8   4  -1  658.83   35.70 
   9  -4   1   71.09   16.20 
   9  -4   1   80.69   21.40 
  -9  -4  -1   79.19   17.60 
   9  -4   1   31.50   16.60 
   9  -4   1   45.30   15.30 
   9  -4   1   50.59   15.90 
  -9  -4  -1   97.29   21.20 
   9  -4   1   56.09   15.50 
   9  -4   1   78.79   23.30 
  -9  -4  -1   76.29   16.70 
   9  -4   1   69.89   20.60 
  -9  -4  -1  102.49   23.80 
   9  -4   1   69.99   18.50 
  -9  -4  -1   53.79   14.30 
  -9  -4  -1   57.39   16.20 
  -9   4  -1   58.99   19.40 
  -9   4  -1   58.19   16.10 
   9   4   1   41.60   17.60 
  -9   4  -1   72.39   15.30 
   9   4   1   57.09   19.20 
   9   4   1   52.79   15.00 
  -9   4  -1   60.69   18.10 
  -9   4  -1   73.19   14.90 
   9   4   1   73.19   18.20 
   9   4   1   65.69   18.90 
   9   4   1   76.39   18.10 
   9   4   1   45.40   24.40 
   9   4   1   96.39   26.80 
  -9   4  -1   62.39   20.30 
   9   4   1   89.79   19.40 
   9   4   1   68.49   18.90 
  -9   4  -1   71.89   17.70 
  -9  -5   1  395.66   37.60 
   9  -5  -1  414.66   42.00 
   9  -5  -1  394.46   37.20 
  -9  -5   1  365.46   33.40 
  -9  -5   1  363.86   41.40 
   9  -5  -1  343.47   41.90 
  -9  -5   1  441.06   39.40 
   9  -5  -1  317.47   39.50 
   9  -5  -1  395.06   39.40 
  -9  -5   1  360.46   37.70 
   9  -5  -1  351.76   40.40 
   9  -5  -1  355.06   32.60 
   9  -5  -1  367.86   37.20 
   9  -5  -1  362.16   47.50 
  -9  -5   1  400.06   38.90 
   9   5  -1  364.76   34.90 
  -9   5   1  395.26   31.90 
   9   5  -1  471.85   34.20 
   9   5  -1  256.17   32.70 
   9   5  -1  406.26   41.20 
  -9   5   1  356.66   36.40 
   9   5  -1  384.26   39.80 
  -9   5   1  393.46   35.30 
   9   5  -1  327.17   37.20 
   9   5  -1  378.06   51.59 
   9   5  -1  358.96   39.40 
   9   5  -1  373.46   41.20 
  -9   5   1  459.25   42.70 
  -9   5   1  341.27   43.80 
  -8  -5   1    8.50   10.10 
   8  -5  -1    5.40    9.50 
   8  -5  -1   33.20   12.60 
   8  -5  -1    7.40   11.00 
  -8  -5   1   13.10    9.40 
   8  -5  -1   24.20   11.00 
   8  -5  -1   32.00   12.70 
   8  -5  -1   15.90   12.00 
  -8  -5   1    8.40   10.70 
   8  -5  -1    4.20   11.30 
  -8  -5   1   35.10   16.10 
   8  -5  -1   10.80   14.40 
  -8  -5   1    8.50    9.00 
   8  -5  -1    7.60   12.80 
   8  -5  -1   18.80   10.30 
  -8  -5   1    2.70    9.40 
   8  -5  -1   15.20   10.70 
  -8  -5   1   28.10   13.80 
  -8  -5   1    9.50   10.50 
   8  -5  -1   24.70   14.30 
   8   5  -1    4.80   13.20 
   8   5  -1    8.10   13.80 
   8   5  -1    8.50   11.20 
  -8   5   1   23.70   11.70 
   8   5  -1   -3.70   16.10 
  -8   5   1    6.40    9.40 
  -8   5   1   20.00   13.20 
   8   5  -1    2.50    9.90 
  -8   5   1   10.70   13.60 
   8   5  -1    3.10   12.00 
   8   5  -1   -1.30   11.00 
   8   5  -1   20.40   10.30 
   8   5  -1   11.50   11.50 
  -8   5   1   27.90   17.30 
  -8   5   1   11.40   11.10 
  -8   5   1   28.70   11.70 
   8   5  -1   38.50   12.80 
   7  -5  -1  204.68   25.00 
   7  -5  -1  235.78   28.00 
   7  -5  -1  205.68   26.10 
   7  -5  -1  255.67   24.50 
  -7  -5   1  264.87   28.70 
  -7  -5   1  209.68   24.50 
  -7  -5   1  228.98   25.00 
   7  -5  -1  227.08   23.50 
   7  -5  -1  229.48   32.50 
  -7  -5   1  247.38   28.20 
  -7  -5   1  193.98   22.40 
   7  -5  -1  252.87   27.70 
   7  -5  -1  235.78   25.40 
   7  -5  -1  268.47   32.90 
   7  -5  -1  229.28   23.30 
   7  -5  -1  194.08   31.60 
  -7  -5   1  247.38   24.90 
   7  -5  -1  220.58   28.60 
  -7  -5   1  202.68   27.30 
   7  -5  -1  248.18   32.80 
  -7  -5   1  199.08   23.20 
  -7   5   1  219.58   21.70 
   7   5  -1  234.38   23.50 
  -7   5   1  191.68   28.20 
  -7   5   1  258.67   25.60 
   7   5  -1  185.98   25.70 
  -7   5   1  226.08   22.60 
  -7   5   1  241.58   28.00 
  -7   5   1  201.18   20.60 
  -7   5   1  263.97   22.80 
   7   5  -1  261.67   25.80 
   7   5  -1  229.08   35.20 
   7   5  -1  230.48   27.40 
  -7   5   1  277.87   27.70 
   7   5  -1  223.38   29.80 
   7   5  -1  193.18   26.50 
   7   5  -1  233.48   26.50 
   7   5  -1  250.97   25.50 
  -7   5   1  228.28   31.40 
  -7   5   1  255.17   32.30 
   7   5  -1  238.38   24.70 
   6  -5  -1  198.78   23.70 
  -6  -5   1  174.98   21.60 
  -6  -5   1  231.98   24.00 
   6  -5  -1  192.28   23.70 
  -6  -5   1  204.48   19.40 
   6  -5  -1  205.58   22.30 
  -6  -5   1  183.18   21.50 
   6  -5  -1  171.48   23.90 
   6  -5  -1  215.58   21.20 
   6  -5  -1  188.78   19.60 
   6  -5  -1  199.58   24.80 
   6  -5  -1  213.68   28.40 
  -6  -5   1  193.88   24.50 
  -6  -5   1  215.08   22.80 
   6  -5  -1  133.29   23.20 
  -6  -5   1  191.18   28.30 
  -6  -5   1  160.08   22.50 
   6  -5  -1  192.68   29.70 
  -6  -5   1  182.68   19.40 
   6  -5  -1  206.28   23.20 
   6  -5  -1  215.48   21.60 
   6  -5  -1  154.78   20.50 
  -6  -5   1  200.58   21.50 
   6   5  -1  216.78   24.60 
   6   5  -1  205.98   17.40 
   6   5  -1  194.08   31.10 
   6   5  -1  185.58   21.10 
  -6   5   1  257.47   25.20 
  -6   5   1  131.49   24.00 
   6   5  -1  231.58   22.70 
   6   5  -1  174.88   23.60 
  -6   5   1  191.78   19.30 
  -6   5   1  209.28   20.90 
  -6   5   1  202.58   18.90 
   6   5  -1  183.08   19.90 
   6   5  -1  222.98   26.40 
  -6   5   1  177.68   22.80 
   6   5  -1  174.88   16.70 
   6   5  -1  180.28   22.10 
  -6   5   1  197.68   14.40 
  -6   5   1  200.18   19.90 
  -6   5   1  181.08   24.70 
  -6   5   1  209.58   20.10 
   6   5  -1  159.98   19.20 
   6   5  -1  227.48   26.60 
   5  -5  -1 2206.98   89.69 
  -5  -5   1 2119.19   88.09 
   5  -5  -1 2061.09   87.99 
  -5  -5   1 1896.51   86.19 
   5  -5  -1 2206.78   89.39 
   5  -5  -1 2222.28   94.19 
   5  -5  -1 2082.39   85.19 
   5  -5  -1 2138.79   94.79 
  -5  -5   1 2048.90   86.39 
  -5  -5   1 2122.79   92.19 
  -5  -5   1 2115.39   87.49 
   5  -5  -1 2067.39   96.89 
   5  -5  -1 2070.59   86.59 
  -5  -5   1 2141.49   98.19 
  -5  -5   1 2146.89   92.49 
   5  -5  -1 2162.18  101.89 
   5  -5  -1 2247.18   91.19 
   5  -5  -1 1988.40   92.19 
  -5  -5   1 2137.59   85.39 
  -5  -5   1 2184.68   87.29 
  -5   5   1 2136.79   79.49 
  -5   5   1 2131.69   88.39 
  -5   5   1 2227.58   86.19 
   5   5  -1 2139.59   85.99 
   5   5  -1 2076.59   91.69 
  -5   5   1 2136.79   86.49 
   5   5  -1 2310.77  103.09 
   5   5  -1 2017.70   82.99 
   5   5  -1 2044.20   85.69 
   5   5  -1 2117.79   86.79 
  -5   5   1 2214.38   95.79 
  -5   5   1 2220.48   91.69 
   5   5  -1 2292.37   87.49 
   5   5  -1 2139.89   83.79 
  -5   5   1 2296.07   88.09 
   5   5  -1 2118.09   88.89 
   5   5  -1 2061.49   92.59 
   5   5  -1 2115.39   92.19 
  -5   5   1 2222.08   83.59 
  -5   5   1 2208.38   99.29 
   5   5  -1 2089.49   92.09 
   4  -5  -1  422.56   31.80 
   4  -5  -1  425.06   24.60 
  -4  -5   1  335.97   23.90 
  -4  -5   1  358.86   23.60 
  -4  -5   1  410.66   28.90 
   4  -5  -1  402.56   27.10 
  -4  -5   1  391.96   24.80 
   4  -5  -1  371.36   26.30 
   4  -5  -1  404.26   26.80 
  -4  -5   1  412.76   27.10 
   4  -5  -1  396.26   28.70 
   4  -5  -1  361.06   27.00 
   4  -5  -1  333.87   32.90 
   4  -5  -1  345.57   28.10 
  -4  -5   1  364.06   30.50 
  -4  -5   1  393.66   29.20 
  -4  -5   1  367.56   25.50 
  -4   5   1  389.36   30.50 
   4   5  -1  381.26   24.70 
   4   5  -1  360.76   23.90 
  -4   5   1  366.36   25.70 
  -4   5   1  366.56   20.20 
  -4   5   1  375.16   25.70 
   4   5  -1  370.36   24.60 
  -4   5   1  361.96   27.30 
   4   5  -1  372.56   29.30 
  -4   5   1  426.96   32.80 
   4   5  -1  406.06   24.60 
   4   5  -1  428.16   29.20 
  -4   5   1  378.96   25.80 
   4   5  -1  406.26   24.30 
   4   5  -1  351.96   26.00 
   4   5  -1  407.36   34.00 
  -4   5   1  341.97   33.90 
   4   5  -1  379.86   23.70 
  -4   5   1  355.66   21.30 
   4   5  -1  357.96   28.70 
   3  -5  -1  615.34   37.50 
  -3  -5   1  662.63   34.60 
  -3  -5   1  763.12   42.10 
   3  -5  -1  721.03   38.60 
  -3  -5   1  700.63   41.10 
   3  -5  -1  619.24   37.60 
  -3  -5   1  686.93   26.80 
  -3  -5   1  692.23   36.10 
   3  -5  -1  682.33   36.70 
  -3  -5   1  702.23   37.60 
   3  -5  -1  751.22   48.30 
   3  -5  -1  703.53   41.40 
  -3  -5   1  678.13   27.10 
  -3  -5   1  692.53   27.30 
  -3  -5   1  738.93   36.20 
  -3  -5   1  660.13   32.90 
   3  -5  -1  657.73   36.20 
  -3   5   1  656.93   36.00 
   3   5  -1  679.63   41.00 
  -3   5   1  644.54   36.20 
  -3   5   1  681.53   31.00 
  -3   5   1  643.44   35.80 
   3   5  -1  716.13   45.00 
  -3   5   1  595.24   39.60 
   3   5  -1  733.73   41.30 
  -3   5   1  662.03   36.10 
   3   5  -1  658.73   35.30 
  -3   5   1  652.33   38.80 
   3   5  -1  718.33   38.00 
   3   5  -1  675.43   34.80 
   3   5  -1  678.33   33.50 
   3   5  -1  672.63   35.30 
  -3   5   1  702.33   32.50 
  -3   5   1  717.13   46.50 
   3   5  -1  661.43   34.50 
   3   5  -1  674.63   34.00 
  -3   5   1  606.54   37.60 
  -2  -5   1    8.90    6.60 
  -2  -5   1   14.40    7.00 
   2  -5  -1    3.50    8.20 
  -2  -5   1   26.00    8.40 
  -2  -5   1   24.40    8.70 
   2  -5  -1   20.20    7.80 
   2  -5  -1   38.20   10.70 
  -2  -5   1   15.30    8.30 
   2  -5  -1   12.20   10.90 
  -2  -5   1   11.90    8.50 
  -2  -5   1   17.20    6.60 
  -2  -5   1   24.50    5.40 
   2  -5  -1   20.20    8.10 
   2  -5  -1   33.50    9.70 
  -2  -5   1   26.80    7.20 
  -2  -5   1   19.40    4.90 
   2   5  -1   15.60    7.60 
   2   5  -1   25.50    8.20 
  -2   5   1   25.90    6.50 
  -2   5   1   23.50   11.90 
  -2   5   1   29.20    8.60 
  -2   5   1   16.30    7.20 
   2   5  -1   17.20   10.80 
  -2   5   1   27.60    7.10 
   2   5  -1   34.50   13.10 
   2   5  -1   19.30    8.00 
  -2   5   1   60.49   10.90 
  -2   5   1   23.50   10.40 
   2   5  -1   10.70    9.30 
   2   5  -1   39.30    8.40 
   2   5  -1   20.20    7.60 
   2   5  -1   18.60    7.20 
  -2   5   1   18.20    9.10 
  -1  -5   1   20.40    8.00 
  -1  -5   1   19.30    5.60 
  -1  -5   1   16.00    8.20 
  -1  -5   1   26.40    8.50 
  -1  -5   1    9.30    8.30 
  -1  -5   1   23.20    7.20 
   1  -5  -1   22.30    9.00 
  -1  -5   1   45.90   10.80 
  -1  -5   1   20.70   14.20 
   1  -5  -1   33.70    8.30 
   1  -5  -1   38.20   15.00 
   1  -5  -1   19.40    7.30 
   1  -5  -1   31.20    8.50 
   1  -5  -1   35.40    9.70 
  -1  -5   1   21.40    7.40 
  -1  -5   1   19.00    7.00 
   1   5  -1   33.90   12.20 
   1   5  -1   21.80   12.30 
   1   5  -1   25.80    6.10 
  -1   5   1   24.00    6.80 
  -1   5   1   20.50    7.70 
  -1   5   1   20.90    7.80 
   1   5  -1   18.90    7.30 
  -1   5   1   23.40    8.50 
   1   5  -1   25.20    7.90 
  -1   5   1   31.80   12.70 
   1   5  -1   24.00    7.50 
  -1   5   1   27.50   10.20 
   1   5  -1   22.50    8.30 
  -1   5   1   18.20    7.80 
  -1   5   1   25.00    9.50 
   1   5  -1    4.00    8.90 
   1   5  -1   11.80    7.40 
  -1   5   1   41.30    7.20 
   1   5  -1   33.20    7.90 
  -1   5   1   35.90    9.50 
   0  -5  -1   21.20    7.70 
   0  -5  -1   18.10    6.90 
   0  -5   1   24.10    8.50 
   0  -5  -1   26.60   16.80 
   0  -5   1    9.10   12.00 
   0  -5   1   25.90    9.80 
   0  -5   1   37.00    9.90 
   0  -5   1   15.90    6.90 
   0  -5   1   20.70    8.60 
   0  -5  -1   26.10    6.70 
   0  -5  -1   33.20   10.80 
   0  -5  -1   20.00    6.80 
   0  -5  -1   20.10    9.80 
   0  -5   1   23.50    8.90 
   0  -5   1   20.90    6.50 
   0   5  -1   43.40   13.10 
   0   5   1   25.00    7.90 
   0   5  -1   33.60    9.80 
   0   5  -1   19.00    7.20 
   0   5  -1   32.70    9.10 
   0   5   1   30.50    8.90 
   0   5  -1   21.00    8.10 
   0   5   1   22.40    8.00 
   0   5   1   29.50   11.20 
   0   5   1   13.40    7.10 
   0   5   1   32.20   10.00 
   0   5  -1   32.10   11.50 
   0   5   1   27.40   13.20 
   0   5   1   27.10    9.30 
   0   5  -1   12.90    7.60 
   0   5   1   20.00    6.30 
   0   5  -1   19.80    7.00 
   1  -5   1 2358.36   94.19 
  -1  -5  -1 2491.25   99.39 
  -1  -5  -1 2280.47   85.29 
  -1  -5  -1 2496.65   97.59 
   1  -5   1 2194.08   91.59 
  -1  -5  -1 2284.47   89.39 
  -1  -5  -1 1985.80   91.69 
   1  -5   1 2214.48   95.19 
  -1  -5  -1 2341.77   90.29 
   1  -5   1 2311.47   90.19 
   1  -5   1 2390.06   93.49 
  -1  -5  -1 2366.76   87.89 
   1  -5   1 2326.87   92.19 
  -1   5  -1 1971.10   93.89 
   1   5   1 2360.46   90.59 
   1   5   1 2365.36   97.19 
   1   5   1 2169.28  102.39 
  -1   5  -1 2512.15   99.69 
   1   5   1 2379.66   90.49 
   1   5   1 2351.96   91.29 
   1   5   1 2293.77   93.39 
  -1   5  -1 2353.56   94.29 
   1   5   1 2325.87   89.19 
   1   5   1 2391.36   90.39 
   1   5   1 2426.26   88.39 
  -1   5  -1 1895.41   89.99 
  -1   5  -1 2256.07   90.59 
  -1   5  -1 2165.88   90.59 
   2  -5   1  198.88   21.70 
  -2  -5  -1  136.49   20.20 
  -2  -5  -1  200.58   15.60 
  -2  -5  -1  179.78   19.90 
   2  -5   1  166.78   27.40 
   2  -5   1  202.08   17.70 
  -2  -5  -1  214.58   16.90 
   2  -5   1  204.98   21.20 
  -2  -5  -1  220.58   13.10 
   2  -5   1  261.87   26.90 
   2  -5   1  217.28   22.10 
   2  -5   1  189.28   20.50 
  -2  -5  -1  226.58   20.50 
  -2  -5  -1  162.78   22.00 
   2  -5   1  189.48   19.00 
  -2   5  -1  190.48   21.70 
   2   5   1  215.78   21.60 
  -2   5  -1  215.98   20.20 
   2   5   1  172.18   17.30 
   2   5   1  198.78   25.70 
   2   5   1  166.38   22.00 
  -2   5  -1  207.68   17.30 
  -2   5  -1  170.08   19.20 
   2   5   1  207.28   19.00 
   2   5   1  193.18   18.60 
   2   5   1  206.18   15.10 
  -2   5  -1  221.08   22.30 
   2   5   1  195.98   29.00 
   2   5   1  182.58   18.50 
  -2   5  -1  227.98   24.40 
   2   5   1  214.88   19.20 
   2   5   1  230.78   17.80 
   3  -5   1 2379.36   97.39 
  -3  -5  -1 2349.86   84.29 
   3  -5   1 2445.66   96.39 
  -3  -5  -1 2346.27   91.89 
   3  -5   1 2506.35  109.49 
   3  -5   1 2373.56   94.59 
   3  -5   1 2355.16   92.19 
  -3  -5  -1 2318.37   90.99 
  -3  -5  -1 2367.76   86.09 
  -3  -5  -1 2257.17   92.29 
  -3  -5  -1 2330.37   93.79 
  -3  -5  -1 2348.36   99.69 
   3  -5   1 2268.67   96.19 
   3  -5   1 2303.87   94.99 
  -3  -5  -1 2401.56   92.29 
   3  -5   1 2293.77   97.89 
  -3  -5  -1 2296.97  101.29 
   3   5   1 2382.36   89.59 
   3   5   1 2322.57   91.49 
  -3   5  -1 2269.57   97.59 
   3   5   1 2352.06   99.99 
   3   5   1 2302.07   91.19 
  -3   5  -1 2461.05   91.59 
  -3   5  -1 2298.77   94.29 
  -3   5  -1 2451.85   96.59 
   3   5   1 2377.86   91.59 
   3   5   1 2388.66   93.99 
   3   5   1 2144.19   98.99 
  -3   5  -1 2345.87  102.99 
   3   5   1 2417.56   92.69 
   3   5   1 2318.17   92.69 
  -3   5  -1 2326.47   99.89 
  -3   5  -1 2429.56   90.69 
   3   5   1 2314.87  107.19 
   4  -5   1  185.28   18.50 
   4  -5   1  191.88   20.40 
  -4  -5  -1  215.38   19.60 
  -4  -5  -1  192.98   23.10 
  -4  -5  -1  210.78   20.60 
   4  -5   1  156.98   21.50 
   4  -5   1  171.28   20.20 
  -4  -5  -1  184.48   12.00 
  -4  -5  -1  193.68   19.10 
  -4  -5  -1  219.08   21.70 
   4  -5   1  209.38   23.00 
   4  -5   1  167.98   23.10 
  -4  -5  -1  154.88   21.30 
  -4  -5  -1  187.28   25.10 
   4  -5   1  187.88   18.60 
   4  -5   1  195.48   27.00 
  -4  -5  -1  218.58   20.30 
  -4  -5  -1  182.08   12.50 
   4  -5   1  193.18   22.00 
  -4  -5  -1  181.08   10.50 
   4   5   1  153.28   17.70 
   4   5   1  171.78   18.10 
   4   5   1  217.98   25.50 
  -4   5  -1  209.98   22.30 
   4   5   1  198.78   18.00 
   4   5   1  192.48   20.50 
   4   5   1  159.98   16.70 
   4   5   1  159.08   17.60 
   4   5   1  187.78   17.10 
  -4   5  -1  181.38   23.80 
  -4   5  -1  155.88   22.90 
  -4   5  -1  199.68   21.20 
   4   5   1  177.88   28.20 
  -4   5  -1  190.08   18.30 
  -4   5  -1  194.08   15.30 
   4   5   1  179.48   20.80 
   4   5   1  195.18   24.30 
   5  -5   1  214.88   29.50 
  -5  -5  -1  231.98   26.70 
   5  -5   1  318.77   31.20 
  -5  -5  -1  252.77   25.60 
   5  -5   1  215.58   21.30 
   5  -5   1  167.08   22.50 
  -5  -5  -1  234.18   25.20 
   5  -5   1  243.58   28.60 
   5  -5   1  307.87   28.70 
   5  -5   1  249.68   24.50 
  -5  -5  -1  233.28   22.10 
  -5  -5  -1  255.37   31.50 
  -5  -5  -1  259.77   19.30 
  -5  -5  -1  258.87   23.70 
  -5  -5  -1  242.98   22.80 
   5  -5   1  227.88   20.00 
   5  -5   1  212.38   24.10 
   5  -5   1  204.98   27.00 
   5   5   1  236.08   24.40 
   5   5   1  229.48   18.80 
   5   5   1  248.48   23.40 
  -5   5  -1  233.28   21.00 
   5   5   1  261.07   21.40 
  -5   5  -1  200.28   16.30 
   5   5   1  232.98   24.60 
   5   5   1  241.08   22.70 
   5   5   1  267.37   28.30 
  -5   5  -1  200.68   22.40 
   5   5   1  208.48   31.00 
  -5   5  -1  241.68   29.90 
  -5   5  -1  284.47   24.30 
   5   5   1  239.78   28.00 
  -5   5  -1  288.07   26.10 
   5   5   1  226.38   20.60 
   5   5   1  267.07   19.10 
  -5   5  -1  223.58   27.00 
   6  -5   1   18.60    9.70 
  -6  -5  -1    7.70    7.40 
   6  -5   1   21.00   12.90 
   6  -5   1   26.80   13.00 
   6  -5   1   30.30   12.30 
  -6  -5  -1    3.00   12.10 
   6  -5   1   18.70    9.50 
  -6  -5  -1   18.50    8.50 
  -6  -5  -1   33.70   11.30 
  -6  -5  -1    7.00    9.40 
   6  -5   1    9.30    9.50 
   6  -5   1    9.60    8.50 
  -6  -5  -1   25.90    7.70 
   6  -5   1   13.80   10.40 
   6  -5   1    2.80    7.70 
  -6  -5  -1   11.70    9.90 
  -6  -5  -1   33.50   12.90 
   6  -5   1   20.40    8.90 
   6  -5   1   26.50   12.80 
  -6  -5  -1   16.20    7.90 
  -6  -5  -1   23.40   10.00 
   6  -5   1   11.70    7.50 
   6  -5   1   14.50    8.70 
   6   5   1   23.30   11.80 
  -6   5  -1   28.90   15.70 
  -6   5  -1   19.10   13.50 
   6   5   1    8.70   10.50 
  -6   5  -1   15.80    9.40 
  -6   5  -1   24.60    7.50 
   6   5   1   31.80    8.90 
   6   5   1   17.10   10.20 
   6   5   1    2.50    7.90 
   6   5   1   19.50   13.00 
  -6   5  -1   15.60    9.10 
  -6   5  -1   10.70    8.10 
  -6   5  -1   25.10    9.90 
  -6   5  -1   46.30   13.40 
   6   5   1   15.00   16.30 
   6   5   1    5.80    8.00 
   6   5   1   35.10    8.60 
   6   5   1   26.70    9.80 
   6   5   1   17.80   13.30 
   7  -5   1  115.19   20.90 
  -7  -5  -1  162.78   24.50 
   7  -5   1  184.78   24.00 
   7  -5   1  156.08   28.30 
  -7  -5  -1  146.19   27.10 
   7  -5   1  176.18   19.60 
   7  -5   1  165.98   21.50 
   7  -5   1  154.78   19.40 
  -7  -5  -1  161.38   20.40 
  -7  -5  -1  172.98   22.20 
  -7  -5  -1  170.88   22.90 
   7  -5   1  147.89   21.10 
  -7  -5  -1  151.58   20.00 
  -7  -5  -1  175.08   21.40 
  -7  -5  -1  124.89   19.00 
   7  -5   1  119.79   26.20 
  -7  -5  -1  152.48   24.60 
   7  -5   1  132.89   21.60 
   7  -5   1  192.08   28.80 
   7  -5   1  153.28   24.80 
   7  -5   1  148.99   19.20 
   7  -5   1  154.48   24.20 
   7   5   1  162.88   21.30 
   7   5   1  181.68   24.40 
  -7   5  -1  156.08   22.20 
  -7   5  -1  134.69   26.00 
   7   5   1  153.98   23.20 
  -7   5  -1  156.38   19.40 
   7   5   1  141.79   23.40 
   7   5   1  155.98   23.90 
  -7   5  -1  140.89   18.10 
   7   5   1  153.98   23.20 
  -7   5  -1  187.28   24.20 
   7   5   1  160.28   19.80 
   7   5   1  132.99   16.50 
   7   5   1  171.58   20.70 
  -7   5  -1  163.68   20.80 
  -7   5  -1  148.99   19.70 
  -7   5  -1  139.29   26.70 
  -7   5  -1  173.48   23.10 
   7   5   1  183.38   23.40 
   7   5   1  153.18   30.40 
  -8  -5  -1   52.29   14.60 
  -8  -5  -1   82.39   15.90 
   8  -5   1   88.49   18.00 
  -8  -5  -1   68.89   15.90 
   8  -5   1  102.29   21.20 
   8  -5   1   77.19   20.80 
  -8  -5  -1   92.89   21.90 
   8  -5   1   74.39   16.80 
   8  -5   1   89.49   23.50 
   8  -5   1   51.99   14.00 
  -8  -5  -1   93.39   17.00 
  -8  -5  -1   63.39   15.80 
   8  -5   1   67.09   16.00 
   8  -5   1   78.79   15.50 
   8  -5   1   90.99   19.00 
  -8  -5  -1   30.50   16.00 
   8  -5   1   60.19   17.10 
  -8  -5  -1   72.79   14.70 
   8  -5   1   77.99   21.50 
   8   5   1   77.59   16.00 
   8   5   1   54.99   17.50 
  -8   5  -1   46.70   13.50 
   8   5   1   78.69   19.70 
  -8   5  -1   48.40   16.00 
   8   5   1   57.99   17.30 
  -8   5  -1   56.29   14.60 
   8   5   1   69.39   16.50 
   8   5   1   88.69   17.00 
  -8   5  -1   69.69   19.80 
   8   5   1   84.89   26.40 
   8   5   1   73.49   19.20 
  -8   5  -1   53.39   13.50 
  -8   5  -1   93.99   17.00 
  -8   5  -1   96.09   25.00 
  -8   5  -1   59.59   17.00 
   8   5   1   99.69   21.20 
   9  -5   1  588.94   49.20 
  -9  -5  -1  493.55   49.70 
   9  -5   1  506.85   43.00 
  -9  -5  -1  712.73   45.30 
   9  -5   1  633.94   49.40 
  -9  -5  -1  554.54   38.90 
   9  -5   1  697.03   47.00 
   9  -5   1  614.64   50.19 
   9  -5   1  766.02   59.39 
   9  -5   1  585.84   40.90 
  -9  -5  -1  644.44   43.80 
   9  -5   1  639.04   43.70 
  -9  -5  -1  593.04   41.20 
  -9   5  -1  597.14   39.20 
  -9   5  -1  572.94   56.79 
   9   5   1  500.05   49.10 
  -9   5  -1  624.64   44.70 
   9   5   1  682.43   43.70 
   9   5   1  611.74   45.60 
   9   5   1  624.54   48.30 
  -9   5  -1  630.24   51.39 
  -9   5  -1  546.25   40.30 
   9   5   1  616.34   46.50 
   9   5   1  635.94   41.80 
   9   5   1  628.34   46.90 
   9   5   1  635.24   47.70 
   9   5   1  749.82   64.29 
  -9   5  -1  636.34   46.00 
  -9   5  -1  610.84   40.70 
   8  -6  -1   12.70   12.40 
   8  -6  -1    5.60   10.30 
   8  -6  -1   21.50   14.30 
  -8  -6   1   40.60   14.70 
   8  -6  -1   29.60   13.30 
   8  -6  -1   28.70   17.30 
   8  -6  -1    0.30   12.90 
  -8  -6   1   22.60   14.10 
   8  -6  -1   22.30   13.20 
   8  -6  -1   26.60   12.70 
  -8  -6   1   20.50   11.30 
  -8  -6   1   53.29   15.90 
   8  -6  -1   26.70   15.20 
  -8  -6   1   21.20   12.30 
   8  -6  -1   27.80   15.90 
   8   6  -1   12.70   19.20 
   8   6  -1   38.50   14.10 
   8   6  -1   19.50   12.80 
   8   6  -1   14.10   11.00 
  -8   6   1   10.80   15.00 
   8   6  -1   18.80   14.40 
   8   6  -1   11.70   14.40 
   8   6  -1   20.50   16.80 
  -8   6   1   18.00   15.80 
  -8   6   1   23.00   12.30 
   8   6  -1   33.00   17.90 
  -8   6   1   26.40   12.70 
  -7  -6   1   13.70   11.30 
   7  -6  -1    1.20   13.00 
  -7  -6   1    0.20    8.30 
   7  -6  -1    0.90    9.10 
   7  -6  -1    5.30    8.60 
  -7  -6   1   12.50   11.90 
   7  -6  -1    5.90   10.40 
   7  -6  -1   34.20   11.30 
   7  -6  -1   11.10   10.30 
   7  -6  -1    3.60   10.30 
  -7  -6   1    3.90    8.40 
   7  -6  -1   -2.50   13.70 
  -7  -6   1   -0.90   11.20 
   7  -6  -1   19.40   12.30 
   7  -6  -1    0.40    8.90 
   7  -6  -1   16.80   12.20 
  -7  -6   1    1.00    9.30 
   7  -6  -1    4.10   11.90 
  -7   6   1   -4.50    8.20 
   7   6  -1  -14.80    9.20 
  -7   6   1    0.60   10.20 
   7   6  -1    5.20   10.50 
   7   6  -1   -8.00   13.90 
  -7   6   1   20.90    9.00 
   7   6  -1    9.60   10.50 
   7   6  -1  -17.10   11.00 
   7   6  -1   11.80   12.30 
  -7   6   1    9.40    8.70 
   7   6  -1   11.60   10.60 
   7   6  -1    7.50    9.30 
  -7   6   1   19.30   11.30 
  -7   6   1   -1.90    9.40 
  -7   6   1    3.40   11.90 
   7   6  -1    2.10   15.60 
  -7   6   1   -2.00   11.20 
   6  -6  -1    6.10    8.40 
  -6  -6   1   23.30   11.90 
   6  -6  -1   14.10    9.90 
  -6  -6   1    8.70    9.40 
   6  -6  -1   15.00   13.90 
  -6  -6   1    3.40    7.10 
  -6  -6   1   26.00   10.40 
  -6  -6   1   11.10    9.10 
  -6  -6   1    7.80   10.40 
   6  -6  -1   12.60   10.90 
  -6  -6   1   27.70   11.00 
  -6  -6   1    6.40   11.60 
   6  -6  -1    4.10    9.80 
   6  -6  -1   28.50   10.70 
   6  -6  -1   11.90    9.80 
  -6  -6   1   -2.90   10.30 
   6  -6  -1   21.20   11.40 
   6  -6  -1   21.70   12.50 
   6  -6  -1   26.00   11.90 
   6  -6  -1   31.40   11.30 
   6   6  -1   22.30   11.80 
  -6   6   1    3.70    8.90 
  -6   6   1   10.30   11.60 
  -6   6   1    6.10    8.00 
   6   6  -1    0.60   10.20 
   6   6  -1   10.60   13.30 
  -6   6   1   18.10   10.70 
  -6   6   1   25.80   11.60 
   6   6  -1   25.90   10.20 
  -6   6   1    9.60   13.30 
   6   6  -1    6.00    8.60 
  -6   6   1   31.70   15.80 
   6   6  -1    9.00   14.10 
  -6   6   1   11.10    8.60 
   6   6  -1    8.40    7.90 
   6   6  -1    5.70    8.90 
   6   6  -1    3.90    8.20 
   6   6  -1    7.80   14.70 
   6   6  -1   14.80    8.60 
   5  -6  -1   24.20   14.60 
   5  -6  -1   30.80   12.20 
   5  -6  -1   28.70   12.50 
  -5  -6   1   24.90   10.10 
   5  -6  -1   25.70   10.80 
  -5  -6   1   33.20   10.60 
   5  -6  -1   19.70   10.50 
   5  -6  -1   17.00   10.00 
   5  -6  -1   19.80   10.80 
  -5  -6   1   17.90   11.00 
  -5  -6   1   27.40    9.30 
  -5  -6   1    8.90    8.10 
   5  -6  -1   43.90   11.00 
  -5  -6   1   25.80   10.00 
  -5  -6   1   19.70   12.70 
   5  -6  -1   13.60   10.60 
  -5  -6   1   27.40   12.50 
   5   6  -1   -2.30   11.70 
   5   6  -1   25.80   14.10 
   5   6  -1   22.20    9.20 
  -5   6   1   18.50   13.60 
   5   6  -1   10.00   10.60 
  -5   6   1   19.10   10.90 
  -5   6   1   29.10   13.70 
   5   6  -1   15.60    9.50 
  -5   6   1   29.40   13.20 
   5   6  -1   22.40   10.20 
  -5   6   1   29.10    7.50 
  -5   6   1   28.70    8.90 
  -5   6   1    8.00    9.20 
  -5   6   1   32.50   11.80 
   5   6  -1   26.90   17.10 
  -5   6   1   13.60    9.40 
   5   6  -1    5.00    8.10 
   5   6  -1   25.80   10.00 
   5   6  -1   20.20    9.30 
   4  -6  -1  159.68   21.50 
   4  -6  -1   97.39   19.70 
  -4  -6   1  112.59   15.00 
  -4  -6   1  113.29   20.50 
  -4  -6   1  143.49   18.80 
   4  -6  -1  107.29   25.20 
   4  -6  -1  126.89   18.20 
  -4  -6   1  117.59   21.00 
   4  -6  -1  130.39   18.20 
  -4  -6   1   99.89   17.40 
   4  -6  -1  132.89   20.50 
   4  -6  -1  108.39   18.50 
   4  -6  -1  133.09   21.90 
  -4  -6   1  154.68   19.20 
  -4  -6   1  109.49   17.50 
  -4  -6   1  116.09   16.40 
   4   6  -1   94.09   22.10 
   4   6  -1  120.19   21.60 
   4   6  -1  134.99   16.40 
  -4   6   1  116.99   23.70 
   4   6  -1  108.69   15.50 
  -4   6   1  165.28   20.90 
   4   6  -1   94.09   15.10 
  -4   6   1  116.59   20.40 
  -4   6   1  123.99   20.30 
  -4   6   1  136.69   18.70 
  -4   6   1  132.49   14.60 
   4   6  -1   96.29   15.50 
   4   6  -1  108.99   15.50 
  -4   6   1  113.89   13.40 
   4   6  -1  115.79   22.00 
   4   6  -1  119.69   18.10 
   4   6  -1  120.29   17.10 
  -4   6   1  136.29   19.10 
  -4   6   1  118.49   17.50 
  -3  -6   1    2.60    3.40 
   3  -6  -1    9.50   10.70 
   3  -6  -1    3.30    8.00 
  -3  -6   1   21.50    8.20 
   3  -6  -1    5.20   11.40 
   3  -6  -1    0.10    7.20 
  -3  -6   1   11.80    8.00 
  -3  -6   1    7.50    6.90 
   3  -6  -1   -0.60    7.40 
   3  -6  -1    9.70    8.10 
  -3  -6   1    5.30    8.40 
   3  -6  -1   26.10   11.00 
  -3  -6   1    7.40    7.70 
  -3  -6   1   16.40    7.40 
  -3  -6   1   10.70   10.40 
   3  -6  -1    5.50    7.60 
   3   6  -1    2.60   11.60 
   3   6  -1    0.40    8.60 
   3   6  -1    5.10    7.90 
  -3   6   1    2.80    8.00 
   3   6  -1   12.00    9.20 
   3   6  -1    6.80    7.40 
   3   6  -1    5.30    7.00 
   3   6  -1    4.30    8.20 
   3   6  -1    7.50    8.00 
   3   6  -1    5.70   11.40 
  -3   6   1  -12.40    6.20 
  -3   6   1    3.90    9.50 
  -3   6   1    8.10    6.30 
   3   6  -1   -0.60   10.40 
  -3   6   1    4.50    8.70 
  -3   6   1   12.60   11.80 
  -3   6   1    2.60    8.80 
  -3   6   1   10.80    7.30 
  -2  -6   1   24.50    8.80 
  -2  -6   1   36.10   11.30 
   2  -6  -1   16.30   14.00 
   2  -6  -1   16.70   10.10 
  -2  -6   1   32.80   10.60 
  -2  -6   1   36.30   13.40 
  -2  -6   1   46.40   11.30 
  -2  -6   1   37.90   11.10 
  -2  -6   1   39.70    7.30 
   2  -6  -1   10.20    8.10 
  -2  -6   1   34.50    9.90 
   2  -6  -1   32.50   10.90 
   2  -6  -1   27.50    9.60 
  -2   6   1   22.60    9.30 
   2   6  -1   33.50    9.70 
  -2   6   1   24.20   12.60 
   2   6  -1   45.90   10.80 
  -2   6   1    9.70    7.80 
   2   6  -1   27.80    9.90 
  -2   6   1   21.70   11.70 
   2   6  -1   33.40   10.60 
  -2   6   1   28.70    8.00 
  -2   6   1   28.90   13.00 
   2   6  -1   19.60   12.30 
   2   6  -1   42.70   16.80 
   2   6  -1   22.30   14.20 
   2   6  -1   20.90    9.70 
  -2   6   1    9.80    8.90 
   2   6  -1   30.50   10.60 
   1  -6  -1  135.79   20.60 
  -1  -6   1  100.79   15.80 
  -1  -6   1  149.49   15.00 
   1  -6  -1  125.69   18.40 
  -1  -6   1   88.89   16.70 
   1  -6  -1  146.39   19.50 
  -1  -6   1   98.79   16.10 
  -1  -6   1  110.39   27.60 
  -1  -6   1  136.49   18.80 
   1  -6  -1   89.99   23.00 
   1  -6  -1   99.09   17.70 
  -1  -6   1  110.09   17.50 
  -1  -6   1  103.29   16.50 
   1  -6  -1  106.09   15.00 
  -1  -6   1  120.69   16.50 
  -1   6   1   68.69   13.60 
   1   6  -1  124.59   25.40 
   1   6  -1  131.49   17.90 
  -1   6   1  125.29   19.00 
  -1   6   1  124.89   15.90 
  -1   6   1  124.19   22.80 
   1   6  -1   81.89   17.40 
  -1   6   1  108.99   19.00 
  -1   6   1   94.29   15.30 
   1   6  -1   86.59   14.80 
   1   6  -1   78.39   14.30 
   1   6  -1  140.59   16.80 
  -1   6   1  125.49   16.80 
  -1   6   1  121.19   13.70 
   1   6  -1  111.29   14.00 
   1   6  -1   66.89   13.10 
   0  -6   1  641.44   40.40 
   0  -6  -1  716.43   36.30 
   0  -6   1  893.91   61.49 
   0  -6   1  676.83   39.40 
   0  -6  -1  734.03   44.80 
   0  -6  -1  807.92   60.59 
   0  -6  -1  682.63   38.60 
   0  -6  -1  705.63   38.70 
   0  -6   1  771.02   40.90 
   0  -6   1  749.62   44.10 
   0  -6  -1  713.33   40.90 
   0  -6   1  714.33   36.30 
   0  -6   1  715.33   39.80 
   0  -6  -1  808.92   45.10 
   0  -6   1  694.43   39.80 
   0  -6  -1  695.53   37.70 
   0   6  -1  807.72   40.70 
   0   6  -1  739.43   44.70 
   0   6   1  703.03   42.50 
   0   6   1  744.23   44.10 
   0   6   1  792.22   38.60 
   0   6   1  717.83   39.50 
   0   6  -1  676.03   37.80 
   0   6   1  734.93   39.60 
   0   6  -1  753.02   41.90 
   0   6  -1  728.93   47.10 
   0   6   1  679.23   38.00 
   0   6   1  794.52   52.19 
   0   6  -1  722.83   39.50 
   0   6   1  751.72   40.70 
   0   6   1  753.32   36.20 
   0   6   1  744.23   41.10 
   0   6  -1  698.03   40.20 
   1  -6   1   60.09   13.20 
  -1  -6  -1   92.69   16.80 
  -1  -6  -1   53.59   13.20 
   1  -6   1   45.50   13.80 
   1  -6   1   88.09   15.40 
  -1  -6  -1   70.59   10.50 
  -1  -6  -1   53.79   12.20 
  -1  -6  -1   44.20   10.50 
  -1  -6  -1   49.00   21.00 
  -1  -6  -1   58.69   15.20 
   1  -6   1   46.60   12.70 
   1  -6   1   84.19   22.80 
   1  -6   1   46.10   10.70 
  -1  -6  -1   74.79   13.70 
   1  -6   1   58.89   12.40 
   1   6   1   38.00   17.00 
   1   6   1   49.50   11.10 
   1   6   1   63.79   12.60 
  -1   6  -1   47.20   12.10 
  -1   6  -1   60.89   13.00 
  -1   6  -1   48.90   12.40 
  -1   6  -1   71.99   16.40 
   1   6   1   75.59   13.60 
  -1   6  -1   63.89   15.90 
   1   6   1   55.89   11.80 
   1   6   1   55.09   15.10 
   1   6   1   42.70    9.90 
  -1   6  -1   51.09   10.80 
   1   6   1   50.59   11.90 
   1   6   1   67.49   14.50 
  -1   6  -1   82.19   14.30 
  -2  -6  -1  260.47   19.20 
   2  -6   1  249.68   25.30 
   2  -6   1  219.68   24.00 
  -2  -6  -1  220.88   22.80 
   2  -6   1  285.57   21.80 
   2  -6   1  252.07   27.10 
  -2  -6  -1  231.18   27.20 
  -2  -6  -1  272.27   25.40 
   2  -6   1  147.69   28.60 
   2  -6   1  246.48   28.20 
  -2  -6  -1  195.88   26.50 
  -2  -6  -1  188.88   23.30 
   2  -6   1  276.17   22.40 
   2  -6   1  244.68   25.50 
  -2  -6  -1  236.48   15.70 
   2   6   1  283.57   24.50 
   2   6   1  243.68   20.50 
  -2   6  -1  291.37   24.00 
  -2   6  -1  247.18   28.90 
   2   6   1  244.48   29.00 
   2   6   1  213.28   32.00 
   2   6   1  205.18   18.40 
  -2   6  -1  272.47   24.90 
   2   6   1  232.88   20.20 
   2   6   1  183.98   20.60 
   2   6   1  278.97   22.40 
  -2   6  -1  255.37   29.10 
   2   6   1  143.09   28.80 
   2   6   1  226.58   21.80 
  -2   6  -1  270.47   27.30 
  -2   6  -1  194.68   21.30 
  -3  -6  -1    1.20    8.90 
   3  -6   1    3.40    6.90 
   3  -6   1   -0.40    7.10 
  -3  -6  -1   -4.80    5.10 
   3  -6   1    4.30   10.60 
   3  -6   1   -1.50    7.10 
  -3  -6  -1   -5.50    3.40 
  -3  -6  -1    3.50    7.10 
  -3  -6  -1   -4.80    5.90 
   3  -6   1    2.70    8.20 
  -3  -6  -1   -2.00    4.90 
   3  -6   1   -3.60    6.60 
  -3  -6  -1   -0.90    9.40 
   3  -6   1    0.80    6.90 
   3  -6   1  -11.50    8.30 
   3   6   1   -6.60    5.10 
   3   6   1   -1.00    6.30 
   3   6   1   -6.60    6.50 
  -3   6  -1    2.20    9.70 
  -3   6  -1    0.60    9.30 
   3   6   1  -13.10    9.30 
   3   6   1    9.80   13.80 
  -3   6  -1    1.90    7.70 
   3   6   1   -8.60    5.80 
   3   6   1   -0.70   11.00 
  -3   6  -1    3.00    9.60 
   3   6   1    1.00    7.40 
  -3   6  -1    4.90    7.30 
  -3   6  -1   -6.00    7.50 
   3   6   1  -16.00    6.90 
   3   6   1    0.20    7.10 
  -3   6  -1    2.70    6.30 
  -4  -6  -1   15.00   11.00 
   4  -6   1   -2.10    6.40 
   4  -6   1   16.10    9.60 
   4  -6   1   22.60   11.50 
  -4  -6  -1    6.10   10.30 
  -4  -6  -1   20.90   12.20 
  -4  -6  -1    8.40    7.30 
   4  -6   1    2.80    7.80 
   4  -6   1   10.90    8.60 
   4  -6   1   16.90    9.50 
  -4  -6  -1    6.30    7.60 
  -4  -6  -1   -2.50    7.50 
   4  -6   1    9.30   12.70 
   4  -6   1    3.20    8.00 
  -4  -6  -1    1.20    6.20 
  -4  -6  -1   12.50    4.70 
  -4   6  -1   -0.80   10.10 
  -4   6  -1   20.80   11.80 
   4   6   1    8.00    7.70 
  -4   6  -1    7.40    7.40 
   4   6   1   -1.30   10.10 
   4   6   1   25.10    9.70 
   4   6   1   16.20    9.00 
   4   6   1    7.40   13.70 
  -4   6  -1    5.30    9.30 
   4   6   1   10.70    7.30 
   4   6   1   31.50   11.10 
  -4   6  -1   13.30   11.10 
   4   6   1   16.20    8.80 
  -4   6  -1   -1.90    7.00 
   4   6   1    6.30   11.70 
   4   6   1   13.40    8.40 
  -5  -6  -1  139.19   22.00 
   5  -6   1   91.79   16.90 
  -5  -6  -1   93.79   15.20 
   5  -6   1  106.09   19.20 
  -5  -6  -1  112.29   18.30 
  -5  -6  -1  122.19   17.30 
   5  -6   1   81.09   17.80 
  -5  -6  -1  116.59   17.00 
   5  -6   1   82.39   17.10 
  -5  -6  -1  120.99   18.10 
   5  -6   1   88.29   16.90 
  -5  -6  -1   63.19   18.30 
  -5  -6  -1  100.89   19.70 
   5  -6   1   77.79   17.90 
   5  -6   1  129.59   25.80 
  -5  -6  -1   96.09   16.10 
   5  -6   1  107.69   19.00 
   5  -6   1   71.99   14.40 
   5   6   1  115.59   22.70 
  -5   6  -1   99.19   13.40 
   5   6   1  123.09   15.80 
   5   6   1   92.79   14.60 
   5   6   1   94.89   15.50 
  -5   6  -1  116.59   19.50 
   5   6   1  102.59   16.20 
  -5   6  -1   98.89   20.80 
  -5   6  -1  100.59   16.90 
  -5   6  -1  112.09   19.40 
  -5   6  -1   74.09   19.50 
   5   6   1   75.39   16.50 
   5   6   1   93.49   20.10 
   5   6   1   76.69   23.80 
  -5   6  -1   93.29   14.80 
   5   6   1  104.89   16.70 
   5   6   1   96.99   15.00 
  -6  -6  -1  425.96   31.60 
   6  -6   1  500.35   30.00 
  -6  -6  -1  482.45   32.80 
  -6  -6  -1  568.84   41.40 
  -6  -6  -1  478.95   33.00 
   6  -6   1  479.85   37.80 
   6  -6   1  478.25   34.70 
   6  -6   1  467.15   36.70 
  -6  -6  -1  512.55   37.80 
  -6  -6  -1  488.75   31.00 
   6  -6   1  483.55   36.50 
  -6  -6  -1  436.06   34.00 
   6  -6   1  476.65   32.60 
  -6  -6  -1  345.97   41.40 
   6  -6   1  509.05   39.50 
  -6  -6  -1  512.55   33.40 
   6  -6   1  508.35   33.50 
   6  -6   1  530.35   37.40 
   6  -6   1  500.25   39.60 
   6  -6   1  533.15   36.10 
   6  -6   1  489.25   44.80 
  -6  -6  -1  458.75   37.00 
   6   6   1  510.05   34.00 
   6   6   1  553.24   49.70 
   6   6   1  493.65   34.00 
  -6   6  -1  445.16   35.00 
  -6   6  -1  501.55   33.60 
  -6   6  -1  494.55   42.80 
  -6   6  -1  509.15   31.70 
   6   6   1  502.25   30.80 
   6   6   1  450.25   32.10 
   6   6   1  529.45   37.10 
   6   6   1  516.35   40.70 
   6   6   1  445.16   43.30 
   6   6   1  456.85   28.90 
  -6   6  -1  450.95   34.60 
  -6   6  -1  410.56   42.00 
   6   6   1  476.75   31.80 
  -6   6  -1  409.06   31.90 
  -6   6  -1  463.35   27.90 
   6   6   1  476.75   36.90 
  -7  -6  -1    6.10   11.20 
   7  -6   1   13.80   10.30 
  -7  -6  -1    1.40   12.30 
   7  -6   1   -4.20   10.90 
   7  -6   1   -7.20   12.80 
   7  -6   1   -3.40    8.20 
   7  -6   1   -9.10    9.80 
  -7  -6  -1   13.10   12.00 
  -7  -6  -1   -5.10    9.00 
   7  -6   1   12.00   10.30 
   7  -6   1    4.00   10.60 
   7  -6   1   10.90   10.50 
  -7  -6  -1    2.70   11.10 
   7  -6   1   23.50   12.10 
  -7  -6  -1   -0.50    8.10 
   7  -6   1    1.10    8.80 
  -7  -6  -1   -4.50    8.00 
  -7  -6  -1    7.20    8.30 
   7   6   1    8.50   16.90 
  -7   6  -1   -2.40   13.00 
  -7   6  -1   21.80   11.50 
  -7   6  -1    7.90    9.30 
   7   6   1  -15.80    7.90 
   7   6   1    2.40   11.70 
   7   6   1   -7.40    7.80 
   7   6   1    6.90   10.70 
   7   6   1    3.40   13.70 
  -7   6  -1    7.70    9.20 
  -7   6  -1    3.20   13.70 
  -7   6  -1   -3.60    9.90 
   7   6   1   14.80   12.50 
  -7   6  -1    3.90    9.30 
   7   6   1   -5.20   13.00 
  -7   6  -1  -13.10   10.40 
   7   6   1   -3.00    9.30 
   8  -6   1  559.74   45.50 
  -8  -6  -1  523.55   37.70 
  -8  -6  -1  498.15   35.30 
   8  -6   1  388.56   40.20 
  -8  -6  -1  443.26   35.80 
   8  -6   1  486.25   36.20 
   8  -6   1  335.37   39.50 
   8  -6   1  483.15   37.70 
   8  -6   1  438.26   47.40 
  -8  -6  -1  475.65   38.90 
   8  -6   1  526.85   41.70 
   8  -6   1  476.95   38.90 
  -8  -6  -1  475.45   35.40 
   8  -6   1  466.65   55.69 
  -8  -6  -1  429.06   45.20 
  -8   6  -1  405.26   32.20 
   8   6   1  420.96   36.60 
  -8   6  -1  482.35   35.40 
  -8   6  -1  528.85   52.19 
   8   6   1  422.56   34.40 
   8   6   1  457.05   40.50 
  -8   6  -1  415.46   40.30 
   8   6   1  452.15   35.00 
   8   6   1  448.86   46.80 
   8   6   1  571.04   44.20 
   8   6   1  420.86   53.99 
   8   6   1  459.55   44.90 
  -8   6  -1  555.04   41.40 
  -8   6  -1  484.45   36.30 
  -8   6  -1  472.05   33.70 
  -8   6  -1  560.04   46.80 
   8   6   1  481.05   35.80 
   8  -7  -1   -5.70   11.10 
   8  -7  -1    7.00   14.10 
  -8  -7   1   -1.60   13.30 
  -8  -7   1    1.80   14.40 
   8  -7  -1  -13.10   10.20 
   8  -7  -1   -5.80   15.00 
  -8  -7   1   14.60   11.40 
   8  -7  -1    7.00   12.60 
  -8   7   1   -6.40   10.30 
  -8   7   1   11.50   16.00 
   8   7  -1   12.60   18.70 
   8   7  -1  -14.20   16.30 
  -8   7   1    8.90   14.70 
   8   7  -1   -3.50   14.20 
  -8   7   1    9.50   12.90 
   8   7  -1  -18.30   19.30 
   7  -7  -1  543.15   42.30 
   7  -7  -1  342.27   39.30 
  -7  -7   1  461.05   35.20 
   7  -7  -1  464.55   56.79 
   7  -7  -1  430.46   44.10 
   7  -7  -1  442.06   33.30 
   7  -7  -1  517.85   50.69 
  -7  -7   1  433.26   43.30 
  -7  -7   1  425.26   48.00 
   7  -7  -1  361.76   40.50 
   7  -7  -1  433.36   44.20 
   7  -7  -1  492.95   44.50 
  -7  -7   1  351.16   35.40 
  -7  -7   1  340.77   40.80 
   7  -7  -1  394.56   45.40 
  -7  -7   1  339.57   38.30 
  -7   7   1  394.06   37.30 
   7   7  -1  470.15   48.50 
  -7   7   1  441.86   44.30 
  -7   7   1  411.66   45.40 
   7   7  -1  349.17   41.10 
  -7   7   1  457.25   50.59 
   7   7  -1  418.46   53.09 
  -7   7   1  453.55   37.30 
   7   7  -1  384.06   40.90 
   7   7  -1  419.96   33.60 
   7   7  -1  393.76   32.80 
   7   7  -1  426.76   33.90 
  -7   7   1  470.05   37.20 
  -6  -7   1   11.60   12.10 
   6  -7  -1    6.80   14.50 
  -6  -7   1   21.80   11.10 
   6  -7  -1   47.20   14.10 
   6  -7  -1   19.10   12.60 
  -6  -7   1   36.00   12.00 
  -6  -7   1   -9.90   12.10 
   6  -7  -1    3.40   10.20 
  -6  -7   1   -5.30   11.10 
  -6  -7   1    6.70    8.80 
  -6  -7   1   27.80   11.20 
   6  -7  -1   18.90   10.40 
   6  -7  -1   20.30   11.80 
   6  -7  -1    9.10   11.00 
   6  -7  -1   -1.20   11.40 
  -6  -7   1    6.10   13.50 
   6  -7  -1   12.80   10.50 
   6  -7  -1   33.80   14.60 
   6   7  -1   14.70   15.40 
   6   7  -1    7.10    9.90 
  -6   7   1   13.30   13.60 
   6   7  -1   10.30   12.50 
   6   7  -1   22.70   10.20 
  -6   7   1   -5.80   12.70 
  -6   7   1   15.80   12.90 
   6   7  -1    5.80   10.10 
   6   7  -1   23.30   15.50 
  -6   7   1   13.60   10.80 
   6   7  -1   10.20   18.80 
  -6   7   1    2.80   11.40 
   6   7  -1   16.00   15.40 
  -6   7   1   10.30   10.80 
  -6   7   1    6.20   11.20 
   6   7  -1    6.60   10.80 
  -5  -7   1 1624.44   77.29 
   5  -7  -1 1723.23   78.99 
   5  -7  -1 1648.73   84.19 
  -5  -7   1 1627.84   75.99 
  -5  -7   1 1420.86   83.09 
  -5  -7   1 1628.24   81.29 
  -5  -7   1 1752.62   76.79 
  -5  -7   1 1516.55   84.09 
   5  -7  -1 1648.54   83.39 
   5  -7  -1 1749.92   81.99 
  -5  -7   1 1675.43   78.19 
   5  -7  -1 1705.73   99.69 
   5  -7  -1 1711.03   82.89 
   5  -7  -1 1672.33   78.99 
   5  -7  -1 1694.83   80.79 
  -5   7   1 1613.54   76.79 
   5   7  -1 1675.83   81.19 
  -5   7   1 1549.54   84.69 
  -5   7   1 1853.41   79.49 
  -5   7   1 1707.53   80.19 
  -5   7   1 1667.33   76.99 
   5   7  -1 1542.95   75.09 
   5   7  -1 1733.73   74.69 
   5   7  -1 1650.23   87.29 
   5   7  -1 1708.73   75.09 
   5   7  -1 1737.13   95.79 
  -5   7   1 1706.93   69.59 
   5   7  -1 1654.23   74.89 
   5   7  -1 1658.73   86.69 
   5   7  -1 1568.54   72.19 
   5   7  -1 1712.13   77.39 
   4  -7  -1   80.69   17.20 
   4  -7  -1   87.39   18.60 
  -4  -7   1   45.50   13.20 
   4  -7  -1   90.39   16.70 
  -4  -7   1   59.19   15.50 
  -4  -7   1   89.29   15.40 
  -4  -7   1   60.49   13.80 
   4  -7  -1   51.29   21.80 
   4  -7  -1   68.09   16.10 
   4  -7  -1   88.19   19.20 
  -4  -7   1   31.10   14.90 
  -4  -7   1   70.79   15.90 
  -4  -7   1   84.09   19.10 
   4  -7  -1   76.89   16.60 
  -4  -7   1   64.79   12.10 
   4  -7  -1   67.09   19.40 
   4   7  -1   66.69   13.20 
   4   7  -1   56.59   21.10 
  -4   7   1   53.59   15.00 
  -4   7   1   54.09   15.00 
   4   7  -1   94.29   17.70 
   4   7  -1   49.40   13.40 
   4   7  -1   86.79   22.80 
  -4   7   1   75.79   18.90 
  -4   7   1   52.09   10.80 
   4   7  -1   59.19   13.80 
   4   7  -1   65.79   20.30 
  -4   7   1   70.79   15.20 
   4   7  -1   73.99   15.20 
  -4   7   1   58.99   12.90 
  -4   7   1   43.30   13.40 
   4   7  -1   86.59   16.30 
  -4   7   1   85.69   22.50 
   4   7  -1   80.59   15.00 
  -3  -7   1  951.40   48.50 
  -3  -7   1  864.61   47.70 
   3  -7  -1  858.71   50.59 
  -3  -7   1  849.81   48.50 
   3  -7  -1  872.81   49.70 
   3  -7  -1  873.51   49.10 
   3  -7  -1  930.81   52.09 
   3  -7  -1  903.71   52.69 
  -3  -7   1  930.91   43.90 
  -3  -7   1  858.81   54.79 
   3  -7  -1  940.41   50.29 
  -3  -7   1  954.20   53.79 
  -3  -7   1  965.70   51.89 
   3   7  -1  919.41   46.80 
   3   7  -1  654.73   57.39 
   3   7  -1  871.41   55.59 
   3   7  -1  777.52   57.69 
   3   7  -1  833.92   48.60 
   3   7  -1  929.61   45.30 
   3   7  -1  889.61   48.20 
  -3   7   1  887.11   49.50 
  -3   7   1  781.52   44.30 
  -3   7   1  967.10   55.79 
  -3   7   1  940.21   59.29 
  -3   7   1  910.91   49.50 
  -3   7   1  905.71   48.30 
   3   7  -1  922.21   48.90 
   3   7  -1  713.83   46.70 
  -3   7   1  842.72   40.80 
   3   7  -1  888.41   48.00 
   3   7  -1 1021.80   51.99 
  -2  -7   1    7.90    7.40 
   2  -7  -1    8.90    7.50 
   2  -7  -1   12.30    9.40 
  -2  -7   1   -8.30    6.90 
   2  -7  -1    7.30    9.70 
   2  -7  -1    1.30    9.70 
  -2  -7   1    8.20   11.20 
   2  -7  -1    7.40    8.30 
  -2  -7   1   -5.30    5.80 
   2  -7  -1    5.80   13.70 
  -2  -7   1   -0.30    4.50 
   2  -7  -1   -4.40    7.00 
  -2  -7   1   -5.10    7.00 
  -2  -7   1   -8.10    7.50 
  -2  -7   1    4.30    7.50 
   2   7  -1    4.20    9.60 
  -2   7   1   16.10    7.20 
   2   7  -1   13.30   14.50 
  -2   7   1    4.80   11.20 
   2   7  -1    3.40    7.90 
  -2   7   1    1.30    9.90 
   2   7  -1    4.70   13.50 
   2   7  -1   -8.30    8.70 
  -2   7   1   -2.60   10.00 
  -2   7   1   -6.30   11.10 
  -2   7   1   -9.40    5.70 
   2   7  -1   -3.50    9.90 
   2   7  -1   -0.50   11.70 
   2   7  -1   -2.60    6.80 
  -2   7   1   -3.40    7.00 
  -2   7   1   -6.10    8.80 
   2   7  -1   -0.90    8.70 
   2   7  -1    3.20    8.50 
  -1  -7   1  292.37   28.50 
  -1  -7   1  315.47   35.00 
  -1  -7   1  295.17   29.80 
  -1  -7   1  349.37   34.00 
  -1  -7   1  302.37   46.40 
   1  -7  -1  291.07   29.50 
   1  -7  -1  288.67   30.80 
  -1  -7   1  339.37   25.80 
  -1  -7   1  309.17   21.30 
  -1  -7   1  265.37   27.70 
   1  -7  -1  301.27   42.60 
   1  -7  -1  256.77   31.80 
   1  -7  -1  320.67   27.50 
  -1  -7   1  294.77   24.50 
   1  -7  -1  286.57   23.70 
   1   7  -1  319.57   25.90 
  -1   7   1  292.77   27.80 
  -1   7   1  327.87   32.70 
  -1   7   1  305.37   31.30 
  -1   7   1  335.27   24.10 
   1   7  -1  315.07   29.80 
   1   7  -1  305.57   38.20 
   1   7  -1  312.17   25.50 
   1   7  -1  285.17   29.90 
   1   7  -1  318.07   23.60 
   1   7  -1  261.77   27.40 
  -1   7   1  276.47   27.90 
  -1   7   1  236.88   26.20 
  -1   7   1  286.57   21.30 
   1   7  -1  320.27   32.70 
  -1   7   1  293.67   32.10 
   1   7  -1  317.57   30.50 
   0  -7   1    8.20    8.40 
   0  -7  -1   -6.40    4.10 
   0  -7  -1    8.20   14.30 
   0  -7   1   14.60    9.00 
   0  -7   1    0.80    7.20 
   0  -7   1    2.00    8.10 
   0  -7   1    6.70    6.90 
   0  -7  -1   -3.20    7.50 
   0  -7   1   -1.40   13.50 
   0  -7   1   -3.60    6.00 
   0  -7   1   13.60    9.40 
   0  -7  -1    5.60    9.00 
   0  -7  -1    5.00    6.60 
   0  -7  -1   -3.60    6.80 
   0  -7  -1   -6.90    6.20 
   0  -7  -1   -2.70    6.80 
   0  -7  -1   -5.70    9.10 
   0  -7   1   -5.60    8.60 
   0   7   1    6.50    8.40 
   0   7  -1   -5.20    7.20 
   0   7   1  -10.50    7.90 
   0   7   1   10.60   10.40 
   0   7   1   -1.50    9.20 
   0   7   1   13.50    7.80 
   0   7  -1    0.00    8.50 
   0   7  -1   -7.80    7.20 
   0   7   1    8.10   11.80 
   0   7  -1   13.20   13.00 
   0   7   1    0.50    7.30 
   0   7  -1    7.50    8.20 
   0   7   1  -14.70    7.50 
   0   7   1    0.40    8.50 
   0   7   1   -4.20    7.40 
   0   7  -1   -2.20    9.80 
   0   7  -1    0.00    8.40 
  -1  -7  -1 1775.22   83.59 
   1  -7   1 1679.23   81.59 
   1  -7   1 1580.54   76.39 
  -1  -7  -1 1686.63   74.79 
  -1  -7  -1 1610.14   75.29 
   1  -7   1 1672.53   73.99 
  -1  -7  -1 1700.33   74.49 
   1  -7   1 1748.23   98.59 
   1  -7   1 1645.84   76.09 
  -1  -7  -1 1635.14   69.59 
  -1  -7  -1 1761.52   78.49 
  -1  -7  -1 1909.61  107.29 
   1  -7   1 1603.64   79.09 
  -1  -7  -1 1863.21   81.69 
   1  -7   1 1652.13   76.69 
   1   7   1 1705.03   76.59 
  -1   7  -1 1764.92   76.19 
   1   7   1 1594.74   90.79 
   1   7   1 1762.22   78.29 
  -1   7  -1 1747.93   79.89 
   1   7   1 1736.73   81.19 
   1   7   1 1744.53   75.29 
  -1   7  -1 1757.82   75.19 
   1   7   1 1414.66   77.49 
   1   7   1 1547.15   73.39 
   1   7   1 1729.73   72.79 
  -1   7  -1 1606.84   80.89 
   1   7   1 1702.43   76.19 
  -1   7  -1 1743.13   72.79 
   1   7   1 1636.94   74.39 
  -1   7  -1 1589.74   76.49 
  -1   7  -1 1797.32   83.49 
  -2  -7  -1  137.29   14.60 
   2  -7   1  126.99   19.20 
  -2  -7  -1  149.88   18.70 
   2  -7   1  122.59   17.80 
   2  -7   1   66.59   22.70 
   2  -7   1  126.99   20.10 
   2  -7   1  144.69   21.50 
   2  -7   1  123.39   22.40 
   2  -7   1  138.99   21.70 
  -2  -7  -1  130.19   19.80 
  -2  -7  -1  152.68   22.80 
  -2  -7  -1  118.49   19.60 
  -2  -7  -1  140.49   24.20 
  -2  -7  -1  149.99   20.30 
   2  -7   1  179.08   23.60 
  -2   7  -1   97.29   21.60 
   2   7   1  120.49   21.30 
   2   7   1  131.19   19.40 
   2   7   1  134.79   20.00 
   2   7   1  118.19   17.80 
   2   7   1  142.59   18.40 
  -2   7  -1  160.98   21.70 
  -2   7  -1  146.99   22.30 
   2   7   1  147.69   28.60 
   2   7   1  142.69   19.80 
  -2   7  -1  131.79   22.80 
   2   7   1  137.69   16.40 
   2   7   1  139.49   22.80 
   2   7   1  105.49   27.50 
   2   7   1  141.49   19.00 
  -2   7  -1  100.19   17.60 
  -2   7  -1  108.89   17.20 
  -3  -7  -1 1085.59   65.89 
  -3  -7  -1 1182.28   48.00 
   3  -7   1 1185.68   59.99 
   3  -7   1 1245.18   65.49 
  -3  -7  -1 1227.38   65.69 
   3  -7   1 1212.88   59.59 
   3  -7   1 1235.28   61.99 
   3  -7   1  862.81   71.79 
  -3  -7  -1 1143.19   57.49 
  -3  -7  -1 1264.97   56.39 
  -3  -7  -1 1048.20   56.09 
   3  -7   1 1158.08   59.89 
   3  -7   1 1219.88   57.79 
   3  -7   1 1151.98   61.59 
  -3  -7  -1 1188.38   57.89 
   3   7   1 1166.28   57.79 
   3   7   1 1184.78   53.39 
   3   7   1 1172.48   56.89 
   3   7   1 1074.99   63.99 
  -3   7  -1 1052.79   62.89 
   3   7   1 1065.69   75.69 
  -3   7  -1 1202.08   59.99 
  -3   7  -1 1228.28   55.39 
   3   7   1 1122.29   58.49 
  -3   7  -1 1029.70   55.29 
   3   7   1 1072.39   56.19 
   3   7   1 1062.29   70.59 
  -3   7  -1 1213.58   66.49 
  -3   7  -1 1202.28   61.89 
   3   7   1 1089.59   55.99 
  -3   7  -1 1365.76   61.19 
  -3   7  -1 1117.89   62.79 
   3   7   1 1176.98   57.99 
   4  -7   1   43.40   13.50 
  -4  -7  -1   54.29   18.10 
  -4  -7  -1   52.89   16.10 
   4  -7   1   41.60   16.20 
   4  -7   1   26.20   18.20 
   4  -7   1   19.80   11.00 
  -4  -7  -1   43.70   12.40 
  -4  -7  -1   34.50   11.00 
  -4  -7  -1   49.60   12.80 
  -4  -7  -1   28.60   11.90 
   4  -7   1   11.70    9.40 
   4  -7   1   46.10   14.00 
  -4  -7  -1   36.60   13.30 
  -4  -7  -1   49.99   16.80 
   4  -7   1   46.10   14.10 
   4  -7   1   37.50   13.50 
   4   7   1   54.89   13.80 
   4   7   1   32.70   19.40 
  -4   7  -1   45.80   11.60 
  -4   7  -1   22.00   13.00 
   4   7   1   65.39   14.40 
  -4   7  -1   36.60   13.40 
  -4   7  -1   35.60   14.10 
   4   7   1   30.30   20.60 
  -4   7  -1   54.09   17.60 
   4   7   1   37.20   12.70 
  -4   7  -1   21.70   13.80 
   4   7   1   52.59   13.70 
   4   7   1   33.00   12.60 
   4   7   1   40.70   18.00 
   4   7   1   76.59   15.70 
   4   7   1   52.39   11.00 
  -4   7  -1   46.80   13.20 
   5  -7   1  247.78   28.50 
  -5  -7  -1  172.08   22.90 
  -5  -7  -1  194.58   24.10 
   5  -7   1  203.08   29.00 
   5  -7   1  169.48   25.20 
   5  -7   1  198.58   36.60 
   5  -7   1  185.88   23.50 
   5  -7   1  220.28   30.20 
   5  -7   1  165.38   22.90 
  -5  -7  -1  141.59   26.80 
  -5  -7  -1  197.08   22.40 
  -5  -7  -1  217.18   28.80 
   5  -7   1  198.38   28.90 
   5  -7   1  156.18   26.50 
  -5  -7  -1  188.88   23.80 
   5  -7   1  208.78   27.60 
  -5  -7  -1  195.78   30.20 
  -5  -7  -1  188.48   24.60 
   5   7   1  201.58   39.30 
   5   7   1  162.28   21.00 
   5   7   1  170.08   21.30 
  -5   7  -1  228.48   26.30 
  -5   7  -1  192.58   26.90 
   5   7   1  206.38   25.80 
   5   7   1  222.38   22.30 
  -5   7  -1  221.38   22.80 
   5   7   1  216.78   24.60 
  -5   7  -1  208.38   27.20 
  -5   7  -1  196.88   29.40 
   5   7   1  110.39   25.30 
  -5   7  -1  194.98   28.90 
   5   7   1  256.67   36.40 
  -5   7  -1  168.38   23.50 
   5   7   1  195.18   22.60 
   5   7   1  175.88   22.90 
  -5   7  -1  180.68   20.60 
  -5   7  -1  173.98   23.70 
   6  -7   1    7.50   10.80 
   6  -7   1   19.90   10.90 
   6  -7   1   36.90   20.20 
   6  -7   1   16.00   12.30 
   6  -7   1   24.20   13.50 
  -6  -7  -1   17.50   15.30 
  -6  -7  -1   37.20   16.70 
   6  -7   1   11.60   11.00 
  -6  -7  -1    6.00    9.80 
   6  -7   1   13.60   11.30 
   6  -7   1   25.50   13.60 
  -6  -7  -1   16.90   10.40 
  -6  -7  -1   52.69   16.80 
  -6  -7  -1   26.60   11.20 
  -6  -7  -1   20.50   11.30 
   6   7   1    9.60   11.30 
   6   7   1   19.80   11.70 
   6   7   1   11.00   10.00 
  -6   7  -1   19.50   12.90 
   6   7   1   48.70   20.50 
  -6   7  -1    9.40   12.80 
  -6   7  -1   36.90   12.30 
   6   7   1   28.00   20.60 
   6   7   1   32.50   11.60 
   6   7   1   22.70   12.00 
  -6   7  -1   14.60   11.50 
   6   7   1   48.70   19.20 
   6   7   1   34.50   15.50 
  -6   7  -1   22.00   12.70 
  -6   7  -1   33.20   17.60 
  -6   7  -1   36.60   16.50 
  -6   7  -1   25.80   13.10 
   6   7   1   12.10   11.20 
  -7  -7  -1  355.26   34.20 
  -7  -7  -1  329.87   37.00 
   7  -7   1  340.27   36.40 
   7  -7   1  378.36   42.40 
   7  -7   1  348.07   39.80 
  -7  -7  -1  373.86   42.20 
   7  -7   1  330.47   41.60 
  -7  -7  -1  378.46   36.10 
   7  -7   1  385.26   51.59 
   7  -7   1  343.67   37.40 
  -7  -7  -1  340.47   40.00 
   7  -7   1  393.16   39.80 
  -7  -7  -1  311.67   42.20 
   7  -7   1  346.97   39.10 
  -7   7  -1  375.66   39.50 
  -7   7  -1  421.16   37.00 
   7   7   1  324.57   30.80 
   7   7   1  308.87   39.00 
   7   7   1  329.67   32.70 
  -7   7  -1  387.66   37.30 
   7   7   1  343.47   51.89 
   7   7   1  335.17   33.70 
  -7   7  -1  357.46   38.70 
  -7   7  -1  405.86   44.20 
   7   7   1  291.87   34.80 
   7   7   1  353.76   43.40 
  -7   7  -1  352.06   42.70 
   7  -8  -1   -7.80   10.70 
  -7  -8   1   15.00   16.50 
   7  -8  -1    2.00   11.80 
  -7  -8   1    9.80    9.70 
   7  -8  -1    0.30   14.40 
  -7  -8   1    4.70   15.20 
  -7  -8   1   11.10   12.00 
   7  -8  -1    2.90   11.60 
   7  -8  -1   14.00   13.20 
   7  -8  -1   29.60   16.00 
  -7  -8   1   -2.50   11.80 
   7  -8  -1   30.30   17.50 
  -7  -8   1    3.50   13.00 
   7  -8  -1    8.40   17.40 
   7   8  -1   25.50   18.90 
  -7   8   1   -5.00   18.30 
   7   8  -1   16.40   13.60 
  -7   8   1    7.40   13.10 
   7   8  -1   13.80   12.80 
  -7   8   1    8.10   13.60 
   7   8  -1  -12.10   16.80 
   7   8  -1   -4.60   14.90 
   7   8  -1    7.10   23.60 
   7   8  -1   16.40   13.70 
   6  -8  -1   23.10   20.10 
   6  -8  -1   23.00   14.70 
  -6  -8   1   21.50   12.40 
   6  -8  -1   10.00   11.20 
  -6  -8   1   36.30   18.00 
   6  -8  -1   22.50   13.60 
  -6  -8   1   25.30   18.10 
  -6  -8   1   15.80   11.30 
   6  -8  -1    1.10   13.80 
  -6  -8   1   -0.90   12.80 
   6  -8  -1   20.20   12.60 
  -6  -8   1   27.40   12.60 
   6  -8  -1   17.20   12.70 
  -6  -8   1    5.70   11.20 
   6  -8  -1   41.90   16.90 
   6  -8  -1   27.40   13.40 
   6   8  -1   15.20   13.40 
   6   8  -1   13.90   11.80 
  -6   8   1   13.30   13.90 
   6   8  -1  -13.70   15.80 
   6   8  -1    6.90   17.20 
  -6   8   1    5.40   17.20 
   6   8  -1    7.80   14.80 
   6   8  -1   30.10   12.80 
   6   8  -1   21.60   25.00 
  -6   8   1   14.80   14.60 
  -6   8   1    9.40   12.80 
  -6   8   1   10.40   13.50 
  -6   8   1   17.10   14.50 
   6   8  -1   28.40   14.20 
   5  -8  -1   18.70   12.30 
  -5  -8   1    5.90   12.30 
   5  -8  -1   -8.60   10.60 
   5  -8  -1    0.60    9.10 
  -5  -8   1   -1.80    8.90 
   5  -8  -1  -11.60    8.40 
  -5  -8   1    6.70   14.90 
   5  -8  -1    6.60   11.40 
   5  -8  -1   -2.70   14.00 
  -5  -8   1    9.90   10.70 
  -5  -8   1   -4.90    8.60 
  -5  -8   1   12.50   10.00 
   5  -8  -1   -1.70   16.80 
   5  -8  -1   -7.20    8.20 
  -5  -8   1   -7.30    8.70 
  -5   8   1    5.10   14.00 
   5   8  -1   12.10   17.60 
  -5   8   1    1.60   11.00 
   5   8  -1    0.10   11.30 
   5   8  -1   10.00   12.20 
   5   8  -1   12.50   13.90 
  -5   8   1  -11.20   10.50 
   5   8  -1    1.30   12.10 
   5   8  -1   16.70   12.00 
  -5   8   1    5.40   11.30 
  -5   8   1   -1.10   10.70 
   5   8  -1   13.30   18.80 
   5   8  -1   22.40   10.30 
   5   8  -1   -5.90   14.40 
  -4  -8   1   40.00   14.10 
   4  -8  -1   37.80   14.10 
  -4  -8   1   27.20   12.60 
  -4  -8   1   56.49   15.60 
   4  -8  -1   42.30   14.80 
   4  -8  -1   24.00   12.30 
   4  -8  -1   10.10   18.80 
  -4  -8   1   44.60   16.00 
  -4  -8   1   56.69   14.80 
   4  -8  -1   17.60   10.70 
  -4  -8   1   44.90   18.80 
   4  -8  -1   27.30   14.70 
   4  -8  -1   45.80   14.20 
  -4  -8   1   42.90   14.30 
  -4   8   1   29.90   17.20 
   4   8  -1   31.50   21.70 
   4   8  -1   40.20   16.50 
  -4   8   1   57.89   15.40 
   4   8  -1   28.40   13.40 
  -4   8   1   56.09   19.80 
  -4   8   1   73.29   18.20 
  -4   8   1   75.79   18.70 
  -4   8   1    9.70   12.30 
   4   8  -1   51.69   15.30 
   4   8  -1   34.00   11.90 
   4   8  -1   29.20   12.70 
   4   8  -1    7.60   15.30 
   4   8  -1    2.40   17.10 
   4   8  -1   40.60   14.60 
   3  -8  -1   24.90   10.80 
  -3  -8   1   49.70   18.10 
  -3  -8   1   44.50   13.70 
  -3  -8   1   62.59   15.30 
   3  -8  -1   73.59   19.30 
  -3  -8   1   34.30   13.70 
   3  -8  -1   67.19   16.40 
  -3  -8   1   46.90   15.00 
  -3  -8   1   45.80   14.00 
   3  -8  -1   51.79   15.20 
   3  -8  -1   35.30   14.90 
   3  -8  -1   22.40   18.20 
   3  -8  -1   30.80   12.80 
   3  -8  -1   23.40   11.70 
   3   8  -1   32.60   14.50 
   3   8  -1   26.10   18.40 
   3   8  -1   48.40   13.50 
  -3   8   1   28.50   15.10 
  -3   8   1   40.10   15.10 
  -3   8   1   55.49   17.50 
   3   8  -1   63.59   15.40 
   3   8  -1   62.09   14.30 
  -3   8   1   41.20   13.70 
   3   8  -1   17.20   12.90 
  -3   8   1   38.50   15.60 
  -3   8   1   56.69   19.30 
   3   8  -1   47.80   15.40 
   3   8  -1   48.30   21.10 
   3   8  -1   17.40   14.50 
  -3   8   1   39.20   12.20 
   3   8  -1   54.99   14.90 
   3   8  -1    5.70   10.80 
  -2  -8   1   49.30   15.00 
   2  -8  -1   28.80   13.00 
   2  -8  -1   33.40   13.20 
  -2  -8   1   37.80   13.40 
   2  -8  -1   26.20   14.00 
  -2  -8   1   42.80   13.90 
   2  -8  -1   44.10   16.50 
   2  -8  -1   60.99   25.10 
  -2  -8   1   40.60   16.50 
  -2  -8   1   55.79   19.20 
  -2  -8   1   42.10   14.00 
   2  -8  -1   34.90   12.10 
   2  -8  -1   33.80   13.50 
   2   8  -1   29.90   12.30 
   2   8  -1   32.60   14.60 
   2   8  -1   26.80   14.00 
   2   8  -1   36.10   11.40 
  -2   8   1   41.80   14.30 
   2   8  -1   28.00   12.50 
  -2   8   1   17.30   12.80 
  -2   8   1   45.20   11.20 
  -2   8   1   44.40   13.80 
  -2   8   1   33.30   14.40 
  -2   8   1   -1.40   13.30 
   2   8  -1   46.20   15.50 
   2   8  -1   27.90   14.70 
   2   8  -1   28.50   13.00 
  -2   8   1   26.10   14.80 
   2   8  -1   52.29   22.00 
  -1  -8   1    9.10    9.20 
  -1  -8   1    8.00    9.60 
   1  -8  -1   -3.40    7.70 
   1  -8  -1    5.10    7.00 
   1  -8  -1   -0.90    7.50 
   1  -8  -1   -1.20    9.40 
  -1  -8   1   -1.20   10.40 
  -1  -8   1   -0.60    9.10 
  -1  -8   1   -8.60    6.30 
  -1  -8   1   -4.20    8.20 
  -1  -8   1   18.40   18.40 
   1  -8  -1    1.70   15.40 
   1  -8  -1   -3.90    9.60 
  -1  -8   1   20.20   10.70 
   1  -8  -1    5.80    8.70 
  -1  -8   1   -5.00    5.90 
  -1   8   1    3.50   10.90 
  -1   8   1    5.40   11.40 
  -1   8   1   14.00    8.40 
  -1   8   1    9.70   12.20 
   1   8  -1   -2.90   10.20 
   1   8  -1    8.20   10.80 
   1   8  -1   14.10   10.70 
  -1   8   1    4.20   12.30 
   1   8  -1   -1.70    9.10 
   1   8  -1    5.10   11.00 
   1   8  -1    1.50   11.70 
   1   8  -1    8.10    9.40 
  -1   8   1   22.20   13.10 
  -1   8   1   24.50    9.60 
   1   8  -1   -1.10    9.10 
   1   8  -1    2.60   14.10 
  -1   8   1    5.60    9.40 
   1   8  -1   11.70   12.30 
  -1   8   1   -2.60    9.90 
   0  -8   1  432.26   33.40 
   0  -8   1  436.96   36.30 
   0  -8   1  404.76   32.10 
   0  -8  -1  444.86   37.80 
   0  -8  -1  538.15   37.90 
   0  -8   1  438.96   37.50 
   0  -8  -1  614.14   56.79 
   0  -8   1  433.66   29.70 
   0  -8  -1  430.16   35.00 
   0  -8  -1  408.36   34.60 
   0  -8  -1  473.75   31.20 
   0  -8   1  462.45   32.00 
   0  -8  -1  461.45   33.90 
   0  -8  -1  412.86   32.80 
   0  -8   1  445.36   55.99 
   0  -8   1  427.86   34.00 
   0  -8  -1  480.55   31.60 
   0   8  -1  416.56   39.70 
   0   8   1  479.35   29.90 
   0   8   1  441.16   35.30 
   0   8   1  441.96   36.80 
   0   8  -1  459.45   36.30 
   0   8   1  460.15   42.90 
   0   8  -1  422.46   34.90 
   0   8   1  384.56   31.60 
   0   8   1  476.75   38.10 
   0   8  -1  448.76   39.30 
   0   8  -1  443.96   35.60 
   0   8  -1  449.56   32.10 
   0   8  -1  452.35   31.00 
   0   8   1  547.75   36.00 
   0   8   1  461.45   37.30 
   0   8   1  426.26   29.40 
   0   8   1  447.86   35.60 
   0   8  -1  484.45   34.30 
   0   8  -1  433.66   36.70 
   1  -8   1  169.68   25.00 
  -1  -8  -1  136.69   22.50 
  -1  -8  -1  131.49   23.10 
  -1  -8  -1  173.28   23.50 
   1  -8   1  122.29   19.90 
  -1  -8  -1  125.09   23.10 
   1  -8   1  101.79   28.20 
   1  -8   1  107.79   17.60 
  -1  -8  -1  129.59   20.70 
  -1  -8  -1  121.79   20.90 
  -1  -8  -1  141.99   17.80 
   1  -8   1  127.29   20.70 
   1  -8   1  110.49   21.80 
  -1  -8  -1  153.48   22.50 
  -1  -8  -1  131.69   31.90 
  -1  -8  -1  118.79   19.40 
   1  -8   1  151.58   24.10 
  -1   8  -1   90.69   18.00 
   1   8   1   94.59   17.90 
  -1   8  -1  107.19   17.50 
  -1   8  -1  134.69   21.80 
   1   8   1  110.79   20.30 
  -1   8  -1  125.09   21.50 
   1   8   1  116.79   18.10 
   1   8   1  133.89   23.60 
  -1   8  -1  115.09   20.90 
   1   8   1  125.49   28.90 
   1   8   1  160.28   21.70 
   1   8   1  110.69   20.30 
  -1   8  -1  157.28   24.90 
  -1   8  -1  147.39   19.40 
   1   8   1  129.19   18.10 
   1   8   1   95.49   21.10 
  -1   8  -1  105.49   22.10 
   1   8   1  112.39   19.80 
  -2  -8  -1  218.88   29.50 
   2  -8   1  181.18   36.20 
  -2  -8  -1  156.68   23.60 
   2  -8   1  217.18   28.40 
  -2  -8  -1  176.98   23.00 
   2  -8   1  217.98   23.40 
  -2  -8  -1  189.58   19.20 
  -2  -8  -1  205.08   30.40 
   2  -8   1  299.97   30.90 
   2  -8   1  222.88   27.10 
  -2  -8  -1  208.08   25.20 
   2  -8   1  198.48   29.60 
   2  -8   1  237.38   28.90 
  -2  -8  -1  214.98   25.50 
  -2  -8  -1  188.68   26.00 
   2  -8   1  196.88   25.50 
   2   8   1  151.18   20.90 
   2   8   1  165.68   25.80 
  -2   8  -1  181.98   22.00 
  -2   8  -1  201.48   26.50 
  -2   8  -1  172.88   24.40 
  -2   8  -1  212.88   28.10 
   2   8   1  122.79   23.50 
   2   8   1  164.48   35.00 
   2   8   1  214.58   26.90 
   2   8   1  220.18   25.20 
   2   8   1  191.48   20.60 
  -2   8  -1  139.69   21.00 
   2   8   1  208.38   27.20 
  -2   8  -1  210.58   30.70 
   2   8   1  201.18   25.30 
  -2   8  -1  208.28   21.90 
  -2   8  -1  235.38   30.90 
   2   8   1  191.38   24.30 
  -3  -8  -1   22.50   14.20 
   3  -8   1   32.80   10.80 
  -3  -8  -1   -2.60   10.60 
  -3  -8  -1    0.00    8.40 
   3  -8   1   12.20   17.90 
  -3  -8  -1   13.40   10.30 
   3  -8   1   25.60   11.90 
   3  -8   1   14.30   11.70 
   3  -8   1   30.00   13.40 
  -3  -8  -1   30.10   12.50 
   3  -8   1   26.40   13.30 
   3  -8   1   22.80   11.10 
  -3  -8  -1   35.60   12.60 
   3  -8   1   30.50   14.40 
  -3  -8  -1    8.20   10.10 
   3   8   1   10.80   11.80 
  -3   8  -1   24.60   14.70 
  -3   8  -1   20.20   13.70 
   3   8   1   -7.30   10.70 
  -3   8  -1   18.50   11.20 
   3   8   1    5.80   17.90 
   3   8   1    5.70   12.20 
   3   8   1   22.80    9.50 
  -3   8  -1   21.40   10.80 
   3   8   1   19.10   12.20 
  -3   8  -1    5.40   12.80 
   3   8   1   17.40   11.50 
   3   8   1   17.40   11.10 
   3   8   1   27.30   12.70 
  -3   8  -1    6.10   13.30 
   3   8   1    5.20   18.10 
  -3   8  -1   36.00   12.80 
   3   8   1   -4.20   11.40 
  -3   8  -1    7.40   13.50 
   4  -8   1    7.00    9.00 
   4  -8   1    7.00   10.30 
   4  -8   1   -5.80    7.20 
  -4  -8  -1    2.00   10.70 
   4  -8   1    9.30    9.00 
   4  -8   1   -3.80   14.00 
  -4  -8  -1   -4.70   11.40 
  -4  -8  -1   -5.70    7.50 
  -4  -8  -1   14.60   10.00 
   4  -8   1   17.30   14.80 
  -4  -8  -1   11.30   14.00 
  -4  -8  -1   -1.40    7.60 
  -4  -8  -1   -2.50    8.40 
   4  -8   1   25.40   11.70 
   4  -8   1   -1.80   10.60 
  -4   8  -1    8.30    9.70 
  -4   8  -1   -4.20   12.10 
  -4   8  -1   -3.60   11.40 
   4   8   1    5.20   11.40 
   4   8   1    2.70    9.30 
   4   8   1   23.20   10.90 
  -4   8  -1    6.90   11.50 
   4   8   1    4.30   17.60 
   4   8   1  -34.40   13.40 
  -4   8  -1   -3.90   13.00 
   4   8   1    0.20    9.60 
   4   8   1    9.90   11.70 
   4   8   1    8.90    8.90 
  -4   8  -1   -3.90   11.50 
  -4   8  -1   -9.20   10.60 
   4   8   1   28.30   16.90 
   4   8   1    6.10   10.90 
   5  -8   1   11.20   10.30 
  -5  -8  -1    2.70    9.40 
   5  -8   1   -2.70   15.30 
   5  -8   1   32.70   20.10 
  -5  -8  -1   17.90   10.70 
   5  -8   1    6.60   11.00 
  -5  -8  -1   23.60   15.30 
   5  -8   1   13.90    9.60 
   5  -8   1    4.20   10.00 
  -5  -8  -1   14.00   10.70 
  -5  -8  -1   -3.40   11.20 
   5  -8   1   11.00   11.40 
   5  -8   1   12.80   12.30 
  -5  -8  -1   -4.70   13.10 
   5  -8   1    4.70    9.50 
  -5  -8  -1    3.70   10.20 
   5   8   1    9.60   12.10 
   5   8   1   -5.00   10.50 
  -5   8  -1   19.90   16.20 
   5   8   1   28.00   13.60 
   5   8   1   36.10   18.80 
  -5   8  -1    3.70   12.90 
   5   8   1    2.40   10.00 
   5   8   1   10.70   10.40 
  -5   8  -1   10.50   12.40 
  -5   8  -1   17.70   13.30 
   5   8   1   31.10   23.60 
   5   8   1    8.70   16.20 
   5   8   1  -13.00    9.60 
  -5   8  -1   19.70   13.20 
   6  -8   1  238.58   31.00 
   6  -8   1  239.58   30.80 
  -6  -8  -1  200.78   33.40 
   6  -8   1  197.68   30.00 
  -6  -8  -1  240.08   28.30 
  -6  -8  -1  216.38   35.10 
   6  -8   1  176.48   28.80 
  -6  -8  -1  227.28   33.00 
  -6  -8  -1  181.58   24.80 
   6  -8   1  202.48   41.80 
  -6  -8  -1  189.78   27.30 
   6  -8   1  237.48   33.40 
   6  -8   1  214.28   28.90 
   6  -8   1  232.48   35.60 
   6   8   1  203.48   34.50 
  -6   8  -1  238.28   29.90 
   6   8   1  177.88   41.80 
  -6   8  -1  185.08   31.10 
   6   8   1  193.38   28.70 
  -6   8  -1  225.98   34.10 
   6   8   1  192.98   24.00 
   6   8   1  251.97   30.30 
   6   8   1  221.68   26.00 
  -6   8  -1  182.78   28.10 
   6   8   1  267.17   41.10 
  -6   8  -1  249.38   30.40 
   6   8   1  237.28   29.20 
  -6   8  -1  230.18   28.90 
  -5  -9   1  740.63   50.29 
   5  -9  -1  725.33   49.40 
   5  -9  -1  652.43   48.90 
  -5  -9   1  691.03   52.29 
   5  -9  -1  711.33   48.00 
   5  -9  -1  669.53   50.59 
  -5  -9   1  705.53   48.60 
   5  -9  -1  417.86   64.49 
  -5  -9   1  488.55   54.49 
   5  -9  -1  756.42   52.19 
  -5  -9   1  775.52   50.29 
  -5   9   1  729.03   54.49 
   5   9  -1  755.82   47.70 
   5   9  -1  659.63   47.10 
  -5   9   1  612.54   50.09 
   5   9  -1  711.63   50.69 
  -5   9   1  703.13   48.80 
   5   9  -1  563.44   64.99 
   5   9  -1  639.44   48.80 
   5   9  -1  698.33   56.19 
  -5   9   1  684.13   46.10 
   5   9  -1  647.14   47.30 
   5   9  -1  717.33   45.40 
   5   9  -1  571.34   70.79 
  -5   9   1  780.52   51.09 
   4  -9  -1  487.35   41.30 
  -4  -9   1  518.25   41.30 
  -4  -9   1  506.25   38.80 
   4  -9  -1  510.15   52.69 
   4  -9  -1  509.65   41.50 
  -4  -9   1  590.54   49.10 
  -4  -9   1  521.65   39.80 
  -4  -9   1  472.05   41.20 
   4  -9  -1  533.95   39.10 
   4  -9  -1  523.95   41.10 
   4  -9  -1  357.06   59.89 
  -4  -9   1  547.75   41.80 
   4  -9  -1  443.36   44.90 
  -4   9   1  500.75   41.80 
   4   9  -1  480.55   45.40 
  -4   9   1  483.75   48.30 
   4   9  -1  512.35   58.39 
   4   9  -1  448.26   40.80 
   4   9  -1  419.06   58.49 
  -4   9   1  347.67   42.00 
  -4   9   1  469.25   37.50 
   4   9  -1  450.65   36.70 
  -4   9   1  436.06   40.80 
   4   9  -1  447.86   46.90 
   4   9  -1  476.25   43.50 
  -4   9   1  524.75   47.80 
   4   9  -1  540.85   41.90 
   4   9  -1  496.05   39.80 
  -3  -9   1  340.77   36.60 
  -3  -9   1  395.66   38.80 
   3  -9  -1  369.26   37.60 
   3  -9  -1  385.76   39.60 
   3  -9  -1  344.67   39.10 
   3  -9  -1  391.66   36.30 
  -3  -9   1  350.86   41.10 
   3  -9  -1  397.06   40.50 
   3  -9  -1  322.27   54.29 
   3  -9  -1  303.37   37.20 
  -3  -9   1  364.56   38.10 
   3  -9  -1  381.06   44.70 
  -3  -9   1  440.66   37.40 
  -3   9   1  315.37   35.00 
  -3   9   1  419.16   42.10 
  -3   9   1  342.17   35.10 
   3   9  -1  402.76   35.70 
   3   9  -1  354.16   36.20 
  -3   9   1  349.87   34.30 
   3   9  -1  358.36   35.90 
  -3   9   1  374.26   45.40 
   3   9  -1  309.07   40.10 
  -3   9   1  285.97   35.50 
   3   9  -1  363.96   39.50 
   3   9  -1  356.36   35.30 
   3   9  -1  419.26   55.79 
   3   9  -1  312.17   31.30 
   3   9  -1  352.96   38.00 
   2  -9  -1   52.69   17.10 
  -2  -9   1   27.60   12.70 
  -2  -9   1   39.10   14.80 
  -2  -9   1   52.09   18.10 
  -2  -9   1   55.19   17.60 
  -2  -9   1   38.30   14.50 
  -2  -9   1   39.40   15.40 
   2  -9  -1   37.30   12.70 
   2  -9  -1   32.20   21.70 
   2  -9  -1   19.60   16.00 
   2  -9  -1   16.20   12.20 
   2  -9  -1   49.40   17.40 
   2  -9  -1   27.80   13.60 
  -2   9   1   57.09   19.50 
   2   9  -1   38.20   14.50 
   2   9  -1   20.40   15.70 
  -2   9   1   51.29   17.30 
   2   9  -1   41.80   22.00 
  -2   9   1   40.70   16.40 
  -2   9   1   41.30   15.30 
   2   9  -1   53.89   16.40 
   2   9  -1   48.70   17.20 
   2   9  -1   23.20   15.30 
   2   9  -1   20.90   12.90 
  -2   9   1   39.70   13.80 
  -2   9   1   20.20   14.40 
  -2   9   1   42.80   18.20 
   2   9  -1   41.30   16.00 
   2   9  -1   50.19   17.70 
   1  -9  -1   36.30   15.10 
  -1  -9   1   40.20   13.60 
  -1  -9   1   41.60   14.50 
   1  -9  -1   54.09   14.50 
   1  -9  -1   69.09   19.50 
  -1  -9   1   65.59   15.90 
   1  -9  -1   47.00   16.10 
  -1  -9   1   56.19   15.90 
   1  -9  -1   41.10   15.10 
  -1  -9   1   44.60   15.10 
   1  -9  -1   96.59   18.70 
   1  -9  -1   59.29   25.50 
  -1  -9   1   37.20   16.30 
   1  -9  -1   56.99   18.70 
   1   9  -1   82.59   18.40 
  -1   9   1   44.50   14.50 
  -1   9   1   56.29   16.30 
   1   9  -1   34.60   16.30 
   1   9  -1   62.89   15.30 
   1   9  -1   69.29   18.60 
   1   9  -1   58.59   16.60 
  -1   9   1   87.49   20.30 
   1   9  -1   45.20   16.20 
  -1   9   1   58.39   20.80 
   1   9  -1   53.89   14.30 
  -1   9   1   46.00   15.80 
   1   9  -1   89.29   24.00 
   1   9  -1   80.19   19.40 
  -1   9   1   42.70   16.10 
  -1   9   1   60.39   19.70 
   0  -9  -1  182.88   27.20 
   0  -9  -1  192.38   27.90 
   0  -9   1  220.98   28.20 
   0  -9   1  230.68   30.30 
   0  -9   1  218.78   31.70 
   0  -9   1  239.18   29.30 
   0  -9  -1  164.38   25.40 
   0  -9  -1  215.88   27.00 
   0  -9  -1  204.88   24.40 
   0  -9   1  197.88   30.50 
   0  -9   1  194.68   23.50 
   0  -9  -1  210.38   40.80 
   0  -9  -1  171.98   25.80 
   0  -9  -1  197.38   30.00 
   0  -9   1  240.08   42.60 
   0   9   1  256.27   36.80 
   0   9  -1  209.78   29.40 
   0   9  -1  274.67   31.40 
   0   9   1  210.38   30.10 
   0   9   1  168.78   23.80 
   0   9  -1  211.38   27.70 
   0   9   1  155.18   24.20 
   0   9   1  215.18   30.30 
   0   9  -1  205.48   23.90 
   0   9   1  177.78   26.90 
   0   9   1  201.08   27.80 
   0   9  -1  245.78   31.90 
   0   9  -1  201.28   26.60 
   0   9  -1  177.18   23.50 
   0   9  -1  207.08   28.70 
   0   9  -1  211.88   32.40 
   1  -9   1  372.96   40.90 
   1  -9   1  336.57   51.09 
   1  -9   1  316.47   32.00 
   1  -9   1  366.46   36.90 
  -1  -9  -1  339.17   36.70 
   1  -9   1  378.76   31.20 
  -1  -9  -1  364.26   41.10 
  -1  -9  -1  334.87   36.30 
  -1  -9  -1  444.06   37.30 
  -1  -9  -1  335.87   32.20 
  -1  -9  -1  421.56   41.10 
   1  -9   1  293.27   33.90 
  -1  -9  -1  318.97   31.80 
   1  -9   1  347.07   38.60 
   1   9   1  380.26   38.70 
  -1   9  -1  368.76   43.50 
   1   9   1  356.06   47.40 
  -1   9  -1  338.07   38.80 
   1   9   1  326.97   36.60 
  -1   9  -1  373.56   39.10 
   1   9   1  326.57   34.20 
   1   9   1  334.87   28.80 
  -1   9  -1  332.07   33.70 
  -1   9  -1  264.07   33.50 
  -1   9  -1  325.07   34.20 
   1   9   1  340.17   33.10 
   1   9   1  303.67   33.00 
   1   9   1  351.76   39.40 
  -1   9  -1  372.16   37.70 
   1   9   1  361.16   36.70 
   2  -9   1  335.97   36.20 
  -2  -9  -1  448.46   46.70 
   2  -9   1  475.65   60.59 
  -2  -9  -1  438.46   38.60 
  -2  -9  -1  444.46   36.30 
   2  -9   1  438.96   32.30 
  -2  -9  -1  430.66   35.70 
   2  -9   1  477.35   37.70 
   2  -9   1  466.95   39.60 
   2  -9   1  462.85   37.60 
  -2  -9  -1  429.96   43.40 
   2  -9   1  427.06   35.50 
   2  -9   1  387.26   43.90 
  -2  -9  -1  432.36   35.40 
  -2  -9  -1  527.15   38.00 
   2   9   1  492.25   40.00 
  -2   9  -1  477.95   47.20 
  -2   9  -1  411.46   41.00 
   2   9   1  442.46   43.30 
   2   9   1  387.66   31.10 
  -2   9  -1  448.46   38.70 
   2   9   1  435.86   35.40 
   2   9   1  512.35   37.80 
   2   9   1  440.26   34.70 
  -2   9  -1  402.76   38.60 
  -2   9  -1  445.26   40.20 
   2   9   1  473.35   46.60 
   2   9   1  488.75   39.00 
   2   9   1  502.05   58.59 
   2   9   1  464.15   35.60 
   2   9   1  383.46   39.20 
   3  -9   1  373.16   38.40 
  -3  -9  -1  366.86   39.80 
   3  -9   1  363.26   38.70 
   3  -9   1  456.85   48.20 
  -3  -9  -1  280.97   38.10 
   3  -9   1  407.56   42.00 
  -3  -9  -1  365.36   40.80 
  -3  -9  -1  358.86   35.70 
   3  -9   1  432.26   31.90 
  -3  -9  -1  379.56   38.00 
   3  -9   1  433.76   35.20 
   3  -9   1  304.87   50.29 
  -3  -9  -1  298.47   33.80 
  -3   9  -1  451.15   35.30 
   3   9   1  429.06   43.60 
  -3   9  -1  396.66   38.10 
  -3   9  -1  382.06   37.80 
   3   9   1  394.96   57.39 
   3   9   1  495.05   37.60 
   3   9   1  383.36   36.60 
  -3   9  -1  314.67   34.00 
   3   9   1  394.36   30.30 
   3   9   1  352.96   36.80 
  -3   9  -1  318.47   39.40 
   3   9   1  396.66   35.10 
   3   9   1  333.97   34.80 
  -3   9  -1  335.27   38.00 
  -3   9  -1  398.66   42.80 
   4  -9   1  136.79   24.90 
   4  -9   1  153.48   25.20 
   4  -9   1  198.88   28.20 
  -4  -9  -1  170.08   25.80 
   4  -9   1  189.28   25.40 
   4  -9   1   95.99   32.00 
  -4  -9  -1  108.29   21.50 
  -4  -9  -1  160.38   24.70 
  -4  -9  -1  181.48   27.70 
   4  -9   1  147.49   28.90 
   4  -9   1  142.99   24.30 
  -4  -9  -1  131.59   28.60 
  -4  -9  -1  130.79   27.00 
  -4  -9  -1  113.49   21.10 
  -4   9  -1  158.78   25.10 
  -4   9  -1  184.88   29.40 
   4   9   1  109.19   34.90 
  -4   9  -1  157.98   26.10 
   4   9   1  119.29   22.60 
   4   9   1  140.09   26.10 
   4   9   1  101.19   29.40 
   4   9   1  119.69   22.40 
  -4   9  -1   87.89   22.70 
   4   9   1  154.98   25.70 
   4   9   1  149.88   21.10 
  -4   9  -1  169.28   25.00 
   4   9   1  130.89   23.90 
   4   9   1  140.09   23.70 
  -5  -9  -1   79.69   18.30 
   5  -9   1   73.39   20.30 
   5  -9   1   59.09   18.70 
  -5  -9  -1   74.49   17.80 
   5  -9   1   43.90   17.90 
   5  -9   1   37.00   18.00 
   5  -9   1   33.40   24.30 
  -5  -9  -1   41.00   20.50 
   5  -9   1   67.59   19.60 
  -5  -9  -1   42.30   19.40 
  -5  -9  -1   30.00   14.40 
  -5  -9  -1   51.59   18.30 
   5  -9   1   58.99   16.10 
   5  -9   1   53.39   17.80 
  -5  -9  -1   51.79   15.90 
   5   9   1   39.30   17.10 
   5   9   1   79.39   21.30 
   5   9   1   65.69   18.10 
  -5   9  -1   45.10   19.20 
   5   9   1   20.40   16.40 
   5   9   1   63.79   21.70 
   5   9   1   80.99   31.30 
  -5   9  -1   42.50   17.90 
   5   9   1   33.50   17.20 
  -5   9  -1   74.09   22.80 
  -5   9  -1   80.99   19.60 
  -5   9  -1   59.19   18.80 
   5   9   1   52.69   16.10 
   5   9   1   27.70   26.70 
   3 -10  -1   45.10   15.60 
   3 -10  -1   39.90   17.50 
   3 -10  -1   28.80   14.10 
  -3 -10   1   24.00   15.90 
  -3 -10   1   27.50   14.10 
   3 -10  -1   16.10   12.90 
   3 -10  -1   28.00   21.90 
   3 -10  -1   39.40   20.10 
  -3 -10   1   42.50   17.10 
  -3 -10   1   46.10   16.30 
   3 -10  -1   37.60   15.20 
  -3 -10   1   72.09   21.50 
  -3  10   1   40.00   19.90 
  -3  10   1   33.50   16.50 
   3  10  -1   55.69   19.40 
   3  10  -1   49.90   17.70 
  -3  10   1   22.40   19.20 
  -3  10   1   17.80   14.60 
   3  10  -1   13.60   17.00 
  -3  10   1   51.09   19.50 
  -3  10   1   27.80   17.80 
   3  10  -1   50.29   20.00 
   3  10  -1   38.70   15.00 
  -3  10   1   36.70   16.80 
   3  10  -1   14.80   15.40 
   3  10  -1   27.00   17.60 
  -2 -10   1   -0.90    9.90 
  -2 -10   1    8.90   12.80 
   2 -10  -1   -0.70   17.20 
  -2 -10   1   -6.70    9.40 
   2 -10  -1   -3.10   10.40 
  -2 -10   1   13.80   12.20 
   2 -10  -1    4.50   10.90 
   2 -10  -1   -1.10    8.60 
   2 -10  -1   11.80   11.20 
   2 -10  -1   15.90   12.30 
   2 -10  -1    2.00   12.70 
  -2 -10   1    0.00    9.80 
  -2 -10   1   22.20   14.70 
   2  10  -1   -0.50   17.00 
  -2  10   1   -7.30   10.40 
   2  10  -1    6.60   14.10 
   2  10  -1    4.90   11.60 
   2  10  -1    3.50   14.30 
  -2  10   1   15.30   16.90 
  -2  10   1  -14.40   15.00 
  -2  10   1   12.90   14.10 
  -2  10   1  -13.30   14.30 
   2  10  -1   22.10   16.00 
   2  10  -1   16.80   15.50 
  -2  10   1   14.40   15.80 
  -2  10   1   30.00   17.50 
   2  10  -1   20.40   15.30 
  -2  10   1    7.40   13.00 
   1 -10  -1   49.70   15.10 
  -1 -10   1   67.79   16.50 
  -1 -10   1   62.29   18.00 
   1 -10  -1   67.69   19.70 
   1 -10  -1   67.29   21.70 
   1 -10  -1   67.59   20.50 
  -1 -10   1   69.69   20.40 
  -1 -10   1   48.30   16.50 
   1 -10  -1   69.29   27.70 
  -1 -10   1   59.19   17.50 
   1 -10  -1   60.99   20.20 
  -1 -10   1   35.80   15.20 
   1 -10  -1   75.79   19.20 
  -1  10   1   25.70   18.00 
  -1  10   1   69.19   19.30 
  -1  10   1  104.19   23.70 
  -1  10   1   72.49   23.10 
  -1  10   1   55.79   20.80 
   1  10  -1   50.49   19.40 
  -1  10   1   50.99   19.90 
  -1  10   1   74.09   19.00 
   1  10  -1   43.90   18.50 
   1  10  -1   22.30   16.50 
   1  10  -1   69.19   21.40 
   1  10  -1   28.60   15.50 
   1  10  -1   28.60   18.10 
   0 -10  -1  102.59   23.00 
   0 -10  -1  103.09   31.40 
   0 -10   1   94.29   22.30 
   0 -10  -1   50.49   17.90 
   0 -10  -1   78.29   19.60 
   0 -10   1  100.49   22.70 
   0 -10   1  103.69   22.60 
   0 -10  -1  110.89   23.50 
   0 -10  -1   64.29   18.60 
   0 -10   1  120.79   21.20 
   0 -10   1  122.99   33.10 
   0 -10   1  101.09   32.00 
   0  10   1  107.99   27.70 
   0  10   1   96.99   23.60 
   0  10  -1   95.89   23.50 
   0  10   1   46.40   17.70 
   0  10  -1   79.39   21.30 
   0  10   1   60.89   20.40 
   0  10   1  111.59   24.50 
   0  10   1   88.59   19.20 
   0  10  -1  108.19   22.10 
   0  10  -1   82.49   20.90 
   0  10  -1  115.19   23.90 
   0  10  -1   88.59   20.10 
   0  10   1   53.69   19.30 
   1 -10   1  133.49   25.70 
  -1 -10  -1  176.98   30.60 
   1 -10   1  195.58   27.80 
   1 -10   1  229.18   32.50 
   1 -10   1  158.38   36.20 
   1 -10   1  253.57   36.40 
  -1 -10  -1  139.79   25.20 
  -1 -10  -1  180.48   30.00 
  -1 -10  -1  126.19   24.80 
   1 -10   1  134.19   22.10 
  -1 -10  -1  174.58   27.50 
   1  10   1  181.08   28.70 
  -1  10  -1  227.28   31.60 
   1  10   1  192.58   36.80 
   1  10   1  143.29   26.80 
  -1  10  -1  188.28   29.10 
   1  10   1  131.19   23.20 
   1  10   1  144.89   26.90 
   1  10   1  166.38   28.60 
   1  10   1  248.68   34.20 
  -1  10  -1  174.28   27.30 
  -1  10  -1  166.98   27.70 
  -1  10  -1  162.78   30.60 
  -1  10  -1  188.88   26.40 
   2 -10   1    5.00   12.90 
   2 -10   1   44.30   18.60 
   2 -10   1   14.50   20.40 
   2 -10   1   29.70   14.60 
  -2 -10  -1   13.30   11.40 
  -2 -10  -1   -1.50   12.10 
  -2 -10  -1    5.50   13.50 
   2 -10   1   18.10   12.00 
   2 -10   1   18.40   12.00 
  -2 -10  -1   11.40   14.10 
  -2 -10  -1   11.70   11.10 
   2  10   1   -6.60   12.70 
   2  10   1    1.90   19.60 
   2  10   1   16.20   15.20 
  -2  10  -1   44.70   18.40 
  -2  10  -1   17.20   14.90 
  -2  10  -1   21.90   14.10 
   2  10   1   21.40   15.00 
  -2  10  -1   17.20   16.80 
   2  10   1    5.10   14.00 
  -2  10  -1    3.10   14.80 
   2  10   1   26.80   16.80 
   2  10   1   12.00   14.20 
   3 -10   1  -15.30   11.40 
   3 -10   1   14.30   12.60 
  -3 -10  -1    1.30   12.90 
   3 -10   1    3.00   10.40 
  -3 -10  -1    0.40   12.40 
   3 -10   1   21.10   13.50 
   3 -10   1    4.20   16.80 
  -3 -10  -1    5.00   12.70 
  -3 -10  -1    3.30   10.40 
   3 -10   1   -3.40   11.90 
  -3 -10  -1   12.80   13.30 
  -3 -10  -1   -3.70   10.40 
   3  10   1   -8.60   12.90 
  -3  10  -1  -12.30   12.90 
   3  10   1   -3.30   11.40 
  -3  10  -1   18.60   15.70 
  -3  10  -1    6.90   12.60 
   3  10   1   14.00   25.20 
  -3  10  -1   -9.30   13.70 
   3  10   1  -15.20   13.90 
  -3  10  -1    5.00   15.80 
   3  10   1   24.80   14.90 
   3  10   1  -20.10   13.40 
 -10   0   2  969.50   56.29 
  10   0  -2 1034.20   60.79 
  10   0  -2 1029.20   57.69 
  10   0  -2 1033.10   53.19 
  10   0  -2 1051.39   59.39 
  10   0  -2 1045.20   54.69 
  10   0  -2 1041.80   61.69 
 -10   0   2 1010.20   61.79 
  10   0  -2 1053.59   55.59 
 -10   0   2 1016.30   64.99 
  10   0  -2 1077.29   59.79 
  10   0  -2  993.20   55.89 
  10   0  -2  943.71   68.39 
  10   0  -2 1090.19   63.39 
 -10   0   2 1041.50   56.89 
  10   0  -2 1049.89   65.09 
   9   0  -2    3.90   11.20 
  -9   0   2    4.10    7.50 
   9   0  -2   -2.40    7.60 
  -9   0   2   -4.30    7.50 
   9   0  -2    2.40    8.20 
   9   0  -2    0.10    8.60 
  -9   0   2    5.20    9.40 
  -9   0   2   -5.10   10.30 
  -9   0   2    0.90    6.20 
   9   0  -2   -8.50    7.80 
  -9   0   2   -3.00    9.00 
   9   0  -2  -11.00    7.70 
   9   0  -2   -6.60    7.80 
   9   0  -2   10.70   10.00 
   9   0  -2   -1.80    6.90 
   9   0  -2    6.90   11.30 
   9   0  -2    9.60   11.10 
  -9   0   2   -8.40    9.70 
  -9   0   2   -2.40    7.10 
  -9   0   2    6.30    8.50 
   9   0  -2   -0.10    9.00 
   8   0  -2 1901.41   74.69 
   8   0  -2 1804.02   78.49 
  -8   0   2 1853.91   80.99 
  -8   0   2 1760.72   75.89 
  -8   0   2 1811.92   84.39 
   8   0  -2 1909.61   84.19 
  -8   0   2 1828.42   74.99 
   8   0  -2 1932.71   80.49 
  -8   0   2 1837.22   80.19 
   8   0  -2 1817.62   83.89 
   8   0  -2 1950.10   94.29 
   8   0  -2 1881.41   82.29 
   8   0  -2 1905.01   85.39 
  -8   0   2 1842.12   87.39 
  -8   0   2 1862.71   76.19 
   8   0  -2 1926.41   83.09 
   8   0  -2 2004.40   82.19 
  -8   0   2 1898.11   74.49 
  -8   0   2 1804.52   79.99 
   8   0  -2 1811.52   77.49 
   8   0  -2 1918.11   78.69 
  -8   0   2 1805.92   79.29 
   8   0  -2 1903.41   80.79 
  -7   0   2    2.00    3.50 
  -7   0   2   -1.70    7.90 
   7   0  -2   -1.80    7.50 
   7   0  -2   -7.30    6.10 
  -7   0   2    8.20    6.90 
  -7   0   2    1.70    6.60 
   7   0  -2    3.70    6.20 
   7   0  -2   -4.10    4.70 
  -7   0   2    1.70    6.30 
   7   0  -2    2.30    3.70 
   7   0  -2   -2.60    7.40 
   7   0  -2    2.50    8.00 
   7   0  -2    0.00    6.90 
  -7   0   2   -2.80    4.60 
  -7   0   2   -0.40    4.70 
   7   0  -2    2.80    7.60 
  -7   0   2   -4.70    7.10 
   7   0  -2   -3.30    6.80 
  -7   0   2   -9.00    5.00 
   7   0  -2   -0.50    6.40 
  -7   0   2   -5.30    5.10 
   7   0  -2    3.00    6.70 
   7   0  -2    1.70    6.10 
   7   0  -2    1.20    9.20 
  -7   0   2    4.50    5.20 
   6   0  -2  531.65   26.40 
  -6   0   2  464.45   29.30 
   6   0  -2  404.96   32.20 
   6   0  -2  485.25   27.50 
  -6   0   2  462.15   30.20 
  -6   0   2  429.36   22.40 
   6   0  -2  458.95   27.70 
   6   0  -2  455.95   21.80 
   6   0  -2  463.45   27.70 
   6   0  -2  498.25   23.70 
   6   0  -2  432.16   23.20 
  -6   0   2  444.36   19.80 
   6   0  -2  468.75   29.20 
  -6   0   2  480.65   24.50 
   6   0  -2  429.36   25.90 
   6   0  -2  496.55   26.60 
  -6   0   2  397.26   23.70 
  -6   0   2  453.05   26.30 
  -6   0   2  453.45   27.00 
   6   0  -2  439.46   19.20 
  -6   0   2  395.66   25.70 
  -6   0   2  457.15   22.90 
   6   0  -2  501.45   28.30 
  -6   0   2  429.46   26.40 
   6   0  -2  452.95   29.50 
   6   0  -2  479.75   29.40 
  -6   0   2  445.76   24.10 
  -5   0   2   -2.40    4.00 
  -5   0   2   -0.80    2.00 
  -5   0   2   -4.70    2.10 
   5   0  -2    1.30    3.40 
   5   0  -2    3.30    4.30 
   5   0  -2   -1.90    5.00 
  -5   0   2    0.80    3.50 
   5   0  -2    0.20    5.40 
   5   0  -2    4.50    5.00 
  -5   0   2    6.30    6.20 
  -5   0   2    1.00    4.10 
  -5   0   2    6.60    7.00 
   5   0  -2    6.90    5.90 
  -5   0   2   -0.40    3.40 
  -5   0   2    3.40    4.00 
   5   0  -2   -3.40    2.10 
   5   0  -2    0.30    5.00 
   5   0  -2    1.30    4.20 
  -5   0   2    3.90    4.80 
  -5   0   2   -3.00    4.60 
  -5   0   2   -2.80    3.50 
   5   0  -2   -5.30    4.30 
   5   0  -2    5.10    3.90 
   5   0  -2    1.90    2.20 
  -5   0   2    3.00    4.60 
   4   0  -2 3176.48  115.69 
   4   0  -2 3045.80  110.19 
   4   0  -2 3086.29  112.69 
   4   0  -2 3098.89  113.49 
  -4   0   2 3235.88  110.59 
   4   0  -2 3116.19  114.79 
  -4   0   2 3131.49  111.79 
   4   0  -2 3019.10  113.89 
   4   0  -2 3146.09  108.99 
   4   0  -2 3226.58  110.09 
  -4   0   2 3191.28  112.59 
   4   0  -2 3079.59  107.19 
  -4   0   2 3037.80  113.69 
   4   0  -2 3158.28  114.49 
  -4   0   2 3142.09  112.79 
   4   0  -2 3125.49  115.09 
  -4   0   2 3068.59  115.59 
   4   0  -2 3176.58  110.19 
  -4   0   2 3092.49  109.29 
  -4   0   2 3159.08  107.69 
  -4   0   2 3222.58  111.09 
  -4   0   2 3163.18  115.49 
  -4   0   2 3130.09  109.79 
  -4   0   2 3217.88  113.79 
  -4   0   2 3078.59  117.59 
  -4   0   2 3007.60  113.19 
  -4   0   2 3175.28  111.89 
   4   0  -2 3170.98  111.59 
  -4   0   2 3117.09  109.29 
   4   0  -2 3142.69  109.69 
   3   0  -2    4.20    2.90 
   3   0  -2    2.10    2.30 
   3   0  -2    2.20    3.60 
   3   0  -2   -1.90    2.00 
   3   0  -2    1.90    2.80 
  -3   0   2   -0.20    3.40 
   3   0  -2    7.50    3.30 
   3   0  -2    3.40    4.20 
  -3   0   2    4.30    3.00 
   3   0  -2    4.60    3.80 
  -3   0   2   -0.20    1.70 
   3   0  -2    0.60    2.00 
  -3   0   2    3.10    3.50 
  -3   0   2   -0.70    2.80 
   3   0  -2    1.30    2.50 
  -3   0   2    1.80    2.90 
  -3   0   2   -0.60    3.20 
   3   0  -2    6.20    3.70 
   3   0  -2    2.20    3.40 
   3   0  -2    1.00    2.00 
   3   0  -2    0.90    4.70 
  -3   0   2    0.90    3.20 
   3   0  -2    3.30    3.40 
   3   0  -2    3.50    2.40 
   3   0  -2    1.10    2.70 
  -3   0   2   -2.00    2.70 
  -3   0   2    3.60    2.50 
  -3   0   2    5.60    3.10 
   3   0  -2    7.00    3.20 
  -3   0   2    2.60    3.10 
  -3   0   2    5.30    1.90 
   3   0  -2    0.60    1.40 
   3   0  -2    0.00    1.30 
  -3   0   2   -0.20    1.90 
  -3   0   2   -0.40    2.80 
  -3   0   2    5.10    3.80 
  -3   0   2    4.50    3.80 
  -3   0   2    0.80    1.50 
   3   0  -2    2.40    1.10 
   3   0  -2    6.80    3.80 
  -3   0   2    4.00    2.30 
  -3   0   2   -2.10    3.00 
   2   0  -2 5755.62  188.18 
   2   0  -2 5504.95  188.08 
   2   0  -2 5529.45  189.58 
  -2   0   2 5542.15  187.48 
   2   0  -2 5631.44  188.28 
   2   0  -2 5473.15  186.98 
  -2   0   2 5492.45  187.98 
  -2   0   2 5401.76  185.98 
   2   0  -2 5588.74  187.68 
   2   0  -2 5587.54  187.58 
   2   0  -2 5366.56  184.48 
   2   0  -2 5358.06  184.48 
  -2   0   2 5396.86  188.58 
  -2   0   2 5462.35  185.58 
  -2   0   2 5399.46  186.88 
   2   0  -2 5429.26  185.08 
   2   0  -2 5535.35  187.38 
  -2   0   2 5444.76  185.18 
  -2   0   2 5287.27  184.58 
  -2   0   2 5554.24  187.28 
   2   0  -2 5508.15  187.38 
  -2   0   2 5452.15  188.38 
  -2   0   2 5489.05  184.78 
   2   0  -2 5544.55  185.58 
  -2   0   2 5470.35  188.28 
   2   0  -2 5452.25  184.88 
   2   0  -2 5503.55  188.18 
   2   0  -2 5680.93  188.58 
   2   0  -2 5357.86  184.68 
   2   0  -2 5435.66  187.18 
   2   0  -2 5344.87  188.18 
   2   0  -2 5507.45  185.98 
   2   0  -2 5319.97  183.88 
   2   0  -2 5547.65  187.28 
  -2   0   2 5463.85  188.48 
  -2   0   2 5390.36  184.68 
   2   0  -2 5299.47  184.38 
  -2   0   2 5499.15  188.58 
  -2   0   2 5639.44  187.78 
  -2   0   2 5817.62  187.58 
   2   0  -2 5545.95  184.98 
   2   0  -2 5574.14  188.58 
  -2   0   2 5600.34  187.18 
   2   0  -2 5459.95  185.98 
   2   0  -2 5343.77  187.68 
  -2   0   2 5501.15  188.38 
   1   0  -2   -0.70    1.00 
   1   0  -2    0.70    0.90 
  -1   0   2   -1.60    1.00 
  -1   0   2    0.90    1.20 
  -1   0   2    1.30    1.60 
   1   0  -2    1.60    1.60 
  -1   0   2    0.40    1.10 
   1   0  -2    0.70    1.60 
   1   0  -2    0.20    1.60 
   1   0  -2    2.60    1.80 
   1   0  -2    0.90    1.50 
   1   0  -2    2.80    1.50 
   1   0  -2   -0.40    1.50 
   1   0  -2   -0.10    1.00 
   1   0  -2    3.30    1.70 
   1   0  -2    0.20    0.70 
   1   0  -2    2.80    1.70 
  -1   0   2    0.30    1.60 
  -1   0   2   -0.40    0.70 
   1   0  -2    0.00    1.50 
   1   0  -2    1.20    2.10 
   1   0  -2    0.60    1.30 
   1   0  -2    0.90    1.40 
   1   0  -2   -0.40    1.20 
   1   0  -2    2.50    0.70 
   0   0  -2 2391.76   70.19 
   0   0  -2 1731.53   71.09 
   1   0   2   -3.60    1.80 
  -1   0  -2    4.00    2.60 
   1   0   2   -0.90    1.70 
   1   0   2    0.30    1.20 
  -1   0  -2    2.10    2.10 
   1   0   2    3.60    1.80 
  -1   0  -2    0.70    2.30 
  -1   0  -2    0.40    1.80 
   1   0   2    2.20    2.00 
  -1   0  -2    0.80    1.60 
  -1   0  -2    3.70    2.00 
  -1   0  -2    1.10    1.90 
   1   0   2    3.60    1.80 
  -1   0  -2    0.40    1.60 
  -1   0  -2   -1.50    1.60 
  -1   0  -2   -2.30    1.80 
  -1   0  -2    0.00    1.40 
   1   0   2    1.70    2.10 
   1   0   2   -0.30    2.30 
   1   0   2    1.90    1.80 
  -1   0  -2    2.90    2.00 
   1   0   2    1.60    1.60 
  -1   0  -2    0.80    1.60 
  -1   0  -2    2.20    1.70 
  -1   0  -2    0.90    1.30 
  -1   0  -2    1.70    1.10 
  -1   0  -2    2.00    1.80 
   1   0   2    4.00    2.40 
   1   0   2    3.70    1.90 
  -1   0  -2    0.50    2.00 
  -1   0  -2    2.30    1.40 
   1   0   2    1.50    1.80 
   1   0   2   -2.50    1.60 
   1   0   2    1.80    2.20 
  -1   0  -2   -0.50    1.60 
   1   0   2    5.70    2.10 
   1   0   2    2.20    1.60 
  -1   0  -2    1.30    2.30 
   1   0   2    7.00    2.30 
   1   0   2    0.00    1.50 
   2   0   2  370.96   17.60 
   2   0   2  357.46   15.90 
   2   0   2  361.56   15.30 
  -2   0  -2  357.46   14.10 
   2   0   2  385.16   18.30 
   2   0   2  356.76   16.70 
  -2   0  -2  359.86   15.10 
   2   0   2  367.06   17.70 
  -2   0  -2  350.36   14.90 
   2   0   2  369.16   15.10 
   2   0   2  365.66   15.90 
  -2   0  -2  341.07   17.10 
   2   0   2  382.96   15.20 
   2   0   2  354.96   16.80 
  -2   0  -2  315.87   16.00 
  -2   0  -2  378.06   16.60 
   2   0   2  373.36   16.60 
   2   0   2  374.46   16.90 
  -2   0  -2  386.36   19.10 
   2   0   2  386.26   18.30 
  -2   0  -2  361.16   16.30 
   2   0   2  369.16   17.80 
   2   0   2  401.86   17.40 
  -2   0  -2  365.96   16.90 
   2   0   2  382.66   16.50 
   2   0   2  377.56   18.60 
  -2   0  -2  393.76   18.20 
  -2   0  -2  389.96   17.80 
  -2   0  -2  356.46   14.80 
   2   0   2  363.16   14.60 
  -2   0  -2  358.46   17.90 
  -2   0  -2  378.96   18.00 
   2   0   2  376.16   15.90 
   2   0   2  343.97   16.30 
  -2   0  -2  355.76   16.60 
  -2   0  -2  385.46   17.00 
  -2   0  -2  382.26   16.50 
   2   0   2  362.36   16.30 
   2   0   2  372.76   17.70 
  -2   0  -2  377.06   13.70 
  -2   0  -2  373.16   16.30 
   2   0   2  389.66   16.60 
  -2   0  -2  379.86   15.40 
  -2   0  -2  364.16   15.80 
  -2   0  -2  352.76   16.70 
  -2   0  -2  349.67   17.40 
  -2   0  -2  380.86   15.80 
  -2   0  -2  347.67   18.30 
  -2   0  -2  348.17   16.70 
   3   0   2    6.30    4.60 
   3   0   2   -4.80    2.80 
   3   0   2   -0.70    2.80 
  -3   0  -2    1.10    3.10 
   3   0   2    5.20    3.60 
  -3   0  -2    4.70    5.60 
  -3   0  -2    1.20    2.30 
   3   0   2    1.30    3.00 
  -3   0  -2   -0.70    4.50 
   3   0   2   -0.40    2.70 
  -3   0  -2    2.30    2.20 
  -3   0  -2    0.10    2.70 
   3   0   2   -0.50    3.70 
  -3   0  -2    0.80    4.30 
   3   0   2    1.80    2.90 
   3   0   2   -3.30    3.40 
  -3   0  -2    2.50    2.20 
  -3   0  -2   -2.20    1.80 
  -3   0  -2    1.50    2.80 
   3   0   2   -0.50    3.40 
   3   0   2   -0.80    3.50 
   3   0   2   -1.10    4.20 
  -3   0  -2   -0.90    2.70 
   3   0   2    0.70    3.10 
   3   0   2    6.80    4.10 
  -3   0  -2   -0.80    3.70 
   3   0   2    4.10    2.70 
   3   0   2   -3.80    2.10 
  -3   0  -2   -3.60    1.60 
  -3   0  -2   -1.50    3.10 
  -3   0  -2   -0.80    3.20 
  -3   0  -2   -1.00    2.90 
   3   0   2   -1.60    2.50 
  -3   0  -2   -2.20    3.80 
   3   0   2    4.00    3.70 
  -3   0  -2   -1.00    2.50 
  -3   0  -2    0.00    2.80 
   3   0   2    2.20    1.90 
  -3   0  -2   -0.60    3.70 
  -3   0  -2    1.20    1.80 
  -3   0  -2   13.80    4.30 
   3   0   2   -2.20    2.40 
  -3   0  -2   -1.20    3.20 
   3   0   2   -2.10    4.50 
  -4   0  -2 3870.21  137.79 
   4   0   2 3810.52  136.99 
   4   0   2 3964.20  138.99 
  -4   0  -2 3794.42  141.39 
  -4   0  -2 3799.22  132.19 
  -4   0  -2 3799.12  131.79 
   4   0   2 3915.61  139.09 
  -4   0  -2 3899.71  133.29 
   4   0   2 3799.02  136.89 
  -4   0  -2 3753.32  134.19 
  -4   0  -2 3817.82  137.19 
  -4   0  -2 3936.41  132.49 
  -4   0  -2 3851.91  138.09 
   4   0   2 3819.02  131.29 
   4   0   2 3737.03  134.19 
   4   0   2 3892.11  140.49 
   4   0   2 3909.71  139.79 
  -4   0  -2 3835.12  142.69 
  -4   0  -2 3850.41  131.09 
  -4   0  -2 3929.71  135.79 
  -4   0  -2 3848.61  136.19 
   4   0   2 3856.21  136.99 
   4   0   2 3964.10  134.69 
  -4   0  -2 3908.21  136.69 
  -4   0  -2 3758.82  130.69 
  -4   0  -2 3784.32  133.39 
   4   0   2 3761.02  139.69 
   4   0   2 3885.31  134.09 
   4   0   2 3834.52  136.89 
   4   0   2 3971.30  137.39 
  -4   0  -2 3863.01  139.29 
  -4   0  -2 3723.73  132.39 
   4   0   2 3720.73  136.49 
   5   0   2   -4.60    4.50 
  -5   0  -2    5.80    3.30 
   5   0   2   -0.80    4.50 
   5   0   2    2.10    4.70 
  -5   0  -2    6.30    7.30 
   5   0   2   -0.90    4.40 
  -5   0  -2   -2.80    3.90 
  -5   0  -2   -2.10    4.90 
   5   0   2    5.00    5.80 
   5   0   2    3.50    4.90 
  -5   0  -2    2.10    4.10 
   5   0   2   -3.00    3.30 
   5   0   2    5.30    4.50 
  -5   0  -2    2.90    3.40 
   5   0   2   -1.40    4.40 
  -5   0  -2    0.10    2.40 
   5   0   2    7.30    6.40 
   5   0   2    1.20    4.30 
  -5   0  -2   -0.60    2.30 
   5   0   2    1.50    5.00 
  -5   0  -2    6.10    5.20 
   5   0   2   -1.00    3.30 
  -5   0  -2    0.10    3.70 
  -5   0  -2    2.20    3.00 
  -5   0  -2   -0.70    3.80 
  -5   0  -2   -1.60    2.40 
  -5   0  -2    6.70    5.10 
  -5   0  -2    1.80    1.50 
  -5   0  -2   11.50    7.10 
   5   0   2   -1.20    4.10 
   5   0   2    7.30    6.00 
  -5   0  -2    1.00    1.80 
  -6   0  -2  732.43   31.00 
  -6   0  -2  738.03   43.80 
  -6   0  -2  742.23   32.20 
   6   0   2  757.02   44.50 
  -6   0  -2  774.72   36.00 
   6   0   2  709.53   38.70 
   6   0   2  714.43   37.70 
   6   0   2  777.52   39.50 
  -6   0  -2  747.83   32.40 
  -6   0  -2  755.62   38.10 
  -6   0  -2  678.23   40.20 
   6   0   2  734.63   40.20 
   6   0   2  739.53   37.20 
   6   0   2  716.43   35.00 
   6   0   2  740.33   40.20 
  -6   0  -2  757.12   30.50 
   6   0   2  733.73   33.90 
   6   0   2  693.83   35.60 
  -6   0  -2  698.93   34.90 
   6   0   2  764.42   36.60 
  -6   0  -2  754.12   37.60 
  -6   0  -2  697.73   34.70 
   6   0   2  702.03   36.20 
   6   0   2  781.22   36.20 
  -6   0  -2  730.23   28.80 
   6   0   2  708.13   33.00 
  -6   0  -2  728.73   36.90 
  -6   0  -2  670.83   38.00 
   6   0   2  718.03   36.00 
   7   0   2   -4.00    4.70 
  -7   0  -2   -3.70    6.10 
  -7   0  -2   -0.40    6.10 
   7   0   2    8.50    7.60 
  -7   0  -2    0.90    6.40 
   7   0   2   20.00    9.70 
  -7   0  -2    4.80    8.10 
  -7   0  -2   -3.40    4.70 
   7   0   2   -1.20    7.70 
  -7   0  -2    7.50    8.30 
   7   0   2   -4.30    7.20 
   7   0   2   -3.40    6.80 
   7   0   2   -4.30    5.70 
   7   0   2    9.60    7.00 
  -7   0  -2    6.30    9.40 
   7   0   2   -1.50    6.80 
   7   0   2   -0.20    7.60 
  -7   0  -2    2.90    4.50 
  -7   0  -2   -8.60    5.50 
   7   0   2    5.20    5.80 
  -7   0  -2  -14.00    6.40 
   7   0   2   -0.70    6.10 
   7   0   2   -1.70    5.90 
   7   0   2  -15.00    7.90 
   7   0   2  -11.10    6.80 
   7   0   2    2.00    7.60 
  -7   0  -2    7.20    6.50 
   8   0   2   10.10   10.80 
  -8   0  -2    2.60    8.90 
   8   0   2   -1.70    7.90 
   8   0   2    0.50    7.00 
   8   0   2   -0.20   10.70 
   8   0   2    9.50    7.80 
  -8   0  -2  -20.40    5.90 
  -8   0  -2   -3.80    9.00 
  -8   0  -2  -11.70    8.60 
  -8   0  -2   -2.20   10.80 
   8   0   2    8.70    8.70 
  -8   0  -2   -3.10    6.60 
  -8   0  -2    5.90    7.20 
   8   0   2   -3.10    7.80 
   8   0   2    8.00    6.70 
   8   0   2    8.80    8.60 
   8   0   2   -0.90    9.50 
   8   0   2    2.40    6.30 
   8   0   2   -7.00    7.40 
  -8   0  -2    3.70    6.20 
  -8   0  -2   -8.00    6.70 
   8   0   2   19.70   10.90 
   8   0   2   -1.00    6.70 
   8   0   2   10.50    8.50 
   8   0   2    6.90    9.70 
  -8   0  -2  -10.80    5.70 
   9   0   2   10.30   10.70 
  -9   0  -2    1.90   10.70 
   9   0   2  -13.00    8.30 
   9   0   2   -4.60   10.50 
  -9   0  -2    9.60   10.50 
   9   0   2   -5.60    7.60 
  -9   0  -2   -3.30    7.40 
   9   0   2    5.40    9.50 
   9   0   2    5.20   12.40 
  -9   0  -2   -0.80    7.00 
  -9   0  -2   -6.30   11.50 
  -9   0  -2   -4.20    6.70 
   9   0   2   14.30   10.00 
  -9   0  -2    2.40    8.10 
   9   0   2  -15.20    8.20 
  -9   0  -2    0.90   11.80 
   9   0   2   -8.70   10.70 
   9   0   2   -5.30   10.10 
   9   0   2    3.30    9.10 
   9   0   2   -2.40    8.60 
   9   0   2   11.10    8.20 
   9   0   2    0.30    7.40 
  10   0   2  131.29   24.20 
  10   0   2  131.89   20.80 
  10   0   2  105.39   23.80 
 -10   0  -2  149.88   20.90 
 -10   0  -2  153.38   26.50 
 -10   0  -2  170.68   29.90 
  10   0   2  131.79   21.60 
  10   0   2  164.18   23.40 
  10   0   2  154.98   26.00 
 -10   0  -2  126.69   21.40 
  10   0   2  151.48   24.50 
 -10   0  -2  124.59   18.90 
  10   0   2  122.39   28.10 
  10   0   2  107.69   23.10 
  10   0   2  106.69   20.30 
 -10   0  -2  164.08   23.60 
  10  -1  -2   -1.90    9.20 
  10  -1  -2   18.00   14.70 
  10  -1  -2   33.50   15.30 
  10  -1  -2   10.30   10.70 
 -10  -1   2   26.70   12.40 
  10  -1  -2   25.70   14.50 
  10  -1  -2   24.40   13.40 
 -10  -1   2   22.40   15.30 
  10  -1  -2   17.50   15.20 
  10  -1  -2   11.20   10.30 
  10  -1  -2   -8.50   11.60 
  10  -1  -2    9.80   11.60 
  10  -1  -2   13.10   16.50 
 -10  -1   2    3.10   10.30 
 -10  -1   2   36.20   13.70 
  10  -1  -2   13.60   11.60 
 -10  -1   2   37.50   16.50 
 -10   1   2   24.20   15.90 
  10   1  -2    4.50   10.00 
  10   1  -2   10.90   12.90 
  10   1  -2   41.10   13.50 
  10   1  -2   21.70   13.70 
 -10   1   2   15.00   13.80 
  10   1  -2    0.00   11.30 
  10   1  -2   21.80   12.40 
  10   1  -2   13.50   11.30 
  10   1  -2    9.70   13.80 
  10   1  -2    6.60   12.60 
  10   1  -2   27.70   18.10 
 -10   1   2   38.10   12.70 
 -10   1   2   12.20   10.70 
  10   1  -2   -3.10   12.60 
  10   1  -2   12.90   13.30 
 -10   1   2   22.90   12.60 
   9  -1  -2   57.49   12.40 
   9  -1  -2   38.90   12.50 
  -9  -1   2   39.00   10.40 
   9  -1  -2   50.79   17.30 
   9  -1  -2   28.30   12.70 
   9  -1  -2   33.00   11.60 
   9  -1  -2   54.29   13.20 
  -9  -1   2   31.10   13.80 
  -9  -1   2   30.30   11.70 
   9  -1  -2   25.50   13.70 
   9  -1  -2   32.70   13.00 
  -9  -1   2   29.20    9.80 
   9  -1  -2   34.70   14.00 
  -9  -1   2   33.00    9.50 
   9  -1  -2   38.50   10.80 
   9  -1  -2   38.00   12.60 
  -9  -1   2   57.99   14.90 
  -9  -1   2   37.90   11.30 
  -9  -1   2   37.90   15.50 
   9  -1  -2   38.30   14.50 
   9  -1  -2   11.30   12.30 
  -9  -1   2   36.30   12.50 
   9   1  -2   32.60   13.50 
  -9   1   2   64.29   15.70 
  -9   1   2   59.99   19.00 
   9   1  -2   10.60   10.00 
   9   1  -2   64.49   15.60 
   9   1  -2   33.30   14.70 
  -9   1   2   37.30   12.80 
   9   1  -2   36.40   14.80 
   9   1  -2   22.40   13.50 
   9   1  -2   42.50   14.80 
   9   1  -2   49.99   13.10 
  -9   1   2   27.20   10.70 
  -9   1   2   49.40   11.90 
  -9   1   2    3.40   11.90 
   9   1  -2   47.80   13.50 
   9   1  -2   35.10   16.40 
   9   1  -2   42.50   14.10 
  -9   1   2   27.10    9.90 
   9   1  -2   54.49   12.30 
   8  -1  -2    3.80    8.20 
   8  -1  -2    9.80    7.70 
   8  -1  -2    7.50   10.20 
  -8  -1   2    2.20    8.30 
  -8  -1   2    7.30    9.90 
   8  -1  -2    0.30    6.00 
   8  -1  -2   22.40   13.60 
   8  -1  -2    2.20   10.00 
  -8  -1   2    8.70    7.90 
   8  -1  -2    9.20    9.70 
   8  -1  -2   25.30    8.80 
  -8  -1   2   25.80    9.10 
  -8  -1   2    7.90    7.20 
  -8  -1   2   15.00    9.10 
  -8  -1   2    1.00    6.20 
   8  -1  -2    5.80   10.10 
   8  -1  -2    2.40    7.50 
  -8  -1   2   17.70    7.40 
  -8  -1   2   13.00    9.20 
  -8  -1   2    6.50    9.70 
   8  -1  -2   -1.90    6.10 
   8  -1  -2    6.90   10.40 
   8  -1  -2    2.20    8.20 
   8   1  -2   10.60    8.10 
   8   1  -2    8.30    8.60 
   8   1  -2    2.00    9.80 
   8   1  -2   14.70   11.50 
   8   1  -2   -1.20    9.40 
   8   1  -2    1.60    6.40 
  -8   1   2    4.30    8.20 
   8   1  -2    6.80    9.30 
  -8   1   2   14.30   10.10 
   8   1  -2   18.60   12.60 
  -8   1   2   -0.90   10.10 
   8   1  -2   -2.80    8.00 
   8   1  -2    8.00    7.70 
   8   1  -2    3.70    9.90 
  -8   1   2    9.80    8.60 
   8   1  -2   -2.80    5.40 
   8   1  -2    3.60   10.00 
  -8   1   2    3.30    6.40 
  -8   1   2    6.40    6.90 
  -8   1   2    1.60    8.40 
   8   1  -2    4.50    8.20 
  -8   1   2    8.90    6.40 
  -7  -1   2   91.19   14.20 
  -7  -1   2   86.39   13.80 
   7  -1  -2  100.69   13.50 
   7  -1  -2   83.79   12.70 
  -7  -1   2   65.59   14.00 
   7  -1  -2   76.79   14.60 
   7  -1  -2   61.59   12.80 
  -7  -1   2   79.29   11.50 
  -7  -1   2   92.99   10.30 
   7  -1  -2   79.29   12.80 
  -7  -1   2   95.99   18.40 
  -7  -1   2   78.29   15.50 
  -7  -1   2   69.19   11.50 
   7  -1  -2   65.29    9.30 
  -7  -1   2   81.89   12.50 
  -7  -1   2   72.99   11.40 
   7  -1  -2   79.79   15.60 
   7  -1  -2   78.39   15.70 
  -7  -1   2   79.89   13.40 
   7  -1  -2  102.09   14.80 
   7  -1  -2   88.09   15.70 
  -7  -1   2   84.29   11.20 
   7  -1  -2   72.29   11.20 
   7  -1  -2   80.29   19.00 
   7   1  -2   71.89   14.30 
   7   1  -2   78.09   13.00 
   7   1  -2   88.89   12.70 
  -7   1   2   84.59   11.40 
   7   1  -2   70.09   13.90 
   7   1  -2   60.29   12.70 
  -7   1   2   77.09   12.00 
   7   1  -2   73.89    9.80 
  -7   1   2   97.29   16.20 
   7   1  -2   50.69   11.40 
  -7   1   2   78.19   10.20 
   7   1  -2   67.99   13.30 
  -7   1   2   87.19   14.00 
  -7   1   2   86.49   13.10 
   7   1  -2   95.19   11.70 
   7   1  -2   81.19   15.20 
   7   1  -2   65.69   11.70 
  -7   1   2   64.99   15.00 
   7   1  -2   88.29   15.80 
  -7   1   2   76.09   14.60 
   6  -1  -2  183.48   16.30 
  -6  -1   2  168.78   18.90 
   6  -1  -2  161.78   15.80 
   6  -1  -2  175.58   20.00 
   6  -1  -2  166.58   14.90 
  -6  -1   2  171.28   16.10 
  -6  -1   2  150.28   11.60 
   6  -1  -2  185.58   12.40 
   6  -1  -2  177.58   20.50 
  -6  -1   2  164.78   12.00 
  -6  -1   2  160.68   17.40 
  -6  -1   2  143.49   15.30 
  -6  -1   2  186.38   18.10 
   6  -1  -2  149.49   15.30 
   6  -1  -2  163.38   19.00 
  -6  -1   2  183.98   21.60 
  -6  -1   2  174.08   19.60 
  -6  -1   2  167.68   13.20 
  -6  -1   2  190.28   18.70 
  -6  -1   2  152.68   14.70 
  -6  -1   2  169.28   15.50 
   6  -1  -2  183.48   20.20 
   6  -1  -2  165.28   16.80 
   6  -1  -2  176.48   22.80 
   6  -1  -2  159.58   16.10 
   6   1  -2  200.88   19.30 
  -6   1   2  177.58   17.80 
  -6   1   2  214.18   14.10 
   6   1  -2  178.18   19.10 
  -6   1   2  192.78   20.40 
   6   1  -2  187.78   17.80 
  -6   1   2  168.48   20.50 
  -6   1   2  167.48    8.50 
  -6   1   2  198.28   13.20 
   6   1  -2  152.48   16.10 
   6   1  -2  171.08   18.00 
   6   1  -2  184.68   13.40 
   6   1  -2  161.58   18.00 
  -6   1   2  166.48    8.20 
   6   1  -2  167.38   15.60 
   6   1  -2  155.78   12.20 
   6   1  -2  187.58   19.60 
  -6   1   2  160.98   18.30 
  -6   1   2  180.88   16.20 
  -6   1   2  156.98   16.40 
  -6   1   2  156.98   16.10 
   6   1  -2  157.68   18.50 
   6   1  -2  154.98   15.90 
   5  -1  -2  638.24   34.60 
   5  -1  -2  684.93   31.50 
   5  -1  -2  642.44   29.90 
  -5  -1   2  651.03   33.90 
  -5  -1   2  656.13   30.40 
   5  -1  -2  619.24   34.20 
   5  -1  -2  622.24   27.70 
   5  -1  -2  622.84   34.30 
  -5  -1   2  647.24   32.00 
  -5  -1   2  662.73   30.10 
   5  -1  -2  634.04   33.40 
  -5  -1   2  650.13   32.30 
   5  -1  -2  652.73   30.50 
  -5  -1   2  645.14   30.20 
   5  -1  -2  629.24   30.80 
  -5  -1   2  666.63   29.90 
   5  -1  -2  666.73   38.70 
  -5  -1   2  694.03   29.20 
  -5  -1   2  623.84   28.50 
  -5  -1   2  657.03   27.60 
  -5  -1   2  647.74   30.40 
  -5  -1   2  634.14   32.00 
   5  -1  -2  649.14   28.10 
  -5  -1   2  634.34   27.50 
   5  -1  -2  630.24   31.50 
   5  -1  -2  634.74   31.60 
   5  -1  -2  652.93   23.90 
  -5  -1   2  589.14   34.30 
   5   1  -2  686.53   31.80 
   5   1  -2  674.73   27.00 
   5   1  -2  663.33   30.20 
   5   1  -2  614.44   32.00 
   5   1  -2  624.34   27.40 
  -5   1   2  638.04   30.30 
  -5   1   2  635.64   24.30 
  -5   1   2  669.03   33.80 
  -5   1   2  634.64   28.20 
   5   1  -2  620.54   29.50 
  -5   1   2  641.84   27.60 
   5   1  -2  682.23   33.40 
   5   1  -2  626.34   31.40 
  -5   1   2  684.93   34.50 
   5   1  -2  600.24   33.00 
  -5   1   2  658.13   31.40 
  -5   1   2  660.13   30.90 
   5   1  -2  583.24   31.60 
   5   1  -2  636.44   33.40 
   5   1  -2  631.64   28.20 
   5   1  -2  686.83   34.30 
  -5   1   2  703.43   37.10 
  -5   1   2  657.23   32.40 
  -5   1   2  664.43   32.20 
  -5   1   2  643.34   23.40 
   4  -1  -2  575.24   27.50 
   4  -1  -2  533.55   27.50 
  -4  -1   2  573.74   25.90 
  -4  -1   2  594.44   27.00 
   4  -1  -2  611.84   28.10 
  -4  -1   2  588.54   25.30 
   4  -1  -2  609.34   27.70 
   4  -1  -2  617.74   25.00 
  -4  -1   2  622.94   30.40 
  -4  -1   2  594.54   25.10 
   4  -1  -2  610.64   27.00 
   4  -1  -2  615.44   31.30 
  -4  -1   2  591.44   30.70 
  -4  -1   2  595.54   28.40 
   4  -1  -2  627.24   31.20 
   4  -1  -2  543.75   30.10 
  -4  -1   2  597.64   29.10 
   4  -1  -2  578.54   25.20 
   4  -1  -2  561.84   33.20 
   4  -1  -2  633.64   27.50 
  -4  -1   2  635.34   27.90 
  -4  -1   2  616.64   27.40 
  -4  -1   2  587.54   25.80 
  -4  -1   2  579.24   25.60 
   4  -1  -2  560.74   29.40 
  -4  -1   2  615.14   24.70 
   4  -1  -2  605.94   24.80 
  -4  -1   2  585.64   28.50 
  -4  -1   2  594.04   24.90 
  -4  -1   2  615.54   25.20 
   4   1  -2  616.44   28.50 
  -4   1   2  589.64   28.20 
  -4   1   2  643.74   29.30 
   4   1  -2  613.64   28.80 
  -4   1   2  621.04   30.70 
   4   1  -2  599.14   26.90 
   4   1  -2  631.04   30.10 
  -4   1   2  583.64   22.70 
  -4   1   2  568.64   29.50 
   4   1  -2  575.64   25.10 
   4   1  -2  579.14   24.40 
   4   1  -2  598.04   26.80 
   4   1  -2  612.44   28.40 
  -4   1   2  608.64   25.60 
  -4   1   2  604.54   27.80 
  -4   1   2  588.24   22.30 
  -4   1   2  590.14   26.20 
  -4   1   2  620.44   27.40 
   4   1  -2  577.04   28.80 
  -4   1   2  630.24   25.20 
   4   1  -2  593.44   26.50 
  -4   1   2  638.54   32.80 
  -4   1   2  583.24   22.30 
   4   1  -2  591.44   24.60 
   4   1  -2  594.94   25.60 
   4   1  -2  590.14   29.00 
   4   1  -2  590.94   21.60 
  -4   1   2  602.84   27.40 
   4   1  -2  570.44   29.80 
   4   1  -2  580.04   29.70 
  -4   1   2  607.34   24.70 
   3  -1  -2  968.60   38.60 
  -3  -1   2  972.50   40.40 
  -3  -1   2  998.40   39.40 
  -3  -1   2  930.21   38.60 
   3  -1  -2  972.40   38.50 
  -3  -1   2  908.31   39.30 
   3  -1  -2  962.60   35.90 
  -3  -1   2  964.70   36.30 
  -3  -1   2  963.50   34.50 
   3  -1  -2  927.91   45.50 
   3  -1  -2  927.01   39.30 
  -3  -1   2  997.80   36.80 
  -3  -1   2  956.60   36.00 
  -3  -1   2  991.50   38.20 
  -3  -1   2  939.11   37.90 
  -3  -1   2  925.51   39.70 
  -3  -1   2  955.30   34.70 
  -3  -1   2  934.01   35.60 
   3  -1  -2  974.50   41.50 
   3  -1  -2  922.91   43.30 
  -3  -1   2  928.11   39.40 
  -3  -1   2 1008.60   39.90 
   3  -1  -2  988.10   38.80 
   3  -1  -2 1011.80   37.80 
  -3  -1   2 1018.70   37.20 
   3  -1  -2 1018.00   39.00 
   3  -1  -2  942.61   36.70 
  -3  -1   2  964.80   35.90 
  -3  -1   2  969.20   39.00 
   3  -1  -2  943.31   37.40 
  -3  -1   2  991.40   39.10 
  -3  -1   2  995.60   37.00 
   3  -1  -2  945.41   40.90 
  -3  -1   2  972.40   35.60 
  -3  -1   2  980.80   40.00 
   3  -1  -2  973.00   38.20 
   3  -1  -2  988.90   38.20 
   3  -1  -2  960.00   40.20 
   3  -1  -2  975.50   35.50 
   3  -1  -2  972.10   40.80 
   3   1  -2  997.70   39.90 
   3   1  -2  947.81   39.50 
   3   1  -2 1010.50   39.90 
  -3   1   2  959.40   42.40 
  -3   1   2  941.71   34.80 
   3   1  -2 1007.20   41.60 
  -3   1   2  907.41   40.50 
  -3   1   2 1003.40   41.80 
  -3   1   2  964.20   34.90 
  -3   1   2  968.20   35.20 
   3   1  -2  951.80   38.60 
   3   1  -2  981.60   36.20 
  -3   1   2  996.10   41.10 
  -3   1   2 1015.70   38.40 
  -3   1   2  986.20   35.70 
   3   1  -2 1051.89   39.60 
  -3   1   2  910.71   39.50 
   3   1  -2  954.10   35.30 
   3   1  -2  948.71   34.00 
   3   1  -2  940.41   38.80 
  -3   1   2 1016.80   38.60 
  -3   1   2  953.60   35.60 
   3   1  -2  912.51   38.60 
  -3   1   2  966.10   36.70 
   3   1  -2  985.50   40.30 
  -3   1   2  975.60   38.10 
   3   1  -2  929.41   36.20 
   3   1  -2  936.71   40.40 
   3   1  -2  956.50   37.10 
  -3   1   2  974.90   40.50 
  -3   1   2  935.31   38.70 
  -3   1   2  960.40   35.30 
   3   1  -2  977.50   37.70 
   3   1  -2  926.01   39.10 
   3   1  -2  946.81   36.80 
   3   1  -2  956.10   37.40 
   3   1  -2  975.80   36.80 
   3   1  -2  981.70   34.10 
  -3   1   2  978.70   36.70 
   3   1  -2 1001.20   38.10 
   3   1  -2 1002.80   39.60 
  -3   1   2  976.60   37.50 
  -2  -1   2   59.69    5.80 
  -2  -1   2   59.49    6.80 
  -2  -1   2   69.99    6.70 
  -2  -1   2   69.59    5.10 
   2  -1  -2   67.69    6.20 
  -2  -1   2   80.19    7.40 
  -2  -1   2   64.49    6.20 
   2  -1  -2   62.39    7.30 
   2  -1  -2   66.59    4.80 
   2  -1  -2   67.19    5.10 
  -2  -1   2   59.09    6.60 
  -2  -1   2   62.59    6.50 
  -2  -1   2   78.59    7.90 
  -2  -1   2   79.99    6.40 
  -2  -1   2   71.79    5.70 
   2  -1  -2   63.19    7.50 
   2  -1  -2   73.49    6.50 
   2  -1  -2   73.49    5.00 
  -2  -1   2   72.59    5.30 
  -2  -1   2   75.09    7.40 
  -2  -1   2   58.79    6.50 
  -2  -1   2   61.39    6.40 
   2  -1  -2   60.79    5.00 
  -2  -1   2   60.19    4.50 
   2  -1  -2   80.89    9.10 
  -2  -1   2   69.29    3.90 
   2  -1  -2   70.59    3.90 
   2  -1  -2   68.49    7.60 
   2  -1  -2   72.79    7.00 
   2  -1  -2   75.49    6.80 
  -2  -1   2   61.99    4.80 
  -2  -1   2   65.09    3.80 
   2  -1  -2   60.99    5.10 
   2  -1  -2   64.89    7.80 
   2  -1  -2   61.99    5.10 
   2  -1  -2   66.59    6.00 
  -2  -1   2   82.49    6.10 
   2  -1  -2   63.59    7.40 
  -2  -1   2   70.99    4.90 
  -2  -1   2   57.19    6.00 
  -2  -1   2   69.29    4.80 
  -2  -1   2   63.79    6.50 
   2  -1  -2   64.29    9.60 
   2  -1  -2   64.09    8.60 
  -2   1   2   58.69    4.70 
   2   1  -2   83.19    7.80 
   2   1  -2   68.69    4.60 
  -2   1   2   65.09    7.70 
  -2   1   2   68.59   10.00 
   2   1  -2   59.39    6.50 
  -2   1   2   56.29    5.80 
  -2   1   2   59.89    4.20 
   2   1  -2   64.69    5.10 
   2   1  -2   64.99    5.90 
   2   1  -2   69.39    7.20 
  -2   1   2   64.39    4.90 
   2   1  -2   69.29    8.00 
  -2   1   2   62.99    6.10 
   2   1  -2   52.39    6.20 
  -2   1   2   53.79    4.40 
   2   1  -2   59.39    5.90 
   2   1  -2   66.39    6.50 
   2   1  -2   48.00    5.70 
   2   1  -2   64.49    4.40 
   2   1  -2   70.89    4.50 
   2   1  -2   56.69    6.00 
   2   1  -2   64.39    6.10 
   2   1  -2   67.29    5.40 
  -2   1   2   63.49    8.20 
   2   1  -2   64.49    6.60 
  -2   1   2   54.79    6.00 
   2   1  -2   67.29    5.20 
  -2   1   2   68.69    7.00 
  -2   1   2   66.39    3.80 
   2   1  -2   62.99    5.40 
   2   1  -2   67.69    6.30 
  -2   1   2   73.19    8.40 
   2   1  -2   61.09    6.60 
  -2   1   2   77.79    8.90 
   2   1  -2   60.29    4.60 
   2   1  -2   63.79    6.50 
  -2   1   2   61.79    4.60 
   2   1  -2   69.39    4.80 
   2   1  -2   59.19    7.10 
  -2   1   2   55.29    6.80 
  -2   1   2   65.69    5.20 
  -2   1   2   61.29    5.00 
  -2   1   2   56.09    5.10 
   2   1  -2   75.49    5.60 
  -2   1   2   77.79    8.40 
  -2   1   2   81.49    5.80 
   1  -1  -2  169.88    8.60 
  -1  -1   2  161.88    8.60 
   1  -1  -2  161.88   10.60 
   1  -1  -2  172.28    8.20 
   1  -1  -2  167.58    8.30 
  -1  -1   2  159.98    8.80 
   1  -1  -2  156.28   10.40 
   1  -1  -2  161.18    7.40 
  -1  -1   2  184.18    9.70 
   1  -1  -2  166.88    7.20 
  -1  -1   2  179.88    9.40 
   1  -1  -2  179.38   13.20 
   1  -1  -2  161.78    8.20 
   1  -1  -2  145.39   10.90 
   1  -1  -2  185.18   11.80 
   1  -1  -2  168.98    6.90 
  -1  -1   2  165.88    9.90 
  -1  -1   2  164.28    8.70 
   1  -1  -2  167.38    6.70 
  -1  -1   2  168.58   12.20 
  -1  -1   2  187.58    9.20 
   1  -1  -2  166.68    9.50 
   1  -1  -2  175.28    8.30 
  -1  -1   2  155.38    7.80 
  -1  -1   2  165.18    8.20 
  -1  -1   2  160.28    9.00 
   1  -1  -2  180.58   10.10 
   1  -1  -2  156.48    8.80 
   1  -1  -2  156.78    7.80 
   1   1  -2  184.08    9.10 
  -1   1   2  171.88    9.60 
   1   1  -2  175.58    8.90 
  -1   1   2  174.98    8.30 
  -1   1   2  166.38    8.90 
  -1   1   2  163.18    7.20 
  -1   1   2  169.48    8.20 
  -1   1   2  167.58    8.60 
  -1   1   2  156.08   10.20 
   1   1  -2  166.08    6.80 
   1   1  -2  168.78    9.40 
  -1   1   2  171.98    8.10 
   1   1  -2  155.88    8.90 
   1   1  -2  156.78    7.80 
   1   1  -2  175.98    8.90 
   1   1  -2  168.58   10.10 
  -1   1   2  171.28    8.20 
   1   1  -2  163.58    8.00 
   1   1  -2  149.39    8.90 
  -1   1   2  169.18   10.20 
  -1   1   2  163.98   12.60 
  -1   1   2  159.78   10.60 
   1   1  -2  170.38    9.00 
  -1   1   2  157.18   11.40 
  -1   1   2  159.78   10.90 
   1   1  -2  173.18    7.10 
   0  -1  -2    4.10    1.90 
   0  -1  -2    2.50    1.90 
   0  -1  -2    4.60    1.30 
   0  -1   2    4.00    2.00 
   0  -1  -2   -2.30    4.20 
   0  -1  -2    3.30    1.60 
   0  -1  -2    2.30    1.00 
   0  -1  -2    4.80    2.70 
   0  -1  -2    3.30    2.40 
   0  -1   2    2.40    1.80 
   0  -1  -2    1.70    1.60 
   0  -1   2    6.20    3.90 
   0  -1  -2    1.50    1.40 
   0  -1  -2   -0.50    1.60 
   0  -1  -2    0.30    3.00 
   0  -1   2    0.50    1.80 
   0  -1  -2    1.80    2.00 
   0  -1   2   -0.90    3.00 
   0  -1  -2    2.80    5.60 
   0  -1  -2    3.60    2.10 
   0  -1  -2   15.60    6.00 
   0  -1   2    2.20    1.90 
   0  -1  -2    1.30    2.00 
   0  -1  -2    3.30    1.00 
   0  -1  -2    4.00    1.60 
   0  -1  -2    0.00    1.20 
   0  -1   2    3.70    2.90 
   0  -1   2    1.90    1.70 
   0  -1  -2    4.80    1.90 
   0  -1  -2    0.80    1.70 
   0   1   2    3.60    1.60 
   0   1  -2    2.80    2.10 
   0   1   2    2.80    2.00 
   0   1   2    0.90    1.70 
   0   1  -2    4.30    2.70 
   0   1   2    3.00    2.70 
   0   1   2    6.20    2.00 
   0   1  -2    3.30    2.70 
   0   1  -2    9.20    2.90 
   0   1  -2   -0.10    2.50 
   0   1   2   10.50    4.60 
   0   1   2    0.00    5.10 
   0   1  -2    1.90    2.30 
   0   1  -2    2.80    1.50 
   0   1  -2    4.80    3.50 
   0   1  -2    1.60    1.50 
   0   1  -2    4.50    1.60 
   0   1   2    3.50    1.80 
   0   1  -2    4.40    3.80 
   0   1  -2    1.90    2.60 
   0   1  -2    1.50    1.30 
   0   1  -2    4.60    2.80 
   0   1   2    7.30    2.00 
   0   1  -2    1.40    2.00 
   0   1   2    1.50    1.60 
   0   1   2   -0.10    1.60 
   0   1  -2   -0.60    4.20 
   0   1   2    4.30    1.30 
   0   1   2    1.50    1.80 
   0   1  -2    2.30    1.70 
   0   1   2    0.00    1.20 
   0   1  -2    3.10    2.00 
  -1  -1  -2  702.03   26.10 
  -1  -1  -2  691.93   26.80 
  -1  -1  -2  675.13   27.80 
  -1  -1  -2  714.63   27.00 
   1  -1   2  707.23   26.30 
  -1  -1  -2  697.33   25.80 
   1  -1   2  691.53   27.40 
  -1  -1  -2  666.73   26.20 
   1  -1   2  668.73   28.20 
  -1  -1  -2  679.33   27.90 
  -1  -1  -2  707.73   31.40 
   1  -1   2  651.03   25.60 
  -1  -1  -2  697.43   26.40 
   1  -1   2  638.04   26.50 
   1  -1   2  716.53   27.20 
  -1  -1  -2  715.13   27.90 
   1  -1   2  700.13   27.40 
  -1  -1  -2  684.73   26.60 
  -1  -1  -2  673.03   27.90 
   1  -1   2  659.93   26.80 
   1  -1   2  707.23   26.60 
   1  -1   2  720.03   27.70 
  -1  -1  -2  708.83   26.50 
   1  -1   2  723.03   29.00 
  -1  -1  -2  711.33   26.90 
  -1  -1  -2  694.03   26.40 
  -1  -1  -2  691.03   25.50 
  -1  -1  -2  716.03   26.40 
  -1  -1  -2  672.13   26.10 
  -1  -1  -2  695.13   26.60 
  -1  -1  -2  698.13   26.70 
   1  -1   2  712.13   25.70 
  -1  -1  -2  671.83   27.90 
  -1  -1  -2  720.03   26.20 
  -1  -1  -2  714.43   25.40 
  -1  -1  -2  693.73   27.00 
  -1  -1  -2  693.63   26.60 
   1  -1   2  702.33   27.80 
   1  -1   2  702.93   26.50 
   1  -1   2  700.33   27.80 
  -1  -1  -2  676.53   30.60 
  -1  -1  -2  679.73   27.00 
  -1   1  -2  657.13   27.60 
  -1   1  -2  668.53   28.00 
  -1   1  -2  666.53   27.10 
   1   1   2  692.93   25.30 
   1   1   2  682.93   26.00 
   1   1   2  647.94   26.70 
   1   1   2  672.33   30.60 
   1   1   2  681.13   26.20 
  -1   1  -2  666.23   27.20 
  -1   1  -2  664.53   26.40 
  -1   1  -2  712.83   26.80 
   1   1   2  693.23   25.70 
   1   1   2  670.43   27.50 
  -1   1  -2  686.93   29.00 
   1   1   2  670.23   27.90 
  -1   1  -2  697.43   26.60 
   1   1   2  729.03   27.20 
   1   1   2  702.13   26.00 
  -1   1  -2  696.33   27.40 
  -1   1  -2  680.43   27.40 
   1   1   2  724.13   27.90 
   1   1   2  692.43   25.40 
  -1   1  -2  680.03   26.50 
   1   1   2  725.93   31.90 
   1   1   2  683.73   26.30 
  -1   1  -2  685.73   25.40 
  -1   1  -2  654.73   27.50 
  -1   1  -2  649.64   25.90 
   1   1   2  686.23   26.30 
   1   1   2  701.13   28.00 
   1   1   2  674.93   26.40 
  -1   1  -2  671.53   28.20 
  -1   1  -2  696.53   27.80 
   1   1   2  687.83   26.70 
   1   1   2  669.33   26.30 
  -1   1  -2  676.53   25.60 
   1   1   2  725.73   28.50 
  -1   1  -2  676.33   27.20 
   1   1   2  668.33   26.20 
   1   1   2  670.83   26.50 
  -1   1  -2  689.93   27.00 
  -2  -1  -2  267.37   15.50 
  -2  -1  -2  248.78   13.00 
  -2  -1  -2  277.57   14.70 
   2  -1   2  252.97   13.10 
   2  -1   2  264.97   13.40 
  -2  -1  -2  271.67   13.00 
  -2  -1  -2  296.17   14.10 
   2  -1   2  279.37   13.90 
  -2  -1  -2  292.67   13.30 
   2  -1   2  275.57   15.90 
   2  -1   2  278.77   14.00 
   2  -1   2  278.77   14.80 
  -2  -1  -2  282.37   13.90 
   2  -1   2  290.37   13.30 
  -2  -1  -2  288.97   14.80 
  -2  -1  -2  264.37   12.60 
   2  -1   2  283.07   15.60 
   2  -1   2  268.17   16.40 
  -2  -1  -2  262.27   14.80 
  -2  -1  -2  291.07   13.40 
  -2  -1  -2  275.17   12.00 
  -2  -1  -2  287.87   14.10 
  -2  -1  -2  287.97   13.80 
   2  -1   2  272.37   12.00 
   2  -1   2  267.77   15.90 
  -2  -1  -2  278.87   12.30 
   2  -1   2  264.47   13.60 
   2  -1   2  265.17   13.80 
  -2  -1  -2  297.37   13.80 
  -2  -1  -2  289.17   14.20 
   2  -1   2  274.37   14.60 
  -2  -1  -2  289.27   14.10 
  -2  -1  -2  269.47   15.40 
   2  -1   2  257.67   12.10 
   2  -1   2  272.07   14.60 
  -2  -1  -2  267.57   13.40 
  -2  -1  -2  286.57   13.80 
  -2  -1  -2  285.47   15.30 
  -2  -1  -2  285.87   14.10 
   2  -1   2  276.37   16.00 
  -2  -1  -2  277.87   12.70 
   2  -1   2  281.47   12.80 
  -2  -1  -2  295.87   17.20 
   2  -1   2  283.07   13.60 
   2  -1   2  231.08   13.90 
  -2  -1  -2  267.97   14.90 
  -2  -1  -2  281.97   14.70 
   2  -1   2  290.67   13.80 
  -2  -1  -2  277.37   14.10 
   2  -1   2  260.47   13.70 
  -2   1  -2  269.47   13.80 
   2   1   2  259.37   13.90 
  -2   1  -2  262.47   14.00 
   2   1   2  273.17   13.40 
   2   1   2  279.87   15.10 
  -2   1  -2  272.17   14.20 
   2   1   2  249.58   12.80 
   2   1   2  271.77   14.80 
   2   1   2  284.57   13.80 
   2   1   2  284.97   15.20 
  -2   1  -2  290.47   12.20 
  -2   1  -2  276.27   13.80 
  -2   1  -2  270.17   16.90 
  -2   1  -2  277.87   13.80 
   2   1   2  293.97   15.90 
   2   1   2  284.87   13.50 
  -2   1  -2  299.77   14.80 
  -2   1  -2  267.47   15.10 
  -2   1  -2  256.77   13.90 
   2   1   2  286.57   12.40 
  -2   1  -2  281.87   13.80 
  -2   1  -2  276.47   14.60 
   2   1   2  273.57   13.50 
   2   1   2  276.77   11.00 
  -2   1  -2  259.77   14.00 
  -2   1  -2  254.77   14.30 
  -2   1  -2  289.37   16.20 
   2   1   2  287.67   14.00 
   2   1   2  272.47   11.90 
   2   1   2  293.97   13.50 
  -2   1  -2  285.97   14.10 
   2   1   2  278.87   13.80 
   2   1   2  275.37   12.70 
  -2   1  -2  270.57   16.20 
  -2   1  -2  260.07   13.60 
  -2   1  -2  281.07   13.60 
   2   1   2  270.97   13.10 
   2   1   2  259.67   16.40 
   2   1   2  278.17   14.90 
   2   1   2  260.27   14.70 
   2   1   2  282.87   13.80 
   2   1   2  283.17   13.70 
  -2   1  -2  293.97   13.70 
   2   1   2  268.47   13.70 
   2   1   2  283.77   13.30 
   3  -1   2 2809.52   98.59 
  -3  -1  -2 2792.82  100.39 
  -3  -1  -2 2813.42  101.69 
   3  -1   2 2788.82  107.09 
  -3  -1  -2 2819.42  102.49 
   3  -1   2 2726.43  102.19 
   3  -1   2 2851.61  101.29 
   3  -1   2 2841.92  100.19 
  -3  -1  -2 2834.92   99.09 
  -3  -1  -2 2884.31  106.09 
   3  -1   2 2771.72  104.09 
   3  -1   2 2864.01   99.49 
  -3  -1  -2 2681.13  104.19 
   3  -1   2 2849.81  102.59 
  -3  -1  -2 2820.42  101.29 
  -3  -1  -2 2821.62  100.79 
  -3  -1  -2 2866.01  101.09 
  -3  -1  -2 2825.12  101.89 
   3  -1   2 2857.71   97.39 
   3  -1   2 2840.52  104.89 
   3  -1   2 2801.52  100.49 
   3  -1   2 2845.02   99.89 
  -3  -1  -2 2799.02  101.69 
  -3  -1  -2 2891.71  101.89 
  -3  -1  -2 2716.83  100.99 
   3  -1   2 2777.72  105.69 
  -3  -1  -2 2924.21  101.09 
  -3  -1  -2 2738.43   97.69 
   3  -1   2 2978.50  102.59 
  -3  -1  -2 2678.83  104.99 
  -3  -1  -2 2783.52   97.59 
   3  -1   2 2944.81  102.49 
   3  -1   2 2863.81   99.19 
   3  -1   2 2848.31  101.69 
  -3  -1  -2 2827.92  103.49 
  -3  -1  -2 2846.12   97.29 
  -3  -1  -2 2884.61  100.39 
  -3  -1  -2 2864.51   98.79 
  -3  -1  -2 2805.52   97.39 
  -3  -1  -2 2778.92   98.39 
   3  -1   2 2836.82  101.99 
   3  -1   2 2805.02   98.59 
   3  -1   2 2834.82  101.19 
   3  -1   2 2881.61  103.29 
   3   1   2 2842.62  100.99 
   3   1   2 2876.11  103.59 
   3   1   2 2790.22  104.29 
   3   1   2 2802.72   97.19 
   3   1   2 2800.12  100.59 
  -3   1  -2 2828.02  105.99 
  -3   1  -2 2876.41  103.19 
  -3   1  -2 2800.62  100.29 
  -3   1  -2 2825.32   99.69 
   3   1   2 2839.32  103.09 
  -3   1  -2 2843.42  100.09 
  -3   1  -2 3014.50   99.39 
   3   1   2 2771.52  101.19 
   3   1   2 2993.50  101.79 
  -3   1  -2 2831.42  106.39 
  -3   1  -2 2833.32  102.19 
  -3   1  -2 2706.03  104.59 
  -3   1  -2 2806.32  102.09 
   3   1   2 2890.81  100.19 
   3   1   2 2784.72   99.09 
  -3   1  -2 2742.73   99.79 
   3   1   2 2779.32  103.19 
   3   1   2 2758.92  100.39 
   3   1   2 2784.92  100.69 
  -3   1  -2 2883.11  101.39 
   3   1   2 2781.32   97.59 
   3   1   2 2860.21   99.79 
  -3   1  -2 2804.82  102.29 
   3   1   2 2805.92  100.79 
  -3   1  -2 2851.41  100.49 
   3   1   2 2851.11  103.59 
   3   1   2 2750.52  100.49 
   3   1   2 2851.91  100.69 
   3   1   2 2771.22  100.59 
  -3   1  -2 2811.92  101.69 
  -3   1  -2 2738.73  100.69 
   4  -1   2    7.80    2.90 
   4  -1   2    4.30    3.50 
  -4  -1  -2    5.10    4.10 
   4  -1   2    6.80    5.50 
   4  -1   2    2.20    5.40 
  -4  -1  -2    7.60    5.10 
  -4  -1  -2    5.50    2.80 
   4  -1   2   15.40    5.60 
  -4  -1  -2    4.90    3.00 
  -4  -1  -2    7.60    4.60 
  -4  -1  -2    6.10    6.60 
  -4  -1  -2    3.50    3.60 
   4  -1   2    9.00    3.20 
  -4  -1  -2    8.90    4.70 
  -4  -1  -2    4.30    4.90 
  -4  -1  -2    6.60    2.40 
   4  -1   2    9.80    4.80 
   4  -1   2   13.90    5.50 
   4  -1   2    6.20    6.10 
   4  -1   2    2.30    4.70 
   4  -1   2    7.70    5.50 
  -4  -1  -2    5.80    2.50 
   4  -1   2   15.80    4.90 
  -4  -1  -2    8.70    6.00 
  -4  -1  -2    8.00    5.70 
  -4  -1  -2    5.20    2.40 
  -4  -1  -2   12.70    5.60 
  -4  -1  -2    6.40    3.30 
  -4  -1  -2   10.10    4.80 
  -4  -1  -2   17.90    7.00 
   4  -1   2    7.70    4.70 
   4  -1   2    3.70    5.10 
  -4  -1  -2    6.30    3.50 
   4  -1   2    8.50    4.80 
  -4   1  -2    6.70    3.80 
   4   1   2    8.30    4.60 
   4   1   2    6.10    5.00 
  -4   1  -2   10.60    4.30 
  -4   1  -2    6.60    3.70 
   4   1   2    5.60    5.30 
  -4   1  -2    9.40    4.10 
  -4   1  -2    4.60    4.50 
  -4   1  -2   10.50    3.40 
  -4   1  -2    0.90    3.50 
   4   1   2    9.20    4.30 
   4   1   2   -1.70    5.30 
   4   1   2    7.50    3.00 
   4   1   2   10.20    3.70 
  -4   1  -2    4.40    4.30 
  -4   1  -2    7.20    6.60 
   4   1   2    9.20    4.60 
   4   1   2    3.50    4.50 
  -4   1  -2   10.80    5.50 
   4   1   2    5.70    2.70 
  -4   1  -2   10.60    3.90 
   4   1   2    8.90    5.80 
  -4   1  -2   10.50    6.80 
   4   1   2    3.20    5.40 
   4   1   2    1.90    5.20 
   4   1   2    7.40    4.10 
   4   1   2    5.90    4.50 
  -4   1  -2   13.00    6.20 
   4   1   2    4.20    4.60 
  -4   1  -2    8.00    3.90 
   4   1   2    5.50    5.50 
   4   1   2    0.50    3.50 
  -4   1  -2    3.70    4.50 
   5  -1   2  178.98   12.60 
  -5  -1  -2  168.58   12.20 
   5  -1   2  188.98   19.40 
   5  -1   2  167.88   15.80 
   5  -1   2  168.78    9.90 
   5  -1   2  176.18   18.60 
   5  -1   2  193.38   14.40 
  -5  -1  -2  154.68   13.20 
   5  -1   2  193.78   15.20 
  -5  -1  -2  189.08   14.50 
  -5  -1  -2  162.98   18.30 
  -5  -1  -2  208.28   15.90 
  -5  -1  -2  179.88   14.00 
   5  -1   2  158.28   16.30 
   5  -1   2  189.78   16.00 
   5  -1   2  152.38   14.90 
   5  -1   2  161.28   10.80 
  -5  -1  -2  181.48   17.30 
  -5  -1  -2  195.78   11.80 
   5  -1   2  214.58   21.30 
  -5  -1  -2  200.58   19.00 
  -5  -1  -2  183.38   20.40 
  -5  -1  -2  176.58    9.00 
   5  -1   2  166.38   14.10 
  -5  -1  -2  166.88    8.80 
  -5  -1  -2  160.18   11.30 
  -5  -1  -2  182.78   10.20 
   5  -1   2  178.28   14.80 
  -5  -1  -2  171.28   15.70 
   5  -1   2  213.48   20.30 
   5   1   2  169.68   15.50 
   5   1   2  205.98   14.50 
  -5   1  -2  231.28   23.60 
  -5   1  -2  154.28   15.40 
   5   1   2  186.38   11.90 
   5   1   2  182.68   18.20 
   5   1   2  163.48   17.70 
  -5   1  -2  195.38   12.00 
   5   1   2  169.08   18.90 
   5   1   2  162.08   17.20 
  -5   1  -2  186.38   12.40 
  -5   1  -2  235.28   23.90 
  -5   1  -2  184.28   13.80 
   5   1   2  183.88   13.60 
  -5   1  -2  176.98    9.70 
  -5   1  -2  201.68   12.50 
  -5   1  -2  163.98   13.30 
   5   1   2  184.18   15.90 
   5   1   2  168.48   13.30 
   5   1   2  188.88   14.70 
  -5   1  -2  172.58   17.40 
   5   1   2  152.18   12.80 
  -5   1  -2  192.18   17.10 
   5   1   2  175.48   14.30 
  -5   1  -2  201.38   15.80 
   5   1   2  174.08   17.90 
   5   1   2  168.08   16.80 
  -6  -1  -2    6.80    3.20 
  -6  -1  -2    8.70    6.40 
  -6  -1  -2   -5.50    5.10 
   6  -1   2   13.70    8.80 
   6  -1   2   21.20    9.10 
   6  -1   2    5.60    6.90 
   6  -1   2    6.50    2.80 
  -6  -1  -2   -0.10    5.90 
   6  -1   2   19.90    6.10 
   6  -1   2    4.70    6.70 
  -6  -1  -2   11.20    7.80 
   6  -1   2    4.50    6.10 
   6  -1   2    1.40    6.10 
  -6  -1  -2   -1.20    7.20 
   6  -1   2   -2.50    6.20 
   6  -1   2   16.00    8.20 
  -6  -1  -2    2.80    5.80 
  -6  -1  -2    6.50    4.70 
  -6  -1  -2    7.80    4.70 
   6  -1   2    7.20    6.10 
  -6  -1  -2    8.40    6.50 
   6  -1   2    8.60    5.30 
   6  -1   2   10.90    8.70 
  -6  -1  -2   10.30    4.50 
  -6  -1  -2   18.40    9.90 
  -6  -1  -2    6.50    5.80 
   6   1   2   -0.20    5.80 
  -6   1  -2    4.90    8.30 
  -6   1  -2    9.70    9.60 
   6   1   2   11.00    6.30 
  -6   1  -2    5.70    6.70 
  -6   1  -2    6.80    6.20 
   6   1   2   11.20    8.00 
   6   1   2    2.30    6.40 
   6   1   2   17.60    6.10 
  -6   1  -2    1.60    6.30 
   6   1   2    8.40    7.70 
  -6   1  -2    4.20    2.80 
   6   1   2    1.00    5.40 
   6   1   2   -0.20    7.20 
  -6   1  -2    7.60    4.40 
  -6   1  -2    8.10    5.70 
  -6   1  -2   15.20    5.10 
   6   1   2    4.50    6.10 
   6   1   2   16.60    8.80 
   6   1   2    6.50    5.80 
   6   1   2   14.70    7.20 
  -6   1  -2   18.10    9.00 
  -6   1  -2   13.70    8.80 
  -6   1  -2    3.40    4.90 
   6   1   2   16.30    8.70 
  -6   1  -2    8.20    6.50 
   6   1   2    8.60    4.80 
  -7  -1  -2  510.95   30.30 
   7  -1   2  515.45   39.10 
  -7  -1  -2  636.44   36.00 
   7  -1   2  495.15   35.30 
  -7  -1  -2  536.25   26.20 
   7  -1   2  525.25   30.90 
   7  -1   2  517.45   27.80 
  -7  -1  -2  525.25   32.90 
  -7  -1  -2  556.14   27.90 
   7  -1   2  495.75   34.40 
   7  -1   2  504.35   31.70 
  -7  -1  -2  591.74   27.10 
   7  -1   2  527.85   35.60 
   7  -1   2  524.45   31.80 
  -7  -1  -2  571.14   35.40 
   7  -1   2  510.75   33.90 
  -7  -1  -2  522.95   29.90 
   7  -1   2  572.44   29.40 
  -7  -1  -2  561.34   33.00 
  -7  -1  -2  555.14   31.50 
   7  -1   2  507.05   33.30 
  -7  -1  -2  536.25   39.60 
  -7  -1  -2  607.14   33.20 
   7  -1   2  526.55   31.40 
   7  -1   2  518.85   30.00 
  -7   1  -2  522.15   37.60 
   7   1   2  546.65   30.20 
   7   1   2  577.44   32.40 
  -7   1  -2  503.35   29.70 
  -7   1  -2  509.15   31.90 
  -7   1  -2  529.25   29.80 
   7   1   2  552.04   31.90 
   7   1   2  540.15   36.90 
   7   1   2  459.85   30.10 
   7   1   2  525.75   35.10 
   7   1   2  540.95   35.90 
  -7   1  -2  547.55   28.10 
  -7   1  -2  546.35   32.70 
  -7   1  -2  516.25   25.50 
   7   1   2  555.74   31.50 
  -7   1  -2  557.14   33.40 
  -7   1  -2  541.95   34.20 
   7   1   2  595.54   36.40 
   7   1   2  551.64   34.70 
  -7   1  -2  516.75   39.20 
   7   1   2  534.75   30.20 
  -7   1  -2  538.85   37.40 
   7   1   2  548.55   35.10 
   7   1   2  550.94   30.10 
   8  -1   2   87.49   15.30 
   8  -1   2   83.19   15.20 
  -8  -1  -2   61.79   13.70 
   8  -1   2   66.39   16.10 
   8  -1   2   65.39   11.50 
   8  -1   2   80.69   15.60 
   8  -1   2   71.99   14.10 
   8  -1   2   78.69   17.20 
   8  -1   2   93.99   14.90 
   8  -1   2   46.40   12.20 
  -8  -1  -2   69.19   13.00 
   8  -1   2   80.89   17.30 
  -8  -1  -2   90.29   17.20 
   8  -1   2   80.59   17.00 
  -8  -1  -2   76.89   11.80 
  -8  -1  -2   92.59   12.60 
  -8  -1  -2   83.29   13.60 
   8  -1   2   64.69   11.80 
  -8  -1  -2   78.89   16.20 
   8  -1   2   84.19   13.00 
  -8  -1  -2   71.39   13.90 
  -8  -1  -2   91.89   14.70 
   8  -1   2   93.19   20.80 
  -8  -1  -2   79.09   20.30 
   8   1   2   83.29   14.70 
   8   1   2   61.29   12.30 
   8   1   2   68.99   18.80 
   8   1   2   96.59   13.80 
  -8   1  -2   97.69   14.40 
   8   1   2   87.19   17.40 
   8   1   2   66.49   15.60 
  -8   1  -2   73.79   19.90 
  -8   1  -2   85.59   18.60 
   8   1   2   62.29   15.50 
   8   1   2   59.69   11.30 
  -8   1  -2   69.59   13.10 
  -8   1  -2   86.79   15.40 
  -8   1  -2   87.09   16.50 
  -8   1  -2   75.89   15.00 
  -8   1  -2   73.99   19.10 
  -8   1  -2   63.49   15.50 
   8   1   2   74.09   14.40 
   8   1   2   79.29   17.30 
   8   1   2   96.89   19.40 
   8   1   2   82.79   14.10 
  -8   1  -2   63.19   10.90 
   8   1   2   39.70   12.50 
  -9  -1  -2  962.70   51.89 
  -9  -1  -2 1009.80   50.79 
   9  -1   2 1001.20   54.59 
   9  -1   2  963.00   51.49 
  -9  -1  -2  975.20   49.90 
   9  -1   2  857.41   59.49 
   9  -1   2 1052.29   58.79 
   9  -1   2 1019.20   51.49 
   9  -1   2  871.91   49.80 
  -9  -1  -2  937.41   61.89 
   9  -1   2  905.21   54.99 
  -9  -1  -2  973.00   52.99 
   9  -1   2  913.31   49.10 
   9  -1   2  948.21   63.09 
   9  -1   2  991.00   54.69 
   9  -1   2  935.11   49.60 
  -9  -1  -2 1000.50   49.20 
   9  -1   2  945.21   59.59 
  -9  -1  -2  867.51   54.99 
   9  -1   2  984.80   52.59 
   9  -1   2 1002.80   58.39 
  -9  -1  -2  949.90   59.79 
   9  -1   2  951.30   55.39 
  -9   1  -2 1036.80   48.90 
  -9   1  -2  879.91   51.09 
   9   1   2  962.40   48.20 
  -9   1  -2  924.91   55.29 
   9   1   2  992.30   57.59 
   9   1   2  882.51   54.69 
   9   1   2  867.51   49.50 
   9   1   2  945.81   55.49 
   9   1   2  971.00   48.90 
  -9   1  -2  949.71   48.50 
   9   1   2  920.01   62.49 
  -9   1  -2  906.21   55.89 
  -9   1  -2  993.40   62.29 
   9   1   2  964.00   51.59 
   9   1   2  932.91   50.99 
   9   1   2  837.02   48.20 
   9   1   2  933.31   46.50 
   9   1   2  888.31   54.69 
  -9   1  -2  963.30   52.39 
  -9   1  -2  963.90   53.19 
   9   1   2 1016.70   59.29 
  10  -1   2   57.49   15.10 
  10  -1   2   27.10   13.30 
  10  -1   2   38.90   16.70 
 -10  -1  -2   25.50   12.60 
  10  -1   2   20.60   14.70 
  10  -1   2   49.10   14.20 
  10  -1   2   26.20   14.40 
 -10  -1  -2   24.10   12.10 
  10  -1   2   40.90   16.40 
  10  -1   2   44.80   16.60 
 -10  -1  -2   21.10   11.30 
 -10  -1  -2   45.40   20.00 
  10  -1   2   19.80   16.70 
  10  -1   2   45.80   19.40 
  10  -1   2   27.30   14.90 
 -10  -1  -2   37.00   19.40 
 -10  -1  -2   18.20   10.40 
 -10  -1  -2   25.60   14.40 
  10  -1   2   37.20   13.20 
  10   1   2   31.70   16.70 
  10   1   2   37.20   17.90 
 -10   1  -2   60.59   19.40 
  10   1   2   50.79   17.80 
  10   1   2   47.30   16.60 
 -10   1  -2   37.50   13.40 
 -10   1  -2   39.90   18.40 
 -10   1  -2   49.80   13.50 
 -10   1  -2   50.49   19.30 
  10   1   2   43.70   15.40 
  10   1   2   55.79   17.90 
  10   1   2   37.50   15.50 
 -10   1  -2   44.20   14.30 
  10   1   2   33.60   17.50 
 -10   1  -2   46.40   13.20 
  10   1   2   55.89   15.40 
  10  -2  -2  920.01   57.09 
  10  -2  -2  820.92   56.19 
  10  -2  -2  745.83   47.00 
  10  -2  -2  758.12   53.79 
  10  -2  -2  790.02   49.99 
  10  -2  -2  823.52   50.19 
  10  -2  -2  894.71   55.59 
  10  -2  -2  791.02   46.10 
  10  -2  -2  779.72   46.70 
  10  -2  -2  753.42   61.29 
 -10  -2   2  826.32   50.39 
 -10  -2   2  816.92   54.99 
  10  -2  -2  844.32   52.19 
 -10  -2   2  960.40   52.89 
 -10  -2   2  736.53   48.60 
  10  -2  -2  847.82   48.70 
  10   2  -2  756.72   52.69 
  10   2  -2  802.52   53.59 
  10   2  -2  821.82   51.39 
  10   2  -2  877.31   56.09 
  10   2  -2  860.31   54.19 
 -10   2   2  833.92   59.49 
  10   2  -2  834.02   63.99 
  10   2  -2  872.51   48.10 
 -10   2   2  852.81   46.60 
  10   2  -2  857.61   50.19 
 -10   2   2  837.32   48.80 
 -10   2   2  870.91   51.59 
  10   2  -2  857.71   54.89 
  10   2  -2  796.52   47.80 
  10   2  -2  798.22   49.60 
 -10   2   2  823.12   54.89 
  10   2  -2  812.82   50.99 
  -9  -2   2  284.37   28.80 
  -9  -2   2  287.17   33.00 
  -9  -2   2  280.47   32.10 
  -9  -2   2  319.37   24.10 
  -9  -2   2  308.37   23.90 
   9  -2  -2  244.28   35.30 
   9  -2  -2  299.87   28.70 
  -9  -2   2  280.37   29.50 
   9  -2  -2  310.57   34.10 
   9  -2  -2  272.27   27.20 
   9  -2  -2  314.87   24.80 
  -9  -2   2  281.67   28.80 
   9  -2  -2  293.87   33.90 
   9  -2  -2  273.27   31.10 
   9  -2  -2  302.67   29.90 
   9  -2  -2  259.97   32.30 
   9  -2  -2  301.57   26.10 
   9  -2  -2  263.27   27.00 
  -9   2   2  367.36   33.70 
   9   2  -2  263.37   30.60 
   9   2  -2  322.27   30.00 
   9   2  -2  332.67   33.70 
  -9   2   2  286.87   32.20 
   9   2  -2  293.37   30.20 
   9   2  -2  221.18   26.20 
   9   2  -2  323.27   33.60 
  -9   2   2  281.37   27.40 
   9   2  -2  310.97   28.70 
   9   2  -2  266.47   28.70 
   9   2  -2  257.67   30.10 
   9   2  -2  327.57   34.20 
  -9   2   2  315.17   33.40 
  -9   2   2  281.57   35.80 
  -9   2   2  270.27   26.80 
   8  -2  -2  770.52   45.40 
  -8  -2   2  759.72   38.30 
   8  -2  -2  739.53   36.50 
   8  -2  -2  737.23   40.30 
  -8  -2   2  755.52   45.80 
  -8  -2   2  712.13   44.80 
   8  -2  -2  666.73   45.00 
   8  -2  -2  794.02   53.89 
  -8  -2   2  735.23   42.60 
   8  -2  -2  751.92   41.30 
  -8  -2   2  733.93   47.80 
  -8  -2   2  739.03   42.10 
   8  -2  -2  718.13   42.20 
  -8  -2   2  798.72   39.70 
  -8  -2   2  711.23   42.20 
   8  -2  -2  716.13   47.30
[truncated: 2,591,328 more chars]
