# Supplementary material
Source: MDPI journal article supplement (https://www.mdpi.com/2073-4352/13/7/1043)
Supplement: s1 [file s1 › 2 Pr(OAc)2Br x 3H2O_Tabellen.pdf]

Table S1. Crystal data and structure refinement for Pr(OAc)2Br·x\_3H2O.

|                                   |                                                                              |
|-----------------------------------|------------------------------------------------------------------------------|
| Identification code               | Ha2019_64_0m_a                                                               |
| Empirical formula                 | C4 H12 Br O7 Pr                                                              |
| Formula weight                    | 392.96                                                                       |
| Temperature                       | 100(2) K                                                                     |
| Wavelength                        | 0.71073 Å                                                                    |
| Crystal system, space group       | Monoclinic, P2(1)/n                                                          |
| Unit cell dimensions              | a = 7.9293(3) Å<br>b = 8.0327(3) Å    β = 96.533(2) deg.<br>c = 18.0186(6) Å |
| Volume                            | 1140.22(7) Å <sup>3</sup>                                                    |
| Z, Calculated density             | 4, 2.289 Mg/m <sup>3</sup>                                                   |
| Absorption coefficient            | 7.781 mm <sup>-1</sup>                                                       |
| F(000)                            | 744                                                                          |
| Crystal size                      | 0.465 x 0.120 x 0.074 mm                                                     |
| Theta range for data collection   | 2.275 to 27.994 deg.                                                         |
| Limiting indices                  | -10 ≤ h ≤ 10, -10 ≤ k ≤ 10, -23 ≤ l ≤ 23                                     |
| Reflections collected / unique    | 92529 / 2753 [R(int) = 0.0497]                                               |
| Completeness to theta = 25.242    | 100.0 %                                                                      |
| Absorption correction             | Semi-empirical from equivalents                                              |
| Max. and min. transmission        | 0.813 and 0.412                                                              |
| Refinement method                 | Full-matrix least-squares on F <sup>2</sup>                                  |
| Data / restraints / parameters    | 2753 / 0 / 125                                                               |
| Goodness-of-fit on F <sup>2</sup> | 1.080                                                                        |
| Final R indices [I > 2σ(I)]       | R1 = 0.0141, wR2 = 0.0295                                                    |
| R indices (all data)              | R1 = 0.0175, wR2 = 0.0305                                                    |
| Extinction coefficient            | n/a                                                                          |
| Largest diff. peak and hole       | 0.441 and -0.499 e.Å <sup>-3</sup>                                           |

Table S2. Atomic coordinates ( $\times 10^4$ ) and equivalent isotropic displacement parameters ( $\text{\AA}^2 \times 10^3$ ) for  $\text{Pr}(\text{OAc})_2\text{Br}\cdot 3\text{H}_2\text{O}$ .  $U(\text{eq})$  is defined as one third of the trace of the orthogonalized  $U_{ij}$  tensor.

|        | x         | y        | z        | U (eq) |
|--------|-----------|----------|----------|--------|
| Pr (1) | 2601 (1)  | 4596 (1) | 5364 (1) | 11 (1) |
| Br (1) | 3952 (1)  | 9603 (1) | 6879 (1) | 18 (1) |
| O (11) | -163 (2)  | 3358 (2) | 5330 (1) | 16 (1) |
| O (12) | -2817 (2) | 2578 (2) | 5220 (1) | 18 (1) |
| C (11) | -1293 (2) | 2299 (3) | 5456 (1) | 14 (1) |
| C (12) | -811 (3)  | 750 (3)  | 5884 (1) | 24 (1) |
| O (21) | 5462 (2)  | 5543 (2) | 5740 (1) | 14 (1) |
| O (22) | 8132 (2)  | 6231 (2) | 5987 (1) | 18 (1) |
| C (21) | 6742 (2)  | 5871 (3) | 6219 (1) | 14 (1) |
| C (22) | 6580 (3)  | 5780 (3) | 7036 (1) | 23 (1) |
| O (1W) | 3901 (2)  | 1761 (2) | 5333 (1) | 15 (1) |
| O (2W) | 1555 (2)  | 6539 (2) | 6272 (1) | 17 (1) |
| O (3W) | 2844 (2)  | 3417 (2) | 6642 (1) | 20 (1) |

Table S3. Bond lengths [Å] and angles [deg] for Pr(OAc)<sub>2</sub>Br·x<sub>3</sub>H<sub>2</sub>O.

---

|                       |            |
|-----------------------|------------|
| Pr(1)-O(11)           | 2.401(1)   |
| Pr(1)-O(21)           | 2.416(1)   |
| Pr(1)-O(2W)           | 2.471(1)   |
| Pr(1)-O(3W)           | 2.476(1)   |
| Pr(1)-O(1W)           | 2.504(1)   |
| Pr(1)-O(12)#1         | 2.516(2)   |
| Pr(1)-O(22)#2         | 2.527(1)   |
| Pr(1)-O(21)#2         | 2.652(1)   |
| Pr(1)-O(11)#1         | 2.730(1)   |
| Pr(1)-Pr(1)#2         | 4.2146(2)  |
| Pr(1)-Pr(1)#1         | 4.2332(2)  |
| O(11)-C(11)           | 1.274(2)   |
| O(12)-C(11)           | 1.255(2)   |
| C(11)-C(12)           | 1.492(3)   |
| O(21)-C(21)           | 1.282(2)   |
| O(22)-C(21)           | 1.256(2)   |
| C(21)-C(22)           | 1.495(3)   |
| O(11)-Pr(1)-O(21)     | 164.37(5)  |
| O(11)-Pr(1)-O(2W)     | 84.53(5)   |
| O(21)-Pr(1)-O(2W)     | 89.47(5)   |
| O(11)-Pr(1)-O(3W)     | 80.78(5)   |
| O(21)-Pr(1)-O(3W)     | 83.59(5)   |
| O(2W)-Pr(1)-O(3W)     | 67.87(5)   |
| O(11)-Pr(1)-O(1W)     | 89.98(5)   |
| O(21)-Pr(1)-O(1W)     | 85.21(5)   |
| O(2W)-Pr(1)-O(1W)     | 139.43(5)  |
| O(3W)-Pr(1)-O(1W)     | 71.57(5)   |
| O(11)-Pr(1)-O(12)#1   | 117.94(5)  |
| O(21)-Pr(1)-O(12)#1   | 74.14(5)   |
| O(2W)-Pr(1)-O(12)#1   | 75.57(5)   |
| O(3W)-Pr(1)-O(12)#1   | 137.07(5)  |
| O(1W)-Pr(1)-O(12)#1   | 139.78(4)  |
| O(11)-Pr(1)-O(22)#2   | 75.96(5)   |
| O(21)-Pr(1)-O(22)#2   | 117.29(4)  |
| O(2W)-Pr(1)-O(22)#2   | 138.26(5)  |
| O(3W)-Pr(1)-O(22)#2   | 141.26(5)  |
| O(1W)-Pr(1)-O(22)#2   | 77.83(5)   |
| O(12)#1-Pr(1)-O(22)#2 | 81.58(5)   |
| O(11)-Pr(1)-O(21)#2   | 124.63(4)  |
| O(21)-Pr(1)-O(21)#2   | 67.54(5)   |
| O(2W)-Pr(1)-O(21)#2   | 142.20(5)  |
| O(3W)-Pr(1)-O(21)#2   | 133.71(5)  |
| O(1W)-Pr(1)-O(21)#2   | 70.70(4)   |
| O(12)#1-Pr(1)-O(21)#2 | 69.59(5)   |
| O(22)#2-Pr(1)-O(21)#2 | 49.82(4)   |
| O(11)-Pr(1)-O(11)#1   | 68.96(5)   |
| O(21)-Pr(1)-O(11)#1   | 122.19(5)  |
| O(2W)-Pr(1)-O(11)#1   | 69.50(4)   |
| O(3W)-Pr(1)-O(11)#1   | 129.26(4)  |
| O(1W)-Pr(1)-O(11)#1   | 144.03(4)  |
| O(12)#1-Pr(1)-O(11)#1 | 48.98(4)   |
| O(22)#2-Pr(1)-O(11)#1 | 69.11(5)   |
| O(21)#2-Pr(1)-O(11)#1 | 96.99(4)   |
| Pr(1)#2-Pr(1)-Pr(1)#1 | 139.645(6) |

|                         |           |
|-------------------------|-----------|
| C (11)-O (11)-Pr (1)    | 158.5 (1) |
| C (11)-O (11)-Pr (1) #1 | 90.4 (1)  |
| Pr (1)-O (11)-Pr (1) #1 | 111.0 (1) |
| C (11)-O (12)-Pr (1) #1 | 101.2 (1) |
| O (12)-C (11)-O (11)    | 119.4 (2) |
| O (12)-C (11)-C (12)    | 120.3 (2) |
| O (11)-C (11)-C (12)    | 120.4 (2) |
| C (21)-O (21)-Pr (1)    | 154.1 (1) |
| C (21)-O (21)-Pr (1) #2 | 91.8 (1)  |
| Pr (1)-O (21)-Pr (1) #2 | 112.5 (1) |
| C (21)-O (22)-Pr (1) #2 | 98.4 (1)  |
| O (22)-C (21)-O (21)    | 118.8 (2) |
| O (22)-C (21)-C (22)    | 121.1 (2) |
| O (21)-C (21)-C (22)    | 120.2 (2) |

---

Symmetry transformations used to generate equivalent atoms:  
 #1 -x,-y+1,-z+1      #2 -x+1,-y+1,-z+1

Table S4. Anisotropic displacement parameters ( $\text{\AA}^2 \times 10^3$ ) for  
 $\text{Pr}(\text{OAc})_2\text{Br} \cdot x_3\text{H}_2\text{O}$ .

The anisotropic displacement factor exponent takes the form:  
 $-2 \pi^2 [ h^2 a^{*2} U_{11} + \dots + 2 h k a^* b^* U_{12} ]$

|       | U <sub>11</sub> | U <sub>22</sub> | U <sub>33</sub> | U <sub>23</sub> | U <sub>13</sub> | U <sub>12</sub> |
|-------|-----------------|-----------------|-----------------|-----------------|-----------------|-----------------|
| Pr(1) | 7(1)            | 13(1)           | 13(1)           | 1(1)            | 2(1)            | -1(1)           |
| Br(1) | 21(1)           | 16(1)           | 18(1)           | 2(1)            | 1(1)            | -3(1)           |
| O(11) | 11(1)           | 18(1)           | 19(1)           | 3(1)            | 2(1)            | -3(1)           |
| O(12) | 10(1)           | 19(1)           | 26(1)           | 6(1)            | 3(1)            | -1(1)           |
| C(11) | 12(1)           | 16(1)           | 14(1)           | -1(1)           | 4(1)            | -1(1)           |
| C(12) | 23(1)           | 21(1)           | 28(1)           | 10(1)           | 1(1)            | 1(1)            |
| O(21) | 10(1)           | 19(1)           | 14(1)           | 0(1)            | 0(1)            | -1(1)           |
| O(22) | 10(1)           | 26(1)           | 18(1)           | -2(1)           | 1(1)            | -2(1)           |
| C(21) | 11(1)           | 15(1)           | 16(1)           | -1(1)           | 0(1)            | 2(1)            |
| C(22) | 18(1)           | 36(1)           | 14(1)           | 1(1)            | 1(1)            | 4(1)            |
| O(1W) | 13(1)           | 16(1)           | 18(1)           | 3(1)            | 5(1)            | 0(1)            |
| O(2W) | 13(1)           | 16(1)           | 22(1)           | -4(1)           | 2(1)            | 0(1)            |
| O(3W) | 28(1)           | 18(1)           | 16(1)           | 3(1)            | 7(1)            | 6(1)            |

Table S5. Hydrogen coordinates ( $\times 10^4$ ) and isotropic displacement parameters ( $\text{\AA}^2 \times 10^3$ ) for  $\text{Pr}(\text{OAc})_2\text{Br}\cdot 3\text{H}_2\text{O}$ .

|        | x     | y    | z    | U (eq) |
|--------|-------|------|------|--------|
| H(12A) | -848  | 955  | 6418 | 80 (7) |
| H(12B) | 340   | 418  | 5799 | 80 (7) |
| H(12C) | -1609 | -142 | 5718 | 80 (7) |
| H(22A) | 7699  | 5572 | 7312 | 36 (6) |
| H(22B) | 5807  | 4872 | 7131 | 36 (6) |
| H(22C) | 6130  | 6836 | 7202 | 36 (6) |
| H(22D) | 5362  | 5855 | 7081 | 36 (6) |
| H(22E) | 7154  | 6777 | 7253 | 36 (6) |
| H(22F) | 7051  | 4790 | 7302 | 36 (6) |
| H(11W) | 3925  | 959  | 5730 | 54 (7) |
| H(12W) | 5058  | 1854 | 5230 | 54 (7) |
| H(21W) | 368   | 6689 | 6313 | 56 (7) |
| H(22W) | 2079  | 7564 | 6449 | 56 (7) |
| H(31W) | 2343  | 3905 | 7051 | 50 (6) |
| H(32W) | 3135  | 2302 | 6801 | 50 (6) |

Table S6. Hydrogen bonds for Pr(OAc)<sub>2</sub>Br·x<sub>3</sub>H<sub>2</sub>O [Å and deg.].

| D-H...A                | d(D-H) | d(H...A) | d(D...A) | <(DHA) |
|------------------------|--------|----------|----------|--------|
| O(1W)-H(11W)...Br(1)#3 | 0.96   | 2.34     | 3.276(1) | 165.7  |
| O(1W)-H(12W)...O(12)#4 | 0.96   | 1.78     | 2.714(2) | 162.2  |
| O(2W)-H(21W)...O(22)#5 | 0.96   | 1.84     | 2.716(2) | 150.2  |
| O(2W)-H(22W)...Br(1)   | 0.96   | 2.29     | 3.223(1) | 165.2  |
| O(3W)-H(31W)...Br(1)#6 | 0.96   | 2.35     | 3.303(1) | 169.6  |
| O(3W)-H(32W)...Br(1)#3 | 0.96   | 2.26     | 3.202(2) | 165.8  |

Symmetry transformations used to generate equivalent atoms:

#1 -x,-y+1,-z+1      #2 -x+1,-y+1,-z+1      #3 x,y-1,z  
#4 x+1,y,z      #5 x-1,y,z      #6 -x+1/2,y-1/2,-z+3/2
