# Supplementary material
Source: MDPI journal article supplement (https://www.mdpi.com/2073-4352/13/7/1043)
Supplement: s1 [file s1 › 2 Pr(OAc)2Cl x 3H2O_Tabellen.pdf]

Table S1. Crystal data and structure refinement for Pr(OAc)2Cl\_x\_3H2O.

|                                   |                                                                              |
|-----------------------------------|------------------------------------------------------------------------------|
| Identification code               | Ha2019_59_0m_a                                                               |
| Empirical formula                 | C4 H12 Cl O7 Pr                                                              |
| Formula weight                    | 348.50                                                                       |
| Temperature                       | 100(2) K                                                                     |
| Wavelength                        | 0.71073 Å                                                                    |
| Crystal system, space group       | Monoclinic, P2(1)/n                                                          |
| Unit cell dimensions              | a = 7.9333(3) Å<br>b = 7.9139(3) Å    β = 98.947(2) deg.<br>c = 17.6327(6) Å |
| Volume                            | 1093.57(7) Å <sup>3</sup>                                                    |
| Z, Calculated density             | 4, 2.117 Mg/m <sup>3</sup>                                                   |
| Absorption coefficient            | 4.703 mm <sup>-1</sup>                                                       |
| F(000)                            | 672                                                                          |
| Crystal size                      | 0.450 x 0.107 x 0.071 mm                                                     |
| Theta range for data collection   | 2.679 to 28.000 deg.                                                         |
| Limiting indices                  | -10 ≤ h ≤ 10, -10 ≤ k ≤ 10, -23 ≤ l ≤ 23                                     |
| Reflections collected / unique    | 125986 / 2645 [R(int) = 0.0398]                                              |
| Completeness to theta = 25.242    | 99.9 %                                                                       |
| Absorption correction             | Semi-empirical from equivalents                                              |
| Max. and min. transmission        | 0.784 and 0.482                                                              |
| Refinement method                 | Full-matrix least-squares on F <sup>2</sup>                                  |
| Data / restraints / parameters    | 2645 / 0 / 125                                                               |
| Goodness-of-fit on F <sup>2</sup> | 1.101                                                                        |
| Final R indices [I > 2σ(I)]       | R1 = 0.0125, wR2 = 0.0280                                                    |
| R indices (all data)              | R1 = 0.0134, wR2 = 0.0283                                                    |
| Extinction coefficient            | n/a                                                                          |
| Largest diff. peak and hole       | 0.457 and -0.609 e.Å <sup>-3</sup>                                           |

Table S2. Atomic coordinates ( $\times 10^4$ ) and equivalent isotropic displacement parameters ( $\text{\AA}^2 \times 10^3$ ) for  $\text{Pr}(\text{OAc})_2\text{Cl} \cdot 3\text{H}_2\text{O}$ .  $U(\text{eq})$  is defined as one third of the trace of the orthogonalized  $U_{ij}$  tensor.

|        | x         | y        | z        | U (eq) |
|--------|-----------|----------|----------|--------|
| Pr (1) | 2642 (1)  | 4608 (1) | 5383 (1) | 9 (1)  |
| Cl (1) | 3844 (1)  | 9706 (1) | 6918 (1) | 16 (1) |
| O (11) | -132 (2)  | 3364 (2) | 5355 (1) | 15 (1) |
| O (12) | -2793 (2) | 2568 (2) | 5258 (1) | 17 (1) |
| C (11) | -1241 (2) | 2286 (2) | 5490 (1) | 12 (1) |
| C (12) | -699 (3)  | 703 (2)  | 5923 (1) | 21 (1) |
| O (21) | 5534 (2)  | 5625 (2) | 5749 (1) | 13 (1) |
| O (22) | 8226 (2)  | 6332 (2) | 5993 (1) | 15 (1) |
| C (21) | 6850 (2)  | 6017 (2) | 6232 (1) | 12 (1) |
| C (22) | 6732 (2)  | 6094 (3) | 7070 (1) | 19 (1) |
| O (1W) | 3954 (2)  | 1725 (2) | 5397 (1) | 14 (1) |
| O (2W) | 1687 (2)  | 6651 (2) | 6285 (1) | 16 (1) |
| O (3W) | 3003 (2)  | 3488 (2) | 6713 (1) | 18 (1) |

Table S3. Bond lengths [Å] and angles [deg] for Pr(OAc)2Cl\_x\_3H2O.

---

|                       |            |
|-----------------------|------------|
| Pr(1)-O(11)           | 2.404(1)   |
| Pr(1)-O(21)           | 2.422(1)   |
| Pr(1)-O(2W)           | 2.468(1)   |
| Pr(1)-O(3W)           | 2.482(1)   |
| Pr(1)-O(1W)           | 2.506(1)   |
| Pr(1)-O(12)#1         | 2.516(1)   |
| Pr(1)-O(22)#2         | 2.529(1)   |
| Pr(1)-O(21)#2         | 2.648(1)   |
| Pr(1)-O(11)#1         | 2.725(1)   |
| Pr(1)-Pr(1)#2         | 4.2173(2)  |
| Pr(1)-Pr(1)#1         | 4.2451(2)  |
| O(11)-C(11)           | 1.274(2)   |
| O(12)-C(11)           | 1.256(2)   |
| C(11)-C(12)           | 1.495(2)   |
| O(21)-C(21)           | 1.280(2)   |
| O(22)-C(21)           | 1.255(2)   |
| C(21)-C(22)           | 1.495(2)   |
| O(11)-Pr(1)-O(21)     | 165.41(4)  |
| O(11)-Pr(1)-O(2W)     | 84.84(4)   |
| O(21)-Pr(1)-O(2W)     | 89.08(4)   |
| O(11)-Pr(1)-O(3W)     | 81.06(4)   |
| O(21)-Pr(1)-O(3W)     | 84.37(4)   |
| O(2W)-Pr(1)-O(3W)     | 68.12(4)   |
| O(11)-Pr(1)-O(1W)     | 90.29(4)   |
| O(21)-Pr(1)-O(1W)     | 85.70(4)   |
| O(2W)-Pr(1)-O(1W)     | 139.36(4)  |
| O(3W)-Pr(1)-O(1W)     | 71.26(4)   |
| O(11)-Pr(1)-O(12)#1   | 117.49(4)  |
| O(21)-Pr(1)-O(12)#1   | 73.44(4)   |
| O(2W)-Pr(1)-O(12)#1   | 75.43(4)   |
| O(3W)-Pr(1)-O(12)#1   | 137.36(4)  |
| O(1W)-Pr(1)-O(12)#1   | 139.83(4)  |
| O(11)-Pr(1)-O(22)#2   | 75.38(4)   |
| O(21)-Pr(1)-O(22)#2   | 117.27(4)  |
| O(2W)-Pr(1)-O(22)#2   | 138.23(4)  |
| O(3W)-Pr(1)-O(22)#2   | 140.87(4)  |
| O(1W)-Pr(1)-O(22)#2   | 78.01(4)   |
| O(12)#1-Pr(1)-O(22)#2 | 81.66(4)   |
| O(11)-Pr(1)-O(21)#2   | 124.16(4)  |
| O(21)-Pr(1)-O(21)#2   | 67.51(4)   |
| O(2W)-Pr(1)-O(21)#2   | 142.16(4)  |
| O(3W)-Pr(1)-O(21)#2   | 133.71(4)  |
| O(1W)-Pr(1)-O(21)#2   | 70.68(4)   |
| O(12)#1-Pr(1)-O(21)#2 | 69.70(4)   |
| O(22)#2-Pr(1)-O(21)#2 | 49.87(4)   |
| O(11)-Pr(1)-O(11)#1   | 68.45(5)   |
| O(21)-Pr(1)-O(11)#1   | 121.52(4)  |
| O(2W)-Pr(1)-O(11)#1   | 69.33(4)   |
| O(3W)-Pr(1)-O(11)#1   | 129.05(4)  |
| O(1W)-Pr(1)-O(11)#1   | 144.32(4)  |
| O(12)#1-Pr(1)-O(11)#1 | 49.06(4)   |
| O(22)#2-Pr(1)-O(11)#1 | 69.24(4)   |
| O(21)#2-Pr(1)-O(11)#1 | 97.21(4)   |
| Pr(1)#2-Pr(1)-Pr(1)#1 | 139.267(5) |

|                         |           |
|-------------------------|-----------|
| C (11)-O (11)-Pr (1)    | 157.9 (1) |
| C (11)-O (11)-Pr (1) #1 | 90.6 (1)  |
| Pr (1)-O (11)-Pr (1) #1 | 111.6 (1) |
| C (11)-O (12)-Pr (1) #1 | 101.0 (1) |
| O (12)-C (11)-O (11)    | 119.4 (2) |
| O (12)-C (11)-C (12)    | 120.3 (2) |
| O (11)-C (11)-C (12)    | 120.3 (2) |
| C (21)-O (21)-Pr (1)    | 154.0 (1) |
| C (21)-O (21)-Pr (1) #2 | 92.0 (1)  |
| Pr (1)-O (21)-Pr (1) #2 | 112.5 (1) |
| C (21)-O (22)-Pr (1) #2 | 98.2 (1)  |
| O (22)-C (21)-O (21)    | 119.1 (2) |
| O (22)-C (21)-C (22)    | 121.1 (2) |
| O (21)-C (21)-C (22)    | 119.9 (2) |

---

Symmetry transformations used to generate equivalent atoms:  
 #1 -x,-y+1,-z+1      #2 -x+1,-y+1,-z+1

Table S4. Anisotropic displacement parameters ( $\text{\AA}^2 \times 10^3$ ) for Pr(OAc)<sub>2</sub>Cl·x·3H<sub>2</sub>O.

The anisotropic displacement factor exponent takes the form:  
 $-2 \pi^2 [ h^2 a^{*2} U_{11} + \dots + 2 h k a^* b^* U_{12} ]$

|       | U <sub>11</sub> | U <sub>22</sub> | U <sub>33</sub> | U <sub>23</sub> | U <sub>13</sub> | U <sub>12</sub> |
|-------|-----------------|-----------------|-----------------|-----------------|-----------------|-----------------|
| Pr(1) | 6(1)            | 10(1)           | 12(1)           | 1(1)            | 2(1)            | -1(1)           |
| Cl(1) | 17(1)           | 13(1)           | 17(1)           | 2(1)            | 2(1)            | -2(1)           |
| O(11) | 9(1)            | 16(1)           | 19(1)           | 2(1)            | 3(1)            | -3(1)           |
| O(12) | 8(1)            | 17(1)           | 26(1)           | 7(1)            | 3(1)            | -1(1)           |
| C(11) | 11(1)           | 14(1)           | 14(1)           | 0(1)            | 4(1)            | 0(1)            |
| C(12) | 20(1)           | 16(1)           | 27(1)           | 9(1)            | 1(1)            | 2(1)            |
| O(21) | 9(1)            | 16(1)           | 14(1)           | 0(1)            | 1(1)            | -2(1)           |
| O(22) | 9(1)            | 21(1)           | 16(1)           | -2(1)           | 1(1)            | -3(1)           |
| C(21) | 10(1)           | 11(1)           | 15(1)           | 1(1)            | 0(1)            | 1(1)            |
| C(22) | 14(1)           | 31(1)           | 13(1)           | -2(1)           | 1(1)            | 2(1)            |
| O(1W) | 11(1)           | 14(1)           | 18(1)           | 3(1)            | 5(1)            | 1(1)            |
| O(2W) | 11(1)           | 14(1)           | 21(1)           | -4(1)           | 2(1)            | 0(1)            |
| O(3W) | 25(1)           | 14(1)           | 16(1)           | 2(1)            | 7(1)            | 5(1)            |

Table S5. Hydrogen coordinates ( $\times 10^4$ ) and isotropic displacement parameters ( $\text{\AA}^2 \times 10^3$ ) for  $\text{Pr}(\text{OAc})_2\text{Cl}\cdot 3\text{H}_2\text{O}$ .

|        | x     | y    | z    | U (eq) |
|--------|-------|------|------|--------|
| H(12A) | -601  | 919  | 6475 | 28 (5) |
| H(12B) | 409   | 336  | 5802 | 28 (5) |
| H(12C) | -1549 | -184 | 5776 | 28 (5) |
| H(12D) | 412   | 753  | 6254 | 28 (5) |
| H(12E) | -1590 | 451  | 6234 | 28 (5) |
| H(12F) | -680  | -183 | 5536 | 28 (5) |
| H(22A) | 7867  | 5921 | 7369 | 46 (5) |
| H(22B) | 5958  | 5208 | 7196 | 46 (5) |
| H(22C) | 6294  | 7202 | 7193 | 46 (5) |
| H(11W) | 3943  | 935  | 5810 | 50 (6) |
| H(12W) | 5126  | 1782 | 5322 | 50 (6) |
| H(21W) | 507   | 6782 | 6336 | 53 (6) |
| H(22W) | 2223  | 7683 | 6481 | 53 (6) |
| H(31W) | 2483  | 3970 | 7120 | 53 (6) |
| H(32W) | 3182  | 2320 | 6850 | 53 (6) |

Table S6. Hydrogen bonds for Pr(OAc)<sub>2</sub>Cl\_x\_3H<sub>2</sub>O [Å and deg.].

| D-H...A                | d(D-H) | d(H...A) | d(D...A) | <(DHA) |
|------------------------|--------|----------|----------|--------|
| O(1W)-H(11W)...Cl(1)#3 | 0.96   | 2.19     | 3.134(1) | 165.6  |
| O(1W)-H(12W)...O(12)#4 | 0.96   | 1.78     | 2.713(2) | 161.9  |
| O(2W)-H(21W)...O(22)#5 | 0.96   | 1.85     | 2.725(2) | 150.1  |
| O(2W)-H(22W)...Cl(1)   | 0.96   | 2.12     | 3.070(1) | 169.2  |
| O(3W)-H(31W)...Cl(1)#6 | 0.96   | 2.21     | 3.163(1) | 171.7  |
| O(3W)-H(32W)...Cl(1)#3 | 0.96   | 2.13     | 3.075(1) | 166.6  |

Symmetry transformations used to generate equivalent atoms:

#1 -x,-y+1,-z+1      #2 -x+1,-y+1,-z+1      #3 x,y-1,z  
#4 x+1,y,z      #5 x-1,y,z      #6 -x+1/2,y-1/2,-z+3/2
