# Supplementary material
Source: MDPI journal article supplement (https://www.mdpi.com/2073-4352/13/7/1043)
Supplement: s1 [file s1 › 3 Nd Ha2019_58_0m_a.cif]

 
data_Ha2019_58_0m_a 
  
_audit_creation_method            'SHELXL-2014/7' 
_shelx_SHELXL_version_number      '2014/7' 
_chemical_name_systematic         ? 
_chemical_name_common             ? 
_chemical_melting_point           ? 
_chemical_formula_moiety          ? 
_chemical_formula_sum 
 'C4 H12 Cl Nd O7' 
_chemical_formula_weight          351.83 
  
loop_ 
 _atom_type_symbol 
 _atom_type_description 
 _atom_type_scat_dispersion_real 
 _atom_type_scat_dispersion_imag 
 _atom_type_scat_source 
 'C'  'C'   0.0033   0.0016 
 'International Tables Vol C Tables 4.2.6.8 and 6.1.1.4' 
 'H'  'H'   0.0000   0.0000 
 'International Tables Vol C Tables 4.2.6.8 and 6.1.1.4' 
 'O'  'O'   0.0106   0.0060 
 'International Tables Vol C Tables 4.2.6.8 and 6.1.1.4' 
 'Cl'  'Cl'   0.1484   0.1585 
 'International Tables Vol C Tables 4.2.6.8 and 6.1.1.4' 
 'Nd'  'Nd'  -0.1943   3.0179 
 'International Tables Vol C Tables 4.2.6.8 and 6.1.1.4' 
  
_space_group_crystal_system       monoclinic 
_space_group_IT_number            14 
_space_group_name_H-M_alt         'P 21/n' 
_space_group_name_Hall            '-P 2yn' 
  
_shelx_space_group_comment 
; 
The symmetry employed for this shelxl refinement is uniquely defined 
by the following loop, which should always be used as a source of 
symmetry information in preference to the above space-group names. 
They are only intended as comments. 
; 
  
loop_ 
 _space_group_symop_operation_xyz 
 'x, y, z' 
 '-x+1/2, y+1/2, -z+1/2' 
 '-x, -y, -z' 
 'x-1/2, -y-1/2, z-1/2' 
  
_cell_length_a                    7.9059(3) 
_cell_length_b                    7.9008(3) 
_cell_length_c                    17.5852(7) 
_cell_angle_alpha                 90 
_cell_angle_beta                  98.856(2) 
_cell_angle_gamma                 90 
_cell_volume                      1085.33(7) 
_cell_formula_units_Z             4 
_cell_measurement_temperature     100(2) 
_cell_measurement_reflns_used     9948 
_cell_measurement_theta_min       2.34 
_cell_measurement_theta_max       27.57 
  
_exptl_crystal_description        bloc 
_exptl_crystal_colour             colourless 
_exptl_crystal_density_meas       ? 
_exptl_crystal_density_method     ? 
_exptl_crystal_density_diffrn     2.153 
_exptl_crystal_F_000              676 
_exptl_transmission_factor_min    ? 
_exptl_transmission_factor_max    ? 
_exptl_crystal_size_max           0.151 
_exptl_crystal_size_mid           0.144 
_exptl_crystal_size_min           0.063 
_exptl_absorpt_coefficient_mu     5.034 
_shelx_estimated_absorpt_T_min    0.517 
_shelx_estimated_absorpt_T_max    0.742 
_exptl_absorpt_correction_type    multi-scan 
_exptl_absorpt_correction_T_min   0.489 
_exptl_absorpt_correction_T_max   0.762 
_exptl_absorpt_process_details    'Bruker SADABS' 
_exptl_absorpt_special_details    ? 
_diffrn_ambient_temperature       100(2) 
_diffrn_radiation_wavelength      0.71073 
_diffrn_radiation_type            MoK\a 
_diffrn_source                    ? 
_diffrn_measurement_device_type   'Bruker APEX-II CCD' 
_diffrn_measurement_method        '\f and \w scans' 
_diffrn_detector_area_resol_mean  ? 
_diffrn_reflns_number             122829 
_diffrn_reflns_av_unetI/netI      0.0123 
_diffrn_reflns_av_R_equivalents   0.0566 
_diffrn_reflns_limit_h_min        -10 
_diffrn_reflns_limit_h_max        10 
_diffrn_reflns_limit_k_min        -10 
_diffrn_reflns_limit_k_max        10 
_diffrn_reflns_limit_l_min        -23 
_diffrn_reflns_limit_l_max        23 
_diffrn_reflns_theta_min          2.689 
_diffrn_reflns_theta_max          27.999 
_diffrn_reflns_theta_full         25.242 
_diffrn_measured_fraction_theta_max   1.000 
_diffrn_measured_fraction_theta_full  0.999 
_diffrn_reflns_Laue_measured_fraction_max    1.000 
_diffrn_reflns_Laue_measured_fraction_full   0.999 
_diffrn_reflns_point_group_measured_fraction_max   1.000 
_diffrn_reflns_point_group_measured_fraction_full  0.999 
_reflns_number_total              2621 
_reflns_number_gt                 2443 
_reflns_threshold_expression      'I > 2\s(I)' 
_reflns_Friedel_coverage          0.000 
_reflns_Friedel_fraction_max      . 
_reflns_Friedel_fraction_full     . 
  
_reflns_special_details 
; 
 Reflections were merged by SHELXL according to the crystal 
 class for the calculation of statistics and refinement. 
  
 _reflns_Friedel_fraction is defined as the number of unique 
 Friedel pairs measured divided by the number that would be 
 possible theoretically, ignoring centric projections and 
 systematic absences. 
; 
  
_computing_data_collection        'Bruker APEX2' 
_computing_cell_refinement        'Bruker SAINT' 
_computing_data_reduction         'Bruker SAINT' 
_computing_structure_solution     'SHELXS-97 (Sheldrick 2008)' 
_computing_structure_refinement 'SHELXL-2014/7 (Sheldrick, 2014)' 
_computing_molecular_graphics     'Bruker SHELXTL' 
_computing_publication_material   'Bruker SHELXTL' 
_refine_special_details           ? 
_refine_ls_structure_factor_coef  Fsqd 
_refine_ls_matrix_type            full 
_refine_ls_weighting_scheme       calc 
_refine_ls_weighting_details 
'w=1/[\s^2^(Fo^2^)+(0.0098P)^2^+0.9781P] where P=(Fo^2^+2Fc^2^)/3' 
_atom_sites_solution_primary      direct 
_atom_sites_solution_secondary    ? 
_atom_sites_solution_hydrogens    mixed 
_refine_ls_hydrogen_treatment     constr
_refine_ls_extinction_method      none 
_refine_ls_extinction_coef        . 
_refine_ls_number_reflns          2621 
_refine_ls_number_parameters      125 
_refine_ls_number_restraints      0 
_refine_ls_R_factor_all           0.0142 
_refine_ls_R_factor_gt            0.0122 
_refine_ls_wR_factor_ref          0.0275 
_refine_ls_wR_factor_gt           0.0270 
_refine_ls_goodness_of_fit_ref    1.064 
_refine_ls_restrained_S_all       1.064 
_refine_ls_shift/su_max           0.001 
_refine_ls_shift/su_mean          0.000 
  
loop_ 
 _atom_site_label 
 _atom_site_type_symbol 
 _atom_site_fract_x 
 _atom_site_fract_y 
 _atom_site_fract_z 
 _atom_site_U_iso_or_equiv 
 _atom_site_adp_type 
 _atom_site_occupancy 
 _atom_site_site_symmetry_order 
 _atom_site_calc_flag 
 _atom_site_refinement_flags_posn 
 _atom_site_refinement_flags_adp 
 _atom_site_refinement_flags_occupancy 
 _atom_site_disorder_assembly 
 _atom_site_disorder_group 
Nd1 Nd 0.26386(2) 0.46142(2) 0.53780(2) 0.00925(3) Uani 1 1 d . . . . . 
Cl1 Cl 0.38459(6) 0.97149(6) 0.69153(2) 0.01594(9) Uani 1 1 d . . . . . 
O11 O -0.01281(15) 0.33787(16) 0.53529(7) 0.0144(3) Uani 1 1 d . . . . . 
O12 O -0.27984(15) 0.25748(17) 0.52569(7) 0.0166(3) Uani 1 1 d . . . . . 
C11 C -0.1237(2) 0.2291(2) 0.54896(10) 0.0127(3) Uani 1 1 d . . . . . 
C12 C -0.0698(3) 0.0710(2) 0.59204(12) 0.0214(4) Uani 1 1 d . . . . . 
H12A H -0.0599 0.0924 0.6474 0.027(5) Uiso 0.64(2) 1 d R U P . . 
H12B H 0.0412 0.0341 0.5798 0.027(5) Uiso 0.64(2) 1 d R U P . . 
H12C H -0.1553 -0.0176 0.5772 0.027(5) Uiso 0.64(2) 1 d R U P . . 
H12D H 0.0417 0.0813 0.6249 0.027(5) Uiso 0.36(2) 1 d R U P . . 
H12E H -0.1570 0.0403 0.6236 0.027(5) Uiso 0.36(2) 1 d R U P . . 
H12F H -0.0639 -0.0167 0.5531 0.027(5) Uiso 0.36(2) 1 d R U P . . 
O21 O 0.55213(15) 0.56193(16) 0.57447(7) 0.0126(2) Uani 1 1 d . . . . . 
O22 O 0.82229(15) 0.63247(17) 0.59905(7) 0.0154(3) Uani 1 1 d . . . . . 
C21 C 0.6840(2) 0.6014(2) 0.62313(10) 0.0122(3) Uani 1 1 d . . . . . 
C22 C 0.6715(2) 0.6089(3) 0.70690(10) 0.0196(4) Uani 1 1 d . . . . . 
H22A H 0.7855 0.5933 0.7370 0.049(5) Uiso 1 1 calc R U . . . 
H22B H 0.5951 0.5190 0.7196 0.049(5) Uiso 1 1 calc R U . . . 
H22C H 0.6257 0.7192 0.7191 0.049(5) Uiso 1 1 calc R U . . . 
O1W O 0.39323(15) 0.17429(16) 0.53904(7) 0.0141(3) Uani 1 1 d . . . . . 
H11W H 0.3920 0.0933 0.5796 0.044(5) Uiso 1 1 d R U . . . 
H12W H 0.5098 0.1769 0.5299 0.044(5) Uiso 1 1 d R U . . . 
O2W O 0.16973(15) 0.66475(16) 0.62795(7) 0.0154(3) Uani 1 1 d . . . . . 
H21W H 0.0521 0.6768 0.6347 0.051(6) Uiso 1 1 d R U . . . 
H22W H 0.2246 0.7664 0.6490 0.051(6) Uiso 1 1 d R U . . . 
O3W O 0.29936(17) 0.34973(17) 0.67028(7) 0.0179(3) Uani 1 1 d . . . . . 
H31W H 0.2446 0.3990 0.7100 0.051(6) Uiso 1 1 d R U . . . 
H32W H 0.3159 0.2329 0.6845 0.051(6) Uiso 1 1 d R U . . . 
  
loop_ 
 _atom_site_aniso_label 
 _atom_site_aniso_U_11 
 _atom_site_aniso_U_22 
 _atom_site_aniso_U_33 
 _atom_site_aniso_U_23 
 _atom_site_aniso_U_13 
 _atom_site_aniso_U_12 
Nd1 0.00598(4) 0.01033(5) 0.01149(5) 0.00076(4) 0.00153(3) -0.00069(4) 
Cl1 0.0173(2) 0.0132(2) 0.0170(2) 0.00179(17) 0.00174(16) -0.00173(17) 
O11 0.0101(6) 0.0151(6) 0.0183(6) 0.0023(5) 0.0032(5) -0.0024(5) 
O12 0.0084(6) 0.0164(7) 0.0253(7) 0.0051(5) 0.0030(5) -0.0008(5) 
C11 0.0117(8) 0.0137(9) 0.0131(8) -0.0004(7) 0.0037(6) -0.0003(7) 
C12 0.0193(9) 0.0172(10) 0.0271(10) 0.0081(8) 0.0013(8) 0.0005(8) 
O21 0.0088(5) 0.0165(7) 0.0119(6) -0.0003(5) 0.0001(4) -0.0016(5) 
O22 0.0092(6) 0.0206(7) 0.0162(6) -0.0015(5) 0.0017(5) -0.0028(5) 
C21 0.0111(8) 0.0094(8) 0.0154(8) 0.0003(7) 0.0000(6) 0.0021(7) 
C22 0.0156(9) 0.0299(11) 0.0129(8) -0.0003(8) 0.0006(7) 0.0021(8) 
O1W 0.0118(6) 0.0130(6) 0.0183(6) 0.0023(5) 0.0052(5) 0.0008(5) 
O2W 0.0114(6) 0.0141(6) 0.0205(7) -0.0039(5) 0.0023(5) -0.0003(5) 
O3W 0.0251(7) 0.0150(7) 0.0150(6) 0.0031(5) 0.0073(5) 0.0049(6) 
  
_geom_special_details 
; 
 All esds (except the esd in the dihedral angle between two l.s. planes) 
 are estimated using the full covariance matrix.  The cell esds are taken 
 into account individually in the estimation of esds in distances, angles 
 and torsion angles; correlations between esds in cell parameters are only 
 used when they are defined by crystal symmetry.  An approximate (isotropic) 
 treatment of cell esds is used for estimating esds involving l.s. planes. 
; 
  
loop_ 
 _geom_bond_atom_site_label_1 
 _geom_bond_atom_site_label_2 
 _geom_bond_distance 
 _geom_bond_site_symmetry_2 
 _geom_bond_publ_flag 
Nd1 O11 2.3895(12) . ? 
Nd1 O21 2.4058(12) . ? 
Nd1 O2W 2.4517(12) . ? 
Nd1 O3W 2.4665(12) . ? 
Nd1 O1W 2.4872(12) . ? 
Nd1 O12 2.4976(13) 3_566 ? 
Nd1 O22 2.5100(12) 3_666 ? 
Nd1 O21 2.6330(12) 3_666 ? 
Nd1 O11 2.7056(12) 3_566 ? 
O11 C11 1.276(2) . ? 
O12 C11 1.259(2) . ? 
C11 C12 1.489(3) . ? 
C12 H12A 0.9800 . ? 
C12 H12B 0.9800 . ? 
C12 H12C 0.9800 . ? 
C12 H12D 0.9800 . ? 
C12 H12E 0.9800 . ? 
C12 H12F 0.9800 . ? 
O21 C21 1.281(2) . ? 
O22 C21 1.256(2) . ? 
C21 C22 1.493(2) . ? 
C22 H22A 0.9800 . ? 
C22 H22B 0.9800 . ? 
C22 H22C 0.9800 . ? 
O1W H11W 0.9600 . ? 
O1W H12W 0.9600 . ? 
O2W H21W 0.9600 . ? 
O2W H22W 0.9600 . ? 
O3W H31W 0.9600 . ? 
O3W H32W 0.9600 . ? 
  
loop_ 
 _geom_angle_atom_site_label_1 
 _geom_angle_atom_site_label_2 
 _geom_angle_atom_site_label_3 
 _geom_angle 
 _geom_angle_site_symmetry_1 
 _geom_angle_site_symmetry_3 
 _geom_angle_publ_flag 
O11 Nd1 O21 165.12(4) . . ? 
O11 Nd1 O2W 84.92(4) . . ? 
O21 Nd1 O2W 88.84(4) . . ? 
O11 Nd1 O3W 80.91(4) . . ? 
O21 Nd1 O3W 84.23(4) . . ? 
O2W Nd1 O3W 68.00(4) . . ? 
O11 Nd1 O1W 90.09(4) . . ? 
O21 Nd1 O1W 85.84(4) . . ? 
O2W Nd1 O1W 139.23(4) . . ? 
O3W Nd1 O1W 71.25(4) . . ? 
O11 Nd1 O12 117.66(4) . 3_566 ? 
O21 Nd1 O12 73.46(4) . 3_566 ? 
O2W Nd1 O12 75.39(4) . 3_566 ? 
O3W Nd1 O12 137.23(4) . 3_566 ? 
O1W Nd1 O12 139.99(4) . 3_566 ? 
O11 Nd1 O22 75.47(4) . 3_666 ? 
O21 Nd1 O22 117.42(4) . 3_666 ? 
O2W Nd1 O22 138.50(4) . 3_666 ? 
O3W Nd1 O22 140.75(4) . 3_666 ? 
O1W Nd1 O22 77.84(4) . 3_666 ? 
O12 Nd1 O22 81.90(4) 3_566 3_666 ? 
O11 Nd1 O21 124.57(4) . 3_666 ? 
O21 Nd1 O21 67.30(5) . 3_666 ? 
O2W Nd1 O21 142.05(4) . 3_666 ? 
O3W Nd1 O21 133.43(4) . 3_666 ? 
O1W Nd1 O21 70.66(4) . 3_666 ? 
O12 Nd1 O21 69.84(4) 3_566 3_666 ? 
O22 Nd1 O21 50.22(4) 3_666 3_666 ? 
O11 Nd1 O11 68.17(5) . 3_566 ? 
O21 Nd1 O11 121.95(4) . 3_566 ? 
O2W Nd1 O11 69.49(4) . 3_566 ? 
O3W Nd1 O11 128.82(4) . 3_566 ? 
O1W Nd1 O11 144.03(4) . 3_566 ? 
O12 Nd1 O11 49.49(4) 3_566 3_566 ? 
O22 Nd1 O11 69.32(4) 3_666 3_566 ? 
O21 Nd1 O11 97.73(4) 3_666 3_566 ? 
Nd1 Nd1 Nd1 139.761(5) 3_666 3_566 ? 
C11 O11 Nd1 157.63(12) . . ? 
C11 O11 Nd1 90.52(10) . 3_566 ? 
Nd1 O11 Nd1 111.83(5) . 3_566 ? 
C11 O12 Nd1 100.88(11) . 3_566 ? 
O12 C11 O11 119.11(16) . . ? 
O12 C11 C12 120.25(16) . . ? 
O11 C11 C12 120.64(16) . . ? 
C11 C12 H12A 109.5 . . ? 
C11 C12 H12B 109.5 . . ? 
H12A C12 H12B 109.5 . . ? 
C11 C12 H12C 109.4 . . ? 
H12A C12 H12C 109.5 . . ? 
H12B C12 H12C 109.5 . . ? 
C11 C12 H12D 113.0 . . ? 
C11 C12 H12E 108.9 . . ? 
H12D C12 H12E 109.5 . . ? 
C11 C12 H12F 106.2 . . ? 
H12D C12 H12F 109.5 . . ? 
H12E C12 H12F 109.5 . . ? 
C21 O21 Nd1 154.07(11) . . ? 
C21 O21 Nd1 91.77(10) . 3_666 ? 
Nd1 O21 Nd1 112.70(4) . 3_666 ? 
C21 O22 Nd1 98.27(10) . 3_666 ? 
O22 C21 O21 118.92(16) . . ? 
O22 C21 C22 121.24(15) . . ? 
O21 C21 C22 119.85(15) . . ? 
C21 C22 H22A 109.5 . . ? 
C21 C22 H22B 109.5 . . ? 
H22A C22 H22B 109.5 . . ? 
C21 C22 H22C 109.5 . . ? 
H22A C22 H22C 109.5 . . ? 
H22B C22 H22C 109.5 . . ? 
Nd1 O1W H11W 124.3 . . ? 
Nd1 O1W H12W 112.5 . . ? 
H11W O1W H12W 105.0 . . ? 
Nd1 O2W H21W 122.7 . . ? 
Nd1 O2W H22W 129.3 . . ? 
H21W O2W H22W 105.0 . . ? 
Nd1 O3W H31W 123.0 . . ? 
Nd1 O3W H32W 125.5 . . ? 
H31W O3W H32W 105.0 . . ? 
  
loop_ 
 _geom_hbond_atom_site_label_D 
 _geom_hbond_atom_site_label_H 
 _geom_hbond_atom_site_label_A 
 _geom_hbond_distance_DH 
 _geom_hbond_distance_HA 
 _geom_hbond_distance_DA 
 _geom_hbond_angle_DHA 
 _geom_hbond_site_symmetry_A 
O1W H11W Cl1  0.96 2.20 3.1335(13) 164.1 1_545 
O1W H12W O12  0.96 1.79 2.7120(17) 159.3 1_655 
O2W H21W O22  0.96 1.86 2.7274(17) 148.6 1_455 
O2W H22W Cl1  0.96 2.12 3.0699(13) 170.3 . 
O3W H31W Cl1  0.96 2.22 3.1677(13) 171.0 2_546 
O3W H32W Cl1  0.96 2.13 3.0736(14) 165.6 1_545 
  
_refine_diff_density_max    0.387 
_refine_diff_density_min   -0.358 
_refine_diff_density_rms    0.069 
  
_shelx_res_file 
; 
  
    Ha2019_58_0m_a.res created by SHELXL-2014/7 
  
  
TITL Ha2019_58_0m_a.res in P2(1)/n 
CELL  0.71073   7.9059   7.9008  17.5852   90.000   98.856   90.000 
ZERR    4.000   0.0003   0.0003   0.0007    0.000    0.002    0.000 
LATT 1 
SYMM 1/2-X, 1/2+Y, 1/2-Z 
SFAC C  H  O  Cl Nd 
UNIT 16 48 28 4 4 
LIST 4 ! automatically inserted. Change 6 to 4 for CHECKCIF!! 
OMIT 0 0 2 
OMIT -3 56 
L.S. 10 
ACTA 
BOND $H 
FMAP 2 
PLAN 5 
SIZE  0.063  0.144 0.151 
rem DFIX 0.96  0.0001 O1w H11w O1w H12w O2w H21w O2w H22w O3w H31w O3w H32w 
rem dfix 1.523  0.0001 H11w H12w H21w H22w H31w H32w 
FREE Nd1 C21_$6 
FREE Nd1 C11_$7 
EQIV $6 1-x, 1-y, 1-z 
BIND Nd1 Nd1_$6 
BIND Nd1 Nd1_$7 
EQIV $7 -x,1-y,1-z 
BIND Nd1 O11_$7 
HTAB 
EQIV $1 -x+3/2, y-1/2, -z+3/2 
EQIV $2 x, y-1, z 
HTAB O1W Cl1_$2 
EQIV $3 x+1, y, z 
HTAB O1W O12_$3 
EQIV $4 x-1, y, z 
HTAB O2W O22_$4 
HTAB O2W Cl1 
EQIV $5 -x+1/2, y-1/2, -z+3/2 
HTAB O3W Cl1_$5 
HTAB O3W Cl1_$2 
SIZE 0.063  0.144  0.151 
rem dfix 0.98  0.0001 C12 H12D C12 H12E C12 H12F 
rem dfix 1.601 0.0001 H12D H12E H12D H12F H12E H12F 
FMAP 2 
PLAN 8 
TEMP -173 
WGHT    0.009800    0.978100 
FVAR       0.34568   0.02670   0.04925   0.04420   0.05063   0.05055   0.64143 
ND1   5    0.263856    0.461424    0.537798    11.00000    0.00598    0.01033 = 
         0.01149    0.00076    0.00153   -0.00069 
CL1   4    0.384591    0.971487    0.691528    11.00000    0.01735    0.01319 = 
         0.01701    0.00179    0.00174   -0.00173 
O11   3   -0.012811    0.337867    0.535290    11.00000    0.01007    0.01505 = 
         0.01834    0.00228    0.00319   -0.00245 
O12   3   -0.279837    0.257483    0.525693    11.00000    0.00836    0.01643 = 
         0.02527    0.00505    0.00304   -0.00080 
C11   1   -0.123678    0.229144    0.548963    11.00000    0.01173    0.01371 = 
         0.01313   -0.00041    0.00366   -0.00025 
C12   1   -0.069796    0.070983    0.592044    11.00000    0.01925    0.01716 = 
         0.02710    0.00807    0.00132    0.00052 
AFIX   3 
H12A  2   -0.059942    0.092353    0.647447    71.00000   21.00000 
H12B  2    0.041226    0.034053    0.579776    71.00000   21.00000 
H12C  2   -0.155296   -0.017600    0.577229    71.00000   21.00000 
  
H12D  2    0.041721    0.081252    0.624871   -71.00000   21.00000 
H12E  2   -0.157017    0.040291    0.623615   -71.00000   21.00000 
H12F  2   -0.063852   -0.016677    0.553116   -71.00000   21.00000 
AFIX   0 
O21   3    0.552130    0.561931    0.574472    11.00000    0.00884    0.01647 = 
         0.01193   -0.00027    0.00010   -0.00156 
O22   3    0.822287    0.632469    0.599048    11.00000    0.00915    0.02062 = 
         0.01624   -0.00151    0.00173   -0.00278 
C21   1    0.684028    0.601450    0.623126    11.00000    0.01112    0.00935 = 
         0.01538    0.00030    0.00003    0.00213 
C22   1    0.671503    0.608867    0.706902    11.00000    0.01557    0.02985 = 
         0.01289   -0.00031    0.00056    0.00206 
AFIX 137 
H22A  2    0.785463    0.593332    0.737023    11.00000   31.00000 
H22B  2    0.595143    0.518968    0.719608    11.00000   31.00000 
H22C  2    0.625682    0.719171    0.719072    11.00000   31.00000 
AFIX   0 
O1W   3    0.393228    0.174290    0.539042    11.00000    0.01178    0.01299 = 
         0.01832    0.00230    0.00521    0.00084 
AFIX   3 
H11W  2    0.392042    0.093261    0.579634    11.00000   41.00000 
H12W  2    0.509823    0.176902    0.529899    11.00000   41.00000 
AFIX   0 
O2W   3    0.169730    0.664746    0.627946    11.00000    0.01141    0.01411 = 
         0.02049   -0.00389    0.00234   -0.00030 
AFIX   3 
H21W  2    0.052104    0.676784    0.634661    11.00000   51.00000 
H22W  2    0.224610    0.766444    0.649014    11.00000   51.00000 
AFIX   0 
O3W   3    0.299361    0.349733    0.670280    11.00000    0.02513    0.01502 = 
         0.01498    0.00307    0.00731    0.00485 
AFIX   3 
H31W  2    0.244565    0.399004    0.710049    11.00000   61.00000 
H32W  2    0.315869    0.232907    0.684514    11.00000   61.00000 
AFIX   0 
HKLF 4 
  
REM  Ha2019_58_0m_a.res in P2(1)/n 
REM R1 =  0.0122 for    2443 Fo > 4sig(Fo)  and  0.0142 for all    2621 data 
REM    125 parameters refined using      0 restraints 
  
END 
  
WGHT      0.0098      0.9781 
  
REM Instructions for potential hydrogen bonds 
HTAB C12 Cl1_$2 
HTAB C22 Cl1_$1 
HTAB C22 Cl1 
HTAB O1W Cl1_$2 
HTAB O1W O12_$3 
HTAB O2W O22_$4 
HTAB O2W Cl1 
HTAB O3W Cl1_$5 
HTAB O3W Cl1_$2 
  
REM Highest difference peak  0.387,  deepest hole -0.358,  1-sigma level  0.069 
Q1    1   0.2474  0.3756  0.6896  11.00000  0.05    0.39 
Q2    1   0.3826  0.1247  0.5646  11.00000  0.05    0.34 
Q3    1   0.6759  0.5836  0.6666  11.00000  0.05    0.34 
Q4    1   0.4548  0.1543  0.5305  11.00000  0.05    0.30 
Q5    1   0.0862  0.6509  0.6280  11.00000  0.05    0.28 
Q6    1   0.2038  0.7241  0.6346  11.00000  0.05    0.28 
Q7    1   0.3268  0.1331  0.5134  11.00000  0.05    0.27 
Q8    1   0.4716  0.5381  0.5856  11.00000  0.05    0.27 
; 
_shelx_res_checksum   85935 
  
_shelx_hkl_file 
; 
  -1   0   0    4.80    1.90 
  -1   0   0    0.30    1.00 
  -1   0   0   -0.20    1.20 
  -1   0   0    1.10    1.10 
  -1   0   0    1.30    1.10 
  -1   0   0    0.80    1.30 
  -1   0   0   -0.40    0.90 
  -1   0   0   -0.70    0.90 
  -1   0   0   -0.60    1.00 
  -1   0   0   -0.70    0.80 
  -1   0   0   -0.90    1.00 
   1   0   0    0.60    1.20 
   1   0   0    7.70    2.40 
   1   0   0    5.70    1.60 
   1   0   0    1.00    1.40 
   1   0   0    2.80    2.60 
   1   0   0    5.30    1.10 
   1   0   0    5.00    2.10 
   1   0   0    1.90    1.60 
   1   0   0    5.10    2.20 
   1   0   0    8.30    1.30 
   1   0   0   -0.90    0.80 
   1   0   0    1.10    1.50 
   1   0   0    7.90    2.40 
   1   0   0    4.30    1.80 
   1   0   0    3.30    1.70 
   1   0   0    1.20    1.20 
   1   0   0    0.30    1.60 
   1   0   0    4.10    1.70 
   1   0   0    7.70    2.30 
   1   0   0    2.20    1.70 
   1   0   0    3.70    1.10 
   1   0   0    1.60    1.50 
   1   0   0    4.80    1.10 
   1   0   0    3.60    1.70 
   1   0   0    7.40    2.30 
   1   0   0    4.20    1.70 
   1   0   0   12.50    2.70 
   1   0   0    7.20    1.70 
   1   0   0    1.80    1.70 
   1   0   0    1.30    1.10 
   1   0   0    2.50    1.40 
   1   0   0   -0.60    1.20 
  -1   0   0    2.00    1.60 
  -1   0   0    0.60    1.20 
   2   0   0 6967.30  243.88 
   2   0   0 7007.90  240.38 
  -2   0   0 6867.31  245.08 
   2   0   0 6931.91  245.78 
   2   0   0 6798.32  237.68 
   2   0   0 6932.91  245.28 
   2   0   0 6708.13  244.78 
   2   0   0 6853.51  243.78 
   2   0   0 6648.13  244.78 
   2   0   0 6739.33  238.58 
   2   0   0 6568.64  237.88 
   2   0   0 6870.91  244.68 
   2   0   0 6680.03  243.98 
   2   0   0 6815.02  243.58 
   2   0   0 6730.13  237.18 
   2   0   0 6658.73  242.58 
   2   0   0 6706.43  242.98 
   2   0   0 6698.73  244.08 
   2   0   0 6798.32  243.38 
   2   0   0 6547.54  243.18 
   2   0   0 6662.43  246.18 
   2   0   0 6783.52  244.28 
   2   0   0 6462.75  237.68 
   2   0   0 6949.10  243.48 
   2   0   0 6971.50  243.78 
   2   0   0 6782.72  242.18 
   2   0   0 6780.02  243.58 
   2   0   0 6795.92  237.28 
  -2   0   0 6795.62  245.28 
   2   0   0 6741.53  244.38 
   2   0   0 6182.68  246.78 
  -2   0   0 6638.74  238.68 
  -2   0   0 7065.19  245.08 
  -2   0   0 6764.52  237.78 
  -2   0   0 6795.52  243.48 
  -2   0   0 6783.62  243.88 
  -2   0   0 6940.71  242.28 
  -2   0   0 6802.82  243.18 
  -2   0   0 6717.13  239.58 
  -2   0   0 6948.00  243.88 
  -2   0   0 7175.78  241.38 
   2   0   0 6890.01  239.48 
   2   0   0 6704.03  243.38 
   2   0   0 6601.04  240.88 
   2   0   0 6970.70  244.78 
  -2   0   0 6646.73  243.08 
  -2   0   0 6631.64  244.38 
  -2   0   0 6698.43  245.68 
  -2   0   0 6770.62  238.28 
  -2   0   0 6751.92  244.78 
  -2   0   0 6762.02  237.38 
  -2   0   0 6844.81  245.18 
  -2   0   0 6864.81  243.38 
  -2   0   0 6863.31  244.78 
  -2   0   0 6662.63  247.18 
  -2   0   0 6776.52  237.98 
  -2   0   0 6866.11  245.08 
  -2   0   0 6632.54  246.48 
  -2   0   0 6947.01  244.08 
  -2   0   0 6854.91  242.98 
  -2   0   0 6848.01  243.68 
   3   0   0    1.90    1.40 
   3   0   0    0.10    3.70 
   3   0   0    2.60    5.20 
   3   0   0    1.60    3.20 
   3   0   0    0.90    1.40 
   3   0   0    4.10    3.50 
   3   0   0    1.80    4.10 
   3   0   0   -1.60    3.00 
   3   0   0    3.40    5.00 
   3   0   0   -2.00    3.40 
   3   0   0    1.70    3.50 
   3   0   0    3.80    4.50 
   3   0   0    2.00    3.60 
   3   0   0   -3.30    2.80 
   3   0   0   -2.60    3.40 
  -3   0   0    5.20    5.10 
   3   0   0    0.40    1.70 
   3   0   0    1.70    4.00 
   3   0   0    6.10    5.40 
   3   0   0   -4.30    2.30 
   3   0   0   -0.60    4.70 
   3   0   0    3.40    2.00 
   3   0   0    3.70    4.30 
   3   0   0    1.40    3.80 
   3   0   0    8.60    5.60 
   3   0   0    1.60    2.40 
   3   0   0    3.80    6.50 
   3   0   0    4.90    4.50 
   3   0   0    0.00    3.60 
   3   0   0    6.40    3.60 
  -3   0   0   -3.60    3.70 
   3   0   0    4.80    4.30 
   3   0   0    5.40    3.00 
  -3   0   0    0.90    2.60 
  -3   0   0   -2.70    3.60 
  -3   0   0    5.60    3.70 
  -3   0   0    2.30    3.70 
  -3   0   0   -3.80    3.60 
  -3   0   0   -2.60    3.80 
  -3   0   0    0.40    1.60 
  -3   0   0    1.90    4.40 
  -3   0   0   -0.90    5.90 
  -3   0   0   -2.40    4.20 
  -3   0   0    4.60    4.60 
  -3   0   0   -3.10    4.70 
  -3   0   0    3.40    2.10 
  -3   0   0   -1.00    4.00 
  -3   0   0    0.90    4.20 
  -3   0   0    6.70    5.00 
  -3   0   0    3.80    3.80 
  -3   0   0   -2.80    3.50 
  -3   0   0    1.70    4.40 
  -3   0   0    0.50    3.10 
  -3   0   0    5.20    2.70 
  -3   0   0   -4.30    3.20 
  -3   0   0   -0.90    1.50 
  -3   0   0   -2.20    2.60 
   4   0   0 1767.42   77.89 
  -4   0   0 1681.63   79.19 
  -4   0   0 1881.91   80.19 
  -4   0   0 1822.72   66.49 
  -4   0   0 1781.72   80.59 
  -4   0   0 1734.13   80.49 
   4   0   0 1843.12   76.79 
   4   0   0 1728.43   74.59 
   4   0   0 1824.02   77.69 
   4   0   0 1784.12   69.19 
   4   0   0 1767.62   71.89 
  -4   0   0 1759.12   78.89 
  -4   0   0 1770.02   77.19 
  -4   0   0 1693.13   77.79 
  -4   0   0 1756.52   76.09 
  -4   0   0 1820.42   70.29 
  -4   0   0 1802.92   77.89 
  -4   0   0 1808.82   66.59 
  -4   0   0 1731.63   72.69 
  -4   0   0 1795.22   80.39 
   4   0   0 2118.89   77.29 
  -4   0   0 1866.11   80.29 
  -4   0   0 1797.42   76.39 
  -4   0   0 1770.12   76.79 
  -4   0   0 1730.53   82.39 
  -4   0   0 1762.72   68.29 
   4   0   0 1844.92   72.79 
   4   0   0 1804.82   73.79 
  -4   0   0 1830.02   84.49 
   4   0   0 1756.32   77.09 
   4   0   0 1742.23   65.79 
   4   0   0 1878.81   77.99 
   4   0   0 1759.82   77.79 
   4   0   0 1683.53   80.29 
   4   0   0 1746.43   67.09 
   4   0   0 1615.84   81.49 
   4   0   0 1739.73   79.19 
   4   0   0 1760.52   64.79 
  -5   0   0   -1.30    1.90 
   5   0   0   -3.60    5.30 
   5   0   0   -6.30    4.80 
  -5   0   0   -8.40    3.60 
   5   0   0    0.60    5.30 
  -5   0   0   -2.60    5.20 
  -5   0   0   -6.10    4.20 
  -5   0   0    1.30    5.00 
  -5   0   0    2.70    5.20 
  -5   0   0    0.00    2.40 
  -5   0   0   -0.70    2.80 
  -5   0   0    3.40    6.60 
  -5   0   0    4.70    5.80 
   5   0   0    2.00    2.80 
   5   0   0    0.50    3.00 
   5   0   0    2.50    2.00 
   5   0   0    2.70    5.80 
   5   0   0    2.00    4.80 
   5   0   0   -4.70    4.50 
   5   0   0    2.10    3.30 
   5   0   0   -4.80    4.50 
  -5   0   0   -6.40    4.10 
   5   0   0   -2.30    4.70 
   5   0   0    0.50    5.80 
   5   0   0    1.60    6.80 
   5   0   0    1.00    2.30 
  -5   0   0   -0.80    6.10 
  -5   0   0   -0.90    2.00 
  -5   0   0   -1.30    2.90 
  -5   0   0   -1.30    5.50 
  -5   0   0    5.90    6.50 
  -5   0   0   -3.10    5.90 
   5   0   0    3.80    5.90 
  -5   0   0    4.10    6.70 
  -5   0   0    4.40    8.20 
   5   0   0   -8.40    5.80 
   6   0   0 1404.16   75.49 
   6   0   0 1294.97   72.89 
   6   0   0 1401.86   67.19 
   6   0   0 1351.46   70.19 
   6   0   0 1363.36   70.69 
  -6   0   0 1488.05   77.19 
  -6   0   0 1378.46   73.69 
  -6   0   0 1409.96   82.39 
  -6   0   0 1465.25   75.39 
   6   0   0 1446.66   54.79 
  -6   0   0 1237.78   71.69 
  -6   0   0 1299.27   78.59 
   6   0   0 1280.87   70.49 
   6   0   0 1404.26   57.69 
   6   0   0 1388.26   55.89 
   6   0   0 1460.95   70.19 
  -6   0   0 1333.47   73.59 
   6   0   0 1475.45   72.49 
  -6   0   0 1494.85   70.49 
  -6   0   0 1355.46   69.59 
  -6   0   0 1347.77   77.69 
  -6   0   0 1408.06   55.69 
  -6   0   0 1520.35   75.19 
  -6   0   0 1406.16   72.79 
  -6   0   0 1375.06   71.09 
  -6   0   0 1517.05   66.19 
  -6   0   0 1508.85   76.29 
   6   0   0 1366.36   75.99 
   6   0   0 1563.04   72.99 
   6   0   0 1350.76   53.49 
   6   0   0 1505.55   77.29 
   7   0   0    3.60    7.10 
   7   0   0    3.00    8.50 
  -7   0   0   -0.10    9.40 
   7   0   0    6.40    7.20 
   7   0   0   11.40    9.30 
  -7   0   0   -1.50    5.20 
  -7   0   0   -5.60    7.70 
   7   0   0   -2.20    7.70 
   7   0   0   -7.10    6.70 
  -7   0   0    0.70    7.70 
  -7   0   0    0.80    7.50 
  -7   0   0    3.60    9.30 
  -7   0   0    1.60    8.00 
  -7   0   0    5.20   11.70 
  -7   0   0    9.40    9.80 
  -7   0   0  -12.10    6.70 
  -7   0   0    1.50    7.90 
   7   0   0    1.20    4.20 
   7   0   0  -12.40    6.40 
   7   0   0  -11.40    9.40 
  -7   0   0    5.20    8.20 
  -7   0   0   13.80   10.30 
   7   0   0   10.50   10.30 
  -7   0   0   -6.50    5.10 
  -7   0   0   11.30   10.70 
   7   0   0   -2.10    6.40 
   7   0   0  -10.20    4.80 
   7   0   0   14.10   10.30 
  -8   0   0  792.02   59.59 
  -8   0   0  894.11   68.69 
   8   0   0  798.22   61.39 
   8   0   0  888.71   55.79 
   8   0   0  866.41   58.69 
  -8   0   0  836.32   55.99 
  -8   0   0  883.81   66.19 
  -8   0   0  918.91   62.99 
  -8   0   0  886.31   60.99 
   8   0   0  845.12   60.89 
   8   0   0  834.62   52.19 
  -8   0   0  917.71   63.19 
  -8   0   0  748.33   60.39 
  -8   0   0  914.11   56.09 
  -8   0   0  967.60   70.79 
   8   0   0  863.61   61.49 
  -8   0   0  815.42   57.79 
   8   0   0  856.61   58.79 
   8   0   0  908.81   58.99 
   8   0   0  836.42   61.59 
   8   0   0  757.82   61.49 
   8   0   0  870.81   58.29 
   8   0   0  761.22   59.49 
  -8   0   0  991.00   63.39 
  -8   0   0  879.51   50.49 
  -8   0   0  904.81   58.49 
   8   0   0  915.21   58.89 
   9   0   0    5.30   11.30 
   9   0   0   -1.60   11.20 
   9   0   0   14.50   14.50 
  -9   0   0    6.40   11.70 
   9   0   0    7.80   10.90 
   9   0   0    9.00   11.40 
  -9   0   0   20.80   11.70 
   9   0   0    4.70   11.90 
  -9   0   0   -6.40   12.10 
   9   0   0    2.90   12.20 
   9   0   0    7.00   14.70 
   9   0   0   23.10   15.00 
  -9   0   0   -2.90    7.60 
   9   0   0    0.30    8.40 
  -9   0   0  -11.20    7.10 
  -9   0   0    3.90   12.80 
  -9   0   0   -1.80   11.00 
  -9   0   0    9.50   12.20 
   9   0   0    6.90   12.10 
  -9   0   0    1.50   11.60 
   9   0   0    9.10   13.50 
  -9   0   0   -3.50    8.60 
  -9   0   0   -1.70    9.30 
   9   0   0   11.70   11.20 
   9   0   0  -14.50    7.30 
  -9   0   0   -8.00   10.20 
  10   0   0  278.07   45.30 
 -10   0   0  180.28   34.70 
 -10   0   0  324.17   47.10 
 -10   0   0  253.07   37.60 
  10   0   0  237.98   40.80 
  10   0   0  287.27   42.40 
  10   0   0  206.28   40.80 
 -10   0   0  213.88   41.40 
 -10   0   0  368.06   52.69 
 -10   0   0  186.78   43.20 
 -10   0   0  171.88   37.30 
 -10   0   0  204.98   40.50 
  10   0   0  213.98   39.10 
  10   0   0  226.68   42.90 
 -10   0   0  266.97   43.90 
  10   0   0  211.98   39.20 
  10   0   0  253.37   42.90 
 -10   0   0  221.38   33.70 
  10   0   0  167.08   33.80 
  10   0   0  201.58   41.00 
  10   0   0  163.18   35.60 
   0  -1   0   -0.20    1.00 
   0  -1   0    0.30    1.80 
   0  -1   0   -0.40    0.70 
   0  -1   0    0.50    1.10 
   0  -1   0    2.40    1.60 
   0  -1   0   -0.20    1.10 
   0   1   0    0.60    1.20 
   0   1   0    9.90    3.50 
   0   1   0    4.40    2.40 
   0   1   0   -1.10    0.80 
   0   1   0    1.20    1.30 
   0   1   0    3.70    1.70 
   0   1   0    0.50    1.80 
   0   1   0    3.40    2.10 
   0   1   0    3.50    1.90 
   0   1   0   -0.30    1.30 
   0   1   0    4.20    2.10 
   0   1   0   -1.10    1.20 
   0   1   0    3.30    1.50 
   0   1   0    2.20    1.60 
   0   1   0    8.20    3.60 
   0   1   0    0.10    1.10 
   0   1   0    1.30    1.40 
   1  -1   0    0.60    3.00 
   1  -1   0    4.10    2.70 
   1  -1   0    2.60    2.60 
   1  -1   0    2.70    2.80 
   1  -1   0    7.80    4.10 
   1  -1   0    2.00    2.50 
  -1  -1   0    1.80    1.80 
   1  -1   0    1.20    2.70 
   1  -1   0    4.00    2.20 
   1  -1   0    2.60    2.60 
   1  -1   0    0.20    2.50 
   1  -1   0    3.70    2.10 
   1  -1   0   -1.90    1.60 
   1  -1   0    2.60    2.00 
   1  -1   0    0.60    2.60 
  -1  -1   0    2.40    2.10 
  -1  -1   0    0.20    1.50 
   1  -1   0    5.60    3.40 
   1  -1   0   -4.10    1.60 
   1  -1   0    9.20    4.90 
  -1  -1   0    1.40    1.60 
   1  -1   0    3.00    2.60 
   1  -1   0    1.50    2.70 
   1  -1   0    6.70    3.30 
   1  -1   0    7.90    3.60 
  -1  -1   0    4.50    3.10 
   1  -1   0    3.40    3.40 
  -1  -1   0   -0.70    2.20 
   1  -1   0   -0.70    2.80 
   1  -1   0    0.90    2.60 
   1  -1   0    0.20    1.80 
   1  -1   0   -3.70    1.90 
  -1  -1   0    1.40    2.10 
  -1  -1   0    1.90    2.10 
  -1  -1   0    2.30    1.70 
  -1  -1   0    3.30    1.80 
   1  -1   0    2.80    2.90 
   1  -1   0    1.80    2.00 
   1  -1   0    0.20    2.80 
  -1   1   0    3.80    3.30 
   1   1   0    4.80    3.40 
   1   1   0    0.80    2.10 
   1   1   0    5.20    3.60 
   1   1   0    2.30    3.20 
  -1   1   0    4.40    2.90 
   1   1   0    3.20    2.00 
   1   1   0    0.80    3.10 
  -1   1   0    7.30    4.00 
   1   1   0    0.40    2.10 
  -1   1   0    2.90    2.70 
   1   1   0   -0.60    1.80 
   1   1   0    3.60    1.50 
  -1   1   0    1.80    1.80 
  -1   1   0   -0.40    1.80 
  -1   1   0    6.20    3.10 
  -1   1   0    2.90    3.00 
  -1   1   0   -1.30    2.10 
   1   1   0    3.90    2.90 
   1   1   0    3.40    3.20 
   1   1   0    5.50    3.50 
   1   1   0    3.10    2.50 
   1   1   0    1.30    1.70 
   1   1   0    0.50    2.70 
   1   1   0    2.80    3.20 
   1   1   0   -1.40    2.10 
  -1   1   0    0.80    2.60 
   1   1   0    4.90    1.80 
  -1   1   0    0.80    2.70 
  -1   1   0    1.20    2.60 
  -1   1   0    1.90    2.90 
  -1   1   0    3.70    3.20 
  -1   1   0    4.90    3.20 
  -1   1   0    3.80    3.00 
   1   1   0    2.80    2.30 
  -1   1   0    4.70    3.20 
  -1   1   0   -1.80    1.90 
   1   1   0    2.40    1.80 
   1   1   0   -0.10    2.60 
  -1   1   0    2.20    2.20 
  -1   1   0   -2.80    1.20 
  -1   1   0    4.70    3.40 
  -1   1   0   -0.80    2.50 
  -1   1   0   -1.20    3.30 
   1   1   0    2.90    2.00 
   1   1   0   -2.80    2.60 
   1   1   0    2.10    2.40 
  -1   1   0    1.70    2.40 
  -1   1   0    5.40    2.80 
   1   1   0    0.40    2.00 
  -1   1   0    1.80    2.20 
   1   1   0    0.40    1.80 
  -1   1   0    0.60    1.50 
   2  -1   0  924.21   38.90 
   2  -1   0  851.41   36.60 
   2  -1   0  822.72   39.10 
   2  -1   0  849.02   34.70 
   2  -1   0  850.31   39.50 
   2  -1   0  873.01   37.30 
   2  -1   0  885.91   41.00 
   2  -1   0  782.82   38.70 
  -2  -1   0  886.41   41.40 
  -2  -1   0  950.40   40.90 
  -2  -1   0  848.92   39.90 
  -2  -1   0  888.31   40.50 
  -2  -1   0  875.11   35.10 
  -2  -1   0  833.32   37.60 
  -2  -1   0  941.61   37.80 
  -2  -1   0  848.92   37.10 
  -2  -1   0  856.31   41.20 
  -2  -1   0  892.11   32.80 
   2  -1   0  872.61   40.30 
   2  -1   0  914.31   40.60 
   2  -1   0  798.52   40.60 
  -2  -1   0  851.31   38.00 
  -2  -1   0  908.71   39.80 
   2  -1   0  891.21   38.60 
   2  -1   0  861.11   46.10 
   2  -1   0  901.21   40.80 
  -2  -1   0  841.22   40.30 
  -2  -1   0  910.01   40.50 
  -2  -1   0  891.61   40.10 
   2  -1   0  850.41   38.60 
   2  -1   0  957.50   41.30 
   2  -1   0  881.71   39.70 
   2  -1   0  913.11   37.90 
  -2  -1   0  942.61   39.60 
   2  -1   0  860.91   36.80 
  -2  -1   0  915.81   40.20 
  -2  -1   0  866.11   39.90 
  -2  -1   0  825.92   38.20 
   2  -1   0  848.62   39.70 
   2  -1   0  944.91   40.40 
  -2  -1   0  879.91   38.20 
  -2  -1   0  897.11   32.70 
  -2  -1   0  874.01   39.70 
  -2  -1   0  914.51   41.40 
   2  -1   0  824.52   40.70 
   2  -1   0  948.51   40.70 
   2  -1   0  938.81   40.30 
   2  -1   0  867.01   38.50 
   2  -1   0  849.61   36.70 
  -2  -1   0  943.51   33.60 
   2  -1   0  886.91   40.10 
  -2  -1   0  841.92   34.60 
   2  -1   0  874.21   40.00 
   2  -1   0  802.92   40.00 
   2  -1   0  961.30   42.10 
   2  -1   0  889.61   38.90 
   2  -1   0  817.42   39.00 
   2  -1   0  881.51   38.10 
   2  -1   0  824.42   37.50 
  -2   1   0  880.51   38.70 
  -2   1   0  875.71   40.20 
  -2   1   0  911.71   40.30 
   2   1   0  906.31   41.00 
  -2   1   0  917.01   41.80 
   2   1   0  866.31   35.10 
   2   1   0  911.61   36.40 
  -2   1   0  884.91   40.00 
  -2   1   0  897.01   37.70 
  -2   1   0  911.51   39.10 
  -2   1   0  871.61   37.20 
  -2   1   0  870.31   38.90 
   2   1   0  877.81   38.60 
   2   1   0  851.41   32.80 
  -2   1   0  849.91   35.70 
  -2   1   0  877.81   40.00 
  -2   1   0  893.81   37.30 
   2   1   0  923.31   38.60 
   2   1   0  914.81   35.10 
   2   1   0  854.81   38.00 
   2   1   0  849.41   37.20 
  -2   1   0  838.32   39.60 
  -2   1   0  841.82   39.00 
  -2   1   0  824.42   40.00 
  -2   1   0  887.91   34.30 
  -2   1   0  880.01   37.90 
  -2   1   0  860.61   39.50 
  -2   1   0  868.51   38.10 
  -2   1   0  912.61   39.30 
  -2   1   0  894.51   40.60 
  -2   1   0  873.91   39.90 
   2   1   0  884.81   39.60 
  -2   1   0  879.01   40.40 
   2   1   0  902.41   39.10 
   2   1   0  919.11   35.20 
   2   1   0  924.41   41.40 
   2   1   0  882.21   40.40 
   2   1   0  870.31   38.10 
   2   1   0  906.11   41.70 
   2   1   0  917.51   40.40 
   2   1   0  926.31   39.10 
   2   1   0  857.61   35.70 
  -2   1   0  881.11   38.80 
   2   1   0  902.01   40.40 
   2   1   0  875.11   38.80 
   2   1   0  877.41   40.30 
  -2   1   0  873.91   40.10 
  -2   1   0  916.81   41.70 
   2   1   0  861.81   32.30 
   2   1   0  872.51   40.40 
  -2   1   0  924.41   47.40 
   2   1   0  879.11   33.80 
   2   1   0  839.52   37.10 
   2   1   0  852.31   39.30 
   2   1   0  904.11   40.80 
   2   1   0  863.51   36.20 
   2   1   0  843.82   39.90 
  -2   1   0  863.41   40.10 
  -2   1   0  878.91   36.40 
  -2   1   0  854.31   34.80 
   2   1   0  858.41   32.70 
  -2   1   0  907.31   37.50 
   3  -1   0   58.19   10.80 
  -3  -1   0   58.99    9.80 
   3  -1   0   57.09   10.10 
   3  -1   0   66.49   15.20 
   3  -1   0   55.99    9.70 
   3  -1   0   56.79    8.00 
   3  -1   0   63.79    9.30 
   3  -1   0   48.40   10.70 
  -3  -1   0   40.30    9.90 
   3  -1   0   49.50    8.70 
   3  -1   0   61.19   11.60 
  -3  -1   0   39.20    9.30 
  -3  -1   0   52.19    7.80 
  -3  -1   0   48.00    8.60 
  -3  -1   0   61.29    9.40 
  -3  -1   0   54.39   10.50 
  -3  -1   0   46.50    7.00 
  -3  -1   0   59.89   11.00 
   3  -1   0   60.89   10.70 
   3  -1   0   51.29    8.70 
  -3  -1   0   59.59   11.50 
   3  -1   0   56.79   10.80 
   3  -1   0   39.00    9.80 
   3  -1   0   28.50    8.60 
   3  -1   0   43.90    9.10 
   3  -1   0   38.90    8.60 
   3  -1   0   46.60    9.40 
   3  -1   0   36.30    9.40 
  -3  -1   0   68.39   11.60 
  -3  -1   0   73.79   12.50 
  -3  -1   0   73.89   13.00 
  -3  -1   0   36.60    8.60 
  -3  -1   0   61.99    6.70 
   3  -1   0   61.39   12.50 
   3  -1   0   58.29    8.20 
  -3  -1   0   61.39   11.50 
  -3  -1   0   62.09   11.80 
   3  -1   0   58.09   11.60 
   3  -1   0   36.00    8.60 
   3  -1   0   57.69    9.20 
  -3  -1   0   61.49   11.40 
   3  -1   0   64.69   11.70 
  -3  -1   0   53.89   11.90 
   3  -1   0   57.79    9.70 
   3  -1   0   48.60    5.70 
   3  -1   0   59.29   11.10 
  -3  -1   0   61.19   11.20 
  -3   1   0   67.09    8.30 
   3   1   0   56.29   11.30 
  -3   1   0   34.00    9.90 
   3   1   0   63.39    7.90 
   3   1   0   53.09   11.30 
   3   1   0   46.30    9.30 
   3   1   0   54.99    9.10 
   3   1   0   40.00    6.60 
   3   1   0   22.80    7.20 
   3   1   0   51.09    5.20 
  -3   1   0   71.29   11.70 
   3   1   0   65.19   12.00 
   3   1   0   42.60    9.50 
   3   1   0   57.29    9.30 
  -3   1   0   46.90    8.00 
  -3   1   0   40.50    8.90 
  -3   1   0   36.70    9.90 
  -3   1   0   43.80    9.40 
   3   1   0   47.80    6.40 
   3   1   0   40.70   10.10 
   3   1   0   58.99    9.40 
   3   1   0   38.20    8.20 
   3   1   0   58.39   12.00 
   3   1   0   63.09   11.30 
  -3   1   0   54.39    8.10 
  -3   1   0   60.49    5.90 
  -3   1   0   74.49    9.30 
  -3   1   0   49.00    7.50 
  -3   1   0   49.40    5.00 
  -3   1   0   54.29    8.80 
  -3   1   0   65.39   11.00 
   3   1   0   53.49    9.50 
   3   1   0   53.99    7.30 
  -3   1   0   54.99    8.70 
  -3   1   0   60.89    6.60 
   3   1   0   46.00    9.50 
  -3   1   0   43.80    9.70 
   3   1   0   43.90    9.30 
   3   1   0   58.69    7.70 
   3   1   0   63.69    8.50 
  -3   1   0   53.39   10.30 
  -3   1   0   43.10    9.00 
  -3   1   0   51.49   10.90 
  -3   1   0   59.49   10.90 
   3   1   0   44.30   11.60 
  -3   1   0   47.60    9.90 
  -3   1   0   41.90   10.90 
  -3   1   0   48.30    9.10 
  -3   1   0   49.30   10.30 
   3   1   0   50.39   10.90 
  -3   1   0   50.29   10.40 
   3   1   0   65.39   11.70 
  -3   1   0   49.99    7.90 
  -3   1   0   42.10   13.20 
  -3   1   0   45.90    4.70 
   3   1   0   54.49   10.20 
  -3   1   0   38.70    9.70 
  -3   1   0   44.70   10.60 
  -4  -1   0    4.50    4.10 
  -4  -1   0    4.80    5.80 
  -4  -1   0   -0.50    3.30 
   4  -1   0    4.80    3.90 
   4  -1   0   16.50    8.20 
  -4  -1   0   -4.10    5.20 
   4  -1   0    1.10    6.80 
   4  -1   0    8.50    6.30 
  -4  -1   0    6.70    6.90 
   4  -1   0   10.50    7.90 
   4  -1   0   12.80    6.80 
  -4  -1   0    7.10    7.30 
  -4  -1   0    5.10    6.80 
  -4  -1   0   -5.60    5.30 
   4  -1   0   -0.70    5.90 
   4  -1   0    3.60    6.70 
   4  -1   0   -2.80    6.80 
  -4  -1   0   17.00    8.90 
  -4  -1   0    0.20    6.30 
  -4  -1   0    9.30    6.80 
  -4  -1   0    8.00    8.00 
   4  -1   0    4.40    2.70 
  -4  -1   0    8.20    5.00 
  -4  -1   0    2.90    5.40 
   4  -1   0   21.30    8.80 
  -4  -1   0   -0.90    5.10 
  -4  -1   0   10.00    7.60 
   4  -1   0    4.20    3.80 
   4  -1   0    1.30    4.00 
   4  -1   0    6.00    5.70 
   4  -1   0    0.50    6.70 
   4  -1   0   -5.00    5.40 
   4  -1   0   -2.30    4.70 
   4  -1   0    3.50    5.40 
   4   1   0    1.40    4.90 
  -4   1   0   10.20    6.50 
  -4   1   0   12.70    8.10 
  -4   1   0   -0.40    5.10 
   4   1   0    6.10    4.50 
  -4   1   0    0.70    3.60 
  -4   1   0  -10.90    3.40 
  -4   1   0   -4.50    4.60 
   4   1   0   -0.20    6.00 
  -4   1   0    5.90    4.50 
   4   1   0   -1.10    6.90 
  -4   1   0    4.00    6.70 
  -4   1   0   10.50    8.20 
   4   1   0    8.10    2.70 
   4   1   0   13.20    6.80 
   4   1   0   11.40    4.80 
   4   1   0    4.10    4.60 
  -4   1   0    8.10    4.30 
   4   1   0    2.50    4.00 
   4   1   0    5.60    7.30 
  -4   1   0    7.60    9.90 
  -4   1   0    6.60    6.00 
   4   1   0    6.40    6.20 
   4   1   0    4.00    5.30 
  -4   1   0    7.50    6.70 
   4   1   0    5.40    6.30 
  -4   1   0    8.20    6.80 
   4   1   0    1.50    6.40 
   4   1   0    5.00    5.80 
   4   1   0    8.20    7.50 
   4   1   0    4.40    7.00 
  -4   1   0   -0.50    2.70 
  -4   1   0   -2.10    3.10 
  -4   1   0   15.40    8.90 
   4   1   0    4.00    5.20 
  -4   1   0   15.90    6.20 
  -4   1   0    9.20    7.00 
   4   1   0    7.60    5.10 
  -4   1   0    5.20    5.00 
  -4   1   0   12.00    7.10 
  -4   1   0   10.00    4.60 
  -4   1   0    3.50    5.80 
   4   1   0    2.60    3.20 
  -4   1   0   -4.70    5.00 
  -5  -1   0  952.80   53.59 
  -5  -1   0  916.41   56.29 
   5  -1   0 1061.39   56.79 
   5  -1   0 1060.29   55.99 
   5  -1   0  957.00   54.09 
   5  -1   0  888.51   37.80 
   5  -1   0  970.40   52.19 
   5  -1   0  953.00   54.39 
  -5  -1   0  934.71   52.59 
   5  -1   0  978.30   50.59 
   5  -1   0  965.70   42.20 
  -5  -1   0  973.50   54.29 
   5  -1   0  860.21   51.29 
  -5  -1   0  954.60   50.59 
  -5  -1   0  920.81   53.49 
  -5  -1   0  987.10   47.70 
  -5  -1   0 1049.00   50.19 
  -5  -1   0  918.01   55.09 
  -5  -1   0 1100.49   54.59 
   5  -1   0  926.61   49.60 
   5  -1   0 1007.90   54.59 
  -5  -1   0  940.81   53.59 
   5  -1   0  876.11   44.00 
  -5  -1   0  860.61   42.20 
   5  -1   0  925.81   50.09 
   5  -1   0  943.81   52.29 
  -5  -1   0  912.71   56.09 
   5  -1   0 1006.10   49.99 
  -5  -1   0  979.40   55.69 
  -5  -1   0  929.71   53.09 
   5   1   0  937.31   52.19 
   5   1   0  960.70   37.40 
  -5   1   0  930.91   42.40 
  -5   1   0  970.70   52.99 
  -5   1   0  947.71   53.59 
  -5   1   0  899.21   52.69 
  -5   1   0  961.30   49.40 
   5   1   0  954.30   45.80 
  -5   1   0 1024.90   53.79 
   5   1   0  884.61   49.00 
  -5   1   0  960.20   43.10 
  -5   1   0  979.20   59.69 
  -5   1   0  902.41   43.70 
   5   1   0  991.50   54.19 
   5   1   0  938.21   54.09 
   5   1   0  941.21   50.99 
  -5   1   0  995.40   39.60 
   5   1   0  987.30   41.40 
  -5   1   0  898.51   51.19 
  -5   1   0 1065.19   56.49 
  -5   1   0  933.11   52.09 
   5   1   0  901.31   48.20 
  -5   1   0 1008.60   44.20 
  -5   1   0 1053.09   53.19 
  -5   1   0  898.01   50.99 
  -5   1   0  956.20   47.30 
  -5   1   0  960.10   63.89 
  -5   1   0  825.62   54.49 
   5   1   0  881.11   38.70 
   5   1   0 1004.50   40.70 
   5   1   0  962.30   52.39 
   5   1   0  959.90   39.90 
   5   1   0  938.81   43.90 
   5   1   0  977.40   56.49 
   5   1   0 1018.00   54.29 
   5   1   0  981.70   54.99 
  -5   1   0  976.10   38.60 
  -5   1   0  983.30   55.69 
   6  -1   0   38.90    9.10 
  -6  -1   0   34.20   12.60 
  -6  -1   0   14.10   10.50 
  -6  -1   0   29.90    7.90 
   6  -1   0   12.10    9.50 
   6  -1   0   28.60   12.20 
   6  -1   0   21.90    3.60 
  -6  -1   0   52.89   12.30 
  -6  -1   0   35.90   13.60 
   6  -1   0   17.00    9.70 
  -6  -1   0   34.60   11.70 
   6  -1   0   54.99   16.30 
  -6  -1   0   44.00   14.30 
  -6  -1   0   33.50   11.50 
  -6  -1   0   18.30   12.00 
  -6  -1   0   31.20   12.00 
  -6  -1   0   22.60   11.10 
   6  -1   0   19.60   11.40 
  -6  -1   0   22.10   11.50 
   6  -1   0   26.70   12.10 
  -6  -1   0   30.00   12.30 
  -6  -1   0   33.90   14.40 
   6  -1   0   10.80    8.00 
   6  -1   0   40.20   12.20 
   6  -1   0   25.10   11.90 
   6  -1   0   24.60    6.70 
  -6  -1   0   35.50   13.20 
   6  -1   0   35.50   11.90 
   6  -1   0   35.10   11.20 
   6  -1   0   21.50    7.10 
   6   1   0   21.50    9.70 
   6   1   0   35.20   12.90 
   6   1   0   13.80    9.80 
   6   1   0   28.40    8.90 
   6   1   0   30.90    6.40 
  -6   1   0   38.90   14.90 
  -6   1   0   35.30   13.20 
   6   1   0   40.50   13.60 
   6   1   0   35.40   12.50 
   6   1   0   23.90   10.80 
  -6   1   0   35.90    8.40 
   6   1   0   30.80   12.40 
  -6   1   0   25.00   11.80 
  -6   1   0   33.70   12.40 
  -6   1   0   28.90    8.00 
  -6   1   0    0.70   11.20 
   6   1   0   33.90    6.70 
   6   1   0   31.60    7.20 
   6   1   0   28.30    5.00 
   6   1   0   29.80    4.10 
   6   1   0   23.80   10.20 
   6   1   0    1.40    9.00 
   6   1   0   23.30    4.60 
   6   1   0   42.60   11.90 
  -6   1   0   14.40    9.70 
  -6   1   0   23.00   13.20 
  -6   1   0   19.30   10.00 
  -6   1   0   17.90    6.30 
  -6   1   0   48.30   13.00 
  -6   1   0    9.40   10.00 
  -6   1   0   22.00   10.80 
   6   1   0   22.90    4.20 
  -6   1   0   30.60   12.60 
   6   1   0   32.30    9.20 
   6   1   0   27.70   12.00 
   6   1   0   26.70   13.00 
  -6   1   0   40.10   13.90 
  -6   1   0   34.50   13.30 
  -7  -1   0 1088.19   67.29 
  -7  -1   0 1163.08   66.19 
   7  -1   0 1133.59   61.99 
   7  -1   0 1072.29   67.59 
   7  -1   0 1077.09   67.59 
  -7  -1   0 1132.29   72.89 
  -7  -1   0 1117.29   52.99 
  -7  -1   0 1064.69   66.99 
   7  -1   0 1114.69   51.99 
  -7  -1   0 1065.49   60.69 
  -7  -1   0 1126.79   67.59 
  -7  -1   0 1134.09   69.69 
  -7  -1   0 1124.99   66.79 
   7  -1   0 1078.69   64.19 
   7  -1   0 1058.89   61.69 
  -7  -1   0 1133.09   69.69 
   7  -1   0  986.90   64.89 
  -7  -1   0 1106.49   67.19 
   7  -1   0 1104.69   65.39 
   7  -1   0 1188.58   50.89 
  -7  -1   0 1086.49   70.89 
   7  -1   0 1132.39   62.09 
  -7  -1   0 1241.98   65.29 
   7  -1   0  932.01   58.79 
   7  -1   0 1136.79   70.09 
  -7  -1   0 1072.99   66.39 
  -7  -1   0 1107.99   58.89 
   7  -1   0 1105.59   67.29 
  -7   1   0 1179.18   70.79 
  -7   1   0 1131.29   68.29 
  -7   1   0  809.82   73.09 
   7   1   0  993.00   64.29 
  -7   1   0 1190.88   67.69 
  -7   1   0 1044.00   62.39 
  -7   1   0 1098.99   71.89 
  -7   1   0 1054.79   51.29 
  -7   1   0 1108.59   66.19 
   7   1   0 1093.19   66.29 
  -7   1   0 1084.79   66.69 
  -7   1   0 1179.38   49.99 
   7   1   0 1059.69   67.59 
   7   1   0 1290.57   65.59 
   7   1   0 1039.50   66.89 
   7   1   0 1171.68   62.69 
   7   1   0 1052.49   62.59 
   7   1   0 1102.39   69.69 
   7   1   0 1079.59   56.49 
  -7   1   0 1047.40   59.19 
  -7   1   0 1012.70   62.29 
  -7   1   0 1125.39   69.09 
   7   1   0 1124.19   60.99 
  -7   1   0 1087.69   73.69 
   7   1   0 1152.08   66.89 
  -7   1   0 1147.79   65.29 
  -7   1   0 1107.09   66.19 
   7   1   0 1114.19   65.19 
   8  -1   0   13.70   15.10 
   8  -1   0   29.10   14.80 
   8  -1   0   20.80   12.80 
  -8  -1   0   12.00   10.40 
  -8  -1   0   -0.20   10.40 
  -8  -1   0    8.60   12.40 
  -8  -1   0   -2.40    9.90 
   8  -1   0   -2.90    8.40 
   8  -1   0    1.40   10.10 
   8  -1   0   13.20   11.70 
  -8  -1   0    1.90    9.70 
   8  -1   0    2.50   10.80 
  -8  -1   0    1.70    9.20 
   8  -1   0   13.20   10.40 
  -8  -1   0   -3.80    7.10 
  -8  -1   0    7.50   10.40 
  -8  -1   0    5.30    9.70 
  -8  -1   0    6.30   11.70 
   8  -1   0   33.60   14.40 
   8  -1   0   32.90   16.70 
  -8  -1   0   17.80   13.60 
   8  -1   0   -2.30    7.90 
   8  -1   0    0.90   10.90 
  -8  -1   0    3.70   10.60 
  -8   1   0   10.10   13.00 
   8   1   0   24.10   15.50 
  -8   1   0    6.40   10.40 
   8   1   0    7.50    8.10 
   8   1   0   17.00   13.50 
   8   1   0   14.50   12.00 
  -8   1   0   12.60   12.50 
   8   1   0    0.90   10.60 
  -8   1   0   13.20   13.00 
   8   1   0   16.10   12.40 
  -8   1   0    1.20    8.20 
   8   1   0   11.60   12.00 
  -8   1   0    5.40   10.00 
  -8   1   0   -4.90    8.90 
  -8   1   0   22.80   18.70 
  -8   1   0    3.90    9.70 
   8   1   0   10.50    9.90 
   8   1   0    2.10    8.70 
  -8   1   0    7.00   13.00 
   8   1   0   -7.00    8.30 
  -8   1   0    7.30    9.10 
   8   1   0   12.20    9.90 
   8   1   0    2.30    8.70 
   8   1   0    5.40   10.40 
  -8   1   0   10.10   12.10 
  -8   1   0   24.40   13.60 
   9  -1   0  224.98   39.90 
  -9  -1   0  145.19   32.10 
   9  -1   0  237.08   40.50 
   9  -1   0  232.08   41.40 
  -9  -1   0  283.97   42.30 
  -9  -1   0  212.88   36.40 
  -9  -1   0  225.08   36.50 
   9  -1   0  181.28   33.50 
   9  -1   0  186.58   32.10 
   9  -1   0  242.38   38.70 
  -9  -1   0  137.39   32.80 
   9  -1   0  187.28   32.20 
  -9  -1   0  207.68   32.60 
  -9  -1   0  190.78   36.20 
  -9  -1   0  169.58   33.90 
  -9  -1   0  206.88   38.20 
  -9  -1   0  204.68   41.50 
  -9  -1   0  197.38   29.90 
  -9  -1   0  218.88   34.70 
   9  -1   0  241.18   34.30 
   9  -1   0  212.18   37.60 
   9  -1   0  242.98   34.00 
   9  -1   0  176.68   33.10 
   9  -1   0  181.88   36.30 
   9   1   0  181.18   32.40 
   9   1   0  199.98   37.10 
   9   1   0  183.88   36.30 
  -9   1   0  210.48   37.00 
   9   1   0  219.68   38.40 
   9   1   0  221.08   36.20 
  -9   1   0  143.79   31.50 
  -9   1   0  237.68   41.80 
  -9   1   0  162.08   31.60 
   9   1   0  184.98   34.60 
  -9   1   0  128.39   31.00 
   9   1   0  229.88   35.30 
   9   1   0  218.38   39.20 
  -9   1   0  218.48   34.50 
  -9   1   0  201.58   29.00 
  -9   1   0  185.48   32.20 
  -9   1   0  235.68   45.00 
   9   1   0  196.68   34.40 
   9   1   0  198.78   37.60 
  -9   1   0  149.69   33.90 
   9   1   0  277.07   35.70 
  -9   1   0  203.48   33.10 
   9   1   0  225.38   37.40 
  -9   1   0  170.98   33.20 
  10  -1   0   11.30   14.60 
 -10  -1   0   24.70   19.50 
  10  -1   0   22.40   17.80 
  10  -1   0   48.90   21.90 
  10  -1   0   44.80   20.70 
 -10  -1   0    5.70   15.60 
  10  -1   0   24.70   17.60 
 -10  -1   0   16.60   17.20 
 -10  -1   0    8.40   13.40 
 -10  -1   0   -0.60   12.20 
  10  -1   0   46.60   20.90 
  10  -1   0    1.20   13.70 
 -10  -1   0   42.50   19.40 
 -10  -1   0    9.50   14.70 
 -10  -1   0   25.50   21.10 
  10  -1   0   55.09   23.30 
  10  -1   0   28.90   16.60 
 -10  -1   0   23.70   16.10 
  10  -1   0   41.70   23.70 
 -10   1   0   30.00   19.20 
  10   1   0   13.60   16.90 
 -10   1   0   29.70   18.60 
 -10   1   0   21.70   19.70 
  10   1   0   29.00   18.40 
 -10   1   0   15.40   19.50 
 -10   1   0   54.29   22.00 
  10   1   0    8.90   15.00 
  10   1   0   -0.20   14.30 
  10   1   0   -9.60   11.00 
 -10   1   0   33.60   21.80 
 -10   1   0   10.70   15.80 
  10   1   0   39.80   18.80 
 -10   1   0   38.00   21.50 
 -10   1   0   22.50   17.60 
  10   1   0   44.30   21.20 
 -10   1   0   25.40   15.60 
 -10   1   0   17.00   14.40 
  10   1   0   27.40   18.80 
  10   1   0   22.30   18.10 
  10   1   0   58.89   23.80 
  10   1   0    5.20   12.90 
   0  -2   0 3900.51  153.88 
   0  -2   0 4186.38  148.59 
   0  -2   0 4048.40  151.18 
   0  -2   0 4296.77  152.28 
   0  -2   0 4065.69  148.49 
   0  -2   0 4131.99  147.59 
   0  -2   0 3951.50  146.79 
   0  -2   0 4205.38  150.38 
   0  -2   0 4089.49  150.28 
   0  -2   0 3877.31  153.98 
   0  -2   0 4029.60  154.68 
   0  -2   0 4072.09  148.09 
   0  -2   0 4239.98  150.68 
   0  -2   0 4027.10  150.68 
   0   2   0 4127.39  150.68 
   0   2   0 3938.51  154.18 
   0   2   0 4070.09  151.38 
   0   2   0 4125.49  150.28 
   0   2   0 4199.98  148.59 
   0   2   0 3959.10  149.79 
   0   2   0 3922.71  153.68 
   0   2   0 4206.88  148.59 
   0   2   0 4184.38  147.79 
   0   2   0 4198.68  154.28 
   0   2   0 3913.21  150.88 
   0   2   0 4075.19  150.58 
   0   2   0 4188.78  158.48 
   0   2   0 4129.59  151.28 
   0   2   0 3919.51  154.08 
   0   2   0 4067.59  150.38 
   0   2   0 4141.09  150.08 
   0   2   0 3844.02  147.29 
  -1  -2   0 3201.88  123.89 
   1  -2   0 3330.87  121.59 
   1  -2   0 3524.55  127.99 
  -1  -2   0 3293.47  120.29 
   1  -2   0 3412.76  126.69 
   1  -2   0 3365.66  125.99 
   1  -2   0 3330.27  127.59 
  -1  -2   0 3303.87  126.49 
   1  -2   0 3381.06  126.29 
   1  -2   0 3296.07  127.59 
   1  -2   0 3288.17  120.39 
   1  -2   0 3426.66  125.19 
   1  -2   0 3331.37  124.79 
   1  -2   0 3283.77  126.79 
   1  -2   0 3193.68  127.59 
   1  -2   0 3211.18  135.49 
  -1  -2   0 3322.07  123.69 
  -1  -2   0 3467.35  124.69 
   1  -2   0 3184.08  125.69 
   1  -2   0 3287.17  125.49 
   1  -2   0 3360.36  126.89 
   1  -2   0 3395.16  126.39 
   1  -2   0 3349.56  128.39 
  -1  -2   0 3512.75  123.09 
   1  -2   0 3379.56  120.29 
  -1  -2   0 3330.57  128.19 
  -1  -2   0 3262.47  122.99 
  -1  -2   0 3176.18  127.39 
  -1  -2   0 3480.55  126.69 
  -1  -2   0 3351.26  121.09 
  -1  -2   0 3410.66  123.99 
  -1  -2   0 3356.96  128.79 
  -1  -2   0 3324.67  119.79 
  -1  -2   0 3349.76  119.49 
  -1  -2   0 3421.96  127.69 
   1  -2   0 3187.58  126.09 
  -1  -2   0 3401.26  121.09 
   1  -2   0 3477.25  131.39 
   1  -2   0 3321.57  125.59 
  -1  -2   0 3424.16  124.39 
   1  -2   0 3385.16  126.99 
   1  -2   0 3417.06  126.89 
  -1  -2   0 3387.76  126.29 
   1  -2   0 3456.95  128.99 
  -1  -2   0 3447.46  127.69 
  -1  -2   0 3360.16  129.39 
  -1   2   0 3243.08  126.29 
   1   2   0 3334.27  123.29 
  -1   2   0 3331.47  125.89 
  -1   2   0 3291.07  124.69 
   1   2   0 3422.26  128.99 
  -1   2   0 3230.88  130.09 
  -1   2   0 3262.47  127.59 
   1   2   0 3375.96  124.29 
  -1   2   0 3398.36  127.69 
  -1   2   0 3341.17  120.19 
   1   2   0 3287.57  123.59 
   1   2   0 3403.46  124.29 
   1   2   0 3319.17  127.79 
   1   2   0 3365.96  123.39 
   1   2   0 3284.97  123.79 
   1   2   0 3297.27  128.49 
   1   2   0 3359.66  120.69 
   1   2   0 3333.17  120.19 
   1   2   0 3448.05  124.29 
  -1   2   0 3350.06  122.69 
   1   2   0 3421.06  123.69 
   1   2   0 3238.08  120.49 
  -1   2   0 3414.26  126.79 
   1   2   0 3355.26  128.79 
  -1   2   0 3368.06  122.09 
   1   2   0 3375.26  127.79 
  -1   2   0 3323.67  127.89 
   1   2   0 3406.86  120.59 
   1   2   0 3328.97  125.59 
  -1   2   0 3652.63  138.69 
  -1   2   0 3261.27  120.49 
  -1   2   0 3310.67  125.69 
  -1   2   0 3417.46  127.19 
   1   2   0 3401.06  127.59 
   1   2   0 3347.67  127.39 
  -1   2   0 3274.37  126.99 
  -1   2   0 3342.17  127.39 
  -1   2   0 3318.77  126.89 
  -1   2   0 3427.26  126.09 
  -1   2   0 3379.16  126.39 
  -1   2   0 3424.26  127.89 
  -1   2   0 3434.56  126.39 
  -1   2   0 3363.16  126.69 
  -1   2   0 3301.77  126.29 
  -2  -2   0 1877.01   68.09 
  -2  -2   0 1966.50   75.09 
  -2  -2   0 1852.31   70.49 
  -2  -2   0 1859.01   73.99 
  -2  -2   0 1880.41   72.69 
   2  -2   0 1911.01   73.29 
  -2  -2   0 1901.51   72.19 
   2  -2   0 1838.62   73.89 
   2  -2   0 1881.61   77.49 
   2  -2   0 1914.81   78.69 
   2  -2   0 1882.11   74.79 
   2  -2   0 1876.11   88.39 
   2  -2   0 1976.10   78.69 
  -2  -2   0 1852.91   79.39 
  -2  -2   0 1868.21   76.59 
   2  -2   0 1838.62   76.19 
   2  -2   0 1909.21   77.89 
  -2  -2   0 1930.91   70.29 
   2  -2   0 1903.71   78.29 
  -2  -2   0 1845.12   71.99 
   2  -2   0 1821.02   76.49 
   2  -2   0 1910.11   78.39 
   2  -2   0 1892.61   77.79 
   2  -2   0 1882.31   73.99 
   2  -2   0 1814.02   76.79 
   2  -2   0 1911.51   82.19 
   2  -2   0 1909.11   73.09 
  -2  -2   0 1905.81   74.59 
  -2  -2   0 2088.09   73.09 
  -2  -2   0 1999.60   77.49 
   2  -2   0 1912.11   79.69 
   2  -2   0 1890.11   78.09 
  -2  -2   0 1810.52   72.99 
  -2  -2   0 1964.60   80.59 
  -2  -2   0 1826.32   77.69 
  -2  -2   0 1892.61   68.59 
  -2  -2   0 1819.12   74.69 
   2  -2   0 1915.11   78.89 
   2  -2   0 2020.70   79.49 
  -2  -2   0 1973.30   76.29 
   2  -2   0 1813.52   76.89 
  -2  -2   0 1899.81   78.09 
  -2  -2   0 1906.41   74.89 
   2  -2   0 1970.40   74.99 
   2   2   0 1874.31   72.39 
  -2   2   0 1860.81   72.49 
  -2   2   0 1870.71   73.89 
  -2   2   0 1860.11   73.89 
   2   2   0 1899.41   72.09 
  -2   2   0 2007.70   79.99 
  -2   2   0 1897.41   81.49 
   2   2   0 1916.11   73.09 
  -2   2   0 1892.61   76.99 
  -2   2   0 1860.01   71.69 
  -2   2   0 1905.81   76.79 
   2   2   0 1897.31   75.19 
  -2   2   0 1958.90   78.99 
  -2   2   0 1912.21   79.09 
  -2   2   0 1863.01   78.59 
  -2   2   0 1940.71   78.99 
  -2   2   0 1870.71   78.09 
  -2   2   0 1885.81   75.99 
  -2   2   0 1891.21   76.99 
  -2   2   0 1913.31   77.69 
  -2   2   0 1926.81   73.69 
   2   2   0 1905.91   79.49 
   2   2   0 1910.91   79.89 
   2   2   0 1982.00   74.59 
  -2   2   0 1897.31   78.69 
  -2   2   0 1914.81   79.09 
   2   2   0 1877.71   73.29 
   2   2   0 1899.81   73.19 
   2   2   0 1887.31   79.69 
   2   2   0 1858.81   74.19 
  -2   2   0 1900.81   77.39 
  -2   2   0 1807.62   79.09 
  -2   2   0 1832.52   88.79 
  -2   2   0 1922.01   77.99 
   2   2   0 1885.51   73.99 
   2   2   0 1887.61   71.79 
   2   2   0 1977.40   77.19 
   2   2   0 1867.51   79.99 
   2   2   0 1935.81   79.29 
   2   2   0 1846.72   70.59 
   2   2   0 1864.51   78.39 
   2   2   0 1909.11   72.89 
   2   2   0 1734.23   76.49 
  -2   2   0 1939.11   82.79 
   2   2   0 1948.71   80.39 
   2   2   0 1962.40   75.59 
   2   2   0 1908.41   72.39 
   2   2   0 1867.91   78.29 
  -2   2   0 1929.31   77.59 
   2   2   0 1882.61   73.09 
  -2   2   0 1925.01   74.59 
   2   2   0 1794.72   73.09 
  -2   2   0 1886.41   78.19 
  -2   2   0 1886.81   77.39 
  -2   2   0 1964.30   74.69 
  -2   2   0 1964.40   78.89 
  -3  -2   0  867.81   41.40 
  -3  -2   0  902.11   40.70 
  -3  -2   0  921.61   36.40 
   3  -2   0  804.12   46.20 
  -3  -2   0  923.01   43.80 
  -3  -2   0  840.12   35.20 
  -3  -2   0  888.21   36.50 
   3  -2   0  886.01   52.09 
   3  -2   0  839.62   45.00 
   3  -2   0  854.51   42.10 
  -3  -2   0  900.11   46.00 
   3  -2   0  873.01   43.10 
   3  -2   0  869.21   46.60 
   3  -2   0  905.01   46.30 
  -3  -2   0  892.91   42.60 
   3  -2   0  922.11   46.10 
  -3  -2   0  871.01   46.90 
   3  -2   0  907.41   42.80 
   3  -2   0  925.31   46.50 
   3  -2   0  853.11   41.40 
   3  -2   0  931.21   45.00 
  -3  -2   0  930.31   47.50 
  -3  -2   0  902.11   48.00 
  -3  -2   0  912.91   35.70 
  -3  -2   0  904.61   45.10 
   3  -2   0  891.61   38.70 
   3  -2   0  889.01   38.90 
  -3  -2   0 1007.00   42.40 
   3  -2   0  865.41   44.90 
  -3  -2   0  918.11   41.70 
  -3  -2   0  949.40   46.20 
   3   2   0  894.11   42.10 
  -3   2   0  862.51   42.00 
   3   2   0  919.31   46.50 
   3   2   0  867.11   42.70 
  -3   2   0  851.31   41.00 
  -3   2   0  805.52   41.80 
  -3   2   0  892.61   46.10 
   3   2   0  892.71   45.20 
   3   2   0  827.02   43.50 
   3   2   0  911.81   46.60 
  -3   2   0  910.91   49.20 
  -3   2   0  909.01   45.90 
  -3   2   0  832.32   37.50 
   3   2   0  917.51   40.90 
   3   2   0  962.20   48.40 
   3   2   0  937.21   46.40 
   3   2   0  858.01   37.70 
   3   2   0  855.41   39.30 
  -3   2   0  867.51   47.30 
  -3   2   0  878.61   46.50 
   3   2   0  910.31   42.40 
  -3   2   0  861.01   37.90 
  -3   2   0  829.92   44.00 
  -3   2   0  894.81   46.60 
  -3   2   0  903.41   46.30 
  -3   2   0  898.31   38.80 
  -3   2   0  908.91   46.40 
   3   2   0  842.62   35.30 
  -3   2   0  889.51   43.00 
   3   2   0  888.11   37.70 
  -3   2   0  957.20   45.20 
   3   2   0  890.21   41.60 
  -3   2   0  858.71   41.80 
   3   2   0  820.52   40.60 
   3   2   0  825.72   38.60 
   3   2   0  837.92   45.60 
   3   2   0  993.80   51.79 
   3   2   0  851.31   41.60 
  -3   2   0  914.71   43.30 
   3   2   0  931.91   40.10 
   3   2   0  923.31   45.50 
  -3   2   0  894.71   45.60 
   3   2   0  858.91   40.70 
   3   2   0  900.71   40.40 
  -3   2   0  954.30   57.69 
  -3   2   0  888.21   38.80 
  -3   2   0  930.51   43.50 
   3   2   0  901.61   35.90 
   3   2   0  849.72   34.60 
   3   2   0  819.92   36.10 
  -4  -2   0 1227.78   62.29 
   4  -2   0 1283.67   65.59 
   4  -2   0 1256.07   60.89 
   4  -2   0 1258.67   58.79 
  -4  -2   0 1230.58   64.19 
  -4  -2   0 1184.88   64.79 
  -4  -2   0 1349.47   63.99 
   4  -2   0 1278.37   57.19 
   4  -2   0 1298.57   63.79 
   4  -2   0 1307.57   58.19 
   4  -2   0 1275.47   56.39 
  -4  -2   0 1218.68   63.79 
  -4  -2   0 1378.66   58.79 
   4  -2   0 1280.37   64.39 
   4  -2   0 1318.77   52.89 
  -4  -2   0 1324.17   62.09 
  -4  -2   0 1322.37   52.99 
  -4  -2   0 1312.37   59.89 
  -4  -2   0 1351.26   65.29 
   4  -2   0 1212.48   62.79 
  -4  -2   0 1310.97   47.30 
   4  -2   0 1214.98   63.99 
   4  -2   0 1329.77   62.89 
   4  -2   0 1218.08   62.29 
  -4  -2   0 1275.67   53.39 
  -4   2   0 1310.27   64.89 
  -4   2   0 1222.88   62.09 
   4   2   0 1286.67   64.19 
   4   2   0 1307.07   57.79 
   4   2   0 1190.78   62.79 
  -4   2   0 1269.57   52.59 
  -4   2   0 1213.38   62.49 
  -4   2   0 1294.17   55.79 
  -4   2   0 1289.67   57.39 
  -4   2   0 1341.87   64.99 
  -4   2   0 1351.76   64.39 
   4   2   0 1334.17   48.80 
  -4   2   0 1369.26   62.69 
   4   2   0 1320.57   64.79 
   4   2   0 1219.38   60.49 
  -4   2   0 1258.77   55.69 
   4   2   0 1275.97   58.39 
   4   2   0 1251.37   54.69 
   4   2   0 1337.17   63.39 
  -4   2   0 1283.67   76.79 
  -4   2   0 1237.88   50.29 
   4   2   0 1246.58   64.89 
  -4   2   0 1271.47   53.09 
  -4   2   0 1122.29   66.39 
  -4   2   0 1333.87   64.49 
  -4   2   0 1326.67   54.69 
   4   2   0 1242.58   54.59 
  -4   2   0 1352.16   66.69 
   4   2   0 1299.87   58.79 
  -4   2   0 1300.77   61.29 
   4   2   0 1354.96   64.59 
  -4   2   0 1318.37   63.39 
  -4   2   0 1282.87   60.59 
   4   2   0 1262.87   55.99 
  -4   2   0 1375.96   59.49 
   4   2   0 1338.77   53.89 
  -4   2   0 1294.97   51.69 
   4   2   0 1301.17   64.69 
   4   2   0 1346.17   60.59 
  -4   2   0 1320.07   57.99 
   4   2   0 1278.77   56.29 
  -4   2   0 1230.98   60.39 
   4   2   0 1254.17   54.59 
  -4   2   0 1285.07   63.19 
   4   2   0 1286.67   62.49 
   4   2   0 1304.97   50.79 
  -5  -2   0  416.66   23.90 
   5  -2   0  407.16   31.30 
  -5  -2   0  450.45   28.80 
   5  -2   0  365.56   30.40 
   5  -2   0  405.96   31.70 
   5  -2   0  403.86   30.30 
  -5  -2   0  371.16   30.60 
  -5  -2   0  432.96   19.80 
   5  -2   0  421.86   27.90 
   5  -2   0  342.67   36.60 
  -5  -2   0  481.65   30.90 
  -5  -2   0  400.66   33.00 
  -5  -2   0  397.56   31.10 
  -5  -2   0  426.96   25.30 
   5  -2   0  482.35   34.90 
   5  -2   0  425.86   26.70 
  -5  -2   0  468.35   46.40 
   5  -2   0  399.36   40.00 
   5  -2   0  500.85   35.30 
   5  -2   0  414.26   33.30 
   5  -2   0  378.86   21.00 
   5  -2   0  420.16   27.70 
  -5  -2   0  434.16   33.20 
  -5  -2   0  391.66   33.70 
  -5   2   0  417.26   24.20 
  -5   2   0  423.06   32.40 
   5   2   0  404.26   33.20 
   5   2   0  396.36   33.00 
  -5   2   0  379.26   30.90 
  -5   2   0  419.56   18.30 
   5   2   0  374.06   21.60 
   5   2   0  436.96   29.60 
  -5   2   0  411.66   33.40 
   5   2   0  446.46   24.50 
   5   2   0  433.76   24.90 
   5   2   0  427.06   25.00 
  -5   2   0  434.66   33.70 
  -5   2   0  401.86   19.60 
   5   2   0  425.46   32.80 
  -5   2   0  448.76   31.60 
  -5   2   0  434.46   31.20 
  -5   2   0  426.86   31.60 
  -5   2   0  437.86   32.30 
   5   2   0  444.76   25.10 
  -5   2   0  428.56   32.70 
   5   2   0  448.06   25.10 
  -5   2   0  424.96   17.80 
  -5   2   0  467.25   34.10 
  -5   2   0  371.46   26.40 
  -5   2   0  439.66   32.00 
  -5   2   0  388.46   25.30 
   5   2   0  440.76   42.00 
  -5   2   0  469.95   44.80 
   5   2   0  371.96   30.60 
   5   2   0  405.56   27.20 
  -5   2   0  424.96   26.50 
   5   2   0  460.25   31.70 
   5   2   0  398.46   39.10 
   5   2   0  423.86   27.20 
   5   2   0  411.26   33.70 
   5   2   0  367.76   30.10 
  -5   2   0  357.56   21.50 
  -5   2   0  391.96   43.90 
  -5   2   0  417.56   33.00 
  -5   2   0  434.36   34.80 
  -5   2   0  411.56   19.40 
  -5   2   0  435.56   25.40 
  -6  -2   0 1610.74   87.39 
  -6  -2   0 1621.14   82.59 
  -6  -2   0 1570.94   83.49 
   6  -2   0 1664.93   76.09 
  -6  -2   0 1571.74   76.49 
  -6  -2   0 1662.43   78.89 
   6  -2   0 1677.03   74.29 
   6  -2   0 1621.34   82.39 
   6  -2   0 1671.33   83.19 
   6  -2   0 1620.24   80.99 
  -6  -2   0 1667.43   89.09 
  -6  -2   0 1566.54   83.89 
  -6  -2   0 1759.02   73.39 
   6  -2   0 1573.24   84.49 
   6  -2   0 1656.73   63.59 
   6  -2   0 1761.52   81.19 
   6  -2   0 1653.13   84.99 
   6  -2   0 1767.02   87.89 
   6  -2   0 1602.14   86.29 
  -6  -2   0 1688.13   84.39 
   6  -2   0 1725.33   85.49 
  -6  -2   0 1620.14   64.49 
   6  -2   0 1633.44   74.59 
   6   2   0 1608.84   80.69 
  -6   2   0 1660.33   74.29 
   6   2   0 1743.83   84.49 
   6   2   0 1620.74   70.99 
   6   2   0 1620.44   67.99 
  -6   2   0 1465.45   81.19 
  -6   2   0 1829.62  104.09 
   6   2   0 1663.93   84.89 
   6   2   0 1577.94   86.39 
   6   2   0 1604.24   78.19 
  -6   2   0 1651.73   87.59 
  -6   2   0 1606.44   82.59 
   6   2   0 1635.04   85.59 
  -6   2   0 1717.23   74.39 
   6   2   0 1668.43   75.09 
  -6   2   0 1617.94   71.89 
   6   2   0 1641.34   70.19 
   6   2   0 1536.75   79.89 
  -6   2   0 1589.74   81.99 
  -6   2   0 1589.04   66.19 
  -6   2   0 1621.54   82.29 
  -6   2   0 1703.93   83.09 
   6   2   0 1614.54   68.69 
  -6   2   0 1609.84   92.09 
  -6   2   0 1703.13   85.99 
   6   2   0 1638.04   69.29 
  -6   2   0 1602.94   79.39 
   6   2   0 1674.53   85.49 
   6   2   0 1637.04   80.79 
   6   2   0 1636.84   67.69 
   6   2   0 1593.74   84.79 
  -6   2   0 1626.54   84.39 
  -6   2   0 1659.63   82.59 
  -6   2   0 1541.15   84.39 
   6   2   0 1573.84   74.79 
  -6   2   0 1608.84   67.89 
  -7  -2   0  123.89   18.80 
  -7  -2   0  109.39   24.20 
  -7  -2   0  102.49   22.70 
   7  -2   0  110.49   22.60 
   7  -2   0  113.99   23.40 
   7  -2   0   87.09   18.10 
  -7  -2   0  129.69   24.20 
   7  -2   0  115.49   21.10 
  -7  -2   0  103.09   23.50 
   7  -2   0  100.49   23.80 
   7  -2   0  109.09   26.30 
   7  -2   0   89.49   20.70 
   7  -2   0  135.79   19.30 
   7  -2   0  116.99   23.30 
  -7  -2   0  118.39   22.30 
  -7  -2   0  157.28   23.60 
  -7  -2   0  126.49   27.70 
   7  -2   0  136.89   18.50 
   7  -2   0   74.99   19.80 
   7  -2   0  125.79   25.40 
  -7  -2   0   93.39   23.40 
   7   2   0  137.49   21.10 
  -7   2   0  130.29   25.20 
   7   2   0  115.99   24.70 
  -7   2   0  140.39   26.20 
   7   2   0   91.99   21.70 
   7   2   0  115.49   22.00 
   7   2   0  115.29   25.70 
  -7   2   0   80.69   26.70 
  -7   2   0  159.38   33.50 
   7   2   0  128.79   22.40 
  -7   2   0  146.19   26.80 
   7   2   0  104.19   16.50 
   7   2   0   88.89   22.70 
   7   2   0   83.99   20.10 
  -7   2   0  131.29   19.00 
  -7   2   0   91.89   22.50 
  -7   2   0  120.59   24.10 
  -7   2   0   92.99   20.40 
  -7   2   0  136.99   18.80 
  -7   2   0  127.59   22.00 
  -7   2   0  118.29   23.10 
  -7   2   0  118.89   26.10 
  -7   2   0  120.89   25.60 
   7   2   0  131.09   16.90 
   7   2   0  118.69   21.90 
   7   2   0  141.79   21.60 
   7   2   0  104.69   23.20 
  -7   2   0  146.49   26.60 
   7   2   0  110.49   24.10 
   8  -2   0  647.14   54.49 
   8  -2   0  751.22   57.49 
  -8  -2   0  780.02   56.59 
  -8  -2   0  674.63   65.39 
   8  -2   0  677.23   50.09 
  -8  -2   0  687.43   58.09 
   8  -2   0  687.43   54.89 
   8  -2   0  754.72   59.29 
   8  -2   0  685.43   51.99 
  -8  -2   0  651.43   42.90 
  -8  -2   0  608.44   51.49 
  -8  -2   0  665.93   52.39 
  -8  -2   0  736.23   60.19 
   8  -2   0  625.44   60.59 
   8  -2   0  558.34   58.99 
   8  -2   0  615.44   46.90 
  -8  -2   0  633.94   46.10 
  -8  -2   0  657.63   48.70 
  -8   2   0  690.83   51.89 
   8   2   0  754.32   56.39 
   8   2   0  688.53   55.89 
   8   2   0  687.63   51.39 
  -8   2   0  625.24   52.59 
  -8   2   0  608.74   59.09 
  -8   2   0  694.83   52.59 
  -8   2   0  671.03   53.29 
   8   2   0  731.03   51.69 
   8   2   0  730.13   50.19 
   8   2   0  668.83   54.79 
   8   2   0  725.53   56.39 
  -8   2   0  780.72   59.49 
  -8   2   0  777.92   54.79 
  -8   2   0  672.03   52.69 
   8   2   0  639.54   64.59 
  -8   2   0  691.53   61.59 
  -8   2   0  719.93   55.69 
   8   2   0  723.43   46.50 
   8   2   0  634.14   51.79 
  -8   2   0  823.32   59.29 
   8   2   0  693.23   49.30 
  -8   2   0  701.83   49.70 
  -9  -2   0   41.40   17.10 
   9  -2   0   70.99   22.60 
   9  -2   0   56.99   20.40 
   9  -2   0   44.30   19.00 
   9  -2   0   31.40   17.00 
  -9  -2   0   34.20   18.90 
   9  -2   0   56.69   19.00 
  -9  -2   0   66.29   25.60 
   9  -2   0   31.60   18.30 
  -9  -2   0   55.99   18.80 
  -9  -2   0   60.69   18.20 
   9  -2   0   11.70   13.70 
   9  -2   0   63.79   22.70 
  -9  -2   0   58.79   19.70 
   9  -2   0   41.90   20.70 
   9  -2   0   61.09   22.80 
  -9  -2   0   67.79   20.80 
  -9  -2   0   67.69   25.40 
  -9   2   0   47.80   19.50 
   9   2   0   69.99   19.80 
  -9   2   0   50.59   20.60 
   9   2   0   13.80   14.10 
   9   2   0   45.50   20.60 
   9   2   0   38.40   16.20 
  -9   2   0   21.20   22.50 
   9   2   0   47.40   21.30 
  -9   2   0   44.20   19.80 
  -9   2   0   31.40   18.80 
  -9   2   0   73.89   20.10 
   9   2   0   37.30   18.70 
   9   2   0  103.29   29.20 
   9   2   0   36.00   19.90 
   9   2   0   36.40   17.40 
  -9   2   0   56.69   23.20 
  -9   2   0   46.10   17.20 
  -9   2   0   22.10   15.00 
  -9   2   0   73.29   25.00 
   9   2   0   65.09   22.80 
  -9   2   0   39.70   17.40 
  -9   2   0   41.00   18.60 
  10  -2   0  411.16   53.89 
  10  -2   0  285.67   42.00 
  10  -2   0  342.57   51.29 
  10  -2   0  281.57   50.29 
 -10  -2   0  449.66   57.49 
 -10  -2   0  491.95   67.39 
 -10  -2   0  368.76   57.99 
  10  -2   0  416.56   53.19 
 -10  -2   0  387.06   48.30 
  10  -2   0  352.56   51.59 
 -10  -2   0  458.85   58.59 
  10  -2   0  383.46   56.89 
  10  -2   0  344.27   50.39 
 -10  -2   0  274.47   44.40 
  10  -2   0  418.06   54.89 
 -10  -2   0  319.47   48.40 
  10  -2   0  273.97   45.90 
 -10   2   0  328.47   47.90 
  10   2   0  300.77   43.60 
  10   2   0  350.06   51.09 
  10   2   0  291.27   45.80 
 -10   2   0  400.96   57.49 
 -10   2   0  403.86   54.89 
 -10   2   0  284.17   48.00 
 -10   2   0  344.17   58.89 
 -10   2   0  359.56   52.59 
 -10   2   0  327.67   50.59 
  10   2   0  381.56   54.09 
  10   2   0  427.46   58.19 
  10   2   0  277.27   47.00 
  10   2   0  298.57   43.40 
 -10   2   0  373.16   50.29 
 -10   2   0  353.36   49.30 
 -10   2   0  316.07   49.90 
  10   2   0  301.17   48.80 
  10   2   0  432.96   58.09 
  10   2   0  396.16   53.19 
   0  -3   0    1.10    5.50 
   0  -3   0    5.70    7.30 
   0  -3   0    2.60    2.90 
   0  -3   0    3.90    4.10 
   0  -3   0   -1.30    3.60 
   0  -3   0    3.10    4.70 
   0  -3   0    1.00    4.10 
   0  -3   0   -0.50    2.60 
   0  -3   0    1.60    2.80 
   0  -3   0    1.20    4.00 
   0  -3   0    3.50    4.10 
   0  -3   0   -0.40    3.20 
   0  -3   0    0.20    3.90 
   0  -3   0   -6.70    6.00 
   0  -3   0   -2.60    4.40 
   0   3   0   -7.30    5.20 
   0   3   0   -5.40    4.90 
   0   3   0   -0.10    2.90 
   0   3   0   -5.00    5.50 
   0   3   0    1.00    6.20 
   0   3   0   -1.60    2.90 
   0   3   0    9.50    4.60 
   0   3   0    1.80    3.90 
   0   3   0    5.70    4.80 
   0   3   0   14.80    6.20 
   0   3   0    4.40    3.70 
   0   3   0    4.90    3.90 
   0   3   0   -5.30    3.30 
   0   3   0   -2.00    5.10 
   0   3   0   -3.10    4.70 
   0   3   0    1.40    4.60 
   0   3   0  -12.20    4.70 
   1  -3   0  258.17   19.80 
   1  -3   0  227.68   18.10 
  -1  -3   0  218.78   17.30 
  -1  -3   0  221.38   12.60 
   1  -3   0  202.58   21.40 
   1  -3   0  180.58   19.60 
  -1  -3   0  223.48   21.20 
  -1  -3   0  281.77   22.50 
   1  -3   0  200.38   20.30 
   1  -3   0  195.18   18.80 
  -1  -3   0  257.97   17.20 
   1  -3   0  226.28   25.10 
   1  -3   0  187.28   20.00 
  -1  -3   0  234.48   25.40 
   1  -3   0  224.28   17.50 
  -1  -3   0  206.08   16.50 
  -1  -3   0  202.48   13.30 
  -1  -3   0  281.87   18.10 
  -1  -3   0  208.28   11.50 
   1  -3   0  213.58   17.10 
  -1  -3   0  216.78   22.50 
  -1  -3   0  195.08   21.40 
  -1  -3   0  207.88   18.60 
  -1  -3   0  199.48   16.00 
  -1  -3   0  244.88   14.50 
   1  -3   0  219.48   16.50 
  -1  -3   0  219.18   16.40 
   1  -3   0  216.28   17.80 
  -1  -3   0  247.68   16.80 
   1  -3   0  210.28   16.50 
  -1  -3   0  218.78   11.90 
  -1  -3   0  242.68   17.50 
   1  -3   0  201.18   23.20 
   1   3   0  223.88   18.60 
  -1   3   0  214.48   15.70 
  -1   3   0  218.48   20.00 
   1   3   0  236.68   17.50 
  -1   3   0  235.88   22.50 
   1   3   0  189.68   14.60 
   1   3   0  241.08   14.40 
  -1   3   0  200.08   22.10 
   1   3   0  221.78   16.00 
  -1   3   0  262.07   27.40 
   1   3   0  215.68   23.80 
   1   3   0  212.08   13.30 
  -1   3   0  228.98   26.10 
   1   3   0  234.08   17.30 
  -1   3   0  246.18   15.90 
  -1   3   0  218.28   16.80 
   1   3   0  241.58   22.80 
  -1   3   0  225.48   17.80 
   1   3   0  225.98   11.80 
  -1   3   0  160.08   20.60 
   1   3   0  216.68   24.50 
   1   3   0  215.38   24.00 
  -1   3   0  222.78   23.30 
   1   3   0  228.88   16.60 
   1   3   0  184.78   18.70 
  -1   3   0  234.28   22.60 
   1   3   0  197.68   14.60 
  -1   3   0  201.18   20.30 
  -1   3   0  199.58   21.20 
  -1   3   0  253.17   25.10 
  -1   3   0  208.88   11.00 
   1   3   0  207.18   21.30 
  -1   3   0  221.98   17.40 
  -1   3   0  211.68   11.10 
   1   3   0  235.58   20.50 
  -1   3   0  216.18   21.90 
  -1   3   0  240.58   24.30 
  -1   3   0  201.18   20.10 
  -2  -3   0   69.19   14.80 
   2  -3   0   65.29   12.60 
  -2  -3   0   81.79    8.20 
  -2  -3   0   95.19   16.00 
   2  -3   0   79.59    9.40 
   2  -3   0   57.19   10.90 
   2  -3   0   81.99   16.00 
   2  -3   0   61.09   12.10 
   2  -3   0   61.19    9.50 
   2  -3   0   93.49   14.10 
   2  -3   0   87.09   15.50 
   2  -3   0   81.79   13.80 
   2  -3   0   75.19   13.90 
  -2  -3   0   67.19    9.60 
  -2  -3   0   80.69    7.60 
  -2  -3   0   74.39    6.80 
  -2  -3   0   72.29   11.00 
  -2  -3   0   78.59   10.20 
   2  -3   0   60.89    8.60 
   2  -3   0   74.19   12.50 
  -2  -3   0   72.19    8.20 
   2  -3   0   60.89   10.40 
  -2  -3   0   72.39   11.10 
  -2  -3   0   87.59   12.20 
  -2  -3   0   62.49   10.00 
  -2  -3   0   75.69   10.40 
  -2  -3   0   55.59   10.60 
  -2  -3   0   50.79    9.20 
  -2  -3   0   47.30   10.20 
  -2  -3   0   73.29    5.20 
   2  -3   0   65.09   14.20 
  -2  -3   0   64.59    9.90 
  -2  -3   0   45.90   12.30 
  -2  -3   0   68.19    9.30 
   2   3   0   42.20   11.00 
   2   3   0   94.79   12.40 
   2   3   0   66.59   10.60 
  -2   3   0   81.49   19.90 
   2   3   0   69.79    8.60 
   2   3   0   60.99   10.70 
   2   3   0   64.69    7.40 
  -2   3   0   74.09    8.70 
  -2   3   0   56.79   11.50 
   2   3   0   76.49   10.50 
  -2   3   0   75.69   10.30 
   2   3   0   72.09   17.00 
   2   3   0   68.49   10.70 
   2   3   0   60.99   10.10 
   2   3   0   53.89   12.50 
   2   3   0   68.59   13.40 
   2   3   0   57.39    9.60 
  -2   3   0   59.29    9.40 
  -2   3   0   64.79   12.50 
  -2   3   0   57.89   13.10 
  -2   3   0   92.29   15.60 
  -2   3   0   72.09   13.50 
  -2   3   0   45.30   11.10 
  -2   3   0   64.99    8.90 
  -2   3   0   85.69   14.30 
   2   3   0   95.69   16.20 
  -2   3   0   71.49   10.90 
  -2   3   0   56.59   13.60 
   2   3   0   69.69    9.50 
   2   3   0   61.89   13.90 
   2   3   0   58.79    6.40 
  -2   3   0   60.39   12.10 
  -2   3   0   61.09   12.60 
  -2   3   0   77.09   14.10 
  -2   3   0   83.49   14.30 
  -2   3   0   60.49   10.50 
   2   3   0   84.39   11.30 
  -3  -3   0   12.60    7.70 
   3  -3   0    3.80    4.40 
  -3  -3   0    1.40    4.40 
   3  -3   0    6.50    5.50 
   3  -3   0    3.70    6.00 
  -3  -3   0    1.90    3.20 
   3  -3   0   15.50   10.00 
   3  -3   0   -2.00    5.40 
   3  -3   0   11.50    7.40 
   3  -3   0    9.60    6.80 
  -3  -3   0    0.90    4.10 
  -3  -3   0    5.90    4.90 
  -3  -3   0    3.70    4.00 
   3  -3   0   -0.40    5.30 
   3  -3   0   -8.00    6.10 
  -3  -3   0   16.60    6.80 
  -3  -3   0   15.40    9.20 
   3  -3   0   -4.20    5.20 
   3  -3   0    3.60    4.10 
  -3  -3   0   10.30    5.20 
  -3  -3   0   -1.70    5.30 
  -3  -3   0    5.40    2.10 
   3  -3   0    4.80    6.90 
  -3  -3   0    1.40    5.50 
  -3  -3   0    7.60    5.60 
  -3  -3   0    6.20    3.20 
  -3  -3   0    4.70    7.60 
   3  -3   0   11.90    6.20 
  -3  -3   0   -4.30    3.10 
  -3  -3   0    7.20    4.40 
   3   3   0    8.90    7.70 
   3   3   0   -1.10    4.50 
  -3   3   0    2.60    3.90 
   3   3   0   -0.60    6.70 
   3   3   0    8.10    5.80 
   3   3   0    5.50    6.60 
   3   3   0    3.10    4.00 
   3   3   0    6.20    5.90 
   3   3   0    8.90    5.40 
   3   3   0    2.90    4.20 
   3   3   0    5.60    6.30 
   3   3   0    7.30    7.40 
   3   3   0   -3.60    6.60 
  -3   3   0    8.70    6.70 
  -3   3   0   12.70    7.70 
   3   3   0    1.80    6.90 
  -3   3   0   23.90    9.50 
   3   3   0    1.70    3.50 
   3   3   0    7.00    4.60 
  -3   3   0    7.60    6.60 
   3   3   0    3.70    3.80 
  -3   3   0    8.40    8.00 
  -3   3   0    9.80    6.90 
  -3   3   0    2.00    4.50 
  -3   3   0    4.80    4.20 
  -3   3   0   -1.10    7.30 
  -3   3   0    2.60    6.60 
  -3   3   0   -1.10    9.90 
  -3   3   0    5.20    5.00 
   3   3   0    7.10    4.00 
   3   3   0    5.30    4.30 
  -3   3   0    6.50    4.70 
  -3   3   0    9.00    7.40 
  -3   3   0   -4.80    4.50 
  -3   3   0   -3.80    5.30 
  -3   3   0    8.00    6.90 
  -3   3   0    7.20    4.00 
  -3   3   0   -1.00    6.50 
   4  -3   0  164.08   23.40 
  -4  -3   0  207.28   12.70 
  -4  -3   0  190.28   12.40 
  -4  -3   0  252.27   24.30 
  -4  -3   0  190.88   22.00 
   4  -3   0  159.58   22.70 
   4  -3   0  209.28   26.80 
   4  -3   0  173.88   23.40 
  -4  -3   0  186.88   24.30 
  -4  -3   0  181.28   25.80 
  -4  -3   0  189.78   12.80 
  -4  -3   0  199.98   20.40 
   4  -3   0  229.08   21.80 
   4  -3   0  199.88   23.80 
   4  -3   0  180.68   17.80 
  -4  -3   0  164.78   22.70 
  -4  -3   0  228.28   28.00 
   4  -3   0  188.58   22.90 
   4  -3   0  219.68   24.70 
   4  -3   0  178.58   23.40 
   4  -3   0  197.38   22.70 
   4  -3   0  162.38   22.40 
  -4  -3   0  172.98   22.70 
   4  -3   0  180.08   25.40 
  -4  -3   0  198.28   20.40 
  -4  -3   0  158.08   11.00 
  -4   3   0  195.18   24.50 
   4   3   0  205.58   26.20 
  -4   3   0  194.38   18.10 
   4   3   0  184.28   25.60 
   4   3   0  172.48   24.50 
  -4   3   0  188.68   24.90 
   4   3   0  178.38   24.50 
   4   3   0  132.19   20.90 
   4   3   0  190.98   15.90 
   4   3   0  203.08   12.80 
  -4   3   0  188.68   24.40 
   4   3   0  170.48   19.20 
  -4   3   0  208.08   35.80 
  -4   3   0  175.08   14.00 
  -4   3   0  213.58   26.10 
  -4   3   0  212.28   23.40 
   4   3   0  191.38   18.80 
   4   3   0  174.98   24.90 
  -4   3   0  217.78   23.80 
  -4   3   0  169.18   25.40 
  -4   3   0  199.88   18.90 
   4   3   0  195.68   13.70 
   4   3   0  191.28   22.90 
  -4   3   0  145.79   22.20 
   4   3   0  174.78   13.60 
  -4   3   0  181.58   21.50 
  -4   3   0  152.68   22.90 
   4   3   0  205.68   12.70 
  -4   3   0  208.78   25.50 
  -4   3   0  150.48   18.60 
   4   3   0  192.48   16.80 
  -4   3   0  167.38   13.00 
   4   3   0  167.88   12.30 
   4   3   0  183.98   19.30 
  -4   3   0  191.98   21.70 
  -4   3   0  162.98   23.40 
   4   3   0  164.88   18.40 
  -4   3   0  180.88   21.50 
  -4   3   0  231.18   30.50 
   5  -3   0  554.84   39.70 
   5  -3   0  492.85   37.80 
   5  -3   0  505.05   27.90 
  -5  -3   0  492.15   37.70 
   5  -3   0  427.66   43.00 
   5  -3   0  504.35   33.00 
  -5  -3   0  474.15   37.40 
  -5  -3   0  494.25   35.10 
  -5  -3   0  518.75   41.10 
   5  -3   0  531.95   34.90 
  -5  -3   0  473.15   31.40 
   5  -3   0  511.85   27.80 
  -5  -3   0  488.55   25.20 
  -5  -3   0  484.45   33.70 
  -5  -3   0  475.85   36.00 
  -5  -3   0  511.35   38.10 
   5  -3   0  509.45   37.20 
   5  -3   0  524.15   36.90 
   5  -3   0  525.85   38.70 
   5  -3   0  474.95   39.00 
   5  -3   0  497.05   37.70 
  -5  -3   0  500.75   25.70 
  -5   3   0  497.65   32.50 
  -5   3   0  564.44   53.49 
  -5   3   0  496.75   38.80 
  -5   3   0  446.76   36.10 
  -5   3   0  497.95   35.20 
   5   3   0  496.35   28.90 
  -5   3   0  498.95   37.70 
   5   3   0  631.14   41.90 
   5   3   0  507.95   38.50 
  -5   3   0  506.95   33.20 
   5   3   0  431.96   37.60 
   5   3   0  497.95   32.60 
  -5   3   0  501.45   37.90 
   5   3   0  546.55   34.30 
  -5   3   0  517.75   27.10 
  -5   3   0  442.26   33.70 
  -5   3   0  485.85   28.40 
  -5   3   0  542.15   41.50 
  -5   3   0  453.75   33.40 
   5   3   0  487.55   28.00 
  -5   3   0  523.45   25.50 
   5   3   0  488.05   21.10 
   5   3   0  525.85   31.40 
  -5   3   0  414.36   42.60 
  -5   3   0  498.25   38.20 
  -5   3   0  534.55   27.30 
  -5   3   0  414.86   46.60 
   5   3   0  481.25   45.80 
  -5   3   0  493.15   36.70 
  -5   3   0  469.85   37.20 
   5   3   0  430.36   35.60 
   5   3   0  512.75   29.80 
   5   3   0  526.25   37.60 
  -5   3   0  484.75   27.90 
  -5   3   0  536.95   34.80 
   5   3   0  547.65   39.10 
   5   3   0  464.15   30.30 
   5   3   0  502.85   22.20 
  -5   3   0  523.35   28.50 
   6  -3   0  871.41   48.70 
   6  -3   0  795.02   55.39 
   6  -3   0  881.01   50.59 
  -6  -3   0  869.31   50.99 
  -6  -3   0  860.01   57.59 
  -6  -3   0  908.11   42.40 
   6  -3   0  851.81   54.69 
  -6  -3   0  938.61   61.49 
   6  -3   0  880.51   54.89 
  -6  -3   0  837.82   53.29 
  -6  -3   0  917.41   56.89 
   6  -3   0  799.12   54.19 
   6  -3   0  829.92   49.70 
   6  -3   0  862.61   58.79 
   6  -3   0  796.92   55.49 
   6  -3   0  938.91   45.10 
   6  -3   0  925.41   58.19 
   6  -3   0  764.42   55.69 
   6  -3   0  816.32   52.19 
  -6  -3   0  967.00   49.90 
  -6  -3   0  858.71   55.89 
  -6   3   0  841.82   55.79 
   6   3   0  867.11   49.70 
  -6   3   0  821.82   56.69 
  -6   3   0  918.31   49.30 
   6   3   0  830.02   57.89 
   6   3   0  769.62   41.40 
   6   3   0  874.21   57.69 
  -6   3   0  857.01   36.30 
  -6   3   0  879.71   63.29 
  -6   3   0  973.60   58.69 
  -6   3   0  793.62   55.69 
   6   3   0  949.01   52.89 
  -6   3   0  836.72   55.49 
  -6   3   0  804.42   54.89 
  -6   3   0  789.72   50.69 
  -6   3   0  849.52   54.09 
  -6   3   0  781.62   56.99 
  -6   3   0  881.01   53.79 
   6   3   0  853.11   57.09 
   6   3   0  908.91   47.20 
   6   3   0  837.02   47.10 
  -6   3   0  919.21   39.50 
   6   3   0  932.71   60.29 
  -6   3   0  889.41   56.99 
   6   3   0  866.01   54.69 
   6   3   0  810.82   53.89 
  -6   3   0  940.61   74.99 
  -6   3   0  880.81   46.90 
   6   3   0  873.21   56.99 
  -6   3   0  977.70   52.09 
   6   3   0  911.41   45.70 
  -6   3   0  882.01   53.39 
  -6   3   0  944.81   51.59 
   7  -3   0  297.57   37.00 
   7  -3   0  247.28   37.30 
   7  -3   0  231.28   35.50 
  -7  -3   0  219.98   34.00 
   7  -3   0  240.58   28.70 
  -7  -3   0  248.28   36.20 
  -7  -3   0  291.27   38.20 
  -7  -3   0  307.77   32.70 
   7  -3   0  242.08   34.50 
  -7  -3   0  278.67   32.80 
   7  -3   0  227.38   28.10 
  -7  -3   0  267.87   41.80 
   7  -3   0  269.87   38.20 
   7  -3   0  247.18   37.60 
  -7  -3   0  234.38   33.70 
   7  -3   0  235.58   32.40 
  -7  -3   0  214.78   22.70 
   7  -3   0  293.67   38.80 
  -7  -3   0  224.18   36.20 
   7  -3   0  252.07   36.00 
  -7   3   0  191.68   31.90 
  -7   3   0  193.98   30.60 
   7   3   0  260.57   34.60 
   7   3   0  232.28   29.60 
   7   3   0  207.28   26.90 
  -7   3   0  254.27   35.50 
   7   3   0  220.78   26.30 
   7   3   0  276.37   39.50 
  -7   3   0  265.87   30.50 
   7   3   0  275.27   39.10 
  -7   3   0  144.39   32.30 
  -7   3   0  214.08   34.50 
   7   3   0  277.77   38.60 
  -7   3   0  213.08   21.90 
  -7   3   0  276.27   38.30 
  -7   3   0  293.57   41.80 
  -7   3   0  295.07   51.89 
  -7   3   0  261.77   34.20 
  -7   3   0  170.48   27.90 
  -7   3   0  228.58   33.20 
   7   3   0  184.58   31.90 
   7   3   0  227.98   31.10 
  -7   3   0  224.28   35.40 
   7   3   0  276.17   34.70 
   7   3   0  266.57   27.40 
  -7   3   0  273.07   31.20 
   7   3   0  214.78   35.20 
   8  -3   0  232.28   40.90 
  -8  -3   0  213.38   37.90 
   8  -3   0  162.88   32.10 
  -8  -3   0  162.68   35.30 
   8  -3   0  243.88   39.20 
   8  -3   0  160.88   31.80 
  -8  -3   0  271.07   40.40 
  -8  -3   0  211.28   30.80 
   8  -3   0  261.67   39.00 
  -8  -3   0  225.18   37.40 
  -8  -3   0  192.98   28.20 
   8  -3   0  183.88   32.40 
   8  -3   0  250.37   39.60 
  -8  -3   0  215.98   34.70 
   8  -3   0  250.87   30.90 
   8  -3   0  223.18   32.80 
   8  -3   0  156.38   31.70 
  -8  -3   0  222.78   34.80 
   8  -3   0  245.08   36.20 
  -8   3   0  329.47   43.60 
  -8   3   0  136.99   33.30 
  -8   3   0  158.08   29.50 
   8   3   0  199.78   29.30 
  -8   3   0  178.48   33.30 
   8   3   0  269.27   40.80 
  -8   3   0  227.68   36.10 
   8   3   0  241.38   38.70 
  -8   3   0  250.97   39.40 
  -8   3   0  201.98   44.20 
   8   3   0  202.28   30.40 
  -8   3   0  229.68   36.80 
  -8   3   0  215.58   32.70 
   8   3   0  222.48   37.00 
   8   3   0  201.78   31.70 
   8   3   0  195.48   32.40 
   8   3   0  196.68   35.60 
   8   3   0  194.68   36.70 
  -8   3   0  235.78   38.90 
  -8   3   0  218.78   33.30 
   8   3   0  232.58   34.20 
  -8   3   0  242.08   37.90 
  -9  -3   0  152.98   36.40 
  -9  -3   0  170.38   34.70 
  -9  -3   0  155.28   33.00 
   9  -3   0  151.88   32.40 
   9  -3   0  109.09   25.20 
   9  -3   0  159.88   36.20 
   9  -3   0  114.29   26.70 
  -9  -3   0  123.09   33.60 
   9  -3   0  123.59   29.40 
  -9  -3   0  127.49   25.90 
   9  -3   0   70.09   23.40 
   9  -3   0  116.29   27.90 
   9  -3   0  121.59   29.90 
   9  -3   0  142.39   31.70 
  -9  -3   0  124.49   28.10 
   9  -3   0  112.39   28.60 
  -9   3   0  137.99   30.70 
  -9   3   0  137.29   31.30 
  -9   3   0  108.99   27.60 
  -9   3   0   87.59   32.40 
  -9   3   0  123.49   27.70 
   9   3   0   84.99   27.20 
  -9   3   0  267.37   43.70 
  -9   3   0   75.39   27.70 
  -9   3   0  111.19   29.00 
   9   3   0  100.09   29.50 
   9   3   0  124.09   30.40 
   9   3   0  121.69   26.50 
  -9   3   0  116.99   28.80 
  -9   3   0  140.99   31.90 
   9   3   0  138.99   28.00 
  -9   3   0  143.39   32.50 
   9   3   0   62.09   25.50 
   9   3   0  116.59   29.00 
  -9   3   0   91.89   28.40 
   9   3   0  153.78   33.40 
   9   3   0  114.29   25.30 
   9   3   0   93.79   23.70 
   0  -4   0  700.33   45.20 
   0  -4   0  691.43   36.20 
   0  -4   0  689.83   34.30 
   0  -4   0  653.53   35.80 
   0  -4   0  672.53   35.20 
   0  -4   0  687.13   34.00 
   0  -4   0  668.83   45.00 
   0  -4   0  728.13   41.70 
   0  -4   0  687.33   33.00 
   0  -4   0  626.04   37.40 
   0  -4   0  696.13   39.50 
   0   4   0  621.74   38.00 
   0   4   0  675.83   43.40 
   0   4   0  679.73   35.90 
   0   4   0  678.03   34.70 
   0   4   0  618.64   38.80 
   0   4   0  654.93   43.90 
   0   4   0  690.63   40.30 
   0   4   0  706.13   34.30 
   0   4   0  706.43   43.20 
   0   4   0  620.04   35.60 
   0   4   0  676.53   43.30 
   0   4   0  713.63   49.20 
   0   4   0  640.64   34.80 
  -1  -4   0 4133.79  147.19 
  -1  -4   0 4022.80  151.18 
  -1  -4   0 4106.99  165.68 
  -1  -4   0 4185.68  159.48 
  -1  -4   0 3927.31  158.88 
  -1  -4   0 4110.09  157.58 
  -1  -4   0 4562.34  171.98 
   1  -4   0 4008.60  159.08 
  -1  -4   0 3948.00  167.88 
  -1  -4   0 3977.20  157.68 
  -1  -4   0 3997.90  165.08 
  -1  -4   0 4330.97  167.88 
   1  -4   0 3944.01  162.18 
   1  -4   0 4123.39  170.08 
  -1  -4   0 4271.57  153.98 
  -1  -4   0 4127.99  160.68 
   1  -4   0 3988.90  157.18 
  -1  -4   0 4179.98  148.29 
  -1  -4   0 4071.59  159.78 
   1  -4   0 4080.19  159.78 
   1  -4   0 3870.81  162.38 
  -1  -4   0 4012.20  157.98 
  -1  -4   0 4204.28  153.48 
   1  -4   0 4044.70  161.48 
   1  -4   0 4196.68  149.19 
   1   4   0 4350.76  167.08 
   1   4   0 4065.19  162.18 
   1   4   0 4119.09  154.28 
  -1   4   0 4037.60  162.08 
  -1   4   0 4049.79  158.68 
  -1   4   0 4152.98  160.08 
  -1   4   0 4244.28  163.98 
   1   4   0 4214.88  160.28 
  -1   4   0 4208.38  166.38 
   1   4   0 3987.60  167.68 
  -1   4   0 4072.89  168.78 
  -1   4   0 4234.78  165.58 
  -1   4   0 4051.79  165.98 
  -1   4   0 4107.29  145.99 
  -1   4   0 4020.90  161.78 
   1   4   0 4208.38  162.88 
   1   4   0 4047.20  154.98 
  -1   4   0 4029.80  155.88 
  -1   4   0 4176.28  180.28 
  -1   4   0 4305.07  163.48 
  -1   4   0 4037.10  162.98 
   1   4   0 4016.70  154.08 
   1   4   0 4111.29  152.58 
  -1   4   0 4143.19  159.28 
   1   4   0 4205.48  173.08 
   2  -4   0  726.03   43.50 
   2  -4   0  745.83   36.00 
   2  -4   0  657.33   43.00 
  -2  -4   0  758.42   39.10 
  -2  -4   0  634.74   38.30 
  -2  -4   0  709.53   45.50 
  -2  -4   0  767.72   43.00 
   2  -4   0  799.12   40.60 
  -2  -4   0  789.32   34.90 
   2  -4   0  720.53   40.40 
  -2  -4   0  775.12   31.90 
  -2  -4   0  719.63   46.50 
   2  -4   0  765.32   33.20 
  -2  -4   0  763.22   40.00 
  -2  -4   0  735.13   36.40 
  -2  -4   0  749.53   32.50 
   2  -4   0  779.92   36.70 
  -2  -4   0  684.43   41.70 
   2  -4   0  713.33   43.00 
   2  -4   0  796.02   41.60 
  -2  -4   0  799.92   33.40 
  -2  -4   0  718.13   30.70 
   2  -4   0  696.33   42.80 
  -2  -4   0  784.12   46.60 
  -2  -4   0  728.73   37.70 
  -2  -4   0  724.63   34.50 
   2  -4   0  710.73   42.20 
  -2  -4   0  773.22   39.70 
   2  -4   0  837.02   49.00 
  -2  -4   0  805.02   40.40 
  -2  -4   0  779.12   39.70 
   2  -4   0  731.93   47.20 
   2   4   0  728.23   36.70 
  -2   4   0  813.42   45.70 
   2   4   0  781.12   33.90 
   2   4   0  707.63   46.20 
  -2   4   0  722.33   43.20 
  -2   4   0  749.13   45.30 
  -2   4   0  779.82   45.10 
   2   4   0  667.53   42.80 
  -2   4   0  749.13   48.90 
   2   4   0  751.22   39.90 
   2   4   0  783.42   34.00 
  -2   4   0  751.52   36.00 
  -2   4   0  807.82   43.20 
   2   4   0  704.83   37.30 
   2   4   0  810.42   34.50 
   2   4   0  765.22   39.40 
  -2   4   0  719.33   42.20 
   2   4   0  732.63   37.30 
  -2   4   0  781.52   57.89 
  -2   4   0  776.22   42.60 
   2   4   0  759.22   44.60 
  -2   4   0  694.63   37.40 
  -2   4   0  714.83   33.30 
   2   4   0  755.52   35.50 
   2   4   0  799.02   45.90 
  -2   4   0  778.82   43.70 
  -2   4   0  730.13   44.90 
  -2   4   0  727.63   42.60 
   2   4   0  748.63   42.70 
  -3  -4   0  668.23   35.80 
   3  -4   0  689.33   43.50 
  -3  -4   0  689.33   35.20 
  -3  -4   0  660.13   27.70 
  -3  -4   0  664.53   43.50 
  -3  -4   0  616.64   34.00 
  -3  -4   0  588.84   33.20 
  -3  -4   0  638.34   30.50 
  -3  -4   0  733.43   45.00 
  -3  -4   0  613.34   42.00 
  -3  -4   0  633.14   37.40 
   3  -4   0  575.04   37.80 
   3  -4   0  581.24   39.70 
   3  -4   0  648.54   31.00 
   3  -4   0  592.04   33.80 
  -3  -4   0  616.94   26.10 
  -3  -4   0  619.54   37.40 
  -3  -4   0  608.04   35.10 
  -3  -4   0  670.53   37.70 
   3  -4   0  683.83   44.20 
   3  -4   0  601.84   41.10 
  -3  -4   0  602.84   34.60 
   3  -4   0  662.73   40.40 
  -3  -4   0  676.73   38.50 
   3  -4   0  571.24   37.50 
   3  -4   0  550.74   38.70 
   3  -4   0  617.24   40.30 
  -3  -4   0  620.34   34.00 
   3  -4   0  601.74   35.70 
  -3  -4   0  622.74   30.60 
  -3   4   0  672.83   41.00 
   3   4   0  611.74   42.30 
  -3   4   0  671.43   42.80 
   3   4   0  632.14   34.70 
  -3   4   0  641.54   40.10 
   3   4   0  679.93   35.00 
   3   4   0  701.83   36.90 
  -3   4   0  574.04   38.40 
   3   4   0  615.84   40.50 
   3   4   0  630.34   28.20 
  -3   4   0  588.84   39.40 
   3   4   0  614.54   31.10 
   3   4   0  619.84   34.30 
  -3   4   0  625.74   40.00 
  -3   4   0  625.64   33.80 
  -3   4   0  658.53   41.80 
   3   4   0  674.03   44.30 
  -3   4   0  607.24   45.30 
  -3   4   0  647.34   42.40 
  -3   4   0  621.54   33.20 
  -3   4   0  670.03   47.30 
  -3   4   0  690.53   42.60 
   3   4   0  588.64   40.10 
   3   4   0  587.04   33.90 
   3   4   0  676.63   34.70 
  -3   4   0  688.83   55.59 
  -3   4   0  703.43   41.80 
   3   4   0  652.03   36.10 
  -3   4   0  662.53   33.60 
   4  -4   0  422.96   31.90 
   4  -4   0  429.56   43.00 
   4  -4   0  390.16   31.80 
   4  -4   0  400.16   32.00 
  -4  -4   0  413.46   35.40 
  -4  -4   0  427.56   20.90 
  -4  -4   0  363.76   27.10 
  -4  -4   0  373.86   30.00 
  -4  -4   0  380.36   27.60 
  -4  -4   0  402.46   34.40 
   4  -4   0  406.26   23.90 
  -4  -4   0  378.36   26.30 
  -4  -4   0  396.36   39.40 
   4  -4   0  455.05   32.80 
   4  -4   0  425.86   33.50 
   4  -4   0  381.26   31.40 
   4  -4   0  405.56   26.90 
  -4  -4   0  390.66   23.70 
  -4  -4   0  408.96   28.70 
  -4  -4   0  384.06   24.10 
   4  -4   0  410.66   40.10 
  -4  -4   0  410.96   29.40 
   4  -4   0  445.56   35.20 
   4   4   0  405.06   25.50 
   4   4   0  476.25   45.00 
  -4   4   0  330.17   38.40 
   4   4   0  367.16   37.60 
   4   4   0  324.87   26.60 
   4   4   0  420.66   25.80 
  -4   4   0  391.46   22.30 
  -4   4   0  427.16   34.10 
  -4   4   0  381.36   22.10 
  -4   4   0  350.16   36.70 
  -4   4   0  490.55   36.80 
  -4   4   0  410.26   40.80 
   4   4   0  404.46   22.00 
   4   4   0  451.85   29.10 
   4   4   0  374.66   22.00 
  -4   4   0  422.76   28.40 
   4   4   0  337.27   35.50 
   4   4   0  360.36   33.00 
  -4   4   0  425.86   31.00 
   4   4   0  456.15   26.60 
  -4   4   0  499.25   49.30 
  -4   4   0  405.56   33.00 
  -4   4   0  380.56   26.90 
  -4   4   0  367.96   30.40 
  -4   4   0  347.07   36.90 
   4   4   0  384.56   23.40 
  -4   4   0  446.16   49.60 
  -4   4   0  442.56   40.90 
   4   4   0  417.96   24.60 
   4   4   0  387.16   28.20 
  -4   4   0  417.96   31.80 
   4   4   0  456.85   36.70 
   5  -4   0 1124.19   62.29 
  -5  -4   0 1165.38   65.89 
  -5  -4   0 1164.88   62.19 
   5  -4   0 1140.79   63.69 
  -5  -4   0 1210.38   51.69 
  -5  -4   0 1087.09   63.69 
  -5  -4   0 1201.28   44.90 
   5  -4   0 1108.39   67.19 
  -5  -4   0 1216.18   48.80 
   5  -4   0 1148.29   69.69 
   5  -4   0 1278.57   68.29 
   5  -4   0 1210.68   68.29 
   5  -4   0 1213.78   66.09 
   5  -4   0 1116.39   67.09 
  -5  -4   0 1241.58   62.39 
  -5  -4   0 1098.59   68.89 
  -5  -4   0 1126.09   65.99 
   5  -4   0 1176.88   65.19 
   5  -4   0 1210.18   65.59 
  -5  -4   0 1185.98   58.99 
   5  -4   0 1298.57   69.69 
   5  -4   0 1236.08   67.99 
  -5  -4   0 1266.17   50.79 
  -5  -4   0 1193.38   58.09 
  -5  -4   0 1233.58   68.69 
   5   4   0 1170.38   70.49 
  -5   4   0 1153.28   67.19 
  -5   4   0 1204.78   69.79 
  -5   4   0 1167.58   60.79 
  -5   4   0 1119.09   63.09 
   5   4   0 1134.79   73.49 
  -5   4   0 1215.08   68.29 
   5   4   0 1178.28   52.09 
   5   4   0 1237.08   69.99 
   5   4   0 1220.78   66.99 
  -5   4   0 1128.99   57.39 
   5   4   0 1205.38   60.79 
  -5   4   0 1204.48   61.39 
   5   4   0 1238.88   56.09 
   5   4   0 1145.49   56.59 
  -5   4   0 1134.19   66.19 
   5   4   0 1257.47   54.89 
  -5   4   0 1180.68   62.09 
   5   4   0 1193.78   49.80 
   5   4   0 1187.68   69.19 
   5   4   0 1131.79   52.39 
  -5   4   0 1326.67   70.69 
   5   4   0 1198.98   68.89 
  -5   4   0 1119.69   72.09 
  -5   4   0 1065.59   66.79 
   5   4   0 1186.98   52.49 
  -5   4   0 1252.67   72.99 
  -5   4   0 1190.88   67.19 
   5   4   0 1207.08   58.79 
  -5   4   0 1184.78   87.49 
  -5   4   0 1192.88   50.99 
   5   4   0 1150.78   59.89 
  -5   4   0 1246.88   69.39 
  -5   4   0 1176.28   62.89 
  -6  -4   0 1028.80   63.29 
   6  -4   0 1016.20   59.29 
   6  -4   0  999.80   64.39 
  -6  -4   0 1184.88   63.09 
   6  -4   0 1058.79   58.89 
  -6  -4   0 1017.90   64.39 
   6  -4   0 1089.59   65.19 
   6  -4   0 1006.60   65.19 
   6  -4   0 1139.39   62.39 
  -6  -4   0 1022.10   62.89 
  -6  -4   0 1012.50   57.79 
  -6  -4   0 1120.89   69.99 
   6  -4   0  972.20   61.19 
   6  -4   0 1027.80   64.69 
   6  -4   0 1104.49   63.89 
   6  -4   0 1035.80   66.19 
   6  -4   0 1040.20   63.69 
  -6  -4   0 1037.20   55.19 
   6  -4   0  901.01   64.39 
  -6   4   0  939.71   81.39 
   6   4   0 1078.79   57.39 
   6   4   0  981.50   55.79 
  -6   4   0  927.11   62.79 
   6   4   0  941.71   49.60 
   6   4   0 1059.79   65.09 
   6   4   0 1031.00   51.89 
   6   4   0 1000.20   66.09 
   6   4   0 1020.00   63.49 
  -6   4   0 1040.20   57.09 
  -6   4   0 1009.20   65.79 
  -6   4   0 1075.59   73.29 
  -6   4   0 1017.00   58.09 
   6   4   0 1037.20   66.49 
  -6   4   0  877.81   60.39 
   6   4   0  989.10   67.19 
  -6   4   0 1020.80   50.79 
   6   4   0 1102.89   67.59 
  -6   4   0 1016.10   64.09 
  -6   4   0 1002.80   58.09 
  -6   4   0 1034.00   65.19 
  -6   4   0  980.20   65.49 
   6   4   0 1018.80   52.49 
  -6   4   0 1081.59   60.29 
  -6   4   0 1014.50   64.19 
  -6   4   0 1033.40   60.39 
  -6   4   0  964.70   63.39 
  -6   4   0 1077.99   60.09 
  -6   4   0 1021.50   46.70 
  -6   4   0 1030.50   68.69 
   7  -4   0  713.33   50.99 
   7  -4   0  725.63   48.80 
  -7  -4   0  606.64   50.59 
  -7  -4   0  664.63   69.29 
   7  -4   0  729.03   58.19 
  -7  -4   0  711.83   50.59 
  -7  -4   0  701.03   53.39 
   7  -4   0  685.33   53.69 
   7  -4   0  774.62   49.80 
   7  -4   0  675.33   51.99 
   7  -4   0  705.93   55.99 
  -7  -4   0  709.83   44.90 
   7  -4   0  699.23   54.19 
  -7  -4   0  739.13   55.29 
   7  -4   0  688.33   54.59 
   7  -4   0  702.03   52.59 
  -7  -4   0  741.03   48.60 
   7  -4   0  642.24   50.09 
   7   4   0  667.43   51.79 
  -7   4   0  668.83   66.49 
  -7   4   0  631.04   52.19 
  -7   4   0  736.63   56.79 
   7   4   0  607.54   50.29 
   7   4   0  719.23   68.49 
  -7   4   0  732.03   52.89 
   7   4   0  737.53   55.89 
   7   4   0  708.23   56.99 
  -7   4   0  773.22   49.30 
  -7   4   0  648.54   70.39 
  -7   4   0  550.74   64.39 
  -7   4   0  726.23   54.59 
   7   4   0  666.03   46.50 
   7   4   0  724.73   47.20 
  -7   4   0  719.93   50.19 
  -7   4   0  613.84   60.89 
  -7   4   0  684.83   42.90 
   7   4   0  663.33   54.29 
  -7   4   0  654.43   65.19 
  -7   4   0  647.14   51.59 
  -7   4   0  658.53   52.39 
   7   4   0  639.94   63.79 
  -7   4   0  607.74   45.70 
   8  -4   0  678.53   66.49 
   8  -4   0  661.23   68.79 
  -8  -4   0  607.94   62.09 
  -8  -4   0  645.74   53.79 
   8  -4   0  816.02   74.19 
  -8  -4   0  765.92   51.19 
   8  -4   0  595.44   46.70 
   8  -4   0  677.13   64.69 
   8  -4   0  715.93   49.30 
   8  -4   0  702.23   68.99 
   8  -4   0  679.93   70.69 
   8  -4   0  716.83   66.39 
   8  -4   0  659.83   51.49 
   8  -4   0  716.53   67.49 
  -8  -4   0  645.94   52.39 
  -8  -4   0  499.65   61.39 
  -8  -4   0  747.23   60.09 
   8  -4   0  685.73   70.19 
   8   4   0  718.63   56.29 
  -8   4   0  704.33   68.49 
   8   4   0  666.23   50.39 
   8   4   0  724.73   70.09 
  -8   4   0  666.83   68.29 
   8   4   0  712.53   73.99 
  -8   4   0  804.32   60.89 
   8   4   0  657.33   70.19 
  -8   4   0  674.23   54.09 
   8   4   0  651.63   69.59 
  -8   4   0  653.23   67.59 
  -8   4   0  637.44   69.79 
   8   4   0  614.64   47.70 
  -8   4   0  588.24   84.59 
   8   4   0  562.94   62.09 
  -8   4   0  701.63   52.69 
  -8   4   0  642.04   47.10 
  -8   4   0  646.94   74.89 
   8   4   0  657.53   52.89 
  -8   4   0  726.43   68.19 
  -8   4   0  646.94   68.29 
   9  -4   0  335.87   46.30 
   9  -4   0  342.57   52.79 
  -9  -4   0  271.37   44.10 
  -9  -4   0  369.46   49.10 
   9  -4   0  356.86   46.30 
  -9  -4   0  436.96   55.79 
   9  -4   0  269.97   43.70 
  -9  -4   0  395.46   45.30 
   9  -4   0  339.57   49.99 
   9  -4   0  440.86   54.59 
  -9  -4   0  300.87   50.59 
   9  -4   0  335.17   47.30 
   9  -4   0  262.77   43.90 
   9  -4   0  261.57   43.70 
   9   4   0  232.88   45.10 
   9   4   0  387.76   54.99 
   9   4   0  385.96   57.09 
  -9   4   0  277.77   47.30 
   9   4   0  435.46   49.00 
  -9   4   0  332.87   45.20 
   9   4   0  338.77   49.60 
   9   4   0  364.96   53.09 
  -9   4   0  432.36   55.69 
  -9   4   0  358.06   47.20 
  -9   4   0  316.07   55.59 
  -9   4   0  255.47   43.50 
  -9   4   0  328.07   47.90 
  -9   4   0  315.67   48.70 
   9   4   0  318.17   46.60 
   9   4   0  297.77   49.20 
   9   4   0  334.17   44.90 
  -9   4   0  355.16   51.89 
   0  -5   0   -0.60    9.40 
   0  -5   0   -2.00    5.50 
   0  -5   0   -1.60    6.90 
   0  -5   0    5.50    5.70 
   0  -5   0   -3.30    8.00 
   0  -5   0   -4.10    6.80 
   0  -5   0   -1.70    5.40 
   0  -5   0   -0.70    4.00 
   0  -5   0   14.00    8.60 
   0  -5   0    0.50    6.00 
   0  -5   0    0.30    3.60 
   0  -5   0   -4.10    3.70 
   0   5   0   -4.10    4.10 
   0   5   0   -9.00    4.90 
   0   5   0   -0.90    6.90 
   0   5   0    3.30    8.90 
   0   5   0   -1.80    5.30 
   0   5   0    1.50    7.30 
   0   5   0    1.90    7.20 
   0   5   0    3.00    5.40 
   0   5   0    8.70    5.60 
   0   5   0    2.40    8.80 
   0   5   0   -0.30    5.40 
   0   5   0    6.00    8.70 
   0   5   0   -6.90    5.20 
   1  -5   0  176.28   21.70 
   1  -5   0  153.28   27.50 
   1  -5   0  153.38   19.70 
  -1  -5   0  151.28   15.50 
  -1  -5   0  147.59   20.10 
  -1  -5   0  112.39   15.60 
   1  -5   0  174.68   17.80 
  -1  -5   0  150.48   21.50 
  -1  -5   0  144.69   10.50 
  -1  -5   0  173.08   27.90 
  -1  -5   0  161.78   25.90 
  -1  -5   0  138.19   20.80 
   1  -5   0  184.58   24.40 
   1  -5   0  180.18   21.70 
   1  -5   0  151.38   23.40 
   1  -5   0  142.59   10.10 
   1  -5   0  163.48   22.40 
  -1  -5   0  156.58   25.70 
  -1  -5   0  141.59   16.40 
  -1  -5   0  162.08   20.40 
   1  -5   0  180.58   25.10 
  -1  -5   0  144.99   25.40 
  -1  -5   0  159.58   27.20 
  -1   5   0  143.29   22.00 
   1   5   0  122.09   20.20 
   1   5   0  166.58   27.00 
   1   5   0  193.58   19.20 
  -1   5   0  178.68   21.10 
  -1   5   0  188.88   25.60 
  -1   5   0  155.78   24.40 
   1   5   0  130.79   22.40 
  -1   5   0  197.88   28.70 
   1   5   0  146.79   22.20 
   1   5   0  140.59   17.20 
   1   5   0  144.79   17.30 
   1   5   0  148.69   21.10 
  -1   5   0  110.69   23.70 
  -1   5   0  158.88   19.90 
  -1   5   0  163.98   22.90 
  -1   5   0  164.28   21.30 
  -1   5   0  149.19   22.30 
  -1   5   0  201.68   36.90 
   1   5   0  155.88   10.60 
   1   5   0  163.88   23.20 
   1   5   0  165.18   22.20 
  -1   5   0  142.79   24.90 
  -1   5   0  129.99   22.00 
   1   5   0  175.68   17.40 
   1   5   0  206.48   32.70 
  -1   5   0  147.49   19.80 
  -2  -5   0    8.10    5.00 
   2  -5   0    3.10    4.80 
  -2  -5   0    6.20    6.90 
   2  -5   0    8.60    6.70 
  -2  -5   0    4.50    5.50 
   2  -5   0   13.60    6.10 
  -2  -5   0    6.30    4.10 
   2  -5   0   -5.40    9.00 
   2  -5   0    5.60    6.80 
  -2  -5   0   19.90   10.50 
  -2  -5   0    9.30    9.00 
  -2  -5   0    3.80    7.10 
   2  -5   0    3.80    6.90 
   2  -5   0    5.40    8.50 
   2  -5   0    5.90    7.00 
  -2  -5   0   14.20   11.30 
  -2  -5   0   -0.80    5.30 
  -2  -5   0   21.20    9.90 
  -2  -5   0   14.80    3.70 
   2  -5   0   23.10   10.90 
   2  -5   0    0.90    6.20 
  -2  -5   0   11.80    4.00 
  -2  -5   0   13.90    6.90 
  -2  -5   0   13.30    5.60 
  -2  -5   0    8.60   11.10 
  -2  -5   0   13.60    5.00 
  -2   5   0    5.70   11.50 
  -2   5   0    2.00    7.30 
   2   5   0    6.30    6.70 
   2   5   0   11.80    6.10 
  -2   5   0   25.40   12.00 
  -2   5   0    3.10    9.10 
  -2   5   0   -0.10    5.40 
   2   5   0   15.80   10.60 
   2   5   0   10.10    5.20 
  -2   5   0   32.60   11.80 
   2   5   0   15.80   10.00 
   2   5   0    9.20    5.50 
  -2   5   0   18.70    8.00 
   2   5   0    2.80    9.60 
   2   5   0    6.10    8.90 
   2   5   0    9.50    8.80 
  -2   5   0    1.30    6.20 
  -2   5   0   13.70    8.40 
  -2   5   0    5.20    8.30 
   2   5   0   12.90    6.40 
  -2   5   0   -5.20    5.80 
  -2   5   0   -2.20    5.40 
  -2   5   0    6.90    7.80 
  -2   5   0   -1.10    4.30 
   2   5   0   20.70    9.30 
   2   5   0    5.50    6.20 
   2   5   0    6.30    7.00 
   2   5   0   16.50    7.90 
  -3  -5   0   -1.80    5.50 
  -3  -5   0   12.60   10.50 
  -3  -5   0   -7.00    6.10 
  -3  -5   0   -1.70    4.70 
  -3  -5   0    6.00    7.60 
   3  -5   0   14.00   11.00 
  -3  -5   0   -2.80    3.50 
   3  -5   0   10.00    8.40 
   3  -5   0    3.50    8.60 
   3  -5   0   17.80   10.80 
  -3  -5   0   -3.70    6.70 
  -3  -5   0   -2.10    4.90 
  -3  -5   0    0.80    3.10 
  -3  -5   0   -2.50    4.40 
  -3  -5   0   -1.90    5.50 
  -3  -5   0    1.50    7.30 
   3  -5   0   12.40    9.00 
  -3  -5   0    2.40    4.50 
   3  -5   0    7.90   11.10 
  -3  -5   0   -2.50    2.60 
   3  -5   0    4.20    4.40 
   3  -5   0   13.00    9.30 
  -3  -5   0   -3.40    5.10 
   3  -5   0   -3.00    5.70 
   3  -5   0    2.90    6.10 
   3   5   0    4.00    3.20 
  -3   5   0   -4.40    5.90 
  -3   5   0   -8.40    6.50 
  -3   5   0   13.00   14.60 
   3   5   0    2.50    5.60 
  -3   5   0    2.00    7.60 
  -3   5   0    1.00    7.90 
   3   5   0    0.60    4.90 
   3   5   0    9.80    9.00 
  -3   5   0    6.90    9.00 
  -3   5   0   12.00    6.30 
   3   5   0   -5.60    6.80 
   3   5   0    3.70    5.30 
  -3   5   0    0.50    3.90 
   3   5   0   -1.70    4.40 
   3   5   0    2.50    6.70 
   3   5   0    4.70    9.70 
  -3   5   0   10.80    9.00 
   3   5   0    5.70    5.10 
  -3   5   0    7.50    6.80 
  -3   5   0    2.70    5.10 
   3   5   0    0.70    8.40 
  -3   5   0   -5.60    7.30 
   3   5   0   -0.50    4.80 
  -3   5   0   -5.90    7.50 
   3   5   0   -0.80    4.20 
   3   5   0   -6.50    5.40 
  -3   5   0    2.50    6.90 
  -3   5   0    4.00    7.20 
  -4  -5   0   68.59    9.30 
  -4  -5   0   49.40   16.50 
   4  -5   0  110.79   21.00 
  -4  -5   0   75.19   13.90 
  -4  -5   0  106.49   18.80 
   4  -5   0   56.59   15.90 
   4  -5   0   77.09   18.20 
  -4  -5   0   91.09   15.60 
  -4  -5   0   65.99   19.50 
  -4  -5   0   85.09   17.10 
  -4  -5   0   36.20   16.90 
   4  -5   0   87.79   18.80 
   4  -5   0   71.29   18.30 
   4  -5   0   73.09   16.40 
   4  -5   0   68.29   18.10 
   4  -5   0  100.49   20.70 
   4  -5   0   57.79   17.80 
   4  -5   0   91.49   22.10 
   4  -5   0   58.49   10.00 
  -4  -5   0   60.69   12.50 
  -4  -5   0   65.79   14.20 
  -4  -5   0   74.59   17.00 
   4   5   0   67.39    7.80 
  -4   5   0   97.59   15.40 
  -4   5   0   77.39   18.90 
  -4   5   0   86.59   20.70 
  -4   5   0   88.49   19.30 
   4   5   0   78.19   20.70 
   4   5   0   59.29   15.30 
   4   5   0   83.29   19.20 
  -4   5   0   66.89   17.70 
   4   5   0   80.89   13.70 
  -4   5   0   88.49   20.40 
   4   5   0   72.99   14.20 
  -4   5   0   51.69   14.90 
  -4   5   0   67.59   11.90 
  -4   5   0   54.49   24.60 
   4   5   0   90.89   21.60 
  -4   5   0   90.99   19.70 
   4   5   0   74.99   12.20 
  -4   5   0   53.59   16.90 
  -4   5   0   89.59   19.30 
   4   5   0   77.39   15.30 
  -4   5   0   83.39   19.00 
  -4   5   0   89.09   22.30 
   4   5   0   68.29   13.80 
  -4   5   0   81.89   22.30 
   4   5   0   55.99   16.40 
   4   5   0   62.79   12.50 
  -4   5   0   70.59   13.70 
   5  -5   0   60.39   16.70 
   5  -5   0   61.79   20.50 
  -5  -5   0   80.39   16.00 
  -5  -5   0   64.39   18.00 
   5  -5   0   87.89   19.10 
   5  -5   0   59.59   19.80 
   5  -5   0   59.09   17.90 
  -5  -5   0   84.89   15.00 
  -5  -5   0   95.29   20.10 
   5  -5   0   77.49   19.20 
   5  -5   0   90.29   20.50 
   5  -5   0   85.39   21.70 
   5  -5   0   41.30   15.40 
  -5  -5   0   82.89   21.80 
  -5  -5   0   87.99   18.60 
   5  -5   0   74.29   19.60 
  -5  -5   0   70.79   14.90 
  -5  -5   0   87.19   22.70 
  -5  -5   0   82.29   13.10 
  -5   5   0   81.89   16.70 
  -5   5   0   80.89   15.80 
   5   5   0   77.39   14.60 
  -5   5   0   77.19   25.30 
  -5   5   0   66.99   28.00 
  -5   5   0   77.49   22.70 
  -5   5   0   98.99   20.50 
  -5   5   0   34.60   15.10 
   5   5   0   63.39   19.50 
   5   5   0   68.99   13.90 
   5   5   0   90.19   16.60 
  -5   5   0   79.69   20.80 
   5   5   0   82.79   16.80 
  -5   5   0  100.59   17.30 
   5   5   0  100.19   24.50 
   5   5   0   67.59   20.70 
  -5   5   0   98.79   21.60 
  -5   5   0   98.19   22.10 
  -5   5   0   93.79   20.20 
  -5   5   0   55.99   17.50 
  -5   5   0   91.79   21.90 
  -5   5   0   98.99   22.20 
  -5   5   0   86.79   18.60 
   5   5   0   44.80   10.10 
   5   5   0   97.79   17.10 
   5   5   0   63.69   18.40 
  -5   5   0   67.99   20.50 
  -5   5   0   68.29   17.60 
  -6  -5   0  489.75   48.90 
  -6  -5   0  466.35   53.99 
   6  -5   0  523.95   51.29 
  -6  -5   0  452.55   44.50 
   6  -5   0  418.26   46.80 
   6  -5   0  432.26   47.50 
   6  -5   0  415.96   46.80 
  -6  -5   0  513.65   35.60 
   6  -5   0  482.85   47.10 
   6  -5   0  412.06   45.60 
   6  -5   0  433.56   50.29 
   6  -5   0  429.56   46.10 
  -6  -5   0  462.05   48.90 
   6  -5   0  462.55   51.99 
   6  -5   0  515.75   55.89 
  -6  -5   0  420.46   40.90 
   6  -5   0  516.05   49.60 
  -6   5   0  426.46   52.29 
  -6   5   0  487.95   52.69 
  -6   5   0  482.95   47.50 
  -6   5   0  451.95   54.79 
   6   5   0  501.95   55.79 
  -6   5   0  573.64   53.49 
  -6   5   0  464.15   33.30 
  -6   5   0  539.05   76.79 
   6   5   0  458.35   54.89 
  -6   5   0  478.25   49.40 
   6   5   0  437.46   33.20 
  -6   5   0  368.76   45.80 
   6   5   0  449.76   42.20 
  -6   5   0  597.84   60.29 
   6   5   0  390.16   45.60 
  -6   5   0  474.55   44.80 
  -6   5   0  462.45   45.80 
  -6   5   0  488.75   37.20 
  -6   5   0  449.95   49.70 
  -6   5   0  500.75   51.09 
  -6   5   0  418.66   50.59 
   6   5   0  473.15   52.39 
  -6   5   0  407.06   47.10 
  -6   5   0  503.95   37.40 
   7  -5   0   60.19   19.90 
  -7  -5   0   45.40   16.70 
   7  -5   0   60.39   19.00 
   7  -5   0   87.89   23.60 
  -7  -5   0   73.09   19.80 
  -7  -5   0   30.40   17.30 
  -7  -5   0   34.90   15.70 
   7  -5   0   85.79   27.30 
  -7  -5   0   34.80   13.90 
   7  -5   0   57.89   21.30 
   7  -5   0  106.59   23.30 
   7  -5   0   52.69   17.90 
   7  -5   0   58.29   20.20 
   7  -5   0   52.79   18.60 
   7  -5   0   62.89   22.20 
  -7  -5   0   71.99   18.20 
   7  -5   0  104.09   26.90 
  -7   5   0  107.99   27.50 
  -7   5   0   25.30   23.80 
   7   5   0   43.50   19.50 
  -7   5   0   95.49   21.20 
  -7   5   0   86.49   21.00 
  -7   5   0   71.29   24.70 
   7   5   0   83.99   23.00 
  -7   5   0   57.99   22.90 
  -7   5   0   58.59   19.60 
   7   5   0   80.49   23.40 
  -7   5   0   68.59   22.70 
  -7   5   0   62.59   20.20 
  -7   5   0   56.09   16.60 
  -7   5   0   61.79   22.40 
   7   5   0   49.10   21.40 
  -7   5   0   47.40   17.30 
  -7   5   0   40.40   14.10 
   7   5   0   39.50   20.00 
  -7   5   0  136.69   29.60 
   7   5   0   52.39   17.30 
   7   5   0   92.19   25.10 
  -7   5   0   50.79   19.00 
  -8  -5   0  290.17   41.80 
   8  -5   0  238.98   40.40 
   8  -5   0  225.58   39.60 
   8  -5   0  222.08   34.70 
  -8  -5   0  210.38   41.40 
  -8  -5   0  224.58   37.30 
   8  -5   0  205.08   36.10 
   8  -5   0  330.27   51.09 
   8  -5   0  244.58   37.00 
   8  -5   0  212.38   37.40 
   8  -5   0  189.98   38.00 
   8  -5   0  172.28   32.20 
   8  -5   0  296.37   45.80 
  -8  -5   0  165.88   28.70 
   8  -5   0  242.28   41.00 
  -8  -5   0  195.78   33.20 
  -8   5   0  226.38   35.20 
  -8   5   0  149.79   48.30 
   8   5   0  260.17   43.40 
  -8   5   0  261.37   41.70 
  -8   5   0  151.28   35.50 
  -8   5   0  248.78   41.10 
   8   5   0  231.68   42.70 
   8   5   0  163.98   35.60 
  -8   5   0  188.98   41.80 
  -8   5   0  172.08   33.90 
  -8   5   0  302.17   47.60 
  -8   5   0  225.28   40.80 
  -8   5   0  192.08   50.09 
  -8   5   0  246.58   42.40 
   8   5   0  186.98   38.30 
  -8   5   0  282.97   38.90 
   8   5   0  204.28   37.00 
   8   5   0  196.98   36.60 
   9  -5   0   75.09   28.80 
   9  -5   0   62.09   23.80 
   9  -5   0   23.70   19.50 
  -9  -5   0   21.30   14.30 
   9  -5   0   71.79   24.20 
   9  -5   0   34.80   20.70 
  -9  -5   0   55.99   22.00 
   9  -5   0   37.30   20.70 
   9  -5   0   56.69   23.80 
   9  -5   0   22.60   18.10 
   9  -5   0   48.40   21.80 
  -9  -5   0   87.99   29.20 
  -9  -5   0   27.60   16.40 
  -9   5   0   17.30   16.20 
  -9   5   0    4.40   13.60 
  -9   5   0   32.10   22.20 
  -9   5   0   51.29   32.70 
   9   5   0   22.10   22.00 
   9   5   0   20.80   18.80 
  -9   5   0   72.19   26.20 
   9   5   0   42.30   25.00 
   9   5   0   49.99   23.80 
  -9   5   0   44.80   24.90 
  -9   5   0   18.00   18.60 
  -9   5   0   44.50   19.90 
  -9   5   0   24.20   17.80 
   9   5   0   47.30   23.20 
  -9   5   0   42.50   23.20 
   0  -6   0  130.99   19.60 
   0  -6   0  164.88   29.90 
   0  -6   0  151.18   23.70 
   0  -6   0  186.98   30.00 
   0  -6   0  170.08   23.90 
   0  -6   0  119.89   17.50 
   0  -6   0  149.69   17.70 
   0  -6   0  131.29   27.60 
   0  -6   0  139.69   22.70 
   0  -6   0  118.99   21.80 
   0  -6   0  139.89   28.30 
   0  -6   0  129.59   13.60 
   0  -6   0  157.98   18.10 
   0   6   0  161.78   23.40 
   0   6   0  137.59   24.20 
   0   6   0  141.79   23.70 
   0   6   0  149.88   22.00 
   0   6   0  141.99   27.80 
   0   6   0  143.29   24.50 
   0   6   0  143.99   19.80 
   0   6   0  136.69   19.40 
   0   6   0  164.38   27.60 
   0   6   0  142.29   25.40 
   0   6   0  141.19   21.70 
   0   6   0  144.89   23.10 
   0   6   0  191.98   31.60 
   0   6   0  108.89   27.40 
   0   6   0  162.28   25.20 
  -1  -6   0 1898.41   89.49 
  -1  -6   0 1978.20   75.19 
  -1  -6   0 2029.70   85.29 
   1  -6   0 1854.21  104.69 
  -1  -6   0 2009.50  101.29 
   1  -6   0 2100.49   97.09 
  -1  -6   0 2010.80   93.99 
   1  -6   0 1971.60   90.69 
  -1  -6   0 1966.40   92.99 
  -1  -6   0 2008.20   82.59 
   1  -6   0 1948.01   97.89 
   1  -6   0 2064.29   84.09 
   1  -6   0 1986.90   72.39 
  -1  -6   0 1853.91   93.59 
  -1  -6   0 2002.90  107.39 
   1  -6   0 2079.89   99.09 
   1  -6   0 1752.62  101.79 
   1  -6   0 2013.30   89.49 
   1  -6   0 2005.90   97.29 
   1  -6   0 2108.49   93.99 
  -1  -6   0 2041.60  105.29 
  -1  -6   0 1958.20  100.59 
  -1  -6   0 2000.80  101.99 
  -1  -6   0 2054.09   88.19 
   1   6   0 1916.11   93.19 
   1   6   0 2086.39   95.09 
  -1   6   0 2023.30  105.49 
  -1   6   0 1863.81   90.99 
  -1   6   0 1895.11   90.19 
  -1   6   0 1532.75  108.49 
  -1   6   0 2144.29   99.19 
   1   6   0 1990.20   84.59 
  -1   6   0 1945.11   89.29 
  -1   6   0 2005.80   90.79 
   1   6   0 1984.50   86.69 
  -1   6   0 2008.00   96.79 
   1   6   0 2013.10   86.79 
   1   6   0 1956.20   95.39 
  -1   6   0 2105.49   90.69 
   1   6   0 2026.00  111.29 
   1   6   0 1947.11   74.39 
  -1   6   0 1965.60   97.29 
   1   6   0 1941.11   94.49 
   1   6   0 2101.69   92.19 
   1   6   0 2089.79  105.09 
   1   6   0 2064.09  102.09 
   1   6   0 1973.20   96.49 
   1   6   0 2064.39   94.79 
  -1   6   0 1995.40  100.89 
  -1   6   0 2006.60   96.49 
  -1   6   0 2112.89  102.49 
   1   6   0 1955.50  101.99 
  -1   6   0 1948.21   95.89 
  -1   6   0 1974.60   99.59 
  -2  -6   0  -11.20    7.80 
  -2  -6   0   25.40   14.50 
   2  -6   0    8.50    9.60 
  -2  -6   0   -0.30    5.40 
   2  -6   0    6.90    4.80 
   2  -6   0    4.90    8.60 
   2  -6   0    6.00    6.30 
  -2  -6   0   19.10   12.50 
   2  -6   0   27.80   17.20 
  -2  -6   0    9.80    4.70 
  -2  -6   0   13.80   12.20 
  -2  -6   0   12.60    8.00 
  -2  -6   0   -2.10    8.50 
  -2  -6   0   -2.10    6.10 
  -2  -6   0    6.40    6.00 
  -2  -6   0   14.80    7.00 
   2  -6   0    6.50    7.40 
   2  -6   0    5.10    7.40 
  -2  -6   0   10.20    4.10 
   2  -6   0   25.10   11.80 
   2  -6   0   13.60    9.90 
  -2  -6   0   -0.30    7.00 
  -2  -6   0   -2.40    5.40 
  -2   6   0   21.60   11.60 
  -2   6   0    6.90   10.90 
   2   6   0   28.40   13.10 
   2   6   0   -0.70    8.80 
   2   6   0   14.90    8.40 
  -2   6   0   29.40   12.70 
  -2   6   0    1.40    9.70 
  -2   6   0   13.30   13.60 
   2   6   0   20.70    9.90 
   2   6   0    0.10   11.80 
  -2   6   0    8.50    8.90 
   2   6   0   21.80   10.20 
   2   6   0    6.60    5.90 
   2   6   0    1.00    6.10 
  -2   6   0   -5.10    7.10 
  -2   6   0    7.00    9.80 
  -2   6   0   10.10    5.90 
  -2   6   0   21.40   10.70 
   2   6   0   13.00    9.30 
  -2   6   0   11.00   11.20 
   2   6   0    8.70   12.00 
   2   6   0   12.10    6.40 
  -2   6   0   20.40   10.10 
   2   6   0   10.80    8.10 
  -2   6   0   -1.10    6.50 
  -2   6   0   10.10    8.80 
  -2   6   0    0.20   10.00 
   2   6   0   -0.40    8.40 
   3  -6   0  703.43   50.89 
  -3  -6   0  754.52   38.60 
  -3  -6   0  778.82   46.30 
   3  -6   0  799.92   48.20 
  -3  -6   0  825.72   42.10 
   3  -6   0  719.33   51.99 
  -3  -6   0  714.63   55.29 
   3  -6   0  737.83   53.69 
  -3  -6   0  796.32   47.50 
  -3  -6   0  756.82   33.40 
  -3  -6   0  824.52   39.90 
  -3  -6   0  832.12   48.00 
   3  -6   0  751.72   52.09 
  -3  -6   0  786.32   39.80 
   3  -6   0  833.02   55.59 
  -3  -6   0  790.42   55.49 
   3  -6   0  848.52   50.79 
   3  -6   0  737.13   50.79 
  -3  -6   0  813.32   48.40 
  -3  -6   0  852.71   52.59 
   3  -6   0  814.92   60.99 
  -3  -6   0  747.23   57.49 
   3   6   0  849.02   54.39 
  -3   6   0  830.52   52.09 
  -3   6   0  675.33   57.79 
  -3   6   0  811.02   53.19 
  -3   6   0  779.02   70.49 
  -3   6   0  849.41   56.09 
  -3   6   0  787.42   53.19 
  -3   6   0  748.33   53.69 
   3   6   0  870.71   53.59 
   3   6   0  721.43   47.90 
   3   6   0  769.82   37.40 
  -3   6   0  777.92   53.09 
  -3   6   0  864.51   52.69 
  -3   6   0  806.82   52.79 
   3   6   0  829.42   48.30 
  -3   6   0  833.52   56.59 
   3   6   0  810.72   42.90 
   3   6   0  714.33   53.39 
   3   6   0  773.92   52.89 
  -3   6   0  794.32   55.89 
   3   6   0  812.52   59.39 
  -3   6   0  778.22   41.10 
   3   6   0  777.42   46.60 
   3   6   0  704.13   55.99 
  -4  -6   0   -7.60    6.00 
   4  -6   0   -8.10    7.40 
  -4  -6   0    0.30    7.50 
   4  -6   0    6.70    9.10 
   4  -6   0   -6.90    7.80 
  -4  -6   0   -4.00    5.80 
  -4  -6   0   -2.10    6.40 
   4  -6   0   12.90   11.50 
  -4  -6   0   -2.50    3.70 
  -4  -6   0   -6.60   10.00 
  -4  -6   0   -0.40    7.20 
   4  -6   0   -1.50    8.70 
  -4  -6   0    1.60    5.30 
   4  -6   0    2.20   12.20 
   4  -6   0    7.20    8.90 
  -4  -6   0    0.10    7.80 
   4  -6   0   -9.70   11.50 
   4  -6   0    3.70    8.40 
   4  -6   0    5.80    8.60 
  -4  -6   0   13.20   11.90 
  -4   6   0    0.00    8.20 
   4   6   0   -0.20    5.90 
  -4   6   0  -10.50    9.60 
  -4   6   0   -0.10   10.90 
  -4   6   0   -4.40    8.00 
  -4   6   0   -1.80    5.60 
   4   6   0    0.60   12.60 
  -4   6   0  -12.00    8.40 
  -4   6   0   -3.50    6.50 
   4   6   0    3.80    8.00 
   4   6   0   11.90   11.20 
   4   6   0    6.40    7.40 
  -4   6   0   -6.90    7.90 
   4   6   0    0.90    7.10 
   4   6   0   -0.80    5.60 
  -4   6   0  -11.20    5.50 
  -4   6   0    2.90   10.60 
  -4   6   0   -1.10    5.30 
   4   6   0    5.90    9.10 
  -4   6   0   -6.20    9.70 
  -4   6   0    4.20    7.90 
   4   6   0   -2.30    9.00 
  -4   6   0   -2.10    9.10 
   4   6   0    6.10   10.80 
  -4   6   0  -13.30    6.70 
   5  -6   0 1293.07   74.89 
  -5  -6   0 1377.16   66.99 
   5  -6   0 1328.87   83.09 
  -5  -6   0 1190.48   70.59 
  -5  -6   0 1265.57   78.19 
  -5  -6   0 1235.68   65.89 
  -5  -6   0 1421.76   85.09 
  -5  -6   0 1190.78   67.99 
  -5  -6   0 1255.57   62.19 
   5  -6   0 1358.76   74.39 
   5  -6   0 1128.89   77.69 
   5  -6   0 1308.17   76.99 
   5  -6   0 1237.18   74.59 
   5  -6   0 1268.77   74.09 
   5  -6   0 1211.48   75.09 
   5  -6   0 1088.59   74.29 
  -5  -6   0 1219.08   78.29 
   5  -6   0 1130.99   74.29 
  -5  -6   0 1227.18   76.29 
  -5   6   0 1238.78   79.09 
   5   6   0 1379.76   70.89 
  -5   6   0 1225.58   77.99 
  -5   6   0 1338.97   78.59 
  -5   6   0 1352.16   86.09 
  -5   6   0 1300.57  103.39 
   5   6   0 1336.87   76.09 
  -5   6   0 1279.87   64.49 
  -5   6   0 1189.28   79.39 
  -5   6   0 1242.78   62.59 
  -5   6   0 1204.78   74.19 
  -5   6   0 1178.48   76.09 
  -5   6   0 1226.58   75.49 
  -5   6   0 1390.16   76.39 
  -5   6   0 1369.46   78.59 
   5   6   0 1218.68   80.29 
   5   6   0 1259.67   61.19 
   5   6   0 1276.07   75.69 
   5   6   0 1217.98   78.79 
   5   6   0 1214.48   66.09 
   5   6   0 1235.68   76.69 
   5   6   0 1213.38   79.39 
  -5   6   0 1219.68   86.09 
  -5   6   0 1090.99   69.69 
   5   6   0 1285.77   64.99 
  -5   6   0 1276.97   76.39 
  -5   6   0 1263.27   76.79 
   6  -6   0   -7.30   10.50 
  -6  -6   0   17.10   13.70 
   6  -6   0    4.40   10.10 
  -6  -6   0    9.90   11.80 
  -6  -6   0   13.90   10.40 
  -6  -6   0    9.60    9.90 
   6  -6   0   -1.60    9.70 
   6  -6   0    8.50   10.90 
   6  -6   0  -19.60    8.80 
   6  -6   0   -0.40   10.50 
  -6  -6   0    0.60    8.20 
   6  -6   0   -0.70   12.50 
   6  -6   0   11.30   13.00 
   6  -6   0   -6.10    7.60 
   6  -6   0   14.00   15.50 
  -6  -6   0    5.80    9.20 
  -6   6   0   -4.90   10.70 
   6   6   0   -9.10    8.90 
  -6   6   0    3.30   10.90 
  -6   6   0   -4.80   11.60 
  -6   6   0   14.70   10.30 
  -6   6   0   15.50   11.80 
   6   6   0   -1.30   13.00 
  -6   6   0   11.20   12.20 
  -6   6   0    7.60   12.40 
  -6   6   0   -4.00    9.20 
  -6   6   0    0.50   10.30 
   6   6   0   -0.10   12.70 
  -6   6   0    7.70   11.10 
  -6   6   0    5.40    9.60 
  -6   6   0   -2.30   12.90 
  -6   6   0   -1.70    8.30 
  -6   6   0   -5.30   11.50 
   6   6   0   -9.80   10.00 
  -6   6   0   13.90   13.20 
  -6   6   0   20.40   22.70 
  -7  -6   0 1092.99   77.19 
  -7  -6   0 1177.88   69.89 
   7  -6   0 1279.37   77.39 
   7  -6   0 1104.09   80.99 
   7  -6   0 1319.97   84.19 
   7  -6   0 1180.38   77.19 
  -7  -6   0 1206.38   84.49 
   7  -6   0 1256.67   80.59 
  -7  -6   0 1232.58   78.19 
   7  -6   0 1251.77   79.89 
  -7  -6   0 1281.67   73.19 
   7  -6   0 1091.09   82.59 
   7  -6   0 1215.88   78.49 
   7  -6   0 1141.79   78.69 
   7  -6   0 1226.18   77.59 
  -7   6   0 1151.28   80.29 
  -7   6   0 1169.78   76.89 
  -7   6   0 1457.45  116.89 
  -7   6   0 1252.77   81.89 
  -7   6   0 1308.67   82.59 
   7   6   0 1284.87   86.99 
  -7   6   0 1308.67   83.29 
   7   6   0 1259.77   79.69 
  -7   6   0 1148.29   85.19 
  -7   6   0 1142.89   86.89 
  -7   6   0 1292.27   78.49 
  -7   6   0 1066.99   77.39 
  -7   6   0 1254.17   86.09 
  -7   6   0 1193.08   70.09 
  -7   6   0 1312.87   74.59 
  -7   6   0 1109.59   80.89 
   7   6   0 1189.48   81.69 
   7   6   0 1017.90   80.59 
   7   6   0 1253.67   81.79 
  -8  -6   0   79.99   24.30 
   8  -6   0   56.79   23.40 
  -8  -6   0   58.19   21.90 
   8  -6   0   50.19   22.50 
   8  -6   0   98.89   27.30 
  -8  -6   0   64.29   20.40 
   8  -6   0   26.00   20.30 
   8  -6   0  108.69   27.90 
   8  -6   0   55.99   20.80 
   8  -6   0   74.29   27.90 
   8  -6   0   68.39   23.10 
   8  -6   0   16.70   16.40 
   8  -6   0   36.30   20.00 
  -8  -6   0   68.89   25.30 
   8   6   0   38.90   22.30 
  -8   6   0   41.70   19.40 
  -8   6   0   67.79   23.30 
   8   6   0   47.10   23.10 
  -8   6   0  104.49   28.80 
   8   6   0   56.09   23.00 
  -8   6   0   82.19   25.50 
  -8   6   0   99.89   40.90 
  -8   6   0   99.49   29.70 
  -8   6   0   72.29   22.00 
   8   6   0   71.49   27.20 
  -8   6   0   32.00   18.70 
   8   6   0   65.79   23.80 
  -8   6   0   56.89   24.50 
  -8   6   0   64.79   23.80 
  -8   6   0   84.89   29.60 
  -8   6   0   76.59   23.10 
   8   6   0   44.00   22.70 
  -8   6   0  109.09   30.60 
   0  -7   0   -1.30    6.20 
   0  -7   0   -6.30    5.80 
   0  -7   0   10.20    4.70 
   0  -7   0   10.20   14.40 
   0  -7   0   -8.70    8.80 
   0  -7   0   -1.30   12.30 
   0  -7   0    4.90   13.80 
   0  -7   0   -2.30    8.80 
   0  -7   0    2.80    7.00 
   0  -7   0   10.30   11.10 
   0  -7   0   -5.80    6.50 
   0   7   0    3.80    7.50 
   0   7   0   -1.90    7.20 
   0   7   0    7.50    8.40 
   0   7   0   -3.50   11.10 
   0   7   0   -9.20    4.90 
   0   7   0   -7.70    9.20 
   0   7   0    0.60   10.70 
   0   7   0   -0.90    5.80 
   0   7   0    2.40    8.30 
   0   7   0   -0.70    9.80 
   0   7   0   -0.20    9.80 
   0   7   0    4.50    8.90 
   0   7   0    9.60    6.90 
   0   7   0    0.60   11.00 
   0   7   0   -2.00    8.40 
   0   7   0    3.10    8.70 
   0   7   0   -0.70   11.10 
   1  -7   0  107.19   20.10 
   1  -7   0  149.59   32.60 
  -1  -7   0  131.69   30.30 
   1  -7   0   97.49   23.70 
  -1  -7   0  120.29   19.30 
  -1  -7   0  114.29   22.70 
   1  -7   0  127.99   22.00 
   1  -7   0  145.19   32.40 
  -1  -7   0  145.39   29.50 
  -1  -7   0  190.48   36.10 
  -1  -7   0  109.59   25.70 
  -1  -7   0  132.89   20.30 
  -1  -7   0  117.99   21.30 
  -1  -7   0  130.69   28.50 
   1  -7   0  132.79   25.20 
   1  -7   0  128.79   24.70 
  -1  -7   0  139.09   24.50 
  -1  -7   0  135.09   23.70 
   1  -7   0  126.29   26.30 
   1  -7   0  126.99   22.20 
   1  -7   0  148.79   17.90 
   1   7   0  116.09   19.00 
  -1   7   0  172.68   25.30 
  -1   7   0  109.59   20.50 
  -1   7   0  100.49   26.30 
   1   7   0  127.59   22.30 
  -1   7   0  136.89   22.40 
   1   7   0  131.69   21.00 
   1   7   0  132.49   19.80 
   1   7   0  144.49   25.80 
  -1   7   0  123.49   24.60 
   1   7   0  155.48   26.20 
   1   7   0  184.58   29.20 
  -1   7   0  131.19   26.40 
   1   7   0  147.79   30.00 
   1   7   0  109.09   28.00 
   1   7   0  128.69   25.10 
   1   7   0  123.69   27.90 
  -1   7   0  184.78   29.40 
  -1   7   0  174.18   30.60 
  -1   7   0   93.39   21.30 
  -1   7   0  108.09   25.60 
  -1   7   0  195.98   42.60 
   1   7   0  108.89   28.60 
   1   7   0  138.69   25.80 
  -1   7   0  111.59   26.30 
   1   7   0   95.89   21.90 
  -1   7   0  157.88   18.50 
  -1   7   0  134.79   23.20 
  -1   7   0  142.19   22.60 
   1   7   0  113.79   22.70 
  -1   7   0  131.39   25.60 
   1   7   0  100.29   24.70 
   2  -7   0    8.60   10.00 
  -2  -7   0   -7.00    7.60 
  -2  -7   0    6.20    7.10 
   2  -7   0    3.80    9.10 
  -2  -7   0    4.40    6.90 
  -2  -7   0   11.30   14.80 
   2  -7   0   -8.70   12.30 
  -2  -7   0   13.40    8.70 
  -2  -7   0   14.80   15.50 
  -2  -7   0   13.90   10.10 
  -2  -7   0   39.70   17.30 
   2  -7   0    8.30    8.90 
  -2  -7   0    6.90   11.30 
  -2  -7   0   16.70   10.70 
  -2  -7   0    9.40    7.80 
   2  -7   0    7.20   11.10 
   2  -7   0    2.70    9.20 
   2  -7   0    1.10    6.20 
  -2  -7   0    9.10   12.10 
   2  -7   0   15.90   11.60 
   2  -7   0   14.70    9.60 
   2   7   0   -2.90    7.60 
  -2   7   0    0.20    7.80 
   2   7   0   12.20    7.90 
   2   7   0   15.90   14.70 
  -2   7   0   10.30   11.90 
  -2   7   0   -0.40   14.00 
  -2   7   0   14.20   14.50 
   2   7   0    8.30   10.00 
  -2   7   0    2.90   11.50 
   2   7   0    4.90   11.00 
   2   7   0   10.40   10.40 
   2   7   0    6.80    9.80 
   2   7   0    4.10    6.90 
  -2   7   0   16.10   10.30 
  -2   7   0    2.80    9.80 
   2   7   0   -0.80   13.60 
   2   7   0   14.80   12.30 
  -2   7   0    3.00    9.10 
  -2   7   0   17.30   14.40 
  -2   7   0    2.90    5.70 
  -2   7   0  -10.00    6.70 
  -2   7   0   -5.60    6.30 
   2   7   0   15.80   13.00 
   2   7   0    7.30    9.70 
   2   7   0    4.50   10.40 
  -2   7   0    2.70    7.40 
  -2   7   0   10.10   10.20 
  -2   7   0   -2.30    9.60 
  -2   7   0    3.60    9.80 
   3  -7   0   10.20   10.50 
   3  -7   0   24.80   12.50 
   3  -7   0   14.80   14.80 
  -3  -7   0   11.50    9.70 
  -3  -7   0   13.90    8.20 
   3  -7   0    9.00   11.60 
   3  -7   0   23.20   14.50 
  -3  -7   0   22.80   16.70 
  -3  -7   0   -2.20    9.00 
  -3  -7   0   23.80   14.00 
  -3  -7   0   21.30   14.80 
  -3  -7   0    3.30    5.80 
   3  -7   0   -2.60    9.20 
   3  -7   0    3.50   11.70 
  -3  -7   0   23.50   11.40 
  -3  -7   0   22.40   12.20 
  -3  -7   0   13.70   12.10 
   3  -7   0   11.90   10.90 
   3   7   0    5.60   12.20 
  -3   7   0   11.80   16.20 
  -3   7   0   32.80   16.10 
   3   7   0   24.30   14.40 
  -3   7   0   22.40    8.60 
   3   7   0   30.60   12.90 
  -3   7   0   20.80   12.10 
  -3   7   0    9.40   13.60 
  -3   7   0   22.50   15.80 
   3   7   0   16.70   11.90 
  -3   7   0   25.80    9.40 
  -3   7   0    5.90   10.20 
   3   7   0   25.20   14.60 
  -3   7   0    8.80   11.40 
  -3   7   0   27.20   14.70 
   3   7   0    3.20   13.50 
  -3   7   0   17.50   12.40 
  -3   7   0   44.70   18.10 
   3   7   0   22.00   14.30 
   3   7   0   20.70    9.10 
   3   7   0   26.30   12.50 
  -3   7   0    4.50    9.80 
  -3   7   0   -9.20   10.40 
   3   7   0    7.70   11.30 
  -3   7   0    7.60   11.40 
   4  -7   0  168.28   30.70 
   4  -7   0  233.38   36.70 
   4  -7   0  149.19   30.80 
  -4  -7   0  182.88   26.30 
  -4  -7   0  205.08   29.60 
  -4  -7   0  262.97   41.00 
   4  -7   0  215.68   40.80 
  -4  -7   0  180.98   33.80 
   4  -7   0  143.99   28.50 
   4  -7   0  167.08   28.40 
  -4  -7   0  136.69   29.90 
   4  -7   0  156.78   31.20 
  -4  -7   0  175.58   28.60 
   4  -7   0  166.18   27.50 
  -4  -7   0  166.08   25.90 
   4   7   0  191.88   28.70 
  -4   7   0  127.99   33.60 
  -4   7   0  166.28   45.10 
  -4   7   0  110.39   27.50 
  -4   7   0  204.58   33.10 
  -4   7   0  218.38   35.30 
   4   7   0  175.68   25.50 
   4   7   0  194.98   35.70 
  -4   7   0  172.28   32.20 
   4   7   0  172.68   30.40 
  -4   7   0  135.39   27.20 
  -4   7   0  181.28   31.40 
  -4   7   0  211.58   33.70 
  -4   7   0  130.69   31.30 
   4   7   0  126.99   27.10 
   4   7   0  161.58   34.20 
  -4   7   0  175.08   33.50 
  -4   7   0  164.18   29.70 
  -4   7   0   90.89   23.50 
   4   7   0  211.28   32.90 
   4   7   0  161.68   32.00 
  -4   7   0  165.48   32.60 
   5  -7   0   -8.50   14.80 
   5  -7   0   13.30   12.70 
  -5  -7   0   13.00    9.60 
   5  -7   0    0.40    9.70 
   5  -7   0    1.50   12.50 
   5  -7   0   -2.40   10.00 
  -5  -7   0   11.00   12.60 
   5  -7   0    8.90   17.10 
   5  -7   0    1.30   11.40 
  -5  -7   0   -2.60    8.30 
   5  -7   0   -0.20   12.60 
  -5  -7   0    7.70   10.10 
   5  -7   0   -8.40    8.60 
  -5  -7   0   -5.80   11.10 
   5  -7   0    0.80   10.60 
  -5   7   0   -1.90   10.20 
  -5   7   0   -3.60   10.80 
  -5   7   0  -13.30    8.10 
  -5   7   0    1.20   12.00 
  -5   7   0    3.30   10.60 
  -5   7   0   15.80   19.80 
  -5   7   0    2.10   12.50 
  -5   7   0    6.70   15.00 
   5   7   0   30.60   17.60 
   5   7   0    3.60   12.50 
  -5   7   0    8.70   13.70 
  -5   7   0   14.10   14.90 
  -5   7   0    4.60   13.50 
   5   7   0   -5.90   10.50 
  -5   7   0    8.50   11.40 
  -5   7   0    8.40   12.60 
  -5   7   0    0.00   10.50 
   5   7   0    7.50   14.60 
  -5   7   0   14.90   14.50 
  -6  -7   0  494.55   52.29 
   6  -7   0  438.16   54.09 
  -6  -7   0  491.15   60.59 
   6  -7   0  621.14   62.59 
   6  -7   0  524.25   55.89 
  -6  -7   0  552.64   44.20 
   6  -7   0  567.14   63.09 
   6  -7   0  538.45   56.69 
   6  -7   0  553.94   61.99 
   6  -7   0  533.05   64.29 
   6  -7   0  529.05   58.09 
  -6  -7   0  587.14   62.29 
   6  -7   0  571.14   67.69 
   6  -7   0  521.25   57.59 
  -6   7   0  570.94   62.29 
   6   7   0  635.94   64.19 
  -6   7   0  616.54   64.69 
  -6   7   0  561.24   63.79 
  -6   7   0  515.45   56.99 
  -6   7   0  478.25   60.39 
  -6   7   0  456.45   79.79 
  -6   7   0  441.36   55.99 
   6   7   0  554.94   65.09 
  -6   7   0  480.85   57.59 
  -6   7   0  587.04   60.49 
   6   7   0  528.25   61.49 
  -6   7   0  669.93   54.89 
  -6   7   0  841.22   81.29 
  -6   7   0  585.14   62.89 
  -6   7   0  552.14   66.49 
  -6   7   0  672.03   52.29 
   6   7   0  605.14   70.99 
   7  -7   0    4.00   20.90 
  -7  -7   0    0.70   11.70 
   7  -7   0   19.00   14.90 
   7  -7   0    8.00   14.60 
   7  -7   0  -12.30   11.50 
   7  -7   0    9.10   17.30 
  -7  -7   0   23.40   19.00 
   7  -7   0  -16.00   11.00 
   7  -7   0  -16.70   10.90 
   7  -7   0    4.00   11.90 
  -7  -7   0    7.10   12.20 
   7  -7   0    9.50   14.40 
   7  -7   0   17.50   15.70 
  -7   7   0    1.90   13.20 
  -7   7   0    2.40   14.70 
  -7   7   0   -7.10   11.80 
  -7   7   0    6.20   13.80 
   7   7   0   -7.70   13.70 
  -7   7   0    1.60   13.10 
  -7   7   0    8.20   14.30 
   7   7   0    1.30   16.60 
  -7   7   0   37.30   21.30 
  -7   7   0   -2.10   19.50 
   7   7   0   -1.10   14.80 
  -7   7   0   -0.60   17.40 
  -7   7   0   13.40   16.80 
   7   7   0   -3.60   13.80 
  -7   7   0   18.60   14.30 
  -7   7   0   21.70   17.80 
  -7   7   0   -4.50   13.60 
   0  -8   0  120.99   30.80 
   0  -8   0  106.09   30.80 
   0  -8   0  146.39   32.60 
   0  -8   0  134.09   25.90 
   0  -8   0  169.78   36.80 
   0  -8   0  147.29   22.90 
   0  -8   0  161.58   26.00 
   0  -8   0  148.39   31.80 
   0  -8   0  118.39   24.10 
   0  -8   0  180.38   33.50 
   0  -8   0  122.59   25.30 
   0   8   0  103.29   27.60 
   0   8   0  124.89   22.80 
   0   8   0  147.79   26.80 
   0   8   0  157.18   35.10 
   0   8   0  163.28   31.40 
   0   8   0  131.69   27.90 
   0   8   0  150.28   29.40 
   0   8   0  105.99   20.60 
   0   8   0  118.39   21.30 
   0   8   0  134.59   28.20 
   0   8   0  110.99   25.20 
   0   8   0  177.98   30.20 
   0   8   0  185.18   26.70 
   0   8   0  172.18   28.70 
   0   8   0   89.29   31.00 
   0   8   0  177.18   34.90 
   0   8   0  117.39   28.80 
   1  -8   0 1324.07   86.09 
   1  -8   0 1131.09   69.29 
  -1  -8   0 1224.18   66.29 
   1  -8   0 1194.58   75.79 
  -1  -8   0 1223.38   75.79 
   1  -8   0 1072.49   82.39 
  -1  -8   0 1221.68   81.59 
   1  -8   0 1155.38   76.89 
  -1  -8   0 1222.58   72.79 
  -1  -8   0 1165.58   84.29 
   1  -8   0 1173.68   66.79 
   1  -8   0 1385.56   83.69 
   1  -8   0 1145.19   81.49 
   1  -8   0 1184.08   74.99 
   1  -8   0 1319.57   72.99 
  -1  -8   0 1326.57   70.69 
  -1  -8   0 1209.48   74.09 
  -1  -8   0 1206.08   81.59 
  -1  -8   0 1210.08   88.59 
   1   8   0 1139.19   74.19 
   1   8   0 1292.57   66.29 
   1   8   0 1215.58   73.29 
   1   8   0 1369.36   98.19 
   1   8   0 1300.47   75.79 
   1   8   0 1271.27   82.29 
   1   8   0 1150.98   76.49 
   1   8   0 1186.58   81.89 
   1   8   0 1125.09   72.69 
   1   8   0 1191.68   75.69 
   1   8   0 1044.20   75.89 
  -1   8   0 1263.67   99.89 
  -1   8   0 1259.07   85.89 
  -1   8   0 1288.57   70.29 
  -1   8   0 1309.17   70.99 
   1   8   0 1267.07   83.39 
  -1   8   0 1322.37   82.29 
  -1   8   0 1159.68   79.09 
  -1   8   0 1256.07   64.09 
  -1   8   0 1027.90   72.29 
   1   8   0 1215.18   76.69 
  -1   8   0 1202.38   77.59 
  -1   8   0 1311.37   78.19 
  -1   8   0 1303.97   72.19 
  -1   8   0 1317.47   78.79 
  -1   8   0 1262.27   69.89 
  -1   8   0 1278.67   81.49 
  -1   8   0 1323.27   70.59 
   1   8   0 1327.57   70.99 
   1   8   0 1249.47   74.99 
  -1   8   0 1046.50   75.19 
   1   8   0 1293.87   67.39 
   2  -8   0    7.50   16.50 
   2  -8   0   39.10   14.80 
  -2  -8   0   52.79   17.10 
   2  -8   0   26.70   15.60 
   2  -8   0   35.70   16.90 
   2  -8   0   28.40   13.70 
  -2  -8   0    9.70   15.70 
   2  -8   0   19.60   14.20 
  -2  -8   0   16.00   10.30 
  -2  -8   0   18.80   17.70 
  -2  -8   0   17.80   15.60 
  -2  -8   0   31.20   19.90 
  -2  -8   0   26.60   10.60 
   2  -8   0    9.60   14.10 
  -2  -8   0   27.00   14.20 
  -2  -8   0   30.50   15.30 
   2  -8   0   15.10   13.50 
  -2  -8   0   44.90   16.70 
  -2  -8   0   40.50   18.00 
   2  -8   0   32.90   17.20 
  -2  -8   0   43.90   14.10 
   2  -8   0   15.70   17.10 
   2   8   0    9.40   10.10 
  -2   8   0   33.50   16.00 
   2   8   0    5.40   14.50 
  -2   8   0   18.10   13.90 
   2   8   0   40.70   16.70 
  -2   8   0   42.80   20.60 
   2   8   0   45.70   12.70 
  -2   8   0   27.60   16.60 
   2   8   0   39.30   20.40 
  -2   8   0   21.60   16.30 
   2   8   0   26.30   13.20 
  -2   8   0   30.90   15.80 
  -2   8   0    9.70    9.20 
   2   8   0   14.60   15.90 
  -2   8   0   34.00   14.20 
  -2   8   0   12.10   12.10 
  -2   8   0   29.40   14.70 
   2   8   0   28.70   13.70 
   2   8   0   31.50   14.00 
  -2   8   0   26.10   13.80 
   2   8   0   31.20   11.70 
   2   8   0    8.50    9.90 
  -2   8   0   22.00   13.00 
   2   8   0    6.70   14.90 
  -2   8   0    3.50   10.90 
   2   8   0   17.20   19.90 
   2   8   0   17.00   13.20 
   2   8   0   -2.00   12.50 
  -2   8   0    9.20   17.80 
   3  -8   0  776.12   61.09 
  -3  -8   0  850.21   65.89 
   3  -8   0  807.72   59.69 
   3  -8   0  919.21   59.59 
  -3  -8   0  933.11   54.19 
  -3  -8   0  680.93   73.99 
   3  -8   0  822.82   83.29 
  -3  -8   0  884.01   71.19 
   3  -8   0  815.72   63.69 
  -3  -8   0  808.02   60.29 
   3  -8   0  939.71   59.89 
   3  -8   0  892.51   53.49 
  -3  -8   0  839.82   58.79 
   3  -8   0  806.02   61.69 
   3  -8   0  887.51   66.19 
   3   8   0  800.02   61.49 
   3   8   0  754.32   60.89 
  -3   8   0  874.81   63.59 
  -3   8   0  798.52   82.69 
  -3   8   0  874.91   66.79 
   3   8   0  905.41   65.99 
  -3   8   0  946.91   68.09 
  -3   8   0  805.42   62.69 
   3   8   0  834.12   59.29 
  -3   8   0  817.62   64.99 
   3   8   0  736.03   68.49 
  -3   8   0  721.63   67.69 
  -3   8   0  909.91   64.59 
  -3   8   0  896.01   60.69 
   3   8   0  963.50   72.79 
  -3   8   0 1017.50   66.09 
   3   8   0 1003.00   66.99 
  -3   8   0  795.92   61.39 
  -3   8   0  852.41   64.79 
   3   8   0  786.72   55.19 
   3   8   0  847.52   61.59 
  -3   8   0  911.21   60.79 
   3   8   0  877.31   60.89 
   4  -8   0  105.39   25.40 
  -4  -8   0  145.39   34.40 
  -4  -8   0  111.29   25.20 
  -4  -8   0   84.39   19.80 
   4  -8   0   90.29   25.90 
  -4  -8   0  113.09   30.10 
   4  -8   0  130.09   31.00 
   4  -8   0  159.58   31.20 
  -4  -8   0  105.49   23.10 
   4  -8   0  132.19   35.10 
   4  -8   0  109.59   22.40 
   4  -8   0  118.29   29.00 
   4  -8   0  111.19   25.10 
   4  -8   0  121.69   28.20 
  -4  -8   0  128.99   24.20 
   4   8   0  113.19   28.60 
  -4   8   0   63.69   24.00 
  -4   8   0  105.39   25.70 
  -4   8   0  100.79   24.30 
   4   8   0   91.69   22.30 
  -4   8   0  106.19   31.10 
  -4   8   0  127.89   35.80 
   4   8   0  125.59   24.10 
   4   8   0  110.19   27.60 
  -4   8   0  122.19   31.60 
  -4   8   0  157.18   33.10 
   4   8   0  112.19   27.60 
  -4   8   0  166.98   34.10 
  -4   8   0  153.68   32.70 
  -4   8   0   95.19   35.80 
  -4   8   0  147.99   30.80 
  -4   8   0  109.49   27.80 
   4   8   0  104.59   38.90 
   4   8   0  148.89   30.30 
   4   8   0   97.39   25.00 
  -4   8   0  128.39   29.20 
  -4   8   0  137.09   29.60 
   4   8   0  146.09   36.60 
   5  -8   0  665.13   67.89 
   5  -8   0  600.34   67.19 
  -5  -8   0  648.04   51.69 
   5  -8   0  694.13   66.59 
  -5  -8   0  754.12   75.49 
   5  -8   0  666.43   69.59 
   5  -8   0  550.74   63.09 
   5  -8   0  665.73   52.09 
   5  -8   0  677.03   78.69 
   5  -8   0  838.12   78.59 
  -5  -8   0  621.34   70.19 
  -5  -8   0  631.84   50.19 
  -5   8   0  751.32   61.99 
  -5   8   0  739.73   70.59 
  -5   8   0  746.03   59.39 
  -5   8   0  667.73   71.89 
  -5   8   0  800.52   80.99 
  -5   8   0  601.34   64.69 
  -5   8   0  794.32   60.29 
   5   8   0  693.73   73.09 
   5   8   0  777.62   60.49 
  -5   8   0  818.42   88.69 
  -5   8   0  639.34   69.59 
   5   8   0  610.74   72.19 
  -5   8   0  738.53   72.89 
  -5   8   0  608.44   64.29 
  -5   8   0  712.63   57.99 
  -5   8   0  669.93   79.19 
   5   8   0  710.33   68.19 
  -5   8   0  620.64   78.49 
   5   8   0  770.82   57.29 
  -5   8   0  655.83   73.79 
   6  -8   0  114.09   34.00 
   6  -8   0   52.29   22.40 
  -6  -8   0  156.18   36.30 
   6  -8   0  157.38   33.30 
   6  -8   0  142.19   34.90 
  -6  -8   0  148.49   35.30 
   6  -8   0   86.99   23.70 
  -6  -8   0  144.09   27.60 
   6  -8   0  170.38   35.10 
   6  -8   0  152.48   34.80 
  -6   8   0  103.09   42.50 
  -6   8   0  139.89   34.70 
  -6   8   0  115.99   30.70 
  -6   8   0  110.19   31.50 
  -6   8   0   93.49   28.50 
   6   8   0  189.08   40.70 
  -6   8   0  115.49   33.90 
  -6   8   0   74.79   26.60 
  -6   8   0  104.39   28.80 
   6   8   0  162.58   35.60 
  -6   8   0  160.08   36.60 
  -6   8   0  122.19   28.40 
  -6   8   0  148.29   34.60 
   6   8   0  142.99   30.40 
  -6   8   0  126.39   31.00 
  -6   8   0   85.19   26.60 
   6   8   0  185.18   41.60 
   0  -9   0   -0.90   10.10 
   0  -9   0    6.10   14.20 
   0  -9   0    7.10    9.70 
   0  -9   0    4.20   17.10 
   0  -9   0  -16.20    8.70 
   0  -9   0    4.20   14.10 
   0  -9   0   12.30   11.70 
   0  -9   0   -7.10   11.90 
   0  -9   0   -1.50    9.30 
   0  -9   0   -1.30   14.20 
   0   9   0    5.80   13.50 
   0   9   0   17.40   19.40 
   0   9   0    5.10   10.40 
   0   9   0   -1.80   13.00 
   0   9   0   -3.50    8.80 
   0   9   0   -4.50    9.00 
   0   9   0   -7.10   14.00 
   0   9   0    5.60   12.50 
   0   9   0    1.80    8.80 
   0   9   0    7.00   12.60 
   0   9   0   -1.90    9.20 
   0   9   0  -13.20    9.90 
   0   9   0   -4.00   10.50 
   0   9   0    6.40   12.40 
   0   9   0    9.90   15.30 
   0   9   0   -4.10    7.00 
   1  -9   0   -2.50   14.10 
  -1  -9   0   10.20   10.60 
   1  -9   0   27.20   21.40 
  -1  -9   0   40.50   25.20 
   1  -9   0    1.20    9.90 
  -1  -9   0    2.60   11.20 
  -1  -9   0   10.10    8.90 
  -1  -9   0   13.00   17.30 
   1  -9   0   34.00   17.10 
  -1  -9   0   18.80   17.50 
   1  -9   0   20.00   18.70 
   1  -9   0   -5.80   10.10 
  -1  -9   0   -8.70    9.20 
   1  -9   0   -0.90    9.70 
   1  -9   0   16.50   16.40 
  -1  -9   0   -5.60   14.10 
   1  -9   0   12.40   13.10 
  -1  -9   0    7.40   14.90 
   1  -9   0    5.10   12.60 
   1  -9   0  -10.20   15.80 
   1   9   0   17.30   15.40 
   1   9   0   -1.70   10.20 
  -1   9   0   30.40   21.00 
   1   9   0    4.80   14.40 
  -1   9   0   -0.70    9.80 
  -1   9   0   -1.90    8.50 
  -1   9   0   19.90   18.20 
   1   9   0    7.20   16.10 
  -1   9   0    9.60   11.50 
   1   9   0   -1.10    7.80 
   1   9   0   14.70   17.70 
   1   9   0   18.90   21.50 
   1   9   0    3.30   13.30 
  -1   9   0   -5.80   14.10 
   1   9   0   10.40   13.60 
   1   9   0   -0.10   11.50 
   1   9   0    1.60   16.60 
   1   9   0   14.40   17.20 
  -1   9   0    9.80   12.50 
  -1   9   0   19.80   16.30 
  -1   9   0    1.70   15.20 
   1   9   0    1.30    9.30 
  -1   9   0    4.40   11.70 
   1   9   0    4.40   12.00 
   1   9   0   25.00   16.90 
  -1   9   0    7.20   15.30 
  -1   9   0    0.60   10.70 
  -1   9   0   21.40   15.10 
  -1   9   0    4.30   13.90 
   2  -9   0   21.00   15.50 
   2  -9   0   38.00   18.70 
   2  -9   0   30.50   19.10 
   2  -9   0   31.50   14.20 
  -2  -9   0   53.99   25.60 
   2  -9   0   12.70   14.90 
  -2  -9   0   39.60   21.00 
   2  -9   0   37.80   19.30 
   2  -9   0   49.20   20.20 
  -2  -9   0   -4.70   14.70 
   2  -9   0   26.10   23.20 
  -2  -9   0   26.00   17.60 
   2  -9   0   12.90   18.70 
  -2  -9   0    5.80   12.50 
   2  -9   0   15.80   14.00 
  -2  -9   0   33.50   22.40 
  -2   9   0   20.00   17.30 
  -2   9   0    3.40   15.00 
  -2   9   0   39.00   18.80 
   2   9   0   19.30   16.80 
  -2   9   0   11.80   20.20 
   2   9   0   11.90   12.30 
   2   9   0    9.20   12.80 
   2   9   0    3.50   12.30 
   2   9   0   24.20   17.90 
   2   9   0   30.00   16.50 
  -2   9   0   43.10   17.10 
   2   9   0   19.20   18.60 
  -2   9   0   30.20   21.80 
  -2   9   0   -3.20   12.80 
   2   9   0   16.40   16.50 
   2   9   0    3.30   13.50 
  -2   9   0   26.70   19.00 
  -2   9   0   40.50   16.70 
  -2   9   0   35.60   21.00 
   2   9   0   14.30   16.00 
  -2   9   0   45.00   18.50 
   2   9   0   34.30   19.80 
  -2   9   0   12.70   12.70 
   2   9   0   36.70   18.50 
   2   9   0   10.40   19.00 
  -2   9   0   12.30   14.20 
   3  -9   0    4.10   19.00 
  -3  -9   0   18.30   16.10 
  -3  -9   0   11.00   13.60 
  -3  -9   0   -2.10   15.30 
   3  -9   0    0.90   11.20 
   3  -9   0   12.70   17.60 
  -3  -9   0   -3.50    9.80 
   3  -9   0   -5.30    9.80 
   3  -9   0    0.40   13.00 
   3  -9   0   14.30   14.40 
   3  -9   0   -7.90   12.20 
   3  -9   0    3.10   10.20 
   3  -9   0    2.10   12.60 
  -3   9   0   -2.40   10.70 
   3   9   0    3.00   16.20 
   3   9   0    6.90   16.50 
   3   9   0   -1.80   12.10 
   3   9   0    5.20   16.90 
  -3   9   0   18.20   15.60 
   3   9   0   -7.30    9.10 
   3   9   0   14.70   14.40 
   3   9   0   12.80   19.50 
   3   9   0   10.70   13.30 
   3   9   0    4.80   12.80 
  -3   9   0    4.90   17.80 
  -3   9   0  -12.60    8.20 
  -3   9   0   14.50   16.80 
  -3   9   0    6.20   12.70 
  -3   9   0    7.40   12.50 
  -3   9   0   29.40   16.70 
  -3   9   0   12.00   14.30 
  -3   9   0    9.60   13.40 
   3   9   0    2.70   13.10 
  -3   9   0   16.80   13.60 
   3   9   0   13.80   18.30 
   3   9   0    0.20   10.00 
  -3   9   0   16.60   19.10 
  -3   9   0   11.30   17.40 
   4  -9   0  123.89   31.00 
  -4  -9   0   74.19   25.60 
  -4  -9   0   38.90   22.00 
   4  -9   0   71.39   26.00 
   4  -9   0   87.29   26.90 
   4  -9   0   96.39   27.40 
  -4  -9   0  129.39   28.80 
   4  -9   0   60.69   22.10 
   4  -9   0   91.09   24.40 
   4  -9   0   63.09   26.80 
   4  -9   0   76.69   33.40 
   4   9   0   81.69   25.70 
  -4   9   0   99.09   30.50 
   4   9   0  117.19   27.60 
   4   9   0   85.59   24.20 
   4   9   0  111.19   26.40 
  -4   9   0   96.79   26.80 
  -4   9   0   53.79   23.00 
  -4   9   0   53.19   22.50 
  -4   9   0   83.39   34.80 
  -4   9   0   43.10   21.40 
  -4   9   0   66.89   31.50 
  -4   9   0  139.39   30.20 
  -4   9   0   75.29   27.90 
  -4   9   0  105.39   28.40 
   4   9   0   79.19   26.80 
  -4   9   0  119.29   30.90 
  -4   9   0   45.90   19.60 
  -4   9   0   73.89   26.90 
   4   9   0   93.19   31.40 
  -4   9   0   55.49   21.60 
   4   9   0   56.89   22.30 
  -4   9   0   83.99   26.30 
   5  -9   0   37.30   23.00 
   5  -9   0  -16.00   20.10 
  -5  -9   0    3.00   17.50 
   5  -9   0   50.99   23.10 
  -5  -9   0   28.70   20.80 
   5  -9   0   26.40   19.40 
   5  -9   0   42.00   21.60 
   5  -9   0   38.90   21.40 
   5  -9   0   10.20   15.10 
   5   9   0   20.20   20.50 
  -5   9   0   22.10   18.50 
  -5   9   0    6.90   14.70 
  -5   9   0   40.80   27.30 
  -5   9   0   61.39   26.50 
   5   9   0   61.59   23.50 
   5   9   0   35.20   23.20 
   5   9   0   40.40   21.00 
  -5   9   0   57.99   23.10 
   5   9   0   35.40   20.80 
  -5   9   0   15.70   17.60 
  -5   9   0   64.29   25.00 
  -5   9   0   31.00   19.80 
  -5   9   0   26.30   18.10 
  -5   9   0   52.49   21.00 
  -5   9   0   50.39   21.50 
   5   9   0   44.40   21.70 
  -5   9   0   44.20   20.90 
  -5   9   0    5.10   20.30 
  -5   9   0   25.10   18.00 
  -5   9   0   60.29   25.20 
   0 -10   0  871.01   90.69 
   0 -10   0  804.52   82.09 
   0 -10   0  711.53   80.19 
   0 -10   0  752.12   76.69 
   0 -10   0  821.62   84.29 
   0 -10   0  681.93   76.69 
   0 -10   0  749.82   55.59 
   0 -10   0  691.13   70.29 
   0  10   0  716.83   77.99 
   0  10   0  746.03   75.79 
   0  10   0  736.33   58.39 
   0  10   0  652.23   91.39 
   0  10   0  707.73   76.39 
   0  10   0  827.22   79.29 
   0  10   0  837.32   63.49 
   0  10   0  856.31   76.59 
   0  10   0  752.32   78.09 
   0  10   0  812.92   78.49 
   0  10   0  597.54   71.29 
   1 -10   0  635.34   76.19 
   1 -10   0  558.14   64.29 
  -1 -10   0  577.54   67.89 
   1 -10   0  594.44   60.69 
   1 -10   0  650.73   78.39 
  -1 -10   0  701.63   67.99 
   1 -10   0  495.35   78.19 
  -1 -10   0  578.84   65.99 
   1 -10   0  534.65   65.79 
  -1 -10   0  635.04   83.59 
  -1 -10   0  671.43   69.19 
   1 -10   0  589.74   73.69 
   1 -10   0  613.04   69.29 
  -1 -10   0  669.63   79.59 
   1 -10   0  640.04   71.09 
  -1 -10   0  500.45   67.99 
   1  10   0  637.54   70.49 
   1  10   0  702.83   69.89 
  -1  10   0  761.02   79.59 
   1  10   0  612.14   65.59 
   1  10   0  535.85   67.59 
   1  10   0  785.52   77.79 
   1  10   0  707.33   74.19 
   1  10   0  699.43   76.39 
  -1  10   0  740.73   74.69 
  -1  10   0  648.34   71.29 
  -1  10   0  594.54   59.89 
  -1  10   0  424.36   76.09 
  -1  10   0  610.54   76.99 
  -1  10   0  627.24   70.49 
   1  10   0  807.82   71.69 
  -1  10   0  708.33   78.89 
  -1  10   0  667.43   70.79 
   1  10   0  507.15   62.49 
   1  10   0  506.85   64.89 
  -1  10   0  529.15   66.29 
   1  10   0  527.45   80.29 
  -1  10   0  614.64   71.49 
   2 -10   0  395.96   50.49 
   2 -10   0  355.26   58.69 
   2 -10   0  369.36   52.79 
  -2 -10   0  377.86   50.89 
   2 -10   0  352.86   52.39 
   2 -10   0  292.67   63.89 
  -2 -10   0  378.86   60.99 
  -2 -10   0  391.66   53.39 
   2 -10   0  433.16   63.09 
   2 -10   0  337.97   51.19 
   2 -10   0  416.66   60.69 
  -2 -10   0  396.56   59.19 
   2 -10   0  391.66   61.29 
   2  10   0  399.86   55.09 
  -2  10   0  406.56   56.29 
   2  10   0  423.66   62.19 
  -2  10   0  316.17   49.70 
  -2  10   0  422.86   59.19 
   2  10   0  224.08   53.89 
  -2  10   0  364.56   52.49 
   2  10   0  330.27   52.99 
   2  10   0  425.66   56.49 
   2  10   0  369.66   52.39 
   2  10   0  375.76   57.19 
  -2  10   0  177.38   51.49 
   2  10   0  443.06   56.99 
  -2  10   0  375.66   56.59 
   2  10   0  337.77   44.30 
  -2  10   0  384.26   56.59 
   2  10   0  425.26   59.69 
   2  10   0  464.75   54.59 
  -2  10   0  405.36   50.29 
   2  10   0  337.57   50.89 
  -2  10   0  358.06   55.49 
  -2  10   0  340.67   44.80 
  -2  10   0  370.46   52.49 
  -2  10   0  338.17   58.39 
   2  10   0  460.85   59.09 
   3 -10   0  141.09   37.70 
   3 -10   0  152.68   44.30 
   3 -10   0  122.99   28.50 
   3 -10   0  115.89   28.80 
   3 -10   0  140.49   33.90 
   3 -10   0  147.29   32.60 
   3 -10   0   81.29   28.70 
  -3 -10   0   89.29   31.60 
   3 -10   0   96.09   33.60 
  -3 -10   0  119.89   28.00 
  -3 -10   0   85.89   30.60 
   3 -10   0  146.49   40.50 
   3  10   0  126.99   30.60 
  -3  10   0  144.59   39.90 
  -3  10   0   95.59   30.70 
  -3  10   0   94.09   29.60 
  -3  10   0  115.89   43.80 
  -3  10   0  147.59   31.10 
   3  10   0  151.88   33.10 
  -3  10   0  228.68   46.20 
   3  10   0  205.78   42.30 
   3  10   0  223.18   41.50 
  -3  10   0  135.39   32.60 
  -3  10   0  142.59   31.70 
   3  10   0   94.79   29.60 
   3  10   0   71.39   26.00 
  -3  10   0  152.68   37.90 
  -3  10   0  137.79   34.70 
   3  10   0  150.28   42.80 
  -3  10   0  172.38   40.20 
  -3  10   0  127.39   34.20 
   3  10   0  118.39   28.20 
   3  10   0  188.88   41.20 
   3  10   0  162.98   34.80 
   3  10   0  154.58   36.60 
 -10   0   1   -7.50   12.10 
 -10   0   1   -6.70   14.40 
  10   0  -1  -21.70   11.50 
  10   0  -1  -12.60    9.90 
 -10   0   1   -2.20   12.80 
  10   0  -1   11.60   14.20 
 -10   0   1    2.50   16.10 
  10   0  -1    3.30   16.10 
  10   0  -1    6.10   11.50 
 -10   0   1    0.20   10.40 
  10   0  -1    0.10   14.00 
 -10   0   1   -2.90   14.90 
 -10   0   1  -20.30    8.80 
 -10   0   1  -12.60   11.60 
  10   0  -1   13.80   13.90 
  10   0  -1    4.00   13.10 
 -10   0   1    5.90   14.90 
 -10   0   1   -7.60   11.40 
  10   0  -1   12.80   14.20 
  10   0  -1   16.50   14.70 
  10   0  -1   17.70   15.30 
 -10   0   1   -4.40    7.90 
  10   0  -1    2.60   11.10 
  -9   0   1  575.04   61.49 
  -9   0   1  343.07   52.69 
   9   0  -1  532.65   54.59 
  -9   0   1  443.76   52.19 
  -9   0   1  465.25   55.99 
   9   0  -1  420.96   42.70 
  -9   0   1  347.47   49.30 
  -9   0   1  449.16   53.39 
  -9   0   1  348.17   52.49 
  -9   0   1  520.25   50.29 
  -9   0   1  454.65   56.19 
   9   0  -1  474.75   49.90 
   9   0  -1  452.25   55.49 
  -9   0   1  419.86   48.50 
   9   0  -1  393.16   50.89 
   9   0  -1  453.55   53.99 
  -9   0   1  288.57   44.50 
   9   0  -1  460.85   51.59 
   9   0  -1  431.86   53.49 
   9   0  -1  416.16   53.79 
   9   0  -1  392.06   52.69 
   9   0  -1  493.15   53.09 
   9   0  -1  556.04   58.89 
   9   0  -1  479.65   52.49 
  -9   0   1  530.55   54.19 
   9   0  -1  369.56   51.19 
   8   0  -1   11.90   10.50 
  -8   0   1   -1.80    8.80 
  -8   0   1  -10.70    8.20 
   8   0  -1   -7.00    8.00 
  -8   0   1    6.00    8.50 
  -8   0   1    4.30    8.30 
  -8   0   1   15.20   13.00 
   8   0  -1   -2.10    9.10 
   8   0  -1   -6.00    9.20 
  -8   0   1    8.60   10.30 
   8   0  -1   -7.30    9.50 
   8   0  -1    4.30    9.80 
   8   0  -1    1.00    8.70 
  -8   0   1   -7.50    7.70 
  -8   0   1   -8.30    5.30 
  -8   0   1    7.00   10.70 
   8   0  -1    0.60    9.80 
   8   0  -1   -9.20    7.70 
   8   0  -1    0.60    8.10 
  -8   0   1  -12.80    7.40 
  -8   0   1   11.00   11.40 
   8   0  -1    1.80   13.30 
  -8   0   1    0.20    8.40 
  -8   0   1   -1.50    6.30 
  -8   0   1    5.90   10.20 
  -8   0   1    2.70   13.20 
   8   0  -1   19.50   12.70 
   8   0  -1    1.40    7.60 
  -7   0   1  201.88   30.60 
   7   0  -1  143.69   22.00 
  -7   0   1  198.18   29.80 
  -7   0   1  185.68   29.90 
   7   0  -1  174.28   28.30 
   7   0  -1  191.68   27.10 
   7   0  -1  190.58   13.70 
   7   0  -1  181.08   28.20 
  -7   0   1  217.38   37.10 
   7   0  -1  124.09   25.80 
  -7   0   1  159.48   21.20 
   7   0  -1  178.58   16.00 
  -7   0   1  177.88   29.40 
  -7   0   1  168.08   24.80 
  -7   0   1  171.28   27.00 
   7   0  -1  166.68   26.20 
   7   0  -1  227.08   34.30 
  -7   0   1  184.88   27.40 
  -7   0   1  161.48   26.50 
  -7   0   1  159.78   28.40 
   7   0  -1  125.19   23.90 
   7   0  -1  150.88   25.50 
  -7   0   1  192.88   29.70 
   7   0  -1  217.98   29.70 
  -7   0   1  181.78   32.60 
   7   0  -1  206.38   31.80 
  -7   0   1  251.67   35.00 
  -7   0   1  148.59   30.10 
  -6   0   1    1.90    8.40 
   6   0  -1   -3.20    6.10 
  -6   0   1    1.70    2.40 
   6   0  -1   -5.50    5.00 
  -6   0   1    2.00    6.10 
   6   0  -1   -2.20    5.60 
   6   0  -1   -1.00    2.10 
   6   0  -1  -10.10    6.80 
  -6   0   1    5.80    5.70 
   6   0  -1    3.20    2.80 
  -6   0   1    7.00    7.50 
  -6   0   1   13.70    9.50 
  -6   0   1   -1.90    7.30 
   6   0  -1    6.40    3.30 
  -6   0   1    4.80    8.50 
  -6   0   1    8.40    8.80 
  -6   0   1   -3.40    4.60 
   6   0  -1    1.40    7.40 
  -6   0   1   -7.40    6.00 
  -6   0   1    9.10    8.40 
   6   0  -1  -10.20    3.60 
   6   0  -1   -0.60    6.20 
  -6   0   1   -4.80    5.20 
  -6   0   1   -5.60    4.60 
  -6   0   1   -0.50    2.40 
  -6   0   1    4.80    2.50 
   6   0  -1   -6.40    6.20 
  -6   0   1   -1.90    6.40 
   6   0  -1    5.00    8.30 
   6   0  -1   -5.50    2.70 
   6   0  -1    2.50    5.80 
   6   0  -1    3.40    8.20 
  -6   0   1    1.50    7.40 
  -5   0   1   67.49   17.30 
   5   0  -1  120.49    7.00 
  -5   0   1  116.29    7.90 
  -5   0   1  109.69    8.00 
  -5   0   1  123.19    7.30 
   5   0  -1  119.79    8.30 
  -5   0   1  119.69    8.90 
  -5   0   1  104.59   16.40 
   5   0  -1  104.29   15.10 
   5   0  -1  103.09   17.80 
  -5   0   1  107.89   17.40 
  -5   0   1  125.09   20.80 
  -5   0   1  115.69   21.60 
   5   0  -1  122.19   19.20 
  -5   0   1  104.79    8.60 
  -5   0   1  112.79   18.00 
  -5   0   1  128.89   20.60 
   5   0  -1  138.49   20.90 
   5   0  -1   84.59   15.70 
  -5   0   1  129.79   19.90 
   5   0  -1  100.99   14.90 
   5   0  -1  103.09   18.00 
  -5   0   1  148.49   22.10 
  -5   0   1   87.19   16.70 
  -5   0   1   91.79   13.30 
   5   0  -1   90.59   18.60 
  -5   0   1   97.49   19.90 
   5   0  -1  114.39   16.80 
  -5   0   1  100.59   18.80 
   5   0  -1  115.79    8.10 
   5   0  -1  117.49   10.80 
   5   0  -1  114.99   18.30 
   5   0  -1   92.49   17.30 
   5   0  -1  110.09   17.40 
  -5   0   1   97.69   16.40 
  -5   0   1  120.59   18.90 
  -5   0   1  138.69   12.90 
   5   0  -1  112.09   11.30 
   4   0  -1    3.30    3.10 
  -4   0   1    5.40    2.80 
   4   0  -1    3.60    2.60 
  -4   0   1   -5.50    4.70 
   4   0  -1   -3.60    6.40 
  -4   0   1    1.10    3.50 
  -4   0   1    0.20    5.80 
   4   0  -1    0.00    6.30 
   4   0  -1   -1.90    5.10 
  -4   0   1    7.50    6.20 
   4   0  -1   -1.60    4.70 
   4   0  -1    3.70    2.70 
  -4   0   1   -2.00    6.00 
  -4   0   1    5.70    5.00 
  -4   0   1    2.50    6.20 
  -4   0   1   -3.30    4.00 
  -4   0   1    1.50    2.30 
  -4   0   1    3.30    5.70 
  -4   0   1    5.40    6.70 
   4   0  -1   -0.90    4.90 
   4   0  -1    7.80    7.20 
   4   0  -1   -2.80    5.70 
   4   0  -1    1.70    4.10 
  -4   0   1   -3.40    2.60 
  -4   0   1    5.60    2.60 
  -4   0   1    1.40    6.30 
  -4   0   1    0.80    5.20 
  -4   0   1   -2.40    4.40 
   4   0  -1    3.00    2.60 
  -4   0   1    6.30    2.70 
   4   0  -1   -1.90    2.90 
   4   0  -1    1.60    2.20 
  -4   0   1    0.80    2.40 
   4   0  -1    6.10    6.40 
  -4   0   1    2.80    7.50 
   4   0  -1   -1.20    5.60 
   4   0  -1   -3.20    4.10 
   4   0  -1   10.90    7.00 
   4   0  -1    0.80    4.90 
   4   0  -1   -3.50    4.40 
  -4   0   1    0.60    2.80 
  -4   0   1    5.90    6.60 
  -4   0   1   -4.00    4.70 
   3   0  -1  238.28   16.60 
   3   0  -1  228.18   18.30 
  -3   0   1  277.77   18.40 
   3   0  -1  199.18   16.60 
   3   0  -1  212.58   21.30 
  -3   0   1  220.08   17.00 
   3   0  -1  247.78   15.20 
  -3   0   1  217.98   19.30 
  -3   0   1  244.08   16.10 
  -3   0   1  235.68   11.90 
   3   0  -1  229.88   12.00 
  -3   0   1  239.58   19.00 
  -3   0   1  231.28   12.30 
   3   0  -1  271.77   18.80 
  -3   0   1  238.78   18.00 
   3   0  -1  225.98   15.40 
  -3   0   1  232.88   17.20 
  -3   0   1  253.07   14.30 
   3   0  -1  216.58   16.70 
  -3   0   1  191.38   20.00 
  -3   0   1  231.48   16.60 
  -3   0   1  225.08   16.60 
   3   0  -1  230.68   11.80 
  -3   0   1  236.38   15.10 
  -3   0   1  198.98   20.30 
   3   0  -1  230.28   18.00 
   3   0  -1  208.28   15.10 
  -3   0   1  251.27   18.70 
  -3   0   1  237.18   18.60 
   3   0  -1  238.08   18.10 
   3   0  -1  227.68   16.30 
   3   0  -1  201.08   16.50 
   3   0  -1  254.67   18.50 
  -3   0   1  231.28   12.30 
   3   0  -1  223.98   11.90 
  -3   0   1  236.48   11.70 
  -3   0   1  238.38   18.70 
  -3   0   1  218.78   12.40 
   3   0  -1  232.68   19.00 
  -3   0   1  278.67   20.80 
   3   0  -1  222.88   21.80 
   3   0  -1  245.58   16.30 
  -3   0   1  212.68   17.10 
  -3   0   1  226.08   17.30 
   3   0  -1  209.38   17.70 
   3   0  -1  212.48   16.70 
   3   0  -1  240.68   14.00 
  -3   0   1  220.18   17.80 
   3   0  -1  228.18   12.20 
   3   0  -1  238.58   12.60 
  -3   0   1  241.88   17.80 
  -3   0   1  249.68   11.80 
   3   0  -1  243.78   20.10 
   2   0  -1   12.00    4.50 
  -2   0   1   -0.30    3.60 
   2   0  -1    1.10    3.70 
  -2   0   1    7.10    2.30 
   2   0  -1    1.80    1.90 
  -2   0   1    8.00    4.20 
  -2   0   1    1.00    2.90 
  -2   0   1    7.90    4.80 
  -2   0   1    4.60    3.50 
   2   0  -1    2.90    2.70 
   2   0  -1    6.30    4.90 
  -2   0   1    1.90    3.50 
  -2   0   1    5.20    2.10 
   2   0  -1    5.60    2.20 
   2   0  -1    9.80    4.20 
   2   0  -1    1.50    4.10 
  -2   0   1    2.00    3.40 
  -2   0   1    1.60    2.90 
  -2   0   1    5.10    2.20 
   2   0  -1    2.30    1.90 
   2   0  -1    4.10    3.80 
  -2   0   1    5.50    3.90 
  -2   0   1    4.80    3.90 
  -2   0   1    3.00    3.80 
  -2   0   1   11.50    4.40 
   2   0  -1   12.40    4.60 
   2   0  -1    4.40    3.50 
  -2   0   1   13.80    5.40 
  -2   0   1    6.80    3.90 
   2   0  -1    5.00    3.50 
   2   0  -1    6.00    3.60 
   2   0  -1    0.90    3.40 
   2   0  -1    3.50    2.50 
   2   0  -1    0.20    3.20 
  -2   0   1    0.80    3.20 
  -2   0   1    7.20    3.40 
   2   0  -1    6.60    3.70 
   2   0  -1    9.60    4.70 
  -2   0   1   11.50    4.40 
   2   0  -1    4.60    3.40 
   2   0  -1    3.50    2.60 
   2   0  -1   -0.40    2.90 
  -2   0   1    7.10    2.60 
   2   0  -1   -1.50    3.30 
   2   0  -1    1.60    2.80 
  -2   0   1   -0.80    2.50 
   2   0  -1    3.30    3.60 
  -2   0   1    2.00    1.90 
  -2   0   1    6.90    3.50 
   2   0  -1    3.60    4.30 
   2   0  -1    3.60    3.00 
   2   0  -1   13.30    4.70 
  -2   0   1    1.50    3.90 
  -2   0   1    3.60    4.00 
   2   0  -1   -3.40    3.10 
   2   0  -1    2.60    3.60 
  -2   0   1    0.90    3.50 
   2   0  -1   -1.30    3.50 
   2   0  -1    0.20    2.50 
  -2   0   1   -0.30    3.40 
   2   0  -1    2.00    3.30 
   1   0  -1  335.77   15.40 
  -1   0   1  331.27   17.20 
   1   0  -1  362.36   15.50 
   1   0  -1  369.36   15.00 
   1   0  -1  374.26   16.90 
   1   0  -1  393.16   17.40 
   1   0  -1  384.96   17.60 
  -1   0   1  355.16   17.50 
  -1   0   1  391.36   17.20 
   1   0  -1  389.36   16.70 
   1   0  -1  346.97   17.40 
   1   0  -1  373.76   17.10 
   1   0  -1  372.06   15.00 
   1   0  -1  386.66   17.00 
   1   0  -1  374.96   16.90 
  -1   0   1  390.06   17.20 
   1   0  -1  386.76   16.20 
   1   0  -1  372.36   17.10 
   1   0  -1  386.26   18.60 
   1   0  -1  393.46   15.90 
   1   0  -1  400.96   16.20 
   1   0  -1  392.36   16.60 
   0   0   1   -0.20    0.40 
  -1   0  -1 1116.09   44.30 
  -1   0  -1  977.50   44.20 
   1   0   1 1149.89   43.60 
   1   0   1 1225.68   49.60 
   1   0   1 1231.78   50.49 
   1   0   1 1149.48   42.90 
   1   0   1 1131.39   43.70 
   1   0   1 1164.48   42.10 
   1   0   1 1127.99   46.30 
   1   0   1 1132.99   44.40 
   1   0   1 1144.19   42.70 
   1   0   1 1132.09   41.90 
   1   0   1 1115.19   42.70 
   1   0   1 1185.48   44.40 
   1   0   1 1178.58   43.30 
   1   0   1 1036.60   44.80 
   1   0   1 1074.29   44.10 
  -1   0  -1 1020.20   44.70 
  -1   0  -1 1153.48   44.80 
   1   0   1 1148.89   42.60 
   1   0   1 1127.19   42.30 
   1   0   1 1210.08   43.00 
   1   0   1 1144.39   40.70 
   1   0   1 1116.19   42.90 
   1   0   1 1086.49   43.10 
   1   0   1 1158.48   44.60 
  -1   0  -1 1150.28   44.10 
   1   0   1 1211.18   43.70 
   1   0   1 1099.49   43.20 
   1   0   1 1112.69   45.20 
   1   0   1 1127.09   42.70 
   1   0   1 1131.69   43.00 
   1   0   1 1104.49   40.80 
   1   0   1 1097.19   42.50 
  -2   0  -1    5.70    3.30 
   2   0   1    6.40    3.20 
   2   0   1    1.80    2.70 
  -2   0  -1    2.80    4.10 
   2   0   1   -1.90    2.50 
   2   0   1   -0.40    2.70 
   2   0   1    3.70    3.20 
  -2   0  -1    2.70    2.70 
  -2   0  -1    0.60    3.50 
  -2   0  -1    3.40    2.70 
  -2   0  -1   -0.30    2.40 
   2   0   1    3.00    3.10 
   2   0   1    0.20    3.10 
   2   0   1   -1.00    4.00 
  -2   0  -1    3.20    3.60 
   2   0   1    2.90    2.30 
   2   0   1    0.80    2.40 
  -2   0  -1    7.50    6.30 
   2   0   1    3.60    2.00 
   2   0   1   -4.00    2.30 
   2   0   1    1.50    3.40 
   2   0   1    4.30    3.90 
  -2   0  -1    2.70    3.60 
  -2   0  -1   -6.10    2.20 
   2   0   1    0.40    3.40 
   2   0   1   -0.50    2.30 
  -2   0  -1    3.00    3.40 
   2   0   1    4.00    4.20 
   2   0   1   -2.50    2.10 
  -2   0  -1    0.80    3.90 
  -2   0  -1    6.60    4.50 
  -2   0  -1    3.10    3.10 
   2   0   1    4.40    1.90 
   2   0   1    2.80    1.70 
   2   0   1    2.80    3.50 
   2   0   1    4.30    3.90 
   2   0   1    3.50    1.10 
  -2   0  -1    3.70    2.10 
  -2   0  -1    4.70    5.20 
   2   0   1    4.90    3.90 
   2   0   1    6.10    3.50 
   2   0   1    4.20    1.60 
   2   0   1    6.40    4.40 
  -2   0  -1    2.10    2.70 
  -2   0  -1    1.10    3.50 
  -2   0  -1    8.70    4.10 
  -2   0  -1   -0.90    3.30 
   2   0   1    2.30    4.60 
  -2   0  -1    1.80    2.00 
   2   0   1    5.20    3.00 
   2   0   1   -0.80    2.10 
  -2   0  -1    7.60    3.20 
  -2   0  -1   -1.00    2.20 
  -2   0  -1   -2.10    2.70 
   2   0   1   -1.60    2.70 
   2   0   1   -3.40    3.80 
   2   0   1    4.90    4.50 
   2   0   1   -3.10    2.40 
  -2   0  -1    2.30    3.00 
  -2   0  -1    0.00    1.70 
   2   0   1    2.80    3.70 
  -2   0  -1   -0.70    2.30 
   2   0   1    0.20    2.60 
  -2   0  -1    3.10    3.10 
   2   0   1    2.00    2.10 
   2   0   1   -1.50    2.50 
  -3   0  -1 1176.68   52.19 
   3   0   1 1208.98   45.20 
   3   0   1 1196.28   42.90 
  -3   0  -1 1234.88   51.89 
  -3   0  -1 1143.19   50.79 
  -3   0  -1 1176.68   51.09 
   3   0   1 1184.58   49.30 
   3   0   1 1192.28   53.39 
   3   0   1 1189.08   57.49 
   3   0   1 1113.69   51.49 
  -3   0  -1 1161.18   51.39 
  -3   0  -1 1127.39   55.09 
   3   0   1 1198.28   50.79 
   3   0   1 1195.18   51.19 
   3   0   1 1197.48   52.39 
  -3   0  -1 1139.49   52.59 
   3   0   1 1324.77   62.09 
   3   0   1 1166.58   45.80 
   3   0   1 1211.18   46.50 
  -3   0  -1 1170.38   54.09 
  -3   0  -1 1226.48   54.49 
   3   0   1 1124.39   54.49 
  -3   0  -1 1177.48   49.70 
  -3   0  -1 1144.29   53.69 
  -3   0  -1 1227.98   57.09 
  -3   0  -1 1246.58   52.49 
  -3   0  -1 1182.78   45.30 
   3   0   1 1173.98   53.59 
  -3   0  -1 1120.49   57.39 
  -3   0  -1 1152.28   54.19 
   3   0   1 1181.58   51.79 
  -3   0  -1 1154.38   49.80 
   3   0   1 1169.78   51.89 
   3   0   1 1197.78   53.89 
   3   0   1 1170.28   54.19 
   3   0   1 1183.88   49.99 
   3   0   1 1045.20   52.39 
  -3   0  -1 1157.58   47.60 
   3   0   1 1091.59   55.09 
  -3   0  -1 1203.48   53.39 
  -3   0  -1 1251.47   51.99 
  -3   0  -1 1173.58   45.30 
   3   0   1 1243.98   54.89 
   3   0   1 1144.19   61.09 
   3   0   1 1229.98   52.79 
  -3   0  -1 1142.29   53.49 
   3   0   1 1222.08   51.39 
  -3   0  -1 1119.29   48.50 
   3   0   1 1215.18   52.29 
   3   0   1 1123.99   47.60 
  -3   0  -1 1183.18   46.00 
   3   0   1 1252.47   52.19 
  -3   0  -1 1162.58   51.99 
   3   0   1 1117.79   44.10 
   3   0   1 1199.18   48.30 
   3   0   1 1225.68   46.90 
  -3   0  -1 1124.39   53.49 
  -4   0  -1    1.80    6.30 
   4   0   1   -0.50    7.10 
  -4   0  -1   -0.50    5.00 
  -4   0  -1   -2.80    5.20 
  -4   0  -1   -1.90    2.00 
  -4   0  -1    5.70    4.20 
   4   0   1    1.40    3.50 
   4   0   1    3.00    2.80 
   4   0   1    2.60    2.10 
   4   0   1   -3.10    2.90 
  -4   0  -1    0.70    5.00 
  -4   0  -1   -0.60    3.80 
  -4   0  -1   -0.40    4.30 
  -4   0  -1   -1.70    3.70 
   4   0   1   -0.10    3.90 
  -4   0  -1   19.40    8.80 
  -4   0  -1    3.40    5.80 
  -4   0  -1    6.50    6.30 
  -4   0  -1    3.90    3.00 
   4   0   1   -1.40    2.10 
   4   0   1   -0.30    4.70 
  -4   0  -1   -3.50    4.10 
   4   0   1   -0.60    4.80 
  -4   0  -1    6.50    5.80 
  -4   0  -1    1.70    6.00 
   4   0   1    0.10    5.60 
  -4   0  -1    0.40    5.70 
   4   0   1    1.60    5.50 
   4   0   1    2.60    3.60 
  -4   0  -1    6.60    6.20 
  -4   0  -1    1.90    7.10 
   4   0   1    1.50    4.30 
   4   0   1   -4.00    2.20 
   4   0   1    0.90    5.70 
   4   0   1   -1.90    4.80 
   4   0   1    0.30    4.50 
  -4   0  -1    2.10    3.00 
  -4   0  -1    3.20    5.70 
   4   0   1    0.30    1.40 
  -4   0  -1    4.30    8.30 
   4   0   1   -3.40    6.90 
   5   0   1  470.85   30.10 
  -5   0  -1  458.95   30.30 
   5   0   1  445.86   19.00 
  -5   0  -1  490.55   34.10 
   5   0   1  434.26   28.80 
  -5   0  -1  440.36   33.50 
  -5   0  -1  482.05   32.50 
   5   0   1  476.55   31.80 
  -5   0  -1  480.65   34.00 
  -5   0  -1  485.05   34.80 
  -5   0  -1  469.55   32.00 
  -5   0  -1  400.06   19.60 
   5   0   1  479.15   35.40 
   5   0   1  479.05   25.30 
   5   0   1  468.85   24.40 
  -5   0  -1  457.65   36.10 
  -5   0  -1  480.55   34.20 
   5   0   1  460.65   31.30 
  -5   0  -1  522.55   42.60 
   5   0   1  483.15   33.20 
  -5   0  -1  479.05   24.40 
  -5   0  -1  452.25   33.50 
  -5   0  -1  440.36   34.60 
  -5   0  -1  452.05   38.10 
  -5   0  -1  448.26   21.10 
  -5   0  -1  484.05   28.70 
   5   0   1  472.05   32.10 
   5   0   1  447.46   34.10 
   5   0   1  475.35   34.10 
   5   0   1  456.25   31.40 
  -5   0  -1  487.45   31.50 
  -6   0  -1    4.60    7.90 
  -6   0  -1    7.40    7.60 
   6   0   1    8.60    7.00 
  -6   0  -1    0.60    3.40 
  -6   0  -1   -1.00    8.30 
  -6   0  -1   -6.50    6.10 
   6   0   1   -6.70    5.10 
  -6   0  -1    3.00    8.40 
   6   0   1   -1.00    4.10 
   6   0   1   -6.20    8.10 
  -6   0  -1   -6.50    6.00 
  -6   0  -1    5.70    7.40 
   6   0   1   -6.70    4.90 
   6   0   1  -12.20    4.30 
  -6   0  -1    4.50    6.90 
   6   0   1    1.80    7.00 
   6   0   1    7.40    9.50 
  -6   0  -1    1.90    7.80 
  -6   0  -1    5.90    5.70 
   6   0   1    9.50    7.20 
  -6   0  -1    2.10    8.00 
   6   0   1    4.10    7.70 
  -6   0  -1   -3.90    6.70 
   6   0   1    4.30    4.50 
   6   0   1   -4.90    6.40 
  -6   0  -1   -1.80    4.70 
   6   0   1   -1.50    6.30 
  -6   0  -1    2.50    6.50 
  -6   0  -1    2.20    6.40 
   7   0   1 2641.44  117.09 
  -7   0  -1 2741.93  120.19 
   7   0   1 2533.85  116.09 
  -7   0  -1 2659.63  122.29 
  -7   0  -1 2410.86  107.89 
   7   0   1 2587.64  117.99 
  -7   0  -1 2521.85  121.69 
  -7   0  -1 2533.85  133.79 
  -7   0  -1 2714.33  116.39 
  -7   0  -1 2536.35  114.09 
  -7   0  -1 2370.76  114.69 
   7   0   1 2487.65  121.99 
   7   0   1 2604.54  100.29 
   7   0   1 2491.45  122.99 
  -7   0  -1 2381.66  125.09 
   7   0   1 2555.14  113.09 
   7   0   1 2650.14  118.49 
   7   0   1 2579.44  116.99 
  -7   0  -1 2445.26  128.39 
  -7   0  -1 2540.45  120.59 
   7   0   1 2582.34  110.99 
  -7   0  -1 2442.56  120.79 
   7   0   1 2338.87  119.59 
  -7   0  -1 2485.65  123.29 
   7   0   1 2543.85  122.79 
   7   0   1 2711.53  123.39 
  -7   0  -1 2535.35  120.49 
   7   0   1 2580.44  117.79 
  -8   0  -1   -2.40    8.00 
   8   0   1   -8.50    9.20 
   8   0   1   -9.00    5.70 
   8   0   1   -4.60    7.30 
   8   0   1    1.60    8.80 
  -8   0  -1   -1.80   10.60 
   8   0   1   -1.50    8.40 
  -8   0  -1   -2.70    7.50 
   8   0   1    0.40    8.70 
  -8   0  -1   -3.40   10.60 
   8   0   1   -4.50    7.20 
  -8   0  -1   -3.70   10.10 
   8   0   1    8.10   10.20 
  -8   0  -1    5.80   10.40 
   8   0   1   12.30    9.50 
  -8   0  -1   -3.00    9.80 
   8   0   1   -4.40    6.90 
  -8   0  -1   15.40    8.90 
  -8   0  -1   -6.60    9.30 
   8   0   1   -2.10   10.50 
   8   0   1    0.30    9.50 
   8   0   1   -4.60    8.60 
  -8   0  -1   14.90   12.40 
   8   0   1   -9.80    8.10 
  -8   0  -1    4.20    7.80 
  -8   0  -1    5.00    9.90 
   8   0   1   11.20   13.30 
  -8   0  -1    7.90   12.20 
  -8   0  -1   -1.30    9.40 
  -9   0  -1 1292.77   76.49 
   9   0   1 1176.78   81.29 
   9   0   1 1175.78   80.09 
   9   0   1 1174.78   75.69 
   9   0   1 1132.79   78.29 
  -9   0  -1 1243.98   89.29 
   9   0   1 1339.27   78.29 
  -9   0  -1 1331.67   74.49 
   9   0   1 1328.97   78.99 
   9   0   1 1221.28   83.09 
   9   0   1 1119.99   78.09 
  -9   0  -1 1211.78   72.49 
   9   0   1 1123.19   82.79 
  -9   0  -1 1246.38   81.49 
   9   0   1 1136.59   79.49 
  -9   0  -1 1177.28   76.69 
  -9   0  -1 1142.69   84.09 
  -9   0  -1 1096.99   77.99 
   9   0   1 1199.98   73.89 
   9   0   1 1395.86   79.59 
  -9   0  -1 1129.19   81.49 
   9   0   1 1145.19   69.19 
  -9   0  -1 1165.58   78.19 
   9   0   1 1154.08   79.09 
  -9   0  -1 1345.97   81.99 
  -9   0  -1 1164.38   79.29 
  10   0   1   10.90   17.30 
  10   0   1   -1.50   11.40 
  10   0   1   -3.10   14.10 
  10   0   1    5.00   13.50 
 -10   0  -1    7.10   13.90 
 -10   0  -1   -4.80   12.20 
  10   0   1    5.20   12.50 
 -10   0  -1  -18.30    8.70 
 -10   0  -1   23.60   18.90 
 -10   0  -1  -11.30   10.30 
  10   0   1    7.50   16.10 
  10   0   1   12.80   14.80 
 -10   0  -1   15.00   13.20 
  10   0   1    7.60   17.60 
 -10   0  -1   -1.80   12.50 
  10   0   1    8.40   15.30 
  10   0   1    3.10   12.20 
 -10   0  -1   -1.80   12.10 
 -10   0  -1   13.90   13.00 
  10   0   1    0.30   13.80 
  10  -1  -1  631.64   71.99 
  10  -1  -1  605.24   63.99 
  10  -1  -1  606.74   70.49 
 -10  -1   1  607.84   68.99 
 -10  -1   1  604.74   65.79 
 -10  -1   1  679.63   65.09 
 -10  -1   1  496.25   66.89 
 -10  -1   1  583.64   64.89 
  10  -1  -1  642.74   61.89 
 -10  -1   1  651.23   69.59 
  10  -1  -1  656.83   65.59 
  10  -1  -1  549.74   63.99 
 -10  -1   1  823.22   82.09 
  10  -1  -1  654.93   71.89 
  10  -1  -1  706.03   73.29 
 -10  -1   1  604.74   75.89 
  10  -1  -1  656.43   66.79 
 -10  -1   1  467.55   55.89 
  10  -1  -1  579.74   67.09 
  10  -1  -1  625.14   59.49 
  10  -1  -1  665.23   72.29 
 -10   1   1  661.83   74.69 
 -10   1   1  477.85   60.79 
  10   1  -1  540.95   63.99 
 -10   1   1  653.43   68.89 
  10   1  -1  587.54   65.79 
 -10   1   1  602.04   67.29 
  10   1  -1  536.15   64.19 
 -10   1   1  618.44   69.99 
  10   1  -1  680.63   65.29 
  10   1  -1  656.73   67.29 
 -10   1   1  670.53   64.79 
  10   1  -1  572.44   57.19 
 -10   1   1  574.24   73.29 
  10   1  -1  685.33   66.39 
 -10   1   1  637.24   72.99 
  10   1  -1  771.82   75.49 
 -10   1   1  525.35   58.79 
 -10   1   1  670.33   65.89 
  10   1  -1  562.64   64.99 
 -10   1   1  500.75   59.59 
  10   1  -1  468.05   61.79 
  10   1  -1  538.45   64.49 
  10   1  -1  639.24   72.79 
   9  -1  -1   20.10   15.40 
   9  -1  -1   17.70   14.80 
   9  -1  -1    2.30   12.40 
  -9  -1   1   11.70   16.40 
   9  -1  -1   28.90   16.70 
  -9  -1   1   12.50   11.10 
   9  -1  -1   14.30   16.70 
   9  -1  -1   -2.60    9.30 
  -9  -1   1   10.80   13.80 
   9  -1  -1   20.60   15.00 
  -9  -1   1   15.90   14.30 
   9  -1  -1   -0.70   10.50 
  -9  -1   1   -1.50   12.50 
   9  -1  -1   16.40   14.40 
  -9  -1   1    5.40   12.50 
  -9  -1   1   17.50   12.70 
  -9  -1   1    1.00    9.50 
   9  -1  -1   -0.70   10.90 
  -9  -1   1   12.80   10.20 
  -9  -1   1   14.70   14.60 
   9  -1  -1    0.50   10.10 
   9  -1  -1   49.90   17.40 
  -9  -1   1   14.20   11.70 
  -9  -1   1    9.00   11.20 
   9   1  -1   13.50   12.90 
  -9   1   1   24.60   15.00 
   9   1  -1   11.80   13.50 
   9   1  -1   -4.70   11.40 
  -9   1   1   16.60   12.70 
  -9   1   1   14.50   12.10 
   9   1  -1   17.40   16.70 
   9   1  -1    4.50   11.90 
  -9   1   1    3.60   12.90 
  -9   1   1   26.90   17.30 
  -9   1   1    8.40   12.90 
   9   1  -1   10.80   12.10 
  -9   1   1   22.80   13.20 
   9   1  -1    4.20   12.30 
  -9   1   1    5.70   15.20 
  -9   1   1   10.40   11.20 
   9   1  -1   18.20   13.40 
   9   1  -1   17.90   12.70 
  -9   1   1   -0.70   12.20 
   9   1  -1   -5.20   10.70 
   9   1  -1    7.90   11.70 
  -9   1   1   -8.10    8.70 
  -9   1   1   11.80   10.40 
   8  -1  -1  638.34   52.19 
  -8  -1   1  621.84   46.60 
  -8  -1   1  698.23   49.70 
   8  -1  -1  680.93   48.30 
  -8  -1   1  656.23   53.69 
   8  -1  -1  756.32   50.29 
   8  -1  -1  669.63   49.80 
  -8  -1   1  737.53   46.60 
   8  -1  -1  631.74   63.09 
   8  -1  -1  626.64   49.50 
  -8  -1   1  687.13   55.69 
   8  -1  -1  612.34   59.49 
  -8  -1   1  678.33   53.29 
  -8  -1   1  649.83   51.49 
   8  -1  -1  690.83   54.09 
  -8  -1   1  796.62   55.39 
  -8  -1   1  744.63   59.39 
  -8  -1   1  592.84   50.49 
  -8  -1   1  629.14   67.39 
   8  -1  -1  779.92   57.29 
   8  -1  -1  725.23   52.19 
   8  -1  -1  716.43   51.09 
   8  -1  -1  718.93   66.69 
  -8  -1   1  761.32   56.09 
   8   1  -1  646.94   43.60 
  -8   1   1  661.33   51.99 
   8   1  -1  690.43   65.89 
  -8   1   1  677.03   50.29 
   8   1  -1  673.23   54.39 
   8   1  -1  680.73   51.89 
   8   1  -1  647.24   52.49 
  -8   1   1  623.64   62.69 
  -8   1   1  710.03   55.69 
   8   1  -1  710.33   53.79 
  -8   1   1  648.44   50.09 
   8   1  -1  635.94   48.00 
  -8   1   1  662.43   52.89 
  -8   1   1  645.84   58.29 
   8   1  -1  667.23   50.79 
   8   1  -1  719.83   55.19 
  -8   1   1  684.73   45.60 
   8   1  -1  641.74   48.70 
   8   1  -1  665.53   52.29 
  -8   1   1  660.13   51.29 
  -8   1   1  569.44   59.39 
  -8   1   1  684.53   49.40 
  -8   1   1  748.83   59.59 
  -8   1   1  556.14   57.99 
  -8   1   1  691.13   53.19 
   7  -1  -1  116.29   21.70 
   7  -1  -1   94.59   20.70 
   7  -1  -1  124.59   22.20 
   7  -1  -1  100.79   20.10 
  -7  -1   1   87.59   20.30 
  -7  -1   1   83.99   21.00 
  -7  -1   1   75.89   15.90 
   7  -1  -1   51.99   16.30 
   7  -1  -1  136.49   27.80 
  -7  -1   1  121.09   25.10 
   7  -1  -1  100.49   22.40 
  -7  -1   1  107.49   22.40 
  -7  -1   1   74.99   18.40 
  -7  -1   1   92.29   22.00 
   7  -1  -1  110.39   14.70 
  -7  -1   1  127.99   25.40 
   7  -1  -1   85.09   21.50 
   7  -1  -1  109.49   22.60 
  -7  -1   1  117.49   23.20 
  -7  -1   1   63.89   20.20 
   7  -1  -1  107.29   20.30 
  -7  -1   1   97.19   14.70 
   7  -1  -1  134.39   25.10 
  -7  -1   1  100.49   21.50 
  -7  -1   1  120.09   21.80 
   7  -1  -1  105.39   23.70 
  -7  -1   1  122.09   26.70 
   7  -1  -1  150.88   15.40 
  -7   1   1   94.59   24.20 
  -7   1   1  115.79   23.30 
   7   1  -1  113.19   22.60 
   7   1  -1   97.49   20.10 
  -7   1   1  115.79   25.20 
  -7   1   1   87.79   19.50 
   7   1  -1  114.99   22.70 
  -7   1   1   80.19   21.50 
   7   1  -1  119.29   23.70 
  -7   1   1   79.59   20.80 
   7   1  -1  100.89   16.90 
  -7   1   1  111.89   13.70 
   7   1  -1  116.29   13.40 
  -7   1   1  122.89   22.80 
   7   1  -1  105.29   18.50 
  -7   1   1  123.49   15.00 
  -7   1   1  100.49   22.20 
  -7   1   1  109.99   20.90 
   7   1  -1  101.99   20.70 
  -7   1   1  107.89   25.30 
   7   1  -1   78.69   21.30 
  -7   1   1   63.89   22.50 
   7   1  -1   97.49   22.00 
   7   1  -1   82.99   20.60 
   7   1  -1  103.59   19.90 
  -7   1   1   95.29   21.30 
  -7   1   1   81.59   19.90 
   7   1  -1  126.09   24.40 
  -7   1   1  106.39   18.60 
   6  -1  -1 2003.10   77.49 
   6  -1  -1 1909.31   73.99 
  -6  -1   1 1974.40   98.89 
   6  -1  -1 1939.91   94.89 
  -6  -1   1 2034.10   80.19 
  -6  -1   1 1854.31   93.49 
  -6  -1   1 1847.22   92.59 
   6  -1  -1 1897.91   78.19 
   6  -1  -1 1875.31   91.49 
  -6  -1   1 1843.62   94.29 
  -6  -1   1 1878.31   87.89 
  -6  -1   1 1851.01   91.69 
   6  -1  -1 1964.00   89.19 
  -6  -1   1 2057.69   95.69 
   6  -1  -1 1832.52   90.49 
   6  -1  -1 1785.12   94.09 
  -6  -1   1 1779.02   96.39 
  -6  -1   1 1881.91   91.69 
  -6  -1   1 1805.22   92.99 
  -6  -1   1 1810.92   91.09 
   6  -1  -1 1990.40   94.09 
   6  -1  -1 1868.91   78.89 
  -6  -1   1 1960.80   90.49 
   6  -1  -1 1864.31   93.79 
   6  -1  -1 2023.90   90.39 
  -6  -1   1 1963.00   85.89 
   6  -1  -1 1945.91   89.09 
   6  -1  -1 1954.70   89.89 
   6   1  -1 1956.50   76.19 
  -6   1   1 1840.12   72.49 
  -6   1   1 1918.71   91.89 
  -6   1   1 1929.31   77.09 
  -6   1   1 1727.03   92.99 
  -6   1   1 1889.11   90.99 
   6   1  -1 1893.31   78.39 
   6   1  -1 1845.52   93.59 
  -6   1   1 1929.01   78.59 
   6   1  -1 1995.10   95.39 
   6   1  -1 1921.51   90.39 
   6   1  -1 1791.02   92.29 
   6   1  -1 2015.80   97.49 
   6   1  -1 1954.10   85.79 
   6   1  -1 1892.41   89.09 
  -6   1   1 1796.22   90.09 
  -6   1   1 1944.71   73.89 
  -6   1   1 1951.50   98.59 
  -6   1   1 1992.10   78.79 
  -6   1   1 1902.21   77.29 
   6   1  -1 1935.81   92.39 
  -6   1   1 1927.51   94.39 
  -6   1   1 2149.69   88.59 
  -6   1   1 1853.41   89.99 
   6   1  -1 1896.31   88.49 
   6   1  -1 1878.41   90.09 
   6   1  -1 1997.80   84.79 
   6   1  -1 1908.01   92.99 
  -6   1   1 2052.09   95.09 
  -6   1   1 1887.31   91.59 
  -6   1   1 1872.61   92.59 
  -6   1   1 1837.62   99.69 
  -6   1   1 1893.21   77.99 
  -6   1   1 1990.20   94.89 
  -6   1   1 1964.40  107.29 
   6   1  -1 1958.70   74.59 
   6   1  -1 1806.72   77.19 
   6   1  -1 2005.20   93.29 
   5  -1  -1  250.07   16.50 
  -5  -1   1  259.77   29.00 
   5  -1  -1  209.98   24.20 
   5  -1  -1  231.38   26.60 
  -5  -1   1  255.67   31.50 
   5  -1  -1  242.08   15.10 
  -5  -1   1  284.77   30.90 
   5  -1  -1  255.87   17.80 
   5  -1  -1  285.07   18.20 
  -5  -1   1  239.58   27.80 
   5  -1  -1  250.87   25.70 
  -5  -1   1  273.47   30.00 
   5  -1  -1  265.87   29.90 
  -5  -1   1  336.27   35.10 
  -5  -1   1  243.18   28.60 
  -5  -1   1  269.67   29.10 
  -5  -1   1  238.18   16.80 
  -5  -1   1  250.77   27.20 
  -5  -1   1  223.98   22.60 
   5  -1  -1  280.07   28.30 
  -5  -1   1  260.27   29.50 
   5  -1  -1  248.48   29.50 
  -5  -1   1  265.37   24.10 
   5  -1  -1  302.77   30.60 
   5  -1  -1  231.38   27.80 
  -5  -1   1  249.08   28.90 
  -5  -1   1  263.57   26.90 
   5  -1  -1  230.08   25.30 
   5  -1  -1  326.67   34.20 
  -5   1   1  252.37   27.90 
  -5   1   1  224.58   11.50 
   5   1  -1  280.57   20.80 
   5   1  -1  216.68   25.50 
   5   1  -1  238.28   16.20 
  -5   1   1  275.47   20.60 
  -5   1   1  260.67   28.40 
   5   1  -1  238.08   21.30 
   5   1  -1  293.87   32.80 
   5   1  -1  225.58   26.00 
  -5   1   1  262.97   29.00 
   5   1  -1  258.67   30.60 
  -5   1   1  245.08   16.80 
   5   1  -1  280.67   19.10 
  -5   1   1  268.17   29.90 
   5   1  -1  251.37   13.80 
  -5   1   1  251.57   17.40 
   5   1  -1  253.87   27.40 
   5   1  -1  280.27   20.60 
   5   1  -1  239.28   16.40 
  -5   1   1  261.27   28.40 
  -5   1   1  282.87   18.30 
  -5   1   1  256.87   27.70 
   5   1  -1  256.87   16.90 
  -5   1   1  293.77   30.20 
  -5   1   1  236.38   15.80 
   5   1  -1  210.88   23.90 
  -5   1   1  256.77   17.00 
  -5   1   1  285.17   29.50 
  -5   1   1  236.08   30.60 
   5   1  -1  242.18   28.80 
   5   1  -1  248.68   28.60 
   5   1  -1  217.38   27.40 
  -5   1   1  243.98   31.10 
   5   1  -1  231.78   17.50 
  -5   1   1  293.07   31.60 
  -5   1   1  211.08   23.30 
  -5   1   1  256.87   28.50 
  -4  -1   1 5539.15  197.28 
  -4  -1   1 5569.84  212.88 
  -4  -1   1 5587.64  210.08 
   4  -1  -1 5674.33  216.38 
   4  -1  -1 5609.24  205.28 
  -4  -1   1 5709.13  215.48 
  -4  -1   1 5636.84  215.38 
  -4  -1   1 5608.04  213.58 
   4  -1  -1 5541.35  203.98 
   4  -1  -1 5748.52  213.98 
   4  -1  -1 5568.84  211.38 
   4  -1  -1 5189.58  219.18 
   4  -1  -1 5636.44  212.18 
   4  -1  -1 5552.14  202.08 
  -4  -1   1 5683.03  207.38 
  -4  -1   1 5667.43  212.18 
  -4  -1   1 5584.14  215.88 
   4  -1  -1 5663.53  215.48 
   4  -1  -1 5514.65  211.48 
  -4  -1   1 5516.45  206.08 
   4  -1  -1 5601.54  199.18 
   4  -1  -1 5604.04  210.28 
   4  -1  -1 5620.44  215.48 
   4  -1  -1 5682.93  212.78 
  -4  -1   1 5369.76  210.68 
  -4  -1   1 5297.37  202.28 
   4  -1  -1 5483.95  210.08 
  -4  -1   1 5667.93  213.98 
  -4  -1   1 5529.85  215.18 
  -4  -1   1 5484.95  214.08 
   4  -1  -1 5835.22  214.78 
   4  -1  -1 6050.59  205.78 
  -4  -1   1 5496.65  217.38 
  -4   1   1 5579.24  199.78 
   4   1  -1 5744.43  216.68 
   4   1  -1 5811.32  207.28 
   4   1  -1 5655.93  215.48 
  -4   1   1 5574.64  209.18 
  -4   1   1 5567.44  214.08 
  -4   1   1 5367.16  211.78 
   4   1  -1 5666.23  203.78 
  -4   1   1 5415.06  204.48 
  -4   1   1 5776.02  204.58 
   4   1  -1 5658.83  201.38 
   4   1  -1 5633.04  214.88 
   4   1  -1 5517.55  212.58 
   4   1  -1 5536.95  206.88 
  -4   1   1 5646.63  199.98 
   4   1  -1 5579.34  210.48 
  -4   1   1 5584.64  209.98 
  -4   1   1 5600.44  205.68 
  -4   1   1 5851.51  215.88 
   4   1  -1 5701.73  215.18 
  -4   1   1 5529.85  212.88 
  -4   1   1 5611.54  213.08 
   4   1  -1 5632.54  212.88 
  -4   1   1 5607.44  204.28 
  -4   1   1 5581.14  213.68 
  -4   1   1 5687.63  217.98 
  -4   1   1 5550.94  215.48 
   4   1  -1 5617.44  206.68 
  -4   1   1 5534.05  212.08 
  -4   1   1 5624.14  212.78 
   4   1  -1 5598.54  207.78 
  -4   1   1 5592.84  208.58 
   4   1  -1 5686.23  213.68 
  -4   1   1 5511.75  202.98 
  -4   1   1 5587.24  223.58 
   4   1  -1 5520.25  214.28 
   4   1  -1 5710.43  204.78 
  -4   1   1 5592.84  206.08 
  -4   1   1 5596.64  214.88 
   4   1  -1 5891.01  207.28 
  -3  -1   1  384.46   25.80 
  -3  -1   1  432.36   24.80 
  -3  -1   1  431.76   26.00 
  -3  -1   1  470.35   27.80 
   3  -1  -1  423.46   24.80 
  -3  -1   1  421.16   17.70 
   3  -1  -1  439.66   27.80 
   3  -1  -1  458.85   25.20 
  -3  -1   1  420.06   26.40 
  -3  -1   1  432.56   22.80 
   3  -1  -1  447.86   25.40 
  -3  -1   1  394.36   22.10 
   3  -1  -1  421.46   19.60 
  -3  -1   1  435.06   19.80 
   3  -1  -1  460.85   26.50 
   3  -1  -1  436.66   30.90 
   3  -1  -1  436.46   25.90 
   3  -1  -1  407.76   24.50 
  -3  -1   1  435.26   25.80 
   3  -1  -1  442.06   28.50 
   3  -1  -1  415.66   29.70 
  -3  -1   1  439.26   24.40 
   3  -1  -1  411.96   25.30 
   3  -1  -1  416.76   26.40 
   3  -1  -1  413.56   27.40 
   3  -1  -1  406.96   22.40 
   3  -1  -1  447.36   26.50 
  -3  -1   1  462.65   27.90 
   3  -1  -1  447.66   26.50 
   3  -1  -1  427.06   24.20 
  -3  -1   1  478.65   28.40 
  -3  -1   1  466.95   27.70 
  -3  -1   1  410.16   26.80 
  -3  -1   1  453.15   20.10 
   3  -1  -1  404.36   21.90 
  -3  -1   1  451.55   28.00 
  -3  -1   1  424.76   17.40 
   3  -1  -1  440.76   26.20 
   3  -1  -1  447.76   27.70 
   3  -1  -1  443.86   26.50 
   3  -1  -1  477.55   27.50 
   3  -1  -1  417.76   20.90 
   3  -1  -1  434.16   22.40 
  -3  -1   1  462.65   27.50 
   3  -1  -1  461.95   28.00 
   3  -1  -1  387.16   22.30 
  -3   1   1  466.85   27.00 
  -3   1   1  474.85   27.20 
   3   1  -1  428.96   17.80 
  -3   1   1  429.56   17.40 
  -3   1   1  405.16   24.60 
   3   1  -1  487.45   25.10 
  -3   1   1  446.46   28.10 
  -3   1   1  430.16   26.60 
  -3   1   1  407.16   26.90 
   3   1  -1  425.66   21.30 
   3   1  -1  418.16   22.80 
   3   1  -1  460.15   28.20 
   3   1  -1  455.95   25.30 
  -3   1   1  444.76   27.70 
   3   1  -1  495.55   26.10 
  -3   1   1  447.96   29.20 
  -3   1   1  434.36   28.50 
  -3   1   1  433.56   20.00 
  -3   1   1  447.36   19.90 
   3   1  -1  424.06   22.70 
  -3   1   1  440.76   26.80 
   3   1  -1  405.86   23.70 
   3   1  -1  457.85   28.50 
   3   1  -1  438.26   27.20 
  -3   1   1  412.66   23.80 
  -3   1   1  459.35   27.40 
  -3   1   1  437.86   23.80 
  -3   1   1  406.06   22.00 
  -3   1   1  435.96   26.20 
  -3   1   1  418.56   26.10 
   3   1  -1  465.05   28.00 
   3   1  -1  455.75   27.30 
  -3   1   1  431.26   27.30 
  -3   1   1  394.56   24.80 
   3   1  -1  449.95   26.20 
  -3   1   1  435.36   23.00 
   3   1  -1  381.06   25.70 
  -3   1   1  491.75   26.80 
   3   1  -1  446.76   26.80 
   3   1  -1  454.75   23.00 
   3   1  -1  427.76   27.10 
   3   1  -1  429.56   22.30 
  -3   1   1  471.75   27.20 
   3   1  -1  465.75   26.10 
  -3   1   1  418.76   26.10 
   3   1  -1  425.06   23.20 
  -3   1   1  432.76   22.30 
  -3   1   1  430.16   23.90 
  -3   1   1  463.05   23.10 
  -3   1   1  438.66   21.40 
  -3   1   1  352.56   29.60 
   3   1  -1  354.06   25.90 
   3   1  -1  397.26   27.70 
   3   1  -1  436.96   22.30 
  -2  -1   1 2141.79   85.79 
  -2  -1   1 2149.19   83.59 
   2  -1  -1 2117.19   90.49 
   2  -1  -1 2256.87   84.99 
   2  -1  -1 2221.58   85.39 
   2  -1  -1 2120.89   88.99 
  -2  -1   1 2174.38   85.79 
   2  -1  -1 2144.39   85.09 
   2  -1  -1 2254.47   85.99 
  -2  -1   1 2269.67   84.39 
  -2  -1   1 2167.78   86.79 
   2  -1  -1 2152.88   86.79 
   2  -1  -1 2338.97   84.99 
  -2  -1   1 2163.68   81.19 
  -2  -1   1 2026.10   82.39 
  -2  -1   1 2089.49   86.19 
   2  -1  -1 2160.48   82.39 
   2  -1  -1 2347.27   86.29 
   2  -1  -1 2168.48   82.59 
   2  -1  -1 2244.78   84.19 
   2  -1  -1 1896.11   84.99 
   2  -1  -1 2093.79   84.79 
  -2  -1   1 2203.18   85.69 
  -2  -1   1 2127.09   83.99 
   2  -1  -1 2209.68   82.99 
  -2  -1   1 2247.58   85.49 
  -2  -1   1 2164.98   79.89 
   2  -1  -1 2179.38   80.49 
  -2  -1   1 2171.38   84.49 
   2  -1  -1 2203.68   83.69 
  -2  -1   1 2154.18   79.29 
  -2  -1   1 2164.88   83.19 
   2  -1  -1 2195.38   85.69 
  -2  -1   1 2276.37   86.89 
   2  -1  -1 2148.69   84.89 
   2  -1  -1 2185.48   85.79 
  -2  -1   1 2138.49   80.69 
   2  -1  -1 2170.08   86.09 
   2  -1  -1 2148.89   86.09 
  -2  -1   1 2289.87   85.89 
   2  -1  -1 2097.69   82.79 
   2  -1  -1 2242.58   85.19 
   2  -1  -1 2185.08   82.79 
   2  -1  -1 2184.18   85.19 
   2  -1  -1 2202.18   81.29 
   2  -1  -1 2097.49   85.49 
   2  -1  -1 2119.09   86.09 
   2  -1  -1 2253.17   86.69 
   2  -1  -1 2131.29   84.59 
   2  -1  -1 2091.29   82.69 
  -2  -1   1 2215.38   84.49 
   2  -1  -1 2086.59   83.79 
  -2  -1   1 2245.18   81.19 
   2  -1  -1 2021.50   84.39 
  -2  -1   1 2184.18   78.19 
  -2  -1   1 2271.47   87.69 
   2  -1  -1 2257.67   83.09 
  -2  -1   1 2243.98   85.99 
   2   1  -1 2114.79   81.69 
   2   1  -1 2176.68   86.19 
   2   1  -1 1925.21   77.79 
   2   1  -1 2182.78   84.59 
  -2   1   1 2218.28   92.19 
   2   1  -1 2105.79   77.09 
  -2   1   1 2178.48   80.59 
  -2   1   1 2250.77   85.59 
  -2   1   1 1975.20   85.49 
  -2   1   1 2243.38   85.39 
  -2   1   1 2183.18   82.49 
   2   1  -1 2174.98   83.49 
  -2   1   1 2121.39   81.29 
  -2   1   1 2142.69   85.59 
   2   1  -1 2125.19   80.09 
  -2   1   1 2111.99   85.29 
   2   1  -1 2317.97   86.49 
   2   1  -1 2024.60   83.79 
   2   1  -1 2235.08   81.79 
   2   1  -1 2275.37   85.69 
  -2   1   1 2255.27   83.59 
   2   1  -1 2204.88   79.89 
   2   1  -1 2101.39   83.49 
  -2   1   1 2213.68   84.99 
  -2   1   1 2145.89   85.89 
   2   1  -1 2186.48   86.19 
  -2   1   1 2166.18   86.69 
   2   1  -1 2154.38   86.99 
  -2   1   1 2217.08   82.59 
   2   1  -1 2231.08   83.29 
  -2   1   1 2078.89   82.79 
  -2   1   1 2196.88   85.09 
  -2   1   1 2049.20   85.39 
  -2   1   1 2269.67   85.89 
  -2   1   1 2252.27   85.49 
  -2   1   1 2200.18   84.49 
  -2   1   1 2114.19   85.39 
  -2   1   1 2286.77   85.79 
   2   1  -1 2180.68   78.49 
   2   1  -1 2246.18   80.09 
  -2   1   1 2070.49   83.19 
   2   1  -1 2248.08   86.29 
  -2   1   1 2110.09   79.89 
  -2   1   1 2264.67   82.89 
   2   1  -1 2272.27   84.09 
   2   1  -1 2210.58   82.19 
  -2   1   1 2239.58   85.79 
  -2   1   1 2119.29   86.09 
  -2   1   1 2094.69   82.79 
   2   1  -1 2166.08   81.49 
   2   1  -1 2268.57   82.39 
   2   1  -1 2169.28   82.89 
   2   1  -1 2204.08   78.09 
   2   1  -1 2294.47   86.89 
   2   1  -1 2226.88   85.89 
   2   1  -1 2157.58   81.59 
  -2   1   1 2013.80   85.39 
   2   1  -1 2184.48   85.39 
  -2   1   1 2103.69   83.59 
  -2   1   1 2055.49   82.49 
   2   1  -1 2096.99   85.59 
   1  -1  -1  174.98   10.60 
  -1  -1   1  147.09    8.40 
   1  -1  -1  174.08   10.10 
  -1  -1   1  169.68   12.10 
  -1  -1   1  171.58   12.40 
   1  -1  -1  156.18   10.50 
   1  -1  -1  152.98   10.90 
   1  -1  -1  157.28   10.60 
  -1  -1   1  166.58   10.40 
   1  -1  -1  149.79    8.40 
  -1  -1   1  171.88   11.40 
   1  -1  -1  124.89    9.40 
   1  -1  -1  149.88   10.60 
   1  -1  -1  151.48   10.40 
  -1  -1   1  177.98   12.50 
   1  -1  -1  154.68   10.30 
   1  -1  -1  157.98   10.90 
   1  -1  -1  113.09    9.00 
  -1  -1   1  162.08   11.00 
  -1  -1   1  161.58   11.50 
  -1  -1   1  159.78    9.40 
   1  -1  -1  159.88   12.00 
   1  -1  -1  164.68   10.50 
  -1  -1   1  133.59   10.40 
  -1  -1   1  148.79    9.00 
   1  -1  -1  156.78   10.70 
   1  -1  -1  144.29   10.40 
   1  -1  -1  165.68   10.00 
   1  -1  -1  142.89   11.80 
  -1  -1   1  129.99   11.00 
  -1  -1   1  108.19   11.00 
   1  -1  -1  154.88   10.20 
   1  -1  -1  164.98   10.80 
  -1  -1   1  168.98   10.10 
   1  -1  -1  174.68   11.30 
   1  -1  -1  157.38   10.60 
  -1  -1   1  149.39    9.30 
   1  -1  -1  189.68   11.50 
  -1  -1   1  168.68   11.10 
   1  -1  -1  151.98   11.10 
   1  -1  -1  155.98   10.20 
   1  -1  -1  160.08   11.40 
  -1   1   1  157.98    9.70 
   1   1  -1  174.68    7.80 
  -1   1   1  171.68   11.00 
   1   1  -1  166.98   11.70 
  -1   1   1  153.68   11.80 
  -1   1   1  178.58   11.80 
  -1   1   1  173.98   12.60 
   1   1  -1  162.98    8.40 
  -1   1   1  163.18   10.50 
  -1   1   1  155.88   10.90 
  -1   1   1  162.78   11.00 
   1   1  -1  146.19    8.90 
  -1   1   1  158.28   10.70 
   1   1  -1  171.28   10.30 
   1   1  -1  171.18    9.50 
   1   1  -1  174.78   12.10 
   1   1  -1  139.69    8.50 
   1   1  -1  172.58   12.10 
  -1   1   1  148.19   10.10 
  -1   1   1  182.48   13.10 
   1   1  -1  153.68   11.10 
  -1   1   1  158.98   11.00 
  -1   1   1  170.08   10.80 
  -1   1   1  146.79   10.40 
   1   1  -1  161.78   10.20 
  -1   1   1  171.38   10.20 
  -1   1   1  160.58   10.70 
   1   1  -1  165.98   12.20 
  -1   1   1  170.28   14.10 
  -1   1   1  181.48   11.40 
   1   1  -1  163.88   11.20 
   1   1  -1  161.08    9.50 
  -1   1   1  162.68   11.00 
   1   1  -1  178.18   12.40 
  -1   1   1  154.78   10.30 
   1   1  -1  156.88   11.00 
   1   1  -1  174.98   10.20 
  -1   1   1  138.69    9.80 
  -1   1   1  153.78    8.50 
   1   1  -1  170.38   10.50 
   1   1  -1  163.88    9.50 
   1   1  -1  162.38   10.60 
  -1   1   1  151.68   10.40 
   1   1  -1  149.09    9.70 
   1   1  -1  157.08   12.10 
  -1   1   1  158.48    9.70 
  -1   1   1  135.39    9.70 
  -1   1   1  179.58   11.30 
  -1   1   1  177.88    8.80 
  -1   1   1  140.79    9.60 
   1   1  -1  160.48    9.20 
   0  -1  -1 6205.48  246.08 
   0  -1  -1 6449.65  245.98 
   0  -1   1 7116.29  246.88 
   0  -1  -1 5906.81  247.38 
   0  -1   1 6995.70  247.18 
   0  -1   1 6173.78  245.98 
   0  -1   1 7257.87  244.28 
   0  -1   1 7229.58  245.38 
   0  -1   1 7343.17  246.68 
   0  -1   1 7129.69  246.88 
   0   1   1 6891.61  246.08 
   0   1  -1 7276.07  246.18 
   0   1  -1 7032.00  246.48 
   0   1   1 7007.20  246.58 
   0   1  -1 7009.60  247.38 
   0   1   1 7009.00  246.58 
   0   1  -1 6811.22  248.88 
   0   1   1 7034.60  246.28 
   0   1  -1 6091.99  247.38 
   0   1  -1 7375.46  246.18 
   0   1   1 6534.45  245.48 
   0   1   1 6732.53  245.48 
   0   1   1 7274.27  245.28 
   0   1   1 7370.06  244.48 
   0   1  -1 7221.68  245.88 
   0   1   1 7148.78  246.38 
   0   1   1 7207.28  245.68 
   0   1  -1 6848.71  249.38 
   0   1  -1 7424.56  251.07 
   0   1  -1 7119.49  246.88 
   0   1   1 7279.67  243.38 
   0   1  -1 7169.78  247.58 
   0   1   1 7255.57  244.68 
   0   1  -1 6929.71  245.88 
   0   1  -1 7266.87  244.28 
   0   1   1 7050.69  245.88 
   0   1   1 6899.81  245.58 
   0   1   1 7060.99  245.58 
   0   1  -1 7099.79  243.18 
   0   1  -1 6828.92  249.68 
   0   1   1 5913.51  246.08 
   1  -1   1  311.47   16.60 
  -1  -1  -1  296.57   16.50 
  -1  -1  -1  323.67   16.80 
   1  -1   1  316.47   17.50 
  -1  -1  -1  313.77   14.30 
   1  -1   1  355.26   16.50 
   1  -1   1  314.77   16.80 
   1  -1   1  340.47   17.30 
  -1  -1  -1  300.57   20.60 
  -1  -1  -1  352.46   20.80 
  -1  -1  -1  268.87   15.10 
  -1  -1  -1  303.77   17.10 
  -1  -1  -1  338.27   16.50 
   1  -1   1  337.87   18.20 
   1  -1   1  302.57   16.90 
   1  -1   1  305.47   17.10 
   1  -1   1  334.27   22.80 
   1  -1   1  320.77   17.10 
   1  -1   1  309.27   16.30 
   1  -1   1  319.87   18.10 
  -1  -1  -1  319.97   15.60 
   1  -1   1  311.57   16.70 
  -1  -1  -1  299.07   18.10 
   1  -1   1  310.17   16.20 
   1  -1   1  305.47   16.20 
   1  -1   1  384.76   20.50 
   1  -1   1  337.27   18.20 
   1  -1   1  327.07   16.40 
   1  -1   1  335.57   18.10 
   1  -1   1  320.17   17.10 
   1  -1   1  335.07   15.90 
  -1  -1  -1  307.57   18.70 
   1  -1   1  312.27   17.90 
   1  -1   1  313.77   17.10 
   1  -1   1  278.67   15.60 
   1  -1   1  348.47   17.60 
   1  -1   1  282.27   15.30 
  -1  -1  -1  301.67   17.20 
  -1  -1  -1  336.77   15.40 
  -1  -1  -1  317.97   18.10 
   1  -1   1  345.27   17.60 
  -1  -1  -1  300.97   15.90 
   1  -1   1  313.37   16.90 
  -1   1  -1  323.17   17.70 
   1   1   1  320.17   13.90 
   1   1   1  313.87   16.10 
  -1   1  -1  312.97   16.50 
  -1   1  -1  292.67   17.00 
   1   1   1  323.37   17.30 
  -1   1  -1  347.87   19.30 
   1   1   1  314.27   14.50 
  -1   1  -1  312.97   17.10 
   1   1   1  330.47   16.80 
   1   1   1  296.87   14.80 
   1   1   1  288.47   16.80 
  -1   1  -1  321.37   16.00 
  -1   1  -1  340.47   17.20 
   1   1   1  328.47   17.50 
  -1   1  -1  293.07   17.60 
  -1   1  -1  320.67   17.70 
   1   1   1  300.57   17.70 
  -1   1  -1  325.67   16.50 
  -1   1  -1  331.37   16.80 
  -1   1  -1  316.97   16.50 
   1   1   1  319.97   16.20 
   1   1   1  316.57   16.10 
  -1   1  -1  342.47   17.40 
  -1   1  -1  329.57   17.20 
   1   1   1  331.77   17.30 
   1   1   1  322.07   16.70 
  -1   1  -1  315.17   15.90 
  -1   1  -1  338.77   17.70 
   1   1   1  320.17   14.40 
  -1   1  -1  330.87   17.30 
  -1   1  -1  341.97   23.20 
   1   1   1  344.97   20.30 
   1   1   1  317.17   16.80 
   1   1   1  323.07   16.90 
  -1   1  -1  328.77   17.80 
  -1   1  -1  342.57   18.40 
  -1   1  -1  327.37   17.10 
   1   1   1  323.37   16.00 
  -1   1  -1  332.07   20.10 
   1   1   1  332.87   17.00 
   1   1   1  366.86   15.60 
   1   1   1  311.17   15.70 
  -1   1  -1  291.97   15.90 
   1   1   1  325.97   15.70 
  -1   1  -1  353.56   17.30 
   1   1   1  292.27   15.30 
   1   1   1  312.97   16.20 
  -1   1  -1  348.47   18.90 
  -1   1  -1  342.57   17.00 
  -1   1  -1  308.27   16.10 
  -1   1  -1  318.77   15.60 
  -1   1  -1  285.67   17.50 
   1   1   1  324.47   17.50 
  -1   1  -1  324.67   14.80 
  -1   1  -1  312.77   16.80 
   1   1   1  328.87   16.70 
   2  -1   1 9321.67  328.07 
   2  -1   1 9347.87  331.17 
   2  -1   1 9021.00  330.87 
  -2  -1  -1 9212.88  325.67 
   2  -1   1 9482.75  333.77 
  -2  -1  -1 9700.73  328.57 
  -2  -1  -1 8819.42  330.47 
   2  -1   1 9294.87  330.97 
   2  -1   1 9423.16  334.47 
   2  -1   1 9085.59  330.87 
   2  -1   1 9139.09  330.17 
  -2  -1  -1 9153.68  330.67 
   2  -1   1 9240.58  331.17 
   2  -1   1 9387.36  326.77 
   2  -1   1 8680.83  329.87 
   2  -1   1 9301.67  330.47 
  -2  -1  -1 9153.68  331.37 
  -2  -1  -1 8959.90  329.67 
   2  -1   1 9208.18  329.57 
   2  -1   1 9305.67  325.57 
  -2  -1  -1 9375.36  324.97 
   2  -1   1 9272.07  332.47 
  -2  -1  -1 9428.96  327.67 
   2  -1   1 9248.97  329.17 
  -2  -1  -1 9467.95  334.27 
  -2  -1  -1 8912.41  331.07 
  -2  -1  -1 8985.40  330.77 
   2  -1   1 9384.86  331.47 
  -2  -1  -1 9379.76  333.47 
   2  -1   1 9276.27  341.87 
  -2  -1  -1 9290.47  324.17 
  -2  -1  -1 8770.92  332.17 
   2  -1   1 9448.85  329.47 
  -2  -1  -1 8999.00  330.17 
   2  -1   1 7836.62  330.97 
  -2  -1  -1 9497.35  331.07 
   2  -1   1 9413.66  328.97 
   2  -1   1 9285.77  331.57 
  -2  -1  -1 9304.57  331.07 
   2  -1   1 8999.20  332.57 
   2  -1   1 9209.18  330.47 
   2  -1   1 9274.27  328.27 
  -2  -1  -1 9657.23  331.97 
   2  -1   1 9210.58  334.77 
  -2  -1  -1 9300.47  326.97 
   2  -1   1 9454.65  331.77 
  -2  -1  -1 9523.55  324.47 
   2  -1   1 8933.31  331.77 
   2  -1   1 9320.97  330.27 
  -2  -1  -1 9439.86  336.57 
   2  -1   1 9999.00  335.87 
  -2  -1  -1 8787.12  336.97 
  -2  -1  -1 9193.78  325.47 
   2  -1   1 9269.17  332.47 
   2  -1   1 9296.67  324.47 
  -2   1  -1 9104.59  330.67 
  -2   1  -1 9406.66  332.27 
   2   1   1 9302.67  329.17 
  -2   1  -1 9071.29  332.47 
  -2   1  -1 8789.82  329.07 
   2   1   1 9453.75  331.47 
   2   1   1 9633.24  330.57 
  -2   1  -1 8742.53  331.67 
   2   1   1 9237.38  332.17 
   2   1   1 9101.09  331.97 
  -2   1  -1 9432.96  329.47 
  -2   1  -1 8945.30  326.87 
   2   1   1 9337.47  328.27 
   2   1   1 9344.87  324.57 
   2   1   1 8794.42  336.47 
   2   1   1 9114.39  329.27 
  -2   1  -1 9199.38  332.17 
   2   1   1 9189.38  327.17 
   2   1   1 9187.58  330.47 
  -2   1  -1 8811.02  330.67 
  -2   1  -1 8998.00  333.77 
   2   1   1 8970.10  330.57 
  -2   1  -1 9426.16  328.67 
  -2   1  -1 9247.97  330.07 
  -2   1  -1 9007.90  330.67 
  -2   1  -1 9226.68  343.17 
   2   1   1 9654.03  331.47 
  -2   1  -1 9430.26  323.87 
  -2   1  -1 9276.47  326.67 
   2   1   1 9233.88  324.47 
   2   1   1 9444.66  337.57 
   2   1   1 9009.30  325.07 
   2   1   1 9456.55  331.57 
  -2   1  -1 9247.07  324.57 
  -2   1  -1 9888.11  336.77 
   2   1   1 9546.34  330.77 
   2   1   1 9227.18  327.77 
  -2   1  -1 9088.99  329.77 
  -2   1  -1 9495.65  329.17 
   2   1   1 9043.50  332.87 
   2   1   1 9164.58  332.17 
   2   1   1 9199.88  325.57 
   2   1   1 9195.98  328.37 
  -2   1  -1 9375.56  325.07 
   2   1   1 9002.30  325.27 
   2   1   1 9026.10  329.37 
   2   1   1 9489.25  323.77 
   2   1   1 9574.04  327.37 
   2   1   1 9094.69  330.87 
  -2   1  -1 9817.52  332.37 
   2   1   1 9580.74  331.37 
  -2   1  -1 9450.65  330.87 
  -2   1  -1 9612.94  329.77 
  -2   1  -1 8847.71  332.07 
   2   1   1 9237.18  326.57 
   2   1   1 9097.59  330.27 
   2   1   1 8809.32  332.97 
   2   1   1 9541.25  325.17 
  -2   1  -1 9161.38  331.17 
   2   1   1 9266.17  330.77 
  -2   1  -1 9459.45  333.37 
  -2   1  -1 9467.75  331.07 
  -2   1  -1 9136.19  326.17 
  -2   1  -1 9157.88  330.97 
  -2   1  -1 9168.88  331.07 
  -2   1  -1 9408.16  327.27 
  -2   1  -1 9402.46  331.37 
   2   1   1 8959.30  330.87 
   2   1   1 9762.92  333.07 
  -2   1  -1 9322.07  330.97 
   2   1   1 9346.07  326.97 
  -3  -1  -1    1.30    4.60 
   3  -1   1   -1.10    2.90 
   3  -1   1   -0.20    3.40 
  -3  -1  -1    3.80    2.70 
  -3  -1  -1   -2.20    4.60 
   3  -1   1    3.70    4.70 
  -3  -1  -1    1.10    6.50 
   3  -1   1    8.80    4.90 
   3  -1   1    1.90    5.40 
  -3  -1  -1    3.70    5.20 
   3  -1   1    0.40    5.60 
   3  -1   1   -0.80    4.00 
  -3  -1  -1    4.10    4.20 
   3  -1   1   -1.90    3.30 
  -3  -1  -1   -3.20    4.40 
  -3  -1  -1    1.80    5.00 
  -3  -1  -1    0.40    5.50 
   3  -1   1    6.30    4.40 
  -3  -1  -1    7.30    7.10 
   3  -1   1    6.20    4.80 
   3  -1   1    1.30    3.40 
   3  -1   1    6.60    4.80 
  -3  -1  -1    6.10    2.90 
   3  -1   1    3.70    5.50 
  -3  -1  -1    9.40    6.40 
   3  -1   1    0.30    5.00 
   3  -1   1   -0.60    4.10 
  -3  -1  -1   -1.20    5.20 
  -3  -1  -1    4.00    3.70 
   3  -1   1   -1.60    5.70 
   3  -1   1   -1.70    4.60 
   3  -1   1   -2.00    4.20 
  -3  -1  -1    3.20    4.70 
   3  -1   1    2.40    4.20 
  -3  -1  -1    6.00    4.70 
  -3  -1  -1   10.70    6.90 
   3  -1   1    2.70    1.80 
   3  -1   1    0.90    6.90 
  -3  -1  -1    2.80    5.10 
   3  -1   1   -1.60    4.70 
   3  -1   1   -1.90    3.80 
   3  -1   1    3.20    5.00 
   3  -1   1    3.20    3.40 
   3  -1   1    6.40    6.00 
   3   1   1    0.90    5.90 
  -3   1  -1   -0.40    4.50 
   3   1   1    3.10    2.40 
   3   1   1    5.10    5.60 
   3   1   1    1.30    3.30 
   3   1   1    2.40    2.20 
  -3   1  -1    0.00    3.80 
   3   1   1    2.70    4.60 
   3   1   1    7.20    5.50 
   3   1   1   -2.30    4.80 
  -3   1  -1    5.30    3.30 
  -3   1  -1   -1.60    5.00 
  -3   1  -1    5.40    3.80 
  -3   1  -1    4.30    2.70 
  -3   1  -1   -3.60    4.50 
  -3   1  -1    4.70    5.00 
  -3   1  -1    0.30    5.00 
   3   1   1    3.60    2.90 
   3   1   1    0.20    3.50 
  -3   1  -1   -1.90    2.40 
   3   1   1    3.70    4.90 
   3   1   1   -2.90    2.70 
  -3   1  -1    9.80    6.80 
   3   1   1   -0.60    2.50 
  -3   1  -1    5.60    7.90 
  -3   1  -1   -4.60    5.20 
   3   1   1   -0.40    4.30 
  -3   1  -1    3.10    5.90 
  -3   1  -1    2.30    3.60 
  -3   1  -1    1.40    3.20 
   3   1   1    2.20    3.10 
   3   1   1    4.20    2.60 
   3   1   1    0.70    4.50 
   3   1   1    2.80    3.20 
  -3   1  -1    0.80    1.40 
  -3   1  -1    3.00    4.00 
   3   1   1   -1.60    3.90 
  -3   1  -1    2.30    1.90 
  -3   1  -1    7.90    6.50 
  -3   1  -1    2.70    3.40 
  -3   1  -1    1.00    3.80 
  -3   1  -1   -0.40    5.50 
   3   1   1    1.30    2.30 
   3   1   1    3.60    6.20 
  -3   1  -1    3.20    4.90 
  -3   1  -1    8.70    6.40 
   3   1   1   -0.10    3.60 
  -3   1  -1   -0.10    4.80 
   3   1   1   -1.90    5.00 
   3   1   1    0.60    2.20 
   3   1   1    0.20    2.10 
   3   1   1    5.00    4.10 
   3   1   1   -0.70    3.60 
   3   1   1    4.30    7.40 
   3   1   1    3.70    3.90 
  -3   1  -1   -0.90    3.20 
   3   1   1    4.50    5.20 
   3   1   1   -3.10    4.00 
   3   1   1    6.30    4.90 
  -3   1  -1    3.70    3.40 
  -3   1  -1    4.40    5.00 
  -3   1  -1    1.00    4.50 
  -3   1  -1    0.10    5.40 
   4  -1   1 2729.53  115.09 
   4  -1   1 2780.72  111.69 
  -4  -1  -1 2770.72  113.69 
   4  -1   1 2761.82  112.69 
   4  -1   1 2825.22  108.59 
   4  -1   1 2783.02   98.29 
  -4  -1  -1 2868.91  111.09 
  -4  -1  -1 2768.12  114.29 
   4  -1   1 2903.51  119.19 
  -4  -1  -1 2707.53  116.99 
  -4  -1  -1 2766.72  107.59 
   4  -1   1 2729.53  115.89 
   4  -1   1 2657.93  109.29 
   4  -1   1 2869.91  116.69 
  -4  -1  -1 2772.52  108.89 
  -4  -1  -1 2859.81  104.29 
  -4  -1  -1 2631.74  114.09 
  -4  -1  -1 2882.61  121.59 
  -4  -1  -1 2632.24  117.29 
  -4  -1  -1 2550.54  117.69 
   4  -1   1 2795.22  108.39 
   4  -1   1 2630.84  104.19 
  -4  -1  -1 2744.23  113.79 
  -4  -1  -1 2860.01  105.79 
   4  -1   1 2801.42  113.69 
   4  -1   1 2819.12  115.69 
   4  -1   1 2741.73  105.39 
   4  -1   1 2798.72  110.59 
   4  -1   1 2680.63  115.09 
   4  -1   1 2754.82  115.99 
  -4  -1  -1 2767.32  114.59 
  -4  -1  -1 2672.53  114.59 
  -4  -1  -1 2808.82  112.49 
   4   1   1 2638.34  114.09 
  -4   1  -1 2815.82  113.39 
  -4   1  -1 2696.23   99.99 
  -4   1  -1 2785.42  114.59 
   4   1   1 2709.63  104.29 
   4   1   1 2688.93  106.79 
  -4   1  -1 3110.69  131.79 
  -4   1  -1 2794.22  100.59 
  -4   1  -1 2601.34  112.39 
   4   1   1 2689.53  109.89 
  -4   1  -1 2637.44  114.89 
  -4   1  -1 2962.50  113.19 
  -4   1  -1 2697.53  113.29 
   4   1   1 2698.93  114.19 
   4   1   1 2701.73  105.39 
  -4   1  -1 2784.62  108.39 
  -4   1  -1 2879.71  107.09 
  -4   1  -1 2793.12  100.89 
   4   1   1 2737.73   99.49 
  -4   1  -1 2497.55  119.19 
  -4   1  -1 2736.63  113.69 
  -4   1  -1 2833.82  106.59 
  -4   1  -1 2653.73  110.29 
  -4   1  -1 2708.63  113.09 
   4   1   1 2808.52   99.69 
   4   1   1 2801.32  102.79 
   4   1   1 2773.02  102.49 
  -4   1  -1 2900.61  107.89 
  -4   1  -1 2680.43  113.69 
   4   1   1 2768.82  111.99 
   4   1   1 2598.84  110.89 
  -4   1  -1 2719.83  111.09 
  -4   1  -1 2797.12  106.19 
   4   1   1 2878.71  103.39 
  -4   1  -1 2699.83  115.49 
   4   1   1 2727.73  104.09 
   4   1   1 2713.73  115.49 
  -4   1  -1 2809.22  113.29 
  -4   1  -1 2614.14  117.89 
  -4   1  -1 2708.23  113.59 
   4   1   1 2671.33  101.59 
   4   1   1 2650.43  115.89 
   4   1   1 2882.21  115.19 
   4   1   1 2840.02  110.99 
   4   1   1 2749.43  103.19 
   4   1   1 2886.81  113.59 
  -4   1  -1 2827.42  117.49 
   4   1   1 2725.33  108.79 
   4   1   1 2798.72  102.79 
  -5  -1  -1   -5.70    3.60 
  -5  -1  -1   -2.40    5.70 
  -5  -1  -1    0.80    6.60 
   5  -1   1    4.10    5.90 
  -5  -1  -1    1.60    4.30 
   5  -1   1   -2.30    5.80 
  -5  -1  -1   -6.70    4.30 
  -5  -1  -1    1.60    5.60 
   5  -1   1    9.20    6.40 
  -5  -1  -1    0.00    6.50 
   5  -1   1   17.20    9.70 
   5  -1   1   -4.10    2.70 
  -5  -1  -1   -5.70    4.90 
  -5  -1  -1    0.70    5.80 
   5  -1   1   12.50    6.70 
  -5  -1  -1   -1.90    6.60 
  -5  -1  -1    7.70    4.40 
   5  -1   1   -6.60    3.80 
   5  -1   1   -4.00    5.50 
   5  -1   1    4.70    7.40 
   5  -1   1    0.40    7.30 
   5  -1   1   -6.00    4.10 
  -5  -1  -1    2.90    6.30 
   5  -1   1    8.10    7.70 
  -5  -1  -1   -2.60    4.80 
  -5  -1  -1    5.60    7.40 
   5  -1   1    3.70    5.90 
   5  -1   1    7.20    5.10 
  -5  -1  -1    2.60    5.10 
   5  -1   1    4.50    3.30 
   5   1   1   16.70    8.30 
  -5   1  -1    5.10    5.10 
   5   1   1    1.00    7.20 
  -5   1  -1   -2.80    6.50 
  -5   1  -1    0.40    5.90 
   5   1   1    5.20    6.40 
  -5   1  -1    4.60    4.70 
   5   1   1   -1.60    4.10 
  -5   1  -1    2.00    5.20 
   5   1   1    0.20    6.40 
   5   1   1    4.60    4.70 
  -5   1  -1   -9.30    6.70 
  -5   1  -1   -2.80    5.40 
  -5   1  -1   -2.10    5.30 
  -5   1  -1   -2.50    5.00 
   5   1   1    0.20    2.40 
   5   1   1    1.10    5.40 
  -5   1  -1    0.10    5.70 
  -5   1  -1    3.40    6.90 
  -5   1  -1    3.70    4.30 
  -5   1  -1    0.00    3.30 
  -5   1  -1   -7.20    4.40 
   5   1   1    3.80    7.00 
   5   1   1   -4.50    4.80 
  -5   1  -1    1.90    7.10 
   5   1   1    8.00    4.90 
   5   1   1   -0.80    3.50 
  -5   1  -1   -7.00    4.10 
   5   1   1    3.10    5.60 
   5   1   1    4.60    3.50 
   5   1   1    1.00    3.00 
  -5   1  -1   -1.30    7.50 
  -5   1  -1    7.20    6.10 
  -5   1  -1    8.20    5.70 
   5   1   1   -5.00    6.40 
   5   1   1   -1.40    5.00 
   5   1   1    1.70    2.50 
   5   1   1    3.90    6.10 
  -5   1  -1    0.10    6.00 
   5   1   1    3.60    3.30 
   6  -1   1  314.27   30.70 
  -6  -1  -1  281.27   27.80 
  -6  -1  -1  263.77   32.30 
  -6  -1  -1  336.57   36.30 
  -6  -1  -1  231.08   34.50 
  -6  -1  -1  266.77   27.90 
   6  -1   1  315.47   33.60 
  -6  -1  -1  262.97   30.60 
  -6  -1  -1  264.67   20.00 
   6  -1   1  244.08   31.60 
   6  -1   1  239.78   30.80 
  -6  -1  -1  232.38   28.50 
   6  -1   1  339.57   32.60 
   6  -1   1  255.87   32.90 
  -6  -1  -1  264.77   32.70 
   6  -1   1  239.08   28.20 
   6  -1   1  296.57   21.80 
  -6  -1  -1  243.78   32.50 
  -6  -1  -1  316.27   35.20 
  -6  -1  -1  290.87   32.10 
  -6  -1  -1  299.47   34.70 
   6  -1   1  283.87   31.20 
   6  -1   1  260.07   33.50 
   6  -1   1  292.97   29.30 
   6  -1   1  331.07   36.40 
   6  -1   1  316.77   37.60 
  -6  -1  -1  277.57   37.30 
  -6  -1  -1  256.87   32.00 
   6  -1   1  250.57   17.10 
  -6   1  -1  238.58   29.50 
   6   1   1  306.57   17.00 
   6   1   1  236.28   33.30 
  -6   1  -1  276.67   33.80 
  -6   1  -1  359.86   36.60 
  -6   1  -1  238.48   32.40 
  -6   1  -1  255.47   30.80 
   6   1   1  257.47   31.90 
   6   1   1  291.77   16.30 
   6   1   1  298.17   33.30 
   6   1   1  293.77   30.30 
   6   1   1  336.67   35.80 
  -6   1  -1  279.37   19.40 
  -6   1  -1  324.07   34.00 
   6   1   1  280.97   21.90 
   6   1   1  298.97   15.40 
   6   1   1  225.48   27.70 
   6   1   1  324.97   32.20 
   6   1   1  314.57   36.90 
  -6   1  -1  301.17   30.40 
  -6   1  -1  236.18   30.30 
   6   1   1  279.67   31.60 
  -6   1  -1  304.57   41.20 
  -6   1  -1  242.48   31.90 
   6   1   1  304.27   16.40 
   6   1   1  309.77   31.20 
  -6   1  -1  286.87   33.80 
  -6   1  -1  289.57   21.70 
  -6   1  -1  256.17   34.30 
  -6   1  -1  258.97   18.50 
   6   1   1  278.27   15.10 
  -6   1  -1  174.38   29.90 
   6   1   1  210.68   29.80 
   7  -1   1    7.50   11.00 
  -7  -1  -1   17.60   10.70 
   7  -1   1    8.30    9.30 
  -7  -1  -1    8.60    9.20 
  -7  -1  -1    0.30    8.90 
   7  -1   1   24.40   11.80 
   7  -1   1   22.30   11.60 
  -7  -1  -1    8.30    8.20 
  -7  -1  -1   10.30   10.00 
  -7  -1  -1   13.80    7.10 
   7  -1   1    7.80   10.00 
   7  -1   1   23.40   11.10 
  -7  -1  -1   24.10   11.50 
  -7  -1  -1   -4.30    7.60 
   7  -1   1    7.00    9.10 
  -7  -1  -1   12.90   10.30 
   7  -1   1    5.20    9.10 
   7  -1   1    6.90   10.70 
   7  -1   1   11.70    6.50 
  -7  -1  -1   17.00   13.50 
  -7  -1  -1    9.30   12.10 
  -7  -1  -1    5.40    9.00 
   7  -1   1   23.40   13.80 
   7  -1   1    8.50    7.00 
  -7  -1  -1   -1.90    9.70 
   7  -1   1   -3.50   10.40 
  -7  -1  -1    4.60    8.30 
   7  -1   1   17.40   11.60 
  -7  -1  -1   29.20   10.80 
  -7   1  -1   -2.80    8.50 
  -7   1  -1   10.90   13.30 
  -7   1  -1    8.10    9.80 
  -7   1  -1   21.00   17.50 
   7   1   1   19.80   10.20 
  -7   1  -1   13.20   11.20 
   7   1   1   25.40   12.70 
   7   1   1   18.20   11.50 
  -7   1  -1    6.00    7.30 
   7   1   1   20.60   12.80 
   7   1   1   -0.90    9.10 
  -7   1  -1   18.90   12.60 
   7   1   1   11.60    9.20 
  -7   1  -1   20.40   13.30 
  -7   1  -1   14.80   10.90 
   7   1   1    2.90    7.80 
  -7   1  -1   11.00    6.70 
   7   1   1   22.70   12.30 
   7   1   1   -2.70    6.30 
   7   1   1    3.10   10.30 
  -7   1  -1   25.10   14.00 
   7   1   1   28.60   11.00 
  -7   1  -1    1.20   10.20 
  -7   1  -1   16.00   11.30 
  -7   1  -1    4.50    8.90 
   7   1   1    6.50   10.20 
   8  -1   1  347.17   38.30 
   8  -1   1  337.37   45.00 
   8  -1   1  318.87   36.10 
   8  -1   1  250.77   31.50 
  -8  -1  -1  311.37   61.49 
  -8  -1  -1  322.57   41.90 
   8  -1   1  247.78   39.10 
  -8  -1  -1  250.47   37.20 
  -8  -1  -1  226.78   32.90 
   8  -1   1  268.57   39.70 
   8  -1   1  258.27   38.60 
   8  -1   1  347.97   43.20 
   8  -1   1  310.27   37.90 
  -8  -1  -1  366.26   45.00 
  -8  -1  -1  339.07   42.30 
  -8  -1  -1  274.17   39.70 
  -8  -1  -1  291.87   33.60 
  -8  -1  -1  306.87   36.30 
  -8  -1  -1  347.57   50.79 
   8  -1   1  258.67   39.10 
   8  -1   1  306.47   37.10 
  -8  -1  -1  334.27   46.20 
  -8  -1  -1  285.97   40.00 
   8  -1   1  309.97   44.00 
  -8  -1  -1  300.17   47.10 
  -8   1  -1  353.06   41.00 
  -8   1  -1  248.78   38.10 
   8   1   1  346.87   39.30 
   8   1   1  277.37   36.00 
  -8   1  -1  349.37   43.30 
  -8   1  -1  279.27   39.50 
  -8   1  -1  327.07   40.00 
   8   1   1  284.37   39.50 
   8   1   1  287.37   42.20 
  -8   1  -1  365.26   46.20 
   8   1   1  287.97   40.40 
   8   1   1  249.08   28.60 
   8   1   1  239.58   36.70 
   8   1   1  282.47   33.90 
  -8   1  -1  369.26   58.29 
  -8   1  -1  297.77   40.00 
   8   1   1  268.77   38.60 
   8   1   1  349.37   39.80 
  -8   1  -1  318.27   44.60 
  -8   1  -1  271.37   44.70 
   8   1   1  255.57   35.60 
  -8   1  -1  292.17   37.30 
   8   1   1  280.27   39.40 
  -8   1  -1  283.47   34.10 
  -8   1  -1  235.78   35.10 
   8   1   1  321.97   43.80 
   9  -1   1    7.50   12.70 
  -9  -1  -1    0.40   11.50 
   9  -1   1   17.60   16.00 
  -9  -1  -1    0.50    8.20 
  -9  -1  -1    5.40   10.90 
   9  -1   1    4.90   11.60 
  -9  -1  -1    4.20   12.80 
  -9  -1  -1   24.90   12.50 
   9  -1   1   -5.60    8.60 
  -9  -1  -1   -7.30    8.00 
  -9  -1  -1    5.40   13.20 
   9  -1   1    8.80   11.60 
  -9  -1  -1   -1.80   10.60 
  -9  -1  -1   -3.40   12.10 
   9  -1   1   -3.70   11.10 
   9  -1   1    6.40   13.30 
   9  -1   1   -3.30    9.30 
   9  -1   1   22.50   16.10 
  -9  -1  -1    8.60   14.30 
   9  -1   1   24.90   13.20 
   9  -1   1   -2.50   11.30 
   9  -1   1    6.70   10.50 
  -9  -1  -1   14.40   13.10 
   9   1   1    1.90   10.60 
   9   1   1    7.50   11.80 
  -9   1  -1   -9.20    8.60 
  -9   1  -1   -8.90    9.70 
   9   1   1    0.30   11.30 
  -9   1  -1  -18.50    7.60 
  -9   1  -1   -5.90    9.20 
   9   1   1    6.60   15.00 
   9   1   1   -2.20   12.00 
  -9   1  -1   28.90   13.60 
  -9   1  -1    4.70   10.70 
  -9   1  -1   24.00   12.40 
  -9   1  -1   15.10   14.60 
   9   1   1    5.50   10.60 
   9   1   1  -10.70    8.50 
   9   1   1    5.60   13.00 
   9   1   1   16.00   14.20 
   9   1   1   -5.60   10.30 
   9   1   1    9.70   12.70 
  -9   1  -1   -4.00   10.80 
  -9   1  -1   -4.80    7.80 
   9   1   1    1.00   11.00 
  -9   1  -1   17.20   15.40 
   9   1   1   -0.10   14.00 
  -9   1  -1  -13.40   10.40 
 -10  -1  -1  231.68   43.90 
  10  -1   1  326.57   50.89 
  10  -1   1  282.97   44.00 
  10  -1   1  294.57   48.30 
  10  -1   1  288.27   46.40 
  10  -1   1  276.57   43.00 
  10  -1   1  338.17   52.29 
  10  -1   1  227.48   41.90 
 -10  -1  -1  242.98   38.60 
  10  -1   1  199.88   39.60 
  10  -1   1  265.47   48.10 
 -10  -1  -1  254.47   47.40 
  10  -1   1  274.37   42.00 
 -10  -1  -1  265.77   50.99 
 -10  -1  -1  190.78   37.70 
 -10  -1  -1  325.37   48.20 
 -10  -1  -1  311.57   47.20 
  10  -1   1  270.27   41.10 
 -10  -1  -1  283.27   46.60 
 -10   1  -1  364.56   50.49 
  10   1   1  224.48   40.90 
 -10   1  -1  265.07   45.70 
 -10   1  -1  281.67   41.30 
  10   1   1  297.77   47.30 
 -10   1  -1  336.07   44.90 
 -10   1  -1  323.67   50.49 
  10   1   1  302.97   47.30 
  10   1   1  338.87   49.90 
 -10   1  -1  340.77   49.99 
 -10   1  -1  233.48   45.60 
  10   1   1  293.27   47.60 
  10   1   1  378.96   55.79 
  10   1   1  271.47   47.00 
 -10   1  -1  279.17   44.40 
  10   1   1  248.58   45.30 
  10   1   1  335.37   44.90 
  10   1   1  341.67   49.80 
 -10   1  -1  270.47   46.40 
 -10   1  -1  237.88   49.20 
  10   1   1  248.08   38.80 
  10  -2  -1  201.38   38.40 
  10  -2  -1  144.29   35.00 
  10  -2  -1  173.78   34.70 
 -10  -2   1  142.89   32.40 
 -10  -2   1  143.39   33.50 
  10  -2  -1  105.49   29.70 
  10  -2  -1  107.59   28.00 
  10  -2  -1   94.79   29.50 
 -10  -2   1  178.98   40.10 
  10  -2  -1  129.49   28.80 
 -10  -2   1   89.49   29.60 
 -10  -2   1  162.48   35.90 
 -10  -2   1  132.19   32.10 
 -10  -2   1  103.79   27.60 
  10  -2  -1  162.18   37.10 
  10  -2  -1  118.49   27.50 
  10  -2  -1  103.29   29.00 
 -10   2   1  124.79   32.00 
  10   2  -1  142.69   31.20 
 -10   2   1  113.79   32.40 
  10   2  -1  141.49   30.00 
  10   2  -1  155.48   35.20 
 -10   2   1  109.59   32.40 
  10   2  -1   87.19   28.20 
 -10   2   1  181.68   36.10 
 -10   2   1  160.38   40.00 
  10   2  -1  103.39   27.60 
 -10   2   1  182.68   35.70 
 -10   2   1  122.09   30.10 
 -10   2   1  151.98   37.20 
  10   2  -1   78.89   25.70 
  10   2  -1  110.79   30.90 
  10   2  -1  150.38   37.90 
  10   2  -1  100.29   29.50 
  10   2  -1  138.39   32.00 
  10   2  -1  155.68   36.30 
 -10   2   1  148.39   32.00 
 -10   2   1  148.09   35.40 
   9  -2  -1  165.58   33.30 
  -9  -2   1  141.09   31.40 
   9  -2  -1  132.19   26.30 
   9  -2  -1  141.79   28.70 
   9  -2  -1  168.68   33.60 
   9  -2  -1  149.79   33.00 
   9  -2  -1  118.69   30.40 
   9  -2  -1  147.29   30.40 
   9  -2  -1  149.99   31.60 
  -9  -2   1  156.08   32.10 
  -9  -2   1  149.09   34.80 
  -9  -2   1  100.79   24.50 
  -9  -2   1  153.38   35.60 
  -9  -2   1  139.59   26.20 
  -9  -2   1  121.79   25.40 
  -9  -2   1  114.79   28.10 
   9  -2  -1   61.89   21.80 
   9  -2  -1  211.28   37.70 
  -9   2   1  119.39   30.10 
   9   2  -1  129.39   31.10 
  -9   2   1  170.08   35.30 
  -9   2   1  136.89   29.20 
   9   2  -1  161.08   32.90 
  -9   2   1  127.69   27.60 
  -9   2   1  186.78   33.80 
   9   2  -1  156.78   30.90 
  -9   2   1  102.89   26.60 
  -9   2   1  104.49   27.30 
   9   2  -1  120.39   31.20 
   9   2  -1  151.78   28.20 
   9   2  -1  156.58   33.60 
   9   2  -1  173.08   32.80 
  -9   2   1  138.59   30.90 
  -9   2   1  139.09   27.10 
   9   2  -1  108.49   25.00 
   9   2  -1  107.59   27.40 
  -9   2   1  168.88   31.80 
   9   2  -1   94.79   27.60 
  -9   2   1  129.19   45.80 
  -9   2   1   78.39   26.50 
  -9   2   1  120.89   33.40 
  -8  -2   1    2.00    7.30 
  -8  -2   1   16.90   12.40 
   8  -2  -1   10.30   11.90 
   8  -2  -1    4.40    9.30 
   8  -2  -1   11.80   10.30 
   8  -2  -1   -4.80    7.90 
   8  -2  -1    2.40   10.90 
  -8  -2   1   10.80   10.00 
  -8  -2   1   -3.30    9.60 
   8  -2  -1   16.30   16.70 
   8  -2  -1   22.50   14.10 
   8  -2  -1  -15.00    9.60 
  -8  -2   1   16.20   12.90 
   8  -2  -1    7.20   10.30 
   8  -2  -1   -2.60    8.70 
  -8  -2   1   24.80   17.20 
  -8  -2   1   -4.50    7.20 
  -8  -2   1    9.10    8.50 
  -8  -2   1    7.80    9.00 
  -8   2   1    3.80   16.60 
  -8   2   1    5.50    9.80 
   8   2  -1   10.50    9.60 
   8   2  -1    1.50   12.40 
  -8   2   1   19.90   12.30 
  -8   2   1    5.10   10.70 
  -8   2   1   12.20   13.10 
  -8   2   1   14.10   13.30 
  -8   2   1    0.90    7.90 
  -8   2   1   16.40   14.70 
  -8   2   1   10.20   11.40 
  -8   2   1   20.00   14.60 
  -8   2   1   -2.70    8.60 
  -8   2   1   16.80   11.70 
   8   2  -1   -0.60    9.40 
   8   2  -1    1.70    8.90 
   8   2  -1    2.50   11.90 
   8   2  -1   30.30   15.60 
   8   2  -1   -9.20    6.60 
   8   2  -1   14.10   11.00 
   8   2  -1   10.70   12.80 
   8   2  -1   19.80   13.70 
   8   2  -1   16.90   12.60 
  -8   2   1   18.40   13.90 
   7  -2  -1    5.80    6.60 
   7  -2  -1  -10.10   11.00 
  -7  -2   1    8.90   11.10 
   7  -2  -1    9.20    9.80 
  -7  -2   1   11.10    9.10 
   7  -2  -1    1.80    7.60 
   7  -2  -1   -3.70    6.70 
  -7  -2   1    4.90    6.60 
  -7  -2   1    9.70    8.50 
  -7  -2   1    4.80   10.90 
   7  -2  -1   11.20   10.60 
   7  -2  -1    8.90    7.30 
   7  -2  -1    2.20   10.00 
  -7  -2   1    0.00    7.30 
  -7  -2   1   10.70    9.80 
   7  -2  -1    7.10    9.30 
  -7  -2   1   -7.60    7.90 
  -7  -2   1   -1.60    8.70 
   7  -2  -1   18.20   11.90 
   7  -2  -1   -1.90    7.80 
   7  -2  -1    5.60    9.60 
   7   2  -1    6.90    9.60 
  -7   2   1   -3.60    6.00 
   7   2  -1    5.30   10.30 
   7   2  -1   12.40    8.60 
  -7   2   1    4.70    8.90 
   7   2  -1   11.60    7.00 
  -7   2   1    9.90   14.80 
  -7   2   1    8.90   11.30 
  -7   2   1   -0.10    9.50 
   7   2  -1    9.30   11.10 
  -7   2   1   -0.10   10.00 
   7   2  -1   10.60    9.00 
  -7   2   1    3.80    9.70 
  -7   2   1   19.00   11.80 
   7   2  -1   -0.10    9.40 
   7   2  -1   11.20    8.00 
   7   2  -1   14.70   10.10 
  -7   2   1   -0.50    5.80 
   7   2  -1   13.30   11.40 
   7   2  -1   11.20    9.20 
  -7   2   1    6.60    4.70 
  -7   2   1    3.90    7.20 
  -7   2   1    4.50    8.00 
  -7   2   1   20.00   12.00 
  -7   2   1   10.00    6.80 
  -7   2   1    7.90   10.80 
   7   2  -1    7.90   11.70 
  -7   2   1   22.90   12.40 
   7   2  -1    3.20    7.40 
  -7   2   1    0.90   11.30 
   7   2  -1   -2.30    8.30 
   6  -2  -1   28.20   12.40 
  -6  -2   1   40.30   10.20 
   6  -2  -1   50.49   15.40 
  -6  -2   1   67.39   18.50 
   6  -2  -1   48.40    8.00 
  -6  -2   1   41.20   15.20 
  -6  -2   1   59.79   16.30 
  -6  -2   1   44.20    7.70 
   6  -2  -1   43.90   14.50 
  -6  -2   1   49.50   13.90 
   6  -2  -1   30.10   14.50 
  -6  -2   1   49.20   14.30 
   6  -2  -1   51.39   14.80 
   6  -2  -1   67.39   15.00 
  -6  -2   1   41.90   14.60 
   6  -2  -1   42.40   14.30 
   6  -2  -1   44.10   14.70 
  -6  -2   1   39.70   14.10 
   6  -2  -1   47.30   15.40 
  -6  -2   1   50.29   13.80 
   6  -2  -1   49.10   11.30 
   6  -2  -1   80.09   18.00 
   6  -2  -1   40.50   11.00 
  -6   2   1   34.90   13.40 
   6   2  -1   36.60   15.20 
  -6   2   1   33.40   15.30 
  -6   2   1   39.70   10.50 
  -6   2   1   51.39   16.30 
   6   2  -1   50.99   10.30 
   6   2  -1   36.00    8.90 
   6   2  -1   49.00    7.80 
   6   2  -1   53.99   14.70 
   6   2  -1   46.40   11.10 
  -6   2   1   64.69   17.10 
   6   2  -1   76.79   16.40 
   6   2  -1   83.39   18.90 
  -6   2   1   40.70   14.90 
   6   2  -1   43.90   10.50 
  -6   2   1   75.29   18.50 
   6   2  -1   68.69   17.60 
  -6   2   1   63.79   16.10 
   6   2  -1   41.20   14.50 
  -6   2   1   45.60    9.10 
   6   2  -1   43.90   10.80 
   6   2  -1   46.50   16.20 
   6   2  -1   52.49   14.20 
  -6   2   1   33.10   12.70 
  -6   2   1   52.49   21.50 
  -6   2   1   55.09   15.30 
   6   2  -1   50.89    9.60 
  -6   2   1   55.79   11.20 
   6   2  -1   71.69   18.00 
  -6   2   1   63.59   16.50 
  -6   2   1   32.00    9.70 
  -6   2   1   43.30   12.60 
   6   2  -1   48.10    8.10 
   6   2  -1   68.79   12.90 
  -6   2   1   57.49   16.30 
  -5  -2   1   94.29   18.20 
   5  -2  -1  139.49   21.10 
   5  -2  -1  105.39   20.80 
   5  -2  -1   81.29   16.10 
  -5  -2   1   93.99   13.30 
   5  -2  -1  101.19   14.90 
   5  -2  -1   97.69   17.80 
   5  -2  -1   99.99   19.20 
   5  -2  -1   73.39   14.90 
   5  -2  -1   98.69   11.60 
   5  -2  -1  115.89   20.30 
  -5  -2   1  109.39   19.50 
  -5  -2   1  110.19   17.20 
  -5  -2   1  119.69    8.80 
   5  -2  -1  132.99   17.40 
  -5  -2   1  131.49   20.80 
  -5  -2   1   79.89   16.00 
   5  -2  -1  123.69   19.00 
   5  -2  -1   97.79   19.30 
  -5  -2   1  118.19   20.80 
  -5  -2   1  139.69   24.80 
   5  -2  -1  105.49   16.40 
  -5  -2   1   93.99   15.40 
  -5   2   1  100.19   21.30 
  -5   2   1  114.89    7.60 
  -5   2   1  110.49   19.00 
   5   2  -1   91.29   18.00 
   5   2  -1  116.49   15.00 
   5   2  -1  141.39   17.60 
  -5   2   1  101.39   10.20 
  -5   2   1  101.69   18.70 
   5   2  -1  114.89   14.60 
   5   2  -1  123.39    9.90 
  -5   2   1   84.49   17.00 
  -5   2   1   98.99   14.70 
  -5   2   1   96.89   19.40 
  -5   2   1  115.29   20.20 
  -5   2   1  122.39   20.40 
  -5   2   1   88.39   17.70 
   5   2  -1  104.59   20.20 
   5   2  -1  121.69   13.10 
   5   2  -1  120.89   20.80 
  -5   2   1  123.19   15.10 
   5   2  -1  127.69   21.40 
  -5   2   1   81.49   15.90 
  -5   2   1  107.19   17.80 
   5   2  -1  102.19   16.50 
  -5   2   1  115.19   15.50 
  -5   2   1  100.19   12.90 
   5   2  -1   93.19   17.50 
   5   2  -1  146.99   25.00 
  -5   2   1  115.69   15.80 
  -5   2   1  104.29   18.00 
   5   2  -1  118.79   14.60 
   5   2  -1  100.99   17.90 
   5   2  -1  139.99   15.20 
  -5   2   1  111.89   26.00 
  -5   2   1  156.08   17.90 
   5   2  -1  125.89   10.20 
  -5   2   1  108.49   19.60 
   5   2  -1  110.79   18.30 
  -5   2   1  123.19    7.00 
  -5   2   1  125.79   11.60 
  -5   2   1  100.39   18.70 
   5   2  -1  123.59   20.70 
   4  -2  -1   -4.30    3.80 
   4  -2  -1   19.70   10.10 
  -4  -2   1    5.70    5.70 
   4  -2  -1   19.10    8.80 
  -4  -2   1    0.00    4.50 
  -4  -2   1    4.40    5.60 
   4  -2  -1   18.90    7.10 
   4  -2  -1    2.30    6.10 
   4  -2  -1   13.50    7.30 
  -4  -2   1    0.50    6.40 
   4  -2  -1    4.40    7.30 
   4  -2  -1    4.20    6.00 
   4  -2  -1    3.80    3.60 
   4  -2  -1    3.10    7.00 
  -4  -2   1    4.70    4.20 
  -4  -2   1    9.90    4.30 
  -4  -2   1    4.90    6.40 
  -4  -2   1    2.90    2.20 
   4  -2  -1   10.30    6.00 
  -4  -2   1    5.60    6.40 
  -4  -2   1    6.40    2.50 
   4  -2  -1   -2.60    4.60 
   4  -2  -1   -4.70    5.30 
   4  -2  -1    0.00    4.70 
  -4  -2   1    3.00    6.70 
   4  -2  -1    2.60    6.30 
  -4  -2   1    3.50    6.00 
  -4   2   1   -2.30    4.80 
  -4   2   1    8.30    6.60 
   4   2  -1    1.00    5.40 
   4   2  -1    9.10    6.50 
   4   2  -1   15.60    7.70 
   4   2  -1    1.50    6.00 
   4   2  -1    3.40    2.70 
  -4   2   1   11.80    8.20 
  -4   2   1    8.80    7.30 
   4   2  -1    3.70    6.90 
   4   2  -1    7.30    6.70 
  -4   2   1   -1.30    5.00 
  -4   2   1    3.80    3.20 
   4   2  -1   -0.70    3.30 
  -4   2   1   -1.50    3.10 
  -4   2   1    2.30    6.10 
  -4   2   1   -0.10    4.30 
  -4   2   1    1.40    5.40 
  -4   2   1   -1.30    5.20 
  -4   2   1   -0.30    7.90 
  -4   2   1    3.90    6.20 
   4   2  -1    1.00    3.90 
  -4   2   1   10.80    7.90 
   4   2  -1    2.10    4.20 
   4   2  -1    7.70    3.90 
  -4   2   1    3.80    6.40 
  -4   2   1    3.30    4.60 
  -4   2   1    0.50    5.30 
  -4   2   1    9.10    7.30 
  -4   2   1    7.70    4.60 
   4   2  -1    8.00    6.00 
   4   2  -1    2.70    5.70 
   4   2  -1    8.30    8.10 
  -4   2   1    7.20    5.80 
  -4   2   1    3.90    5.80 
  -4   2   1   13.80    4.70 
   4   2  -1    6.80    6.00 
   4   2  -1    8.90    7.10 
  -4   2   1   -2.20    4.30 
   4   2  -1    1.60    5.00 
   4   2  -1    1.30    4.00 
   4   2  -1    1.20    4.40 
  -3  -2   1   62.39    6.30 
   3  -2  -1   39.90   10.10 
  -3  -2   1   67.49    9.40 
  -3  -2   1   66.39   14.60 
  -3  -2   1   60.39    8.20 
  -3  -2   1   57.59    6.70 
  -3  -2   1   63.89   12.50 
  -3  -2   1   63.49   13.30 
  -3  -2   1   66.79   10.60 
   3  -2  -1   53.99   10.40 
   3  -2  -1   61.59   11.90 
  -3  -2   1   65.39   11.40 
   3  -2  -1   71.79   13.30 
  -3  -2   1   23.30    8.00 
   3  -2  -1   60.89   11.10 
   3  -2  -1   61.59   12.20 
   3  -2  -1   84.99   15.50 
  -3  -2   1   54.99    6.90 
   3  -2  -1   61.09    9.20 
  -3  -2   1   52.69   11.60 
  -3  -2   1   48.70    7.10 
   3  -2  -1   62.09   11.50 
  -3  -2   1   68.99    7.30 
  -3  -2   1   59.79    7.60 
   3  -2  -1   66.39   12.00 
   3  -2  -1   75.19   13.10 
  -3  -2   1   56.79    4.40 
   3  -2  -1   56.89    9.90 
  -3  -2   1   57.79    4.10 
   3  -2  -1   67.79   17.60 
   3  -2  -1   64.59   10.70 
   3  -2  -1   56.79    9.90 
  -3  -2   1   83.29   12.40 
  -3  -2   1   59.29   11.20 
   3  -2  -1   61.29   10.70 
   3  -2  -1   56.69   12.00 
   3  -2  -1   70.69   15.20 
  -3  -2   1   38.30    9.10 
  -3   2   1   58.69   10.50 
   3   2  -1   61.79    8.20 
   3   2  -1   56.69    9.50 
  -3   2   1   79.19   13.40 
   3   2  -1   58.39    7.80 
  -3   2   1   68.39   13.00 
  -3   2   1   69.39   14.40 
   3   2  -1   48.60   10.70 
  -3   2   1   60.39   12.30 
  -3   2   1   59.09   10.70 
   3   2  -1   68.69   13.40 
  -3   2   1   59.09   12.20 
   3   2  -1   75.09   12.00 
  -3   2   1   64.19    8.70 
   3   2  -1   75.69    7.80 
   3   2  -1   55.89    9.90 
   3   2  -1   54.39    8.70 
   3   2  -1   55.39   12.60 
   3   2  -1   75.99   11.00 
   3   2  -1   53.19    7.20 
  -3   2   1   57.79   10.10 
  -3   2   1   56.49   12.30 
   3   2  -1   49.40    7.30 
   3   2  -1   57.99   10.20 
  -3   2   1   61.79   12.10 
  -3   2   1   62.19   12.10 
   3   2  -1   55.89   10.60 
  -3   2   1   52.49    9.40 
   3   2  -1   81.19   11.00 
  -3   2   1   61.59   16.40 
  -3   2   1   67.49    9.80 
  -3   2   1   64.79   11.90 
   3   2  -1   74.49   11.50 
  -3   2   1   67.29    9.40 
   3   2  -1   75.69   11.40 
   3   2  -1   69.69    9.10 
   3   2  -1   77.79   14.60 
  -3   2   1   58.69   10.80 
   3   2  -1   54.59    6.10 
  -3   2   1   42.70   11.30 
  -3   2   1   59.09   12.30 
   3   2  -1   54.49    8.30 
  -3   2   1   41.10   10.00 
  -3   2   1   65.19   10.00 
   3   2  -1   61.19   10.10 
   3   2  -1   48.80   11.30 
   3   2  -1   44.90   11.40 
   2  -2  -1   -4.20    3.20 
  -2  -2   1    1.80    2.80 
  -2  -2   1    6.00    3.80 
   2  -2  -1    0.70    3.60 
   2  -2  -1    6.60    4.30 
   2  -2  -1    4.30    4.60 
  -2  -2   1    4.60    2.80 
   2  -2  -1   -1.90    3.00 
   2  -2  -1    3.10    5.80 
  -2  -2   1    0.20    4.20 
   2  -2  -1    1.80    2.60 
  -2  -2   1   17.50    7.10 
  -2  -2   1    2.00    3.70 
  -2  -2   1    2.00    2.80 
  -2  -2   1    3.70    2.70 
   2  -2  -1    4.20    3.90 
   2  -2  -1    1.60    4.10 
  -2  -2   1    0.10    2.90 
   2  -2  -1   -3.40    2.60 
   2  -2  -1    7.50    4.80 
   2  -2  -1   -0.10    4.00 
   2  -2  -1    1.60    4.40 
  -2  -2   1    6.60    5.40 
   2  -2  -1   12.60    6.00 
  -2  -2   1    3.20    4.20 
  -2  -2   1    1.30    2.80 
  -2  -2   1   -0.40    2.20 
   2  -2  -1    2.90    5.30 
   2  -2  -1   -1.60    3.50 
  -2  -2   1    4.40    5.60 
   2  -2  -1    5.10    3.70 
  -2  -2   1    0.80    4.50 
  -2  -2   1    0.50    3.70 
   2  -2  -1    2.90    3.10 
  -2  -2   1   -0.10    3.00 
   2  -2  -1   -2.30    3.10 
  -2  -2   1   -0.10    1.60 
  -2  -2   1    6.30    3.90 
  -2  -2   1   -0.80    2.50 
  -2  -2   1   -0.40    2.10 
   2  -2  -1   -1.60    5.30 
   2  -2  -1    4.70    3.10 
   2  -2  -1    7.80    4.40 
   2  -2  -1    0.90    4.40 
  -2  -2   1    3.10    2.70 
   2  -2  -1   -3.10    3.60 
  -2  -2   1    0.90    3.20 
   2  -2  -1    4.50    4.40 
   2   2  -1    2.80    3.90 
  -2   2   1    1.20    4.70 
  -2   2   1   10.90    8.80 
   2   2  -1    3.40    3.50 
   2   2  -1    2.80    3.70 
   2   2  -1   -0.20    2.60 
   2   2  -1    5.80    3.70 
   2   2  -1    3.20    2.80 
  -2   2   1    1.80    5.20 
  -2   2   1   -0.50    4.40 
  -2   2   1    2.40    4.00 
   2   2  -1    4.70    2.90 
   2   2  -1   -6.70    2.60 
  -2   2   1   -1.40    3.30 
   2   2  -1    5.60    3.60 
  -2   2   1    0.10    4.30 
  -2   2   1    5.10    4.60 
   2   2  -1    3.20    2.80 
  -2   2   1   -1.90    3.70 
  -2   2   1    3.90    4.10 
  -2   2   1   -1.30    5.10 
   2   2  -1    3.10    3.20 
  -2   2   1    4.70    3.30 
   2   2  -1    2.10    5.30 
  -2   2   1   10.10    4.00 
  -2   2   1    0.30    3.80 
   2   2  -1    1.40    2.60 
   2   2  -1    4.80    4.40 
   2   2  -1    1.20    3.50 
  -2   2   1   -0.20    3.80 
  -2   2   1    1.70    3.10 
  -2   2   1    3.80    3.50 
   2   2  -1    1.10    4.40 
  -2   2   1    3.70    4.70 
  -2   2   1    1.70    4.10 
  -2   2   1    8.10    4.90 
  -2   2   1    1.90    3.80 
   2   2  -1    1.80    3.40 
   2   2  -1    7.30    5.50 
   2   2  -1   -2.00    4.30 
  -2   2   1    8.10    5.80 
  -2   2   1    0.70    3.50 
  -2   2   1    8.00    3.90 
   2   2  -1    4.00    2.90 
   2   2  -1    5.10    5.00 
   2   2  -1    3.60    3.90 
   2   2  -1    5.00    5.50 
   2   2  -1   -1.20    4.30 
  -2   2   1    1.60    4.30 
  -2   2   1    4.00    3.70 
  -2   2   1    1.90    3.00 
   2   2  -1    4.10    3.10 
   2   2  -1   -1.00    3.30 
  -1  -2   1    1.20    2.30 
  -1  -2   1   14.10    4.00 
  -1  -2   1    5.80    3.20 
  -1  -2   1   10.20    5.90 
   1  -2  -1    6.10    5.00 
   1  -2  -1    6.10    4.00 
   1  -2  -1    5.50    4.50 
   1  -2  -1    5.90    3.50 
  -1  -2   1    6.10    2.80 
  -1  -2   1    3.80    1.90 
  -1  -2   1    5.30    4.00 
   1  -2  -1    3.40    4.20 
  -1  -2   1    6.50    4.90 
  -1  -2   1    5.70    4.10 
   1  -2  -1   -1.00    3.00 
  -1  -2   1    0.30    4.70 
   1  -2  -1    4.60    3.30 
  -1  -2   1    3.50    3.20 
   1  -2  -1    5.70    3.90 
   1  -2  -1    3.70    4.80 
   1  -2  -1    0.70    3.30 
   1  -2  -1   10.20    6.20 
  -1  -2   1    7.60    3.00 
   1  -2  -1    5.10    3.80 
  -1  -2   1    2.40    2.90 
  -1  -2   1    7.40    3.60 
   1  -2  -1    0.80    4.80 
   1  -2  -1    2.30    2.20 
   1  -2  -1    6.90    4.40 
   1  -2  -1    8.40    4.60 
   1  -2  -1    9.10    4.40 
  -1  -2   1    5.50    3.50 
  -1  -2   1   18.90    5.50 
   1  -2  -1    0.90    3.10 
  -1  -2   1    8.70    6.10 
  -1  -2   1    7.20    3.70 
   1  -2  -1   15.90    5.60 
  -1  -2   1    3.70    4.20 
   1  -2  -1    7.80    4.60 
   1  -2  -1    2.80    3.80 
  -1  -2   1    8.20    4.80 
   1  -2  -1    6.10    4.20 
   1  -2  -1   11.10    4.90 
   1  -2  -1    0.40    3.80 
   1  -2  -1    8.30    2.20 
   1  -2  -1    3.50    3.50 
   1  -2  -1   10.90    5.20 
  -1  -2   1    5.10    4.70 
  -1   2   1    8.40    3.90 
   1   2  -1    7.30    3.60 
   1   2  -1   10.00    4.30 
   1   2  -1    5.50    2.20 
  -1   2   1    5.50    3.70 
  -1   2   1   12.40    4.30 
   1   2  -1    3.30    4.20 
   1   2  -1    2.80    3.50 
   1   2  -1    0.70    3.70 
   1   2  -1    8.20    5.70 
  -1   2   1    2.50    3.70 
  -1   2   1    2.80    3.90 
   1   2  -1    6.60    4.10 
  -1   2   1    4.10    3.90 
  -1   2   1   14.50    6.60 
  -1   2   1    3.90    4.40 
   1   2  -1    0.80    3.70 
  -1   2   1    3.00    3.50 
  -1   2   1    2.90    4.10 
  -1   2   1   13.90    4.70 
   1   2  -1    7.90    4.20 
   1   2  -1    9.40    4.00 
  -1   2   1    5.70    4.40 
  -1   2   1   11.50    4.70 
   1   2  -1    4.30    4.00 
  -1   2   1   10.40    4.90 
  -1   2   1    8.10    5.10 
   1   2  -1    8.40    4.70 
  -1   2   1   12.50    7.20 
  -1   2   1    8.40    4.60 
  -1   2   1   15.00    5.00 
  -1   2   1    4.90    4.60 
  -1   2   1   -1.40    3.50 
  -1   2   1    5.60    4.00 
   1   2  -1    5.50    2.30 
   1   2  -1    4.80    4.10 
  -1   2   1    2.80    2.30 
  -1   2   1    2.10    3.70 
  -1   2   1    2.90    4.30 
   1   2  -1    6.80    5.60 
   1   2  -1    2.20    3.60 
   1   2  -1    8.90    5.20 
   1   2  -1   12.50    5.50 
   1   2  -1   15.80    5.20 
  -1   2   1    3.70    3.30 
  -1   2   1    7.40    2.50 
   1   2  -1    9.90    5.60 
   1   2  -1    1.00    3.40 
   1   2  -1   -2.60    2.00 
   1   2  -1    4.30    3.50 
   0  -2   1   56.89    8.70 
   0  -2  -1   61.59    8.80 
   0  -2  -1   73.29   11.50 
   0  -2   1   67.49   12.20 
   0  -2  -1   58.89    9.10 
   0  -2   1   63.69   11.40 
   0  -2  -1   71.39    9.40 
   0  -2  -1   79.99   12.10 
   0  -2  -1   50.09    6.80 
   0  -2  -1   69.39   10.80 
   0  -2   1   71.99    8.40 
   0  -2   1   64.19    9.10 
   0  -2  -1   55.09    6.30 
   0  -2   1   72.49    9.50 
   0  -2   1   68.79    8.20 
   0  -2  -1   67.19    9.00 
   0  -2   1   77.39    9.90 
   0  -2  -1   72.59    8.00 
   0  -2  -1   77.39   10.10 
   0  -2  -1   66.99    8.80 
   0  -2  -1   59.69    9.30 
   0  -2  -1   74.39    8.10 
   0  -2  -1   73.79    7.30 
   0  -2   1   61.89   10.30 
   0  -2   1   62.99    8.80 
   0  -2   1   69.39    8.50 
   0  -2  -1   63.99    8.50 
   0  -2  -1   59.69    4.60 
   0  -2  -1   64.89    7.10 
   0  -2  -1   63.89   10.80 
   0  -2  -1   62.09    8.90 
   0  -2   1   76.79    9.70 
   0  -2   1   51.79    8.90 
   0  -2   1   78.59    9.60 
   0  -2   1   70.19   12.70 
   0  -2  -1   76.79    9.90 
   0  -2   1   70.39   10.70 
   0   2  -1   43.50    8.40 
   0   2   1   66.29    7.80 
   0   2  -1   62.79    8.40 
   0   2   1   45.30    9.20 
   0   2   1   65.49    8.70 
   0   2  -1   62.79    8.10 
   0   2  -1   57.79   10.40 
   0   2   1   64.59    7.50 
   0   2  -1   63.79    8.20 
   0   2   1   80.09   10.20 
   0   2   1   61.39    8.70 
   0   2  -1   57.79    9.30 
   0   2   1   61.19    7.00 
   0   2   1   79.89    7.40 
   0   2   1   65.29    8.60 
   0   2   1   70.59    9.50 
   0   2  -1   64.89   12.20 
   0   2   1   78.69    9.50 
   0   2  -1   58.29    8.90 
   0   2  -1   79.39   12.70 
   0   2  -1   69.89   10.00 
   0   2  -1   66.69    9.00 
   0   2  -1   66.39   12.10 
   0   2  -1   44.40    7.70 
   0   2   1   66.79   11.00 
   0   2   1   64.59    7.20 
   0   2   1   57.09    8.50 
   0   2   1   68.29   11.20 
   0   2  -1   93.29   11.60 
   0   2  -1   54.19    7.90 
   0   2   1   56.49    8.50 
   0   2  -1   57.59    8.50 
   0   2   1   57.59    8.50 
   0   2  -1   76.99   10.00 
   0   2  -1   59.69   11.50 
   0   2   1   61.09    3.70 
   0   2   1   96.49   11.30 
   0   2   1   62.69   10.20 
   1  -2   1 1316.47   52.39 
  -1  -2  -1 1090.59   47.50 
   1  -2   1 1032.60   50.69 
  -1  -2  -1 1054.79   45.70 
   1  -2   1 1136.29   47.80 
   1  -2   1 1083.29   43.40 
   1  -2   1 1127.29   49.40 
   1  -2   1 1050.59   47.50 
   1  -2   1 1101.29   47.40 
  -1  -2  -1 1130.49   45.70 
  -1  -2  -1 1117.39   49.20 
   1  -2   1 1070.49   48.30 
   1  -2   1 1080.09   47.50 
  -1  -2  -1 1048.00   40.10 
  -1  -2  -1 1094.59   46.60 
  -1  -2  -1 1079.69   51.49 
  -1  -2  -1 1105.09   44.60 
   1  -2   1  999.60   48.90 
   1  -2   1 1039.30   46.30 
  -1  -2  -1 1097.69   43.30 
  -1  -2  -1 1028.10   45.20 
   1  -2   1 1106.89   48.80 
   1  -2   1 1128.09   47.50 
   1  -2   1 1151.58   57.49 
  -1  -2  -1 1079.59   39.80 
  -1  -2  -1 1060.19   46.40 
  -1  -2  -1 1041.70   47.70 
  -1  -2  -1 1094.99   45.10 
  -1  -2  -1 1049.20   47.20 
   1  -2   1 1094.29   47.20 
   1  -2   1 1074.89   42.70 
   1  -2   1 1120.89   48.20 
   1  -2   1 1081.79   47.50 
  -1  -2  -1 1114.99   46.40 
   1  -2   1 1047.30   46.90 
  -1  -2  -1 1052.09   45.80 
  -1  -2  -1 1066.79   45.40 
   1  -2   1 1078.09   47.80 
   1  -2   1 1134.89   48.30 
  -1  -2  -1 1035.80   41.70 
   1  -2   1 1106.29   50.59 
  -1  -2  -1 1108.59   47.20 
  -1  -2  -1 1066.59   42.10 
   1  -2   1 1143.19   43.40 
  -1  -2  -1 1069.19   48.30 
  -1  -2  -1 1075.79   42.90 
   1   2   1 1130.49   42.00 
  -1   2  -1 1102.99   47.90 
  -1   2  -1 1074.99   47.60 
   1   2   1 1082.59   42.20 
  -1   2  -1 1163.88   49.80 
   1   2   1 1060.39   48.40 
  -1   2  -1 1112.89   46.50 
   1   2   1  995.10   45.30 
   1   2   1 1107.99   42.90 
  -1   2  -1 1066.09   47.10 
   1   2   1 1164.18   47.20 
  -1   2  -1 1068.59   42.80 
   1   2   1 1051.59   48.20 
   1   2   1 1133.79   45.50 
   1   2   1 1063.29   48.30 
   1   2   1 1180.08   47.80 
  -1   2  -1 1091.79   47.80 
  -1   2  -1 1026.80   49.10 
   1   2   1 1025.20   46.50 
   1   2   1 1118.89   43.80 
  -1   2  -1 1151.18   49.80 
  -1   2  -1 1027.40   47.80 
  -1   2  -1 1088.39   46.60 
  -1   2  -1 1125.49   48.10 
   1   2   1 1085.09   45.40 
  -1   2  -1 1078.59   49.50 
  -1   2  -1 1172.48   50.19 
  -1   2  -1 1040.30   47.70 
   1   2   1 1080.79   47.70 
  -1   2  -1 1059.59   47.30 
   1   2   1 1079.89   43.20 
   1   2   1 1068.69   46.90 
   1   2   1 1056.49   42.50 
   1   2   1 1109.69   46.60 
  -1   2  -1 1046.10   42.70 
   1   2   1 1193.38   52.09 
  -1   2  -1 1148.79   58.19 
   1   2   1 1043.30   41.40 
  -1   2  -1 1038.50   45.30 
  -1   2  -1 1092.39   47.50 
  -1   2  -1 1199.38   49.10 
   1   2   1 1075.99   39.80 
   1   2   1 1098.09   42.90 
  -1   2  -1 1109.09   51.79 
  -1   2  -1 1050.39   46.90 
  -1   2  -1 1086.69   48.30 
  -1   2  -1 1052.29   49.70 
  -1   2  -1 1111.79   48.60 
   1   2   1 1103.49   45.40 
   1   2   1 1094.59   48.90 
  -1   2  -1 1102.69   41.60 
   1   2   1 1072.69   39.50 
  -1   2  -1 1078.19   45.30 
  -2  -2  -1  123.09   14.20 
   2  -2   1  147.49   15.30 
   2  -2   1  100.39   13.90 
  -2  -2  -1  104.79    8.90 
   2  -2   1   96.09   12.30 
  -2  -2  -1  139.99   15.00 
   2  -2   1  112.79   13.10 
   2  -2   1  116.09   19.60 
   2  -2   1  110.39   12.60 
   2  -2   1  115.09   14.60 
   2  -2   1  133.59   13.80 
  -2  -2  -1  135.79   16.40 
   2  -2   1  116.89   16.00 
  -2  -2  -1  115.79    6.40 
  -2  -2  -1  126.29    9.10 
  -2  -2  -1  112.09   14.70 
   2  -2   1  149.19   16.00 
   2  -2   1  115.09    8.30 
   2  -2   1  118.59   14.20 
   2  -2   1  122.39   14.90 
  -2  -2  -1  130.49   15.80 
  -2  -2  -1  133.79   14.90 
   2  -2   1  102.99   11.40 
  -2  -2  -1  136.39   14.50 
  -2  -2  -1  116.89   12.80 
  -2  -2  -1  121.19    9.80 
   2  -2   1  127.49   18.00 
   2  -2   1  102.39   11.10 
  -2  -2  -1  110.59   12.90 
  -2  -2  -1   97.09   11.00 
  -2  -2  -1  118.59   17.80 
  -2  -2  -1  106.39   13.40 
   2  -2   1  136.19   14.70 
   2  -2   1  118.49   14.00 
  -2  -2  -1  131.59   13.10 
   2  -2   1  133.89   15.10 
   2  -2   1  123.19   14.20 
   2  -2   1  101.29   13.70 
   2  -2   1  112.89   14.20 
   2  -2   1  112.59   15.10 
  -2  -2  -1   82.79   12.00 
  -2  -2  -1  110.39    8.80 
  -2  -2  -1  126.89    9.90 
   2   2   1  112.89    8.90 
  -2   2  -1  118.29   12.60 
   2   2   1  112.09   12.20 
  -2   2  -1  119.09   14.80 
   2   2   1  127.19   15.20 
   2   2   1  118.99    9.80 
   2   2   1  111.59   10.50 
  -2   2  -1  125.79   21.70 
  -2   2  -1  136.09   16.70 
   2   2   1  112.19   15.80 
   2   2   1  109.79   14.70 
  -2   2  -1  132.19   15.60 
   2   2   1  123.39    9.60 
  -2   2  -1  117.99   15.10 
  -2   2  -1  111.09   14.80 
   2   2   1  111.19   13.30 
   2   2   1  133.09   12.80 
  -2   2  -1  107.79   11.80 
   2   2   1  136.39   16.80 
  -2   2  -1  139.49   16.40 
   2   2   1  131.19   12.30 
  -2   2  -1  109.19   14.10 
   2   2   1  115.59   12.40 
  -2   2  -1  113.79    7.20 
  -2   2  -1  108.89   12.30 
  -2   2  -1  111.59   13.80 
   2   2   1  119.29    9.20 
  -2   2  -1  148.59   16.30 
   2   2   1  126.89   14.20 
   2   2   1  134.99   13.80 
  -2   2  -1  134.39   14.70 
   2   2   1  102.69   10.50 
   2   2   1  140.39   14.80 
   2   2   1  101.09   10.00 
   2   2   1  115.79    6.90 
   2   2   1  144.49   16.20 
  -2   2  -1   96.59   13.00 
   2   2   1  111.69   14.00 
   2   2   1  116.79   12.40 
   2   2   1  113.59    9.10 
  -2   2  -1   95.59   12.40 
  -2   2  -1  127.59   13.80 
   2   2   1   96.49   12.70 
  -2   2  -1  109.79   11.30 
  -2   2  -1  107.39   13.90 
  -2   2  -1  115.39   16.60 
   2   2   1  154.08   14.40 
  -2   2  -1  106.69   11.10 
   2   2   1  119.29   15.30 
  -2   2  -1  120.49    7.20 
  -2   2  -1  137.79   16.20 
  -2   2  -1   90.69   15.40 
  -2   2  -1  103.69   13.80 
   2   2   1  143.79   13.90 
  -2   2  -1  110.59   14.00 
   2   2   1   97.09   11.70 
  -3  -2  -1  293.17   18.00 
   3  -2   1  304.47   21.40 
  -3  -2  -1  282.77   17.70 
  -3  -2  -1  296.67   14.00 
  -3  -2  -1  255.97   20.80 
  -3  -2  -1  303.67   22.50 
   3  -2   1  301.27   22.90 
   3  -2   1  235.68   23.20 
   3  -2   1  275.37   26.50 
   3  -2   1  289.97   27.40 
   3  -2   1  312.67   21.40 
   3  -2   1  269.77   19.80 
  -3  -2  -1  308.77   21.60 
   3  -2   1  296.97   20.70 
  -3  -2  -1  301.27   22.70 
   3  -2   1  260.27   15.90 
   3  -2   1  267.37   15.10 
  -3  -2  -1  346.87   25.50 
  -3  -2  -1  279.87   15.50 
   3  -2   1  303.27   23.00 
  -3  -2  -1  277.87   14.30 
  -3  -2  -1  269.37   25.20 
  -3  -2  -1  253.47   18.80 
  -3  -2  -1  252.87   22.60 
  -3  -2  -1  271.07   13.50 
  -3  -2  -1  311.67   21.70 
   3  -2   1  278.27   20.60 
   3  -2   1  257.67   26.10 
   3  -2   1  258.27   26.60 
   3  -2   1  295.47   24.00 
   3  -2   1  267.17   18.90 
   3  -2   1  277.87   25.70 
  -3   2  -1  282.67   16.30 
   3   2   1  288.67   19.70 
  -3   2  -1  302.67   22.30 
  -3   2  -1  318.37   19.90 
  -3   2  -1  336.67   21.30 
  -3   2  -1  242.88   24.90 
   3   2   1  282.87   14.30 
  -3   2  -1  261.87   20.20 
   3   2   1  319.87   21.70 
   3   2   1  293.77   22.30 
   3   2   1  265.67   15.60 
  -3   2  -1  299.67   23.40 
   3   2   1  262.77   14.30 
  -3   2  -1  317.97   22.90 
   3   2   1  252.87   24.80 
  -3   2  -1  259.27   15.50 
   3   2   1  305.07   19.40 
  -3   2  -1  282.37   28.40 
  -3   2  -1  264.77   24.20 
   3   2   1  270.97   24.50 
  -3   2  -1  257.27   25.30 
   3   2   1  294.07   18.20 
   3   2   1  298.07   18.50 
  -3   2  -1  280.07   20.40 
   3   2   1  248.08   18.40 
  -3   2  -1  253.57   14.10 
   3   2   1  300.87   17.90 
   3   2   1  263.17   15.10 
  -3   2  -1  282.07   19.90 
   3   2   1  273.57   19.40 
   3   2   1  296.77   20.50 
   3   2   1  291.77   14.50 
   3   2   1  312.37   22.80 
   3   2   1  276.07   14.10 
  -3   2  -1  284.97   16.20 
   3   2   1  277.97   15.60 
  -3   2  -1  285.97   30.90 
   3   2   1  296.27   15.70 
  -3   2  -1  298.37   22.80 
  -3   2  -1  274.37   17.90 
  -3   2  -1  251.97   24.60 
  -3   2  -1  251.37   19.60 
   3   2   1  247.18   20.70 
   3   2   1  238.08   24.70 
   3   2   1  261.17   23.60 
   3   2   1  250.47   17.70 
   3   2   1  277.07   23.40 
  -3   2  -1  272.37   20.50 
   3   2   1  289.77   20.10 
   3   2   1  268.57   15.10 
   3   2   1  294.57   26.90 
  -3   2  -1  245.08   24.90 
  -3   2  -1  306.67   18.80 
   3   2   1  269.27   14.30 
   3   2   1  296.47   23.20 
   3   2   1  261.37   18.10 
  -3   2  -1  283.37   21.30 
  -4  -2  -1  380.96   24.00 
  -4  -2  -1  408.36   21.70 
  -4  -2  -1  418.26   30.20 
   4  -2   1  444.76   32.70 
  -4  -2  -1  349.57   30.20 
   4  -2   1  389.66   22.80 
   4  -2   1  404.16   25.00 
  -4  -2  -1  438.26   19.40 
   4  -2   1  364.76   29.40 
   4  -2   1  338.67   28.70 
   4  -2   1  431.96   26.40 
  -4  -2  -1  391.36   27.30 
   4  -2   1  452.95   28.90 
  -4  -2  -1  463.45   29.90 
   4  -2   1  388.86   28.80 
  -4  -2  -1  446.96   30.50 
  -4  -2  -1  427.86   29.40 
  -4  -2  -1  404.76   33.50 
   4  -2   1  415.86   29.40 
   4  -2   1  441.86   28.20 
   4  -2   1  417.36   31.30 
  -4  -2  -1  379.96   25.50 
  -4  -2  -1  380.46   16.80 
  -4  -2  -1  408.76   31.40 
   4  -2   1  412.86   31.10 
  -4  -2  -1  411.46   20.50 
   4  -2   1  368.46   29.90 
  -4   2  -1  362.96   27.40 
  -4   2  -1  388.56   30.10 
   4   2   1  500.75   35.90 
  -4   2  -1  367.96   19.30 
   4   2   1  396.86   26.60 
   4   2   1  406.46   30.70 
   4   2   1  404.36   21.80 
   4   2   1  426.96   25.90 
   4   2   1  367.66   27.60 
   4   2   1  414.36   30.80 
   4   2   1  414.06   21.60 
  -4   2  -1  429.86   23.20 
   4   2   1  390.36   27.30 
  -4   2  -1  356.36   28.00 
  -4   2  -1  404.96   24.10 
  -4   2  -1  438.46   41.70 
  -4   2  -1  403.36   18.60 
  -4   2  -1  400.96   28.40 
  -4   2  -1  414.46   18.70 
   4   2   1  424.06   25.30 
  -4   2  -1  425.06   30.30 
   4   2   1  419.76   25.50 
  -4   2  -1  386.66   27.60 
   4   2   1  441.16   31.80 
   4   2   1  438.06   20.50 
   4   2   1  368.96   28.80 
   4   2   1  419.96   26.10 
  -4   2  -1  417.96   26.90 
  -4   2  -1  391.66   29.40 
  -4   2  -1  397.46   26.30 
  -4   2  -1  401.56   22.70 
  -4   2  -1  387.16   21.10 
  -4   2  -1  407.56   20.70 
  -4   2  -1  407.36   25.60 
   4   2   1  426.16   19.50 
  -4   2  -1  428.16   34.60 
   4   2   1  394.36   24.20 
   4   2   1  404.56   18.70 
   4   2   1  406.86   22.80 
  -4   2  -1  420.16   29.20 
  -4   2  -1  348.37   28.40 
  -4   2  -1  388.86   31.60 
   4   2   1  444.16   27.30 
  -4   2  -1  426.46   29.70 
   4   2   1  422.76   28.90 
   4   2   1  419.66   23.40 
  -4   2  -1  360.26   29.90 
   4   2   1  401.36   23.20 
   4   2   1  438.16   21.30 
  -4   2  -1  413.46   23.30 
   5  -2   1  391.26   31.10 
   5  -2   1  404.06   33.50 
  -5  -2  -1  450.05   25.50 
   5  -2   1  420.96   33.40 
   5  -2   1  428.46   34.50 
  -5  -2  -1  408.76   27.30 
   5  -2   1  467.35   33.70 
   5  -2   1  414.46   34.00 
   5  -2   1  403.56   38.90 
   5  -2   1  436.36   27.60 
   5  -2   1  374.56   30.90 
  -5  -2  -1  427.46   23.30 
  -5  -2  -1  452.35   20.40 
  -5  -2  -1  440.06   36.20 
  -5  -2  -1  436.46   33.70 
   5  -2   1  450.65   28.40 
  -5  -2  -1  466.85   33.30 
  -5  -2  -1  413.56   32.80 
   5  -2   1  404.56   29.70 
  -5  -2  -1  438.96   35.60 
   5  -2   1  417.16   26.40 
   5  -2   1  424.56   28.90 
  -5  -2  -1  462.35   33.70 
   5   2   1  359.46   31.80 
  -5   2  -1  464.65   28.80 
   5   2   1  437.76   27.80 
   5   2   1  468.35   31.70 
   5   2   1  435.86   21.10 
  -5   2  -1  412.46   33.60 
   5   2   1  452.65   35.80 
  -5   2  -1  440.26   32.40 
  -5   2  -1  434.96   23.30 
  -5   2  -1  371.66   42.70 
  -5   2  -1  422.46   41.50 
  -5   2  -1  443.76   22.30 
  -5   2  -1  375.36   30.10 
  -5   2  -1  384.56   31.20 
   5   2   1  404.86   23.90 
   5   2   1  394.86   32.70 
   5   2   1  398.46   28.30 
  -5   2  -1  399.76   44.20 
  -5   2  -1  469.15   25.20 
  -5   2  -1  427.16   35.30 
  -5   2  -1  499.55   34.60 
   5   2   1  427.06   25.60 
  -5   2  -1  415.46   32.50 
   5   2   1  427.86   24.70 
  -5   2  -1  380.16   31.70 
   5   2   1  428.46   29.40 
   5   2   1  447.06   23.90 
   5   2   1  447.76   24.20 
  -5   2  -1  443.86   21.20 
   5   2   1  445.96   32.30 
  -5   2  -1  399.96   23.90 
   5   2   1  466.55   35.60 
   5   2   1  420.46   33.70 
  -5   2  -1  427.96   26.50 
  -5   2  -1  382.56   31.10 
   5   2   1  453.75   20.60 
  -5   2  -1  440.86   32.40 
   5   2   1  389.06   29.00 
   5   2   1  382.76   29.80 
  -5   2  -1  384.46   27.50 
   5   2   1  399.46   21.40 
  -5   2  -1  369.26   37.20 
  -6  -2  -1  706.93   40.80 
  -6  -2  -1  699.13   47.00 
   6  -2   1  687.43   43.20 
   6  -2   1  715.93   38.30 
   6  -2   1  705.03   45.60 
  -6  -2  -1  689.73   51.19 
  -6  -2  -1  653.83   47.00 
   6  -2   1  729.53   42.00 
   6  -2   1  745.03   47.30 
   6  -2   1  682.73   40.40 
  -6  -2  -1  636.04   41.90 
  -6  -2  -1  607.64   48.90 
   6  -2   1  658.83   48.80 
   6  -2   1  669.03   45.90 
  -6  -2  -1  660.43   45.30 
   6  -2   1  674.93   39.60 
   6  -2   1  543.85   44.90 
  -6  -2  -1  774.92   32.50 
   6  -2   1  677.03   48.00 
   6  -2   1  707.73   49.99 
  -6  -2  -1  700.83   38.00 
  -6  -2  -1  573.24   46.50 
   6  -2   1  676.83   48.60 
  -6  -2  -1  600.34   45.10 
   6   2   1  724.13   51.09 
   6   2   1  652.73   41.50 
  -6   2  -1  704.53   47.70 
   6   2   1  735.93   28.60 
  -6   2  -1  694.53   63.39 
  -6   2  -1  722.53   47.30 
  -6   2  -1  714.63   51.29 
   6   2   1  628.24   43.80 
   6   2   1  658.13   38.90 
   6   2   1  804.22   51.09 
  -6   2  -1  684.33   48.50 
   6   2   1  614.34   46.90 
  -6   2  -1  740.23   47.70 
   6   2   1  659.03   47.60 
  -6   2  -1  630.64   45.10 
   6   2   1  706.53   42.40 
   6   2   1  676.73   42.20 
   6   2   1  697.73   41.10 
  -6   2  -1  724.83   40.80 
  -6   2  -1  680.33   29.50 
  -6   2  -1  652.03   45.00 
  -6   2  -1  708.33   49.30 
   6   2   1  695.83   28.30 
  -6   2  -1  716.33   45.10 
  -6   2  -1  594.34   50.69 
  -6   2  -1  752.12   49.20 
   6   2   1  752.82   45.20 
   6   2   1  689.93   47.80 
   6   2   1  676.23   45.70 
  -6   2  -1  675.93   39.00 
   6   2   1  690.63   36.00 
  -6   2  -1  690.83   46.50 
  -6   2  -1  780.52   48.40 
  -7  -2  -1  896.51   49.20 
  -7  -2  -1 1007.60   61.59 
   7  -2   1  843.62   59.99 
  -7  -2  -1  900.51   60.19 
   7  -2   1  977.30   50.09 
   7  -2   1  927.51   55.29 
   7  -2   1  949.80   62.49 
  -7  -2  -1  862.41   63.49 
   7  -2   1  913.61   57.59 
  -7  -2  -1  949.01   66.39 
   7  -2   1  971.40   60.19 
  -7  -2  -1  880.41   59.19 
   7  -2   1  850.41   52.49 
   7  -2   1  935.01   52.09 
   7  -2   1  879.71   60.39 
   7  -2   1  963.00   50.89 
  -7  -2  -1  951.50   53.09 
   7  -2   1  952.40   59.19 
  -7  -2  -1  941.61   59.79 
   7  -2   1  876.21   62.19 
  -7  -2  -1  799.32   52.79 
   7  -2   1  894.81   61.89 
   7   2   1 1001.80   62.99 
   7   2   1  878.61   46.20 
   7   2   1  875.61   57.69 
   7   2   1  836.72   61.69 
   7   2   1  836.12   55.89 
  -7   2  -1  881.81   57.69 
  -7   2  -1  924.91   58.99 
  -7   2  -1  908.41   68.39 
  -7   2  -1  908.71   48.20 
   7   2   1  812.02   58.79 
   7   2   1  872.21   61.49 
   7   2   1  916.91   53.69 
  -7   2  -1 1040.70   61.89 
  -7   2  -1  935.91   61.89 
  -7   2  -1  941.91   60.09 
   7   2   1 1061.09   64.39 
   7   2   1  904.61   53.39 
   7   2   1  946.41   49.80 
  -7   2  -1  961.50   64.29 
   7   2   1  913.91   55.09 
  -7   2  -1  845.82   58.89 
  -7   2  -1  879.81   49.60 
  -7   2  -1  904.01   58.79 
   7   2   1 1059.59   57.39 
  -7   2  -1  898.91   61.19 
  -7   2  -1  934.51   56.29 
  -8  -2  -1  266.67   42.60 
  -8  -2  -1  213.98   34.80 
   8  -2   1  310.97   39.40 
   8  -2   1  225.58   37.00 
   8  -2   1  314.27   40.80 
  -8  -2  -1  269.77   30.00 
  -8  -2  -1  314.07   42.20 
   8  -2   1  355.36   45.00 
  -8  -2  -1  276.57   35.50 
   8  -2   1  280.47   34.40 
  -8  -2  -1  285.17   33.50 
   8  -2   1  279.77   42.30 
  -8  -2  -1  209.08   39.50 
  -8  -2  -1  245.88   37.60 
   8  -2   1  218.58   37.60 
   8  -2   1  278.67   42.20 
   8  -2   1  277.57   37.00 
  -8  -2  -1  260.87   37.50 
   8   2   1  290.17   41.30 
   8   2   1  298.37   41.50 
  -8   2  -1  423.86   49.00 
  -8   2  -1  330.77   38.80 
  -8   2  -1  282.87   47.00 
  -8   2  -1  308.17   40.10 
   8   2   1  260.67   35.00 
   8   2   1  289.97   43.70 
  -8   2  -1  302.17   39.60 
  -8   2  -1  332.87   45.20 
  -8   2  -1  258.27   40.30 
  -8   2  -1  261.97   37.30 
   8   2   1  283.07   35.10 
   8   2   1  236.78   37.60 
  -8   2  -1  167.78   41.90 
   8   2   1  314.37   40.80 
   8   2   1  204.18   34.10 
  -8   2  -1  230.98   37.90 
  -8   2  -1  255.67   38.00 
   8   2   1  347.87   38.00 
   8   2   1  331.27   41.30 
   8   2   1  251.67   32.50 
  -8   2  -1  285.17   39.40 
   9  -2   1  666.93   64.19 
  -9  -2  -1  750.22   60.39 
  -9  -2  -1  693.93   68.19 
  -9  -2  -1  689.43   77.99 
   9  -2   1  844.02   80.59 
   9  -2   1  655.33   70.49 
   9  -2   1  676.83   55.59 
   9  -2   1  670.43   66.39 
   9  -2   1  586.04   65.39 
  -9  -2  -1  751.42   59.99 
   9  -2   1  597.44   66.09 
  -9  -2  -1  658.13   65.79 
   9  -2   1  649.74   50.79 
   9  -2   1  658.83   68.69 
   9  -2   1  686.83   53.69 
   9  -2   1  765.62   74.39 
  -9  -2  -1  767.02   80.79 
  -9  -2  -1  756.62   54.09 
  -9   2  -1  777.12   83.49 
  -9   2  -1  633.74   49.99 
  -9   2  -1  703.43   71.79 
   9   2   1  671.93   52.09 
  -9   2  -1  741.83   75.19 
   9   2   1  776.82   60.59 
  -9   2  -1  719.73   70.79 
  -9   2  -1  662.93   54.39 
   9   2   1  648.14   64.19 
  -9   2  -1  834.52   61.19 
   9   2   1  625.84   63.89 
   9   2   1  678.83   70.69 
   9   2   1  739.73   61.59 
   9   2   1  766.82   60.39 
  -9   2  -1  845.22   61.59 
   9   2   1  692.53   72.19 
  -9   2  -1  595.94   61.89 
  -9   2  -1  705.23   74.09 
  -9   2  -1  784.22   72.39 
   9   2   1  686.03   50.49 
  -9   2  -1  685.13   69.79 
   9   2   1  698.23   68.99 
   9   2   1  765.72   55.59 
  10  -2   1   98.09   31.30 
  10  -2   1   78.39   26.60 
  10  -2   1   78.39   25.20 
 -10  -2  -1   84.19   29.10 
 -10  -2  -1  154.38   39.10 
  10  -2   1  140.79   33.90 
  10  -2   1  117.49   28.30 
 -10  -2  -1  112.19   30.30 
  10  -2   1   74.99   29.40 
  10  -2   1   79.79   24.30 
  10  -2   1  112.89   30.80 
  10  -2   1   98.99   28.50 
 -10  -2  -1   77.09   24.60 
 -10  -2  -1  154.68   29.90 
 -10  -2  -1  151.38   32.40 
 -10  -2  -1   95.09   30.40 
  10  -2   1  187.78   38.70 
 -10   2  -1   91.69   28.50 
  10   2   1  112.59   30.00 
 -10   2  -1  106.39   30.80 
  10   2   1  171.98   32.80 
 -10   2  -1  117.29   31.70 
  10   2   1  111.59   27.30 
  10   2   1   90.19   28.30 
 -10   2  -1  113.89   30.60 
  10   2   1  135.99   32.40 
 -10   2  -1   87.69   27.50 
 -10   2  -1  124.09   34.60 
 -10   2  -1   79.89   30.80 
 -10   2  -1  112.19   29.90 
  10   2   1   90.99   29.00 
  10   2   1   96.19   28.50 
  10   2   1  105.49   31.70 
  10   2   1  127.99   32.70 
 -10   2  -1  126.09   29.60 
  10   2   1   90.79   29.70 
 -10   2  -1  110.49   28.30 
  10  -3  -1  216.78   41.00 
  10  -3  -1  309.47   42.70 
 -10  -3   1  237.48   44.30 
 -10  -3   1  253.97   46.30 
 -10  -3   1  240.68   38.80 
  10  -3  -1  206.98   39.50 
 -10  -3   1  307.77   47.10 
  10  -3  -1  300.77   53.29 
 -10  -3   1  212.08   40.80 
  10  -3  -1  314.77   48.40 
  10  -3  -1  256.57   42.70 
  10  -3  -1  245.38   43.10 
  10  -3  -1  198.98   40.20 
  10  -3  -1  241.48   43.10 
  10  -3  -1  232.48   43.20 
  10  -3  -1  200.28   40.70 
 -10  -3   1  286.37   51.59 
 -10   3   1  235.68   44.80 
 -10   3   1  240.48   42.00 
 -10   3   1  257.47   43.00 
 -10   3   1  286.17   46.30 
 -10   3   1  200.88   37.80 
 -10   3   1  176.58   33.40 
  10   3  -1  213.28   44.80 
  10   3  -1  285.67   48.30 
  10   3  -1  187.28   40.30 
  10   3  -1  222.38   39.90 
 -10   3   1  233.18   43.70 
  10   3  -1  225.68   41.80 
  10   3  -1  366.56   54.19 
 -10   3   1  214.08   42.20 
  10   3  -1  322.37   44.60 
 -10   3   1  254.67   46.10 
 -10   3   1  216.38   48.30 
  10   3  -1  313.27   45.20 
 -10   3   1  188.18   38.30 
  10   3  -1  230.88   47.10 
  -9  -3   1  315.77   40.70 
   9  -3  -1  321.27   45.90 
  -9  -3   1  321.97   48.40 
   9  -3  -1  337.07   52.09 
   9  -3  -1  300.17   40.40 
   9  -3  -1  322.37   48.10 
  -9  -3   1  380.06   53.29 
   9  -3  -1  318.47   46.60 
   9  -3  -1  225.28   40.90 
  -9  -3   1  414.56   53.49 
   9  -3  -1  284.57   45.30 
   9  -3  -1  314.47   43.40 
  -9  -3   1  365.46   50.29 
   9  -3  -1  379.26   49.70 
  -9  -3   1  306.57   38.80 
  -9  -3   1  324.77   43.70 
   9  -3  -1  234.98   37.90 
  -9  -3   1  285.27   47.90 
  -9   3   1  331.37   45.70 
   9   3  -1  301.97   42.60 
  -9   3   1  338.37   45.10 
  -9   3   1  364.76   51.09 
  -9   3   1  307.37   52.69 
   9   3  -1  255.37   43.60 
  -9   3   1  312.17   48.70 
   9   3  -1  416.76   48.80 
   9   3  -1  337.77   47.70 
  -9   3   1  311.47   43.80 
  -9   3   1  241.68   42.40 
   9   3  -1  310.87   48.00 
   9   3  -1  317.87   49.50 
  -9   3   1  326.87   47.20 
   9   3  -1  325.97   49.60 
   9   3  -1  358.66   51.49 
   9   3  -1  268.47   38.20 
  -9   3   1  391.06   51.69 
   9   3  -1  310.87   42.50 
  -9   3   1  313.97   44.20 
  -9   3   1  343.77   44.80 
   8  -3  -1  579.84   57.39 
   8  -3  -1  526.25   58.69 
  -8  -3   1  520.95   50.49 
   8  -3  -1  598.24   39.70 
  -8  -3   1  476.25   53.19 
  -8  -3   1  443.56   49.60 
   8  -3  -1  485.05   50.69 
   8  -3  -1  509.15   54.69 
   8  -3  -1  556.74   57.49 
  -8  -3   1  488.35   56.89 
   8  -3  -1  520.55   58.39 
  -8  -3   1  549.95   41.20 
   8  -3  -1  479.65   55.99 
  -8  -3   1  574.44   59.49 
   8  -3  -1  597.34   57.69 
   8  -3  -1  591.94   58.29 
  -8  -3   1  507.05   59.99 
  -8  -3   1  359.46   52.19 
  -8   3   1  603.34   59.89 
   8   3  -1  489.35   57.69 
  -8   3   1  535.25   60.19 
   8   3  -1  535.35   50.89 
  -8   3   1  419.96   48.20 
  -8   3   1  602.34   69.39 
   8   3  -1  416.26   48.20 
  -8   3   1  489.55   55.79 
   8   3  -1  537.45   58.19 
  -8   3   1  573.24   58.89 
  -8   3   1  565.14   54.99 
   8   3  -1  504.75   58.69 
   8   3  -1  596.14   56.29 
   8   3  -1  493.05   56.59 
   8   3  -1  541.65   57.99 
  -8   3   1  558.74   54.29 
   8   3  -1  559.54   57.39 
  -8   3   1  524.95   55.89 
  -8   3   1  403.86   48.50 
   8   3  -1  565.24   55.79 
  -8   3   1  466.85   54.89 
  -7  -3   1  374.06   39.90 
   7  -3  -1  391.36   29.70 
  -7  -3   1  482.25   56.59 
   7  -3  -1  473.85   53.59 
   7  -3  -1  331.37   39.30 
   7  -3  -1  371.36   45.90 
  -7  -3   1  411.76   48.10 
  -7  -3   1  297.97   38.10 
  -7  -3   1  379.96   45.30 
   7  -3  -1  402.36   31.80 
   7  -3  -1  371.36   31.40 
  -7  -3   1  394.96   39.40 
   7  -3  -1  371.46   44.50 
   7  -3  -1  324.57   42.70 
   7  -3  -1  332.57   41.80 
  -7  -3   1  405.76   46.60 
   7  -3  -1  389.06   44.00 
   7  -3  -1  350.16   41.00 
  -7  -3   1  421.76   27.50 
  -7  -3   1  423.56   49.40 
   7  -3  -1  464.15   48.70 
   7   3  -1  414.36   48.00 
   7   3  -1  412.16   28.60 
   7   3  -1  422.16   49.40 
  -7   3   1  377.86   47.10 
   7   3  -1  367.96   44.90 
   7   3  -1  435.66   50.19 
   7   3  -1  337.47   28.30 
   7   3  -1  407.36   45.50 
  -7   3   1  386.66   31.50 
   7   3  -1  442.06   42.10 
  -7   3   1  407.46   47.90 
  -7   3   1  350.36   35.00 
  -7   3   1  405.96   47.80 
  -7   3   1  397.26   45.20 
  -7   3   1  386.76   59.59 
  -7   3   1  388.36   47.20 
  -7   3   1  387.26   52.59 
  -7   3   1  385.26   41.60 
   7   3  -1  460.55   50.59 
  -7   3   1  383.46   44.20 
  -7   3   1  397.86   30.40 
  -7   3   1  432.46   44.00 
   7   3  -1  335.47   27.50 
  -7   3   1  403.26   29.10 
   7   3  -1  408.76   28.90 
  -7   3   1  398.16   41.90 
   7   3  -1  411.76   43.80 
   7   3  -1  452.95   36.50 
  -7   3   1  372.46   43.30 
   6  -3  -1 1826.72   95.09 
  -6  -3   1 1742.33   88.59 
   6  -3  -1 1760.22   77.99 
  -6  -3   1 1906.71   92.89 
   6  -3  -1 1981.30   96.69 
   6  -3  -1 1889.11   97.79 
   6  -3  -1 1820.12   83.29 
   6  -3  -1 1938.51   95.79 
   6  -3  -1 1979.00   95.29 
  -6  -3   1 2026.40   98.39 
   6  -3  -1 1967.50   94.19 
  -6  -3   1 1834.82   99.39 
  -6  -3   1 1936.01   79.99 
   6  -3  -1 1950.70   88.39 
  -6  -3   1 1980.60   88.69 
   6  -3  -1 1930.21   88.49 
  -6  -3   1 1808.92   93.49 
   6  -3  -1 1683.03   93.49 
  -6  -3   1 1856.81   95.89 
  -6  -3   1 2059.39  100.59 
   6  -3  -1 1912.81   94.29 
   6  -3  -1 1840.22   98.99 
  -6   3   1 1960.30   96.79 
   6   3  -1 1989.20   98.19 
  -6   3   1 1776.12   90.29 
  -6   3   1 2028.00   97.49 
  -6   3   1 1987.80   75.19 
  -6   3   1 2049.49  117.69 
  -6   3   1 1906.41   85.89 
  -6   3   1 1839.92  103.09 
  -6   3   1 1957.00   97.99 
   6   3  -1 1684.73   95.59 
   6   3  -1 1920.41   99.09 
  -6   3   1 1954.00   96.19 
   6   3  -1 2000.00   83.59 
   6   3  -1 1866.71   94.99 
   6   3  -1 1795.92   95.59 
   6   3  -1 2006.00   98.69 
  -6   3   1 1964.60   75.59 
  -6   3   1 1998.20   96.79 
   6   3  -1 1851.61   81.29 
   6   3  -1 1982.80   79.99 
   6   3  -1 2090.49   98.19 
   6   3  -1 1958.70   89.69 
  -6   3   1 1891.21   86.59 
   6   3  -1 1727.93   88.19 
  -6   3   1 1932.01   88.09 
  -6   3   1 1960.20   98.79 
  -6   3   1 2051.89   99.99 
  -6   3   1 1956.30   96.49 
  -6   3   1 1896.01   91.09 
   6   3  -1 1924.61   81.89 
  -6   3   1 1938.71   93.79 
   5  -3  -1 1299.17   57.89 
   5  -3  -1 1377.36   70.09 
   5  -3  -1 1304.87   64.29 
   5  -3  -1 1336.07   70.09 
  -5  -3   1 1294.57   70.19 
   5  -3  -1 1367.16   74.29 
  -5  -3   1 1295.47   68.79 
  -5  -3   1 1321.37   56.29 
   5  -3  -1 1404.06   70.19 
  -5  -3   1 1301.97   73.19 
  -5  -3   1 1358.96   69.29 
   5  -3  -1 1281.67   68.09 
  -5  -3   1 1296.17   66.29 
  -5  -3   1 1308.87   65.39 
   5  -3  -1 1316.07   63.79 
   5  -3  -1 1283.97   67.89 
  -5  -3   1 1326.37   50.09 
   5  -3  -1 1269.57   70.89 
   5  -3  -1 1265.47   64.49 
  -5  -3   1 1418.26   56.29 
   5  -3  -1 1303.87   69.99 
   5  -3  -1 1317.67   69.89 
  -5  -3   1 1360.46   64.09 
   5  -3  -1 1272.57   59.29 
  -5   3   1 1348.17   70.39 
  -5   3   1 1175.38   72.09 
  -5   3   1 1278.97   55.09 
  -5   3   1 1352.46   64.29 
  -5   3   1 1345.07   71.89 
  -5   3   1 1287.77   56.69 
   5   3  -1 1362.96   71.69 
  -5   3   1 1317.77   58.09 
  -5   3   1 1284.97   68.99 
  -5   3   1 1216.68   57.99 
   5   3  -1 1292.97   51.59 
   5   3  -1 1195.78   69.39 
  -5   3   1 1447.06   74.29 
  -5   3   1 1322.77   56.69 
  -5   3   1 1429.16   89.39 
   5   3  -1 1340.37   64.09 
   5   3  -1 1262.77   52.69 
  -5   3   1 1290.27   55.39 
   5   3  -1 1313.57   56.29 
  -5   3   1 1340.07   65.79 
  -5   3   1 1256.57   62.89 
  -5   3   1 1273.17   69.39 
  -5   3   1 1330.17   62.89 
   5   3  -1 1265.77   57.99 
   5   3  -1 1276.17   63.59 
  -5   3   1 1323.37   64.39 
  -5   3   1 1327.27   68.19 
  -5   3   1 1332.77   70.29 
   5   3  -1 1332.77   58.49 
   5   3  -1 1340.47   71.49 
   5   3  -1 1325.57   69.89 
  -5   3   1 1221.98   68.79 
   5   3  -1 1176.18   68.09 
   5   3  -1 1144.99   70.49 
  -5   3   1 1332.17   65.39 
  -5   3   1 1263.17   70.39 
   5   3  -1 1311.17   58.49 
  -5   3   1 1443.86   66.09 
  -4  -3   1 1425.26   54.89 
   4  -3  -1 1282.17   63.99 
   4  -3  -1 1381.46   66.59 
   4  -3  -1 1333.77   68.49 
  -4  -3   1 1332.87   59.49 
  -4  -3   1 1464.05   57.59 
  -4  -3   1 1451.15   66.89 
  -4  -3   1 1394.96   55.89 
   4  -3  -1 1360.96   66.39 
   4  -3  -1 1425.66   60.09 
  -4  -3   1 1467.55   69.29 
   4  -3  -1 1351.46   67.79 
  -4  -3   1 1439.46   66.49 
  -4  -3   1 1414.16   55.69 
  -4  -3   1 1307.57   71.39 
   4  -3  -1 1375.86   65.49 
  -4  -3   1 1394.76   55.49 
  -4  -3   1 1439.06   65.99 
   4  -3  -1 1426.66   69.09 
  -4  -3   1 1373.06   70.09 
  -4  -3   1 1404.56   65.19 
   4  -3  -1 1417.66   61.19 
  -4  -3   1 1433.36   64.69 
   4  -3  -1 1322.07   69.29 
   4  -3  -1 1456.35   69.09 
   4  -3  -1 1281.97   68.39 
   4  -3  -1 1401.26   69.29 
   4   3  -1 1291.67   68.89 
   4   3  -1 1469.65   71.09 
  -4   3   1 1438.66   68.89 
  -4   3   1 1413.36   65.99 
   4   3  -1 1367.86   54.49 
   4   3  -1 1529.45   62.69 
  -4   3   1 1370.96   68.79 
  -4   3   1 1370.46   71.49 
  -4   3   1 1426.06   65.59 
  -4   3   1 1398.96   60.09 
   4   3  -1 1349.16   65.69 
   4   3  -1 1427.86   54.39 
   4   3  -1 1359.36   69.29 
  -4   3   1 1451.65   70.59 
   4   3  -1 1269.17   61.79 
  -4   3   1 1347.77   64.99 
  -4   3   1 1358.96   60.59 
   4   3  -1 1471.15   72.29 
   4   3  -1 1360.46   55.89 
  -4   3   1 1434.66   69.89 
  -4   3   1 1422.86   84.69 
   4   3  -1 1421.26   61.39 
   4   3  -1 1336.77   71.19 
   4   3  -1 1330.57   57.69 
  -4   3   1 1369.66   63.09 
  -4   3   1 1393.66   63.99 
   4   3  -1 1411.66   58.29 
  -4   3   1 1366.66   59.39 
  -4   3   1 1256.87   68.79 
  -4   3   1 1356.06   69.49 
   4   3  -1 1388.16   58.59 
   4   3  -1 1441.46   63.49 
   4   3  -1 1223.88   56.49 
   4   3  -1 1298.87   62.99 
  -4   3   1 1296.17   67.39 
  -4   3   1 1304.47   59.49 
  -4   3   1 1354.46   63.99 
  -4   3   1 1360.46   69.19 
   4   3  -1 1433.96   54.19 
   3  -3  -1 1819.22   78.99 
  -3  -3   1 1743.63   77.29 
  -3  -3   1 1716.53   74.29 
   3  -3  -1 1742.53   77.39 
  -3  -3   1 1716.03   81.19 
   3  -3  -1 1817.72   76.09 
  -3  -3   1 1680.03   70.39 
  -3  -3   1 1743.03   70.69 
  -3  -3   1 1804.92   75.29 
  -3  -3   1 1787.02   71.39 
  -3  -3   1 1767.42   78.39 
  -3  -3   1 1761.22   69.09 
   3  -3  -1 1807.52   79.69 
  -3  -3   1 1712.23   69.59 
   3  -3  -1 1766.22   80.59 
   3  -3  -1 1664.23   73.49 
   3  -3  -1 1785.72   74.69 
  -3  -3   1 1881.61   70.99 
  -3  -3   1 1743.23   66.29 
   3  -3  -1 1762.52   79.29 
   3  -3  -1 1780.72   73.19 
  -3  -3   1 1813.32   78.49 
  -3  -3   1 1843.62   72.59 
   3  -3  -1 1847.02   79.39 
  -3  -3   1 1798.92   70.89 
   3  -3  -1 1805.92   79.79 
  -3  -3   1 1666.03   71.89 
  -3  -3   1 1723.33   82.39 
  -3  -3   1 1780.02   75.99 
   3  -3  -1 1677.73   80.19 
   3  -3  -1 1808.62   78.29 
   3  -3  -1 1803.22   73.19 
  -3  -3   1 1845.02   67.19 
   3  -3  -1 1884.31   80.29 
  -3   3   1 1738.33   77.59 
  -3   3   1 1772.92   79.59 
  -3   3   1 1746.43   74.09 
  -3   3   1 1740.33   73.19 
  -3   3   1 1724.43   73.49 
   3   3  -1 1727.73   72.49 
   3   3  -1 1711.63   81.59 
   3   3  -1 1688.63   70.79 
  -3   3   1 1830.92   79.89 
  -3   3   1 1785.02   79.19 
   3   3  -1 1669.73   69.69 
   3   3  -1 1779.02   70.09 
   3   3  -1 1743.53   80.19 
  -3   3   1 1785.12   72.69 
  -3   3   1 1698.73   71.49 
  -3   3   1 1720.73   82.59 
   3   3  -1 1689.83   73.69 
  -3   3   1 1758.62   81.19 
  -3   3   1 1700.93   79.39 
  -3   3   1 1831.32   95.89 
   3   3  -1 1712.03   72.49 
   3   3  -1 1800.62   73.19 
   3   3  -1 1754.92   82.59 
   3   3  -1 1835.62   69.69 
  -3   3   1 1854.01   81.69 
  -3   3   1 1771.92   80.19 
  -3   3   1 1832.42   81.19 
   3   3  -1 1706.13   70.29 
  -3   3   1 1745.13   77.89 
   3   3  -1 1740.43   80.39 
  -3   3   1 1783.52   73.69 
   3   3  -1 1746.33   69.59 
  -3   3   1 1756.02   77.59 
   3   3  -1 1751.52   75.29 
  -3   3   1 1721.33   84.39 
   2  -3  -1  852.51   45.30 
   2  -3  -1  886.31   43.90 
   2  -3  -1  924.21   46.10 
   2  -3  -1  923.81   44.40 
   2  -3  -1  954.90   38.20 
   2  -3  -1  979.00   48.10 
  -2  -3   1  780.42   42.50 
  -2  -3   1  947.11   39.60 
  -2  -3   1  890.61   40.50 
  -2  -3   1  892.71   42.00 
  -2  -3   1 1001.90   42.70 
  -2  -3   1  888.21   36.70 
   2  -3  -1  951.70   48.90 
  -2  -3   1  895.81   39.80 
  -2  -3   1  925.21   50.29 
   2  -3  -1  882.41   46.70 
  -2  -3   1  864.51   44.90 
  -2  -3   1  905.61   41.20 
   2  -3  -1  936.81   49.20 
   2  -3  -1  847.32   46.80 
   2  -3  -1  951.10   46.80 
  -2  -3   1  886.41   49.20 
   2  -3  -1  902.71   43.70 
  -2  -3   1  946.71   39.90 
  -2  -3   1  957.80   40.60 
   2  -3  -1  926.61   39.80 
  -2  -3   1  862.31   42.00 
   2  -3  -1  914.11   41.20 
  -2  -3   1  910.31   40.90 
  -2  -3   1  901.91   42.10 
  -2  -3   1  900.01   37.50 
   2  -3  -1  915.41   47.20 
  -2  -3   1  962.10   39.10 
   2   3  -1  878.41   39.40 
  -2   3   1  911.11   47.10 
  -2   3   1  843.72   42.80 
  -2   3   1  914.81   43.70 
   2   3  -1  927.01   49.70 
   2   3  -1  913.21   40.50 
  -2   3   1  949.71   59.19 
   2   3  -1  924.11   37.90 
  -2   3   1  882.61   43.90 
  -2   3   1  865.61   44.90 
   2   3  -1  899.61   43.10 
  -2   3   1  965.70   48.80 
   2   3  -1  948.51   44.60 
  -2   3   1  888.21   50.69 
   2   3  -1  913.31   43.70 
  -2   3   1  902.61   46.30 
   2   3  -1  930.11   48.70 
  -2   3   1  958.80   46.80 
   2   3  -1  918.81   38.90 
   2   3  -1  981.90   44.70 
  -2   3   1  947.41   46.60 
   2   3  -1  887.11   40.90 
  -2   3   1  900.21   46.30 
  -2   3   1  902.51   46.00 
  -2   3   1  890.71   42.60 
  -2   3   1  867.21   46.80 
  -2   3   1  893.71   46.00 
   2   3  -1  914.71   46.70 
   2   3  -1  967.40   49.60 
   2   3  -1  953.10   42.60 
  -2   3   1  967.80   39.60 
   2   3  -1  890.81   41.60 
  -2   3   1  940.81   45.70 
   2   3  -1  935.01   39.30 
  -2   3   1  934.21   39.70 
   1  -3  -1 2215.68   89.19 
   1  -3  -1 2143.99   87.69 
   1  -3  -1 2160.18   88.79 
  -1  -3   1 2125.29   89.29 
  -1  -3   1 2287.97   88.29 
  -1  -3   1 2370.46   88.39 
   1  -3  -1 2204.98   89.49 
   1  -3  -1 2054.29   89.89 
  -1  -3   1 2201.68   84.49 
   1  -3  -1 2262.07   96.99 
  -1  -3   1 2148.58   88.89 
   1  -3  -1 2342.97   87.49 
  -1  -3   1 2135.69   94.89 
  -1  -3   1 2209.08   86.29 
  -1  -3   1 2172.58   83.59 
   1  -3  -1 2359.66   95.59 
   1  -3  -1 2326.57   92.49 
  -1  -3   1 2264.07   89.79 
   1  -3  -1 2239.78   89.69 
  -1  -3   1 2223.78   88.99 
   1  -3  -1 2130.09   85.09 
   1  -3  -1 2154.38   89.99 
   1  -3  -1 2250.37   92.09 
  -1  -3   1 2274.07   94.79 
   1  -3  -1 2180.28   91.29 
  -1  -3   1 2243.08   91.49 
   1  -3  -1 2146.19   86.09 
  -1  -3   1 2117.59   83.59 
   1  -3  -1 2176.38   93.59 
   1  -3  -1 2216.28   88.09 
  -1  -3   1 2307.67   94.99 
   1  -3  -1 2154.08   91.39 
   1  -3  -1 2182.48   90.09 
  -1  -3   1 2257.27   96.39 
  -1  -3   1 2141.69   88.39 
   1   3  -1 2164.68   94.29 
   1   3  -1 2206.88   84.99 
   1   3  -1 2285.17   88.29 
  -1   3   1 2083.49   89.99 
  -1   3   1 2204.68   81.89 
  -1   3   1 2136.19   91.49 
   1   3  -1 2209.98   92.99 
  -1   3   1 2289.87   91.29 
   1   3  -1 2218.68   95.99 
   1   3  -1 2170.08   95.49 
  -1   3   1 2173.28   79.99 
  -1   3   1 2214.48   88.39 
  -1   3   1 2191.08   91.69 
  -1   3   1 2201.08   91.69 
  -1   3   1 2136.39   88.99 
   1   3  -1 2231.78   95.19 
   1   3  -1 2213.48   87.59 
   1   3  -1 2175.78   92.29 
   1   3  -1 2268.07   89.39 
   1   3  -1 2192.88   90.99 
  -1   3   1 2235.98   88.29 
   1   3  -1 2182.48   91.89 
  -1   3   1 2199.88   91.09 
   1   3  -1 2207.58   84.39 
  -1   3   1 2141.09   87.89 
  -1   3   1 2241.58   91.79 
  -1   3   1 2234.08   97.09 
   1   3  -1 2266.47   90.69 
   1   3  -1 2102.29   89.49 
   1   3  -1 2166.78   88.89 
   1   3  -1 2237.78   92.19 
   1   3  -1 2290.07   89.19 
  -1   3   1 2201.18   91.19 
  -1   3   1 2196.88   89.69 
   1   3  -1 2185.28   79.19 
  -1   3   1 2191.38   90.59 
   1   3  -1 2188.28   88.59 
  -1   3   1 2122.09   90.69 
  -1   3   1 2253.17  103.69 
  -1   3   1 2125.19   89.09 
   1   3  -1 2304.87   88.29 
   1   3  -1 2194.48   96.39 
   0  -3   1  770.32   39.40 
   0  -3   1  777.02   41.60 
   0  -3   1  837.32   46.20 
   0  -3  -1  803.32   35.40 
   0  -3  -1  767.22   35.20 
   0  -3  -1  800.72   36.20 
   0  -3  -1  836.72   41.10 
   0  -3   1  759.62   38.70 
   0  -3   1  874.21   39.30 
   0  -3   1  830.92   37.70 
   0  -3  -1  847.32   39.70 
   0  -3  -1  792.22   36.80 
   0  -3  -1  730.83   45.90 
   0  -3   1  816.22   37.00 
   0  -3   1  791.02   37.10 
   0  -3  -1  851.91   40.50 
   0  -3   1  746.63   39.60 
   0  -3  -1  779.92   31.70 
   0  -3  -1  822.52   43.40 
   0  -3  -1  804.92   43.80 
   0  -3   1  872.01   44.70 
   0  -3  -1  877.81   44.30 
   0  -3   1  756.22   46.20 
   0  -3  -1  864.51   40.70 
   0  -3  -1  760.92   39.80 
   0  -3  -1  797.02   40.30 
   0  -3   1  839.92   39.90 
   0  -3  -1  758.42   39.10 
   0  -3  -1  797.82   35.70 
   0  -3  -1  819.62   37.00 
   0  -3   1  769.82   38.40 
   0   3  -1  717.13   37.60 
   0   3   1  761.12   39.40 
   0   3  -1  815.42   40.80 
   0   3   1  851.41   40.60 
   0   3   1  760.62   39.50 
   0   3  -1  789.32   41.20 
   0   3   1  754.92   39.40 
   0   3  -1  774.42   40.30 
   0   3  -1  759.42   39.40 
   0   3  -1  791.82   40.20 
   0   3  -1  835.32   38.50 
   0   3  -1  838.02   38.60 
   0   3  -1  769.02   44.40 
   0   3   1  828.72   43.50 
   0   3   1  830.12   44.80 
   0   3   1  836.22   35.10 
   0   3   1  714.63   41.70 
   0   3  -1  764.12   47.60 
   0   3  -1  759.62   42.60 
   0   3   1  774.02   38.70 
   0   3  -1  829.82   44.80 
   0   3  -1  775.12   39.30 
   0   3  -1  768.72   37.20 
   0   3   1  871.31   41.20 
   0   3  -1  766.32   44.80 
   0   3   1  812.82   42.20 
   0   3  -1  758.32   37.00 
   0   3   1  811.82   39.60 
   0   3   1  766.12   35.30 
   0   3   1  809.02   40.00 
   0   3   1  786.02   37.10 
   0   3   1  846.12   43.20 
   0   3   1  770.32   35.70 
  -1  -3  -1 4830.72  176.48 
   1  -3   1 4554.64  181.48 
  -1  -3  -1 4875.31  186.08 
   1  -3   1 4914.11  180.68 
  -1  -3  -1 4961.80  184.58 
  -1  -3  -1 4982.80  189.38 
   1  -3   1 4789.02  187.78 
  -1  -3  -1 4888.01  172.78 
   1  -3   1 4804.92  183.68 
  -1  -3  -1 4891.81  183.38 
   1  -3   1 4737.43  173.18 
  -1  -3  -1 4818.72  172.78 
   1  -3   1 4605.44  181.78 
  -1  -3  -1 4839.22  183.88 
  -1  -3  -1 5012.00  183.28 
  -1  -3  -1 4510.75  179.48 
  -1  -3  -1 4849.51  176.18 
   1  -3   1 5029.40  182.18 
   1  -3   1 4816.12  182.78 
   1  -3   1 4750.32  195.28 
   1  -3   1 4866.31  180.18 
   1  -3   1 4857.71  182.58 
  -1  -3  -1 4337.77  170.78 
  -1  -3  -1 4896.71  172.58 
  -1  -3  -1 4958.00  179.38 
  -1  -3  -1 4915.61  180.18 
  -1  -3  -1 4749.52  179.38 
   1  -3   1 4714.13  171.98 
  -1  -3  -1 5011.60  180.98 
  -1  -3  -1 4734.73  175.38 
  -1  -3  -1 4760.12  174.28 
  -1  -3  -1 4826.02  179.28 
   1  -3   1 4835.22  180.78 
  -1  -3  -1 4910.11  174.58 
  -1  -3  -1 4838.82  171.78 
   1  -3   1 4669.93  187.98 
  -1   3  -1 4864.71  174.78 
  -1   3  -1 4645.14  180.88 
  -1   3  -1 4964.70  182.88 
   1   3   1 4940.41  182.18 
  -1   3  -1 4829.32  188.18 
   1   3   1 4707.03  184.48 
  -1   3  -1 4649.04  181.68 
  -1   3  -1 4833.92  172.78 
  -1   3  -1 4748.82  185.38 
  -1   3  -1 4780.42  179.28 
   1   3   1 4837.62  181.18 
  -1   3  -1 4769.42  185.68 
   1   3   1 4939.21  179.88 
  -1   3  -1 5034.90  198.08 
  -1   3  -1 4980.30  181.48 
   1   3   1 4577.24  184.28 
  -1   3  -1 4875.41  185.78 
  -1   3  -1 4847.51  181.98 
   1   3   1 4631.04  181.08 
  -1   3  -1 4632.84  185.18 
   1   3   1 4722.73  173.98 
   1   3   1 5032.10  183.58 
   1   3   1 5013.80  181.88 
  -1   3  -1 4810.22  180.68 
   1   3   1 4785.02  183.98 
   1   3   1 5041.10  172.48 
  -1   3  -1 4636.04  183.08 
   1   3   1 4781.32  180.98 
   1   3   1 4750.12  185.18 
  -1   3  -1 4819.22  186.48 
   1   3   1 4817.02  174.58 
  -1   3  -1 4796.52  179.98 
   1   3   1 4721.13  182.58 
  -1   3  -1 4970.30  183.08 
   1   3   1 4901.11  172.88 
  -1   3  -1 4687.43  182.68 
   1   3   1 4855.91  174.48 
  -2  -3  -1 2219.88   81.49 
  -2  -3  -1 2223.08   97.59 
  -2  -3  -1 2095.89   87.49 
  -2  -3  -1 2171.28   85.49 
   2  -3   1 2139.69   84.89 
  -2  -3  -1 2201.18   88.59 
   2  -3   1 2265.97   86.99 
   2  -3   1 2179.58   92.49 
  -2  -3  -1 2087.59   89.29 
  -2  -3  -1 2214.98   83.89 
  -2  -3  -1 2234.68   89.39 
   2  -3   1 2222.18   91.09 
   2  -3   1 2126.79   92.29 
   2  -3   1 2093.19   92.79 
   2  -3   1 2217.98   88.09 
  -2  -3  -1 2207.18   79.99 
  -2  -3  -1 2213.18   86.09 
   2  -3   1 2210.48   81.09 
  -2  -3  -1 2113.49   90.99 
   2  -3   1 2093.09   91.69 
   2  -3   1 2020.40   93.79 
   2  -3   1 2122.29   84.69 
  -2  -3  -1 2217.28   87.29 
  -2  -3  -1 2270.57   86.89 
  -2  -3  -1 2211.48   94.29 
  -2  -3  -1 2245.38   89.09 
   2  -3   1 2170.78   95.39 
  -2  -3  -1 2365.26   94.89 
  -2  -3  -1 2215.98   88.79 
  -2  -3  -1 2274.97   83.49 
   2  -3   1 2101.39   91.69 
  -2   3  -1 2242.68   87.79 
  -2   3  -1 2076.19   98.29 
  -2   3  -1 2134.19   94.19 
   2   3   1 2122.29   91.49 
   2   3   1 2176.48   86.99 
   2   3   1 2156.98   94.69 
   2   3   1 2192.18   93.99 
   2   3   1 2261.37   87.19 
   2   3   1 2188.18   81.69 
  -2   3  -1 2111.39   93.59 
  -2   3  -1 2262.57   93.19 
   2   3   1 2149.19   80.19 
   2   3   1 2231.88   86.09 
   2   3   1 2169.78   96.79 
  -2   3  -1 2305.87  109.49 
  -2   3  -1 2239.98   88.49 
  -2   3  -1 2088.29   93.09 
   2   3   1 2177.98   84.89 
   2   3   1 2122.69   81.39 
   2   3   1 2268.17   90.09 
   2   3   1 2198.48   93.79 
   2   3   1 2246.98   89.19 
  -2   3  -1 2136.89   92.19 
   2   3   1 2422.56   96.89 
   2   3   1 2156.18   86.49 
  -2   3  -1 2211.08   83.39 
   2   3   1 2258.47   84.79 
   2   3   1 2162.48   85.89 
  -2   3  -1 2056.19   96.59 
  -2   3  -1 2209.38   92.49 
  -2   3  -1 2146.49   90.79 
   2   3   1 2246.38   92.19 
  -2   3  -1 2153.38   85.39 
  -2   3  -1 2232.88   84.99 
   2   3   1 2204.18   94.29 
  -2   3  -1 2144.19   92.29 
   2   3   1 2235.88   85.89 
  -2   3  -1 2158.98   92.99 
   2   3   1 2277.27   87.29 
   2   3   1 2242.98   94.39 
  -2   3  -1 2264.97   92.49 
   2   3   1 2214.48   91.99 
  -3  -3  -1 1772.62   82.29 
   3  -3   1 1935.21   80.89 
  -3  -3  -1 1669.63   71.39 
   3  -3   1 1814.12   79.19 
  -3  -3  -1 1806.12   71.49 
   3  -3   1 1756.12   79.09 
  -3  -3  -1 1857.11   76.39 
  -3  -3  -1 1831.62   73.39 
   3  -3   1 1725.43   74.29 
  -3  -3  -1 1825.92   70.89 
   3  -3   1 1669.13   78.29 
   3  -3   1 1805.12   82.09 
  -3  -3  -1 1836.92   77.99 
  -3  -3  -1 1788.62   80.49 
  -3  -3  -1 1765.22   74.99 
  -3  -3  -1 1770.62   65.59 
  -3  -3  -1 1780.42   71.59 
   3  -3   1 1713.83   79.59 
   3  -3   1 1684.73   79.89 
  -3  -3  -1 1734.03   76.59 
   3  -3   1 1919.11   85.19 
   3  -3   1 1768.22   81.09 
  -3  -3  -1 1726.03   77.69 
  -3  -3  -1 1724.73   85.59 
   3  -3   1 1712.83   68.49 
  -3  -3  -1 1887.61   82.09 
   3  -3   1 1812.62   82.89 
  -3   3  -1 1763.72   80.79 
   3   3   1 1724.83   76.89 
   3   3   1 1744.33   67.09 
   3   3   1 1849.31   79.69 
  -3   3  -1 1718.63   67.49 
  -3   3  -1 1782.12   73.69 
   3   3   1 1878.01   78.39 
   3   3   1 1815.32   72.09 
   3   3   1 1813.12   81.59 
   3   3   1 1831.32   74.79 
  -3   3  -1 1876.01   83.39 
  -3   3  -1 1769.92   73.29 
  -3   3  -1 1845.22   75.49 
   3   3   1 1757.72   80.29 
   3   3   1 1759.12   81.89 
  -3   3  -1 1811.22   85.89 
  -3   3  -1 1753.22   76.99 
   3   3   1 1576.34   75.39 
   3   3   1 1800.92   71.29 
  -3   3  -1 1897.61   80.49 
  -3   3  -1 1709.73   80.99 
   3   3   1 1772.62   81.59 
  -3   3  -1 1726.43   66.89 
  -3   3  -1 1813.32   78.89 
  -3   3  -1 1781.72   80.89 
   3   3   1 1721.23   82.69 
   3   3   1 1759.12   72.89 
   3   3   1 1869.01   72.09 
  -3   3  -1 1865.11   99.19 
   3   3   1 1795.52   85.59 
  -3   3  -1 1739.43   73.89 
  -3   3  -1 1789.02   80.99 
   3   3   1 1738.23   71.09 
  -3   3  -1 1727.23   86.59 
  -3   3  -1 1830.12   76.49 
  -3   3  -1 1907.91   86.19 
   3   3   1 1813.52   75.09 
  -3   3  -1 1762.72   80.19 
   3   3   1 1847.52   71.89 
  -3   3  -1 1726.43   81.09 
  -4  -3  -1  674.93   32.30 
   4  -3   1  743.33   44.70 
   4  -3   1  779.12   46.80 
  -4  -3  -1  699.63   28.90 
  -4  -3  -1  690.73   40.40 
   4  -3   1  684.93   43.20 
   4  -3   1  735.83   44.20 
  -4  -3  -1  730.53   44.70 
  -4  -3  -1  688.43   45.10 
   4  -3   1  770.22   41.90 
   4  -3   1  750.32   46.50 
  -4  -3  -1  709.63   42.30 
   4  -3   1  759.02   42.40 
  -4  -3  -1  668.43   46.50 
  -4  -3  -1  635.34   41.50 
   4  -3   1  715.53   44.50 
  -4  -3  -1  721.63   28.90 
  -4  -3  -1  717.53   39.00 
  -4  -3  -1  702.23   39.60 
  -4  -3  -1  768.72   37.30 
   4  -3   1  642.84   34.30 
   4  -3   1  692.13   42.20 
  -4  -3  -1  721.73   30.90 
   4  -3   1  731.83   45.40 
   4  -3   1  696.43   41.50 
  -4   3  -1  643.24   55.29 
   4   3   1  719.23   32.10 
   4   3   1  685.73   45.80 
   4   3   1  668.03   31.80 
   4   3   1  766.22   43.20 
  -4   3  -1  735.33   37.30 
  -4   3  -1  644.24   43.10 
  -4   3  -1  645.24   42.60 
  -4   3  -1  681.33   42.90 
  -4   3  -1  730.23   40.70 
   4   3   1  715.13   37.90 
  -4   3  -1  664.33   40.40 
  -4   3  -1  682.83   34.60 
  -4   3  -1  649.54   39.20 
  -4   3  -1  806.42   46.90 
   4   3   1  686.73   44.20 
  -4   3  -1  700.23   29.90 
  -4   3  -1  704.03   32.30 
   4   3   1  730.93   32.70 
  -4   3  -1  738.53   44.00 
   4   3   1  730.93   38.30 
  -4   3  -1  719.33   44.00 
   4   3   1  692.03   35.70 
   4   3   1  721.03   38.10 
  -4   3  -1  738.23   40.50 
   4   3   1  689.53   43.60 
  -4   3  -1  729.23   39.20 
   4   3   1  632.14   37.30 
   4   3   1  682.23   46.70 
   4   3   1  692.03   37.00 
  -4   3  -1  655.93   41.10 
   4   3   1  685.63   31.30 
  -4   3  -1  654.43   43.00 
  -4   3  -1  671.53   43.60 
  -4   3  -1  747.83   35.10 
   4   3   1  690.63   36.80 
   4   3   1  664.33   43.90 
  -4   3  -1  703.43   47.90 
  -4   3  -1  765.82   48.70 
   4   3   1  670.23   32.40 
   5  -3   1  553.64   36.30 
  -5  -3  -1  540.75   33.80 
   5  -3   1  469.35   35.90 
   5  -3   1  437.96   32.20 
   5  -3   1  358.56   39.50 
  -5  -3  -1  414.46   37.50 
   5  -3   1  489.45   37.30 
  -5  -3  -1  482.85   35.70 
   5  -3   1  564.54   41.40 
   5  -3   1  522.35   38.30 
  -5  -3  -1  507.75   34.10 
   5  -3   1  531.15   36.50 
  -5  -3  -1  494.85   37.10 
  -5  -3  -1  508.05   23.30 
  -5  -3  -1  524.45   31.40 
  -5  -3  -1  470.05   36.60 
  -5  -3  -1  519.95   40.70 
  -5  -3  -1  470.45   23.70 
   5  -3   1  512.15   39.30 
   5  -3   1  497.85   39.90 
  -5  -3  -1  559.74   42.70 
   5  -3   1  533.15   26.00 
  -5  -3  -1  541.25   25.60 
   5  -3   1  453.55   37.60 
   5   3   1  518.95   39.50 
  -5   3  -1  500.15   41.20 
  -5   3  -1  486.75   35.20 
   5   3   1  539.25   31.80 
  -5   3  -1  527.05   43.80 
  -5   3  -1  563.64   37.40 
   5   3   1  608.14   44.20 
  -5   3  -1  549.45   34.60 
  -5   3  -1  529.65   36.00 
   5   3   1  522.35   32.50 
  -5   3  -1  528.15   24.90 
  -5   3  -1  473.05   34.30 
  -5   3  -1  531.55   38.80 
   5   3   1  512.95   39.50 
  -5   3  -1  475.05   38.30 
  -5   3  -1  428.56   36.20 
   5   3   1  462.35   27.20 
  -5   3  -1  501.95   39.60 
  -5   3  -1  503.85   38.30 
   5   3   1  510.95   31.80 
   5   3   1  532.75   34.10 
  -5   3  -1  513.85   37.90 
   5   3   1  538.85   37.70 
   5   3   1  504.45   32.80 
  -5   3  -1  498.45   24.90 
  -5   3  -1  477.75   27.00 
  -5   3  -1  511.35   35.20 
   5   3   1  501.45   36.20 
   5   3   1  518.55   24.70 
   5   3   1  533.55   22.80 
  -5   3  -1  470.65   50.89 
  -5   3  -1  522.75   28.10 
  -5   3  -1  525.85   29.90 
  -5   3  -1  522.35   37.90 
  -5   3  -1  514.65   24.90 
   5   3   1  521.35   38.70 
   5   3   1  478.95   39.90 
  -5   3  -1  529.45   39.80 
   5   3   1  567.54   34.30 
   5   3   1  526.95   23.90 
  -5   3  -1  498.65   26.10 
  -5   3  -1  517.75   32.30 
  -6  -3  -1  909.91   50.79 
   6  -3   1  811.72   51.69 
  -6  -3  -1  860.21   54.89 
   6  -3   1  918.11   59.59 
   6  -3   1  992.40   60.09 
  -6  -3  -1  899.21   41.60 
  -6  -3  -1  847.12   54.19 
   6  -3   1  792.62   47.40 
   6  -3   1  862.31   54.79 
   6  -3   1  960.80   59.59 
   6  -3   1  862.71   41.70 
   6  -3   1  854.71   56.99 
   6  -3   1  945.21   52.19 
  -6  -3  -1  865.41   58.89 
   6  -3   1  833.72   57.79 
   6  -3   1  875.21   54.79 
  -6  -3  -1  823.62   46.80 
  -6  -3  -1  829.72   58.39 
   6  -3   1  910.51   56.59 
  -6  -3  -1  850.21   55.49 
   6  -3   1  795.52   53.89 
  -6   3  -1  770.22   71.29 
  -6   3  -1  911.51   57.89 
  -6   3  -1  771.22   55.89 
   6   3   1  801.42   48.40 
  -6   3  -1  870.01   50.49 
   6   3   1  863.11   36.50 
   6   3   1  784.02   52.19 
  -6   3  -1  888.91   55.79 
   6   3   1  935.31   54.89 
   6   3   1  906.31   58.69 
  -6   3  -1  860.91   56.59 
  -6   3  -1  846.32   50.29 
   6   3   1  900.51   60.09 
   6   3   1  822.12   56.69 
  -6   3  -1  844.92   62.79 
   6   3   1  841.52   46.90 
  -6   3  -1  862.01   56.19 
   6   3   1  819.52   57.49 
  -6   3  -1  949.11   41.50 
  -6   3  -1  912.01   45.10 
  -6   3  -1  906.01   55.49 
  -6   3  -1  917.01   57.09 
   6   3   1  792.32   54.79 
  -6   3  -1  767.52   52.09 
   6   3   1  857.91   50.59 
   6   3   1  850.21   45.00 
   6   3   1  912.31   49.60 
  -6   3  -1  909.81   58.49 
  -6   3  -1  852.71   59.39 
  -6   3  -1  947.61   55.49 
   6   3   1  877.21   49.30 
  -6   3  -1  948.81   55.39 
   7  -3   1  156.68   27.40 
  -7  -3  -1  279.87   37.10 
   7  -3   1  205.48   30.20 
   7  -3   1  266.77   39.20 
  -7  -3  -1  203.28   35.70 
   7  -3   1  197.38   27.30 
   7  -3   1  124.19   24.70 
  -7  -3  -1  185.38   29.40 
   7  -3   1  174.98   27.10 
   7  -3   1  255.77   35.00 
   7  -3   1  167.08   24.10 
   7  -3   1  210.28   35.20 
  -7  -3  -1  188.38   30.70 
  -7  -3  -1  154.88   24.70 
  -7  -3  -1  165.88   32.20 
   7  -3   1  237.98   35.40 
   7  -3   1  222.88   34.40 
   7  -3   1  201.08   32.80 
  -7  -3  -1  208.98   26.40 
  -7   3  -1  179.68   30.80 
   7   3   1  202.28   29.50 
   7   3   1  207.18   33.40 
  -7   3  -1  198.78   31.50 
   7   3   1  204.58   26.60 
  -7   3  -1  226.78   34.00 
   7   3   1  224.58   30.30 
  -7   3  -1  269.67   39.00 
   7   3   1  203.48   31.10 
  -7   3  -1  153.68   30.00 
   7   3   1  224.68   34.90 
  -7   3  -1  211.28   38.20 
   7   3   1  153.78   31.70 
   7   3   1  210.38   27.40 
  -7   3  -1  210.78   26.80 
  -7   3  -1  171.78   27.80 
  -7   3  -1  154.28   27.00 
   7   3   1  204.18   27.80 
   7   3   1  216.58   35.10 
  -7   3  -1  217.38   48.30 
   7   3   1  204.18   34.30 
  -7   3  -1  226.28   32.70 
  -7   3  -1  170.58   29.80 
  -7   3  -1  197.88   32.80 
  -7   3  -1  228.28   28.10 
   7   3   1  223.18   26.40 
  -7   3  -1  236.08   37.80 
   8  -3   1  423.26   49.40 
  -8  -3  -1  521.95   59.99 
  -8  -3  -1  484.45   53.59 
   8  -3   1  450.45   55.59 
  -8  -3  -1  444.66   43.20 
  -8  -3  -1  483.15   52.59 
   8  -3   1  500.55   53.69 
   8  -3   1  458.45   50.39 
   8  -3   1  415.36   54.19 
   8  -3   1  462.85   52.99 
   8  -3   1  431.86   52.59 
   8  -3   1  478.95   55.99 
  -8  -3  -1  442.06   51.79 
   8  -3   1  429.16   35.50 
  -8  -3  -1  519.55   49.40 
   8  -3   1  444.96   45.60 
   8  -3   1  558.14   56.09 
  -8   3  -1  489.75   53.09 
   8   3   1  479.05   48.00 
   8   3   1  377.96   50.19 
   8   3   1  458.65   45.20 
  -8   3  -1  419.36   49.40 
   8   3   1  448.46   46.40 
   8   3   1  413.06   52.29 
  -8   3  -1  495.35   50.49 
   8   3   1  522.45   57.89 
  -8   3  -1  425.96   54.69 
  -8   3  -1  446.26   52.79 
  -8   3  -1  562.94   56.19 
  -8   3  -1  546.85   60.49 
  -8   3  -1  376.06   62.89 
   8   3   1  542.45   59.59 
  -8   3  -1  531.45   56.69 
  -8   3  -1  585.64   69.39 
  -8   3  -1  446.06   52.79 
   8   3   1  484.25   52.39 
   8   3   1  458.35   48.00 
   8   3   1  478.65   57.89 
  -8   3  -1  460.95   52.29 
  -9  -3  -1  159.38   35.60 
   9  -3   1  144.69   33.90 
   9  -3   1  155.28   32.00 
   9  -3   1  151.88   33.00 
   9  -3   1  107.19   26.30 
  -9  -3  -1  171.38   38.50 
   9  -3   1  115.79   25.40 
  -9  -3  -1  104.99   24.50 
   9  -3   1   80.59   25.90 
  -9  -3  -1   97.99   25.80 
   9  -3   1  152.58   31.60 
   9  -3   1   60.09   23.90 
  -9  -3  -1  148.79   30.00 
   9  -3   1  112.99   27.00 
  -9  -3  -1  159.88   32.50 
   9  -3   1  123.99   31.80 
   9   3   1  155.18   33.70 
   9   3   1   95.19   27.90 
   9   3   1  124.19   27.90 
   9   3   1  155.58   42.30 
  -9   3  -1  100.69   27.80 
  -9   3  -1   76.79   27.70 
  -9   3  -1  102.39   28.70 
  -9   3  -1  108.49   41.40 
  -9   3  -1  121.89   29.80 
  -9   3  -1  125.59   29.50 
   9   3   1  112.99   34.30 
   9   3   1  216.08   33.70 
  -9   3  -1  116.89   29.30 
   9   3   1  164.08   31.80 
  -9   3  -1  103.59   25.10 
  -9   3  -1  140.99   33.30 
   9   3   1   69.49   24.90 
  -9   3  -1  141.39   30.90 
   9   3   1  158.88   29.40 
  -9   3  -1  113.09   30.60 
  -9   3  -1  155.48   32.10 
   9   3   1  117.69   30.00 
  -9  -4   1  110.79   26.20 
  -9  -4   1  103.89   27.80 
   9  -4  -1   85.19   27.10 
   9  -4  -1  119.69   31.10 
   9  -4  -1   40.20   20.80 
   9  -4  -1   90.89   26.20 
   9  -4  -1  118.79   29.10 
   9  -4  -1  112.99   28.10 
   9  -4  -1   90.99   24.70 
   9  -4  -1  104.69   26.80 
  -9  -4   1  105.19   25.20 
  -9  -4   1   49.70   22.30 
  -9  -4   1  110.49   29.10 
   9  -4  -1   74.49   25.50 
   9   4  -1   98.69   28.50 
  -9   4   1  124.99   29.40 
   9   4  -1   78.79   24.40 
   9   4  -1  111.99   30.40 
  -9   4   1   78.39   29.90 
   9   4  -1  100.09   25.70 
  -9   4   1  112.89   29.10 
  -9   4   1  102.89   26.70 
  -9   4   1   94.09   28.60 
   9   4  -1  109.49   31.00 
  -9   4   1   54.19   33.30 
  -9   4   1   44.00   21.20 
  -9   4   1   96.99   28.50 
  -9   4   1  147.09   32.30 
  -9   4   1  103.59   25.70 
   9   4  -1  145.19   33.90 
   9   4  -1  113.09   29.50 
   9   4  -1  116.89   25.60 
   9   4  -1   79.69   26.40 
  -9   4   1   50.59   21.30 
   9   4  -1   95.99   24.80 
   8  -4  -1   84.99   21.90 
   8  -4  -1  130.89   28.80 
  -8  -4   1  130.99   23.80 
  -8  -4   1   55.19   20.50 
   8  -4  -1   81.49   25.10 
  -8  -4   1   81.89   21.60 
  -8  -4   1  103.79   29.50 
  -8  -4   1  149.79   31.80 
   8  -4  -1  125.49   28.50 
  -8  -4   1  103.39   23.00 
   8  -4  -1   87.99   24.70 
   8  -4  -1  101.29   21.30 
   8  -4  -1   85.79   25.10 
   8  -4  -1  101.39   24.70 
   8  -4  -1   80.19   24.20 
  -8  -4   1  129.19   28.10 
   8  -4  -1   94.59   26.50 
   8  -4  -1   74.89   18.80 
  -8   4   1   94.69   26.60 
  -8   4   1   65.09   21.80 
  -8   4   1   68.89   23.00 
  -8   4   1   59.19   21.00 
   8   4  -1   68.99   22.20 
   8   4  -1  114.79   28.60 
  -8   4   1  118.39   26.30 
  -8   4   1   97.09   36.60 
   8   4  -1   81.49   20.00 
   8   4  -1  105.29   28.20 
   8   4  -1   81.89   26.10 
  -8   4   1  146.89   27.80 
   8   4  -1  104.19   29.20 
  -8   4   1  104.09   26.60 
  -8   4   1  128.29   30.40 
  -8   4   1   77.79   19.30 
   8   4  -1  110.39   27.20 
  -8   4   1   85.89   27.40 
   8   4  -1   67.79   21.00 
  -8   4   1   35.80   20.60 
   8   4  -1   98.19   23.20 
  -7  -4   1   40.50   17.20 
  -7  -4   1   56.39   18.90 
  -7  -4   1   49.30   15.00 
  -7  -4   1   50.29   15.10 
   7  -4  -1   38.40   17.50 
  -7  -4   1   33.20   14.80 
   7  -4  -1   53.29   17.90 
   7  -4  -1   51.19   17.90 
   7  -4  -1   28.70   13.60 
   7  -4  -1   37.90   15.40 
   7  -4  -1   90.29   23.30 
  -7  -4   1   13.50   11.20 
   7  -4  -1   36.70   16.70 
   7  -4  -1   55.69   17.00 
   7  -4  -1   35.40   15.10 
  -7  -4   1   44.80   17.70 
   7  -4  -1   46.80   16.60 
   7  -4  -1   19.50   12.50 
  -7   4   1   41.60   14.40 
   7   4  -1   53.79   18.60 
  -7   4   1   18.80   13.10 
   7   4  -1   13.20   10.50 
  -7   4   1   46.40   17.50 
   7   4  -1   60.99   21.10 
  -7   4   1   67.59   20.30 
  -7   4   1   51.49   15.40 
  -7   4   1   61.79   15.90 
  -7   4   1   57.99   19.40 
  -7   4   1   43.10   18.60 
  -7   4   1   35.70   15.20 
   7   4  -1   31.40   16.60 
  -7   4   1   43.90   25.70 
   7   4  -1   58.39   19.50 
   7   4  -1   54.79   21.50 
  -7   4   1   13.90   13.30 
  -7   4   1   54.99   16.00 
   7   4  -1   49.00   18.90 
   7   4  -1   35.20   17.40 
   7   4  -1   46.50   15.00 
  -7   4   1   27.70   13.70 
  -7   4   1   18.10   13.30 
  -7   4   1   49.60   18.80 
   6  -4  -1   45.00   10.80 
  -6  -4   1   21.50   11.70 
  -6  -4   1   28.60   11.30 
   6  -4  -1   26.20   12.90 
   6  -4  -1   49.00   14.70 
  -6  -4   1   32.10   14.20 
   6  -4  -1   25.70   14.20 
   6  -4  -1   12.90   11.50 
   6  -4  -1   26.30   12.60 
  -6  -4   1   43.80   13.60 
   6  -4  -1   41.10   17.00 
   6  -4  -1   17.50   11.60 
   6  -4  -1   35.40   15.50 
   6  -4  -1   26.40   10.80 
   6  -4  -1   30.70   13.50 
  -6  -4   1   43.70   16.70 
  -6  -4   1   28.80   14.60 
   6  -4  -1   16.30   11.90 
  -6  -4   1   30.80   11.60 
   6   4  -1   26.30   14.30 
   6   4  -1   37.90    9.70 
   6   4  -1   39.90   15.90 
  -6   4   1   26.10   12.90 
  -6   4   1   32.70   13.80 
   6   4  -1   37.40   15.80 
   6   4  -1   44.90    9.80 
  -6   4   1   38.70   17.20 
  -6   4   1    7.20    9.30 
   6   4  -1   12.80   13.10 
   6   4  -1   36.30   12.30 
   6   4  -1   30.40   14.90 
   6   4  -1    5.80    8.00 
  -6   4   1   56.49   15.50 
  -6   4   1   29.70   11.60 
  -6   4   1   17.40   12.90 
  -6   4   1    5.80    8.50 
  -6   4   1   25.00   13.40 
  -6   4   1   24.90    7.80 
  -6   4   1   44.00   17.60 
  -6   4   1   44.20   22.80 
  -6   4   1   32.50   15.30 
  -6   4   1   19.90   13.50 
  -6   4   1    8.50   10.40 
  -6   4   1   24.70   11.30 
   6   4  -1   31.70   14.60 
  -6   4   1   40.90    9.90 
   5  -4  -1  192.08   25.70 
  -5  -4   1  196.98   25.80 
   5  -4  -1  146.69   25.50 
   5  -4  -1  200.58   27.60 
  -5  -4   1  252.37   30.30 
  -5  -4   1  189.68   14.60 
  -5  -4   1  187.88   12.50 
  -5  -4   1  173.38   27.30 
   5  -4  -1  190.88   21.20 
   5  -4  -1  235.08   29.30 
   5  -4  -1  175.08   25.40 
   5  -4  -1  194.18   28.40 
  -5  -4   1  206.58   26.50 
   5  -4  -1  189.08   27.10 
  -5  -4   1  208.68   24.70 
   5  -4  -1  168.08   25.50 
   5  -4  -1  201.88   27.60 
  -5  -4   1  223.38   27.10 
   5  -4  -1  155.38   27.10 
   5  -4  -1  200.48   28.00 
   5  -4  -1  182.88   28.50 
  -5  -4   1  176.88   29.40 
  -5  -4   1  155.28   24.80 
  -5  -4   1  239.88   16.00 
  -5  -4   1  169.98   13.30 
   5   4  -1  205.28   19.80 
  -5   4   1  174.48   24.90 
  -5   4   1  216.88   33.60 
   5   4  -1  175.18   27.40 
   5   4  -1  202.48   25.00 
  -5   4   1  176.18   26.30 
  -5   4   1  178.78   27.60 
  -5   4   1  168.98   26.90 
   5   4  -1  203.28   23.30 
   5   4  -1  180.48   18.20 
   5   4  -1  148.09   26.20 
   5   4  -1  174.38   29.50 
   5   4  -1  135.59   24.70 
   5   4  -1  206.68   23.70 
  -5   4   1  180.18   22.70 
  -5   4   1  215.68   21.10 
   5   4  -1  208.68   27.30 
  -5   4   1  195.78   27.00 
  -5   4   1  236.18   31.10 
  -5   4   1  203.88   25.80 
   5   4  -1  214.88   20.60 
  -5   4   1  203.38   40.80 
  -5   4   1  227.88   30.20 
   5   4  -1  213.18   15.90 
  -5   4   1  226.88   29.90 
   5   4  -1  176.48   12.90 
  -5   4   1  222.78   32.50 
  -5   4   1  193.08   19.60 
   5   4  -1  172.98   13.30 
  -5   4   1  217.28   25.40 
  -5   4   1  170.28   27.60 
  -5   4   1  190.08   19.30 
  -5   4   1  187.08   28.60 
  -4  -4   1  128.99   18.40 
  -4  -4   1  106.19   21.10 
  -4  -4   1  123.49    8.60 
  -4  -4   1  123.09   14.20 
   4  -4  -1   91.59   18.40 
  -4  -4   1   97.99   13.10 
   4  -4  -1  121.69   23.20 
   4  -4  -1  106.69   15.80 
   4  -4  -1  146.49   22.00 
  -4  -4   1  128.39   13.50 
  -4  -4   1  133.79   15.30 
  -4  -4   1  114.99    9.10 
  -4  -4   1  165.38   23.10 
   4  -4  -1  130.39   22.20 
   4  -4  -1  111.89   19.50 
   4  -4  -1  125.59   19.50 
   4  -4  -1  127.19   20.50 
  -4  -4   1  152.98   22.80 
  -4  -4   1  122.89    7.80 
  -4  -4   1  142.19   19.70 
   4  -4  -1  132.29   20.50 
  -4  -4   1  108.39   17.90 
  -4  -4   1  106.49   13.90 
   4  -4  -1  115.69   17.30 
   4  -4  -1  132.19   21.00 
  -4  -4   1  106.59   15.10 
   4  -4  -1  121.99   21.20 
  -4  -4   1  158.08   26.50 
   4  -4  -1  128.59   21.40 
   4   4  -1  126.79   21.90 
  -4   4   1  117.69   20.80 
   4   4  -1  162.68   25.10 
  -4   4   1   94.59   27.10 
  -4   4   1  127.29   23.20 
  -4   4   1  137.19   15.30 
  -4   4   1  132.89   19.90 
  -4   4   1  100.89   19.10 
  -4   4   1  114.59   20.80 
   4   4  -1   94.49   20.70 
  -4   4   1  111.09   20.40 
  -4   4   1  100.79   19.80 
  -4   4   1  143.39   18.50 
  -4   4   1  124.79   20.40 
  -4   4   1  112.19   19.50 
  -4   4   1  118.19   20.60 
   4   4  -1  106.99   13.20 
  -4   4   1  112.29   20.40 
   4   4  -1   91.89   16.10 
   4   4  -1  121.39   11.40 
   4   4  -1  140.99   14.70 
  -4   4   1  154.18   18.40 
   4   4  -1  133.99   14.90 
   4   4  -1  145.49   17.70 
   4   4  -1  103.99   15.10 
  -4   4   1  162.18   26.90 
  -4   4   1   97.59   18.00 
  -4   4   1  148.99   17.00 
   4   4  -1   91.79   20.00 
   4   4  -1  143.29   17.40 
   4   4  -1  125.99   21.30 
   3  -4  -1   61.49   14.40 
   3  -4  -1   79.69   13.90 
  -3  -4   1   70.49   14.00 
   3  -4  -1   58.39    9.50 
  -3  -4   1   89.09   15.90 
  -3  -4   1   67.49    8.70 
   3  -4  -1   91.39   18.20 
  -3  -4   1   56.09   11.00 
  -3  -4   1   63.79    7.40 
  -3  -4   1   74.09   17.00 
   3  -4  -1   49.50   12.80 
  -3  -4   1   55.59   11.30 
  -3  -4   1   59.19    6.10 
   3  -4  -1   59.29   12.90 
  -3  -4   1   53.99   10.30 
  -3  -4   1   63.29   10.70 
  -3  -4   1   67.19   11.10 
   3  -4  -1  108.89   19.50 
   3  -4  -1   47.50   12.90 
  -3  -4   1   71.59   11.40 
  -3  -4   1   46.50   13.20 
  -3  -4   1   44.90    9.80 
  -3  -4   1   68.09   10.00 
   3  -4  -1   56.39   15.00 
   3  -4  -1   42.20   12.40 
  -3  -4   1   84.29   11.50 
  -3  -4   1   64.49   16.20 
   3  -4  -1   63.69   14.20 
   3  -4  -1   67.39   14.00 
  -3  -4   1   64.39   11.50 
  -3  -4   1   72.29    9.30 
   3  -4  -1   67.29   11.00 
   3  -4  -1   66.19   11.20 
  -3  -4   1   61.59   11.10 
  -3  -4   1   51.09    9.90 
  -3   4   1   41.90   12.20 
   3   4  -1   49.90   14.00 
  -3   4   1   56.19   16.00 
  -3   4   1   79.79   15.80 
   3   4  -1   75.49   11.40 
   3   4  -1   71.49   11.30 
  -3   4   1   46.40   12.60 
   3   4  -1   84.99   10.70 
  -3   4   1   71.69   11.00 
  -3   4   1   91.89   16.80 
  -3   4   1   57.59   13.50 
  -3   4   1   64.09   12.60 
  -3   4   1   49.20   12.70 
   3   4  -1   48.90    9.80 
  -3   4   1   91.39   16.80 
  -3   4   1   58.69   14.70 
   3   4  -1   78.29   11.00 
  -3   4   1   53.69   15.80 
  -3   4   1   52.49    9.40 
   3   4  -1   61.79   16.00 
   3   4  -1   71.09   13.00 
   3   4  -1   59.59   12.20 
  -3   4   1   49.40   13.70 
   3   4  -1   71.19   15.30 
   3   4  -1   73.49   13.60 
  -3   4   1   80.19   16.00 
   3   4  -1   66.99   14.70 
  -3   4   1   33.40   16.60 
   3   4  -1   62.59   12.60 
   3   4  -1   76.09   14.40 
   3   4  -1   61.19   15.50 
  -2  -4   1   25.30    6.00 
   2  -4  -1   27.10    8.60 
   2  -4  -1   32.60    8.80 
  -2  -4   1   34.40   11.60 
  -2  -4   1   29.10    7.50 
   2  -4  -1   34.30    8.40 
  -2  -4   1   26.50    5.70 
  -2  -4   1   38.00    9.30 
  -2  -4   1   32.00   10.50 
   2  -4  -1   25.00    6.20 
  -2  -4   1   27.10    8.90 
  -2  -4   1   31.60    8.80 
  -2  -4   1   17.60    9.90 
   2  -4  -1   17.10    8.20 
   2  -4  -1   38.40   13.60 
  -2  -4   1   19.80    5.40 
  -2  -4   1   24.80    8.10 
  -2  -4   1   29.80    8.00 
  -2  -4   1   31.80   12.20 
  -2  -4   1   33.20    7.60 
   2  -4  -1   21.80    4.90 
  -2  -4   1   18.40    9.40 
   2  -4  -1   36.60   12.50 
  -2  -4   1   43.50    9.80 
   2  -4  -1   39.80   12.00 
  -2  -4   1   18.10    6.10 
   2  -4  -1   24.60    9.70 
   2  -4  -1   22.10    8.40 
   2  -4  -1   20.50    9.10 
  -2  -4   1   27.70   11.00 
   2  -4  -1   23.70    9.20 
  -2  -4   1   28.80    6.50 
   2  -4  -1   19.10    8.90 
   2   4  -1   21.70    9.10 
  -2   4   1   31.70   10.40 
   2   4  -1    9.40    9.00 
   2   4  -1   37.70   10.50 
  -2   4   1   41.90   11.20 
   2   4  -1   36.90   12.80 
  -2   4   1   36.70    9.60 
   2   4  -1   23.20    5.80 
   2   4  -1   19.60    5.90 
  -2   4   1   27.00   10.10 
  -2   4   1   27.20   10.10 
  -2   4   1   22.60   13.30 
  -2   4   1   68.59   17.20 
  -2   4   1   21.70    9.90 
  -2   4   1   11.40    8.20 
   2   4  -1   14.90    7.60 
   2   4  -1   25.20    5.50 
   2   4  -1   26.90    8.50 
  -2   4   1   31.40    6.40 
   2   4  -1   21.80   10.50 
   2   4  -1   21.10    8.50 
  -2   4   1   20.80    8.10 
   2   4  -1   26.80    8.50 
   2   4  -1   17.80    6.30 
   2   4  -1   34.10    6.50 
  -2   4   1   18.90    5.20 
   2   4  -1   27.30    8.30 
  -2   4   1    7.20    6.50 
  -2   4   1   10.70    7.70 
  -2   4   1   25.40    9.70 
   2   4  -1   25.80    9.60 
   2   4  -1   21.90    7.70 
  -1  -4   1   40.80   14.40 
   1  -4  -1   35.40   10.70 
  -1  -4   1   38.80    9.50 
   1  -4  -1   38.50   11.30 
   1  -4  -1   24.20    8.80 
  -1  -4   1   37.70    9.40 
  -1  -4   1   43.90    5.80 
  -1  -4   1   29.20   11.80 
  -1  -4   1   70.89   16.90 
  -1  -4   1   43.80    8.70 
  -1  -4   1   46.50    5.60 
   1  -4  -1   35.50   11.10 
   1  -4  -1   37.50    9.20 
  -1  -4   1   51.89   15.60 
  -1  -4   1   41.70    7.80 
   1  -4  -1   25.10    8.80 
   1  -4  -1   43.50   12.20 
   1  -4  -1   42.80   10.10 
  -1  -4   1   12.90    7.50 
  -1  -4   1   38.20    7.40 
  -1  -4   1   35.80    8.70 
   1  -4  -1   45.30    8.20 
   1  -4  -1   55.69   13.00 
   1  -4  -1   18.10   12.30 
  -1  -4   1   37.90   11.10 
  -1   4   1   55.29   13.60 
  -1   4   1   24.30   14.70 
  -1   4   1   51.19   13.30 
  -1   4   1   37.80    9.20 
  -1   4   1   40.10    9.70 
   1   4  -1   26.30    8.80 
   1   4  -1   31.40    7.90 
  -1   4   1   52.59   11.50 
   1   4  -1   45.50   10.60 
  -1   4   1   34.10   12.50 
   1   4  -1   31.90   13.00 
   1   4  -1   17.00    7.60 
   1   4  -1   20.10    9.90 
   1   4  -1   29.70    9.40 
  -1   4   1   26.90   11.20 
   1   4  -1   49.30   15.40 
   1   4  -1   34.10    8.20 
   1   4  -1   37.50    9.20 
  -1   4   1   42.30   11.00 
  -1   4   1   42.00   11.70 
   1   4  -1   33.90   11.20 
  -1   4   1   24.90   10.10 
   1   4  -1   46.80   11.60 
   1   4  -1   26.10    9.60 
  -1   4   1   39.40   11.30 
  -1   4   1   41.30   11.40 
  -1   4   1   43.20    7.00 
   0  -4   1  183.08   22.10 
   0  -4   1  193.48   15.20 
   0  -4  -1  167.18   24.50 
   0  -4  -1  192.98   23.00 
   0  -4   1  158.38   26.50 
   0  -4   1  183.48   25.70 
   0  -4  -1  198.98   19.30 
   0  -4   1  188.88   18.60 
   0  -4   1  131.39   17.40 
   0  -4  -1  189.58   14.90 
   0  -4  -1  138.39   18.60 
   0  -4   1  204.48   21.80 
   0  -4   1  204.28   19.30 
   0  -4  -1  176.08   20.70 
   0  -4   1  230.48   24.10 
   0  -4  -1  202.68   19.80 
   0  -4   1  190.88   26.80 
   0  -4  -1  193.88   18.90 
   0  -4   1  192.08   24.40 
   0  -4  -1  186.68   21.80 
   0  -4  -1  208.68   11.30 
   0  -4  -1  218.78   23.60 
   0  -4  -1  183.68   11.50 
   0  -4  -1  226.48   28.20 
   0  -4  -1  174.68   18.10 
   0  -4  -1  206.28   15.40 
   0  -4  -1  209.48   19.80 
   0   4   1  232.68   32.90 
   0   4   1  190.18   25.90 
   0   4   1  184.88   21.70 
   0   4  -1  181.98   22.00 
   0   4  -1  187.08   22.70 
   0   4  -1  190.38   19.40 
   0   4   1  190.08   15.30 
   0   4  -1  194.58   19.50 
   0   4  -1  167.08   24.60 
   0   4  -1  200.18   28.00 
   0   4  -1  200.88   20.80 
   0   4  -1  144.19   23.10 
   0   4  -1  197.78   20.50 
   0   4   1  161.08   20.80 
   0   4   1  229.98   27.50 
   0   4  -1  203.58   31.30 
   0   4   1  180.18   21.20 
   0   4   1  243.28   29.80 
   0   4  -1  198.68   25.60 
   0   4   1  179.58   18.50 
   0   4   1  207.98   16.30 
   0   4  -1  177.08   21.20 
   0   4   1  231.58   26.40 
   0   4   1  183.88   14.50 
   0   4   1  144.49   19.10 
   0   4  -1  178.28   18.40 
   0   4  -1  243.88   25.60 
   1  -4   1  413.76   30.10 
  -1  -4  -1  495.75   29.80 
   1  -4   1  444.66   31.50 
   1  -4   1  414.56   28.20 
  -1  -4  -1  487.95   33.10 
   1  -4   1  438.66   43.50 
  -1  -4  -1  447.86   23.30 
  -1  -4  -1  459.95   25.00 
   1  -4   1  461.15   29.50 
  -1  -4  -1  489.05   30.20 
   1  -4   1  466.45   30.30 
  -1  -4  -1  449.06   27.10 
  -1  -4  -1  449.86   20.70 
  -1  -4  -1  450.25   20.70 
   1  -4   1  468.85   19.90 
  -1  -4  -1  468.05   26.90 
  -1  -4  -1  499.45   34.30 
  -1  -4  -1  448.66   29.80 
  -1  -4  -1  495.85   38.20 
   1  -4   1  474.25   21.70 
  -1  -4  -1  462.65   25.40 
  -1  -4  -1  436.16   22.40 
  -1  -4  -1  505.05   36.50 
  -1  -4  -1  512.15   34.50 
   1  -4   1  452.65   32.70 
  -1  -4  -1  497.05   27.80 
  -1   4  -1  415.96   30.40 
  -1   4  -1  454.85   34.50 
   1   4   1  475.55   29.90 
  -1   4  -1  436.96   29.10 
  -1   4  -1  527.95   34.00 
  -1   4  -1  473.65   30.40 
   1   4   1  466.05   23.40 
  -1   4  -1  474.75   21.40 
   1   4   1  536.25   37.30 
  -1   4  -1  465.65   35.50 
  -1   4  -1  510.05   35.20 
  -1   4  -1  422.56   29.40 
   1   4   1  408.26   29.60 
  -1   4  -1  514.35   36.80 
  -1   4  -1  417.96   30.40 
   1   4   1  430.76   24.00 
  -1   4  -1  419.16   40.50 
  -1   4  -1  473.45   32.90 
   1   4   1  452.75   25.20 
  -1   4  -1  422.26   30.30 
   1   4   1  465.75   30.10 
   1   4   1  443.56   21.20 
   1   4   1  500.45   35.40 
   1   4   1  461.75   25.00 
  -1   4  -1  459.05   25.80 
   2  -4   1  748.03   43.90 
  -2  -4  -1  812.02   41.00 
  -2  -4  -1  729.93   39.10 
  -2  -4  -1  754.52   42.10 
   2  -4   1  800.82   43.40 
  -2  -4  -1  787.62   47.80 
  -2  -4  -1  794.72   40.50 
   2  -4   1  747.83   38.60 
  -2  -4  -1  795.52   34.60 
  -2  -4  -1  766.72   48.80 
  -2  -4  -1  757.52   30.30 
  -2  -4  -1  807.92   42.90 
   2  -4   1  696.23   47.40 
   2  -4   1  789.32   44.80 
   2  -4   1  784.52   34.80 
   2  -4   1  742.33   45.10 
   2  -4   1  761.72   44.80 
   2  -4   1  756.62   36.60 
  -2  -4  -1  748.93   35.10 
  -2  -4  -1  744.43   28.90 
  -2  -4  -1  812.92   36.30 
  -2  -4  -1  736.83   41.50 
   2  -4   1  731.23   43.70 
  -2  -4  -1  726.63   40.50 
   2  -4   1  707.33   47.70 
  -2  -4  -1  734.53   33.40 
  -2  -4  -1  711.93   39.60 
  -2  -4  -1  750.22   45.30 
  -2  -4  -1  808.02   36.20 
   2   4   1  766.22   36.30 
   2   4   1  778.42   36.20 
   2   4   1  785.12   31.60 
  -2   4  -1  821.42   35.20 
  -2   4  -1  735.53   43.50 
  -2   4  -1  741.43   44.90 
   2   4   1  819.32   47.20 
   2   4   1  805.02   47.40 
   2   4   1  775.72   34.00 
   2   4   1  756.72   40.60 
   2   4   1  817.82   44.60 
  -2   4  -1  768.12   43.60 
   2   4   1  782.22   40.50 
  -2   4  -1  858.31   52.19 
  -2   4  -1  754.52   46.50 
  -2   4  -1  771.02   44.00 
  -2   4  -1  762.62   43.90 
   2   4   1  782.52   36.30 
  -2   4  -1  744.13   38.20 
  -2   4  -1  820.32   47.10 
  -2   4  -1  780.42   36.50 
   2   4   1  774.82   38.30 
   2   4   1  730.83   46.30 
  -2   4  -1  829.42   48.20 
  -2   4  -1  672.83   55.09 
  -2   4  -1  818.62   45.40 
   2   4   1  799.02   36.30 
  -2   4  -1  785.42   44.80 
  -2   4  -1  721.93   34.90 
  -3  -4  -1   57.09   11.10 
  -3  -4  -1   69.69   11.60 
  -3  -4  -1   85.09   13.20 
   3  -4   1   90.59   16.90 
   3  -4   1   75.59   16.00 
  -3  -4  -1   79.49   14.60 
   3  -4   1   39.80   11.80 
   3  -4   1   37.90   10.60 
  -3  -4  -1   66.69   15.60 
  -3  -4  -1   54.19    7.00 
   3  -4   1   45.50   15.10 
  -3  -4  -1   43.90   10.70 
   3  -4   1   38.70   14.20 
  -3  -4  -1   75.69   13.90 
  -3  -4  -1   30.80   11.60 
   3  -4   1   54.19   13.30 
  -3  -4  -1   50.09   15.50 
   3  -4   1   60.09   14.80 
  -3  -4  -1   77.19   12.50 
   3  -4   1   54.39   14.00 
  -3  -4  -1   79.39   14.50 
  -3  -4  -1   51.69   13.00 
   3  -4   1   66.69    7.70 
  -3  -4  -1   60.39   12.10 
  -3   4  -1   54.29   16.90 
   3   4   1   92.29   13.50 
  -3   4  -1   41.20   12.40 
   3   4   1   43.30   10.50 
  -3   4  -1   57.59   14.00 
   3   4   1   74.69   15.40 
   3   4   1   59.39   15.30 
  -3   4  -1   59.79    7.30 
   3   4   1   75.79   15.80 
   3   4   1   57.89   10.40 
  -3   4  -1   70.49   15.40 
  -3   4  -1   62.69   14.50 
  -3   4  -1   84.89   16.70 
  -3   4  -1   27.30   13.40 
   3   4   1   45.50   13.00 
  -3   4  -1   58.69   10.80 
  -3   4  -1   90.89   17.20 
   3   4   1   71.69   11.40 
   3   4   1   64.59    8.90 
  -3   4  -1   56.69   11.40 
   3   4   1   39.40   12.60 
   3   4   1   47.80   10.10 
  -3   4  -1   47.40    9.10 
  -3   4  -1   40.20   13.30 
   3   4   1   63.69   12.40 
  -3   4  -1   72.39   10.00 
  -3   4  -1   58.69   15.10 
  -3   4  -1   63.89   14.10 
  -3   4  -1   71.19   23.80 
   4  -4   1   64.19   16.90 
  -4  -4  -1   83.09   14.80 
  -4  -4  -1  100.79   13.40 
  -4  -4  -1  101.89   17.20 
   4  -4   1   66.79   15.70 
   4  -4   1   86.39   10.20 
  -4  -4  -1  103.59   18.00 
   4  -4   1   64.79   15.10 
  -4  -4  -1   79.29   16.60 
   4  -4   1   89.89   21.10 
  -4  -4  -1   87.99   19.00 
  -4  -4  -1   88.19   14.20 
  -4  -4  -1   89.09   15.40 
  -4  -4  -1   81.59    6.30 
  -4  -4  -1   85.09   21.30 
   4  -4   1   64.99   15.10 
  -4  -4  -1   75.29   14.50 
  -4  -4  -1   66.29   10.70 
   4  -4   1  110.99   19.80 
   4  -4   1   83.99   17.50 
   4  -4   1   83.69   17.80 
   4  -4   1   81.89   18.40 
   4   4   1   69.69   18.00 
   4   4   1   93.79   14.20 
  -4   4  -1   90.99   20.70 
   4   4   1   97.79   12.20 
  -4   4  -1   81.39   17.40 
   4   4   1   84.69   12.90 
  -4   4  -1   67.69   16.50 
   4   4   1   92.99    9.00 
  -4   4  -1   82.39   14.20 
  -4   4  -1   69.99   14.70 
  -4   4  -1   60.09   18.80 
  -4   4  -1   71.09   17.00 
   4   4   1   68.49   16.70 
  -4   4  -1  121.29   19.50 
   4   4   1   99.79   15.70 
   4   4   1   90.99   16.50 
   4   4   1   79.39   19.70 
  -4   4  -1   90.69    9.60 
  -4   4  -1   85.49   26.30 
  -4   4  -1  107.89   22.50 
  -4   4  -1   70.09   16.70 
  -4   4  -1  101.89   20.10 
  -4   4  -1   56.59   15.00 
  -4   4  -1  104.99   20.70 
   4   4   1   83.69   12.60 
  -4   4  -1   83.49    7.00 
  -4   4  -1   87.89   19.20 
   4   4   1   30.40   11.80 
  -4   4  -1   78.29   18.10 
  -4   4  -1   84.49   15.40 
  -4   4  -1   88.99   15.80 
   4   4   1   73.89   12.50 
   4   4   1  117.19   16.50 
   5  -4   1  288.27   36.60 
  -5  -4  -1  255.87   33.00 
  -5  -4  -1  337.77   41.00 
  -5  -4  -1  291.37   22.70 
   5  -4   1  196.68   28.90 
  -5  -4  -1  251.07   30.40 
   5  -4   1  267.77   30.90 
   5  -4   1  237.88   31.90 
  -5  -4  -1  275.77   34.00 
  -5  -4  -1  255.17   27.60 
   5  -4   1  264.67   36.80 
   5  -4   1  257.97   31.30 
   5  -4   1  270.67   34.10 
  -5  -4  -1  263.77   28.30 
   5  -4   1  228.88   29.10 
  -5  -4  -1  274.37   18.00 
   5  -4   1  260.77   32.90 
   5  -4   1  257.37   32.90 
  -5  -4  -1  266.27   29.70 
  -5  -4  -1  197.58   30.30 
  -5   4  -1  268.57   49.80 
  -5   4  -1  210.28   33.00 
  -5   4  -1  249.08   33.00 
  -5   4  -1  279.37   32.70 
   5   4   1  250.97   25.90 
  -5   4  -1  206.78   27.80 
  -5   4  -1  193.38   29.40 
  -5   4  -1  246.38   28.00 
   5   4   1  222.58   16.70 
   5   4   1  217.98   31.20 
  -5   4  -1  213.08   29.80 
   5   4   1  288.77   39.10 
   5   4   1  230.68   25.60 
   5   4   1  233.08   16.50 
  -5   4  -1  238.28   36.10 
  -5   4  -1  201.58   24.80 
  -5   4  -1  219.48   31.10 
   5   4   1  242.18   24.90 
   5   4   1  267.87   22.00 
  -5   4  -1  166.48   28.00 
   5   4   1  288.17   36.10 
  -5   4  -1  238.78   25.50 
  -5   4  -1  216.18   28.00 
   5   4   1  236.58   32.60 
   5   4   1  234.68   30.00 
  -5   4  -1  259.87   27.90 
   5   4   1  257.97   22.50 
  -5   4  -1  278.57   35.60 
  -5   4  -1  263.77   33.90 
  -6  -4  -1  498.65   35.20 
  -6  -4  -1  455.35   45.80 
   6  -4   1  462.65   51.99 
  -6  -4  -1  432.96   30.70 
   6  -4   1  501.45   39.20 
  -6  -4  -1  474.25   51.59 
   6  -4   1  536.95   50.99 
  -6  -4  -1  524.45   40.70 
   6  -4   1  340.87   40.70 
   6  -4   1  391.56   45.40 
   6  -4   1  440.36   43.50 
   6  -4   1  438.26   34.70 
  -6  -4  -1  412.26   39.60 
   6  -4   1  391.06   44.60 
   6  -4   1  455.55   49.99 
   6  -4   1  492.35   50.19 
  -6  -4  -1  394.26   41.20 
  -6  -4  -1  478.35   51.59 
   6   4   1  456.25   50.09 
   6   4   1  424.66   47.10 
   6   4   1  425.26   32.70 
   6   4   1  505.75   32.10 
   6   4   1  412.56   29.80 
  -6   4  -1  460.05   48.50 
   6   4   1  429.06   47.00 
  -6   4  -1  525.75   59.59 
  -6   4  -1  404.16   48.40 
  -6   4  -1  431.56   41.90 
  -6   4  -1  458.55   36.20 
  -6   4  -1  455.55   44.10 
   6   4   1  411.46   31.70 
   6   4   1  438.86   31.60 
  -6   4  -1  379.36   44.40 
  -6   4  -1  454.75   37.10 
   6   4   1  468.25   47.00 
  -6   4  -1  446.76   48.70 
  -6   4  -1  520.85   53.69 
  -6   4  -1  449.36   29.60 
   6   4   1  437.96   49.99 
  -6   4  -1  393.06   31.60 
  -6   4  -1  424.66   47.10 
   6   4   1  454.75   33.30 
  -6   4  -1  458.85   69.59 
  -6   4  -1  455.75   48.40 
  -6   4  -1  400.06   44.20 
   6   4   1  497.55   47.20 
   7  -4   1  376.16   44.20 
  -7  -4  -1  306.57   44.20 
   7  -4   1  295.57   41.60 
   7  -4   1  396.46   48.50 
   7  -4   1  343.77   43.80 
   7  -4   1  293.67   36.20 
   7  -4   1  350.86   42.70 
  -7  -4  -1  316.47   45.30 
   7  -4   1  267.87   39.10 
   7  -4   1  334.67   36.30 
   7  -4   1  283.97   41.00 
   7  -4   1  328.37   46.40 
  -7  -4  -1  332.57   42.70 
  -7  -4  -1  305.97   32.00 
  -7  -4  -1  259.77   32.30 
   7  -4   1  350.16   38.60 
  -7  -4  -1  310.57   39.70 
   7  -4   1  368.26   40.50 
  -7  -4  -1  323.07   41.20 
  -7   4  -1  347.87   43.90 
   7   4   1  300.07   42.90 
  -7   4  -1  345.17   39.90 
  -7   4  -1  317.07   31.50 
   7   4   1  368.06   48.00 
   7   4   1  293.77   37.90 
  -7   4  -1  356.86   44.20 
  -7   4  -1  371.76   46.10 
  -7   4  -1  351.06   46.80 
   7   4   1  357.56   37.60 
   7   4   1  316.87   43.40 
  -7   4  -1  342.27   39.00 
   7   4   1  276.27   30.90 
  -7   4  -1  347.97   44.70 
  -7   4  -1  369.36   39.80 
  -7   4  -1  330.17   44.60 
  -7   4  -1  285.37   44.60 
   7   4   1  389.86   38.20 
  -7   4  -1  317.57   42.80 
  -7   4  -1  336.07   38.40 
   7   4   1  336.07   41.20 
   7   4   1  326.87   43.10 
   7   4   1  366.16   46.00 
  -7   4  -1  379.26   63.79 
  -7   4  -1  401.26   55.49 
   8  -4   1 1063.79   74.39 
   8  -4   1  888.01   65.49 
  -8  -4  -1  971.70   66.39 
   8  -4   1 1012.30   64.49 
   8  -4   1  883.01   82.09 
  -8  -4  -1  995.90   60.99 
  -8  -4  -1 1099.89   76.59 
   8  -4   1  877.71   68.09 
   8  -4   1  946.01   69.59 
   8  -4   1  925.41   67.09 
   8  -4   1 1014.90   73.29 
   8  -4   1  918.71   59.59 
   8  -4   1  925.71   67.39 
   8  -4   1  979.50   67.39 
  -8  -4  -1  847.52   69.59 
   8  -4   1  923.41   59.79 
  -8  -4  -1  957.30   65.59 
  -8  -4  -1  941.51   67.39 
  -8   4  -1  960.00   69.09 
   8   4   1  849.02   69.09 
   8   4   1  992.90   74.29 
   8   4   1 1054.49   73.49 
   8   4   1  974.80   71.89 
  -8   4  -1  999.60   78.99 
  -8   4  -1  984.40   69.09 
  -8   4  -1  921.91   59.79 
  -8   4  -1  948.21   70.79 
  -8   4  -1  948.01   93.49 
  -8   4  -1  872.31   70.99 
  -8   4  -1 1005.40   66.59 
   8   4   1  948.01   59.39 
   8   4   1  892.51   64.19 
  -8   4  -1  930.31   69.29 
  -8   4  -1  812.62   65.69 
   8   4   1  925.01   69.09 
   8   4   1  966.50   60.89 
  -8   4  -1 1022.50   66.49 
   8   4   1  930.81   62.99 
  -9  -4  -1  268.57   36.40 
  -9  -4  -1  158.48   34.20 
   9  -4   1  333.47   50.99 
   9  -4   1  308.07   44.50 
   9  -4   1  218.08   39.70 
   9  -4   1  222.28   38.60 
  -9  -4  -1  277.07   49.30 
   9  -4   1  201.68   41.30 
   9  -4   1  263.37   45.50 
  -9  -4  -1  247.18   40.00 
   9  -4   1  268.17   39.50 
   9  -4   1  344.67   48.80 
  -9  -4  -1  263.57   47.00 
   9  -4   1  269.87   44.80 
   9  -4   1  311.17   46.20 
  -9  -4  -1  327.67   47.40 
  -9   4  -1  227.48   41.30 
   9   4   1  258.97   39.30 
  -9   4  -1  228.08   40.80 
  -9   4  -1  319.67   45.00 
  -9   4  -1  205.08   51.59 
   9   4   1  268.67   46.80 
  -9   4  -1  298.57   44.40 
  -9   4  -1  174.98   35.30 
   9   4   1  262.47   45.10 
   9   4   1  263.17   45.30 
  -9   4  -1  147.09   36.40 
  -9   4  -1  215.58   47.20 
   9   4   1  291.47   47.10 
   9   4   1  186.48   38.70 
  -9   4  -1  182.88   37.00 
  -9   4  -1  302.57   49.10 
   9  -5  -1  520.95   64.99 
  -9  -5   1  531.05   62.89 
   9  -5  -1  691.33   70.49 
  -9  -5   1  643.34   64.59 
  -9  -5   1  592.14   75.39 
   9  -5  -1  536.25   58.99 
  -9  -5   1  586.74   58.09 
   9  -5  -1  636.14   70.59 
   9  -5  -1  547.05   65.79 
   9  -5  -1  676.23   69.79 
  -9  -5   1  612.54   69.39 
   9  -5  -1  597.34   65.99 
   9  -5  -1  695.53   78.79 
   9  -5  -1  610.84   68.59 
  -9   5   1  604.24   69.09 
  -9   5   1  644.34   73.89 
   9   5  -1  608.54   71.49 
  -9   5   1  798.32   75.29 
   9   5  -1  581.74   70.69 
  -9   5   1  628.74   69.29 
   9   5  -1  545.95   63.09 
  -9   5   1  545.65   67.29 
  -9   5   1  738.53   68.09 
  -9   5   1  608.54   69.49 
  -9   5   1  629.24   94.89 
  -9   5   1  598.44   71.69 
   9   5  -1  596.44   72.99 
   9   5  -1  570.04   71.49 
  -9   5   1  453.85   67.99 
   9   5  -1  629.24   68.89 
  -8  -5   1   55.79   21.80 
   8  -5  -1   69.79   21.30 
  -8  -5   1   69.09   19.90 
   8  -5  -1   44.80   20.70 
   8  -5  -1   47.60   23.60 
  -8  -5   1   78.79   22.20 
   8  -5  -1   49.00   19.70 
   8  -5  -1   38.00   17.10 
   8  -5  -1   64.69   20.70 
   8  -5  -1   88.79   23.50 
   8  -5  -1   61.89   22.30 
   8  -5  -1   72.79   21.00 
   8  -5  -1   63.69   23.70 
   8  -5  -1   33.60   19.90 
  -8  -5   1   69.09   23.10 
  -8  -5   1   18.60   17.40 
   8   5  -1   60.79   22.60 
  -8   5   1   60.49   21.40 
  -8   5   1   80.49   21.80 
   8   5  -1   77.49   26.20 
  -8   5   1   72.49   25.30 
  -8   5   1   89.99   37.70 
   8   5  -1   50.49   21.00 
  -8   5   1   58.99   22.70 
  -8   5   1   60.89   19.70 
  -8   5   1   48.90   18.60 
  -8   5   1   45.00   22.60 
   8   5  -1   28.70   20.40 
  -8   5   1   75.79   24.50 
  -8   5   1   63.49   24.20 
  -8   5   1   34.80   16.00 
   8   5  -1   95.59   28.40 
   8   5  -1   74.99   24.50 
  -8   5   1   54.89   17.70 
   8   5  -1   79.99   21.70 
   7  -5  -1  518.55   45.10 
  -7  -5   1  565.04   45.00 
   7  -5  -1  722.83   56.89 
  -7  -5   1  605.14   47.20 
  -7  -5   1  668.93   57.29 
   7  -5  -1  591.64   58.39 
   7  -5  -1  666.43   51.29 
   7  -5  -1  563.44   60.09 
   7  -5  -1  566.84   59.79 
  -7  -5   1  502.85   54.59 
   7  -5  -1  627.04   66.89 
   7  -5  -1  585.84   59.39 
  -7  -5   1  617.34   43.60 
  -7  -5   1  510.25   55.69 
   7  -5  -1  615.14   59.59 
   7  -5  -1  680.83   49.40 
   7  -5  -1  686.73   66.09 
  -7   5   1  648.84   64.99 
  -7   5   1  731.03   48.60 
  -7   5   1  676.93   49.10 
  -7   5   1  609.74   69.89 
   7   5  -1  561.64   59.39 
   7   5  -1  667.23   52.99 
  -7   5   1  573.24   60.19 
  -7   5   1  594.14   44.60 
   7   5  -1  484.95   59.69 
  -7   5   1  694.33   48.50 
   7   5  -1  654.03   44.90 
  -7   5   1  690.93   69.29 
   7   5  -1  516.15   60.39 
   7   5  -1  655.63   67.89 
  -7   5   1  559.24   61.69 
  -7   5   1  628.14   87.89 
  -7   5   1  660.53   64.09 
  -7   5   1  597.94   64.59 
   7   5  -1  541.15   59.99 
  -7   5   1  677.13   65.99 
  -7   5   1  660.23   49.50 
  -7   5   1  630.84   61.19 
   7   5  -1  643.94   46.80 
  -6  -5   1  349.96   42.10 
   6  -5  -1  334.67   40.70 
   6  -5  -1  341.87   41.30 
   6  -5  -1  433.36   47.90 
   6  -5  -1  389.66   44.50 
   6  -5  -1  373.46   45.40 
   6  -5  -1  486.35   56.29 
   6  -5  -1  383.06   43.00 
  -6  -5   1  433.16   49.20 
  -6  -5   1  365.86   39.00 
   6  -5  -1  361.16   41.80 
   6  -5  -1  428.46   44.50 
  -6  -5   1  432.26   33.00 
  -6  -5   1  418.46   41.60 
  -6  -5   1  403.16   50.79 
   6  -5  -1  271.07   39.30 
  -6   5   1  385.26   48.50 
   6   5  -1  362.76   43.40 
  -6   5   1  382.36   40.60 
  -6   5   1  398.16   30.30 
  -6   5   1  375.26   50.29 
  -6   5   1  399.06   42.60 
   6   5  -1  562.24   58.29 
  -6   5   1  360.36   36.80 
  -6   5   1  392.46   47.60 
  -6   5   1  413.46   46.50 
   6   5  -1  365.86   38.80 
  -6   5   1  387.66   42.00 
  -6   5   1  328.57   41.20 
  -6   5   1  378.76   47.30 
  -6   5   1  344.57   42.40 
  -6   5   1  388.46   48.60 
   6   5  -1  413.56   50.39 
   6   5  -1  394.76   46.80 
  -6   5   1  380.46   63.29 
  -6   5   1  446.66   48.50 
   6   5  -1  363.16   35.40 
  -6   5   1  405.06   28.10 
   5  -5  -1 2114.89  102.69 
   5  -5  -1 2161.78  103.79 
  -5  -5   1 2103.89  101.19 
   5  -5  -1 1920.01  103.49 
   5  -5  -1 1942.31   98.89 
  -5  -5   1 2127.39  108.49 
   5  -5  -1 2032.40   92.69 
  -5  -5   1 2117.49   99.59 
   5  -5  -1 1845.12   97.99 
  -5  -5   1 2112.99   95.49 
  -5  -5   1 2032.70   97.39 
  -5  -5   1 2126.59   86.39 
   5  -5  -1 2047.80  100.79 
   5  -5  -1 2203.38  107.19 
  -5  -5   1 2231.68   97.39 
   5  -5  -1 1923.81  100.79 
   5  -5  -1 2271.07  105.99 
   5  -5  -1 2295.27  109.79 
  -5  -5   1 2057.09  105.29 
  -5  -5   1 2086.39   87.29 
  -5   5   1 1922.41  101.49 
   5   5  -1 1886.01  105.69 
  -5   5   1 2156.18  101.49 
   5   5  -1 2133.99   91.59 
   5   5  -1 2101.09   96.59 
  -5   5   1 1999.00  102.59 
  -5   5   1 2050.69  100.89 
   5   5  -1 1934.61  106.59 
  -5   5   1 2142.69  105.89 
  -5   5   1 1959.60  102.29 
  -5   5   1 1962.40  111.39 
   5   5  -1 2127.19   86.19 
  -5   5   1 2038.20  107.89 
  -5   5   1 2060.49   99.39 
   5   5  -1 2047.80  104.79 
  -5   5   1 2156.48   93.79 
  -5   5   1 2074.49  105.69 
  -5   5   1 2085.09  129.59 
  -5   5   1 2187.68   93.29 
   5   5  -1 2055.69   96.39 
  -5   5   1 2169.58  104.09 
   5   5  -1 2029.40  103.79 
   5   5  -1 2130.09   90.99 
  -5   5   1 2134.99  108.29 
   5   5  -1 2148.58   91.09 
   5   5  -1 2182.78   95.49 
  -4  -5   1  623.14   35.70 
   4  -5  -1  563.04   37.30 
  -4  -5   1  585.94   45.50 
  -4  -5   1  624.54   47.20 
   4  -5  -1  589.34   43.40 
   4  -5  -1  591.24   43.70 
  -4  -5   1  543.85   34.90 
   4  -5  -1  600.94   44.80 
  -4  -5   1  515.55   37.20 
   4  -5  -1  526.15   39.50 
   4  -5  -1  618.34   42.50 
  -4  -5   1  563.54   24.30 
  -4  -5   1  585.14   32.50 
  -4  -5   1  614.04   32.50 
  -4  -5   1  576.84   35.20 
  -4  -5   1  543.85   34.10 
   4  -5  -1  567.14   42.80 
  -4  -5   1  616.94   41.00 
   4  -5  -1  568.64   44.60 
  -4  -5   1  574.84   40.30 
   4  -5  -1  576.24   41.10 
   4  -5  -1  568.44   42.10 
   4  -5  -1  568.14   45.50 
  -4   5   1  562.14   42.20 
  -4   5   1  555.74   41.80 
   4   5  -1  527.45   43.90 
   4   5  -1  573.34   33.80 
   4   5  -1  569.84   38.80 
  -4   5   1  635.54   45.70 
   4   5  -1  582.14   36.90 
   4   5  -1  625.14   34.50 
  -4   5   1  499.05   40.20 
  -4   5   1  614.04   48.40 
  -4   5   1  564.64   41.00 
   4   5  -1  581.74   38.10 
  -4   5   1  570.54   34.70 
  -4   5   1  615.24   59.79 
   4   5  -1  587.54   37.40 
  -4   5   1  548.95   41.70 
   4   5  -1  578.74   29.60 
  -4   5   1  592.94   32.10 
  -4   5   1  590.74   49.40 
  -4   5   1  487.15   39.90 
   4   5  -1  580.64   32.70 
   4   5  -1  555.44   43.70 
  -4   5   1  604.04   42.50 
   4   5  -1  565.84   46.10 
  -4   5   1  571.14   33.80 
  -4   5   1  607.54   45.80 
  -4   5   1  546.35   33.50 
  -4   5   1  650.23   46.00 
   4   5  -1  602.04   44.50 
   4   5  -1  606.74   42.80 
  -3  -5   1 1090.09   66.99 
  -3  -5   1 1125.49   45.90 
  -3  -5   1 1161.68   50.19 
   3  -5  -1 1036.50   56.99 
  -3  -5   1 1217.28   67.59 
  -3  -5   1 1156.58   61.89 
  -3  -5   1 1119.19   48.20 
   3  -5  -1 1088.89   65.89 
  -3  -5   1 1120.59   55.89 
   3  -5  -1 1077.09   63.69 
  -3  -5   1 1181.68   62.19 
   3  -5  -1 1082.69   66.29 
   3  -5  -1 1059.59   61.29 
  -3  -5   1 1080.49   44.10 
   3  -5  -1 1133.19   47.90 
   3  -5  -1 1045.60   62.19 
  -3  -5   1 1141.19   53.79 
  -3  -5   1 1155.48   54.99 
  -3  -5   1 1127.89   53.39 
   3  -5  -1 1104.39   63.09 
   3  -5  -1 1081.59   57.59 
  -3  -5   1 1062.59   52.19 
  -3  -5   1 1080.69   47.10 
  -3  -5   1 1087.09   62.79 
  -3  -5   1 1105.09   55.59 
  -3  -5   1 1142.39   51.79 
   3  -5  -1  984.20   59.49 
   3  -5  -1 1160.48   51.39 
   3  -5  -1 1072.29   61.09 
   3  -5  -1 1049.99   57.99 
   3   5  -1 1135.79   65.59 
  -3   5   1 1103.79   80.79 
   3   5  -1 1206.28   48.20 
  -3   5   1 1076.09   49.99 
   3   5  -1 1147.69   57.79 
  -3   5   1 1108.49   61.79 
   3   5  -1 1255.67   56.99 
  -3   5   1 1047.20   60.89 
  -3   5   1 1103.39   62.99 
   3   5  -1 1152.08   60.49 
   3   5  -1 1059.09   54.59 
   3   5  -1 1062.39   62.69 
   3   5  -1 1135.99   61.89 
  -3   5   1 1171.18   62.59 
   3   5  -1 1058.39   47.00 
  -3   5   1 1111.09   61.89 
  -3   5   1 1096.79   64.49 
  -3   5   1 1115.99   49.50 
  -3   5   1 1150.58   61.39 
   3   5  -1 1025.10   63.19 
   3   5  -1 1096.49   48.50 
   3   5  -1 1095.99   57.99 
   3   5  -1 1172.08   68.59 
  -3   5   1 1066.09   61.49 
  -3   5   1 1130.59   63.79 
   3   5  -1 1146.99   51.69 
  -3   5   1 1101.09   55.89 
   3   5  -1 1110.99   49.20 
  -3   5   1 1049.59   68.19 
  -3   5   1 1108.89   60.59 
   2  -5  -1  112.89   20.00 
  -2  -5   1  112.79   13.50 
  -2  -5   1  124.69   12.10 
  -2  -5   1   96.49   19.50 
   2  -5  -1   97.29   18.90 
  -2  -5   1  113.39   11.90 
  -2  -5   1   93.09   18.80 
  -2  -5   1   81.19   15.40 
  -2  -5   1   95.49   11.20 
   2  -5  -1   96.79   17.10 
   2  -5  -1  120.49   21.50 
   2  -5  -1   79.89   14.70 
  -2  -5   1   78.69   18.20 
   2  -5  -1  152.58   25.80 
  -2  -5   1  127.09   24.20 
   2  -5  -1  117.59   16.50 
   2  -5  -1   92.59   18.00 
   2  -5  -1  106.09   18.70 
  -2  -5   1  126.69   17.90 
  -2  -5   1  109.29   14.60 
  -2  -5   1   60.89   13.70 
   2  -5  -1  104.89   12.60 
   2  -5  -1   57.79   13.90 
  -2  -5   1   94.79   22.30 
  -2  -5   1  109.99   16.40 
  -2  -5   1   91.69   13.00 
   2   5  -1  104.79   12.00 
   2   5  -1   81.79   14.10 
  -2   5   1  122.79   22.10 
  -2   5   1  109.39   18.00 
  -2   5   1   79.79   16.50 
   2   5  -1  128.99   21.70 
   2   5  -1  109.49   20.20 
  -2   5   1   99.19   22.50 
  -2   5   1   96.79   18.60 
  -2   5   1  109.09   19.70 
  -2   5   1   75.29   24.40 
   2   5  -1   98.39   16.50 
  -2   5   1   69.39   14.50 
  -2   5   1  100.69   19.40 
  -2   5   1  100.89   11.30 
  -2   5   1  114.99   17.60 
   2   5  -1  109.69   18.60 
  -2   5   1   57.59   15.80 
   2   5  -1  116.99   14.20 
  -2   5   1   94.89    9.20 
   2   5  -1  140.39   19.70 
   2   5  -1  124.69   19.90 
   2   5  -1   89.99   20.60 
  -2   5   1   84.19   17.50 
   2   5  -1  135.59   21.60 
  -2   5   1   74.89   15.80 
   2   5  -1  108.29   23.10 
  -1  -5   1  464.55   39.30 
  -1  -5   1  541.85   27.60 
   1  -5  -1  561.84   33.30 
   1  -5  -1  544.05   29.20 
   1  -5  -1  527.15   36.60 
  -1  -5   1  563.74   32.00 
  -1  -5   1  539.25   35.00 
  -1  -5   1  565.24   43.40 
  -1  -5   1  527.35   35.50 
   1  -5  -1  533.55   36.80 
   1  -5  -1  524.35   38.00 
   1  -5  -1  537.45   34.60 
   1  -5  -1  503.15   37.00 
  -1  -5   1  555.44   43.20 
   1  -5  -1  526.25   33.40 
  -1  -5   1  543.35   40.40 
   1  -5  -1  586.04   44.00 
  -1  -5   1  524.45   21.60 
  -1  -5   1  536.35   29.40 
  -1  -5   1  567.04   36.80 
  -1  -5   1  594.54   36.50 
  -1   5   1  534.25   42.70 
  -1   5   1  498.95   37.60 
  -1   5   1  519.25   33.90 
   1   5  -1  559.04   31.30 
   1   5  -1  488.35   34.60 
   1   5  -1  547.55   31.80 
   1   5  -1  537.45   37.30 
   1   5  -1  545.35   35.50 
   1   5  -1  510.35   41.60 
  -1   5   1  444.16   31.80 
  -1   5   1  564.54   27.30 
   1   5  -1  490.15   37.10 
  -1   5   1  570.04   38.60 
  -1   5   1  522.85   38.60 
  -1   5   1  510.15   47.40 
   1   5  -1  513.55   33.50 
  -1   5   1  510.35   36.90 
  -1   5   1  535.05   37.10 
  -1   5   1  491.75   33.90 
   1   5  -1  690.33   40.00 
   1   5  -1  524.65   32.60 
   1   5  -1  578.94   40.70 
   1   5  -1  529.65   45.00 
  -1   5   1  519.35   38.90 
  -1   5   1  520.65   33.10 
   1   5  -1  533.35   37.20 
  -1   5   1  502.75   36.50 
   0  -5   1   94.59   21.60 
   0  -5  -1  102.49   15.30 
   0  -5  -1  104.19   10.10 
   0  -5   1   89.89   14.10 
   0  -5  -1   84.39   12.50 
   0  -5  -1   74.89   13.10 
   0  -5  -1  110.09   19.40 
   0  -5  -1  105.09   14.10 
   0  -5   1   87.09   15.10 
   0  -5  -1  116.69   23.10 
   0  -5  -1   63.19   14.20 
   0  -5   1   79.69   19.50 
   0  -5   1  125.19   16.70 
   0  -5   1  114.79   14.20 
   0  -5  -1   92.49   13.00 
   0  -5  -1   88.79   16.50 
   0  -5  -1  104.59   21.20 
   0  -5   1   98.89   16.90 
   0  -5   1  101.29   20.30 
   0  -5  -1   96.59    6.00 
   0  -5   1   83.89   15.80 
   0  -5   1   77.39   16.00 
   0  -5   1   60.59   19.10 
   0  -5  -1   85.49   20.20 
   0  -5  -1  121.89   20.90 
   0   5  -1  102.59   20.40 
   0   5  -1  127.79   28.00 
   0   5   1  100.89   15.10 
   0   5  -1   93.79   18.20 
   0   5   1   95.49   19.70 
   0   5   1   97.89   17.50 
   0   5   1   70.29   15.30 
   0   5  -1   91.09   13.30 
   0   5   1   80.89   19.70 
   0   5  -1   93.19   20.70 
   0   5  -1  107.09   21.10 
   0   5  -1  117.99   17.00 
   0   5   1  101.69   14.50 
   0   5  -1   81.79   18.40 
   0   5   1   79.09   17.80 
   0   5   1  104.59   18.30 
   0   5  -1   84.79   15.30 
   0   5   1   83.29   18.50 
   0   5  -1   75.19   14.00 
   0   5   1   83.79   16.40 
   0   5   1  120.49   26.60 
   0   5  -1   82.79   17.50 
   0   5  -1   90.19   20.20 
   0   5   1   81.09   15.00 
   0   5  -1   86.39   14.20 
   0   5   1   72.39   12.50 
   0   5  -1  104.89   18.60 
   0   5  -1   93.89   15.80 
   0   5  -1   85.59    8.50 
   0   5  -1   93.89   18.40 
   0   5   1   81.29   12.90 
   1  -5   1 2281.07   95.99 
   1  -5   1 2105.39  100.09 
  -1  -5  -1 2163.08   85.89 
  -1  -5  -1 2270.97  110.49 
   1  -5   1 2254.77   94.99 
  -1  -5  -1 2314.27   93.39 
   1  -5   1 2122.39  107.59 
  -1  -5  -1 2173.08   96.59 
  -1  -5  -1 2106.69  101.39 
  -1  -5  -1 2161.58   95.89 
  -1  -5  -1 2212.48  106.09 
   1  -5   1 2175.58   81.29 
  -1  -5  -1 2222.88   92.29 
  -1  -5  -1 2239.18   90.49 
   1  -5   1 2134.79   98.69 
   1  -5   1 2134.89   96.69 
   1  -5   1 2059.19   94.19 
  -1  -5  -1 2248.08   97.99 
  -1  -5  -1 2217.58  102.69 
  -1  -5  -1 2201.68  101.79 
  -1  -5  -1 2256.97   87.49 
   1  -5   1 2131.39   99.39 
  -1   5  -1 2171.88   95.39 
  -1   5  -1 2144.89   99.09 
  -1   5  -1 2229.58   96.99 
   1   5   1 2189.38   96.59 
   1   5   1 2182.38   97.69 
  -1   5  -1 2048.99   98.09 
  -1   5  -1 2120.89  105.69 
  -1   5  -1 2312.87  100.59 
   1   5   1 2130.29   86.79 
   1   5   1 2228.68   89.29 
  -1   5  -1 2228.88   81.29 
   1   5   1 2173.48   81.59 
  -1   5  -1 2372.76  105.19 
  -1   5  -1 2169.18  104.49 
  -1   5  -1 2245.68   91.59 
   1   5   1 2112.99   87.19 
   1   5   1 2189.18  111.69 
   1   5   1 2118.39  103.39 
  -1   5  -1 2253.17  101.79 
  -1   5  -1 2233.38   96.39 
  -1   5  -1 2256.47   92.59 
  -1   5  -1 2165.48  100.59 
   1   5   1 2181.38   90.19 
   1   5   1 2194.98  104.79 
   1   5   1 2193.88   98.59 
  -1   5  -1 2182.88  104.89 
  -1   5  -1 2280.07  119.39 
   1   5   1 2143.59   97.99 
  -2  -5  -1  393.56   30.10 
  -2  -5  -1  382.76   22.10 
  -2  -5  -1  426.76   24.50 
   2  -5   1  313.77   34.20 
   2  -5   1  448.66   34.70 
  -2  -5  -1  422.36   30.90 
   2  -5   1  515.05   35.00 
   2  -5   1  400.76   28.60 
  -2  -5  -1  411.66   20.40 
  -2  -5  -1  451.25   28.40 
  -2  -5  -1  462.45   38.00 
   2  -5   1  423.76   46.70 
   2  -5   1  364.56   34.50 
  -2  -5  -1  437.76   35.10 
  -2  -5  -1  431.76   38.40 
  -2  -5  -1  449.16   33.00 
  -2  -5  -1  415.66   19.30 
  -2  -5  -1  399.86   29.40 
   2  -5   1  453.45   35.40 
   2  -5   1  442.56   24.20 
  -2  -5  -1  371.96   24.10 
  -2  -5  -1  411.56   29.90 
   2   5   1  350.46   40.10 
  -2   5  -1  413.56   54.89 
  -2   5  -1  504.15   46.80 
  -2   5  -1  497.65   37.50 
   2   5   1  410.06   23.70 
   2   5   1  442.06   25.20 
   2   5   1  438.96   32.50 
  -2   5  -1  423.86   32.20 
  -2   5  -1  422.66   26.40 
   2   5   1  431.36   34.70 
  -2   5  -1  423.16   41.90 
   2   5   1  451.55   30.80 
  -2   5  -1  425.46   33.40 
   2   5   1  449.26   25.20 
   2   5   1  436.26   32.70 
  -2   5  -1  407.16   31.60 
  -2   5  -1  461.15   40.20 
  -2   5  -1  413.16   40.40 
   2   5   1  379.06   27.30 
  -2   5  -1  457.15   34.00 
  -2   5  -1  405.06   31.80 
   2   5   1  430.66   35.90 
  -2   5  -1  407.96   21.80 
   2   5   1  419.46   23.50 
  -2   5  -1  417.16   26.60 
  -2   5  -1  387.96   40.90 
  -2   5  -1  400.46   32.80 
   3  -5   1 2188.78  112.69 
  -3  -5  -1 2395.46  102.29 
  -3  -5  -1 2360.66   91.89 
   3  -5   1 2280.67  106.99 
  -3  -5  -1 2418.26   90.09 
  -3  -5  -1 2297.37  109.39 
  -3  -5  -1 2402.26  115.19 
   3  -5   1 2236.78  106.69 
   3  -5   1 2257.87  107.39 
   3  -5   1 2220.18  108.29 
   3  -5   1 2305.27  107.29 
  -3  -5  -1 2394.06  111.39 
  -3  -5  -1 2328.47  102.29 
  -3  -5  -1 2441.16   95.99 
  -3  -5  -1 2400.76  101.69 
   3  -5   1 2359.76  104.99 
  -3  -5  -1 2307.27  100.19 
   3  -5   1 2326.77  103.79 
  -3  -5  -1 2325.27  101.09 
   3  -5   1 2338.57  113.69 
  -3  -5  -1 2276.07   85.19 
  -3  -5  -1 2352.86   86.49 
  -3   5  -1 2249.77   93.79 
  -3   5  -1 2427.26  119.19 
  -3   5  -1 2341.67  109.89 
   3   5   1 2289.27   87.39 
  -3   5  -1 2537.15  113.19 
   3   5   1 2415.76  108.59 
   3   5   1 2297.37   93.59 
   3   5   1 2262.87   88.49 
   3   5   1 2418.36   95.59 
  -3   5  -1 2247.48  106.99 
  -3   5  -1 2308.37  106.69 
  -3   5  -1 2434.66  108.29 
   3   5   1 2284.87  110.29 
   3   5   1 2308.57   99.49 
   3   5   1 2355.96  108.09 
  -3   5  -1 2334.27  107.09 
  -3   5  -1 2383.36   98.09 
  -3   5  -1 2469.65  111.59 
  -3   5  -1 2237.08  129.29 
  -3   5  -1 2291.97  109.99 
  -3   5  -1 2343.37  106.99 
   3   5   1 2298.37  105.99 
  -3   5  -1 2416.16  107.19 
  -3   5  -1 2358.16   94.49 
  -3   5  -1 2504.65  110.79 
   3   5   1 2269.87   97.09 
   3   5   1 2197.48  100.59 
   3   5   1 2321.07  111.59 
   3   5   1 2457.25   99.79 
  -4  -5  -1  332.27   25.70 
  -4  -5  -1  330.57   16.80 
   4  -5   1  315.67   38.80 
  -4  -5  -1  349.87   26.50 
   4  -5   1  372.66   43.30 
  -4  -5  -1  333.67   34.10 
  -4  -5  -1  367.36   45.30 
   4  -5   1  415.76   34.10 
  -4  -5  -1  362.86   42.20 
   4  -5   1  399.76   41.00 
   4  -5   1  391.36   38.90 
  -4  -5  -1  376.46   41.40 
   4  -5   1  308.87   36.30 
  -4  -5  -1  312.27   31.80 
   4  -5   1  362.16   38.60 
   4  -5   1  386.86   44.90 
  -4  -5  -1  355.06   26.80 
  -4  -5  -1  413.76   29.90 
  -4  -5  -1  333.17   16.90 
   4  -5   1  379.06   40.00 
   4   5   1  332.87   31.30 
  -4   5  -1  367.86   40.50 
  -4   5  -1  325.17   38.20 
  -4   5  -1  354.56   37.50 
  -4   5  -1  382.46   39.90 
  -4   5  -1  305.17   38.20 
  -4   5  -1  372.26   58.29 
  -4   5  -1  359.46   25.80 
   4   5   1  374.76   43.10 
  -4   5  -1  371.06   27.80 
   4   5   1  337.37   24.30 
  -4   5  -1  418.86   48.80 
   4   5   1  332.77   25.10 
   4   5   1  272.67   34.40 
  -4   5  -1  351.66   41.20 
  -4   5  -1  274.07   35.00 
   4   5   1  340.87   38.00 
   4   5   1  332.37   21.70 
  -4   5  -1  313.57   43.20 
  -4   5  -1  332.47   37.30 
  -4   5  -1  368.46   44.00 
  -4   5  -1  401.66   40.20 
  -4   5  -1  371.06   37.50 
  -4   5  -1  364.56   39.20 
   4   5   1  376.16   27.70 
   4   5   1  383.16   27.40 
   4   5   1  401.66   43.90 
  -5  -5  -1  939.21   50.59 
   5  -5   1  838.02   55.19 
   5  -5   1  778.42   56.59 
  -5  -5  -1  848.02   46.80 
   5  -5   1  876.21   60.79 
  -5  -5  -1  834.42   60.79 
   5  -5   1  850.11   57.19 
  -5  -5  -1  916.81   44.80 
  -5  -5  -1  879.81   54.29 
  -5  -5  -1  787.42   58.09 
   5  -5   1  933.01   56.39 
  -5  -5  -1  813.82   49.90 
  -5  -5  -1  866.31   57.19 
   5  -5   1  810.02   56.39 
  -5  -5  -1  909.31   50.89 
   5  -5   1  878.21   56.59 
   5  -5   1  789.62   59.59 
   5  -5   1  990.70   58.29 
   5   5   1  905.91   56.49 
   5   5   1  840.22   43.20 
  -5   5  -1  914.41   58.99 
  -5   5  -1  914.71   58.59 
  -5   5  -1  991.00   82.89 
   5   5   1  896.21   59.59 
  -5   5  -1  881.01   58.99 
   5   5   1  844.72   45.90 
  -5   5  -1  776.72   53.19 
   5   5   1  992.70   63.29 
  -5   5  -1  716.23   55.89 
   5   5   1  885.01   62.39 
  -5   5  -1  885.71   63.79 
  -5   5  -1  807.62   48.90 
  -5   5  -1  992.60   60.19 
   5   5   1  865.91   49.00 
  -5   5  -1  806.42   58.09 
   5   5   1  813.42   46.90 
  -5   5  -1  847.12   61.99 
  -5   5  -1  762.62   53.39 
   5   5   1  915.41   45.90 
  -5   5  -1  841.02   52.99 
  -5   5  -1  921.61   60.09 
  -5   5  -1  920.61   51.79 
   5   5   1  796.62   44.00 
  -5   5  -1  901.51   51.09 
  -5   5  -1  981.40   60.99 
  -6  -5  -1   19.70   12.80 
   6  -5   1   10.00   13.30 
  -6  -5  -1   14.00   11.10 
  -6  -5  -1   20.70   10.40 
   6  -5   1    7.10    8.60 
   6  -5   1    4.40   10.10 
   6  -5   1   27.20   14.30 
  -6  -5  -1    7.70    8.60 
  -6  -5  -1   20.00   13.00 
  -6  -5  -1   10.20    8.50 
  -6  -5  -1   13.80   12.60 
  -6  -5  -1    8.90    8.60 
   6  -5   1   32.10   16.80 
   6  -5   1   20.80   13.90 
   6  -5   1   22.10   13.00 
   6  -5   1    9.20   10.60 
   6  -5   1   24.50   13.30 
   6  -5   1   -6.20   10.40 
  -6   5  -1   21.00   11.40 
  -6   5  -1    2.60   12.50 
  -6   5  -1   11.80   12.50 
   6   5   1   17.00   13.10 
  -6   5  -1   -5.20    6.50 
  -6   5  -1    6.60   12.80 
  -6   5  -1   14.90   10.90 
  -6   5  -1   43.40   16.10 
  -6   5  -1   20.10   11.10 
   6   5   1   -6.80   11.00 
  -6   5  -1   48.60   17.70 
  -6   5  -1   31.80   14.40 
   6   5   1   45.70   18.80 
  -6   5  -1   13.20   12.20 
  -6   5  -1    6.80   12.70 
   6   5   1   18.60   12.70 
   6   5   1   17.10    8.40 
  -6   5  -1   18.10   13.80 
  -6   5  -1   37.50   24.00 
  -6   5  -1   10.00    8.90 
  -6   5  -1    8.00    9.50 
   6   5   1    9.20    8.50 
  -7  -5  -1  206.88   34.10 
   7  -5   1  260.67   38.70 
   7  -5   1  253.17   35.90 
   7  -5   1  173.88   33.00 
   7  -5   1  287.17   43.20 
  -7  -5  -1  281.67   39.80 
   7  -5   1  235.88   37.80 
  -7  -5  -1  200.28   36.60 
   7  -5   1  260.77   42.40 
   7  -5   1  175.68   32.60 
   7  -5   1  229.18   33.70 
   7  -5   1  262.47   36.40 
  -7  -5  -1  255.77   33.10 
  -7  -5  -1  279.37   37.20 
   7  -5   1  289.97   39.60 
   7  -5   1  202.18   35.00 
  -7   5  -1  255.77   39.40 
  -7   5  -1  228.88   37.40 
  -7   5  -1  208.28   35.50 
  -7   5  -1  270.77   37.10 
  -7   5  -1  278.37   41.30 
  -7   5  -1  274.17   35.60 
  -7   5  -1  213.28   37.00 
  -7   5  -1  194.18   38.90 
  -7   5  -1  247.08   34.10 
  -7   5  -1  249.58   43.70 
   7   5   1  196.78   38.40 
  -7   5  -1  255.87   31.10 
  -7   5  -1  253.37   56.99 
  -7   5  -1  231.18   39.60 
  -7   5  -1  277.57   40.60 
   7   5   1  284.67   38.60 
   7   5   1  248.68   40.10 
   7   5   1  193.78   31.80 
  -7   5  -1  276.67   37.30 
   7   5   1  263.17   38.00 
   7   5   1  210.38   37.80 
   8  -5   1   95.49   26.60 
  -8  -5  -1   48.30   19.40 
   8  -5   1   47.30   19.70 
  -8  -5  -1   92.79   26.10 
   8  -5   1   37.00   18.60 
   8  -5   1   86.09   22.60 
  -8  -5  -1   78.29   25.80 
  -8  -5  -1   55.89   18.20 
   8  -5   1   70.19   26.40 
   8  -5   1   50.29   18.90 
   8  -5   1   70.79   25.00 
   8  -5   1  122.09   26.70 
  -8  -5  -1   50.49   19.80 
   8  -5   1   66.69   23.40 
   8  -5   1   42.30   22.40 
   8  -5   1   58.89   22.00 
  -8   5  -1  127.49   29.80 
  -8   5  -1  116.99   28.60 
  -8   5  -1   51.19   19.00 
  -8   5  -1  116.59   28.70 
  -8   5  -1   54.89   25.00 
  -8   5  -1   80.69   22.70 
  -8   5  -1  120.49   44.00 
  -8   5  -1  104.49   27.30 
   8   5   1   86.49   28.40 
   8   5   1   53.99   22.00 
  -8   5  -1   94.39   26.70 
  -8   5  -1   65.99   24.60 
   8   5   1   61.09   23.50 
   8   5   1   84.19   23.10 
   8   5   1   60.09   23.30 
  -8   5  -1   85.59   27.10 
  -8   5  -1   65.89   22.70 
   8   5   1   99.49   28.20 
  -9  -5  -1  404.76   52.59 
  -9  -5  -1  404.66   54.59 
   9  -5   1  230.68   46.80 
   9  -5   1  311.77   49.80 
   9  -5   1  299.67   48.10 
   9  -5   1  281.77   47.50 
  -9  -5  -1  364.26   49.30 
   9  -5   1  342.77   46.00 
   9  -5   1  350.06   52.79 
   9  -5   1  263.37   45.90 
   9  -5   1  330.97   48.40 
  -9  -5  -1  270.87   49.50 
   9  -5   1  362.16   51.79 
  -9   5  -1  377.06   57.09 
  -9   5  -1  294.87   45.30 
  -9   5  -1  316.77   52.29 
  -9   5  -1  384.36   56.29 
  -9   5  -1  283.37   49.00 
  -9   5  -1  322.57   45.30 
  -9   5  -1  359.16   51.69 
  -9   5  -1  276.17   50.69 
   9   5   1  264.27   49.10 
   9   5   1  350.26   55.59 
  -9   5  -1  381.06   71.89 
   9   5   1  334.37   52.89 
  -9   5  -1  339.27   59.99 
   9   5   1  281.17   48.60 
   8  -6  -1   57.59   24.00 
  -8  -6   1   79.09   23.50 
   8  -6  -1  115.39   32.60 
  -8  -6   1   77.69   25.80 
   8  -6  -1   90.09   26.10 
   8  -6  -1   91.79   29.20 
   8  -6  -1   97.09   26.40 
  -8  -6   1   84.19   22.40 
  -8  -6   1  106.09   24.60 
   8  -6  -1  123.59   29.90 
   8  -6  -1   93.79   26.50 
   8  -6  -1   99.39   28.80 
   8  -6  -1  170.38   34.00 
   8  -6  -1  108.69   29.40 
  -8  -6   1  130.09   32.30 
  -8   6   1   87.29   25.80 
   8   6  -1   86.19   27.50 
  -8   6   1  129.09   42.70 
  -8   6   1  106.29   25.60 
  -8   6   1  108.39   30.50 
   8   6  -1   74.39   27.90 
  -8   6   1   87.39   26.30 
  -8   6   1   88.39   24.00 
  -8   6   1  127.59   34.30 
  -8   6   1  129.69   33.70 
  -8   6   1   91.89   26.20 
   8   6  -1  101.19   31.50 
   8   6  -1   42.80   20.70 
   8   6  -1   99.39   30.00 
   8   6  -1   82.49   27.50 
  -8   6   1  115.79   28.60 
  -8   6   1  121.19   34.70 
  -8   6   1  100.29   28.50 
  -7  -6   1    1.60   10.80 
   7  -6  -1  -13.20   10.20 
   7  -6  -1    7.40   12.00 
  -7  -6   1    3.60   11.60 
   7  -6  -1   32.10   19.60 
  -7  -6   1   -8.60    9.70 
   7  -6  -1    9.90   14.80 
   7  -6  -1    4.50   11.30 
   7  -6  -1   13.60   13.40 
   7  -6  -1    0.70    9.40 
  -7  -6   1    1.00    9.40 
   7  -6  -1    9.70   15.20 
   7  -6  -1   12.90   12.80 
   7  -6  -1   -7.50   10.30 
  -7  -6   1   -3.90   10.40 
  -7   6   1   24.10   14.00 
   7   6  -1   -0.50   11.90 
   7   6  -1   19.00   14.40 
  -7   6   1   -3.90    9.80 
   7   6  -1   20.60   18.40 
   7   6  -1    4.80   12.50 
  -7   6   1    4.70   12.60 
  -7   6   1    3.80   10.60 
  -7   6   1  -11.60    8.90 
  -7   6   1    4.50   12.70 
   7   6  -1   -1.70   11.20 
  -7   6   1   -4.10    9.40 
  -7   6   1    0.40   12.60 
  -7   6   1    8.00   12.90 
  -7   6   1    3.30   13.90 
  -7   6   1    4.90   10.60 
  -7   6   1   11.40   11.80 
  -7   6   1    3.10   12.70 
  -7   6   1   19.30   16.40 
  -7   6   1  -11.00   14.20 
   6  -6  -1   85.89   22.10 
  -6  -6   1  148.99   30.10 
   6  -6  -1  119.49   26.40 
   6  -6  -1   92.39   24.00 
  -6  -6   1  106.69   22.20 
  -6  -6   1   96.39   21.70 
   6  -6  -1   83.79   25.90 
   6  -6  -1   79.99   23.20 
   6  -6  -1   86.59   23.90 
   6  -6  -1  110.79   27.00 
  -6  -6   1   88.69   19.60 
  -6  -6   1   72.79   22.60 
   6  -6  -1  132.39   29.30 
   6  -6  -1   95.29   23.10 
  -6  -6   1   66.89   18.40 
   6  -6  -1   99.09   23.50 
   6   6  -1  106.59   26.30 
  -6   6   1   93.59   25.20 
  -6   6   1   82.99   21.90 
  -6   6   1   85.49   35.00 
   6   6  -1   77.19   25.80 
  -6   6   1   98.19   25.60 
  -6   6   1  149.99   30.10 
  -6   6   1   91.59   24.50 
  -6   6   1  139.69   29.80 
   6   6  -1  106.19   28.20 
  -6   6   1   98.89   22.40 
  -6   6   1   51.59   21.60 
  -6   6   1   88.89   22.90 
  -6   6   1  116.89   20.60 
  -6   6   1  123.09   27.30 
   6   6  -1  122.99   23.50 
  -6   6   1  109.99   23.30 
  -6   6   1   92.89   26.80 
  -6   6   1   97.89   23.00 
  -6   6   1   91.19   28.60 
  -6   6   1  100.49   26.50 
   6   6  -1  107.99   25.60 
  -5  -6   1   36.50   11.80 
   5  -6  -1   38.50   16.30 
  -5  -6   1   38.90   13.60 
   5  -6  -1   26.40   16.00 
  -5  -6   1   31.60   14.30 
  -5  -6   1   72.39   20.50 
   5  -6  -1   87.19   22.50 
   5  -6  -1   58.79   18.90 
   5  -6  -1   65.99   21.50 
   5  -6  -1   68.99   21.50 
   5  -6  -1   50.19   16.40 
   5  -6  -1    4.40   10.10 
   5  -6  -1   91.79   22.50 
  -5  -6   1   29.30   12.90 
  -5  -6   1   75.19   16.60 
   5  -6  -1   42.90   17.00 
  -5  -6   1   57.79   18.80 
   5   6  -1   55.49   19.10 
  -5   6   1   41.50   15.90 
  -5   6   1   78.79   21.50 
  -5   6   1   33.00   19.20 
   5   6  -1   67.19   17.40 
   5   6  -1   37.60   17.40 
  -5   6   1   46.20   24.50 
  -5   6   1   34.20   11.30 
   5   6  -1   30.90   15.80 
  -5   6   1   56.79   19.00 
   5   6  -1   50.59   12.50 
  -5   6   1   35.70   15.70 
  -5   6   1   33.60   17.10 
  -5   6   1   54.29   23.20 
   5   6  -1   63.29   15.30 
  -5   6   1   59.99   13.80 
  -5   6   1   62.69   18.80 
  -5   6   1   32.00   12.80 
  -5   6   1   19.00   13.10 
   5   6  -1   60.69   21.90 
   5   6  -1   34.20   11.50 
  -5   6   1   40.20   16.60 
  -5   6   1   70.79   19.20 
   4  -6  -1  118.89   23.70 
  -4  -6   1  111.89   26.10 
   4  -6  -1  105.69   23.50 
   4  -6  -1   89.99   25.20 
  -4  -6   1   90.49   15.20 
  -4  -6   1  101.59   20.60 
  -4  -6   1   68.59   20.60 
  -4  -6   1  117.29   16.40 
   4  -6  -1   93.59   20.70 
   4  -6  -1  113.59   23.70 
  -4  -6   1  116.49   18.90 
   4  -6  -1  107.19   21.00 
   4  -6  -1  123.09   24.50 
  -4  -6   1   90.59   17.60 
  -4  -6   1  136.89   23.20 
  -4  -6   1  115.29   25.20 
   4  -6  -1  113.59   24.90 
   4  -6  -1   93.29   20.70 
  -4  -6   1   78.89   18.80 
   4  -6  -1  132.79   28.60 
  -4   6   1  107.19   24.10 
  -4   6   1  104.09   26.20 
  -4   6   1  100.59   22.90 
  -4   6   1   69.89   19.10 
   4   6  -1   92.09   23.70 
  -4   6   1  104.89   25.20 
   4   6  -1  137.39   23.50 
  -4   6   1  128.49   25.00 
   4   6  -1  112.69   18.20 
   4   6  -1  101.09   14.70 
  -4   6   1  119.89   23.80 
  -4   6   1   78.99   20.20 
  -4   6   1  124.99   24.00 
  -4   6   1  123.09   24.10 
   4   6  -1   96.79   25.80 
   4   6  -1  146.39   23.40 
  -4   6   1  127.29   16.30 
  -4   6   1  102.99   28.10 
   4   6  -1  145.59   23.00 
  -4   6   1   45.90   24.50 
   4   6  -1   98.69   21.60 
   4   6  -1   78.69   16.50 
   4   6  -1  102.59   23.00 
  -4   6   1   79.49   21.40 
  -4   6   1  143.29   17.60 
   4   6  -1   83.79   21.40 
  -3  -6   1   17.20   14.30 
  -3  -6   1   25.80    7.80 
   3  -6  -1   31.70   10.90 
  -3  -6   1   47.30   11.60 
   3  -6  -1   17.20    9.50 
   3  -6  -1   47.70   15.00 
  -3  -6   1   21.60   14.10 
   3  -6  -1   20.30   12.40 
  -3  -6   1   30.00   10.70 
   3  -6  -1   61.59   21.10 
  -3  -6   1   42.60   11.50 
   3  -6  -1   17.70   12.00 
   3  -6  -1   23.10   11.90 
   3  -6  -1   35.60   15.10 
   3  -6  -1   22.00   12.40 
  -3  -6   1   32.40   17.20 
  -3  -6   1   40.50    8.10 
  -3  -6   1   16.60   10.70 
  -3  -6   1    6.70    9.20 
  -3  -6   1   22.30    8.30 
  -3  -6   1   23.70   11.00 
   3   6  -1   30.50   12.40 
  -3   6   1   15.60   10.40 
   3   6  -1   28.60   11.80 
  -3   6   1   16.90   11.30 
  -3   6   1   21.90   12.50 
  -3   6   1   24.80   15.00 
  -3   6   1   34.50    8.40 
   3   6  -1   27.70   11.10 
  -3   6   1   48.80   14.90 
  -3   6   1    7.10   10.20 
   3   6  -1   19.60   11.90 
  -3   6   1   34.90   21.10 
   3   6  -1   40.00   16.10 
  -3   6   1   44.40   15.90 
  -3   6   1   23.70   12.10 
   3   6  -1   23.30   14.70 
   3   6  -1   27.20    9.40 
   3   6  -1   39.60    9.20 
  -3   6   1   33.20    7.70 
   3   6  -1   35.50   11.40 
  -3   6   1   32.80   13.70 
  -3   6   1   24.60   13.60 
   3   6  -1   47.70   18.10 
  -3   6   1   38.20   14.20 
   2  -6  -1   13.90    6.30 
   2  -6  -1   18.60    9.80 
  -2  -6   1   16.60   12.70 
  -2  -6   1    4.30    8.30 
  -2  -6   1   11.50    4.40 
  -2  -6   1   23.80   14.90 
   2  -6  -1   13.40   10.40 
  -2  -6   1   13.20    7.90 
  -2  -6   1    4.90    6.50 
   2  -6  -1   16.10   11.20 
  -2  -6   1   11.90    8.10 
   2  -6  -1    4.00    6.40 
  -2  -6   1   37.00   12.50 
  -2  -6   1   15.40    5.00 
  -2  -6   1   22.90   13.60 
  -2  -6   1    5.00    4.50 
  -2  -6   1   21.20   13.80 
   2  -6  -1   20.80    9.60 
   2  -6  -1   12.90   15.20 
   2  -6  -1    6.50    5.70 
   2  -6  -1   15.40    9.00 
  -2  -6   1   25.90    9.80 
  -2  -6   1    9.20    8.50 
   2  -6  -1   -2.30    6.60 
  -2   6   1   20.50   10.80 
  -2   6   1   19.30   11.00 
  -2   6   1   18.00   11.10 
   2   6  -1   13.30   10.30 
  -2   6   1   16.10    5.70 
   2   6  -1    7.10    6.10 
   2   6  -1   49.60   17.60 
  -2   6   1   18.20   13.10 
   2   6  -1   10.90    9.10 
  -2   6   1    8.20    9.80 
   2   6  -1   11.90   10.30 
  -2   6   1   16.70    9.90 
   2   6  -1   10.40    5.00 
   2   6  -1   11.40   12.10 
  -2   6   1    7.30    9.00 
  -2   6   1    9.70    8.00 
  -2   6   1   22.40   17.50 
   2   6  -1   11.60    9.30 
   2   6  -1   10.50    7.90 
  -2   6   1   13.20    8.70 
   2   6  -1   10.50    8.10 
  -2   6   1   18.20   11.10 
   2   6  -1    8.50    7.90 
   2   6  -1   20.80   12.20 
   2   6  -1   11.30    8.50 
  -2   6   1   23.80   12.60 
  -2   6   1   11.40   11.70 
   1  -6  -1  160.78   31.30 
  -1  -6   1  153.68   24.30 
   1  -6  -1  225.28   25.30 
  -1  -6   1  193.38   32.80 
   1  -6  -1  215.28   20.30 
  -1  -6   1  193.88   32.90 
   1  -6  -1  195.88   28.00 
   1  -6  -1  199.48   32.80 
   1  -6  -1  211.28   28.70 
  -1  -6   1  235.48   33.40 
  -1  -6   1  241.48   29.90 
   1  -6  -1  189.48   11.50 
   1  -6  -1  156.08   22.40 
  -1  -6   1  183.68   25.80 
  -1  -6   1  218.68   34.00 
  -1  -6   1  181.38   16.90 
  -1  -6   1  189.28   22.60 
   1  -6  -1  222.78   30.80 
  -1  -6   1  125.79   26.60 
   1  -6  -1  206.78   24.40 
   1  -6  -1  151.48   24.20 
  -1  -6   1  187.68   22.50 
  -1  -6   1  169.48   24.90 
   1   6  -1  212.38   28.80 
   1   6  -1  152.88   26.20 
  -1   6   1  161.98   28.50 
   1   6  -1  204.68   27.20 
   1   6  -1  228.08   30.00 
  -1   6   1  176.48   26.40 
  -1   6   1  175.38   36.50 
   1   6  -1  207.38   32.10 
   1   6  -1  217.98   29.40 
   1   6  -1  185.58   22.10 
  -1   6   1  181.58   14.90 
  -1   6   1  221.28   25.40 
  -1   6   1  131.59   26.80 
   1   6  -1  233.28   29.40 
   1   6  -1  164.18   22.00 
  -1   6   1  215.48   31.40 
   1   6  -1  180.68   31.10 
   1   6  -1  187.58   35.70 
   1   6  -1  234.98   35.80 
  -1   6   1  193.38   29.20 
  -1   6   1  191.88   25.10 
  -1   6   1  196.58   26.00 
   1   6  -1  215.18   23.00 
  -1   6   1  174.98   27.50 
   1   6  -1  168.68   22.50 
  -1   6   1  201.08   28.60 
  -1   6   1  168.38   26.60 
  -1   6   1  150.18   21.30 
   0  -6  -1  346.97   36.50 
   0  -6  -1  354.66   22.50 
   0  -6  -1  358.46   19.60 
   0  -6  -1  344.97   27.50 
   0  -6   1  340.37   42.60 
   0  -6  -1  339.67   36.80 
   0  -6  -1  374.06   25.80 
   0  -6   1  367.86   36.00 
   0  -6  -1  378.86   39.10 
   0  -6   1  344.87   27.60 
   0  -6   1  378.06   37.90 
   0  -6  -1  359.66   28.40 
   0  -6   1  398.96   43.30 
   0  -6   1  421.06   47.50 
   0  -6  -1  413.36   47.20 
   0  -6   1  360.36   28.90 
   0  -6  -1  443.56   48.80 
   0  -6   1  363.46   37.50 
   0  -6   1  393.06   38.90 
   0  -6   1  401.86   49.60 
   0  -6  -1  353.66   40.30 
   0  -6  -1  231.08   39.20 
   0  -6  -1  360.46   24.40 
   0  -6  -1  422.36   46.70 
   0  -6   1  328.07   23.50 
   0   6   1  305.47   34.60 
   0   6   1  352.86   26.60 
   0   6   1  412.66   44.60 
   0   6   1  339.87   40.40 
   0   6  -1  379.16   29.20 
   0   6  -1  428.76   46.70 
   0   6  -1  399.06   29.90 
   0   6   1  434.76   41.60 
   0   6  -1  423.76   29.30 
   0   6  -1  365.36   38.00 
   0   6  -1  305.37   36.80 
   0   6  -1  295.47   35.80 
   0   6  -1  336.27   41.40 
   0   6  -1  371.16   29.90 
   0   6  -1  392.86   53.09 
   0   6  -1  388.46   38.80 
   0   6  -1  395.96   29.70 
   0   6  -1  376.46   16.30 
   0   6  -1  332.17   36.40 
   0   6   1  383.46   52.39 
   0   6   1  443.56   40.10 
   0   6   1  361.46   30.60 
   0   6  -1  409.16   28.20 
   0   6   1  383.16   26.90 
   0   6   1  326.37   36.20 
   0   6  -1  319.57   37.50 
   0   6   1  312.37   30.80 
   0   6   1  339.17   36.20 
   0   6  -1  354.76   41.50 
   0   6  -1  431.66   38.50 
   0   6   1  296.27   37.00 
   1  -6   1  123.49   27.60 
   1  -6   1  161.48   25.40 
  -1  -6  -1  146.19   15.90 
   1  -6   1   79.69   19.80 
  -1  -6  -1  146.29   26.50 
  -1  -6  -1  106.39   23.00 
  -1  -6  -1  109.99   23.50 
  -1  -6  -1  135.49   22.10 
  -1  -6  -1  131.89   22.70 
  -1  -6  -1  150.38   22.80 
   1  -6   1  114.89   18.50 
  -1  -6  -1  133.99   29.40 
   1  -6   1  102.69   19.50 
   1  -6   1  114.29   28.20 
   1  -6   1  142.19   22.00 
  -1  -6  -1  155.18   21.10 
  -1  -6  -1  117.79   15.90 
  -1  -6  -1  129.89   17.40 
   1  -6   1  157.28   23.80 
  -1  -6  -1  183.08   32.10 
  -1   6  -1  127.59   16.20 
  -1   6  -1  157.88   30.80 
  -1   6  -1   91.79   18.20 
  -1   6  -1  118.89   22.10 
  -1   6  -1  120.09   25.00 
   1   6   1  104.19   16.00 
  -1   6  -1  139.19   21.40 
   1   6   1  104.99   20.20 
   1   6   1  137.79   23.00 
  -1   6  -1  150.28   20.30 
  -1   6  -1  144.79   24.10 
   1   6   1  132.09   16.10 
   1   6   1  165.88   25.00 
   1   6   1  146.89   27.40 
   1   6   1  111.79   16.80 
   1   6   1  141.89   27.00 
   1   6   1  109.59   22.70 
  -1   6  -1  142.39   25.40 
  -1   6  -1  143.79   21.30 
   1   6   1   88.79   19.40 
  -1   6  -1   76.99   20.40 
  -1   6  -1  162.98   26.90 
  -1   6  -1  149.39   28.10 
   1   6   1  109.49   21.90 
   1   6   1  144.29   26.80 
   1   6   1  123.59    8.20 
   1   6   1  124.99   29.90 
  -1   6  -1  147.79   34.70 
  -1   6  -1  154.08   21.00 
  -1   6  -1  136.39   23.40 
  -1   6  -1  166.48   27.00 
  -2  -6  -1  427.26   42.20 
   2  -6   1  391.06   40.40 
  -2  -6  -1  423.06   21.70 
  -2  -6  -1  419.96   43.10 
  -2  -6  -1  478.65   35.40 
  -2  -6  -1  442.26   27.20 
   2  -6   1  440.36   24.10 
  -2  -6  -1  491.15   40.10 
   2  -6   1  464.25   35.40 
   2  -6   1  414.76   42.40 
  -2  -6  -1  387.36   32.90 
  -2  -6  -1  425.66   29.70 
   2  -6   1  433.06   34.20 
  -2  -6  -1  507.05   29.20 
   2  -6   1  372.76   39.00 
  -2  -6  -1  413.86   23.40 
   2  -6   1  442.76   31.50 
  -2  -6  -1  431.16   43.40 
  -2  -6  -1  442.56   33.90 
  -2  -6  -1  458.45   34.50 
   2  -6   1  423.26   51.29 
  -2  -6  -1  444.86   27.80 
   2  -6   1  409.86   43.60 
  -2  -6  -1  406.56   47.10 
  -2   6  -1  492.85   38.50 
   2   6   1  536.85   54.39 
  -2   6  -1  536.85   42.00 
  -2   6  -1  462.75   30.50 
  -2   6  -1  432.86   45.50 
   2   6   1  435.96   30.30 
   2   6   1  425.26   35.40 
  -2   6  -1  413.76   46.30 
  -2   6  -1  432.86   45.00 
   2   6   1  433.76   27.20 
  -2   6  -1  455.05   45.10 
   2   6   1  435.96   37.20 
   2   6   1  446.06   33.80 
  -2   6  -1  476.95   29.40 
   2   6   1  538.25   42.60 
   2   6   1  406.46   43.50 
   2   6   1  417.86   27.10 
  -2   6  -1  359.86   42.70 
  -2   6  -1  400.96   45.60 
  -2   6  -1  428.56   28.90 
  -2   6  -1  431.46   41.60 
   2   6   1  460.25   37.30 
  -2   6  -1  399.16   43.10 
  -2   6  -1  465.25   36.00 
   2   6   1  420.66   34.60 
  -2   6  -1  466.45   54.39 
  -2   6  -1  418.06   58.99 
  -2   6  -1  427.96   34.50 
   2   6   1  432.86   24.00 
   2   6   1  407.56   42.90 
  -3  -6  -1   -4.30    4.00 
  -3  -6  -1   -8.60    6.90 
  -3  -6  -1   -0.50    8.70 
  -3  -6  -1    4.00    4.30 
  -3  -6  -1   -2.20    7.90 
   3  -6   1   -2.00    7.10 
  -3  -6  -1    0.10   11.10 
   3  -6   1   -5.20   11.40 
  -3  -6  -1   -3.30    8.40 
  -3  -6  -1   -2.30    4.20 
  -3  -6  -1   -1.70    6.30 
   3  -6   1   -2.40    6.90 
  -3  -6  -1   -1.60    4.70 
   3  -6   1   -0.50    6.20 
   3  -6   1    7.30    9.10 
   3  -6   1  -10.20    8.00 
  -3  -6  -1   -5.30    5.80 
   3  -6   1  -10.80   10.60 
  -3   6  -1   -2.30   10.10 
   3   6   1   -0.70    6.70 
   3   6   1    3.50    6.90 
  -3   6  -1   10.00    9.90 
  -3   6  -1   -2.10    4.60 
  -3   6  -1    8.00    9.30 
   3   6   1    7.80    6.00 
  -3   6  -1   -4.60    5.20 
   3   6   1   12.80    9.50 
  -3   6  -1    9.80    9.50 
   3   6   1    3.20   10.10 
   3   6   1   -1.90    6.30 
  -3   6  -1    1.90    9.50 
   3   6   1    1.70    9.40 
  -3   6  -1  -15.10    4.40 
  -3   6  -1   -0.60    6.70 
  -3   6  -1    0.20    9.70 
  -3   6  -1  -10.70    7.00 
   3   6   1   -3.00    3.70 
  -3   6  -1    5.00   13.30 
  -3   6  -1   -5.00    5.80 
   3   6   1    8.60   10.30 
   3   6   1   -9.90    8.00 
  -3   6  -1    1.40   14.60 
  -3   6  -1    1.00    7.50 
   3   6   1   14.90   14.10 
  -4  -6  -1  187.18   25.10 
   4  -6   1  180.38   28.90 
   4  -6   1  221.18   31.80 
   4  -6   1  178.78   31.80 
  -4  -6  -1  185.38   24.20 
  -4  -6  -1  167.88   24.50 
  -4  -6  -1  172.78   21.50 
   4  -6   1  185.28   35.30 
  -4  -6  -1  177.78   30.80 
   4  -6   1  229.28   32.50 
  -4  -6  -1  172.58   26.30 
   4  -6   1  207.18   31.50 
   4  -6   1  178.48   34.60 
   4  -6   1  144.59   24.30 
  -4  -6  -1  145.59   22.00 
   4  -6   1  122.29   24.50 
   4  -6   1  147.69   26.70 
  -4  -6  -1  148.19   28.60 
  -4  -6  -1  184.58   35.50 
  -4   6  -1  114.19   34.40 
   4   6   1  141.99   29.00 
  -4   6  -1  181.18   30.50 
   4   6   1  182.38   23.10 
  -4   6  -1  134.49   27.80 
  -4   6  -1  139.09   27.90 
  -4   6  -1  184.38   30.20 
  -4   6  -1  154.18   28.40 
  -4   6  -1  183.38   34.80 
   4   6   1  171.18   22.40 
  -4   6  -1  158.98   27.60 
   4   6   1  164.78   26.80 
   4   6   1  144.09   22.70 
  -4   6  -1  176.38   35.10 
  -4   6  -1  150.78   26.70 
  -4   6  -1  186.88   33.60 
   4   6   1  138.29   25.90 
   4   6   1  137.19   25.10 
   4   6   1  159.18   31.30 
  -4   6  -1  143.09   27.80 
  -4   6  -1  181.98   30.50 
   4   6   1  171.58   19.00 
  -4   6  -1  155.98   26.10 
  -4   6  -1  173.78   22.00 
  -4   6  -1  130.29   25.70 
  -4   6  -1  142.79   18.80 
  -5  -6  -1  107.49   28.00 
  -5  -6  -1  110.79   20.10 
   5  -6   1  139.49   28.50 
   5  -6   1  130.19   25.40 
  -5  -6  -1  128.49   20.40 
   5  -6   1  120.79   30.20 
  -5  -6  -1  130.69   26.10 
   5  -6   1  110.19   24.30 
  -5  -6  -1  132.19   22.60 
   5  -6   1  150.68   26.80 
  -5  -6  -1  160.38   20.70 
   5  -6   1  175.28   29.80 
  -5  -6  -1  137.19   29.50 
  -5  -6  -1  133.29   20.90 
   5  -6   1  114.99   26.70 
  -5  -6  -1  131.69   24.30 
   5  -6   1  113.89   24.20 
   5  -6   1  125.49   27.40 
   5  -6   1  110.99   27.70 
  -5   6  -1  120.99   22.50 
  -5   6  -1   86.69   22.50 
   5   6   1   69.79   22.20 
  -5   6  -1  146.39   34.20 
  -5   6  -1  102.09   25.00 
  -5   6  -1  117.59   27.00 
  -5   6  -1  117.99   28.60 
  -5   6  -1  114.39   24.60 
  -5   6  -1  103.89   18.90 
  -5   6  -1  149.19   27.90 
  -5   6  -1  116.69   27.60 
  -5   6  -1  147.79   29.30 
  -5   6  -1  188.08   32.50 
   5   6   1   95.09   25.20 
   5   6   1  126.29   20.40 
  -5   6  -1  119.29   23.30 
  -5   6  -1  148.69   41.00 
   5   6   1  112.39   24.40 
  -5   6  -1  121.09   28.10 
   5   6   1  123.29   21.30 
  -5   6  -1  134.69   21.40 
   5   6   1   80.89   22.50 
   5   6   1   87.79   19.20 
  -5   6  -1  179.18   30.90 
   5   6   1  141.99   19.50 
  -6  -6  -1  502.75   54.69 
   6  -6   1  497.75   58.39 
  -6  -6  -1  537.45   41.20 
   6  -6   1  505.45   54.49 
   6  -6   1  471.05   50.89 
   6  -6   1  469.35   51.59 
  -6  -6  -1  448.56   49.20 
   6  -6   1  535.25   56.29 
   6  -6   1  481.05   55.39 
  -6  -6  -1  542.15   40.30 
   6  -6   1  537.95   57.19 
   6  -6   1  537.65   54.29 
   6  -6   1  541.85   54.09 
  -6  -6  -1  506.65   57.69 
   6  -6   1  588.04   66.19 
  -6   6  -1  450.05   57.19 
  -6   6  -1  523.35   59.69 
  -6   6  -1  515.05   53.39 
  -6   6  -1  558.04   64.49 
  -6   6  -1  547.45   39.40 
   6   6   1  556.54   61.99 
  -6   6  -1  509.35   39.10 
  -6   6  -1  473.25   49.00 
  -6   6  -1  511.05   56.39 
  -6   6  -1  444.46   52.59 
  -6   6  -1  537.45   64.39 
   6   6   1  482.05   51.79 
   6   6   1  520.05   60.89 
  -6   6  -1  541.55   56.29 
  -6   6  -1  612.64   61.09 
  -6   6  -1  504.15   55.49 
  -6   6  -1  543.85   82.59 
  -6   6  -1  586.74   61.39 
   6   6   1  532.65   57.99 
   7  -6   1   23.00   16.00 
   7  -6   1   30.00   16.00 
  -7  -6  -1    7.20    9.60 
   7  -6   1   25.30   18.30 
   7  -6   1    8.90   12.50 
   7  -6   1   -7.90   10.20 
  -7  -6  -1   12.00   11.50 
   7  -6   1    3.20   12.60 
   7  -6   1   15.30   12.00 
  -7  -6  -1    3.10   10.90 
   7  -6   1   -3.20   11.60 
   7  -6   1   -3.40   15.10 
  -7  -6  -1    8.40   10.00 
   7  -6   1    4.90   11.90 
   7  -6   1   12.00   14.20 
  -7  -6  -1   -3.30   11.50 
  -7   6  -1   13.60   15.80 
  -7   6  -1   -6.40   10.00 
  -7   6  -1   15.70   12.00 
   7   6   1    3.60   13.60 
  -7   6  -1   19.50   12.00 
  -7   6  -1   24.10   15.00 
  -7   6  -1    0.10   15.00 
   7   6   1   34.40   18.20 
   7   6   1   -5.80   12.00 
  -7   6  -1   15.30   12.50 
  -7   6  -1    9.60   18.80 
   7   6   1   -3.00   12.40 
  -7   6  -1   11.60   15.40 
  -7   6  -1  -13.20    7.80 
  -7   6  -1   -5.20   13.40 
  -7   6  -1    8.80   11.40 
  -7   6  -1    9.60   14.10 
  -7   6  -1   20.90   14.10 
   7   6   1    7.30   14.80 
  -7   6  -1   -2.00   10.20 
   8  -6   1  448.86   61.79 
   8  -6   1  558.24   64.29 
   8  -6   1  670.63   66.49 
   8  -6   1  696.73   70.69 
  -8  -6  -1  597.34   71.99 
  -8  -6  -1  693.53   54.29 
   8  -6   1  681.83   68.69 
   8  -6   1  652.83   76.19 
   8  -6   1  740.03   69.59 
   8  -6   1  707.13   67.79 
   8  -6   1  637.54   68.59 
   8  -6   1  688.73   73.29 
  -8  -6  -1  590.44   65.39 
  -8  -6  -1  561.24   61.29 
  -8   6  -1  708.73   72.89 
  -8   6  -1  689.03   72.59 
  -8   6  -1  600.04   72.79 
  -8   6  -1  524.75   67.49 
  -8   6  -1  620.04   96.49 
  -8   6  -1  538.45   72.59 
  -8   6  -1  640.74   63.19 
   8   6   1  597.14   70.89 
   8   6   1  671.03   67.29 
  -8   6  -1  623.74   72.49 
   8   6   1  681.13   77.39 
  -8   6  -1  677.63   72.19 
   8   6   1  654.43   73.29 
  -8   6  -1  642.64   96.69 
  -8   6  -1  714.93   54.69 
  -8   6  -1  703.53   71.59 
  -8   6  -1  587.24   65.59 
   8   6   1  794.52   79.49 
   7  -7  -1 1154.18   77.09 
   7  -7  -1 1080.79   79.29 
   7  -7  -1 1086.79   74.89 
  -7  -7   1 1100.69   69.19 
  -7  -7   1  987.80   76.49 
   7  -7  -1  942.91   72.19 
  -7  -7   1 1093.79   73.39 
   7  -7  -1  944.01   94.29 
   7  -7  -1 1090.59   76.89 
   7  -7  -1 1056.59   76.69 
   7  -7  -1 1021.30   71.89 
   7  -7  -1  901.41   88.79 
   7  -7  -1 1107.69   76.49 
  -7  -7   1 1062.79   80.39 
   7   7  -1 1033.80   81.09 
  -7   7   1 1026.00   83.99 
  -7   7   1 1155.58   78.79 
  -7   7   1 1242.58  112.69 
  -7   7   1 1009.90   74.79 
  -7   7   1  994.20   74.69 
  -7   7   1  968.30   69.79 
   7   7  -1  948.31   93.59 
   7   7  -1  957.40   75.29 
  -7   7   1 1097.89   84.89 
  -7   7   1 1062.59   79.99 
  -7   7   1 1090.79   73.39 
  -7   7   1  968.20   74.79 
  -7   7   1 1117.99   84.29 
  -7   7   1 1129.39   80.99 
  -7   7   1 1123.39   74.59 
   7   7  -1 1002.20   74.89 
  -7   7   1 1140.39   77.39 
   6  -7  -1   11.80   13.10 
  -6  -7   1    4.30   11.40 
   6  -7  -1   -3.20   15.10 
   6  -7  -1    7.40   13.40 
   6  -7  -1   -2.60   10.10 
   6  -7  -1   -2.10   11.70 
   6  -7  -1    7.30   14.10 
   6  -7  -1   22.20   15.10 
   6  -7  -1   -4.30    8.90 
   6  -7  -1  -25.10   12.00 
  -6  -7   1    5.80   13.10 
  -6  -7   1    9.30   10.70 
  -6  -7   1   15.10   15.00 
   6  -7  -1    9.30   12.10 
  -6   7   1   -1.00   12.70 
  -6   7   1   11.60   14.20 
  -6   7   1   16.70   13.70 
  -6   7   1    5.10   11.60 
  -6   7   1   -0.40   11.30 
  -6   7   1   -7.10   13.70 
  -6   7   1    1.50   14.20 
  -6   7   1   11.00   11.70 
  -6   7   1   15.40   22.70 
  -6   7   1    4.70   11.60 
  -6   7   1    6.40   11.10 
  -6   7   1   18.80   13.70 
   6   7  -1   -7.60   10.10 
  -6   7   1    1.10   11.40 
   6   7  -1   -5.50   14.70 
  -6   7   1   -6.70   13.50 
   6   7  -1   -3.40    9.50 
  -6   7   1   17.60   16.10 
   6   7  -1    0.60   11.10 
  -5  -7   1 1990.90  101.29 
   5  -7  -1 1957.30  106.49 
   5  -7  -1 1959.30  113.29 
   5  -7  -1 1875.11  105.89 
   5  -7  -1 1929.51  107.69 
   5  -7  -1 1838.72  104.09 
   5  -7  -1 2103.59  104.09 
   5  -7  -1 2023.50  107.79 
   5  -7  -1 1881.91  100.19 
  -5  -7   1 1993.50  112.69 
  -5  -7   1 2105.59  102.69 
  -5  -7   1 1835.62  110.29 
   5  -7  -1 2051.39  117.19 
  -5  -7   1 1978.20   97.69 
   5  -7  -1 1868.11  108.39 
  -5   7   1 1977.70  112.49 
   5   7  -1 1958.10  115.29 
  -5   7   1 1997.00  116.19 
  -5   7   1 2012.00  106.59 
  -5   7   1 1745.73  103.69 
  -5   7   1 1836.72  135.09 
  -5   7   1 2083.59  105.99 
  -5   7   1 1880.71  107.79 
   5   7  -1 1921.71  111.39 
  -5   7   1 2154.38  110.09 
  -5   7   1 2010.90  110.69 
  -5   7   1 1951.00  105.19 
  -5   7   1 1968.50  106.89 
   5   7  -1 1967.00  106.69 
  -5   7   1 2049.99  106.59 
  -5   7   1 2226.58  125.09 
   5   7  -1 1897.01  106.29 
  -5   7   1 2001.40  109.49 
   5   7  -1 1978.00  115.19 
  -4  -7   1    9.90   11.70 
   4  -7  -1   24.90   20.90 
   4  -7  -1    8.10   12.50 
   4  -7  -1    9.50   11.60 
  -4  -7   1   16.70   10.00 
   4  -7  -1   52.59   18.00 
  -4  -7   1   14.40   10.80 
  -4  -7   1   18.50   11.20 
   4  -7  -1   13.90   14.10 
   4  -7  -1   22.20   11.20 
   4  -7  -1   25.40   15.10 
  -4  -7   1   19.30   16.10 
  -4  -7   1   22.70   13.90 
   4  -7  -1  -11.20    8.40 
  -4  -7   1    2.30   12.70 
   4  -7  -1   27.10   12.30 
  -4  -7   1   15.10   13.50 
  -4   7   1    3.60   11.10 
  -4   7   1   25.10   19.60 
   4   7  -1   25.30   13.40 
   4   7  -1    7.90    8.20 
   4   7  -1   27.80   15.00 
  -4   7   1   27.60   19.10 
   4   7  -1   20.00   16.60 
  -4   7   1   10.60   11.30 
  -4   7   1    4.20   12.70 
   4   7  -1   39.10   18.10 
  -4   7   1   18.70   13.30 
   4   7  -1   22.10   14.10 
   4   7  -1   33.30   14.30 
  -4   7   1   34.20   16.00 
  -4   7   1   20.90   15.00 
  -4   7   1   14.10   13.10 
  -4   7   1    8.20   11.20 
   4   7  -1   24.90   14.70 
  -4   7   1   25.80   13.40 
  -4   7   1   15.90   14.30 
   4   7  -1   15.00   10.20 
  -4   7   1   53.89   22.10 
  -3  -7   1 1586.04   79.99 
  -3  -7   1 1524.65   94.89 
   3  -7  -1 1513.75   87.89 
  -3  -7   1 1506.65   77.49 
  -3  -7   1 1550.74   78.59 
   3  -7  -1 1454.85   85.19 
  -3  -7   1 1567.64   92.69 
  -3  -7   1 1455.05   73.19 
  -3  -7   1 1533.95   80.09 
   3  -7  -1 1383.56   85.09 
   3  -7  -1 1574.84   80.69 
  -3  -7   1 1547.75   70.79 
   3  -7  -1 1398.96   83.89 
   3  -7  -1 1484.95   75.39 
   3  -7  -1 1467.95   93.39 
  -3  -7   1 1565.64   86.09 
   3  -7  -1 1606.94   85.29 
  -3  -7   1 1593.84   73.39 
  -3  -7   1 1572.94   86.59 
  -3  -7   1 1369.16   87.79 
   3   7  -1 1433.26   81.69 
   3   7  -1 1592.84   73.79 
  -3   7   1 1660.93   88.29 
   3   7  -1 1459.25   86.69 
  -3   7   1 1517.35   86.19 
  -3   7   1 1531.75   84.29 
   3   7  -1 1581.44   86.49 
  -3   7   1 1418.26   84.19 
  -3   7   1 1572.94   89.99 
  -3   7   1 1499.75   82.29 
   3   7  -1 1563.04   86.49 
  -3   7   1 1543.65   86.39 
   3   7  -1 1518.45   82.59 
  -3   7   1 1619.94   89.09 
  -3   7   1 1551.84   97.09 
   3   7  -1 1490.75   77.79 
  -3   7   1 1507.65  109.89 
  -3   7   1 1415.16   86.19 
   3   7  -1 1613.24   85.69 
   3   7  -1 1455.25   92.69 
  -3   7   1 1570.84   82.69 
   3   7  -1 1574.34   94.89 
  -2  -7   1    7.10   12.20 
  -2  -7   1   11.30    7.90 
   2  -7  -1   10.20    9.90 
  -2  -7   1    7.00    9.80 
   2  -7  -1    4.30    8.70 
  -2  -7   1   -2.80   10.60 
   2  -7  -1   -4.10   14.00 
   2  -7  -1    3.60    9.50 
  -2  -7   1   23.60   16.10 
  -2  -7   1   10.50    7.80 
   2  -7  -1    7.90    7.80 
   2  -7  -1   23.60   12.70 
   2  -7  -1   -2.00    9.30 
  -2  -7   1    1.20   10.60 
   2  -7  -1   17.70   11.20 
  -2  -7   1   13.70   10.70 
   2  -7  -1    7.80   10.60 
  -2  -7   1   11.90    9.00 
  -2  -7   1    2.00   11.00 
  -2  -7   1    0.10    7.00 
  -2  -7   1   24.30   11.70 
  -2   7   1    7.90    8.50 
   2   7  -1   30.20   16.30 
  -2   7   1   15.10   14.30 
  -2   7   1    2.70   10.60 
  -2   7   1   -3.00    9.70 
   2   7  -1   -2.00    6.80 
  -2   7   1   16.80    6.50 
   2   7  -1   15.60   12.90 
   2   7  -1    2.80    8.30 
   2   7  -1   16.60    9.10 
  -2   7   1    7.60   11.10 
  -2   7   1   -0.70    9.40 
   2   7  -1    1.10   10.40 
  -2   7   1   24.00   12.90 
   2   7  -1   -0.70    8.00 
  -2   7   1   -7.70   10.60 
  -2   7   1   19.00   12.50 
   2   7  -1   10.50   11.20 
   2   7  -1    4.80   10.30 
  -2   7   1    9.20   10.70 
   2   7  -1   -7.70   10.70 
  -2   7   1   10.20   10.30 
  -2   7   1   -0.90    7.70 
   2   7  -1    5.90   13.90 
  -2   7   1   20.10   13.80 
  -1  -7   1 1163.18   69.59 
  -1  -7   1 1290.87   79.59 
   1  -7  -1 1141.19   79.09 
   1  -7  -1 1326.27   74.09 
  -1  -7   1 1216.98   64.59 
   1  -7  -1 1289.37   56.69 
   1  -7  -1 1192.68   78.69 
  -1  -7   1 1282.17   72.39 
   1  -7  -1 1197.78   71.59 
  -1  -7   1 1151.08   75.69 
  -1  -7   1 1165.88   78.39 
   1  -7  -1 1225.38   65.39 
   1  -7  -1 1386.06   77.39 
  -1  -7   1 1231.78   67.99 
  -1  -7   1 1200.48   68.89 
  -1  -7   1 1222.68   82.39 
  -1  -7   1 1212.28   62.89 
   1  -7  -1 1400.36   69.79 
   1  -7  -1 1289.57   64.59 
   1  -7  -1 1146.39   71.89 
  -1  -7   1 1086.89   77.79 
   1   7  -1 1335.77   79.39 
   1   7  -1 1276.77   69.39 
   1   7  -1 1196.08   86.89 
  -1   7   1 1266.47   76.49 
   1   7  -1 1275.57   71.19 
   1   7  -1 1223.48   63.89 
  -1   7   1 1310.27   66.49 
  -1   7   1 1329.87   76.59 
   1   7  -1 1119.59   75.29 
  -1   7   1 1188.88   67.29 
   1   7  -1 1149.58   72.39 
   1   7  -1 1364.26   67.79 
  -1   7   1 1270.47   76.39 
  -1   7   1 1148.19   71.09 
   1   7  -1 1249.57   73.59 
   1   7  -1 1262.67   73.69 
  -1   7   1 1156.08   53.59 
  -1   7   1 1317.97   74.69 
   1   7  -1 1221.88   63.99 
   1   7  -1 1303.47   72.09 
  -1   7   1 1313.27   82.69 
   1   7  -1 1211.08   79.89 
  -1   7   1  906.31   83.79 
  -1   7   1 1217.48   72.09 
   1   7  -1 1273.07   78.79 
  -1   7   1 1353.26   74.89 
  -1   7   1 1228.28   68.19 
   1   7  -1 1205.08   70.29 
  -1   7   1 1297.77   66.39 
   0  -7  -1   -5.80    8.50 
   0  -7  -1   12.60   15.40 
   0  -7  -1   -1.10   11.20 
   0  -7   1    2.00    7.20 
   0  -7   1   -9.60    6.20 
   0  -7   1   -2.00   14.20 
   0  -7   1   13.90   11.20 
   0  -7  -1    9.90   11.00 
   0  -7  -1    3.90    3.40 
   0  -7  -1    5.80    6.60 
   0  -7   1    5.50   13.20 
   0  -7  -1    1.40    7.60 
   0  -7   1   10.00   15.20 
   0  -7  -1   -3.70   12.60 
   0  -7  -1    7.20    9.80 
   0  -7   1    1.00    5.70 
   0  -7   1    3.00    9.40 
   0  -7  -1    1.10    7.30 
   0  -7  -1   15.00   15.20 
   0  -7   1   15.40   11.20 
   0  -7  -1    5.40    8.30 
   0  -7   1  -11.60    8.70 
   0   7  -1   -4.90    6.70 
   0   7  -1   -6.30    6.30 
   0   7  -1    3.20    6.70 
   0   7   1    0.70   10.70 
   0   7  -1   -6.90    8.00 
   0   7  -1    9.90   13.30 
   0   7   1    3.50   10.10 
   0   7   1    9.30   10.10 
   0   7  -1   12.30   11.20 
   0   7  -1   -4.10   10.20 
   0   7   1    4.50    7.30 
   0   7   1    2.60   12.70 
   0   7   1    1.70    8.70 
   0   7  -1   -4.50    6.40 
   0   7   1   -3.80    9.10 
   0   7   1   -0.50    7.00 
   0   7   1   -8.50    7.80 
   0   7   1   -1.50    6.50 
   0   7   1  -11.50    9.20 
   0   7  -1    0.00   13.10 
   0   7  -1    1.10    7.90 
   0   7   1   -5.10   11.00 
   0   7  -1    5.40   12.40 
   0   7  -1   -0.70    9.20 
   0   7  -1   -0.90   12.70 
   0   7  -1   -2.00    5.60 
   0   7  -1    2.50    9.30 
   0   7   1   -1.70    8.60 
   0   7   1   -1.40    8.40 
   0   7  -1   -0.30    9.90 
   0   7  -1    3.20    8.80 
   0   7   1    6.60    7.70 
   1  -7   1 1958.50   91.79 
   1  -7   1 1781.52   94.69 
   1  -7   1 1767.02  100.29 
  -1  -7  -1 1802.42   97.49 
  -1  -7  -1 1751.62   89.19 
   1  -7   1 1730.63   85.09 
   1  -7   1 1805.02  106.49 
  -1  -7  -1 1753.72  106.39 
  -1  -7  -1 1872.91   98.19 
  -1  -7  -1 1799.32   84.09 
  -1  -7  -1 1764.22   97.09 
   1  -7   1 1789.12   78.89 
  -1  -7  -1 1756.22   81.89 
  -1  -7  -1 1842.92   91.69 
  -1  -7  -1 1639.94   99.39 
   1  -7   1 1763.92  101.99 
  -1  -7  -1 1839.62   79.29 
   1  -7   1 1763.92   96.29 
   1  -7   1 1724.83   87.69 
   1  -7   1 1607.34   91.29 
  -1  -7  -1 1826.02   92.69 
   1  -7   1 1687.23   91.29 
  -1   7  -1 1675.23   86.99 
   1   7   1 1755.92   91.59 
  -1   7  -1 1826.72   98.49 
   1   7   1 1696.73   95.89 
   1   7   1 1695.33   89.79 
  -1   7  -1 1863.71   88.29 
   1   7   1 1578.74   89.39 
  -1   7  -1 1950.60   97.79 
   1   7   1 1858.31  111.79 
  -1   7  -1 1694.73   92.09 
   1   7   1 1749.72   86.89 
   1   7   1 1845.62   97.39 
  -1   7  -1 1699.43   78.79 
  -1   7  -1 1677.43   82.99 
  -1   7  -1 1638.04   85.79 
  -1   7  -1 1700.13   97.09 
   1   7   1 1726.43   78.09 
   1   7   1 1889.41  101.19 
   1   7   1 1766.32   79.99 
  -1   7  -1 1791.42   95.29 
  -1   7  -1 1910.61  101.09 
  -1   7  -1 1790.12   84.79 
   1   7   1 1728.63   91.39 
   1   7   1 1796.02   91.49 
   1   7   1 1856.41   91.99 
   1   7   1 1780.62   82.09 
  -1   7  -1 1767.92   92.99 
  -1   7  -1 1782.42  102.49 
   1   7   1 1914.81  102.19 
  -1   7  -1 1654.73   94.09 
  -1   7  -1 1718.03   92.69 
  -1   7  -1 1744.63  114.69 
  -2  -7  -1   66.69   22.80 
   2  -7   1   33.90   15.20 
  -2  -7  -1    5.60   11.40 
  -2  -7  -1   28.70    9.00 
   2  -7   1    4.20   12.00 
  -2  -7  -1   36.80   11.40 
   2  -7   1   17.00   11.80 
  -2  -7  -1   19.80    8.50 
  -2  -7  -1   26.20    9.00 
   2  -7   1   25.70   10.80 
  -2  -7  -1   22.80   14.10 
  -2  -7  -1   24.70   13.00 
  -2  -7  -1   14.80   13.00 
  -2  -7  -1   44.20   16.90 
   2  -7   1   35.90   13.80 
  -2  -7  -1   24.20   11.90 
   2  -7   1   14.20   12.90 
   2  -7   1   29.90   12.90 
  -2  -7  -1   23.10   15.70 
   2  -7   1   24.80   19.50 
   2  -7   1   21.40   11.00 
  -2  -7  -1   18.10   10.20 
  -2   7  -1    6.30   10.30 
  -2   7  -1   -1.90   10.80 
   2   7   1    8.60   11.90 
  -2   7  -1   20.60   14.30 
  -2   7  -1   35.90    8.80 
   2   7   1   22.40    8.70 
   2   7   1   26.60    9.10 
   2   7   1    7.80    8.60 
  -2   7  -1   16.30   12.30 
  -2   7  -1   13.50   13.10 
  -2   7  -1   23.40   10.20 
   2   7   1   15.10   10.20 
   2   7   1    2.00   10.00 
   2   7   1   56.49   23.40 
   2   7   1    4.70    8.30 
  -2   7  -1    4.20   11.80 
  -2   7  -1   23.50   13.80 
  -2   7  -1   13.70    8.30 
   2   7   1   33.00   13.80 
  -2   7  -1   25.80    9.00 
   2   7   1   17.90   11.70 
  -2   7  -1   16.80   12.40 
  -2   7  -1   27.50   16.30 
   2   7   1   55.79   17.00 
  -2   7  -1   25.90   13.60 
   2   7   1   18.90   16.80 
   2   7   1   20.50   11.70 
  -2   7  -1    6.50   15.70 
  -2   7  -1   19.10   15.60 
  -2   7  -1   37.20   17.00 
  -2   7  -1    2.00    9.40 
  -3  -7  -1 1119.59   76.09 
  -3  -7  -1 1154.18   65.59 
  -3  -7  -1 1020.20   58.89 
   3  -7   1 1140.29   66.49 
   3  -7   1 1157.18   73.99 
   3  -7   1 1178.18   68.09 
   3  -7   1 1087.59   68.49 
  -3  -7  -1 1087.29   77.79 
   3  -7   1 1042.90   70.39 
   3  -7   1 1067.29   61.99 
  -3  -7  -1 1127.09   64.19 
  -3  -7  -1 1160.08   73.29 
  -3  -7  -1 1176.18   53.79 
   3  -7   1 1079.49   69.39 
  -3  -7  -1 1138.39   66.89 
   3  -7   1 1094.79   70.89 
   3  -7   1 1049.59   78.09 
   3   7   1 1121.79   68.29 
   3   7   1 1074.69   67.39 
  -3   7  -1 1100.29   68.29 
   3   7   1 1176.78   73.89 
   3   7   1 1161.98   72.69 
  -3   7  -1 1111.29   56.19 
   3   7   1 1237.48   79.19 
  -3   7  -1 1125.59   68.09 
  -3   7  -1 1094.99   68.89 
   3   7   1 1085.59   65.79 
  -3   7  -1 1047.90   69.69 
   3   7   1 1072.39   63.59 
  -3   7  -1 1249.07   98.09 
   3   7   1 1035.80   65.49 
   3   7   1 1106.39   79.19 
  -3   7  -1 1163.48   70.89 
   3   7   1 1077.69   58.19 
  -3   7  -1 1131.09   81.09 
  -3   7  -1  978.30   71.19 
  -3   7  -1 1095.99   72.69 
  -3   7  -1 1164.38   68.79 
  -3   7  -1 1065.29   69.29 
   3   7   1 1250.97   65.39 
  -3   7  -1 1229.48   76.49 
  -3   7  -1 1124.59   73.79 
  -3   7  -1 1111.39   71.99 
   3   7   1 1098.89   71.99 
   4  -7   1   20.40   14.60 
  -4  -7  -1   24.70   13.20 
   4  -7   1   22.20   13.20 
   4  -7   1   11.90   19.70 
  -4  -7  -1    1.50   10.20 
   4  -7   1   27.30   14.50 
  -4  -7  -1   21.30   16.70 
   4  -7   1    8.70   11.40 
  -4  -7  -1   29.70   12.20 
   4  -7   1    7.10   10.30 
   4  -7   1   10.70   11.40 
  -4  -7  -1    8.40   12.90 
  -4  -7  -1    7.50   13.10 
  -4  -7  -1    4.30    9.80 
  -4  -7  -1   41.30   13.50 
   4  -7   1   27.10   14.60 
  -4   7  -1   22.00   12.90 
  -4   7  -1   30.40   17.00 
  -4   7  -1    3.80   11.50 
   4   7   1   32.60   17.80 
   4   7   1   23.30   12.40 
  -4   7  -1   23.00   15.50 
   4   7   1   24.60   13.10 
   4   7   1   11.70   12.70 
  -4   7  -1    7.00    7.60 
  -4   7  -1   35.90   17.60 
  -4   7  -1   57.29   19.70 
  -4   7  -1    8.40   10.80 
   4   7   1   19.20   15.70 
  -4   7  -1   19.10   15.10 
  -4   7  -1   40.90   16.50 
  -4   7  -1   44.50   22.90 
   4   7   1   23.40   16.40 
  -4   7  -1   31.30   16.90 
  -4   7  -1   46.20   16.30 
   4   7   1    5.50   11.20 
  -4   7  -1   38.60   20.30 
   4   7   1   15.70   11.40 
   4   7   1   18.00   13.10 
  -4   7  -1   16.00   12.30 
  -4   7  -1    5.30   18.40 
   5  -7   1  608.04   61.19 
   5  -7   1  486.15   52.09 
   5  -7   1  469.85   56.49 
   5  -7   1  544.55   56.19 
   5  -7   1  442.36   58.89 
   5  -7   1  525.15   64.39 
   5  -7   1  569.74   47.40 
   5  -7   1  554.64   57.29 
  -5  -7  -1  553.64   61.59 
   5  -7   1  590.14   61.09 
  -5  -7  -1  571.14   42.90 
   5  -7   1  575.74   60.49 
  -5  -7  -1  495.85   56.39 
  -5  -7  -1  566.64   44.00 
  -5   7  -1  456.65   58.59 
  -5   7  -1  676.03   73.79 
  -5   7  -1  555.14   57.49 
  -5   7  -1  553.24   61.59 
  -5   7  -1  463.85   75.89 
  -5   7  -1  587.94   57.99 
  -5   7  -1  592.24   65.09 
  -5   7  -1  510.35   58.49 
   5   7   1  617.94   68.99 
  -5   7  -1  540.95   57.29 
  -5   7  -1  552.84   59.99 
  -5   7  -1  606.84   61.19 
  -5   7  -1  655.93   63.19 
  -5   7  -1  519.95   60.49 
  -5   7  -1  599.14   46.90 
  -5   7  -1  624.54   49.40 
   5   7   1  660.73   69.09 
   5   7   1  554.24   56.89 
   5   7   1  451.55   53.49 
  -6  -7  -1  112.49   22.50 
  -6  -7  -1   84.99   24.70 
   6  -7   1   88.19   23.00 
   6  -7   1  102.69   29.30 
   6  -7   1   85.19   26.00 
  -6  -7  -1   69.39   22.70 
   6  -7   1   99.29   31.30 
   6  -7   1   52.49   21.20 
   6  -7   1  122.89   27.70 
  -6  -7  -1  107.19   24.60 
   6  -7   1  126.09   27.60 
   6  -7   1   70.39   24.00 
   6  -7   1   94.29   31.00 
   6  -7   1  132.59   30.10 
   6   7   1   96.79   26.20 
  -6   7  -1   97.79   24.30 
   6   7   1  102.49   30.50 
  -6   7  -1   93.39   25.50 
  -6   7  -1  119.59   29.30 
   6   7   1  130.59   29.80 
  -6   7  -1   88.79   26.60 
  -6   7  -1  103.59   27.60 
  -6   7  -1  135.69   34.60 
   6   7   1  103.59   31.20 
  -6   7  -1  108.29   30.50 
  -6   7  -1  104.49   29.00 
  -6   7  -1   79.69   28.20 
  -6   7  -1   50.59   21.20 
  -6   7  -1  163.38   50.39 
  -6   7  -1  118.39   29.60 
  -6   7  -1   58.49   19.90 
  -7  -7  -1  496.45   58.19 
   7  -7   1  529.75   60.49 
  -7  -7  -1  504.55   63.79 
  -7  -7  -1  537.95   58.49 
   7  -7   1  480.05   56.59 
   7  -7   1  495.55   65.89 
   7  -7   1  518.15   63.39 
   7  -7   1  447.56   55.69 
   7  -7   1  440.16   54.79 
   7  -7   1  395.76   55.69 
   7  -7   1  579.44   62.29 
   7  -7   1  474.85   66.09 
   7  -7   1  511.05   59.59 
  -7   7  -1  356.76   52.79 
  -7   7  -1  518.85   59.49 
  -7   7  -1  381.96   53.49 
  -7   7  -1  437.76   51.59 
   7   7   1  382.96   56.49 
   7   7   1  564.14   59.89 
  -7   7  -1  503.45   61.19 
  -7   7  -1  473.95   65.39 
  -7   7  -1  596.24   66.79 
  -7   7  -1  436.06   57.89 
   7   7   1  459.85   62.89 
  -7   7  -1  429.86   60.09 
  -7   7  -1  444.56   62.09 
  -7   7  -1  460.25   63.09 
   7   7   1  438.76   56.69 
  -7   7  -1  393.56   52.09 
  -7   7  -1  483.05   86.39 
   6  -8  -1   61.09   25.30 
   6  -8  -1   18.30   14.20 
   6  -8  -1   19.30   14.10 
   6  -8  -1   31.40   16.90 
  -6  -8   1   24.40   16.50 
  -6  -8   1   47.70   24.30 
   6  -8  -1   51.99   22.20 
   6  -8  -1   41.60   25.10 
   6  -8  -1   36.60   19.80 
  -6  -8   1   48.70   21.80 
   6  -8  -1   43.20   18.00 
   6  -8  -1   15.70   15.00 
  -6  -8   1   26.00   15.70 
  -6   8   1   31.80   21.20 
   6   8  -1   12.20   13.70 
  -6   8   1   51.69   24.90 
  -6   8   1   34.70   18.90 
  -6   8   1    6.60   14.20 
   6   8  -1   32.10   19.10 
  -6   8   1   50.29   19.70 
   6   8  -1   76.39   28.40 
  -6   8   1   11.00   16.60 
  -6   8   1    8.00   13.80 
  -6   8   1   15.40   17.10 
  -6   8   1   24.80   18.30 
  -6   8   1   51.49   31.50 
  -6   8   1   -6.00   13.60 
  -6   8   1    9.60   16.70 
  -6   8   1   31.40   22.20 
   6   8  -1   57.09   26.70 
  -6   8   1   34.80   19.70 
   5  -8  -1   13.30   15.10 
  -5  -8   1   -2.40   11.00 
  -5  -8   1    2.60   12.50 
   5  -8  -1   12.30   11.80 
  -5  -8   1   -4.40    8.60 
   5  -8  -1   20.10   21.50 
   5  -8  -1    9.40   14.10 
   5  -8  -1    7.50   11.20 
   5  -8  -1   28.50   15.90 
  -5  -8   1   13.50   14.40 
   5  -8  -1   16.40   16.40 
  -5   8   1    3.60   13.10 
  -5   8   1    3.90   12.70 
   5   8  -1    4.90   14.20 
  -5   8   1    9.40   14.10 
  -5   8   1    1.50   14.40 
  -5   8   1   11.90   17.00 
   5   8  -1  -16.30    7.00 
  -5   8   1   31.10   18.40 
  -5   8   1   12.40   15.50 
  -5   8   1    6.30   12.50 
   5   8  -1   -3.40   16.60 
  -5   8   1   -2.80    9.00 
  -5   8   1   -1.60   13.30 
  -5   8   1   22.50   25.60 
  -5   8   1   -1.60   12.20 
  -5   8   1    5.70   17.00 
  -5   8   1   12.80   14.10 
   5   8  -1   42.10   19.20 
  -5   8   1   13.60   14.00 
  -4  -8   1   73.39   23.00 
   4  -8  -1  117.09   27.80 
   4  -8  -1   48.90   21.20 
   4  -8  -1   88.89   19.90 
  -4  -8   1   40.00   20.20 
  -4  -8   1   56.39   23.10 
   4  -8  -1   39.70   21.90 
   4  -8  -1   66.59   21.10 
   4  -8  -1   49.50   18.00 
  -4  -8   1   68.49   18.90 
   4  -8  -1   39.20   18.80 
  -4  -8   1   45.50   16.30 
  -4  -8   1   43.50   18.00 
   4  -8  -1   87.19   26.50 
  -4   8   1   63.19   19.10 
  -4   8   1   70.59   28.60 
  -4   8   1   93.89   24.10 
   4   8  -1   70.09   21.90 
  -4   8   1   35.80   18.30 
  -4   8   1   69.19   21.90 
   4   8  -1  105.69   28.70 
  -4   8   1   47.00   19.00 
  -4   8   1   60.09   21.10 
  -4   8   1   57.59   20.50 
  -4   8   1   67.69   22.40 
   4   8  -1   90.69   21.10 
  -4   8   1   59.69   23.90 
   4   8  -1   41.50   23.70 
  -4   8   1   55.49   21.50 
  -4   8   1   48.80   28.90 
  -4   8   1   62.49   24.10 
   4   8  -1   83.29   22.60 
   4   8  -1   52.69   20.30 
   4   8  -1   98.39   26.40 
  -4   8   1   79.89   29.60 
  -3  -8   1    3.90    9.00 
   3  -8  -1   15.70   14.40 
  -3  -8   1   38.50   19.30 
  -3  -8   1   23.60   16.20 
   3  -8  -1    1.30    8.90 
   3  -8  -1    5.80   18.00 
  -3  -8   1    1.70   10.40 
  -3  -8   1    3.80   11.30 
  -3  -8   1   10.10   14.20 
   3  -8  -1   10.60   11.50 
  -3  -8   1   12.40   15.20 
   3  -8  -1   -0.30    9.20 
   3  -8  -1   -1.20   12.10 
   3  -8  -1   -0.80    9.90 
  -3  -8   1    7.50   10.50 
   3  -8  -1   21.60   11.20 
   3  -8  -1    7.00   11.70 
   3   8  -1    4.20   10.60 
   3   8  -1    7.40   12.30 
  -3   8   1    6.00   12.40 
   3   8  -1    1.20   12.70 
  -3   8   1    5.50   10.90 
  -3   8   1   -3.50    8.90 
  -3   8   1   -6.60    9.20 
  -3   8   1   -3.70    9.90 
   3   8  -1   -1.00   15.10 
  -3   8   1   10.40   14.80 
   3   8  -1   -0.40   11.60 
   3   8  -1   19.20   11.60 
  -3   8   1    4.30   11.20 
  -3   8   1    9.60   13.30 
  -3   8   1   27.90   15.50 
   3   8  -1   15.10   11.00 
  -3   8   1   11.70   17.40 
  -3   8   1    5.90   11.70 
   3   8  -1    6.60   12.90 
  -3   8   1    0.30    9.90 
  -3   8   1   -2.70    9.90 
   3   8  -1    8.30   12.40 
   2  -8  -1    5.30   11.70 
  -2  -8   1    4.50    9.50 
  -2  -8   1    0.90    9.60 
   2  -8  -1    0.10    9.80 
  -2  -8   1    2.00   14.00 
   2  -8  -1   14.10   20.50 
  -2  -8   1   13.20   13.30 
  -2  -8   1    2.20    8.00 
  -2  -8   1   -8.20    8.20 
  -2  -8   1   -3.50   13.30 
   2  -8  -1   22.20   12.80 
  -2  -8   1   22.70   10.60 
   2  -8  -1   25.50   12.10 
  -2  -8   1    8.80   13.00 
  -2  -8   1    1.30    8.50 
   2  -8  -1   -6.60    9.60 
   2  -8  -1    2.70   17.10 
   2  -8  -1   16.60    9.80 
  -2  -8   1   10.70   15.40 
   2  -8  -1   -3.00   10.50 
  -2   8   1   -8.00    9.40 
   2   8  -1    9.40   11.80 
  -2   8   1  -12.40    7.20 
  -2   8   1    5.90   14.60 
   2   8  -1    8.90   11.20 
   2   8  -1   -1.10    7.70 
  -2   8   1   -0.20    7.70 
  -2   8   1   -5.80    6.50 
   2   8  -1   18.50   17.40 
   2   8  -1   15.20   18.10 
  -2   8   1    5.30   11.00 
   2   8  -1    3.60   13.90 
  -2   8   1   -6.50   10.00 
   2   8  -1   -3.00    7.50 
  -2   8   1    2.20   13.00 
   2   8  -1   -4.30    9.20 
   2   8  -1    2.10    9.50 
  -2   8   1   12.20   10.20 
  -2   8   1  -10.80    8.70 
   2   8  -1    2.80    8.50 
   2   8  -1   -3.00   11.60 
   2   8  -1   -6.50   13.10 
   2   8  -1   14.30   13.40 
  -2   8   1   21.00   21.30 
   2   8  -1    0.50   10.80 
  -2   8   1    9.00   12.00 
  -2   8   1    7.80   10.10 
  -2   8   1   -5.90   11.00 
   1  -8  -1   36.90   14.30 
  -1  -8   1   16.30   10.90 
   1  -8  -1    3.00   13.70 
  -1  -8   1   12.60   15.60 
   1  -8  -1    3.30   10.00 
   1  -8  -1   -2.90   11.20 
  -1  -8   1    6.20   11.60 
  -1  -8   1    7.20   14.30 
  -1  -8   1   24.00   12.30 
   1  -8  -1   10.20   11.10 
  -1  -8   1    2.60   15.10 
  -1  -8   1   -1.00    7.40 
  -1  -8   1    4.80   15.80 
   1  -8  -1    4.70   11.70 
   1  -8  -1   18.00   12.80 
  -1  -8   1   17.60   13.10 
   1  -8  -1    3.70   10.10 
   1  -8  -1   -5.10   14.70 
   1  -8  -1    6.70   14.00 
  -1  -8   1   10.50   11.00 
  -1  -8   1    3.70    9.30 
  -1   8   1    7.80    9.20 
   1   8  -1    0.70   12.40 
  -1   8   1    0.80   11.70 
  -1   8   1   21.30   19.60 
   1   8  -1   -6.90    8.70 
  -1   8   1   -2.90    8.30 
  -1   8   1   -1.00   10.00 
   1   8  -1    4.20   12.40 
   1   8  -1    6.70    9.80 
  -1   8   1   -0.30   13.00 
   1   8  -1    9.30   18.40 
   1   8  -1    9.40   12.70 
  -1   8   1    0.90    8.20 
  -1   8   1   -8.50    8.20 
   1   8  -1    6.00    8.70 
   1   8  -1   16.90   11.50 
  -1   8   1   -3.90   13.30 
  -1   8   1    9.80   10.20 
  -1   8   1   -2.60   11.40 
   1   8  -1   -1.20   10.90 
   1   8  -1   -0.50   13.70 
  -1   8   1    7.90   10.80 
   1   8  -1   -3.50    9.10 
   1   8  -1    8.20   11.80 
   1   8  -1   -9.40    8.60 
   1   8  -1   -3.30    9.30 
   1   8  -1   15.60   10.80 
  -1   8   1    8.90    9.50 
  -1   8   1    2.00   13.50 
   0  -8   1  282.67   39.30 
   0  -8  -1  258.47   43.30 
   0  -8  -1  412.36   48.50 
   0  -8   1  274.47   43.80 
   0  -8  -1  309.87   44.20 
   0  -8  -1  342.27   33.30 
   0  -8  -1  283.37   38.20 
   0  -8   1  351.86   50.89 
   0  -8   1  308.97   36.30 
   0  -8  -1  281.27   33.80 
   0  -8  -1  389.16   51.79 
   0  -8   1  287.87   40.90 
   0  -8   1  309.47   37.90 
   0  -8   1  422.46   48.00 
   0  -8  -1  310.67   36.50 
   0  -8  -1  370.16   57.09 
   0  -8   1  309.27   34.60 
   0  -8   1  331.47   48.00 
   0  -8  -1  334.67   48.10 
   0  -8  -1  323.47   41.40 
   0  -8   1  296.47   44.70 
   0   8   1  273.27   37.20 
   0   8   1  313.67   38.60 
   0   8   1  333.47   34.60 
   0   8  -1  389.86   53.09 
   0   8  -1  233.88   41.10 
   0   8   1  436.96   57.99 
   0   8   1  293.27   40.50 
   0   8  -1  323.67   38.20 
   0   8  -1  295.07   39.20 
   0   8  -1  350.06   35.30 
   0   8  -1  262.97   39.50 
   0   8   1  289.17   39.90 
   0   8  -1  381.86   47.10 
   0   8  -1  247.18   41.20 
   0   8   1  264.77   41.00 
   0   8   1  336.67   42.80 
   0   8   1  355.96   37.30 
   0   8  -1  391.26   43.10 
   0   8  -1  283.87   40.10 
   0   8  -1  294.57   35.10 
   0   8  -1  317.27   41.90 
   0   8   1  249.18   50.99 
   0   8  -1  264.87   38.80 
   0   8   1  408.76   50.29 
   0   8   1  292.97   35.20 
   0   8   1  332.47   44.60 
   0   8  -1  290.47   44.70 
   0   8   1  302.17   40.30 
   0   8   1  336.37   45.40 
   0   8  -1  388.56   40.10 
   0   8  -1  332.77   56.39 
   0   8   1  356.66   43.90 
   0   8   1  297.87   32.30 
   0   8  -1  372.66   38.90 
   1  -8   1   37.80   14.60 
   1  -8   1   71.39   21.70 
   1  -8   1   33.60   16.30 
  -1  -8  -1   80.39   23.70 
  -1  -8  -1   58.19   16.00 
  -1  -8  -1   74.69   20.00 
   1  -8   1   59.19   20.10 
   1  -8   1   22.80   17.30 
  -1  -8  -1   83.49   21.80 
  -1  -8  -1   43.40   21.20 
  -1  -8  -1   58.89   26.00 
   1  -8   1   46.50   17.70 
  -1  -8  -1   95.69   26.90 
  -1  -8  -1   48.30   17.60 
   1  -8   1   39.50   14.70 
   1  -8   1   40.70   22.90 
  -1  -8  -1   59.79   20.90 
  -1  -8  -1   58.99   14.70 
   1  -8   1   35.40   19.50 
   1  -8   1   39.20   20.30 
  -1   8  -1   38.00   25.70 
  -1   8  -1   54.39   21.20 
  -1   8  -1   47.30   18.20 
   1   8   1   21.30   12.70 
   1   8   1   48.70   23.40 
  -1   8  -1   39.30   13.90 
   1   8   1   43.20   17.00 
   1   8   1   47.10   19.30 
  -1   8  -1   71.19   19.20 
   1   8   1   40.10   19.50
[truncated: 3,572,568 more chars]
