# Supplementary material
Source: MDPI journal article supplement (https://www.mdpi.com/2073-4352/13/7/1043)
Supplement: s1 [file s1 › 3 Nd Ha2019_63_0m_a.cif]

 
data_Ha2019_63_0m_a 
  
_audit_creation_method            'SHELXL-2014/7' 
_shelx_SHELXL_version_number      '2014/7' 
_chemical_name_systematic         ? 
_chemical_name_common             ? 
_chemical_melting_point           ? 
_chemical_formula_moiety          ? 
_chemical_formula_sum 
 'C4 H12 Br Nd O7' 
_chemical_formula_weight          396.29 
  
loop_ 
 _atom_type_symbol 
 _atom_type_description 
 _atom_type_scat_dispersion_real 
 _atom_type_scat_dispersion_imag 
 _atom_type_scat_source 
 'C'  'C'   0.0033   0.0016 
 'International Tables Vol C Tables 4.2.6.8 and 6.1.1.4' 
 'H'  'H'   0.0000   0.0000 
 'International Tables Vol C Tables 4.2.6.8 and 6.1.1.4' 
 'O'  'O'   0.0106   0.0060 
 'International Tables Vol C Tables 4.2.6.8 and 6.1.1.4' 
 'Br'  'Br'  -0.2901   2.4595 
 'International Tables Vol C Tables 4.2.6.8 and 6.1.1.4' 
 'Nd'  'Nd'  -0.1943   3.0179 
 'International Tables Vol C Tables 4.2.6.8 and 6.1.1.4' 
  
_space_group_crystal_system       monoclinic 
_space_group_IT_number            14 
_space_group_name_H-M_alt         'P 21/n' 
_space_group_name_Hall            '-P 2yn' 
  
_shelx_space_group_comment 
; 
The symmetry employed for this shelxl refinement is uniquely defined 
by the following loop, which should always be used as a source of 
symmetry information in preference to the above space-group names. 
They are only intended as comments. 
; 
  
loop_ 
 _space_group_symop_operation_xyz 
 'x, y, z' 
 '-x+1/2, y+1/2, -z+1/2' 
 '-x, -y, -z' 
 'x-1/2, -y-1/2, z-1/2' 
  
_cell_length_a                    7.9027(3) 
_cell_length_b                    8.0349(3) 
_cell_length_c                    17.9481(6) 
_cell_angle_alpha                 90 
_cell_angle_beta                  96.414(2) 
_cell_angle_gamma                 90 
_cell_volume                      1132.52(7) 
_cell_formula_units_Z             4 
_cell_measurement_temperature     100(2) 
_cell_measurement_reflns_used     9633 
_cell_measurement_theta_min       2.28 
_cell_measurement_theta_max       27.65 
  
_exptl_crystal_description        prism 
_exptl_crystal_colour             pink 
_exptl_crystal_density_meas       ? 
_exptl_crystal_density_method     ? 
_exptl_crystal_density_diffrn     2.324 
_exptl_crystal_F_000              748 
_exptl_transmission_factor_min    ? 
_exptl_transmission_factor_max    ? 
_exptl_crystal_size_max           0.314 
_exptl_crystal_size_mid           0.236 
_exptl_crystal_size_min           0.176 
_exptl_absorpt_coefficient_mu     8.117 
_shelx_estimated_absorpt_T_min    0.185 
_shelx_estimated_absorpt_T_max    0.329 
_exptl_absorpt_correction_type    multi-scan 
_exptl_absorpt_correction_T_min   0.414 
_exptl_absorpt_correction_T_max   0.746 
_exptl_absorpt_process_details    'Bruker SADABS' 
_exptl_absorpt_special_details    ? 
_diffrn_ambient_temperature       100(2) 
_diffrn_radiation_wavelength      0.71073 
_diffrn_radiation_type            MoK\a 
_diffrn_source                    ? 
_diffrn_measurement_device_type   'Bruker APEX-II CCD' 
_diffrn_measurement_method        '\f and \w scans' 
_diffrn_detector_area_resol_mean  ? 
_diffrn_reflns_number             132337 
_diffrn_reflns_av_unetI/netI      0.0120 
_diffrn_reflns_av_R_equivalents   0.0553 
_diffrn_reflns_limit_h_min        -10 
_diffrn_reflns_limit_h_max        10 
_diffrn_reflns_limit_k_min        -10 
_diffrn_reflns_limit_k_max        10 
_diffrn_reflns_limit_l_min        -23 
_diffrn_reflns_limit_l_max        23 
_diffrn_reflns_theta_min          2.715 
_diffrn_reflns_theta_max          27.995 
_diffrn_reflns_theta_full         25.242 
_diffrn_measured_fraction_theta_max   1.000 
_diffrn_measured_fraction_theta_full  1.000 
_diffrn_reflns_Laue_measured_fraction_max    1.000 
_diffrn_reflns_Laue_measured_fraction_full   1.000 
_diffrn_reflns_point_group_measured_fraction_max   1.000 
_diffrn_reflns_point_group_measured_fraction_full  1.000 
_reflns_number_total              2735 
_reflns_number_gt                 2535 
_reflns_threshold_expression      'I > 2\s(I)' 
_reflns_Friedel_coverage          0.000 
_reflns_Friedel_fraction_max      . 
_reflns_Friedel_fraction_full     . 
  
_reflns_special_details 
; 
 Reflections were merged by SHELXL according to the crystal 
 class for the calculation of statistics and refinement. 
  
 _reflns_Friedel_fraction is defined as the number of unique 
 Friedel pairs measured divided by the number that would be 
 possible theoretically, ignoring centric projections and 
 systematic absences. 
; 
  
_computing_data_collection        'Bruker APEX2' 
_computing_cell_refinement        'Bruker SAINT' 
_computing_data_reduction         'Bruker SAINT' 
_computing_structure_solution     'SHELXS-97 (Sheldrick 2008)' 
_computing_structure_refinement 'SHELXL-2014/7 (Sheldrick, 2014)' 
_computing_molecular_graphics     'Bruker SHELXTL' 
_computing_publication_material   'Bruker SHELXTL' 
_refine_special_details           ? 
_refine_ls_structure_factor_coef  Fsqd 
_refine_ls_matrix_type            full 
_refine_ls_weighting_scheme       calc 
_refine_ls_weighting_details 
'w=1/[\s^2^(Fo^2^)+(0.0123P)^2^+1.1370P] where P=(Fo^2^+2Fc^2^)/3' 
_atom_sites_solution_primary      direct
_atom_sites_solution_secondary    ? 
_atom_sites_solution_hydrogens    mixed 
_refine_ls_hydrogen_treatment     constr 
_refine_ls_extinction_method      none 
_refine_ls_extinction_coef        . 
_refine_ls_number_reflns          2735 
_refine_ls_number_parameters      125 
_refine_ls_number_restraints      0 
_refine_ls_R_factor_all           0.0154 
_refine_ls_R_factor_gt            0.0129 
_refine_ls_wR_factor_ref          0.0306 
_refine_ls_wR_factor_gt           0.0300 
_refine_ls_goodness_of_fit_ref    1.055 
_refine_ls_restrained_S_all       1.055 
_refine_ls_shift/su_max           0.002 
_refine_ls_shift/su_mean          0.000 
  
loop_ 
 _atom_site_label 
 _atom_site_type_symbol 
 _atom_site_fract_x 
 _atom_site_fract_y 
 _atom_site_fract_z 
 _atom_site_U_iso_or_equiv 
 _atom_site_adp_type 
 _atom_site_occupancy 
 _atom_site_site_symmetry_order 
 _atom_site_calc_flag 
 _atom_site_refinement_flags_posn 
 _atom_site_refinement_flags_adp 
 _atom_site_refinement_flags_occupancy 
 _atom_site_disorder_assembly 
 _atom_site_disorder_group 
Nd1 Nd 0.25979(2) 0.46032(2) 0.53589(2) 0.01038(3) Uani 1 1 d . . . . . 
Br1 Br 0.39527(3) 0.96127(3) 0.68759(2) 0.01762(5) Uani 1 1 d . . . . . 
O11 O -0.01590(16) 0.33726(17) 0.53284(8) 0.0154(3) Uani 1 1 d . . . . . 
O12 O -0.28178(16) 0.25868(18) 0.52195(8) 0.0170(3) Uani 1 1 d . . . . . 
C11 C -0.1287(2) 0.2308(2) 0.54542(11) 0.0136(4) Uani 1 1 d . . . . . 
C12 C -0.0803(3) 0.0756(3) 0.58858(13) 0.0230(5) Uani 1 1 d . . . . . 
H12A H -0.0728 0.0992 0.6424 0.077(7) Uiso 1 1 calc R U . . . 
H12B H 0.0304 0.0362 0.5760 0.077(7) Uiso 1 1 calc R U . . . 
H12C H -0.1667 -0.0102 0.5756 0.077(7) Uiso 1 1 calc R U . . . 
O21 O 0.54530(16) 0.55404(17) 0.57365(7) 0.0138(3) Uani 1 1 d . . . . . 
O22 O 0.81288(16) 0.62213(19) 0.59840(8) 0.0175(3) Uani 1 1 d . . . . . 
C21 C 0.6732(2) 0.5863(2) 0.62170(11) 0.0136(4) Uani 1 1 d . . . . . 
C22 C 0.6564(3) 0.5779(3) 0.70358(12) 0.0224(5) Uani 1 1 d . . . . . 
H22A H 0.7676 0.5528 0.7312 0.075(7) Uiso 1 1 calc R U . . . 
H22B H 0.5752 0.4902 0.7129 0.075(7) Uiso 1 1 calc R U . . . 
H22C H 0.6154 0.6851 0.7204 0.075(7) Uiso 1 1 calc R U . . . 
O1W O 0.38850(16) 0.17791(17) 0.53277(8) 0.0149(3) Uani 1 1 d . . . . . 
H11W H 0.3860 0.0973 0.5721 0.049(6) Uiso 1 1 d R U . . . 
H12W H 0.5053 0.1821 0.5229 0.049(6) Uiso 1 1 d R U . . . 
O2W O 0.15605(17) 0.65373(17) 0.62659(8) 0.0166(3) Uani 1 1 d . . . . . 
H21W H 0.0364 0.6674 0.6298 0.054(7) Uiso 1 1 d R U . . . 
H22W H 0.2069 0.7566 0.6447 0.054(7) Uiso 1 1 d R U . . . 
O3W O 0.28348(18) 0.34264(18) 0.66322(8) 0.0198(3) Uani 1 1 d . . . . . 
H31W H 0.2320 0.3895 0.7044 0.053(6) Uiso 1 1 d R U . . . 
H32W H 0.3158 0.2318 0.6790 0.053(6) Uiso 1 1 d R U . . . 
  
loop_ 
 _atom_site_aniso_label 
 _atom_site_aniso_U_11 
 _atom_site_aniso_U_22 
 _atom_site_aniso_U_33 
 _atom_site_aniso_U_23 
 _atom_site_aniso_U_13 
 _atom_site_aniso_U_12 
Nd1 0.00623(5) 0.01283(6) 0.01213(5) 0.00089(4) 0.00126(3) -0.00090(4) 
Br1 0.02005(10) 0.01512(10) 0.01735(10) 0.00208(8) 0.00063(7) -0.00260(8) 
O11 0.0097(6) 0.0178(7) 0.0189(7) 0.0027(6) 0.0024(5) -0.0033(5) 
O12 0.0094(6) 0.0184(7) 0.0233(7) 0.0057(6) 0.0018(5) -0.0013(5) 
C11 0.0116(8) 0.0158(9) 0.0139(9) -0.0002(8) 0.0031(7) -0.0003(7) 
C12 0.0206(10) 0.0196(11) 0.0285(12) 0.0091(9) 0.0006(9) -0.0007(8) 
O21 0.0084(6) 0.0188(7) 0.0137(6) -0.0001(5) -0.0004(5) -0.0006(5) 
O22 0.0094(6) 0.0250(8) 0.0182(7) -0.0022(6) 0.0012(5) -0.0029(6) 
C21 0.0121(9) 0.0116(9) 0.0165(9) -0.0008(7) -0.0009(7) 0.0024(7) 
C22 0.0170(10) 0.0355(13) 0.0145(10) 0.0005(9) 0.0006(8) 0.0045(9) 
O1W 0.0119(6) 0.0155(7) 0.0180(7) 0.0023(6) 0.0044(5) -0.0001(5) 
O2W 0.0124(6) 0.0169(7) 0.0203(7) -0.0045(6) 0.0007(5) -0.0006(5) 
O3W 0.0277(8) 0.0172(7) 0.0153(7) 0.0024(6) 0.0068(6) 0.0053(6) 
  
_geom_special_details 
; 
 All esds (except the esd in the dihedral angle between two l.s. planes) 
 are estimated using the full covariance matrix.  The cell esds are taken 
 into account individually in the estimation of esds in distances, angles 
 and torsion angles; correlations between esds in cell parameters are only 
 used when they are defined by crystal symmetry.  An approximate (isotropic) 
 treatment of cell esds is used for estimating esds involving l.s. planes. 
; 
  
loop_ 
 _geom_bond_atom_site_label_1 
 _geom_bond_atom_site_label_2 
 _geom_bond_distance 
 _geom_bond_site_symmetry_2 
 _geom_bond_publ_flag 
Nd1 O11 2.3876(13) . ? 
Nd1 O21 2.4033(13) . ? 
Nd1 O2W 2.4567(14) . ? 
Nd1 O3W 2.4610(14) . ? 
Nd1 O1W 2.4898(14) . ? 
Nd1 O12 2.4992(14) 3_566 ? 
Nd1 O22 2.5036(14) 3_666 ? 
Nd1 O21 2.6320(13) 3_666 ? 
Nd1 O11 2.7111(14) 3_566 ? 
O11 C11 1.274(2) . ? 
O12 C11 1.256(2) . ? 
C11 C12 1.495(3) . ? 
C12 H12A 0.9800 . ? 
C12 H12B 0.9800 . ? 
C12 H12C 0.9800 . ? 
O21 C21 1.280(2) . ? 
O22 C21 1.257(2) . ? 
C21 C22 1.492(3) . ? 
C22 H22A 0.9800 . ? 
C22 H22B 0.9800 . ? 
C22 H22C 0.9800 . ? 
O1W H11W 0.9600 . ? 
O1W H12W 0.9600 . ? 
O2W H21W 0.9600 . ? 
O2W H22W 0.9600 . ? 
O3W H31W 0.9600 . ? 
O3W H32W 0.9600 . ? 
  
loop_ 
 _geom_angle_atom_site_label_1 
 _geom_angle_atom_site_label_2 
 _geom_angle_atom_site_label_3 
 _geom_angle 
 _geom_angle_site_symmetry_1 
 _geom_angle_site_symmetry_3 
 _geom_angle_publ_flag 
O11 Nd1 O21 164.11(5) . . ? 
O11 Nd1 O2W 84.60(5) . . ? 
O21 Nd1 O2W 89.27(5) . . ? 
O11 Nd1 O3W 80.61(5) . . ? 
O21 Nd1 O3W 83.50(5) . . ? 
O2W Nd1 O3W 67.92(5) . . ? 
O11 Nd1 O1W 89.78(5) . . ? 
O21 Nd1 O1W 85.35(4) . . ? 
O2W Nd1 O1W 139.36(5) . . ? 
O3W Nd1 O1W 71.45(5) . . ? 
O11 Nd1 O12 118.05(4) . 3_566 ? 
O21 Nd1 O12 74.18(4) . 3_566 ? 
O2W Nd1 O12 75.38(5) . 3_566 ? 
O3W Nd1 O12 136.99(5) . 3_566 ? 
O1W Nd1 O12 140.04(4) . 3_566 ? 
O11 Nd1 O22 75.98(4) . 3_666 ? 
O21 Nd1 O22 117.49(4) . 3_666 ? 
O2W Nd1 O22 138.39(5) . 3_666 ? 
O3W Nd1 O22 141.06(5) . 3_666 ? 
O1W Nd1 O22 77.74(5) . 3_666 ? 
O12 Nd1 O22 81.85(5) 3_566 3_666 ? 
O11 Nd1 O21 124.98(4) . 3_666 ? 
O21 Nd1 O21 67.36(5) . 3_666 ? 
O2W Nd1 O21 142.11(5) . 3_666 ? 
O3W Nd1 O21 133.37(4) . 3_666 ? 
O1W Nd1 O21 70.65(4) . 3_666 ? 
O12 Nd1 O21 69.86(4) 3_566 3_666 ? 
O22 Nd1 O21 50.19(4) 3_666 3_666 ? 
O11 Nd1 O11 68.74(5) . 3_566 ? 
O21 Nd1 O11 122.52(4) . 3_566 ? 
O2W Nd1 O11 69.46(4) . 3_566 ? 
O3W Nd1 O11 129.01(4) . 3_566 ? 
O1W Nd1 O11 143.90(4) . 3_566 ? 
O12 Nd1 O11 49.30(4) 3_566 3_566 ? 
O22 Nd1 O11 69.26(4) 3_666 3_566 ? 
O21 Nd1 O11 97.59(4) 3_666 3_566 ? 
Nd1 Nd1 Nd1 140.204(6) 3_666 3_566 ? 
C11 O11 Nd1 158.27(13) . . ? 
C11 O11 Nd1 90.43(11) . 3_566 ? 
Nd1 O11 Nd1 111.26(5) . 3_566 ? 
C11 O12 Nd1 101.03(12) . 3_566 ? 
O12 C11 O11 119.20(18) . . ? 
O12 C11 C12 120.24(17) . . ? 
O11 C11 C12 120.55(17) . . ? 
C11 C12 H12A 109.5 . . ? 
C11 C12 H12B 109.5 . . ? 
H12A C12 H12B 109.5 . . ? 
C11 C12 H12C 109.5 . . ? 
H12A C12 H12C 109.5 . . ? 
H12B C12 H12C 109.5 . . ? 
C21 O21 Nd1 154.09(13) . . ? 
C21 O21 Nd1 91.61(11) . 3_666 ? 
Nd1 O21 Nd1 112.64(5) . 3_666 ? 
C21 O22 Nd1 98.29(12) . 3_666 ? 
O22 C21 O21 118.63(18) . . ? 
O22 C21 C22 121.09(18) . . ? 
O21 C21 C22 120.27(18) . . ? 
C21 C22 H22A 109.5 . . ? 
C21 C22 H22B 109.5 . . ? 
H22A C22 H22B 109.5 . . ? 
C21 C22 H22C 109.5 . . ? 
H22A C22 H22C 109.5 . . ? 
H22B C22 H22C 109.5 . . ? 
Nd1 O1W H11W 123.8 . . ? 
Nd1 O1W H12W 112.1 . . ? 
H11W O1W H12W 105.0 . . ? 
Nd1 O2W H21W 121.1 . . ? 
Nd1 O2W H22W 127.7 . . ? 
H21W O2W H22W 105.0 . . ? 
Nd1 O3W H31W 124.8 . . ? 
Nd1 O3W H32W 128.3 . . ? 
H31W O3W H32W 105.0 . . ? 
  
loop_ 
 _geom_hbond_atom_site_label_D 
 _geom_hbond_atom_site_label_H 
 _geom_hbond_atom_site_label_A 
 _geom_hbond_distance_DH 
 _geom_hbond_distance_HA 
 _geom_hbond_distance_DA 
 _geom_hbond_angle_DHA 
 _geom_hbond_site_symmetry_A 
O1W H11W Br1  0.96 2.34 3.2743(14) 165.1 1_545 
O1W H12W O12  0.96 1.79 2.7133(18) 159.4 1_655 
O2W H21W O22  0.96 1.83 2.7146(18) 151.9 1_455 
O2W H22W Br1  0.96 2.29 3.2274(14) 164.3 . 
O3W H31W Br1  0.96 2.35 3.3043(14) 171.0 2_546 
O3W H32W Br1  0.96 2.26 3.2055(15) 166.8 1_545 
  
_refine_diff_density_max    0.402 
_refine_diff_density_min   -0.415 
_refine_diff_density_rms    0.079 
  
_shelx_res_file 
; 
  
    Ha2019_63_0m_a.res created by SHELXL-2014/7 
  
  
TITL Ha2019_63_0m_a.res in P2(1)/n 
CELL  0.71073   7.9027   8.0349  17.9481   90.000   96.414   90.000 
ZERR    4.000   0.0003   0.0003   0.0006    0.000    0.002    0.000 
LATT 1 
SYMM 1/2-X, 1/2+Y, 1/2-Z 
SFAC C  H  O  Br Nd 
UNIT 16 48 28 4 4 
LIST 4 ! automatically inserted. Change 6 to 4 for CHECKCIF!! 
OMIT -3 56 
L.S. 10 
SIZE  0.070  0.116  0.285 
ACTA 
  
rem DFIX 0.96  0.0001 O1w H11w O1w H12w O2w H21w O2w H22w O3w H31w O3w H32w 
rem dfix 1.523  0.0001 H11w H12w H21w H22w H31w H32w 
FREE Nd1 C21_$6 
FREE Nd1 C11_$7 
EQIV $6 1-x, 1-y, 1-z 
BIND Nd1 Nd1_$6 
BIND Nd1 Nd1_$7 
EQIV $7 -x,1-y,1-z 
BIND Nd1 O11_$7 
  
ACTA 
HTAB 
EQIV $1 -x+3/2, y-1/2, -z+3/2 
EQIV $2 x, y-1, z 
HTAB O1W Br1_$2 
EQIV $3 x+1, y, z 
HTAB O1W O12_$3 
EQIV $4 x-1, y, z 
HTAB O2W O22_$4 
HTAB O2W Br1 
EQIV $5 -x+1/2, y-1/2, -z+3/2 
HTAB O3W Br1_$5 
HTAB O3W Br1_$2 
SIZE 0.176  0.236  0.314 
BOND $H 
FMAP 2 
PLAN 15 
TEMP -173 
WGHT    0.012300    1.137000 
FVAR       0.28707   0.07669   0.07518   0.04895   0.05406   0.05274 
ND1   5    0.259792    0.460318    0.535888    11.00000    0.00623    0.01283 = 
         0.01213    0.00089    0.00126   -0.00090 
BR1   4    0.395266    0.961268    0.687592    11.00000    0.02005    0.01512 = 
         0.01735    0.00208    0.00063   -0.00260 
O11   3   -0.015901    0.337265    0.532835    11.00000    0.00970    0.01782 = 
         0.01894    0.00268    0.00244   -0.00327 
O12   3   -0.281776    0.258675    0.521950    11.00000    0.00938    0.01836 = 
         0.02325    0.00574    0.00176   -0.00131 
C11   1   -0.128695    0.230820    0.545417    11.00000    0.01157    0.01579 = 
         0.01391   -0.00020    0.00307   -0.00030 
C12   1   -0.080291    0.075644    0.588583    11.00000    0.02055    0.01961 = 
         0.02848    0.00913    0.00062   -0.00073 
AFIX 137 
H12A  2   -0.072846    0.099240    0.642421    11.00000   21.00000 
H12B  2    0.030356    0.036200    0.575979    11.00000   21.00000 
H12C  2   -0.166652   -0.010233    0.575647    11.00000   21.00000 
AFIX   0 
O21   3    0.545304    0.554043    0.573649    11.00000    0.00843    0.01878 = 
         0.01371   -0.00009   -0.00039   -0.00059 
O22   3    0.812878    0.622131    0.598396    11.00000    0.00939    0.02497 = 
         0.01820   -0.00220    0.00117   -0.00295 
C21   1    0.673221    0.586285    0.621699    11.00000    0.01205    0.01161 = 
         0.01651   -0.00082   -0.00089    0.00238 
C22   1    0.656419    0.577884    0.703582    11.00000    0.01698    0.03553 = 
         0.01446    0.00050    0.00061    0.00453 
AFIX 137 
H22A  2    0.767604    0.552809    0.731155    11.00000   31.00000 
H22B  2    0.575179    0.490235    0.712933    11.00000   31.00000 
H22C  2    0.615438    0.685091    0.720445    11.00000   31.00000 
AFIX   0 
O1W   3    0.388498    0.177909    0.532772    11.00000    0.01193    0.01550 = 
         0.01800    0.00228    0.00442   -0.00012 
AFIX   3 
H11W  2    0.386003    0.097284    0.572107    11.00000   41.00000 
H12W  2    0.505330    0.182052    0.522892    11.00000   41.00000 
AFIX   0 
O2W   3    0.156054    0.653728    0.626590    11.00000    0.01237    0.01692 = 
         0.02028   -0.00450    0.00068   -0.00059 
AFIX   3 
H21W  2    0.036421    0.667400    0.629839    11.00000   51.00000 
H22W  2    0.206885    0.756604    0.644748    11.00000   51.00000 
AFIX   0 
O3W   3    0.283483    0.342643    0.663224    11.00000    0.02772    0.01723 = 
         0.01531    0.00239    0.00678    0.00535 
AFIX   3 
H31W  2    0.231975    0.389479    0.704432    11.00000   61.00000 
H32W  2    0.315793    0.231838    0.678971    11.00000   61.00000 
AFIX   0 
HKLF 4 
  
REM  Ha2019_63_0m_a.res in P2(1)/n 
REM R1 =  0.0129 for    2535 Fo > 4sig(Fo)  and  0.0154 for all    2735 data 
REM    125 parameters refined using      0 restraints 
  
END 
  
WGHT      0.0123      1.1370 
  
REM Instructions for potential hydrogen bonds 
HTAB C22 Br1_$1 
HTAB C22 O3W 
HTAB C22 Br1 
HTAB O1W Br1_$2 
HTAB O1W O12_$3 
HTAB O2W O22_$4 
HTAB O2W Br1 
HTAB O3W Br1_$5 
HTAB O3W Br1_$2 
  
REM Highest difference peak  0.402,  deepest hole -0.415,  1-sigma level  0.079 
Q1    1  -0.1196 -0.0317  0.5431  11.00000  0.05    0.40 
Q2    1   0.3722  0.1232  0.5561  11.00000  0.05    0.37 
Q3    1   0.6627  0.6034  0.6648  11.00000  0.05    0.32 
Q4    1  -0.1031  0.1480  0.5636  11.00000  0.05    0.30 
Q5    1   0.7671  0.5999  0.7349  11.00000  0.05    0.30 
Q6    1   0.2413  0.3824  0.6818  11.00000  0.05    0.29 
Q7    1   0.5559  0.5530  0.5377  11.00000  0.05    0.29 
Q8    1   0.3182  0.3974  0.6330  11.00000  0.05    0.29 
Q9    1   0.8199  0.5872  0.5600  11.00000  0.05    0.28 
Q10   1   0.4628  0.1919  0.5359  11.00000  0.05    0.27 
Q11   1   0.0926  0.6721  0.6247  11.00000  0.05    0.27 
Q12   1   0.0166  0.0943  0.6250  11.00000  0.05    0.26 
Q13   1   0.5151  0.5818  0.7044  11.00000  0.05    0.25 
Q14   1   0.2228  0.3517  0.6236  11.00000  0.05    0.25 
Q15   1   0.8788  0.6490  0.6349  11.00000  0.05    0.24 
; 
_shelx_res_checksum   57769 
  
_shelx_hkl_file 
; 
   1   0   0    2.30    1.10 
   1   0   0    4.20    1.50 
   1   0   0    1.20    1.10 
   1   0   0    1.20    1.20 
   1   0   0    2.20    1.10 
   1   0   0    3.70    1.40 
   1   0   0    1.50    0.90 
   1   0   0    2.50    1.00 
   1   0   0    8.70    1.90 
   1   0   0    0.40    0.80 
   1   0   0    9.30    1.70 
   1   0   0    0.70    0.80 
   1   0   0    3.40    1.10 
   1   0   0    2.10    1.30 
   1   0   0   -0.70    0.50 
   1   0   0    0.50    0.60 
   1   0   0    1.20    1.00 
   1   0   0   -0.20    0.70 
   1   0   0    4.60    1.00 
   1   0   0    4.40    1.50 
   1   0   0    5.30    1.40 
   1   0   0    2.80    1.30 
   1   0   0    0.00    0.60 
  -1   0   0   -0.30    0.30 
  -1   0   0    2.40    1.30 
  -1   0   0    0.50    0.60 
  -1   0   0    0.00    0.50 
  -1   0   0   -0.10    0.50 
  -1   0   0   -0.40    0.50 
  -1   0   0    2.60    1.30 
  -1   0   0    1.60    1.00 
  -1   0   0   -0.30    0.50 
  -1   0   0    0.10    0.60 
  -1   0   0    0.10    0.70 
  -1   0   0    0.30    0.50 
  -1   0   0   -0.30    0.60 
  -1   0   0    0.20    0.60 
  -1   0   0    0.30    0.50 
  -1   0   0   -0.40    0.40 
  -1   0   0    0.50    0.80 
  -1   0   0    0.30    0.70 
   1   0   0    6.40    1.70 
   1   0   0    0.20    0.50 
   1   0   0    4.80    1.50 
   1   0   0    2.50    1.00 
   1   0   0    7.20    1.70 
   1   0   0    1.60    0.90 
   1   0   0    3.60    1.50 
   2   0   0 3713.93  139.09 
   2   0   0 3719.63  137.69 
   2   0   0 3715.13  139.49 
   2   0   0 3820.52  140.99 
   2   0   0 3697.13  140.09 
   2   0   0 3776.72  140.99 
   2   0   0 3731.33  139.99 
   2   0   0 3702.23  137.29 
   2   0   0 3722.33  137.29 
   2   0   0 3714.83  139.79 
   2   0   0 3737.33  141.39 
   2   0   0 3765.82  141.09 
   2   0   0 3747.43  137.39 
   2   0   0 3751.32  137.99 
   2   0   0 3692.83  139.59 
   2   0   0 3686.13  136.99 
   2   0   0 3746.63  140.19 
   2   0   0 3692.73  140.39 
   2   0   0 3795.22  140.19 
   2   0   0 3855.51  140.19 
   2   0   0 3705.13  136.29 
   2   0   0 3714.33  140.99 
   2   0   0 3711.63  136.19 
   2   0   0 3689.73  139.59 
   2   0   0 3719.43  140.09 
   2   0   0 3715.33  138.19 
   2   0   0 3856.51  140.49 
   2   0   0 3722.43  139.69 
   2   0   0 3628.54  138.49 
  -2   0   0 3740.53  139.59 
  -2   0   0 3854.81  139.39 
  -2   0   0 3761.02  140.49 
  -2   0   0 3882.81  138.29 
  -2   0   0 3735.63  139.09 
  -2   0   0 3745.73  137.19 
  -2   0   0 3680.43  138.19 
  -2   0   0 3792.32  139.49 
  -2   0   0 3743.23  136.99 
  -2   0   0 3590.44  139.89 
  -2   0   0 3761.02  139.99 
  -2   0   0 3835.62  141.09 
  -2   0   0 3737.03  136.09 
  -2   0   0 3641.44  138.39 
  -2   0   0 3726.63  140.39 
  -2   0   0 3692.83  140.59 
  -2   0   0 3661.33  139.99 
  -2   0   0 3722.83  141.09 
  -2   0   0 3840.22  140.09 
  -2   0   0 3824.22  140.69 
  -2   0   0 3718.43  137.29 
  -2   0   0 3584.34  136.79 
  -2   0   0 3848.11  140.09 
  -2   0   0 3837.32  141.39 
  -2   0   0 3741.63  136.39 
  -2   0   0 3750.12  137.79 
  -2   0   0 3738.13  134.59 
  -2   0   0 3795.12  139.49 
   2   0   0 3794.52  138.69 
   2   0   0 3892.51  140.59 
   2   0   0 3690.03  139.09 
  -3   0   0    2.20    2.60 
  -3   0   0    6.40    3.60 
  -3   0   0   -0.70    2.30 
   3   0   0   -0.20    2.30 
   3   0   0    1.20    2.40 
   3   0   0    5.40    4.10 
   3   0   0    3.70    3.50 
  -3   0   0    7.90    4.30 
  -3   0   0   -1.70    1.60 
  -3   0   0   -2.20    1.60 
  -3   0   0    3.10    2.10 
  -3   0   0    1.30    2.60 
  -3   0   0    1.00    1.10 
  -3   0   0    2.30    2.40 
  -3   0   0    0.20    2.60 
  -3   0   0   -0.10    1.70 
  -3   0   0    2.70    2.20 
  -3   0   0    3.10    2.20 
  -3   0   0    2.60    1.90 
  -3   0   0    5.80    4.00 
  -3   0   0    3.00    1.90 
  -3   0   0    2.70    2.30 
  -3   0   0    1.50    3.10 
  -3   0   0    1.30    3.20 
  -3   0   0    0.30    2.50 
  -3   0   0    0.00    2.50 
  -3   0   0    1.90    2.10 
  -3   0   0    0.50    2.10 
  -3   0   0    0.60    1.90 
   3   0   0    1.60    2.80 
   3   0   0    7.70    3.80 
   3   0   0    2.60    2.90 
   3   0   0   -1.10    2.00 
   3   0   0    2.00    1.90 
   3   0   0    3.50    3.30 
   3   0   0    2.30    2.10 
   3   0   0   -1.00    2.30 
   3   0   0    2.30    2.40 
   3   0   0    1.70    2.80 
   3   0   0   -0.20    2.80 
   3   0   0    1.70    3.20 
   3   0   0   -0.50    2.70 
   3   0   0    2.30    2.20 
   3   0   0    1.60    2.20 
   3   0   0   -1.60    2.20 
   3   0   0   -0.70    3.10 
   3   0   0    3.00    2.30 
   3   0   0    3.70    3.10 
   3   0   0    3.30    2.40 
   3   0   0    9.40    3.50 
   3   0   0    3.80    3.30 
   3   0   0   -0.70    1.70 
   3   0   0    3.30    3.10 
   3   0   0    4.20    2.80 
  -3   0   0    1.80    1.10 
  -3   0   0    3.70    2.50 
   4   0   0  562.44   29.80 
   4   0   0  575.04   28.50 
   4   0   0  545.45   31.00 
   4   0   0  552.54   27.00 
   4   0   0  561.64   31.70 
   4   0   0  554.54   32.40 
   4   0   0  535.15   31.50 
   4   0   0  555.94   33.10 
   4   0   0  532.35   27.20 
   4   0   0  579.14   31.60 
   4   0   0  591.84   29.90 
  -4   0   0  581.54   26.60 
  -4   0   0  541.75   25.90 
  -4   0   0  606.44   32.20 
  -4   0   0  548.45   25.10 
   4   0   0  528.65   30.70 
   4   0   0  563.44   33.50 
   4   0   0  532.85   27.80 
  -4   0   0  532.95   21.90 
  -4   0   0  593.64   27.00 
  -4   0   0  536.85   31.20 
  -4   0   0  563.34   25.90 
  -4   0   0  586.04   28.60 
   4   0   0  556.44   25.70 
   4   0   0  558.34   33.20 
   4   0   0  555.54   25.90 
   4   0   0  584.24   31.60 
   4   0   0  588.04   32.20 
   4   0   0  571.64   27.60 
   4   0   0  611.64   27.90 
  -4   0   0  566.74   32.70 
  -4   0   0  589.84   32.50 
  -4   0   0  569.24   30.70 
  -4   0   0  569.04   25.70 
  -4   0   0  530.55   31.70 
  -4   0   0  561.54   22.80 
  -4   0   0  596.74   30.70 
  -4   0   0  581.54   27.60 
  -4   0   0  523.55   31.80 
  -4   0   0  534.65   27.40 
  -4   0   0  568.84   27.70 
  -4   0   0  547.95   28.30 
  -4   0   0  564.94   29.20 
  -4   0   0  573.74   29.80 
  -4   0   0  544.15   32.00 
  -5   0   0   -3.60    3.00 
  -5   0   0    1.80    3.90 
   5   0   0   -3.50    3.60 
   5   0   0    2.50    4.10 
   5   0   0    2.70    5.10 
   5   0   0    1.30    3.70 
  -5   0   0   -1.90    4.00 
  -5   0   0   -0.40    2.80 
   5   0   0   -3.10    3.40 
   5   0   0    1.90    4.40 
  -5   0   0    3.90    2.80 
  -5   0   0   -1.80    3.70 
  -5   0   0    4.00    3.10 
  -5   0   0   -2.30    2.50 
   5   0   0    0.70    4.00 
   5   0   0   -0.20    3.10 
   5   0   0   -0.40    2.80 
   5   0   0   -3.20    4.40 
  -5   0   0    1.80    1.50 
  -5   0   0   -0.10    4.10 
  -5   0   0    0.80    3.20 
  -5   0   0   -1.20    3.20 
  -5   0   0    0.30    2.50 
  -5   0   0   -0.60    2.50 
   5   0   0    0.20    2.60 
   5   0   0   -0.60    4.90 
  -5   0   0    5.20    4.60 
  -5   0   0    2.40    4.60 
  -5   0   0   -2.10    4.00 
  -5   0   0    4.50    5.00 
   5   0   0    3.40    4.70 
  -5   0   0    0.60    3.90 
   5   0   0   -1.50    2.90 
   5   0   0    1.20    2.50 
   5   0   0   -3.10    3.90 
   5   0   0   -4.00    3.80 
   5   0   0   -0.60    3.70 
  -5   0   0    4.40    5.10 
  -5   0   0    1.70    1.70 
   5   0   0   -2.90    3.40 
  -5   0   0    1.30    2.90 
  -5   0   0    2.00    2.90 
   6   0   0 1917.11   90.39 
   6   0   0 1975.40   93.19 
   6   0   0 2144.89   91.59 
  -6   0   0 1952.00   88.69 
  -6   0   0 2031.30   94.09 
  -6   0   0 1983.50   92.59 
  -6   0   0 2061.29   88.49 
  -6   0   0 1939.11   92.79 
   6   0   0 2001.70   91.59 
  -6   0   0 1964.50   79.09 
   6   0   0 1993.00   94.99 
   6   0   0 1932.31   90.39 
  -6   0   0 2116.19   81.79 
  -6   0   0 1998.10   91.89 
   6   0   0 1931.51   92.19 
   6   0   0 1968.60   79.59 
  -6   0   0 2103.99   94.39 
  -6   0   0 2051.29   90.39 
  -6   0   0 2011.50   93.39 
  -6   0   0 2131.09   82.29 
  -6   0   0 1994.90   91.89 
  -6   0   0 2040.80   80.49 
  -6   0   0 1964.80   84.99 
   6   0   0 1881.61   90.59 
   6   0   0 2114.99   84.29 
   6   0   0 1968.10   94.59 
   6   0   0 2082.09   81.49 
   6   0   0 1996.50   95.89 
   6   0   0 1989.80   92.19 
  -6   0   0 1972.60   91.69 
   6   0   0 2102.79   85.69 
   6   0   0 1960.90   91.59 
   6   0   0 2017.90   88.89 
  -6   0   0 1999.30   80.99 
  -6   0   0 1969.00   83.29 
   7   0   0    0.00    6.60 
  -7   0   0    4.40    7.70 
  -7   0   0   -2.10    5.80 
  -7   0   0    0.70    6.50 
  -7   0   0   -3.10    5.70 
  -7   0   0   -5.90    5.80 
  -7   0   0    3.70    7.50 
  -7   0   0   -7.50    4.90 
  -7   0   0    1.60    3.80 
   7   0   0   15.30    8.90 
   7   0   0   -0.20    3.50 
  -7   0   0    2.50    8.50 
   7   0   0    4.40    7.20 
   7   0   0   -5.10    5.70 
   7   0   0   -4.80    3.90 
   7   0   0    1.60    7.10 
   7   0   0   -0.90    7.10 
  -7   0   0   -3.50    5.20 
  -7   0   0   -3.50    3.60 
  -7   0   0    2.50    4.90 
   7   0   0   -5.50    5.10 
   7   0   0   -2.40    3.80 
   7   0   0    3.10    7.10 
   7   0   0   -7.40    4.60 
   7   0   0   -1.10    4.20 
   7   0   0    8.50    8.80 
   7   0   0   -5.00    5.00 
  -7   0   0    1.70    3.50 
  -7   0   0   -1.40    3.60 
   7   0   0   -1.60    5.50 
   7   0   0   -2.60    6.70 
  -7   0   0   -0.60    5.90 
  -7   0   0   -3.10    5.00 
   8   0   0 1265.27   66.69 
   8   0   0 1116.39   67.89 
  -8   0   0 1074.69   67.79 
   8   0   0 1135.79   66.19 
   8   0   0 1284.77   70.19 
  -8   0   0 1187.98   62.89 
   8   0   0 1209.48   72.09 
  -8   0   0 1145.69   68.69 
  -8   0   0 1187.28   59.59 
  -8   0   0 1127.79   62.89 
   8   0   0 1170.28   68.39 
   8   0   0 1112.39   69.89 
  -8   0   0 1114.19   66.59 
  -8   0   0 1134.39   68.69 
   8   0   0 1174.48   66.69 
   8   0   0 1142.89   57.69 
  -8   0   0 1121.79   66.89 
   8   0   0 1143.79   67.09 
   8   0   0 1245.78   58.39 
   8   0   0 1125.49   68.49 
  -8   0   0 1244.38   70.59 
   8   0   0 1294.47   69.19 
  -8   0   0 1060.19   66.29 
  -8   0   0 1150.98   56.39 
   8   0   0 1212.18   72.99 
   8   0   0 1145.19   70.69 
  -9   0   0    2.60    7.80 
   9   0   0    0.80    8.80 
   9   0   0    3.00    8.10 
   9   0   0   -8.60    7.20 
   9   0   0   -2.70    9.50 
  -9   0   0   -3.40    8.00 
  -9   0   0   -5.10    8.20 
  -9   0   0   -2.10    8.60 
  -9   0   0   -3.80    9.70 
  -9   0   0   -1.40    8.30 
   9   0   0    1.00   10.30 
   9   0   0    0.00    9.70 
   9   0   0   -8.70    6.50 
   9   0   0   -3.20    9.10 
   9   0   0    0.00    8.20 
   9   0   0   -3.80    8.60 
  -9   0   0    7.80   10.00 
   9   0   0   -2.70    8.00 
  -9   0   0   -2.70    7.50 
   9   0   0    6.60   11.20 
  -9   0   0    1.20    6.10 
  10   0   0  164.18   33.00 
  10   0   0  131.99   28.70 
  10   0   0  130.99   29.70 
  10   0   0  157.98   29.10 
 -10   0   0  166.28   31.20 
 -10   0   0  144.19   29.00 
 -10   0   0  147.69   29.80 
 -10   0   0  118.09   27.40 
  10   0   0  216.88   38.50 
 -10   0   0  124.79   27.00 
  10   0   0  118.69   27.20 
  10   0   0  141.89   29.30 
  10   0   0  169.88   34.50 
  10   0   0  169.18   33.60 
  10   0   0  164.08   32.30 
 -10   0   0  109.99   26.20 
 -10   0   0   75.19   20.20 
 -10   0   0  173.28   30.90 
  10   0   0  229.58   34.80 
   0  -1   0   10.00    1.50 
   0  -1   0    6.60    1.20 
   0  -1   0    6.30    1.00 
   0  -1   0    5.30    0.90 
   0  -1   0    8.50    1.90 
   0  -1   0    8.90    1.90 
   0  -1   0    1.60    1.00 
   0  -1   0    7.40    1.00 
   0  -1   0    4.10    1.40 
   0  -1   0    8.10    2.50 
   0  -1   0    5.00    1.50 
   0  -1   0    9.20    2.20 
   0  -1   0    4.60    1.90 
   0  -1   0    9.80    1.50 
   0  -1   0    5.20    1.30 
   0  -1   0    2.90    1.20 
   0  -1   0    1.10    1.00 
   0  -1   0   12.10    3.20 
   0  -1   0    1.70    1.10 
   0  -1   0    7.40    1.90 
   0  -1   0    4.50    1.30 
   0   1   0   -0.10    1.00 
   1  -1   0  288.07   13.70 
  -1  -1   0  274.37   13.90 
   1  -1   0  268.47   13.20 
   1  -1   0  281.87   12.40 
  -1  -1   0  302.07   13.80 
   1  -1   0  274.37   12.80 
  -1  -1   0  305.37   15.90 
  -1  -1   0  267.27   13.90 
  -1  -1   0  289.57   13.00 
  -1  -1   0  287.37   14.00 
  -1  -1   0  288.57   13.20 
   1  -1   0  290.47   13.50 
   1  -1   0  287.77   13.00 
   1  -1   0  312.07   13.20 
   1  -1   0  266.77   13.00 
   1  -1   0  285.07   11.10 
   1  -1   0  263.17   12.00 
   1  -1   0  270.57   13.20 
  -1  -1   0  293.57   14.20 
  -1  -1   0  299.57   14.20 
  -1  -1   0  280.47   13.60 
  -1  -1   0  300.97   14.40 
  -1  -1   0  278.07   13.20 
  -1  -1   0  274.27   14.80 
   1  -1   0  279.77   13.10 
   1  -1   0  273.37   11.60 
   1  -1   0  275.57   13.50 
  -1  -1   0  272.87   14.10 
   1  -1   0  270.47   11.60 
   1  -1   0  284.17   13.60 
   1  -1   0  267.87   11.90 
   1  -1   0  304.77   13.20 
   1  -1   0  266.47   12.30 
   1  -1   0  292.27   15.00 
   1  -1   0  266.27   13.40 
   1  -1   0  283.27   13.30 
  -1  -1   0  299.57   14.50 
  -1  -1   0  293.27   13.40 
  -1  -1   0  273.97   13.80 
  -1  -1   0  302.57   14.70 
   1  -1   0  304.87   13.70 
   1  -1   0  275.67   12.30 
   1  -1   0  273.37   14.30 
   1  -1   0  290.47   13.00 
  -1  -1   0  278.17   13.40 
   1  -1   0  272.37   13.70 
   1  -1   0  268.07   12.80 
   1  -1   0  276.77   14.50 
  -1  -1   0  265.17   14.20 
  -1  -1   0  283.17   12.80 
   1  -1   0  283.47   10.70 
  -1  -1   0  270.77   13.40 
  -1  -1   0  261.77   14.00 
  -1  -1   0  281.37   13.60 
  -1  -1   0  264.67   14.20 
  -1  -1   0  304.77   13.60 
  -1  -1   0  294.27   15.60 
  -1  -1   0  289.57   13.70 
  -1  -1   0  289.57   13.60 
   1  -1   0  279.17   10.90 
   1  -1   0  266.27   13.80 
   1   1   0  270.67   13.50 
   1   1   0  282.77   14.30 
   1   1   0  264.97   14.30 
   1   1   0  275.27   15.10 
   1   1   0  283.87   14.10 
   1   1   0  272.67   13.00 
  -1   1   0  292.77   14.70 
   1   1   0  280.87   15.50 
   1   1   0  269.87   14.20 
   1   1   0  287.37   13.60 
  -1   1   0  281.17   13.40 
   1   1   0  279.47   13.80 
   1   1   0  283.77   13.70 
   1   1   0  268.77   13.40 
   1   1   0  296.07   13.10 
  -1   1   0  242.78   12.90 
  -1   1   0  275.37   14.60 
   1   1   0  281.17   13.30 
  -1   1   0  281.87   13.40 
  -1   1   0  250.37   13.00 
   1   1   0  276.07   13.50 
   1   1   0  286.77   14.90 
   1   1   0  296.27   14.60 
   1   1   0  269.07   13.10 
   1   1   0  292.27   14.10 
  -1   1   0  266.77   12.70 
   1   1   0  265.67   13.30 
   1   1   0  246.98   13.40 
   1   1   0  250.87   13.40 
   1   1   0  281.37   13.90 
   1   1   0  299.87   15.20 
   1   1   0  305.27   14.40 
  -1   1   0  270.57   12.80 
  -2  -1   0  348.67   16.80 
  -2  -1   0  312.27   18.90 
  -2  -1   0  322.07   18.30 
  -2  -1   0  325.07   19.50 
  -2  -1   0  338.87   19.30 
  -2  -1   0  330.37   17.90 
   2  -1   0  343.47   13.80 
   2  -1   0  345.17   17.80 
  -2  -1   0  333.07   17.50 
  -2  -1   0  337.97   18.40 
  -2  -1   0  334.87   18.00 
  -2  -1   0  330.07   18.20 
  -2  -1   0  342.77   18.70 
  -2  -1   0  333.17   19.90 
  -2  -1   0  325.17   18.10 
   2  -1   0  390.46   16.90 
  -2  -1   0  344.67   17.20 
   2  -1   0  340.97   15.20 
   2  -1   0  353.96   18.00 
   2  -1   0  350.36   16.10 
   2  -1   0  316.07   17.60 
   2  -1   0  312.97   17.40 
  -2  -1   0  338.87   18.60 
  -2  -1   0  321.67   17.90 
  -2  -1   0  383.26   18.40 
   2  -1   0  350.96   17.00 
   2  -1   0  336.47   16.10 
   2  -1   0  342.97   17.40 
   2  -1   0  369.96   18.50 
   2  -1   0  355.06   15.70 
   2  -1   0  360.86   18.60 
  -2  -1   0  348.87   17.20 
  -2  -1   0  322.17   18.00 
   2  -1   0  373.26   18.20 
   2  -1   0  346.27   17.30 
   2  -1   0  362.46   18.90 
   2  -1   0  331.17   16.60 
   2  -1   0  332.57   15.60 
  -2  -1   0  334.87   18.90 
   2  -1   0  337.17   18.90 
   2  -1   0  339.77   13.60 
   2  -1   0  335.77   17.90 
   2  -1   0  349.57   19.60 
  -2  -1   0  343.37   18.40 
  -2  -1   0  369.96   18.20 
   2  -1   0  342.57   14.80 
   2  -1   0  354.16   16.10 
  -2  -1   0  349.67   17.30 
   2  -1   0  353.86   18.40 
  -2  -1   0  317.57   16.50 
  -2  -1   0  310.47   18.50 
   2  -1   0  360.36   18.40 
  -2  -1   0  340.97   17.60 
  -2  -1   0  331.07   17.60 
  -2  -1   0  348.97   17.70 
  -2  -1   0  299.57   18.60 
  -2  -1   0  336.27   18.40 
   2  -1   0  334.57   19.20 
   2  -1   0  345.17   19.60 
   2  -1   0  350.86   13.60 
   2  -1   0  351.16   15.90 
  -2  -1   0  348.97   18.70 
  -2  -1   0  349.77   19.60 
  -2  -1   0  346.77   17.50 
   2   1   0  337.17   18.40 
  -2   1   0  335.27   18.80 
   2   1   0  356.36   18.40 
  -2   1   0  344.07   15.00 
  -2   1   0  354.76   18.20 
  -2   1   0  354.56   19.60 
  -2   1   0  342.17   18.50 
  -2   1   0  351.06   14.90 
  -2   1   0  340.37   15.60 
  -2   1   0  327.97   17.30 
  -2   1   0  329.77   15.80 
   2   1   0  311.87   17.20 
   2   1   0  373.86   20.20 
  -2   1   0  291.37   17.60 
  -2   1   0  344.67   15.30 
  -2   1   0  361.86   15.80 
  -2   1   0  334.07   17.70 
  -2   1   0  336.37   17.70 
  -2   1   0  342.37   17.90 
  -2   1   0  349.67   19.40 
   2   1   0  334.57   18.60 
   2   1   0  366.56   18.10 
   2   1   0  325.97   18.40 
   2   1   0  354.66   18.40 
   2   1   0  359.96   17.60 
   2   1   0  351.76   19.70 
   2   1   0  309.67   18.10 
   2   1   0  366.06   17.90 
   2   1   0  359.26   18.20 
   2   1   0  355.46   16.80 
   2   1   0  352.16   19.30 
   2   1   0  346.47   18.50 
   2   1   0  340.57   18.50 
   2   1   0  366.56   19.60 
   2   1   0  349.96   17.40 
  -2   1   0  330.87   15.50 
   2   1   0  336.97   18.50 
  -2   1   0  364.26   18.10 
  -2   1   0  347.27   18.00 
  -2   1   0  342.87   17.30 
  -2   1   0  358.46   16.40 
  -2   1   0  354.96   16.90 
   2   1   0  323.97   17.90 
  -2   1   0  328.37   17.10 
   2   1   0  349.27   18.40 
  -2   1   0  321.07   17.40 
   2   1   0  350.06   18.40 
   2   1   0  346.07   19.50 
   2   1   0  324.67   17.90 
   2   1   0  329.07   17.50 
   2   1   0  361.66   19.70 
   2   1   0  302.97   19.50 
  -2   1   0  340.07   13.70 
   2   1   0  349.47   18.30 
   3  -1   0    6.60    3.40 
  -3  -1   0    8.30    3.20 
  -3  -1   0    9.80    3.90 
  -3  -1   0    7.60    3.30 
   3  -1   0    5.20    2.90 
  -3  -1   0   10.70    5.50 
  -3  -1   0   10.70    3.70 
  -3  -1   0   14.40    4.60 
   3  -1   0   12.10    3.30 
   3  -1   0    9.50    2.80 
   3  -1   0    4.50    3.60 
   3  -1   0    8.20    4.10 
   3  -1   0   12.20    4.50 
   3  -1   0   11.80    4.50 
   3  -1   0   12.30    3.40 
  -3  -1   0   12.40    4.20 
  -3  -1   0    6.80    4.10 
  -3  -1   0    6.50    3.50 
  -3  -1   0   11.80    4.50 
   3  -1   0    6.90    3.40 
   3  -1   0    2.50    3.50 
  -3  -1   0   12.40    4.50 
   3  -1   0    8.20    3.90 
  -3  -1   0   19.20    5.70 
  -3  -1   0   14.10    5.40 
  -3  -1   0   11.60    3.20 
   3  -1   0    8.90    4.10 
   3  -1   0   10.80    5.10 
   3  -1   0   11.90    3.10 
   3  -1   0    7.20    4.00 
   3  -1   0   11.40    5.20 
   3  -1   0    8.90    3.80 
  -3  -1   0   14.20    4.90 
  -3  -1   0   11.20    4.60 
  -3  -1   0    4.70    3.50 
   3  -1   0   11.80    5.40 
   3  -1   0    7.40    3.80 
  -3  -1   0   13.70    4.50 
  -3  -1   0   17.30    4.60 
  -3  -1   0    8.40    4.30 
   3  -1   0   16.00    3.50 
   3  -1   0   17.00    5.20 
  -3  -1   0   23.00    5.00 
  -3  -1   0   13.50    5.00 
  -3  -1   0    7.90    3.30 
  -3  -1   0    6.10    3.60 
   3  -1   0   12.40    3.70 
  -3  -1   0   10.20    5.00 
  -3  -1   0   18.50    4.50 
   3  -1   0   11.30    3.20 
  -3  -1   0    8.90    5.00 
   3  -1   0    7.90    4.00 
   3  -1   0    9.50    3.90 
   3  -1   0   17.90    3.60 
   3  -1   0   19.60    6.20 
   3  -1   0   11.10    3.90 
   3   1   0    5.90    3.80 
   3   1   0   13.10    4.00 
   3   1   0    7.10    4.00 
   3   1   0   11.70    4.30 
   3   1   0   15.60    5.00 
   3   1   0   15.70    5.30 
  -3   1   0   11.90    1.70 
   3   1   0   15.20    4.70 
  -3   1   0   18.60    3.80 
  -3   1   0   12.60    3.40 
  -3   1   0   19.10    4.00 
   3   1   0    4.20    3.50 
   3   1   0    8.60    3.10 
   3   1   0   16.50    5.50 
  -3   1   0    9.90    3.80 
  -3   1   0    9.70    4.40 
   3   1   0    8.90    4.80 
  -3   1   0    7.20    3.80 
  -3   1   0   11.60    1.40 
  -3   1   0    7.60    2.90 
  -3   1   0    9.10    4.20 
   3   1   0    7.70    3.20 
  -3   1   0    8.60    4.10 
   3   1   0   13.90    4.60 
  -3   1   0   13.30    4.70 
  -3   1   0   15.80    3.40 
  -3   1   0   12.70    3.60 
   3   1   0   12.80    4.60 
   3   1   0    3.00    3.40 
   3   1   0   13.20    5.70 
  -3   1   0   14.50    5.00 
   3   1   0   13.90    5.10 
   3   1   0   18.90    5.90 
  -3   1   0    7.10    2.20 
  -3   1   0   15.30    2.10 
  -3   1   0    5.80    2.40 
  -3   1   0   11.20    4.30 
  -3   1   0   14.10    4.60 
   3   1   0    7.80    3.60 
  -3   1   0   19.20    3.70 
   3   1   0    0.70    2.90 
   3   1   0   13.40    4.90 
   3   1   0   10.90    4.40 
   3   1   0    9.80    3.80 
   3   1   0   13.70    4.80 
  -3   1   0    9.30    3.30 
   3   1   0    3.10    3.20 
   3   1   0    8.40    3.90 
  -3   1   0    6.40    1.50 
  -3   1   0    9.60    4.60 
  -3   1   0   16.50    4.70 
   4  -1   0    1.10    3.50 
   4  -1   0    3.10    3.00 
   4  -1   0   -6.10    2.80 
  -4  -1   0    2.20    4.70 
  -4  -1   0    6.60    4.20 
   4  -1   0   -2.20    3.20 
   4  -1   0    2.50    2.40 
  -4  -1   0    3.70    3.70 
   4  -1   0   -2.50    2.10 
  -4  -1   0    8.90    5.00 
  -4  -1   0    2.90    3.20 
  -4  -1   0    2.40    2.90 
  -4  -1   0   -4.50    2.70 
  -4  -1   0    3.90    4.60 
  -4  -1   0    6.80    3.10 
  -4  -1   0    7.40    4.20 
  -4  -1   0    1.50    4.20 
   4  -1   0   -1.00    3.80 
  -4  -1   0    2.10    4.00 
   4  -1   0    0.40    3.90 
   4  -1   0    7.90    3.30 
   4  -1   0   -1.20    3.40 
   4  -1   0    8.30    4.90 
   4  -1   0    1.30    3.10 
  -4  -1   0    3.60    4.60 
  -4  -1   0    7.80    4.10 
   4  -1   0    6.50    3.30 
  -4  -1   0    3.50    4.50 
  -4  -1   0    4.30    4.50 
   4  -1   0    8.00    5.10 
   4  -1   0    4.10    4.90 
  -4  -1   0    5.20    4.60 
  -4  -1   0    1.50    4.10 
   4  -1   0   -0.70    3.90 
   4  -1   0    0.60    2.60 
   4  -1   0    1.60    4.00 
  -4  -1   0    2.20    3.80 
  -4   1   0    1.90    4.10 
  -4   1   0    0.00    3.50 
   4   1   0    4.70    4.20 
   4   1   0    4.40    4.00 
   4   1   0    0.30    4.20 
  -4   1   0    3.90    3.00 
  -4   1   0    0.50    1.30 
   4   1   0    6.80    4.90 
   4   1   0    2.50    3.10 
  -4   1   0   -1.40    3.50 
  -4   1   0    0.50    2.10 
   4   1   0    3.00    4.80 
  -4   1   0    2.90    2.90 
  -4   1   0    5.30    2.80 
  -4   1   0    8.80    4.80 
  -4   1   0    6.70    4.90 
  -4   1   0    1.60    2.30 
   4   1   0   10.90    5.70 
   4   1   0    2.70    3.50 
   4   1   0    0.30    3.40 
   4   1   0   -4.60    2.80 
   4   1   0    4.10    5.20 
   4   1   0   10.00    5.40 
   4   1   0   -0.30    3.50 
   4   1   0   -0.30    2.40 
  -4   1   0    7.70    4.60 
  -4   1   0    4.70    4.20 
   4   1   0   10.60    4.20 
  -4   1   0    2.40    1.70 
  -4   1   0    6.30    3.50 
   4   1   0    2.70    4.10 
   4   1   0    7.50    3.90 
   4   1   0    2.30    3.50 
  -4   1   0    3.90    3.50 
  -4   1   0    4.20    2.50 
   4   1   0    5.40    4.90 
  -4   1   0    1.30    3.70 
  -4   1   0    5.20    2.90 
  -4   1   0    5.40    3.50 
  -4   1   0    1.30    1.20 
  -5  -1   0 1170.28   54.79 
   5  -1   0 1047.70   47.80 
  -5  -1   0 1188.58   50.49 
   5  -1   0 1080.79   48.10 
   5  -1   0 1157.18   55.59 
  -5  -1   0 1151.88   55.29 
   5  -1   0 1117.69   48.00 
  -5  -1   0 1120.19   56.59 
  -5  -1   0 1022.90   51.49 
  -5  -1   0 1149.19   58.09 
   5  -1   0 1154.88   52.09 
   5  -1   0 1083.79   57.39 
   5  -1   0 1078.79   47.80 
   5  -1   0 1177.78   55.19 
  -5  -1   0 1157.58   55.69 
  -5  -1   0 1104.19   48.30 
  -5  -1   0 1140.69   56.39 
  -5  -1   0 1133.59   46.30 
   5  -1   0 1151.68   58.49 
   5  -1   0 1106.29   52.89 
  -5  -1   0 1126.19   58.19 
   5  -1   0 1136.89   55.09 
  -5  -1   0 1104.19   45.90 
  -5  -1   0 1064.89   55.39 
   5  -1   0 1035.70   56.49 
   5  -1   0 1104.99   55.29 
  -5  -1   0 1087.49   55.19 
   5  -1   0 1132.09   54.59 
   5  -1   0 1078.39   48.40 
   5  -1   0 1090.89   57.89 
  -5  -1   0 1103.29   49.70 
  -5  -1   0 1000.70   49.20 
  -5  -1   0 1103.79   51.39 
  -5  -1   0 1044.80   55.79 
   5  -1   0 1043.90   55.39 
   5   1   0 1082.69   56.99 
  -5   1   0 1083.79   55.89 
   5   1   0 1007.60   54.69 
   5   1   0 1099.89   57.59 
  -5   1   0 1098.39   54.89 
   5   1   0 1104.79   50.89 
   5   1   0 1078.89   58.29 
   5   1   0 1161.08   54.99 
   5   1   0 1154.18   56.29 
  -5   1   0 1132.59   54.39 
   5   1   0 1093.49   52.59 
  -5   1   0 1127.09   55.79 
  -5   1   0 1127.49   51.19 
  -5   1   0 1117.79   42.70 
   5   1   0 1182.88   55.79 
   5   1   0 1105.09   49.90 
   5   1   0 1042.70   55.89 
  -5   1   0 1119.79   46.60 
  -5   1   0 1107.19   48.90 
   5   1   0 1129.19   53.99 
  -5   1   0 1039.80   53.69 
  -5   1   0 1140.09   43.00 
  -5   1   0 1047.30   48.00 
   5   1   0 1120.09   56.79 
   5   1   0 1133.79   47.30 
   5   1   0 1159.58   56.29 
   5   1   0 1116.89   50.49 
   5   1   0 1144.49   56.89 
   5   1   0 1115.39   55.29 
  -5   1   0 1112.99   47.20 
  -5   1   0 1123.99   49.10 
  -5   1   0 1075.99   43.80 
  -5   1   0 1088.89   49.99 
  -5   1   0 1079.89   45.40 
  -5   1   0 1126.79   56.79 
  -5   1   0 1135.39   55.49 
   6  -1   0   14.30    8.60 
   6  -1   0   12.40    5.30 
   6  -1   0   -2.80    4.20 
   6  -1   0   -1.70    3.60 
   6  -1   0    8.60    7.70 
  -6  -1   0   -1.30    4.00 
   6  -1   0    2.60    3.60 
  -6  -1   0   -3.50    4.90 
   6  -1   0   -4.20    4.40 
  -6  -1   0    5.40    3.10 
  -6  -1   0   12.40    8.40 
  -6  -1   0    5.90    6.10 
   6  -1   0    0.00    3.60 
   6  -1   0    0.40    5.60 
   6  -1   0    2.30    6.60 
   6  -1   0   -2.80    4.90 
  -6  -1   0    5.60    5.90 
  -6  -1   0   -1.00    5.20 
   6  -1   0    9.50    7.80 
  -6  -1   0    4.80    6.20 
   6  -1   0   -3.70    2.90 
   6  -1   0   -1.00    4.60 
  -6  -1   0   -2.10    4.20 
  -6  -1   0   10.50    7.90 
   6  -1   0   -1.50    3.00 
   6  -1   0    8.00    6.70 
  -6  -1   0   -3.10    3.20 
  -6  -1   0    6.30    7.10 
  -6  -1   0   -2.70    4.20 
  -6  -1   0    2.80    5.10 
   6  -1   0    2.00    5.10 
  -6  -1   0    0.20    5.10 
  -6  -1   0    2.70    3.00 
   6  -1   0    8.40    6.30 
   6   1   0   -4.90    4.60 
  -6   1   0    3.10    3.70 
  -6   1   0    8.30    6.10 
   6   1   0   20.50    9.40 
   6   1   0   -2.80    5.20 
   6   1   0    3.40    6.50 
  -6   1   0    4.10    4.40 
   6   1   0    6.20    7.00 
  -6   1   0   -1.60    5.00 
   6   1   0   -2.40    5.90 
   6   1   0   -4.30    4.70 
   6   1   0    8.60    7.10 
  -6   1   0    3.80    2.30 
  -6   1   0    1.50    2.70 
   6   1   0    9.60    7.60 
  -6   1   0   -3.00    4.90 
  -6   1   0   -5.90    3.70 
   6   1   0    3.60    6.20 
   6   1   0   12.10    6.30 
   6   1   0   10.30    6.60 
   6   1   0   10.20    6.80 
   6   1   0   11.20    7.20 
  -6   1   0    2.70    5.60 
  -6   1   0    6.30    3.50 
  -6   1   0    1.90    2.50 
   6   1   0    5.90    3.90 
  -6   1   0    5.00    3.70 
  -6   1   0   16.40    7.40 
  -6   1   0   -1.30    1.80 
  -6   1   0   10.10    5.60 
  -6   1   0   -1.80    5.30 
   6   1   0    2.80    4.60 
   6   1   0   -5.10    4.90 
  -6   1   0    8.80    5.40 
   7  -1   0  276.07   27.80 
   7  -1   0  258.57   17.30 
  -7  -1   0  245.78   31.40 
  -7  -1   0  214.18   29.00 
   7  -1   0  267.37   19.10 
   7  -1   0  250.77   28.70 
   7  -1   0  222.18   27.30 
   7  -1   0  266.07   31.10 
   7  -1   0  278.87   32.70 
   7  -1   0  202.88   28.80 
  -7  -1   0  265.27   16.80 
   7  -1   0  236.48   28.60 
   7  -1   0  296.57   29.20 
  -7  -1   0  254.47   19.10 
  -7  -1   0  224.28   30.10 
  -7  -1   0  281.77   31.40 
   7  -1   0  269.17   33.40 
   7  -1   0  278.37   33.80 
  -7  -1   0  241.88   22.40 
  -7  -1   0  294.67   31.10 
  -7  -1   0  226.28   29.60 
   7  -1   0  264.37   30.90 
   7  -1   0  285.97   19.90 
  -7  -1   0  225.88   24.90 
   7  -1   0  300.27   34.90 
  -7  -1   0  258.37   29.40 
  -7  -1   0  259.17   17.90 
  -7  -1   0  288.07   26.70 
   7  -1   0  274.37   19.80 
  -7  -1   0  252.87   30.80 
   7  -1   0  241.08   28.90 
  -7  -1   0  227.48   27.50 
  -7  -1   0  243.68   29.50 
   7   1   0  301.17   26.70 
  -7   1   0  257.37   31.20 
   7   1   0  230.18   28.70 
  -7   1   0  245.98   29.40 
  -7   1   0  261.97   30.50 
   7   1   0  287.17   30.80 
  -7   1   0  260.77   25.10 
   7   1   0  226.38   28.40 
   7   1   0  239.18   29.20 
   7   1   0  316.77   32.30 
   7   1   0  257.57   33.10 
  -7   1   0  230.18   28.40 
  -7   1   0  275.27   20.40 
   7   1   0  263.37   32.10 
  -7   1   0  270.17   29.30 
   7   1   0  301.27   21.30 
  -7   1   0  254.67   18.20 
   7   1   0  301.07   33.30 
  -7   1   0  306.17   22.80 
  -7   1   0  326.07   34.30 
  -7   1   0  267.77   15.50 
  -7   1   0  227.48   28.30 
   7   1   0  241.28   31.90 
   7   1   0  290.47   27.30 
   7   1   0  210.48   26.10 
   7   1   0  297.97   33.30 
   7   1   0  248.48   16.60 
   7   1   0  267.07   30.20 
   8  -1   0    7.30   10.30 
   8  -1   0    1.10    8.00 
   8  -1   0    3.20    9.20 
  -8  -1   0    2.30    8.20 
  -8  -1   0   10.20    9.80 
  -8  -1   0   -8.00    6.40 
  -8  -1   0   21.50   11.50 
   8  -1   0   11.80   10.90 
  -8  -1   0   13.10   10.10 
  -8  -1   0   -4.10    6.70 
   8  -1   0   13.80    7.30 
   8  -1   0    9.30   11.00 
   8  -1   0   21.10   11.60 
  -8  -1   0   14.80   11.40 
  -8  -1   0    1.00    5.90 
   8  -1   0   11.50   11.60 
  -8  -1   0    0.30    8.90 
  -8  -1   0   10.00    8.40 
  -8  -1   0   20.40   12.50 
   8  -1   0   -3.00    7.00 
   8  -1   0    8.40   10.50 
   8  -1   0   16.70    9.70 
   8  -1   0   12.30    9.40 
  -8  -1   0    8.70    9.30 
  -8  -1   0    4.90    7.00 
   8  -1   0   -7.60    7.60 
   8  -1   0   22.10   11.60 
  -8   1   0   13.70    8.50 
   8   1   0    8.90    9.40 
   8   1   0   12.80   10.20 
  -8   1   0   20.20   11.30 
   8   1   0   10.50    6.90 
   8   1   0   20.70   11.00 
  -8   1   0    4.60    9.30 
  -8   1   0    2.30    7.90 
   8   1   0    3.50   10.30 
  -8   1   0   24.10   10.30 
   8   1   0    5.50    9.20 
  -8   1   0   24.30    8.50 
  -8   1   0   12.70    8.40 
   8   1   0    2.30    8.00 
  -8   1   0    7.00    8.90 
  -8   1   0   13.80    9.30 
   8   1   0   26.00   13.10 
   8   1   0    7.90    7.70 
   8   1   0   19.40    9.20 
   8   1   0   22.30   12.10 
  -8   1   0    4.70    9.40 
   8   1   0   40.30   14.60 
   8   1   0    2.40    9.80 
   8   1   0    0.00    8.20 
   8   1   0   33.20   13.40 
   9  -1   0   -3.40    8.40 
   9  -1   0    8.10   11.30 
  -9  -1   0   16.00   11.50 
   9  -1   0   12.10   10.60 
  -9  -1   0   -1.80    9.60 
  -9  -1   0   11.40   10.30 
   9  -1   0   -6.40    8.70 
   9  -1   0   18.90   13.00 
  -9  -1   0    4.50    9.40 
   9  -1   0    6.50   10.60 
   9  -1   0  -11.70    7.00 
  -9  -1   0   -3.10    7.50 
  -9  -1   0   -4.60    7.70 
  -9  -1   0  -11.30    8.30 
  -9  -1   0   -4.20    9.00 
  -9  -1   0    0.90    7.60 
  -9  -1   0  -11.70    7.90 
   9  -1   0   13.60   11.30 
   9  -1   0   -0.60    9.90 
   9  -1   0   12.30   12.30 
   9  -1   0    3.40    9.80 
   9  -1   0    1.50   10.10 
   9  -1   0    6.00   11.10 
  -9  -1   0    4.90   10.10 
  -9  -1   0    2.90    9.50 
  -9   1   0    8.00    9.30 
   9   1   0   -9.20    7.00 
   9   1   0   13.70   11.10 
   9   1   0   24.40   13.50 
  -9   1   0   -7.40    7.80 
  -9   1   0    3.90    8.90 
  -9   1   0   -3.00    9.00 
  -9   1   0    8.90    9.00 
  -9   1   0    5.80   10.30 
   9   1   0   -1.90    8.40 
  -9   1   0    2.50    9.30 
   9   1   0   -8.40    7.30 
   9   1   0    5.50    9.80 
   9   1   0    9.50   11.70 
  -9   1   0   -5.60    8.50 
   9   1   0   -0.70    8.00 
   9   1   0    8.00   12.70 
   9   1   0   -0.30    9.40 
   9   1   0    5.90    9.50 
   9   1   0   -5.30    9.20 
   9   1   0    4.80    9.40 
 -10  -1   0   -0.60   11.60 
  10  -1   0    8.60   12.80 
  10  -1   0   40.80   18.50 
  10  -1   0   23.40   14.50 
  10  -1   0   44.00   17.40 
 -10  -1   0   23.10   16.00 
 -10  -1   0    3.90   12.00 
 -10  -1   0   29.00   15.20 
  10  -1   0   60.79   19.60 
 -10  -1   0   25.30   15.70 
  10  -1   0   13.10   13.00 
 -10  -1   0   12.90   16.50 
  10  -1   0   25.00   15.70 
  10  -1   0   20.40   16.00 
 -10  -1   0   34.70   17.80 
  10  -1   0   29.70   19.80 
 -10  -1   0   31.30   15.40 
  10  -1   0   36.20   16.10 
  10  -1   0   45.70   20.70 
 -10   1   0   27.50   15.50 
  10   1   0   33.70   17.00 
  10   1   0   16.60   14.60 
 -10   1   0   46.60   18.10 
  10   1   0   31.10   15.50 
  10   1   0   20.50   15.20 
  10   1   0   26.40   15.80 
  10   1   0   26.60   17.20 
  10   1   0   14.70   12.30 
  10   1   0   24.60   13.70 
  10   1   0   35.10   15.90 
 -10   1   0   45.30   16.70 
 -10   1   0   11.80   12.60 
 -10   1   0   18.80   14.10 
 -10   1   0   34.20   16.10 
 -10   1   0   16.90   13.40 
  10   1   0   18.70   17.60 
  10   1   0   -0.90    9.70 
  10   1   0   14.70   15.30 
   0  -2   0 5134.99  184.38 
   0  -2   0 5098.79  187.88 
   0  -2   0 5146.29  190.68 
   0  -2   0 5112.29  188.28 
   0  -2   0 5342.67  187.88 
   0  -2   0 5105.99  185.08 
   0  -2   0 5221.38  187.78 
   0  -2   0 5245.98  188.38 
   0  -2   0 4898.11  184.88 
   0  -2   0 5348.17  184.38 
   0  -2   0 5112.39  188.18 
   0  -2   0 5229.48  187.28 
   0  -2   0 5093.99  184.18 
   0  -2   0 5223.18  184.98 
   0  -2   0 5122.59  191.28 
   0  -2   0 5316.87  188.78 
   0  -2   0 5354.76  189.68 
   0  -2   0 5067.09  184.08 
   0  -2   0 5146.29  188.98 
   0  -2   0 5250.88  188.48 
   0  -2   0 5022.90  187.68 
   0  -2   0 5266.77  188.98 
   0  -2   0 5211.08  190.08 
   0  -2   0 4991.60  185.48 
   0  -2   0 5028.20  191.98 
   0  -2   0 5247.18  189.08 
   0  -2   0 5348.27  187.88 
   0   2   0 5158.48  190.38 
   0   2   0 5207.28  187.88 
   0   2   0 5162.78  188.48 
   0   2   0 4375.96  193.08 
   0   2   0 5272.77  187.88 
   0   2   0 5180.38  189.28 
   0   2   0 5106.89  189.08 
   0   2   0 5182.08  188.68 
   0   2   0 4267.87  192.28 
   0   2   0 4937.01  188.28 
   0   2   0 5152.38  185.18 
   0   2   0 5256.77  189.08 
   0   2   0 5313.27  187.28 
   0   2   0 5033.80  188.78 
   0   2   0 5216.28  188.68 
   0   2   0 5070.99  188.28 
   0   2   0 5115.99  192.08 
   0   2   0 4961.90  184.68 
   0   2   0 4967.80  184.58 
   1  -2   0 2828.22  104.29 
   1  -2   0 2791.32  103.99 
   1  -2   0 2895.01  107.89 
  -1  -2   0 2827.72  104.69 
   1  -2   0 2742.83  103.29 
  -1  -2   0 2832.52  104.69 
  -1  -2   0 2813.22  107.69 
   1  -2   0 2821.92  102.79 
  -1  -2   0 2763.22  107.39 
  -1  -2   0 2661.23  109.49 
  -1  -2   0 2764.42  107.69 
   1  -2   0 2754.32  105.59 
  -1  -2   0 2786.32  103.49 
   1  -2   0 2864.51  103.59 
   1  -2   0 2876.11  106.19 
   1  -2   0 2719.33  103.49 
   1  -2   0 2844.22  102.69 
  -1  -2   0 2731.83  106.89 
  -1  -2   0 2832.12  106.49 
   1  -2   0 2740.33  104.19 
   1  -2   0 2834.82  101.59 
  -1  -2   0 2642.84  105.09 
   1  -2   0 2824.02  104.59 
  -1  -2   0 2896.71  107.79 
   1  -2   0 2777.12  102.39 
   1  -2   0 2877.51  103.69 
   1  -2   0 2679.83  106.19 
  -1  -2   0 2772.32  105.59 
  -1  -2   0 2809.52  106.59 
  -1  -2   0 2897.91  105.19 
   1  -2   0 2787.42  106.09 
  -1  -2   0 2775.52  108.69 
  -1  -2   0 2769.32  105.09 
  -1  -2   0 2898.41  107.19 
  -1  -2   0 2838.72  103.49 
   1  -2   0 2770.72  101.69 
   1  -2   0 2805.82  104.69 
   1  -2   0 2767.92  101.39 
  -1  -2   0 2758.72  106.99 
   1  -2   0 2835.72  106.19 
  -1  -2   0 2802.02  103.19 
  -1  -2   0 2795.62  106.69 
  -1  -2   0 2851.51  103.59 
  -1  -2   0 2786.82  106.79 
   1  -2   0 2794.02  106.19 
  -1  -2   0 2815.92  107.49 
  -1  -2   0 2932.91  106.79 
  -1  -2   0 2814.72  107.49 
  -1  -2   0 2900.11  106.99 
  -1  -2   0 2889.81  107.29 
   1  -2   0 2795.92  101.79 
   1  -2   0 2860.11  104.09 
   1  -2   0 2746.43  103.89 
   1  -2   0 2773.52  103.49 
   1  -2   0 2722.03  105.69 
   1  -2   0 2822.72  106.99 
  -1  -2   0 2754.42  103.99 
   1  -2   0 2725.83  108.39 
   1  -2   0 2671.43  104.19 
   1  -2   0 2800.82  102.79 
  -1  -2   0 2787.12  110.29 
  -1   2   0 2730.83  102.39 
   1   2   0 2817.32  103.49 
   1   2   0 2728.43  103.49 
   1   2   0 2879.01  105.59 
  -1   2   0 2831.62  104.49 
  -1   2   0 2830.22  107.79 
   1   2   0 2817.52  105.69 
  -1   2   0 2723.03  103.99 
  -1   2   0 2812.82  104.09 
   1   2   0 2742.63  106.49 
   1   2   0 2885.81  108.39 
   1   2   0 2819.62  107.79 
   1   2   0 2814.62  109.99 
   1   2   0 2660.83  106.59 
  -1   2   0 2777.62  102.49 
  -1   2   0 2790.52  101.99 
  -1   2   0 2803.82  103.39 
   1   2   0 2818.82  104.89 
  -1   2   0 2848.92  102.89 
   1   2   0 2778.52  104.49 
   1   2   0 2783.92  106.79 
  -1   2   0 2889.51  107.89 
   1   2   0 2897.21  104.69 
   1   2   0 2732.13  104.39 
   1   2   0 2805.22  103.19 
  -1   2   0 2677.13  105.29 
  -1   2   0 2852.51  103.99 
   1   2   0 2829.72  103.69 
   1   2   0 2860.31  107.69 
   1   2   0 2768.12  106.69 
   1   2   0 2797.72  107.69 
  -1   2   0 2784.92  106.09 
  -1   2   0 2860.31  106.59 
   1   2   0 2729.33  104.29 
  -1   2   0 2789.92  104.69 
   1   2   0 2863.61  107.09 
  -1   2   0 2788.72  107.59 
  -1   2   0 2866.91  103.69 
  -1   2   0 2908.51  107.69 
   1   2   0 2821.22  107.39 
  -1   2   0 2706.73  103.39 
   1   2   0 2796.82  104.89 
   1   2   0 2790.12  106.39 
   1   2   0 2821.42  108.19 
   2  -2   0 1021.00   39.50 
   2  -2   0 1028.10   44.20 
   2  -2   0 1037.00   42.60 
  -2  -2   0  996.60   46.40 
   2  -2   0 1023.00   45.80 
  -2  -2   0 1032.80   47.10 
   2  -2   0 1030.80   42.70 
   2  -2   0  981.20   43.10 
  -2  -2   0 1026.40   43.50 
   2  -2   0 1013.50   38.60 
  -2  -2   0 1031.00   44.00 
   2  -2   0 1074.59   43.40 
   2  -2   0 1041.80   44.40 
   2  -2   0 1003.60   38.40 
   2  -2   0  957.50   41.10 
   2  -2   0 1014.60   43.60 
   2  -2   0 1009.90   43.00 
   2  -2   0  999.30   39.70 
  -2  -2   0 1076.09   45.20 
   2  -2   0  995.60   39.20 
   2  -2   0 1012.20   42.90 
   2  -2   0 1023.30   46.10 
   2  -2   0  956.90   42.90 
  -2  -2   0 1058.49   46.80 
   2  -2   0 1063.29   42.80 
   2  -2   0  993.70   41.00 
   2  -2   0 1028.40   42.50 
  -2  -2   0 1018.00   45.90 
   2  -2   0  974.00   39.80 
   2  -2   0 1053.79   44.10 
  -2  -2   0 1057.19   45.80 
  -2  -2   0  981.20   41.60 
  -2  -2   0  978.40   47.60 
  -2  -2   0 1025.20   43.20 
  -2  -2   0  999.30   43.40 
   2  -2   0 1009.30   45.90 
   2  -2   0 1000.70   40.30 
   2  -2   0 1058.89   44.10 
   2  -2   0 1032.30   40.70 
  -2  -2   0 1057.39   46.00 
  -2  -2   0  987.90   44.80 
   2  -2   0 1059.89   44.40 
  -2  -2   0 1052.59   44.10 
  -2  -2   0 1007.70   44.00 
  -2  -2   0 1136.89   49.70 
  -2  -2   0 1067.79   45.50 
   2  -2   0  994.10   46.80 
   2  -2   0  989.30   41.20 
  -2  -2   0 1069.79   44.50 
  -2  -2   0 1003.80   44.60 
  -2  -2   0 1074.69   44.70 
  -2  -2   0  975.10   42.70 
   2  -2   0 1060.19   41.30 
   2  -2   0  989.40   41.20 
  -2  -2   0  989.20   45.40 
  -2  -2   0 1028.20   44.30 
  -2  -2   0 1082.69   45.40 
   2  -2   0 1035.20   44.70 
  -2  -2   0 1024.90   43.20 
   2  -2   0 1051.39   42.40 
   2  -2   0 1082.69   42.90 
  -2  -2   0 1035.00   43.80 
  -2  -2   0  995.40   44.80 
  -2  -2   0  947.81   44.30 
   2  -2   0 1007.10   44.00 
  -2   2   0 1008.60   38.60 
   2   2   0 1007.70   44.00 
   2   2   0 1023.40   43.90 
   2   2   0 1000.50   42.60 
   2   2   0  988.30   44.50 
   2   2   0 1049.79   44.90 
  -2   2   0  999.10   43.50 
  -2   2   0  974.80   42.80 
  -2   2   0 1033.50   43.10 
  -2   2   0 1003.60   42.50 
   2   2   0 1028.60   43.40 
   2   2   0  919.91   44.90 
   2   2   0 1009.30   43.90 
   2   2   0 1062.49   45.80 
  -2   2   0  992.40   41.40 
   2   2   0 1023.40   44.00 
  -2   2   0 1011.90   39.00 
   2   2   0  984.50   43.60 
   2   2   0 1023.70   42.60 
   2   2   0  968.20   44.80 
   2   2   0 1070.09   44.70 
   2   2   0 1057.29   46.90 
  -2   2   0 1055.89   43.40 
   2   2   0  990.50   42.90 
   2   2   0 1046.10   47.30 
   2   2   0 1030.60   43.60 
  -2   2   0  966.10   45.30 
  -2   2   0 1016.80   41.00 
   2   2   0 1020.10   48.70 
  -2   2   0 1045.70   42.60 
   2   2   0  998.30   44.10 
  -2   2   0  997.50   42.50 
  -2   2   0 1048.70   46.40 
   2   2   0 1033.80   42.80 
   2   2   0  926.91   43.00 
   2   2   0 1028.20   46.10 
  -2   2   0 1027.10   42.30 
  -2   2   0 1034.30   43.00 
   2   2   0  979.40   44.20 
   2   2   0 1014.80   44.90 
  -2   2   0 1034.60   40.20 
  -2   2   0 1057.69   40.90 
   2   2   0 1054.59   43.50 
   2   2   0 1019.30   46.00 
   2   2   0 1002.80   43.20 
   3  -2   0  353.66   22.70 
   3  -2   0  404.66   24.80 
   3  -2   0  395.86   21.50 
   3  -2   0  369.56   15.70 
  -3  -2   0  361.86   22.70 
  -3  -2   0  385.96   23.60 
  -3  -2   0  372.66   22.10 
  -3  -2   0  348.77   21.80 
  -3  -2   0  382.46   21.30 
   3  -2   0  374.46   19.70 
  -3  -2   0  367.76   22.30 
  -3  -2   0  331.97   22.00 
   3  -2   0  391.26   24.90 
   3  -2   0  379.06   22.30 
   3  -2   0  362.06   16.40 
  -3  -2   0  346.57   23.00 
   3  -2   0  398.26   20.20 
  -3  -2   0  382.96   22.00 
   3  -2   0  388.16   18.10 
  -3  -2   0  400.16   25.70 
   3  -2   0  399.76   19.60 
   3  -2   0  366.06   16.80 
   3  -2   0  371.26   20.90 
  -3  -2   0  355.56   22.70 
   3  -2   0  369.86   21.50 
  -3  -2   0  402.16   23.10 
  -3  -2   0  396.76   22.90 
   3  -2   0  345.87   19.30 
   3  -2   0  379.66   21.60 
   3  -2   0  377.16   27.30 
   3  -2   0  379.76   19.50 
   3  -2   0  363.56   17.40 
   3  -2   0  321.57   20.60 
  -3  -2   0  433.66   27.20 
   3  -2   0  378.66   22.10 
  -3  -2   0  385.76   21.30 
  -3  -2   0  385.76   20.40 
   3  -2   0  377.26   18.30 
   3  -2   0  348.67   20.10 
  -3  -2   0  351.76   23.20 
   3  -2   0  403.66   22.20 
   3  -2   0  364.66   20.20 
   3  -2   0  378.96   19.90 
   3  -2   0  365.86   16.90 
   3  -2   0  379.26   23.10 
   3  -2   0  348.67   22.60 
   3  -2   0  371.26   19.10 
  -3  -2   0  377.26   21.20 
  -3  -2   0  368.86   23.80 
   3   2   0  369.46   23.70 
   3   2   0  382.06   21.80 
  -3   2   0  394.26   19.60 
  -3   2   0  356.16   23.50 
   3   2   0  364.26   20.90 
  -3   2   0  377.16   19.40 
  -3   2   0  390.36   20.50 
  -3   2   0  366.96   16.60 
  -3   2   0  389.86   20.40 
   3   2   0  377.86   23.60 
  -3   2   0  324.37   21.50 
   3   2   0  379.56   22.00 
   3   2   0  308.87   20.90 
   3   2   0  396.96   23.30 
   3   2   0  305.77   23.10 
  -3   2   0  345.57   20.70 
  -3   2   0  340.87   20.20 
  -3   2   0  376.66   22.20 
   3   2   0  359.46   21.20 
   3   2   0  360.96   24.40 
  -3   2   0  383.36   21.90 
   3   2   0  386.76   26.10 
   3   2   0  390.86   22.20 
   3   2   0  345.27   21.60 
  -3   2   0  355.16   20.50 
   3   2   0  378.56   22.80 
  -3   2   0  358.46   17.20 
   3   2   0  330.47   21.60 
   3   2   0  405.66   23.30 
   3   2   0  384.96   20.60 
  -3   2   0  374.56   27.20 
  -3   2   0  398.06   21.60 
   3   2   0  391.56   21.60 
  -3   2   0  365.36   21.20 
   4  -2   0  400.46   25.00 
   4  -2   0  399.36   16.40 
   4  -2   0  401.86   21.30 
  -4  -2   0  437.66   29.80 
  -4  -2   0  398.16   27.30 
  -4  -2   0  441.26   28.70 
   4  -2   0  425.16   28.80 
   4  -2   0  403.86   19.20 
   4  -2   0  411.96   26.50 
   4  -2   0  405.66   20.50 
   4  -2   0  388.16   26.70 
  -4  -2   0  418.66   27.00 
  -4  -2   0  390.56   26.10 
  -4  -2   0  455.65   23.80 
   4  -2   0  415.36   22.00 
   4  -2   0  414.96   28.30 
  -4  -2   0  417.06   24.70 
  -4  -2   0  414.66   27.50 
   4  -2   0  421.06   21.50 
  -4  -2   0  421.66   26.00 
  -4  -2   0  396.96   23.30 
   4  -2   0  401.16   25.80 
  -4  -2   0  411.76   25.10 
   4  -2   0  413.26   19.50 
   4  -2   0  459.55   22.70 
   4  -2   0  441.36   26.40 
  -4  -2   0  399.96   25.80 
  -4  -2   0  372.66   25.40 
  -4  -2   0  416.56   26.70 
  -4  -2   0  427.76   24.20 
   4  -2   0  409.16   24.30 
   4  -2   0  426.06   24.00 
   4  -2   0  414.46   22.40 
  -4  -2   0  387.16   28.20 
   4  -2   0  392.96   21.90 
   4  -2   0  424.16   25.60 
   4  -2   0  377.36   22.80 
  -4  -2   0  365.56   24.50 
  -4  -2   0  394.86   25.10 
   4  -2   0  444.06   28.20 
  -4  -2   0  400.06   26.80 
   4   2   0  400.26   27.60 
   4   2   0  424.26   28.30 
  -4   2   0  431.56   26.70 
  -4   2   0  417.66   24.90 
   4   2   0  413.06   26.20 
   4   2   0  396.06   25.40 
   4   2   0  387.26   24.20 
  -4   2   0  423.76   21.70 
  -4   2   0  397.56   20.90 
  -4   2   0  354.36   26.20 
  -4   2   0  428.26   22.70 
  -4   2   0  441.46   26.00 
  -4   2   0  427.16   20.40 
  -4   2   0  403.86   19.10 
  -4   2   0  414.96   24.80 
  -4   2   0  390.86   25.10 
   4   2   0  465.15   23.40 
   4   2   0  388.66   24.50 
   4   2   0  418.76   26.90 
   4   2   0  392.26   26.50 
   4   2   0  381.26   28.90 
  -4   2   0  420.16   19.90 
  -4   2   0  364.46   23.90 
  -4   2   0  380.36   19.80 
  -4   2   0  406.76   16.40 
   4   2   0  434.26   27.20 
  -4   2   0  437.96   25.90 
   4   2   0  456.05   26.90 
  -4   2   0  428.56   24.70 
   4   2   0  410.96   26.70 
  -4   2   0  406.46   18.30 
   4   2   0  385.56   27.60 
   4   2   0  405.96   24.90 
   4   2   0  383.16   24.40 
  -4   2   0  338.77   24.90 
   5  -2   0  413.06   28.60 
   5  -2   0  433.76   30.90 
   5  -2   0  401.26   22.20 
  -5  -2   0  483.15   34.20 
  -5  -2   0  442.86   24.80 
   5  -2   0  459.05   32.20 
   5  -2   0  433.16   28.60 
   5  -2   0  390.16   30.30 
   5  -2   0  456.45   23.70 
   5  -2   0  442.16   23.30 
  -5  -2   0  408.26   28.00 
  -5  -2   0  363.66   27.70 
  -5  -2   0  441.46   29.60 
   5  -2   0  412.36   24.20 
  -5  -2   0  436.76   32.20 
   5  -2   0  416.06   21.50 
  -5  -2   0  448.46   30.20 
  -5  -2   0  414.16   29.70 
  -5  -2   0  458.05   30.90 
  -5  -2   0  452.65   31.30 
   5  -2   0  434.06   27.70 
   5  -2   0  436.96   21.40 
  -5  -2   0  441.16   27.00 
   5  -2   0  446.56   32.70 
  -5  -2   0  421.66   24.50 
   5  -2   0  425.36   31.00 
   5  -2   0  405.06   28.60 
  -5  -2   0  455.45   32.30 
   5  -2   0  466.15   29.30 
   5  -2   0  419.36   25.20 
  -5  -2   0  443.06   27.50 
  -5  -2   0  381.16   28.90 
   5  -2   0  424.06   26.00 
  -5  -2   0  405.56   27.30 
   5  -2   0  439.66   26.00 
   5  -2   0  450.75   30.10 
  -5  -2   0  448.86   30.20 
   5   2   0  471.35   27.80 
  -5   2   0  426.56   28.50 
  -5   2   0  440.36   27.80 
  -5   2   0  417.56   22.10 
  -5   2   0  427.96   22.30 
   5   2   0  395.56   29.00 
  -5   2   0  443.96   23.10 
   5   2   0  433.26   30.60 
  -5   2   0  413.76   22.00 
   5   2   0  391.56   27.50 
   5   2   0  453.55   32.10 
   5   2   0  379.56   29.80 
  -5   2   0  417.16   27.70 
   5   2   0  391.86   28.40 
  -5   2   0  436.56   29.90 
   5   2   0  476.45   29.20 
  -5   2   0  460.25   23.60 
   5   2   0  484.05   30.70 
   5   2   0  432.16   24.30 
   5   2   0  389.96   32.10 
  -5   2   0  418.36   30.10 
  -5   2   0  467.85   29.50 
  -5   2   0  483.35   31.40 
   5   2   0  426.76   29.10 
  -5   2   0  419.46   27.50 
   5   2   0  460.05   24.40 
   5   2   0  435.06   29.30 
   5   2   0  459.05   31.80 
  -5   2   0  446.76   21.30 
  -5   2   0  421.46   22.40 
  -5   2   0  424.76   19.00 
   5   2   0  496.75   27.80 
   5   2   0  418.76   30.20 
   6  -2   0 1722.83   83.79 
  -6  -2   0 1808.82   82.59 
   6  -2   0 1837.22   82.89 
   6  -2   0 1630.24   77.99 
   6  -2   0 1886.41   83.79 
  -6  -2   0 1787.52   79.49 
   6  -2   0 1885.11   85.39 
   6  -2   0 1808.12   85.49 
  -6  -2   0 1846.52   85.39 
  -6  -2   0 1876.41   85.59 
   6  -2   0 1754.12   88.09 
  -6  -2   0 1696.13   84.99 
   6  -2   0 1651.23   86.99 
  -6  -2   0 1725.33   84.39 
  -6  -2   0 1647.34   87.69 
  -6  -2   0 1943.21   90.89 
  -6  -2   0 1880.61   80.09 
   6  -2   0 1740.53   82.79 
  -6  -2   0 1691.13   84.39 
   6  -2   0 1753.92   79.39 
   6  -2   0 1765.82   87.59 
  -6  -2   0 1920.51   82.69 
   6  -2   0 1932.41   74.09 
  -6  -2   0 1781.82   85.89 
   6  -2   0 1795.72   74.39 
  -6  -2   0 1712.23   86.09 
   6  -2   0 1775.22   88.89 
  -6  -2   0 1872.31   75.39 
   6  -2   0 1885.31   73.49 
   6  -2   0 1737.53   71.69 
  -6  -2   0 1789.42   85.29 
   6  -2   0 1860.61   76.69 
   6  -2   0 1843.52   87.99 
   6   2   0 1849.02   87.09 
  -6   2   0 1802.02   86.29 
  -6   2   0 1774.72   73.79 
  -6   2   0 1921.41   83.99 
  -6   2   0 1787.82   74.69 
   6   2   0 1923.01   88.49 
   6   2   0 1930.81   83.99 
   6   2   0 1751.52   82.69 
   6   2   0 1827.12   80.49 
  -6   2   0 1786.72   73.89 
  -6   2   0 1739.03   73.59 
  -6   2   0 1817.42   69.59 
  -6   2   0 1750.42   83.49 
  -6   2   0 1784.02   81.99 
   6   2   0 1725.63   74.09 
   6   2   0 1745.53   82.99 
  -6   2   0 1845.62   74.99 
   6   2   0 1783.62   79.59 
  -6   2   0 1855.21   84.69 
   6   2   0 1807.52   90.79 
  -6   2   0 1881.21   83.59 
  -6   2   0 1800.02   72.19 
   6   2   0 1842.42   83.89 
   6   2   0 1799.22   86.89 
   6   2   0 1858.41   86.09 
   6   2   0 1796.72   84.69 
  -6   2   0 1876.91   74.59 
  -6   2   0 1765.02   71.99 
   6   2   0 1759.02   84.79 
   6   2   0 1679.13   86.99 
  -6   2   0 1714.33   84.79 
   6   2   0 1853.51   87.79 
   7  -2   0  354.36   22.40 
  -7  -2   0  350.06   36.70 
  -7  -2   0  343.97   35.70 
  -7  -2   0  317.97   36.20 
  -7  -2   0  342.27   35.50 
  -7  -2   0  358.26   32.40 
   7  -2   0  339.77   21.80 
   7  -2   0  354.96   36.20 
   7  -2   0  360.06   34.20 
  -7  -2   0  332.97   35.80 
  -7  -2   0  386.36   29.70 
   7  -2   0  360.46   39.40 
   7  -2   0  300.27   32.90 
  -7  -2   0  349.57   21.30 
   7  -2   0  332.87   34.10 
   7  -2   0  328.87   35.10 
   7  -2   0  345.17   26.90 
  -7  -2   0  333.07   35.20 
   7  -2   0  330.27   37.00 
   7  -2   0  311.57   36.40 
  -7  -2   0  326.47   25.60 
  -7  -2   0  269.97   34.80 
   7  -2   0  413.96   42.20 
  -7  -2   0  421.16   43.30 
   7  -2   0  366.86   39.70 
   7  -2   0  294.37   30.90 
  -7  -2   0  276.77   33.50 
  -7  -2   0  354.76   25.40 
  -7  -2   0  336.27   35.20 
   7  -2   0  355.06   23.50 
   7  -2   0  311.47   25.70 
  -7   2   0  345.67   28.70 
  -7   2   0  286.67   33.90 
   7   2   0  271.17   32.50 
   7   2   0  377.66   40.20 
   7   2   0  384.46   39.30 
   7   2   0  361.36   35.00 
  -7   2   0  274.17   31.50 
   7   2   0  349.67   21.30 
   7   2   0  289.27   32.70 
   7   2   0  278.77   27.80 
  -7   2   0  343.07   33.60 
   7   2   0  403.06   36.90 
  -7   2   0  372.66   22.70 
   7   2   0  368.26   37.10 
  -7   2   0  313.37   32.40 
   7   2   0  354.26   36.00 
   7   2   0  366.96   37.90 
  -7   2   0  286.77   32.60 
   7   2   0  317.67   31.50 
  -7   2   0  339.57   21.70 
   7   2   0  257.97   32.50 
  -7   2   0  234.88   30.60 
   7   2   0  409.66   43.80 
  -7   2   0  303.77   24.50 
   7   2   0  337.37   25.70 
  -7   2   0  383.26   23.50 
  -8  -2   0  727.53   50.19 
   8  -2   0  591.54   46.20 
  -8  -2   0  673.33   49.10 
  -8  -2   0  644.34   50.49 
   8  -2   0  684.13   46.80 
   8  -2   0  665.53   46.90 
   8  -2   0  694.03   51.99 
  -8  -2   0  676.33   48.40 
  -8  -2   0  749.62   51.89 
  -8  -2   0  600.64   40.00 
  -8  -2   0  709.83   51.69 
  -8  -2   0  720.43   48.70 
   8  -2   0  725.83   42.70 
  -8  -2   0  675.53   48.00 
  -8  -2   0  669.83   46.90 
   8  -2   0  641.54   50.89 
  -8  -2   0  646.64   43.90 
   8  -2   0  647.74   49.90 
  -8  -2   0  662.73   48.70 
   8  -2   0  652.93   45.70 
   8  -2   0  734.23   50.19 
  -8  -2   0  636.14   42.40 
   8  -2   0  679.83   51.39 
   8  -2   0  621.54   44.30 
   8  -2   0  662.13   50.19 
   8   2   0  739.13   45.80 
   8   2   0  585.54   46.10 
   8   2   0  668.63   49.40 
   8   2   0  744.43   48.00 
   8   2   0  645.44   47.40 
   8   2   0  648.94   50.39 
  -8   2   0  609.34   47.80 
   8   2   0  705.03   48.30 
   8   2   0  639.14   51.89 
  -8   2   0  657.83   47.00 
   8   2   0  585.34   44.00 
   8   2   0  587.74   46.40 
  -8   2   0  675.03   44.60 
  -8   2   0  712.53   47.30 
   8   2   0  625.74   48.90 
  -8   2   0  687.43   49.00 
   8   2   0  720.83   51.59 
  -8   2   0  716.03   47.30 
   8   2   0  652.53   41.70 
  -8   2   0  649.74   46.50 
   8   2   0  590.64   39.00 
  -9  -2   0   17.80   14.00 
  -9  -2   0   35.00   15.10 
   9  -2   0   25.70   14.40 
  -9  -2   0   53.09   17.70 
  -9  -2   0   27.20   15.40 
   9  -2   0   60.39   19.10 
  -9  -2   0   36.40   13.10 
  -9  -2   0   10.60   12.70 
   9  -2   0   24.90   13.60 
  -9  -2   0   20.10   13.40 
  -9  -2   0   42.20   14.00 
   9  -2   0   36.10   15.60 
   9  -2   0   24.20   12.10 
   9  -2   0    8.10   12.70 
   9  -2   0   39.70   15.40 
  -9  -2   0   15.70   12.10 
   9  -2   0   15.40   10.60 
   9  -2   0   72.49   23.10 
   9  -2   0   18.50   13.60 
  -9  -2   0   23.40   14.70 
  -9  -2   0   53.19   17.20 
  -9  -2   0   19.30   13.10 
  -9  -2   0   23.40   15.10 
   9  -2   0   16.80   12.70 
   9  -2   0   14.10   12.10 
   9   2   0   30.60   14.00 
  -9   2   0   42.40   15.80 
   9   2   0   50.19   18.20 
  -9   2   0   50.69   17.10 
   9   2   0   32.60   15.90 
  -9   2   0   11.80   11.40 
   9   2   0   38.30   15.90 
  -9   2   0   19.80   12.20 
   9   2   0   16.70   12.60 
   9   2   0   27.90   13.50 
   9   2   0    8.40   14.80 
   9   2   0   30.70   15.20 
   9   2   0   17.70   14.10 
  -9   2   0   33.90   14.00 
   9   2   0   29.00   15.00 
   9   2   0   22.20   12.00 
   9   2   0   17.90   12.80 
  -9   2   0   25.60   13.20 
  -9   2   0   44.90   15.60 
   9   2   0   37.30   15.40 
 -10  -2   0  140.99   29.60 
  10  -2   0  231.78   37.10 
 -10  -2   0  164.48   32.20 
  10  -2   0  170.48   31.20 
 -10  -2   0  212.98   36.90 
 -10  -2   0  210.78   31.10 
  10  -2   0  191.08   31.90 
  10  -2   0  116.09   25.80 
 -10  -2   0  200.18   37.70 
  10  -2   0  137.99   31.40 
  10  -2   0  237.78   40.90 
 -10  -2   0  199.58   36.80 
 -10  -2   0  213.78   35.60 
  10  -2   0  184.08   32.80 
 -10  -2   0  162.28   34.30 
  10  -2   0  215.98   38.90 
 -10  -2   0  190.88   33.10 
  10  -2   0  173.08   33.80 
 -10  -2   0  202.58   35.40 
  10  -2   0  138.49   30.00 
  10  -2   0  202.28   36.00 
  10   2   0  153.58   32.10 
  10   2   0  189.88   32.60 
  10   2   0  159.08   31.30 
  10   2   0  186.68   35.20 
  10   2   0  182.28   33.20 
  10   2   0  200.88   36.50 
  10   2   0  186.58   33.80 
 -10   2   0  149.09   30.10 
  10   2   0  143.89   31.30 
 -10   2   0  236.48   37.00 
 -10   2   0  184.08   31.50 
 -10   2   0  214.68   33.60 
 -10   2   0  190.78   33.70 
  10   2   0  150.58   29.40 
  10   2   0  230.18   39.40 
  10   2   0  245.48   37.50 
 -10   2   0  103.09   26.60 
  10   2   0  211.78   38.70 
   0  -3   0    4.80    4.10 
   0  -3   0    3.60    3.40 
   0  -3   0    2.30    2.80 
   0  -3   0   -0.90    2.50 
   0  -3   0    2.10    2.30 
   0  -3   0    0.70    2.40 
   0  -3   0    0.90    2.90 
   0  -3   0    0.60    2.40 
   0  -3   0    1.70    2.90 
   0  -3   0   -1.50    1.90 
   0  -3   0   -2.20    2.30 
   0  -3   0   -0.80    1.00 
   0  -3   0   -2.90    1.80 
   0  -3   0   -3.10    2.40 
   0  -3   0   -3.60    1.90 
   0  -3   0    0.30    1.40 
   0  -3   0   -0.50    2.50 
   0  -3   0    1.50    1.10 
   0  -3   0    4.50    2.10 
   0  -3   0    1.00    1.20 
   0  -3   0   -0.50    2.10 
   0  -3   0    2.30    1.70 
   0  -3   0   -2.80    1.40 
   0  -3   0   17.40    5.20 
   0  -3   0   -2.20    1.60 
   0  -3   0    2.60    4.30 
   0  -3   0   -1.80    1.90 
   0   3   0    6.60    3.90 
   0   3   0    1.00    2.90 
   0   3   0    3.10    2.80 
   0   3   0    2.50    1.80 
   0   3   0    5.20    5.40 
   0   3   0    1.60    2.70 
   0   3   0    1.20    2.90 
   0   3   0   -2.80    2.30 
   0   3   0    5.60    2.80 
   0   3   0   -0.20    2.40 
   0   3   0    1.90    3.90 
   0   3   0    0.90    1.20 
   0   3   0   -4.10    1.80 
   0   3   0   -0.30    1.90 
   0   3   0    1.30    1.60 
   0   3   0   -1.00    2.10 
   0   3   0   -1.50    2.40 
   0   3   0    1.10    2.60 
  -1  -3   0   10.00    4.70 
   1  -3   0   33.80    7.30 
   1  -3   0   19.50    2.70 
   1  -3   0   17.10    5.50 
   1  -3   0   17.10    4.30 
   1  -3   0   22.40    3.10 
   1  -3   0   21.30    4.00 
  -1  -3   0   24.30    7.10 
  -1  -3   0   19.40    5.50 
   1  -3   0   22.50    4.90 
   1  -3   0   19.40    5.60 
   1  -3   0   20.60    2.00 
   1  -3   0   22.70    6.30 
   1  -3   0   20.50    5.30 
   1  -3   0   17.30    4.00 
   1  -3   0   10.70    3.20 
  -1  -3   0   15.20    5.10 
  -1  -3   0   17.10    3.10 
  -1  -3   0   24.00    6.70 
  -1  -3   0   19.60    4.00 
   1  -3   0   25.40    3.50 
  -1  -3   0   20.80    5.80 
   1  -3   0   30.60    5.90 
  -1  -3   0   17.90    6.40 
  -1  -3   0   33.80    7.10 
   1  -3   0   17.30    4.30 
   1  -3   0   19.60    4.90 
   1  -3   0   34.70    8.00 
  -1  -3   0   29.10    5.40 
   1  -3   0   18.50    4.60 
   1  -3   0   21.90    3.10 
  -1  -3   0   22.10    4.30 
   1  -3   0   17.10    4.10 
   1  -3   0   41.20    9.70 
  -1  -3   0   17.90    5.70 
   1  -3   0   16.50    2.30 
  -1  -3   0   18.20    5.60 
  -1  -3   0   18.30    3.10 
  -1  -3   0   12.90    4.80 
   1  -3   0   11.00    4.40 
  -1  -3   0   22.80    3.90 
   1  -3   0   23.90    4.90 
  -1  -3   0   19.00    4.90 
  -1  -3   0   24.40    3.70 
  -1  -3   0   21.00    5.20 
   1  -3   0   16.70    2.70 
  -1  -3   0   24.40    6.40 
   1  -3   0   23.20    2.20 
  -1  -3   0   25.60    5.30 
   1  -3   0   18.80    3.70 
  -1  -3   0   23.80    4.40 
  -1  -3   0   34.40    5.70 
  -1  -3   0   17.50    5.80 
   1  -3   0   16.20    4.90 
  -1  -3   0   20.70    5.30 
   1  -3   0   20.70    3.40 
   1  -3   0   17.60    3.90 
   1   3   0   20.30    6.10 
   1   3   0   17.90    3.00 
   1   3   0   21.60    5.90 
  -1   3   0   28.30    6.80 
  -1   3   0   14.70    4.10 
   1   3   0   16.00    3.90 
   1   3   0    8.50    4.50 
   1   3   0   29.10    6.50 
   1   3   0   21.50    3.60 
   1   3   0   17.70    5.60 
  -1   3   0   23.80    5.00 
  -1   3   0   20.70    4.80 
   1   3   0   16.10    5.20 
  -1   3   0   23.00    4.20 
   1   3   0   19.80    3.20 
   1   3   0   13.20    4.50 
   1   3   0   18.40    4.00 
   1   3   0   12.90    4.30 
   1   3   0   16.30    3.80 
   1   3   0   17.60    5.00 
  -1   3   0   24.90    5.40 
  -1   3   0   16.10    5.30 
  -1   3   0   27.20    7.30 
   1   3   0   20.80    4.70 
  -1   3   0   14.70    3.30 
  -1   3   0   21.20    4.60 
   1   3   0   12.50    3.00 
   1   3   0   18.60    5.60 
  -1   3   0   19.80    5.40 
   1   3   0   22.70    6.20 
  -1   3   0   20.10    3.50 
   1   3   0   31.40    6.90 
   1   3   0   25.90    4.10 
   1   3   0    8.80    5.20 
   1   3   0   14.40    5.00 
   1   3   0   22.70    5.80 
  -1   3   0   20.20    5.60 
   1   3   0   18.00    3.30 
  -1   3   0   17.10    2.70 
  -1   3   0   30.10    7.10 
   1   3   0   22.50    7.20 
   1   3   0   22.40    5.10 
  -2  -3   0   36.60    5.80 
   2  -3   0   48.10    6.50 
  -2  -3   0   51.39    8.90 
  -2  -3   0   31.70    5.80 
   2  -3   0   34.50    7.50 
  -2  -3   0   47.90    8.60 
   2  -3   0   21.60    6.10 
   2  -3   0   32.80    5.20 
  -2  -3   0   33.40    7.30 
   2  -3   0   35.20    3.90 
   2  -3   0   40.40    5.40 
  -2  -3   0   49.80    8.60 
  -2  -3   0   34.20    6.00 
  -2  -3   0   38.10    6.80 
  -2  -3   0   28.00    5.70 
  -2  -3   0   54.39   11.50 
   2  -3   0   47.10    8.00 
   2  -3   0   40.50    5.00 
   2  -3   0   27.00    4.00 
  -2  -3   0   33.40    7.30 
   2  -3   0   38.00    4.90 
   2  -3   0   41.60    6.20 
  -2  -3   0   39.80    7.60 
   2  -3   0   42.00    6.30 
  -2  -3   0   30.20    7.60 
   2  -3   0   42.50    5.10 
  -2  -3   0   37.30    8.10 
   2  -3   0   32.80    7.20 
   2  -3   0   31.50    6.50 
   2  -3   0   46.90    8.50 
   2  -3   0   38.30    5.80 
   2  -3   0   53.49   10.70 
   2  -3   0   34.30    4.80 
  -2  -3   0   39.70    7.70 
   2  -3   0   44.40    6.30 
   2  -3   0   35.60    3.70 
   2  -3   0   37.60    5.40 
   2  -3   0   35.60    6.50 
   2  -3   0   17.30    6.80 
  -2  -3   0   28.80    7.10 
  -2  -3   0   38.10    6.10 
   2  -3   0   34.10    6.30 
   2  -3   0   32.10    5.50 
   2  -3   0   34.70    6.40 
   2  -3   0   29.70    6.00 
   2  -3   0   29.80    5.90 
   2  -3   0   48.10    8.80 
  -2  -3   0   28.70    5.30 
   2  -3   0   30.80    5.10 
  -2  -3   0   54.89    9.10 
   2  -3   0   47.40    8.10 
  -2   3   0   40.00    8.70 
   2   3   0   36.40    6.10 
   2   3   0   35.70    6.90 
   2   3   0   25.30    8.20 
   2   3   0   37.70    7.00 
  -2   3   0   37.60    5.30 
   2   3   0   43.80    8.50 
  -2   3   0   29.60    5.10 
  -2   3   0   52.29    9.20 
   2   3   0   32.50    6.80 
   2   3   0   35.10    6.10 
   2   3   0   46.80    9.30 
   2   3   0   36.90    7.10 
  -2   3   0   34.90    4.80 
   2   3   0   44.30    7.10 
   2   3   0   39.50    8.70 
  -2   3   0   25.50    6.60 
   2   3   0   37.90    6.30 
   2   3   0   36.80    6.10 
   2   3   0   37.60    6.10 
  -2   3   0   45.70    7.40 
   2   3   0   48.10    8.40 
   2   3   0   45.30    8.70 
   2   3   0   34.40    8.10 
  -2   3   0   35.30    6.20 
  -2   3   0   28.30    7.20 
  -2   3   0   24.00    4.80 
  -2   3   0   31.90    4.60 
   2   3   0   34.50    8.90 
  -2   3   0   41.50    5.10 
   2   3   0   39.80    6.60 
   2   3   0   32.20    7.50 
   2   3   0   31.10    6.90 
   2   3   0   47.00    6.60 
   2   3   0   27.20    5.90 
  -2   3   0   35.70    6.90 
  -2   3   0   38.80    6.10 
   2   3   0   39.30    7.40 
   3  -3   0    9.90    3.00 
   3  -3   0   -0.30    3.00 
   3  -3   0    1.90    2.70 
   3  -3   0    7.00    3.00 
   3  -3   0    5.80    2.50 
  -3  -3   0    7.70    4.50 
  -3  -3   0    4.60    4.20 
   3  -3   0    8.50    4.80 
   3  -3   0    1.70    3.40 
  -3  -3   0    5.10    4.00 
  -3  -3   0    7.50    5.40 
   3  -3   0    5.80    4.10 
   3  -3   0    5.10    1.80 
  -3  -3   0    6.90    4.80 
  -3  -3   0    9.90    5.40 
  -3  -3   0    1.70    4.20 
  -3  -3   0    3.20    4.80 
   3  -3   0   25.20    6.60 
   3  -3   0    9.20    2.70 
   3  -3   0    1.00    3.80 
   3  -3   0    9.10    3.70 
  -3  -3   0    7.80    4.40 
  -3  -3   0    0.40    3.80 
   3  -3   0    2.80    3.90 
   3  -3   0    2.00    2.50 
   3  -3   0    7.60    4.00 
   3  -3   0    4.10    3.10 
   3  -3   0    0.90    3.10 
   3  -3   0   15.70    5.00 
  -3  -3   0    2.90    5.10 
   3  -3   0    5.30    2.70 
   3  -3   0    6.70    4.30 
  -3  -3   0    0.10    3.70 
  -3  -3   0   -0.90    3.50 
   3  -3   0    8.30    3.70 
  -3  -3   0   -0.30    3.70 
  -3  -3   0    5.30    4.60 
   3  -3   0    1.70    3.30 
   3  -3   0    6.10    3.40 
   3  -3   0    2.10    4.60 
  -3  -3   0    1.60    3.10 
   3  -3   0    2.70    3.50 
   3  -3   0    0.00    2.40 
   3  -3   0    5.10    5.50 
   3  -3   0    4.90    2.40 
   3  -3   0    5.30    1.90 
   3   3   0    7.40    4.40 
   3   3   0    1.00    3.10 
  -3   3   0    0.60    2.80 
   3   3   0    1.30    3.70 
   3   3   0   -0.80    2.90 
   3   3   0   -2.20    3.10 
   3   3   0    1.20    3.50 
   3   3   0    3.20    3.80 
  -3   3   0   11.80    5.00 
   3   3   0    5.00    5.00 
  -3   3   0    7.20    2.20 
   3   3   0    1.00    3.80 
   3   3   0    0.30    2.90 
   3   3   0    6.80    5.20 
   3   3   0    2.70    3.20 
  -3   3   0    2.70    1.90 
  -3   3   0    2.30    3.10 
  -3   3   0    3.70    3.60 
  -3   3   0    7.70    5.00 
   3   3   0    3.00    3.60 
  -3   3   0    3.20    2.60 
   3   3   0    0.40    4.10 
  -3   3   0   13.90    5.90 
  -3   3   0    1.30    3.10 
  -3   3   0    6.10    3.00 
   3   3   0    7.30    5.80 
   3   3   0    1.00    4.70 
  -3   3   0    1.80    3.00 
  -3   3   0    2.10    2.70 
  -3   3   0    6.20    3.20 
   3   3   0    2.80    4.10 
   3   3   0    5.60    6.00 
  -3   3   0   -0.10    2.90 
   4  -3   0  213.18   10.60 
   4  -3   0  180.08   18.50 
   4  -3   0  211.78   10.60 
   4  -3   0  259.77   19.50 
  -4  -3   0  230.78   21.40 
   4  -3   0  171.38   18.00 
   4  -3   0  225.58   17.40 
   4  -3   0  237.18   13.20 
  -4  -3   0  258.07   26.50 
   4  -3   0  225.48   16.10 
   4  -3   0  181.78   20.20 
  -4  -3   0  172.48   19.60 
   4  -3   0  186.48   12.40 
   4  -3   0  207.28   15.70 
  -4  -3   0  181.38   20.50 
   4  -3   0  196.18   11.70 
  -4  -3   0  223.38   17.70 
   4  -3   0  192.18   14.60 
   4  -3   0  200.08   20.00 
  -4  -3   0  190.48   20.10 
   4  -3   0  192.68   13.20 
  -4  -3   0  209.68   22.60 
  -4  -3   0  202.28   22.20 
  -4  -3   0  241.58   23.00 
  -4  -3   0  216.98   25.30 
   4  -3   0  158.38   21.30 
  -4  -3   0  244.88   24.00 
  -4  -3   0  222.48   15.60 
   4  -3   0  263.57   26.20 
   4  -3   0  147.69   15.20 
   4  -3   0  212.58   20.70 
  -4  -3   0  205.78   21.10 
  -4  -3   0  234.68   24.50 
  -4  -3   0  198.58   19.90 
   4  -3   0  220.48   22.20 
   4  -3   0  209.88   12.60 
   4  -3   0  213.08   11.20 
  -4  -3   0  171.38   19.70 
  -4  -3   0  228.18   22.50 
   4   3   0  212.08   23.10 
   4   3   0  156.78   18.60 
   4   3   0  172.08   20.70 
  -4   3   0  185.18   20.20 
  -4   3   0  201.08   14.90 
  -4   3   0  196.68   10.40 
  -4   3   0  137.99   19.80 
   4   3   0  244.38   25.90 
  -4   3   0  180.38   18.50 
  -4   3   0  173.08   14.00 
   4   3   0  217.38   16.50 
   4   3   0  201.28   16.20 
  -4   3   0  192.58   19.60 
   4   3   0  229.88   22.10 
   4   3   0  238.28   22.00 
  -4   3   0  207.88   12.00 
  -4   3   0  199.28   19.20 
   4   3   0  203.18   20.50 
  -4   3   0  200.58   16.20 
   4   3   0  232.28   22.60 
   4   3   0  219.68   21.10 
  -4   3   0  235.38   22.20 
   4   3   0  236.88   17.60 
   4   3   0  204.58   21.10 
  -4   3   0  224.38   16.40 
   4   3   0  245.78   25.60 
   4   3   0  210.58   26.00 
  -5  -3   0  585.84   36.30 
   5  -3   0  532.85   28.80 
   5  -3   0  536.05   38.00 
   5  -3   0  602.14   36.30 
   5  -3   0  599.94   35.00 
  -5  -3   0  550.24   35.00 
  -5  -3   0  579.04   37.00 
  -5  -3   0  542.25   35.00 
  -5  -3   0  563.44   38.20 
  -5  -3   0  504.65   38.10 
  -5  -3   0  569.64   32.80 
  -5  -3   0  573.24   36.80 
  -5  -3   0  584.24   37.90 
  -5  -3   0  532.85   36.80 
   5  -3   0  584.94   26.80 
  -5  -3   0  625.34   41.80 
   5  -3   0  544.15   24.60 
   5  -3   0  594.54   37.50 
   5  -3   0  603.24   33.80 
   5  -3   0  525.15   32.20 
   5  -3   0  570.94   35.40 
  -5  -3   0  603.84   35.70 
   5  -3   0  562.64   37.40 
   5  -3   0  616.34   39.70 
   5  -3   0  557.24   30.90 
   5  -3   0  574.64   23.80 
  -5  -3   0  545.05   33.90 
  -5  -3   0  543.35   35.00 
   5  -3   0  579.94   35.10 
  -5  -3   0  603.24   38.00 
  -5  -3   0  623.24   37.10 
   5  -3   0  605.74   35.20 
   5  -3   0  562.54   24.80 
   5  -3   0  594.44   40.20 
   5  -3   0  565.44   30.00 
  -5   3   0  615.74   34.00 
   5   3   0  595.94   32.00 
   5   3   0  511.05   35.50 
  -5   3   0  603.94   33.70 
   5   3   0  624.44   36.80 
  -5   3   0  614.04   29.90 
  -5   3   0  537.45   34.90 
  -5   3   0  527.15   33.60 
   5   3   0  562.34   36.40 
   5   3   0  588.94   39.20 
  -5   3   0  603.54   39.00 
  -5   3   0  566.04   34.50 
  -5   3   0  567.94   24.40 
   5   3   0  490.65   34.10 
   5   3   0  586.34   34.70 
   5   3   0  507.75   39.50 
  -5   3   0  624.54   33.20 
   5   3   0  527.75   35.70 
   5   3   0  573.74   39.00 
  -5   3   0  564.54   26.00 
   5   3   0  621.94   39.10 
  -5   3   0  535.55   35.90 
   5   3   0  571.34   36.50 
   5   3   0  583.44   34.20 
   5   3   0  544.15   35.30 
   5   3   0  570.64   33.60 
  -6  -3   0  564.74   37.20 
  -6  -3   0  520.65   37.80 
  -6  -3   0  522.55   35.70 
  -6  -3   0  603.54   38.40 
  -6  -3   0  541.65   34.60 
  -6  -3   0  553.94   38.90 
   6  -3   0  537.75   23.50 
  -6  -3   0  496.55   37.80 
  -6  -3   0  517.55   38.50 
   6  -3   0  548.65   31.80 
   6  -3   0  521.65   35.20 
   6  -3   0  493.45   38.70 
  -6  -3   0  563.94   36.40 
   6  -3   0  539.45   34.40 
   6  -3   0  506.85   34.70 
  -6  -3   0  621.54   40.10 
  -6  -3   0  588.74   38.80 
  -6  -3   0  510.75   40.80 
  -6  -3   0  597.34   37.90 
  -6  -3   0  532.25   31.80 
   6  -3   0  627.84   38.80 
  -6  -3   0  542.75   41.20 
   6  -3   0  555.64   36.90 
   6  -3   0  620.34   40.80 
  -6  -3   0  537.55   39.90 
   6  -3   0  517.75   38.60 
   6  -3   0  532.15   31.40 
   6  -3   0  501.65   39.00 
   6  -3   0  494.95   33.00 
   6  -3   0  570.34   29.20 
   6  -3   0  559.84   31.70 
   6  -3   0  509.75   36.10 
   6  -3   0  414.46   42.50 
   6   3   0  567.94   40.50 
   6   3   0  516.85   30.20 
  -6   3   0  521.25   36.90 
  -6   3   0  598.04   35.50 
   6   3   0  524.25   37.60 
  -6   3   0  537.45   35.80 
  -6   3   0  533.15   34.20 
   6   3   0  461.85   37.60 
  -6   3   0  509.95   35.30 
  -6   3   0  516.05   33.30 
  -6   3   0  545.95   25.80 
   6   3   0  539.95   35.20 
   6   3   0  429.86   45.10 
   6   3   0  540.55   38.30 
  -6   3   0  563.84   28.60 
   6   3   0  547.55   37.20 
   6   3   0  506.85   36.30 
   6   3   0  553.34   38.40 
   6   3   0  578.44   36.30 
   6   3   0  487.35   37.90 
   6   3   0  499.95   36.10 
   6   3   0  567.94   35.40 
  -6   3   0  474.55   36.30 
   7  -3   0   18.10   10.30 
   7  -3   0   22.70    8.20 
   7  -3   0   31.10   11.10 
   7  -3   0   34.90   12.60 
   7  -3   0   22.50   11.40 
  -7  -3   0   19.30    7.60 
  -7  -3   0   21.10   10.00 
   7  -3   0   13.30   10.40 
  -7  -3   0   15.10   10.80 
  -7  -3   0   27.90   10.00 
  -7  -3   0   26.10   11.20 
   7  -3   0   27.00    7.20 
   7  -3   0   29.00   13.00 
  -7  -3   0   20.10   11.20 
  -7  -3   0    8.40    9.20 
  -7  -3   0    5.00    9.40 
   7  -3   0   22.40   10.80 
  -7  -3   0   20.80   10.40 
   7  -3   0   31.10    9.50 
   7  -3   0   37.40   12.70 
  -7  -3   0   27.20   11.90 
  -7  -3   0   20.40    9.60 
  -7  -3   0   32.20   12.70 
  -7  -3   0    8.10    8.80 
   7  -3   0   16.10   10.10 
   7  -3   0   14.40    9.40 
  -7  -3   0   10.40    8.90 
   7  -3   0   30.60   11.60 
  -7  -3   0   25.20   10.10 
  -7   3   0   19.00    9.20 
   7   3   0   10.50    6.20 
   7   3   0   36.40   13.50 
   7   3   0   23.00   10.90 
   7   3   0   18.70    9.20 
  -7   3   0   25.30   10.80 
  -7   3   0   14.20    8.80 
   7   3   0   -0.60    7.20 
   7   3   0   19.90   10.70 
   7   3   0   39.40   14.60 
  -7   3   0   24.30   11.00 
   7   3   0   38.00   11.70 
   7   3   0   26.70    9.60 
   7   3   0   16.20    9.80 
  -7   3   0   14.00    8.80 
   7   3   0   34.30   13.40 
   7   3   0   38.00   15.60 
   7   3   0   27.00   11.30 
  -7   3   0   13.90   10.50 
  -7   3   0   23.90    9.70 
   7   3   0   27.50   11.70 
  -8  -3   0   -5.60    8.30 
  -8  -3   0    8.90   10.80 
  -8  -3   0   -1.10    9.00 
  -8  -3   0    0.20    9.80 
   8  -3   0    6.00    9.40 
  -8  -3   0   -6.30    7.40 
  -8  -3   0    4.50    7.80 
  -8  -3   0   -1.90    6.80 
  -8  -3   0    6.00   10.50 
   8  -3   0    3.20    9.50 
   8  -3   0    3.20   10.20 
   8  -3   0   12.00    9.00 
   8  -3   0    5.40    8.50 
  -8  -3   0   -3.70    7.50 
   8  -3   0    1.60    7.90 
   8  -3   0   -5.20    7.50 
   8  -3   0   -3.80    8.20 
   8  -3   0   -3.20    9.20 
  -8  -3   0   15.50   10.00 
   8  -3   0   -5.20    9.00 
  -8  -3   0    4.10    8.80 
  -8  -3   0    6.70    8.30 
   8  -3   0    6.50   10.50 
  -8  -3   0   -2.60    8.00 
   8   3   0    4.20    8.30 
  -8   3   0    7.10    8.60 
   8   3   0    9.50    8.90 
   8   3   0   -4.50    8.20 
   8   3   0   -6.20    7.80 
   8   3   0    6.20    8.60 
  -8   3   0    4.50    8.70 
  -8   3   0    4.20    9.50 
   8   3   0   25.80   12.70 
  -8   3   0   -8.80    6.20 
   8   3   0   12.70   12.40 
   8   3   0   12.50    8.90 
  -8   3   0    0.20    7.40 
  -8   3   0    7.00    8.30 
   8   3   0    3.60    9.70 
   8   3   0    1.90    8.10 
   8   3   0    0.20   11.00 
  -8   3   0    1.00    7.10 
   8   3   0    4.80    8.60 
   8   3   0   17.70   11.20 
   9  -3   0   -4.20    8.50 
  -9  -3   0   -0.20    9.70 
  -9  -3   0   -1.50    7.40 
   9  -3   0   13.20   12.30 
   9  -3   0   -1.10    9.10 
  -9  -3   0    3.30   10.10 
  -9  -3   0   11.20    9.90 
   9  -3   0    0.60   12.80 
  -9  -3   0    4.30   10.70 
  -9  -3   0    4.20   10.60 
   9  -3   0    4.50   10.70 
   9  -3   0   21.50   14.60 
  -9  -3   0  -10.00    8.00 
  -9  -3   0   10.10   10.60 
  -9  -3   0    6.30   11.50 
   9  -3   0    6.60   11.70 
   9  -3   0  -10.90    9.10 
  -9  -3   0   -2.60    9.70 
  -9  -3   0    7.50    8.30 
   9  -3   0   -3.90    9.10 
   9  -3   0   -1.70    9.80 
  -9  -3   0    8.90   10.40 
  -9  -3   0   -4.80   10.00 
   9   3   0    3.20   11.10 
   9   3   0    7.10   10.10 
   9   3   0    4.10    9.40 
  -9   3   0    4.10   10.10 
   9   3   0   -0.20    9.60 
   9   3   0    0.90   10.50 
  -9   3   0   -3.00    8.80 
  -9   3   0    0.60    8.00 
   9   3   0   -2.70    8.20 
   9   3   0   41.20   17.50 
  -9   3   0    7.90   10.50 
   9   3   0    9.80   13.50 
   9   3   0   11.40   11.80 
   9   3   0   -2.10   11.10 
   9   3   0   -1.90    9.90 
  -9   3   0    8.70   10.20 
   9   3   0    1.30   10.50 
  -9   3   0    9.60   10.20 
   9   3   0   12.80   12.10 
  10  -3   0   74.69   21.40 
  10  -3   0   72.99   24.20 
 -10  -3   0   61.99   22.10 
 -10  -3   0   73.79   24.50 
  10  -3   0   50.69   20.90 
  10  -3   0   55.69   23.00 
 -10  -3   0   65.79   18.60 
  10  -3   0   68.49   21.80 
  10  -3   0   58.79   21.50 
 -10  -3   0   59.09   20.50 
  10  -3   0   76.99   25.20 
 -10  -3   0   34.00   18.40 
 -10  -3   0   55.29   21.20 
 -10  -3   0   33.00   15.50 
 -10  -3   0  128.89   28.10 
 -10  -3   0   37.70   15.90 
 -10  -3   0   58.29   22.10 
 -10  -3   0   78.49   24.40 
 -10  -3   0   62.69   19.30 
  10  -3   0   62.69   22.00 
  10  -3   0   64.59   20.10 
 -10  -3   0   56.09   22.60 
  10  -3   0   32.00   17.90 
  10   3   0   53.59   22.70 
 -10   3   0   61.19   19.80 
 -10   3   0   51.39   18.20 
 -10   3   0   67.19   19.50 
  10   3   0   82.09   24.90 
  10   3   0   55.39   23.70 
  10   3   0   77.59   25.20 
  10   3   0   89.39   23.90 
  10   3   0   79.89   25.90 
  10   3   0   61.79   22.00 
  10   3   0   31.40   15.70 
  10   3   0   50.49   19.50 
  10   3   0   21.40   14.50 
  10   3   0   49.70   19.40 
 -10   3   0   51.59   19.10 
   0  -4   0  969.70   43.80 
   0  -4   0  982.60   49.20 
   0  -4   0  830.42   41.20 
   0  -4   0  914.31   42.10 
   0  -4   0  953.50   39.30 
   0  -4   0  898.91   34.90 
   0  -4   0 1000.90   50.29 
   0  -4   0  842.82   44.90 
   0  -4   0  926.91   42.50 
   0  -4   0  911.41   43.40 
   0  -4   0  916.31   42.90 
   0  -4   0  921.61   38.40 
   0  -4   0  899.51   43.10 
   0  -4   0  882.41   35.60 
   0  -4   0  899.11   36.00 
   0  -4   0  969.20   46.00 
   0  -4   0  865.61   44.80 
   0  -4   0 1002.20   44.30 
   0  -4   0  871.71   36.40 
   0  -4   0  985.20   45.10 
   0  -4   0  863.81   42.10 
   0   4   0  947.91   47.70 
   0   4   0  917.21   45.70 
   0   4   0  928.71   46.30 
   0   4   0  900.41   44.40 
   0   4   0  921.21   43.90 
   0   4   0  871.71   43.60 
   0   4   0  887.31   38.90 
   0   4   0  925.61   38.50 
   0   4   0  982.90   45.70 
   0   4   0  966.20   39.50 
   0   4   0  891.51   43.60 
   0   4   0  898.11   35.00 
   0   4   0  886.41   42.70 
   0   4   0  956.00   45.50 
   0   4   0 1036.30   49.70 
   0   4   0  940.11   43.10 
   0   4   0  941.01   52.49 
   0   4   0  919.61   41.90 
  -1  -4   0 4081.29  154.08 
  -1  -4   0 4056.99  158.48 
   1  -4   0 3981.20  155.58 
   1  -4   0 4178.78  163.88 
   1  -4   0 4171.58  155.18 
  -1  -4   0 4205.28  157.98 
  -1  -4   0 4055.29  148.79 
   1  -4   0 3993.80  152.58 
  -1  -4   0 4049.99  151.48 
  -1  -4   0 4212.08  159.28 
   1  -4   0 4103.89  154.68 
  -1  -4   0 3988.00  150.28 
   1  -4   0 3666.73  154.18 
   1  -4   0 4136.79  147.49 
   1  -4   0 4150.38  150.88 
  -1  -4   0 4200.08  151.78 
   1  -4   0 4057.79  161.98 
   1  -4   0 4048.80  146.99 
  -1  -4   0 4069.89  158.48 
  -1  -4   0 4081.09  154.38 
   1  -4   0 4108.59  154.98 
  -1  -4   0 4250.97  157.58 
   1  -4   0 4099.49  154.98 
   1  -4   0 4068.59  158.28 
  -1  -4   0 3977.90  159.48 
   1  -4   0 4076.89  152.58 
   1  -4   0 3653.33  151.18 
  -1  -4   0 4156.98  164.18 
   1  -4   0 4121.09  147.99 
  -1  -4   0 4091.79  148.09 
   1  -4   0 4069.39  153.38 
   1  -4   0 4173.58  155.18 
  -1  -4   0 4160.58  157.18 
   1  -4   0 4037.70  154.88 
   1  -4   0 3585.64  161.78 
   1  -4   0 4031.40  147.79 
  -1  -4   0 4113.39  156.48 
   1  -4   0 4085.99  146.39 
  -1  -4   0 4136.39  151.78 
  -1  -4   0 4143.99  148.79 
  -1  -4   0 4007.60  159.78 
   1  -4   0 4120.09  148.99 
  -1  -4   0 4064.79  159.88 
   1  -4   0 3952.70  147.69 
   1   4   0 4016.20  162.98 
   1   4   0 4073.59  149.09 
   1   4   0 4008.80  158.78 
  -1   4   0 4048.40  158.68 
  -1   4   0 3969.80  158.78 
   1   4   0 3859.11  162.58 
  -1   4   0 4195.18  157.18 
  -1   4   0 4145.39  156.78 
  -1   4   0 4087.49  160.88 
  -1   4   0 4162.38  155.58 
   1   4   0 4022.60  147.79 
  -1   4   0 3978.90  158.18 
  -1   4   0 4133.39  149.09 
   1   4   0 4054.09  153.38 
   1   4   0 4186.88  149.09 
   1   4   0 4063.69  159.58 
   1   4   0 4044.10  157.48 
   1   4   0 4050.39  153.38 
  -1   4   0 4118.89  149.99 
   1   4   0 4130.19  147.69 
  -1   4   0 4208.78  161.18 
   1   4   0 4128.49  159.38 
   1   4   0 4059.19  159.28 
   1   4   0 4142.49  147.79 
   1   4   0 4006.40  149.49 
   1   4   0 4106.69  155.68 
   1   4   0 3987.00  162.28 
   1   4   0 4190.88  152.18 
   1   4   0 4214.98  160.68 
  -1   4   0 3982.50  154.18 
  -1   4   0 4210.58  152.98 
   1   4   0 4102.99  152.58 
  -1   4   0 3995.50  155.38 
  -1   4   0 3814.42  162.78 
   1   4   0 4043.40  153.48 
   1   4   0 4184.88  160.08 
  -2  -4   0  413.56   27.40 
   2  -4   0  393.66   22.50 
   2  -4   0  425.66   24.80 
   2  -4   0  409.86   22.90 
   2  -4   0  420.56   22.10 
  -2  -4   0  411.16   26.40 
  -2  -4   0  401.86   25.90 
  -2  -4   0  424.56   27.40 
   2  -4   0  407.76   21.00 
   2  -4   0  432.86   25.80 
  -2  -4   0  373.96   29.20 
  -2  -4   0  393.36   20.80 
   2  -4   0  427.56   24.90 
   2  -4   0  405.36   16.10 
   2  -4   0  423.56   22.70 
   2  -4   0  415.36   20.20 
   2  -4   0  433.96   21.90 
   2  -4   0  452.05   23.10 
  -2  -4   0  406.46   27.20 
   2  -4   0  383.76   24.40 
   2  -4   0  400.56   24.00 
  -2  -4   0  433.06   21.70 
  -2  -4   0  397.96   23.10 
   2  -4   0  422.56   18.90 
   2  -4   0  399.66   17.80 
   2  -4   0  366.46   27.90 
  -2  -4   0  424.66   21.30 
   2  -4   0  408.76   21.10 
   2  -4   0  440.76   23.30 
   2  -4   0  405.76   21.30 
   2  -4   0  398.46   22.70 
  -2  -4   0  397.06   26.30 
   2  -4   0  419.86   22.80 
   2  -4   0  380.86   25.70 
  -2  -4   0  409.76   25.40 
  -2  -4   0  433.86   22.50 
  -2  -4   0  405.16   21.20 
   2  -4   0  410.06   20.00 
  -2  -4   0  414.56   25.10 
   2  -4   0  397.26   17.40 
   2  -4   0  406.76   18.50 
   2  -4   0  423.76   20.80 
   2  -4   0  385.06   25.80 
   2  -4   0  408.76   20.40 
   2  -4   0  401.46   19.50 
  -2  -4   0  459.45   23.60 
  -2   4   0  421.36   27.40 
  -2   4   0  392.96   25.10 
  -2   4   0  386.56   26.00 
  -2   4   0  401.26   20.20 
   2   4   0  403.26   21.70 
  -2   4   0  453.25   27.40 
  -2   4   0  388.56   21.50 
  -2   4   0  429.66   24.50 
   2   4   0  399.56   22.90 
  -2   4   0  407.06   21.20 
   2   4   0  488.75   30.30 
  -2   4   0  418.26   19.00 
   2   4   0  438.36   27.70 
   2   4   0  386.16   27.70 
  -2   4   0  422.36   24.50 
   2   4   0  428.36   29.80 
  -2   4   0  444.36   22.80 
   2   4   0  386.46   26.70 
   2   4   0  416.46   23.60 
   2   4   0  397.56   23.50 
   2   4   0  395.16   20.80 
   2   4   0  382.46   25.50 
   2   4   0  456.45   26.10 
   2   4   0  449.26   21.70 
   2   4   0  412.96   22.80 
   2   4   0  415.06   24.20 
   2   4   0  446.36   21.50 
   2   4   0  403.66   26.20 
   2   4   0  399.96   27.30 
   2   4   0  425.66   22.00 
   2   4   0  404.06   27.70 
   2   4   0  419.86   21.80 
  -2   4   0  348.87   26.10 
  -2   4   0  457.35   27.00 
   2   4   0  394.46   27.20 
   2   4   0  455.35   22.70 
   2   4   0  418.46   27.70 
   3  -4   0   59.79    8.60 
   3  -4   0   43.60    6.10 
  -3  -4   0   46.50    8.30 
  -3  -4   0   57.39   13.70 
   3  -4   0   59.19    5.50 
   3  -4   0   69.89   11.90 
  -3  -4   0   73.69   12.70 
   3  -4   0   65.69    9.10 
   3  -4   0   52.69    9.60 
   3  -4   0   55.89    7.60 
   3  -4   0   92.49   13.90 
   3  -4   0   39.40   11.30 
  -3  -4   0   67.09   10.60 
  -3  -4   0   59.49   11.60 
  -3  -4   0   64.29    9.80 
   3  -4   0   59.39   10.50 
   3  -4   0   60.39   10.10 
   3  -4   0   61.19    7.50 
   3  -4   0   55.19   11.20 
   3  -4   0   44.80    6.30 
   3  -4   0   48.30    9.60 
  -3  -4   0   49.10   10.60 
   3  -4   0   62.99    8.80 
  -3  -4   0   49.80   11.40 
  -3  -4   0   57.19    8.50 
  -3  -4   0   63.79   12.30 
   3  -4   0   51.29    5.90 
   3  -4   0   62.59    7.70 
   3  -4   0   56.29    8.40 
   3  -4   0   54.29   12.00 
   3  -4   0   53.99    8.40 
   3  -4   0   69.39    9.10 
  -3  -4   0   57.69   11.10 
  -3  -4   0   60.79   11.70 
   3  -4   0   52.99    6.00 
   3  -4   0   62.49   11.40 
   3  -4   0   59.49    7.80 
   3  -4   0   65.89    7.80 
   3  -4   0   62.09   11.50 
   3  -4   0   65.19    9.00 
  -3  -4   0   62.19   12.80 
   3  -4   0   60.99    9.90 
  -3  -4   0   39.90   10.20 
   3  -4   0   55.29    8.90 
   3   4   0   79.59   15.20 
   3   4   0   74.49   11.90 
  -3   4   0   60.09    7.20 
  -3   4   0   76.79   14.10 
   3   4   0   50.59    9.00 
  -3   4   0   42.60    9.00 
   3   4   0   45.80    8.10 
   3   4   0   61.49   11.00 
   3   4   0   70.49   13.20 
   3   4   0   24.80    9.10 
   3   4   0   77.69   12.90 
   3   4   0   63.69    9.60 
   3   4   0   60.19   12.70 
   3   4   0   61.29    9.80 
  -3   4   0   67.09   12.20 
  -3   4   0   55.99    9.30 
   3   4   0   55.09    9.90 
  -3   4   0   61.29    8.00 
  -3   4   0   70.69   11.70 
  -3   4   0   48.20    7.00 
   3   4   0   49.90   10.90 
  -3   4   0   59.19    7.30 
   3   4   0   56.59    9.00 
  -3   4   0   48.70    8.00 
   3   4   0   53.49   12.20 
  -3   4   0   44.90    8.30 
   3   4   0   51.49    8.80 
   3   4   0   53.49    9.90 
  -3   4   0   37.50    8.40 
   4  -4   0  162.38   15.20 
   4  -4   0  169.18   17.90 
  -4  -4   0  159.58   19.90 
   4  -4   0  186.28   19.90 
  -4  -4   0  158.68   21.20 
   4  -4   0  128.39    9.20 
  -4  -4   0  166.98   15.70 
   4  -4   0  176.18   17.90 
   4  -4   0  139.79   14.00 
   4  -4   0  155.48   17.20 
   4  -4   0  140.29   10.40 
   4  -4   0  148.09   14.80 
  -4  -4   0  112.49   17.30 
  -4  -4   0  137.49   16.30 
  -4  -4   0  157.18   18.80 
   4  -4   0  149.79   14.40 
   4  -4   0  157.88   16.90 
  -4  -4   0  156.78   21.50 
   4  -4   0  136.29   14.30 
  -4  -4   0  148.29   19.70 
   4  -4   0  139.19   13.90 
  -4  -4   0  105.29   16.60 
  -4  -4   0  161.78   20.00 
  -4  -4   0  126.09   20.70 
  -4  -4   0  132.09   18.80 
   4  -4   0  148.39   18.50 
   4  -4   0  171.08   18.50 
   4  -4   0  142.89    8.20 
   4  -4   0  160.48   11.90 
   4  -4   0  136.89   10.10 
  -4  -4   0  157.48   17.30 
   4  -4   0  117.99   20.10 
   4  -4   0  129.39   17.30 
  -4  -4   0  169.68   21.10 
  -4  -4   0  167.78   19.80 
   4  -4   0  157.48   15.20 
   4  -4   0  178.98   19.90 
   4  -4   0  121.09   18.90 
   4  -4   0  161.58   15.00 
   4  -4   0  150.08    9.70 
   4  -4   0  144.29    8.00 
   4  -4   0  137.09   18.10 
  -4  -4   0  149.29   20.60 
   4   4   0  127.89   17.10 
   4   4   0  150.48   20.20 
  -4   4   0  150.98   17.40 
  -4   4   0  197.58   15.80 
   4   4   0  141.19   16.10 
  -4   4   0  142.99   20.80 
   4   4   0  180.98   25.10 
  -4   4   0  126.59   14.90 
  -4   4   0   95.99   13.40 
   4   4   0  138.39   18.00 
   4   4   0  178.68   19.80 
  -4   4   0  139.69   16.30 
  -4   4   0  164.08   11.00 
  -4   4   0  171.28   13.50 
   4   4   0  152.58   17.50 
  -4   4   0  130.69   11.40 
   4   4   0  151.28   18.70 
   4   4   0  133.99   20.80 
   4   4   0  139.29   17.90 
   4   4   0  128.69   16.30 
  -4   4   0  159.28   20.30 
   4   4   0  105.79   17.50 
   4   4   0  177.98   23.40 
   4   4   0  132.09   15.80 
  -5  -4   0  677.33   44.00 
   5  -4   0  727.93   33.90 
  -5  -4   0  765.82   43.50 
   5  -4   0  743.73   29.10 
   5  -4   0  738.73   37.70 
  -5  -4   0  731.53   49.50 
  -5  -4   0  764.32   42.70 
  -5  -4   0  694.53   44.20 
   5  -4   0  793.32   42.50 
  -5  -4   0  749.62   44.50 
   5  -4   0  752.02   43.20 
   5  -4   0  741.33   32.30 
   5  -4   0  729.03   29.50 
   5  -4   0  756.02   30.00 
   5  -4   0  771.82   40.20 
   5  -4   0  726.93   48.80 
  -5  -4   0  781.72   46.60 
   5  -4   0  774.82   42.40 
   5  -4   0  784.22   45.50 
  -5  -4   0  744.83   42.30 
  -5  -4   0  755.22   44.70 
  -5  -4   0  744.53   44.00 
  -5  -4   0  672.73   46.90 
   5  -4   0  686.13   43.80 
  -5  -4   0  744.63   45.20 
  -5  -4   0  678.93   44.90 
   5  -4   0  823.02   39.90 
   5  -4   0  758.42   41.70 
   5  -4   0  705.43   34.00 
  -5  -4   0  811.72   48.00 
   5  -4   0  743.43   30.70 
   5  -4   0  740.83   32.60 
   5  -4   0  770.92   47.50 
  -5  -4   0  785.92   47.30 
   5  -4   0  834.82   38.20 
   5  -4   0  759.42   43.50 
  -5  -4   0  763.32   42.90 
   5  -4   0  704.93   41.40 
   5   4   0  671.93   49.30 
   5   4   0  741.23   41.50 
   5   4   0  708.43   46.10 
  -5   4   0  684.93   39.30 
  -5   4   0  772.92   38.00 
  -5   4   0  713.13   42.10 
  -5   4   0  751.62   32.50 
   5   4   0  863.81   44.90 
   5   4   0  734.73   48.20 
  -5   4   0  741.33   39.40 
  -5   4   0  731.73   41.10 
   5   4   0  728.03   47.60 
   5   4   0  708.43   39.90 
   5   4   0  766.52   46.60 
  -5   4   0  778.02   39.00 
   5   4   0  766.12   44.90 
   5   4   0  763.42   43.70 
  -5   4   0  704.33   40.70 
   5   4   0  761.12   44.20 
  -5   4   0  808.12   45.10 
   5   4   0  702.73   40.40 
   5   4   0  746.63   43.70 
  -5   4   0  751.12   47.60 
   5   4   0  728.93   44.00 
  -6  -4   0  817.22   51.09 
   6  -4   0  744.03   49.30 
  -6  -4   0  792.32   55.19 
  -6  -4   0  767.22   49.30 
   6  -4   0  867.31   49.10 
  -6  -4   0  799.82   47.90 
  -6  -4   0  809.32   48.10 
   6  -4   0  812.72   40.30 
  -6  -4   0  797.52   49.10 
   6  -4   0  782.42   52.59 
  -6  -4   0  722.23   50.69 
   6  -4   0  735.43   52.79 
   6  -4   0  840.42   42.00 
  -6  -4   0  833.02   52.19 
  -6  -4   0  865.51   50.39 
   6  -4   0  805.72   48.60 
   6  -4   0  857.61   48.30 
   6  -4   0  906.51   49.00 
   6  -4   0  799.62   53.09 
  -6  -4   0  860.31   53.19 
  -6  -4   0  768.02   50.69 
  -6  -4   0  763.32   45.30 
  -6  -4   0  796.12   53.99 
  -6  -4   0  789.72   49.00 
   6  -4   0  866.91   45.60 
  -6  -4   0  847.52   48.60 
   6  -4   0  813.92   51.09 
   6  -4   0  818.32   46.50 
  -6  -4   0  778.22   49.70 
   6  -4   0  798.92   43.20 
   6  -4   0  798.82   47.50 
  -6   4   0  773.62   47.70 
  -6   4   0  856.61   44.00 
   6   4   0  680.73   48.50 
   6   4   0  835.02   49.60 
   6   4   0  808.92   52.89 
  -6   4   0  862.91   41.90 
  -6   4   0  787.42   44.70 
   6   4   0  847.92   44.20 
   6   4   0  850.01   49.80 
   6   4   0  817.22   48.90 
  -6   4   0  833.82   45.50 
  -6   4   0  785.32   46.50 
  -6   4   0  714.63   50.79 
   6   4   0  931.61   59.59 
  -6   4   0  849.02   47.40 
   6   4   0  831.42   48.70 
   6   4   0  876.21   48.00 
   6   4   0  772.62   49.00 
   6   4   0  962.70   57.09 
   6   4   0  871.11   46.80 
   6   4   0  771.72   49.50 
  -6   4   0  863.11   50.69 
   6   4   0  879.51   53.89 
   7  -4   0 1023.50   62.59 
   7  -4   0  990.30   55.79 
  -7  -4   0  860.91   58.59 
  -7  -4   0  947.81   57.59 
   7  -4   0  859.41   55.89 
  -7  -4   0 1104.19   59.49 
   7  -4   0  994.80   63.69 
  -7  -4   0  928.31   52.09 
  -7  -4   0  952.50   57.49 
  -7  -4   0 1024.80   60.99 
   7  -4   0 1003.90   63.19 
  -7  -4   0  978.10   60.89 
  -7  -4   0  913.21   64.19 
  -7  -4   0 1093.89   60.09 
   7  -4   0  970.10   50.99 
   7  -4   0 1020.20   57.69 
   7  -4   0  823.32   61.89 
   7  -4   0  994.90   54.09 
  -7  -4   0  944.41   58.49 
  -7  -4   0  947.81   55.89 
  -7  -4   0 1048.70   61.49 
   7  -4   0  947.71   60.29 
   7  -4   0  944.31   55.49 
  -7  -4   0  997.00   65.09 
  -7  -4   0  994.90   61.69 
   7  -4   0 1016.70   58.49 
   7   4   0 1057.99   56.29 
   7   4   0  826.12   56.39 
   7   4   0  923.31   57.29 
  -7   4   0  957.40   55.89 
   7   4   0  990.90   59.89 
  -7   4   0  988.70   59.99 
   7   4   0  936.11   61.29 
  -7   4   0  906.71   57.09 
   7   4   0  957.30   55.89 
  -7   4   0 1051.29   54.79 
   7   4   0  900.91   61.29 
   7   4   0  984.30   67.19 
   7   4   0  962.30   55.79 
  -7   4   0 1002.70   57.09 
  -7   4   0  960.80   54.29 
   7   4   0 1046.70   63.79 
   7   4   0 1000.80   60.29 
   7   4   0  970.60   58.49 
   7   4   0  987.00   49.99 
   7   4   0  995.00   60.79 
  -7   4   0  975.60   52.89 
  -8  -4   0  459.65   48.80 
   8  -4   0  429.76   48.30 
   8  -4   0  449.66   50.99 
   8  -4   0  308.07   41.10 
  -8  -4   0  342.17   40.00 
   8  -4   0  418.06   47.70 
  -8  -4   0  394.26   41.00 
   8  -4   0  382.16   41.00 
   8  -4   0  371.46   40.70 
   8  -4   0  509.05   47.80 
   8  -4   0  382.56   40.60 
  -8  -4   0  479.65   43.60 
   8  -4   0  434.96   40.60 
  -8  -4   0  433.16   50.49 
  -8  -4   0  409.56   45.00 
  -8  -4   0  426.46   51.29 
  -8  -4   0  562.84   52.79 
   8  -4   0  399.86   45.20 
  -8  -4   0  494.35   48.10 
  -8  -4   0  447.96   45.00 
  -8  -4   0  403.16   42.80 
  -8  -4   0  399.46   42.60 
  -8  -4   0  510.05   50.49 
   8   4   0  480.45   50.79 
  -8   4   0  475.85   46.00 
   8   4   0  352.06   40.70 
   8   4   0  471.15   47.00 
   8   4   0  367.96   42.90 
  -8   4   0  455.05   41.80 
   8   4   0  479.65   46.80 
   8   4   0  401.46   45.30 
   8   4   0  484.95   45.00 
  -8   4   0  410.26   41.50 
   8   4   0  421.56   40.90 
   8   4   0  331.47   42.60 
   8   4   0  373.26   44.90 
   8   4   0  379.86   43.20 
   8   4   0  486.75   54.89 
  -8   4   0  430.16   42.90 
  -9  -4   0  250.47   35.70 
  -9  -4   0  211.48   31.50 
  -9  -4   0  245.28   40.30 
   9  -4   0  235.18   39.70 
   9  -4   0  303.57   44.20 
   9  -4   0  260.37   34.50 
   9  -4   0  235.98   34.50 
  -9  -4   0  283.57   40.40 
  -9  -4   0  289.77   38.40 
   9  -4   0  310.67   42.80 
  -9  -4   0  269.27   43.20 
  -9  -4   0  233.08   36.20 
  -9  -4   0  232.98   38.20 
   9  -4   0  273.77   35.60 
  -9  -4   0  286.77   40.20 
   9  -4   0  257.87   36.50 
  -9  -4   0  226.38   35.30 
   9  -4   0  268.57   40.90 
   9  -4   0  329.07   43.90 
   9  -4   0  264.67   36.60 
  -9  -4   0  335.57   42.80 
  -9  -4   0  243.78   34.40 
   9   4   0  285.47   41.80 
   9   4   0  282.17   44.70 
   9   4   0  246.48   34.30 
   9   4   0  330.67   44.40 
   9   4   0  276.77   34.30 
   9   4   0  265.87   40.30 
   9   4   0  308.87   39.20 
  -9   4   0  299.47   39.50 
  -9   4   0  279.07   36.70 
   9   4   0  197.78   35.60 
   9   4   0  227.18   35.80 
   9   4   0  242.98   37.00 
  -9   4   0  268.27   34.80 
   9   4   0  222.58   34.50 
   9   4   0  331.47   43.70 
  -9   4   0  294.77   37.40 
   9   4   0  248.78   37.60 
   0  -5   0    9.10    6.00 
   0  -5   0    1.80    3.90 
   0  -5   0    3.20    3.20 
   0  -5   0   -1.00    4.40 
   0  -5   0    3.10    3.80 
   0  -5   0   11.90    7.30 
   0  -5   0   19.50    7.70 
   0  -5   0    8.20    2.60 
   0  -5   0    3.20    1.70 
   0  -5   0    4.20    4.60 
   0  -5   0   10.80    6.40 
   0  -5   0    5.80    5.00 
   0  -5   0    0.50    3.10 
   0  -5   0    1.70    4.50 
   0  -5   0    2.30    4.00 
   0  -5   0    2.70    1.80 
   0  -5   0   -1.80    3.10 
   0  -5   0    1.80    0.90 
   0  -5   0    8.50    5.90 
   0   5   0    1.10    3.20 
   0   5   0    0.30    2.70 
   0   5   0    2.40    4.70 
   0   5   0    6.10    6.00 
   0   5   0    2.20    3.80 
   0   5   0    4.80    6.00 
   0   5   0    3.30    2.10 
   0   5   0    2.10    4.60 
   0   5   0    0.60    3.70 
   0   5   0   -0.50    4.80 
   0   5   0   -3.10    4.00 
   0   5   0    6.60    5.30 
   0   5   0   -1.00    4.00 
   0   5   0   -0.40    4.30 
   1  -5   0  128.69   17.10 
   1  -5   0  122.69    7.60 
   1  -5   0  121.99   14.30 
  -1  -5   0  129.19    7.70 
  -1  -5   0  113.59   14.90 
  -1  -5   0  103.19   14.20 
  -1  -5   0   98.49   16.00 
   1  -5   0  104.99   11.80 
   1  -5   0  128.49    8.50 
  -1  -5   0  133.19   10.10 
  -1  -5   0  128.89   16.00 
   1  -5   0  131.59   13.50 
  -1  -5   0  122.69   11.60 
  -1  -5   0  120.49   17.20 
   1  -5   0  131.19    9.90 
   1  -5   0  125.59    9.30 
  -1  -5   0  116.39   16.10 
   1  -5   0  136.09   20.60 
   1  -5   0  109.59   13.50 
   1  -5   0  123.79    8.70 
   1  -5   0  112.19   14.10 
  -1  -5   0  155.88   20.50 
   1  -5   0  100.69   16.90 
   1  -5   0  110.89   13.60 
  -1  -5   0  105.59   15.20 
   1  -5   0  129.79    9.60 
  -1  -5   0  122.19   14.90 
  -1  -5   0  107.89   18.50 
   1  -5   0  112.09   13.40 
   1  -5   0  115.39   13.00 
  -1  -5   0  135.79   12.30 
   1  -5   0  130.59   12.10 
  -1  -5   0  121.49   13.70 
  -1  -5   0  120.19    9.00 
   1   5   0  117.29   14.50 
   1   5   0  139.59   13.20 
  -1   5   0  122.49   15.30 
   1   5   0  118.39   16.50 
   1   5   0  127.59    7.50 
  -1   5   0  115.59   15.40 
  -1   5   0  116.29   19.30 
   1   5   0  119.09    7.50 
  -1   5   0  116.99    7.60 
   1   5   0  131.39   12.50 
  -1   5   0  111.09   14.20 
  -1   5   0  112.99   16.40 
  -1   5   0  132.69   17.40 
   1   5   0  116.79    9.50 
   1   5   0  116.39   20.70 
  -1   5   0  123.89   16.00 
   1   5   0  142.29   15.60 
  -1   5   0  109.89   17.00 
   1   5   0  126.29   16.00 
   1   5   0  134.89   18.80 
  -1   5   0  140.59   17.80 
   1   5   0  138.29   21.50 
   1   5   0  127.19   19.20 
   1   5   0  123.49   17.40 
  -1   5   0  121.99   18.30 
   1   5   0  112.79   16.70 
   1   5   0   93.79   15.30 
   1   5   0  128.19   14.80 
  -1   5   0  112.29   14.30 
   1   5   0  138.49    9.60 
   1   5   0  123.89   17.00 
   2  -5   0  233.38   24.60 
  -2  -5   0  228.68   23.50 
   2  -5   0  271.87   19.30 
  -2  -5   0  270.77   20.20 
  -2  -5   0  273.07   15.20 
   2  -5   0  276.77   18.90 
  -2  -5   0  301.97   26.80 
  -2  -5   0  292.47   20.60 
   2  -5   0  240.18   19.80 
   2  -5   0  244.78   15.50 
   2  -5   0  293.67   29.20 
   2  -5   0  239.58   17.30 
  -2  -5   0  271.57   15.60 
  -2  -5   0  308.67   29.30 
  -2  -5   0  232.58   24.90 
   2  -5   0  238.58   17.60 
   2  -5   0  271.17   17.80 
   2  -5   0  273.07   27.00 
   2  -5   0  255.67   12.30 
   2  -5   0  262.17   17.30 
  -2  -5   0  255.97   15.90 
  -2  -5   0  293.37   31.00 
   2  -5   0  282.87   17.00 
   2  -5   0  251.07   15.20 
  -2  -5   0  262.07   16.50 
   2  -5   0  311.37   22.20 
   2  -5   0  254.97   14.50 
  -2  -5   0  262.77   15.80 
   2  -5   0  234.48   15.40 
  -2  -5   0  228.88   17.10 
  -2  -5   0  228.08   24.70 
   2  -5   0  269.37   15.10 
  -2  -5   0  270.87   26.20 
   2  -5   0  300.27   24.70 
  -2  -5   0  232.58   25.20 
   2  -5   0  242.38   18.30 
   2  -5   0  290.67   14.60 
   2  -5   0  269.87   13.90 
  -2  -5   0  266.87   19.10 
  -2  -5   0  243.58   19.90 
   2  -5   0  272.87   14.30 
   2  -5   0  282.87   21.90 
   2  -5   0  257.37   17.60 
  -2   5   0  293.57   22.70 
  -2   5   0  251.27   24.60 
   2   5   0  267.87   24.70 
   2   5   0  244.88   15.00 
   2   5   0  254.07   16.10 
   2   5   0  253.27   27.30 
   2   5   0  267.37   26.80 
   2   5   0  242.28   25.30 
   2   5   0  270.47   16.20 
  -2   5   0  320.37   23.60 
   2   5   0  244.88   15.00 
   2   5   0  253.47   16.80 
  -2   5   0  276.37   15.80 
   2   5   0  270.77   28.40 
  -2   5   0  262.57   18.00 
  -2   5   0  243.68   25.80 
   2   5   0  251.57   18.30 
   2   5   0  287.97   19.10 
   2   5   0  264.07   14.90 
   2   5   0  228.48   25.70 
  -2   5   0  260.77   14.20 
   2   5   0  249.48   25.20 
   2   5   0  255.67   14.70 
  -2   5   0  271.17   20.40 
  -2   5   0  210.78   17.20 
   2   5   0  255.47   18.20 
   2   5   0  217.78   24.80 
   2   5   0  243.58   17.60 
   2   5   0  251.17   29.00 
   2   5   0  258.47   25.40 
  -2   5   0  252.87   19.60 
  -2   5   0  265.77   28.40 
   2   5   0  258.77   18.40 
   2   5   0  231.68   27.50 
  -2   5   0  258.87   27.00 
   3  -5   0    2.40    5.00 
   3  -5   0   -0.30    3.20 
  -3  -5   0    3.30    3.80 
   3  -5   0   13.20    5.50 
  -3  -5   0   -7.20    4.00 
   3  -5   0    3.90    4.90 
   3  -5   0    6.70    5.00 
  -3  -5   0   -2.80    4.70 
  -3  -5   0    2.40    5.90 
   3  -5   0    6.00    5.20 
   3  -5   0    5.40    6.60 
  -3  -5   0   -0.80    4.60 
   3  -5   0    2.70    2.10 
   3  -5   0    2.20    2.60 
   3  -5   0   -3.60    3.90 
   3  -5   0   -3.20    3.80 
   3  -5   0    0.00    5.30 
   3  -5   0   -0.90    2.90 
  -3  -5   0   -2.20    3.10 
   3  -5   0    2.60    3.60 
   3  -5   0    3.20    2.30 
   3  -5   0   -1.70    4.80 
   3  -5   0   -0.30    3.00 
   3  -5   0    4.20    2.90 
   3  -5   0    4.60    3.50 
   3  -5   0    1.00    2.20 
   3  -5   0    6.90    3.80 
  -3  -5   0    2.20    5.50 
  -3  -5   0   -1.10    5.10 
   3  -5   0   -1.40    3.70 
  -3  -5   0    0.80    4.70 
   3  -5   0    1.30    4.40 
  -3  -5   0    2.30    5.80 
   3  -5   0   -0.70    2.30 
  -3  -5   0    2.60    5.70 
  -3  -5   0    0.10    3.50 
  -3  -5   0    7.10    4.10 
   3  -5   0    0.40    2.60 
  -3  -5   0    3.90    6.90 
   3  -5   0    7.40    4.20 
  -3  -5   0   -1.30    4.80 
  -3   5   0    0.20    3.80 
   3   5   0    0.90    3.50 
   3   5   0    4.70    4.70 
   3   5   0    4.00    4.90 
   3   5   0   -4.40    4.50 
   3   5   0    7.00    4.10 
  -3   5   0    2.80    5.10 
   3   5   0    2.40    5.80 
  -3   5   0    3.70    3.80 
  -3   5   0   -4.40    4.30 
   3   5   0   -5.10    2.80 
   3   5   0   -2.00    4.80 
  -3   5   0    0.80    4.00 
   3   5   0    3.80    3.90 
   3   5   0   -0.60    4.90 
  -3   5   0    0.10    2.60 
  -3   5   0   -0.80    4.20 
   3   5   0    3.80    5.80 
   3   5   0   17.40    7.00 
   3   5   0    4.70    5.80 
   3   5   0    9.20    8.20 
  -3   5   0    1.90    4.60 
   3   5   0   -0.10    3.40 
   3   5   0    0.30    4.30 
   3   5   0    0.50    3.80 
  -3   5   0   -2.30    2.90 
   3   5   0    1.80    3.90 
  -3   5   0   -1.90    2.80 
   3   5   0   -0.10    4.70 
  -3   5   0    5.40    5.30 
   4  -5   0  193.88   15.10 
  -4  -5   0  201.28   14.80 
   4  -5   0  210.68   25.60 
   4  -5   0  146.49   18.30 
   4  -5   0  196.28   14.10 
   4  -5   0  200.78   12.00 
  -4  -5   0  137.59   24.10 
   4  -5   0  172.08   10.20 
   4  -5   0  198.58   22.00 
   4  -5   0  164.68   19.90 
  -4  -5   0  162.58   21.70 
  -4  -5   0  179.28   20.80 
   4  -5   0  190.78   10.50 
   4  -5   0  170.28   14.00 
   4  -5   0  214.58   18.90 
   4  -5   0  204.78   24.60 
  -4  -5   0  150.58   20.60 
   4  -5   0  162.88   18.60 
   4  -5   0  181.08   12.70 
   4  -5   0  199.88   13.40 
   4  -5   0  189.68   13.90 
  -4  -5   0  235.28   27.40 
   4  -5   0  204.38   19.10 
   4  -5   0  181.68   13.70 
  -4  -5   0  181.58   23.80 
   4  -5   0  198.88   22.80 
  -4  -5   0  173.48   18.90 
  -4  -5   0  145.89   22.70 
   4  -5   0  194.28   19.20 
  -4  -5   0  182.38   18.70 
   4  -5   0  190.18   23.30 
   4  -5   0  165.78   22.10 
  -4  -5   0  193.68   23.50 
   4  -5   0  205.98   14.00 
  -4  -5   0  159.98   22.00 
  -4  -5   0  177.98   22.80 
   4  -5   0  210.28   20.30 
   4  -5   0  200.88   29.10 
  -4  -5   0  163.78   23.10 
  -4  -5   0  198.68   24.50 
  -4  -5   0  193.68   23.40 
  -4   5   0  160.28   19.50 
  -4   5   0  211.08   20.70 
  -4   5   0  203.38   26.70 
   4   5   0  178.88   26.20 
   4   5   0  170.68   24.90 
  -4   5   0  206.48   14.10 
   4   5   0  194.08   23.50 
  -4   5   0  199.58   12.80 
   4   5   0  202.48   18.90 
   4   5   0  160.78   18.30 
  -4   5   0  166.88   17.50 
   4   5   0  165.78   23.70 
  -4   5   0  184.78   24.20 
  -4   5   0  194.38   12.20 
   4   5   0  219.28   24.60 
   4   5   0  213.98   21.60 
   4   5   0  205.68   21.00 
   4   5   0  169.38   20.90 
   4   5   0  186.38   26.20 
   4   5   0  179.38   21.40 
   4   5   0  153.78   19.70 
  -4   5   0  174.08   19.10 
  -4   5   0  195.08   14.50 
   4   5   0  221.58   27.40 
  -4   5   0  189.48   19.40 
  -5  -5   0  122.69   20.70 
   5  -5   0  125.29   14.80 
   5  -5   0   82.99   17.80 
   5  -5   0  114.29   16.50 
   5  -5   0  113.99   19.10 
  -5  -5   0  122.19   20.70 
   5  -5   0  129.99   17.70 
   5  -5   0  123.59   19.60 
   5  -5   0  113.39   16.90 
   5  -5   0  127.19   17.40 
   5  -5   0   88.09   20.50 
   5  -5   0  125.29   15.00 
   5  -5   0  105.69   17.50 
  -5  -5   0   96.89   18.00 
   5  -5   0  108.39   18.20 
  -5  -5   0  140.39   22.30 
  -5  -5   0   80.19   18.20 
   5  -5   0  133.39   17.60 
   5  -5   0  109.39   10.40 
   5  -5   0  117.89   19.30 
  -5  -5   0  110.49   17.20 
   5  -5   0  106.69   13.50 
  -5  -5   0   91.29   21.00 
  -5  -5   0   93.59   17.30 
  -5  -5   0  107.09   18.10 
  -5  -5   0   96.59   15.90 
  -5  -5   0  165.48   24.30 
  -5  -5   0  108.39   19.10 
  -5  -5   0  141.49   21.80 
  -5  -5   0   80.99   17.50 
  -5  -5   0   69.49   16.40 
  -5   5   0   97.19   16.20 
  -5   5   0  127.99   11.40 
   5   5   0  145.69   17.80 
  -5   5   0   99.29   15.50 
   5   5   0  140.59   25.60 
  -5   5   0   99.09   15.20 
   5   5   0  109.39   18.40 
   5   5   0  142.39   20.80 
   5   5   0   85.89   15.50 
  -5   5   0  123.09   13.20 
   5   5   0   79.09   19.60 
  -5   5   0   75.19   13.80 
   5   5   0  113.69   19.00 
   5   5   0   89.79   19.70 
  -5   5   0  122.99   15.00 
   5   5   0  123.69   17.20 
   5   5   0  118.89   21.40 
  -5   5   0   91.19   14.90 
   5   5   0   75.89   15.90 
   5   5   0   89.89   19.80 
   5   5   0  123.69   18.20 
   5   5   0  119.09   21.50 
   5   5   0  108.49   16.90 
  -5   5   0  111.89   21.10 
   6  -5   0  408.46   31.10 
  -6  -5   0  349.87   36.90 
  -6  -5   0  402.56   42.30 
  -6  -5   0  391.06   38.30 
  -6  -5   0  423.46   44.10 
  -6  -5   0  420.56   44.40 
   6  -5   0  464.15   45.60 
   6  -5   0  378.86   31.60 
   6  -5   0  373.96   45.00 
  -6  -5   0  403.36   47.20 
  -6  -5   0  414.66   40.80 
   6  -5   0  438.56   32.80 
   6  -5   0  430.26   32.20 
  -6  -5   0  389.46   40.20 
   6  -5   0  429.06   44.10 
   6  -5   0  427.06   41.20 
   6  -5   0  475.95   34.40 
   6  -5   0  387.96   30.30 
   6  -5   0  404.76   26.70 
  -6  -5   0  353.66   36.20 
   6  -5   0  391.06   29.20 
  -6  -5   0  424.56   42.20 
   6  -5   0  406.36   40.40 
  -6  -5   0  424.86   32.30 
  -6  -5   0  405.06   40.90 
  -6  -5   0  505.15   38.70 
   6  -5   0  408.26   27.50 
  -6  -5   0  408.96   31.90 
  -6  -5   0  401.76   32.10 
  -6   5   0  476.55   46.00 
   6   5   0  401.16   38.50 
   6   5   0  425.46   31.80 
  -6   5   0  411.96   31.90 
  -6   5   0  414.06   30.60 
   6   5   0  380.46   36.40 
   6   5   0  401.06   29.30 
   6   5   0  465.95   35.80 
  -6   5   0  432.96   31.30 
   6   5   0  422.46   47.00 
   6   5   0  371.66   37.30 
   6   5   0  343.87   38.70 
   6   5   0  412.16   44.50 
  -6   5   0  375.26   28.50 
   6   5   0  374.46   31.50 
   6   5   0  492.25   32.20 
   6   5   0  429.86   44.40 
   6   5   0  385.16   38.70 
   6   5   0  437.16   45.90 
  -6   5   0  373.56   27.00 
  -6   5   0  411.66   28.40 
  -7  -5   0   43.90   12.80 
  -7  -5   0   20.10   14.00 
  -7  -5   0   23.50   12.90 
   7  -5   0   21.10   12.00 
  -7  -5   0   37.10   14.20 
  -7  -5   0   32.30   13.90 
   7  -5   0   24.10   13.10 
  -7  -5   0   28.70   12.40 
   7  -5   0   22.20   11.60 
   7  -5   0   30.40   13.10 
  -7  -5   0   46.50   17.50 
  -7  -5   0   16.10   12.70 
   7  -5   0   27.10   13.00 
  -7  -5   0   22.40   12.60 
  -7  -5   0    4.60    9.60 
  -7  -5   0   31.20   12.80 
  -7  -5   0   30.50   12.20 
   7  -5   0   34.10   13.20 
   7  -5   0   62.69   16.10 
  -7  -5   0   14.40   11.20 
   7  -5   0   26.80   13.30 
  -7  -5   0   24.70   11.80 
   7  -5   0   46.50   19.30 
  -7  -5   0   19.70   13.80 
   7  -5   0   27.00   10.40 
   7  -5   0   21.50   10.10 
   7  -5   0   22.80   11.80 
   7   5   0   27.20   13.90 
  -7   5   0   10.80   10.60 
   7   5   0   33.50   13.40 
   7   5   0   42.70   17.40 
   7   5   0   23.00   13.20 
   7   5   0   29.70   11.90 
  -7   5   0   38.10   11.80 
   7   5   0   34.90   13.30 
   7   5   0   44.70   18.00 
   7   5   0   29.30   16.00 
   7   5   0   47.20   15.60 
  -7   5   0   20.70   10.20 
  -7   5   0   18.70   10.50 
   7   5   0   27.10   12.20 
   7   5   0   19.50   12.00 
   7   5   0   26.90   12.70 
  -7   5   0   29.70   10.80 
   7   5   0   35.20   12.00 
   8  -5   0   -3.20    8.90 
   8  -5   0   -0.40    7.60 
  -8  -5   0   13.20   11.30 
  -8  -5   0   -1.60   11.70 
  -8  -5   0   -1.00    6.90 
  -8  -5   0    9.30   10.50 
   8  -5   0    8.00   11.30 
  -8  -5   0   10.40   12.10 
  -8  -5   0   10.40   11.10 
   8  -5   0   -8.30    8.40 
  -8  -5   0   -4.90    9.20 
  -8  -5   0   -8.50    7.90 
  -8  -5   0   19.30   11.30 
   8  -5   0   12.00   12.50 
   8  -5   0    7.10   12.90 
  -8  -5   0  -11.30    7.30 
   8  -5   0   -0.30    8.10 
  -8  -5   0    9.00   11.00 
   8  -5   0    3.70   10.20 
  -8  -5   0    0.30    9.90 
   8  -5   0   -5.80   12.00 
  -8  -5   0    5.90    9.60 
  -8  -5   0   15.50   20.30 
  -8   5   0   -2.50    8.50 
   8   5   0   -5.80    7.60 
   8   5   0    6.50    9.70 
   8   5   0    5.10   10.80 
   8   5   0   -2.70    7.90 
   8   5   0    3.40   10.10 
   8   5   0   -1.00   10.70 
   8   5   0    8.80   11.10 
   8   5   0   18.10   11.30 
  -8   5   0   12.70   10.40 
  -8   5   0    5.80    9.50 
   8   5   0   -1.60   10.80 
   8   5   0  -10.00    6.90 
   8   5   0    6.10   12.50 
   8   5   0    8.80   11.60 
   9  -5   0    4.70   13.20 
  -9  -5   0   13.90   12.90 
   9  -5   0   15.10   13.10 
  -9  -5   0   20.70   14.20 
  -9  -5   0   -5.50   10.20 
  -9  -5   0    7.40   12.20 
  -9  -5   0   11.60   13.60 
  -9  -5   0   -0.90   11.50 
  -9  -5   0   11.30   13.60 
   9  -5   0   18.50   13.50 
   9  -5   0    1.60   13.30 
   9  -5   0   -9.70   11.70 
  -9  -5   0   -0.60   10.50 
  -9  -5   0    5.50   14.50 
  -9  -5   0   16.20   13.70 
   9  -5   0    5.00   11.90 
  -9  -5   0    8.60   13.30 
   9  -5   0   35.40   18.40 
   9  -5   0    5.90   13.90 
  -9  -5   0   24.80   17.50 
   9  -5   0   -4.20   11.60 
  -9  -5   0    5.10   11.90 
   9   5   0   14.00   11.90 
  -9   5   0   -8.80    7.60 
   9   5   0    5.40   12.60 
   9   5   0    5.30   12.10 
   9   5   0    6.10   11.30 
   9   5   0   13.50   13.00 
   9   5   0    5.90   13.60 
   9   5   0   19.40   13.40 
   9   5   0   10.20   12.70 
   9   5   0   22.20   15.60 
   9   5   0   -6.80   12.20 
   9   5   0   10.50   13.50 
   9   5   0   28.10   17.20 
  -9   5   0   -1.70    8.80 
   9   5   0    8.90   11.30 
   0  -6   0    8.30    6.00 
   0  -6   0   57.39   14.70 
   0  -6   0   26.10    7.90 
   0  -6   0   28.60    3.60 
   0  -6   0   21.80    6.00 
   0  -6   0   28.80    3.10 
   0  -6   0   26.50    8.40 
   0  -6   0   20.40    8.50 
   0  -6   0   23.70    3.60 
   0  -6   0   36.00    9.60 
   0  -6   0   37.90    9.50 
   0  -6   0   16.60    5.60 
   0  -6   0   18.40    7.60 
   0  -6   0   30.90   10.20 
   0  -6   0   24.90    3.70 
   0  -6   0   32.20   10.80 
   0  -6   0   16.00    9.00 
   0   6   0   23.40    9.20 
   0   6   0   33.80    5.70 
   0   6   0   38.10   12.20 
   0   6   0   21.80    9.10 
   0   6   0   27.10    3.90 
   0   6   0   17.50    8.70 
   0   6   0   27.70   10.60 
   0   6   0   47.90   11.30 
   0   6   0   27.90    9.40 
   0   6   0   39.70   10.70 
   0   6   0   35.30   11.40 
   0   6   0   24.70    3.60 
   0   6   0   24.20    8.10 
  -1  -6   0 2254.97   95.29 
  -1  -6   0 2282.27   81.69 
   1  -6   0 2362.66  101.89 
   1  -6   0 2261.27   84.49 
  -1  -6   0 2242.68   97.49 
  -1  -6   0 2205.08   85.39 
   1  -6   0 1913.31   87.89 
  -1  -6   0 2191.18   98.49 
   1  -6   0 2291.47   93.69 
   1  -6   0 2199.28   92.19 
  -1  -6   0 2215.98  104.89 
   1  -6   0 2288.27   82.09 
  -1  -6   0 2064.39   92.79 
  -1  -6   0 2266.67   96.59 
  -1  -6   0 2299.57   88.19 
   1  -6   0 2224.28   81.69 
   1  -6   0 2115.49   89.79 
   1  -6   0 2226.98   87.79 
  -1  -6   0 2270.97   87.79 
   1  -6   0 2233.68   99.69 
   1  -6   0 2265.37  104.09 
   1  -6   0 2150.38   99.39 
   1  -6   0 2249.47   89.19 
   1  -6   0 2196.58   93.09 
  -1  -6   0 2061.69  100.19 
   1  -6   0 2322.17   95.49 
  -1  -6   0 2188.18  101.19 
  -1  -6   0 2262.37  101.89 
  -1  -6   0 2243.08   92.89 
   1  -6   0 2254.77   84.99 
  -1  -6   0 2297.07   87.39 
  -1  -6   0 2395.16   97.99 
   1  -6   0 2192.98   94.99 
  -1  -6   0 2183.48   98.39 
  -1   6   0 2135.99   98.79 
  -1   6   0 2253.57   81.79 
  -1   6   0 2150.78   96.19 
   1   6   0 2273.57  105.19 
   1   6   0 2199.18   81.69 
  -1   6   0 2351.46   96.99 
  -1   6   0 2168.68   99.99 
   1   6   0 2172.28  100.89 
   1   6   0 2202.48  100.29 
   1   6   0 2313.17   91.09 
  -1   6   0 2418.86  108.39 
   1   6   0 2153.88   97.69 
   1   6   0 2338.97  109.39 
   1   6   0 2410.66  102.99 
   1   6   0 2268.37   99.79 
   1   6   0 2228.98  101.69 
   1   6   0 2141.19   95.39 
   1   6   0 2327.67  101.09 
   1   6   0 2215.78   92.59 
  -1   6   0 2319.27  100.39 
  -1   6   0 2339.87   95.89 
  -1   6   0 2360.96  100.99 
  -1   6   0 2227.28  103.69 
   1   6   0 2218.18   91.29 
   1   6   0 2201.38   90.09 
   1   6   0 2270.37   89.89 
  -1   6   0 2407.36   99.39 
   2  -6   0   -5.00    4.40 
   2  -6   0   -1.90    3.40 
   2  -6   0    2.30    3.20 
   2  -6   0   -3.10    4.80 
   2  -6   0    8.90    7.20 
  -2  -6   0    1.40    2.20 
  -2  -6   0   -1.60    4.10 
   2  -6   0    0.40    4.50 
  -2  -6   0    4.10    6.60 
   2  -6   0    0.50    4.30 
   2  -6   0    0.50    2.10 
  -2  -6   0    5.70    7.00 
   2  -6   0    0.00    3.60 
   2  -6   0   -2.10    3.60 
   2  -6   0    1.50    3.80 
   2  -6   0    6.20    5.00 
  -2  -6   0    2.00    3.60 
   2  -6   0    3.40    7.40 
  -2  -6   0   -1.30    4.40 
  -2  -6   0   -1.50    2.40 
  -2  -6   0   -0.70    4.80 
  -2  -6   0   -1.00    6.50 
  -2  -6   0    5.20    7.00 
  -2  -6   0    3.20    5.20 
  -2  -6   0    4.20    5.90 
   2  -6   0   -0.90    3.00 
   2  -6   0    4.40    6.20 
   2  -6   0    0.50    2.40 
  -2  -6   0    0.70    4.20 
   2  -6   0    1.10    3.40 
  -2  -6   0    0.00    3.20 
   2  -6   0    4.90    2.80 
   2  -6   0   -0.60    4.30 
  -2  -6   0    7.20    6.10 
  -2  -6   0   -3.40    4.70 
   2  -6   0    1.50    5.40 
   2  -6   0    4.70    4.50 
  -2  -6   0   -1.00    5.40 
  -2   6   0    3.00    5.40 
   2   6   0    0.90    6.00 
   2   6   0   -2.70    5.50 
   2   6   0   -4.70    5.30 
   2   6   0   -0.40    4.60 
  -2   6   0   -0.20    5.70 
   2   6   0    1.60    3.10 
  -2   6   0    0.50    5.50 
   2   6   0   -0.40    6.00 
  -2   6   0    8.60    5.50 
  -2   6   0    1.70    4.50 
  -2   6   0    2.20    4.30 
  -2   6   0   -3.20    5.00 
   2   6   0    1.70    2.90 
   2   6   0   -0.80    3.00 
   2   6   0   -2.60    4.60 
   2   6   0   -3.40    3.80 
   2   6   0   -2.70    5.70 
   2   6   0    1.20    6.40 
   2   6   0   -6.60    3.20 
  -2   6   0    5.60    5.50 
   2   6   0    1.00    4.30 
  -2   6   0    2.90    5.20 
   2   6   0   -1.80    2.60 
  -2   6   0   -1.50    4.90 
   2   6   0   -0.50    2.30 
   2   6   0   -1.00    2.30 
  -2   6   0    0.30    3.00 
   2   6   0    0.30    2.00 
   2   6   0    2.60    6.10 
   2   6   0    2.00    4.90 
   2   6   0   -1.80    5.40 
   3  -6   0  161.88   17.20 
   3  -6   0  130.49   22.00 
   3  -6   0  168.98   17.50 
   3  -6   0  148.89   21.90 
  -3  -6   0  152.08   22.50 
   3  -6   0  136.29   13.50 
   3  -6   0  152.88   17.50 
   3  -6   0  145.49   10.90 
  -3  -6   0  183.88   21.30 
   3  -6   0  146.89   17.30 
  -3  -6   0  155.78   21.90 
   3  -6   0  181.78   16.90 
  -3  -6   0  141.39   22.10 
  -3  -6   0  124.49   19.30 
  -3  -6   0  179.48   22.30 
  -3  -6   0  149.79   21.30 
  -3  -6   0  115.39   20.20 
  -3  -6   0  149.29   15.10 
   3  -6   0  159.28   23.10 
  -3  -6   0  176.78   27.90 
   3  -6   0  155.18   15.10 
  -3  -6   0  159.98   18.20 
   3  -6   0  159.38   20.60 
  -3  -6   0  149.69   21.50 
   3  -6   0  154.68   11.90 
   3  -6   0  151.38   22.90 
   3  -6   0  169.58   22.10 
  -3  -6   0  175.08   21.70 
   3  -6   0  142.39   27.60 
  -3  -6   0  174.58   16.10 
   3  -6   0  145.99   19.50 
   3  -6   0  157.98   14.70 
   3  -6   0  174.78   18.70 
  -3  -6   0  148.89   22.10 
   3   6   0  171.18   24.90 
   3   6   0  129.09   19.70 
   3   6   0  181.68   23.30 
  -3   6   0  145.19   13.80 
  -3   6   0  172.28   20.30 
  -3   6   0  174.98   17.50 
   3   6   0  144.09   23.10 
  -3   6   0  163.58   24.10 
   3   6   0  183.58   23.00 
   3   6   0  157.88   17.40 
   3   6   0  156.08   15.40 
   3   6   0  138.99   18.00 
   3   6   0  190.38   26.30 
   3   6   0  170.68   17.10 
   3   6   0  176.68   25.00 
   3   6   0  158.08   25.50 
   3   6   0  160.98   13.20 
  -3   6   0  164.98   15.70 
  -3   6   0  174.18   17.50 
  -3   6   0  124.89   21.60 
  -3   6   0  149.19   20.30 
   3   6   0  171.98   20.30 
  -3   6   0  167.08   21.00 
   3   6   0  141.99   21.10 
  -3   6   0  190.28   22.60 
   3   6   0  188.98   26.00 
   3   6   0  124.49   22.90 
  -4  -6   0    2.10    7.30 
   4  -6   0   13.70    8.80 
  -4  -6   0   -2.40    5.80 
  -4  -6   0   -1.50    5.80 
   4  -6   0    8.50    5.10 
   4  -6   0    9.70    9.00 
  -4  -6   0   -0.20    6.40 
  -4  -6   0    2.40    7.30 
  -4  -6   0    8.00    8.40 
  -4  -6   0   12.60    6.10 
   4  -6   0    0.50    3.90 
   4  -6   0   -1.00    4.00 
   4  -6   0   -1.40    3.30 
   4  -6   0    7.50    6.90 
   4  -6   0    6.40    5.90 
   4  -6   0    3.00    4.80 
   4  -6   0   -1.30    4.80 
  -4  -6   0   -6.10    4.60 
  -4  -6   0   -5.70    6.10 
  -4  -6   0    9.10    8.70 
   4  -6   0    5.40    7.70 
  -4  -6   0    9.10    8.60 
  -4  -6   0   10.20    7.60 
  -4  -6   0   -5.90    6.80 
   4  -6   0    2.40    5.50 
  -4  -6   0   -2.40    5.90 
   4  -6   0    2.00    5.70 
   4  -6   0   -0.80    5.60 
   4  -6   0   -0.70    4.80 
   4  -6   0    4.50    8.20 
   4  -6   0    4.60    6.80 
  -4  -6   0   -2.00    4.40 
  -4  -6   0    3.90    6.80 
  -4   6   0    9.20    8.70 
   4   6   0   11.20    7.50 
  -4   6   0    6.50    6.40 
   4   6   0   -0.70    6.70 
  -4   6   0    2.10    7.20 
   4   6   0    4.10    7.50 
  -4   6   0    3.50    4.40 
  -4   6   0    8.60    6.80 
   4   6   0    7.60    8.80 
  -4   6   0    1.40    3.90 
  -4   6   0    5.90    5.90 
  -4   6   0    4.40    5.10 
   4   6   0   -3.60    4.90 
   4   6   0    1.00    4.60 
   4   6   0   10.00    7.40 
   4   6   0   -1.20    4.60 
   4   6   0   10.90    9.00 
   4   6   0    6.00    5.00 
   4   6   0    6.50    7.20 
   4   6   0    7.80    6.70 
   4   6   0   10.20    4.80 
   4   6   0    0.90    6.60 
  -4   6   0    5.90    5.00 
   4   6   0    0.70    7.50 
   4   6   0    4.10    7.20 
  -4   6   0    2.50    5.40 
   5  -6   0  822.32   45.30 
   5  -6   0  731.43   45.90 
   5  -6   0  826.82   51.39 
  -5  -6   0  872.11   46.30 
   5  -6   0  887.11   50.29 
  -5  -6   0  771.12   50.59 
   5  -6   0  771.22   42.40 
   5  -6   0  768.12   43.10 
  -5  -6   0  720.83   51.19 
  -5  -6   0  766.22   56.99 
  -5  -6   0  856.21   54.69 
  -5  -6   0  725.63   50.59 
  -5  -6   0  819.22   45.30 
   5  -6   0  832.62   52.49 
   5  -6   0  785.72   43.10 
  -5  -6   0  835.92   52.09 
   5  -6   0  694.93   46.10 
  -5  -6   0  720.53   49.40 
  -5  -6   0  770.72   48.10 
  -5  -6   0  844.82   54.39 
  -5  -6   0  829.22   51.29 
  -5  -6   0  806.42   51.09 
  -5  -6   0  740.63   52.59 
   5  -6   0  901.91   62.49 
   5  -6   0  790.52   49.80 
  -5  -6   0  733.23   50.89 
  -5  -6   0  809.12   51.69 
   5  -6   0  818.42   49.50 
   5  -6   0  784.52   49.80 
   5  -6   0  799.52   44.20 
   5  -6   0  835.52   47.70 
   5   6   0  755.22   44.40 
   5   6   0  821.12   54.89 
  -5   6   0  828.72   45.30 
  -5   6   0  855.61   46.40 
   5   6   0  820.82   54.59 
   5   6   0  817.52   46.90 
   5   6   0  832.02   49.20 
   5   6   0  837.22   48.90 
   5   6   0  753.02   55.19 
   5   6   0  827.02   49.60 
  -5   6   0  872.71   56.49 
   5   6   0  750.52   54.59 
   5   6   0  874.41   56.29 
   5   6   0 1006.70   59.49 
   5   6   0  843.12   50.49 
  -5   6   0  753.92   44.20 
  -5   6   0  838.72   47.30 
   5   6   0  779.92   50.69 
  -5   6   0  770.82   42.80 
   5   6   0  836.22   46.80 
   6  -6   0    3.80    9.50 
   6  -6   0    0.90    9.50 
  -6  -6   0    5.20    8.30 
  -6  -6   0   14.90   10.80 
  -6  -6   0   17.40   11.40 
  -6  -6   0   -4.40    7.60 
   6  -6   0   24.40   12.00 
  -6  -6   0    9.40   10.20 
  -6  -6   0   21.40   12.00 
   6  -6   0   10.80    8.20 
  -6  -6   0    0.20    8.40 
  -6  -6   0   -6.60    7.20 
  -6  -6   0   -0.40    9.70 
  -6  -6   0    8.00    7.80 
   6  -6   0   11.80    9.60 
   6  -6   0   -0.90    6.30 
   6  -6   0  -17.20    9.40 
  -6  -6   0    3.10    8.70 
  -6  -6   0   14.80   11.60 
   6  -6   0    0.40    7.90 
  -6  -6   0   -2.80    7.30 
  -6  -6   0    4.90    8.60 
  -6  -6   0    5.60    8.10 
   6  -6   0   12.60    8.10 
   6  -6   0   -8.70    5.20 
   6  -6   0    0.80    7.20 
   6  -6   0   -1.10    6.60 
  -6  -6   0   -3.70    6.60 
   6   6   0   22.30   12.30 
   6   6   0   -1.30    9.20 
   6   6   0    0.70    6.50 
   6   6   0   -5.60    9.00 
   6   6   0   -4.60    7.30 
   6   6   0    6.10    8.00 
   6   6   0   18.70   10.20 
   6   6   0   16.40    9.70 
  -6   6   0    7.90    8.60 
  -6   6   0   11.50   10.80 
  -6   6   0    2.10    6.10 
   6   6   0    3.90    7.50 
   6   6   0   -4.40    8.80 
   6   6   0    0.70    7.10 
   6   6   0    4.50    8.80 
  -6   6   0    2.10    6.00 
   6   6   0   -4.40    9.60 
  -6   6   0   -3.10    6.80 
  -7  -6   0 1313.67   80.69 
   7  -6   0 1164.18   66.59 
  -7  -6   0 1362.46   78.49 
   7  -6   0 1262.57   70.59 
  -7  -6   0 1240.78   74.69 
  -7  -6   0 1129.49   71.39 
   7  -6   0 1201.68   76.59 
   7  -6   0 1085.99   79.79 
   7  -6   0 1224.48   67.89 
  -7  -6   0 1269.37   75.59 
  -7  -6   0 1307.57   69.39 
  -7  -6   0 1286.77   75.49 
   7  -6   0 1166.18   72.49 
   7  -6   0 1239.78   67.99 
  -7  -6   0 1252.07   76.29 
  -7  -6   0 1267.37   75.29 
  -7  -6   0 1223.28   72.09 
  -7  -6   0 1260.17   73.89 
  -7  -6   0 1372.26   79.09 
  -7  -6   0 1411.46   86.59 
  -7  -6   0 1175.98   76.29 
   7  -6   0 1421.06   77.69 
   7  -6   0 1191.98   70.09 
  -7  -6   0 1289.37   71.49 
   7  -6   0 1378.36   78.29 
  -7  -6   0 1267.47   69.59 
  -7   6   0 1254.47   78.49 
  -7   6   0 1174.68   67.59 
   7   6   0 1247.28   69.99 
   7   6   0 1227.28   72.99 
   7   6   0 1140.89   71.09 
   7   6   0 1149.78   68.39 
  -7   6   0 1335.87   68.29 
   7   6   0 1329.57   81.59 
   7   6   0 1252.47   76.99 
   7   6   0 1261.27   77.69 
   7   6   0 1272.27   69.09 
   7   6   0 1130.19   77.39 
   7   6   0 1294.57   79.79 
   7   6   0 1260.27   73.09 
   7   6   0 1246.98   66.19 
   7   6   0 1276.77   73.89 
  -8  -6   0   46.70   16.60 
   8  -6   0   34.50   14.90 
  -8  -6   0   28.80   16.50 
  -8  -6   0   68.79   20.30 
   8  -6   0   50.09   17.40 
   8  -6   0   24.80   15.60 
  -8  -6   0   41.60   17.00 
  -8  -6   0   39.40   19.20 
   8  -6   0   52.39   19.30 
  -8  -6   0   29.70   15.50 
  -8  -6   0   28.70   16.50 
   8  -6   0   59.79   23.50 
  -8  -6   0   40.10   17.40 
   8  -6   0   29.80   16.30 
  -8  -6   0   53.49   20.20 
   8  -6   0   36.70   17.70 
  -8  -6   0   74.99   22.10 
  -8  -6   0   11.50   13.00 
   8  -6   0   61.79   18.40 
   8  -6   0   44.00   15.60 
  -8  -6   0   38.90   19.90 
  -8  -6   0   16.80   15.60 
   8   6   0   42.80   18.80 
   8   6   0   44.30   17.90 
   8   6   0   60.89   19.30 
   8   6   0   36.10   18.30 
   8   6   0   54.49   19.80 
   8   6   0   72.49   22.10 
   8   6   0   49.99   17.00 
   8   6   0   62.59   19.30 
   8   6   0   25.10   15.30 
   8   6   0   28.00   17.30 
   8   6   0   56.49   22.60 
  -8   6   0   48.40   15.30 
   8   6   0   36.80   16.90 
   8   6   0   45.40   18.50 
  -8   6   0   25.90   13.10 
   8   6   0   51.39   21.40 
   0  -7   0    4.30    6.80 
   0  -7   0    1.70    5.40 
   0  -7   0    5.10    5.50 
   0  -7   0   -3.80    5.60 
   0  -7   0   11.00    7.30 
   0  -7   0   -1.60    6.70 
   0  -7   0   -2.70    4.50 
   0  -7   0    4.10    7.60 
   0  -7   0    2.00    4.00 
   0  -7   0    0.10    4.10 
   0  -7   0   -5.30    4.50 
   0   7   0   41.60   14.60 
   0   7   0    0.50    6.30 
   0   7   0   -7.60    5.30 
   0   7   0   -4.20    4.90 
   0   7   0   -1.20    6.20 
   0   7   0    5.20    6.00 
   0   7   0    1.70    5.70 
   0   7   0   -1.70    5.90 
   0   7   0    1.30    7.40 
   0   7   0    2.60    6.40 
  -1  -7   0   38.60   11.80 
   1  -7   0   25.40    9.20 
  -1  -7   0   29.80   12.30 
   1  -7   0   57.79   13.70 
   1  -7   0   41.90   10.20 
   1  -7   0   52.19   12.40 
  -1  -7   0   37.00   12.10 
   1  -7   0   48.90    8.50 
  -1  -7   0   40.70   12.20 
  -1  -7   0   57.39   12.20 
  -1  -7   0   48.60    7.10 
   1  -7   0   49.90   14.20 
   1  -7   0   35.80   12.50 
   1  -7   0   46.50   14.50 
  -1  -7   0   29.70   11.40 
   1  -7   0   40.80   11.40 
   1  -7   0   50.39   13.70 
  -1  -7   0   50.09   10.90 
  -1  -7   0   45.20   13.30 
   1  -7   0   35.50    9.40 
   1  -7   0   37.30    7.80 
  -1  -7   0   52.39   11.20 
  -1  -7   0   40.20   13.20 
  -1  -7   0   53.29   12.40 
   1   7   0   29.90   11.80 
   1   7   0   43.00   14.00 
  -1   7   0   48.90   13.30 
  -1   7   0   83.99   16.90 
   1   7   0   34.00   13.60 
  -1   7   0   66.09   17.10 
  -1   7   0   47.90   11.70 
   1   7   0   48.00   16.40 
   1   7   0   47.10   12.40 
  -1   7   0   39.60   12.70 
  -1   7   0   51.09   13.80 
  -1   7   0   33.70   10.70 
   1   7   0   43.50    9.90 
  -1   7   0   25.80   11.90 
   1   7   0   83.79   18.60 
   1   7   0   41.20   13.00 
   1   7   0   31.40   11.80 
   1   7   0   14.80    9.60 
   1   7   0   38.70   11.70 
  -1   7   0   46.40   12.20 
  -1   7   0   46.70   12.70 
  -2  -7   0   60.19   14.60 
   2  -7   0   71.69   11.40 
  -2  -7   0  102.29   21.60 
  -2  -7   0   81.99   17.80 
   2  -7   0   51.09   13.80 
  -2  -7   0   86.29   14.90 
   2  -7   0   76.99   12.00 
  -2  -7   0   91.59   19.00 
  -2  -7   0   39.50   11.00 
  -2  -7   0   61.19   15.30 
   2  -7   0   75.49   11.90 
   2  -7   0   59.39   14.70 
   2  -7   0  103.89   16.00 
  -2  -7   0   72.69   15.70 
  -2  -7   0   64.59   11.00 
  -2  -7   0   64.09   15.30 
   2  -7   0  101.09   21.00 
  -2  -7   0   61.49   13.40 
   2  -7   0   90.99   13.70 
  -2  -7   0   79.99   13.70 
  -2  -7   0   91.39   17.70 
   2  -7   0   72.59   11.40 
   2  -7   0   69.79   16.90 
   2  -7   0   79.69   13.40 
   2  -7   0   76.79   16.90 
   2  -7   0   61.89   16.90 
   2   7   0   86.09   17.60 
  -2   7   0   80.69   16.40 
   2   7   0   56.39   15.60 
   2   7   0   67.39   15.30 
   2   7   0   78.49   12.90 
  -2   7   0   52.19   13.70 
  -2   7   0   73.49   16.80 
   2   7   0   81.69   12.70 
  -2   7   0   67.39   13.30 
   2   7   0   49.99   14.60 
   2   7   0   34.20   12.80 
   2   7   0   88.19   20.90 
  -2   7   0   63.39   17.00 
   2   7   0   75.79   13.80 
   2   7   0   55.29   15.00 
  -2   7   0   66.89   16.00 
   2   7   0   81.79   19.50 
  -2   7   0   81.89   17.20 
   2   7   0   64.99   17.20 
   2   7   0   85.39   14.30 
  -2   7   0   56.39   12.20 
   3  -7   0   18.90    6.40 
   3  -7   0   17.40    7.90 
  -3  -7   0   16.80   10.10 
   3  -7   0    8.80    9.60 
  -3  -7   0   12.80    7.80 
   3  -7   0   22.30   12.90 
  -3  -7   0   15.70    9.20 
   3  -7   0   18.90   10.60 
  -3  -7   0   27.50   11.90 
   3  -7   0   26.20    8.30 
  -3  -7   0   19.30   11.90 
  -3  -7   0   17.80    9.40 
  -3  -7   0   10.40    9.90 
   3  -7   0    1.40    8.20 
  -3  -7   0   11.50    9.60 
   3  -7   0   34.30   10.00 
  -3  -7   0   32.60   12.00 
  -3  -7   0    9.50    9.60 
  -3  -7   0   16.10    7.40 
   3  -7   0   11.30    9.30 
   3  -7   0   16.10    7.10 
   3  -7   0   11.90   12.90 
  -3  -7   0   31.80   12.80 
   3  -7   0    3.60    7.60 
  -3  -7   0   19.00   10.10 
  -3  -7   0   10.10    7.90 
   3  -7   0   23.90    7.80 
   3   7   0   11.70    7.60 
  -3   7   0    2.10    5.70 
  -3   7   0   15.60    8.40 
   3   7   0   29.10    9.00 
   3   7   0    5.20    9.60 
   3   7   0   17.90   10.50 
  -3   7   0   34.90   10.70 
   3   7   0   48.10   15.20 
   3   7   0   16.30    8.10 
  -3   7   0   20.50    9.30 
   3   7   0    0.20    7.70 
   3   7   0   16.00    7.90 
   3   7   0   20.30   12.90 
   3   7   0   24.50   11.10 
  -3   7   0   27.80   12.70 
  -3   7   0   30.90   11.90 
  -3   7   0   24.60   10.70 
  -3   7   0   18.00    7.50 
   3   7   0   34.00   14.10 
   4  -7   0  197.18   26.30 
   4  -7   0  187.18   22.10 
   4  -7   0  209.88   30.50 
  -4  -7   0  218.68   25.20 
  -4  -7   0  148.69   25.40 
  -4  -7   0  269.07   38.00 
  -4  -7   0  287.07   35.00 
  -4  -7   0  255.57   29.00 
   4  -7   0  184.88   25.90 
   4  -7   0  195.88   28.10 
  -4  -7   0  271.97   32.50 
   4  -7   0  205.58   22.50 
  -4  -7   0  166.78   26.00 
   4  -7   0  224.88   22.20 
   4  -7   0  163.48   26.20 
  -4  -7   0  208.98   28.70 
   4  -7   0  186.78   29.60 
  -4  -7   0  190.08   27.20 
  -4  -7   0  173.08   25.80 
   4  -7   0  205.38   35.50 
  -4  -7   0  267.97   30.60 
   4  -7   0  227.38   26.70 
  -4  -7   0  211.68   29.20 
  -4  -7   0  222.58   28.30 
  -4  -7   0  176.38   28.40 
   4  -7   0  187.88   28.70 
   4   7   0  217.38   33.60 
   4   7   0  209.18   21.80 
  -4   7   0  173.08   25.30 
   4   7   0  242.78   26.30 
   4   7   0  265.27   33.90 
   4   7   0  217.78   31.80 
  -4   7   0  229.58   28.70 
   4   7   0  185.08   23.50 
  -4   7   0  212.48   24.80 
   4   7   0  240.48   29.50 
   4   7   0  146.89   26.90 
   4   7   0  204.38   21.00 
  -4   7   0  213.08   31.90 
   4   7   0  237.38   34.60 
   4   7   0  192.28   30.30 
   4   7   0  225.78   29.40 
   4   7   0  145.79   24.40 
  -5  -7   0    7.10   11.10 
  -5  -7   0   18.70   13.70 
  -5  -7   0   11.90   11.80 
   5  -7   0    7.70    8.80 
   5  -7   0   30.70   13.60 
  -5  -7   0   32.60   14.30 
  -5  -7   0   42.40   14.50 
   5  -7   0   30.60   11.50 
   5  -7   0   40.40   12.30 
   5  -7   0   39.10   14.50 
   5  -7   0   14.30   10.60 
  -5  -7   0   36.80   15.10 
  -5  -7   0   27.10   13.00 
  -5  -7   0   35.20   16.00 
  -5  -7   0   24.10   11.40 
  -5  -7   0   30.90   13.20 
   5  -7   0   18.60    8.50 
  -5  -7   0   19.00   10.90 
  -5  -7   0   42.10   15.50 
   5  -7   0   21.80   17.60 
  -5  -7   0    2.90    9.10 
  -5  -7   0    7.20    9.90 
   5  -7   0   29.60   12.80 
   5   7   0   17.60    9.50 
   5   7   0   12.70   11.80 
   5   7   0   13.10   12.50 
   5   7   0   28.80   15.40 
   5   7   0   35.30   15.30 
   5   7   0   24.70   12.00 
   5   7   0   18.80   11.40 
   5   7   0   26.70   11.40 
   5   7   0   19.20   13.80 
   5   7   0   12.80    8.80 
   5   7   0   16.30   11.20 
  -5   7   0   49.80   12.40 
  -5   7   0   25.50   10.90 
  -5   7   0   16.60   12.40 
   5   7   0   18.30   13.10 
   6  -7   0  486.35   49.99 
   6  -7   0  463.25   57.29 
   6  -7   0  444.16   45.00 
  -6  -7   0  482.05   48.40 
  -6  -7   0  454.85   46.70 
  -6  -7   0  414.66   47.90 
  -6  -7   0  456.95   46.70 
   6  -7   0  440.66   33.50 
  -6  -7   0  424.76   44.30 
  -6  -7   0  439.46   53.79 
  -6  -7   0  418.26   46.40 
   6  -7   0  428.16   45.70 
  -6  -7   0  454.25   46.20 
  -6  -7   0  501.45   52.69 
   6  -7   0  437.86   41.50 
  -6  -7   0  460.05   49.40 
  -6  -7   0  442.56   43.10 
  -6  -7   0  467.05   48.90 
   6  -7   0  461.05   42.90 
  -6  -7   0  409.46   47.60 
  -6  -7   0  462.45   47.80 
   6   7   0  471.05   46.70 
   6   7   0  461.45   47.40 
   6   7   0  437.06   50.59 
  -6   7   0  475.25   52.09 
   6   7   0  347.57   45.80 
   6   7   0  473.75   45.70 
   6   7   0  529.05   54.59 
   6   7   0  397.06   47.70 
  -6   7   0  446.86   34.60 
   6   7   0  420.06   49.99 
   6   7   0  422.06   47.80 
   6   7   0  368.76   37.00 
   6   7   0  536.65   40.00 
   6   7   0  401.56   40.60 
  -7  -7   0  -16.90    7.90 
  -7  -7   0    3.30    9.90 
   7  -7   0   -0.50   13.10 
   7  -7   0   -0.70    8.90 
  -7  -7   0   11.70   11.70 
   7  -7   0    3.30    9.60 
  -7  -7   0   -7.30   10.40 
  -7  -7   0   -5.80    7.70 
   7  -7   0   -4.60    9.90 
  -7  -7   0    2.90   12.00 
   7  -7   0    0.80   10.30 
  -7  -7   0   18.70   15.10 
  -7  -7   0   -2.70   11.00 
  -7  -7   0   -5.50   12.80 
  -7  -7   0    4.10   12.70 
  -7  -7   0   -2.60    8.80 
  -7  -7   0    5.20   10.60 
  -7  -7   0    8.50   10.80 
  -7   7   0   12.80   14.10 
   7   7   0    4.40   10.80 
   7   7   0   12.00   12.40 
   7   7   0   -3.20   10.60 
   7   7   0  -11.80   11.00 
   7   7   0    7.70   10.90 
   7   7   0   -4.90   12.30 
   7   7   0    0.60   10.40 
   7   7   0    5.80   11.70 
   7   7   0    9.90   12.20 
   7   7   0  -13.90   10.40 
   7   7   0   -8.20   11.20 
   7   7   0   13.70   12.50 
   0  -8   0  352.76   40.30 
   0  -8   0  369.06   25.90 
   0  -8   0  415.76   38.10 
   0  -8   0  403.16   32.30 
   0  -8   0  375.36   28.60 
   0  -8   0  412.36   33.00 
   0  -8   0  329.97   40.80 
   0  -8   0  403.36   30.30 
   0  -8   0  389.16   41.20 
   0  -8   0  367.86   34.80 
   0  -8   0  359.96   39.30 
   0   8   0  379.76   40.50 
   0   8   0  367.26   36.70 
   0   8   0  394.96   39.50 
   0   8   0  379.56   44.20 
   0   8   0  352.96   35.70 
   0   8   0  446.76   45.50 
   0   8   0  404.26   41.40 
   0   8   0  437.96   34.80 
   0   8   0  306.67   36.70 
   0   8   0  388.96   37.80 
   1  -8   0 1089.99   62.79 
  -1  -8   0 1106.49   62.59 
  -1  -8   0 1113.59   58.09 
  -1  -8   0  957.70   64.89 
   1  -8   0 1002.60   61.99 
  -1  -8   0 1022.90   57.99 
   1  -8   0 1067.99   66.59 
  -1  -8   0 1069.39   54.09 
   1  -8   0  933.31   60.89 
  -1  -8   0  992.90   59.29 
   1  -8   0 1087.99   58.29 
  -1  -8   0 1085.59   59.69 
  -1  -8   0 1041.80   63.79 
  -1  -8   0 1071.59   52.09 
   1  -8   0 1063.49   55.59 
   1  -8   0  959.10   55.99 
  -1  -8   0  948.21   62.19 
   1  -8   0 1015.20   62.29 
  -1  -8   0 1092.99   54.99 
   1  -8   0 1099.69   54.29 
   1  -8   0 1051.59   54.09 
  -1  -8   0 1082.59   53.69 
   1   8   0 1180.98   64.89 
   1   8   0 1145.39   59.09 
   1   8   0  949.51   62.39 
  -1   8   0 1118.19   62.49 
  -1   8   0 1019.40   57.99 
   1   8   0  938.01   61.29 
   1   8   0 1048.70   60.79 
   1   8   0  996.50   60.99 
   1   8   0  980.10   65.69 
  -1   8   0 1122.29   64.39 
   1   8   0  976.60   62.99 
   1   8   0 1040.80   63.69 
   1   8   0  967.50   62.49 
  -1   8   0 1125.89   65.99 
  -1   8   0 1025.20   58.29 
  -1   8   0 1149.48   69.09 
  -1   8   0 1071.19   57.99 
  -1   8   0 1042.40   63.19 
  -1   8   0 1054.49   61.39 
  -2  -8   0   26.20   11.90 
   2  -8   0   24.20    8.60 
   2  -8   0   25.30    9.80 
  -2  -8   0   16.30   11.30 
   2  -8   0   31.40   13.60 
  -2  -8   0   32.60   14.40 
  -2  -8   0    5.80    9.90 
   2  -8   0   29.10   10.30 
   2  -8   0    5.90    7.20 
  -2  -8   0   14.10   10.20 
  -2  -8   0   18.30   10.50 
  -2  -8   0   25.40   10.30 
  -2  -8   0   30.80   14.80 
  -2  -8   0   11.80    8.30 
   2  -8   0   44.30   16.40 
  -2  -8   0   38.80   11.20 
   2  -8   0   34.80   12.80 
   2  -8   0   24.90   11.50 
   2  -8   0   21.90   14.50 
   2  -8   0    8.00   10.70 
  -2  -8   0   17.10    9.90 
  -2  -8   0   44.40   13.90 
  -2  -8   0   13.70    9.10 
  -2   8   0   20.20   11.60 
   2   8   0   28.00   13.10 
  -2   8   0   13.90    8.70 
  -2   8   0   19.10   11.90 
   2   8   0   12.50   12.90 
  -2   8   0   41.60   12.80 
   2   8   0   38.00   14.80 
   2   8   0    2.40    9.50 
   2   8   0   30.50   10.70 
   2   8   0    7.80    9.60 
  -2   8   0   32.40   12.70 
   2   8   0   12.30   11.40 
  -2   8   0   16.90   10.30 
   2   8   0   11.60   10.00 
  -2   8   0   20.60   11.80 
  -2   8   0   28.30   10.90 
   2   8   0   24.70   12.30 
   3  -8   0  282.67   32.80 
   3  -8   0  265.57   44.30 
   3  -8   0  285.87   35.80 
   3  -8   0  324.37   39.80 
  -3  -8   0  278.67   31.30 
   3  -8   0  242.08   31.20 
  -3  -8   0  278.57   34.00 
  -3  -8   0  268.07   34.80 
  -3  -8   0  268.27   39.60 
  -3  -8   0  251.97   31.50 
  -3  -8   0  251.77   31.10 
  -3  -8   0  232.88   31.60 
  -3  -8   0  295.87   31.80 
  -3  -8   0  331.07   37.80 
  -3  -8   0  320.97   31.50 
  -3  -8   0  268.47   36.10 
   3  -8   0  283.27   29.40 
  -3  -8   0  249.28   32.50 
  -3  -8   0  370.76   42.10 
   3  -8   0  256.77   36.00 
   3   8   0  289.17   34.90 
  -3   8   0  316.37   33.00 
   3   8   0  340.67   42.90 
  -3   8   0  298.67   39.20 
   3   8   0  272.87   34.40 
  -3   8   0  338.67   26.30 
  -3   8   0  319.07   36.00 
   3   8   0  285.77   36.80 
   3   8   0  264.87   37.00 
  -3   8   0  285.67   36.50 
  -3   8   0  285.07   28.30 
   3   8   0  287.37   39.10 
   3   8   0  308.27   38.60 
   3   8   0  261.77   27.00 
   4  -8   0   26.80   14.10 
   4  -8   0   17.90   10.40 
  -4  -8   0   -0.50    8.90 
  -4  -8   0   25.40   13.00 
  -4  -8   0   16.80   12.00 
  -4  -8   0   42.50   15.30 
  -4  -8   0   19.00   12.70 
  -4  -8   0   38.10   12.90 
   4  -8   0   35.80   15.30 
   4  -8   0   42.30   15.70 
   4  -8   0   15.70   11.10 
  -4  -8   0   29.10   12.70 
   4  -8   0   21.40   11.60 
  -4  -8   0   13.30   12.70 
  -4  -8   0   51.89   15.20 
   4  -8   0   57.69   15.30 
   4  -8   0   36.20   15.70 
  -4  -8   0   24.60   13.60 
  -4  -8   0   35.60   15.00 
  -4  -8   0   46.80   17.20 
   4  -8   0   18.20   14.40 
   4  -8   0   30.30   13.20 
  -4  -8   0   18.70   13.00 
   4   8   0   28.70   15.10 
  -4   8   0   37.40   14.10 
   4   8   0   32.20   12.00 
  -4   8   0   28.10   12.00 
   4   8   0   33.60   14.80 
  -4   8   0   33.40   14.40 
   4   8   0   33.80   13.20 
   4   8   0   36.50   14.20 
  -4   8   0   16.10   11.00 
   4   8   0   16.90   11.70 
   4   8   0   17.80   13.50 
   4   8   0   20.60   13.00 
  -5  -8   0  541.95   52.69 
   5  -8   0  490.65   62.59 
  -5  -8   0  628.84   64.99 
  -5  -8   0  565.44   43.30 
   5  -8   0  587.84   44.30 
  -5  -8   0  485.25   53.29 
  -5  -8   0  522.05   53.99 
  -5  -8   0  609.94   58.69 
   5  -8   0  517.45   51.99 
  -5  -8   0  501.75   50.09 
   5  -8   0  720.53   51.79 
  -5  -8   0  710.23   51.09 
   5  -8   0  556.44   44.30 
  -5  -8   0  640.24   49.20 
   5  -8   0  546.25   56.59 
  -5  -8   0  608.94   41.80 
  -5  -8   0  593.64   44.60 
   5  -8   0  543.35   40.40 
  -5  -8   0  606.04   48.20 
  -5  -8   0  586.64   53.59 
  -5  -8   0  585.34   47.50 
  -5   8   0  494.35   40.50 
   5   8   0  521.05   58.89 
   5   8   0  550.64   59.59 
   5   8   0  598.04   59.29 
   5   8   0  502.05   54.29 
   5   8   0  639.44   46.40 
   5   8   0  615.54   61.09 
   5   8   0  529.35   58.09 
  -5   8   0  482.75   52.79 
   5   8   0  528.45   52.79 
   5   8   0  625.44   43.60 
   6  -8   0  151.58   36.40 
  -6  -8   0  144.89   28.20 
   6  -8   0  167.48   31.00 
  -6  -8   0  131.89   27.40 
  -6  -8   0  139.79   29.60 
  -6  -8   0  201.58   38.20 
  -6  -8   0  192.38   33.90 
  -6  -8   0  147.69   28.70 
   6  -8   0  153.38   30.70 
  -6  -8   0  199.38   32.70 
  -6  -8   0  199.88   31.90 
   6  -8   0  204.88   32.60 
   6  -8   0  149.29   28.20 
  -6  -8   0  209.68   30.10 
  -6  -8   0  135.19   27.60 
   6  -8   0  186.18   31.60 
  -6  -8   0  204.08   31.70 
  -6  -8   0  190.58   31.90 
  -6  -8   0  163.38   31.80 
   6  -8   0  143.19   25.70 
  -6  -8   0  171.58   32.10 
  -6   8   0  214.58   36.60 
   6   8   0  254.57   36.70 
   6   8   0  192.38   33.80 
   6   8   0  129.49   29.70 
   6   8   0  196.18   36.30 
   6   8   0  180.68   35.60 
   6   8   0  225.68   36.20 
   6   8   0  221.28   35.30 
   6   8   0  163.38   27.20 
   6   8   0  186.18   28.20 
   6   8   0  140.19   30.10 
   0  -9   0   -4.40    7.30 
   0  -9   0    4.00    9.80 
   0  -9   0    2.30    7.50 
   0  -9   0   -6.50    8.50 
   0  -9   0   10.00   10.40 
   0  -9   0    3.20   10.10 
   0  -9   0   -4.00    6.90 
   0  -9   0   -2.90    7.80 
   0  -9   0   -8.90    8.10 
   0  -9   0   -0.90    6.60 
   0   9   0   -6.30    8.00 
   0   9   0  -11.60    6.70 
   0   9   0    0.00    8.60 
   0   9   0   -2.50    9.40 
   0   9   0   -0.20    7.70 
   0   9   0   -8.70    7.00 
   0   9   0    7.90    9.60 
   0   9   0   -4.50    8.30 
   1  -9   0   25.30   11.70 
   1  -9   0   59.49   17.70 
  -1  -9   0   43.40   17.00 
   1  -9   0   53.39   17.60 
   1  -9   0   35.50   13.40 
   1  -9   0   39.30   12.50 
  -1  -9   0   49.99   14.40 
  -1  -9   0   63.09   18.50 
   1  -9   0   72.99   17.90 
  -1  -9   0   45.00   16.50 
  -1  -9   0   71.39   22.20 
  -1  -9   0   39.90   14.20 
   1  -9   0   25.10   11.90 
   1  -9   0   50.79   18.60 
  -1  -9   0   61.09   16.80 
   1  -9   0   74.89   20.60 
  -1  -9   0   61.09   17.40 
  -1  -9   0   48.70   17.80 
   1  -9   0   37.40   15.50 
  -1  -9   0   38.50   14.70 
   1   9   0   29.80   14.10 
  -1   9   0   33.30   13.90 
   1   9   0   44.30   13.70 
  -1   9   0   28.90   14.20 
   1   9   0   49.40   18.30 
  -1   9   0   47.00   15.10 
   1   9   0   58.59   19.50 
   1   9   0   26.20   13.20 
   1   9   0   60.09   19.30 
   1   9   0   36.80   17.10 
  -1   9   0   40.40   14.80 
   1   9   0   35.70   15.10 
  -1   9   0   45.00   17.20 
  -1   9   0   64.29   18.20 
   1   9   0   74.89   19.90 
  -2  -9   0   60.09   20.40 
   2  -9   0  115.09   20.80 
  -2  -9   0  135.19   21.60 
   2  -9   0  101.89   22.70 
  -2  -9   0   75.09   23.00 
  -2  -9   0   72.79   20.90 
  -2  -9   0  157.08   26.70 
  -2  -9   0   86.49   20.50 
   2  -9   0  116.19   25.00 
  -2  -9   0  121.59   21.60 
   2  -9   0   49.70   18.40 
   2  -9   0   86.39   21.90 
  -2  -9   0   69.49   20.00 
  -2  -9   0  131.19   24.20 
   2  -9   0  114.89   22.20 
  -2  -9   0   70.69   20.60 
   2  -9   0   93.89   22.50 
  -2   9   0  156.18   31.80 
   2   9   0  128.49   27.40 
  -2   9   0  133.39   25.80 
  -2   9   0  126.49   25.20 
   2   9   0  113.99   24.90 
   2   9   0  101.89   25.10 
   2   9   0   80.59   21.60 
  -2   9   0   99.99   19.20 
   2   9   0  139.79   21.80 
   2   9   0   83.79   20.00 
   2   9   0  115.29   23.90 
  -2   9   0  113.09   21.00 
  -3  -9   0  -16.20    8.40 
   3  -9   0  -11.60   11.20 
  -3  -9   0   -8.90    7.20 
  -3  -9   0   -0.50    9.30 
   3  -9   0    1.90    9.80 
  -3  -9   0   -1.70    9.80 
   3  -9   0    2.30   10.60 
   3  -9   0   -1.30   10.60 
  -3  -9   0   -4.20    8.20 
  -3  -9   0    6.50   12.30 
  -3  -9   0   17.70   14.10 
  -3  -9   0   -0.90    9.90 
  -3  -9   0   11.90    9.70 
  -3  -9   0   11.80   12.00 
   3  -9   0    7.10   11.50 
   3  -9   0   -3.50    9.10 
   3  -9   0   -1.00    9.50 
   3  -9   0    0.20    9.80 
   3   9   0  -13.40    7.90 
   3   9   0    7.90   11.80 
   3   9   0    2.60    9.30 
  -3   9   0   16.00   14.30 
   3   9   0   -3.50    8.70 
  -3   9   0    6.20    9.20 
   3   9   0    0.60    9.60 
  -3   9   0   12.70   11.70 
   3   9   0    1.00   10.20 
  -4  -9   0   61.89   16.80 
  -4  -9   0   46.50   18.30 
  -4  -9   0   46.30   21.40 
   4  -9   0   67.89   20.40 
  -4  -9   0   55.09   17.50 
  -4  -9   0   70.39   21.20 
  -4  -9   0   46.90   18.00 
   4  -9   0   44.50   20.70 
   4  -9   0   54.69   18.90 
  -4  -9   0   47.90   18.00 
  -4  -9   0   40.00   17.20 
  -4  -9   0   86.09   23.30 
   4  -9   0   64.79   19.00 
  -4  -9   0   31.80   16.00 
   4  -9   0   82.99   23.50 
   4  -9   0   57.39   19.30 
   4  -9   0   24.30   12.90 
   4  -9   0   57.99   16.80 
  -4  -9   0   68.19   21.00 
  -4   9   0   31.60   15.10 
   4   9   0   33.10   16.90 
   4   9   0   57.39   19.60 
  -4   9   0   67.19   20.00 
   4   9   0   43.60   18.10 
   4   9   0   23.60   15.10 
   4   9   0   93.19   25.20 
   4   9   0   34.20   15.70 
  -5  -9   0  145.59   28.70 
   5  -9   0  151.38   28.20 
   5  -9   0  117.99   25.50 
  -5  -9   0  134.29   27.50 
  -5  -9   0  144.49   28.10 
  -5  -9   0  152.18   34.90 
   5  -9   0  194.88   31.50 
  -5  -9   0  106.09   26.90 
   5  -9   0  145.99   29.60 
  -5  -9   0  133.79   28.40 
   5  -9   0  110.99   27.30 
   5  -9   0  135.99   26.50 
  -5  -9   0  136.39   28.10 
  -5  -9   0  157.28   32.20 
   5  -9   0  148.09   38.40 
  -5  -9   0  148.39   28.50 
  -5  -9   0  103.49   24.50 
  -5  -9   0  120.69   27.50 
   5   9   0  120.39   28.90 
  -5   9   0  150.18   27.10 
  -5   9   0  151.18   32.40 
   5   9   0  124.39   26.70 
   5   9   0   83.79   24.50 
   5   9   0  104.09   25.40 
   5   9   0  177.88   35.50 
   5   9   0  153.38   33.80 
   0 -10   0  879.11   63.79 
   0 -10   0  936.41   64.29 
   0 -10   0  861.31   62.39 
   0 -10   0  739.33   52.89 
   0 -10   0  863.51   66.79 
   0 -10   0  966.80   60.69 
   0 -10   0  948.51   60.39 
   0 -10   0  822.92   62.49 
   0 -10   0  906.61   55.89 
   0 -10   0  917.41   61.39 
   0  10   0  984.00   66.79 
   0  10   0  885.41   59.29 
   0  10   0  854.61   67.09 
   0  10   0  962.20   64.69 
   0  10   0  989.30   61.29 
   1 -10   0  346.67   46.30 
   1 -10   0  389.96   46.50 
  -1 -10   0  329.77   41.30 
  -1 -10   0  320.47   46.90 
  -1 -10   0  290.57   41.20 
   1 -10   0  357.36   43.80 
   1 -10   0  331.37   42.50 
  -1 -10   0  201.08   34.40 
   1 -10   0  339.17   43.30 
  -1 -10   0  326.17   40.90 
  -1 -10   0  298.37   35.90 
  -1 -10   0  352.26   41.50 
   1 -10   0  249.08   36.50 
   1 -10   0  330.47   44.70 
  -1 -10   0  260.87   33.90 
  -1 -10   0  305.17   41.80 
   1 -10   0  364.96   40.50 
   1  10   0  306.97   42.50 
  -1  10   0  316.07   37.20 
   1  10   0  336.17   44.10 
   1  10   0  309.97   35.90 
   1  10   0  209.38   38.60 
   1  10   0  286.97   39.50 
  -1  10   0  307.07   46.60 
  -1  10   0  378.26   43.20 
  -1  10   0  279.57   40.10 
   1  10   0  318.17   39.00 
   2 -10   0  273.17   41.50 
  -2 -10   0  217.58   36.10 
  -2 -10   0  155.08   27.80 
   2 -10   0  174.88   31.70 
   2 -10   0  169.08   32.10 
  -2 -10   0  199.68   33.30 
   2 -10   0  168.88   31.70 
  -2 -10   0  217.78   34.70 
  -2 -10   0  231.18   40.00 
  -2 -10   0  213.28   36.30 
  -2 -10   0  210.08   32.30 
  -2 -10   0  224.98   36.20 
   2 -10   0  238.88   36.80 
  -2 -10   0  243.18   37.30 
   2 -10   0  209.18   34.80 
   2 -10   0  212.98   31.20 
  -2  10   0  244.78   41.50 
   2  10   0  163.18   32.10 
   2  10   0  213.18   36.90 
   2  10   0  225.08   38.80 
  -2  10   0  284.27   40.10 
   2  10   0  243.38   35.20 
  -2  10   0  219.68   34.30 
   2  10   0  274.07   39.10 
  -3 -10   0   49.80   20.80 
  -3 -10   0   21.80   16.60 
   3 -10   0   37.40   17.60 
   3 -10   0   22.00   20.00 
   3 -10   0   44.90   18.40 
   3 -10   0   32.80   16.20 
  -3 -10   0   21.90   14.30 
  -3 -10   0   36.00   16.60 
  -3 -10   0   13.60   14.60 
   3 -10   0   60.19   21.30 
  -3 -10   0   29.50   14.90 
   3 -10   0   19.40   15.30 
  -3 -10   0    9.60   14.20 
  -3 -10   0   50.99   20.10 
   3 -10   0    8.90   16.20 
  -3 -10   0   44.10   19.70 
   3  10   0   34.50   17.90 
   3  10   0    9.30   17.50 
   3  10   0   11.40   15.90 
  -3  10   0    6.50   13.90 
  -3  10   0   30.60   16.60 
   3  10   0    8.10   14.10 
   3  10   0   22.90   15.40 
  -3  10   0   50.09   22.80 
  10   0  -1   12.20   12.70 
  10   0  -1    4.50   11.30 
 -10   0   1   -3.30    8.70 
  10   0  -1    9.50   12.70 
 -10   0   1   -5.70   10.70 
 -10   0   1   -5.00    9.70 
  10   0  -1   -1.30   11.90 
  10   0  -1    3.90   12.50 
 -10   0   1   -9.00    7.00 
 -10   0   1   16.10   12.10 
 -10   0   1    2.80   10.80 
  10   0  -1   -0.70   10.30 
  10   0  -1    0.10   10.60 
 -10   0   1    4.30   12.80 
 -10   0   1   -5.60   12.10 
  10   0  -1    4.20   11.30 
  10   0  -1   -3.40   11.00 
  10   0  -1   11.80   14.40 
  10   0  -1   -2.40    9.20 
  -9   0   1  291.77   38.40 
   9   0  -1  353.26   40.10 
   9   0  -1  257.97   34.80 
  -9   0   1  352.36   43.00 
   9   0  -1  405.56   47.10 
   9   0  -1  335.07   42.20 
  -9   0   1  350.36   40.30 
  -9   0   1  316.87   38.90 
   9   0  -1  302.57   41.80 
   9   0  -1  362.66   40.60 
   9   0  -1  306.47   39.90 
   9   0  -1  237.08   37.60 
  -9   0   1  314.57   40.50 
   9   0  -1  284.57   37.70 
   9   0  -1  317.67   42.10 
   9   0  -1  351.26   37.20 
   9   0  -1  396.66   46.10 
  -9   0   1  334.77   36.20 
  -9   0   1  337.47   40.50 
  -9   0   1  292.07   38.70 
  -9   0   1  336.97   33.00 
  -8   0   1    1.30    6.70 
  -8   0   1  -11.70    5.60 
   8   0  -1   -2.90    7.30 
  -8   0   1    4.30    8.40 
   8   0  -1    2.30    9.10 
   8   0  -1   -1.30    6.90 
  -8   0   1    2.20    7.30 
   8   0  -1   -5.20    6.70 
  -8   0   1   -0.30    6.70 
  -8   0   1    9.50    8.70 
  -8   0   1    3.00    8.50 
  -8   0   1    0.30    8.40 
  -8   0   1   -5.90    4.40 
  -8   0   1    4.70    7.90 
   8   0  -1   -0.80    7.40 
   8   0  -1    4.70    9.60 
   8   0  -1    2.50    7.20 
   8   0  -1    4.50    6.30 
   8   0  -1   -4.00    7.20 
   8   0  -1   -5.90    5.70 
  -8   0   1   -4.70    4.50 
   8   0  -1    5.00    6.00 
   8   0  -1  -10.90    6.10 
   8   0  -1   -0.90    8.50 
   8   0  -1    2.70    8.20 
   7   0  -1   18.70    8.50 
  -7   0   1   34.20   12.50 
  -7   0   1   31.50    8.30 
  -7   0   1   18.00    4.40 
  -7   0   1   30.80   12.00 
   7   0  -1   38.90   12.70 
  -7   0   1   19.20   10.60 
  -7   0   1   37.90   10.90 
   7   0  -1   15.40    9.50 
  -7   0   1   38.00   12.60 
  -7   0   1   33.40    6.90 
   7   0  -1   21.70    9.50 
   7   0  -1   19.20    7.50 
   7   0  -1   30.70   12.10 
   7   0  -1   31.40   12.20 
   7   0  -1   36.60   12.60 
  -7   0   1   15.80    7.60 
  -7   0   1   29.30    6.00 
   7   0  -1   26.90    7.00 
   7   0  -1   44.70   13.80 
   7   0  -1   27.20    8.40 
  -7   0   1   39.40   12.20 
  -7   0   1   25.00   10.60 
  -7   0   1   31.10   11.20 
   7   0  -1   20.40    9.80 
   7   0  -1   20.90    9.20 
  -7   0   1   12.10    8.30 
   7   0  -1   23.40   10.90 
   7   0  -1    4.40    7.00 
  -7   0   1   14.60    8.70 
   7   0  -1   30.80   12.00 
   6   0  -1   -5.10    5.00 
   6   0  -1    4.90    3.80 
   6   0  -1   -6.10    4.10 
   6   0  -1    2.90    5.30 
  -6   0   1    1.60    2.30 
  -6   0   1    2.40    5.90 
   6   0  -1   -3.50    4.40 
  -6   0   1   -6.20    4.00 
  -6   0   1    4.70    5.90 
   6   0  -1    2.30    2.60 
   6   0  -1   -3.20    5.20 
   6   0  -1    3.00    3.30 
   6   0  -1    7.50    7.00 
  -6   0   1   -8.60    3.30 
  -6   0   1   -2.20    4.60 
  -6   0   1   -2.50    4.70 
   6   0  -1   -6.90    4.60 
   6   0  -1    1.50    4.10 
  -6   0   1    1.10    2.70 
  -6   0   1   -4.30    2.80 
  -6   0   1    2.20    3.20 
  -6   0   1    0.90    4.10 
  -6   0   1   -2.70    1.50 
  -6   0   1   -0.90    1.70 
   6   0  -1    5.70    6.60 
  -6   0   1   -0.30    3.40 
  -6   0   1    2.40    2.80 
  -6   0   1   -1.00    3.00 
  -6   0   1    2.70    6.30 
   6   0  -1    3.80    5.90 
  -6   0   1    3.90    6.30 
   6   0  -1    3.20    4.10 
   6   0  -1   -1.30    5.60 
  -6   0   1   -0.10    5.80 
   6   0  -1    3.30    4.80 
   6   0  -1    1.50    4.80 
  -6   0   1   -4.50    4.20 
   6   0  -1    0.50    5.10 
  -6   0   1    0.10    5.50 
   5   0  -1   16.70    6.50 
   5   0  -1   11.80    6.30 
  -5   0   1   12.90    2.90 
  -5   0   1    8.50    2.90 
  -5   0   1   17.70    4.90 
  -5   0   1   11.50    4.30 
   5   0  -1    8.90    4.00 
  -5   0   1   15.00    6.60 
  -5   0   1    8.20    6.70 
   5   0  -1    6.50    5.10 
  -5   0   1    6.10    3.00 
   5   0  -1    9.60    6.70 
   5   0  -1   19.80    7.10 
  -5   0   1    8.90    5.70 
  -5   0   1   14.70    4.30 
  -5   0   1   10.40    6.20 
  -5   0   1    6.70    4.00 
   5   0  -1   21.90    8.70 
   5   0  -1   13.70    6.90 
   5   0  -1   12.10    3.40 
  -5   0   1   18.80    6.60 
  -5   0   1    5.90    5.70 
   5   0  -1    8.50    3.70 
  -5   0   1   14.60    6.40 
   5   0  -1   13.80    5.00 
   5   0  -1    2.50    4.80 
  -5   0   1   13.30    6.90 
   5   0  -1   17.60    8.10 
   5   0  -1    7.60    5.30 
  -5   0   1   16.00    5.60 
   5   0  -1   11.30    6.10 
   5   0  -1    8.80    5.90 
   5   0  -1   17.50    6.80 
  -5   0   1   10.10    3.80 
  -5   0   1    2.70    5.20 
   5   0  -1   15.90    5.80 
  -5   0   1    8.60    5.60 
  -5   0   1    9.00    4.30 
  -5   0   1   11.80    3.80 
   5   0  -1   12.10    5.20 
  -4   0   1   -0.80    2.80 
   4   0  -1    1.30    2.80 
   4   0  -1    0.40    3.10 
  -4   0   1    0.60    3.40 
   4   0  -1   -4.40    2.90 
  -4   0   1    4.50    2.50 
  -4   0   1    0.10    3.50 
  -4   0   1    3.50    2.20 
   4   0  -1    1.80    2.60 
  -4   0   1    6.20    4.30 
   4   0  -1   -0.40    2.50 
  -4   0   1   -0.20    4.20 
  -4   0   1    0.00    2.00 
   4   0  -1   18.50    6.90 
  -4   0   1    0.00    2.40 
   4   0  -1    2.50    3.10 
  -4   0   1    1.40    2.50 
  -4   0   1   -1.10    3.50 
  -4   0   1    1.60    3.00 
   4   0  -1    1.40    2.00 
   4   0  -1    3.10    3.10 
   4   0  -1    8.80    4.30 
  -4   0   1   -1.10    1.10 
  -4   0   1   -1.10    1.40 
  -4   0   1   -0.90    1.90 
   4   0  -1    2.20    3.70 
   4   0  -1    5.50    4.60 
   4   0  -1    0.40    3.80 
  -4   0   1    6.70    4.40 
   4   0  -1    2.80    3.50 
   4   0  -1   -1.90    3.80 
   4   0  -1    0.90    3.70 
   4   0  -1   -1.60    3.50 
   4   0  -1    6.20    4.50 
  -4   0   1    0.90    3.60 
  -4   0   1    7.10    4.10 
   4   0  -1   -4.00    2.30 
   4   0  -1    3.60    2.50 
  -4   0   1    3.00    3.30 
  -4   0   1   -5.30    2.50 
   4   0  -1    3.40    4.20 
  -4   0   1   -2.10    2.30 
  -4   0   1   -1.00    1.90 
   4   0  -1    1.10    1.80 
  -4   0   1    1.00    1.70 
  -3   0   1  603.14   24.60 
  -3   0   1  595.94   28.10 
  -3   0   1  561.84   30.30 
   3   0  -1  608.14   31.90 
   3   0  -1  594.54   31.40 
   3   0  -1  570.64   27.40 
   3   0  -1  633.24   26.10 
  -3   0   1  655.73   31.80 
   3   0  -1  606.54   28.20 
  -3   0   1  604.34   30.90 
  -3   0   1  603.94   31.40 
   3   0  -1  660.73   32.70 
  -3   0   1  602.04   26.30 
   3   0  -1  627.24   30.60 
  -3   0   1  572.34   30.50 
   3   0  -1  602.04   29.70 
   3   0  -1  553.84   28.80 
  -3   0   1  621.14   31.20 
   3   0  -1  613.74   25.50 
   3   0  -1  622.24   30.30 
  -3   0   1  610.54   25.30 
  -3   0   1  568.74   29.20 
   3   0  -1  608.14   30.80 
  -3   0   1  610.04   24.50 
  -3   0   1  604.04   27.40 
  -3   0   1  592.64   29.90 
   3   0  -1  618.04   31.30 
  -3   0   1  647.64   27.60 
  -3   0   1  615.34   28.40 
   3   0  -1  615.24   26.00 
   3   0  -1  601.34   27.40 
   3   0  -1  598.24   24.40 
  -3   0   1  548.95   28.70 
  -3   0   1  598.24   24.00 
   3   0  -1  639.04   29.80 
   3   0  -1  629.44   27.60 
   3   0  -1  613.84   28.80 
  -3   0   1  573.54   31.40 
  -3   0   1  558.74   25.40 
  -3   0   1  569.74   30.80 
   3   0  -1  630.04   30.60 
  -3   0   1  625.34   25.90 
  -3   0   1  660.73   28.20 
  -3   0   1  570.34   25.30 
   3   0  -1  632.84   31.00 
   3   0  -1  561.24   27.70 
  -3   0   1  644.44   28.70 
  -3   0   1  670.83   31.60 
  -3   0   1  679.33   31.00 
   3   0  -1  617.24   30.00 
   3   0  -1  592.54   30.20 
   3   0  -1  593.54   29.70 
  -3   0   1  634.94   28.50 
  -3   0   1  552.34   29.90 
   3   0  -1  615.14   30.40 
   3   0  -1  645.34   31.30 
   3   0  -1  590.64   31.00 
  -2   0   1    4.70    2.20 
  -2   0   1    6.40    1.50 
  -2   0   1    3.10    2.60 
  -2   0   1    5.60    1.70 
  -2   0   1    1.90    1.80 
   2   0  -1    1.70    1.20 
  -2   0   1    3.90    1.40 
  -2   0   1    2.10    1.30 
  -2   0   1    1.70    1.10 
   2   0  -1    0.30    1.80 
  -2   0   1    1.10    1.60 
   2   0  -1    3.70    2.00 
   2   0  -1    1.70    1.70 
   2   0  -1    3.60    1.80 
  -2   0   1    9.80    2.80 
  -2   0   1    1.00    1.80 
  -2   0   1    4.50    2.20 
  -2   0   1   -0.80    1.60 
  -2   0   1    5.00    2.60 
   2   0  -1   -1.20    1.70 
  -2   0   1    3.20    2.30 
   2   0  -1   -1.00    1.60 
  -2   0   1    4.60    2.00 
  -2   0   1    3.60    2.40 
  -2   0   1    4.50    2.80 
   2   0  -1    5.00    2.60 
   2   0  -1    3.50    2.70 
   2   0  -1    5.80    2.80 
   2   0  -1    2.00    2.20 
  -2   0   1    8.20    2.90 
   2   0  -1    4.30    1.10 
   2   0  -1    5.30    3.00 
   2   0  -1    3.60    1.70 
   2   0  -1    0.10    1.40 
   2   0  -1    4.30    2.80 
  -2   0   1    9.70    3.30 
  -2   0   1    3.90    1.80 
   2   0  -1    8.40    3.10 
  -2   0   1    5.40    2.90 
  -2   0   1    3.20    1.20 
   2   0  -1    2.90    2.20 
  -2   0   1    0.40    1.30 
   2   0  -1    1.60    2.00 
   2   0  -1    3.60    2.40 
   2   0  -1    1.70    2.40 
   2   0  -1    1.60    2.30 
   2   0  -1    3.00    2.10 
  -2   0   1    6.30    2.80 
  -2   0   1    3.70    1.90 
  -2   0   1    9.20    3.20 
   2   0  -1    4.40    2.30 
  -2   0   1    3.40    2.20 
   2   0  -1    2.10    1.30 
   2   0  -1    2.70    2.30 
  -2   0   1   -0.90    1.90 
  -2   0   1    2.20    2.20 
  -2   0   1   -1.00    1.30 
   2   0  -1    7.30    2.70 
  -2   0   1    1.80    1.80 
   2   0  -1    3.60    1.20 
   2   0  -1    2.70    2.20 
  -2   0   1    2.50    2.20 
   2   0  -1    6.60    3.00 
   2   0  -1    2.90    2.20 
   1   0  -1  398.16   15.60 
   1   0  -1  317.77   16.50 
   1   0  -1  325.57   16.70 
   1   0  -1  416.36   15.40 
   1   0  -1  352.76   16.80 
   1   0  -1  423.16   16.30 
   1   0  -1  416.46   15.60 
   1   0  -1  405.36   16.00 
   1   0  -1  381.76   16.90 
   1   0  -1  405.96   16.60 
   1   0  -1  335.87   16.50 
   1   0  -1  390.96   16.10 
   1   0  -1  396.66   15.30 
   1   0  -1  309.67   16.00 
   1   0  -1  402.06   15.50 
   1   0  -1  371.96   16.80 
   1   0  -1  409.66   17.50 
   1   0  -1  322.67   16.30 
   1   0  -1  402.56   15.90 
   1   0  -1  416.96   16.50 
   1   0  -1  379.16   16.80 
   0   0   1    0.40    0.50 
   0   0  -1   -0.10    0.20 
   0   0  -1    0.00    0.20 
   0   0   1   -0.20    0.50 
   0   0   1   -0.20    0.50 
   0   0   1    0.00    0.40 
   0   0  -1   -0.10    0.20 
   0   0  -1   -0.10    0.20 
   0   0  -1    0.00    0.20 
   0   0  -1    0.30    0.30 
   1   0   1 1798.42   66.39 
   1   0   1 1796.02   67.19 
   1   0   1 1729.03   66.69 
   1   0   1 1761.52   67.19 
  -1   0  -1 1784.42   67.79 
  -1   0  -1 1820.52   67.49 
   1   0   1 1847.22   66.99 
   1   0   1 1778.52   67.69 
   1   0   1 1748.43   67.09 
  -1   0  -1 1740.73   65.59 
   1   0   1 1825.32   65.19 
  -1   0  -1 1712.43   67.89 
   1   0   1 1801.12   65.49 
   1   0   1 1822.22   66.09 
  -1   0  -1 1726.93   67.29 
   1   0   1 1807.42   65.79 
   1   0   1 1816.52   66.99 
   1   0   1 1792.52   66.79 
   1   0   1 1803.32   66.99 
   1   0   1 1805.32   67.59 
   1   0   1 1743.43   64.69 
   1   0   1 1783.02   67.79 
   1   0   1 1831.82   65.89 
   1   0   1 1544.65   67.29 
   1   0   1 1772.52   67.19 
   1   0   1 1752.12   66.69 
   1   0   1 1790.22   67.09 
  -2   0  -1    5.90    2.70 
  -2   0  -1    7.40    2.80 
  -2   0  -1    7.70    3.10 
  -2   0  -1   10.10    3.20 
   2   0   1    2.30    2.60 
  -2   0  -1    4.00    2.70 
   2   0   1    5.60    2.30 
   2   0   1    2.70    2.10 
   2   0   1    2.20    1.70 
   2   0   1    6.50    3.30 
  -2   0  -1    3.90    1.80 
  -2   0  -1    2.50    1.20 
   2   0   1    2.50    2.20 
   2   0   1   -2.20    1.50 
   2   0   1   12.30    4.00 
   2   0   1    1.50    2.00 
   2   0   1    2.40    1.50 
  -2   0  -1    3.10    2.20 
   2   0   1    3.70    2.40 
   2   0   1    5.70    2.10 
  -2   0  -1    6.90    3.00 
   2   0   1   -2.30    1.60 
  -2   0  -1   -0.60    2.20 
  -2   0  -1    2.30    1.80 
  -2   0  -1    1.60    1.60 
  -2   0  -1    3.70    2.40 
  -2   0  -1    5.20    1.80 
   2   0   1    5.40    2.80 
  -2   0  -1    2.00    2.50 
  -2   0  -1    4.80    2.90 
  -2   0  -1    2.10    1.70 
  -2   0  -1   -0.80    2.10 
   2   0   1    2.30    2.40 
   2   0   1    1.90    2.20 
   2   0   1    6.20    2.90 
  -2   0  -1    0.00    1.50 
   2   0   1   -3.90    1.90 
   2   0   1    4.30    2.60 
   2   0   1    8.70    3.60 
  -2   0  -1    3.80    2.10 
  -2   0  -1    2.50    2.50 
   2   0   1    1.80    1.60 
  -2   0  -1   -0.10    2.00 
  -2   0  -1    3.30    1.90 
  -2   0  -1    0.00    1.40 
   2   0   1   -0.90    1.70 
   2   0   1    4.20    2.50 
   2   0   1    6.50    2.80 
  -2   0  -1    4.40    2.40 
  -2   0  -1    3.80    2.50 
  -2   0  -1    6.70    2.10 
   2   0   1   10.10    2.90 
  -2   0  -1   11.20    3.60 
  -2   0  -1   -0.80    2.20 
   2   0   1   13.00    4.10 
   2   0   1    6.30    2.70 
  -2   0  -1    4.80    2.90 
   2   0   1    8.70    2.90 
   2   0   1   -1.00    1.80 
   3   0   1  105.39   12.00 
  -3   0  -1  106.59    6.60 
   3   0   1   93.39   12.30 
  -3   0  -1  101.99   12.10 
   3   0   1  119.19   13.60 
   3   0   1  114.69   12.30 
  -3   0  -1  105.99   11.70 
   3   0   1   97.29    9.40 
  -3   0  -1  107.79    7.90 
  -3   0  -1   97.29   11.50 
  -3   0  -1  112.49   13.20 
   3   0   1  116.59   12.60 
   3   0   1   97.19    9.90 
  -3   0  -1  102.49   12.30 
  -3   0  -1  122.19    9.30 
  -3   0  -1  120.59   11.20 
   3   0   1   84.69    9.90 
   3   0   1  107.59   11.30 
   3   0   1   97.79   11.70 
   3   0   1  129.09   13.70 
  -3   0  -1   91.59    9.30 
   3   0   1  118.99   13.30 
  -3   0  -1  102.49    9.80 
   3   0   1  122.59   13.20 
  -3   0  -1  116.19   11.80 
   3   0   1  129.59   14.70 
  -3   0  -1  129.99   14.60 
   3   0   1  104.99    9.30 
   3   0   1  120.19    8.90 
  -3   0  -1  112.29    8.00 
  -3   0  -1   79.79   10.30 
  -3   0  -1  111.89    8.80 
   3   0   1  107.99   12.30 
   3   0   1  107.19   13.20 
  -3   0  -1  123.99   13.30 
  -3   0  -1  114.59   10.70 
   3   0   1  105.99    8.00 
  -3   0  -1  108.79    7.60 
   3   0   1  113.29   12.60 
   3   0   1  105.29   10.50 
   3   0   1  118.19   11.50 
  -3   0  -1  109.29   11.40 
  -3   0  -1  115.79   12.80 
  -3   0  -1   97.79    9.00 
   3   0   1  129.39   12.70 
  -3   0  -1  122.19   13.70 
   3   0   1  104.49   13.40 
   3   0   1  130.49   12.30 
  -3   0  -1  115.39   12.70 
  -3   0  -1  151.28   15.10 
   3   0   1  119.09   12.60 
   3   0   1  104.99    8.00 
   3   0   1  118.09    9.40 
  -4   0  -1    0.70    1.50 
  -4   0  -1    1.90    2.60 
  -4   0  -1    0.50    3.80 
  -4   0  -1    1.00    2.50 
  -4   0  -1    0.20    3.50 
   4   0   1   -1.40    4.10 
   4   0   1    0.10    2.70 
  -4   0  -1   -0.80    2.20 
   4   0   1   -2.00    3.10 
   4   0   1    2.20    3.50 
   4   0   1    5.10    3.50 
  -4   0  -1    0.90    3.30 
   4   0   1   -0.50    2.60 
  -4   0  -1    4.30    3.70 
  -4   0  -1    1.30    2.60 
  -4   0  -1   -0.30    3.20 
  -4   0  -1    0.50    2.40 
   4   0   1   -0.60    2.40 
  -4   0  -1    2.80    2.80 
  -4   0  -1    2.90    2.60 
   4   0   1   -0.50    2.20 
  -4   0  -1   -4.90    2.30 
   4   0   1   -2.40    3.20 
  -4   0  -1   -0.70    1.20 
  -4   0  -1    0.30    2.50 
   4   0   1    0.70    3.30 
   4   0   1   -2.20    3.20 
  -4   0  -1   -3.00    2.30 
   4   0   1   -3.90    2.70 
  -4   0  -1    3.70    3.60 
   4   0   1   -0.40    3.40 
  -4   0  -1    1.70    3.70 
   4   0   1    4.90    4.80 
   4   0   1   -2.10    2.00 
   4   0   1    6.60    4.70 
   4   0   1   -5.00    2.90 
  -4   0  -1   -1.40    2.70 
   4   0   1    0.60    4.00 
  -4   0  -1    0.50    2.60 
   4   0   1    1.80    3.20 
  -4   0  -1    4.10    4.90 
  -4   0  -1   -2.20    3.20 
  -4   0  -1    0.90    1.20 
  -4   0  -1    4.40    4.10 
   4   0   1    0.00    3.40 
   5   0   1  100.89   16.30 
   5   0   1  131.69   13.10 
  -5   0  -1  105.09   15.40 
   5   0   1  117.59   16.30 
  -5   0  -1  112.09    6.20 
  -5   0  -1   89.89   13.80 
  -5   0  -1  130.19   13.30 
  -5   0  -1  111.49   11.80 
  -5   0  -1   91.89   15.10 
  -5   0  -1  115.09   12.40 
  -5   0  -1  101.19   16.70 
   5   0   1   96.09   11.50 
  -5   0  -1  104.49   10.40 
  -5   0  -1   99.19   12.30 
  -5   0  -1  127.09   17.70 
  -5   0  -1  113.69   11.50 
  -5   0  -1  105.49    5.40 
   5   0   1  114.09   17.50 
  -5   0  -1   80.29   13.60 
   5   0   1   90.59   12.40 
  -5   0  -1  101.99    5.80 
   5   0   1  125.29   15.60 
   5   0   1  105.29   16.00 
  -5   0  -1  114.99   11.50 
  -5   0  -1  104.59    6.60 
  -5   0  -1  114.19   16.00 
  -5   0  -1  110.09   15.10 
   5   0   1   89.19   14.30 
   5   0   1   94.39   14.50 
   5   0   1  106.69   15.70 
   5   0   1   94.19   10.60 
  -5   0  -1   87.89   15.00 
   5   0   1   89.89   14.40 
   5   0   1  135.29   19.30 
   5   0   1   71.29   10.70 
  -5   0  -1   86.79   13.30 
   5   0   1  102.09   14.80 
  -5   0  -1  117.79   16.80 
   5   0   1   85.59   15.40 
  -5   0  -1   99.19   11.90 
   6   0   1   -4.30    4.00 
   6   0   1    0.60    4.90 
  -6   0  -1    1.70    3.30 
  -6   0  -1   -3.10    4.30 
  -6   0  -1   -0.80    5.20 
   6   0   1   -0.10    5.20 
   6   0   1    2.40    5.50 
   6   0   1   -1.80    5.20 
   6   0   1   -3.00    4.30 
  -6   0  -1   -0.30    5.30 
  -6   0  -1    7.30    5.80 
  -6   0  -1    1.80    3.50 
  -6   0  -1    0.30    3.60 
   6   0   1    1.80    3.60 
   6   0   1   -1.60    4.10 
   6   0   1    2.50    7.10 
   6   0   1    7.50    7.40 
  -6   0  -1    1.00    5.00 
   6   0   1    0.20    5.50 
  -6   0  -1    8.50    6.70 
   6   0   1    0.40    3.40 
   6   0   1    1.10    6.60 
  -6   0  -1   -0.20    4.60 
  -6   0  -1   -5.90    3.00 
  -6   0  -1    0.30    4.50 
   6   0   1   -2.10    4.80 
   6   0   1    1.10    3.20 
  -6   0  -1    0.60    6.10 
   6   0   1   -2.40    3.90 
  -6   0  -1    4.60    4.50 
   6   0   1    8.00    7.10 
   6   0   1    1.50    6.10 
  -6   0  -1   -1.90    4.90 
  -6   0  -1   -3.00    2.60 
  -6   0  -1    1.10    5.10 
   6   0   1   -6.80    4.20 
  -7   0  -1 2131.29  105.09 
  -7   0  -1 2138.19  103.39 
  -7   0  -1 2149.58  105.09 
   7   0   1 2196.78   92.79 
   7   0   1 2223.38   90.59 
  -7   0  -1 2308.57   94.39 
   7   0   1 2116.69  103.59 
  -7   0  -1 2198.38  105.49 
   7   0   1 2257.37  103.39 
  -7   0  -1 2317.97  100.69 
   7   0   1 2198.58  105.99 
   7   0   1 2421.56  110.39 
  -7   0  -1 2285.77  105.29 
   7   0   1 2176.88  104.59 
  -7   0  -1 2207.98  104.89 
   7   0   1 2242.78  103.29 
  -7   0  -1 2264.47   92.09 
   7   0   1 2145.69  102.99 
  -7   0  -1 2258.77   89.89 
  -7   0  -1 2146.79   89.69 
   7   0   1 2264.57  103.49 
   7   0   1 2241.98  108.39 
   7   0   1 2173.48  108.89 
  -7   0  -1 2197.38  101.19 
   7   0   1 2334.97  105.99 
   7   0   1 2377.46  106.19 
   7   0   1 2160.78  107.29 
   7   0   1 2228.88   96.49 
  -7   0  -1 2235.88  100.79 
  -7   0  -1 2339.77   96.09 
  -7   0  -1 2268.97  104.89 
  -8   0  -1   -4.80    5.20 
  -8   0  -1    2.10    6.70 
  -8   0  -1   14.10    7.60 
   8   0   1    2.40    7.60 
   8   0   1   -1.30    8.00 
  -8   0  -1   -8.70    7.00 
   8   0   1   -5.80    8.10 
  -8   0  -1  -14.70    5.00 
  -8   0  -1    3.30    7.50 
   8   0   1    6.30   10.60 
   8   0   1   -4.20    6.10 
   8   0   1    2.90    7.60 
   8   0   1   -1.30    5.30 
   8   0   1   -2.30    8.30 
  -8   0  -1    2.40    8.40 
   8   0   1    2.60    8.20 
   8   0   1    7.00    8.40 
   8   0   1   -0.50    7.60 
  -8   0  -1    7.30    9.00 
   8   0   1   -4.80    7.30 
   8   0   1    1.60    7.20 
   8   0   1   -4.40    6.50 
  -8   0  -1    0.40    6.90 
  -8   0  -1    1.80    6.70 
  -8   0  -1    1.20    8.90 
   8   0   1    8.50    9.30 
  -8   0  -1   10.50    8.60 
   9   0   1  439.96   49.10 
  -9   0  -1  536.65   52.89 
  -9   0  -1  491.45   52.19 
  -9   0  -1  483.75   49.30 
   9   0   1  547.95   51.79 
   9   0   1  469.85   52.09 
   9   0   1  450.05   47.80 
  -9   0  -1  590.74   54.49 
  -9   0  -1  525.65   52.19 
   9   0   1  482.65   50.29 
   9   0   1  616.74   60.39 
   9   0   1  495.05   49.80 
   9   0   1  452.25   45.70 
  -9   0  -1  429.26   48.60 
   9   0   1  525.65   54.69 
  -9   0  -1  469.85   43.60 
   9   0   1  479.35   49.20 
   9   0   1  512.35   51.89 
   9   0   1  469.65   50.59 
   9   0   1  541.65   55.59 
  -9   0  -1  556.74   46.50 
 -10   0  -1    3.30   11.10 
  10   0   1    1.20   14.30 
 -10   0  -1   -1.40   10.10 
 -10   0  -1  -10.40    8.60 
  10   0   1    5.00   12.20 
  10   0   1    5.60   13.90 
  10   0   1   -4.80    9.40 
  10   0   1   -2.40    9.40 
  10   0   1   -8.10    9.20 
  10   0   1    8.80   14.00 
 -10   0  -1    3.30   11.20 
 -10   0  -1    0.10    8.80 
 -10   0  -1   -5.50   10.50 
  10   0   1    8.80   14.20 
  10   0   1    0.20   10.20 
  10   0   1    3.50   11.10 
  10   0   1   -3.30    9.10 
  10   0   1    9.20   13.70 
 -10   0  -1   -0.80   10.20 
 -10   0  -1    3.30   11.60 
  10  -1  -1  714.63   71.79 
 -10  -1   1  831.32   59.89 
  10  -1  -1  818.02   62.39 
 -10  -1   1  747.53   53.79 
  10  -1  -1  779.92   58.49 
 -10  -1   1  731.63   57.19 
  10  -1  -1  791.82   62.89 
  10  -1  -1  637.54   64.39 
  10  -1  -1  771.82   56.79 
  10  -1  -1  745.73   67.49 
  10  -1  -1  692.13   69.29 
  10  -1  -1  767.12   61.29 
 -10  -1   1  713.03   56.89 
 -10  -1   1  788.92   59.79 
 -10  -1   1  650.23   55.59 
 -10  -1   1  647.34   66.19 
 -10  -1   1  726.23   58.79 
  10  -1  -1  717.63   55.19 
  10  -1  -1  702.03   55.29 
 -10   1   1  651.03   55.49 
  10   1  -1  756.62   57.99 
  10   1  -1  727.33   59.79 
 -10   1   1  745.53   59.09 
 -10   1   1  792.12   58.39 
 -10   1   1  715.53   56.69 
  10   1  -1  695.23   52.59 
 -10   1   1  712.33   57.79 
  10   1  -1  809.92   62.69 
  10   1  -1  689.23   69.39 
  10   1  -1  679.73   55.29 
  10   1  -1  744.83   56.79 
 -10   1   1  842.72   59.29 
  10   1  -1  769.42   60.19 
  10   1  -1  760.12   62.89 
  10   1  -1  710.63   54.39 
  10   1  -1  825.02   58.49 
  10   1  -1  662.33   63.69 
  -9  -1   1   -2.60    8.60 
   9  -1  -1   15.80   13.30 
  -9  -1   1   16.40   12.90 
   9  -1  -1   28.40   15.60 
  -9  -1   1   11.00    9.10 
  -9  -1   1   15.70   12.20 
  -9  -1   1    1.20    8.30 
   9  -1  -1   12.70   11.60 
   9  -1  -1    9.80   12.50 
  -9  -1   1    8.80   10.50 
  -9  -1   1   12.50    9.20 
   9  -1  -1   26.70   13.70 
   9  -1  -1   12.10    9.80 
   9  -1  -1   22.00   15.80 
  -9  -1   1    3.90   10.90 
  -9  -1   1   -8.50    7.70 
  -9  -1   1   29.90   11.50 
   9  -1  -1    4.50    9.90 
  -9  -1   1    7.80   10.80 
   9  -1  -1    4.60   10.50 
   9  -1  -1    0.10    9.30 
  -9  -1   1    5.00   11.80 
   9  -1  -1   31.30   14.00 
  -9  -1   1    8.80   10.10 
   9  -1  -1    3.60   10.90 
   9   1  -1    3.40    9.10 
   9   1  -1    3.50    9.60 
   9   1  -1   -1.20    9.80 
   9   1  -1    4.40   11.00 
  -9   1   1    0.80    9.10 
  -9   1   1    9.30    8.70 
  -9   1   1    8.00    9.90 
   9   1  -1   15.30   13.10 
   9   1  -1   -0.30    7.90 
  -9   1   1    4.30    9.70 
   9   1  -1    3.50    9.40 
  -9   1   1    7.60   10.40 
   9   1  -1   10.10   12.30 
   9   1  -1   10.50   10.50 
   9   1  -1   21.10   14.40 
  -9   1   1    6.30    9.20 
  -9   1   1   14.70   11.30 
  -9   1   1   13.60   12.30 
   9   1  -1   17.00   12.40 
   9   1  -1   11.10    9.00 
   9   1  -1   18.20   13.10 
   8  -1  -1  341.47   37.30 
  -8  -1   1  309.37   35.50 
  -8  -1   1  278.27   33.80 
  -8  -1   1  304.87   34.80 
  -8  -1   1  340.37   30.70 
   8  -1  -1  288.97   37.70 
   8  -1  -1  291.27   37.40 
   8  -1  -1  301.07   37.70 
   8  -1  -1  339.07   38.20 
   8  -1  -1  383.36   43.00 
   8  -1  -1  300.87   31.50 
  -8  -1   1  279.87   32.40 
   8  -1  -1  286.77   32.10 
   8  -1  -1  346.07   36.60 
   8  -1  -1  296.47   23.10 
   8  -1  -1  270.37   32.80 
  -8  -1   1  276.77   29.40 
  -8  -1   1  300.47   33.20 
   8  -1  -1  313.07   36.20 
  -8  -1   1  274.47   35.50 
  -8  -1   1  323.97   37.90 
   8  -1  -1  298.97   38.10 
  -8  -1   1  261.17   35.30 
  -8  -1   1  209.48   31.10 
   8  -1  -1  350.96   33.30 
  -8  -1   1  293.37   35.10 
  -8  -1   1  258.77   34.40 
   8  -1  -1  216.18   29.70 
  -8   1   1  303.47   35.80 
   8   1  -1  330.67   34.60 
  -8   1   1  269.27   26.30 
   8   1  -1  360.06   42.00 
  -8   1   1  264.07   34.50 
   8   1  -1  309.27   35.80 
  -8   1   1  307.47   28.70 
  -8   1   1  322.37   36.40 
  -8   1   1  325.07   36.70 
   8   1  -1  255.07   33.10 
   8   1  -1  238.58   30.20 
   8   1  -1  255.47   33.60 
   8   1  -1  295.07   37.30 
   8   1  -1  319.77   36.90 
  -8   1   1  386.86   38.50 
  -8   1   1  352.86   33.80 
   8   1  -1  351.66   32.20 
   8   1  -1  266.27   32.90 
   8   1  -1  323.37   35.30 
  -8   1   1  255.97   32.50 
   8   1  -1  277.17   36.40 
   8   1  -1  286.57   26.40 
   8   1  -1  270.37   27.90 
   8   1  -1  301.37   36.50 
  -8   1   1  272.97   33.40 
   7  -1  -1   93.89   15.90 
  -7  -1   1   62.49    9.30 
  -7  -1   1   84.09   16.40 
   7  -1  -1   48.50   13.60 
   7  -1  -1   89.39   18.70 
   7  -1  -1   57.19   16.00 
  -7  -1   1   67.69   15.20 
  -7  -1   1   67.29   11.30 
  -7  -1   1   54.29   14.40 
  -7  -1   1   93.99   18.50 
  -7  -1   1   97.09   19.40 
  -7  -1   1   90.19   11.70 
  -7  -1   1  102.29   20.10 
   7  -1  -1   90.69   18.10 
   7  -1  -1   77.39   16.80 
   7  -1  -1   91.09   11.80 
   7  -1  -1   60.29   10.90 
  -7  -1   1   69.89   17.30 
  -7  -1   1   63.29   15.40 
   7  -1  -1   88.59   19.50 
  -7  -1   1   93.89   16.90 
  -7  -1   1   81.29   17.70 
  -7  -1   1   68.39   13.70 
   7  -1  -1   75.09   14.40 
   7  -1  -1   74.69   18.30 
   7  -1  -1   71.09   14.80 
   7  -1  -1   84.19   17.20 
  -7  -1   1   57.59   12.00 
   7  -1  -1   93.29   18.40 
   7  -1  -1   74.59   16.40 
   7   1  -1   48.30   14.90 
  -7   1   1  107.69   19.60 
  -7   1   1   71.29   15.70 
   7   1  -1   84.59   14.20 
  -7   1   1   94.09   18.70 
  -7   1   1   87.39   14.60 
   7   1  -1   86.49   15.10 
  -7   1   1   73.99   11.00 
   7   1  -1   48.60   14.50 
  -7   1   1   75.09   16.80 
  -7   1   1   65.09   12.50 
   7   1  -1   62.69   14.70 
  -7   1   1  104.69   10.40 
   7   1  -1   74.29   16.50 
  -7   1   1   69.59   15.10 
   7   1  -1   75.79   16.90 
  -7   1   1  111.99   19.20 
   7   1  -1   51.49   14.50 
   7   1  -1   94.49   19.80 
   7   1  -1   90.69   17.80 
   7   1  -1   66.19   16.30 
   7   1  -1   94.99   17.20 
  -7   1   1   71.99   16.40 
  -7   1   1   51.59   10.70 
   7   1  -1   74.69   15.40 
   7   1  -1   76.89   12.50 
   7   1  -1   62.19   14.90 
  -6  -1   1 1704.53   67.29 
  -6  -1   1 1749.32   72.79 
  -6  -1   1 1683.43   76.79 
  -6  -1   1 1642.74   81.29 
   6  -1  -1 1650.33   69.69 
   6  -1  -1 1669.43   80.49 
  -6  -1   1 1619.54   81.49 
   6  -1  -1 1686.93   78.19 
  -6  -1   1 1682.03   82.89 
  -6  -1   1 1668.53   71.09 
  -6  -1   1 1724.33   71.59 
  -6  -1   1 1761.72   82.69 
   6  -1  -1 1755.32   80.09 
  -6  -1   1 1743.83   81.19 
  -6  -1   1 1680.63   83.39 
   6  -1  -1 1741.53   69.99 
  -6  -1   1 1731.73   79.69 
   6  -1  -1 1744.53   68.89 
   6  -1  -1 1758.42   80.89 
  -6  -1   1 1690.33   78.29 
   6  -1  -1 1659.43   75.79 
   6  -1  -1 1697.63   83.69 
   6  -1  -1 1704.43   72.79 
  -6  -1   1 1783.62   68.59 
  -6  -1   1 1680.83   68.49 
  -6  -1   1 1701.53   75.39 
  -6  -1   1 1758.02   82.89 
  -6  -1   1 1567.14   79.09 
   6  -1  -1 1692.23   83.89 
   6  -1  -1 1799.72   76.89 
   6  -1  -1 1675.53   81.29 
   6  -1  -1 1621.94   82.89 
   6  -1  -1 1679.83   67.59 
   6  -1  -1 1801.02   80.89 
   6  -1  -1 1714.13   66.29 
   6  -1  -1 1726.03   83.39 
  -6   1   1 1681.23   69.69 
   6   1  -1 1688.03   83.29 
   6   1  -1 1723.73   66.99 
  -6   1   1 1667.13   71.49 
  -6   1   1 1741.33   68.29 
   6   1  -1 1570.24   83.19 
  -6   1   1 1671.03   81.79 
   6   1  -1 1703.53   81.29 
  -6   1   1 1805.12   73.89 
  -6   1   1 1825.72   82.39 
   6   1  -1 1785.82   73.49 
  -6   1   1 1688.53   66.99 
  -6   1   1 1659.03   79.49 
   6   1  -1 1727.63   80.89 
   6   1  -1 1803.02   79.49 
  -6   1   1 1753.22   81.29 
   6   1  -1 1603.14   74.69 
   6   1  -1 1671.73   75.59 
  -6   1   1 1765.32   81.59 
   6   1  -1 1692.73   80.99 
   6   1  -1 1738.33   84.69 
   6   1  -1 1832.82   81.49 
   6   1  -1 1525.25   80.49 
  -6   1   1 1738.03   74.99 
  -6   1   1 1690.83   65.29 
  -6   1   1 1737.53   73.19 
  -6   1   1 1710.33   82.29 
  -6   1   1 1679.03   77.89 
   6   1  -1 1678.83   81.29 
   6   1  -1 1711.53   79.39 
  -6   1   1 1736.33   67.39 
   6   1  -1 1686.53   80.69 
   5  -1  -1  358.96   25.50 
   5  -1  -1  343.37   19.40 
  -5  -1   1  328.17   23.60 
   5  -1  -1  321.57   18.30 
   5  -1  -1  361.46   26.00 
   5  -1  -1  312.07   25.60 
   5  -1  -1  324.07   26.30 
   5  -1  -1  373.26   21.30 
  -5  -1   1  339.67   25.10 
   5  -1  -1  322.57   24.40 
  -5  -1   1  289.67   24.50 
  -5  -1   1  319.47   18.10 
   5  -1  -1  366.16   22.80 
   5  -1  -1  347.57   18.40 
  -5  -1   1  352.46   25.30 
  -5  -1   1  326.07   25.30 
   5  -1  -1  315.77   26.00 
  -5  -1   1  298.27   17.70 
   5  -1  -1  346.37   24.40 
   5  -1  -1  328.57   15.80 
   5  -1  -1  312.67   22.90 
   5  -1  -1  320.17   18.60 
  -5  -1   1  340.57   20.50 
  -5  -1   1  332.27   17.90 
   5  -1  -1  347.47   26.80 
  -5  -1   1  293.37   21.30 
   5  -1  -1  358.16   20.80 
  -5  -1   1  337.87   20.30 
  -5  -1   1  335.27   26.60 
  -5  -1   1  304.47   22.20 
   5  -1  -1  332.27   22.10 
  -5  -1   1  310.07   25.00 
  -5  -1   1  348.27   26.90 
  -5  -1   1  334.57   19.90 
   5  -1  -1  353.16   25.00 
   5  -1  -1  341.27   16.80 
  -5  -1   1  347.97   24.90 
  -5  -1   1  314.57   24.70 
   5   1  -1  348.27   26.10 
   5   1  -1  381.36   23.10 
   5   1  -1  331.67   19.30 
  -5   1   1  321.97   25.10 
  -5   1   1  357.46   20.80 
   5   1  -1  358.46   17.60 
  -5   1   1  335.47   20.30 
  -5   1   1  331.77   16.80 
   5   1  -1  366.36   24.60 
  -5   1   1  343.27   17.20 
   5   1  -1  368.06   26.10 
  -5   1   1  360.06   25.60 
   5   1  -1  347.07   26.60 
  -5   1   1  320.87   17.50 
   5   1  -1  369.46   25.90 
   5   1  -1  364.76   25.60 
   5   1  -1  360.46   25.60 
  -5   1   1  351.06   21.80 
   5   1  -1  345.87   27.10 
  -5   1   1  345.57   24.90 
   5   1  -1  338.77   25.20 
   5   1  -1  336.87   22.70 
  -5   1   1  291.97   23.60 
   5   1  -1  321.67   23.90 
  -5   1   1  332.97   23.30 
  -5   1   1  377.56   20.30 
   5   1  -1  311.37   24.30 
  -5   1   1  343.47   18.50 
  -5   1   1  315.77   18.70 
  -5   1   1  317.07   19.50 
  -5   1   1  364.86   25.20 
   5   1  -1  365.86   21.40 
  -5   1   1  370.36   16.40 
  -5   1   1  335.37   19.80 
  -5   1   1  361.16   26.20 
   5   1  -1  337.97   27.30 
   4  -1  -1 5850.81  210.58 
   4  -1  -1 5816.92  210.38 
  -4  -1   1 5849.51  210.68 
   4  -1  -1 5597.44  219.98 
  -4  -1   1 5774.22  210.58 
   4  -1  -1 5655.13  209.68 
   4  -1  -1 5837.92  217.78 
  -4  -1   1 5564.54  217.28 
   4  -1  -1 5491.75  216.18 
  -4  -1   1 5709.23  212.38 
  -4  -1   1 5880.31  216.48 
   4  -1  -1 5623.34  220.08 
  -4  -1   1 5505.95  217.68 
   4  -1  -1 5758.82  209.58 
  -4  -1   1 5627.64  218.58 
  -4  -1   1 5724.73  216.68 
  -4  -1   1 5624.34  220.28 
   4  -1  -1 5813.72  208.78 
   4  -1  -1 5791.22  214.18 
  -4  -1   1 5809.02  215.08 
  -4  -1   1 5850.51  210.58 
   4  -1  -1 5892.31  211.88 
  -4  -1   1 5703.63  215.78 
   4  -1  -1 5607.74  212.38 
  -4  -1   1 5759.32  219.18 
   4  -1  -1 5578.04  217.58 
   4  -1  -1 5605.34  219.88 
   4  -1  -1 5813.02  218.68 
  -4  -1   1 5725.63  212.78 
  -4  -1   1 5658.63  219.18 
  -4  -1   1 5594.04  212.48 
   4  -1  -1 5749.22  209.78 
   4  -1  -1 5704.33  206.78 
  -4  -1   1 5469.35  217.38 
  -4  -1   1 5859.91  221.38 
   4  -1  -1 5889.11  213.78 
   4  -1  -1 5600.54  219.98 
   4  -1  -1 5745.42  217.78 
   4  -1  -1 5642.04  215.78 
  -4  -1   1 5907.21  219.78 
  -4   1   1 5684.13  218.58 
  -4   1   1 5727.73  217.38 
   4   1  -1 5823.22  215.08 
  -4   1   1 5570.84  215.28 
  -4   1   1 5736.23  218.98 
  -4   1   1 5703.03  209.08 
   4   1  -1 5770.62  221.68 
   4   1  -1 5720.93  221.38 
  -4   1   1 5846.92  216.78 
   4   1  -1 5863.91  217.08 
   4   1  -1 5605.94  217.98 
   4   1  -1 5655.83  218.18 
  -4   1   1 5707.03  210.48 
   4   1  -1 5888.01  215.78 
  -4   1   1 5721.93  210.08 
  -4   1   1 5689.43  211.08 
   4   1  -1 5639.74  212.88 
   4   1  -1 5617.04  217.98 
  -4   1   1 5753.72  207.78 
  -4   1   1 5921.41  218.08 
  -4   1   1 5460.05  212.68 
   4   1  -1 5719.33  217.68 
  -4   1   1 5628.14  215.48 
   4   1  -1 5869.21  220.78 
  -4   1   1 5621.04  211.38 
   4   1  -1 5759.12  209.38 
   4   1  -1 5773.02  211.48 
   4   1  -1 5681.83  218.08 
  -4   1   1 5811.02  208.58 
   4   1  -1 5778.62  218.68 
  -4   1   1 5984.00  209.78 
   4   1  -1 5840.92  220.18 
  -4   1   1 5743.83  217.88 
   4   1  -1 5681.03  216.48 
  -4   1   1 5981.00  212.38 
  -4   1   1 5783.12  211.68 
  -4   1   1 5880.81  218.58 
   3  -1  -1  396.66   22.00 
   3  -1  -1  393.76   17.40 
   3  -1  -1  385.66   22.90 
   3  -1  -1  421.76   22.60 
   3  -1  -1  388.56   20.00 
   3  -1  -1  352.86   21.80 
   3  -1  -1  381.56   22.40 
  -3  -1   1  395.86   23.10 
  -3  -1   1  419.46   19.70 
  -3  -1   1  376.06   23.80 
   3  -1  -1  407.56   17.50 
  -3  -1   1  417.16   23.00 
  -3  -1   1  410.66   22.90 
   3  -1  -1  404.96   15.60 
   3  -1  -1  409.66   20.10 
  -3  -1   1  438.56   24.10 
   3  -1  -1  453.25   24.80 
  -3  -1   1  346.57   22.60 
   3  -1  -1  446.86   24.80 
  -3  -1   1  415.06   21.90 
  -3  -1   1  406.56   20.50 
  -3  -1   1  374.16   21.90 
   3  -1  -1  422.66   24.50 
   3  -1  -1  419.76   21.70 
   3  -1  -1  377.66   22.60 
  -3  -1   1  375.56   22.70 
  -3  -1   1  402.56   23.20 
  -3  -1   1  403.66   24.70 
  -3  -1   1  442.46   24.20 
   3  -1  -1  396.66   22.50 
   3  -1  -1  408.76   17.80 
  -3  -1   1  393.46   18.80 
  -3  -1   1  391.86   23.50 
  -3  -1   1  388.96   22.00 
  -3  -1   1  382.76   20.20 
  -3  -1   1  388.26   20.20 
   3  -1  -1  380.96   22.60 
   3  -1  -1  426.26   20.10 
   3  -1  -1  394.36   18.30 
  -3  -1   1  388.56   19.00 
  -3  -1   1  359.06   21.70 
   3  -1  -1  376.36   22.10 
   3  -1  -1  394.96   22.60 
   3  -1  -1  445.86   24.70 
   3  -1  -1  382.06   23.60 
   3  -1  -1  410.96   18.10 
   3  -1  -1  388.06   20.10 
   3  -1  -1  379.56   17.80 
  -3  -1   1  400.76   24.50 
  -3  -1   1  426.16   22.10 
   3  -1  -1  401.96   19.30 
  -3  -1   1  422.46   23.50 
  -3  -1   1  430.76   24.50 
  -3  -1   1  406.46   22.20 
   3  -1  -1  396.76   18.10 
   3  -1  -1  408.96   15.80 
   3  -1  -1  411.16   20.60 
   3  -1  -1  417.96   21.90 
   3  -1  -1  405.86   22.10 
  -3  -1   1  351.86   22.40 
   3   1  -1  407.86   23.10 
  -3   1   1  388.26   17.60 
   3   1  -1  377.26   23.00 
   3   1  -1  356.96   21.20 
   3   1  -1  372.26   21.90 
  -3   1   1  387.36   22.90 
  -3   1   1  381.56   20.90 
   3   1  -1  411.06   22.20 
  -3   1   1  420.46   19.90 
   3   1  -1  377.06   22.20 
   3   1  -1  420.56   23.90 
  -3   1   1  380.06   18.40 
  -3   1   1  410.66   23.30 
  -3   1   1  415.56   23.10 
   3   1  -1  388.66   18.20 
   3   1  -1  404.96   21.70 
  -3   1   1  432.96   24.60 
  -3   1   1  395.76   20.60 
  -3   1   1  423.26   19.80 
   3   1  -1  378.86   22.30 
  -3   1   1  408.16   22.60 
   3   1  -1  394.26   21.80 
  -3   1   1  397.76   17.40 
  -3   1   1  407.56   23.40 
  -3   1   1  396.76   17.80 
  -3   1   1  322.67   21.30 
  -3   1   1  405.76   18.70 
  -3   1   1  384.66   20.90 
   3   1  -1  390.76   23.20 
   3   1  -1  377.56   19.40 
   3   1  -1  371.06   23.80 
  -3   1   1  421.26   22.70 
   3   1  -1  434.36   23.80 
   3   1  -1  403.06   23.00 
   3   1  -1  413.46   20.80 
  -3   1   1  389.96   19.30 
  -3   1   1  383.86   17.80 
   3   1  -1  398.06   21.50 
   3   1  -1  423.56   24.30 
  -3   1   1  405.26   17.20 
   3   1  -1  359.56   22.30 
   3   1  -1  383.06   21.70 
   3   1  -1  378.96   22.90 
   3   1  -1  416.86   23.60 
   3   1  -1  411.46   23.00 
   3   1  -1  395.76   24.80 
  -2  -1   1  513.55   23.00 
  -2  -1   1  521.65   24.60 
  -2  -1   1  517.65   24.40 
  -2  -1   1  489.25   23.50 
   2  -1  -1  511.75   23.60 
  -2  -1   1  507.95   24.70 
   2  -1  -1  486.55   21.50 
   2  -1  -1  516.85   25.50 
  -2  -1   1  491.15   24.80 
  -2  -1   1  482.95   24.30 
  -2  -1   1  554.24   25.70 
   2  -1  -1  512.15   24.20 
  -2  -1   1  508.55   22.70 
   2  -1  -1  503.15   24.90 
   2  -1  -1  505.05   20.40 
  -2  -1   1  511.45   23.80 
  -2  -1   1  516.65   24.20 
  -2  -1   1  510.45   22.80 
  -2  -1   1  541.75   24.50 
   2  -1  -1  530.75   21.40 
  -2  -1   1  530.65   25.40 
   2  -1  -1  530.05   24.20 
  -2  -1   1  439.96   23.10 
   2  -1  -1  464.05   23.60 
   2  -1  -1  477.65   23.10 
   2  -1  -1  488.35   22.40 
   2  -1  -1  509.85   25.10 
  -2  -1   1  513.35   26.00 
  -2  -1   1  521.05   21.80 
  -2  -1   1  497.65   23.00 
  -2  -1   1  495.15   24.40 
   2  -1  -1  512.55   20.90 
   2  -1  -1  524.85   23.60 
  -2  -1   1  507.45   24.50 
   2  -1  -1  505.05   20.50 
  -2  -1   1  508.05   25.50 
   2  -1  -1  510.75   23.90 
  -2  -1   1  527.75   24.20 
   2  -1  -1  539.85   24.90 
   2  -1  -1  485.95   19.60 
   2  -1  -1  496.05   18.80 
   2  -1  -1  494.75   19.80 
   2  -1  -1  490.85   21.30 
   2  -1  -1  522.55   25.30 
   2  -1  -1  518.45   22.10 
  -2  -1   1  517.35   25.90 
   2  -1  -1  493.05   21.50 
   2  -1  -1  520.45   25.10 
  -2  -1   1  504.65   24.60 
   2  -1  -1  490.75   23.90 
   2  -1  -1  473.35   22.60 
  -2  -1   1  485.15   21.90 
  -2  -1   1  464.55   25.30 
   2  -1  -1  468.55   20.90 
   2  -1  -1  492.45   19.00 
  -2  -1   1  541.45   24.50 
  -2  -1   1  514.05   25.30 
  -2  -1   1  514.35   24.50 
   2  -1  -1  523.15   24.20 
   2  -1  -1  520.25   24.50 
   2  -1  -1  423.46   23.30 
  -2  -1   1  515.15   23.90 
  -2  -1   1  467.65   24.10 
   2  -1  -1  495.05   23.20 
   2  -1  -1  469.85   23.80 
  -2  -1   1  516.45   24.30 
  -2  -1   1  537.55   25.20 
   2   1  -1  498.35   25.00 
   2   1  -1  483.05   24.10 
   2   1  -1  526.95   24.60 
  -2   1   1  519.25   24.30 
   2   1  -1  536.75   26.70 
  -2   1   1  491.85   25.20 
   2   1  -1  549.45   24.60 
  -2   1   1  491.05   23.10 
  -2   1   1  505.55   25.10 
  -2   1   1  552.64   24.40 
  -2   1   1  462.55   22.80 
  -2   1   1  492.55   23.80 
   2   1  -1  506.35   25.80 
   2   1  -1  536.75   26.10 
   2   1  -1  510.95   22.60 
  -2   1   1  494.25   20.50 
  -2   1   1  489.25   23.50 
   2   1  -1  481.65   23.50 
   2   1  -1  526.25   24.90 
  -2   1   1  488.35   24.00 
   2   1  -1  501.05   25.00 
  -2   1   1  474.15   23.90 
   2   1  -1  481.65   23.10 
  -2   1   1  484.45   21.80 
   2   1  -1  482.75   24.30 
   2   1  -1  501.35   24.20 
  -2   1   1  490.95   20.10 
  -2   1   1  494.75   23.50 
   2   1  -1  518.55   24.50 
   2   1  -1  459.05   23.50 
   2   1  -1  543.65   24.70 
   2   1  -1  515.25   21.50 
  -2   1   1  512.25   24.00 
   2   1  -1  530.15   25.10 
   2   1  -1  465.15   23.90 
   2   1  -1  474.25   23.60 
   2   1  -1  476.65   23.40 
   2   1  -1  496.55   24.90 
  -2   1   1  511.15   22.50 
  -2   1   1  491.45   24.10 
   2   1  -1  552.84   25.10 
   2   1  -1  501.85   24.40 
  -2   1   1  464.65   20.50 
  -2   1   1  534.85   25.00 
   2   1  -1  465.55   22.80 
   2   1  -1  475.35   23.90 
  -2   1   1  484.65   22.20 
   2   1  -1  478.05   23.60 
  -2   1   1  527.75   24.40 
  -2   1   1  495.75   20.60 
  -2   1   1  503.95   20.60 
   2   1  -1  489.75   24.10 
  -2   1   1  492.65   19.90 
  -2   1   1  482.75   19.80 
  -1  -1   1   22.60    3.50 
  -1  -1   1   20.80    3.50 
  -1  -1   1   25.10    4.10 
   1  -1  -1   27.70    3.50 
  -1  -1   1   24.90    3.60 
  -1  -1   1   25.70    3.50 
   1  -1  -1   26.20    3.50 
  -1  -1   1   11.90    2.50 
   1  -1  -1   24.90    3.40 
  -1  -1   1   22.60    3.80 
  -1  -1   1   30.10    4.20 
  -1  -1   1   19.90    3.50 
   1  -1  -1   18.90    2.90 
   1  -1  -1   20.80    2.60 
   1  -1  -1   22.60    3.10 
   1  -1  -1   21.00    2.80 
  -1  -1   1   24.00    3.40 
  -1  -1   1   20.00    3.10 
   1  -1  -1   23.00    1.70 
   1  -1  -1   24.10    3.60 
   1  -1  -1   28.10    3.50 
  -1  -1   1   28.40    4.20 
   1  -1  -1   28.40    3.80 
  -1  -1   1   37.60    5.70 
  -1  -1   1   27.80    4.70 
   1  -1  -1   13.90    2.90 
  -1  -1   1   22.10    4.10 
   1  -1  -1   27.60    4.60 
  -1  -1   1   23.20    4.00 
   1  -1  -1   23.40    3.30 
  -1  -1   1   21.10    2.70 
  -1  -1   1   25.60    3.40 
  -1  -1   1   22.50    3.50 
   1  -1  -1   22.10    2.80 
   1  -1  -1   16.90    3.40 
  -1  -1   1   27.40    3.90 
  -1  -1   1   19.10    3.30 
   1  -1  -1   24.70    4.00 
   1  -1  -1   27.00    3.40 
  -1  -1   1   18.20    3.30 
  -1  -1   1   19.50    3.40 
   1  -1  -1   18.40    3.50 
  -1  -1   1   27.40    4.10 
   1  -1  -1   22.40    3.20 
  -1  -1   1   26.90    4.30 
   1  -1  -1   27.70    2.70 
   1  -1  -1   23.60    1.70 
   1  -1  -1   28.30    3.60 
   1  -1  -1   21.70    2.50 
   1  -1  -1   23.80    2.70 
   1  -1  -1   16.70    3.20 
   1  -1  -1   27.20    1.80 
  -1  -1   1   27.70    4.40 
   1  -1  -1   25.30    3.70 
  -1  -1   1   33.80    4.60 
  -1  -1   1   26.60    3.90 
   1  -1  -1   31.80    3.80 
   1  -1  -1   22.60    3.20 
  -1  -1   1   32.30    4.40 
  -1  -1   1   15.50    3.90 
   1   1  -1   24.90    3.90 
   1   1  -1   22.60    3.40 
   1   1  -1   24.90    3.50 
   1   1  -1   24.10    4.00 
   1   1  -1   23.20    3.60 
   1   1  -1   17.80    3.20 
   1   1  -1   25.00    3.60 
   1   1  -1   24.90    2.90 
   1   1  -1   22.70    3.40 
   1   1  -1   21.70    3.80 
   1   1  -1   25.60    3.70 
  -1   1   1   21.20    2.90 
   1   1  -1   26.20    4.50 
  -1   1   1   20.00    3.10 
   1   1  -1   19.10    3.30 
   1   1  -1   22.80    3.40 
  -1   1   1   16.10    2.20 
   1   1  -1   16.60    2.80 
   1   1  -1   14.90    3.30 
  -1   1   1   13.90    2.20 
   1   1  -1   26.10    4.90 
   1   1  -1   30.50    4.30 
   1   1  -1   17.80    3.40 
   1   1  -1   15.20    3.30 
   1   1  -1   26.10    3.90 
   1   1  -1   28.00    3.50 
   1   1  -1   22.00    3.20 
  -1   1   1   24.30    3.20 
  -1   1   1   28.70    3.90 
   1   1  -1   26.60    4.20 
   1   1  -1   25.00    3.70 
  -1   1   1   22.00    3.00 
   1   1  -1   17.40    3.30 
   1   1  -1   20.70    4.00 
  -1   1   1    9.30    2.30 
   1   1  -1   28.40    3.80 
   1   1  -1   14.80    2.90 
   1   1  -1   25.40    4.20 
  -1   1   1   11.10    2.70 
   1   1  -1   16.60    3.20 
   1   1  -1   31.90    5.20 
  -1   1   1   19.10    3.80 
  -1   1   1   26.90    3.60 
   0  -1  -1 4049.19  143.99 
   0  -1  -1 3780.02  145.59 
   0  -1   1 3594.64  148.79 
   0  -1   1 3976.00  144.59 
   0  -1  -1 3983.70  144.09 
   0  -1  -1 4063.29  145.19 
   0  -1  -1 4010.30  144.89 
   0  -1   1 3371.36  144.49 
   0  -1  -1 4040.20  144.99 
   0  -1   1 3981.00  142.49 
   0  -1   1 4094.59  142.79 
   0  -1  -1 4059.89  144.59 
   0  -1  -1 4028.80  144.49 
   0  -1   1 3943.41  144.59 
   0  -1  -1 4002.30  144.89 
   0  -1  -1 3917.11  145.09 
   0  -1  -1 4167.98  142.69 
   0  -1   1 4204.78  144.09 
   0  -1   1 3933.91  143.19 
   0  -1   1 3804.72  147.09 
   0  -1   1 4073.69  145.59 
   0  -1  -1 4044.80  145.09 
   0  -1  -1 4100.09  144.49 
   0  -1   1 4081.09  142.39 
   0  -1   1 3793.92  146.69 
   0  -1  -1 4028.50  146.39 
   0  -1  -1 4121.69  145.29 
   0  -1   1 4085.89  143.89 
   0  -1   1 4072.29  145.19 
   0  -1   1 4122.59  142.99 
   0  -1   1 4125.39  143.19 
   0  -1   1 4091.39  143.59 
   0  -1   1 3603.84  144.29 
   0  -1  -1 4116.49  144.29 
   0  -1   1 3845.62  145.69 
   0  -1   1 3986.70  145.59 
   0  -1  -1 3417.66  144.09 
   0  -1   1 3887.61  146.19 
   0   1  -1 3972.20  144.99 
   1  -1   1  347.47   14.90 
  -1  -1  -1  339.47   15.80 
  -1  -1  -1  352.36   15.90 
   1  -1   1  346.37   18.20 
  -1  -1  -1  322.67   17.30 
  -1  -1  -1  295.97   16.30 
  -1  -1  -1  343.07   16.80 
   1  -1   1  355.76   17.30 
   1  -1   1  344.27   17.20 
   1  -1   1  353.36   14.80 
   1  -1   1  348.67   16.20 
   1  -1   1  334.47   13.80 
  -1  -1  -1  334.17   16.30 
  -1  -1  -1  367.46   16.80 
  -1  -1  -1  326.67   16.50 
   1  -1   1  328.57   14.80 
   1  -1   1  352.06   14.80 
   1  -1   1  323.97   16.40 
   1  -1   1  341.17   15.00 
   1  -1   1  354.16   18.10 
   1  -1   1  351.36   15.20 
   1  -1   1  304.67   16.50 
   1  -1   1  347.57   15.70 
  -1  -1  -1  352.36   16.80 
   1  -1   1  363.46   15.20 
  -1  -1  -1  326.27   16.30 
  -1  -1  -1  365.86   17.50 
  -1  -1  -1  340.87   17.70 
  -1  -1  -1  354.36   16.20 
  -1  -1  -1  343.17   17.90 
  -1  -1  -1  358.06   17.90 
  -1  -1  -1  343.67   17.30 
  -1  -1  -1  322.97   17.50 
  -1  -1  -1  371.06   16.30 
  -1  -1  -1  336.37   16.80 
  -1  -1  -1  335.57   17.40 
   1  -1   1  354.16   15.60 
   1  -1   1  381.26   17.50 
   1  -1   1  340.57   17.90 
   1  -1   1  338.67   15.60 
  -1  -1  -1  339.17   15.90 
  -1  -1  -1  344.87   17.30 
   1  -1   1  342.17   15.70 
   1  -1   1  343.67   16.40 
   1  -1   1  362.96   15.90 
  -1  -1  -1  349.67   16.70 
  -1  -1  -1  395.36   16.70 
   1  -1   1  340.87   15.70 
   1  -1   1  341.17   15.70 
  -1  -1  -1  342.07   16.80 
   1  -1   1  346.87   16.80 
  -1  -1  -1  345.67   16.30 
   1  -1   1  350.06   16.00 
   1  -1   1  378.36   16.80 
   1  -1   1  351.86   14.60 
  -1  -1  -1  325.87   16.60 
  -1  -1  -1  351.36   17.40 
   1   1   1  355.86   17.10 
  -1   1  -1  342.57   14.10 
   1   1   1  358.96   17.80 
   1   1   1  370.66   17.10 
  -1   1  -1  260.37   15.70 
   1   1   1  349.17   16.90 
   1   1   1  341.27   17.10 
  -1   1  -1  330.77   16.70 
   1   1   1  330.47   15.60 
   1   1   1  357.36   16.90 
   1   1   1  345.17   16.20 
   1   1   1  306.57   15.80 
   1   1   1  349.17   18.10 
   1   1   1  336.87   16.60 
   1   1   1  360.16   17.60 
  -1   1  -1  355.76   15.10 
   1   1   1  337.07   16.30 
  -1   1  -1  323.77   15.40 
   1   1   1  368.56   17.50 
   1   1   1  361.96   18.00 
  -1   1  -1  346.27   17.00 
   1   1   1  330.07   16.20 
  -1   1  -1  354.06   15.30 
   1   1   1  344.97   16.00 
  -1   1  -1  367.66   18.70 
  -1   1  -1  339.37   14.00 
  -1   1  -1  330.87   15.80 
   1   1   1  298.97   15.40 
  -1   1  -1  383.16   18.50 
  -1   1  -1  346.47   16.00 
  -1   1  -1  347.57   17.10 
   1   1   1  370.56   17.20 
   1   1   1  328.87   17.50 
   1   1   1  357.26   17.90 
  -1   1  -1  336.87   16.30 
   1   1   1  342.47   17.20 
   1   1   1  342.17   16.40 
   1   1   1  354.86   16.70 
   1   1   1  383.56   18.30 
   2  -1   1 9318.57  344.37 
   2  -1   1 9386.46  343.57 
   2  -1   1 9033.60  347.77 
  -2  -1  -1 9842.82  348.77 
   2  -1   1 9399.86  348.47 
   2  -1   1 9751.32  346.67 
  -2  -1  -1 9654.03  346.37 
  -2  -1  -1 9544.35  348.77 
  -2  -1  -1 9780.32  345.77 
  -2  -1  -1 9623.84  346.57 
   2  -1   1 9437.26  340.87 
   2  -1   1 9556.24  345.07 
   2  -1   1 9562.84  346.67 
   2  -1   1 9781.92  345.07 
   2  -1   1 9657.43  345.47 
   2  -1   1 9559.94  345.97 
  -2  -1  -1 9497.45  348.17 
   2  -1   1 9347.67  341.17 
  -2  -1  -1 9938.91  347.77 
  -2  -1  -1 9642.94  345.97 
   2  -1   1 9288.87  344.67 
  -2  -1  -1 9556.34  348.57 
   2  -1   1 9163.28  341.97 
  -2  -1  -1 9821.62  348.87 
  -2  -1  -1 9716.83  346.47 
   2  -1   1 9021.70  348.47 
   2  -1   1 9054.79  347.17 
  -2  -1  -1 9608.94  345.07 
  -2  -1  -1 9442.66  346.37 
  -2  -1  -1 9798.62  346.67 
  -2  -1  -1 9868.81  347.27 
  -2  -1  -1 9765.12  347.67 
   2  -1   1 9444.46  347.57 
   2  -1   1 9550.64  345.87 
  -2  -1  -1 9525.55  349.07 
  -2  -1  -1 9643.24  346.07 
  -2  -1  -1 9871.21  346.77 
  -2  -1  -1 9594.64  345.57 
  -2  -1  -1 9656.63  346.37 
   2  -1   1 9322.17  348.67 
   2  -1   1 9446.25  340.67 
   2  -1   1 9268.87  346.57 
  -2  -1  -1 9521.05  346.37 
   2  -1   1 9696.83  344.67 
  -2  -1  -1 9548.94  347.87 
   2  -1   1 9783.42  343.67 
   2  -1   1 9681.93  345.47 
  -2  -1  -1 9701.43  347.07 
  -2  -1  -1 9507.75  347.07 
  -2  -1  -1 9641.74  346.77 
  -2  -1  -1 9627.84  344.97 
  -2  -1  -1 9491.55  345.47 
   2  -1   1 9374.06  343.97 
   2  -1   1 9330.37  346.17 
  -2  -1  -1 9489.25  347.17 
   2  -1   1 9187.08  344.07 
  -2  -1  -1 9500.95  345.97 
  -2  -1  -1 9463.95  346.57 
   2  -1   1 9617.34  344.97 
   2  -1   1 9332.97  344.37 
   2  -1   1 9392.26  344.97 
   2  -1   1 9129.99  346.97 
   2  -1   1 9369.86  346.67 
   2  -1   1 9425.26  341.57 
   2  -1   1 9731.13  346.17 
  -2   1  -1 8673.93  346.07 
   2   1   1 9608.04  348.47 
  -2   1  -1 9700.83  345.87 
  -2   1  -1 9805.82  345.27 
  -2   1  -1 9807.12  345.87 
  -2   1  -1 9870.21  345.37 
   2   1   1 9853.91  346.97 
   2   1   1 9426.16  346.17 
   2   1   1 9792.12  347.27 
  -2   1  -1 9094.19  341.97 
   2   1   1 9652.13  346.17 
   2   1   1 9654.73  348.57 
  -2   1  -1 8975.90  348.27 
   2   1   1 9849.92  346.37 
   2   1   1 9416.66  345.87 
  -2   1  -1 9558.04  345.17 
   2   1   1 9516.15  346.57 
  -2   1  -1 9781.32  344.87 
   2   1   1 9415.26  346.97 
   2   1   1 9652.03  347.07 
  -2   1  -1 9519.55  344.17 
   2   1   1 9654.83  346.67 
   2   1   1 9273.77  346.87 
  -2   1  -1 9566.64  342.67 
   2   1   1 9854.71  346.27 
   2   1   1 9944.71  347.67 
  -2   1  -1 8858.51  346.27 
   2   1   1 9599.44  348.47 
  -2   1  -1 9485.25  346.77 
   2   1   1 9672.63  346.67 
   2   1   1 9999.00  349.07 
  -2   1  -1 8931.01  343.67 
   2   1   1 9566.34  345.37 
   2   1   1 9413.86  346.57 
   2   1   1 9551.24  348.47 
  -2   1  -1 9706.23  343.67 
  -2   1  -1 9473.45  343.87 
  -2   1  -1 9505.45  347.07 
  -2   1  -1 9538.25  346.97 
  -2   1  -1 9688.03  341.57 
  -2   1  -1 9919.01  347.67 
  -2   1  -1 9487.05  345.07 
   2   1   1 9756.42  345.17 
  -2   1  -1 9763.02  349.17 
  -2   1  -1 9366.16  341.57 
  -2   1  -1 9081.49  343.57 
  -2   1  -1 9322.77  345.67 
   2   1   1 8983.90  348.77 
   2   1   1 9535.15  346.27 
   2   1   1 9168.18  346.57 
  -2   1  -1 8738.43  343.87 
  -2   1  -1 9795.12  341.27 
   2   1   1 9516.75  345.37 
   2   1   1 9854.61  344.57 
   2   1   1 9739.83  346.27 
  -3  -1  -1   57.49    8.00 
  -3  -1  -1   67.49    9.90 
  -3  -1  -1   70.99   10.40 
  -3  -1  -1   47.60    9.00 
  -3  -1  -1   54.69    9.00 
   3  -1   1   64.09   10.40 
   3  -1   1   86.79    9.20 
   3  -1   1   59.39    8.40 
  -3  -1  -1   44.80    7.30 
   3  -1   1   69.49    6.40 
   3  -1   1   60.19    7.60 
   3  -1   1   74.29    9.40 
  -3  -1  -1   80.49   11.80 
   3  -1   1   61.69    9.30 
  -3  -1  -1   55.09    8.90 
   3  -1   1   68.59    8.20 
  -3  -1  -1   64.39    7.90 
   3  -1   1   57.09    8.40 
   3  -1   1   68.39    9.10 
   3  -1   1   64.09    9.50 
  -3  -1  -1   46.40    8.40 
   3  -1   1   62.59    7.90 
  -3  -1  -1   68.49    9.50 
   3  -1   1   54.69    7.50 
  -3  -1  -1   46.50    8.90 
   3  -1   1   61.79    6.00 
  -3  -1  -1   64.39    8.30 
   3  -1   1   44.90    8.30 
   3  -1   1   66.19    8.10 
   3  -1   1   57.89    9.60 
  -3  -1  -1   64.09    9.00 
   3  -1   1   53.29    9.20 
  -3  -1  -1   70.59    9.80 
  -3  -1  -1   66.89    9.10 
  -3  -1  -1   61.99    9.50 
   3  -1   1   48.30    8.10 
   3  -1   1   63.39   10.60 
   3  -1   1   40.90    7.50 
  -3  -1  -1   55.49    9.60 
  -3  -1  -1   84.29   11.10 
   3  -1   1   54.99   10.10 
   3  -1   1   62.09    5.90 
  -3  -1  -1   77.59    8.80 
  -3  -1  -1   83.89   11.70 
   3  -1   1   76.19   10.30 
   3  -1   1   45.30    7.80 
   3  -1   1   72.39    9.40 
  -3  -1  -1   70.39    9.20 
   3  -1   1   65.69   10.10 
   3  -1   1   61.49    7.40 
  -3  -1  -1   72.49    9.20 
  -3  -1  -1   59.19   11.40 
   3   1   1   67.89   12.20 
  -3   1  -1   54.19    6.70 
  -3   1  -1   43.30    6.30 
   3   1   1   48.80    8.00 
  -3   1  -1   46.60    8.00 
  -3   1  -1   59.49    7.80 
   3   1   1   58.79    9.30 
  -3   1  -1   51.99    3.80 
  -3   1  -1   58.39    6.70 
   3   1   1   60.39   10.50 
   3   1   1   39.70    7.70 
   3   1   1   52.79    9.60 
   3   1   1   82.99   10.50 
  -3   1  -1   60.89    7.80 
  -3   1  -1   55.29    8.50 
   3   1   1   58.39    8.90 
  -3   1  -1   61.79    9.50 
  -3   1  -1   57.89    9.30 
  -3   1  -1   81.09   11.50 
  -3   1  -1   58.89    6.30 
  -3   1  -1   62.39    8.60 
  -3   1  -1   69.19    8.50 
  -3   1  -1   79.39   10.60 
   3   1   1   52.99    8.90 
   3   1   1   64.49    8.50 
  -3   1  -1   55.59    7.50 
   3   1   1   61.89    8.20 
   3   1   1   49.80    9.20 
   3   1   1   69.69   10.30 
  -3   1  -1   70.79    9.20 
   3   1   1   35.60    7.70 
   3   1   1   49.10    7.80 
   3   1   1   45.20    8.40 
   3   1   1   72.19   11.10 
  -3   1  -1   51.49    8.00 
  -3   1  -1   44.50    6.90 
   3   1   1   47.00    8.30 
  -3   1  -1   60.59    7.30 
   3   1   1   49.80    7.10 
   3   1   1   60.69    8.50 
   3   1   1   79.29    9.90 
   3   1   1   66.09   10.30 
  -3   1  -1   60.69    5.90 
   3   1   1   53.39    7.90 
   3   1   1   45.20    8.40 
  -3   1  -1   64.59    5.70 
  -3   1  -1   69.59    9.80 
   3   1   1   60.39    6.70 
  -3   1  -1   54.29    5.50 
   4  -1   1 1913.71   77.09 
  -4  -1  -1 1816.52   82.29 
  -4  -1  -1 1919.41   78.49 
  -4  -1  -1 1963.00   84.49 
  -4  -1  -1 1885.41   77.59 
  -4  -1  -1 1962.70   78.89 
   4  -1   1 2000.60   84.39 
   4  -1   1 1913.41   81.89 
   4  -1   1 1957.40   73.89 
   4  -1   1 1862.61   80.09 
   4  -1   1 1964.10   72.19 
   4  -1   1 1852.21   81.09 
  -4  -1  -1 1908.01   82.19 
  -4  -1  -1 1874.01   77.29 
  -4  -1  -1 1896.31   74.29 
   4  -1   1 1950.70   81.79 
  -4  -1  -1 1768.42   80.49 
   4  -1   1 1927.21   74.29 
  -4  -1  -1 1825.32   81.09 
  -4  -1  -1 1941.61   81.59 
  -4  -1  -1 1867.91   81.09 
  -4  -1  -1 1818.52   78.59 
  -4  -1  -1 2041.90   83.19 
   4  -1   1 1914.41   80.19 
   4  -1   1 1939.51   76.89 
  -4  -1  -1 1912.41   84.29 
   4  -1   1 1867.11   76.19 
  -4  -1  -1 1880.71   81.89 
   4  -1   1 1869.21   83.99 
   4  -1   1 1871.41   80.19 
   4  -1   1 1987.00   83.09 
   4  -1   1 1977.40   81.59 
   4  -1   1 1846.22   76.89 
   4  -1   1 1847.72   84.59 
   4  -1   1 1884.31   83.29 
  -4  -1  -1 1850.31   78.09 
  -4   1  -1 1844.72   80.69 
   4   1   1 1912.01   76.69 
   4   1   1 1869.31   80.29 
  -4   1  -1 1829.62   80.79 
   4   1   1 1918.51   83.59 
   4   1   1 1966.20   75.89 
  -4   1  -1 1906.41   74.49 
  -4   1  -1 1833.32   81.79 
  -4   1  -1 1797.82   79.79 
   4   1   1 1775.12   79.79 
  -4   1  -1 1830.72   74.69 
  -4   1  -1 1878.21   75.69 
   4   1   1 1947.21   77.59 
  -4   1  -1 1905.31   77.19 
   4   1   1 1863.51   82.89 
  -4   1  -1 1951.80   80.99 
   4   1   1 1913.01   83.89 
  -4   1  -1 1911.41   70.79 
  -4   1  -1 1892.81   81.09 
  -4   1  -1 1900.61   77.69 
  -4   1  -1 1899.31   74.19 
  -4   1  -1 1914.11   82.79 
  -4   1  -1 1863.71   75.59 
  -4   1  -1 1927.21   77.79 
  -4   1  -1 1953.80   81.09 
   4   1   1 1987.20   83.79 
  -4   1  -1 1920.81   75.89 
   4   1   1 1860.11   79.89 
   4   1   1 2067.49   84.79 
   4   1   1 1904.41   77.19 
  -4   1  -1 1939.01   78.59 
   4   1   1 1964.30   82.19 
   4   1   1 1961.00   80.69 
   4   1   1 1914.31   82.59 
  -4   1  -1 1886.61   73.29 
   4   1   1 1799.12   80.59 
  -4   1  -1 1838.12   71.99 
   4   1   1 1888.91   84.99 
   4   1   1 1882.01   81.69 
  -4   1  -1 1905.51   70.69 
  -4   1  -1 1969.30   77.79 
   4   1   1 2049.49   82.09 
  -5  -1  -1   -3.80    3.60 
  -5  -1  -1    1.00    4.60 
  -5  -1  -1    5.20    5.40 
  -5  -1  -1   -1.00    2.20 
  -5  -1  -1    9.50    5.70 
   5  -1   1   -3.30    4.20 
   5  -1   1    1.80    3.50 
   5  -1   1   -5.40    4.10 
   5  -1   1    3.60    5.20 
  -5  -1  -1    3.30    5.60 
  -5  -1  -1    2.40    3.00 
  -5  -1  -1   -1.20    4.40 
  -5  -1  -1    1.20    3.30 
   5  -1   1    3.90    4.70 
   5  -1   1   -2.10    3.40 
  -5  -1  -1   -1.50    4.20 
   5  -1   1    3.00    5.40 
   5  -1   1    3.80    5.80 
   5  -1   1   -0.50    4.90 
  -5  -1  -1    0.20    3.30 
   5  -1   1    4.20    4.70 
  -5  -1  -1    3.20    5.40 
   5  -1   1   -1.90    3.20 
   5  -1   1   -1.10    2.90 
   5  -1   1    3.00    3.60 
   5  -1   1   -3.20    3.70 
  -5  -1  -1    8.50    7.10 
  -5  -1  -1    1.80    3.50 
   5  -1   1    4.00    3.10 
   5  -1   1    5.80    5.80 
  -5  -1  -1    2.40    4.90 
  -5  -1  -1    5.80    4.30 
  -5  -1  -1   -1.60    4.30 
   5  -1   1   -2.10    4.10 
  -5   1  -1    2.90    4.90 
  -5   1  -1    2.40    5.00 
   5   1   1    3.00    5.50 
  -5   1  -1    0.80    1.80 
  -5   1  -1    4.10    2.40 
  -5   1  -1    1.20    3.10 
   5   1   1    0.30    4.50 
   5   1   1   -0.10    4.70 
   5   1   1    4.90    5.30 
  -5   1  -1   -1.00    4.60 
   5   1   1    1.50    5.20 
  -5   1  -1    3.50    4.90 
   5   1   1    1.10    3.30 
  -5   1  -1    1.40    3.40 
  -5   1  -1   -0.80    3.40 
  -5   1  -1    1.40    1.90 
  -5   1  -1    4.50    5.10 
   5   1   1    0.50    4.50 
  -5   1  -1   -1.10    3.60 
  -5   1  -1    2.60    2.80 
   5   1   1   -2.30    3.70 
   5   1   1    3.00    3.80 
   5   1   1    4.80    5.40 
   5   1   1   -1.10    3.00 
   5   1   1    1.30    3.70 
  -5   1  -1   -2.30    3.90 
   5   1   1   -0.80    4.10 
  -5   1  -1    4.60    3.10 
  -5   1  -1    4.40    4.10 
  -5   1  -1    2.80    3.90 
  -5   1  -1    7.20    3.30 
   5   1   1    0.90    3.40 
   5   1   1    4.10    5.40 
  -5   1  -1    3.10    3.10 
   5   1   1   -3.00    3.50 
   5   1   1    9.30    6.00 
  -5   1  -1   -2.90    2.30 
   5   1   1   -2.80    4.30 
   6  -1   1   27.10   10.70 
   6  -1   1   42.70   10.90 
  -6  -1  -1   40.90   11.80 
  -6  -1  -1   38.80   11.00 
  -6  -1  -1   47.00   13.00 
   6  -1   1   45.20   12.60 
   6  -1   1   27.20    9.30 
  -6  -1  -1   38.30   10.90 
  -6  -1  -1   39.10    9.10 
   6  -1   1   37.50    7.40 
  -6  -1  -1   43.20    9.30 
   6  -1   1   42.80   12.40 
   6  -1   1   46.00   12.20 
   6  -1   1   31.90    7.90 
   6  -1   1   54.09   12.50 
   6  -1   1   44.80   12.30 
  -6  -1  -1   53.89    8.00 
   6  -1   1   43.90   14.10 
  -6  -1  -1   35.20    9.30 
   6  -1   1   28.80   10.60 
  -6  -1  -1   47.60    6.90 
   6  -1   1   37.00    8.90 
  -6  -1  -1   26.00    9.60 
   6  -1   1   46.50    8.50 
  -6  -1  -1   40.20   11.80 
  -6  -1  -1   40.00   12.50 
  -6  -1  -1   36.70   10.80 
   6  -1   1   48.00   13.10 
  -6  -1  -1   33.50    9.20 
  -6  -1  -1   22.40    9.60 
   6  -1   1   34.90   10.20 
  -6  -1  -1   30.00   10.10 
  -6  -1  -1   45.50    7.00 
  -6   1  -1   39.80    5.70 
  -6   1  -1   55.79   13.50 
   6   1   1   40.50    9.20 
   6   1   1   40.60   12.50 
  -6   1  -1   25.00    8.10 
  -6   1  -1   25.80    9.60 
   6   1   1   47.70   12.20 
   6   1   1   47.60   13.30 
   6   1   1   60.29    9.50 
  -6   1  -1   50.69    8.10 
  -6   1  -1   34.40   10.40 
  -6   1  -1   26.60    8.00 
   6   1   1   14.60    7.80 
  -6   1  -1   23.00    9.10 
  -6   1  -1   49.70    5.40 
  -6   1  -1   28.20    6.80 
   6   1   1   32.90   10.70 
   6   1   1   35.90   12.70 
   6   1   1   30.20    9.80 
  -6   1  -1   40.80    5.70 
   6   1   1   39.30    8.70 
  -6   1  -1   48.60   12.20 
   6   1   1   51.69   13.50 
  -6   1  -1   32.90   10.40 
   6   1   1   30.80    9.30 
  -6   1  -1   46.90   12.60 
   6   1   1   28.50   10.00 
  -6   1  -1   47.40    7.70 
   6   1   1   39.70   12.30 
   6   1   1   44.10   12.10 
   6   1   1   29.60    9.80 
   7  -1   1   13.50    8.40 
   7  -1   1   17.30   10.40 
  -7  -1  -1   19.10    9.80 
   7  -1   1   35.90   14.00 
   7  -1   1    3.20    8.70 
   7  -1   1   17.80    7.30 
  -7  -1  -1   17.90    7.60 
   7  -1   1    4.50    7.60 
  -7  -1  -1   -1.20    6.40 
   7  -1   1    9.40    7.20 
  -7  -1  -1   11.00    9.80 
   7  -1   1   16.40   10.40 
  -7  -1  -1   20.40    6.90 
  -7  -1  -1   21.20    9.00 
  -7  -1  -1   10.20    8.20 
   7  -1   1   14.20    8.30 
   7  -1   1   26.70    7.40 
  -7  -1  -1   21.40   10.00 
   7  -1   1   28.80   10.90 
  -7  -1  -1   11.30    6.50 
  -7  -1  -1   16.00    7.70 
  -7  -1  -1   21.30   10.90 
  -7  -1  -1   19.30    5.70 
  -7  -1  -1   20.00   11.00 
  -7  -1  -1   31.50   11.90 
   7  -1   1   29.20    7.80 
  -7  -1  -1   25.40   10.40 
   7  -1   1   13.70    8.50 
   7  -1   1   13.40    9.00 
  -7  -1  -1   18.60    7.10 
   7  -1   1   16.60    7.10 
  -7  -1  -1   15.20   10.30 
   7  -1   1   -1.50    6.70 
   7   1   1   21.00    8.40 
  -7   1  -1   24.40    6.20 
   7   1   1   12.80    8.90 
   7   1   1   10.60    6.60 
  -7   1  -1   23.90   10.30 
   7   1   1    7.50    8.10 
  -7   1  -1    2.20    7.00 
  -7   1  -1    2.40    7.40 
   7   1   1   23.30   10.90 
   7   1   1   30.00   13.00 
   7   1   1   11.90    9.70 
   7   1   1   20.20   10.80 
  -7   1  -1   13.10    8.40 
   7   1   1   10.10    9.40 
   7   1   1   10.90    8.70 
  -7   1  -1   18.60   10.40 
  -7   1  -1   18.10    6.30 
  -7   1  -1   20.50    8.00 
   7   1   1   35.80   12.40 
   7   1   1    5.70    6.80 
   7   1   1   13.00    9.10 
   7   1   1    2.20    7.00 
  -7   1  -1   11.30    5.80 
  -7   1  -1    6.10    7.70 
   7   1   1   12.80    5.60 
   7   1   1    5.10    5.80 
  -7   1  -1   16.70    9.70 
   7   1   1   20.50   10.00 
  -7   1  -1    9.60    7.30 
  -8  -1  -1  649.54   45.00 
   8  -1   1  622.74   47.30 
   8  -1   1  608.94   44.50 
  -8  -1  -1  560.14   38.80 
  -8  -1  -1  595.54   47.60 
  -8  -1  -1  669.93   47.40 
   8  -1   1  556.84   55.49 
  -8  -1  -1  679.33   47.80 
  -8  -1  -1  644.84   47.60 
   8  -1   1  619.44   49.00 
  -8  -1  -1  653.43   48.40 
   8  -1   1  653.23   49.50 
  -8  -1  -1  595.94   44.10 
   8  -1   1  626.04   47.60 
  -8  -1  -1  648.44   39.60 
  -8  -1  -1  581.04   46.30 
  -8  -1  -1  611.24   44.10 
  -8  -1  -1  750.22   51.89 
   8  -1   1  658.33   46.90 
   8  -1   1  611.24   44.70 
   8  -1   1  534.05   40.90 
  -8  -1  -1  520.15   44.20 
   8  -1   1  537.85   42.90 
   8  -1   1  695.53   46.80 
   8  -1   1  721.73   49.40 
   8  -1   1  690.03   50.79 
   8   1   1  652.93   45.50 
   8   1   1  631.34   40.60 
   8   1   1  607.34   45.40 
  -8   1  -1  664.33   46.30 
   8   1   1  656.13   46.10 
  -8   1  -1  588.64   44.90 
   8   1   1  643.84   47.80 
   8   1   1  681.53   39.20 
   8   1   1  610.54   48.80 
  -8   1  -1  602.24   39.00 
  -8   1  -1  654.53   45.60 
   8   1   1  583.14   44.30 
  -8   1  -1  607.94   46.80 
   8   1   1  604.64   45.40 
   8   1   1  651.03   50.99 
   8   1   1  618.54   48.80 
   8   1   1  686.13   48.80 
  -8   1  -1  652.73   36.40 
   8   1   1  582.84   47.10 
  -8   1  -1  610.64   47.50 
   8   1   1  669.13   41.90 
  -8   1  -1  613.44   45.60 
  -8   1  -1  643.14   40.00 
  -8   1  -1  614.94   45.50 
   8   1   1  639.34   46.70 
   9  -1   1   31.50   15.40 
  -9  -1  -1   10.30   10.60 
  -9  -1  -1   18.60   12.20 
  -9  -1  -1   16.00   11.30 
   9  -1   1    7.40   10.40 
   9  -1   1   13.40   12.10 
  -9  -1  -1    0.50   11.80 
  -9  -1  -1   16.20   13.90 
   9  -1   1    2.90   11.60 
  -9  -1  -1   -0.10    8.50 
   9  -1   1   11.50   11.20 
   9  -1   1   23.70   12.70 
  -9  -1  -1   32.00   15.40 
  -9  -1  -1   18.70   12.40 
  -9  -1  -1   28.30   14.00 
  -9  -1  -1   22.80   10.80 
   9  -1   1    4.50   11.20 
   9  -1   1   23.40   15.30 
   9  -1   1   36.20   16.40 
   9  -1   1   23.90   13.80 
   9  -1   1    1.10    9.50 
   9  -1   1    5.70   10.20 
   9  -1   1   25.10   14.00 
  -9  -1  -1    3.50    9.70 
  -9  -1  -1   -2.10    7.30 
  -9   1  -1   22.30   13.60 
   9   1   1   32.40   15.00 
  -9   1  -1    7.00    9.20 
   9   1   1    6.50   13.50 
   9   1   1   11.10   11.50 
   9   1   1   47.00   16.70 
  -9   1  -1   12.30    9.40 
   9   1   1   25.30   14.50 
   9   1   1   16.50   11.20 
  -9   1  -1    2.00    9.90 
  -9   1  -1   10.80   11.40 
   9   1   1   18.10   15.30 
   9   1   1   19.00   11.90 
   9   1   1   34.70   14.40 
  -9   1  -1   19.50   13.50 
   9   1   1   17.00   13.10 
  -9   1  -1   10.40   10.60 
   9   1   1    9.90   11.70 
   9   1   1   -2.60    9.30 
   9   1   1   40.40   15.40 
  -9   1  -1   23.00   12.60 
  10  -1   1  546.25   57.99 
  10  -1   1  437.26   49.70 
 -10  -1  -1  410.46   50.99 
 -10  -1  -1  509.85   56.49 
 -10  -1  -1  459.25   54.29 
  10  -1   1  428.76   51.99 
  10  -1   1  437.86   56.79 
 -10  -1  -1  533.95   58.89 
  10  -1   1  493.05   57.39 
 -10  -1  -1  496.25   54.19 
  10  -1   1  518.75   55.19 
  10  -1   1  440.36   54.89 
 -10  -1  -1  546.45   52.09 
  10  -1   1  600.04   65.29 
  10  -1   1  566.54   56.39 
  10  -1   1  427.26   54.69 
  10  -1   1  466.65   51.29 
  10  -1   1  425.56   51.49 
 -10  -1  -1  531.05   57.39 
 -10  -1  -1  476.15   52.99 
  10   1   1  562.04   61.89 
 -10   1  -1  444.66   51.49 
 -10   1  -1  565.04   56.59 
 -10   1  -1  499.45   54.79 
  10   1   1  522.25   55.39 
  10   1   1  436.66   55.29 
 -10   1  -1  533.85   57.09 
  10   1   1  496.25   54.39 
  10   1   1  409.06   48.30 
  10   1   1  510.65   54.29 
 -10   1  -1  476.95   51.89 
  10   1   1  513.55   55.69 
  10   1   1  451.25   55.69 
 -10   1  -1  598.14   57.39 
  10   1   1  417.06   52.09 
 -10   1  -1  571.14   48.10 
  10   1   1  474.45   50.99 
  10   1   1  599.84   62.99 
  10   1   1  554.04   57.89 
 -10  -2   1   66.79   25.00 
 -10  -2   1  180.98   33.00 
 -10  -2   1  141.29   29.90 
  10  -2  -1  170.18   30.60 
  10  -2  -1  110.29   24.20 
 -10  -2   1  137.99   25.20 
 -10  -2   1   92.79   26.80 
  10  -2  -1   95.69   27.40 
  10  -2  -1  125.89   29.20 
  10  -2  -1  145.79   30.20 
  10  -2  -1  145.59   32.30 
  10  -2  -1  126.69   28.70 
 -10  -2   1  126.39   29.00 
  10  -2  -1  133.19   30.80 
 -10  -2   1  121.29   25.70 
 -10  -2   1  158.78   30.20 
 -10  -2   1  136.09   31.20 
  10  -2  -1  233.58   38.60 
  10  -2  -1  125.09   27.20 
 -10   2   1   91.89   26.20 
  10   2  -1   94.89   23.80 
  10   2  -1  124.69   28.40 
  10   2  -1  179.98   33.40 
  10   2  -1  140.09   28.90 
 -10   2   1  111.79   27.20 
 -10   2   1  118.49   27.40 
 -10   2   1   87.79   24.30 
  10   2  -1  100.09   25.10 
 -10   2   1  109.59   25.80 
  10   2  -1  104.19   27.20 
  10   2  -1  132.79   28.60 
  10   2  -1  121.09   26.30 
  10   2  -1  153.68   31.60 
  10   2  -1  190.98   34.10 
  10   2  -1   89.49   23.50 
 -10   2   1  115.89   26.30 
  10   2  -1  102.89   27.30 
  -9  -2   1  127.19   25.30 
  -9  -2   1   84.49   22.30 
  -9  -2   1   72.79   19.00 
   9  -2  -1  106.59   22.80 
   9  -2  -1  134.09   23.10 
   9  -2  -1  138.39   26.00 
   9  -2  -1  110.99   26.10 
  -9  -2   1  148.09   23.90 
  -9  -2   1  133.69   28.40 
   9  -2  -1   86.99   21.40 
  -9  -2   1  153.38   25.20 
  -9  -2   1  112.69   25.50 
   9  -2  -1  125.19   27.00 
  -9  -2   1  123.69   21.60 
  -9  -2   1  110.69   23.80 
   9  -2  -1  119.19   27.40 
  -9  -2   1  125.99   24.80 
   9  -2  -1  112.59   25.80 
  -9  -2   1  119.79   25.10 
  -9  -2   1  117.59   26.10 
  -9  -2   1   98.89   23.20 
   9  -2  -1  153.28   26.90 
   9  -2  -1  124.69   24.00 
   9  -2  -1  159.88   27.50 
   9  -2  -1   98.59   24.90 
  -9   2   1   99.49   22.50 
  -9   2   1  142.29   26.10 
   9   2  -1   89.29   22.20 
   9   2  -1   96.09   23.10 
   9   2  -1   92.79   24.30 
  -9   2   1  126.79   23.70 
   9   2  -1  148.29   28.30 
  -9   2   1  139.19   25.90 
   9   2  -1  136.99   22.00 
   9   2  -1  117.59   23.20 
  -9   2   1  155.48   27.10 
   9   2  -1  142.89   27.90 
  -9   2   1  104.09   21.20 
   9   2  -1  153.48   28.00 
   9   2  -1  129.69   28.50 
   9   2  -1  164.88   28.50 
   9   2  -1  122.09   21.90 
   9   2  -1  127.39   24.70 
  -9   2   1  128.89   26.50 
   9   2  -1  132.39   27.30 
   8  -2  -1    5.30    9.80 
   8  -2  -1   17.60   11.50 
  -8  -2   1   36.30   13.00 
  -8  -2   1    0.80    7.90 
  -8  -2   1   30.30   11.60 
   8  -2  -1   14.50    9.70 
   8  -2  -1   36.70   11.70 
  -8  -2   1   17.00   11.60 
   8  -2  -1   16.40    7.50 
   8  -2  -1   19.40   12.90 
  -8  -2   1   20.40    9.70 
  -8  -2   1   12.30   10.70 
   8  -2  -1   15.50    8.20 
  -8  -2   1   16.40   10.70 
   8  -2  -1   10.80    9.60 
  -8  -2   1   19.90    8.90 
   8  -2  -1    8.10   10.00 
  -8  -2   1   23.40   12.10 
  -8  -2   1   20.50   10.70 
  -8  -2   1   16.50   11.30 
   8  -2  -1   42.10   15.20 
   8  -2  -1   41.10   15.00 
   8  -2  -1   14.50   11.30 
  -8  -2   1   22.50   11.50 
   8  -2  -1   23.80   10.30 
  -8  -2   1   13.90   10.90 
  -8  -2   1   14.50   10.40 
   8  -2  -1   29.70   12.70 
   8   2  -1   16.20   10.70 
   8   2  -1   20.80   11.90 
   8   2  -1    5.10    9.30 
   8   2  -1   14.70   10.10 
   8   2  -1   25.10    9.50 
   8   2  -1   15.50   11.00 
  -8   2   1   19.50   11.30 
  -8   2   1   17.20    9.70 
  -8   2   1   14.30   10.00 
  -8   2   1   34.40   12.90 
   8   2  -1   18.10   14.60 
  -8   2   1    7.70    9.10 
   8   2  -1   20.80   12.40 
   8   2  -1   16.30   11.40 
   8   2  -1   18.60   10.10 
  -8   2   1   13.60   11.00 
   8   2  -1   17.40   11.60 
   8   2  -1   15.20   11.50 
   8   2  -1   20.00   10.00 
  -8   2   1   24.50   11.30 
   8   2  -1    5.80    9.10 
   8   2  -1    2.40    7.40 
  -7  -2   1  173.48   16.60 
   7  -2  -1  168.08   24.30 
  -7  -2   1  152.18   24.00 
  -7  -2   1  179.68   25.10 
   7  -2  -1  146.79   22.20 
  -7  -2   1  197.38   28.30 
  -7  -2   1  134.99   21.50 
   7  -2  -1  178.08   27.60 
  -7  -2   1  143.59   20.40 
  -7  -2   1  186.38   27.90 
  -7  -2   1  160.98   22.10 
   7  -2  -1  164.08   26.70 
  -7  -2   1  146.89   23.10 
  -7  -2   1  168.18   25.20 
   7  -2  -1  218.78   24.80 
  -7  -2   1  161.28   24.70 
   7  -2  -1  192.18   20.70 
   7  -2  -1  170.18   18.20 
   7  -2  -1  139.69   24.10 
  -7  -2   1  201.38   20.70 
   7  -2  -1  204.88   22.90 
   7  -2  -1  130.99   24.00 
  -7  -2   1  179.98   25.70 
  -7  -2   1  187.28   21.40 
   7  -2  -1  162.18   25.50 
   7  -2  -1  188.78   17.10 
   7  -2  -1  232.58   26.70 
  -7  -2   1  251.37   32.70 
   7  -2  -1  156.68   23.30 
   7  -2  -1  191.58   26.30 
  -7   2   1  142.99   21.30 
  -7   2   1  215.28   25.70 
   7   2  -1  219.18   29.10 
   7   2  -1  137.19   22.00 
   7   2  -1  154.78   22.50 
   7   2  -1  159.08   22.50 
  -7   2   1  174.18   24.30 
   7   2  -1  128.79   21.40 
   7   2  -1  184.58   17.30 
   7   2  -1  179.18   25.50 
   7   2  -1  168.78   20.80 
  -7   2   1  179.58   22.80 
   7   2  -1  134.99   23.20 
  -7   2   1  159.18   24.70 
   7   2  -1  174.18   23.90 
  -7   2   1  167.08   13.10 
  -7   2   1  186.38   17.40 
   7   2  -1  195.28   29.60 
  -7   2   1  156.18   15.00 
  -7   2   1  163.88   16.30 
   7   2  -1  184.78   25.40 
   7   2  -1  177.78   21.40 
  -7   2   1  130.29   22.20 
  -7   2   1  220.48   27.00 
   7   2  -1  141.99   20.20 
   7   2  -1  179.38   26.10 
   7   2  -1  175.88   26.50 
  -6  -2   1   10.90    7.80 
  -6  -2   1   17.50    8.90 
  -6  -2   1   30.20   10.70 
  -6  -2   1   25.80    8.70 
  -6  -2   1   24.70    9.30 
   6  -2  -1   37.00   10.10 
  -6  -2   1   18.40    9.30 
  -6  -2   1   21.60    7.20 
   6  -2  -1   35.10    6.70 
   6  -2  -1   24.20   11.20 
   6  -2  -1   28.80    6.20 
  -6  -2   1   29.80    9.80 
  -6  -2   1   13.20    8.80 
   6  -2  -1   20.20    9.00 
  -6  -2   1   43.00   12.40 
   6  -2  -1   41.20   12.80 
   6  -2  -1   26.00    9.90 
   6  -2  -1   25.20    6.40 
   6  -2  -1   12.90    6.40 
   6  -2  -1   25.50    9.30 
   6  -2  -1   17.20    9.70 
   6  -2  -1   32.00   11.10 
  -6  -2   1   30.60    8.20 
  -6  -2   1   30.10   11.20 
  -6  -2   1   23.10   10.00 
  -6  -2   1   26.60    6.70 
   6  -2  -1   33.60    5.50 
   6  -2  -1   36.50   10.70 
  -6  -2   1   41.10   11.80 
   6  -2  -1   36.80   12.10 
   6  -2  -1   30.20   10.60 
   6  -2  -1   25.40    6.50 
   6  -2  -1   44.90    9.50 
   6  -2  -1   38.60    7.90 
   6   2  -1   39.20    9.70 
  -6   2   1   46.40   11.70 
  -6   2   1   24.70    6.50 
  -6   2   1   22.40    8.70 
  -6   2   1   34.30    6.90 
  -6   2   1   22.50    8.40 
  -6   2   1   37.30    7.30 
   6   2  -1   35.20    9.90 
  -6   2   1   34.20   10.90 
   6   2  -1   36.80   10.50 
   6   2  -1   29.00   10.30 
   6   2  -1   30.80   10.80 
  -6   2   1   31.10    5.90 
  -6   2   1   42.60    7.00 
  -6   2   1   27.80    5.10 
   6   2  -1   16.10    8.00 
  -6   2   1   40.30    7.10 
   6   2  -1   49.80   13.40 
   6   2  -1   27.70    8.00 
   6   2  -1   16.70    9.50 
  -6   2   1   31.10    5.90 
   6   2  -1   21.40    9.70 
  -6   2   1   26.10   10.10 
   6   2  -1   24.80   10.30 
   6   2  -1   25.90   10.30 
   6   2  -1   40.00   11.90 
  -6   2   1   39.80   11.10 
  -6   2   1   38.10    5.50 
   6   2  -1   40.00    7.10 
   6   2  -1   42.80   14.10 
   6   2  -1   19.20    8.60 
  -6   2   1   38.10   11.30 
   5  -2  -1    7.80    4.10 
   5  -2  -1    2.60    4.40 
   5  -2  -1    2.20    3.60 
   5  -2  -1    9.70    2.70 
   5  -2  -1    1.50    3.40 
   5  -2  -1    5.60    3.40 
  -5  -2   1   -0.40    4.50 
  -5  -2   1    1.40    3.70 
  -5  -2   1    1.00    5.40 
   5  -2  -1    1.90    3.10 
   5  -2  -1    7.70    5.90 
  -5  -2   1    4.80    5.60 
  -5  -2   1    3.40    5.30 
   5  -2  -1   13.20    7.70 
  -5  -2   1    4.80    5.30 
  -5  -2   1    4.30    5.50 
   5  -2  -1    2.30    3.00 
  -5  -2   1   22.10    7.90 
  -5  -2   1    7.00    5.90 
   5  -2  -1   -0.90    4.00 
  -5  -2   1    5.60    6.00 
   5  -2  -1    1.90    4.90 
   5  -2  -1    5.10    3.00 
  -5  -2   1    1.80    3.90 
   5  -2  -1    0.80    4.20 
  -5  -2   1    3.90    5.40 
  -5  -2   1    4.50    3.50 
   5  -2  -1    5.10    5.90 
  -5  -2   1   16.50    5.10 
   5  -2  -1   -3.90    4.30 
   5  -2  -1    7.70    5.00 
  -5  -2   1    8.60    6.20 
   5  -2  -1    2.10    3.60 
   5  -2  -1    2.50    3.60 
   5  -2  -1    0.20    4.80 
  -5  -2   1    7.30    4.90 
  -5   2   1    4.00    5.20 
   5   2  -1    8.40    6.80 
  -5   2   1    7.40    3.30 
  -5   2   1    2.70    2.00 
  -5   2   1   12.30    3.80 
  -5   2   1    6.60    2.80 
   5   2  -1    1.10    4.60 
   5   2  -1    2.00    5.10 
  -5   2   1    4.90    2.70 
   5   2  -1   -2.70    3.80 
  -5   2   1    3.90    4.70 
   5   2  -1    2.10    3.10 
  -5   2   1    1.30    4.10 
   5   2  -1    3.00    4.60 
   5   2  -1    5.70    5.70 
   5   2  -1    4.50    5.60 
  -5   2   1   11.50    6.00 
  -5   2   1    7.30    6.10 
   5   2  -1    0.70    4.50 
   5   2  -1   -1.60    4.10 
   5   2  -1   -4.00    3.60 
   5   2  -1    3.50    5.10 
  -5   2   1    3.90    2.90 
  -5   2   1    5.70    4.80 
   5   2  -1   -0.50    6.20 
  -5   2   1   12.20    5.60 
   5   2  -1    5.40    5.90 
  -5   2   1    1.00    2.40 
   5   2  -1   -0.70    4.50 
  -5   2   1    1.70    2.60 
   5   2  -1    8.70    5.30 
  -5   2   1    8.90    3.20 
  -4  -2   1   -1.30    3.20 
   4  -2  -1    1.30    4.80 
  -4  -2   1    6.30    4.50 
   4  -2  -1    0.70    2.70 
   4  -2  -1   -5.70    3.70 
   4  -2  -1    2.10    3.20 
  -4  -2   1    5.50    4.90 
  -4  -2   1   -0.20    3.70 
   4  -2  -1    1.50    3.70 
   4  -2  -1    3.50    4.30 
   4  -2  -1    2.60    3.50 
  -4  -2   1    4.30    4.50 
  -4  -2   1    0.10    3.10 
   4  -2  -1    0.70    4.70 
   4  -2  -1    0.50    3.50 
  -4  -2   1   -1.30    3.00 
   4  -2  -1    1.10    2.70 
  -4  -2   1    1.40    3.60 
  -4  -2   1    0.00    3.80 
   4  -2  -1    0.80    1.40 
  -4  -2   1    0.00    3.70 
  -4  -2   1    1.20    3.80 
   4  -2  -1    3.30    3.70 
  -4  -2   1    2.70    4.70 
  -4  -2   1   -0.90    2.50 
   4  -2  -1   -1.90    1.90 
   4  -2  -1   -3.20    3.00 
   4  -2  -1    2.30    1.50 
   4  -2  -1    0.10    1.70 
   4  -2  -1   -1.50    1.90 
   4  -2  -1    0.10    2.50 
   4  -2  -1   -0.50    2.30 
   4  -2  -1    0.80    2.40 
  -4  -2   1    1.90    4.30 
   4  -2  -1    2.40    1.30 
   4  -2  -1   -2.60    2.00 
  -4  -2   1   -2.00    3.10 
   4  -2  -1    0.00    1.30 
   4  -2  -1    1.80    3.70 
  -4  -2   1   -2.70    3.30 
  -4  -2   1   -3.10    3.50 
  -4   2   1   -2.30    3.30 
   4   2  -1    8.00    4.60 
   4   2  -1   -1.10    3.50 
   4   2  -1   -0.60    3.50 
  -4   2   1    2.10    2.30 
  -4   2   1   -0.70    2.40 
  -4   2   1    8.30    4.30 
   4   2  -1    2.90    3.70 
   4   2  -1    1.70    3.90 
   4   2  -1    3.20    4.50 
   4   2  -1    8.40    3.70 
   4   2  -1    1.50    3.70 
   4   2  -1   -1.70    4.30 
  -4   2   1    0.90    1.70 
   4   2  -1    3.00    4.30 
   4   2  -1   -6.00    2.20 
  -4   2   1    0.20    1.60 
  -4   2   1    4.90    2.20 
   4   2  -1   -0.90    3.10 
  -4   2   1    9.70    6.20 
  -4   2   1    3.90    3.60 
  -4   2   1    2.00    1.60 
   4   2  -1   -1.90    3.10 
  -4   2   1    2.40    3.30 
  -4   2   1    2.30    3.80 
  -4   2   1   -0.90    3.40 
   4   2  -1    4.40    4.30 
   4   2  -1   -0.10    4.10 
  -4   2   1    1.30    1.20 
   4   2  -1    7.40    5.50 
  -4   2   1    2.90    3.50 
  -4   2   1   -0.20    3.80 
  -4   2   1    0.30    1.30 
  -4   2   1    1.30    1.30 
  -4   2   1    3.50    2.60 
   3  -2  -1  266.57   14.50 
   3  -2  -1  250.07   10.70 
   3  -2  -1  238.28   15.60 
  -3  -2   1  246.88   18.20 
   3  -2  -1  253.97   16.90 
  -3  -2   1  267.47   16.20 
   3  -2  -1  259.47   11.80 
   3  -2  -1  261.07   18.30 
   3  -2  -1  280.37   17.70 
  -3  -2   1  273.67   20.30 
  -3  -2   1  266.77   16.10 
   3  -2  -1  244.98   18.80 
  -3  -2   1  275.87   18.00 
  -3  -2   1  299.57   22.70 
  -3  -2   1  291.07   19.40 
   3  -2  -1  269.07   15.10 
   3  -2  -1  249.28   13.30 
   3  -2  -1  254.57   16.10 
   3  -2  -1  276.97   13.30 
  -3  -2   1  238.48   16.20 
   3  -2  -1  249.88   10.50 
   3  -2  -1  263.47   14.30 
   3  -2  -1  268.27   13.60 
   3  -2  -1  258.67   19.00 
   3  -2  -1  251.17   17.60 
   3  -2  -1  273.87   16.40 
   3  -2  -1  280.87   16.40 
   3  -2  -1  240.78   14.30 
  -3  -2   1  284.27   19.20 
   3  -2  -1  279.57   19.40 
  -3  -2   1  274.87   18.50 
   3  -2  -1  251.77   15.90 
   3  -2  -1  275.57   17.40 
   3  -2  -1  263.77   11.90 
   3  -2  -1  235.58   18.40 
   3  -2  -1  258.07   17.30 
   3  -2  -1  230.68   15.60 
  -3  -2   1  230.08   18.80 
   3  -2  -1  240.08   13.20 
   3  -2  -1  261.07   17.20 
  -3  -2   1  279.67   16.90 
  -3  -2   1  315.67   21.90 
   3  -2  -1  239.38   17.00 
  -3  -2   1  222.58   17.10 
   3  -2  -1  260.57   17.30 
   3  -2  -1  257.07   16.30 
  -3  -2   1  246.68   18.20 
  -3  -2   1  263.07   18.00 
  -3  -2   1  247.18   16.80 
  -3  -2   1  263.67   18.10 
   3  -2  -1  254.47   15.90 
  -3  -2   1  260.87   18.60 
  -3  -2   1  247.38   17.00 
   3  -2  -1  286.37   17.30 
   3   2  -1  300.87   18.40 
  -3   2   1  252.87   15.90 
  -3   2   1  260.57   19.30 
  -3   2   1  227.48   16.60 
   3   2  -1  249.28   17.30 
   3   2  -1  236.18   16.30 
  -3   2   1  240.88   16.10 
   3   2  -1  278.67   20.00 
   3   2  -1  268.07   19.60 
   3   2  -1  287.77   21.70 
   3   2  -1  228.58   20.10 
   3   2  -1  249.28   17.40 
  -3   2   1  258.27   17.40 
   3   2  -1  265.97   17.70 
  -3   2   1  304.47   17.30 
  -3   2   1  230.08   17.90 
  -3   2   1  251.67   14.20 
   3   2  -1  271.47   19.80 
  -3   2   1  243.88   16.00 
  -3   2   1  257.07   11.60 
  -3   2   1  252.27   15.50 
  -3   2   1  274.57   17.60 
  -3   2   1  260.67   15.60 
   3   2  -1  252.17   17.00 
   3   2  -1  242.68   17.80 
   3   2  -1  270.97   18.70 
   3   2  -1  277.47   17.90 
   3   2  -1  266.57   15.60 
  -3   2   1  187.48   16.00 
  -3   2   1  243.88   11.90 
   3   2  -1  243.78   16.10 
   3   2  -1  252.47   17.80 
   3   2  -1  272.67   18.90 
   3   2  -1  227.58   16.60 
  -2  -2   1   21.20    6.30 
  -2  -2   1   24.20    5.40 
  -2  -2   1   15.60    6.00 
   2  -2  -1   26.70    4.90 
   2  -2  -1   21.70    5.00 
  -2  -2   1   23.80    5.10 
  -2  -2   1   13.70    4.40 
  -2  -2   1   26.40    6.80 
  -2  -2   1   28.30    5.10 
   2  -2  -1   26.20    5.70 
   2  -2  -1   34.20    3.70 
  -2  -2   1   25.70    5.40 
   2  -2  -1   26.30    2.60 
  -2  -2   1   17.80    4.60 
  -2  -2   1   31.50    5.80 
   2  -2  -1   32.80    5.80 
  -2  -2   1   23.20    6.30 
   2  -2  -1   26.20    5.00 
   2  -2  -1   25.50    3.00 
  -2  -2   1   23.50    5.00 
  -2  -2   1   21.10    5.50 
   2  -2  -1   28.80    4.80 
   2  -2  -1   25.40    2.20 
   2  -2  -1   30.30    5.00 
   2  -2  -1   19.80    4.00 
  -2  -2   1   26.40    6.20 
   2  -2  -1   23.20    5.40 
   2  -2  -1   28.10    5.30 
   2  -2  -1   20.60    4.20 
   2  -2  -1   26.30    4.70 
   2  -2  -1   24.30    2.20 
  -2  -2   1   28.90    5.70 
   2  -2  -1   29.60    4.50 
   2  -2  -1   28.70    5.00 
   2  -2  -1   17.40    4.40 
  -2  -2   1   23.50    5.10 
   2  -2  -1   31.80    6.50 
   2  -2  -1   24.30    5.40 
   2  -2  -1   21.60    5.00 
   2  -2  -1   23.00    3.40 
   2  -2  -1   28.10    5.10 
  -2  -2   1   20.60    4.80 
  -2  -2   1   32.20    6.50 
   2  -2  -1   23.90    4.40 
   2  -2  -1   24.90    4.80 
   2  -2  -1   25.20    4.30 
  -2  -2   1   16.30    5.40 
  -2  -2   1   21.20    4.80 
  -2  -2   1   20.70    4.20 
  -2  -2   1   28.40    5.70 
  -2  -2   1   19.70    4.50 
   2  -2  -1   17.50    4.40 
   2  -2  -1   25.90    2.50 
  -2  -2   1   26.80    5.40 
   2  -2  -1   25.20    5.00 
   2  -2  -1   19.40    4.40 
   2  -2  -1   36.50    7.30 
  -2  -2   1   35.10    7.10 
   2  -2  -1   28.50    2.90 
   2  -2  -1   24.90    4.70 
  -2  -2   1   28.80    5.80 
  -2  -2   1   43.20    7.40 
   2  -2  -1   25.40    4.40 
   2  -2  -1   29.20    2.10 
   2  -2  -1   27.50    6.40 
  -2  -2   1   29.20    5.80 
   2  -2  -1   27.40    3.10 
   2   2  -1   19.60    5.10 
   2   2  -1   20.20    5.20 
  -2   2   1   21.10    4.10 
   2   2  -1   22.60    5.00 
   2   2  -1   29.80    5.60 
  -2   2   1   32.10    5.20 
  -2   2   1   28.10    4.70 
   2   2  -1   27.60    5.50 
   2   2  -1   29.20    5.30 
   2   2  -1   22.10    4.80 
   2   2  -1   19.00    5.60 
   2   2  -1   23.40    5.30 
  -2   2   1   21.90    3.60 
  -2   2   1   26.00    4.70 
  -2   2   1   25.60    4.80 
   2   2  -1   30.90    5.90 
   2   2  -1   11.90    5.30 
   2   2  -1   35.20    6.40 
   2   2  -1   25.90    4.40 
  -2   2   1   30.70    4.80 
  -2   2   1   21.30    4.00 
  -2   2   1   28.40    5.80 
  -2   2   1   21.90    2.90 
  -2   2   1   25.70    5.10 
   2   2  -1   18.60    5.80 
  -2   2   1   33.30    7.10 
  -2   2   1   24.20    4.90 
   2   2  -1   17.70    4.20 
   2   2  -1   25.20    5.90 
   2   2  -1   22.10    5.30 
   2   2  -1   14.50    5.00 
   2   2  -1   24.40    5.10 
   2   2  -1   24.70    6.10 
  -2   2   1   27.40    4.60 
   2   2  -1   23.20    5.50 
  -2   2   1   27.00    5.10 
   2   2  -1   17.30    5.50 
  -2   2   1   21.00    4.60 
   2   2  -1   27.80    5.60 
   2   2  -1   31.30    6.30 
   2   2  -1   27.00    5.70 
   2   2  -1   19.10    4.50 
   2   2  -1   20.10    4.60 
   1  -2  -1    3.10    1.70 
   1  -2  -1    3.50    1.90 
  -1  -2   1    5.90    2.50 
  -1  -2   1   10.50    3.50 
   1  -2  -1    3.40    2.10 
   1  -2  -1    2.70    1.80 
   1  -2  -1    4.70    1.80 
   1  -2  -1    5.10    2.40 
   1  -2  -1    4.40    1.90 
  -1  -2   1   13.30    4.90 
  -1  -2   1    7.00    2.30 
  -1  -2   1    7.40    3.70 
   1  -2  -1   11.30    2.70 
   1  -2  -1    7.20    2.00 
  -1  -2   1    6.60    3.20 
  -1  -2   1    5.80    2.00 
  -1  -2   1    9.30    2.80 
   1  -2  -1    7.60    2.90 
   1  -2  -1    8.30    2.50 
  -1  -2   1    8.90    2.90 
   1  -2  -1    8.70    2.10 
  -1  -2   1    2.30    2.30 
  -1  -2   1    9.20    3.00 
   1  -2  -1    4.80    2.50 
   1  -2  -1    5.00    1.70 
  -1  -2   1    4.60    2.90 
  -1  -2   1    6.40    3.70 
  -1  -2   1    5.20    2.90 
  -1  -2   1    6.40    2.40 
   1  -2  -1    3.00    1.60 
   1  -2  -1    8.90    2.90 
   1  -2  -1    7.10    3.10 
  -1  -2   1    4.30    2.60 
   1  -2  -1    8.30    2.20 
  -1  -2   1   11.00    4.60 
  -1  -2   1    9.60    3.60 
  -1  -2   1    8.60    2.50 
   1  -2  -1    2.40    1.90 
   1  -2  -1   11.40    2.90 
   1  -2  -1    5.80    2.00 
  -1  -2   1   10.40    3.70 
   1  -2  -1   11.90    3.70 
   1  -2  -1    4.60    1.80 
   1  -2  -1    2.70    2.00 
   1  -2  -1    8.60    2.30 
  -1  -2   1    1.70    2.10 
  -1  -2   1    5.70    1.70 
  -1  -2   1    6.20    2.50 
  -1  -2   1    2.70    2.40 
   1  -2  -1    4.80    1.70 
   1  -2  -1   10.80    2.50 
  -1  -2   1    5.40    2.90 
   1  -2  -1    3.40    1.70 
  -1  -2   1    4.80    2.80 
  -1  -2   1    2.90    2.30 
  -1  -2   1    8.10    3.30 
  -1  -2   1    7.20    2.50 
  -1  -2   1   11.30    3.60 
  -1   2   1    4.00    2.00 
  -1   2   1    4.30    2.80 
   1   2  -1   10.60    3.00 
   1   2  -1    5.60    3.10 
  -1   2   1    1.10    1.90 
  -1   2   1    6.50    2.00 
   1   2  -1   12.10    4.70 
  -1   2   1   10.40    3.10 
  -1   2   1   10.80    3.40 
  -1   2   1   11.00    3.20 
  -1   2   1    4.00    1.70 
   1   2  -1    6.50    2.80 
   1   2  -1    9.70    3.20 
   1   2  -1   12.10    4.30 
   1   2  -1    0.30    2.30 
  -1   2   1    5.20    1.80 
   1   2  -1    4.20    1.80 
   1   2  -1    6.00    1.90 
   1   2  -1    7.70    3.10 
   1   2  -1   10.30    2.70 
   1   2  -1    5.70    2.80 
   1   2  -1    6.00    3.50 
  -1   2   1    3.50    2.70 
   1   2  -1    5.10    2.80 
   1   2  -1    6.70    3.00 
   1   2  -1    5.70    2.20 
   1   2  -1    8.60    2.70 
   1   2  -1    7.00    3.00 
   1   2  -1    6.50    2.40 
   1   2  -1    4.10    2.80 
  -1   2   1    2.50    2.10 
   1   2  -1   11.30    4.70 
   1   2  -1    5.60    1.90 
  -1   2   1    4.80    1.80 
  -1   2   1    8.70    2.30 
  -1   2   1    5.60    2.20 
  -1   2   1    3.50    2.40 
  -1   2   1    3.90    1.80 
  -1   2   1    3.50    1.80 
   1   2  -1    7.10    2.10 
   1   2  -1    6.90    2.90 
  -1   2   1    3.90    2.40 
  -1   2   1    3.40    1.90 
   1   2  -1    5.20    2.40 
   1   2  -1    8.90    3.10 
   1   2  -1    3.90    2.70 
  -1   2   1    6.20    2.80 
   1   2  -1   14.70    4.50 
   1   2  -1    6.60    2.70 
   0  -2   1   22.30    4.50 
   0  -2  -1   21.10    2.70 
   0  -2   1   19.60    4.40 
   0  -2   1   14.70    3.80 
   0  -2  -1   19.00    3.80 
   0  -2   1   16.20    4.30 
   0  -2  -1   17.10    3.80 
   0  -2  -1   14.40    3.70 
   0  -2  -1   18.20    4.10 
   0  -2  -1   17.50    3.80 
   0  -2   1   23.40    4.50 
   0  -2   1   22.10    3.40 
   0  -2  -1   17.50    3.70 
   0  -2   1   16.00    4.00 
   0  -2  -1   24.60    4.70 
   0  -2  -1   15.90    3.10 
   0  -2   1   18.50    4.10 
   0  -2  -1   10.90    3.50 
   0  -2   1   23.40    4.50 
   0  -2   1   24.70    4.90 
   0  -2   1   20.40    3.70 
   0  -2  -1   20.80    4.80 
   0  -2  -1   12.30    4.30 
   0  -2   1   18.90    5.00 
   0  -2  -1   21.50    4.60 
   0  -2   1   15.10    1.90 
   0  -2   1   18.40    3.50 
   0  -2   1   11.80    3.50 
   0  -2  -1   22.90    4.80 
   0  -2   1   21.20    4.20 
   0  -2   1   16.90    4.40 
   0  -2   1   23.50    4.70 
   0  -2   1   23.80    4.30 
   0  -2   1   18.60    2.40 
   0  -2  -1   21.20    4.30 
   0  -2   1   16.80    2.70 
   0  -2  -1   22.00    4.00 
   0  -2   1   47.40    8.80 
   0  -2  -1   21.20    2.90 
   0  -2   1   19.20    4.00 
   0  -2   1   18.40    3.60 
   0  -2  -1   20.20    7.00 
   0  -2   1   17.90    2.10 
   0  -2  -1   27.90    4.50 
   0  -2   1   23.60    3.50 
   0  -2  -1   17.20    4.60 
   0  -2  -1   24.60    3.50 
   0  -2  -1   17.50    4.30 
   0  -2  -1   22.20    4.80 
   0  -2  -1   20.00    3.40 
   0  -2   1   26.00    4.80 
   0  -2   1   22.40    3.10 
   0   2  -1   33.00    6.30 
   0   2   1   15.20    3.80 
   0   2  -1   12.80    3.20 
   0   2  -1   19.10    2.10 
   0   2  -1   19.10    6.00 
   0   2  -1   18.70    7.00 
   0   2  -1   18.20    2.50 
   0   2  -1   16.30    3.80 
   0   2   1   15.10    4.00 
   0   2  -1   24.50    4.80 
   0   2  -1   19.80    4.50 
   0   2  -1   14.00    3.20 
   0   2  -1    9.30    4.60 
   0   2  -1   20.50    4.50 
   0   2  -1   21.60    5.10 
   0   2   1   18.90    5.10 
   0   2   1   23.60    8.10 
   0   2   1   13.60    3.60 
   0   2  -1   11.80    3.60 
   0   2   1   14.40    3.70 
   0   2   1   17.40    4.90 
   0   2  -1   20.90    2.40 
   0   2   1   18.40    2.70 
   0   2  -1   19.50    4.40 
   0   2  -1   18.80    4.20 
   0   2  -1   20.20    3.50 
   0   2  -1   19.20    3.50 
   0   2  -1   14.60    3.70 
   0   2   1   23.10    4.40 
   0   2   1   16.30    4.40 
   0   2  -1   15.30    1.80 
   0   2   1   17.30    3.70 
   0   2   1   22.20    4.00 
   0   2   1   17.00    3.40 
   0   2  -1   20.30    4.40 
   0   2  -1   18.30    3.40 
   0   2   1   15.20    4.00 
   0   2   1   20.90    5.30 
   0   2   1   23.10    4.20 
   0   2   1   21.90    4.60 
   0   2  -1   20.90    3.90 
   0   2  -1   18.80    2.10 
   0   2   1   17.90    4.50 
   0   2   1   27.40    4.80 
   0   2   1   10.40    3.50 
   1  -2   1 1382.06   53.29 
  -1  -2  -1 1373.26   56.19 
  -1  -2  -1 1329.17   55.39 
  -1  -2  -1 1342.57   55.69 
  -1  -2  -1 1408.76   53.59 
   1  -2   1 1323.87   51.99 
   1  -2   1 1375.56   51.69 
  -1  -2  -1 1336.97   53.29 
   1  -2   1 1313.67   55.49 
  -1  -2  -1 1387.26   56.39 
  -1  -2  -1 1350.26   55.69 
  -1  -2  -1 1279.67   55.29 
   1  -2   1 1363.66   50.09 
   1  -2   1 1357.46   52.69 
   1  -2   1 1369.76   54.49 
  -1  -2  -1 1352.96   57.29 
   1  -2   1 1323.07   49.50 
   1  -2   1 1295.97   51.19 
  -1  -2  -1 1388.96   56.29 
  -1  -2  -1 1321.87   55.09 
  -1  -2  -1 1385.66   54.89 
   1  -2   1 1292.17   51.79 
   1  -2   1 1358.76   54.59 
   1  -2   1 1294.97   49.60 
  -1  -2  -1 1331.97   55.59 
   1  -2   1 1333.67   53.29 
   1  -2   1 1340.57   50.29 
   1  -2   1 1332.47   55.19 
  -1  -2  -1 1293.37   57.19 
  -1  -2  -1 1392.66   54.79 
  -1  -2  -1 1376.26   51.49 
  -1  -2  -1 1366.96   53.69 
  -1  -2  -1 1305.47   53.29 
  -1  -2  -1 1325.87   52.19 
  -1  -2  -1 1373.46   57.49 
  -1  -2  -1 1341.57   53.39 
   1  -2   1 1314.67   54.09 
  -1  -2  -1 1318.77   51.19 
  -1  -2  -1 1341.77   54.79 
  -1  -2  -1 1341.67   53.39 
   1  -2   1 1305.47   54.79 
   1  -2   1 1398.56   53.99 
   1  -2   1 1372.36   52.09 
   1  -2   1 1374.96   51.19 
  -1  -2  -1 1327.47   55.59 
   1  -2   1 1336.97   51.29 
  -1  -2  -1 1306.47   55.19 
  -1  -2  -1 1371.96   53.69 
   1  -2   1 1291.07   55.19 
   1  -2   1 1305.27   53.49 
   1  -2   1 1247.78   53.19 
   1  -2   1 1350.36   58.49 
   1  -2   1 1356.96   52.69 
   1  -2   1 1385.66   55.29 
  -1  -2  -1 1379.76   51.99 
   1  -2   1 1356.06   50.69 
   1  -2   1 1367.96   55.09 
   1  -2   1 1349.96   49.70 
  -1  -2  -1 1260.27   50.39 
   1  -2   1 1329.47   52.69 
   1   2   1 1377.06   53.39 
  -1   2  -1 1383.46   52.79 
   1   2   1 1340.27   51.69 
   1   2   1 1365.86   55.39 
   1   2   1 1328.87   54.79 
  -1   2  -1 1295.87   51.59 
   1   2   1 1412.56   55.99 
   1   2   1 1368.76   57.29 
   1   2   1 1383.96   54.39 
  -1   2  -1 1347.57   54.19 
  -1   2  -1 1424.96   56.39 
  -1   2  -1 1345.97   50.69 
   1   2   1 1307.37   55.09 
   1   2   1 1320.67   52.59 
   1   2   1 1341.57   55.39 
  -1   2  -1 1334.07   54.39 
  -1   2  -1 1366.46   52.09 
   1   2   1 1385.56   56.39 
  -1   2  -1 1356.26   50.59 
   1   2   1 1337.47   51.39 
  -1   2  -1 1288.87   50.69 
  -1   2  -1 1346.17   52.89 
  -1   2  -1 1314.97   49.50 
   1   2   1 1333.87   55.69 
   1   2   1 1276.87   54.89 
   1   2   1 1342.57   56.09 
   1   2   1 1276.37   55.19 
  -1   2  -1 1358.56   49.30 
  -1   2  -1 1317.37   52.99 
  -1   2  -1 1338.27   53.49 
   1   2   1 1263.57   56.09 
   1   2   1 1307.77   54.59 
  -1   2  -1 1342.67   50.49 
   1   2   1 1337.27   51.89 
   1   2   1 1251.67   54.09 
   1   2   1 1328.87   51.19 
  -1   2  -1 1351.66   54.79 
   1   2   1 1350.86   50.19 
  -1   2  -1 1320.57   53.49 
  -1   2  -1 1442.16   58.59 
   1   2   1 1308.27   51.89 
  -1   2  -1 1338.87   57.69 
   1   2   1 1418.46   57.59 
   1   2   1 1348.27   56.29 
   1   2   1 1320.57   51.29 
  -1   2  -1 1310.77   52.19 
  -1   2  -1 1320.17   50.99 
  -1   2  -1 1308.17   55.49 
   1   2   1 1316.67   53.29 
   1   2   1 1329.27   53.69 
   1   2   1 1342.27   57.99 
   2  -2   1   92.29   10.30 
  -2  -2  -1   99.99   11.30 
   2  -2   1   98.09   10.10 
  -2  -2  -1   78.19    8.80 
  -2  -2  -1  108.89   12.80 
   2  -2   1   93.09   10.90 
   2  -2   1   94.39    7.30 
   2  -2   1   89.59    9.00 
   2  -2   1   96.09   10.90 
  -2  -2  -1   92.59   10.10 
   2  -2   1  114.69    8.90 
  -2  -2  -1   91.99    6.60 
  -2  -2  -1  111.59   12.50 
  -2  -2  -1   90.19    9.60 
   2  -2   1  100.29   11.50 
   2  -2   1  100.09   10.80 
   2  -2   1   81.39    7.80 
   2  -2   1  107.69   10.40 
  -2  -2  -1   75.89    9.00 
   2  -2   1   93.69    5.60 
   2  -2   1  102.39   13.10 
  -2  -2  -1   97.79   10.60 
  -2  -2  -1   89.49    9.10 
   2  -2   1   86.19    9.30 
  -2  -2  -1   92.19   11.50 
   2  -2   1  111.09   12.60 
   2  -2   1  119.79   13.90 
   2  -2   1  101.19    7.50 
   2  -2   1  102.49    8.10 
   2  -2   1  105.99    7.60 
  -2  -2  -1  111.09   11.20 
  -2  -2  -1   72.29   10.30 
   2  -2   1   85.59   10.30 
   2  -2   1   86.39    6.50 
   2  -2   1   92.69    9.80 
   2  -2   1   98.99    9.50 
   2  -2   1   82.09    6.30 
   2  -2   1  107.79    9.70 
  -2  -2  -1   85.19   10.70 
  -2  -2  -1   93.99   12.00 
  -2  -2  -1   87.39    9.40 
   2  -2   1   97.09   11.10 
  -2  -2  -1   92.99   10.70 
  -2  -2  -1   92.69   10.60 
  -2  -2  -1  122.29   14.20 
   2  -2   1  106.59    8.00 
  -2  -2  -1  110.29   11.30 
   2  -2   1   89.49    7.10 
   2  -2   1   99.19    7.70 
  -2  -2  -1  101.19   11.20 
  -2  -2  -1  100.29   11.30 
  -2  -2  -1   93.09   12.40 
  -2  -2  -1  107.09   11.80 
  -2  -2  -1   97.69   12.60 
  -2  -2  -1  106.09   12.60 
   2  -2   1  102.09    7.10 
  -2  -2  -1   87.59   10.20 
   2  -2   1  100.29    9.80 
  -2  -2  -1   86.19   11.10 
   2  -2   1  101.49   11.60 
  -2   2  -1   99.59   10.10 
  -2   2  -1  116.39   10.70 
  -2   2  -1   88.79   10.10 
   2   2   1   81.09    9.70 
  -2   2  -1   94.39    9.60 
   2   2   1   87.09   11.60 
   2   2   1   81.69    9.90 
   2   2   1  100.89   12.10 
   2   2   1   67.79    9.00 
   2   2   1  101.09   11.10 
  -2   2  -1  102.89   10.20 
   2   2   1   82.09    9.50 
  -2   2  -1  108.99    7.40 
   2   2   1  105.39    7.50 
   2   2   1  126.99   13.00 
   2   2   1   92.59   10.90 
   2   2   1  105.19   11.60 
  -2   2  -1   97.59   12.50 
  -2   2  -1   80.99    8.00 
  -2   2  -1  101.49   10.60 
   2   2   1   86.99   10.50 
  -2   2  -1  101.79    7.60 
  -2   2  -1   97.69    7.50 
   2   2   1  105.39   11.50 
  -2   2  -1   98.49    9.50 
  -2   2  -1  101.19   10.50 
   2   2   1   97.39   11.10 
  -2   2  -1  116.19    8.70 
   2   2   1   95.69   10.60 
   2   2   1   99.79   12.70 
  -2   2  -1   93.89    5.70 
   2   2   1   87.89    9.60 
  -2   2  -1   98.99   11.80 
  -2   2  -1   87.49   11.20 
   2   2   1   90.79    9.70 
  -2   2  -1  101.59   10.70 
   2   2   1   99.69   12.60 
   2   2   1  106.79   10.20 
   2   2   1   73.49    8.90 
   2   2   1  108.69   10.40 
   2   2   1   91.69   11.70 
   2   2   1   97.89    9.70 
  -2   2  -1   98.89    6.60 
  -2   2  -1  101.59    7.00 
  -2   2  -1   93.69    9.10 
  -2   2  -1   97.09    7.40 
   3  -2   1    7.50    3.80 
   3  -2   1    6.50    4.30 
   3  -2   1    8.20    2.50 
   3  -2   1   10.20    4.20 
   3  -2   1   11.70    5.00 
   3  -2   1   17.30    6.80 
  -3  -2  -1    9.20    4.40 
   3  -2   1   11.40    4.20 
   3  -2   1   10.70    3.30 
   3  -2   1    5.10    3.30 
   3  -2   1    3.60    3.70 
   3  -2   1    6.80    2.40 
  -3  -2  -1    4.20    4.20 
   3  -2   1    8.70    4.70 
  -3  -2  -1    3.40    4.10 
  -3  -2  -1    5.90    4.00 
  -3  -2  -1    5.20    3.90 
   3  -2   1    3.00    3.70 
   3  -2   1    3.60    2.70 
   3  -2   1    6.90    3.80 
   3  -2   1    6.10    3.10 
   3  -2   1   10.30    3.90 
   3  -2   1    9.70    1.90 
  -3  -2  -1   10.80    5.00 
   3  -2   1    8.60    2.20 
  -3  -2  -1   16.50    5.60 
  -3  -2  -1    2.60    3.20 
   3  -2   1    4.80    4.00 
  -3  -2  -1   19.90    6.60 
   3  -2   1    6.40    4.80 
  -3  -2  -1   11.20    5.40 
   3  -2   1   13.50    5.20 
  -3  -2  -1    0.40    3.10 
   3  -2   1    9.90    3.50 
  -3  -2  -1    7.70    4.40 
  -3  -2  -1   10.80    4.90 
   3  -2   1    2.60    3.90 
  -3  -2  -1    5.40    3.50 
   3  -2   1    9.90    4.10 
  -3  -2  -1   11.00    5.20 
  -3  -2  -1    7.50    4.20 
  -3  -2  -1   10.40    5.90 
   3  -2   1   12.10    4.30 
   3  -2   1   13.20    4.20 
   3  -2   1   11.40    4.10 
   3  -2   1    8.10    3.80 
  -3  -2  -1   10.40    4.50 
  -3  -2  -1    5.00    4.00 
   3  -2   1    5.00    3.20 
   3   2   1    9.00    4.90 
  -3   2  -1   10.10    2.10 
   3   2   1   11.90    5.50 
   3   2   1   14.30    4.80 
  -3   2  -1    6.40    3.80 
   3   2   1    3.80    3.80 
   3   2   1   11.30    4.90 
  -3   2  -1    5.40    3.10 
  -3   2  -1    1.50    2.50 
   3   2   1    4.00    3.80 
  -3   2  -1    9.30    2.20 
  -3   2  -1    4.60    3.20 
  -3   2  -1    2.50    3.50 
  -3   2  -1   12.50    3.90 
   3   2   1   17.80    4.40 
  -3   2  -1   11.00    5.20 
   3   2   1    5.60    4.70 
   3   2   1    7.60    4.60 
  -3   2  -1   10.70    3.80 
  -3   2  -1   15.80    4.90 
   3   2   1   14.50    5.10 
   3   2   1    8.10    4.20 
  -3   2  -1    3.30    4.60 
  -3   2  -1   16.70    5.80 
   3   2   1   14.00    5.40 
   3   2   1   10.40    4.80 
  -3   2  -1   15.50    3.70 
  -3   2  -1    8.20    4.50 
   3   2   1    4.60    5.10 
  -3   2  -1    3.00    2.70 
   3   2   1    5.90    4.10 
  -3   2  -1    6.30    3.10 
  -3   2  -1   11.10    4.30 
   3   2   1   12.10    6.00 
  -4  -2  -1   79.19   11.60 
   4  -2   1   69.49   10.30 
   4  -2   1   58.09    8.50 
   4  -2   1   50.89   10.00 
   4  -2   1   78.49   13.20 
   4  -2   1   69.49    9.40 
   4  -2   1   70.89    9.60 
   4  -2   1   42.30   10.30 
   4  -2   1   38.70    9.70 
  -4  -2  -1   60.29   12.60 
  -4  -2  -1   62.69   11.60 
   4  -2   1   50.19   11.80 
   4  -2   1   68.19    6.20 
  -4  -2  -1   70.79   10.70 
   4  -2   1   57.09    4.30 
  -4  -2  -1   49.70    9.90 
   4  -2   1   53.49    7.60 
  -4  -2  -1   38.70    7.90 
  -4  -2  -1   61.19   11.60 
  -4  -2  -1   70.79   12.60 
   4  -2   1   55.19    9.70 
  -4  -2  -1   43.60    9.40 
   4  -2   1   43.90    9.60 
   4  -2   1   52.29    8.50 
   4  -2   1   51.39    8.20 
  -4  -2  -1   51.59    9.90 
   4  -2   1   57.09   10.50 
   4  -2   1   50.29    6.40 
  -4  -2  -1   39.60    9.60 
  -4  -2  -1   65.69   11.40 
  -4  -2  -1   68.29   11.90 
  -4  -2  -1   78.39   13.20 
   4  -2   1   58.09    5.80 
  -4  -2  -1   58.09    9.00 
  -4  -2  -1   57.59   12.10 
   4  -2   1   53.09    9.60 
  -4   2  -1   57.29    7.70 
   4   2   1   53.29   11.60 
  -4   2  -1   37.00    7.00 
  -4   2  -1   55.19    7.00 
   4   2   1   67.89   10.50 
   4   2   1   62.49   10.20 
  -4   2  -1   53.19    7.90 
  -4   2  -1   50.49    8.70 
  -4   2  -1   50.79    7.70 
   4   2   1   66.49   12.20 
   4   2   1   42.10    8.40 
  -4   2  -1   60.79    7.90 
   4   2   1   66.99   11.60 
  -4   2  -1   34.10    9.10 
   4   2   1   60.89   10.20 
   4   2   1   64.09   12.50 
  -4   2  -1   43.30    8.30 
  -4   2  -1   65.39    6.70 
   4   2   1   56.59   10.60 
   4   2   1   55.59   11.80 
   4   2   1   41.40    9.00 
  -4   2  -1   43.10    9.00 
  -4   2  -1   51.09    7.50 
  -4   2  -1   46.00    9.30 
  -4   2  -1   58.59   10.60 
   4   2   1   35.60    8.70 
  -4   2  -1   30.60    8.20 
   4   2   1   64.89   11.70 
  -4   2  -1   40.40    9.20 
   4   2   1   57.39   10.40 
  -4   2  -1   59.69    4.10 
   4   2   1   68.69   10.20 
   4   2   1   62.69   12.90 
   5  -2   1   94.89   15.00 
  -5  -2  -1  112.29   15.50 
  -5  -2  -1  106.29   14.20 
   5  -2   1   78.89   13.00 
   5  -2   1   88.19   16.70 
  -5  -2  -1  103.19   16.30 
  -5  -2  -1   97.89   17.10 
  -5  -2  -1   84.19   14.50 
   5  -2   1  102.59   14.50 
   5  -2   1  103.39   16.10 
  -5  -2  -1  100.89   16.50 
   5  -2   1   97.09   17.30 
  -5  -2  -1   92.39   14.00 
   5  -2   1  114.69   16.60 
  -5  -2  -1   87.59   15.30 
   5  -2   1  100.49    9.40 
   5  -2   1   84.09   15.10 
  -5  -2  -1  105.09   16.30 
   5  -2   1   79.29   14.90 
   5  -2   1   87.49   16.40 
  -5  -2  -1  108.89   15.30 
   5  -2   1   98.39   13.30 
   5  -2   1  116.59   17.40 
  -5  -2  -1  101.49   15.90 
  -5  -2  -1  120.89   18.80 
  -5  -2  -1   74.79   13.40 
  -5  -2  -1  125.49   17.90 
  -5  -2  -1   68.89   15.40 
  -5  -2  -1  108.89   13.60 
   5  -2   1   89.99   13.50 
   5  -2   1   78.79   11.60 
   5  -2   1  108.29   13.40 
   5  -2   1   97.39    9.90 
   5  -2   1   94.79   10.70 
  -5  -2  -1   95.19   11.80 
   5   2   1  112.59   13.40 
  -5   2  -1   81.49   13.40 
  -5   2  -1  103.39    7.00 
   5   2   1   92.89   15.30 
  -5   2  -1   83.49   11.00 
  -5   2  -1   92.09   11.50 
  -5   2  -1  103.39   15.00 
  -5   2  -1   88.69   15.00 
   5   2   1  118.89   18.20 
  -5   2  -1  105.49   11.70 
   5   2   1   81.79   13.10 
  -5   2  -1   79.99   12.90 
   5   2   1   91.89   13.80 
   5   2   1   75.09   12.20 
  -5   2  -1   74.09   14.10 
   5   2   1  113.09   17.80 
  -5   2  -1   98.89   16.10 
   5   2   1   66.89   13.00 
   5   2   1   94.39   17.30 
   5   2   1  110.09   16.20 
   5   2   1   85.99   14.00 
   5   2   1  127.39   18.00 
  -5   2  -1   87.89   10.70 
  -5   2  -1  125.69   15.80 
   5   2   1   83.59   14.90 
   5   2   1   85.19   15.40 
  -5   2  -1   84.79   10.20 
  -5   2  -1  115.09   12.30 
  -5   2  -1   79.99    9.10 
  -5   2  -1   80.49   13.60 
   5   2   1   93.39   15.50 
   5   2   1  106.09   11.40 
  -6  -2  -1  516.35   36.10 
  -6  -2  -1  505.35   38.60 
   6  -2   1  503.35   38.20 
   6  -2   1  535.35   35.90 
   6  -2   1  454.65   36.30 
  -6  -2  -1  502.35   32.90 
  -6  -2  -1  455.65   32.60 
   6  -2   1  499.45   27.00 
   6  -2   1  539.85   33.40 
  -6  -2  -1  491.85   36.70 
  -6  -2  -1  522.85   38.90 
   6  -2   1  463.95   33.20 
  -6  -2  -1  506.45   38.60 
   6  -2   1  483.05   35.50 
   6  -2   1  475.55   38.40 
   6  -2   1  483.85   37.20 
  -6  -2  -1  490.35   28.00 
  -6  -2  -1  562.64   33.30 
  -6  -2  -1  524.95   32.50 
   6  -2   1  536.05   36.00 
   6  -2   1  524.65   26.20 
  -6  -2  -1  477.25   35.70 
  -6  -2  -1  518.25   36.80 
  -6  -2  -1  500.25   35.80 
  -6  -2  -1  536.65   36.70 
   6  -2   1  553.84   31.20 
  -6  -2  -1  530.75   36.40 
   6  -2   1  480.25   34.80 
   6  -2   1  456.25   36.00 
  -6  -2  -1  448.26   34.10 
   6  -2   1  560.64   27.00 
   6  -2   1  510.65   33.90 
  -6   2  -1  563.14   38.00 
  -6   2  -1  491.05   33.90 
  -6   2  -1  497.55   28.20 
   6   2   1  503.35   37.30 
  -6   2  -1  506.35   28.40 
   6   2   1  483.45   34.70 
   6   2   1  555.84   35.60 
   6   2   1  494.45   27.50 
   6   2   1  465.95   33.80 
   6   2   1  588.44   33.40 
   6   2   1  598.94   42.10 
   6   2   1  532.05   37.30 
   6   2   1  512.25   37.50 
  -6   2  -1  490.35   28.70 
   6   2   1  488.95   35.50 
  -6   2  -1  503.15   23.40 
   6   2   1  570.34   37.20 
  -6   2  -1  523.05   34.20 
  -6   2  -1  452.45   34.60 
   6   2   1  529.35   34.20 
  -6   2  -1  479.15   34.20 
  -6   2  -1  526.15   34.30 
  -6   2  -1  517.45   26.30 
  -6   2  -1  506.95   33.20 
   6   2   1  581.74   38.80 
  -6   2  -1  503.25   26.60 
   6   2   1  489.25   31.40 
   6   2   1  494.65   29.00 
   6   2   1  520.15   38.00 
  -6   2  -1  508.95   28.00 
   7  -2   1  706.43   51.59 
   7  -2   1  762.52   49.60 
   7  -2   1  760.22   48.70 
  -7  -2  -1  817.32   44.70 
  -7  -2  -1  865.31   41.20 
  -7  -2  -1  756.22   49.30 
   7  -2   1  789.42   37.80 
  -7  -2  -1  809.72   44.50 
  -7  -2  -1  751.92   49.60 
  -7  -2  -1  815.62   51.99 
  -7  -2  -1  718.43   45.50 
   7  -2   1  808.52   53.39 
  -7  -2  -1  805.42   50.89 
   7  -2   1  822.52   49.10 
  -7  -2  -1  801.42   38.60 
   7  -2   1  768.32   52.29 
   7  -2   1  743.93   38.10 
  -7  -2  -1  760.82   51.09 
   7  -2   1  787.32   51.09 
  -7  -2  -1  750.02   52.99 
  -7  -2  -1  758.92   50.59 
   7  -2   1  912.01   55.39 
   7  -2   1  821.22   54.99 
  -7  -2  -1  678.93   50.99 
  -7  -2  -1  765.92   45.90 
   7  -2   1  888.51   51.19 
  -7  -2  -1  799.62   49.80 
   7  -2   1  799.32   46.60 
   7  -2   1  804.12   48.10 
   7  -2   1  803.82   42.40 
  -7  -2  -1  849.72   51.79 
   7   2   1  780.22   49.60 
   7   2   1  873.01   53.79 
   7   2   1  825.32   55.79 
   7   2   1  698.83   49.90 
  -7   2  -1  765.22   37.10 
  -7   2  -1  814.32   41.60 
   7   2   1  815.82   52.49 
   7   2   1  791.92   51.29 
   7   2   1  795.12   48.80 
  -7   2  -1  758.52   48.60 
  -7   2  -1  832.62   41.00 
  -7   2  -1  863.81   52.69 
   7   2   1  768.72   43.90 
  -7   2  -1  787.82   48.30 
   7   2   1  860.41   52.09 
   7   2   1  844.32   48.90 
  -7   2  -1  788.82   40.10 
   7   2   1  745.63   47.70 
  -7   2  -1  761.42   50.29 
   7   2   1  744.73   39.40 
   7   2   1  815.02   53.19 
   7   2   1  774.82   51.59 
  -7   2  -1  776.92   47.70 
  -7   2  -1  740.13   47.60 
  -7   2  -1  771.02   47.70 
   7   2   1  807.52   50.99 
  -8  -2  -1  188.18   27.70 
  -8  -2  -1  141.89   25.10 
   8  -2   1  115.49   21.60 
   8  -2   1  105.09   23.90 
   8  -2   1  132.89   25.90 
  -8  -2  -1   95.29   22.50 
  -8  -2  -1  169.68   29.50 
  -8  -2  -1  127.99   21.40 
  -8  -2  -1  133.79   24.50 
  -8  -2  -1  153.28   21.20 
   8  -2   1   97.59   21.20 
  -8  -2  -1  124.09   23.50 
   8  -2   1  137.59   26.10 
   8  -2   1  105.89   23.50 
   8  -2   1  141.19   24.40 
  -8  -2  -1  156.78   26.20 
   8  -2   1  111.29   19.70 
   8  -2   1  136.39   23.90 
  -8  -2  -1  118.79   23.50 
  -8  -2  -1  145.59   25.10 
   8  -2   1  112.89   22.00 
  -8  -2  -1  104.49   18.90 
   8  -2   1  133.49   26.50 
   8  -2   1  127.19   21.80 
  -8  -2  -1  113.69   23.70 
  -8   2  -1  149.88   24.40 
  -8   2  -1  114.09   23.00 
   8   2   1  128.49   24.00 
   8   2   1  139.79   20.30 
   8   2   1   90.39   21.40 
   8   2   1  134.19   25.40 
  -8   2  -1  123.99   21.60 
   8   2   1  150.88   25.90 
   8   2   1  122.79   24.10 
  -8   2  -1  110.59   21.20 
   8   2   1  138.09   22.50 
   8   2   1  144.99   24.40 
  -8   2  -1  157.78   25.10 
   8   2   1  123.89   25.30 
   8   2   1  129.09   22.90 
   8   2   1  120.49   26.30 
  -8   2  -1  187.48   25.10 
   8   2   1  148.29   26.50 
   8   2   1  110.39   21.50 
  -8   2  -1  148.19   24.70 
  -8   2  -1  132.69   24.90 
   8   2   1  115.89   23.30 
  -9  -2  -1  192.98   28.50 
   9  -2   1  168.58   27.90 
   9  -2   1  182.88   32.10 
   9  -2   1  181.38   33.30 
   9  -2   1  206.08   31.00 
   9  -2   1  218.98   33.80 
  -9  -2  -1  214.68   28.10 
  -9  -2  -1  183.08   31.80 
  -9  -2  -1  198.08   31.40 
  -9  -2  -1  283.47   36.20 
   9  -2   1  216.38   32.60 
  -9  -2  -1  192.88   32.10 
  -9  -2  -1  141.79   27.60 
   9  -2   1  141.69   30.60 
   9  -2   1  162.08   29.40 
  -9  -2  -1  257.07   36.20 
   9  -2   1  188.28   32.20 
  -9  -2  -1  177.48   32.80 
  -9  -2  -1  226.68   35.70 
  -9  -2  -1  289.37   40.40 
   9  -2   1  138.69   30.20 
   9  -2   1  180.38   33.70 
   9  -2   1  226.88   32.50 
  -9  -2  -1  234.58   37.60 
  -9  -2  -1  243.38   34.10 
   9   2   1  255.97   37.30 
   9   2   1  153.38   29.00 
   9   2   1  157.78   29.60 
   9   2   1  219.68   34.10 
   9   2   1  163.88   29.10 
  -9   2  -1  235.08   33.00 
   9   2   1  199.88   33.60 
  -9   2  -1  230.08   32.80 
  -9   2  -1  221.88   31.70 
   9   2   1  217.88   33.40 
  -9   2  -1  201.08   33.60 
  -9   2  -1  188.98   30.70 
  -9   2  -1  199.38   33.10 
  -9   2  -1  312.77   37.30 
   9   2   1  192.68   30.20 
   9   2   1  223.48   34.50 
   9   2   1  172.68   27.10 
   9   2   1  268.87   40.80 
   9   2   1  232.28   32.40 
   9   2   1  179.38   30.80 
  10  -2   1   48.70   17.40 
  10  -2   1    1.70   12.10 
 -10  -2  -1   42.70   16.90 
 -10  -2  -1    6.90   13.90 
  10  -2   1   23.60   16.90 
  10  -2   1   43.30   20.80 
  10  -2   1   30.40   15.70 
 -10  -2  -1   18.20   14.10 
 -10  -2  -1   33.90   14.60 
 -10  -2  -1   54.59   20.10 
 -10  -2  -1    9.00   14.00 
  10  -2   1   33.30   18.20 
 -10  -2  -1   46.00   18.50 
  10  -2   1    8.50   14.90 
  10  -2   1    7.20   12.40 
 -10  -2  -1   34.80   22.10 
 -10  -2  -1   23.60   14.00 
  10  -2   1    7.60   14.30 
  10  -2   1   16.40   17.20 
 -10  -2  -1   47.30   21.40 
 -10  -2  -1    7.70   13.50 
  10  -2   1   39.60   18.10 
 -10  -2  -1   27.40   17.40 
 -10   2  -1    9.30   12.70 
  10   2   1   18.90   15.10 
 -10   2  -1   19.20   13.10 
  10   2   1    8.60   16.00 
 -10   2  -1   21.70   14.10 
 -10   2  -1   11.90   13.40 
 -10   2  -1   47.40   19.40 
  10   2   1   19.30   14.80 
  10   2   1   12.00   15.40 
  10   2   1    4.60   12.70 
  10   2   1   46.60   17.50 
  10   2   1   17.10   18.40 
  10   2   1   35.90   16.20 
  10   2   1   32.40   16.40 
  10   2   1   15.10   15.90 
  10   2   1   29.10   17.70 
  10   2   1   27.50   17.50 
 -10  -3   1  305.37   45.70 
  10  -3  -1  328.97   44.10 
 -10  -3   1  214.08   37.50 
  10  -3  -1  329.37   42.10 
  10  -3  -1  305.17   45.30 
 -10  -3   1  364.96   41.70 
 -10  -3   1  229.58   38.10 
 -10  -3   1  265.87   39.60 
  10  -3  -1  366.36   49.10 
 -10  -3   1  264.67   37.60 
  10  -3  -1  344.37   48.60 
 -10  -3   1  326.57   48.60 
  10  -3  -1  304.07   46.50 
 -10  -3   1  211.48   36.20 
 -10  -3   1  277.67   43.80 
  10  -3  -1  262.27   42.10 
  10  -3  -1  287.47   38.90 
  10  -3  -1  313.57   41.80 
  10  -3  -1  304.37   42.40 
 -10  -3   1  323.07   43.80 
 -10  -3   1  395.66   49.40 
 -10  -3   1  309.67   37.70 
 -10   3   1  277.27   41.10 
 -10   3   1  305.17   43.50 
  10   3  -1  344.87   42.30 
  10   3  -1  361.06   46.50 
  10   3  -1  239.48   38.90 
  10   3  -1  368.46   48.70 
  10   3  -1  364.26   46.30 
  10   3  -1  187.58   37.20 
  10   3  -1  212.88   38.00 
 -10   3   1  268.47   39.70 
  10   3  -1  304.47   48.60 
  10   3  -1  301.27   42.90 
  10   3  -1  298.37   44.10 
  10   3  -1  283.57   40.90 
 -10   3   1  316.17   40.60 
 -10   3   1  270.37   38.70 
  -9  -3   1  290.47   38.60 
  -9  -3   1  205.98   36.80 
  -9  -3   1  243.68   34.90 
  -9  -3   1  268.07   34.80 
   9  -3  -1  224.68   31.10 
  -9  -3   1  243.08   36.20 
   9  -3  -1  282.87   41.30 
   9  -3  -1  194.38   31.30 
   9  -3  -1  270.47   39.70 
  -9  -3   1  255.97   38.60 
   9  -3  -1  232.78   37.00 
   9  -3  -1  194.88   33.80 
  -9  -3   1  213.08   33.40 
  -9  -3   1  290.47   38.80 
   9  -3  -1  221.38   32.10 
  -9  -3   1  221.68   33.40 
  -9  -3   1  205.28   36.00 
  -9  -3   1  175.28   27.50 
  -9  -3   1  283.27   35.60 
   9  -3  -1  237.78   34.80 
   9  -3  -1  192.08   31.30 
   9  -3  -1  196.48   35.30 
  -9   3   1  243.38   34.80 
   9   3  -1  252.17   33.70 
   9   3  -1  253.67   35.40 
  -9   3   1  240.48   35.60 
  -9   3   1  188.68   28.80 
   9   3  -1  268.17   37.80 
   9   3  -1  270.77   40.40 
   9   3  -1  192.98   29.60 
   9   3  -1  198.48   35.80 
   9   3  -1  259.77   35.40 
   9   3  -1  256.47   37.70 
  -9   3   1  186.18   29.60 
   9   3  -1  193.28   32.50 
   9   3  -1  200.08   32.00 
  -9   3   1  204.28   33.70 
   9   3  -1  239.78   35.40 
  -9   3   1  224.78   31.40 
   9   3  -1  268.97   38.20 
  -8  -3   1  135.19   24.90 
  -8  -3   1  102.49   22.20 
  -8  -3   1  176.48   23.80 
  -8  -3   1  127.59   24.00 
  -8  -3   1  179.98   29.00 
  -8  -3   1  160.98   28.90 
   8  -3  -1  119.39   25.40 
  -8  -3   1  120.59   23.30 
  -8  -3   1  143.89   28.40 
   8  -3  -1  134.89   24.10 
  -8  -3   1  132.69   23.10 
  -8  -3   1  175.58   28.20 
  -8  -3   1  142.19   23.40 
   8  -3  -1  131.29   21.20 
   8  -3  -1  156.78   25.90 
   8  -3  -1  130.29   22.80 
   8  -3  -1  155.38   27.30 
  -8  -3   1  144.29   24.70 
  -8  -3   1  143.69   24.10 
   8  -3  -1  170.48   29.40 
   8  -3  -1  143.39   28.20 
   8  -3  -1  142.89   27.50 
   8  -3  -1  145.39   23.30 
   8   3  -1  134.09   24.20 
   8   3  -1  150.28   25.70 
   8   3  -1  162.28   27.20 
  -8   3   1  173.88   23.60 
   8   3  -1   91.39   21.60 
  -8   3   1  152.88   26.40 
   8   3  -1  125.49   22.90 
   8   3  -1  135.59   26.70 
  -8   3   1  169.68   25.80 
   8   3  -1  174.18   31.60 
   8   3  -1  151.48   26.40 
   8   3  -1  143.19   23.30 
   8   3  -1  181.38   24.60 
  -8   3   1  180.08   25.20 
  -8   3   1  195.58   28.80 
  -8   3   1  167.08   26.50 
   8   3  -1  123.79   23.60 
   8   3  -1  157.58   26.90 
   8   3  -1  133.29   26.00 
  -8   3   1  122.99   22.10 
  -7  -3   1  221.08   22.10 
  -7  -3   1  233.28   28.70 
   7  -3  -1  178.48   27.90 
   7  -3  -1  182.88   27.50 
   7  -3  -1  141.49   21.50 
   7  -3  -1  222.48   27.50 
  -7  -3   1  154.28   24.10 
   7  -3  -1  196.08   29.80 
   7  -3  -1  181.68   19.50 
   7  -3  -1  158.08   20.30 
  -7  -3   1  205.18   30.90 
   7  -3  -1  229.98   28.60 
  -7  -3   1  184.48   26.40 
  -7  -3   1  168.28   25.50 
   7  -3  -1  189.98   19.10 
  -7  -3   1  196.28   26.90 
  -7  -3   1  167.48   26.70 
   7  -3  -1  163.08   24.60 
   7  -3  -1  148.69   20.70 
  -7  -3   1  187.38   25.50 
  -7  -3   1  144.79   23.00 
   7  -3  -1  176.38   27.20 
  -7  -3   1  213.38   24.10 
  -7  -3   1  174.08   23.30 
   7  -3  -1  178.78   28.30 
  -7  -3   1  135.09   25.10 
   7  -3  -1  222.38   23.10 
   7  -3  -1  186.88   25.10 
  -7  -3   1  187.18   23.00 
  -7  -3   1  195.78   25.90 
   7   3  -1  160.58   24.40 
   7   3  -1  219.18   30.00 
   7   3  -1  197.38   26.00 
  -7   3   1  180.98   26.30 
   7   3  -1  158.08   25.30 
  -7   3   1  148.79   22.90 
   7   3  -1  172.98   26.20 
   7   3  -1  165.58   24.40 
   7   3  -1  187.28   23.40 
   7   3  -1  171.58   23.40 
  -7   3   1  218.08   24.70 
  -7   3   1  157.58   23.30 
   7   3  -1  201.98   18.60 
   7   3  -1  198.28   28.50 
  -7   3   1  194.08   24.80 
   7   3  -1  129.29   25.40 
   7   3  -1  196.58   26.50 
   7   3  -1  138.59   25.10 
   7   3  -1  215.78   28.70 
  -7   3   1  194.98   26.70 
   7   3  -1  148.49   23.90 
  -7   3   1  215.68   25.40 
   7   3  -1  185.38   24.40 
  -6  -3   1 1080.69   56.89 
  -6  -3   1 1020.60   64.19 
  -6  -3   1 1219.88   63.09 
  -6  -3   1 1120.09   57.59 
   6  -3  -1 1048.00   55.99 
  -6  -3   1 1128.29   60.19 
  -6  -3   1 1094.79   62.29 
   6  -3  -1 1154.08   53.59 
  -6  -3   1 1146.79   62.49 
   6  -3  -1 1187.58   64.69 
   6  -3  -1 1179.78   60.29 
  -6  -3   1 1148.09   59.59 
   6  -3  -1 1190.88   63.29 
  -6  -3   1 1144.79   54.79 
   6  -3  -1 1120.49   64.59 
   6  -3  -1 1071.99   51.69 
   6  -3  -1 1108.69   64.39 
   6  -3  -1 1092.09   62.29 
   6  -3  -1 1160.08   60.39 
   6  -3  -1 1168.58   56.09 
   6  -3  -1 1108.29   51.89 
  -6  -3   1 1134.59   60.59 
   6  -3  -1 1100.59   59.99 
  -6  -3   1 1176.68   61.89 
   6  -3  -1 1078.69   56.69 
  -6  -3   1 1162.98   62.19 
   6  -3  -1 1090.09   58.79 
  -6  -3   1 1062.79   64.39 
  -6  -3   1 1100.39   61.39 
   6  -3  -1 1121.99   52.29 
  -6  -3   1 1128.99   60.29 
  -6   3   1 1155.58   58.09 
   6   3  -1 1213.68   60.89 
   6   3  -1 1250.27   62.09 
   6   3  -1 1145.09   57.69 
   6   3  -1 1202.18   65.09 
  -6   3   1 1070.19   59.59 
   6   3  -1 1197.28   59.39 
   6   3  -1 1223.18   65.79 
   6   3  -1 1098.39   60.89 
  -6   3   1 1217.28   60.69 
   6   3  -1 1205.38   68.29 
   6   3  -1 1137.69   60.79 
   6   3  -1 1208.28   61.29 
   6   3  -1 1124.39   63.19 
   6   3  -1 1173.78   59.49 
   6   3  -1 1096.99   57.69 
   6   3  -1 1174.18   63.29 
  -6   3   1 1119.49   44.30 
  -6   3   1 1098.79   56.89 
  -6   3   1 1113.59   60.99 
   6   3  -1 1215.58   52.39 
  -6   3   1 1137.49   55.89 
  -6   3   1 1121.19   58.89 
   6   3  -1 1189.48   62.59 
  -6   3   1 1073.29   48.80 
  -5  -3   1 1646.74   79.19 
  -5  -3   1 1711.63   77.19 
  -5  -3   1 1714.63   83.59 
   5  -3  -1 1726.83   76.59 
  -5  -3   1 1741.73   73.79 
  -5  -3   1 1712.23   75.59 
  -5  -3   1 1681.83   76.09 
  -5  -3   1 1726.83   79.09 
   5  -3  -1 1688.83   63.19 
  -5  -3   1 1573.64   79.19 
  -5  -3   1 1756.62   83.99 
  -5  -3   1 1579.34   76.79 
   5  -3  -1 1689.13   75.99 
   5  -3  -1 1636.24   64.09 
  -5  -3   1 1641.54   77.39 
  -5  -3   1 1662.93   78.99 
   5  -3  -1 1614.14   69.49 
   5  -3  -1 1584.54   70.29 
   5  -3  -1 1634.94   65.49 
  -5  -3   1 1677.53   77.09 
  -5  -3   1 1721.93   78.79 
  -5  -3   1 1687.73   79.49 
   5  -3  -1 1683.93   73.29 
   5  -3  -1 1767.32   81.99 
   5  -3  -1 1637.04   61.79 
   5  -3  -1 1634.44   68.79 
   5  -3  -1 1705.73   73.59 
   5  -3  -1 1555.14   78.99 
   5  -3  -1 1621.64   73.49 
   5  -3  -1 1579.74   77.49 
   5  -3  -1 1628.94   78.69 
   5  -3  -1 1715.93   76.19 
   5  -3  -1 1621.64   62.79 
   5  -3  -1 1584.94   76.39 
   5  -3  -1 1660.93   69.29 
  -5  -3   1 1618.84   75.99 
   5  -3  -1 1740.53   81.89 
   5  -3  -1 1674.43   61.59 
  -5   3   1 1682.13   74.29 
   5   3  -1 1780.82   77.69 
  -5   3   1 1624.54   72.09 
   5   3  -1 1641.74   77.69 
   5   3  -1 1707.43   75.49 
  -5   3   1 1698.03   68.59 
  -5   3   1 1628.84   76.29 
  -5   3   1 1678.73   80.69 
   5   3  -1 1632.74   75.19 
  -5   3   1 1680.03   75.69 
   5   3  -1 1701.83   78.29 
   5   3  -1 1664.83   80.39 
   5   3  -1 1707.23   81.69 
   5   3  -1 1671.33   78.19 
   5   3  -1 1609.34   70.39 
   5   3  -1 1647.84   74.29 
   5   3  -1 1651.33   76.59 
  -5   3   1 1723.83   73.99 
   5   3  -1 1751.42   81.89 
   5   3  -1 1604.34   78.09 
   5   3  -1 1610.84   83.79 
   5   3  -1 1702.43   76.39 
  -5   3   1 1708.33   76.19 
  -5   3   1 1572.54   76.59 
  -5   3   1 1699.43   62.79 
   4  -3  -1 1416.66   61.49 
  -4  -3   1 1345.47   68.29 
   4  -3  -1 1363.66   65.39 
   4  -3  -1 1411.96   63.39 
  -4  -3   1 1362.26   65.59 
  -4  -3   1 1390.46   65.59 
  -4  -3   1 1441.56   67.59 
   4  -3  -1 1276.07   66.69 
   4  -3  -1 1497.45   65.39 
   4  -3  -1 1367.76   59.79 
  -4  -3   1 1452.85   65.39 
   4  -3  -1 1461.45   63.69 
   4  -3  -1 1440.26   62.99 
   4  -3  -1 1374.96   63.49 
  -4  -3   1 1440.96   63.79 
   4  -3  -1 1448.46   65.69 
  -4  -3   1 1436.06   66.89 
   4  -3  -1 1488.75   58.59 
   4  -3  -1 1350.86   62.19 
   4  -3  -1 1464.15   53.69 
  -4  -3   1 1360.86   65.09 
  -4  -3   1 1453.95   65.19 
   4  -3  -1 1378.56   56.69 
  -4  -3   1 1425.36   64.29 
   4  -3  -1 1457.45   57.19 
   4  -3  -1 1401.76   68.39 
  -4  -3   1 1451.45   66.39 
  -4  -3   1 1374.36   66.69 
   4  -3  -1 1420.06   62.59 
   4  -3  -1 1391.26   55.69 
   4  -3  -1 1417.56   57.29 
   4  -3  -1 1416.16   61.09 
  -4  -3   1 1493.55   64.39 
   4  -3  -1 1409.56   67.49 
  -4  -3   1 1412.06   70.49 
   4  -3  -1 1390.96   51.99 
  -4  -3   1 1445.26   62.99 
  -4  -3   1 1383.66   61.59 
  -4  -3   1 1367.26   66.49 
  -4   3   1 1346.27   60.49 
   4   3  -1 1458.65   64.89 
   4   3  -1 1423.56   62.29 
  -4   3   1 1402.76   53.79 
   4   3  -1 1367.36   65.19 
   4   3  -1 1403.66   68.09 
   4   3  -1 1441.56   64.19 
   4   3  -1 1393.86   65.69 
  -4   3   1 1367.86   62.69 
   4   3  -1 1409.76   61.39 
   4   3  -1 1467.85   64.59 
  -4   3   1 1444.06   68.59 
   4   3  -1 1356.46   63.89 
  -4   3   1 1458.15   62.29 
  -4   3   1 1379.96   59.29 
  -4   3   1 1484.95   61.09 
   4   3  -1 1454.35   64.89 
   4   3  -1 1381.76   68.29 
   4   3  -1 1451.95   65.29 
  -4   3   1 1495.75   64.39 
   4   3  -1 1412.26   68.89 
  -4   3   1 1443.86   64.89 
   4   3  -1 1452.45   72.09 
   4   3  -1 1419.06   66.89 
  -4   3   1 1451.45   64.39 
  -4   3   1 1424.66   61.19 
   4   3  -1 1392.66   64.89 
  -3  -3   1 1492.55   65.69 
  -3  -3   1 1399.06   63.69 
  -3  -3   1 1321.47   60.69 
   3  -3  -1 1396.66   60.29 
   3  -3  -1 1413.76   56.69 
   3  -3  -1 1347.67   52.29 
   3  -3  -1 1397.56   55.89 
  -3  -3   1 1388.36   62.09 
   3  -3  -1 1472.75   59.79 
   3  -3  -1 1436.96   61.59 
   3  -3  -1 1372.76   53.39 
   3  -3  -1 1378.46   61.59 
   3  -3  -1 1395.96   59.89 
   3  -3  -1 1457.35   64.49 
  -3  -3   1 1448.76   68.69 
  -3  -3   1 1535.35   64.29 
  -3  -3   1 1348.67   63.29 
   3  -3  -1 1373.56   58.19 
   3  -3  -1 1337.27   60.29 
   3  -3  -1 1402.76   58.09 
   3  -3  -1 1393.36   57.29 
  -3  -3   1 1464.75   60.79 
   3  -3  -1 1400.26   57.89 
   3  -3  -1 1393.56   61.99 
  -3  -3   1 1458.95   63.89 
   3  -3  -1 1434.76   60.49 
  -3  -3   1 1469.85   66.19 
   3  -3  -1 1390.56   66.49 
   3  -3  -1 1419.06   61.39 
   3  -3  -1 1423.86   54.69 
  -3  -3   1 1452.15   60.29 
   3  -3  -1 1414.96   60.09 
  -3  -3   1 1405.46   62.49 
   3  -3  -1 1423.26   59.79 
   3  -3  -1 1450.45   54.79 
  -3  -3   1 1364.36   63.09 
   3  -3  -1 1456.35   58.49 
   3  -3  -1 1380.16   61.19 
  -3  -3   1 1448.06   63.69 
  -3  -3   1 1444.46   61.29 
   3  -3  -1 1414.96   53.29 
   3  -3  -1 1454.15   61.89 
   3  -3  -1 1404.76   60.99 
   3  -3  -1 1460.75   62.39 
  -3  -3   1 1435.86   63.49 
   3  -3  -1 1403.56   57.99 
   3  -3  -1 1403.06   59.89 
   3  -3  -1 1384.36   53.59 
  -3   3   1 1447.26   60.79 
   3   3  -1 1432.36   62.39 
  -3   3   1 1434.56   58.89 
   3   3  -1 1403.36   61.39 
   3   3  -1 1409.56   66.29 
  -3   3   1 1397.56   54.29 
   3   3  -1 1442.76   60.99 
   3   3  -1 1441.46   66.49 
   3   3  -1 1447.06   61.79 
  -3   3   1 1412.26   63.19 
  -3   3   1 1480.35   61.39 
  -3   3   1 1343.37   65.39 
   3   3  -1 1427.06   64.99 
  -3   3   1 1438.76   58.49 
   3   3  -1 1303.57   61.09 
  -3   3   1 1413.26   59.39 
   3   3  -1 1371.66   58.89 
   3   3  -1 1473.65   66.59 
   3   3  -1 1431.96   63.59 
   3   3  -1 1442.76   61.59 
   3   3  -1 1323.37   64.19 
   3   3  -1 1392.66   68.79 
   3   3  -1 1405.26   60.59 
  -3   3   1 1350.26   60.69 
   3   3  -1 1393.46   62.59 
   3   3  -1 1393.36   60.99 
  -3   3   1 1414.56   55.29 
   3   3  -1 1431.76   60.19 
  -3   3   1 1463.65   58.29 
   3   3  -1 1455.25   63.19 
  -3   3   1 1423.96   58.89 
  -3   3   1 1466.45   60.29 
  -2  -3   1  264.37   16.50 
   2  -3  -1  285.67   17.20 
   2  -3  -1  267.77   13.20 
  -2  -3   1  231.88   15.30 
   2  -3  -1  249.48   12.30 
   2  -3  -1  313.57   18.60 
  -2  -3   1  251.97   17.90 
   2  -3  -1  304.97   17.50 
  -2  -3   1  282.27   14.70 
   2  -3  -1  274.67   15.20 
  -2  -3   1  261.57   15.50 
  -2  -3   1  272.37   21.70 
   2  -3  -1  301.87   18.50 
  -2  -3   1  246.38   16.70 
  -2  -3   1  265.57   18.70 
  -2  -3   1  260.97   15.20 
  -2  -3   1  325.47   18.70 
  -2  -3   1  278.97   18.90 
   2  -3  -1  256.67   16.80 
  -2  -3   1  279.57   17.70 
  -2  -3   1  281.37   19.70 
   2  -3  -1  252.97   15.00 
  -2  -3   1  272.77   19.30 
  -2  -3   1  249.68   17.90 
   2  -3  -1  267.77   13.80 
   2  -3  -1  273.17   15.00 
   2  -3  -1  258.97   16.70 
  -2  -3   1  265.27   16.10 
  -2  -3   1  246.58   17.90 
   2  -3  -1  271.07   20.80 
  -2  -3   1  218.18   17.50 
   2  -3  -1  259.27   17.00 
   2  -3  -1  278.27   14.10 
   2  -3  -1  248.58   13.80 
   2  -3  -1  249.68   13.60 
   2  -3  -1  268.07   16.00 
   2  -3  -1  271.27   16.00 
   2  -3  -1  257.27   15.90 
   2  -3  -1  277.97   15.30 
   2  -3  -1  252.87   15.30 
  -2  -3   1  261.07   18.60 
   2  -3  -1  291.57   17.40 
   2  -3  -1  267.17   17.30 
   2  -3  -1  252.77   14.80 
  -2  -3   1  280.37   18.70 
  -2  -3   1  276.67   16.90 
   2  -3  -1  246.58   18.00 
   2  -3  -1  251.97   16.60 
   2  -3  -1  257.97   14.00 
  -2  -3   1  245.38   17.10 
   2  -3  -1  282.37   14.50 
   2  -3  -1  256.07   15.90 
   2  -3  -1  253.67   14.10 
   2  -3  -1  261.47   13.80 
   2  -3  -1  278.57   15.20 
  -2   3   1  250.27   14.30 
   2   3  -1  273.87   17.10 
   2   3  -1  253.17   17.30 
   2   3  -1  296.17   17.90 
   2   3  -1  254.17   17.50 
   2   3  -1  263.37   19.80 
  -2   3   1  248.68   14.40 
   2   3  -1  266.27   15.20 
  -2   3   1  245.28   14.90 
  -2   3   1  257.77   16.30 
   2   3  -1  246.18   16.40 
   2   3  -1  222.48   18.20 
  -2   3   1  264.37   15.10 
   2   3  -1  286.37   17.90 
  -2   3   1  286.77   18.10 
   2   3  -1  276.57   18.70 
   2   3  -1  254.27   14.90 
   2   3  -1  259.87   16.30 
  -2   3   1  261.17   15.80 
  -2   3   1  279.57   15.30 
   2   3  -1  283.87   17.20 
   2   3  -1  283.87   16.70 
   2   3  -1  271.17   20.20 
  -2   3   1  239.48   16.90 
  -2   3   1  229.18   16.20 
  -2   3   1  279.87   19.80 
  -2   3   1  291.87   16.10 
   2   3  -1  268.97   16.00 
  -2   3   1  294.67   15.60 
   2   3  -1  304.87   20.50 
   2   3  -1  288.47   20.90 
   2   3  -1  270.37   20.60 
  -2   3   1  270.17   17.20 
   2   3  -1  250.47   15.30 
   2   3  -1  287.57   18.30 
   2   3  -1  261.57   15.80 
  -2   3   1  272.07   14.20 
  -2   3   1  261.77   18.10 
   2   3  -1  299.87   18.90 
   2   3  -1  271.97   16.40 
  -2   3   1  268.37   15.60 
   1  -3  -1  648.04   26.80 
  -1  -3   1  597.64   31.30 
  -1  -3   1  638.14   34.00 
  -1  -3   1  614.44   27.30 
  -1  -3   1  588.04   31.60 
  -1  -3   1  651.23   27.90 
   1  -3  -1  669.83   29.40 
   1  -3  -1  643.04   25.90 
   1  -3  -1  639.44   28.50 
   1  -3  -1  626.44   30.20 
   1  -3  -1  662.93   28.30 
   1  -3  -1  649.34   26.30 
  -1  -3   1  636.44   31.50 
  -1  -3   1  655.83   29.40 
   1  -3  -1  640.74   34.90 
  -1  -3   1  617.64   32.40 
   1  -3  -1  631.94   29.00 
   1  -3  -1  605.64   28.10 
   1  -3  -1  627.84   32.10 
   1  -3  -1  679.93   32.20 
   1  -3  -1  634.74   28.30 
   1  -3  -1  643.54   26.40 
  -1  -3   1  658.03   26.20 
  -1  -3   1  637.54   32.50 
  -1  -3   1  626.84   27.80 
  -1  -3   1  651.73   32.60 
  -1  -3   1  644.24   34.10 
   1  -3  -1  671.03   28.90 
   1  -3  -1  644.74   29.80 
   1  -3  -1  622.14   30.30 
  -1  -3   1  633.14   30.30 
   1  -3  -1  662.43   31.70 
  -1  -3   1  637.64   29.20 
  -1  -3   1  656.23   34.40 
   1  -3  -1  662.53   25.70 
   1  -3  -1  620.94   26.20 
  -1  -3   1  665.53   28.20 
  -1  -3   1  663.13   29.20 
   1  -3  -1  619.54   25.70 
   1  -3  -1  615.94   33.10 
   1  -3  -1  577.34   29.00 
  -1  -3   1  645.54   28.50 
   1  -3  -1  598.94   28.20 
  -1  -3   1  657.13   36.00 
  -1  -3   1  644.14   32.20 
   1  -3  -1  617.94   28.80 
   1  -3  -1  616.64   32.70 
  -1  -3   1  600.84   29.70 
   1  -3  -1  626.74   30.30 
  -1  -3   1  650.43   31.40 
   1  -3  -1  617.44   27.10 
  -1  -3   1  624.34   30.20 
  -1  -3   1  624.54   25.70 
   1  -3  -1  613.94   27.80 
   1  -3  -1  627.24   25.80 
   1  -3  -1  636.04   32.60 
  -1  -3   1  621.74   30.90 
   1   3  -1  625.44   30.60 
   1   3  -1  617.74   27.80 
  -1   3   1  634.94   32.20 
   1   3  -1  660.53   26.70 
  -1   3   1  628.14   29.70 
  -1   3   1  616.84   29.00 
   1   3  -1  606.94   29.90 
  -1   3   1  640.14   25.70 
  -1   3   1  639.54   29.40 
   1   3  -1  617.34   32.20 
   1   3  -1  616.44   31.00 
  -1   3   1  615.34   26.10 
   1   3  -1  621.74   28.30 
   1   3  -1  649.54   34.30 
  -1   3   1  654.03   29.40 
  -1   3   1  675.03   30.50 
   1   3  -1  621.54   33.00 
  -1   3   1  600.54   31.40 
   1   3  -1  633.34   30.10 
   1   3  -1  606.84   30.50 
   1   3  -1  630.54   32.20 
   1   3  -1  672.33   33.00 
   1   3  -1  577.74   30.40 
  -1   3   1  640.44   26.00 
  -1   3   1  648.14   29.20 
   1   3  -1  613.74   27.30 
   1   3  -1  655.83   30.10 
   1   3  -1  574.34   36.00 
   1   3  -1  640.74   26.40 
   1   3  -1  628.64   29.00 
   1   3  -1  613.84   29.00 
   1   3  -1  668.73   31.00 
   1   3  -1  612.84   29.20 
   1   3  -1  651.53   30.30 
  -1   3   1  679.73   31.10 
   1   3  -1  591.24   27.30 
   1   3  -1  611.54   31.40 
  -1   3   1  637.34   31.90 
   1   3  -1  621.64   26.10 
   1   3  -1  640.74   25.90 
  -1   3   1  586.14   31.80 
   1   3  -1  624.44   34.90 
  -1   3   1  624.74   26.00 
   1   3  -1  648.84   33.20 
  -1   3   1  650.13   31.50 
   0  -3   1  432.86   21.40 
   0  -3  -1  442.86   23.90 
   0  -3   1  423.66   22.00 
   0  -3  -1  400.86   24.40 
   0  -3   1  454.85   21.20 
   0  -3  -1  416.06   17.40 
   0  -3   1  411.46   23.80 
   0  -3   1  435.46   24.60 
   0  -3   1  477.05   22.00 
   0  -3  -1  450.15   23.40 
   0  -3   1  428.96   23.60 
   0  -3   1  432.46   22.20 
   0  -3  -1  464.85   22.90 
   0  -3   1  430.06   20.00 
   0  -3   1  475.35   21.10 
   0  -3   1  514.15   24.40 
   0  -3   1  501.45   28.20 
   0  -3  -1  464.85   24.20 
   0  -3  -1  456.95   25.00 
   0  -3   1  486.15   23.20 
   0  -3  -1  435.76   25.80 
   0  -3  -1  441.66   23.40 
   0  -3  -1  423.16   23.20 
   0  -3   1  435.46   23.50 
   0  -3  -1  477.55   24.70 
   0  -3  -1  390.66   25.00 
   0  -3  -1  447.66   23.40 
   0  -3   1  442.66   24.00 
   0  -3  -1  432.56   16.90 
   0  -3  -1  441.36   19.70 
   0  -3   1  420.26   17.70 
   0  -3   1  495.25   26.20 
   0  -3  -1  446.76   23.20 
   0  -3  -1  407.06   22.70 
   0  -3   1  437.86   21.20 
   0  -3  -1  429.46   24.20 
   0  -3   1  435.56   20.00 
   0  -3  -1  435.66   24.60 
   0  -3  -1  431.56   19.70 
   0  -3  -1  443.46   19.80 
   0  -3  -1  446.96   22.70 
   0  -3   1  428.86   23.60 
   0  -3   1  416.86   23.10 
   0  -3   1  454.85   23.80 
   0  -3   1  432.76   17.40 
   0  -3  -1  404.56   28.30 
   0  -3   1  422.66   21.00 
   0  -3  -1  437.76   18.30 
   0  -3   1  462.95   22.50 
   0  -3   1  463.95   27.20 
   0   3  -1  413.86   25.20 
   0   3   1  412.56   22.80 
   0   3  -1  410.56   22.00 
   0   3  -1  459.25   24.70 
   0   3  -1  463.85   24.70 
   0   3   1  424.06   23.30 
   0   3   1  464.75   23.80 
   0   3  -1  424.46   18.70 
   0   3   1  529.75   23.70 
   0   3  -1  445.36   24.00 
   0   3  -1  449.56   22.00 
   0   3   1  457.25   23.30 
   0   3  -1  404.76   22.40 
   0   3  -1  479.55   25.00 
   0   3  -1  436.86   22.10 
   0   3   1  476.15   25.20 
   0   3  -1  474.65   25.00 
   0   3   1  417.46   24.20 
   0   3   1  449.95   19.90 
   0   3   1  427.46   23.30 
   0   3  -1  456.05   22.40 
   0   3  -1  379.76   30.40 
   0   3  -1  453.15   26.10 
   0   3   1  471.95   26.20 
   0   3   1  463.75   24.40 
   0   3  -1  479.65   26.10 
   0   3  -1  428.66   17.90 
   0   3  -1  416.26   17.50 
   0   3   1  423.36   25.30 
   0   3   1  474.95   31.60 
   0   3  -1  452.05   17.80 
   0   3   1  430.86   29.40 
   0   3  -1  433.96   23.90 
   0   3   1  450.85   23.70 
   0   3  -1  411.16   24.10 
   0   3   1  423.96   27.50 
   0   3   1  404.36   22.70 
   0   3   1  442.06   22.70 
   0   3  -1  443.96   26.20 
   0   3  -1  432.56   23.50 
   1  -3   1 4183.68  152.58 
   1  -3   1 4161.28  160.28 
   1  -3   1 4245.98  155.08 
   1  -3   1 4220.98  155.08 
   1  -3   1 4171.58  161.18 
   1  -3   1 4411.36  157.48 
  -1  -3  -1 4256.37  157.68 
   1  -3   1 4209.88  159.48 
   1  -3   1 4217.98  153.48 
  -1  -3  -1 4162.88  160.78 
  -1  -3  -1 4113.19  162.48 
   1  -3   1 4265.07  155.08 
  -1  -3  -1 4078.49  158.08 
   1  -3   1 4586.34  159.38 
  -1  -3  -1 4337.97  160.18 
  -1  -3  -1 4280.37  160.98 
   1  -3   1 4026.90  153.98 
  -1  -3  -1 4370.36  156.98 
  -1  -3  -1 4308.97  156.58 
  -1  -3  -1 4310.57  156.78 
   1  -3   1 4304.77  154.88 
  -1  -3  -1 4259.77  161.58 
   1  -3   1 4271.87  158.18 
  -1  -3  -1 4115.99  164.18 
   1  -3   1 4172.08  153.08 
   1  -3   1 4314.67  160.18 
  -1  -3  -1 4059.69  163.48 
   1  -3   1 4375.66  155.58 
  -1  -3  -1 4181.58  160.98 
   1  -3   1 4160.98  160.28 
  -1  -3  -1 3940.91  157.08 
   1  -3   1 4238.98  156.78 
   1  -3   1 4098.89  158.18 
   1  -3   1 3917.01  166.58 
   1  -3   1 4219.58  157.38 
  -1  -3  -1 4329.17  154.78 
  -1  -3  -1 4160.08  160.68 
   1  -3   1 4311.47  158.58 
   1  -3   1 4157.18  155.48 
   1  -3   1 4172.78  161.18 
   1  -3   1 4253.87  157.58 
  -1  -3  -1 4141.79  158.98 
  -1  -3  -1 4255.07  162.48 
  -1  -3  -1 4159.48  160.38 
   1  -3   1 4240.48  156.38 
   1  -3   1 4267.37  152.58 
   1  -3   1 4281.67  161.58 
  -1  -3  -1 4212.28  153.28 
  -1  -3  -1 4132.59  153.98 
   1  -3   1 4315.07  152.98 
   1  -3   1 4195.08  160.38 
  -1  -3  -1 4143.49  160.68 
  -1  -3  -1 4384.86  162.08 
   1  -3   1 4209.88  159.88 
  -1  -3  -1 4227.78  157.38 
  -1  -3  -1 4182.68  156.98 
   1   3   1 4067.69  160.78 
   1   3   1 4169.98  154.18 
   1   3   1 4266.47  156.78 
  -1   3  -1 4281.67  156.68 
  -1   3  -1 4276.17  160.08 
   1   3   1 4039.70  159.58 
   1   3   1 4120.69  157.08 
   1   3   1 4217.88  161.18 
  -1   3  -1 4235.28  156.88 
  -1   3  -1 4151.08  161.88 
  -1   3  -1 4181.28  155.08 
   1   3   1 4058.89  163.78 
  -1   3  -1 4226.18  152.88 
   1   3   1 4106.69  161.08 
   1   3   1 4151.98  156.88 
   1   3   1 4299.57  153.58 
   1   3   1 4163.18  160.08 
   1   3   1 4185.58  161.48 
  -1   3  -1 4301.07  160.58 
   1   3   1 4241.38  159.68 
  -1   3  -1 4279.87  161.68 
  -1   3  -1 4246.48  155.68 
   1   3   1 4232.48  161.78 
   1   3   1 4184.88  153.68 
  -1   3  -1 4234.28  152.48 
  -1   3  -1 4276.67  155.08 
   1   3   1 4168.38  161.68 
   1   3   1 4328.57  160.88 
  -1   3  -1 4084.99  164.98 
  -1   3  -1 4139.69  156.48 
   1   3   1 3728.73  161.28 
   1   3   1 4168.28  153.28 
  -1   3  -1 4148.29  159.98 
   1   3   1 4120.69  161.68 
   1   3   1 4333.47  156.88 
   1   3   1 4281.07  160.38 
  -1   3  -1 4179.18  155.68 
  -1   3  -1 4108.29  158.98 
   1   3   1 4251.37  161.48 
   1   3   1 4215.58  154.78 
   1   3   1 4194.68  155.48 
  -1   3  -1 4364.36  158.28 
  -1   3  -1 4063.69  165.18 
   1   3   1 4502.75  164.78 
   1   3   1 4210.88  161.08 
  -2  -3  -1 2637.54   98.99 
  -2  -3  -1 2552.34  103.49 
   2  -3   1 2557.64   94.79 
   2  -3   1 2533.75   93.89 
   2  -3   1 2629.24  104.19 
  -2  -3  -1 2594.34  103.09 
   2  -3   1 2470.15   97.39 
  -2  -3  -1 2514.75  103.29 
   2  -3   1 2468.15   97.29 
   2  -3   1 2506.25   94.19 
  -2  -3  -1 2566.84  103.79 
   2  -3   1 2681.63   99.49 
  -2  -3  -1 2628.44  104.39 
  -2  -3  -1 2534.85  102.69 
   2  -3   1 2530.55   96.59 
   2  -3   1 2541.65   95.69 
   2  -3   1 2541.85  106.39 
   2  -3   1 2488.85   98.49 
  -2  -3  -1 2569.84  101.49 
   2  -3   1 2517.95  100.09 
   2  -3   1 2534.85   96.19 
   2  -3   1 2471.65  101.59 
   2  -3   1 2667.83   99.49 
   2  -3   1 2549.65   97.89 
   2  -3   1 2499.85  107.19 
   2  -3   1 2597.34  104.39 
   2  -3   1 2588.64   99.69 
   2  -3   1 2544.15   98.99 
  -2  -3  -1 2539.75  106.89 
   2  -3   1 2706.43  100.99 
  -2  -3  -1 2490.55  103.99 
   2  -3   1 2567.24   94.79 
   2  -3   1 2499.35   97.19 
   2  -3   1 2557.94  101.19 
  -2  -3  -1 2586.84  100.99 
   2  -3   1 2570.14   97.59 
  -2  -3  -1 2594.84   99.19 
   2  -3   1 2539.15  102.19 
   2  -3   1 2445.76   95.09 
  -2  -3  -1 2616.54   98.59 
  -2  -3  -1 2508.15   95.39 
  -2  -3  -1 2571.84   97.99 
   2  -3   1 2538.85   93.89 
  -2  -3  -1 2554.94  103.59 
  -2  -3  -1 2616.14   98.59 
   2  -3   1 2568.14  103.19 
  -2  -3  -1 2535.25  100.59 
   2  -3   1 2611.14   97.29 
   2   3   1 2538.35  100.49 
   2   3   1 2597.84   97.99 
   2   3   1 2476.05  104.69 
   2   3   1 2467.15  104.29 
   2   3   1 2569.94  102.79 
   2   3   1 2594.94  101.19 
  -2   3  -1 2612.94   97.49 
   2   3   1 2538.25   98.19 
   2   3   1 2528.95  106.09 
  -2   3  -1 2546.55   96.89 
  -2   3  -1 2526.35  105.09 
  -2   3  -1 2490.45   92.79 
  -2   3  -1 2569.84   95.29 
  -2   3  -1 2614.34   99.99 
  -2   3  -1 2544.55  101.39 
   2   3   1 2603.34  100.69 
  -2   3  -1 2585.14   96.79 
   2   3   1 2559.84   99.39 
  -2   3  -1 2512.05   99.29 
   2   3   1 2611.84  102.79 
  -2   3  -1 2566.64   94.69 
   2   3   1 2476.65  107.39 
   2   3   1 2559.74   96.49 
  -2   3  -1 2512.05   93.79 
  -2   3  -1 2518.55   96.89 
   2   3   1 2502.55   98.29 
  -2   3  -1 2593.04  101.29 
   2   3   1 2587.24  102.79 
   2   3   1 2568.84  102.69 
  -2   3  -1 2391.26  103.59 
  -2   3  -1 2560.74   99.49 
   2   3   1 2636.14  101.09 
   2   3   1 2571.54   99.29 
  -2   3  -1 2500.25   95.89 
   2   3   1 2571.74   98.29 
   2   3   1 2683.33  105.19 
  -2   3  -1 2485.95  104.49 
   2   3   1 2462.45   96.19 
  -2   3  -1 2569.14   98.19 
   3  -3   1 2123.89   94.79 
   3  -3   1 2144.39   85.39 
  -3  -3  -1 2200.78   82.69 
   3  -3   1 2048.50   85.69 
   3  -3   1 2136.89   85.29 
  -3  -3  -1 2058.09   93.49 
   3  -3   1 2119.19   85.59 
   3  -3   1 2218.78   83.59 
   3  -3   1 1992.80   91.49 
   3  -3   1 2008.20   88.29 
   3  -3   1 2173.68   84.39 
  -3  -3  -1 2142.09   91.19 
   3  -3   1 2071.19   79.79 
   3  -3   1 2111.89   82.39 
  -3  -3  -1 2040.50   89.19 
   3  -3   1 2140.69   88.59 
  -3  -3  -1 2130.19   91.49 
  -3  -3  -1 2248.08   87.39 
   3  -3   1 2105.89   83.69 
   3  -3   1 2062.29   83.29 
   3  -3   1 2185.68   81.79 
  -3  -3  -1 2198.48   89.39 
   3  -3   1 2149.98   87.29 
   3  -3   1 2104.69   83.29 
  -3  -3  -1 2121.49   89.29 
  -3  -3  -1 2144.99   88.99 
  -3  -3  -1 2149.19   89.59 
   3  -3   1 2206.38   86.99 
   3  -3   1 2094.09   90.09 
  -3  -3  -1 2157.88   90.79 
   3  -3   1 2139.79   83.39 
  -3  -3  -1 2058.89   86.89 
  -3  -3  -1 2148.29   90.79 
   3  -3   1 2055.49   83.29 
  -3  -3  -1 2269.37   87.19 
   3  -3   1 2121.79   89.59 
   3  -3   1 2198.88   83.79 
   3  -3   1 2147.99   84.59 
   3  -3   1 2064.49   90.49 
  -3  -3  -1 2207.68   91.39 
   3  -3   1 2185.08   86.19 
  -3  -3  -1 2130.89   92.19 
   3   3   1 2085.79   92.99 
  -3   3  -1 2161.98   85.79 
   3   3   1 2196.48   84.19 
   3   3   1 2163.38   95.69 
  -3   3  -1 2101.79   87.49 
   3   3   1 2147.79   90.19 
  -3   3  -1 2069.79   87.29 
   3   3   1 2177.48   93.99 
   3   3   1 2164.38   87.39 
   3   3   1 2153.48   89.59 
  -3   3  -1 2146.89   81.99 
   3   3   1 2122.59   88.29 
  -3   3  -1 2217.88   92.39 
  -3   3  -1 2126.39   86.29 
   3   3   1 2044.20   91.29 
  -3   3  -1 2180.48   84.99 
  -3   3  -1 1996.40   86.89 
  -3   3  -1 2157.08   79.29 
  -3   3  -1 2056.89   83.49 
   3   3   1 2120.09   87.89 
   3   3   1 2204.78   86.59 
   3   3   1 2173.78   89.49 
   3   3   1 2114.59   87.29 
   3   3   1 2112.19   87.39 
  -3   3  -1 2098.39   82.79 
  -3   3  -1 2163.38   83.09 
   3   3   1 2174.68   88.99 
  -3   3  -1 2142.99   81.39 
  -3   3  -1 2129.19   92.19 
  -4  -3  -1  472.45   28.80 
  -4  -3  -1  463.15   30.00 
   4  -3   1  421.06   24.70 
   4  -3   1  426.46   25.70 
   4  -3   1  413.16   29.00 
  -4  -3  -1  399.36   27.80 
   4  -3   1  433.46   31.20 
  -4  -3  -1  434.86   27.50 
   4  -3   1  471.45   27.80 
   4  -3   1  482.35   30.50 
   4  -3   1  432.56   28.70 
   4  -3   1  438.96   23.40 
   4  -3   1  441.16   21.60 
  -4  -3  -1  450.25   32.60 
   4  -3   1  437.26   23.50 
   4  -3   1  467.25   20.70 
  -4  -3  -1  439.96   30.00 
  -4  -3  -1  420.86   27.70 
  -4  -3  -1  438.26   30.70 
   4  -3   1  461.75   20.10 
   4  -3   1  410.26   26.50 
   4  -3   1  397.16   26.70 
  -4  -3  -1  483.65   31.30 
   4  -3   1  432.26   26.20 
   4  -3   1  406.96   31.20 
  -4  -3  -1  355.36   27.10 
   4  -3   1  431.26   23.10 
  -4  -3  -1  400.36   29.10 
  -4  -3  -1  440.46   27.70 
  -4  -3  -1  444.46   29.10 
  -4  -3  -1  445.76   29.60 
  -4  -3  -1  434.56   27.10 
   4  -3   1  473.85   23.20 
   4   3   1  455.55   30.00 
  -4   3  -1  457.85   26.40 
   4   3   1  405.96   26.60 
   4   3   1  416.36   31.00 
   4   3   1  414.26   27.60 
  -4   3  -1  474.35   29.30 
   4   3   1  451.15   29.30 
   4   3   1  508.05   29.80 
  -4   3  -1  434.86   27.20 
  -4   3  -1  430.76   27.90 
   4   3   1  462.25   28.90 
   4   3   1  391.76   24.30 
  -4   3  -1  446.16   25.10 
  -4   3  -1  436.96   26.60 
   4   3   1  396.26   29.40 
  -4   3  -1  444.06   22.40 
   4   3   1  455.15   28.10 
  -4   3  -1  405.46   20.60 
   4   3   1  463.55   32.30 
   4   3   1  451.95   28.50 
  -4   3  -1  432.36   25.20 
   4   3   1  377.06   31.10 
  -4   3  -1  450.05   24.10 
  -4   3  -1  466.75   31.40 
  -4   3  -1  465.85   31.30 
   4   3   1  430.96   26.60 
  -5  -3  -1  123.79   16.30 
  -5  -3  -1  162.28   21.40 
   5  -3   1  137.99   21.80 
  -5  -3  -1  176.08   22.10 
  -5  -3  -1  163.38   23.60 
  -5  -3  -1  158.18   20.00 
   5  -3   1  151.78   18.00 
   5  -3   1  132.89   16.30 
   5  -3   1  104.79   17.50 
  -5  -3  -1  144.09   18.20 
   5  -3   1  132.69   21.00 
  -5  -3  -1   97.09   15.90 
   5  -3   1  124.49   17.90 
   5  -3   1  134.69    8.30 
   5  -3   1  134.49    7.20 
   5  -3   1  135.29    7.20 
   5  -3   1  134.49   10.70 
  -5  -3  -1  165.18   22.00 
  -5  -3  -1  130.19   18.90 
   5  -3   1  136.39   18.10 
   5  -3   1  136.89   17.90 
   5  -3   1  126.39   12.20 
   5  -3   1  106.49   17.40 
  -5  -3  -1  108.79   19.40 
  -5  -3  -1  132.49   18.00 
  -5  -3  -1  114.29   16.70 
   5  -3   1  139.09   19.30 
  -5  -3  -1  113.89   17.60 
   5  -3   1  140.69   19.00 
  -5  -3  -1  121.79   17.90 
   5  -3   1  146.79   16.30 
   5  -3   1  159.28   14.70 
  -5  -3  -1  123.99   20.50 
  -5  -3  -1  140.39   20.00 
  -5   3  -1  118.89   17.30 
   5   3   1  128.79   18.90 
  -5   3  -1  130.59   14.20 
  -5   3  -1  124.99   12.30 
   5   3   1  119.69   17.70 
  -5   3  -1  185.18   23.60 
  -5   3  -1  143.39   16.00 
   5   3   1  107.89   16.30 
  -5   3  -1  143.59   18.00 
   5   3   1  131.29   15.90 
   5   3   1  128.19   22.00 
  -5   3  -1  160.18   20.10 
  -5   3  -1  133.19   10.20 
   5   3   1  117.49   19.50 
   5   3   1  166.08   23.30 
   5   3   1  126.99   19.30 
   5   3   1  118.69   16.60 
  -5   3  -1  148.59   17.10 
   5   3   1  148.69   19.70 
   5   3   1  149.88   20.20 
  -5   3  -1  130.89   16.90 
   5   3   1  140.99   19.20 
   5   3   1  145.59   17.00 
  -5   3  -1  144.49   19.90 
   5   3   1  147.19   19.20 
  -6  -3  -1  424.86   33.10 
   6  -3   1  390.16   38.50 
  -6  -3  -1  391.06   30.80 
   6  -3   1  371.86   28.30 
   6  -3   1  348.87   36.50 
  -6  -3  -1  403.36   30.40 
   6  -3   1  391.86   29.30 
   6  -3   1  461.45   36.00 
  -6  -3  -1  399.86   33.10 
  -6  -3  -1  379.96   30.00 
   6  -3   1  385.56   22.00 
  -6  -3  -1  403.26   38.40 
   6  -3   1  403.06   28.10 
   6  -3   1  404.76   31.40 
  -6  -3  -1  425.56   27.30 
   6  -3   1  453.25   32.70 
   6  -3   1  451.55   32.30 
  -6  -3  -1  363.36   38.70 
  -6  -3  -1  441.76   36.60 
   6  -3   1  386.76   40.10 
  -6  -3  -1  347.27   34.50 
  -6  -3  -1  378.66   37.80 
  -6  -3  -1  387.66   40.80 
  -6  -3  -1  377.66   28.60 
   6  -3   1  400.46   21.30 
   6  -3   1  386.66   26.70 
   6  -3   1  391.26   30.80 
  -6  -3  -1  405.16   31.10 
   6  -3   1  456.05   43.60 
  -6  -3  -1  410.86   32.60 
  -6  -3  -1  380.86   30.50 
  -6   3  -1  416.26   30.10 
   6   3   1  382.66   29.30 
  -6   3  -1  400.06   28.00 
  -6   3  -1  407.16   24.30 
   6   3   1  401.16   28.50 
   6   3   1  405.16   32.00 
   6   3   1  358.46   37.60 
   6   3   1  443.36   42.90 
   6   3   1  410.16   32.00 
   6   3   1  438.76   32.90 
  -6   3  -1  359.16   33.80 
   6   3   1  411.06   32.60 
   6   3   1  365.56   36.00 
  -6   3  -1  447.96   30.90 
  -6   3  -1  398.16   28.70 
  -6   3  -1  432.06   32.30 
  -6   3  -1  385.46   22.40 
   6   3   1  394.36   26.20 
   6   3   1  405.86   29.90 
   6   3   1  378.36   41.30 
  -6   3  -1  470.15   35.20 
   6   3   1  386.16   38.50 
   6   3   1  473.65   33.80 
  -6   3  -1  431.26   32.70 
   7  -3   1  139.89   22.30 
  -7  -3  -1  137.19   20.60 
   7  -3   1  129.79   25.20 
   7  -3   1  134.59   24.10 
  -7  -3  -1  132.19   24.10 
  -7  -3  -1  133.49   22.00 
  -7  -3  -1  161.38   23.00 
  -7  -3  -1  118.29   21.90 
   7  -3   1  162.08   20.20 
   7  -3   1  112.29   23.60 
  -7  -3  -1  184.08   19.60 
  -7  -3  -1  115.79   20.40 
   7  -3   1  151.68   23.10 
  -7  -3  -1  102.79   20.70 
   7  -3   1  135.29   18.60 
  -7  -3  -1  181.68   28.80 
   7  -3   1  105.19   19.00 
   7  -3   1  173.38   25.40 
  -7  -3  -1  150.18   23.60 
  -7  -3  -1  116.99   19.60 
  -7  -3  -1  154.78   24.30 
   7  -3   1  119.79   19.40 
  -7  -3  -1  122.79   18.00 
  -7  -3  -1  151.48   27.50 
  -7  -3  -1  130.49   22.70 
   7  -3   1  144.89   22.40 
   7  -3   1  131.59   24.20 
   7  -3   1  137.19   24.60 
  -7  -3  -1  124.69   22.40 
  -7   3  -1  131.79   19.40 
   7   3   1  149.79   20.60 
   7   3   1  138.59   25.10 
   7   3   1  159.38   22.50 
   7   3   1  133.69   23.40 
   7   3   1  114.09   22.20 
   7   3   1  133.49   24.10 
  -7   3  -1  133.89   20.10 
  -7   3  -1  171.98   16.90 
   7   3   1  128.49   16.60 
   7   3   1  131.79   22.40 
  -7   3  -1  144.19   23.20 
   7   3   1  152.08   24.40 
   7   3   1  161.88   24.90 
  -7   3  -1  149.79   24.50 
  -7   3  -1  127.29   21.30 
   7   3   1  168.68   25.20 
   7   3   1  115.99   24.30 
  -7   3  -1  150.98   22.70 
   7   3   1  117.49   20.30 
   7   3   1  135.89   22.60 
  -7   3  -1  124.99   20.10 
  -8  -3  -1  471.55   48.60 
  -8  -3  -1  644.84   51.39 
   8  -3   1  656.33   47.30 
  -8  -3  -1  621.04   44.30 
   8  -3   1  589.54   47.90 
  -8  -3  -1  554.34   46.90 
   8  -3   1  658.93   44.40 
  -8  -3  -1  617.04   46.20 
  -8  -3  -1  555.44   41.60 
  -8  -3  -1  608.64   50.49 
  -8  -3  -1  689.53   43.20 
   8  -3   1  577.64   57.49 
  -8  -3  -1  496.15   48.60 
  -8  -3  -1  571.44   45.60 
   8  -3   1  576.64   44.50 
   8  -3   1  640.64   49.80 
   8  -3   1  628.74   49.50 
   8  -3   1  633.34   51.39 
   8  -3   1  534.35   43.60 
  -8  -3  -1  583.04   41.00 
   8  -3   1  559.64   43.10 
   8  -3   1  565.94   42.60 
  -8  -3  -1  696.73   49.20 
  -8  -3  -1  675.93   48.20 
  -8  -3  -1  646.14   48.10 
   8   3   1  653.03   50.09 
   8   3   1  560.94   41.70 
  -8   3  -1  562.04   41.70 
   8   3   1  634.54   41.60 
   8   3   1  632.34   46.70 
  -8   3  -1  632.74   45.50 
  -8   3  -1  548.15   44.60 
  -8   3  -1  645.04   42.80 
   8   3   1  633.74   47.50 
   8   3   1  646.34   49.70 
   8   3   1  641.64   46.90 
   8   3   1  548.05   57.69 
   8   3   1  595.34   44.30 
   8   3   1  610.64   44.60 
  -8   3  -1  637.14   45.40 
   8   3   1  558.84   46.10 
   8   3   1  562.84   45.80 
   8   3   1  558.54   54.59 
  -8   3  -1  616.24   43.40 
   8   3   1  588.64   47.20 
  -9  -3  -1  291.87   41.00 
   9  -3   1  388.46   49.99 
  -9  -3  -1  427.16   49.80 
  -9  -3  -1  399.66   47.00 
  -9  -3  -1  281.07   38.50 
   9  -3   1  328.27   39.40 
   9  -3   1  367.36   41.70 
  -9  -3  -1  312.47   40.50 
  -9  -3  -1  305.47   37.20 
  -9  -3  -1  283.07   39.50 
   9  -3   1  330.77   45.20 
   9  -3   1  302.27   40.50 
  -9  -3  -1  428.96   47.30 
  -9  -3  -1  354.16   39.80 
   9  -3   1  323.37   42.30 
   9  -3   1  337.07   41.40 
  -9  -3  -1  295.37   43.20 
  -9  -3  -1  425.16   46.90 
  -9  -3  -1  360.56   47.40 
   9  -3   1  311.07   45.60 
   9  -3   1  365.86   46.20 
   9  -3   1  294.07   41.30 
   9  -3   1  367.36   48.10 
   9   3   1  327.57   48.10 
  -9   3  -1  450.95   46.50 
  -9   3  -1  369.26   42.60 
   9   3   1  331.57   39.60 
  -9   3  -1  369.26   44.50 
  -9   3  -1  295.57   36.50 
   9   3   1  361.66   44.90 
   9   3   1  445.36   50.49 
   9   3   1  372.86   44.40 
   9   3   1  353.96   45.00 
  -9   3  -1  339.57   44.50 
   9   3   1  288.67   41.10 
   9   3   1  352.36   40.30 
   9   3   1  365.76   44.30 
   9   3   1  330.57   42.20 
  -9   3  -1  338.97   43.80 
   9   3   1  398.06   47.50 
   9   3   1  323.17   40.80 
 -10  -3  -1  291.67   42.50 
 -10  -3  -1  278.97   40.90 
 -10  -3  -1  255.27   43.70 
 -10  -3  -1  273.77   37.30 
  10  -3   1  291.67   44.40 
  10  -3   1  264.77   37.70 
  10  -3   1  233.68   36.70 
 -10  -3  -1  387.26   48.40 
  10  -3   1  308.37   46.30 
 -10  -3  -1  323.97   43.20 
 -10  -3  -1  219.68   36.10 
 -10  -3  -1  384.26   52.69 
 -10  -3  -1  361.26   41.10 
  10  -3   1  301.87   42.80 
  10  -3   1  234.58   43.00 
 -10  -3  -1  277.17   38.60 
 -10  -3  -1  278.47   45.50 
  10   3   1  389.46   46.50 
 -10   3  -1  278.97   41.00 
  10   3   1  349.87   48.10 
  10   3   1  320.47   45.20 
  10   3   1  258.37   40.80 
  10   3   1  304.17   43.00 
  -9  -4   1   90.29   24.20 
  -9  -4   1   46.80   16.40 
   9  -4  -1   46.00   19.60 
   9  -4  -1   92.69   22.50 
   9  -4  -1   88.29   21.30 
  -9  -4   1   64.49   20.00 
  -9  -4   1   80.89   21.80 
  -9  -4   1   72.19   22.50 
   9  -4  -1   76.89   19.30 
   9  -4  -1   86.69   21.60 
  -9  -4   1   47.20   19.80 
  -9  -4   1   60.79   21.80 
   9  -4  -1   92.29   23.80 
   9  -4  -1   66.89   21.80 
  -9  -4   1   57.39   20.00 
  -9  -4   1   75.79   21.20 
   9  -4  -1   77.19   22.20 
   9  -4  -1   54.19   20.90 
  -9  -4   1   60.99   17.80 
  -9  -4   1   61.49   18.70 
   9  -4  -1   89.19   23.90 
  -9  -4   1   60.49   20.90 
   9   4  -1   71.39   22.30 
  -9   4   1   71.99   20.60 
   9   4  -1   40.10   19.80 
   9   4  -1   63.69   19.70 
  -9   4   1   79.89   20.60 
   9   4  -1   66.49   19.00 
   9   4  -1   86.49   23.30 
   9   4  -1   57.79   18.70 
   9   4  -1   70.29   22.90 
   9   4  -1   78.99   22.90 
   9   4  -1  111.99   25.60 
   9   4  -1   68.09   17.80 
  -9   4   1   83.79   20.60 
   9   4  -1   64.79   18.00 
  -9   4   1   48.40   16.20 
   9   4  -1   65.09   20.00 
  -8  -4   1   14.50   11.40 
   8  -4  -1   20.90   13.30 
   8  -4  -1   13.30   12.50 
   8  -4  -1    1.00   10.30 
  -8  -4   1    8.60   10.10 
  -8  -4   1   -0.20    7.70 
  -8  -4   1    6.50   10.80 
   8  -4  -1    7.60   10.40 
  -8  -4   1   21.90   12.20 
   8  -4  -1   32.60   13.40 
  -8  -4   1    3.90    8.90 
  -8  -4   1   21.10   11.80 
  -8  -4   1   27.60   14.70 
  -8  -4   1   25.40   13.60 
   8  -4  -1    5.50    9.90 
  -8  -4   1   17.00   11.60 
   8  -4  -1   15.20   10.30 
  -8  -4   1   11.90    9.80 
   8  -4  -1   -4.00    9.30 
  -8  -4   1    3.40    9.50 
  -8  -4   1    6.40    8.80 
   8  -4  -1   24.40   11.70 
   8  -4  -1   12.00   11.10 
   8   4  -1   -2.30   10.50 
  -8   4   1    0.20    7.10 
   8   4  -1   20.10   11.30 
   8   4  -1   13.20   10.30 
   8   4  -1    7.40   10.10 
  -8   4   1   14.90    9.50 
   8   4  -1   22.20   15.10 
   8   4  -1   12.00   10.90 
   8   4  -1   10.70   12.10 
  -8   4   1    9.70   10.40 
   8   4  -1   23.20   13.60 
  -8   4   1   11.30    9.40 
   8   4  -1    9.00   10.00 
   8   4  -1    7.20   10.60 
   8   4  -1   18.00   12.10 
  -8   4   1   20.80   11.60 
   8   4  -1   22.00   11.70 
   8   4  -1   25.60   14.00 
  -7  -4   1    3.80    8.00 
   7  -4  -1   -4.40    6.40 
  -7  -4   1    1.30    8.60 
  -7  -4   1   -3.00    7.10 
   7  -4  -1   -8.80    7.80 
  -7  -4   1    7.90    9.80 
   7  -4  -1   -0.60   10.00 
   7  -4  -1   -3.70    6.50 
   7  -4  -1   -7.60    7.10 
  -7  -4   1   -4.20    5.90 
   7  -4  -1    0.00    7.40 
  -7  -4   1    1.50    7.80 
   7  -4  -1    1.60    5.20 
  -7  -4   1   -3.80    5.40 
  -7  -4   1   -4.30    6.40 
   7  -4  -1   -6.70    5.10 
   7  -4  -1    3.60    6.30 
   7  -4  -1   -3.80    7.30 
   7  -4  -1    6.40    7.60 
  -7  -4   1   -2.70    8.00 
   7  -4  -1   -0.50    7.20 
  -7  -4   1    2.80    7.80 
  -7  -4   1   12.10    9.80 
   7  -4  -1   -1.20    6.50 
  -7  -4   1    2.30    7.60 
  -7  -4   1    5.50    7.50 
  -7  -4   1   -4.70    6.60 
  -7  -4   1    5.40    7.50 
  -7   4   1   -5.60    5.60 
   7   4  -1   -1.20    7.10 
  -7   4   1    1.60    6.50 
  -7   4   1    3.20    8.10 
   7   4  -1   -3.30    7.70 
   7   4  -1    0.00    7.40 
  -7   4   1   -3.50    5.90 
  -7   4   1    7.00    7.40 
   7   4  -1    1.00    9.00 
   7   4  -1   -7.30    6.10 
   7   4  -1   -1.60    7.50 
  -7   4   1   11.00    9.80 
   7   4  -1    7.10   10.00 
   7   4  -1    8.10   10.70 
   7   4  -1    4.60    5.60 
  -7   4   1   -1.90    5.70 
   7   4  -1    3.80    8.90 
   7   4  -1    3.10    7.50 
   7   4  -1   -5.10    8.40 
   7   4  -1    7.90    8.40 
   7   4  -1    7.40    9.30 
  -6  -4   1  118.39   18.00 
   6  -4  -1   90.19   17.20 
   6  -4  -1   74.69   16.40 
   6  -4  -1   90.09   15.80 
  -6  -4   1  140.79   21.70 
  -6  -4   1   99.39   17.50 
   6  -4  -1   95.99   18.80 
  -6  -4   1   82.79   17.60 
   6  -4  -1  111.89   14.80 
   6  -4  -1  106.89   13.60 
  -6  -4   1  102.29   21.40 
  -6  -4   1   68.59   16.30 
   6  -4  -1  146.09   25.40 
  -6  -4   1   84.99   17.30 
   6  -4  -1  122.69   18.40 
   6  -4  -1  111.49   20.20 
  -6  -4   1  120.69   20.70 
  -6  -4   1   90.69   16.60 
   6  -4  -1   91.99   16.80 
  -6  -4   1  101.39   17.10 
   6  -4  -1  124.69   13.50 
   6  -4  -1   76.89   14.20 
   6  -4  -1   80.59   18.60 
   6  -4  -1   91.19   13.80 
   6  -4  -1  121.09   18.00 
   6  -4  -1   90.59   16.70 
  -6  -4   1   91.99   17.40 
  -6  -4   1   69.79   17.10 
  -6  -4   1   83.49   20.00 
  -6  -4   1  100.79   18.50 
  -6   4   1  126.39   16.60 
   6   4  -1   99.79   16.30 
  -6   4   1   71.99   13.00 
  -6   4   1   94.79   17.80 
   6   4  -1   76.19   15.10 
   6   4  -1  138.69   21.80 
   6   4  -1   53.89   14.00 
  -6   4   1  109.99   17.90 
  -6   4   1   96.49   18.00 
   6   4  -1   93.19   17.70 
   6   4  -1  117.59   15.60 
   6   4  -1   56.59   15.80 
   6   4  -1   86.09   16.80 
   6   4  -1  116.09   19.40 
   6   4  -1   73.39   15.30 
  -6   4   1  103.59   16.20 
   6   4  -1  124.19   20.50 
  -6   4   1   94.49   12.90 
  -6   4   1   85.39   16.20 
   6   4  -1  112.09   23.60 
   6   4  -1  104.79   20.20 
   6   4  -1   95.19   19.90 
   6   4  -1   97.99   19.20 
   5  -4  -1   28.90    8.00 
  -5  -4   1   22.70    8.30 
   5  -4  -1   37.00   10.20 
  -5  -4   1   38.80   10.50 
   5  -4  -1   38.30    9.90 
   5  -4  -1   32.40   10.40 
  -5  -4   1   31.10   10.80 
   5  -4  -1   30.80    9.30 
  -5  -4   1   38.70   14.20 
   5  -4  -1   57.49   12.00 
   5  -4  -1   40.20    9.50 
   5  -4  -1   26.10   10.80 
  -5  -4   1   40.40   11.80 
   5  -4  -1   38.90    9.10 
   5  -4  -1   71.39   16.50 
   5  -4  -1   30.50    9.10 
  -5  -4   1   23.40    9.70 
   5  -4  -1   31.80    6.60 
   5  -4  -1   33.10   10.60 
  -5  -4   1   32.30   10.60 
  -5  -4   1   25.10    8.70 
  -5  -4   1   22.80    9.70 
   5  -4  -1   36.20    7.00 
  -5  -4   1   51.89   14.30 
   5  -4  -1   31.50    9.70 
  -5  -4   1   42.80   12.00 
   5  -4  -1   37.90    7.10 
   5  -4  -1   13.90    8.70 
   5  -4  -1   46.90    7.90 
  -5  -4   1   27.50   10.40 
  -5  -4   1   62.79   14.10 
  -5  -4   1   40.60   11.00 
  -5  -4   1   40.90   11.90 
   5  -4  -1   40.20    5.60 
   5   4  -1   23.10   11.80 
   5   4  -1   22.50   11.00 
   5   4  -1   37.60   10.30 
   5   4  -1   27.20    9.10 
   5   4  -1   46.60   10.10 
   5   4  -1   27.30   10.70 
   5   4  -1   40.70   11.00 
   5   4  -1   44.90   11.20 
   5   4  -1   41.80   10.00 
   5   4  -1   29.70    9.00 
  -5   4   1   36.50    4.20 
  -5   4   1   38.30    9.00 
   5   4  -1   53.29   12.80 
   5   4  -1   30.50   11.10 
  -5   4   1   31.10    7.80 
  -5   4   1   31.20    8.90 
  -5   4   1   36.90    9.70 
   5   4  -1   41.60   11.40 
  -5   4   1   45.40    9.20 
   5   4  -1   26.90   11.30 
  -5   4   1   42.30   11.10 
  -5   4   1   39.60   10.10 
   5   4  -1   39.00   11.30 
  -5   4   1   27.50    8.10 
  -5   4   1   46.40   13.80 
   4  -4  -1  165.78   23.60 
  -4  -4   1  175.88   18.60 
   4  -4  -1  180.58   11.80 
   4  -4  -1  182.28   13.80 
   4  -4  -1  198.18   20.20 
  -4  -4   1  196.18   15.40 
   4  -4  -1  194.18   18.40 
  -4  -4   1  236.18   24.70 
  -4  -4   1  150.58   18.90 
   4  -4  -1  185.68   12.40 
   4  -4  -1  170.68   10.90 
   4  -4  -1  158.08   11.40 
   4  -4  -1  149.39   10.20 
   4  -4  -1  176.18   21.40 
  -4  -4   1  145.29   19.40 
   4  -4  -1  172.98   10.80 
   4  -4  -1  160.48   11.60 
   4  -4  -1  167.48   19.60 
  -4  -4   1  176.28   20.80 
   4  -4  -1  173.98   19.40 
   4  -4  -1  178.78   10.30 
  -4  -4   1  169.58   21.10 
   4  -4  -1  152.28   18.20 
   4  -4  -1  163.68   18.20 
   4  -4  -1  165.78   15.90 
  -4  -4   1   99.19   19.10 
   4  -4  -1  120.79   16.30 
  -4  -4   1  163.18   19.00 
   4  -4  -1  172.68    8.40 
  -4  -4   1  147.99   21.00 
  -4  -4   1  148.79   19.40 
   4  -4  -1  160.68   16.90 
   4  -4  -1  165.48   17.30 
   4  -4  -1  153.08   18.60 
   4  -4  -1  160.98    8.90 
   4  -4  -1  191.18   19.00 
  -4  -4   1  159.08   19.90 
  -4  -4   1  189.78   21.60 
  -4  -4   1  178.38   18.60 
   4  -4  -1  167.98   13.50 
   4  -4  -1  172.68   10.80 
  -4  -4   1  157.48   21.10 
   4   4  -1  140.49   17.50 
   4   4  -1  155.58   21.70 
  -4   4   1  192.68   18.20 
   4   4  -1  168.18   18.10 
   4   4  -1  144.59   20.50 
  -4   4   1  185.58   10.50 
   4   4  -1  167.98   18.40 
  -4   4   1  139.49   14.80 
  -4   4   1  134.99   20.70 
   4   4  -1  153.68   17.80 
   4   4  -1  151.18   23.40 
   4   4  -1  170.68   19.50 
  -4   4   1  146.39   16.20 
   4   4  -1  156.98   19.20 
  -4   4   1  133.89   16.10 
  -4   4   1  174.28   18.90 
   4   4  -1  155.08   21.60 
  -4   4   1  181.08   13.80 
   4   4  -1  169.88   22.20 
   4   4  -1  120.39   16.70 
   4   4  -1  165.48   17.00 
  -4   4   1  161.28   16.70 
   4   4  -1  120.99   16.00 
   4   4  -1  120.29   17.50 
   4   4  -1  169.28   22.60 
   4   4  -1  163.08   22.60 
  -4   4   1  168.18   18.10 
   3  -4  -1  150.68   16.80 
   3  -4  -1  143.69   14.60 
  -3  -4   1  190.38   18.90 
   3  -4  -1  152.88   15.50 
  -3  -4   1  159.28   18.20 
  -3  -4   1  146.49   21.50 
   3  -4  -1  188.68   15.10 
  -3  -4   1  158.48   15.70 
   3  -4  -1  147.99   16.20 
   3  -4  -1  162.78   11.20 
  -3  -4   1  146.29   15.20 
   3  -4  -1  164.98   11.50 
   3  -4  -1  155.98    7.40 
  -3  -4   1  146.89   14.50 
   3  -4  -1  165.98   15.00 
   3  -4  -1  147.99   21.10 
  -3  -4   1  146.29   18.90 
   3  -4  -1  176.68   19.60 
   3  -4  -1  135.39   13.60 
  -3  -4   1  151.28   17.60 
   3  -4  -1  141.19   13.90 
   3  -4  -1  148.29   10.10 
   3  -4  -1  162.18   18.20 
   3  -4  -1  166.68   11.60 
   3  -4  -1  168.08   16.30 
  -3  -4   1  105.29   15.90 
  -3  -4   1  137.39   18.30 
   3  -4  -1  146.89   14.80 
   3  -4  -1  167.28   18.70 
  -3  -4   1  127.19   16.80 
  -3  -4   1  164.78   19.80 
  -3  -4   1  146.39   19.20 
   3  -4  -1  154.38   11.30 
   3  -4  -1  128.29   17.30 
   3  -4  -1  148.99   10.10 
   3  -4  -1  146.79   10.80 
   3  -4  -1  172.68   17.10 
   3  -4  -1  159.38   10.10 
   3  -4  -1  155.78   11.30 
   3  -4  -1  152.18    7.20 
  -3  -4   1  160.68   17.90 
  -3  -4   1  136.79   17.30 
   3  -4  -1  135.29   15.20 
  -3  -4   1  160.58   18.80 
   3  -4  -1  155.78    7.70 
   3  -4  -1  164.88   16.60 
   3  -4  -1  162.68   10.50 
  -3   4   1  165.38   17.20 
  -3   4   1  158.48   16.00 
  -3   4   1  156.48   12.30 
   3   4  -1  126.69   18.90 
   3   4  -1  146.99   16.70 
  -3   4   1  125.49   13.80 
   3   4  -1  126.99   14.40 
  -3   4   1  175.98   21.20 
   3   4  -1  162.08   17.30 
   3   4  -1  161.98   18.00 
   3   4  -1  161.68   20.70 
   3   4  -1  154.68   14.80 
   3   4  -1  169.28   21.70 
   3   4  -1  152.88   19.20 
   3   4  -1  145.79   16.10 
   3   4  -1  166.48   17.50 
   3   4  -1  131.89   15.60 
   3   4  -1  176.48   19.70 
  -3   4   1  166.38   10.90 
  -3   4   1  146.49   11.50 
  -3   4   1  153.88   17.60 
   3   4  -1  160.98   15.30 
   3   4  -1  157.68   18.00 
  -3   4   1  134.29   15.60 
  -3   4   1  151.08   14.30 
   3   4  -1  142.79   19.00 
  -3   4   1  152.68   11.00 
   3   4  -1  164.68   20.90 
   3   4  -1  148.09   15.10 
  -3   4   1  148.79   14.50 
  -2  -4   1  224.38   15.30 
   2  -4  -1  224.18   13.30 
  -2  -4   1  236.18   19.00 
   2  -4  -1  218.18   13.40 
  -2  -4   1  216.08   21.90 
   2  -4  -1  187.98   19.70 
   2  -4  -1  194.78   13.30 
  -2  -4   1  201.78   17.10 
   2  -4  -1  215.88   13.80 
   2  -4  -1  223.78   11.70 
   2  -4  -1  204.48   14.00 
   2  -4  -1  214.58   12.90 
  -2  -4   1  187.18   19.10 
  -2  -4   1  185.38   12.20 
   2  -4  -1  227.78   13.10 
   2  -4  -1  199.08   14.70 
  -2  -4   1  180.68   17.90 
   2  -4  -1  210.08   13.30 
   2  -4  -1  226.18   13.20 
   2  -4  -1  221.08   14.40 
  -2  -4   1  250.17   19.50 
   2  -4  -1  241.38   14.40 
  -2  -4   1  198.18   20.20 
   2  -4  -1  213.88   12.70 
   2  -4  -1  221.78   11.40 
   2  -4  -1  201.98   12.60 
   2  -4  -1  195.28   15.10 
  -2  -4   1  203.78   15.70 
  -2  -4   1  219.38   16.40 
  -2  -4   1  223.78   15.00 
   2  -4  -1  213.58   21.90 
   2  -4  -1  189.28   15.90 
   2  -4  -1  216.98   14.10 
   2  -4  -1  196.28   13.20 
   2  -4  -1  214.38   14.40 
   2  -4  -1  183.08   14.60 
   2  -4  -1  225.58   14.80 
   2  -4  -1  198.68   19.10 
  -2  -4   1  191.78   24.00 
  -2  -4   1  203.78   13.70 
   2  -4  -1  219.88   17.30 
   2  -4  -1  197.88   11.40 
   2  -4  -1  188.58   12.40 
   2  -4  -1  227.88   12.60 
   2  -4  -1  204.98   14.40 
   2  -4  -1  201.38   15.30 
  -2  -4   1  236.78   17.60 
  -2  -4   1  227.28   22.10 
  -2  -4   1  231.68   13.70 
  -2  -4   1  192.18   19.30 
   2   4  -1  205.98   14.70 
   2   4  -1  206.98   15.10 
   2   4  -1  199.98   13.40 
  -2   4   1  201.38   16.60 
  -2   4   1  194.78   12.70 
  -2   4   1  225.68   15.40 
   2   4  -1  184.38   14.90 
  -2   4   1  199.58   20.00 
   2   4  -1  229.38   15.00 
  -2   4   1  239.58   19.00 
   2   4  -1  186.88   18.90 
   2   4  -1  230.98   15.70 
   2   4  -1  183.48   20.70 
   2   4  -1  199.48   15.70 
   2   4  -1  227.38   14.20 
  -2   4   1  246.88   16.00 
  -2   4   1  206.98   12.90 
   2   4  -1  226.78   15.40 
   2   4  -1  189.58   20.00 
  -2   4   1  203.78   14.30 
   2   4  -1  235.98   17.90 
   2   4  -1  191.88   20.70 
  -2   4   1  223.88   22.10 
   2   4  -1  181.98   20.90 
   2   4  -1  194.28   13.60 
   2   4  -1  212.38   22.80 
  -2   4   1  188.18   19.20 
   2   4  -1  201.28   19.60 
   2   4  -1  205.88   23.70 
  -2   4   1  197.08   15.70 
  -2   4   1  208.08   16.90 
   2   4  -1  220.08   23.50 
   2   4  -1  181.18   19.30 
  -2   4   1  204.18   13.80 
   2   4  -1  230.08   16.50 
   2   4  -1  220.58   13.20 
  -2   4   1  234.98   13.60 
   2   4  -1  189.38   21.80 
  -1  -4   1    4.90    2.80 
   1  -4  -1    7.30    5.10 
  -1  -4   1    5.80    5.70 
  -1  -4   1    5.00    3.60 
   1  -4  -1    2.80    2.30 
   1  -4  -1    4.40    3.30 
   1  -4  -1    4.90    1.80 
   1  -4  -1    9.50    2.70 
   1  -4  -1    5.20    1.80 
  -1  -4   1   35.70    9.30 
   1  -4  -1   19.30    8.20 
   1  -4  -1    4.80    3.50 
   1  -4  -1    3.50    4.30 
   1  -4  -1   18.00    3.10 
   1  -4  -1    5.40    1.90 
   1  -4  -1    7.90    4.00 
  -1  -4   1   -1.70    3.20 
   1  -4  -1    4.50    2.20 
   1  -4  -1    7.50    3.60 
   1  -4  -1    5.60    3.40 
  -1  -4   1    4.20    6.00 
  -1  -4   1    6.80    2.50 
   1  -4  -1   13.00    5.60 
   1  -4  -1    5.10    3.70 
  -1  -4   1   -4.20    2.00 
  -1  -4   1    7.20    3.30 
  -1  -4   1    8.00    3.00 
  -1  -4   1    4.80    3.80 
  -1  -4   1    6.10    2.80 
  -1  -4   1   10.10    3.70 
   1  -4  -1    5.30    5.10 
  -1  -4   1   -2.20    3.00 
  -1  -4   1    8.10    4.30 
   1  -4  -1    4.60    1.90 
   1  -4  -1   12.10    5.40 
   1  -4  -1    2.60    4.10 
  -1  -4   1   10.10    5.70 
  -1  -4   1   11.10    5.10 
   1  -4  -1    5.60    4.00 
   1  -4  -1    4.50    3.90 
  -1  -4   1    8.40    5.00 
  -1  -4   1   12.10    5.20 
   1  -4  -1    3.00    2.50 
   1  -4  -1    5.30    2.90 
   1  -4  -1    8.90    3.70 
   1  -4  -1    6.20    4.00 
   1   4  -1    8.10    3.10 
   1   4  -1    3.60    2.10 
   1   4  -1   10.10    3.80 
   1   4  -1    5.20    4.80 
  -1   4   1    4.80    3.70 
  -1   4   1    4.40    1.80 
   1   4  -1    2.40    4.30 
  -1   4   1    7.20    4.20 
  -1   4   1    4.80    4.80 
   1   4  -1    5.80    1.90 
   1   4  -1    2.80    3.90 
   1   4  -1    6.30    4.30 
  -1   4   1    4.10    3.70 
   1   4  -1    6.40    5.20 
  -1   4   1    0.50    3.60 
   1   4  -1    6.20    5.30 
   1   4  -1    3.00    2.90 
  -1   4   1   14.40    6.10 
  -1   4   1    3.40    4.90 
  -1   4   1    3.10    4.10 
   1   4  -1    5.80    2.40 
   1   4  -1    1.60    2.50 
   1   4  -1    8.60    5.30 
  -1   4   1    5.50    1.90 
  -1   4   1    1.30    4.10 
   1   4  -1    6.30    4.80 
   1   4  -1    7.90    4.30 
  -1   4   1   -2.70    3.30 
   1   4  -1    4.10    4.70 
   1   4  -1    6.00    4.40 
   1   4  -1   12.00    6.50 
   1   4  -1    2.90    2.00 
  -1   4   1    7.40    4.50 
   1   4  -1    7.10    4.40 
   1   4  -1    6.60    6.50 
   0  -4  -1  436.86   24.50 
   0  -4   1  433.96   21.30 
   0  -4   1  458.65   27.10 
   0  -4  -1  444.26   25.90 
   0  -4  -1  457.35   30.60 
   0  -4   1  439.86   18.10 
   0  -4   1  462.25   24.30 
   0  -4  -1  453.85   17.20 
   0  -4  -1  407.76   24.70 
   0  -4   1  427.76   22.40 
   0  -4  -1  427.16   27.30 
   0  -4  -1  434.16   25.10 
   0  -4  -1  410.86   26.70 
   0  -4  -1  431.56   20.10 
   0  -4  -1  435.66   20.90 
   0  -4  -1  446.76   17.50 
   0  -4   1  444.66   21.40 
   0  -4   1  452.05   20.50 
   0  -4   1  420.26   23.90 
   0  -4   1  428.86   24.90 
   0  -4   1  485.15   24.10 
   0  -4  -1  393.66   24.50 
   0  -4   1  448.96   25.40 
   0  -4  -1  443.96   29.60 
   0  -4  -1  422.36   21.20 
   0  -4  -1  459.85   24.70 
   0  -4   1  417.46   21.20 
   0  -4   1  423.06   26.60 
   0  -4  -1  396.76   27.90 
   0  -4   1  442.66   22.60 
   0  -4  -1  454.25   28.10 
   0  -4  -1  484.55   28.60 
   0  -4  -1  411.66   25.40 
   0  -4   1  417.16   23.90 
   0  -4   1  438.46   25.70 
   0  -4   1  443.66   17.70 
   0  -4   1  478.65   33.60 
   0  -4   1  506.75   29.50 
   0  -4   1  431.46   21.50 
   0  -4  -1  443.46   20.00 
   0  -4   1  420.26   29.20 
   0   4  -1  441.66   19.00 
   0   4  -1  438.56   26.00 
   0   4  -1  459.05   18.10 
   0   4  -1  416.26   24.60 
   0   4   1  382.36   27.30 
   0   4   1  423.46   25.10 
   0   4  -1  435.16   26.10 
   0   4   1  417.86   28.10 
   0   4   1  422.96   18.00 
   0   4  -1  493.25   27.20 
   0   4   1  479.75   26.70 
   0   4   1  492.95   26.40 
   0   4   1  397.06   25.30 
   0   4  -1  446.16   27.20 
   0   4  -1  466.15   35.30 
   0   4  -1  465.85   29.60 
   0   4  -1  486.55   25.70 
   0   4  -1  407.46   26.20 
   0   4  -1  440.46   18.20 
   0   4  -1  395.16   27.60 
   0   4   1  462.55   26.10 
   0   4  -1  446.06   24.50 
   0   4   1  450.05   24.60 
   0   4   1  475.95   27.80 
   0   4   1  406.56   24.10 
   0   4  -1  489.15   28.00 
   0   4   1  463.85   27.70 
   0   4   1  460.75   26.40 
   0   4   1  471.05   28.70 
   0   4   1  440.36   32.30 
   0   4   1  470.25   30.90 
   0   4  -1  426.76   25.90 
   0   4  -1  412.86   19.00 
   0   4  -1  434.06   25.20 
   0   4  -1  439.56   26.90 
   0   4  -1  418.86   23.60 
   0   4  -1  428.66   20.90 
  -1  -4  -1  524.05   27.30 
   1  -4   1  549.65   23.30 
   1  -4   1  546.95   30.20 
  -1  -4  -1  528.25   33.30 
  -1  -4  -1  451.95   27.50 
   1  -4   1  564.74   28.30 
  -1  -4  -1  557.34   31.90 
  -1  -4  -1  515.55   22.40 
   1  -4   1  523.85   25.50 
  -1  -4  -1  521.55   29.20 
  -1  -4  -1  555.64   25.90 
  -1  -4  -1  510.95   25.30 
  -1  -4  -1  541.35   30.40 
   1  -4   1  453.65   31.80 
   1  -4   1  447.86   33.40 
   1  -4   1  501.05   26.90 
   1  -4   1  504.85   30.00 
  -1  -4  -1  514.65   21.90 
   1  -4   1  531.15   22.90 
  -1  -4  -1  523.05   26.90 
   1  -4   1  565.44   29.70 
  -1  -4  -1  523.15   30.40 
   1  -4   1  541.45   25.90 
   1  -4   1  521.85   24.40 
   1  -4   1  474.15   30.80 
   1  -4   1  449.46   29.10 
   1  -4   1  557.34   28.10 
   1  -4   1  563.14   28.30 
  -1  -4  -1  501.75   31.10 
  -1  -4  -1  498.65   30.20 
   1  -4   1  467.15   29.00 
   1  -4   1  524.65   24.30 
   1  -4   1  531.75   28.30 
  -1  -4  -1  589.74   31.00 
  -1  -4  -1  552.74   23.50 
   1  -4   1  504.15   23.30 
  -1  -4  -1  479.45   28.50 
   1  -4   1  569.14   26.20 
  -1   4  -1  576.04   35.20 
  -1   4  -1  542.95   25.70 
  -1   4  -1  526.55   29.40 
   1   4   1  503.05   22.90 
   1   4   1  554.84   31.30 
  -1   4  -1  514.85   31.70 
   1   4   1  526.05   27.30 
   1   4   1  509.65   25.50 
   1   4   1  499.35   24.30 
  -1   4  -1  564.04   31.00 
  -1   4  -1  495.85   25.00 
   1   4   1  545.05   26.50 
  -1   4  -1  539.75   29.70 
   1   4   1  581.84   30.80 
  -1   4  -1  540.75   30.60 
  -1   4  -1  511.75   20.90 
  -1   4  -1  569.94   24.60 
   1   4   1  501.85   30.30 
   1   4   1  573.94   25.00 
   1   4   1  517.15   32.80 
   1   4   1  499.95   21.50 
   1   4   1  555.14   22.10 
   1   4   1  466.35   30.20 
   1   4   1  509.85   24.80 
  -1   4  -1  553.34   27.50 
   1   4   1  523.75   31.60 
  -1   4  -1  551.94   31.40 
  -1   4  -1  521.85   35.40 
   1   4   1  537.95   23.40 
   1   4   1  500.35   30.50 
   1   4   1  516.45   26.60 
   1   4   1  577.14   31.10 
  -1   4  -1  521.05   23.40 
  -1   4  -1  509.35   27.90 
   1   4   1  572.34   36.70 
   1   4   1  508.65   30.80 
  -1   4  -1  529.05   26.50 
  -2  -4  -1  407.66   20.00 
   2  -4   1  412.46   22.10 
  -2  -4  -1  367.86   26.00 
   2  -4   1  416.36   23.10 
  -2  -4  -1  412.46   21.50 
   2  -4   1  421.26   25.90 
  -2  -4  -1  387.96   24.00 
  -2  -4  -1  398.36   27.10 
   2  -4   1  400.46   16.20 
   2  -4   1  397.06   23.30 
  -2  -4  -1  395.56   26.30 
   2  -4   1  396.36   20.90 
  -2  -4  -1  413.56   20.50 
   2  -4   1  423.36   22.20 
  -2  -4  -1  386.86   25.80 
   2  -4   1  396.06   21.80 
   2  -4   1  387.46   25.30 
   2  -4   1  398.96   23.00 
  -2  -4  -1  384.66   22.90 
   2  -4   1  406.26   19.20 
   2  -4   1  386.16   24.90 
  -2  -4  -1  364.46   23.40 
   2  -4   1  394.66   26.30 
  -2  -4  -1  363.86   21.50 
   2  -4   1  398.46   17.60 
   2  -4   1  389.56   19.30 
   2  -4   1  381.06   16.90 
   2  -4   1  376.56   19.70 
   2  -4   1  400.26   16.40 
   2  -4   1  408.86   26.50 
   2  -4   1  417.36   22.20 
  -2  -4  -1  448.96   27.90 
   2  -4   1  403.56   21.20 
  -2  -4  -1  398.06   25.60 
   2  -4   1  397.16   19.70 
   2  -4   1  415.76   21.70 
  -2  -4  -1  394.26   20.70 
  -2  -4  -1  370.56   25.80 
   2  -4   1  367.46   23.70 
   2  -4   1  417.96   19.30 
   2  -4   1  390.36   18.90 
   2  -4   1  396.76   22.00 
  -2  -4  -1  390.86   29.00 
   2   4   1  422.66   26.50 
  -2   4  -1  394.66   21.50 
  -2   4  -1  420.76   25.60 
   2   4   1  424.56   27.80 
   2   4   1  383.56   26.40 
   2   4   1  327.57   20.30 
   2   4   1  387.06   23.10 
   2   4   1  379.86   25.40 
   2   4   1  383.96   23.40 
   2   4   1  377.66   25.20 
  -2   4  -1  365.26   20.60 
   2   4   1  391.16   25.10 
   2   4   1  401.76   26.00 
  -2   4  -1  374.26   27.20 
   2   4   1  396.36   20.20 
   2   4   1  380.56   20.60 
  -2   4  -1  374.66   21.40 
  -2   4  -1  388.16   18.90 
   2   4   1  348.87   26.00 
   2   4   1  410.66   26.60 
   2   4   1  388.86   26.30 
  -2   4  -1  420.06   19.90 
  -2   4  -1  375.96   20.70 
  -2   4  -1  403.06   22.40 
   2   4   1  374.16   20.60 
  -2   4  -1  398.86   28.20 
   2   4   1  402.36   20.70 
   2   4   1  403.26   22.10 
   2   4   1  419.96   28.00 
  -2   4  -1  381.46   16.90 
  -2   4  -1  392.86   24.50 
   2   4   1  407.66   22.00 
  -2   4  -1  415.36   27.50 
  -2   4  -1  376.36   26.30 
   2   4   1  403.16   20.60 
   2   4   1  386.66   28.50 
  -3  -4  -1   -2.40    3.90 
  -3  -4  -1    4.80    3.70 
   3  -4   1   -1.30    2.50 
  -3  -4  -1    4.80    4.60 
   3  -4   1    1.80    2.90 
   3  -4   1    4.60    3.50 
   3  -4   1    6.00    6.30 
   3  -4   1    2.80    3.70 
  -3  -4  -1   -1.50    3.50 
  -3  -4  -1   -1.30    3.70 
   3  -4   1    6.40    5.50 
   3  -4   1    3.70    4.70 
  -3  -4  -1   -0.10    4.20 
   3  -4   1    3.40    2.70 
   3  -4   1    3.00    4.30 
   3  -4   1    1.20    2.50 
  -3  -4  -1    1.80    3.30 
   3  -4   1    0.50    3.30 
  -3  -4  -1    1.60    2.30 
  -3  -4  -1   -2.40    3.90 
  -3  -4  -1   -0.50    4.10 
   3  -4   1   -1.80    2.30 
   3  -4   1    1.00    3.30 
   3  -4   1    1.50    2.70 
   3  -4   1   -1.00    2.00 
  -3  -4  -1    3.20    4.40 
  -3  -4  -1    4.60    5.10 
   3  -4   1   -1.20    3.80 
   3  -4   1   -2.00    2.90 
  -3  -4  -1   -4.10    3.70 
   3  -4   1   -2.20    1.70 
  -3  -4  -1   -2.20    3.30 
   3  -4   1    0.70    1.30 
   3  -4   1    1.00    3.00 
   3  -4   1    1.30    3.50 
   3  -4   1    1.60    2.60 
   3  -4   1    1.80    3.30 
  -3  -4  -1    6.40    5.60 
   3  -4   1    0.20    4.60 
   3  -4   1    2.90    3.60 
   3  -4   1   -0.90    2.50 
  -3  -4  -1    3.70    3.80 
   3   4   1    2.60    4.00 
  -3   4  -1   -0.90    2.70 
  -3   4  -1   -3.80    1.60 
   3   4   1    3.40    5.00 
   3   4   1    0.50    3.00 
  -3   4  -1    1.10    2.30 
  -3   4  -1    4.90    4.20 
  -3   4  -1    1.10    2.70 
  -3   4  -1    1.30    1.80 
  -3   4  -1   -2.30    2.00 
   3   4   1    3.30    4.40 
   3   4   1    0.80    3.80 
   3   4   1    0.60    3.40 
  -3   4  -1   -0.60    3.00 
   3   4   1   -0.70    2.40 
  -3   4  -1   -4.30    4.40 
   3   4   1   -1.20    3.10 
   3   4   1   -1.30    4.80 
  -3   4  -1    2.50    2.20 
   3   4   1    1.00    4.50 
  -3   4  -1    0.10    4.30 
  -3   4  -1    0.30    2.60 
   3   4   1   -2.30    3.00 
  -3   4  -1   -2.20    3.40 
   3   4   1    0.80    3.90 
   3   4   1    3.00    5.10 
  -3   4  -1    1.40    3.40 
   3   4   1   -2.90    4.00 
   3   4   1   -3.70    5.00 
   3   4   1    9.20    4.90 
   4  -4   1   32.60    8.50 
  -4  -4  -1   33.70   11.30 
   4  -4   1   26.80   10.30 
  -4  -4  -1   18.40    8.20 
  -4  -4  -1   12.30    7.30 
  -4  -4  -1   31.50    8.80 
   4  -4   1   34.30    9.80 
   4  -4   1   46.50    9.00 
   4  -4   1   30.60    6.10 
  -4  -4  -1   33.10    9.30 
   4  -4   1   40.30    8.30 
   4  -4   1   31.10    6.20 
   4  -4   1   31.10    8.10 
  -4  -4  -1   34.60   10.20 
   4  -4   1   26.30    5.60 
   4  -4   1   25.50    7.60 
   4  -4   1   29.60    8.70 
   4  -4   1   39.80    8.40 
  -4  -4  -1   29.90   10.00 
  -4  -4  -1   28.70    9.80 
   4  -4   1   33.30   11.30 
  -4  -4  -1   22.00    8.10 
   4  -4   1   38.60    6.90 
  -4  -4  -1   25.60    9.80 
  -4  -4  -1   35.50   10.50 
   4  -4   1   28.70    6.80 
   4  -4   1   40.20    8.20 
  -4  -4  -1   29.30    6.30 
   4  -4   1   33.50    8.70 
   4  -4   1   49.50   12.00 
   4  -4   1   35.10   10.50 
  -4  -4  -1   22.90    8.80 
  -4  -4  -1   34.70    8.50 
   4  -4   1   33.90    4.20 
  -4  -4  -1   28.90    8.50 
   4  -4   1   41.30    7.60 
   4  -4   1   34.80    6.20 
  -4  -4  -1   28.10    9.70 
  -4   4  -1   33.50    4.00 
  -4   4  -1   30.10    7.80 
  -4   4  -1   39.80    5.80 
   4   4   1   32.40   11.00 
   4   4   1   42.10   11.50 
   4   4   1   29.80    7.10 
   4   4   1   29.10    8.10 
  -4   4  -1   31.10    5.80 
  -4   4  -1   27.60    7.50 
  -4   4  -1   43.00   11.10 
  -4   4  -1   26.90    8.50 
   4   4   1   29.50    9.20 
  -4   4  -1   33.40    6.60 
   4   4   1   18.40    7.70 
   4   4   1   29.70    8.10 
   4   4   1   16.80    9.50 
  -4   4  -1   30.40    6.80 
  -4   4  -1   40.80    9.50 
   4   4   1   26.70    7.90 
   4   4   1   13.60    8.10 
   4   4   1   28.50   10.10 
  -4   4  -1   26.20    9.70 
   4   4   1   26.30    8.70 
   4   4   1   38.20   10.10 
   4   4   1   25.50    8.80 
  -4   4  -1   26.50    7.00 
  -5  -4  -1   51.39   14.80 
  -5  -4  -1   72.69   13.40 
   5  -4   1   73.79    9.10 
   5  -4   1   86.29   14.80 
   5  -4   1   91.99   15.30 
   5  -4   1   96.09   18.10 
  -5  -4  -1   73.89   13.80 
  -5  -4  -1   94.59   16.80 
   5  -4   1   94.99   16.70 
  -5  -4  -1  134.29   20.90 
   5  -4   1   96.69   10.70 
   5  -4   1   90.59   11.70 
   5  -4   1   79.39   14.50 
   5  -4   1   94.19   19.80 
  -5  -4  -1   90.79   17.00 
   5  -4   1   78.49   13.90 
   5  -4   1  108.29   15.40 
  -5  -4  -1   76.69   15.10 
   5  -4   1   92.79   14.60 
   5  -4   1   88.19   11.70 
  -5  -4  -1   66.19   13.40 
   5  -4   1   99.39   11.50 
  -5  -4  -1   83.89   15.20 
   5  -4   1   70.69   14.80 
  -5  -4  -1   90.09   17.50 
  -5  -4  -1   68.09   14.20 
  -5  -4  -1   92.09   15.00 
  -5  -4  -1   66.39   15.30 
   5  -4   1   81.49    9.60 
   5  -4   1   99.89    9.30 
  -5  -4  -1   73.19   15.30 
   5  -4   1   88.69   16.80 
  -5  -4  -1   95.49   18.40 
  -5  -4  -1   79.19   17.50 
   5  -4   1   69.39   11.50 
   5  -4   1   89.89   10.20 
  -5   4  -1   87.49    8.20 
  -5   4  -1   83.29   13.40 
   5   4   1   76.39   16.50 
   5   4   1   74.19   14.30 
   5   4   1  104.19   17.70 
  -5   4  -1   73.59   12.30 
   5   4   1   68.59   14.20 
   5   4   1   88.89   15.00 
  -5   4  -1   84.89   14.30 
   5   4   1  104.39   16.50 
  -5   4  -1  118.99   15.30 
   5   4   1   75.59   15.90 
  -5   4  -1   62.79   12.70 
   5   4   1  111.79   21.40 
  -5   4  -1  116.89   17.90 
   5   4   1   79.29   14.00 
   5   4   1   46.10   14.20 
  -5   4  -1  119.59   13.70 
   5   4   1   93.59   13.40 
   5   4   1   93.09   17.00 
  -5   4  -1   75.19   16.40 
   5   4   1  107.19   20.20 
   5   4   1   68.69   14.60 
  -5   4  -1   86.59   10.20 
   6  -4   1  388.96   43.10 
  -6  -4  -1  417.76   41.20 
   6  -4   1  455.85   32.70 
  -6  -4  -1  386.36   31.20 
   6  -4   1  393.46   30.60 
   6  -4   1  426.36   32.40 
  -6  -4  -1  477.15   36.20 
   6  -4   1  448.06   31.50 
  -6  -4  -1  372.46   41.10 
  -6  -4  -1  347.57   41.10 
   6  -4   1  479.55   38.00 
  -6  -4  -1  320.07   36.90 
   6  -4   1  444.86   29.50 
  -6  -4  -1  490.75   33.90 
  -6  -4  -1  391.96   29.40 
   6  -4   1  406.46   32.20 
   6  -4   1  501.55   37.10 
  -6  -4  -1  426.96   36.10 
  -6  -4  -1  435.06   32.80 
  -6  -4  -1  392.56   39.70 
   6  -4   1  404.16   23.50 
  -6  -4  -1  437.26   33.60 
  -6  -4  -1  421.06   33.80 
   6  -4   1  420.96   42.50 
   6  -4   1  442.16   29.20 
  -6  -4  -1  367.56   37.20 
  -6  -4  -1  379.36   37.70 
   6  -4   1  414.06   32.40 
  -6  -4  -1  484.55   34.80 
   6  -4   1  361.76   37.70 
   6   4   1  443.16   33.60 
   6   4   1  386.66   38.10 
   6   4   1  432.16   29.40 
   6   4   1  413.06   37.40 
   6   4   1  489.55   33.20 
  -6   4  -1  482.55   23.60 
   6   4   1  415.96   43.30 
   6   4   1  438.06   33.90 
   6   4   1  393.96   39.20 
   6   4   1  423.76   40.00 
   6   4   1  393.96   44.40 
   6   4   1  414.56   29.00 
  -6   4  -1  411.16   30.20 
   6   4   1  453.95   33.60 
  -6   4  -1  399.76   26.40 
  -6   4  -1  403.36   29.00 
   6   4   1  426.96   41.00 
   6   4   1  407.96   41.80 
  -6   4  -1  368.86   29.80 
  -6   4  -1  512.65   32.70 
  -6   4  -1  379.56   27.10 
  -6   4  -1  370.06   36.30 
  -6   4  -1  483.15   45.70 
   7  -4   1  300.87   33.40 
   7  -4   1  334.77   42.10 
   7  -4   1  326.97   30.60 
  -7  -4  -1  310.47   35.30 
  -7  -4  -1  284.17   35.00 
  -7  -4  -1  359.56   27.70 
   7  -4   1  359.06   36.60 
  -7  -4  -1  329.57   34.70 
  -7  -4  -1  305.97   36.90 
  -7  -4  -1  269.87   37.10 
   7  -4   1  386.76   42.60 
  -7  -4  -1  320.07   37.00 
  -7  -4  -1  334.77   42.80 
   7  -4   1  354.86   35.10 
   7  -4   1  329.87   39.10 
  -7  -4  -1  303.27   34.30 
  -7  -4  -1  284.27   34.00 
   7  -4   1  336.87   39.00 
  -7  -4  -1  278.37   37.70 
  -7  -4  -1  362.46   38.70 
   7  -4   1  280.27   32.90 
  -7  -4  -1  331.47   39.00 
  -7  -4  -1  340.97   34.50 
   7  -4   1  313.87   37.20 
   7  -4   1  298.47   30.60 
  -7  -4  -1  336.37   39.50 
   7  -4   1  314.87   34.80 
  -7  -4  -1  400.06   38.80 
  -7   4  -1  365.06   40.40 
   7   4   1  344.57   32.40 
   7   4   1  314.17   38.70 
   7   4   1  340.77   37.70 
   7   4   1  309.17   35.90 
   7   4   1  291.27   38.10 
  -7   4  -1  352.86   33.70 
  -7   4  -1  318.07   35.60 
  -7   4  -1  378.06   30.00 
   7   4   1  302.67   36.10 
   7   4   1  272.77   33.20 
   7   4   1  317.97   42.50 
   7   4   1  275.17   34.30 
   7   4   1  262.97   33.60 
   7   4   1  293.97   32.30 
   7   4   1  368.66   40.50 
  -7   4  -1  334.47   34.10 
  -7   4  -1  296.27   30.20 
  -7   4  -1  291.87   25.50 
   7   4   1  303.57   28.80 
   7   4   1  278.57   31.40 
  -8  -4  -1  730.13   52.79 
   8  -4   1  620.74   46.10 
  -8  -4  -1  555.64   45.90 
   8  -4   1  544.25   57.79 
   8  -4   1  522.75   58.69 
  -8  -4  -1  639.24   57.99 
  -8  -4  -1  617.14   50.29 
  -8  -4  -1  679.33   47.40 
  -8  -4  -1  692.63   46.30 
  -8  -4  -1  643.74   49.50 
  -8  -4  -1  582.34   45.50 
  -8  -4  -1  580.94   45.90 
   8  -4   1  651.93   62.19 
  -8  -4  -1  643.34   64.49 
   8  -4   1  640.64   46.90 
   8  -4   1  615.34   50.49 
  -8  -4  -1  566.04   59.09 
   8  -4   1  633.24   50.39 
  -8  -4  -1  681.63   50.69 
   8  -4   1  672.53   45.80 
  -8  -4  -1  612.34   46.40 
   8  -4   1  601.54   42.90 
   8  -4   1  642.14   47.40 
  -8  -4  -1  628.24   45.50 
   8  -4   1  581.64   44.60 
  -8   4  -1  677.83   44.50 
   8   4   1  616.74   48.20 
   8   4   1  623.14   48.20 
  -8   4  -1  552.34   43.50 
   8   4   1  641.14   59.79 
   8   4   1  565.84   62.49 
   8   4   1  662.13   49.70 
   8   4   1  596.44   59.39 
   8   4   1  571.54   56.89 
   8   4   1  656.33   44.70 
  -8   4  -1  676.83   46.10 
   8   4   1  629.44   47.80 
  -8   4  -1  618.24   43.10 
  -8   4  -1  647.64   48.60 
   8   4   1  661.83   48.90 
   8   4   1  624.44   46.30 
   8   4   1  612.64   49.40 
   8   4   1  679.13   50.99 
  -9  -4  -1   67.09   18.90 
   9  -4   1   79.99   24.70 
   9  -4   1   82.39   26.40 
  -9  -4  -1   65.69   21.00 
  -9  -4  -1   55.29   20.30 
  -9  -4  -1   53.49   18.40 
   9  -4   1   78.39   23.30 
   9  -4   1   48.20   17.90 
   9  -4   1   73.09   19.70 
  -9  -4  -1   78.19   22.40 
  -9  -4  -1   75.29   22.70 
   9  -4   1   71.09   18.60 
  -9  -4  -1   45.90   17.20 
  -9  -4  -1   53.79   19.30 
   9  -4   1   73.09   18.90 
  -9  -4  -1  101.49   27.00 
  -9  -4  -1   56.79   17.20 
  -9  -4  -1   62.99   20.80 
  -9  -4  -1   78.59   22.60 
   9  -4   1   71.19   20.80 
   9  -4   1   42.20   18.90 
   9  -4   1   84.89   24.50 
  -9   4  -1   76.29   19.40 
   9   4   1   86.89   24.10 
   9   4   1   74.89   22.10 
   9   4   1   40.40   16.70 
   9   4   1   70.49   20.80 
   9   4   1   66.49   21.20 
   9   4   1   53.89   18.40 
   9   4   1   53.39   22.10 
   9   4   1   63.19   21.80 
   9   4   1   73.69   18.90 
   9   4   1   56.79   18.60 
   9   4   1   47.30   19.50 
   9   4   1   82.69   23.00 
  -9   4  -1  113.59   23.60 
   9   4   1   80.89   20.70 
  -9   4  -1   76.69   21.20 
  -9   4  -1   52.59   17.00 
  -9  -5   1  368.96   48.80 
  -9  -5   1  402.36   49.30 
   9  -5  -1  397.16   45.60 
  -9  -5   1  423.06   48.60 
  -9  -5   1  359.16   43.50 
  -9  -5   1  475.05   48.90 
  -9  -5   1  428.16   45.50 
   9  -5  -1  336.57   41.90 
   9  -5  -1  421.76   55.49 
   9  -5  -1  382.36   45.30 
   9  -5  -1  469.75   54.59 
  -9  -5   1  424.16   50.49 
  -9  -5   1  395.66   48.50 
   9  -5  -1  411.76   46.80 
  -9  -5   1  448.86   52.99 
  -9  -5   1  454.25   47.70 
   9  -5  -1  396.66   51.09 
  -9  -5   1  400.26   52.19 
  -9  -5   1  378.16   46.50 
   9  -5  -1  386.86   47.80 
  -9  -5   1  380.26   51.89 
   9   5  -1  443.16   49.60 
  -9   5   1  400.26   43.90 
   9   5  -1  350.06   50.09 
   9   5  -1  455.05   50.69 
   9   5  -1  483.85   53.69 
   9   5  -1  472.85   47.70 
   9   5  -1  431.06   48.90 
   9   5  -1  417.16   52.09 
   9   5  -1  466.35   50.99 
   9   5  -1  464.35   50.39 
   9   5  -1  481.05   56.99 
   9   5  -1  419.46   56.39 
  -9   5   1  365.66   43.60 
   9   5  -1  331.87   40.70 
   9   5  -1  441.06   50.69 
  -8  -5   1   17.00   10.80 
  -8  -5   1   41.10   17.20 
  -8  -5   1   23.80   12.70 
  -8  -5   1   13.70   13.30 
   8  -5  -1    6.30   12.50 
  -8  -5   1   33.50   16.70 
  -8  -5   1    9.30   10.60 
  -8  -5   1    9.70    9.50 
  -8  -5   1   19.90   13.30 
   8  -5  -1   12.40   12.50 
  -8  -5   1   14.70   12.20 
   8  -5  -1   35.90   14.20 
   8  -5  -1   36.00   13.70 
  -8  -5   1   30.60   12.90 
  -8  -5   1   27.10   16.70 
   8  -5  -1   17.30   13.30 
  -8  -5   1    6.10    9.60 
   8  -5  -1   23.80   13.30 
  -8  -5   1    8.30   11.10 
   8  -5  -1    9.80   11.80 
   8  -5  -1   28.40   13.50 
   8  -5  -1   18.40   14.50 
  -8   5   1   35.00   13.70 
   8   5  -1    9.60   11.20 
   8   5  -1   27.50   14.20 
   8   5  -1   10.20   12.70 
   8   5  -1   24.40   14.30 
   8   5  -1   21.60   13.80 
   8   5  -1    6.30    9.50 
   8   5  -1    9.10   10.60 
  -8   5   1   11.40   10.80 
   8   5  -1   12.30   12.70 
   8   5  -1   43.30   18.50 
  -8   5   1   12.00   11.50 
   8   5  -1   15.80   13.70 
  -8   5   1   33.70   13.20 
   8   5  -1   14.90   11.60 
   8   5  -1   13.10   11.40 
   8   5  -1    3.70   11.60 
   7  -5  -1  236.58   28.40 
   7  -5  -1  258.47   33.50 
  -7  -5   1  209.18   30.30 
  -7  -5   1  272.77   30.40 
  -7  -5   1  233.78   38.40 
   7  -5  -1  236.88   28.40 
   7  -5  -1  220.88   35.70 
   7  -5  -1  205.48   28.80 
  -7  -5   1  232.68   33.20 
   7  -5  -1  222.78   28.60 
  -7  -5   1  278.47   34.40 
  -7  -5   1  239.38   29.80 
  -7  -5   1  288.77   33.90 
  -7  -5   1  237.68   31.00 
   7  -5  -1  292.57   29.80 
  -7  -5   1  243.48   33.10 
  -7  -5   1  213.18   33.70 
   7  -5  -1  275.37   35.60 
   7  -5  -1  308.97   33.50 
  -7  -5   1  229.58   32.90 
  -7  -5   1  261.77   31.80 
  -7  -5   1  259.57   32.20 
  -7  -5   1  256.07   34.70 
  -7  -5   1  215.08   32.50 
   7  -5  -1  263.57   36.80 
   7  -5  -1  232.98   32.20 
   7   5  -1  229.78   31.70 
  -7   5   1  274.57   28.90 
   7   5  -1  266.47   36.60 
   7   5  -1  270.77   30.40 
   7   5  -1  303.27   28.40 
  -7   5   1  242.18   29.90 
   7   5  -1  267.87   32.50 
   7   5  -1  258.37   37.10 
   7   5  -1  235.48   34.30 
   7   5  -1  237.08   31.80 
  -7   5   1  290.17   31.40 
  -7   5   1  256.77   30.50 
   7   5  -1  268.07   35.20 
   7   5  -1  245.38   30.40 
   7   5  -1  218.88   30.10 
   7   5  -1  200.98   34.60 
   7   5  -1  247.68   35.40 
   7   5  -1  202.18   29.20 
   6  -5  -1  322.97   24.00 
   6  -5  -1  196.58   24.80 
  -6  -5   1  246.18   31.10 
   6  -5  -1  209.28   22.30 
   6  -5  -1  183.98   28.70 
  -6  -5   1  185.38   25.70 
   6  -5  -1  203.88   25.50 
   6  -5  -1  226.08   28.30 
  -6  -5   1  162.28   25.80 
   6  -5  -1  283.77   26.10 
  -6  -5   1  280.27   30.50 
  -6  -5   1  231.78   31.30 
  -6  -5   1  180.78   26.90 
  -6  -5   1  258.47   33.90 
  -6  -5   1  244.08   35.10 
   6  -5  -1  229.58   30.50 
  -6  -5   1  250.77   27.50 
   6  -5  -1  221.88   25.10 
  -6  -5   1  239.58   31.40 
  -6  -5   1  204.58   28.90 
  -6  -5   1  221.18   29.50 
   6  -5  -1  176.18   25.80 
   6  -5  -1  222.78   33.40 
   6  -5  -1  210.38   25.20 
  -6  -5   1  281.37   33.40 
  -6  -5   1  221.98   28.30 
   6  -5  -1  236.08   26.10 
  -6  -5   1  225.38   28.40 
  -6  -5   1  219.58   26.60 
   6  -5  -1  246.68   28.90 
   6   5  -1  235.88   35.00 
   6   5  -1  235.08   24.80 
   6   5  -1  199.68   30.70 
   6   5  -1  258.37   28.90 
   6   5  -1  223.68   30.50 
  -6   5   1  254.67   25.30 
   6   5  -1  308.47   37.10 
   6   5  -1  233.68   27.10 
   6   5  -1  232.78   28.30 
  -6   5   1  225.18   25.70 
   6   5  -1  191.48   24.00 
   6   5  -1  303.27   37.40 
   6   5  -1  195.68   27.30 
   6   5  -1  233.88   29.20 
   6   5  -1  230.58   25.70 
  -6   5   1  231.38   22.90 
  -6   5   1  238.38   26.60 
  -6   5   1  254.67   34.20 
   6   5  -1  229.28   28.90 
  -6   5   1  259.17   25.10 
   6   5  -1  171.68   27.80 
  -6   5   1  240.18   26.90 
   5  -5  -1 2233.58   97.39 
  -5  -5   1 2247.48  104.79 
   5  -5  -1 2188.78   98.59 
   5  -5  -1 2208.48   98.09 
   5  -5  -1 2101.89   98.19 
   5  -5  -1 2147.99   99.49 
  -5  -5   1 2110.59  101.49 
   5  -5  -1 2074.49   90.39 
  -5  -5   1 2234.38  100.79 
  -5  -5   1 2348.27  103.69 
   5  -5  -1 2110.29   90.89 
   5  -5  -1 2134.69   96.79 
   5  -5  -1 2271.07  100.39 
  -5  -5   1 2166.68  100.69 
   5  -5  -1 2287.57   87.29 
  -5  -5   1 2377.16  104.69 
   5  -5  -1 2425.46  111.39 
  -5  -5   1 2286.57  103.19 
  -5  -5   1 2132.19   99.69 
   5  -5  -1 2120.49   94.89 
   5  -5  -1 2287.97   92.09 
  -5  -5   1 2227.98  104.79 
   5  -5  -1 2113.49  103.79 
  -5  -5   1 2300.57  104.19 
  -5  -5   1 2228.58  110.79 
  -5  -5   1 2133.09  101.69 
  -5  -5   1 2179.58  105.89 
   5  -5  -1 2210.98   87.19 
  -5  -5   1 2212.78   97.09 
  -5  -5   1 2319.37  103.09 
   5  -5  -1 2266.77   95.79 
   5  -5  -1 2221.58   95.59 
   5  -5  -1 2354.76  104.49 
  -5  -5   1 2316.37   97.59 
  -5   5   1 2186.48   93.09 
   5   5  -1 2161.78   96.69 
   5   5  -1 2093.59  104.09 
  -5   5   1 2295.77  107.39 
  -5   5   1 2093.09   96.49 
   5   5  -1 2150.28  106.69 
  -5   5   1 2339.57   93.39 
  -5   5   1 2225.88   95.59 
   5   5  -1 2195.18  101.09 
   5   5  -1 2436.36  101.79 
  -5   5   1 2197.98   94.69 
   5   5  -1 2145.69  105.29 
   5   5  -1 2219.28  106.79 
  -5   5   1 2082.69   95.79 
   5   5  -1 2250.27  108.49 
   5   5  -1 2296.87  101.39 
   5   5  -1 2056.09   98.79 
   5   5  -1 2226.68   97.79 
   5   5  -1 2238.38   95.69 
   5   5  -1 2244.68   96.59 
  -5   5   1 2094.79   90.29 
   5   5  -1 2239.98   97.49 
  -4  -5   1  500.55   35.50 
  -4  -5   1  504.55   33.50 
   4  -5  -1  448.16   32.50 
  -4  -5   1  423.76   33.40 
   4  -5  -1  363.26   41.50 
  -4  -5   1  395.76   31.70 
  -4  -5   1  414.16   32.00 
   4  -5  -1  435.86   22.30 
  -4  -5   1  508.45   34.40 
  -4  -5   1  462.15   34.50 
   4  -5  -1  429.56   19.80 
   4  -5  -1  459.65   29.80 
   4  -5  -1  447.66   21.90 
   4  -5  -1  507.55   24.30 
  -4  -5   1  431.46   32.40 
  -4  -5   1  530.85   35.30 
   4  -5  -1  453.25   27.30 
   4  -5  -1  468.55   24.50 
   4  -5  -1  481.25   32.00 
   4  -5  -1  479.05   22.70 
  -4  -5   1  482.55   32.90 
   4  -5  -1  455.55   32.70 
  -4  -5   1  437.96   28.10 
   4  -5  -1  453.25   27.90 
   4  -5  -1  419.46   30.50 
   4  -5  -1  400.26   29.20 
  -4  -5   1  447.76   28.00 
   4  -5  -1  487.75   30.70 
   4  -5  -1  520.95   30.60 
   4  -5  -1  447.56   25.80 
   4  -5  -1  442.26   21.40 
  -4  -5   1  464.85   32.30 
   4  -5  -1  437.96   27.60 
  -4  -5   1  411.26   43.10 
   4  -5  -1  422.16   21.50 
   4  -5  -1  449.46   24.10 
   4  -5  -1  437.46   27.00 
   4  -5  -1  426.26   20.70 
   4  -5  -1  437.56   24.80 
   4  -5  -1  456.55   24.70 
   4  -5  -1  446.56   29.70 
   4  -5  -1  463.85   24.10 
  -4  -5   1  499.65   31.40 
   4   5  -1  522.85   37.80 
   4   5  -1  379.76   38.40 
  -4   5   1  491.85   30.40 
   4   5  -1  493.65   35.90 
   4   5  -1  426.06   34.50 
   4   5  -1  513.25   32.60 
  -4   5   1  454.35   23.10 
   4   5  -1  423.76   27.70 
  -4   5   1  434.76   27.60 
  -4   5   1  482.25   30.40 
   4   5  -1  450.25   30.50 
  -4   5   1  460.75   27.40 
  -4   5   1  457.45   24.90 
   4   5  -1  498.45   31.60 
  -4   5   1  481.35   28.00 
   4   5  -1  473.75   36.90 
   4   5  -1  464.05   32.70 
   4   5  -1  457.65   27.80 
  -4   5   1  453.35   31.50 
   4   5  -1  445.26   28.30 
   4   5  -1  460.55   30.80 
  -4   5   1  468.65   35.50 
   4   5  -1  455.75   34.90 
   4   5  -1  441.66   28.20 
  -4   5   1  483.05   26.00 
   3  -5  -1  696.03   33.70 
   3  -5  -1  728.23   30.50 
  -3  -5   1  688.23   43.20 
   3  -5  -1  759.22   44.10 
  -3  -5   1  727.53   40.30 
   3  -5  -1  754.82   34.60 
  -3  -5   1  726.73   42.70 
   3  -5  -1  763.72   35.10 
  -3  -5   1  738.03   38.50 
   3  -5  -1  724.63   34.50 
   3  -5  -1  755.62   38.30 
   3  -5  -1  732.13   33.60 
  -3  -5   1  717.23   41.00 
   3  -5  -1  729.93   36.00 
  -3  -5   1  713.23   42.70 
  -3  -5   1  734.73   42.10 
  -3  -5   1  714.53   35.40 
   3  -5  -1  758.52   42.50 
  -3  -5   1  704.93   48.00 
   3  -5  -1  691.43   37.60 
   3  -5  -1  692.23   31.00 
  -3  -5   1  704.53   36.80 
   3  -5  -1  753.12   33.20 
   3  -5  -1  708.83   34.90 
   3  -5  -1  746.63   38.80 
   3  -5  -1  732.93   33.50 
   3  -5  -1  774.72   42.20 
   3  -5  -1  694.43   38.90 
  -3  -5   1  755.62   36.30 
  -3  -5   1  742.33   44.20 
  -3  -5   1  689.03   41.70 
   3  -5  -1  704.53   37.50 
   3  -5  -1  715.33   40.20 
   3  -5  -1  735.33   37.40 
   3  -5  -1  655.23   41.00 
   3  -5  -1  655.23   47.30 
   3  -5  -1  725.83   33.40 
   3  -5  -1  705.23   33.70 
  -3  -5   1  774.82   41.10 
   3  -5  -1  700.63   36.30 
   3  -5  -1  726.53   31.90 
  -3  -5   1  675.33   42.60 
   3  -5  -1  710.13   34.00 
   3  -5  -1  628.14   39.40 
  -3  -5   1  742.73   42.60 
   3  -5  -1  740.53   37.60 
   3   5  -1  702.23   43.80 
  -3   5   1  751.02   35.00 
  -3   5   1  683.93   42.80 
   3   5  -1  707.73   35.90 
   3   5  -1  747.93   37.60 
   3   5  -1  772.32   46.90 
  -3   5   1  771.12   35.80 
   3   5  -1  757.92   46.40 
  -3   5   1  727.03   37.60 
   3   5  -1  715.53   41.80 
   3   5  -1  783.12   39.30 
   3   5  -1  709.83   35.70 
   3   5  -1  741.83   41.50 
  -3   5   1  691.53   39.70 
   3   5  -1  687.03   44.60 
  -3   5   1  671.23   34.10 
   3   5  -1  772.02   44.20 
   3   5  -1  680.73   45.60 
  -3   5   1  722.43   33.70 
  -3   5   1  639.34   42.80 
  -3   5   1  761.02   40.90 
   3   5  -1  757.02   37.20 
   3   5  -1  736.53   34.90 
   3   5  -1  713.93   45.00 
   3   5  -1  792.62   40.70 
  -3   5   1  738.83   35.30 
   3   5  -1  745.63   44.60 
  -3   5   1  757.12   38.30 
   3   5  -1  700.53   39.50 
   3   5  -1  786.92   37.70 
  -3   5   1  685.73   39.90 
  -2  -5   1   35.60   10.10 
   2  -5  -1   28.20    4.20 
   2  -5  -1   25.30    3.20 
  -2  -5   1   24.90    6.80 
   2  -5  -1   27.80    9.90 
   2  -5  -1   30.60    5.00 
   2  -5  -1   23.60    6.20 
   2  -5  -1   14.00    6.60 
   2  -5  -1   26.50    5.00 
  -2  -5   1   24.60    8.90 
   2  -5  -1   26.90    3.60 
   2  -5  -1   29.80    5.70 
   2  -5  -1   30.30    7.30 
   2  -5  -1   39.40    8.10 
   2  -5  -1   27.90    6.90 
   2  -5  -1   26.90    4.80 
   2  -5  -1   38.80    9.60 
  -2  -5   1   28.40    9.50 
  -2  -5   1   27.90    5.20 
   2  -5  -1   24.40    4.30 
  -2  -5   1   26.00    5.10 
  -2  -5   1   15.90    7.80 
   2  -5  -1   26.60    6.30 
   2  -5  -1   26.80    3.70 
  -2  -5   1   21.40    7.90 
   2  -5  -1   31.70    6.80 
  -2  -5   1   46.50   11.20 
  -2  -5   1   17.60    9.40 
  -2  -5   1   21.50    5.80 
  -2  -5   1   25.30    7.90 
   2  -5  -1   28.60    4.90 
   2  -5  -1   18.90    7.20 
   2  -5  -1   24.70    6.30 
   2  -5  -1   15.10    5.30 
   2  -5  -1   25.70    6.00 
  -2  -5   1   26.00    7.80 
  -2  -5   1   28.40    6.40 
   2  -5  -1   20.90    5.50 
  -2  -5   1   27.50    7.40 
  -2  -5   1   21.40    8.30 
   2  -5  -1   12.60    6.10 
   2  -5  -1   31.40    4.10 
   2  -5  -1   34.70    7.20 
   2  -5  -1   28.80    5.30 
   2  -5  -1   26.00    9.80 
   2  -5  -1   27.40    6.80 
   2  -5  -1   29.90    5.40 
  -2  -5   1   36.30   10.10 
  -2  -5   1   38.00    6.50 
   2   5  -1   27.90    6.90 
   2   5  -1   17.30    4.70 
   2   5  -1   26.50    5.70 
   2   5  -1   24.50    8.60 
  -2   5   1   41.40    9.80 
   2   5  -1   17.90    4.50 
  -2   5   1   25.30    4.90 
   2   5  -1   25.90   10.80 
  -2   5   1   12.60    5.70 
   2   5  -1   16.20    7.80 
   2   5  -1   17.50    6.50 
   2   5  -1   32.20   10.30 
  -2   5   1   21.70    7.40 
   2   5  -1   35.20    9.30 
  -2   5   1   22.60    8.50 
  -2   5   1   24.00    8.40 
  -2   5   1   25.70    9.20 
   2   5  -1   28.10    5.00 
   2   5  -1   24.40    6.40 
  -2   5   1   22.10    6.40 
   2   5  -1   35.00   10.80 
  -2   5   1   22.30    6.60 
   2   5  -1   19.70    8.50 
   2   5  -1   23.60    9.90 
   2   5  -1   18.90    4.80 
   2   5  -1   28.20    9.80 
   2   5  -1   25.90    7.60 
  -2   5   1   35.40    9.00 
   2   5  -1   23.90    5.60 
   2   5  -1   20.60    7.00 
   2   5  -1   20.10    7.60 
   2   5  -1   28.20    7.10 
  -2   5   1   14.40    5.60 
  -1  -5   1   29.10    8.10 
   1  -5  -1   48.80    9.20 
  -1  -5   1   31.40   10.90 
   1  -5  -1   27.70    8.30 
   1  -5  -1   41.30    5.40 
  -1  -5   1   43.60    8.50 
  -1  -5   1   47.00    5.80 
   1  -5  -1   37.80    8.20 
   1  -5  -1   37.10    7.60 
  -1  -5   1   28.80    6.40 
   1  -5  -1   23.30    7.30 
   1  -5  -1   44.10    4.00 
  -1  -5   1   41.60    5.70 
  -1  -5   1   17.60    6.60 
   1  -5  -1   34.10    2.60 
   1  -5  -1   38.70    4.00 
  -1  -5   1   33.80    5.60 
   1  -5  -1   36.80   10.70 
   1  -5  -1   38.60   12.00 
   1  -5  -1   29.10    7.20 
   1  -5  -1   42.30    3.80 
  -1  -5   1   48.90   10.80 
   1  -5  -1   24.80    7.20 
  -1  -5   1   36.80    8.60 
  -1  -5   1   49.99    7.10 
   1  -5  -1   46.50    4.20 
  -1  -5   1   44.50    7.70 
   1  -5  -1   38.10    3.60 
  -1  -5   1   48.30   11.30 
   1  -5  -1   33.50    3.30 
  -1  -5   1   44.50   12.30 
   1  -5  -1   38.80    8.70 
  -1  -5   1   36.80    7.60 
   1  -5  -1   40.80   10.10 
  -1  -5   1   39.30    8.30 
  -1  -5   1   55.79   11.90 
   1  -5  -1   46.90    5.70 
   1  -5  -1   34.90    7.30 
   1  -5  -1   44.30    4.20 
  -1  -5   1   41.30    6.30 
  -1   5   1   50.79   12.20 
   1   5  -1   21.10    8.40 
   1   5  -1   29.00   11.80 
  -1   5   1   43.80    4.10 
   1   5  -1   47.40   10.90 
   1   5  -1   38.60   10.50 
   1   5  -1   45.80    4.40 
   1   5  -1   38.40    9.60 
   1   5  -1   37.60    5.00 
   1   5  -1   41.60    6.50 
  -1   5   1   31.40    7.80 
   1   5  -1   40.30    8.90 
  -1   5   1   52.89   12.90 
   1   5  -1   41.30    5.50 
   1   5  -1   25.30   10.60 
  -1   5   1   33.00    9.60 
   1   5  -1   42.60    4.50 
   1   5  -1   46.90   10.60 
   1   5  -1   25.90    8.90 
  -1   5   1   33.70    8.10 
  -1   5   1   46.40   10.00 
   1   5  -1   42.60    9.60 
   1   5  -1   38.40    9.20 
  -1   5   1   26.40    7.90 
   1   5  -1   47.30    7.20 
  -1   5   1   37.90    9.70 
   1   5  -1   26.90    8.40 
   1   5  -1   33.60    3.60 
  -1   5   1   61.29   11.80 
   1   5  -1   36.50   10.60 
  -1   5   1   44.20    9.40 
   0  -5   1   24.70    7.60 
   0  -5   1   38.00    6.00 
   0  -5   1   40.20    7.90 
   0  -5   1   28.60    7.20 
   0  -5  -1   39.70    6.80 
   0  -5   1   30.70    6.00 
   0  -5   1   26.70    7.80 
   0  -5   1   44.90    9.30 
   0  -5   1   29.50    7.00 
   0  -5  -1   33.80    8.40 
   0  -5  -1   23.60    7.10 
   0  -5   1   23.60    7.00 
   0  -5  -1   30.20    9.70 
   0  -5  -1   18.70    6.70 
   0  -5  -1   39.60   10.70 
   0  -5   1   44.40    8.30 
   0  -5  -1   32.60    9.50 
   0  -5  -1   35.60    5.20 
   0  -5   1   30.10   10.20 
   0  -5   1   23.50    8.30 
   0  -5   1   33.00    6.50 
   0  -5  -1   45.70    8.90 
   0  -5  -1   19.30    6.70 
   0  -5  -1   42.20   10.30 
   0  -5   1   31.60    4.60 
   0  -5   1   44.30    7.50 
   0  -5  -1   45.20   10.10 
   0  -5  -1   30.30    7.60 
   0  -5  -1   45.90   10.80 
   0  -5  -1   22.80    8.90 
   0  -5   1   40.10    3.80 
   0  -5  -1   36.40    4.90 
   0   5   1   19.90    9.70 
   0   5  -1   46.50    9.20 
   0   5  -1   26.70    8.00 
   0   5   1   32.30    9.10 
   0   5   1   36.20    9.10 
   0   5   1   30.80    7.40 
   0   5  -1   51.99   11.00 
   0   5   1   21.60    7.40 
   0   5  -1   45.90    6.00 
   0   5  -1   35.00    4.90 
   0   5  -1   24.30   11.40 
   0   5  -1   20.30    7.50 
   0   5  -1   30.60    3.50 
   0   5  -1   38.40    7.00 
   0   5  -1   27.60    9.20 
   0   5   1   22.00    8.20 
   0   5  -1   51.79   12.70 
   0   5   1   39.20    8.20 
   0   5  -1   30.60    9.40 
   0   5  -1   30.20    8.60 
   0   5  -1   31.70    9.10 
   0   5   1   21.00    8.80 
   0   5   1   21.30    7.20 
   0   5   1   37.60    9.00 
   0   5   1   29.00    8.10 
   0   5   1   44.30   10.70 
   0   5   1   37.20   10.80 
   0   5  -1   33.00    8.80 
   1  -5   1 2383.56  103.19 
   1  -5   1 2380.66   90.89 
   1  -5   1 2445.56   94.79 
  -1  -5  -1 2424.26   95.99 
   1  -5   1 2380.06   95.09 
  -1  -5  -1 2389.26  100.79 
   1  -5   1 2334.57  101.19 
   1  -5   1 2171.68  104.49 
  -1  -5  -1 2379.16   99.59 
   1  -5   1 2416.66   95.09 
   1  -5   1 2462.65   96.09 
  -1  -5  -1 2548.15  104.59 
  -1  -5  -1 2516.65  102.09 
  -1  -5  -1 2498.85   93.49 
  -1  -5  -1 2334.47  105.79 
   1  -5   1 2310.87   87.09 
   1  -5   1 2302.07  100.89 
  -1  -5  -1 2444.86   87.79 
   1  -5   1 2264.37   93.79 
   1  -5   1 2376.66   90.89 
   1  -5   1 2414.26   98.19 
  -1  -5  -1 2436.26   93.09 
   1  -5   1 2352.16   94.99 
  -1  -5  -1 2285.77   98.29 
  -1  -5  -1 2425.46   89.39 
  -1  -5  -1 2544.05   96.29 
  -1  -5  -1 2466.05  101.59 
  -1  -5  -1 2335.97  100.89 
  -1  -5  -1 2238.38   99.89 
   1  -5   1 2476.85   90.89 
  -1  -5  -1 2367.26  103.29 
   1  -5   1 2332.07   91.79 
   1  -5   1 2143.89   88.49 
   1   5   1 2370.96   94.99 
  -1   5  -1 2382.56  102.09 
  -1   5  -1 2366.96   92.19 
  -1   5  -1 2420.46  100.79 
  -1   5  -1 2553.64  108.19 
  -1   5  -1 2414.86   97.29 
   1   5   1 2358.36   94.29 
   1   5   1 2505.25  104.09 
   1   5   1 2411.26  101.39 
  -1   5  -1 2432.66   90.89 
   1   5   1 2378.96   89.49 
  -1   5  -1 2415.36   98.69 
   1   5   1 2390.56   86.99 
  -1   5  -1 2376.36  100.69 
   1   5   1 2364.56   95.29 
   1   5   1 2303.27  102.09 
   1   5   1 2286.27   97.09 
  -1   5  -1 2307.17  104.39 
  -1   5  -1 2451.55  102.19 
   1   5   1 2356.86  102.49 
  -1   5  -1 2323.57   96.59 
   1   5   1 2418.96  106.69 
   1   5   1 2482.45  101.29 
   1   5   1 2348.17  102.69 
   1   5   1 2361.26  105.79 
   1   5   1 2335.97   93.39 
   1   5   1 2433.06   96.09 
   1   5   1 2328.17   94.69 
   1   5   1 2436.56   93.79 
  -1   5  -1 2431.36  110.99 
  -1   5  -1 2266.97  101.69 
  -1   5  -1 2441.96   95.29 
   1   5   1 2382.26  101.89 
  -2  -5  -1  293.37   17.00 
  -2  -5  -1  271.97   15.40 
   2  -5   1  294.77   16.50 
   2  -5   1  267.27   18.90 
  -2  -5  -1  288.07   28.80 
   2  -5   1  297.47   23.30 
  -2  -5  -1  224.08   21.50 
   2  -5   1  275.87   17.10 
  -2  -5  -1  265.27   22.10 
   2  -5   1  289.17   16.60 
   2  -5   1  256.07   17.00 
   2  -5   1  265.77   14.00 
  -2  -5  -1  244.28   27.90 
   2  -5   1  268.07   16.60 
  -2  -5  -1  306.97   24.20 
   2  -5   1  317.47   24.00 
  -2  -5  -1  273.67   22.30 
   2  -5   1  261.57   14.30 
  -2  -5  -1  269.07   18.60 
   2  -5   1  274.77   16.20 
  -2  -5  -1  251.07   26.20 
   2  -5   1  310.77   23.60 
   2  -5   1  284.67   30.30 
  -2  -5  -1  245.58   25.20 
  -2  -5  -1  331.67   16.70 
  -2  -5  -1  256.77   24.90 
   2  -5   1  263.87   13.90 
   2  -5   1  322.57   23.70 
   2  -5   1  231.78   23.40 
  -2  -5  -1  255.27   16.60 
   2  -5   1  268.07   27.60 
   2  -5   1  250.57   25.80 
   2  -5   1  262.57   17.40 
   2  -5   1  254.07   14.50 
   2  -5   1  264.37   20.20 
   2  -5   1  266.17   18.80 
   2   5   1  246.98   15.00 
   2   5   1  255.77   28.60 
   2   5   1  262.67   16.30 
  -2   5  -1  284.47   18.70 
  -2   5  -1  243.08   18.50 
  -2   5  -1  234.48   25.50 
  -2   5  -1  264.07   14.40 
   2   5   1  248.88   26.60 
  -2   5  -1  275.87   21.20 
   2   5   1  279.17   27.80 
  -2   5  -1  260.87   25.20 
   2   5   1  287.07   19.80 
  -2   5  -1  257.17   27.90 
   2   5   1  279.97   16.10 
   2   5   1  268.57   17.50 
  -2   5  -1  265.97   16.90 
   2   5   1  332.97   25.00 
   2   5   1  263.67   17.90 
   2   5   1  287.37   18.80 
  -2   5  -1  245.68   29.10 
  -2   5  -1  248.78   20.80 
   2   5   1  246.68   26.20 
   2   5   1  277.17   26.40 
   2   5   1  278.07   27.90 
   2   5   1  265.07   15.30 
   2   5   1  262.27   25.00 
   2   5   1  271.47   16.80 
   2   5   1  263.27   29.10 
  -2   5  -1  244.18   26.70 
   3  -5   1 2471.05   98.59 
   3  -5   1 2483.35   96.49 
   3  -5   1 2475.65   97.19 
   3  -5   1 2422.16  108.19 
   3  -5   1 2451.95  106.29 
   3  -5   1 2409.76   97.49 
  -3  -5  -1 2475.75  106.89 
  -3  -5  -1 2454.25  107.49 
  -3  -5  -1 2494.45   98.49 
   3  -5   1 2545.75  117.49 
   3  -5   1 2555.24  104.99 
  -3  -5  -1 2524.85  105.99 
   3  -5   1 2410.06   92.39 
   3  -5   1 2406.06   91.69 
   3  -5   1 2557.24  102.69 
   3  -5   1 2438.26   94.99 
  -3  -5  -1 2535.05  107.89 
  -3  -5  -1 2463.95  108.69 
   3  -5   1 2451.65   92.49 
  -3  -5  -1 2283.47  106.29 
   3  -5   1 2448.35  105.29 
  -3  -5  -1 2435.16  108.79 
   3  -5   1 2457.55   97.89 
   3  -5   1 2430.76   91.39 
   3  -5   1 2425.66   98.29 
   3  -5   1 2414.16  100.09 
   3  -5   1 2465.55   93.69 
   3  -5   1 2354.06  101.59 
  -3  -5  -1 2275.37  111.69 
   3  -5   1 2485.55   96.89 
  -3  -5  -1 2501.15   98.09 
  -3  -5  -1 2320.07  106.39 
  -3  -5  -1 2352.76  101.79 
  -3  -5  -1 2477.95  106.69 
  -3  -5  -1 2401.26   93.89 
  -3  -5  -1 2427.56  104.19 
   3  -5   1 2463.65   91.49 
   3  -5   1 2461.45   98.79 
   3   5   1 2418.86  108.59 
  -3   5  -1 2540.05   99.59 
   3   5   1 2431.26   97.99 
  -3   5  -1 2456.35   96.39 
  -3   5  -1 2566.24  103.69 
   3   5   1 2541.75  108.19 
   3   5   1 2521.45  108.89 
   3   5   1 2344.27  109.79 
   3   5   1 2464.25  103.19 
  -3   5  -1 2405.96   92.49 
   3   5   1 2319.37  103.59 
   3   5   1 2381.56  111.69 
   3   5   1 2627.44  100.89 
   3   5   1 2465.85  109.29 
  -3   5  -1 2419.96   98.49 
   3   5   1 2505.15  106.69 
  -3   5  -1 2491.05  108.19 
  -3   5  -1 2484.25   99.19 
  -3   5  -1 2420.16  109.29 
  -3   5  -1 2454.95  104.39 
   3   5   1 2556.64  107.19 
   3   5   1 2417.86  106.09 
   3   5   1 2395.36  100.59 
   3   5   1 2502.85   97.89 
   3   5   1 2435.36   98.09 
  -3   5  -1 2389.16   96.39 
   3   5   1 2426.86   96.99 
  -3   5  -1 2525.95  107.29 
   4  -5   1  168.88   24.80 
   4  -5   1  204.38   14.30 
  -4  -5  -1  228.08   26.90 
   4  -5   1  212.28   20.50 
   4  -5   1  181.38   24.50 
   4  -5   1  221.28   20.80 
   4  -5   1  204.38   21.70 
  -4  -5  -1  181.88   26.80 
  -4  -5  -1  228.28   27.20 
   4  -5   1  201.38   16.00 
   4  -5   1  236.28   25.80 
  -4  -5  -1  194.18   19.70 
  -4  -5  -1  254.87   27.70 
   4  -5   1  217.08   23.30 
   4  -5   1  183.08   22.90 
  -4  -5  -1  203.38   25.10 
  -4  -5  -1  207.68   25.50 
   4  -5   1  218.68   23.90 
  -4  -5  -1  207.58   20.60 
   4  -5   1  227.08   17.80 
   4  -5   1  210.58   23.30 
  -4  -5  -1  213.58   24.90 
   4  -5   1  188.38   14.20 
  -4  -5  -1  244.18   14.90 
   4  -5   1  211.08   14.40 
  -4  -5  -1  180.98   23.30 
  -4  -5  -1  199.48   23.80 
   4  -5   1  254.37   34.50 
   4  -5   1  208.38   14.70 
  -4  -5  -1  287.57   30.40 
   4  -5   1  237.08   15.80 
   4  -5   1  203.08   15.10 
  -4  -5  -1  196.38   25.40 
   4  -5   1  233.48   16.70 
  -4  -5  -1  250.57   24.70 
   4  -5   1  229.98   18.10 
  -4   5  -1  190.58   19.10 
  -4   5  -1  221.08   21.80 
   4   5   1  207.18   20.80 
  -4   5  -1  231.28   13.70 
   4   5   1  225.78   22.30 
  -4   5  -1  225.98   17.70 
   4   5   1  239.58   24.10 
  -4   5  -1  253.67   24.70 
   4   5   1  195.18   14.90 
  -4   5  -1  217.58   15.10 
   4   5   1  266.97   26.90 
   4   5   1  221.08   26.60 
   4   5   1  197.18   26.50 
   4   5   1  198.18   24.30 
   4   5   1  186.48   21.90 
   4   5   1  181.78   26.50 
  -4   5  -1  240.28   23.60 
  -4   5  -1  223.18   15.80 
   4   5   1  187.98   14.00 
   4   5   1  184.58   24.80 
  -4   5  -1  218.58   27.20 
   4   5   1  192.68   23.40 
  -4   5  -1  216.48   26.00 
   4   5   1  144.19   20.00 
   4   5   1  309.77   34.20 
   5  -5   1  196.48   20.90 
   5  -5   1  293.57   31.70 
   5  -5   1  297.27   23.10 
   5  -5   1  295.07   26.90 
   5  -5   1  237.28   30.40 
  -5  -5  -1  245.88   27.40 
  -5  -5  -1  260.07   25.90 
   5  -5   1  284.57   27.10 
   5  -5   1  224.68   18.00 
   5  -5   1  246.58   18.10 
  -5  -5  -1  267.07   29.00 
  -5  -5  -1  218.48   29.10 
   5  -5   1  287.47   27.50 
   5  -5   1  271.67   27.50 
  -5  -5  -1  302.27   36.50 
   5  -5   1  237.78   27.20 
   5  -5   1  235.48   33.90 
  -5  -5  -1  271.97   31.00 
  -5  -5  -1  257.07   29.00 
  -5  -5  -1  267.27   29.50 
  -5  -5  -1  230.38   28.10 
   5  -5   1  199.28   26.40 
   5  -5   1  233.28   27.50 
  -5  -5  -1  250.37   30.90 
  -5  -5  -1  270.37   31.60 
  -5  -5  -1  244.98   29.60 
   5  -5   1  278.97   18.30 
   5  -5   1  244.58   18.60 
  -5  -5  -1  268.47   33.10 
  -5  -5  -1  228.98   29.20 
  -5  -5  -1  226.88   24.40 
   5   5   1  220.48   28.00 
  -5   5  -1  244.48   24.80 
   5   5   1  323.57   25.20 
  -5   5  -1  248.38   24.50 
  -5   5  -1  283.07   20.10 
   5   5   1  231.48   30.10 
   5   5   1  236.58   29.70 
   5   5   1  251.77   15.90 
   5   5   1  242.18   26.70 
  -5   5  -1  269.97   27.00 
   5   5   1  202.18   27.80 
   5   5   1  295.87   28.60 
  -5   5  -1  265.17   31.10 
  -5   5  -1  243.88   20.40 
   5   5   1  256.47   19.80 
  -5   5  -1  230.58   30.70 
   5   5   1  261.67   33.10 
  -5   5  -1  259.47   16.80 
   5   5   1  234.38   27.90 
   5   5   1  309.97   30.70 
  -5   5  -1  263.07   26.50 
   5   5   1  307.77   31.70 
   5   5   1  326.07   25.20 
   5   5   1  227.28   33.50 
  -5   5  -1  257.47   17.80 
   6  -5   1   31.60   14.70 
   6  -5   1   14.00    7.50 
   6  -5   1   29.00    9.40 
   6  -5   1   22.70   10.30 
   6  -5   1   25.00   12.50 
   6  -5   1   29.70   11.40 
  -6  -5  -1   29.10   11.40 
   6  -5   1   12.50    8.50 
  -6  -5  -1   17.20   10.00 
   6  -5   1   18.70    9.90 
  -6  -5  -1   47.40   16.70 
  -6  -5  -1   39.00   12.00 
   6  -5   1   35.00   11.90 
  -6  -5  -1   24.40   10.80 
  -6  -5  -1   30.00   11.30 
   6  -5   1   22.40   11.80 
  -6  -5  -1   28.70   12.60 
  -6  -5  -1   41.40   13.30 
  -6  -5  -1   16.50   11.90 
  -6  -5  -1   33.60   14.20 
   6  -5   1   45.30   14.50 
  -6  -5  -1   22.40   11.70 
   6  -5   1   16.50   12.00 
  -6  -5  -1   33.70   13.70 
  -6  -5  -1   45.70   12.60 
  -6  -5  -1   25.40   11.70 
   6  -5   1   18.80    8.80 
  -6  -5  -1    3.10    8.90 
   6   5   1   25.40   14.00 
   6   5   1   18.60   11.30 
  -6   5  -1   43.70   11.50 
   6   5   1   20.70   10.60 
  -6   5  -1   28.10   10.90 
   6   5   1   24.00   10.10 
  -6   5  -1   32.30   10.30 
   6   5   1   45.00   13.80 
  -6   5  -1    5.30    7.80 
   6   5   1   23.70   14.10 
   6   5   1   24.90   11.60 
   6   5   1   22.10   11.10 
  -6   5  -1   32.60   13.60 
   6   5   1   18.70   10.70 
   6   5   1   48.90   12.60 
   6   5   1   24.50   12.10 
  -6   5  -1   16.60    7.50 
  -6   5  -1   48.40   12.10 
   6   5   1   23.50   10.40 
   6   5   1   18.80    9.40 
  -7  -5  -1  161.78   26.40 
  -7  -5  -1  153.88   26.50 
  -7  -5  -1  138.29   22.80 
  -7  -5  -1  150.58   29.20 
  -7  -5  -1  180.08   30.10 
   7  -5   1  178.98   24.10 
  -7  -5  -1  186.08   30.00 
  -7  -5  -1  188.28   25.60 
  -7  -5  -1  151.88   30.30 
   7  -5   1  142.09   20.60 
   7  -5   1  182.98   26.30 
   7  -5   1  169.08   29.70 
   7  -5   1  159.18   28.50 
  -7  -5  -1  128.39   22.30 
   7  -5   1  172.28   24.80 
   7  -5   1  165.58   32.00 
   7  -5   1  198.08   31.10 
  -7  -5  -1  144.39   26.90 
  -7  -5  -1  151.78   26.10 
   7  -5   1  162.58   24.00 
   7  -5   1  170.28   28.30 
  -7  -5  -1  195.48   27.70 
  -7  -5  -1  164.48   29.30 
  -7  -5  -1  182.38   29.50 
   7  -5   1  234.58   29.00 
   7  -5   1  133.49   23.80 
   7  -5   1  174.08   26.60 
  -7  -5  -1  238.98   32.50 
   7   5   1  157.78   25.70 
  -7   5  -1  167.58   23.90 
   7   5   1  163.08   27.20 
   7   5   1  143.99   26.40 
   7   5   1  227.78   34.50 
   7   5   1  182.58   23.40 
   7   5   1  188.38   28.50 
   7   5   1  169.38   25.80 
   7   5   1   94.99   23.70 
  -7   5  -1  214.18   26.20 
   7   5   1  161.58   30.90 
   7   5   1  193.68   28.90 
  -7   5  -1  195.98   31.10 
   7   5   1  193.88   27.00 
   7   5   1  149.69   24.70 
   7   5   1  173.28   27.30 
  -7   5  -1  217.48   25.20 
   7   5   1  184.98   29.60 
  -7   5  -1  182.58   24.70 
  -7   5  -1  186.78   27.20 
  -8  -5  -1  115.89   25.70 
  -8  -5  -1  105.39   25.20 
  -8  -5  -1   93.19   22.50 
  -8  -5  -1  102.29   24.30 
   8  -5   1  108.59   22.90 
  -8  -5  -1   95.39   21.90 
  -8  -5  -1   88.09   21.20 
  -8  -5  -1   70.09   20.70 
  -8  -5  -1   87.09   22.50 
   8  -5   1   56.89   20.00 
   8  -5   1   86.49   24.30 
  -8  -5  -1  124.99   29.40 
  -8  -5  -1   54.39   17.50 
  -8  -5  -1   97.09   22.30 
   8  -5   1   78.19   19.10 
   8  -5   1   90.79   24.00 
  -8  -5  -1  109.79   26.90 
   8  -5   1   96.59   26.80 
   8  -5   1   45.60   17.90 
   8  -5   1   96.09   22.10 
  -8  -5  -1   82.09   20.40 
   8  -5   1  110.39   22.70 
  -8  -5  -1   82.29   21.00 
   8   5   1   86.29   19.70 
   8   5   1  118.69   24.10 
   8   5   1  123.39   28.00 
   8   5   1  120.79   26.40 
  -8   5  -1   78.99   18.50 
   8   5   1   67.89   19.90 
   8   5   1  112.39   24.20 
   8   5   1   83.09   20.50 
   8   5   1  123.29   24.60 
   8   5   1   79.79   20.90 
   8   5   1   70.79   24.10 
   8   5   1   83.39   21.10 
   8   5   1   91.89   24.20 
  -8   5  -1   99.79   21.80 
   8   5   1  123.69   26.50 
  -9  -5  -1  686.63   54.29 
  -9  -5  -1  682.53   61.49 
   9  -5   1  624.94   58.89 
  -9  -5  -1  686.23   51.99 
  -9  -5  -1  737.53   56.69 
   9  -5   1  708.53   57.89 
   9  -5   1  643.04   70.79 
   9  -5   1  724.33   53.89 
  -9  -5  -1  648.04   62.59 
   9  -5   1  743.43   54.79 
  -9  -5  -1  622.54   63.29 
  -9  -5  -1  689.13   67.49 
   9  -5   1  596.14   63.49 
  -9  -5  -1  638.04   68.69 
   9  -5   1  649.93   49.70 
   9  -5   1  695.03   68.69 
  -9  -5  -1  564.64   54.99 
  -9  -5  -1  738.63   59.09 
  -9  -5  -1  688.83   72.19 
   9  -5   1  710.63   69.69 
  -9  -5  -1  700.23   68.99 
  -9  -5  -1  592.84   58.09 
   9   5   1  609.84   61.29 
   9   5   1  628.14   67.49 
  -9   5  -1  629.74   50.09 
   9   5   1  650.73   65.59 
  -9   5  -1  683.23   52.69 
   9   5   1  707.53   65.69 
   9   5   1  662.83   52.29 
   9   5   1  649.34   66.29 
   9   5   1  673.73   72.69 
   9   5   1  661.33   54.29 
   9   5   1  632.54   61.49 
   9   5   1  754.82   69.39 
   9   5   1  697.23   52.79 
   9   5   1  745.73   56.19 
   9   5   1  681.03   66.39 
  -8  -6   1   56.29   23.20 
  -8  -6   1   55.99   19.60 
   8  -6  -1   32.80   17.70 
  -8  -6   1   20.30   13.30 
  -8  -6   1   21.60   16.60 
  -8  -6   1    5.80   11.00 
   8  -6  -1   32.70   14.30 
  -8  -6   1   55.19   16.90 
  -8  -6   1    8.50   12.10 
   8  -6  -1    8.60   13.10 
  -8  -6   1   18.60   14.20 
   8  -6  -1   14.00   14.20 
  -8  -6   1   17.90   13.40 
  -8  -6   1   27.60   14.50 
  -8  -6   1    5.10   10.40 
   8  -6  -1   12.10   13.10 
   8  -6  -1   36.20   17.10 
   8  -6  -1   11.70   15.10 
   8  -6  -1   26.10   13.30 
   8  -6  -1   24.90   14.30 
  -8  -6   1    6.10   11.60 
  -8  -6   1    2.90   10.60 
   8   6  -1   20.90   13.70 
   8   6  -1   35.30   16.70 
   8   6  -1   21.10   13.50 
   8   6  -1   27.00   14.40 
  -8   6   1   22.10   12.00 
   8   6  -1   18.60   13.90 
   8   6  -1   33.00   19.00 
   8   6  -1   24.60   12.90 
   8   6  -1   18.30   14.30 
   8   6  -1   36.70   14.90 
   8   6  -1    0.10   10.80 
   8   6  -1    8.30   10.20 
  -8   6   1   26.00   13.70 
   7  -6  -1    7.60   10.30 
  -7  -6   1   -5.20    8.50 
   7  -6  -1   18.40   12.30 
  -7  -6   1    7.20   11.80 
  -7  -6   1   -1.40    7.20 
  -7  -6   1    1.70    8.00 
  -7  -6   1   11.60   10.50 
  -7  -6   1   25.80   11.30 
   7  -6  -1   14.40   11.80 
   7  -6  -1   -4.10    6.50 
   7  -6  -1    6.50   12.50 
   7  -6  -1    5.20    9.70 
  -7  -6   1    2.20   10.70 
   7  -6  -1   -2.50    9.70 
  -7  -6   1    1.20    9.30 
  -7  -6   1    6.10    9.30 
   7  -6  -1   -3.50    8.00 
  -7  -6   1    4.50    9.70 
  -7  -6   1   -4.50    8.10 
  -7  -6   1    4.90    9.90 
  -7  -6   1   -3.80    8.10 
  -7  -6   1    1.90   11.50 
   7  -6  -1    1.50    8.30 
  -7  -6   1   12.60   13.90 
   7  -6  -1    2.10    7.90 
   7   6  -1   13.30    9.90 
   7   6  -1    7.50   12.50 
   7   6  -1   -0.20    9.80 
   7   6  -1    4.40    9.60 
   7   6  -1    3.50    9.50 
   7   6  -1    3.10    9.80 
  -7   6   1    5.30    8.50 
   7   6  -1   -2.00    8.60 
   7   6  -1   -6.20   10.00 
   7   6  -1   -9.60    8.80 
  -7   6   1   -0.40    7.20 
   7   6  -1    0.50    8.40 
   7   6  -1    5.20   11.00 
   7   6  -1   13.70   13.10 
  -6  -6   1   21.50   10.60 
  -6  -6   1    9.50    9.80 
  -6  -6   1   16.30   11.60 
  -6  -6   1    6.70   11.30 
  -6  -6   1   28.30   10.40 
  -6  -6   1    1.40    9.20 
  -6  -6   1    4.30    8.30 
   6  -6  -1   20.80   12.60 
  -6  -6   1    0.10    8.00 
   6  -6  -1   18.50   10.60 
   6  -6  -1   18.90    8.80 
   6  -6  -1   14.40    8.40 
   6  -6  -1   20.30    9.80 
  -6  -6   1    7.80   10.40 
  -6  -6   1    9.30   11.00 
   6  -6  -1   21.50   11.10 
  -6  -6   1   29.80   11.80 
  -6  -6   1   23.40   10.30 
   6  -6  -1   22.10   10.80 
  -6  -6   1   -0.90    7.50 
   6  -6  -1   18.20    9.70 
  -6  -6   1   38.60   13.40 
   6  -6  -1   20.60   10.90 
  -6  -6   1   13.80   10.90 
   6  -6  -1   14.80    8.00 
   6  -6  -1   25.80   16.50 
   6  -6  -1    4.60    9.70 
  -6  -6   1   11.20   10.50 
   6   6  -1   16.30   11.70 
   6   6  -1   21.20   14.10 
   6   6  -1   25.60   15.40 
   6   6  -1   24.90   13.30 
   6   6  -1   16.70   12.80 
   6   6  -1   25.30   10.80 
   6   6  -1   24.20   10.80 
  -6   6   1    5.50    9.60 
   6   6  -1   30.20   12.00 
   6   6  -1   12.00   11.50 
  -6   6   1    5.60    7.30 
   6   6  -1   19.20    9.70 
   6   6  -1   21.50   11.10 
  -6   6   1   27.00   10.00 
  -6   6   1   29.80   10.00 
   6   6  -1   16.40    8.70 
  -6   6   1    3.90    7.70 
   6   6  -1   24.20   10.50 
  -5  -6   1   19.10   11.00 
   5  -6  -1   22.50    9.80 
  -5  -6   1   37.30   13.50 
  -5  -6   1   27.80   11.30 
   5  -6  -1   27.40    9.40 
  -5  -6   1   33.40   13.10 
   5  -6  -1   30.90   13.40 
   5  -6  -1   17.40   10.00 
   5  -6  -1   13.20    9.40 
  -5  -6   1   43.50   16.20 
   5  -6  -1   21.20    8.80 
  -5  -6   1   38.10   14.20 
  -5  -6   1   41.10   13.60 
  -5  -6   1   29.80   12.10 
   5  -6  -1   11.10    8.30 
   5  -6  -1   20.20    8.10 
   5  -6  -1   24.20    9.60 
  -5  -6   1    4.60    7.90 
  -5  -6   1   22.70   11.20 
   5  -6  -1   16.80    7.70 
   5  -6  -1   18.20    9.80 
  -5  -6   1   21.20   11.20 
   5  -6  -1   26.30    9.40 
   5  -6  -1    7.80    8.20 
  -5  -6   1   45.10   12.70 
   5  -6  -1   25.50   13.30 
  -5  -6   1   18.70   10.70 
  -5  -6   1    7.20    7.60 
   5  -6  -1   25.60   10.50 
   5  -6  -1   17.90    8.80 
  -5  -6   1   23.60    9.50 
   5  -6  -1   17.70    9.50 
  -5  -6   1   29.50   12.50 
  -5   6   1   23.00   13.00 
   5   6  -1   24.00   13.10 
   5   6  -1   17.50    8.90 
   5   6  -1   47.50   13.60 
  -5   6   1   24.40    8.40 
   5   6  -1   26.00   13.10 
  -5   6   1   12.20    7.90 
  -5   6   1   37.90   11.20 
   5   6  -1   24.40    9.70 
   5   6  -1   14.00    8.20 
   5   6  -1   17.80   11.70 
   5   6  -1   34.40   13.80 
   5   6  -1   18.20    7.90 
   5   6  -1   20.00    7.30 
  -5   6   1   33.90    9.90 
   5   6  -1   25.90    9.30 
   5   6  -1   17.60   10.70 
   5   6  -1   13.40    9.40 
  -5   6   1   37.80    9.90 
   5   6  -1   20.10   11.50 
   5   6  -1   15.60   12.10 
   5   6  -1   20.20   10.20 
   4  -6  -1  130.59   21.40 
  -4  -6   1   96.89   16.90 
  -4  -6   1  148.19   22.00 
   4  -6  -1  137.19   15.90 
  -4  -6   1  104.59   17.90 
   4  -6  -1   91.69   21.70 
   4  -6  -1  125.99   14.50 
   4  -6  -1   99.69   16.20 
  -4  -6   1   87.89   17.30 
   4  -6  -1  129.79   19.10 
   4  -6  -1   88.99   17.60 
  -4  -6   1  134.99   21.20 
  -4  -6   1  130.89   18.20 
   4  -6  -1  108.49   12.40 
  -4  -6   1  152.48   17.40 
   4  -6  -1   90.09   15.10 
   4  -6  -1  118.89   17.50 
  -4  -6   1  125.19   22.50 
  -4  -6   1  175.08   28.70 
   4  -6  -1  103.49   13.60 
   4  -6  -1   76.29   17.80 
   4  -6  -1  137.09   14.00 
   4  -6  -1  131.39   12.00 
   4  -6  -1  128.59   18.30 
  -4  -6   1  112.89   20.10 
   4  -6  -1  137.39   17.90 
  -4  -6   1  123.09   21.50 
  -4  -6   1  103.49   18.80 
   4  -6  -1  124.89   20.00 
   4  -6  -1  115.49   14.10 
  -4  -6   1  105.79   14.70 
   4  -6  -1   96.39   16.20 
   4  -6  -1  117.49   11.80 
  -4  -6   1  100.99   19.10 
   4  -6  -1  142.49   18.20 
  -4  -6   1  120.29   20.30 
  -4   6   1  111.89   18.40 
   4   6  -1  106.39   14.90 
   4   6  -1  111.99   21.30 
   4   6  -1  122.69   17.80 
  -4   6   1  143.09   16.20 
   4   6  -1  122.59   22.90 
  -4   6   1   94.89   13.30 
   4   6  -1   74.89   15.60 
   4   6  -1  107.19   14.80 
   4   6  -1  180.58   26.50 
   4   6  -1  144.59   21.50 
   4   6  -1   94.59   13.70 
  -4   6   1  127.79   18.50 
  -4   6   1  123.69   13.40 
  -4   6   1  131.99   13.90 
   4   6  -1  118.89   23.00 
   4   6  -1  106.39   21.90 
   4   6  -1  132.59   19.60 
   4   6  -1  133.09   19.80 
  -4   6   1  113.99   18.30 
  -4   6   1  109.19   20.60 
   4   6  -1  104.39   15.90 
   4   6  -1  132.39   22.90 
  -4   6   1  120.09   16.00 
   4   6  -1  121.09   15.20 
   4   6  -1  134.39   15.80 
   4   6  -1  115.69   21.90 
  -3  -6   1    9.90    9.00 
   3  -6  -1    6.60    4.10 
   3  -6  -1   14.20    7.90 
  -3  -6   1    3.50    5.60 
  -3  -6   1    6.60    6.00 
  -3  -6   1    0.00    7.00 
  -3  -6   1    7.10    7.20 
   3  -6  -1   14.20    4.90 
   3  -6  -1   16.10    5.50 
   3  -6  -1   19.70    9.70 
   3  -6  -1    4.10    5.40 
  -3  -6   1    5.90    7.80 
  -3  -6   1    2.50    7.70 
  -3  -6   1    9.20    7.60 
  -3  -6   1    7.90    6.70 
  -3  -6   1   12.80    5.70 
   3  -6  -1    8.60    6.60 
   3  -6  -1    5.20    3.60 
   3  -6  -1    5.10    7.30 
   3  -6  -1    9.90    6.80 
  -3  -6   1    7.30    5.00 
   3  -6  -1   20.10    7.80 
   3  -6  -1   13.90    4.30 
   3  -6  -1    1.60    4.10 
   3  -6  -1    5.00    5.40 
  -3  -6   1   11.00    7.80 
  -3  -6   1    0.20    6.10 
   3  -6  -1    2.10    5.40 
   3  -6  -1    9.10    5.10 
  -3  -6   1    6.40    7.70 
   3  -6  -1   11.90    6.50 
   3  -6  -1   15.70    8.40 
  -3  -6   1    5.40    7.00 
   3  -6  -1    3.90    6.50 
   3  -6  -1   18.50    9.90 
   3  -6  -1    1.40    4.60 
   3   6  -1    8.50    6.00 
   3   6  -1    4.00    4.80 
   3   6  -1    5.30    5.80 
   3   6  -1    8.30    7.30 
  -3   6   1   29.70   10.80 
   3   6  -1    4.50    4.80 
   3   6  -1   10.50    8.70 
   3   6  -1   13.30    8.20 
   3   6  -1   20.50   10.50 
  -3   6   1   10.70    4.70 
  -3   6   1    2.70    6.00 
   3   6  -1   12.70    8.80 
  -3   6   1    7.60    5.10 
   3   6  -1    9.70    7.40 
  -3   6   1    4.70    4.70 
   3   6  -1    2.50    7.40 
   3   6  -1    4.30    4.80 
  -3   6   1    7.90    5.60 
   3   6  -1   11.00    9.10 
   3   6  -1    6.20    7.50 
  -3   6   1    6.50    6.00 
  -3   6   1   12.70    5.10 
  -3   6   1   17.50    7.90 
   3   6  -1    6.70    7.60 
   3   6  -1   16.00    7.40 
  -3   6   1   10.30    7.60 
   3   6  -1    0.20    6.80 
   3   6  -1    7.90    6.70 
  -2  -6   1   33.00   10.20 
   2  -6  -1   34.00    4.60 
  -2  -6   1   35.40    6.30 
   2  -6  -1   24.30    7.10 
   2  -6  -1   24.70   10.80 
   2  -6  -1   35.30    8.70 
  -2  -6   1   43.50   12.70 
   2  -6  -1   23.30    4.10 
   2  -6  -1   29.40    8.40 
   2  -6  -1   39.60    5.70 
  -2  -6   1   21.50    9.30 
   2  -6  -1   29.00    4.60 
   2  -6  -1   18.50    6.50 
  -2  -6   1   41.20    9.30 
   2  -6  -1   29.60    5.20 
  -2  -6   1   10.90    6.60 
  -2  -6   1   18.20   10.30 
   2  -6  -1   28.50    6.70 
   2  -6  -1   30.20    5.10 
   2  -6  -1   26.70    6.50 
   2  -6  -1   16.30   11.00 
   2  -6  -1   17.50    6.30 
  -2  -6   1   23.80    6.50 
   2  -6  -1   18.00    6.50 
   2  -6  -1   25.60    7.30 
  -2  -6   1   26.80    8.90 
   2  -6  -1   30.80   10.30 
  -2  -6   1   31.10   11.00 
   2  -6  -1   20.20    7.10 
   2  -6  -1   29.10    3.40 
   2  -6  -1   24.40    9.20 
   2  -6  -1   22.90    5.60 
  -2  -6   1   31.40    8.60 
  -2  -6   1   33.70   10.50 
  -2  -6   1   24.90    8.60 
  -2  -6   1   16.40    8.30 
   2  -6  -1   28.00    4.60 
   2  -6  -1   29.90    3.60 
  -2  -6   1   19.90    5.70 
  -2  -6   1   30.50    5.50 
   2  -6  -1   28.00    9.00 
   2  -6  -1   28.00    4.10 
   2  -6  -1   31.90    6.70 
  -2   6   1   28.90    7.70 
  -2   6   1   37.70    9.60 
   2   6  -1   23.40    4.80 
   2   6  -1   28.00    4.50 
   2   6  -1   21.80    7.20 
   2   6  -1   25.00    7.00 
  -2   6   1   37.60   10.70 
   2   6  -1   22.80    5.60 
   2   6  -1   36.50   11.50 
  -2   6   1   30.60    9.90 
   2   6  -1   31.70   11.60 
  -2   6   1   31.60   11.50 
  -2   6   1   27.90    9.50 
   2   6  -1   16.20    8.20 
   2   6  -1   23.50    5.40 
   2   6  -1   29.20    4.90 
   2   6  -1   29.90   10.60 
  -2   6   1   21.20    4.30 
  -2   6   1   29.00    8.40 
  -2   6   1   17.90    7.60 
   2   6  -1   16.40    8.60 
   2   6  -1   15.70   10.10 
   2   6  -1   22.50    5.30 
   2   6  -1   24.30    6.50 
  -2   6   1   17.20    8.50 
   2   6  -1   11.20    6.70 
   2   6  -1   25.00    8.00 
   2   6  -1   29.70   10.30 
   2   6  -1   18.80   10.70 
   2   6  -1   23.00   10.10 
  -1  -6   1  116.29    8.30 
  -1  -6   1  164.38   19.80 
  -1  -6   1  125.39   21.40 
   1  -6  -1  116.89   15.90 
  -1  -6   1  129.39   16.10 
   1  -6  -1  131.49   19.10 
  -1  -6   1   90.89   13.60 
   1  -6  -1  136.69   22.10 
  -1  -6   1  102.59   17.90 
   1  -6  -1  126.79   16.60 
   1  -6  -1  109.99   15.20 
  -1  -6   1  130.19   10.00 
  -1  -6   1  116.19   13.60 
  -1  -6   1  113.29   14.40 
  -1  -6   1  124.49   11.70 
   1  -6  -1  115.09   15.50 
  -1  -6   1  106.19   17.90 
   1  -6  -1  124.79   15.70 
  -1  -6   1  143.89   18.80 
  -1  -6   1   95.29   17.00 
   1  -6  -1  127.89   16.90 
   1  -6  -1  134.19   10.40 
   1  -6  -1  109.49   14.90 
   1  -6  -1  122.89   19.30 
  -1  -6   1  130.79    9.10 
  -1  -6   1  109.49   14.40 
  -1  -6   1  141.69   12.40 
   1  -6  -1  101.89   13.80 
   1  -6  -1  149.09   22.10 
  -1  -6   1  174.68   21.50 
   1   6  -1  127.69   17.50 
   1   6  -1  129.29   11.90 
   1   6  -1  138.29   13.20 
  -1   6   1  110.39   15.60 
  -1   6   1  134.59   20.00 
  -1   6   1  110.99   19.90 
  -1   6   1  124.89   21.60 
   1   6  -1  150.78   13.80 
   1   6  -1  110.69   16.40 
   1   6  -1  147.39   20.80 
   1   6  -1  101.69   19.30 
   1   6  -1  151.88   22.50 
   1   6  -1  130.69   20.50 
   1   6  -1  110.39   18.00 
   1   6  -1  131.89    8.80 
   1   6  -1  160.98   19.60 
  -1   6   1  116.99   16.40 
  -1   6   1  137.89   19.40 
   1   6  -1  141.89   13.00 
   1   6  -1  141.89   24.90 
   1   6  -1  119.69   11.60 
  -1   6   1  125.69   18.50 
  -1   6   1  102.39   15.50 
   1   6  -1  123.39   16.80 
  -1   6   1  122.59   17.00 
  -1   6   1  109.89   16.90 
   1   6  -1  125.49   20.80 
   1   6  -1  124.79   19.70 
   1   6  -1  119.49   18.70 
   0  -6  -1  735.83   29.80 
   0  -6  -1  703.13   38.90 
   0  -6  -1  635.54   63.29 
   0  -6  -1  692.03   40.00 
   0  -6   1  701.43   38.40 
   0  -6   1  791.12   41.60 
   0  -6  -1  754.32   44.20 
   0  -6   1  743.03   34.50 
   0  -6  -1  798.02   41.30 
   0  -6  -1  671.23   32.00 
   0  -6   1  727.23   46.80 
   0  -6  -1  678.93   41.90 
   0  -6  -1  690.83   39.70 
   0  -6  -1  716.93   34.50 
   0  -6   1  688.63   42.90 
   0  -6  -1  697.13   30.20 
   0  -6  -1  743.93   46.00 
   0  -6   1  689.63   36.40 
   0  -6  -1  689.33   39.80 
   0  -6   1  716.83   41.10 
   0  -6  -1  665.93   42.60 
   0  -6   1  727.03   28.80 
   0  -6   1  692.93   37.00 
   0  -6   1  683.23   31.10 
   0  -6   1  697.23   38.70 
   0  -6   1  778.82   38.20 
   0  -6   1  702.83   33.40 
   0  -6   1  730.73   38.80 
   0  -6   1  704.13   28.60 
   0  -6   1  728.53   31.00 
   0  -6   1  692.03   35.40 
   0   6   1  704.23   41.30 
   0   6  -1  747.73   49.20 
   0   6   1  718.23   43.50 
   0   6  -1  597.84   39.70 
   0   6  -1  673.23   40.80 
   0   6  -1  709.03   43.10 
   0   6   1  706.43   40.30 
   0   6   1  731.53   32.70 
   0   6  -1  660.93   31.90 
   0   6  -1  649.14   44.30 
   0   6   1  722.03   46.00 
   0   6  -1  786.42   47.80 
   0   6   1  716.23   41.40 
   0   6  -1  692.63   39.50 
   0   6   1  686.53   43.10 
   0   6  -1  542.35   40.10 
   0   6   1  742.73   41.10 
   0   6   1  711.63   35.00 
   0   6  -1  746.23   28.90 
   0   6  -1  710.93   43.40 
   0   6   1  769.72   44.40 
   0   6   1  737.63   43.90 
   0   6   1  623.24   40.40 
   0   6  -1  724.33   41.70 
  -1  -6  -1   55.49   14.40 
   1  -6   1   70.59    5.80 
   1  -6   1   77.99   11.70 
   1  -6   1   72.09   14.70 
   1  -6   1   64.09   11.00 
   1  -6   1   79.99   13.50 
   1  -6   1   78.29   14.90 
   1  -6   1   85.19    9.70 
  -1  -6  -1   78.69    9.70 
   1  -6   1   63.99   10.10 
   1  -6   1   79.49   17.00 
   1  -6   1   76.49    9.60 
   1  -6   1   88.39   15.10 
  -1  -6  -1   72.69   13.70 
   1  -6   1   77.29    9.60 
  -1  -6  -1   85.49   16.50 
   1  -6   1   74.39    8.60 
  -1  -6  -1   53.69   12.00 
  -1  -6  -1   71.69   15.30 
  -1  -6  -1   74.99   14.00 
  -1  -6  -1   88.99   13.00 
   1  -6   1  106.89   21.80 
   1  -6   1   73.49    8.60
[truncated: 3,849,768 more chars]
