# Supplementary material
Source: MDPI journal article supplement (https://www.mdpi.com/2073-4352/13/7/1043)
Supplement: s1 [file s1 › 3 Nd(OAc)2Cl x 3H2O_Tabellen.pdf]

Table S1. Crystal data and structure refinement for Nd(OAc)2Cl)·x·3H2O.

|                                   |                                                                              |
|-----------------------------------|------------------------------------------------------------------------------|
| Identification code               | Ha2019_58_0m_a                                                               |
| Empirical formula                 | C4 H12 Cl Nd O7                                                              |
| Formula weight                    | 351.83                                                                       |
| Temperature                       | 100(2) K                                                                     |
| Wavelength                        | 0.71073 Å                                                                    |
| Crystal system, space group       | Monoclinic, P2(1)/n                                                          |
| Unit cell dimensions              | a = 7.9059(3) Å<br>b = 7.9008(3) Å    β = 98.856(2) deg.<br>c = 17.5852(7) Å |
| Volume                            | 1085.33(7) Å <sup>3</sup>                                                    |
| Z, Calculated density             | 4, 2.153 Mg/m <sup>3</sup>                                                   |
| Absorption coefficient            | 5.034 mm <sup>-1</sup>                                                       |
| F(000)                            | 676                                                                          |
| Crystal size                      | 0.151 x 0.144 x 0.063 mm                                                     |
| Theta range for data collection   | 2.689 to 27.999 deg.                                                         |
| Limiting indices                  | -10 ≤ h ≤ 10, -10 ≤ k ≤ 10, -23 ≤ l ≤ 23                                     |
| Reflections collected / unique    | 122829 / 2621 [R(int) = 0.0566]                                              |
| Completeness to theta = 25.242    | 99.9 %                                                                       |
| Absorption correction             | Semi-empirical from equivalents                                              |
| Max. and min. transmission        | 0.762 and 0.489                                                              |
| Refinement method                 | Full-matrix least-squares on F <sup>2</sup>                                  |
| Data / restraints / parameters    | 2621 / 0 / 125                                                               |
| Goodness-of-fit on F <sup>2</sup> | 1.064                                                                        |
| Final R indices [I > 2σ(I)]       | R1 = 0.0122, wR2 = 0.0270                                                    |
| R indices (all data)              | R1 = 0.0142, wR2 = 0.0275                                                    |
| Extinction coefficient            | n/a                                                                          |
| Largest diff. peak and hole       | 0.387 and -0.358 e.Å <sup>-3</sup>                                           |

Table S2. Atomic coordinates ( $\times 10^4$ ) and equivalent isotropic displacement parameters ( $\text{\AA}^2 \times 10^3$ ) for  $\text{Nd}(\text{OAc})_2\text{Cl} \cdot 3\text{H}_2\text{O}$ .  $U(\text{eq})$  is defined as one third of the trace of the orthogonalized  $U_{ij}$  tensor.

|       | x        | y       | z       | U (eq) |
|-------|----------|---------|---------|--------|
| Nd(1) | 2639(1)  | 4614(1) | 5378(1) | 9(1)   |
| Cl(1) | 3846(1)  | 9715(1) | 6915(1) | 16(1)  |
| O(11) | -128(2)  | 3379(2) | 5353(1) | 14(1)  |
| O(12) | -2798(2) | 2575(2) | 5257(1) | 17(1)  |
| C(11) | -1237(2) | 2291(2) | 5490(1) | 13(1)  |
| C(12) | -698(3)  | 710(2)  | 5920(1) | 21(1)  |
| O(21) | 5521(2)  | 5619(2) | 5745(1) | 13(1)  |
| O(22) | 8223(2)  | 6325(2) | 5990(1) | 15(1)  |
| C(21) | 6840(2)  | 6014(2) | 6231(1) | 12(1)  |
| C(22) | 6715(2)  | 6089(3) | 7069(1) | 20(1)  |
| O(1W) | 3932(2)  | 1743(2) | 5390(1) | 14(1)  |
| O(2W) | 1697(2)  | 6648(2) | 6279(1) | 15(1)  |
| O(3W) | 2994(2)  | 3497(2) | 6703(1) | 18(1)  |

Table S3. Bond lengths [Å] and angles [deg] for Nd(OAc)2Cl)·x\_3H2O.

---

|                       |            |
|-----------------------|------------|
| Nd(1)-O(11)           | 2.390(1)   |
| Nd(1)-O(21)           | 2.406(1)   |
| Nd(1)-O(2W)           | 2.452(1)   |
| Nd(1)-O(3W)           | 2.467(1)   |
| Nd(1)-O(1W)           | 2.487(1)   |
| Nd(1)-O(12)#1         | 2.498(1)   |
| Nd(1)-O(22)#2         | 2.510(1)   |
| Nd(1)-O(21)#2         | 2.633(1)   |
| Nd(1)-O(11)#1         | 2.706(1)   |
|                       |            |
| Nd(1)-Nd(1)#2         | 4.1963(2)  |
| Nd(1)-Nd(1)#1         | 4.2234(2)  |
|                       |            |
| O(11)-C(11)           | 1.276(2)   |
| O(12)-C(11)           | 1.259(2)   |
| C(11)-C(12)           | 1.489(3)   |
|                       |            |
| O(21)-C(21)           | 1.281(2)   |
| O(22)-C(21)           | 1.256(2)   |
| C(21)-C(22)           | 1.493(2)   |
|                       |            |
| O(11)-Nd(1)-O(21)     | 165.12(4)  |
| O(11)-Nd(1)-O(2W)     | 84.92(4)   |
| O(21)-Nd(1)-O(2W)     | 88.84(4)   |
| O(11)-Nd(1)-O(3W)     | 80.91(4)   |
| O(21)-Nd(1)-O(3W)     | 84.23(4)   |
| O(2W)-Nd(1)-O(3W)     | 68.00(4)   |
| O(11)-Nd(1)-O(1W)     | 90.09(4)   |
| O(21)-Nd(1)-O(1W)     | 85.84(4)   |
| O(2W)-Nd(1)-O(1W)     | 139.23(4)  |
| O(3W)-Nd(1)-O(1W)     | 71.25(4)   |
| O(11)-Nd(1)-O(12)#1   | 117.66(4)  |
| O(21)-Nd(1)-O(12)#1   | 73.46(4)   |
| O(2W)-Nd(1)-O(12)#1   | 75.39(4)   |
| O(3W)-Nd(1)-O(12)#1   | 137.23(4)  |
| O(1W)-Nd(1)-O(12)#1   | 139.99(4)  |
| O(11)-Nd(1)-O(22)#2   | 75.47(4)   |
| O(21)-Nd(1)-O(22)#2   | 117.42(4)  |
| O(2W)-Nd(1)-O(22)#2   | 138.50(4)  |
| O(3W)-Nd(1)-O(22)#2   | 140.75(4)  |
| O(1W)-Nd(1)-O(22)#2   | 77.84(4)   |
| O(12)#1-Nd(1)-O(22)#2 | 81.90(4)   |
| O(11)-Nd(1)-O(21)#2   | 124.57(4)  |
| O(21)-Nd(1)-O(21)#2   | 67.30(5)   |
| O(2W)-Nd(1)-O(21)#2   | 142.05(4)  |
| O(3W)-Nd(1)-O(21)#2   | 133.43(4)  |
| O(1W)-Nd(1)-O(21)#2   | 70.66(4)   |
| O(12)#1-Nd(1)-O(21)#2 | 69.84(4)   |
| O(22)#2-Nd(1)-O(21)#2 | 50.22(4)   |
| O(11)-Nd(1)-O(11)#1   | 68.17(5)   |
| O(21)-Nd(1)-O(11)#1   | 121.95(4)  |
| O(2W)-Nd(1)-O(11)#1   | 69.49(4)   |
| O(3W)-Nd(1)-O(11)#1   | 128.82(4)  |
| O(1W)-Nd(1)-O(11)#1   | 144.03(4)  |
| O(12)#1-Nd(1)-O(11)#1 | 49.49(4)   |
| O(22)#2-Nd(1)-O(11)#1 | 69.32(4)   |
| O(21)#2-Nd(1)-O(11)#1 | 97.73(4)   |
|                       |            |
| Nd(1)#2-Nd(1)-Nd(1)#1 | 139.761(5) |

|                         |           |
|-------------------------|-----------|
| C (11)-O (11)-Nd (1)    | 157.6 (1) |
| C (11)-O (11)-Nd (1) #1 | 90.5 (1)  |
| Nd (1)-O (11)-Nd (1) #1 | 111.8 (1) |
| C (11)-O (12)-Nd (1) #1 | 100.9 (1) |
| O (12)-C (11)-O (11)    | 119.1 (2) |
| O (12)-C (11)-C (12)    | 120.3 (2) |
| O (11)-C (11)-C (12)    | 120.6 (2) |
| C (21)-O (21)-Nd (1)    | 154.1 (1) |
| C (21)-O (21)-Nd (1) #2 | 91.8 (1)  |
| Nd (1)-O (21)-Nd (1) #2 | 112.7 (1) |
| C (21)-O (22)-Nd (1) #2 | 98.3 (1)  |
| O (22)-C (21)-O (21)    | 118.9 (2) |
| O (22)-C (21)-C (22)    | 121.2 (2) |
| O (21)-C (21)-C (22)    | 119.9 (2) |

---

Symmetry transformations used to generate equivalent atoms:

#1 -x,-y+1,-z+1      #2 -x+1,-y+1,-z+1

Table S4. Anisotropic displacement parameters ( $\text{\AA}^2 \times 10^3$ ) for Nd(OAc)<sub>2</sub>Cl<sub>2</sub>·3H<sub>2</sub>O.

The anisotropic displacement factor exponent takes the form:  
 $-2 \pi^2 [ h^2 a^{*2} U_{11} + \dots + 2 h k a^* b^* U_{12} ]$

|       | U <sub>11</sub> | U <sub>22</sub> | U <sub>33</sub> | U <sub>23</sub> | U <sub>13</sub> | U <sub>12</sub> |
|-------|-----------------|-----------------|-----------------|-----------------|-----------------|-----------------|
| Nd(1) | 6(1)            | 10(1)           | 11(1)           | 1(1)            | 2(1)            | -1(1)           |
| Cl(1) | 17(1)           | 13(1)           | 17(1)           | 2(1)            | 2(1)            | -2(1)           |
| O(11) | 10(1)           | 15(1)           | 18(1)           | 2(1)            | 3(1)            | -2(1)           |
| O(12) | 8(1)            | 16(1)           | 25(1)           | 5(1)            | 3(1)            | -1(1)           |
| C(11) | 12(1)           | 14(1)           | 13(1)           | 0(1)            | 4(1)            | 0(1)            |
| C(12) | 19(1)           | 17(1)           | 27(1)           | 8(1)            | 1(1)            | 1(1)            |
| O(21) | 9(1)            | 16(1)           | 12(1)           | 0(1)            | 0(1)            | -2(1)           |
| O(22) | 9(1)            | 21(1)           | 16(1)           | -2(1)           | 2(1)            | -3(1)           |
| C(21) | 11(1)           | 9(1)            | 15(1)           | 0(1)            | 0(1)            | 2(1)            |
| C(22) | 16(1)           | 30(1)           | 13(1)           | 0(1)            | 1(1)            | 2(1)            |
| O(1W) | 12(1)           | 13(1)           | 18(1)           | 2(1)            | 5(1)            | 1(1)            |
| O(2W) | 11(1)           | 14(1)           | 21(1)           | -4(1)           | 2(1)            | 0(1)            |
| O(3W) | 25(1)           | 15(1)           | 15(1)           | 3(1)            | 7(1)            | 5(1)            |

Table S5. Hydrogen coordinates ( $\times 10^4$ ) and isotropic displacement parameters ( $\text{\AA}^2 \times 10^3$ ) for Nd(OAc)<sub>2</sub>Cl·x\_3H<sub>2</sub>O.

|        | x     | y    | z    | U (eq) |
|--------|-------|------|------|--------|
| H(12A) | -599  | 924  | 6474 | 27 (5) |
| H(12B) | 412   | 341  | 5798 | 27 (5) |
| H(12C) | -1553 | -176 | 5772 | 27 (5) |
| H(12D) | 417   | 813  | 6249 | 27 (5) |
| H(12E) | -1570 | 403  | 6236 | 27 (5) |
| H(12F) | -639  | -167 | 5531 | 27 (5) |
| H(22A) | 7855  | 5933 | 7370 | 49 (5) |
| H(22B) | 5951  | 5190 | 7196 | 49 (5) |
| H(22C) | 6257  | 7192 | 7191 | 49 (5) |
| H(11W) | 3920  | 933  | 5796 | 44 (5) |
| H(12W) | 5098  | 1769 | 5299 | 44 (5) |
| H(21W) | 521   | 6768 | 6347 | 51 (6) |
| H(22W) | 2246  | 7664 | 6490 | 51 (6) |
| H(31W) | 2446  | 3990 | 7100 | 51 (6) |
| H(32W) | 3159  | 2329 | 6845 | 51 (6) |

Table S6. Hydrogen bonds for Nd(OAc)2Cl)\_x\_3H2O [A and deg.].

| D-H...A                | d(D-H) | d(H...A) | d(D...A) | <(DHA) |
|------------------------|--------|----------|----------|--------|
| O(1W)-H(11W)...Cl(1)#3 | 0.96   | 2.20     | 3.134(1) | 164.1  |
| O(1W)-H(12W)...O(12)#4 | 0.96   | 1.79     | 2.712(2) | 159.3  |
| O(2W)-H(21W)...O(22)#5 | 0.96   | 1.86     | 2.727(2) | 148.6  |
| O(2W)-H(22W)...Cl(1)   | 0.96   | 2.12     | 3.070(1) | 170.3  |
| O(3W)-H(31W)...Cl(1)#6 | 0.96   | 2.22     | 3.168(1) | 171.0  |
| O(3W)-H(32W)...Cl(1)#3 | 0.96   | 2.13     | 3.074(1) | 165.6  |

Symmetry transformations used to generate equivalent atoms:

#1 -x,-y+1,-z+1      #2 -x+1,-y+1,-z+1      #3 x,y-1,z  
#4 x+1,y,z      #5 x-1,y,z      #6 -x+1/2,y-1/2,-z+3/2
