# Supplementary material
Source: MDPI journal article supplement (https://www.mdpi.com/2073-4352/13/7/1043)
Supplement: s1 [file s1 › 5 Sm Ha2019_80_0m_a.cif]

 
data_Ha2019_80_0m_a 
  
_audit_creation_method            'SHELXL-2014/7' 
_shelx_SHELXL_version_number      '2014/7' 
_chemical_name_systematic         ? 
_chemical_name_common             ? 
_chemical_melting_point           ? 
_chemical_formula_moiety          ? 
_chemical_formula_sum 
 'C4 H12 Br O7 Sm' 
_chemical_formula_weight          402.40 
  
loop_ 
 _atom_type_symbol 
 _atom_type_description 
 _atom_type_scat_dispersion_real 
 _atom_type_scat_dispersion_imag 
 _atom_type_scat_source 
 'C'  'C'   0.0033   0.0016 
 'International Tables Vol C Tables 4.2.6.8 and 6.1.1.4' 
 'H'  'H'   0.0000   0.0000 
 'International Tables Vol C Tables 4.2.6.8 and 6.1.1.4' 
 'O'  'O'   0.0106   0.0060 
 'International Tables Vol C Tables 4.2.6.8 and 6.1.1.4' 
 'Br'  'Br'  -0.2901   2.4595 
 'International Tables Vol C Tables 4.2.6.8 and 6.1.1.4' 
 'Sm'  'Sm'  -0.1638   3.4418 
 'International Tables Vol C Tables 4.2.6.8 and 6.1.1.4' 
  
_space_group_crystal_system       monoclinic 
_space_group_IT_number            14 
_space_group_name_H-M_alt         'P 21/n' 
_space_group_name_Hall            '-P 2yn' 
  
_shelx_space_group_comment 
; 
The symmetry employed for this shelxl refinement is uniquely defined 
by the following loop, which should always be used as a source of 
symmetry information in preference to the above space-group names. 
They are only intended as comments. 
; 
  
loop_ 
 _space_group_symop_operation_xyz 
 'x, y, z' 
 '-x+1/2, y+1/2, -z+1/2' 
 '-x, -y, -z' 
 'x-1/2, -y-1/2, z-1/2' 
  
_cell_length_a                    7.8473(3) 
_cell_length_b                    8.0230(3) 
_cell_length_c                    17.8722(7) 
_cell_angle_alpha                 90 
_cell_angle_beta                  95.987(2) 
_cell_angle_gamma                 90 
_cell_volume                      1119.08(7) 
_cell_formula_units_Z             4 
_cell_measurement_temperature     100(2) 
_cell_measurement_reflns_used     8089 
_cell_measurement_theta_min       2.74 
_cell_measurement_theta_max       25.82 
  
_exptl_crystal_description        prism 
_exptl_crystal_colour             colorless 
_exptl_crystal_density_meas       ? 
_exptl_crystal_density_method     ? 
_exptl_crystal_density_diffrn     2.388 
_exptl_crystal_F_000              756 
_exptl_transmission_factor_min    ? 
_exptl_transmission_factor_max    ? 
_exptl_crystal_size_max           0.210 
_exptl_crystal_size_mid           0.050 
_exptl_crystal_size_min           0.045 
_exptl_absorpt_coefficient_mu     8.822 
_shelx_estimated_absorpt_T_min    0.259 
_shelx_estimated_absorpt_T_max    0.692 
_exptl_absorpt_correction_type    multi-scan 
_exptl_absorpt_correction_T_min   0.471 
_exptl_absorpt_correction_T_max   0.746 
_exptl_absorpt_process_details    'Bruker SADABS' 
_exptl_absorpt_special_details    ? 
_diffrn_ambient_temperature       100(2) 
_diffrn_radiation_wavelength      0.71073 
_diffrn_radiation_type            MoK\a 
_diffrn_source                    ? 
_diffrn_measurement_device_type   'Bruker APEX-II CCD' 
_diffrn_measurement_method        '\f and \w scans' 
_diffrn_detector_area_resol_mean  ? 
_diffrn_reflns_number             113760 
_diffrn_reflns_av_unetI/netI      0.0170 
_diffrn_reflns_av_R_equivalents   0.0701 
_diffrn_reflns_limit_h_min        -10 
_diffrn_reflns_limit_h_max        10 
_diffrn_reflns_limit_k_min        -10 
_diffrn_reflns_limit_k_max        10 
_diffrn_reflns_limit_l_min        -23 
_diffrn_reflns_limit_l_max        23 
_diffrn_reflns_theta_min          2.739 
_diffrn_reflns_theta_max          27.986 
_diffrn_reflns_theta_full         25.242 
_diffrn_measured_fraction_theta_max   1.000 
_diffrn_measured_fraction_theta_full  1.000 
_diffrn_reflns_Laue_measured_fraction_max    1.000 
_diffrn_reflns_Laue_measured_fraction_full   1.000 
_diffrn_reflns_point_group_measured_fraction_max   1.000 
_diffrn_reflns_point_group_measured_fraction_full  1.000 
_reflns_number_total              2708 
_reflns_number_gt                 2406 
_reflns_threshold_expression      'I > 2\s(I)' 
_reflns_Friedel_coverage          0.000 
_reflns_Friedel_fraction_max      . 
_reflns_Friedel_fraction_full     . 
  
_reflns_special_details 
; 
 Reflections were merged by SHELXL according to the crystal 
 class for the calculation of statistics and refinement. 
  
 _reflns_Friedel_fraction is defined as the number of unique 
 Friedel pairs measured divided by the number that would be 
 possible theoretically, ignoring centric projections and 
 systematic absences. 
; 
  
_computing_data_collection        'Bruker APEX2' 
_computing_cell_refinement        'Bruker SAINT' 
_computing_data_reduction         'Bruker SAINT' 
_computing_structure_solution     'SHELXS-97 (Sheldrick 2008)' 
_computing_structure_refinement 'SHELXL-2014/7 (Sheldrick, 2014)' 
_computing_molecular_graphics     'Bruker SHELXTL' 
_computing_publication_material   'Bruker SHELXTL' 
_refine_special_details           ? 
_refine_ls_structure_factor_coef  Fsqd 
_refine_ls_matrix_type            full 
_refine_ls_weighting_scheme       calc 
_refine_ls_weighting_details 
'w=1/[\s^2^(Fo^2^)+(0.0072P)^2^+1.6298P] where P=(Fo^2^+2Fc^2^)/3' 
_atom_sites_solution_primary      direct 
_atom_sites_solution_secondary    ? 
_atom_sites_solution_hydrogens    mixed 
_refine_ls_hydrogen_treatment     constr 
_refine_ls_extinction_method      none 
_refine_ls_extinction_coef        . 
_refine_ls_number_reflns          2708 
_refine_ls_number_parameters      125 
_refine_ls_number_restraints      0 
_refine_ls_R_factor_all           0.0201 
_refine_ls_R_factor_gt            0.0150 
_refine_ls_wR_factor_ref          0.0321 
_refine_ls_wR_factor_gt           0.0305 
_refine_ls_goodness_of_fit_ref    1.084 
_refine_ls_restrained_S_all       1.084 
_refine_ls_shift/su_max           0.001 
_refine_ls_shift/su_mean          0.000 
  
loop_ 
 _atom_site_label 
 _atom_site_type_symbol 
 _atom_site_fract_x 
 _atom_site_fract_y 
 _atom_site_fract_z 
 _atom_site_U_iso_or_equiv 
 _atom_site_adp_type 
 _atom_site_occupancy 
 _atom_site_site_symmetry_order 
 _atom_site_calc_flag 
 _atom_site_refinement_flags_posn 
 _atom_site_refinement_flags_adp 
 _atom_site_refinement_flags_occupancy 
 _atom_site_disorder_assembly 
 _atom_site_disorder_group 
Sm1 Sm 0.25980(2) 0.46025(2) 0.53553(2) 0.01066(4) Uani 1 1 d . . . . . 
Br1 Br 0.39459(3) 0.96233(3) 0.68684(2) 0.01794(6) Uani 1 1 d . . . . . 
O11 O -0.0124(2) 0.3373(2) 0.53298(10) 0.0163(4) Uani 1 1 d . . . . . 
O12 O -0.2815(2) 0.2629(2) 0.52270(10) 0.0172(4) Uani 1 1 d . . . . . 
C11 C -0.1277(3) 0.2327(3) 0.54574(13) 0.0131(5) Uani 1 1 d . . . . . 
C12 C -0.0826(3) 0.0762(3) 0.58854(16) 0.0226(6) Uani 1 1 d . . . . . 
H12A H -0.0949 0.0941 0.6420 0.082(9) Uiso 1 1 calc R U . . . 
H12B H 0.0360 0.0454 0.5826 0.082(9) Uiso 1 1 calc R U . . . 
H12C H -0.1595 -0.0137 0.5691 0.082(9) Uiso 1 1 calc R U . . . 
O21 O 0.54185(19) 0.5541(2) 0.57367(9) 0.0137(3) Uani 1 1 d . . . . . 
O22 O 0.8119(2) 0.6189(2) 0.59767(9) 0.0167(4) Uani 1 1 d . . . . . 
C21 C 0.6706(3) 0.5853(3) 0.62138(14) 0.0135(5) Uani 1 1 d . . . . . 
C22 C 0.6543(3) 0.5773(4) 0.70365(14) 0.0217(6) Uani 1 1 d . . . . . 
H22A H 0.7684 0.5686 0.7314 0.031(8) Uiso 0.65(3) 1 d R U P . . 
H22B H 0.5860 0.4796 0.7144 0.031(8) Uiso 0.65(3) 1 d R U P . . 
H22C H 0.5976 0.6785 0.7192 0.031(8) Uiso 0.65(3) 1 d R U P . . 
H22D H 0.5313 0.5833 0.7087 0.031(8) Uiso 0.35(3) 1 d R U P . . 
H22E H 0.7112 0.6770 0.7259 0.031(8) Uiso 0.35(3) 1 d R U P . . 
H22F H 0.7028 0.4778 0.7296 0.031(8) Uiso 0.35(3) 1 d R U P . . 
O1W O 0.3866(2) 0.1805(2) 0.53160(10) 0.0152(4) Uani 1 1 d . . . . . 
H11W H 0.3868 0.1026 0.5724 0.058(8) Uiso 1 1 d R U . . . 
H12W H 0.5036 0.1859 0.5206 0.058(8) Uiso 1 1 d R U . . . 
O2W O 0.1570(2) 0.6525(2) 0.62542(10) 0.0166(4) Uani 1 1 d . . . . . 
H21W H 0.0358 0.6638 0.6277 0.061(9) Uiso 1 1 d R U . . . 
H22W H 0.2053 0.7554 0.6450 0.061(9) Uiso 1 1 d R U . . . 
O3W O 0.2826(2) 0.3444(2) 0.66184(10) 0.0192(4) Uani 1 1 d . . . . . 
H31W H 0.2291 0.3903 0.7031 0.064(9) Uiso 1 1 d R U . . . 
H32W H 0.3090 0.2312 0.6761 0.064(9) Uiso 1 1 d R U . . . 
  
loop_ 
 _atom_site_aniso_label 
 _atom_site_aniso_U_11 
 _atom_site_aniso_U_22 
 _atom_site_aniso_U_33 
 _atom_site_aniso_U_23 
 _atom_site_aniso_U_13 
 _atom_site_aniso_U_12 
Sm1 0.00702(5) 0.01266(6) 0.01237(6) 0.00065(5) 0.00141(4) -0.00118(5) 
Br1 0.02076(12) 0.01509(12) 0.01765(12) 0.00205(10) 0.00054(9) -0.00257(10) 
O11 0.0108(8) 0.0189(9) 0.0193(9) 0.0019(7) 0.0027(7) -0.0029(7) 
O12 0.0091(8) 0.0192(9) 0.0234(10) 0.0052(8) 0.0021(7) -0.0009(7) 
C11 0.0125(11) 0.0141(12) 0.0129(11) 0.0001(9) 0.0030(9) -0.0003(9) 
C12 0.0217(13) 0.0198(14) 0.0257(14) 0.0084(11) -0.0003(11) -0.0001(11) 
O21 0.0089(7) 0.0177(9) 0.0144(8) -0.0001(7) 0.0004(6) -0.0017(7) 
O22 0.0092(8) 0.0248(10) 0.0160(9) -0.0016(8) 0.0006(7) -0.0034(7) 
C21 0.0120(11) 0.0133(12) 0.0149(11) -0.0021(9) 0.0007(9) 0.0023(9) 
C22 0.0180(12) 0.0333(17) 0.0139(12) 0.0011(11) 0.0023(10) 0.0033(11) 
O1W 0.0127(8) 0.0155(9) 0.0178(9) 0.0030(7) 0.0042(7) 0.0000(7) 
O2W 0.0126(8) 0.0164(9) 0.0210(9) -0.0040(7) 0.0025(7) -0.0002(7) 
O3W 0.0265(10) 0.0160(9) 0.0157(9) 0.0013(7) 0.0055(8) 0.0050(8) 
  
_geom_special_details 
; 
 All esds (except the esd in the dihedral angle between two l.s. planes) 
 are estimated using the full covariance matrix.  The cell esds are taken 
 into account individually in the estimation of esds in distances, angles 
 and torsion angles; correlations between esds in cell parameters are only 
 used when they are defined by crystal symmetry.  An approximate (isotropic) 
 treatment of cell esds is used for estimating esds involving l.s. planes. 
; 
  
loop_ 
 _geom_bond_atom_site_label_1 
 _geom_bond_atom_site_label_2 
 _geom_bond_distance 
 _geom_bond_site_symmetry_2 
 _geom_bond_publ_flag 
Sm1 O11 2.3489(16) . ? 
Sm1 O21 2.3696(16) . ? 
Sm1 O2W 2.4251(17) . ? 
Sm1 O3W 2.4305(17) . ? 
Sm1 O1W 2.4592(17) . ? 
Sm1 O12 2.4661(17) 3_566 ? 
Sm1 O22 2.4713(17) 3_666 ? 
Sm1 O21 2.6228(16) 3_666 ? 
Sm1 O11 2.7221(17) 3_566 ? 
O11 C11 1.272(3) . ? 
O12 C11 1.258(3) . ? 
C11 C12 1.494(3) . ? 
C12 H12A 0.9800 . ? 
C12 H12B 0.9800 . ? 
C12 H12C 0.9800 . ? 
O21 C21 1.277(3) . ? 
O22 C21 1.257(3) . ? 
C21 C22 1.491(3) . ? 
C22 H22A 0.9800 . ? 
C22 H22B 0.9800 . ? 
C22 H22C 0.9800 . ? 
C22 H22D 0.9800 . ? 
C22 H22E 0.9800 . ? 
C22 H22F 0.9800 . ? 
O1W H11W 0.9600 . ? 
O1W H12W 0.9600 . ? 
O2W H21W 0.9600 . ? 
O2W H22W 0.9600 . ? 
O3W H31W 0.9600 . ? 
O3W H32W 0.9600 . ? 
  
loop_ 
 _geom_angle_atom_site_label_1 
 _geom_angle_atom_site_label_2 
 _geom_angle_atom_site_label_3 
 _geom_angle 
 _geom_angle_site_symmetry_1 
 _geom_angle_site_symmetry_3 
 _geom_angle_publ_flag 
O11 Sm1 O21 163.58(6) . . ? 
O11 Sm1 O2W 85.13(6) . . ? 
O21 Sm1 O2W 88.45(6) . . ? 
O11 Sm1 O3W 80.58(6) . . ? 
O21 Sm1 O3W 83.00(6) . . ? 
O2W Sm1 O3W 68.00(6) . . ? 
O11 Sm1 O1W 89.20(6) . . ? 
O21 Sm1 O1W 85.96(6) . . ? 
O2W Sm1 O1W 139.73(6) . . ? 
O3W Sm1 O1W 71.74(6) . . ? 
O11 Sm1 O12 118.21(6) . 3_566 ? 
O21 Sm1 O12 74.44(6) . 3_566 ? 
O2W Sm1 O12 75.48(6) . 3_566 ? 
O3W Sm1 O12 137.28(6) . 3_566 ? 
O1W Sm1 O12 139.81(6) . 3_566 ? 
O11 Sm1 O22 76.00(6) . 3_666 ? 
O21 Sm1 O22 118.08(5) . 3_666 ? 
O2W Sm1 O22 138.02(6) . 3_666 ? 
O3W Sm1 O22 141.60(6) . 3_666 ? 
O1W Sm1 O22 77.88(6) . 3_666 ? 
O12 Sm1 O22 81.01(6) 3_566 3_666 ? 
O11 Sm1 O21 125.19(6) . 3_666 ? 
O21 Sm1 O21 67.60(6) . 3_666 ? 
O2W Sm1 O21 141.73(6) . 3_666 ? 
O3W Sm1 O21 133.03(5) . 3_666 ? 
O1W Sm1 O21 70.46(5) . 3_666 ? 
O12 Sm1 O21 69.68(6) 3_566 3_666 ? 
O22 Sm1 O21 50.59(5) 3_666 3_666 ? 
O11 Sm1 O11 68.74(6) . 3_566 ? 
O21 Sm1 O11 122.74(5) . 3_566 ? 
O2W Sm1 O11 69.36(5) . 3_566 ? 
O3W Sm1 O11 128.76(5) . 3_566 ? 
O1W Sm1 O11 143.45(5) . 3_566 ? 
O12 Sm1 O11 49.49(5) 3_566 3_566 ? 
O22 Sm1 O11 68.90(6) 3_666 3_566 ? 
O21 Sm1 O11 98.17(5) 3_666 3_566 ? 
Sm1 Sm1 Sm1 140.334(7) 3_666 3_566 ? 
C11 O11 Sm1 159.38(16) . . ? 
C11 O11 Sm1 89.26(13) . 3_566 ? 
Sm1 O11 Sm1 111.26(6) . 3_566 ? 
C11 O12 Sm1 101.85(14) . 3_566 ? 
O12 C11 O11 119.4(2) . . ? 
O12 C11 C12 119.8(2) . . ? 
O11 C11 C12 120.8(2) . . ? 
C11 C12 H12A 109.5 . . ? 
C11 C12 H12B 109.5 . . ? 
H12A C12 H12B 109.5 . . ? 
C11 C12 H12C 109.5 . . ? 
H12A C12 H12C 109.5 . . ? 
H12B C12 H12C 109.5 . . ? 
C21 O21 Sm1 154.78(16) . . ? 
C21 O21 Sm1 90.90(14) . 3_666 ? 
Sm1 O21 Sm1 112.40(6) . 3_666 ? 
C21 O22 Sm1 98.60(14) . 3_666 ? 
O22 C21 O21 118.8(2) . . ? 
O22 C21 C22 120.8(2) . . ? 
O21 C21 C22 120.4(2) . . ? 
C21 C22 H22A 109.5 . . ? 
C21 C22 H22B 109.5 . . ? 
H22A C22 H22B 109.5 . . ? 
C21 C22 H22C 109.5 . . ? 
H22A C22 H22C 109.5 . . ? 
H22B C22 H22C 109.5 . . ? 
C21 C22 H22D 106.0 . . ? 
C21 C22 H22E 106.4 . . ? 
H22D C22 H22E 109.5 . . ? 
C21 C22 H22F 115.6 . . ? 
H22D C22 H22F 109.5 . . ? 
H22E C22 H22F 109.5 . . ? 
Sm1 O1W H11W 122.8 . . ? 
Sm1 O1W H12W 111.3 . . ? 
H11W O1W H12W 105.0 . . ? 
Sm1 O2W H21W 119.2 . . ? 
Sm1 O2W H22W 130.0 . . ? 
H21W O2W H22W 105.0 . . ? 
Sm1 O3W H31W 124.9 . . ? 
Sm1 O3W H32W 127.0 . . ? 
H31W O3W H32W 105.0 . . ? 
  
loop_ 
 _geom_hbond_atom_site_label_D 
 _geom_hbond_atom_site_label_H 
 _geom_hbond_atom_site_label_A 
 _geom_hbond_distance_DH 
 _geom_hbond_distance_HA 
 _geom_hbond_distance_DA 
 _geom_hbond_angle_DHA 
 _geom_hbond_site_symmetry_A 
O1W H11W Br1  0.96 2.33 3.2755(17) 168.2 1_545 
O1W H12W O12  0.96 1.79 2.708(2) 158.3 1_655 
O2W H21W O22  0.96 1.82 2.715(2) 154.0 1_455 
O2W H22W Br1  0.96 2.30 3.2303(17) 163.2 . 
O3W H31W Br1  0.96 2.35 3.3057(17) 171.1 2_546 
O3W H32W Br1  0.96 2.26 3.2072(18) 168.2 1_545 
  
_refine_diff_density_max    0.442 
_refine_diff_density_min   -0.443 
_refine_diff_density_rms    0.100 
  
_shelx_res_file 
; 
  
    Ha2019_80_0m_a.res created by SHELXL-2014/7 
  
  
TITL Ha2019_80_0m_a.res in P2(1)/n 
CELL  0.71073   7.8473   8.0230  17.8722   90.000   95.987   90.000 
ZERR    4.000   0.0003   0.0003   0.0007    0.000    0.002    0.000 
LATT 1 
SYMM 1/2-X, 1/2+Y, 1/2-Z 
SFAC C  H  O  Br Sm 
UNIT 16 48 28 4 4 
LIST 4 ! automatically inserted. Change 6 to 4 for CHECKCIF!! 
OMIT 0 0 2 
OMIT -3 56 
L.S. 10 
ACTA 
  
FMAP 2 
rem DFIX 0.96  0.0001 O1w H11w O1w H12w O2w H21w O2w H22w O3w H31w O3w H32w 
rem dfix 1.523  0.0001 H11w H12w H21w H22w H31w H32w 
FREE Sm1 C21_$6 
FREE Sm1 C11_$7 
EQIV $6 1-x, 1-y, 1-z 
BIND Sm1 Sm1_$6 
BIND Sm1 Sm1_$7 
EQIV $7 -x,1-y,1-z 
BIND Sm1 O11_$7 
HTAB 
EQIV $1 -x+3/2, y-1/2, -z+3/2 
EQIV $2 x, y-1, z 
HTAB O1W Br1_$2 
EQIV $3 x+1, y, z 
HTAB O1W O12_$3 
EQIV $4 x-1, y, z 
HTAB O2W O22_$4 
HTAB O2W Br1 
EQIV $5 -x+1/2, y-1/2, -z+3/2 
HTAB O3W Br1_$5 
HTAB O3W Br1_$2 
SIZE 0.074  0.120  0.465 
BOND $H 
FMAP 2 
SIZE 0.045  0.050  0.210 
rem DFIX 0.98  0.0001 C22 H22d C22 H22e C22 H22f 
rem dfix 1.601 0.0001 H22d H22e H22d H22f H22e H22f 
PLAN 5 
TEMP -173 
WGHT    0.007200    1.629800 
FVAR       0.27252   0.08243   0.03063   0.05814   0.06055   0.06445   0.64983 
SM1   5    0.259798    0.460251    0.535535    11.00000    0.00702    0.01266 = 
         0.01237    0.00065    0.00141   -0.00118 
BR1   4    0.394586    0.962327    0.686840    11.00000    0.02076    0.01509 = 
         0.01765    0.00205    0.00054   -0.00257 
O11   3   -0.012415    0.337321    0.532977    11.00000    0.01083    0.01892 = 
         0.01932    0.00190    0.00269   -0.00291 
O12   3   -0.281547    0.262933    0.522696    11.00000    0.00906    0.01915 = 
         0.02336    0.00516    0.00209   -0.00086 
C11   1   -0.127688    0.232736    0.545743    11.00000    0.01246    0.01410 = 
         0.01295    0.00005    0.00299   -0.00028 
C12   1   -0.082638    0.076160    0.588543    11.00000    0.02166    0.01980 = 
         0.02567    0.00842   -0.00033   -0.00010 
AFIX 137 
H12A  2   -0.094858    0.094099    0.641960    11.00000   21.00000 
H12B  2    0.036044    0.045358    0.582597    11.00000   21.00000 
H12C  2   -0.159548   -0.013690    0.569150    11.00000   21.00000 
AFIX   0 
O21   3    0.541847    0.554054    0.573672    11.00000    0.00894    0.01772 = 
         0.01440   -0.00011    0.00039   -0.00173 
O22   3    0.811903    0.618895    0.597666    11.00000    0.00923    0.02482 = 
         0.01603   -0.00162    0.00062   -0.00338 
C21   1    0.670639    0.585317    0.621378    11.00000    0.01200    0.01330 = 
         0.01494   -0.00209    0.00067    0.00225 
C22   1    0.654271    0.577295    0.703647    11.00000    0.01802    0.03332 = 
         0.01393    0.00109    0.00226    0.00331 
AFIX   3 
H22A  2    0.768434    0.568555    0.731370    71.00000   31.00000 
H22B  2    0.585973    0.479576    0.714409    71.00000   31.00000 
H22C  2    0.597622    0.678491    0.719247    71.00000   31.00000 
  
H22D  2    0.531261    0.583258    0.708694   -71.00000   31.00000 
H22E  2    0.711198    0.676975    0.725912   -71.00000   31.00000 
H22F  2    0.702835    0.477793    0.729574   -71.00000   31.00000 
AFIX   0 
O1W   3    0.386582    0.180475    0.531595    11.00000    0.01267    0.01554 = 
         0.01781    0.00302    0.00423   -0.00002 
AFIX   3 
H11W  2    0.386832    0.102580    0.572378    11.00000   41.00000 
H12W  2    0.503624    0.185880    0.520612    11.00000   41.00000 
AFIX   0 
O2W   3    0.156950    0.652490    0.625418    11.00000    0.01258    0.01642 = 
         0.02102   -0.00398    0.00252   -0.00016 
AFIX   3 
H21W  2    0.035829    0.663806    0.627742    11.00000   51.00000 
H22W  2    0.205333    0.755433    0.645048    11.00000   51.00000 
AFIX   0 
O3W   3    0.282645    0.344403    0.661840    11.00000    0.02645    0.01603 = 
         0.01570    0.00125    0.00549    0.00502 
AFIX   3 
H31W  2    0.229122    0.390325    0.703138    11.00000   61.00000 
H32W  2    0.308994    0.231197    0.676096    11.00000   61.00000 
AFIX   0 
HKLF 4 
  
REM  Ha2019_80_0m_a.res in P2(1)/n 
REM R1 =  0.0150 for    2406 Fo > 4sig(Fo)  and  0.0201 for all    2708 data 
REM    125 parameters refined using      0 restraints 
  
END 
  
WGHT      0.0072      1.6298 
  
REM Instructions for potential hydrogen bonds 
HTAB C22 Br1_$1 
HTAB C22 Br1 
HTAB O1W Br1_$2 
HTAB O1W O12_$3 
HTAB O2W O22_$4 
HTAB O2W Br1 
HTAB O3W Br1_$5 
HTAB O3W Br1_$2 
  
REM Highest difference peak  0.442,  deepest hole -0.443,  1-sigma level  0.100 
Q1    1  -0.1150  0.1425  0.5622  11.00000  0.05    0.44 
Q2    1   0.4474  1.0524  0.6868  11.00000  0.05    0.42 
Q3    1   0.1087  0.3581  0.5478  11.00000  0.05    0.37 
Q4    1   0.1673  0.5738  0.6273  11.00000  0.05    0.35 
Q5    1   0.7782  0.8003  0.6887  11.00000  0.05    0.35 
; 
_shelx_res_checksum   76684 
  
_shelx_hkl_file 
; 
  -1   0   0    1.30    1.80 
  -1   0   0    2.50    1.60 
  -1   0   0   -1.00    0.90 
  -1   0   0    1.70    1.40 
  -1   0   0    2.60    1.80 
  -1   0   0   -2.10    1.50 
   1   0   0    4.70    2.00 
   1   0   0    2.40    2.00 
   1   0   0    0.30    1.40 
   1   0   0   -1.40    1.10 
   1   0   0    2.50    1.90 
   1   0   0    2.50    1.60 
   1   0   0    5.10    1.90 
   1   0   0    5.30    1.40 
   1   0   0    2.90    1.70 
   1   0   0    0.00    1.20 
   1   0   0    2.60    2.00 
   1   0   0    2.80    1.50 
   1   0   0    2.90    2.10 
   1   0   0   -2.20    1.00 
   1   0   0    4.80    1.90 
   1   0   0    2.20    1.40 
   1   0   0    1.00    0.90 
   1   0   0    4.80    2.00 
   1   0   0    5.20    2.10 
   1   0   0    2.20    2.00 
   1   0   0    4.20    2.10 
   1   0   0    0.00    1.30 
   1   0   0    3.70    1.50 
   1   0   0    4.30    2.40 
   1   0   0    3.30    1.70 
   1   0   0    2.00    2.10 
   1   0   0   -0.70    1.30 
   1   0   0   -1.10    0.90 
   1   0   0    0.20    1.70 
  -1   0   0    0.20    1.20 
  -1   0   0   -0.20    1.30 
  -1   0   0   -2.00    0.90 
  -1   0   0    3.60    2.30 
  -1   0   0    0.60    1.30 
  -1   0   0    2.50    1.80 
  -1   0   0    0.80    1.40 
  -2   0   0 3584.14  197.88 
  -2   0   0 3618.74  193.48 
  -2   0   0 3652.63  197.88 
  -2   0   0 3780.32  199.28 
  -2   0   0 3616.54  197.18 
  -2   0   0 3628.24  198.18 
  -2   0   0 3766.52  198.68 
  -2   0   0 3751.92  195.98 
  -2   0   0 3702.23  197.08 
  -2   0   0 3644.64  198.38 
  -2   0   0 3782.92  195.08 
  -2   0   0 3658.13  194.98 
  -2   0   0 3714.53  193.58 
  -2   0   0 4123.29  197.18 
  -2   0   0 3687.73  196.58 
  -2   0   0 3705.33  194.68 
  -2   0   0 3780.92  197.68 
  -2   0   0 3843.82  198.58 
  -2   0   0 3397.56  198.28 
   2   0   0 3622.54  197.18 
   2   0   0 3710.63  197.48 
   2   0   0 3716.63  198.08 
  -2   0   0 3836.12  197.58 
  -2   0   0 3873.71  197.68 
  -2   0   0 3707.73  197.98 
   2   0   0 3665.33  197.08 
   2   0   0 3839.82  193.88 
   2   0   0 3707.23  198.18 
   2   0   0 3667.53  198.08 
   2   0   0 3579.64  198.18 
   2   0   0 3646.34  195.78 
   2   0   0 3574.74  196.98 
   2   0   0 3814.02  198.58 
   2   0   0 3838.92  195.98 
   2   0   0 3619.04  195.58 
   2   0   0 3753.62  193.58 
   2   0   0 3684.73  196.98 
   2   0   0 3665.63  196.78 
   2   0   0 3619.64  197.18 
   2   0   0 3635.74  197.78 
   2   0   0 3833.32  196.78 
   2   0   0 3662.93  194.58 
   2   0   0 3628.84  197.68 
   2   0   0 3624.74  198.08 
   2   0   0 3646.14  192.98 
   2   0   0 3955.30  198.88 
   2   0   0 3842.42  198.78 
   2   0   0 3612.34  197.18 
   2   0   0 3638.14  197.78 
   2   0   0 3762.72  197.98 
   2   0   0 3765.72  199.08 
  -3   0   0    0.30    4.60 
  -3   0   0    4.70    5.70 
  -3   0   0   -2.90    3.40 
  -3   0   0    0.90    4.90 
  -3   0   0    8.20    5.40 
  -3   0   0    1.90    4.30 
  -3   0   0   -0.60    4.60 
  -3   0   0    1.20    1.80 
  -3   0   0    3.80    5.40 
  -3   0   0    5.10    5.30 
  -3   0   0    5.60    5.40 
  -3   0   0    0.30    5.10 
  -3   0   0    2.60    5.60 
  -3   0   0   -2.20    3.70 
  -3   0   0    0.60    4.50 
  -3   0   0   -1.50    4.70 
  -3   0   0   -3.10    2.40 
  -3   0   0    2.20    2.90 
   3   0   0   10.50    5.80 
   3   0   0    2.10    5.80 
   3   0   0    0.50    2.00 
   3   0   0   10.00    5.80 
   3   0   0    4.00    3.20 
   3   0   0    1.90    4.90 
  -3   0   0    2.10    2.10 
   3   0   0    5.50    4.70 
   3   0   0    1.10    4.70 
   3   0   0   -5.30    4.10 
   3   0   0   -4.10    3.90 
   3   0   0    0.70    4.80 
   3   0   0    1.60    2.40 
  -3   0   0   -1.40    4.10 
   3   0   0   -2.40    3.80 
   3   0   0    5.80    5.20 
   3   0   0   -1.60    3.30 
   3   0   0   -3.70    2.90 
   3   0   0   -0.90    4.30 
   3   0   0   -0.30    4.20 
   3   0   0    3.70    5.30 
   3   0   0   -2.00    4.10 
   3   0   0   -1.10    4.30 
   3   0   0    1.80    3.90 
   3   0   0    2.50    4.30 
  -3   0   0    0.80    5.70 
  -4   0   0  610.64   43.70 
   4   0   0  647.14   43.80 
  -4   0   0  583.94   41.90 
  -4   0   0  606.64   36.00 
  -4   0   0  606.84   36.10 
  -4   0   0  623.84   34.10 
  -4   0   0  582.44   42.30 
  -4   0   0  620.54   40.30 
  -4   0   0  521.75   42.70 
   4   0   0  607.94   42.90 
   4   0   0  571.14   34.50 
   4   0   0  613.24   43.40 
   4   0   0  667.03   42.00 
  -4   0   0  633.64   42.50 
  -4   0   0  573.24   42.50 
  -4   0   0  568.04   33.70 
  -4   0   0  615.84   43.10 
   4   0   0  601.84   33.10 
   4   0   0  572.34   43.60 
   4   0   0  615.44   43.40 
   4   0   0  597.04   40.70 
   4   0   0  605.54   41.80 
   4   0   0  654.63   41.20 
   4   0   0  596.04   36.20 
   4   0   0  592.54   42.50 
   4   0   0  598.24   39.40 
  -4   0   0  609.84   44.10 
   4   0   0  639.34   33.30 
  -4   0   0  613.04   41.60 
   4   0   0  586.84   49.00 
  -4   0   0  614.84   43.80 
  -4   0   0  651.03   39.80 
   4   0   0  590.24   40.70 
   5   0   0   -1.10    3.40 
   5   0   0    8.70    7.60 
   5   0   0  -12.20    5.30 
   5   0   0    6.80    7.60 
   5   0   0   -4.30    4.80 
  -5   0   0    2.50    7.10 
  -5   0   0   -3.70    6.40 
  -5   0   0   -9.90    4.90 
  -5   0   0    1.80    8.80 
  -5   0   0    7.40    7.10 
  -5   0   0    7.20    8.40 
  -5   0   0   -8.10    4.90 
  -5   0   0    2.00    5.40 
  -5   0   0   -4.10    6.10 
   5   0   0    1.30    7.90 
  -5   0   0    2.60    3.30 
   5   0   0    4.50    7.20 
   5   0   0   -6.00    6.30 
   5   0   0   -1.40    2.80 
   5   0   0    0.30    3.70 
   5   0   0   -0.80    6.10 
  -5   0   0   -3.10    5.80 
  -5   0   0    7.70    8.40 
   5   0   0   -7.80    5.90 
   5   0   0  -11.00    6.30 
   5   0   0    3.90    6.70 
  -5   0   0   -2.10    2.80 
   6   0   0 1817.52  100.49 
   6   0   0 1759.72  113.09 
   6   0   0 1694.43  112.19 
   6   0   0 1865.21  110.29 
   6   0   0 1924.21  108.79 
   6   0   0 1807.62  112.89 
   6   0   0 1800.82  111.79 
  -6   0   0 1757.32  106.99 
  -6   0   0 1823.72  114.79 
  -6   0   0 1762.72  112.29 
   6   0   0 1805.72  113.19 
   6   0   0 1685.23  106.69 
   6   0   0 2003.70  110.09 
   6   0   0 1818.32  110.79 
  -6   0   0 1920.71  115.69 
  -6   0   0 1834.22  111.69 
   6   0   0 1707.43  100.29 
  -6   0   0 1766.82  112.19 
  -6   0   0 1871.21  115.59 
  -6   0   0 1939.01  115.89 
  -6   0   0 1967.00  111.49 
   6   0   0 1933.81  115.29 
   6   0   0 1795.32   96.89 
   6   0   0 1722.63  100.39 
  -6   0   0 1838.12  111.89 
   7   0   0   -1.40    5.00 
   7   0   0  -16.10    9.90 
  -7   0   0   16.30   12.30 
  -7   0   0   11.70   12.00 
   7   0   0    2.30   10.50 
  -7   0   0   -1.90    9.50 
  -7   0   0  -12.10    8.10 
  -7   0   0    3.60   10.40 
  -7   0   0   -1.30    8.20 
  -7   0   0   -2.90    8.90 
   7   0   0   -4.40    8.50 
   7   0   0   33.70   14.40 
  -7   0   0   -2.20    9.30 
   7   0   0   -6.80   10.70 
  -7   0   0    2.00   12.10 
   7   0   0   -3.00    9.60 
   7   0   0    3.00   10.40 
   7   0   0    4.50    8.50 
   7   0   0   -6.50    6.70 
   7   0   0   12.00   12.30 
  -7   0   0    2.00   10.40 
   7   0   0   19.10   14.30 
   7   0   0    6.70   11.60 
  -8   0   0 1167.08   85.59 
   8   0   0 1307.57   83.29 
   8   0   0 1177.28   85.09 
  -8   0   0 1266.77   85.79 
   8   0   0 1205.48   91.79 
   8   0   0 1138.79   86.19 
   8   0   0 1246.08   89.69 
  -8   0   0 1144.39   87.99 
  -8   0   0 1236.38   91.59 
  -8   0   0 1258.37   86.89 
   8   0   0 1308.07   84.09 
   8   0   0 1195.48   81.59 
   8   0   0 1194.48   89.39 
   8   0   0 1040.80   85.19 
   8   0   0 1152.48   89.79 
  -8   0   0 1308.67   91.59 
  -8   0   0 1263.07   91.69 
  -8   0   0 1179.58   78.39 
  -8   0   0 1127.19   88.79 
   8   0   0 1182.98   88.39 
   8   0   0 1223.08   84.19 
   8   0   0 1194.48   88.49 
   9   0   0  -15.10   11.50 
  -9   0   0    2.30   14.40 
  -9   0   0   -8.40   13.60 
   9   0   0  -13.50   10.30 
  -9   0   0  -13.10   14.80 
  -9   0   0   27.20   18.30 
  -9   0   0   17.70   19.20 
   9   0   0   13.90   15.10 
   9   0   0  -18.00   10.10 
  -9   0   0   14.50   14.90 
   9   0   0   -3.70   14.30 
   9   0   0    2.00   16.20 
  -9   0   0  -20.00   11.10 
  -9   0   0   12.80   15.00 
   9   0   0    3.80   15.60 
   9   0   0  -13.00   13.40 
   9   0   0  -17.20   13.90 
   9   0   0    9.90   15.10 
   9   0   0    9.00   16.50 
 -10   0   0  112.29   34.00 
  10   0   0  157.88   38.20 
 -10   0   0  104.99   29.80 
  10   0   0  144.49   37.40 
  10   0   0  147.59   30.40 
  10   0   0  123.49   31.60 
  10   0   0  194.18   39.80 
  10   0   0  164.68   38.10 
 -10   0   0  123.89   30.50 
  10   0   0  131.79   33.10 
 -10   0   0  200.48   41.90 
  10   0   0  183.38   39.00 
 -10   0   0  158.68   34.70 
  10   0   0  120.49   35.30 
 -10   0   0  109.69   30.00 
 -10   0   0  165.18   37.10 
 -10   0   0  187.88   39.60 
  10   0   0  118.69   31.10 
   0  -1   0    5.10    2.30 
   0  -1   0   -0.30    1.40 
   0  -1   0   -1.30    0.80 
   0  -1   0    3.80    2.00 
   0  -1   0   -0.10    1.00 
   0  -1   0    1.50    1.70 
   0  -1   0   -0.40    1.10 
   0  -1   0   -1.10    1.20 
   0  -1   0    2.40    1.60 
   0  -1   0   -2.40    0.90 
   0  -1   0   -2.90    1.90 
   0  -1   0   -0.30    1.00 
   0  -1   0    0.30    0.80 
   0   1   0    2.50    1.60 
   0   1   0    4.50    1.60 
   0   1   0    7.60    1.70 
   0   1   0    2.70    1.70 
   0   1   0    0.70    1.40 
   0   1   0   -1.40    1.10 
   0   1   0    3.00    1.80 
   0   1   0    9.00    1.80 
   0   1   0    7.60    1.70 
   0   1   0    8.40    2.30 
   0   1   0    9.00    2.30 
   0   1   0    0.60    1.60 
   0   1   0    1.60    1.90 
   0   1   0    2.70    2.10 
   0   1   0    5.60    2.20 
   0   1   0    6.00    2.00 
   0   1   0    1.20    1.20 
   0   1   0    2.00    1.40 
   0   1   0    5.80    1.80 
   0   1   0    1.20    2.10 
   0   1   0    1.70    1.60 
   0   1   0    5.20    1.80 
  -1  -1   0  262.07   15.50 
   1  -1   0  246.38   16.10 
   1  -1   0  238.28   15.90 
  -1  -1   0  232.48   15.10 
   1  -1   0  225.18   16.40 
   1  -1   0  250.17   16.30 
   1  -1   0  223.98   15.50 
   1  -1   0  230.78   15.40 
   1  -1   0  250.27   15.70 
   1  -1   0  229.38   16.70 
  -1  -1   0  249.28   15.30 
   1  -1   0  229.88   16.30 
   1  -1   0  233.68   15.00 
   1  -1   0  231.98   15.50 
   1  -1   0  235.98   16.20 
   1  -1   0  235.18   16.20 
   1  -1   0  251.47   16.60 
   1  -1   0  215.58   16.10 
   1  -1   0  217.38   15.10 
   1  -1   0  229.18   16.10 
   1  -1   0  247.28   15.00 
  -1  -1   0  237.28   15.20 
  -1  -1   0  245.38   14.80 
   1  -1   0  257.97   16.20 
  -1  -1   0  188.18   13.90 
   1  -1   0  226.78   15.10 
   1  -1   0  233.28   16.10 
   1  -1   0  227.28   15.00 
  -1  -1   0  233.28   15.30 
   1  -1   0  243.28   16.60 
  -1  -1   0  221.48   15.40 
   1  -1   0  208.38   15.90 
  -1  -1   0  228.08   15.30 
   1   1   0  229.58   14.60 
   1   1   0  206.58   14.40 
   1   1   0  224.08   13.70 
  -1   1   0  238.08   15.40 
   1   1   0  247.08   15.30 
  -1   1   0  230.98   15.40 
   1   1   0  255.17   15.50 
  -1   1   0  217.38   14.90 
   1   1   0  224.28   15.00 
   1   1   0  230.78   15.30 
  -1   1   0  234.48   16.20 
  -1   1   0  261.97   16.60 
  -1   1   0  219.78   15.30 
   1   1   0  230.88   14.70 
  -1   1   0  259.57   16.70 
   1   1   0  219.18   15.30 
   1   1   0  243.08   14.30 
  -1   1   0  236.38   16.20 
  -1   1   0  223.08   15.80 
   1   1   0  234.98   15.00 
   1   1   0  220.58   14.50 
   1   1   0  229.18   14.90 
  -1   1   0  223.38   16.30 
  -1   1   0  222.18   15.60 
  -1   1   0  232.88   15.70 
  -1   1   0  219.08   15.80 
  -1   1   0  231.88   15.40 
  -1   1   0  219.68   16.50 
  -1   1   0  237.38   16.50 
  -1   1   0  221.28   16.10 
  -1   1   0  250.77   16.60 
  -1   1   0  222.08   15.90 
  -1   1   0  248.38   16.20 
   1   1   0  253.77   15.50 
   1   1   0  235.58   14.60 
   1   1   0  222.38   14.90 
  -1   1   0  243.28   16.20 
   1   1   0  249.88   15.70 
   1   1   0  235.58   15.10 
   1   1   0  239.68   14.70 
  -1   1   0  258.17   16.80 
   1   1   0  242.58   15.50 
   1   1   0  234.58   15.30 
  -1   1   0  238.18   15.30 
   1   1   0  235.58   14.80 
   1   1   0  209.48   15.00 
  -1   1   0  231.08   15.60 
   2  -1   0  314.97   18.40 
   2  -1   0  322.27   22.00 
   2  -1   0  303.17   22.10 
  -2  -1   0  299.37   21.80 
   2  -1   0  278.87   19.80 
   2  -1   0  294.27   21.80 
   2  -1   0  303.77   21.70 
  -2  -1   0  282.57   21.80 
   2  -1   0  294.97   22.10 
  -2  -1   0  313.07   20.60 
   2  -1   0  292.37   22.00 
   2  -1   0  278.97   21.00 
   2  -1   0  330.77   20.80 
   2  -1   0  330.27   22.70 
   2  -1   0  263.37   21.80 
   2  -1   0  306.17   22.30 
  -2  -1   0  307.57   19.10 
  -2  -1   0  297.37   21.20 
  -2  -1   0  299.17   18.90 
   2  -1   0  291.97   22.00 
  -2  -1   0  283.77   19.70 
  -2  -1   0  315.57   19.90 
  -2  -1   0  302.77   19.70 
   2  -1   0  282.87   21.60 
  -2  -1   0  283.77   20.10 
   2  -1   0  296.47   21.90 
   2  -1   0  283.77   20.90 
   2  -1   0  322.87   21.60 
   2  -1   0  332.17   22.60 
   2  -1   0  303.97   22.40 
  -2  -1   0  335.97   18.20 
  -2  -1   0  297.87   21.90 
  -2  -1   0  272.37   20.90 
   2  -1   0  314.77   21.90 
   2  -1   0  303.87   22.60 
  -2  -1   0  316.77   21.40 
  -2  -1   0  308.97   17.70 
  -2  -1   0  338.27   21.40 
   2  -1   0  318.97   22.60 
   2  -1   0  277.17   21.50 
   2  -1   0  276.97   19.50 
   2  -1   0  305.47   21.70 
   2  -1   0  298.37   19.80 
   2  -1   0  289.87   21.50 
  -2  -1   0  303.97   19.20 
  -2  -1   0  323.37   22.10 
  -2  -1   0  314.17   20.00 
  -2  -1   0  319.57   20.60 
  -2  -1   0  315.07   21.60 
   2  -1   0  328.37   20.00 
   2   1   0  299.07   19.70 
  -2   1   0  335.67   22.80 
  -2   1   0  293.67   19.80 
  -2   1   0  345.27   21.70 
  -2   1   0  302.27   21.50 
   2   1   0  301.77   21.10 
  -2   1   0  272.27   18.10 
  -2   1   0  254.17   19.60 
  -2   1   0  352.76   23.40 
  -2   1   0  306.87   22.10 
   2   1   0  267.67   17.40 
   2   1   0  349.67   21.90 
   2   1   0  294.27   18.20 
   2   1   0  305.77   19.10 
   2   1   0  267.27   19.10 
   2   1   0  292.67   21.70 
  -2   1   0  313.17   19.10 
  -2   1   0  324.37   22.50 
  -2   1   0  297.77   22.20 
  -2   1   0  264.37   21.10 
   2   1   0  278.87   19.90 
  -2   1   0  291.07   22.70 
  -2   1   0  293.57   21.60 
  -2   1   0  284.37   21.50 
  -2   1   0  263.37   21.20 
  -2   1   0  302.57   21.90 
   2   1   0  282.97   19.90 
   2   1   0  321.67   21.60 
   2   1   0  314.97   21.40 
  -2   1   0  302.97   21.30 
   2   1   0  283.87   20.40 
   2   1   0  311.07   19.00 
  -2   1   0  321.47   21.90 
  -2   1   0  311.57   19.90 
  -2   1   0  272.77   19.50 
  -2   1   0  296.17   21.60 
  -2   1   0  294.27   19.70 
   2   1   0  295.97   17.70 
   2   1   0  317.27   19.70 
   2   1   0  318.17   20.30 
  -2   1   0  287.47   21.70 
   2   1   0  320.87   21.60 
   2   1   0  300.77   21.80 
   2   1   0  293.47   20.40 
  -2   1   0  296.57   21.80 
  -2   1   0  324.47   22.20 
  -2   1   0  278.87   18.00 
   2   1   0  305.27   20.80 
  -2   1   0  282.87   18.20 
   2   1   0  298.37   19.40 
   2   1   0  266.87   20.90 
   2   1   0  311.57   21.40 
   2   1   0  259.37   21.10 
  -2   1   0  281.47   22.10 
   2   1   0  295.67   19.10 
   2   1   0  297.07   20.50 
   2   1   0  287.17   18.00 
  -3  -1   0    4.80    5.80 
   3  -1   0   11.60    5.90 
  -3  -1   0   12.40    5.80 
  -3  -1   0   -1.60    5.20 
   3  -1   0    6.10    4.70 
  -3  -1   0   13.50    5.50 
  -3  -1   0   15.30    5.30 
   3  -1   0   15.00    6.80 
   3  -1   0   14.60    6.40 
  -3  -1   0    7.20    5.30 
   3  -1   0    4.00    6.50 
  -3  -1   0   12.60    5.60 
   3  -1   0    7.80    3.00 
   3  -1   0   10.40    6.50 
  -3  -1   0   21.00    7.20 
  -3  -1   0   10.70    6.50 
   3  -1   0   14.40    6.80 
   3  -1   0    5.80    3.90 
  -3  -1   0   13.40    6.00 
   3  -1   0    5.70    6.00 
   3  -1   0    7.60    5.50 
   3  -1   0    8.60    5.90 
   3  -1   0   16.00    6.10 
  -3  -1   0    5.40    3.50 
  -3  -1   0    1.60    3.70 
   3  -1   0    8.30    6.20 
   3  -1   0   14.50    7.00 
   3  -1   0   14.80    6.10 
  -3  -1   0    8.90    6.30 
   3  -1   0    4.60    3.80 
   3  -1   0    0.80    5.30 
   3  -1   0    7.40    4.80 
   3  -1   0   -2.50    5.50 
  -3  -1   0    5.50    5.30 
  -3  -1   0   15.10    6.80 
  -3  -1   0   13.00    5.20 
   3  -1   0   -2.70    5.40 
   3  -1   0   12.00    4.50 
   3  -1   0    0.90    5.10 
   3  -1   0   -1.60    4.40 
  -3  -1   0    1.90    5.90 
   3   1   0    9.10    2.90 
  -3   1   0    5.70    5.80 
   3   1   0   12.50    6.40 
   3   1   0    9.30    6.30 
  -3   1   0   11.00    6.20 
   3   1   0   11.20    6.70 
   3   1   0    8.80    4.60 
   3   1   0   10.20    5.30 
   3   1   0    4.00    4.00 
   3   1   0   10.20    3.00 
  -3   1   0    2.80    5.10 
   3   1   0   12.60    4.00 
  -3   1   0    3.80    6.00 
  -3   1   0    8.30    2.60 
  -3   1   0    8.00    5.90 
  -3   1   0    0.40    4.70 
  -3   1   0   12.20    6.80 
  -3   1   0    2.40    4.40 
  -3   1   0    0.60    4.60 
  -3   1   0    9.30    4.00 
  -3   1   0   -1.10    4.40 
   3   1   0   17.10    6.00 
  -3   1   0   -1.80    5.40 
   3   1   0   11.30    4.30 
   3   1   0    6.70    4.40 
  -3   1   0    2.80    3.60 
   3   1   0    5.20    5.10 
  -3   1   0    5.00    3.00 
   3   1   0    9.70    5.30 
  -3   1   0    7.80    3.90 
  -3   1   0    7.70    6.50 
  -3   1   0    4.70    5.30 
  -3   1   0    2.80    5.20 
   3   1   0    3.40    4.50 
   3   1   0    9.40    4.80 
   3   1   0    6.60    5.00 
  -3   1   0   19.00    4.90 
   3   1   0   12.70    6.60 
   3   1   0   -3.40    4.50 
   3   1   0   12.10    4.20 
   3   1   0    9.20    6.20 
   3   1   0    6.80    2.90 
  -3   1   0    5.10    4.10 
   3   1   0   10.20    3.70 
   3   1   0    5.50    5.00 
  -3   1   0    5.70    6.30 
   3   1   0    5.50    2.80 
  -3   1   0   10.10    3.30 
  -3   1   0   11.30    6.70 
  -3   1   0   -1.30    4.00 
  -3   1   0   11.20    3.00 
   3   1   0    4.90    4.10 
   3   1   0   12.10    6.20 
   4  -1   0    4.40    6.70 
  -4  -1   0    3.30    7.20 
  -4  -1   0    2.20    5.80 
  -4  -1   0   -1.30    5.70 
   4  -1   0    1.70    4.20 
   4  -1   0    2.90    5.90 
   4  -1   0    1.80    7.50 
   4  -1   0    0.00    3.40 
   4  -1   0    5.60    7.50 
  -4  -1   0    4.70    6.80 
  -4  -1   0    4.60    7.60 
   4  -1   0    4.30    6.80 
  -4  -1   0    1.70    4.30 
  -4  -1   0    6.90    7.10 
   4  -1   0    4.00    7.40 
   4  -1   0    5.00    4.40 
   4  -1   0   -2.10    5.80 
   4  -1   0    6.50    4.50 
  -4  -1   0   14.40    8.50 
  -4  -1   0    7.40    6.30 
   4  -1   0   16.10    8.30 
  -4  -1   0    2.20    5.00 
   4  -1   0   12.50    7.90 
  -4  -1   0    7.00    7.00 
  -4  -1   0    3.20    6.10 
  -4  -1   0   -1.00    6.40 
   4  -1   0   -2.80    6.50 
   4  -1   0    4.30    2.70 
  -4   1   0    1.60    5.60 
   4   1   0   -0.60    3.50 
   4   1   0    3.00    2.40 
   4   1   0   14.40    6.50 
  -4   1   0    7.20    7.40 
   4   1   0    1.00    2.50 
  -4   1   0    4.70    6.20 
  -4   1   0    3.80    3.60 
  -4   1   0    3.30    6.50 
  -4   1   0    5.30    7.30 
   4   1   0    1.30    6.80 
  -4   1   0    1.60    6.20 
   4   1   0    6.00    2.80 
   4   1   0   -1.20    2.80 
   4   1   0   -2.00    6.50 
   4   1   0   14.50    8.10 
  -4   1   0   23.20    9.70 
   4   1   0    0.30    4.50 
   4   1   0    5.10    7.00 
   4   1   0    7.90    4.20 
   4   1   0   13.40    4.00 
  -4   1   0   -2.20    4.80 
  -4   1   0    6.00    6.90 
  -4   1   0    5.10    6.70 
  -4   1   0    9.40    4.40 
  -4   1   0   -1.20    6.00 
  -4   1   0    2.80    7.00 
   4   1   0    9.80    8.30 
   4   1   0    2.90    5.90 
   4   1   0    5.20    6.60 
  -4   1   0    6.30    2.90 
   4   1   0    4.80    4.00 
   4   1   0    0.30    5.60 
  -4   1   0    1.10    4.10 
   4   1   0    5.10    4.70 
  -4   1   0    1.10    3.40 
   4   1   0    2.30    2.80 
   4   1   0   10.50    6.20 
   4   1   0    3.00    3.30 
   4   1   0    4.30    3.80 
  -4   1   0    4.60    7.70 
   4   1   0    6.40    4.70 
  -4   1   0    1.20    4.50 
  -5  -1   0 1035.20   64.29 
  -5  -1   0  901.91   67.39 
   5  -1   0 1006.00   57.19 
  -5  -1   0  980.70   64.89 
   5  -1   0  980.10   58.89 
  -5  -1   0 1089.29   62.19 
  -5  -1   0 1029.80   67.89 
  -5  -1   0 1008.70   68.29 
  -5  -1   0 1047.10   68.69 
   5  -1   0  936.81   64.19 
   5  -1   0  969.40   58.09 
   5  -1   0  941.71   65.09 
  -5  -1   0 1051.29   67.59 
   5  -1   0 1021.70   59.09 
   5  -1   0 1042.80   67.89 
   5  -1   0 1006.70   68.39 
   5  -1   0  973.50   65.09 
   5  -1   0 1048.80   68.19 
  -5  -1   0 1115.99   68.09 
   5  -1   0  938.51   67.79 
   5  -1   0 1066.09   68.59 
  -5  -1   0 1032.00   69.49 
   5  -1   0 1086.89   68.89 
  -5  -1   0 1102.79   65.59 
   5  -1   0 1054.19   66.29 
   5   1   0  958.20   65.19 
  -5   1   0 1034.20   63.79 
  -5   1   0  985.40   68.69 
  -5   1   0  971.20   56.89 
   5   1   0  988.80   60.99 
   5   1   0 1017.10   67.59 
   5   1   0  974.10   65.49 
  -5   1   0  931.41   66.09 
  -5   1   0  999.90   58.49 
  -5   1   0  941.21   67.79 
  -5   1   0  988.60   59.49 
   5   1   0 1035.10   60.39 
   5   1   0 1047.60   54.59 
   5   1   0 1070.99   63.29 
   5   1   0 1008.50   61.99 
  -5   1   0 1010.60   62.19 
  -5   1   0 1066.09   58.09 
   5   1   0  900.91   64.69 
   5   1   0 1028.60   68.19 
   5   1   0 1000.10   56.19 
   5   1   0  996.00   58.29 
  -5   1   0 1018.60   62.29 
  -5   1   0  907.21   66.09 
  -5   1   0 1027.50   68.49 
  -5   1   0 1031.80   68.39 
   5   1   0 1057.49   58.89 
   5   1   0 1062.19   54.19 
   5   1   0  980.10   54.09 
   5   1   0  988.70   67.49 
   5   1   0  935.21   66.29 
   5   1   0  988.60   54.69 
  -5   1   0  933.81   66.09 
  -5   1   0  955.60   67.49 
   5   1   0  982.10   65.09 
  -5   1   0  949.11   65.99 
   6  -1   0    6.40    9.00 
   6  -1   0    2.70    4.70 
  -6  -1   0   -7.40    8.20 
   6  -1   0   -1.20    9.60 
   6  -1   0   13.80    9.00 
   6  -1   0   -9.30    7.50 
   6  -1   0   -1.10   10.10 
   6  -1   0   -3.50    8.10 
   6  -1   0   11.10    5.70 
   6  -1   0   13.30   10.30 
  -6  -1   0   -2.20    7.00 
  -6  -1   0    8.70    8.70 
  -6  -1   0    5.50   10.60 
   6  -1   0    1.20    8.30 
  -6  -1   0    6.00    6.80 
   6  -1   0    1.90   10.30 
  -6  -1   0   -3.50    9.80 
   6  -1   0   -6.90    8.70 
  -6  -1   0   -5.40    8.40 
   6  -1   0    0.40    7.60 
  -6  -1   0  -10.80    8.20 
   6  -1   0   -5.60    4.10 
  -6  -1   0   -5.60    9.00 
  -6  -1   0   -2.30    7.40 
  -6  -1   0   11.90    9.00 
   6   1   0    8.10   10.00 
   6   1   0    7.70    8.10 
   6   1   0   10.70   11.10 
  -6   1   0   -6.80    9.70 
  -6   1   0  -11.90    5.80 
  -6   1   0    7.80   10.20 
  -6   1   0   -0.80    5.30 
   6   1   0   -3.50    5.90 
  -6   1   0    3.30    4.30 
  -6   1   0   -2.60    7.90 
  -6   1   0    7.20    8.70 
  -6   1   0   -1.50    8.70 
  -6   1   0    3.20    8.10 
   6   1   0   -2.00    7.90 
  -6   1   0    2.30    4.30 
   6   1   0    1.60    3.30 
  -6   1   0   -3.60    7.50 
  -6   1   0    0.20   10.10 
   6   1   0    2.10    9.30 
   6   1   0   10.70    6.80 
   6   1   0    7.30    5.30 
  -6   1   0    5.80    6.20 
   6   1   0  -10.00    7.80 
   6   1   0    0.50    9.00 
   6   1   0    0.50    7.20 
   6   1   0    8.60    5.20 
   6   1   0    4.40   10.30 
  -6   1   0   -3.20    7.10 
   7  -1   0  231.08   34.70 
   7  -1   0  228.28   34.90 
   7  -1   0  275.57   20.50 
   7  -1   0  223.38   30.50 
  -7  -1   0  245.08   35.00 
   7  -1   0  223.28   31.30 
   7  -1   0  239.98   35.60 
   7  -1   0  216.18   33.30 
  -7  -1   0  274.77   34.70 
  -7  -1   0  178.88   23.90 
   7  -1   0  195.38   31.40 
  -7  -1   0  258.47   33.30 
   7  -1   0  255.17   27.90 
   7  -1   0  307.67   35.50 
  -7  -1   0  218.18   34.70 
   7  -1   0  278.37   33.20 
  -7  -1   0  300.17   37.30 
  -7  -1   0  218.78   33.40 
  -7  -1   0  217.08   29.80 
   7  -1   0  305.97   37.80 
   7  -1   0  206.48   33.50 
  -7  -1   0  215.08   33.00 
  -7  -1   0  268.07   36.30 
   7   1   0  200.38   32.60 
  -7   1   0  245.88   21.80 
   7   1   0  281.27   31.40 
  -7   1   0  239.88   33.30 
  -7   1   0  227.98   27.90 
   7   1   0  280.67   40.10 
  -7   1   0  205.88   31.60 
   7   1   0  212.58   32.60 
   7   1   0  256.77   29.00 
   7   1   0  234.68   34.60 
  -7   1   0  203.78   33.40 
  -7   1   0  174.58   29.60 
   7   1   0  299.17   36.60 
   7   1   0  140.49   26.30 
   7   1   0  204.48   30.50 
  -7   1   0  305.67   38.40 
  -7   1   0  254.27   38.50 
  -7   1   0  257.77   36.10 
  -7   1   0  238.88   35.90 
   7   1   0  246.08   36.30 
   7   1   0  155.38   29.10 
  -7   1   0  191.68   30.60 
   7   1   0  220.78   26.50 
   7   1   0  280.47   35.30 
   8  -1   0    9.40   15.40 
   8  -1   0    3.90   12.00 
  -8  -1   0   21.00   17.50 
  -8  -1   0    3.50   12.80 
   8  -1   0   34.20   18.80 
  -8  -1   0   10.30   12.10 
   8  -1   0   -2.30   10.80 
  -8  -1   0   39.30   17.10 
   8  -1   0    6.90   13.50 
   8  -1   0   14.90   13.20 
   8  -1   0    5.90   15.30 
  -8  -1   0   17.30   15.50 
  -8  -1   0   -1.90   13.80 
  -8  -1   0   14.60   15.80 
  -8  -1   0   -2.40   11.10 
   8  -1   0   18.30   13.80 
   8  -1   0    3.30   12.60 
   8  -1   0    5.50   14.10 
   8  -1   0   -8.10   12.10 
   8  -1   0    9.20   14.60 
   8   1   0   11.50   14.90 
  -8   1   0   10.80   13.90 
   8   1   0   20.90   16.70 
   8   1   0   23.70   14.00 
  -8   1   0   -8.90   10.70 
  -8   1   0   -4.40    9.60 
   8   1   0   16.20   16.30 
  -8   1   0    7.20   13.40 
  -8   1   0    0.10    9.30 
   8   1   0   21.00   12.00 
   8   1   0  -15.60    9.40 
   8   1   0    1.40   12.80 
   8   1   0   16.40   14.50 
  -8   1   0   11.80   13.80 
   8   1   0   -3.60   10.90 
   8   1   0    1.20   13.90 
   8   1   0   31.40   15.20 
   8   1   0   14.90   15.10 
  -8   1   0    8.70   14.20 
  -8   1   0   -9.70   11.80 
  -8   1   0    6.20   13.20 
  -9  -1   0   -6.50   15.90 
  -9  -1   0   11.80   17.20 
  -9  -1   0   15.60   15.80 
   9  -1   0   41.00   19.00 
   9  -1   0   32.50   18.60 
   9  -1   0   27.00   17.10 
  -9  -1   0    6.90   12.30 
   9  -1   0   44.50   22.50 
   9  -1   0    6.20   14.50 
   9  -1   0   11.70   15.50 
  -9  -1   0    4.00   13.90 
   9  -1   0    3.40   17.00 
  -9  -1   0    8.90   15.10 
  -9  -1   0    7.10   15.10 
   9  -1   0    4.30   14.30 
   9  -1   0   36.00   20.00 
   9  -1   0   16.20   15.90 
  -9  -1   0   32.80   18.80 
   9  -1   0   17.70   18.70 
   9  -1   0   12.80   17.10 
   9   1   0  -12.90   12.70 
   9   1   0    2.70   13.80 
  -9   1   0   19.60   18.00 
  -9   1   0   -1.70   15.30 
  -9   1   0   24.50   17.50 
  -9   1   0   28.60   18.30 
   9   1   0    1.80   12.90 
   9   1   0   13.10   16.30 
  -9   1   0    3.10   16.10 
  -9   1   0   -8.50   13.10 
   9   1   0   -7.50   14.40 
   9   1   0    3.70   13.70 
  -9   1   0    6.30   15.80 
  -9   1   0    8.80   15.30 
   9   1   0  -17.20   11.40 
   9   1   0    3.50   15.60 
   9   1   0   -1.60   17.60 
   9   1   0   -7.70   13.50 
   9   1   0   -0.60   14.70 
   9   1   0   13.50   17.10 
  10  -1   0    5.60   21.50 
  10  -1   0    3.80   19.70 
 -10  -1   0   38.10   20.70 
  10  -1   0   57.09   24.50 
  10  -1   0    9.60   19.10 
 -10  -1   0   14.40   17.80 
  10  -1   0   24.50   22.30 
  10  -1   0    7.60   19.00 
 -10  -1   0   52.89   22.90 
 -10  -1   0   -8.10   19.30 
 -10  -1   0   43.70   22.60 
 -10  -1   0   19.50   20.30 
  10  -1   0   52.89   24.40 
 -10  -1   0   27.60   20.00 
  10  -1   0   47.40   25.40 
 -10  -1   0  -18.50   15.10 
  10  -1   0   24.90   21.00 
  10  -1   0    9.10   17.10 
  10  -1   0   22.30   18.80 
  10   1   0   36.60   26.30 
  10   1   0   11.10   18.50 
 -10   1   0   36.10   22.70 
 -10   1   0   45.20   25.40 
  10   1   0   40.90   23.80 
 -10   1   0   10.80   17.10 
 -10   1   0   17.90   19.00 
  10   1   0  -19.30   12.80 
 -10   1   0   22.80   20.10 
 -10   1   0   13.60   20.00 
  10   1   0   31.90   19.00 
  10   1   0   43.20   23.10 
  10   1   0    5.70   18.80 
  10   1   0   10.80   23.70 
 -10   1   0   23.90   19.40 
 -10   1   0   23.10   19.80 
  10   1   0   21.10   19.40 
   0  -2   0 5281.57  273.97 
   0  -2   0 5202.58  273.37 
   0  -2   0 5255.97  275.07 
   0  -2   0 5142.69  275.37 
   0  -2   0 5228.88  273.97 
   0  -2   0 4792.02  277.07 
   0  -2   0 5332.27  275.07 
   0  -2   0 5367.86  273.77 
   0  -2   0 5338.87  276.07 
   0  -2   0 5359.46  275.87 
   0  -2   0 4978.40  274.57 
   0  -2   0 5272.17  273.67 
   0  -2   0 5302.87  272.47 
   0  -2   0 5217.48  274.07 
   0  -2   0 4828.02  272.17 
   0  -2   0 4723.83  274.07 
   0  -2   0 5433.96  275.27 
   0  -2   0 5172.28  275.97 
   0  -2   0 5018.30  273.07 
   0  -2   0 5255.17  274.57 
   0  -2   0 5113.39  271.97 
   0  -2   0 5055.59  274.97 
   0   2   0 5321.37  272.67 
   0   2   0 5233.98  271.27 
   0   2   0 5171.28  274.27 
   0   2   0 5066.59  270.97 
   0   2   0 5347.96  275.27 
   0   2   0 5219.58  270.37 
   0   2   0 5184.08  273.77 
   0   2   0 5429.86  273.57 
   0   2   0 5233.48  271.57 
   0   2   0 5081.69  273.27 
   0   2   0 5283.97  275.27 
   0   2   0 5286.27  273.07 
   0   2   0 5547.65  275.37 
   0   2   0 5034.20  275.37 
   0   2   0 5176.98  274.87 
   0   2   0 5238.58  274.97 
   0   2   0 5209.58  272.47 
   0   2   0 5080.49  275.57 
   0   2   0 5139.09  272.27 
   0   2   0 5203.58  270.47 
   0   2   0 5324.57  274.17 
   0   2   0 5337.07  275.37 
   0   2   0 5359.26  275.87 
   0   2   0 5095.79  272.27 
   0   2   0 5097.59  273.37 
   0   2   0 5289.87  273.47 
  -1  -2   0 2651.93  140.79 
   1  -2   0 2619.24  141.49 
   1  -2   0 2638.84  141.69 
   1  -2   0 2581.84  140.19 
  -1  -2   0 2587.84  139.99 
  -1  -2   0 2557.84  139.49 
   1  -2   0 2586.34  137.59 
   1  -2   0 2508.35  140.59 
   1  -2   0 2593.44  140.29 
   1  -2   0 2643.54  137.89 
  -1  -2   0 2625.14  140.99 
  -1  -2   0 2656.03  137.29 
   1  -2   0 2545.35  140.49 
   1  -2   0 2657.43  140.19 
   1  -2   0 2633.24  141.79 
   1  -2   0 2634.34  141.59 
  -1  -2   0 2533.35  138.79 
   1  -2   0 2624.34  140.19 
   1  -2   0 2538.45  139.89 
   1  -2   0 2611.54  137.59 
  -1  -2   0 2636.24  138.49 
  -1  -2   0 2695.33  141.09 
  -1  -2   0 2605.84  140.69 
  -1  -2   0 2549.34  138.89 
   1  -2   0 2719.63  141.19 
   1  -2   0 2637.94  138.49 
   1  -2   0 2457.65  138.19 
  -1  -2   0 2623.94  140.59 
   1  -2   0 2623.14  141.19 
   1  -2   0 2551.84  139.89 
  -1  -2   0 2638.44  137.79 
   1  -2   0 2594.94  139.69 
  -1  -2   0 2648.24  139.89 
   1  -2   0 2637.24  138.19 
   1  -2   0 2609.04  139.89 
   1  -2   0 2648.83  141.09 
   1  -2   0 2478.45  138.29 
   1  -2   0 2676.73  140.49 
   1  -2   0 2507.55  140.39 
   1  -2   0 2642.44  139.99 
  -1  -2   0 2646.64  140.59 
   1  -2   0 2599.94  140.69 
   1  -2   0 2746.63  142.29 
  -1  -2   0 2650.63  137.29 
  -1  -2   0 2600.44  137.49 
   1  -2   0 2579.14  140.69 
   1  -2   0 2653.43  137.29 
  -1   2   0 2574.24  140.49 
   1   2   0 2523.35  140.39 
   1   2   0 2598.54  138.49 
  -1   2   0 2484.35  140.49 
  -1   2   0 2592.24  141.59 
   1   2   0 2724.13  137.89 
   1   2   0 2506.75  139.99 
  -1   2   0 2638.84  140.79 
   1   2   0 2599.14  140.39 
   1   2   0 2641.04  138.09 
   1   2   0 2566.74  138.59 
  -1   2   0 2654.93  137.69 
   1   2   0 2643.04  139.79 
   1   2   0 2692.13  140.49 
  -1   2   0 2511.35  140.49 
   1   2   0 2550.84  140.19 
   1   2   0 2509.85  137.29 
   1   2   0 2568.54  137.39 
   1   2   0 2497.95  140.09 
   1   2   0 2607.44  139.39 
  -1   2   0 2635.14  140.19 
  -1   2   0 2536.65  137.19 
  -1   2   0 2511.65  141.39 
  -1   2   0 2536.55  141.39 
  -1   2   0 2511.75  140.19 
  -1   2   0 2615.44  140.49 
  -1   2   0 2564.54  141.09 
  -1   2   0 2620.54  138.09 
  -1   2   0 2607.54  139.49 
  -1   2   0 2619.34  141.19 
  -1   2   0 2587.64  139.89 
   1   2   0 2573.54  138.19 
   1   2   0 2528.35  137.59 
   1   2   0 2519.05  137.19 
  -1   2   0 2583.44  139.59 
  -1   2   0 2504.45  138.29 
   1   2   0 2572.74  138.09 
  -1   2   0 2713.73  142.39 
  -1   2   0 2585.14  138.19 
   1   2   0 2646.24  137.69 
  -1   2   0 2500.25  139.89 
  -1   2   0 2670.93  141.09 
  -1   2   0 2642.74  138.19 
   1   2   0 2470.55  139.79 
   1   2   0 2580.14  140.39 
   1   2   0 2703.63  141.09 
  -1   2   0 2544.85  140.29 
  -1   2   0 2571.54  139.79 
   1   2   0 2578.04  137.79 
   1   2   0 2610.14  137.49 
  -1   2   0 2610.54  139.89 
  -1   2   0 2599.44  140.49 
  -1   2   0 2571.24  140.49 
   2  -2   0 1026.70   62.59 
   2  -2   0 1096.29   60.29 
  -2  -2   0 1038.70   59.29 
   2  -2   0 1121.69   61.79 
  -2  -2   0 1050.59   61.19 
  -2  -2   0  973.00   61.19 
  -2  -2   0 1052.49   61.49 
  -2  -2   0 1035.20   59.39 
   2  -2   0 1045.10   63.79 
  -2  -2   0 1055.99   60.69 
   2  -2   0 1025.60   60.29 
  -2  -2   0 1044.30   59.19 
   2  -2   0 1096.89   61.69 
  -2  -2   0  989.60   60.39 
   2  -2   0 1022.80   60.69 
  -2  -2   0 1099.09   60.49 
  -2  -2   0  950.20   60.49 
   2  -2   0 1036.00   62.09 
  -2  -2   0 1066.29   59.79 
  -2  -2   0 1069.29   60.49 
  -2  -2   0 1021.60   60.19 
   2  -2   0 1031.70   62.79 
   2  -2   0 1008.00   62.59 
   2  -2   0 1049.49   62.59 
   2  -2   0 1096.99   63.39 
   2  -2   0 1116.49   63.99 
   2  -2   0 1000.20   61.39 
   2  -2   0 1114.59   61.19 
   2  -2   0 1024.50   62.79 
  -2  -2   0 1011.50   60.49 
  -2  -2   0 1183.88   61.79 
   2  -2   0 1040.30   62.79 
  -2  -2   0 1093.19   61.19 
   2  -2   0 1082.49   62.59 
   2  -2   0 1081.79   62.89 
   2  -2   0 1008.00   60.79 
   2  -2   0 1036.10   62.99 
  -2  -2   0  995.40   60.49 
   2  -2   0 1024.60   61.19 
   2  -2   0 1087.09   63.69 
   2  -2   0 1055.19   60.99 
  -2  -2   0 1093.99   60.09 
  -2  -2   0 1078.09   61.39 
   2  -2   0 1041.50   61.19 
   2  -2   0 1112.69   62.59 
   2  -2   0 1047.90   63.49 
  -2  -2   0 1044.30   60.49 
   2  -2   0 1053.39   60.29 
   2  -2   0 1135.89   61.99 
  -2   2   0 1065.69   61.69 
   2   2   0 1012.10   59.39 
   2   2   0 1053.29   61.59 
  -2   2   0 1073.89   63.49 
   2   2   0 1063.09   61.69 
  -2   2   0 1034.30   62.79 
  -2   2   0 1116.79   61.59 
  -2   2   0 1058.39   62.79 
   2   2   0 1062.69   59.99 
   2   2   0 1066.09   60.89 
   2   2   0 1011.00   60.09 
  -2   2   0 1029.20   62.79 
   2   2   0 1040.70   57.69 
  -2   2   0 1060.29   63.29 
   2   2   0 1028.00   60.59 
   2   2   0 1110.69   61.39 
   2   2   0 1064.59   59.79 
   2   2   0 1064.79   60.19 
   2   2   0 1023.60   60.39 
  -2   2   0 1069.59   61.59 
  -2   2   0  964.80   60.89 
  -2   2   0 1084.69   61.59 
   2   2   0 1090.89   58.79 
   2   2   0 1068.89   59.69 
  -2   2   0 1019.10   63.09 
  -2   2   0 1059.09   61.39 
  -2   2   0 1005.90   60.89 
  -2   2   0 1061.29   60.59 
  -2   2   0 1005.10   61.59 
  -2   2   0 1042.10   59.99 
  -2   2   0 1035.10   62.59 
  -2   2   0 1093.99   60.69 
   2   2   0 1040.70   59.39 
   2   2   0 1075.49   61.19 
  -2   2   0 1067.59   63.09 
   2   2   0 1067.49   61.09 
  -2   2   0 1003.30   63.39 
  -2   2   0 1049.70   62.39 
   2   2   0 1048.60   59.79 
   2   2   0 1084.69   61.09 
   2   2   0 1083.79   60.39 
   2   2   0 1125.89   62.19 
  -2   2   0 1112.99   61.99 
   2   2   0 1055.79   61.49 
   2   2   0 1006.20   59.29 
   2   2   0 1034.60   60.29 
   2   2   0 1027.60   61.29 
  -2   2   0 1042.60   60.69 
  -2   2   0 1049.89   59.99 
   2   2   0 1064.59   61.09 
  -2   2   0 1031.10   62.79 
  -2   2   0 1160.58   64.59 
  -3  -2   0  391.16   28.00 
  -3  -2   0  352.26   25.60 
  -3  -2   0  365.56   27.00 
  -3  -2   0  353.86   23.00 
   3  -2   0  393.16   29.20 
  -3  -2   0  341.57   28.10 
  -3  -2   0  383.46   26.20 
  -3  -2   0  378.36   25.90 
  -3  -2   0  384.06   28.50 
  -3  -2   0  353.46   25.10 
   3  -2   0  394.26   30.60 
  -3  -2   0  365.56   25.20 
   3  -2   0  371.96   26.20 
  -3  -2   0  364.26   27.20 
   3  -2   0  413.56   29.10 
   3  -2   0  351.96   27.80 
   3  -2   0  357.96   28.60 
   3  -2   0  331.57   26.90 
   3  -2   0  390.26   27.40 
   3  -2   0  373.46   28.70 
   3  -2   0  293.97   24.70 
  -3  -2   0  345.67   27.00 
  -3  -2   0  389.16   24.10 
  -3  -2   0  326.37   24.40 
  -3  -2   0  327.87   27.50 
  -3  -2   0  361.76   25.50 
  -3  -2   0  365.06   25.90 
  -3  -2   0  381.86   27.30 
  -3  -2   0  382.76   27.40 
   3  -2   0  414.36   28.30 
  -3  -2   0  379.16   24.90 
   3  -2   0  375.06   26.90 
   3  -2   0  386.76   30.30 
   3  -2   0  344.67   29.30 
   3  -2   0  360.96   28.20 
   3  -2   0  340.77   27.10 
   3  -2   0  375.96   26.50 
   3  -2   0  345.97   28.70 
   3  -2   0  344.27   23.80 
   3   2   0  331.37   24.00 
  -3   2   0  310.57   27.60 
   3   2   0  341.97   26.60 
   3   2   0  341.97   23.70 
   3   2   0  332.47   22.80 
   3   2   0  337.37   23.80 
   3   2   0  377.66   25.20 
   3   2   0  360.06   26.70 
   3   2   0  348.57   26.60 
  -3   2   0  353.16   26.60 
   3   2   0  369.96   28.90 
   3   2   0  329.07   23.00 
   3   2   0  358.66   27.00 
   3   2   0  369.06   25.80 
   3   2   0  339.37   26.70 
  -3   2   0  358.36   28.90 
  -3   2   0  351.26   26.00 
  -3   2   0  383.06   24.40 
  -3   2   0  321.77   27.60 
  -3   2   0  350.26   29.10 
   3   2   0  388.66   27.60 
   3   2   0  350.36   25.60 
   3   2   0  370.46   25.70 
  -3   2   0  331.97   26.80 
  -3   2   0  380.16   27.00 
  -3   2   0  362.36   26.30 
   3   2   0  354.46   25.70 
  -3   2   0  358.86   25.20 
   3   2   0  382.36   24.10 
  -3   2   0  413.96   30.10 
  -3   2   0  324.87   28.40 
  -3   2   0  342.37   23.60 
   3   2   0  344.67   23.20 
   3   2   0  341.87   24.80 
  -3   2   0  359.76   27.80 
  -3   2   0  347.07   29.20 
   3   2   0  408.86   25.50 
   3   2   0  384.76   26.00 
  -3   2   0  353.36   23.80 
  -3   2   0  315.97   27.20 
   3   2   0  326.37   22.70 
   3   2   0  357.26   25.80 
   3   2   0  379.66   26.90 
  -3   2   0  365.86   25.90 
   3   2   0  354.46   25.30 
  -3   2   0  387.86   29.70 
   4  -2   0  417.56   30.00 
   4  -2   0  429.36   34.80 
  -4  -2   0  523.15   36.40 
   4  -2   0  449.06   34.50 
   4  -2   0  392.26   33.50 
   4  -2   0  425.26   29.80 
   4  -2   0  439.26   35.20 
   4  -2   0  399.86   34.00 
  -4  -2   0  412.66   32.20 
  -4  -2   0  449.86   35.40 
   4  -2   0  378.26   34.40 
  -4  -2   0  376.66   29.60 
   4  -2   0  440.26   33.10 
  -4  -2   0  425.66   33.10 
  -4  -2   0  436.36   30.30 
  -4  -2   0  411.76   24.90 
  -4  -2   0  398.96   32.30 
   4  -2   0  424.36   29.80 
  -4  -2   0  373.46   30.40 
   4  -2   0  369.96   32.60 
  -4  -2   0  362.26   31.80 
  -4  -2   0  353.96   31.80 
  -4  -2   0  391.36   33.50 
  -4  -2   0  415.56   29.90 
   4  -2   0  436.06   35.10 
  -4  -2   0  414.96   28.50 
  -4  -2   0  489.15   34.30 
   4  -2   0  439.06   30.60 
   4  -2   0  372.36   37.30 
   4  -2   0  430.66   26.90 
   4   2   0  405.46   33.70 
  -4   2   0  411.26   28.20 
   4   2   0  484.45   34.40 
   4   2   0  424.66   30.60 
   4   2   0  417.86   25.10 
   4   2   0  434.26   26.90 
   4   2   0  400.66   32.60 
  -4   2   0  433.26   30.30 
  -4   2   0  398.16   34.10 
  -4   2   0  414.66   35.40 
  -4   2   0  369.56   34.00 
   4   2   0  441.66   28.30 
   4   2   0  404.96   31.00 
  -4   2   0  436.26   30.10 
   4   2   0  424.86   28.50 
   4   2   0  419.76   28.90 
  -4   2   0  373.86   33.10 
  -4   2   0  445.46   31.10 
   4   2   0  457.35   32.20 
  -4   2   0  400.56   32.90 
  -4   2   0  413.46   34.30 
   4   2   0  463.15   29.20 
   4   2   0  430.36   25.60 
  -4   2   0  418.46   34.60 
   4   2   0  394.86   29.90 
   4   2   0  429.36   29.50 
   4   2   0  431.06   28.00 
  -4   2   0  421.86   34.40 
   4   2   0  476.05   26.80 
   4   2   0  411.66   28.90 
  -4   2   0  431.66   34.10 
  -4   2   0  397.66   30.00 
   4   2   0  497.45   35.50 
   4   2   0  447.46   29.40 
  -4   2   0  412.66   26.90 
   4   2   0  406.06   30.60 
  -4   2   0  401.56   26.20 
  -4   2   0  391.76   33.20 
  -4   2   0  415.46   26.60 
  -4   2   0  406.86   34.40 
   4   2   0  434.46   33.20 
  -5  -2   0  463.15   34.00 
  -5  -2   0  393.36   31.50 
   5  -2   0  393.06   25.40 
   5  -2   0  424.86   35.80 
   5  -2   0  417.16   41.80 
  -5  -2   0  437.66   37.40 
   5  -2   0  397.76   41.70 
  -5  -2   0  430.66   34.60 
  -5  -2   0  283.97   35.80 
  -5  -2   0  447.16   31.30 
   5  -2   0  436.26   37.30 
  -5  -2   0  476.85   36.80 
   5  -2   0  379.16   37.60 
   5  -2   0  410.56   29.80 
  -5  -2   0  408.66   35.30 
   5  -2   0  358.36   29.10 
   5  -2   0  410.66   39.90 
   5  -2   0  415.16   29.80 
   5  -2   0  359.76   38.80 
  -5  -2   0  378.36   34.60 
  -5  -2   0  495.95   36.90 
   5  -2   0  327.77   37.00 
   5  -2   0  379.96   29.50 
  -5  -2   0  396.56   31.70 
  -5  -2   0  369.06   39.30 
   5  -2   0  463.35   44.90 
   5  -2   0  422.36   41.10 
   5  -2   0  441.86   36.10 
   5   2   0  424.76   28.10 
   5   2   0  426.76   35.10 
   5   2   0  400.96   26.70 
   5   2   0  378.56   39.10 
  -5   2   0  350.36   39.50 
  -5   2   0  429.26   42.40 
   5   2   0  390.26   28.70 
  -5   2   0  433.36   42.90 
  -5   2   0  435.76   37.30 
  -5   2   0  409.66   24.50 
   5   2   0  385.56   29.00 
   5   2   0  412.26   26.30 
   5   2   0  317.77   36.20 
   5   2   0  380.46   29.70 
   5   2   0  400.86   37.90 
   5   2   0  397.56   27.90 
   5   2   0  425.76   36.00 
   5   2   0  416.56   35.90 
  -5   2   0  465.05   37.80 
  -5   2   0  457.75   37.70 
   5   2   0  391.76   33.00 
  -5   2   0  406.06   40.80 
  -5   2   0  432.36   30.10 
   5   2   0  399.96   30.50 
  -5   2   0  428.36   30.90 
   5   2   0  429.76   33.80 
  -5   2   0  432.06   34.90 
  -5   2   0  403.76   30.60 
  -5   2   0  407.96   27.10 
  -5   2   0  372.36   40.70 
  -5   2   0  382.96   24.50 
   5   2   0  382.76   27.80 
   5   2   0  407.16   24.90 
  -5   2   0  398.86   29.40 
  -5   2   0  430.36   35.70 
   5   2   0  438.46   26.40 
   5   2   0  396.06   25.30 
  -5   2   0  451.95   36.60 
  -5   2   0  468.75   35.00 
   6  -2   0 1530.35   93.29 
   6  -2   0 1543.25  101.89 
   6  -2   0 1639.54   93.39 
  -6  -2   0 1623.24  103.99 
   6  -2   0 1618.04   86.69 
  -6  -2   0 1706.03  103.89 
   6  -2   0 1623.94  103.89 
  -6  -2   0 1659.13   98.99 
   6  -2   0 1577.14  105.69 
   6  -2   0 1580.84   93.69 
   6  -2   0 1536.25  104.79 
   6  -2   0 1657.53  105.99 
   6  -2   0 1584.44  102.89 
   6  -2   0 1707.63  103.89 
  -6  -2   0 1796.62  108.19 
  -6  -2   0 1572.24  104.99 
   6  -2   0 1611.84  101.99 
   6  -2   0 1692.23  105.29 
  -6  -2   0 1647.84  103.79 
  -6  -2   0 1648.24  100.09 
   6  -2   0 1713.03  105.29 
  -6  -2   0 1740.03   99.99 
  -6  -2   0 1667.53   95.89 
   6  -2   0 1602.04  104.19 
  -6  -2   0 1637.64  105.29 
  -6  -2   0 1649.23  102.09 
   6   2   0 1551.04  102.49 
   6   2   0 1652.13   95.29 
   6   2   0 1635.54  102.99 
   6   2   0 1592.24  103.29 
   6   2   0 1649.63  100.99 
  -6   2   0 1557.84   99.49 
  -6   2   0 1612.14  106.29 
  -6   2   0 1589.34  104.99 
  -6   2   0 1614.44  104.99 
  -6   2   0 1675.83   95.49 
   6   2   0 1587.74   92.39 
   6   2   0 1504.45   89.99 
  -6   2   0 1561.74  104.69 
   6   2   0 1650.23   93.19 
   6   2   0 1620.24   90.69 
   6   2   0 1612.24   96.29 
  -6   2   0 1666.83  103.49 
  -6   2   0 1640.24   95.09 
  -6   2   0 1555.24   92.89 
  -6   2   0 1600.64  104.49 
  -6   2   0 1668.43   93.69 
  -6   2   0 1697.53  105.19 
   6   2   0 1515.25  104.39 
   6   2   0 1648.83   93.09 
  -6   2   0 1794.12  107.09 
   6   2   0 1559.74  103.39 
  -6   2   0 1668.43  104.59 
   6   2   0 1744.63  105.69 
   6   2   0 1639.24  101.09 
   6   2   0 1630.94   87.79 
  -6   2   0 1634.84   99.79 
  -6   2   0 1642.14   88.09 
   6   2   0 1755.92   91.89 
   6   2   0 1600.94   87.79 
   6   2   0 1668.33  101.09 
  -7  -2   0  316.37   38.50 
   7  -2   0  287.67   36.90 
   7  -2   0  309.37   40.00 
   7  -2   0  305.87   37.60 
   7  -2   0  279.77   39.50 
   7  -2   0  346.57   41.10 
  -7  -2   0  325.57   35.90 
   7  -2   0  337.27   26.60 
  -7  -2   0  300.27   35.50 
  -7  -2   0  311.47   43.40 
   7  -2   0  341.77   26.60 
   7  -2   0  252.87   38.80 
  -7  -2   0  307.77   39.90 
  -7  -2   0  312.67   39.60 
  -7  -2   0  345.57   41.90 
  -7  -2   0  289.27   30.50 
   7  -2   0  268.27   37.90 
  -7  -2   0  318.47   40.90 
  -7  -2   0  377.96   38.50 
   7  -2   0  293.67   39.80 
   7  -2   0  330.87   38.90 
   7  -2   0  333.77   41.40 
   7  -2   0  288.67   39.20 
  -7  -2   0  275.27   40.80 
   7   2   0  339.77   34.50 
   7   2   0  281.07   35.60 
   7   2   0  310.87   41.60 
   7   2   0  320.17   40.20 
  -7   2   0  231.48   37.00 
   7   2   0  280.47   37.20 
  -7   2   0  321.17   27.50 
  -7   2   0  383.46   45.40 
  -7   2   0  320.07   35.50 
   7   2   0  388.96   42.40 
  -7   2   0  263.77   38.90 
  -7   2   0  331.97   43.40 
  -7   2   0  288.97   39.80 
   7   2   0  331.97   40.00 
   7   2   0  276.57   40.00 
   7   2   0  355.06   33.00 
   7   2   0  303.17   38.90 
   7   2   0  279.77   35.50 
  -7   2   0  323.27   34.50 
  -7   2   0  399.06   43.90 
   7   2   0  294.37   38.60 
   7   2   0  324.87   41.40 
  -7   2   0  344.37   45.40 
  -7   2   0  291.07   40.10 
  -7   2   0  305.97   40.90 
  -8  -2   0  707.33   60.29 
   8  -2   0  630.64   64.39 
   8  -2   0  617.74   61.69 
  -8  -2   0  610.94   52.79 
  -8  -2   0  582.44   63.39 
  -8  -2   0  614.34   62.59 
   8  -2   0  563.74   64.09 
   8  -2   0  607.94   64.29 
   8  -2   0  738.33   60.49 
   8  -2   0  546.75   58.89 
   8  -2   0  603.14   64.69 
  -8  -2   0  614.44   52.19 
   8  -2   0  579.84   60.89 
   8  -2   0  559.74   62.49 
   8  -2   0  509.65   60.69 
  -8  -2   0  616.14   65.19 
  -8  -2   0  624.24   53.59 
   8  -2   0  667.43   63.69 
  -8  -2   0  725.53   60.39 
   8   2   0  629.74   67.09 
  -8   2   0  600.74   63.99 
   8   2   0  642.84   66.99 
  -8   2   0  610.84   63.89 
   8   2   0  722.03   50.39 
  -8   2   0  709.33   48.80 
  -8   2   0  512.45   60.59 
   8   2   0  631.94   53.69 
   8   2   0  584.84   53.09 
   8   2   0  645.74   65.79 
   8   2   0  648.84   70.29 
  -8   2   0  758.42   62.69 
  -8   2   0  519.05   62.49 
   8   2   0  694.63   57.19 
   8   2   0  540.25   46.50 
  -8   2   0  648.34   51.69 
  -8   2   0  732.13   71.09 
   8   2   0  692.13   55.29 
   8   2   0  604.24   64.19 
   8   2   0  697.43   67.79 
  -8   2   0  449.66   58.09 
  -8   2   0  582.04   62.69 
  -9  -2   0   24.40   15.90 
   9  -2   0   40.10   20.20 
   9  -2   0   69.89   26.50 
  -9  -2   0   77.59   27.70 
   9  -2   0   40.20   20.70 
   9  -2   0   10.50   19.90 
   9  -2   0   57.29   22.30 
   9  -2   0   28.00   21.50 
   9  -2   0  -11.70   15.10 
   9  -2   0   11.10   20.40 
   9  -2   0   26.70   19.40 
  -9  -2   0   26.30   15.40 
  -9  -2   0   29.90   20.00 
   9  -2   0   21.60   19.60 
   9  -2   0   43.10   19.60 
  -9  -2   0   38.10   19.30 
  -9  -2   0   38.60   20.80 
  -9  -2   0   53.49   21.70 
   9  -2   0   62.19   24.30 
  -9  -2   0   53.59   19.60 
  -9   2   0   33.40   21.40 
   9   2   0   38.50   21.60 
   9   2   0   77.69   25.10 
   9   2   0   60.19   24.70 
   9   2   0   -0.30   16.20 
  -9   2   0   42.10   23.70 
  -9   2   0   10.70   16.60 
   9   2   0   25.60   21.30 
  -9   2   0   41.50   20.60 
  -9   2   0   47.10   21.10 
   9   2   0   54.69   20.60 
  -9   2   0   47.80   24.40 
   9   2   0   23.50   19.40 
   9   2   0   16.80   16.50 
  -9   2   0   75.39   22.40 
   9   2   0   24.40   21.40 
   9   2   0    1.30   16.40 
  -9   2   0   20.70   18.70 
  10  -2   0  198.48   40.90 
 -10  -2   0  243.98   47.50 
  10  -2   0  240.98   46.60 
  10  -2   0  204.28   43.90 
  10  -2   0  186.58   38.70 
  10  -2   0  241.18   45.90 
  10  -2   0  136.59   34.40 
 -10  -2   0  165.88   39.50 
  10  -2   0  144.69   35.80 
  10  -2   0  203.38   43.70 
  10  -2   0  161.08   36.30 
  10  -2   0  104.79   31.80 
 -10  -2   0  220.08   43.20 
  10  -2   0  248.78   40.60 
 -10  -2   0  104.89   34.20 
 -10  -2   0  163.48   35.50 
  10   2   0  148.89   34.50 
 -10   2   0  174.68   38.60 
  10   2   0  180.78   36.20 
  10   2   0  212.58   45.00 
 -10   2   0  225.48   45.00 
 -10   2   0  162.68   36.20 
 -10   2   0  151.38   34.30 
 -10   2   0  222.38   46.40 
  10   2   0  203.08   38.90 
  10   2   0  115.99   32.00 
  10   2   0  134.39   34.00 
  10   2   0  215.08   44.20 
 -10   2   0  148.99   38.10 
 -10   2   0  227.88   42.90 
  10   2   0  144.59   37.40 
 -10   2   0  131.99   37.30 
  10   2   0  229.48   43.60 
   0  -3   0    1.50    2.90 
   0  -3   0    2.90    6.00 
   0  -3   0   -0.40    2.50 
   0  -3   0   -7.00    6.60 
   0  -3   0   -3.20    3.20 
   0  -3   0    6.60    6.00 
   0  -3   0   -3.30    5.20 
   0  -3   0    2.60    4.80 
   0  -3   0   -8.80    4.20 
   0  -3   0   -2.10    5.00 
   0  -3   0    1.30    3.80 
   0  -3   0   -1.40    4.40 
   0  -3   0   -5.00    3.80 
   0  -3   0    1.20    5.70 
   0  -3   0    1.00    6.50 
   0  -3   0   -2.40    4.30 
   0  -3   0    6.10    4.90 
   0  -3   0    0.80    5.30 
   0  -3   0   -2.30    4.00 
   0  -3   0   -1.80    3.70 
   0  -3   0    1.10    2.60 
   0  -3   0   10.10    5.40 
   0  -3   0   -6.10    4.70 
   0  -3   0   -0.80    4.50 
   0   3   0   -0.60    5.00 
   0   3   0    2.80    1.70 
   0   3   0    0.70    3.20 
   0   3   0    1.90    4.90 
   0   3   0   -7.70    4.00 
   0   3   0    3.10    5.20 
   0   3   0   -0.90    2.90 
   0   3   0   -0.40    3.20 
   0   3   0    1.60    3.50 
   0   3   0    0.30    2.60 
   0   3   0    1.00    2.30 
   0   3   0    0.70    3.00 
   0   3   0    0.70    4.40 
   0   3   0   -4.40    3.40 
   0   3   0    0.30    3.50 
   0   3   0   -4.00    3.00 
   0   3   0   -2.20    3.70 
   0   3   0   -1.20    3.50 
   0   3   0    1.60    2.20 
   0   3   0    8.80    5.20 
   0   3   0    5.10    4.50 
   0   3   0   -2.00    4.50 
   0   3   0    3.90    4.50 
   0   3   0   -2.80    3.30 
  -1  -3   0   14.60    4.70 
  -1  -3   0   14.30    7.00 
   1  -3   0    3.40    5.30 
  -1  -3   0   23.20    8.00 
   1  -3   0   12.00    5.10 
   1  -3   0   18.50    6.70 
  -1  -3   0   16.40    3.90 
   1  -3   0    3.90    5.90 
   1  -3   0    1.40    5.60 
   1  -3   0   18.90    4.00 
  -1  -3   0   14.40    7.10 
   1  -3   0   18.20    7.80 
  -1  -3   0   22.80    4.90 
   1  -3   0   13.40    7.40 
   1  -3   0    6.00    3.80 
   1  -3   0   11.50    4.00 
   1  -3   0    8.00    6.30 
   1  -3   0   22.50    5.30 
   1  -3   0    5.60    4.30 
   1  -3   0   22.70    7.50 
   1  -3   0    4.60    5.30 
  -1  -3   0   11.50    6.70 
  -1  -3   0   11.10    6.00 
   1  -3   0   12.10    5.30 
  -1  -3   0   19.00    7.20 
   1  -3   0   13.60    7.40 
   1  -3   0   16.40    6.00 
  -1  -3   0   18.30    7.00 
  -1  -3   0   12.70    7.20 
   1  -3   0    9.50    3.50 
   1  -3   0   20.00    7.00 
   1  -3   0   13.40    3.50 
   1  -3   0   19.70    4.30 
  -1  -3   0   11.30    6.40 
  -1  -3   0    2.20    5.90 
  -1  -3   0    9.50    5.60 
   1  -3   0   16.50    6.70 
   1  -3   0   16.20    7.60 
   1  -3   0   36.60    9.50 
   1  -3   0   11.70    5.30 
   1  -3   0   11.40    6.90 
   1  -3   0   12.40    7.00 
  -1  -3   0   12.90    3.80 
   1   3   0   18.40    5.30 
   1   3   0   16.20    3.70 
  -1   3   0   23.30    7.30 
   1   3   0   15.30    6.90 
  -1   3   0   28.50    7.10 
   1   3   0   25.60    8.30 
  -1   3   0    4.10    5.10 
  -1   3   0    4.60    6.50 
   1   3   0   19.60    6.80 
   1   3   0   10.70    4.90 
   1   3   0   22.70    6.20 
  -1   3   0   19.60    5.70 
  -1   3   0   16.30    6.10 
   1   3   0   13.50    3.90 
  -1   3   0   10.70    6.50 
  -1   3   0   17.00    4.90 
   1   3   0   13.70    5.60 
  -1   3   0   15.40    6.00 
   1   3   0   27.00    8.10 
  -1   3   0   22.30    7.20 
  -1   3   0   16.80    6.50 
  -1   3   0   29.60    7.40 
   1   3   0   15.60    4.30 
  -1   3   0   20.70    7.50 
   1   3   0   16.40    5.50 
   1   3   0   19.70    8.10 
   1   3   0   10.70    5.80 
  -1   3   0   16.80    4.50 
   1   3   0   12.50    3.60 
   1   3   0   12.20    5.20 
  -1   3   0   22.10    7.90 
   1   3   0   14.60    5.70 
   1   3   0   16.90    4.10 
  -1   3   0   12.20    5.90 
  -1   3   0   15.60    4.60 
   1   3   0   14.90    6.90 
   1   3   0   11.60    3.60 
  -1   3   0    6.50    5.30 
   1   3   0   17.10    7.70 
   1   3   0   17.30    4.60 
   1   3   0   16.30    5.50 
   1   3   0   15.40    6.20 
  -1   3   0    9.00    7.20 
   1   3   0   12.20    3.40 
   1   3   0   12.70    4.60 
  -1   3   0    8.60    5.60 
   1   3   0   16.90    5.40 
   1   3   0   14.20    6.20 
  -1   3   0   10.80    6.40 
  -1   3   0    9.00    6.10 
  -1   3   0   13.80    4.50 
  -2  -3   0   21.80    6.40 
   2  -3   0   28.90    9.20 
  -2  -3   0   22.40    7.50 
   2  -3   0   23.10    6.50 
   2  -3   0   36.10   10.50 
   2  -3   0   25.10    7.00 
   2  -3   0   17.30    5.70 
   2  -3   0   34.50    7.40 
  -2  -3   0   23.70    5.80 
   2  -3   0   19.90    7.10 
  -2  -3   0   24.40    7.30 
   2  -3   0    8.40    7.10 
  -2  -3   0   26.50    8.70 
   2  -3   0   30.50    9.40 
   2  -3   0   30.70    8.60 
  -2  -3   0   30.80    7.30 
   2  -3   0   12.30    8.70 
   2  -3   0   28.80    6.50 
   2  -3   0   47.80    9.80 
   2  -3   0   20.60    7.80 
  -2  -3   0   23.80    8.10 
  -2  -3   0   20.80    7.60 
   2  -3   0   22.80    8.70 
  -2  -3   0   29.90    6.70 
  -2  -3   0   28.40    6.60 
  -2  -3   0   27.90    9.60 
  -2  -3   0   26.40    6.40 
   2  -3   0   26.90    8.70 
   2  -3   0   42.70    8.00 
   2  -3   0   16.50    6.30 
   2  -3   0   31.60    7.80 
  -2  -3   0   26.80    9.20 
  -2  -3   0   41.00    8.40 
   2  -3   0   24.20    9.20 
   2  -3   0   35.60    7.80 
   2  -3   0   20.90    8.50 
   2  -3   0   30.50    8.80 
   2  -3   0   12.90    7.90 
   2  -3   0   13.60    7.50 
  -2   3   0   38.70    7.90 
  -2   3   0   43.00    8.70 
   2   3   0   37.50    7.70 
  -2   3   0   33.60    9.50 
   2   3   0   33.50    9.70 
   2   3   0   24.60    7.30 
   2   3   0   32.60    6.70 
   2   3   0   36.60    7.30 
  -2   3   0   37.60    9.10 
  -2   3   0   25.00    8.20 
   2   3   0   27.80    8.00 
   2   3   0   29.20    6.60 
   2   3   0   37.50    8.40 
   2   3   0   31.20    8.40 
   2   3   0   24.60    5.50 
   2   3   0   31.20    6.70 
   2   3   0   31.90    4.70 
   2   3   0   37.80    7.70 
   2   3   0   30.40    7.30 
  -2   3   0    8.70    8.00 
  -2   3   0   23.00    6.80 
   2   3   0   50.09    8.70 
   2   3   0   24.70    6.60 
   2   3   0   43.60    8.10 
   2   3   0   30.20    7.90 
   2   3   0   39.70    8.60 
   2   3   0   34.30    9.40 
  -2   3   0   30.90    7.20 
  -2   3   0   27.80    7.10 
  -2   3   0   23.30    8.10 
   2   3   0   34.80    8.60 
  -2   3   0   20.40    7.60 
   2   3   0   30.80    9.80 
  -2   3   0   15.20    8.60 
   2   3   0   28.70    8.40 
   2   3   0   36.60    7.50 
  -2   3   0   32.10    8.90 
   2   3   0   25.20    6.70 
   2   3   0   33.30    9.40 
  -2   3   0   25.70    8.80 
  -2   3   0   29.50    9.60 
   2   3   0   28.20    6.40 
  -2   3   0   38.70   11.20 
  -2   3   0   36.80    6.90 
  -2   3   0   30.10    8.50 
   3  -3   0   -2.20    5.60 
  -3  -3   0    3.50    6.00 
   3  -3   0   -0.80    5.60 
   3  -3   0    7.00    7.10 
   3  -3   0    1.30    5.10 
  -3  -3   0    2.10    5.50 
   3  -3   0    0.10    7.00 
   3  -3   0    8.90    5.90 
   3  -3   0    2.60    6.80 
   3  -3   0    8.40    8.00 
  -3  -3   0    5.80    6.50 
  -3  -3   0   11.10    5.20 
   3  -3   0    4.00    6.20 
   3  -3   0   12.00    9.70 
   3  -3   0   -1.30    5.50 
  -3  -3   0   14.40    7.50 
   3  -3   0    1.50    6.50 
   3  -3   0   -3.40    5.60 
   3  -3   0   -2.10    5.10 
   3  -3   0   -1.90    6.00 
  -3  -3   0    6.60    5.90 
  -3  -3   0    8.00    6.20 
  -3  -3   0   14.00    5.80 
  -3  -3   0    4.80    6.60 
  -3  -3   0    1.30    4.90 
  -3  -3   0   -3.00    4.60 
  -3  -3   0    0.20    5.10 
  -3  -3   0    8.80    6.00 
   3  -3   0   15.00    6.90 
  -3  -3   0    3.60    4.80 
  -3  -3   0   -7.60    4.20 
  -3  -3   0   14.50    6.90 
   3  -3   0    3.60    6.60 
  -3  -3   0    1.60    5.50 
  -3   3   0    7.80    6.20 
  -3   3   0    1.90    4.90 
   3   3   0    0.30    4.50 
  -3   3   0    7.70    7.00 
   3   3   0    6.50    5.50 
  -3   3   0    4.80    5.40 
   3   3   0   -3.40    4.50 
   3   3   0    2.30    4.90 
   3   3   0    4.70    5.60 
  -3   3   0   -0.70    5.90 
   3   3   0    6.60    3.60 
  -3   3   0   11.80    6.90 
   3   3   0    7.90    5.80 
   3   3   0   14.10    6.90 
   3   3   0    9.60    4.90 
  -3   3   0    4.20    7.50 
   3   3   0    3.80    4.70 
   3   3   0    0.10    4.30 
   3   3   0    7.50    6.60 
   3   3   0    0.40    4.10 
   3   3   0    4.60    3.30 
   3   3   0    2.00    4.70 
  -3   3   0    5.20    6.00 
  -3   3   0    5.00    7.10 
   3   3   0    5.10    4.70 
   3   3   0   11.40    5.90 
  -3   3   0   14.70    6.60 
  -3   3   0    5.20    5.80 
  -3   3   0    8.70    7.90 
   3   3   0    6.10    5.60 
   3   3   0    2.80    5.00 
   3   3   0    3.70    5.50 
   3   3   0    3.90    4.60 
  -3   3   0    5.40    7.40 
   3   3   0   10.50    4.70 
   3   3   0   -1.70    4.50 
   3   3   0    4.30    5.40 
  -3   3   0    1.30    6.60 
  -4  -3   0  179.58   22.20 
  -4  -3   0  206.98   23.40 
  -4  -3   0  175.58   18.20 
  -4  -3   0  189.68   16.40 
  -4  -3   0  189.18   20.80 
  -4  -3   0  177.78   20.80 
   4  -3   0  187.88   24.10 
   4  -3   0  170.28   25.60 
   4  -3   0  186.98   24.90 
   4  -3   0  188.78   26.30 
  -4  -3   0  190.08   23.50 
   4  -3   0  199.68   25.20 
   4  -3   0  207.68   22.50 
  -4  -3   0  180.48   20.90 
  -4  -3   0  206.08   22.70 
   4  -3   0  174.88   22.60 
  -4  -3   0  283.97   28.60 
  -4  -3   0  216.28   25.90 
   4  -3   0  161.88   21.30 
   4  -3   0  173.78   24.40 
  -4  -3   0  231.28   25.70 
  -4  -3   0  200.58   20.60 
  -4  -3   0  197.98   23.10 
  -4  -3   0  176.38   21.00 
   4  -3   0  179.68   25.00 
   4  -3   0  205.78   23.80 
   4  -3   0  200.48   26.00 
  -4  -3   0  197.18   21.90 
   4  -3   0  148.69   21.60 
   4  -3   0  151.88   20.70 
   4  -3   0  180.28   18.80 
  -4  -3   0  191.98   21.60 
   4  -3   0  205.68   23.50 
  -4  -3   0  204.28   22.60 
   4   3   0  176.18   14.80 
  -4   3   0  186.18   24.00 
   4   3   0  205.18   19.50 
   4   3   0  210.28   17.00 
  -4   3   0  153.58   22.40 
  -4   3   0  207.08   25.80 
   4   3   0  209.28   22.40 
   4   3   0  199.18   21.00 
  -4   3   0  183.68   24.90 
  -4   3   0  114.79   21.20 
  -4   3   0  164.98   19.00 
   4   3   0  181.98   15.80 
  -4   3   0  195.58   26.40 
   4   3   0  176.48   23.00 
   4   3   0  215.58   20.40 
   4   3   0  249.38   26.00 
   4   3   0  188.38   20.70 
   4   3   0  208.68   19.50 
   4   3   0  154.38   21.40 
  -4   3   0  207.18   26.90 
   4   3   0  141.29   19.30 
  -4   3   0  212.18   24.50 
  -4   3   0  160.28   21.70 
   4   3   0  169.18   20.10 
   4   3   0  228.48   18.80 
   4   3   0  172.88   21.10 
   4   3   0  184.78   23.00 
  -4   3   0  205.98   22.80 
   4   3   0  205.78   20.70 
   4   3   0  168.48   23.00 
  -4   3   0  206.68   27.40 
  -4   3   0  200.28   25.90 
  -4   3   0  196.58   21.80 
   4   3   0  195.88   26.30 
   4   3   0  193.98   22.60 
  -4   3   0  227.38   26.80 
   4   3   0  192.68   16.30 
  -5  -3   0  562.34   43.10 
   5  -3   0  512.65   34.70 
   5  -3   0  526.85   39.10 
   5  -3   0  508.85   41.70 
  -5  -3   0  518.45   43.30 
   5  -3   0  478.05   43.10 
   5  -3   0  495.95   43.10 
  -5  -3   0  551.94   37.70 
   5  -3   0  496.75   50.79 
   5  -3   0  501.75   39.30 
  -5  -3   0  530.75   43.10 
   5  -3   0  578.04   44.80 
   5  -3   0  528.75   38.40 
   5  -3   0  509.45   44.10 
  -5  -3   0  492.05   42.80 
  -5  -3   0  520.05   41.00 
   5  -3   0  537.65   45.80 
   5  -3   0  546.75   43.00 
   5  -3   0  528.95   42.60 
   5  -3   0  523.15   43.70 
  -5  -3   0  534.25   41.20 
  -5  -3   0  567.44   39.60 
  -5  -3   0  476.25   40.60 
  -5  -3   0  537.85   38.50 
  -5  -3   0  535.75   38.10 
  -5  -3   0  566.84   42.60 
   5  -3   0  543.35   45.60 
  -5  -3   0  532.65   41.80 
   5   3   0  542.75   38.10 
  -5   3   0  535.85   43.90 
  -5   3   0  439.86   47.10 
  -5   3   0  515.55   41.40 
   5   3   0  569.54   40.10 
  -5   3   0  481.75   43.20 
  -5   3   0  481.55   44.10 
   5   3   0  542.25   36.10 
   5   3   0  567.34   40.70 
   5   3   0  600.34   41.10 
   5   3   0  511.15   43.40 
  -5   3   0  542.15   44.40 
   5   3   0  559.14   32.80 
  -5   3   0  581.84   46.10 
  -5   3   0  545.35   35.30 
   5   3   0  536.35   43.60 
  -5   3   0  570.34   40.10 
   5   3   0  471.15   36.10 
   5   3   0  506.85   36.30 
  -5   3   0  519.35   43.30 
   5   3   0  508.55   33.00 
  -5   3   0  454.15   41.60 
  -5   3   0  609.14   38.00 
   5   3   0  540.75   40.00 
   5   3   0  503.15   34.60 
  -5   3   0  533.05   34.60 
  -5   3   0  504.15   42.30 
   5   3   0  479.55   41.30 
   5   3   0  498.75   40.90 
  -5   3   0  574.94   35.50 
   5   3   0  555.54   43.50 
   5   3   0  462.05   40.20 
   5   3   0  569.64   34.20 
  -5   3   0  505.05   44.10 
   5   3   0  494.75   34.00 
   5   3   0  506.75   42.00 
   6  -3   0  485.25   48.60 
  -6  -3   0  435.46   46.40 
   6  -3   0  566.34   45.50 
   6  -3   0  502.05   37.60 
  -6  -3   0  495.05   42.90 
   6  -3   0  453.05   48.00 
  -6  -3   0  525.85   42.30 
   6  -3   0  454.15   46.90 
  -6  -3   0  525.05   38.50 
   6  -3   0  522.05   52.99 
  -6  -3   0  478.35   49.70 
   6  -3   0  521.75   37.20 
  -6  -3   0  486.55   37.80 
  -6  -3   0  411.56   45.90 
   6  -3   0  388.26   45.00 
   6  -3   0  492.45   37.40 
   6  -3   0  452.25   50.39 
   6  -3   0  522.15   51.89 
   6  -3   0  460.05   48.90 
   6  -3   0  467.05   48.80 
   6  -3   0  405.16   43.10 
  -6  -3   0  498.75   39.50 
  -6  -3   0  507.65   44.00 
  -6  -3   0  514.65   42.90 
  -6  -3   0  447.56   35.90 
   6  -3   0  520.05   31.90 
  -6   3   0  450.95   46.20 
  -6   3   0  436.46   37.30 
  -6   3   0  450.95   33.40 
   6   3   0  515.85   30.40 
   6   3   0  472.85   44.30 
  -6   3   0  444.66   50.09 
  -6   3   0  467.75   48.40 
  -6   3   0  456.75   49.70 
  -6   3   0  480.75   51.29 
   6   3   0  491.35   42.30 
  -6   3   0  590.44   48.00 
  -6   3   0  475.25   49.70 
   6   3   0  428.96   33.60 
   6   3   0  424.46   34.20 
   6   3   0  496.65   35.40 
   6   3   0  506.85   50.79 
  -6   3   0  498.95   51.39 
  -6   3   0  493.25   41.70 
   6   3   0  539.65   40.90 
   6   3   0  470.05   30.90 
   6   3   0  439.26   39.10 
   6   3   0  391.56   46.20 
  -6   3   0  512.25   43.30 
  -6   3   0  458.35   49.80 
  -6   3   0  420.46   46.70 
   6   3   0  555.24   43.70 
  -6   3   0  429.86   30.20 
   6   3   0  454.65   33.00 
   6   3   0  500.55   34.00 
   6   3   0  439.46   47.30 
   6   3   0  531.35   51.39 
   6   3   0  449.16   47.90 
   7  -3   0   29.00   15.30 
   7  -3   0    8.40    9.30 
   7  -3   0   -3.20   11.30 
   7  -3   0    2.50   12.30 
  -7  -3   0   21.30   11.40 
   7  -3   0   30.10   17.20 
  -7  -3   0    4.40   13.50 
   7  -3   0   36.90   16.80 
  -7  -3   0   31.10   16.60 
   7  -3   0   18.80    9.80 
  -7  -3   0   34.60   14.10 
  -7  -3   0   11.70   12.00 
  -7  -3   0   24.10   16.50 
   7  -3   0   28.00   15.00 
   7  -3   0   20.80   15.40 
  -7  -3   0   10.10   13.00 
   7  -3   0   10.00   15.00 
  -7  -3   0    0.90    7.80 
   7  -3   0   38.60   12.50 
   7  -3   0   23.60   15.60 
  -7  -3   0   30.40   14.20 
   7  -3   0   33.80   17.00 
   7  -3   0   11.00   12.10 
  -7  -3   0   24.20   12.30 
  -7   3   0   22.70   14.20 
   7   3   0   15.90   12.70 
   7   3   0   50.89   18.30 
   7   3   0   12.40   11.60 
   7   3   0   26.90   15.50 
  -7   3   0   23.00   15.90 
  -7   3   0   46.50   19.20 
  -7   3   0   14.80   12.60 
  -7   3   0   24.70   14.90 
  -7   3   0    3.50    8.90 
   7   3   0    6.00   11.50 
   7   3   0   -2.40   11.10 
   7   3   0   27.40   12.70 
   7   3   0    3.50   10.40 
  -7   3   0   50.89   16.40 
  -7   3   0   27.60   16.30 
   7   3   0   17.00   12.00 
   7   3   0   19.60   10.90 
   7   3   0   15.10    8.20 
  -7   3   0   15.60   15.30 
   7   3   0   40.70   16.70 
   7   3   0   33.20   17.00 
  -7   3   0   26.20   16.30 
  -7   3   0   26.00   14.80 
   8  -3   0   15.80   17.80 
   8  -3   0    0.60   14.10 
   8  -3   0   -7.60   12.50 
   8  -3   0   -1.70   10.80 
   8  -3   0   -4.10   14.50 
  -8  -3   0   10.80   13.40 
   8  -3   0  -12.80   13.10 
   8  -3   0   -2.70   13.50 
  -8  -3   0    9.10   11.70 
   8  -3   0   -6.30   14.40 
  -8  -3   0   -1.90   11.60 
  -8  -3   0   -9.10   10.70 
  -8  -3   0    2.60   13.70 
   8  -3   0   19.00   16.80 
   8  -3   0  -10.20   13.50 
   8  -3   0    4.50   15.10 
  -8  -3   0   -7.90    9.40 
  -8  -3   0   16.60   15.40 
  -8  -3   0   -4.60   11.60 
   8  -3   0   12.40   15.00 
   8   3   0    1.90   14.10 
   8   3   0   17.30   17.80 
   8   3   0   15.80   13.50 
  -8   3   0   -0.20   12.90 
  -8   3   0    1.50   13.30 
   8   3   0    7.80   13.90 
  -8   3   0   18.00   14.60 
  -8   3   0   -6.80   10.40 
   8   3   0   -9.10   11.60 
   8   3   0   -5.30   12.50 
  -8   3   0    1.40   13.60 
   8   3   0    7.80   14.20 
  -8   3   0  -19.30    9.70 
  -8   3   0    8.10   14.00 
  -8   3   0   38.60   20.80 
  -8   3   0   12.40   17.60 
   8   3   0   18.90   16.20 
   8   3   0    5.50   13.70 
   8   3   0  -11.50   10.00 
  -8   3   0   29.80   14.40 
   8   3   0   11.80   13.10 
   9  -3   0  -20.10   15.00 
   9  -3   0    4.50   17.90 
   9  -3   0    1.30   16.00 
  -9  -3   0   23.00   20.00 
  -9  -3   0  -19.30   13.30 
   9  -3   0  -29.40   15.80 
  -9  -3   0    9.40   15.70 
   9  -3   0   -4.40   16.30 
   9  -3   0    9.70   18.60 
   9  -3   0  -24.60   14.00 
   9  -3   0    9.50   19.60 
  -9  -3   0   -4.80   15.00 
   9  -3   0   29.20   21.10 
   9  -3   0   -2.60   16.90 
   9  -3   0    7.20   20.30 
  -9  -3   0  -20.20   11.50 
   9  -3   0   -0.60   15.00 
   9   3   0   11.70   15.80 
  -9   3   0   12.50   15.90 
  -9   3   0    5.10   17.00 
   9   3   0   15.30   16.90 
   9   3   0    6.70   14.80 
  -9   3   0    0.90   17.10 
  -9   3   0   35.10   21.20 
  -9   3   0  -17.10   14.30 
   9   3   0    8.50   18.60 
  -9   3   0   -0.50   15.30 
  -9   3   0  -18.30   14.20 
  -9   3   0    7.70   16.70 
   9   3   0   12.80   16.70 
   9   3   0   -2.70   14.60 
   9   3   0    4.90   15.90 
   9   3   0    7.00   15.50 
   9   3   0   -3.20   14.50 
   9   3   0    7.40   13.10 
   9   3   0   -0.50   13.80 
  10  -3   0   55.79   29.90 
  10  -3   0    3.10   20.80 
  10  -3   0   67.29   29.50 
  10   3   0   51.19   24.40 
  10   3   0   75.99   26.20 
   0  -4   0  920.21   60.19 
   0  -4   0  931.81   62.59 
   0  -4   0  957.70   58.59 
   0  -4   0  941.71   57.09 
   0  -4   0  957.60   57.89 
   0  -4   0  882.31   59.59 
   0  -4   0  968.40   56.79 
   0  -4   0  878.41   56.89 
   0  -4   0  875.11   60.59 
   0  -4   0  967.10   59.99 
   0  -4   0  897.41   50.49 
   0  -4   0  923.61   60.89 
   0  -4   0  980.10   56.09 
   0  -4   0  892.81   58.69 
   0  -4   0  887.91   57.99 
   0  -4   0 1025.70   59.09 
   0  -4   0  977.70   57.69 
   0  -4   0  918.01   54.39 
   0  -4   0  892.41   56.49 
   0  -4   0  860.51   58.89 
   0   4   0  867.81   60.39 
   0   4   0  938.51   54.39 
   0   4   0  960.20   56.19 
   0   4   0  976.30   56.29 
   0   4   0  896.91   56.59 
   0   4   0  934.21   57.59 
   0   4   0  878.01   50.49 
   0   4   0  913.31   60.29 
   0   4   0  965.70   56.39 
   0   4   0  872.01   53.89 
   0   4   0  974.90   53.69 
   0   4   0  868.01   57.89 
   0   4   0  950.20   56.09 
   0   4   0  923.41   53.79 
   0   4   0  892.01   51.09 
   0   4   0  889.71   59.19 
   0   4   0  941.91   52.39 
   0   4   0  968.90   56.39 
   0   4   0  911.71   55.29 
   1  -4   0 3899.61  218.98 
   1  -4   0 3977.60  210.58 
  -1  -4   0 4024.80  221.08 
  -1  -4   0 3828.52  220.18 
   1  -4   0 4167.58  217.18 
   1  -4   0 4091.89  219.98 
   1  -4   0 3948.00  216.18 
   1  -4   0 4059.19  218.98 
  -1  -4   0 4129.99  220.98 
  -1  -4   0 3937.61  219.98 
   1  -4   0 4002.30  211.98 
   1  -4   0 4060.49  222.28 
   1  -4   0 4013.60  222.18 
   1  -4   0 3999.40  220.18 
   1  -4   0 3992.60  218.48 
   1  -4   0 3926.61  218.08 
   1  -4   0 3911.11  217.28 
   1  -4   0 4008.70  213.68 
   1  -4   0 4009.80  220.68 
  -1  -4   0 3955.80  220.18 
  -1  -4   0 3879.31  219.48 
   1  -4   0 4170.38  210.18 
   1  -4   0 4048.80  216.58 
  -1  -4   0 3974.40  210.48 
  -1  -4   0 3795.82  218.88 
   1  -4   0 3888.91  209.58 
   1  -4   0 3996.30  212.78 
   1  -4   0 3793.42  219.18 
   1  -4   0 3958.30  214.08 
  -1  -4   0 4135.39  220.98 
  -1  -4   0 4063.99  212.58 
   1  -4   0 4032.40  210.88 
  -1  -4   0 4134.09  218.08 
  -1  -4   0 3957.10  218.98 
  -1  -4   0 4107.19  212.98 
   1  -4   0 3823.72  213.48 
   1  -4   0 4211.48  219.48 
  -1   4   0 4005.80  220.38 
   1   4   0 3992.50  221.08 
   1   4   0 4051.29  215.18 
  -1   4   0 3844.52  211.98 
  -1   4   0 4065.99  211.58 
   1   4   0 4115.39  214.88 
   1   4   0 4000.40  214.48 
   1   4   0 3849.91  213.18 
   1   4   0 3966.30  220.48 
   1   4   0 3860.01  214.38 
  -1   4   0 4083.99  213.08 
   1   4   0 4058.19  209.78 
  -1   4   0 4164.98  215.58 
   1   4   0 4123.69  220.18 
   1   4   0 3949.70  213.38 
  -1   4   0 4169.38  218.48 
   1   4   0 3903.21  213.68 
  -1   4   0 4242.08  216.38 
   1   4   0 3981.70  211.38 
   1   4   0 3797.02  213.28 
   1   4   0 3974.40  211.68 
  -1   4   0 4106.19  219.18 
   1   4   0 4137.29  211.78 
   1   4   0 4147.08  215.38 
   1   4   0 3973.90  225.58 
   1   4   0 3968.70  216.18 
   1   4   0 4021.70  210.38 
  -1   4   0 4114.59  220.78 
  -1   4   0 3852.91  219.68 
  -1   4   0 4052.09  217.88 
  -1   4   0 4031.50  216.88 
   1   4   0 3960.50  215.58 
  -1   4   0 4081.89  218.78 
  -1   4   0 3968.40  217.48 
   1   4   0 4019.30  216.08 
   1   4   0 3994.00  209.78 
  -1   4   0 4024.30  217.48 
   1   4   0 3975.70  214.38 
   1   4   0 4243.28  210.38 
  -1   4   0 3941.51  212.58 
   1   4   0 4001.60  214.78 
   1   4   0 3918.71  209.98 
  -1   4   0 4035.60  222.18 
  -2  -4   0  441.76   32.40 
   2  -4   0  407.96   31.00 
   2  -4   0  441.16   35.40 
   2  -4   0  400.86   31.70 
  -2  -4   0  352.16   26.00 
   2  -4   0  401.16   27.80 
   2  -4   0  420.86   31.30 
   2  -4   0  353.36   26.40 
   2  -4   0  395.66   34.30 
  -2  -4   0  403.56   30.80 
   2  -4   0  402.66   31.20 
  -2  -4   0  388.86   29.00 
  -2  -4   0  385.36   31.70 
  -2  -4   0  420.76   28.90 
   2  -4   0  394.76   32.00 
  -2  -4   0  363.16   27.10 
  -2  -4   0  399.36   30.90 
  -2  -4   0  373.76   31.40 
  -2  -4   0  405.36   26.00 
  -2  -4   0  388.06   25.80 
   2  -4   0  343.97   31.00 
   2  -4   0  369.16   27.90 
   2  -4   0  357.76   25.90 
   2  -4   0  392.36   26.50 
   2  -4   0  420.36   32.20 
  -2  -4   0  457.75   33.00 
   2  -4   0  372.56   25.60 
   2  -4   0  356.16   31.60 
   2  -4   0  353.46   26.70 
  -2  -4   0  413.96   28.20 
   2  -4   0  464.25   34.20 
  -2  -4   0  425.26   33.40 
   2  -4   0  381.36   28.30 
   2  -4   0  350.06   35.20 
   2  -4   0  396.06   28.30 
  -2   4   0  371.26   26.90 
   2   4   0  367.96   26.10 
  -2   4   0  384.76   32.10 
   2   4   0  438.06   28.90 
  -2   4   0  361.36   31.90 
   2   4   0  375.56   31.70 
   2   4   0  403.16   26.10 
   2   4   0  389.36   26.60 
   2   4   0  382.26   23.20 
   2   4   0  394.56   25.80 
   2   4   0  381.26   27.00 
  -2   4   0  419.36   31.50 
   2   4   0  402.86   29.20 
   2   4   0  367.86   28.00 
   2   4   0  398.46   29.00 
   2   4   0  339.37   28.30 
   2   4   0  411.56   26.50 
  -2   4   0  377.86   30.00 
  -2   4   0  396.46   34.40 
   2   4   0  401.36   23.10 
   2   4   0  363.46   25.40 
  -2   4   0  386.56   27.60 
   2   4   0  408.86   31.80 
   2   4   0  393.46   28.40 
   2   4   0  361.76   26.50 
   2   4   0  386.56   27.30 
   2   4   0  378.36   26.60 
  -2   4   0  397.46   27.40 
  -2   4   0  402.46   34.40 
  -2   4   0  387.06   31.30 
   2   4   0  378.56   26.40 
   2   4   0  413.16   26.80 
  -2   4   0  359.86   30.80 
   2   4   0  352.36   31.90 
  -2   4   0  382.86   31.60 
   2   4   0  443.96   26.60 
   2   4   0  430.76   26.50 
   2   4   0  375.26   27.50 
  -2   4   0  362.76   31.40 
   2   4   0  380.76   27.70 
   2   4   0  405.06   30.30 
  -2   4   0  363.86   31.40 
   3  -4   0   80.39   13.40 
  -3  -4   0  107.29   15.70 
   3  -4   0  131.39   17.20 
  -3  -4   0  105.89   14.30 
  -3  -4   0   94.79   17.00 
  -3  -4   0   96.29   14.00 
   3  -4   0  102.39   18.40 
  -3  -4   0  119.19   17.20 
  -3  -4   0  118.39   16.80 
   3  -4   0   93.29   14.10 
   3  -4   0   89.29   16.10 
   3  -4   0   83.29   14.50 
   3  -4   0  121.49   19.80 
   3  -4   0   86.39   17.40 
   3  -4   0   83.39   17.50 
   3  -4   0   82.59   14.90 
   3  -4   0   87.19   17.90 
   3  -4   0   90.69   17.30 
  -3  -4   0  141.49   20.90 
  -3  -4   0  102.49   13.50 
  -3  -4   0  128.49   16.50 
   3  -4   0  110.59   14.50 
  -3  -4   0  105.39   17.70 
  -3  -4   0   96.39   14.90 
   3  -4   0   92.59   17.60 
   3  -4   0  131.59   20.70 
  -3  -4   0  103.19   15.40 
   3  -4   0  112.79   19.20 
  -3  -4   0   89.79   12.70 
  -3  -4   0   96.59   14.10 
   3  -4   0   81.29   16.50 
  -3   4   0  112.49   19.10 
   3   4   0   98.49   13.90 
   3   4   0  101.49   14.60 
  -3   4   0  130.09   18.90 
   3   4   0  131.69   20.10 
  -3   4   0   80.79   18.20 
   3   4   0  144.59   20.20 
   3   4   0   94.99   17.10 
   3   4   0  104.79   16.20 
   3   4   0  118.89   14.40 
   3   4   0  124.59   13.60 
  -3   4   0  103.79   15.40 
   3   4   0  124.19   12.50 
   3   4   0   99.69   16.80 
   3   4   0   94.19   14.10 
   3   4   0  119.49   15.10 
  -3   4   0   96.69   15.10 
   3   4   0  104.09   14.20 
  -3   4   0  101.99   19.70 
  -3   4   0  120.39   17.90 
  -3   4   0  129.89   17.60 
   3   4   0  108.49   14.60 
  -3   4   0  107.09   19.00 
  -3   4   0   98.89   17.90 
  -3   4   0   98.99   17.70 
   3   4   0   88.19   12.20 
   3   4   0   98.99    8.60 
  -3   4   0  107.59   18.20 
  -3   4   0  119.49   19.00 
   3   4   0  118.59   15.80 
   3   4   0  116.19   15.70 
  -4  -4   0  123.29   19.50 
  -4  -4   0  151.58   19.50 
   4  -4   0  133.19   23.00 
   4  -4   0  144.89   23.40 
   4  -4   0  122.19   19.60 
   4  -4   0  111.49   18.50 
   4  -4   0  130.69   22.80 
   4  -4   0  106.79   19.40 
   4  -4   0  133.79   18.10 
  -4  -4   0  153.68   22.00 
   4  -4   0  133.89   20.90 
  -4  -4   0  150.78   17.80 
  -4  -4   0  125.99   17.80 
   4  -4   0  134.89   20.20 
  -4  -4   0  105.79   15.60 
  -4  -4   0  124.69   16.80 
   4  -4   0  131.29   20.30 
  -4  -4   0  128.09   18.80 
  -4  -4   0  137.19   20.40 
   4  -4   0  150.58   21.20 
  -4  -4   0  108.59   17.60 
  -4  -4   0  135.19   20.60 
  -4  -4   0  107.39   18.30 
  -4  -4   0  140.19   19.80 
   4  -4   0  125.49   23.50 
   4  -4   0  140.89   23.50 
   4  -4   0  127.39   19.00 
  -4  -4   0  140.59   19.00 
  -4  -4   0  119.29   18.20 
   4  -4   0  136.89   22.20 
   4  -4   0  129.29   21.60 
  -4  -4   0  145.19   19.90 
  -4   4   0  115.59   21.30 
   4   4   0  131.99   13.40 
   4   4   0  166.48   12.80 
   4   4   0  122.09   20.40 
   4   4   0  159.18   21.50 
   4   4   0  102.99   16.60 
   4   4   0  153.48   16.50 
  -4   4   0  167.98   24.30 
   4   4   0  145.49   17.80 
   4   4   0  128.19   17.20 
  -4   4   0  111.59   18.70 
   4   4   0  161.18   21.20 
   4   4   0  120.29   18.90 
  -4   4   0   79.59   18.40 
  -4   4   0  131.49   23.30 
  -4   4   0  171.48   26.40 
  -4   4   0  141.69   19.60 
  -4   4   0  137.19   21.00 
   4   4   0  139.09   19.00 
   4   4   0  162.88   21.90 
   4   4   0  128.19   18.20 
  -4   4   0  147.19   24.50 
  -4   4   0  131.39   19.90 
  -4   4   0  163.98   23.20 
   4   4   0  174.08   23.30 
   4   4   0  133.59   17.10 
   4   4   0  152.08   17.80 
  -4   4   0  175.68   26.00 
   4   4   0  109.89   19.30 
   4   4   0  150.68   17.50 
  -4   4   0  190.98   23.00 
   4   4   0  147.79   20.40 
   5  -4   0  649.04   48.80 
   5  -4   0  719.33   51.29 
   5  -4   0  716.83   54.69 
   5  -4   0  640.44   53.79 
  -5  -4   0  606.54   50.59 
  -5  -4   0  690.03   49.80 
  -5  -4   0  658.33   50.39 
   5  -4   0  754.52   54.39 
  -5  -4   0  684.63   48.00 
   5  -4   0  674.83   53.89 
   5  -4   0  624.64   50.59 
   5  -4   0  622.14   49.80 
   5  -4   0  728.23   46.20 
  -5  -4   0  645.94   45.70 
   5  -4   0  653.33   50.79 
   5  -4   0  721.73   52.89 
   5  -4   0  643.74   55.19 
  -5  -4   0  721.73   50.69 
  -5  -4   0  682.93   51.19 
  -5  -4   0  625.24   50.79 
  -5  -4   0  683.73   49.80 
  -5  -4   0  664.33   48.80 
   5  -4   0  615.24   48.90 
   5  -4   0  673.63   55.79 
   5  -4   0  733.33   54.89 
  -5   4   0  753.12   53.19 
  -5   4   0  603.64   52.99 
  -5   4   0  702.33   48.60 
  -5   4   0  672.33   54.09 
   5   4   0  680.13   41.10 
   5   4   0  685.33   49.00 
   5   4   0  743.63   46.60 
   5   4   0  723.33   43.50 
   5   4   0  630.54   47.40 
  -5   4   0  648.14   54.69 
   5   4   0  714.43   49.90 
  -5   4   0  699.93   55.29 
   5   4   0  634.34   49.50 
  -5   4   0  717.83   52.29 
   5   4   0  675.03   51.39 
   5   4   0  638.04   43.90 
  -5   4   0  674.83   51.29 
  -5   4   0  667.53   54.49 
   5   4   0  620.74   49.60 
   5   4   0  727.13   47.90 
   5   4   0  738.03   55.59 
   5   4   0  680.53   49.60 
  -5   4   0  703.03   54.89 
  -5   4   0  681.93   46.50 
   5   4   0  669.53   45.90 
   5   4   0  703.63   48.00 
   5   4   0  609.44   50.59 
   5   4   0  632.74   52.79 
  -5   4   0  661.13   53.59 
  -5   4   0  649.14   49.40 
   5   4   0  690.73   47.90 
   5   4   0  686.03   47.00 
   6  -4   0  712.63   61.09 
  -6  -4   0  820.42   54.39 
   6  -4   0  816.62   62.29 
   6  -4   0  749.53   58.59 
   6  -4   0  748.13   54.39 
  -6  -4   0  882.31   58.99 
   6  -4   0  609.64   56.59 
   6  -4   0  824.02   61.99 
  -6  -4   0  784.22   53.39 
   6  -4   0  807.82   61.99 
   6  -4   0  768.12   49.90 
  -6  -4   0  764.02   59.59 
  -6  -4   0  817.92   59.79 
  -6  -4   0  890.31   60.19 
  -6  -4   0  911.31   63.09 
   6  -4   0  700.13   62.09 
   6  -4   0  785.52   64.19 
   6  -4   0  782.42   58.99 
   6  -4   0  743.93   61.09 
  -6  -4   0  765.42   59.89 
   6  -4   0  725.33   61.99 
   6  -4   0  731.23   55.99 
   6  -4   0  728.13   55.09 
   6   4   0  681.03   57.99 
   6   4   0  754.62   61.69 
  -6   4   0  786.12   62.99 
   6   4   0  788.02   60.89 
  -6   4   0  833.92   62.89 
  -6   4   0  781.02   59.99 
   6   4   0  751.12   53.49 
   6   4   0  788.32   55.89 
   6   4   0  781.82   58.89 
   6   4   0  765.72   47.10 
   6   4   0  748.03   49.70 
  -6   4   0  749.62   61.29 
  -6   4   0  829.02   53.59 
   6   4   0  793.62   54.59 
   6   4   0  823.82   58.29 
  -6   4   0  686.83   60.99 
   6   4   0  782.42   52.39 
   6   4   0  666.13   51.39 
   6   4   0  804.72   60.99 
  -6   4   0  749.23   49.90 
  -6   4   0  787.12   56.09 
   6   4   0  790.92   59.39 
   6   4   0  734.63   56.89 
  -6   4   0  803.22   63.49 
  -6   4   0  704.43   60.69 
  -6   4   0  752.62   59.79 
  -6   4   0  700.33   61.29 
  -6   4   0  731.73   58.99 
   6   4   0  715.23   51.79 
   6   4   0  825.82   59.89 
   6   4   0  776.52   49.50 
   6   4   0  746.13   54.59 
   6   4   0  770.62   57.19 
   7  -4   0  895.81   69.19 
   7  -4   0  931.11   74.69 
   7  -4   0 1067.79   77.79 
  -7  -4   0 1096.39   75.29 
  -7  -4   0  920.11   69.59 
   7  -4   0  851.51   71.49 
   7  -4   0  989.40   74.89 
  -7  -4   0  932.71   65.99 
  -7  -4   0  991.50   64.89 
   7  -4   0  811.42   68.29 
  -7  -4   0  905.01   62.19 
   7  -4   0  820.22   71.09 
  -7  -4   0 1007.20   74.99 
   7  -4   0  903.61   62.99 
   7  -4   0 1084.19   74.89 
   7  -4   0  865.11   73.89 
   7  -4   0  937.01   76.19 
  -7  -4   0  884.41   70.99 
  -7  -4   0  981.20   72.79 
  -7  -4   0 1004.40   69.89 
   7  -4   0  948.21   65.99 
   7  -4   0  883.61   63.79 
   7  -4   0  829.92   70.79 
   7   4   0  822.12   65.19 
   7   4   0  946.91   73.49 
  -7   4   0  877.21   73.69 
   7   4   0 1051.19   69.89 
  -7   4   0  985.10   76.49 
   7   4   0  903.71   70.29 
   7   4   0  875.51   68.59 
   7   4   0 1049.49   74.19 
  -7   4   0  986.50   66.49 
   7   4   0  944.31   65.69 
  -7   4   0  834.42   72.19 
   7   4   0  848.22   68.19 
  -7   4   0  908.31   71.79 
  -7   4   0  914.21   73.39 
   7   4   0 1063.29   68.39 
   7   4   0  917.51   72.49 
  -7   4   0 1031.60   74.69 
  -7   4   0  796.32   68.49 
   7   4   0  860.61   70.39 
   7   4   0  986.70   72.49 
   7   4   0  956.20   73.59 
  -7   4   0  910.61   73.39 
  -7   4   0  861.21   70.79 
  -7   4   0  860.91   70.99 
  -7   4   0  916.21   74.69 
  -8  -4   0  313.07   45.30 
   8  -4   0  406.96   52.09 
   8  -4   0  338.97   48.00 
   8  -4   0  313.47   43.70 
   8  -4   0  414.56   50.89 
  -8  -4   0  397.36   49.00 
   8  -4   0  373.56   47.90 
  -8  -4   0  447.26   48.40 
   8  -4   0  306.57   45.60 
   8  -4   0  386.96   51.49 
   8  -4   0  303.57   47.60 
   8  -4   0  354.96   48.80 
  -8  -4   0  389.06   50.19 
   8  -4   0  345.37   51.59 
   8  -4   0  375.36   50.49 
  -8   4   0  312.37   46.90 
  -8   4   0  378.46   50.49 
  -8   4   0  298.57   47.90 
  -8   4   0  312.57   43.60 
  -8   4   0  373.76   46.30 
   8   4   0  317.67   47.50 
   8   4   0  408.76   51.99 
   8   4   0  410.76   46.50 
   8   4   0  314.87   44.00 
  -8   4   0  467.95   56.79 
  -8   4   0  446.96   55.49 
  -8   4   0  395.66   51.19 
   8   4   0  399.66   48.10 
   8   4   0  414.06   46.30 
  -8   4   0  312.87   46.80 
   8   4   0  392.96   51.09 
   8   4   0  390.26   52.59 
   8   4   0  449.26   54.29 
   8   4   0  454.05   47.50 
   8   4   0  388.46   50.09 
   8   4   0  417.56   53.39 
  -8   4   0  372.36   53.59 
   8   4   0  397.66   45.50 
   9  -4   0  215.88   42.10 
   9  -4   0  249.28   43.20 
   9  -4   0  314.77   50.19 
   9  -4   0  278.57   44.60 
  -9  -4   0  206.68   39.50 
  -9  -4   0  220.18   41.40 
   9  -4   0  292.67   46.10 
  -9  -4   0  247.08   43.40 
   9  -4   0  280.77   48.20 
   9  -4   0  242.68   45.60 
  -9  -4   0  319.47   66.99 
   9  -4   0  276.97   46.90 
   9  -4   0  279.37   45.30 
   9  -4   0  349.96   47.80 
   9  -4   0  231.68   43.30 
   9   4   0  277.77   40.10 
   9   4   0  265.87   46.90 
   9   4   0  288.97   46.60 
  -9   4   0  293.27   50.59 
   9   4   0  288.77   43.90 
  -9   4   0  281.17   46.90 
   9   4   0  301.17   48.30 
  -9   4   0  359.96   52.99 
   9   4   0  268.37   44.30 
  -9   4   0  266.57   44.10 
   9   4   0  279.07   43.10 
  -9   4   0  252.27   46.10 
  -9   4   0  414.46   59.49 
   9   4   0  267.87   47.40 
   9   4   0  196.18   38.30 
  -9   4   0  340.97   51.19 
   9   4   0  269.37   39.60 
   9   4   0  370.26   51.79 
   0  -5   0   17.00   10.00 
   0  -5   0    9.20    7.30 
   0  -5   0    7.90    7.40 
   0  -5   0   12.90    9.50 
   0  -5   0   -0.70    7.30 
   0  -5   0    2.30    4.60 
   0  -5   0    7.20    6.10 
   0  -5   0    2.30    7.70 
   0  -5   0   -2.90    7.20 
   0  -5   0   -5.70    6.70 
   0  -5   0   -5.20    7.40 
   0  -5   0   -0.30    5.60 
   0  -5   0   -6.50    6.90 
   0  -5   0    5.40    9.40 
   0  -5   0    9.80    9.50 
   0  -5   0    8.20    6.50 
   0  -5   0   -3.20    6.70 
   0  -5   0   -2.40    5.80 
   0   5   0    2.70    3.80 
   0   5   0   -2.50    5.00 
   0   5   0   -0.30    3.70 
   0   5   0    2.30    6.30 
   0   5   0   -2.00    5.40 
   0   5   0   -1.70    7.80 
   0   5   0    5.50    4.80 
   0   5   0   -0.90    4.80 
   0   5   0    4.30    3.10 
   0   5   0    0.00    3.50 
   0   5   0    4.80    8.30 
   0   5   0    1.90    3.70 
   0   5   0   -0.20    5.00 
   0   5   0    2.00    5.30 
   0   5   0    2.10    7.40 
   0   5   0    2.70    2.40 
   0   5   0   -6.50    4.30 
   1  -5   0  137.29   23.00 
   1  -5   0   84.19   18.90 
   1  -5   0  138.29   19.30 
  -1  -5   0  131.49   13.70 
  -1  -5   0  112.39   19.60 
   1  -5   0  127.99   21.70 
   1  -5   0  138.29   18.90 
   1  -5   0   97.69   17.90 
   1  -5   0  105.49   18.60 
   1  -5   0  121.69   15.80 
   1  -5   0   92.89   12.70 
  -1  -5   0  121.29    9.50 
  -1  -5   0  121.19   20.70 
   1  -5   0  127.39   20.30 
   1  -5   0  110.99   15.70 
   1  -5   0  113.09   21.60 
   1  -5   0  119.89   19.00 
  -1  -5   0  139.09   21.60 
   1  -5   0  150.08   13.10 
   1  -5   0   95.79   18.70 
  -1  -5   0  134.39   21.30 
   1  -5   0  156.18   23.50 
  -1  -5   0  124.39   13.30 
  -1  -5   0  130.19   21.00 
   1  -5   0  127.19   17.10 
  -1  -5   0  162.08   25.00 
  -1  -5   0  101.49   18.40 
  -1  -5   0  122.59   20.90 
   1  -5   0  146.19   19.70 
  -1  -5   0  133.99   21.80 
  -1   5   0  133.29   20.30 
  -1   5   0  119.99   10.30 
  -1   5   0   77.09   18.40 
  -1   5   0  169.38   23.80 
   1   5   0  147.29   14.10 
   1   5   0  121.49    8.50 
   1   5   0  118.99   14.20 
  -1   5   0  136.99   13.30 
   1   5   0  134.69   10.50 
   1   5   0  119.69   12.00 
  -1   5   0  134.39   22.20 
  -1   5   0  128.79   13.00 
  -1   5   0  118.09   18.50 
   1   5   0  133.39   10.60 
   1   5   0  140.59   22.00 
  -1   5   0  120.09   17.90 
   1   5   0  116.49   16.70 
   1   5   0  117.19   17.90 
   1   5   0  136.59   14.40 
   1   5   0  146.29   17.10 
  -1   5   0  138.39   16.60 
   1   5   0  148.49   17.10 
   1   5   0  149.99   18.00 
  -1   5   0  117.59   14.10 
   1   5   0  113.29   20.60 
   1   5   0  113.79   19.60 
   1   5   0  135.99   14.90 
  -1   5   0  136.99   23.50 
  -1   5   0  124.39   18.70 
  -1   5   0  155.78   18.00 
  -1   5   0  121.29   16.80 
   1   5   0  117.49   14.30 
  -1   5   0  164.98   24.30 
   2  -5   0  211.58   29.40 
  -2  -5   0  247.18   19.30 
  -2  -5   0  192.58   25.70 
   2  -5   0  210.88   27.90 
   2  -5   0  212.78   27.80 
  -2  -5   0  203.68   25.00 
   2  -5   0  178.08   23.80 
   2  -5   0  189.28   15.80 
  -2  -5   0  248.78   25.40 
   2  -5   0  227.08   18.60 
  -2  -5   0  211.98   27.40 
   2  -5   0  233.68   30.60 
  -2  -5   0  223.18   16.70 
   2  -5   0  230.78   27.60 
  -2  -5   0  172.18   25.70 
   2  -5   0  199.58   25.60 
  -2  -5   0  179.08   25.60 
   2  -5   0  203.08   16.70 
  -2  -5   0  240.98   28.30 
   2  -5   0  224.78   22.50 
   2  -5   0  240.58   19.00 
   2  -5   0  195.98   25.80 
  -2  -5   0  228.18   17.40 
   2  -5   0  179.78   25.50 
   2  -5   0  215.38   17.90 
   2  -5   0  192.48   25.90 
   2  -5   0  250.17   23.00 
   2  -5   0  217.98   22.20 
  -2  -5   0  252.77   26.50 
   2  -5   0  204.38   20.60 
   2  -5   0  188.48   26.70 
   2  -5   0  219.68   27.70 
  -2  -5   0  205.68   25.90 
   2  -5   0  209.68   17.20 
  -2  -5   0  252.47   29.40 
   2   5   0  198.08   17.30 
  -2   5   0  220.28   29.60 
   2   5   0  183.28   16.80 
  -2   5   0  232.78   31.40 
   2   5   0  271.27   28.50 
   2   5   0  277.47   33.50 
   2   5   0  217.78   22.20 
   2   5   0  220.08   22.00 
   2   5   0  234.98   25.10 
   2   5   0  208.48   17.80 
  -2   5   0  260.37   30.60 
  -2   5   0  179.18   24.00 
   2   5   0  196.78   20.10 
   2   5   0  204.68   17.70 
   2   5   0  194.08   22.50 
  -2   5   0  218.28   18.50 
  -2   5   0  173.78   25.60 
  -2   5   0  208.38   28.00 
  -2   5   0  239.68   26.90 
   2   5   0  198.28   17.00 
   2   5   0  204.98   16.00 
   2   5   0  203.48   27.20 
  -2   5   0  219.38   18.10 
   2   5   0  184.48   26.40 
   2   5   0  172.38   21.40 
   2   5   0  246.48   25.30 
  -2   5   0  164.78   23.90 
   2   5   0  222.48   16.50 
   2   5   0  223.08   14.50 
   2   5   0  237.68   18.40 
  -2   5   0  223.28   22.10 
  -2   5   0  245.28   29.20 
   2   5   0  193.68   16.70 
   2   5   0  214.98   24.30 
   2   5   0  230.68   20.20 
  -2   5   0  221.18   25.10 
   2   5   0  195.08   20.60 
   2   5   0  218.78   21.40 
   2   5   0  234.08   16.80 
  -3  -5   0    6.10    7.30 
   3  -5   0   12.70    7.10 
   3  -5   0   10.70    6.40 
   3  -5   0    2.30    8.30 
   3  -5   0    3.40    8.20 
   3  -5   0    6.40   10.20 
  -3  -5   0   -2.30    4.70 
   3  -5   0    0.00    6.80 
  -3  -5   0    7.40    5.60 
   3  -5   0    8.60    6.90 
  -3  -5   0    5.30    8.00 
  -3  -5   0    2.30    5.30 
  -3  -5   0    2.10    5.60 
  -3  -5   0    6.70    8.50 
   3  -5   0   -6.00    7.40 
   3  -5   0    1.50    8.40 
   3  -5   0    8.60    9.80 
   3  -5   0   -4.60    6.60 
   3  -5   0    4.40    8.90 
  -3  -5   0   19.50   11.70 
   3  -5   0   24.40   12.00 
  -3  -5   0   -5.00    5.10 
   3  -5   0    1.10    5.60 
   3  -5   0    9.00    9.60 
  -3  -5   0   17.00    7.60 
  -3  -5   0   11.30    9.40 
  -3  -5   0   -2.90    8.20 
   3  -5   0    8.30   10.30 
  -3   5   0    4.90    6.40 
   3   5   0    8.10    5.80 
  -3   5   0    7.70    9.20 
   3   5   0    4.50    5.10 
   3   5   0    2.70    5.60 
   3   5   0   -2.00    5.00 
   3   5   0    3.90    6.10 
   3   5   0   -1.60    5.40 
   3   5   0    0.40    4.30 
  -3   5   0   -6.20    6.80 
  -3   5   0    0.50    6.80 
   3   5   0    4.00    5.60 
   3   5   0    3.20    7.60 
  -3   5   0   -2.20    6.80 
   3   5   0    2.90    4.90 
  -3   5   0    0.20    6.20 
   3   5   0    3.70    8.40 
  -3   5   0   -3.50    7.70 
   3   5   0    1.60    5.10 
   3   5   0   -2.80    7.00 
  -3   5   0    9.70    9.30 
   3   5   0    5.00    6.10 
   3   5   0   -0.30    4.70 
   3   5   0    2.30    5.30 
   3   5   0    7.50    8.20 
   3   5   0    2.80    5.30 
  -3   5   0    1.40    8.00 
   3   5   0   -0.80    6.10 
  -3   5   0   11.20    7.40 
   3   5   0    1.70    5.10 
  -3   5   0   -6.10    6.70 
   3   5   0   -3.70    3.60 
  -3   5   0    4.70    9.60 
   3   5   0    2.20    6.30 
  -4  -5   0  153.38   21.00 
  -4  -5   0  171.58   19.70 
  -4  -5   0  171.58   21.10 
  -4  -5   0  190.68   25.00 
  -4  -5   0  172.18   24.90 
   4  -5   0  148.89   24.50 
   4  -5   0  132.99   23.80 
   4  -5   0  155.68   21.90 
   4  -5   0  149.19   24.80 
   4  -5   0  147.39   25.40 
   4  -5   0  133.99   25.30 
   4  -5   0  115.89   20.40 
   4  -5   0  167.78   27.00 
   4  -5   0   90.69   22.40 
  -4  -5   0  149.88   21.30 
  -4  -5   0  170.38   22.30 
   4  -5   0  114.69   21.10 
   4  -5   0  170.78   21.80 
  -4  -5   0  172.78   22.50 
  -4  -5   0  203.38   24.20 
   4  -5   0  160.98   22.50 
  -4  -5   0  147.59   18.30 
   4  -5   0  158.88   22.60 
  -4  -5   0  182.98   26.00 
  -4  -5   0  118.49   22.40 
   4  -5   0  136.29   24.10 
   4  -5   0  107.69   22.00 
   4   5   0  149.88   20.30 
  -4   5   0  133.89   22.80 
   4   5   0  153.48   15.00 
  -4   5   0  184.38   28.10 
   4   5   0  175.48   21.40 
   4   5   0  168.08   11.40 
   4   5   0  153.88   24.70 
   4   5   0  190.38   23.70 
  -4   5   0  162.58   27.10 
   4   5   0  167.88   23.60 
   4   5   0  179.18   22.90 
   4   5   0  174.48   18.20 
   4   5   0  178.68   19.80 
  -4   5   0  112.29   24.70 
  -4   5   0  169.88   26.60 
   4   5   0  164.08   13.70 
  -4   5   0  172.08   24.10 
   4   5   0  166.28   22.10 
   4   5   0  168.18   15.50 
  -4   5   0  167.28   24.30 
   4   5   0  179.68   19.00 
   4   5   0  115.69   20.60 
  -4   5   0  190.78   29.50 
  -4   5   0  144.39   23.70 
   4   5   0  116.89   22.20 
   4   5   0  168.28   26.70 
   4   5   0  156.08   24.10 
   4   5   0  210.18   22.40 
  -4   5   0  151.78   26.30 
  -4   5   0  162.08   22.50 
   4   5   0  158.68   19.30 
  -4   5   0  171.88   25.50 
  -5  -5   0  154.58   21.60 
   5  -5   0  117.99   19.80 
  -5  -5   0  107.19   17.40 
   5  -5   0  127.59   23.90 
   5  -5   0   98.59   20.80 
   5  -5   0   85.79   19.90 
  -5  -5   0  118.59   22.30 
   5  -5   0  128.79   23.10 
  -5  -5   0  133.19   23.00 
   5  -5   0  154.38   23.50 
   5  -5   0  117.19   24.40 
   5  -5   0  134.89   21.70 
  -5  -5   0  122.29   22.40 
   5  -5   0  102.79   22.00 
  -5  -5   0  138.99   22.80 
   5  -5   0  126.59   24.70 
   5  -5   0   90.79   22.40 
  -5  -5   0  121.59   21.30 
   5  -5   0  122.29   24.10 
  -5  -5   0  134.69   20.20 
   5  -5   0  137.39   26.70 
   5  -5   0  147.29   25.60 
   5   5   0  113.19   21.00 
  -5   5   0  118.29   20.50 
  -5   5   0  129.29   23.20 
  -5   5   0  116.69   21.70 
   5   5   0  165.98   24.20 
   5   5   0  122.09   22.90 
   5   5   0  135.99   22.00 
  -5   5   0   73.59   20.90 
   5   5   0  130.59   19.90 
  -5   5   0  114.79   23.50 
   5   5   0  155.38   24.20 
   5   5   0  131.39   16.50 
   5   5   0  113.99   21.50 
  -5   5   0   87.39   22.00 
  -5   5   0  155.38   24.70 
   5   5   0  114.09   22.90 
   5   5   0  150.48   18.50 
  -5   5   0  115.99   25.50 
   5   5   0  157.68   21.10 
  -5   5   0  151.58   23.80 
  -5   5   0   84.59   23.20 
   5   5   0  124.79   22.50 
  -5   5   0  119.29   24.50 
  -5   5   0  165.28   29.60 
   5   5   0  162.28   23.40 
   5   5   0  108.89   22.10 
   5   5   0  127.99   20.30 
   5   5   0  165.08   22.90 
   5   5   0  144.89   19.60 
  -5   5   0   87.09   18.90 
  -6  -5   0  345.77   40.00 
   6  -5   0  398.36   47.00 
   6  -5   0  412.56   46.90 
   6  -5   0  368.86   40.50 
  -6  -5   0  254.37   35.60 
   6  -5   0  311.37   39.50 
   6  -5   0  350.46   45.00 
   6  -5   0  329.97   44.70 
   6  -5   0  357.06   40.50 
   6  -5   0  324.07   40.20 
   6  -5   0  345.97   47.10 
   6  -5   0  410.06   49.20 
   6  -5   0  392.16   32.40 
  -6  -5   0  321.77   40.00 
   6  -5   0  311.77   40.40 
   6  -5   0  406.76   44.60 
  -6  -5   0  470.35   47.00 
   6  -5   0  411.86   41.20 
   6   5   0  367.66   42.30 
   6   5   0  405.56   39.00 
   6   5   0  380.76   40.70 
   6   5   0  402.36   43.20 
  -6   5   0  322.17   39.90 
  -6   5   0  340.97   35.60 
   6   5   0  426.66   40.60 
  -6   5   0  364.16   45.10 
  -6   5   0  400.56   44.70 
  -6   5   0  413.16   49.10 
  -6   5   0  347.97   45.30 
   6   5   0  419.36   41.70 
   6   5   0  395.06   44.50 
   6   5   0  367.76   38.10 
   6   5   0  327.77   40.40 
   6   5   0  387.96   44.20 
  -6   5   0  330.57   45.10 
  -6   5   0  262.57   38.30 
   6   5   0  378.16   32.60 
   6   5   0  374.36   36.00 
  -6   5   0  335.67   44.30 
  -6   5   0  389.86   44.00 
   6   5   0  335.67   39.20 
   6   5   0  413.46   46.90 
   6   5   0  362.96   38.40 
   6   5   0  390.36   49.90 
   6   5   0  287.77   37.90 
  -6   5   0  349.77   37.80 
  -6   5   0  295.57   41.90 
  -6   5   0  457.75   51.19 
   7  -5   0    3.10   14.20 
  -7  -5   0   20.30   14.00 
  -7  -5   0   10.50   15.20 
   7  -5   0   33.10   19.40 
   7  -5   0   22.20   17.40 
   7  -5   0   43.60   17.50 
   7  -5   0   17.30   18.70 
  -7  -5   0   32.40   18.00 
   7  -5   0   22.60   15.10 
   7  -5   0   -3.90   13.20 
   7  -5   0   63.39   21.30 
   7  -5   0   22.40   18.30 
   7  -5   0   39.90   20.90 
   7  -5   0   42.80   17.80 
   7  -5   0   26.20   15.10 
   7  -5   0   21.10   16.20 
   7  -5   0    9.60   12.20 
  -7  -5   0   42.30   18.40 
   7   5   0   15.90   13.00 
   7   5   0   41.50   15.80 
  -7   5   0   31.60   17.60 
  -7   5   0   28.30   19.90 
  -7   5   0   -4.60   11.00 
   7   5   0    8.60   14.10 
   7   5   0   47.80   16.70 
  -7   5   0   24.10   18.20 
   7   5   0   22.90   15.10 
  -7   5   0   49.90   20.10 
   7   5   0   13.10   13.40 
  -7   5   0   32.90   15.00 
  -7   5   0   29.50   17.50 
  -7   5   0   26.70   13.80 
   7   5   0   33.30   18.30 
  -7   5   0   21.80   16.70 
   7   5   0   18.10   13.80 
  -7   5   0   35.40   19.60 
   7   5   0   28.30   14.70 
   7   5   0   34.90   17.30 
   7   5   0   32.30   14.20 
  -7   5   0   13.10   17.40 
   7   5   0   67.59   21.60 
   8  -5   0   14.40   18.30 
   8  -5   0   -5.20   13.20 
   8  -5   0    4.60   14.00 
  -8  -5   0    1.10   14.60 
   8  -5   0   10.20   17.90 
   8  -5   0   -7.00   16.90 
   8  -5   0   -5.80   15.70 
   8  -5   0   10.80   18.00 
   8  -5   0   25.70   22.90 
   8  -5   0   -5.10   13.80 
   8  -5   0    3.00   16.10 
  -8  -5   0   -9.10   13.50 
   8  -5   0    3.40   17.50 
  -8  -5   0   30.20   18.20 
  -8   5   0    4.40   15.40 
   8   5   0    4.40   13.90 
   8   5   0    5.80   14.60 
   8   5   0   11.50   15.20 
   8   5   0   -1.20   13.10 
  -8   5   0   11.50   13.60 
  -8   5   0   29.80   19.70 
   8   5   0   -7.40   11.60 
  -8   5   0   10.90   18.60 
   8   5   0   17.10   16.60 
  -8   5   0    1.00   15.20 
  -8   5   0   -4.20   14.10 
  -8   5   0   -3.50   14.40 
  -8   5   0  -15.10   13.50 
  -8   5   0    2.30   15.30 
  -8   5   0  -32.80   11.20 
   8   5   0   -4.50   15.30 
   8   5   0   15.20   15.70 
   8   5   0   11.40   14.60 
   8   5   0   18.40   19.40 
   9  -5   0    1.90   18.40 
   9  -5   0    0.70   17.60 
  -9  -5   0    1.70   16.10 
   9  -5   0    7.00   24.00 
   9  -5   0  -24.30   19.10 
   9  -5   0   -3.80   19.90 
   9  -5   0   -1.70   16.40 
   9  -5   0    9.50   16.60 
   9  -5   0  -16.10   21.70 
   9  -5   0   32.20   24.40 
   9  -5   0  -10.30   17.60 
   9  -5   0   -8.40   17.20 
   9   5   0   46.50   24.70 
   9   5   0    2.00   15.50 
   9   5   0   24.70   18.80 
  -9   5   0   10.90   17.80 
  -9   5   0   22.90   19.50 
   9   5   0  -14.10   15.40 
  -9   5   0   -7.60   15.80 
   9   5   0   -5.30   14.30 
  -9   5   0    2.90   19.10 
   9   5   0   11.70   14.40 
  -9   5   0    1.70   18.00 
   9   5   0    0.60   16.10 
  -9   5   0   29.70   24.10 
   9   5   0   -7.30   16.40 
  -9   5   0    1.00   17.70 
  -9   5   0   10.40   19.80 
   0  -6   0   22.20   10.00 
   0  -6   0   38.90    9.10 
   0  -6   0   11.40   10.70 
   0  -6   0   26.50    6.80 
   0  -6   0   10.00   11.20 
   0  -6   0   39.70   14.60 
   0  -6   0   38.30   12.20 
   0  -6   0   43.50   15.70 
   0  -6   0   25.40   12.60 
   0  -6   0   31.60   11.60 
   0  -6   0   20.30   12.60 
   0  -6   0    5.60    9.30 
   0  -6   0   35.70   12.80 
   0  -6   0   42.10   11.10 
   0  -6   0   19.20   12.50 
   0   6   0   30.90   11.00 
   0   6   0   30.00    5.00 
   0   6   0   31.30   10.90 
   0   6   0   42.50    7.70 
   0   6   0    0.90   10.50 
   0   6   0    7.90    9.40 
   0   6   0   30.90    9.90 
   0   6   0   25.80    8.30 
   0   6   0   38.50   14.40 
   0   6   0   39.00   16.00 
   0   6   0   19.60    8.70 
   0   6   0   45.00   14.60 
   0   6   0   14.50    8.30 
   0   6   0   25.10    7.70 
   0   6   0   32.10    8.20 
   1  -6   0 2052.49  127.59 
   1  -6   0 2117.99  126.09 
   1  -6   0 2079.69  124.09 
   1  -6   0 2033.40  122.69 
  -1  -6   0 2192.98  128.09 
   1  -6   0 2078.89  113.59 
  -1  -6   0 2224.18  131.29 
  -1  -6   0 2114.49  128.39 
  -1  -6   0 2151.28  128.49 
   1  -6   0 2195.68  131.19 
  -1  -6   0 2053.39  127.09 
   1  -6   0 2047.50  125.09 
   1  -6   0 2089.29  116.99 
   1  -6   0 2108.79  126.39 
   1  -6   0 2032.60  128.99 
   1  -6   0 2054.49  130.89 
  -1  -6   0 1984.30  128.39 
   1  -6   0 2220.98  121.49 
   1  -6   0 2228.88  129.79 
   1  -6   0 2113.09  128.59 
  -1  -6   0 2203.78  130.39 
   1  -6   0 2116.69  131.69 
   1  -6   0 2121.69  125.99 
   1  -6   0 2180.68  115.99 
  -1  -6   0 2152.38  115.49 
  -1  -6   0 2097.39  128.09 
  -1  -6   0 1812.72  126.59 
   1  -6   0 2103.59  125.39 
  -1   6   0 2185.58  123.89 
   1   6   0 1968.80  119.89 
   1   6   0 2150.38  119.89 
   1   6   0 2209.28  116.69 
   1   6   0 2041.40  115.19 
  -1   6   0 2125.19  112.09 
   1   6   0 2135.79  130.99 
  -1   6   0 2126.69  123.69 
  -1   6   0 2012.00  128.29 
  -1   6   0 2140.69  114.89 
   1   6   0 2033.60  113.49 
  -1   6   0 2165.88  129.09 
  -1   6   0 2133.79  120.29 
  -1   6   0 2064.09  130.59 
  -1   6   0 2146.59  130.99 
  -1   6   0 2066.69  121.79 
  -1   6   0 2306.77  126.69 
   1   6   0 2070.59  116.59 
   1   6   0 2099.89  129.39 
   1   6   0 2218.98  131.29 
   1   6   0 2048.90  112.99 
  -1   6   0 2255.47  130.99 
   1   6   0 2102.39  116.99 
  -1   6   0 2081.99  125.29 
   1   6   0 2248.77  116.19 
   1   6   0 2089.19  120.59 
   1   6   0 2135.39  120.59 
   1   6   0 2148.58  124.49 
   1   6   0 2199.08  129.09 
   1   6   0 2129.19  119.99 
  -1   6   0 2048.70  119.29 
  -2  -6   0    2.80    5.00 
   2  -6   0   -1.00    6.60 
   2  -6   0    2.30    4.70 
  -2  -6   0    0.70   10.00 
   2  -6   0   -0.10   10.10 
  -2  -6   0   -7.60    9.70 
  -2  -6   0   -5.50    9.60 
   2  -6   0   -7.70    5.20 
   2  -6   0   -6.10    6.40 
  -2  -6   0   -0.90    4.40 
   2  -6   0   -1.30    3.80 
   2  -6   0   -3.60    3.10 
  -2  -6   0   -8.00    8.60 
   2  -6   0  -11.40    7.80 
   2  -6   0    7.80   10.70 
   2  -6   0   -3.20    5.20 
   2  -6   0    6.90   11.10 
   2  -6   0    1.90    4.60 
  -2  -6   0  -10.80    9.20 
   2  -6   0   -0.20    8.30 
  -2  -6   0    1.70    7.90 
  -2  -6   0    3.70    8.60 
   2  -6   0   11.10   10.40 
   2  -6   0   -6.00    9.70 
   2  -6   0    3.50    7.40 
   2  -6   0    8.20    5.30 
   2  -6   0  -19.60    7.50 
   2  -6   0   -3.10    8.50 
  -2  -6   0    2.10    8.00 
  -2  -6   0   -4.70    9.40 
   2  -6   0    3.00    5.30 
   2  -6   0   17.30    9.70 
   2   6   0   -1.30    3.00 
   2   6   0   -2.10    5.30 
  -2   6   0   -1.50    8.60 
   2   6   0   -5.70    7.60 
   2   6   0   -0.60    5.90 
   2   6   0    0.60    5.70 
   2   6   0   -2.80    5.70 
   2   6   0    4.30    8.80 
   2   6   0    5.90    7.40 
   2   6   0    6.10    8.40 
   2   6   0    3.70    3.40 
  -2   6   0   -1.30    7.70 
  -2   6   0    2.50    8.00 
   2   6   0    0.60    4.90 
   2   6   0    6.90   10.70 
  -2   6   0    4.20    4.40 
   2   6   0    0.40    4.20 
  -2   6   0   -5.00    6.90 
  -2   6   0   -4.70    9.10 
   2   6   0    4.50    3.70 
   2   6   0   -1.00    4.90 
  -2   6   0   -1.20    7.10 
   2   6   0   -1.40    5.10 
   2   6   0   -3.90    4.60 
   2   6   0    0.40    3.40 
  -2   6   0    0.10    7.10 
   2   6   0   -2.60    3.40 
   2   6   0    2.10    3.30 
   2   6   0    0.10    2.80 
   2   6   0   -0.60    5.70 
  -2   6   0   -2.70    8.50 
  -2   6   0   -2.90    4.60 
  -2   6   0   -4.70    5.50 
   2   6   0    1.00    6.40 
   2   6   0    0.40    6.40 
   2   6   0    1.30    4.10 
  -2   6   0   -2.60    7.70 
   2   6   0   -0.60    6.20 
   2   6   0    3.80    7.70 
  -3  -6   0  179.58   29.40 
   3  -6   0  211.38   29.50 
  -3  -6   0  183.98   18.90 
   3  -6   0  157.08   19.60 
  -3  -6   0  241.38   30.60 
  -3  -6   0  177.78   20.90 
  -3  -6   0  187.78   28.10 
   3  -6   0  213.88   28.70 
   3  -6   0  174.58   28.20 
  -3  -6   0  177.68   27.00 
  -3  -6   0  209.08   25.00 
  -3  -6   0  186.48   21.70 
   3  -6   0  172.38   28.50 
   3  -6   0  179.08   27.00 
   3  -6   0  161.38   22.10 
   3  -6   0  214.98   29.80 
   3  -6   0  196.68   28.50 
   3  -6   0  182.08   22.90 
   3  -6   0  212.18   31.20 
  -3  -6   0  198.98   29.70 
   3  -6   0  149.88   25.80 
   3  -6   0  163.88   19.60 
  -3  -6   0  189.88   27.40 
   3  -6   0  236.88   32.40 
   3  -6   0  154.88   28.40 
   3   6   0  196.98   20.80 
  -3   6   0  202.48   29.70 
  -3   6   0  200.38   28.80 
  -3   6   0  179.78   25.50 
  -3   6   0  218.18   33.00 
   3   6   0  220.88   23.50 
  -3   6   0  153.88   26.10 
   3   6   0  231.98   21.00 
   3   6   0  180.88   22.20 
  -3   6   0  169.78   25.60 
   3   6   0  173.78   20.20 
  -3   6   0  181.28   21.80 
   3   6   0  168.08   27.00 
  -3   6   0  175.18   22.10 
   3   6   0  189.88   20.40 
   3   6   0  170.48   24.00 
  -3   6   0  232.88   31.80 
  -3   6   0  195.98   28.60 
   3   6   0  248.08   33.60 
  -3   6   0  196.68   30.50 
  -3   6   0  203.28   32.00 
   3   6   0  177.98   30.30 
   3   6   0  167.98   23.90 
   3   6   0  186.48   26.90 
  -4  -6   0    1.80    7.70 
  -4  -6   0   -8.40    6.00 
   4  -6   0   -4.80    8.10 
  -4  -6   0  -14.50    7.60 
   4  -6   0   -7.90    6.80 
   4  -6   0   11.40   14.20 
  -4  -6   0   -0.20    9.40 
  -4  -6   0   -8.20    9.60 
   4  -6   0    7.20   12.10 
  -4  -6   0   -4.20    5.80 
   4  -6   0    8.60   11.30 
  -4  -6   0    3.80   12.10 
  -4  -6   0   21.00    9.60 
   4  -6   0    0.30   11.60 
   4  -6   0   -2.80   11.00 
  -4  -6   0    7.50   10.00 
   4  -6   0    9.60   11.30 
   4  -6   0   -7.20   11.80 
   4  -6   0   -4.60    7.20 
   4  -6   0   -4.70   11.10 
   4  -6   0    6.40    9.90 
   4  -6   0   12.80   13.50 
   4  -6   0   16.10   14.50 
   4  -6   0    8.80    9.90 
   4   6   0   12.30    9.80 
  -4   6   0   -5.70    8.50 
  -4   6   0    0.10    9.70 
   4   6   0    0.70    6.80 
   4   6   0    3.10    6.40 
   4   6   0    9.80   10.90 
   4   6   0    9.00    6.30 
  -4   6   0   14.60   11.00 
   4   6   0   -0.60    7.80 
  -4   6   0  -12.80    9.10 
  -4   6   0   -1.40    7.30 
  -4   6   0   11.40   10.50 
  -4   6   0   -1.10   10.60 
  -4   6   0   -0.80   11.60 
  -4   6   0   -2.70    6.50 
  -4   6   0   -1.70    8.80 
   4   6   0    5.70    6.60 
   4   6   0   -7.30    7.40 
   4   6   0   -1.50    9.10 
  -4   6   0   -0.80   10.80 
   4   6   0    0.00    6.10 
   4   6   0   -1.90    8.50 
  -4   6   0    2.60   10.40 
   4   6   0    3.30   10.80 
   5  -6   0  686.93   54.19 
  -5  -6   0  768.12   60.19 
  -5  -6   0  851.21   58.19 
   5  -6   0  753.92   62.49 
   5  -6   0  719.93   63.39 
   5  -6   0  739.93   60.99 
  -5  -6   0  709.33   54.29 
   5  -6   0  803.12   60.89 
   5  -6   0  762.52   62.59 
   5  -6   0  772.42   61.59 
   5  -6   0  702.23   55.39 
   5  -6   0  761.02   62.19 
   5  -6   0  779.92   57.29 
   5  -6   0  840.52   60.89 
  -5  -6   0  664.83   56.29 
  -5  -6   0  719.43   52.79 
   5  -6   0  676.33   55.69 
   5  -6   0  796.32   63.49 
   5  -6   0  738.13   54.59 
  -5  -6   0  709.13   55.29 
   5   6   0  723.63   53.49 
  -5   6   0  729.43   63.99 
  -5   6   0  734.63   58.59 
   5   6   0  752.82   55.39 
   5   6   0  746.23   58.79 
  -5   6   0  711.33   55.79 
  -5   6   0  729.73   59.59 
   5   6   0  782.42   51.99 
  -5   6   0  760.12   56.29 
   5   6   0  783.82   53.29 
   5   6   0  812.32   57.49 
  -5   6   0  793.42   62.49 
   5   6   0  651.83   54.39 
   5   6   0  755.62   58.59 
  -5   6   0  854.11   65.59 
  -5   6   0  762.72   60.49 
  -5   6   0  740.53   57.39 
   5   6   0  764.52   56.49 
   5   6   0  645.24   57.29 
  -5   6   0  778.22   64.79 
   5   6   0  693.43   51.69 
  -5   6   0  843.22   63.09 
   5   6   0  646.24   53.49 
  -5   6   0  766.92   62.39 
   5   6   0  652.73   55.69 
   5   6   0  774.52   51.89 
   6  -6   0   -6.00   10.40 
   6  -6   0    7.10   14.00 
   6  -6   0   17.50   16.10 
   6  -6   0  -10.00   11.60 
   6  -6   0   15.70   16.30 
   6  -6   0   13.60   14.60 
   6  -6   0    2.30   13.80 
   6  -6   0   10.50   13.70 
   6  -6   0   11.00   14.80 
   6  -6   0    9.80   12.90 
   6  -6   0   10.40   14.30 
   6  -6   0   24.00   15.40 
   6  -6   0    8.10   13.30 
  -6  -6   0    3.90   12.10 
  -6  -6   0    3.00   13.40 
   6  -6   0   14.70   18.00 
   6  -6   0   15.10   15.90 
   6   6   0    8.70   10.90 
   6   6   0    0.00    9.60 
  -6   6   0   24.60   13.30 
   6   6   0   -5.40    9.90 
  -6   6   0   20.90   15.50 
   6   6   0    1.80   10.90 
  -6   6   0    2.50   10.60 
   6   6   0   -1.30    9.70 
  -6   6   0  -19.50   10.00 
  -6   6   0   11.10   13.70 
   6   6   0    4.20   11.60 
  -6   6   0   -6.00   11.50 
  -6   6   0   20.60   18.00 
   6   6   0    6.50    9.20 
  -6   6   0   -1.60   10.70 
  -6   6   0   -0.30   11.70 
   6   6   0   23.00   16.70 
  -6   6   0    9.00   15.70 
   6   6   0   16.20   12.50 
  -6   6   0    8.30   13.70 
   6   6   0    9.00   10.70 
   6   6   0   -4.70    8.60 
   6   6   0   -3.20   11.20 
   6   6   0    2.90   12.30 
   6   6   0    3.90   11.20 
  -6   6   0   11.10   13.10 
   7  -6   0 1067.19   79.59 
   7  -6   0 1159.68   88.59 
   7  -6   0 1273.37   86.29 
   7  -6   0 1082.09   81.49 
   7  -6   0 1097.09   82.59 
   7  -6   0 1027.70   90.39 
   7  -6   0 1147.99   89.69 
   7  -6   0 1164.48   85.49 
   7  -6   0 1173.18   84.19 
   7  -6   0 1164.98   84.99 
   7  -6   0 1078.49   88.29 
   7  -6   0  936.01   85.19 
   7  -6   0 1033.50   87.09 
   7  -6   0 1230.38   86.09 
   7   6   0 1127.19   77.79 
  -7   6   0 1261.77   86.49 
   7   6   0 1025.00   81.69 
  -7   6   0 1234.48   91.99 
  -7   6   0  995.30   85.89 
  -7   6   0  976.20   87.89 
   7   6   0 1196.38   80.99 
  -7   6   0 1342.77   94.09 
   7   6   0 1144.59   81.69 
   7   6   0 1087.99   83.79 
  -7   6   0 1188.18   83.39 
  -7   6   0 1327.67   93.29 
  -7   6   0 1204.48   89.69 
   7   6   0 1247.58   86.19 
  -7   6   0  962.50   86.49 
   7   6   0 1113.69   81.59 
   7   6   0 1089.79   88.99 
  -7   6   0 1071.19   82.19 
   8  -6   0   89.89   30.80 
   8  -6   0   59.79   24.20 
   8  -6   0   66.89   28.50 
   8  -6   0   44.30   22.60 
   8  -6   0   45.40   22.40 
   8  -6   0   40.60   25.20 
   8  -6   0   29.50   21.20 
   8  -6   0   45.60   21.00 
   8  -6   0   41.70   20.40 
   8  -6   0   19.30   21.50 
   8  -6   0   36.30   21.60 
   8   6   0   30.10   23.60 
  -8   6   0   25.70   18.60 
  -8   6   0   23.20   19.60 
  -8   6   0   34.10   22.80 
   8   6   0   28.40   18.80 
   8   6   0   10.00   17.30 
   8   6   0   38.50   19.10 
  -8   6   0   23.00   22.30 
   8   6   0   25.40   17.90 
  -8   6   0   60.49   26.60 
   8   6   0   49.00   21.60 
  -8   6   0   48.80   24.50 
  -8   6   0   46.60   25.80 
  -8   6   0   53.29   25.80 
  -8   6   0   28.10   20.20 
  -8   6   0   51.79   24.10 
   0  -7   0    1.10    4.40 
   0  -7   0   18.30   11.40 
   0  -7   0    2.80   11.70 
   0  -7   0   -6.00    8.70 
   0  -7   0    1.20   10.30 
   0  -7   0    9.20   10.20 
   0  -7   0   11.50   14.20 
   0  -7   0    8.30   10.50 
   0  -7   0    0.30   12.00 
   0  -7   0    2.40   10.50 
   0  -7   0  -12.20    8.50 
   0  -7   0   -0.80   10.20 
   0   7   0    3.50    9.60 
   0   7   0   -8.30    6.40 
   0   7   0   -3.20    6.60 
   0   7   0    6.20    6.40 
   0   7   0   -1.40    8.60 
   0   7   0   -3.10    8.60 
   0   7   0   -4.50    5.90 
   0   7   0   -4.70    6.20 
   0   7   0   -5.80    8.20 
   0   7   0   -1.40    6.70 
   0   7   0   -4.40    7.90 
   0   7   0   -8.00    6.10 
   1  -7   0   39.70   14.40 
  -1  -7   0   43.80   16.50 
   1  -7   0   51.19   16.60 
  -1  -7   0   22.90   15.00 
   1  -7   0   39.80   17.50 
   1  -7   0   23.10   14.50 
   1  -7   0   40.50   14.70 
   1  -7   0   35.20   17.20 
  -1  -7   0   51.29   17.50 
   1  -7   0   54.39   12.70 
  -1  -7   0   53.69   20.00 
   1  -7   0   61.09   19.80 
  -1  -7   0   38.30    7.60 
   1  -7   0   35.70   14.80 
   1  -7   0   41.40   12.50 
   1  -7   0   37.80   17.10 
   1  -7   0   33.40   15.00 
   1  -7   0   42.90   18.50 
  -1  -7   0   30.10   16.50 
  -1  -7   0   29.00   16.40 
   1  -7   0   61.79   18.40 
  -1  -7   0   25.30   14.50 
   1  -7   0   47.90   15.80 
  -1   7   0   57.79   16.00 
   1   7   0   68.89   16.90 
   1   7   0   56.19   14.40 
   1   7   0   40.00    9.60 
  -1   7   0   37.70   17.00 
  -1   7   0   57.19   18.10 
  -1   7   0   42.60   13.90 
  -1   7   0   18.00   15.60 
   1   7   0   38.20   17.90 
   1   7   0   54.69   13.80 
   1   7   0   42.60   11.40 
   1   7   0   72.99   21.30 
   1   7   0   36.20   14.70 
  -1   7   0   62.29   13.50 
  -1   7   0   20.30   14.00 
  -1   7   0   39.20   10.90 
   1   7   0   44.00    9.30 
  -1   7   0   48.30   14.80 
  -1   7   0   23.30   14.20 
   1   7   0   50.79   12.60 
  -1   7   0   60.59   14.50 
   1   7   0   70.09   19.10 
   1   7   0   65.09   15.00 
   2  -7   0   72.79   15.60 
  -2  -7   0   51.39   18.30 
   2  -7   0   52.59   19.50 
   2  -7   0   70.09   17.80 
  -2  -7   0   62.89   18.80 
  -2  -7   0  110.79   25.50 
   2  -7   0  133.39   25.70 
  -2  -7   0   32.10   16.40 
   2  -7   0   98.09   22.10 
  -2  -7   0   74.89   11.20 
  -2  -7   0   65.29   12.20 
   2  -7   0   46.30   20.10 
   2  -7   0   39.80   19.40 
   2  -7   0   88.69   16.60 
  -2  -7   0   51.79   17.50 
   2  -7   0   74.09   17.00 
   2  -7   0   89.39   22.50 
  -2  -7   0  147.89   25.60 
   2  -7   0   30.20   14.70 
   2  -7   0   85.19   20.20 
   2  -7   0   53.79   20.60 
  -2  -7   0   63.89   16.90 
   2  -7   0   71.39   15.30 
   2  -7   0   85.49   20.10 
  -2   7   0   63.79   21.80 
  -2   7   0   60.39   17.20 
   2   7   0   77.19   15.60 
  -2   7   0   90.39   12.80 
   2   7   0   78.89   21.90 
   2   7   0   87.49   14.70 
  -2   7   0   36.40   12.60 
   2   7   0   79.99   14.20 
  -2   7   0   86.49   23.10 
  -2   7   0   94.59   23.70 
  -2   7   0   30.20   17.40 
  -2   7   0   42.90   15.40 
   2   7   0   46.30   18.00 
   2   7   0   81.69   20.80 
   2   7   0   84.19   13.30 
  -2   7   0   71.49   18.40 
   2   7   0   47.50   14.40 
   2   7   0   48.60   18.20 
  -2   7   0   82.09   18.40 
  -2   7   0   93.09   22.40 
  -3  -7   0   26.20   11.20 
  -3  -7   0   22.40   15.00 
   3  -7   0   10.00   11.10 
   3  -7   0   22.10   16.20 
   3  -7   0   33.40   15.00 
   3  -7   0   22.80   17.00 
   3  -7   0    7.30   14.20 
  -3  -7   0   16.10   13.90 
   3  -7   0    5.90   10.60 
  -3  -7   0   43.00   18.20 
   3  -7   0   11.80   14.20 
   3  -7   0   15.30   15.20 
  -3  -7   0   24.30   13.60 
   3  -7   0   -0.50   12.00 
   3  -7   0    3.70   11.20 
  -3  -7   0   11.50    9.60 
   3  -7   0   12.80   14.20 
  -3  -7   0   16.80   14.20 
  -3  -7   0   17.20   15.30 
   3  -7   0   14.40   13.10 
   3  -7   0    8.90   13.90 
  -3   7   0   28.70   14.70 
  -3   7   0   33.40   14.20 
  -3   7   0    3.70   12.00 
  -3   7   0   13.00   11.40 
   3   7   0   25.90    9.60 
   3   7   0   16.10   12.50 
   3   7   0   29.00   11.50 
  -3   7   0   25.90    9.90 
   3   7   0    7.70   11.60 
  -3   7   0   13.30   14.00 
  -3   7   0   18.00   13.20 
   3   7   0   20.50   11.00 
   3   7   0    6.30   11.00 
  -3   7   0   20.00    8.40 
  -3   7   0   10.70   11.60 
  -3   7   0   47.70   14.40 
  -3   7   0   32.90   16.60 
   3   7   0   21.40   14.10 
  -3   7   0   13.90   14.10 
   4  -7   0  177.58   31.90 
   4  -7   0  172.38   32.90 
   4  -7   0  233.38   28.90 
  -4  -7   0  172.18   31.90 
   4  -7   0  177.28   26.50 
   4  -7   0  211.58   33.90 
  -4  -7   0  189.38   31.80 
   4  -7   0  201.58   32.70 
   4  -7   0  194.78   33.40 
   4  -7   0  136.19   29.60 
   4  -7   0  249.78   36.40 
  -4  -7   0  174.28   32.30 
  -4  -7   0  202.38   31.00 
   4  -7   0  217.18   35.90 
  -4  -7   0  170.88   28.80 
   4  -7   0  251.07   33.20 
   4  -7   0  154.78   29.10 
   4  -7   0  208.98   34.60 
  -4   7   0  229.38   34.50 
   4   7   0  234.48   33.90 
  -4   7   0  160.48   32.60 
   4   7   0  233.28   35.70 
  -4   7   0  216.78   25.80 
  -4   7   0  141.09   27.80 
   4   7   0  240.78   38.50 
  -4   7   0  214.68   39.10 
  -4   7   0  214.88   34.40 
  -4   7   0  124.39   28.60 
  -4   7   0  232.68   35.70 
  -4   7   0  219.68   27.90 
   4   7   0  160.28   29.40 
  -4   7   0  162.28   30.40 
  -4   7   0  169.68   29.10 
  -4   7   0  143.49   28.90 
   5  -7   0   46.20   18.60 
   5  -7   0   21.50   18.40 
   5  -7   0   -3.20   13.60 
  -5  -7   0   10.60   16.30 
   5  -7   0   27.70   17.20 
   5  -7   0  -20.30   12.00 
  -5  -7   0   27.00   14.30 
   5  -7   0   -0.90   12.90 
  -5  -7   0   47.80   17.70 
   5  -7   0   15.30   17.10 
  -5  -7   0   21.90   16.40 
   5  -7   0   18.30   17.60 
   5  -7   0   23.30   19.30 
   5  -7   0   -6.90   11.50 
   5  -7   0   63.49   21.50 
   5  -7   0   18.20   16.70 
   5   7   0   20.50   14.00 
   5   7   0   15.90   13.60 
  -5   7   0   37.40   18.60 
  -5   7   0   13.80   15.10 
  -5   7   0   21.80   15.50 
  -5   7   0   14.20   14.40 
  -5   7   0   11.00   16.70 
  -5   7   0   25.20   12.70 
  -5   7   0   39.40   18.80 
   5   7   0   19.80   15.00 
  -5   7   0   28.90   18.50 
  -5   7   0    5.70   12.10 
  -5   7   0    6.10   16.60 
  -5   7   0   48.80   17.90 
  -5   7   0    5.80   14.30 
   5   7   0    9.90   13.30 
   5   7   0   20.80   15.70 
  -6  -7   0  415.56   50.49 
   6  -7   0  387.36   53.09 
   6  -7   0  457.95   53.99 
   6  -7   0  386.86   52.99 
   6  -7   0  367.96   51.99 
   6  -7   0  483.15   56.29 
   6  -7   0  477.55   52.09 
   6  -7   0  479.25   52.19 
   6  -7   0  428.46   48.40 
   6  -7   0  497.75   54.49 
   6  -7   0  460.95   55.49 
   6  -7   0  375.26   50.99 
   6  -7   0  366.96   44.40 
  -6   7   0  423.26   50.29 
  -6   7   0  340.57   46.60 
  -6   7   0  500.65   64.19 
  -6   7   0  379.26   52.09 
   6   7   0  440.16   49.99 
  -6   7   0  391.76   51.99 
  -6   7   0  332.17   49.10 
  -6   7   0  379.16   45.20 
   6   7   0  421.16   52.79 
  -6   7   0  501.65   60.09 
  -6   7   0  379.66   46.80 
  -6   7   0  378.56   49.90 
   6   7   0  449.56   48.60 
   6   7   0  414.66   56.19 
  -6   7   0  461.75   55.79 
   6   7   0  395.76   50.09 
   6   7   0  376.96   48.90 
   7  -7   0   13.20   19.90 
   7  -7   0   -6.30   13.50 
   7  -7   0   24.50   18.50 
   7  -7   0   13.80   21.40 
   7  -7   0   -1.60   16.20 
   7  -7   0   23.50   21.80 
   7  -7   0    6.60   19.50 
   7  -7   0   31.30   18.90 
   7  -7   0    6.80   17.70 
   7  -7   0   -4.90   20.50 
   7  -7   0   36.10   20.10 
  -7   7   0   -3.10   15.90 
  -7   7   0    0.10   16.40 
  -7   7   0   11.00   21.70 
   7   7   0  -18.90   14.40 
  -7   7   0   -6.40   12.60 
   7   7   0   -8.30   12.00 
  -7   7   0    1.30   16.70 
  -7   7   0    6.30   17.20 
  -7   7   0   21.40   20.80 
  -7   7   0   -9.70   14.90 
  -7   7   0   24.40   20.60 
  -7   7   0    8.20   15.70 
   0  -8   0  291.57   42.10 
   0  -8   0  425.66   49.80 
   0  -8   0  327.87   41.70 
   0  -8   0  292.27   44.50 
   0  -8   0  396.76   45.40 
   0  -8   0  362.16   46.00 
   0  -8   0  331.57   44.70 
   0   8   0  306.57   44.60 
   0   8   0  311.87   45.30 
   0   8   0  335.37   36.60 
   0   8   0  304.37   41.10 
   0   8   0  276.57   34.50 
   0   8   0  420.96   51.99 
   0   8   0  340.07   28.90 
   0   8   0  322.67   37.40 
   0   8   0  238.78   40.80 
  -1  -8   0 1113.29   84.59 
   1  -8   0 1021.50   76.89 
   1  -8   0 1156.08   78.29 
   1  -8   0 1086.09   84.09 
  -1  -8   0 1152.28   84.89 
   1  -8   0 1054.89   78.19 
  -1  -8   0 1064.79   81.79 
   1  -8   0 1093.29   82.39 
   1  -8   0 1054.69   81.49 
   1  -8   0 1065.19   80.19 
  -1  -8   0 1031.70   75.89 
  -1  -8   0 1128.19   78.69 
  -1  -8   0  973.50   79.09 
   1  -8   0 1099.49   77.79 
   1  -8   0 1054.69   83.59 
   1  -8   0  964.00   74.89 
   1  -8   0  972.50   75.89 
   1  -8   0 1190.08   77.09 
  -1  -8   0 1191.08   83.09 
  -1   8   0 1002.00   79.79 
   1   8   0  940.81   74.39 
  -1   8   0 1020.70   79.19 
   1   8   0 1155.58   83.89 
   1   8   0 1080.39   72.59 
   1   8   0  991.90   67.69 
  -1   8   0 1126.59   73.29 
   1   8   0 1226.98   83.09 
  -1   8   0 1027.30   81.89 
  -1   8   0 1084.19   81.69 
   1   8   0 1036.80   68.59 
  -1   8   0  969.40   80.69 
   1   8   0  973.90   69.29 
   1   8   0 1073.09   81.99 
  -1   8   0 1095.79   73.39 
   1   8   0 1031.10   80.79 
  -1   8   0  989.70   69.59 
  -1   8   0 1082.29   75.19 
   1   8   0 1036.20   70.69 
   2  -8   0   24.40   15.90 
   2  -8   0   55.19   18.00 
   2  -8   0   26.70   19.60 
  -2  -8   0   24.60   18.60 
   2  -8   0    4.40   14.00 
   2  -8   0   43.50   18.50 
   2  -8   0   53.49   21.30 
   2  -8   0   38.50   17.00 
   2  -8   0   29.40   17.40 
  -2  -8   0   30.30   15.90 
  -2  -8   0   69.49   22.60 
  -2  -8   0   38.10   19.50 
   2  -8   0   51.19   22.10 
  -2  -8   0   18.80   16.60 
   2  -8   0   18.60   18.30 
   2  -8   0   42.60   17.10 
   2  -8   0   66.39   22.80 
   2  -8   0   37.60   23.40 
  -2   8   0   28.90   12.40 
   2   8   0   25.20   15.70 
   2   8   0   44.00   13.30 
   2   8   0   25.50   15.50 
  -2   8   0   29.80   14.40 
  -2   8   0   12.60   16.40 
  -2   8   0   44.30   15.80 
  -2   8   0   23.90   12.90 
  -2   8   0   23.00   13.00 
   2   8   0   33.70   13.50 
  -2   8   0   26.10   15.00 
  -2   8   0   45.50   19.60 
  -2   8   0   27.50   18.00 
   2   8   0   13.00   13.90 
  -2   8   0   21.40   15.30 
   2   8   0   21.50   19.20 
  -3  -8   0  190.48   35.40 
  -3  -8   0  228.08   37.30 
   3  -8   0  281.27   39.00 
   3  -8   0  277.37   42.60 
  -3  -8   0  201.48   37.40 
   3  -8   0  218.18   37.40 
  -3  -8   0  312.77   43.90 
   3  -8   0  270.97   42.90 
   3  -8   0  270.67   38.20 
   3  -8   0  286.87   41.20 
   3  -8   0  246.48   39.40 
   3  -8   0  349.07   47.20 
   3  -8   0  277.67   41.40 
   3  -8   0  312.57   40.50 
   3  -8   0  306.57   42.40 
  -3  -8   0  364.56   44.10 
   3   8   0  233.08   37.90 
  -3   8   0  305.47   38.20 
   3   8   0  330.97   48.00 
  -3   8   0  265.87   34.00 
  -3   8   0  368.26   49.20 
  -3   8   0  263.97   42.30 
  -3   8   0  237.88   39.90 
  -3   8   0  308.57   46.10 
   3   8   0  302.07   44.40 
   3   8   0  311.17   43.80 
  -3   8   0  306.17   42.60 
  -3   8   0  338.67   40.60 
  -3   8   0  273.27   41.20 
  -3   8   0  242.78   35.40 
   4  -8   0   63.79   21.90 
   4  -8   0   27.20   19.60 
   4  -8   0   38.10   19.10 
  -4  -8   0   35.90   20.70 
   4  -8   0   53.89   23.70 
   4  -8   0   36.30   20.80 
   4  -8   0   80.99   26.90 
  -4  -8   0   53.59   21.40 
   4  -8   0   40.60   19.60 
   4  -8   0   44.10   20.90 
  -4  -8   0   20.90   17.90 
  -4  -8   0   33.80   18.70 
   4  -8   0   31.30   19.10 
  -4  -8   0   25.60   16.30 
   4  -8   0   63.59   22.20 
   4   8   0   53.09   20.30 
  -4   8   0   44.40   20.20 
  -4   8   0   24.20   17.20 
  -4   8   0   39.20   17.30 
  -4   8   0   53.79   23.40 
  -4   8   0   74.29   23.40 
  -4   8   0   31.70   19.20 
   4   8   0   26.50   16.90 
   4   8   0   25.80   16.00 
  -4   8   0   15.70   14.80 
   4   8   0   31.30   16.80 
  -4   8   0   29.50   16.70 
  -4   8   0   28.30   16.40 
  -4   8   0   50.29   24.50 
   5  -8   0  510.55   62.29 
   5  -8   0  565.64   62.09 
   5  -8   0  606.84   66.99 
   5  -8   0  528.35   61.49 
  -5  -8   0  637.14   60.99 
   5  -8   0  458.05   60.99 
  -5  -8   0  484.75   60.09 
   5  -8   0  492.75   59.39 
   5  -8   0  536.15   62.49 
   5  -8   0  626.94   61.09 
   5  -8   0  480.85   57.99 
   5  -8   0  563.04   62.19 
  -5  -8   0  514.25   57.39 
  -5  -8   0  742.63   70.49 
   5   8   0  672.73   57.09 
  -5   8   0  524.95   61.09 
  -5   8   0  635.24   67.29 
   5   8   0  601.14   60.59 
  -5   8   0  531.35   61.89 
  -5   8   0  665.53   66.79 
  -5   8   0  610.54   66.09 
  -5   8   0  530.35   60.89 
  -5   8   0  406.26   54.89 
   5   8   0  609.14   64.99 
  -5   8   0  540.15   65.89 
  -5   8   0  739.13   58.09 
   5   8   0  507.95   61.89 
   5   8   0  574.04   60.69 
  -5   8   0  584.74   69.99 
   6  -8   0  195.58   40.30 
  -6  -8   0  181.78   37.10 
   6  -8   0  153.38   34.40 
   6  -8   0  100.39   28.80 
   6  -8   0  189.88   35.00 
   6  -8   0  188.28   38.40 
   6  -8   0   95.49   31.90 
   6  -8   0  140.79   32.30 
   6  -8   0  143.79   35.90 
   6  -8   0  121.89   32.10 
   6   8   0  159.48   34.20 
   6   8   0  127.09   28.00 
  -6   8   0  124.19   30.30 
   6   8   0  171.28   34.70 
  -6   8   0  101.29   29.90 
  -6   8   0  148.19   33.40 
  -6   8   0  169.58   34.50 
   6   8   0  138.29   37.50 
  -6   8   0  203.88   43.60 
  -6   8   0  127.79   32.20 
  -6   8   0  198.08   40.60 
   6   8   0  174.98   34.90 
  -6   8   0  188.58   37.50 
  -6   8   0  113.19   33.30 
   0  -9   0   10.10   19.10 
   0  -9   0    4.10   18.00 
   0  -9   0   11.10   16.10 
   0  -9   0  -20.20   16.10 
   0  -9   0  -13.50   11.80 
   0   9   0   10.10   16.40 
   0   9   0   13.10   16.20 
   0   9   0  -10.30   11.50 
   0   9   0   -0.10   12.60 
   0   9   0   -0.60   11.60 
   0   9   0    9.90   17.90 
   0   9   0    5.00   11.80 
  -1  -9   0   31.10   20.40 
   1  -9   0   23.40   23.10 
   1  -9   0   52.09   21.40 
   1  -9   0   35.70   19.40 
   1  -9   0   31.60   19.70 
   1  -9   0   10.30   18.60 
   1  -9   0   28.80   23.40 
   1  -9   0   12.30   17.70 
  -1  -9   0   78.39   26.30 
  -1  -9   0   53.39   24.40 
   1  -9   0   13.10   16.30 
  -1  -9   0   22.70   18.50 
  -1  -9   0   25.00   23.20 
   1  -9   0    5.00   18.00 
   1  -9   0   29.00   16.70 
   1  -9   0   18.90   19.40 
   1   9   0   10.10   16.30 
  -1   9   0   33.50   18.90 
   1   9   0   14.60   18.00 
   1   9   0   70.19   25.90 
   1   9   0   47.80   18.00 
  -1   9   0   33.40   15.60 
  -1   9   0   48.40   21.70 
  -1   9   0    0.30   14.50 
   1   9   0    6.40   14.00 
  -1   9   0   36.80   15.20 
  -1   9   0   35.80   20.80 
  -1   9   0   19.20   19.10 
  -1   9   0   18.40   14.00 
   2  -9   0   81.09   24.80 
  -2  -9   0  107.29   29.10 
   2  -9   0   74.89   26.40 
   2  -9   0   85.29   28.10 
   2  -9   0  117.89   30.90 
   2  -9   0   71.99   26.10 
   2  -9   0   73.89   23.70 
  -2  -9   0   68.79   24.70 
   2  -9   0   63.19   24.10 
   2  -9   0   74.19   26.90 
  -2  -9   0  124.99   29.40 
  -2  -9   0   73.59   29.50 
   2  -9   0  107.69   26.60 
   2  -9   0   83.69   24.00 
   2  -9   0   73.59   28.10 
  -2  -9   0  112.09   29.50 
  -2   9   0   80.79   24.50 
   2   9   0  120.89   30.30 
  -2   9   0   98.49   23.00 
  -2   9   0   94.89   28.10 
   2   9   0  101.09   27.30 
  -2   9   0  103.89   29.80 
  -2   9   0  114.59   28.90 
  -2   9   0   82.89   22.90 
  -2   9   0  125.99   25.00 
   2   9   0   97.89   30.80 
  -2   9   0  118.39   26.30 
  -2   9   0   83.79   26.70 
   2   9   0  115.19   31.50 
  -3  -9   0   20.60   19.30 
   3  -9   0    5.60   17.30 
   3  -9   0   16.70   19.00 
   3  -9   0   12.70   20.50 
  -3  -9   0    6.70   18.00 
  -3  -9   0   31.00   17.90 
   3  -9   0   14.80   18.90 
   3  -9   0   -1.90   14.50 
   3  -9   0    5.20   15.80 
  -3  -9   0   14.90   18.90 
   3  -9   0   34.00   19.40 
   3  -9   0    3.20   18.60 
   3  -9   0    3.80   14.30 
   3  -9   0  -24.90   14.00 
  -3  -9   0    2.30   18.80 
   3   9   0    1.50   13.30 
   3   9   0   18.80   16.50 
  -3   9   0  -20.80   13.20 
   3   9   0   16.10   16.80 
  -3   9   0    7.70   16.80 
  -3   9   0   -0.70   12.60 
  -3   9   0   -3.80   12.20 
  -3   9   0   -4.70   13.80 
  -3   9   0    7.50   12.20 
  -3   9   0   -4.90   12.60 
   3   9   0   22.70   17.90 
  -3   9   0    8.50   15.80 
  -3   9   0   10.40   17.50 
  -4  -9   0   85.49   28.60 
   4  -9   0   17.30   24.10 
  -4  -9   0   88.49   27.70 
   4  -9   0  112.39   30.70 
  -4  -9   0   73.79   28.20 
   4  -9   0   51.39   24.60 
  -4  -9   0   77.59   26.80 
   4  -9   0   93.69   29.40 
   4  -9   0   33.30   20.20 
   4  -9   0   56.19   23.70 
   4  -9   0   47.30   22.40 
   4  -9   0   50.89   26.20 
  -4   9   0   89.99   26.80 
   4   9   0   42.00   21.20 
  -4   9   0   55.49   23.20 
  -4   9   0   71.19   24.20 
   4   9   0   31.50   19.50 
  -4   9   0   67.99   23.90 
   4   9   0   58.69   24.90 
  -4   9   0   22.70   22.70 
   4   9   0   93.89   29.30 
  -4   9   0   14.60   17.50 
  -4   9   0   36.00   22.30 
  -4   9   0   48.40   19.10 
  -4   9   0   69.29   28.10 
   5  -9   0   77.09   26.10 
   5  -9   0   77.59   27.00 
   5  -9   0   95.59   34.30 
   5  -9   0   54.79   25.60 
   5  -9   0  109.79   29.50 
   5  -9   0   87.79   30.90 
  -5  -9   0  118.99   32.10 
   5  -9   0  107.09   31.00 
   5  -9   0  101.29   32.50 
   5   9   0   74.39   24.90 
  -5   9   0  127.09   32.40 
  -5   9   0  121.29   30.00 
   5   9   0   89.49   26.30 
  -5   9   0  118.69   31.60 
   5   9   0  189.08   36.00 
  -5   9   0  112.19   31.10 
   5   9   0   72.89   29.60 
  -5   9   0  130.69   37.30 
  -5   9   0   98.29   31.90 
  -5   9   0  164.98   36.60 
   5   9   0  114.49   32.30 
  -5   9   0  111.39   29.60 
  -5   9   0  125.19   31.70 
   0 -10   0  770.12   84.79 
   0 -10   0  787.02   85.19 
   0 -10   0  902.31   86.79 
   0 -10   0  924.11   86.89 
   0  10   0  722.73   77.79 
   0  10   0  631.04   77.79 
   0  10   0  948.91   95.39 
   0  10   0 1006.70   94.99 
   0  10   0  783.22   84.39 
   1 -10   0  314.37   53.79 
  -1 -10   0  324.87   50.39 
  -1 -10   0  247.18   48.60 
  -1 -10   0  216.08   44.40 
   1 -10   0  328.37   51.09 
   1 -10   0  327.27   51.59 
   1 -10   0  376.26   58.79 
  -1 -10   0  369.86   55.19 
   1  10   0  289.37   49.40 
   1  10   0  359.56   54.89 
  -1  10   0  282.77   47.50 
   1  10   0  368.56   56.99 
   1  10   0  220.58   46.40 
   1  10   0  317.07   47.50 
  -1  10   0  317.77   51.49 
  -1  10   0  343.47   54.69 
  -1  10   0  389.66   56.39 
  -1  10   0  366.96   52.89 
  -2 -10   0  243.58   46.40 
  -2 -10   0  220.68   42.90 
   2 -10   0  183.08   43.50 
   2 -10   0  134.99   36.20 
  -2 -10   0  240.08   44.40 
   2 -10   0  170.28   38.30 
   2 -10   0  194.48   39.90 
   2 -10   0  206.68   37.00 
  -2 -10   0  191.18   40.20 
   2 -10   0  204.28   41.00 
  -2  10   0  179.68   40.90 
   2  10   0  241.58   44.80 
   2  10   0  167.98   38.80 
  -2  10   0  239.88   59.39 
  -2  10   0  210.18   43.00 
  -2  10   0  231.18   38.70 
  -2  10   0  158.98   36.20 
   2  10   0  236.08   43.00 
   2  10   0  190.78   38.80 
  -2  10   0  209.68   44.20 
  -2  10   0  222.68   42.40 
  -3 -10   0   -3.30   20.30 
   3 -10   0   22.30   24.30 
  -3 -10   0   25.90   22.90 
   3 -10   0  -18.90   23.20 
  -3 -10   0   57.09   25.90 
   3 -10   0   37.10   25.50 
   3 -10   0   24.80   25.30 
   3 -10   0   13.10   20.10 
   3 -10   0   23.00   24.60 
   3 -10   0   88.89   31.20 
  -3 -10   0   43.50   25.30 
   3 -10   0   20.50   20.60 
  -3  10   0  -19.60   13.60 
   3  10   0   20.70   18.60 
   3  10   0   33.20   21.00 
   3  10   0   19.00   18.90 
   3  10   0   32.10   22.90 
  -3  10   0    4.80   15.10 
  -3  10   0   30.30   19.10 
  -3  10   0   22.30   22.40 
  -3  10   0    9.10   21.80 
  -3  10   0  -20.80   12.20 
  -3  10   0    2.10   17.40 
  10   0  -1   -7.00   15.40 
  10   0  -1    5.00   20.60 
 -10   0   1   20.80   20.70 
  10   0  -1   -4.60   16.80 
 -10   0   1   -9.60   14.30 
 -10   0   1   11.50   18.50 
  10   0  -1   -1.20   15.60 
 -10   0   1    6.60   18.60 
 -10   0   1    3.50   19.20 
  10   0  -1   25.20   19.80 
 -10   0   1    3.80   16.40 
  10   0  -1   22.00   19.40 
  10   0  -1    1.60   14.50 
  10   0  -1   46.00   23.10 
  10   0  -1  -20.20   15.40 
 -10   0   1    8.50   16.00 
  10   0  -1    0.30   17.00 
 -10   0   1   -0.70   14.90 
  10   0  -1   -0.10   21.20 
   9   0  -1  273.67   36.90 
  -9   0   1  299.67   43.70 
   9   0  -1  227.88   37.40 
   9   0  -1  244.78   39.90 
   9   0  -1  253.57   45.40 
  -9   0   1  261.77   43.50 
   9   0  -1  263.07   43.30 
   9   0  -1  181.58   36.70 
   9   0  -1  283.97   37.70 
  -9   0   1  239.08   42.40 
   9   0  -1  313.97   45.40 
   9   0  -1  302.77   44.80 
  -9   0   1  309.37   48.60 
   9   0  -1  333.97   44.20 
  -9   0   1  223.18   37.50 
  -9   0   1  232.68   37.50 
  -9   0   1  325.87   44.00 
   9   0  -1  240.58   42.10 
  -9   0   1  206.38   41.00 
   8   0  -1    0.40   11.40 
  -8   0   1    4.80   14.20 
  -8   0   1    1.40   12.80 
   8   0  -1   -5.90   11.50 
   8   0  -1    7.90   10.80 
   8   0  -1   -0.10   13.10 
  -8   0   1   -6.80   10.70 
   8   0  -1   -3.20   11.10 
   8   0  -1   -1.30   10.70 
  -8   0   1    1.20   11.20 
   8   0  -1   -3.40   10.60 
  -8   0   1   -9.90   11.20 
   8   0  -1   11.50   14.60 
   8   0  -1   17.00   13.80 
   8   0  -1   -9.10   12.30 
   8   0  -1   -8.50   12.20 
  -8   0   1   -3.90   12.60 
   8   0  -1   -0.70   10.20 
  -8   0   1   -0.70   12.70 
  -8   0   1  -17.70   11.10 
  -8   0   1   19.10   13.70 
   7   0  -1   52.69   18.10 
  -7   0   1   10.20    8.80 
  -7   0   1   15.60   14.60 
  -7   0   1   14.50   12.60 
  -7   0   1   20.40   13.60 
   7   0  -1   -3.70   10.50 
  -7   0   1   26.10   14.20 
  -7   0   1   25.60   15.20 
   7   0  -1   14.20   12.20 
   7   0  -1   11.10   12.50 
  -7   0   1   21.20   11.90 
  -7   0   1   12.20   13.40 
   7   0  -1    9.60    7.10 
   7   0  -1   13.60   12.20 
   7   0  -1   11.10   11.10 
   7   0  -1   32.00   15.50 
   7   0  -1   19.30   12.00 
   7   0  -1   21.20   11.30 
   7   0  -1   26.30   12.70 
   7   0  -1   29.50   13.90 
  -7   0   1   -2.70   10.40 
  -7   0   1   23.90   13.50 
   7   0  -1   12.50   11.10 
  -6   0   1    2.10    9.30 
  -6   0   1  -11.20    7.20 
   6   0  -1   -2.00    7.40 
  -6   0   1   -6.00    6.40 
   6   0  -1    3.60    5.60 
  -6   0   1   -3.80    3.00 
  -6   0   1   -8.70    6.90 
   6   0  -1    9.40   10.40 
  -6   0   1  -11.20    8.20 
  -6   0   1    0.10    8.60 
   6   0  -1   14.60   11.40 
   6   0  -1   10.40    9.10 
  -6   0   1   -6.80    8.40 
   6   0  -1   -6.40    9.80 
  -6   0   1   -9.50    8.20 
   6   0  -1    1.40    7.20 
   6   0  -1   -8.50    6.10 
   6   0  -1   12.90   10.60 
   6   0  -1   -2.80    9.60 
  -6   0   1   -5.90    5.70 
   6   0  -1   -3.30    7.80 
   6   0  -1   -4.50    6.20 
   6   0  -1   -1.70    9.20 
   6   0  -1    1.90    3.40 
  -6   0   1   -7.10    6.50 
  -5   0   1   -2.90    7.20 
  -5   0   1    0.80    3.60 
   5   0  -1   20.90   10.10 
  -5   0   1    5.10    8.20 
  -5   0   1   13.90    4.50 
   5   0  -1   11.60    8.00 
  -5   0   1   -1.80    5.70 
  -5   0   1    7.10    8.00 
   5   0  -1    1.50    6.70 
   5   0  -1    5.10    6.20 
   5   0  -1   -5.00    5.50 
   5   0  -1    9.80    3.80 
  -5   0   1   -5.60    7.50 
  -5   0   1    1.00    7.20 
  -5   0   1   -2.70    5.00 
  -5   0   1    5.20    3.50 
  -5   0   1   10.60    8.80 
  -5   0   1   -4.80    6.40 
   5   0  -1    6.90    8.20 
   5   0  -1    8.00    9.00 
  -5   0   1    4.70    7.40 
  -5   0   1    0.70    7.10 
   5   0  -1    7.20    6.60 
   5   0  -1   17.10   10.20 
   5   0  -1    5.00    8.50 
   5   0  -1    6.70    7.40 
   4   0  -1   -1.50    5.80 
   4   0  -1    1.00    5.00 
   4   0  -1    1.30    3.10 
  -4   0   1   -5.50    4.50 
  -4   0   1    6.30    7.00 
  -4   0   1    4.30    6.30 
   4   0  -1    2.10    2.30 
  -4   0   1    1.70    6.30 
   4   0  -1   -7.00    5.50 
  -4   0   1   -5.30    5.20 
   4   0  -1    3.40    7.10 
  -4   0   1   -0.20    5.60 
   4   0  -1   -1.50    4.20 
   4   0  -1   -2.70    4.50 
   4   0  -1   -4.10    4.00 
   4   0  -1    9.40    7.40 
  -4   0   1    1.30    3.20 
   4   0  -1    2.80    2.60 
   4   0  -1    4.90    6.20 
   4   0  -1    8.70    6.40 
   4   0  -1    5.70    7.10 
   4   0  -1    1.10    2.20 
  -4   0   1    9.30    7.50 
  -4   0   1    0.20    3.80 
  -4   0   1   -4.20    2.80 
  -4   0   1   -0.50    5.80 
  -4   0   1   -4.80    6.30 
   4   0  -1    7.40    6.00 
  -4   0   1   -6.20    4.30 
  -4   0   1    1.30    3.20 
   4   0  -1   -4.90    5.60 
  -3   0   1  492.35   30.50 
   3   0  -1  483.85   34.90 
   3   0  -1  486.15   32.10 
   3   0  -1  546.85   29.20 
   3   0  -1  491.15   34.60 
  -3   0   1  496.05   34.20 
  -3   0   1  504.05   34.30 
   3   0  -1  534.35   35.20 
  -3   0   1  516.75   30.50 
  -3   0   1  529.75   33.30 
  -3   0   1  567.24   34.10 
   3   0  -1  507.95   33.80 
  -3   0   1  513.35   30.40 
  -3   0   1  496.65   28.30 
   3   0  -1  517.95   28.20 
   3   0  -1  498.85   35.10 
   3   0  -1  478.35   32.20 
  -3   0   1  544.05   35.00 
   3   0  -1  456.55   33.90 
   3   0  -1  518.45   29.00 
  -3   0   1  475.55   34.80 
   3   0  -1  520.45   33.20 
  -3   0   1  553.14   35.60 
  -3   0   1  529.35   31.60 
   3   0  -1  539.55   34.10 
   3   0  -1  493.35   34.10 
  -3   0   1  521.45   34.60 
   3   0  -1  514.55   33.10 
  -3   0   1  567.34   36.90 
   3   0  -1  532.05   35.70 
  -3   0   1  490.35   35.90 
   3   0  -1  519.55   33.90 
   3   0  -1  551.84   33.10 
   3   0  -1  522.85   34.90 
  -3   0   1  521.05   36.20 
  -3   0   1  529.65   35.70 
   3   0  -1  509.65   30.30 
  -3   0   1  486.75   28.30 
   3   0  -1  494.75   28.00 
   3   0  -1  494.55   34.30 
  -3   0   1  517.95   33.00 
   3   0  -1  526.75   36.20 
   3   0  -1  537.65   35.60 
  -2   0   1    4.30    4.10 
   2   0  -1    0.60    3.40 
  -2   0   1    2.80    1.80 
   2   0  -1    3.10    4.40 
   2   0  -1    0.10    3.50 
  -2   0   1    0.30    2.20 
  -2   0   1    5.50    2.30 
   2   0  -1   -2.60    3.60 
  -2   0   1    2.30    1.60 
  -2   0   1   -0.10    3.60 
   2   0  -1    2.50    3.90 
  -2   0   1    3.70    2.80 
   2   0  -1    2.60    2.50 
   2   0  -1    1.90    2.90 
  -2   0   1   -1.90    3.10 
  -2   0   1    3.50    4.10 
  -2   0   1    0.50    3.90 
   2   0  -1    1.90    2.10 
  -2   0   1    7.90    4.00 
  -2   0   1    2.70    1.40 
  -2   0   1   -3.20    2.60 
  -2   0   1    2.60    2.40 
  -2   0   1    1.00    2.20 
   2   0  -1    6.80    4.40 
   2   0  -1    2.40    3.40 
   2   0  -1   -3.20    2.90 
   2   0  -1   -0.10    3.00 
  -2   0   1   -1.70    3.70 
   2   0  -1    4.20    3.20 
  -2   0   1    7.20    4.30 
   2   0  -1   -3.90    2.90 
   2   0  -1    1.10    3.90 
   2   0  -1    0.60    1.80 
   2   0  -1    5.10    3.90 
  -2   0   1    5.90    4.10 
   2   0  -1   -1.00    2.60 
  -2   0   1    6.40    3.60 
  -2   0   1    5.10    3.40 
   2   0  -1    5.00    3.80 
   2   0  -1    2.50    1.40 
   2   0  -1   -3.80    3.60 
   2   0  -1    4.70    4.00 
  -2   0   1   -0.40    3.90 
   2   0  -1   10.00    4.60 
   2   0  -1    5.50    4.00 
  -2   0   1   -0.60    3.50 
   2   0  -1    0.30    1.50 
   2   0  -1    0.50    3.10 
   2   0  -1    2.20    4.00 
   2   0  -1    8.90    4.40 
  -2   0   1    0.40    2.90 
  -2   0   1    3.70    4.00 
  -2   0   1    8.50    4.10 
  -2   0   1    5.30    3.60 
   2   0  -1    7.60    3.90 
   2   0  -1    2.20    1.60 
   2   0  -1    2.90    4.00 
  -1   0   1  285.07   21.00 
   1   0  -1  378.86   20.40 
   1   0  -1  368.96   19.60 
   1   0  -1  342.17   21.30 
   1   0  -1  289.57   20.60 
   1   0  -1  328.97   21.40 
   1   0  -1  363.86   20.40 
   1   0  -1  352.66   21.40 
   1   0  -1  375.76   21.00 
   1   0  -1  358.66   21.00 
   1   0  -1  370.56   21.00 
   1   0  -1  326.27   20.20 
   1   0  -1  309.17   20.90 
   1   0  -1  365.56   19.90 
   1   0  -1  347.47   20.80 
   1   0  -1  372.56   19.80 
   1   0  -1  362.86   20.40 
   1   0  -1  356.96   20.60 
   1   0  -1  378.26   19.50 
   1   0  -1  376.36   19.80 
   1   0  -1  279.17   20.60 
   1   0  -1  387.16   20.00 
  -1   0   1  292.47   21.10 
   1   0  -1  401.96   21.60 
   1   0   1 1676.73   88.39 
  -1   0  -1 1578.24   88.49 
   1   0   1 1706.23   88.29 
   1   0   1 1731.33   87.89 
   1   0   1 1668.63   88.69 
  -1   0  -1 1540.65   88.89 
   1   0   1 1350.16   87.99 
   1   0   1 1677.23   88.49 
  -1   0  -1 1711.93   89.19 
   1   0   1 1699.53   88.39 
   1   0   1 1703.53   87.49 
   1   0   1 1639.84   87.69 
  -1   0  -1 1569.94   88.59 
   1   0   1 1648.94   87.59 
   1   0   1 1680.23   88.29 
   1   0   1 1659.53   86.89 
   1   0   1 1731.73   86.59 
   1   0   1 1721.43   87.79 
  -1   0  -1 1426.36   88.09 
   1   0   1 1622.34   88.69 
   1   0   1 1679.63   87.79 
  -1   0  -1 1679.13   88.99 
   1   0   1 1682.23   88.89 
   2   0   1    3.50    4.20 
   2   0   1    3.20    4.10 
   2   0   1    4.80    4.50 
  -2   0  -1    8.60    4.60 
   2   0   1   -0.20    3.50 
  -2   0  -1    4.70    1.80 
  -2   0  -1    0.40    1.40 
   2   0   1    7.20    3.80 
   2   0   1    5.10    4.30 
  -2   0  -1    0.50    2.00 
  -2   0  -1    7.80    4.20 
  -2   0  -1    0.70    3.70 
   2   0   1    4.50    3.90 
  -2   0  -1    7.10    4.50 
  -2   0  -1    1.90    3.40 
   2   0   1    9.40    4.70 
  -2   0  -1    4.00    3.40 
   2   0   1   -0.20    3.70 
   2   0   1    4.70    3.10 
  -2   0  -1    2.80    3.40 
  -2   0  -1   -2.30    3.50 
  -2   0  -1    3.70    3.10 
  -2   0  -1    0.40    4.40 
   2   0   1    5.70    3.60 
   2   0   1    5.70    1.80 
  -2   0  -1    6.80    4.00 
  -2   0  -1    0.60    2.60 
   2   0   1   -0.70    3.00 
   2   0   1    0.80    3.30 
   2   0   1    5.20    4.50 
   2   0   1   -0.90    1.90 
   2   0   1    7.20    5.00 
   2   0   1    0.50    3.00 
  -2   0  -1    5.40    4.20 
  -2   0  -1    2.70    4.40 
  -2   0  -1    2.40    4.70 
  -2   0  -1    3.20    3.90 
   2   0   1    7.20    4.30 
   2   0   1   12.10    4.70 
   2   0   1    1.70    3.80 
  -2   0  -1    3.10    4.00 
   2   0   1   -0.50    4.30 
   2   0   1    7.90    4.50 
  -2   0  -1    1.60    2.70 
   2   0   1   -4.30    2.80 
   2   0   1    2.50    4.00 
   2   0   1   -3.60    3.70 
  -2   0  -1    7.30    5.10 
   2   0   1    4.60    1.60 
   2   0   1    1.10    3.10 
   2   0   1   -2.00    2.80 
  -2   0  -1    2.40    4.10 
   2   0   1    3.50    4.20 
  -2   0  -1   -1.10    3.50 
   3   0   1  124.99   15.80 
  -3   0  -1  159.28   16.00 
  -3   0  -1  112.29   15.90 
   3   0   1  107.19   13.10 
  -3   0  -1  120.29   15.10 
  -3   0  -1   99.29   13.40 
   3   0   1  153.98   16.30 
  -3   0  -1  120.29   11.00 
   3   0   1  109.79   15.50 
  -3   0  -1  104.19   11.20 
  -3   0  -1  174.18   19.00 
   3   0   1  137.49   16.10 
   3   0   1   97.99   14.00 
   3   0   1  126.09   13.80 
   3   0   1  129.99   15.80 
  -3   0  -1  146.29   17.10 
  -3   0  -1  102.99   14.80 
  -3   0  -1  172.88   20.10 
   3   0   1  129.19   15.10 
  -3   0  -1  119.59   13.70 
   3   0   1   97.49   14.10 
  -3   0  -1  123.69   16.00 
   3   0   1  110.99   13.00 
   3   0   1  124.99   16.50 
  -3   0  -1  130.59   16.50 
   3   0   1  132.49   16.10 
  -3   0  -1  111.79   15.00 
  -3   0  -1   94.19   13.90 
  -3   0  -1  151.58   18.10 
   3   0   1  128.09   15.10 
   3   0   1  127.29   12.60 
   3   0   1  146.79   17.30 
   3   0   1  126.59   14.80 
   3   0   1   96.79   14.80 
  -3   0  -1  133.79   17.40 
   3   0   1  125.19    8.60 
   3   0   1  128.89   16.70 
   3   0   1  119.69   14.10 
  -3   0  -1  149.99   16.90 
   3   0   1  132.39   17.00 
   3   0   1  123.79   11.70 
  -3   0  -1   97.99   15.60 
   3   0   1  130.49   16.90 
   3   0   1   96.19   14.20 
  -4   0  -1   -0.50    3.40 
  -4   0  -1   -1.00    3.20 
  -4   0  -1   -5.90    6.00 
  -4   0  -1    5.00    4.70 
  -4   0  -1   -2.30    6.60 
   4   0   1   -1.60    6.80 
  -4   0  -1   -0.40    6.30 
   4   0   1   -1.00    6.00 
  -4   0  -1    7.60    7.60 
  -4   0  -1    1.40    6.50 
   4   0   1    2.20    3.40 
   4   0   1   -5.60    5.40 
  -4   0  -1    4.70    6.20 
   4   0   1   -3.60    2.40 
   4   0   1    0.20    6.00 
   4   0   1   -2.30    4.20 
   4   0   1    1.00    6.70 
   4   0   1   -3.30    4.90 
   4   0   1   -2.90    6.00 
   4   0   1   -3.50    4.00 
  -4   0  -1   -2.90    5.00 
  -4   0  -1   -1.10    4.80 
   4   0   1   -4.40    5.50 
  -4   0  -1   -5.90    4.70 
   4   0   1    1.30    5.70 
  -4   0  -1   -7.40    5.40 
   4   0   1    0.10    2.80 
  -4   0  -1    0.40    2.90 
   4   0   1    0.70    2.70 
  -4   0  -1    9.80    7.10 
   4   0   1   -3.00    3.80 
  -5   0  -1  122.59   12.00 
  -5   0  -1  110.99   20.60 
   5   0   1  108.09   10.80 
   5   0   1  124.89   20.90 
   5   0   1  113.99    9.80 
  -5   0  -1  177.88   24.40 
   5   0   1  125.39   20.50 
   5   0   1  110.29   11.00 
   5   0   1  103.89   15.60 
   5   0   1  160.58   22.80 
   5   0   1  121.59   18.70 
  -5   0  -1  117.99   17.90 
  -5   0  -1  150.68   20.70 
   5   0   1   98.29   18.10 
  -5   0  -1  113.29   18.30 
  -5   0  -1  103.79   20.50 
   5   0   1  108.69   16.60 
  -5   0  -1  146.09   22.10 
  -5   0  -1  112.79    9.80 
   5   0   1  113.19   20.40 
  -5   0  -1  106.49   19.10 
   5   0   1  116.29   18.70 
   5   0   1  131.29   14.90 
   5   0   1  119.89    9.70 
  -5   0  -1   85.19   19.30 
  -5   0  -1   98.49   18.20 
   5   0   1  107.69   12.00 
  -5   0  -1  106.99   19.80 
   5   0   1  109.89   19.00 
   5   0   1  131.79   21.00 
  -5   0  -1  122.59   11.10 
   6   0   1  -12.30    8.10 
  -6   0  -1   -1.10    6.90 
  -6   0  -1   -1.40    9.40 
  -6   0  -1   -1.50    9.90 
   6   0   1  -11.10    6.90 
   6   0   1    2.40    4.10 
   6   0   1   -5.40    4.30 
  -6   0  -1    4.40    8.20 
   6   0   1   -4.80    9.10 
   6   0   1   -1.80    3.60 
   6   0   1    6.10    9.30 
   6   0   1   23.80   12.50 
  -6   0  -1    3.40    9.60 
  -6   0  -1    9.90   10.60 
   6   0   1   -4.40    7.70 
   6   0   1   -4.70    8.80 
   6   0   1   -0.40    9.30 
   6   0   1    3.70    8.80 
   6   0   1    1.10    3.60 
   6   0   1    0.00    8.60 
  -6   0  -1    0.00    8.60 
  -6   0  -1    2.20    8.70 
   6   0   1  -11.90    4.90 
  -6   0  -1  -16.60    4.40 
   6   0   1  -10.30    5.80 
  -6   0  -1   -6.00    8.70 
  -6   0  -1   -4.80    8.10 
  -7   0  -1 1886.41  121.89 
   7   0   1 1764.32  121.29 
  -7   0  -1 1963.30  125.89 
   7   0   1 1971.10  121.09 
   7   0   1 1779.62  122.99 
   7   0   1 1985.30  121.89 
   7   0   1 1933.51  124.69 
  -7   0  -1 2066.59  123.69 
   7   0   1 1750.82  124.69 
   7   0   1 1956.10  117.99 
  -7   0  -1 2048.40  127.29 
   7   0   1 2055.49  125.99 
  -7   0  -1 1939.91  125.49 
   7   0   1 2013.40  124.79 
  -7   0  -1 1935.01  117.79 
  -7   0  -1 2064.19  127.99 
  -7   0  -1 1837.92  126.19 
  -7   0  -1 1986.40  120.59 
  -7   0  -1 1958.40  124.79 
   7   0   1 1920.41  117.69 
   7   0   1 1988.30  123.89 
   7   0   1 2103.19  120.69 
  -8   0  -1   12.70   15.30 
  -8   0  -1    1.10   11.70 
   8   0   1   -0.50   13.90 
   8   0   1   16.20   15.20 
   8   0   1   -4.40   10.20 
  -8   0  -1    0.80   13.80 
   8   0   1   18.00   14.40 
   8   0   1    5.90   13.30 
   8   0   1   19.50   14.50 
  -8   0  -1   -4.00    9.00 
   8   0   1   10.50   14.30 
   8   0   1    4.90   12.90 
  -8   0  -1    1.90   12.50 
   8   0   1  -20.10    8.50 
  -8   0  -1    1.60   11.50 
   8   0   1    8.40   11.40 
  -8   0  -1   -3.20   12.10 
  -8   0  -1   -6.20   12.40 
   8   0   1    0.00    9.30 
  -8   0  -1   -8.60   10.00 
   8   0   1   -2.80   12.40 
   8   0   1   18.90   15.40 
  -9   0  -1  493.95   60.39 
   9   0   1  510.85   61.29 
   9   0   1  495.35   56.19 
   9   0   1  498.55   61.59 
  -9   0  -1  388.96   56.09 
   9   0   1  414.06   54.89 
  -9   0  -1  461.75   54.89 
  -9   0  -1  453.55   56.79 
   9   0   1  393.96   56.89 
   9   0   1  515.55   51.29 
   9   0   1  413.36   50.39 
   9   0   1  404.06   56.09 
  -9   0  -1  491.45   56.39 
  -9   0  -1  367.26   52.29 
  -9   0  -1  464.65   58.39 
   9   0   1  466.75   57.79 
  -9   0  -1  522.15   57.29 
   9   0   1  461.05   55.49 
   9   0   1  626.84   63.49 
 -10   0  -1   -4.70   15.20 
 -10   0  -1   -5.40   16.60 
 -10   0  -1   58.59   27.60 
  10   0   1   -1.20   18.10 
  10   0   1  -27.80   15.20 
 -10   0  -1    3.10   15.30 
  10   0   1    7.90   19.40 
  10   0   1   34.50   21.00 
 -10   0  -1  -12.60   12.90 
 -10   0  -1   21.70   16.30 
 -10   0  -1    6.60   19.50 
 -10   0  -1   -9.80   17.30 
  10   0   1   22.60   22.70 
  10   0   1   -1.00   16.00 
  10   0   1    5.10   17.50 
  10   0   1   10.00   18.30 
  10   0   1  -12.00   13.20 
  10   0   1   -9.20   18.60 
  10  -1  -1  494.75   66.69 
  10  -1  -1  567.84   73.69 
  10  -1  -1  629.74   68.59 
 -10  -1   1  535.15   65.09 
 -10  -1   1  614.94   73.09 
  10  -1  -1  657.33   65.19 
  10  -1  -1  604.44   69.59 
  10  -1  -1  743.93   78.59 
  10  -1  -1  557.64   69.69 
 -10  -1   1  504.85   60.29 
  10  -1  -1  625.44   73.79 
 -10  -1   1  673.93   74.19 
 -10  -1   1  795.62   73.59 
 -10  -1   1  619.54   74.19 
 -10  -1   1  611.14   73.89 
 -10  -1   1  605.64   63.99 
  10  -1  -1  710.73   77.49 
  10  -1  -1  723.23   76.09 
  10   1  -1  655.73   71.99 
 -10   1   1  428.06   60.99 
 -10   1   1  646.34   77.19 
  10   1  -1  627.54   68.19 
 -10   1   1  595.54   72.79 
 -10   1   1  595.14   70.19 
 -10   1   1  558.94   65.99 
  10   1  -1  684.83   77.09 
  10   1  -1  535.85   67.49 
  10   1  -1  704.03   75.39 
  10   1  -1  647.94   68.99 
 -10   1   1  719.23   73.99 
  10   1  -1  454.05   64.09 
 -10   1   1  658.83   74.29 
  10   1  -1  762.12   79.29 
  10   1  -1  725.53   81.19 
   9  -1  -1   24.40   17.80 
   9  -1  -1   23.30   17.60 
   9  -1  -1   -9.40   14.70 
   9  -1  -1   20.40   19.60 
  -9  -1   1   26.20   18.40 
   9  -1  -1   11.70   15.20 
   9  -1  -1   23.70   18.80 
   9  -1  -1   13.10   18.70 
   9  -1  -1   -6.60   10.90 
   9  -1  -1   20.90   15.60 
   9  -1  -1   -4.20   12.60 
   9  -1  -1    5.80   16.60 
  -9  -1   1   42.00   21.40 
  -9  -1   1    7.90   15.00 
  -9  -1   1   28.80   16.80 
  -9  -1   1   16.20   17.20 
  -9  -1   1   14.60   17.00 
   9  -1  -1   36.20   19.00 
  -9  -1   1    4.60   17.30 
  -9  -1   1   -1.50   13.60 
   9   1  -1   28.10   15.30 
   9   1  -1   12.20   15.60 
   9   1  -1    0.10   17.50 
   9   1  -1   15.80   18.40 
  -9   1   1    0.10   14.20 
   9   1  -1   31.70   19.00 
   9   1  -1   19.50   15.80 
   9   1  -1   13.10   13.00 
  -9   1   1   -1.20   17.70 
  -9   1   1    4.50   15.20 
  -9   1   1    4.80   13.00 
   9   1  -1   16.80   18.90 
  -9   1   1   -6.10   12.10 
   9   1  -1   28.00   17.30 
  -9   1   1   30.90   20.80 
  -9   1   1   -6.00   12.80 
   9   1  -1   -9.30   13.50 
   9   1  -1   33.90   19.70 
   9   1  -1    1.60   15.10 
  -9   1   1   59.69   20.70 
  -8  -1   1  286.17   39.70 
   8  -1  -1  349.07   43.70 
  -8  -1   1  354.46   44.90 
   8  -1  -1  245.18   38.10 
  -8  -1   1  389.86   47.60 
   8  -1  -1  246.08   40.60 
  -8  -1   1  302.47   39.20 
   8  -1  -1  296.47   38.50 
  -8  -1   1  331.47   40.30 
  -8  -1   1  318.57   39.70 
  -8  -1   1  287.27   43.60 
   8  -1  -1  343.57   40.60 
   8  -1  -1  336.97   46.10 
   8  -1  -1  265.97   40.40 
  -8  -1   1  343.37   45.50 
   8  -1  -1  267.17   40.70 
   8  -1  -1  347.57   45.50 
   8  -1  -1  287.77   37.60 
  -8  -1   1  339.77   46.30 
   8  -1  -1  335.87   43.10 
   8   1  -1  323.67   35.90 
   8   1  -1  367.56   45.10 
   8   1  -1  368.26   42.50 
   8   1  -1  346.47   47.60 
  -8   1   1  246.88   32.20 
  -8   1   1  306.47   40.70 
   8   1  -1  460.75   42.90 
   8   1  -1  283.57   40.30 
  -8   1   1  379.56   45.30 
   8   1  -1  407.96   49.99 
   8   1  -1  177.28   34.90 
  -8   1   1  345.27   47.40 
  -8   1   1  308.87   44.10 
   8   1  -1  404.56   44.90 
   8   1  -1  401.36   47.60 
  -8   1   1  283.87   41.10 
   8   1  -1  366.06   43.40 
  -8   1   1  267.17   41.00 
  -8   1   1  280.27   40.10 
  -8   1   1  300.47   43.00 
  -8   1   1  350.16   43.20 
   7  -1  -1   58.09   16.80 
   7  -1  -1   53.09   16.50 
  -7  -1   1   62.09   17.50 
   7  -1  -1   56.69   18.80 
  -7  -1   1   66.89   18.60 
   7  -1  -1   66.39   12.60 
  -7  -1   1   45.80   16.70 
  -7  -1   1   74.49   21.10 
  -7  -1   1  128.59   23.50 
   7  -1  -1   67.09   17.70 
  -7  -1   1   35.40   14.90 
   7  -1  -1   60.49   19.80 
  -7  -1   1   14.80   13.00 
   7  -1  -1   60.89   17.00 
  -7  -1   1   70.59   18.00 
   7  -1  -1  104.49   24.80 
   7  -1  -1   87.69   21.60 
  -7  -1   1   59.79   19.50 
   7  -1  -1   49.50   16.90 
  -7  -1   1   61.79   13.00 
   7  -1  -1   82.59   21.20 
   7  -1  -1   96.59   21.50 
   7   1  -1  125.09   24.10 
  -7   1   1   62.99   18.70 
  -7   1   1   48.60   13.30 
  -7   1   1   69.19   20.80 
   7   1  -1   70.99   18.00 
  -7   1   1   71.49   21.90 
   7   1  -1   63.09   15.90 
   7   1  -1   80.09   21.00 
  -7   1   1   81.89   20.70 
   7   1  -1   81.09   20.70 
   7   1  -1   97.19   23.70 
  -7   1   1   86.09   22.50 
   7   1  -1   62.69   16.20 
   7   1  -1   73.59   17.80 
  -7   1   1   84.99   21.20 
  -7   1   1   72.39   12.60 
  -7   1   1   69.19   19.70 
   7   1  -1   93.49   21.30 
  -7   1   1  111.29   23.50 
   7   1  -1   81.59   16.20 
   7   1  -1   80.09   22.10 
  -7   1   1   83.39   23.00 
   7   1  -1   64.39   19.50 
  -6  -1   1 1676.53  100.99 
   6  -1  -1 1771.62  103.49 
   6  -1  -1 1668.43   91.69 
   6  -1  -1 1614.34  101.59 
   6  -1  -1 1678.93  104.99 
  -6  -1   1 1723.93  105.79 
   6  -1  -1 1583.04  104.79 
   6  -1  -1 1579.04  100.79 
  -6  -1   1 1684.83  105.89 
   6  -1  -1 1571.54  104.99 
  -6  -1   1 1687.43  104.29 
   6  -1  -1 1591.34  104.69 
  -6  -1   1 1669.23  101.29 
   6  -1  -1 1722.73  105.29 
  -6  -1   1 1619.14  105.69 
  -6  -1   1 1647.14  105.29 
   6  -1  -1 1830.12  108.39 
   6  -1  -1 1629.74   94.49 
  -6  -1   1 1654.03  103.09 
   6  -1  -1 1607.64  100.79 
  -6  -1   1 1632.44   94.89 
   6  -1  -1 1673.03   90.69 
   6  -1  -1 1736.93   90.39 
   6  -1  -1 1528.65  102.89 
  -6  -1   1 1601.74  100.39 
  -6  -1   1 1601.04  103.69 
   6   1  -1 1635.74   89.89 
   6   1  -1 1711.53  102.19 
  -6   1   1 1532.15  102.69 
  -6   1   1 1632.44  105.89 
   6   1  -1 1686.43  104.79 
   6   1  -1 1629.84   95.59 
  -6   1   1 1594.64   95.19 
  -6   1   1 1625.34  105.09 
  -6   1   1 1554.14  102.39 
   6   1  -1 1734.73   94.39 
  -6   1   1 1639.94   95.49 
   6   1  -1 1657.13  101.19 
   6   1  -1 1633.84  104.29 
   6   1  -1 1503.45   96.79 
  -6   1   1 1590.34  103.29 
   6   1  -1 1580.94  104.29 
  -6   1   1 1717.73  107.09 
   6   1  -1 1641.84  102.89 
  -6   1   1 1663.83   91.29 
  -6   1   1 1610.54  104.39 
  -6   1   1 1679.03  105.99 
   6   1  -1 1703.43  104.79 
  -6   1   1 1652.23   97.89 
  -6   1   1 1728.53  104.49 
   6   1  -1 1803.32  108.09 
   6   1  -1 1620.94   98.09 
  -6   1   1 1642.94   92.39 
   6   1  -1 1567.64  101.09 
   5  -1  -1  333.17   24.30 
   5  -1  -1  309.87   21.60 
   5  -1  -1  351.86   34.00 
  -5  -1   1  326.87   34.80 
  -5  -1   1  346.47   35.00 
   5  -1  -1  371.76   37.70 
   5  -1  -1  334.07   29.40 
   5  -1  -1  283.77   30.50 
   5  -1  -1  292.47   21.70 
   5  -1  -1  321.87   34.00 
  -5  -1   1  305.77   31.40 
   5  -1  -1  273.07   31.70 
   5  -1  -1  273.57   32.60 
   5  -1  -1  262.97   32.20 
   5  -1  -1  292.67   33.00 
  -5  -1   1  304.67   34.90 
  -5  -1   1  344.87   32.60 
  -5  -1   1  396.26   32.30 
  -5  -1   1  378.46   29.00 
   5  -1  -1  307.07   21.90 
   5  -1  -1  281.37   30.60 
  -5  -1   1  337.07   24.40 
  -5  -1   1  385.26   36.80 
  -5  -1   1  347.97   28.30 
   5  -1  -1  281.57   32.90 
  -5  -1   1  294.97   34.90 
  -5  -1   1  350.26   38.20 
  -5   1   1  310.97   22.40 
  -5   1   1  223.38   30.60 
   5   1  -1  325.17   33.10 
  -5   1   1  348.77   37.10 
  -5   1   1  199.68   28.80 
  -5   1   1  282.67   33.50 
   5   1  -1  329.67   19.70 
  -5   1   1  287.67   22.50 
  -5   1   1  314.27   22.30 
  -5   1   1  317.67   33.50 
   5   1  -1  287.77   32.70 
   5   1  -1  319.17   32.70 
   5   1  -1  315.37   23.50 
   5   1  -1  313.47   20.00 
   5   1  -1  325.57   20.30 
  -5   1   1  298.87   25.50 
   5   1  -1  321.67   24.00 
   5   1  -1  311.97   25.90 
   5   1  -1  337.17   19.90 
   5   1  -1  311.07   20.10 
  -5   1   1  257.77   30.50 
   5   1  -1  277.87   33.50 
   5   1  -1  304.07   20.70 
   5   1  -1  321.47   34.10 
   5   1  -1  328.87   24.00 
   5   1  -1  259.47   29.70 
   5   1  -1  311.77   31.30 
   5   1  -1  260.67   31.40 
  -5   1   1  328.37   26.10 
  -5   1   1  316.47   34.10 
  -5   1   1  330.57   34.30 
   5   1  -1  305.07   25.30 
  -5   1   1  460.05   42.30 
  -5   1   1  330.77   25.70 
   4  -1  -1 5544.25  296.97 
  -4  -1   1 5374.76  296.67 
   4  -1  -1 5383.76  295.27 
  -4  -1   1 5521.85  295.87 
   4  -1  -1 5572.64  295.87 
   4  -1  -1 5720.43  295.77 
   4  -1  -1 5836.82  294.47 
  -4  -1   1 5768.42  296.17 
  -4  -1   1 5184.28  288.47 
  -4  -1   1 5441.96  294.87 
   4  -1  -1 5399.46  292.77 
   4  -1  -1 5484.65  296.37 
   4  -1  -1 5537.75  294.37 
  -4  -1   1 5663.93  292.57 
   4  -1  -1 5520.65  294.17 
   4  -1  -1 5397.46  288.07 
  -4  -1   1 5197.68  294.17 
  -4  -1   1 5480.45  292.17 
  -4  -1   1 5363.96  295.37 
  -4  -1   1 5369.06  286.37 
  -4  -1   1 5304.57  290.67 
  -4  -1   1 5499.15  293.57 
  -4  -1   1 5467.95  290.37 
   4  -1  -1 5321.07  287.37 
  -4  -1   1 5493.95  292.97 
  -4  -1   1 5547.15  293.57 
   4  -1  -1 5403.66  287.57 
   4  -1  -1 5771.52  294.47 
  -4  -1   1 5453.65  296.37 
   4  -1  -1 5579.74  289.97 
   4  -1  -1 5021.40  295.77 
  -4   1   1 5481.45  284.77 
  -4   1   1 5328.07  288.47 
  -4   1   1 5594.14  296.07 
  -4   1   1 5621.94  287.77 
   4   1  -1 5471.95  295.27 
  -4   1   1 5242.48  296.27 
   4   1  -1 5180.88  294.67 
  -4   1   1 5572.54  295.17 
   4   1  -1 5432.66  286.67 
  -4   1   1 5270.27  291.47 
  -4   1   1 5425.16  296.17 
  -4   1   1 5520.65  288.07 
   4   1  -1 5369.36  287.57 
   4   1  -1 5663.13  294.57 
  -4   1   1 5427.76  284.57 
   4   1  -1 5628.34  293.47 
  -4   1   1 5379.66  295.17 
   4   1  -1 5363.76  292.97 
  -4   1   1 5526.25  288.47 
  -4   1   1 5536.55  291.87 
   4   1  -1 5448.46  287.67 
   4   1  -1 5511.65  286.47 
   4   1  -1 5468.85  293.07 
   4   1  -1 5404.56  291.57 
   4   1  -1 5459.45  286.07 
  -4   1   1 5174.48  294.37 
  -4   1   1 5555.34  294.97 
  -4   1   1 5498.95  293.37 
   4   1  -1 5491.15  289.57 
   4   1  -1 5271.27  294.57 
   4   1  -1 5596.14  291.77 
   4   1  -1 5414.06  284.67 
   4   1  -1 5571.14  286.67 
  -4   1   1 5283.47  284.67 
  -4   1   1 5485.45  291.27 
   4   1  -1 5505.45  291.17 
   4   1  -1 5400.66  290.07 
  -4   1   1 5497.25  296.37 
  -4   1   1 5555.64  295.27 
  -4   1   1 5368.36  288.07 
   4   1  -1 5327.77  288.37 
   4   1  -1 5675.53  286.77 
  -3  -1   1  365.76   27.80 
   3  -1  -1  398.76   27.90 
   3  -1  -1  392.46   24.20 
  -3  -1   1  343.67   26.30 
  -3  -1   1  335.67   27.00 
  -3  -1   1  336.77   27.10 
  -3  -1   1  317.97   26.40 
   3  -1  -1  403.26   27.80 
  -3  -1   1  378.06   22.50 
   3  -1  -1  347.97   22.90 
   3  -1  -1  344.87   24.60 
  -3  -1   1  398.56   26.70 
   3  -1  -1  365.76   27.30 
   3  -1  -1  387.36   28.10 
  -3  -1   1  335.77   27.10 
  -3  -1   1  364.06   25.30 
   3  -1  -1  356.96   27.60 
   3  -1  -1  352.06   26.70 
   3  -1  -1  329.47   27.20 
   3  -1  -1  364.86   24.20 
   3  -1  -1  337.37   26.70 
   3  -1  -1  357.56   26.80 
   3  -1  -1  378.26   20.80 
   3  -1  -1  384.56   29.00 
  -3  -1   1  307.27   27.00 
   3  -1  -1  344.87   27.90 
  -3  -1   1  395.26   25.30 
  -3  -1   1  357.46   22.80 
  -3  -1   1  325.57   27.50 
   3  -1  -1  383.66   28.10 
   3  -1  -1  370.56   23.20 
   3  -1  -1  372.26   27.60 
   3  -1  -1  374.96   26.90 
   3  -1  -1  390.86   29.00 
   3  -1  -1  353.66   25.90 
  -3  -1   1  321.57   22.80 
   3  -1  -1  414.66   29.60 
   3  -1  -1  370.26   27.50 
  -3  -1   1  365.66   26.70 
  -3  -1   1  373.56   24.10 
  -3  -1   1  362.96   25.10 
   3  -1  -1  363.46   27.70 
  -3  -1   1  345.97   25.70 
   3   1  -1  408.06   28.60 
  -3   1   1  366.86   27.90 
   3   1  -1  357.86   24.90 
   3   1  -1  370.96   26.60 
   3   1  -1  343.17   24.20 
  -3   1   1  352.46   20.70 
  -3   1   1  304.17   26.90 
  -3   1   1  332.97   26.00 
   3   1  -1  404.16   21.60 
   3   1  -1  343.67   22.70 
   3   1  -1  403.76   21.70 
  -3   1   1  381.56   28.00 
   3   1  -1  368.16   26.20 
   3   1  -1  359.36   20.00 
  -3   1   1  335.77   27.90 
   3   1  -1  381.86   27.30 
  -3   1   1  372.76   27.10 
  -3   1   1  366.76   28.30 
   3   1  -1  355.16   21.90 
   3   1  -1  405.86   27.70 
  -3   1   1  364.56   27.90 
   3   1  -1  370.76   24.80 
   3   1  -1  348.27   26.20 
   3   1  -1  364.66   22.40 
  -3   1   1  340.87   26.80 
  -3   1   1  418.16   27.50 
  -3   1   1  352.36   28.40 
   3   1  -1  399.36   26.40 
   3   1  -1  384.06   27.10 
   3   1  -1  392.46   27.70 
   3   1  -1  341.67   23.00 
   3   1  -1  395.36   26.60 
  -3   1   1  324.57   27.30 
  -3   1   1  344.67   23.70 
  -3   1   1  341.57   25.10 
  -3   1   1  352.36   21.60 
  -3   1   1  358.66   23.90 
  -3   1   1  332.77   23.70 
   3   1  -1  363.86   27.00 
   3   1  -1  406.66   27.00 
  -3   1   1  400.86   23.70 
  -3   1   1  347.57   21.90 
  -3   1   1  345.77   26.00 
  -3   1   1  366.66   27.80 
  -3   1   1  319.77   22.90 
   3   1  -1  329.27   23.60 
   3   1  -1  388.76   23.00 
  -3   1   1  351.96   21.60 
   3   1  -1  312.27   24.90 
   3   1  -1  374.36   27.40 
   3   1  -1  343.77   24.50 
  -3   1   1  387.36   28.80 
   3   1  -1  355.56   21.40 
  -3   1   1  349.27   27.90 
   2  -1  -1  543.85   31.20 
   2  -1  -1  547.75   34.20 
   2  -1  -1  513.65   34.00 
   2  -1  -1  501.65   33.60 
   2  -1  -1  551.94   34.40 
   2  -1  -1  546.75   34.00 
   2  -1  -1  518.45   34.10 
   2  -1  -1  509.55   33.20 
  -2  -1   1  547.65   32.30 
  -2  -1   1  523.85   30.90 
   2  -1  -1  563.44   31.70 
  -2  -1   1  508.15   32.40 
  -2  -1   1  525.25   30.40 
   2  -1  -1  564.04   34.70 
   2  -1  -1  498.45   34.20 
  -2  -1   1  555.24   34.30 
   2  -1  -1  521.55   32.30 
   2  -1  -1  517.05   29.90 
   2  -1  -1  537.55   33.40 
   2  -1  -1  524.65   34.40 
   2  -1  -1  567.04   34.80 
   2  -1  -1  543.85   33.50 
  -2  -1   1  537.05   34.10 
   2  -1  -1  508.05   33.10 
  -2  -1   1  546.35   29.40 
  -2  -1   1  540.15   31.40 
  -2  -1   1  526.45   31.30 
   2  -1  -1  559.14   30.80 
   2  -1  -1  553.44   34.40 
  -2  -1   1  432.46   32.90 
  -2  -1   1  569.44   33.70 
   2  -1  -1  572.14   34.50 
  -2  -1   1  534.25   31.50 
   2  -1  -1  529.15   34.30 
  -2  -1   1  495.85   33.30 
   2  -1  -1  565.94   33.90 
  -2  -1   1  508.75   32.70 
  -2  -1   1  534.35   33.60 
  -2  -1   1  536.55   33.20 
   2  -1  -1  515.15   33.40 
   2  -1  -1  530.25   33.40 
   2  -1  -1  495.15   31.90 
   2  -1  -1  537.95   34.10 
   2  -1  -1  523.25   33.90 
  -2  -1   1  534.95   30.60 
  -2  -1   1  545.05   33.70 
   2  -1  -1  521.75   34.20 
   2  -1  -1  559.14   32.70 
   2  -1  -1  571.64   35.20 
   2   1  -1  536.85   32.30 
   2   1  -1  500.15   32.60 
   2   1  -1  517.75   31.10 
   2   1  -1  513.75   32.30 
   2   1  -1  530.25   33.40 
  -2   1   1  516.55   34.00 
   2   1  -1  554.14   30.70 
   2   1  -1  555.24   34.30 
  -2   1   1  547.35   33.80 
  -2   1   1  564.34   34.00 
  -2   1   1  539.75   34.10 
   2   1  -1  517.85   30.90 
   2   1  -1  529.85   31.90 
   2   1  -1  554.14   34.10 
   2   1  -1  538.35   29.40 
   2   1  -1  527.95   30.90 
  -2   1   1  525.95   32.20 
   2   1  -1  558.74   32.70 
  -2   1   1  527.65   32.10 
   2   1  -1  494.85   30.90 
   2   1  -1  516.65   29.30 
   2   1  -1  505.75   32.90 
  -2   1   1  511.45   33.90 
  -2   1   1  520.45   34.00 
   2   1  -1  535.95   33.80 
  -2   1   1  519.75   30.70 
  -2   1   1  508.05   33.90 
   2   1  -1  532.85   31.40 
   2   1  -1  571.84   33.60 
   2   1  -1  518.25   30.30 
  -2   1   1  536.55   34.30 
  -2   1   1  551.74   33.70 
   2   1  -1  572.44   32.80 
   2   1  -1  491.15   31.60 
  -2   1   1  532.15   32.10 
  -2   1   1  532.25   34.20 
  -2   1   1  523.05   33.40 
  -2   1   1  543.25   29.90 
  -2   1   1  488.85   33.90 
  -2   1   1  550.84   31.40 
  -2   1   1  521.95   33.70 
   2   1  -1  498.05   31.80 
   2   1  -1  534.55   33.50 
   2   1  -1  492.15   30.90 
   2   1  -1  552.04   33.80 
  -2   1   1  526.85   31.30 
   2   1  -1  509.55   32.90 
  -2   1   1  538.75   34.50 
  -2   1   1  544.35   32.40 
  -2   1   1  560.44   33.80 
  -2   1   1  568.64   34.80 
  -2   1   1  496.15   33.80 
   2   1  -1  515.15   30.70 
  -2   1   1  546.95   33.30 
  -2   1   1  540.95   33.90 
  -2   1   1  557.14   34.70 
  -1  -1   1   25.20    5.10 
  -1  -1   1   29.30    4.50 
   1  -1  -1   25.80    4.90 
  -1  -1   1   22.40    4.40 
   1  -1  -1   30.10    5.40 
  -1  -1   1   31.00    5.10 
   1  -1  -1   24.20    4.70 
   1  -1  -1   25.00    5.20 
  -1  -1   1   29.10    5.30 
   1  -1  -1   27.20    4.30 
  -1  -1   1   24.40    4.60 
  -1  -1   1   29.00    4.80 
   1  -1  -1   22.90    4.50 
  -1  -1   1   22.30    3.50 
  -1  -1   1    9.00    3.00 
  -1  -1   1   23.10    3.90 
   1  -1  -1   34.90    6.10 
   1  -1  -1   15.70    4.70 
   1  -1  -1   39.00    5.90 
   1  -1  -1   26.30    5.00 
   1  -1  -1   29.90    4.80 
   1  -1  -1   33.10    5.60 
   1  -1  -1   25.90    4.40 
  -1  -1   1   10.80    3.80 
   1  -1  -1   16.30    3.90 
   1  -1  -1   23.50    4.30 
  -1  -1   1   41.20    4.80 
   1  -1  -1   29.70    5.60 
   1  -1  -1   34.20    6.00 
   1  -1  -1   22.10    4.40 
   1  -1  -1   24.40    5.30 
   1  -1  -1   14.60    3.80 
   1  -1  -1   24.00    4.70 
   1  -1  -1   13.70    3.80 
  -1  -1   1   23.80    4.90 
   1  -1  -1   20.70    4.40 
   1  -1  -1   28.00    5.10 
   1  -1  -1   20.90    5.00 
   1  -1  -1   24.40    5.20 
  -1  -1   1   16.70    4.10 
  -1  -1   1   22.30    4.50 
  -1   1   1   29.40    5.00 
   1   1  -1   29.50    5.00 
   1   1  -1   35.20    5.40 
  -1   1   1   18.90    4.60 
   1   1  -1   32.80    5.10 
  -1   1   1   30.70    5.60 
  -1   1   1   22.00    4.30 
  -1   1   1   28.50    4.70 
   1   1  -1   24.60    3.50 
  -1   1   1   29.80    5.30 
  -1   1   1   24.40    4.50 
   1   1  -1   28.90    4.30 
  -1   1   1   27.60    4.70 
   1   1  -1   31.10    4.60 
   1   1  -1   22.10    5.10 
  -1   1   1   18.10    4.50 
   1   1  -1   27.20    5.20 
   1   1  -1   30.20    3.60 
   1   1  -1   17.20    4.30 
   1   1  -1   34.80    5.30 
  -1   1   1   29.80    5.30 
  -1   1   1   29.50    4.90 
  -1   1   1   39.70    5.90 
   1   1  -1   32.30    5.50 
  -1   1   1   27.00    4.70 
   1   1  -1   24.90    5.20 
  -1   1   1   33.60    6.20 
   1   1  -1   27.70    3.90 
   1   1  -1   27.90    2.90 
  -1   1   1   12.90    4.00 
  -1   1   1   24.10    5.30 
   1   1  -1   29.90    4.30 
  -1   1   1   24.20    5.10 
   1   1  -1   26.30    4.60 
  -1   1   1   33.60    5.50 
  -1   1   1   25.80    5.60 
  -1   1   1   31.90    5.30 
   1   1  -1   27.00    3.50 
  -1   1   1   24.20    5.10 
   1   1  -1   26.90    4.20 
   1   1  -1   33.90    5.10 
   1   1  -1   28.10    2.80 
  -1   1   1   30.10    5.70 
  -1   1   1   24.40    5.00 
  -1   1   1   29.50    5.80 
   1   1  -1   27.10    4.40 
   1   1  -1   23.40    4.60 
   1   1  -1   28.50    4.20 
   1   1  -1   33.90    5.00 
   1   1  -1   30.60    5.20 
  -1   1   1   29.60    5.60 
  -1   1   1   26.10    5.00 
   1   1  -1   30.20    5.00 
   1   1  -1   22.10    4.30 
  -1   1   1   10.70    3.30 
   1   1  -1   32.40    5.20 
   0  -1  -1 4160.78  211.28 
   0  -1  -1 4027.60  211.68 
   0  -1   1 4156.38  211.38 
   0  -1  -1 3906.11  211.18 
   0  -1   1 4149.58  211.38 
   0   1  -1 4246.48  209.38 
   0   1  -1 4152.48  208.98 
   0   1   1 4095.39  211.58 
   0   1   1 4230.38  211.68 
   0   1   1 3814.12  211.18 
   0   1  -1 4027.30  211.88 
   0   1  -1 3907.61  211.58 
   0   1  -1 4268.67  210.08 
   0   1   1 3797.22  210.78 
   0   1   1 4202.18  209.48 
   0   1  -1 4135.09  211.18 
   0   1   1 4124.79  211.68 
   0   1  -1 3480.45  211.18 
   0   1   1 4204.68  209.28 
   0   1  -1 3462.35  210.58 
   0   1  -1 4129.89  209.78 
   0   1   1 3971.10  211.38 
   0   1  -1 4178.48  211.78 
   0   1   1 3721.73  212.28 
   0   1  -1 4104.69  213.08 
   0   1  -1 4154.88  209.98 
   0   1  -1 4195.88  209.48 
   0   1  -1 3473.95  210.98 
   0   1  -1 4222.28  209.28 
   0   1   1 3892.21  211.68 
   0   1  -1 3926.71  211.58 
   0   1  -1 3940.01  210.08 
   0   1   1 4375.46  211.08 
   0   1   1 3622.84  211.88 
   0   1   1 4317.57  213.38 
   0   1  -1 3909.41  210.98 
   0   1   1 4270.37  211.78 
   0   1   1 4057.79  211.28 
   0   1  -1 4117.59  211.78 
   0   1   1 4180.88  209.88 
   0   1   1 3695.93  210.18 
   0   1  -1 3993.00  212.58 
   0   1  -1 3749.52  212.28 
  -1  -1  -1  267.87   20.50 
   1  -1   1  340.67   21.30 
   1  -1   1  316.37   20.50 
  -1  -1  -1  317.07   21.00 
   1  -1   1  311.07   21.80 
   1  -1   1  302.87   20.50 
  -1  -1  -1  318.27   21.40 
  -1  -1  -1  330.27   21.60 
   1  -1   1  315.87   21.00 
   1  -1   1  342.47   22.00 
   1  -1   1  322.57   20.10 
   1  -1   1  317.47   20.20 
  -1  -1  -1  342.17   21.20 
   1  -1   1  323.37   21.00 
   1  -1   1  323.57   20.40 
   1  -1   1  329.17   21.50 
   1  -1   1  400.06   22.70 
  -1  -1  -1  288.77   20.40 
   1  -1   1  328.17   20.40 
   1  -1   1  326.27   21.40 
   1  -1   1  313.77   21.50 
   1  -1   1  327.77   20.20 
  -1  -1  -1  339.07   21.50 
  -1  -1  -1  350.66   19.70 
   1  -1   1  314.17   20.30 
   1  -1   1  299.37   21.00 
   1  -1   1  326.67   21.20 
   1  -1   1  343.97   21.90 
   1  -1   1  312.97   21.00 
  -1  -1  -1  312.27   19.80 
  -1  -1  -1  242.28   20.20 
   1  -1   1  328.77   21.00 
   1  -1   1  310.27   21.00 
  -1  -1  -1  324.97   19.60 
   1  -1   1  330.07   20.80 
   1  -1   1  348.67   22.20 
   1  -1   1  357.76   22.10 
   1  -1   1  307.87   21.60 
  -1  -1  -1  337.07   20.40 
  -1  -1  -1  330.97   20.20 
  -1  -1  -1  318.37   20.10 
   1  -1   1  288.87   20.40 
  -1  -1  -1  296.77   21.20 
   1  -1   1  295.17   20.80 
   1  -1   1  333.47   20.20 
  -1   1  -1  339.37   21.60 
   1   1   1  321.87   18.00 
   1   1   1  340.97   20.90 
  -1   1  -1  307.67   21.00 
   1   1   1  344.77   18.80 
  -1   1  -1  318.67   20.80 
   1   1   1  331.17   19.90 
  -1   1  -1  292.67   21.70 
  -1   1  -1  317.47   20.80 
  -1   1  -1  314.67   20.60 
  -1   1  -1  322.87   21.30 
   1   1   1  328.67   19.60 
  -1   1  -1  352.46   22.20 
  -1   1  -1  328.57   20.80 
  -1   1  -1  344.17   21.20 
  -1   1  -1  339.17   21.30 
   1   1   1  326.27   20.00 
  -1   1  -1  325.97   20.90 
   1   1   1  311.67   19.70 
  -1   1  -1  323.47   21.80 
   1   1   1  346.07   20.00 
  -1   1  -1  327.97   21.40 
  -1   1  -1  325.97   21.50 
  -1   1  -1  345.07   21.90 
   1   1   1  334.07   21.90 
  -1   1  -1  348.47   21.50 
   1   1   1  315.37   18.40 
   1   1   1  342.87   21.40 
   1   1   1  361.86   21.90 
   1   1   1  357.06   20.70 
   1   1   1  349.96   20.80 
  -1   1  -1  339.27   21.90 
  -1   1  -1  342.07   20.30 
   1   1   1  351.26   21.50 
   1   1   1  348.87   20.40 
   1   1   1  369.56   20.50 
   1   1   1  318.37   19.10 
   1   1   1  313.77   21.10 
   1   1   1  360.06   20.60 
   1   1   1  354.46   19.80 
  -1   1  -1  289.87   19.90 
   1   1   1  316.57   20.60 
   1   1   1  344.27   18.20 
  -1   1  -1  329.67   21.30 
   1   1   1  342.87   20.30 
   1   1   1  312.47   20.90 
  -1   1  -1  335.27   21.90 
  -1   1  -1  352.76   21.30 
  -1   1  -1  345.97   20.50 
  -1   1  -1  318.47   20.50 
   1   1   1  354.56   21.80 
   1   1   1  325.57   20.20 
  -1   1  -1  335.67   21.30 
   1   1   1  331.67   21.00 
  -1   1  -1  320.37   20.40 
  -1   1  -1  320.87   21.70 
  -1   1  -1  296.97   20.10 
   1   1   1  355.06   20.60 
   2  -1   1 9622.64  497.35 
   2  -1   1 9479.85  495.45 
   2  -1   1 9649.83  498.35 
   2  -1   1 9632.14  497.55 
   2  -1   1 9366.86  497.35 
   2  -1   1 9549.25  496.95 
  -2  -1  -1 9494.15  498.05 
  -2  -1  -1 9267.07  497.15 
   2  -1   1 9430.16  496.25 
   2  -1   1 9356.86  497.35 
   2  -1   1 9401.06  496.75 
  -2  -1  -1 9392.26  495.55 
  -2  -1  -1 9194.08  495.85 
   2  -1   1 9293.97  496.85 
  -2  -1  -1 9835.12  493.65 
  -2  -1  -1 9137.39  494.85 
   2  -1   1 9849.31  497.95 
  -2  -1  -1 9501.45  492.45 
   2  -1   1 9451.85  497.65 
   2  -1   1 9612.94  498.45 
   2  -1   1 9675.03  497.35 
   2  -1   1 9567.04  497.05 
   2  -1   1 9481.65  497.25 
  -2  -1  -1 9239.88  497.15 
   2  -1   1 9551.64  494.85 
  -2  -1  -1 9229.88  492.85 
  -2  -1  -1 9424.36  493.25 
   2  -1   1 9391.06  494.05 
   2  -1   1 9533.25  492.85 
   2  -1   1 9394.16  497.35 
   2  -1   1 9461.15  497.15 
   2  -1   1 9249.07  495.95 
  -2  -1  -1 9542.85  495.95 
   2  -1   1 9542.85  493.75 
  -2  -1  -1 9386.06  496.65 
   2  -1   1 9632.74  498.15 
  -2  -1  -1 9678.83  496.25 
  -2  -1  -1 9615.34  496.55 
   2  -1   1 9469.15  497.25 
   2  -1   1 9455.05  497.15 
   2  -1   1 9575.64  495.35 
  -2  -1  -1 9129.09  493.85 
   2  -1   1 9617.24  497.05 
   2  -1   1 9376.36  496.85 
  -2  -1  -1 9538.55  496.85 
   2  -1   1 9419.16  493.75 
  -2  -1  -1 9521.45  496.35 
   2   1   1 9592.84  495.05 
   2   1   1 9312.77  496.95 
  -2   1  -1 9015.70  494.45 
   2   1   1 9300.27  496.15 
   2   1   1 9805.32  496.25 
   2   1   1 9079.99  497.15 
   2   1   1 9262.67  493.65 
   2   1   1 9339.57  491.65 
  -2   1  -1 9786.32  497.85 
  -2   1  -1 9176.98  496.25 
  -2   1  -1 9602.84  496.75 
   2   1   1 9531.65  492.55 
   2   1   1 9885.01  496.95 
  -2   1  -1 9426.86  493.75 
  -2   1  -1 9570.24  497.35 
   2   1   1 9473.35  495.25 
  -2   1  -1 9419.36  495.05 
   2   1   1 9547.04  496.35 
   2   1   1 9713.13  493.95 
  -2   1  -1 9559.34  496.85 
   2   1   1 9394.76  495.25 
  -2   1  -1 9210.18  497.75 
   2   1   1 9479.85  496.65 
  -2   1  -1 9691.43  495.75 
  -2   1  -1 9316.77  496.75 
  -2   1  -1 8657.43  497.05 
  -2   1  -1 9308.77  498.15 
  -2   1  -1 9514.15  493.85 
  -2   1  -1 9848.91  498.15 
  -2   1  -1 9189.48  497.05 
  -2   1  -1 9714.83  497.35 
   2   1   1 9428.06  495.05 
   2   1   1 9432.56  496.05 
   2   1   1 9463.85  494.55 
   2   1   1 9431.06  494.35 
  -2   1  -1 9554.94  492.95 
   2   1   1 9491.85  491.55 
   2   1   1 9580.24  497.15 
   2   1   1 9600.84  492.85 
   2   1   1 9524.75  497.95 
  -2   1  -1 9641.24  497.25 
  -2   1  -1 9895.11  497.35 
   2   1   1 9723.73  493.75 
   2   1   1 9485.95  497.65 
  -2   1  -1 9387.56  497.25 
   2   1   1 9413.26  495.95 
   2   1   1 9333.27  496.95 
  -2   1  -1 9945.80  494.45 
   2   1   1 9256.87  495.95 
  -2   1  -1 9446.16  497.05 
   2   1   1 9727.53  496.45 
   2   1   1 9352.86  494.15 
  -2   1  -1 9691.03  497.85 
  -2   1  -1 8645.04  497.25 
   2   1   1 9191.48  493.25 
  -2   1  -1 9477.85  497.95 
  -2   1  -1 9474.65  495.45 
   2   1   1 9999.00  493.45 
  -2   1  -1 9598.94  497.15 
   2   1   1 9627.34  496.65 
  -2   1  -1 9405.86  496.95 
   3  -1   1   44.30   10.30 
   3  -1   1   60.69   10.90 
  -3  -1  -1   62.79   11.50 
   3  -1   1   65.69   11.60 
   3  -1   1   63.89    7.80 
  -3  -1  -1   65.69   10.00 
   3  -1   1   53.79   11.00 
   3  -1   1   60.29   10.60 
   3  -1   1   68.09   11.70 
  -3  -1  -1   78.79   12.00 
   3  -1   1   55.69    9.00 
   3  -1   1   42.40   10.30 
  -3  -1  -1   60.39   12.90 
  -3  -1  -1   49.00   11.20 
   3  -1   1   44.50    9.90 
   3  -1   1   46.30    7.10 
   3  -1   1   49.20   10.40 
   3  -1   1   53.39   12.00 
   3  -1   1   68.69   11.80 
  -3  -1  -1   37.00    8.30 
  -3  -1  -1   36.00   10.00 
   3  -1   1   52.59   11.60 
  -3  -1  -1   64.89    8.20 
  -3  -1  -1   73.99   12.50 
   3  -1   1   46.90    9.90 
  -3  -1  -1   54.09   11.50 
   3  -1   1   45.50   10.20 
   3  -1   1   68.99   10.00 
   3  -1   1   58.09    8.10 
  -3  -1  -1   68.59   11.80 
  -3  -1  -1   64.49    9.70 
  -3  -1  -1   49.99   10.10 
   3  -1   1   56.79   11.70 
  -3  -1  -1   64.49   10.30 
   3  -1   1   40.20   10.90 
  -3  -1  -1   55.19    6.20 
  -3   1  -1   65.09    6.10 
   3   1   1   55.09   10.70 
   3   1   1   51.79    9.50 
  -3   1  -1   48.10   10.70 
   3   1   1   64.59   10.10 
  -3   1  -1   43.30   10.00 
  -3   1  -1   36.50    9.60 
  -3   1  -1   73.09   11.50 
   3   1   1   60.39    7.40 
   3   1   1   72.69   11.80 
  -3   1  -1   55.09   11.60 
   3   1   1   62.29    7.50 
  -3   1  -1   55.19   10.50 
   3   1   1   56.59   11.20 
   3   1   1   36.80    8.80 
  -3   1  -1   65.89    8.30 
  -3   1  -1   61.09   11.50 
  -3   1  -1   74.89   10.00 
  -3   1  -1   47.80   10.30 
   3   1   1   70.09   11.50 
   3   1   1   75.39   11.30 
   3   1   1   64.59   10.20 
   3   1   1   44.20    8.20 
  -3   1  -1   53.49    7.30 
   3   1   1   64.19    7.80 
  -3   1  -1   73.99   11.90 
   3   1   1   70.39    7.50 
  -3   1  -1   75.89   10.40 
   3   1   1   56.09   11.30 
  -3   1  -1   55.49   11.50 
  -3   1  -1   53.29   10.90 
  -3   1  -1   57.19    8.80 
  -3   1  -1   63.19   12.10 
  -3   1  -1   66.69    6.30 
   3   1   1   56.09    7.10 
   3   1   1   65.29   11.60 
   3   1   1   56.49    7.30 
   3   1   1   52.59    9.50 
   3   1   1   57.09    8.00 
   3   1   1   61.79   11.10 
   3   1   1   74.59   11.10 
   3   1   1   54.89   11.20 
   3   1   1   57.19    7.40 
  -3   1  -1   52.89   10.50 
  -3   1  -1   61.29   11.20 
  -3   1  -1   66.29   12.40 
   3   1   1   52.59   10.70 
  -3   1  -1   69.49   11.00 
   3   1   1   63.09   12.30 
  -3   1  -1   48.80   10.80 
   3   1   1   58.99    8.10 
   4  -1   1 1958.10  114.29 
  -4  -1  -1 1909.91  109.29 
  -4  -1  -1 2037.00  114.19 
  -4  -1  -1 2110.79  113.39 
   4  -1   1 1935.31  113.49 
   4  -1   1 1959.70  112.39 
  -4  -1  -1 1926.31  114.89 
   4  -1   1 1898.61  107.59 
  -4  -1  -1 1820.22  112.09 
  -4  -1  -1 1841.32  113.39 
  -4  -1  -1 2039.70  112.19 
  -4  -1  -1 1988.80  109.69 
   4  -1   1 1955.40  106.89 
   4  -1   1 1992.90  105.49 
  -4  -1  -1 1920.81  107.39 
   4  -1   1 1982.00  104.19 
  -4  -1  -1 1934.21  112.59 
   4  -1   1 1953.40  111.79 
   4  -1   1 1957.50  114.29 
  -4  -1  -1 1842.62  113.69 
   4  -1   1 1988.10  112.49 
  -4  -1  -1 1907.41  102.39 
   4  -1   1 2022.80  111.89 
  -4  -1  -1 2082.39  111.59 
   4  -1   1 1860.71  112.89 
   4  -1   1 1868.61  111.49 
   4  -1   1 1976.80  113.79 
  -4  -1  -1 1852.71  112.89 
   4  -1   1 1986.30  113.59 
   4  -1   1 1884.61  104.89 
   4   1   1 1856.51  109.29 
  -4   1  -1 2008.00  109.99 
   4   1   1 1822.22  103.79 
   4   1   1 1924.71  105.39 
  -4   1  -1 2004.20  110.09 
   4   1   1 1971.60  104.49 
  -4   1  -1 1918.61  110.79 
  -4   1  -1 2004.50  108.19 
  -4   1  -1 2068.59  114.29 
  -4   1  -1 1906.31  113.29 
  -4   1  -1 2012.00  114.69 
   4   1   1 1877.91  103.69 
  -4   1  -1 1862.81  113.99 
   4   1   1 1987.70  113.09 
  -4   1  -1 1955.00  115.19 
  -4   1  -1 1891.71  113.69 
   4   1   1 1947.21  103.39 
  -4   1  -1 2000.00  112.89 
   4   1   1 1930.41  107.69 
  -4   1  -1 1875.81  106.79 
   4   1   1 1914.01  106.39 
  -4   1  -1 1907.31  103.79 
   4   1   1 1782.72  109.69 
   4   1   1 1936.51  112.69 
   4   1   1 2026.60  106.39 
   4   1   1 1987.20  113.39 
   4   1   1 1924.91  110.99 
  -4   1  -1 2002.50  105.39 
   4   1   1 1868.51  106.69 
   4   1   1 1999.90  112.39 
   4   1   1 1862.91  112.69 
  -4   1  -1 1962.40  113.99 
  -4   1  -1 1915.91  113.89 
   4   1   1 1838.62  108.59 
   4   1   1 1931.51  112.59 
  -4   1  -1 1910.41  112.39 
  -4   1  -1 1874.71  104.69 
   4   1   1 1942.91  104.59 
  -5  -1  -1   -2.90    7.60 
   5  -1   1    0.50    7.20 
   5  -1   1   -3.60    3.10 
   5  -1   1    5.20    7.50 
   5  -1   1    6.50    8.40 
   5  -1   1    4.30    4.60 
   5  -1   1    5.20    9.00 
  -5  -1  -1   -7.00    7.10 
   5  -1   1   -0.50    3.20 
   5  -1   1   15.20    9.90 
   5  -1   1   -6.60    5.70 
  -5  -1  -1    5.30    7.00 
   5  -1   1    8.70    8.60 
   5  -1   1   -5.20    7.10 
  -5  -1  -1   -0.90    6.20 
   5  -1   1   -2.70    6.30 
  -5  -1  -1   -2.80    6.80 
  -5  -1  -1    6.30    8.70 
   5  -1   1    2.60    9.00 
  -5  -1  -1   -6.50    6.60 
   5  -1   1    2.40    5.10 
  -5  -1  -1    9.80    6.90 
  -5  -1  -1  -15.50    4.10 
  -5  -1  -1   -0.60    7.30 
  -5  -1  -1   -2.90    6.90 
   5   1   1   -1.80    6.90 
   5   1   1    2.10    3.80 
  -5   1  -1    6.30    8.10 
  -5   1  -1    1.20    7.40 
  -5   1  -1    5.00    8.20 
   5   1   1   -4.70    6.70 
   5   1   1   -2.30    4.60 
   5   1   1    2.10    4.90 
   5   1   1    6.50    9.00 
   5   1   1    3.30    8.00 
  -5   1  -1    0.30    3.50 
   5   1   1   11.10    8.20 
   5   1   1    6.60    8.00 
   5   1   1    0.00    4.60 
  -5   1  -1    1.40    8.70 
  -5   1  -1   -3.10    7.10 
   5   1   1    3.10    3.80 
   5   1   1    2.80    6.30 
  -5   1  -1    2.90    7.50 
  -5   1  -1    0.30    3.20 
   5   1   1    1.00    2.80 
   5   1   1    5.30    3.80 
   5   1   1    7.70    7.20 
  -5   1  -1   -2.00    7.90 
  -5   1  -1   -2.40    7.30 
  -5   1  -1    3.40    5.70 
  -5   1  -1   -2.40    5.70 
   5   1   1    0.40    3.50 
  -5   1  -1   -6.00    4.40 
  -5   1  -1    0.30    6.80 
  -5   1  -1   -4.90    6.40 
  -5   1  -1    4.60    4.40 
   5   1   1   10.70    7.60 
   5   1   1   -4.00    7.30 
  -5   1  -1   -3.90    4.40 
   6  -1   1   49.99   16.00 
  -6  -1  -1   34.90   14.00 
   6  -1   1   37.00   15.50 
  -6  -1  -1   63.39   14.30 
   6  -1   1   41.20   15.30 
  -6  -1  -1   71.19   17.90 
   6  -1   1   44.60    9.20 
   6  -1   1   50.79   13.90 
  -6  -1  -1   49.00   14.30 
  -6  -1  -1   26.70   14.00 
   6  -1   1   25.10   10.90 
   6  -1   1   17.90   11.70 
  -6  -1  -1   16.20   11.50 
  -6  -1  -1   31.80   10.80 
  -6  -1  -1   25.80   11.30 
  -6  -1  -1   46.30   15.50 
   6  -1   1   39.60   14.20 
  -6  -1  -1   59.89   17.40 
   6  -1   1   52.59   15.50 
   6  -1   1   45.00   10.70 
   6  -1   1   35.60   14.50 
   6  -1   1   47.20    7.80 
  -6  -1  -1   56.29   15.00 
   6  -1   1   30.20   13.40 
  -6   1  -1   24.40   11.00 
   6   1   1   42.60   11.50 
   6   1   1   43.30    7.60 
  -6   1  -1   48.60   16.40 
  -6   1  -1   40.40    8.40 
   6   1   1   55.69   10.20 
   6   1   1   44.80    6.70 
   6   1   1   75.29   19.30 
   6   1   1   41.10   11.40 
   6   1   1   23.20   12.10 
  -6   1  -1   29.80   12.60 
  -6   1  -1   38.30   16.10 
  -6   1  -1   69.69   20.00 
  -6   1  -1   52.29   11.60 
  -6   1  -1   47.40   10.50 
   6   1   1   45.20   15.80 
  -6   1  -1   16.80   11.80 
   6   1   1   58.69   17.10 
   6   1   1   64.69   15.00 
  -6   1  -1   32.30   14.80 
  -6   1  -1   34.50   13.60 
   6   1   1   28.80   11.00 
   6   1   1   47.50    6.80 
   6   1   1   47.70   14.40 
  -6   1  -1   17.90   11.00 
   6   1   1   23.60   12.20 
   6   1   1   62.59   17.60 
  -6   1  -1   52.09    7.20 
   6   1   1   44.10    7.10 
  -6   1  -1   44.00   15.60 
   6   1   1   70.79   16.90 
   7  -1   1    8.00   11.80 
   7  -1   1   39.60   16.10 
   7  -1   1   28.00   15.00 
  -7  -1  -1    7.60   11.90 
   7  -1   1    9.50   12.20 
  -7  -1  -1    7.30   12.60 
  -7  -1  -1    0.80    8.10 
  -7  -1  -1    0.70   13.80 
   7  -1   1    5.70   12.30 
   7  -1   1   20.40    7.60 
  -7  -1  -1   -2.00    9.90 
   7  -1   1    2.20   11.00 
  -7  -1  -1   14.00   13.80 
  -7  -1  -1    6.50   10.40 
  -7  -1  -1    2.90   10.10 
   7  -1   1   15.90   13.20 
   7  -1   1   29.00   15.80 
  -7  -1  -1    6.10   11.50 
   7  -1   1   15.50   11.30 
  -7  -1  -1    4.30   11.40 
   7  -1   1   -7.90   10.20 
   7  -1   1   19.60   12.60 
   7   1   1   13.00   12.90 
   7   1   1   -2.80   10.30 
   7   1   1    2.60   12.20 
  -7   1  -1   58.69   16.90 
   7   1   1   28.00   14.30 
   7   1   1   23.50   12.80 
   7   1   1    4.00   12.20 
  -7   1  -1   10.00    7.50 
  -7   1  -1   -5.70    9.60 
  -7   1  -1   25.10   13.90 
  -7   1  -1    9.80   11.90 
   7   1   1    9.40   12.40 
   7   1   1   21.80   12.20 
   7   1   1   20.50   10.40 
   7   1   1   12.70   13.90 
  -7   1  -1    9.00   11.50 
   7   1   1   22.80   10.60 
  -7   1  -1    2.00    8.90 
  -7   1  -1   15.30   15.10 
  -7   1  -1   22.00   14.50 
   7   1   1   10.30   12.80 
  -7   1  -1   23.10   13.00 
  -8  -1  -1  505.85   59.49 
  -8  -1  -1  562.14   57.79 
   8  -1   1  597.84   64.79 
  -8  -1  -1  553.84   54.39 
  -8  -1  -1  478.75   54.99 
   8  -1   1  680.63   68.39 
   8  -1   1  549.74   53.79 
   8  -1   1  531.35   61.19 
   8  -1   1  596.84   58.79 
   8  -1   1  642.34   63.09 
   8  -1   1  487.75   57.69 
  -8  -1  -1  557.54   61.09 
  -8  -1  -1  607.84   45.90 
  -8  -1  -1  598.14   64.19 
   8  -1   1  578.44   60.29 
   8  -1   1  640.44   52.59 
   8  -1   1  572.44   57.99 
  -8  -1  -1  480.65   52.39 
   8  -1   1  512.35   57.49 
   8  -1   1  525.75   58.99 
  -8  -1  -1  585.94   62.09 
   8   1   1  620.14   63.49 
  -8   1  -1  618.94   60.29 
  -8   1  -1  564.84   48.60 
   8   1   1  462.45   58.49 
  -8   1  -1  522.65   60.89 
   8   1   1  674.33   68.49 
  -8   1  -1  597.84   63.59 
  -8   1  -1  530.85   60.69 
   8   1   1  665.43   54.49 
  -8   1  -1  565.04   64.19 
   8   1   1  525.55   56.29 
   8   1   1  576.64   46.50 
  -8   1  -1  635.14   65.79 
   8   1   1  557.84   59.99 
   8   1   1  556.14   59.09 
   8   1   1  566.34   47.90 
   8   1   1  648.34   64.49 
   8   1   1  496.55   54.29 
  -8   1  -1  545.25   58.29 
   8   1   1  616.14   61.39 
  -8   1  -1  512.15   56.29 
  -9  -1  -1   48.00   23.20 
  -9  -1  -1   22.10   19.70 
   9  -1   1   52.69   20.50 
  -9  -1  -1   23.40   16.30 
   9  -1   1   -2.30   14.90 
  -9  -1  -1   14.60   16.30 
   9  -1   1   19.60   16.00 
   9  -1   1   10.20   18.00 
   9  -1   1   43.70   19.50 
  -9  -1  -1   19.90   15.50 
   9  -1   1   31.50   17.40 
   9  -1   1   31.30   19.90 
   9  -1   1    7.40   17.90 
   9  -1   1   11.50   17.60 
  -9  -1  -1   31.50   19.70 
  -9  -1  -1   24.00   19.20 
   9  -1   1   30.40   17.70 
   9  -1   1   14.30   14.50 
  -9  -1  -1  -14.00   13.80 
   9  -1   1   10.10   18.40 
  -9   1  -1   23.60   21.40 
   9   1   1    7.50   15.20 
   9   1   1   21.50   16.60 
  -9   1  -1   10.50   17.10 
  -9   1  -1   20.40   20.60 
   9   1   1   26.00   17.60 
  -9   1  -1   -6.60   14.60 
  -9   1  -1   14.40   15.10 
   9   1   1   14.50   15.50 
  -9   1  -1    0.70   14.10 
   9   1   1   12.10   16.90 
   9   1   1   42.20   18.50 
   9   1   1   43.60   24.20 
   9   1   1   27.40   18.50 
   9   1   1   80.19   25.70 
  -9   1  -1   24.10   17.40 
   9   1   1    6.00   15.60 
  -9   1  -1   35.70   21.40 
   9   1   1   29.80   18.60 
  10  -1   1  523.15   60.19 
  10  -1   1  511.15   68.29 
  10  -1   1  345.17   53.89 
  10  -1   1  387.36   51.19 
  10  -1   1  502.25   62.29 
 -10  -1  -1  505.15   64.59 
 -10  -1  -1  375.66   51.29 
 -10  -1  -1  335.17   49.90 
  10  -1   1  568.34   65.79 
 -10  -1  -1  615.74   71.29 
  10  -1   1  419.46   60.89 
  10  -1   1  421.76   57.19 
  10  -1   1  459.75   64.69 
 -10  -1  -1  582.14   72.39 
 -10  -1  -1  366.56   54.79 
  10  -1   1  487.65   61.29 
  10  -1   1  385.16   53.69 
 -10  -1  -1  427.36   55.19 
 -10  -1  -1  284.47   50.79 
 -10   1  -1  580.84   62.89 
 -10   1  -1  451.05   60.89 
  10   1   1  436.06   57.49 
  10   1   1  535.55   62.69 
 -10   1  -1  457.45   61.99 
  10   1   1  372.96   57.19 
  10   1   1  433.76   60.29 
  10   1   1  462.45   64.79 
  10   1   1  470.45   66.19 
  10   1   1  539.05   67.39 
 -10   1  -1  415.06   55.39 
  10   1   1  392.46   54.29 
  10   1   1  386.76   56.49 
 -10   1  -1  477.85   64.29 
 -10   1  -1  338.17   54.89 
 -10   1  -1  520.75   70.39 
 -10   1  -1  392.86   54.99 
  10  -2  -1   96.29   33.50 
  10  -2  -1  140.19   33.10 
  10  -2  -1  125.39   32.40 
  10  -2  -1   85.69   29.70 
 -10  -2   1   84.59   29.40 
 -10  -2   1   88.49   28.20 
  10  -2  -1  107.19   34.90 
  10  -2  -1  108.19   31.50 
  10  -2  -1   82.49   31.00 
  10  -2  -1  156.88   39.70 
  10  -2  -1   81.89   26.20 
 -10  -2   1   95.29   30.40 
  10  -2  -1   92.89   28.80 
  10  -2  -1   55.29   28.50 
 -10  -2   1   78.09   27.90 
 -10  -2   1  152.88   40.30 
  10   2  -1  221.88   41.30 
 -10   2   1  131.59   33.80 
  10   2  -1  160.58   35.60 
 -10   2   1  142.69   36.50 
 -10   2   1   85.39   28.20 
  10   2  -1  139.19   32.20 
 -10   2   1  174.28   40.30 
  10   2  -1  180.08   39.70 
  10   2  -1  171.08   34.10 
 -10   2   1   72.49   28.90 
  10   2  -1  110.29   32.30 
 -10   2   1  116.59   33.20 
  10   2  -1  118.69   32.20 
  10   2  -1  182.78   39.00 
 -10   2   1   38.00   21.90 
  10   2  -1  119.89   36.90 
   9  -2  -1  145.69   33.60 
  -9  -2   1  106.79   31.10 
   9  -2  -1  115.49   28.70 
  -9  -2   1  124.39   31.20 
   9  -2  -1  108.59   26.50 
   9  -2  -1   98.19   28.90 
  -9  -2   1   89.09   28.40 
   9  -2  -1   70.99   25.20 
   9  -2  -1   78.89   27.10 
  -9  -2   1  108.39   26.00 
  -9  -2   1   72.09   23.90 
   9  -2  -1   75.09   24.10 
  -9  -2   1  162.28   29.90 
   9  -2  -1  131.99   30.80 
  -9  -2   1  136.29   28.60 
   9  -2  -1  113.49   30.70 
  -9  -2   1   72.49   26.00 
   9  -2  -1   61.19   27.20 
   9  -2  -1   93.39   25.90 
   9   2  -1   95.19   24.20 
   9   2  -1  104.69   28.60 
  -9   2   1  115.49   30.80 
   9   2  -1   73.09   22.10 
   9   2  -1  111.69   28.10 
  -9   2   1   76.39   25.60 
  -9   2   1  189.48   35.80 
   9   2  -1  128.09   29.40 
   9   2  -1  108.09   29.50 
  -9   2   1  194.48   37.20 
  -9   2   1   71.09   27.00 
   9   2  -1  139.99   33.50 
  -9   2   1   35.80   20.70 
   9   2  -1  145.19   29.80 
  -9   2   1  139.29   33.00 
   9   2  -1   92.99   28.70 
  -9   2   1   85.99   27.20 
   9   2  -1  129.89   31.70 
  -8  -2   1    8.20   15.40 
   8  -2  -1   14.80   15.40 
  -8  -2   1   16.30   13.50 
   8  -2  -1   17.00   14.60 
   8  -2  -1   15.30   14.50 
  -8  -2   1    6.70   14.70 
   8  -2  -1  -11.40   12.90 
   8  -2  -1   -3.30   13.70 
  -8  -2   1   14.70   14.30 
   8  -2  -1   -3.90   16.10 
   8  -2  -1   -2.10   12.30 
   8  -2  -1    4.60   13.40 
   8  -2  -1   17.00   14.50 
  -8  -2   1    8.40   11.50 
  -8  -2   1   32.60   17.60 
  -8  -2   1   -2.60   10.20 
  -8  -2   1   18.80   16.30 
   8  -2  -1   19.10   16.90 
  -8  -2   1   18.20   13.80 
   8  -2  -1   16.40   17.30 
   8   2  -1    0.00   11.90 
  -8   2   1    6.00   15.20 
  -8   2   1   10.30   13.00 
   8   2  -1   17.60   15.90 
  -8   2   1   -9.90    9.50 
   8   2  -1   38.50   17.90 
   8   2  -1   10.30   15.90 
   8   2  -1   10.90   13.40 
  -8   2   1  -14.60    8.50 
  -8   2   1   -4.40   10.60 
  -8   2   1   18.40   15.70 
   8   2  -1   30.30   17.90 
  -8   2   1   21.80   17.60 
   8   2  -1   31.80   15.60 
   8   2  -1    5.90   11.00 
   8   2  -1   11.60   13.80 
   8   2  -1    9.50   13.80 
  -8   2   1    2.00   11.10 
   8   2  -1   18.60   13.40 
  -8   2   1    1.10   13.00 
   8   2  -1   10.80   11.10 
  -8   2   1   17.60   11.60 
  -8   2   1   29.00   18.10 
   7  -2  -1  174.08   29.10 
  -7  -2   1  142.39   28.00 
   7  -2  -1  128.59   26.80 
  -7  -2   1  188.48   28.70 
  -7  -2   1  151.98   25.10 
   7  -2  -1  152.28   29.20 
   7  -2  -1  147.09   25.60 
   7  -2  -1  156.18   20.20 
  -7  -2   1  142.49   22.90 
   7  -2  -1  136.99   23.60 
  -7  -2   1  107.99   24.10 
   7  -2  -1  120.29   26.20 
  -7  -2   1  209.48   33.50 
  -7  -2   1  177.98   25.20 
  -7  -2   1  151.68   19.40 
   7  -2  -1  155.48   27.90 
   7  -2  -1  144.49   27.30 
   7  -2  -1  120.49   25.20 
   7  -2  -1  114.89   24.90 
   7  -2  -1  192.38   19.80 
  -7  -2   1  204.68   29.60 
   7  -2  -1  182.28   30.80 
   7  -2  -1  135.59   24.40 
  -7  -2   1  122.79   25.20 
  -7   2   1  141.39   27.00 
  -7   2   1  162.78   24.40 
   7   2  -1  128.09   26.70 
  -7   2   1   94.79   23.20 
   7   2  -1  185.68   29.10 
  -7   2   1  153.28   29.10 
   7   2  -1  109.69   22.70 
   7   2  -1  157.68   22.70 
   7   2  -1  161.48   29.40 
   7   2  -1  128.39   26.60 
  -7   2   1  144.09   27.00 
   7   2  -1  147.09   28.40 
   7   2  -1  166.28   26.70 
  -7   2   1  117.09   26.60 
  -7   2   1  161.48   29.90 
  -7   2   1  139.29   25.80 
  -7   2   1  161.98   23.30 
   7   2  -1  172.18   26.20 
   7   2  -1  194.38   23.80 
   7   2  -1  178.98   29.80 
   7   2  -1  164.18   25.60 
  -7   2   1  149.88   28.50 
  -7   2   1  158.18   18.90 
  -7   2   1  217.08   34.10 
   6  -2  -1   45.10   15.50 
   6  -2  -1   22.20   14.20 
   6  -2  -1   33.90    9.30 
  -6  -2   1   61.09   18.10 
  -6  -2   1   49.99   13.30 
  -6  -2   1   24.40   12.20 
  -6  -2   1   29.20   11.20 
   6  -2  -1   39.30   14.30 
   6  -2  -1   36.30   14.00 
   6  -2  -1   20.00   12.30 
  -6  -2   1   12.00   12.10 
   6  -2  -1   28.50    8.50 
   6  -2  -1   22.80    8.80 
   6  -2  -1   15.10   11.70 
  -6  -2   1   37.50   12.70 
   6  -2  -1   20.40   13.30 
   6  -2  -1   39.00   15.30 
  -6  -2   1   30.90   13.30 
  -6  -2   1    9.70   10.80 
  -6  -2   1   26.00   13.70 
   6  -2  -1   26.80   14.00 
   6  -2  -1   21.70   12.50 
  -6  -2   1   14.50   10.40 
  -6  -2   1   37.40    9.60 
  -6  -2   1   11.20   10.10 
   6  -2  -1   25.50   13.20 
   6  -2  -1   53.09   10.80 
   6   2  -1   25.80   11.70 
   6   2  -1   33.10    7.10 
  -6   2   1   32.00    9.10 
   6   2  -1   28.20   13.20 
   6   2  -1   38.10   15.40 
   6   2  -1   11.40    7.70 
  -6   2   1   28.20    5.10 
  -6   2   1   17.70   11.30 
  -6   2   1   16.90    7.80 
   6   2  -1   17.70   11.00 
   6   2  -1   30.40    8.00 
  -6   2   1   28.10    9.00 
  -6   2   1   11.60   10.50 
   6   2  -1   25.90    7.10 
   6   2  -1   35.00    8.10 
   6   2  -1   22.30    8.10 
  -6   2   1   20.70   10.60 
  -6   2   1    9.60   11.30 
  -6   2   1   33.80   13.40 
   6   2  -1   24.00    6.70 
  -6   2   1   27.50   12.10 
  -6   2   1   16.10   11.40 
   6   2  -1   45.60   13.80 
   6   2  -1   31.00    9.50 
   6   2  -1   21.90   11.80 
  -6   2   1   27.40    9.20 
   6   2  -1   38.50   12.90 
   6   2  -1   19.80   10.70 
   6   2  -1   42.10   14.80 
  -6   2   1   29.40   12.70 
  -6   2   1   37.60   12.50 
   6   2  -1   27.00    5.80 
   6   2  -1   36.00    8.50 
  -6   2   1   25.10   12.00 
  -6   2   1   23.50   12.60 
  -6   2   1   24.00   13.20 
   5  -2  -1   -0.80    7.60 
   5  -2  -1   -6.30    5.40 
   5  -2  -1   15.10   10.00 
  -5  -2   1   11.60    6.70 
   5  -2  -1    6.00    8.70 
   5  -2  -1   10.00    8.40 
   5  -2  -1   -5.90    7.50 
  -5  -2   1    1.80    4.60 
  -5  -2   1    0.90    7.00 
   5  -2  -1   -2.90    7.20 
   5  -2  -1    6.30    6.70 
  -5  -2   1    8.60    8.90 
  -5  -2   1    6.80    7.00 
   5  -2  -1    3.30    4.70 
  -5  -2   1    0.60    5.10 
  -5  -2   1   -4.90    6.80 
  -5  -2   1   11.30    9.20 
   5  -2  -1    2.20    3.50 
   5  -2  -1   -5.20    5.30 
   5  -2  -1   11.10    9.40 
   5  -2  -1   -1.20    5.50 
   5  -2  -1    0.30    4.90 
   5  -2  -1   10.50    8.10 
  -5  -2   1    5.00    7.10 
  -5  -2   1   -5.90    6.70 
  -5  -2   1   -6.60    6.90 
  -5  -2   1   -4.20    6.80 
   5  -2  -1   13.50    9.80 
  -5  -2   1    1.40    6.40 
  -5   2   1   -0.70    4.90 
   5   2  -1    5.90    7.60 
   5   2  -1    4.80    7.50 
   5   2  -1    2.60    7.50 
  -5   2   1    4.10    5.50 
   5   2  -1   -1.10    4.00 
   5   2  -1   -0.20    4.50 
   5   2  -1   10.80    2.70 
   5   2  -1   -1.00    6.50 
  -5   2   1    2.00    7.20 
  -5   2   1   -9.10    6.20 
  -5   2   1   12.00    9.60 
   5   2  -1    7.00    8.50 
   5   2  -1    2.50    8.00 
  -5   2   1    8.90    9.60 
  -5   2   1   -2.10    3.60 
  -5   2   1    3.00    7.00 
   5   2  -1    5.80    4.10 
  -5   2   1   19.20   10.80 
   5   2  -1   -1.50    6.10 
  -5   2   1   -0.10    3.40 
  -5   2   1    1.20    5.10 
   5   2  -1    0.50    4.40 
   5   2  -1   10.70    5.50 
  -5   2   1   -5.40    7.10 
  -5   2   1    2.80    6.00 
  -5   2   1   10.90    8.30 
   5   2  -1    0.90    2.20 
  -5   2   1    3.20    7.60 
   5   2  -1    0.90    3.70 
   5   2  -1   12.30    8.20 
   5   2  -1    3.10    3.60 
   5   2  -1   10.50    8.80 
  -5   2   1   -5.30    6.70 
   5   2  -1    4.20    5.20 
  -5   2   1   16.50    8.40 
  -5   2   1    1.90    3.20 
   5   2  -1    2.50    5.20 
   5   2  -1    0.40    5.00 
  -5   2   1   11.30    8.70 
   5   2  -1    1.00    5.00 
  -4  -2   1    2.30    5.00 
   4  -2  -1    1.20    6.80 
   4  -2  -1   -5.40    5.70 
   4  -2  -1   -7.50    5.10 
  -4  -2   1    8.30    7.50 
  -4  -2   1    6.40    5.40 
  -4  -2   1   -2.90    5.30 
   4  -2  -1   -2.40    5.10 
  -4  -2   1    2.70    6.80 
   4  -2  -1   -9.00    5.70 
   4  -2  -1   -0.10    7.00 
  -4  -2   1    1.20    6.70 
   4  -2  -1    2.70    5.30 
  -4  -2   1    2.50    6.00 
   4  -2  -1   -0.10    5.90 
  -4  -2   1   -6.10    4.60 
  -4  -2   1   -4.70    4.90 
  -4  -2   1   -8.10    3.60 
   4  -2  -1   -0.30    7.50 
  -4  -2   1   -3.30    4.50 
   4  -2  -1    7.60    5.30 
  -4  -2   1   -8.40    4.90 
   4  -2  -1   -3.20    3.50 
   4  -2  -1    1.30    6.70 
   4  -2  -1    0.50    4.70 
   4  -2  -1    5.40    6.50 
  -4  -2   1   -1.20    4.50 
   4  -2  -1   -8.50    6.90 
  -4  -2   1    2.30    4.90 
   4  -2  -1   -1.10    3.60 
  -4  -2   1    1.60    5.50 
  -4  -2   1   -8.40    4.60 
   4  -2  -1   -1.10    5.40 
   4   2  -1    9.50    8.00 
   4   2  -1   -1.30    3.40 
  -4   2   1    2.50    6.10 
  -4   2   1    3.60    4.70 
  -4   2   1    1.60    6.90 
  -4   2   1   -0.40    7.20 
  -4   2   1    3.10    5.60 
   4   2  -1   -1.40    4.90 
   4   2  -1   -4.40    3.70 
   4   2  -1   16.60    7.10 
   4   2  -1    0.20    3.60 
  -4   2   1   -5.10    5.70 
   4   2  -1    3.40    4.20 
   4   2  -1   -1.10    4.00 
  -4   2   1    4.40    6.90 
  -4   2   1   -1.50    3.40 
  -4   2   1   -4.40    4.50 
  -4   2   1    4.30    5.40 
   4   2  -1    1.40    2.30 
  -4   2   1    8.40    5.50 
   4   2  -1    1.50    4.90 
   4   2  -1    6.00    5.70 
   4   2  -1    6.90    6.90 
   4   2  -1    3.50    4.50 
   4   2  -1   -3.30    3.90 
  -4   2   1   -0.30    5.90 
  -4   2   1    6.10    3.60 
  -4   2   1   -2.90    3.20 
   4   2  -1   -1.70    3.60 
  -4   2   1    6.20    7.60 
  -4   2   1   -7.30    5.60 
  -4   2   1   11.20    8.00 
  -4   2   1    0.80    3.20 
   4   2  -1    3.80    2.90 
   4   2  -1    0.60    3.10 
   4   2  -1    9.10    7.50 
   4   2  -1   -0.70    4.20 
  -4   2   1   -4.50    6.70 
   4   2  -1   -0.50    6.80 
   4   2  -1   -0.40    4.60 
   4   2  -1    0.40    4.80 
   3  -2  -1  160.28   21.30 
  -3  -2   1  221.08   17.00 
  -3  -2   1  211.68   17.90 
  -3  -2   1  202.18   20.10 
   3  -2  -1  228.08   22.70 
   3  -2  -1  170.08   20.80 
  -3  -2   1  219.68   22.50 
   3  -2  -1  151.88   19.10 
  -3  -2   1  209.08   15.30 
  -3  -2   1  227.78   18.60 
  -3  -2   1  214.48   18.00 
   3  -2  -1  181.78   21.60 
  -3  -2   1  215.48   16.80 
   3  -2  -1  206.48   18.50 
   3  -2  -1  197.78   20.70 
  -3  -2   1  205.08   21.10 
   3  -2  -1  220.78   21.50 
   3  -2  -1  229.48   24.80 
  -3  -2   1  210.68   16.10 
  -3  -2   1  198.38   17.50 
   3  -2  -1  187.18   21.80 
   3  -2  -1  197.48   20.40 
   3  -2  -1  200.38   24.90 
   3  -2  -1  234.28   23.50 
  -3  -2   1  212.88   20.70 
  -3  -2   1  223.98   22.70 
  -3  -2   1  227.18   22.10 
   3  -2  -1  260.37   26.10 
  -3  -2   1  235.28   23.00 
   3  -2  -1  207.78   17.50 
   3  -2  -1  185.18   19.40 
  -3  -2   1  194.88   21.00 
  -3  -2   1  186.38   19.30 
   3  -2  -1  211.08   23.00 
   3  -2  -1  193.88   15.60 
   3  -2  -1  255.37   24.30 
  -3  -2   1  209.88   19.70 
   3  -2  -1  189.58   19.50 
  -3  -2   1  206.78   21.70 
  -3   2   1  215.78   23.40 
  -3   2   1  186.18   16.20 
  -3   2   1  217.98   23.30 
  -3   2   1  206.48   20.40 
  -3   2   1  190.08   20.70 
   3   2  -1  224.68   15.80 
  -3   2   1  194.38   20.10 
   3   2  -1  236.38   17.40 
   3   2  -1  173.58   14.40 
   3   2  -1  232.08   17.70 
  -3   2   1  215.98   15.90 
  -3   2   1  213.38   18.70 
  -3   2   1  232.78   18.20 
   3   2  -1  252.27   21.70 
   3   2  -1  203.18   16.20 
   3   2  -1  193.08   17.10 
   3   2  -1  231.08   18.80 
   3   2  -1  193.18   16.10 
   3   2  -1  185.88   19.90 
   3   2  -1  184.78   16.60 
   3   2  -1  221.28   18.10 
   3   2  -1  217.58   16.00 
  -3   2   1  217.38   22.50 
   3   2  -1  212.08   21.00 
  -3   2   1  226.28   23.80 
   3   2  -1  230.88   17.50 
  -3   2   1  212.28   22.40 
  -3   2   1  197.48   22.30 
  -3   2   1  200.88   23.00 
   3   2  -1  195.88   16.80 
   3   2  -1  236.88   19.40 
   3   2  -1  219.08   17.20 
   3   2  -1  203.78   17.60 
   3   2  -1  217.38   16.10 
  -3   2   1  210.18   16.20 
   3   2  -1  199.88   16.90 
   3   2  -1  221.98   15.10 
  -3   2   1  176.38   21.50 
   3   2  -1  220.78   15.10 
   3   2  -1  189.48   20.30 
   3   2  -1  246.58   19.60 
  -3   2   1  228.78   24.20 
  -3   2   1  218.18   18.10 
  -3   2   1  175.18   21.70 
   2  -2  -1   28.60    6.60 
   2  -2  -1   22.80    6.80 
   2  -2  -1    8.80    6.50 
  -2  -2   1   23.30    6.30 
  -2  -2   1   17.40    5.50 
   2  -2  -1   18.30    7.20 
   2  -2  -1   20.40    6.60 
   2  -2  -1    1.80    4.90 
   2  -2  -1   20.30    6.60 
  -2  -2   1   18.00    3.60 
  -2  -2   1   20.00    5.10 
   2  -2  -1   30.00    8.10 
   2  -2  -1   14.50    6.60 
   2  -2  -1   16.80    6.80 
   2  -2  -1   25.40    7.70 
   2  -2  -1   11.60    5.70 
  -2  -2   1   15.20    5.50 
   2  -2  -1    6.70    4.60 
   2  -2  -1   20.60    5.80 
   2  -2  -1   16.00    6.10 
  -2  -2   1   18.50    5.80 
   2  -2  -1   18.30    6.70 
  -2  -2   1   16.40    5.50 
  -2  -2   1   22.00    6.20 
   2  -2  -1    6.20    5.00 
  -2  -2   1   16.40    5.70 
   2  -2  -1   14.30    5.00 
   2  -2  -1    8.50    6.00 
   2  -2  -1   13.20    6.60 
   2  -2  -1   17.10    6.50 
   2  -2  -1   17.90    6.40 
   2  -2  -1   12.60    6.20 
   2  -2  -1   17.90    6.00 
  -2  -2   1   14.40    4.70 
  -2  -2   1    9.20    4.80 
  -2  -2   1   20.40    6.10 
  -2  -2   1   25.60    6.60 
   2  -2  -1   12.30    4.90 
  -2  -2   1   14.20    5.30 
  -2  -2   1   16.00    5.00 
   2  -2  -1   13.70    6.00 
  -2  -2   1   16.80    4.90 
   2  -2  -1   17.50    6.30 
  -2  -2   1   11.70    4.60 
  -2  -2   1    4.40    5.10 
  -2  -2   1   12.40    4.90 
   2  -2  -1   15.20    6.60 
  -2  -2   1   18.10    6.60 
   2   2  -1   16.70    5.50 
  -2   2   1   21.50    6.40 
   2   2  -1   12.00    5.10 
  -2   2   1   11.50    5.90 
   2   2  -1   22.70    6.00 
   2   2  -1   18.70    5.80 
  -2   2   1   12.90    6.70 
   2   2  -1   14.40    5.90 
  -2   2   1   19.20    6.90 
  -2   2   1   20.20    5.80 
  -2   2   1   20.40    6.40 
  -2   2   1   20.20    6.80 
   2   2  -1   16.00    4.60 
  -2   2   1   13.90    6.00 
  -2   2   1   12.50    5.60 
   2   2  -1   12.80    4.60 
  -2   2   1   28.60    6.50 
   2   2  -1   15.40    4.40 
  -2   2   1   24.80    6.50 
  -2   2   1    6.90    5.10 
   2   2  -1   22.20    5.70 
   2   2  -1   16.50    4.10 
  -2   2   1   19.70    7.30 
  -2   2   1   15.70    6.00 
  -2   2   1   14.40    5.60 
   2   2  -1   15.90    5.40 
   2   2  -1   20.10    6.60 
  -2   2   1   11.80    6.30 
  -2   2   1   21.80    6.50 
   2   2  -1   21.90    5.50 
  -2   2   1   12.20    5.80 
   2   2  -1   13.30    5.30 
   2   2  -1   29.60    5.90 
   2   2  -1   23.10    6.30 
  -2   2   1   22.10    5.80 
   2   2  -1   13.20    3.00 
   2   2  -1   18.70    5.20 
   2   2  -1   16.70    5.30 
   2   2  -1   26.10    6.90 
  -2   2   1   25.00    7.40 
   2   2  -1   20.30    5.50 
   2   2  -1   13.80    5.60 
  -2   2   1   20.30    6.10 
  -2   2   1   18.10    6.60 
   2   2  -1   16.00    5.10 
  -2   2   1   14.60    4.90 
   2   2  -1   14.40    4.90 
  -2   2   1   21.70    7.10 
   2   2  -1   18.60    5.90 
  -2   2   1   11.40    6.10 
   2   2  -1   16.30    5.70 
   1  -2  -1   10.20    5.20 
   1  -2  -1    0.60    4.40 
  -1  -2   1   14.00    5.10 
   1  -2  -1    9.40    5.00 
  -1  -2   1    2.60    4.40 
   1  -2  -1   16.30    5.80 
   1  -2  -1    1.50    2.50 
  -1  -2   1   10.40    3.40 
   1  -2  -1    3.80    2.90 
   1  -2  -1    2.20    3.40 
  -1  -2   1    4.10    3.00 
   1  -2  -1    7.40    4.90 
   1  -2  -1   -1.00    3.70 
   1  -2  -1    8.50    4.20 
  -1  -2   1    3.00    2.70 
   1  -2  -1    6.00    4.20 
   1  -2  -1    7.40    3.80 
   1  -2  -1    3.50    2.90 
   1  -2  -1    9.40    5.50 
  -1  -2   1   -0.50    3.90 
   1  -2  -1    5.90    4.40 
   1  -2  -1    4.30    4.90 
   1  -2  -1    4.30    4.50 
   1  -2  -1   -0.20    3.50 
   1  -2  -1   13.30    5.60 
   1  -2  -1    0.10    3.70 
   1  -2  -1    7.50    4.80 
   1  -2  -1    7.30    3.20 
  -1  -2   1    3.80    3.70 
   1  -2  -1    5.40    5.00 
  -1  -2   1    1.10    5.30 
  -1  -2   1    3.50    3.30 
  -1  -2   1    8.70    4.60 
   1  -2  -1    7.70    3.20 
   1  -2  -1    5.50    4.00 
  -1  -2   1    1.50    4.00 
   1  -2  -1   10.50    4.70 
   1  -2  -1    6.10    3.60 
   1  -2  -1    3.40    3.50 
  -1  -2   1   10.10    4.90 
  -1  -2   1    5.50    5.60 
  -1   2   1    2.90    3.20 
  -1   2   1    5.20    4.70 
   1   2  -1    0.10    3.40 
  -1   2   1   -0.10    3.80 
  -1   2   1    6.50    4.60 
   1   2  -1    5.90    4.10 
   1   2  -1    3.60    4.50 
  -1   2   1    4.60    5.10 
   1   2  -1    6.60    4.10 
   1   2  -1    9.80    3.30 
   1   2  -1    3.90    2.70 
  -1   2   1    4.50    4.10 
   1   2  -1   10.80    5.60 
  -1   2   1    8.70    4.70 
  -1   2   1    4.90    4.20 
  -1   2   1    5.80    5.00 
  -1   2   1   12.50    4.40 
  -1   2   1   13.00    4.90 
   1   2  -1    4.10    4.60 
   1   2  -1    4.80    3.00 
  -1   2   1    1.50    4.40 
   1   2  -1    1.80    4.10 
  -1   2   1    7.90    5.30 
   1   2  -1   11.10    3.80 
  -1   2   1    7.60    4.40 
   1   2  -1    5.00    3.10 
   1   2  -1    4.30    4.40 
  -1   2   1   13.90    6.10 
  -1   2   1    3.10    3.50 
  -1   2   1    3.20    3.10 
  -1   2   1    3.00    3.50 
  -1   2   1    1.60    3.80 
  -1   2   1    5.60    4.10 
   1   2  -1    2.50    2.90 
  -1   2   1   12.60    5.30 
  -1   2   1    4.10    4.50 
   1   2  -1    9.70    4.30 
  -1   2   1    2.60    3.00 
  -1   2   1    1.10    4.20 
  -1   2   1    6.40    4.50 
   1   2  -1    8.70    2.70 
   1   2  -1    1.80    2.90 
  -1   2   1    3.80    4.50 
   1   2  -1    3.40    2.90 
   1   2  -1    4.90    4.20 
  -1   2   1    5.30    4.20 
   1   2  -1    4.30    4.00 
   1   2  -1    7.00    3.40 
  -1   2   1    3.30    2.80 
   0  -2  -1   20.60    6.50 
   0  -2   1   16.80    6.30 
   0  -2  -1   22.30    5.80 
   0  -2  -1   12.60    5.50 
   0  -2   1   17.70    4.20 
   0  -2   1   20.60    5.80 
   0  -2  -1   20.10    4.50 
   0  -2   1   14.00    5.10 
   0  -2  -1   12.70    4.20 
   0  -2   1   16.70    5.80 
   0  -2  -1   17.40    6.00 
   0  -2  -1   14.60    5.60 
   0  -2   1   19.10    3.30 
   0  -2  -1   21.60    4.40 
   0  -2  -1   19.30    6.40 
   0  -2   1   17.20    7.00 
   0  -2  -1   19.50    5.50 
   0  -2  -1   25.20    6.70 
   0  -2  -1   20.00    4.70 
   0  -2   1   10.40    5.20 
   0  -2  -1   18.40    3.70 
   0  -2  -1   15.60    7.60 
   0  -2   1    6.50    5.50 
   0  -2  -1   13.30    5.60 
   0  -2  -1   14.80    6.40 
   0  -2   1   19.10    4.20 
   0  -2  -1   21.30    3.80 
   0  -2   1   13.20    5.60 
   0  -2   1   22.20    6.50 
   0  -2  -1   17.90    9.30 
   0  -2   1   16.90    3.90 
   0  -2   1   18.50    6.10 
   0  -2   1   23.40    5.10 
   0  -2   1   16.10    7.10 
   0  -2  -1   13.20    5.20 
   0  -2  -1   18.70    3.50 
   0  -2   1   18.40    4.20 
   0  -2   1   23.20    6.10 
   0  -2   1   15.20    2.90 
   0  -2  -1   21.60    4.90 
   0  -2   1   14.60    5.80 
   0  -2   1   20.40    5.90 
   0  -2   1   17.90    7.30 
   0  -2   1   28.30    5.80 
   0  -2   1   21.60    6.10 
   0  -2   1   26.50    6.90 
   0  -2  -1   17.10    6.00 
   0   2   1   18.20    5.40 
   0   2   1   15.40    5.30 
   0   2  -1   14.80    4.60 
   0   2   1   14.90    3.60 
   0   2   1   22.10    4.40 
   0   2  -1    9.90    3.70 
   0   2  -1   18.50    5.90 
   0   2  -1   17.60    5.60 
   0   2   1   20.90    5.90 
   0   2  -1   16.50    5.60 
   0   2  -1   19.00    2.70 
   0   2  -1   19.70    4.30 
   0   2   1   18.60    3.10 
   0   2  -1   20.20    4.20 
   0   2  -1   19.40    4.60 
   0   2  -1   16.90    5.50 
   0   2   1   16.80    4.40 
   0   2   1   22.30    5.80 
   0   2  -1   18.30    5.70 
   0   2  -1   16.80    5.30 
   0   2   1   25.80    6.40 
   0   2  -1   17.20    5.70 
   0   2   1   15.00    5.80 
   0   2   1   15.50    4.90 
   0   2  -1   18.30    5.70 
   0   2  -1   13.90    3.60 
   0   2  -1   17.20    4.90 
   0   2  -1   22.50    5.80 
   0   2   1   19.40    6.40 
   0   2  -1   13.40    5.70 
   0   2  -1   20.00    2.90 
   0   2  -1   17.70    5.80 
   0   2   1    3.80    6.70 
   0   2   1   18.10    2.90 
   0   2  -1   17.00    4.70 
   0   2   1   10.80    5.30 
   0   2   1    8.60    5.20 
   0   2   1   20.80    5.60 
   0   2   1   24.60    5.70 
   0   2   1   14.20    3.10 
   0   2  -1   22.10    6.40 
   0   2   1   20.90    5.70 
   0   2   1   20.90    4.60 
   0   2  -1   14.10    4.80 
   0   2   1   18.70    4.60 
   0   2   1   26.20    6.10 
   0   2  -1   13.80    3.90 
   0   2   1   19.60    5.60 
   0   2  -1   26.80    6.50 
   0   2  -1   17.00    3.90 
   0   2   1   13.90    4.10 
   0   2   1   13.10    5.20 
   0   2  -1   17.90    5.40 
   1  -2   1 1270.27   72.19 
   1  -2   1 1311.97   71.09 
   1  -2   1 1218.58   71.59 
  -1  -2  -1 1251.97   71.89 
   1  -2   1 1264.97   72.09 
  -1  -2  -1 1290.77   71.49 
  -1  -2  -1 1248.28   67.69 
   1  -2   1 1296.67   68.99 
   1  -2   1 1299.17   69.39 
   1  -2   1 1270.97   70.09 
   1  -2   1 1262.27   71.19 
   1  -2   1 1222.48   71.29 
  -1  -2  -1 1345.67   71.79 
  -1  -2  -1 1254.77   68.19 
  -1  -2  -1 1227.98   69.09 
   1  -2   1 1249.47   71.19 
  -1  -2  -1 1253.27   72.69 
   1  -2   1 1228.18   70.59 
   1  -2   1 1345.07   71.89 
   1  -2   1 1286.77   72.49 
   1  -2   1 1194.38   69.69 
   1  -2   1 1243.48   70.89 
   1  -2   1 1214.68   68.69 
   1  -2   1 1292.57   72.99 
   1  -2   1 1181.68   68.69 
   1  -2   1 1315.27   71.99 
   1  -2   1 1203.68   71.29 
   1  -2   1 1305.37   72.09 
  -1  -2  -1 1288.67   67.19 
  -1  -2  -1 1356.26   70.09 
  -1  -2  -1 1309.87   68.19 
  -1  -2  -1 1274.67   71.19 
   1  -2   1 1290.67   72.89 
  -1  -2  -1 1298.67   71.89 
  -1  -2  -1 1244.28   71.29 
   1  -2   1 1246.88   72.59 
   1  -2   1 1279.17   69.49 
   1  -2   1 1274.27   70.39 
   1  -2   1 1226.58   72.79 
  -1  -2  -1 1256.27   70.79 
  -1  -2  -1 1215.88   72.39 
   1  -2   1 1265.47   72.69 
   1  -2   1 1174.38   68.29 
  -1  -2  -1 1235.08   71.39 
   1  -2   1 1331.37   71.99 
  -1   2  -1 1223.18   68.79 
   1   2   1 1263.77   72.09 
   1   2   1 1225.48   67.79 
  -1   2  -1 1244.88   71.19 
  -1   2  -1 1273.17   68.69 
   1   2   1 1310.57   68.19 
   1   2   1 1292.17   68.59 
   1   2   1 1280.57   67.49 
   1   2   1 1281.57   71.59 
   1   2   1 1286.77   69.39 
   1   2   1 1250.37   71.29 
  -1   2  -1 1276.17   71.59 
  -1   2  -1 1214.58   72.39 
  -1   2  -1 1176.48   68.69 
   1   2   1 1266.77   71.49 
  -1   2  -1 1251.67   69.99 
   1   2   1 1251.27   71.19 
  -1   2  -1 1327.87   70.79 
   1   2   1 1219.08   67.49 
   1   2   1 1216.78   72.39 
  -1   2  -1 1267.27   72.49 
  -1   2  -1 1299.17   71.99 
   1   2   1 1220.48   68.29 
   1   2   1 1233.28   67.89 
  -1   2  -1 1225.68   71.29 
  -1   2  -1 1298.37   71.99 
   1   2   1 1315.17   71.09 
   1   2   1 1181.38   70.79 
  -1   2  -1 1248.58   68.79 
   1   2   1 1250.57   67.89 
  -1   2  -1 1291.57   71.99 
  -1   2  -1 1251.57   69.59 
   1   2   1 1271.07   68.29 
   1   2   1 1255.17   67.29 
  -1   2  -1 1257.97   70.79 
  -1   2  -1 1266.87   69.99 
  -1   2  -1 1237.08   71.39 
  -1   2  -1 1260.77   71.39 
  -1   2  -1 1244.48   70.99 
  -1   2  -1 1273.87   71.69 
  -1   2  -1 1243.18   72.89 
  -1   2  -1 1183.78   70.79 
   1   2   1 1257.87   67.79 
  -1   2  -1 1234.48   71.79 
   1   2   1 1291.77   71.99 
  -1   2  -1 1283.07   72.49 
  -1   2  -1 1240.58   72.69 
   1   2   1 1190.38   69.79 
   1   2   1 1270.07   72.09 
  -1   2  -1 1224.68   72.09 
  -1   2  -1 1295.27   72.29 
   1   2   1 1303.77   67.19 
   1   2   1 1238.88   71.19 
  -1   2  -1 1179.78   72.19 
   1   2   1 1302.47   72.69 
  -1   2  -1 1274.97   71.09 
   2  -2   1   82.19   11.60 
   2  -2   1   83.19   11.50 
   2  -2   1   87.59   11.50 
   2  -2   1  102.59   11.80 
  -2  -2  -1   82.29   10.40 
   2  -2   1   89.99   11.30 
   2  -2   1   84.59   11.10 
   2  -2   1  117.29   15.10 
  -2  -2  -1   85.49    9.10 
   2  -2   1   96.69   12.10 
   2  -2   1   92.59   13.90 
  -2  -2  -1   82.99   12.10 
  -2  -2  -1  120.59   13.40 
   2  -2   1   85.49   11.30 
   2  -2   1   72.19   11.20 
   2  -2   1   84.79   11.50 
  -2  -2  -1   87.49   12.40 
   2  -2   1  107.79   13.40 
   2  -2   1  107.69   21.80 
   2  -2   1   71.89   12.10 
   2  -2   1   66.39   11.50 
   2  -2   1   81.79   12.10 
  -2  -2  -1   93.79   12.60 
   2  -2   1   52.99   11.50 
   2  -2   1  104.59   14.30 
  -2  -2  -1   96.19   11.30 
  -2  -2  -1   87.09   10.60 
  -2  -2  -1   82.39    9.40 
  -2  -2  -1   80.09    8.70 
   2  -2   1  106.69   13.60 
  -2  -2  -1   90.39   11.20 
   2  -2   1   79.59   11.80 
   2  -2   1   87.09   14.80 
   2  -2   1   75.99   11.90 
  -2  -2  -1   96.29   11.00 
   2  -2   1   94.49   13.20 
   2  -2   1   60.19   10.90 
   2  -2   1   83.19   10.90 
  -2  -2  -1  127.89   14.60 
  -2  -2  -1   89.49   11.40 
   2  -2   1   80.29   12.10 
   2  -2   1   99.19   13.50 
   2  -2   1   60.89   11.70 
  -2  -2  -1  103.19   12.80 
  -2  -2  -1  101.49   11.80 
   2   2   1   86.89   10.80 
  -2   2  -1  108.49   13.30 
  -2   2  -1  105.89   14.30 
   2   2   1  110.19   12.90 
   2   2   1   92.69   11.20 
   2   2   1  117.29   13.60 
   2   2   1  114.99   13.70 
  -2   2  -1   84.89   13.20 
   2   2   1   82.39   10.30 
   2   2   1   91.19    6.70 
   2   2   1   85.89   10.50 
   2   2   1   89.99    7.80 
   2   2   1   96.59   12.60 
  -2   2  -1   98.49   12.50 
  -2   2  -1  122.49   14.60 
   2   2   1  112.29   11.50 
  -2   2  -1   99.69   12.00 
  -2   2  -1   73.99   11.80 
   2   2   1   88.99   10.90 
   2   2   1   83.59   12.70 
  -2   2  -1   84.59   13.40 
  -2   2  -1   66.59   10.80 
   2   2   1  108.39   10.50 
   2   2   1  105.59   12.50 
   2   2   1   85.29   12.40 
  -2   2  -1   95.29   12.60 
  -2   2  -1  102.89   14.50 
  -2   2  -1   77.29   12.40 
   2   2   1   99.19   11.60 
   2   2   1  112.19   13.30 
  -2   2  -1  101.09   14.00 
  -2   2  -1   91.09   12.20 
   2   2   1  127.29   13.10 
   2   2   1   85.59    9.10 
   2   2   1  111.49   13.30 
   2   2   1  115.99   14.70 
  -2   2  -1  110.09   13.20 
  -2   2  -1  102.19   12.80 
  -2   2  -1   87.29   12.10 
  -2   2  -1  108.49   14.90 
   2   2   1   94.39    9.90 
  -2   2  -1  106.89   14.50 
   2   2   1  104.79   12.70 
   2   2   1  108.99   12.20 
   2   2   1   80.89   10.50 
  -2   2  -1   94.49   11.50 
  -2   2  -1   82.99   12.50 
   2   2   1  120.99   11.40 
  -2   2  -1  114.49   13.70 
  -2   2  -1  112.29   12.10 
  -2   2  -1   92.49   14.10 
   2   2   1  105.79   12.00 
   2   2   1   85.89    8.90 
   2   2   1   88.09   12.60 
  -2   2  -1  102.79   14.60 
  -3  -2  -1    0.20    3.10 
   3  -2   1    5.90    6.40 
   3  -2   1    1.10    6.50 
  -3  -2  -1   -3.20    4.40 
  -3  -2  -1   -1.10    4.20 
   3  -2   1   20.30    7.50 
  -3  -2  -1   -1.30    4.10 
   3  -2   1   -0.60    7.00 
  -3  -2  -1    6.50    4.20 
  -3  -2  -1    5.10    5.90 
   3  -2   1   10.60    7.30 
   3  -2   1    4.70    6.70 
   3  -2   1   13.20    6.10 
  -3  -2  -1   -1.40    4.90 
   3  -2   1    5.00    4.50 
  -3  -2  -1    1.00    5.10 
   3  -2   1    4.30    6.40 
   3  -2   1    9.10    5.60 
  -3  -2  -1   -3.00    4.10 
  -3  -2  -1    4.50    5.20 
  -3  -2  -1   10.80    6.70 
   3  -2   1    7.60    5.30 
   3  -2   1    8.20    6.90 
   3  -2   1    3.00    4.10 
  -3  -2  -1   10.70    6.60 
   3  -2   1   -4.20    5.50 
   3  -2   1   -0.20    4.70 
  -3  -2  -1    7.10    4.10 
  -3  -2  -1    5.60    6.20 
  -3  -2  -1    7.90    5.30 
   3  -2   1    7.30    5.00 
   3  -2   1    9.70    6.80 
   3  -2   1    5.20    5.70 
   3   2   1    1.50    4.40 
  -3   2  -1   -0.80    5.30 
   3   2   1    3.30    5.00 
   3   2   1    6.70    7.60 
   3   2   1    0.00    3.40 
  -3   2  -1   12.50    7.60 
   3   2   1    7.60    5.00 
  -3   2  -1    8.10    6.20 
   3   2   1    1.30    5.60 
   3   2   1    4.80    5.50 
   3   2   1    7.90    5.40 
   3   2   1    1.10    4.40 
   3   2   1    1.40    4.00 
  -3   2  -1    7.20    4.80 
   3   2   1    6.90    4.60 
  -3   2  -1    1.40    4.50 
  -3   2  -1   17.30    7.40 
   3   2   1    0.20    4.40 
  -3   2  -1    9.10    5.20 
  -3   2  -1   -5.60    5.50 
   3   2   1   12.60    6.70 
  -3   2  -1    5.00    6.90 
   3   2   1   10.40    5.50 
   3   2   1    4.60    6.20 
  -3   2  -1    1.60    3.70 
   3   2   1    3.00    5.30 
   3   2   1    1.90    3.10 
   3   2   1    3.90    5.40 
   3   2   1    2.50    2.70 
   3   2   1    7.90    3.60 
   3   2   1   10.40    5.90 
  -3   2  -1    6.20    6.40 
  -3   2  -1    5.70    4.80 
   3   2   1   15.40    5.10 
  -3   2  -1    4.70    6.10 
  -3   2  -1    4.60    6.50 
   3   2   1    9.00    4.40 
  -3   2  -1   14.40    6.60 
  -3   2  -1    6.50    5.00 
  -3   2  -1    1.90    5.60 
  -3   2  -1    8.60    6.70 
   3   2   1    4.50    4.10 
   3   2   1    0.00    4.70 
  -3   2  -1   -2.30    3.40 
   3   2   1   -0.30    4.40 
   3   2   1    6.50    4.40 
  -4  -2  -1   59.39   14.20 
   4  -2   1   57.99   13.30 
   4  -2   1   46.00   12.60 
  -4  -2  -1   71.99   15.30 
  -4  -2  -1   58.99   13.10 
  -4  -2  -1   68.39   13.60 
   4  -2   1   65.09    9.50 
   4  -2   1   51.89   13.80 
  -4  -2  -1   62.49   12.00 
   4  -2   1   49.60   12.90 
   4  -2   1   63.49   11.70 
   4  -2   1   58.39   13.10 
  -4  -2  -1   52.19    9.80 
   4  -2   1   58.99   11.00 
   4  -2   1   46.70   10.20 
  -4  -2  -1   83.79   16.60 
   4  -2   1   34.90   12.10 
  -4  -2  -1   57.39    7.30 
   4  -2   1   48.50   14.20 
   4  -2   1   52.09   13.80 
  -4  -2  -1   44.80   11.80 
  -4  -2  -1   48.40   12.00 
  -4  -2  -1   67.89   12.10 
   4  -2   1   68.39   10.70 
  -4  -2  -1   59.49    7.70 
  -4  -2  -1   71.59   13.20 
   4  -2   1   37.80   12.00 
  -4  -2  -1   80.09   11.50 
   4  -2   1   69.09   12.80 
  -4  -2  -1   76.79   14.70 
  -4   2  -1   57.49    9.40 
  -4   2  -1   48.20   10.40 
  -4   2  -1   57.99    9.70 
   4   2   1   55.09   11.10 
  -4   2  -1   47.50   12.20 
  -4   2  -1   43.90   12.50 
   4   2   1   91.29   17.00 
   4   2   1   71.69    7.30 
   4   2   1   64.79   10.30 
  -4   2  -1   71.89   15.10 
  -4   2  -1   66.49   12.40 
  -4   2  -1   73.19   11.50 
  -4   2  -1   44.30   12.70 
   4   2   1   64.29   12.90 
  -4   2  -1   68.89   13.70 
   4   2   1   67.09    8.00 
   4   2   1   48.70   13.60 
   4   2   1   74.99   11.90 
   4   2   1   62.99   12.60 
  -4   2  -1   38.30   12.90 
   4   2   1   68.49   10.60 
   4   2   1   58.39    6.70 
   4   2   1   73.79   12.40 
  -4   2  -1   57.39   13.40 
   4   2   1   37.00   10.00 
   4   2   1   64.99    7.30 
   4   2   1   68.99   12.30 
  -4   2  -1   56.09   12.40 
   4   2   1   72.09   10.10 
   4   2   1   64.99   13.30 
  -4   2  -1   66.39   15.00 
   4   2   1   68.49   14.00 
  -4   2  -1   75.49   17.10 
  -4   2  -1   45.50   12.80 
   4   2   1   54.99    8.70 
   4   2   1   48.40   10.90 
   4   2   1   81.79   10.30 
   4   2   1   50.19   12.40 
  -4   2  -1  104.89   17.60 
  -4   2  -1   65.69    8.60 
  -4   2  -1   65.89    8.80 
   5  -2   1   95.29   11.60 
  -5  -2  -1   94.89   14.60 
  -5  -2  -1  109.89   17.80 
  -5  -2  -1   98.29   18.90 
   5  -2   1  124.39   14.30 
   5  -2   1   81.99   17.20 
   5  -2   1   98.29   19.30 
   5  -2   1   94.09   18.90 
  -5  -2  -1   87.59   18.30 
   5  -2   1   74.69   17.30 
  -5  -2  -1  131.09   20.00 
   5  -2   1   92.39   13.60 
  -5  -2  -1   62.89   15.20 
   5  -2   1   89.69   14.20 
   5  -2   1  115.09   20.50 
   5  -2   1  108.99   19.20 
  -5  -2  -1   73.99   16.10 
   5  -2   1   81.39   18.60 
  -5  -2  -1   68.69   17.60 
   5  -2   1  124.69   20.20 
   5  -2   1   96.89   18.00 
   5  -2   1   81.29   17.60 
  -5  -2  -1   81.09   15.20 
  -5  -2  -1   75.39   17.80 
  -5  -2  -1  106.49   16.30 
  -5  -2  -1   85.79   18.60 
  -5   2  -1  102.09   12.70 
   5   2   1  113.09   14.10 
   5   2   1   85.09   11.10 
  -5   2  -1  101.09    9.30 
  -5   2  -1  105.19   15.10 
  -5   2  -1   89.49    8.70 
   5   2   1   95.39   11.60 
  -5   2  -1  102.89   19.80 
   5   2   1  100.89   18.80 
  -5   2  -1  120.39   19.40 
   5   2   1  101.99   11.60 
  -5   2  -1   89.49   13.10 
   5   2   1   74.99   16.70 
  -5   2  -1   83.09   18.20 
  -5   2  -1   69.29   16.80 
   5   2   1  109.39   17.50 
  -5   2  -1   88.29   12.90 
  -5   2  -1   92.19   18.70 
   5   2   1   59.39   14.60 
  -5   2  -1   94.39   19.20 
  -5   2  -1   75.79   14.00 
  -5   2  -1  100.09   19.80 
   5   2   1  103.79   11.80 
   5   2   1   39.20   14.70 
  -5   2  -1  140.49   23.70 
   5   2   1  119.59   17.20 
  -5   2  -1   98.79   19.60 
  -5   2  -1   84.69   17.20 
   5   2   1   98.39   12.40 
  -5   2  -1   81.79   17.70 
   5   2   1   92.59   12.60 
   5   2   1  123.89   21.50 
   5   2   1   59.49   11.80 
   5   2   1  109.59   13.20 
  -5   2  -1  112.19   17.80 
   5   2   1  106.49   18.70 
   5   2   1   95.39   20.00 
   6  -2   1  365.16   43.50 
   6  -2   1  462.25   47.70 
   6  -2   1  448.46   49.50 
   6  -2   1  411.96   43.70 
   6  -2   1  440.76   46.60 
  -6  -2  -1  438.76   35.60 
  -6  -2  -1  467.45   35.70 
  -6  -2  -1  384.76   41.70 
  -6  -2  -1  452.05   47.90 
  -6  -2  -1  448.76   38.60 
   6  -2   1  436.66   27.20 
  -6  -2  -1  405.16   45.30 
  -6  -2  -1  427.66   36.80 
   6  -2   1  437.06   32.90 
  -6  -2  -1  472.65   49.70 
   6  -2   1  456.25   46.30 
  -6  -2  -1  543.45   42.10 
   6  -2   1  412.96   44.40 
   6  -2   1  435.86   42.90 
   6  -2   1  426.66   30.90 
   6  -2   1  401.06   42.80 
  -6  -2  -1  438.06   45.50 
   6  -2   1  460.05   31.70 
   6  -2   1  418.16   45.10 
  -6   2  -1  517.85   39.80 
   6   2   1  451.85   42.80 
  -6   2  -1  398.86   44.70 
  -6   2  -1  437.36   34.30 
   6   2   1  424.06   27.10 
   6   2   1  389.16   34.30 
  -6   2  -1  400.66   33.40 
   6   2   1  485.85   48.40 
  -6   2  -1  443.46   47.90 
   6   2   1  462.75   32.60 
  -6   2  -1  434.36   37.40 
   6   2   1  418.56   31.20 
   6   2   1  437.06   28.90 
   6   2   1  443.96   27.90 
  -6   2  -1  516.85   49.90 
  -6   2  -1  513.65   51.49 
   6   2   1  374.46   44.30 
  -6   2  -1  391.76   45.10 
   6   2   1  439.66   47.30 
   6   2   1  451.95   37.70 
   6   2   1  477.25   29.40 
  -6   2  -1  460.35   46.20 
   6   2   1  478.65   47.20 
  -6   2  -1  438.76   27.60 
   6   2   1  394.96   43.00 
  -6   2  -1  386.76   44.30 
  -6   2  -1  367.26   43.50 
  -6   2  -1  397.26   31.00 
   6   2   1  453.05   34.60 
   6   2   1  428.36   43.80 
   6   2   1  487.85   48.60 
  -7  -2  -1  749.53   60.29 
   7  -2   1  784.62   62.99 
   7  -2   1  699.83   58.69 
  -7  -2  -1  688.23   57.69 
   7  -2   1  739.23   59.69 
   7  -2   1  651.53   66.89 
   7  -2   1  789.02   61.39 
   7  -2   1  696.03   61.49 
  -7  -2  -1  750.02   62.59 
   7  -2   1  767.82   59.39 
  -7  -2  -1  781.12   60.59 
  -7  -2  -1  693.43   59.59 
  -7  -2  -1  729.73   51.99 
   7  -2   1  681.73   66.69 
  -7  -2  -1  742.03   55.79 
  -7  -2  -1  771.12   57.29 
   7  -2   1  753.92   48.60 
   7  -2   1  671.23   56.59 
  -7  -2  -1  730.03   53.99 
   7  -2   1  774.62   62.49 
   7  -2   1  602.44   59.79 
   7  -2   1  649.24   58.09 
  -7  -2  -1  774.32   62.09 
   7   2   1  687.13   58.29 
   7   2   1  689.13   62.19 
  -7   2  -1  659.63   60.29 
  -7   2  -1  700.73   60.09 
   7   2   1  839.42   58.59 
  -7   2  -1  758.72   53.69 
   7   2   1  730.03   50.09 
  -7   2  -1  731.83   55.79 
   7   2   1  694.23   59.39 
   7   2   1  729.43   57.39 
   7   2   1  607.54   56.29 
  -7   2  -1  692.93   59.89 
   7   2   1  800.42   63.09 
   7   2   1  752.02   58.09 
  -7   2  -1  757.82   62.79 
   7   2   1  782.82   53.59 
  -7   2  -1  716.83   60.99 
  -7   2  -1  763.22   59.79 
  -7   2  -1  665.53   59.69 
  -7   2  -1  576.64   62.89 
   7   2   1  735.63   60.39 
   7   2   1  829.42   61.39 
  -7   2  -1  718.03   50.29 
   8  -2   1  121.59   27.90 
  -8  -2  -1  123.39   24.40 
  -8  -2  -1  121.99   29.50 
   8  -2   1  164.28   31.70 
   8  -2   1  137.99   30.20 
   8  -2   1  112.39   29.00 
  -8  -2  -1  114.09   27.80 
  -8  -2  -1  120.69   27.10 
  -8  -2  -1  121.49   27.50 
   8  -2   1  117.69   26.00 
   8  -2   1  118.29   28.20 
   8  -2   1  149.09   29.40 
  -8  -2  -1  130.99   26.50 
  -8  -2  -1  125.79   29.30 
   8  -2   1  114.29   26.90 
   8  -2   1  116.99   25.20 
  -8  -2  -1  102.09   25.80 
   8  -2   1  138.49   28.50 
  -8  -2  -1  158.48   25.80 
   8  -2   1   98.79   28.40 
   8  -2   1  108.89   25.40 
  -8   2  -1  101.09   28.00 
  -8   2  -1  103.19   27.00 
   8   2   1  123.29   28.60 
   8   2   1  153.08   30.80 
  -8   2  -1  103.89   26.60 
  -8   2  -1  118.09   20.40 
   8   2   1  121.49   27.60 
  -8   2  -1  142.19   25.50 
  -8   2  -1   75.29   22.70 
  -8   2  -1  159.18   33.70 
   8   2   1  161.88   28.30 
   8   2   1   91.39   25.10 
   8   2   1   82.29   24.00 
  -8   2  -1  127.29   30.80 
   8   2   1  126.39   22.60 
  -8   2  -1   97.99   24.90 
   8   2   1  112.09   25.70 
   8   2   1  175.58   33.90 
   8   2   1  165.78   30.40 
   8   2   1  155.68   32.50 
   8   2   1  135.39   30.50 
  -8   2  -1  148.39   30.70 
   9  -2   1  177.28   36.20 
   9  -2   1  181.38   38.10 
  -9  -2  -1  222.58   37.30 
   9  -2   1  151.58   33.30 
  -9  -2  -1  207.08   36.80 
  -9  -2  -1  235.78   34.70 
  -9  -2  -1  161.28   33.00 
   9  -2   1  187.68   35.60 
   9  -2   1  217.08   39.20 
   9  -2   1  173.78   34.00 
   9  -2   1  190.08   39.80 
  -9  -2  -1  160.28   35.40 
  -9  -2  -1  220.68   38.30 
   9  -2   1  167.18   35.90 
   9  -2   1  177.68   33.80 
  -9  -2  -1  146.89   36.30 
  -9  -2  -1  197.18   33.20 
   9  -2   1  283.27   46.40 
   9  -2   1  158.58   31.90 
   9  -2   1  185.58   37.20 
   9   2   1  217.08   36.10 
  -9   2  -1  160.78   34.20 
   9   2   1  187.08   37.30 
   9   2   1  195.38   37.20 
   9   2   1  139.69   30.20 
   9   2   1  233.18   40.30 
   9   2   1  247.48   38.60 
  -9   2  -1  210.28   38.70 
   9   2   1  257.47   42.30 
   9   2   1  204.58   38.60 
   9   2   1  135.09   34.00 
   9   2   1  216.88   37.60 
  -9   2  -1  230.08   42.20 
  -9   2  -1  209.98   39.50 
  -9   2  -1  154.68   33.60 
  -9   2  -1  194.18   37.50 
  -9   2  -1  156.38   37.30 
  -9   2  -1  189.58   36.30 
  10  -2   1    0.20   21.50 
  10  -2   1   -1.00   21.00 
 -10  -2  -1   36.20   24.10 
  10  -2   1   -9.90   14.50 
  10  -2   1   14.60   19.10 
  10  -2   1   -3.50   16.90 
  10  -2   1   51.89   22.50 
 -10  -2  -1    0.00   18.80 
  10  -2   1   41.10   20.90 
  10  -2   1   69.29   30.40 
 -10  -2  -1   42.10   26.00 
 -10  -2  -1   32.00   21.50 
  10  -2   1   13.40   20.90 
 -10  -2  -1   37.80   24.80 
  10  -2   1   36.60   24.80 
  10  -2   1   10.00   19.70 
  10   2   1   30.70   22.00 
 -10   2  -1   34.00   21.30 
 -10   2  -1   36.70   21.40 
 -10   2  -1   70.59   30.70 
 -10   2  -1   21.40   21.30 
  10   2   1   50.49   27.00 
  10   2   1   34.30   23.50 
  10   2   1   29.90   20.20 
 -10   2  -1   29.80   21.40 
  10   2   1   24.90   20.80 
 -10   2  -1   40.50   21.80 
 -10   2  -1   -2.70   18.50 
  10   2   1   30.10   22.50 
  10   2   1    9.70   20.80 
  10   2   1   12.70   17.30 
 -10   2  -1   38.30   24.70 
  10   2   1   42.90   28.00 
  10   2   1   16.40   19.30 
  10   2   1   16.60   21.20 
  10  -3  -1  288.37   52.69 
  10  -3  -1  252.97   47.00 
  10  -3  -1  230.88   42.30 
  10  -3  -1  236.88   43.30 
  10  -3  -1  285.07   47.80 
 -10  -3   1  247.18   45.00 
  10  -3  -1  261.17   49.30 
  10  -3  -1  254.57   47.30 
  10  -3  -1  312.07   50.49 
  10  -3  -1  234.28   46.10 
  10  -3  -1  281.97   51.79 
  10  -3  -1  250.17   46.80 
 -10  -3   1  311.57   50.39 
 -10  -3   1  282.47   48.40 
 -10   3   1  249.48   45.70 
  10   3  -1  270.17   43.20 
  10   3  -1  348.97   54.19 
  10   3  -1  288.77   49.10 
 -10   3   1  281.27   52.79 
  10   3  -1  273.97   43.70 
 -10   3   1  375.66   52.49 
  10   3  -1  290.47   52.29 
  10   3  -1  257.27   45.50 
  10   3  -1  325.67   51.39 
 -10   3   1  241.88   44.50 
  10   3  -1  266.67   49.40 
  10   3  -1  287.47   49.10 
  10   3  -1  317.07   49.00 
 -10   3   1  257.37   45.70 
 -10   3   1  303.17   50.49 
 -10   3   1  291.77   49.99 
  -9  -3   1  255.27   41.30 
   9  -3  -1  253.37   43.20 
  -9  -3   1  187.98   37.20 
   9  -3  -1  218.08   38.40 
  -9  -3   1  209.78   35.10 
   9  -3  -1  273.17   41.30 
  -9  -3   1  196.88   37.80 
  -9  -3   1  230.68   43.60 
   9  -3  -1  219.68   39.30 
   9  -3  -1  146.79   37.00 
   9  -3  -1  221.38   36.30 
   9  -3  -1  234.88   41.90 
   9  -3  -1  184.78   36.90 
   9  -3  -1  228.48   40.30 
   9  -3  -1  188.68   37.00 
   9  -3  -1  143.49   35.90 
   9   3  -1  229.88   34.60 
   9   3  -1  231.88   42.10 
  -9   3   1  157.88   35.60 
   9   3  -1  198.48   40.20 
  -9   3   1  215.18   40.10 
  -9   3   1  219.18   41.20 
   9   3  -1  198.88   36.60 
  -9   3   1  157.48   35.50 
   9   3  -1  244.98   40.00 
   9   3  -1  244.78   41.00 
   9   3  -1  254.67   43.90 
  -9   3   1  156.88   34.90 
  -9   3   1  293.47   45.70 
   9   3  -1  215.28   40.10 
   9   3  -1  213.08   40.10 
  -9   3   1  177.08   37.90 
   9   3  -1  205.98   35.10 
   9   3  -1  178.48   32.90 
   8  -3  -1   52.79   21.20 
   8  -3  -1  148.19   30.80 
  -8  -3   1  145.89   26.00 
  -8  -3   1  135.39   25.80 
  -8  -3   1   99.29   26.70 
   8  -3  -1  149.39   32.80 
  -8  -3   1  176.78   30.20 
   8  -3  -1  111.39   26.80 
  -8  -3   1  144.29   29.70 
   8  -3  -1  138.19   29.50 
   8  -3  -1  162.08   31.00 
  -8  -3   1  131.19   30.20 
   8  -3  -1  133.89   30.80 
   8  -3  -1  152.68   31.70 
   8  -3  -1  150.68   30.60 
  -8  -3   1  107.49   26.90 
  -8  -3   1  123.79   23.10 
  -8  -3   1  194.98   33.60 
   8  -3  -1  170.08   35.80 
   8   3  -1  108.89   26.40 
  -8   3   1  149.39   32.20 
  -8   3   1  127.89   30.60 
   8   3  -1  124.39   29.20 
   8   3  -1  156.38   30.40 
  -8   3   1  193.38   35.70 
  -8   3   1  135.89   26.10 
   8   3  -1  118.49   24.50 
  -8   3   1   88.29   25.00 
   8   3  -1  144.09   27.10 
  -8   3   1  173.48   35.20 
  -8   3   1  116.59   28.10 
   8   3  -1  150.58   28.40 
   8   3  -1   89.29   24.70 
  -8   3   1  201.08   35.30 
   8   3  -1  188.38   35.20 
   8   3  -1  169.88   30.70 
   8   3  -1  158.28   32.50 
  -8   3   1  134.89   31.10 
  -8   3   1  167.18   27.30 
  -7  -3   1  177.68   30.60 
  -7  -3   1  232.58   28.80 
   7  -3  -1  222.08   35.10 
   7  -3  -1  250.37   27.70 
   7  -3  -1  159.38   29.50 
   7  -3  -1  217.58   34.40 
  -7  -3   1  200.78   29.90 
   7  -3  -1  235.28   34.20 
  -7  -3   1  222.38   34.20 
   7  -3  -1  156.28   29.00 
   7  -3  -1  198.28   34.00 
   7  -3  -1  147.99   28.70 
  -7  -3   1  194.78   30.90 
  -7  -3   1  238.08   28.10 
   7  -3  -1  201.38   24.50 
  -7  -3   1  207.08   23.20 
   7  -3  -1  203.18   33.20 
   7  -3  -1  241.28   35.10 
  -7  -3   1  286.57   37.30 
   7  -3  -1  192.08   32.20 
  -7  -3   1  182.68   32.20 
   7  -3  -1  197.48   24.40 
   7  -3  -1  176.68   31.00 
   7   3  -1  228.58   31.00 
   7   3  -1  185.28   32.10 
   7   3  -1  174.68   23.00 
   7   3  -1  197.58   32.60 
   7   3  -1  147.69   26.60 
  -7   3   1  265.17   38.30 
  -7   3   1  202.98   32.50 
  -7   3   1  221.58   34.70 
   7   3  -1  213.08   32.80 
  -7   3   1  180.68   31.50 
  -7   3   1  192.38   33.30 
   7   3  -1  239.38   33.90 
   7   3  -1  154.58   28.60 
  -7   3   1  158.08   28.90 
  -7   3   1  255.47   27.20 
  -7   3   1  144.49   28.70 
  -7   3   1  210.58   30.80 
  -7   3   1  231.68   34.50 
  -7   3   1  160.78   28.90 
  -7   3   1  207.58   30.20 
   7   3  -1  209.98   24.40 
   7   3  -1  255.97   35.00 
   7   3  -1  212.68   30.00 
  -7   3   1  235.58   37.70 
   7   3  -1  228.98   33.70 
   6  -3  -1  997.80   76.39 
  -6  -3   1 1129.69   69.49 
  -6  -3   1 1120.79   67.99 
   6  -3  -1 1081.49   60.79 
  -6  -3   1 1070.69   74.49 
  -6  -3   1 1056.59   73.09 
   6  -3  -1 1097.09   75.19 
  -6  -3   1 1087.49   73.69 
   6  -3  -1  976.70   73.19 
  -6  -3   1 1000.60   70.59 
   6  -3  -1 1030.20   75.99 
   6  -3  -1 1063.79   68.39 
   6  -3  -1 1035.00   73.69 
  -6  -3   1 1042.40   65.59 
  -6  -3   1 1175.68   76.59 
  -6  -3   1 1080.79   75.19 
  -6  -3   1 1111.99   70.09 
   6  -3  -1 1051.89   73.69 
   6  -3  -1 1064.29   67.09 
   6  -3  -1 1083.09   75.89 
   6  -3  -1 1169.08   77.79 
   6  -3  -1  975.40   75.79 
   6  -3  -1 1022.00   75.69 
  -6  -3   1 1006.60   74.59 
   6  -3  -1 1214.58   78.69 
  -6  -3   1 1081.29   76.09 
   6  -3  -1 1059.09   67.99 
   6   3  -1  910.71   71.39 
  -6   3   1 1041.90   73.49 
  -6   3   1  991.10   71.49 
   6   3  -1 1135.29   63.29 
   6   3  -1 1039.30   64.99 
   6   3  -1 1189.98   77.39 
  -6   3   1 1037.50   61.39 
   6   3  -1 1101.29   70.49 
   6   3  -1 1171.28   72.29 
  -6   3   1 1065.79   63.99 
   6   3  -1 1076.19   64.59 
  -6   3   1 1029.40   76.89 
   6   3  -1 1003.40   63.39 
   6   3  -1 1003.00   74.69 
   6   3  -1 1137.29   74.39 
   6   3  -1 1087.49   74.09 
  -6   3   1 1020.10   75.09 
   6   3  -1 1122.29   74.89 
   6   3  -1 1197.58   73.09 
  -6   3   1  883.31   73.49 
   6   3  -1 1068.49   59.79 
  -6   3   1 1028.80   74.69 
  -6   3   1 1059.49   74.79 
   6   3  -1  978.90   63.29 
  -6   3   1  999.50   72.49 
   6   3  -1 1201.08   76.09 
  -6   3   1 1074.09   68.19 
  -6   3   1  992.60   73.69 
  -6   3   1 1035.50   75.19 
  -6   3   1 1083.69   77.29 
   6   3  -1 1035.50   65.59 
  -6   3   1 1119.29   77.49 
   5  -3  -1 1533.75   96.69 
  -5  -3   1 1546.75   97.09 
  -5  -3   1 1641.64   94.89 
   5  -3  -1 1587.34   92.99 
  -5  -3   1 1658.33   91.69 
  -5  -3   1 1517.55   97.29 
  -5  -3   1 1502.55   93.99 
   5  -3  -1 1575.64   88.29 
   5  -3  -1 1695.73  100.29 
   5  -3  -1 1574.64  100.09 
   5  -3  -1 1585.54   99.19 
   5  -3  -1 1618.54   99.09 
  -5  -3   1 1556.64   96.29 
  -5  -3   1 1499.55   97.69 
   5  -3  -1 1640.04  100.49 
   5  -3  -1 1507.45   99.49 
  -5  -3   1 1594.94   92.29 
   5  -3  -1 1534.25   96.89 
  -5  -3   1 1586.54   90.79 
   5  -3  -1 1669.03  101.99 
  -5  -3   1 1620.14   91.59 
  -5  -3   1 1620.14   97.19 
   5  -3  -1 1480.45   96.89 
  -5  -3   1 1600.24   98.69 
   5  -3  -1 1496.45   98.29 
   5  -3  -1 1574.44   93.69 
  -5  -3   1 1597.84   93.39 
   5  -3  -1 1643.24   94.79 
  -5  -3   1 1593.84   97.89 
   5   3  -1 1559.64   96.29 
   5   3  -1 1538.95   96.99 
  -5   3   1 1662.63   93.59 
  -5   3   1 1604.34   98.39 
   5   3  -1 1638.84   88.69 
  -5   3   1 1469.55   99.29 
  -5   3   1 1517.25   88.49 
   5   3  -1 1494.55   87.39 
   5   3  -1 1495.55   94.19 
   5   3  -1 1736.53   94.99 
  -5   3   1 1452.05   87.89 
   5   3  -1 1530.85   92.39 
  -5   3   1 1517.85   99.49 
   5   3  -1 1519.95   91.99 
   5   3  -1 1697.93   90.69 
  -5   3   1 1573.04   98.29 
   5   3  -1 1472.35   85.29 
   5   3  -1 1554.24   93.69 
  -5   3   1 1521.65   88.99 
   5   3  -1 1504.35   89.59 
  -5   3   1 1529.75   98.99 
   5   3  -1 1620.34   98.49 
  -5   3   1 1538.35   99.89 
  -5   3   1 1658.73  100.19 
  -5   3   1 1605.44   99.09 
   5   3  -1 1658.83   93.49 
   5   3  -1 1513.25   92.99 
   5   3  -1 1572.24   97.09 
   5   3  -1 1503.25   97.89 
  -5   3   1 1567.24   98.69 
  -5   3   1 1472.15   98.69 
   5   3  -1 1489.75   95.79 
   5   3  -1 1619.34   89.69 
  -5   3   1 1564.54   90.89 
  -5   3   1 1596.14   96.69 
   5   3  -1 1596.44   90.69 
   5   3  -1 1515.95   89.39 
   5   3  -1 1550.54   86.59 
  -4  -3   1 1348.27   81.99 
  -4  -3   1 1393.36   83.59 
   4  -3  -1 1381.16   81.39 
  -4  -3   1 1480.55   84.59 
   4  -3  -1 1336.07   85.49 
  -4  -3   1 1261.87   81.89 
  -4  -3   1 1316.77   79.99 
  -4  -3   1 1270.17   76.39 
  -4  -3   1 1259.67   81.09 
  -4  -3   1 1357.06   82.99 
   4  -3  -1 1400.46   77.89 
   4  -3  -1 1377.76   82.69 
  -4  -3   1 1333.37   78.89 
  -4  -3   1 1395.06   83.29 
   4  -3  -1 1433.26   83.19 
  -4  -3   1 1396.96   78.69 
   4  -3  -1 1318.97   84.69 
  -4  -3   1 1424.66   80.99 
   4  -3  -1 1315.57   83.79 
   4  -3  -1 1428.26   85.59 
   4  -3  -1 1374.26   82.69 
  -4  -3   1 1362.86   79.99 
   4  -3  -1 1455.45   84.09 
  -4  -3   1 1333.07   80.29 
   4  -3  -1 1415.36   83.79 
   4  -3  -1 1306.17   81.29 
  -4  -3   1 1272.77   79.19 
   4  -3  -1 1519.25   88.09 
  -4  -3   1 1349.56   76.59 
  -4  -3   1 1419.36   81.09 
   4  -3  -1 1310.47   84.79 
   4  -3  -1 1444.16   85.89 
  -4  -3   1 1327.07   80.19 
  -4  -3   1 1358.36   82.09 
   4  -3  -1 1505.55   87.99 
   4   3  -1 1367.16   76.99 
   4   3  -1 1431.76   82.89 
  -4   3   1 1368.96   78.89 
   4   3  -1 1372.86   78.89 
  -4   3   1 1258.87   85.09 
  -4   3   1 1305.17   79.49 
  -4   3   1 1387.26   86.39 
   4   3  -1 1392.16   81.99 
   4   3  -1 1354.46   79.89 
  -4   3   1 1208.58   83.79 
  -4   3   1 1309.77   82.89 
   4   3  -1 1371.66   79.39 
   4   3  -1 1373.36   76.49 
   4   3  -1 1361.06   79.19 
   4   3  -1 1280.37   83.09 
   4   3  -1 1417.06   80.09 
  -4   3   1 1335.47   83.59 
   4   3  -1 1346.47   78.99 
  -4   3   1 1359.76   81.99 
   4   3  -1 1343.67   76.39 
   4   3  -1 1317.27   76.99 
  -4   3   1 1444.86   86.19 
   4   3  -1 1322.27   80.99 
  -4   3   1 1334.77   84.99 
   4   3  -1 1237.58   79.69 
  -4   3   1 1385.96   85.79 
  -4   3   1 1309.77   77.49 
   4   3  -1 1365.56   80.89 
   4   3  -1 1410.66   75.49 
   4   3  -1 1354.26   82.79 
   4   3  -1 1387.96   75.99 
   4   3  -1 1305.17   82.89 
   4   3  -1 1309.17   77.49 
   4   3  -1 1259.67   80.29 
  -4   3   1 1299.87   80.89 
  -4   3   1 1321.77   83.69 
  -4   3   1 1339.77   85.59 
   4   3  -1 1304.67   80.59 
   4   3  -1 1251.77   79.19 
   3  -3  -1 1416.86   79.99 
  -3  -3   1 1416.86   81.49 
  -3  -3   1 1446.46   79.89 
   3  -3  -1 1391.36   84.99 
  -3  -3   1 1399.26   81.29 
  -3  -3   1 1330.67   81.49 
   3  -3  -1 1346.57   80.09 
  -3  -3   1 1469.85   81.99 
   3  -3  -1 1414.66   84.59 
   3  -3  -1 1392.86   81.09 
   3  -3  -1 1354.16   81.59 
  -3  -3   1 1435.16   80.99 
   3  -3  -1 1376.56   86.39 
   3  -3  -1 1391.16   83.79 
  -3  -3   1 1398.86   82.99 
  -3  -3   1 1420.06   79.99 
   3  -3  -1 1370.76   82.49 
   3  -3  -1 1417.06   83.79 
  -3  -3   1 1368.86   79.99 
   3  -3  -1 1405.76   81.89 
  -3  -3   1 1399.56   81.99 
  -3  -3   1 1326.97   78.89 
   3  -3  -1 1391.46   85.99 
   3  -3  -1 1440.86   82.69 
   3  -3  -1 1355.56   84.09 
   3  -3  -1 1425.06   84.39 
  -3  -3   1 1338.67   79.29 
   3  -3  -1 1391.56   82.39 
   3  -3  -1 1319.57   83.49 
  -3  -3   1 1488.45   81.39 
  -3  -3   1 1439.46   80.99 
   3  -3  -1 1373.06   84.09 
  -3  -3   1 1429.86   82.09 
  -3  -3   1 1430.06   81.89 
  -3   3   1 1355.56   85.09 
  -3   3   1 1377.46   80.59 
  -3   3   1 1362.66   82.29 
  -3   3   1 1373.76   81.69 
   3   3  -1 1431.86   82.19 
   3   3  -1 1296.87   80.09 
   3   3  -1 1429.76   76.09 
   3   3  -1 1387.26   80.59 
   3   3  -1 1288.67   80.09 
   3   3  -1 1337.27   80.39 
   3   3  -1 1384.06   81.49 
  -3   3   1 1378.46   83.89 
  -3   3   1 1411.96   81.99 
   3   3  -1 1363.46   80.29 
   3   3  -1 1345.67   80.19 
  -3   3   1 1350.06   80.69 
   3   3  -1 1392.66   77.19 
  -3   3   1 1447.16   84.19 
   3   3  -1 1398.96   81.39 
   3   3  -1 1270.37   78.39 
   3   3  -1 1301.07   78.49 
   3   3  -1 1371.96   80.49 
   3   3  -1 1405.16   80.19 
   3   3  -1 1367.06   80.59 
   3   3  -1 1280.07   78.69 
  -3   3   1 1404.26   85.19 
  -3   3   1 1443.76   85.19 
  -3   3   1 1425.36   84.89 
   3   3  -1 1302.67   81.49 
   3   3  -1 1391.46   81.69 
  -3   3   1 1413.06   82.19 
  -3   3   1 1403.56   85.19 
   3   3  -1 1418.86   80.29 
   3   3  -1 1449.06   78.79 
   3   3  -1 1377.26   74.99 
   2  -3  -1  267.47   26.30 
  -2  -3   1  256.27   20.80 
   2  -3  -1  329.47   23.70 
   2  -3  -1  260.77   21.60 
   2  -3  -1  265.87   23.80 
  -2  -3   1  278.57   19.70 
   2  -3  -1  289.87   31.40 
  -2  -3   1  276.57   24.00 
   2  -3  -1  281.17   23.00 
   2  -3  -1  247.78   19.90 
   2  -3  -1  292.07   22.20 
   2  -3  -1  230.08   25.50 
  -2  -3   1  257.47   22.30 
  -2  -3   1  289.87   23.30 
  -2  -3   1  238.98   20.90 
   2  -3  -1  273.27   23.50 
   2  -3  -1  250.47   20.80 
   2  -3  -1  279.07   27.00 
  -2  -3   1  241.78   19.50 
   2  -3  -1  287.07   20.20 
  -2  -3   1  264.87   20.00 
  -2  -3   1  273.57   20.40 
   2  -3  -1  285.77   24.40 
   2  -3  -1  289.97   20.70 
  -2  -3   1  282.07   21.90 
   2  -3  -1  283.27   20.10 
  -2  -3   1  238.08   19.70 
   2  -3  -1  258.57   26.50 
   2  -3  -1  314.37   24.60 
  -2  -3   1  314.17   23.80 
  -2  -3   1  273.17   20.50 
  -2  -3   1  264.27   20.20 
   2  -3  -1  261.17   20.50 
   2  -3  -1  290.97   22.60 
   2  -3  -1  288.17   24.10 
   2  -3  -1  273.47   20.20 
  -2  -3   1  246.58   22.20 
   2   3  -1  263.97   19.00 
   2   3  -1  267.07   23.20 
   2   3  -1  321.97   21.30 
   2   3  -1  292.37   20.70 
   2   3  -1  249.78   19.90 
  -2   3   1  286.17   23.30 
   2   3  -1  252.47   21.60 
   2   3  -1  273.27   22.90 
  -2   3   1  300.07   24.80 
   2   3  -1  291.17   22.20 
   2   3  -1  272.17   20.60 
   2   3  -1  297.07   22.00 
   2   3  -1  284.87   20.50 
  -2   3   1  229.68   24.60 
   2   3  -1  274.97   21.80 
   2   3  -1  293.47   22.80 
  -2   3   1  266.97   23.00 
  -2   3   1  244.68   21.30 
   2   3  -1  267.57   22.20 
   2   3  -1  284.67   21.70 
   2   3  -1  254.37   22.40 
  -2   3   1  299.77   25.80 
  -2   3   1  286.87   28.00 
   2   3  -1  254.27   20.10 
   2   3  -1  264.97   20.10 
  -2   3   1  269.67   22.70 
  -2   3   1  247.08   21.30 
  -2   3   1  257.67   22.90 
   2   3  -1  282.77   21.80 
   2   3  -1  256.77   19.50 
   2   3  -1  250.37   18.70 
   2   3  -1  256.17   20.20 
  -2   3   1  264.87   27.70 
  -2   3   1  244.08   21.80 
   2   3  -1  286.77   19.80 
   2   3  -1  255.47   17.50 
   2   3  -1  284.17   21.10 
  -2   3   1  267.47   28.00 
  -2   3   1  267.47   20.50 
  -2   3   1  295.07   20.20 
   2   3  -1  289.37   21.60 
   1  -3  -1  646.24   37.50 
   1  -3  -1  621.74   42.40 
  -1  -3   1  645.34   40.90 
   1  -3  -1  599.04   39.10 
  -1  -3   1  631.94   41.50 
  -1  -3   1  639.04   42.80 
   1  -3  -1  654.73   39.20 
   1  -3  -1  655.93   42.10 
   1  -3  -1  654.33   41.50 
  -1  -3   1  636.44   43.00 
   1  -3  -1  627.44   40.90 
   1  -3  -1  640.74   43.50 
   1  -3  -1  649.74   38.10 
   1  -3  -1  622.54   43.00 
   1  -3  -1  637.94   42.50 
   1  -3  -1  656.83   42.20 
   1  -3  -1  653.93   36.60 
  -1  -3   1  717.63   43.10 
   1  -3  -1  634.34   37.00 
  -1  -3   1  658.93   39.60 
  -1  -3   1  653.03   39.80 
  -1  -3   1  667.53   42.70 
   1  -3  -1  637.84   40.70 
   1  -3  -1  691.63   39.10 
   1  -3  -1  683.93   43.40 
   1  -3  -1  668.83   39.90 
   1  -3  -1  695.53   40.00 
   1  -3  -1  662.23   37.10 
   1  -3  -1  665.53   37.10 
   1  -3  -1  616.04   43.70 
   1  -3  -1  659.63   41.70 
   1  -3  -1  627.74   41.50 
   1  -3  -1  624.84   36.40 
  -1  -3   1  579.94   41.60 
   1  -3  -1  608.44   41.80 
  -1  -3   1  637.64   41.60 
   1  -3  -1  650.93   43.20 
   1  -3  -1  633.94   41.70 
  -1  -3   1  636.94   36.70 
  -1  -3   1  656.93   36.60 
  -1  -3   1  666.03   43.40 
  -1  -3   1  618.74   38.20 
  -1  -3   1  648.44   37.90 
  -1  -3   1  645.84   42.70 
   1  -3  -1  630.34   39.60 
   1  -3  -1  710.43   44.50 
  -1  -3   1  640.44   43.40 
  -1   3   1  640.14   42.40 
   1   3  -1  640.14   43.20 
  -1   3   1  627.64   43.90 
   1   3  -1  664.33   36.70 
  -1   3   1  586.54   42.70 
   1   3  -1  673.43   42.80 
  -1   3   1  643.74   41.90 
  -1   3   1  627.84   43.00 
  -1   3   1  566.64   38.40 
   1   3  -1  637.44   42.20 
   1   3  -1  650.43   36.70 
   1   3  -1  648.14   37.90 
  -1   3   1  660.43   41.00 
   1   3  -1  703.63   42.60 
   1   3  -1  636.04   42.10 
  -1   3   1  653.43   37.60 
   1   3  -1  637.34   38.70 
   1   3  -1  656.73   36.30 
  -1   3   1  611.94   42.90 
   1   3  -1  722.63   43.60 
  -1   3   1  622.44   42.20 
   1   3  -1  644.94   39.50 
  -1   3   1  637.74   41.00 
   1   3  -1  658.13   37.90 
  -1   3   1  670.43   42.50 
  -1   3   1  669.63   39.60 
  -1   3   1  607.94   42.30 
  -1   3   1  671.23   36.60 
   1   3  -1  647.74   36.70 
  -1   3   1  655.63   39.10 
   1   3  -1  627.84   40.40 
   1   3  -1  643.74   38.20 
   1   3  -1  663.73   42.50 
   1   3  -1  652.43   37.80 
  -1   3   1  641.04   41.60 
   1   3  -1  650.13   42.50 
   1   3  -1  674.53   37.80 
  -1   3   1  645.24   37.10 
   1   3  -1  694.73   39.40 
   1   3  -1  629.64   38.90 
   1   3  -1  619.04   37.80 
   1   3  -1  645.64   35.50 
   1   3  -1  645.64   42.00 
  -1   3   1  661.33   39.40 
  -1   3   1  648.24   42.90 
   1   3  -1  638.94   41.90 
  -1   3   1  706.23   43.90 
   1   3  -1  649.54   36.70 
  -1   3   1  671.93   41.50 
   1   3  -1  615.74   41.00 
   1   3  -1  646.34   40.60 
  -1   3   1  693.43   41.50 
   0  -3  -1  435.46   31.70 
   0  -3  -1  415.36   28.10 
   0  -3   1  389.06   30.60 
   0  -3   1  473.55   31.40 
   0  -3   1  441.56   29.20 
   0  -3   1  425.86   26.90 
   0  -3   1  384.76   26.50 
   0  -3   1  419.66   30.70 
   0  -3   1  437.46   30.80 
   0  -3  -1  443.26   42.10 
   0  -3  -1  426.96   31.60 
   0  -3  -1  406.16   30.50 
   0  -3   1  458.35   30.30 
   0  -3   1  497.15   34.40 
   0  -3  -1  444.76   30.30 
   0  -3  -1  391.56   30.50 
   0  -3   1  439.76   28.20 
   0  -3  -1  411.36   28.10 
   0  -3   1  422.46   28.40 
   0  -3  -1  429.16   29.60 
   0  -3  -1  456.05   29.60 
   0  -3  -1  436.06   31.50 
   0  -3   1  418.76   31.00 
   0  -3   1  415.16   27.60 
   0  -3  -1  442.16   32.30 
   0  -3   1  470.95   32.90 
   0  -3   1  423.06   31.80 
   0  -3  -1  428.76   25.10 
   0  -3   1  429.66   28.60 
   0  -3   1  442.36   30.50 
   0  -3  -1  502.55   32.20 
   0  -3  -1  383.26   27.80 
   0  -3   1  428.76   31.40 
   0  -3  -1  467.35   27.30 
   0  -3  -1  389.36   32.40 
   0  -3  -1  433.76   30.90 
   0  -3   1  454.35   26.80 
   0  -3  -1  439.16   28.60 
   0  -3  -1  386.66   30.80 
   0  -3   1  411.06   31.80 
   0  -3   1  418.96   30.80 
   0  -3   1  432.36   31.20 
   0  -3   1  399.26   32.90 
   0  -3  -1  387.16   27.60 
   0  -3  -1  433.46   31.70 
   0   3  -1  417.76   31.10 
   0   3   1  435.66   31.40 
   0   3   1  427.16   27.30 
   0   3  -1  410.76   24.20 
   0   3   1  457.65   31.70 
   0   3  -1  446.96   27.00 
   0   3  -1  404.06   29.40 
   0   3   1  442.86   25.10 
   0   3   1  506.75   33.40 
   0   3  -1  429.06   27.40 
   0   3   1  407.66   30.60 
   0   3   1  487.85   29.80 
   0   3  -1  447.96   29.70 
   0   3  -1  462.35   31.60 
   0   3   1  446.26   30.30 
   0   3  -1  436.56   26.40 
   0   3  -1  404.56   28.70 
   0   3  -1  392.26   30.80 
   0   3   1  453.55   27.70 
   0   3   1  436.66   27.40 
   0   3  -1  400.86   31.50 
   0   3   1  455.15   31.30 
   0   3   1  438.56   25.50 
   0   3  -1  437.86   24.60 
   0   3   1  429.36   28.70 
   0   3  -1  431.56   28.70 
   0   3   1  401.06   27.60 
   0   3  -1  384.86   30.10 
   0   3  -1  437.26   27.30 
   0   3  -1  427.36   29.20 
   0   3  -1  397.66   27.90 
   0   3  -1  440.46   30.00 
   0   3  -1  425.16   29.10 
   0   3  -1  422.26   26.80 
   0   3   1  432.26   27.50 
   0   3  -1  412.66   31.10 
   0   3   1  441.06   28.30 
   0   3   1  431.76   26.20 
   0   3   1  447.96   30.00 
   0   3  -1  430.36   27.00 
   0   3  -1  442.36   28.20 
   0   3   1  387.56   30.80 
   0   3  -1  440.76   30.50 
   0   3  -1  433.66   28.30 
   0   3   1  409.16   31.80 
   0   3   1  446.26   25.80 
   0   3   1  423.66   27.90 
  -1  -3  -1 4037.30  209.68 
   1  -3   1 3998.70  208.08 
  -1  -3  -1 3807.62  209.88 
   1  -3   1 3938.91  213.58 
  -1  -3  -1 3991.70  213.68 
   1  -3   1 4031.40  207.48 
   1  -3   1 3787.62  212.48 
   1  -3   1 3883.21  212.08 
   1  -3   1 3900.51  212.68 
   1  -3   1 3640.24  212.48 
   1  -3   1 3940.21  207.08 
   1  -3   1 4000.00  213.78 
   1  -3   1 3896.41  209.98 
   1  -3   1 4020.60  207.88 
   1  -3   1 3984.00  211.58 
   1  -3   1 3800.22  213.28 
  -1  -3  -1 3845.92  215.08 
   1  -3   1 3935.11  209.58 
   1  -3   1 4070.79  213.48 
  -1  -3  -1 3791.02  214.18 
   1  -3   1 3807.62  214.48 
   1  -3   1 3760.62  210.48 
  -1  -3  -1 3848.91  210.18 
   1  -3   1 4028.10  214.68 
   1  -3   1 3887.01  215.08 
   1  -3   1 3910.31  206.98 
   1  -3   1 3970.90  212.38 
   1  -3   1 3896.61  208.18 
  -1  -3  -1 3884.01  213.18 
   1  -3   1 3863.81  212.08 
  -1  -3  -1 4006.90  208.68 
   1  -3   1 3907.11  211.28 
   1  -3   1 4007.90  211.38 
  -1  -3  -1 4043.40  213.48 
  -1  -3  -1 3836.22  213.88 
   1  -3   1 3852.71  213.08 
  -1  -3  -1 3803.52  213.18 
  -1  -3  -1 3887.81  213.58 
   1  -3   1 3960.50  208.58 
  -1  -3  -1 3975.30  212.78 
  -1  -3  -1 3921.01  207.58 
   1  -3   1 4018.10  211.08 
  -1  -3  -1 4117.99  208.68 
   1  -3   1 4088.99  212.68 
   1   3   1 3897.71  207.68 
  -1   3  -1 4033.00  212.38 
  -1   3  -1 4180.68  215.18 
   1   3   1 3992.70  212.08 
  -1   3  -1 4114.79  210.88 
   1   3   1 3834.72  215.78 
  -1   3  -1 3955.40  213.28 
   1   3   1 3973.80  208.78 
  -1   3  -1 3944.01  212.68 
  -1   3  -1 3871.21  212.48 
  -1   3  -1 3691.33  207.18 
   1   3   1 3776.02  206.18 
   1   3   1 3942.71  213.08 
  -1   3  -1 4087.69  209.98 
   1   3   1 4081.89  208.08 
   1   3   1 3839.42  211.48 
   1   3   1 4012.30  206.98 
  -1   3  -1 3978.20  211.18 
  -1   3  -1 3955.50  211.58 
   1   3   1 4077.59  208.18 
   1   3   1 3938.21  206.28 
  -1   3  -1 3772.42  213.58 
   1   3   1 4089.89  206.68 
  -1   3  -1 3988.10  213.78 
   1   3   1 3914.81  206.78 
   1   3   1 3879.41  213.08 
   1   3   1 3923.31  213.28 
  -1   3  -1 3897.41  214.08 
   1   3   1 3820.82  212.58 
  -1   3  -1 4100.09  209.18 
   1   3   1 4027.90  206.18 
   1   3   1 3977.10  210.08 
  -1   3  -1 3896.41  213.48 
   1   3   1 4008.40  207.78 
   1   3   1 3923.61  211.28 
  -1   3  -1 3999.40  207.18 
  -1   3  -1 3865.91  214.48 
  -1   3  -1 4010.60  207.88 
  -1   3  -1 3880.51  211.98 
  -1   3  -1 3996.60  211.28 
   1   3   1 3910.01  207.78 
   1   3   1 4005.20  209.88 
   1   3   1 3760.02  212.78 
  -1   3  -1 3929.41  207.68 
   1   3   1 4100.19  214.68 
  -1   3  -1 3903.01  211.48 
  -1   3  -1 3854.01  209.18 
   1   3   1 3980.60  212.98 
   1   3   1 3872.01  209.38 
  -1   3  -1 3795.92  213.88 
   1   3   1 3906.21  208.28 
   1   3   1 3790.62  213.78 
  -1   3  -1 3890.11  212.98 
   1   3   1 4239.98  213.68 
   2  -3   1 2382.56  138.09 
   2  -3   1 2514.95  133.39 
   2  -3   1 2345.77  133.09 
   2  -3   1 2470.45  137.89 
  -2  -3  -1 2441.96  135.29 
   2  -3   1 2461.35  134.99 
  -2  -3  -1 2477.95  135.59 
  -2  -3  -1 2367.16  135.69 
  -2  -3  -1 2394.96  135.79 
   2  -3   1 2511.35  137.69 
   2  -3   1 2427.56  134.79 
   2  -3   1 2458.15  135.99 
   2  -3   1 2458.55  139.39 
  -2  -3  -1 2454.05  130.09 
   2  -3   1 2367.66  137.99 
   2  -3   1 2383.56  136.49 
   2  -3   1 2419.16  132.89 
  -2  -3  -1 2472.85  131.79 
   2  -3   1 2515.05  133.49 
   2  -3   1 2489.15  137.29 
  -2  -3  -1 2328.07  135.09 
  -2  -3  -1 2447.46  136.09 
  -2  -3  -1 2376.86  134.49 
   2  -3   1 2352.46  135.89 
  -2  -3  -1 2506.45  130.59 
   2  -3   1 2527.85  132.39 
   2  -3   1 2413.46  134.79 
  -2  -3  -1 2282.07  135.09 
   2  -3   1 2465.65  138.39 
  -2  -3  -1 2434.66  133.29 
  -2  -3  -1 2444.86  134.69 
   2  -3   1 2462.35  134.39 
   2  -3   1 2357.46  136.49 
   2  -3   1 2462.65  134.39 
   2  -3   1 2451.85  134.79 
  -2  -3  -1 2313.37  131.89 
   2  -3   1 2306.17  136.39 
  -2  -3  -1 2493.85  136.49 
   2   3   1 2559.14  134.69 
  -2   3  -1 2567.94  139.19 
   2   3   1 2607.14  134.29 
  -2   3  -1 2452.05  134.09 
   2   3   1 2479.85  132.09 
   2   3   1 2405.66  131.09 
   2   3   1 2530.45  136.49 
  -2   3  -1 2438.46  138.19 
   2   3   1 2464.75  137.29 
  -2   3  -1 2357.06  136.29 
   2   3   1 2437.86  134.79 
  -2   3  -1 2509.35  136.99 
   2   3   1 2367.66  134.59 
  -2   3  -1 2370.46  135.89 
   2   3   1 2471.35  133.49 
   2   3   1 2448.75  129.69 
  -2   3  -1 2504.15  133.19 
   2   3   1 2566.74  132.39 
   2   3   1 2261.57  134.39 
   2   3   1 2530.75  137.69 
   2   3   1 2302.57  130.59 
   2   3   1 2440.06  130.99 
  -2   3  -1 2412.26  133.89 
  -2   3  -1 2478.75  132.69 
  -2   3  -1 2470.25  137.19 
   2   3   1 2453.05  134.69 
  -2   3  -1 2455.05  135.89 
   2   3   1 2362.96  134.69 
   2   3   1 2255.07  135.59 
  -2   3  -1 2527.35  136.69 
   2   3   1 2510.25  132.39 
  -2   3  -1 2525.95  133.69 
   2   3   1 2362.56  136.49 
   2   3   1 2455.05  132.49 
   2   3   1 2489.55  129.69 
  -2   3  -1 2472.85  136.99 
  -2   3  -1 2423.76  137.19 
  -2   3  -1 2328.97  138.09 
  -2   3  -1 2319.47  135.69 
   2   3   1 2453.35  128.79 
   2   3   1 2391.66  129.89 
   2   3   1 2475.45  131.79 
   2   3   1 2428.76  131.59 
   2   3   1 2401.56  135.19 
   3  -3   1 2003.20  113.29 
   3  -3   1 1969.60  117.69 
   3  -3   1 2068.89  114.79 
   3  -3   1 2020.30  116.29 
  -3  -3  -1 1914.61  112.89 
   3  -3   1 1914.41  115.59 
   3  -3   1 1970.00  113.49 
   3  -3   1 2050.19  118.49 
   3  -3   1 1963.30  117.19 
  -3  -3  -1 2119.39  113.69 
   3  -3   1 2089.79  120.09 
  -3  -3  -1 2170.18  116.29 
   3  -3   1 1963.50  117.99 
  -3  -3  -1 2073.29  115.29 
  -3  -3  -1 2143.59  113.99 
  -3  -3  -1 2053.39  115.89 
   3  -3   1 2076.79  119.99 
  -3  -3  -1 2021.10  110.59 
   3  -3   1 2133.09  115.59 
  -3  -3  -1 1981.10  111.49 
  -3  -3  -1 1998.90  113.49 
  -3  -3  -1 2121.19  116.09 
   3  -3   1 2055.69  117.19 
   3  -3   1 1966.10  113.69 
   3  -3   1 2022.80  116.19 
  -3  -3  -1 2044.80  116.99 
  -3  -3  -1 2178.08  115.69 
  -3  -3  -1 2078.79  114.39 
   3  -3   1 2016.10  114.89 
   3   3   1 2117.29  116.69 
   3   3   1 2033.10  116.99 
   3   3   1 2079.99  110.69 
  -3   3  -1 1918.61  115.29 
  -3   3  -1 2021.90  113.89 
   3   3   1 2063.69  109.59 
   3   3   1 1989.20  112.79 
  -3   3  -1 1984.10  117.89 
  -3   3  -1 2117.89  116.09 
   3   3   1 2105.79  117.29 
  -3   3  -1 1989.70  119.19 
  -3   3  -1 1903.41  117.09 
   3   3   1 1999.70  110.69 
  -3   3  -1 1997.00  115.19 
   3   3   1 2064.09  111.69 
  -3   3  -1 1986.90  114.89 
   3   3   1 2010.90  113.89 
  -3   3  -1 2042.80  119.49 
   3   3   1 2053.49  114.59 
  -3   3  -1 1944.71  116.09 
   3   3   1 2063.39  113.19 
   3   3   1 1956.60  110.99 
   3   3   1 2039.10  113.69 
   3   3   1 1994.70  107.59 
   3   3   1 1979.40  111.79 
   3   3   1 2135.89  114.89 
   3   3   1 1957.90  113.19 
  -3   3  -1 1937.11  117.69 
  -3   3  -1 2003.70  115.39 
   3   3   1 1956.10  112.79 
   3   3   1 2041.10  113.69 
   3   3   1 1893.61  113.39 
   3   3   1 2075.59  118.99 
  -3   3  -1 1968.90  118.29 
  -3   3  -1 1947.71  118.09 
   3   3   1 2129.29  113.19 
   3   3   1 2069.39  115.89 
  -4  -3  -1  398.16   29.10 
   4  -3   1  444.16   30.80 
   4  -3   1  399.76   31.70 
  -4  -3  -1  430.36   36.00 
  -4  -3  -1  434.56   34.70 
  -4  -3  -1  475.15   36.20 
   4  -3   1  417.76   36.00 
   4  -3   1  347.27   32.10 
   4  -3   1  412.56   34.20 
   4  -3   1  400.16   35.50 
  -4  -3  -1  390.46   29.20 
  -4  -3  -1  458.35   34.00 
   4  -3   1  377.46   32.60 
   4  -3   1  409.96   36.40 
  -4  -3  -1  478.85   30.30 
  -4  -3  -1  492.15   36.60 
   4  -3   1  422.86   38.10 
   4  -3   1  430.66   36.50 
  -4  -3  -1  400.86   32.50 
   4  -3   1  480.25   36.30 
   4  -3   1  357.76   39.10 
  -4  -3  -1  411.56   34.00 
  -4  -3  -1  469.05   32.80 
   4  -3   1  480.35   34.80 
  -4  -3  -1  397.06   32.60 
  -4  -3  -1  426.96   33.70 
   4  -3   1  436.66   35.40 
   4   3   1  375.36   34.10 
  -4   3  -1  418.36   35.60 
   4   3   1  454.45   30.00 
  -4   3  -1  416.76   30.30 
  -4   3  -1  410.06   33.30 
  -4   3  -1  455.55   32.70 
  -4   3  -1  478.35   36.20 
  -4   3  -1  433.56   36.60 
  -4   3  -1  475.75   38.20 
   4   3   1  438.46   29.20 
   4   3   1  469.55   31.70 
  -4   3  -1  416.76   31.20 
  -4   3  -1  479.85   37.50 
   4   3   1  386.16   32.60 
   4   3   1  451.75   29.80 
  -4   3  -1  383.36   40.20 
   4   3   1  459.25   37.60 
   4   3   1  462.65   36.30 
   4   3   1  417.56   26.30 
  -4   3  -1  486.25   39.20 
  -4   3  -1  431.16   35.10 
   4   3   1  440.26   32.90 
   4   3   1  455.15   29.10 
   4   3   1  435.76   34.00 
   4   3   1  439.86   30.90 
  -4   3  -1  447.26   37.80 
   4   3   1  448.76   31.00 
   4   3   1  415.36   30.30 
   4   3   1  365.66   31.10 
  -4   3  -1  445.76   35.20 
   4   3   1  402.16   33.50 
   4   3   1  405.06   29.00 
   5  -3   1  147.29   24.40 
   5  -3   1  131.69   23.80 
  -5  -3  -1  116.49   17.20 
   5  -3   1  149.29   20.00 
  -5  -3  -1  142.99   19.80 
   5  -3   1  136.69   23.00 
   5  -3   1  161.88   23.40 
  -5  -3  -1  110.69   20.90 
   5  -3   1  153.68   24.50 
   5  -3   1  228.28   29.90 
  -5  -3  -1  122.79   22.20 
   5  -3   1  164.98   26.00 
  -5  -3  -1  156.78   18.90 
   5  -3   1  164.88   19.80 
  -5  -3  -1  150.48   22.20 
   5  -3   1  171.28   21.80 
  -5  -3  -1  153.88   22.80 
  -5  -3  -1  166.08   23.50 
  -5  -3  -1  120.89   21.90 
   5  -3   1  181.48   26.40 
   5  -3   1  110.79   22.10 
   5  -3   1  132.09   25.40 
  -5  -3  -1  149.09   14.70 
   5  -3   1  109.99   20.30 
  -5  -3  -1  165.18   24.10 
  -5  -3  -1  125.89   19.40 
   5  -3   1  181.08   18.50 
  -5   3  -1  148.49   25.10 
  -5   3  -1  157.58   24.00 
   5   3   1  159.98   19.90 
   5   3   1  151.88   23.80 
  -5   3  -1  188.68   27.50 
   5   3   1  132.19   24.10 
   5   3   1  144.49   11.60 
  -5   3  -1  186.08   23.40 
   5   3   1  208.08   25.80 
   5   3   1  152.38   22.20 
  -5   3  -1  145.29   24.40 
  -5   3  -1  161.98   17.50 
   5   3   1  177.68   20.50 
   5   3   1  150.68   11.60 
  -5   3  -1  183.78   26.70 
  -5   3  -1  165.88   17.30 
  -5   3  -1  147.09   23.40 
  -5   3  -1  147.29   23.70 
  -5   3  -1  156.58   24.50 
   5   3   1  149.88   13.40 
   5   3   1  133.59   19.20 
   5   3   1  147.39   15.60 
   5   3   1  167.38   26.30 
   5   3   1  139.39   14.80 
   5   3   1  170.18   22.90 
   5   3   1  175.78   25.90 
  -5   3  -1  107.99   22.90 
  -5   3  -1  126.39   22.90 
   5   3   1  185.48   18.40 
  -5   3  -1  145.69   18.50 
  -6  -3  -1  370.46   42.50 
   6  -3   1  372.86   41.90 
  -6  -3  -1  378.46   31.90 
   6  -3   1  298.97   41.60 
   6  -3   1  306.57   38.50 
   6  -3   1  297.27   35.90 
   6  -3   1  355.96   41.70 
   6  -3   1  364.26   26.20 
  -6  -3  -1  295.27   36.60 
   6  -3   1  386.46   43.70 
  -6  -3  -1  379.66   38.20 
   6  -3   1  358.86   40.90 
  -6  -3  -1  334.87   33.00 
   6  -3   1  308.77   40.40 
  -6  -3  -1  391.96   40.30 
  -6  -3  -1  261.37   36.50 
   6  -3   1  367.46   31.10 
   6  -3   1  316.47   38.50 
  -6  -3  -1  340.37   35.10 
   6  -3   1  383.56   35.60 
  -6  -3  -1  500.95   49.70 
   6  -3   1  400.56   30.00 
  -6  -3  -1  380.56   40.50 
   6  -3   1  355.56   41.50 
   6  -3   1  276.27   36.90 
   6   3   1  380.66   42.10 
  -6   3  -1  278.47   37.70 
  -6   3  -1  317.07   34.10 
   6   3   1  374.96   30.30 
   6   3   1  388.96   41.60 
   6   3   1  357.56   28.60 
   6   3   1  366.76   39.50 
   6   3   1  319.47   39.40 
   6   3   1  443.36   47.10 
  -6   3  -1  277.27   38.80 
  -6   3  -1  284.87   37.70 
   6   3   1  349.67   37.50 
   6   3   1  444.36   42.20 
  -6   3  -1  468.95   45.80 
   6   3   1  355.86   27.20 
   6   3   1  367.66   25.20 
  -6   3  -1  349.17   23.70 
   6   3   1  373.26   32.40 
   6   3   1  333.07   25.80 
  -6   3  -1  303.77   40.20 
   6   3   1  328.37   41.30 
  -6   3  -1  268.07   38.20 
  -6   3  -1  389.36   28.40 
  -6   3  -1  314.57   40.40 
  -6   3  -1  372.66   42.50 
   6   3   1  340.17   41.60 
   6   3   1  346.47   22.50 
  -6   3  -1  336.27   41.10 
  -6   3  -1  372.36   40.30 
  -6   3  -1  357.96   43.20 
  -7  -3  -1   91.29   21.80 
   7  -3   1  130.49   26.70 
  -7  -3  -1  125.69   26.70 
   7  -3   1  105.79   25.70 
   7  -3   1  141.89   28.80 
   7  -3   1  151.98   30.20 
  -7  -3  -1  166.98   30.20 
   7  -3   1  144.39   22.20 
   7  -3   1  140.49   27.30 
   7  -3   1   91.89   22.70 
   7  -3   1  117.59   25.40 
  -7  -3  -1   94.89   18.40 
   7  -3   1  123.59   20.30 
  -7  -3  -1  109.79   25.40 
  -7  -3  -1  106.59   19.10 
   7  -3   1   82.39   24.90 
  -7  -3  -1  143.29   27.10 
   7  -3   1   49.60   20.80 
   7  -3   1  109.29   26.50 
  -7  -3  -1  162.98   25.90 
   7  -3   1   97.69   25.30 
  -7  -3  -1  159.78   28.80 
  -7  -3  -1  136.89   22.80 
   7  -3   1  111.19   18.50 
   7  -3   1  130.09   26.70 
  -7   3  -1  132.29   28.70 
  -7   3  -1  106.49   25.40 
  -7   3  -1  107.09   25.60 
   7   3   1  193.28   32.70 
   7   3   1  110.39   24.20 
  -7   3  -1  157.48   30.90 
   7   3   1  141.79   26.00 
   7   3   1  123.39   25.80 
   7   3   1  147.59   25.60 
  -7   3  -1   77.59   20.60 
  -7   3  -1  107.09   19.50 
  -7   3  -1  164.68   29.50 
   7   3   1  150.38   25.60 
  -7   3  -1  214.58   34.20 
  -7   3  -1  119.59   26.50 
   7   3   1  116.89   22.50 
   7   3   1  137.59   29.00 
  -7   3  -1  132.19   28.40 
   7   3   1  114.09   25.30 
   7   3   1  100.39   24.90 
   7   3   1   98.29   19.20 
  -7   3  -1  134.19   24.80 
  -8  -3  -1  679.93   66.49 
  -8  -3  -1  528.05   52.49 
   8  -3   1  638.74   65.69 
   8  -3   1  731.23   71.99 
  -8  -3  -1  528.05   60.39 
  -8  -3  -1  635.04   61.99 
   8  -3   1  524.65   59.19 
   8  -3   1  554.14   57.59 
   8  -3   1  469.15   54.39 
  -8  -3  -1  654.13   49.00 
   8  -3   1  616.54   64.09 
   8  -3   1  508.55   59.59 
   8  -3   1  528.75   60.09 
   8  -3   1  565.84   61.59 
  -8  -3  -1  528.55   54.09 
  -8  -3  -1  526.95   59.59 
  -8  -3  -1  491.45   59.29 
  -8  -3  -1  440.96   57.79 
   8  -3   1  563.64   62.89 
   8  -3   1  587.44   66.39 
   8  -3   1  461.05   57.99 
  -8   3  -1  635.94   67.99 
   8   3   1  483.45   62.39 
   8   3   1  678.83   67.69 
   8   3   1  546.75   54.59 
  -8   3  -1  699.73   69.59 
   8   3   1  543.85   56.89 
  -8   3  -1  515.85   48.00 
  -8   3  -1  531.45   66.49 
   8   3   1  644.64   61.79 
   8   3   1  536.05   62.79 
  -8   3  -1  626.24   64.29 
   8   3   1  588.14   61.39 
  -8   3  -1  532.35   62.49 
   8   3   1  455.85   57.99 
  -8   3  -1  632.84   66.39 
   8   3   1  534.15   59.59 
   8   3   1  513.15   56.99 
   8   3   1  505.45   60.19 
  -8   3  -1  575.54   64.39 
  -8   3  -1  553.54   62.09 
  -8   3  -1  562.54   56.39 
   9  -3   1  350.46   51.59 
   9  -3   1  368.26   54.59 
   9  -3   1  305.07   46.40 
  -9  -3  -1  328.27   46.70 
   9  -3   1  318.57   48.80 
   9  -3   1  451.15   52.99 
   9  -3   1  460.85   57.09 
  -9  -3  -1  290.07   46.60 
   9  -3   1  317.47   47.30 
   9  -3   1  331.17   45.90 
   9  -3   1  238.28   42.50 
   9  -3   1  303.37   48.40 
   9  -3   1  304.27   48.10 
   9  -3   1  363.16   53.49 
  -9  -3  -1  342.07   48.50 
  -9  -3  -1  286.27   46.40 
   9   3   1  319.37   48.80 
   9   3   1  411.06   52.39 
   9   3   1  243.38   43.90 
   9   3   1  413.86   57.09 
   9   3   1  346.67   51.99 
  -9   3  -1  354.36   51.59 
   9   3   1  392.66   47.50 
  -9   3  -1  396.36   53.69 
  -9   3  -1  339.57   49.20 
   9   3   1  244.38   42.80 
   9   3   1  345.87   45.60 
  -9   3  -1  334.57   52.19 
   9   3   1  264.07   46.80 
  -9   3  -1  328.37   51.29 
   9   3   1  276.67   42.40 
  -9   3  -1  300.07   46.70 
   9   3   1  341.97   46.70 
  -9   3  -1  257.67   44.80 
  -9   3  -1  252.87   46.30 
   9  -4  -1   63.09   24.80 
   9  -4  -1   78.99   28.90 
   9  -4  -1   43.00   23.00 
  -9  -4   1   61.09   24.60 
   9  -4  -1   52.19   28.30 
   9  -4  -1   60.79   24.40 
  -9  -4   1   58.29   25.10 
   9  -4  -1   57.39   22.20 
  -9  -4   1   59.19   23.40 
   9  -4  -1   51.89   25.90 
   9  -4  -1   83.69   28.80 
   9  -4  -1  131.79   32.70 
   9  -4  -1    0.40   16.10 
   9  -4  -1   49.70   24.10 
  -9   4   1   76.99   27.20 
   9   4  -1   50.49   24.80 
  -9   4   1   46.40   22.50 
   9   4  -1   72.79   26.00 
  -9   4   1   18.50   18.00 
   9   4  -1   52.49   23.10 
   9   4  -1   49.90   24.10 
   9   4  -1   83.19   22.90 
  -9   4   1   46.40   24.10 
   9   4  -1   62.19   23.80 
   9   4  -1   74.49   27.20 
   9   4  -1   35.00   21.90 
  -9   4   1   54.69   22.80 
  -9   4   1   61.19   24.00 
   9   4  -1   36.10   20.30 
   9   4  -1   94.79   25.80 
  -9   4   1   24.50   19.90 
  -8  -4   1   18.20   15.20 
   8  -4  -1   -1.20   15.80 
  -8  -4   1    3.40   15.00 
   8  -4  -1    3.20   15.60 
   8  -4  -1   47.50   20.80 
   8  -4  -1   18.30   18.10 
  -8  -4   1   -3.40   14.20 
  -8  -4   1    3.20   14.60 
   8  -4  -1   28.90   17.70 
  -8  -4   1    3.20   13.40 
   8  -4  -1   17.80   18.20 
   8  -4  -1   12.60   17.70 
   8  -4  -1   32.00   20.80 
   8  -4  -1   23.90   16.90 
   8  -4  -1   15.40   17.20 
  -8   4   1   15.70   18.30 
  -8   4   1   -1.50   13.30 
   8   4  -1   -0.20   12.40 
   8   4  -1   -2.80    9.90 
   8   4  -1   12.60   13.00 
   8   4  -1   34.90   17.70 
  -8   4   1    6.60   16.10 
   8   4  -1   13.50   14.90 
   8   4  -1    7.20   15.40 
   8   4  -1   32.50   17.40 
  -8   4   1   15.00   17.40 
  -8   4   1   21.30   15.70 
  -8   4   1    6.00   14.60 
   8   4  -1   15.80   13.40 
  -8   4   1   21.60   17.30 
   8   4  -1   10.60   14.70 
   8   4  -1   -1.20   14.10 
   8   4  -1    2.60   14.50 
  -8   4   1   -0.30   13.60 
  -8   4   1   25.80   15.50 
   8   4  -1   12.10   15.70 
  -8   4   1   26.30   18.50 
   7  -4  -1  -11.20   10.80 
  -7  -4   1   11.30   12.70 
   7  -4  -1  -16.20   11.00 
  -7  -4   1   -9.80    8.60 
  -7  -4   1    9.00   11.80 
   7  -4  -1   10.90   13.00 
  -7  -4   1   13.70   15.40 
   7  -4  -1    2.30   13.80 
   7  -4  -1   12.70   11.10 
  -7  -4   1    6.30    9.80 
   7  -4  -1   -3.40   12.90 
   7  -4  -1  -13.70    9.90 
  -7  -4   1  -17.10    9.40 
  -7  -4   1   -2.80   10.40 
   7  -4  -1   -2.00   13.50 
   7  -4  -1  -19.40   10.70 
  -7  -4   1   -1.80   11.10 
   7  -4  -1    4.00   11.70 
   7  -4  -1    7.50   11.00 
   7  -4  -1   18.20   15.30 
   7  -4  -1   12.40   11.10 
  -7   4   1   -1.50   11.10 
   7   4  -1    0.90    9.50 
  -7   4   1  -11.60   10.80 
   7   4  -1   10.40   10.70 
   7   4  -1   -8.40   10.50 
   7   4  -1    3.40   10.60 
   7   4  -1    5.00    9.80 
   7   4  -1    5.10   15.20 
  -7   4   1   -7.60    9.00 
  -7   4   1   15.20   16.30 
  -7   4   1   -5.60   10.60 
  -7   4   1   -5.70   12.00 
  -7   4   1   12.20   13.20 
   7   4  -1   -1.20   11.70 
   7   4  -1   -4.50   10.30 
   7   4  -1   15.50   14.00 
   7   4  -1   -8.20   10.80 
  -7   4   1  -11.80   11.20 
   7   4  -1    9.80   12.30 
   7   4  -1   13.20   14.10 
   7   4  -1  -18.70    8.80 
  -7   4   1   -8.60   11.20 
  -7   4   1   -7.00    9.50 
   7   4  -1    9.80   13.50 
  -7   4   1   19.60   14.20 
   7   4  -1   -3.30    9.70 
   6  -4  -1   52.49   18.60 
   6  -4  -1  101.09   22.40 
   6  -4  -1   58.19   17.00 
   6  -4  -1   60.59   19.30 
   6  -4  -1  103.59   21.70 
  -6  -4   1   88.09   20.20 
  -6  -4   1   58.69   16.00 
   6  -4  -1   82.79   21.40 
   6  -4  -1   80.39   20.90 
  -6  -4   1   52.69   16.00 
   6  -4  -1   73.09   21.30 
   6  -4  -1  104.79   15.10 
   6  -4  -1   33.30   17.00 
   6  -4  -1   59.59   16.80 
  -6  -4   1   70.99   18.30 
  -6  -4   1   71.29   16.20 
  -6  -4   1   86.19   20.50 
   6  -4  -1   53.69   15.70 
   6  -4  -1   47.70   14.70 
  -6  -4   1   74.49   18.60 
  -6  -4   1   66.59   18.50 
  -6  -4   1   43.50   16.40 
   6  -4  -1   98.29   18.70 
   6   4  -1   75.29   16.70 
  -6   4   1  106.69   23.10 
   6   4  -1  121.99   18.50 
   6   4  -1   83.59   13.00 
  -6   4   1   97.09   23.10 
   6   4  -1   68.99   14.40 
   6   4  -1   66.79   19.30 
  -6   4   1   89.09   14.60 
   6   4  -1   94.49   17.80 
   6   4  -1   63.69   17.70 
   6   4  -1   58.09   16.10 
   6   4  -1   84.99   21.60 
   6   4  -1   84.99   12.80 
   6   4  -1   51.69   14.50 
  -6   4   1   54.59   17.00 
   6   4  -1   59.09   15.00 
  -6   4   1   81.19   17.50 
   6   4  -1   71.89   18.00 
  -6   4   1   79.79   18.70 
  -6   4   1  105.89   24.90 
   6   4  -1   95.99   19.20 
   6   4  -1   64.49   17.90 
   6   4  -1   95.99   16.10 
   6   4  -1   71.99   19.80 
  -6   4   1  111.59   23.70 
  -6   4   1   70.49   17.70 
  -6   4   1   67.49   14.50 
   6   4  -1   64.09   17.80 
   6   4  -1   72.39   18.60 
  -6   4   1  140.49   27.60 
  -6   4   1   64.89   20.70 
  -6   4   1   99.09   22.10 
   6   4  -1   78.09   19.30 
  -6   4   1   78.19   20.70 
  -5  -4   1   25.20   12.00 
   5  -4  -1   15.80   11.60 
   5  -4  -1   35.00   12.90 
   5  -4  -1   48.10   11.50 
   5  -4  -1   19.00   13.00 
   5  -4  -1   48.10   14.20 
   5  -4  -1   17.20   11.20 
  -5  -4   1   34.70   12.40 
   5  -4  -1   33.40   14.00 
  -5  -4   1   16.00   10.50 
   5  -4  -1   53.89   14.90 
   5  -4  -1   25.50   12.20 
  -5  -4   1   29.40   11.80 
  -5  -4   1   45.00   13.60 
  -5  -4   1   23.20   11.00 
  -5  -4   1   21.20   11.20 
   5  -4  -1   47.10   14.60 
   5  -4  -1   21.80   12.60 
   5  -4  -1   22.60   11.30 
  -5  -4   1   26.70    9.80 
  -5  -4   1   17.30    9.60 
  -5  -4   1   24.70   11.60 
   5  -4  -1   14.50   12.00 
  -5  -4   1   34.30   12.60 
   5  -4  -1   59.39   17.10 
  -5  -4   1   23.50   10.40 
   5  -4  -1   14.20   11.40 
   5   4  -1   28.00   11.40 
   5   4  -1   27.20   11.80 
   5   4  -1   22.60   10.30 
   5   4  -1   21.30   12.80 
   5   4  -1   32.70   11.40 
  -5   4   1   22.20    9.40 
  -5   4   1   37.10   14.80 
   5   4  -1   30.30   11.20 
   5   4  -1   45.70   13.30 
  -5   4   1   16.80   13.10 
  -5   4   1   40.20   13.40 
   5   4  -1   26.50    7.80 
   5   4  -1   43.60   11.40 
   5   4  -1   32.20    7.60 
  -5   4   1   39.50   14.20 
   5   4  -1   40.90    9.50 
  -5   4   1   25.40   14.10 
   5   4  -1   20.00   11.10 
  -5   4   1   49.40   12.00 
  -5   4   1   18.60   11.50 
  -5   4   1   27.00   10.90 
   5   4  -1   43.80   13.90 
   5   4  -1   35.90   13.00 
   5   4  -1   15.90    9.20 
  -5   4   1   39.40   14.10 
   5   4  -1   23.20   11.10 
  -5   4   1   15.80   11.70 
   5   4  -1   28.10    8.50 
   5   4  -1   39.60   11.40 
   5   4  -1   42.40   12.70 
  -5   4   1   44.50   16.10 
   5   4  -1   28.40    9.70 
  -5   4   1   19.80   10.20 
  -5   4   1   29.80   12.50 
   5   4  -1   28.20    9.60 
   5   4  -1   26.60    8.90 
   5   4  -1   37.60   11.20 
   4  -4  -1  150.48   24.20 
  -4  -4   1  154.38   18.80 
   4  -4  -1  127.99   21.50 
   4  -4  -1  165.78   22.20 
  -4  -4   1  166.18   22.00 
  -4  -4   1  123.19   20.40 
  -4  -4   1  175.48   22.50 
  -4  -4   1  148.39   18.80 
   4  -4  -1  136.19   21.90 
   4  -4  -1  152.68   24.90 
  -4  -4   1  130.99   19.10 
  -4  -4   1  144.19   19.40 
  -4  -4   1  157.38   19.30 
   4  -4  -1  121.79   19.00 
  -4  -4   1  145.89   18.30 
   4  -4  -1  132.19   20.60 
   4  -4  -1  134.09   19.70 
  -4  -4   1  129.29   19.90 
  -4  -4   1  153.28   20.10 
  -4  -4   1  176.18   22.20 
   4  -4  -1  156.88   22.60 
  -4  -4   1  163.88   22.00 
   4  -4  -1  119.29   21.00 
   4  -4  -1  156.18   23.90 
  -4  -4   1  142.39   20.10 
   4  -4  -1  169.18   23.00 
   4  -4  -1  178.58   25.90 
   4  -4  -1  131.49   20.00 
   4  -4  -1  166.78   19.70 
   4   4  -1  153.98   21.10 
   4   4  -1  168.88   21.70 
  -4   4   1  123.19   22.90 
  -4   4   1  121.39   19.80 
   4   4  -1  164.08   12.00 
  -4   4   1  148.79   24.40 
  -4   4   1  164.58   25.60 
   4   4  -1  129.99   17.10 
  -4   4   1  155.48   20.80 
  -4   4   1  151.88   21.00 
   4   4  -1  166.48   18.90 
  -4   4   1  153.28   25.60 
  -4   4   1  166.98   24.90 
   4   4  -1  127.69   20.60 
   4   4  -1  143.39   18.40 
   4   4  -1  160.68   21.90 
  -4   4   1  147.79   22.00 
   4   4  -1  159.58   17.30 
  -4   4   1  160.98   23.90 
  -4   4   1  133.29   22.30 
   4   4  -1  129.29   19.30 
   4   4  -1  173.18   16.60 
   4   4  -1  162.58   22.20 
   4   4  -1  147.39   21.10 
   4   4  -1  189.18   19.90 
   4   4  -1  172.68   22.20 
   4   4  -1  135.49   18.70 
  -4   4   1  160.68   21.70 
   4   4  -1  135.69   18.20 
   4   4  -1  158.28   14.90 
   4   4  -1  171.58   22.40 
  -4   4   1  170.08   22.70 
   3  -4  -1  141.79   21.40 
   3  -4  -1  166.78   23.30 
   3  -4  -1  121.49   20.70 
   3  -4  -1  138.29   18.10 
   3  -4  -1  158.28   20.10 
   3  -4  -1  152.58   22.50 
  -3  -4   1  153.48   17.90 
   3  -4  -1  130.59   20.30 
   3  -4  -1  180.78   18.50 
   3  -4  -1  109.39   19.70 
   3  -4  -1  124.59   17.60 
  -3  -4   1  172.28   18.40 
  -3  -4   1  141.59   20.40 
   3  -4  -1  220.28   25.60 
   3  -4  -1  117.99   19.10 
  -3  -4   1  160.28   19.30 
  -3  -4   1  115.89   18.40 
  -3  -4   1  150.08   18.20 
   3  -4  -1  140.59   17.30 
  -3  -4   1  140.69   18.90 
  -3  -4   1  135.59   20.30 
   3  -4  -1  141.09   21.90 
   3  -4  -1  138.59   20.80 
  -3  -4   1  142.49   18.10 
  -3  -4   1  178.08   19.30 
  -3  -4   1  177.08   18.20 
   3  -4  -1  132.19   17.90 
  -3  -4   1  157.48   17.80 
  -3  -4   1  169.28   22.70 
   3   4  -1  180.98   23.10 
  -3   4   1  133.19   22.10 
  -3   4   1  181.28   18.90 
  -3   4   1  131.29   21.60 
   3   4  -1  161.78   18.80 
  -3   4   1  157.38   24.20 
   3   4  -1  155.88   17.10 
   3   4  -1  162.28   12.80 
   3   4  -1  173.78   18.00 
   3   4  -1  162.48   18.80 
  -3   4   1  134.79   21.00 
   3   4  -1  210.98   23.40 
   3   4  -1  154.08   20.20 
   3   4  -1  168.48   19.20 
  -3   4   1  140.99   21.80 
  -3   4   1  146.79   19.00 
  -3   4   1  170.18   21.40 
  -3   4   1  126.29   19.70 
   3   4  -1  184.18   16.90 
  -3   4   1  139.89   22.90 
  -3   4   1  187.28   22.10 
   3   4  -1  154.78   19.80 
   3   4  -1  169.88   23.80 
   3   4  -1  158.58   19.20 
   3   4  -1  151.28   19.40 
   3   4  -1  160.18   21.40 
   3   4  -1  180.18   19.10 
   3   4  -1  149.88   18.90 
  -3   4   1  167.58   22.50 
   3   4  -1  134.19   17.30 
  -2  -4   1  170.48   17.70 
   2  -4  -1  182.68   15.40 
   2  -4  -1  162.98   17.60 
   2  -4  -1  178.98   23.30 
   2  -4  -1  163.88   22.10 
   2  -4  -1  198.18   24.10 
   2  -4  -1  163.58   16.00 
   2  -4  -1  193.38   22.90 
  -2  -4   1  179.68   23.60 
   2  -4  -1  201.38   24.40 
   2  -4  -1  175.88   19.80 
  -2  -4   1  200.28   16.00 
  -2  -4   1  170.68   16.50 
  -2  -4   1  180.08   21.80 
   2  -4  -1  205.98   16.10 
  -2  -4   1  176.88   22.20 
   2  -4  -1  183.08   20.10 
   2  -4  -1  174.68   22.10 
  -2  -4   1  171.28   21.30 
  -2  -4   1  203.88   17.70 
  -2  -4   1  216.28   25.30 
  -2  -4   1  206.48   23.80 
  -2  -4   1  163.58   21.50 
   2  -4  -1  195.98   17.20 
   2  -4  -1  182.88   23.60 
   2  -4  -1  185.78   18.00 
  -2  -4   1  165.78   15.30 
   2  -4  -1  141.79   22.00 
   2  -4  -1  179.68   21.80 
   2  -4  -1  199.58   17.40 
   2  -4  -1  167.88   24.40 
   2  -4  -1  175.28   15.70 
  -2  -4   1  218.88   22.90 
   2  -4  -1  182.18   20.90 
   2   4  -1  189.28   22.50 
   2   4  -1  183.88   18.20 
   2   4  -1  174.68   14.30 
  -2   4   1  185.88   21.10 
   2   4  -1  183.18   18.20 
  -2   4   1  187.68   23.90 
   2   4  -1  211.38   21.80 
   2   4  -1  188.68   16.70 
  -2   4   1  214.58   24.00 
   2   4  -1  166.18   14.70 
   2   4  -1  178.78   22.70 
  -2   4   1  164.48   21.70 
  -2   4   1  186.48   20.00 
   2   4  -1  183.98   15.70 
   2   4  -1  166.88   15.30 
  -2   4   1  206.88   21.50 
   2   4  -1  202.98   22.10 
  -2   4   1  183.78   24.00 
  -2   4   1  187.28   16.20 
   2   4  -1  187.58   15.80 
   2   4  -1  180.58   19.30 
   2   4  -1  172.88   19.60 
   2   4  -1  190.18   16.00 
   2   4  -1  166.28   17.80 
   2   4  -1  186.48   18.40 
   2   4  -1  199.18   21.90 
   2   4  -1  227.38   21.40 
   2   4  -1  181.48   14.90 
  -2   4   1  169.18   21.60 
  -2   4   1  176.58   25.00 
  -2   4   1  155.78   21.30 
   2   4  -1  195.88   19.90 
   2   4  -1  182.48   22.40 
   2   4  -1  178.88   19.00 
   2   4  -1  200.98   15.80 
  -2   4   1  184.98   15.10 
   2   4  -1  196.58   21.60 
  -2   4   1  167.68   22.30 
   1  -4  -1   -7.80    7.20 
   1  -4  -1   -2.10    5.60 
   1  -4  -1   -2.60    7.60 
   1  -4  -1    1.60    4.30 
   1  -4  -1    6.00    7.20 
   1  -4  -1   -0.50    4.10 
   1  -4  -1    1.50    7.90 
   1  -4  -1    3.30    6.40 
   1  -4  -1    8.10    5.20 
   1  -4  -1    2.00    4.60 
   1  -4  -1   -1.30    3.00 
   1  -4  -1   11.20    6.50 
   1  -4  -1   11.50    5.90 
   1  -4  -1    4.30    3.10 
   1  -4  -1   -9.80    6.80 
   1  -4  -1    7.00    4.00 
   1  -4  -1   -1.80    5.40 
   1  -4  -1   -0.60    6.80 
   1  -4  -1   -9.30    6.80 
  -1  -4   1    7.10    6.00 
   1  -4  -1    0.50    2.30 
   1  -4  -1    1.10    3.40 
  -1  -4   1   11.20    7.80 
   1  -4  -1    0.40    4.90 
   1  -4  -1    0.30    6.30 
   1  -4  -1    3.50    2.80 
  -1   4   1    6.40    6.70 
   1   4  -1   -1.70    6.50 
  -1   4   1   10.70    7.00 
  -1   4   1   10.60    5.40 
  -1   4   1    1.40    7.30 
   1   4  -1    0.50    3.40 
  -1   4   1   -0.10    3.70 
  -1   4   1    1.30    5.70 
  -1   4   1   10.00    7.60 
  -1   4   1    7.30    5.70 
  -1   4   1   -1.30    2.70 
  -1   4   1    8.00    6.40 
  -1   4   1   -3.20    4.10 
   1   4  -1    8.20    5.20 
  -1   4   1    0.10    5.70 
   1   4  -1   -1.60    3.20 
  -1   4   1    6.70    4.40 
   1   4  -1   -5.40    2.40 
  -1   4   1   11.20    6.20 
  -1   4   1   11.10    6.80 
   1   4  -1   11.20    5.30 
   0  -4   1  430.86   30.20 
   0  -4   1  402.76   26.10 
   0  -4   1  374.46   25.70 
   0  -4  -1  404.16   31.40 
   0  -4  -1  418.16   30.70 
   0  -4  -1  381.36   28.00 
   0  -4  -1  385.66   23.60 
   0  -4   1  388.76   28.20 
   0  -4   1  369.86   27.90 
   0  -4  -1  400.66   31.50 
   0  -4   1  356.86   31.40 
   0  -4  -1  366.66   27.90 
   0  -4   1  382.86   31.30 
   0  -4   1  340.47   26.80 
   0  -4  -1  363.46   32.20 
   0  -4   1  350.16   32.20 
   0  -4  -1  385.86   30.00 
   0  -4   1  368.86   23.80 
   0  -4  -1  370.76   30.60 
   0  -4  -1  324.87   30.90 
   0  -4  -1  337.27   30.50 
   0  -4   1  343.27   31.20 
   0  -4   1  378.06   25.20 
   0  -4  -1  387.36   31.50 
   0  -4   1  341.07   30.50 
   0  -4  -1  415.16   31.20 
   0  -4  -1  352.96   39.70 
   0  -4   1  373.16   25.90 
   0  -4   1  385.26   30.80 
   0  -4   1  377.26   32.60 
   0  -4   1  384.76   31.30 
   0  -4  -1  361.16   30.40 
   0  -4  -1  384.66   26.00 
   0  -4  -1  384.66   28.20 
   0  -4   1  397.96   31.90 
   0  -4  -1  384.66   28.00 
   0  -4   1  393.86   31.00 
   0  -4  -1  350.16   28.50 
   0  -4   1  421.56   32.20 
   0   4   1  364.06   21.60 
   0   4  -1  393.96   27.30 
   0   4  -1  373.16   24.30 
   0   4  -1  409.96   27.00 
   0   4  -1  368.26   27.70 
   0   4  -1  385.16   28.90 
   0   4   1  412.26   25.80 
   0   4   1  371.76   23.20 
   0   4   1  347.47   26.60 
   0   4   1  362.06   31.50 
   0   4  -1  397.46   32.50 
   0   4  -1  379.96   26.60 
   0   4   1  384.16   30.90 
   0   4  -1  398.36   25.90 
   0   4   1  366.26   24.10 
   0   4   1  420.96   29.50 
   0   4  -1  367.96   27.00 
   0   4  -1  410.06   28.70 
   0   4   1  382.86   29.90 
   0   4  -1  357.46   23.40 
   0   4   1  398.06   26.90 
   0   4   1  383.66   26.60 
   0   4   1  354.06   24.70 
   0   4  -1  428.16   32.90 
   0   4  -1  432.46   30.20 
   0   4  -1  363.06   27.40 
   0   4   1  359.46   27.20 
   0   4   1  335.27   30.60 
   0   4  -1  382.66   30.00 
   0   4  -1  409.96   31.70 
   0   4  -1  386.56   27.30 
   0   4  -1  376.26   26.10 
   0   4  -1  386.46   22.90 
   0   4   1  370.96   23.90 
   0   4   1  399.96   26.60 
   1  -4   1  430.36   35.60 
   1  -4   1  450.75   35.40 
   1  -4   1  524.95   37.60 
   1  -4   1  528.95   30.90 
  -1  -4  -1  527.35   34.40 
   1  -4   1  481.15   37.50 
  -1  -4  -1  474.15   29.00 
   1  -4   1  479.95   36.60 
  -1  -4  -1  476.25   37.70 
   1  -4   1  456.15   38.60 
  -1  -4  -1  506.75   38.20 
   1  -4   1  531.05   30.90 
   1  -4   1  494.45   28.90 
   1  -4   1  510.25   29.20 
   1  -4   1  503.65   31.20 
  -1  -4  -1  519.75   38.00 
  -1  -4  -1  475.35   37.30 
  -1  -4  -1  436.16   39.10 
   1  -4   1  495.45   30.90 
   1  -4   1  495.35   32.80 
   1  -4   1  496.85   34.20 
   1  -4   1  504.45   33.90 
  -1  -4  -1  579.64   33.70 
   1  -4   1  446.16   34.80 
   1  -4   1  494.45   34.90 
   1  -4   1  500.95   28.60 
   1  -4   1  525.25   36.70 
   1  -4   1  476.25   28.90 
  -1  -4  -1  447.06   34.60 
  -1  -4  -1  389.96   34.90 
   1  -4   1  542.25   35.40 
   1  -4   1  481.75   35.20 
   1  -4   1  459.65   36.70 
  -1  -4  -1  472.45   38.90 
   1  -4   1  443.16   38.00 
   1  -4   1  480.45   37.40 
  -1  -4  -1  416.76   36.30 
  -1  -4  -1  488.15   32.80 
   1  -4   1  484.25   28.50 
   1   4   1  445.16   36.00 
   1   4   1  488.25   30.30 
  -1   4  -1  507.95   34.50 
   1   4   1  543.05   39.10 
  -1   4  -1  502.85   35.70 
   1   4   1  506.05   30.00 
   1   4   1  469.45   31.10 
  -1   4  -1  489.25   29.80 
   1   4   1  504.65   29.40 
  -1   4  -1  502.25   37.80 
   1   4   1  485.55   33.70 
  -1   4  -1  508.35   34.80 
   1   4   1  462.55   37.50 
  -1   4  -1  564.04   31.00 
  -1   4  -1  474.95   38.10 
   1   4   1  456.65   33.60 
   1   4   1  508.55   29.20 
   1   4   1  498.05   28.40 
  -1   4  -1  528.85   35.20 
   1   4   1  504.95   28.30 
   1   4   1  463.35   33.80 
   1   4   1  531.15   38.20 
   1   4   1  496.75   31.30 
   1   4   1  510.15   35.40 
  -1   4  -1  519.25   39.10 
   1   4   1  498.55   34.10 
   1   4   1  503.55   27.60 
  -1   4  -1  509.75   31.60 
  -1   4  -1  495.75   33.20 
  -1   4  -1  475.75   36.30 
  -1   4  -1  459.85   35.50 
  -1   4  -1  483.45   30.90 
   1   4   1  503.35   31.90 
  -1   4  -1  492.35   34.30 
   1   4   1  494.95   29.30 
   1   4   1  507.45   27.60 
   1   4   1  499.75   29.90 
  -1   4  -1  551.84   35.00 
  -1   4  -1  489.65   38.30 
   1   4   1  568.34   33.00 
   1   4   1  483.35   30.90 
   2  -4   1  392.56   26.00 
   2  -4   1  373.86   28.30 
  -2  -4  -1  444.06   33.10 
   2  -4   1  340.37   29.80 
   2  -4   1  385.96   32.40 
   2  -4   1  402.26   29.20 
  -2  -4  -1  363.36   25.50 
   2  -4   1  401.06   30.40 
   2  -4   1  412.36   32.10 
   2  -4   1  405.66   31.70 
   2  -4   1  359.46   31.10 
   2  -4   1  424.66   35.50 
  -2  -4  -1  401.86   31.40 
   2  -4   1  435.86   27.70 
  -2  -4  -1  405.86   32.30 
   2  -4   1  375.06   33.20 
  -2  -4  -1  358.26   25.90 
   2  -4   1  406.06   33.90 
  -2  -4  -1  404.86   32.00 
   2  -4   1  438.96   33.30 
  -2  -4  -1  341.67   29.70 
  -2  -4  -1  383.76   32.10 
   2  -4   1  379.56   26.50 
   2  -4   1  384.76   30.80 
  -2  -4  -1  390.06   25.50 
  -2  -4  -1  392.26   24.40 
   2  -4   1  365.66   31.70 
   2  -4   1  368.96   27.00 
   2  -4   1  381.16   26.60 
   2  -4   1  368.86   27.30 
   2  -4   1  349.77   32.00 
   2  -4   1  400.16   28.40 
  -2  -4  -1  371.06   28.40 
  -2  -4  -1  369.86   31.90 
  -2  -4  -1  374.56   26.70 
  -2  -4  -1  385.46   31.30 
   2   4   1  389.36   25.80 
  -2   4  -1  396.16   27.80 
  -2   4  -1  351.46   31.50 
   2   4   1  412.86   26.10 
  -2   4  -1  354.96   31.50 
   2   4   1  365.56   24.90 
   2   4   1  366.66   27.90 
   2   4   1  407.86   27.70 
   2   4   1  399.16   30.50 
   2   4   1  407.46   32.80 
   2   4   1  374.26   24.90 
  -2   4  -1  477.45   32.50 
   2   4   1  385.76   25.10 
   2   4   1  352.26   32.00 
   2   4   1  429.46   25.40 
   2   4   1  395.26   30.50 
   2   4   1  373.16   26.20 
  -2   4  -1  408.16   27.60 
   2   4   1  418.66   27.00 
  -2   4  -1  356.36   30.80 
   2   4   1  369.26   31.30 
  -2   4  -1  410.16   33.20 
   2   4   1  360.46   31.00 
   2   4   1  393.66   24.30 
   2   4   1  378.76   25.20 
   2   4   1  365.86   29.10 
  -2   4  -1  411.46   34.40 
   2   4   1  370.26   27.20 
  -2   4  -1  388.36   26.40 
  -2   4  -1  365.26   30.30 
  -2   4  -1  356.76   27.40 
   2   4   1  378.36   25.40 
   2   4   1  431.46   27.70 
  -2   4  -1  416.76   34.40 
   2   4   1  367.46   30.40 
  -2   4  -1  381.26   30.90 
  -2   4  -1  378.56   31.40 
   2   4   1  357.76   25.60 
  -2   4  -1  396.36   32.30 
   3  -4   1   -3.30    5.40 
   3  -4   1   -3.70    5.60 
  -3  -4  -1   -3.30    6.70 
   3  -4   1   -9.90    4.40 
  -3  -4  -1    2.00    4.10 
  -3  -4  -1    0.70    6.70 
   3  -4   1   -1.20    6.40 
   3  -4   1    0.50    6.20 
   3  -4   1    1.30    7.10 
  -3  -4  -1    1.90    6.00 
   3  -4   1    2.90    8.80 
   3  -4   1   10.60    9.00 
   3  -4   1    3.60    6.90 
   3  -4   1    8.40    7.90 
  -3  -4  -1    3.90    6.30 
   3  -4   1   -2.80    7.30 
  -3  -4  -1   -2.50    5.00 
  -3  -4  -1    0.60    6.40 
   3  -4   1    3.80    5.80 
  -3  -4  -1   -0.50    5.00 
   3  -4   1    2.30    5.30 
   3  -4   1   12.70    9.50 
   3  -4   1    1.90    6.00 
  -3  -4  -1   -0.70    3.70 
  -3  -4  -1   -9.50    5.40 
   3  -4   1    4.00    8.00 
  -3  -4  -1    3.60    5.90 
   3  -4   1    3.50    7.70 
  -3  -4  -1   -3.10    4.90 
   3  -4   1    2.80    8.60 
   3   4   1    2.80    6.60 
   3   4   1    3.20    2.60 
  -3   4  -1    2.90    5.40 
   3   4   1   -1.70    4.30 
   3   4   1    9.40    7.80 
  -3   4  -1   -6.70    5.70 
  -3   4  -1   -8.10    4.40 
  -3   4  -1   15.80   10.10 
   3   4   1    2.80    3.20 
  -3   4  -1    2.10    7.10 
   3   4   1    0.30    3.30 
   3   4   1   -6.00    2.90 
   3   4   1   12.50    9.10 
   3   4   1    0.70    4.10 
   3   4   1   -1.00    4.90 
   3   4   1   -2.00    4.60 
   3   4   1   -6.40    3.50 
   3   4   1    3.90    4.90 
  -3   4  -1   -4.20    6.60 
   3   4   1    6.10    3.60 
   3   4   1   -0.40    4.90 
   3   4   1   -3.10    5.70 
   3   4   1    8.80    7.50 
  -3   4  -1   11.40    9.60 
  -3   4  -1    1.20    6.90 
  -3   4  -1   11.40    7.50 
   3   4   1    1.00    3.90 
  -3   4  -1    2.80    5.40 
  -3   4  -1   -1.30    6.10 
  -3   4  -1    0.90    6.30 
   3   4   1    0.60    3.60 
  -3   4  -1    5.90    6.70 
   3   4   1    3.80    4.70 
   4  -4   1   16.40    9.20 
   4  -4   1   25.40   13.00 
   4  -4   1   28.70   10.30 
   4  -4   1   14.60    9.70 
  -4  -4  -1    9.60    7.70 
   4  -4   1   20.20   11.10 
   4  -4   1   15.50    9.00 
  -4  -4  -1   14.60    8.50 
   4  -4   1   13.10    8.50 
   4  -4   1   12.60   10.60 
   4  -4   1   -1.10   10.50 
   4  -4   1   18.50   11.80 
  -4  -4  -1   10.50    9.20 
   4  -4   1   17.60   10.90 
  -4  -4  -1   10.20    7.60 
   4  -4   1    5.00    8.80 
  -4  -4  -1   21.90    9.60 
   4  -4   1   14.70   11.60 
  -4  -4  -1   13.80    8.10 
   4  -4   1   19.80   10.00 
  -4  -4  -1   21.20    9.80 
  -4  -4  -1   13.10    8.90 
  -4  -4  -1   15.30    7.70 
   4  -4   1   26.50   11.70 
  -4  -4  -1   20.50    9.60 
   4   4   1   17.20    4.00 
  -4   4  -1   16.50    8.70 
  -4   4  -1   16.00    8.80 
  -4   4  -1   21.20   11.30 
  -4   4  -1    1.90    8.30 
   4   4   1   23.40    9.50 
   4   4   1   24.80   10.80 
   4   4   1   35.00   10.40 
   4   4   1   37.60   10.10 
  -4   4  -1   22.80   10.80 
  -4   4  -1   16.60   10.60 
   4   4   1   25.80    6.70 
  -4   4  -1   29.70   12.20 
   4   4   1   22.60    8.30 
   4   4   1   21.90    7.70 
  -4   4  -1    8.10    8.40 
   4   4   1    9.40    5.80 
   4   4   1   26.90    8.10 
   4   4   1   16.30    5.90 
   4   4   1   19.70    6.60 
  -4   4  -1    5.80    7.40 
  -4   4  -1    6.70    8.80 
  -4   4  -1   12.80    9.30 
   4   4   1    6.60    7.60 
   4   4   1   11.00   10.10 
  -4   4  -1   16.70   10.00 
   4   4   1   20.30    9.80 
  -4   4  -1   33.70   10.00 
   4   4   1   21.50    4.10 
   4   4   1    8.90    8.60 
   4   4   1    2.30    5.70 
   4   4   1   25.20    4.30 
   5  -4   1   59.29   15.60 
   5  -4   1   81.29   14.70 
  -5  -4  -1   65.19   16.00 
  -5  -4  -1   79.79   16.60 
  -5  -4  -1   78.09   12.60 
   5  -4   1   79.19   19.10 
   5  -4   1   65.69   16.60 
   5  -4   1  101.09   21.60 
   5  -4   1   86.69   20.50 
   5  -4   1   74.29   20.90 
  -5  -4  -1   41.80   14.30 
   5  -4   1   73.99   19.40 
  -5  -4  -1   90.79   17.20 
   5  -4   1   78.89   16.40 
  -5  -4  -1   83.09   14.00 
   5  -4   1   65.19   16.20 
  -5  -4  -1   41.80   14.30 
   5  -4   1   61.09   16.50 
  -5  -4  -1   75.09   15.80 
   5  -4   1   59.49   15.50 
  -5  -4  -1   70.09   16.70 
   5  -4   1   78.09   17.70 
   5  -4   1   58.89   17.50 
   5  -4   1   79.09   20.50 
  -5   4  -1  101.19   21.30 
   5   4   1   91.19   14.00 
   5   4   1   61.99   12.90 
   5   4   1   54.59   12.30 
   5   4   1   82.89   15.90 
   5   4   1   43.70   14.20 
  -5   4  -1   81.59   18.00 
  -5   4  -1   72.69   15.40 
  -5   4  -1   43.80   17.10 
  -5   4  -1  105.59   19.50 
  -5   4  -1   74.39   18.90 
   5   4   1   70.29   18.20 
  -5   4  -1   59.99   18.70 
   5   4   1   57.19   17.90 
   5   4   1   71.09   18.00 
   5   4   1   61.59   14.80 
  -5   4  -1   70.19   19.10 
   5   4   1   60.49   14.10 
  -5   4  -1   83.39   14.50 
  -5   4  -1  111.59   22.70 
   5   4   1   84.19   17.30 
   5   4   1   68.39   16.30 
   5   4   1  116.69   19.60 
   5   4   1   76.09    8.70 
   5   4   1   73.09   13.20 
   5   4   1   80.59   14.10 
  -5   4  -1  114.59   21.40 
  -5   4  -1   74.19   17.90 
   5   4   1   64.59   15.20 
   5   4   1   54.99   18.20 
  -5   4  -1   78.89   19.40 
   6  -4   1  347.87   41.90 
  -6  -4  -1  392.36   41.40 
  -6  -4  -1  379.26   43.90 
   6  -4   1  368.16   42.90 
   6  -4   1  331.87   40.70 
   6  -4   1  447.36   32.10 
  -6  -4  -1  346.57   40.70 
   6  -4   1  388.06   45.40 
   6  -4   1  369.26   45.20 
   6  -4   1  387.86   43.20 
   6  -4   1  388.96   47.80 
   6  -4   1  413.46   34.60 
  -6  -4  -1  346.27   37.10 
  -6  -4  -1  372.16   31.80 
   6  -4   1  390.16   39.90 
   6  -4   1  411.96   46.00 
   6  -4   1  448.66   38.30 
  -6  -4  -1  398.46   41.90 
  -6  -4  -1  447.96   47.00 
   6  -4   1  446.16   47.30 
  -6  -4  -1  415.36   43.80 
   6  -4   1  291.87   41.70 
   6  -4   1  406.16   48.50 
  -6   4  -1  460.05   51.29 
  -6   4  -1  431.16   49.30 
  -6   4  -1  409.96   45.40 
   6   4   1  381.56   32.50 
  -6   4  -1  437.56   46.40 
  -6   4  -1  418.36   48.80 
   6   4   1  366.26   46.50 
   6   4   1  424.46   42.40 
   6   4   1  411.36   34.40 
   6   4   1  387.56   44.80 
   6   4   1  379.16   45.10 
  -6   4  -1  344.27   29.60 
  -6   4  -1  434.46   50.29 
  -6   4  -1  316.27   42.90 
   6   4   1  410.06   44.60 
  -6   4  -1  346.77   43.10 
   6   4   1  444.36   42.40 
  -6   4  -1  351.56   43.50 
   6   4   1  383.96   31.60 
   6   4   1  426.36   43.20 
  -6   4  -1  362.76   45.30 
   6   4   1  387.36   33.40 
  -6   4  -1  388.46   45.40 
   6   4   1  406.56   29.70 
   6   4   1  440.36   34.00 
  -6   4  -1  428.36   34.00 
   6   4   1  440.56   48.40 
   6   4   1  361.26   30.80 
   6   4   1  464.85   46.10 
   6   4   1  356.76   39.40 
  -6   4  -1  384.86   40.80 
   7  -4   1  303.97   39.80 
   7  -4   1  316.87   44.80 
   7  -4   1  270.87   39.20 
   7  -4   1  281.37   41.00 
   7  -4   1  258.37   33.10 
   7  -4   1  348.27   45.60 
   7  -4   1  327.67   43.70 
   7  -4   1  262.67   37.50 
  -7  -4  -1  342.97   35.60 
   7  -4   1  298.57   40.90 
   7  -4   1  273.67   38.80 
  -7  -4  -1  466.35   50.69 
  -7  -4  -1  276.07   37.50 
   7  -4   1  284.27   41.20 
  -7  -4  -1  366.86   51.59 
  -7  -4  -1  323.47   40.80 
   7  -4   1  278.77   43.00 
   7  -4   1  246.88   31.60 
  -7  -4  -1  254.37   33.90 
  -7  -4  -1  304.47   39.10 
  -7  -4  -1  272.77   40.60 
   7  -4   1  307.37   44.90 
   7  -4   1  301.87   32.00 
  -7   4  -1  260.47   39.60 
  -7   4  -1  282.97   44.30 
   7   4   1  276.67   32.80 
   7   4   1  356.76   43.30 
  -7   4  -1  215.78   31.70 
  -7   4  -1  270.27   39.30 
   7   4   1  286.27   41.90 
   7   4   1  276.27   40.80 
  -7   4  -1  226.48   39.30 
   7   4   1  281.17   41.20 
   7   4   1  342.97   39.40 
   7   4   1  353.26   42.90 
   7   4   1  315.47   36.20 
   7   4   1  295.07   42.60 
  -7   4  -1  415.46   51.39 
  -7   4  -1  340.27   46.40 
  -7   4  -1  325.87   43.40 
   7   4   1  317.27   43.50 
  -7   4  -1  331.87   46.50 
  -7   4  -1  273.27   39.90 
   7   4   1  287.97   36.50 
   7   4   1  275.07   37.40 
  -7   4  -1  329.97   41.90 
  -7   4  -1  313.07   44.90 
   7   4   1  342.67   41.00 
  -8  -4  -1  608.94   62.79 
   8  -4   1  469.65   54.59 
   8  -4   1  545.65   62.59 
   8  -4   1  470.05   59.79 
  -8  -4  -1  372.96   54.49 
  -8  -4  -1  583.24   59.59 
   8  -4   1  483.15   61.19 
   8  -4   1  690.63   67.19 
  -8  -4  -1  595.24   63.09 
   8  -4   1  465.45   58.59 
   8  -4   1  577.74   64.99 
  -8  -4  -1  527.45   57.99 
   8  -4   1  637.34   63.89 
   8  -4   1  478.55   56.29 
   8  -4   1  577.14   63.59 
   8  -4   1  504.95   63.69 
   8  -4   1  540.35   63.69 
   8   4   1  587.24   65.39 
  -8   4  -1  676.13   73.19 
   8   4   1  618.84   59.49 
  -8   4  -1  522.05   62.29 
   8   4   1  576.44   64.39 
   8   4   1  568.64   63.59 
   8   4   1  621.64   62.39 
   8   4   1  518.85   55.49 
  -8   4  -1  615.64   67.09 
  -8   4  -1  481.45   55.89 
  -8   4  -1  583.44   59.89 
   8   4   1  528.05   56.09 
   8   4   1  621.04   61.39 
   8   4   1  559.84   64.89 
  -8   4  -1  519.05   64.09 
  -8   4  -1  536.65   61.79 
  -8   4  -1  481.15   61.29 
   8   4   1  586.04   63.69 
   8   4   1  666.53   69.79 
  -8   4  -1  544.15   62.09 
  -8   4  -1  590.54   65.09 
   9  -4   1   68.59   27.50 
   9  -4   1   65.39   25.60 
   9  -4   1   73.99   28.70 
  -9  -4  -1  110.59   27.80 
   9  -4   1   40.40   23.40 
   9  -4   1   54.09   24.70 
   9  -4   1   71.49   24.60 
   9  -4   1   79.39   27.60 
   9  -4   1   55.49   24.80 
  -9  -4  -1  102.49   27.90 
   9  -4   1   96.29   31.40 
   9  -4   1   49.00   24.10 
  -9  -4  -1  107.09   30.50 
  -9  -4  -1   76.59   27.20 
   9  -4   1  104.59   32.60 
   9  -4   1  101.19   31.40 
  -9   4  -1   78.99   26.80 
  -9   4  -1   80.69   28.00 
  -9   4  -1  106.39   33.50 
   9   4   1   84.69   30.10 
   9   4   1   80.79   27.50 
  -9   4  -1   66.99   23.20 
   9   4   1   53.39   26.60 
   9   4   1   91.49   28.60 
   9   4   1   80.69   24.40 
  -9   4  -1   85.79   27.60 
   9   4   1  100.29   31.10 
   9   4   1   62.69   24.30 
  -9   4  -1   53.59   25.10 
  -9   4  -1   70.99   27.30 
  -9   4  -1   48.10   25.90 
   9   4   1   81.19   23.40 
   9   4   1   72.79   25.30 
   9   4   1   26.70   22.00 
   9   4   1  124.49   31.90 
  -9   4  -1  110.99   32.90 
   9  -5  -1  289.07   51.69 
   9  -5  -1  374.66   55.89 
   9  -5  -1  425.76   55.79 
   9  -5  -1  397.66   56.09 
   9  -5  -1  269.87   47.60 
   9  -5  -1  434.06   55.29 
   9  -5  -1  362.26   56.89 
   9  -5  -1  275.57   46.50 
   9  -5  -1  331.17   51.49 
   9  -5  -1  438.46   56.89 
   9  -5  -1  352.46   53.79 
   9   5  -1  373.46   51.29 
   9   5  -1  389.56   53.19 
  -9   5   1  445.36   58.89 
  -9   5   1  371.76   51.59 
  -9   5   1  365.26   56.19 
  -9   5   1  343.77   51.79 
   9   5  -1  349.27   52.29 
   9   5  -1  344.67   45.70 
   9   5  -1  427.26   56.99 
   9   5  -1  337.37   51.29 
  -9   5   1  415.76   59.19 
  -9   5   1  349.77   53.59 
   9   5  -1  353.16   54.69 
  -9   5   1  412.06   58.19 
   9   5  -1  472.15   57.49 
   9   5  -1  316.67   51.79 
  -9   5   1  406.66   58.59 
   8  -5  -1   -4.30   16.00 
   8  -5  -1   -2.00   19.10 
   8  -5  -1    7.70   17.00 
   8  -5  -1  -14.00   15.60 
   8  -5  -1   10.00   15.40 
   8  -5  -1   31.30   18.70 
   8  -5  -1   17.10   18.60 
   8  -5  -1    9.60   20.30 
   8  -5  -1    8.80   16.70 
   8  -5  -1   24.00   16.70 
  -8   5   1   23.20   19.70 
  -8   5   1   27.20   18.30 
   8   5  -1   -2.80   11.90 
   8   5  -1    1.40   14.40 
  -8   5   1   21.00   17.60 
  -8   5   1   25.90   19.60 
  -8   5   1   28.30   17.90 
  -8   5   1  -27.40   11.90 
   8   5  -1   18.70   14.20 
   8   5  -1   23.60   16.50 
   8   5  -1    1.00   18.70 
  -8   5   1   12.80   17.10 
   8   5  -1   14.70   16.70 
  -8   5   1   18.40   19.50 
  -8   5   1   -7.00   13.90 
   8   5  -1   -6.00   15.20 
  -8   5   1   22.20   19.30 
   8   5  -1    9.10   15.00 
   8   5  -1   24.20   17.00 
   7  -5  -1  191.98   35.10 
   7  -5  -1  287.97   38.20 
   7  -5  -1  260.37   36.60 
   7  -5  -1  276.67   39.80 
   7  -5  -1  295.97   45.10 
   7  -5  -1  269.67   35.10 
   7  -5  -1  276.87   38.60 
   7  -5  -1  295.07   35.80 
   7  -5  -1  314.47   43.60 
   7  -5  -1  274.37   41.80 
   7  -5  -1  314.47   43.90 
   7  -5  -1  272.87   35.20 
   7  -5  -1  280.87   43.20 
  -7   5   1  225.98   31.70 
   7   5  -1  359.46   41.40 
  -7   5   1  188.18   36.10 
   7   5  -1  278.47   40.40 
   7   5  -1  194.88   35.70 
   7   5  -1  216.08   31.30 
  -7   5   1  192.48   36.40 
   7   5  -1  219.58   31.00 
   7   5  -1  235.58   31.10 
  -7   5   1  215.58   38.20 
   7   5  -1  218.78   34.00 
  -7   5   1  283.17   40.80 
  -7   5   1  272.77   42.50 
   7   5  -1  272.27   38.10 
  -7   5   1  288.77   43.70 
   7   5  -1  312.47   41.20 
   7   5  -1  285.07   37.80 
   7   5  -1  315.97   41.70 
   7   5  -1  311.47   37.00 
   7   5  -1  333.37   42.20 
  -7   5   1  170.28   34.60 
  -7   5   1  208.38   34.80 
  -7   5   1  305.37   46.00 
   7   5  -1  302.37   45.70 
   6  -5  -1  279.47   38.40 
  -6  -5   1  200.68   30.70 
   6  -5  -1  159.08   31.70 
  -6  -5   1  268.17   35.00 
   6  -5  -1  195.18   30.60 
   6  -5  -1  259.47   39.10 
   6  -5  -1  196.08   31.30 
   6  -5  -1  188.48   30.30 
   6  -5  -1  190.08   33.20 
   6  -5  -1  183.28   33.40 
   6  -5  -1  248.38   31.60 
  -6  -5   1  215.58   30.00 
   6  -5  -1  306.77   35.30 
   6  -5  -1  273.87   28.20 
   6  -5  -1  240.98   32.60 
   6  -5  -1  213.38   31.70 
   6  -5  -1  220.68   33.80 
   6   5  -1  199.68   29.50 
  -6   5   1  276.67   39.70 
   6   5  -1  221.38   32.80 
  -6   5   1  251.57   33.40 
   6   5  -1  250.37   38.50 
   6   5  -1  193.28   26.50 
   6   5  -1  334.77   38.70 
  -6   5   1  234.58   36.20 
   6   5  -1  262.27   32.70 
   6   5  -1  278.27   35.50 
   6   5  -1  204.08   30.10 
   6   5  -1  201.68   27.30 
   6   5  -1  264.37   29.40 
   6   5  -1  212.48   31.00 
   6   5  -1  237.68   33.60 
  -6   5   1  268.07   37.30 
  -6   5   1  217.48   32.60 
  -6   5   1  283.07   40.40 
   6   5  -1  241.18   28.50 
   6   5  -1  226.78   31.50 
   6   5  -1  204.58   28.30 
   6   5  -1  196.68   32.50 
  -6   5   1  264.27   38.60 
  -6   5   1  187.08   32.50 
  -6   5   1  221.88   37.20 
  -6   5   1  182.68   32.90 
   6   5  -1  207.78   28.00 
   6   5  -1  198.98   28.50 
  -6   5   1  205.88   26.80 
  -6   5   1  229.68   29.90 
   5  -5  -1 2113.99  125.09 
   5  -5  -1 2066.79  129.59 
  -5  -5   1 2031.60  118.69 
  -5  -5   1 2207.68  123.29 
   5  -5  -1 2030.30  128.79 
   5  -5  -1 2048.79  129.29 
   5  -5  -1 2020.70  120.19 
   5  -5  -1 2090.19  123.29 
  -5  -5   1 2051.19  119.09 
  -5  -5   1 2106.09  119.69 
   5  -5  -1 2012.70  126.69 
   5  -5  -1 1952.80  128.89 
   5  -5  -1 2114.09  125.39 
  -5  -5   1 2052.79  124.09 
   5  -5  -1 2199.38  129.79 
   5  -5  -1 2028.70  127.99 
   5  -5  -1 1872.91  128.99 
  -5  -5   1 1923.81  123.19 
  -5  -5   1 2075.59  121.99 
  -5  -5   1 2001.30  121.69 
  -5  -5   1 2136.69  124.09 
   5  -5  -1 2084.69  125.19 
   5  -5  -1 2121.89  124.89 
  -5  -5   1 2105.99  119.89 
   5  -5  -1 2086.69  125.09 
  -5  -5   1 2088.79  124.39 
  -5  -5   1 2000.50  125.49 
   5   5  -1 2104.69  119.99 
  -5   5   1 1977.70  128.69 
  -5   5   1 2038.20  123.59 
  -5   5   1 2014.10  128.09 
   5   5  -1 1968.30  123.59 
   5   5  -1 2054.29  118.59 
   5   5  -1 2186.98  123.39 
  -5   5   1 2035.80  125.19 
   5   5  -1 2012.70  123.89 
   5   5  -1 1940.41  121.19 
  -5   5   1 2151.88  122.79 
   5   5  -1 1945.31  121.09 
  -5   5   1 1941.41  129.39 
   5   5  -1 2065.99  119.29 
   5   5  -1 2083.49  121.99 
   5   5  -1 2182.38  125.09 
   5   5  -1 2157.48  112.39 
  -5   5   1 2010.40  123.39 
   5   5  -1 2069.59  123.89 
   5   5  -1 2007.80  121.29 
  -5   5   1 2041.80  130.59 
   5   5  -1 2158.88  118.79 
  -5   5   1 2061.09  128.09 
  -5   5   1 2078.69  131.09 
   5   5  -1 2119.69  123.89 
   5   5  -1 2039.30  125.09 
  -5   5   1 1893.01  127.49 
   5   5  -1 1954.90  122.79 
   5   5  -1 2026.70  113.59 
  -5   5   1 2050.39  125.19 
  -4  -5   1  460.15   35.50 
  -4  -5   1  450.15   35.70 
   4  -5  -1  481.25   46.80 
   4  -5  -1  413.76   39.60 
   4  -5  -1  462.85   35.00 
   4  -5  -1  427.66   45.20 
  -4  -5   1  444.46   35.20 
  -4  -5   1  362.26   39.10 
  -4  -5   1  480.15   38.50 
  -4  -5   1  445.26   33.40 
   4  -5  -1  416.16   42.90 
   4  -5  -1  468.45   39.50 
   4  -5  -1  387.76   43.40 
   4  -5  -1  467.45   36.30 
  -4  -5   1  420.66   32.80 
  -4  -5   1  470.65   40.10 
  -4  -5   1  399.46   41.60 
   4  -5  -1  476.15   46.70 
   4  -5  -1  317.27   40.00 
   4  -5  -1  509.25   37.60 
   4  -5  -1  378.16   35.00 
  -4  -5   1  449.95   34.00 
   4  -5  -1  437.46   46.50 
  -4  -5   1  481.85   34.80 
   4  -5  -1  399.36   43.80 
  -4  -5   1  404.46   32.70 
   4  -5  -1  372.46   40.50 
   4   5  -1  498.35   35.10 
  -4   5   1  480.75   38.40 
   4   5  -1  411.86   35.50 
   4   5  -1  410.96   35.70 
   4   5  -1  403.46   43.50 
   4   5  -1  399.36   28.10 
   4   5  -1  475.75   35.00 
   4   5  -1  406.46   29.80 
   4   5  -1  455.95   32.30 
   4   5  -1  394.26   35.80 
   4   5  -1  499.35   36.60 
  -4   5   1  464.25   36.10 
  -4   5   1  435.16   44.60 
  -4   5   1  369.66   40.30 
  -4   5   1  440.86   47.80 
  -4   5   1  363.26   43.50 
   4   5  -1  436.66   29.80 
  -4   5   1  426.36   38.20 
   4   5  -1  410.06   32.20 
  -4   5   1  400.06   44.60 
   4   5  -1  438.26   31.70 
   4   5  -1  487.65   28.60 
  -4   5   1  471.95   47.60 
   4   5  -1  387.46   35.10 
   4   5  -1  435.56   35.50 
  -4   5   1  441.06   36.40 
  -4   5   1  435.76   44.60 
   4   5  -1  418.66   37.90 
  -4   5   1  473.75   39.00 
   4   5  -1  465.15   38.20 
   3  -5  -1  786.12   53.99 
  -3  -5   1  705.33   54.29 
   3  -5  -1  888.81   60.39 
  -3  -5   1  766.62   48.30 
  -3  -5   1  721.03   49.30 
  -3  -5   1  745.93   55.29 
  -3  -5   1  768.02   48.40 
   3  -5  -1  742.23   53.19 
   3  -5  -1  705.73   47.30 
   3  -5  -1  774.32   56.09 
  -3  -5   1  793.52   56.79 
   3  -5  -1  833.92   51.19 
  -3  -5   1  757.52   47.90 
  -3  -5   1  791.12   49.20 
  -3  -5   1  684.13   53.39 
  -3  -5   1  765.82   54.09 
   3  -5  -1  783.52   55.79 
  -3  -5   1  794.02   53.29 
   3  -5  -1  660.43   54.49 
   3  -5  -1  803.92   50.89 
   3  -5  -1  790.32   56.39 
   3  -5  -1  870.61   59.99 
   3  -5  -1  737.83   55.59 
   3  -5  -1  812.92   57.29 
   3  -5  -1  728.43   54.99 
   3  -5  -1  759.72   48.50 
   3  -5  -1  828.12   52.39 
  -3  -5   1  830.02   49.80 
  -3   5   1  778.12   55.69 
   3   5  -1  742.83   45.20 
  -3   5   1  709.13   56.89 
  -3   5   1  694.23   55.59 
   3   5  -1  776.32   52.59 
   3   5  -1  700.23   47.00 
   3   5  -1  753.22   47.80 
   3   5  -1  772.62   48.10 
   3   5  -1  730.13   46.60 
   3   5  -1  785.52   54.69 
   3   5  -1  746.03   50.59 
  -3   5   1  806.62   55.59 
  -3   5   1  739.63   49.30 
  -3   5   1  777.02   55.59 
   3   5  -1  716.33   48.80 
   3   5  -1  762.22   56.19 
  -3   5   1  826.92   55.79 
  -3   5   1  845.12   59.99 
   3   5  -1  697.23   47.70 
   3   5  -1  721.53   48.50 
   3   5  -1  744.03   47.10 
  -3   5   1  835.22   54.19 
   3   5  -1  807.72   49.50 
   3   5  -1  768.82   49.10 
   3   5  -1  751.22   51.39 
   3   5  -1  684.63   49.20 
   3   5  -1  769.92   47.70 
   3   5  -1  859.71   53.49 
  -3   5   1  680.93   54.39 
   3   5  -1  784.32   49.60 
  -3   5   1  752.82   50.89 
   3   5  -1  732.13   54.99 
   3   5  -1  760.92   49.99 
   3   5  -1  723.13   53.09 
  -3   5   1  806.22   56.09 
  -2  -5   1   42.50   12.70 
   2  -5  -1   35.80    9.20 
  -2  -5   1   28.60   11.90 
   2  -5  -1   28.20   12.50 
   2  -5  -1   30.50   11.50 
   2  -5  -1   30.30    7.50 
  -2  -5   1   22.50   11.30 
   2  -5  -1   20.90    8.80 
  -2  -5   1   31.60    7.00 
   2  -5  -1   24.90    9.10 
   2  -5  -1   20.30    6.90 
   2  -5  -1   34.50   10.40 
  -2  -5   1   27.80    7.10 
   2  -5  -1   34.90   13.10 
  -2  -5   1   27.60    8.50 
   2  -5  -1   12.50   10.80 
  -2  -5   1   22.70   10.90 
   2  -5  -1   28.70    6.60 
   2  -5  -1   19.60    5.90 
  -2  -5   1    4.40    8.30 
  -2  -5   1   19.60    8.80 
   2  -5  -1   29.50   12.80 
   2  -5  -1   29.20   10.40 
   2  -5  -1   21.90   11.80 
  -2  -5   1   15.40   10.30 
   2  -5  -1   13.10   10.40 
   2  -5  -1   20.80    6.40 
   2  -5  -1   15.80    8.90 
   2  -5  -1   32.30    7.20 
  -2  -5   1   19.30    9.80 
   2  -5  -1   28.70   11.90 
   2  -5  -1   23.00    7.40 
   2   5  -1   36.20   11.10 
  -2   5   1   11.10    7.30 
   2   5  -1   15.50    5.90 
   2   5  -1   36.50    9.10 
   2   5  -1   17.50    6.60 
  -2   5   1   34.60    7.60 
  -2   5   1   37.30   11.50 
   2   5  -1   31.20   12.50 
   2   5  -1   25.90    6.30 
   2   5  -1   17.10    7.10 
  -2   5   1   27.00   10.80 
   2   5  -1   22.70    8.20 
   2   5  -1   32.40    7.30 
   2   5  -1   33.00    9.00 
   2   5  -1   10.60    6.80 
   2   5  -1   22.20   10.20 
   2   5  -1   43.60   11.20 
   2   5  -1   25.70    6.20 
  -2   5   1   16.90    8.80 
   2   5  -1   24.00    8.30 
   2   5  -1   37.40   12.40 
   2   5  -1   31.90    7.10 
  -2   5   1    4.40    9.60 
  -2   5   1   10.20    9.70 
   2   5  -1   15.50   10.10 
   2   5  -1   34.20    8.40 
   2   5  -1   30.30    6.60 
  -2   5   1   28.70   12.20 
   2   5  -1   36.30    9.50 
  -2   5   1   35.00    8.60 
   2   5  -1   35.40    9.50 
   2   5  -1   21.80    9.90 
   2   5  -1   17.90    7.00 
   2   5  -1   22.90    6.60 
  -2   5   1   35.40   10.20 
   2   5  -1   27.60    6.20 
   2   5  -1   15.80    6.70 
  -2   5   1   28.40   12.50 
   1  -5  -1   73.09   16.50 
   1  -5  -1   41.90   13.60 
   1  -5  -1   66.89   14.60 
   1  -5  -1   52.39   17.20 
   1  -5  -1   90.19   18.10 
   1  -5  -1   48.20   11.00 
   1  -5  -1   81.29   15.80 
  -1  -5   1   73.39   11.70 
  -1  -5   1   58.59   15.30 
  -1  -5   1   52.69   14.20 
   1  -5  -1   80.29   14.30 
   1  -5  -1   70.09   17.00 
   1  -5  -1   53.79   13.80 
   1  -5  -1   67.69    7.70 
   1  -5  -1   71.29   15.20 
   1  -5  -1   75.19   17.10 
   1  -5  -1   64.79   10.40 
   1  -5  -1   74.69    9.60 
  -1  -5   1   58.19   14.60 
  -1  -5   1   92.59   17.90 
  -1  -5   1   78.29    8.10 
  -1  -5   1   91.59    9.70 
  -1  -5   1   54.39   14.30 
   1  -5  -1   63.19   12.60 
   1  -5  -1   81.19   14.30 
  -1  -5   1  100.29   17.80 
  -1  -5   1   72.69   17.40 
  -1  -5   1   51.79   14.80 
   1  -5  -1   71.69   12.20 
  -1  -5   1   90.29   18.70 
   1   5  -1   91.19   12.30 
   1   5  -1   83.49   13.50 
   1   5  -1   75.19    9.20 
  -1   5   1   79.09    6.70 
  -1   5   1   88.99   16.90 
  -1   5   1   50.99   12.30 
   1   5  -1   64.39   15.70 
   1   5  -1   40.10   13.90 
  -1   5   1   52.19   10.60 
  -1   5   1   58.39   12.80 
   1   5  -1   77.89   11.10 
  -1   5   1   74.69   16.10 
   1   5  -1   82.79   12.20 
   1   5  -1   66.29   15.80 
  -1   5   1   81.89   11.30 
  -1   5   1   67.89   15.60 
   1   5  -1   72.59    7.00 
  -1   5   1  100.49   13.00 
   1   5  -1   50.99   10.90 
   1   5  -1   78.79    6.20 
   1   5  -1   71.49    8.50 
   1   5  -1   77.19   11.70 
   1   5  -1   90.19    9.10 
   1   5  -1   57.59   12.60 
   1   5  -1   83.29   16.60 
  -1   5   1   88.59   19.00 
  -1   5   1   74.59   16.30 
   1   5  -1   88.39   13.30 
  -1   5   1   80.79   13.40 
   1   5  -1   76.89   14.10 
   1   5  -1   58.49   11.20 
  -1   5   1   82.59   15.80 
   0  -5  -1   39.50   10.30 
   0  -5  -1   20.40    8.30 
   0  -5   1   33.50   10.80 
   0  -5  -1   42.90   13.00 
   0  -5  -1   41.30    7.80 
   0  -5  -1   39.70   12.40 
   0  -5  -1   35.40   12.50 
   0  -5  -1   34.30   14.60 
   0  -5  -1   26.00    9.30 
   0  -5   1   34.10   12.30 
   0  -5   1   45.70    7.30 
   0  -5   1   38.10   12.60 
   0  -5   1   26.50    9.70 
   0  -5  -1   30.40   10.10 
   0  -5  -1   36.60   12.40 
   0  -5  -1   22.60   12.20 
   0  -5  -1   38.00    5.70 
   0  -5  -1   38.80   13.10 
   0  -5   1   23.30    9.60 
   0  -5   1   21.20   11.10 
   0  -5   1   44.60    9.20 
   0  -5  -1   20.00   10.40 
   0  -5   1   35.30   11.80 
   0  -5   1   51.79   11.50 
   0  -5  -1   42.90   10.90 
   0  -5   1   26.40   11.40 
   0  -5   1   39.40   10.10 
   0  -5   1   47.90   13.00 
   0  -5   1   40.20   10.70 
   0  -5   1   23.90   11.10 
   0  -5  -1   27.80   10.80 
   0  -5   1   25.60   10.80 
   0  -5   1   29.10    7.40 
   0  -5   1   48.60   13.10 
   0  -5   1   38.30   12.00 
   0  -5   1   27.50    5.60 
   0  -5  -1   33.00    9.10 
   0  -5  -1   36.00   12.00 
   0   5  -1   47.20   14.10 
   0   5  -1   18.90   10.30 
   0   5  -1   53.09   12.20 
   0   5   1   35.10    8.90 
   0   5  -1   48.50    9.40 
   0   5   1   25.20    9.20 
   0   5   1   30.90    6.50 
   0   5  -1   17.00    7.80 
   0   5   1   40.60    7.70 
   0   5   1   18.00   10.60 
   0   5  -1   29.10    8.40 
   0   5  -1   40.40    9.70 
   0   5   1   45.30    8.60 
   0   5  -1   40.00    6.20 
   0   5   1   37.10   12.70 
   0   5  -1   38.00   10.10 
   0   5  -1   46.40    9.90 
   0   5  -1   39.40    5.70 
   0   5   1   29.90    8.20 
   0   5   1   40.50   10.90 
   0   5  -1   66.09   14.40 
   0   5   1   38.40   10.20 
   0   5  -1   19.30   10.40 
   0   5  -1   52.49   14.20 
   0   5   1   30.40   11.90 
   0   5   1   43.40   11.80 
   0   5  -1   43.70    9.90 
   0   5  -1   28.40    8.20 
   0   5   1   33.70    7.00 
   0   5  -1   29.80    6.30 
   0   5   1   25.00    7.70 
  -1  -5  -1 2264.77  136.49 
  -1  -5  -1 2230.38  135.69 
   1  -5   1 2269.17  138.69 
   1  -5   1 2490.05  135.89 
   1  -5   1 2304.17  138.69 
  -1  -5  -1 2306.67  136.89 
   1  -5   1 2299.67  136.49 
  -1  -5  -1 2397.66  134.19 
   1  -5   1 2231.18  127.59 
   1  -5   1 2310.27  124.79 
  -1  -5  -1 2280.07  135.59 
   1  -5   1 2351.66  132.29 
   1  -5   1 2323.77  133.69 
   1  -5   1 2313.97  136.09 
   1  -5   1 2219.18  131.99 
   1  -5   1 2198.88  134.39 
  -1  -5  -1 2565.64  139.89 
   1  -5   1 2386.46  136.19 
  -1  -5  -1 2360.56  128.89 
   1  -5   1 2213.88  134.99 
  -1  -5  -1 2490.25  135.69 
  -1  -5  -1 2484.15  138.19 
   1  -5   1 2372.86  132.49 
  -1  -5  -1 2449.25  138.49 
   1  -5   1 2292.07  135.49 
   1  -5   1 2410.26  137.69 
   1  -5   1 2344.67  126.39 
  -1  -5  -1 1953.40  136.49 
   1   5   1 2323.37  128.49 
  -1   5  -1 2296.07  131.79 
   1   5   1 2402.86  132.89 
   1   5   1 2247.78  127.69 
   1   5   1 2258.67  127.69 
  -1   5  -1 2264.67  133.09 
   1   5   1 2278.07  128.69 
  -1   5  -1 2381.26  132.09 
  -1   5  -1 2296.37  137.69 
   1   5   1 2260.77  137.19 
   1   5   1 2421.06  127.19 
  -1   5  -1 2210.88  136.09 
   1   5   1 2275.17  127.69 
   1   5   1 2241.08  125.09 
  -1   5  -1 2426.86  138.69 
  -1   5  -1 2188.78  130.49 
  -1   5  -1 2382.76  126.19 
  -1   5  -1 2434.06  131.59 
  -1   5  -1 2396.36  137.49 
  -1   5  -1 2424.36  137.09 
   1   5   1 2287.87  126.09 
   1   5   1 2325.37  128.49 
   1   5   1 2347.17  138.19 
   1   5   1 2376.56  124.29 
   1   5   1 2323.47  127.29 
   1   5   1 2364.36  125.09 
  -1   5  -1 2328.37  133.49 
  -1   5  -1 2293.17  125.89 
   1   5   1 2331.07  125.09 
  -1   5  -1 2409.26  135.79 
   1   5   1 2557.84  137.79 
  -1   5  -1 2382.86  124.89 
  -1   5  -1 2380.56  127.09 
   1   5   1 2283.57  131.99 
  -2  -5  -1  249.97   31.80 
   2  -5   1  302.87   33.30 
  -2  -5  -1  275.37   31.40 
  -2  -5  -1  309.57   24.00 
   2  -5   1  260.57   30.20 
  -2  -5  -1  258.07   31.80 
  -2  -5  -1  352.36   29.80 
   2  -5   1  311.77   23.80 
   2  -5   1  285.47   22.60 
   2  -5   1  263.87   32.30 
  -2  -5  -1  285.77   22.30 
   2  -5   1  250.97   28.90 
  -2  -5  -1  283.47   32.00 
   2  -5   1  260.37   22.20 
  -2  -5  -1  298.77   24.10 
  -2  -5  -1  305.87   21.30 
  -2  -5  -1  259.97   19.00 
   2  -5   1  270.77   21.50 
   2  -5   1  286.07   31.80 
   2  -5   1  309.87   32.90 
   2  -5   1  261.77   27.20 
   2  -5   1  276.47   33.00 
   2  -5   1  306.87   32.50 
   2  -5   1  311.87   31.10 
   2  -5   1  250.47   20.60 
   2  -5   1  287.17   30.30 
   2  -5   1  343.17   37.50 
   2  -5   1  287.27   32.00 
  -2  -5  -1  309.67   31.70 
   2  -5   1  273.57   31.50 
   2  -5   1  323.07   20.60 
   2  -5   1  323.57   21.70 
   2  -5   1  284.77   21.20 
   2  -5   1  306.27   21.20 
  -2  -5  -1  251.37   30.20 
   2   5   1  252.77   22.00 
   2   5   1  334.87   23.10 
   2   5   1  347.47   35.90 
   2   5   1  262.57   18.90 
   2   5   1  292.07   22.80 
   2   5   1  286.17   20.30 
   2   5   1  312.27   31.80 
   2   5   1  269.27   21.30 
   2   5   1  250.17   20.40 
  -2   5  -1  328.47   32.60 
   2   5   1  238.28   19.00 
   2   5   1  278.77   21.60 
   2   5   1  272.77   20.30 
   2   5   1  258.77   20.80 
  -2   5  -1  271.87   32.20 
  -2   5  -1  294.67   30.60 
  -2   5  -1  257.07   21.90 
  -2   5  -1  270.47   22.40 
  -2   5  -1  330.07   36.70 
   2   5   1  292.47   24.20 
  -2   5  -1  290.77   33.70 
  -2   5  -1  258.47   21.40 
  -2   5  -1  304.57   34.00 
  -2   5  -1  290.07   31.60 
   2   5   1  297.47   33.70 
  -2   5  -1  285.47   32.70 
   2   5   1  287.37   19.70 
   2   5   1  258.57   19.70 
  -2   5  -1  304.27   32.60 
   2   5   1  321.17   24.00 
   2   5   1  246.48   19.50 
   2   5   1  347.37   37.50 
   2   5   1  273.17   23.60 
   2   5   1  266.27   19.60 
  -2   5  -1  245.58   27.90 
   2   5   1  282.37   19.90 
  -2   5  -1  305.47   35.90 
   3  -5   1 2298.77  136.59 
  -3  -5  -1 2333.27  137.39 
  -3  -5  -1 2419.46  136.39 
   3  -5   1 2505.45  133.29 
  -3  -5  -1 2316.37  127.49 
   3  -5   1 2206.28  138.79 
   3  -5   1 2328.57  131.39 
   3  -5   1 2267.57  138.29 
   3  -5   1 2460.95  132.19 
  -3  -5  -1 2431.76  134.39 
   3  -5   1 2181.68  139.69 
   3  -5   1 2383.36  136.69 
  -3  -5  -1 2132.89  126.99 
   3  -5   1 2395.66  134.69 
  -3  -5  -1 2210.68  130.99 
  -3  -5  -1 2291.97  137.99 
   3  -5   1 2425.86  138.59 
   3  -5   1 2458.05  142.59 
   3  -5   1 2241.18  137.79 
   3  -5   1 2468.15  136.69 
  -3  -5  -1 2420.66  136.19 
   3  -5   1 2260.37  137.99 
   3  -5   1 2315.37  140.19 
  -3  -5  -1 2220.88  136.79 
   3  -5   1 2413.96  138.09 
  -3  -5  -1 2384.86  136.99 
   3  -5   1 2427.06  130.29 
  -3   5  -1 2404.86  138.19 
   3   5   1 2401.66  133.59 
  -3   5  -1 2319.57  132.59 
  -3   5  -1 2272.57  138.79 
   3   5   1 2431.46  127.09 
  -3   5  -1 2376.06  137.89 
   3   5   1 2393.36  129.29 
   3   5   1 2377.46  129.49 
  -3   5  -1 2351.16  138.79 
   3   5   1 2425.86  126.99 
   3   5   1 2305.67  129.09 
  -3   5  -1 2301.37  137.19 
   3   5   1 2252.87  138.39 
  -3   5  -1 2194.38  131.69 
  -3   5  -1 2383.46  142.19 
   3   5   1 2354.86  137.49 
   3   5   1 2352.66  129.09 
  -3   5  -1 2264.87  141.39 
  -3   5  -1 2343.57  130.99 
   3   5   1 2224.98  136.79 
  -3   5  -1 2436.16  138.29 
   3   5   1 2365.16  128.79 
   3   5   1 2323.37  125.49 
  -3   5  -1 2247.68  138.09 
   3   5   1 2255.67  130.19 
   3   5   1 2320.87  129.79 
   3   5   1 2377.56  128.89 
   3   5   1 2391.56  131.39 
  -3   5  -1 2268.57  138.89 
   3   5   1 2398.86  139.79 
   3   5   1 2391.76  125.99 
   4  -5   1  196.58   27.00 
  -4  -5  -1  230.68   18.90 
   4  -5   1  208.38   29.90 
   4  -5   1  217.18   32.30 
  -4  -5  -1  241.98   28.10 
  -4  -5  -1  226.28   27.20 
   4  -5   1  209.38   30.50 
   4  -5   1  282.67   28.80 
   4  -5   1  232.68   30.50 
  -4  -5  -1  214.58   25.70 
  -4  -5  -1  203.38   27.70 
   4  -5   1  286.47   32.50 
  -4  -5  -1  215.68   26.50 
  -4  -5  -1  290.47   33.00 
   4  -5   1  194.58   25.20 
   4  -5   1  222.88   27.60 
   4  -5   1  233.78   30.80 
   4  -5   1  217.58   31.30 
   4  -5   1  241.38   30.40 
   4  -5   1  216.08   31.10 
  -4  -5  -1  180.68   25.50 
   4  -5   1  252.77   35.10 
  -4  -5  -1  215.68   26.40 
   4  -5   1  221.88   26.50 
  -4  -5  -1  212.88   25.00 
   4   5   1  224.78   31.30 
   4   5   1  208.58   17.50 
  -4   5  -1  234.78   30.50 
   4   5   1  249.58   20.00 
   4   5   1  224.68   14.30 
  -4   5  -1  160.58   27.40 
  -4   5  -1  240.08   27.30 
   4   5   1  238.88   18.10 
  -4   5  -1  211.58   32.00 
  -4   5  -1  258.27   33.10 
  -4   5  -1  292.57   30.50 
  -4   5  -1  238.68   27.60 
   4   5   1  254.57   32.40 
  -4   5  -1  213.58   30.80 
   4   5   1  218.18   17.70 
  -4   5  -1  214.38   32.70 
   4   5   1  251.27   25.40 
   4   5   1  254.77   28.00 
  -4   5  -1  227.78   29.60 
  -4   5  -1  228.68   31.70 
   4   5   1  235.88   27.40 
  -4   5  -1  190.08   30.60 
  -4   5  -1  232.98   30.40 
   4   5   1  236.48   31.50 
   4   5   1  231.08   25.70 
   4   5   1  199.68   27.30 
   4   5   1  264.27   30.60 
   4   5   1  234.78   31.30 
   5  -5   1  217.78   35.10 
   5  -5   1  285.27   35.50 
  -5  -5  -1  283.77   32.60 
  -5  -5  -1  303.67   34.10 
  -5  -5  -1  239.98   30.20 
   5  -5   1  206.28   33.40 
   5  -5   1  265.07   33.80 
   5  -5   1  267.37   32.50 
   5  -5   1  302.07   39.70 
   5  -5   1  368.16   45.10 
   5  -5   1  241.48   36.10 
   5  -5   1  273.07   36.00 
  -5  -5  -1  273.57   33.60 
   5  -5   1  285.37   33.30 
  -5  -5  -1  313.37   35.60 
   5  -5   1  238.78   33.00 
   5  -5   1  241.78   30.60 
  -5  -5  -1  319.17   32.50 
  -5  -5  -1  272.47   28.70 
   5  -5   1  273.87   32.60 
   5  -5   1  256.07   33.60 
   5  -5   1  342.47   37.00 
   5  -5   1  264.17   30.00 
  -5   5  -1  344.67   41.80 
   5   5   1  285.07   22.10 
  -5   5  -1  265.27   32.50 
   5   5   1  281.17   24.50 
  -5   5  -1  273.37   33.50 
   5   5   1  304.07   37.20 
  -5   5  -1  292.47   34.60 
   5   5   1  371.66   34.70 
  -5   5  -1  287.37   40.70 
   5   5   1  262.67   36.30 
   5   5   1  266.37   27.30 
  -5   5  -1  233.98   31.00 
   5   5   1  259.87   32.40 
   5   5   1  294.97   33.60 
   5   5   1  317.17   41.50 
   5   5   1  271.47   31.90 
  -5   5  -1  237.48   32.60 
   5   5   1  273.47   33.60 
   5   5   1  258.97   31.00 
  -5   5  -1  261.27   30.40 
  -5   5  -1  252.27   36.00 
   5   5   1  324.27   35.20 
  -5   5  -1  319.17   40.90 
   5   5   1  271.47   35.30 
   5   5   1  339.07   33.40 
  -5   5  -1  261.07   36.40 
  -5   5  -1  239.28   34.90 
  -5   5  -1  341.07   42.10 
   6  -5   1   51.59   19.80 
   6  -5   1   47.50   19.80 
   6  -5   1   25.10   15.90 
   6  -5   1   23.90   14.80 
  -6  -5  -1   33.10   14.00 
   6  -5   1   30.20   15.20 
  -6  -5  -1   33.60   13.50 
   6  -5   1   29.40   14.90 
  -6  -5  -1   22.90   13.50 
   6  -5   1   10.40   15.40 
   6  -5   1   10.50   12.70 
  -6  -5  -1   37.30   16.60 
  -6  -5  -1   30.70   13.70 
   6  -5   1    5.70   16.60 
   6  -5   1   10.30   13.90 
   6  -5   1   20.30   14.90 
   6  -5   1   14.70   13.10 
  -6  -5  -1   45.00   15.90 
   6  -5   1   38.40   12.90 
   6  -5   1    5.50   12.80 
   6  -5   1   34.60   14.80 
   6  -5   1   41.50   17.30 
  -6  -5  -1   16.70   12.50 
  -6   5  -1    3.40   13.60 
   6   5   1   27.50   15.40 
  -6   5  -1   37.10   16.00 
   6   5   1   31.00   15.30 
  -6   5  -1   44.10   13.90 
   6   5   1   38.40   13.60 
   6   5   1   19.60   12.40 
   6   5   1   42.50   18.60 
   6   5   1   32.40   15.00 
   6   5   1   32.00   11.60 
   6   5   1   22.00   14.80 
  -6   5  -1   45.70   19.10 
   6   5   1   26.00   14.10 
  -6   5  -1   50.29   16.90 
   6   5   1   33.20   11.10 
  -6   5  -1   46.00   15.70 
  -6   5  -1   35.20   17.10 
   6   5   1   35.00   13.90 
   6   5   1   32.90   12.70 
  -6   5  -1   31.70   12.10 
  -6   5  -1   10.70   15.40 
   6   5   1   64.39   17.30 
  -6   5  -1   46.60   19.90 
   6   5   1   41.30   14.00 
  -6   5  -1   38.30   18.60 
  -6   5  -1   35.50   18.00 
  -6   5  -1   22.30   13.20 
   6   5   1   42.30   12.80 
   7  -5   1  192.58   34.10 
   7  -5   1  137.09   28.80 
   7  -5   1  150.48   32.30 
  -7  -5  -1  151.88   31.30 
   7  -5   1  139.69   29.80 
   7  -5   1  177.68   30.60 
   7  -5   1  163.48   31.40 
   7  -5   1   98.09   28.50 
   7  -5   1  166.78   32.60 
  -7  -5  -1  148.09   30.60 
   7  -5   1  185.18   27.50 
   7  -5   1  169.38   32.30 
   7  -5   1  211.18   33.30 
   7  -5   1  170.48   30.50 
  -7  -5  -1  175.18   29.40 
   7  -5   1  183.78   36.00 
  -7  -5  -1  143.69   27.60 
   7  -5   1  231.18   39.50 
  -7  -5  -1  181.08   27.30 
   7  -5   1  143.89   27.00 
   7   5   1  186.28   33.60 
   7   5   1  157.58   34.80 
   7   5   1  168.88   29.50 
   7   5   1  128.19   25.70 
  -7   5  -1  160.88   33.20 
  -7   5  -1  208.38   35.40 
  -7   5  -1  147.59   31.70 
  -7   5  -1  162.88   33.00 
  -7   5  -1  120.09   29.40 
   7   5   1  176.88   32.20 
   7   5   1  148.19   28.90 
   7   5   1  189.58   32.70 
   7   5   1  198.68   30.00 
  -7   5  -1  125.79   31.40 
  -7   5  -1  126.09   31.60 
  -7   5  -1  252.37   40.10 
  -7   5  -1  220.08   38.80 
  -7   5  -1  150.58   28.10 
   7   5   1  169.38   31.30 
   7   5   1  190.38   34.10 
   7   5   1  164.08   29.60 
   7   5   1  152.08   26.30 
  -7   5  -1  215.58   34.70 
  -7   5  -1  181.68   33.10 
   8  -5   1  122.29   31.70 
   8  -5   1   79.99   28.50 
  -8  -5  -1   74.69   25.00 
   8  -5   1   51.89   21.30 
   8  -5   1   60.09   24.40 
  -8  -5  -1  106.19   28.50 
   8  -5   1   57.29   25.10 
   8  -5   1  111.79   27.40 
   8  -5   1   64.49   26.20 
   8  -5   1   94.89   28.40 
   8  -5   1  101.69   31.20 
  -8  -5  -1   46.60   20.10 
   8  -5   1   37.50   22.30 
  -8  -5  -1  100.79   26.70 
   8  -5   1   50.99   24.50 
  -8   5  -1   72.99   24.00 
   8   5   1   86.19   26.80 
   8   5   1  106.79   31.00 
   8   5   1  126.29   31.80 
   8   5   1  111.69   28.30 
  -8   5  -1   75.29   26.30 
   8   5   1   93.89   24.30 
  -8   5  -1   61.79   25.50 
  -8   5  -1   97.99   31.30 
   8   5   1   72.49   24.80 
   8   5   1   82.89   25.30 
  -8   5  -1   69.29   24.20 
   8   5   1   83.69   23.80 
  -8   5  -1   88.99   25.90 
  -8   5  -1   85.89   26.70 
  -8   5  -1   43.50   23.20 
   8   5   1  108.79   28.60 
  -8   5  -1   67.89   25.30 
  -8   5  -1   94.19   28.00 
   8   5   1  116.49   26.40 
   8   5   1   87.19   23.30 
  -8   5  -1   90.09   26.80 
   9  -5   1  659.93   79.09 
   9  -5   1  527.05   67.89 
   9  -5   1  509.05   66.09 
  -9  -5  -1  706.53   74.39 
  -9  -5  -1  673.53   69.09 
   9  -5   1  515.85   63.89 
   9  -5   1  573.24   67.79 
   9  -5   1  564.04   70.49 
   9  -5   1  539.65   65.89 
   9  -5   1  584.74   69.59 
   9  -5   1  514.65   64.39 
   9  -5   1  444.06   64.19 
   9  -5   1  610.14   64.69 
   9   5   1  586.04   92.89 
   9   5   1  622.64   72.29 
   9   5   1  468.95   63.79 
   9   5   1  640.34   74.09 
  -9   5  -1  470.75   61.99 
   9   5   1  698.53   73.89 
  -9   5  -1  606.94   73.99 
  -9   5  -1  601.84   65.59 
  -9   5  -1  632.94   73.79 
   9   5   1  703.33   75.19 
  -9   5  -1  425.06   62.29 
  -9   5  -1  725.53   78.89 
   9   5   1  710.33   67.39 
   9   5   1  742.53   74.39 
  -9   5  -1  639.94   71.29 
  -9   5  -1  555.04   72.09 
  -9   5  -1  516.75   63.79 
   8  -6  -1   20.90   18.10 
   8  -6  -1   -1.10   19.40 
   8  -6  -1   -1.70   15.90 
   8  -6  -1   46.10   22.30 
   8  -6  -1    2.10   19.50 
   8  -6  -1   10.30   20.70 
   8  -6  -1   32.10   25.50 
   8  -6  -1   21.80   20.90 
   8  -6  -1   32.90   21.70 
   8  -6  -1   25.70   20.00 
   8  -6  -1  -17.20   13.60 
  -8   6   1   28.10   19.10 
  -8   6   1  -29.40   13.30 
  -8   6   1   38.80   18.20 
  -8   6   1   13.20   19.40 
   8   6  -1   24.50   20.00 
   8   6  -1   19.20   16.00 
  -8   6   1    3.20   18.00 
  -8   6   1  -19.50   14.90 
   8   6  -1   46.90   20.90 
  -8   6   1   -2.80   17.40 
  -8   6   1    0.50   18.70 
  -8   6   1   -2.60   14.70 
   8   6  -1   14.20   15.90 
   8   6  -1   28.20   18.20 
   8   6  -1   26.40   18.10 
  -8   6   1   39.80   21.40 
   7  -6  -1    9.30   17.00 
   7  -6  -1   24.10   20.60 
   7  -6  -1   -5.10   14.10 
   7  -6  -1    3.00   13.70 
   7  -6  -1  -17.10   11.40 
   7  -6  -1    4.00   18.10 
   7  -6  -1   -2.80   15.00 
   7  -6  -1   -9.00   14.00 
   7  -6  -1   10.40   18.70 
   7  -6  -1  -19.20   12.00 
   7  -6  -1    9.50   15.30 
   7  -6  -1    7.30   14.60 
   7  -6  -1    7.00   15.70 
   7   6  -1   -8.50   12.20 
  -7   6   1   13.40   16.10 
  -7   6   1   -3.50   12.20 
  -7   6   1    7.50   15.80 
  -7   6   1   -2.20   13.30 
   7   6  -1  -13.90    9.70 
   7   6  -1    4.50   11.40 
   7   6  -1    0.30   12.30 
  -7   6   1  -12.90   13.80 
   7   6  -1    1.30    8.70 
   7   6  -1    0.00   12.50 
  -7   6   1  -20.80   10.30 
  -7   6   1   12.20   16.70 
   7   6  -1   15.40   15.70 
  -7   6   1   -6.60   12.90 
   7   6  -1   -1.40   16.50 
   7   6  -1   10.50   13.70 
  -7   6   1    9.00   18.90 
  -7   6   1    1.40   13.20 
   6  -6  -1   44.70   18.30 
   6  -6  -1   22.50   17.90 
   6  -6  -1   -2.80   11.50 
   6  -6  -1   10.10   13.50 
   6  -6  -1   -0.40   11.70 
   6  -6  -1   -9.10   12.70 
   6  -6  -1    5.80   11.30 
   6  -6  -1    8.20   15.50 
   6  -6  -1    3.40   13.30 
   6  -6  -1    8.90   15.40 
   6  -6  -1   39.70   19.00 
  -6  -6   1   18.80   14.40 
   6  -6  -1    2.50   11.30 
   6  -6  -1   20.60   18.50 
   6  -6  -1   18.10   14.60 
  -6   6   1    5.20   14.50 
   6   6  -1   -3.30    9.20 
  -6   6   1   25.40   15.20 
  -6   6   1    6.30   14.10 
  -6   6   1   10.50   12.40 
  -6   6   1   13.00   16.90 
   6   6  -1   28.60   14.10 
   6   6  -1   14.70   12.80 
  -6   6   1   17.10   13.10 
  -6   6   1    2.40   10.10 
   6   6  -1   18.00   13.50 
  -6   6   1    7.00   12.10 
   6   6  -1   16.60   13.30 
   6   6  -1    7.20   10.90 
   6   6  -1    3.00   14.60 
   6   6  -1   15.60   12.50 
  -6   6   1    1.30   13.50 
   6   6  -1    4.00    9.20 
   6   6  -1   -7.50    9.40 
  -6   6   1    9.80   11.00 
   6   6  -1   19.10   12.00 
   6   6  -1  -14.10    8.60 
  -6   6   1  -10.20   10.30 
  -6   6   1   10.40   12.40 
   6   6  -1   11.60   10.70 
   6   6  -1   -2.00    8.60 
   5  -6  -1    4.40   13.30 
   5  -6  -1   16.20   14.00 
  -5  -6   1    6.20    7.90 
  -5  -6   1   10.30   12.00 
   5  -6  -1   32.80   15.00 
  -5  -6   1   19.30   13.70 
   5  -6  -1   18.90   14.50 
  -5  -6   1   16.40   11.20 
   5  -6  -1    3.20   11.10 
   5  -6  -1   17.10   11.60 
   5  -6  -1   30.10   18.00 
   5  -6  -1    5.60   15.20 
  -5  -6   1   17.80   14.40 
   5  -6  -1   -2.20   11.70 
  -5  -6   1   16.70   12.70 
   5  -6  -1   -1.40   14.20 
   5  -6  -1   15.50   14.60 
   5  -6  -1   18.40   13.10 
  -5  -6   1   17.80    9.20 
   5  -6  -1   46.40   19.50 
  -5  -6   1   23.70   13.40 
   5  -6  -1   25.40   13.90 
   5  -6  -1   11.10   11.30 
  -5   6   1    6.70   11.60 
   5   6  -1   21.20   13.50 
  -5   6   1   29.80   15.40 
  -5   6   1    0.40   11.60 
  -5   6   1   29.60   16.70 
   5   6  -1   14.10   10.20 
   5   6  -1   31.80   11.20 
   5   6  -1   20.10   10.40 
   5   6  -1   38.40   12.30 
  -5   6   1   17.00   15.60 
  -5   6   1    3.60   13.50 
   5   6  -1   12.80    9.00 
  -5   6   1    4.50    9.80 
   5   6  -1   29.60   14.70 
  -5   6   1    2.20    9.60 
   5   6  -1    5.40    9.40 
  -5   6   1   15.70   14.40 
  -5   6   1   22.80   13.60 
   5   6  -1   20.60   12.70 
   5   6  -1   38.30   15.90 
   5   6  -1   21.00   11.30 
  -5   6   1   23.40   15.80 
   5   6  -1   11.90   11.10 
   5   6  -1   10.90    8.50 
   5   6  -1   25.80   13.00 
  -5   6   1    3.00   12.00 
   5   6  -1   43.90   15.10 
   4  -6  -1   93.69   18.00 
   4  -6  -1  120.39   19.60 
   4  -6  -1   84.89   22.20 
   4  -6  -1   86.09   22.70 
   4  -6  -1  131.19   25.90 
   4  -6  -1  139.29   19.60 
  -4  -6   1   90.59   21.50 
   4  -6  -1   83.89   19.70 
   4  -6  -1   86.09   22.00 
  -4  -6   1  100.39   16.80 
  -4  -6   1  108.49   20.80 
  -4  -6   1  118.09   18.40 
   4  -6  -1   88.99   23.00 
  -4  -6   1  140.99   25.10 
   4  -6  -1   91.19   20.40 
   4  -6  -1   85.89   20.70 
  -4  -6   1  111.69   16.10 
  -4  -6   1   97.19   16.10 
   4  -6  -1  102.09   23.60 
  -4  -6   1   95.59   16.60 
   4  -6  -1  122.09   23.20 
   4  -6  -1  114.09   22.90 
   4  -6  -1   99.79   19.60 
  -4  -6   1   83.49   20.80 
  -4  -6   1  118.49   24.20 
   4   6  -1  141.49   18.10 
  -4   6   1  120.29   24.40 
   4   6  -1  102.99   17.20 
  -4   6   1  111.99   20.10 
  -4   6   1  125.99   19.20 
  -4   6   1  121.09   25.50 
   4   6  -1  102.29   17.70 
  -4   6   1   93.19   20.60 
  -4   6   1   91.99   23.10 
  -4   6   1   98.99   21.60 
  -4   6   1  100.09   22.00 
   4   6  -1  136.09   26.00 
   4   6  -1  101.39   21.20 
  -4   6   1   83.09   20.20 
   4   6  -1  100.99   20.00 
   4   6  -1  113.59   22.60 
   4   6  -1  131.19   22.30 
   4   6  -1  134.79   20.70 
   4   6  -1  126.69   21.20 
   4   6  -1   79.89   14.50 
  -4   6   1  118.49   27.00 
  -4   6   1  125.39   24.30 
   4   6  -1  126.39   18.60 
   3  -6  -1    6.60   10.90 
   3  -6  -1   20.40    8.90 
   3  -6  -1   -9.10    6.70 
  -3  -6   1   25.90    8.10 
   3  -6  -1   19.30    7.70 
  -3  -6   1   16.80    7.60 
  -3  -6   1   18.60   14.70 
   3  -6  -1   47.20   16.70 
   3  -6  -1    5.70    9.50 
  -3  -6   1   30.30   15.00 
  -3  -6   1   24.80   12.30 
   3  -6  -1   10.80   11.50 
   3  -6  -1    2.90   11.40 
   3  -6  -1   -0.70   10.50 
  -3  -6   1   14.80    8.10 
   3  -6  -1   29.80   13.80 
   3  -6  -1   31.80   13.00 
  -3  -6   1   30.50    8.80 
  -3  -6   1   13.90   10.70 
   3  -6  -1    8.30   12.70 
  -3  -6   1   12.50    8.90 
   3  -6  -1    9.10    8.50 
  -3  -6   1   30.10   13.60 
   3  -6  -1    7.90   11.70 
   3  -6  -1   30.70   16.00 
  -3  -6   1   -1.60   12.20 
  -3   6   1   16.80   11.70 
   3   6  -1   13.70   11.30 
   3   6  -1   25.40   13.50 
  -3   6   1   44.80   17.50 
  -3   6   1   14.90   11.60 
   3   6  -1    4.50    6.70 
   3   6  -1   38.60   10.50 
   3   6  -1   30.50    9.30 
   3   6  -1    1.30    9.50 
  -3   6   1   21.20   11.70 
  -3   6   1   17.10   11.10 
  -3   6   1   26.20   13.40 
  -3   6   1   10.60   11.50 
  -3   6   1   17.50   10.80 
   3   6  -1   13.70    6.90 
  -3   6   1    8.30    8.70 
   3   6  -1   18.40    7.60 
   3   6  -1   11.00   10.20 
   3   6  -1   13.10   10.90 
   3   6  -1   17.70    8.30 
  -3   6   1   14.90    7.90 
  -3   6   1    3.80    8.50 
  -3   6   1   32.60    9.90 
   2  -6  -1   17.70    5.30 
   2  -6  -1   16.30    9.20 
  -2  -6   1   19.20   12.00 
   2  -6  -1   25.80   14.70 
  -2  -6   1   33.00   12.60 
   2  -6  -1   16.00    8.10 
   2  -6  -1   16.90    6.50 
   2  -6  -1   23.60    6.70 
   2  -6  -1   32.30   11.80 
  -2  -6   1   17.90   10.00 
   2  -6  -1   19.10   10.60 
   2  -6  -1   33.00   14.70 
  -2  -6   1   18.50    5.80 
   2  -6  -1   10.10    6.80 
   2  -6  -1   15.40   13.20 
   2  -6  -1   21.50    5.50 
   2  -6  -1   12.10   11.10 
  -2  -6   1   14.10   12.20 
   2  -6  -1   30.20   14.50 
   2  -6  -1   33.00   15.40 
  -2  -6   1   23.00    9.40 
  -2  -6   1   13.70   11.30 
  -2  -6   1   -0.20    8.70 
   2  -6  -1   -7.80    8.30 
   2  -6  -1   18.40   11.30 
   2  -6  -1   44.90   16.10 
  -2  -6   1   15.00    5.90 
   2  -6  -1   18.60    5.00 
  -2  -6   1   29.30   14.20 
  -2  -6   1   16.90   11.90 
   2  -6  -1   31.30    9.00 
  -2   6   1    8.10   11.20 
   2   6  -1   16.70    6.60 
   2   6  -1   20.80    6.40 
   2   6  -1   14.60    4.90 
   2   6  -1   37.10   10.80 
   2   6  -1   12.10    4.40 
  -2   6   1   25.50    9.00 
  -2   6   1   17.10    9.80 
   2   6  -1   25.00    6.20 
   2   6  -1   12.90    5.90 
   2   6  -1   15.30   11.00 
   2   6  -1   22.50    5.40 
   2   6  -1   11.20    7.30 
   2   6  -1   21.90    9.20 
   2   6  -1   17.20   10.80 
  -2   6   1   25.40    8.80 
   2   6  -1   17.30    8.70 
   2   6  -1   23.40    7.20 
   2   6  -1   18.90    8.00 
  -2   6   1   35.50   13.70 
   2   6  -1   24.10   10.00 
  -2   6   1   14.70    8.70 
   2   6  -1   16.30    8.00 
  -2   6   1    3.90    9.30 
   2   6  -1   20.50   11.70 
   2   6  -1   14.20    4.90 
   2   6  -1   11.30    6.90 
  -2   6   1   42.50   13.30 
  -2   6   1    1.60    8.90 
   2   6  -1   23.10   10.90 
   2   6  -1   27.20    5.60 
  -2   6   1   20.40   12.30 
  -2   6   1   31.20    7.20 
  -2   6   1   22.70   12.20 
   1  -6  -1  146.59   13.40 
   1  -6  -1  131.39   23.50 
   1  -6  -1  132.99   26.10 
  -1  -6   1  210.28   25.70 
  -1  -6   1  144.19   23.50 
   1  -6  -1   99.19   22.20 
   1  -6  -1  138.59   23.20 
   1  -6  -1  101.39   22.70 
  -1  -6   1  145.09   24.30 
   1  -6  -1  129.79   20.70 
  -1  -6   1  202.28   27.80 
   1  -6  -1  129.39   23.60 
  -1  -6   1  205.18   12.60 
   1  -6  -1   97.79   19.20 
   1  -6  -1  112.09   20.00 
   1  -6  -1  141.09   23.40 
   1  -6  -1  100.79   21.30 
  -1  -6   1  144.19   24.20 
  -1  -6   1  180.88   25.80 
  -1  -6   1  165.28   24.10 
   1  -6  -1   98.69   18.30 
   1  -6  -1  132.39   20.40 
   1  -6  -1  118.19   20.80 
   1  -6  -1  111.59   21.50 
  -1  -6   1  168.68   26.20 
   1   6  -1  130.89   13.60 
   1   6  -1  136.19   10.20 
   1   6  -1  151.48   18.00 
   1   6  -1  117.49   16.90 
  -1   6   1  102.49   15.10 
   1   6  -1  139.99   17.60 
  -1   6   1  150.28   23.20 
   1   6  -1  162.38   24.80 
  -1   6   1  131.79   25.00 
  -1   6   1  115.29   20.20 
  -1   6   1  107.69   14.10 
   1   6  -1  137.79   17.00 
   1   6  -1  165.28   25.00 
  -1   6   1   96.39   20.60 
  -1   6   1  121.09   19.00 
   1   6  -1  134.69   19.70 
   1   6  -1  183.28   23.70 
  -1   6   1  112.89   23.30 
   1   6  -1  103.79   21.40 
  -1   6   1  125.49   19.40 
   1   6  -1  143.59   17.20 
  -1   6   1   87.49   18.10 
  -1   6   1  107.69   15.70 
  -1   6   1  169.08   26.50 
   1   6  -1  114.79   22.50 
   0  -6   1  673.23   48.40 
   0  -6   1  686.63   51.89 
   0  -6   1  587.04   50.09 
   0  -6  -1  669.83   53.69 
   0  -6   1  652.03   48.50 
   0  -6   1  612.54   50.89 
   0  -6   1  610.04   47.70 
   0  -6  -1  645.64   47.90 
   0  -6  -1  664.63   51.19 
   0  -6   1  611.94   52.39 
   0  -6   1  613.24   51.09 
   0  -6  -1  734.23   52.79 
   0  -6   1  661.53   47.20 
   0  -6  -1  731.93   50.89 
   0  -6  -1  647.84   52.99 
   0  -6   1  645.44   47.00 
   0  -6   1  649.64   48.30 
   0  -6  -1  638.74   48.10 
   0  -6   1  694.53   48.40 
   0  -6  -1  626.44   51.39 
   0  -6  -1  680.93   48.80 
   0  -6   1  726.73   54.89 
   0  -6  -1  664.53   52.39 
   0  -6   1  676.03   38.40 
   0  -6  -1  602.44   44.10 
   0  -6  -1  641.24   43.50 
   0  -6  -1  715.13   47.90 
   0  -6   1  693.23   51.39 
   0  -6   1  729.23   54.29 
   0  -6  -1  636.54   39.40 
   0   6   1  647.94   44.00 
   0   6   1  659.13   40.50 
   0   6  -1  625.84   49.20 
   0   6  -1  679.63   43.20 
   0   6  -1  662.93   38.50 
   0   6   1  752.52   54.69 
   0   6  -1  672.43   51.89 
   0   6  -1  652.73   47.50 
   0   6  -1  619.44   43.80 
   0   6  -1  679.73   46.90 
   0   6  -1  637.54   44.30 
   0   6  -1  693.23   47.00 
   0   6  -1  642.34   43.30 
   0   6   1  591.94   45.60 
   0   6  -1  611.64   42.50 
   0   6   1  683.13   47.50 
   0   6   1  588.94   39.50 
   0   6   1  703.73   46.70 
   0   6   1  646.74   52.29 
   0   6  -1  751.72   55.19 
   0   6  -1  618.24   38.00 
   0   6   1  608.44   50.89 
   0   6   1  645.24   47.60 
   0   6   1  676.63   44.90 
   0   6  -1  677.73   52.89 
   0   6   1  687.13   50.59 
   0   6  -1  727.13   53.69 
   0   6   1  643.24   39.60 
   1  -6   1   83.89   18.50 
  -1  -6  -1   76.39   19.30 
   1  -6   1   81.89   10.80 
   1  -6   1   91.89   20.40 
   1  -6   1   95.59   22.10 
   1  -6   1   31.10   14.40 
  -1  -6  -1   92.59   20.90 
  -1  -6  -1   84.99   12.80 
   1  -6   1   78.29   18.20 
   1  -6   1   85.09   13.70 
  -1  -6  -1   58.69   16.40 
   1  -6   1   98.99   19.90 
   1  -6   1   84.19   20.70 
   1  -6   1   90.39   20.10 
   1  -6   1  109.09   20.80 
   1  -6   1   67.79   17.90 
  -1  -6  -1   83.79   19.00 
   1  -6   1   62.99   17.20 
   1  -6   1   67.59   15.80 
  -1  -6  -1   74.19   18.50 
  -1  -6  -1   22.60   14.00 
   1  -6   1   91.39   14.80 
   1  -6   1  116.99   16.60 
  -1  -6  -1   79.59   19.10 
   1  -6   1   80.29   16.80 
   1  -6   1   69.19   13.30 
   1   6   1   86.19   19.70 
   1   6   1  103.49   15.40 
  -1   6  -1   77.79   19.10 
   1   6   1   60.89   16.80 
   1   6   1   60.59   18.10 
   1   6   1  101.79   11.00 
  -1   6  -1   79.99   11.20 
  -1   6  -1   98.29   10.60 
   1   6   1   80.59   11.00 
   1   6   1   80.29   10.00 
  -1   6  -1   91.19   15.90 
  -1   6  -1   93.39   18.90 
   1   6   1   72.79   11.80 
   1   6   1  102.09   14.00 
  -1   6  -1   97.09   21.60 
  -1   6  -1   97.29   20.00 
  -1   6  -1   74.49   15.30 
  -1   6  -1   72.59   14.40 
   1   6   1   87.19    9.30 
  -1   6  -1   70.39    8.40 
   1   6   1   61.79   14.60 
   1   6   1  101.69   10.50 
   1   6   1   82.59   13.20 
  -1   6  -1   82.19   19.20 
   1   6   1  110.39   17.80 
   1   6   1   78.29   11.60 
  -1   6  -1  106.39   12.40 
  -1   6  -1   37.90   14.90 
  -1   6  -1   77.19   16.80 
  -1   6  -1   55.59   14.10 
   2  -6   1  205.98   16.50 
  -2  -6  -1  230.88   16.60 
   2  -6   1  238.08   30.60 
  -2  -6  -1  257.87   25.70 
   2  -6   1  166.98   29.40 
  -2  -6  -1  246.18   32.00 
   2  -6   1  223.38   16.10 
   2  -6   1  195.98   20.90 
   2  -6   1  220.18   17.30 
  -2  -6  -1  210.28   32.10 
   2  -6   1  200.78   29.50 
  -2  -6  -1  187.88   21.60 
   2  -6   1  188.28   20.00 
   2  -6   1  252.97   21.30 
  -2  -6  -1  209.58   29.30 
   2  -6   1  235.78   18.20 
   2  -6   1  217.38   30.50 
   2  -6   1  241.18   24.00 
   2  -6   1  216.38   29.80 
  -2  -6  -1  236.98   31.70 
  -2  -6  -1  216.38   31.00 
  -2  -6  -1  238.28   31.80 
   2  -6   1  246.38   32.10 
   2  -6   1  216.68   32.20 
   2  -6   1  187.68   29.50 
   2  -6   1  217.28   30.30 
   2  -6   1  205.78   30.50 
   2  -6   1  243.68   17.10 
   2  -6   1  183.58   24.30 
   2  -6   1  214.28   29.30 
   2  -6   1  204.98   27.80 
   2   6   1  224.98   17.20 
   2   6   1  209.38   17.10 
   2   6   1  222.28   19.30 
  -2   6  -1  201.18   26.30 
   2   6   1  254.37   34.60 
  -2   6  -1  226.68   22.60 
  -2   6  -1  216.18   18.40 
   2   6   1  208.38   15.80 
  -2   6  -1  253.47   30.40 
   2   6   1  232.78   17.20 
   2   6   1  211.38   15.50 
   2   6   1  225.28   30.30 
   2   6   1  234.88   19.10 
   2   6   1  292.17   30.30 
   2   6   1  240.68   24.60 
  -2   6  -1  181.38   29.60 
   2   6   1  244.18   18.90 
  -2   6  -1  259.07   29.40 
  -2   6  -1  275.37   33.90 
   2   6   1  231.78   16.90 
   2   6   1  237.28   16.90 
   2   6   1  232.48   19.30 
   2   6   1  220.98   18.90 
  -2   6  -1  233.68   34.50 
   2   6   1  185.68   24.40 
  -2   6  -1  281.17   34.80 
  -2   6  -1  199.68   27.60 
   2   6   1  216.68   25.80 
  -2   6  -1  224.38   19.30 
  -2   6  -1  247.78   32.90 
   2   6   1  218.08   19.10 
   2   6   1  244.28   18.00 
  -2   6  -1  239.48   34.60 
   2   6   1  213.28   15.50 
  -2   6  -1  240.98   31.30 
   2   6   1  205.08   30.10 
   2   6   1  229.58   14.80 
   3  -6   1   -2.40    6.30 
   3  -6   1   -6.10    8.20 
   3  -6   1    9.90    9.00 
   3  -6   1    1.20    6.40 
   3  -6   1   -2.80   10.20 
  -3  -6  -1   -9.80    8.90 
  -3  -6  -1    3.40    7.40 
  -3  -6  -1   -4.10    8.50 
  -3  -6  -1    0.50    5.30 
   3  -6   1  -13.20    8.40 
  -3  -6  -1    7.50   10.60 
   3  -6   1   -1.20   10.10 
   3  -6   1   -0.80    7.80 
   3  -6   1   -1.20   10.70 
   3  -6   1   -2.00    9.10 
   3  -6   1   -1.20    6.70 
  -3  -6  -1    6.60    5.20 
   3  -6   1   -1.60   10.50 
  -3  -6  -1    4.00    6.00 
  -3  -6  -1   -6.60    9.30 
   3  -6   1   -2.30    7.50 
  -3  -6  -1   -3.90    7.40 
   3  -6   1   11.00   11.50 
  -3  -6  -1    6.20    9.70 
   3  -6   1   13.00    9.80 
   3  -6   1    2.30    9.70 
   3   6   1   -3.70    7.80 
   3   6   1    0.00    4.30 
   3   6   1   -1.50    9.90 
   3   6   1   -0.50    5.30 
   3   6   1    1.10    5.50 
  -3   6  -1    3.70    8.70 
   3   6   1   -7.00    4.20 
   3   6   1   -1.40    6.90 
  -3   6  -1   -0.10    7.80 
   3   6   1    3.20    9.40 
  -3   6  -1   -5.20    6.60 
  -3   6  -1   -2.90   10.00 
  -3   6  -1   10.60   12.20 
   3   6   1    1.70    3.00 
   3   6   1  -11.60    5.30 
  -3   6  -1    5.50    9.10 
  -3   6  -1    1.20    6.00 
  -3   6  -1    4.30    8.20 
  -3   6  -1  -10.40    6.40 
  -3   6  -1   -1.90    5.90 
  -3   6  -1    1.60    8.80 
  -3   6  -1   17.00   11.60 
   3   6   1  -10.30    7.00 
   3   6   1    2.20    4.10 
   3   6   1    4.70    4.90 
  -4  -6  -1    4.00    9.20 
   4  -6   1   -0.10    7.80 
  -4  -6  -1   10.60    8.90 
   4  -6   1   28.90   15.10 
  -4  -6  -1   -3.00   10.00 
   4  -6   1    5.50    8.60 
   4  -6   1   20.70   13.60 
  -4  -6  -1    1.70    8.40 
   4  -6   1    6.90   12.10 
   4  -6   1   -4.10   10.90 
  -4  -6  -1   18.80   12.20 
   4  -6   1   -3.10    9.50 
  -4  -6  -1    4.80    8.70 
  -4  -6  -1   16.40   13.00 
   4  -6   1   13.10   12.20 
   4  -6   1   13.60    9.30 
   4  -6   1    8.00   11.10 
   4  -6   1    7.70   14.10 
   4  -6   1   13.50   13.00 
  -4  -6  -1   -2.10    9.90 
   4  -6   1    6.50    9.10 
  -4  -6  -1    6.70    7.10 
   4  -6   1    9.10   13.40 
   4  -6   1   11.10   12.20 
   4   6   1    7.90    8.30 
  -4   6  -1   10.30   11.50 
  -4   6  -1   13.30    9.30 
  -4   6  -1    2.50    9.30 
   4   6   1    7.40   10.90 
   4   6   1    8.50    6.00 
   4   6   1    0.20    8.80 
   4   6   1   10.80    9.30 
   4   6   1    6.30    8.40 
  -4   6  -1    9.40   11.80 
   4   6   1   -0.80    5.60 
   4   6   1   19.30   11.80 
  -4   6  -1   25.60   10.90 
   4   6   1    8.80    8.50 
  -4   6  -1   -7.80    9.90 
   4   6   1    6.30   10.00 
  -4   6  -1   -8.40   10.10 
  -4   6  -1    2.10    9.90 
   4   6   1   10.60    6.60 
  -4   6  -1    9.40   12.40 
  -4   6  -1    4.60    9.30 
   4   6   1   11.80   10.40 
  -4   6  -1   11.20   14.40 
  -4   6  -1   -3.10    9.20 
   5  -6   1  114.59   21.70 
  -5  -6  -1   82.19   18.70 
   5  -6   1  109.49   24.40 
  -5  -6  -1   68.89   17.30 
   5  -6   1   77.99   19.00 
   5  -6   1   76.99   23.80 
  -5  -6  -1  104.99   21.50 
  -5  -6  -1   82.89   19.10 
   5  -6   1  122.19   23.40 
   5  -6   1   70.69   21.60 
   5  -6   1   44.40   19.00 
   5  -6   1   97.29   21.30 
   5  -6   1   69.89   22.00 
   5  -6   1  105.19   24.90 
   5  -6   1   55.29   22.20 
  -5  -6  -1  106.99   23.00 
   5  -6   1   96.69   20.30 
   5  -6   1   75.09   19.70 
   5  -6   1   71.09   20.30 
   5  -6   1  102.49   23.40 
  -5  -6  -1  101.99   20.90 
  -5   6  -1  105.19   25.80 
   5   6   1  100.99   20.60 
  -5   6  -1   58.29   19.50 
   5   6   1   97.39   23.00 
  -5   6  -1  135.99   26.00 
  -5   6  -1   78.69   24.00 
  -5   6  -1   74.89   22.30 
  -5   6  -1  119.19   22.30 
  -5   6  -1   86.59   24.40 
   5   6   1   85.29   22.80 
   5   6   1  110.59   18.20 
   5   6   1   90.29   22.10 
   5   6   1  119.89   22.50 
  -5   6  -1   67.79   18.90 
  -5   6  -1  119.29   25.20 
   5   6   1  134.59   26.20 
   5   6   1  100.79   19.70 
   5   6   1   93.89   19.60 
  -5   6  -1  111.69   22.50 
  -5   6  -1   70.29   19.40 
  -5   6  -1   79.19   22.40 
   5   6   1   57.19   18.00 
   5   6   1   77.39   16.70 
   6  -6   1  532.85   58.49 
   6  -6   1  511.05   57.99 
   6  -6   1  472.45   53.09 
   6  -6   1  505.45   52.59 
   6  -6   1  461.25   48.60 
  -6  -6  -1  453.55   49.80 
   6  -6   1  468.15   45.70 
   6  -6   1  401.06   51.99 
   6  -6   1  538.95   59.59 
   6  -6   1  469.65   48.70 
  -6  -6  -1  439.16   49.30 
   6  -6   1  513.45   52.99 
   6  -6   1  451.35   48.20 
  -6  -6  -1  529.25   45.70 
  -6  -6  -1  411.66   48.10 
   6  -6   1  528.65   56.39 
   6  -6   1  391.16   52.59 
   6  -6   1  401.26   45.60 
   6  -6   1  443.26   48.50 
   6   6   1  500.65   55.29 
  -6   6  -1  549.35   60.69 
  -6   6  -1  471.45   51.49 
  -6   6  -1  483.95   49.99 
   6   6   1  487.85   53.59 
   6   6   1  476.25   51.19 
  -6   6  -1  464.75   57.19 
  -6   6  -1  493.75   57.79 
   6   6   1  480.85   60.89 
   6   6   1  579.64   56.59 
  -6   6  -1  434.06   52.69 
   6   6   1  439.56   50.79 
   6   6   1  479.95   49.50 
  -6   6  -1  540.15   61.09 
  -6   6  -1  549.15   62.39 
   6   6   1  472.15   46.10 
  -6   6  -1  397.66   49.40 
  -6   6  -1  539.45   44.80 
   6   6   1  474.25   49.20 
   6   6   1  465.55   49.30 
   6   6   1  552.34   47.30 
   6   6   1  491.05   41.50 
  -6   6  -1  369.76   51.59 
   6   6   1  460.25   40.30 
  -6   6  -1  448.06   49.50 
   7  -6   1    0.00   16.00 
   7  -6   1   -7.00   15.40 
   7  -6   1   -1.00   15.70 
   7  -6   1   -8.00   18.40 
   7  -6   1   38.90   18.40 
   7  -6   1  -16.80   12.40 
   7  -6   1   26.50   18.90 
  -7  -6  -1   12.50   15.10 
   7  -6   1    9.20   16.60 
   7  -6   1   -6.00   15.40 
  -7  -6  -1    3.70   13.30 
   7  -6   1    2.00   14.30 
   7  -6   1    3.30   17.80 
   7  -6   1  -18.80   11.60 
   7  -6   1    9.20   18.20 
   7   6   1    8.60   11.80 
  -7   6  -1   -0.70   15.90 
   7   6   1    9.20   12.20 
  -7   6  -1   10.70   16.80 
  -7   6  -1  -11.30   13.40 
  -7   6  -1   -1.20   17.20 
  -7   6  -1   22.60   17.90 
   7   6   1   -9.70   10.40 
  -7   6  -1  -11.00   12.20 
   7   6   1    8.00   14.00 
  -7   6  -1   -3.10   12.60 
  -7   6  -1  -10.60   12.20 
   7   6   1   11.70   12.50 
   7   6   1   -1.50   13.10 
   7   6   1    5.10   17.50 
   7   6   1   -1.30   13.50 
  -7   6  -1  -17.30   10.40 
  -7   6  -1   -1.70   12.90 
   8  -6   1  416.66   53.09 
   8  -6   1  468.55   58.39 
   8  -6   1  355.66   54.19 
   8  -6   1  435.86   62.29 
   8  -6   1  405.96   53.59 
   8  -6   1  387.66   56.19 
   8  -6   1  470.35   58.19 
   8  -6   1  367.26   54.79 
   8  -6   1  395.66   51.79 
   8  -6   1  414.46   52.69 
  -8  -6  -1  548.05   61.19 
   8  -6   1  412.36   54.49 
  -8   6  -1  413.06   57.59 
  -8   6  -1  387.76   58.59 
  -8   6  -1  400.96   58.19 
  -8   6  -1  348.07   55.59 
   8   6   1  585.14   63.09 
   8   6   1  477.55   60.99 
   8   6   1  418.36   52.29 
   8   6   1  404.76   59.89 
  -8   6  -1  465.95   61.59 
  -8   6  -1  512.35   63.79 
   8   6   1  517.35   60.69 
  -8   6  -1  434.36   56.39 
  -8   6  -1  499.55   59.59 
  -8   6  -1  354.16   50.09 
  -8   6  -1  462.55   62.29 
   8   6   1  356.36   46.30 
   7  -7  -1  347.47   52.19 
   7  -7  -1  496.25   59.79 
   7  -7  -1  533.05   62.79 
   7  -7  -1  408.26   54.59 
   7  -7  -1  486.65   54.19 
   7  -7  -1  480.15   54.49 
   7  -7  -1  473.25   55.19 
   7  -7  -1  441.06   52.39 
   7  -7  -1  378.56   51.29 
   7  -7  -1  502.35   61.99 
   7  -7  -1  412.86   56.69 
  -7   7   1  376.36   49.60 
  -7   7   1  569.14   67.99 
  -7   7   1  504.15   60.79 
  -7   7   1  357.96   54.59 
  -7   7   1  444.36   53.69 
  -7   7   1  395.56   58.29 
  -7   7   1  460.95   58.59 
  -7   7   1  404.46   55.89 
  -7   7   1  427.46   57.29 
   7   7  -1  489.95   54.59 
   7   7  -1  406.66   57.49 
   6  -7  -1   20.40   16.70 
   6  -7  -1   16.80   16.50 
   6  -7  -1   25.60   18.60 
   6  -7  -1    4.00   16.40 
   6  -7  -1   -8.30   18.00 
   6  -7  -1   11.50   16.10 
   6  -7  -1    2.30   19.60 
  -6  -7   1    6.60   15.80 
   6  -7  -1  -10.40   12.80 
   6  -7  -1   -8.00   15.20 
   6  -7  -1   10.40   23.40 
   6  -7  -1   31.00   19.50 
   6  -7  -1   -5.90   12.80 
  -6   7   1   -5.40   16.20 
   6   7  -1    5.90   13.10 
  -6   7   1   -6.40   18.80 
  -6   7   1   21.10   21.00 
   6   7  -1   -3.50   12.90 
  -6   7   1   -8.60   13.00 
   6   7  -1    0.90   12.10 
  -6   7   1   16.70   13.80 
  -6   7   1    2.40   13.40 
  -6   7   1   26.80   16.90 
  -6   7   1    8.40   13.50 
  -6   7   1    2.20   13.90 
  -6   7   1   -6.20   13.20 
   6   7  -1   13.70   13.10 
  -6   7   1    1.20   13.70 
   6   7  -1   -1.00   10.70 
  -6   7   1   16.50   14.30 
   5  -7  -1 1807.72  110.49 
   5  -7  -1 1593.04  110.59 
  -5  -7   1 1669.63  107.99 
   5  -7  -1 1681.33  103.89 
   5  -7  -1 1538.45  108.09 
  -5  -7   1 1510.25  101.69 
   5  -7  -1 1557.44  111.09 
   5  -7  -1 1336.67  107.39 
   5  -7  -1 1699.53  104.19 
   5  -7  -1 1553.44  108.99 
   5  -7  -1 1579.94  111.39 
  -5  -7   1 1740.13  108.29 
   5  -7  -1 1622.74  102.49 
  -5  -7   1 1765.52  112.29 
   5  -7  -1 1503.15  107.39 
   5  -7  -1 1620.44  110.59 
   5   7  -1 1381.36  105.39 
  -5   7   1 1747.23  103.69 
  -5   7   1 1697.63  109.39 
   5   7  -1 1572.24  105.39 
  -5   7   1 1492.65  100.29 
   5   7  -1 1555.24  104.49 
  -5   7   1 1538.95  110.69 
  -5   7   1 1593.94  106.69 
   5   7  -1 1678.63  107.19 
  -5   7   1 1539.55  109.29 
  -5   7   1 1623.84  109.09 
  -5   7   1 1581.14  113.89 
  -5   7   1 1566.24  108.49 
   5   7  -1 1605.34  108.89 
  -5   7   1 1608.74  106.79 
  -5   7   1 1665.53  115.09 
  -5   7   1 1688.43  110.49 
   4  -7  -1   46.00   13.00 
   4  -7  -1   59.09   21.40 
   4  -7  -1   41.50   16.90 
  -4  -7   1   77.39   21.90 
   4  -7  -1   49.80   18.30 
   4  -7  -1   53.99   18.30 
   4  -7  -1   33.10   17.60 
   4  -7  -1   73.39   24.20 
  -4  -7   1   86.79   22.40 
   4  -7  -1   43.20   19.90 
   4  -7  -1   45.10   16.20 
   4  -7  -1   44.10   18.90 
   4  -7  -1   39.50   15.60 
   4  -7  -1    3.40   15.00 
   4  -7  -1   78.69   23.90 
  -4  -7   1   29.30   17.70 
  -4  -7   1   36.80   17.10 
   4   7  -1   23.20   15.40 
  -4   7   1   84.99   22.60 
  -4   7   1   60.29   20.00 
  -4   7   1   45.60   20.60 
  -4   7   1   78.39   20.60 
   4   7  -1   58.59   19.50 
  -4   7   1   44.50   19.30 
  -4   7   1   26.30   15.90 
  -4   7   1   47.70   13.50 
  -4   7   1   40.30   13.40 
   4   7  -1   57.49   18.20 
  -4   7   1   52.09   19.20 
   4   7  -1   39.70   15.50 
  -4   7   1   48.50   18.10 
  -4   7   1   15.10   12.70 
  -4   7   1   48.90   19.00 
  -3  -7   1  870.11   63.29 
   3  -7  -1 1039.90   76.09 
   3  -7  -1  974.70   70.59 
   3  -7  -1  905.21   69.19 
  -3  -7   1  864.51   70.89 
   3  -7  -1 1004.90   61.59 
  -3  -7   1  873.51   61.09 
  -3  -7   1  935.01   68.59 
   3  -7  -1  936.91   69.59 
  -3  -7   1  896.41   69.39 
   3  -7  -1  916.11   68.39 
   3  -7  -1 1035.10   65.09 
   3  -7  -1  969.00   72.49 
   3  -7  -1  983.50   75.29 
   3  -7  -1  877.71   71.19 
   3  -7  -1 1028.40   67.89 
  -3  -7   1  978.30   72.69 
  -3  -7   1  890.91   71.29 
   3  -7  -1  975.70   71.19 
  -3  -7   1  829.92   69.69 
   3  -7  -1  886.11   70.19 
  -3  -7   1  861.31   56.69 
  -3   7   1  973.40   60.69 
   3   7  -1  901.71   59.49 
  -3   7   1  975.50   74.59 
   3   7  -1 1032.50   80.89 
   3   7  -1  854.61   70.19 
  -3   7   1  979.80   70.49 
  -3   7   1  896.41   63.49 
   3   7  -1  905.81   61.59 
  -3   7   1  948.81   67.99 
  -3   7   1  907.91   69.19 
  -3   7   1  935.31   67.79 
   3   7  -1  862.71   70.89 
  -3   7   1  862.11   71.49 
   3   7  -1  847.42   67.79 
   3   7  -1  889.71   57.69 
  -3   7   1  995.80   72.99 
   3   7  -1  892.21   70.19 
  -3   7   1  903.41   70.39 
  -3   7   1  892.31   67.89 
   3   7  -1  907.41   69.09 
   2  -7  -1    0.80   11.30 
   2  -7  -1   -1.50    8.90 
  -2  -7   1    8.90   14.50 
   2  -7  -1   13.80   11.20 
  -2  -7   1    5.20    8.90 
  -2  -7   1    8.30   13.30 
  -2  -7   1   -5.80   11.30 
   2  -7  -1    0.00   13.10 
  -2  -7   1    7.80    6.70 
   2  -7  -1   -4.20    9.20 
  -2  -7   1   21.30   15.50 
   2  -7  -1    0.60   14.90 
   2  -7  -1   -4.20   10.50 
   2  -7  -1   20.10   16.00 
  -2  -7   1   18.30   13.00 
   2  -7  -1  -11.70   10.70 
   2  -7  -1   15.40   12.40 
   2  -7  -1    7.40   10.80 
   2  -7  -1   16.50   11.50 
  -2  -7   1   -6.10   12.60 
  -2  -7   1   33.00   15.10 
   2  -7  -1   -0.70   11.50 
   2  -7  -1    4.30   13.60 
   2   7  -1    4.80    6.40 
  -2   7   1    6.90    6.70 
  -2   7   1    5.70   10.50 
   2   7  -1    4.00    7.50 
  -2   7   1   -5.40   10.40 
  -2   7   1    5.70    9.50 
  -2   7   1    6.10   12.60 
  -2   7   1    3.00   11.60 
   2   7  -1   -0.80    7.30 
  -2   7   1    3.70    7.60 
   2   7  -1    5.60    7.50 
   2   7  -1    9.70    6.40 
   2   7  -1    5.10    7.30 
   2   7  -1   -4.40    7.60 
   2   7  -1    9.00   11.80 
  -2   7   1    0.80   10.40 
   2   7  -1    7.80    8.10 
   2   7  -1    2.10    9.20 
  -2   7   1    0.90    9.60 
   2   7  -1   15.10   12.50 
  -2   7   1   16.90   11.40 
  -2   7   1   -9.10    6.20 
  -1  -7   1  367.26   44.20 
   1  -7  -1  416.26   47.60 
  -1  -7   1  286.37   39.30 
  -1  -7   1  339.27   42.40 
   1  -7  -1  423.86   38.00 
   1  -7  -1  313.87   34.30 
   1  -7  -1  360.26   43.50 
   1  -7  -1  200.88   34.70 
  -1  -7   1  384.96   41.50 
   1  -7  -1  313.97   35.30 
   1  -7  -1  339.87   38.90 
   1  -7  -1  330.07   37.70 
  -1  -7   1  397.26   45.00 
   1  -7  -1  322.77   38.00 
   1  -7  -1  327.17   37.80 
  -1  -7   1  270.87   40.70 
   1  -7  -1  251.67   38.50 
   1  -7  -1  351.36   41.30 
   1  -7  -1  367.76   45.80 
  -1  -7   1  246.28   37.30 
   1  -7  -1  274.17   35.50 
   1  -7  -1  305.87   40.90 
  -1  -7   1  360.36   41.50 
  -1   7   1  358.06   43.10 
   1   7  -1  295.87   32.50 
   1   7  -1  348.57   39.60 
  -1   7   1  357.66   35.80 
   1   7  -1  326.47   25.80 
  -1   7   1  333.37   42.00 
  -1   7   1  351.96   24.10 
  -1   7   1  299.97   37.10 
  -1   7   1  348.57   37.10 
   1   7  -1  411.46   49.20 
   1   7  -1  322.27   42.90 
  -1   7   1  393.36   47.90 
   1   7  -1  338.87   27.70 
  -1   7   1  364.16   43.80 
   1   7  -1  375.16   24.90 
  -1   7   1  343.37   35.80 
   1   7  -1  387.66   36.80 
   1   7  -1  311.47   32.90 
   1   7  -1  304.67   26.70 
   1   7  -1  326.77   42.10 
  -1   7   1  253.67   38.70 
   1   7  -1  348.37   43.20 
  -1   7   1  333.57   26.80 
   1   7  -1  363.46   28.40 
   0  -7  -1  -14.10    9.00 
   0  -7   1   14.70   11.70 
   0  -7  -1    7.40    6.50 
   0  -7   1    9.40   12.20 
   0  -7   1   13.70   13.70 
   0  -7   1    0.50   12.70 
   0  -7  -1   -2.80    8.20 
   0  -7   1  -10.70    9.80 
   0  -7  -1   -9.80   11.20 
   0  -7  -1   14.30   10.40 
   0  -7  -1   15.30   15.00 
   0  -7   1  -17.10    7.90 
   0  -7   1    0.90   12.00 
   0  -7   1   12.90   11.20 
   0  -7  -1    2.00    9.60 
   0  -7  -1   15.10   10.60 
   0  -7   1    9.80   13.40 
   0  -7  -1    8.30   12.00 
   0  -7   1   10.10   12.30 
   0  -7   1    9.60   12.20 
   0  -7  -1   12.00   12.50 
   0  -7  -1    6.60   11.90 
   0   7  -1    3.20    8.80 
   0   7  -1   -5.20    9.00 
   0   7   1   -0.20   12.00 
   0   7  -1    7.50    8.10 
   0   7   1    2.50    3.90 
   0   7   1   -5.00    5.60 
   0   7   1   12.00    9.00 
   0   7  -1   13.70   12.30 
   0   7   1   -2.30    9.00 
   0   7  -1    2.80   11.50 
   0   7  -1    1.80    7.50 
   0   7   1    1.30    7.70 
   0   7   1    2.30    9.90 
   0   7  -1    8.00    6.60 
   0   7  -1    0.10    9.50 
   0   7   1    5.60    6.80 
   0   7  -1   -4.50    5.80 
   0   7   1    1.80    9.00 
   0   7   1    2.20    5.20 
   0   7  -1   21.60   12.50 
   0   7  -1    4.70    7.00 
   0   7   1  -10.40    7.10 
   0   7   1   -3.60    6.40 
   1  -7   1 1620.64   94.89 
  -1  -7  -1 1793.22  110.39 
   1  -7   1 1651.13  109.19 
  -1  -7  -1 1680.93  105.99 
   1  -7   1 1545.55  104.79 
   1  -7   1 1713.43   98.29 
   1  -7   1 1730.53  107.69 
  -1  -7  -1 1579.14  110.29 
  -1  -7  -1 1746.83  111.49 
   1  -7   1 1646.64  107.49 
   1  -7   1 1683.43  111.99 
   1  -7   1 1650.13  109.79 
   1  -7   1 1656.83  112.99 
  -1  -7  -1 1695.83  111.79 
  -1  -7  -1 1755.42   96.19 
   1  -7   1 1683.63  114.09 
   1  -7   1 1795.22   96.19 
   1  -7   1 1564.24  107.39 
   1  -7   1 1699.73  111.19 
   1  -7   1 1701.13  109.39 
   1  -7   1 1712.43   93.99 
   1  -7   1 1812.52  105.69 
   1  -7   1 1605.24  106.89 
   1  -7   1 1664.93  106.89 
  -1  -7  -1 1892.41  111.79 
  -1  -7  -1 1589.94  111.09 
  -1   7  -1 1675.93  101.09 
   1   7   1 1861.41  113.79 
  -1   7  -1 1682.23  104.59 
  -1   7  -1 1672.63  106.49 
   1   7   1 1712.03  101.79 
  -1   7  -1 1732.33  112.19 
  -1   7  -1 1656.23  104.79 
   1   7   1 1576.54  104.59 
  -1   7  -1 1712.13  102.79 
   1   7   1 1689.43   99.99 
  -1   7  -1 1703.53  112.29 
   1   7   1 1618.24   96.79 
   1   7   1 1631.64  101.59 
   1   7   1 1656.23   96.59 
   1   7   1 1774.02  103.49 
  -1   7  -1 1808.22  101.69 
  -1   7  -1 1557.44  110.69 
   1   7   1 1660.13   98.19 
   1   7   1 1719.23   93.59 
   1   7   1 1718.23  112.19 
  -1   7  -1 1732.13  110.89 
   1   7   1 1712.93  110.19 
  -1   7  -1 1705.83  110.29 
   2  -7   1  103.59   22.20 
  -2  -7  -1  105.79   24.10 
   2  -7   1  119.59   25.30 
   2  -7   1   58.09   17.60 
  -2  -7  -1   98.69   23.40 
  -2  -7  -1  129.19   26.40 
  -2  -7  -1  115.89   24.50 
   2  -7   1   38.50   16.60 
   2  -7   1  112.89   24.20 
  -2  -7  -1   95.29   17.20 
  -2  -7  -1  111.89   24.70 
   2  -7   1  101.49   24.20 
  -2  -7  -1   97.79   14.50 
   2  -7   1   69.39   17.30 
   2  -7   1  107.99   20.70 
   2  -7   1   86.39   22.90 
   2  -7   1   54.69   18.50 
   2  -7   1   78.69   15.50 
   2  -7   1  140.79   26.20 
   2  -7   1  112.59   24.90 
   2  -7   1   72.69   20.40 
   2  -7   1  107.29   23.50 
  -2  -7  -1   77.89   21.30 
  -2   7  -1  103.49   13.80 
   2   7   1  104.39   24.00 
   2   7   1   70.39   21.90 
  -2   7  -1   82.99   23.40 
   2   7   1  111.99   15.20 
  -2   7  -1   86.09   18.30 
  -2   7  -1   91.39   23.30 
   2   7   1  123.39   16.80 
  -2   7  -1  105.99   24.00 
   2   7   1  156.68   28.60 
  -2   7  -1   64.19   19.80 
  -2   7  -1  100.99   19.50 
   2   7   1   72.49   22.90 
  -2   7  -1   51.29   17.40 
  -2   7  -1   59.89   18.10 
  -2   7  -1   95.59   18.80 
   2   7   1   93.49   18.40 
   2   7   1  109.49   20.30 
  -2   7  -1   68.49   21.10 
   2   7   1  121.49   16.20 
   3  -7   1 1238.88   85.29 
  -3  -7  -1 1307.27   76.49 
   3  -7   1 1088.09   86.09 
   3  -7   1 1307.37   88.29 
   3  -7   1 1064.29   83.19 
   3  -7   1 1191.58   84.69 
   3  -7   1 1145.19   88.89 
   3  -7   1 1247.48   87.09 
   3  -7   1 1189.28   79.49 
  -3  -7  -1 1145.39   85.59 
  -3  -7  -1 1248.68   84.29 
  -3  -7  -1 1284.27   83.79 
   3  -7   1 1274.27   84.59 
   3  -7   1 1235.78   77.19 
   3  -7   1 1198.78   87.29 
  -3  -7  -1 1186.58   85.69 
  -3  -7  -1 1213.28   86.39 
   3  -7   1 1254.47   85.79 
  -3  -7  -1 1217.68   86.99 
  -3   7  -1 1189.18   87.29 
  -3   7  -1 1331.67   84.69 
  -3   7  -1 1188.58   88.89 
  -3   7  -1 1260.17   82.19 
   3   7   1 1236.88   87.09 
  -3   7  -1 1140.19   85.49 
   3   7   1 1248.18   86.09 
   3   7   1 1309.27   89.39 
  -3   7  -1 1319.37   89.19 
   3   7   1 1164.78   78.69 
  -3   7  -1 1285.37   86.39 
  -3   7  -1 1226.48   74.99 
  -3   7  -1 1310.37   84.29 
  -3   7  -1 1201.58   73.99 
   3   7   1 1199.58   77.59 
   3   7   1 1150.08   87.29 
  -3   7  -1 1337.47   86.59 
  -3   7  -1 1192.68   89.19 
  -4  -7  -1   54.19   15.80 
  -4  -7  -1   26.00   18.30 
   4  -7   1   64.79   22.90 
   4  -7   1   31.50   17.90 
   4  -7   1   43.80   17.30 
   4  -7   1   52.49   20.00 
   4  -7   1   63.49   16.80 
  -4  -7  -1   41.40   16.20 
   4  -7   1   55.49   22.40 
   4  -7   1   -9.60   14.40 
   4  -7   1   40.80   17.40 
  -4  -7  -1   27.40   16.20 
  -4  -7  -1   27.90   15.90 
  -4  -7  -1   35.90   13.50 
   4  -7   1   47.30   20.30 
   4  -7   1   49.90   20.70 
  -4  -7  -1   25.20   15.20 
   4  -7   1   64.99   16.10 
   4  -7   1   53.69   20.60 
   4   7   1   29.60   14.90 
  -4   7  -1    0.70   13.50 
   4   7   1   29.70   14.70 
   4   7   1   17.80   15.30 
  -4   7  -1   22.60   16.80 
  -4   7  -1   38.70   16.10 
   4   7   1   30.10   15.00 
  -4   7  -1   31.00   17.50 
  -4   7  -1   34.60   12.40 
  -4   7  -1   42.90   16.70 
   4   7   1   53.79   18.00 
  -4   7  -1   27.50   15.70 
  -4   7  -1   49.70   17.90 
  -4   7  -1   74.19   21.00 
  -4   7  -1   15.50   12.60 
  -4   7  -1   40.40   17.40 
  -4   7  -1   22.60   11.60 
   5  -7   1  290.67   40.60 
   5  -7   1  233.58   33.90 
   5  -7   1  285.97   34.40 
  -5  -7  -1  221.28   35.80 
   5  -7   1  151.48   32.30 
   5  -7   1  214.48   36.20 
  -5  -7  -1  285.87   35.90 
   5  -7   1  262.57   40.50 
   5  -7   1  214.28   36.40 
   5  -7   1  253.97   41.70 
  -5  -7  -1  255.87   35.10 
   5  -7   1  222.58   32.20 
   5  -7   1  229.88   38.90 
   5  -7   1  295.47   40.00 
   5  -7   1  284.87   40.90 
  -5   7  -1  196.58   37.40 
  -5   7  -1  234.88   34.80 
  -5   7  -1  135.79   29.10 
  -5   7  -1  243.88   38.40 
  -5   7  -1  301.97   41.60 
   5   7   1  261.67   37.20 
  -5   7  -1  273.67   34.20 
  -5   7  -1  223.18   38.90 
  -5   7  -1  205.48   35.90 
   5   7   1  233.78   37.60 
   5   7   1  207.68   34.70 
  -5   7  -1  288.57   40.10 
   5   7   1  265.47   38.80 
  -5   7  -1  227.38   36.00 
  -5   7  -1  233.98   37.20 
  -5   7  -1  260.47   32.80 
  -6  -7  -1   21.60   16.50 
   6  -7   1   13.80   19.50 
   6  -7   1  -11.10   12.70 
   6  -7   1   48.20   22.50 
   6  -7   1   42.70   19.30 
   6  -7   1   -1.60   16.60 
   6  -7   1   47.70   19.30 
   6  -7   1   28.50   18.40 
   6  -7   1   -2.80   14.70 
   6  -7   1    6.90   16.60 
   6  -7   1   12.60   18.80 
   6  -7   1   32.40   18.90 
   6  -7   1   53.59   23.70 
   6   7   1   66.99   21.90 
  -6   7  -1   21.30   16.00 
   6   7   1   -8.90   16.40 
  -6   7  -1   14.10   12.70 
  -6   7  -1   12.00   19.10 
  -6   7  -1    8.90   12.70 
  -6   7  -1   29.10   16.50 
   6   7   1   28.60   15.20 
  -6   7  -1    2.00   19.50 
  -6   7  -1   21.50   16.30 
  -6   7  -1    7.40   15.30 
  -6   7  -1   29.10   19.30 
  -6   7  -1   24.70   17.50 
   6   7   1   31.10   17.60 
   6   7   1   19.90   15.10 
  -6   7  -1   34.30   18.00 
   7  -7   1  381.46   54.09 
   7  -7   1  375.86   52.49 
   7  -7   1  395.86   51.29 
   7  -7   1  305.77   50.89 
   7  -7   1  404.86   50.69 
   7  -7   1  269.07   43.10 
   7  -7   1  295.07   47.70 
   7  -7   1  348.87   52.19 
   7  -7   1  467.65   58.79 
   7  -7   1  388.96   47.30 
   7   7   1  405.36   59.29 
  -7   7  -1  318.27   45.50 
  -7   7  -1  348.57   51.99 
  -7   7  -1  266.27   47.60 
  -7   7  -1  412.16   50.19 
  -7   7  -1  483.25   58.99 
  -7   7  -1  519.85   60.69 
  -7   7  -1  292.67   51.19 
  -7   7  -1  395.56   56.19 
  -7   7  -1  408.96   75.19 
   7   7   1  399.16   52.09 
   7   7   1  505.25   57.59 
  -7   7  -1  406.96   58.29 
   6  -8  -1   27.90   21.90 
   6  -8  -1   14.00   20.70 
   6  -8  -1   31.10   24.60 
   6  -8  -1  -36.10   18.60 
   6  -8  -1   18.00   22.90 
   6  -8  -1    2.40   19.90 
   6  -8  -1   -8.40   14.10 
   6  -8  -1    0.50   20.30 
   6  -8  -1   12.20   16.30 
  -6  -8   1   -8.00   16.50 
   6  -8  -1   16.10   20.20 
  -6   8   1    5.30   17.90 
   6   8  -1   20.20   17.50 
  -6   8   1   13.50   21.10 
  -6   8   1    4.30   18.10 
  -6   8   1   20.30   17.70 
  -6   8   1    0.10   15.30 
  -6   8   1   17.80   18.10 
   6   8  -1   24.60   16.50 
  -6   8   1   13.60   16.20 
   6   8  -1   22.10   17.10 
  -6   8   1   29.60   17.90 
  -6   8   1   10.80   16.20 
  -5  -8   1  -12.80   14.30 
   5  -8  -1   19.30   20.30 
   5  -8  -1   10.30   16.40 
   5  -8  -1    6.40   15.80 
   5  -8  -1  -16.20   14.10 
  -5  -8   1  -17.60   13.10 
   5  -8  -1   20.60   19.40 
   5  -8  -1   14.90   17.70 
   5  -8  -1  -23.10   13.00 
   5  -8  -1    5.20   15.50 
   5  -8  -1   17.90   19.40 
   5  -8  -1   -3.70   15.50 
  -5  -8   1    5.70   17.60 
   5  -8  -1    5.10   18.30 
  -5  -8   1   29.10   18.30 
   5   8  -1   -4.00   12.80 
  -5   8   1  -16.00   14.10 
  -5   8   1   -4.20   13.20 
  -5   8   1   10.90   15.00 
  -5   8   1    0.10   10.70 
   5   8  -1  -13.00   10.00 
  -5   8   1  -11.80   14.40 
   5   8  -1    6.20   14.60 
  -5   8   1    1.70   14.60 
   5   8  -1   22.30   15.30 
  -5   8   1    9.90   17.00 
  -5   8   1   28.50   21.80 
  -5   8   1    2.30   12.00 
   5   8  -1  -11.80   12.20 
  -5   8   1   -5.60   12.20 
  -4  -8   1   77.19   23.60 
   4  -8  -1   54.59   17.40 
   4  -8  -1   32.50   17.50 
   4  -8  -1   38.00   17.10 
   4  -8  -1    9.90   19.90 
   4  -8  -1   16.50   19.10 
   4  -8  -1   33.50   20.40 
   4  -8  -1   43.80   21.00 
   4  -8  -1   26.10   18.10 
  -4  -8   1   22.60   18.90 
   4  -8  -1   76.09   24.90 
   4  -8  -1   31.60   17.80 
  -4  -8   1   37.00   20.30 
  -4  -8   1   17.60   17.10 
   4  -8  -1   62.09   24.60 
   4  -8  -1   64.19   23.20 
  -4   8   1   45.80   20.30 
  -4   8   1   52.89   21.40 
  -4   8   1  109.79   26.40 
  -4   8   1   82.39   24.00 
   4   8  -1   41.40   18.40 
  -4   8   1   64.49   19.80 
  -4   8   1   36.90   20.10 
  -4   8   1   57.99   18.10 
  -4   8   1   21.80   16.70 
  -4   8   1   58.39   24.60 
  -4   8   1   70.79   22.30 
   4   8  -1   46.60   17.70 
   4   8  -1   16.00   15.40 
   4   8  -1   69.09   22.70 
  -3  -8   1   46.60   22.80 
   3  -8  -1   22.10   19.50 
   3  -8  -1   45.50   22.20 
   3  -8  -1   59.79   22.80 
   3  -8  -1   64.89   20.70 
   3  -8  -1   18.80   16.60 
   3  -8  -1   33.70   19.70 
  -3  -8   1   21.40   18.30 
  -3  -8   1   25.40   18.30 
   3  -8  -1   23.00   21.00 
   3  -8  -1   45.10   18.90 
   3  -8  -1   25.40   17.20 
   3  -8  -1   14.70   14.00 
   3  -8  -1   21.80   14.50 
  -3  -8   1   17.10   19.00 
   3  -8  -1   31.50   19.30 
   3   8  -1   22.20   17.10 
  -3   8   1   35.80   15.50 
  -3   8   1   20.70   17.40 
  -3   8   1   18.50   16.20 
  -3   8   1   24.70   12.30 
  -3   8   1   20.60   15.00 
  -3   8   1   34.40   18.40 
  -3   8   1   32.10   18.00 
   3   8  -1    4.50   13.60 
  -3   8   1   15.20   14.50 
   3   8  -1   29.80   17.50 
   3   8  -1   17.00   15.70 
  -3   8   1  -19.00    8.90 
  -3   8   1   34.30   15.90 
   2  -8  -1   33.70   18.00 
   2  -8  -1   53.79   18.70 
   2  -8  -1   15.60   17.00 
   2  -8  -1   43.40   21.50 
  -2  -8   1   63.69   22.30 
  -2  -8   1   67.09   22.20 
   2  -8  -1   35.60   20.10 
   2  -8  -1   43.10   20.60 
   2  -8  -1   74.49   21.50 
   2  -8  -1   44.00   18.80 
  -2  -8   1   22.40   18.50 
   2  -8  -1   22.40   14.30 
  -2  -8   1   66.49   20.50 
   2  -8  -1   29.20   18.90 
   2  -8  -1   45.00   20.40 
   2  -8  -1   26.30   19.70 
  -2  -8   1   31.90   20.30 
  -2   8   1   30.60   18.20 
  -2   8   1   47.90   16.70 
   2   8  -1   29.90   16.30 
   2   8  -1   52.69   21.80 
   2   8  -1   60.69   15.80 
   2   8  -1   56.69   20.00 
   2   8  -1   42.30   13.40 
  -2   8   1   26.90   17.70 
  -2   8   1   31.00   16.40 
  -2   8   1   34.30   17.90 
  -2   8   1   68.99   22.30 
   2   8  -1   28.70   13.80 
  -2   8   1   56.39   19.80 
   2   8  -1   74.09   23.40 
  -2   8   1   68.99   18.90 
  -2   8   1   85.19   21.60 
   1  -8  -1  -12.90    9.90 
  -1  -8   1   26.60   16.30 
  -1  -8   1   38.50   17.50 
  -1  -8   1   -1.30   14.10 
  -1  -8   1    7.40   12.70 
   1  -8  -1    8.70   15.00 
  -1  -8   1   11.40   13.70 
   1  -8  -1    0.10   14.60 
   1  -8  -1   10.40   14.00 
   1  -8  -1   15.30   15.90 
  -1  -8   1   14.90   15.60 
   1  -8  -1   -1.40   12.50 
   1  -8  -1    1.80   13.00 
   1  -8  -1   -8.30   16.30 
  -1  -8   1   18.80   17.80 
   1  -8  -1    8.80   15.10 
   1  -8  -1    4.40   11.40 
   1  -8  -1   -2.00   12.60 
  -1  -8   1   13.10   15.40 
   1  -8  -1   -6.90   10.50 
   1   8  -1   18.10   15.00 
  -1   8   1   -5.20   10.00 
  -1   8   1  -10.90    7.70 
  -1   8   1    0.80   11.70 
  -1   8   1   -4.60   11.30 
   1   8  -1    8.00   11.70 
   1   8  -1   19.00   10.00 
   1   8  -1    7.20    9.20 
   1   8  -1    1.60   11.80 
   1   8  -1    5.50    8.20 
   1   8  -1   -4.40   11.10 
  -1   8   1  -18.00    8.90 
   1   8  -1   11.30   14.30 
  -1   8   1   -8.70    7.90 
  -1   8   1   -9.20   10.30 
  -1   8   1  -11.90   11.20 
   1   8  -1    3.30    8.30 
  -1   8   1    0.00    8.90 
   0  -8  -1  500.75   55.19 
   0  -8  -1  467.55   52.99 
   0  -8   1  513.65   55.09 
   0  -8  -1  556.14   57.39 
   0  -8  -1  521.45   51.59 
   0  -8   1  469.55   48.40 
   0  -8   1  435.26   51.09 
   0  -8  -1  391.96   50.19 
   0  -8   1  534.25   57.79 
   0  -8   1  389.26   43.90 
   0  -8   1  462.05   54.69 
   0  -8   1  374.46   49.30 
   0  -8  -1  418.16   52.09 
   0  -8  -1  441.16   46.30 
   0  -8  -1  492.25   56.59 
   0  -8   1  393.76   51.69 
   0   8  -1  491.05   42.10 
   0   8  -1  427.96   44.90 
   0   8   1  454.45   50.39 
   0   8  -1  461.55   54.09 
   0   8  -1  423.96   36.40 
   0   8   1  469.15   45.60 
   0   8   1  442.96   54.39 
   0   8   1  478.65   48.00 
   0   8  -1  442.46   53.69 
   0   8   1  428.56   35.60 
   0   8   1  436.66   53.99 
   0   8   1  364.06   48.20 
   0   8   1  420.06   36.60 
   0   8  -1  383.46   47.60 
   0   8  -1  488.65   56.19 
   0   8   1  468.15   39.80 
   0   8  -1  453.25   53.69 
   0   8  -1  475.85   40.20 
   0   8   1  470.95   57.59 
   1  -8   1  134.09   26.90 
  -1  -8  -1  102.09   26.30 
  -1  -8  -1  115.39   26.90 
   1  -8   1  115.19   29.70 
  -1  -8  -1   68.19   23.00 
   1  -8   1   79.09   25.10 
   1  -8   1  155.98   31.00 
  -1  -8  -1   55.19   20.90 
   1  -8   1   81.89   21.50 
   1  -8   1   81.69   21.30 
  -1  -8  -1   55.49   19.20 
   1  -8   1   74.09   23.00 
   1  -8   1   98.49   21.40 
   1  -8   1   69.69   22.60 
   1  -8   1  115.09   24.70 
   1  -8   1  112.79   24.80 
  -1  -8  -1  109.29   26.50 
  -1  -8  -1  151.58   30.00 
   1  -8   1  125.49   30.00 
  -1   8  -1   36.70   13.40 
  -1   8  -1   98.99   21.40 
  -1   8  -1  112.39   27.40 
   1   8   1  128.69   22.20 
  -1   8  -1   99.99   22.50 
  -1   8  -1  107.39   21.80 
   1   8   1  127.09   21.10 
  -1   8  -1   75.79   24.00 
   1   8   1  117.89   27.70 
  -1   8  -1   96.09   25.00 
   1   8   1  125.19   18.50 
   1   8   1   98.89   24.50 
   1   8   1  124.39   24.90 
   1   8   1   93.19   19.50 
   1   8   1  101.19   25.90 
  -1   8  -1   65.19   21.00 
  -1   8  -1  123.79   20.50 
  -1   8  -1   92.59   19.00 
  -1   8  -1   59.09   21.60 
   1   8   1   76.99   26.30 
   2  -8   1  208.58   34.80 
  -2  -8  -1  175.38   33.50 
   2  -8   1  228.68   32.50 
   2  -8   1  160.48   32.60 
  -2  -8  -1  229.48   35.50 
   2  -8   1  237.98   38.10 
   2  -8   1  246.58   37.50 
  -2  -8  -1  272.07   39.30 
  -2  -8  -1  223.38   35.80 
  -2  -8  -1  267.27   38.40 
   2  -8   1  177.68   33.20 
   2  -8   1  202.78   35.10 
   2  -8   1  270.47   41.50 
  -2  -8  -1  236.78   38.10 
   2  -8   1  139.39   30.00 
   2  -8   1  155.38   35.00 
   2  -8   1  196.58   34.70 
  -2   8  -1  201.98   28.10 
  -2   8  -1  237.88   31.90 
   2   8   1  261.37   41.00 
   2   8   1  187.98   26.00 
  -2   8  -1  219.58   33.30 
  -2   8  -1  241.28   36.80 
  -2   8  -1  206.68   33.60 
   2   8   1  233.08   37.20 
   2   8   1  283.87   42.40 
   2   8   1  228.98   32.10 
   2   8   1  240.18   30.10 
   2   8   1  193.88   37.60 
  -2   8  -1  233.18   38.90 
  -2   8  -1  248.58   39.80 
  -2   8  -1  243.18   40.20 
  -2   8  -1  227.78   40.20 
  -2   8  -1  201.78   30.10 
  -3  -8  -1   44.40   20.70 
   3  -8   1    4.80   17.80 
  -3  -8  -1   12.30   17.60 
   3  -8   1   12.60   16.90 
   3  -8   1    1.10   17.10 
   3  -8   1   23.80   16.20 
   3  -8   1   26.70   18.20 
   3  -8   1   22.10   17.60 
   3  -8   1   23.80   16.30 
   3  -8   1   26.50   20.20 
  -3  -8  -1   15.40   17.20 
  -3  -8  -1   19.60   15.70 
   3  -8   1   11.90   13.60 
   3  -8   1   21.30   16.70 
   3  -8   1   47.00   20.30 
  -3  -8  -1    1.20   13.50 
  -3   8  -1   14.50   14.90 
   3   8   1   20.80   17.70 
   3   8   1    3.10   12.20 
  -3   8  -1   35.40   15.00 
  -3   8  -1    0.80   10.50 
  -3   8  -1   29.50   17.40 
  -3   8  -1   23.90   19.60 
  -3   8  -1   29.90   19.40 
  -3   8  -1   18.60   15.20 
   3   8   1   21.10   16.30 
   3   8   1   18.80   16.90 
  -3   8  -1   27.90   13.90 
  -3   8  -1   -0.70   12.70 
  -3   8  -1   29.10   16.00 
   4  -8   1   -8.00   13.50 
   4  -8   1   20.40   17.90 
   4  -8   1    8.80   19.00 
   4  -8   1   -7.10   14.80 
  -4  -8  -1   -7.20   13.00 
  -4  -8  -1   -3.70   13.00 
   4  -8   1   -4.00   12.90 
   4  -8   1   18.70   17.20 
  -4  -8  -1   -6.70   11.80 
  -4  -8  -1  -31.20   10.80 
   4  -8   1    7.30   20.10 
   4  -8   1   -9.90   12.00 
   4  -8   1   -7.90   12.00 
  -4  -8  -1   -9.10   13.40 
   4  -8   1   14.00   16.70 
  -4   8  -1   -5.60   12.30 
  -4   8  -1  -13.40   11.40 
  -4   8  -1   14.30   12.80 
  -4   8  -1  -15.70   10.20 
   4   8   1    3.60   13.20 
   4   8   1   18.10   15.90 
  -4   8  -1   -0.60   11.90 
  -4   8  -1    1.00   14.00 
  -4   8  -1   -4.20   14.00 
  -4   8  -1    5.60   12.30 
   4   8   1   -9.90   11.40 
  -4   8  -1   -2.40   12.70 
  -4   8  -1    0.80   12.60 
   4   8   1   -6.30   11.50 
   5  -8   1   37.70   22.60 
   5  -8   1    2.50   16.50 
   5  -8   1    1.70   18.70 
   5  -8   1    9.80   17.40 
   5  -8   1   -9.40   16.30 
   5  -8   1   22.70   18.40 
   5  -8   1   13.60   20.90 
   5  -8   1   17.30   18.60 
  -5  -8  -1   16.50   17.90 
   5  -8   1   13.00   16.10 
   5  -8   1    7.50   15.50 
  -5  -8  -1   19.00   17.50 
  -5  -8  -1   17.90   19.30 
  -5   8  -1   -9.30   14.60 
   5   8   1   16.40   16.30 
  -5   8  -1   36.60   22.10 
  -5   8  -1   11.20   16.60 
  -5   8  -1   15.20   17.60 
  -5   8  -1    1.20   13.00 
   5   8   1   -4.40   13.00 
  -5   8  -1   16.50   17.40 
  -5   8  -1    1.80   15.90 
  -5   8  -1    9.00   15.00 
  -5   8  -1   24.10   17.00 
   5   8   1    5.30   14.40 
  -5   8  -1    3.50   14.40 
   5   8   1    3.30   12.80 
   6  -8   1  189.18   41.00 
   6  -8   1  281.27   44.00 
   6  -8   1  244.78   44.70 
   6  -8   1  208.38   39.10 
   6  -8   1  232.98   42.00 
   6  -8   1  262.87   43.70 
   6  -8   1  177.08   37.50 
  -6  -8  -1  259.37   43.30 
   6  -8   1  285.27   46.20 
   6  -8   1  257.77   41.30 
  -6   8  -1  237.48   41.80 
  -6   8  -1  196.68   40.10 
  -6   8  -1  227.98   46.10 
  -6   8  -1  245.78   47.80 
  -6   8  -1  251.67   41.80 
   6   8   1  191.28   35.20 
   6   8   1  171.78   34.90 
  -6   8  -1  261.87   42.20 
  -6   8  -1  268.67   47.20 
   6   8   1  142.79   36.50 
  -6   8  -1  247.28   42.20 
   6   8   1  230.08   39.50 
  -6   8  -1  233.28   40.60 
   6   8   1  231.78   39.60 
   5  -9  -1  664.23   75.79 
  -5  -9   1  673.63   76.49 
   5  -9  -1  717.53   79.09
[truncated: 3,242,058 more chars]
