# Supplementary material
Source: MDPI journal article supplement (https://www.mdpi.com/2073-4352/13/7/1043)
Supplement: s1 [file s1 › 5 Sm Ha2019_99g_0m_a.cif]

 
data_Ha2019_99g_0m_a 
  
_audit_creation_method            'SHELXL-2014/7' 
_shelx_SHELXL_version_number      '2014/7' 
_chemical_name_systematic         ? 
_chemical_name_common             ? 
_chemical_melting_point           ? 
_chemical_formula_moiety          ? 
_chemical_formula_sum 
 'C4 H12 Cl O7 Sm' 
_chemical_formula_weight          357.94 
  
loop_ 
 _atom_type_symbol 
 _atom_type_description 
 _atom_type_scat_dispersion_real 
 _atom_type_scat_dispersion_imag 
 _atom_type_scat_source 
 'C'  'C'   0.0033   0.0016 
 'International Tables Vol C Tables 4.2.6.8 and 6.1.1.4' 
 'H'  'H'   0.0000   0.0000 
 'International Tables Vol C Tables 4.2.6.8 and 6.1.1.4' 
 'O'  'O'   0.0106   0.0060 
 'International Tables Vol C Tables 4.2.6.8 and 6.1.1.4' 
 'Cl'  'Cl'   0.1484   0.1585 
 'International Tables Vol C Tables 4.2.6.8 and 6.1.1.4' 
 'Sm'  'Sm'  -0.1638   3.4418 
 'International Tables Vol C Tables 4.2.6.8 and 6.1.1.4' 
  
_space_group_crystal_system       monoclinic 
_space_group_IT_number            14 
_space_group_name_H-M_alt         'P 21/n' 
_space_group_name_Hall            '-P 2yn' 
  
_shelx_space_group_comment 
; 
The symmetry employed for this shelxl refinement is uniquely defined 
by the following loop, which should always be used as a source of 
symmetry information in preference to the above space-group names. 
They are only intended as comments. 
; 
  
loop_ 
 _space_group_symop_operation_xyz 
 'x, y, z' 
 '-x+1/2, y+1/2, -z+1/2' 
 '-x, -y, -z' 
 'x-1/2, -y-1/2, z-1/2' 
  
_cell_length_a                    7.8503(3) 
_cell_length_b                    7.8844(3) 
_cell_length_c                    17.5192(6) 
_cell_angle_alpha                 90 
_cell_angle_beta                  98.483(2) 
_cell_angle_gamma                 90 
_cell_volume                      1072.49(7) 
_cell_formula_units_Z             4 
_cell_measurement_temperature     100(2) 
_cell_measurement_reflns_used     9081 
_cell_measurement_theta_min       2.84 
_cell_measurement_theta_max       28.29 
  
_exptl_crystal_description        prism 
_exptl_crystal_colour             colourless 
_exptl_crystal_density_meas       ? 
_exptl_crystal_density_method     ? 
_exptl_crystal_density_diffrn     2.217 
_exptl_crystal_F_000              684 
_exptl_transmission_factor_min    ? 
_exptl_transmission_factor_max    ? 
_exptl_crystal_size_max           0.448 
_exptl_crystal_size_mid           0.112 
_exptl_crystal_size_min           0.076 
_exptl_absorpt_coefficient_mu     5.728 
_shelx_estimated_absorpt_T_min    0.183 
_shelx_estimated_absorpt_T_max    0.670 
_exptl_absorpt_correction_type    multi-scan 
_exptl_absorpt_correction_T_min   0.416
_exptl_absorpt_correction_T_max   0.749 
_exptl_absorpt_process_details    'Bruker SADABS' 
_exptl_absorpt_special_details    ? 
_diffrn_ambient_temperature       100(2) 
_diffrn_radiation_wavelength      0.71073 
_diffrn_radiation_type            MoK\a 
_diffrn_source                    ? 
_diffrn_measurement_device_type   'Bruker APEX-II CCD' 
_diffrn_measurement_method        '\f and \w scans' 
_diffrn_detector_area_resol_mean  ? 
_diffrn_reflns_number             130814 
_diffrn_reflns_av_unetI/netI      0.0069 
_diffrn_reflns_av_R_equivalents   0.0344 
_diffrn_reflns_limit_h_min        -10 
_diffrn_reflns_limit_h_max        10 
_diffrn_reflns_limit_k_min        -10 
_diffrn_reflns_limit_k_max        10 
_diffrn_reflns_limit_l_min        -23 
_diffrn_reflns_limit_l_max        23 
_diffrn_reflns_theta_min          2.712 
_diffrn_reflns_theta_max          27.998 
_diffrn_reflns_theta_full         25.242 
_diffrn_measured_fraction_theta_max   0.999 
_diffrn_measured_fraction_theta_full  0.999 
_diffrn_reflns_Laue_measured_fraction_max    0.999 
_diffrn_reflns_Laue_measured_fraction_full   0.999 
_diffrn_reflns_point_group_measured_fraction_max   0.999 
_diffrn_reflns_point_group_measured_fraction_full  0.999 
_reflns_number_total              2595 
_reflns_number_gt                 2537 
_reflns_threshold_expression      'I > 2\s(I)' 
_reflns_Friedel_coverage          0.000 
_reflns_Friedel_fraction_max      . 
_reflns_Friedel_fraction_full     . 
  
_reflns_special_details 
; 
 Reflections were merged by SHELXL according to the crystal 
 class for the calculation of statistics and refinement. 
  
 _reflns_Friedel_fraction is defined as the number of unique 
 Friedel pairs measured divided by the number that would be 
 possible theoretically, ignoring centric projections and 
 systematic absences. 
; 
  
_computing_data_collection        'Bruker APEX2' 
_computing_cell_refinement        'Bruker SAINT' 
_computing_data_reduction         'Bruker SAINT' 
_computing_structure_solution     'SHELXS-97 (Sheldrick 2008)' 
_computing_structure_refinement 'SHELXL-2014/7 (Sheldrick, 2014)' 
_computing_molecular_graphics     'Bruker SHELXTL' 
_computing_publication_material   'Bruker SHELXTL' 
_refine_special_details           ? 
_refine_ls_structure_factor_coef  Fsqd 
_refine_ls_matrix_type            full 
_refine_ls_weighting_scheme       calc 
_refine_ls_weighting_details 
'w=1/[\s^2^(Fo^2^)+(0.0078P)^2^+1.0058P] where P=(Fo^2^+2Fc^2^)/3' 
_atom_sites_solution_primary      direct 
_atom_sites_solution_secondary    ? 
_atom_sites_solution_hydrogens    mixed 
_refine_ls_hydrogen_treatment     constr
_refine_ls_extinction_method      'SHELXL-2014/7 (Sheldrick 2014' 
_refine_ls_extinction_coef        0.00104(9) 
_refine_ls_extinction_expression 
 'Fc^*^=kFc[1+0.001xFc^2^\l^3^/sin(2\q)]^-1/4^' 
_refine_ls_number_reflns          2595 
_refine_ls_number_parameters      126 
_refine_ls_number_restraints      0 
_refine_ls_R_factor_all           0.0105 
_refine_ls_R_factor_gt            0.0101 
_refine_ls_wR_factor_ref          0.0236 
_refine_ls_wR_factor_gt           0.0234 
_refine_ls_goodness_of_fit_ref    1.129 
_refine_ls_restrained_S_all       1.129 
_refine_ls_shift/su_max           0.003 
_refine_ls_shift/su_mean          0.000 
  
loop_ 
 _atom_site_label 
 _atom_site_type_symbol 
 _atom_site_fract_x 
 _atom_site_fract_y 
 _atom_site_fract_z 
 _atom_site_U_iso_or_equiv 
 _atom_site_adp_type 
 _atom_site_occupancy 
 _atom_site_site_symmetry_order 
 _atom_site_calc_flag 
 _atom_site_refinement_flags_posn 
 _atom_site_refinement_flags_adp 
 _atom_site_refinement_flags_occupancy 
 _atom_site_disorder_assembly 
 _atom_site_disorder_group 
Sm1 Sm 0.26391(2) 0.46121(2) 0.53748(2) 0.00909(3) Uani 1 1 d . . . . . 
Cl1 Cl 0.38346(5) 0.97180(5) 0.69075(2) 0.01574(7) Uani 1 1 d . . . . . 
O11 O -0.00904(14) 0.33721(14) 0.53564(6) 0.0145(2) Uani 1 1 d . . . . . 
O12 O -0.27910(14) 0.26191(15) 0.52618(7) 0.0159(2) Uani 1 1 d . . . . . 
C11 C -0.12283(19) 0.2305(2) 0.54912(9) 0.0121(3) Uani 1 1 d . . . . . 
C12 C -0.0718(2) 0.0703(2) 0.59188(11) 0.0210(4) Uani 1 1 d . . . . . 
H12A H -0.1534 -0.0198 0.5733 0.032(5) Uiso 0.62(2) 1 d R U P . . 
H12B H -0.0726 0.0882 0.6472 0.032(5) Uiso 0.62(2) 1 d R U P . . 
H12C H 0.0442 0.0373 0.5832 0.032(5) Uiso 0.62(2) 1 d R U P . . 
H12D H 0.0326 0.0880 0.6292 0.032(5) Uiso 0.38(2) 1 d R U P . . 
H12E H -0.1646 0.0293 0.6189 0.032(5) Uiso 0.38(2) 1 d R U P . . 
H12F H -0.0533 -0.0108 0.5515 0.032(5) Uiso 0.38(2) 1 d R U P . . 
O21 O 0.54903(13) 0.56183(14) 0.57422(6) 0.0126(2) Uani 1 1 d . . . . . 
O22 O 0.82131(13) 0.62958(15) 0.59799(6) 0.0149(2) Uani 1 1 d . . . . . 
C21 C 0.68157(19) 0.60003(19) 0.62275(9) 0.0119(3) Uani 1 1 d . . . . . 
C22 C 0.6699(2) 0.6080(2) 0.70690(9) 0.0188(3) Uani 1 1 d . . . . . 
H22A H 0.7846 0.5913 0.7366 0.048(4) Uiso 1 1 calc R U . . . 
H22B H 0.5924 0.5187 0.7201 0.048(4) Uiso 1 1 calc R U . . . 
H22C H 0.6251 0.7190 0.7193 0.048(4) Uiso 1 1 calc R U . . . 
O1W O 0.39151(14) 0.17664(14) 0.53799(6) 0.0140(2) Uani 1 1 d . . . . . 
H11W H 0.3869 0.0970 0.5791 0.045(5) Uiso 1 1 d R U . . . 
H12W H 0.5109 0.1818 0.5318 0.045(5) Uiso 1 1 d R U . . . 
O2W O 0.16970(14) 0.66301(14) 0.62666(6) 0.0150(2) Uani 1 1 d . . . . . 
H21W H 0.0507 0.6758 0.6326 0.049(5) Uiso 1 1 d R U . . . 
H22W H 0.2242 0.7656 0.6472 0.049(5) Uiso 1 1 d R U . . . 
O3W O 0.29918(15) 0.35094(15) 0.66887(6) 0.0177(2) Uani 1 1 d . . . . . 
H31W H 0.2459 0.4013 0.7093 0.054(6) Uiso 1 1 d R U . . . 
H32W H 0.3190 0.2348 0.6842 0.054(6) Uiso 1 1 d R U . . . 
  
loop_ 
 _atom_site_aniso_label 
 _atom_site_aniso_U_11 
 _atom_site_aniso_U_22 
 _atom_site_aniso_U_33 
 _atom_site_aniso_U_23 
 _atom_site_aniso_U_13 
 _atom_site_aniso_U_12 
Sm1 0.00624(4) 0.01001(4) 0.01116(4) 0.00057(3) 0.00173(3) -0.00092(3) 
Cl1 0.01714(17) 0.01302(17) 0.01682(17) 0.00138(14) 0.00172(14) -0.00156(14) 
O11 0.0101(5) 0.0159(6) 0.0180(5) 0.0006(4) 0.0035(4) -0.0030(4) 
O12 0.0091(5) 0.0157(6) 0.0233(6) 0.0053(5) 0.0035(4) -0.0001(4) 
C11 0.0109(7) 0.0126(7) 0.0132(7) -0.0008(6) 0.0033(5) -0.0004(6) 
C12 0.0210(8) 0.0167(8) 0.0246(9) 0.0074(7) 0.0011(7) 0.0017(7) 
O21 0.0089(5) 0.0156(5) 0.0131(5) -0.0003(4) 0.0009(4) -0.0014(4) 
O22 0.0094(5) 0.0198(6) 0.0154(5) -0.0010(5) 0.0015(4) -0.0021(4) 
C21 0.0107(6) 0.0105(7) 0.0140(7) 0.0006(6) 0.0002(5) 0.0018(6) 
C22 0.0148(7) 0.0290(9) 0.0124(7) -0.0011(7) 0.0006(6) 0.0026(7) 
O1W 0.0124(5) 0.0133(5) 0.0172(5) 0.0021(4) 0.0052(4) 0.0003(4) 
O2W 0.0114(5) 0.0142(5) 0.0194(6) -0.0038(4) 0.0019(4) -0.0001(4) 
O3W 0.0246(6) 0.0145(6) 0.0153(5) 0.0019(4) 0.0073(5) 0.0046(5) 
  
_geom_special_details 
; 
 All esds (except the esd in the dihedral angle between two l.s. planes) 
 are estimated using the full covariance matrix.  The cell esds are taken 
 into account individually in the estimation of esds in distances, angles 
 and torsion angles; correlations between esds in cell parameters are only 
 used when they are defined by crystal symmetry.  An approximate (isotropic) 
 treatment of cell esds is used for estimating esds involving l.s. planes. 
; 
  
loop_ 
 _geom_bond_atom_site_label_1 
 _geom_bond_atom_site_label_2 
 _geom_bond_distance 
 _geom_bond_site_symmetry_2 
 _geom_bond_publ_flag 
Sm1 O11 2.3511(11) . ? 
Sm1 O21 2.3725(11) . ? 
Sm1 O2W 2.4209(11) . ? 
Sm1 O3W 2.4379(11) . ? 
Sm1 O1W 2.4565(11) . ? 
Sm1 O12 2.4623(11) 3_566 ? 
Sm1 O22 2.4747(11) 3_666 ? 
Sm1 O21 2.6203(11) 3_666 ? 
Sm1 O11 2.7228(11) 3_566 ? 
O11 C11 1.2744(18) . ? 
O12 C11 1.2579(18) . ? 
C11 C12 1.493(2) . ? 
C12 H12A 0.9800 . ? 
C12 H12B 0.9800 . ? 
C12 H12C 0.9800 . ? 
C12 H12D 0.9800 . ? 
C12 H12E 0.9800 . ? 
C12 H12F 0.9800 . ? 
O21 C21 1.2788(18) . ? 
O22 C21 1.2594(18) . ? 
C21 C22 1.492(2) . ? 
C22 H22A 0.9800 . ? 
C22 H22B 0.9800 . ? 
C22 H22C 0.9800 . ? 
O1W H11W 0.9600 . ? 
O1W H12W 0.9600 . ? 
O2W H21W 0.9600 . ? 
O2W H22W 0.9600 . ? 
O3W H31W 0.9600 . ? 
O3W H32W 0.9600 . ? 
  
loop_ 
 _geom_angle_atom_site_label_1 
 _geom_angle_atom_site_label_2 
 _geom_angle_atom_site_label_3 
 _geom_angle 
 _geom_angle_site_symmetry_1 
 _geom_angle_site_symmetry_3 
 _geom_angle_publ_flag 
O11 Sm1 O21 164.62(4) . . ? 
O11 Sm1 O2W 85.27(4) . . ? 
O21 Sm1 O2W 88.33(4) . . ? 
O11 Sm1 O3W 80.85(4) . . ? 
O21 Sm1 O3W 83.79(4) . . ? 
O2W Sm1 O3W 68.16(4) . . ? 
O11 Sm1 O1W 89.46(4) . . ? 
O21 Sm1 O1W 86.36(4) . . ? 
O2W Sm1 O1W 139.56(4) . . ? 
O3W Sm1 O1W 71.42(4) . . ? 
O11 Sm1 O12 117.86(4) . 3_566 ? 
O21 Sm1 O12 73.72(4) . 3_566 ? 
O2W Sm1 O12 75.49(4) . 3_566 ? 
O3W Sm1 O12 137.52(4) . 3_566 ? 
O1W Sm1 O12 139.86(4) . 3_566 ? 
O11 Sm1 O22 75.51(4) . 3_666 ? 
O21 Sm1 O22 117.88(4) . 3_666 ? 
O2W Sm1 O22 138.07(4) . 3_666 ? 
O3W Sm1 O22 141.20(4) . 3_666 ? 
O1W Sm1 O22 77.98(4) . 3_666 ? 
O12 Sm1 O22 81.16(4) 3_566 3_666 ? 
O11 Sm1 O21 124.82(4) . 3_666 ? 
O21 Sm1 O21 67.39(4) . 3_666 ? 
O2W Sm1 O21 141.79(4) . 3_666 ? 
O3W Sm1 O21 133.03(4) . 3_666 ? 
O1W Sm1 O21 70.51(3) . 3_666 ? 
O12 Sm1 O21 69.71(4) 3_566 3_666 ? 
O22 Sm1 O21 50.64(3) 3_666 3_666 ? 
O11 Sm1 O11 68.37(4) . 3_566 ? 
O21 Sm1 O11 122.06(4) . 3_566 ? 
O2W Sm1 O11 69.31(4) . 3_566 ? 
O3W Sm1 O11 128.73(4) . 3_566 ? 
O1W Sm1 O11 143.68(4) . 3_566 ? 
O12 Sm1 O11 49.51(3) 3_566 3_566 ? 
O22 Sm1 O11 69.01(4) 3_666 3_566 ? 
O21 Sm1 O11 98.22(3) 3_666 3_566 ? 
Sm1 Sm1 Sm1 139.819(4) 3_666 3_566 ? 
C11 O11 Sm1 159.12(10) . . ? 
C11 O11 Sm1 89.20(9) . 3_566 ? 
Sm1 O11 Sm1 111.63(4) . 3_566 ? 
C11 O12 Sm1 102.08(9) . 3_566 ? 
O12 C11 O11 119.21(14) . . ? 
O12 C11 C12 120.26(14) . . ? 
O11 C11 C12 120.53(14) . . ? 

C11 C12 H12A 109.4 . . ? 
C11 C12 H12B 109.5 . . ? 
H12A C12 H12B 109.5 . . ? 
C11 C12 H12C 109.5 . . ? 
H12A C12 H12C 109.5 . . ? 
H12B C12 H12C 109.5 . . ? 
C11 C12 H12D 110.5 . . ? 
C11 C12 H12E 111.0 . . ? 
H12D C12 H12E 109.4 . . ? 
C11 C12 H12F 104.3 . . ? 
H12D C12 H12F 112.1 . . ? 
H12E C12 H12F 109.4 . . ? 
C21 O21 Sm1 154.38(10) . . ? 
C21 O21 Sm1 91.27(9) . 3_666 ? 
Sm1 O21 Sm1 112.61(4) . 3_666 ? 
C21 O22 Sm1 98.67(9) . 3_666 ? 
O22 C21 O21 118.63(14) . . ? 
O22 C21 C22 121.06(14) . . ? 
O21 C21 C22 120.30(14) . . ? 
C21 C22 H22A 109.5 . . ? 
C21 C22 H22B 109.5 . . ? 
H22A C22 H22B 109.5 . . ? 
C21 C22 H22C 109.5 . . ? 
H22A C22 H22C 109.5 . . ? 
H22B C22 H22C 109.5 . . ? 
Sm1 O1W H11W 122.7 . . ? 
Sm1 O1W H12W 111.4 . . ? 
H11W O1W H12W 105.0 . . ? 
Sm1 O2W H21W 122.2 . . ? 
Sm1 O2W H22W 129.3 . . ? 
H21W O2W H22W 105.0 . . ? 
Sm1 O3W H31W 123.2 . . ? 
Sm1 O3W H32W 126.5 . . ? 
H31W O3W H32W 105.0 . . ? 
  
loop_ 
 _geom_hbond_atom_site_label_D 
 _geom_hbond_atom_site_label_H 
 _geom_hbond_atom_site_label_A 
 _geom_hbond_distance_DH 
 _geom_hbond_distance_HA 
 _geom_hbond_distance_DA 
 _geom_hbond_angle_DHA 
 _geom_hbond_site_symmetry_A 
O1W H11W Cl1  0.96 2.20 3.1343(12) 165.7 1_545 
O1W H12W O12  0.96 1.78 2.7091(15) 161.4 1_655 
O2W H21W O22  0.96 1.85 2.7197(15) 149.3 1_455 
O2W H22W Cl1  0.96 2.12 3.0737(12) 170.5 . 
O3W H31W Cl1  0.96 2.22 3.1706(12) 170.1 2_546 
O3W H32W Cl1  0.96 2.13 3.0734(12) 165.7 1_545 
  
_refine_diff_density_max    0.381 
_refine_diff_density_min   -0.529 
_refine_diff_density_rms    0.058 
  
_shelx_res_file 
; 
  
    Ha2019_99g_0m_a.res created by SHELXL-2014/7 
  
  
TITL Ha2019_99g_0m_a.res in P2(1)/n 
CELL  0.71073   7.8503   7.8844  17.5192   90.000   98.483   90.000 
ZERR    4.000   0.0003   0.0003   0.0006    0.000    0.002    0.000 
LATT 1 
SYMM 1/2-X, 1/2+Y, 1/2-Z 
SFAC C  H  O  Cl Sm 
UNIT 16 48 28 4 4 
LIST 4 ! automatically inserted. Change 6 to 4 for CHECKCIF!! 
OMIT 0 1 1 
OMIT -3 56 
rem DFIX 0.96  0.0001 O1w H11w O1w H12w O2w H21w O2w H22w O3w H31w O3w H32w 
rem dfix 1.523  0.0001 H11w H12w H21w H22w H31w H32w 
FREE Sm1 C21_$6 
FREE Sm1 C11_$7 
EQIV $6 1-x, 1-y, 1-z 
BIND Sm1 Sm1_$6 
BIND Sm1 Sm1_$7 
EQIV $7 -x,1-y,1-z 
BIND Sm1 O11_$7 
ACTA 
L.S. 10 
HTAB 
EQIV $1 -x+3/2, y-1/2, -z+3/2 
EQIV $2 x, y-1, z 
HTAB O1W Cl1_$2 
EQIV $3 x+1, y, z 
HTAB O1W O12_$3 
EQIV $4 x-1, y, z 
HTAB O2W O22_$4 
HTAB O2W Cl1 
EQIV $5 -x+1/2, y-1/2, -z+3/2 
HTAB O3W Cl1_$5 
HTAB O3W Cl1_$2 
SIZE 0.076  0.112  0.448 
BOND $H 
rem dfix 0.98  0.0001 C12 H12d C12 H12e C12 H12f 
rem dfix 1.6  0.0001 H12d H12e H12ed H12f H12e H12f 
FMAP 2 
PLAN 15 
TEMP -173 
WGHT    0.007800    1.005800 
EXTI    0.001045 
FVAR       0.35305   0.03222   0.04779   0.04502   0.04933   0.05382   0.61952 
SM1   5    0.263910    0.461205    0.537476    11.00000    0.00624    0.01001 = 
         0.01116    0.00057    0.00173   -0.00092 
CL1   4    0.383459    0.971801    0.690745    11.00000    0.01714    0.01302 = 
         0.01682    0.00138    0.00172   -0.00156 
O11   3   -0.009043    0.337213    0.535642    11.00000    0.01009    0.01590 = 
         0.01800    0.00056    0.00351   -0.00297 
O12   3   -0.279100    0.261908    0.526182    11.00000    0.00910    0.01572 = 
         0.02328    0.00527    0.00347   -0.00010 
C11   1   -0.122833    0.230484    0.549122    11.00000    0.01090    0.01262 = 
         0.01317   -0.00084    0.00328   -0.00041 
C12   1   -0.071783    0.070297    0.591884    11.00000    0.02101    0.01675 = 
         0.02463    0.00738    0.00107    0.00168 
AFIX   3 
H12A  2   -0.153437   -0.019846    0.573304    71.00000   21.00000 
H12B  2   -0.072615    0.088191    0.647186    71.00000   21.00000 
H12C  2    0.044196    0.037343    0.583207    71.00000   21.00000 
  
H12D  2    0.032577    0.088019    0.629217   -71.00000   21.00000 
H12E  2   -0.164576    0.029279    0.618872   -71.00000   21.00000 
H12F  2   -0.053264   -0.010801    0.551519   -71.00000   21.00000 
AFIX   0 
O21   3    0.549031    0.561832    0.574215    11.00000    0.00891    0.01557 = 
         0.01307   -0.00033    0.00086   -0.00136 
O22   3    0.821310    0.629576    0.597992    11.00000    0.00940    0.01982 = 
         0.01542   -0.00101    0.00153   -0.00213 
C21   1    0.681567    0.600033    0.622749    11.00000    0.01072    0.01047 = 
         0.01405    0.00056    0.00017    0.00179 
C22   1    0.669931    0.607961    0.706896    11.00000    0.01475    0.02897 = 
         0.01236   -0.00112    0.00060    0.00259 
AFIX 137 
H22A  2    0.784645    0.591333    0.736578    11.00000   31.00000 
H22B  2    0.592359    0.518736    0.720064    11.00000   31.00000 
H22C  2    0.625145    0.719022    0.719327    11.00000   31.00000 
AFIX   0 
O1W   3    0.391510    0.176642    0.537989    11.00000    0.01237    0.01332 = 
         0.01719    0.00212    0.00524    0.00027 
AFIX   3 
H11W  2    0.386858    0.096953    0.579061    11.00000   41.00000 
H12W  2    0.510869    0.181794    0.531773    11.00000   41.00000 
AFIX   0 
O2W   3    0.169702    0.663014    0.626661    11.00000    0.01144    0.01418 = 
         0.01935   -0.00380    0.00192   -0.00009 
AFIX   3 
H21W  2    0.050725    0.675768    0.632554    11.00000   51.00000 
H22W  2    0.224213    0.765626    0.647192    11.00000   51.00000 
AFIX   0 
O3W   3    0.299178    0.350941    0.668872    11.00000    0.02458    0.01452 = 
         0.01532    0.00189    0.00729    0.00459 
AFIX   3 
H31W  2    0.245889    0.401289    0.709299    11.00000   61.00000 
H32W  2    0.318980    0.234847    0.684178    11.00000   61.00000 
AFIX   0 
HKLF 4 
  
REM  Ha2019_99g_0m_a.res in P2(1)/n 
REM R1 =  0.0101 for    2537 Fo > 4sig(Fo)  and  0.0105 for all    2595 data 
REM    126 parameters refined using      0 restraints 
  
END 
  
WGHT      0.0078      1.0058 
  
REM Instructions for potential hydrogen bonds 
HTAB C12 Cl1_$2 
HTAB C22 Cl1_$1 
HTAB C22 Cl1 
HTAB O1W Cl1_$2 
HTAB O1W O12_$3 
HTAB O2W O22_$4 
HTAB O2W Cl1 
HTAB O3W Cl1_$5 
HTAB O3W Cl1_$2 
  
REM Highest difference peak  0.381,  deepest hole -0.529,  1-sigma level  0.058 
Q1    1   0.6790  0.6051  0.6669  11.00000  0.05    0.38 
Q2    1  -0.0963  0.1387  0.5683  11.00000  0.05    0.36 
Q3    1   0.0919  0.6533  0.6274  11.00000  0.05    0.27 
Q4    1   0.2467  0.3804  0.6877  11.00000  0.05    0.27 
Q5    1   0.3313  0.3948  0.6372  11.00000  0.05    0.26 
Q6    1   0.2072  0.7253  0.6315  11.00000  0.05    0.26 
Q7    1   0.5633  0.6578  0.7196  11.00000  0.05    0.25 
Q8    1   0.4706  0.1787  0.5395  11.00000  0.05    0.24 
Q9    1  -0.0532  0.2861  0.5336  11.00000  0.05    0.24 
Q10   1   0.3883  0.1279  0.5618  11.00000  0.05    0.24 
Q11   1   0.8134  0.5997  0.5554  11.00000  0.05    0.24 
Q12   1   0.3085  0.2823  0.6756  11.00000  0.05    0.23 
Q13   1   0.2211  0.5957  0.6142  11.00000  0.05    0.23 
Q14   1  -0.2023  0.2385  0.5268  11.00000  0.05    0.23 
Q15   1   0.3792  0.2550  0.5516  11.00000  0.05    0.22 
; 
_shelx_res_checksum   51202 
  
_shelx_hkl_file 
; 
   1   0   0    6.40    0.90 
   1   0   0    6.70    1.30 
   1   0   0    5.90    1.20 
   1   0   0    6.50    1.30 
   1   0   0    2.20    1.00 
   1   0   0    8.80    1.60 
   1   0   0    9.10    1.40 
   1   0   0    5.00    1.10 
   1   0   0    8.80    1.50 
   1   0   0    6.00    1.20 
   1   0   0    8.70    1.60 
   1   0   0    7.50    1.10 
   1   0   0   14.30    1.70 
   1   0   0    6.50    1.50 
   1   0   0   10.10    1.30 
   1   0   0    6.70    1.10 
   1   0   0    6.80    1.40 
   1   0   0    5.10    1.30 
   1   0   0    4.60    1.10 
   1   0   0    9.10    1.70 
   1   0   0    6.60    1.30 
  -1   0   0    1.80    0.90 
  -1   0   0    3.10    1.00 
  -1   0   0    1.90    0.90 
  -1   0   0    1.70    0.90 
   1   0   0    6.90    1.30 
   1   0   0    8.20    1.00 
   1   0   0    8.90    1.00 
   1   0   0   11.70    1.60 
   1   0   0    7.00    0.90 
   2   0   0 7160.68  140.79 
   2   0   0 7018.90  138.49 
   2   0   0 7491.65  142.29 
   2   0   0 6835.92  144.39 
   2   0   0 7206.68  139.79 
   2   0   0 6926.41  139.59 
   2   0   0 7124.59  139.99 
   2   0   0 7180.58  138.59 
   2   0   0 7255.37  141.49 
   2   0   0 7024.30  141.29 
   2   0   0 7051.29  140.39 
   2   0   0 6957.10  139.89 
   2   0   0 7038.80  137.79 
   2   0   0 6880.81  138.09 
   2   0   0 7017.80  140.09 
   2   0   0 6810.92  137.29 
   2   0   0 7042.20  139.09 
   2   0   0 7216.38  140.19 
   2   0   0 7019.10  140.89 
   2   0   0 7004.60  142.89 
   2   0   0 6896.61  140.89 
   2   0   0 7093.59  139.69 
   2   0   0 6888.81  140.79 
   2   0   0 6928.31  139.39 
   2   0   0 7039.10  140.99 
   2   0   0 6875.11  139.09 
   2   0   0 7104.69  140.59 
   2   0   0 6819.92  138.19 
   2   0   0 6913.21  141.29 
   2   0   0 7240.98  141.19 
   2   0   0 7059.89  138.29 
   2   0   0 6899.11  140.49 
   2   0   0 6765.12  145.29 
   2   0   0 6783.82  141.79 
   2   0   0 7072.99  139.79 
   2   0   0 6958.20  141.39 
  -2   0   0 7088.09  138.69 
  -2   0   0 7042.20  141.59 
  -2   0   0 6774.62  141.69 
  -2   0   0 6808.62  137.99 
   2   0   0 7215.88  139.29 
  -2   0   0 7072.59  138.19 
  -2   0   0 6905.61  140.19 
  -2   0   0 7032.20  139.09 
  -2   0   0 6955.30  140.19 
  -2   0   0 7190.88  141.09 
  -2   0   0 7087.29  141.39 
  -2   0   0 7131.39  140.89 
  -2   0   0 7189.18  140.59 
  -2   0   0 6947.20  137.69 
  -2   0   0 6925.81  139.79 
  -2   0   0 6878.21  139.59 
  -2   0   0 7006.30  138.79 
  -2   0   0 7202.48  139.69 
  -2   0   0 6969.30  141.09 
  -2   0   0 7293.77  141.49 
  -2   0   0 6792.42  141.59 
  -2   0   0 6870.91  136.99 
  -2   0   0 7094.19  140.79 
  -2   0   0 7108.69  138.29 
  -2   0   0 7070.69  139.69 
  -2   0   0 6827.92  137.39 
  -2   0   0 6843.82  135.49 
  -2   0   0 6909.51  139.39 
  -2   0   0 6996.80  140.69 
  -2   0   0 7270.57  141.59 
  -3   0   0    2.00    1.00 
  -3   0   0    3.40    2.50 
  -3   0   0    2.00    1.50 
  -3   0   0    1.00    0.80 
  -3   0   0    1.10    1.70 
  -3   0   0    2.90    1.60 
  -3   0   0    0.40    2.10 
   3   0   0    0.70    1.70 
   3   0   0    3.70    2.00 
  -3   0   0    2.70    2.30 
   3   0   0    3.60    1.40 
  -3   0   0   -2.10    1.20 
   3   0   0    1.60    2.00 
   3   0   0    2.60    1.60 
   3   0   0    0.80    1.90 
   3   0   0    1.90    1.90 
   3   0   0    2.70    1.70 
   3   0   0   -0.20    1.30 
   3   0   0    3.00    2.20 
   3   0   0    2.80    1.60 
   3   0   0    4.10    2.10 
   3   0   0   -0.20    1.50 
   3   0   0    1.90    2.00 
   3   0   0    0.50    1.90 
   3   0   0    4.20    2.00 
   3   0   0    1.90    1.30 
   3   0   0   -0.80    1.40 
   3   0   0    0.40    1.80 
   3   0   0    1.10    0.80 
   3   0   0    4.10    2.00 
   3   0   0    6.90    2.50 
   3   0   0    1.50    1.30 
   3   0   0    7.40    2.10 
   3   0   0   -0.10    1.80 
   3   0   0    2.00    2.10 
   3   0   0    1.00    2.10 
   3   0   0    0.90    1.60 
  -3   0   0    3.40    2.10 
  -3   0   0    1.80    1.20 
  -3   0   0    0.90    1.80 
  -3   0   0   -2.00    1.50 
  -3   0   0    5.40    2.60 
  -3   0   0    2.40    1.50 
  -3   0   0    2.60    1.60 
  -3   0   0    5.70    2.50 
  -3   0   0    1.70    1.90 
  -3   0   0    2.10    2.20 
  -3   0   0    1.30    2.00 
  -3   0   0    6.00    2.80 
  -3   0   0    4.50    2.60 
  -3   0   0    1.70    1.70 
   3   0   0    5.30    1.50 
  -3   0   0   -0.60    1.10 
   4   0   0 2055.09   55.89 
  -4   0   0 2043.60   51.49 
   4   0   0 2097.79   52.89 
   4   0   0 2105.19   42.10 
   4   0   0 2010.30   54.09 
   4   0   0 2120.99   49.80 
   4   0   0 2023.70   49.99 
   4   0   0 2022.90   48.50 
   4   0   0 2151.68   55.09 
  -4   0   0 2051.39   53.49 
  -4   0   0 2039.90   55.09 
  -4   0   0 2024.30   54.99 
  -4   0   0 2075.79   54.59 
  -4   0   0 2017.60   50.39 
  -4   0   0 2054.09   45.80 
  -4   0   0 2110.69   50.19 
   4   0   0 2034.70   46.50 
   4   0   0 2104.49   50.19 
   4   0   0 2060.09   45.10 
   4   0   0 2082.99   47.40 
   4   0   0 2052.89   48.00 
   4   0   0 2003.60   51.89 
   4   0   0 2105.29   50.39 
   4   0   0 2043.30   50.39 
   4   0   0 2048.79   51.49 
  -4   0   0 2012.60   49.50 
  -4   0   0 2053.39   45.00 
  -4   0   0 2150.58   48.50 
  -4   0   0 2033.80   54.89 
  -4   0   0 2057.19   42.10 
  -4   0   0 2067.29   52.59 
  -4   0   0 2022.30   54.69 
  -4   0   0 2034.80   53.69 
  -4   0   0 2134.79   49.30 
  -4   0   0 2042.70   53.29 
  -4   0   0 1971.40   54.49 
   4   0   0 2099.79   43.50 
   4   0   0 2033.90   48.40 
   4   0   0 1973.40   52.49 
   4   0   0 2037.00   45.50 
  -4   0   0 2032.00   52.09 
   4   0   0 2098.29   55.39 
  -4   0   0 2039.70   53.99 
   5   0   0    0.30    0.70 
   5   0   0    0.50    1.30 
   5   0   0    0.80    0.80 
   5   0   0    2.70    2.90 
   5   0   0    0.60    1.80 
   5   0   0    2.00    2.00 
   5   0   0    2.00    2.90 
  -5   0   0   -3.70    1.50 
  -5   0   0    4.70    2.90 
  -5   0   0    3.00    1.60 
   5   0   0    1.10    2.00 
   5   0   0    1.40    2.40 
   5   0   0    2.40    2.10 
  -5   0   0    0.40    2.10 
  -5   0   0   -1.10    2.30 
  -5   0   0    1.40    2.10 
  -5   0   0    5.10    3.10 
   5   0   0    1.90    2.30 
  -5   0   0    2.60    3.10 
   5   0   0    2.60    2.20 
  -5   0   0    1.30    2.50 
  -5   0   0   -0.60    2.00 
   5   0   0    1.50    3.10 
   5   0   0   -0.60    1.50 
   5   0   0   -1.90    2.00 
   5   0   0    3.30    3.40 
   5   0   0    0.50    1.10 
   5   0   0    1.70    3.10 
  -5   0   0    1.60    2.70 
  -5   0   0    0.90    2.70 
  -5   0   0    1.20    0.80 
  -5   0   0   -1.60    2.10 
  -5   0   0    1.90    2.40 
   5   0   0    0.10    2.30 
   5   0   0    1.70    2.30 
  -5   0   0   -2.70    2.20 
   5   0   0    1.90    2.50 
   5   0   0    1.80    2.60 
   5   0   0    2.90    1.50 
  -5   0   0   -1.30    1.90 
  -5   0   0    1.70    0.90 
   6   0   0 1473.95   39.70 
   6   0   0 1608.84   53.19 
  -6   0   0 1372.46   48.50 
  -6   0   0 1468.35   44.10 
  -6   0   0 1340.47   36.50 
   6   0   0 1494.85   45.60 
   6   0   0 1497.95   46.90 
   6   0   0 1567.64   45.00 
  -6   0   0 1421.86   49.70 
  -6   0   0 1435.16   48.40 
  -6   0   0 1559.54   49.30 
  -6   0   0 1466.65   45.40 
  -6   0   0 1460.95   48.60 
  -6   0   0 1445.26   46.80 
  -6   0   0 1428.46   50.19 
  -6   0   0 1519.25   41.40 
  -6   0   0 1555.04   51.89 
   6   0   0 1484.25   50.59 
   6   0   0 1537.45   41.80 
   6   0   0 1510.55   37.10 
   6   0   0 1506.65   49.90 
   6   0   0 1564.14   54.39 
   6   0   0 1460.55   32.90 
   6   0   0 1519.05   48.30 
   6   0   0 1456.75   42.80 
   6   0   0 1519.05   44.00 
  -6   0   0 1487.35   50.69 
   6   0   0 1529.65   33.10 
   6   0   0 1530.55   48.30 
  -6   0   0 1470.25   46.60 
  -6   0   0 1527.05   49.90 
   6   0   0 1573.34   36.80 
   6   0   0 1508.75   47.50 
   6   0   0 1516.95   43.90 
  -7   0   0   11.50    5.10 
  -7   0   0    3.40    3.80 
   7   0   0   -0.10    1.70 
  -7   0   0    1.70    3.30 
  -7   0   0    3.10    3.80 
   7   0   0   -2.20    2.70 
   7   0   0    4.50    3.10 
   7   0   0    0.70    3.80 
  -7   0   0   -0.70    3.20 
  -7   0   0    3.50    3.30 
  -7   0   0    2.60    2.70 
   7   0   0    0.40    3.10 
   7   0   0    0.30    3.30 
   7   0   0    2.30    3.30 
   7   0   0    2.00    3.50 
   7   0   0    7.10    4.60 
   7   0   0    0.60    2.90 
   7   0   0   -2.20    2.80 
   7   0   0    0.70    4.00 
   7   0   0    0.30    3.80 
   7   0   0   -3.30    3.80 
   7   0   0    5.40    4.40 
  -7   0   0   -1.70    3.40 
  -7   0   0    1.90    2.00 
  -7   0   0   -1.50    3.70 
   7   0   0   -1.30    2.70 
  -7   0   0   -5.40    2.30 
  -7   0   0    2.30    3.30 
  -7   0   0    1.60    4.20 
   7   0   0    2.20    4.40 
  -8   0   0  967.20   44.70 
  -8   0   0 1008.40   41.70 
   8   0   0 1077.99   38.80 
   8   0   0 1042.20   39.30 
  -8   0   0 1059.99   47.40 
  -8   0   0 1133.29   40.20 
   8   0   0  999.90   49.20 
  -8   0   0 1111.89   35.90 
  -8   0   0 1021.20   46.30 
  -8   0   0  980.70   43.90 
  -8   0   0 1116.89   45.40 
   8   0   0 1039.50   43.90 
   8   0   0 1049.00   38.30 
   8   0   0 1035.70   38.40 
   8   0   0 1057.79   35.80 
   8   0   0 1000.30   45.70 
   8   0   0 1056.99   42.70 
  -8   0   0 1031.00   42.70 
   8   0   0 1048.00   40.90 
   8   0   0 1128.99   45.10 
   8   0   0 1043.10   42.80 
   8   0   0  959.90   46.50 
  -8   0   0 1071.39   47.30 
  -8   0   0 1062.19   46.20 
   8   0   0 1081.99   46.70 
   8   0   0 1033.60   46.70 
  -8   0   0 1125.69   48.90 
   8   0   0 1101.69   43.40 
  -9   0   0    5.40    5.80 
   9   0   0    8.70    5.60 
   9   0   0   10.70    5.70 
  -9   0   0    4.30    6.40 
   9   0   0    3.50    6.00 
  -9   0   0    7.30    6.40 
  -9   0   0    0.50    5.90 
   9   0   0    3.70    6.40 
   9   0   0    8.10    5.50 
  -9   0   0    3.10    3.90 
   9   0   0    4.40    5.10 
  -9   0   0   -1.50    4.70 
   9   0   0   -4.00    3.10 
   9   0   0   -0.80    4.60 
   9   0   0    0.60    4.60 
  -9   0   0    2.50    6.10 
  -9   0   0    0.90    6.00 
   9   0   0   -3.60    5.80 
   9   0   0   -2.10    4.10 
   9   0   0    2.20    6.70 
  -9   0   0    1.60    4.10 
  -9   0   0   -3.40    3.90 
   9   0   0    2.60    4.50 
   9   0   0    0.00    4.10 
  10   0   0  224.68   27.40 
  10   0   0  200.88   27.30 
  10   0   0  312.37   36.80 
 -10   0   0  215.38   27.80 
  10   0   0  275.87   32.10 
  10   0   0  252.67   27.70 
 -10   0   0  273.77   29.30 
 -10   0   0  236.68   30.10 
 -10   0   0  274.27   28.80 
  10   0   0  239.38   31.00 
  10   0   0  281.07   28.90 
  10   0   0  227.58   28.70 
 -10   0   0  260.17   29.40 
 -10   0   0  291.17   29.60 
  10   0   0  242.38   28.20 
 -10   0   0  270.67   31.20 
  10   0   0  266.47   31.80 
 -10   0   0  204.58   28.30 
  10   0   0  254.77   27.10 
 -10   0   0  224.08   29.30 
   0  -1   0    5.70    1.20 
   0  -1   0    2.70    0.90 
   0  -1   0    1.70    0.90 
   0  -1   0    4.40    1.20 
   0  -1   0    6.80    1.20 
   0  -1   0    3.10    1.00 
   0  -1   0    4.30    1.10 
   0  -1   0    2.70    1.00 
   0  -1   0    4.10    1.30 
   0  -1   0    7.20    1.70 
   0  -1   0    4.90    1.30 
   0  -1   0    4.90    1.20 
   0  -1   0    3.40    0.90 
   0  -1   0    4.00    1.10 
   0  -1   0    1.90    0.90 
   0  -1   0    5.60    1.00 
   0  -1   0    2.10    0.90 
   0  -1   0    0.30    0.60 
   0  -1   0    2.00    0.90 
   0  -1   0    3.50    1.20 
   0  -1   0    3.50    1.10 
   0  -1   0    2.70    1.00 
   0   1   0    0.10    0.50 
   0   1   0    0.10    0.60 
   0   1   0    0.90    0.70 
   0   1   0    0.40    0.40 
   0   1   0    2.00    0.90 
   0   1   0    0.40    0.50 
   0   1   0    0.90    0.50 
   0   1   0   -0.20    0.50 
   1  -1   0    5.90    1.70 
  -1  -1   0    1.10    1.00 
  -1  -1   0    2.90    1.50 
  -1  -1   0    2.90    1.50 
   1  -1   0    4.00    1.20 
   1  -1   0    5.10    1.80 
  -1  -1   0    3.50    1.50 
  -1  -1   0    1.10    0.90 
  -1  -1   0    2.40    1.50 
  -1  -1   0    4.10    1.60 
  -1  -1   0   15.50    2.60 
  -1  -1   0    5.40    1.60 
  -1  -1   0    2.60    1.10 
   1  -1   0    8.00    1.90 
   1  -1   0    3.20    1.50 
   1  -1   0    5.50    1.70 
  -1  -1   0    4.40    1.70 
   1  -1   0    1.90    1.10 
   1  -1   0    2.30    1.10 
   1  -1   0    4.40    0.90 
   1  -1   0    6.10    1.10 
   1  -1   0    3.90    1.40 
  -1  -1   0    3.50    1.30 
  -1  -1   0    2.60    1.10 
   1  -1   0    6.70    1.30 
  -1  -1   0    3.30    1.50 
  -1  -1   0    9.80    2.00 
  -1  -1   0    4.40    1.50 
  -1  -1   0    4.70    1.60 
   1  -1   0    2.90    1.20 
  -1  -1   0    2.20    1.40 
  -1  -1   0    3.30    1.10 
  -1  -1   0    0.70    1.10 
  -1  -1   0    2.00    1.20 
   1  -1   0    2.80    1.20 
   1  -1   0    2.20    1.00 
   1  -1   0    2.20    0.70 
  -1  -1   0    4.20    1.30 
  -1  -1   0   11.90    2.40 
  -1  -1   0    3.10    1.60 
   1  -1   0   12.80    2.30 
   1  -1   0    6.10    0.90 
  -1  -1   0    0.90    1.20 
  -1  -1   0    5.90    1.80 
  -1  -1   0    3.20    1.50 
   1  -1   0    2.30    1.10 
   1  -1   0    3.50    1.30 
   1  -1   0    4.40    1.40 
   1  -1   0    2.90    1.30 
   1  -1   0    3.20    0.90 
   1  -1   0    4.20    1.30 
  -1  -1   0    7.30    1.90 
  -1  -1   0    3.30    1.50 
   1  -1   0    4.00    1.60 
   1  -1   0    5.50    1.40 
   1  -1   0    3.60    1.50 
  -1  -1   0    2.50    1.40 
   1   1   0    1.70    1.00 
  -1   1   0    2.90    1.30 
   1   1   0    7.80    2.00 
  -1   1   0    0.40    0.70 
   1   1   0    6.00    1.80 
   1   1   0    2.70    1.40 
   1   1   0    3.10    1.50 
   1   1   0    2.70    1.30 
  -1   1   0    7.80    1.70 
   1   1   0    5.10    1.70 
   1   1   0    3.00    1.10 
   1   1   0    2.30    1.20 
   1   1   0    2.40    1.40 
   1   1   0    2.00    1.40 
   1   1   0    3.30    1.40 
   1   1   0    7.80    2.00 
   1   1   0    4.40    1.70 
   1   1   0    7.70    2.00 
  -1   1   0    0.70    0.80 
   1   1   0    7.10    1.60 
  -1   1   0    0.60    0.70 
   1   1   0    3.50    1.40 
  -1   1   0   -0.10    0.60 
  -1   1   0    4.90    1.40 
   1   1   0    4.90    1.60 
  -1   1   0   -0.10    0.60 
  -1   1   0    2.10    0.70 
   1   1   0    2.20    1.10 
   1   1   0    3.00    1.50 
  -1   1   0    2.50    0.80 
   1   1   0    4.80    1.70 
  -1   1   0    5.10    1.30 
   1   1   0    1.40    1.20 
   1   1   0    2.60    1.20 
  -1   1   0    4.00    1.00 
  -1   1   0    5.80    1.60 
  -1   1   0    2.50    1.10 
   1   1   0    2.40    1.40 
  -1   1   0   -0.30    0.60 
  -1   1   0    3.20    1.00 
   1   1   0    5.00    1.40 
   1   1   0    7.10    2.00 
   1   1   0    3.40    1.50 
   1   1   0    1.30    1.30 
   1   1   0    1.50    0.90 
   1   1   0    2.10    1.30 
   1   1   0    2.60    1.10 
   2  -1   0  910.31   20.10 
   2  -1   0  900.31   22.10 
  -2  -1   0  903.71   25.30 
   2  -1   0  927.41   23.80 
   2  -1   0  895.41   23.20 
   2  -1   0  909.71   24.40 
  -2  -1   0  920.81   25.70 
  -2  -1   0  922.81   23.60 
  -2  -1   0  892.01   23.50 
  -2  -1   0  897.41   21.90 
   2  -1   0  908.31   25.10 
  -2  -1   0  941.71   26.50 
  -2  -1   0  924.51   24.60 
   2  -1   0  926.81   25.20 
   2  -1   0  917.51   20.80 
   2  -1   0  914.11   22.30 
  -2  -1   0  930.01   21.80 
   2  -1   0  919.51   22.40 
   2  -1   0  927.01   21.70 
   2  -1   0  944.31   23.50 
  -2  -1   0  914.81   25.10 
  -2  -1   0  952.30   25.60 
  -2  -1   0  951.50   23.10 
  -2  -1   0  907.61   23.70 
   2  -1   0  904.11   19.90 
   2  -1   0  909.31   23.40 
   2  -1   0  920.31   25.40 
   2  -1   0  905.21   22.20 
   2  -1   0  909.61   23.70 
  -2  -1   0  914.51   25.50 
  -2  -1   0  955.30   26.20 
  -2  -1   0  910.61   21.80 
  -2  -1   0  956.20   25.70 
  -2  -1   0  954.00   26.30 
   2  -1   0  904.91   22.30 
   2  -1   0  934.71   24.50 
   2  -1   0  968.90   25.20 
   2  -1   0  933.11   24.90 
  -2  -1   0  947.91   25.10 
  -2  -1   0  967.80   25.30 
  -2  -1   0  902.11   20.30 
   2  -1   0  888.11   20.10 
   2  -1   0  901.31   24.70 
   2  -1   0  929.21   25.20 
   2  -1   0  860.11   23.40 
   2  -1   0  914.11   24.40 
   2  -1   0  922.81   25.00 
  -2  -1   0  884.31   21.50 
  -2  -1   0  942.11   25.00 
  -2  -1   0  949.01   25.70 
   2  -1   0  919.81   21.80 
   2  -1   0  921.31   24.70 
   2  -1   0  907.41   23.90 
   2  -1   0  903.81   25.10 
   2  -1   0  885.81   25.20 
  -2  -1   0  918.41   24.30 
  -2  -1   0  884.11   24.20 
   2  -1   0  923.11   24.30 
  -2  -1   0  931.51   25.80 
   2  -1   0  908.31   23.50 
   2  -1   0  878.51   21.90 
   2  -1   0  889.61   23.60 
  -2  -1   0  931.01   26.30 
  -2  -1   0  897.51   26.50 
   2  -1   0  864.81   22.30 
  -2  -1   0  976.40   26.30 
  -2  -1   0  952.20   25.50 
   2   1   0  927.71   25.40 
   2   1   0  937.41   25.10 
   2   1   0  947.51   24.30 
  -2   1   0  907.91   22.40 
  -2   1   0  899.11   23.40 
  -2   1   0  897.91   20.20 
  -2   1   0  899.21   22.00 
  -2   1   0  923.71   23.60 
  -2   1   0  927.21   25.80 
  -2   1   0  897.11   21.90 
  -2   1   0  894.51   25.00 
  -2   1   0  921.81   22.80 
  -2   1   0  904.81   22.40 
  -2   1   0  927.51   20.10 
  -2   1   0  912.11   23.90 
   2   1   0  926.51   25.00 
  -2   1   0  936.01   22.60 
  -2   1   0  930.91   24.60 
   2   1   0  929.61   25.60 
  -2   1   0  907.41   24.90 
   2   1   0  929.51   25.70 
   2   1   0  938.61   25.40 
   2   1   0  973.10   27.30 
   2   1   0  944.61   24.80 
  -2   1   0  887.01   25.10 
  -2   1   0  897.51   25.30 
   2   1   0  898.11   26.00 
  -2   1   0  909.31   24.80 
  -2   1   0  926.81   20.00 
  -2   1   0  899.61   23.80 
   2   1   0  947.71   24.30 
   2   1   0  948.21   25.50 
   2   1   0  956.30   26.40 
   2   1   0  925.11   24.50 
   2   1   0  970.60   26.10 
   2   1   0  904.11   25.30 
   2   1   0  917.31   22.10 
   2   1   0  922.91   25.80 
   2   1   0  949.40   25.50 
  -2   1   0  910.61   22.20 
   2   1   0  916.91   25.10 
   2   1   0  964.60   27.10 
  -2   1   0  949.40   24.80 
   2   1   0  922.91   25.50 
   2   1   0  913.41   26.20 
   2   1   0  917.11   22.20 
   2   1   0  888.91   25.00 
   2   1   0  934.61   25.60 
   2   1   0  979.10   26.10 
   2   1   0  898.81   21.70 
  -2   1   0  927.61   25.10 
  -2   1   0  928.41   25.30 
   2   1   0  937.61   25.00 
   2   1   0  981.80   26.90 
  -2   1   0  891.81   24.40 
   3  -1   0   59.39    7.60 
  -3  -1   0   70.79    7.60 
   3  -1   0   66.99    3.20 
  -3  -1   0   55.39    6.40 
  -3  -1   0   60.39    4.60 
  -3  -1   0   58.39    6.20 
   3  -1   0   59.29    6.50 
   3  -1   0   65.39    3.90 
   3  -1   0   64.79    2.50 
   3  -1   0   60.39    6.50 
   3  -1   0   47.40    5.40 
   3  -1   0   56.19    6.90 
   3  -1   0   59.79    4.00 
   3  -1   0   57.79    6.40 
  -3  -1   0   63.09    7.60 
   3  -1   0   67.99    5.40 
  -3  -1   0   58.79    7.20 
  -3  -1   0   62.69    4.80 
  -3  -1   0   61.09    4.90 
  -3  -1   0   66.39    7.80 
  -3  -1   0   62.19    7.50 
  -3  -1   0   66.89    8.10 
   3  -1   0   72.29    5.70 
   3  -1   0   58.39    5.90 
   3  -1   0   48.60    5.70 
   3  -1   0   60.19    6.30 
   3  -1   0   55.49    5.50 
  -3  -1   0   59.39    3.30 
  -3  -1   0   63.49    7.90 
   3  -1   0   66.99    5.00 
   3  -1   0   65.09    4.10 
  -3  -1   0   56.09    4.60 
   3  -1   0   56.09    3.70 
   3  -1   0   60.29    6.40 
  -3  -1   0   60.59    7.70 
  -3  -1   0   65.59    8.20 
  -3  -1   0   56.59    3.90 
  -3  -1   0   72.19    7.80 
  -3  -1   0   75.89    8.20 
   3  -1   0   65.19    4.60 
   3  -1   0   58.59    6.50 
   3  -1   0   67.19    7.90 
  -3  -1   0   56.49    6.90 
   3  -1   0   61.99    6.80 
   3  -1   0   57.19    2.40 
  -3  -1   0   63.49    3.90 
  -3  -1   0   60.69    7.80 
  -3  -1   0   53.79    6.50 
  -3  -1   0   57.49    6.90 
   3  -1   0   51.99    5.90 
   3  -1   0   63.19    4.90 
   3  -1   0   66.29    3.90 
   3  -1   0   65.09    5.10 
  -3  -1   0   72.89    7.90 
  -3  -1   0   68.89    4.10 
  -3  -1   0   53.49    6.90 
   3  -1   0   53.39    6.30 
   3  -1   0   54.39    7.10 
   3  -1   0   66.09    5.20 
   3  -1   0   69.69    7.70 
  -3  -1   0   52.69    6.80 
   3  -1   0   55.49    6.50 
   3   1   0   65.39    3.70 
  -3   1   0   55.69    6.30 
   3   1   0   64.19    7.50 
   3   1   0   60.09    3.00 
   3   1   0   42.20    6.50 
   3   1   0   65.29    7.40 
   3   1   0   74.89    8.50 
   3   1   0   70.79    7.30 
   3   1   0   72.69    8.00 
   3   1   0   68.59    9.00 
   3   1   0   64.59    3.50 
  -3   1   0   60.59    6.50 
  -3   1   0   61.79    3.80 
   3   1   0   51.19    5.90 
   3   1   0   55.99    6.50 
  -3   1   0   66.49    4.70 
   3   1   0   65.79    8.30 
   3   1   0   78.59    8.90 
   3   1   0   63.19    8.00 
   3   1   0   58.39    3.90 
  -3   1   0   60.99    7.20 
   3   1   0   53.79    4.30 
   3   1   0   59.79    7.70 
   3   1   0   53.09    6.80 
  -3   1   0   48.20    5.50 
  -3   1   0   55.59    7.00 
   3   1   0   66.19    7.60 
  -3   1   0   59.59    6.50 
  -3   1   0   62.29    7.50 
  -3   1   0   54.79    6.70 
  -3   1   0   53.69    3.90 
   3   1   0   77.69    8.20 
  -3   1   0   56.19    6.00 
   3   1   0   61.19    7.50 
   3   1   0   51.89    6.80 
  -3   1   0   63.19    7.10 
  -3   1   0   60.49    6.00 
  -3   1   0   70.79    8.00 
  -3   1   0   62.59    7.40 
   3   1   0   56.89    7.20 
  -3   1   0   77.09    8.60 
  -3   1   0   60.79    4.20 
   3   1   0   67.69    7.60 
   3   1   0   64.19    7.20 
   3   1   0   68.39    5.00 
  -3   1   0   47.70    5.50 
   3   1   0   56.59    6.60 
   3   1   0   63.29    6.50 
   3   1   0   64.49    6.90 
   3   1   0   58.39    7.30 
   3   1   0   59.29    7.20 
  -3   1   0   60.79    7.30 
   4  -1   0   10.50    3.30 
   4  -1   0   15.10    4.20 
   4  -1   0   15.40    2.80 
   4  -1   0   11.40    2.60 
   4  -1   0    9.90    3.20 
  -4  -1   0   11.80    4.40 
   4  -1   0    4.30    2.50 
   4  -1   0   12.40    2.90 
   4  -1   0   13.10    3.00 
   4  -1   0   11.30    3.30 
   4  -1   0    8.10    3.20 
  -4  -1   0    5.30    3.80 
  -4  -1   0   11.70    3.10 
   4  -1   0   10.20    2.80 
  -4  -1   0   16.00    4.90 
  -4  -1   0    6.10    3.50 
  -4  -1   0    5.50    3.60 
   4  -1   0    5.40    3.80 
   4  -1   0    6.70    2.60 
   4  -1   0   13.70    4.20 
   4  -1   0   13.60    3.70 
   4  -1   0   11.50    3.60 
  -4  -1   0   12.80    2.10 
  -4  -1   0   12.30    3.00 
  -4  -1   0   11.10    2.60 
   4  -1   0   10.50    3.40 
  -4  -1   0   10.50    2.20 
   4  -1   0   15.10    2.90 
   4  -1   0   15.00    3.90 
  -4  -1   0   11.80    3.60 
   4  -1   0   14.10    3.70 
   4  -1   0   11.70    2.20 
   4  -1   0    9.80    3.70 
   4  -1   0    9.70    3.90 
  -4  -1   0   15.80    4.70 
   4  -1   0   13.70    3.60 
   4  -1   0   13.00    2.30 
  -4  -1   0   16.40    4.80 
  -4  -1   0    8.70    3.80 
  -4  -1   0   11.60    4.40 
  -4  -1   0   10.10    2.50 
  -4  -1   0    5.50    3.60 
  -4  -1   0   14.10    4.80 
  -4  -1   0   12.10    4.50 
  -4  -1   0    8.90    1.90 
  -4  -1   0   11.80    3.80 
   4  -1   0   15.70    3.90 
  -4   1   0   12.80    3.60 
  -4   1   0   14.90    4.70 
   4   1   0   14.00    4.30 
   4   1   0   15.60    4.60 
  -4   1   0    7.90    1.90 
   4   1   0   10.20    2.00 
  -4   1   0    8.00    4.00 
  -4   1   0    5.80    2.20 
  -4   1   0    9.70    2.50 
  -4   1   0   15.00    4.60 
  -4   1   0   10.60    3.40 
  -4   1   0    6.90    3.30 
   4   1   0   14.50    4.40 
   4   1   0   14.60    2.70 
   4   1   0   13.10    4.60 
   4   1   0   12.50    2.40 
  -4   1   0    8.50    3.50 
   4   1   0   14.60    4.70 
  -4   1   0   10.40    2.50 
  -4   1   0   16.30    4.80 
  -4   1   0   13.00    4.20 
  -4   1   0   14.70    4.40 
  -4   1   0   14.00    4.80 
  -4   1   0   10.20    4.50 
  -4   1   0    8.30    3.40 
   4   1   0   19.50    4.60 
  -4   1   0   21.00    4.60 
   4   1   0   11.80    4.50 
   4   1   0    9.50    2.90 
   4   1   0    8.00    3.10 
   4   1   0   13.00    2.10 
   4   1   0    6.50    3.90 
   4   1   0   13.00    4.80 
   4   1   0    9.60    3.80 
   4   1   0   21.60    5.10 
   4   1   0   12.20    4.10 
  -5  -1   0 1071.19   37.90 
  -5  -1   0 1062.89   24.80 
  -5  -1   0 1074.99   29.20 
  -5  -1   0 1064.69   32.80 
   5  -1   0 1034.00   27.80 
  -5  -1   0 1047.90   36.20 
   5  -1   0 1053.09   35.30 
  -5  -1   0 1080.99   24.80 
   5  -1   0 1036.50   27.80 
  -5  -1   0 1060.79   35.50 
  -5  -1   0 1051.49   37.80 
  -5  -1   0 1117.79   38.30 
   5  -1   0 1071.89   33.20 
   5  -1   0 1055.29   31.20 
   5  -1   0 1032.70   36.90 
   5  -1   0 1014.10   26.40 
   5  -1   0 1078.79   33.10 
   5  -1   0 1077.99   29.60 
   5  -1   0 1077.59   28.00 
   5  -1   0 1085.39   34.60 
   5  -1   0  990.20   37.20 
   5  -1   0 1053.79   31.00 
  -5  -1   0 1096.09   38.80 
   5  -1   0 1051.29   29.60 
  -5  -1   0 1042.40   22.30 
   5  -1   0 1068.59   33.90 
   5  -1   0 1049.00   24.50 
   5  -1   0 1016.40   32.80 
   5  -1   0 1032.00   32.00 
   5  -1   0 1047.20   28.40 
   5  -1   0 1009.90   31.50 
  -5  -1   0 1071.59   36.50 
  -5  -1   0 1073.99   37.30 
  -5  -1   0 1068.99   37.60 
  -5  -1   0 1053.99   25.90 
  -5  -1   0 1043.10   38.00 
  -5  -1   0 1077.69   37.80 
  -5  -1   0 1067.49   36.10 
  -5  -1   0 1037.80   26.00 
   5  -1   0 1008.00   35.30 
  -5   1   0 1046.10   37.70 
  -5   1   0 1102.09   28.30 
  -5   1   0 1024.50   36.60 
   5   1   0 1076.79   31.10 
  -5   1   0 1070.19   34.70 
  -5   1   0 1106.89   34.30 
  -5   1   0 1045.70   37.40 
   5   1   0 1100.99   34.90 
  -5   1   0 1073.59   30.10 
   5   1   0 1068.79   24.80 
   5   1   0 1023.40   25.90 
   5   1   0 1102.79   28.00 
  -5   1   0 1077.99   33.60 
  -5   1   0 1087.19   37.30 
   5   1   0 1011.40   35.70 
   5   1   0 1039.70   38.70 
   5   1   0 1042.30   38.20 
   5   1   0 1050.19   35.70 
  -5   1   0 1034.90   28.20 
  -5   1   0 1034.20   34.00 
  -5   1   0 1049.00   24.90 
  -5   1   0 1058.99   34.30 
   5   1   0 1027.00   37.30 
  -5   1   0 1072.79   32.70 
   5   1   0 1094.49   36.20 
   5   1   0  997.90   35.60 
  -5   1   0 1014.60   36.60 
   5   1   0 1033.10   37.90 
  -5   1   0 1069.89   37.00 
   5   1   0 1052.79   39.90 
   5   1   0 1054.79   33.10 
   5   1   0 1048.50   36.90 
   5   1   0 1032.40   24.60 
  -5   1   0 1059.39   36.60 
  -5   1   0 1039.80   37.50 
   5   1   0 1001.70   33.70 
   6  -1   0   30.90    7.50 
   6  -1   0   20.90    5.50 
   6  -1   0   20.40    4.00 
  -6  -1   0   25.50    6.00 
   6  -1   0   42.60    8.00 
  -6  -1   0   28.60    7.40 
   6  -1   0   27.70    5.90 
  -6  -1   0   29.80    8.00 
   6  -1   0   20.70    4.40 
  -6  -1   0   15.90    5.90 
  -6  -1   0   29.20    8.00 
  -6  -1   0   24.20    6.60 
  -6  -1   0   25.20    2.60 
  -6  -1   0   27.20    2.70 
   6  -1   0   18.10    5.10 
   6  -1   0   22.30    5.30 
  -6  -1   0   21.30    7.00 
   6  -1   0   22.40    5.80 
  -6  -1   0   31.30    7.80 
   6  -1   0   21.00    4.50 
   6  -1   0    6.40    4.70 
   6  -1   0   26.20    2.50 
  -6  -1   0   22.60    7.10 
  -6  -1   0   23.50    7.70 
  -6  -1   0   27.60    7.50 
   6  -1   0   28.10    4.90 
  -6  -1   0   17.40    6.70 
   6  -1   0   28.50    2.60 
  -6  -1   0   18.80    4.20 
   6  -1   0   15.80    5.10 
   6  -1   0   22.80    7.10 
   6  -1   0   21.40    5.80 
  -6  -1   0   25.50    7.10 
   6  -1   0   30.40    7.70 
   6  -1   0   24.10    5.90 
  -6   1   0   30.50    4.80 
   6   1   0   29.70    7.90 
   6   1   0   27.90    7.60 
   6   1   0   31.70    8.50 
  -6   1   0   36.00    8.70 
  -6   1   0   20.20    5.50 
  -6   1   0   25.20    7.50 
   6   1   0   25.00    6.70 
  -6   1   0   20.90    7.00 
   6   1   0   18.20    3.40 
  -6   1   0   21.70    5.10 
   6   1   0   17.80    4.10 
   6   1   0   34.00    8.60 
   6   1   0   28.80    8.50 
   6   1   0   26.00    7.60 
   6   1   0   15.80    5.20 
   6   1   0   29.10    4.90 
  -6   1   0   24.60    2.50 
   6   1   0   21.90    6.70 
  -6   1   0   28.00    4.80 
   6   1   0   20.20    6.40 
  -6   1   0   17.10    5.40 
   6   1   0   25.60    5.60 
  -6   1   0   18.40    5.20 
  -6   1   0   19.20    6.30 
   6   1   0   23.80    6.20 
  -6   1   0   33.90    8.20 
  -6   1   0   23.40    7.50 
  -6   1   0   24.40    7.10 
   6   1   0   29.60    7.30 
   6   1   0   23.50    2.50 
   6   1   0   27.50    6.50 
  -6   1   0   22.60    6.20 
  -6   1   0   17.60    5.80 
   7  -1   0 1162.98   44.00 
  -7  -1   0 1235.88   46.00 
   7  -1   0 1209.78   43.10 
  -7  -1   0 1224.18   48.10 
   7  -1   0 1210.18   42.40 
   7  -1   0 1180.58   40.50 
   7  -1   0 1205.68   40.30 
   7  -1   0 1218.28   40.50 
   7  -1   0 1222.88   43.20 
   7  -1   0 1164.48   34.10 
   7  -1   0 1214.48   38.70 
   7  -1   0 1189.18   48.00 
   7  -1   0 1249.07   46.40 
   7  -1   0 1192.68   50.19 
  -7  -1   0 1209.48   46.50 
  -7  -1   0 1187.18   45.00 
   7  -1   0 1178.88   39.90 
   7  -1   0 1174.88   41.00 
  -7  -1   0 1200.38   33.30 
   7  -1   0 1236.08   39.70 
  -7  -1   0 1199.18   47.10 
  -7  -1   0 1283.27   40.50 
  -7  -1   0 1193.48   47.50 
  -7  -1   0 1166.68   47.00 
  -7  -1   0 1218.58   47.40 
   7  -1   0 1248.08   47.80 
  -7  -1   0 1169.08   47.90 
  -7  -1   0 1213.08   43.80 
  -7  -1   0 1251.17   48.80 
  -7  -1   0 1276.47   45.50 
   7  -1   0 1212.48   33.00 
  -7   1   0 1204.18   47.70 
  -7   1   0 1189.68   46.20 
  -7   1   0 1243.28   34.50 
   7   1   0 1223.68   40.60 
   7   1   0 1238.78   48.50 
   7   1   0 1201.08   42.20 
   7   1   0 1227.28   46.80 
  -7   1   0 1141.09   46.00 
   7   1   0 1276.67   34.60 
   7   1   0 1190.98   45.00 
  -7   1   0 1214.88   37.50 
   7   1   0 1091.79   48.70 
  -7   1   0 1218.68   47.90 
   7   1   0 1212.18   38.60 
  -7   1   0 1179.78   46.60 
  -7   1   0 1219.58   43.70 
  -7   1   0 1156.98   47.20 
  -7   1   0 1158.38   40.10 
  -7   1   0 1208.78   43.60 
   7   1   0 1202.68   49.20 
   7   1   0 1263.17   44.80 
  -7   1   0 1283.07   44.30 
   7   1   0 1204.38   45.30 
  -7   1   0 1256.77   42.40 
   7   1   0 1211.28   48.00 
   7   1   0 1227.48   45.20 
   7   1   0 1219.78   42.00 
   7   1   0 1209.78   34.50 
  -7   1   0 1222.18   47.10 
   7   1   0 1223.48   45.40 
   7   1   0 1210.38   48.40 
   8  -1   0    1.10    3.80 
   8  -1   0    6.90    5.50 
   8  -1   0   12.60    6.40 
   8  -1   0    8.50    4.60 
  -8  -1   0    2.90    5.30 
  -8  -1   0    5.20    5.70 
   8  -1   0   15.90    7.20 
   8  -1   0    9.30    5.80 
  -8  -1   0    8.70    6.80 
  -8  -1   0   14.00    7.50 
   8  -1   0    8.50    6.80 
   8  -1   0    5.30    4.90 
   8  -1   0    8.70    6.40 
   8  -1   0   14.30    6.10 
  -8  -1   0    6.90    5.60 
  -8  -1   0    3.80    4.10 
  -8  -1   0    7.40    6.10 
  -8  -1   0   16.90    7.00 
  -8  -1   0    9.50    6.40 
   8  -1   0   10.90    4.90 
  -8  -1   0   10.10    5.90 
   8  -1   0    4.20    4.70 
  -8  -1   0   -0.20    4.60 
   8  -1   0    3.40    4.80 
   8  -1   0    9.00    5.20 
   8  -1   0    8.10    6.60 
  -8  -1   0   10.20    6.10 
   8  -1   0   12.80    5.30 
   8  -1   0   11.60    7.20 
  -8   1   0   12.50    6.80 
   8   1   0    8.50    5.20 
   8   1   0   13.80    6.60 
   8   1   0   12.50    7.30 
  -8   1   0    2.10    4.90 
  -8   1   0   20.20    7.10 
   8   1   0   20.80    7.90 
   8   1   0   26.70   10.00 
   8   1   0    7.70    7.00 
   8   1   0    6.10    6.20 
   8   1   0    9.30    5.50 
   8   1   0    4.90    4.50 
   8   1   0   12.00    6.40 
  -8   1   0   17.10    7.00 
  -8   1   0   18.40    7.70 
  -8   1   0    4.80    5.50 
   8   1   0    6.40    4.80 
  -8   1   0    5.10    5.80 
  -8   1   0    6.00    4.80 
   8   1   0    5.30    5.70 
   8   1   0    5.70    6.00 
   8   1   0   13.40    5.20 
  -8   1   0   21.10    7.20 
   8   1   0    2.80    5.30 
  -8   1   0   11.00    6.60 
   9  -1   0  228.18   27.60 
  -9  -1   0  197.98   25.30 
   9  -1   0  273.77   21.40 
   9  -1   0  243.98   28.90 
  -9  -1   0  247.58   28.10 
  -9  -1   0  204.78   24.80 
  -9  -1   0  231.48   26.60 
   9  -1   0  256.77   25.90 
   9  -1   0  219.68   21.10 
  -9  -1   0  261.67   27.20 
  -9  -1   0  201.38   23.20 
  -9  -1   0  232.28   27.70 
   9  -1   0  287.47   20.90 
   9  -1   0  227.08   27.00 
  -9  -1   0  243.38   28.60 
   9  -1   0  241.98   24.10 
   9  -1   0  202.18   25.80 
  -9  -1   0  256.97   29.00 
   9  -1   0  267.97   21.10 
   9  -1   0  225.98   29.60 
   9  -1   0  250.57   19.10 
  -9  -1   0  245.18   20.10 
   9  -1   0  239.68   26.80 
   9  -1   0  223.68   25.10 
  -9   1   0  234.98   24.40 
   9   1   0  354.06   27.70 
  -9   1   0  223.88   25.80 
  -9   1   0  258.57   29.60 
  -9   1   0  260.77   26.20 
   9   1   0  252.87   26.20 
   9   1   0  262.77   20.10 
  -9   1   0  259.67   21.60 
   9   1   0  272.87   29.80 
   9   1   0  257.17   27.30 
   9   1   0  249.08   29.00 
  -9   1   0  259.37   29.10 
   9   1   0  255.17   24.20 
   9   1   0  269.47   27.80 
   9   1   0  254.37   19.00 
  -9   1   0  248.48   28.10 
  -9   1   0  228.08   27.70 
   9   1   0  247.88   26.30 
   9   1   0  286.97   31.30 
  -9   1   0  216.28   22.50 
   9   1   0  254.67   26.00 
  -9   1   0  257.37   29.40 
   9   1   0  326.27   28.60 
   9   1   0  262.27   25.80 
 -10  -1   0   15.40    8.30 
  10  -1   0    8.60    9.30 
  10  -1   0   26.50   11.90 
 -10  -1   0    4.30    7.20 
 -10  -1   0   24.90   11.00 
 -10  -1   0   23.70   11.50 
  10  -1   0   24.90   10.60 
 -10  -1   0   19.30   10.10 
  10  -1   0   32.70   10.70 
 -10  -1   0   22.70   10.90 
 -10  -1   0   28.00   10.60 
  10  -1   0   30.80   11.50 
  10  -1   0   27.90   10.20 
 -10  -1   0   30.00   11.90 
  10  -1   0   27.10   10.00 
  10  -1   0   37.00   11.60 
  10  -1   0   32.80   12.40 
 -10  -1   0    6.50    6.90 
  10  -1   0   20.80   10.30 
 -10   1   0   21.50    9.80 
 -10   1   0   30.70   11.50 
 -10   1   0   21.90   11.40 
  10   1   0   33.10   11.60 
  10   1   0   31.40   10.50 
  10   1   0   16.40   10.40 
  10   1   0   21.80    9.40 
  10   1   0   29.70   12.00 
  10   1   0   37.20   13.10 
  10   1   0   41.20   15.20 
 -10   1   0   30.30   11.30 
 -10   1   0   28.30   10.60 
 -10   1   0   18.30    8.70 
  10   1   0   26.00   11.70 
  10   1   0   14.40    8.90 
  10   1   0   43.90   13.30 
  10   1   0   10.90    8.20 
   0  -2   0 4596.64   91.79 
   0  -2   0 4485.65   93.79 
   0  -2   0 4599.14   92.89 
   0  -2   0 4670.83   93.29 
   0  -2   0 4506.85   92.49 
   0  -2   0 4640.24   93.99 
   0  -2   0 4533.25   93.69 
   0  -2   0 4569.54   91.99 
   0  -2   0 4367.96   93.89 
   0  -2   0 4566.44   94.19 
   0  -2   0 4493.05   93.59 
   0  -2   0 4666.43   93.29 
   0  -2   0 4691.93   94.69 
   0  -2   0 4546.45   92.29 
   0  -2   0 4586.04   92.59 
   0  -2   0 4476.85   94.39 
   0  -2   0 4480.05   94.39 
   0  -2   0 4461.55   93.69 
   0  -2   0 4868.61   94.19 
   0  -2   0 4327.67   93.79 
   0  -2   0 4602.84   94.19 
   0  -2   0 4488.65   93.69 
   0  -2   0 4829.42   93.69 
   0  -2   0 4618.84   91.19 
   0  -2   0 4676.03   93.59 
   0  -2   0 4722.93   94.69 
   0   2   0 4604.24   92.89 
   0   2   0 4545.85   93.59 
   0   2   0 4450.25   92.69 
   0   2   0 4401.96   92.59 
   0   2   0 4743.63   94.99 
   0   2   0 4366.16   94.79 
   0   2   0 4379.56   93.39 
   0   2   0 4542.85   91.09 
   0   2   0 4500.45   93.79 
   0   2   0 4658.53   91.79 
   0   2   0 4590.54   92.39 
   0   2   0 4531.85   89.69 
   0   2   0 4588.34   94.59 
   0   2   0 4545.65   94.19 
   0   2   0 4615.34   91.79 
   0   2   0 4202.28   94.49 
   0   2   0 4488.85   94.79 
   0   2   0 4532.25   93.39 
   0   2   0 4641.74   95.69 
   0   2   0 4562.94   94.59 
   0   2   0 4576.64   93.99 
   0   2   0 4276.77   95.49 
   0   2   0 4582.04   93.09 
   0   2   0 4732.93   94.59 
  -1  -2   0 3477.45   74.19 
  -1  -2   0 3556.34   76.79 
   1  -2   0 3468.75   74.49 
   1  -2   0 3611.14   76.19 
  -1  -2   0 3626.04   77.09 
  -1  -2   0 3596.14   71.09 
   1  -2   0 3334.77   75.89 
   1  -2   0 3507.75   71.29 
  -1  -2   0 3714.23   77.79 
   1  -2   0 3598.94   72.99 
   1  -2   0 3621.94   71.59 
  -1  -2   0 3596.34   75.99 
  -1  -2   0 3625.34   75.79 
   1  -2   0 3566.74   76.29 
   1  -2   0 3594.74   71.99 
   1  -2   0 3383.76   74.09 
  -1  -2   0 3622.74   74.09 
  -1  -2   0 3446.56   75.99 
  -1  -2   0 3589.34   76.09 
   1  -2   0 3594.24   76.59 
   1  -2   0 3552.14   71.69 
  -1  -2   0 3429.46   72.99 
  -1  -2   0 3555.14   71.79 
  -1  -2   0 3830.42   77.49 
  -1  -2   0 3547.25   76.69 
  -1  -2   0 3495.25   75.79 
   1  -2   0 3539.85   72.89 
   1  -2   0 3454.15   72.69 
   1  -2   0 3308.47   75.39 
   1  -2   0 3613.04   75.39 
   1  -2   0 3461.95   72.79 
   1  -2   0 3547.15   73.19 
  -1  -2   0 3531.95   75.49 
   1  -2   0 3543.45   69.99 
  -1  -2   0 3539.85   76.69 
  -1  -2   0 3473.25   75.59 
   1  -2   0 3506.75   74.89 
  -1  -2   0 3518.85   75.89 
  -1  -2   0 3600.14   76.99 
  -1  -2   0 3592.64   76.89 
   1  -2   0 3596.24   72.99 
   1  -2   0 3611.34   74.59 
  -1  -2   0 3540.85   71.89 
  -1  -2   0 3649.03   77.29 
  -1  -2   0 3585.34   75.49 
  -1  -2   0 3561.34   76.09 
   1  -2   0 3634.74   71.49 
   1  -2   0 3530.55   71.59 
   1  -2   0 3377.26   73.49 
   1  -2   0 3634.14   75.79 
  -1  -2   0 3629.44   74.49 
  -1  -2   0 3551.84   75.99 
  -1  -2   0 3637.64   76.69 
  -1  -2   0 3543.65   76.39 
  -1  -2   0 3487.55   76.59 
   1  -2   0 3615.94   69.39 
  -1  -2   0 3545.95   76.49 
   1  -2   0 3476.55   76.09 
   1  -2   0 3618.24   71.79 
  -1  -2   0 3477.25   75.29 
   1  -2   0 3588.24   72.49 
   1  -2   0 3506.95   73.09 
  -1  -2   0 3565.74   71.49 
  -1  -2   0 3600.64   75.49 
   1  -2   0 3446.96   74.49 
   1  -2   0 3443.26   70.99 
  -1  -2   0 3565.84   75.39 
   1  -2   0 3444.76   73.69 
   1  -2   0 3514.55   76.09 
   1   2   0 3620.14   74.09 
   1   2   0 3576.14   76.09 
   1   2   0 3626.84   73.69 
  -1   2   0 3480.65   70.29 
  -1   2   0 3757.62   77.39 
   1   2   0 3588.24   76.59 
   1   2   0 3552.64   72.19 
  -1   2   0 3520.45   73.09 
   1   2   0 3655.23   76.09 
   1   2   0 3626.54   75.39 
   1   2   0 3545.65   77.09 
  -1   2   0 3558.94   73.69 
  -1   2   0 3559.14   76.19 
  -1   2   0 3506.95   72.09 
   1   2   0 3500.55   74.49 
  -1   2   0 3503.75   75.79 
  -1   2   0 3637.14   71.39 
   1   2   0 3547.55   76.49 
  -1   2   0 3517.15   72.89 
  -1   2   0 3612.24   69.59 
  -1   2   0 3559.74   76.79 
  -1   2   0 3546.75   75.79 
   1   2   0 3626.34   71.29 
  -1   2   0 3488.55   72.29 
   1   2   0 3557.04   77.39 
  -1   2   0 3554.44   73.49 
  -1   2   0 3439.96   71.69 
   1   2   0 3540.55   76.89 
   1   2   0 3487.95   75.79 
   1   2   0 3519.55   75.79 
   1   2   0 3631.44   76.89 
   1   2   0 3542.25   76.49 
   1   2   0 3619.14   76.39 
   1   2   0 3453.25   75.39 
   1   2   0 3499.55   71.29 
   1   2   0 3446.46   75.89 
  -1   2   0 3557.64   71.09 
   1   2   0 3553.54   76.79 
  -1   2   0 3553.74   71.99 
   1   2   0 3617.24   74.29 
  -1   2   0 3492.65   73.39 
   1   2   0 3647.44   77.09 
   1   2   0 3668.93   76.29 
  -1   2   0 3570.14   74.99 
  -1   2   0 3551.04   73.39 
   1   2   0 3556.14   76.19 
  -1   2   0 3494.55   74.49 
   1   2   0 3652.93   76.69 
  -1   2   0 3659.03   75.69 
   1   2   0 3620.34   77.39 
   1   2   0 3614.64   77.19 
  -1   2   0 3639.44   71.89 
   1   2   0 3715.73   75.59 
   1   2   0 3527.85   76.19 
   1   2   0 3617.54   76.59 
   2  -2   0 2226.68   47.00 
   2  -2   0 2257.67   47.20 
   2  -2   0 2226.18   45.90 
   2  -2   0 2259.27   48.70 
   2  -2   0 2236.38   50.69 
   2  -2   0 2286.67   45.50 
  -2  -2   0 2244.58   50.79 
   2  -2   0 2167.88   51.69 
  -2  -2   0 2289.77   54.59 
   2  -2   0 2229.18   49.99 
  -2  -2   0 2262.77   54.69 
  -2  -2   0 2305.27   55.79 
  -2  -2   0 2312.97   53.99 
  -2  -2   0 2233.78   53.19 
  -2  -2   0 2289.47   52.49 
  -2  -2   0 2185.58   44.70 
   2  -2   0 2235.88   50.59 
   2  -2   0 2263.87   50.69 
   2  -2   0 2238.18   53.79 
   2  -2   0 2329.87   51.09 
   2  -2   0 2258.37   52.09 
   2  -2   0 2215.08   50.59 
   2  -2   0 2181.78   49.10 
   2  -2   0 2245.88   50.39 
   2  -2   0 2351.66   50.49 
  -2  -2   0 2335.67   54.39 
  -2  -2   0 2228.68   54.19 
   2  -2   0 2315.47   52.29 
   2  -2   0 2213.78   53.19 
   2  -2   0 2270.87   50.29 
   2  -2   0 2282.17   51.09 
   2  -2   0 2226.58   51.19 
  -2  -2   0 2289.97   51.19 
   2  -2   0 2243.88   52.79 
  -2  -2   0 2298.47   53.49 
  -2  -2   0 2323.07   51.19 
   2  -2   0 2282.07   51.69 
  -2  -2   0 2221.58   54.59 
  -2  -2   0 2294.17   54.39 
  -2  -2   0 2224.88   44.00 
  -2  -2   0 2228.88   53.69 
  -2  -2   0 2228.78   55.09 
  -2  -2   0 2229.48   52.49 
   2  -2   0 2222.88   48.40 
   2  -2   0 2233.38   51.39 
   2  -2   0 2277.67   49.00 
   2  -2   0 2245.48   50.79 
   2  -2   0 2206.08   52.89 
  -2  -2   0 2293.87   50.39 
  -2  -2   0 2322.07   54.99 
  -2  -2   0 2197.98   53.39 
   2  -2   0 2260.57   48.00 
   2  -2   0 2221.88   52.39 
   2  -2   0 2259.17   52.69 
   2  -2   0 2272.37   49.30 
   2  -2   0 2229.28   47.20 
  -2  -2   0 2204.88   50.69 
  -2  -2   0 2274.47   50.69 
  -2  -2   0 2222.78   53.99 
  -2  -2   0 2247.88   52.49 
  -2  -2   0 2242.58   51.19 
  -2   2   0 2223.68   51.29 
   2   2   0 2294.87   54.89 
   2   2   0 2272.07   50.99 
  -2   2   0 2184.48   50.49 
   2   2   0 2217.08   54.59 
  -2   2   0 2238.18   53.69 
   2   2   0 2275.57   51.09 
   2   2   0 2351.56   55.09 
   2   2   0 2259.57   51.79 
   2   2   0 2217.28   53.49 
   2   2   0 2241.78   53.69 
  -2   2   0 2211.78   48.80 
  -2   2   0 2164.98   50.59 
   2   2   0 2263.77   52.39 
  -2   2   0 2235.98   51.19 
   2   2   0 2294.67   53.29 
   2   2   0 2259.47   55.19 
   2   2   0 2303.07   55.39 
   2   2   0 2283.77   54.89 
   2   2   0 2196.88   54.59 
   2   2   0 2319.37   54.39 
  -2   2   0 2182.78   48.20 
  -2   2   0 2237.58   50.79 
  -2   2   0 2182.48   49.20 
  -2   2   0 2208.38   47.30 
   2   2   0 2295.97   54.29 
   2   2   0 2276.27   49.70 
   2   2   0 2442.46   52.89 
   2   2   0 2268.87   50.89 
  -2   2   0 2220.28   44.80 
  -2   2   0 2186.48   47.30 
   2   2   0 2334.47   53.49 
   2   2   0 2313.77   54.69 
  -2   2   0 2238.88   51.19 
   2   2   0 2175.98   51.09 
   2   2   0 2294.37   54.49 
   2   2   0 2353.36   51.19 
  -2   2   0 2301.77   52.19 
  -2   2   0 2224.38   52.49 
   2   2   0 2314.77   54.59 
  -2   2   0 2286.97   50.99 
  -2   2   0 2344.57   52.99 
  -2   2   0 2355.36   53.49 
  -2   2   0 2251.37   50.49 
   2   2   0 2318.17   53.09 
   2   2   0 2244.58   51.69 
   2   2   0 2272.27   54.79 
   2   2   0 2260.77   50.19 
   2   2   0 2196.38   53.59 
  -3  -2   0  931.11   30.60 
  -3  -2   0  922.91   29.40 
  -3  -2   0  979.20   27.70 
   3  -2   0  974.70   25.20 
   3  -2   0  935.01   25.50 
  -3  -2   0  925.31   27.80 
   3  -2   0  892.01   26.80 
   3  -2   0  957.80   20.40 
   3  -2   0  978.60   28.30 
  -3  -2   0  954.40   30.00 
   3  -2   0  977.30   28.60 
  -3  -2   0  938.41   31.50 
  -3  -2   0  960.60   30.90 
  -3  -2   0  965.90   31.50 
   3  -2   0  995.80   28.40 
   3  -2   0  957.50   27.60 
   3  -2   0  943.21   27.20 
   3  -2   0 1018.20   28.40 
   3  -2   0  972.20   30.30 
  -3  -2   0  954.50   32.30 
  -3  -2   0  982.80   25.50 
  -3  -2   0  980.90   31.30 
  -3  -2   0  950.30   28.10 
  -3  -2   0  943.71   28.40 
   3  -2   0  961.50   22.40 
   3  -2   0  954.20   25.20 
   3  -2   0  929.31   29.20 
   3  -2   0  948.01   30.10 
   3  -2   0  941.71   29.10 
   3  -2   0  946.61   26.70 
   3  -2   0  945.31   25.60 
  -3  -2   0  939.81   31.00 
   3  -2   0  967.40   24.80 
   3  -2   0  938.31   24.00 
  -3  -2   0  953.00   23.50 
   3  -2   0  958.60   23.80 
   3  -2   0  969.10   21.90 
   3  -2   0  975.70   29.10 
  -3  -2   0  952.40   28.30 
  -3  -2   0  946.21   26.00 
  -3  -2   0  980.00   26.20 
  -3  -2   0  932.01   30.10 
  -3  -2   0  971.80   21.70 
   3  -2   0  994.70   26.30 
   3  -2   0 1013.80   33.00 
  -3  -2   0  976.70   26.00 
   3  -2   0  962.60   29.20 
   3  -2   0  943.01   22.00 
   3  -2   0  972.30   27.50 
  -3  -2   0  997.10   29.60 
   3  -2   0  958.70   26.80 
   3   2   0  962.10   30.10 
   3   2   0  957.50   25.90 
  -3   2   0  911.91   26.50 
   3   2   0  974.60   31.20 
  -3   2   0  992.10   24.50 
  -3   2   0  957.00   25.50 
  -3   2   0  984.80   27.90 
   3   2   0 1009.20   29.20 
  -3   2   0  976.90   25.00 
   3   2   0  982.60   32.00 
  -3   2   0  961.90   23.80 
  -3   2   0  938.01   21.70 
  -3   2   0  954.30   26.00 
   3   2   0 1009.20   28.90 
   3   2   0  952.10   25.90 
   3   2   0 1007.10   31.70 
  -3   2   0  941.01   29.10 
  -3   2   0  988.10   28.70 
   3   2   0  958.40   30.80 
  -3   2   0  975.10   29.70 
   3   2   0  986.50   30.50 
   3   2   0  914.51   25.90 
  -3   2   0  942.41   26.20 
   3   2   0  960.30   31.90 
   3   2   0  952.60   28.90 
  -3   2   0  905.61   29.30 
   3   2   0  925.41   30.00 
  -3   2   0  974.40   29.00 
   3   2   0  969.00   29.90 
   3   2   0  976.20   31.80 
  -3   2   0  952.00   30.80 
   3   2   0  934.81   31.60 
  -3   2   0  935.81   29.40 
  -3   2   0  963.70   28.90 
   4  -2   0 1546.25   39.00 
   4  -2   0 1471.95   37.90 
   4  -2   0 1511.15   32.60 
  -4  -2   0 1548.05   45.30 
  -4  -2   0 1465.15   44.60 
  -4  -2   0 1511.85   45.00 
   4  -2   0 1514.55   33.60 
   4  -2   0 1504.05   34.70 
  -4  -2   0 1486.45   42.30 
   4  -2   0 1518.35   40.60 
   4  -2   0 1471.15   41.90 
   4  -2   0 1504.65   41.20 
   4  -2   0 1521.75   37.60 
  -4  -2   0 1525.75   40.40 
  -4  -2   0 1536.45   45.80 
  -4  -2   0 1485.85   37.40 
  -4  -2   0 1497.55   44.00 
  -4  -2   0 1476.45   33.60 
   4  -2   0 1468.55   32.90 
   4  -2   0 1490.25   43.60 
  -4  -2   0 1560.64   43.40 
   4  -2   0 1512.15   38.10 
   4  -2   0 1494.45   38.90 
   4  -2   0 1525.85   37.70 
  -4  -2   0 1513.15   47.00 
   4  -2   0 1498.55   31.30 
   4  -2   0 1505.05   36.60 
  -4  -2   0 1546.55   45.90 
  -4  -2   0 1558.14   45.60 
   4  -2   0 1595.74   44.20 
   4  -2   0 1484.75   37.70 
  -4  -2   0 1439.26   45.60 
   4  -2   0 1533.15   37.00 
   4  -2   0 1559.04   41.80 
   4  -2   0 1462.25   40.20 
  -4  -2   0 1442.06   43.50 
   4  -2   0 1493.75   40.30 
   4  -2   0 1499.45   44.40 
   4  -2   0 1552.34   41.70 
   4  -2   0 1539.45   38.40 
   4  -2   0 1512.15   37.60 
  -4  -2   0 1471.05   36.80 
  -4  -2   0 1518.65   36.60 
  -4  -2   0 1440.66   43.80 
  -4  -2   0 1548.45   37.10 
  -4  -2   0 1551.44   40.20 
  -4  -2   0 1505.15   39.20 
  -4   2   0 1525.35   43.00 
   4   2   0 1485.35   44.70 
   4   2   0 1547.25   43.80 
  -4   2   0 1503.65   32.10 
   4   2   0 1443.56   45.40 
   4   2   0 1508.95   42.60 
   4   2   0 1507.15   37.90 
  -4   2   0 1456.35   43.80 
  -4   2   0 1519.85   37.90 
   4   2   0 1455.55   45.80 
   4   2   0 1502.25   43.90 
  -4   2   0 1375.56   37.50 
  -4   2   0 1473.55   38.00 
  -4   2   0 1511.75   39.20 
  -4   2   0 1459.15   36.90 
   4   2   0 1496.75   46.20 
   4   2   0 1468.55   46.90 
  -4   2   0 1486.25   40.60 
   4   2   0 1514.95   44.90 
  -4   2   0 1449.55   44.00 
  -4   2   0 1544.65   44.10 
   4   2   0 1505.35   36.80 
  -4   2   0 1494.95   44.20 
   4   2   0 1556.44   44.60 
  -4   2   0 1402.16   42.60 
   4   2   0 1503.85   41.50 
  -4   2   0 1505.45   41.60 
   4   2   0 1432.76   44.40 
  -4   2   0 1464.55   44.80 
   5  -2   0  517.85   22.30 
   5  -2   0  489.35   21.80 
   5  -2   0  485.35   19.20 
  -5  -2   0  475.95   23.80 
   5  -2   0  537.05   21.60 
   5  -2   0  491.35   13.60 
   5  -2   0  490.05   19.30 
  -5  -2   0  443.86   23.10 
   5  -2   0  504.85   14.00 
   5  -2   0  483.55   21.00 
   5  -2   0  476.65   19.60 
   5  -2   0  493.35   14.40 
   5  -2   0  491.55   14.70 
   5  -2   0  479.25   14.90 
   5  -2   0  482.25   23.70 
   5  -2   0  464.75   13.20 
   5  -2   0  474.75   18.40 
   5  -2   0  486.25   16.10 
  -5  -2   0  483.55   18.50 
  -5  -2   0  465.75   24.40 
  -5  -2   0  469.95   23.40 
   5  -2   0  512.35   19.00 
  -5  -2   0  497.95   22.70 
  -5  -2   0  482.25   16.10 
   5  -2   0  512.25   22.30 
  -5  -2   0  495.65   19.10 
  -5  -2   0  500.15   24.60 
  -5  -2   0  497.75   24.20 
  -5  -2   0  495.05   24.10 
   5  -2   0  495.45   18.00 
   5  -2   0  467.45   19.90 
   5  -2   0  488.85   23.70 
   5  -2   0  486.95   16.40 
   5  -2   0  477.95   21.80 
  -5  -2   0  473.55   16.30 
  -5  -2   0  477.75   16.10 
  -5  -2   0  521.75   24.60 
   5  -2   0  492.45   21.20 
  -5  -2   0  479.35   13.50 
  -5  -2   0  515.65   24.30 
  -5  -2   0  456.25   24.10 
  -5  -2   0  522.55   22.60 
   5  -2   0  507.05   22.90 
  -5  -2   0  488.55   19.00 
  -5  -2   0  490.25   25.50 
  -5   2   0  504.55   20.00 
   5   2   0  517.45   24.50 
   5   2   0  465.75   22.20 
   5   2   0  455.55   24.40 
  -5   2   0  470.05   21.30 
  -5   2   0  516.35   23.90 
  -5   2   0  498.05   16.70 
  -5   2   0  496.95   24.10 
  -5   2   0  464.45   19.70 
  -5   2   0  496.45   24.40 
   5   2   0  492.65   16.40 
  -5   2   0  524.05   24.80 
  -5   2   0  479.25   14.70 
   5   2   0  548.95   26.40 
   5   2   0  485.85   25.80 
  -5   2   0  485.85   14.80 
   5   2   0  485.95   25.20 
  -5   2   0  501.45   23.70 
   5   2   0  478.25   22.70 
   5   2   0  500.25   18.00 
  -5   2   0  466.05   19.30 
  -5   2   0  497.65   23.10 
   5   2   0  485.05   22.50 
   5   2   0  481.85   23.70 
   5   2   0  485.75   21.10 
  -5   2   0  501.25   24.30 
   5   2   0  466.55   23.30 
  -5   2   0  492.25   20.90 
   5   2   0  509.75   25.40 
  -5   2   0  479.85   19.10 
   5   2   0  502.75   24.30 
   6  -2   0 1835.62   57.49 
   6  -2   0 1699.33   51.19 
   6  -2   0 1774.42   41.30 
   6  -2   0 1738.83   56.39 
   6  -2   0 1772.12   42.90 
  -6  -2   0 1613.84   56.69 
   6  -2   0 1834.02   51.79 
   6  -2   0 1741.53   40.60 
   6  -2   0 1722.63   47.50 
  -6  -2   0 1715.03   55.69 
   6  -2   0 1721.93   42.60 
   6  -2   0 1774.62   56.29 
   6  -2   0 1775.02   48.10 
   6  -2   0 1702.53   44.40 
  -6  -2   0 1741.03   59.19 
   6  -2   0 1761.52   52.89 
   6  -2   0 1739.93   53.29 
  -6  -2   0 1738.53   42.00 
  -6  -2   0 1587.64   55.49 
  -6  -2   0 1783.82   44.70 
   6  -2   0 1791.92   50.39 
   6  -2   0 1784.02   51.29 
   6  -2   0 1728.73   52.99 
   6  -2   0 1747.93   41.60 
  -6  -2   0 1737.03   58.09 
  -6  -2   0 1650.53   55.09 
  -6  -2   0 1782.12   56.89 
  -6  -2   0 1715.33   54.09 
  -6  -2   0 1812.72   46.60 
   6  -2   0 1785.32   48.20 
  -6  -2   0 1764.92   52.09 
  -6  -2   0 1858.91   57.69 
  -6  -2   0 1758.12   44.40 
  -6  -2   0 1774.42   42.10 
   6  -2   0 1784.62   47.10 
   6  -2   0 1776.62   50.29 
   6  -2   0 1745.23   51.99 
  -6  -2   0 1746.83   57.09 
  -6  -2   0 1731.03   36.50 
  -6  -2   0 1733.03   55.89 
  -6   2   0 1856.51   53.19 
  -6   2   0 1805.52   56.19 
  -6   2   0 1805.52   42.10 
  -6   2   0 1740.13   49.50 
   6   2   0 1787.82   56.89 
   6   2   0 1751.82   57.59 
  -6   2   0 1766.42   55.59 
  -6   2   0 1797.02   41.70 
   6   2   0 1757.92   41.10 
  -6   2   0 1762.22   57.19 
   6   2   0 1713.43   57.99 
   6   2   0 1737.23   56.49 
   6   2   0 1752.22   53.79 
   6   2   0 1839.82   45.40 
  -6   2   0 1819.92   56.59 
  -6   2   0 1828.42   51.89 
   6   2   0 1761.62   60.29 
   6   2   0 1738.73   55.99 
   6   2   0 1838.72   59.49 
  -6   2   0 1700.23   40.50 
  -6   2   0 1682.93   55.89 
   6   2   0 1807.12   56.29 
  -6   2   0 1789.02   57.39 
   6   2   0 1815.72   51.49 
  -6   2   0 1811.72   50.19 
  -6   2   0 1800.82   57.59 
  -6   2   0 1742.13   49.80 
   6   2   0 1770.62   59.39 
  -6   2   0 1750.52   48.30 
   6   2   0 1710.33   54.09 
   6   2   0 1767.92   53.59 
   6   2   0 1751.12   56.09 
   7  -2   0  117.59   15.10 
   7  -2   0  139.99   11.10 
   7  -2   0  112.39   13.50 
  -7  -2   0  108.19   15.90 
   7  -2   0  139.99   15.60 
   7  -2   0  131.49   14.60 
   7  -2   0  145.29   18.40 
  -7  -2   0  106.49   15.70 
  -7  -2   0  129.49   16.40 
  -7  -2   0  130.89    7.50 
   7  -2   0  152.28   16.00 
   7  -2   0  133.19   10.60 
  -7  -2   0  131.29   17.20 
  -7  -2   0  135.19   18.10 
   7  -2   0  116.89   14.30 
  -7  -2   0  148.39   18.50 
  -7  -2   0  161.98   20.10 
   7  -2   0  123.19   14.90 
   7  -2   0  125.39   13.10 
   7  -2   0  154.28   17.20 
   7  -2   0  129.09   13.40 
  -7  -2   0  157.58   19.50 
  -7  -2   0  145.79   16.30 
  -7  -2   0  170.48   19.30 
  -7  -2   0  135.29   10.10 
   7  -2   0  181.78   20.40 
  -7  -2   0  100.79   16.00 
  -7  -2   0  106.49   16.60 
   7  -2   0  119.09   14.50 
   7  -2   0  146.59   11.70 
   7  -2   0  128.59   17.20 
   7   2   0  129.19   17.40 
   7   2   0  111.49   15.90 
   7   2   0   97.39   13.80 
  -7   2   0  138.09   18.40 
   7   2   0  147.49   19.20 
  -7   2   0  149.69   14.50 
   7   2   0  109.59   16.90 
   7   2   0  119.29   18.00 
  -7   2   0  135.99   17.90 
   7   2   0  135.49   14.80 
   7   2   0  123.79   16.40 
   7   2   0  122.09   17.00 
  -7   2   0  113.19   16.80 
   7   2   0  130.39   16.50 
  -7   2   0  122.29   13.80 
   7   2   0  124.99   16.90 
   7   2   0  152.38   19.70 
  -7   2   0  125.29   17.50 
  -7   2   0  118.49   17.20 
   7   2   0  153.78   17.40 
   7   2   0  143.49    9.90 
  -7   2   0  129.09   15.50 
  -7   2   0  129.59   14.50 
  -7   2   0  120.69   13.80 
  -7   2   0  127.09   16.80 
   7   2   0  113.89   15.70 
   8  -2   0  762.12   39.60 
   8  -2   0  743.53   30.80 
   8  -2   0  783.62   34.10 
  -8  -2   0  715.73   38.40 
   8  -2   0  835.02   35.10 
   8  -2   0  757.32   36.00 
   8  -2   0  795.82   34.60 
  -8  -2   0  758.12   39.90 
   8  -2   0  778.02   39.80 
   8  -2   0  750.72   33.00 
   8  -2   0  777.52   30.80 
   8  -2   0  812.32   34.50 
  -8  -2   0  754.42   36.80 
   8  -2   0  784.52   42.40 
  -8  -2   0  738.13   39.10 
  -8  -2   0  785.62   40.90 
  -8  -2   0  833.52   40.80 
   8  -2   0  743.13   36.20 
  -8  -2   0  723.13   37.10 
  -8  -2   0  692.23   36.30 
   8  -2   0  770.02   33.00 
  -8  -2   0  781.02   33.70 
   8  -2   0  744.93   38.60 
   8  -2   0  755.32   31.40 
   8  -2   0  737.83   34.00 
  -8  -2   0  737.93   38.10 
  -8  -2   0  755.22   40.50 
  -8   2   0  782.72   39.50 
  -8   2   0  737.53   34.60 
  -8   2   0  764.82   39.20 
   8   2   0  732.73   34.80 
   8   2   0  804.52   38.90 
  -8   2   0  793.02   33.90 
  -8   2   0  738.33   37.40 
   8   2   0  710.03   36.40 
  -8   2   0  749.13   37.90 
   8   2   0  695.13   37.70 
   8   2   0  800.32   40.00 
   8   2   0  716.33   37.40 
   8   2   0  784.32   38.40 
  -8   2   0  808.92   34.30 
  -8   2   0  701.33   37.20 
  -8   2   0  724.93   38.80 
   8   2   0  752.02   41.90 
   8   2   0  763.22   36.90 
   8   2   0  693.03   39.40 
   8   2   0  775.62   40.80 
   8   2   0  790.22   33.50 
  -8   2   0  805.62   33.80 
   8   2   0  764.82   40.30 
   8   2   0  747.23   35.00 
  -9  -2   0   63.89   12.30 
   9  -2   0   67.99   15.60 
   9  -2   0   73.89   13.20 
   9  -2   0   58.89   12.70 
  -9  -2   0   61.79   13.90 
   9  -2   0   86.79   15.50 
  -9  -2   0   74.59   16.00 
   9  -2   0   62.19   12.40 
   9  -2   0   79.99   17.20 
   9  -2   0   80.19   13.80 
   9  -2   0   58.99   13.10 
   9  -2   0   56.49   15.40 
  -9  -2   0   61.59   14.90 
   9  -2   0   63.59   14.70 
  -9  -2   0   76.09   16.50 
  -9  -2   0   66.89   16.10 
  -9  -2   0   46.80   12.60 
  -9  -2   0   78.69   17.10 
   9  -2   0   70.29   15.20 
  -9  -2   0   54.39   13.50 
  -9  -2   0   56.79   13.40 
   9  -2   0   73.29   13.50 
   9  -2   0   64.79   12.60 
  -9  -2   0   91.29   16.30 
   9   2   0   45.20   11.50 
   9   2   0   67.59   12.20 
   9   2   0   78.89   15.60 
  -9   2   0   69.19   15.60 
   9   2   0   53.09   13.10 
  -9   2   0   70.89   13.50 
  -9   2   0   75.69   15.50 
   9   2   0   36.20   11.70 
   9   2   0   58.19   12.50 
   9   2   0   55.19   14.50 
  -9   2   0   58.99   14.40 
   9   2   0   52.39   13.80 
   9   2   0   62.29   14.00 
  -9   2   0   87.99   16.10 
   9   2   0   47.20   11.90 
  -9   2   0   74.79   16.00 
   9   2   0   77.29   17.10 
  -9   2   0   53.49   13.10 
   9   2   0   67.89   15.00 
   9   2   0   80.89   17.10 
   9   2   0   56.09   15.40 
  10  -2   0  396.56   31.70 
 -10  -2   0  410.26   33.40 
 -10  -2   0  345.07   35.80 
 -10  -2   0  380.36   29.80 
  10  -2   0  391.56   32.10 
  10  -2   0  414.96   33.10 
 -10  -2   0  450.05   34.00 
 -10  -2   0  393.26   32.40 
 -10  -2   0  474.45   33.60 
 -10  -2   0  317.47   35.70 
 -10  -2   0  392.26   32.00 
  10  -2   0  336.37   32.20 
 -10  -2   0  423.56   33.90 
  10  -2   0  378.06   38.50 
  10  -2   0  410.86   27.00 
  10  -2   0  365.66   28.60 
  10  -2   0  446.56   36.80 
  10   2   0  407.56   30.50 
  10   2   0  404.06   32.80 
  10   2   0  358.66   30.10 
 -10   2   0  401.76   32.40 
  10   2   0  354.16   38.90 
  10   2   0  369.16   39.90 
  10   2   0  372.46   29.90 
 -10   2   0  381.76   38.10 
 -10   2   0  319.57   33.80 
  10   2   0  448.66   31.40 
  10   2   0  435.76   31.40 
 -10   2   0  467.65   34.60 
 -10   2   0  439.56   32.60 
  10   2   0  334.97   35.80 
 -10   2   0  457.65   30.70 
  10   2   0  313.27   35.50 
   0  -3   0    9.80    3.20 
   0  -3   0   -1.80    1.40 
   0  -3   0   -0.10    1.60 
   0  -3   0    0.40    1.80 
   0  -3   0    0.30    0.70 
   0  -3   0    0.70    2.10 
   0  -3   0    6.80    2.50 
   0  -3   0    2.40    1.60 
   0  -3   0    1.90    1.70 
   0  -3   0    2.30    2.10 
   0  -3   0   -0.20    1.20 
   0  -3   0    0.40    1.90 
   0  -3   0    1.40    1.80 
   0  -3   0    1.30    1.80 
   0  -3   0    3.20    2.30 
   0  -3   0   -1.60    1.50 
   0  -3   0   -2.20    1.00 
   0  -3   0    2.30    1.90 
   0  -3   0    2.00    1.90 
   0  -3   0    0.10    1.50 
   0  -3   0   -0.50    1.80 
   0  -3   0   -0.90    1.10 
   0  -3   0    1.40    1.70 
   0  -3   0   -0.30    1.70 
   0  -3   0    2.30    1.80 
   0  -3   0    3.20    2.30 
   0  -3   0    0.40    1.40 
   0  -3   0    2.70    1.80 
   0  -3   0    1.80    1.60 
   0   3   0    0.70    1.30 
   0   3   0   -1.10    1.30 
   0   3   0   -0.80    1.70 
   0   3   0    3.30    2.70 
   0   3   0   -0.50    1.00 
   0   3   0    0.50    1.60 
   0   3   0    0.10    1.80 
   0   3   0    0.50    1.90 
   0   3   0    3.70    2.50 
   0   3   0    3.90    2.50 
   0   3   0    1.80    2.20 
   0   3   0    2.50    2.00 
   0   3   0   -0.20    2.20 
   0   3   0    1.40    1.90 
   0   3   0    0.60    1.60 
   0   3   0    3.20    2.40 
   0   3   0    0.60    1.70 
   0   3   0    1.90    2.00 
   0   3   0    0.80    1.70 
   0   3   0    0.80    1.10 
   0   3   0   -0.90    1.20 
   0   3   0    0.30    2.00 
   0   3   0    2.20    1.40 
   0   3   0    1.80    2.10 
   0   3   0    1.40    2.00 
   0   3   0    1.80    2.10 
   0   3   0    2.50    2.20 
   0   3   0    1.10    1.80 
   0   3   0    7.50    2.90 
  -1  -3   0  222.48   12.30 
  -1  -3   0  225.88   10.30 
  -1  -3   0  221.28   11.60 
   1  -3   0  227.98   10.90 
  -1  -3   0  229.08   12.30 
   1  -3   0  242.68   11.50 
  -1  -3   0  235.98    9.70 
  -1  -3   0  230.38    9.70 
   1  -3   0  220.78   10.00 
   1  -3   0  234.38    9.10 
  -1  -3   0  231.68   12.30 
   1  -3   0  234.38    9.10 
   1  -3   0  245.28    8.90 
   1  -3   0  227.68    8.70 
   1  -3   0  229.08   12.40 
   1  -3   0  244.98   12.50 
  -1  -3   0  206.68   11.20 
  -1  -3   0  244.08   12.30 
   1  -3   0  243.18    9.90 
  -1  -3   0  243.18   12.50 
  -1  -3   0  217.68   11.40 
   1  -3   0  226.18   10.10 
   1  -3   0  223.08    8.20 
   1  -3   0  243.58   10.90 
   1  -3   0  240.28    8.20 
   1  -3   0  245.48   12.50 
   1  -3   0  246.18   12.30 
  -1  -3   0  234.38   11.50 
  -1  -3   0  235.48   12.40 
   1  -3   0  231.98    7.90 
  -1  -3   0  235.18   12.50 
   1  -3   0  218.28   10.30 
   1  -3   0  212.08   11.30 
  -1  -3   0  228.98   11.30 
   1  -3   0  235.48   12.00 
  -1  -3   0  250.07    8.70 
  -1  -3   0  229.58   11.90 
  -1  -3   0  223.98   11.40 
   1  -3   0  236.48   11.60 
  -1  -3   0  228.98    9.90 
   1  -3   0  246.08   10.80 
   1  -3   0  209.58   12.40 
  -1  -3   0  246.38   12.40 
   1  -3   0  231.38   10.30 
   1  -3   0  242.48   11.60 
   1  -3   0  212.68   12.00 
  -1  -3   0  230.08   11.80 
   1  -3   0  227.98   10.00 
  -1  -3   0  238.78   12.80 
   1  -3   0  231.78   12.10 
  -1  -3   0  224.38   12.10 
  -1  -3   0  232.58    7.70 
  -1  -3   0  227.38   11.50 
   1  -3   0  239.18   10.60 
   1  -3   0  226.78    7.30 
  -1  -3   0  224.98   12.20 
  -1  -3   0  227.28   10.30 
  -1  -3   0  237.98   12.70 
  -1  -3   0  215.18   11.50 
  -1  -3   0  236.18   11.80 
   1  -3   0  230.08    8.40 
   1  -3   0  237.18   10.40 
   1  -3   0  216.08   11.60 
  -1  -3   0  200.98   11.80 
   1   3   0  245.28   12.40 
   1   3   0  215.78   11.60 
   1   3   0  226.78   12.40 
   1   3   0  225.58   11.90 
   1   3   0  219.28   11.80 
  -1   3   0  232.78   11.30 
   1   3   0  228.58   12.20 
   1   3   0  224.08    8.50 
  -1   3   0  262.07   13.30 
  -1   3   0  223.78    9.60 
  -1   3   0  222.28    9.60 
  -1   3   0  220.98   10.70 
   1   3   0  217.28   11.80 
  -1   3   0  225.58   12.60 
   1   3   0  237.78   11.10 
   1   3   0  218.98   11.20 
  -1   3   0  228.38   10.20 
   1   3   0  239.08   12.90 
   1   3   0  222.38   11.90 
   1   3   0  234.68   11.80 
  -1   3   0  246.78   12.40 
  -1   3   0  230.48   12.80 
  -1   3   0  222.98    6.30 
   1   3   0  249.68    8.10 
   1   3   0  229.98   12.80 
   1   3   0  224.78    7.90 
  -1   3   0  231.78   11.10 
   1   3   0  214.88   12.50 
  -1   3   0  223.38   11.70 
   1   3   0  230.08   12.00 
  -1   3   0  215.08   11.90 
   1   3   0  236.18   11.60 
   1   3   0  254.07   12.80 
   1   3   0  223.58    7.50 
  -1   3   0  195.68   12.20 
  -1   3   0  234.88    7.90 
  -1   3   0  231.08   10.80 
   1   3   0  234.98   10.90 
   1   3   0  235.28   10.50 
  -1   3   0  229.48    8.00 
  -1   3   0  209.08    7.40 
   1   3   0  215.88   11.90 
   1   3   0  224.88   11.80 
   1   3   0  223.58   12.40 
   1   3   0  255.87   12.50 
  -1   3   0  245.48    8.90 
  -1   3   0  245.18   11.50 
  -1   3   0  227.98    9.00 
  -1   3   0  243.08   11.00 
  -1   3   0  238.18   11.70 
  -1   3   0  232.98    7.80 
  -1   3   0  243.78   10.20 
  -2  -3   0   78.09    9.10 
   2  -3   0   82.19    5.90 
   2  -3   0   62.69    8.00 
   2  -3   0   75.19    7.80 
   2  -3   0   78.09    3.60 
  -2  -3   0   67.29    7.40 
   2  -3   0   94.99    9.80 
   2  -3   0   70.99    7.60 
  -2  -3   0   61.89    8.60 
  -2  -3   0   92.99   10.30 
  -2  -3   0   74.19    8.00 
  -2  -3   0   72.09    8.20 
  -2  -3   0   82.59    9.40 
  -2  -3   0   82.89    6.00 
   2  -3   0   82.69    6.50 
   2  -3   0   77.49    8.70 
   2  -3   0   81.99    5.60 
   2  -3   0   72.99    5.80 
   2  -3   0   73.39    5.60 
   2  -3   0   82.19    5.90 
   2  -3   0   80.29    5.60 
   2  -3   0   85.39    4.20 
   2  -3   0   78.29    4.80 
  -2  -3   0   84.39    8.60 
   2  -3   0   82.99    6.30 
   2  -3   0   88.19    6.20 
   2  -3   0   81.49    5.70 
   2  -3   0   75.29    8.70 
  -2  -3   0   77.89    4.30 
  -2  -3   0   70.49    8.60 
  -2  -3   0   67.39    8.10 
  -2  -3   0   75.49    7.50 
   2  -3   0   78.79    6.00 
   2  -3   0   87.99    9.70 
  -2  -3   0   65.09    8.30 
  -2  -3   0   73.49    8.40 
  -2  -3   0   70.09    8.50 
   2  -3   0   69.19    5.50 
   2  -3   0   80.69    8.10 
  -2  -3   0   72.69    5.40 
   2  -3   0   75.69    6.00 
   2  -3   0   78.09    5.70 
   2  -3   0   61.59    8.20 
  -2  -3   0   80.19    4.70 
   2  -3   0   83.69    6.00 
   2  -3   0   85.09    6.80 
   2  -3   0   74.29    7.70 
  -2  -3   0   77.39    8.30 
  -2  -3   0   71.59    8.90 
  -2  -3   0   86.69    9.90 
  -2  -3   0   93.29    6.30 
   2  -3   0   76.39    8.10 
   2  -3   0   84.49    5.70 
   2  -3   0   78.69    8.00 
   2  -3   0   71.59    5.80 
   2  -3   0   77.69    8.00 
  -2  -3   0   77.79    6.30 
   2   3   0   86.69    9.80 
   2   3   0   62.79    6.90 
   2   3   0   90.19    7.30 
  -2   3   0   73.89    5.90 
   2   3   0   77.79    5.70 
  -2   3   0   72.59    7.90 
   2   3   0   80.49    7.40 
  -2   3   0   75.29    5.70 
   2   3   0   69.09    7.70 
   2   3   0   67.89    8.90 
  -2   3   0   76.49    5.90 
  -2   3   0   71.99    7.80 
   2   3   0   74.49    8.40 
   2   3   0   69.09    8.80 
   2   3   0   87.49    6.70 
   2   3   0   71.69    7.10 
   2   3   0   83.99    7.90 
  -2   3   0   64.29    7.10 
   2   3   0   76.39    8.30 
  -2   3   0   69.89    9.90 
  -2   3   0   64.49    5.50 
  -2   3   0   71.49    5.40 
  -2   3   0   77.09    3.90 
  -2   3   0   58.89    8.00 
   2   3   0   98.59   10.80 
   2   3   0   80.09    9.50 
   2   3   0   75.59    8.90 
  -2   3   0   67.79    6.50 
   2   3   0   53.89    7.80 
  -2   3   0   71.69    5.50 
   2   3   0   67.59    8.50 
   2   3   0   85.79    9.60 
   2   3   0   81.19    5.90 
  -2   3   0   62.29    7.70 
  -2   3   0   69.79    8.00 
  -2   3   0   78.69    8.30 
   2   3   0   69.59    8.60 
   2   3   0   90.99   10.10 
  -2   3   0   72.99    5.70 
   2   3   0   68.59    8.40 
  -3  -3   0    4.50    2.40 
   3  -3   0    2.30    2.30 
  -3  -3   0    7.50    3.90 
  -3  -3   0    6.80    3.30 
   3  -3   0    4.70    1.50 
   3  -3   0    4.60    3.10 
   3  -3   0    4.90    2.60 
   3  -3   0    3.80    2.60 
  -3  -3   0    3.70    3.00 
  -3  -3   0    8.10    3.60 
  -3  -3   0    6.20    3.70 
  -3  -3   0    5.40    3.50 
   3  -3   0    4.40    2.40 
   3  -3   0    8.10    2.20 
   3  -3   0    4.60    2.30 
   3  -3   0    6.90    2.80 
   3  -3   0    6.50    3.60 
   3  -3   0    6.10    2.60 
  -3  -3   0    7.20    3.70 
  -3  -3   0   13.60    4.70 
  -3  -3   0    4.70    3.70 
   3  -3   0    8.00    2.60 
  -3  -3   0    2.70    2.50 
   3  -3   0    6.50    3.00 
   3  -3   0   11.80    2.60 
  -3  -3   0    1.30    1.80 
   3  -3   0    6.70    1.90 
   3  -3   0    5.70    2.10 
  -3  -3   0    3.40    2.90 
  -3  -3   0   12.30    4.20 
   3  -3   0    6.30    1.40 
   3  -3   0    4.00    2.90 
  -3  -3   0    5.90    2.70 
   3  -3   0    8.10    2.50 
  -3  -3   0    5.70    1.20 
   3  -3   0    7.30    2.70 
   3  -3   0    3.50    2.20 
   3  -3   0    7.20    2.90 
   3  -3   0    5.20    2.90 
   3  -3   0    3.50    1.30 
  -3  -3   0    3.30    2.00 
  -3  -3   0    3.40    2.90 
  -3  -3   0    2.80    2.50 
   3  -3   0    7.60    3.50 
   3   3   0    4.30    3.40 
   3   3   0   25.00    6.30 
  -3   3   0    6.80    2.70 
  -3   3   0    1.00    2.50 
  -3   3   0    8.00    3.20 
  -3   3   0    3.00    1.70 
   3   3   0    1.30    2.50 
  -3   3   0    9.60    3.50 
  -3   3   0    6.90    2.20 
  -3   3   0    4.90    2.70 
   3   3   0    6.70    3.20 
   3   3   0    7.90    3.00 
  -3   3   0    3.80    2.40 
   3   3   0    7.90    3.80 
   3   3   0    3.30    3.10 
  -3   3   0    9.70    2.80 
   3   3   0   11.10    4.20 
   3   3   0    1.70    2.80 
  -3   3   0    7.90    3.40 
   3   3   0    5.10    2.50 
  -3   3   0    3.30    2.40 
  -3   3   0    7.60    2.40 
   3   3   0    4.00    3.30 
   3   3   0    5.90    2.70 
  -3   3   0    1.90    2.00 
   3   3   0    8.80    4.20 
   3   3   0    5.70    3.50 
   3   3   0    2.50    2.30 
   3   3   0    0.80    2.50 
   3   3   0    2.00    2.60 
  -3   3   0    9.10    3.40 
   3   3   0    1.40    2.00 
  -4  -3   0  219.28   13.00 
   4  -3   0  208.38    7.60 
  -4  -3   0  204.78    7.90 
   4  -3   0  220.08   13.50 
   4  -3   0  211.58   10.30 
  -4  -3   0  219.08   11.70 
  -4  -3   0  200.48   15.20 
  -4  -3   0  208.68   14.80 
   4  -3   0  195.68   10.20 
  -4  -3   0  258.77   16.50 
  -4  -3   0  207.28   10.70 
   4  -3   0  203.68   11.90 
   4  -3   0  214.68    8.00 
   4  -3   0  228.98   11.20 
  -4  -3   0  218.68   12.90 
   4  -3   0  190.28   10.00 
  -4  -3   0  226.98   14.50 
   4  -3   0  191.38   11.10 
   4  -3   0  210.38   10.40 
  -4  -3   0  195.88   13.80 
   4  -3   0  196.18   13.80 
  -4  -3   0  205.08   13.40 
   4  -3   0  214.08    8.90 
  -4  -3   0  215.58   13.60 
   4  -3   0  163.98   13.10 
  -4  -3   0  188.18   14.10 
   4  -3   0  187.38   11.60 
  -4  -3   0  209.18   16.00 
  -4  -3   0  183.68   13.90 
  -4  -3   0  206.48   15.30 
   4  -3   0  211.78    7.90 
   4  -3   0  191.08   12.80 
   4  -3   0  185.18   11.50 
   4  -3   0  197.68    8.70 
   4  -3   0  210.38   10.80 
   4  -3   0  207.38   12.60 
   4  -3   0  205.68   13.70 
  -4  -3   0  195.28    9.30 
   4   3   0  185.28   12.60 
  -4   3   0  192.38   13.20 
  -4   3   0  206.98   13.80 
  -4   3   0  193.18   11.30 
  -4   3   0  215.98   12.00 
   4   3   0  227.58   15.50 
  -4   3   0  185.28   11.90 
  -4   3   0  208.38   13.70 
  -4   3   0  210.48    8.40 
   4   3   0  216.98   14.70 
  -4   3   0  187.78   12.30 
  -4   3   0  206.78   10.20 
   4   3   0  227.68   12.00 
   4   3   0  200.08   15.00 
   4   3   0  214.98   15.30 
  -4   3   0  201.98   13.40 
  -4   3   0  205.18    7.30 
   4   3   0  188.88   14.80 
   4   3   0  201.48   11.40 
   4   3   0  194.38   13.30 
  -4   3   0  209.48    9.10 
   4   3   0  177.38   14.10 
   4   3   0  170.38   13.90 
   4   3   0  205.78   13.80 
   4   3   0  214.08   15.00 
  -4   3   0  211.88   13.10 
   4   3   0  199.18   15.00 
  -4   3   0  190.78   10.20 
   4   3   0  210.88   15.30 
   5  -3   0  534.15   14.00 
  -5  -3   0  551.24   16.70 
   5  -3   0  590.54   26.90 
   5  -3   0  561.44   18.60 
   5  -3   0  551.74   21.50 
  -5  -3   0  571.14   24.40 
   5  -3   0  543.55   20.00 
  -5  -3   0  522.35   22.90 
   5  -3   0  578.84   25.30 
  -5  -3   0  549.74   27.00 
   5  -3   0  552.44   22.80 
  -5  -3   0  563.24   27.50 
   5  -3   0  581.54   24.50 
   5  -3   0  554.74   19.40 
  -5  -3   0  563.04   27.10 
  -5  -3   0  600.74   30.00 
   5  -3   0  495.75   17.80 
   5  -3   0  548.15   15.40 
   5  -3   0  540.15   25.60 
  -5  -3   0  597.64   28.00 
  -5  -3   0  541.55   22.30 
  -5  -3   0  556.64   26.20 
  -5  -3   0  556.44   25.70 
   5  -3   0  510.55   18.60 
   5  -3   0  530.85   23.10 
   5  -3   0  547.15   20.60 
   5  -3   0  556.34   14.60 
  -5  -3   0  551.64   25.70 
   5  -3   0  521.65   18.30 
  -5  -3   0  537.35   26.80 
   5  -3   0  547.15   23.10 
  -5  -3   0  552.54   27.70 
   5  -3   0  523.85   22.80 
   5  -3   0  552.74   21.90 
   5  -3   0  516.95   24.60 
  -5  -3   0  547.95   28.00 
  -5   3   0  524.85   25.10 
   5   3   0  537.45   24.00 
   5   3   0  549.25   20.20 
  -5   3   0  543.75   25.70 
  -5   3   0  523.25   19.00 
   5   3   0  534.95   27.60 
   5   3   0  558.74   27.50 
  -5   3   0  587.64   26.60 
  -5   3   0  557.44   23.00 
  -5   3   0  550.14   18.50 
   5   3   0  514.35   27.20 
  -5   3   0  536.55   20.20 
   5   3   0  604.54   25.60 
   5   3   0  532.55   26.70 
   5   3   0  547.95   26.00 
  -5   3   0  542.35   21.20 
  -5   3   0  554.54   27.40 
  -5   3   0  564.54   24.80 
  -5   3   0  567.74   20.80 
   5   3   0  564.44   26.10 
   5   3   0  533.05   26.10 
   5   3   0  523.45   27.20 
   5   3   0  495.35   26.00 
   5   3   0  554.04   20.90 
   5   3   0  502.85   27.30 
   5   3   0  591.24   28.00 
  -6  -3   0  852.51   40.70 
  -6  -3   0  920.31   40.10 
   6  -3   0  928.81   35.10 
  -6  -3   0  958.50   38.70 
  -6  -3   0  920.41   39.50 
  -6  -3   0  920.41   39.10 
  -6  -3   0  937.51   40.90 
   6  -3   0  918.01   37.00 
  -6  -3   0  985.30   40.40 
   6  -3   0  976.10   38.60 
   6  -3   0  903.41   35.70 
  -6  -3   0  904.41   39.10 
  -6  -3   0  906.01   36.30 
   6  -3   0  957.40   23.10 
   6  -3   0  931.31   33.50 
   6  -3   0  957.60   30.50 
  -6  -3   0  943.11   39.00 
  -6  -3   0 1006.70   33.30 
   6  -3   0  989.90   34.80 
  -6  -3   0  941.61   32.20 
   6  -3   0  931.31   29.60 
   6  -3   0  949.31   32.60 
   6  -3   0  898.81   34.60 
   6  -3   0  965.50   33.90 
  -6  -3   0  909.01   39.10 
  -6  -3   0  975.70   36.90 
   6  -3   0  988.80   31.90 
   6  -3   0  966.00   35.50 
   6  -3   0 1017.70   40.30 
   6   3   0  967.70   42.30 
  -6   3   0  872.41   37.60 
  -6   3   0  907.51   36.40 
  -6   3   0  964.50   38.30 
  -6   3   0  951.30   29.20 
  -6   3   0  946.21   29.70 
   6   3   0  955.30   30.20 
  -6   3   0 1000.20   40.70 
   6   3   0  951.80   28.80 
   6   3   0  963.10   38.60 
  -6   3   0  968.60   39.20 
   6   3   0  908.31   39.40 
   6   3   0  852.81   37.10 
  -6   3   0  950.40   34.00 
   6   3   0  949.31   39.60 
   6   3   0  937.51   39.60 
   6   3   0  947.11   35.50 
  -6   3   0  990.30   32.80 
  -6   3   0  925.41   30.60 
   6   3   0  926.21   39.10 
   6   3   0  885.21   35.90 
   6   3   0  936.81   40.60 
   6   3   0  910.61   40.40 
  -6   3   0  965.00   30.70 
   6   3   0  912.11   40.00 
   6   3   0  938.71   41.10 
   6   3   0  980.30   38.40 
   7  -3   0  254.87   20.60 
   7  -3   0  292.07   22.10 
   7  -3   0  287.97   15.60 
   7  -3   0  301.77   15.90 
  -7  -3   0  294.77   20.80 
   7  -3   0  258.97   15.90 
   7  -3   0  259.97   18.80 
   7  -3   0  263.27   18.70 
   7  -3   0  283.57   15.10 
   7  -3   0  251.77   16.70 
  -7  -3   0  277.47   16.00 
  -7  -3   0  263.47   26.10 
   7  -3   0  261.67   19.40 
   7  -3   0  265.67   20.80 
   7  -3   0  283.27   18.20 
  -7  -3   0  256.47   18.90 
  -7  -3   0  262.27   22.00 
   7  -3   0  255.07   18.60 
  -7  -3   0  287.37   21.90 
  -7  -3   0  277.47   15.30 
  -7  -3   0  289.17   22.00 
  -7  -3   0  298.67   22.50 
  -7  -3   0  236.48   24.40 
  -7  -3   0  252.97   20.80 
  -7  -3   0  243.98   26.60 
   7  -3   0  256.17   17.90 
   7  -3   0  267.37   18.40 
  -7  -3   0  264.37   27.50 
  -7  -3   0  287.67   22.00 
   7  -3   0  298.77   18.00 
   7  -3   0  241.58   15.80 
   7   3   0  266.07   21.20 
  -7   3   0  279.87   16.30 
  -7   3   0  282.37   17.30 
  -7   3   0  223.88   24.40 
  -7   3   0  266.57   20.50 
   7   3   0  215.48   23.10 
   7   3   0  249.28   26.30 
   7   3   0  300.47   19.50 
   7   3   0  271.67   23.20 
  -7   3   0  296.57   22.20 
   7   3   0  271.07   21.80 
  -7   3   0  264.47   15.60 
   7   3   0  244.78   25.40 
   7   3   0  283.47   20.50 
  -7   3   0  244.18   24.30 
   7   3   0  271.87   20.10 
  -7   3   0  260.77   17.50 
   7   3   0  260.87   21.90 
   7   3   0  287.87   23.00 
   7   3   0  245.98   24.80 
   7   3   0  262.77   20.20 
   7   3   0  256.27   20.50 
  -7   3   0  272.27   20.10 
  -7   3   0  275.47   15.90 
   8  -3   0  213.68   21.80 
  -8  -3   0  219.58   24.60 
   8  -3   0  257.57   27.30 
   8  -3   0  220.28   17.80 
   8  -3   0  268.77   18.90 
   8  -3   0  251.57   19.00 
   8  -3   0  233.08   25.10 
   8  -3   0  200.58   23.20 
  -8  -3   0  261.47   29.30 
   8  -3   0  240.68   17.70 
  -8  -3   0  251.67   27.30 
  -8  -3   0  232.68   27.00 
  -8  -3   0  243.18   25.90 
  -8  -3   0  208.58   21.80 
  -8  -3   0  241.48   26.80 
   8  -3   0  242.28   22.80 
  -8  -3   0  206.88   24.60 
  -8  -3   0  229.08   25.40 
   8  -3   0  261.77   25.30 
   8  -3   0  239.38   17.30 
  -8  -3   0  212.88   24.20 
   8  -3   0  241.58   17.20 
   8  -3   0  230.18   19.10 
  -8  -3   0  210.78   26.10 
   8   3   0  228.28   25.90 
   8   3   0  288.17   23.20 
  -8   3   0  221.58   25.30 
  -8   3   0  214.88   24.40 
   8   3   0  260.77   29.40 
   8   3   0  223.68   27.40 
  -8   3   0  223.58   25.70 
   8   3   0  209.38   24.00 
   8   3   0  224.98   23.40 
   8   3   0  205.48   22.60 
  -8   3   0  223.58   17.00 
  -8   3   0  237.38   26.40 
   8   3   0  192.58   24.20 
  -8   3   0  209.18   23.10 
   8   3   0  213.58   25.70 
   8   3   0  217.78   23.00 
   8   3   0  228.48   26.40 
   8   3   0  288.67   23.30 
   8   3   0  222.38   21.80 
   8   3   0  212.68   24.30 
   9  -3   0  138.39   21.70 
  -9  -3   0   99.79   17.90 
   9  -3   0  172.28   21.20 
  -9  -3   0  181.28   24.30 
  -9  -3   0  132.79   18.60 
   9  -3   0  167.88   23.30 
   9  -3   0  156.98   21.00 
  -9  -3   0  192.78   24.80 
   9  -3   0  164.58   25.40 
   9  -3   0  197.78   26.20 
   9  -3   0  179.38   22.10 
  -9  -3   0  136.59   22.30 
   9  -3   0  150.38   22.30 
  -9  -3   0  171.98   23.90 
  -9  -3   0  174.28   26.00 
   9  -3   0  138.99   18.30 
  -9  -3   0  173.68   24.60 
  -9  -3   0  156.08   22.70 
  -9  -3   0  180.28   24.90 
  -9  -3   0  170.18   23.90 
   9   3   0  192.98   27.60 
   9   3   0  145.09   23.40 
  -9   3   0  169.48   22.80 
   9   3   0  132.09   21.80 
   9   3   0  123.09   21.70 
  -9   3   0  120.19   20.50 
   9   3   0  191.78   23.60 
   9   3   0  148.69   20.80 
   9   3   0  150.58   22.50 
   9   3   0  180.78   24.20 
  -9   3   0  119.69   20.30 
  -9   3   0  156.58   22.70 
   9   3   0  165.38   23.20 
   9   3   0  141.99   20.30 
  -9   3   0  174.98   23.70 
   9   3   0  160.28   24.30 
   9   3   0  147.79   22.30 
   9   3   0  175.38   20.40 
   9   3   0  147.89   21.70 
   0  -4   0  742.03   26.90 
   0  -4   0  788.42   27.20 
   0  -4   0  806.72   25.50 
   0  -4   0  793.62   26.50 
   0  -4   0  799.52   27.50 
   0  -4   0  799.72   27.60 
   0  -4   0  796.02   24.90 
   0  -4   0  811.32   26.60 
   0  -4   0  814.62   22.50 
   0  -4   0  848.12   27.20 
   0  -4   0  806.52   25.80 
   0  -4   0  817.02   17.50 
   0  -4   0  780.72   27.60 
   0  -4   0  812.22   25.30 
   0  -4   0  797.12   24.80 
   0  -4   0  834.12   25.20 
   0  -4   0  782.42   23.30 
   0  -4   0  781.82   27.40 
   0  -4   0  822.82   18.30 
   0  -4   0  758.62   23.40 
   0  -4   0  844.92   26.60 
   0  -4   0  819.92   27.30 
   0   4   0  812.42   22.70 
   0   4   0  835.12   28.10 
   0   4   0  814.62   24.10 
   0   4   0  804.92   27.30 
   0   4   0  830.72   26.70 
   0   4   0  784.82   27.70 
   0   4   0  835.02   29.00 
   0   4   0  801.52   28.60 
   0   4   0  796.92   24.60 
   0   4   0  790.92   22.20 
   0   4   0  826.22   29.60 
   0   4   0  780.92   28.10 
   0   4   0  842.52   30.50 
   0   4   0  832.72   26.00 
   0   4   0  808.82   26.70 
   0   4   0  833.52   30.20 
   0   4   0  803.52   26.70 
   0   4   0  787.02   26.50 
   0   4   0  778.92   28.10 
   0   4   0  809.62   28.80 
   0   4   0  728.63   23.90 
   0   4   0  833.82   22.30 
   0   4   0  813.52   26.70 
   0   4   0  836.12   25.30 
   0   4   0  819.02   26.00 
   0   4   0  747.63   28.40 
   1  -4   0 4858.71   95.09 
  -1  -4   0 4689.93  104.09 
  -1  -4   0 4855.01   95.19 
  -1  -4   0 4668.83  106.19 
  -1  -4   0 4787.42   98.79 
  -1  -4   0 4779.42   99.99 
  -1  -4   0 4585.54  105.29 
   1  -4   0 4780.12   93.79 
  -1  -4   0 4810.72   93.09 
   1  -4   0 4857.61  105.69 
   1  -4   0 4795.52  100.99 
   1  -4   0 4753.42  100.19 
   1  -4   0 4773.52  100.29 
  -1  -4   0 4817.22  100.59 
  -1  -4   0 4837.02  103.69 
   1  -4   0 4697.73  100.49 
   1  -4   0 4585.34  105.09 
  -1  -4   0 4732.03  106.39 
   1  -4   0 4816.12   93.99 
  -1  -4   0 4726.43  100.69 
  -1  -4   0 4774.32  104.99 
   1  -4   0 4798.32  103.39 
   1  -4   0 4882.41   98.59 
   1  -4   0 4769.02   99.69 
  -1  -4   0 4770.82  106.59 
   1  -4   0 4633.54  105.39 
   1  -4   0 4624.94  103.49 
  -1  -4   0 4558.94  104.69 
  -1  -4   0 4806.32  100.29 
  -1  -4   0 4762.82  103.39 
  -1  -4   0 4695.73  103.19 
   1  -4   0 4696.73   96.69 
  -1  -4   0 4792.42  105.09 
   1  -4   0 4731.93  107.29 
  -1  -4   0 4771.02  104.69 
  -1  -4   0 4665.03  105.89 
   1  -4   0 4823.02  102.49 
  -1  -4   0 4719.63  106.69 
   1  -4   0 4729.53  106.19 
   1   4   0 4747.92   92.29 
   1   4   0 4792.62  103.29 
  -1   4   0 4758.62   96.19 
   1   4   0 4750.42  105.89 
   1   4   0 4679.13  106.49 
  -1   4   0 4741.63  103.29 
   1   4   0 4756.72  108.39 
  -1   4   0 4826.02  102.99 
  -1   4   0 4349.46  106.99 
  -1   4   0 4545.75  103.59 
   1   4   0 4642.64  105.49 
  -1   4   0 4428.76  100.99 
  -1   4   0 4693.73  103.99 
  -1   4   0 4610.34   99.49 
  -1   4   0 4777.92   99.99 
  -1   4   0 4759.52   97.29 
  -1   4   0 4694.03  103.99 
  -1   4   0 4648.53   92.89 
  -1   4   0 4857.21  105.99 
   1   4   0 4645.44  105.79 
  -1   4   0 4722.03  106.39 
  -1   4   0 4695.13  105.79 
   1   4   0 4827.22  105.59 
   1   4   0 4955.00  104.59 
   1   4   0 4671.03  107.79 
   1   4   0 4756.02  104.79 
  -1   4   0 4614.34   98.99 
  -1   4   0 4798.52  106.19 
   1   4   0 4806.82  107.19 
  -1   4   0 4752.32   93.39 
  -1   4   0 4503.95  108.49 
   1   4   0 4759.92   94.89 
   1   4   0 4685.63  107.49 
  -1   4   0 4668.63  104.89 
   1   4   0 4623.94  104.19 
   1   4   0 4640.64  106.39 
  -1   4   0 4785.92   97.89 
  -1   4   0 4492.05  102.79 
  -1   4   0 4699.53   93.29 
  -1   4   0 4671.23  102.79 
  -1   4   0 4563.74  106.89 
   1   4   0 4603.94  106.69 
  -1   4   0 4660.63  106.39 
  -2  -4   0  813.62   30.80 
  -2  -4   0  830.52   27.40 
   2  -4   0  842.62   24.10 
  -2  -4   0  845.12   31.90 
   2  -4   0  826.52   25.00 
   2  -4   0  863.21   26.50 
   2  -4   0  818.82   27.20 
   2  -4   0  835.52   30.30 
  -2  -4   0  890.61   31.20 
  -2  -4   0  860.51   30.10 
  -2  -4   0  793.62   30.10 
  -2  -4   0  822.32   30.40 
   2  -4   0  838.42   21.90 
   2  -4   0  857.11   25.60 
   2  -4   0  876.51   25.80 
   2  -4   0  844.42   24.20 
   2  -4   0  828.32   25.00 
   2  -4   0  853.11   27.90 
  -2  -4   0  865.11   30.90 
   2  -4   0  836.22   22.50 
  -2  -4   0  831.12   31.10 
   2  -4   0  894.31   24.30 
   2  -4   0  840.22   25.20 
   2  -4   0  848.82   25.50 
   2  -4   0  839.72   30.50 
  -2  -4   0  850.81   22.90 
   2  -4   0  825.42   30.40 
  -2  -4   0  879.41   26.00 
  -2  -4   0  801.02   27.50 
  -2  -4   0  805.82   26.50 
  -2  -4   0  844.42   23.90 
   2  -4   0  862.91   22.80 
   2  -4   0  864.61   23.40 
   2  -4   0  827.52   30.20 
  -2  -4   0  815.32   22.80 
   2  -4   0  872.01   25.80 
  -2  -4   0  814.92   29.10 
   2  -4   0  836.92   23.40 
  -2  -4   0  840.92   29.70 
   2  -4   0  798.92   25.50 
  -2  -4   0  864.81   24.30 
   2  -4   0  798.42   22.90 
   2   4   0  826.62   29.00 
  -2   4   0  813.42   24.70 
  -2   4   0  810.82   29.30 
   2   4   0  858.41   31.90 
   2   4   0  837.12   23.10 
  -2   4   0  833.32   29.30 
   2   4   0  830.32   26.80 
  -2   4   0  863.41   24.50 
  -2   4   0  871.11   27.00 
  -2   4   0  837.32   26.90 
  -2   4   0  835.52   29.70 
  -2   4   0  876.81   24.10 
   2   4   0  871.41   31.70 
   2   4   0  855.81   31.60 
   2   4   0  850.01   30.20 
   2   4   0  848.02   30.50 
  -2   4   0  878.81   31.50 
   2   4   0  836.42   29.00 
   2   4   0  846.72   30.50 
   2   4   0  875.01   23.40 
   2   4   0  856.41   24.70 
   2   4   0  870.81   30.20 
  -2   4   0  856.91   29.30 
  -2   4   0  846.32   26.20 
  -2   4   0  855.31   21.70 
  -2   4   0  856.21   26.20 
   2   4   0  848.62   23.90 
   2   4   0  872.01   28.60 
  -2   4   0  829.22   24.30 
   2   4   0  823.52   31.40 
   2   4   0  825.42   25.60 
   2   4   0  833.02   30.10 
  -2   4   0  837.52   23.80 
   2   4   0  872.81   31.60 
  -2   4   0  814.32   25.90 
   2   4   0  834.32   30.70 
   3  -4   0  829.22   26.10 
  -3  -4   0  845.42   21.30 
  -3  -4   0  840.32   26.50 
  -3  -4   0  825.82   30.00 
   3  -4   0  841.52   31.40 
  -3  -4   0  826.72   25.70 
   3  -4   0  836.82   25.40 
   3  -4   0  865.61   30.30 
   3  -4   0  873.91   28.90 
  -3  -4   0  818.12   19.50 
  -3  -4   0  788.82   31.50 
  -3  -4   0  880.21   32.00 
   3  -4   0  828.02   25.20 
   3  -4   0  865.31   28.90 
   3  -4   0  817.72   17.60 
  -3  -4   0  765.32   31.30 
   3  -4   0  837.62   23.90 
   3  -4   0  829.52   26.30 
  -3  -4   0  807.62   28.70 
   3  -4   0  796.92   21.90 
   3  -4   0  807.92   30.40 
  -3  -4   0  824.12   33.30 
   3  -4   0  796.52   24.10 
   3  -4   0  886.01   25.50 
   3  -4   0  826.32   27.70 
  -3  -4   0  790.62   31.40 
   3  -4   0  783.52   31.00 
   3  -4   0  825.62   24.70 
   3  -4   0  825.32   25.00 
   3  -4   0  878.31   26.80 
  -3  -4   0  849.02   25.60 
   3  -4   0  771.62   31.10 
  -3  -4   0  803.32   31.80 
  -3  -4   0  788.92   31.80 
  -3  -4   0  888.61   33.90 
  -3  -4   0  860.31   31.60 
   3  -4   0  822.82   25.50 
   3   4   0  776.02   26.50 
  -3   4   0  799.62   25.40 
   3   4   0  810.72   32.10 
   3   4   0  786.52   32.20 
   3   4   0  796.12   32.10 
   3   4   0  840.22   32.10 
  -3   4   0  808.82   28.80 
  -3   4   0  820.72   24.70 
  -3   4   0  793.42   29.50 
   3   4   0  797.52   31.30 
   3   4   0  797.72   32.40 
  -3   4   0  842.42   31.70 
   3   4   0  840.62   31.00 
  -3   4   0  833.02   29.60 
  -3   4   0  912.71   30.20 
   3   4   0  839.12   28.90 
   3   4   0  849.02   26.20 
   3   4   0  815.42   31.60 
   3   4   0  809.42   32.40 
   3   4   0  820.22   32.00 
  -3   4   0  828.92   28.10 
   3   4   0  832.92   32.60 
  -3   4   0  852.01   27.10 
   3   4   0  817.52   28.80 
  -3   4   0  851.71   25.30 
   3   4   0  875.51   29.10 
  -3   4   0  824.22   24.80 
  -3   4   0  787.32   25.50 
  -3   4   0  833.72   25.20 
   3   4   0  841.42   29.80 
   4  -4   0  452.75   12.60 
  -4  -4   0  449.95   22.90 
   4  -4   0  464.15   14.70 
  -4  -4   0  440.36   24.60 
   4  -4   0  424.76   19.10 
   4  -4   0  494.55   20.80 
  -4  -4   0  445.86   16.20 
   4  -4   0  492.05   19.10 
   4  -4   0  453.75   12.90 
  -4  -4   0  478.65   22.40 
   4  -4   0  433.36   10.70 
  -4  -4   0  469.75   24.60 
  -4  -4   0  465.45   20.70 
  -4  -4   0  440.76   21.70 
  -4  -4   0  445.66   23.20 
   4  -4   0  480.35   19.30 
   4  -4   0  454.75   17.30 
   4  -4   0  427.76   19.20 
   4  -4   0  432.96   15.30 
   4  -4   0  451.35   22.00 
  -4  -4   0  407.06   24.40 
  -4  -4   0  435.66   23.70 
  -4  -4   0  450.95   22.50 
  -4  -4   0  432.36   19.20 
   4  -4   0  452.85   17.90 
   4  -4   0  438.76   16.80 
   4  -4   0  432.06   23.20 
  -4  -4   0  456.15   24.60 
   4  -4   0  432.96   18.90 
  -4  -4   0  462.35   23.70 
   4  -4   0  444.86   18.40 
  -4  -4   0  456.85   17.60 
   4  -4   0  436.86   22.60 
   4  -4   0  461.05   14.60 
   4   4   0  411.36   21.50 
   4   4   0  498.85   24.70 
   4   4   0  445.36   23.70 
   4   4   0  457.45   20.60 
  -4   4   0  452.25   22.90 
   4   4   0  505.05   25.30 
   4   4   0  412.86   23.60 
  -4   4   0  416.96   16.80 
  -4   4   0  431.16   21.40 
  -4   4   0  429.86   20.30 
  -4   4   0  445.16   19.60 
   4   4   0  446.96   19.90 
  -4   4   0  437.16   16.50 
  -4   4   0  468.15   21.90 
  -4   4   0  459.95   20.70 
   4   4   0  470.55   24.50 
   4   4   0  455.05   24.20 
   4   4   0  439.46   24.10 
  -4   4   0  457.75   20.90 
  -4   4   0  456.05   14.80 
   4   4   0  430.76   19.80 
  -4   4   0  447.66   19.90 
   4   4   0  413.66   23.90 
   4   4   0  449.95   24.40 
   4   4   0  437.46   21.30 
  -4   4   0  478.05   18.50 
   5  -4   0 1282.97   29.80 
   5  -4   0 1243.58   31.10 
  -5  -4   0 1280.47   30.50 
   5  -4   0 1268.17   43.90 
   5  -4   0 1353.26   46.70 
   5  -4   0 1388.56   39.10 
   5  -4   0 1221.48   35.70 
  -5  -4   0 1238.38   45.10 
  -5  -4   0 1210.98   45.00 
   5  -4   0 1318.37   45.70 
  -5  -4   0 1278.67   48.00 
  -5  -4   0 1297.47   46.60 
  -5  -4   0 1257.27   40.70 
   5  -4   0 1310.27   28.70 
   5  -4   0 1291.17   40.40 
   5  -4   0 1308.37   42.30 
  -5  -4   0 1288.67   47.00 
  -5  -4   0 1262.17   41.60 
  -5  -4   0 1244.58   49.10 
   5  -4   0 1298.47   34.90 
   5  -4   0 1271.77   29.20 
  -5  -4   0 1260.07   37.20 
  -5  -4   0 1263.47   47.80 
  -5  -4   0 1252.17   46.80 
   5  -4   0 1298.17   39.60 
   5  -4   0 1281.37   39.60 
  -5  -4   0 1229.68   42.60 
  -5  -4   0 1289.67   42.70 
   5  -4   0 1365.66   44.00 
  -5  -4   0 1366.36   45.10 
   5  -4   0 1257.37   32.10 
   5  -4   0 1231.58   42.60 
   5  -4   0 1263.07   39.40 
   5   4   0 1317.37   47.00 
  -5   4   0 1251.77   35.40 
  -5   4   0 1243.98   43.50 
   5   4   0 1219.58   47.60 
  -5   4   0 1351.46   41.50 
   5   4   0 1287.27   48.20 
   5   4   0 1295.47   42.30 
  -5   4   0 1287.47   34.90 
   5   4   0 1351.06   45.10 
   5   4   0 1230.18   42.90 
   5   4   0 1210.68   46.40 
  -5   4   0 1278.67   43.90 
   5   4   0 1245.68   38.60 
  -5   4   0 1285.37   39.80 
   5   4   0 1171.68   46.70 
   5   4   0 1236.38   47.30 
   5   4   0 1312.17   46.50 
   5   4   0 1273.07   46.70 
  -5   4   0 1276.37   44.00 
  -5   4   0 1268.07   41.20 
   5   4   0 1212.08   46.40 
  -5   4   0 1339.37   43.90 
   5   4   0 1207.68   46.60 
   5   4   0 1318.47   39.30 
   6  -4   0 1116.69   39.80 
  -6  -4   0 1138.29   40.50 
   6  -4   0 1102.19   38.60 
  -6  -4   0 1101.39   42.20 
  -6  -4   0 1171.98   41.30 
   6  -4   0 1088.79   43.80 
  -6  -4   0 1186.48   48.80 
  -6  -4   0 1119.59   45.70 
  -6  -4   0 1078.59   48.10 
   6  -4   0 1130.39   39.40 
  -6  -4   0 1238.08   45.40 
  -6  -4   0 1119.49   43.80 
   6  -4   0 1063.29   37.70 
  -6  -4   0 1137.29   39.30 
  -6  -4   0 1104.89   45.90 
   6  -4   0 1081.09   43.40 
   6  -4   0 1140.49   35.50 
   6  -4   0 1106.09   42.50 
  -6  -4   0 1104.39   45.50 
   6  -4   0 1160.88   41.90 
   6  -4   0 1184.58   41.30 
   6  -4   0 1173.28   37.60 
   6  -4   0 1133.49   32.60 
   6  -4   0 1116.69   32.80 
  -6  -4   0 1056.19   44.80 
   6  -4   0 1130.99   42.30 
   6  -4   0 1088.09   36.90 
  -6  -4   0 1128.89   45.80 
  -6  -4   0 1131.69   47.00 
   6   4   0 1095.59   41.30 
   6   4   0 1178.98   48.40 
  -6   4   0 1162.38   34.40 
   6   4   0 1154.88   46.10 
   6   4   0 1156.18   36.40 
   6   4   0 1145.19   47.60 
   6   4   0 1112.69   35.80 
   6   4   0 1232.58   46.40 
   6   4   0 1186.68   44.80 
   6   4   0 1104.79   45.80 
   6   4   0 1080.99   46.90 
  -6   4   0 1126.19   43.40 
  -6   4   0 1113.79   43.10 
  -6   4   0 1227.78   42.40 
   6   4   0 1106.79   44.80 
  -6   4   0 1144.19   43.90 
   6   4   0 1133.89   46.50 
  -6   4   0 1173.88   36.90 
   6   4   0 1198.88   47.50 
   6   4   0 1049.00   45.00 
   6   4   0 1293.37   49.80 
  -6   4   0 1134.39   39.40 
   6   4   0 1160.48   42.30 
   7  -4   0  703.33   34.20 
  -7  -4   0  772.52   41.80 
   7  -4   0  740.33   31.00 
   7  -4   0  731.03   29.60 
  -7  -4   0  720.13   37.60 
  -7  -4   0  704.03   30.40 
  -7  -4   0  818.62   37.50 
  -7  -4   0  794.52   39.90 
   7  -4   0  785.32   37.00 
   7  -4   0  824.12   34.40 
   7  -4   0  790.92   32.90 
   7  -4   0  824.32   39.10 
  -7  -4   0  727.43   38.40 
  -7  -4   0  756.92   31.40 
  -7  -4   0  764.72   40.50 
  -7  -4   0  746.83   38.50 
   7  -4   0  798.92   32.30 
  -7  -4   0  698.93   35.20 
   7  -4   0  756.52   29.80 
   7  -4   0  726.13   33.80 
  -7  -4   0  791.52   38.20 
  -7  -4   0  790.42   40.20 
   7  -4   0  823.22   34.90 
  -7  -4   0  744.63   38.10 
   7  -4   0  795.82   33.30 
   7  -4   0  827.42   37.50 
   7  -4   0  802.42   33.40 
   7   4   0  749.13   35.20 
   7   4   0  793.72   40.90 
  -7   4   0  767.72   37.30 
   7   4   0  730.73   36.80 
   7   4   0  741.13   38.60 
   7   4   0  769.82   37.30 
   7   4   0  762.42   40.00 
   7   4   0  720.33   39.50 
  -7   4   0  744.73   36.60 
   7   4   0  735.83   38.70 
   7   4   0  772.62   39.50 
   7   4   0  799.72   38.20 
  -7   4   0  752.32   34.90 
   7   4   0  666.43   37.00 
   7   4   0  800.02   41.30 
  -7   4   0  740.83   36.60 
   7   4   0  843.92   35.70 
  -7   4   0  815.22   33.30 
   7   4   0  767.72   38.60 
  -8  -4   0  627.44   38.60 
  -8  -4   0  742.53   42.90 
   8  -4   0  746.73   35.80 
  -8  -4   0  638.24   37.90 
  -8  -4   0  680.23   39.20 
   8  -4   0  692.53   34.40 
   8  -4   0  779.92   35.60 
   8  -4   0  689.23   38.40 
   8  -4   0  711.93   32.60 
   8  -4   0  750.92   38.00 
   8  -4   0  722.03   32.70 
   8  -4   0  758.22   37.40 
   8  -4   0  710.63   37.40 
  -8  -4   0  729.63   38.40 
  -8  -4   0  703.73   39.20 
   8  -4   0  603.34   33.60 
  -8  -4   0  685.73   36.00 
  -8  -4   0  739.93   40.50 
  -8  -4   0  718.43   41.40 
  -8  -4   0  677.53   38.00 
   8  -4   0  735.43   38.10 
  -8  -4   0  654.03   37.90 
   8  -4   0  704.13   33.90 
   8   4   0  633.44   37.90 
  -8   4   0  685.93   35.70 
   8   4   0  734.93   40.00 
   8   4   0  697.63   40.30 
   8   4   0  694.83   40.20 
   8   4   0  751.02   38.30 
   8   4   0  815.52   41.00 
   8   4   0  803.32   36.10 
   8   4   0  718.63   41.80 
  -8   4   0  674.73   37.80 
   8   4   0  732.83   42.30 
  -8   4   0  681.13   36.90 
   8   4   0  693.23   38.80 
   8   4   0  635.44   39.30 
   8   4   0  682.03   39.20 
   8   4   0  627.34   34.60 
   8   4   0  674.93   37.10 
  -8   4   0  755.42   39.40 
  -9  -4   0  378.46   36.50 
   9  -4   0  380.36   29.60 
  -9  -4   0  320.07   33.60 
   9  -4   0  405.86   27.70 
  -9  -4   0  378.66   36.90 
   9  -4   0  407.36   28.70 
   9  -4   0  434.66   31.80 
  -9  -4   0  460.05   32.70 
  -9  -4   0  382.16   30.50 
   9  -4   0  359.26   31.00 
  -9  -4   0  400.16   27.90 
  -9  -4   0  414.96   34.00 
  -9  -4   0  358.36   29.70 
  -9  -4   0  417.86   31.80 
   9  -4   0  417.26   28.00 
   9  -4   0  364.56   26.40 
  -9  -4   0  430.86   33.70 
   9  -4   0  356.46   35.90 
   9  -4   0  355.46   28.10 
  -9  -4   0  379.96   32.10 
   9   4   0  405.26   38.90 
   9   4   0  430.56   33.40 
   9   4   0  392.86   32.10 
   9   4   0  405.06   31.30 
   9   4   0  363.56   27.90 
   9   4   0  345.07   36.40 
   9   4   0  320.27   35.90 
   9   4   0  381.76   29.10 
   9   4   0  385.26   30.20 
   9   4   0  398.36   26.80 
   9   4   0  446.46   32.30 
   9   4   0  386.36   30.40 
  -9   4   0  361.06   29.30 
   9   4   0  425.36   31.80 
  -9   4   0  412.06   28.80 
   9   4   0  443.96   34.40 
  -9   4   0  367.66   29.10 
  -9   4   0  396.06   30.00 
   9   4   0  394.86   28.80 
   0  -5   0   -1.70    1.90 
   0  -5   0    8.30    3.30 
   0  -5   0    1.20    2.10 
   0  -5   0    2.70    2.50 
   0  -5   0    5.40    3.40 
   0  -5   0    2.00    2.80 
   0  -5   0    4.00    1.20 
   0  -5   0    0.10    2.60 
   0  -5   0    0.70    2.50 
   0  -5   0    2.80    2.60 
   0  -5   0   -0.90    2.20 
   0  -5   0   -0.30    1.70 
   0  -5   0    1.30    2.60 
   0  -5   0   -1.10    2.10 
   0  -5   0    1.00    2.20 
   0  -5   0    1.60    2.50 
   0  -5   0    2.30    1.80 
   0  -5   0    4.40    2.90 
   0  -5   0    1.60    2.30 
   0   5   0    0.80    2.50 
   0   5   0    1.00    2.40 
   0   5   0    5.00    3.40 
   0   5   0   -2.10    2.10 
   0   5   0    2.70    2.80 
   0   5   0    3.30    2.60 
   0   5   0    5.50    3.80 
   0   5   0    2.30    1.80 
   0   5   0   -2.40    2.10 
   0   5   0    9.60    4.90 
   0   5   0    3.50    2.90 
   0   5   0    5.10    2.50 
   0   5   0    0.40    2.10 
   0   5   0    7.40    2.50 
   0   5   0    3.30    3.60 
   0   5   0    2.80    3.20 
   0   5   0    2.30    3.00 
   0   5   0    9.10    3.50 
   0   5   0    1.80    3.10 
   0   5   0    1.10    2.70 
   0   5   0    2.40    1.80 
   0   5   0   -2.40    1.90 
   0   5   0    1.00    2.10 
   0   5   0   -0.90    2.70 
   0   5   0    0.70    1.90 
   0   5   0    0.40    2.30 
  -1  -5   0  168.08   12.40 
   1  -5   0  166.38    9.70 
  -1  -5   0  137.89    8.80 
  -1  -5   0  145.89   10.20 
  -1  -5   0  159.78    7.20 
   1  -5   0  142.69   10.50 
  -1  -5   0  188.48   13.20 
   1  -5   0  158.88   12.40 
  -1  -5   0  164.18    9.90 
   1  -5   0  174.78    6.50 
   1  -5   0  154.28   11.90 
  -1  -5   0  158.18   13.00 
  -1  -5   0  153.08   11.90 
  -1  -5   0  167.28   13.10 
  -1  -5   0  160.98    5.50 
  -1  -5   0  142.19   14.50 
   1  -5   0  153.08    7.90 
   1  -5   0  171.78   11.10 
  -1  -5   0  150.78    9.90 
  -1  -5   0  175.38   13.40 
   1  -5   0  126.19   13.60 
  -1  -5   0  136.49   14.30 
  -1  -5   0  149.79   14.70 
   1  -5   0  132.99   10.70 
   1  -5   0  145.89   11.90 
   1  -5   0  149.79   10.00 
  -1  -5   0  164.98   12.30 
   1  -5   0  144.89   11.40 
  -1  -5   0  153.58   11.40 
  -1  -5   0  156.88   11.30 
  -1  -5   0  151.38   11.90 
   1  -5   0  173.68   12.80 
  -1  -5   0  180.08   13.70 
   1   5   0  159.78   15.80 
  -1   5   0  175.18   12.70 
  -1   5   0  148.29   15.00 
   1   5   0  160.78   15.60 
  -1   5   0  147.99    9.30 
  -1   5   0  140.69   15.80 
   1   5   0  127.69   13.80 
  -1   5   0  146.99   10.70 
  -1   5   0  148.09   15.20 
  -1   5   0  151.28    9.80 
   1   5   0  141.69   14.90 
  -1   5   0  164.88   12.40 
  -1   5   0  163.68    9.60 
   1   5   0  163.38    9.40 
  -1   5   0  170.88   13.30 
   1   5   0  158.18    6.60 
  -1   5   0  154.88   12.80 
  -1   5   0  165.48    5.80 
   1   5   0  132.29   14.90 
  -1   5   0  152.38    8.50 
  -1   5   0  144.99   11.10 
  -1   5   0  161.68    6.90 
   1   5   0  158.28   13.00 
   1   5   0  173.78   13.10 
   1   5   0  164.88   13.70 
  -1   5   0  155.38   12.00 
   1   5   0  156.48   11.50 
  -1   5   0  160.38   11.90 
  -1   5   0  150.78   12.00 
  -1   5   0  158.08   16.60 
  -1   5   0  149.59    8.50 
  -1   5   0  157.38   10.30 
  -1   5   0  140.09   15.20 
   1   5   0  160.98   12.80 
   1   5   0  145.59   15.10 
   1   5   0  157.08   12.20 
   1   5   0  144.69   11.40 
   1   5   0  185.08   13.20 
  -1   5   0  140.99   11.20 
   1   5   0  175.08   14.40 
  -2  -5   0    5.70    3.10 
  -2  -5   0    8.50    4.50 
  -2  -5   0    4.60    3.60 
   2  -5   0    8.10    2.70 
   2  -5   0    7.00    3.40 
   2  -5   0    3.70    3.70 
   2  -5   0    7.30    3.00 
  -2  -5   0    2.40    3.10 
   2  -5   0    6.70    3.30 
   2  -5   0    5.40    3.00 
   2  -5   0    5.70    2.20 
  -2  -5   0    0.00    2.70 
   2  -5   0    6.60    3.20 
  -2  -5   0    7.50    4.40 
  -2  -5   0    7.50    3.20 
   2  -5   0    8.30    4.20 
  -2  -5   0    8.50    3.00 
   2  -5   0    8.30    4.30 
   2  -5   0    6.40    1.90 
   2  -5   0    1.20    2.30 
  -2  -5   0   10.70    5.10 
  -2  -5   0   14.20    4.40 
   2  -5   0   10.00    2.90 
  -2  -5   0   10.90    4.40 
   2  -5   0    5.20    2.20 
  -2  -5   0    4.80    3.50 
  -2  -5   0    2.30    2.40 
  -2  -5   0    1.30    3.30 
  -2  -5   0    3.20    3.50 
   2  -5   0    8.00    4.10 
  -2  -5   0    6.90    3.90 
   2  -5   0   13.80    3.30 
   2  -5   0    5.60    2.30 
   2  -5   0    4.00    3.70 
  -2  -5   0    5.20    2.00 
   2   5   0    1.30    2.70 
   2   5   0    7.20    4.50 
   2   5   0    3.70    3.00 
  -2   5   0    3.70    3.50 
  -2   5   0    1.90    3.30 
  -2   5   0    8.20    3.60 
  -2   5   0    5.40    1.30 
   2   5   0    2.30    2.50 
   2   5   0   19.50    6.30 
  -2   5   0    5.00    2.70 
   2   5   0    2.90    3.10 
   2   5   0    7.00    3.60 
   2   5   0    5.10    3.70 
  -2   5   0    4.10    3.50 
  -2   5   0    1.80    3.00 
  -2   5   0    4.10    2.10 
  -2   5   0    5.80    2.90 
   2   5   0    0.40    3.30 
  -2   5   0    4.70    2.70 
   2   5   0    0.20    2.70 
  -2   5   0    8.00    4.00 
   2   5   0    5.70    4.10 
  -2   5   0    2.00    2.30 
  -2   5   0   -1.30    2.40 
  -2   5   0    7.10    2.40 
   2   5   0    9.30    4.80 
   2   5   0    7.30    2.30 
  -2   5   0    5.90    2.20 
   2   5   0    3.60    3.40 
   2   5   0    3.00    1.80 
  -2   5   0    6.10    3.20 
   2   5   0    1.50    2.90 
   2   5   0   10.20    3.10 
  -3  -5   0    0.60    2.50 
   3  -5   0   -1.20    2.10 
  -3  -5   0   -4.80    2.50 
  -3  -5   0   -0.90    2.60 
   3  -5   0    0.50    2.30 
  -3  -5   0    2.20    1.90 
  -3  -5   0    8.00    5.00 
  -3  -5   0   -0.20    3.10 
   3  -5   0   -0.10    2.10 
   3  -5   0    1.50    1.50 
   3  -5   0    0.00    1.90 
   3  -5   0   -3.40    2.70 
   3  -5   0   -2.10    2.80 
  -3  -5   0   -3.90    2.10 
   3  -5   0    4.90    2.80 
   3  -5   0    4.20    3.70 
   3  -5   0   -1.10    1.90 
  -3  -5   0    1.40    3.70 
   3  -5   0    1.70    2.10 
  -3  -5   0    3.20    3.30 
   3  -5   0    2.90    2.60 
   3  -5   0    1.90    1.70 
  -3  -5   0    2.90    3.90 
   3  -5   0   -0.10    2.30 
  -3  -5   0    1.00    2.00 
  -3  -5   0   -1.90    2.40 
   3  -5   0    3.60    2.70 
   3  -5   0   -2.00    2.60 
   3  -5   0   -1.70    2.30 
  -3  -5   0   -0.90    1.50 
  -3  -5   0    1.40    3.70 
  -3  -5   0    3.70    3.40 
  -3  -5   0    1.80    2.90 
   3   5   0    0.20    2.70 
   3   5   0    2.70    4.00 
  -3   5   0    1.70    3.30 
  -3   5   0    1.60    2.50 
  -3   5   0    3.10    2.60 
   3   5   0   -2.20    1.90 
   3   5   0   -2.00    2.80 
  -3   5   0    1.60    2.40 
   3   5   0    2.40    3.70 
   3   5   0    2.00    3.70 
   3   5   0    4.30    3.90 
  -3   5   0    1.50    3.20 
   3   5   0   -2.10    1.80 
  -3   5   0    0.80    2.10 
   3   5   0    3.60    4.00 
   3   5   0    4.10    3.70 
  -3   5   0    2.30    2.40 
   3   5   0   -1.80    2.90 
   3   5   0    4.10    3.80 
  -3   5   0   -1.60    1.60 
   3   5   0    2.50    3.50 
  -3   5   0    1.10    1.90 
  -3   5   0    1.70    2.90 
  -3   5   0    2.10    3.20 
   3   5   0    1.70    3.00 
  -3   5   0    3.30    3.30 
  -3   5   0    2.30    2.50 
   3   5   0    1.40    3.70 
   3   5   0   -0.90    2.20 
  -4  -5   0  100.39   14.50 
   4  -5   0   75.79   11.50 
  -4  -5   0   84.39   11.20 
   4  -5   0   95.29   10.60 
   4  -5   0   85.49    8.90 
  -4  -5   0   78.69    8.90 
   4  -5   0   79.59    8.80 
  -4  -5   0   72.69    9.00 
   4  -5   0   78.39    9.90 
   4  -5   0   54.49   10.80 
  -4  -5   0   63.49   11.30 
  -4  -5   0   79.89   13.70 
   4  -5   0   91.49    9.90 
   4  -5   0   80.09    6.50 
  -4  -5   0   90.39   13.60 
  -4  -5   0   82.69   12.80 
  -4  -5   0   81.79   10.30 
   4  -5   0   85.49   10.00 
  -4  -5   0   74.89   11.20 
  -4  -5   0   89.69    4.70 
   4  -5   0   77.59   12.40 
   4  -5   0   88.19   10.30 
  -4  -5   0   71.59   12.20 
   4  -5   0   85.99   10.80 
   4  -5   0   69.89   11.70 
  -4  -5   0   87.89   14.10 
  -4  -5   0   71.99   12.20 
   4   5   0   78.99   13.30 
   4   5   0   67.19   10.20 
  -4   5   0   69.09    9.40 
  -4   5   0   70.19    8.50 
  -4   5   0  106.69   12.90 
   4   5   0   75.79   12.80 
  -4   5   0   71.29    8.30 
  -4   5   0   92.49    9.20 
   4   5   0   81.49   12.60 
   4   5   0   73.69   12.30 
   4   5   0   74.39   12.90 
  -4   5   0   76.19    9.30 
  -4   5   0  103.99   13.40 
   4   5   0  116.49   14.60 
   4   5   0   92.29   14.10 
  -4   5   0   84.69   11.10 
  -4   5   0   56.49   10.70 
  -4   5   0   78.79   11.20 
  -4   5   0   75.19    9.40 
   4   5   0   64.79   12.10 
   4   5   0   73.89   12.10 
   4   5   0   74.69   12.80 
   4   5   0  103.69   12.60 
  -4   5   0   82.69    8.80 
   4   5   0   83.09   10.50 
   4   5   0   69.29   10.20 
   4   5   0   87.59   13.40 
  -5  -5   0   76.09   12.90 
   5  -5   0  103.49   12.30 
  -5  -5   0  102.49   12.00 
   5  -5   0   85.39   13.80 
  -5  -5   0   94.29   15.90 
   5  -5   0   91.99   11.90 
   5  -5   0   85.69   13.70 
  -5  -5   0  111.79   15.10 
  -5  -5   0  109.79   15.90 
   5  -5   0   81.79   11.60 
   5  -5   0  100.59   11.50 
   5  -5   0  104.09   15.30 
  -5  -5   0   74.49   12.50 
   5  -5   0   89.29   13.50 
  -5  -5   0  101.79   15.20 
   5  -5   0   98.49   13.80 
  -5  -5   0  107.89   14.00 
  -5  -5   0   87.59   14.40 
   5  -5   0  116.09   12.90 
   5  -5   0  117.89   12.40 
  -5  -5   0   87.69   11.80 
   5  -5   0  103.99   11.30 
  -5  -5   0  105.19   16.50 
  -5  -5   0   73.89   13.80 
  -5  -5   0   86.79    8.70 
  -5  -5   0   77.99   12.10 
   5   5   0   98.09   13.10 
  -5   5   0  111.89   13.60 
   5   5   0  100.69   15.20 
  -5   5   0  105.79   10.90 
  -5   5   0   96.99   13.90 
   5   5   0   95.39   15.30 
  -5   5   0  102.29   14.70 
   5   5   0   93.79   13.90 
   5   5   0   82.29   11.40 
   5   5   0   79.69   13.70 
   5   5   0   87.99   14.80 
  -5   5   0  109.79   13.20 
  -5   5   0   79.99   11.90 
   5   5   0   89.69   14.70 
   5   5   0   97.89   15.30 
   5   5   0  105.09   12.80 
   5   5   0   89.79   14.70 
   5   5   0   98.69   13.30 
   5   5   0  103.49   15.90 
   5   5   0   92.19   14.80 
   5   5   0   83.39   14.00 
   5   5   0  120.19   16.10 
  -5   5   0  108.59   13.60 
  -5   5   0  100.79   10.10 
   5   5   0   98.59   12.50 
  -5   5   0   85.39    8.80 
  -6  -5   0  530.65   27.40 
  -6  -5   0  495.95   25.30 
  -6  -5   0  490.45   28.10 
   6  -5   0  551.04   31.00 
  -6  -5   0  575.64   28.50 
   6  -5   0  527.25   30.00 
  -6  -5   0  496.25   30.00 
  -6  -5   0  527.35   32.40 
  -6  -5   0  468.65   30.70 
   6  -5   0  544.75   28.50 
  -6  -5   0  566.84   29.00 
   6  -5   0  549.74   24.60 
   6  -5   0  558.34   25.30 
  -6  -5   0  473.65   32.00 
  -6  -5   0  529.55   31.50 
   6  -5   0  532.65   27.20 
   6  -5   0  528.05   25.40 
   6  -5   0  530.55   24.80 
  -6  -5   0  527.65   30.60 
  -6  -5   0  498.45   29.70 
   6  -5   0  491.05   27.50 
  -6  -5   0  518.65   31.30 
   6  -5   0  508.05   25.50 
   6  -5   0  579.14   30.10 
   6  -5   0  564.04   23.90 
   6  -5   0  469.05   28.70 
   6  -5   0  571.74   24.60 
   6  -5   0  560.04   25.10 
   6   5   0  614.34   30.50 
   6   5   0  599.04   29.70 
   6   5   0  574.54   31.70 
   6   5   0  503.75   31.80 
  -6   5   0  567.84   29.60 
  -6   5   0  524.95   27.90 
   6   5   0  531.65   32.70 
   6   5   0  538.05   31.40 
   6   5   0  533.25   32.00 
  -6   5   0  534.05   28.60 
   6   5   0  525.85   30.50 
   6   5   0  576.04   25.50 
   6   5   0  583.94   30.00 
   6   5   0  468.85   29.90 
   6   5   0  538.05   24.70 
   6   5   0  547.55   32.60 
   6   5   0  507.35   31.40 
  -6   5   0  563.64   25.80 
   6   5   0  578.84   32.80 
   6   5   0  510.25   31.40 
  -6   5   0  580.64   26.80 
   6   5   0  540.35   27.70 
  -7  -5   0   93.39   17.10 
  -7  -5   0  111.69   18.40 
   7  -5   0   84.09   14.50 
  -7  -5   0   82.19   16.10 
   7  -5   0  108.99   14.90 
  -7  -5   0   78.59   13.20 
   7  -5   0  101.99   16.80 
   7  -5   0  113.19   18.10 
  -7  -5   0  106.89   17.20 
  -7  -5   0   70.29   14.60 
   7  -5   0   78.99   14.40 
  -7  -5   0   86.49   16.50 
  -7  -5   0   73.99   16.10 
  -7  -5   0   72.59   12.80 
  -7  -5   0   94.59   17.70 
   7  -5   0  109.39   14.30 
  -7  -5   0   91.09   14.90 
   7  -5   0   93.89   16.20 
   7  -5   0   78.59   13.20 
   7  -5   0   78.29   13.90 
   7  -5   0   99.09   14.00 
  -7  -5   0   67.49   15.10 
   7  -5   0   90.19   14.70 
  -7  -5   0   82.49   14.60 
   7  -5   0   88.19   14.60 
  -7   5   0   93.89   16.00 
   7   5   0   78.29   15.90 
   7   5   0   94.49   16.70 
   7   5   0   84.39   15.70 
   7   5   0   63.89   14.50 
  -7   5   0  104.89   14.30 
   7   5   0   80.69   15.60 
   7   5   0   85.29   16.20 
  -7   5   0  108.89   16.80 
  -7   5   0   91.69   14.10 
   7   5   0   80.29   17.00 
   7   5   0   84.79   14.20 
   7   5   0   71.59   13.00 
   7   5   0   96.09   18.00 
   7   5   0   89.19   15.80 
   7   5   0  106.49   18.20 
   7   5   0   78.59   14.50 
   7   5   0   83.29   16.20 
   7   5   0   87.59   15.10 
  -7   5   0   83.09   14.50 
   8  -5   0  241.98   26.70 
   8  -5   0  281.37   22.10 
   8  -5   0  283.17   23.90 
  -8  -5   0  291.97   31.80 
  -8  -5   0  255.57   28.20 
   8  -5   0  278.77   26.80 
   8  -5   0  307.27   22.10 
   8  -5   0  228.08   27.40 
   8  -5   0  327.97   25.00 
  -8  -5   0  293.97   24.20 
  -8  -5   0  224.38   27.40 
   8  -5   0  225.38   25.10 
   8  -5   0  302.77   22.20 
  -8  -5   0  233.58   27.90 
  -8  -5   0  263.57   30.20 
  -8  -5   0  331.07   36.20 
  -8  -5   0  310.67   33.50 
  -8  -5   0  307.97   31.30 
   8  -5   0  255.27   27.90 
   8  -5   0  267.57   21.20 
  -8  -5   0  277.27   32.70 
  -8  -5   0  293.27   31.60 
  -8  -5   0  289.47   29.40 
   8   5   0  281.97   27.50 
   8   5   0  263.37   29.60 
   8   5   0  254.17   30.00 
   8   5   0  267.77   30.70 
  -8   5   0  241.38   26.20 
   8   5   0  284.07   29.00 
   8   5   0  237.98   30.70 
  -8   5   0  320.97   25.20 
   8   5   0  288.97   32.40 
   8   5   0  262.47   28.20 
   8   5   0  289.97   33.20 
   8   5   0  265.37   30.50 
   8   5   0  268.17   30.40 
  -8   5   0  261.87   21.80 
   8   5   0  305.67   32.10 
  -8   5   0  266.17   28.00 
   8   5   0  282.97   28.90 
   8   5   0  235.88   27.50 
   8   5   0  291.57   23.00 
  -9  -5   0   38.10   13.10 
  -9  -5   0   53.19   13.90 
  -9  -5   0   43.00   14.20 
  -9  -5   0   39.50   13.30 
  -9  -5   0   42.00   13.70 
  -9  -5   0   38.90   12.60 
  -9  -5   0   59.59   16.20 
   9  -5   0   44.50   14.60 
   9  -5   0   48.40   14.30 
  -9  -5   0   42.20   14.00 
   9  -5   0   42.20   12.00 
   9  -5   0   65.49   13.90 
   9  -5   0   30.60   11.80 
   9  -5   0   33.30   11.20 
  -9  -5   0   23.70   12.60 
  -9  -5   0   47.50   13.50 
  -9  -5   0   38.60   14.20 
   9  -5   0   43.60   12.80 
   9  -5   0   50.39   12.80 
   9   5   0   38.00   11.70 
  -9   5   0   52.69   14.10 
   9   5   0   44.30   14.30 
   9   5   0   44.30   14.70 
   9   5   0   58.39   16.80 
   9   5   0   40.20   12.70 
  -9   5   0   38.10   12.20 
  -9   5   0   69.89   15.80 
   9   5   0   43.30   13.20 
   9   5   0   58.89   16.20 
   9   5   0   52.49   14.70 
   9   5   0   31.50   10.60 
   9   5   0   35.60   13.00 
   9   5   0   51.79   16.00 
   9   5   0   35.30   13.10 
   9   5   0   47.30   14.00 
   9   5   0   48.30   14.30 
   0  -6   0  137.09   14.40 
   0  -6   0  135.09    8.50 
   0  -6   0  109.29   13.80 
   0  -6   0  113.49   13.10 
   0  -6   0  137.89   14.80 
   0  -6   0  148.79   11.20 
   0  -6   0  133.39   13.60 
   0  -6   0  137.79    9.90 
   0  -6   0  148.19   15.30 
   0  -6   0  133.49   10.00 
   0  -6   0  134.19   14.60 
   0  -6   0  120.99   14.10 
   0  -6   0  148.69   11.20 
   0  -6   0  138.59   14.90 
   0  -6   0  117.99   13.30 
   0  -6   0  123.69    8.70 
   0  -6   0  138.99   14.90 
   0   6   0  135.49   10.00 
   0   6   0  140.99    7.60 
   0   6   0  138.79    6.70 
   0   6   0  123.09   15.40 
   0   6   0  129.69   16.40 
   0   6   0  137.09   17.40 
   0   6   0  129.49    9.40 
   0   6   0  113.79   14.60 
   0   6   0  149.29   16.50 
   0   6   0  162.68   13.80 
   0   6   0  145.69   11.10 
   0   6   0  121.39   13.70 
   0   6   0  115.59   14.80 
   0   6   0  171.98   18.10 
   0   6   0  139.49   14.80 
   0   6   0  131.79   15.30 
   0   6   0  149.99    9.30 
   0   6   0  115.29   14.00 
   0   6   0  144.19   14.90 
   0   6   0  117.69   15.50 
   0   6   0  136.59   14.00 
   0   6   0  155.58   16.50 
   0   6   0  121.69   14.90 
   1  -6   0 2186.78   44.40 
   1  -6   0 2219.88   61.99 
   1  -6   0 2169.58   56.19 
   1  -6   0 2109.59   57.19 
   1  -6   0 2208.08   59.89 
  -1  -6   0 2182.88   63.89 
  -1  -6   0 2215.18   64.29 
  -1  -6   0 2153.68   62.29 
  -1  -6   0 2213.58   64.99 
   1  -6   0 2268.37   64.89 
  -1  -6   0 2226.88   58.49 
   1  -6   0 2182.18   62.59 
  -1  -6   0 2247.88   61.99 
   1  -6   0 2123.19   61.39 
  -1  -6   0 2276.37   62.79 
  -1  -6   0 2166.58   53.49 
   1  -6   0 2190.98   50.69 
  -1  -6   0 2106.29   54.19 
   1  -6   0 2140.69   50.39 
  -1  -6   0 2271.17   62.29 
  -1  -6   0 2183.78   59.79 
  -1  -6   0 2137.29   64.29 
   1  -6   0 2189.08   58.79 
  -1  -6   0 2284.07   65.09 
   1  -6   0 2261.97   62.59 
  -1  -6   0 2082.59   62.69 
  -1  -6   0 2271.47   59.89 
   1  -6   0 2218.88   51.39 
   1  -6   0 2320.37   61.79 
   1  -6   0 2220.88   61.69 
   1  -6   0 2293.77   45.10 
  -1  -6   0 2187.78   55.99 
   1  -6   0 2175.88   58.29 
  -1  -6   0 2224.68   63.19 
  -1   6   0 2243.48   48.50 
   1   6   0 2047.60   63.39 
  -1   6   0 2382.16   67.19 
   1   6   0 2108.69   63.39 
   1   6   0 2385.96   68.59 
  -1   6   0 2199.68   53.29 
  -1   6   0 2201.68   58.59 
  -1   6   0 2198.28   64.49 
   1   6   0 2184.48   63.99 
  -1   6   0 2126.29   64.09 
  -1   6   0 2197.28   55.29 
  -1   6   0 2263.07   51.69 
  -1   6   0 2246.98   58.09 
   1   6   0 2247.38   62.59 
  -1   6   0 2178.48   64.89 
  -1   6   0 2201.88   66.59 
   1   6   0 2157.88   65.29 
  -1   6   0 2290.47   62.59 
   1   6   0 2327.17   63.09 
   1   6   0 2231.38   65.89 
   1   6   0 2151.98   56.29 
  -1   6   0 2248.88   54.59 
   1   6   0 2326.47   66.79 
  -1   6   0 2237.28   55.89 
   1   6   0 2272.17   65.89 
  -1   6   0 2194.18   68.09 
  -1   6   0 2341.97   63.89 
   1   6   0 2090.69   62.49 
   1   6   0 2158.38   60.79 
  -1   6   0 2244.28   61.39 
  -1   6   0 2194.58   66.09 
   1   6   0 2250.57   66.89 
   1   6   0 2181.08   53.49 
   1   6   0 2168.78   67.19 
   1   6   0 2186.48   65.59 
  -1   6   0 2231.58   63.39 
   1   6   0 2207.78   44.90 
   1   6   0 2266.47   65.29 
  -2  -6   0   17.00    6.50 
   2  -6   0    9.00    4.60 
   2  -6   0   14.40    3.90 
   2  -6   0    5.00    3.60 
   2  -6   0   10.00    4.70 
  -2  -6   0    7.50    4.70 
   2  -6   0    3.70    3.90 
   2  -6   0    5.30    3.50 
  -2  -6   0   10.30    4.10 
   2  -6   0    4.60    4.40 
   2  -6   0   10.50    2.90 
  -2  -6   0   11.50    4.90 
  -2  -6   0    0.20    3.20 
  -2  -6   0   14.10    5.30 
  -2  -6   0   11.70    4.20 
  -2  -6   0   13.20    5.30 
  -2  -6   0    5.50    3.10 
  -2  -6   0    9.90    5.30 
   2  -6   0    6.00    4.60 
   2  -6   0   11.20    2.50 
  -2  -6   0   11.80    5.50 
   2  -6   0   11.70    4.10 
   2  -6   0   22.50    7.00 
   2  -6   0   11.30    4.10 
  -2  -6   0    9.10    5.20 
   2  -6   0   13.50    3.20 
  -2  -6   0    5.30    3.70 
   2  -6   0    5.60    3.20 
   2  -6   0    9.60    1.80 
  -2  -6   0    7.10    4.70 
  -2   6   0   10.40    3.10 
  -2   6   0    9.70    3.50 
   2   6   0    9.40    5.10 
   2   6   0   28.50    8.30 
   2   6   0    7.80    4.40 
   2   6   0   20.30    6.90 
  -2   6   0   10.00    4.60 
   2   6   0    8.50    4.90 
   2   6   0   15.30    6.40 
  -2   6   0    3.20    3.70 
  -2   6   0   12.90    4.20 
   2   6   0    5.30    4.10 
   2   6   0    5.80    2.40 
  -2   6   0    6.00    2.80 
  -2   6   0    9.10    4.30 
   2   6   0   13.10    5.90 
   2   6   0   11.30    4.80 
   2   6   0   13.10    5.70 
   2   6   0   16.40    6.50 
  -2   6   0    5.20    2.10 
   2   6   0   11.50    5.70 
  -2   6   0   10.10    4.70 
   2   6   0   14.20    5.70 
  -2   6   0    3.90    3.80 
   2   6   0    6.40    4.40 
  -2   6   0   10.50    5.10 
  -2   6   0    6.70    3.20 
  -2   6   0    8.80    5.20 
  -2   6   0   11.20    5.00 
  -2   6   0   15.80    6.20 
  -2   6   0    8.50    2.00 
  -3  -6   0  886.71   39.70 
   3  -6   0  993.80   39.90 
   3  -6   0  931.41   39.00 
   3  -6   0  953.80   33.90 
   3  -6   0  984.50   35.30 
   3  -6   0 1002.70   28.30 
  -3  -6   0 1020.10   40.40 
  -3  -6   0  929.11   40.00 
  -3  -6   0  960.40   33.80 
  -3  -6   0  965.50   27.80 
  -3  -6   0  927.51   39.30 
   3  -6   0  961.90   31.50 
  -3  -6   0  936.01   27.20 
  -3  -6   0 1016.80   38.90 
  -3  -6   0 1007.90   34.90 
   3  -6   0  937.41   25.70 
   3  -6   0  916.71   38.40 
   3  -6   0  932.41   30.70 
   3  -6   0  978.90   38.50 
  -3  -6   0  953.30   34.80 
  -3  -6   0  919.91   35.40 
   3  -6   0  960.30   26.30 
   3  -6   0  929.61   30.30 
  -3  -6   0  974.60   38.80 
  -3  -6   0  969.70   40.10 
   3  -6   0  961.30   29.10 
  -3  -6   0  995.10   41.10 
   3  -6   0  964.90   31.20 
  -3  -6   0  946.31   39.10 
   3  -6   0  964.90   29.70 
  -3   6   0  977.40   29.30 
  -3   6   0  947.81   40.10 
   3   6   0  906.11   40.40 
   3   6   0  924.81   37.30 
   3   6   0  895.41   37.90 
  -3   6   0  938.81   38.00 
   3   6   0  987.30   40.50 
  -3   6   0  984.30   34.00 
  -3   6   0 1014.60   34.30 
   3   6   0  969.00   39.50 
  -3   6   0  982.30   38.50 
   3   6   0  930.71   38.90 
   3   6   0  962.40   28.90 
   3   6   0  955.50   41.20 
  -3   6   0  955.20   28.30 
  -3   6   0 1005.40   34.60 
   3   6   0  939.31   39.20 
   3   6   0  981.70   41.20 
   3   6   0  910.81   33.70 
   3   6   0  969.80   41.20 
  -3   6   0  951.70   32.40 
   3   6   0  931.41   39.90 
   3   6   0 1002.70   38.00 
  -3   6   0  908.21   36.90 
  -3   6   0  990.00   38.50 
  -3   6   0  906.61   28.70 
   3   6   0  934.71   38.10 
  -4  -6   0    2.80    4.00 
   4  -6   0   -1.10    1.90 
  -4  -6   0   -0.10    3.70 
  -4  -6   0    0.70    3.60 
   4  -6   0    4.00    3.60 
  -4  -6   0   -2.00    2.60 
  -4  -6   0    1.90    4.10 
   4  -6   0    1.20    3.80 
  -4  -6   0   -0.20    3.40 
   4  -6   0    2.80    3.00 
  -4  -6   0    3.70    3.20 
   4  -6   0    4.30    3.40 
   4  -6   0   -3.60    3.60 
   4  -6   0    0.00    2.30 
   4  -6   0   -0.20    2.00 
   4  -6   0    2.40    3.90 
  -4  -6   0    0.00    3.10 
  -4  -6   0   -4.50    2.50 
  -4  -6   0    0.80    3.70 
  -4  -6   0   -1.60    2.90 
   4  -6   0    3.00    4.50 
   4  -6   0   -0.80    2.60 
   4  -6   0    2.50    3.60 
  -4  -6   0   -0.60    3.50 
  -4   6   0    2.40    3.00 
   4   6   0    2.70    4.30 
  -4   6   0   -1.30    2.50 
   4   6   0   -0.70    2.90 
   4   6   0   -6.10    2.00 
   4   6   0    1.40    3.20 
  -4   6   0    1.10    2.50 
   4   6   0    2.20    3.50 
  -4   6   0   -3.40    3.20 
  -4   6   0    0.70    2.40 
  -4   6   0   -0.90    2.60 
  -4   6   0   -1.50    2.60 
   4   6   0   -1.50    3.70 
   4   6   0   22.00    7.80 
  -4   6   0    2.60    4.20 
  -4   6   0   -0.50    3.10 
   4   6   0    5.60    4.40 
  -4   6   0    9.20    4.60 
   4   6   0    3.10    4.20 
   4   6   0    1.30    3.80 
   4   6   0   -2.00    3.40 
  -4   6   0    0.40    3.80 
   4   6   0    2.10    2.80 
   4   6   0    5.20    4.70 
   4   6   0    1.90    4.20 
   4   6   0    3.20    4.00 
   5  -6   0 1367.96   43.60 
  -5  -6   0 1317.67   49.50 
  -5  -6   0 1337.77   51.79 
   5  -6   0 1395.26   40.80 
   5  -6   0 1342.17   41.40 
  -5  -6   0 1347.57   53.59 
  -5  -6   0 1427.76   45.30 
   5  -6   0 1368.36   42.90 
   5  -6   0 1372.86   52.49 
   5  -6   0 1359.56   50.79 
  -5  -6   0 1459.35   49.20 
  -5  -6   0 1409.56   53.59 
  -5  -6   0 1385.36   51.09 
  -5  -6   0 1382.46   51.89 
   5  -6   0 1373.66   45.00 
   5  -6   0 1420.56   52.79 
   5  -6   0 1370.36   44.00 
  -5  -6   0 1443.06   55.29 
   5  -6   0 1443.46   53.99 
   5  -6   0 1463.55   52.49 
  -5  -6   0 1318.57   54.59 
  -5  -6   0 1422.76   54.49 
  -5  -6   0 1353.16   55.89 
   5   6   0 1456.35   48.40 
   5   6   0 1435.86   47.20 
   5   6   0 1343.47   53.29 
  -5   6   0 1457.15   53.69 
  -5   6   0 1353.86   45.20 
   5   6   0 1382.96   53.69 
  -5   6   0 1406.36   47.60 
   5   6   0 1309.27   53.59 
   5   6   0 1400.26   48.40 
   5   6   0 1283.27   52.49 
  -5   6   0 1374.16   40.10 
   5   6   0 1336.97   54.39 
   5   6   0 1311.97   52.69 
   5   6   0 1334.77   45.20 
  -5   6   0 1393.06   48.70 
  -5   6   0 1342.37   48.90 
   5   6   0 1309.07   53.59 
   5   6   0 1323.07   54.09 
  -5   6   0 1359.16   47.80 
   5   6   0 1342.27   54.79 
   5   6   0 1317.57   53.99 
   5   6   0 1379.56   49.99 
  -6  -6   0   -0.80    4.70 
  -6  -6   0    6.10    5.90 
   6  -6   0    7.50    4.50 
   6  -6   0    4.50    4.40 
   6  -6   0    1.40    5.10 
   6  -6   0    1.60    3.40 
   6  -6   0   -2.80    5.00 
  -6  -6   0   -0.20    5.30 
  -6  -6   0   14.20    6.30 
  -6  -6   0   -3.10    3.80 
  -6  -6   0    0.90    4.80 
   6  -6   0    1.40    4.60 
   6  -6   0    6.70    4.70 
  -6  -6   0   -0.60    4.20 
  -6  -6   0    6.90    6.10 
   6  -6   0   -0.20    4.70 
  -6  -6   0    4.40    5.00 
  -6  -6   0   -1.60    4.20 
  -6  -6   0    1.80    4.50 
  -6   6   0    0.00    4.10 
   6   6   0    8.60    5.90 
  -6   6   0    8.90    5.70 
   6   6   0    5.90    5.20 
   6   6   0   -3.50    3.30 
  -6   6   0   -1.30    3.80 
  -6   6   0    2.00    4.60 
   6   6   0    2.10    4.00 
   6   6   0    0.70    5.00 
  -6   6   0    8.00    5.20 
  -6   6   0    4.60    4.40 
   6   6   0   -1.40    4.80 
   6   6   0   -1.10    4.30 
   6   6   0   -0.80    4.10 
   6   6   0   -3.20    3.90 
   6   6   0   20.10    8.50 
   6   6   0    1.40    3.80 
   6   6   0   -0.60    3.90 
   6   6   0    0.90    5.10 
   6   6   0   -1.20    3.40 
   6   6   0    3.80    5.20 
   6   6   0    0.80    4.80 
  -7  -6   0 1289.17   60.19 
   7  -6   0 1275.37   54.99 
  -7  -6   0 1320.17   59.09 
  -7  -6   0 1263.47   55.39 
  -7  -6   0 1296.87   58.89 
   7  -6   0 1302.57   53.49 
   7  -6   0 1328.77   55.29 
  -7  -6   0 1320.87   58.19 
  -7  -6   0 1245.38   56.09 
  -7  -6   0 1214.38   55.39 
   7  -6   0 1263.07   54.39 
   7  -6   0 1344.17   52.49 
   7  -6   0 1335.27   52.49 
  -7  -6   0 1295.47   51.19 
  -7  -6   0 1406.06   57.09 
  -7  -6   0 1304.67   50.49 
  -7  -6   0 1288.97   54.89 
  -7  -6   0 1405.76   54.39 
  -7   6   0 1316.07   50.99 
   7   6   0 1268.97   51.79 
   7   6   0 1262.07   57.29 
   7   6   0 1311.67   58.89 
   7   6   0 1325.37   57.19 
  -7   6   0 1312.37   51.89 
   7   6   0 1339.17   56.49 
   7   6   0 1406.16   56.79 
   7   6   0 1268.17   56.79 
   7   6   0 1330.37   51.69 
  -7   6   0 1352.56   53.29 
   7   6   0 1319.47   52.59 
   7   6   0 1233.38   55.59 
   7   6   0 1235.38   57.09 
   7   6   0 1253.77   57.89 
   7   6   0 1188.78   55.79 
   7   6   0 1193.98   55.69 
   8  -6   0   70.49   15.70 
   8  -6   0   87.99   16.90 
  -8  -6   0   40.40   13.10 
   8  -6   0   61.09   13.50 
   8  -6   0   70.09   15.10 
   8  -6   0   98.29   17.40 
  -8  -6   0   77.89   14.20 
  -8  -6   0   59.69   14.10 
  -8  -6   0   71.79   15.80 
  -8  -6   0   95.59   20.90 
  -8  -6   0   49.70   14.30 
  -8  -6   0   66.09   15.80 
  -8  -6   0   53.69   14.50 
  -8  -6   0   80.29   17.60 
   8  -6   0   31.40   12.10 
   8  -6   0   72.69   16.80 
  -8  -6   0   76.39   17.20 
   8  -6   0   72.19   15.10 
  -8  -6   0   87.99   19.80 
   8   6   0   82.09   18.10 
   8   6   0   77.79   18.10 
   8   6   0   61.19   16.20 
   8   6   0   78.69   17.20 
  -8   6   0   52.99   13.60 
   8   6   0   90.79   19.20 
   8   6   0   45.20   13.90 
   8   6   0  101.79   20.00 
   8   6   0   66.59   16.70 
  -8   6   0   76.49   16.10 
   8   6   0   75.99   15.60 
   8   6   0   80.09   17.50 
  -8   6   0   39.60   11.60 
   8   6   0   59.09   13.50 
   8   6   0   91.39   16.70 
   8   6   0   81.19   19.40 
   8   6   0  102.29   19.50 
   0  -7   0    2.50    3.90 
   0  -7   0    2.30    3.60 
   0  -7   0    1.20    2.20 
   0  -7   0    2.50    4.20 
   0  -7   0    0.40    3.40 
   0  -7   0    6.00    4.80 
   0  -7   0   -0.10    3.70 
   0  -7   0   -5.20    2.70 
   0  -7   0   -2.00    2.50 
   0  -7   0   -0.50    2.70 
   0  -7   0    3.20    3.30 
   0  -7   0    2.70    2.90 
   0  -7   0   -1.90    2.70 
   0  -7   0    1.00    3.40 
   0  -7   0    1.40    3.40 
   0  -7   0    5.10    4.00 
   0   7   0   11.70    6.00 
   0   7   0    2.60    4.00 
   0   7   0    8.00    5.00 
   0   7   0    3.80    4.20 
   0   7   0   -1.70    3.50 
   0   7   0    9.10    5.90 
   0   7   0   -0.10    3.40 
   0   7   0   -2.60    3.70 
   0   7   0    1.20    4.30 
   0   7   0    2.40    2.90 
   0   7   0    1.30    4.10 
   0   7   0    0.50    2.40 
   0   7   0   -1.30    2.70 
   0   7   0    0.50    3.60 
   0   7   0    0.80    2.30 
   0   7   0    4.70    4.40 
   0   7   0   -3.80    3.10 
   0   7   0    0.60    2.70 
   0   7   0   -0.30    2.70 
   0   7   0    8.40    4.90 
   1  -7   0  138.29   16.10 
   1  -7   0  118.19   14.40 
  -1  -7   0  123.09   14.00 
  -1  -7   0  155.28   18.00 
  -1  -7   0  133.99   16.60 
   1  -7   0  119.29    8.50 
   1  -7   0  145.29   16.20 
   1  -7   0  120.19   15.70 
   1  -7   0  149.19   18.20 
   1  -7   0  143.69   13.90 
  -1  -7   0  138.09   15.00 
  -1  -7   0  144.09   17.40 
  -1  -7   0  117.69   15.30 
  -1  -7   0  132.29   10.60 
   1  -7   0  111.99   13.10 
  -1  -7   0  122.79   17.10 
  -1  -7   0  139.49   16.10 
   1  -7   0  150.28   16.00 
  -1  -7   0  169.08   19.20 
   1  -7   0  118.99   15.80 
  -1  -7   0  155.58   18.10 
  -1  -7   0  135.89   15.80 
   1  -7   0  107.89   12.80 
  -1  -7   0  140.89   10.30 
  -1  -7   0  126.39   15.50 
  -1  -7   0  128.09   15.30 
   1  -7   0  148.49   17.20 
   1  -7   0  131.19   12.90 
   1  -7   0  140.49   15.80 
   1  -7   0  161.58   17.30 
  -1  -7   0  125.19   13.80 
   1  -7   0  138.29    8.10 
   1   7   0  125.69   15.80 
  -1   7   0  147.79   19.80 
   1   7   0  119.59   12.50 
   1   7   0  172.48   17.80 
  -1   7   0  144.29    8.40 
   1   7   0  110.39   15.70 
   1   7   0  151.38   16.00 
   1   7   0  158.98   17.00 
   1   7   0  167.38   19.00 
   1   7   0  156.98   20.10 
  -1   7   0  125.59   13.70 
  -1   7   0  154.98   18.80 
  -1   7   0  126.89   17.30 
   1   7   0  117.39   17.00 
  -1   7   0  138.69   11.10 
  -1   7   0  144.19   17.50 
   1   7   0  125.29   17.10 
  -1   7   0  150.68   10.20 
   1   7   0  134.49   17.40 
   1   7   0  121.89   17.50 
   1   7   0  135.39   17.60 
  -1   7   0  165.38   17.90 
   1   7   0  155.48   13.40 
   1   7   0  135.39   18.20 
  -1   7   0  142.69   16.30 
   1   7   0  140.09    8.20 
  -1   7   0  138.09   16.80 
   1   7   0  133.29   16.50 
  -1   7   0  141.99   14.60 
   1   7   0  156.88   11.50 
  -1   7   0  149.19   18.00 
   1   7   0  113.59   16.00 
   1   7   0  116.49   16.10 
  -1   7   0  143.99   18.20 
   1   7   0  111.99   16.20 
  -1   7   0  145.39   18.50 
  -2  -7   0   10.70    4.70 
   2  -7   0   12.20    6.20 
   2  -7   0    7.50    5.20 
   2  -7   0    9.80    4.50 
  -2  -7   0   27.50    8.50 
  -2  -7   0    8.70    5.90 
   2  -7   0    4.20    4.10 
  -2  -7   0    4.30    5.10 
   2  -7   0   11.60    5.10 
  -2  -7   0   12.70    6.30 
  -2  -7   0    4.30    4.30 
  -2  -7   0   -0.40    3.40 
  -2  -7   0    8.00    5.40 
   2  -7   0    8.60    4.00 
  -2  -7   0    0.80    4.00 
  -2  -7   0    5.00    3.80 
  -2  -7   0    6.90    5.30 
   2  -7   0    3.70    3.30 
  -2  -7   0    8.50    5.30 
  -2  -7   0   10.10    4.40 
   2  -7   0    2.90    3.90 
   2  -7   0    8.30    5.90 
   2  -7   0   14.40    5.60 
   2  -7   0   23.90    7.20 
   2  -7   0   12.30    5.40 
  -2  -7   0   12.40    6.10 
  -2   7   0   10.00    5.30 
   2   7   0    9.60    4.90 
   2   7   0    3.50    4.80 
   2   7   0    5.50    4.80 
   2   7   0    8.40    6.10 
   2   7   0    8.50    6.10 
   2   7   0    7.00    3.30 
   2   7   0   13.20    6.30 
   2   7   0    7.20    5.20 
  -2   7   0    8.40    6.10 
   2   7   0    5.40    5.70 
   2   7   0    6.10    5.00 
  -2   7   0    7.80    4.00 
  -2   7   0    9.80    5.50 
   2   7   0   10.60    6.20 
  -2   7   0    7.40    5.50 
  -2   7   0   12.30    5.60 
   2   7   0    4.30    4.70 
  -2   7   0    5.70    5.00 
  -2   7   0    8.80    5.60 
   2   7   0    1.60    4.60 
   2   7   0    6.10    5.30 
  -2   7   0    8.70    3.60 
  -2   7   0   10.80    6.30 
  -2   7   0   14.40    6.60 
   2   7   0   18.10    8.30 
   2   7   0    5.50    4.00 
   2   7   0   13.40    6.20 
   2   7   0    5.30    5.50 
  -2   7   0   14.30    4.70 
  -2   7   0    8.40    3.60 
  -3  -7   0   24.70    9.10 
   3  -7   0   16.70    5.20 
  -3  -7   0   18.00    7.70 
  -3  -7   0   30.90    8.40 
  -3  -7   0   12.10    6.10 
  -3  -7   0   18.50    5.80 
  -3  -7   0   25.30    7.40 
  -3  -7   0   18.80    7.70 
   3  -7   0   23.90    6.20 
   3  -7   0   12.90    6.70 
   3  -7   0   26.60    8.30 
  -3  -7   0   21.60    7.20 
   3  -7   0   24.30    7.60 
  -3  -7   0   11.10    4.30 
  -3  -7   0   21.00    6.50 
   3  -7   0   11.70    5.40 
   3  -7   0   12.10    5.10 
  -3  -7   0   15.00    7.30 
   3  -7   0   19.80    7.50 
   3  -7   0   26.40    6.50 
   3  -7   0   22.50    7.60 
  -3  -7   0   21.40    8.50 
  -3  -7   0   18.60    7.80 
  -3  -7   0   15.10    7.20 
   3   7   0   20.30    8.10 
   3   7   0   16.80    6.90 
   3   7   0   17.80    7.50 
  -3   7   0   18.50    5.30 
   3   7   0   24.70    8.30 
   3   7   0    5.00    5.20 
   3   7   0    8.10    5.80 
   3   7   0   19.00    7.70 
  -3   7   0    6.90    5.90 
   3   7   0   26.00    8.70 
   3   7   0   28.30    8.90 
  -3   7   0   10.30    5.40 
  -3   7   0   19.90    5.70 
   3   7   0   18.90    7.40 
  -3   7   0   18.80    6.60 
   3   7   0   19.20    8.40 
   3   7   0   16.70    5.70 
  -3   7   0   16.50    7.30 
   3   7   0   18.10    7.50 
  -3   7   0   27.40    8.60 
  -3   7   0    9.60    6.00 
   3   7   0   19.40    8.10 
   3   7   0    6.50    5.20 
   3   7   0   15.70    6.80 
  -3   7   0   36.60   10.40 
   4  -7   0  180.48   21.00 
   4  -7   0  141.69   18.70 
   4  -7   0  184.58   18.00 
  -4  -7   0  212.38   22.80 
  -4  -7   0  162.38   20.70 
   4  -7   0  180.98   21.40 
  -4  -7   0  253.97   18.40 
  -4  -7   0  172.08   21.40 
  -4  -7   0  218.88   16.20 
   4  -7   0  219.88   15.80 
  -4  -7   0  232.78   24.50 
  -4  -7   0  194.58   23.40 
  -4  -7   0  205.58   23.80 
   4  -7   0  205.08   22.90 
  -4  -7   0  195.28   23.20 
  -4  -7   0  170.98   21.30 
  -4  -7   0  189.28   17.90 
   4   7   0  178.68   22.10 
  -4   7   0  187.98   22.40 
   4   7   0  153.68   20.40 
  -4   7   0  161.88   19.70 
   4   7   0  231.28   26.30 
   4   7   0  189.58   22.90 
   4   7   0  171.98   22.20 
   4   7   0  191.58   21.90 
   4   7   0  217.08   16.80 
  -4   7   0  174.58   19.60 
   4   7   0  198.18   20.80 
  -4   7   0  195.58   21.50 
   4   7   0  169.58   22.20 
   4   7   0  209.18   24.20 
   4   7   0  179.38   15.20 
   4   7   0  164.28   20.60 
   4   7   0  172.88   19.30 
  -4   7   0  219.18   15.40 
   4   7   0  200.18   23.20 
   5  -7   0    6.60    4.40 
  -5  -7   0   -1.20    3.70 
  -5  -7   0   11.30    7.40 
  -5  -7   0    5.50    6.20 
  -5  -7   0   17.10    7.90 
  -5  -7   0    7.00    5.20 
   5  -7   0    5.00    5.20 
  -5  -7   0    4.50    6.00 
   5  -7   0    3.20    4.90 
   5  -7   0    0.20    5.10 
   5  -7   0   10.60    7.10 
   5  -7   0    6.00    5.60 
  -5  -7   0    5.70    5.50 
  -5  -7   0    3.90    5.30 
  -5  -7   0   -3.10    3.40 
  -5  -7   0   13.80    9.20 
  -5  -7   0    2.00    4.30 
   5   7   0    5.50    5.20 
  -5   7   0    9.70    5.70 
   5   7   0    3.60    6.00 
  -5   7   0   12.50    6.20 
  -5   7   0    3.50    5.30 
   5   7   0   12.00    7.20 
   5   7   0   11.70    6.60 
   5   7   0    5.20    5.90 
   5   7   0   -0.50    4.30 
   5   7   0    9.50    6.70 
   5   7   0   11.20    6.80 
  -5   7   0    8.50    6.60 
   5   7   0   -1.20    4.00 
   5   7   0   -0.30    4.90 
   5   7   0    5.70    5.60 
   5   7   0    6.10    5.50 
   5   7   0   12.30    7.50 
  -5   7   0    2.50    4.20 
   5   7   0   -2.90    4.40 
  -6  -7   0  576.24   36.60 
  -6  -7   0  592.84   36.80 
   6  -7   0  686.53   37.70 
  -6  -7   0  627.24   38.40 
   6  -7   0  656.23   37.80 
  -6  -7   0  572.44   38.30 
  -6  -7   0  670.03   33.80 
  -6  -7   0  589.94   34.40 
  -6  -7   0  613.14   35.90 
   6  -7   0  637.84   37.00 
  -6  -7   0  654.33   35.70 
  -6  -7   0  611.54   36.70 
  -6  -7   0  602.24   35.10 
  -6  -7   0  661.33   40.20 
   6  -7   0  594.64   34.50 
   6  -7   0  591.24   34.70 
   6   7   0  579.34   37.50 
  -6   7   0  583.94   31.80 
   6   7   0  591.54   38.10 
   6   7   0  619.44   37.20 
   6   7   0  579.84   36.30 
   6   7   0  615.74   34.00 
   6   7   0  615.64   38.80 
   6   7   0  615.94   32.00 
   6   7   0  651.33   38.30 
   6   7   0  555.24   36.50 
  -6   7   0  611.34   36.00 
   6   7   0  531.95   35.80 
  -6   7   0  659.83   32.80 
   6   7   0  696.83   40.10 
   6   7   0  588.04   36.50 
  -6   7   0  604.04   33.30 
   6   7   0  592.74   32.40 
   7  -7   0   14.80    8.50 
  -7  -7   0   -6.30    4.50 
   7  -7   0    9.90    8.20 
   7  -7   0    8.40    7.30 
  -7  -7   0   14.20    7.70 
  -7  -7   0   18.10   10.60 
  -7  -7   0    9.10    8.50 
  -7  -7   0    9.80    8.00 
  -7  -7   0    7.50    6.80 
   7  -7   0    7.40    7.30 
  -7  -7   0   -3.10    4.50 
  -7  -7   0    0.50    5.50 
  -7  -7   0    9.90    9.00 
  -7  -7   0   -2.90    5.60 
   7  -7   0    7.60    7.70 
  -7  -7   0    0.30    6.90 
  -7  -7   0   -0.30    5.80 
   7  -7   0    9.20    7.00 
   7   7   0   -0.10    5.50 
   7   7   0    8.00    7.70 
   7   7   0    3.10    7.90 
  -7   7   0   10.10    6.90 
   7   7   0    1.70    6.10 
   7   7   0    7.70    7.70 
   7   7   0    6.70    7.70 
  -7   7   0    1.70    5.10 
   7   7   0    9.40    8.00 
   7   7   0    6.60    7.00 
   7   7   0    8.90    8.10 
   7   7   0   10.70    8.20 
   7   7   0   12.20    8.10 
   7   7   0    1.10    5.40 
   7   7   0    6.70    6.90 
   0  -8   0  168.88   19.40 
   0  -8   0  178.68   19.10 
   0  -8   0  167.08   18.20 
   0  -8   0  149.49   15.70 
   0  -8   0  172.48   20.40 
   0  -8   0  183.88   20.40 
   0  -8   0  158.58   17.80 
   0  -8   0  196.28   21.60 
   0  -8   0  169.18   18.70 
   0  -8   0  178.98   21.30 
   0  -8   0  152.08   19.40 
   0  -8   0  181.78   18.90 
   0  -8   0  197.98   15.90 
   0  -8   0  182.68   19.90 
   0   8   0  188.58   21.30 
   0   8   0  179.08   21.30 
   0   8   0  158.48   18.70 
   0   8   0  187.18   19.80 
   0   8   0  178.48   21.60 
   0   8   0  193.58   23.50 
   0   8   0  170.18   21.40 
   0   8   0  159.48   16.60 
   0   8   0  157.28   17.90 
   0   8   0  189.98   21.80 
   0   8   0  191.18   22.30 
   0   8   0  140.59   16.50 
   0   8   0  188.08   21.90 
   0   8   0  179.48   21.60 
   0   8   0  157.88   21.00 
   0   8   0  180.18   22.40 
   0   8   0  182.98   18.60 
  -1  -8   0 1476.25   52.99 
  -1  -8   0 1418.16   48.10 
   1  -8   0 1419.06   49.50 
   1  -8   0 1404.56   53.69 
   1  -8   0 1464.15   49.80 
  -1  -8   0 1467.85   53.29 
  -1  -8   0 1393.26   47.30 
   1  -8   0 1471.55   47.70 
  -1  -8   0 1423.16   50.09 
  -1  -8   0 1380.46   52.09 
  -1  -8   0 1493.55   50.79 
   1  -8   0 1346.37   51.49 
  -1  -8   0 1317.27   52.99 
  -1  -8   0 1422.26   53.09 
   1  -8   0 1442.86   51.39 
  -1  -8   0 1423.96   53.89 
   1  -8   0 1438.36   44.40 
  -1  -8   0 1453.85   51.29 
  -1  -8   0 1391.06   49.40 
   1  -8   0 1435.56   50.99 
   1  -8   0 1416.06   50.39 
   1  -8   0 1403.56   51.39 
   1  -8   0 1528.75   50.59 
   1  -8   0 1388.76   47.70 
  -1  -8   0 1465.45   53.39 
   1  -8   0 1539.95   56.09 
  -1  -8   0 1414.66   47.00 
   1   8   0 1398.26   55.79 
   1   8   0 1351.16   54.89 
  -1   8   0 1482.55   51.09 
  -1   8   0 1415.26   52.99 
   1   8   0 1491.65   55.79 
  -1   8   0 1371.86   52.99 
   1   8   0 1414.96   55.09 
  -1   8   0 1401.76   54.29 
   1   8   0 1251.67   50.19 
  -1   8   0 1412.16   52.49 
   1   8   0 1384.16   55.99 
   1   8   0 1492.95   54.59 
  -1   8   0 1393.66   55.39 
  -1   8   0 1456.65   54.59 
   1   8   0 1475.45   53.89 
   1   8   0 1396.96   56.19 
   1   8   0 1381.76   51.09 
   1   8   0 1415.26   54.69 
   1   8   0 1402.36   50.19 
   1   8   0 1423.86   43.80 
   1   8   0 1469.35   55.19 
   1   8   0 1507.55   50.49 
  -1   8   0 1378.26   55.59 
  -1   8   0 1513.35   52.39 
   1   8   0 1419.46   51.09 
   1   8   0 1495.55   56.89 
   1   8   0 1368.76   55.09 
  -1   8   0 1396.46   46.60 
   2  -8   0   34.00    9.30 
   2  -8   0   31.90    9.10 
   2  -8   0   19.30    8.10 
  -2  -8   0   34.40    8.90 
   2  -8   0   29.50    9.20 
  -2  -8   0   48.40   11.00 
   2  -8   0   31.70    8.00 
   2  -8   0   22.20    7.80 
  -2  -8   0   26.20    8.50 
   2  -8   0   39.80    9.60 
  -2  -8   0   24.30    8.60 
  -2  -8   0   21.40    7.90 
  -2  -8   0   22.60    8.00 
   2  -8   0   25.90    7.30 
   2  -8   0   37.50   10.10 
  -2  -8   0   15.10    7.40 
   2  -8   0   39.30    9.50 
  -2  -8   0   46.80   11.50 
   2  -8   0   22.90    6.60 
  -2  -8   0   26.20    9.70 
  -2  -8   0   38.50   10.80 
  -2  -8   0   21.50    8.80 
  -2   8   0   33.60    9.80 
  -2   8   0   30.30    9.60 
  -2   8   0   37.40    9.70 
   2   8   0   40.80   11.10 
  -2   8   0   32.30    9.10 
  -2   8   0   42.20    9.90 
   2   8   0   39.00    9.80 
   2   8   0   42.70   10.70 
   2   8   0   33.70   11.40 
   2   8   0   25.80    8.90 
   2   8   0   20.00    6.40 
   2   8   0   12.00    8.20 
   2   8   0   20.20    8.30 
   2   8   0   30.10   10.00 
   2   8   0   39.90   10.90 
   2   8   0   24.90    8.70 
   2   8   0   42.10   10.40 
   2   8   0   36.70   10.50 
   2   8   0   43.90   11.80 
  -2   8   0   31.90   10.40 
   2   8   0   25.90    9.20 
  -2   8   0   61.89   12.80 
   2   8   0   26.30    9.30 
  -2   8   0   26.60    9.30 
   2   8   0   34.60   10.70 
   2   8   0   12.50    6.80 
  -3  -8   0  925.11   44.30 
  -3  -8   0  916.91   45.00 
  -3  -8   0 1008.20   45.90 
   3  -8   0 1040.30   45.80 
   3  -8   0 1019.00   41.30 
   3  -8   0 1026.00   37.80 
   3  -8   0 1012.90   42.40 
  -3  -8   0 1020.00   38.20 
  -3  -8   0 1041.20   41.90 
  -3  -8   0 1022.30   46.10 
   3  -8   0  992.60   45.40 
  -3  -8   0 1002.20   45.20 
  -3  -8   0 1029.10   43.00 
  -3  -8   0  984.50   42.50 
  -3  -8   0 1021.70   47.60 
   3  -8   0 1007.30   40.20 
   3  -8   0  976.80   44.80 
  -3  -8   0  981.50   43.10 
   3  -8   0 1052.79   37.20 
   3   8   0 1140.69   48.40 
  -3   8   0 1004.60   45.50 
  -3   8   0 1007.10   43.00 
   3   8   0  972.30   40.30 
   3   8   0 1033.00   49.10 
   3   8   0  969.00   45.40 
   3   8   0 1048.70   48.00 
   3   8   0  959.20   47.30 
  -3   8   0  965.20   43.60 
   3   8   0  982.40   44.30 
   3   8   0  877.81   45.60 
   3   8   0  989.50   45.50 
   3   8   0 1055.79   47.50 
   3   8   0 1049.79   44.60 
   3   8   0 1033.40   44.70 
   3   8   0  936.21   45.40 
  -3   8   0  942.51   39.90 
   3   8   0  970.90   44.60 
   3   8   0 1075.19   46.60 
  -3   8   0  958.30   46.10 
   3   8   0  977.20   43.90 
  -3   8   0  978.30   44.40 
   3   8   0  978.10   47.50 
   4  -8   0  160.98   22.00 
  -4  -8   0  174.18   22.80 
   4  -8   0  172.38   21.80 
  -4  -8   0  173.68   19.10 
  -4  -8   0  164.48   23.30 
   4  -8   0  163.58   18.00 
  -4  -8   0  160.28   22.30 
  -4  -8   0  166.18   22.20 
  -4  -8   0  146.79   21.20 
  -4  -8   0  148.69   19.80 
   4  -8   0  148.59   20.30 
   4  -8   0  169.88   22.80 
  -4  -8   0  154.68   18.20 
  -4  -8   0  156.78   18.10 
  -4  -8   0  189.78   23.60 
  -4  -8   0  148.89   22.20 
   4   8   0  169.98   22.20 
  -4   8   0  173.08   23.60 
   4   8   0  139.59   22.40 
   4   8   0  138.39   18.70 
   4   8   0  149.39   19.90 
   4   8   0  176.18   22.80 
   4   8   0  170.78   23.00 
  -4   8   0  187.98   22.90 
   4   8   0  157.88   21.50 
  -4   8   0  148.49   20.30 
  -4   8   0  153.48   20.00 
   4   8   0  145.59   18.60 
   4   8   0  153.38   21.80 
   4   8   0  144.69   21.60 
   4   8   0  172.38   24.40 
   4   8   0  145.79   22.00 
   4   8   0  166.88   24.40 
   4   8   0  141.79   21.10 
   4   8   0  199.48   23.80 
   4   8   0  152.18   22.20 
  -5  -8   0  785.22   42.70 
   5  -8   0  863.11   43.20 
  -5  -8   0  787.42   41.20 
   5  -8   0  827.62   43.50 
  -5  -8   0  834.72   46.30 
  -5  -8   0  787.12   44.90 
  -5  -8   0  873.51   45.20 
  -5  -8   0  849.32   44.40 
  -5  -8   0  835.22   43.90 
   5  -8   0  819.52   43.30 
  -5  -8   0  819.42   43.30 
  -5  -8   0  801.32   38.50 
  -5  -8   0  868.61   44.50 
   5  -8   0  778.62   40.90 
   5   8   0  786.72   44.90 
   5   8   0  814.42   44.60 
  -5   8   0  848.72   46.90 
   5   8   0  780.12   42.70 
   5   8   0  808.82   46.10 
   5   8   0  860.11   46.60 
  -5   8   0  819.82   40.90 
   5   8   0  769.32   44.30 
   5   8   0  829.32   46.00 
   5   8   0  821.12   44.80 
   5   8   0  881.91   46.50 
   5   8   0  836.52   39.20 
   5   8   0  799.02   39.70 
   5   8   0  876.61   42.40 
   5   8   0  817.72   44.00 
   5   8   0  831.32   43.90 
  -5   8   0  804.12   43.70 
  -6  -8   0  148.49   23.50 
  -6  -8   0  133.59   22.30 
  -6  -8   0  184.48   26.70 
   6  -8   0  122.49   20.50 
  -6  -8   0  206.78   29.20 
  -6  -8   0  171.28   23.90 
  -6  -8   0  163.98   23.70 
  -6  -8   0  174.18   24.40 
   6  -8   0  157.78   22.70 
  -6  -8   0  186.58   23.00 
   6  -8   0  160.98   24.40 
  -6  -8   0  183.88   24.60 
   6  -8   0  156.08   22.30 
  -6  -8   0  137.39   22.70 
   6   8   0  158.88   24.30 
   6   8   0  173.48   25.90 
   6   8   0  156.08   23.40 
  -6   8   0  151.68   23.40 
   6   8   0  185.08   22.70 
   6   8   0  159.28   23.70 
   6   8   0  131.39   22.20 
   6   8   0  155.08   25.10 
  -6   8   0  149.69   20.60 
   6   8   0  168.98   23.20 
   6   8   0  184.38   27.10 
   6   8   0  181.78   26.30 
   6   8   0  133.99   22.20 
   6   8   0  133.09   23.00 
   6   8   0  187.48   27.00 
   0  -9   0    0.20    5.10 
   0  -9   0    6.10    5.90 
   0  -9   0    5.50    5.50 
   0  -9   0    1.70    4.90 
   0  -9   0   -2.70    3.90 
   0  -9   0   -4.60    4.20 
   0  -9   0    5.90    7.10 
   0  -9   0    4.20    5.70 
   0  -9   0    7.70    5.60 
   0  -9   0    1.00    4.30 
   0  -9   0    6.10    5.30 
   0  -9   0    1.90    4.70 
   0   9   0    5.90    5.80 
   0   9   0   -2.90    4.10 
   0   9   0    7.00    6.10 
   0   9   0    0.70    5.50 
   0   9   0   10.40    7.20 
   0   9   0    8.70    6.60 
   0   9   0    0.50    5.50 
   0   9   0    0.90    4.40 
   0   9   0    3.50    5.50 
   0   9   0    4.60    6.40 
   0   9   0    6.60    6.00 
  -1  -9   0    7.10    5.60 
   1  -9   0   13.60    8.60 
  -1  -9   0   -4.00    5.60 
  -1  -9   0    4.10    5.00 
   1  -9   0    8.00    6.60 
   1  -9   0    4.90    5.40 
   1  -9   0    7.80    5.80 
   1  -9   0   -4.00    4.50 
   1  -9   0   -0.30    4.10 
  -1  -9   0   -0.40    5.10 
  -1  -9   0    0.30    5.90 
  -1  -9   0    3.70    5.50 
   1  -9   0    6.50    5.40 
   1  -9   0    0.50    5.10 
  -1  -9   0    9.90    7.70 
  -1  -9   0   17.70    7.10 
   1  -9   0    0.80    4.30 
   1  -9   0   -0.70    4.50 
   1  -9   0    3.80    5.10 
  -1  -9   0    4.40    5.20 
  -1  -9   0    8.90    6.10 
  -1  -9   0    7.80    6.10 
  -1   9   0    3.10    5.90 
   1   9   0   -3.10    5.30 
   1   9   0    9.10    6.10 
   1   9   0   11.40    6.90 
   1   9   0    7.60    6.00 
  -1   9   0    0.40    6.10 
  -1   9   0    3.30    5.40 
   1   9   0    8.50    6.80 
   1   9   0    1.50    5.00 
   1   9   0   -5.00    3.60 
  -1   9   0    8.00    5.80 
   1   9   0    9.30    6.50 
  -1   9   0    8.30    5.80 
   1   9   0    7.50    6.70 
  -1   9   0    2.50    5.50 
   1   9   0    4.20    5.80 
   1   9   0    7.30    6.30 
   1   9   0    3.50    6.20 
  -1   9   0    7.30    6.90 
   1   9   0    8.30    6.90 
  -1   9   0    4.70    5.50 
   1   9   0   11.40   11.00 
   1   9   0   -2.00    4.90 
  -2  -9   0   20.50    8.90 
  -2  -9   0   20.70    8.30 
  -2  -9   0   13.60    7.90 
   2  -9   0   29.80    9.00 
   2  -9   0    9.60    6.20 
   2  -9   0   28.50    9.40 
  -2  -9   0   26.80   10.30 
  -2  -9   0   26.00   10.00 
   2  -9   0   10.10    6.40 
   2  -9   0   19.40    8.80 
  -2  -9   0   39.80   11.20 
  -2  -9   0   23.50    8.30 
  -2  -9   0   28.00   10.20 
   2  -9   0   16.00    7.70 
   2  -9   0   32.00    9.10 
  -2  -9   0   32.00    9.50 
  -2  -9   0   14.90    7.70 
   2  -9   0   27.50    9.40 
  -2  -9   0   10.70    6.90 
   2  -9   0   22.40    9.20 
   2   9   0   42.10   11.40 
  -2   9   0   14.50    8.60 
   2   9   0   24.90   10.30 
   2   9   0   18.60    9.50 
   2   9   0   12.00    8.10 
   2   9   0   37.90   12.20 
   2   9   0   11.00    7.00 
  -2   9   0   14.60    8.10 
   2   9   0   16.50    8.20 
   2   9   0   20.50    9.40 
   2   9   0   22.90    8.90 
   2   9   0   31.40    9.90 
   2   9   0   32.00    9.80 
  -2   9   0   26.30    9.40 
   2   9   0   23.30    9.90 
  -2   9   0   28.50   10.80 
   2   9   0   22.20    9.80 
   2   9   0   19.50    9.10 
   2   9   0    4.70    6.90 
  -2   9   0   31.30   10.50 
   2   9   0   20.60    9.50 
  -2   9   0   17.30    7.80 
   3  -9   0    1.20    6.00 
   3  -9   0    5.10    6.20 
   3  -9   0    1.30    5.00 
  -3  -9   0   -6.20    5.50 
  -3  -9   0    5.50    5.40 
   3  -9   0    5.80    5.20 
  -3  -9   0    4.80    6.20 
   3  -9   0    7.30    6.60 
  -3  -9   0    5.80    6.60 
  -3  -9   0   -6.40    3.20 
  -3  -9   0    8.00    6.00 
   3  -9   0   -2.60    4.30 
  -3  -9   0   -2.70    4.90 
  -3  -9   0    2.40    6.10 
  -3  -9   0   -1.70    4.30 
  -3  -9   0   -3.60    5.80 
  -3  -9   0    2.80    5.80 
   3   9   0   -4.20    4.30 
   3   9   0   12.30    7.80 
  -3   9   0    0.50    6.50 
   3   9   0    8.90    7.70 
   3   9   0   11.60    8.20 
   3   9   0    9.10    7.20 
   3   9   0    2.50    6.50 
  -3   9   0   10.40    7.30 
   3   9   0   -5.50    4.80 
  -3   9   0    2.20    5.90 
   3   9   0    8.30    7.30 
   3   9   0   -1.60    6.50 
   3   9   0    4.50    5.80 
   3   9   0    0.50    5.00 
   3   9   0    7.30    6.90 
  -3   9   0   -4.70    4.80 
   3   9   0    4.40    7.10 
   3   9   0   10.00    6.90 
   3   9   0   -0.90    6.00 
   3   9   0    2.50    5.60 
   3   9   0    6.20    6.60 
   4  -9   0   92.29   18.00 
  -4  -9   0   93.49   19.10 
  -4  -9   0   88.49   17.40 
  -4  -9   0  125.89   20.80 
  -4  -9   0   93.19   18.20 
  -4  -9   0  112.39   20.10 
   4  -9   0   67.49   15.70 
  -4  -9   0  126.09   20.70 
  -4  -9   0   66.59   14.50 
  -4  -9   0   88.29   15.20 
  -4  -9   0  108.59   20.00 
   4  -9   0   78.39   16.20 
   4   9   0   73.79   16.40 
   4   9   0   79.79   17.10 
   4   9   0   91.29   18.90 
   4   9   0   96.89   19.70 
   4   9   0  115.49   20.30 
   4   9   0  105.09   19.90 
  -4   9   0   68.09   15.90 
   4   9   0  101.29   16.80 
   4   9   0   95.39   17.70 
   4   9   0   97.29   19.80 
   4   9   0  117.69   20.30 
   4   9   0  148.59   24.00 
   4   9   0   87.29   17.50 
   4   9   0   96.59   18.60 
   4   9   0  131.09   20.40 
   4   9   0   68.39   15.10 
  -4   9   0   62.09   15.10 
  -5  -9   0   49.80   14.10 
   5  -9   0   60.89   15.30 
   5  -9   0   54.69   15.00 
   5  -9   0   26.30   11.30 
  -5  -9   0   35.00   11.90 
  -5  -9   0   50.69   13.60 
  -5  -9   0   58.49   15.90 
   5  -9   0   34.90   11.40 
  -5  -9   0   29.80   12.80 
  -5  -9   0   56.49   14.60 
  -5  -9   0   69.59   16.20 
  -5  -9   0   54.19   15.20 
  -5  -9   0   45.10   14.40 
   5   9   0   51.49   15.30 
   5   9   0   32.40   12.90 
   5   9   0   32.90   12.50 
   5   9   0   55.39   15.70 
   5   9   0   34.10   12.40 
   5   9   0   44.00   14.20 
   5   9   0   47.80   12.80 
   5   9   0   29.80   11.50 
   5   9   0   39.70   12.30 
   5   9   0   39.50   11.80 
   5   9   0   29.40   11.90 
  -5   9   0   59.19   15.00 
   5   9   0   37.50   11.90 
   5   9   0   31.70   10.90 
   5   9   0   41.70   14.20 
   5   9   0   40.20   13.00 
  -5   9   0   51.19   14.40 
   0 -10   0  821.02   43.60 
   0 -10   0  886.11   45.70 
   0 -10   0  892.81   46.10 
   0 -10   0  855.61   44.70 
   0 -10   0  837.82   42.40 
   0 -10   0  884.41   42.80 
   0 -10   0  813.42   39.90 
   0  10   0  791.82   44.20 
   0  10   0  881.81   44.90 
   0  10   0  815.42   46.10 
   0  10   0  947.31   49.20 
   0  10   0  890.71   46.80 
   0  10   0  833.32   45.60 
   0  10   0  792.22   41.90 
   0  10   0  862.41   45.90 
  -1 -10   0  609.04   35.20 
  -1 -10   0  614.24   37.20 
  -1 -10   0  702.33   39.40 
  -1 -10   0  708.73   39.30 
  -1 -10   0  594.64   37.30 
   1 -10   0  705.33   40.40 
   1 -10   0  692.73   37.80 
  -1 -10   0  729.73   41.70 
  -1 -10   0  640.64   37.60 
   1 -10   0  718.83   38.10 
   1 -10   0  723.93   40.20 
   1 -10   0  695.93   36.30 
   1 -10   0  747.63   38.60 
  -1 -10   0  735.93   40.00 
   1 -10   0  646.34   39.00 
   1  10   0  698.53   40.50 
  -1  10   0  690.13   42.60 
   1  10   0  746.83   43.50 
   1  10   0  713.93   41.60 
  -1  10   0  654.13   41.20 
   1  10   0  645.44   40.00 
  -1  10   0  671.13   39.30 
  -1  10   0  672.43   39.90 
   1  10   0  676.83   42.20 
   1  10   0  686.23   38.80 
   1  10   0  677.53   41.50 
   1  10   0  767.92   40.20 
   1  10   0  699.73   41.80 
  -1  10   0  673.93   40.30 
   1  10   0  703.13   41.70 
   2 -10   0  455.65   33.10 
  -2 -10   0  498.65   33.70 
   2 -10   0  417.96   30.10 
   2 -10   0  459.15   31.60 
  -2 -10   0  415.36   30.00 
  -2 -10   0  447.66   30.60 
  -2 -10   0  437.46   31.80 
   2 -10   0  550.14   55.79 
   2 -10   0  426.96   29.00 
  -2 -10   0  478.05   31.50 
  -2 -10   0  502.75   34.20 
  -2 -10   0  460.45   34.20 
   2 -10   0  426.46   31.70 
  -2 -10   0  420.66   30.60 
   2  10   0  480.35   33.90 
   2  10   0  450.75   34.20 
   2  10   0  433.76   33.40 
  -2  10   0  454.55   34.50 
  -2  10   0  453.35   32.50 
   2  10   0  537.95   37.40 
   2  10   0  471.25   33.40 
   2  10   0  436.56   33.70 
   2  10   0  476.25   49.60 
  -2  10   0  458.95   34.30 
   2  10   0  453.75   34.10 
   2  10   0  484.05   33.70 
  -2  10   0  452.15   32.70 
   2  10   0  490.25   36.10 
   2  10   0  478.45   32.30 
   2  10   0  534.05   36.00 
   3 -10   0  149.39   22.80 
  -3 -10   0  169.68   23.80 
   3 -10   0  171.18   23.40 
  -3 -10   0  207.68   26.40 
  -3 -10   0  156.58   24.20 
  -3 -10   0  162.58   24.60 
  -3 -10   0  173.18   22.50 
   3 -10   0  148.29   23.00 
  -3 -10   0  174.38   22.80 
  -3 -10   0  133.79   20.20 
  -3 -10   0  153.78   24.40 
   3  10   0  146.69   24.10 
  -3  10   0  174.88   26.30 
   3  10   0  146.09   23.30 
   3  10   0  166.88   23.20 
   3  10   0  173.18   26.40 
   3  10   0  183.28   25.70 
   3  10   0  164.38   26.60 
   3  10   0  173.68   25.00 
   3  10   0  134.09   21.80 
   3  10   0  163.58   25.20 
   3  10   0  118.29   22.50 
  -3  10   0  121.29   21.40 
   3  10   0  152.08   23.00 
   3  10   0  146.09   24.40 
   3  10   0  187.68   26.50 
  10   0  -1    2.40    5.50 
 -10   0   1   -5.30    5.60 
 -10   0   1    1.30    6.40 
  10   0  -1    0.60    6.50 
  10   0  -1   -2.40    4.80 
 -10   0   1    5.20    6.80 
  10   0  -1    2.40    7.90 
 -10   0   1   -1.00    4.70 
 -10   0   1    0.30    5.10 
  10   0  -1    5.90    8.60 
  10   0  -1   -7.50    5.10 
  10   0  -1    8.20    6.90 
 -10   0   1   -1.00    6.50 
  10   0  -1   -1.60    6.10 
 -10   0   1   -1.20    5.20 
  10   0  -1    4.80    6.50 
  10   0  -1   -4.00    4.50 
  10   0  -1    3.10    7.10 
 -10   0   1    2.60    7.00 
 -10   0   1   -4.00    4.70 
   9   0  -1  487.25   33.60 
   9   0  -1  443.86   28.10 
  -9   0   1  468.85   31.20 
   9   0  -1  438.76   31.10 
   9   0  -1  430.56   27.40 
   9   0  -1  444.36   33.80 
  -9   0   1  496.25   31.20 
  -9   0   1  526.35   30.40 
  -9   0   1  521.25   34.10 
   9   0  -1  476.95   28.00 
   9   0  -1  462.45   29.40 
  -9   0   1  485.55   33.00 
  -9   0   1  461.25   32.20 
   9   0  -1  466.95   31.80 
   9   0  -1  388.66   29.70 
   9   0  -1  452.95   27.80 
  -9   0   1  492.35   30.70 
   9   0  -1  502.75   26.80 
  -9   0   1  477.45   31.90 
  -9   0   1  487.05   29.40 
   9   0  -1  399.16   28.00 
   9   0  -1  515.25   25.60 
   8   0  -1    7.00    4.80 
  -8   0   1    6.50    5.30 
   8   0  -1    3.00    3.90 
   8   0  -1   -1.40    3.20 
  -8   0   1    1.90    5.00 
  -8   0   1   -2.30    2.90 
   8   0  -1    1.50    3.60 
   8   0  -1   -1.70    4.30 
   8   0  -1   -3.30    3.70 
  -8   0   1    8.20    5.50 
   8   0  -1   -2.50    4.40 
   8   0  -1   -1.80    3.40 
   8   0  -1    1.60    5.00 
   8   0  -1    4.00    6.30 
  -8   0   1   -1.10    2.80 
  -8   0   1   -1.10    3.40 
   8   0  -1   -3.90    3.80 
   8   0  -1   -5.20    3.20 
  -8   0   1    2.90    3.50 
  -8   0   1   -2.20    4.20 
   8   0  -1    0.30    3.30 
   8   0  -1   -2.30    2.80 
  -8   0   1    8.60    6.20 
   8   0  -1   -2.40    3.60 
  -8   0   1    2.80    4.40 
   8   0  -1   -4.40    2.90 
  -8   0   1   -2.10    3.70 
  -8   0   1   -1.20    4.20 
  -7   0   1  189.68   16.30 
   7   0  -1  175.38   20.10 
  -7   0   1  195.08   20.20 
   7   0  -1  181.48   22.00 
   7   0  -1  208.28   16.10 
  -7   0   1  174.18   20.00 
   7   0  -1  197.58   13.60 
   7   0  -1  209.18   15.90 
  -7   0   1  171.28   18.70 
  -7   0   1  204.18   14.70 
   7   0  -1  216.18   15.10 
  -7   0   1  216.28   22.30 
   7   0  -1  170.68   18.20 
   7   0  -1  179.78   12.40 
   7   0  -1  181.48   20.80 
  -7   0   1  195.28   20.80 
   7   0  -1  193.68   20.90 
   7   0  -1  222.18   22.40 
   7   0  -1  212.98   20.50 
  -7   0   1  229.98   17.80 
  -7   0   1  193.58   22.00 
   7   0  -1  216.48   16.20 
   7   0  -1  204.38   13.80 
   7   0  -1  162.38   17.00 
   7   0  -1  176.68   13.40 
  -7   0   1  169.38   17.60 
  -7   0   1  183.88   18.20 
  -7   0   1  196.38   20.80 
  -7   0   1  189.68   11.10 
  -7   0   1  192.08   12.80 
  -6   0   1   -3.30    2.30 
  -6   0   1   -1.30    3.20 
   6   0  -1    0.90    2.60 
   6   0  -1    0.90    2.80 
   6   0  -1   -0.20    2.70 
   6   0  -1    0.30    2.70 
   6   0  -1   11.60    5.30 
   6   0  -1   -1.20    2.10 
  -6   0   1   -2.20    2.40 
  -6   0   1   -0.20    2.80 
  -6   0   1   -2.10    2.50 
   6   0  -1   -1.40    1.60 
   6   0  -1    2.80    3.70 
  -6   0   1   -1.10    2.00 
   6   0  -1    0.40    1.50 
  -6   0   1    3.00    3.60 
   6   0  -1   -0.40    3.20 
   6   0  -1    2.10    3.00 
   6   0  -1   -0.10    1.10 
  -6   0   1   -0.30    2.70 
   6   0  -1   -0.70    3.10 
   6   0  -1    1.60    2.00 
   6   0  -1    0.30    2.50 
  -6   0   1    1.60    3.40 
   6   0  -1    1.30    3.50 
  -6   0   1    2.20    2.70 
  -6   0   1   -1.20    2.60 
   6   0  -1    2.10    2.90 
  -6   0   1    0.90    2.70 
   6   0  -1    2.80    3.10 
   6   0  -1   -1.10    1.00 
   6   0  -1    0.70    2.10 
   6   0  -1    0.40    3.10 
  -6   0   1    0.60    1.80 
  -6   0   1    0.60    2.90 
  -5   0   1  137.59   14.60 
  -5   0   1  173.38   12.30 
   5   0  -1  147.49   11.10 
   5   0  -1  151.08   11.30 
  -5   0   1  132.19   13.70 
   5   0  -1  134.89   10.60 
  -5   0   1  133.09   10.70 
   5   0  -1  145.49   10.70 
   5   0  -1  144.59    9.90 
   5   0  -1  147.99    6.10 
   5   0  -1  138.79   14.50 
   5   0  -1  136.69    6.50 
   5   0  -1  133.79   10.90 
  -5   0   1  141.29   14.40 
   5   0  -1  150.78    6.20 
  -5   0   1  138.29   14.80 
  -5   0   1  129.89   11.20 
  -5   0   1  138.99    9.30 
   5   0  -1  149.39    9.50 
   5   0  -1  150.68   12.50 
   5   0  -1  143.89   14.50 
   5   0  -1  132.79    9.20 
   5   0  -1  134.19    8.70 
   5   0  -1  138.69    7.90 
   5   0  -1  146.19   10.60 
   5   0  -1  135.79    8.20 
  -5   0   1  165.78   12.70 
  -5   0   1  134.29   14.10 
   5   0  -1  123.49   15.00 
  -5   0   1  123.39    9.80 
   5   0  -1  136.59   10.80 
  -5   0   1  129.59    8.10 
   5   0  -1  157.18    9.90 
   5   0  -1  136.69   13.40 
  -5   0   1  137.99   11.60 
   5   0  -1  151.48   10.80 
  -5   0   1  137.89   14.50 
   4   0  -1    3.50    2.90 
  -4   0   1    1.30    1.80 
  -4   0   1    0.70    2.10 
   4   0  -1   -0.30    1.70 
   4   0  -1    1.00    1.90 
   4   0  -1    3.00    2.60 
   4   0  -1    2.30    3.10 
   4   0  -1    1.50    1.90 
   4   0  -1    2.30    1.30 
   4   0  -1   -1.70    1.00 
  -4   0   1    0.60    1.60 
  -4   0   1    3.10    2.50 
  -4   0   1    4.80    2.60 
  -4   0   1   -0.10    2.10 
   4   0  -1   -0.20    2.10 
  -4   0   1    0.00    2.40 
   4   0  -1   -2.20    1.80 
   4   0  -1    1.80    1.90 
   4   0  -1   -1.40    1.20 
   4   0  -1   -0.20    2.00 
   4   0  -1    1.20    1.10 
   4   0  -1    1.10    1.80 
   4   0  -1    3.20    2.10 
  -4   0   1    2.20    2.90 
   4   0  -1   -0.60    2.20 
  -4   0   1   -0.30    1.90 
  -4   0   1    0.50    2.20 
   4   0  -1    2.40    2.30 
   4   0  -1   -0.60    2.20 
   4   0  -1    1.00    1.30 
  -4   0   1    2.90    3.00 
  -4   0   1    1.60    2.70 
  -4   0   1    5.10    3.40 
  -4   0   1    5.10    3.10 
   4   0  -1    6.00    2.80 
  -4   0   1    0.80    2.80 
  -4   0   1    0.00    1.50 
   4   0  -1    3.00    3.00 
   4   0  -1    2.60    1.60 
  -4   0   1    0.20    1.50 
   4   0  -1    0.50    1.90 
  -4   0   1    3.00    2.00 
  -4   0   1    1.30    2.70 
   4   0  -1    4.80    2.10 
  -4   0   1    6.80    3.00 
  -3   0   1  229.38   11.80 
   3   0  -1  251.07   12.30 
   3   0  -1  258.07   10.00 
   3   0  -1  257.37   10.30 
  -3   0   1  218.68   12.20 
  -3   0   1  243.58   10.20 
   3   0  -1  250.27   11.90 
   3   0  -1  236.58    9.50 
  -3   0   1  260.37   12.40 
   3   0  -1  245.28   11.10 
  -3   0   1  245.38   12.20 
   3   0  -1  227.18    9.40 
  -3   0   1  226.38   10.90 
   3   0  -1  248.18   11.60 
   3   0  -1  242.18   12.40 
   3   0  -1  249.18   11.20 
  -3   0   1  232.38   11.80 
   3   0  -1  213.58   10.20 
  -3   0   1  234.58   10.50 
   3   0  -1  245.08    8.40 
  -3   0   1  245.28   10.00 
  -3   0   1  240.58   11.30 
   3   0  -1  253.57   11.20 
   3   0  -1  231.68    9.90 
  -3   0   1  240.78    9.60 
   3   0  -1  252.47   12.60 
  -3   0   1  231.38    9.50 
   3   0  -1  270.67   12.30 
   3   0  -1  250.17   12.60 
   3   0  -1  228.88   10.60 
   3   0  -1  225.98   11.30 
  -3   0   1  254.37   12.40 
   3   0  -1  234.98   11.30 
  -3   0   1  247.48   11.80 
  -3   0   1  259.97   11.20 
   3   0  -1  233.08   10.90 
  -3   0   1  232.18   12.20 
   3   0  -1  250.77   12.40 
   3   0  -1  223.88    9.50 
  -3   0   1  218.48   12.20 
  -3   0   1  251.27   12.70 
   3   0  -1  231.38    7.50 
   3   0  -1  228.58   12.10 
  -3   0   1  240.38   10.80 
  -3   0   1  262.07   13.10 
  -3   0   1  245.68   12.20 
   3   0  -1  247.28    7.60 
   3   0  -1  240.48    8.30 
   3   0  -1  228.08   10.80 
  -3   0   1  227.48   12.30 
   3   0  -1  240.68    8.30 
  -3   0   1  250.77    9.80 
   3   0  -1  251.17   13.50 
   3   0  -1  245.28   10.70 
   3   0  -1  225.68   11.20 
  -3   0   1  249.38   11.10 
   2   0  -1    4.50    2.00 
  -2   0   1    4.20    2.10 
   2   0  -1    6.70    2.30 
   2   0  -1    1.90    1.60 
  -2   0   1   18.30    3.30 
   2   0  -1    3.40    1.60 
  -2   0   1   10.80    2.10 
   2   0  -1    3.00    1.70 
   2   0  -1    9.60    2.30 
   2   0  -1    5.50    1.80 
   2   0  -1    1.60    1.80 
   2   0  -1    3.60    1.00 
   2   0  -1    4.20    2.00 
  -2   0   1    4.70    2.10 
  -2   0   1    6.70    2.50 
  -2   0   1    4.40    2.20 
  -2   0   1    6.70    2.10 
  -2   0   1    0.80    1.20 
  -2   0   1    3.80    1.30 
   2   0  -1    7.10    2.20 
   2   0  -1    6.30    2.10 
  -2   0   1    5.50    1.80 
   2   0  -1    4.30    1.90 
   2   0  -1    4.10    1.50 
  -2   0   1    5.80    2.30 
   2   0  -1    2.40    1.40 
   2   0  -1    3.10    1.80 
  -2   0   1    6.20    2.10 
  -2   0   1    1.80    1.00 
   2   0  -1    4.40    1.80 
   2   0  -1    5.80    2.20 
   2   0  -1    3.80    1.10 
  -2   0   1    8.20    2.60 
   2   0  -1    6.10    2.10 
  -2   0   1    5.70    0.90 
  -2   0   1    4.50    1.90 
  -2   0   1    2.10    1.70 
   2   0  -1    3.40    1.30 
   2   0  -1    5.10    1.60 
   2   0  -1    3.20    1.00 
   2   0  -1   11.50    2.40 
   2   0  -1   10.70    2.90 
   2   0  -1    4.00    2.00 
  -2   0   1    6.20    2.20 
  -2   0   1    4.90    1.80 
   2   0  -1    9.90    2.60 
  -2   0   1    5.40    1.90 
   2   0  -1    5.00    1.50 
  -2   0   1    4.00    2.00 
   2   0  -1    5.30    1.20 
   2   0  -1    4.40    1.90 
  -2   0   1    3.20    1.90 
   2   0  -1    4.80    1.70 
  -2   0   1    5.70    1.80 
   2   0  -1    6.60    2.10 
   2   0  -1    7.60    2.30 
   2   0  -1    3.20    1.40 
   2   0  -1    5.90    2.30 
   2   0  -1    3.30    1.30 
  -2   0   1    4.00    1.40 
   2   0  -1    5.40    1.90 
  -2   0   1    2.60    1.40 
  -2   0   1    2.50    1.50 
   2   0  -1    5.70    1.20 
  -2   0   1    0.70    1.40 
   1   0  -1  404.36   10.50 
   1   0  -1  378.76   10.50 
   1   0  -1  396.76   11.10 
   1   0  -1  411.16   10.60 
   1   0  -1  388.06   10.70 
   1   0  -1  346.47   10.30 
   1   0  -1  407.16   11.30 
   1   0  -1  347.27   11.00 
   1   0  -1  412.26   11.20 
   1   0  -1  404.86   10.30 
   1   0  -1  353.06   10.30 
   1   0  -1  408.76   11.10 
   1   0  -1  417.76    8.90 
   1   0  -1  410.06   10.10 
   1   0  -1  377.36   11.20 
   1   0  -1  411.56    9.40 
   1   0  -1  393.96   11.10 
   1   0  -1  320.77   10.30 
   1   0  -1  408.86    9.40 
   1   0  -1  391.96   10.10 
   1   0  -1  415.66    8.90 
   1   0  -1  408.46    8.90 
   1   0  -1  405.76   11.10 
   1   0  -1  434.16   10.20 
   0   0   1   -0.10    0.20 
   1   0   1 1220.98   26.20 
   1   0   1 1167.88   27.50 
   1   0   1 1225.98   27.80 
   1   0   1 1219.08   26.20 
   1   0   1 1224.78   27.40 
   1   0   1 1161.68   26.30 
   1   0   1 1248.58   27.90 
   1   0   1 1228.78   25.70 
  -1   0  -1 1204.98   27.20 
   1   0   1 1235.68   27.50 
   1   0   1 1219.18   28.00 
  -1   0  -1 1167.38   27.40 
   1   0   1 1238.98   25.40 
   1   0   1 1260.87   25.70 
   1   0   1 1188.88   27.20 
   1   0   1 1241.78   26.80 
   1   0   1 1185.58   26.70 
   1   0   1 1238.78   26.50 
  -1   0  -1 1237.78   28.00 
   1   0   1 1220.68   27.40 
   1   0   1 1228.58   27.30 
   1   0   1 1248.18   28.40 
  -1   0  -1 1237.78   27.80 
   1   0   1 1214.58   27.70 
   1   0   1 1247.68   26.20 
   1   0   1 1239.78   27.40 
   1   0   1 1224.98   25.00 
   1   0   1 1194.08   27.70 
  -2   0  -1    4.30    1.60 
  -2   0  -1    7.30    2.00 
   2   0   1    3.80    2.00 
  -2   0  -1    2.40    1.40 
   2   0   1    7.50    2.30 
  -2   0  -1    3.20    1.10 
  -2   0  -1   -0.10    1.20 
   2   0   1    4.30    1.90 
  -2   0  -1    2.70    1.80 
  -2   0  -1    2.10    1.90 
   2   0   1    2.50    1.30 
  -2   0  -1    4.60    2.00 
   2   0   1   10.50    2.50 
   2   0   1    2.90    1.30 
  -2   0  -1    3.80    2.10 
   2   0   1    3.10    1.90 
   2   0   1    3.70    1.80 
   2   0   1    2.10    1.80 
   2   0   1    3.30    1.90 
  -2   0  -1    9.60    2.70 
   2   0   1    4.90    1.60 
   2   0   1    2.60    0.80 
   2   0   1    3.70    1.50 
   2   0   1    0.10    1.50 
   2   0   1    3.10    1.70 
   2   0   1    0.30    0.90 
  -2   0  -1    8.00    2.60 
   2   0   1    3.40    1.90 
   2   0   1    1.80    1.50 
  -2   0  -1    3.50    1.50 
   2   0   1    3.00    1.60 
   2   0   1    3.40    1.90 
  -2   0  -1    4.70    1.90 
   2   0   1    3.50    1.80 
  -2   0  -1    5.70    1.60 
  -2   0  -1    2.00    0.70 
  -2   0  -1    7.70    2.60 
  -2   0  -1    6.10    2.10 
   2   0   1    1.60    1.30 
   2   0   1    5.60    2.40 
   2   0   1    0.50    0.90 
   2   0   1   11.00    2.80 
   2   0   1    5.20    1.80 
  -2   0  -1    1.30    1.60 
  -2   0  -1    5.90    1.50 
  -2   0  -1   -0.30    1.60 
  -2   0  -1    6.60    2.10 
   2   0   1    0.40    1.40 
  -2   0  -1    4.00    2.20 
   2   0   1    5.80    1.70 
  -2   0  -1    3.60    1.40 
  -2   0  -1    3.20    0.80 
   2   0   1    5.00    1.60 
  -2   0  -1    1.20    1.10 
  -2   0  -1   -1.90    1.30 
   2   0   1    2.40    1.90 
   2   0   1    1.70    1.50 
  -2   0  -1    2.40    1.70 
  -2   0  -1    5.20    1.30 
   2   0   1    3.60    0.90 
  -2   0  -1    1.10    1.40 
  -2   0  -1    3.00    1.80 
   3   0   1 1337.17   35.70 
   3   0   1 1340.87   37.90 
  -3   0  -1 1336.67   32.30 
  -3   0  -1 1304.57   35.90 
   3   0   1 1342.57   36.80 
   3   0   1 1373.96   36.30 
  -3   0  -1 1341.47   33.60 
   3   0   1 1310.07   33.40 
   3   0   1 1325.37   29.70 
   3   0   1 1334.87   35.00 
   3   0   1 1235.78   35.00 
   3   0   1 1352.76   36.80 
   3   0   1 1309.17   33.60 
  -3   0  -1 1345.17   35.90 
  -3   0  -1 1280.37   36.40 
  -3   0  -1 1337.37   35.90 
   3   0   1 1325.07   28.50 
  -3   0  -1 1334.87   37.20 
   3   0   1 1304.17   33.60 
   3   0   1 1310.97   36.30 
  -3   0  -1 1296.87   33.70 
  -3   0  -1 1287.67   28.30 
  -3   0  -1 1247.38   36.60 
   3   0   1 1340.87   31.50 
   3   0   1 1324.57   34.30 
  -3   0  -1 1325.17   36.40 
  -3   0  -1 1322.17   31.40 
  -3   0  -1 1321.67   34.30 
   3   0   1 1333.97   35.50 
   3   0   1 1343.57   31.90 
  -3   0  -1 1338.37   32.60 
  -3   0  -1 1319.47   29.90 
  -3   0  -1 1318.77   34.20 
   3   0   1 1326.67   37.30 
  -3   0  -1 1335.27   37.10 
   3   0   1 1340.07   35.60 
  -3   0  -1 1331.67   28.60 
   3   0   1 1364.96   32.60 
  -3   0  -1 1282.67   36.60 
   3   0   1 1316.97   36.50 
  -3   0  -1 1361.16   36.00 
  -3   0  -1 1356.96   35.50 
   3   0   1 1371.06   32.80 
   3   0   1 1306.27   31.00 
  -3   0  -1 1335.07   28.40 
   3   0   1 1359.56   34.70 
   3   0   1 1330.47   36.90 
   3   0   1 1287.47   26.20 
  -3   0  -1 1266.57   30.80 
   3   0   1 1348.57   29.70 
   3   0   1 1290.87   31.40 
  -3   0  -1 1371.26   34.80 
  -3   0  -1 1400.46   33.90 
   3   0   1 1361.56   34.70 
   3   0   1 1320.17   36.20 
   3   0   1 1297.37   34.90 
  -3   0  -1 1266.67   35.90 
  -4   0  -1    3.20    3.10 
  -4   0  -1   -2.20    1.60 
   4   0   1   -1.40    1.80 
   4   0   1    1.20    1.80 
  -4   0  -1   -2.10    1.80 
   4   0   1   -0.20    1.50 
  -4   0  -1    1.10    1.10 
   4   0   1    7.00    2.60 
   4   0   1   -2.00    0.90 
  -4   0  -1   -0.50    2.10 
   4   0   1    3.40    3.20 
  -4   0  -1    4.40    3.40 
   4   0   1   -1.00    1.20 
   4   0   1    1.80    2.30 
   4   0   1    3.70    2.10 
   4   0   1    3.40    3.10 
  -4   0  -1   -2.10    1.70 
  -4   0  -1   -0.90    1.60 
   4   0   1    2.00    2.30 
  -4   0  -1    1.70    2.80 
   4   0   1   -0.60    1.30 
   4   0   1    1.00    1.80 
  -4   0  -1    0.10    2.40 
  -4   0  -1   -0.10    2.30 
   4   0   1    2.50    2.00 
  -4   0  -1    1.80    2.20 
   4   0   1    2.80    2.80 
   4   0   1   -2.20    1.70 
  -4   0  -1   -2.60    1.90 
  -4   0  -1    0.60    2.20 
   4   0   1   -0.80    1.40 
  -4   0  -1   -3.00    1.60 
  -4   0  -1   -1.00    1.80 
  -4   0  -1    1.40    1.60 
   4   0   1    2.20    2.10 
   4   0   1    0.90    1.00 
  -4   0  -1    1.40    1.50 
  -4   0  -1    1.40    1.20 
  -4   0  -1    0.60    2.10 
   5   0   1  565.04   18.10 
   5   0   1  549.25   22.20 
  -5   0  -1  538.15   25.40 
  -5   0  -1  587.44   19.60 
   5   0   1  531.75   23.70 
  -5   0  -1  538.55   25.40 
   5   0   1  550.44   22.20 
   5   0   1  594.14   23.10 
  -5   0  -1  570.84   24.30 
  -5   0  -1  507.75   22.40 
   5   0   1  539.65   20.00 
  -5   0  -1  559.84   23.00 
   5   0   1  530.05   25.90 
  -5   0  -1  510.45   23.50 
   5   0   1  524.55   24.40 
  -5   0  -1  585.24   18.10 
   5   0   1  588.44   19.40 
   5   0   1  546.95   15.30 
   5   0   1  520.25   19.30 
   5   0   1  546.05   23.50 
   5   0   1  547.55   23.80 
  -5   0  -1  573.94   25.80 
  -5   0  -1  529.65   15.60 
   5   0   1  515.95   20.30 
  -5   0  -1  556.04   25.60 
   5   0   1  556.94   15.80 
  -5   0  -1  578.54   26.00 
   5   0   1  519.05   25.20 
  -5   0  -1  538.35   21.50 
  -5   0  -1  496.05   23.90 
  -5   0  -1  523.55   15.20 
  -5   0  -1  534.45   24.40 
  -5   0  -1  581.04   25.70 
   5   0   1  549.65   21.40 
  -6   0  -1    1.20    3.70 
  -6   0  -1    3.10    1.40 
   6   0   1    0.60    3.50 
  -6   0  -1    3.40    2.60 
  -6   0  -1    2.50    3.10 
   6   0   1    1.80    1.50 
   6   0   1    0.00    2.60 
  -6   0  -1    1.50    3.20 
  -6   0  -1   -2.50    2.20 
  -6   0  -1    1.00    1.50 
   6   0   1    2.20    3.70 
  -6   0  -1   -0.20    3.00 
  -6   0  -1    3.50    4.10 
  -6   0  -1    6.40    4.30 
  -6   0  -1   -2.50    2.60 
  -6   0  -1   -2.70    2.30 
  -6   0  -1    0.70    2.80 
   6   0   1    4.80    4.20 
   6   0   1   -2.00    2.00 
   6   0   1    0.90    3.30 
  -6   0  -1    4.90    3.30 
  -6   0  -1   -2.30    3.00 
   6   0   1    1.50    1.80 
  -6   0  -1   -1.70    2.50 
   6   0   1    0.00    3.30 
   6   0   1    3.50    3.30 
   6   0   1    3.60    3.70 
   6   0   1    1.60    1.30 
   6   0   1    2.70    3.40 
   6   0   1    3.30    3.20 
   6   0   1    5.90    3.70 
   6   0   1    0.70    3.20 
   6   0   1    0.10    2.40 
   7   0   1 2578.64   74.89 
  -7   0  -1 2674.93   70.29 
   7   0   1 2634.44   71.49 
  -7   0  -1 2578.84   72.89 
  -7   0  -1 2812.82   76.69 
   7   0   1 2716.43   61.09 
  -7   0  -1 2573.74   76.59 
  -7   0  -1 2568.64   77.89 
   7   0   1 2678.73   78.29 
   7   0   1 2657.23   68.49 
   7   0   1 2590.94   71.19 
   7   0   1 2581.54   75.49 
   7   0   1 2626.84   70.79 
  -7   0  -1 2639.64   64.99 
  -7   0  -1 2536.35   78.39 
   7   0   1 2712.53   67.09 
  -7   0  -1 2546.75   78.79 
  -7   0  -1 2585.64   72.59 
   7   0   1 2614.04   74.49 
   7   0   1 2579.44   79.39 
   7   0   1 2614.24   80.59 
  -7   0  -1 2564.14   79.29 
   7   0   1 2711.53   70.09 
   7   0   1 2557.34   82.49 
   7   0   1 2656.63   76.29 
  -7   0  -1 2765.62   80.49 
  -7   0  -1 2630.94   76.29 
  -7   0  -1 2690.63   78.29 
   8   0   1    2.60    3.70 
   8   0   1    6.60    5.90 
   8   0   1   -2.20    3.40 
  -8   0  -1    8.10    5.70 
   8   0   1    0.30    3.50 
   8   0   1    2.30    5.00 
   8   0   1    3.30    5.10 
   8   0   1   -0.60    3.70 
  -8   0  -1    1.20    4.90 
   8   0   1   -2.20    4.10 
   8   0   1    9.00    5.40 
   8   0   1    0.20    4.30 
  -8   0  -1   -1.40    4.30 
  -8   0  -1    2.20    4.50 
  -8   0  -1   -3.60    2.60 
   8   0   1    3.40    3.80 
   8   0   1    0.80    5.20 
   8   0   1   -1.40    4.00 
  -8   0  -1    3.30    5.00 
  -8   0  -1   -0.40    3.80 
   8   0   1    3.40    4.10 
  -8   0  -1    0.40    3.60 
  -8   0  -1    3.70    5.00 
   8   0   1   -3.30    2.50 
  -8   0  -1    2.50    4.80 
  -8   0  -1    2.30    4.80 
   8   0   1    1.70    3.80 
   9   0   1 1324.57   56.59 
   9   0   1 1338.17   58.89 
   9   0   1 1299.07   54.29 
   9   0   1 1332.57   47.90 
   9   0   1 1399.96   58.89 
  -9   0  -1 1416.86   59.49 
  -9   0  -1 1458.95   60.49 
   9   0   1 1278.67   58.89 
   9   0   1 1350.66   62.39 
  -9   0  -1 1285.27   56.29 
   9   0   1 1397.26   54.19 
   9   0   1 1409.46   50.99 
   9   0   1 1315.87   53.59 
  -9   0  -1 1397.86   56.59 
   9   0   1 1475.05   61.09 
   9   0   1 1357.26   49.40 
  -9   0  -1 1369.76   58.99 
  -9   0  -1 1319.57   54.59 
   9   0   1 1348.37   49.80 
  -9   0  -1 1394.76   52.79 
  -9   0  -1 1333.67   53.99 
   9   0   1 1400.86   53.69 
  -9   0  -1 1350.26   57.29 
   9   0   1 1344.07   54.69 
  -9   0  -1 1329.37   59.09 
  10   0   1    1.40    5.90 
  10   0   1    3.70    6.80 
 -10   0  -1   -3.10    5.30 
 -10   0  -1    2.80    5.30 
 -10   0  -1   -0.90    6.50 
 -10   0  -1   -2.40    6.10 
  10   0   1    2.30    7.60 
  10   0   1   -3.50    4.60 
  10   0   1    3.20    6.60 
 -10   0  -1   -4.10    4.30 
 -10   0  -1    0.30    7.10 
 -10   0  -1   -3.50    4.90 
  10   0   1    3.40    7.10 
  10   0   1    5.60    6.80 
  10   0   1   13.30    8.60 
  10   0   1    0.30    6.10 
 -10   0  -1   -3.30    5.30 
 -10   0  -1   -4.40    5.10 
  10   0   1    0.50    6.20 
  10   0   1   -2.10    5.60 
 -10  -1   1  552.14   37.40 
  10  -1  -1  712.33   42.70 
  10  -1  -1  656.03   42.20 
 -10  -1   1  673.63   38.20 
 -10  -1   1  610.94   40.20 
  10  -1  -1  670.13   41.00 
 -10  -1   1  674.93   38.80 
 -10  -1   1  666.43   40.40 
 -10  -1   1  704.83   42.00 
  10  -1  -1  612.24   42.80 
  10  -1  -1  611.04   40.10 
  10  -1  -1  676.73   38.90 
  10  -1  -1  636.94   36.00 
 -10  -1   1  632.24   41.30 
 -10  -1   1  593.74   39.90 
  10  -1  -1  652.53   39.70 
 -10  -1   1  719.03   42.30 
  10   1  -1  610.34   36.70 
  10   1  -1  665.43   38.00 
 -10   1   1  557.14   38.10 
  10   1  -1  736.03   41.50 
 -10   1   1  669.73   40.80 
  10   1  -1  699.33   40.30 
  10   1  -1  628.54   36.90 
 -10   1   1  577.94   34.10 
  10   1  -1  595.64   39.30 
 -10   1   1  769.92   38.90 
  10   1  -1  648.64   44.00 
 -10   1   1  697.33   42.90 
 -10   1   1  637.14   39.30 
 -10   1   1  720.73   43.20 
  10   1  -1  679.93   37.60 
  10   1  -1  691.13   42.50 
  10   1  -1  651.23   42.70 
  10   1  -1  651.73   42.60 
  10   1  -1  706.03   39.50 
  10   1  -1  641.24   41.40 
 -10   1   1  712.33   38.30 
   9  -1  -1   23.70    8.10 
  -9  -1   1   14.80    7.80 
   9  -1  -1   22.30    8.70 
  -9  -1   1   13.30    8.60 
   9  -1  -1    0.20    5.00 
   9  -1  -1   15.00    8.50 
   9  -1  -1    7.20    6.30 
  -9  -1   1   15.60    7.20 
   9  -1  -1   20.70    8.20 
   9  -1  -1   17.60    8.40 
   9  -1  -1    7.10    5.60 
  -9  -1   1   10.60    6.80 
  -9  -1   1   24.10    8.70 
  -9  -1   1    4.10    6.00 
  -9  -1   1   10.60    6.90 
   9  -1  -1   15.70    6.90 
   9  -1  -1   25.50    9.60 
   9  -1  -1   20.30    7.00 
  -9  -1   1    1.20    5.90 
   9  -1  -1   21.20   10.10 
  -9  -1   1   23.60    9.40 
  -9  -1   1    3.40    5.70 
   9  -1  -1   10.90    7.50 
   9  -1  -1   14.20    7.70 
   9  -1  -1    9.30    6.00 
   9   1  -1   25.00    9.40 
  -9   1   1   17.80    9.20 
   9   1  -1   21.00    7.60 
   9   1  -1   15.00    8.40 
   9   1  -1   13.70    7.40 
   9   1  -1   31.00   11.00 
  -9   1   1    7.50    5.40 
  -9   1   1   23.50    9.30 
   9   1  -1   14.90    6.80 
  -9   1   1   12.90    7.80 
   9   1  -1   16.00    8.50 
   9   1  -1   22.70    9.70 
   9   1  -1   18.10    7.40 
   9   1  -1   16.20    7.70 
   9   1  -1   24.40    9.00 
  -9   1   1    9.80    6.80 
  -9   1   1   28.20   10.60 
  -9   1   1   20.50    8.50 
   9   1  -1   10.10    8.20 
  -9   1   1   10.70    6.30 
   9   1  -1   21.60    9.60 
  -9   1   1    3.30    5.20 
  -9   1   1    1.20    4.90 
   8  -1  -1  800.82   32.40 
  -8  -1   1  845.32   38.00 
  -8  -1   1  807.02   40.80 
   8  -1  -1  872.01   35.00 
  -8  -1   1  826.42   32.90 
   8  -1  -1  863.71   33.80 
  -8  -1   1  806.32   38.00 
  -8  -1   1  801.12   35.80 
   8  -1  -1  745.23   38.80 
  -8  -1   1  803.02   39.70 
   8  -1  -1  816.62   35.40 
  -8  -1   1  842.22   39.00 
   8  -1  -1  799.02   34.00 
  -8  -1   1  808.82   40.10 
  -8  -1   1  765.62   38.70 
   8  -1  -1  864.81   32.10 
   8  -1  -1  858.51   32.80 
   8  -1  -1  740.63   38.30 
   8  -1  -1  853.71   43.90 
   8  -1  -1  774.02   36.80 
   8  -1  -1  837.62   36.10 
  -8  -1   1  824.62   41.00 
   8  -1  -1  804.92   39.10 
   8  -1  -1  803.62   32.30 
  -8  -1   1  828.42   39.80 
   8  -1  -1  787.22   34.50 
   8  -1  -1  827.92   41.30 
  -8  -1   1  826.62   40.70 
  -8   1   1  823.12   35.60 
   8   1  -1  838.92   31.00 
   8   1  -1  818.92   41.00 
  -8   1   1  794.52   40.50 
   8   1  -1  863.71   38.00 
   8   1  -1  776.82   37.10 
   8   1  -1  791.22   37.00 
   8   1  -1  807.62   43.00 
  -8   1   1  787.42   35.30 
   8   1  -1  768.52   34.40 
  -8   1   1  811.42   40.40 
  -8   1   1  754.12   38.50 
   8   1  -1  808.72   32.40 
   8   1  -1  862.91   38.30 
  -8   1   1  852.21   37.20 
   8   1  -1  782.52   37.30 
   8   1  -1  816.02   38.70 
   8   1  -1  752.82   39.20 
  -8   1   1  816.62   36.70 
   8   1  -1  745.13   39.30 
  -8   1   1  818.52   39.20 
   8   1  -1  871.61   35.20 
  -8   1   1  781.12   39.40 
   8   1  -1  781.72   41.10 
  -8   1   1  827.72   40.50 
   7  -1  -1   99.29   12.90 
  -7  -1   1   97.99   15.40 
   7  -1  -1  109.29   11.90 
   7  -1  -1  112.59   16.30 
   7  -1  -1  127.79   18.40 
   7  -1  -1  120.19   13.20 
   7  -1  -1  113.59   15.90 
  -7  -1   1   99.59   15.30 
  -7  -1   1  142.89   18.00 
   7  -1  -1  137.49   14.60 
   7  -1  -1  121.69   13.90 
   7  -1  -1  118.49   13.80 
  -7  -1   1  135.09   18.00 
  -7  -1   1  116.79   16.70 
  -7  -1   1   83.09   13.40 
  -7  -1   1  119.79   15.70 
  -7  -1   1  141.09   18.30 
  -7  -1   1  144.49   18.10 
   7  -1  -1  117.09   13.40 
   7  -1  -1  112.59   14.60 
  -7  -1   1  131.09   17.00 
   7  -1  -1  115.49   12.90 
  -7  -1   1  122.89   16.80 
   7  -1  -1  105.09   15.90 
   7  -1  -1  109.59   13.90 
  -7  -1   1   99.99   12.10 
   7  -1  -1  147.39   16.10 
  -7  -1   1  138.19   16.10 
  -7  -1   1  130.09    9.50 
   7  -1  -1  119.49    8.10 
   7  -1  -1  111.89   15.10 
   7  -1  -1  109.19    8.10 
  -7   1   1  114.69   11.90 
  -7   1   1  124.29    9.10 
   7   1  -1  101.79   14.90 
  -7   1   1   91.49   14.50 
  -7   1   1   98.29   15.40 
   7   1  -1  116.29   16.40 
   7   1  -1   98.59   15.60 
  -7   1   1  119.89   16.80 
  -7   1   1  114.39   16.00 
  -7   1   1  123.39   14.70 
   7   1  -1  121.49   12.30 
   7   1  -1  122.29   15.70 
   7   1  -1  106.39   17.10 
   7   1  -1   98.69   15.30 
  -7   1   1  117.89    9.10 
  -7   1   1   98.29   14.60 
   7   1  -1  120.69   15.40 
   7   1  -1  121.29   15.40 
  -7   1   1  111.19   14.50 
   7   1  -1  116.29    8.50 
   7   1  -1   92.49    7.20 
  -7   1   1   88.09   14.00 
   7   1  -1  119.69   15.60 
   7   1  -1  134.59   15.00 
  -7   1   1  122.79   14.80 
  -7   1   1  100.59   13.70 
   7   1  -1  109.89   14.60 
   7   1  -1  106.09   13.80 
  -7   1   1  119.29   16.30 
   7   1  -1  126.79   13.50 
   7   1  -1  123.09   17.40 
  -6  -1   1 2136.29   64.99 
   6  -1  -1 2198.48   58.19 
   6  -1  -1 2264.67   58.89 
  -6  -1   1 2147.79   53.29 
   6  -1  -1 2170.28   57.29 
  -6  -1   1 2174.18   64.89 
   6  -1  -1 2189.08   65.69 
   6  -1  -1 2161.98   52.29 
   6  -1  -1 2200.78   51.39 
   6  -1  -1 2162.28   54.59 
   6  -1  -1 2119.19   58.99 
   6  -1  -1 2117.69   62.59 
  -6  -1   1 2110.99   60.99 
   6  -1  -1 2047.60   60.79 
   6  -1  -1 2160.28   58.39 
   6  -1  -1 2220.68   59.49 
   6  -1  -1 2160.48   63.79 
  -6  -1   1 2097.19   65.09 
   6  -1  -1 2059.19   54.59 
   6  -1  -1 2094.29   52.79 
  -6  -1   1 2115.39   63.59 
   6  -1  -1 2135.39   57.59 
   6  -1  -1 2166.38   51.39 
  -6  -1   1 2147.19   62.09 
   6  -1  -1 2099.09   56.59 
  -6  -1   1 2099.69   62.19 
  -6  -1   1 2180.48   65.29 
  -6  -1   1 2162.88   64.39 
  -6  -1   1 2188.58   64.89 
   6  -1  -1 2215.68   56.59 
  -6  -1   1 2212.28   63.09 
  -6  -1   1 2195.38   58.09 
  -6  -1   1 2107.39   64.89 
   6  -1  -1 2078.49   66.79 
   6   1  -1 2075.09   67.49 
   6   1  -1 2166.78   49.99 
   6   1  -1 2193.18   62.89 
   6   1  -1 2253.17   62.89 
   6   1  -1 2165.28   62.29 
  -6   1   1 2198.78   65.29 
  -6   1   1 2221.48   60.99 
  -6   1   1 2200.68   59.99 
  -6   1   1 2204.48   63.49 
   6   1  -1 2181.58   65.19 
   6   1  -1 2170.68   62.19 
  -6   1   1 2212.58   54.89 
   6   1  -1 2122.89   60.09 
  -6   1   1 2256.17   53.19 
   6   1  -1 2124.99   49.20 
  -6   1   1 2248.68   60.09 
  -6   1   1 2146.29   63.59 
   6   1  -1 2227.58   59.39 
  -6   1   1 2107.89   59.89 
   6   1  -1 2255.97   62.79 
   6   1  -1 2184.18   50.79 
   6   1  -1 2146.99   65.49 
  -6   1   1 2221.98   65.59 
   6   1  -1 2176.78   49.99 
  -6   1   1 2191.78   52.79 
  -6   1   1 2172.28   63.99 
   6   1  -1 2232.38   63.99 
   6   1  -1 2143.29   56.39 
   6   1  -1 2181.98   54.39 
  -6   1   1 2241.38   57.09 
   6   1  -1 2199.38   65.69 
  -6   1   1 1995.10   63.19 
   6   1  -1 2083.59   66.09 
  -6   1   1 2223.98   63.79 
  -6   1   1 2182.58   64.49 
  -5  -1   1  300.97   16.80 
  -5  -1   1  258.37   16.90 
   5  -1  -1  268.97   14.40 
   5  -1  -1  283.87   12.90 
   5  -1  -1  305.37   10.20 
   5  -1  -1  317.97   12.70 
  -5  -1   1  288.47    9.60 
  -5  -1   1  288.47   16.50 
  -5  -1   1  287.27    9.50 
   5  -1  -1  284.57   12.40 
  -5  -1   1  287.57   18.00 
  -5  -1   1  287.27    7.70 
  -5  -1   1  291.87   15.10 
   5  -1  -1  286.57   12.70 
  -5  -1   1  285.57   16.90 
   5  -1  -1  292.67   17.20 
  -5  -1   1  312.47   17.40 
   5  -1  -1  291.87    7.70 
   5  -1  -1  298.57   13.70 
   5  -1  -1  272.57   16.60 
   5  -1  -1  303.37   14.80 
  -5  -1   1  258.37   17.00 
  -5  -1   1  280.47   17.50 
   5  -1  -1  282.77   13.00 
   5  -1  -1  285.67   14.90 
  -5  -1   1  274.47   17.10 
  -5  -1   1  287.17   17.70 
   5  -1  -1  278.97   14.00 
  -5  -1   1  289.47    8.20 
   5  -1  -1  246.78   13.70 
   5  -1  -1  284.07   16.20 
   5  -1  -1  300.37   18.20 
   5  -1  -1  288.37   12.30 
   5  -1  -1  287.67   15.10 
  -5  -1   1  266.47   12.90 
   5  -1  -1  282.87   15.00 
  -5  -1   1  289.97   12.80 
  -5  -1   1  330.37   18.70 
  -5  -1   1  271.97   17.60 
   5  -1  -1  271.07   14.80 
  -5   1   1  271.77   14.90 
   5   1  -1  261.07   12.60 
  -5   1   1  282.67   17.30 
  -5   1   1  297.07   15.70 
   5   1  -1  290.47   16.10 
  -5   1   1  260.07   17.20 
  -5   1   1  283.47   16.80 
   5   1  -1  271.97   16.40 
   5   1  -1  296.97   16.80 
   5   1  -1  295.67   15.50 
  -5   1   1  294.77    7.90 
   5   1  -1  277.87   16.50 
   5   1  -1  288.67   11.20 
  -5   1   1  277.77   17.10 
  -5   1   1  269.97   17.10 
  -5   1   1  272.47   13.70 
   5   1  -1  308.07   18.40 
  -5   1   1  313.27   15.30 
  -5   1   1  276.57   12.60 
  -5   1   1  279.87   13.10 
  -5   1   1  303.37   15.90 
  -5   1   1  291.07   12.40 
  -5   1   1  276.97   16.80 
  -5   1   1  287.97   15.80 
   5   1  -1  284.57   17.30 
   5   1  -1  288.17   18.10 
   5   1  -1  279.77   14.10 
  -5   1   1  291.97   17.60 
   5   1  -1  282.37   16.40 
   5   1  -1  288.57    7.70 
  -5   1   1  297.57   17.40 
   5   1  -1  295.87   11.50 
   5   1  -1  269.87   16.40 
   5   1  -1  278.37   17.80 
   5   1  -1  289.37   10.80 
   5   1  -1  321.17   20.00 
   4  -1  -1 6168.38  126.79 
   4  -1  -1 6209.28  126.89 
   4  -1  -1 6198.18  117.19 
  -4  -1   1 6014.60  130.49 
  -4  -1   1 6098.99  133.29 
   4  -1  -1 6085.99  124.99 
  -4  -1   1 6148.48  132.69 
  -4  -1   1 6111.49  123.19 
   4  -1  -1 6134.89  126.09 
   4  -1  -1 6044.50  124.29 
   4  -1  -1 5975.10  118.19 
   4  -1  -1 5985.50  124.09 
  -4  -1   1 6005.40  125.59 
   4  -1  -1 5981.50  116.59 
   4  -1  -1 5827.62  126.89 
  -4  -1   1 5876.71  127.69 
  -4  -1   1 6049.19  130.99 
   4  -1  -1 5984.90  126.89 
  -4  -1   1 6105.19  134.09 
   4  -1  -1 6145.48  117.09 
   4  -1  -1 5989.70  123.39 
   4  -1  -1 6166.98  124.29 
   4  -1  -1 5886.61  126.79 
   4  -1  -1 6140.79  127.39 
  -4  -1   1 5769.22  131.09 
  -4  -1   1 5908.61  132.89 
  -4  -1   1 5952.50  121.69 
   4  -1  -1 6024.10  132.59 
   4  -1  -1 6093.49  131.29 
   4  -1  -1 6054.79  123.59 
  -4  -1   1 6039.50  127.99 
  -4  -1   1 6189.08  133.09 
   4  -1  -1 6037.00  122.69 
  -4  -1   1 6025.20  121.49 
  -4  -1   1 6147.98  120.39 
  -4  -1   1 6109.89  132.29 
  -4  -1   1 6031.50  132.49 
  -4  -1   1 6195.78  125.29 
  -4  -1   1 6089.09  118.49 
  -4  -1   1 6027.10  132.59 
   4  -1  -1 6137.79  127.09 
   4  -1  -1 6043.70  126.59 
  -4  -1   1 6055.49  130.69 
  -4  -1   1 6078.59  119.29 
   4  -1  -1 6121.69  123.09 
   4  -1  -1 6193.78  128.59 
   4  -1  -1 5951.00  129.49 
   4  -1  -1 5945.81  130.59 
   4  -1  -1 6017.80  127.89 
   4  -1  -1 6056.29  127.09 
   4   1  -1 6338.47  125.19 
   4   1  -1 6288.07  131.29 
   4   1  -1 6092.69  131.59 
   4   1  -1 6119.89  130.39 
  -4   1   1 6171.98  123.99 
  -4   1   1 6076.39  132.79 
  -4   1   1 6163.88  133.19 
  -4   1   1 6055.69  132.09 
  -4   1   1 5927.41  131.79 
  -4   1   1 5945.40  132.59 
   4   1  -1 6099.49  133.79 
  -4   1   1 6089.09  118.59 
  -4   1   1 6211.58  132.49 
   4   1  -1 6056.39  120.99 
   4   1  -1 6196.98  134.09 
   4   1  -1 6076.29  135.79 
   4   1  -1 6166.38  118.49 
  -4   1   1 6001.20  127.39 
   4   1  -1 6136.39  131.39 
   4   1  -1 6033.40  123.49 
   4   1  -1 6037.10  120.19 
  -4   1   1 6104.19  128.39 
   4   1  -1 5886.61  129.39 
   4   1  -1 6159.78  120.89 
  -4   1   1 5977.30  130.69 
   4   1  -1 5962.60  132.39 
   4   1  -1 6072.69  125.99 
   4   1  -1 6051.29  132.29 
   4   1  -1 6020.40  125.89 
  -4   1   1 6159.88  132.29 
  -4   1   1 6158.88  126.89 
  -4   1   1 6095.79  130.59 
  -4   1   1 6141.89  127.69 
  -4   1   1 6176.98  127.99 
   4   1  -1 6064.79  130.79 
  -4   1   1 6456.25  124.99 
  -4   1   1 6065.79  128.39 
   4   1  -1 6181.58  128.49 
  -4   1   1 6184.08  125.29 
  -4   1   1 5982.20  122.79 
   3  -1  -1  454.55   16.40 
  -3  -1   1  455.45   12.40 
   3  -1  -1  498.55   16.50 
  -3  -1   1  489.15   18.80 
   3  -1  -1  482.15   15.40 
  -3  -1   1  465.35   18.00 
  -3  -1   1  480.95   17.00 
  -3  -1   1  467.75   13.20 
   3  -1  -1  469.85   18.00 
   3  -1  -1  515.75   16.10 
   3  -1  -1  485.05   15.60 
  -3  -1   1  481.15   14.70 
  -3  -1   1  489.05   18.80 
  -3  -1   1  471.15   14.90 
   3  -1  -1  451.15   13.90 
   3  -1  -1  483.95   16.20 
  -3  -1   1  476.15   19.40 
   3  -1  -1  505.05   16.10 
   3  -1  -1  488.45   12.70 
   3  -1  -1  457.05   11.80 
  -3  -1   1  446.56   18.40 
   3  -1  -1  474.85   15.80 
   3  -1  -1  467.35   12.40 
   3  -1  -1  468.45   18.10 
  -3  -1   1  468.35   18.60 
   3  -1  -1  500.95   15.90 
   3  -1  -1  466.45   16.20 
  -3  -1   1  469.75   17.80 
  -3  -1   1  469.85   15.50 
  -3  -1   1  471.45   18.80 
   3  -1  -1  471.25   15.20 
   3  -1  -1  494.25   14.30 
   3  -1  -1  481.25   18.10 
  -3  -1   1  472.55   18.90 
  -3  -1   1  474.75   18.50 
   3  -1  -1  453.25   14.50 
   3  -1  -1  453.85   17.50 
  -3  -1   1  479.95   17.10 
   3  -1  -1  463.85   14.90 
  -3  -1   1  466.85   15.60 
   3  -1  -1  464.65   15.70 
  -3  -1   1  449.76   17.50 
   3  -1  -1  454.15   13.90 
   3  -1  -1  460.65   16.00 
  -3  -1   1  454.45   13.70 
  -3  -1   1  456.85   18.70 
  -3  -1   1  463.45   12.50 
  -3  -1   1  466.65   18.40 
   3  -1  -1  441.16   15.50 
   3  -1  -1  470.55   17.40 
  -3  -1   1  447.16   12.20 
  -3  -1   1  471.85   17.90 
   3  -1  -1  476.55   14.40 
   3  -1  -1  458.85   16.40 
  -3  -1   1  504.45   18.70 
  -3   1   1  476.55   18.20 
  -3   1   1  450.15   14.00 
   3   1  -1  461.25   12.30 
  -3   1   1  497.55   18.10 
   3   1  -1  466.75   19.10 
   3   1  -1  488.45   18.10 
   3   1  -1  466.95   13.90 
  -3   1   1  490.35   15.50 
   3   1  -1  464.65   13.10 
  -3   1   1  448.46   15.40 
   3   1  -1  465.95   18.60 
   3   1  -1  477.55   18.40 
  -3   1   1  459.55   18.30 
  -3   1   1  486.15   18.80 
  -3   1   1  447.06   17.30 
  -3   1   1  453.95   14.50 
   3   1  -1  489.95   19.10 
   3   1  -1  470.75   17.30 
  -3   1   1  445.46   15.10 
   3   1  -1  448.26   16.70 
  -3   1   1  454.65   18.00 
   3   1  -1  499.85   18.60 
  -3   1   1  470.95   15.80 
   3   1  -1  480.05   17.60 
   3   1  -1  459.15   17.90 
   3   1  -1  439.86   18.50 
   3   1  -1  477.45   18.80 
   3   1  -1  471.45   18.40 
   3   1  -1  473.85   17.50 
   3   1  -1  422.86   17.50 
  -3   1   1  467.65   18.20 
   3   1  -1  488.45   18.80 
  -3   1   1  453.85   17.90 
  -3   1   1  498.85   16.70 
  -3   1   1  436.26   16.70 
   3   1  -1  480.05   18.20 
   3   1  -1  455.65   15.40 
  -3   1   1  464.25   14.20 
  -3   1   1  488.95   16.90 
   3   1  -1  486.95   15.90 
   3   1  -1  473.05   18.30 
  -3   1   1  498.85   17.80 
   3   1  -1  454.55   18.00 
  -3   1   1  456.75   15.80 
   3   1  -1  473.35   12.40 
   3   1  -1  465.35   15.80 
   3   1  -1  497.25   16.20 
   3   1  -1  458.05   16.70 
  -3   1   1  477.45   16.90 
   3   1  -1  444.76   18.40 
   3   1  -1  469.95   12.50 
  -3   1   1  436.26   15.60 
  -3   1   1  491.85   12.80 
  -3   1   1  467.15   18.50 
   3   1  -1  491.25   19.40 
   2  -1  -1 2531.15   55.79 
   2  -1  -1 2370.56   53.29 
   2  -1  -1 2554.14   51.49 
  -2  -1   1 2593.24   57.39 
   2  -1  -1 2440.76   53.19 
  -2  -1   1 2645.24   57.89 
  -2  -1   1 2378.06   53.49 
  -2  -1   1 2541.25   56.49 
  -2  -1   1 2485.25   53.99 
   2  -1  -1 2477.65   52.49 
   2  -1  -1 2400.66   53.79 
  -2  -1   1 2638.34   57.59 
  -2  -1   1 2503.65   51.29 
   2  -1  -1 2490.05   50.89 
  -2  -1   1 2428.16   53.19 
   2  -1  -1 2484.85   51.89 
   2  -1  -1 2459.75   54.19 
  -2  -1   1 2471.55   55.79 
   2  -1  -1 2483.05   51.69 
  -2  -1   1 2491.25   56.09 
   2  -1  -1 2452.75   55.39 
   2  -1  -1 2546.05   54.69 
  -2  -1   1 2466.85   55.89 
  -2  -1   1 2528.35   55.39 
  -2  -1   1 2565.84   57.99 
  -2  -1   1 2425.76   54.69 
  -2  -1   1 2393.76   55.89 
  -2  -1   1 2558.54   56.39 
  -2  -1   1 2506.65   56.39 
   2  -1  -1 2496.15   54.99 
  -2  -1   1 2576.04   56.89 
   2  -1  -1 2511.95   51.99 
   2  -1  -1 2461.65   52.09 
   2  -1  -1 2485.75   53.39 
  -2  -1   1 2461.15   49.20 
   2  -1  -1 2482.05   52.19 
  -2  -1   1 2564.84   55.99 
   2  -1  -1 2466.45   54.89 
   2  -1  -1 2422.56   52.89 
  -2  -1   1 2682.83   56.89 
   2  -1  -1 2559.34   55.69 
   2  -1  -1 2487.55   54.19 
  -2  -1   1 2484.65   54.89 
  -2  -1   1 2522.65   51.29 
  -2  -1   1 2496.55   49.70 
   2  -1  -1 2449.25   51.09 
   2  -1  -1 2482.65   51.09 
   2  -1  -1 2420.16   54.19 
   2  -1  -1 2414.26   55.59 
   2  -1  -1 2525.15   55.29 
  -2  -1   1 2504.35   48.60 
   2  -1  -1 2452.35   50.79 
   2  -1  -1 2482.55   51.09 
  -2  -1   1 2623.64   56.99 
  -2  -1   1 2563.74   56.89 
  -2  -1   1 2538.05   56.49 
  -2  -1   1 2538.35   55.99 
  -2  -1   1 2458.75   53.19 
  -2  -1   1 2452.45   50.49 
  -2  -1   1 2614.64   58.19 
   2  -1  -1 2507.35   55.49 
  -2   1   1 2448.35   52.99 
   2   1  -1 2625.54   56.59 
   2   1  -1 2521.25   58.09 
   2   1  -1 2569.54   56.49 
  -2   1   1 2530.65   52.29 
   2   1  -1 2576.54   56.49 
  -2   1   1 2445.76   50.89 
   2   1  -1 2416.16   55.69 
  -2   1   1 2486.65   55.49 
  -2   1   1 2432.16   55.79 
  -2   1   1 2481.05   51.19 
  -2   1   1 2515.15   55.29 
   2   1  -1 2473.45   54.89 
   2   1  -1 2506.25   55.69 
   2   1  -1 2512.55   55.49 
  -2   1   1 2509.95   51.29 
   2   1  -1 2519.55   55.69 
   2   1  -1 2642.04   57.99 
   2   1  -1 2506.35   55.59 
   2   1  -1 2403.56   56.29 
   2   1  -1 2590.24   56.39 
  -2   1   1 2508.75   50.99 
  -2   1   1 2543.95   54.69 
  -2   1   1 2508.05   52.09 
   2   1  -1 2585.64   56.79 
   2   1  -1 2571.54   51.59 
   2   1  -1 2473.75   50.69 
   2   1  -1 2408.86   56.19 
   2   1  -1 2487.65   56.89 
  -2   1   1 2495.35   52.59 
   2   1  -1 2499.45   57.29 
   2   1  -1 2472.05   56.39 
   2   1  -1 2420.56   54.09 
  -2   1   1 2507.45   55.79 
  -2   1   1 2472.45   56.09 
   2   1  -1 2535.75   56.39 
   2   1  -1 2483.85   56.79 
  -2   1   1 2508.15   54.89 
   2   1  -1 2486.55   54.69 
   2   1  -1 2511.15   56.49 
  -2   1   1 2532.15   51.99 
   2   1  -1 2555.34   56.99 
  -2   1   1 2426.06   53.59 
   2   1  -1 2412.96   55.99 
  -2   1   1 2491.25   55.89 
   2   1  -1 2448.56   54.99 
  -2   1   1 2452.55   53.39 
   2   1  -1 2565.84   56.39 
   2   1  -1 2480.85   51.19 
  -2   1   1 2409.06   54.19 
   2   1  -1 2470.25   55.79 
  -2   1   1 2425.76   54.29 
  -2   1   1 2534.65   54.39 
  -2   1   1 2433.06   55.09 
  -2   1   1 2500.35   53.39 
   2   1  -1 2481.95   54.19 
   2   1  -1 2495.15   50.79 
  -2   1   1 2453.65   51.89 
   2   1  -1 2556.54   54.89 
  -2   1   1 2509.55   55.39 
  -2   1   1 2528.65   51.49 
   2   1  -1 2527.35   55.89 
   1  -1  -1  186.78    7.30 
   1  -1  -1  188.78    6.90 
   1  -1  -1  182.28    7.50 
  -1  -1   1  182.38    7.00 
  -1  -1   1  193.58    8.20 
   1  -1  -1  188.08    7.10 
  -1  -1   1  179.48    7.60 
  -1  -1   1  205.28    8.10 
  -1  -1   1  192.58    8.30 
  -1  -1   1  181.48    7.60 
   1  -1  -1  194.58    7.40 
   1  -1  -1  189.78    6.50 
  -1  -1   1  193.08    6.40 
  -1  -1   1  190.18    7.80 
  -1  -1   1  180.68    7.90 
  -1  -1   1  191.68    8.00 
   1  -1  -1  187.98    7.50 
   1  -1  -1  206.98    7.10 
  -1  -1   1  185.38    7.20 
   1  -1  -1  188.78    7.00 
   1  -1  -1  192.08    6.70 
   1  -1  -1  205.88    7.00 
   1  -1  -1  198.08    5.20 
   1  -1  -1  203.28    6.10 
  -1  -1   1  174.88    8.10 
   1  -1  -1  191.88    6.70 
   1  -1  -1  193.88    7.50 
   1  -1  -1  191.18    6.80 
  -1  -1   1  198.88    8.00 
  -1  -1   1  198.58    8.30 
  -1  -1   1  178.98    5.50 
  -1  -1   1  190.78    8.10 
  -1  -1   1  192.58    7.10 
  -1  -1   1  181.58    8.00 
   1  -1  -1  193.78    7.30 
   1  -1  -1  196.38    6.80 
   1  -1  -1  199.88    7.90 
   1  -1  -1  193.08    6.80 
   1  -1  -1  198.28    7.70 
   1  -1  -1  193.08    6.70 
   1  -1  -1  205.88    7.50 
  -1  -1   1  189.48    8.00 
  -1  -1   1  194.78    7.20 
  -1  -1   1  166.08    7.30 
   1  -1  -1  197.78    5.80 
  -1  -1   1  188.38    8.30 
  -1  -1   1  196.88    8.50 
  -1  -1   1  194.08    6.80 
   1  -1  -1  204.68    6.60 
  -1  -1   1  201.68    7.90 
   1  -1  -1  189.28    5.80 
   1  -1  -1  197.58    7.40 
  -1  -1   1  201.68    7.80 
  -1  -1   1  184.88    7.20 
   1  -1  -1  202.48    7.00 
  -1  -1   1  195.38    8.00 
  -1  -1   1  204.78    8.20 
   1  -1  -1  190.48    7.30 
  -1  -1   1  188.18    7.70 
   1  -1  -1  191.08    5.50 
   1  -1  -1  179.68    7.20 
   1  -1  -1  190.58    6.30 
   1  -1  -1  178.08    7.60 
  -1  -1   1  195.18    8.20 
  -1   1   1  201.08    7.40 
   1   1  -1  197.58    7.80 
   1   1  -1  201.18    8.10 
   1   1  -1  183.38    7.60 
  -1   1   1  193.58    7.70 
   1   1  -1  190.68    8.30 
  -1   1   1  192.08    7.90 
   1   1  -1  199.78    8.20 
  -1   1   1  185.08    6.60 
   1   1  -1  200.98    8.20 
   1   1  -1  198.28    8.20 
   1   1  -1  203.08    8.20 
   1   1  -1  203.98    8.10 
   1   1  -1  225.38    8.60 
  -1   1   1  180.78    6.30 
  -1   1   1  200.78    7.40 
  -1   1   1  181.58    7.30 
   1   1  -1  196.18    7.60 
   1   1  -1  187.48    7.20 
  -1   1   1  188.78    7.60 
   1   1  -1  208.18    6.60 
   1   1  -1  204.58    8.80 
   1   1  -1  191.78    8.00 
   1   1  -1  185.98    7.80 
   1   1  -1  199.08    5.60 
   1   1  -1  194.88    7.90 
   1   1  -1  178.98    7.60 
   1   1  -1  199.38    8.20 
   1   1  -1  190.38    8.30 
   1   1  -1  191.28    6.80 
  -1   1   1  196.58    7.00 
   1   1  -1  191.48    8.20 
  -1   1   1  191.08    7.30 
   1   1  -1  211.38    8.80 
   1   1  -1  205.98    7.40 
   1   1  -1  208.48    8.50 
   1   1  -1  184.18    5.10 
   1   1  -1  185.58    6.90 
   1   1  -1  191.38    7.90 
  -1   1   1  207.38    7.20 
   1   1  -1  182.28    7.70 
   1   1  -1  199.48    7.30 
  -1   1   1  195.98    6.90 
   1   1  -1  205.48    7.90 
  -1   1   1  198.08    7.40 
   0  -1  -1 4089.19   75.59 
   0  -1   1 3421.66   73.69 
   0   1   1 3370.26   74.59 
   0   1  -1 3624.24   73.89 
   0   1   1 3672.83   74.69 
   0   1   1 4067.69   75.69 
  -1  -1  -1  347.87   12.00 
  -1  -1  -1  388.56   11.40 
  -1  -1  -1  392.36   11.00 
   1  -1   1  364.36   11.30 
  -1  -1  -1  367.76   12.20 
   1  -1   1  377.66   12.00 
  -1  -1  -1  392.86   12.80 
  -1  -1  -1  406.16   12.40 
   1  -1   1  360.36    8.70 
  -1  -1  -1  385.56   11.40 
   1  -1   1  397.86    9.80 
   1  -1   1  388.76   12.70 
  -1  -1  -1  404.76   11.80 
   1  -1   1  392.86    9.60 
   1  -1   1  368.96   12.70 
   1  -1   1  368.76   11.90 
   1  -1   1  370.76   12.00 
  -1  -1  -1  421.86   12.90 
   1  -1   1  382.96    9.60 
   1  -1   1  372.56   11.30 
   1  -1   1  388.86   11.60 
  -1  -1  -1  368.66   11.10 
   1  -1   1  386.06    8.60 
  -1  -1  -1  394.66   12.00 
  -1  -1  -1  386.86   12.90 
   1  -1   1  368.96   12.00 
  -1  -1  -1  408.96   12.70 
  -1  -1  -1  374.46   12.20 
  -1  -1  -1  401.66   12.70 
  -1  -1  -1  376.46   10.30 
  -1  -1  -1  388.16   12.90 
   1  -1   1  384.56   10.50 
  -1  -1  -1  386.96    9.40 
  -1  -1  -1  369.56   12.90 
  -1  -1  -1  397.76   12.80 
   1  -1   1  375.46   10.00 
   1  -1   1  362.16   10.30 
   1  -1   1  377.36    8.20 
   1  -1   1  365.56   10.30 
  -1  -1  -1  438.06   13.50 
   1  -1   1  362.06   10.60 
  -1  -1  -1  386.06   11.20 
  -1  -1  -1  366.96   12.60 
   1  -1   1  388.06   12.00 
  -1  -1  -1  406.26   11.80 
  -1  -1  -1  395.36   12.80 
   1  -1   1  404.96   12.50 
   1  -1   1  387.16   11.30 
   1  -1   1  373.96   10.50 
   1  -1   1  394.56   12.30 
  -1  -1  -1  375.66   11.60 
   1  -1   1  392.26   11.90 
  -1  -1  -1  390.76   12.50 
  -1  -1  -1  381.06   12.30 
   1  -1   1  395.26   12.90 
   1   1   1  403.96   13.20 
  -1   1  -1  330.07   11.50 
  -1   1  -1  305.27   10.80 
   1   1   1  391.06   12.60 
   1   1   1  390.06   12.20 
   1   1   1  376.46   12.70 
  -1   1  -1  400.66   13.00 
  -1   1  -1  406.86   12.60 
   1   1   1  403.46   12.60 
   1   1   1  399.86   11.70 
   1   1   1  398.26   12.60 
   1   1   1  370.26    8.90 
   1   1   1  386.76   13.10 
   1   1   1  378.66   12.30 
   1   1   1  387.26   11.70 
   1   1   1  400.76   12.00 
   1   1   1  411.66   12.80 
   1   1   1  398.36   12.40 
  -1   1  -1  389.06    9.60 
   1   1   1  381.76   12.00 
   1   1   1  377.26   12.40 
  -1   1  -1  352.36   11.60 
  -1   1  -1  386.46   12.40 
   1   1   1  377.96   12.00 
   1   1   1  369.26   12.50 
  -1   1  -1  363.76   12.20 
   1   1   1  403.76   11.70 
  -1   1  -1  384.46   11.90 
   1   1   1  385.36   11.90 
   1   1   1  378.16   11.10 
   1   1   1  383.46   12.30 
   1   1   1  382.26   12.30 
   1   1   1  378.36   11.30 
  -1   1  -1  398.86   12.20 
   1   1   1  362.86   10.60 
   1   1   1  391.56   11.90 
  -1   1  -1  389.26   11.70 
   1   1   1  387.06   12.70 
   1   1   1  381.76   11.40 
   1   1   1  407.86   12.70 
  -1   1  -1  368.46   12.70 
   1   1   1  390.76   11.40 
   1   1   1  384.96   10.40 
  -1   1  -1  384.56   12.20 
   2  -1   1 9718.63  186.18 
  -2  -1  -1 9597.94  186.98 
  -2  -1  -1 9197.28  188.08 
   2  -1   1 9409.56  186.18 
  -2  -1  -1 9574.24  187.98 
   2  -1   1 9001.10  185.38 
  -2  -1  -1 9580.84  187.58 
   2  -1   1 9806.82  186.38 
  -2  -1  -1 9622.54  188.98 
   2  -1   1 9078.49  183.78 
   2  -1   1 9274.87  182.38 
   2  -1   1 9226.98  185.88 
  -2  -1  -1 9759.92  187.48 
  -2  -1  -1 9655.53  187.38 
   2  -1   1 9404.56  187.28 
   2  -1   1 9427.26  187.58 
   2  -1   1 9445.25  186.58 
   2  -1   1 9025.80  184.38 
   2  -1   1 9228.68  193.98 
   2  -1   1 9384.56  184.38 
   2  -1   1 9414.76  187.68 
   2  -1   1 9598.34  183.48 
  -2  -1  -1 9847.92  188.38 
   2  -1   1 8963.50  187.68 
  -2  -1  -1 9965.20  187.18 
  -2  -1  -1 9277.67  188.68 
   2  -1   1 9467.75  185.58 
   2  -1   1 9479.95  186.08 
  -2  -1  -1 9762.42  187.98 
  -2  -1  -1 9758.52  188.68 
   2  -1   1 9421.06  187.68 
   2  -1   1 9270.87  184.88 
   2  -1   1 9755.42  187.78 
   2  -1   1 9277.57  187.08 
  -2  -1  -1 9360.66  185.08 
  -2  -1  -1 9208.98  183.98 
  -2  -1  -1 9200.08  185.88 
  -2  -1  -1 9374.46  187.28 
  -2  -1  -1 9048.29  188.38 
  -2  -1  -1 9557.64  186.68 
  -2  -1  -1 8584.84  186.68 
   2  -1   1 9380.26  183.18 
  -2  -1  -1 9176.68  188.88 
  -2  -1  -1 9657.93  187.08 
  -2  -1  -1 9853.71  187.98 
   2  -1   1 9227.18  187.38 
   2  -1   1 9008.10  185.78 
  -2  -1  -1 9904.51  188.08 
  -2  -1  -1 9041.40  188.78 
  -2  -1  -1 9251.17  185.78 
  -2  -1  -1 9174.48  185.68 
  -2  -1  -1 8732.43  187.78 
   2  -1   1 9169.78  185.68 
  -2  -1  -1 9169.58  185.98 
   2  -1   1 9500.55  187.98 
   2  -1   1 9661.83  186.68 
   2  -1   1 9277.27  187.98 
   2  -1   1 9593.64  185.88 
  -2  -1  -1 9153.98  185.08 
   2  -1   1 9720.73  185.18 
   2  -1   1 9003.40  189.68 
  -2  -1  -1 9027.90  186.98 
  -2  -1  -1 9655.83  185.88 
  -2  -1  -1 8627.64  186.88 
   2  -1   1 9621.74  183.78 
   2  -1   1 9747.72  190.98 
   2  -1   1 9072.89  185.78 
  -2  -1  -1 9307.47  186.78 
   2  -1   1 9653.23  194.68 
  -2   1  -1 9298.77  192.38 
   2   1   1 9376.66  188.48 
  -2   1  -1 8966.10  187.38 
   2   1   1 9315.27  184.28 
   2   1   1 9857.51  187.98 
  -2   1  -1 9602.54  187.68 
   2   1   1 9587.64  186.58 
   2   1   1 9651.23  188.78 
   2   1   1 9530.55  186.48 
   2   1   1 9282.77  190.68 
  -2   1  -1 9532.15  188.68 
  -2   1  -1 9092.99  186.08 
   2   1   1 9512.95  187.58 
   2   1   1 9049.79  182.98 
   2   1   1 9128.49  186.08 
   2   1   1 9386.66  186.18 
  -2   1  -1 9121.29  184.58 
   2   1   1 9594.54  189.08 
  -2   1  -1 9556.64  189.08 
   2   1   1 9477.45  186.18 
   2   1   1 9377.36  187.28 
   2   1   1 9512.45  185.68 
  -2   1  -1 8965.40  181.98 
  -2   1  -1 9179.38  187.88 
  -2   1  -1 9484.35  191.28 
   2   1   1 9368.96  192.28 
  -2   1  -1 9251.17  187.48 
  -2   1  -1 9234.98  182.38 
   2   1   1 9858.51  185.98 
   2   1   1 9764.42  187.48 
   2   1   1 9612.64  188.18 
   2   1   1 9623.64  187.58 
   2   1   1 9177.58  188.48 
   2   1   1 9498.75  187.28 
   2   1   1 9550.44  187.58 
   2   1   1 9492.35  188.28 
  -2   1  -1 9735.03  185.08 
   2   1   1 9711.33  186.98 
   2   1   1 9262.77  187.98 
  -2   1  -1 9526.35  187.38 
  -2   1  -1 9638.34  186.68 
   2   1   1 9661.93  186.88 
   2   1   1 9483.65  186.28 
  -2   1  -1 9999.00  188.28 
   2   1   1 9553.24  187.68 
   2   1   1 9260.27  187.18 
   2   1   1 9455.75  187.28 
   2   1   1 9711.43  190.48 
  -2   1  -1 9045.89  187.18 
  -2   1  -1 8889.91  185.98 
   2   1   1 9662.93  187.48 
   2   1   1 9701.53  183.58 
  -2   1  -1 9823.02  186.08 
   2   1   1 9705.53  188.58 
  -3  -1  -1    2.30    1.80 
  -3  -1  -1    7.00    3.00 
  -3  -1  -1    2.40    2.30 
   3  -1   1    3.70    2.50 
  -3  -1  -1    2.80    2.40 
  -3  -1  -1    6.00    2.90 
   3  -1   1    1.80    1.00 
  -3  -1  -1    2.30    1.30 
   3  -1   1    3.20    2.40 
  -3  -1  -1    1.60    1.70 
   3  -1   1    2.50    2.30 
   3  -1   1    3.70    1.40 
   3  -1   1    3.50    2.30 
  -3  -1  -1   -0.50    2.20 
  -3  -1  -1    7.50    2.70 
   3  -1   1    6.00    2.30 
  -3  -1  -1   -1.10    1.80 
  -3  -1  -1    2.80    2.50 
   3  -1   1    7.00    1.90 
   3  -1   1    6.30    1.30 
   3  -1   1   -2.10    1.30 
  -3  -1  -1    3.20    1.40 
   3  -1   1    1.90    2.20 
   3  -1   1    1.90    1.70 
  -3  -1  -1    4.30    1.60 
  -3  -1  -1    2.50    3.00 
  -3  -1  -1    2.10    2.20 
   3  -1   1    2.50    1.50 
   3  -1   1    5.70    2.30 
  -3  -1  -1    4.50    2.30 
  -3  -1  -1    3.90    2.00 
   3  -1   1   -1.30    1.80 
   3  -1   1    7.10    3.10 
   3  -1   1    5.30    1.30 
  -3  -1  -1    5.20    3.10 
  -3  -1  -1    8.50    2.80 
  -3  -1  -1    0.00    1.70 
   3  -1   1   19.20    3.60 
   3  -1   1    0.90    2.20 
   3  -1   1    0.30    1.10 
  -3  -1  -1    2.50    0.90 
   3  -1   1    4.60    1.80 
   3  -1   1    3.20    1.90 
  -3  -1  -1    4.50    2.70 
   3  -1   1   13.90    3.40 
  -3  -1  -1    5.40    3.10 
  -3  -1  -1    1.60    2.20 
   3  -1   1    2.20    1.80 
  -3  -1  -1    3.40    2.50 
   3  -1   1    5.10    3.00 
   3  -1   1    4.30    2.30 
   3  -1   1    4.00    2.00 
  -3  -1  -1    3.80    1.70 
  -3  -1  -1    1.60    1.80 
   3  -1   1    6.40    2.30 
   3  -1   1    4.20    2.00 
   3  -1   1    7.50    2.20 
  -3  -1  -1    3.60    1.50 
   3   1   1    5.30    2.80 
   3   1   1    4.00    2.50 
   3   1   1    2.10    2.30 
   3   1   1    5.60    3.00 
   3   1   1    3.40    2.60 
  -3   1  -1    2.00    1.10 
   3   1   1    3.30    2.20 
   3   1   1   -0.70    1.30 
   3   1   1    5.30    1.80 
  -3   1  -1    1.90    2.30 
  -3   1  -1    7.10    2.80 
   3   1   1    4.50    2.50 
  -3   1  -1    5.00    2.30 
   3   1   1    1.50    0.90 
   3   1   1    2.00    2.20 
   3   1   1   -0.50    1.60 
   3   1   1    6.30    3.10 
   3   1   1   -0.20    1.60 
   3   1   1    3.40    2.00 
   3   1   1    1.00    2.20 
  -3   1  -1    7.60    2.80 
  -3   1  -1    4.30    2.80 
   3   1   1    5.70    1.70 
  -3   1  -1    4.80    2.00 
  -3   1  -1    3.30    1.60 
  -3   1  -1    1.80    2.10 
   3   1   1    1.30    1.30 
  -3   1  -1    5.60    1.80 
   3   1   1    1.50    2.40 
   3   1   1    9.10    3.40 
  -3   1  -1    5.20    2.70 
  -3   1  -1    1.20    2.10 
   3   1   1    1.60    1.80 
   3   1   1    4.80    2.40 
  -3   1  -1    1.70    2.00 
   3   1   1    6.30    2.80 
   3   1   1    0.50    2.10 
  -3   1  -1    1.90    1.70 
   3   1   1   -0.50    2.00 
   3   1   1    4.10    2.50 
  -3   1  -1    5.20    2.80 
  -3   1  -1    4.10    2.10 
  -3   1  -1    5.20    2.80 
   3   1   1    4.80    1.00 
   3   1   1    1.40    2.30 
  -4  -1  -1 3146.59   77.29 
   4  -1   1 3167.28   72.19 
  -4  -1  -1 3110.29   76.89 
   4  -1   1 3128.89   72.19 
   4  -1   1 3120.89   61.19 
  -4  -1  -1 3315.07   67.29 
   4  -1   1 3154.48   73.19 
  -4  -1  -1 3077.69   76.19 
   4  -1   1 3069.89   71.69 
  -4  -1  -1 3199.18   66.29 
   4  -1   1 3184.88   65.79 
   4  -1   1 3222.58   71.39 
   4  -1   1 3077.09   66.09 
  -4  -1  -1 3201.48   75.69 
  -4  -1  -1 3157.38   70.59 
   4  -1   1 3193.58   74.59 
  -4  -1  -1 3198.18   77.99 
   4  -1   1 3196.28   65.29 
  -4  -1  -1 3133.79   64.39 
   4  -1   1 3078.89   73.99 
  -4  -1  -1 3120.69   75.19 
   4  -1   1 3155.88   69.99 
  -4  -1  -1 3241.48   68.59 
  -4  -1  -1 3165.08   66.99 
   4  -1   1 3155.28   77.89 
   4  -1   1 3227.28   71.99 
  -4  -1  -1 3305.07   78.59 
   4  -1   1 3123.99   72.19 
   4  -1   1 3163.88   68.69 
   4  -1   1 3179.98   66.39 
   4  -1   1 3090.59   61.19 
  -4  -1  -1 3170.28   78.29 
   4  -1   1 3309.07   74.09 
  -4  -1  -1 3259.37   75.99 
   4  -1   1 3112.19   73.09 
   4  -1   1 3220.78   70.39 
   4  -1   1 3122.99   73.09 
   4  -1   1 3191.48   65.99 
  -4  -1  -1 3200.58   72.49 
  -4  -1  -1 3190.78   77.29 
   4  -1   1 3162.48   74.59 
  -4  -1  -1 3144.59   68.49 
  -4  -1  -1 3163.68   78.39 
  -4  -1  -1 3182.08   75.79 
  -4  -1  -1 3115.99   76.29 
   4  -1   1 3116.79   69.49 
  -4   1  -1 3093.29   77.49 
   4   1   1 3226.98   66.79 
   4   1   1 3103.19   77.79 
  -4   1  -1 3156.08   76.29 
  -4   1  -1 3062.99   76.99 
  -4   1  -1 3334.87   68.69 
  -4   1  -1 3134.69   71.29 
  -4   1  -1 3305.07   73.29 
   4   1   1 2991.50   77.89 
   4   1   1 3165.58   71.09 
   4   1   1 3129.89   64.49 
   4   1   1 3158.18   73.19 
  -4   1  -1 3224.28   74.49 
  -4   1  -1 3185.78   66.89 
   4   1   1 3182.38   76.39 
   4   1   1 3168.88   73.19 
   4   1   1 3127.09   72.59 
  -4   1  -1 3100.29   74.59 
   4   1   1 3190.48   75.19 
   4   1   1 3157.18   76.69 
   4   1   1 3091.09   78.19 
   4   1   1 3156.38   61.49 
  -4   1  -1 3187.38   65.49 
  -4   1  -1 3246.58   73.09 
   4   1   1 3086.99   79.39 
  -4   1  -1 3110.69   76.99 
  -4   1  -1 3134.79   77.39 
   4   1   1 3223.98   74.99 
   4   1   1 3085.49   66.19 
  -4   1  -1 3080.89   76.69 
   4   1   1 3134.39   66.79 
  -4   1  -1 3093.89   76.49 
   4   1   1 3254.97   75.69 
  -4   1  -1 3314.17   74.09 
  -4   1  -1 3235.48   70.29 
  -5  -1  -1    4.30    1.80 
  -5  -1  -1    5.20    3.50 
   5  -1   1    3.00    2.00 
   5  -1   1    4.10    3.00 
   5  -1   1    3.90    3.40 
  -5  -1  -1    1.90    1.60 
   5  -1   1    1.90    1.70 
   5  -1   1    2.30    2.40 
   5  -1   1    2.70    2.30 
   5  -1   1    2.30    2.30 
   5  -1   1    2.70    3.30 
   5  -1   1    1.90    2.20 
  -5  -1  -1    1.60    3.00 
  -5  -1  -1    0.40    2.50 
   5  -1   1    4.60    1.80 
  -5  -1  -1    5.30    3.30 
  -5  -1  -1    8.40    4.10 
   5  -1   1   11.40    4.30 
  -5  -1  -1   -2.20    2.50 
   5  -1   1    3.70    1.60 
  -5  -1  -1    2.40    1.60 
   5  -1   1    0.40    2.90 
  -5  -1  -1    1.10    2.40 
  -5  -1  -1    1.00    2.70 
   5  -1   1    1.70    2.70 
  -5  -1  -1    8.00    3.70 
  -5  -1  -1    3.10    2.90 
   5  -1   1    2.30    2.20 
  -5  -1  -1    2.10    3.10 
  -5  -1  -1    4.30    2.00 
   5  -1   1    5.00    3.90 
  -5  -1  -1    0.20    3.10 
  -5  -1  -1   -2.60    2.20 
  -5  -1  -1    3.20    2.60 
   5  -1   1    3.90    2.30 
   5  -1   1    4.40    3.00 
  -5  -1  -1    5.50    2.20 
   5  -1   1    6.00    3.20 
  -5  -1  -1    3.40    1.10 
  -5   1  -1    9.00    3.90 
  -5   1  -1    1.90    2.00 
  -5   1  -1   11.10    4.60 
  -5   1  -1    1.60    2.30 
   5   1   1    7.40    3.30 
  -5   1  -1    2.00    3.00 
   5   1   1    0.90    3.00 
   5   1   1    7.20    4.60 
  -5   1  -1    7.30    2.30 
   5   1   1    8.10    4.10 
   5   1   1    5.50    3.50 
  -5   1  -1   -0.10    2.70 
   5   1   1    5.80    1.90 
   5   1   1    2.70    1.80 
   5   1   1    1.40    1.70 
   5   1   1    6.30    3.80 
   5   1   1    1.70    2.90 
  -5   1  -1    4.50    2.90 
  -5   1  -1    3.00    3.30 
   5   1   1    4.10    2.90 
  -5   1  -1    3.00    2.40 
   5   1   1   11.80    4.10 
  -5   1  -1    6.10    3.30 
   5   1   1   -0.70    3.10 
   5   1   1    3.70    1.90 
  -5   1  -1    3.30    1.90 
  -5   1  -1    1.20    3.00 
   5   1   1    4.20    3.60 
   5   1   1    3.50    3.60 
  -5   1  -1    2.10    2.80 
   5   1   1    4.70    3.30 
  -5   1  -1    3.80    3.20 
  -5   1  -1    2.00    2.60 
   6  -1   1  305.57   17.10 
  -6  -1  -1  310.87   21.10 
   6  -1   1  285.57   17.10 
   6  -1   1  345.17   13.70 
  -6  -1  -1  303.17   20.40 
  -6  -1  -1  285.77   16.00 
  -6  -1  -1  288.57   18.70 
  -6  -1  -1  310.27   20.10 
   6  -1   1  331.47   11.80 
   6  -1   1  331.17   11.30 
   6  -1   1  332.57   21.70 
   6  -1   1  309.07   19.20 
   6  -1   1  335.47   19.50 
   6  -1   1  309.87   18.60 
   6  -1   1  296.57   18.30 
  -6  -1  -1  340.87   21.20 
   6  -1   1  322.47   15.50 
   6  -1   1  290.27   20.30 
   6  -1   1  333.37   16.80 
  -6  -1  -1  285.97   20.00 
   6  -1   1  338.47   17.60 
  -6  -1  -1  333.57   11.50 
   6  -1   1  321.37   14.90 
  -6  -1  -1  373.26   21.40 
  -6  -1  -1  319.57   18.80 
   6  -1   1  311.17   11.00 
  -6  -1  -1  312.57   11.20 
  -6  -1  -1  293.97   19.90 
   6  -1   1  342.87   13.20 
  -6  -1  -1  315.27    9.30 
  -6  -1  -1  334.87   12.20 
   6  -1   1  315.47   20.90 
   6  -1   1  364.96   18.90 
  -6  -1  -1  299.17   20.40 
  -6  -1  -1  368.16   22.40 
  -6  -1  -1  321.57   12.60 
  -6   1  -1  319.57   17.40 
  -6   1  -1  303.97   12.80 
   6   1   1  268.77   19.10 
  -6   1  -1  325.47   20.70 
   6   1   1  298.47   20.80 
  -6   1  -1  331.37   11.50 
   6   1   1  329.77   18.10 
   6   1   1  311.17   13.90 
   6   1   1  299.27   19.30 
   6   1   1  317.97   11.10 
   6   1   1  298.07   16.20 
  -6   1  -1  299.87   20.70 
  -6   1  -1  313.57   18.60 
   6   1   1  311.57   22.10 
  -6   1  -1  320.17   17.60 
  -6   1  -1  342.17   21.20 
  -6   1  -1  332.07   18.90 
   6   1   1  290.07   20.20 
   6   1   1  331.07   21.40 
   6   1   1  327.57   18.00 
  -6   1  -1  275.37   17.90 
  -6   1  -1  310.97   21.10 
   6   1   1  299.47   18.10 
  -6   1  -1  336.27   21.40 
   6   1   1  336.67   19.60 
  -6   1  -1  300.87   19.90 
   6   1   1  356.56   22.80 
   6   1   1  301.67   11.80 
   6   1   1  326.17   20.20 
   6   1   1  315.87   11.90 
  -6   1  -1  324.77   20.80 
  -6   1  -1  327.57   15.40 
   6   1   1  323.47   19.80 
   7  -1   1    7.20    4.00 
  -7  -1  -1    7.70    5.00 
   7  -1   1    5.50    4.80 
  -7  -1  -1    5.20    5.20 
   7  -1   1   12.30    5.60 
   7  -1   1    2.80    3.50 
   7  -1   1    5.40    4.30 
   7  -1   1    9.00    5.50 
  -7  -1  -1    1.60    4.30 
  -7  -1  -1   10.50    5.50 
   7  -1   1   -2.90    4.30 
   7  -1   1    3.90    3.00 
   7  -1   1    6.60    4.80 
  -7  -1  -1    3.20    4.00 
  -7  -1  -1   15.20    6.90 
  -7  -1  -1    7.20    6.00 
  -7  -1  -1    5.40    5.10 
   7  -1   1   11.50    4.60 
   7  -1   1   10.90    6.00 
  -7  -1  -1   11.20    6.00 
  -7  -1  -1    7.40    4.30 
  -7  -1  -1    5.00    5.10 
  -7  -1  -1    3.60    3.40 
   7  -1   1   12.00    5.30 
   7  -1   1    4.00    4.50 
   7  -1   1    6.90    5.00 
   7  -1   1   10.10    5.50 
  -7   1  -1    9.50    3.90 
  -7   1  -1    8.10    4.80 
   7   1   1   13.10    6.80 
  -7   1  -1    8.10    6.20 
  -7   1  -1    6.20    5.70 
   7   1   1    6.80    5.60 
   7   1   1    1.60    3.80 
   7   1   1    3.40    3.80 
  -7   1  -1    9.30    6.30 
  -7   1  -1    3.30    4.00 
   7   1   1    7.90    5.10 
  -7   1  -1   10.40    6.10 
   7   1   1    6.90    5.40 
   7   1   1   16.30    6.80 
   7   1   1    7.40    3.60 
  -7   1  -1    6.90    2.80 
   7   1   1   14.60    7.00 
   7   1   1    3.90    4.70 
  -7   1  -1   15.10    6.80 
   7   1   1   10.80    5.90 
   7   1   1    6.10    4.30 
  -7   1  -1    7.50    4.10 
  -7   1  -1    3.70    4.10 
  -7   1  -1    7.40    4.70 
  -7   1  -1    4.80    5.20 
   7   1   1    4.40    4.00 
  -7   1  -1    8.00    5.70 
   7   1   1   11.30    5.00 
   7   1   1    1.70    3.90 
   8  -1   1  340.87   22.40 
   8  -1   1  287.07   29.90 
   8  -1   1  233.48   27.70 
  -8  -1  -1  307.87   24.10 
   8  -1   1  317.97   19.40 
  -8  -1  -1  337.07   25.90 
  -8  -1  -1  316.67   24.90 
  -8  -1  -1  331.47   24.70 
  -8  -1  -1  284.87   22.50 
   8  -1   1  314.67   21.00 
  -8  -1  -1  347.67   26.10 
  -8  -1  -1  358.36   26.10 
   8  -1   1  303.17   22.90 
  -8  -1  -1  336.07   22.20 
   8  -1   1  307.47   21.90 
  -8  -1  -1  299.67   24.30 
   8  -1   1  326.47   20.50 
  -8  -1  -1  319.57   19.00 
   8  -1   1  294.97   22.10 
   8  -1   1  320.47   22.70 
   8  -1   1  290.47   19.00 
   8  -1   1  341.37   25.70 
   8  -1   1  257.77   26.60 
   8  -1   1  291.27   19.30 
   8  -1   1  332.57   20.70 
  -8  -1  -1  272.07   22.60 
   8  -1   1  326.37   22.10 
  -8  -1  -1  303.87   22.10 
  -8   1  -1  276.87   28.00 
   8   1   1  329.17   23.40 
   8   1   1  326.97   25.10 
  -8   1  -1  347.57   25.20 
   8   1   1  333.67   19.80 
   8   1   1  312.37   22.00 
  -8   1  -1  342.57   25.10 
   8   1   1  300.27   19.90 
   8   1   1  283.17   22.00 
   8   1   1  308.47   22.60 
  -8   1  -1  347.67   22.90 
  -8   1  -1  312.97   22.20 
   8   1   1  324.97   20.70 
  -8   1  -1  257.67   26.40 
  -8   1  -1  335.87   25.70 
   8   1   1  291.57   22.60 
  -8   1  -1  298.67   20.10 
   8   1   1  294.67   23.60 
  -8   1  -1  321.47   20.70 
   8   1   1  314.07   26.40 
   8   1   1  277.67   27.90 
  -8   1  -1  305.67   24.60 
   8   1   1  283.57   28.90 
   8   1   1  298.77   20.80 
  -8   1  -1  308.57   24.00 
  -8   1  -1  319.87   22.30 
   8   1   1  314.77   25.50 
   9  -1   1    6.30    5.30 
  -9  -1  -1    4.60    5.80 
   9  -1   1   10.40    7.80 
  -9  -1  -1   12.90    7.70 
   9  -1   1    3.70    5.70 
  -9  -1  -1    6.70    6.60 
   9  -1   1    0.80    5.30 
  -9  -1  -1   -3.80    5.40 
  -9  -1  -1    6.10    6.20 
  -9  -1  -1   11.70    8.40 
   9  -1   1    9.50    6.90 
   9  -1   1   12.90    8.00 
  -9  -1  -1   10.20    7.30 
  -9  -1  -1    5.80    5.10 
  -9  -1  -1    6.40    6.70 
   9  -1   1    7.70    6.30 
  -9  -1  -1    5.30    5.70 
   9  -1   1    1.10    5.50 
   9  -1   1    2.50    4.50 
   9  -1   1   16.30    7.90 
   9  -1   1    4.30    5.50 
   9  -1   1    6.90    5.80 
   9  -1   1    8.00    6.80 
  -9  -1  -1    3.10    5.00 
   9  -1   1   11.90    6.90 
   9   1   1    0.30    5.00 
   9   1   1    8.30    6.60 
   9   1   1    6.40    6.20 
  -9   1  -1    0.30    5.50 
   9   1   1   10.90    8.20 
   9   1   1   14.70    6.90 
  -9   1  -1   16.40    7.60 
   9   1   1    5.50    5.70 
   9   1   1    6.10    6.60 
  -9   1  -1   -0.10    5.00 
   9   1   1    6.40    7.10 
   9   1   1    9.30    6.60 
  -9   1  -1    0.10    4.70 
   9   1   1    1.80    5.00 
   9   1   1    4.60    6.50 
  -9   1  -1    2.10    6.10 
  -9   1  -1    4.60    6.20 
  -9   1  -1    5.90    5.20 
   9   1   1    4.90    6.00 
   9   1   1   -1.10    5.30 
  -9   1  -1   16.00    8.90 
   9   1   1   -0.50    4.50 
  -9   1  -1    3.10    5.20 
  10  -1   1  423.66   51.09 
  10  -1   1  288.77   30.30 
 -10  -1  -1  318.67   33.90 
  10  -1   1  328.17   34.80 
  10  -1   1  305.87   29.80 
  10  -1   1  313.97   35.30 
 -10  -1  -1  280.97   33.50 
 -10  -1  -1  352.46   36.50 
  10  -1   1  321.47   31.40 
 -10  -1  -1  295.17   34.60 
  10  -1   1  353.16   37.20 
 -10  -1  -1  324.87   33.30 
  10  -1   1  221.58   31.60 
  10  -1   1  266.97   25.90 
  10  -1   1  314.87   35.70 
  10  -1   1  356.96   28.70 
 -10  -1  -1  345.77   36.50 
 -10  -1  -1  297.27   33.70 
  10  -1   1  313.97   31.00 
 -10  -1  -1  353.26   29.20 
 -10  -1  -1  257.67   27.90 
 -10   1  -1  300.27   30.90 
 -10   1  -1  341.17   36.30 
  10   1   1  361.06   37.20 
  10   1   1  316.67   32.30 
  10   1   1  331.17   37.70 
  10   1   1  331.87   27.30 
 -10   1  -1  262.47   31.60 
 -10   1  -1  320.47   34.50 
  10   1   1  336.87   36.70 
  10   1   1  303.17   33.10 
  10   1   1  316.67   32.90 
 -10   1  -1  361.26   37.20 
  10   1   1  308.57   33.40 
  10   1   1  335.27   35.40 
  10   1   1  342.87   34.30 
 -10   1  -1  306.67   34.40 
 -10  -2   1  158.28   24.90 
  10  -2  -1  167.48   24.50 
 -10  -2   1  108.29   19.90 
  10  -2  -1  151.48   24.20 
 -10  -2   1  195.68   27.20 
  10  -2  -1  154.78   24.00 
 -10  -2   1  115.59   21.50 
 -10  -2   1  104.39   19.80 
 -10  -2   1  175.38   24.30 
  10  -2  -1  168.38   25.50 
  10  -2  -1  153.78   23.10 
  10  -2  -1  175.78   28.10 
  10  -2  -1  109.69   19.00 
  10  -2  -1  151.48   19.90 
 -10  -2   1  158.08   23.00 
 -10  -2   1  164.08   25.50 
 -10  -2   1  201.88   27.60 
  10   2  -1  164.28   23.40 
  10   2  -1  115.99   23.40 
  10   2  -1  108.09   22.00 
 -10   2   1  153.78   24.50 
 -10   2   1  174.98   25.10 
 -10   2   1  159.48   24.50 
 -10   2   1  151.78   22.70 
  10   2  -1  143.89   23.50 
  10   2  -1  140.59   21.60 
  10   2  -1  175.88   24.20 
  10   2  -1  171.48   24.60 
  10   2  -1  122.09   22.20 
  10   2  -1  105.19   20.90 
  10   2  -1  193.18   26.70 
  10   2  -1  178.88   24.20 
  10   2  -1  122.79   21.70 
 -10   2   1  110.79   20.00 
  10   2  -1  145.59   23.70 
   9  -2  -1  187.78   23.10 
  -9  -2   1  169.68   22.00 
   9  -2  -1  168.78   24.00 
  -9  -2   1  183.88   25.00 
   9  -2  -1  201.98   26.10 
   9  -2  -1  128.59   17.40 
   9  -2  -1  166.68   23.40 
  -9  -2   1  155.28   18.90 
  -9  -2   1  167.28   23.80 
  -9  -2   1  146.89   22.80 
   9  -2  -1  167.38   19.30 
   9  -2  -1  171.48   21.10 
   9  -2  -1  182.48   26.00 
   9  -2  -1  122.39   16.30 
  -9  -2   1  149.39   21.60 
  -9  -2   1  161.98   22.80 
  -9  -2   1  149.39   22.50 
  -9  -2   1  144.19   21.50 
  -9  -2   1  165.08   21.50 
   9  -2  -1  150.88   18.30 
   9  -2  -1  136.89   19.90 
   9  -2  -1  162.48   22.30 
  -9  -2   1  153.18   22.50 
  -9   2   1  137.09   20.60 
   9   2  -1  174.58   21.70 
  -9   2   1  150.08   22.30 
   9   2  -1  146.89   21.90 
  -9   2   1  156.58   18.60 
   9   2  -1  168.68   23.70 
   9   2  -1  153.28   21.00 
  -9   2   1  117.59   19.60 
  -9   2   1  161.78   22.10 
   9   2  -1  158.28   22.60 
   9   2  -1  137.39   20.00 
   9   2  -1  161.18   19.70 
  -9   2   1  182.88   21.20 
   9   2  -1  145.19   20.50 
  -9   2   1  154.38   22.40 
   9   2  -1  121.59   20.90 
   9   2  -1  140.49   20.00 
  -9   2   1  157.48   21.80 
   9   2  -1  198.38   26.40 
   9   2  -1  164.98   22.00 
   9   2  -1  127.89   22.10 
  -8  -2   1    1.80    4.50 
  -8  -2   1    8.60    5.50 
   8  -2  -1    9.40    6.90 
   8  -2  -1    7.60    4.80 
  -8  -2   1    0.80    4.90 
  -8  -2   1   -0.10    3.80 
   8  -2  -1    1.40    4.70 
   8  -2  -1   13.80    6.10 
   8  -2  -1    0.00    5.40 
  -8  -2   1    9.60    6.50 
   8  -2  -1    0.90    4.00 
   8  -2  -1    4.00    5.40 
   8  -2  -1    1.00    3.70 
   8  -2  -1   12.60    6.50 
   8  -2  -1   -1.10    3.80 
   8  -2  -1   16.70    6.20 
   8  -2  -1    5.50    4.00 
   8  -2  -1   12.80    6.50 
  -8  -2   1   -0.20    4.30 
   8  -2  -1    2.10    4.70 
  -8  -2   1   -4.20    4.50 
   8  -2  -1    2.00    4.00 
  -8  -2   1    6.20    5.80 
   8  -2  -1   14.20    5.90 
   8  -2  -1    2.20    4.30 
  -8  -2   1   13.30    7.40 
  -8  -2   1    0.70    5.20 
   8  -2  -1    4.40    5.60 
  -8  -2   1    6.30    5.60 
  -8  -2   1    7.20    5.90 
  -8   2   1    7.40    5.60 
  -8   2   1    5.50    4.50 
  -8   2   1    7.40    5.20 
   8   2  -1    2.10    4.00 
   8   2  -1    3.00    5.50 
  -8   2   1    6.10    6.20 
   8   2  -1    8.60    6.10 
   8   2  -1   12.00    7.20 
   8   2  -1    6.30    6.10 
   8   2  -1    4.90    5.40 
  -8   2   1    4.20    4.50 
  -8   2   1   -1.90    3.20 
   8   2  -1   15.00    7.30 
  -8   2   1    5.40    5.60 
  -8   2   1    8.00    5.20 
   8   2  -1   16.40    7.30 
   8   2  -1    3.90    6.10 
   8   2  -1    9.30    6.70 
   8   2  -1   10.60    7.10 
  -8   2   1    8.90    6.50 
  -8   2   1    7.50    5.00 
   8   2  -1    9.40    5.90 
   8   2  -1   10.00    5.30 
   8   2  -1    9.20    5.90 
   7  -2  -1    5.30    4.10 
   7  -2  -1    8.10    3.10 
  -7  -2   1    6.10    5.30 
  -7  -2   1   13.30    7.00 
   7  -2  -1   16.30    5.60 
   7  -2  -1    9.10    4.10 
  -7  -2   1    3.70    4.60 
  -7  -2   1    5.40    4.40 
  -7  -2   1    5.10    5.20 
  -7  -2   1    2.70    2.60 
  -7  -2   1   12.50    6.50 
   7  -2  -1    4.90    3.90 
   7  -2  -1   11.20    5.10 
  -7  -2   1    3.20    4.00 
   7  -2  -1    6.20    4.80 
   7  -2  -1   12.70    4.60 
   7  -2  -1    5.70    3.60 
   7  -2  -1    6.40    5.00 
   7  -2  -1   14.90    5.00 
  -7  -2   1    5.50    5.10 
   7  -2  -1    9.70    6.30 
   7  -2  -1   10.80    4.40 
   7  -2  -1    5.30    4.30 
  -7  -2   1    5.90    3.80 
  -7  -2   1    4.50    4.50 
   7  -2  -1    4.70    3.90 
  -7  -2   1    5.40    5.00 
  -7  -2   1    8.90    6.00 
   7  -2  -1    4.50    4.60 
   7  -2  -1    1.40    3.30 
   7  -2  -1    5.50    4.80 
  -7  -2   1    8.30    3.80 
   7  -2  -1    5.10    4.10 
   7  -2  -1    5.50    4.60 
  -7   2   1    7.90    4.50 
  -7   2   1    7.60    2.90 
   7   2  -1   12.10    6.30 
   7   2  -1    3.50    4.20 
   7   2  -1   11.50    6.00 
  -7   2   1    9.10    5.80 
  -7   2   1    7.80    4.80 
   7   2  -1    0.40    3.30 
  -7   2   1   22.00    8.10 
   7   2  -1    9.80    4.80 
  -7   2   1    1.20    4.00 
  -7   2   1    5.00    4.40 
   7   2  -1   12.40    6.50 
   7   2  -1   13.50    6.70 
   7   2  -1    7.20    4.90 
   7   2  -1    1.40    3.80 
  -7   2   1   -0.20    4.00 
  -7   2   1   -0.60    3.70 
  -7   2   1    5.60    3.40 
   7   2  -1    8.50    6.20 
  -7   2   1    3.30    2.40 
   7   2  -1   15.00    7.20 
  -7   2   1   -0.70    3.00 
   7   2  -1   12.10    5.40 
   7   2  -1   -1.90    3.00 
   7   2  -1    5.50    4.70 
  -7   2   1    6.50    5.60 
   6  -2  -1   52.79    7.90 
   6  -2  -1   51.99    7.40 
   6  -2  -1   45.90    8.60 
   6  -2  -1   43.60    5.50 
   6  -2  -1   45.30    9.40 
   6  -2  -1   42.60    8.40 
   6  -2  -1   42.30    4.40 
   6  -2  -1   40.70    8.70 
  -6  -2   1   55.39   10.00 
  -6  -2   1   58.39   10.40 
  -6  -2   1   46.90    9.70 
  -6  -2   1   54.79    5.50 
   6  -2  -1   40.50    6.70 
   6  -2  -1   48.60    3.90 
   6  -2  -1   39.00    7.30 
   6  -2  -1   48.60    8.00 
  -6  -2   1   47.80    9.70 
   6  -2  -1   36.70    7.30 
   6  -2  -1   53.99    7.60 
   6  -2  -1   39.90    7.10 
   6  -2  -1   43.80    5.90 
  -6  -2   1   27.80    8.30 
  -6  -2   1   38.00    7.80 
   6  -2  -1   54.89   10.20 
  -6  -2   1   48.50    9.90 
  -6  -2   1   43.70   10.20 
  -6  -2   1   42.10    4.60 
  -6  -2   1   48.50    6.20 
  -6  -2   1   47.20    7.30 
   6  -2  -1   43.50    7.50 
  -6  -2   1   48.40    6.20 
  -6  -2   1   50.09   10.50 
   6  -2  -1   29.70    7.00 
   6  -2  -1   36.30    7.60 
   6  -2  -1   51.59    8.40 
  -6  -2   1   47.90    9.60 
  -6  -2   1   52.89   10.50 
   6  -2  -1   57.89    6.30 
  -6  -2   1   66.69   11.70 
   6  -2  -1   57.19    6.40 
  -6   2   1   60.29   11.00 
   6   2  -1   39.60    9.40 
   6   2  -1   34.40    9.10 
   6   2  -1   45.00    9.20 
  -6   2   1   39.90    8.60 
  -6   2   1   41.60    7.90 
   6   2  -1   64.79   11.70 
   6   2  -1   38.00    8.00 
   6   2  -1   41.10    9.10 
  -6   2   1   34.80    6.80 
   6   2  -1   54.89    6.30 
  -6   2   1   55.69    7.60 
  -6   2   1   43.50    8.00 
   6   2  -1   60.99   10.90 
  -6   2   1   50.89    6.00 
  -6   2   1   49.40    9.60 
  -6   2   1   44.50    9.50 
  -6   2   1   51.19    8.10 
   6   2  -1   57.19   10.40 
   6   2  -1   46.30    9.00 
  -6   2   1   48.30   10.20 
   6   2  -1   43.80    4.50 
  -6   2   1   39.10    8.70 
  -6   2   1   33.00    8.30 
   6   2  -1   43.50    9.70 
   6   2  -1   53.49    8.90 
  -6   2   1   52.69    5.10 
   6   2  -1   47.40   10.60 
   6   2  -1   50.89   10.00 
  -6   2   1   49.60    6.00 
  -6   2   1   27.70    7.20 
   5  -2  -1  144.59    6.20 
  -5  -2   1  135.69   14.30 
   5  -2  -1  141.69    9.10 
  -5  -2   1  144.29   15.10 
   5  -2  -1  156.18   10.20 
   5  -2  -1  162.68   11.90 
  -5  -2   1  166.78   13.90 
   5  -2  -1  150.98   10.60 
  -5  -2   1  142.99   15.20 
  -5  -2   1  141.59   11.40 
   5  -2  -1  155.18   10.20 
   5  -2  -1  138.59    9.70 
   5  -2  -1  154.48    9.30 
  -5  -2   1  169.08   10.10 
   5  -2  -1  129.29    7.00 
  -5  -2   1  143.89   14.10 
  -5  -2   1  124.29   14.10 
  -5  -2   1  155.18   10.40 
  -5  -2   1  118.89   14.10 
   5  -2  -1  144.49   10.20 
  -5  -2   1  145.89    7.50 
   5  -2  -1  146.89    7.70 
   5  -2  -1  157.68   12.70 
   5  -2  -1  160.08    8.00 
   5  -2  -1  160.08   12.30 
  -5  -2   1  163.88   17.40 
  -5  -2   1  143.29    9.20 
   5  -2  -1  148.39    4.70 
  -5  -2   1  150.28    7.80 
   5  -2  -1  142.19    7.60 
   5  -2  -1  142.09    9.90 
  -5  -2   1  133.19    7.70 
   5  -2  -1  140.49   10.30 
   5  -2  -1  141.99   13.30 
   5  -2  -1  143.89    9.70 
   5  -2  -1  142.89    7.40 
  -5  -2   1  128.29   15.00 
  -5  -2   1  170.48   13.60 
   5  -2  -1  121.69    8.90 
  -5  -2   1  137.69   14.70 
   5  -2  -1  150.48    8.20 
  -5  -2   1  146.09    8.50 
   5  -2  -1  134.49   13.50 
   5  -2  -1  145.29   12.40 
   5  -2  -1  147.19    9.30 
   5  -2  -1  149.79   10.20 
   5   2  -1  142.99   14.30 
  -5   2   1  130.69   10.30 
   5   2  -1  122.79   14.30 
   5   2  -1  154.98   12.40 
   5   2  -1  121.69   13.90 
   5   2  -1  123.79   14.90 
  -5   2   1  144.79    9.70 
   5   2  -1  139.99   15.00 
   5   2  -1  126.79    9.90 
   5   2  -1  133.59    7.30 
  -5   2   1  138.09   13.90 
  -5   2   1  141.29    7.60 
  -5   2   1  143.79    7.40 
   5   2  -1  146.99   15.50 
   5   2  -1  141.79   15.50 
  -5   2   1  161.38   12.70 
   5   2  -1  133.99   13.70 
  -5   2   1  131.59   14.40 
  -5   2   1  138.89   10.10 
  -5   2   1  149.69   10.30 
  -5   2   1  107.79   12.30 
  -5   2   1  141.09    9.10 
   5   2  -1  144.89   15.40 
  -5   2   1  148.99    9.90 
   5   2  -1  145.39    8.20 
  -5   2   1  133.99    7.70 
  -5   2   1  131.49   14.50 
  -5   2   1  141.89   10.50 
   5   2  -1  129.59   15.90 
   5   2  -1  108.89   13.20 
  -5   2   1  161.38   15.90 
  -5   2   1  144.29   14.80 
  -5   2   1  161.38   16.10 
  -4  -2   1    5.20    2.70 
  -4  -2   1    7.60    3.80 
   4  -2  -1    9.60    3.80 
  -4  -2   1   10.30    4.20 
   4  -2  -1    7.30    3.00 
   4  -2  -1    7.50    3.00 
  -4  -2   1    3.80    3.40 
  -4  -2   1    5.50    3.40 
   4  -2  -1    5.20    1.90 
  -4  -2   1    6.10    3.40 
   4  -2  -1    3.70    2.70 
   4  -2  -1    6.80    3.40 
  -4  -2   1    6.00    2.50 
   4  -2  -1   27.10    4.80 
  -4  -2   1    3.40    2.40 
  -4  -2   1    7.00    2.40 
   4  -2  -1    5.00    2.20 
   4  -2  -1    9.40    3.30 
   4  -2  -1    3.90    2.20 
   4  -2  -1    9.90    4.00 
  -4  -2   1    7.20    4.10 
   4  -2  -1   17.50    4.10 
   4  -2  -1    6.20    2.00 
   4  -2  -1    7.60    3.10 
   4  -2  -1   13.80    3.90 
  -4  -2   1    7.30    3.90 
   4  -2  -1    5.20    2.60 
  -4  -2   1    2.00    3.10 
  -4  -2   1    1.50    1.60 
  -4  -2   1    6.10    3.30 
   4  -2  -1    5.10    2.60 
   4  -2  -1    3.60    2.90 
   4  -2  -1    5.20    3.20 
   4  -2  -1    2.70    1.70 
   4  -2  -1    5.80    2.20 
   4  -2  -1    2.40    1.80 
   4  -2  -1    5.50    2.30 
  -4  -2   1   10.00    3.70 
  -4  -2   1    5.00    2.10 
   4  -2  -1    8.30    2.30 
   4  -2  -1    2.30    1.40 
   4  -2  -1    2.30    2.20 
  -4  -2   1    2.50    3.00 
  -4  -2   1    3.00    2.30 
  -4  -2   1    3.40    1.10 
   4  -2  -1    3.00    2.30 
  -4  -2   1    2.70    2.80 
  -4   2   1    2.40    2.80 
  -4   2   1    4.70    3.20 
  -4   2   1    7.00    2.90 
  -4   2   1    9.90    3.10 
   4   2  -1    3.90    3.10 
  -4   2   1    4.50    3.00 
  -4   2   1    4.50    2.50 
  -4   2   1    1.90    2.80 
  -4   2   1    8.30    3.70 
   4   2  -1    4.20    3.40 
  -4   2   1    2.30    2.90 
   4   2  -1    3.30    3.50 
   4   2  -1    3.80    3.40 
  -4   2   1    3.50    2.90 
  -4   2   1    4.30    2.00 
   4   2  -1    4.60    3.20 
  -4   2   1    3.50    2.60 
  -4   2   1    8.00    3.00 
  -4   2   1    6.80    3.70 
   4   2  -1    4.40    2.80 
  -4   2   1    2.80    2.10 
   4   2  -1    5.00    3.50 
  -4   2   1    2.20    2.30 
   4   2  -1   -0.60    2.30 
  -4   2   1    4.80    2.80 
   4   2  -1    3.40    3.40 
  -4   2   1    5.70    2.40 
  -4   2   1    6.10    3.10 
  -4   2   1    4.20    3.10 
   4   2  -1    2.90    2.70 
   4   2  -1    3.50    1.90 
  -4   2   1    6.40    2.30 
   4   2  -1    5.70    3.10 
  -4   2   1    1.50    1.40 
  -4   2   1    6.90    1.80 
   4   2  -1    5.60    3.40 
   4   2  -1    4.20    3.40 
   4   2  -1    4.70    2.10 
  -4   2   1    6.10    2.70 
  -3  -2   1   61.39    8.30 
   3  -2  -1   50.59    6.40 
  -3  -2   1   52.69    3.00 
   3  -2  -1   45.70    6.40 
   3  -2  -1   52.19    5.60 
   3  -2  -1   46.70    5.60 
   3  -2  -1   52.29    6.50 
  -3  -2   1   42.00    5.90 
  -3  -2   1   47.40    7.10 
   3  -2  -1   49.80    5.20 
  -3  -2   1   50.99    2.30 
   3  -2  -1   39.10    5.20 
  -3  -2   1   44.10    7.40 
  -3  -2   1   56.99    3.70 
  -3  -2   1   39.50    6.50 
   3  -2  -1   44.90    5.10 
   3  -2  -1   49.40    2.90 
  -3  -2   1   38.10    6.30 
  -3  -2   1   55.39    6.70 
   3  -2  -1   61.89    7.70 
  -3  -2   1   47.40    6.50 
   3  -2  -1   49.40    6.10 
  -3  -2   1   44.20    6.00 
   3  -2  -1   52.69    4.10 
  -3  -2   1   47.00    7.30 
   3  -2  -1   47.60    6.10 
  -3  -2   1   53.39    5.60 
   3  -2  -1   47.30    5.90 
  -3  -2   1   43.10    7.10 
   3  -2  -1   59.89    6.20 
  -3  -2   1   59.29    8.20 
  -3  -2   1   47.30    5.00 
   3  -2  -1   50.29    4.00 
   3  -2  -1   53.69    7.00 
  -3  -2   1   42.70    6.50 
  -3  -2   1   41.80    5.70 
   3  -2  -1   61.89    6.50 
  -3  -2   1   56.29    5.80 
  -3  -2   1   49.80    4.80 
   3  -2  -1   49.60    6.60 
   3  -2  -1   47.50    6.60 
   3  -2  -1   50.39    5.40 
  -3  -2   1   46.40    6.20 
   3  -2  -1   56.89    4.40 
   3  -2  -1   54.39    4.10 
   3  -2  -1   61.69    4.70 
  -3  -2   1   58.39    6.10 
   3  -2  -1   54.19    3.90 
   3   2  -1   40.50    6.10 
   3   2  -1   52.79    7.40 
  -3   2   1   56.49    5.80 
  -3   2   1   48.10    6.40 
   3   2  -1   43.30    6.60 
  -3   2   1   43.90    4.80 
  -3   2   1   54.29    4.10 
   3   2  -1   43.00    7.10 
  -3   2   1   47.00    6.60 
   3   2  -1   46.10    6.80 
  -3   2   1   44.90    6.60 
  -3   2   1   47.30    5.80 
  -3   2   1   50.89    5.30 
   3   2  -1   55.59    7.80 
  -3   2   1   63.19    7.30 
   3   2  -1   50.99    5.60 
  -3   2   1   51.99    6.90 
   3   2  -1   53.89    7.30 
  -3   2   1   53.59    5.80 
   3   2  -1   64.59    7.70 
  -3   2   1   67.89    7.70 
  -3   2   1   63.99    8.30 
  -3   2   1   50.99    5.70 
  -3   2   1   51.19    6.90 
  -3   2   1   48.80    6.70 
  -3   2   1   43.20    6.10 
  -3   2   1   61.09    7.60 
  -3   2   1   53.79    4.00 
   3   2  -1   58.89    4.80 
   3   2  -1   59.79    8.20 
   3   2  -1   38.40    6.80 
   3   2  -1   53.19    6.60 
   3   2  -1   49.20    7.80 
   3   2  -1   56.29    4.50 
  -3   2   1   45.90    6.50 
   3   2  -1   43.80    7.10 
  -3   2   1   42.10    5.80 
   3   2  -1   51.29    6.60 
   3   2  -1   50.59    5.40 
   3   2  -1   44.00    7.50 
  -3   2   1   49.99    4.00 
  -2  -2   1    1.30    2.00 
   2  -2  -1    4.80    1.90 
   2  -2  -1    1.90    1.70 
  -2  -2   1    0.40    1.80 
  -2  -2   1    3.80    2.70 
   2  -2  -1    0.20    1.40 
  -2  -2   1    2.80    2.00 
   2  -2  -1    1.10    1.60 
  -2  -2   1    0.20    1.60 
   2  -2  -1    2.00    1.70 
   2  -2  -1    0.80    1.50 
   2  -2  -1    3.40    2.00 
  -2  -2   1    1.40    1.70 
   2  -2  -1    2.20    1.60 
  -2  -2   1    0.30    1.30 
   2  -2  -1    4.40    2.20 
   2  -2  -1    4.00    1.20 
  -2  -2   1    5.10    2.20 
  -2  -2   1    3.90    2.10 
   2  -2  -1    0.60    1.50 
   2  -2  -1    5.00    2.10 
  -2  -2   1   -0.30    2.00 
  -2  -2   1    1.20    2.10 
   2  -2  -1    6.10    2.70 
   2  -2  -1    0.90    1.60 
   2  -2  -1    3.80    1.30 
  -2  -2   1    1.50    1.90 
  -2  -2   1    4.10    2.10 
   2  -2  -1    2.00    1.30 
  -2  -2   1    4.00    2.20 
  -2  -2   1    4.70    2.50 
  -2  -2   1   -1.30    1.60 
   2  -2  -1    1.50    1.50 
  -2  -2   1    0.10    2.10 
   2  -2  -1    1.30    1.40 
  -2  -2   1    3.40    2.30 
  -2  -2   1   -0.80    1.30 
   2  -2  -1    2.70    1.50 
   2  -2  -1    2.80    1.50 
   2  -2  -1    4.40    1.90 
   2  -2  -1    3.20    2.00 
   2  -2  -1   13.20    3.20 
   2  -2  -1    2.00    1.60 
   2  -2  -1    7.50    2.50 
  -2  -2   1   -1.10    1.40 
   2  -2  -1    0.60    1.40 
   2  -2  -1    1.80    1.60 
  -2  -2   1    3.50    2.40 
  -2  -2   1    5.00    2.30 
  -2  -2   1    3.50    2.20 
   2  -2  -1    6.90    1.40 
   2  -2  -1    0.50    1.70 
  -2  -2   1    5.90    2.30 
  -2  -2   1    0.50    1.90 
   2  -2  -1    2.10    1.60 
   2  -2  -1    2.20    1.60 
   2  -2  -1   -0.10    0.80 
   2  -2  -1    0.70    1.20 
  -2  -2   1    3.00    2.10 
   2  -2  -1    2.50    1.50 
  -2   2   1    2.30    1.70 
  -2   2   1    4.40    1.70 
  -2   2   1    4.60    2.30 
   2   2  -1    2.20    2.00 
   2   2  -1    2.40    2.00 
  -2   2   1    2.40    1.20 
  -2   2   1    5.30    2.00 
  -2   2   1    5.20    2.20 
   2   2  -1    1.60    1.20 
  -2   2   1    2.70    1.80 
  -2   2   1    4.60    2.50 
  -2   2   1   -0.70    1.50 
   2   2  -1    3.90    2.30 
  -2   2   1    1.50    1.30 
  -2   2   1    2.10    1.50 
   2   2  -1    1.60    2.00 
   2   2  -1    1.00    1.90 
   2   2  -1    0.10    1.90 
   2   2  -1    4.20    2.60 
   2   2  -1    3.00    2.00 
  -2   2   1    3.10    1.70 
   2   2  -1    3.20    2.20 
   2   2  -1    2.00    2.20 
   2   2  -1    0.60    1.90 
  -2   2   1    2.00    1.70 
   2   2  -1    1.90    1.80 
   2   2  -1    2.60    1.90 
   2   2  -1    3.10    2.00 
  -2   2   1    2.40    1.50 
   2   2  -1    1.10    1.80 
   2   2  -1    1.60    1.50 
   2   2  -1    7.60    2.40 
   2   2  -1    2.80    2.20 
  -2   2   1    2.40    1.70 
   2   2  -1    3.30    1.70 
   2   2  -1    4.60    2.70 
   2   2  -1    2.00    2.10 
   2   2  -1    0.20    1.30 
  -2   2   1    3.70    2.00 
   2   2  -1    3.10    2.00 
  -2   2   1    4.00    1.90 
   2   2  -1    3.00    2.30 
   2   2  -1   -0.60    1.70 
   2   2  -1    0.60    1.90 
   2   2  -1    2.00    2.30 
   2   2  -1    1.80    1.50 
   2   2  -1    3.10    1.90 
  -2   2   1    1.60    1.70 
  -2   2   1    3.80    2.10 
   2   2  -1    3.40    2.10 
   2   2  -1    3.40    2.30 
   1  -2  -1    9.70    2.50 
   1  -2  -1    7.50    1.70 
  -1  -2   1    5.90    1.90 
  -1  -2   1    5.90    2.30 
   1  -2  -1    9.90    2.60 
   1  -2  -1    9.30    2.00 
  -1  -2   1    5.90    2.50 
   1  -2  -1    6.20    2.10 
   1  -2  -1    7.90    1.40 
   1  -2  -1    9.30    1.80 
   1  -2  -1    6.00    1.70 
   1  -2  -1    7.60    2.20 
  -1  -2   1    7.40    2.00 
   1  -2  -1   12.30    3.00 
  -1  -2   1    8.40    2.90 
  -1  -2   1    8.70    2.70 
   1  -2  -1    6.80    2.30 
   1  -2  -1    6.50    2.40 
   1  -2  -1    7.70    1.20 
   1  -2  -1    5.80    2.00 
   1  -2  -1    8.20    2.20 
   1  -2  -1    7.90    1.10 
   1  -2  -1   10.10    1.80 
  -1  -2   1    9.40    2.60 
   1  -2  -1    7.50    2.10 
  -1  -2   1    7.00    2.30 
  -1  -2   1    8.00    2.40 
  -1  -2   1    8.20    2.80 
  -1  -2   1   11.80    2.70 
   1  -2  -1   10.60    2.80 
   1  -2  -1    6.60    2.40 
   1  -2  -1   12.50    2.40 
  -1  -2   1   12.30    3.00 
   1  -2  -1    5.60    1.90 
   1  -2  -1    6.90    2.10 
  -1  -2   1    6.40    2.60 
  -1  -2   1    2.90    1.90 
   1  -2  -1   19.50    3.40 
   1  -2  -1    7.70    2.40 
   1  -2  -1    6.90    2.50 
  -1  -2   1    4.20    2.30 
   1  -2  -1    5.50    1.60 
  -1  -2   1   13.50    3.10 
  -1  -2   1    8.00    2.50 
  -1  -2   1    5.80    2.60 
   1  -2  -1    9.00    2.40 
  -1  -2   1    7.60    2.70 
  -1  -2   1   17.20    3.90 
   1  -2  -1    7.10    2.50 
  -1  -2   1    6.00    2.30 
   1  -2  -1    8.40    2.00 
  -1  -2   1   19.30    3.70 
   1  -2  -1   13.40    2.80 
  -1  -2   1    6.80    2.50 
  -1  -2   1    9.40    2.40 
  -1  -2   1    5.80    2.40 
  -1  -2   1    3.50    1.80 
   1  -2  -1   12.00    2.90 
  -1  -2   1    9.70    2.00 
   1  -2  -1   11.10    2.50 
  -1  -2   1   11.80    2.00 
  -1  -2   1   19.00    3.20 
  -1  -2   1   11.50    3.20 
  -1  -2   1   13.50    2.60 
  -1  -2   1    7.30    2.30 
   1  -2  -1    2.70    1.80 
   1  -2  -1    2.70    2.00 
  -1  -2   1    9.50    2.60 
  -1   2   1    4.60    1.80 
  -1   2   1   13.10    3.00 
   1   2  -1    6.60    1.60 
  -1   2   1   19.40    3.10 
   1   2  -1   10.10    2.50 
  -1   2   1    5.20    1.70 
   1   2  -1   12.00    3.00 
   1   2  -1    8.00    2.00 
  -1   2   1   10.40    2.00 
  -1   2   1    7.40    1.30 
   1   2  -1    6.40    2.40 
   1   2  -1    9.20    2.90 
   1   2  -1    4.60    2.10 
  -1   2   1   10.80    2.30 
   1   2  -1   19.50    3.60 
  -1   2   1   11.30    2.70 
  -1   2   1    3.80    2.10 
   1   2  -1    6.00    1.60 
   1   2  -1    8.00    2.90 
  -1   2   1    8.00    1.20 
   1   2  -1    6.40    2.20 
   1   2  -1   22.20    3.90 
  -1   2   1   11.70    1.60 
  -1   2   1    5.00    2.30 
   1   2  -1   13.30    3.20 
  -1   2   1    9.70    1.80 
   1   2  -1    9.10    2.80 
   1   2  -1   13.20    3.10 
   1   2  -1    6.80    2.60 
  -1   2   1    6.60    1.60 
  -1   2   1   10.70    2.90 
  -1   2   1   20.20    3.00 
   1   2  -1   10.40    2.60 
   1   2  -1    2.90    1.90 
   1   2  -1    4.50    2.30 
   1   2  -1    9.10    2.70 
  -1   2   1    6.30    2.40 
   1   2  -1    6.30    2.40 
   1   2  -1   10.10    2.70 
   1   2  -1    2.40    1.90 
   1   2  -1    7.90    2.90 
   1   2  -1    4.30    2.20 
   1   2  -1    5.60    1.50 
  -1   2   1    5.40    2.10 
  -1   2   1    8.00    2.40 
  -1   2   1   13.60    2.00 
   1   2  -1    5.70    1.80 
   1   2  -1   10.80    2.90 
   1   2  -1    8.90    2.00 
   1   2  -1    5.90    2.10 
  -1   2   1    8.80    2.40 
  -1   2   1    7.90    2.30 
   1   2  -1   12.00    2.50 
  -1   2   1    7.80    2.60 
   1   2  -1    4.70    2.40 
  -1   2   1    8.40    1.80 
  -1   2   1    6.90    2.60 
   1   2  -1    9.60    2.70 
   1   2  -1   12.40    2.90 
   0  -2   1   60.09    6.00 
   0  -2   1   63.59    4.70 
   0  -2  -1   61.79    4.70 
   0  -2  -1   67.79    4.60 
   0  -2  -1   60.89    6.00 
   0  -2   1   53.99    4.40 
   0  -2   1   64.69    4.40 
   0  -2  -1   48.80    5.00 
   0  -2  -1   54.39    5.90 
   0  -2   1   63.69    4.50 
   0  -2   1   67.59    4.70 
   0  -2   1   51.49    4.30 
   0  -2  -1   65.99    5.40 
   0  -2   1   57.09    6.50 
   0  -2  -1   73.29    5.00 
   0  -2  -1   68.39    5.20 
   0  -2   1   61.49    5.80 
   0  -2   1   59.99    6.00 
   0  -2  -1   53.69    5.70 
   0  -2  -1   63.69    5.10 
   0  -2  -1   59.79    5.90 
   0  -2   1   57.39    5.40 
   0  -2  -1   65.19    5.40 
   0  -2   1   60.59    3.90 
   0  -2   1   49.30    5.00 
   0  -2   1   65.49    6.10 
   0  -2   1   59.39    6.00 
   0  -2  -1   60.99    6.00 
   0  -2   1   50.99    6.50 
   0  -2  -1   63.29    6.20 
   0  -2  -1   46.20    5.10 
   0  -2  -1   60.49    3.90 
   0  -2   1   60.19    6.20 
   0  -2   1   46.50    5.90 
   0  -2  -1   57.89    4.40 
   0  -2   1   55.19    4.60 
   0  -2   1   61.49    4.80 
   0  -2  -1   58.29    3.00 
   0  -2  -1   61.79    4.60 
   0  -2  -1   60.69    3.50 
   0  -2  -1   59.49    4.70 
   0  -2   1   68.69    4.10 
   0  -2   1   62.99    4.60 
   0  -2   1   64.49    2.80 
   0  -2   1   56.09    4.10 
   0  -2  -1   62.19    4.30 
   0  -2  -1   57.09    6.00 
   0  -2  -1   63.39    4.40 
   0  -2   1   68.29    4.00 
   0  -2  -1   69.29    6.40 
   0  -2   1   64.79    5.30 
   0  -2  -1   61.99    4.40 
   0  -2  -1   61.69    4.40 
   0  -2  -1   59.19    6.20 
   0  -2   1   67.19    5.10 
   0   2  -1   58.99    6.10 
   0   2   1   67.89    5.10 
   0   2  -1   56.39    6.10 
   0   2   1   64.69    4.90 
   0   2   1   66.69    5.30 
   0   2  -1   65.49    7.10 
   0   2   1   71.09    5.80 
   0   2   1   68.79    5.20 
   0   2   1   58.09    4.60 
   0   2  -1   60.99    6.30 
   0   2   1   58.99    5.90 
   0   2   1   57.49    6.50 
   0   2  -1   61.69    4.10 
   0   2  -1   56.09    4.60 
   0   2   1   64.09    2.80 
   0   2   1   65.99    4.30 
   0   2   1   62.29    6.50 
   0   2   1   53.09    5.40 
   0   2  -1   64.99    4.70 
   0   2   1   54.49    5.70 
   0   2   1   64.19    6.50 
   0   2  -1   60.99    6.90 
   0   2   1   64.39    4.70 
   0   2   1   58.59    4.40 
   0   2   1   59.49    5.80 
   0   2   1   55.39    5.90 
   0   2  -1   61.09    4.60 
   0   2  -1   61.39    5.00 
   0   2  -1   56.39    3.80 
   0   2  -1   49.30    5.50 
   0   2  -1   53.69    7.10 
   0   2  -1   57.19    5.90 
   0   2   1   60.09    6.20 
   0   2   1   52.69    5.80 
   0   2  -1   56.49    4.40 
   0   2   1   55.39    4.40 
   0   2  -1   61.59    6.90 
   0   2  -1   63.09    6.00 
   0   2  -1   58.79    4.60 
   0   2  -1   70.39    4.80 
   0   2   1   62.39    4.30 
   0   2  -1   61.79    4.40 
   0   2  -1   65.19    3.90 
   0   2  -1   59.59    4.00 
   0   2   1   62.99    4.40 
   0   2  -1   61.99    4.80 
   0   2   1   63.19    6.50 
   0   2  -1   63.39    4.80 
   0   2   1   56.59    6.10 
   0   2  -1   57.09    5.80 
   0   2   1   72.09    5.10 
   0   2   1   55.09    5.90 
   1  -2   1 1156.18   31.70 
   1  -2   1 1153.68   30.80 
   1  -2   1 1168.58   25.10 
   1  -2   1 1174.98   26.10 
  -1  -2  -1 1190.88   31.10 
  -1  -2  -1 1178.68   31.80 
  -1  -2  -1 1185.58   30.50 
  -1  -2  -1 1181.48   30.50 
   1  -2   1 1154.38   30.10 
   1  -2   1 1197.48   25.70 
  -1  -2  -1 1166.28   30.40 
   1  -2   1 1167.08   28.10 
   1  -2   1 1127.19   30.10 
  -1  -2  -1 1178.28   31.00 
  -1  -2  -1 1064.29   30.90 
   1  -2   1 1188.78   30.10 
   1  -2   1 1189.88   30.40 
  -1  -2  -1 1216.18   31.90 
  -1  -2  -1 1176.18   29.00 
   1  -2   1 1169.08   28.00 
   1  -2   1 1186.18   32.00 
   1  -2   1 1158.08   26.00 
   1  -2   1 1231.38   26.40 
  -1  -2  -1 1140.29   26.70 
  -1  -2  -1 1196.28   28.10 
   1  -2   1 1249.57   31.20 
  -1  -2  -1 1219.68   30.50 
  -1  -2  -1 1156.78   28.70 
   1  -2   1 1149.58   32.20 
  -1  -2  -1 1172.18   30.80 
  -1  -2  -1 1117.29   29.30 
   1  -2   1 1222.18   26.70 
  -1  -2  -1 1178.78   30.80 
   1  -2   1 1179.18   25.40 
  -1  -2  -1 1190.68   30.60 
   1  -2   1 1118.99   32.10 
   1  -2   1 1154.18   25.70 
   1  -2   1 1193.78   30.30 
   1  -2   1 1173.58   26.50 
   1  -2   1 1125.69   29.00 
   1  -2   1 1210.68   28.50 
   1  -2   1 1170.38   31.00 
  -1  -2  -1 1167.08   30.10 
  -1  -2  -1 1163.98   26.00 
  -1  -2  -1 1178.68   26.70 
  -1  -2  -1 1181.18   31.70 
  -1  -2  -1 1223.48   31.40 
   1  -2   1 1222.38   28.20 
   1  -2   1 1167.98   26.00 
   1  -2   1 1167.78   30.80 
  -1  -2  -1 1200.78   31.40 
  -1  -2  -1 1161.48   29.90 
   1  -2   1 1186.18   27.00 
   1  -2   1 1169.38   25.30 
  -1  -2  -1 1165.28   31.60 
  -1  -2  -1 1220.78   27.90 
  -1  -2  -1 1156.98   30.10 
  -1  -2  -1 1182.08   31.10 
   1  -2   1 1143.69   28.80 
   1  -2   1 1170.78   26.70 
  -1  -2  -1 1213.48   31.10 
  -1  -2  -1 1134.89   31.40 
   1   2   1 1215.48   30.50 
  -1   2  -1 1161.38   26.00 
  -1   2  -1 1211.88   27.00 
  -1   2  -1 1170.68   29.20 
  -1   2  -1 1198.38   30.70 
   1   2   1 1150.38   31.30 
  -1   2  -1 1289.27   32.40 
   1   2   1 1165.68   30.70 
   1   2   1 1176.78   30.90 
  -1   2  -1 1203.38   28.00 
  -1   2  -1 1176.98   32.10 
   1   2   1 1138.89   26.60 
   1   2   1 1188.08   30.50 
   1   2   1 1160.78   29.50 
   1   2   1 1141.29   30.80 
   1   2   1 1178.68   31.40 
   1   2   1 1169.58   32.00 
  -1   2  -1 1116.29   31.70 
  -1   2  -1 1157.58   27.10 
  -1   2  -1 1196.58   30.80 
   1   2   1 1187.18   31.10 
   1   2   1 1180.88   30.90 
   1   2   1 1216.78   29.50 
   1   2   1 1209.38   27.60 
   1   2   1 1176.68   27.20 
   1   2   1 1250.47   30.10 
   1   2   1 1130.99   30.90 
  -1   2  -1 1172.28   25.70 
  -1   2  -1 1150.28   28.60 
   1   2   1 1190.38   30.70 
  -1   2  -1 1199.28   30.80 
  -1   2  -1 1170.88   28.80 
  -1   2  -1 1181.08   27.40 
  -1   2  -1 1148.59   25.60 
   1   2   1 1211.68   31.00 
   1   2   1 1151.98   30.50 
  -1   2  -1 1173.18   25.60 
   1   2   1 1218.48   32.20 
   1   2   1 1194.68   31.10 
   1   2   1 1201.48   31.00 
  -1   2  -1 1142.09   30.20 
   1   2   1 1191.48   30.60 
  -1   2  -1 1200.38   29.90 
   1   2   1 1198.38   26.10 
   1   2   1 1181.48   29.80 
   1   2   1 1230.48   28.10 
  -1   2  -1 1190.68   25.30 
   1   2   1 1180.08   30.40 
   1   2   1 1228.28   31.60 
   1   2   1 1226.28   30.80 
  -1   2  -1 1176.58   27.20 
  -1   2  -1 1197.48   30.30 
   1   2   1 1168.18   26.80 
  -1   2  -1 1206.78   30.40 
   1   2   1 1227.58   32.20 
  -1   2  -1 1165.58   25.50 
  -1   2  -1 1177.98   28.30 
   2  -2   1  135.59    6.90 
  -2  -2  -1  138.69    9.10 
  -2  -2  -1  136.69    9.10 
   2  -2   1  128.19    6.00 
   2  -2   1  138.39    8.10 
   2  -2   1  133.59    6.00 
  -2  -2  -1  140.39    8.60 
  -2  -2  -1  117.69    8.20 
   2  -2   1  126.19    6.70 
   2  -2   1  126.99    6.10 
  -2  -2  -1  148.39    9.40 
  -2  -2  -1  136.19    7.90 
   2  -2   1  127.79    8.20 
  -2  -2  -1  122.69    6.80 
  -2  -2  -1  138.29    9.30 
   2  -2   1  143.79    8.40 
   2  -2   1  131.49    7.10 
   2  -2   1  127.29    8.70 
  -2  -2  -1  140.19    9.00 
  -2  -2  -1  142.69    8.70 
  -2  -2  -1  132.29    7.70 
  -2  -2  -1  145.29    9.10 
  -2  -2  -1  159.18    9.60 
   2  -2   1  115.79    8.00 
  -2  -2  -1  133.69    4.30 
  -2  -2  -1  122.89    7.50 
   2  -2   1  132.49    5.60 
  -2  -2  -1  128.29    7.50 
  -2  -2  -1  141.39    7.90 
  -2  -2  -1  139.99    9.10 
   2  -2   1  131.99    4.60 
  -2  -2  -1  147.09    9.80 
   2  -2   1  133.89    6.00 
   2  -2   1  133.99    7.20 
   2  -2   1  134.09    8.60 
   2  -2   1  141.89    5.70 
   2  -2   1  129.09    8.30 
   2  -2   1  136.99    6.30 
   2  -2   1  146.19    9.20 
  -2  -2  -1  128.59    7.80 
   2  -2   1  132.59    8.00 
   2  -2   1  131.29    7.50 
   2  -2   1  131.49    7.50 
   2  -2   1  139.99    9.00 
  -2  -2  -1  128.89    7.60 
  -2  -2  -1  145.89    9.70 
   2  -2   1  120.99    7.70 
  -2  -2  -1  121.19    8.70 
   2  -2   1  147.29    9.40 
   2  -2   1  122.89    6.90 
  -2  -2  -1  129.69    7.10 
  -2  -2  -1  133.19    8.70 
  -2  -2  -1  147.19    9.00 
  -2  -2  -1  128.79    6.30 
   2  -2   1  131.99    4.70 
   2  -2   1  137.59    7.80 
   2  -2   1  147.09    9.00 
   2  -2   1  146.99    8.90 
   2  -2   1  123.29    7.60 
   2   2   1  142.39    9.10 
   2   2   1  138.09    8.90 
   2   2   1  136.59    7.70 
   2   2   1  146.49    9.30 
  -2   2  -1  130.09    4.50 
   2   2   1  133.49    8.00 
  -2   2  -1  140.19    5.10 
  -2   2  -1  152.98    9.50 
   2   2   1  118.79    7.60 
   2   2   1  130.69    7.70 
   2   2   1  133.29    9.10 
   2   2   1  123.59    8.50 
  -2   2  -1  127.39    7.80 
   2   2   1  140.49    9.20 
  -2   2  -1  147.19    9.20 
  -2   2  -1  134.99    5.70 
   2   2   1  136.19    8.60 
   2   2   1  140.49    9.10 
   2   2   1  129.59    7.70 
   2   2   1  134.29    7.10 
  -2   2  -1  128.69    5.30 
   2   2   1  128.89    8.70 
   2   2   1  140.29    8.10 
  -2   2  -1  122.49    8.40 
   2   2   1  143.49    9.40 
   2   2   1  134.09    7.90 
   2   2   1  129.39    9.20 
  -2   2  -1  130.59    4.90 
  -2   2  -1  134.69    7.00 
  -2   2  -1  151.48    8.90 
   2   2   1  142.69    8.00 
   2   2   1  136.89    7.60 
   2   2   1  145.29    9.50 
  -2   2  -1  126.39    6.10 
   2   2   1  131.39    9.10 
   2   2   1  145.79    9.50 
  -2   2  -1  129.39    8.40 
   2   2   1  139.49    9.10 
  -2   2  -1  136.69    8.20 
  -2   2  -1  132.29    7.40 
  -2   2  -1  127.69    7.90 
  -2   2  -1  138.39    8.20 
   2   2   1  121.59    8.80 
   2   2   1  142.19    9.60 
   2   2   1  131.29    9.20 
  -3  -2  -1  304.97    7.80 
   3  -2   1  298.97   15.60 
  -3  -2  -1  349.87   14.80 
   3  -2   1  319.97   14.20 
   3  -2   1  324.27   13.60 
   3  -2   1  322.37   11.90 
   3  -2   1  317.27   12.50 
  -3  -2  -1  331.67   16.30 
  -3  -2  -1  305.67   12.60 
   3  -2   1  315.77   14.70 
   3  -2   1  327.77   14.70 
  -3  -2  -1  336.07   16.50 
  -3  -2  -1  318.07   12.50 
  -3  -2  -1  315.67    9.90 
   3  -2   1  321.97   11.20 
  -3  -2  -1  302.47   16.30 
   3  -2   1  329.27   11.80 
  -3  -2  -1  326.07   15.30 
   3  -2   1  308.57   12.90 
   3  -2   1  309.97   11.30 
  -3  -2  -1  320.07   17.10 
  -3  -2  -1  316.57   15.80 
  -3  -2  -1  313.87   11.50 
   3  -2   1  349.37   14.80 
   3  -2   1  289.67   14.20 
   3  -2   1  324.87   14.40 
  -3  -2  -1  295.87   12.70 
   3  -2   1  287.67   12.40 
   3  -2   1  323.67   10.60 
  -3  -2  -1  294.07   14.50 
  -3  -2  -1  327.47   15.70 
   3  -2   1  311.87   12.60 
   3  -2   1  319.37   12.50 
  -3  -2  -1  297.87   15.70 
   3  -2   1  327.07   13.90 
  -3  -2  -1  322.77   12.90 
   3  -2   1  340.07   10.10 
   3  -2   1  326.27   13.00 
  -3  -2  -1  313.27   14.40 
   3  -2   1  323.97   10.90 
   3  -2   1  276.97   14.70 
  -3  -2  -1  330.07   14.20 
   3  -2   1  297.97    7.30 
  -3  -2  -1  338.17   15.30 
  -3  -2  -1  319.77   15.00 
  -3  -2  -1  298.97   15.90 
   3  -2   1  296.67   11.60 
   3  -2   1  322.17   15.30 
   3  -2   1  313.87    7.50 
   3   2   1  310.17   16.30 
   3   2   1  321.97   14.80 
  -3   2  -1  325.77   11.80 
  -3   2  -1  332.87   11.90 
   3   2   1  318.67   16.20 
   3   2   1  313.57   14.80 
   3   2   1  322.57   15.70 
   3   2   1  324.37   14.70 
  -3   2  -1  319.07   15.50 
   3   2   1  311.67   15.40 
  -3   2  -1  326.27   14.10 
  -3   2  -1  312.87   13.10 
   3   2   1  291.97   15.40 
   3   2   1  320.87   16.50 
  -3   2  -1  308.57   13.00 
   3   2   1  375.06   17.70 
   3   2   1  298.67   15.90 
  -3   2  -1  327.27   15.30 
   3   2   1  315.57   14.70 
   3   2   1  309.57   13.30 
   3   2   1  296.97   14.40 
  -3   2  -1  348.27   17.00 
   3   2   1  330.47   16.30 
  -3   2  -1  348.47   16.10 
   3   2   1  312.67   16.00 
  -3   2  -1  310.07   14.60 
  -3   2  -1  319.47   11.10 
   3   2   1  315.77   12.90 
   4  -2   1  461.15   16.60 
  -4  -2  -1  463.85   16.70 
  -4  -2  -1  485.65   16.40 
  -4  -2  -1  461.45   21.60 
  -4  -2  -1  468.55   17.20 
  -4  -2  -1  488.15   16.70 
   4  -2   1  460.25   17.00 
   4  -2   1  455.55   20.40 
  -4  -2  -1  424.96   21.10 
  -4  -2  -1  456.55   21.50 
   4  -2   1  467.35   11.10 
  -4  -2  -1  492.05   23.20 
   4  -2   1  460.35   18.80 
   4  -2   1  509.65   20.40 
  -4  -2  -1  473.65   22.10 
   4  -2   1  474.55   21.50 
  -4  -2  -1  503.35   23.10 
   4  -2   1  466.55   17.70 
   4  -2   1  473.75   16.60 
   4  -2   1  477.15   18.80 
  -4  -2  -1  442.36   19.70 
   4  -2   1  448.36   16.10 
   4  -2   1  439.06   21.30 
   4  -2   1  428.26   19.30 
   4  -2   1  477.65   15.80 
   4  -2   1  442.56   18.50 
   4  -2   1  442.36   14.20 
   4  -2   1  473.15   11.20 
   4  -2   1  494.55   16.00 
  -4  -2  -1  472.45   11.00 
  -4  -2  -1  484.95   19.00 
   4  -2   1  483.45   19.70 
  -4  -2  -1  498.25   15.20 
  -4  -2  -1  451.85   17.10 
  -4  -2  -1  436.86   19.40 
   4  -2   1  483.25   15.70 
   4  -2   1  470.45   13.60 
  -4  -2  -1  423.66   20.10 
   4  -2   1  464.75   16.60 
  -4  -2  -1  472.95   21.10 
  -4  -2  -1  514.75   22.20 
  -4  -2  -1  500.05   23.70 
   4  -2   1  479.45   19.50 
   4  -2   1  457.35   16.00 
  -4  -2  -1  450.35   20.90 
  -4   2  -1  433.36   19.20 
  -4   2  -1  439.06   20.90 
  -4   2  -1  453.85   21.30 
  -4   2  -1  495.15   18.40 
  -4   2  -1  409.96   16.50 
   4   2   1  497.95   22.30 
   4   2   1  460.85   21.80 
   4   2   1  483.25   21.30 
  -4   2  -1  469.45   17.00 
  -4   2  -1  460.15   20.00 
   4   2   1  456.75   16.50 
   4   2   1  466.15   22.50 
   4   2   1  426.36   19.70 
  -4   2  -1  517.45   20.90 
   4   2   1  493.65   21.50 
  -4   2  -1  464.15   21.30 
  -4   2  -1  474.55   21.50 
   4   2   1  426.36   20.90 
   4   2   1  466.15   20.80 
   4   2   1  437.16   21.80 
  -4   2  -1  491.45   22.40 
   4   2   1  477.75   22.50 
  -4   2  -1  468.25   16.90 
   4   2   1  505.65   23.40 
   4   2   1  457.25   22.60 
  -4   2  -1  466.95   11.90 
   4   2   1  468.15   17.70 
   4   2   1  459.85   19.70 
  -4   2  -1  423.76   16.30 
   5  -2   1  522.45   18.20 
   5  -2   1  530.25   13.60 
   5  -2   1  540.65   17.90 
  -5  -2  -1  504.45   15.80 
   5  -2   1  538.05   18.90 
  -5  -2  -1  542.95   25.50 
   5  -2   1  494.15   21.90 
  -5  -2  -1  517.05   24.70 
   5  -2   1  544.95   21.20 
   5  -2   1  478.05   21.90 
  -5  -2  -1  485.95   24.20 
  -5  -2  -1  544.05   26.60 
   5  -2   1  510.45   20.80 
  -5  -2  -1  533.55   18.20 
   5  -2   1  539.05   22.80 
   5  -2   1  509.85   17.50 
  -5  -2  -1  515.95   16.90 
   5  -2   1  507.35   13.30 
   5  -2   1  473.85   24.10 
  -5  -2  -1  539.65   26.30 
   5  -2   1  504.85   17.70 
  -5  -2  -1  513.25   25.30 
  -5  -2  -1  502.95   19.80 
   5  -2   1  502.55   22.40 
   5  -2   1  531.75   23.40 
  -5  -2  -1  485.85   24.00 
  -5  -2  -1  499.65   24.40 
   5  -2   1  505.75   15.80 
  -5  -2  -1  515.85   18.60 
   5  -2   1  523.55   23.00 
  -5  -2  -1  497.75   24.70 
   5  -2   1  474.65   20.00 
  -5  -2  -1  526.65   22.90 
   5  -2   1  514.65   22.60 
  -5  -2  -1  521.25   17.60 
  -5  -2  -1  511.45   24.50 
   5  -2   1  524.05   25.50 
  -5  -2  -1  510.65   26.40 
  -5  -2  -1  521.25   23.60 
   5  -2   1  507.25   14.10 
   5   2   1  512.05   26.00 
   5   2   1  515.05   25.50 
   5   2   1  522.75   22.80 
  -5   2  -1  506.05   22.90 
   5   2   1  497.35   24.70 
   5   2   1  513.05   17.70 
  -5   2  -1  510.15   25.10 
  -5   2  -1  546.15   24.10 
   5   2   1  473.45   25.70 
  -5   2  -1  500.25   22.40 
  -5   2  -1  557.74   20.50 
   5   2   1  539.75   26.50 
  -5   2  -1  541.15   25.50 
   5   2   1  499.75   24.20 
  -5   2  -1  529.05   15.20 
  -5   2  -1  526.05   20.60 
   5   2   1  495.95   25.70 
   5   2   1  561.64   24.60 
   5   2   1  511.95   24.90 
  -5   2  -1  501.35   20.50 
  -5   2  -1  495.35   20.70 
   5   2   1  491.75   19.30 
  -5   2  -1  511.65   24.80 
   5   2   1  503.55   23.30 
  -5   2  -1  434.06   23.40 
   5   2   1  536.75   25.10 
  -5   2  -1  505.45   17.90 
   5   2   1  518.55   23.90 
  -5   2  -1  523.85   24.70 
   6  -2   1  687.63   24.80 
  -6  -2  -1  733.43   33.10 
  -6  -2  -1  714.83   34.60 
   6  -2   1  742.73   30.40 
   6  -2   1  780.32   30.40 
  -6  -2  -1  744.63   29.40 
   6  -2   1  772.92   28.30 
  -6  -2  -1  725.43   32.60 
   6  -2   1  720.63   33.40 
   6  -2   1  734.73   18.80 
   6  -2   1  798.72   31.20 
   6  -2   1  726.33   26.80 
   6  -2   1  711.43   32.90 
   6  -2   1  755.12   24.70 
  -6  -2  -1  703.83   24.00 
  -6  -2  -1  669.33   33.00 
  -6  -2  -1  727.03   33.00 
   6  -2   1  714.23   29.40 
   6  -2   1  754.12   30.60 
  -6  -2  -1  719.23   34.30 
  -6  -2  -1  713.23   32.70 
  -6  -2  -1  729.23   23.90 
   6  -2   1  703.73   28.70 
   6  -2   1  736.43   29.80 
  -6  -2  -1  754.82   33.20 
   6  -2   1  756.72   30.70 
  -6  -2  -1  677.83   31.40 
  -6  -2  -1  739.83   29.50 
  -6  -2  -1  642.04   31.70 
  -6  -2  -1  754.12   33.50 
  -6   2  -1  708.23   21.00 
   6   2   1  741.53   32.80 
   6   2   1  722.23   22.10 
  -6   2  -1  736.03   33.40 
   6   2   1  705.13   32.40 
  -6   2  -1  686.23   32.20 
  -6   2  -1  744.53   18.60 
   6   2   1  751.62   31.50 
  -6   2  -1  707.33   29.50 
   6   2   1  748.83   34.10 
  -6   2  -1  694.13   29.90 
  -6   2  -1  735.33   28.10 
   6   2   1  718.13   34.40 
  -6   2  -1  682.63   27.10 
  -6   2  -1  710.63   32.90 
   6   2   1  765.02   32.80 
   6   2   1  723.13   32.80 
  -6   2  -1  713.93   26.80 
   6   2   1  781.92   35.50 
   6   2   1  744.53   25.60 
  -6   2  -1  685.33   32.50 
   6   2   1  672.43   30.40 
   6   2   1  736.23   30.70 
  -6   2  -1  738.43   22.60 
  -6   2  -1  682.33   31.70 
   6   2   1  665.93   28.50 
   6   2   1  759.52   36.00 
  -6   2  -1  689.03   27.40 
   6   2   1  750.82   34.70 
  -6   2  -1  738.23   31.90 
  -7  -2  -1 1018.30   43.20 
  -7  -2  -1  990.80   42.30 
   7  -2   1 1051.29   43.80 
   7  -2   1 1027.60   32.20 
   7  -2   1 1015.70   38.00 
  -7  -2  -1 1038.70   43.40 
  -7  -2  -1  946.41   42.50 
   7  -2   1 1018.20   38.80 
   7  -2   1  998.50   39.10 
  -7  -2  -1  966.80   44.30 
   7  -2   1  910.61   42.10 
   7  -2   1 1017.30   43.80 
   7  -2   1  988.20   37.90 
  -7  -2  -1 1053.19   45.80 
   7  -2   1 1053.69   40.30 
   7  -2   1 1087.89   39.70 
  -7  -2  -1  987.50   41.30 
  -7  -2  -1 1003.20   37.50 
   7  -2   1 1040.10   33.90 
  -7  -2  -1  976.10   43.60 
  -7  -2  -1 1009.60   42.80 
   7  -2   1 1028.70   36.20 
   7  -2   1 1012.00   38.10 
   7  -2   1  994.90   39.50 
  -7  -2  -1 1038.90   28.10 
   7  -2   1 1030.50   34.30 
  -7  -2  -1 1028.10   42.80 
   7  -2   1  999.20   38.40 
  -7  -2  -1 1004.30   42.10 
  -7  -2  -1 1016.00   30.10 
   7   2   1  989.50   45.80 
   7   2   1  959.30   41.90 
   7   2   1  997.00   44.50 
   7   2   1 1077.19   41.00 
   7   2   1  991.30   44.00 
  -7   2  -1 1040.20   44.30 
   7   2   1 1005.40   41.40 
   7   2   1 1010.50   43.70 
  -7   2  -1  974.50   42.10 
  -7   2  -1  989.30   43.30 
   7   2   1 1052.29   42.90 
  -7   2  -1  998.80   42.20 
   7   2   1 1009.30   41.10 
  -7   2  -1 1019.90   37.30 
  -7   2  -1 1076.79   40.80 
  -7   2  -1 1037.10   43.70 
  -7   2  -1  929.01   40.10 
   7   2   1  970.30   38.90 
  -7   2  -1 1028.90   36.00 
  -7   2  -1  972.30   36.30 
   7   2   1 1031.80   38.30 
  -7   2  -1  998.70   36.20 
   7   2   1  946.01   41.50 
   7   2   1  925.51   43.50 
   7   2   1 1005.30   32.40 
  -8  -2  -1  299.07   24.30 
   8  -2   1  284.97   18.90 
  -8  -2  -1  252.77   26.10 
   8  -2   1  322.87   21.20 
   8  -2   1  334.87   20.20 
   8  -2   1  359.06   22.30 
   8  -2   1  233.68   26.70 
  -8  -2  -1  250.37   27.30 
  -8  -2  -1  287.67   28.40 
  -8  -2  -1  329.37   24.60 
   8  -2   1  312.37   21.00 
   8  -2   1  317.07   21.10 
  -8  -2  -1  301.27   24.90 
  -8  -2  -1  292.67   22.40 
  -8  -2  -1  269.27   28.00 
   8  -2   1  282.47   23.60 
   8  -2   1  288.37   21.10 
   8  -2   1  285.67   26.70 
  -8  -2  -1  313.17   25.10 
   8  -2   1  296.87   24.40 
  -8  -2  -1  298.47   19.90 
   8  -2   1  339.17   22.20 
   8  -2   1  262.67   20.80 
   8  -2   1  314.07   21.00 
  -8  -2  -1  303.67   23.30 
  -8   2  -1  283.57   28.60 
   8   2   1  329.67   24.60 
   8   2   1  354.46   25.40 
  -8   2  -1  280.57   28.70 
   8   2   1  289.97   22.10 
   8   2   1  254.37   25.90 
  -8   2  -1  287.57   23.00 
   8   2   1  285.37   20.60 
   8   2   1  314.47   20.70 
   8   2   1  281.27   23.60 
  -8   2  -1  293.67   19.30 
   8   2   1  319.97   25.80 
   8   2   1  244.88   27.10 
   8   2   1  334.57   25.20 
  -8   2  -1  302.67   20.10 
   8   2   1  299.37   25.80 
  -8   2  -1  311.17   19.80 
   8   2   1  268.97   29.00 
   8   2   1  310.97   22.10 
  -8   2  -1  284.67   21.50 
  -8   2  -1  309.07   20.50 
  -8   2  -1  340.37   25.80 
  -8   2  -1  284.27   23.10 
  -8   2  -1  269.57   28.30 
  -9  -2  -1  863.51   43.40 
  -9  -2  -1  709.63   40.80 
  -9  -2  -1  684.63   41.90 
   9  -2   1  831.22   40.80 
   9  -2   1  736.13   45.00 
  -9  -2  -1  741.23   39.10 
   9  -2   1  825.32   39.20 
   9  -2   1  832.52   37.30 
  -9  -2  -1  789.62   44.00 
  -9  -2  -1  817.02   44.10 
   9  -2   1  746.63   41.90 
  -9  -2  -1  819.52   44.20 
   9  -2   1  818.82   38.30 
   9  -2   1  801.92   43.90 
  -9  -2  -1  778.12   40.60 
   9  -2   1  853.81   37.60 
   9  -2   1  794.92   43.80 
   9  -2   1  763.42   43.20 
   9  -2   1  738.03   36.20 
  -9  -2  -1  782.62   42.90 
   9  -2   1  793.32   38.40 
  -9  -2  -1  838.72   45.90 
   9  -2   1  786.72   36.90 
   9  -2   1  733.63   38.10 
  -9   2  -1  822.52   44.60 
   9   2   1  827.22   37.20 
   9   2   1  840.72   44.00 
   9   2   1  777.32   45.90 
  -9   2  -1  815.52   43.70 
  -9   2  -1  809.72   42.00 
   9   2   1  739.63   39.60 
   9   2   1  815.32   42.20 
   9   2   1  828.12   39.40 
  -9   2  -1  843.32   40.20 
  -9   2  -1  794.52   43.10 
   9   2   1  826.42   45.30 
   9   2   1  727.43   42.40 
   9   2   1  816.92   40.60 
   9   2   1  800.62   37.70 
   9   2   1  811.32   42.50 
   9   2   1  836.02   44.00 
  -9   2  -1  741.73   41.70 
   9   2   1  707.93   42.90 
   9   2   1  821.52   42.70 
  10  -2   1  118.59   21.80 
  10  -2   1  107.79   18.70 
  10  -2   1  161.88   26.20 
  10  -2   1  153.28   23.10 
  10  -2   1  108.99   21.50 
  10  -2   1  156.58   25.50 
 -10  -2  -1   95.29   19.60 
 -10  -2  -1  151.68   23.70 
 -10  -2  -1  125.69   20.10 
 -10  -2  -1  188.08   27.70 
 -10  -2  -1  134.49   23.10 
 -10  -2  -1  160.38   24.50 
  10  -2   1  112.29   22.80 
 -10  -2  -1  115.19   21.20 
 -10  -2  -1  100.69   20.20 
  10  -2   1  117.19   17.80 
 -10  -2  -1  146.99   23.60 
 -10   2  -1  126.99   22.50 
  10   2   1  123.49   23.10 
  10   2   1  120.79   21.30 
 -10   2  -1  109.89   20.50 
 -10   2  -1  117.69   20.80 
  10   2   1  110.99   18.70 
  10   2   1  146.49   22.60 
  10   2   1  135.99   23.50 
 -10   2  -1  107.79   20.60 
  10   2   1  141.89   21.30 
  10   2   1  104.99   20.30 
  10   2   1  134.19   21.40 
 -10   2  -1  112.69   18.30 
  10   2   1  116.49   23.10 
  10   2   1  164.08   24.10 
  10   2   1  152.38   25.30 
  10   2   1  138.39   24.20 
   9  -3  -1  329.37   24.80 
   9  -3  -1  435.36   30.30 
   9  -3  -1  396.46   27.50 
  -9  -3   1  411.16   30.60 
  -9  -3   1  408.66   31.20 
  -9  -3   1  406.36   30.60 
  -9  -3   1  381.06   28.70 
  -9  -3   1  343.27   29.10 
   9  -3  -1  350.96   28.30 
   9  -3  -1  389.06   25.50 
   9  -3  -1  383.96   26.20 
   9  -3  -1  349.37   28.40 
  -9  -3   1  416.26   30.00 
  -9  -3   1  365.96   28.40 
  -9  -3   1  391.36   26.30 
  -9  -3   1  332.37   35.30 
   9  -3  -1  340.97   24.40 
  -9  -3   1  396.76   30.00 
  -9  -3   1  370.46   30.20 
   9  -3  -1  397.66   30.30 
   9  -3  -1  382.86   31.10 
   9   3  -1  402.76   29.90 
   9   3  -1  370.26   27.10 
  -9   3   1  370.06   28.80 
  -9   3   1  369.96   29.20 
   9   3  -1  384.16   30.20 
  -9   3   1  373.46   29.00 
   9   3  -1  383.16   28.80 
   9   3  -1  331.47   32.50 
   9   3  -1  349.67   34.90 
   9   3  -1  334.17   36.40 
   9   3  -1  388.86   27.90 
   9   3  -1  354.86   27.90 
   9   3  -1  327.77   35.00 
   9   3  -1  417.66   27.60 
  -9   3   1  394.86   28.50 
   9   3  -1  314.57   32.00 
   9   3  -1  322.47   34.20 
   9   3  -1  354.56   29.90 
  -8  -3   1  569.84   36.10 
   8  -3  -1  595.84   27.10 
  -8  -3   1  538.05   32.70 
  -8  -3   1  588.74   34.20 
   8  -3  -1  609.34   28.10 
   8  -3  -1  570.74   30.80 
  -8  -3   1  573.44   33.90 
  -8  -3   1  549.45   34.60 
   8  -3  -1  600.14   28.70 
  -8  -3   1  600.54   34.70 
   8  -3  -1  574.84   27.20 
   8  -3  -1  522.65   32.40 
   8  -3  -1  545.65   28.90 
   8  -3  -1  515.95   31.80 
  -8  -3   1  520.25   32.50 
   8  -3  -1  537.15   29.70 
   8  -3  -1  516.45   32.10 
  -8  -3   1  591.74   32.10 
  -8  -3   1  602.84   36.30 
   8  -3  -1  544.65   27.20 
   8  -3  -1  543.35   30.00 
  -8  -3   1  476.35   30.70 
   8  -3  -1  566.04   35.30 
  -8  -3   1  525.75   29.40 
   8  -3  -1  582.84   32.70 
  -8  -3   1  600.64   35.10 
   8   3  -1  527.05   32.60 
  -8   3   1  516.75   31.20 
   8   3  -1  530.65   32.30 
   8   3  -1  559.64   31.30 
  -8   3   1  590.54   33.70 
   8   3  -1  561.84   36.10 
  -8   3   1  619.14   28.90 
   8   3  -1  527.15   32.10 
   8   3  -1  586.34   31.60 
   8   3  -1  628.14   36.00 
   8   3  -1  594.24   36.30 
   8   3  -1  554.64   33.00 
   8   3  -1  533.45   32.90 
   8   3  -1  569.64   28.40 
  -8   3   1  588.14   34.30 
   8   3  -1  574.14   35.20 
  -8   3   1  535.65   31.60 
   8   3  -1  589.84   32.40 
   8   3  -1  545.65   34.70 
  -8   3   1  521.55   32.30 
  -7  -3   1  483.65   28.30 
  -7  -3   1  446.36   28.00 
   7  -3  -1  502.75   22.60 
   7  -3  -1  463.25   26.10 
  -7  -3   1  488.45   30.70 
   7  -3  -1  495.45   23.40 
  -7  -3   1  512.05   30.00 
  -7  -3   1  479.25   30.00 
  -7  -3   1  446.16   27.80 
   7  -3  -1  456.25   27.20 
   7  -3  -1  454.15   21.40 
   7  -3  -1  436.06   22.70 
   7  -3  -1  474.95   25.50 
   7  -3  -1  453.25   22.30 
   7  -3  -1  479.85   27.20 
   7  -3  -1  467.55   21.50 
   7  -3  -1  494.75   22.00 
   7  -3  -1  462.75   27.80 
   7  -3  -1  477.95   22.10 
  -7  -3   1  510.95   23.10 
  -7  -3   1  528.35   27.80 
   7  -3  -1  479.95   21.90 
   7  -3  -1  446.06   20.20 
  -7  -3   1  464.75   29.10 
  -7  -3   1  472.95   20.20 
   7  -3  -1  463.15   25.20 
  -7  -3   1  490.85   28.70 
  -7  -3   1  459.85   28.20 
  -7  -3   1  445.36   27.90 
  -7  -3   1  427.56   25.20 
   7  -3  -1  454.05   22.50 
   7  -3  -1  459.75   25.50 
   7  -3  -1  470.15   24.20 
  -7   3   1  468.65   28.70 
  -7   3   1  403.66   26.10 
  -7   3   1  460.25   21.70 
   7   3  -1  452.25   28.80 
   7   3  -1  487.15   28.40 
   7   3  -1  432.46   23.30 
   7   3  -1  495.05   31.40 
   7   3  -1  455.85   29.50 
   7   3  -1  459.75   29.40 
  -7   3   1  491.15   21.20 
   7   3  -1  445.06   27.90 
  -7   3   1  503.45   29.10 
   7   3  -1  424.96   25.30 
   7   3  -1  494.25   30.50 
   7   3  -1  476.55   26.80 
  -7   3   1  510.05   27.90 
   7   3  -1  445.76   26.80 
  -7   3   1  479.35   27.20 
   7   3  -1  404.46   26.70 
   7   3  -1  488.05   29.00 
   7   3  -1  493.95   29.20 
  -7   3   1  419.66   19.30 
  -7   3   1  471.95   23.40 
  -6  -3   1 2079.89   68.49 
   6  -3  -1 2093.99   54.79 
  -6  -3   1 2149.39   56.49 
   6  -3  -1 2154.98   59.19 
  -6  -3   1 2189.98   58.09 
  -6  -3   1 2107.19   64.89 
   6  -3  -1 2168.98   61.29 
  -6  -3   1 1912.81   64.29 
   6  -3  -1 2051.69   54.09 
   6  -3  -1 2128.99   56.49 
  -6  -3   1 2047.00   65.79 
   6  -3  -1 2046.30   55.29 
  -6  -3   1 2190.48   64.59 
   6  -3  -1 1998.60   61.89 
   6  -3  -1 2101.09   62.89 
   6  -3  -1 2078.09   53.29 
  -6  -3   1 2072.79   64.89 
   6  -3  -1 2179.38   58.89 
  -6  -3   1 2002.40   66.59 
   6  -3  -1 2076.19   50.39 
   6  -3  -1 2078.89   59.79 
   6  -3  -1 2177.18   61.59 
  -6  -3   1 2027.10   61.59 
  -6  -3   1 2150.88   61.99 
   6  -3  -1 2131.69   57.59 
   6  -3  -1 2105.19   57.19 
  -6  -3   1 2068.99   65.89 
   6  -3  -1 2151.08   53.79 
  -6  -3   1 2077.09   66.19 
   6  -3  -1 2119.69   54.69 
   6  -3  -1 2126.49   64.39 
   6  -3  -1 2103.29   47.60 
  -6  -3   1 2115.09   66.29 
   6   3  -1 2011.40   64.69 
  -6   3   1 2088.49   64.09 
  -6   3   1 2034.60   62.19 
   6   3  -1 2105.79   67.89 
  -6   3   1 2184.88   64.69 
   6   3  -1 2052.59   62.29 
   6   3  -1 2136.59   50.99 
  -6   3   1 1980.40   61.79 
  -6   3   1 2123.69   52.49 
   6   3  -1 2073.59   51.29 
   6   3  -1 2098.09   61.89 
   6   3  -1 2149.08   67.99 
   6   3  -1 2053.29   64.39 
   6   3  -1 2105.19   64.99 
  -6   3   1 2092.39   57.49 
   6   3  -1 2170.78   66.39 
   6   3  -1 2176.68   59.79 
   6   3  -1 2008.70   67.69 
  -6   3   1 2177.68   51.79 
  -6   3   1 2157.08   54.79 
   6   3  -1 2013.40   65.99 
  -6   3   1 2122.59   56.99 
  -6   3   1 2121.59   65.59 
   6   3  -1 2107.39   65.99 
   6   3  -1 2161.08   64.59 
  -6   3   1 2182.68   52.59 
   5  -3  -1 1507.95   37.90 
  -5  -3   1 1540.45   44.40 
   5  -3  -1 1508.55   44.50 
   5  -3  -1 1453.15   43.20 
  -5  -3   1 1558.44   48.00 
  -5  -3   1 1494.85   47.60 
   5  -3  -1 1524.65   37.00 
   5  -3  -1 1455.15   46.00 
  -5  -3   1 1475.25   50.79 
   5  -3  -1 1448.46   47.20 
  -5  -3   1 1454.45   51.39 
   5  -3  -1 1504.55   35.20 
   5  -3  -1 1574.64   44.70 
   5  -3  -1 1540.85   39.40 
   5  -3  -1 1468.85   35.70 
   5  -3  -1 1500.75   36.20 
   5  -3  -1 1435.66   41.50 
   5  -3  -1 1453.95   34.40 
  -5  -3   1 1478.05   38.00 
  -5  -3   1 1516.25   49.90 
   5  -3  -1 1462.95   47.70 
   5  -3  -1 1494.25   38.80 
  -5  -3   1 1478.25   49.40 
  -5  -3   1 1441.76   49.80 
   5  -3  -1 1531.75   40.90 
  -5  -3   1 1492.25   33.60 
   5  -3  -1 1488.25   35.80 
  -5  -3   1 1600.24   46.40 
   5  -3  -1 1507.15   40.20 
   5  -3  -1 1447.16   45.60 
   5  -3  -1 1553.64   45.70 
   5  -3  -1 1515.15   42.30 
   5  -3  -1 1468.55   31.70 
  -5  -3   1 1485.75   43.70 
  -5  -3   1 1498.55   49.20 
  -5  -3   1 1478.35   49.40 
   5  -3  -1 1492.45   44.30 
  -5  -3   1 1573.84   40.00 
  -5  -3   1 1411.56   47.60 
   5  -3  -1 1489.35   38.60 
   5  -3  -1 1481.55   38.10 
   5  -3  -1 1405.76   38.70 
   5   3  -1 1437.16   47.90 
   5   3  -1 1542.45   51.19 
   5   3  -1 1470.75   50.49 
  -5   3   1 1501.65   46.60 
   5   3  -1 1476.35   39.40 
  -5   3   1 1550.14   38.60 
  -5   3   1 1495.65   45.10 
  -5   3   1 1476.75   47.20 
   5   3  -1 1380.96   49.99 
   5   3  -1 1574.74   46.40 
   5   3  -1 1454.35   39.00 
  -5   3   1 1559.64   50.39 
   5   3  -1 1482.65   48.50 
  -5   3   1 1542.75   43.20 
  -5   3   1 1485.25   37.10 
  -5   3   1 1494.75   39.40 
   5   3  -1 1501.25   49.70 
   5   3  -1 1494.45   51.79 
  -5   3   1 1498.65   47.40 
  -5   3   1 1541.95   44.30 
  -5   3   1 1523.65   40.90 
  -5   3   1 1559.94   40.40 
   5   3  -1 1476.55   47.50 
   5   3  -1 1552.64   49.70 
   5   3  -1 1566.04   50.59 
  -5   3   1 1468.45   46.50 
  -5   3   1 1402.76   46.10 
   5   3  -1 1493.65   44.90 
   5   3  -1 1442.36   49.40 
  -5   3   1 1495.65   42.20 
   4  -3  -1 1524.25   43.50 
   4  -3  -1 1537.25   36.30 
  -4  -3   1 1525.65   33.90 
   4  -3  -1 1568.54   36.50 
   4  -3  -1 1571.74   36.60 
   4  -3  -1 1534.85   33.70 
  -4  -3   1 1493.55   42.80 
   4  -3  -1 1550.64   40.50 
   4  -3  -1 1437.86   45.60 
   4  -3  -1 1490.45   41.10 
   4  -3  -1 1458.15   38.70 
  -4  -3   1 1519.15   43.90 
  -4  -3   1 1544.55   49.50 
   4  -3  -1 1547.45   43.30 
   4  -3  -1 1542.05   40.30 
  -4  -3   1 1483.55   47.00 
  -4  -3   1 1424.76   43.40 
  -4  -3   1 1550.94   35.80 
  -4  -3   1 1485.05   46.80 
   4  -3  -1 1525.35   33.10 
   4  -3  -1 1542.95   45.10 
  -4  -3   1 1533.45   37.50 
   4  -3  -1 1525.55   35.70 
  -4  -3   1 1470.55   47.70 
  -4  -3   1 1553.44   46.20 
  -4  -3   1 1480.65   46.00 
   4  -3  -1 1500.85   36.30 
  -4  -3   1 1478.95   43.10 
  -4  -3   1 1466.65   46.80 
  -4  -3   1 1535.55   33.70 
  -4  -3   1 1513.25   48.20 
  -4  -3   1 1503.35   39.80 
   4  -3  -1 1495.25   36.20 
   4  -3  -1 1429.46   33.10 
  -4  -3   1 1511.25   45.90 
   4  -3  -1 1513.35   35.80 
   4  -3  -1 1484.95   39.40 
   4  -3  -1 1562.44   41.90 
   4  -3  -1 1502.15   42.80 
   4  -3  -1 1570.74   40.40 
   4   3  -1 1495.55   45.50 
  -4   3   1 1544.15   40.80 
   4   3  -1 1500.55   40.10 
  -4   3   1 1472.25   44.20 
   4   3  -1 1598.74   48.70 
   4   3  -1 1531.75   39.50 
  -4   3   1 1526.35   39.60 
  -4   3   1 1497.25   44.20 
   4   3  -1 1537.65   47.90 
   4   3  -1 1512.85   47.70 
   4   3  -1 1469.15   45.80 
  -4   3   1 1471.15   43.30 
  -4   3   1 1487.25   35.80 
  -4   3   1 1549.45   40.70 
   4   3  -1 1578.14   38.60 
   4   3  -1 1484.65   46.70 
   4   3  -1 1594.44   44.20 
  -4   3   1 1474.45   43.70 
  -4   3   1 1573.54   44.30 
  -4   3   1 1527.25   44.30 
   4   3  -1 1549.05   47.50 
   4   3  -1 1463.55   47.70 
  -4   3   1 1510.75   41.60 
  -4   3   1 1568.34   44.70 
  -4   3   1 1478.05   36.40 
   4   3  -1 1461.75   48.30 
   4   3  -1 1502.15   42.90 
  -4   3   1 1586.04   33.90 
   4   3  -1 1481.35   47.70 
  -4   3   1 1584.34   46.60 
   4   3  -1 1597.04   49.60 
   3  -3  -1 2044.80   42.40 
  -3  -3   1 2151.58   58.09 
  -3  -3   1 2004.80   42.20 
   3  -3  -1 2057.09   54.89 
   3  -3  -1 2017.50   43.40 
   3  -3  -1 2072.99   52.89 
   3  -3  -1 2026.00   48.50 
  -3  -3   1 2004.20   55.59 
  -3  -3   1 2023.40   49.60 
  -3  -3   1 1978.40   53.39 
  -3  -3   1 1977.50   54.99 
  -3  -3   1 1987.20   54.19 
  -3  -3   1 1992.50   50.69 
   3  -3  -1 2059.79   50.49 
   3  -3  -1 2027.60   48.50 
   3  -3  -1 2042.40   48.50 
   3  -3  -1 2116.09   51.09 
   3  -3  -1 2008.00   49.40 
   3  -3  -1 1997.70   40.50 
  -3  -3   1 2014.70   54.89 
  -3  -3   1 2099.19   53.49 
   3  -3  -1 2033.30   40.40 
  -3  -3   1 2035.40   53.29 
   3  -3  -1 2100.09   52.69 
   3  -3  -1 2002.40   51.49 
   3  -3  -1 2066.79   43.50 
  -3  -3   1 2012.60   55.69 
   3  -3  -1 2060.49   49.99 
   3  -3  -1 2021.90   49.70 
   3  -3  -1 2013.30   50.19 
   3  -3  -1 2044.50   46.30 
   3  -3  -1 2009.20   46.30 
   3  -3  -1 2037.00   46.60 
  -3  -3   1 2002.50   55.99 
   3  -3  -1 2131.79   50.99 
   3  -3  -1 2096.89   51.59 
   3  -3  -1 2069.09   49.20 
  -3  -3   1 2052.49   49.60 
  -3  -3   1 2029.70   49.99 
   3  -3  -1 2026.80   46.70 
  -3  -3   1 1982.70   53.09 
  -3  -3   1 2086.59   53.99 
   3  -3  -1 1989.00   49.20 
   3  -3  -1 2031.00   49.80 
   3   3  -1 2083.99   53.09 
  -3   3   1 2052.09   50.39 
  -3   3   1 2045.50   49.20 
  -3   3   1 1990.10   48.30 
  -3   3   1 2056.59   49.60 
   3   3  -1 2029.80   55.49 
  -3   3   1 2069.29   51.29 
   3   3  -1 2041.30   55.99 
   3   3  -1 2038.80   55.79 
   3   3  -1 1943.91   55.09 
   3   3  -1 2107.39   49.70 
  -3   3   1 1975.20   54.09 
   3   3  -1 1939.21   52.09 
  -3   3   1 2084.89   51.19 
   3   3  -1 2089.19   56.49 
   3   3  -1 2062.69   51.19 
  -3   3   1 2033.00   50.99 
   3   3  -1 2047.60   55.79 
  -3   3   1 2035.40   49.40 
  -3   3   1 1989.20   50.49 
  -3   3   1 2009.10   51.19 
  -3   3   1 2041.30   51.19 
  -3   3   1 2059.29   45.30 
   3   3  -1 2078.59   50.69 
   3   3  -1 1922.41   53.99 
   3   3  -1 1933.21   54.79 
   3   3  -1 1999.40   49.99 
   3   3  -1 1987.80   56.49 
  -3   3   1 1977.20   47.10 
  -3   3   1 2040.50   51.29 
   3   3  -1 2115.49   56.99 
  -3   3   1 2069.99   53.69 
  -3   3   1 2008.20   47.10 
   3   3  -1 2074.89   47.40 
   3   3  -1 2093.59   50.39 
   2  -3  -1 1067.19   30.50 
   2  -3  -1 1049.89   28.70 
   2  -3  -1 1052.99   30.90 
   2  -3  -1 1094.79   28.10 
   2  -3  -1 1070.19   28.90 
   2  -3  -1 1049.59   28.40 
   2  -3  -1 1050.59   25.10 
   2  -3  -1 1109.49   29.70 
  -2  -3   1 1049.20   32.70 
  -2  -3   1  995.60   33.30 
   2  -3  -1 1084.59   31.10 
   2  -3  -1 1068.69   29.90 
   2  -3  -1 1089.49   29.80 
  -2  -3   1 1070.59   24.80 
   2  -3  -1 1121.39   29.10 
   2  -3  -1 1077.99   26.60 
  -2  -3   1 1065.99   26.10 
  -2  -3   1 1059.89   33.20 
  -2  -3   1 1071.19   31.20 
   2  -3  -1 1076.59   27.20 
  -2  -3   1 1056.29   33.40 
   2  -3  -1 1020.60   32.40 
   2  -3  -1 1063.39   32.00 
   2  -3  -1 1055.79   28.60 
  -2  -3   1 1033.30   27.50 
  -2  -3   1 1091.59   28.90 
  -2  -3   1 1025.60   30.30 
   2  -3  -1 1071.59   28.90 
   2  -3  -1 1115.69   31.00 
  -2  -3   1 1046.80   31.00 
   2  -3  -1 1078.79   28.90 
  -2  -3   1 1029.30   32.50 
  -2  -3   1 1090.89   33.00 
   2  -3  -1 1046.40   30.60 
  -2  -3   1 1059.69   33.00 
   2  -3  -1 1064.19   30.00 
  -2  -3   1 1059.09   33.90 
  -2  -3   1 1064.39   30.20 
   2  -3  -1 1033.80   28.20 
   2  -3  -1 1092.69   28.60 
   2  -3  -1 1067.39   30.50 
   2  -3  -1 1113.19   30.10 
   2  -3  -1 1015.00   30.00 
  -2  -3   1 1075.59   30.40 
  -2  -3   1 1057.89   32.60 
  -2  -3   1 1125.19   33.80 
   2  -3  -1 1081.19   23.50 
  -2  -3   1 1053.29   30.20 
   2  -3  -1 1067.99   28.90 
   2  -3  -1 1050.19   23.70 
   2  -3  -1 1055.19   26.40 
   2  -3  -1 1084.49   29.10 
  -2  -3   1 1038.60   32.90 
   2   3  -1 1053.19   33.20 
   2   3  -1 1052.49   30.90 
  -2   3   1 1047.40   29.00 
  -2   3   1 1085.19   32.90 
  -2   3   1 1093.19   30.20 
  -2   3   1 1047.50   29.10 
   2   3  -1 1051.09   30.30 
  -2   3   1 1062.79   28.50 
   2   3  -1 1084.49   34.70 
   2   3  -1 1057.29   27.90 
  -2   3   1 1082.89   31.20 
  -2   3   1 1025.40   29.90 
   2   3  -1 1032.90   27.80 
   2   3  -1 1064.69   28.60 
  -2   3   1 1066.49   29.30 
   2   3  -1 1095.79   32.30 
   2   3  -1 1054.89   33.40 
  -2   3   1 1052.49   32.80 
   2   3  -1 1073.09   33.70 
   2   3  -1 1066.99   30.90 
  -2   3   1 1092.99   29.90 
  -2   3   1 1063.39   26.70 
   2   3  -1 1037.90   33.70 
  -2   3   1 1036.40   28.70 
  -2   3   1 1067.19   29.90 
   2   3  -1 1042.10   33.50 
  -2   3   1 1094.69   28.20 
   2   3  -1 1017.30   30.90 
   2   3  -1 1045.10   27.80 
   2   3  -1 1053.99   28.40 
   2   3  -1 1061.59   32.90 
   2   3  -1 1096.39   28.20 
   2   3  -1 1043.10   33.20 
   2   3  -1 1066.09   33.20 
  -2   3   1 1029.40   29.10 
  -2   3   1 1047.70   28.80 
   2   3  -1 1037.00   32.30 
  -2   3   1 1077.59   31.50 
  -2   3   1 1059.09   28.20 
   2   3  -1 1077.29   30.30 
  -1  -3   1 2524.05   59.09 
   1  -3  -1 2411.66   56.89 
  -1  -3   1 2405.36   59.29 
  -1  -3   1 2546.15   59.89 
   1  -3  -1 2383.16   57.69 
   1  -3  -1 2496.65   50.69 
   1  -3  -1 2448.35   57.49 
   1  -3  -1 2503.75   54.69 
  -1  -3   1 2407.06   59.49 
  -1  -3   1 2561.04   58.29 
   1  -3  -1 2503.25   55.49 
  -1  -3   1 2495.05   51.99 
   1  -3  -1 2442.66   52.99 
   1  -3  -1 2453.35   51.59 
  -1  -3   1 2414.16   57.09 
   1  -3  -1 2504.95   56.89 
   1  -3  -1 2375.56   56.39 
   1  -3  -1 2414.76   57.49 
  -1  -3   1 2576.74   60.09 
   1  -3  -1 2434.86   59.19 
   1  -3  -1 2474.75   56.09 
  -1  -3   1 2515.15   56.79 
   1  -3  -1 2397.26   53.39 
   1  -3  -1 2432.86   57.09 
   1  -3  -1 2474.45   55.99 
   1  -3  -1 2423.06   57.69 
  -1  -3   1 2361.86   59.19 
   1  -3  -1 2470.35   56.29 
  -1  -3   1 2421.06   58.89 
  -1  -3   1 2505.75   58.19 
  -1  -3   1 2409.36   53.89 
  -1  -3   1 2369.66   56.09 
   1  -3  -1 2377.36   57.79 
   1  -3  -1 2421.66   51.79 
   1  -3  -1 2491.35   51.09 
   1  -3  -1 2446.86   53.89 
  -1  -3   1 2491.15   58.59 
   1  -3  -1 2489.55   57.39 
  -1  -3   1 2458.15   59.39 
  -1  -3   1 2390.46   55.59 
   1  -3  -1 2472.15   59.49 
  -1  -3   1 2488.65   54.89 
  -1  -3   1 2483.05   59.29 
   1  -3  -1 2504.15   57.09 
  -1  -3   1 2488.05   58.49 
  -1  -3   1 2429.26   53.89 
  -1  -3   1 2469.15   58.49 
   1  -3  -1 2478.75   50.29 
   1  -3  -1 2496.25   57.09 
   1  -3  -1 2457.55   56.59 
  -1  -3   1 2477.45   57.19 
  -1  -3   1 2337.87   57.69 
  -1  -3   1 2418.06   58.09 
  -1  -3   1 2485.25   60.39 
   1  -3  -1 2436.56   48.60 
   1  -3  -1 2454.35   56.39 
  -1  -3   1 2401.56   58.79 
   1  -3  -1 2400.06   57.99 
   1  -3  -1 2446.86   56.09 
  -1  -3   1 2419.36   59.49 
  -1  -3   1 2465.85   56.49 
   1  -3  -1 2430.16   50.89 
   1   3  -1 2501.65   51.29 
  -1   3   1 2458.15   48.60 
   1   3  -1 2429.06   60.39 
  -1   3   1 2524.55   58.79 
  -1   3   1 2418.76   58.09 
   1   3  -1 2487.25   58.59 
  -1   3   1 2472.35   52.39 
  -1   3   1 2450.55   59.69 
  -1   3   1 2455.55   57.79 
  -1   3   1 2406.26   53.29 
   1   3  -1 2464.85   57.89 
  -1   3   1 2631.64   59.09 
   1   3  -1 2432.96   56.89 
  -1   3   1 2573.64   59.59 
   1   3  -1 2480.45   57.59 
   1   3  -1 2477.55   58.09 
  -1   3   1 2521.95   57.19 
  -1   3   1 2434.16   56.69 
  -1   3   1 2476.65   58.99 
  -1   3   1 2405.06   56.39 
  -1   3   1 2388.46   58.09 
   1   3  -1 2507.55   52.19 
   1   3  -1 2467.35   57.99 
   1   3  -1 2554.84   59.69 
  -1   3   1 2478.35   57.69 
   1   3  -1 2533.25   59.19 
  -1   3   1 2427.36   54.49 
  -1   3   1 2390.36   57.59 
  -1   3   1 2498.65   50.69 
  -1   3   1 2446.56   51.79 
  -1   3   1 2490.85   59.19 
   1   3  -1 2446.26   58.89 
   1   3  -1 2427.26   61.09 
  -1   3   1 2489.65   57.19 
  -1   3   1 2430.36   51.29 
  -1   3   1 2458.05   57.49 
   1   3  -1 2447.66   58.99 
   1   3  -1 2417.86   51.29 
   1   3  -1 2555.24   58.49 
  -1   3   1 2453.05   50.99 
   1   3  -1 2472.35   60.09 
   1   3  -1 2474.35   54.49 
   1   3  -1 2508.05   55.49 
   1   3  -1 2466.45   59.99 
  -1   3   1 2465.25   57.29 
  -1   3   1 2490.25   55.69 
  -1   3   1 2470.65   52.49 
   1   3  -1 2467.55   56.79 
   1   3  -1 2518.15   59.49 
  -1   3   1 2470.05   48.20 
   1   3  -1 2415.56   51.19 
   1   3  -1 2522.05   60.99 
  -1   3   1 2450.95   57.29 
   1   3  -1 2459.15   58.29 
   0  -3   1  916.21   27.00 
   0  -3   1  930.21   30.20 
   0  -3   1  923.51   24.30 
   0  -3  -1  919.71   25.70 
   0  -3   1  971.20   29.50 
   0  -3  -1  909.11   29.90 
   0  -3  -1  938.01   24.90 
   0  -3  -1  880.21   26.80 
   0  -3  -1  905.01   26.70 
   0  -3  -1  985.20   28.30 
   0  -3   1  918.01   26.00 
   0  -3  -1  939.11   27.00 
   0  -3   1  934.11   23.90 
   0  -3   1  922.71   29.50 
   0  -3  -1  926.41   25.00 
   0  -3   1  938.81   25.40 
   0  -3  -1  919.91   25.80 
   0  -3   1  903.01   25.80 
   0  -3   1  929.71   26.30 
   0  -3  -1  930.61   26.70 
   0  -3   1  938.01   24.40 
   0  -3  -1  860.51   27.70 
   0  -3   1  945.21   26.90 
   0  -3   1  892.41   27.80 
   0  -3   1  884.01   27.40 
   0  -3  -1  894.01   26.80 
   0  -3  -1  930.01   25.40 
   0  -3  -1  909.11   27.80 
   0  -3   1  889.91   27.70 
   0  -3   1  874.91   28.00 
   0  -3   1  930.71   25.60 
   0  -3   1  963.10   28.10 
   0  -3   1  960.60   26.70 
   0  -3  -1  931.21   27.00 
   0  -3  -1  921.71   27.40 
   0  -3  -1  919.31   27.70 
   0  -3  -1  950.60   26.50 
   0  -3   1  961.90   26.70 
   0  -3  -1  890.11   27.60 
   0  -3   1  943.11   25.80 
   0  -3  -1  878.71   27.70 
   0  -3  -1  877.21   24.50 
   0  -3   1  928.11   27.70 
   0  -3  -1  908.91   23.10 
   0  -3   1  938.71   26.70 
   0  -3   1  941.11   21.40 
   0  -3  -1  919.21   27.00 
   0  -3   1  873.41   27.30 
   0  -3  -1  899.61   22.00 
   0  -3   1  914.61   26.80 
   0  -3   1  916.81   20.20 
   0  -3  -1  901.01   26.50 
   0  -3   1  930.31   29.20 
   0  -3  -1  927.01   25.30 
   0   3   1  918.91   28.50 
   0   3   1  950.20   28.40 
   0   3  -1  911.81   26.60 
   0   3  -1  909.51   25.70 
   0   3   1  916.31   28.10 
   0   3  -1  891.81   21.10 
   0   3  -1  931.41   26.80 
   0   3  -1  918.51   24.80 
   0   3  -1  927.01   30.60 
   0   3  -1  910.31   28.70 
   0   3  -1  951.70   29.10 
   0   3   1  963.80   26.20 
   0   3   1  912.11   28.20 
   0   3  -1  959.00   30.60 
   0   3  -1  894.71   25.00 
   0   3   1  904.31   27.40 
   0   3   1  851.71   27.00 
   0   3  -1  913.51   25.40 
   0   3  -1  951.50   27.90 
   0   3   1  907.51   28.30 
   0   3   1  943.71   25.30 
   0   3   1  956.10   26.80 
   0   3   1  922.41   25.10 
   0   3  -1  915.21   31.90 
   0   3   1 1007.00   29.90 
   0   3   1  905.21   27.70 
   0   3   1  924.71   28.10 
   0   3  -1  953.90   30.30 
   0   3   1  957.00   28.80 
   0   3  -1  870.01   25.90 
   0   3  -1  899.51   28.20 
   0   3   1  912.01   26.90 
   0   3  -1  942.51   25.30 
   0   3   1  905.71   29.00 
   0   3  -1  938.21   25.80 
   0   3   1  931.51   27.60 
   0   3   1  876.31   25.00 
   0   3   1  887.01   27.30 
   0   3  -1  947.81   28.30 
   0   3   1  927.31   27.60 
   0   3   1  912.61   23.20 
   0   3  -1  921.51   26.80 
   0   3  -1  935.01   28.40 
   0   3   1  980.20   29.50 
   0   3  -1  938.71   28.10 
   0   3   1  946.51   25.10 
   0   3  -1  924.61   23.90 
   0   3   1  925.21   28.10 
   0   3  -1  928.91   23.60 
   0   3   1  864.91   26.90 
   0   3   1  905.21   20.50 
   0   3   1  923.41   27.90 
   0   3   1  898.21   28.10 
  -1  -3  -1 5111.19  103.49 
  -1  -3  -1 5343.07  110.69 
   1  -3   1 5035.80  103.49 
   1  -3   1 5190.78  100.89 
   1  -3   1 5284.07  104.79 
  -1  -3  -1 5157.28  104.19 
   1  -3   1 4993.30  112.49 
  -1  -3  -1 5443.36  110.19 
   1  -3   1 5056.99  106.29 
  -1  -3  -1 5164.18  111.39 
  -1  -3  -1 5303.47  111.99 
  -1  -3  -1 5126.19  109.79 
   1  -3   1 5224.98  104.19 
   1  -3   1 5149.38  109.09 
  -1  -3  -1 5120.39  110.09 
   1  -3   1 5075.29  111.59 
   1  -3   1 5232.18  103.29 
   1  -3   1 5139.79  107.79 
   1  -3   1 5217.28  109.59 
   1  -3   1 5116.59  105.59 
   1  -3   1 5268.67  107.79 
   1  -3   1 5283.17  115.49 
  -1  -3  -1 5158.38  109.69 
   1  -3   1 5345.37  107.59 
   1  -3   1 5173.18  110.29 
  -1  -3  -1 5160.98  109.09 
  -1  -3  -1 5287.37  110.49 
  -1  -3  -1 5041.10  110.29 
   1  -3   1 5163.68  103.99 
  -1  -3  -1 5238.18  100.89 
  -1  -3  -1 4976.70  109.99 
  -1  -3  -1 5185.18  104.79 
  -1  -3  -1 5019.50  112.79 
  -1  -3  -1 5320.77  111.09 
   1  -3   1 5186.18  103.39 
   1  -3   1 5245.08  100.89 
   1  -3   1 4971.40  100.99 
  -1  -3  -1 4972.00  109.89 
  -1  -3  -1 5169.58  110.09 
  -1  -3  -1 5220.28  101.49 
   1  -3   1 5209.98   99.89 
   1  -3   1 5020.70  110.19 
  -1  -3  -1 5141.79  111.49 
   1  -3   1 4926.91  113.89 
  -1  -3  -1 5031.40  106.69 
   1  -3   1 5173.18  109.89 
   1  -3   1 5087.79  110.09 
   1  -3   1 5148.68  105.59 
  -1  -3  -1 5222.58  108.59 
   1  -3   1 5182.28  101.89 
   1  -3   1 5065.49  111.69 
   1  -3   1 5097.69  109.59 
   1  -3   1 5119.89  109.69 
   1  -3   1 5191.88  105.29 
  -1  -3  -1 5278.97  108.79 
  -1  -3  -1 5014.40  105.19 
   1  -3   1 4957.80  102.69 
   1  -3   1 5149.98  105.99 
   1  -3   1 5296.97  110.59 
  -1  -3  -1 5013.00  109.29 
   1   3   1 5060.29  112.29 
   1   3   1 5224.98  109.89 
  -1   3  -1 5032.00  106.49 
   1   3   1 5269.67  109.89 
  -1   3  -1 4974.60  103.09 
   1   3   1 5119.49  110.69 
  -1   3  -1 5097.69  111.49 
   1   3   1 5210.88  101.59 
  -1   3  -1 5315.77  114.19 
  -1   3  -1 5024.90  110.29 
  -1   3  -1 5274.27  108.79 
  -1   3  -1 4910.51  112.39 
  -1   3  -1 5197.98  107.09 
  -1   3  -1 5153.88  102.89 
   1   3   1 4851.31  108.09 
   1   3   1 5201.68  103.59 
  -1   3  -1 5300.07  110.59 
   1   3   1 5070.09  104.49 
  -1   3  -1 5139.99  110.79 
   1   3   1 5429.66  112.29 
   1   3   1 5404.26  101.19 
  -1   3  -1 5019.00  108.79 
   1   3   1 5224.68  112.29 
  -1   3  -1 5159.88  104.79 
   1   3   1 5116.19  111.89 
  -1   3  -1 5224.68  106.59 
  -1   3  -1 4968.40  104.89 
   1   3   1 5149.88  108.79 
   1   3   1 5223.28  110.79 
   1   3   1 5234.58  111.59 
  -1   3  -1 5199.18  103.49 
   1   3   1 5198.78  111.29 
   1   3   1 5294.97  111.79 
   1   3   1 5195.58  110.59 
  -1   3  -1 5029.00  102.09 
   1   3   1 5285.77  110.99 
   1   3   1 5140.09  108.19 
   1   3   1 5244.38  105.69 
   1   3   1 5160.28  111.39 
   1   3   1 5283.57  109.79 
  -1   3  -1 5361.46  109.29 
  -1   3  -1 4946.21  112.89 
  -1   3  -1 5159.48  106.29 
  -1   3  -1 5062.59  101.79 
   1   3   1 5202.38  109.59 
  -1   3  -1 5129.89  101.09 
   1   3   1 5200.58  110.39 
  -1   3  -1 5173.18  113.69 
   1   3   1 5220.08  105.79 
   1   3   1 5193.28  111.19 
  -1   3  -1 5132.59  104.49 
   1   3   1 5065.99  111.99 
  -1   3  -1 5129.59  100.19 
  -1   3  -1 5171.88  104.59 
   2  -3   1 2394.36   55.49 
  -2  -3  -1 2319.77   60.89 
   2  -3   1 2413.66   61.39 
   2  -3   1 2416.96   51.59 
   2  -3   1 2347.27   56.99 
   2  -3   1 2382.16   51.69 
   2  -3   1 2362.36   48.20 
  -2  -3  -1 2302.67   57.09 
  -2  -3  -1 2426.76   60.39 
  -2  -3  -1 2343.27   56.39 
   2  -3   1 2316.47   55.99 
  -2  -3  -1 2468.95   58.89 
   2  -3   1 2344.47   59.79 
   2  -3   1 2417.06   54.99 
   2  -3   1 2334.77   57.59 
   2  -3   1 2373.26   54.59 
   2  -3   1 2413.16   57.29 
  -2  -3  -1 2325.47   59.39 
   2  -3   1 2427.66   53.09 
   2  -3   1 2370.66   52.39 
  -2  -3  -1 2388.06   57.39 
  -2  -3  -1 2430.06   55.69 
  -2  -3  -1 2362.16   60.79 
   2  -3   1 2341.47   59.49 
   2  -3   1 2343.87   51.79 
   2  -3   1 2421.26   54.29 
   2  -3   1 2343.87   51.59 
  -2  -3  -1 2365.16   57.69 
   2  -3   1 2436.86   52.39 
   2  -3   1 2366.36   51.49 
   2  -3   1 2501.35   59.39 
  -2  -3  -1 2449.35   59.79 
  -2  -3  -1 2368.16   58.09 
   2  -3   1 2401.96   59.79 
   2  -3   1 2344.27   52.09 
   2  -3   1 2420.26   52.99 
  -2  -3  -1 2380.26   59.69 
   2  -3   1 2369.06   54.99 
   2  -3   1 2352.46   50.39 
  -2  -3  -1 2355.06   50.49 
   2  -3   1 2351.46   60.39 
  -2  -3  -1 2351.66   57.39 
  -2  -3  -1 2395.76   60.69 
   2  -3   1 2362.86   53.09 
  -2  -3  -1 2408.96   54.69 
   2  -3   1 2382.36   48.50 
  -2  -3  -1 2370.86   57.39 
  -2  -3  -1 2385.76   53.59 
   2  -3   1 2430.66   51.49 
   2  -3   1 2389.26   51.39 
  -2  -3  -1 2416.26   52.59 
   2  -3   1 2287.87   56.59 
  -2  -3  -1 2362.36   59.49 
   2  -3   1 2374.76   52.99 
  -2   3  -1 2358.16   51.99 
  -2   3  -1 2121.59   53.89 
   2   3   1 2342.77   57.29 
   2   3   1 2379.56   60.09 
  -2   3  -1 2413.06   57.49 
   2   3   1 2438.86   52.69 
  -2   3  -1 2461.25   60.29 
  -2   3  -1 2431.86   51.79 
   2   3   1 2426.16   55.79 
   2   3   1 2357.76   60.79 
  -2   3  -1 2341.97   57.69 
  -2   3  -1 2360.06   48.70 
   2   3   1 2456.35   58.49 
   2   3   1 2412.86   53.59 
  -2   3  -1 2462.15   54.59 
  -2   3  -1 2434.06   51.19 
   2   3   1 2434.96   54.69 
   2   3   1 2441.56   59.69 
   2   3   1 2420.06   58.49 
   2   3   1 2378.76   60.49 
  -2   3  -1 2356.36   57.09 
  -2   3  -1 2391.86   52.59 
   2   3   1 2342.47   54.99 
   2   3   1 2350.06   59.99 
  -2   3  -1 2373.66   58.39 
  -2   3  -1 2386.46   52.19 
   2   3   1 2489.95   58.09 
   2   3   1 2343.27   60.89 
  -2   3  -1 2499.85   55.99 
  -2   3  -1 2359.86   48.30 
  -2   3  -1 2445.26   60.09 
  -2   3  -1 2420.86   52.39 
  -2   3  -1 2389.36   52.09 
   2   3   1 2374.66   60.09 
   2   3   1 2403.56   59.49 
   2   3   1 2375.36   60.79 
   2   3   1 2420.76   58.89 
  -3  -3  -1 2004.30   54.79 
   3  -3   1 2004.90   48.60 
   3  -3   1 1969.60   47.60 
   3  -3   1 1972.00   42.00 
   3  -3   1 1967.60   52.39 
  -3  -3  -1 2031.70   50.49 
   3  -3   1 1993.90   46.30 
   3  -3   1 1979.10   44.90 
  -3  -3  -1 1950.30   50.39 
  -3  -3  -1 2016.50   54.99 
  -3  -3  -1 2088.29   48.10 
   3  -3   1 2033.50   47.20 
   3  -3   1 2008.00   47.20 
   3  -3   1 1932.41   48.60 
  -3  -3  -1 1943.21   48.60 
  -3  -3  -1 1950.80   55.39 
  -3  -3  -1 2062.79   55.59 
   3  -3   1 1975.60   44.10 
  -3  -3  -1 1987.00   53.19 
   3  -3   1 1898.31   49.70 
  -3  -3  -1 2039.30   46.20 
   3  -3   1 1997.00   47.70 
   3  -3   1 1975.00   50.99 
   3  -3   1 2031.10   54.89 
  -3  -3  -1 1979.40   55.29 
   3  -3   1 1999.20   47.20 
  -3  -3  -1 2043.50   51.69 
  -3  -3  -1 1979.90   53.69 
  -3  -3  -1 2023.60   56.99 
  -3  -3  -1 2087.89   54.99 
   3  -3   1 1971.10   50.99 
   3  -3   1 1876.51   50.39 
   3  -3   1 2057.69   46.80 
   3  -3   1 2018.70   45.20 
   3  -3   1 2017.00   48.20 
  -3  -3  -1 1995.20   39.60 
   3  -3   1 1979.90   44.20 
  -3  -3  -1 2001.70   48.90 
   3  -3   1 2033.10   47.90 
   3  -3   1 2078.49   44.80 
   3  -3   1 2050.69   44.60 
  -3  -3  -1 2032.90   56.59 
   3  -3   1 1970.90   49.00 
   3  -3   1 2038.30   54.49 
  -3  -3  -1 2006.70   54.59 
   3  -3   1 1939.51   42.20 
   3   3   1 2000.30   55.59 
  -3   3  -1 2036.50   49.00 
   3   3   1 2077.29   55.99 
   3   3   1 2047.90   55.79 
  -3   3  -1 2030.50   52.29 
  -3   3  -1 2045.80   54.09 
   3   3   1 2076.69   55.59 
   3   3   1 1967.50   49.80 
  -3   3  -1 1997.00   46.50 
   3   3   1 2054.09   51.49 
   3   3   1 1963.20   55.39 
  -3   3  -1 2049.29   48.80 
  -3   3  -1 1992.20   53.79 
   3   3   1 2004.70   56.09 
  -3   3  -1 1989.20   44.10 
   3   3   1 2023.20   50.99 
  -3   3  -1 2072.99   52.99 
   3   3   1 1997.00   53.29 
   3   3   1 1988.60   54.29 
  -3   3  -1 1953.20   50.49 
   3   3   1 2024.10   50.99 
   3   3   1 2034.30   54.89 
   3   3   1 1909.41   54.99 
  -3   3  -1 1939.21   42.40 
   3   3   1 2044.00   50.59 
  -3   3  -1 2052.89   51.59 
  -3   3  -1 1999.40   42.40 
  -4  -3  -1  761.22   29.90 
   4  -3   1  820.12   29.10 
  -4  -3  -1  797.02   31.10 
   4  -3   1  810.92   28.00 
   4  -3   1  766.92   25.10 
  -4  -3  -1  808.12   29.70 
   4  -3   1  757.22   25.40 
   4  -3   1  807.52   25.30 
   4  -3   1  823.12   23.60 
   4  -3   1  768.72   24.70 
   4  -3   1  846.02   22.30 
   4  -3   1  810.52   23.10 
   4  -3   1  829.62   29.80 
  -4  -3  -1  788.82   32.30 
  -4  -3  -1  814.22   33.70 
  -4  -3  -1  808.82   32.10 
   4  -3   1  825.92   22.80 
   4  -3   1  835.52   30.00 
  -4  -3  -1  837.02   29.60 
   4  -3   1  766.82   25.90 
   4  -3   1  811.72   21.80 
  -4  -3  -1  780.32   32.40 
  -4  -3  -1  827.72   28.10 
  -4  -3  -1  862.51   28.20 
  -4  -3  -1  816.22   21.20 
   4  -3   1  845.22   27.30 
  -4  -3  -1  835.32   32.30 
   4  -3   1  800.02   30.90 
   4  -3   1  817.62   23.70 
   4  -3   1  812.22   31.40 
  -4  -3  -1  782.52   28.90 
   4  -3   1  791.22   29.30 
   4  -3   1  774.52   24.30 
  -4  -3  -1  801.32   23.70 
  -4  -3  -1  809.32   31.10 
  -4  -3  -1  830.32   32.10 
   4  -3   1  766.82   21.30 
  -4   3  -1  814.92   29.90 
   4   3   1  812.42   27.20 
   4   3   1  770.62   29.20 
   4   3   1  866.61   32.20 
   4   3   1  818.02   32.30 
   4   3   1  797.02   32.70 
  -4   3  -1  812.62   30.60 
   4   3   1  847.02   32.90 
  -4   3  -1  772.92   28.30 
  -4   3  -1  809.12   21.50 
   4   3   1  819.42   32.30 
   4   3   1  819.32   32.80 
   4   3   1  783.12   28.70 
   4   3   1  789.92   29.30 
   4   3   1  789.62   26.10 
  -4   3  -1  839.32   28.10 
   4   3   1  791.52   31.80 
   4   3   1  889.81   32.30 
  -4   3  -1  814.82   26.00 
  -4   3  -1  847.72   27.30 
   4   3   1  782.62   30.80 
  -4   3  -1  761.92   30.00 
  -4   3  -1  800.32   22.10 
   4   3   1  833.12   33.00 
  -5  -3  -1  620.84   30.70 
   5  -3   1  547.15   24.90 
  -5  -3  -1  602.94   27.00 
   5  -3   1  584.54   23.60 
   5  -3   1  599.64   23.50 
  -5  -3  -1  586.34   24.60 
   5  -3   1  600.54   27.00 
   5  -3   1  546.15   19.70 
  -5  -3  -1  596.84   28.40 
  -5  -3  -1  577.54   18.80 
  -5  -3  -1  579.64   25.20 
   5  -3   1  588.74   19.00 
   5  -3   1  665.43   28.60 
  -5  -3  -1  530.05   26.70 
  -5  -3  -1  598.44   28.40 
   5  -3   1  563.54   24.20 
   5  -3   1  552.24   23.70 
  -5  -3  -1  572.34   28.50 
  -5  -3  -1  525.95   26.80 
  -5  -3  -1  576.44   28.40 
   5  -3   1  578.04   19.30 
   5  -3   1  577.14   20.40 
  -5  -3  -1  565.64   29.00 
   5  -3   1  592.24   17.80 
   5  -3   1  618.34   20.40 
   5  -3   1  577.74   19.60 
   5  -3   1  603.84   25.10 
  -5  -3  -1  585.54   26.60 
   5  -3   1  618.34   26.60 
   5  -3   1  591.54   19.70 
  -5  -3  -1  574.84   27.00 
   5  -3   1  572.44   23.50 
  -5  -3  -1  582.54   22.80 
   5  -3   1  625.14   28.60 
  -5   3  -1  585.24   25.00 
  -5   3  -1  539.85   21.70 
   5   3   1  567.44   28.70 
   5   3   1  624.24   28.90 
   5   3   1  644.94   28.40 
  -5   3  -1  539.85   24.30 
  -5   3  -1  579.34   21.10 
   5   3   1  597.34   26.20 
  -5   3  -1  581.24   22.00 
   5   3   1  536.25   28.10 
   5   3   1  589.74   28.60 
  -5   3  -1  624.54   27.70 
   5   3   1  601.54   22.90 
   5   3   1  566.84   26.40 
   5   3   1  624.14   26.30 
   5   3   1  542.05   28.40 
   5   3   1  586.74   28.10 
  -5   3  -1  563.84   28.20 
  -5   3  -1  578.64   20.00 
  -5   3  -1  556.44   26.60 
   5   3   1  637.84   22.40 
   5   3   1  602.54   28.90 
  -5   3  -1  537.25   26.40 
   5   3   1  601.44   29.40 
  -5   3  -1  588.74   19.80 
   5   3   1  583.64   27.10 
  -6  -3  -1  945.51   39.00 
  -6  -3  -1  987.70   40.30 
   6  -3   1  976.70   29.10 
  -6  -3  -1  942.41   39.20 
   6  -3   1 1031.20   34.10 
  -6  -3  -1  817.62   39.90 
   6  -3   1  955.70   34.70 
  -6  -3  -1  890.11   38.90 
   6  -3   1  978.20   36.70 
   6  -3   1  979.90   37.00 
   6  -3   1  954.60   38.90 
   6  -3   1  973.70   40.10 
   6  -3   1  921.31   35.00 
  -6  -3  -1  888.61   36.20 
  -6  -3  -1  915.51   39.60 
  -6  -3  -1  958.30   40.40 
   6  -3   1  938.51   34.10 
  -6  -3  -1  927.01   31.30 
  -6  -3  -1  963.10   38.70 
  -6  -3  -1  934.61   40.60 
  -6  -3  -1  923.91   32.70 
  -6  -3  -1  960.70   41.70 
   6  -3   1  965.10   38.00 
   6  -3   1  990.40   28.80 
   6  -3   1  965.90   36.20 
   6  -3   1  906.71   34.30 
  -6   3  -1  941.21   30.10 
  -6   3  -1 1018.00   40.20 
  -6   3  -1  980.20   31.70 
   6   3   1  927.81   38.40 
   6   3   1  991.20   40.40 
   6   3   1  945.41   41.50 
   6   3   1  988.20   40.20 
   6   3   1  941.81   41.00 
   6   3   1  941.41   38.30 
  -6   3  -1  982.10   36.00 
  -6   3  -1  988.60   37.10 
  -6   3  -1  979.90   39.60 
   6   3   1  877.61   39.80 
   6   3   1  901.71   31.10 
  -6   3  -1  990.10   41.10 
  -6   3  -1  955.30   39.20 
   6   3   1  975.70   40.80 
  -6   3  -1  923.91   32.00 
  -6   3  -1  913.01   29.90 
   6   3   1  902.51   37.30 
   6   3   1  938.41   29.60 
   6   3   1 1018.70   37.10 
   6   3   1  919.81   40.80 
  -6   3  -1  901.01   29.90 
   6   3   1  960.90   42.00 
   6   3   1  935.41   37.30 
   7  -3   1  190.68   14.40 
   7  -3   1  169.38   20.00 
  -7  -3  -1  210.78   22.80 
  -7  -3  -1  227.28   23.80 
   7  -3   1  187.68   18.90 
  -7  -3  -1  185.48   22.20 
  -7  -3  -1  153.78   21.00 
   7  -3   1  181.18   18.20 
  -7  -3  -1  198.48   22.10 
  -7  -3  -1  203.38   13.00 
  -7  -3  -1  152.88   20.90 
   7  -3   1  199.08   19.70 
   7  -3   1  210.38   20.10 
   7  -3   1  181.08   19.80 
  -7  -3  -1  185.58   21.50 
   7  -3   1  213.08   15.50 
   7  -3   1  154.98   16.90 
   7  -3   1  194.38   22.10 
  -7  -3  -1  175.68   22.20 
  -7  -3  -1  173.88   12.50 
  -7  -3  -1  186.08   21.30 
  -7  -3  -1  185.68   21.40 
   7  -3   1  187.78   19.40 
   7  -3   1  200.18   18.80 
  -7  -3  -1  178.68   19.00 
   7  -3   1  203.18   22.40 
  -7   3  -1  193.98   13.30 
  -7   3  -1  186.78   21.50 
  -7   3  -1  216.18   14.10 
  -7   3  -1  201.78   14.00 
   7   3   1  175.18   21.80 
   7   3   1  212.08   21.50 
   7   3   1  173.48   20.90 
   7   3   1  197.48   21.80 
  -7   3  -1  198.88   15.90 
  -7   3  -1  153.68   19.80 
   7   3   1  214.98   21.70 
   7   3   1  218.98   24.30 
  -7   3  -1  157.88   18.00 
   7   3   1  166.08   12.20 
   7   3   1  209.08   21.40 
   7   3   1  181.18   18.30 
   7   3   1  160.38   20.90 
   7   3   1  187.48   21.80 
   7   3   1  161.48   21.30 
  -7   3  -1  221.88   23.80 
   7   3   1  210.68   22.70 
  -7   3  -1  221.68   15.00 
   7   3   1  176.08   20.90 
  -7   3  -1  191.38   22.00 
   7   3   1  190.38   22.80 
   8  -3   1  462.45   25.40 
  -8  -3  -1  497.35   31.30 
   8  -3   1  486.95   27.00 
   8  -3   1  503.05   31.80 
   8  -3   1  488.65   28.30 
   8  -3   1  492.75   27.70 
   8  -3   1  471.35   27.40 
   8  -3   1  504.05   28.50 
  -8  -3  -1  508.25   32.40 
   8  -3   1  481.35   27.40 
   8  -3   1  469.35   30.90 
  -8  -3  -1  485.45   31.10 
  -8  -3  -1  470.55   30.70 
  -8  -3  -1  522.85   34.20 
  -8  -3  -1  450.25   32.10 
  -8  -3  -1  446.36   31.60 
  -8  -3  -1  540.45   32.50 
   8  -3   1  475.85   28.00 
  -8  -3  -1  478.25   31.00 
  -8  -3  -1  509.15   28.40 
   8  -3   1  461.55   30.30 
   8  -3   1  413.66   22.90 
  -8  -3  -1  458.85   30.20 
   8   3   1  513.05   31.20 
   8   3   1  466.65   32.40 
   8   3   1  480.05   33.40 
   8   3   1  450.05   31.10 
  -8   3  -1  417.16   29.50 
   8   3   1  464.65   32.00 
   8   3   1  514.35   32.00 
   8   3   1  510.55   29.60 
   8   3   1  465.85   30.60 
  -8   3  -1  450.45   30.20 
  -8   3  -1  520.85   31.90 
   8   3   1  469.75   31.20 
  -8   3  -1  401.06   29.20 
   8   3   1  431.36   31.30 
   8   3   1  462.55   28.90 
   8   3   1  440.86   29.50 
   8   3   1  520.25   28.00 
   8   3   1  531.75   30.60 
  -9  -3  -1  146.49   22.40 
  -9  -3  -1  107.69   19.90 
   9  -3   1  123.69   18.40 
   9  -3   1  134.09   19.40 
  -9  -3  -1  170.58   23.70 
  -9  -3  -1  140.59   22.30 
   9  -3   1  144.09   18.90 
   9  -3   1  125.89   20.80 
   9  -3   1  130.29   18.70 
  -9  -3  -1  131.29   20.50 
   9  -3   1  173.98   23.60 
   9  -3   1  157.38   23.40 
  -9  -3  -1  139.99   22.80 
  -9  -3  -1  103.59   18.70 
  -9  -3  -1  167.78   24.60 
   9  -3   1  122.39   22.20 
  -9  -3  -1  131.99   18.20 
   9  -3   1  138.59   22.50 
  -9  -3  -1  132.99   22.30 
  -9  -3  -1  140.39   21.80 
   9  -3   1  169.88   21.70 
  -9   3  -1  115.89   20.00 
   9   3   1  127.49   20.00 
   9   3   1  154.08   22.90 
   9   3   1  133.99   21.20 
  -9   3  -1  205.78   25.20 
   9   3   1  134.29   19.40 
   9   3   1  172.28   25.20 
   9   3   1  130.39   21.20 
   9   3   1  123.39   21.80 
  -9   3  -1  147.99   23.00 
   9   3   1  123.09   17.30 
   9   3   1  137.69   19.90 
   9   3   1  100.89   19.60 
   9   3   1  160.08   21.60 
  -9   3  -1   95.69   17.90 
  -9   3  -1  181.68   24.80 
   9   3   1  150.38   22.10 
   9   3   1  150.98   24.30 
   9   3   1  171.98   24.80 
   9   3   1  133.89   20.50 
  -9  -4   1   76.29   17.50 
   9  -4  -1  147.89   22.40 
   9  -4  -1   93.99   18.40 
  -9  -4   1   97.59   19.00 
   9  -4  -1  121.49   19.30 
  -9  -4   1  124.89   21.30 
   9  -4  -1   92.79   17.80 
   9  -4  -1  123.69   19.90 
  -9  -4   1   54.59   14.10 
   9  -4  -1   85.89   18.00 
  -9  -4   1   76.09   16.80 
   9  -4  -1  112.39   17.80 
  -9  -4   1  109.19   20.40 
   9  -4  -1  110.59   18.20 
  -9  -4   1   83.79   19.30 
  -9  -4   1   97.49   16.90 
  -9  -4   1  123.89   21.90 
   9  -4  -1  112.29   18.80 
  -9  -4   1  114.59   20.30 
   9  -4  -1  123.29   18.50 
   9  -4  -1  102.09   17.90 
   9  -4  -1  104.29   20.40 
  -9  -4   1  119.09   20.50 
   9   4  -1  110.59   20.20 
   9   4  -1  127.29   22.40 
   9   4  -1   90.99   18.40 
   9   4  -1   93.79   19.00 
  -9   4   1  106.69   19.00 
   9   4  -1   99.49   18.50 
  -9   4   1  100.59   19.10 
   9   4  -1  105.89   18.00 
   9   4  -1   94.99   20.00 
  -9   4   1   81.09   16.20 
   9   4  -1  113.59   22.10 
   9   4  -1  101.09   19.50 
   9   4  -1   80.39   18.00 
   9   4  -1   78.39   16.60 
   9   4  -1  137.29   21.90 
   9   4  -1   93.79   16.80 
  -9   4   1   93.79   17.10 
   9   4  -1  118.79   20.40 
   8  -4  -1  112.09   15.30 
  -8  -4   1  123.39   18.10 
   8  -4  -1  100.29   16.40 
   8  -4  -1  144.39   19.20 
   8  -4  -1  130.69   20.30 
   8  -4  -1   96.39   15.10 
  -8  -4   1   83.29   16.00 
  -8  -4   1   99.79   18.70 
   8  -4  -1  115.99   17.50 
  -8  -4   1   93.09   17.40 
   8  -4  -1   86.29   14.80 
  -8  -4   1  115.89   20.20 
  -8  -4   1  127.09   20.20 
  -8  -4   1  101.19   18.10 
   8  -4  -1  113.69   17.00 
   8  -4  -1  135.99   18.00 
   8  -4  -1  117.99   17.80 
   8  -4  -1  128.29   19.40 
  -8  -4   1  117.39   18.60 
   8  -4  -1  108.89   15.30 
   8  -4  -1  104.29   14.50 
   8  -4  -1  105.19   15.80 
  -8  -4   1   90.89   17.20 
  -8  -4   1  124.99   19.60 
   8  -4  -1  111.29   16.60 
  -8  -4   1  103.89   17.80 
   8   4  -1  105.49   16.60 
   8   4  -1  104.39   16.50 
   8   4  -1  103.59   19.10 
   8   4  -1  107.49   19.70 
   8   4  -1  123.09   20.30 
   8   4  -1  126.99   19.80 
   8   4  -1  117.59   19.80 
   8   4  -1   87.89   16.40 
   8   4  -1  125.59   19.90 
  -8   4   1  119.69   18.90 
  -8   4   1  100.89   16.60 
  -8   4   1  105.19   17.60 
   8   4  -1  131.89   21.60 
   8   4  -1  128.79   19.50 
   8   4  -1  123.09   19.40 
  -8   4   1   90.89   15.50 
   8   4  -1  132.59   17.00 
   8   4  -1   93.89   17.00 
   8   4  -1   80.39   16.30 
   7  -4  -1   37.90    9.00 
  -7  -4   1   51.29   11.10 
  -7  -4   1   48.60    9.30 
   7  -4  -1   47.00    9.30 
  -7  -4   1   54.49   10.00 
  -7  -4   1   59.69   13.30 
   7  -4  -1   46.30    9.30 
   7  -4  -1   35.20    7.50 
  -7  -4   1   26.40    9.60 
  -7  -4   1   43.10   12.10 
  -7  -4   1   26.00    9.40 
   7  -4  -1   32.00    8.40 
   7  -4  -1   53.19   11.30 
  -7  -4   1   34.90    9.20 
  -7  -4   1   31.60   10.30 
   7  -4  -1   46.70    9.90 
  -7  -4   1   36.00   10.50 
  -7  -4   1   63.69   13.40 
  -7  -4   1   43.20   11.00 
  -7  -4   1   39.20   10.20 
   7  -4  -1   43.80   10.30 
  -7  -4   1   56.59   12.70 
   7  -4  -1   65.29   11.30 
   7  -4  -1   35.70    9.20 
   7  -4  -1   43.60   10.80 
   7  -4  -1   34.80    9.40 
   7  -4  -1   48.80   10.60 
   7  -4  -1   33.50    7.30 
   7  -4  -1   25.00    7.70 
   7   4  -1   41.60   11.80 
  -7   4   1   46.00   10.30 
   7   4  -1   41.90   10.00 
   7   4  -1   40.60   11.00 
  -7   4   1   43.10   10.90 
   7   4  -1   43.10   11.70 
  -7   4   1   32.60    7.90 
   7   4  -1   36.60   10.40 
   7   4  -1   28.10   10.30 
  -7   4   1   42.90   10.60 
   7   4  -1   57.99   12.70 
   7   4  -1   41.20   10.20 
   7   4  -1   39.70   10.20 
   7   4  -1   43.60   11.50 
   7   4  -1   79.09   14.90 
   7   4  -1   42.70   11.30 
  -7   4   1   51.19   10.70 
   7   4  -1   37.40   10.20 
   7   4  -1   49.99   13.00 
   7   4  -1   47.10   11.40 
   6  -4  -1   51.89    6.70 
  -6  -4   1   44.30   10.60 
  -6  -4   1   40.80    9.80 
  -6  -4   1   39.80    9.40 
   6  -4  -1   41.90    7.80 
  -6  -4   1   46.10   10.70 
   6  -4  -1   49.30    9.60 
   6  -4  -1   50.09    7.60 
   6  -4  -1   49.10   10.30 
   6  -4  -1   43.30    6.40 
   6  -4  -1   35.10    8.70 
   6  -4  -1   56.69    9.70 
  -6  -4   1   26.70    7.50 
  -6  -4   1   35.40    9.80 
  -6  -4   1   27.90    8.00 
   6  -4  -1   37.20    6.60 
   6  -4  -1   43.60    7.50 
   6  -4  -1   50.59   10.70 
   6  -4  -1   59.59   10.50 
  -6  -4   1   34.90   10.00 
  -6  -4   1   38.40    8.30 
  -6  -4   1   54.69   11.40 
   6  -4  -1   49.50    8.90 
   6  -4  -1   39.60    8.80 
  -6  -4   1   35.20    9.60 
   6  -4  -1   35.70    8.30 
   6  -4  -1   53.89    8.70 
  -6  -4   1   43.80   11.20 
  -6  -4   1   33.20    9.20 
   6  -4  -1   30.20    6.80 
   6  -4  -1   47.70    8.90 
  -6  -4   1   43.10    8.70 
   6  -4  -1   44.10    9.10 
   6   4  -1   37.50    9.50 
   6   4  -1   50.09   10.50 
   6   4  -1   35.40   10.60 
  -6   4   1   30.70    8.00 
   6   4  -1   38.70   10.30 
   6   4  -1   49.10    9.30 
   6   4  -1   45.30    8.90 
   6   4  -1   37.40   10.10 
   6   4  -1   39.40   10.00 
  -6   4   1   39.80    9.90 
   6   4  -1   46.30   10.80 
   6   4  -1   41.90    7.00 
  -6   4   1   45.70    9.80 
  -6   4   1   56.29    7.00 
   6   4  -1   40.50    9.70 
  -6   4   1   54.79   10.00 
  -6   4   1   50.49    8.20 
  -6   4   1   36.60    7.30 
   6   4  -1   48.50   11.30 
   6   4  -1   25.00    8.60 
   6   4  -1   57.09    8.30 
  -5  -4   1  213.28   16.80 
  -5  -4   1  215.18   10.90 
   5  -4  -1  202.48    9.50 
   5  -4  -1  200.98   15.70 
   5  -4  -1  206.58    9.20 
   5  -4  -1  231.28   15.30 
  -5  -4   1  201.38   15.40 
  -5  -4   1  253.37   18.80 
  -5  -4   1  207.68   19.90 
   5  -4  -1  210.48   11.80 
   5  -4  -1  230.98   10.10 
   5  -4  -1  222.58   16.40 
   5  -4  -1  223.68   10.70 
   5  -4  -1  206.18   16.70 
  -5  -4   1  199.78    8.50 
   5  -4  -1  214.68   14.00 
   5  -4  -1  226.08   11.70 
  -5  -4   1  196.18   14.70 
   5  -4  -1  213.48    9.60 
  -5  -4   1  193.18   19.80 
   5  -4  -1  221.08   13.40 
  -5  -4   1  202.68    8.60 
  -5  -4   1  247.98   17.70 
  -5  -4   1  218.38   18.20 
   5  -4  -1  207.18   14.70 
   5  -4  -1  229.98   14.20 
   5  -4  -1  221.68   14.50 
   5  -4  -1  210.88   16.60 
  -5  -4   1  241.08   18.50 
  -5  -4   1  227.58   19.40 
  -5  -4   1  259.67   16.00 
  -5  -4   1  224.18   15.90 
   5  -4  -1  202.58   14.00 
   5  -4  -1  216.18   11.00 
   5  -4  -1  218.18   11.30 
   5  -4  -1  216.48   15.50 
  -5  -4   1  222.38   22.10 
   5  -4  -1  213.68   12.40 
   5   4  -1  193.68   21.00 
   5   4  -1  248.78   16.40 
   5   4  -1  201.78   14.60 
   5   4  -1  266.47   18.50 
   5   4  -1  205.18   20.30 
   5   4  -1  209.78   16.20 
   5   4  -1  210.58   20.80 
   5   4  -1  206.28   12.80 
  -5   4   1  227.18    9.50 
  -5   4   1  206.18   15.70 
  -5   4   1  227.38   15.50 
  -5   4   1  230.28   16.00 
   5   4  -1  235.38   18.40 
  -5   4   1  211.48   13.70 
   5   4  -1  252.27   18.70 
  -5   4   1  223.38   15.90 
  -5   4   1  209.78   15.10 
   5   4  -1  215.68   17.90 
  -5   4   1  235.68   14.20 
  -5   4   1  195.98   14.70 
  -5   4   1  214.68   13.50 
   5   4  -1  197.78   20.60 
  -5   4   1  240.38   11.10 
  -5   4   1  220.08   12.50 
   5   4  -1  238.18   18.70 
   5   4  -1  203.58   13.00 
   5   4  -1  213.08   22.00 
  -4  -4   1  126.89   14.00 
  -4  -4   1  156.98   11.00 
   4  -4  -1  139.19   10.30 
   4  -4  -1  148.39    8.40 
  -4  -4   1  136.39    8.90 
   4  -4  -1  137.99    8.20 
   4  -4  -1  109.29   11.10 
   4  -4  -1  121.99    5.10 
  -4  -4   1  131.89   15.30 
   4  -4  -1  134.39   15.10 
   4  -4  -1  122.39    8.00 
   4  -4  -1  119.09    5.10 
  -4  -4   1  125.59   15.80 
  -4  -4   1  112.69   13.10 
  -4  -4   1  134.79   15.20 
  -4  -4   1  123.59   13.30 
   4  -4  -1  134.29   10.60 
   4  -4  -1  124.69    6.20 
  -4  -4   1  153.28   16.70 
  -4  -4   1  156.78   16.80 
   4  -4  -1  138.29    7.60 
  -4  -4   1  148.09   11.40 
   4  -4  -1  124.09   13.50 
  -4  -4   1  132.39    8.10 
   4  -4  -1  146.99   10.60 
   4  -4  -1  140.89    9.80 
  -4  -4   1  146.49   14.90 
   4  -4  -1  124.59    9.30 
  -4  -4   1  121.49   14.10 
   4  -4  -1  133.49    5.50 
  -4  -4   1  138.19   15.90 
   4  -4  -1  113.79   12.90 
   4  -4  -1  116.49   13.80 
   4   4  -1  139.89   10.60 
   4   4  -1  127.39   15.20 
   4   4  -1  121.29   13.40 
  -4   4   1  133.19   10.70 
   4   4  -1  135.19   15.70 
   4   4  -1  125.49   14.80 
  -4   4   1  149.19   11.30 
   4   4  -1  141.39   15.20 
   4   4  -1  135.09   15.80 
  -4   4   1  136.39   10.60 
  -4   4   1  141.29   11.30 
   4   4  -1  150.98   16.70 
   4   4  -1  131.89   11.30 
   4   4  -1  141.49   14.40 
  -4   4   1  126.69    7.70 
  -4   4   1  145.49   11.10 
  -4   4   1  114.99   13.30 
   4   4  -1  146.99   16.20 
   4   4  -1  138.59   15.60 
   4   4  -1  114.79   12.10 
   4   4  -1  136.19   10.10 
  -4   4   1  119.79    9.40 
  -4   4   1  132.79    9.10 
   4   4  -1  127.59   14.90 
   4   4  -1  140.69   10.90 
   4   4  -1  155.88   17.90 
  -4   4   1  134.19   10.90 
  -4   4   1  132.59   10.20 
  -4   4   1  140.09    8.60 
  -4   4   1  147.19   11.60 
   3  -4  -1   60.89    7.70 
   3  -4  -1   67.99    9.70 
  -3  -4   1   69.89   10.20 
   3  -4  -1   75.89    8.40 
   3  -4  -1   66.69    8.10 
  -3  -4   1   70.99    9.40 
   3  -4  -1   76.99    8.30 
   3  -4  -1   78.19   10.70 
  -3  -4   1   71.89   10.20 
  -3  -4   1   63.29    9.90 
  -3  -4   1   63.69   10.40 
  -3  -4   1   59.39    7.00 
   3  -4  -1   67.79    8.20 
   3  -4  -1   67.39    3.90 
  -3  -4   1   72.99    5.00 
   3  -4  -1   65.09    7.20 
   3  -4  -1   66.39    7.90 
   3  -4  -1   69.89    8.40 
  -3  -4   1   73.89    9.60 
   3  -4  -1   63.39    9.40 
  -3  -4   1   70.09   10.80 
   3  -4  -1   78.29    6.60 
  -3  -4   1   75.89   11.10 
   3  -4  -1   74.09    4.10 
  -3  -4   1   68.89   10.40 
   3  -4  -1   58.79    7.40 
   3  -4  -1   74.49    7.10 
   3  -4  -1   70.09    7.40 
   3  -4  -1   75.89   10.70 
   3  -4  -1   65.79    7.80 
  -3  -4   1   56.69    9.20 
   3  -4  -1   70.89    8.60 
   3   4  -1   86.59   11.70 
   3   4  -1   58.29    7.60 
  -3   4   1   65.49    7.60 
  -3   4   1   63.29    9.70 
  -3   4   1   59.49    7.60 
   3   4  -1   66.19    9.00 
   3   4  -1   61.19    9.80 
  -3   4   1   68.19    8.10 
  -3   4   1   68.19    7.90 
  -3   4   1   66.19    8.90 
  -3   4   1   72.29    8.20 
  -3   4   1   65.49    7.60 
  -3   4   1   62.09    8.30 
   3   4  -1   64.09   10.20 
   3   4  -1   75.29    9.80 
  -3   4   1   69.19   10.20 
  -3   4   1   79.49    7.50 
   3   4  -1   54.39    8.20 
  -3   4   1   68.39    9.50 
   3   4  -1   63.49    9.90 
   3   4  -1   73.19    9.00 
   3   4  -1   73.69   11.00 
   3   4  -1   68.09   10.20 
  -3   4   1   66.19    8.50 
   3   4  -1   80.89   11.00 
   3   4  -1   82.79    8.70 
   3   4  -1   62.49   10.40 
   3   4  -1   72.59   10.10 
   3   4  -1   59.89    9.70 
   3   4  -1   82.39    8.70 
   3   4  -1   83.09   11.80 
  -3   4   1   84.19    8.80 
  -3   4   1   66.49    8.30 
   2  -4  -1   34.10    4.70 
  -2  -4   1   29.90    7.10 
   2  -4  -1   25.00    4.10 
  -2  -4   1   29.30    5.40 
   2  -4  -1   19.30    5.10 
   2  -4  -1   31.80    4.90 
   2  -4  -1   36.70    3.80 
   2  -4  -1   27.60    5.30 
   2  -4  -1   21.80    4.70 
   2  -4  -1   29.00    5.10 
  -2  -4   1   31.10    4.70 
  -2  -4   1   35.40    4.60 
   2  -4  -1   29.60    5.30 
   2  -4  -1   24.40    5.00 
  -2  -4   1   17.50    5.20 
   2  -4  -1   33.70    6.50 
  -2  -4   1   22.10    5.80 
  -2  -4   1   26.40    6.10 
   2  -4  -1   28.80    5.40 
  -2  -4   1   32.80    5.90 
   2  -4  -1   29.70    6.00 
  -2  -4   1   28.80    6.30 
   2  -4  -1   32.10    4.50 
   2  -4  -1   36.10    6.10 
  -2  -4   1   31.10    5.60 
  -2  -4   1   32.70    6.70 
   2  -4  -1   30.70    4.70 
  -2  -4   1   24.00    5.90 
   2  -4  -1   31.30    5.50 
   2  -4  -1   27.00    4.00 
   2  -4  -1   29.30    5.00 
   2  -4  -1   30.60    2.50 
  -2  -4   1   25.30    6.00 
  -2  -4   1   29.80    5.30 
   2  -4  -1   39.60    7.30 
   2  -4  -1   27.20    4.90 
   2  -4  -1   32.80    5.20 
   2  -4  -1   23.70    5.70 
   2  -4  -1   34.70    4.90 
   2  -4  -1   30.30    3.90 
   2  -4  -1   21.30    5.40 
  -2  -4   1   21.30    5.80 
   2  -4  -1   30.00    5.60 
   2  -4  -1   23.40    5.40 
  -2  -4   1   31.60    4.30 
  -2  -4   1   26.10    6.40 
  -2   4   1   36.70    6.10 
  -2   4   1   26.60    6.20 
  -2   4   1   23.00    4.90 
  -2   4   1   30.40    6.40 
   2   4  -1   29.00    4.50 
  -2   4   1   27.30    4.20 
  -2   4   1   29.80    5.00 
   2   4  -1   39.20    7.80 
  -2   4   1   27.50    2.80 
   2   4  -1   37.00    7.10 
   2   4  -1   33.70    7.10 
  -2   4   1   27.60    5.40 
   2   4  -1   27.30    6.60 
   2   4  -1   22.40    4.10 
   2   4  -1   53.49    8.00 
  -2   4   1   34.50    4.50 
   2   4  -1   26.80    6.30 
  -2   4   1   21.90    5.70 
   2   4  -1   39.50    7.50 
  -2   4   1   29.60    4.80 
   2   4  -1   27.30    6.90 
   2   4  -1   29.40    6.20 
   2   4  -1   21.20    5.40 
  -2   4   1   32.50    6.00 
   2   4  -1   28.10    5.50 
  -2   4   1   32.10    4.10 
  -2   4   1   29.90    5.90 
  -2   4   1   31.80    5.00 
  -2   4   1   19.60    4.90 
  -2   4   1   26.20    4.80 
   2   4  -1   28.30    4.20 
   2   4  -1   36.20    5.00 
   2   4  -1   30.70    4.80 
   2   4  -1   27.00    6.30 
   2   4  -1   37.70    6.20 
  -2   4   1   31.90    6.70 
  -2   4   1   23.40    4.80 
   2   4  -1   31.50    6.80 
   2   4  -1   31.60    6.90 
   1  -4  -1   32.50    4.20 
   1  -4  -1   29.60    5.70 
  -1  -4   1   35.50    5.60 
   1  -4  -1   28.80    5.40 
   1  -4  -1   52.79    7.60 
   1  -4  -1   40.80    6.20 
  -1  -4   1   48.30    7.20 
  -1  -4   1   43.60    6.40 
   1  -4  -1   35.60    5.90 
  -1  -4   1   40.20    6.90 
  -1  -4   1   34.80    6.00 
   1  -4  -1   31.10    6.60 
  -1  -4   1   27.90    4.90 
  -1  -4   1   38.10    6.70 
  -1  -4   1   45.70    7.50 
  -1  -4   1   34.00    5.20 
  -1  -4   1   35.70    6.90 
  -1  -4   1   27.00    6.20 
  -1  -4   1   34.90    6.80 
   1  -4  -1   38.30    6.30 
  -1  -4   1   32.40    6.40 
   1  -4  -1   35.20    6.20 
   1  -4  -1   37.70    6.30 
  -1  -4   1   36.80    3.90 
  -1  -4   1   44.60    7.20 
   1  -4  -1   39.20    2.80 
  -1  -4   1   32.00    6.40 
   1  -4  -1   36.10    4.50 
   1  -4  -1   42.30    6.10 
  -1  -4   1   40.90    7.20 
  -1  -4   1   40.70    6.40 
   1  -4  -1   32.80    5.70 
  -1  -4   1   32.10    5.80 
   1  -4  -1   39.00    2.90 
  -1  -4   1   27.80    4.30 
   1  -4  -1   34.60    4.40 
   1  -4  -1   40.20    5.50 
   1  -4  -1   37.00    6.40 
  -1   4   1   37.10    6.60 
   1   4  -1   35.70    5.90 
  -1   4   1   41.20    4.70 
  -1   4   1   40.00    4.60 
  -1   4   1   39.60    6.90 
   1   4  -1   32.20    7.20 
  -1   4   1   38.60    4.60 
  -1   4   1   36.60    5.60 
   1   4  -1   36.10    5.60 
   1   4  -1   47.80    8.60 
   1   4  -1   28.20    6.00 
   1   4  -1   33.70    6.00 
  -1   4   1   36.00    2.70 
  -1   4   1   32.30    6.50 
  -1   4   1   39.00    6.20 
  -1   4   1   37.30    5.60 
  -1   4   1   31.90    6.20 
  -1   4   1   28.40    5.70 
  -1   4   1   36.70    6.50 
   1   4  -1   37.30    3.00 
   1   4  -1   45.90    6.80 
  -1   4   1   44.50    7.40 
   1   4  -1   43.00    7.60 
   1   4  -1   36.90    3.00 
   1   4  -1   33.40    6.60 
   1   4  -1   40.80    6.60 
  -1   4   1   32.80    6.70 
  -1   4   1   28.00    5.90 
  -1   4   1   35.60    3.60 
  -1   4   1   31.70    2.60 
  -1   4   1   33.40    4.70 
  -1   4   1   50.49    8.20 
   1   4  -1   23.70    5.70 
  -1   4   1   49.10    7.60 
  -1   4   1   50.79    8.20 
   1   4  -1   56.49    8.90 
   1   4  -1   47.00    7.50 
  -1   4   1   27.30    5.60 
   1   4  -1   33.00    6.30 
  -1   4   1   36.00    6.30 
   1   4  -1   38.50    6.70 
   1   4  -1   39.10    7.60 
   1   4  -1   46.90    6.10 
  -1   4   1   31.80    6.20 
  -1   4   1   50.39    5.40 
   1   4  -1   35.10    7.00 
  -1   4   1   33.20    6.50 
   0  -4  -1  198.58   12.80 
   0  -4  -1  171.18   10.20 
   0  -4  -1  204.18   12.80 
   0  -4  -1  200.38   12.20 
   0  -4   1  197.28   10.90 
   0  -4   1  201.78   12.70 
   0  -4  -1  197.58   11.80 
   0  -4   1  206.78   11.80 
   0  -4   1  187.08   10.80 
   0  -4   1  202.48   10.30 
   0  -4   1  182.78   12.70 
   0  -4  -1  193.08   11.80 
   0  -4  -1  190.18    9.20 
   0  -4   1  173.78   12.30 
   0  -4   1  201.48   12.00 
   0  -4   1  200.68   11.30 
   0  -4  -1  184.48   10.10 
   0  -4   1  207.38   11.80 
   0  -4   1  207.88    7.90 
   0  -4  -1  202.08   10.90 
   0  -4  -1  199.28   11.40 
   0  -4  -1  201.08   10.60 
   0  -4  -1  211.68   11.60 
   0  -4   1  194.28   10.10 
   0  -4   1  202.58    9.90 
   0  -4   1  217.28   11.50 
   0  -4  -1  203.28   12.30 
   0  -4   1  196.78   12.00 
   0  -4   1  206.18   11.80 
   0  -4   1  187.38    7.70 
   0  -4  -1  203.58   12.10 
   0  -4   1  216.68   13.20 
   0  -4  -1  194.68   10.30 
   0  -4  -1  204.08   11.90 
   0  -4   1  209.88   12.30 
   0  -4  -1  195.78   11.90 
   0  -4  -1  202.38    8.50 
   0  -4   1  195.88   13.00 
   0   4   1  178.38   11.20 
   0   4  -1  191.88   12.90 
   0   4   1  181.18   12.10 
   0   4   1  213.38   12.90 
   0   4   1  209.68   12.90 
   0   4   1  186.38   12.40 
   0   4   1  185.98   10.20 
   0   4   1  204.18   13.20 
   0   4  -1  196.98   10.50 
   0   4   1  190.88   13.00 
   0   4  -1  190.78   11.50 
   0   4   1  210.48   10.90 
   0   4   1  200.88   11.00 
   0   4  -1  215.78   11.40 
   0   4   1  185.08   12.60 
   0   4  -1  196.88   11.50 
   0   4  -1  192.88   11.90 
   0   4   1  201.98   13.00 
   0   4   1  185.58   12.60 
   0   4  -1  184.88    9.70 
   0   4  -1  195.38   12.30 
   0   4   1  201.48   11.60 
   0   4   1  187.88   12.50 
   0   4  -1  210.68   13.30 
   0   4   1  196.28   12.90 
   0   4   1  202.98   12.90 
   0   4  -1  196.78   12.00 
   0   4  -1  227.58   15.70 
   0   4  -1  200.28   13.30 
   0   4   1  190.68   12.40 
   0   4   1  204.28    7.80 
   0   4  -1  202.88   13.40 
   0   4  -1  192.58   10.60 
   0   4  -1  199.58   10.50 
   0   4  -1  213.78   13.20 
   0   4   1  189.48   13.10 
   0   4  -1  196.28    7.20 
   0   4  -1  207.18   10.00 
   0   4   1  174.48   12.80 
   0   4  -1  195.68   14.00 
   0   4   1  188.68   10.30 
   0   4  -1  191.78   11.40 
   0   4   1  183.18   12.20 
   0   4  -1  181.48   12.60 
   0   4  -1  178.38    9.00 
   0   4   1  183.58   10.50 
   0   4  -1  173.68   13.50 
   0   4  -1  186.58   11.40 
   0   4  -1  210.98   11.40 
   0   4   1  211.08   13.00 
   0   4   1  198.38    9.10 
   0   4  -1  194.28    6.10 
   0   4   1  187.98    7.20 
   0   4   1  191.48   12.20 
   0   4  -1  193.18   10.90 
   1  -4   1  489.65   13.30 
   1  -4   1  512.95   16.30 
  -1  -4  -1  496.75   21.70 
  -1  -4  -1  517.65   18.60 
  -1  -4  -1  456.75   20.20 
  -1  -4  -1  533.25   22.30 
   1  -4   1  491.85   18.90 
   1  -4   1  490.75   16.40 
  -1  -4  -1  460.45   20.00 
  -1  -4  -1  465.55   20.60 
   1  -4   1  502.25   23.40 
  -1  -4  -1  478.95   19.70 
   1  -4   1  508.95   18.10 
   1  -4   1  497.95   10.90 
   1  -4   1  499.25   21.10 
   1  -4   1  506.25   17.60 
  -1  -4  -1  482.05   18.70 
   1  -4   1  497.25   13.80 
   1  -4   1  510.05   16.50 
  -1  -4  -1  458.65   20.00 
   1  -4   1  514.15   20.80 
  -1  -4  -1  481.35   21.20 
  -1  -4  -1  475.95   15.40 
   1  -4   1  522.65   18.60 
  -1  -4  -1  495.05   16.70 
   1  -4   1  511.95   21.10 
  -1  -4  -1  464.85   20.30 
   1  -4   1  490.25   18.60 
  -1  -4  -1  481.55   19.40 
  -1  -4  -1  477.95   21.10 
  -1  -4  -1  479.65   17.90 
  -1  -4  -1  508.65   15.70 
   1  -4   1  493.45   22.10 
   1  -4   1  506.55   17.60 
   1  -4   1  498.75   21.20 
  -1  -4  -1  495.65   19.70 
   1  -4   1  470.75   17.40 
   1  -4   1  509.25   16.70 
  -1   4  -1  508.15   19.10 
   1   4   1  472.25   22.30 
  -1   4  -1  482.55   21.40 
  -1   4  -1  521.75   21.70 
   1   4   1  502.85   22.50 
  -1   4  -1  494.55   14.40 
  -1   4  -1  492.25   20.00 
  -1   4  -1  474.65   23.20 
  -1   4  -1  501.95   21.00 
  -1   4  -1  510.15   15.80 
  -1   4  -1  499.65   14.40 
  -1   4  -1  478.65   21.30 
  -1   4  -1  479.95   21.70 
  -1   4  -1  480.85   14.00 
   1   4   1  524.85   25.30 
  -1   4  -1  495.05   17.20 
   1   4   1  484.15   21.50 
   1   4   1  529.25   20.60 
  -1   4  -1  505.95   17.70 
  -1   4  -1  468.75   18.90 
  -1   4  -1  496.15   22.60 
   1   4   1  498.45   21.60 
   1   4   1  473.55   21.90 
  -1   4  -1  476.25   23.20 
   1   4   1  530.95   22.30 
   1   4   1  515.85   22.00 
  -1   4  -1  477.25   18.80 
  -1   4  -1  484.65   15.30 
   1   4   1  487.65   21.50 
  -1   4  -1  538.55   19.30 
   1   4   1  506.45   20.30 
   1   4   1  497.75   20.30 
  -1   4  -1  498.85   19.10 
   1   4   1  479.15   21.40 
  -1   4  -1  504.25   16.90 
   1   4   1  493.35   20.60 
  -1   4  -1  508.35   13.70 
   1   4   1  516.15   21.30 
  -1   4  -1  507.15   15.80 
   1   4   1  502.75   12.70 
  -1   4  -1  509.05   18.60 
   1   4   1  484.45   21.90 
   1   4   1  486.55   21.30 
   2  -4   1  862.91   21.70 
  -2  -4  -1  869.41   31.40 
  -2  -4  -1  820.52   23.40 
   2  -4   1  865.21   24.20 
   2  -4   1  850.71   22.90 
  -2  -4  -1  821.82   31.60 
  -2  -4  -1  893.61   32.40 
   2  -4   1  826.02   30.30 
  -2  -4  -1  870.51   29.70 
  -2  -4  -1  861.41   22.80 
  -2  -4  -1  857.11   23.60 
   2  -4   1  870.81   22.70 
  -2  -4  -1  858.31   31.20 
   2  -4   1  856.41   32.00 
   2  -4   1  892.91   22.50 
  -2  -4  -1  864.71   30.60 
   2  -4   1  874.31   26.60 
   2  -4   1  846.62   23.10 
   2  -4   1  880.61   29.30 
   2  -4   1  888.01   27.20 
   2  -4   1  905.51   24.80 
  -2  -4  -1  884.01   27.80 
   2  -4   1  839.42   24.80 
  -2  -4  -1  918.61   29.10 
  -2  -4  -1  854.21   26.40 
   2  -4   1  859.41   29.30 
  -2  -4  -1  799.72   30.20 
  -2  -4  -1  805.02   30.80 
   2  -4   1  870.81   24.00 
   2  -4   1  878.71   24.60 
   2  -4   1  837.22   30.70 
  -2  -4  -1  862.21   24.10 
   2  -4   1  894.91   24.80 
   2  -4   1  846.42   24.80 
  -2  -4  -1  854.61   31.40 
   2  -4   1  840.92   22.10 
   2  -4   1  874.71   24.70 
  -2  -4  -1  834.42   30.50 
  -2  -4  -1  861.91   29.10 
   2  -4   1  831.12   30.50 
  -2  -4  -1  879.31   29.20 
   2  -4   1  863.71   24.80 
   2  -4   1  851.71   24.10 
   2   4   1  892.01   30.90 
  -2   4  -1  820.02   24.60 
   2   4   1  858.31   32.40 
  -2   4  -1  907.51   27.00 
  -2   4  -1  758.72   30.20 
  -2   4  -1  830.52   19.70 
  -2   4  -1  885.81   23.70 
   2   4   1  849.91   30.40 
   2   4   1  841.02   30.70 
  -2   4  -1  831.52   25.60 
  -2   4  -1  893.41   28.40 
   2   4   1  833.32   31.70 
  -2   4  -1  879.41   24.00 
   2   4   1  857.91   31.10 
  -2   4  -1  818.42   25.70 
  -2   4  -1  915.41   28.20 
   2   4   1  869.41   26.30 
   2   4   1  882.11   23.20 
  -2   4  -1  856.11   26.40 
  -2   4  -1  903.01   30.90 
   2   4   1  870.91   23.60 
  -2   4  -1  866.71   22.80 
  -2   4  -1  877.81   32.10 
   2   4   1  864.21   29.80 
   2   4   1  858.81   31.50 
  -2   4  -1  842.32   29.60 
   2   4   1  836.32   32.00 
   2   4   1  881.61   25.60 
   2   4   1  812.22   29.00 
   2   4   1  855.11   31.70 
   2   4   1  862.01   29.90 
  -2   4  -1  858.01   22.90 
   2   4   1  876.61   26.20 
   2   4   1  843.72   31.40 
  -2   4  -1  890.61   24.70 
   2   4   1  892.51   30.90 
  -2   4  -1  871.81   30.40 
   3  -4   1   83.79    8.00 
  -3  -4  -1   66.09    4.10 
   3  -4   1   72.69    8.30 
   3  -4   1   58.79    8.40 
  -3  -4  -1   82.89    9.60 
  -3  -4  -1   75.79   11.00 
  -3  -4  -1   62.59   10.40 
  -3  -4  -1   61.89    9.70 
  -3  -4  -1   62.89   10.40 
   3  -4   1   68.39    5.30 
  -3  -4  -1   71.59    9.90 
   3  -4   1   78.69   11.50 
   3  -4   1   73.79    5.70 
   3  -4   1   60.39    6.30 
   3  -4   1   62.29    9.40 
   3  -4   1   68.19    7.40 
   3  -4   1   75.39    5.70 
  -3  -4  -1   63.39    7.10 
   3  -4   1   71.89    4.50 
   3  -4   1   78.69    7.60 
   3  -4   1   56.69    9.50 
  -3  -4  -1   59.79    7.50 
   3  -4   1   82.59    8.30 
  -3  -4  -1   51.19    9.60 
  -3  -4  -1   68.49   10.30 
  -3  -4  -1   69.59   10.70 
   3  -4   1   77.29    5.30 
  -3  -4  -1   83.29   11.40 
  -3  -4  -1   63.19    9.50 
   3  -4   1   88.69    6.50 
   3  -4   1   73.69    8.70 
   3  -4   1   68.99    7.60 
   3  -4   1   76.89    7.50 
   3  -4   1   70.49    5.60 
  -3  -4  -1   68.39    4.50 
   3  -4   1   60.49    7.00 
   3  -4   1   76.49    3.10 
  -3  -4  -1   65.89    7.60 
  -3  -4  -1   68.99   10.40 
  -3   4  -1   75.79   10.60 
  -3   4  -1   82.79    9.10 
  -3   4  -1   70.29    6.70 
   3   4   1   78.39   10.80 
  -3   4  -1   62.09    7.80 
   3   4   1   83.39   10.10 
  -3   4  -1   93.19   10.80 
   3   4   1   68.19   10.60 
   3   4   1   81.99    8.80 
  -3   4  -1   53.99    8.10 
   3   4   1   65.39   10.30 
   3   4   1   73.89   11.10 
  -3   4  -1   73.99   10.00 
   3   4   1  111.39   13.30 
   3   4   1   67.39    9.70 
   3   4   1   87.49   11.10 
  -3   4  -1   82.19   11.20 
  -3   4  -1   70.59    5.60 
   3   4   1   68.59    8.50 
   3   4   1   77.19   11.60 
   3   4   1   67.09   10.20 
  -3   4  -1   69.79    5.50 
   3   4   1   99.89   12.40 
   3   4   1   66.89   10.30 
  -3   4  -1   71.19    7.40 
  -3   4  -1   70.49    5.90 
   3   4   1   69.09    9.20 
   4  -4   1  126.79    9.30 
  -4  -4  -1  100.89   14.40 
  -4  -4  -1   96.09   11.40 
   4  -4   1   90.29    9.30 
   4  -4   1  114.79    5.20 
   4  -4   1  107.49   13.60 
   4  -4   1  106.69    7.00 
  -4  -4  -1   99.09   14.20 
   4  -4   1  105.69    6.90 
  -4  -4  -1   89.29   12.60 
  -4  -4  -1  113.19   11.10 
   4  -4   1  103.09    8.10 
  -4  -4  -1   92.99   12.40 
   4  -4   1  120.89    5.20 
  -4  -4  -1  119.09   14.80 
  -4  -4  -1  110.89   14.70 
   4  -4   1  116.39   12.30 
  -4  -4  -1   83.29   11.90 
   4  -4   1  107.19    7.70 
   4  -4   1  109.59   13.60 
   4  -4   1  104.99   12.50 
   4  -4   1  117.69   13.40 
   4  -4   1  109.69    8.40 
   4  -4   1   99.19    6.90 
   4  -4   1  121.79   12.40 
  -4  -4  -1  115.69   14.80 
  -4  -4  -1  123.59   12.50 
   4  -4   1  109.69    5.10 
   4  -4   1  107.89    5.90 
  -4  -4  -1   94.49   12.40 
  -4  -4  -1  114.29    7.70 
   4  -4   1  115.49    6.40 
  -4  -4  -1  111.79   13.90 
   4   4   1  109.99   14.10 
   4   4   1   86.09   11.90 
  -4   4  -1   95.19    9.70 
   4   4   1  125.59   15.50 
   4   4   1  101.09   12.70 
   4   4   1  108.69   13.90 
   4   4   1  105.89   13.80 
   4   4   1  127.49   14.80 
   4   4   1  125.19   12.40 
  -4   4  -1   93.89   12.80 
   4   4   1   82.19   12.10 
   4   4   1   95.59   11.50 
  -4   4  -1  116.59    5.20 
   4   4   1   91.19   12.70 
   4   4   1  120.29   12.20 
   4   4   1  112.39   13.90 
   4   4   1  101.39   13.70 
   4   4   1  105.29   11.60 
  -4   4  -1  122.19    8.40 
  -4   4  -1  122.69   14.10 
  -4   4  -1  104.69    6.60 
   4   4   1   98.29   13.60 
  -4   4  -1   94.69   11.10 
  -4   4  -1  132.79   13.80 
  -4   4  -1   97.19   11.30 
  -4   4  -1  129.89   14.00 
  -4   4  -1  117.19    9.30 
  -5  -4  -1  274.27   21.30 
  -5  -4  -1  204.98   20.70 
   5  -4   1  239.58   14.70 
  -5  -4  -1  273.17   17.70 
  -5  -4  -1  265.47   10.40 
   5  -4   1  259.17   17.80 
   5  -4   1  286.77   18.60 
  -5  -4  -1  277.07   19.10 
   5  -4   1  233.88   14.50 
   5  -4   1  262.07   16.00 
  -5  -4  -1  265.37   17.60 
   5  -4   1  269.87   17.50 
  -5  -4  -1  225.38   18.90 
  -5  -4  -1  291.87   19.90 
   5  -4   1  298.07   20.30 
  -5  -4  -1  253.47   19.00 
  -5  -4  -1  246.38   16.00 
   5  -4   1  223.68   17.60 
   5  -4   1  254.17   11.00 
  -5  -4  -1  271.07   18.10 
  -5  -4  -1  229.28   18.50 
   5  -4   1  227.38   16.20 
   5  -4   1  273.47   14.20 
   5  -4   1  268.57   14.70 
  -5  -4  -1  233.68   19.20 
  -5   4  -1  275.57   18.90 
   5   4   1  242.58   19.20 
  -5   4  -1  219.48   14.60 
  -5   4  -1  262.57    9.40 
   5   4   1  238.58   18.40 
   5   4   1  225.98   18.40 
   5   4   1  239.88   18.90 
   5   4   1  256.77   20.00 
  -5   4  -1  253.57   14.20 
  -5   4  -1  263.77   16.70 
   5   4   1  267.77   18.10 
   5   4   1  252.97   19.30 
   5   4   1  239.58   19.10 
   5   4   1  263.27   15.50 
   5   4   1  251.37   17.10 
  -5   4  -1  250.77   17.90 
   5   4   1  259.07   18.90 
   5   4   1  232.78   14.70 
   5   4   1  240.48   18.40 
  -5   4  -1  290.87   18.50 
  -5   4  -1  267.57   16.30 
   5   4   1  268.67   19.30 
   5   4   1  258.07   19.40 
   5   4   1  258.97   17.70 
   6  -4   1  563.84   27.10 
   6  -4   1  568.04   21.10 
  -6  -4  -1  558.44   25.10 
  -6  -4  -1  498.35   28.80 
   6  -4   1  572.74   25.70 
  -6  -4  -1  511.95   28.10 
   6  -4   1  521.15   28.60 
  -6  -4  -1  580.44   31.40 
   6  -4   1  511.85   29.00 
   6  -4   1  590.04   25.10 
   6  -4   1  528.75   27.10 
  -6  -4  -1  549.05   31.20 
  -6  -4  -1  573.34   32.30 
   6  -4   1  547.55   25.50 
  -6  -4  -1  563.04   33.30 
   6  -4   1  527.75   25.30 
   6  -4   1  568.34   28.50 
  -6  -4  -1  517.55   27.40 
   6  -4   1  534.85   27.70 
  -6  -4  -1  566.64   31.10 
  -6  -4  -1  581.24   31.00 
  -6  -4  -1  552.44   26.50 
   6  -4   1  546.85   23.10 
  -6  -4  -1  547.25   30.50 
   6  -4   1  532.65   24.60 
   6   4   1  543.45   29.80 
   6   4   1  495.85   26.80 
   6   4   1  538.75   23.60 
   6   4   1  574.84   29.30 
   6   4   1  509.25   27.00 
   6   4   1  527.15   31.10 
  -6   4  -1  548.35   28.70 
   6   4   1  514.25   30.10 
   6   4   1  558.24   30.60 
  -6   4  -1  514.15   28.40 
  -6   4  -1  541.65   26.20 
  -6   4  -1  561.14   29.50 
  -6   4  -1  602.04   23.60 
   6   4   1  572.84   31.90 
  -6   4  -1  563.94   26.80 
  -6   4  -1  555.24   23.90 
   6   4   1  512.05   29.50 
   6   4   1  484.95   28.10 
   6   4   1  554.34   23.30 
   6   4   1  555.24   31.80 
   6   4   1  524.95   30.30 
   6   4   1  513.75   29.90 
   6   4   1  534.65   31.00 
   7  -4   1  365.16   21.30 
   7  -4   1  325.27   24.50 
   7  -4   1  342.07   23.00 
  -7  -4  -1  394.26   27.00 
  -7  -4  -1  299.87   31.20 
  -7  -4  -1  352.76   26.30 
  -7  -4  -1  369.26   24.90 
  -7  -4  -1  334.27   24.10 
  -7  -4  -1  346.87   25.60 
   7  -4   1  332.97   21.60 
   7  -4   1  369.16   22.00 
  -7  -4  -1  365.76   20.00 
   7  -4   1  344.07   19.60 
   7  -4   1  335.57   23.60 
   7  -4   1  394.16   20.70 
  -7  -4  -1  361.46   26.20 
   7  -4   1  320.27   20.60 
  -7  -4  -1  337.07   25.90 
   7  -4   1  303.97   19.00 
  -7  -4  -1  405.36   26.90 
  -7  -4  -1  385.36   21.40 
   7  -4   1  333.67   22.90 
   7  -4   1  333.97   21.30 
  -7  -4  -1  330.47   26.10 
  -7  -4  -1  353.86   23.90 
   7  -4   1  386.66   22.90 
   7  -4   1  386.06   25.20 
   7   4   1  324.57   25.10 
   7   4   1  383.46   25.80 
   7   4   1  320.47   24.00 
  -7   4  -1  343.27   24.70 
   7   4   1  301.97   25.20 
   7   4   1  366.66   27.20 
  -7   4  -1  328.77   22.10 
   7   4   1  399.06   28.10 
   7   4   1  326.37   22.30 
   7   4   1  366.86   26.40 
   7   4   1  331.47   23.10 
  -7   4  -1  393.36   22.80 
   7   4   1  354.16   24.90 
   7   4   1  306.97   25.20 
   7   4   1  346.17   25.30 
   7   4   1  394.96   27.70 
   7   4   1  332.37   25.30 
  -7   4  -1  314.07   23.50 
  -7   4  -1  291.47   22.90 
  -8  -4  -1  953.80   50.09 
  -8  -4  -1  995.60   47.90 
  -8  -4  -1  890.41   45.60 
   8  -4   1  982.70   42.00 
   8  -4   1  964.00   43.00 
   8  -4   1 1047.50   44.10 
   8  -4   1 1042.90   46.70 
  -8  -4  -1 1038.30   44.60 
   8  -4   1 1008.50   40.50 
   8  -4   1  992.50   46.40 
  -8  -4  -1  958.10   48.80 
  -8  -4  -1  953.20   47.40 
   8  -4   1  947.31   40.70 
  -8  -4  -1 1020.10   50.79 
   8  -4   1 1018.60   45.40 
   8  -4   1  995.80   42.10 
   8  -4   1  988.10   40.00 
   8  -4   1  979.40   47.40 
   8  -4   1 1045.10   46.90 
  -8  -4  -1 1027.20   49.10 
  -8  -4  -1  947.31   47.00 
  -8  -4  -1 1005.50   46.70 
  -8  -4  -1  988.10   46.00 
   8   4   1  951.50   44.10 
  -8   4  -1  964.10   46.00 
  -8   4  -1 1016.30   41.40 
   8   4   1  941.01   47.00 
   8   4   1  960.70   48.90 
   8   4   1 1017.80   50.69 
   8   4   1  976.50   48.30 
   8   4   1 1113.49   47.60 
   8   4   1 1017.50   49.70 
  -8   4  -1  915.01   45.20 
   8   4   1 1035.30   50.89 
   8   4   1  954.60   46.60 
   8   4   1 1015.90   43.10 
  -8   4  -1  992.80   47.00 
   8   4   1 1063.19   47.00 
   8   4   1  988.10   49.60 
   8   4   1  955.50   46.60 
   8   4   1  993.20   46.30 
  -8   4  -1 1046.20   44.50 
   9  -4   1  290.97   28.40 
  -9  -4  -1  335.47   34.80 
   9  -4   1  304.77   24.80 
  -9  -4  -1  330.47   35.40 
  -9  -4  -1  329.77   34.40 
  -9  -4  -1  304.27   34.40 
   9  -4   1  293.57   32.90 
  -9  -4  -1  328.07   33.10 
  -9  -4  -1  285.37   31.20 
   9  -4   1  322.67   32.60 
  -9  -4  -1  315.97   30.60 
   9  -4   1  281.97   28.30 
  -9  -4  -1  297.17   32.40 
   9  -4   1  315.27   29.40 
  -9  -4  -1  338.67   38.00 
  -9  -4  -1  294.07   33.00 
   9  -4   1  300.37   31.50 
  -9  -4  -1  338.07   35.20 
   9  -4   1  297.97   33.20 
   9   4   1  301.27   33.10 
   9   4   1  321.27   24.40 
   9   4   1  291.27   31.70 
   9   4   1  278.67   29.50 
   9   4   1  332.97   36.30 
   9   4   1  324.87   35.20 
  -9   4  -1  298.57   32.90 
  -9   4  -1  313.67   33.30 
   9   4   1  268.77   32.00 
  -9   4  -1  310.87   33.10 
   9   4   1  312.37   36.40 
   9   4   1  252.07   30.20 
   9   4   1  278.67   33.60 
  -9   4  -1  286.97   29.10 
   9   4   1  293.77   30.10 
   9   4   1  306.37   32.60 
   9   4   1  293.87   30.50 
   9   4   1  249.88   31.00 
   9   4   1  338.07   27.00 
   9  -5  -1  700.83   43.10 
   9  -5  -1  591.14   38.60 
   9  -5  -1  719.53   42.10 
  -9  -5   1  692.63   43.10 
   9  -5  -1  678.73   36.10 
   9  -5  -1  721.03   38.80 
  -9  -5   1  613.24   40.60 
   9  -5  -1  687.13   38.20 
  -9  -5   1  655.03   42.10 
  -9  -5   1  618.14   42.20 
  -9  -5   1  597.04   39.90 
   9  -5  -1  678.23   39.60 
  -9  -5   1  631.24   41.30 
   9  -5  -1  634.74   38.30 
   9  -5  -1  678.23   40.00 
  -9  -5   1  662.33   39.10 
  -9  -5   1  697.33   46.00 
   9  -5  -1  710.73   41.50 
  -9  -5   1  650.73   40.30 
  -9  -5   1  665.73   41.60 
   9   5  -1  693.43   42.60 
  -9   5   1  678.23   39.90 
   9   5  -1  648.64   42.30 
  -9   5   1  647.14   38.80 
   9   5  -1  658.93   43.70 
   9   5  -1  706.93   43.60 
  -9   5   1  702.23   39.80 
   9   5  -1  701.23   41.60 
   9   5  -1  582.74   40.80 
   9   5  -1  680.93   41.20 
   9   5  -1  575.14   39.00 
   9   5  -1  658.83   41.70 
   9   5  -1  707.33   45.50 
   9   5  -1  615.04   38.10 
   9   5  -1  686.93   38.50 
   9   5  -1  637.04   40.90 
   9   5  -1  612.04   39.00 
   9   5  -1  673.23   44.30 
  -8  -5   1   71.19   16.30 
   8  -5  -1   71.29   14.20 
   8  -5  -1   66.49   14.40 
   8  -5  -1   86.19   15.20 
   8  -5  -1   80.19   14.60 
   8  -5  -1   97.79   16.90 
   8  -5  -1   61.59   14.50 
  -8  -5   1   63.29   14.60 
  -8  -5   1   75.39   17.70 
  -8  -5   1   68.49   15.90 
  -8  -5   1   61.99   14.40 
   8  -5  -1   56.49   11.80 
  -8  -5   1   74.89   16.50 
   8  -5  -1   56.89   13.70 
   8  -5  -1   56.59   12.70 
   8  -5  -1   77.29   14.10 
   8  -5  -1   56.59   11.70 
  -8  -5   1   73.69   17.20 
  -8  -5   1   60.09   14.40 
  -8  -5   1   64.19   15.10 
   8  -5  -1   74.79   14.80 
   8  -5  -1   89.39   14.30 
  -8  -5   1   74.79   16.90 
   8   5  -1  109.29   18.50 
   8   5  -1   66.59   15.80 
  -8   5   1   53.99   12.50 
   8   5  -1   74.19   16.70 
   8   5  -1   74.09   15.50 
   8   5  -1   75.79   16.60 
   8   5  -1   72.39   16.20 
   8   5  -1   59.89   15.30 
   8   5  -1   68.89   15.90 
   8   5  -1   65.09   15.30 
   8   5  -1   42.90   11.20 
   8   5  -1   58.79   14.40 
   8   5  -1   47.20   12.80 
  -8   5   1   75.39   15.30 
   8   5  -1   84.39   14.80 
  -8   5   1   52.59   13.10 
   8   5  -1   30.70   11.30 
   8   5  -1   58.49   13.50 
  -7  -5   1  671.63   38.60 
  -7  -5   1  683.03   38.00 
   7  -5  -1  772.62   34.90 
  -7  -5   1  617.54   36.40 
  -7  -5   1  693.13   37.50 
   7  -5  -1  667.33   31.00 
   7  -5  -1  670.63   35.80 
   7  -5  -1  697.93   33.30 
  -7  -5   1  683.33   38.20 
   7  -5  -1  676.03   36.10 
  -7  -5   1  731.03   41.50 
   7  -5  -1  760.42   32.50 
  -7  -5   1  685.43   32.60 
   7  -5  -1  685.03   36.60 
   7  -5  -1  712.93   34.00 
   7  -5  -1  748.23   34.30 
  -7  -5   1  679.63   32.50 
   7  -5  -1  736.43   33.20 
   7  -5  -1  710.63   35.70 
  -7  -5   1  651.03   37.70 
  -7  -5   1  736.63   40.60 
  -7  -5   1  716.53   36.70 
  -7  -5   1  699.83   36.60 
   7  -5  -1  708.33   31.80 
  -7  -5   1  637.24   31.90 
   7   5  -1  729.63   39.50 
   7   5  -1  666.53   38.80 
   7   5  -1  684.83   38.60 
  -7   5   1  703.93   34.90 
   7   5  -1  705.93   34.00 
   7   5  -1  658.93   35.00 
   7   5  -1  666.03   38.90 
   7   5  -1  712.93   38.60 
   7   5  -1  727.83   40.00 
   7   5  -1  757.52   38.20 
   7   5  -1  710.23   40.20 
   7   5  -1  689.13   33.60 
  -7   5   1  674.13   34.60 
   7   5  -1  637.34   35.10 
  -7   5   1  707.73   35.60 
   7   5  -1  731.03   39.50 
   7   5  -1  705.83   38.30 
   7   5  -1  730.03   38.70 
   6  -5  -1  449.76   25.50 
   6  -5  -1  419.76   25.80 
   6  -5  -1  385.96   19.80 
  -6  -5   1  463.35   29.90 
  -6  -5   1  457.85   23.80 
  -6  -5   1  435.96   27.00 
   6  -5  -1  466.95   24.20 
  -6  -5   1  418.06   29.60 
  -6  -5   1  464.85   25.40 
  -6  -5   1  450.25   28.50 
   6  -5  -1  473.55   25.80 
   6  -5  -1  433.96   26.10 
   6  -5  -1  428.46   22.30 
  -6  -5   1  386.06   26.40 
  -6  -5   1  416.36   28.50 
   6  -5  -1  445.86   23.80 
   6  -5  -1  421.86   23.00 
  -6  -5   1  393.76   27.10 
   6  -5  -1  448.26   27.80 
   6  -5  -1  448.66   21.40 
  -6  -5   1  373.66   23.60 
   6  -5  -1  415.96   26.30 
   6  -5  -1  495.45   23.60 
   6  -5  -1  420.36   21.80 
  -6  -5   1  421.86   25.60 
  -6  -5   1  441.06   27.30 
   6   5  -1  386.86   26.70 
   6   5  -1  451.35   29.00 
   6   5  -1  432.66   27.20 
   6   5  -1  438.96   29.00 
   6   5  -1  458.85   26.00 
   6   5  -1  376.46   26.60 
  -6   5   1  435.66   22.30 
   6   5  -1  450.85   25.50 
   6   5  -1  404.56   27.60 
   6   5  -1  404.06   27.10 
   6   5  -1  406.66   23.30 
   6   5  -1  427.56   28.50 
   6   5  -1  466.45   30.00 
  -6   5   1  408.46   21.40 
   6   5  -1  347.47   26.20 
   6   5  -1  480.15   27.50 
  -6   5   1  408.86   24.20 
  -6   5   1  472.35   26.70 
  -6   5   1  476.65   25.90 
   6   5  -1  430.46   21.80 
  -6   5   1  422.46   21.60 
   6   5  -1  448.06   27.70 
   6   5  -1  432.26   20.80 
  -6   5   1  431.56   25.10 
   5  -5  -1 2248.77   66.89 
  -5  -5   1 2245.78   71.19 
  -5  -5   1 2297.07   61.99 
  -5  -5   1 2322.57   54.69 
   5  -5  -1 2274.07   61.89 
  -5  -5   1 2319.37   68.79 
  -5  -5   1 2212.98   70.89 
   5  -5  -1 2247.48   52.99 
  -5  -5   1 2265.17   74.19 
  -5  -5   1 2336.97   72.99 
  -5  -5   1 2242.28   67.69 
   5  -5  -1 2292.17   62.59 
   5  -5  -1 2328.17   60.59 
  -5  -5   1 2277.97   67.29 
   5  -5  -1 2302.47   61.69 
  -5  -5   1 2279.47   70.79 
  -5  -5   1 2198.58   69.39 
   5  -5  -1 2294.27   70.69 
   5  -5  -1 2300.37   62.79 
   5  -5  -1 2232.28   59.89 
   5  -5  -1 2228.08   69.29 
   5  -5  -1 2224.48   67.59 
  -5  -5   1 2284.87   67.49 
  -5  -5   1 2298.07   73.69 
   5   5  -1 2279.27   62.89 
   5   5  -1 2272.67   71.89 
   5   5  -1 2161.58   70.59 
   5   5  -1 2372.76   73.19 
   5   5  -1 2174.28   66.19 
   5   5  -1 2360.16   61.89 
  -5   5   1 2334.87   57.89 
  -5   5   1 2410.06   63.19 
   5   5  -1 2344.17   73.39 
   5   5  -1 2243.78   70.29 
  -5   5   1 2453.55   64.49 
   5   5  -1 2250.27   71.09 
  -5   5   1 2390.36   60.79 
   5   5  -1 2320.07   72.99 
  -5   5   1 2257.57   53.69 
   5   5  -1 2407.26   64.19 
  -5   5   1 2330.17   53.89 
   5   5  -1 2180.88   72.49 
  -5   5   1 2336.27   69.59 
  -5   5   1 2346.07   64.69 
  -5   5   1 2322.67   64.09 
  -5   5   1 2376.96   66.29 
   5   5  -1 2196.08   71.19 
   5   5  -1 2344.47   65.49 
  -5   5   1 2290.27   64.79 
   5   5  -1 2237.58   72.19 
   5   5  -1 2403.66   68.39 
  -4  -5   1  651.83   18.10 
   4  -5  -1  689.13   26.60 
  -4  -5   1  677.33   33.20 
   4  -5  -1  684.03   30.10 
   4  -5  -1  636.24   21.60 
   4  -5  -1  618.94   30.40 
  -4  -5   1  651.73   23.40 
   4  -5  -1  635.74   15.00 
  -4  -5   1  632.94   28.00 
   4  -5  -1  634.54   30.20 
   4  -5  -1  662.53   25.10 
  -4  -5   1  612.04   23.70 
   4  -5  -1  639.34   23.00 
  -4  -5   1  616.94   30.00 
   4  -5  -1  626.44   21.70 
   4  -5  -1  658.83   29.40 
  -4  -5   1  656.23   31.40 
  -4  -5   1  632.84   29.60 
   4  -5  -1  657.73   25.40 
   4  -5  -1  632.14   23.70 
   4  -5  -1  606.34   22.10 
  -4  -5   1  661.33   31.00 
   4  -5  -1  662.33   25.30 
  -4  -5   1  593.84   30.00 
  -4  -5   1  637.44   30.00 
  -4  -5   1  686.23   32.00 
  -4  -5   1  639.24   28.10 
  -4  -5   1  608.14   31.20 
  -4   5   1  647.94   27.30 
  -4   5   1  573.64   26.10 
  -4   5   1  668.53   26.90 
   4   5  -1  653.93   31.20 
   4   5  -1  598.14   24.60 
  -4   5   1  660.93   28.00 
  -4   5   1  643.74   25.20 
  -4   5   1  639.94   25.30 
   4   5  -1  588.24   30.50 
   4   5  -1  672.33   26.90 
   4   5  -1  639.74   27.10 
   4   5  -1  646.74   31.40 
  -4   5   1  648.24   24.00 
   4   5  -1  678.33   31.70 
   4   5  -1  639.54   27.80 
   4   5  -1  621.94   27.60 
   4   5  -1  635.84   30.90 
  -4   5   1  621.44   23.60 
  -4   5   1  654.43   23.50 
   4   5  -1  596.44   25.20 
   4   5  -1  657.23   31.90 
   4   5  -1  593.44   30.50 
   4   5  -1  640.84   31.40 
   4   5  -1  580.54   30.50 
  -4   5   1  678.13   26.60 
  -4   5   1  652.33   21.50 
  -4   5   1  659.43   30.60 
   4   5  -1  613.24   31.60 
  -4   5   1  668.03   23.90 
   3  -5  -1 1330.17   30.00 
   3  -5  -1 1415.86   35.60 
   3  -5  -1 1411.06   46.70 
  -3  -5   1 1358.26   35.10 
   3  -5  -1 1339.57   38.20 
  -3  -5   1 1298.07   46.80 
  -3  -5   1 1393.16   42.10 
  -3  -5   1 1341.97   36.40 
  -3  -5   1 1362.06   42.30 
  -3  -5   1 1325.97   47.30 
   3  -5  -1 1278.57   39.30 
   3  -5  -1 1379.56   40.00 
  -3  -5   1 1338.77   33.00 
  -3  -5   1 1401.26   46.40 
  -3  -5   1 1347.27   47.00 
   3  -5  -1 1361.96   38.70 
  -3  -5   1 1356.36   40.60 
   3  -5  -1 1387.46   36.20 
  -3  -5   1 1334.27   45.30 
   3  -5  -1 1330.17   40.70 
  -3  -5   1 1382.06   46.40 
   3  -5  -1 1331.87   46.10 
  -3  -5   1 1361.86   46.00 
  -3  -5   1 1419.56   47.00 
   3  -5  -1 1335.77   38.30 
   3  -5  -1 1313.87   44.60 
   3  -5  -1 1368.66   37.50 
   3  -5  -1 1399.96   37.80 
   3  -5  -1 1305.67   35.10 
   3  -5  -1 1356.46   44.10 
   3  -5  -1 1294.97   37.30 
   3  -5  -1 1325.37   32.50 
  -3   5   1 1396.26   38.60 
  -3   5   1 1393.76   40.80 
   3   5  -1 1393.16   46.40 
  -3   5   1 1397.26   43.10 
  -3   5   1 1325.37   45.90 
  -3   5   1 1333.37   40.70 
   3   5  -1 1345.27   42.50 
   3   5  -1 1310.07   47.20 
   3   5  -1 1329.57   44.30 
  -3   5   1 1368.56   44.30 
  -3   5   1 1361.86   37.30 
   3   5  -1 1438.46   47.10 
  -3   5   1 1384.56   37.90 
  -3   5   1 1307.57   36.60 
   3   5  -1 1371.96   47.20 
  -3   5   1 1258.37   42.70 
  -3   5   1 1408.56   42.80 
   3   5  -1 1381.96   43.70 
   3   5  -1 1400.96   46.80 
   3   5  -1 1331.17   37.80 
   3   5  -1 1387.26   47.10 
  -3   5   1 1374.16   39.20 
   3   5  -1 1315.27   36.60 
   3   5  -1 1323.67   47.10 
   3   5  -1 1325.97   48.10 
   3   5  -1 1413.66   43.10 
  -3   5   1 1360.46   38.40 
   3   5  -1 1362.36   47.20 
   3   5  -1 1346.17   46.70 
  -2  -5   1  126.69    9.40 
   2  -5  -1  123.49    6.70 
   2  -5  -1  120.69    6.70 
   2  -5  -1  115.69    8.20 
  -2  -5   1  123.49   10.00 
  -2  -5   1  103.39   13.00 
   2  -5  -1  126.69   10.20 
  -2  -5   1  119.29   14.00 
   2  -5  -1  136.09    8.70 
  -2  -5   1  110.09   13.00 
  -2  -5   1  118.39    8.20 
   2  -5  -1  135.69   13.70 
  -2  -5   1   95.29   12.50 
   2  -5  -1  117.39   13.80 
  -2  -5   1   98.19   11.30 
  -2  -5   1  112.49   13.50 
   2  -5  -1  107.89   11.20 
   2  -5  -1  117.29    9.80 
   2  -5  -1  119.59   13.40 
   2  -5  -1  105.59    6.70 
  -2  -5   1  125.19    7.10 
   2  -5  -1  118.49    5.40 
   2  -5  -1  102.19   10.90 
  -2  -5   1  129.89   13.60 
   2  -5  -1  119.89    9.70 
   2  -5  -1  120.09    9.60 
  -2  -5   1  118.59   13.70 
  -2  -5   1  122.79   13.00 
   2  -5  -1  127.19    5.00 
  -2  -5   1  117.99   13.70 
   2  -5  -1  124.39    9.80 
  -2  -5   1  106.79   12.60 
  -2  -5   1  107.79   12.60 
   2  -5  -1  135.29    8.50 
   2  -5  -1  142.19   14.80 
  -2  -5   1  116.09   13.80 
  -2   5   1  116.99   13.20 
  -2   5   1  119.99    7.00 
   2   5  -1  108.09   14.00 
  -2   5   1  105.99   13.10 
   2   5  -1  134.09   15.50 
   2   5  -1  100.99   12.80 
  -2   5   1  127.09    7.10 
  -2   5   1  126.49    8.40 
  -2   5   1  100.29    8.20 
  -2   5   1  133.59   13.70 
   2   5  -1  117.59   13.20 
  -2   5   1  123.69    9.50 
  -2   5   1  107.89    8.00 
  -2   5   1  106.99   12.20 
  -2   5   1  116.79    7.80 
   2   5  -1  123.79   14.60 
   2   5  -1  129.79   14.40 
   2   5  -1  114.49   12.70 
  -2   5   1  109.49   13.00 
   2   5  -1  120.49   13.50 
  -2   5   1  128.79   14.00 
   2   5  -1  141.89    7.80 
   2   5  -1  131.19    7.10 
   2   5  -1  109.39   13.50 
  -2   5   1  107.59   11.10 
  -2   5   1  117.99   12.70 
   2   5  -1  111.69    7.20 
   2   5  -1  126.09   14.30 
   2   5  -1  119.99   14.30 
  -2   5   1  116.29    6.40 
   2   5  -1  124.79   13.90 
   2   5  -1  100.19   12.60 
  -2   5   1  128.79   13.30 
  -1  -5   1  713.23   27.90 
   1  -5  -1  684.43   21.40 
   1  -5  -1  738.83   21.50 
   1  -5  -1  658.83   21.60 
   1  -5  -1  748.73   25.80 
  -1  -5   1  664.53   24.70 
   1  -5  -1  742.33   29.40 
  -1  -5   1  686.23   25.20 
  -1  -5   1  718.03   22.10 
  -1  -5   1  699.33   25.50 
  -1  -5   1  680.63   23.60 
   1  -5  -1  714.13   15.50 
  -1  -5   1  737.13   18.40 
  -1  -5   1  735.43   28.80 
   1  -5  -1  664.23   25.50 
  -1  -5   1  704.43   27.10 
  -1  -5   1  696.83   28.70 
   1  -5  -1  711.53   26.00 
  -1  -5   1  628.44   27.50 
  -1  -5   1  696.73   26.90 
   1  -5  -1  741.63   26.80 
  -1  -5   1  696.63   29.00 
  -1  -5   1  726.63   27.70 
  -1  -5   1  716.43   24.70 
   1  -5  -1  711.23   26.10 
   1  -5  -1  735.93   26.80 
   1  -5  -1  729.23   27.30 
   1  -5  -1  723.63   25.40 
   1  -5  -1  662.13   27.10 
   1  -5  -1  700.03   26.70 
  -1  -5   1  718.73   28.70 
  -1  -5   1  692.63   28.40 
  -1  -5   1  711.13   28.50 
  -1   5   1  680.33   20.50 
   1   5  -1  673.43   30.50 
  -1   5   1  691.53   20.90 
  -1   5   1  733.03   21.70 
  -1   5   1  722.63   29.20 
   1   5  -1  668.93   28.60 
  -1   5   1  675.33   27.30 
  -1   5   1  712.33   17.90 
  -1   5   1  711.23   25.50 
  -1   5   1  674.43   17.80 
  -1   5   1  736.13   28.50 
   1   5  -1  718.13   28.10 
  -1   5   1  694.13   29.50 
  -1   5   1  711.13   28.20 
   1   5  -1  735.63   28.90 
  -1   5   1  742.03   27.60 
   1   5  -1  691.83   27.10 
   1   5  -1  735.73   30.20 
  -1   5   1  694.63   23.50 
  -1   5   1  697.83   29.10 
  -1   5   1  693.03   28.10 
  -1   5   1  669.43   28.20 
  -1   5   1  700.83   25.70 
   1   5  -1  702.43   29.50 
   1   5  -1  711.13   28.70 
  -1   5   1  673.53   21.90 
  -1   5   1  731.73   23.60 
  -1   5   1  688.33   27.50 
  -1   5   1  722.33   30.40 
   1   5  -1  709.43   24.50 
   1   5  -1  688.23   16.40 
   1   5  -1  707.53   16.20 
   1   5  -1  732.23   30.70 
   1   5  -1  703.93   26.00 
   1   5  -1  659.23   27.70 
   1   5  -1  686.93   30.70 
   1   5  -1  699.13   28.50 
   1   5  -1  698.33   23.70 
  -1   5   1  699.73   17.30 
  -1   5   1  726.03   29.20 
   1   5  -1  688.63   30.00 
   1   5  -1  710.43   27.20 
   0  -5  -1  116.09   11.80 
   0  -5  -1  110.79   12.60 
   0  -5   1  109.19    8.70 
   0  -5  -1  117.99    5.80 
   0  -5   1  109.89    8.00 
   0  -5  -1   97.09   11.30 
   0  -5  -1   99.69   11.20 
   0  -5   1   98.29    5.90 
   0  -5  -1   98.79    7.70 
   0  -5  -1   99.29   11.60 
   0  -5   1   86.39   11.30 
   0  -5   1   98.69   11.00 
   0  -5   1  101.19   11.90 
   0  -5   1  120.59    9.40 
   0  -5   1  110.99    9.10 
   0  -5  -1  101.39   10.90 
   0  -5  -1   91.19    7.90 
   0  -5   1  119.69   12.00 
   0  -5  -1   99.79    6.40 
   0  -5  -1  127.09   10.00 
   0  -5   1   83.69   11.10 
   0  -5   1  104.79   11.00 
   0  -5  -1  103.39    7.30 
   0  -5  -1   95.09    7.90 
   0  -5  -1   92.99   10.40 
   0  -5   1  117.69   12.70 
   0  -5   1  105.19   11.70 
   0  -5   1  108.39    5.30 
   0  -5  -1  103.39   11.70 
   0  -5  -1   81.79   10.50 
   0  -5  -1   86.09    9.90 
   0  -5   1  110.39    8.40 
   0  -5  -1  102.59    8.50 
   0  -5   1   81.29   10.00 
   0  -5   1   92.09   11.20 
   0   5   1  105.39    4.10 
   0   5   1   99.89    4.70 
   0   5   1   93.29    7.60 
   0   5  -1  102.49   12.30 
   0   5  -1  131.99   13.00 
   0   5  -1  111.79   11.30 
   0   5   1  117.89    8.80 
   0   5   1  106.29   12.50 
   0   5   1   81.49   11.00 
   0   5  -1  109.09   11.60 
   0   5   1  143.69   14.60 
   0   5  -1  113.19   11.50 
   0   5   1   94.29   12.30 
   0   5  -1  115.39   11.40 
   0   5   1  113.99   13.40 
   0   5  -1  110.29   13.00 
   0   5  -1   99.79   13.40 
   0   5  -1  108.29   11.90 
   0   5  -1  104.39    7.30 
   0   5  -1  112.79   13.90 
   0   5  -1  120.79   10.00 
   0   5   1  100.69   11.90 
   0   5   1   95.19   10.00 
   0   5   1  105.69   12.40 
   0   5   1  127.09   10.40 
   0   5   1   95.29   11.60 
   0   5   1  114.39   13.30 
   0   5  -1  117.09   13.40 
   0   5  -1  103.89   13.30 
   0   5   1   93.09   11.80 
   0   5  -1  112.89    7.60 
   0   5  -1   89.69   10.80 
   0   5  -1  100.49    7.70 
   0   5  -1   88.69   10.70 
   0   5  -1   90.89    9.60 
   0   5  -1  105.59    7.90 
   0   5  -1  115.29    8.70 
   0   5  -1  107.99   12.50 
   0   5   1  109.59    7.10 
   0   5   1  106.89    8.50 
   0   5   1   95.59   12.70 
   0   5   1   90.89   11.50 
   0   5   1   95.09    9.70 
   0   5   1  105.99   13.00 
   0   5   1  106.59    4.80 
   0   5   1   90.39   11.20 
   0   5   1   79.69   10.80 
   0   5  -1  111.29    5.20 
   0   5  -1   88.69   11.80 
   0   5   1   95.99   10.60 
   0   5  -1  109.89   13.10 
  -1  -5  -1 2615.94   61.99 
   1  -5   1 2602.34   61.79 
  -1  -5  -1 2490.15   63.79 
  -1  -5  -1 2510.85   56.49 
  -1  -5  -1 2478.25   66.89 
  -1  -5  -1 2563.94   67.29 
   1  -5   1 2484.75   60.89 
  -1  -5  -1 2526.85   64.19 
  -1  -5  -1 2542.65   66.89 
  -1  -5  -1 2658.63   62.29 
   1  -5   1 2591.24   58.99 
  -1  -5  -1 2534.15   66.69 
  -1  -5  -1 2473.45   61.49 
  -1  -5  -1 2609.54   68.49 
   1  -5   1 2536.65   65.49 
  -1  -5  -1 2533.85   65.09 
   1  -5   1 2500.95   54.79 
  -1  -5  -1 2592.54   58.89 
  -1  -5  -1 2585.14   55.79 
   1  -5   1 2526.75   63.39 
   1  -5   1 2455.15   66.99 
   1  -5   1 2453.15   62.09 
  -1  -5  -1 2536.65   65.49 
  -1  -5  -1 2617.94   64.69 
  -1  -5  -1 2547.05   68.59 
   1  -5   1 2543.95   54.39 
   1  -5   1 2532.75   53.09 
   1  -5   1 2499.45   60.19 
   1  -5   1 2592.94   66.59 
  -1  -5  -1 2506.05   67.69 
   1  -5   1 2562.54   53.39 
   1  -5   1 2536.85   66.29 
   1  -5   1 2533.15   67.99 
   1  -5   1 2544.55   67.29 
   1  -5   1 2547.75   58.79 
   1   5   1 2508.25   68.29 
  -1   5  -1 2543.75   54.99 
   1   5   1 2515.15   66.59 
  -1   5  -1 2481.25   55.09 
   1   5   1 2483.85   65.59 
  -1   5  -1 2519.15   65.29 
  -1   5  -1 2495.65   62.59 
  -1   5  -1 2643.84   62.39 
   1   5   1 2652.03   65.19 
   1   5   1 2579.64   68.49 
  -1   5  -1 2446.86   68.39 
  -1   5  -1 2524.45   60.19 
  -1   5  -1 2538.95   67.59 
   1   5   1 2618.94   69.39 
  -1   5  -1 2429.56   70.89 
   1   5   1 2502.75   68.89 
   1   5   1 2589.24   68.49 
   1   5   1 2539.05   66.69 
  -1   5  -1 2523.75   52.89 
   1   5   1 2524.25   68.49 
  -1   5  -1 2378.16   71.19 
   1   5   1 2553.14   68.99 
  -1   5  -1 2441.96   56.99 
  -1   5  -1 2559.54   69.69 
   1   5   1 2645.54   70.89 
  -1   5  -1 2579.94   64.69 
   1   5   1 2614.64   70.79 
  -1   5  -1 2572.14   67.99 
  -1   5  -1 2581.84   57.79 
   1   5   1 2579.24   68.69 
  -1   5  -1 2546.65   53.49 
  -1   5  -1 2511.95   63.69 
  -1   5  -1 2482.45   68.19 
   1   5   1 2417.06   56.89 
   1   5   1 2513.35   65.09 
  -1   5  -1 2460.45   59.59 
  -1   5  -1 2559.64   68.59 
  -1   5  -1 2507.45   65.09 
  -1   5  -1 2521.45   62.79 
   1   5   1 2496.85   67.79 
   2  -5   1  492.55   16.80 
   2  -5   1  465.95   17.00 
   2  -5   1  459.15   17.20 
  -2  -5  -1  476.65   18.80 
   2  -5   1  494.55   19.40 
  -2  -5  -1  464.85   23.70 
  -2  -5  -1  489.45   18.30 
  -2  -5  -1  454.25   24.00 
  -2  -5  -1  453.95   23.40 
   2  -5   1  468.75   23.80 
   2  -5   1  449.16   14.40 
   2  -5   1  424.76   22.30 
   2  -5   1  440.16   22.70 
  -2  -5  -1  471.75   23.80 
   2  -5   1  449.36   15.30 
  -2  -5  -1  449.36   23.20 
  -2  -5  -1  488.45   17.90 
   2  -5   1  491.15   14.50 
  -2  -5  -1  481.45   23.70 
   2  -5   1  501.65   22.20 
   2  -5   1  463.85   13.10 
  -2  -5  -1  522.35   23.70 
   2  -5   1  440.06   17.50 
  -2  -5  -1  448.86   21.70 
  -2  -5  -1  488.75   25.00 
  -2  -5  -1  505.55   23.00 
   2  -5   1  440.96   22.70 
   2  -5   1  453.55   16.80 
  -2  -5  -1  475.15   22.90 
  -2  -5  -1  477.95   21.10 
   2  -5   1  477.55   18.70 
   2  -5   1  469.95   17.70 
  -2  -5  -1  479.85   21.00 
   2  -5   1  485.65   17.60 
   2   5   1  468.25   23.50 
   2   5   1  456.45   22.60 
  -2   5  -1  458.65   23.90 
   2   5   1  510.05   23.50 
   2   5   1  500.85   15.20 
   2   5   1  473.85   24.50 
  -2   5  -1  432.66   22.50 
  -2   5  -1  506.95   20.60 
  -2   5  -1  477.85   17.50 
   2   5   1  490.15   23.40 
   2   5   1  460.45   24.80 
   2   5   1  464.35   19.00 
   2   5   1  439.86   22.40 
   2   5   1  468.95   22.90 
  -2   5  -1  457.85   20.20 
  -2   5  -1  470.05   17.20 
  -2   5  -1  491.95   20.40 
  -2   5  -1  458.65   13.30 
   2   5   1  438.06   21.80 
  -2   5  -1  429.76   22.00 
  -2   5  -1  493.55   23.80 
   2   5   1  447.56   23.50 
  -2   5  -1  483.35   24.70 
   2   5   1  486.95   24.90 
  -2   5  -1  473.25   16.00 
  -2   5  -1  492.55   20.00 
  -2   5  -1  459.75   14.60 
   2   5   1  505.75   20.10 
   2   5   1  488.55   15.60 
   2   5   1  481.75   15.10 
   2   5   1  450.75   23.70 
  -2   5  -1  483.45   26.80 
   2   5   1  480.05   17.80 
   2   5   1  502.55   24.70 
  -2   5  -1  490.85   16.30 
  -2   5  -1  461.85   16.40 
  -2   5  -1  482.95   21.00 
  -3  -5  -1 2590.04   62.09 
  -3  -5  -1 2762.52   70.99 
   3  -5   1 2703.53   73.59 
  -3  -5  -1 2529.35   72.19 
  -3  -5  -1 2697.33   73.89 
   3  -5   1 2610.44   73.89 
  -3  -5  -1 2587.04   75.19 
  -3  -5  -1 2701.53   66.69 
   3  -5   1 2620.64   61.29 
  -3  -5  -1 2581.54   73.19 
  -3  -5  -1 2667.23   59.49 
  -3  -5  -1 2773.72   72.19 
  -3  -5  -1 2486.75   72.39 
  -3  -5  -1 2637.24   73.49 
  -3  -5  -1 2880.81   67.19 
   3  -5   1 2660.53   55.69 
   3  -5   1 2633.24   62.69 
   3  -5   1 2681.93   59.89 
   3  -5   1 2639.84   59.09 
   3  -5   1 2616.84   61.09 
  -3  -5  -1 2549.65   73.69 
   3  -5   1 2520.75   72.79 
   3  -5   1 2673.63   60.79 
   3  -5   1 2720.03   60.59 
  -3  -5  -1 2692.23   75.59 
   3  -5   1 2645.84   72.39 
   3  -5   1 2720.13   61.29 
  -3  -5  -1 2600.94   57.89 
   3  -5   1 2693.23   62.79 
   3  -5   1 2623.74   61.39 
  -3  -5  -1 2636.34   74.79 
   3  -5   1 2655.83   61.19 
   3  -5   1 2661.43   65.49 
   3  -5   1 2631.44   68.59 
   3  -5   1 2647.54   54.69 
   3  -5   1 2707.63   62.39 
   3  -5   1 2550.14   60.79 
  -3   5  -1 2619.04   62.89 
   3   5   1 2667.43   74.19 
   3   5   1 2655.03   73.29 
   3   5   1 2621.64   74.59 
   3   5   1 2605.34   73.59 
   3   5   1 2726.33   76.19 
   3   5   1 2683.93   67.89 
  -3   5  -1 2659.53   73.99 
  -3   5  -1 2686.13   71.59 
  -3   5  -1 2778.62   67.59 
  -3   5  -1 2674.13   68.29 
   3   5   1 2627.44   72.99 
   3   5   1 2672.53   70.79 
   3   5   1 2614.34   74.99 
  -3   5  -1 2629.54   73.39 
   3   5   1 2587.54   72.89 
   3   5   1 2697.23   70.89 
  -3   5  -1 2695.83   64.19 
   3   5   1 2720.33   66.59 
  -3   5  -1 2600.44   59.39 
   3   5   1 2750.92   75.49 
  -3   5  -1 2636.34   70.29 
   3   5   1 2682.33   75.89 
   3   5   1 2700.33   72.29 
  -3   5  -1 2548.25   71.19 
  -3   5  -1 2668.53   62.39 
   3   5   1 2635.74   71.59 
  -3   5  -1 2683.53   63.99 
   3   5   1 2755.72   62.49 
   4  -5   1  418.96   17.00 
  -4  -5  -1  433.86   24.60 
  -4  -5  -1  435.66   18.60 
   4  -5   1  444.16   17.70 
   4  -5   1  448.56   21.00 
  -4  -5  -1  383.36   24.10 
  -4  -5  -1  447.86   26.70 
   4  -5   1  404.16   17.90 
  -4  -5  -1  480.05   24.50 
  -4  -5  -1  418.66   25.10 
   4  -5   1  453.05   25.50 
   4  -5   1  402.56   22.90 
  -4  -5  -1  418.96   25.10 
  -4  -5  -1  405.76   23.50 
   4  -5   1  390.66   23.50 
   4  -5   1  401.76   17.80 
  -4  -5  -1  433.66   24.00 
  -4  -5  -1  405.56   11.10 
  -4  -5  -1  433.76   19.80 
  -4  -5  -1  377.06   20.40 
  -4  -5  -1  381.96   24.70 
  -4  -5  -1  385.96   23.70 
   4  -5   1  412.46   13.90 
   4  -5   1  437.66   17.70 
   4  -5   1  423.96   23.60 
   4  -5   1  427.06   24.50 
   4  -5   1  403.46   14.20 
   4  -5   1  425.16   21.30 
  -4   5  -1  381.56   20.80 
   4   5   1  387.26   23.80 
  -4   5  -1  418.26   19.40 
   4   5   1  419.46   23.60 
  -4   5  -1  401.46   15.40 
   4   5   1  443.66   22.20 
   4   5   1  406.06   24.00 
  -4   5  -1  398.46   23.70 
   4   5   1  427.16   25.60 
   4   5   1  364.56   19.90 
  -4   5  -1  416.36   23.30 
  -4   5  -1  436.96   15.80 
   4   5   1  441.36   24.30 
   4   5   1  369.36   23.90 
  -4   5  -1  442.06   16.80 
  -4   5  -1  433.76   22.90 
   4   5   1  394.46   24.90 
   4   5   1  423.96   22.50 
   4   5   1  418.96   24.70 
   4   5   1  446.16   25.90 
  -4   5  -1  414.96   20.30 
   4   5   1  410.36   25.20 
   4   5   1  412.56   21.40 
   4   5   1  452.15   25.90 
  -4   5  -1  407.96   21.80 
  -5  -5  -1  976.00   36.10 
  -5  -5  -1  958.00   42.40 
  -5  -5  -1  972.20   37.90 
   5  -5   1  889.31   40.10 
  -5  -5  -1  965.40   40.80 
   5  -5   1 1027.40   40.80 
   5  -5   1 1026.60   32.20 
  -5  -5  -1  984.10   43.20 
  -5  -5  -1 1013.90   38.70 
  -5  -5  -1  981.70   44.60 
   5  -5   1  990.20   32.00 
   5  -5   1 1041.10   37.70 
   5  -5   1 1002.90   33.60 
   5  -5   1  978.80   39.30 
   5  -5   1 1006.30   30.70 
  -5  -5  -1  959.00   43.50 
  -5  -5  -1  998.90   40.00 
  -5  -5  -1 1031.40   42.80 
  -5  -5  -1 1038.00   29.90 
  -5  -5  -1 1014.40   41.20 
   5  -5   1  989.30   41.60 
   5  -5   1  970.70   35.80 
  -5  -5  -1  957.50   41.00 
   5  -5   1 1014.40   34.40 
   5  -5   1 1013.00   33.20 
   5   5   1  930.11   42.10 
   5   5   1  953.20   37.40 
   5   5   1 1055.09   40.90 
  -5   5  -1  992.30   37.30 
   5   5   1 1074.09   45.30 
   5   5   1 1068.29   37.10 
  -5   5  -1  990.70   38.80 
  -5   5  -1  968.10   39.80 
   5   5   1 1049.70   44.30 
  -5   5  -1 1006.80   38.60 
  -5   5  -1 1020.70   30.90 
   5   5   1  873.41   41.10 
   5   5   1 1004.40   42.30 
   5   5   1 1001.10   42.20 
   5   5   1  923.31   35.30 
   5   5   1 1011.50   42.90 
  -5   5  -1 1014.50   41.10 
  -5   5  -1  998.40   37.10 
  -5   5  -1 1032.10   33.20 
   5   5   1 1038.20   42.80 
   5   5   1 1008.50   43.50 
   5   5   1 1103.59   41.80 
   5   5   1  966.70   42.70 
  -6  -5  -1   30.90    9.80 
  -6  -5  -1   30.60    9.20 
  -6  -5  -1   19.40    8.00 
   6  -5   1   33.30    9.60 
   6  -5   1   39.80   10.10 
   6  -5   1   19.00    7.40 
  -6  -5  -1   30.20    8.30 
   6  -5   1   21.10    6.60 
   6  -5   1   24.90    7.30 
   6  -5   1   41.30    8.80 
   6  -5   1   44.80    9.20 
  -6  -5  -1   26.60    8.60 
  -6  -5  -1   34.50    8.60 
  -6  -5  -1   31.60    9.60 
   6  -5   1   32.90    7.10 
   6  -5   1   20.70    8.10 
  -6  -5  -1   18.70    8.30 
  -6  -5  -1   36.40    9.00 
   6  -5   1   22.40    6.60 
   6  -5   1   28.00    8.00 
  -6  -5  -1   37.20   11.40 
  -6  -5  -1   14.60    6.00 
   6  -5   1   24.40    6.80 
  -6  -5  -1   12.20    6.90 
   6  -5   1   32.90    9.30 
  -6  -5  -1   17.80    7.80 
   6   5   1   35.30   10.60 
   6   5   1   26.20    7.20 
   6   5   1   20.80    6.50 
   6   5   1   22.00    8.00 
   6   5   1   13.20    7.30 
   6   5   1   29.40    9.50 
  -6   5  -1   29.20    8.20 
  -6   5  -1   44.70    9.60 
   6   5   1   13.70    6.10 
   6   5   1   73.69   14.10 
   6   5   1   26.10    9.50 
   6   5   1   30.20    9.50 
   6   5   1   34.00    9.40 
  -6   5  -1   31.10    9.00 
  -6   5  -1   29.80    7.50 
  -6   5  -1   29.90    7.40 
   6   5   1   30.50    9.70 
  -6   5  -1    4.60    5.00 
   6   5   1   22.60    8.30 
   6   5   1   33.00    9.80 
   6   5   1   23.30    8.70 
  -7  -5  -1  249.28   20.40 
   7  -5   1  249.97   19.60 
   7  -5   1  288.27   23.20 
   7  -5   1  305.77   22.50 
   7  -5   1  256.37   19.30 
  -7  -5  -1  279.67   20.40 
   7  -5   1  256.17   20.80 
   7  -5   1  280.27   19.30 
  -7  -5  -1  231.98   26.90 
  -7  -5  -1  305.07   30.20 
  -7  -5  -1  297.07   31.60 
  -7  -5  -1  233.48   27.70 
  -7  -5  -1  264.47   21.50 
   7  -5   1  257.37   18.60 
   7  -5   1  229.28   26.20 
  -7  -5  -1  270.07   28.20 
  -7  -5  -1  322.87   25.70 
  -7  -5  -1  255.07   18.60 
  -7  -5  -1  261.17   27.10 
   7  -5   1  236.88   18.70 
   7  -5   1  226.48   20.90 
  -7  -5  -1  249.38   28.70 
   7  -5   1  254.17   25.20 
  -7  -5  -1  301.67   30.50 
  -7   5  -1  244.08   25.30 
   7   5   1  282.27   23.70 
  -7   5  -1  277.17   22.00 
   7   5   1  246.38   28.80 
   7   5   1  277.17   28.40 
  -7   5  -1  260.67   19.50 
   7   5   1  272.57   28.00 
   7   5   1  266.07   21.10 
   7   5   1  247.48   27.70 
   7   5   1  243.88   24.30 
   7   5   1  311.47   22.40 
   7   5   1  227.68   26.30 
  -7   5  -1  239.38   25.30 
  -7   5  -1  283.27   20.30 
   7   5   1  224.08   25.80 
   7   5   1  254.87   28.20 
   7   5   1  282.87   29.60 
   7   5   1  284.77   29.50 
   7   5   1  283.87   24.80 
  -8  -5  -1   71.79   15.90 
  -8  -5  -1   74.79   16.20 
  -8  -5  -1   63.59   14.00 
   8  -5   1   91.79   17.90 
  -8  -5  -1   75.59   16.90 
   8  -5   1   93.19   15.90 
   8  -5   1   93.29   15.10 
   8  -5   1   75.69   15.30 
   8  -5   1   70.29   15.30 
  -8  -5  -1   71.69   17.00 
  -8  -5  -1   99.19   19.70 
   8  -5   1   83.29   15.50 
  -8  -5  -1   73.69   15.70 
  -8  -5  -1   61.29   15.00 
  -8  -5  -1  117.19   18.50 
  -8  -5  -1  113.49   18.80 
   8  -5   1   95.09   14.60 
   8  -5   1   88.09   16.00 
  -8  -5  -1  112.89   20.30 
  -8  -5  -1   69.69   13.70 
   8   5   1  109.49   19.40 
   8   5   1   84.39   17.30 
   8   5   1   91.99   16.40 
  -8   5  -1  114.69   18.60 
   8   5   1   73.09   16.20 
   8   5   1  115.69   18.00 
  -8   5  -1  108.29   16.60 
   8   5   1   48.20   14.50 
   8   5   1   66.99   15.40 
  -8   5  -1   92.89   17.00 
   8   5   1  102.09   19.30 
  -8   5  -1   94.39   16.80 
   8   5   1   71.09   15.50 
   8   5   1  111.49   20.00 
   8   5   1   63.39   15.20 
   8   5   1   65.09   16.10 
   8   5   1   72.89   16.30 
   9  -5   1  315.77   34.90 
  -9  -5  -1  368.46   39.60 
  -9  -5  -1  312.97   34.60 
   9  -5   1  346.87   34.30 
  -9  -5  -1  323.17   35.00 
  -9  -5  -1  388.66   30.10 
   9  -5   1  388.26   29.70 
  -9  -5  -1  354.66   35.80 
  -9  -5  -1  321.17   36.00 
   9  -5   1  350.96   34.20 
   9  -5   1  355.26   33.50 
  -9  -5  -1  376.76   35.20 
  -9  -5  -1  302.67   33.90 
  -9  -5  -1  356.56   38.40 
   9  -5   1  375.16   26.40 
  -9  -5  -1  316.77   36.80 
  -9  -5  -1  379.56   37.70 
   9   5   1  353.46   38.50 
   9   5   1  340.17   36.50 
   9   5   1  366.56   37.20 
   9   5   1  358.16   26.80 
   9   5   1  408.96   41.40 
   9   5   1  307.97   36.40 
  -9   5  -1  336.67   34.50 
   9   5   1  392.26   30.70 
   9   5   1  344.87   35.20 
   9   5   1  353.86   38.30 
   9   5   1  463.55   32.80 
   9   5   1  411.96   30.90 
  -9   5  -1  333.17   33.90 
  -9   5  -1  290.37   32.00 
   9   5   1  326.47   34.50 
   9   5   1  369.86   30.00 
   9   5   1  332.17   37.30 
   9   5   1  394.66   39.10 
  -8  -6   1  109.49   19.70 
   8  -6  -1  123.99   20.80 
   8  -6  -1   90.49   16.80 
  -8  -6   1  100.79   20.90 
   8  -6  -1   97.09   17.10 
  -8  -6   1   94.09   17.50 
   8  -6  -1  120.29   18.80 
  -8  -6   1   65.09   16.30 
   8  -6  -1   93.09   17.80 
  -8  -6   1  110.39   20.90 
  -8  -6   1   99.69   20.50 
  -8  -6   1  120.19   20.10 
  -8  -6   1   94.19   15.70 
   8  -6  -1  113.69   18.10 
  -8  -6   1  119.19   22.00 
   8  -6  -1   97.99   17.80 
  -8  -6   1  110.29   20.50 
  -8  -6   1  101.89   20.20 
   8  -6  -1   90.59   16.50 
   8   6  -1   98.49   20.20 
   8   6  -1   99.19   19.30 
   8   6  -1   63.19   14.90 
   8   6  -1  112.49   20.80 
   8   6  -1   88.59   16.70 
   8   6  -1   94.19   19.60 
   8   6  -1   93.09   16.70 
  -8   6   1   76.59   14.70 
  -8   6   1  102.99   17.60 
   8   6  -1  133.29   23.00 
   8   6  -1   62.19   15.70 
   8   6  -1  115.69   20.70 
   8   6  -1   96.09   19.60 
   8   6  -1   90.39   18.10 
   8   6  -1  115.49   18.00 
  -8   6   1  102.29   17.70 
   8   6  -1   87.69   18.80 
   8   6  -1   87.69   17.50 
   7  -6  -1   -4.70    4.60 
   7  -6  -1   -2.30    3.80 
  -7  -6   1    2.20    5.70 
   7  -6  -1    7.30    6.10 
   7  -6  -1   -4.00    4.30 
  -7  -6   1   13.70    8.50 
  -7  -6   1   -6.10    5.40 
   7  -6  -1    1.90    4.00 
  -7  -6   1    4.20    5.60 
   7  -6  -1   12.90    7.60 
  -7  -6   1   -4.40    4.10 
  -7  -6   1   -1.90    4.70 
  -7  -6   1   -3.30    4.20 
  -7  -6   1    5.60    7.20 
  -7  -6   1   14.00    8.30 
   7  -6  -1    9.20    7.30 
   7  -6  -1    1.70    5.50 
  -7  -6   1    7.50    6.70 
  -7  -6   1    5.00    5.50 
  -7  -6   1    2.50    5.00 
  -7   6   1    4.50    5.80 
   7   6  -1    4.30    5.60 
   7   6  -1    3.00    4.80 
   7   6  -1    2.20    5.50 
   7   6  -1    1.60    5.30 
  -7   6   1    0.00    3.90 
   7   6  -1    6.60    6.80 
   7   6  -1    1.40    5.90 
   7   6  -1    2.30    5.50 
  -7   6   1    0.90    4.50 
   7   6  -1    1.10    4.50 
   7   6  -1   -4.60    4.00 
   7   6  -1    4.50    6.30 
   7   6  -1    1.70    5.20 
   7   6  -1    4.10    6.50 
   7   6  -1    1.90    5.50 
   7   6  -1    1.50    5.40 
   7   6  -1    3.80    5.20 
  -6  -6   1  113.09   19.00 
  -6  -6   1  134.59   20.90 
   6  -6  -1  134.79   18.50 
   6  -6  -1  127.79   17.60 
   6  -6  -1  132.79   18.60 
  -6  -6   1  103.49   16.40 
   6  -6  -1  118.19   17.00 
   6  -6  -1  149.88   19.50 
  -6  -6   1  125.39   18.90 
  -6  -6   1  123.59   18.10 
  -6  -6   1   98.69   17.50 
  -6  -6   1  112.69   17.40 
  -6  -6   1   96.79   17.00 
  -6  -6   1  131.89   17.50 
   6  -6  -1  130.39   16.40 
  -6  -6   1  108.89   13.80 
   6  -6  -1  141.29   20.30 
   6  -6  -1  130.09   14.10 
  -6  -6   1  111.79   18.20 
  -6  -6   1  115.19   16.50 
   6  -6  -1  155.58   16.70 
   6   6  -1   88.69   17.00 
   6   6  -1  151.48   21.70 
   6   6  -1   92.69   15.80 
   6   6  -1  127.89   17.20 
   6   6  -1  146.69   21.30 
   6   6  -1  143.09   16.30 
   6   6  -1  109.49   17.70 
   6   6  -1  136.29   20.00 
  -6   6   1  123.79   16.20 
  -6   6   1  136.99   18.30 
   6   6  -1  120.09   19.20 
   6   6  -1  118.79   15.80 
   6   6  -1  165.28   17.80 
   6   6  -1  123.39   14.50 
   6   6  -1  125.59   19.90 
   6   6  -1  129.69   20.10 
   6   6  -1  129.39   19.20 
  -6   6   1  148.29   18.30 
  -6   6   1  132.69   16.30 
  -6   6   1  144.29   17.00 
   6   6  -1   94.99   16.80 
   5  -6  -1   35.10    7.90 
  -5  -6   1   34.40   10.30 
   5  -6  -1   46.80   10.60 
  -5  -6   1   65.19   13.00 
  -5  -6   1   57.39    9.80 
   5  -6  -1   61.99   12.80 
  -5  -6   1   47.10   10.50 
   5  -6  -1   65.99    9.20 
   5  -6  -1   48.80    9.00 
  -5  -6   1   55.49   11.50 
  -5  -6   1   45.60    7.90 
   5  -6  -1   46.80    9.00 
   5  -6  -1   58.99   10.20 
  -5  -6   1   59.79   12.60 
  -5  -6   1   52.49   11.70 
  -5  -6   1   60.69   13.50 
   5  -6  -1   73.69   11.20 
  -5  -6   1   64.39   12.10 
  -5  -6   1   61.59   12.70 
  -5  -6   1   48.90    8.60 
  -5  -6   1   48.50   13.10 
   5  -6  -1   50.39   11.70 
   5  -6  -1   49.80   11.00 
  -5  -6   1   48.20   11.10 
   5   6  -1   46.10   11.80 
   5   6  -1   50.39   12.10 
  -5   6   1   41.20    8.90 
  -5   6   1   50.79    9.00 
   5   6  -1   64.49   13.10 
   5   6  -1   45.60   10.30 
  -5   6   1   50.19    9.30 
   5   6  -1   44.20   10.00 
  -5   6   1   60.19    8.70 
  -5   6   1   51.09   11.50 
   5   6  -1   53.09    9.70 
  -5   6   1   48.20    8.10 
   5   6  -1   56.29   12.60 
  -5   6   1   60.19   10.40 
   5   6  -1   30.70   10.40 
  -5   6   1   40.10    9.50 
   5   6  -1   56.29   12.20 
   5   6  -1   45.60   11.30 
   5   6  -1   51.39    9.80 
   5   6  -1   23.20    9.10 
  -5   6   1   61.89   11.40 
   5   6  -1   56.29   12.30 
   5   6  -1   51.49   11.70 
   4  -6  -1  131.89   17.20 
   4  -6  -1  111.19   10.40 
   4  -6  -1  165.88   19.70 
  -4  -6   1   98.19   15.20 
   4  -6  -1  132.89   13.40 
  -4  -6   1   97.39   15.00 
   4  -6  -1  122.89    9.80 
  -4  -6   1  126.99   14.90 
   4  -6  -1  126.19   13.00 
   4  -6  -1  135.19   16.50 
  -4  -6   1  106.79   16.60 
   4  -6  -1  112.59   12.00 
  -4  -6   1  111.99   12.50 
  -4  -6   1  107.19   16.20 
   4  -6  -1  105.39   14.90 
  -4  -6   1  113.49   16.10 
   4  -6  -1  120.09    9.60 
   4  -6  -1  124.19   13.10 
  -4  -6   1  119.79   14.50 
  -4  -6   1  145.99   18.30 
  -4  -6   1  120.99   17.40 
   4  -6  -1  107.69   12.90 
  -4  -6   1  130.19   12.30 
   4  -6  -1  106.79   11.80 
  -4  -6   1  120.89   16.40 
   4   6  -1  115.89   14.30 
  -4   6   1  110.59   14.50 
  -4   6   1  112.19   11.20 
   4   6  -1   99.19   16.20 
   4   6  -1  122.49   17.00 
  -4   6   1  119.99   13.00 
   4   6  -1  116.29   16.60 
  -4   6   1  113.69   11.50 
  -4   6   1  125.59   15.20 
   4   6  -1  107.99   16.00 
   4   6  -1  106.29   14.70 
  -4   6   1  117.29   14.10 
   4   6  -1  112.49   15.70 
   4   6  -1   99.59   16.20 
   4   6  -1  109.89   16.40 
  -4   6   1  119.59   16.40 
  -4   6   1  111.69   12.70 
   4   6  -1  108.19   13.90 
   4   6  -1  107.89   15.90 
  -4   6   1  131.69   10.70 
   4   6  -1  104.79   11.80 
   4   6  -1  107.19   16.30 
   4   6  -1  121.89   17.10 
  -4   6   1  146.89   16.50 
  -4   6   1  109.49   12.30 
   4   6  -1  119.49   14.80 
  -4   6   1  135.69   10.80 
  -3  -6   1   44.30    8.40 
  -3  -6   1   42.40    5.90 
  -3  -6   1   48.70   10.60 
  -3  -6   1   37.60    8.30 
  -3  -6   1   45.90   10.10 
  -3  -6   1   42.20    8.30 
  -3  -6   1   25.30    7.70 
   3  -6  -1   43.90    5.60 
   3  -6  -1   34.80    5.70 
  -3  -6   1   31.70    8.10 
  -3  -6   1   32.90    9.10 
   3  -6  -1   39.30    7.20 
   3  -6  -1   45.00    5.90 
  -3  -6   1   24.50    8.30 
   3  -6  -1   44.90    7.70 
  -3  -6   1   32.60    9.10 
   3  -6  -1   48.00    8.30 
   3  -6  -1   36.60    7.60 
   3  -6  -1   41.90    7.70 
   3  -6  -1   29.60    8.50 
   3  -6  -1   43.80    7.90 
   3  -6  -1   29.70    8.50 
  -3  -6   1   37.20    5.70 
  -3  -6   1   31.80    8.60 
   3  -6  -1   18.10    7.20 
   3  -6  -1   41.80    4.60 
   3  -6  -1   29.90    7.30 
   3   6  -1   29.10    8.80 
  -3   6   1   20.50    6.90 
   3   6  -1   30.10    8.60 
  -3   6   1   30.50    6.30 
  -3   6   1   44.30    8.50 
   3   6  -1   33.40    6.10 
   3   6  -1   37.80    9.60 
  -3   6   1   31.20    6.40 
   3   6  -1   28.00    7.70 
  -3   6   1   35.90    8.50 
  -3   6   1   41.80    8.20 
   3   6  -1   34.10    8.00 
  -3   6   1   33.10    7.50 
   3   6  -1   50.39   10.70 
   3   6  -1   30.80    8.50 
   3   6  -1   28.10    8.10 
  -3   6   1   40.60    6.90 
  -3   6   1   37.80    5.90 
   3   6  -1   40.20    8.80 
   3   6  -1   30.60    9.10 
  -3   6   1   39.20    6.40 
   3   6  -1   33.20    8.50 
   3   6  -1   31.00    8.60 
  -3   6   1   32.20    8.70 
   3   6  -1   42.50   10.20 
   3   6  -1   36.70    9.20 
  -3   6   1   31.10    8.70 
  -2  -6   1   13.90    5.60 
   2  -6  -1   21.10    4.90 
  -2  -6   1   21.30    3.50 
   2  -6  -1   25.00    5.70 
  -2  -6   1   18.90    6.70 
  -2  -6   1   20.40    6.20 
   2  -6  -1   19.20    6.30 
   2  -6  -1   12.70    5.00 
  -2  -6   1   23.90    5.50 
   2  -6  -1    7.30    4.20 
   2  -6  -1   24.10    3.30 
   2  -6  -1   17.90    5.40 
  -2  -6   1   20.50    7.00 
  -2  -6   1   30.50    7.90 
   2  -6  -1   27.50    6.70 
  -2  -6   1   19.40    4.80 
   2  -6  -1   20.20    2.90 
  -2  -6   1   14.10    5.40 
  -2  -6   1   15.80    6.50 
  -2  -6   1   22.80    6.70 
  -2  -6   1   26.10    7.00 
   2  -6  -1   16.90    4.00 
  -2  -6   1   17.00    5.10 
  -2  -6   1   16.00    6.30 
  -2  -6   1   15.40    6.60 
   2  -6  -1   20.90    3.30
[truncated: 3,808,878 more chars]
