# Supplementary material
Source: MDPI journal article supplement (https://www.mdpi.com/2073-4352/13/7/1043)
Supplement: s1 [file s1 › 5 Sm(OAc)2Cl x 3H2O_Tabellen.pdf]

Table S1. Crystal data and structure refinement for Sm(OAc)2Cl\_x\_3H2O.

|                                   |                                                                              |
|-----------------------------------|------------------------------------------------------------------------------|
| Identification code               | Ha2019_99g_0m_a                                                              |
| Empirical formula                 | C4 H12 Cl O7 Sm                                                              |
| Formula weight                    | 357.94                                                                       |
| Temperature                       | 100(2) K                                                                     |
| Wavelength                        | 0.71073 Å                                                                    |
| Crystal system, space group       | Monoclinic, P2(1)/n                                                          |
| Unit cell dimensions              | a = 7.8503(3) Å<br>b = 7.8844(3) Å    β = 98.483(2) deg.<br>c = 17.5192(6) Å |
| Volume                            | 1072.49(7) Å <sup>3</sup>                                                    |
| Z, Calculated density             | 4, 2.217 Mg/m <sup>3</sup>                                                   |
| Absorption coefficient            | 5.728 mm <sup>-1</sup>                                                       |
| F(000)                            | 684                                                                          |
| Crystal size                      | 0.448 x 0.112 x 0.076 mm                                                     |
| Theta range for data collection   | 2.712 to 27.998 deg.                                                         |
| Limiting indices                  | -10 ≤ h ≤ 10, -10 ≤ k ≤ 10, -23 ≤ l ≤ 23                                     |
| Reflections collected / unique    | 130814 / 2595 [R(int) = 0.0344]                                              |
| Completeness to theta = 25.242    | 99.9 %                                                                       |
| Absorption correction             | Semi-empirical from equivalents                                              |
| Refinement method                 | Full-matrix least-squares on F <sup>2</sup>                                  |
| Data / restraints / parameters    | 2595 / 0 / 126                                                               |
| Goodness-of-fit on F <sup>2</sup> | 1.129                                                                        |
| Final R indices [I > 2σ(I)]       | R1 = 0.0101, wR2 = 0.0234                                                    |
| R indices (all data)              | R1 = 0.0105, wR2 = 0.0236                                                    |
| Extinction coefficient            | 0.00104(9)                                                                   |
| Largest diff. peak and hole       | 0.381 and -0.529 e.Å <sup>-3</sup>                                           |

Table S2. Atomic coordinates ( $\times 10^4$ ) and equivalent isotropic displacement parameters ( $\text{\AA}^2 \times 10^3$ ) for  $\text{Sm}(\text{OAc})_2\text{Cl}\cdot 3\text{H}_2\text{O}$ .  $U(\text{eq})$  is defined as one third of the trace of the orthogonalized  $U_{ij}$  tensor.

|       | x        | y       | z       | U (eq) |
|-------|----------|---------|---------|--------|
| Sm(1) | 2639(1)  | 4612(1) | 5375(1) | 9(1)   |
| Cl(1) | 3835(1)  | 9718(1) | 6908(1) | 16(1)  |
| O(11) | -90(1)   | 3372(1) | 5356(1) | 14(1)  |
| O(12) | -2791(1) | 2619(2) | 5262(1) | 16(1)  |
| C(11) | -1228(2) | 2305(2) | 5491(1) | 12(1)  |
| C(12) | -718(2)  | 703(2)  | 5919(1) | 21(1)  |
| O(21) | 5490(1)  | 5618(1) | 5742(1) | 13(1)  |
| O(22) | 8213(1)  | 6296(2) | 5980(1) | 15(1)  |
| C(21) | 6816(2)  | 6000(2) | 6228(1) | 12(1)  |
| C(22) | 6699(2)  | 6080(2) | 7069(1) | 19(1)  |
| O(1W) | 3915(1)  | 1766(1) | 5380(1) | 14(1)  |
| O(2W) | 1697(1)  | 6630(1) | 6267(1) | 15(1)  |
| O(3W) | 2992(2)  | 3509(2) | 6689(1) | 18(1)  |

Table S3. Bond lengths [Å] and angles [deg] for Sm(OAc)2Cl\_x\_3H2O.

---

|                       |            |
|-----------------------|------------|
| Sm(1)-O(11)           | 2.351(1)   |
| Sm(1)-O(21)           | 2.373(1)   |
| Sm(1)-O(2W)           | 2.421(1)   |
| Sm(1)-O(3W)           | 2.438(1)   |
| Sm(1)-O(1W)           | 2.457(1)   |
| Sm(1)-O(12)#1         | 2.462(1)   |
| Sm(1)-O(22)#2         | 2.475(1)   |
| Sm(1)-O(21)#2         | 2.620(1)   |
| Sm(1)-O(11)#1         | 2.723(1)   |
|                       |            |
| Sm(1)-Sm(1)#2         | 4.1563(2)  |
| Sm(1)-Sm(1)#1         | 4.2026(2)  |
|                       |            |
| O(11)-C(11)           | 1.274(2)   |
| O(12)-C(11)           | 1.258(2)   |
| C(11)-C(12)           | 1.493(2)   |
|                       |            |
| O(21)-C(21)           | 1.279(2)   |
| O(22)-C(21)           | 1.259(2)   |
| C(21)-C(22)           | 1.492(2)   |
|                       |            |
| O(11)-Sm(1)-O(21)     | 164.62(4)  |
| O(11)-Sm(1)-O(2W)     | 85.27(4)   |
| O(21)-Sm(1)-O(2W)     | 88.33(4)   |
| O(11)-Sm(1)-O(3W)     | 80.85(4)   |
| O(21)-Sm(1)-O(3W)     | 83.79(4)   |
| O(2W)-Sm(1)-O(3W)     | 68.16(4)   |
| O(11)-Sm(1)-O(1W)     | 89.46(4)   |
| O(21)-Sm(1)-O(1W)     | 86.36(4)   |
| O(2W)-Sm(1)-O(1W)     | 139.56(4)  |
| O(3W)-Sm(1)-O(1W)     | 71.42(4)   |
| O(11)-Sm(1)-O(12)#1   | 117.86(4)  |
| O(21)-Sm(1)-O(12)#1   | 73.72(4)   |
| O(2W)-Sm(1)-O(12)#1   | 75.49(4)   |
| O(3W)-Sm(1)-O(12)#1   | 137.52(4)  |
| O(1W)-Sm(1)-O(12)#1   | 139.86(4)  |
| O(11)-Sm(1)-O(22)#2   | 75.51(4)   |
| O(21)-Sm(1)-O(22)#2   | 117.88(4)  |
| O(2W)-Sm(1)-O(22)#2   | 138.07(4)  |
| O(3W)-Sm(1)-O(22)#2   | 141.20(4)  |
| O(1W)-Sm(1)-O(22)#2   | 77.98(4)   |
| O(12)#1-Sm(1)-O(22)#2 | 81.16(4)   |
| O(11)-Sm(1)-O(21)#2   | 124.82(4)  |
| O(21)-Sm(1)-O(21)#2   | 67.39(4)   |
| O(2W)-Sm(1)-O(21)#2   | 141.79(4)  |
| O(3W)-Sm(1)-O(21)#2   | 133.03(4)  |
| O(1W)-Sm(1)-O(21)#2   | 70.51(3)   |
| O(12)#1-Sm(1)-O(21)#2 | 69.71(4)   |
| O(22)#2-Sm(1)-O(21)#2 | 50.64(3)   |
| O(11)-Sm(1)-O(11)#1   | 68.37(4)   |
| O(21)-Sm(1)-O(11)#1   | 122.06(4)  |
| O(2W)-Sm(1)-O(11)#1   | 69.31(4)   |
| O(3W)-Sm(1)-O(11)#1   | 128.73(4)  |
| O(1W)-Sm(1)-O(11)#1   | 143.68(4)  |
| O(12)#1-Sm(1)-O(11)#1 | 49.51(3)   |
| O(22)#2-Sm(1)-O(11)#1 | 69.01(4)   |
| O(21)#2-Sm(1)-O(11)#1 | 98.22(3)   |
|                       |            |
| Sm(1)#2-Sm(1)-Sm(1)#1 | 139.819(4) |

|                         |           |
|-------------------------|-----------|
| C (11)-O (11)-Sm (1)    | 159.1 (1) |
| C (11)-O (11)-Sm (1) #1 | 89.2 (1)  |
| Sm (1)-O (11)-Sm (1) #1 | 111.6 (1) |
| C (11)-O (12)-Sm (1) #1 | 102.1 (1) |
| O (12)-C (11)-O (11)    | 119.2 (1) |
| O (12)-C (11)-C (12)    | 120.3 (1) |
| O (11)-C (11)-C (12)    | 120.5 (1) |
| C (21)-O (21)-Sm (1)    | 154.4 (1) |
| C (21)-O (21)-Sm (1) #2 | 91.3 (1)  |
| Sm (1)-O (21)-Sm (1) #2 | 112.6 (1) |
| C (21)-O (22)-Sm (1) #2 | 98.7 (1)  |
| O (22)-C (21)-O (21)    | 118.6 (1) |
| O (22)-C (21)-C (22)    | 121.1 (1) |
| O (21)-C (21)-C (22)    | 120.3 (1) |

---

Symmetry transformations used to generate equivalent atoms:

#1 -x,-y+1,-z+1      #2 -x+1,-y+1,-z+1

Table S4. Anisotropic displacement parameters ( $\text{\AA}^2 \times 10^3$ ) for Sm(OAc)<sub>2</sub>Cl<sub>2</sub>·3H<sub>2</sub>O.

The anisotropic displacement factor exponent takes the form:  
 $-2 \pi^2 [ h^2 a^{*2} U_{11} + \dots + 2 h k a^* b^* U_{12} ]$

|       | U <sub>11</sub> | U <sub>22</sub> | U <sub>33</sub> | U <sub>23</sub> | U <sub>13</sub> | U <sub>12</sub> |
|-------|-----------------|-----------------|-----------------|-----------------|-----------------|-----------------|
| Sm(1) | 6(1)            | 10(1)           | 11(1)           | 1(1)            | 2(1)            | -1(1)           |
| Cl(1) | 17(1)           | 13(1)           | 17(1)           | 1(1)            | 2(1)            | -2(1)           |
| O(11) | 10(1)           | 16(1)           | 18(1)           | 1(1)            | 4(1)            | -3(1)           |
| O(12) | 9(1)            | 16(1)           | 23(1)           | 5(1)            | 4(1)            | 0(1)            |
| C(11) | 11(1)           | 13(1)           | 13(1)           | -1(1)           | 3(1)            | 0(1)            |
| C(12) | 21(1)           | 17(1)           | 25(1)           | 7(1)            | 1(1)            | 2(1)            |
| O(21) | 9(1)            | 16(1)           | 13(1)           | 0(1)            | 1(1)            | -1(1)           |
| O(22) | 9(1)            | 20(1)           | 15(1)           | -1(1)           | 2(1)            | -2(1)           |
| C(21) | 11(1)           | 10(1)           | 14(1)           | 1(1)            | 0(1)            | 2(1)            |
| C(22) | 15(1)           | 29(1)           | 12(1)           | -1(1)           | 1(1)            | 3(1)            |
| O(1W) | 12(1)           | 13(1)           | 17(1)           | 2(1)            | 5(1)            | 0(1)            |
| O(2W) | 11(1)           | 14(1)           | 19(1)           | -4(1)           | 2(1)            | 0(1)            |
| O(3W) | 25(1)           | 14(1)           | 15(1)           | 2(1)            | 7(1)            | 5(1)            |

Table S5. Hydrogen coordinates ( $\times 10^4$ ) and isotropic displacement parameters ( $\text{\AA}^2 \times 10^3$ ) for  $\text{Sm}(\text{OAc})_2\text{Cl}\cdot 3\text{H}_2\text{O}$ .

|        | x     | y    | z    | U (eq) |
|--------|-------|------|------|--------|
| H(12A) | -1534 | -198 | 5733 | 32 (5) |
| H(12B) | -726  | 882  | 6472 | 32 (5) |
| H(12C) | 442   | 373  | 5832 | 32 (5) |
| H(12D) | 326   | 880  | 6292 | 32 (5) |
| H(12E) | -1646 | 293  | 6189 | 32 (5) |
| H(12F) | -533  | -108 | 5515 | 32 (5) |
| H(22A) | 7846  | 5913 | 7366 | 48 (4) |
| H(22B) | 5924  | 5187 | 7201 | 48 (4) |
| H(22C) | 6251  | 7190 | 7193 | 48 (4) |
| H(11W) | 3869  | 970  | 5791 | 45 (5) |
| H(12W) | 5109  | 1818 | 5318 | 45 (5) |
| H(21W) | 507   | 6758 | 6326 | 49 (5) |
| H(22W) | 2242  | 7656 | 6472 | 49 (5) |
| H(31W) | 2459  | 4013 | 7093 | 54 (6) |
| H(32W) | 3190  | 2348 | 6842 | 54 (6) |

Table S6. Hydrogen bonds for Sm(OAc)<sub>2</sub>Cl<sub>x</sub>·3H<sub>2</sub>O [Å and deg.].

| D-H...A                | d(D-H) | d(H...A) | d(D...A) | <(DHA) |
|------------------------|--------|----------|----------|--------|
| O(1W)-H(11W)...Cl(1)#3 | 0.96   | 2.20     | 3.134(1) | 165.7  |
| O(1W)-H(12W)...O(12)#4 | 0.96   | 1.78     | 2.709(2) | 161.4  |
| O(2W)-H(21W)...O(22)#5 | 0.96   | 1.85     | 2.720(2) | 149.3  |
| O(2W)-H(22W)...Cl(1)   | 0.96   | 2.12     | 3.074(1) | 170.5  |
| O(3W)-H(31W)...Cl(1)#6 | 0.96   | 2.22     | 3.171(1) | 170.1  |
| O(3W)-H(32W)...Cl(1)#3 | 0.96   | 2.13     | 3.073(1) | 165.7  |

Symmetry transformations used to generate equivalent atoms:

#1 -x,-y+1,-z+1      #2 -x+1,-y+1,-z+1      #3 x,y-1,z  
#4 x+1,y,z      #5 x-1,y,z      #6 -x+1/2,y-1/2,-z+3/2
