# Supplementary material
Source: MDPI journal article supplement (https://www.mdpi.com/2073-4352/13/7/1043)
Supplement: s1 [file s1 › 6 Eu Ha2019_37_0m_a.cif]

 
data_Ha2019_37_0m_a 
  
_audit_creation_method            'SHELXL-2014/7' 
_shelx_SHELXL_version_number      '2014/7' 
_chemical_name_systematic         ? 
_chemical_name_common             ? 
_chemical_melting_point           ? 
_chemical_formula_moiety          ? 
_chemical_formula_sum 
 'C4 H12 Cl Eu O7' 
_chemical_formula_weight          359.55 
  
loop_ 
 _atom_type_symbol 
 _atom_type_description 
 _atom_type_scat_dispersion_real 
 _atom_type_scat_dispersion_imag 
 _atom_type_scat_source 
 'C'  'C'   0.0033   0.0016 
 'International Tables Vol C Tables 4.2.6.8 and 6.1.1.4' 
 'H'  'H'   0.0000   0.0000 
 'International Tables Vol C Tables 4.2.6.8 and 6.1.1.4' 
 'O'  'O'   0.0106   0.0060 
 'International Tables Vol C Tables 4.2.6.8 and 6.1.1.4' 
 'Cl'  'Cl'   0.1484   0.1585 
 'International Tables Vol C Tables 4.2.6.8 and 6.1.1.4' 
 'Eu'  'Eu'  -0.1578   3.6682 
 'International Tables Vol C Tables 4.2.6.8 and 6.1.1.4' 
  
_space_group_crystal_system       monoclinic 
_space_group_IT_number            14 
_space_group_name_H-M_alt         'P 21/n' 
_space_group_name_Hall            '-P 2yn' 
  
_shelx_space_group_comment 
; 
The symmetry employed for this shelxl refinement is uniquely defined 
by the following loop, which should always be used as a source of 
symmetry information in preference to the above space-group names. 
They are only intended as comments. 
; 
  
loop_ 
 _space_group_symop_operation_xyz 
 'x, y, z' 
 '-x+1/2, y+1/2, -z+1/2' 
 '-x, -y, -z' 
 'x-1/2, -y-1/2, z-1/2' 
  
_cell_length_a                    7.8412(2) 
_cell_length_b                    7.8769(2) 
_cell_length_c                    17.4901(5) 
_cell_angle_alpha                 90 
_cell_angle_beta                  98.3540(10) 
_cell_angle_gamma                 90 
_cell_volume                      1068.80(5) 
_cell_formula_units_Z             4 
_cell_measurement_temperature     100(2) 
_cell_measurement_reflns_used     9070 
_cell_measurement_theta_min       2.36 
_cell_measurement_theta_max       28.33 
  
_exptl_crystal_description        plate 
_exptl_crystal_colour             colourless 
_exptl_crystal_density_meas       ? 
_exptl_crystal_density_method     ? 
_exptl_crystal_density_diffrn     2.234 
_exptl_crystal_F_000              688 
_exptl_transmission_factor_min    ? 
_exptl_transmission_factor_max    ? 
_exptl_crystal_size_max           0.462 
_exptl_crystal_size_mid           0.163 
_exptl_crystal_size_min           0.034 
_exptl_absorpt_coefficient_mu     6.122 
_shelx_estimated_absorpt_T_min    0.164 
_shelx_estimated_absorpt_T_max    0.819 
_exptl_absorpt_correction_type    multi-scan 
_exptl_absorpt_correction_T_min   0.436 
_exptl_absorpt_correction_T_max   0.781 
_exptl_absorpt_process_details    'Bruker SADABS'
_exptl_absorpt_special_details    ? 
_diffrn_ambient_temperature       100(2) 
_diffrn_radiation_wavelength      0.71073 
_diffrn_radiation_type            MoK\a 
_diffrn_source                    ? 
_diffrn_measurement_device_type   'Bruker APEX-II CCD' 
_diffrn_measurement_method        '\f and \w scans' 
_diffrn_detector_area_resol_mean  ? 
_diffrn_reflns_number             79828 
_diffrn_reflns_av_unetI/netI      0.0107 
_diffrn_reflns_av_R_equivalents   0.0399 
_diffrn_reflns_limit_h_min        -10 
_diffrn_reflns_limit_h_max        10 
_diffrn_reflns_limit_k_min        -10 
_diffrn_reflns_limit_k_max        10 
_diffrn_reflns_limit_l_min        -23 
_diffrn_reflns_limit_l_max        23 
_diffrn_reflns_theta_min          2.717 
_diffrn_reflns_theta_max          28.000 
_diffrn_reflns_theta_full         25.242 
_diffrn_measured_fraction_theta_max   1.000 
_diffrn_measured_fraction_theta_full  0.999 
_diffrn_reflns_Laue_measured_fraction_max    1.000 
_diffrn_reflns_Laue_measured_fraction_full   0.999 
_diffrn_reflns_point_group_measured_fraction_max   1.000 
_diffrn_reflns_point_group_measured_fraction_full  0.999 
_reflns_number_total              2587 
_reflns_number_gt                 2513 
_reflns_threshold_expression      'I > 2\s(I)' 
_reflns_Friedel_coverage          0.000 
_reflns_Friedel_fraction_max      . 
_reflns_Friedel_fraction_full     . 
  
_reflns_special_details 
; 
 Reflections were merged by SHELXL according to the crystal 
 class for the calculation of statistics and refinement. 
  
 _reflns_Friedel_fraction is defined as the number of unique 
 Friedel pairs measured divided by the number that would be 
 possible theoretically, ignoring centric projections and 
 systematic absences. 
; 
  
_computing_data_collection        'Bruker APEX2' 
_computing_cell_refinement        'Bruker SAINT' 
_computing_data_reduction         'Bruker SAINT' 
_computing_structure_solution     'SHELXS-97 (Sheldrick 2008)' 
_computing_structure_refinement 'SHELXL-2014/7 (Sheldrick, 2014)' 
_computing_molecular_graphics     'Bruker SHELXTL' 
_computing_publication_material   'Bruker SHELXTL' 
_refine_special_details           ? 
_refine_ls_structure_factor_coef  Fsqd 
_refine_ls_matrix_type            full 
_refine_ls_weighting_scheme       calc 
_refine_ls_weighting_details 
'w=1/[\s^2^(Fo^2^)+(0.0155P)^2^+1.2162P] where P=(Fo^2^+2Fc^2^)/3' 
_atom_sites_solution_primary      direct 
_atom_sites_solution_secondary    ? 
_atom_sites_solution_hydrogens    mixed 
_refine_ls_hydrogen_treatment     constr
_refine_ls_extinction_method      none 
_refine_ls_extinction_coef        . 
_refine_ls_number_reflns          2587 
_refine_ls_number_parameters      125 
_refine_ls_number_restraints      0 
_refine_ls_R_factor_all           0.0137 
_refine_ls_R_factor_gt            0.0131 
_refine_ls_wR_factor_ref          0.0330 
_refine_ls_wR_factor_gt           0.0327 
_refine_ls_goodness_of_fit_ref    1.099 
_refine_ls_restrained_S_all       1.099 
_refine_ls_shift/su_max           0.003 
_refine_ls_shift/su_mean          0.000 
  
loop_ 
 _atom_site_label 
 _atom_site_type_symbol 
 _atom_site_fract_x 
 _atom_site_fract_y 
 _atom_site_fract_z 
 _atom_site_U_iso_or_equiv 
 _atom_site_adp_type 
 _atom_site_occupancy 
 _atom_site_site_symmetry_order 
 _atom_site_calc_flag 
 _atom_site_refinement_flags_posn 
 _atom_site_refinement_flags_adp 
 _atom_site_refinement_flags_occupancy 
 _atom_site_disorder_assembly 
 _atom_site_disorder_group 
Eu1 Eu 0.26405(2) 0.46091(2) 0.53737(2) 0.00883(4) Uani 1 1 d . . . . . 
Cl1 Cl 0.38360(6) 0.97079(6) 0.69016(3) 0.01464(9) Uani 1 1 d . . . . . 
O11 O -0.00803(17) 0.33763(18) 0.53580(8) 0.0145(3) Uani 1 1 d . . . . . 
O12 O -0.27844(17) 0.26343(18) 0.52621(8) 0.0151(3) Uani 1 1 d . . . . . 
C11 C -0.1222(2) 0.2314(2) 0.54920(11) 0.0114(3) Uani 1 1 d . . . . . 
C12 C -0.0720(3) 0.0703(3) 0.59182(14) 0.0211(4) Uani 1 1 d . . . . . 
H12A H -0.1550 -0.0190 0.5736 0.085(8) Uiso 1 1 calc R U . . . 
H12B H -0.0714 0.0885 0.6473 0.085(8) Uiso 1 1 calc R U . . . 
H12C H 0.0433 0.0360 0.5825 0.085(8) Uiso 1 1 calc R U . . . 
O21 O 0.54805(17) 0.56114(17) 0.57396(8) 0.0121(3) Uani 1 1 d . . . . . 
O22 O 0.82043(16) 0.62867(18) 0.59769(8) 0.0142(3) Uani 1 1 d . . . . . 
C21 C 0.6807(2) 0.5986(2) 0.62277(11) 0.0112(3) Uani 1 1 d . . . . . 
C22 C 0.6689(3) 0.6065(3) 0.70688(11) 0.0186(4) Uani 1 1 d . . . . . 
H22A H 0.7840 0.5921 0.7365 0.053(6) Uiso 1 1 calc R U . . . 
H22B H 0.5931 0.5157 0.7203 0.053(6) Uiso 1 1 calc R U . . . 
H22C H 0.6219 0.7168 0.7192 0.053(6) Uiso 1 1 calc R U . . . 
O1W O 0.39183(17) 0.17790(17) 0.53757(8) 0.0135(3) Uani 1 1 d . . . . . 
H11W H 0.3884 0.0958 0.5779 0.041(6) Uiso 1 1 d R U . . . 
H12W H 0.5097 0.1794 0.5286 0.041(6) Uiso 1 1 d R U . . . 
O2W O 0.16864(17) 0.66117(17) 0.62612(8) 0.0143(3) Uani 1 1 d . . . . . 
H21W H 0.0501 0.6743 0.6329 0.041(6) Uiso 1 1 d R U . . . 
H22W H 0.2240 0.7639 0.6462 0.041(6) Uiso 1 1 d R U . . . 
O3W O 0.29946(18) 0.35077(18) 0.66830(8) 0.0170(3) Uani 1 1 d . . . . . 
H31W H 0.2517 0.4026 0.7101 0.052(7) Uiso 1 1 d R U . . . 
H32W H 0.3263 0.2366 0.6851 0.052(7) Uiso 1 1 d R U . . . 
  
loop_ 
 _atom_site_aniso_label 
 _atom_site_aniso_U_11 
 _atom_site_aniso_U_22 
 _atom_site_aniso_U_33 
 _atom_site_aniso_U_23 
 _atom_site_aniso_U_13 
 _atom_site_aniso_U_12 
Eu1 0.00587(5) 0.00997(5) 0.01081(5) 0.00035(3) 0.00175(3) -0.00093(3) 
Cl1 0.0168(2) 0.0117(2) 0.0152(2) 0.00154(16) 0.00176(17) -0.00184(16) 
O11 0.0101(6) 0.0154(7) 0.0182(7) 0.0004(5) 0.0035(5) -0.0032(5) 
O12 0.0083(6) 0.0156(7) 0.0215(7) 0.0046(6) 0.0027(5) 0.0001(5) 
C11 0.0106(8) 0.0116(8) 0.0126(8) -0.0007(7) 0.0035(7) 0.0005(7) 
C12 0.0212(10) 0.0171(10) 0.0243(11) 0.0076(8) 0.0012(8) 0.0024(8) 
O21 0.0086(6) 0.0148(7) 0.0129(6) -0.0007(5) 0.0015(5) -0.0017(5) 
O22 0.0082(6) 0.0187(7) 0.0156(7) -0.0019(6) 0.0018(5) -0.0019(5) 
C21 0.0095(8) 0.0104(8) 0.0131(9) -0.0012(7) 0.0003(6) 0.0008(7) 
C22 0.0141(9) 0.0309(11) 0.0102(9) 0.0000(8) 0.0003(7) 0.0017(8) 
O1W 0.0111(6) 0.0134(6) 0.0167(7) 0.0022(5) 0.0045(5) 0.0008(5) 
O2W 0.0104(6) 0.0142(6) 0.0184(7) -0.0044(5) 0.0016(5) 0.0002(5) 
O3W 0.0235(7) 0.0138(7) 0.0147(7) 0.0025(5) 0.0065(6) 0.0040(6) 
  
_geom_special_details 
; 
 All esds (except the esd in the dihedral angle between two l.s. planes) 
 are estimated using the full covariance matrix.  The cell esds are taken 
 into account individually in the estimation of esds in distances, angles 
 and torsion angles; correlations between esds in cell parameters are only 
 used when they are defined by crystal symmetry.  An approximate (isotropic) 
 treatment of cell esds is used for estimating esds involving l.s. planes. 
; 
  
loop_ 
 _geom_bond_atom_site_label_1 
 _geom_bond_atom_site_label_2 
 _geom_bond_distance 
 _geom_bond_site_symmetry_2 
 _geom_bond_publ_flag 
Eu1 O11 2.3406(13) . ? 
Eu1 O21 2.3617(13) . ? 
Eu1 O2W 2.4072(13) . ? 
Eu1 O3W 2.4267(14) . ? 
Eu1 O1W 2.4439(13) . ? 
Eu1 O12 2.4496(14) 3_566 ? 
Eu1 O22 2.4621(14) 3_666 ? 
Eu1 O21 2.6127(14) 3_666 ? 
Eu1 O11 2.7276(14) 3_566 ? 
O11 C11 1.272(2) . ? 
O12 C11 1.258(2) . ? 
C11 C12 1.495(3) . ? 
C12 H12A 0.9800 . ? 
C12 H12B 0.9800 . ? 
C12 H12C 0.9800 . ? 
O21 C21 1.281(2) . ? 
O22 C21 1.260(2) . ? 
C21 C22 1.489(3) . ? 
C22 H22A 0.9800 . ? 
C22 H22B 0.9800 . ? 
C22 H22C 0.9800 . ? 
O1W H11W 0.9600 . ? 
O1W H12W 0.9600 . ? 
O2W H21W 0.9600 . ? 
O2W H22W 0.9600 . ? 
O3W H31W 0.9600 . ? 
O3W H32W 0.9600 . ? 
  
loop_ 
 _geom_angle_atom_site_label_1 
 _geom_angle_atom_site_label_2 
 _geom_angle_atom_site_label_3 
 _geom_angle 
 _geom_angle_site_symmetry_1 
 _geom_angle_site_symmetry_3 
 _geom_angle_publ_flag 
O11 Eu1 O21 164.54(5) . . ? 
O11 Eu1 O2W 84.91(5) . . ? 
O21 Eu1 O2W 88.59(5) . . ? 
O11 Eu1 O3W 80.90(5) . . ? 
O21 Eu1 O3W 83.67(5) . . ? 
O2W Eu1 O3W 68.25(5) . . ? 
O11 Eu1 O1W 89.68(5) . . ? 
O21 Eu1 O1W 86.23(5) . . ? 
O2W Eu1 O1W 139.69(5) . . ? 
O3W Eu1 O1W 71.45(5) . . ? 
O11 Eu1 O12 117.68(5) . 3_566 ? 
O21 Eu1 O12 73.91(5) . 3_566 ? 
O2W Eu1 O12 75.58(5) . 3_566 ? 
O3W Eu1 O12 137.63(5) . 3_566 ? 
O1W Eu1 O12 139.76(5) . 3_566 ? 
O11 Eu1 O22 75.65(5) . 3_666 ? 
O21 Eu1 O22 117.87(5) . 3_666 ? 
O2W Eu1 O22 137.81(5) . 3_666 ? 
O3W Eu1 O22 141.34(5) . 3_666 ? 
O1W Eu1 O22 78.05(5) . 3_666 ? 
O12 Eu1 O22 80.92(5) 3_566 3_666 ? 
O11 Eu1 O21 125.13(5) . 3_666 ? 
O21 Eu1 O21 67.20(5) . 3_666 ? 
O2W Eu1 O21 141.80(4) . 3_666 ? 
O3W Eu1 O21 132.84(5) . 3_666 ? 
O1W Eu1 O21 70.42(4) . 3_666 ? 
O12 Eu1 O21 69.66(4) 3_566 3_666 ? 
O22 Eu1 O21 50.82(4) 3_666 3_666 ? 
O11 Eu1 O11 68.19(5) . 3_566 ? 
O21 Eu1 O11 122.24(4) . 3_566 ? 
O2W Eu1 O11 69.19(4) . 3_566 ? 
O3W Eu1 O11 128.77(4) . 3_566 ? 
O1W Eu1 O11 143.61(4) . 3_566 ? 
O12 Eu1 O11 49.50(4) 3_566 3_566 ? 
O22 Eu1 O11 68.87(4) 3_666 3_566 ? 
O21 Eu1 O11 98.35(4) 3_666 3_566 ? 
Eu1 Eu1 Eu1 139.857(5) 3_666 3_566 ? 
C11 O11 Eu1 159.32(13) . . ? 
C11 O11 Eu1 88.83(11) . 3_566 ? 
Eu1 O11 Eu1 111.81(5) . 3_566 ? 
C11 O12 Eu1 102.48(11) . 3_566 ? 
O12 C11 O11 119.18(17) . . ? 
O12 C11 C12 120.22(17) . . ? 
O11 C11 C12 120.60(17) . . ? 
C11 C12 H12A 109.5 . . ? 
C11 C12 H12B 109.5 . . ? 
H12A C12 H12B 109.5 . . ? 
C11 C12 H12C 109.5 . . ? 
H12A C12 H12C 109.5 . . ? 
H12B C12 H12C 109.5 . . ? 
C21 O21 Eu1 154.21(13) . . ? 
C21 O21 Eu1 91.18(11) . 3_666 ? 
Eu1 O21 Eu1 112.80(5) . 3_666 ? 
C21 O22 Eu1 98.85(11) . 3_666 ? 
O22 C21 O21 118.31(17) . . ? 
O22 C21 C22 121.22(16) . . ? 
O21 C21 C22 120.47(17) . . ? 
C21 C22 H22A 109.5 . . ? 
C21 C22 H22B 109.5 . . ? 
H22A C22 H22B 109.5 . . ? 
C21 C22 H22C 109.5 . . ? 
H22A C22 H22C 109.5 . . ? 
H22B C22 H22C 109.5 . . ? 
Eu1 O1W H11W 124.1 . . ? 
Eu1 O1W H12W 113.1 . . ? 
H11W O1W H12W 105.0 . . ? 
Eu1 O2W H21W 123.2 . . ? 
Eu1 O2W H22W 128.4 . . ? 
H21W O2W H22W 105.0 . . ? 
Eu1 O3W H31W 124.3 . . ? 
Eu1 O3W H32W 127.8 . . ? 
H31W O3W H32W 105.0 . . ? 
  
loop_ 
 _geom_hbond_atom_site_label_D 
 _geom_hbond_atom_site_label_H 
 _geom_hbond_atom_site_label_A 
 _geom_hbond_distance_DH 
 _geom_hbond_distance_HA 
 _geom_hbond_distance_DA 
 _geom_hbond_angle_DHA 
 _geom_hbond_site_symmetry_A 
O1W H11W Cl1  0.96 2.20 3.1366(14) 164.2 1_545 
O1W H12W O12  0.96 1.79 2.7070(19) 157.7 1_655 
O2W H21W O22  0.96 1.85 2.7153(18) 148.3 1_455 
O2W H22W Cl1  0.96 2.13 3.0814(14) 171.0 . 
O3W H31W Cl1  0.96 2.23 3.1804(15) 168.2 2_546 
O3W H32W Cl1  0.96 2.14 3.0768(15) 164.7 1_545 
  
_refine_diff_density_max    0.470 
_refine_diff_density_min   -0.703 
_refine_diff_density_rms    0.094 
  
_shelx_res_file 
; 
  
    Ha2019_37_0m_a.res created by SHELXL-2014/7 
  
  
TITL Ha2019_37_0m_a.res in P2(1)/n 
CELL  0.71073   7.8412   7.8769  17.4901   90.000   98.354   90.000 
ZERR    4.000   0.0002   0.0002   0.0005    0.000    0.001    0.000 
LATT 1 
SYMM 1/2-X, 1/2+Y, 1/2-Z 
SFAC C  H  O  Cl Eu 
UNIT 16 48 28 4 4 
LIST 4 ! automatically inserted. Change 6 to 4 for CHECKCIF!! 
OMIT 0 0 2 
OMIT -3 56 
L.S. 10 
ACTA 
BOND $H 
FMAP 2 
PLAN 5 
SIZE  0.034  0.163  0.462 
TEMP -173 
L.S. 10 
rem DFIX 0.96  0.0001 O1w H11w O1w H12w O2w H21w O2w H22w O3w H31w O3w H32w 
rem dfix 1.523  0.0001 H11w H12w H21w H22w H31w H32w 
FREE Eu1 C21_$6 
FREE Eu1 C11_$7 
EQIV $6 1-x, 1-y, 1-z 
BIND Eu1 Eu1_$6 
BIND Eu1 Eu1_$7 
EQIV $7 -x,1-y,1-z 
BIND Eu1 O11_$7 
ACTA 
HTAB 
EQIV $1 -x+3/2, y-1/2, -z+3/2 
EQIV $2 x, y-1, z 
HTAB O1W Cl1_$2 
EQIV $3 x+1, y, z 
HTAB O1W O12_$3 
EQIV $4 x-1, y, z 
HTAB O2W O22_$4 
HTAB O2W Cl1 
EQIV $5 -x+1/2, y-1/2, -z+3/2 
HTAB O3W Cl1_$5 
HTAB O3W Cl1_$2 
SIZE 0.034  0.163  0.462 
BOND $H 
FMAP 2 
PLAN 15 
TEMP -173 
WGHT    0.015500    1.216200 
FVAR       0.10865   0.08512   0.05333   0.04126   0.04129   0.05152 
EU1   5    0.264052    0.460914    0.537370    11.00000    0.00587    0.00997 = 
         0.01081    0.00035    0.00175   -0.00093 
CL1   4    0.383596    0.970786    0.690156    11.00000    0.01678    0.01172 = 
         0.01525    0.00154    0.00176   -0.00184 
O11   3   -0.008029    0.337629    0.535803    11.00000    0.01014    0.01543 = 
         0.01823    0.00037    0.00351   -0.00317 
O12   3   -0.278435    0.263428    0.526206    11.00000    0.00828    0.01558 = 
         0.02148    0.00461    0.00267    0.00006 
C11   1   -0.122190    0.231356    0.549196    11.00000    0.01058    0.01155 = 
         0.01263   -0.00071    0.00352    0.00046 
C12   1   -0.072017    0.070347    0.591815    11.00000    0.02124    0.01706 = 
         0.02426    0.00765    0.00121    0.00241 
AFIX 137 
H12A  2   -0.155043   -0.019022    0.573627    11.00000   21.00000 
H12B  2   -0.071416    0.088454    0.647289    11.00000   21.00000 
H12C  2    0.043309    0.036031    0.582476    11.00000   21.00000 
AFIX   0 
O21   3    0.548048    0.561137    0.573961    11.00000    0.00862    0.01484 = 
         0.01292   -0.00068    0.00145   -0.00171 
O22   3    0.820431    0.628674    0.597688    11.00000    0.00823    0.01871 = 
         0.01558   -0.00192    0.00177   -0.00194 
C21   1    0.680731    0.598643    0.622770    11.00000    0.00954    0.01043 = 
         0.01314   -0.00118    0.00030    0.00078 
C22   1    0.668920    0.606472    0.706876    11.00000    0.01414    0.03095 = 
         0.01016    0.00000    0.00031    0.00171 
AFIX 137 
H22A  2    0.784029    0.592087    0.736524    11.00000   31.00000 
H22B  2    0.593071    0.515709    0.720286    11.00000   31.00000 
H22C  2    0.621883    0.716777    0.719190    11.00000   31.00000 
AFIX   0 
O1W   3    0.391827    0.177902    0.537565    11.00000    0.01113    0.01339 = 
         0.01665    0.00224    0.00454    0.00079 
AFIX   3 
H11W  2    0.388406    0.095843    0.577896    11.00000   41.00000 
H12W  2    0.509740    0.179376    0.528608    11.00000   41.00000 
AFIX   0 
O2W   3    0.168637    0.661166    0.626116    11.00000    0.01037    0.01416 = 
         0.01837   -0.00436    0.00162    0.00017 
AFIX   3 
H21W  2    0.050058    0.674259    0.632932    11.00000   51.00000 
H22W  2    0.223963    0.763866    0.646184    11.00000   51.00000 
AFIX   0 
O3W   3    0.299458    0.350774    0.668300    11.00000    0.02353    0.01384 = 
         0.01469    0.00251    0.00649    0.00397 
AFIX   3 
H31W  2    0.251695    0.402642    0.710112    11.00000   61.00000 
H32W  2    0.326336    0.236587    0.685082    11.00000   61.00000 
AFIX   0 
HKLF 4 
  
REM  Ha2019_37_0m_a.res in P2(1)/n 
REM R1 =  0.0131 for    2513 Fo > 4sig(Fo)  and  0.0137 for all    2587 data 
REM    125 parameters refined using      0 restraints 
  
END 
  
WGHT      0.0155      1.2162 
  
REM Instructions for potential hydrogen bonds 
HTAB C22 Cl1_$1 
HTAB C22 Cl1 
HTAB O1W Cl1_$2 
HTAB O1W O12_$3 
HTAB O2W O22_$4 
HTAB O2W Cl1 
HTAB O3W Cl1_$5 
HTAB O3W Cl1_$2 
  
REM Highest difference peak  0.470,  deepest hole -0.703,  1-sigma level  0.094 
Q1    1   0.5942  0.5428  0.5272  11.00000  0.05    0.47 
Q2    1  -0.0852  0.1447  0.5661  11.00000  0.05    0.43 
Q3    1  -0.0873 -0.0372  0.5542  11.00000  0.05    0.40 
Q4    1   0.6777  0.5999  0.6688  11.00000  0.05    0.39 
Q5    1   0.7611  0.5362  0.5433  11.00000  0.05    0.34 
Q6    1   0.4946  0.5228  0.6070  11.00000  0.05    0.34 
Q7    1   0.8010  0.5654  0.5510  11.00000  0.05    0.34 
Q8    1   0.4630  0.2007  0.5372  11.00000  0.05    0.33 
Q9    1   0.8387  0.5695  0.5647  11.00000  0.05    0.32 
Q10   1   0.3844  0.1280  0.5602  11.00000  0.05    0.31 
Q11   1  -0.0332  0.4064  0.5428  11.00000  0.05    0.30 
Q12   1   0.0147  0.0943  0.6402  11.00000  0.05    0.30 
Q13   1   0.4064  0.9719  0.6584  11.00000  0.05    0.29 
Q14   1   0.0331  0.2587  0.5404  11.00000  0.05    0.29 
Q15   1   0.0933  0.4687  0.4748  11.00000  0.05    0.29 
; 
_shelx_res_checksum   13068 
  
_shelx_hkl_file 
; 
   1   0   0    0.01    0.04 
  -1   0   0    0.76    0.10 
  -1   0   0    0.14    0.07 
   1   0   0    0.20    0.08 
   1   0   0    0.25    0.08 
   1   0   0    0.21    0.09 
  -1   0   0    0.31    0.11 
   1   0   0    0.03    0.05 
   1   0   0    0.16    0.06 
   1   0   0    0.05    0.05 
  -1   0   0    0.43    0.09 
  -1   0   0    0.59    0.07 
   1   0   0    0.03    0.05 
  -1   0   0    0.51    0.10 
  -1   0   0    0.06    0.06 
  -1   0   0    0.34    0.08 
  -1   0   0    0.23    0.07 
  -1   0   0    0.42    0.09 
  -1   0   0    0.50    0.06 
  -1   0   0    0.32    0.07 
  -1   0   0    0.03    0.05 
  -1   0   0    0.46    0.06 
  -1   0   0    0.07    0.06 
  -1   0   0    0.22    0.06 
  -1   0   0    0.25    0.08 
  -1   0   0    0.21    0.09 
   1   0   0    0.02    0.04 
  -1   0   0    0.26    0.08 
   2   0   0  709.77   25.12 
  -2   0   0  698.50   24.94 
   2   0   0  711.74   25.11 
  -2   0   0  718.68   25.07 
  -2   0   0  705.35   25.11 
   2   0   0  716.92   25.10 
   2   0   0  717.96   25.10 
  -2   0   0  693.39   25.15 
   2   0   0  634.99   25.08 
   2   0   0  679.44   24.99 
  -2   0   0  683.95   25.09 
   2   0   0  619.30   24.99 
   2   0   0  691.02   25.20 
  -2   0   0  701.25   25.19 
   2   0   0  699.49   25.11 
   2   0   0  669.50   25.06 
   2   0   0  726.73   25.19 
  -2   0   0  706.05   25.10 
   2   0   0  683.71   25.07 
   2   0   0  700.22   25.34 
  -2   0   0  707.68   25.11 
  -2   0   0  712.42   25.31 
   2   0   0  698.54   24.97 
  -2   0   0  700.70   25.03 
  -2   0   0  689.79   25.01 
  -2   0   0  702.19   25.11 
   2   0   0  687.20   24.99 
   2   0   0  616.52   24.96 
  -2   0   0  686.03   25.09 
  -2   0   0  717.74   25.28 
   2   0   0  692.21   25.12 
  -2   0   0  720.02   25.24 
   2   0   0  687.72   25.23 
   2   0   0  703.31   25.16 
  -2   0   0  718.64   25.19 
   2   0   0  707.08   25.28 
  -2   0   0  695.93   25.11 
  -2   0   0  701.86   25.33 
  -2   0   0  647.23   24.99 
  -2   0   0  651.06   25.08 
   3   0   0    0.15    0.10 
   3   0   0   -0.02    0.12 
  -3   0   0    0.04    0.05 
  -3   0   0    0.22    0.16 
  -3   0   0    0.11    0.14 
  -3   0   0    0.17    0.13 
  -3   0   0    0.16    0.12 
  -3   0   0    0.12    0.08 
   3   0   0    0.37    0.20 
   3   0   0    0.10    0.06 
   3   0   0    0.12    0.20 
   3   0   0    0.02    0.07 
  -3   0   0   -0.11    0.12 
   3   0   0    0.19    0.13 
  -3   0   0    0.29    0.18 
   3   0   0    0.00    0.13 
   3   0   0    0.39    0.19 
  -3   0   0    0.32    0.21 
   3   0   0    0.40    0.15 
  -3   0   0   -0.09    0.10 
  -3   0   0    0.00    0.13 
   3   0   0   -0.03    0.13 
   3   0   0    0.20    0.14 
  -3   0   0    0.25    0.16 
   3   0   0    0.09    0.13 
   3   0   0    0.11    0.10 
   3   0   0    0.53    0.24 
  -3   0   0    0.39    0.18 
  -3   0   0    0.37    0.18 
   3   0   0   -0.05    0.13 
  -3   0   0    0.31    0.21 
  -3   0   0    0.21    0.05 
   3   0   0    0.27    0.15 
  -4   0   0  203.48    8.48 
   4   0   0  217.44    7.98 
   4   0   0  197.19    7.60 
  -4   0   0  204.07    7.54 
   4   0   0  206.66    7.63 
   4   0   0  202.97    7.94 
   4   0   0  199.81    7.53 
  -4   0   0  207.42    7.90 
   4   0   0  199.24    7.78 
   4   0   0  202.93    8.02 
  -4   0   0  212.27    7.91 
   4   0   0  205.34    7.91 
  -4   0   0  198.94    7.84 
  -4   0   0  202.57    7.89 
   4   0   0  202.26    8.10 
   4   0   0  203.26    7.43 
   4   0   0  211.72    7.88 
  -4   0   0  203.58    7.77 
  -4   0   0  206.55    8.24 
  -4   0   0  204.46    7.46 
   4   0   0  202.24    8.16 
   4   0   0  209.07    7.64 
   4   0   0  204.26    8.05 
   5   0   0    0.03    0.19 
   5   0   0    0.04    0.19 
  -5   0   0   -0.25    0.13 
  -5   0   0   -0.02    0.27 
   5   0   0    0.71    0.30 
  -5   0   0    0.04    0.17 
  -5   0   0    0.26    0.11 
   5   0   0    0.72    0.32 
  -5   0   0    0.16    0.17 
   5   0   0    0.17    0.11 
   5   0   0    0.29    0.11 
   5   0   0   -0.12    0.20 
  -5   0   0    0.08    0.05 
   5   0   0    0.00    0.19 
   5   0   0    0.13    0.14 
   5   0   0    0.10    0.24 
  -5   0   0    0.32    0.23 
  -5   0   0    0.16    0.28 
   5   0   0    0.19    0.24 
   5   0   0    0.11    0.19 
   5   0   0    0.15    0.12 
  -6   0   0  159.10    6.34 
   6   0   0  163.41    6.33 
  -6   0   0  154.05    5.71 
   6   0   0  150.34    6.33 
   6   0   0  147.13    6.12 
  -6   0   0  149.30    6.29 
   6   0   0  152.74    5.79 
  -6   0   0  148.41    6.74 
   6   0   0  143.58    6.33 
  -6   0   0  157.84    6.17 
  -6   0   0  153.99    7.20 
  -6   0   0  151.12    6.30 
   6   0   0  154.69    6.57 
   6   0   0  150.32    5.58 
   6   0   0  152.69    5.75 
   6   0   0  153.44    6.76 
   6   0   0  153.79    6.41 
   6   0   0  148.91    6.48 
   6   0   0  149.93    6.64 
   7   0   0    0.00    0.27 
   7   0   0    0.32    0.29 
   7   0   0    0.34    0.38 
   7   0   0   -0.31    0.22 
  -7   0   0   -0.08    0.24 
  -7   0   0   -0.18    0.20 
   7   0   0    0.30    0.36 
  -7   0   0   -0.13    0.24 
  -7   0   0    0.12    0.29 
  -7   0   0   -0.06    0.40 
   7   0   0    0.22    0.32 
   7   0   0   -0.02    0.31 
   7   0   0   -0.06    0.26 
  -7   0   0    0.35    0.43 
   8   0   0  107.05    5.47 
   8   0   0  107.13    5.08 
  -8   0   0  112.78    5.06 
  -8   0   0  108.46    4.99 
  -8   0   0  109.65    4.84 
   8   0   0   99.65    4.87 
   8   0   0  102.98    5.50 
  -8   0   0  106.54    5.56 
   8   0   0  104.02    5.00 
  -8   0   0  109.58    6.12 
   8   0   0  111.19    5.33 
   8   0   0  108.19    5.26 
  -8   0   0  106.24    4.96 
   8   0   0  113.85    5.19 
   9   0   0    0.25    0.42 
  -9   0   0   -0.26    0.39 
   9   0   0    0.30    0.51 
   9   0   0    0.10    0.42 
   9   0   0    0.04    0.38 
  -9   0   0    0.16    0.43 
  -9   0   0   -0.28    0.43 
  -9   0   0   -0.33    0.52 
   9   0   0    0.29    0.44 
   9   0   0    0.27    0.50 
  -9   0   0    0.01    0.49 
   9   0   0    0.18    0.34 
   9   0   0    0.21    0.42 
  -9   0   0   -0.03    0.33 
  10   0   0   26.27    2.72 
  10   0   0   28.08    2.97 
  10   0   0   27.07    2.75 
 -10   0   0   23.49    2.86 
  10   0   0   24.81    2.17 
  10   0   0   29.93    2.29 
 -10   0   0   24.01    3.35 
 -10   0   0   23.09    1.97 
  10   0   0   23.00    2.52 
 -10   0   0   27.37    3.22 
  10   0   0   22.45    2.30 
 -10   0   0   26.75    2.10 
 -10   0   0   23.10    2.28 
  10   0   0   27.37    3.02 
   0  -1   0    0.11    0.07 
   0   1   0    0.51    0.06 
   0   1   0    0.41    0.08 
   0   1   0    0.30    0.09 
   0   1   0    0.40    0.10 
   0   1   0    0.25    0.07 
   0   1   0    0.23    0.06 
   0   1   0    0.36    0.08 
   0   1   0    0.48    0.07 
   0   1   0    0.36    0.08 
   0   1   0    0.45    0.09 
   0   1   0    0.27    0.08 
   0   1   0    0.64    0.08 
   0   1   0    0.40    0.09 
  -1  -1   0    0.47    0.13 
  -1  -1   0    0.32    0.10 
  -1  -1   0    0.48    0.11 
  -1  -1   0    0.15    0.08 
  -1  -1   0    0.17    0.10 
   1  -1   0    0.04    0.05 
   1  -1   0    0.19    0.08 
   1  -1   0    0.06    0.07 
   1  -1   0    0.13    0.06 
  -1  -1   0    0.26    0.09 
  -1  -1   0    0.31    0.11 
  -1  -1   0    0.26    0.11 
  -1  -1   0    0.44    0.12 
  -1  -1   0    0.28    0.10 
  -1  -1   0    0.42    0.12 
  -1  -1   0    0.10    0.09 
   1  -1   0    0.06    0.05 
  -1  -1   0    0.13    0.07 
  -1  -1   0    0.21    0.10 
   1  -1   0    0.26    0.10 
   1  -1   0    0.20    0.08 
  -1  -1   0    0.22    0.09 
  -1  -1   0    0.07    0.09 
   1  -1   0    0.23    0.07 
   1  -1   0    0.46    0.12 
   1  -1   0    0.25    0.08 
  -1  -1   0    0.24    0.10 
  -1  -1   0    0.27    0.10 
  -1  -1   0    0.25    0.10 
   1  -1   0    0.34    0.08 
  -1  -1   0    0.27    0.12 
   1  -1   0    0.10    0.07 
   1  -1   0    0.20    0.07 
   1  -1   0    0.20    0.07 
   1  -1   0    0.12    0.05 
  -1  -1   0    0.34    0.11 
   1  -1   0    0.08    0.06 
   1   1   0    0.26    0.11 
  -1   1   0    0.31    0.09 
   1   1   0    0.31    0.11 
   1   1   0    0.30    0.10 
  -1   1   0    0.32    0.11 
  -1   1   0    0.28    0.09 
   1   1   0    0.25    0.10 
   1   1   0    0.03    0.07 
  -1   1   0    0.47    0.10 
   1   1   0    0.16    0.08 
   1   1   0    0.38    0.11 
   1   1   0    0.14    0.09 
   1   1   0    0.10    0.07 
   1   1   0    0.35    0.10 
  -1   1   0    0.16    0.07 
  -1   1   0    0.29    0.10 
  -1   1   0    0.71    0.13 
   1   1   0    0.34    0.11 
   1   1   0    0.42    0.12 
  -1   1   0    0.14    0.08 
   1   1   0    0.19    0.08 
  -1   1   0    0.19    0.06 
  -1   1   0    0.24    0.07 
  -1   1   0    0.16    0.08 
  -1   1   0    0.63    0.12 
   1   1   0    0.18    0.12 
   1   1   0    0.13    0.07 
   1   1   0    0.32    0.11 
  -1   1   0    0.24    0.10 
  -1   1   0    0.32    0.08 
   1   1   0    0.26    0.11 
  -1   1   0    0.39    0.11 
   1   1   0    0.66    0.17 
   1   1   0    0.26    0.11 
   1   1   0    0.07    0.09 
  -1   1   0    0.25    0.07 
  -1   1   0    0.32    0.09 
   1   1   0    0.31    0.11 
  -2  -1   0   87.07    3.46 
   2  -1   0   84.47    3.30 
   2  -1   0   85.48    3.26 
  -2  -1   0   85.52    3.40 
   2  -1   0   83.62    3.44 
  -2  -1   0   89.01    3.42 
  -2  -1   0   90.45    3.49 
  -2  -1   0   82.68    3.34 
  -2  -1   0   83.89    3.40 
   2  -1   0   81.83    3.34 
  -2  -1   0   85.46    3.31 
  -2  -1   0   91.84    3.60 
   2  -1   0   87.35    3.29 
   2  -1   0   85.59    3.19 
  -2  -1   0   85.18    3.30 
   2  -1   0   86.78    3.35 
  -2  -1   0   88.99    3.32 
  -2  -1   0   83.32    3.59 
  -2  -1   0   86.54    3.42 
  -2  -1   0   86.95    3.44 
   2  -1   0   82.82    3.49 
   2  -1   0   86.47    3.35 
   2  -1   0   89.74    3.45 
  -2  -1   0   81.18    3.41 
  -2  -1   0   88.47    3.50 
  -2  -1   0   88.29    3.55 
  -2  -1   0   83.33    3.65 
  -2  -1   0   87.29    3.42 
  -2  -1   0   86.47    3.46 
   2  -1   0   90.16    3.43 
   2  -1   0   84.84    3.52 
  -2  -1   0   88.89    3.45 
  -2  -1   0   87.20    3.45 
  -2  -1   0   85.90    3.44 
   2  -1   0   89.16    3.59 
  -2   1   0   88.01    3.32 
  -2   1   0   83.62    3.34 
   2   1   0   87.89    3.42 
   2   1   0   84.91    3.49 
   2   1   0   92.85    3.50 
  -2   1   0   83.60    3.42 
   2   1   0   86.04    3.41 
   2   1   0   88.91    3.43 
   2   1   0   82.27    3.43 
  -2   1   0   85.92    3.44 
   2   1   0   89.96    3.47 
   2   1   0   90.34    3.49 
  -2   1   0   90.19    3.24 
   2   1   0   85.42    3.50 
   2   1   0   86.41    3.57 
  -2   1   0   88.24    3.53 
   2   1   0   83.48    3.35 
  -2   1   0   88.48    3.35 
   2   1   0   89.31    3.45 
  -2   1   0   84.14    3.27 
  -2   1   0   90.31    3.52 
  -2   1   0   84.63    3.34 
  -2   1   0   82.76    3.54 
   2   1   0   85.41    3.43 
   2   1   0   84.06    3.44 
  -2   1   0   88.94    3.28 
  -2   1   0   85.47    3.33 
  -2   1   0   87.64    3.33 
  -2   1   0   86.73    3.21 
   2   1   0   88.78    3.31 
   2   1   0   85.32    3.42 
   2   1   0   85.74    3.31 
  -2   1   0   83.69    3.34 
  -2   1   0   89.76    3.51 
   2   1   0   87.38    3.42 
   2   1   0   85.40    3.26 
  -2   1   0   85.51    3.19 
  -2   1   0   88.36    3.33 
   2   1   0   88.09    3.32 
  -2   1   0   83.52    3.19 
  -2   1   0   83.40    3.40 
   3  -1   0    5.65    0.67 
  -3  -1   0    5.94    0.40 
   3  -1   0    4.89    0.58 
  -3  -1   0    6.19    0.75 
  -3  -1   0    5.98    0.62 
   3  -1   0    6.75    0.57 
  -3  -1   0    6.58    0.57 
   3  -1   0    6.02    0.66 
  -3  -1   0    5.97    0.61 
   3  -1   0    6.08    0.46 
  -3  -1   0    6.82    0.43 
   3  -1   0    6.30    0.65 
   3  -1   0    6.49    0.28 
   3  -1   0    7.28    0.53 
  -3  -1   0    6.12    0.78 
  -3  -1   0    5.82    0.59 
  -3  -1   0    6.77    0.48 
  -3  -1   0    5.91    0.81 
   3  -1   0    7.30    0.71 
   3  -1   0    7.09    0.49 
  -3  -1   0    6.55    0.58 
  -3  -1   0    6.22    0.71 
   3  -1   0    6.12    0.48 
  -3  -1   0    5.51    0.57 
   3  -1   0    6.30    0.52 
   3  -1   0    5.16    0.52 
   3  -1   0    6.71    0.40 
  -3  -1   0    6.35    0.54 
   3  -1   0    6.78    0.52 
  -3   1   0    7.23    0.65 
  -3   1   0    6.58    0.33 
   3   1   0    5.95    0.69 
  -3   1   0    5.57    0.71 
   3   1   0    6.12    0.42 
   3   1   0    6.96    0.43 
   3   1   0    6.28    0.47 
  -3   1   0    7.34    0.55 
   3   1   0    6.42    0.47 
  -3   1   0    7.64    0.60 
   3   1   0    6.49    0.53 
   3   1   0    5.96    0.62 
  -3   1   0    6.89    0.47 
  -3   1   0    6.87    0.52 
   3   1   0    7.53    0.66 
  -3   1   0    6.21    0.39 
  -3   1   0    6.61    0.50 
   3   1   0    6.68    0.66 
   3   1   0    6.03    0.64 
  -3   1   0    6.26    0.45 
  -3   1   0    7.03    0.52 
  -3   1   0    6.52    0.51 
   3   1   0    5.89    0.73 
  -3   1   0    6.52    0.44 
   3   1   0    6.24    0.36 
   3   1   0    5.52    0.60 
  -3   1   0    6.36    0.49 
   3   1   0    6.09    0.61 
   3   1   0    5.99    0.64 
  -3   1   0    5.97    0.62 
   3   1   0    7.37    0.58 
  -3   1   0    6.29    0.37 
   3   1   0    5.74    0.51 
  -3   1   0    6.42    0.38 
  -3   1   0    6.32    0.33 
   3   1   0    6.89    0.43 
   3   1   0    7.18    0.71 
   4  -1   0    1.10    0.20 
  -4  -1   0    1.08    0.40 
  -4  -1   0    0.70    0.21 
   4  -1   0    0.96    0.33 
   4  -1   0    1.18    0.30 
   4  -1   0    0.86    0.31 
   4  -1   0    1.31    0.40 
  -4  -1   0    0.96    0.31 
   4  -1   0    1.22    0.28 
   4  -1   0    0.70    0.24 
  -4  -1   0    1.25    0.35 
   4  -1   0    1.33    0.34 
  -4  -1   0    1.39    0.33 
  -4  -1   0    1.19    0.33 
  -4  -1   0    1.29    0.21 
  -4  -1   0    1.24    0.20 
  -4  -1   0    1.10    0.45 
   4  -1   0    1.51    0.31 
   4  -1   0    1.22    0.34 
   4   1   0    1.31    0.23 
   4   1   0    1.23    0.34 
   4   1   0    1.16    0.25 
   4   1   0    1.23    0.41 
   4   1   0    1.23    0.37 
  -4   1   0    1.33    0.23 
   4   1   0    1.50    0.42 
  -4   1   0    1.41    0.15 
  -4   1   0    1.41    0.25 
   4   1   0    0.88    0.31 
   4   1   0    1.21    0.31 
   4   1   0    1.75    0.42 
  -4   1   0    1.54    0.22 
  -4   1   0    1.05    0.37 
  -4   1   0    1.01    0.27 
  -4   1   0    1.45    0.31 
  -4   1   0    1.26    0.15 
  -4   1   0    1.12    0.25 
   4   1   0    0.57    0.30 
  -4   1   0    1.15    0.32 
   4   1   0    1.23    0.17 
  -4   1   0    1.20    0.29 
   4   1   0    1.02    0.29 
  -4   1   0    0.92    0.29 
   4   1   0    1.49    0.35 
   4   1   0    0.86    0.19 
   4   1   0    1.22    0.35 
   4   1   0    1.28    0.21 
  -4   1   0    1.18    0.17 
  -5  -1   0  105.50    4.55 
   5  -1   0  104.14    4.48 
  -5  -1   0  103.60    4.55 
   5  -1   0  105.53    4.52 
   5  -1   0  110.38    4.36 
   5  -1   0  106.86    4.39 
  -5  -1   0  105.69    4.93 
   5  -1   0  104.35    4.63 
   5  -1   0  109.69    4.86 
  -5  -1   0  106.54    4.59 
   5  -1   0  106.34    4.49 
  -5  -1   0  109.79    4.05 
  -5  -1   0  111.49    5.26 
   5  -1   0  104.78    4.73 
   5  -1   0  101.31    4.65 
  -5  -1   0  106.81    4.22 
  -5  -1   0  107.18    4.49 
   5  -1   0  102.94    4.08 
  -5   1   0  110.23    4.07 
  -5   1   0  107.31    4.42 
   5   1   0   95.03    4.16 
  -5   1   0  107.58    5.19 
   5   1   0  114.84    4.95 
   5   1   0  107.53    4.56 
   5   1   0  107.04    4.23 
   5   1   0  106.96    4.57 
   5   1   0  105.78    4.38 
   5   1   0  107.35    4.69 
   5   1   0  107.71    4.71 
  -5   1   0  103.01    4.43 
   5   1   0  105.38    4.19 
  -5   1   0  107.58    4.84 
   5   1   0  106.46    4.10 
   5   1   0  110.48    4.67 
  -5   1   0  108.57    3.91 
  -5   1   0   99.03    4.00 
   5   1   0  114.06    4.90 
  -5   1   0  108.61    4.46 
  -5   1   0  105.08    4.24 
   5   1   0  109.37    4.66 
  -5   1   0  108.47    3.93 
   5   1   0  106.14    4.07 
   5   1   0  105.28    4.62 
  -6  -1   0    1.93    0.50 
   6  -1   0    2.31    0.53 
   6  -1   0    2.19    0.50 
   6  -1   0    2.32    0.59 
   6  -1   0    2.55    0.48 
   6  -1   0    2.46    0.30 
   6  -1   0    2.25    0.64 
  -6  -1   0    2.75    0.59 
  -6  -1   0    2.71    0.57 
  -6  -1   0    1.86    0.34 
   6  -1   0    2.24    0.50 
  -6  -1   0    1.51    0.47 
  -6  -1   0    3.25    0.78 
   6  -1   0    1.74    0.48 
  -6  -1   0    2.80    0.84 
   6  -1   0    2.06    0.58 
   6   1   0    1.98    0.50 
   6   1   0    2.75    0.53 
  -6   1   0    1.88    0.40 
   6   1   0    1.52    0.48 
   6   1   0    1.97    0.43 
   6   1   0    1.84    0.56 
   6   1   0    1.25    0.43 
   6   1   0    1.87    0.49 
   6   1   0    2.10    0.28 
   6   1   0    2.10    0.60 
  -6   1   0    1.94    0.44 
   6   1   0    1.79    0.42 
   6   1   0    2.89    0.41 
  -6   1   0    2.82    0.56 
   6   1   0    1.44    0.53 
  -6   1   0    1.92    0.68 
   6   1   0    3.60    0.68 
  -6   1   0    3.00    0.56 
  -6   1   0    1.53    0.55 
  -7  -1   0  118.69    5.37 
  -7  -1   0  120.09    5.39 
  -7  -1   0  114.02    6.22 
   7  -1   0  121.74    5.34 
   7  -1   0  119.77    5.37 
  -7  -1   0  120.59    5.28 
   7  -1   0  126.63    5.04 
   7  -1   0  122.20    5.33 
   7  -1   0  118.71    5.52 
   7  -1   0  111.35    5.72 
  -7  -1   0  116.84    5.36 
  -7  -1   0  116.78    5.85 
   7  -1   0  122.29    5.19 
   7  -1   0  116.81    5.55 
  -7  -1   0  120.28    4.77 
   7  -1   0  119.18    5.70 
   7   1   0  114.52    5.44 
   7   1   0  125.83    5.42 
  -7   1   0  119.32    6.28 
   7   1   0  116.93    5.58 
  -7   1   0  121.46    5.81 
   7   1   0  130.50    4.99 
  -7   1   0  125.28    5.31 
   7   1   0  117.41    5.23 
  -7   1   0  125.95    5.06 
   7   1   0  118.16    5.79 
   7   1   0  120.03    5.40 
  -7   1   0  124.33    5.25 
  -7   1   0  123.79    5.28 
   7   1   0  120.96    5.58 
   7   1   0  125.38    5.79 
   7   1   0  127.15    5.57 
  -8  -1   0    1.16    0.49 
  -8  -1   0    1.16    0.78 
   8  -1   0    1.01    0.57 
  -8  -1   0    0.95    0.47 
   8  -1   0    0.11    0.44 
   8  -1   0    0.69    0.44 
  -8  -1   0    1.33    0.52 
  -8  -1   0    0.88    0.48 
   8  -1   0    0.57    0.39 
   8  -1   0    0.22    0.38 
   8  -1   0    0.74    0.41 
   8  -1   0    0.68    0.43 
   8  -1   0    1.72    0.58 
  -8  -1   0    0.88    0.62 
   8   1   0    1.38    0.61 
   8   1   0    0.44    0.39 
  -8   1   0    1.95    0.57 
  -8   1   0    0.61    0.55 
   8   1   0    1.16    0.59 
   8   1   0    1.02    0.52 
  -8   1   0    0.43    0.53 
   8   1   0    1.04    0.45 
  -8   1   0    0.77    0.40 
   8   1   0    0.94    0.56 
  -8   1   0    1.25    0.47 
   8   1   0    0.46    0.47 
   8   1   0    0.44    0.41 
  -9  -1   0   24.86    2.69 
  -9  -1   0   27.79    2.07 
  -9  -1   0   28.27    2.49 
  -9  -1   0   23.21    2.81 
   9  -1   0   27.30    2.20 
   9  -1   0   27.26    1.91 
   9  -1   0   23.46    2.12 
   9  -1   0   26.82    1.99 
   9  -1   0   22.67    2.51 
   9  -1   0   25.74    2.00 
   9  -1   0   26.95    2.41 
  -9  -1   0   27.75    2.00 
  -9  -1   0   29.71    2.13 
   9  -1   0   27.74    2.07 
  -9  -1   0   27.62    2.05 
   9   1   0   23.18    2.37 
   9   1   0   27.67    2.23 
  -9   1   0   28.62    2.02 
  -9   1   0   24.59    2.32 
   9   1   0   26.30    1.99 
   9   1   0   24.62    2.33 
   9   1   0   25.15    2.09 
  -9   1   0   27.87    1.94 
  -9   1   0   25.10    2.69 
   9   1   0   23.98    2.65 
   9   1   0   26.65    2.04 
  -9   1   0   25.58    1.90 
   9   1   0   25.41    2.17 
  -9   1   0   25.39    2.48 
  10  -1   0    3.10    0.94 
  10  -1   0    1.33    0.81 
  10  -1   0    2.58    0.80 
  10  -1   0    3.18    1.00 
  10  -1   0    2.49    1.00 
 -10  -1   0    2.67    1.09 
 -10  -1   0    3.86    1.37 
  10  -1   0    2.04    0.72 
 -10  -1   0    3.10    0.93 
 -10  -1   0    2.53    0.85 
 -10  -1   0    3.88    0.95 
 -10  -1   0    1.42    0.97 
 -10   1   0    2.98    0.78 
  10   1   0    1.46    0.82 
  10   1   0    4.09    1.07 
  10   1   0    2.55    0.86 
  10   1   0    4.22    0.98 
  10   1   0    1.94    0.87 
  10   1   0    2.58    0.90 
 -10   1   0    2.36    0.98 
 -10   1   0    3.27    0.89 
 -10   1   0    2.15    1.09 
 -10   1   0    2.97    1.15 
  10   1   0    1.50    0.86 
  10   1   0    2.48    0.94 
   0  -2   0  460.08   16.83 
   0  -2   0  491.76   16.87 
   0  -2   0  410.45   16.87 
   0  -2   0  466.25   16.79 
   0  -2   0  463.61   16.74 
   0  -2   0  484.37   16.93 
   0  -2   0  464.79   16.86 
   0  -2   0  474.99   16.89 
   0  -2   0  457.45   16.74 
   0  -2   0  456.03   17.19 
   0   2   0  451.60   16.74 
   0   2   0  459.24   16.77 
   0   2   0  455.39   16.78 
   0   2   0  487.50   16.88 
   0   2   0  473.35   16.93 
   0   2   0  473.48   16.86 
   0   2   0  443.26   16.74 
   0   2   0  479.76   16.91 
   0   2   0  448.06   16.88 
   0   2   0  469.00   16.84 
   0   2   0  450.49   16.70 
   0   2   0  445.82   16.92 
   0   2   0  451.41   16.74 
   0   2   0  454.94   16.89 
   0   2   0  452.23   16.86 
   0   2   0  466.86   16.78 
   0   2   0  458.88   16.66 
   0   2   0  483.47   16.74 
  -1  -2   0  356.00   12.83 
  -1  -2   0  373.11   12.90 
  -1  -2   0  352.90   12.80 
  -1  -2   0  369.27   12.85 
  -1  -2   0  339.88   12.87 
   1  -2   0  347.91   12.78 
  -1  -2   0  343.59   12.87 
  -1  -2   0  347.47   12.87 
   1  -2   0  340.75   12.95 
  -1  -2   0  350.14   12.90 
  -1  -2   0  355.57   12.96 
  -1  -2   0  355.87   12.73 
  -1  -2   0  341.98   12.73 
   1  -2   0  358.04   12.84 
   1  -2   0  345.42   12.73 
   1  -2   0  359.70   12.89 
  -1  -2   0  333.94   12.78 
   1  -2   0  347.68   12.86 
  -1  -2   0  346.58   12.96 
   1  -2   0  358.67   12.82 
  -1  -2   0  345.94   12.85 
   1  -2   0  341.11   12.87 
  -1  -2   0  337.05   12.80 
  -1  -2   0  361.43   12.90 
   1  -2   0  357.23   12.83 
   1  -2   0  334.90   12.83 
  -1  -2   0  351.35   12.79 
  -1  -2   0  353.32   12.92 
  -1  -2   0  345.76   12.89 
  -1   2   0  357.63   12.86 
  -1   2   0  333.73   12.72 
   1   2   0  338.95   12.86 
  -1   2   0  335.80   12.72 
  -1   2   0  356.78   12.71 
  -1   2   0  335.61   12.92 
   1   2   0  344.67   12.87 
  -1   2   0  350.56   12.86 
   1   2   0  353.86   12.74 
   1   2   0  352.24   12.81 
   1   2   0  356.76   12.89 
   1   2   0  337.80   12.78 
   1   2   0  351.47   12.90 
  -1   2   0  345.73   12.89 
   1   2   0  364.15   12.92 
  -1   2   0  366.31   12.88 
   1   2   0  358.68   12.89 
  -1   2   0  343.09   12.71 
   1   2   0  348.68   12.86 
   1   2   0  356.68   12.90 
   1   2   0  349.65   12.83 
   1   2   0  358.85   12.75 
   1   2   0  348.09   12.97 
  -1   2   0  333.93   12.74 
   1   2   0  354.72   12.91 
  -1   2   0  350.56   12.72 
  -1   2   0  356.01   12.81 
  -1   2   0  344.54   12.82 
  -1   2   0  338.02   12.77 
   1   2   0  359.40   12.88 
  -1   2   0  345.34   12.81 
   1   2   0  355.86   12.80 
   1   2   0  353.17   12.86 
   1   2   0  357.98   12.87 
  -1   2   0  349.91   12.71 
   1   2   0  367.18   12.92 
  -1   2   0  317.31   12.98 
  -1   2   0  348.95   12.73 
   1   2   0  355.08   12.79 
   1   2   0  351.21   12.83 
   2  -2   0  224.96    8.42 
   2  -2   0  216.02    8.42 
   2  -2   0  228.61    8.46 
   2  -2   0  228.70    8.35 
  -2  -2   0  231.09    8.56 
  -2  -2   0  221.71    8.57 
  -2  -2   0  228.17    8.55 
  -2  -2   0  226.85    8.55 
  -2  -2   0  228.09    8.60 
  -2  -2   0  230.30    8.53 
   2  -2   0  222.46    8.38 
  -2  -2   0  225.53    8.74 
  -2  -2   0  227.81    8.55 
  -2  -2   0  229.02    8.53 
  -2  -2   0  233.04    8.50 
   2  -2   0  231.99    8.49 
   2  -2   0  228.63    8.43 
  -2  -2   0  227.54    8.53 
  -2  -2   0  229.99    8.53 
   2  -2   0  227.70    8.48 
   2  -2   0  232.17    8.61 
  -2  -2   0  229.05    8.49 
   2  -2   0  232.03    8.37 
   2  -2   0  218.47    8.55 
  -2  -2   0  231.37    8.69 
  -2  -2   0  226.18    8.49 
   2  -2   0  201.29    8.39 
   2  -2   0  229.22    8.43 
   2  -2   0  234.22    8.40 
   2  -2   0  223.06    8.53 
  -2  -2   0  221.97    8.71 
   2  -2   0  211.65    8.47 
  -2   2   0  225.79    8.28 
  -2   2   0  220.88    8.51 
  -2   2   0  226.17    8.59 
  -2   2   0  223.31    8.46 
   2   2   0  236.31    8.69 
  -2   2   0  230.12    8.36 
  -2   2   0  226.29    8.49 
  -2   2   0  220.84    8.40 
   2   2   0  232.55    8.65 
  -2   2   0  227.57    8.47 
  -2   2   0  222.45    8.44 
   2   2   0  229.88    8.58 
   2   2   0  238.92    8.60 
   2   2   0  228.31    8.57 
  -2   2   0  222.10    8.36 
  -2   2   0  214.23    8.41 
  -2   2   0  221.71    8.43 
   2   2   0  231.19    8.55 
   2   2   0  231.79    8.49 
   2   2   0  220.40    8.45 
   2   2   0  230.94    8.53 
   2   2   0  228.69    8.55 
   2   2   0  230.69    8.51 
   2   2   0  227.18    8.50 
  -2   2   0  231.13    8.53 
  -2   2   0  231.10    8.47 
   2   2   0  224.48    8.56 
   2   2   0  226.25    8.57 
  -2   2   0  225.80    8.37 
   2   2   0  233.07    8.56 
  -2   2   0  223.90    8.37 
  -2   2   0  224.49    8.72 
   2   2   0  226.60    8.57 
  -2   2   0  228.84    8.63 
   2   2   0  223.97    8.53 
  -2   2   0  231.83    8.44 
   2   2   0  227.57    8.51 
  -3  -2   0   90.66    3.93 
   3  -2   0   92.66    3.57 
   3  -2   0   93.87    3.66 
  -3  -2   0   91.89    3.82 
  -3  -2   0   93.11    3.89 
   3  -2   0   95.93    3.76 
   3  -2   0   94.60    3.97 
   3  -2   0   95.56    4.08 
   3  -2   0   94.16    3.91 
  -3  -2   0   94.33    4.10 
   3  -2   0   92.36    3.65 
   3  -2   0   93.20    3.88 
   3  -2   0   94.93    3.74 
   3  -2   0   98.77    3.89 
   3  -2   0   98.61    3.88 
  -3  -2   0   90.30    3.88 
   3  -2   0   94.75    4.01 
  -3  -2   0   89.56    3.90 
   3  -2   0   96.96    3.64 
  -3  -2   0   95.75    3.79 
  -3  -2   0   89.26    4.19 
  -3  -2   0   98.33    3.77 
   3  -2   0   94.25    3.71 
  -3  -2   0   96.76    3.93 
  -3   2   0   95.35    3.60 
  -3   2   0   93.54    3.71 
   3   2   0   93.91    3.93 
  -3   2   0   94.24    3.96 
  -3   2   0   97.11    3.75 
   3   2   0   95.53    3.92 
   3   2   0   90.98    3.96 
   3   2   0   93.16    3.75 
  -3   2   0   93.27    3.86 
  -3   2   0   94.04    3.65 
   3   2   0   93.69    3.93 
  -3   2   0   85.84    4.11 
  -3   2   0   92.31    3.73 
  -3   2   0   93.17    3.58 
   3   2   0   95.99    3.98 
  -3   2   0   93.49    3.70 
  -3   2   0   95.57    3.73 
   3   2   0   98.65    3.78 
  -3   2   0   96.02    3.68 
   3   2   0   93.59    3.77 
   3   2   0   94.88    3.99 
   3   2   0   89.02    3.91 
  -3   2   0   93.18    3.70 
  -3   2   0   91.09    3.70 
   3   2   0   92.27    3.90 
  -3   2   0   94.10    3.58 
  -3   2   0   95.70    3.76 
  -3   2   0   92.40    3.82 
   3   2   0   99.67    3.86 
   3   2   0   90.97    3.86 
  -3   2   0   93.34    3.72 
   3   2   0   93.02    3.70 
  -3   2   0   92.08    3.58 
  -3   2   0   95.43    4.06 
   3   2   0   96.68    3.92 
   4  -2   0  150.91    5.51 
  -4  -2   0  150.19    6.04 
  -4  -2   0  150.39    6.10 
   4  -2   0  146.23    5.63 
   4  -2   0  155.87    5.94 
   4  -2   0  151.63    6.33 
   4  -2   0  150.42    5.74 
   4  -2   0  146.31    6.22 
   4  -2   0  146.94    6.05 
  -4  -2   0  149.80    5.78 
   4  -2   0  151.41    5.89 
   4  -2   0  125.20    5.69 
  -4  -2   0  150.63    6.06 
  -4  -2   0  155.07    5.89 
   4  -2   0  148.19    6.18 
   4  -2   0  149.97    5.88 
  -4  -2   0  155.16    6.36 
  -4  -2   0  149.90    6.05 
   4  -2   0  150.12    6.02 
  -4  -2   0  149.11    6.52 
   4  -2   0  153.37    6.12 
  -4   2   0  149.16    5.88 
   4   2   0  145.65    6.16 
  -4   2   0  142.12    5.86 
  -4   2   0  149.81    5.52 
  -4   2   0  147.09    5.53 
  -4   2   0  148.55    5.54 
   4   2   0  150.20    5.68 
  -4   2   0  153.02    5.61 
  -4   2   0  135.61    5.57 
   4   2   0  155.27    6.16 
  -4   2   0  147.56    5.69 
   4   2   0  147.87    5.90 
   4   2   0  145.86    5.77 
   4   2   0  146.51    6.02 
  -4   2   0  145.84    6.15 
  -4   2   0  153.53    5.83 
  -4   2   0  153.35    5.79 
  -4   2   0  151.28    5.85 
  -4   2   0  152.14    5.49 
   4   2   0  153.24    6.13 
   4   2   0  147.58    6.09 
   4   2   0  148.78    5.78 
   4   2   0  156.42    5.79 
   4   2   0  151.47    6.18 
  -4   2   0  147.11    5.72 
   4   2   0  154.68    6.09 
   4   2   0  145.40    5.99 
  -4   2   0  149.06    5.82 
   4   2   0  154.89    6.03 
  -4   2   0  152.83    5.73 
   4   2   0  159.72    6.13 
   5  -2   0   50.71    2.73 
  -5  -2   0   52.73    2.60 
   5  -2   0   50.23    2.42 
  -5  -2   0   46.73    2.96 
  -5  -2   0   50.77    2.84 
  -5  -2   0   48.79    2.56 
  -5  -2   0   51.06    2.21 
   5  -2   0   50.91    2.05 
   5  -2   0   51.22    2.41 
  -5  -2   0   50.82    2.32 
   5  -2   0   50.25    2.59 
  -5  -2   0   48.31    2.51 
   5  -2   0   46.31    2.49 
   5  -2   0   51.44    2.66 
   5  -2   0   50.87    2.21 
   5  -2   0   48.66    2.25 
  -5  -2   0   50.02    2.53 
   5  -2   0   51.06    2.42 
   5   2   0   49.51    2.55 
  -5   2   0   50.07    1.88 
   5   2   0   50.77    2.57 
   5   2   0   46.40    2.58 
  -5   2   0   45.75    2.22 
  -5   2   0   49.33    2.07 
  -5   2   0   46.92    2.10 
   5   2   0   48.35    2.45 
   5   2   0   47.15    2.66 
   5   2   0   51.79    2.54 
  -5   2   0   50.06    2.31 
   5   2   0   52.77    2.75 
  -5   2   0   51.64    2.38 
   5   2   0   52.69    2.22 
   5   2   0   48.33    2.20 
   5   2   0   51.10    2.22 
  -5   2   0   48.70    2.33 
  -5   2   0   47.54    2.04 
  -5   2   0   50.45    2.18 
   5   2   0   48.99    2.07 
   5   2   0   52.79    2.64 
   5   2   0   46.38    2.56 
  -5   2   0   44.61    2.61 
  -5   2   0   52.97    1.95 
   5   2   0   50.63    2.65 
  -5   2   0   51.92    3.04 
  -5   2   0   51.42    2.45 
  -6  -2   0  181.38    7.18 
   6  -2   0  181.65    7.54 
  -6  -2   0  178.83    6.62 
  -6  -2   0  175.27    7.70 
   6  -2   0  170.35    6.68 
  -6  -2   0  168.81    7.15 
  -6  -2   0  172.65    7.96 
   6  -2   0  169.28    6.99 
   6  -2   0  169.51    7.02 
   6  -2   0  168.02    7.19 
  -6  -2   0  173.92    7.19 
  -6  -2   0  179.33    6.82 
   6  -2   0  169.88    7.25 
   6  -2   0  171.01    6.82 
   6  -2   0  167.86    6.39 
  -6  -2   0  170.74    7.21 
   6  -2   0  172.16    7.03 
   6  -2   0  175.50    7.38 
   6   2   0  169.03    7.28 
   6   2   0  165.01    7.24 
   6   2   0  171.05    7.30 
   6   2   0  178.91    7.50 
  -6   2   0  178.61    6.94 
   6   2   0  174.84    7.16 
   6   2   0  171.68    7.46 
   6   2   0  175.07    6.64 
   6   2   0  175.20    7.02 
   6   2   0  166.12    6.67 
   6   2   0  171.11    7.20 
   6   2   0  181.06    6.82 
  -6   2   0  156.90    7.00 
  -6   2   0  167.06    7.40 
  -6   2   0  176.44    6.48 
  -6   2   0  175.79    6.96 
   6   2   0  174.47    7.29 
  -6   2   0  174.26    6.63 
  -6   2   0  172.03    6.49 
  -6   2   0  166.24    6.35 
  -6   2   0  168.53    6.86 
   6   2   0  166.53    7.19 
  -6   2   0  179.01    7.98 
  -7  -2   0   11.73    1.38 
  -7  -2   0   14.04    1.45 
  -7  -2   0    9.93    1.29 
   7  -2   0   14.18    1.60 
  -7  -2   0   12.07    1.33 
  -7  -2   0   14.41    2.01 
   7  -2   0   15.00    1.23 
  -7  -2   0   12.83    1.67 
  -7  -2   0   11.26    0.92 
   7  -2   0   12.71    1.32 
   7  -2   0   13.86    1.07 
   7  -2   0   12.08    1.29 
   7  -2   0   12.27    0.89 
   7  -2   0   12.59    1.43 
   7  -2   0   10.15    1.46 
   7  -2   0   12.42    1.44 
   7   2   0   14.32    1.68 
   7   2   0   14.31    1.21 
   7   2   0   14.87    1.56 
  -7   2   0   11.87    1.84 
   7   2   0   14.00    1.69 
  -7   2   0   13.43    0.95 
  -7   2   0   11.78    1.23 
   7   2   0   13.24    1.51 
   7   2   0   12.15    1.46 
  -7   2   0   13.85    1.08 
  -7   2   0   14.35    1.67 
   7   2   0   14.67    1.59 
   7   2   0   13.94    1.45 
   7   2   0   13.36    1.11 
  -7   2   0   13.32    1.27 
   7   2   0   12.27    1.39 
   8  -2   0   78.63    3.61 
   8  -2   0   75.12    3.79 
  -8  -2   0   78.31    4.85 
  -8  -2   0   76.57    3.90 
  -8  -2   0   74.11    3.90 
  -8  -2   0   75.04    3.93 
   8  -2   0   75.15    4.05 
  -8  -2   0   77.79    4.45 
   8  -2   0   73.29    3.96 
   8  -2   0   73.22    3.75 
   8  -2   0   74.42    4.13 
   8  -2   0   69.21    4.19 
   8  -2   0   73.98    3.75 
  -8  -2   0   70.59    3.79 
   8   2   0   69.53    4.15 
   8   2   0   72.78    4.01 
   8   2   0   73.76    3.88 
  -8   2   0   71.12    3.64 
   8   2   0   78.49    4.08 
   8   2   0   75.00    4.05 
  -8   2   0   76.70    3.59 
   8   2   0   78.93    4.36 
   8   2   0   74.48    3.91 
  -8   2   0   69.85    4.15 
  -8   2   0   77.51    4.83 
  -8   2   0   73.07    3.62 
  -8   2   0   68.13    4.33 
   8   2   0   74.77    3.52 
   8   2   0   75.49    4.04 
   9  -2   0    5.39    0.99 
   9  -2   0    7.06    1.26 
  -9  -2   0    7.50    1.24 
  -9  -2   0    6.97    1.24 
   9  -2   0    5.86    1.23 
   9  -2   0    6.30    1.22 
   9  -2   0    8.06    1.28 
   9  -2   0    3.96    1.14 
  -9  -2   0    6.95    1.70 
  -9  -2   0    4.39    1.22 
  -9  -2   0    6.13    1.40 
  -9  -2   0    7.70    1.28 
  -9  -2   0    6.41    1.18 
  -9   2   0    9.19    1.61 
   9   2   0    4.62    1.05 
  -9   2   0    5.36    1.00 
   9   2   0    7.01    1.44 
   9   2   0    6.94    1.33 
   9   2   0    6.22    1.25 
   9   2   0    6.25    1.23 
  -9   2   0    8.66    1.70 
   9   2   0    7.03    1.21 
   9   2   0    6.83    1.21 
  -9   2   0    8.06    1.83 
  -9   2   0    7.21    1.66 
  -9   2   0    6.82    1.07 
   9   2   0    6.78    1.38 
 -10  -2   0   39.47    3.31 
 -10  -2   0   38.23    2.80 
 -10  -2   0   37.99    2.74 
  10  -2   0   35.20    2.63 
 -10  -2   0   38.73    3.35 
  10  -2   0   38.34    3.06 
  10  -2   0   39.55    2.90 
  10  -2   0   43.13    3.33 
 -10  -2   0   40.36    3.75 
  10  -2   0   38.89    2.96 
 -10  -2   0   44.75    2.90 
 -10  -2   0   38.64    2.70 
  10  -2   0   37.62    2.61 
  10   2   0   34.29    2.82 
 -10   2   0   39.37    3.39 
  10   2   0   38.04    3.18 
 -10   2   0   39.45    3.69 
  10   2   0   36.96    2.73 
  10   2   0   38.01    3.14 
  10   2   0   36.04    2.81 
 -10   2   0   38.83    2.59 
 -10   2   0   37.12    2.49 
  10   2   0   39.71    2.78 
 -10   2   0   41.41    3.83 
  10   2   0   43.10    3.00 
 -10   2   0   39.40    3.14 
  10   2   0   40.95    3.00 
   0  -3   0    0.13    0.12 
   0  -3   0   -0.01    0.13 
   0  -3   0    0.00    0.14 
   0  -3   0    0.19    0.21 
   0  -3   0    0.13    0.10 
   0  -3   0    0.01    0.15 
   0  -3   0    0.17    0.16 
   0  -3   0    0.07    0.10 
   0  -3   0    0.14    0.11 
   0  -3   0    0.08    0.17 
   0  -3   0   -0.03    0.13 
   0  -3   0   -0.09    0.08 
   0  -3   0    0.12    0.13 
   0   3   0    0.00    0.11 
   0   3   0   -0.06    0.10 
   0   3   0    0.22    0.10 
   0   3   0    0.17    0.15 
   0   3   0   -0.10    0.09 
   0   3   0    0.04    0.07 
   0   3   0    0.18    0.10 
   0   3   0   -0.14    0.11 
   0   3   0    0.00    0.14 
   0   3   0    0.01    0.17 
   0   3   0    0.05    0.10 
   0   3   0    0.00    0.14 
   0   3   0    0.12    0.13 
   0   3   0    0.04    0.10 
   0   3   0   -0.02    0.15 
   0   3   0   -0.02    0.12 
   0   3   0   -0.04    0.08 
   0   3   0    0.06    0.08 
   0   3   0    0.02    0.05 
   0   3   0    0.07    0.10 
   1  -3   0   21.66    1.04 
  -1  -3   0   21.92    1.25 
  -1  -3   0   21.69    1.15 
   1  -3   0   21.94    1.24 
  -1  -3   0   23.50    1.34 
  -1  -3   0   23.10    1.09 
  -1  -3   0   20.87    1.22 
  -1  -3   0   23.06    0.99 
   1  -3   0   23.47    1.16 
  -1  -3   0   22.04    1.28 
   1  -3   0   21.45    1.19 
  -1  -3   0   21.64    1.01 
  -1  -3   0   21.36    1.08 
  -1  -3   0   22.06    1.18 
   1  -3   0   20.04    1.17 
  -1  -3   0   22.64    1.23 
  -1  -3   0   21.72    1.12 
   1  -3   0   22.17    1.15 
   1  -3   0   23.50    1.19 
   1  -3   0   26.07    1.28 
  -1  -3   0   21.98    1.19 
  -1  -3   0   24.45    1.16 
   1  -3   0   21.89    0.97 
  -1   3   0   22.91    1.18 
   1   3   0   22.26    1.14 
   1   3   0   22.44    1.01 
   1   3   0   19.32    1.19 
   1   3   0   21.13    1.23 
  -1   3   0   23.50    1.22 
   1   3   0   23.19    1.29 
   1   3   0   22.57    1.21 
   1   3   0   21.41    1.07 
  -1   3   0   21.68    1.02 
  -1   3   0   22.11    1.00 
  -1   3   0   22.26    1.01 
  -1   3   0   22.62    1.02 
  -1   3   0   21.99    0.99 
  -1   3   0   22.75    1.13 
   1   3   0   23.75    1.12 
   1   3   0   23.17    1.13 
   1   3   0   22.41    1.13 
   1   3   0   23.20    1.18 
  -1   3   0   22.90    0.99 
   1   3   0   20.70    1.22 
  -1   3   0   21.20    0.97 
  -1   3   0   24.26    1.18 
   1   3   0   21.00    0.97 
  -1   3   0   22.43    1.25 
   1   3   0   21.20    1.19 
   1   3   0   21.63    1.17 
  -1   3   0   23.44    1.06 
  -1   3   0   22.10    1.09 
  -1   3   0   23.46    1.19 
  -1   3   0   22.84    1.17 
   1   3   0   25.14    1.31 
   1   3   0   22.06    1.21 
   1   3   0   22.06    1.14 
   1   3   0   22.28    1.09 
  -1   3   0   23.07    1.19 
   2  -3   0    7.54    0.55 
  -2  -3   0    6.67    0.69 
  -2  -3   0    7.11    0.72 
   2  -3   0    6.90    0.59 
  -2  -3   0    7.12    0.59 
   2  -3   0    6.83    0.51 
  -2  -3   0    5.16    0.65 
   2  -3   0    7.17    0.52 
  -2  -3   0    7.17    0.75 
   2  -3   0    6.66    0.53 
  -2  -3   0    6.89    0.71 
  -2  -3   0    7.15    0.67 
  -2  -3   0    7.56    0.74 
   2  -3   0    6.14    0.64 
  -2  -3   0    7.20    0.54 
  -2  -3   0    5.48    0.58 
  -2  -3   0    7.19    0.53 
   2  -3   0    7.41    0.59 
   2  -3   0    7.12    0.57 
  -2  -3   0    7.40    0.73 
   2  -3   0    5.82    0.60 
  -2  -3   0    6.62    0.68 
  -2  -3   0    6.58    0.65 
  -2  -3   0    7.00    0.73 
  -2   3   0    6.45    0.52 
   2   3   0    7.90    0.60 
   2   3   0    6.18    0.70 
  -2   3   0    6.91    0.47 
  -2   3   0    7.19    0.46 
   2   3   0    7.77    0.66 
  -2   3   0    5.81    0.60 
  -2   3   0    6.99    0.67 
  -2   3   0    7.41    0.47 
  -2   3   0    6.67    0.45 
  -2   3   0    7.94    0.62 
  -2   3   0    7.16    0.59 
  -2   3   0    6.75    0.50 
   2   3   0    5.01    0.63 
  -2   3   0    6.08    0.51 
  -2   3   0    6.75    0.50 
   2   3   0    7.23    0.71 
  -2   3   0    6.71    0.53 
  -2   3   0    6.53    0.57 
   2   3   0    7.46    0.72 
  -2   3   0    7.06    0.51 
   2   3   0    7.13    0.59 
  -2   3   0    4.74    0.63 
   2   3   0    7.45    0.55 
  -2   3   0    5.50    0.83 
   2   3   0    6.89    0.55 
   2   3   0    5.61    0.64 
   2   3   0    6.93    0.73 
  -2   3   0    6.86    0.69 
   2   3   0    6.91    0.71 
   2   3   0    7.41    0.59 
  -2   3   0    6.99    0.51 
  -3  -3   0    0.67    0.26 
  -3  -3   0    0.42    0.26 
  -3  -3   0    0.50    0.27 
  -3  -3   0    0.54    0.25 
   3  -3   0    0.49    0.19 
  -3  -3   0    0.46    0.27 
   3  -3   0    0.54    0.22 
   3  -3   0    0.62    0.22 
  -3  -3   0    0.41    0.24 
  -3  -3   0    0.33    0.27 
   3  -3   0    0.65    0.26 
   3  -3   0    0.01    0.16 
  -3  -3   0    0.41    0.22 
   3  -3   0    0.51    0.25 
   3  -3   0    0.16    0.17 
   3  -3   0    0.30    0.20 
   3  -3   0    0.61    0.17 
  -3  -3   0    0.18    0.19 
   3  -3   0    0.46    0.23 
   3  -3   0    0.36    0.19 
   3  -3   0    0.32    0.18 
   3   3   0    0.30    0.23 
   3   3   0    0.57    0.27 
  -3   3   0    0.44    0.16 
   3   3   0    0.37    0.22 
  -3   3   0    0.47    0.27 
   3   3   0    0.51    0.23 
   3   3   0    0.45    0.22 
  -3   3   0    0.46    0.20 
  -3   3   0    0.15    0.19 
  -3   3   0    0.86    0.30 
  -3   3   0    0.38    0.15 
  -3   3   0    0.60    0.23 
  -3   3   0    0.41    0.21 
  -3   3   0    0.27    0.17 
  -3   3   0    0.74    0.21 
  -3   3   0    0.77    0.20 
  -3   3   0    0.92    0.25 
  -3   3   0    0.63    0.18 
  -3   3   0    0.79    0.16 
  -3   3   0    0.80    0.31 
   3   3   0    0.51    0.26 
   3   3   0    0.39    0.27 
   3   3   0    0.13    0.23 
   3   3   0   -0.06    0.18 
   3   3   0    0.31    0.22 
   3   3   0    0.29    0.23 
  -3   3   0    1.07    0.23 
  -3   3   0    0.68    0.18 
  -3   3   0    0.58    0.21 
  -3   3   0    0.35    0.22 
  -3   3   0    0.48    0.23 
   3   3   0    0.70    0.24 
  -4  -3   0   20.50    1.39 
  -4  -3   0   21.80    1.43 
   4  -3   0   23.00    1.22 
  -4  -3   0   24.06    1.63 
   4  -3   0   21.71    1.44 
   4  -3   0   22.96    1.09 
   4  -3   0   22.25    1.35 
   4  -3   0   21.41    1.35 
   4  -3   0   21.70    1.14 
   4  -3   0   20.55    1.20 
  -4  -3   0   23.96    1.33 
   4  -3   0   21.09    1.45 
   4  -3   0   23.50    1.42 
  -4  -3   0   20.14    1.31 
   4  -3   0   20.95    1.39 
   4  -3   0   23.41    1.28 
   4  -3   0   23.25    1.56 
  -4  -3   0   22.01    1.39 
   4  -3   0   20.75    1.22 
  -4  -3   0   19.27    1.24 
  -4  -3   0   20.34    1.63 
  -4  -3   0   22.26    1.47 
   4   3   0   22.06    1.46 
  -4   3   0   23.12    1.15 
  -4   3   0   21.27    1.19 
   4   3   0   24.81    1.27 
  -4   3   0   23.18    1.68 
  -4   3   0   22.71    1.36 
  -4   3   0   21.93    1.17 
   4   3   0   24.63    1.48 
   4   3   0   22.13    1.45 
  -4   3   0   20.11    1.31 
  -4   3   0   22.45    1.09 
  -4   3   0   20.61    1.15 
  -4   3   0   21.24    1.07 
   4   3   0   22.35    1.49 
  -4   3   0   20.79    1.40 
   4   3   0   23.31    1.45 
   4   3   0   24.09    1.51 
  -4   3   0   22.69    1.27 
  -4   3   0   21.66    1.22 
  -4   3   0   22.38    1.26 
  -4   3   0   22.19    1.18 
   4   3   0   21.91    1.29 
  -4   3   0   21.15    1.07 
   4   3   0   21.06    1.42 
  -4   3   0   23.01    1.05 
   4   3   0   21.91    1.44 
   4   3   0   21.31    1.37 
   4   3   0   22.87    1.40 
   5  -3   0   54.07    2.96 
  -5  -3   0   54.91    2.57 
   5  -3   0   58.77    2.62 
  -5  -3   0   59.02    2.92 
  -5  -3   0   56.04    2.89 
   5  -3   0   53.04    2.91 
   5  -3   0   57.78    2.49 
   5  -3   0   54.26    2.60 
  -5  -3   0   54.71    2.80 
   5  -3   0   56.23    2.84 
   5  -3   0   52.02    2.48 
  -5  -3   0   56.34    3.12 
   5  -3   0   57.04    2.83 
  -5  -3   0   52.22    2.65 
  -5  -3   0   56.36    3.29 
  -5  -3   0   59.61    2.90 
   5  -3   0   54.22    2.86 
   5  -3   0   57.90    2.79 
  -5   3   0   53.20    3.21 
   5   3   0   55.34    2.86 
   5   3   0   59.59    2.86 
   5   3   0   56.31    2.85 
  -5   3   0   57.15    2.51 
  -5   3   0   55.32    2.89 
  -5   3   0   54.17    2.64 
  -5   3   0   57.76    2.53 
  -5   3   0   55.05    2.13 
   5   3   0   57.06    2.97 
   5   3   0   56.58    2.95 
  -5   3   0   56.29    2.37 
   5   3   0   55.06    2.87 
  -5   3   0   54.45    2.35 
  -5   3   0   56.47    2.50 
  -5   3   0   57.19    2.48 
   5   3   0   53.94    2.85 
   5   3   0   52.46    2.79 
   5   3   0   55.54    2.45 
  -5   3   0   56.04    2.56 
  -5   3   0   54.06    2.48 
  -5   3   0   57.48    2.18 
   5   3   0   57.15    2.95 
   5   3   0   56.76    2.57 
  -5   3   0   50.52    2.63 
  -5   3   0   53.97    3.20 
  -5   3   0   54.07    2.23 
   5   3   0   57.69    2.81 
  -5   3   0   51.85    2.30 
  -5   3   0   54.23    2.25 
   6  -3   0   94.60    4.38 
  -6  -3   0   93.88    4.42 
   6  -3   0   95.37    4.62 
   6  -3   0   95.34    4.44 
  -6  -3   0   92.70    3.99 
   6  -3   0   93.67    4.40 
   6  -3   0   97.62    3.94 
   6  -3   0   92.48    4.46 
   6  -3   0   94.63    4.18 
  -6  -3   0   91.86    4.37 
  -6  -3   0   89.84    4.43 
  -6  -3   0   95.16    4.44 
  -6  -3   0   97.24    4.89 
  -6  -3   0   97.29    4.16 
  -6  -3   0   87.00    4.96 
   6  -3   0   96.09    4.02 
   6  -3   0   95.20    4.16 
   6   3   0   92.85    4.59 
   6   3   0   91.77    4.41 
   6   3   0   88.93    4.44 
   6   3   0   95.57    4.52 
   6   3   0   93.36    4.53 
  -6   3   0   92.04    3.87 
  -6   3   0   92.31    3.87 
  -6   3   0   91.53    4.04 
   6   3   0   93.47    3.98 
   6   3   0  100.72    4.67 
  -6   3   0   98.67    4.60 
  -6   3   0   94.72    4.06 
   6   3   0  100.02    4.40 
  -6   3   0   93.26    4.10 
   6   3   0   98.73    4.53 
   6   3   0   95.08    3.84 
  -6   3   0   93.40    3.69 
  -6   3   0  102.71    5.16 
  -6   3   0   91.54    4.97 
   6   3   0   86.17    4.30 
  -6   3   0   96.29    4.00 
   6   3   0   95.25    4.46 
  -7  -3   0   26.37    1.91 
   7  -3   0   26.07    1.88 
  -7  -3   0   24.77    2.16 
   7  -3   0   26.83    1.99 
   7  -3   0   29.06    1.79 
  -7  -3   0   29.83    1.96 
   7  -3   0   26.18    1.72 
   7  -3   0   25.52    2.07 
  -7  -3   0   25.62    1.63 
   7  -3   0   28.03    1.93 
   7  -3   0   28.86    1.67 
  -7  -3   0   28.05    1.99 
   7  -3   0   29.72    2.01 
  -7  -3   0   27.56    2.46 
  -7  -3   0   27.57    1.95 
  -7   3   0   27.76    2.45 
   7   3   0   24.79    1.89 
   7   3   0   24.96    1.96 
   7   3   0   26.06    2.07 
   7   3   0   27.63    2.02 
   7   3   0   25.00    1.85 
   7   3   0   22.95    1.90 
  -7   3   0   26.41    1.59 
   7   3   0   26.70    1.96 
   7   3   0   26.91    2.10 
   7   3   0   25.92    1.94 
  -7   3   0   26.91    1.70 
  -7   3   0   24.67    1.61 
  -7   3   0   27.05    2.06 
   7   3   0   27.12    1.83 
  -7   3   0   23.92    2.29 
  -8  -3   0   24.59    2.26 
  -8  -3   0   21.90    2.12 
   8  -3   0   23.43    1.90 
   8  -3   0   24.35    1.97 
  -8  -3   0   22.66    1.90 
   8  -3   0   21.64    1.67 
  -8  -3   0   22.86    2.20 
   8  -3   0   21.58    2.29 
   8  -3   0   28.52    2.27 
  -8  -3   0   22.49    1.85 
  -8  -3   0   24.18    1.90 
  -8  -3   0   26.76    2.60 
   8  -3   0   21.86    1.69 
   8   3   0   22.75    2.22 
   8   3   0   22.82    2.44 
   8   3   0   18.28    2.00 
   8   3   0   24.96    1.76 
   8   3   0   24.77    2.02 
  -8   3   0   20.23    1.94 
  -8   3   0   25.88    2.32 
   8   3   0   21.49    2.03 
   8   3   0   25.06    2.00 
  -8   3   0   21.74    1.62 
   8   3   0   23.86    1.96 
  -8   3   0   25.18    2.56 
   8   3   0   22.43    1.83 
  -8   3   0   21.70    1.57 
  -8   3   0   24.54    2.49 
  -9  -3   0   17.74    1.96 
  -9  -3   0   20.37    2.11 
   9  -3   0   16.79    2.23 
   9  -3   0   12.87    1.80 
   9  -3   0   18.26    2.16 
   9  -3   0   17.57    1.97 
  -9  -3   0   16.15    2.62 
  -9  -3   0   16.77    1.92 
  -9  -3   0   12.32    2.02 
  -9  -3   0   17.79    2.02 
  -9  -3   0   16.55    2.34 
   9  -3   0   18.60    1.83 
   9  -3   0   19.45    1.93 
   9   3   0   19.60    2.36 
   9   3   0   17.73    2.27 
  -9   3   0   18.66    2.71 
  -9   3   0   19.66    2.30 
   9   3   0   16.08    2.00 
   9   3   0   17.10    2.09 
  -9   3   0   18.43    1.92 
   9   3   0   15.48    1.94 
   9   3   0   14.90    1.90 
  -9   3   0   15.61    2.25 
   9   3   0   17.02    2.08 
  -9   3   0   17.43    1.75 
  -9   3   0   16.89    2.66 
   9   3   0   16.51    1.92 
   0  -4   0   80.36    3.54 
   0  -4   0   81.46    3.52 
   0  -4   0   80.02    3.49 
   0  -4   0   80.10    3.28 
   0  -4   0   84.58    3.39 
   0  -4   0   81.94    3.34 
   0  -4   0   82.74    3.29 
   0  -4   0   75.24    3.56 
   0   4   0   81.73    3.12 
   0   4   0   77.32    3.50 
   0   4   0   80.81    3.03 
   0   4   0   78.79    3.43 
   0   4   0   83.31    3.24 
   0   4   0   83.32    3.28 
   0   4   0   79.91    3.20 
   0   4   0   79.21    3.37 
   0   4   0   79.71    3.56 
   0   4   0   80.68    3.27 
   0   4   0   78.89    3.25 
   0   4   0   79.22    3.59 
   0   4   0   79.97    3.13 
   0   4   0   85.10    3.38 
   0   4   0   87.22    3.29 
  -1  -4   0  479.34   17.25 
  -1  -4   0  453.75   17.66 
   1  -4   0  487.83   17.73 
  -1  -4   0  463.74   17.77 
  -1  -4   0  470.58   17.48 
   1  -4   0  454.39   17.55 
  -1  -4   0  457.77   17.32 
   1  -4   0  498.82   17.76 
   1  -4   0  465.36   17.66 
  -1  -4   0  501.33   17.91 
  -1  -4   0  481.10   17.59 
  -1  -4   0  494.46   17.76 
  -1  -4   0  463.53   17.25 
  -1  -4   0  456.43   17.70 
  -1  -4   0  462.01   17.23 
   1  -4   0  478.59   17.37 
  -1  -4   0  473.74   17.54 
  -1  -4   0  489.32   17.68 
   1  -4   0  476.86   17.62 
  -1  -4   0  464.42   17.51 
   1  -4   0  489.64   17.82 
   1   4   0  495.97   17.48 
  -1   4   0  490.02   17.30 
  -1   4   0  492.70   17.74 
  -1   4   0  462.57   17.44 
   1   4   0  467.57   17.82 
   1   4   0  491.02   17.81 
   1   4   0  490.57   17.57 
   1   4   0  465.11   17.76 
  -1   4   0  479.56   17.38 
  -1   4   0  401.54   17.64 
   1   4   0  496.82   17.45 
   1   4   0  478.07   17.62 
   1   4   0  469.50   17.69 
   1   4   0  473.33   17.80 
   1   4   0  465.60   17.68 
  -1   4   0  491.52   17.85 
  -1   4   0  487.74   17.54 
  -1   4   0  480.16   17.71 
   1   4   0  487.18   17.60 
   1   4   0  486.50   17.48 
  -1   4   0  486.59   17.52 
   1   4   0  486.25   17.32 
  -1   4   0  473.87   17.21 
  -1   4   0  475.58   17.27 
  -1   4   0  475.47   17.39 
  -1   4   0  487.02   17.24 
  -1   4   0  468.07   17.79 
   1   4   0  471.55   17.49 
  -1   4   0  479.79   17.45 
   1   4   0  486.18   17.58 
  -2  -4   0   79.15    3.55 
  -2  -4   0   82.44    3.64 
  -2  -4   0   82.43    3.52 
  -2  -4   0   80.17    3.63 
  -2  -4   0   80.37    3.42 
   2  -4   0   80.00    3.56 
  -2  -4   0   87.17    3.50 
   2  -4   0   87.04    3.54 
  -2  -4   0   81.06    3.29 
   2  -4   0   76.10    3.60 
  -2  -4   0   82.93    3.61 
  -2  -4   0   77.11    3.55 
   2  -4   0   89.86    3.52 
   2  -4   0   76.46    3.34 
  -2  -4   0   82.56    3.56 
   2  -4   0   82.47    3.45 
  -2  -4   0   80.24    3.70 
  -2  -4   0   80.70    3.29 
   2  -4   0   74.72    3.27 
   2  -4   0   79.76    3.51 
   2   4   0   78.22    3.29 
  -2   4   0   82.28    3.28 
   2   4   0   78.29    3.29 
  -2   4   0   78.16    3.46 
  -2   4   0   80.84    3.34 
   2   4   0   85.47    3.45 
   2   4   0   80.59    3.60 
  -2   4   0   79.17    3.23 
  -2   4   0   81.46    3.25 
   2   4   0   77.30    3.39 
  -2   4   0   83.85    3.27 
   2   4   0   82.04    3.62 
  -2   4   0   84.03    3.23 
  -2   4   0   80.66    3.39 
   2   4   0   80.08    3.41 
  -2   4   0   80.65    3.23 
   2   4   0   77.93    3.58 
  -2   4   0   87.53    3.95 
   2   4   0   84.48    3.62 
  -2   4   0   79.61    3.27 
   2   4   0   84.31    3.52 
   2   4   0   79.85    3.54 
   2   4   0   78.88    3.55 
  -2   4   0   81.26    3.53 
   2   4   0   87.54    3.68 
  -2   4   0   78.84    3.19 
  -2   4   0   84.77    3.63 
  -2   4   0   82.99    3.26 
  -2   4   0   81.05    3.29 
  -2   4   0   80.40    3.17 
  -2   4   0   86.59    3.61 
  -2   4   0   81.47    3.60 
   3  -4   0   83.00    3.72 
   3  -4   0   85.45    3.69 
  -3  -4   0   87.67    3.78 
  -3  -4   0   89.13    3.85 
   3  -4   0   88.71    3.68 
  -3  -4   0   88.25    3.76 
   3  -4   0   86.40    3.63 
   3  -4   0   82.97    3.40 
  -3  -4   0   85.83    3.85 
  -3  -4   0   83.22    3.94 
   3  -4   0   85.38    3.75 
  -3  -4   0   84.23    3.83 
   3  -4   0   86.13    3.67 
  -3  -4   0   86.97    3.96 
  -3  -4   0   89.30    3.90 
   3  -4   0   90.46    3.61 
  -3  -4   0   88.07    3.81 
   3   4   0   91.24    3.92 
   3   4   0   84.75    3.80 
  -3   4   0   86.82    3.57 
   3   4   0   82.26    3.71 
   3   4   0   83.95    3.70 
  -3   4   0   82.92    3.39 
   3   4   0   89.73    3.78 
   3   4   0   85.23    3.83 
  -3   4   0   86.53    3.42 
  -3   4   0   82.32    3.71 
   3   4   0   83.62    3.74 
   3   4   0   84.91    3.63 
  -3   4   0   91.09    3.82 
  -3   4   0   86.27    3.79 
  -3   4   0   85.07    3.63 
  -3   4   0   84.89    3.31 
  -3   4   0   81.12    3.46 
  -3   4   0   84.80    3.75 
  -3   4   0   87.25    3.47 
  -3   4   0   93.24    3.61 
   3   4   0   84.03    3.85 
  -3   4   0   84.01    3.98 
  -3   4   0   86.74    3.75 
   3   4   0   84.73    3.67 
  -3   4   0   87.03    3.59 
   3   4   0   90.84    3.83 
  -3   4   0   79.73    3.70 
   3   4   0   82.14    3.87 
   4  -4   0   44.86    2.10 
  -4  -4   0   46.63    2.40 
  -4  -4   0   45.79    2.66 
  -4  -4   0   43.43    2.31 
  -4  -4   0   45.64    2.44 
   4  -4   0   43.73    2.42 
   4  -4   0   42.88    2.32 
   4  -4   0   47.28    2.07 
  -4  -4   0   43.66    2.55 
  -4  -4   0   45.45    2.38 
  -4  -4   0   45.62    2.28 
   4  -4   0   44.47    2.37 
  -4  -4   0   40.58    2.38 
   4  -4   0   46.04    2.26 
  -4  -4   0   45.65    2.31 
   4  -4   0   44.63    2.16 
  -4   4   0   46.83    2.30 
  -4   4   0   44.14    1.83 
  -4   4   0   43.69    2.25 
   4   4   0   45.72    2.31 
   4   4   0   45.70    2.41 
   4   4   0   47.43    2.46 
   4   4   0   43.64    2.41 
  -4   4   0   45.72    2.64 
   4   4   0   47.32    2.47 
  -4   4   0   40.60    2.04 
  -4   4   0   44.42    2.23 
   4   4   0   43.71    2.38 
   4   4   0   40.92    2.29 
  -4   4   0   44.72    2.02 
   4   4   0   48.53    2.28 
  -4   4   0   43.04    1.95 
  -4   4   0   45.44    2.31 
  -4   4   0   44.29    2.04 
  -4   4   0   43.97    1.98 
   4   4   0   41.23    2.31 
   4   4   0   46.78    2.34 
  -4   4   0   46.31    2.24 
   4   4   0   46.90    2.30 
  -4   4   0   46.76    2.01 
  -4   4   0   42.74    2.04 
  -4   4   0   43.13    2.06 
  -4   4   0   43.00    2.24 
   4   4   0   41.18    2.42 
   5  -4   0  127.02    5.65 
   5  -4   0  131.52    5.31 
  -5  -4   0  125.84    6.07 
   5  -4   0  129.87    5.04 
  -5  -4   0  126.43    5.55 
   5  -4   0  126.45    5.22 
  -5  -4   0  129.56    5.62 
   5  -4   0  131.98    5.54 
  -5  -4   0  123.79    5.65 
   5  -4   0  130.92    5.49 
  -5  -4   0  134.09    5.53 
   5  -4   0  130.78    5.70 
  -5  -4   0  127.04    5.92 
  -5  -4   0  127.64    5.42 
   5  -4   0  131.62    5.54 
  -5  -4   0  130.04    5.68 
   5   4   0  131.62    5.30 
  -5   4   0  129.03    5.29 
  -5   4   0  124.24    5.18 
  -5   4   0  130.54    5.34 
   5   4   0  132.56    5.71 
   5   4   0  126.88    5.63 
  -5   4   0  124.52    5.55 
  -5   4   0  127.87    6.01 
  -5   4   0  127.06    5.33 
  -5   4   0  124.90    5.11 
   5   4   0  129.21    5.40 
  -5   4   0  131.60    5.21 
   5   4   0  128.14    5.63 
  -5   4   0  113.83    5.51 
   5   4   0  129.82    5.66 
   5   4   0  131.07    5.73 
  -5   4   0  136.11    5.50 
   5   4   0  125.33    5.51 
  -5   4   0  127.25    6.05 
  -5   4   0  125.82    5.05 
   5   4   0  124.34    5.51 
  -5   4   0  131.68    5.08 
   5   4   0  122.39    5.59 
   5   4   0  127.08    5.77 
   5   4   0  133.68    5.71 
  -5   4   0  138.46    5.50 
   6  -4   0  115.03    4.66 
  -6  -4   0  112.01    4.84 
  -6  -4   0  107.78    4.92 
   6  -4   0  115.38    5.15 
  -6  -4   0  110.34    5.11 
   6  -4   0  114.72    5.12 
   6  -4   0  112.31    5.27 
  -6  -4   0  113.83    5.18 
   6  -4   0  116.82    4.93 
  -6  -4   0  111.85    5.77 
  -6  -4   0  114.00    5.26 
  -6  -4   0  107.32    5.49 
   6  -4   0  108.81    4.92 
  -6  -4   0  113.73    5.22 
   6  -4   0  113.99    5.04 
   6  -4   0  106.57    4.78 
  -6   4   0  111.99    5.18 
   6   4   0  112.44    5.32 
  -6   4   0  103.86    5.02 
  -6   4   0  107.63    4.69 
  -6   4   0  112.90    5.73 
   6   4   0  109.91    5.16 
   6   4   0  112.99    5.17 
  -6   4   0  112.14    4.65 
   6   4   0  107.68    5.15 
   6   4   0  111.15    5.07 
   6   4   0  121.12    4.87 
   6   4   0  110.88    4.65 
   6   4   0  115.59    5.27 
  -6   4   0  108.22    5.37 
  -6   4   0  113.05    4.73 
  -6   4   0  113.42    4.71 
  -6   4   0  107.53    5.63 
   6   4   0  107.69    5.21 
  -6   4   0  106.62    4.54 
  -6   4   0  117.62    4.76 
   6   4   0  120.58    5.19 
   6   4   0  111.48    5.26 
  -6   4   0  117.65    4.98 
   6   4   0  112.01    5.29 
  -7  -4   0   73.00    4.33 
  -7  -4   0   75.99    4.09 
  -7  -4   0   83.51    3.86 
  -7  -4   0   77.94    4.05 
  -7  -4   0   87.47    4.28 
   7  -4   0   76.96    4.09 
  -7  -4   0   77.17    4.49 
   7  -4   0   78.35    4.09 
  -7  -4   0   87.23    4.93 
   7  -4   0   85.59    3.90 
   7  -4   0   83.99    4.05 
   7  -4   0   84.32    3.84 
  -7  -4   0   83.72    3.96 
   7  -4   0   80.63    4.30 
  -7  -4   0   73.65    4.04 
  -7   4   0   80.20    4.19 
   7   4   0   83.59    4.21 
   7   4   0   80.44    4.05 
   7   4   0   75.77    4.13 
   7   4   0   79.60    4.22 
  -7   4   0   78.89    3.59 
   7   4   0   83.68    4.33 
  -7   4   0   78.18    3.66 
   7   4   0   76.77    4.12 
   7   4   0   77.33    4.04 
  -7   4   0   79.10    4.42 
  -7   4   0   76.35    4.67 
  -7   4   0   81.65    4.80 
   7   4   0   81.81    4.29 
   7   4   0   80.99    4.33 
   7   4   0   76.06    4.05 
  -8  -4   0   66.94    3.84 
  -8  -4   0   72.67    4.41 
   8  -4   0   74.94    3.68 
  -8  -4   0   70.99    4.68 
   8  -4   0   68.45    3.92 
  -8  -4   0   60.64    3.78 
   8  -4   0   70.82    4.13 
   8  -4   0   78.39    4.23 
  -8  -4   0   72.41    3.91 
  -8  -4   0   70.79    4.30 
  -8  -4   0   71.10    3.86 
   8  -4   0   64.29    3.70 
   8   4   0   75.01    4.09 
   8   4   0   70.76    4.12 
  -8   4   0   62.28    3.88 
  -8   4   0   72.01    4.67 
  -8   4   0   62.08    4.40 
  -8   4   0   67.48    3.41 
   8   4   0   69.33    4.02 
   8   4   0   70.86    3.90 
   8   4   0   71.10    3.96 
   8   4   0   73.90    3.88 
   8   4   0   71.68    3.97 
   8   4   0   69.48    3.93 
  -8   4   0   71.89    4.31 
   8   4   0   68.99    4.10 
   8   4   0   67.12    3.68 
  -9  -4   0   40.69    3.56 
  -9  -4   0   39.77    3.17 
  -9  -4   0   39.36    2.74 
   9  -4   0   39.68    2.76 
   9  -4   0   39.26    2.56 
  -9  -4   0   37.41    3.16 
  -9  -4   0   40.49    2.79 
   9  -4   0   38.67    2.83 
   9  -4   0   35.79    2.90 
  -9  -4   0   37.50    2.77 
  -9   4   0   44.85    3.66 
   9   4   0   39.67    2.88 
   9   4   0   42.00    2.65 
   9   4   0   37.19    2.70 
   9   4   0   36.88    2.86 
   9   4   0   35.90    2.74 
   9   4   0   35.41    2.92 
   9   4   0   38.26    2.99 
  -9   4   0   38.88    3.21 
   9   4   0   34.20    2.74 
  -9   4   0   40.31    2.92 
   9   4   0   39.65    2.85 
  -9   4   0   37.52    3.45 
   0  -5   0    0.47    0.24 
   0  -5   0    0.19    0.22 
   0  -5   0   -0.04    0.18 
   0  -5   0    0.09    0.24 
   0  -5   0    0.16    0.16 
   0  -5   0   -0.03    0.21 
   0  -5   0    0.18    0.20 
   0  -5   0    0.03    0.13 
   0  -5   0   -0.03    0.09 
   0  -5   0   -0.11    0.17 
   0  -5   0    0.07    0.16 
   0   5   0    0.14    0.19 
   0   5   0    0.10    0.19 
   0   5   0    0.15    0.11 
   0   5   0   -0.04    0.11 
   0   5   0    0.06    0.21 
   0   5   0   -0.07    0.21 
   0   5   0   -0.17    0.12 
   0   5   0    0.07    0.11 
   0   5   0    0.08    0.15 
   0   5   0    0.22    0.16 
   0   5   0    0.02    0.06 
   0   5   0    0.23    0.14 
   0   5   0    0.04    0.24 
   0   5   0    0.04    0.15 
  -1  -5   0   14.53    0.99 
  -1  -5   0   16.31    1.18 
  -1  -5   0   15.41    1.07 
   1  -5   0   14.06    1.15 
  -1  -5   0   12.82    1.14 
   1  -5   0   13.09    0.92 
   1  -5   0   16.00    1.16 
  -1  -5   0   15.15    0.98 
   1  -5   0   14.63    1.05 
  -1  -5   0   16.39    1.32 
   1  -5   0   12.90    1.04 
  -1  -5   0   13.33    1.12 
   1  -5   0   14.20    0.77 
  -1  -5   0   13.50    1.09 
   1  -5   0    9.51    1.42 
  -1  -5   0   15.41    1.15 
  -1  -5   0   14.33    1.05 
  -1   5   0   14.16    0.68 
   1   5   0   13.81    0.83 
  -1   5   0   14.09    1.16 
  -1   5   0   14.07    0.83 
  -1   5   0   14.41    0.97 
   1   5   0   14.83    0.73 
   1   5   0   15.75    0.99 
   1   5   0   14.29    1.01 
   1   5   0   16.28    1.01 
   1   5   0   13.08    1.10 
  -1   5   0   14.63    0.82 
  -1   5   0   15.07    1.18 
  -1   5   0   14.91    0.85 
   1   5   0   15.27    1.18 
  -1   5   0   13.65    0.71 
   1   5   0   14.52    1.07 
  -1   5   0   14.01    0.93 
   1   5   0   14.29    0.91 
   1   5   0   14.74    0.89 
   1   5   0   14.94    1.15 
   1   5   0   13.27    1.03 
  -1   5   0   15.43    0.72 
  -1   5   0   14.15    1.10 
   1   5   0   13.07    1.14 
  -1   5   0   15.52    0.76 
  -1   5   0   13.67    0.94 
  -2  -5   0    0.59    0.31 
   2  -5   0    0.46    0.32 
  -2  -5   0    0.17    0.21 
  -2  -5   0    0.12    0.21 
   2  -5   0    0.77    0.31 
  -2  -5   0    0.62    0.19 
  -2  -5   0   -0.09    0.19 
  -2  -5   0    0.24    0.17 
  -2  -5   0   -0.17    0.21 
   2  -5   0    0.31    0.30 
   2  -5   0    0.10    0.23 
  -2  -5   0    0.57    0.27 
  -2  -5   0    0.22    0.28 
  -2  -5   0    0.62    0.31 
  -2  -5   0    0.28    0.23 
  -2  -5   0    0.37    0.16 
   2  -5   0    0.37    0.18 
   2  -5   0    0.80    0.32 
   2  -5   0    0.77    0.35 
  -2  -5   0    0.43    0.25 
   2   5   0    0.77    0.24 
  -2   5   0    0.87    0.37 
  -2   5   0    0.48    0.27 
   2   5   0    0.17    0.25 
  -2   5   0    0.59    0.32 
  -2   5   0    0.50    0.19 
  -2   5   0    0.82    0.22 
  -2   5   0    0.57    0.19 
  -2   5   0    0.57    0.21 
   2   5   0    0.77    0.32 
  -2   5   0    0.57    0.19 
  -2   5   0    0.36    0.16 
  -2   5   0    0.13    0.16 
   2   5   0    0.49    0.19 
   2   5   0    0.43    0.31 
  -2   5   0    1.10    0.39 
   2   5   0    0.23    0.27 
   2   5   0    0.59    0.31 
   2   5   0    0.50    0.23 
  -2   5   0    0.79    0.40 
   2   5   0    0.30    0.30 
  -2   5   0    0.54    0.20 
   2   5   0    0.35    0.24 
  -2   5   0    0.11    0.25 
   2   5   0    0.47    0.27 
  -2   5   0    0.53    0.29 
  -2   5   0    0.44    0.18 
  -2   5   0    0.58    0.21 
  -3  -5   0   -0.38    0.14 
   3  -5   0    0.17    0.16 
  -3  -5   0   -0.17    0.26 
   3  -5   0   -0.26    0.23 
   3  -5   0   -0.09    0.23 
  -3  -5   0    0.16    0.26 
  -3  -5   0    0.07    0.29 
   3  -5   0    0.23    0.23 
  -3  -5   0   -0.10    0.22 
   3  -5   0    0.17    0.21 
  -3  -5   0    0.21    0.24 
   3  -5   0    0.01    0.23 
  -3  -5   0   -0.05    0.27 
  -3  -5   0   -0.11    0.21 
  -3  -5   0   -0.22    0.20 
  -3   5   0    0.33    0.17 
  -3   5   0    0.29    0.25 
   3   5   0    0.06    0.25 
   3   5   0    0.19    0.25 
  -3   5   0   -0.07    0.21 
  -3   5   0    0.26    0.19 
  -3   5   0    0.14    0.25 
  -3   5   0    0.06    0.20 
  -3   5   0    0.03    0.14 
  -3   5   0    0.02    0.14 
   3   5   0   -0.05    0.28 
  -3   5   0    0.09    0.19 
  -3   5   0    0.12    0.27 
  -3   5   0    0.02    0.14 
  -3   5   0    0.09    0.20 
  -3   5   0    0.01    0.31 
   3   5   0    0.10    0.29 
  -3   5   0   -0.02    0.18 
  -3   5   0    0.11    0.13 
   3   5   0   -0.08    0.25 
   3   5   0    0.11    0.26 
  -3   5   0    0.35    0.19 
   3   5   0    0.01    0.21 
   3   5   0   -0.03    0.22 
   3   5   0    0.30    0.22 
  -3   5   0   -0.11    0.22 
   3   5   0    0.01    0.25 
  -3   5   0   -0.19    0.18 
   3   5   0    0.02    0.19 
   3   5   0    0.09    0.24 
  -4  -5   0    7.43    1.10 
  -4  -5   0    7.48    0.96 
  -4  -5   0   10.36    1.15 
   4  -5   0    8.91    0.98 
   4  -5   0   10.69    0.85 
  -4  -5   0    7.54    1.09 
  -4  -5   0   11.33    1.14 
  -4  -5   0    9.07    1.04 
  -4  -5   0    6.78    0.97 
   4  -5   0    8.52    0.59 
   4  -5   0    8.82    0.97 
  -4  -5   0    8.70    1.13 
   4  -5   0   10.57    0.83 
  -4  -5   0    9.07    1.09 
   4  -5   0    9.05    0.89 
  -4   5   0    9.02    0.59 
   4   5   0    9.03    1.04 
   4   5   0    9.95    1.13 
  -4   5   0    9.28    1.06 
  -4   5   0    9.72    0.65 
   4   5   0    9.21    1.15 
  -4   5   0    7.72    0.90 
  -4   5   0    9.69    1.10 
  -4   5   0    7.86    1.00 
   4   5   0    8.57    1.02 
   4   5   0    9.04    1.12 
  -4   5   0    7.73    0.98 
  -4   5   0    8.98    0.66 
   4   5   0   10.29    0.91 
   4   5   0    8.32    0.92 
   4   5   0    8.31    1.12 
  -4   5   0    8.71    1.25 
   4   5   0   10.48    1.24 
  -4   5   0    8.45    0.90 
  -4   5   0    7.77    0.95 
  -4   5   0    9.45    0.79 
  -4   5   0    9.35    0.51 
   4   5   0    6.96    0.95 
   4   5   0    6.99    0.91 
  -4   5   0    8.21    0.61 
   4   5   0    8.85    1.04 
  -5  -5   0    8.59    1.19 
  -5  -5   0   11.53    1.28 
   5  -5   0    9.35    1.15 
  -5  -5   0    7.84    1.23 
   5  -5   0    9.01    0.96 
  -5  -5   0    9.46    1.38 
   5  -5   0    9.95    0.81 
  -5  -5   0   10.76    1.25 
   5  -5   0   10.25    1.20 
  -5  -5   0   11.62    1.21 
  -5  -5   0   11.12    1.22 
  -5  -5   0    8.67    1.19 
   5   5   0   10.83    1.30 
  -5   5   0   11.10    1.56 
  -5   5   0   10.50    1.01 
  -5   5   0    9.28    1.35 
   5   5   0    9.45    1.15 
   5   5   0    9.74    1.12 
  -5   5   0    9.47    0.77 
  -5   5   0   10.00    0.92 
  -5   5   0    9.36    0.72 
  -5   5   0   11.01    1.19 
   5   5   0    8.67    1.06 
   5   5   0    9.04    1.17 
  -5   5   0    9.95    0.70 
  -5   5   0   10.45    1.14 
   5   5   0   10.66    1.15 
   5   5   0   10.88    1.33 
   5   5   0    8.89    1.12 
  -5   5   0   10.58    1.17 
   5   5   0    7.85    1.19 
  -5   5   0   10.43    0.82 
   5   5   0    9.45    1.26 
   5   5   0    9.14    1.18 
   5   5   0    9.32    1.17 
  -5   5   0    8.11    1.13 
  -5   5   0    9.22    1.09 
  -6  -5   0   57.06    3.28 
  -6  -5   0   57.42    3.50 
  -6  -5   0   56.34    3.00 
   6  -5   0   57.76    3.21 
  -6  -5   0   61.55    3.72 
   6  -5   0   52.73    2.99 
  -6  -5   0   58.16    3.10 
  -6  -5   0   59.01    3.17 
  -6  -5   0   59.11    3.23 
  -6  -5   0   56.88    3.31 
  -6   5   0   57.87    3.10 
  -6   5   0   54.69    3.51 
   6   5   0   52.78    3.02 
  -6   5   0   61.03    3.39 
   6   5   0   56.07    3.17 
  -6   5   0   59.70    2.83 
   6   5   0   54.66    3.24 
   6   5   0   56.01    2.96 
   6   5   0   55.10    3.31 
  -6   5   0   52.20    2.82 
  -6   5   0   51.78    2.92 
   6   5   0   57.78    2.86 
   6   5   0   61.17    3.31 
  -6   5   0   60.39    3.68 
  -6   5   0   59.54    2.92 
   6   5   0   60.23    3.31 
  -6   5   0   61.39    2.75 
   6   5   0   57.79    3.25 
   6   5   0   57.75    3.12 
   6   5   0   55.76    3.24 
  -6   5   0   59.82    2.88 
   6   5   0   53.86    3.11 
   7  -5   0    8.25    1.28 
  -7  -5   0    6.01    0.99 
  -7  -5   0    8.66    1.25 
  -7  -5   0    9.01    1.22 
  -7  -5   0   10.16    1.39 
  -7  -5   0    7.89    1.51 
   7  -5   0    9.76    1.32 
  -7  -5   0    9.30    1.55 
  -7  -5   0    8.72    1.35 
  -7  -5   0    7.80    1.38 
  -7   5   0    8.59    1.28 
   7   5   0    8.87    1.34 
   7   5   0    8.97    1.34 
   7   5   0    6.95    1.12 
  -7   5   0   10.13    1.74 
   7   5   0    8.71    1.41 
   7   5   0    7.26    1.23 
   7   5   0    8.80    1.25 
   7   5   0    9.34    1.42 
   7   5   0    9.35    1.42 
   7   5   0    8.86    1.37 
  -7   5   0   10.46    1.26 
  -7   5   0    7.25    1.42 
   7   5   0    8.41    1.28 
  -7   5   0    9.20    1.43 
  -8  -5   0   29.22    2.62 
  -8  -5   0   26.89    2.17 
   8  -5   0   27.54    2.32 
  -8  -5   0   29.14    2.11 
   8  -5   0   31.73    2.30 
  -8  -5   0   30.56    2.39 
  -8  -5   0   28.90    2.81 
  -8  -5   0   27.37    2.44 
  -8  -5   0   27.23    2.23 
   8   5   0   29.65    2.39 
   8   5   0   28.70    2.31 
   8   5   0   25.36    2.58 
  -8   5   0   26.08    2.41 
  -8   5   0   29.16    2.79 
  -8   5   0   31.31    2.35 
   8   5   0   29.87    2.37 
   8   5   0   26.23    2.14 
  -8   5   0   28.66    2.72 
   8   5   0   33.13    2.54 
   8   5   0   32.53    2.32 
   8   5   0   28.98    2.25 
   8   5   0   29.37    2.41 
   8   5   0   29.93    2.44 
  -9  -5   0    3.39    1.04 
  -9  -5   0    4.73    1.11 
  -9  -5   0    4.70    1.30 
  -9  -5   0    4.99    1.45 
  -9  -5   0    5.74    1.22 
   9  -5   0    3.65    1.08 
   9  -5   0    4.71    1.17 
  -9  -5   0    4.47    1.33 
  -9   5   0    5.85    1.39 
   9   5   0    4.70    1.18 
   9   5   0    5.58    1.31 
  -9   5   0    5.94    1.61 
   9   5   0    5.84    1.29 
   9   5   0    5.37    1.14 
  -9   5   0    5.82    1.66 
   9   5   0    3.31    1.07 
   9   5   0   10.01    1.50 
   9   5   0    6.04    1.34 
   9   5   0    5.02    1.26 
   9   5   0    3.20    1.03 
   9   5   0    4.50    1.08 
   0  -6   0   10.93    0.92 
   0  -6   0   10.25    1.13 
   0  -6   0    9.84    0.81 
   0  -6   0   10.43    0.64 
   0  -6   0    8.58    1.13 
   0  -6   0    9.20    1.01 
   0  -6   0   13.19    1.10 
   0  -6   0   10.28    1.18 
   0  -6   0   11.77    1.12 
   0  -6   0    9.04    1.08 
   0   6   0   10.75    0.71 
   0   6   0    7.05    1.01 
   0   6   0   10.33    0.94 
   0   6   0   10.73    0.85 
   0   6   0    9.74    0.73 
   0   6   0   10.63    0.60 
   0   6   0    9.90    1.16 
   0   6   0   10.55    0.78 
   0   6   0    9.69    1.20 
   0   6   0   10.71    0.92 
   0   6   0   11.03    0.76 
   1  -6   0  239.24    9.17 
  -1  -6   0  224.30    8.83 
  -1  -6   0  235.50    9.25 
  -1  -6   0  236.20    8.47 
  -1  -6   0  224.19    8.98 
  -1  -6   0  195.04    8.93 
  -1  -6   0  230.08    9.17 
   1  -6   0  221.75    8.21 
   1  -6   0  218.54    8.57 
  -1  -6   0  225.18    8.66 
   1  -6   0  227.45    9.02 
  -1  -6   0  221.19    8.74 
  -1  -6   0  196.02    9.12 
  -1  -6   0  223.95    9.07 
  -1  -6   0  218.84    9.06 
   1  -6   0  216.10    8.88 
   1  -6   0  233.19    8.93 
  -1   6   0  220.16    8.67 
  -1   6   0  233.81    8.46 
   1   6   0  220.78    8.98 
   1   6   0  223.42    8.65 
  -1   6   0  218.52    8.66 
   1   6   0  228.28    8.63 
  -1   6   0  217.69    9.09 
   1   6   0  236.12    9.12 
   1   6   0  227.06    8.87 
  -1   6   0  220.16    8.51 
   1   6   0  223.40    8.89 
   1   6   0  219.82    8.75 
   1   6   0  217.57    8.47 
  -1   6   0  226.55    8.38 
  -1   6   0  222.86    8.17 
  -1   6   0  211.44    8.92 
  -1   6   0  231.54    9.12 
  -1   6   0  223.78    8.57 
   1   6   0  220.19    8.16 
   1   6   0  204.39    8.97 
  -1   6   0  225.32    8.18 
   1   6   0  214.48    9.08 
  -1   6   0  233.11    8.62 
  -1   6   0  219.41    8.36 
  -1   6   0  224.94    8.42 
   1   6   0  216.48    8.55 
   1   6   0  222.47    8.39 
   2  -6   0    0.52    0.31 
   2  -6   0    0.34    0.29 
  -2  -6   0    0.38    0.30 
   2  -6   0    1.65    0.52 
   2  -6   0    0.61    0.37 
  -2  -6   0    1.41    0.49 
  -2  -6   0    0.15    0.30 
  -2  -6   0    0.61    0.23 
  -2  -6   0    0.63    0.31 
  -2  -6   0    0.65    0.31 
  -2  -6   0    0.30    0.28 
  -2  -6   0    0.93    0.23 
  -2  -6   0    0.74    0.53 
  -2  -6   0    0.74    0.19 
  -2  -6   0    0.74    0.33 
  -2  -6   0    1.30    0.49 
  -2  -6   0    0.48    0.17 
  -2  -6   0    0.63    0.35 
   2  -6   0    0.55    0.20 
   2  -6   0    0.08    0.30 
   2   6   0    0.63    0.29 
   2   6   0    0.24    0.30 
  -2   6   0    0.47    0.26 
  -2   6   0    0.69    0.19 
  -2   6   0    0.48    0.22 
   2   6   0    0.39    0.32 
  -2   6   0    0.48    0.35 
  -2   6   0    0.73    0.18 
  -2   6   0    0.79    0.26 
  -2   6   0    0.65    0.25 
  -2   6   0    0.61    0.24 
  -2   6   0    0.56    0.21 
   2   6   0    0.81    0.42 
   2   6   0    0.47    0.24 
   2   6   0    0.40    0.36 
   2   6   0    0.41    0.17 
  -2   6   0    1.02    0.46 
  -2   6   0    1.18    0.33 
  -2   6   0    0.62    0.27 
  -2   6   0    0.76    0.18 
  -2   6   0    0.39    0.24 
   2   6   0    1.03    0.38 
   2   6   0    1.12    0.36 
   2   6   0    0.43    0.32 
   2   6   0    0.93    0.33 
  -2   6   0   -0.05    0.26 
  -2   6   0    0.97    0.20 
  -2   6   0    0.70    0.37 
  -2   6   0    0.51    0.18 
  -3  -6   0   92.28    4.33 
  -3  -6   0   98.13    4.36 
  -3  -6   0   97.59    4.56 
   3  -6   0   91.67    4.16 
  -3  -6   0   94.59    4.27 
  -3  -6   0   94.35    4.48 
   3  -6   0   98.03    4.27 
  -3  -6   0  100.78    4.66 
   3  -6   0   88.80    3.95 
   3  -6   0   96.51    4.43 
  -3  -6   0   99.72    4.50 
  -3  -6   0   99.28    4.60 
   3  -6   0   91.89    4.30 
  -3  -6   0   93.91    4.02 
  -3  -6   0   97.30    4.44 
  -3   6   0   93.98    3.88 
   3   6   0   94.87    4.51 
   3   6   0  100.49    4.01 
   3   6   0  100.58    4.51 
   3   6   0   96.33    4.22 
   3   6   0   96.13    4.50 
  -3   6   0   95.40    3.96 
   3   6   0  100.04    4.23 
  -3   6   0   99.35    4.43 
   3   6   0   90.13    4.47 
  -3   6   0   92.05    4.19 
  -3   6   0   95.16    4.48 
  -3   6   0   89.34    4.43 
   3   6   0   99.46    4.46 
  -3   6   0   94.11    3.89 
   3   6   0  101.52    4.38 
   3   6   0   91.94    4.51 
  -3   6   0   97.42    4.03 
   3   6   0   93.23    4.16 
  -3   6   0   93.79    4.45 
  -4  -6   0   -0.30    0.24 
  -4  -6   0    0.18    0.30 
  -4  -6   0    0.13    0.32 
  -4  -6   0   -0.05    0.31 
  -4  -6   0    0.13    0.41 
  -4  -6   0    0.26    0.24 
   4  -6   0    0.34    0.32 
   4  -6   0    0.05    0.22 
  -4  -6   0    0.12    0.31 
   4  -6   0   -0.01    0.20 
  -4  -6   0    0.11    0.28 
  -4  -6   0   -0.18    0.20 
  -4  -6   0    0.10    0.29 
   4  -6   0   -0.15    0.25 
  -4   6   0    0.13    0.15 
  -4   6   0   -0.04    0.30 
   4   6   0   -0.22    0.26 
  -4   6   0   -0.17    0.23 
   4   6   0    0.33    0.32 
  -4   6   0   -0.11    0.26 
   4   6   0    0.45    0.38 
   4   6   0   -0.11    0.32 
  -4   6   0   -0.33    0.29 
   4   6   0    0.08    0.22 
   4   6   0    0.21    0.31 
  -4   6   0   -0.08    0.26 
  -4   6   0   -0.03    0.21 
   4   6   0   -0.14    0.29 
  -4   6   0   -0.14    0.20 
   4   6   0    0.05    0.24 
  -4   6   0    0.16    0.29 
   4   6   0    0.23    0.27 
   4   6   0   -0.06    0.25 
   4   6   0    0.12    0.31 
  -4   6   0    0.14    0.41 
  -5  -6   0  127.98    6.32 
   5  -6   0  140.89    6.00 
  -5  -6   0  138.57    6.15 
  -5  -6   0  138.44    6.45 
   5  -6   0  134.66    5.76 
  -5  -6   0  141.19    6.13 
  -5  -6   0  139.05    6.18 
  -5  -6   0  137.24    6.06 
  -5  -6   0  126.21    5.97 
   5  -6   0  137.60    5.69 
  -5  -6   0  137.07    6.24 
  -5   6   0  128.05    5.75 
  -5   6   0  141.06    6.71 
   5   6   0  145.96    6.07 
   5   6   0  137.82    6.08 
   5   6   0  139.06    6.11 
   5   6   0  137.28    5.93 
  -5   6   0  136.62    5.66 
   5   6   0  127.27    6.19 
  -5   6   0  140.79    6.02 
   5   6   0  141.38    6.07 
   5   6   0  124.02    6.21 
   5   6   0  143.55    5.88 
   5   6   0  139.36    6.25 
  -5   6   0  130.39    5.68 
  -5   6   0  143.42    6.02 
   5   6   0  127.58    6.09 
  -5   6   0  129.28    5.96 
  -5   6   0  140.92    6.08 
   5   6   0  133.17    6.26 
   5   6   0  142.69    6.03 
  -5   6   0  137.38    6.31 
  -5   6   0  143.79    6.07 
  -6  -6   0    0.31    0.50 
  -6  -6   0   -0.06    0.44 
  -6  -6   0    0.66    0.48 
  -6  -6   0    0.40    0.47 
  -6  -6   0   -0.08    0.34 
  -6  -6   0   -0.30    0.36 
  -6  -6   0   -0.18    0.31 
  -6  -6   0   -0.26    0.27 
  -6   6   0    0.35    0.41 
   6   6   0    0.25    0.40 
   6   6   0    0.25    0.41 
   6   6   0    0.66    0.50 
  -6   6   0    0.45    0.38 
   6   6   0    0.05    0.35 
   6   6   0    0.08    0.39 
   6   6   0    0.05    0.33 
  -6   6   0    0.25    0.42 
  -6   6   0    0.43    0.41 
   6   6   0   -0.23    0.37 
  -6   6   0   -0.17    0.31 
   6   6   0   -0.07    0.33 
   6   6   0    0.10    0.34 
  -6   6   0    0.39    0.47 
   6   6   0    0.48    0.45 
   6   6   0   -0.39    0.28 
   6   6   0   -0.12    0.33 
  -7  -6   0  122.59    6.02 
  -7  -6   0  129.36    6.28 
  -7  -6   0  130.88    5.99 
  -7  -6   0  124.69    6.50 
  -7  -6   0  128.72    6.16 
  -7  -6   0  124.08    6.67 
  -7  -6   0  135.07    6.31 
  -7  -6   0  128.43    5.85 
   7   6   0  136.74    6.27 
  -7   6   0  129.67    6.28 
   7   6   0  123.36    5.87 
   7   6   0  141.03    6.19 
   7   6   0  128.07    6.35 
   7   6   0  122.07    6.19 
   7   6   0  131.66    6.25 
  -7   6   0  128.76    6.74 
   7   6   0  115.33    5.86 
  -7   6   0  128.94    6.60 
   7   6   0  126.16    6.07 
  -7   6   0  128.35    5.79 
   7   6   0  126.64    6.20 
   7   6   0  125.14    6.21 
  -8  -6   0    4.33    1.15 
  -8  -6   0    5.51    1.45 
  -8  -6   0    4.67    1.24 
  -8  -6   0    6.60    1.19 
  -8  -6   0    6.82    1.30 
  -8  -6   0    6.50    1.30 
  -8  -6   0    7.33    1.37 
  -8   6   0    7.44    1.49 
   8   6   0    6.38    1.23 
   8   6   0    7.56    1.47 
   8   6   0    5.11    1.09 
   8   6   0    7.71    1.45 
   8   6   0    6.68    1.36 
   8   6   0    6.23    1.18 
  -8   6   0    8.12    1.73 
   8   6   0    6.71    1.30 
   8   6   0    7.55    1.39 
   8   6   0    7.65    1.47 
   0  -7   0    0.03    0.27 
   0  -7   0    0.01    0.27 
   0  -7   0   -0.38    0.21 
   0  -7   0    0.34    0.40 
   0  -7   0    0.31    0.34 
   0  -7   0    0.25    0.35 
   0  -7   0    0.70    0.33 
   0   7   0   -0.02    0.30 
   0   7   0    0.07    0.21 
   0   7   0   -0.17    0.24 
   0   7   0   -0.29    0.25 
   0   7   0    0.21    0.23 
   0   7   0   -0.06    0.30 
   0   7   0    0.22    0.29 
   0   7   0    0.08    0.22 
   0   7   0    0.18    0.28 
   0   7   0   -0.11    0.15 
  -1  -7   0   15.31    1.35 
   1  -7   0   15.45    1.33 
  -1  -7   0   12.86    1.04 
  -1  -7   0   12.03    1.26 
  -1  -7   0   10.43    1.48 
  -1  -7   0   12.14    1.25 
   1  -7   0    9.99    1.66 
   1  -7   0   13.00    1.47 
  -1  -7   0   15.61    1.39 
  -1  -7   0   10.81    1.34 
  -1  -7   0   12.76    0.95 
   1  -7   0    9.84    1.37 
  -1  -7   0   12.68    1.54 
   1  -7   0   11.73    1.34 
  -1  -7   0   12.26    1.46 
  -1   7   0   10.46    1.36 
   1   7   0   14.85    1.16 
  -1   7   0   11.82    1.37 
   1   7   0   13.75    0.91 
   1   7   0   12.60    0.95 
  -1   7   0   11.33    0.84 
  -1   7   0    9.19    1.34 
   1   7   0   13.86    1.51 
   1   7   0   13.26    1.03 
  -1   7   0   13.39    0.99 
  -1   7   0   13.16    0.97 
   1   7   0   10.80    1.22 
   1   7   0   13.03    1.39 
  -1   7   0   10.49    1.13 
  -1   7   0   12.91    0.87 
   1   7   0   12.26    0.79 
   1   7   0   10.00    1.39 
  -1   7   0   12.32    0.79 
   1   7   0   11.78    1.43 
  -1   7   0   14.40    1.09 
   2  -7   0    0.89    0.42 
  -2  -7   0    0.52    0.34 
  -2  -7   0    1.16    0.54 
  -2  -7   0    0.65    0.44 
  -2  -7   0    0.21    0.40 
  -2  -7   0    0.79    0.39 
   2  -7   0    1.39    0.49 
  -2  -7   0    0.48    0.48 
   2  -7   0    0.80    0.42 
   2  -7   0    0.78    0.43 
  -2  -7   0    0.69    0.44 
  -2  -7   0    0.32    0.36 
   2  -7   0    0.16    0.43 
  -2   7   0    0.90    0.28 
   2   7   0    0.42    0.26 
   2   7   0    0.69    0.43 
   2   7   0    1.12    0.41 
  -2   7   0    1.25    0.48 
  -2   7   0    0.92    0.26 
  -2   7   0    0.60    0.26 
  -2   7   0    1.64    0.59 
   2   7   0    0.86    0.44 
   2   7   0   -0.18    0.28 
  -2   7   0    0.44    0.29 
  -2   7   0    0.23    0.21 
   2   7   0    1.09    0.39 
   2   7   0    0.22    0.37 
  -2   7   0   -0.34    0.30 
   2   7   0    0.52    0.27 
  -2   7   0    0.59    0.32 
   2   7   0    1.76    0.59 
   2   7   0    0.50    0.34 
   3  -7   0    2.36    0.71 
   3  -7   0    1.50    0.53 
   3  -7   0    1.62    0.51 
  -3  -7   0    2.48    0.63 
  -3  -7   0    0.68    0.49 
  -3  -7   0    3.79    0.82 
  -3  -7   0    2.37    0.62 
  -3  -7   0    1.91    0.64 
   3  -7   0    1.95    0.66 
  -3  -7   0    2.22    0.67 
  -3  -7   0    1.43    0.56 
  -3   7   0    2.18    0.56 
   3   7   0    1.84    0.50 
  -3   7   0    2.24    0.68 
   3   7   0    2.72    0.63 
   3   7   0    1.55    0.60 
  -3   7   0    2.26    0.70 
   3   7   0    1.53    0.45 
  -3   7   0    2.09    0.68 
  -3   7   0    2.01    0.66 
   3   7   0    1.18    0.55 
   3   7   0    1.99    0.58 
   3   7   0    1.52    0.60 
   3   7   0    2.30    0.68 
   3   7   0    1.27    0.56 
   3   7   0    1.50    0.49 
   4  -7   0   19.66    1.52 
  -4  -7   0   20.87    2.79 
  -4  -7   0   19.71    1.72 
  -4  -7   0   15.98    1.80 
  -4  -7   0   19.22    1.58 
  -4  -7   0   20.61    1.68 
   4  -7   0   20.73    1.50 
  -4  -7   0   21.60    1.60 
  -4  -7   0   20.91    1.74 
  -4  -7   0   18.93    1.70 
   4  -7   0   17.53    1.80 
   4   7   0   21.92    1.56 
  -4   7   0   19.66    1.66 
  -4   7   0   19.08    1.65 
   4   7   0   22.78    1.54 
   4   7   0   23.16    1.84 
   4   7   0   19.22    1.58 
   4   7   0   21.04    1.54 
  -4   7   0   22.53    1.61 
   4   7   0   17.55    1.82 
   4   7   0   20.11    1.75 
   4   7   0   17.69    1.92 
  -4   7   0   19.50    1.59 
  -4   7   0   21.59    1.71 
   4   7   0   18.25    1.92 
   4   7   0   20.01    1.66 
  -5  -7   0    0.39    0.48 
  -5  -7   0    1.08    0.55 
  -5  -7   0    1.54    0.60 
  -5  -7   0    1.64    0.61 
  -5  -7   0    0.33    0.49 
  -5  -7   0    1.84    0.70 
   5  -7   0    1.78    0.58 
   5   7   0   -0.07    0.49 
  -5   7   0    1.21    0.61 
  -5   7   0    0.69    0.52 
   5   7   0    0.80    0.55 
   5   7   0    0.64    0.51 
   5   7   0    0.61    0.50 
   5   7   0    0.87    0.47 
   5   7   0    1.48    0.63 
   5   7   0    0.49    0.61 
  -5   7   0   -0.12    0.44 
   5   7   0    0.60    0.50 
  -5   7   0    0.74    0.43 
   5   7   0    1.10    0.56 
  -5   7   0    0.76    0.50 
   5   7   0    0.50    0.47 
  -6  -7   0   64.95    3.65 
  -6  -7   0   56.58    3.73 
  -6  -7   0   66.86    3.79 
  -6  -7   0   57.57    3.50 
  -6  -7   0   67.30    3.60 
  -6  -7   0   59.13    3.48 
  -6   7   0   58.39    3.36 
  -6   7   0   58.98    3.39 
   6   7   0   62.82    3.54 
   6   7   0   61.18    3.42 
   6   7   0   61.09    3.68 
   6   7   0   67.64    3.56 
   6   7   0   59.78    3.75 
  -6   7   0   61.62    3.39 
   6   7   0   62.93    3.66 
   6   7   0   65.68    3.47 
   6   7   0   67.35    3.78 
   6   7   0   64.50    3.56 
   6   7   0   58.23    3.68 
  -7  -7   0    1.49    0.69 
  -7  -7   0    1.45    0.76 
  -7  -7   0    0.63    0.58 
  -7  -7   0   -0.11    0.56 
  -7  -7   0    0.00    0.41 
  -7  -7   0    0.62    0.53 
   7   7   0    0.67    0.59 
   7   7   0    0.32    0.47 
   7   7   0    0.78    0.66 
   7   7   0    0.47    0.52 
   7   7   0    0.10    0.48 
   7   7   0    0.92    0.66 
   7   7   0    0.67    0.66 
   7   7   0   -0.10    0.42 
  -7   7   0    0.37    0.57 
   0  -8   0   22.38    1.74 
   0  -8   0   21.59    1.81 
   0  -8   0   24.11    2.14 
   0  -8   0   17.71    1.96 
   0  -8   0   22.02    2.01 
   0   8   0   19.40    1.24 
   0   8   0   20.02    1.50 
   0   8   0   17.21    1.93 
   0   8   0   20.70    1.73 
   0   8   0   14.99    1.79 
   0   8   0   21.03    1.60 
   0   8   0   17.60    1.24 
   0   8   0   18.15    1.36 
  -1  -8   0  143.62    5.96 
  -1  -8   0  131.78    6.30 
  -1  -8   0  145.81    6.61 
  -1  -8   0  147.95    6.21 
   1  -8   0  140.36    6.44 
  -1  -8   0  146.27    6.50 
   1  -8   0  153.45    6.55 
   1  -8   0  138.67    6.31 
  -1  -8   0  131.88    6.45 
   1  -8   0  135.71    6.48 
  -1  -8   0  135.14    6.53 
  -1  -8   0  150.93    6.22 
   1   8   0  142.57    5.89 
   1   8   0  142.16    6.54 
   1   8   0  135.22    6.03 
   1   8   0  145.45    6.31 
   1   8   0  139.19    5.78 
  -1   8   0  144.36    6.43 
   1   8   0  134.46    6.14 
   1   8   0  128.54    6.45 
  -1   8   0  145.39    5.83 
   1   8   0  142.31    6.47 
  -1   8   0  135.46    6.53 
  -1   8   0  142.82    5.99 
  -1   8   0  135.77    6.49 
  -1   8   0  144.95    6.09 
  -2  -8   0    3.98    0.95 
   2  -8   0    5.24    1.02 
   2  -8   0    3.92    0.85 
  -2  -8   0    4.50    0.91 
  -2  -8   0    3.57    0.86 
   2  -8   0    4.41    0.87 
  -2  -8   0    4.36    0.87 
  -2  -8   0    3.75    0.79 
  -2  -8   0    3.87    0.72 
  -2  -8   0    5.27    1.02 
  -2  -8   0    3.51    0.93 
  -2   8   0    5.17    1.07 
   2   8   0    3.40    0.90 
  -2   8   0    3.45    0.87 
  -2   8   0    2.55    0.63 
   2   8   0    3.15    0.79 
  -2   8   0    3.95    0.71 
   2   8   0    3.85    0.86 
   2   8   0    2.30    0.78 
   2   8   0    3.08    0.75 
   2   8   0    3.84    0.73 
   2   8   0    3.62    0.89 
  -2   8   0    3.73    0.91 
  -2   8   0    3.04    0.77 
   2   8   0    3.56    0.67 
  -3  -8   0   97.34    4.49 
  -3  -8   0  100.71    4.98 
   3  -8   0   95.67    4.81 
  -3  -8   0   99.39    4.80 
   3  -8   0   98.41    4.70 
   3  -8   0   96.39    4.57 
  -3  -8   0  101.34    4.63 
  -3  -8   0   90.78    4.65 
  -3  -8   0   93.60    4.89 
   3   8   0   89.66    4.81 
   3   8   0   94.00    4.50 
   3   8   0   96.81    4.67 
  -3   8   0   90.72    4.79 
  -3   8   0   90.23    4.81 
  -3   8   0   91.65    4.68 
   3   8   0   97.81    4.79 
   3   8   0   95.15    4.83 
   3   8   0   97.35    4.92 
   3   8   0   96.99    4.87 
   3   8   0   91.06    4.32 
  -3   8   0   90.72    4.82 
  -4  -8   0   15.49    1.90 
  -4  -8   0   16.34    1.66 
  -4  -8   0   14.80    1.75 
  -4  -8   0   15.63    1.87 
   4  -8   0   16.05    1.66 
  -4  -8   0   16.17    1.91 
  -4  -8   0   13.43    1.60 
   4  -8   0   15.74    1.69 
  -4   8   0   16.90    1.74 
   4   8   0   14.45    1.81 
   4   8   0   18.08    1.97 
  -4   8   0   16.07    1.77 
   4   8   0   17.89    1.43 
   4   8   0   19.48    1.85 
   4   8   0   18.73    2.01 
   4   8   0   16.74    1.93 
   4   8   0   16.95    1.43 
  -4   8   0   15.27    1.79 
  -4   8   0   15.44    1.80 
  -4   8   0   17.41    1.98 
   4   8   0   16.05    1.79 
   4   8   0   12.67    1.68 
  -5  -8   0   82.02    4.60 
  -5  -8   0   84.85    4.51 
  -5  -8   0   74.37    4.37 
  -5  -8   0   83.52    4.33 
  -5  -8   0   79.38    4.47 
  -5  -8   0   82.89    4.23 
  -5   8   0   87.41    4.48 
   5   8   0   83.72    4.63 
   5   8   0   86.28    4.43 
   5   8   0   82.92    4.34 
   5   8   0   77.11    4.46 
  -5   8   0   85.02    4.31 
  -5   8   0   79.55    4.35 
   5   8   0   87.19    4.19 
   5   8   0   81.86    4.45 
   5   8   0   79.87    4.52 
   5   8   0   74.84    4.01 
  -5   8   0   82.73    4.37 
   5   8   0   83.97    4.50 
  -6  -8   0   17.91    2.10 
  -6  -8   0   15.09    1.98 
  -6  -8   0   14.06    2.05 
  -6  -8   0   13.56    1.86 
  -6  -8   0   16.68    1.90 
  -6  -8   0   13.89    1.82 
   6   8   0   20.09    1.97 
   6   8   0   18.53    2.20 
  -6   8   0   22.23    2.18 
   6   8   0   14.98    2.02 
   6   8   0   18.92    1.92 
   6   8   0   20.51    2.16 
   6   8   0   16.86    2.15 
  -6   8   0   16.97    1.93 
  -6   8   0   16.67    1.91 
   6   8   0   17.41    2.05 
   6   8   0   17.73    2.09 
   0  -9   0    0.06    0.41 
   0  -9   0    0.71    0.57 
   0  -9   0   -0.25    0.37 
   0  -9   0    0.32    0.48 
   0   9   0    0.77    0.41 
   0   9   0   -0.05    0.38 
   0   9   0   -0.37    0.36 
   0   9   0    0.53    0.57 
   0   9   0    1.65    0.69 
   0   9   0   -0.25    0.47 
  -1  -9   0    0.76    0.58 
  -1  -9   0    0.32    0.54 
   1  -9   0    0.48    0.46 
   1  -9   0    0.57    0.50 
  -1  -9   0   -0.13    0.38 
   1  -9   0    0.20    0.58 
  -1  -9   0    1.14    0.59 
  -1  -9   0    0.62    0.53 
   1   9   0   -0.26    0.33 
   1   9   0    0.14    0.39 
  -1   9   0    0.74    0.60 
   1   9   0   -0.34    0.42 
   1   9   0    0.78    0.55 
   1   9   0    0.42    0.54 
  -1   9   0    0.14    0.46 
  -1   9   0    0.12    0.48 
   1   9   0   -0.06    0.37 
  -1   9   0    0.21    0.44 
   2  -9   0    3.29    0.93 
  -2  -9   0    1.06    0.65 
  -2  -9   0    3.15    0.90 
  -2  -9   0    1.34    0.63 
  -2  -9   0    1.56    0.60 
   2  -9   0    0.89    0.64 
  -2  -9   0    2.58    0.73 
   2  -9   0    1.83    0.68 
  -2  -9   0    2.38    0.81 
  -2  -9   0    1.31    0.58 
  -2   9   0    1.98    0.75 
  -2   9   0    2.76    0.82 
   2   9   0    2.63    0.87 
   2   9   0    1.30    0.53 
   2   9   0    2.17    0.72 
   2   9   0    2.12    0.68 
   2   9   0    2.07    0.76 
   2   9   0    2.49    0.86 
  -2   9   0    2.14    0.74 
  -2   9   0    2.16    0.77 
   2   9   0    2.70    0.85 
   3  -9   0    0.29    0.48 
  -3  -9   0    0.64    0.48 
  -3  -9   0    0.63    0.61 
   3  -9   0    0.50    0.66 
  -3  -9   0    0.08    0.52 
  -3  -9   0   -0.09    0.41 
  -3  -9   0    1.11    0.60 
   3  -9   0    1.09    0.53 
  -3  -9   0    0.98    0.66 
  -3  -9   0   -0.09    0.51 
  -3   9   0   -0.33    0.55 
   3   9   0    0.36    0.58 
  -3   9   0    1.48    0.73 
   3   9   0   -0.04    0.56 
   3   9   0    0.26    0.45 
   3   9   0    0.17    0.53 
  -3   9   0    0.23    0.64 
   3   9   0   -0.26    0.48 
   3   9   0    1.17    0.62 
   3   9   0    0.52    0.45 
   3   9   0    0.33    0.51 
  -3   9   0    0.37    0.56 
  -4  -9   0   10.97    1.49 
  -4  -9   0   10.90    1.57 
  -4  -9   0   11.40    1.72 
  -4  -9   0    7.75    1.41 
   4  -9   0    9.20    1.41 
  -4  -9   0   10.22    1.39 
   4   9   0    9.94    1.65 
  -4   9   0   11.20    1.63 
   4   9   0    9.60    1.49 
  -4   9   0   10.19    1.53 
  -4   9   0    9.25    1.55 
   4   9   0   10.05    1.64 
   4   9   0   10.11    1.29 
   4   9   0   10.08    1.63 
  -4   9   0    9.38    1.53 
   4   9   0   13.67    1.81 
   4   9   0    9.94    1.50 
   4   9   0   10.31    1.40 
  -4   9   0   12.36    1.65 
  -5  -9   0    6.34    1.33 
  -5  -9   0    6.01    1.35 
  -5  -9   0    6.14    1.22 
  -5  -9   0    5.27    1.04 
  -5  -9   0    8.26    1.55 
   5   9   0    5.12    1.23 
   5   9   0    3.37    1.00 
   5   9   0    5.78    1.17 
   5   9   0    5.75    1.31 
   5   9   0    5.47    1.18 
   5   9   0    5.12    1.14 
  -5   9   0    8.15    1.41 
  -5   9   0    6.66    1.36 
  -5   9   0    3.06    0.95 
   5   9   0    7.85    1.18 
  -5   9   0    5.40    1.22 
   5   9   0    6.45    1.20 
   0 -10   0   86.65    4.79 
   0 -10   0   88.66    4.96 
   0 -10   0   93.64    5.12 
   0  10   0   92.55    5.17 
   0  10   0   83.50    4.80 
   0  10   0   87.99    5.00 
   0  10   0   94.26    4.70 
   1 -10   0   67.49    3.94 
   1 -10   0   56.80    3.80 
  -1 -10   0   61.01    3.93 
  -1 -10   0   61.90    3.91 
  -1  10   0   56.33    3.65 
   1  10   0   59.36    3.76 
   1  10   0   58.71    3.50 
   1  10   0   63.76    3.99 
  -1  10   0   59.96    3.85 
   1  10   0   56.87    3.79 
   1  10   0   65.12    3.72 
  -1  10   0   66.78    4.09 
  -1  10   0   59.04    3.90 
   2 -10   0   46.02    3.16 
   2 -10   0   45.98    3.28 
  -2 -10   0   49.37    3.42 
  -2 -10   0   52.72    3.45 
  -2 -10   0   45.37    3.26 
  -2 -10   0   46.21    2.98 
  -2  10   0   46.61    3.28 
  -2  10   0   49.50    3.41 
  -2  10   0   51.81    3.30 
   2  10   0   45.60    3.16 
  -2  10   0   51.50    3.46 
   2  10   0   41.54    3.14 
   2  10   0   42.00    3.22 
   2  10   0   41.90    3.15 
   2  10   0   47.79    3.03 
   2  10   0   42.79    2.82 
  -3 -10   0   13.45    1.98 
  -3 -10   0   12.06    1.95 
   3 -10   0   15.56    1.99 
  -3 -10   0   10.12    1.57 
  -3 -10   0   15.28    2.22 
  -3  10   0   17.01    2.23 
  -3  10   0   13.14    1.91 
  -3  10   0   16.03    2.13 
   3  10   0   14.47    2.02 
  -3  10   0   13.79    1.87 
  -3  10   0   17.95    2.21 
   3  10   0   15.89    2.14 
   3  10   0   16.73    2.11 
   3  10   0   15.96    1.88 
   3  10   0   16.98    2.21 
   3  10   0   13.43    1.83 
  10   0  -1    0.64    0.54 
  10   0  -1    0.02    0.49 
 -10   0   1   -0.28    0.46 
 -10   0   1   -0.37    0.53 
  10   0  -1    0.03    0.46 
 -10   0   1   -0.10    0.46 
  10   0  -1   -0.09    0.41 
  10   0  -1    0.19    0.53 
 -10   0   1   -0.36    0.42 
  10   0  -1    0.40    0.57 
  10   0  -1    0.13    0.55 
 -10   0   1    0.22    0.69 
 -10   0   1    0.00    0.46 
  10   0  -1    0.84    0.59 
   9   0  -1   46.26    2.90 
  -9   0   1   47.24    2.88 
   9   0  -1   49.06    3.17 
  -9   0   1   48.68    2.87 
  -9   0   1   49.98    3.90 
   9   0  -1   41.25    2.88 
  -9   0   1   50.43    3.46 
   9   0  -1   49.82    2.89 
   9   0  -1   48.60    3.14 
   9   0  -1   50.54    2.95 
  -9   0   1   49.20    3.57 
   9   0  -1   44.29    3.18 
  -9   0   1   46.84    2.80 
   9   0  -1   51.85    3.48 
   8   0  -1    0.20    0.41 
   8   0  -1    0.07    0.32 
   8   0  -1   -0.30    0.23 
   8   0  -1   -0.32    0.34 
  -8   0   1   -0.26    0.34 
  -8   0   1   -0.16    0.26 
   8   0  -1    0.24    0.41 
  -8   0   1   -0.44    0.39 
  -8   0   1    0.49    0.40 
  -8   0   1   -0.18    0.45 
   8   0  -1   -0.42    0.25 
  -8   0   1    0.22    0.38 
   8   0  -1    0.27    0.40 
  -8   0   1   -0.04    0.27 
   8   0  -1    0.27    0.36 
  -7   0   1   17.79    1.40 
   7   0  -1   19.60    1.53 
   7   0  -1   19.04    1.60 
   7   0  -1   19.83    1.60 
  -7   0   1   20.14    1.42 
   7   0  -1   19.04    1.44 
  -7   0   1   18.04    1.70 
  -7   0   1   19.92    1.07 
   7   0  -1   20.59    1.78 
  -7   0   1   19.08    1.98 
  -7   0   1   17.84    1.41 
  -7   0   1   17.80    1.29 
   7   0  -1   21.38    1.35 
   7   0  -1   18.29    1.66 
   7   0  -1   17.28    1.41 
   7   0  -1   17.53    1.40 
   6   0  -1    0.06    0.12 
  -6   0   1    0.12    0.26 
  -6   0   1   -0.21    0.35 
  -6   0   1    0.03    0.22 
   6   0  -1   -0.02    0.24 
   6   0  -1    0.06    0.13 
   6   0  -1   -0.07    0.18 
  -6   0   1   -0.20    0.25 
   6   0  -1    0.25    0.24 
   6   0  -1    0.21    0.24 
   6   0  -1    0.06    0.21 
   6   0  -1    0.21    0.27 
   6   0  -1    0.21    0.25 
   6   0  -1   -0.01    0.13 
  -6   0   1    0.07    0.14 
   6   0  -1    0.59    0.44 
  -6   0   1   -0.06    0.19 
  -6   0   1   -0.16    0.20 
   6   0  -1    0.11    0.25 
  -5   0   1   15.75    0.81 
   5   0  -1   15.82    1.10 
   5   0  -1   13.19    1.20 
   5   0  -1   15.99    1.13 
   5   0  -1   13.70    1.13 
  -5   0   1   14.27    1.02 
   5   0  -1   14.99    1.15 
  -5   0   1   13.18    0.99 
   5   0  -1   15.09    1.22 
  -5   0   1   17.28    1.13 
   5   0  -1   15.92    1.08 
   5   0  -1   12.74    0.82 
  -5   0   1   13.67    0.93 
   5   0  -1   15.43    0.82 
   5   0  -1   14.95    1.11 
  -5   0   1   15.13    1.45 
   5   0  -1   15.65    1.08 
  -5   0   1   14.42    1.28 
   5   0  -1   14.41    0.79 
   4   0  -1    0.35    0.26 
  -4   0   1    0.27    0.28 
  -4   0   1    0.17    0.19 
   4   0  -1    0.13    0.19 
   4   0  -1    0.00    0.15 
   4   0  -1    0.01    0.12 
   4   0  -1    0.36    0.23 
  -4   0   1    0.20    0.29 
  -4   0   1    0.21    0.18 
   4   0  -1   -0.08    0.21 
   4   0  -1    0.05    0.11 
   4   0  -1    0.00    0.20 
   4   0  -1    0.30    0.18 
  -4   0   1    0.08    0.15 
  -4   0   1   -0.15    0.11 
  -4   0   1   -0.11    0.12 
  -4   0   1   -0.01    0.10 
   4   0  -1    0.80    0.27 
  -4   0   1    0.01    0.16 
   4   0  -1    0.22    0.06 
   4   0  -1    0.16    0.13 
   4   0  -1   -0.04    0.16 
   4   0  -1    0.12    0.20 
  -4   0   1    0.42    0.09 
  -3   0   1   24.92    1.15 
  -3   0   1   23.77    1.30 
   3   0  -1   25.84    1.10 
  -3   0   1   24.39    1.21 
  -3   0   1   23.63    1.14 
   3   0  -1   24.99    1.26 
   3   0  -1   24.63    1.21 
   3   0  -1   22.65    1.21 
  -3   0   1   23.03    1.24 
  -3   0   1   24.46    1.56 
  -3   0   1   25.48    1.02 
  -3   0   1   25.81    1.23 
   3   0  -1   25.92    1.27 
  -3   0   1   24.00    1.10 
   3   0  -1   24.63    0.96 
   3   0  -1   23.50    1.35 
  -3   0   1   24.01    1.21 
  -3   0   1   25.47    1.18 
   3   0  -1   23.16    0.98 
  -3   0   1   24.54    1.22 
   3   0  -1   23.82    1.31 
  -3   0   1   24.74    1.43 
   3   0  -1   24.23    1.09 
   3   0  -1   22.77    1.21 
  -3   0   1   25.15    1.22 
   3   0  -1   25.31    1.50 
  -3   0   1   22.88    1.44 
   3   0  -1   24.78    1.31 
  -3   0   1   23.30    1.27 
   3   0  -1   23.89    1.22 
   3   0  -1   22.46    1.25 
   3   0  -1   23.78    1.10 
   3   0  -1   24.02    1.39 
  -2   0   1    0.64    0.16 
   2   0  -1    0.67    0.19 
  -2   0   1    0.62    0.17 
  -2   0   1    0.53    0.17 
  -2   0   1    0.24    0.16 
  -2   0   1    0.15    0.14 
   2   0  -1    0.31    0.07 
  -2   0   1    0.34    0.11 
  -2   0   1    0.35    0.15 
   2   0  -1    0.29    0.10 
   2   0  -1    0.45    0.17 
   2   0  -1    0.71    0.19 
   2   0  -1    0.84    0.17 
   2   0  -1    0.09    0.11 
   2   0  -1    0.32    0.15 
  -2   0   1    0.29    0.17 
   2   0  -1    0.47    0.19 
  -2   0   1    0.44    0.15 
   2   0  -1    0.36    0.14 
   2   0  -1    0.17    0.12 
  -2   0   1    0.67    0.21 
  -2   0   1    0.56    0.12 
   2   0  -1    0.60    0.12 
   2   0  -1    0.72    0.23 
  -2   0   1    0.33    0.13 
   2   0  -1    0.41    0.15 
   2   0  -1    0.28    0.10 
   2   0  -1    0.11    0.11 
  -2   0   1    0.44    0.14 
  -2   0   1    0.22    0.14 
   2   0  -1    0.62    0.15 
  -2   0   1    0.43    0.13 
  -2   0   1    0.16    0.17 
  -2   0   1    0.43    0.07 
  -2   0   1    0.37    0.12 
  -2   0   1    0.53    0.13 
  -2   0   1    0.53    0.18 
  -1   0   1   28.53    1.31 
  -1   0   1   33.58    1.17 
  -1   0   1   28.03    1.28 
  -1   0   1   33.84    1.20 
  -1   0   1   35.53    1.24 
  -1   0   1   31.28    1.24 
  -1   0   1   30.52    1.18 
  -1   0   1   28.91    1.27 
  -1   0   1   27.97    1.23 
  -1   0   1   34.08    1.25 
   1   0   1  102.36    4.31 
  -1   0  -1  123.10    4.30 
  -1   0  -1  103.44    4.28 
  -1   0  -1  107.00    4.24 
  -1   0  -1  121.32    4.17 
  -1   0  -1  119.74    4.31 
  -1   0  -1  109.72    4.27 
  -1   0  -1  103.30    4.23 
  -1   0  -1  119.82    4.28 
  -1   0  -1  123.97    4.30 
  -1   0  -1  122.06    4.16 
  -1   0  -1  111.44    4.27 
  -1   0  -1  122.63    4.31 
  -1   0  -1  114.87    4.21 
  -1   0  -1  103.17    4.28 
  -1   0  -1  122.32    4.24 
  -2   0  -1    0.27    0.11 
  -2   0  -1    0.28    0.17 
   2   0   1    0.24    0.14 
  -2   0  -1    0.26    0.14 
  -2   0  -1    0.26    0.16 
  -2   0  -1    0.29    0.13 
   2   0   1    0.45    0.17 
  -2   0  -1    0.15    0.15 
   2   0   1    0.27    0.16 
   2   0   1    0.00    0.08 
  -2   0  -1    0.27    0.13 
   2   0   1    0.16    0.12 
   2   0   1    0.26    0.11 
  -2   0  -1    0.11    0.13 
   2   0   1    0.27    0.16 
  -2   0  -1    0.41    0.14 
   2   0   1    0.18    0.09 
  -2   0  -1    0.43    0.14 
   2   0   1    0.28    0.07 
   2   0   1    0.17    0.14 
  -2   0  -1    0.20    0.17 
   2   0   1    0.68    0.19 
  -2   0  -1    0.33    0.12 
   2   0   1    0.17    0.14 
  -2   0  -1    0.14    0.11 
  -2   0  -1    0.36    0.13 
   2   0   1    0.36    0.14 
   2   0   1    0.47    0.16 
  -2   0  -1    0.20    0.07 
   2   0   1    0.35    0.14 
  -2   0  -1    0.32    0.16 
  -2   0  -1    0.31    0.16 
   2   0   1    0.27    0.17 
  -2   0  -1    0.46    0.17 
   2   0   1    0.08    0.09 
   2   0   1    0.24    0.14 
  -2   0  -1    0.29    0.14 
  -2   0  -1    0.36    0.15 
   2   0   1    0.28    0.07 
  -2   0  -1    0.38    0.09 
   3   0   1  131.74    5.06 
   3   0   1  125.55    4.98 
   3   0   1  136.49    5.13 
  -3   0  -1  127.93    4.85 
  -3   0  -1  124.85    5.07 
  -3   0  -1  128.09    5.02 
  -3   0  -1  128.65    5.06 
  -3   0  -1  127.42    5.11 
  -3   0  -1  126.26    4.74 
   3   0   1  133.21    5.08 
  -3   0  -1  125.54    5.05 
   3   0   1  119.79    5.01 
  -3   0  -1  131.06    5.38 
   3   0   1  126.73    5.24 
   3   0   1  127.73    5.13 
  -3   0  -1  128.07    5.14 
   3   0   1  131.62    4.88 
  -3   0  -1  126.52    4.86 
  -3   0  -1  122.06    5.13 
  -3   0  -1  133.80    5.29 
  -3   0  -1  134.65    4.97 
  -3   0  -1  129.26    4.92 
   3   0   1  131.78    5.39 
   3   0   1  129.73    5.28 
   3   0   1  129.83    4.89 
  -3   0  -1  129.56    4.96 
   3   0   1  128.54    4.89 
  -3   0  -1  133.01    5.12 
  -3   0  -1  127.46    5.05 
  -3   0  -1  128.71    4.76 
   3   0   1  128.84    4.72 
   3   0   1  126.97    5.03 
   3   0   1  127.72    5.15 
   3   0   1  127.09    5.19 
   4   0   1    0.04    0.06 
  -4   0  -1    0.10    0.10 
   4   0   1   -0.04    0.12 
  -4   0  -1    0.08    0.17 
   4   0   1    0.03    0.11 
  -4   0  -1    0.03    0.15 
   4   0   1    0.07    0.08 
   4   0   1    0.30    0.20 
   4   0   1    0.07    0.07 
  -4   0  -1    0.33    0.21 
   4   0   1    0.23    0.24 
   4   0   1    0.07    0.18 
   4   0   1   -0.15    0.15 
   4   0   1   -0.06    0.15 
   4   0   1    0.23    0.21 
  -4   0  -1    0.06    0.07 
   4   0   1    0.12    0.14 
  -4   0  -1   -0.10    0.07 
   4   0   1   -0.24    0.17 
   4   0   1   -0.06    0.16 
  -4   0  -1   -0.17    0.14 
   4   0   1    0.16    0.18 
  -4   0  -1    0.06    0.22 
   5   0   1   60.72    2.71 
   5   0   1   58.21    2.46 
  -5   0  -1   59.78    2.76 
   5   0   1   59.09    2.77 
   5   0   1   58.75    2.79 
   5   0   1   58.72    2.97 
  -5   0  -1   57.59    2.71 
  -5   0  -1   57.60    2.30 
   5   0   1   55.91    2.21 
   5   0   1   56.72    2.88 
   5   0   1   55.68    2.43 
   5   0   1   55.38    2.87 
  -5   0  -1   56.09    2.61 
   5   0   1   59.12    2.40 
  -5   0  -1   62.28    3.12 
   5   0   1   62.96    3.15 
  -5   0  -1   55.88    2.73 
   5   0   1   52.29    2.49 
   5   0   1   58.09    2.81 
  -5   0  -1   56.46    2.24 
   6   0   1    0.38    0.31 
   6   0   1    0.15    0.25 
  -6   0  -1   -0.08    0.30 
   6   0   1    0.21    0.14 
   6   0   1    0.03    0.29 
   6   0   1   -0.23    0.22 
  -6   0  -1    0.17    0.10 
   6   0   1    0.40    0.26 
  -6   0  -1    0.02    0.22 
  -6   0  -1   -0.04    0.32 
  -6   0  -1   -0.11    0.24 
   6   0   1    0.15    0.19 
   6   0   1   -0.15    0.24 
  -6   0  -1   -0.16    0.19 
   6   0   1    0.17    0.18 
  -6   0  -1    0.18    0.09 
   6   0   1    0.07    0.28 
   6   0   1   -0.04    0.21 
  -6   0  -1   -0.09    0.20 
   6   0   1    0.14    0.15 
   7   0   1  263.70   10.77 
  -7   0  -1  269.10   10.52 
   7   0   1  257.43   11.01 
  -7   0  -1  259.61   10.43 
  -7   0  -1  254.95   11.00 
   7   0   1  260.77   10.56 
  -7   0  -1  273.58   10.54 
   7   0   1  270.34   10.76 
  -7   0  -1  261.16   11.62 
   7   0   1  270.82   10.96 
   7   0   1  259.72   10.49 
   7   0   1  242.70   10.32 
  -7   0  -1  266.58   10.32 
   7   0   1  265.38   10.60 
  -8   0  -1   -0.15    0.29 
  -8   0  -1    0.26    0.32 
   8   0   1   -0.03    0.30 
   8   0   1    0.10    0.31 
   8   0   1   -0.35    0.26 
  -8   0  -1   -0.02    0.44 
   8   0   1    0.07    0.37 
  -8   0  -1   -0.34    0.24 
  -8   0  -1    0.14    0.33 
   8   0   1   -0.22    0.33 
   8   0   1   -0.20    0.32 
  -8   0  -1    0.12    0.40 
   8   0   1   -0.22    0.27 
   8   0   1    0.74    0.51 
   9   0   1  132.78    6.70 
   9   0   1  133.46    6.29 
   9   0   1  129.42    6.15 
   9   0   1  127.16    6.77 
   9   0   1  124.17    6.19 
  -9   0  -1  129.96    6.76 
   9   0   1  134.58    6.04 
  -9   0  -1  141.22    6.26 
  -9   0  -1  130.80    6.07 
   9   0   1  134.76    6.51 
  -9   0  -1  136.86    6.18 
  -9   0  -1  149.30    7.75 
   9   0   1  131.63    6.43 
  10   0   1    0.04    0.45 
 -10   0  -1   -0.27    0.38 
  10   0   1    0.01    0.48 
 -10   0  -1   -0.31    0.48 
  10   0   1    0.36    0.58 
 -10   0  -1    0.06    0.41 
 -10   0  -1   -0.37    0.45 
 -10   0  -1   -0.40    0.55 
  10   0   1    0.04    0.54 
 -10   0  -1    0.32    0.74 
  10   0   1    0.08    0.62 
  10   0   1    0.29    0.52 
  10   0   1    0.00    0.47 
 -10  -1   1   59.38    4.34 
 -10  -1   1   61.52    4.28 
  10  -1  -1   58.82    3.60 
 -10  -1   1   61.39    3.65 
 -10  -1   1   66.44    3.76 
  10  -1  -1   67.54    3.82 
  10  -1  -1   63.11    4.15 
 -10  -1   1   65.60    3.78 
  10  -1  -1   67.49    4.04 
  10  -1  -1   61.77    3.97 
 -10  -1   1   72.27    5.07 
  10  -1  -1   62.69    4.26 
  10   1  -1   63.83    3.71 
  10   1  -1   66.89    4.26 
 -10   1   1   61.06    4.74 
 -10   1   1   64.54    4.30 
 -10   1   1   64.19    3.61 
  10   1  -1   70.84    4.45 
  10   1  -1   64.95    4.00 
  10   1  -1   68.32    3.98 
  10   1  -1   60.84    3.94 
 -10   1   1   66.59    3.65 
 -10   1   1   60.20    4.39 
  10   1  -1   70.46    3.94 
  10   1  -1   65.27    3.77 
  -9  -1   1    1.77    0.92 
   9  -1  -1    2.39    0.76 
   9  -1  -1    3.46    0.80 
  -9  -1   1    1.07    0.59 
   9  -1  -1    0.47    0.55 
  -9  -1   1    1.81    0.81 
   9  -1  -1    0.88    0.54 
   9  -1  -1    1.21    0.59 
  -9  -1   1    2.14    0.69 
   9  -1  -1    2.62    0.71 
   9  -1  -1    2.63    0.91 
  -9  -1   1    2.52    0.91 
  -9  -1   1    2.54    0.75 
   9  -1  -1    2.30    0.74 
  -9  -1   1    2.43    0.70 
   9   1  -1    1.04    0.61 
   9   1  -1    1.80    0.67 
  -9   1   1    1.15    0.78 
   9   1  -1    2.19    0.77 
   9   1  -1    1.83    0.61 
  -9   1   1    1.96    0.95 
   9   1  -1    2.23    0.78 
   9   1  -1    1.12    0.61 
   9   1  -1    0.93    0.66 
  -9   1   1    1.75    0.81 
  -9   1   1    2.17    0.68 
   9   1  -1    2.30    0.87 
  -9   1   1    0.53    0.48 
  -9   1   1    1.61    0.59 
   8  -1  -1   81.80    3.95 
   8  -1  -1   75.81    4.47 
  -8  -1   1   79.38    4.08 
   8  -1  -1   86.75    4.40 
   8  -1  -1   88.32    4.54 
  -8  -1   1   81.79    4.13 
   8  -1  -1   87.24    4.21 
   8  -1  -1   79.33    4.01 
  -8  -1   1   80.11    3.99 
  -8  -1   1   84.80    5.13 
   8  -1  -1   79.83    4.02 
  -8  -1   1   79.64    4.06 
  -8  -1   1   82.60    4.74 
   8  -1  -1   80.86    4.26 
  -8  -1   1   80.84    4.63 
   8   1  -1   87.70    4.61 
  -8   1   1   80.63    4.55 
  -8   1   1   86.16    4.05 
   8   1  -1   84.65    4.36 
  -8   1   1   88.01    4.09 
  -8   1   1   84.63    5.09 
   8   1  -1   80.32    4.11 
   8   1  -1   79.37    4.17 
   8   1  -1   83.94    4.39 
   8   1  -1   88.83    4.68 
   8   1  -1   84.29    4.17 
  -8   1   1   79.34    4.70 
  -8   1   1   90.84    4.82 
  -8   1   1   83.11    3.93 
   8   1  -1   82.97    4.28 
   7  -1  -1   12.31    0.82 
   7  -1  -1   11.17    1.27 
   7  -1  -1   11.84    1.38 
  -7  -1   1    8.03    1.09 
  -7  -1   1   11.58    1.21 
  -7  -1   1   10.21    1.70 
   7  -1  -1    9.60    1.09 
   7  -1  -1    9.95    1.12 
  -7  -1   1   10.91    0.78 
  -7  -1   1    9.82    1.45 
   7  -1  -1   12.08    1.60 
   7  -1  -1   11.22    1.44 
  -7  -1   1   11.70    1.30 
   7  -1  -1   12.26    1.25 
   7  -1  -1   11.38    1.20 
  -7  -1   1   10.98    1.22 
   7  -1  -1   11.65    1.39 
  -7   1   1   11.40    1.13 
  -7   1   1   11.10    1.70 
  -7   1   1   11.53    1.21 
   7   1  -1    9.62    1.23 
  -7   1   1    9.56    1.10 
   7   1  -1   10.61    1.47 
  -7   1   1    9.71    1.40 
   7   1  -1   10.04    1.38 
   7   1  -1    9.54    1.22 
   7   1  -1   11.76    0.88 
   7   1  -1    9.75    1.19 
  -7   1   1   10.78    0.89 
   7   1  -1    9.64    1.17 
   7   1  -1   11.50    1.38 
   7   1  -1   10.26    1.35 
   7   1  -1   10.28    1.23 
  -6  -1   1  220.48    8.72 
  -6  -1   1  216.08    8.56 
  -6  -1   1  218.95    8.25 
  -6  -1   1  217.95    8.67 
  -6  -1   1  210.28    9.47 
   6  -1  -1  219.17    8.86 
   6  -1  -1  214.99    8.77 
   6  -1  -1  219.10    8.57 
  -6  -1   1  209.48    9.11 
   6  -1  -1  213.47    8.18 
   6  -1  -1  217.58    8.96 
   6  -1  -1  221.42    8.24 
   6  -1  -1  225.10    8.61 
   6  -1  -1  210.15    8.49 
  -6  -1   1  228.01    8.70 
   6  -1  -1  233.86    9.14 
   6  -1  -1  220.32    8.69 
  -6   1   1  208.39    9.02 
   6   1  -1  218.04    8.01 
  -6   1   1  213.56    8.57 
   6   1  -1  217.25    8.68 
  -6   1   1  215.66    8.52 
   6   1  -1  218.32    8.38 
   6   1  -1  212.36    8.85 
  -6   1   1  217.83    7.97 
   6   1  -1  218.38    8.62 
   6   1  -1  221.05    8.77 
  -6   1   1  214.94    9.49 
   6   1  -1  214.83    8.84 
   6   1  -1  214.83    8.78 
   6   1  -1  207.42    8.16 
   6   1  -1  218.42    8.70 
  -6   1   1  208.44    7.94 
   6   1  -1  208.92    9.00 
   6   1  -1  212.18    8.23 
   6   1  -1  222.03    9.01 
  -6   1   1  213.86    8.29 
  -6   1   1  212.84    8.46 
  -5  -1   1   30.49    1.98 
   5  -1  -1   32.02    1.66 
  -5  -1   1   28.39    1.44 
   5  -1  -1   30.59    1.76 
   5  -1  -1   28.06    1.76 
   5  -1  -1   28.55    1.87 
   5  -1  -1   28.51    1.42 
   5  -1  -1   30.07    2.03 
   5  -1  -1   29.08    1.67 
   5  -1  -1   30.57    1.43 
   5  -1  -1   31.09    1.87 
  -5  -1   1   30.24    1.64 
  -5  -1   1   30.25    1.70 
  -5  -1   1   29.25    2.14 
  -5  -1   1   30.59    1.71 
  -5  -1   1   26.86    1.66 
   5  -1  -1   29.54    1.61 
   5  -1  -1   29.26    1.58 
   5   1  -1   32.12    1.83 
   5   1  -1   28.83    1.70 
  -5   1   1   27.80    1.23 
  -5   1   1   29.63    1.28 
   5   1  -1   28.96    1.36 
   5   1  -1   29.18    1.56 
   5   1  -1   29.18    1.44 
  -5   1   1   29.69    2.14 
  -5   1   1   27.67    1.28 
   5   1  -1   28.82    1.63 
  -5   1   1   28.03    1.60 
   5   1  -1   28.55    1.25 
   5   1  -1   27.03    1.84 
  -5   1   1   29.23    1.54 
   5   1  -1   30.13    1.70 
  -5   1   1   29.97    1.92 
   5   1  -1   27.85    1.24 
  -5   1   1   28.07    1.37 
  -5   1   1   29.84    1.43 
  -5   1   1   31.24    1.62 
   5   1  -1   31.58    1.77 
   5   1  -1   30.67    1.72 
   5   1  -1   33.28    1.81 
   5   1  -1   31.66    1.58 
   5   1  -1   30.90    1.83 
   5   1  -1   31.86    1.32 
   5   1  -1   28.87    1.84 
  -4  -1   1  615.99   21.90 
  -4  -1   1  597.82   22.38 
   4  -1  -1  604.77   21.85 
   4  -1  -1  590.21   22.03 
  -4  -1   1  600.83   22.94 
   4  -1  -1  614.59   22.36 
  -4  -1   1  619.18   22.31 
   4  -1  -1  602.04   22.76 
  -4  -1   1  624.46   22.71 
   4  -1  -1  615.80   22.61 
   4  -1  -1  623.70   22.28 
   4  -1  -1  600.52   22.22 
   4  -1  -1  606.29   22.46 
   4  -1  -1  610.00   22.22 
   4  -1  -1  606.23   22.33 
  -4  -1   1  592.00   22.22 
  -4  -1   1  613.65   22.35 
  -4  -1   1  599.44   22.13 
   4  -1  -1  615.05   22.41 
   4  -1  -1  620.51   22.54 
   4  -1  -1  571.18   22.09 
  -4  -1   1  611.29   22.37 
   4   1  -1  608.99   22.48 
  -4   1   1  609.98   21.85 
  -4   1   1  573.79   21.92 
   4   1  -1  608.48   22.12 
   4   1  -1  607.20   22.38 
  -4   1   1  618.64   22.29 
  -4   1   1  609.12   22.63 
   4   1  -1  621.62   22.26 
   4   1  -1  584.39   21.92 
   4   1  -1  617.10   22.43 
   4   1  -1  607.68   22.49 
   4   1  -1  604.63   21.99 
  -4   1   1  599.39   22.18 
   4   1  -1  589.60   22.41 
   4   1  -1  613.82   21.96 
   4   1  -1  605.27   22.21 
   4   1  -1  616.47   22.36 
  -4   1   1  592.10   22.89 
  -4   1   1  597.74   22.00 
   4   1  -1  603.57   22.03 
  -4   1   1  597.07   21.97 
  -4   1   1  610.94   21.87 
  -4   1   1  615.01   22.39 
   4   1  -1  603.67   22.59 
  -4   1   1  615.31   22.02 
  -4   1   1  613.40   22.02 
   4   1  -1  610.96   22.33 
  -4   1   1  619.21   22.19 
   4   1  -1  606.79   22.55 
  -4   1   1  605.38   22.26 
  -4   1   1  605.72   22.22 
   3  -1  -1   46.37    1.97 
   3  -1  -1   46.66    1.99 
   3  -1  -1   46.97    2.00 
  -3  -1   1   46.80    1.90 
  -3  -1   1   47.01    1.89 
  -3  -1   1   46.65    2.44 
   3  -1  -1   47.82    2.02 
  -3  -1   1   44.20    2.08 
  -3  -1   1   45.27    2.14 
   3  -1  -1   50.37    2.22 
  -3  -1   1   47.37    2.19 
  -3  -1   1   47.20    2.13 
  -3  -1   1   46.71    2.12 
  -3  -1   1   45.63    2.02 
   3  -1  -1   44.22    2.30 
  -3  -1   1   46.58    2.00 
   3  -1  -1   47.68    1.99 
  -3  -1   1   46.29    2.34 
  -3  -1   1   46.61    2.09 
   3  -1  -1   44.50    1.85 
   3  -1  -1   47.14    2.24 
  -3  -1   1   47.05    1.85 
   3  -1  -1   45.57    1.81 
   3  -1  -1   46.25    2.14 
  -3  -1   1   46.91    2.30 
   3  -1  -1   48.12    2.08 
   3  -1  -1   47.26    1.96 
   3  -1  -1   44.65    2.09 
  -3  -1   1   44.43    2.10 
  -3  -1   1   46.38    2.08 
   3   1  -1   47.07    2.07 
  -3   1   1   46.64    1.83 
   3   1  -1   49.46    2.26 
   3   1  -1   44.59    2.03 
  -3   1   1   45.63    1.98 
  -3   1   1   48.37    1.99 
   3   1  -1   44.43    1.88 
   3   1  -1   46.64    1.85 
  -3   1   1   45.70    1.82 
  -3   1   1   47.54    2.43 
  -3   1   1   45.30    2.19 
  -3   1   1   45.24    2.30 
   3   1  -1   47.95    2.16 
   3   1  -1   50.15    2.09 
  -3   1   1   46.59    2.09 
  -3   1   1   47.66    2.24 
  -3   1   1   46.59    1.95 
  -3   1   1   47.45    1.83 
   3   1  -1   45.79    1.97 
   3   1  -1   43.89    2.12 
  -3   1   1   45.95    2.10 
  -3   1   1   46.03    2.25 
  -3   1   1   46.42    2.04 
  -3   1   1   45.80    1.99 
   3   1  -1   46.10    2.16 
   3   1  -1   49.10    2.19 
   3   1  -1   48.04    1.89 
   3   1  -1   45.17    2.08 
  -3   1   1   45.95    1.96 
  -3   1   1   47.04    1.87 
   3   1  -1   48.00    2.25 
  -3   1   1   43.42    1.86 
  -3   1   1   45.73    2.12 
   3   1  -1   49.64    2.17 
  -3   1   1   44.48    2.05 
   3   1  -1   44.70    2.10 
  -3   1   1   47.23    1.76 
   3   1  -1   45.78    1.89 
  -3   1   1   47.75    1.80 
   3   1  -1   48.04    2.31 
  -2  -1   1  255.84    9.04 
   2  -1  -1  235.53    9.07 
  -2  -1   1  254.20    9.34 
   2  -1  -1  240.96    9.02 
  -2  -1   1  243.31    9.20 
  -2  -1   1  251.53    9.21 
   2  -1  -1  243.28    9.33 
   2  -1  -1  246.21    9.01 
  -2  -1   1  253.46    9.21 
   2  -1  -1  247.51    8.98 
   2  -1  -1  251.95    9.05 
  -2  -1   1  254.26    9.26 
   2  -1  -1  253.70    9.17 
  -2  -1   1  255.21    9.15 
  -2  -1   1  240.29    9.16 
  -2  -1   1  248.96    9.19 
  -2  -1   1  236.72    9.34 
   2  -1  -1  252.35    8.98 
   2  -1  -1  251.27    9.19 
   2  -1  -1  241.90    9.13 
  -2  -1   1  251.49    9.23 
  -2  -1   1  242.76    9.16 
  -2  -1   1  251.72    9.19 
   2  -1  -1  257.34    9.08 
  -2  -1   1  238.32    9.43 
  -2  -1   1  249.75    9.06 
   2  -1  -1  238.17    8.99 
  -2  -1   1  247.71    9.15 
  -2  -1   1  251.22    9.20 
   2  -1  -1  241.00    9.21 
  -2  -1   1  253.57    9.19 
  -2  -1   1  249.48    9.06 
   2  -1  -1  256.02    9.16 
  -2  -1   1  237.88    9.11 
   2  -1  -1  248.97    9.27 
   2  -1  -1  231.14    9.08 
   2   1  -1  253.19    9.16 
   2   1  -1  247.62    9.22 
  -2   1   1  245.23    9.02 
  -2   1   1  250.23    9.18 
  -2   1   1  256.80    9.13 
   2   1  -1  248.45    9.20 
  -2   1   1  244.59    8.93 
   2   1  -1  252.57    9.14 
   2   1  -1  249.74    9.44 
   2   1  -1  238.83    9.20 
   2   1  -1  248.53    9.16 
  -2   1   1  247.64    9.23 
   2   1  -1  245.96    9.03 
   2   1  -1  241.43    9.17 
  -2   1   1  252.91    9.07 
  -2   1   1  236.11    9.02 
  -2   1   1  239.33    9.16 
  -2   1   1  249.10    9.41 
  -2   1   1  239.71    9.04 
  -2   1   1  250.39    9.25 
  -2   1   1  240.47    9.01 
  -2   1   1  250.86    8.98 
   2   1  -1  253.94    9.20 
  -2   1   1  244.93    9.13 
  -2   1   1  238.24    9.03 
   2   1  -1  256.90    9.23 
  -2   1   1  237.11    9.05 
   2   1  -1  240.78    9.31 
   2   1  -1  242.93    9.05 
  -2   1   1  237.74    9.18 
  -2   1   1  247.75    9.13 
   2   1  -1  245.19    9.19 
  -2   1   1  246.06    9.00 
  -2   1   1  242.83    9.33 
   2   1  -1  244.46    9.20 
   2   1  -1  249.98    9.27 
   2   1  -1  250.15    9.06 
   2   1  -1  249.36    9.15 
  -2   1   1  246.18    9.21 
   2   1  -1  255.41    9.18 
   2   1  -1  239.13    9.22 
   2   1  -1  254.20    9.39 
   2   1  -1  240.38    9.05 
  -1  -1   1   18.98    0.86 
  -1  -1   1   19.69    0.87 
   1  -1  -1   18.83    0.84 
  -1  -1   1   16.13    0.87 
  -1  -1   1   19.73    0.90 
  -1  -1   1   16.86    0.86 
  -1  -1   1   16.85    0.87 
   1  -1  -1   20.05    0.85 
  -1  -1   1   19.41    0.86 
   1  -1  -1   18.22    0.87 
  -1  -1   1   20.61    0.90 
  -1  -1   1   19.69    0.88 
  -1  -1   1   19.30    0.86 
  -1  -1   1   18.54    0.97 
  -1  -1   1   18.22    0.86 
  -1  -1   1   19.22    0.90 
   1  -1  -1   18.61    0.85 
   1  -1  -1   17.75    0.87 
   1  -1  -1   18.89    0.88 
  -1  -1   1   19.23    0.87 
  -1  -1   1   19.41    1.01 
  -1   1   1   18.88    0.80 
   1   1  -1   19.01    0.87 
  -1   1   1   19.51    0.84 
  -1   1   1   19.41    0.81 
   1   1  -1   20.77    1.00 
   1   1  -1   17.85    0.86 
  -1   1   1   18.66    0.84 
  -1   1   1   18.79    0.87 
  -1   1   1   18.91    0.87 
   1   1  -1   19.07    0.89 
   1   1  -1   19.46    0.86 
  -1   1   1   18.30    0.72 
  -1   1   1   19.54    0.82 
   1   1  -1   18.59    0.89 
   1   1  -1   18.02    0.86 
  -1   1   1   19.32    0.75 
  -1   1   1   19.10    0.85 
   1   1  -1   19.03    0.86 
  -1   1   1   19.65    0.80 
   1   1  -1   19.18    0.87 
  -1   1   1   20.37    0.86 
   1   1  -1   18.40    0.90 
  -1   1   1   20.58    0.83 
  -1   1   1   18.55    0.98 
  -1   1   1   19.64    0.94 
   1   1  -1   19.24    0.89 
   1   1  -1   18.15    0.89 
  -1   1   1   18.36    0.76 
  -1   1   1   19.25    0.88 
   1   1  -1   19.64    0.88 
  -1   1   1   21.00    0.88 
  -1   1   1   18.30    0.83 
  -1   1   1   19.86    0.85 
  -1   1   1   19.89    0.94 
   1   1  -1   21.32    0.90 
  -1   1   1   18.33    0.89 
   1   1  -1   19.83    0.90 
   0  -1  -1  719.18   25.59 
   0  -1  -1  724.71   25.59 
   0  -1   1  692.80   25.74 
   0  -1   1  605.78   25.56 
   0  -1  -1  733.11   25.82 
   0   1   1  625.67   25.61 
   0   1  -1  638.37   26.19 
   0   1  -1  770.45   25.78 
   0   1  -1  749.81   25.80 
   0   1   1  731.33   25.59 
   0   1  -1  753.73   25.57 
   0   1   1  713.45   25.58 
   0   1  -1  745.55   25.65 
   0   1   1  763.72   25.73 
   0   1   1  741.62   25.55 
   0   1  -1  742.35   25.61 
   0   1   1  764.33   25.66 
   0   1   1  676.29   25.90 
   0   1  -1  760.63   25.60 
   0   1  -1  588.58   25.60 
   0   1  -1  757.09   25.59 
   0   1   1  718.57   25.56 
   0   1   1  733.68   25.76 
   0   1   1  579.94   25.86 
   0   1  -1  714.28   25.57 
   0   1  -1  729.02   25.63 
   0   1   1  662.18   25.81 
  -1  -1  -1   36.99    1.53 
  -1  -1  -1   39.14    1.55 
  -1  -1  -1   37.74    1.53 
   1  -1   1   37.12    1.70 
  -1  -1  -1   40.19    1.67 
  -1  -1  -1   37.10    1.56 
  -1  -1  -1   38.85    1.59 
   1  -1   1   36.30    1.51 
  -1  -1  -1   36.62    1.65 
  -1  -1  -1   38.63    1.57 
  -1  -1  -1   38.94    1.60 
   1  -1   1   31.62    1.52 
   1  -1   1   37.47    1.57 
   1  -1   1   36.08    1.46 
   1  -1   1   30.74    1.50 
  -1  -1  -1   38.88    1.55 
  -1  -1  -1   37.61    1.58 
   1  -1   1   31.86    1.53 
  -1  -1  -1   37.47    1.56 
   1  -1   1   32.86    1.42 
  -1  -1  -1   40.39    1.67 
  -1  -1  -1   39.79    1.56 
   1  -1   1   36.55    1.52 
  -1  -1  -1   31.91    1.54 
  -1  -1  -1   38.83    1.59 
  -1  -1  -1   38.97    1.58 
   1  -1   1   36.99    1.66 
  -1   1  -1   38.81    1.50 
   1   1   1   36.61    1.59 
   1   1   1   32.75    1.54 
  -1   1  -1   37.98    1.42 
  -1   1  -1   39.22    1.43 
   1   1   1   38.52    1.58 
   1   1   1   38.77    1.58 
   1   1   1   39.14    1.54 
  -1   1  -1   36.21    1.55 
   1   1   1   37.10    1.53 
  -1   1  -1   38.93    1.53 
   1   1   1   38.72    1.58 
   1   1   1   37.38    1.57 
   1   1   1   36.44    1.58 
  -1   1  -1   38.50    1.53 
  -1   1  -1   39.97    1.52 
   1   1   1   34.80    1.55 
   1   1   1   38.64    1.55 
  -1   1  -1   38.42    1.65 
   1   1   1   39.21    1.61 
  -1   1  -1   38.83    1.53 
  -1   1  -1   39.38    1.73 
   1   1   1   38.64    1.54 
  -1   1  -1   37.06    1.56 
   1   1   1   36.67    1.54 
   1   1   1   39.73    1.60 
  -1   1  -1   38.02    1.46 
  -1   1  -1   37.66    1.55 
  -1   1  -1   39.44    1.57 
   1   1   1   41.15    1.69 
   1   1   1   39.71    1.59 
   1   1   1   34.95    1.55 
  -1   1  -1   37.77    1.69 
   1   1   1   38.34    1.55 
  -1   1  -1   38.17    1.54 
   1   1   1   41.03    1.67 
  -1   1  -1   36.79    1.57 
  -1   1  -1   39.08    1.40 
  -2  -1  -1  958.58   34.08 
  -2  -1  -1  960.01   33.98 
  -2  -1  -1  939.87   34.25 
   2  -1   1  934.04   34.11 
   2  -1   1  952.75   33.96 
   2  -1   1  919.88   34.08 
   2  -1   1  973.24   34.15 
   2  -1   1  951.48   33.94 
  -2  -1  -1  950.59   34.07 
  -2  -1  -1  956.45   34.30 
  -2  -1  -1  924.59   34.18 
  -2  -1  -1  942.34   34.04 
  -2  -1  -1  958.44   33.97 
   2  -1   1  963.79   34.04 
  -2  -1  -1  959.19   33.97 
   2  -1   1  873.96   34.20 
  -2  -1  -1  950.32   34.14 
  -2  -1  -1  954.78   34.10 
  -2  -1  -1  966.83   34.13 
  -2  -1  -1  967.07   34.13 
  -2  -1  -1  938.27   34.07 
  -2  -1  -1  915.30   34.07 
   2  -1   1  866.27   34.04 
   2  -1   1  918.80   34.03 
  -2  -1  -1  941.17   34.05 
   2  -1   1  942.92   34.09 
   2  -1   1  973.07   33.97 
  -2  -1  -1  964.15   34.15 
   2  -1   1  916.25   34.02 
   2  -1   1  874.94   33.89 
  -2  -1  -1  956.40   34.09 
  -2  -1  -1  963.62   34.09 
   2   1   1  959.36   33.98 
  -2   1  -1  881.59   34.00 
  -2   1  -1  965.92   34.23 
   2   1   1  964.87   34.26 
  -2   1  -1  975.87   33.94 
   2   1   1  988.11   34.11 
   2   1   1  919.52   34.05 
  -2   1  -1  944.29   33.91 
   2   1   1  935.94   34.09 
   2   1   1  952.90   34.03 
  -2   1  -1  961.96   34.13 
   2   1   1  935.48   34.08 
  -2   1  -1  939.95   33.94 
  -2   1  -1  979.27   33.87 
   2   1   1  944.45   33.95 
   2   1   1  948.29   34.06 
   2   1   1  977.88   34.09 
   2   1   1  938.99   34.10 
  -2   1  -1  896.85   33.97 
   2   1   1  931.69   34.05 
   2   1   1 1000.00   34.14 
  -2   1  -1  955.25   33.94 
   2   1   1  920.66   34.09 
  -2   1  -1  839.65   33.99 
  -2   1  -1  999.38   33.91 
   2   1   1  923.10   34.15 
  -2   1  -1  941.31   34.14 
   2   1   1  989.72   34.18 
   2   1   1  953.06   33.99 
   2   1   1  951.41   34.06 
  -2   1  -1  862.50   33.96 
  -2   1  -1  883.01   33.98 
  -2   1  -1  856.14   34.00 
  -2   1  -1  923.12   34.00 
   2   1   1  969.98   34.19 
   2   1   1  934.80   34.22 
  -2   1  -1  943.89   33.89 
  -2   1  -1  956.79   33.89 
  -2   1  -1  964.29   34.08 
   2   1   1  915.24   33.96 
   3  -1   1    0.36    0.19 
  -3  -1  -1    0.49    0.24 
  -3  -1  -1    0.31    0.20 
   3  -1   1    0.31    0.22 
  -3  -1  -1    0.16    0.20 
   3  -1   1    0.34    0.19 
   3  -1   1    0.21    0.19 
   3  -1   1    0.31    0.23 
   3  -1   1    0.01    0.12 
   3  -1   1    0.22    0.08 
   3  -1   1    0.46    0.21 
  -3  -1  -1    0.29    0.14 
   3  -1   1    0.44    0.16 
  -3  -1  -1    0.19    0.17 
  -3  -1  -1    0.44    0.19 
  -3  -1  -1    0.41    0.14 
   3  -1   1    0.23    0.16 
   3  -1   1    0.26    0.15 
  -3  -1  -1    0.32    0.14 
  -3  -1  -1    0.08    0.15 
   3  -1   1    0.24    0.18 
  -3  -1  -1    0.25    0.18 
   3  -1   1    0.31    0.13 
   3  -1   1    0.26    0.07 
   3  -1   1    0.05    0.12 
  -3  -1  -1    0.38    0.19 
  -3   1  -1    0.50    0.22 
  -3   1  -1    0.00    0.12 
  -3   1  -1    0.07    0.16 
   3   1   1    0.18    0.17 
   3   1   1    0.40    0.14 
  -3   1  -1    0.11    0.14 
  -3   1  -1    0.45    0.18 
  -3   1  -1    0.30    0.18 
  -3   1  -1    0.07    0.09 
   3   1   1    0.18    0.18 
   3   1   1    0.09    0.16 
   3   1   1    0.25    0.08 
   3   1   1    0.35    0.20 
  -3   1  -1    0.44    0.23 
   3   1   1    0.45    0.20 
   3   1   1    0.30    0.14 
   3   1   1    0.22    0.13 
  -3   1  -1    0.35    0.11 
  -3   1  -1    0.18    0.12 
   3   1   1   -0.01    0.13 
   3   1   1    0.36    0.19 
  -3   1  -1    0.08    0.13 
  -3   1  -1    0.25    0.16 
   3   1   1    0.21    0.13 
   3   1   1    0.12    0.18 
   3   1   1    0.22    0.16 
   3   1   1    0.45    0.18 
  -3   1  -1    0.51    0.12 
  -3   1  -1    0.46    0.11 
   3   1   1    0.35    0.21 
  -3   1  -1    0.15    0.13 
   3   1   1    0.09    0.10 
   3   1   1    0.24    0.15 
  -3   1  -1    0.44    0.13 
  -3   1  -1    0.33    0.17 
  -4  -1  -1  320.90   12.05 
   4  -1   1  324.34   11.99 
  -4  -1  -1  314.29   12.09 
  -4  -1  -1  320.63   11.68 
   4  -1   1  309.96   11.82 
   4  -1   1  321.25   11.50 
   4  -1   1  329.54   12.17 
   4  -1   1  323.85   12.13 
   4  -1   1  321.43   12.42 
   4  -1   1  319.29   11.96 
   4  -1   1  313.81   12.00 
   4  -1   1  313.14   12.16 
  -4  -1  -1  316.78   12.00 
   4  -1   1  317.92   12.27 
   4  -1   1  322.23   11.69 
  -4  -1  -1  312.79   12.03 
  -4  -1  -1  319.22   11.70 
  -4  -1  -1  322.98   11.75 
  -4  -1  -1  304.61   12.32 
   4  -1   1  318.17   11.49 
  -4   1  -1  324.27   11.96 
  -4   1  -1  299.18   11.86 
   4   1   1  314.57   12.24 
   4   1   1  313.97   11.69 
  -4   1  -1  311.23   11.77 
  -4   1  -1  317.65   11.74 
   4   1   1  316.13   12.09 
   4   1   1  319.05   11.76 
   4   1   1  326.15   12.17 
  -4   1  -1  320.27   11.71 
  -4   1  -1  319.40   11.57 
   4   1   1  316.56   11.71 
   4   1   1  314.80   11.82 
  -4   1  -1  329.47   11.99 
   4   1   1  308.85   11.82 
  -4   1  -1  316.62   12.26 
   4   1   1  316.10   12.03 
  -4   1  -1  323.92   11.94 
   4   1   1  318.71   12.27 
  -4   1  -1  319.78   11.53 
   4   1   1  314.55   12.02 
  -4   1  -1  325.84   11.91 
   4   1   1  311.35   12.13 
   4   1   1  317.90   11.91 
   4   1   1  312.57   12.12 
   4   1   1  314.47   12.11 
  -4   1  -1  319.69   11.97 
   4   1   1  317.58   11.91 
  -4   1  -1  333.34   11.57 
  -5  -1  -1    0.37    0.27 
   5  -1   1    0.41    0.17 
  -5  -1  -1    0.24    0.39 
  -5  -1  -1    0.54    0.35 
   5  -1   1    0.45    0.26 
   5  -1   1    0.31    0.30 
   5  -1   1    0.37    0.26 
  -5  -1  -1    0.52    0.27 
   5  -1   1    0.62    0.27 
  -5  -1  -1    0.29    0.17 
  -5  -1  -1    0.37    0.26 
  -5  -1  -1    0.72    0.18 
   5  -1   1    0.47    0.29 
   5  -1   1    0.31    0.24 
   5  -1   1    0.34    0.23 
  -5  -1  -1    0.62    0.31 
   5  -1   1    0.41    0.30 
  -5  -1  -1    0.43    0.16 
  -5   1  -1    0.37    0.19 
   5   1   1    0.39    0.18 
   5   1   1    0.08    0.22 
   5   1   1    0.62    0.34 
  -5   1  -1    0.33    0.13 
  -5   1  -1    0.73    0.29 
   5   1   1    0.44    0.23 
   5   1   1    0.56    0.25 
   5   1   1    0.34    0.21 
   5   1   1    0.32    0.23 
   5   1   1    0.52    0.17 
   5   1   1    0.45    0.31 
   5   1   1    0.65    0.35 
  -5   1  -1    0.14    0.18 
   5   1   1    0.12    0.25 
   5   1   1    0.30    0.24 
  -5   1  -1    0.13    0.19 
   5   1   1    0.08    0.23 
  -5   1  -1    0.24    0.29 
  -5   1  -1    0.58    0.22 
   6  -1   1   31.32    2.08 
   6  -1   1   32.24    1.88 
   6  -1   1   29.91    2.13 
   6  -1   1   34.97    1.79 
  -6  -1  -1   31.57    1.91 
  -6  -1  -1   30.80    1.94 
   6  -1   1   31.89    1.80 
   6  -1   1   31.46    2.02 
   6  -1   1   33.43    2.05 
   6  -1   1   30.60    1.86 
   6  -1   1   32.57    1.91 
  -6  -1  -1   33.83    1.36 
  -6  -1  -1   28.38    2.14 
  -6  -1  -1   31.20    1.89 
  -6  -1  -1   30.95    1.84 
  -6  -1  -1   30.85    1.39 
  -6  -1  -1   31.00    1.50 
  -6  -1  -1   31.51    2.47 
  -6   1  -1   31.31    1.82 
   6   1   1   32.67    1.49 
   6   1   1   30.61    2.15 
   6   1   1   30.03    1.96 
   6   1   1   30.68    2.03 
   6   1   1   32.85    1.70 
   6   1   1   28.96    1.68 
  -6   1  -1   27.45    2.06 
   6   1   1   32.33    1.77 
   6   1   1   31.53    1.45 
  -6   1  -1   36.90    1.93 
   6   1   1   34.77    2.04 
  -6   1  -1   32.00    1.68 
  -6   1  -1   30.82    1.38 
   6   1   1   27.50    1.95 
   6   1   1   32.07    1.90 
  -6   1  -1   31.12    2.45 
   6   1   1   35.76    2.22 
   6   1   1   30.61    1.92 
   6   1   1   33.17    1.45 
  -6   1  -1   34.38    1.85 
   7  -1   1    1.10    0.41 
   7  -1   1    0.59    0.36 
  -7  -1  -1    0.81    0.40 
  -7  -1  -1    0.85    0.41 
   7  -1   1    0.60    0.38 
   7  -1   1    1.13    0.53 
  -7  -1  -1    0.41    0.49 
  -7  -1  -1    0.74    0.37 
   7  -1   1    0.54    0.40 
  -7  -1  -1    0.50    0.50 
   7  -1   1    0.73    0.43 
  -7  -1  -1    0.61    0.39 
   7  -1   1    0.73    0.46 
   7  -1   1    0.10    0.29 
   7  -1   1    0.92    0.44 
  -7  -1  -1    0.76    0.43 
  -7   1  -1    0.41    0.37 
  -7   1  -1    0.06    0.32 
   7   1   1    0.27    0.43 
   7   1   1    0.87    0.50 
  -7   1  -1    0.29    0.43 
   7   1   1    0.30    0.33 
  -7   1  -1    0.74    0.35 
   7   1   1    0.72    0.31 
   7   1   1    0.63    0.41 
  -7   1  -1    0.99    0.41 
  -7   1  -1    1.03    0.60 
   7   1   1    0.98    0.46 
   7   1   1    0.59    0.46 
   7   1   1    0.26    0.39 
   7   1   1    1.20    0.45 
   7   1   1    0.40    0.36 
   8  -1   1   27.26    2.35 
   8  -1   1   28.06    2.20 
   8  -1   1   33.60    1.98 
  -8  -1  -1   31.32    2.13 
   8  -1   1   29.00    2.20 
  -8  -1  -1   30.06    2.80 
   8  -1   1   30.00    2.07 
  -8  -1  -1   29.20    2.06 
   8  -1   1   29.76    2.34 
  -8  -1  -1   31.19    2.50 
  -8  -1  -1   28.75    2.09 
   8  -1   1   35.88    2.18 
  -8  -1  -1   31.60    2.07 
   8  -1   1   34.08    2.17 
   8   1   1   28.22    2.14 
  -8   1  -1   32.50    2.02 
   8   1   1   34.58    2.38 
  -8   1  -1   32.09    2.46 
   8   1   1   27.87    2.04 
   8   1   1   30.58    2.19 
  -8   1  -1   32.95    2.07 
   8   1   1   28.62    2.41 
   8   1   1   31.23    2.27 
  -8   1  -1   27.93    1.99 
   8   1   1   28.56    2.33 
   8   1   1   27.45    2.01 
  -8   1  -1   29.25    2.75 
  -9  -1  -1    0.37    0.47 
  -9  -1  -1    0.71    0.68 
  -9  -1  -1    0.48    0.48 
   9  -1   1    0.15    0.50 
   9  -1   1    0.38    0.52 
   9  -1   1    0.67    0.59 
   9  -1   1    0.40    0.41 
  -9  -1  -1    0.38    0.40 
   9  -1   1    0.39    0.43 
  -9  -1  -1    0.55    0.51 
  -9  -1  -1    0.33    0.53 
   9  -1   1    0.52    0.54 
   9  -1   1    0.43    0.51 
   9   1   1    0.82    0.58 
   9   1   1    1.21    0.61 
  -9   1  -1    0.60    0.48 
   9   1   1    0.24    0.49 
   9   1   1    0.19    0.51 
  -9   1  -1    0.82    0.76 
   9   1   1    0.75    0.46 
  -9   1  -1    0.85    0.67 
   9   1   1    1.14    0.66 
   9   1   1    0.29    0.47 
  -9   1  -1    1.10    0.55 
   9   1   1    1.44    0.56 
  -9   1  -1    0.26    0.39 
 -10  -1  -1   28.72    3.14 
  10  -1   1   30.46    2.61 
  10  -1   1   32.07    2.38 
 -10  -1  -1   30.87    2.40 
  10  -1   1   31.93    2.44 
  10  -1   1   36.71    3.02 
 -10  -1  -1   30.29    2.96 
 -10  -1  -1   30.54    2.39 
  10  -1   1   30.82    2.55 
 -10  -1  -1   32.20    2.89 
  10  -1   1   25.07    2.92 
 -10  -1  -1   34.19    2.43 
 -10   1  -1   29.65    2.31 
 -10   1  -1   35.03    3.46 
  10   1   1   31.29    2.64 
 -10   1  -1   30.31    2.74 
  10   1   1   36.51    2.75 
 -10   1  -1   29.71    2.22 
 -10   1  -1   31.70    3.33 
  10   1   1   25.71    2.53 
  10   1   1   33.75    2.56 
  10   1   1   30.55    2.80 
 -10   1  -1   31.96    3.06 
  10   1   1   32.02    2.42 
  10   1   1   31.73    2.78 
  10   1   1   29.31    2.89 
  10  -2  -1   16.67    1.85 
  10  -2  -1   17.05    2.41 
 -10  -2   1   14.61    2.55 
  10  -2  -1   18.07    2.31 
 -10  -2   1   14.57    1.84 
  10  -2  -1   13.97    1.99 
 -10  -2   1   13.96    2.24 
 -10  -2   1   15.00    1.94 
 -10  -2   1   15.70    1.95 
  10  -2  -1   13.06    1.76 
  10  -2  -1   17.57    2.14 
 -10  -2   1   21.80    2.88 
  10   2  -1   14.08    1.82 
  10   2  -1   15.45    2.05 
  10   2  -1   17.69    2.21 
 -10   2   1   16.51    1.80 
  10   2  -1   16.75    2.03 
  10   2  -1   13.57    2.14 
 -10   2   1   14.95    2.26 
 -10   2   1   14.82    2.37 
 -10   2   1   15.96    2.64 
  10   2  -1   16.68    2.13 
 -10   2   1   15.97    2.72 
 -10   2   1   14.81    1.70 
  10   2  -1   15.49    2.22 
  10   2  -1   16.06    2.17 
   9  -2  -1   17.39    1.85 
   9  -2  -1   15.14    2.09 
  -9  -2   1   19.29    2.76 
  -9  -2   1   19.74    2.05 
   9  -2  -1   17.75    1.98 
  -9  -2   1   17.45    2.39 
  -9  -2   1   24.04    2.22 
   9  -2  -1   15.03    2.01 
  -9  -2   1   19.19    1.96 
  -9  -2   1   19.88    1.96 
   9  -2  -1   15.95    1.95 
   9  -2  -1   15.96    1.72 
  -9  -2   1   17.56    2.31 
  -9   2   1   17.94    2.63 
   9   2  -1   17.58    1.97 
   9   2  -1   21.52    2.51 
  -9   2   1   16.26    1.71 
  -9   2   1   16.18    1.68 
  -9   2   1   18.48    2.28 
   9   2  -1   18.73    2.11 
   9   2  -1   15.43    1.90 
  -9   2   1   15.65    2.21 
   9   2  -1   15.41    1.94 
   9   2  -1   18.25    2.29 
   9   2  -1   17.44    1.90 
   9   2  -1   15.76    1.94 
   8  -2  -1    0.65    0.48 
   8  -2  -1    0.45    0.44 
  -8  -2   1    0.67    0.45 
  -8  -2   1    0.44    0.52 
   8  -2  -1   -0.24    0.31 
   8  -2  -1    0.84    0.44 
  -8  -2   1    0.63    0.44 
   8  -2  -1    1.16    0.57 
  -8  -2   1    0.71    0.50 
   8  -2  -1    0.68    0.38 
  -8  -2   1    0.53    0.41 
  -8  -2   1    0.36    0.54 
   8  -2  -1    0.26    0.47 
  -8  -2   1    0.08    0.43 
   8  -2  -1    0.08    0.36 
   8   2  -1    1.13    0.57 
   8   2  -1    3.85    0.95 
   8   2  -1   -0.16    0.31 
   8   2  -1    0.78    0.45 
   8   2  -1    0.31    0.37 
  -8   2   1    0.19    0.51 
   8   2  -1   -0.18    0.36 
   8   2  -1   -0.36    0.35 
  -8   2   1    0.47    0.32 
  -8   2   1    0.49    0.62 
  -8   2   1   -0.16    0.28 
  -8   2   1    0.85    0.56 
   8   2  -1    0.81    0.50 
  -8   2   1    1.16    0.49 
   8   2  -1   -0.06    0.33 
  -7  -2   1    0.20    0.43 
   7  -2  -1    0.35    0.32 
  -7  -2   1   -0.38    0.24 
   7  -2  -1   -0.09    0.26 
  -7  -2   1    0.35    0.25 
  -7  -2   1   -0.05    0.24 
   7  -2  -1    0.35    0.40 
  -7  -2   1   -0.13    0.22 
   7  -2  -1    0.06    0.36 
   7  -2  -1    1.03    0.39 
   7  -2  -1    0.31    0.36 
   7  -2  -1    1.16    0.34 
  -7  -2   1    0.03    0.31 
  -7  -2   1    0.28    0.42 
   7  -2  -1    0.09    0.30 
   7  -2  -1    0.62    0.40 
  -7  -2   1    0.53    0.49 
   7   2  -1    0.56    0.39 
   7   2  -1    0.48    0.39 
  -7   2   1    0.82    0.59 
  -7   2   1    0.47    0.29 
   7   2  -1    0.97    0.46 
  -7   2   1    0.24    0.22 
  -7   2   1    0.42    0.38 
   7   2  -1    0.13    0.36 
   7   2  -1    0.26    0.36 
  -7   2   1    0.07    0.24 
   7   2  -1    0.20    0.31 
   7   2  -1    0.61    0.42 
   7   2  -1    0.44    0.40 
   7   2  -1    0.90    0.46 
   7   2  -1    0.69    0.48 
  -7   2   1    0.16    0.26 
  -7   2   1    0.03    0.33 
  -6  -2   1    3.81    0.57 
  -6  -2   1    4.42    0.73 
   6  -2  -1    4.07    0.75 
   6  -2  -1    4.49    0.67 
  -6  -2   1    3.22    0.87 
   6  -2  -1    3.57    0.71 
  -6  -2   1    3.69    0.70 
   6  -2  -1    3.19    0.57 
   6  -2  -1    4.33    0.49 
   6  -2  -1    4.67    0.49 
  -6  -2   1    2.78    0.62 
  -6  -2   1    3.47    0.65 
   6  -2  -1    4.57    0.89 
  -6  -2   1    4.71    0.95 
   6  -2  -1    3.69    0.60 
   6  -2  -1    3.50    0.63 
   6  -2  -1    2.99    0.72 
   6   2  -1    3.31    0.66 
  -6   2   1    3.89    0.49 
  -6   2   1    4.71    0.61 
   6   2  -1    2.70    0.62 
   6   2  -1    4.91    0.56 
  -6   2   1    3.38    0.59 
   6   2  -1    5.64    0.56 
  -6   2   1    4.89    0.57 
  -6   2   1    4.61    0.35 
   6   2  -1    4.38    0.44 
  -6   2   1    4.10    0.96 
   6   2  -1    3.30    0.74 
   6   2  -1    4.89    0.81 
   6   2  -1    5.18    0.76 
   6   2  -1    3.94    0.83 
  -6   2   1    3.44    0.59 
  -6   2   1    4.76    0.47 
  -6   2   1    4.09    0.48 
   6   2  -1    3.88    0.74 
   6   2  -1    4.27    0.77 
  -6   2   1    4.35    0.29 
  -6   2   1    4.15    0.29 
   6   2  -1    4.24    0.74 
  -6   2   1    3.79    0.79 
   6   2  -1    4.70    0.83 
   6   2  -1    4.63    0.49 
  -5  -2   1   14.52    1.14 
  -5  -2   1   14.47    1.11 
   5  -2  -1   15.11    1.06 
  -5  -2   1   11.68    1.40 
   5  -2  -1   14.69    1.16 
  -5  -2   1   14.14    1.09 
   5  -2  -1   13.41    0.81 
   5  -2  -1   15.73    1.02 
  -5  -2   1   16.91    1.21 
   5  -2  -1   15.32    1.13 
   5  -2  -1   14.10    0.95 
   5  -2  -1   16.50    1.05 
   5  -2  -1   15.33    0.86 
   5  -2  -1   16.35    1.24 
  -5  -2   1   15.80    0.90 
  -5  -2   1   14.73    1.45 
   5  -2  -1   16.61    1.40 
  -5  -2   1   13.33    0.96 
   5  -2  -1   14.96    1.26 
  -5   2   1   14.92    0.96 
   5   2  -1   16.57    1.23 
  -5   2   1   15.32    0.77 
   5   2  -1   13.54    0.82 
  -5   2   1   15.80    1.00 
  -5   2   1   14.69    0.74 
  -5   2   1   15.61    0.86 
   5   2  -1   14.12    1.22 
  -5   2   1   15.97    0.95 
  -5   2   1   13.63    1.38 
  -5   2   1   14.08    0.64 
   5   2  -1   15.73    0.89 
  -5   2   1   14.09    0.61 
   5   2  -1   13.68    1.09 
   5   2  -1   14.83    0.89 
  -5   2   1   14.83    0.77 
   5   2  -1   15.37    1.27 
   5   2  -1   13.90    1.16 
  -5   2   1   14.37    0.79 
  -5   2   1   13.66    1.21 
   5   2  -1   14.38    0.85 
  -5   2   1   14.56    0.92 
  -5   2   1   13.95    0.99 
   5   2  -1   12.82    1.04 
   5   2  -1   12.85    1.05 
   5   2  -1   15.36    1.21 
   5   2  -1   13.52    1.15 
  -5   2   1   13.03    0.81 
   5   2  -1   16.37    1.19 
  -4  -2   1    0.64    0.28 
  -4  -2   1    0.84    0.31 
  -4  -2   1    0.35    0.24 
  -4  -2   1    0.29    0.18 
   4  -2  -1    0.60    0.31 
   4  -2  -1    0.64    0.22 
   4  -2  -1    0.53    0.28 
   4  -2  -1    0.69    0.24 
   4  -2  -1    0.49    0.24 
  -4  -2   1    0.87    0.24 
   4  -2  -1    0.81    0.28 
  -4  -2   1    0.62    0.37 
   4  -2  -1    0.55    0.29 
   4  -2  -1    0.82    0.23 
   4  -2  -1    0.91    0.23 
  -4  -2   1    0.33    0.25 
  -4  -2   1    0.39    0.21 
   4  -2  -1    0.46    0.17 
   4  -2  -1    0.48    0.28 
  -4  -2   1    0.61    0.35 
   4   2  -1    0.81    0.31 
   4   2  -1    0.78    0.22 
   4   2  -1    0.53    0.20 
  -4   2   1    0.57    0.15 
   4   2  -1    0.83    0.30 
  -4   2   1    1.48    0.28 
  -4   2   1    0.66    0.13 
   4   2  -1    0.56    0.21 
  -4   2   1    0.78    0.25 
  -4   2   1    0.44    0.18 
  -4   2   1    0.51    0.11 
   4   2  -1    0.17    0.20 
  -4   2   1    0.67    0.27 
  -4   2   1    1.09    0.25 
   4   2  -1    1.27    0.36 
   4   2  -1    0.37    0.26 
  -4   2   1    0.68    0.20 
   4   2  -1    0.37    0.18 
  -4   2   1    0.67    0.12 
   4   2  -1    0.34    0.25 
   4   2  -1    0.59    0.29 
   4   2  -1    1.11    0.34 
  -4   2   1    0.55    0.33 
   4   2  -1    0.72    0.33 
  -4   2   1    1.06    0.36 
  -4   2   1    0.78    0.19 
  -4   2   1    0.33    0.17 
  -4   2   1    0.33    0.18 
  -4   2   1    0.74    0.17 
   4   2  -1    0.45    0.25 
  -4   2   1    0.57    0.37 
   3  -2  -1    6.26    0.53 
   3  -2  -1    5.03    0.48 
   3  -2  -1    3.91    0.56 
   3  -2  -1    5.16    0.45 
   3  -2  -1    5.75    0.56 
  -3  -2   1    5.01    0.56 
  -3  -2   1    4.68    0.59 
  -3  -2   1    4.69    0.58 
  -3  -2   1    5.72    0.73 
  -3  -2   1    4.58    0.55 
  -3  -2   1    4.91    0.50 
   3  -2  -1    5.86    0.45 
   3  -2  -1    4.55    0.54 
  -3  -2   1    5.12    0.69 
  -3  -2   1    5.06    0.55 
  -3  -2   1    5.51    0.86 
   3  -2  -1    4.39    0.57 
  -3  -2   1    6.20    0.84 
  -3  -2   1    5.47    0.44 
   3  -2  -1    5.21    0.51 
   3  -2  -1    4.69    0.58 
   3  -2  -1    5.32    0.40 
  -3  -2   1    4.35    0.59 
   3  -2  -1    5.20    0.68 
   3  -2  -1    5.49    0.40 
   3  -2  -1    6.48    0.49 
  -3  -2   1    5.19    0.53 
  -3   2   1    5.81    0.40 
   3   2  -1    5.29    0.62 
  -3   2   1    5.42    0.40 
  -3   2   1    5.00    0.41 
  -3   2   1    5.25    0.42 
  -3   2   1    4.79    0.55 
   3   2  -1    4.76    0.50 
   3   2  -1    5.04    0.61 
  -3   2   1    5.32    0.62 
  -3   2   1    5.25    0.41 
  -3   2   1    6.21    0.44 
   3   2  -1    5.18    0.45 
   3   2  -1    4.25    0.58 
  -3   2   1    5.60    0.54 
   3   2  -1    4.66    0.57 
  -3   2   1    6.01    0.74 
   3   2  -1    5.24    0.52 
   3   2  -1    5.11    0.58 
  -3   2   1    5.93    0.42 
  -3   2   1    6.02    0.80 
  -3   2   1    5.94    0.44 
   3   2  -1    6.63    0.67 
  -3   2   1    5.92    0.48 
   3   2  -1    5.40    0.60 
   3   2  -1    4.38    0.61 
  -3   2   1    4.83    0.36 
   3   2  -1    4.08    0.55 
  -3   2   1    5.19    0.39 
   3   2  -1    5.72    0.64 
  -3   2   1    5.65    0.53 
  -3   2   1    5.12    0.43 
  -3   2   1    4.85    0.34 
  -3   2   1    5.90    0.61 
   3   2  -1    4.36    0.59 
  -3   2   1    5.15    0.53 
   3   2  -1    5.19    0.53 
   2  -2  -1    0.19    0.15 
  -2  -2   1    0.12    0.15 
  -2  -2   1    0.19    0.14 
  -2  -2   1    0.03    0.12 
  -2  -2   1   -0.02    0.17 
  -2  -2   1    0.57    0.21 
   2  -2  -1    0.08    0.11 
   2  -2  -1    0.37    0.15 
   2  -2  -1    0.56    0.21 
   2  -2  -1   -0.02    0.10 
  -2  -2   1    0.12    0.13 
   2  -2  -1    0.29    0.15 
  -2  -2   1    0.25    0.18 
  -2  -2   1    0.26    0.14 
   2  -2  -1   -0.05    0.08 
  -2  -2   1    0.05    0.11 
  -2  -2   1    0.27    0.19 
   2  -2  -1    0.27    0.11 
   2  -2  -1    0.20    0.14 
   2  -2  -1    0.15    0.12 
  -2  -2   1    0.62    0.22 
   2  -2  -1    0.17    0.15 
   2  -2  -1    0.24    0.11 
  -2  -2   1    0.34    0.16 
  -2  -2   1    0.24    0.16 
  -2  -2   1    0.08    0.15 
   2  -2  -1    0.16    0.14 
  -2  -2   1    0.14    0.12 
   2  -2  -1    0.20    0.14 
  -2  -2   1    0.22    0.17 
  -2  -2   1    0.36    0.18 
   2  -2  -1    0.23    0.11 
  -2  -2   1    0.16    0.15 
  -2   2   1    0.26    0.14 
  -2   2   1    0.32    0.10 
   2   2  -1   -0.01    0.13 
  -2   2   1    0.17    0.13 
   2   2  -1    0.13    0.17 
  -2   2   1    0.01    0.08 
   2   2  -1    0.41    0.16 
   2   2  -1    0.32    0.18 
  -2   2   1    0.32    0.09 
  -2   2   1    0.38    0.16 
   2   2  -1    0.09    0.13 
   2   2  -1    0.15    0.17 
  -2   2   1    0.06    0.07 
  -2   2   1    0.20    0.12 
  -2   2   1    0.39    0.22 
   2   2  -1    0.32    0.16 
   2   2  -1    0.25    0.16 
   2   2  -1    0.00    0.13 
   2   2  -1    0.19    0.14 
   2   2  -1    0.17    0.15 
   2   2  -1    0.08    0.13 
  -2   2   1    0.15    0.13 
   2   2  -1    0.08    0.13 
  -2   2   1    0.33    0.14 
  -2   2   1    0.25    0.13 
  -2   2   1    0.50    0.17 
  -2   2   1    0.16    0.13 
  -2   2   1    0.21    0.17 
  -2   2   1    0.27    0.13 
  -2   2   1    0.68    0.16 
   2   2  -1    0.36    0.18 
   2   2  -1    0.48    0.19 
   2   2  -1    0.25    0.16 
   2   2  -1    0.33    0.16 
   2   2  -1    0.13    0.17 
  -2   2   1    0.10    0.10 
   2   2  -1    0.22    0.16 
  -2   2   1    0.25    0.13 
  -2   2   1    0.58    0.24 
  -2   2   1    0.19    0.14 
  -2   2   1    0.22    0.12 
  -1  -2   1    0.53    0.14 
  -1  -2   1    0.81    0.21 
  -1  -2   1    0.91    0.21 
   1  -2  -1    0.83    0.24 
  -1  -2   1    0.75    0.21 
   1  -2  -1    0.60    0.12 
  -1  -2   1    0.43    0.15 
   1  -2  -1    0.58    0.18 
   1  -2  -1    1.05    0.20 
  -1  -2   1    0.82    0.22 
  -1  -2   1    0.47    0.16 
  -1  -2   1    0.91    0.19 
  -1  -2   1    0.69    0.19 
   1  -2  -1    0.42    0.15 
  -1  -2   1    0.89    0.20 
   1  -2  -1    0.41    0.17 
  -1  -2   1    0.72    0.22 
  -1  -2   1    0.42    0.12 
  -1  -2   1    0.53    0.15 
  -1  -2   1    0.50    0.16 
  -1  -2   1    0.68    0.15 
  -1  -2   1    0.51    0.21 
  -1  -2   1    0.98    0.17 
  -1  -2   1    0.57    0.16 
  -1  -2   1    0.81    0.22 
  -1  -2   1    0.47    0.17 
   1  -2  -1    0.92    0.22 
   1  -2  -1    0.58    0.18 
   1  -2  -1    0.96    0.17 
  -1  -2   1    0.63    0.19 
   1  -2  -1    0.62    0.26 
  -1   2   1    0.66    0.20 
   1   2  -1    0.78    0.20 
   1   2  -1    0.58    0.19 
  -1   2   1    0.59    0.14 
   1   2  -1    0.59    0.17 
  -1   2   1    0.81    0.21 
  -1   2   1    0.85    0.12 
  -1   2   1    0.66    0.17 
   1   2  -1    0.37    0.13 
  -1   2   1    0.74    0.12 
   1   2  -1    0.77    0.20 
   1   2  -1    0.46    0.13 
  -1   2   1    0.86    0.21 
   1   2  -1    0.32    0.15 
   1   2  -1    0.73    0.19 
  -1   2   1    0.62    0.16 
  -1   2   1    1.16    0.20 
  -1   2   1    0.62    0.12 
   1   2  -1    0.81    0.21 
  -1   2   1    0.55    0.15 
   1   2  -1    0.59    0.19 
   1   2  -1    0.83    0.21 
  -1   2   1    0.96    0.21 
   1   2  -1    0.60    0.20 
   1   2  -1    1.26    0.22 
  -1   2   1    0.64    0.19 
  -1   2   1    0.59    0.15 
  -1   2   1    0.83    0.11 
   1   2  -1    0.87    0.20 
  -1   2   1    0.55    0.11 
  -1   2   1    1.33    0.22 
   1   2  -1    0.84    0.19 
   1   2  -1    0.72    0.15 
   1   2  -1    0.43    0.14 
   1   2  -1    0.56    0.17 
  -1   2   1    0.59    0.17 
  -1   2   1    0.81    0.20 
  -1   2   1    0.27    0.13 
  -1   2   1    0.70    0.16 
   0  -2  -1    5.68    0.45 
   0  -2  -1    4.03    0.46 
   0  -2  -1    4.45    0.47 
   0  -2  -1    4.18    0.34 
   0  -2  -1    5.40    0.41 
   0  -2  -1    4.91    0.31 
   0  -2   1    4.76    0.41 
   0  -2  -1    5.27    0.30 
   0  -2   1    4.67    0.46 
   0  -2   1    5.14    0.41 
   0  -2  -1    5.15    0.62 
   0  -2   1    5.61    0.58 
   0  -2  -1    4.57    0.41 
   0  -2  -1    5.35    0.42 
   0  -2   1    5.59    0.32 
   0  -2  -1    5.43    0.39 
   0  -2   1    4.94    0.41 
   0  -2   1    4.72    0.44 
   0  -2   1    4.30    0.46 
   0  -2   1    5.31    0.39 
   0  -2  -1    3.97    0.32 
   0  -2   1    4.46    0.34 
   0  -2  -1    4.17    0.30 
   0  -2   1    2.57    0.49 
   0  -2   1    4.91    0.36 
   0  -2  -1    4.51    0.46 
   0  -2   1    4.91    0.42 
   0  -2   1    4.99    0.30 
   0  -2  -1    5.60    0.42 
   0  -2   1    4.50    0.35 
   0   2  -1    4.70    0.40 
   0   2  -1    4.60    0.30 
   0   2   1    4.63    0.41 
   0   2  -1    4.54    0.26 
   0   2  -1    4.59    0.35 
   0   2  -1    5.40    0.52 
   0   2  -1    5.22    0.37 
   0   2   1    5.41    0.44 
   0   2   1    4.15    0.45 
   0   2  -1    4.74    0.45 
   0   2  -1    4.29    0.29 
   0   2  -1    4.11    0.43 
   0   2   1    5.25    0.27 
   0   2  -1    5.37    0.43 
   0   2   1    4.70    0.35 
   0   2   1    4.51    0.40 
   0   2   1    5.82    0.46 
   0   2   1    4.09    0.43 
   0   2  -1    3.71    0.42 
   0   2  -1    4.85    0.26 
   0   2   1    5.26    0.38 
   0   2   1    4.56    0.46 
   0   2  -1    5.67    0.45 
   0   2   1    4.79    0.35 
   0   2   1    4.86    0.40 
   0   2   1    4.54    0.28 
   0   2  -1    4.56    0.29 
   0   2  -1    4.55    0.44 
   0   2   1    4.38    0.43 
   0   2   1    4.52    0.34 
   0   2  -1    5.29    0.34 
   0   2   1    5.59    0.32 
   0   2   1    5.09    0.28 
   0   2  -1    5.07    0.39 
   0   2  -1    5.58    0.38 
   0   2   1    5.22    0.30 
   1  -2   1  116.06    4.31 
  -1  -2  -1  116.93    4.53 
  -1  -2  -1  117.66    4.52 
  -1  -2  -1  118.68    4.49 
  -1  -2  -1  118.79    4.41 
  -1  -2  -1  122.28    4.60 
  -1  -2  -1  115.03    4.40 
  -1  -2  -1  117.25    4.41 
   1  -2   1  112.20    4.38 
  -1  -2  -1  118.76    4.44 
   1  -2   1  116.66    4.44 
  -1  -2  -1  112.52    4.51 
   1  -2   1  121.14    4.50 
  -1  -2  -1  122.27    4.52 
   1  -2   1  111.76    4.77 
  -1  -2  -1  115.83    4.54 
   1  -2   1  110.14    4.48 
   1  -2   1  114.76    4.50 
  -1  -2  -1  113.80    4.35 
  -1  -2  -1  117.39    4.62 
  -1  -2  -1  117.75    4.53 
   1  -2   1  113.64    4.62 
  -1  -2  -1  116.01    4.53 
   1  -2   1  125.60    4.34 
  -1  -2  -1  121.61    4.51 
  -1  -2  -1  114.33    4.50 
  -1  -2  -1  116.61    4.49 
   1  -2   1  116.46    4.45 
   1  -2   1  116.94    4.37 
  -1   2  -1  112.83    4.29 
  -1   2  -1  123.81    4.79 
   1   2   1  119.55    4.41 
   1   2   1  117.89    4.36 
  -1   2  -1  113.37    4.36 
   1   2   1  110.58    4.50 
   1   2   1  113.80    4.48 
  -1   2  -1  118.72    4.51 
  -1   2  -1  114.07    4.43 
   1   2   1  120.95    4.58 
   1   2   1  117.76    4.53 
  -1   2  -1  118.72    4.39 
  -1   2  -1  116.44    4.27 
   1   2   1  113.72    4.39 
  -1   2  -1  117.98    4.52 
   1   2   1  116.16    4.50 
   1   2   1  119.52    4.42 
   1   2   1  117.83    4.55 
   1   2   1  115.49    4.52 
   1   2   1  116.28    4.56 
   1   2   1  115.11    4.63 
   1   2   1  115.56    4.43 
  -1   2  -1  103.17    4.78 
  -1   2  -1  117.22    4.25 
   1   2   1  105.84    4.51 
  -1   2  -1  114.25    4.26 
   1   2   1  115.25    4.54 
   1   2   1  116.36    4.52 
  -1   2  -1  119.89    4.31 
   1   2   1  118.03    4.51 
  -1   2  -1  108.36    4.51 
  -1   2  -1  114.39    4.43 
  -1   2  -1  116.77    4.49 
   1   2   1  112.57    4.47 
  -1   2  -1  115.21    4.40 
   1   2   1  116.76    4.49 
  -1   2  -1  111.51    4.31 
   2  -2   1   15.25    0.83 
  -2  -2  -1   13.76    0.97 
   2  -2   1   14.17    0.74 
  -2  -2  -1   13.20    0.88 
  -2  -2  -1   14.07    0.84 
  -2  -2  -1   13.49    0.82 
  -2  -2  -1   13.24    0.83 
  -2  -2  -1   13.69    0.88 
  -2  -2  -1   13.77    0.84 
  -2  -2  -1   14.60    0.84 
  -2  -2  -1   13.64    0.80 
   2  -2   1   13.26    0.91 
   2  -2   1   14.16    0.69 
  -2  -2  -1   13.77    0.82 
  -2  -2  -1   13.85    0.89 
   2  -2   1   14.68    0.81 
   2  -2   1   12.68    0.89 
  -2  -2  -1   14.96    0.91 
  -2  -2  -1   14.72    0.89 
  -2  -2  -1   12.54    0.84 
  -2  -2  -1   13.23    0.94 
   2  -2   1   13.34    0.80 
  -2  -2  -1   15.20    0.86 
  -2  -2  -1   14.14    0.82 
   2  -2   1   13.95    0.72 
   2  -2   1   13.92    0.86 
   2   2   1   13.32    0.87 
   2   2   1   12.86    0.82 
  -2   2  -1   14.70    0.68 
   2   2   1   15.66    0.94 
  -2   2  -1   14.28    0.79 
  -2   2  -1   13.23    0.66 
  -2   2  -1   14.18    0.74 
   2   2   1   13.76    0.81 
  -2   2  -1   15.75    0.87 
   2   2   1   15.27    0.87 
   2   2   1   15.47    0.88 
   2   2   1   14.69    0.86 
  -2   2  -1   13.93    0.59 
   2   2   1   15.52    0.90 
  -2   2  -1   14.61    0.78 
  -2   2  -1   15.05    0.80 
  -2   2  -1   14.48    0.83 
  -2   2  -1   12.17    0.77 
   2   2   1   15.21    0.89 
  -2   2  -1   13.63    0.80 
  -2   2  -1   12.75    0.84 
  -2   2  -1   13.89    0.74 
  -2   2  -1   15.09    0.83 
   2   2   1   14.73    0.84 
  -2   2  -1   14.63    0.71 
   2   2   1   13.98    0.78 
   2   2   1   14.46    0.85 
   2   2   1   13.47    0.94 
  -2   2  -1   14.65    0.84 
  -2   2  -1   13.22    0.80 
   2   2   1   13.08    0.86 
   2   2   1   14.16    0.89 
   2   2   1   14.03    0.98 
  -2   2  -1   14.73    0.85 
  -2   2  -1   13.35    0.72 
  -2   2  -1   15.32    0.75 
   2   2   1   15.41    0.85 
   2   2   1   16.23    0.93 
   2   2   1   13.55    0.87 
  -2   2  -1   15.31    1.01 
  -3  -2  -1   30.52    1.67 
  -3  -2  -1   32.28    1.56 
   3  -2   1   32.05    1.62 
   3  -2   1   32.72    1.63 
   3  -2   1   32.21    1.35 
  -3  -2  -1   31.62    1.89 
   3  -2   1   33.06    1.52 
   3  -2   1   32.66    1.77 
   3  -2   1   31.79    1.36 
  -3  -2  -1   33.31    1.84 
   3  -2   1   32.41    1.46 
   3  -2   1   28.42    1.64 
  -3  -2  -1   30.83    1.51 
  -3  -2  -1   31.99    1.64 
   3  -2   1   31.58    1.62 
   3  -2   1   32.12    1.69 
  -3  -2  -1   31.46    1.53 
  -3  -2  -1   28.48    1.58 
   3  -2   1   32.33    1.33 
   3  -2   1   33.48    1.55 
  -3  -2  -1   32.54    1.67 
  -3  -2  -1   31.19    1.77 
   3   2   1   33.88    1.66 
  -3   2  -1   32.11    1.49 
  -3   2  -1   30.91    1.50 
  -3   2  -1   30.66    1.37 
  -3   2  -1   31.00    1.47 
   3   2   1   32.92    1.68 
   3   2   1   29.74    1.67 
  -3   2  -1   31.96    1.61 
   3   2   1   32.66    1.44 
   3   2   1   33.32    1.55 
  -3   2  -1   30.29    1.49 
  -3   2  -1   32.05    1.43 
   3   2   1   34.35    1.75 
  -3   2  -1   31.65    1.42 
  -3   2  -1   29.60    1.38 
   3   2   1   33.14    1.72 
  -3   2  -1   31.52    1.31 
  -3   2  -1   31.87    1.31 
   3   2   1   32.75    1.67 
   3   2   1   29.11    1.62 
   3   2   1   31.95    1.64 
  -3   2  -1   30.03    1.88 
  -3   2  -1   31.04    1.43 
  -3   2  -1   32.75    1.67 
   3   2   1   32.22    1.51 
   3   2   1   31.19    1.52 
  -3   2  -1   32.79    1.75 
  -3   2  -1   31.21    1.42 
   3   2   1   32.22    1.66 
  -3   2  -1   30.74    1.50 
   3   2   1   28.58    1.56 
   3   2   1   33.73    1.58 
   4  -2   1   47.36    2.14 
  -4  -2  -1   45.23    2.32 
   4  -2   1   48.30    2.31 
  -4  -2  -1   44.55    2.68 
   4  -2   1   46.74    2.02 
   4  -2   1   46.72    1.89 
  -4  -2  -1   47.23    2.33 
  -4  -2  -1   50.99    2.38 
  -4  -2  -1   46.99    2.60 
  -4  -2  -1   49.54    2.12 
  -4  -2  -1   47.12    2.39 
   4  -2   1   47.58    2.17 
   4  -2   1   48.56    2.39 
  -4  -2  -1   46.49    2.17 
   4  -2   1   46.02    2.44 
   4  -2   1   45.91    2.32 
   4  -2   1   47.18    2.36 
  -4  -2  -1   47.04    2.12 
   4  -2   1   49.49    2.58 
   4  -2   1   44.04    2.19 
   4   2   1   48.99    2.38 
  -4   2  -1   48.96    1.99 
   4   2   1   49.74    2.33 
   4   2   1   48.29    2.15 
  -4   2  -1   46.53    2.41 
  -4   2  -1   47.90    1.88 
   4   2   1   48.14    2.41 
  -4   2  -1   49.11    2.20 
   4   2   1   45.74    2.45 
   4   2   1   47.85    2.43 
   4   2   1   47.04    2.38 
   4   2   1   48.41    2.23 
   4   2   1   46.24    2.35 
  -4   2  -1   48.61    1.97 
  -4   2  -1   47.47    2.16 
   4   2   1   46.67    1.98 
  -4   2  -1   45.28    1.78 
   4   2   1   45.69    2.10 
  -4   2  -1   47.31    1.97 
   4   2   1   47.69    2.38 
   4   2   1   46.52    2.18 
  -4   2  -1   49.30    2.02 
   4   2   1   48.11    2.31 
  -4   2  -1   45.84    2.03 
  -4   2  -1   49.23    2.17 
  -4   2  -1   50.60    2.23 
  -4   2  -1   46.34    2.12 
   4   2   1   44.88    2.42 
  -4   2  -1   46.31    2.11 
   5  -2   1   51.09    2.32 
   5  -2   1   53.96    1.99 
  -5  -2  -1   54.40    2.35 
  -5  -2  -1   49.83    2.91 
   5  -2   1   51.55    2.72 
  -5  -2  -1   52.87    2.66 
  -5  -2  -1   52.36    2.31 
   5  -2   1   55.44    2.89 
  -5  -2  -1   51.86    2.64 
   5  -2   1   52.91    2.41 
   5  -2   1   52.31    2.94 
  -5  -2  -1   51.74    2.41 
   5  -2   1   55.92    2.72 
   5  -2   1   54.51    2.62 
  -5  -2  -1   52.70    2.71 
   5  -2   1   56.14    2.76 
   5  -2   1   54.57    2.56 
  -5  -2  -1   51.60    2.65 
   5  -2   1   50.50    2.48 
  -5  -2  -1   52.81    3.17 
   5   2   1   48.73    2.82 
   5   2   1   51.55    2.83 
  -5   2  -1   50.41    2.41 
  -5   2  -1   52.34    2.21 
   5   2   1   51.99    2.70 
   5   2   1   54.06    2.88 
   5   2   1   52.09    2.58 
  -5   2  -1   51.64    2.47 
  -5   2  -1   51.57    2.50 
   5   2   1   50.41    2.70 
  -5   2  -1   52.92    2.48 
   5   2   1   51.74    2.66 
  -5   2  -1   52.17    2.22 
   5   2   1   53.60    2.38 
  -5   2  -1   53.62    2.39 
   5   2   1   51.41    2.71 
  -5   2  -1   52.82    2.10 
  -5   2  -1   55.06    2.83 
   5   2   1   54.06    2.13 
   5   2   1   53.15    2.64 
   5   2   1   52.32    2.74 
  -5   2  -1   51.33    2.47 
  -5   2  -1   52.46    2.19 
   5   2   1   55.86    2.43 
   5   2   1   51.41    2.70 
   6  -2   1   69.20    3.57 
  -6  -2  -1   71.16    3.50 
   6  -2   1   74.23    3.70 
  -6  -2  -1   75.17    4.24 
   6  -2   1   70.75    3.42 
  -6  -2  -1   73.26    3.02 
   6  -2   1   70.35    3.15 
  -6  -2  -1   73.20    3.16 
   6  -2   1   71.52    3.34 
  -6  -2  -1   68.66    3.84 
   6  -2   1   70.62    3.14 
   6  -2   1   71.51    3.38 
   6  -2   1   71.09    3.55 
  -6  -2  -1   65.77    3.44 
  -6  -2  -1   69.90    3.47 
   6  -2   1   71.10    3.76 
  -6  -2  -1   71.04    3.55 
   6   2   1   75.94    3.36 
   6   2   1   66.85    3.43 
   6   2   1   75.33    3.63 
   6   2   1   70.89    3.17 
   6   2   1   70.11    3.59 
   6   2   1   68.46    3.32 
   6   2   1   73.43    3.61 
   6   2   1   68.37    3.57 
   6   2   1   70.50    3.73 
  -6   2  -1   73.53    2.84 
   6   2   1   69.32    3.73 
  -6   2  -1   72.70    3.05 
  -6   2  -1   81.09    3.42 
  -6   2  -1   74.09    2.95 
  -6   2  -1   69.07    3.68 
   6   2   1   72.93    3.53 
   6   2   1   70.97    3.61 
  -6   2  -1   69.75    3.26 
  -6   2  -1   70.93    3.25 
  -7  -2  -1  102.71    4.28 
   7  -2   1   95.64    4.84 
   7  -2   1   98.34    4.63 
  -7  -2  -1  102.96    4.86 
   7  -2   1  106.24    4.37 
  -7  -2  -1  100.07    5.25 
   7  -2   1  104.41    4.89 
   7  -2   1  102.64    4.73 
   7  -2   1  106.97    4.44 
  -7  -2  -1  112.63    4.89 
   7  -2   1   99.07    5.13 
   7  -2   1  110.53    5.11 
  -7  -2  -1  101.80    4.76 
   7  -2   1   96.52    4.59 
  -7  -2  -1   99.49    4.78 
  -7  -2  -1  104.06    5.67 
  -7   2  -1  105.36    4.54 
   7   2   1  103.59    4.80 
   7   2   1  102.64    5.14 
  -7   2  -1  104.59    5.69 
   7   2   1  104.20    4.95 
   7   2   1  105.58    4.96 
  -7   2  -1  101.54    4.62 
  -7   2  -1  101.01    4.31 
   7   2   1  103.93    4.54 
   7   2   1  102.16    4.94 
   7   2   1   99.92    4.80 
  -7   2  -1  100.81    4.55 
  -7   2  -1   98.56    5.06 
   7   2   1   99.88    4.92 
   7   2   1  100.70    5.14 
  -8  -2  -1   27.55    2.12 
  -8  -2  -1   31.60    2.13 
  -8  -2  -1   29.81    2.11 
   8  -2   1   29.37    2.08 
   8  -2   1   33.08    2.12 
   8  -2   1   29.36    2.41 
   8  -2   1   27.53    1.97 
  -8  -2  -1   24.88    2.61 
  -8  -2  -1   32.60    2.19 
   8  -2   1   28.69    2.27 
  -8  -2  -1   32.30    2.58 
   8  -2   1   27.86    2.20 
   8  -2   1   26.24    1.95 
   8  -2   1   28.77    2.16 
  -8   2  -1   30.09    2.37 
   8   2   1   29.48    2.22 
   8   2   1   30.74    2.42 
  -8   2  -1   30.59    1.93 
   8   2   1   26.89    2.33 
   8   2   1   30.19    2.23 
   8   2   1   33.37    2.23 
  -8   2  -1   30.19    1.92 
   8   2   1   30.26    2.26 
  -8   2  -1   32.50    2.89 
   8   2   1   30.28    2.13 
  -8   2  -1   28.91    2.77 
  -8   2  -1   30.97    2.01 
   8   2   1   27.30    2.13 
   8   2   1   29.83    1.84 
   9  -2   1   85.75    4.20 
  -9  -2  -1   78.96    4.82 
   9  -2   1   81.46    4.32 
  -9  -2  -1   78.04    4.21 
  -9  -2  -1   85.95    4.34 
  -9  -2  -1   74.32    5.18 
  -9  -2  -1   84.57    4.38 
   9  -2   1   79.81    4.40 
   9  -2   1   76.12    4.48 
   9  -2   1   71.06    4.58 
  -9  -2  -1   84.43    4.27 
   9  -2   1   81.53    4.50 
   9  -2   1   79.41    4.12 
   9   2   1   78.95    4.66 
   9   2   1   75.71    4.31 
   9   2   1   80.79    4.46 
  -9   2  -1   81.26    4.98 
  -9   2  -1   76.06    4.58 
  -9   2  -1   77.52    3.92 
  -9   2  -1   80.28    4.07 
   9   2   1   78.39    4.44 
   9   2   1   80.59    4.27 
   9   2   1   79.82    4.76 
   9   2   1   71.99    4.29 
  -9   2  -1   72.74    5.15 
  -9   2  -1   82.10    5.35 
   9   2   1   80.25    4.26 
 -10  -2  -1   12.37    2.49 
 -10  -2  -1   10.01    1.98 
 -10  -2  -1   10.65    1.61 
  10  -2   1   12.48    1.70 
 -10  -2  -1   10.48    1.54 
 -10  -2  -1   15.04    1.96 
  10  -2   1   13.03    1.67 
  10  -2   1   11.70    2.02 
 -10  -2  -1   13.12    1.84 
  10  -2   1   12.53    1.85 
  10  -2   1   12.76    2.00 
 -10  -2  -1   13.03    2.19 
 -10   2  -1   14.66    2.36 
  10   2   1   14.54    2.01 
 -10   2  -1   14.03    2.13 
  10   2   1   18.78    2.24 
  10   2   1   14.36    2.21 
 -10   2  -1   13.83    2.58 
  10   2   1   10.68    1.62 
  10   2   1   10.41    1.72 
 -10   2  -1   13.23    1.67 
  10   2   1   10.25    1.54 
  10   2   1   14.84    2.22 
  10   2   1   13.57    1.91 
 -10   2  -1   12.73    2.50 
  -9  -3   1   36.11    3.02 
   9  -3  -1   40.73    2.73 
   9  -3  -1   33.16    2.77 
  -9  -3   1   34.80    3.29 
  -9  -3   1   33.08    2.52 
  -9  -3   1   38.92    3.10 
  -9  -3   1   35.19    2.52 
  -9  -3   1   40.92    2.71 
   9  -3  -1   38.29    2.82 
   9  -3  -1   36.18    2.66 
   9  -3  -1   37.47    2.40 
   9  -3  -1   35.35    2.45 
  -9   3   1   33.98    3.20 
  -9   3   1   36.43    2.29 
  -9   3   1   33.06    2.74 
   9   3  -1   41.40    2.76 
   9   3  -1   41.58    2.85 
   9   3  -1   36.55    2.87 
   9   3  -1   35.50    2.68 
  -9   3   1   35.94    3.30 
   9   3  -1   42.32    2.86 
  -9   3   1   34.01    2.94 
   9   3  -1   37.03    2.89 
   9   3  -1   37.66    2.74 
  -9   3   1   38.05    2.32 
   9   3  -1   41.73    2.72 
  -8  -3   1   53.10    3.12 
  -8  -3   1   54.01    3.19 
   8  -3  -1   53.86    3.14 
  -8  -3   1   50.61    3.08 
   8  -3  -1   54.24    2.99 
  -8  -3   1   52.84    3.88 
  -8  -3   1   51.56    3.52 
   8  -3  -1   53.05    3.43 
   8  -3  -1   49.79    3.16 
  -8  -3   1   59.72    3.73 
   8  -3  -1   54.00    3.33 
   8  -3  -1   57.58    2.98 
  -8  -3   1   53.81    3.19 
  -8   3   1   53.65    2.85 
   8   3  -1   58.35    3.36 
  -8   3   1   50.08    3.51 
   8   3  -1   56.35    3.26 
  -8   3   1   56.71    3.96 
   8   3  -1   57.69    3.52 
   8   3  -1   59.62    3.40 
  -8   3   1   56.96    3.92 
   8   3  -1   52.78    2.94 
   8   3  -1   55.85    3.33 
  -8   3   1   54.53    3.40 
   8   3  -1   52.32    3.12 
   8   3  -1   51.38    3.25 
   8   3  -1   53.97    3.13 
   8   3  -1   52.28    3.39 
  -8   3   1   54.05    2.84 
  -7  -3   1   47.04    2.46 
   7  -3  -1   51.05    2.53 
  -7  -3   1   47.45    3.14 
   7  -3  -1   48.25    2.82 
   7  -3  -1   44.70    2.50 
  -7  -3   1   47.32    2.75 
   7  -3  -1   49.67    2.77 
  -7  -3   1   48.37    3.43 
   7  -3  -1   46.99    2.59 
   7  -3  -1   54.54    2.79 
   7  -3  -1   46.44    2.97 
  -7  -3   1   41.54    2.69 
  -7  -3   1   47.10    2.78 
  -7  -3   1   43.10    2.67 
   7  -3  -1   52.55    2.97 
  -7  -3   1   46.96    3.09 
   7   3  -1   48.59    2.79 
   7   3  -1   47.91    2.84 
   7   3  -1   41.19    2.84 
   7   3  -1   47.57    2.82 
  -7   3   1   50.28    3.40 
  -7   3   1   43.52    3.02 
   7   3  -1   48.04    2.88 
   7   3  -1   45.86    2.86 
  -7   3   1   45.91    2.47 
   7   3  -1   49.43    2.89 
   7   3  -1   49.23    3.02 
   7   3  -1   52.45    2.84 
  -7   3   1   47.06    2.31 
   7   3  -1   47.95    2.67 
  -7   3   1   46.54    2.92 
  -7   3   1   55.16    2.55 
   6  -3  -1  206.10    8.04 
   6  -3  -1  211.01    8.29 
  -6  -3   1  193.64    8.69 
  -6  -3   1  209.53    8.41 
  -6  -3   1  206.83    8.36 
  -6  -3   1  199.03    8.79 
   6  -3  -1  206.89    7.76 
  -6  -3   1  203.40    8.11 
   6  -3  -1  201.98    8.37 
   6  -3  -1  204.27    8.48 
   6  -3  -1  214.41    8.66 
   6  -3  -1  204.63    8.08 
  -6  -3   1  192.63    8.34 
   6  -3  -1  202.48    8.30 
  -6  -3   1  206.85    8.44 
  -6  -3   1  210.13    7.97 
   6  -3  -1  206.94    8.17 
  -6  -3   1  198.81    9.08 
   6  -3  -1  207.18    7.75 
   6   3  -1  202.15    8.44 
   6   3  -1  201.87    8.58 
   6   3  -1  208.33    8.62 
  -6   3   1  202.02    8.74 
   6   3  -1  198.49    8.50 
   6   3  -1  206.39    7.87 
   6   3  -1  211.91    8.53 
  -6   3   1  196.81    7.83 
  -6   3   1  204.52    7.58 
   6   3  -1  204.54    8.36 
  -6   3   1  196.04    8.97 
   6   3  -1  205.24    8.36 
  -6   3   1  199.20    7.98 
  -6   3   1  198.79    7.83 
   6   3  -1  203.54    7.84 
   6   3  -1  206.99    8.34 
   6   3  -1  198.77    8.43 
  -6   3   1  200.19    8.55 
   6   3  -1  203.61    8.49 
  -6   3   1  203.57    8.03 
  -6   3   1  201.65    7.83 
  -6   3   1  204.59    7.77 
   5  -3  -1  154.08    6.72 
  -5  -3   1  158.51    6.48 
  -5  -3   1  155.38    6.39 
   5  -3  -1  156.43    6.13 
   5  -3  -1  147.92    6.31 
   5  -3  -1  156.97    6.39 
   5  -3  -1  154.88    6.19 
   5  -3  -1  159.18    6.47 
  -5  -3   1  150.78    6.95 
  -5  -3   1  150.80    6.23 
   5  -3  -1  156.21    6.56 
   5  -3  -1  152.90    5.97 
   5  -3  -1  157.79    6.15 
  -5  -3   1  151.49    6.42 
  -5  -3   1  151.46    6.09 
  -5  -3   1  155.04    6.11 
  -5  -3   1  157.16    6.45 
   5  -3  -1  152.36    6.30 
  -5  -3   1  152.00    6.76 
   5  -3  -1  159.13    5.95 
   5   3  -1  153.16    6.53 
   5   3  -1  151.62    6.53 
   5   3  -1  152.15    6.46 
   5   3  -1  149.70    6.36 
   5   3  -1  159.91    6.52 
  -5   3   1  157.33    6.07 
   5   3  -1  157.65    6.57 
  -5   3   1  152.87    6.33 
   5   3  -1  156.58    6.42 
  -5   3   1  152.81    6.67 
  -5   3   1  144.19    5.94 
  -5   3   1  152.26    5.94 
   5   3  -1  155.91    6.47 
  -5   3   1  153.83    5.91 
  -5   3   1  154.65    5.97 
   5   3  -1  156.65    6.09 
  -5   3   1  153.82    6.39 
   5   3  -1  154.52    6.38 
  -5   3   1  154.05    5.83 
   5   3  -1  150.12    6.01 
  -5   3   1  154.63    5.61 
  -5   3   1  149.49    6.08 
  -5   3   1  146.07    5.70 
  -5   3   1  127.52    6.44 
  -5   3   1  159.29    6.06 
   5   3  -1  154.14    6.44 
  -5   3   1  152.09    6.87 
  -5   3   1  152.95    6.00 
  -5   3   1  152.51    6.52 
  -5   3   1  156.09    5.88 
   4  -3  -1  133.23    6.02 
  -4  -3   1  150.13    6.04 
   4  -3  -1  158.77    5.87 
   4  -3  -1  153.28    6.27 
  -4  -3   1  153.57    6.65 
   4  -3  -1  152.13    5.93 
  -4  -3   1  151.61    6.22 
  -4  -3   1  155.13    6.26 
   4  -3  -1  153.12    6.13 
   4  -3  -1  153.94    6.23 
   4  -3  -1  153.14    6.42 
   4  -3  -1  157.29    5.95 
   4  -3  -1  140.04    6.01 
  -4  -3   1  154.54    6.28 
   4  -3  -1  152.04    6.00 
   4  -3  -1  153.14    6.07 
  -4  -3   1  149.00    6.00 
  -4  -3   1  160.68    6.51 
   4  -3  -1  151.63    5.87 
  -4  -3   1  149.04    6.17 
  -4  -3   1  150.24    6.13 
   4  -3  -1  155.02    6.21 
  -4   3   1  151.68    5.94 
  -4   3   1  148.50    5.95 
  -4   3   1  154.75    5.80 
  -4   3   1  153.36    5.79 
   4   3  -1  155.56    6.18 
  -4   3   1  144.72    6.22 
  -4   3   1  147.85    6.24 
   4   3  -1  145.19    6.28 
   4   3  -1  150.84    6.23 
  -4   3   1  150.19    5.85 
  -4   3   1  153.12    6.38 
  -4   3   1  155.42    5.87 
   4   3  -1  149.92    6.26 
   4   3  -1  154.69    6.02 
   4   3  -1  150.86    6.24 
  -4   3   1  152.36    6.01 
  -4   3   1  154.78    6.04 
   4   3  -1  150.11    6.24 
   4   3  -1  145.79    6.16 
   4   3  -1  144.54    6.17 
  -4   3   1  144.90    5.81 
  -4   3   1  157.74    5.76 
  -4   3   1  150.86    5.92 
  -4   3   1  160.16    6.10 
  -4   3   1  157.91    6.31 
  -4   3   1  154.95    5.75 
  -4   3   1  158.89    6.27 
  -4   3   1  150.15    5.81 
   4   3  -1  147.79    6.22 
   4   3  -1  152.34    6.27 
  -4   3   1  153.73    5.92 
  -4   3   1  149.86    6.53 
   4   3  -1  150.60    5.97 
   3  -3  -1  201.76    7.84 
   3  -3  -1  215.32    7.92 
   3  -3  -1  208.12    7.98 
   3  -3  -1  205.82    7.80 
   3  -3  -1  194.83    7.73 
   3  -3  -1  202.93    7.89 
   3  -3  -1  214.74    7.82 
   3  -3  -1  202.49    8.00 
   3  -3  -1  206.09    7.86 
  -3  -3   1  205.69    8.20 
  -3  -3   1  211.50    8.36 
  -3  -3   1  198.11    8.07 
   3  -3  -1  202.17    7.80 
   3  -3  -1  205.38    7.89 
  -3  -3   1  212.10    8.02 
  -3  -3   1  205.66    7.94 
  -3  -3   1  203.02    8.08 
  -3  -3   1  216.70    8.06 
   3  -3  -1  200.69    8.12 
   3  -3  -1  207.05    7.97 
  -3  -3   1  203.37    7.98 
   3  -3  -1  206.53    7.86 
  -3  -3   1  202.58    8.04 
   3   3  -1  209.64    8.07 
  -3   3   1  209.20    7.69 
  -3   3   1  206.24    8.22 
   3   3  -1  203.44    8.03 
   3   3  -1  199.17    8.07 
  -3   3   1  203.57    7.89 
   3   3  -1  210.14    8.17 
  -3   3   1  209.11    7.95 
  -3   3   1  211.82    7.90 
   3   3  -1  200.49    7.97 
   3   3  -1  207.75    8.05 
   3   3  -1  213.68    8.04 
  -3   3   1  210.48    7.82 
  -3   3   1  206.78    7.83 
  -3   3   1  196.50    7.79 
   3   3  -1  208.41    7.98 
   3   3  -1  199.63    8.06 
  -3   3   1  210.98    7.81 
   3   3  -1  203.50    7.94 
  -3   3   1  197.90    7.65 
  -3   3   1  208.84    8.14 
  -3   3   1  220.25    7.84 
   3   3  -1  204.11    8.02 
  -3   3   1  206.46    7.74 
  -3   3   1  203.54    8.04 
  -3   3   1  207.51    7.70 
  -3   3   1  205.49    8.17 
  -3   3   1  208.66    8.24 
  -3   3   1  211.74    8.10 
  -3   3   1  207.85    8.10 
   3   3  -1  207.13    7.93 
  -3   3   1  207.59    7.61 
  -3   3   1  204.87    7.71 
  -2  -3   1  105.18    4.13 
   2  -3  -1  107.86    4.32 
  -2  -3   1  103.67    4.50 
   2  -3  -1  105.60    4.13 
  -2  -3   1  102.08    4.19 
  -2  -3   1  101.00    4.30 
   2  -3  -1  102.71    4.06 
  -2  -3   1  100.60    4.29 
  -2  -3   1  104.27    4.23 
  -2  -3   1  100.83    4.22 
  -2  -3   1  103.79    4.12 
   2  -3  -1  101.40    4.22 
  -2  -3   1  104.98    4.17 
  -2  -3   1  107.77    4.33 
  -2  -3   1  100.96    4.29 
   2  -3  -1  101.28    4.10 
   2  -3  -1  114.36    4.28 
  -2  -3   1  102.15    4.20 
   2  -3  -1  106.32    4.25 
  -2  -3   1  100.86    4.23 
   2  -3  -1  106.83    4.27 
  -2  -3   1  106.13    4.41 
   2  -3  -1  110.86    4.22 
  -2  -3   1  109.18    4.33 
   2  -3  -1  100.37    4.12 
   2   3  -1  101.52    4.36 
   2   3  -1  107.39    4.43 
   2   3  -1  101.86    4.22 
  -2   3   1  101.06    4.15 
   2   3  -1  102.12    4.21 
  -2   3   1  110.90    4.18 
  -2   3   1  103.79    4.23 
  -2   3   1  111.61    4.22 
  -2   3   1  107.53    3.92 
  -2   3   1  104.51    4.13 
   2   3  -1  104.88    4.28 
   2   3  -1  102.12    4.26 
   2   3  -1  105.01    4.34 
  -2   3   1  103.93    4.02 
   2   3  -1   99.68    4.23 
  -2   3   1  106.70    4.13 
  -2   3   1  102.25    4.14 
   2   3  -1  104.33    4.20 
   2   3  -1  108.98    4.33 
   2   3  -1  107.01    4.31 
  -2   3   1  104.73    4.06 
  -2   3   1  103.03    4.18 
  -2   3   1  104.74    4.13 
  -2   3   1  106.37    4.29 
   2   3  -1   99.93    4.29 
  -2   3   1  103.19    4.27 
  -2   3   1  103.85    4.06 
   2   3  -1  104.56    4.14 
   2   3  -1  104.12    4.14 
  -2   3   1  101.43    3.95 
  -2   3   1  103.63    4.25 
  -2   3   1  103.52    4.12 
   2   3  -1  104.89    4.18 
  -1  -3   1  237.23    8.91 
   1  -3  -1  251.22    9.20 
  -1  -3   1  231.09    9.16 
  -1  -3   1  247.69    9.25 
  -1  -3   1  235.40    9.18 
  -1  -3   1  235.58    9.03 
   1  -3  -1  251.43    9.11 
  -1  -3   1  238.35    9.02 
  -1  -3   1  241.51    8.85 
   1  -3  -1  236.67    9.09 
  -1  -3   1  238.90    9.12 
  -1  -3   1  241.04    9.15 
  -1  -3   1  238.46    9.26 
   1  -3  -1  251.18    9.17 
  -1  -3   1  246.06    8.89 
  -1  -3   1  236.18    9.12 
   1  -3  -1  247.30    9.20 
  -1  -3   1  243.83    9.20 
  -1  -3   1  243.13    9.00 
  -1  -3   1  243.78    9.03 
   1  -3  -1  250.92    9.32 
   1  -3  -1  240.91    9.04 
  -1  -3   1  225.75    8.91 
  -1  -3   1  238.04    8.99 
  -1  -3   1  240.88    9.10 
  -1  -3   1  238.95    9.05 
  -1   3   1  239.22    8.88 
  -1   3   1  245.63    8.86 
   1   3  -1  251.22    9.03 
   1   3  -1  241.17    9.07 
  -1   3   1  243.30    9.08 
   1   3  -1  231.86    8.91 
  -1   3   1  244.71    8.92 
   1   3  -1  251.16    9.04 
  -1   3   1  246.41    9.22 
  -1   3   1  238.74    9.11 
  -1   3   1  247.93    8.90 
   1   3  -1  239.06    9.01 
  -1   3   1  248.32    9.23 
   1   3  -1  249.17    9.23 
   1   3  -1  238.79    9.27 
  -1   3   1  237.03    8.80 
  -1   3   1  235.40    8.82 
   1   3  -1  235.34    8.92 
  -1   3   1  246.44    9.12 
   1   3  -1  249.12    9.11 
   1   3  -1  246.66    9.03 
   1   3  -1  234.14    9.18 
   1   3  -1  236.45    9.00 
  -1   3   1  246.72    9.09 
  -1   3   1  243.28    8.84 
  -1   3   1  243.98    8.99 
   1   3  -1  228.61    9.15 
   1   3  -1  243.73    9.14 
   1   3  -1  239.81    9.15 
   1   3  -1  243.14    9.19 
  -1   3   1  236.51    9.07 
   0  -3   1   92.58    3.84 
   0  -3  -1   90.90    3.77 
   0  -3  -1   88.87    3.52 
   0  -3   1   93.36    3.41 
   0  -3  -1  100.32    3.70 
   0  -3  -1   90.69    3.61 
   0  -3   1   93.49    3.77 
   0  -3   1   94.08    3.74 
   0  -3   1   92.31    3.67 
   0  -3   1   93.10    3.77 
   0  -3  -1   95.71    3.70 
   0  -3  -1   81.05    3.91 
   0  -3  -1   93.54    3.75 
   0  -3  -1   89.14    3.79 
   0  -3  -1   90.36    3.76 
   0  -3   1   88.83    3.59 
   0  -3   1   91.48    3.85 
   0  -3  -1   94.88    3.36 
   0  -3  -1   95.15    3.75 
   0  -3   1   89.53    3.65 
   0  -3   1   90.89    3.53 
   0  -3  -1   90.58    3.77 
   0  -3   1   93.63    3.84 
   0  -3   1   84.13    4.10 
   0   3   1   92.86    3.52 
   0   3  -1   93.09    3.66 
   0   3   1   90.83    3.44 
   0   3   1   87.35    3.63 
   0   3   1   92.29    3.49 
   0   3   1   92.83    3.35 
   0   3   1   93.65    3.77 
   0   3   1   95.67    3.63 
   0   3  -1   90.78    3.51 
   0   3  -1   90.93    3.51 
   0   3  -1   92.89    3.57 
   0   3   1   86.52    3.73 
   0   3  -1   91.46    3.72 
   0   3  -1   90.52    3.73 
   0   3   1   91.08    3.58 
   0   3  -1   93.82    3.80 
   0   3   1   91.15    3.82 
   0   3  -1   92.19    3.49 
   0   3  -1   89.34    3.36 
   0   3  -1   92.94    3.59 
   0   3  -1   92.50    3.65 
   0   3  -1   91.15    3.64 
   0   3  -1   92.61    3.63 
   0   3   1   91.51    3.74 
   0   3   1   93.61    3.61 
   0   3  -1   91.85    3.77 
   0   3  -1   87.75    3.72 
   0   3  -1   91.50    3.46 
   0   3   1   91.92    3.63 
   0   3   1   86.20    3.65 
   0   3   1   93.16    3.65 
   0   3  -1   88.56    3.75 
   0   3   1   92.33    3.73 
   1  -3   1  505.64   18.58 
  -1  -3  -1  518.98   18.69 
   1  -3   1  504.83   18.66 
   1  -3   1  531.48   18.57 
  -1  -3  -1  514.05   18.79 
  -1  -3  -1  504.48   18.84 
  -1  -3  -1  514.11   18.92 
  -1  -3  -1  496.65   18.65 
   1  -3   1  518.57   18.91 
  -1  -3  -1  500.46   18.94 
   1  -3   1  518.99   18.87 
  -1  -3  -1  501.39   18.61 
   1  -3   1  507.60   18.81 
  -1  -3  -1  555.55   18.95 
  -1  -3  -1  508.15   18.70 
   1  -3   1  525.06   18.84 
  -1  -3  -1  512.44   18.73 
  -1  -3  -1  520.47   18.82 
  -1  -3  -1  515.28   18.57 
  -1  -3  -1  498.94   18.81 
  -1  -3  -1  503.31   18.96 
   1  -3   1  519.91   18.73 
  -1  -3  -1  505.80   18.66 
  -1  -3  -1  519.75   19.07 
   1  -3   1  497.59   18.96 
  -1  -3  -1  523.33   18.94 
  -1  -3  -1  533.77   18.87 
  -1   3  -1  516.86   18.59 
  -1   3  -1  509.27   18.91 
   1   3   1  512.80   18.80 
  -1   3  -1  525.49   18.90 
   1   3   1  492.50   18.93 
   1   3   1  513.63   18.57 
   1   3   1  513.82   19.01 
  -1   3  -1  515.00   18.63 
  -1   3  -1  528.53   18.51 
  -1   3  -1  515.09   18.81 
   1   3   1  518.78   18.81 
   1   3   1  523.20   18.70 
  -1   3  -1  508.19   18.53 
  -1   3  -1  521.82   18.65 
   1   3   1  514.63   18.87 
  -1   3  -1  487.06   18.57 
   1   3   1  507.16   18.60 
  -1   3  -1  480.29   18.66 
   1   3   1  519.64   18.86 
   1   3   1  520.05   18.95 
   1   3   1  526.32   18.89 
   1   3   1  513.12   18.75 
  -1   3  -1  511.85   19.02 
   1   3   1  513.77   18.72 
  -1   3  -1  511.15   18.80 
  -1   3  -1  521.15   18.71 
  -1   3  -1  512.38   18.97 
  -1   3  -1  505.24   18.88 
  -1   3  -1  505.29   18.98 
   1   3   1  503.88   18.88 
   1   3   1  504.69   18.66 
   1   3   1  515.85   18.92 
  -1   3  -1  510.10   18.61 
   1   3   1  500.59   18.85 
   2  -3   1  232.48    9.06 
   2  -3   1  234.50    8.91 
   2  -3   1  243.48    8.87 
  -2  -3  -1  241.89    9.37 
   2  -3   1  232.42    8.83 
  -2  -3  -1  240.91    8.98 
  -2  -3  -1  228.13    9.08 
  -2  -3  -1  234.94    9.00 
   2  -3   1  229.93    8.80 
   2  -3   1  239.96    8.90 
  -2  -3  -1  239.41    9.00 
  -2  -3  -1  229.32    8.93 
   2  -3   1  229.43    8.57 
  -2  -3  -1  234.23    9.00 
   2  -3   1  234.09    8.74 
   2  -3   1  248.66    8.85 
  -2  -3  -1  232.57    8.82 
  -2  -3  -1  235.81    8.88 
  -2  -3  -1  232.21    8.84 
  -2  -3  -1  229.57    9.02 
  -2  -3  -1  223.21    8.97 
  -2  -3  -1  238.06    8.78 
  -2  -3  -1  250.51    9.04 
   2   3   1  230.89    8.83 
   2   3   1  238.04    8.96 
  -2   3  -1  235.08    8.76 
  -2   3  -1  234.22    8.81 
  -2   3  -1  238.71    8.80 
  -2   3  -1  223.13    9.19 
  -2   3  -1  233.33    8.80 
   2   3   1  228.33    9.00 
  -2   3  -1  230.45    8.80 
   2   3   1  231.06    8.90 
  -2   3  -1  231.47    8.84 
   2   3   1  233.37    9.01 
  -2   3  -1  234.02    8.88 
  -2   3  -1  236.67    8.53 
   2   3   1  233.50    8.85 
   2   3   1  234.49    8.79 
  -2   3  -1  231.76    8.55 
  -2   3  -1  228.00    8.59 
  -2   3  -1  235.94    8.95 
   2   3   1  233.83    8.94 
  -2   3  -1  234.52    8.77 
   2   3   1  238.68    9.00 
  -2   3  -1  228.73    8.94 
   2   3   1  239.99    9.20 
  -2   3  -1  230.94    8.79 
   2   3   1  233.49    9.08 
  -2   3  -1  232.22    8.86 
  -2   3  -1  238.76    8.59 
   2   3   1  241.50    9.01 
   2   3   1  230.37    8.99 
  -2   3  -1  233.55    8.96 
  -2   3  -1  237.30    8.72 
   2   3   1  240.10    8.88 
   3  -3   1  206.73    7.82 
   3  -3   1  206.83    7.67 
  -3  -3  -1  205.17    8.23 
  -3  -3  -1  195.16    8.00 
   3  -3   1  208.51    7.65 
   3  -3   1  202.06    7.82 
  -3  -3  -1  201.20    7.96 
   3  -3   1  205.26    7.94 
  -3  -3  -1  201.51    8.01 
  -3  -3  -1  206.14    7.88 
  -3  -3  -1  208.66    7.92 
   3  -3   1  198.75    8.03 
  -3  -3  -1  206.20    7.94 
  -3  -3  -1  200.08    7.90 
   3  -3   1  209.52    7.69 
  -3  -3  -1  207.72    8.20 
  -3   3  -1  205.62    8.30 
   3   3   1  208.08    7.91 
  -3   3  -1  210.46    7.88 
   3   3   1  202.03    7.93 
   3   3   1  200.41    7.98 
  -3   3  -1  199.68    7.72 
  -3   3  -1  176.67    7.76 
   3   3   1  204.36    8.00 
   3   3   1  192.50    7.86 
   3   3   1  200.82    8.00 
  -3   3  -1  205.88    7.86 
  -3   3  -1  206.64    7.80 
  -3   3  -1  202.38    7.54 
  -3   3  -1  190.60    7.80 
   3   3   1  212.11    7.96 
   3   3   1  203.28    8.06 
  -3   3  -1  201.64    7.72 
  -3   3  -1  200.07    7.58 
   3   3   1  207.85    8.04 
  -3   3  -1  205.87    7.57 
   3   3   1  204.66    7.81 
   3   3   1  209.43    7.88 
  -3   3  -1  203.04    7.87 
  -3   3  -1  204.59    7.68 
   3   3   1  207.64    8.02 
  -3   3  -1  209.16    7.65 
  -3   3  -1  205.88    7.42 
  -3   3  -1  204.38    7.99 
  -4  -3  -1   75.65    3.70 
  -4  -3  -1   85.60    3.76 
   4  -3   1   83.57    3.64 
  -4  -3  -1   79.67    3.68 
  -4  -3  -1   84.87    4.10 
   4  -3   1   83.10    3.54 
   4  -3   1   85.77    3.28 
   4  -3   1   85.96    3.28 
  -4  -3  -1   79.88    3.58 
   4  -3   1   83.28    3.66 
   4  -3   1   82.29    3.62 
   4  -3   1   80.73    3.74 
  -4  -3  -1   80.47    3.66 
  -4  -3  -1   80.88    3.94 
   4  -3   1   84.74    3.41 
   4  -3   1   74.64    3.29 
   4  -3   1   72.96    3.72 
   4  -3   1   81.94    3.47 
  -4  -3  -1   81.04    3.54 
   4  -3   1   82.81    3.85 
  -4   3  -1   85.78    3.71 
  -4   3  -1   81.69    3.45 
  -4   3  -1   84.23    3.22 
   4   3   1   82.81    3.81 
   4   3   1   86.79    3.69 
  -4   3  -1   82.43    3.23 
  -4   3  -1   83.85    3.49 
   4   3   1   80.39    3.53 
  -4   3  -1   80.42    3.43 
   4   3   1   78.06    3.67 
  -4   3  -1   83.03    3.49 
   4   3   1   86.05    3.79 
   4   3   1   87.75    3.75 
  -4   3  -1   74.84    3.41 
   4   3   1   81.23    3.72 
  -4   3  -1   78.23    3.27 
   4   3   1   82.89    3.75 
   4   3   1   81.94    3.73 
  -4   3  -1   80.50    3.39 
   4   3   1   82.52    3.42 
  -4   3  -1   78.75    3.45 
  -4   3  -1   78.91    3.30 
   4   3   1   80.68    3.78 
   4   3   1   83.79    3.65 
  -4   3  -1   82.44    3.14 
  -4   3  -1   85.89    3.41 
   5  -3   1   61.61    3.02 
  -5  -3  -1   58.39    2.99 
  -5  -3  -1   59.08    2.98 
   5  -3   1   61.03    2.74 
   5  -3   1   59.39    2.69 
   5  -3   1   60.71    2.42 
  -5  -3  -1   61.80    3.06 
   5  -3   1   56.63    3.10 
   5  -3   1   60.07    2.83 
   5  -3   1   61.50    3.23 
  -5  -3  -1   60.77    3.48 
  -5  -3  -1   62.72    2.78 
   5  -3   1   60.23    2.59 
   5  -3   1   59.13    2.97 
   5  -3   1   59.84    3.00 
   5  -3   1   54.46    3.05 
  -5  -3  -1   57.95    3.27 
  -5  -3  -1   54.64    2.78 
  -5  -3  -1   59.96    3.07 
   5   3   1   64.49    3.10 
   5   3   1   53.69    2.88 
   5   3   1   63.84    3.02 
   5   3   1   56.60    3.00 
   5   3   1   60.56    3.13 
  -5   3  -1   59.30    2.33 
  -5   3  -1   59.22    2.45 
   5   3   1   63.75    3.20 
  -5   3  -1   58.29    2.64 
   5   3   1   57.22    3.08 
  -5   3  -1   60.77    3.06 
  -5   3  -1   58.41    2.63 
  -5   3  -1   60.38    2.66 
  -5   3  -1   61.24    2.77 
   5   3   1   58.76    2.75 
  -5   3  -1   55.59    2.33 
   5   3   1   63.26    3.10 
  -5   3  -1   58.83    2.27 
  -5   3  -1   59.65    3.47 
   5   3   1   63.77    3.05 
  -5   3  -1   59.81    2.49 
   5   3   1   57.00    3.00 
  -5   3  -1   61.37    2.70 
  -5   3  -1   62.04    2.74 
  -5   3  -1   62.95    2.56 
  -5   3  -1   60.62    2.45 
  -5   3  -1   59.84    2.30 
  -5   3  -1   60.06    2.73 
   5   3   1   59.62    2.58 
   6  -3   1   91.17    4.16 
   6  -3   1   99.44    4.49 
  -6  -3  -1   96.15    5.07 
   6  -3   1   96.28    4.12 
   6  -3   1   89.87    3.93 
  -6  -3  -1   95.39    4.11 
   6  -3   1   91.62    4.35 
   6  -3   1   98.61    4.65 
  -6  -3  -1   93.38    4.36 
  -6  -3  -1   87.17    4.33 
   6  -3   1   93.92    4.48 
  -6  -3  -1   93.92    4.40 
   6  -3   1   93.08    4.69 
   6  -3   1   93.81    4.43 
   6  -3   1   93.73    3.91 
  -6  -3  -1   89.31    4.72 
  -6  -3  -1   97.00    4.49 
  -6  -3  -1   92.37    3.97 
  -6   3  -1   89.19    3.95 
  -6   3  -1   96.72    5.09 
  -6   3  -1   95.60    4.16 
   6   3   1   89.81    4.56 
   6   3   1   93.64    4.45 
  -6   3  -1   89.36    3.68 
   6   3   1   91.96    4.30 
   6   3   1   95.14    4.35 
  -6   3  -1   93.44    3.82 
   6   3   1   90.80    4.55 
   6   3   1   91.76    4.49 
   6   3   1   87.79    4.37 
   6   3   1   92.69    3.73 
  -6   3  -1   93.15    4.02 
   6   3   1   96.11    4.49 
   6   3   1   89.03    4.40 
   6   3   1   96.79    4.03 
  -6   3  -1   90.49    4.47 
  -6   3  -1   90.11    4.09 
   6   3   1   94.00    4.43 
   7  -3   1   17.54    1.21 
   7  -3   1   18.29    1.60 
  -7  -3  -1   19.15    1.91 
  -7  -3  -1   17.97    1.77 
   7  -3   1   19.26    1.66 
  -7  -3  -1   22.36    1.99 
  -7  -3  -1   20.05    1.36 
   7  -3   1   22.31    1.75 
   7  -3   1   16.21    1.36 
  -7  -3  -1   19.56    1.60 
   7  -3   1   18.92    1.41 
   7  -3   1   19.24    1.76 
   7  -3   1   18.60    1.57 
  -7  -3  -1   16.87    2.23 
  -7  -3  -1   18.07    1.55 
   7   3   1   15.62    1.87 
   7   3   1   21.03    1.65 
  -7   3  -1   18.23    1.39 
   7   3   1   21.42    1.73 
  -7   3  -1   16.88    1.61 
   7   3   1   19.00    1.50 
  -7   3  -1   18.84    1.32 
   7   3   1   19.04    1.63 
   7   3   1   18.80    1.92 
   7   3   1   20.85    1.83 
  -7   3  -1   19.78    2.09 
   7   3   1   20.02    1.62 
   7   3   1   22.89    1.79 
  -7   3  -1   18.34    2.04 
  -7   3  -1   21.17    1.37 
   7   3   1   15.68    1.71 
   8  -3   1   47.00    2.94 
  -8  -3  -1   46.16    2.88 
   8  -3   1   43.34    2.65 
   8  -3   1   46.97    3.19 
  -8  -3  -1   48.43    3.37 
  -8  -3  -1   49.69    3.70 
   8  -3   1   47.56    3.04 
  -8  -3  -1   45.04    2.86 
   8  -3   1   47.80    2.73 
   8  -3   1   50.69    3.15 
  -8  -3  -1   45.41    2.93 
  -8  -3  -1   46.93    2.91 
   8  -3   1   47.08    3.00 
  -8   3  -1   45.94    3.06 
   8   3   1   44.93    2.98 
  -8   3  -1   43.69    3.55 
   8   3   1   45.00    2.89 
  -8   3  -1   42.78    3.49 
   8   3   1   52.16    3.29 
   8   3   1   49.92    3.26 
   8   3   1   47.78    2.69 
   8   3   1   47.91    3.01 
  -8   3  -1   47.28    2.53 
   8   3   1   43.28    2.88 
   8   3   1   44.85    2.84 
  -8   3  -1   45.50    2.63 
   8   3   1   46.69    3.00 
   9  -3   1   12.71    1.84 
  -9  -3  -1   13.71    1.77 
  -9  -3  -1   14.94    2.51 
   9  -3   1   10.42    1.59 
   9  -3   1   12.12    1.57 
  -9  -3  -1   19.87    2.54 
   9  -3   1   16.31    1.88 
  -9  -3  -1   15.28    1.88 
  -9  -3  -1   14.48    2.20 
   9  -3   1   14.86    2.12 
  -9  -3  -1   15.68    1.89 
  -9  -3  -1   14.59    1.82 
   9   3   1   14.50    1.92 
   9   3   1   14.68    1.79 
   9   3   1   15.64    2.14 
   9   3   1   16.69    2.03 
  -9   3  -1   15.20    2.05 
  -9   3  -1   17.81    2.70 
  -9   3  -1   17.73    1.76 
  -9   3  -1   16.54    2.36 
   9   3   1   13.49    1.79 
   9   3   1   14.66    1.90 
   9   3   1   12.09    1.72 
   9   3   1   14.36    2.07 
  -9   3  -1   12.86    2.32 
  -9  -4   1   10.84    1.89 
   9  -4  -1   11.25    1.79 
  -9  -4   1   11.69    1.71 
   9  -4  -1   10.29    1.98 
  -9  -4   1    9.79    1.82 
  -9  -4   1    7.07    1.28 
  -9  -4   1    8.96    1.97 
   9  -4  -1    9.94    1.47 
   9  -4  -1   11.51    1.67 
  -9  -4   1   11.09    1.61 
   9  -4  -1   11.09    1.69 
  -9   4   1   10.25    1.80 
   9   4  -1   11.78    1.86 
  -9   4   1    9.88    1.65 
  -9   4   1    9.91    1.94 
   9   4  -1    9.37    1.52 
   9   4  -1   10.28    1.60 
  -9   4   1    9.83    2.05 
   9   4  -1   11.10    1.49 
   9   4  -1    7.73    1.42 
   9   4  -1   12.80    1.69 
   9   4  -1    7.99    1.49 
   9   4  -1   12.39    1.82 
   9   4  -1    9.30    1.63 
  -8  -4   1   12.85    1.67 
  -8  -4   1    8.74    1.34 
   8  -4  -1   12.18    1.50 
   8  -4  -1    9.40    1.46 
   8  -4  -1    9.90    1.63 
   8  -4  -1   14.14    1.46 
  -8  -4   1   13.01    1.62 
  -8  -4   1   13.56    1.92 
  -8  -4   1   13.48    1.39 
   8  -4  -1   12.48    1.43 
  -8  -4   1   12.70    2.12 
  -8  -4   1   11.17    1.82 
   8  -4  -1    8.68    1.32 
   8   4  -1   10.13    1.42 
   8   4  -1    8.63    1.44 
   8   4  -1   10.38    1.59 
   8   4  -1   11.15    1.55 
  -8   4   1   13.32    1.73 
  -8   4   1   10.43    1.84 
  -8   4   1   10.22    1.87 
   8   4  -1   11.64    1.57 
  -8   4   1   12.28    1.35 
  -8   4   1   11.80    1.33 
   8   4  -1   15.53    1.86 
   8   4  -1   13.43    1.73 
  -8   4   1   12.62    1.86 
   8   4  -1   13.53    1.71 
   8   4  -1   10.01    1.62 
   8   4  -1    7.11    1.19 
  -7  -4   1    2.97    0.71 
  -7  -4   1    4.51    0.90 
   7  -4  -1    4.24    0.91 
   7  -4  -1    5.17    0.81 
   7  -4  -1    3.50    0.73 
   7  -4  -1    4.66    1.01 
   7  -4  -1    4.96    0.91 
  -7  -4   1    4.43    0.78 
  -7  -4   1    3.54    0.93 
  -7  -4   1    5.36    1.30 
   7  -4  -1    3.74    0.84 
  -7  -4   1    5.27    1.17 
  -7  -4   1    4.12    0.92 
   7   4  -1    4.41    0.93 
   7   4  -1    3.71    0.85 
  -7   4   1    5.68    1.04 
  -7   4   1    4.64    0.71 
   7   4  -1    5.27    0.97 
   7   4  -1    3.88    0.88 
   7   4  -1    3.95    0.81 
  -7   4   1    2.86    0.59 
  -7   4   1    4.00    0.73 
   7   4  -1    4.01    0.92 
  -7   4   1    3.05    0.91 
   7   4  -1    6.87    1.16 
   7   4  -1    4.87    1.00 
   7   4  -1    3.92    0.87 
  -7   4   1    5.75    1.31 
   7   4  -1    4.48    0.93 
  -7   4   1    4.61    1.07 
  -6  -4   1    3.11    0.67 
  -6  -4   1    3.11    0.70 
   6  -4  -1    5.41    0.85 
   6  -4  -1    3.83    0.81 
   6  -4  -1    4.27    0.76 
  -6  -4   1    2.69    0.65 
  -6  -4   1    2.93    0.67 
  -6  -4   1    2.98    0.78 
  -6  -4   1    3.29    0.89 
   6  -4  -1    3.37    0.62 
  -6  -4   1    4.40    0.73 
   6  -4  -1    4.38    0.75 
   6  -4  -1    5.18    0.90 
   6  -4  -1    3.42    0.65 
   6  -4  -1    5.22    0.74 
  -6  -4   1    4.28    0.95 
  -6  -4   1    4.96    0.90 
  -6   4   1    4.05    0.65 
  -6   4   1    4.57    0.53 
   6   4  -1    6.07    0.99 
   6   4  -1    4.92    0.87 
  -6   4   1    5.39    0.68 
  -6   4   1    4.62    0.89 
  -6   4   1    5.03    0.67 
  -6   4   1    4.45    0.73 
   6   4  -1    3.72    0.73 
   6   4  -1    4.95    0.93 
   6   4  -1    3.99    0.85 
   6   4  -1    4.84    0.71 
   6   4  -1    3.83    0.82 
  -6   4   1    4.17    1.04 
  -6   4   1    4.28    0.98 
  -6   4   1    4.89    0.65 
  -6   4   1    4.30    0.62 
   6   4  -1    4.44    0.66 
  -6   4   1    5.00    0.96 
   6   4  -1    3.80    0.74 
   6   4  -1    4.92    0.94 
  -6   4   1    4.43    0.86 
   6   4  -1    4.53    0.90 
   6   4  -1    4.16    0.84 
   5  -4  -1   23.42    1.74 
  -5  -4   1   23.43    1.90 
  -5  -4   1   21.45    1.72 
   5  -4  -1   20.72    1.56 
  -5  -4   1   22.19    1.53 
  -5  -4   1   19.78    1.61 
  -5  -4   1   19.17    1.56 
  -5  -4   1   20.86    1.54 
  -5  -4   1   21.95    1.43 
  -5  -4   1   20.67    1.37 
   5  -4  -1   23.37    1.43 
   5  -4  -1   20.17    1.48 
   5  -4  -1   20.07    1.37 
  -5  -4   1   21.44    1.55 
   5  -4  -1   21.57    1.47 
  -5  -4   1   19.26    1.44 
   5  -4  -1   23.02    1.38 
   5   4  -1   21.21    1.35 
  -5   4   1   20.95    1.25 
  -5   4   1   22.20    1.36 
   5   4  -1   19.61    1.58 
  -5   4   1   20.79    1.63 
  -5   4   1   19.95    1.62 
   5   4  -1   20.94    1.38 
   5   4  -1   22.77    1.62 
  -5   4   1   21.71    1.28 
   5   4  -1   23.86    1.63 
  -5   4   1   24.07    1.57 
  -5   4   1   20.26    1.74 
   5   4  -1   20.48    1.53 
  -5   4   1   21.70    1.22 
  -5   4   1   21.46    1.08 
  -5   4   1   21.21    1.38 
  -5   4   1   22.03    1.22 
  -5   4   1   21.40    1.31 
  -5   4   1   20.65    1.36 
  -5   4   1   21.74    1.54 
   5   4  -1   21.01    1.57 
   5   4  -1   22.69    1.54 
  -5   4   1   21.47    1.76 
   5   4  -1   20.46    1.48 
   5   4  -1   21.59    1.59 
   5   4  -1   19.23    1.51 
   5   4  -1   20.70    1.54 
   4  -4  -1   13.06    1.03 
  -4  -4   1   15.24    1.16 
   4  -4  -1   15.76    1.02 
   4  -4  -1   13.86    1.19 
  -4  -4   1   12.98    1.07 
  -4  -4   1   12.37    1.04 
   4  -4  -1   13.48    1.09 
  -4  -4   1   15.91    1.18 
   4  -4  -1   14.70    0.91 
   4  -4  -1   14.86    1.06 
  -4  -4   1   15.90    1.31 
   4  -4  -1   15.22    1.11 
   4  -4  -1   13.98    0.97 
  -4  -4   1   13.23    1.16 
  -4  -4   1   13.37    1.05 
  -4  -4   1   14.24    1.18 
   4  -4  -1   13.38    0.89 
  -4  -4   1   12.48    1.25 
  -4   4   1   13.22    0.79 
  -4   4   1   14.35    1.05 
   4   4  -1   14.58    1.07 
   4   4  -1   14.33    1.17 
  -4   4   1   14.19    0.96 
  -4   4   1   14.82    0.92 
  -4   4   1   14.90    0.90 
  -4   4   1   15.39    0.83 
  -4   4   1   15.19    0.90 
  -4   4   1   13.96    0.84 
  -4   4   1   13.07    1.04 
   4   4  -1   14.25    1.13 
   4   4  -1   15.84    1.18 
  -4   4   1   14.58    1.04 
  -4   4   1   14.10    1.16 
   4   4  -1   13.84    1.09 
  -4   4   1   13.87    0.93 
   4   4  -1   14.16    1.05 
  -4   4   1   14.04    1.10 
   4   4  -1   13.68    1.13 
   4   4  -1   12.91    1.29 
   4   4  -1   14.40    1.10 
  -4   4   1   13.82    1.24 
  -4   4   1   14.77    0.77 
   4   4  -1   15.19    1.10 
   4   4  -1   16.56    1.25 
  -4   4   1   16.00    1.21 
  -4   4   1   13.23    1.22 
  -4   4   1   13.49    1.01 
   4   4  -1   14.87    1.23 
  -3  -4   1    5.92    0.74 
  -3  -4   1    7.38    0.87 
   3  -4  -1    6.35    0.66 
  -3  -4   1    7.41    0.83 
  -3  -4   1    6.58    0.78 
   3  -4  -1    7.75    0.68 
   3  -4  -1    7.51    0.74 
   3  -4  -1    6.45    0.73 
   3  -4  -1    7.45    0.65 
   3  -4  -1    5.88    0.72 
  -3  -4   1    7.06    0.93 
  -3  -4   1    7.10    0.85 
  -3  -4   1    7.03    0.83 
   3  -4  -1    7.36    0.60 
  -3  -4   1    6.21    0.76 
  -3  -4   1    6.84    0.89 
   3   4  -1    7.06    0.86 
   3   4  -1    7.94    0.87 
   3   4  -1    4.85    0.71 
  -3   4   1    6.03    0.65 
   3   4  -1    6.00    0.77 
  -3   4   1    7.76    0.78 
   3   4  -1    5.87    0.67 
   3   4  -1    8.06    0.85 
   3   4  -1    7.13    0.66 
  -3   4   1    6.49    0.80 
  -3   4   1    5.90    0.76 
   3   4  -1    6.85    0.78 
  -3   4   1    7.62    0.66 
  -3   4   1    6.78    0.50 
   3   4  -1    7.14    0.77 
  -3   4   1    7.16    0.71 
  -3   4   1    7.84    0.60 
  -3   4   1    7.44    0.58 
   3   4  -1    6.68    0.88 
  -3   4   1    7.38    0.76 
   3   4  -1    8.55    0.94 
  -3   4   1    7.20    0.53 
  -3   4   1    6.06    0.77 
  -3   4   1    6.51    0.50 
  -3   4   1    5.88    0.71 
   3   4  -1    8.51    0.83 
  -3   4   1    7.38    0.77 
  -3   4   1    5.14    0.88 
  -3   4   1    7.11    0.45 
  -3   4   1    9.54    0.92 
   2  -4  -1    3.26    0.47 
   2  -4  -1    2.63    0.48 
  -2  -4   1    2.92    0.52 
  -2  -4   1    3.25    0.53 
   2  -4  -1    3.20    0.53 
  -2  -4   1    3.20    0.50 
  -2  -4   1    3.50    0.55 
   2  -4  -1    3.55    0.71 
   2  -4  -1    3.02    0.42 
  -2  -4   1    3.39    0.40 
  -2  -4   1    3.29    0.50 
   2  -4  -1    4.50    0.72 
  -2  -4   1    3.36    0.49 
   2  -4  -1    2.97    0.45 
  -2  -4   1    2.46    0.37 
  -2  -4   1    3.04    0.50 
  -2  -4   1    3.48    0.59 
  -2  -4   1    4.22    0.63 
  -2  -4   1    2.89    0.42 
  -2  -4   1    3.60    0.66 
  -2  -4   1    3.50    0.46 
  -2   4   1    4.46    0.58 
   2   4  -1    2.39    0.49 
  -2   4   1    4.03    0.56 
   2   4  -1    3.01    0.50 
   2   4  -1    3.54    0.60 
  -2   4   1    1.88    0.44 
  -2   4   1    4.63    0.70 
  -2   4   1    3.74    0.45 
  -2   4   1    3.63    0.35 
  -2   4   1    4.07    0.51 
  -2   4   1    3.80    0.47 
  -2   4   1    3.06    0.43 
   2   4  -1    2.56    0.45 
  -2   4   1    3.61    0.46 
  -2   4   1    3.94    0.61 
  -2   4   1    4.04    0.39 
  -2   4   1    3.88    0.49 
  -2   4   1    3.07    0.55 
   2   4  -1    2.91    0.53 
  -2   4   1    3.84    0.40 
  -2   4   1    2.70    0.43 
  -2   4   1    3.39    0.35 
   2   4  -1    2.42    0.48 
   2   4  -1    4.15    0.55 
   2   4  -1    3.70    0.54 
  -2   4   1    3.41    0.42 
   2   4  -1    2.93    0.40 
   2   4  -1    2.43    0.43 
  -2   4   1    4.28    0.38 
   2   4  -1    2.88    0.50 
  -2   4   1    5.62    0.75 
  -2   4   1    3.31    0.41 
   2   4  -1    1.79    0.42 
   2   4  -1    3.07    0.43 
  -1  -4   1    2.63    0.41 
  -1  -4   1    3.08    0.54 
  -1  -4   1    2.75    0.22 
  -1  -4   1    3.05    0.52 
  -1  -4   1    3.01    0.56 
  -1  -4   1    2.32    0.47 
   1  -4  -1    4.46    0.69 
   1  -4  -1    2.52    0.48 
   1  -4  -1    3.95    0.62 
  -1  -4   1    3.13    0.50 
  -1  -4   1    2.69    0.55 
  -1  -4   1    2.91    0.40 
  -1  -4   1    3.40    0.39 
   1  -4  -1    1.74    0.39 
  -1  -4   1    2.44    0.24 
  -1  -4   1    3.31    0.47 
  -1  -4   1    2.63    0.37 
  -1  -4   1    2.81    0.32 
   1  -4  -1    1.40    0.45 
   1  -4  -1    2.56    0.39 
   1  -4  -1    3.74    0.56 
   1   4  -1    2.99    0.43 
  -1   4   1    3.08    0.38 
  -1   4   1    2.60    0.22 
  -1   4   1    2.82    0.52 
   1   4  -1    2.81    0.39 
   1   4  -1    2.19    0.44 
  -1   4   1    3.29    0.34 
  -1   4   1    2.74    0.47 
   1   4  -1    2.89    0.33 
   1   4  -1    2.95    0.43 
   1   4  -1    2.41    0.49 
  -1   4   1    2.82    0.29 
   1   4  -1    3.23    0.42 
  -1   4   1    2.96    0.41 
   1   4  -1    3.84    0.59 
  -1   4   1    1.98    0.47 
  -1   4   1    2.42    0.48 
  -1   4   1    3.63    0.29 
  -1   4   1    2.83    0.26 
  -1   4   1    2.73    0.44 
   1   4  -1    2.71    0.43 
  -1   4   1    2.75    0.32 
  -1   4   1    2.92    0.44 
  -1   4   1    2.85    0.21 
  -1   4   1    2.66    0.60 
   1   4  -1    2.58    0.31 
   1   4  -1    3.13    0.42 
  -1   4   1    3.20    0.38 
   1   4  -1    2.10    0.48 
   1   4  -1    2.53    0.38 
   0  -4  -1   19.83    1.11 
   0  -4   1   19.17    1.23 
   0  -4   1   18.69    1.06 
   0  -4  -1   18.77    1.20 
   0  -4  -1   20.64    1.02 
   0  -4  -1   22.39    1.30 
   0  -4  -1   22.35    1.29 
   0  -4   1   22.29    1.26 
   0  -4   1   18.48    1.12 
   0  -4   1   19.13    1.14 
   0  -4  -1   21.45    1.32 
   0  -4   1   20.50    1.14 
   0  -4  -1   19.08    1.15 
   0  -4   1   21.75    1.35 
   0  -4   1   20.58    1.15 
   0  -4   1   19.43    0.84 
   0  -4   1   20.36    1.31 
   0  -4   1   19.23    1.03 
   0  -4  -1   20.49    1.25 
   0  -4  -1   17.97    1.10 
   0   4   1   20.21    1.14 
   0   4   1   17.38    1.21 
   0   4  -1   18.59    1.04 
   0   4  -1   20.44    0.99 
   0   4   1   19.81    1.29 
   0   4  -1   19.76    1.24 
   0   4   1   19.11    0.96 
   0   4  -1   20.29    1.20 
   0   4  -1   18.02    1.23 
   0   4   1   19.14    0.91 
   0   4  -1   19.75    0.94 
   0   4   1   20.87    1.02 
   0   4  -1   20.21    1.04 
   0   4  -1   19.90    0.92 
   0   4  -1   21.00    1.01 
   0   4  -1   18.93    0.82 
   0   4   1   20.36    1.08 
   0   4   1   17.24    1.07 
   0   4  -1   19.18    1.12 
   0   4   1   19.84    1.22 
   0   4   1   19.15    1.09 
   0   4   1   19.47    0.99 
   0   4  -1   19.66    1.12 
   0   4   1   20.85    1.24 
   0   4  -1   19.66    1.04 
  -1  -4  -1   48.48    2.26 
   1  -4   1   48.69    1.92 
  -1  -4  -1   48.59    2.36 
  -1  -4  -1   50.00    2.09 
   1  -4   1   49.33    2.17 
   1  -4   1   54.04    2.27 
  -1  -4  -1   50.40    2.29 
  -1  -4  -1   50.49    2.02 
  -1  -4  -1   52.67    2.43 
  -1  -4  -1   47.57    1.94 
   1  -4   1   47.87    1.92 
  -1  -4  -1   50.23    2.42 
  -1  -4  -1   51.35    2.06 
  -1  -4  -1   49.66    2.26 
   1  -4   1   47.33    2.36 
   1  -4   1   51.38    2.44 
  -1  -4  -1   48.04    2.42 
  -1  -4  -1   46.33    2.37 
  -1  -4  -1   47.17    2.07 
   1  -4   1   49.43    2.34 
   1  -4   1   47.40    2.29 
  -1  -4  -1   48.96    2.17 
  -1   4  -1   52.50    2.61 
  -1   4  -1   50.65    1.88 
  -1   4  -1   48.40    1.98 
  -1   4  -1   50.09    1.99 
  -1   4  -1   47.83    2.12 
  -1   4  -1   44.78    2.36 
   1   4   1   49.16    1.95 
   1   4   1   50.77    2.17 
  -1   4  -1   48.42    2.09 
   1   4   1   48.32    2.37 
  -1   4  -1   48.42    1.95 
   1   4   1   45.57    2.29 
   1   4   1   46.02    2.34 
  -1   4  -1   44.50    2.32 
  -1   4  -1   48.59    1.95 
   1   4   1   49.06    1.94 
  -1   4  -1   48.08    2.03 
  -1   4  -1   48.77    2.17 
   1   4   1   47.14    2.42 
  -1   4  -1   46.97    2.02 
   1   4   1   46.82    2.11 
   1   4   1   50.13    2.09 
  -1   4  -1   47.67    2.20 
   1   4   1   47.35    2.23 
   1   4   1   48.53    2.29 
   1   4   1   48.05    2.42 
  -1   4  -1   49.19    1.97 
   1   4   1   50.89    2.32 
  -2  -4  -1   88.07    3.75 
  -2  -4  -1   86.56    3.61 
  -2  -4  -1   82.32    3.78 
   2  -4   1   81.59    3.66 
  -2  -4  -1   85.74    3.79 
   2  -4   1   86.22    3.73 
   2  -4   1   84.64    3.61 
   2  -4   1   89.96    3.91 
  -2  -4  -1   86.22    3.48 
   2  -4   1   91.24    3.59 
  -2  -4  -1   83.35    3.53 
   2  -4   1   85.85    3.48 
   2  -4   1   89.19    3.67 
  -2  -4  -1   91.26    3.78 
  -2  -4  -1   85.76    3.68 
  -2  -4  -1   89.29    3.76 
  -2  -4  -1   84.27    3.69 
  -2  -4  -1   86.69    3.83 
   2  -4   1   91.17    3.42 
  -2  -4  -1   84.49    3.82 
  -2  -4  -1   86.57    3.44 
   2  -4   1   85.91    3.47 
  -2  -4  -1   87.46    4.02 
  -2   4  -1   74.66    3.40 
  -2   4  -1   85.18    3.33 
   2   4   1   84.00    3.48 
  -2   4  -1   85.82    4.24 
   2   4   1   83.57    3.44 
  -2   4  -1   82.22    3.44 
   2   4   1   85.79    3.73 
  -2   4  -1   85.90    3.40 
  -2   4  -1   86.89    3.36 
   2   4   1   83.26    3.76 
   2   4   1   90.70    3.84 
  -2   4  -1   84.13    3.75 
   2   4   1   84.15    3.67 
   2   4   1   85.22    3.79 
  -2   4  -1   79.04    3.72 
  -2   4  -1   83.34    3.48 
  -2   4  -1   87.00    3.73 
  -2   4  -1   89.10    3.29 
  -2   4  -1   86.93    3.77 
   2   4   1   84.60    3.72 
  -2   4  -1   82.97    3.46 
   2   4   1   87.65    3.59 
   2   4   1   84.96    3.63 
   2   4   1   86.42    3.78 
  -2   4  -1   83.49    3.50 
  -2   4  -1   81.06    3.46 
   2   4   1   83.96    3.56 
   2   4   1   88.40    3.96 
  -2   4  -1   83.75    3.45 
  -2   4  -1   88.24    3.36 
  -2   4  -1   86.90    3.28 
   3  -4   1    7.33    0.78 
   3  -4   1    7.02    0.70 
   3  -4   1    5.84    0.65 
   3  -4   1    6.50    0.83 
   3  -4   1    6.80    0.42 
   3  -4   1    6.83    0.60 
  -3  -4  -1    7.36    0.86 
  -3  -4  -1    6.05    0.88 
   3  -4   1    7.01    0.80 
   3  -4   1    6.27    0.73 
  -3  -4  -1    8.03    0.92 
  -3  -4  -1    5.90    0.81 
  -3  -4  -1    5.89    0.85 
  -3  -4  -1    8.61    0.93 
  -3  -4  -1    7.50    0.88 
  -3  -4  -1    7.20    0.83 
  -3  -4  -1    7.43    0.82 
   3   4   1    8.26    0.89 
  -3   4  -1    6.69    0.80 
  -3   4  -1    8.32    0.50 
  -3   4  -1    8.72    0.91 
   3   4   1    7.47    0.69 
  -3   4  -1    7.83    1.07 
   3   4   1    6.77    0.71 
   3   4   1    7.19    0.88 
   3   4   1    6.75    0.83 
   3   4   1    7.29    0.78 
   3   4   1    7.08    0.88 
  -3   4  -1    7.34    0.71 
  -3   4  -1    7.76    0.44 
  -3   4  -1    7.55    0.37 
   3   4   1    7.78    0.95 
  -3   4  -1    7.78    0.65 
  -3   4  -1    7.22    0.71 
  -3   4  -1    6.19    0.78 
   3   4   1    5.65    0.74 
   3   4   1    7.30    0.87 
   3   4   1    8.42    0.94 
  -3   4  -1    6.95    0.46 
  -3   4  -1    7.11    0.47 
   3   4   1    6.58    0.75 
  -3   4  -1    5.78    0.77 
  -3   4  -1    8.19    0.79 
  -4  -4  -1   13.91    1.11 
   4  -4   1   11.61    0.93 
  -4  -4  -1   12.51    1.28 
   4  -4   1    9.94    0.96 
  -4  -4  -1   10.10    1.08 
  -4  -4  -1   10.58    1.18 
   4  -4   1   12.55    1.09 
   4  -4   1   11.22    0.89 
   4  -4   1   14.45    0.88 
  -4  -4  -1   11.07    1.18 
  -4  -4  -1   11.54    0.98 
   4  -4   1   13.41    0.84 
  -4  -4  -1    8.56    0.99 
  -4  -4  -1   11.26    1.32 
  -4   4  -1   13.07    0.99 
  -4   4  -1   12.44    0.80 
   4   4   1   11.41    0.95 
   4   4   1    9.77    1.04 
  -4   4  -1   11.29    0.61 
  -4   4  -1   11.34    0.79 
   4   4   1   10.75    1.07 
   4   4   1   11.74    1.22 
   4   4   1    8.95    1.08 
   4   4   1    9.91    1.11 
  -4   4  -1   12.12    1.00 
  -4   4  -1   12.26    0.97 
   4   4   1   11.47    1.24 
   4   4   1   10.43    1.08 
  -4   4  -1   12.32    0.80 
   4   4   1   10.62    1.18 
  -4   4  -1   12.28    0.87 
  -4   4  -1   12.02    0.54 
   4   4   1   12.54    0.95 
  -4   4  -1   10.89    0.70 
  -4   4  -1   12.34    0.98 
   4   4   1   13.28    1.11 
   4   4   1   10.55    0.97 
  -4   4  -1   11.73    0.53 
  -4   4  -1   13.02    1.28 
  -4   4  -1   11.68    0.74 
  -5  -4  -1   29.97    1.89 
  -5  -4  -1   26.74    1.73 
   5  -4   1   26.03    1.49 
  -5  -4  -1   25.59    1.67 
  -5  -4  -1   26.24    1.98 
  -5  -4  -1   25.41    2.06 
  -5  -4  -1   24.81    1.61 
   5  -4   1   26.70    1.35 
   5  -4   1   27.82    1.56 
  -5  -4  -1   26.29    1.83 
   5  -4   1   23.69    1.75 
  -5  -4  -1   22.98    1.69 
   5  -4   1   27.03    1.70 
   5  -4   1   26.38    1.86 
  -5   4  -1   21.90    1.59 
   5   4   1   27.82    1.74 
  -5   4  -1   25.60    1.54 
  -5   4  -1   27.35    1.38 
   5   4   1   25.92    1.79 
   5   4   1   25.66    1.51 
   5   4   1   28.24    1.68 
   5   4   1   25.77    1.74 
   5   4   1   26.73    1.80 
  -5   4  -1   24.44    1.53 
   5   4   1   25.72    1.81 
  -5   4  -1   25.35    1.09 
  -5   4  -1   23.97    1.67 
   5   4   1   29.14    1.78 
  -5   4  -1   23.56    1.60 
  -5   4  -1   26.55    1.42 
  -5   4  -1   27.14    1.52 
   5   4   1   27.06    1.86 
   5   4   1   29.24    1.89 
   5   4   1   26.12    1.79 
  -5   4  -1   25.54    1.29 
   5   4   1   28.23    1.91 
  -5   4  -1   26.95    2.12 
  -6  -4  -1   55.80    3.14 
  -6  -4  -1   57.30    2.89 
  -6  -4  -1   60.77    3.75 
   6  -4   1   58.56    2.98 
  -6  -4  -1   59.82    3.29 
   6  -4   1   55.38    3.09 
  -6  -4  -1   54.32    3.17 
   6  -4   1   58.41    2.79 
   6  -4   1   61.60    3.33 
  -6  -4  -1   55.50    2.96 
   6  -4   1   59.12    2.84 
  -6  -4  -1   60.51    3.16 
   6  -4   1   51.19    3.02 
   6  -4   1   57.66    3.35 
  -6  -4  -1   63.73    3.61 
  -6   4  -1   60.53    2.70 
   6   4   1   60.33    3.36 
  -6   4  -1   59.06    2.85 
  -6   4  -1   60.62    2.80 
   6   4   1   53.39    3.23 
   6   4   1   60.11    2.72 
  -6   4  -1   61.68    2.76 
   6   4   1   60.69    3.23 
  -6   4  -1   59.26    3.01 
   6   4   1   60.80    3.27 
  -6   4  -1   61.95    3.79 
   6   4   1   63.98    2.96 
   6   4   1   59.84    3.21 
   6   4   1   59.28    3.24 
   6   4   1   59.04    3.15 
  -6   4  -1   63.66    2.88 
   6   4   1   62.53    3.29 
  -6   4  -1   55.93    2.84 
   6   4   1   55.73    3.06 
  -6   4  -1   53.51    3.57 
   6   4   1   61.32    3.33 
  -6   4  -1   60.28    3.21 
  -7  -4  -1   35.26    2.70 
   7  -4   1   35.88    2.09 
   7  -4   1   36.35    2.39 
  -7  -4  -1   29.34    2.72 
  -7  -4  -1   35.14    2.34 
  -7  -4  -1   39.07    2.30 
  -7  -4  -1   34.50    2.41 
  -7  -4  -1   30.93    2.05 
  -7  -4  -1   36.88    2.41 
  -7  -4  -1   35.33    2.41 
   7  -4   1   31.13    2.32 
   7  -4   1   35.27    2.50 
   7  -4   1   32.12    2.13 
   7  -4   1   36.10    2.35 
   7   4   1   37.17    2.45 
  -7   4  -1   33.53    2.37 
  -7   4  -1   36.30    2.89 
  -7   4  -1   34.54    2.03 
   7   4   1   41.13    2.56 
   7   4   1   34.19    2.29 
   7   4   1   33.96    2.41 
   7   4   1   33.84    2.36 
   7   4   1   36.60    2.51 
   7   4   1   36.02    2.51 
   7   4   1   31.01    2.20 
  -7   4  -1   34.34    1.90 
   7   4   1   39.34    2.63 
   7   4   1   37.20    2.39 
  -7   4  -1   35.39    2.90 
  -8  -4  -1  105.79    5.23 
   8  -4   1  103.88    5.47 
  -8  -4  -1  105.88    5.30 
  -8  -4  -1   97.73    5.09 
  -8  -4  -1   97.24    5.16 
   8  -4   1  100.09    5.20 
  -8  -4  -1  107.99    5.73 
   8  -4   1  103.84    4.96 
  -8  -4  -1  104.79    5.74 
  -8  -4  -1  102.92    6.04 
   8  -4   1  102.47    5.17 
   8   4   1   98.15    5.27 
  -8   4  -1  105.13    5.33 
  -8   4  -1  102.79    6.02 
   8   4   1  104.58    5.48 
   8   4   1  102.53    5.36 
   8   4   1  107.37    5.24 
  -8   4  -1  103.88    5.68 
   8   4   1  104.97    5.05 
   8   4   1  101.10    5.22 
   8   4   1  103.45    5.13 
  -8   4  -1  112.42    6.25 
   8   4   1  112.69    5.62 
   8   4   1  104.17    5.31 
  -8   4  -1  105.57    4.79 
   8   4   1  108.36    5.32 
  -9  -4  -1   29.71    2.33 
  -9  -4  -1   27.16    2.90 
   9  -4   1   26.66    2.89 
   9  -4   1   27.63    2.38 
   9  -4   1   28.63    2.18 
  -9  -4  -1   28.62    2.32 
  -9  -4  -1   29.92    2.40 
   9  -4   1   24.39    2.18 
  -9  -4  -1   24.23    2.46 
  -9  -4  -1   30.08    2.73 
  -9  -4  -1   29.15    2.72 
   9   4   1   29.81    2.16 
   9   4   1   28.24    2.33 
   9   4   1   25.49    2.64 
   9   4   1   30.98    2.35 
   9   4   1   30.63    2.61 
  -9   4  -1   28.24    2.74 
   9   4   1   34.92    2.59 
   9   4   1   28.02    2.45 
   9   4   1   28.07    2.53 
  -9   4  -1   32.42    3.16 
  -9   4  -1   23.82    2.26 
   9   4   1   25.71    2.61 
  -9   4  -1   27.88    2.92 
  -9  -5   1   68.07    4.54 
  -9  -5   1   67.91    4.06 
  -9  -5   1   69.95    4.43 
  -9  -5   1   66.39    4.08 
  -9  -5   1   68.58    4.86 
   9  -5  -1   67.02    3.99 
  -9  -5   1   64.62    3.92 
   9   5  -1   71.47    4.16 
   9   5  -1   68.53    3.92 
   9   5  -1   66.64    4.24 
  -9   5   1   76.45    5.01 
  -9   5   1   60.78    4.27 
   9   5  -1   73.39    4.23 
   9   5  -1   66.82    4.18 
   9   5  -1   62.25    3.85 
   9   5  -1   60.86    3.88 
  -9   5   1   67.25    4.69 
  -9   5   1   60.74    4.24 
   9   5  -1   67.66    4.08 
   9   5  -1   64.03    4.03 
  -8  -5   1    8.76    1.57 
  -8  -5   1    6.11    1.15 
  -8  -5   1    5.93    1.46 
  -8  -5   1    4.15    0.99 
  -8  -5   1    7.40    1.50 
  -8  -5   1    5.95    1.22 
  -8  -5   1    7.56    1.13 
   8  -5  -1    4.78    1.04 
   8   5  -1    8.31    1.37 
   8   5  -1    6.83    1.31 
  -8   5   1    7.16    1.31 
   8   5  -1    4.88    1.05 
  -8   5   1    5.81    1.43 
   8   5  -1    7.31    1.31 
   8   5  -1    5.76    1.20 
   8   5  -1    4.92    1.14 
  -8   5   1    6.37    1.36 
  -8   5   1    7.19    1.62 
   8   5  -1    7.85    1.29 
   8   5  -1    6.01    1.24 
   8   5  -1    7.16    1.35 
   8   5  -1    6.07    1.12 
  -7  -5   1   73.14    3.81 
   7  -5  -1   74.83    3.97 
  -7  -5   1   71.87    3.68 
  -7  -5   1   68.39    3.81 
   7  -5  -1   72.01    3.78 
  -7  -5   1   66.60    3.99 
  -7  -5   1   72.20    4.47 
  -7  -5   1   66.15    4.13 
  -7  -5   1   72.33    3.95 
   7   5  -1   68.11    3.71 
   7   5  -1   70.08    3.93 
   7   5  -1   67.54    3.81 
  -7   5   1   72.52    4.39 
   7   5  -1   65.91    3.78 
  -7   5   1   67.55    3.76 
  -7   5   1   72.43    3.51 
   7   5  -1   70.29    3.87 
  -7   5   1   69.05    4.26 
   7   5  -1   70.04    3.93 
   7   5  -1   70.74    3.90 
  -7   5   1   77.43    4.16 
   7   5  -1   76.45    3.85 
   7   5  -1   69.34    3.99 
   7   5  -1   66.94    3.88 
  -6  -5   1   43.80    2.84 
  -6  -5   1   44.10    2.69 
  -6  -5   1   38.23    2.53 
  -6  -5   1   44.76    2.59 
  -6  -5   1   37.99    2.85 
   6  -5  -1   41.85    2.54 
  -6  -5   1   41.33    2.36 
  -6  -5   1   37.89    2.41 
  -6  -5   1   41.27    2.44 
  -6   5   1   40.37    2.46 
   6   5  -1   44.28    2.73 
   6   5  -1   41.71    2.53 
   6   5  -1   35.88    2.32 
   6   5  -1   37.90    2.39 
  -6   5   1   37.63    2.12 
  -6   5   1   38.47    2.20 
  -6   5   1   44.07    2.92 
   6   5  -1   38.53    2.54 
  -6   5   1   37.71    2.24 
   6   5  -1   41.17    2.31 
   6   5  -1   39.52    2.54 
  -6   5   1   40.80    2.03 
  -6   5   1   39.23    2.76 
  -6   5   1   36.54    2.54 
   6   5  -1   35.65    2.43 
   6   5  -1   36.53    2.48 
  -6   5   1   39.36    2.00 
  -6   5   1   37.30    2.16 
   6   5  -1   41.11    2.58 
   6   5  -1   37.75    2.46 
   6   5  -1   43.81    2.27 
  -5  -5   1  235.42    9.83 
   5  -5  -1  237.97    8.99 
  -5  -5   1  216.91    9.25 
  -5  -5   1  232.91    9.41 
   5  -5  -1  236.55    9.20 
  -5  -5   1  221.93    9.39 
  -5  -5   1  228.76    9.62 
  -5  -5   1  221.83    9.29 
  -5  -5   1  213.85    9.07 
  -5  -5   1  226.45    9.27 
   5  -5  -1  222.18    9.38 
  -5  -5   1  228.10    9.20 
   5   5  -1  241.28    9.49 
   5   5  -1  228.07    9.30 
  -5   5   1  226.86    8.74 
   5   5  -1  230.67    9.43 
  -5   5   1  230.44    8.69 
   5   5  -1  214.30    9.18 
  -5   5   1  230.56    8.97 
  -5   5   1  234.83    9.11 
   5   5  -1  230.31    9.25 
  -5   5   1  227.72    9.65 
   5   5  -1  223.41    9.37 
   5   5  -1  221.05    9.13 
   5   5  -1  233.53    9.13 
   5   5  -1  216.73    9.27 
   5   5  -1  224.93    9.34 
  -5   5   1  230.49    8.87 
  -5   5   1  226.37    9.20 
  -5   5   1  240.29    9.10 
  -5   5   1  236.16    9.41 
  -5   5   1  230.32    9.10 
   5   5  -1  231.22    9.19 
  -5   5   1  223.25    9.10 
   5   5  -1  220.14    9.46 
  -5   5   1  230.28    9.61 
   4  -5  -1   62.53    3.13 
  -4  -5   1   58.99    3.08 
  -4  -5   1   59.40    3.03 
   4  -5  -1   61.45    2.98 
  -4  -5   1   64.03    3.16 
  -4  -5   1   60.72    3.19 
   4  -5  -1   61.95    2.93 
  -4  -5   1   61.81    3.08 
  -4  -5   1   60.16    3.17 
  -4  -5   1   65.40    3.13 
  -4  -5   1   60.41    3.27 
   4  -5  -1   64.35    2.73 
   4  -5  -1   62.13    2.96 
  -4  -5   1   59.37    3.34 
   4  -5  -1   60.11    2.83 
   4   5  -1   62.83    3.25 
  -4   5   1   62.35    2.81 
   4   5  -1   60.39    2.98 
  -4   5   1   62.00    3.09 
  -4   5   1   63.31    2.64 
   4   5  -1   64.69    3.22 
  -4   5   1   63.34    3.09 
  -4   5   1   63.77    2.73 
  -4   5   1   63.62    3.18 
   4   5  -1   63.08    3.10 
   4   5  -1   62.16    3.12 
   4   5  -1   61.39    3.20 
   4   5  -1   61.43    3.05 
  -4   5   1   66.73    3.28 
  -4   5   1   55.88    2.93 
   4   5  -1   59.72    3.03 
   4   5  -1   61.19    3.12 
  -4   5   1   65.93    2.54 
  -4   5   1   61.83    3.05 
  -4   5   1   67.45    2.72 
   4   5  -1   61.46    3.26 
  -4   5   1   64.35    3.35 
  -4   5   1   61.01    2.51 
   4   5  -1   62.36    2.96 
  -4   5   1   66.46    3.05 
  -4   5   1   62.77    2.92 
   4   5  -1   64.36    3.12 
  -4   5   1   63.28    2.82 
  -4   5   1   64.32    3.11 
   3  -5  -1  134.73    5.65 
   3  -5  -1  144.13    5.75 
  -3  -5   1  140.07    5.75 
  -3  -5   1  140.64    5.94 
   3  -5  -1  134.79    5.52 
  -3  -5   1  141.12    5.61 
  -3  -5   1  135.28    5.87 
  -3  -5   1  139.61    5.89 
   3  -5  -1  137.02    5.76 
  -3  -5   1  138.16    5.87 
   3  -5  -1  141.54    5.57 
   3  -5  -1  143.41    5.63 
  -3  -5   1  131.74    5.76 
  -3  -5   1  139.51    5.73 
  -3  -5   1  132.92    5.88 
  -3   5   1  136.24    5.83 
   3   5  -1  138.44    5.83 
   3   5  -1  134.76    5.81 
  -3   5   1  133.17    5.39 
  -3   5   1  139.98    5.28 
   3   5  -1  136.57    5.63 
   3   5  -1  138.77    5.75 
  -3   5   1  131.40    5.47 
   3   5  -1  139.10    5.68 
  -3   5   1  135.39    5.70 
  -3   5   1  134.69    5.27 
  -3   5   1  139.32    5.64 
   3   5  -1  133.89    5.89 
  -3   5   1  138.59    5.73 
   3   5  -1  139.47    5.93 
  -3   5   1  140.34    5.61 
   3   5  -1  142.97    5.93 
  -3   5   1  144.95    6.13 
   3   5  -1  141.55    5.69 
  -3   5   1  137.74    5.49 
  -3   5   1  136.34    5.22 
   3   5  -1  139.22    5.54 
  -3   5   1  138.21    5.73 
  -3   5   1  135.66    5.37 
  -3   5   1  133.10    5.42 
  -3   5   1  134.48    5.82 
   3   5  -1  140.42    5.87 
  -3   5   1  132.58    5.35 
  -3   5   1  135.64    5.28 
  -2  -5   1   12.12    0.76 
  -2  -5   1   11.72    0.92 
  -2  -5   1   11.84    1.22 
   2  -5  -1   12.77    1.05 
   2  -5  -1   11.34    1.42 
  -2  -5   1   11.94    0.78 
  -2  -5   1   11.91    1.00 
   2  -5  -1   11.31    0.84 
  -2  -5   1   11.50    0.89 
   2  -5  -1   11.05    0.82 
  -2  -5   1   10.84    0.89 
  -2  -5   1   11.51    0.95 
  -2  -5   1   12.52    0.72 
  -2  -5   1   11.45    1.20 
  -2  -5   1   10.59    1.10 
   2  -5  -1   12.64    1.03 
  -2  -5   1   11.86    0.97 
   2  -5  -1   12.69    0.96 
  -2   5   1   12.18    0.73 
  -2   5   1   13.63    0.90 
   2   5  -1   11.52    1.20 
  -2   5   1   12.37    1.05 
  -2   5   1   13.05    1.12 
  -2   5   1   12.32    0.70 
   2   5  -1   11.24    0.80 
  -2   5   1   12.31    0.77 
  -2   5   1   10.42    0.67 
   2   5  -1   12.06    0.91 
  -2   5   1   11.89    0.77 
   2   5  -1   11.56    0.87 
  -2   5   1   14.27    0.96 
   2   5  -1   13.16    1.01 
  -2   5   1   12.58    0.78 
   2   5  -1   12.87    0.94 
  -2   5   1   12.06    0.76 
  -2   5   1   11.23    0.66 
  -2   5   1   13.80    1.12 
   2   5  -1   10.19    1.12 
   2   5  -1   11.51    0.77 
  -2   5   1   13.43    1.02 
  -2   5   1    9.02    1.19 
  -2   5   1   12.17    0.70 
   2   5  -1   12.26    1.03 
  -2   5   1   11.54    0.79 
   2   5  -1   12.64    1.25 
  -2   5   1   12.36    1.24 
  -2   5   1   12.09    0.71 
   2   5  -1   12.20    1.04 
  -1  -5   1   70.92    3.36 
  -1  -5   1   73.80    3.54 
   1  -5  -1   71.99    3.39 
   1  -5  -1   71.67    3.04 
  -1  -5   1   73.84    3.31 
   1  -5  -1   71.56    3.31 
   1  -5  -1   79.21    3.43 
  -1  -5   1   72.20    3.52 
  -1  -5   1   70.56    3.26 
  -1  -5   1   74.24    3.17 
  -1  -5   1   73.71    3.01 
  -1  -5   1   68.44    3.40 
   1  -5  -1   74.85    3.47 
  -1  -5   1   72.04    3.18 
  -1  -5   1   70.47    3.47 
  -1   5   1   72.71    2.94 
   1   5  -1   69.82    3.19 
   1   5  -1   71.36    3.46 
   1   5  -1   76.07    3.13 
  -1   5   1   72.31    2.97 
  -1   5   1   68.97    2.85 
   1   5  -1   74.12    3.09 
   1   5  -1   74.22    3.13 
  -1   5   1   77.12    3.38 
   1   5  -1   77.22    3.10 
  -1   5   1   73.60    3.24 
   1   5  -1   66.68    3.26 
   1   5  -1   78.51    3.50 
  -1   5   1   74.74    3.16 
  -1   5   1   71.87    3.12 
  -1   5   1   74.39    3.46 
  -1   5   1   77.57    2.98 
  -1   5   1   73.34    3.48 
   1   5  -1   66.81    3.09 
   1   5  -1   71.83    2.92 
  -1   5   1   74.32    2.92 
   1   5  -1   70.49    2.90 
   1   5  -1   68.60    3.39 
  -1   5   1   76.82    3.07 
  -1   5   1   74.00    2.86 
   0  -5  -1    9.65    1.17 
   0  -5  -1    9.49    0.69 
   0  -5  -1    9.07    0.97 
   0  -5   1   11.60    1.04 
   0  -5  -1    9.55    0.85 
   0  -5   1    8.34    1.01 
   0  -5  -1   10.17    0.86 
   0  -5  -1   10.49    0.79 
   0  -5  -1    9.75    1.07 
   0  -5  -1    9.13    0.87 
   0  -5   1    9.84    0.75 
   0  -5   1   10.36    0.83 
   0  -5   1    9.06    0.99 
   0  -5   1    9.00    1.36 
   0  -5   1   10.50    0.76 
   0  -5  -1   10.30    0.83 
   0  -5  -1   10.14    0.78 
   0  -5   1    8.97    0.99 
   0  -5  -1    9.85    1.05 
   0   5  -1    9.91    0.66 
   0   5   1   10.70    0.66 
   0   5   1    9.33    0.58 
   0   5   1    8.71    1.01 
   0   5  -1    9.37    0.68 
   0   5   1    9.29    0.85 
   0   5   1    8.71    0.70 
   0   5  -1    9.52    0.46 
   0   5  -1    9.52    0.60 
   0   5   1    9.87    0.78 
   0   5  -1    9.92    0.73 
   0   5   1   10.28    1.06 
   0   5  -1    8.46    1.04 
   0   5   1    8.12    1.03 
   0   5  -1    9.92    0.80 
   0   5  -1    9.74    0.55 
   0   5  -1   10.30    0.68 
   0   5  -1    8.38    0.98 
   0   5   1    9.88    0.74 
   0   5  -1    9.67    0.66 
   0   5   1   10.00    0.81 
   0   5  -1    8.06    0.84 
   0   5  -1    8.45    1.00 
   0   5  -1   10.50    0.72 
   0   5  -1    9.92    0.83 
   0   5   1    9.86    0.64 
  -1  -5  -1  247.59   10.24 
   1  -5   1  258.31   10.13 
   1  -5   1  260.09   10.00 
  -1  -5  -1  249.65    9.89 
  -1  -5  -1  259.05   10.08 
  -1  -5  -1  254.14   10.03 
  -1  -5  -1  257.69   10.33 
   1  -5   1  261.73   10.30 
  -1  -5  -1  262.54    9.76 
  -1  -5  -1  267.32   10.09 
   1  -5   1  274.00   10.11 
   1  -5   1  256.30   10.18 
  -1  -5  -1  265.76   10.23 
  -1  -5  -1  273.49    9.86 
  -1  -5  -1  283.88   10.50 
   1  -5   1  256.56   10.14 
  -1  -5  -1  267.31   10.74 
  -1   5  -1  257.14    9.76 
  -1   5  -1  262.18   10.18 
   1   5   1  250.78    9.77 
  -1   5  -1  253.83    9.86 
   1   5   1  259.73   10.07 
   1   5   1  266.71   10.28 
   1   5   1  268.12    9.87 
  -1   5  -1  258.71    9.91 
   1   5   1  259.10   10.30 
  -1   5  -1  261.59    9.69 
  -1   5  -1  281.35   10.09 
  -1   5  -1  263.55    9.67 
   1   5   1  270.12   10.30 
  -1   5  -1  255.56   10.30 
   1   5   1  262.59   10.11 
   1   5   1  259.12   10.00 
   1   5   1  260.68   10.13 
   1   5   1  258.95    9.54 
   1   5   1  249.12   10.28 
   1   5   1  263.09    9.85 
  -1   5  -1  256.24   10.28 
  -1   5  -1  263.49    9.68 
  -1   5  -1  260.09    9.60 
   1   5   1  266.34   10.06 
  -1   5  -1  262.70   10.22 
   2  -5   1   42.65    1.91 
  -2  -5  -1   44.29    2.42 
   2  -5   1   45.57    2.23 
  -2  -5  -1   42.51    2.27 
  -2  -5  -1   45.59    1.96 
  -2  -5  -1   43.00    2.24 
  -2  -5  -1   43.79    1.92 
   2  -5   1   50.03    2.21 
  -2  -5  -1   44.89    2.01 
  -2  -5  -1   41.39    2.30 
  -2  -5  -1   41.23    2.29 
  -2  -5  -1   43.53    2.14 
  -2  -5  -1   45.50    2.19 
  -2  -5  -1   44.05    2.38 
   2  -5   1   49.30    2.56 
   2  -5   1   48.63    2.40 
  -2  -5  -1   46.49    2.45 
  -2  -5  -1   40.78    2.34 
   2  -5   1   44.85    2.28 
   2  -5   1   36.58    2.21 
  -2   5  -1   42.87    2.29 
  -2   5  -1   41.99    1.89 
  -2   5  -1   45.14    2.40 
  -2   5  -1   43.93    1.96 
   2   5   1   42.72    1.91 
   2   5   1   42.52    2.07 
  -2   5  -1   44.48    1.82 
  -2   5  -1   45.50    2.10 
  -2   5  -1   43.12    2.30 
   2   5   1   44.12    2.49 
   2   5   1   45.12    2.34 
   2   5   1   47.07    2.32 
  -2   5  -1   45.34    2.03 
   2   5   1   41.52    2.21 
   2   5   1   41.78    2.32 
  -2   5  -1   41.96    1.97 
  -2   5  -1   41.74    2.04 
  -2   5  -1   42.95    1.95 
   2   5   1   43.21    2.11 
  -2   5  -1   44.51    2.38 
  -2   5  -1   42.99    1.87 
   2   5   1   41.04    2.35 
  -2   5  -1   45.84    1.83 
  -2   5  -1   44.25    2.40 
  -2   5  -1   45.25    1.99 
   2   5   1   44.33    1.94 
  -2   5  -1   42.64    1.83 
  -2   5  -1   34.20    2.58 
  -2   5  -1   42.43    2.45 
  -2   5  -1   47.07    1.94 
   2   5   1   39.30    2.09 
   2   5   1   44.17    2.35 
  -2   5  -1   42.98    1.81 
  -2   5  -1   44.81    2.11 
   2   5   1   43.98    2.40 
   3  -5   1  266.44   10.49 
   3  -5   1  277.26   10.37 
  -3  -5  -1  267.72   10.56 
  -3  -5  -1  263.10   10.58 
   3  -5   1  278.38   10.32 
   3  -5   1  262.99    9.83 
  -3  -5  -1  273.49   10.62 
  -3  -5  -1  269.21   10.56 
  -3  -5  -1  272.50   10.56 
   3  -5   1  265.29   10.47 
   3  -5   1  274.11   10.22 
  -3  -5  -1  268.83   10.39 
  -3  -5  -1  262.97   10.48 
  -3  -5  -1  256.85   10.65 
  -3  -5  -1  275.59   11.10 
  -3  -5  -1  264.15   10.49 
   3   5   1  271.55   10.23 
  -3   5  -1  266.66   10.55 
  -3   5  -1  268.98   10.04 
  -3   5  -1  265.50   10.55 
  -3   5  -1  270.36   10.30 
  -3   5  -1  263.35    9.74 
   3   5   1  265.39   10.32 
   3   5   1  271.93   10.60 
  -3   5  -1  262.02    9.93 
  -3   5  -1  276.93   10.12 
  -3   5  -1  270.17    9.85 
   3   5   1  250.62   10.55 
   3   5   1  271.80   10.56 
  -3   5  -1  259.19   10.22 
   3   5   1  276.57   10.52 
  -3   5  -1  262.45    9.85 
  -3   5  -1  261.63    9.85 
   3   5   1  262.37   10.61 
   3   5   1  266.82   10.31 
  -3   5  -1  269.35    9.76 
  -3   5  -1  263.13    9.85 
  -3   5  -1  272.56   10.55 
  -3   5  -1  272.58   11.23 
   3   5   1  262.39   10.40 
   3   5   1  262.25   10.15 
   3   5   1  271.86   10.63 
  -3   5  -1  265.11   10.48 
   3   5   1  270.65   10.50 
  -4  -5  -1   39.13    2.45 
  -4  -5  -1   40.20    2.49 
  -4  -5  -1   40.34    2.30 
   4  -5   1   40.28    2.29 
  -4  -5  -1   43.81    2.30 
   4  -5   1   42.38    2.19 
   4  -5   1   41.61    2.05 
  -4  -5  -1   41.19    2.34 
  -4  -5  -1   40.45    2.36 
  -4  -5  -1   38.90    2.28 
   4  -5   1   39.76    2.17 
   4  -5   1   41.19    2.05 
  -4  -5  -1   39.68    2.35 
  -4   5  -1   40.00    1.68 
   4   5   1   38.48    2.35 
  -4   5  -1   35.52    2.18 
   4   5   1   38.43    2.34 
  -4   5  -1   40.47    2.66 
   4   5   1   37.67    2.25 
   4   5   1   39.59    2.10 
  -4   5  -1   39.93    2.07 
   4   5   1   43.11    2.33 
  -4   5  -1   42.59    2.28 
  -4   5  -1   38.90    1.68 
   4   5   1   43.17    2.25 
  -4   5  -1   37.91    1.72 
   4   5   1   38.95    2.38 
   4   5   1   41.27    2.20 
   4   5   1   37.96    2.16 
   4   5   1   39.67    2.22 
  -4   5  -1   40.43    2.26 
   4   5   1   37.90    2.33 
   4   5   1   41.07    2.34 
  -4   5  -1   38.80    2.23 
   5  -5   1  101.42    4.60 
  -5  -5  -1   93.27    4.67 
  -5  -5  -1   97.85    4.63 
  -5  -5  -1   98.51    4.99 
  -5  -5  -1   95.48    4.69 
   5  -5   1   99.72    4.69 
  -5  -5  -1   96.70    4.55 
   5  -5   1  108.55    4.46 
  -5  -5  -1   96.52    4.57 
   5  -5   1   98.16    4.14 
  -5  -5  -1   98.69    4.53 
  -5  -5  -1   93.79    4.88 
   5  -5   1  101.44    4.36 
   5  -5   1  101.54    4.19 
   5   5   1   96.58    4.54 
  -5   5  -1  100.70    4.19 
   5   5   1  100.73    4.48 
  -5   5  -1   94.12    4.09 
   5   5   1   97.66    4.72 
   5   5   1   97.24    4.68 
   5   5   1   93.89    4.48 
  -5   5  -1  102.11    4.46 
   5   5   1  102.20    4.55 
  -5   5  -1   95.85    4.44 
  -5   5  -1   98.39    4.43 
  -5   5  -1   99.01    3.95 
   5   5   1   99.25    4.80 
  -5   5  -1   94.56    5.04 
  -5   5  -1   96.53    4.51 
   5   5   1   96.29    4.70 
  -5   5  -1   94.31    4.39 
   5   5   1  102.19    4.40 
   5   5   1   96.01    4.70 
  -5   5  -1  104.08    4.09 
   5   5   1   99.09    4.69 
   5   5   1   99.66    4.58 
  -6  -5  -1    2.96    0.71 
  -6  -5  -1    3.04    0.73 
  -6  -5  -1    3.40    0.91 
  -6  -5  -1    5.65    1.19 
   6  -5   1    3.37    0.79 
   6  -5   1    2.56    0.72 
   6  -5   1    3.73    0.65 
  -6  -5  -1    3.48    0.77 
  -6  -5  -1    2.44    0.71 
  -6  -5  -1    3.56    0.85 
  -6  -5  -1    2.72    0.69 
  -6   5  -1    2.30    0.58 
  -6   5  -1    3.83    1.01 
   6   5   1    3.55    0.84 
  -6   5  -1    3.92    0.71 
  -6   5  -1    3.73    1.02 
  -6   5  -1    4.84    0.81 
  -6   5  -1    3.38    0.75 
  -6   5  -1    4.04    0.92 
  -6   5  -1    3.30    0.60 
   6   5   1    3.60    0.78 
   6   5   1    2.73    0.79 
   6   5   1    3.92    0.79 
   6   5   1    1.60    0.67 
   6   5   1    2.53    0.64 
   6   5   1    2.57    0.77 
   6   5   1    2.08    0.69 
   6   5   1    2.73    0.82 
  -6   5  -1    3.85    0.79 
   6   5   1    3.08    0.62 
   6   5   1    3.84    0.85 
   6   5   1    2.72    0.69 
  -7  -5  -1   28.78    2.10 
  -7  -5  -1   24.78    2.03 
  -7  -5  -1   27.13    2.48 
  -7  -5  -1   28.16    2.19 
  -7  -5  -1   27.01    2.36 
  -7  -5  -1   22.18    1.87 
  -7  -5  -1   29.12    1.90 
   7  -5   1   24.26    1.90 
  -7  -5  -1   24.88    2.18 
   7  -5   1   23.33    2.00 
  -7  -5  -1   27.14    1.93 
   7   5   1   23.66    2.07 
   7   5   1   28.49    2.04 
   7   5   1   26.01    2.11 
   7   5   1   29.93    2.20 
   7   5   1   23.69    2.07 
  -7   5  -1   24.73    1.95 
  -7   5  -1   27.32    1.68 
  -7   5  -1   23.66    2.33 
  -7   5  -1   26.75    2.23 
   7   5   1   25.78    2.08 
   7   5   1   29.20    2.11 
   7   5   1   26.63    1.97 
  -7   5  -1   27.84    2.55 
   7   5   1   20.22    1.85 
   7   5   1   23.93    2.00 
  -7   5  -1   27.15    1.90 
   8  -5   1    8.19    1.37 
  -8  -5  -1    9.98    1.48 
  -8  -5  -1    8.89    1.78 
   8  -5   1    8.21    1.43 
  -8  -5  -1    6.11    1.41 
  -8  -5  -1    8.92    1.43 
  -8  -5  -1    6.21    1.35 
  -8  -5  -1    7.75    1.38 
  -8  -5  -1   11.12    1.58 
   8   5   1   11.32    1.69 
   8   5   1    9.43    1.46 
   8   5   1    8.07    1.29 
  -8   5  -1    9.01    1.87 
  -8   5  -1    5.78    1.50 
   8   5   1   10.15    1.57 
  -8   5  -1    9.89    1.49 
   8   5   1    8.30    1.42 
   8   5   1    9.43    1.43 
   8   5   1    9.41    1.57 
  -8   5  -1   11.52    1.44 
  -8   5  -1    9.67    1.67 
   8   5   1    9.15    1.40 
   8   5   1    8.86    1.52 
   8   5   1    8.02    1.46 
   9  -5   1   29.90    2.53 
  -9  -5  -1   35.18    3.32 
  -9  -5  -1   29.66    2.59 
   9  -5   1   35.49    2.84 
  -9  -5  -1   37.65    3.08 
  -9  -5  -1   33.74    2.74 
  -9  -5  -1   35.01    3.09 
  -9  -5  -1   30.26    2.48 
   9   5   1   37.07    2.76 
   9   5   1   30.15    2.74 
   9   5   1   38.32    2.83 
   9   5   1   34.86    2.74 
   9   5   1   29.95    2.66 
   9   5   1   30.20    2.52 
   9   5   1   35.79    2.58 
   9   5   1   35.54    2.65 
  -9   5  -1   30.73    2.90 
   9   5   1   38.08    2.78 
  -9   5  -1   33.98    3.34 
   9   5   1   33.08    2.81 
  -9   5  -1   36.84    3.39 
  -8  -6   1   10.77    1.70 
  -8  -6   1    9.74    1.80 
  -8  -6   1   13.03    1.73 
  -8  -6   1    9.12    1.89 
  -8  -6   1   10.65    1.54 
  -8  -6   1   10.28    1.71 
  -8  -6   1   10.60    1.50 
   8   6  -1   12.25    1.80 
  -8   6   1   11.09    1.77 
   8   6  -1   11.74    1.58 
   8   6  -1   11.67    1.75 
   8   6  -1    7.98    1.41 
   8   6  -1    9.91    1.56 
   8   6  -1   12.46    1.85 
   8   6  -1   10.06    1.63 
  -8   6   1   12.79    2.07 
   8   6  -1   11.98    1.72 
   8   6  -1    9.98    1.48 
  -7  -6   1    0.66    0.56 
  -7  -6   1   -0.36    0.27 
  -7  -6   1    0.52    0.54 
  -7  -6   1   -0.22    0.48 
  -7  -6   1    0.23    0.50 
  -7  -6   1    0.08    0.36 
  -7  -6   1    0.02    0.45 
  -7  -6   1   -0.21    0.54 
   7   6  -1    0.02    0.44 
   7   6  -1    0.25    0.47 
   7   6  -1   -0.08    0.41 
   7   6  -1    0.08    0.39 
   7   6  -1   -0.29    0.47 
   7   6  -1   -0.18    0.41 
   7   6  -1    0.45    0.48 
  -7   6   1    0.28    0.59 
   7   6  -1   -0.05    0.40 
  -7   6   1   -0.02    0.39 
  -7   6   1    0.56    0.56 
   7   6  -1   -0.04    0.35 
  -7   6   1   -0.41    0.59 
  -6  -6   1   11.07    1.63 
  -6  -6   1   14.36    1.68 
  -6  -6   1   13.52    1.87 
  -6  -6   1   13.13    1.58 
  -6  -6   1   11.08    1.44 
  -6  -6   1   14.86    1.71 
  -6  -6   1   13.51    1.59 
  -6  -6   1   13.55    1.60 
   6   6  -1   13.52    1.66 
   6   6  -1   12.79    1.57 
  -6   6   1   11.91    1.35 
  -6   6   1   13.42    1.44 
   6   6  -1   14.85    1.71 
   6   6  -1   15.98    1.75 
   6   6  -1   16.80    1.60 
  -6   6   1   15.14    1.98 
  -6   6   1   14.58    1.57 
   6   6  -1   10.47    1.56 
  -6   6   1   13.54    1.61 
   6   6  -1   11.89    1.43 
  -6   6   1   14.12    1.31 
   6   6  -1   14.94    1.58 
   6   6  -1   14.19    1.70 
   6   6  -1   17.80    1.77 
   6   6  -1   14.51    1.52 
  -6   6   1   13.35    1.43 
  -5  -6   1    4.62    0.97 
  -5  -6   1    4.61    0.88 
  -5  -6   1    5.46    0.97 
  -5  -6   1    5.75    1.14 
   5  -6  -1    6.24    0.88 
  -5  -6   1    7.25    1.12 
  -5  -6   1    4.17    0.80 
  -5  -6   1    4.05    0.79 
  -5  -6   1    3.79    0.84 
  -5  -6   1    3.52    0.79 
   5  -6  -1    5.37    0.94 
  -5   6   1    4.81    0.87 
   5   6  -1    5.45    0.92 
  -5   6   1    5.64    0.87 
  -5   6   1    3.59    0.69 
  -5   6   1    5.26    0.82 
  -5   6   1    4.92    0.94 
   5   6  -1    3.67    0.89 
  -5   6   1    5.35    0.91 
  -5   6   1    4.71    0.88 
   5   6  -1    3.98    0.81 
  -5   6   1    5.20    0.90 
   5   6  -1    3.89    0.82 
   5   6  -1    5.25    0.99 
  -5   6   1    3.97    0.97 
   5   6  -1    3.91    0.87 
   5   6  -1    4.85    0.82 
   5   6  -1    6.18    0.96 
   5   6  -1    4.92    0.89 
   5   6  -1    3.29    0.79 
   5   6  -1    5.13    0.88 
   4  -6  -1   10.90    1.18 
  -4  -6   1   11.67    1.28 
   4  -6  -1   10.91    0.96 
   4  -6  -1   11.50    1.27 
   4  -6  -1   12.45    1.11 
   4  -6  -1   12.37    1.19 
  -4  -6   1    8.61    1.14 
  -4  -6   1   13.33    1.10 
  -4  -6   1    9.55    1.24 
  -4  -6   1   13.71    1.49 
  -4  -6   1   11.72    1.41 
  -4  -6   1   11.42    1.35 
  -4  -6   1   10.65    1.26 
   4  -6  -1   11.39    0.83 
  -4  -6   1   11.15    1.23 
  -4   6   1   12.30    1.24 
  -4   6   1   12.90    1.39 
   4   6  -1   10.75    1.32 
  -4   6   1   14.04    1.20 
   4   6  -1   12.72    1.38 
   4   6  -1   13.80    1.49 
   4   6  -1   11.00    1.26 
   4   6  -1   12.19    1.39 
  -4   6   1   11.26    1.60 
  -4   6   1   11.44    0.98 
  -4   6   1   13.32    0.80 
  -4   6   1   10.58    0.84 
   4   6  -1   10.90    1.18 
   4   6  -1   13.16    1.12 
   4   6  -1   12.90    1.02 
  -4   6   1   13.79    1.20 
   4   6  -1   12.20    1.36 
   4   6  -1   11.73    1.39 
   4   6  -1   12.27    1.25 
  -4   6   1   13.01    1.09 
  -4   6   1   11.15    1.24 
  -4   6   1   10.87    1.29 
   3  -6  -1    3.83    0.72 
  -3  -6   1    3.42    0.72 
  -3  -6   1    4.31    0.80 
  -3  -6   1    2.90    0.75 
   3  -6  -1    3.70    0.56 
   3  -6  -1    4.00    0.76 
  -3  -6   1    2.96    0.64 
   3  -6  -1    4.25    0.70 
  -3  -6   1    4.00    0.71 
   3  -6  -1    3.21    0.56 
  -3  -6   1    2.54    0.47 
   3  -6  -1    2.06    0.56 
  -3  -6   1    4.55    0.82 
  -3  -6   1    3.46    0.71 
  -3  -6   1    2.48    0.64 
   3   6  -1    4.21    0.68 
   3   6  -1    3.61    0.74 
   3   6  -1    3.17    0.59 
  -3   6   1    3.66    0.77 
  -3   6   1    3.30    0.46 
   3   6  -1    2.40    0.68 
   3   6  -1    2.00    0.55 
   3   6  -1    3.66    0.54 
  -3   6   1    3.13    0.51 
  -3   6   1    3.37    0.66 
   3   6  -1    4.03    0.66 
   3   6  -1    4.54    0.66 
   3   6  -1    1.79    0.60 
   3   6  -1    3.69    0.80 
  -3   6   1    2.82    0.68 
  -3   6   1    3.37    0.54 
  -3   6   1    3.03    0.78 
   3   6  -1    4.13    0.80 
  -3   6   1    3.17    0.56 
  -2  -6   1    1.61    0.53 
  -2  -6   1    1.93    0.52 
   2  -6  -1    1.99    0.56 
   2  -6  -1    1.62    0.40 
  -2  -6   1    2.56    0.45 
  -2  -6   1    2.17    0.49 
  -2  -6   1    1.41    0.43 
  -2  -6   1    2.00    0.38 
  -2  -6   1    1.85    0.27 
   2  -6  -1    1.32    0.45 
  -2  -6   1    1.85    0.56 
  -2  -6   1    2.18    0.59 
   2  -6  -1    2.19    0.40 
  -2  -6   1    1.91    0.51 
   2  -6  -1    1.83    0.52 
  -2  -6   1    2.04    0.26 
   2  -6  -1    2.45    0.72 
  -2  -6   1    1.56    0.44 
  -2  -6   1    1.56    0.25 
  -2  -6   1    2.31    0.46 
  -2   6   1    2.14    0.31 
  -2   6   1    2.19    0.39 
   2   6  -1    1.54    0.49 
   2   6  -1    1.43    0.51 
  -2   6   1    1.95    0.33 
  -2   6   1    1.92    0.46 
   2   6  -1    1.18    0.41 
  -2   6   1    1.89    0.24 
  -2   6   1    1.99    0.31 
  -2   6   1    2.17    0.56 
   2   6  -1    2.40    0.62 
   2   6  -1    1.96    0.34 
   2   6  -1    1.50    0.42 
   2   6  -1    1.28    0.32 
   2   6  -1    2.04    0.43 
   2   6  -1    1.24    0.40 
   2   6  -1    2.88    0.64 
  -2   6   1    1.45    0.35 
  -2   6   1    2.10    0.32 
  -2   6   1    2.08    0.24 
  -2   6   1    1.61    0.50 
  -2   6   1    1.79    0.33 
  -2   6   1    1.88    0.38 
  -2   6   1    1.71    0.41 
   2   6  -1    1.18    0.36 
  -2   6   1    2.03    0.58 
  -2   6   1    2.11    0.45 
   1  -6  -1   13.63    1.76 
   1  -6  -1   16.43    1.42 
  -1  -6   1   19.21    1.26 
   1  -6  -1   20.53    1.43 
  -1  -6   1   20.31    1.56 
  -1  -6   1   20.85    1.27 
  -1  -6   1   20.69    1.40 
  -1  -6   1   18.53    1.46 
  -1  -6   1   21.51    1.62 
   1  -6  -1   19.06    1.07 
  -1  -6   1   19.86    1.35 
  -1  -6   1   19.97    1.47 
   1  -6  -1   17.60    1.40 
  -1  -6   1   20.62    1.71 
  -1  -6   1   19.23    1.04 
   1  -6  -1   18.70    1.43 
  -1  -6   1   18.96    1.26 
  -1  -6   1   18.90    1.48 
   1   6  -1   18.11    0.94 
   1   6  -1   20.24    1.30 
  -1   6   1   18.47    0.99 
   1   6  -1   18.57    1.16 
   1   6  -1   20.44    1.51 
  -1   6   1   19.59    1.02 
   1   6  -1   20.77    1.41 
   1   6  -1   18.82    0.98 
   1   6  -1   19.56    1.10 
   1   6  -1   23.11    1.27 
  -1   6   1   21.79    1.49 
  -1   6   1   19.08    1.20 
  -1   6   1   17.11    1.10 
  -1   6   1   19.19    1.13 
  -1   6   1   19.55    1.30 
  -1   6   1   19.27    1.25 
   1   6  -1   14.52    1.55 
  -1   6   1   18.40    1.50 
  -1   6   1   14.00    1.51 
  -1   6   1   18.20    0.93 
  -1   6   1   21.25    1.04 
  -1   6   1   18.52    0.94 
   1   6  -1   19.75    1.40 
  -1   6   1   19.03    1.00 
   1   6  -1   20.08    1.52 
   1   6  -1   18.75    1.19 
   1   6  -1   19.12    1.14 
   0  -6  -1   45.60    2.29 
   0  -6   1   42.45    2.45 
   0  -6   1   38.60    2.25 
   0  -6   1   40.99    2.08 
   0  -6   1   39.65    2.48 
   0  -6   1   41.88    2.24 
   0  -6  -1   42.26    1.99 
   0  -6  -1   44.45    2.39 
   0  -6  -1   40.30    1.95 
   0  -6  -1   40.66    2.41 
   0  -6  -1   37.74    2.24 
   0  -6  -1   43.91    2.05 
   0  -6   1   43.96    2.61 
   0  -6  -1   41.54    2.37 
   0  -6   1   41.58    2.10 
   0  -6   1   40.74    2.34 
   0  -6  -1   40.26    2.10 
   0  -6  -1   40.82    2.32 
   0   6  -1   41.21    1.92 
   0   6  -1   42.56    1.96 
   0   6  -1   44.16    2.07 
   0   6  -1   41.07    2.17 
   0   6   1   40.54    2.26 
   0   6  -1   42.30    2.17 
   0   6  -1   41.76    2.42 
   0   6   1   42.23    2.41 
   0   6   1   43.05    2.05 
   0   6   1   41.36    1.84 
   0   6  -1   36.92    2.35 
   0   6   1   38.59    1.86 
   0   6  -1   40.05    1.66 
   0   6   1   40.92    2.33 
   0   6  -1   40.19    1.97 
   0   6   1   39.66    2.11 
   0   6   1   45.78    2.23 
   0   6  -1   41.08    1.79 
   0   6   1   40.48    2.09 
   0   6   1   40.71    2.03 
   0   6   1   41.19    2.43 
   0   6  -1   38.35    2.29 
   0   6  -1   37.47    1.77 
   0   6   1   41.03    1.78 
  -1  -6  -1   12.66    1.40 
   1  -6   1   11.90    1.02 
  -1  -6  -1   12.22    1.04 
   1  -6   1   10.32    1.71 
   1  -6   1   12.36    1.28 
  -1  -6  -1   13.13    1.38 
  -1  -6  -1   14.93    1.01 
  -1  -6  -1   10.90    1.52 
  -1  -6  -1   13.45    1.43 
  -1  -6  -1   12.32    1.30 
  -1  -6  -1   10.43    1.45 
  -1  -6  -1   14.57    1.22 
   1  -6   1   13.57    1.05 
   1  -6   1   10.22    1.26 
  -1  -6  -1   12.45    1.02 
   1  -6   1   11.83    1.23 
   1   6   1   10.17    1.27 
   1   6   1   14.05    1.11 
  -1   6  -1   11.60    0.98 
   1   6   1   12.47    1.02 
   1   6   1   12.47    0.82 
   1   6   1   13.26    1.14 
  -1   6  -1   13.55    0.79 
   1   6   1   14.55    1.45 
  -1   6  -1   12.88    0.64 
  -1   6  -1   14.29    1.40 
   1   6   1   12.53    1.15 
   1   6   1   15.49    1.07 
   1   6   1   12.01    1.32 
  -1   6  -1   12.99    0.82 
  -1   6  -1   12.28    1.36 
   1   6   1   13.22    0.87 
  -1   6  -1   14.47    1.04 
  -1   6  -1   13.61    0.87 
  -1   6  -1   13.54    0.70 
  -1   6  -1   14.41    0.90 
  -1   6  -1    9.13    1.23 
  -1   6  -1   13.03    0.94 
  -1   6  -1   12.94    0.71 
  -1   6  -1   13.65    0.80 
   1   6   1   11.97    0.88 
  -2  -6  -1   46.66    2.46 
  -2  -6  -1   44.71    2.04 
  -2  -6  -1   45.84    2.65 
   2  -6   1   48.33    2.65 
  -2  -6  -1   44.18    2.62 
  -2  -6  -1   46.34    2.10 
  -2  -6  -1   46.34    2.57 
  -2  -6  -1   44.11    2.63 
   2  -6   1   51.52    2.82 
   2  -6   1   48.00    2.52 
  -2  -6  -1   47.09    2.01 
  -2  -6  -1   48.02    2.17 
  -2  -6  -1   48.80    2.66 
   2  -6   1   46.02    2.53 
  -2  -6  -1   46.82    2.52 
  -2  -6  -1   46.23    2.27 
   2  -6   1   48.49    2.50 
  -2  -6  -1   52.59    2.43 
   2   6   1   50.62    2.49 
  -2   6  -1   51.32    2.74 
  -2   6  -1   44.54    2.54 
  -2   6  -1   45.94    2.12 
  -2   6  -1   48.54    1.98 
   2   6   1   47.62    2.63 
   2   6   1   45.42    2.65 
  -2   6  -1   46.01    1.83 
   2   6   1   48.20    2.26 
  -2   6  -1   47.98    2.06 
  -2   6  -1   49.62    2.00 
  -2   6  -1   47.10    2.64 
  -2   6  -1   45.06    1.93 
  -2   6  -1   47.47    1.97 
  -2   6  -1   47.02    2.67 
   2   6   1   49.94    2.63 
  -2   6  -1   46.19    2.24 
  -2   6  -1   45.11    1.99 
   2   6   1   46.32    2.73 
   2   6   1   43.99    2.47 
  -2   6  -1   45.85    2.07 
   2   6   1   45.20    2.28 
   2   6   1   46.94    2.66 
   2   6   1   48.21    2.02 
  -2   6  -1   45.41    1.94 
  -2   6  -1   51.71    2.37 
  -2   6  -1   49.84    2.34 
  -2   6  -1   46.06    2.66 
  -2   6  -1   47.04    2.00 
   2   6   1   47.25    2.56 
  -2   6  -1   46.91    2.05 
   2   6   1   49.13    2.32 
  -2   6  -1   40.87    2.66 
  -3  -6  -1    0.41    0.35 
  -3  -6  -1    0.47    0.31 
   3  -6   1   -0.33    0.29 
   3  -6   1   -0.04    0.30 
  -3  -6  -1   -0.12    0.34 
   3  -6   1    0.03    0.13 
  -3  -6  -1    0.34    0.34 
  -3  -6  -1   -0.13    0.24 
  -3  -6  -1    0.18    0.29 
   3  -6   1    0.34    0.29 
  -3  -6  -1    0.20    0.24 
  -3  -6  -1   -0.25    0.23 
  -3  -6  -1    0.04    0.30 
   3  -6   1    0.38    0.30 
  -3  -6  -1   -0.21    0.23 
   3   6   1   -0.06    0.35 
   3   6   1    0.01    0.23 
   3   6   1    0.11    0.28 
  -3   6  -1   -0.06    0.29 
   3   6   1    0.13    0.27 
   3   6   1    0.20    0.30 
  -3   6  -1    0.18    0.13 
  -3   6  -1   -0.14    0.31 
   3   6   1    0.39    0.23 
  -3   6  -1   -0.19    0.35 
  -3   6  -1    0.11    0.31 
  -3   6  -1   -0.15    0.20 
  -3   6  -1    0.18    0.16 
   3   6   1   -0.16    0.27 
   3   6   1    0.28    0.41 
   3   6   1    1.03    0.47 
  -3   6  -1    0.08    0.24 
   3   6   1    0.08    0.18 
   3   6   1    0.19    0.29 
  -3   6  -1    0.05    0.13 
  -3   6  -1   -0.25    0.19 
   3   6   1    0.38    0.27 
  -3   6  -1   -0.12    0.18 
   4  -6   1   19.64    1.47 
  -4  -6  -1   18.87    1.58 
  -4  -6  -1   18.84    1.55 
  -4  -6  -1   17.35    1.40 
   4  -6   1   18.34    1.31 
  -4  -6  -1   20.10    1.61 
  -4  -6  -1   18.97    1.57 
   4  -6   1   18.93    1.37 
  -4  -6  -1   18.58    1.88 
  -4  -6  -1   19.41    1.41 
  -4  -6  -1   21.86    1.59 
   4  -6   1   19.45    1.36 
  -4  -6  -1   19.27    1.67 
   4   6   1   18.21    1.40 
  -4   6  -1   21.18    1.59 
  -4   6  -1   20.99    1.26 
  -4   6  -1   20.56    1.89 
  -4   6  -1   19.57    1.55 
   4   6   1   20.18    1.31 
   4   6   1   19.12    1.51 
   4   6   1   19.40    1.62 
   4   6   1   20.64    1.62 
   4   6   1   18.55    1.55 
   4   6   1   19.13    1.34 
  -4   6  -1   20.67    1.55 
   4   6   1   19.78    1.50 
  -4   6  -1   18.82    1.99 
  -4   6  -1   20.73    1.58 
   4   6   1   18.02    1.39 
  -4   6  -1   20.84    1.45 
   4   6   1   19.55    1.63 
   4   6   1   21.11    1.60 
   4   6   1   19.56    1.64 
  -5  -6  -1   11.46    1.60 
  -5  -6  -1   12.59    1.45 
   5  -6   1   12.86    1.09 
   5  -6   1   12.32    1.26 
  -5  -6  -1   16.37    1.66 
  -5  -6  -1   15.62    1.59 
  -5  -6  -1   14.36    1.87 
  -5  -6  -1   12.80    1.49 
  -5  -6  -1   10.84    1.40 
   5  -6   1   14.01    1.23 
  -5  -6  -1   13.79    1.59 
   5  -6   1   14.11    1.14 
  -5  -6  -1   14.93    1.53 
  -5   6  -1   13.80    1.48 
  -5   6  -1   14.92    1.51 
   5   6   1   13.55    1.24 
   5   6   1   13.54    1.52 
   5   6   1   13.14    1.48 
  -5   6  -1   13.99    1.47 
  -5   6  -1   14.43    1.34 
  -5   6  -1   13.22    1.46 
   5   6   1   16.25    1.27 
  -5   6  -1   12.69    1.06 
  -5   6  -1   13.40    1.47 
   5   6   1   12.91    1.40 
  -5   6  -1   15.29    2.02 
   5   6   1   15.32    1.73 
   5   6   1   11.81    1.33 
   5   6   1   13.16    1.55 
   5   6   1   13.12    1.60 
  -5   6  -1   13.10    1.00 
   5   6   1   12.45    1.57 
   5   6   1   16.49    1.60 
  -5   6  -1   13.04    1.44 
   5   6   1   14.10    1.62 
  -6  -6  -1   64.01    4.51 
  -6  -6  -1   64.79    3.51 
   6  -6   1   56.17    3.22 
   6  -6   1   60.53    3.49 
  -6  -6  -1   57.69    3.34 
  -6  -6  -1   54.32    3.58 
  -6  -6  -1   60.53    3.28 
  -6  -6  -1   55.58    3.40 
  -6  -6  -1   57.52    3.28 
  -6  -6  -1   55.90    3.23 
  -6  -6  -1   63.40    3.81 
  -6   6  -1   63.02    3.28 
  -6   6  -1   58.55    3.09 
  -6   6  -1   64.36    3.65 
   6   6   1   55.30    3.40 
   6   6   1   56.00    3.04 
  -6   6  -1   64.48    4.03 
   6   6   1   55.04    3.22 
   6   6   1   60.50    3.44 
   6   6   1   57.00    3.50 
   6   6   1   58.54    3.27 
   6   6   1   54.87    3.38 
   6   6   1   61.53    3.27 
  -6   6  -1   58.73    3.67 
  -6   6  -1   59.57    3.40 
   6   6   1   57.14    3.43 
   6   6   1   57.88    3.12 
   6   6   1   55.18    3.18 
  -6   6  -1   58.29    3.16 
   6   6   1   55.76    3.33 
  -7  -6  -1    0.07    0.44 
   7  -6   1    0.22    0.43 
  -7  -6  -1    1.93    0.69 
  -7  -6  -1    0.85    0.66 
  -7  -6  -1    0.42    0.50 
  -7  -6  -1    1.32    0.59 
  -7  -6  -1    0.56    0.53 
  -7  -6  -1    0.29    0.81 
  -7  -6  -1    0.47    0.63 
  -7  -6  -1    1.02    0.71 
   7   6   1    2.05    0.78 
   7   6   1    1.16    0.60 
   7   6   1    0.09    0.44 
  -7   6  -1    1.11    0.53 
  -7   6  -1    0.46    0.55 
   7   6   1    0.74    0.57 
   7   6   1   -0.17    0.35 
   7   6   1    0.95    0.61 
   7   6   1    0.42    0.53 
   7   6   1    0.48    0.53 
   7   6   1   -0.23    0.44 
  -7   6  -1    0.22    0.51 
  -7   6  -1    0.21    0.52 
   7   6   1    0.71    0.52 
  -8  -6  -1   69.02    5.59 
  -8  -6  -1   64.40    4.02 
  -8  -6  -1   76.84    4.39 
  -8  -6  -1   69.72    5.02 
  -8  -6  -1   73.48    4.81 
  -8  -6  -1   68.52    4.33 
  -8  -6  -1   72.52    4.11 
   8  -6   1   72.10    4.22 
  -8  -6  -1   72.77    4.64 
   8   6   1   63.55    4.12 
  -8   6  -1   72.29    4.40 
   8   6   1   78.26    4.41 
   8   6   1   73.74    4.07 
   8   6   1   70.98    4.16 
   8   6   1   68.84    3.96 
   8   6   1   72.19    4.11 
   8   6   1   72.27    4.35 
  -8   6  -1   74.27    4.80 
   8   6   1   69.59    4.32 
   8   6   1   77.40    4.31 
   8   6   1   75.44    4.34 
  -7  -7   1  118.72    5.89 
  -7  -7   1  117.17    6.02 
  -7  -7   1  117.39    6.24 
  -7  -7   1  118.01    5.81 
  -7  -7   1  111.83    5.77 
   7   7  -1  108.72    5.87 
   7   7  -1  119.04    5.82 
   7   7  -1  124.33    6.24 
   7   7  -1  121.74    6.08 
   7   7  -1  121.91    5.79 
   7   7  -1  128.01    6.10 
   7   7  -1  122.17    5.91 
   7   7  -1  125.08    6.16 
  -6  -7   1    0.54    0.72 
  -6  -7   1    1.78    0.74 
  -6  -7   1    0.28    0.52 
  -6  -7   1    1.25    0.71 
  -6  -7   1    1.99    0.66 
  -6  -7   1    0.44    0.48 
  -6  -7   1    0.71    0.58 
  -6   7   1    0.13    0.46 
   6   7  -1    1.52    0.75 
   6   7  -1    1.03    0.60 
   6   7  -1    1.09    0.56 
  -6   7   1    0.77    0.50 
   6   7  -1    1.30    0.63 
   6   7  -1    0.01    0.45 
   6   7  -1    0.22    0.41 
   6   7  -1    1.84    0.66 
  -6   7   1    0.77    0.53 
   6   7  -1    2.06    0.84 
   6   7  -1    1.15    0.52 
   6   7  -1    0.60    0.58 
   6   7  -1    1.04    0.54 
  -5  -7   1  207.24    9.06 
  -5  -7   1  213.87    8.99 
  -5  -7   1  213.96    8.95 
   5  -7  -1  202.15    8.73 
  -5  -7   1  207.10    8.98 
  -5  -7   1  218.69    9.20 
  -5  -7   1  214.52    9.29 
  -5  -7   1  207.86    9.15 
  -5  -7   1  217.24    9.29 
   5   7  -1  207.28    8.99 
  -5   7   1  219.65    9.01 
   5   7  -1  202.63    9.09 
  -5   7   1  215.95    9.01 
   5   7  -1  211.70    8.62 
  -5   7   1  211.72    8.70 
   5   7  -1  207.03    8.86 
   5   7  -1  209.36    9.25 
   5   7  -1  229.16    9.19 
   5   7  -1  217.01    9.30 
   5   7  -1  217.56    8.91 
   5   7  -1  210.93    8.84 
   5   7  -1  220.90    9.06 
   5   7  -1  220.27    9.28 
  -5   7   1  221.88    8.91 
  -5   7   1  210.30    8.98 
  -4  -7   1    3.36    0.83 
   4  -7  -1    4.05    0.80 
  -4  -7   1    3.93    0.81 
  -4  -7   1    3.67    0.83 
  -4  -7   1    3.00    0.78 
  -4  -7   1    3.97    0.92 
  -4  -7   1    4.91    0.96 
  -4  -7   1    5.21    1.02 
  -4  -7   1    3.77    0.77 
   4   7  -1    2.75    0.74 
  -4   7   1    3.86    0.84 
   4   7  -1    3.56    0.85 
   4   7  -1    3.63    0.82 
   4   7  -1    2.54    0.73 
  -4   7   1    4.52    0.91 
   4   7  -1    2.70    0.64 
   4   7  -1    2.81    0.76 
  -4   7   1    3.98    0.86 
   4   7  -1    3.55    0.72 
  -4   7   1    3.07    0.77 
  -4   7   1    4.90    0.87 
   4   7  -1    4.58    0.78 
   4   7  -1    3.37    0.75 
   4   7  -1    2.90    0.58 
   4   7  -1    2.66    0.71 
  -3  -7   1  173.81    7.22 
   3  -7  -1  169.06    7.00 
  -3  -7   1  168.62    6.98 
   3  -7  -1  164.78    8.10 
  -3  -7   1  163.57    7.30 
   3  -7  -1  167.18    7.11 
  -3  -7   1  154.99    6.92 
  -3  -7   1  168.80    7.11 
   3  -7  -1  162.81    7.17 
  -3  -7   1  164.07    7.31 
  -3  -7   1  162.38    7.15 
  -3  -7   1  170.88    7.20 
   3   7  -1  164.82    7.28 
   3   7  -1  158.51    7.20 
   3   7  -1  162.75    6.54 
   3   7  -1  169.23    7.25 
  -3   7   1  172.12    6.86 
   3   7  -1  162.53    7.07 
   3   7  -1  169.69    6.84 
   3   7  -1  175.05    6.92 
  -3   7   1  160.41    7.24 
  -3   7   1  165.13    7.07 
   3   7  -1  166.49    6.69 
   3   7  -1  165.56    7.32 
   3   7  -1  160.76    6.91 
  -3   7   1  162.33    7.23 
   3   7  -1  166.73    7.25 
  -2  -7   1    1.75    0.55 
   2  -7  -1    2.54    0.52 
   2  -7  -1    2.06    0.77 
  -2  -7   1    1.27    0.54 
  -2  -7   1    1.14    0.53 
   2  -7  -1    1.04    0.53 
   2  -7  -1    1.56    0.53 
  -2  -7   1    2.83    0.63 
  -2  -7   1    1.70    0.66 
  -2  -7   1    1.79    0.51 
  -2  -7   1    2.65    0.68 
  -2  -7   1    2.39    0.54 
   2  -7  -1    2.81    0.69 
   2   7  -1    3.03    0.54 
  -2   7   1    2.34    0.46 
   2   7  -1    2.18    0.56 
   2   7  -1    2.62    0.55 
  -2   7   1    1.71    0.57 
   2   7  -1    1.81    0.47 
   2   7  -1    3.34    0.72 
  -2   7   1    3.23    0.60 
  -2   7   1    3.03    0.47 
   2   7  -1    2.19    0.61 
   2   7  -1    2.63    0.43 
  -2   7   1    2.69    0.53 
   2   7  -1    1.92    0.66 
  -2   7   1    1.49    0.59 
  -2   7   1    2.92    0.66 
  -2   7   1    2.44    0.36 
   2   7  -1    1.69    0.57 
   2   7  -1    2.58    0.71 
  -1  -7   1  141.57    6.26 
  -1  -7   1  134.45    5.69 
  -1  -7   1  132.29    6.12 
  -1  -7   1  135.46    5.88 
   1  -7  -1  154.72    6.25 
  -1  -7   1  119.25    5.89 
  -1  -7   1  130.38    6.01 
   1  -7  -1  131.89    6.13 
  -1  -7   1  145.91    5.80 
   1  -7  -1  116.49    6.21 
  -1  -7   1  143.61    6.28 
   1  -7  -1  137.83    5.98 
   1  -7  -1  140.83    6.14 
   1   7  -1  141.30    5.97 
  -1   7   1  128.51    6.13 
  -1   7   1  133.19    5.99 
  -1   7   1  133.12    5.30 
   1   7  -1  132.51    5.50 
   1   7  -1  138.84    6.13 
  -1   7   1  141.77    5.82 
   1   7  -1  137.24    5.60 
  -1   7   1  143.12    6.21 
  -1   7   1  135.84    5.63 
   1   7  -1  138.44    5.93 
   1   7  -1  138.96    5.76 
  -1   7   1  141.87    5.76 
  -1   7   1  144.28    5.53 
   1   7  -1  138.71    5.58 
   1   7  -1  129.93    6.09 
  -1   7   1  136.54    5.58 
   1   7  -1  132.99    6.17 
   0  -7   1    0.28    0.32 
   0  -7  -1    0.30    0.35 
   0  -7  -1    0.55    0.32 
   0  -7   1    0.92    0.43 
   0  -7   1    0.34    0.41 
   0  -7  -1    0.38    0.34 
   0  -7  -1    0.64    0.38 
   0  -7  -1    0.44    0.22 
   0  -7  -1    0.70    0.46 
   0  -7   1    0.42    0.33 
   0  -7  -1    0.68    0.33 
   0  -7   1    0.97    0.51 
   0  -7  -1    0.67    0.41 
   0  -7   1    0.29    0.34 
   0   7   1    0.71    0.42 
   0   7  -1    0.92    0.30 
   0   7  -1   -0.35    0.24 
   0   7   1    0.02    0.27 
   0   7   1    0.40    0.42 
   0   7  -1    0.84    0.46 
   0   7   1    0.57    0.49 
   0   7   1    0.92    0.24 
   0   7   1    0.87    0.22 
   0   7  -1    0.43    0.31 
   0   7   1    0.46    0.31 
   0   7  -1    0.29    0.38 
   0   7   1    1.15    0.31 
   0   7  -1    1.07    0.30 
   0   7   1    1.29    0.44 
   0   7   1    0.78    0.34 
   0   7   1    0.63    0.31 
   0   7  -1    0.57    0.29 
   0   7  -1    0.54    0.35 
  -1  -7  -1  193.96    7.91 
   1  -7   1  206.47    8.06 
   1  -7   1  190.21    8.15 
  -1  -7  -1  189.87    7.90 
   1  -7   1  153.76    8.61 
  -1  -7  -1  188.05    8.08 
  -1  -7  -1  200.69    7.91 
   1  -7   1  194.94    8.26 
  -1  -7  -1  196.12    8.16 
  -1  -7  -1  187.47    8.27 
  -1  -7  -1  196.29    8.26 
   1  -7   1  185.15    8.01 
  -1  -7  -1  199.95    8.28 
  -1  -7  -1  193.07    7.70 
  -1   7  -1  198.47    7.48 
  -1   7  -1  192.94    8.25 
   1   7   1  192.48    7.57 
   1   7   1  195.90    8.17 
   1   7   1  192.10    7.45 
   1   7   1  198.02    7.78 
   1   7   1  194.26    7.88 
  -1   7  -1  198.95    7.57 
   1   7   1  194.45    7.44 
  -1   7  -1  195.75    7.53 
  -1   7  -1  192.67    7.38 
   1   7   1  196.10    7.95 
   1   7   1  197.57    8.04 
   1   7   1  204.10    8.25 
  -1   7  -1  189.46    8.11 
   1   7   1  184.67    8.24 
  -1   7  -1  195.73    7.75 
  -1   7  -1  196.14    7.82 
  -1   7  -1  195.25    8.31 
   1   7   1  199.11    8.26 
  -2  -7  -1    5.44    1.05 
   2  -7   1    3.12    0.82 
   2  -7   1    3.76    0.76 
   2  -7   1    2.79    0.75 
   2  -7   1    3.10    0.70 
   2  -7   1    6.49    1.08 
  -2  -7  -1    5.63    1.02 
  -2  -7  -1    3.29    0.59 
  -2  -7  -1    3.51    0.71 
  -2  -7  -1    3.17    0.69 
  -2  -7  -1    4.38    0.87 
  -2  -7  -1    2.76    0.73 
  -2  -7  -1    3.15    0.98 
  -2  -7  -1    6.25    1.16 
  -2   7  -1    4.24    0.87 
   2   7   1    4.50    0.64 
   2   7   1    4.45    0.91 
  -2   7  -1    4.55    0.53 
   2   7   1    5.10    0.70 
  -2   7  -1    5.21    0.90 
   2   7   1    3.49    0.84 
   2   7   1    3.84    0.71 
  -2   7  -1    4.44    0.87 
  -2   7  -1    3.32    0.84 
   2   7   1    3.50    0.72 
   2   7   1    4.52    0.80 
  -2   7  -1    4.71    0.70 
   2   7   1    3.72    0.83 
  -2   7  -1    4.09    0.75 
   2   7   1    2.87    0.68 
   2   7   1    4.56    0.64 
  -3  -7  -1  120.84    5.67 
  -3  -7  -1  122.72    5.65 
   3  -7   1  122.54    5.49 
  -3  -7  -1  127.76    5.45 
   3  -7   1  123.53    5.55 
  -3  -7  -1  117.80    5.77 
  -3  -7  -1  123.68    5.81 
   3  -7   1  124.93    5.50 
  -3  -7  -1  121.27    5.55 
  -3  -7  -1  120.83    5.82 
   3  -7   1  128.09    5.75 
   3   7   1  127.54    5.77 
   3   7   1  126.87    5.36 
  -3   7  -1  118.35    5.71 
   3   7   1  128.48    5.81 
   3   7   1  129.73    5.69 
  -3   7  -1  129.13    5.83 
   3   7   1  119.47    5.66 
  -3   7  -1  125.76    5.68 
  -3   7  -1  134.41    5.98 
   3   7   1  122.29    5.80 
  -3   7  -1  128.64    5.44 
   3   7   1  126.80    5.36 
   3   7   1  127.09    5.55 
   3   7   1  126.69    5.30 
  -3   7  -1  121.51    5.77 
   3   7   1  122.85    5.80 
  -4  -7  -1    5.68    1.03 
   4  -7   1    3.39    0.72 
   4  -7   1    3.44    0.70 
  -4  -7  -1    4.49    0.87 
  -4  -7  -1    4.70    0.94 
  -4  -7  -1    3.87    0.78 
  -4  -7  -1    2.71    0.76 
  -4  -7  -1    4.60    0.98 
   4   7   1    3.34    0.69 
   4   7   1    4.89    0.79 
   4   7   1    6.19    1.10 
   4   7   1    4.20    0.92 
   4   7   1    2.79    0.72 
   4   7   1    3.70    0.71 
   4   7   1    5.08    0.97 
  -4   7  -1    5.17    0.94 
   4   7   1    4.63    0.88 
   4   7   1    3.67    0.90 
  -4   7  -1    4.38    0.94 
   4   7   1    3.84    0.90 
  -4   7  -1    4.55    0.94 
  -4   7  -1    4.58    0.91 
  -5  -7  -1   66.29    3.67 
  -5  -7  -1   71.97    3.65 
  -5  -7  -1   68.01    3.76 
  -5  -7  -1   65.97    3.77 
  -5  -7  -1   66.72    3.95 
  -5  -7  -1   61.05    3.70 
   5  -7   1   69.90    3.37 
   5   7   1   71.71    3.58 
   5   7   1   66.43    3.59 
   5   7   1   68.63    3.82 
  -5   7  -1   69.62    3.65 
  -5   7  -1   67.51    3.67 
  -5   7  -1   66.37    3.64 
   5   7   1   67.98    3.74 
   5   7   1   69.27    3.74 
   5   7   1   67.79    3.87 
   5   7   1   66.28    3.84 
  -5   7  -1   67.21    3.68 
   5   7   1   72.66    3.70 
   5   7   1   66.72    3.84 
   5   7   1   68.85    3.52 
  -6  -7  -1   12.02    1.81 
  -6  -7  -1   13.88    1.72 
  -6  -7  -1   11.03    1.58 
  -6  -7  -1   11.76    1.57 
  -6  -7  -1   11.88    1.48 
  -6  -7  -1   11.26    1.58 
   6   7   1    9.30    1.42 
   6   7   1    8.35    1.40 
   6   7   1   10.97    1.79 
   6   7   1   10.44    1.42 
   6   7   1   13.15    1.73 
   6   7   1   12.39    1.62 
   6   7   1   11.53    1.66 
   6   7   1   10.26    1.56 
   6   7   1    9.22    1.42 
  -6   7  -1   12.84    1.59 
  -6   7  -1    9.93    1.44 
   6   7   1   12.19    1.44 
  -6   7  -1    9.94    1.37 
  -7  -7  -1   51.95    3.34 
  -7  -7  -1   52.69    3.27 
  -7  -7  -1   45.64    3.54 
  -7  -7  -1   50.48    3.43 
  -7  -7  -1   53.47    3.30 
   7   7   1   60.16    3.70 
   7   7   1   55.83    3.28 
   7   7   1   55.50    3.45 
   7   7   1   48.84    3.34 
   7   7   1   56.03    3.55 
   7   7   1   51.50    3.45 
   7   7   1   55.80    3.54 
   7   7   1   53.46    3.24 
  -7   7  -1   50.87    3.12 
  -6  -8   1    4.23    1.15 
  -6  -8   1    4.55    1.11 
  -6  -8   1    4.50    1.15 
  -6  -8   1    2.53    0.79 
  -6  -8   1    4.97    1.04 
  -6  -8   1    2.41    0.94 
  -6   8   1    5.15    1.04 
   6   8  -1    4.40    0.99 
   6   8  -1    5.91    1.20 
   6   8  -1    3.90    1.31 
   6   8  -1    3.79    0.91 
   6   8  -1    6.58    1.29 
   6   8  -1    6.42    1.22 
   6   8  -1    2.44    0.87 
  -6   8   1    4.19    0.98 
   6   8  -1    3.57    1.02 
  -6   8   1    4.19    0.97 
   6   8  -1    5.15    1.17 
  -5  -8   1    0.95    0.70 
  -5  -8   1    1.15    0.62 
  -5  -8   1    1.28    0.61 
  -5  -8   1    0.19    0.55 
  -5  -8   1    0.78    0.60 
  -5  -8   1    0.96    0.61 
   5   8  -1    0.59    0.65 
  -5   8   1    0.25    0.56 
  -5   8   1    2.07    0.72 
   5   8  -1    0.54    0.50 
   5   8  -1    1.11    0.62 
   5   8  -1    1.14    0.66 
   5   8  -1    1.21    0.58 
   5   8  -1    0.69    0.54 
   5   8  -1    3.72    0.99 
   5   8  -1    0.17    0.49 
  -5   8   1    0.12    0.57 
   5   8  -1    0.84    0.58 
  -5   8   1    0.73    0.65 
  -4  -8   1    9.44    1.47 
  -4  -8   1    7.05    1.08 
  -4  -8   1    7.76    1.17 
  -4  -8   1    7.75    1.28 
  -4  -8   1    9.66    1.35 
  -4  -8   1    8.20    1.29 
   4  -8  -1    8.96    1.32 
   4  -8  -1    8.38    1.34 
  -4   8   1    7.39    1.30 
   4   8  -1    6.10    1.16 
   4   8  -1   10.15    1.45 
   4   8  -1   10.02    1.41 
   4   8  -1    7.99    1.37 
   4   8  -1    9.45    1.18 
   4   8  -1    7.30    1.10 
   4   8  -1    6.25    1.16 
  -4   8   1    8.30    1.27 
  -4   8   1    8.45    1.32 
   4   8  -1    7.77    1.08 
  -4   8   1    9.89    1.35 
   4   8  -1    9.49    1.43 
  -4   8   1    9.07    1.38 
  -3  -8   1    0.09    0.37 
  -3  -8   1    0.34    0.40 
   3  -8  -1    0.58    0.44 
   3  -8  -1    0.03    0.51 
  -3  -8   1    0.65    0.52 
  -3  -8   1    0.69    0.56 
   3  -8  -1    0.10    0.34 
  -3  -8   1    0.00    0.45 
  -3  -8   1    0.55    0.52 
  -3   8   1    0.01    0.40 
   3   8  -1    0.03    0.42 
  -3   8   1    0.04    0.45 
  -3   8   1    0.07    0.41 
   3   8  -1    0.35    0.39 
  -3   8   1   -0.01    0.51 
   3   8  -1    0.94    0.56 
  -3   8   1   -0.22    0.42 
   3   8  -1    0.35    0.42 
   3   8  -1    0.41    0.40 
   3   8  -1   -0.18    0.45 
   3   8  -1    0.16    0.48 
   3   8  -1    0.14    0.40 
   3   8  -1    0.53    0.48 
   2  -8  -1    0.64    0.44 
  -2  -8   1    0.73    0.52 
  -2  -8   1    0.70    0.51 
   2  -8  -1    0.98    0.55 
  -2  -8   1    0.32    0.36 
  -2  -8   1    0.85    0.45 
   2  -8  -1   -0.08    0.39 
  -2  -8   1    0.55    0.37 
  -2  -8   1    0.19    0.42 
  -2  -8   1    0.33    0.51 
   2   8  -1    0.86    0.56 
   2   8  -1   -0.28    0.35 
   2   8  -1    1.08    0.55 
  -2   8   1    0.38    0.44 
  -2   8   1    0.66    0.47 
   2   8  -1    1.46    0.47 
  -2   8   1    0.15    0.30 
   2   8  -1    0.75    0.46 
   2   8  -1    0.03    0.30 
  -2   8   1    1.57    0.64 
   2   8  -1    0.69    0.40 
   2   8  -1    0.67    0.50 
   2   8  -1    1.24    0.48 
  -1  -8   1    0.79    0.56 
  -1  -8   1   -0.23    0.36 
   1  -8  -1    1.23    0.61 
  -1  -8   1    0.52    0.44 
  -1  -8   1   -0.17    0.38 
   1  -8  -1    0.63    0.49 
  -1  -8   1    0.30    0.32 
   1  -8  -1   -0.32    0.38 
   1  -8  -1   -0.34    0.34 
  -1  -8   1   -0.05    0.34 
  -1  -8   1    0.75    0.57 
  -1  -8   1    0.60    0.37 
  -1   8   1   -0.19    0.32 
  -1   8   1    0.30    0.32 
   1   8  -1   -0.10    0.36 
   1   8  -1    0.14    0.36 
   1   8  -1    0.08    0.43 
   1   8  -1    0.48    0.30 
  -1   8   1    1.26    0.66 
   1   8  -1   -0.17    0.28 
   1   8  -1    0.16    0.41 
   1   8  -1    0.39    0.38 
  -1   8   1    0.45    0.37 
   1   8  -1    0.28    0.47 
  -1   8   1    0.80    0.56 
  -1   8   1   -0.07    0.28 
  -1   8   1   -0.18    0.34 
  -1   8   1    0.71    0.56 
   0  -8  -1   36.52    2.39 
   0  -8  -1   31.16    2.22 
   0  -8   1   28.45    2.17 
   0  -8  -1   36.08    2.50 
   0  -8   1   33.83    2.45 
   0  -8   1   37.84    2.89 
   0  -8  -1   34.54    2.41 
   0  -8   1   31.97    2.34 
   0  -8   1   34.23    2.25 
   0   8  -1   35.48    1.99 
   0   8  -1   32.61    2.37 
   0   8   1   30.02    2.31 
   0   8  -1   36.28    1.88 
   0   8   1   37.85    2.09 
   0   8   1   32.97    2.43 
   0   8  -1   35.69    2.17 
   0   8   1   35.43    2.10 
   0   8  -1   34.99    2.39 
   0   8  -1   32.56    2.42 
   0   8  -1   35.27    2.19 
   0   8   1   31.77    1.87 
   0   8   1   34.69    2.21 
   0   8   1   36.76    2.39 
   0   8   1   33.55    2.16 
  -1  -8  -1    8.89    1.19 
   1  -8   1    6.79    1.20 
  -1  -8  -1    7.02    1.23 
   1  -8   1    5.96    1.06 
  -1  -8  -1    5.85    1.15 
   1  -8   1    4.68    1.26 
  -1  -8  -1    5.53    1.07 
  -1  -8  -1    6.83    0.97 
  -1  -8  -1    5.90    1.07 
   1  -8   1    4.81    0.96 
  -1  -8  -1    6.19    0.87 
   1  -8   1    7.59    1.22 
  -1  -8  -1    7.06    1.13 
   1   8   1    5.55    1.12 
   1   8   1    5.51    0.91 
   1   8   1    7.75    0.96 
   1   8   1    6.10    1.08 
  -1   8  -1    6.16    1.17 
  -1   8  -1    5.31    1.08 
   1   8   1    6.58    0.79 
  -1   8  -1    6.44    0.78 
   1   8   1    6.49    1.06 
  -1   8  -1    7.25    1.01 
  -1   8  -1    5.86    1.15 
  -1   8  -1    6.96    0.78 
  -1   8  -1    6.20    1.08 
   1   8   1    7.38    1.04 
   1   8   1    7.64    1.23 
  -2  -8  -1   31.24    2.27 
  -2  -8  -1   32.11    2.36 
   2  -8   1   38.73    2.43 
  -2  -8  -1   33.83    2.03 
  -2  -8  -1   31.19    2.39 
  -2  -8  -1   34.78    2.24 
  -2  -8  -1   34.23    2.44 
  -2  -8  -1   41.19    2.35 
   2  -8   1   33.43    2.23 
   2  -8   1   33.30    2.40 
  -2  -8  -1   32.93    2.43 
   2   8   1   33.06    2.19 
  -2   8  -1   30.09    2.34 
   2   8   1   30.17    2.34 
   2   8   1   35.03    2.32 
  -2   8  -1   35.86    2.06 
  -2   8  -1   37.47    2.40 
   2   8   1   37.73    2.33 
   2   8   1   35.27    2.12 
   2   8   1   30.65    2.35 
   2   8   1   35.28    1.95 
  -2   8  -1   30.58    2.37 
  -2   8  -1   32.97    2.39 
   2   8   1   31.20    2.33 
  -3  -8  -1    7.15    1.15 
  -3  -8  -1    7.44    1.25 
  -3  -8  -1    8.19    1.42 
  -3  -8  -1    6.64    1.27 
  -3  -8  -1    7.48    1.12 
   3  -8   1    7.52    1.13 
  -3  -8  -1   11.40    1.28 
  -3  -8  -1    5.24    1.13 
   3  -8   1    9.55    1.30 
   3  -8   1    7.95    1.29 
   3   8   1    8.36    1.03 
  -3   8  -1    8.07    1.38 
   3   8   1    8.05    1.15 
   3   8   1    8.54    1.20 
   3   8   1    7.31    1.26 
  -3   8  -1    8.00    1.29 
  -3   8  -1    8.90    1.28 
   3   8   1    9.93    1.43 
   3   8   1    8.04    1.29 
  -3   8  -1    8.65    1.39 
   3   8   1    7.16    1.19 
   3   8   1    8.10    1.34 
   4  -8   1   15.36    1.59 
  -4  -8  -1   11.29    1.62 
  -4  -8  -1   14.10    1.87 
  -4  -8  -1   17.56    1.93 
   4  -8   1   17.68    1.76 
  -4  -8  -1   13.50    1.52 
  -4  -8  -1   11.73    1.58 
  -4  -8  -1   12.87    1.56 
   4   8   1   11.60    1.54 
   4   8   1   12.33    1.36 
  -4   8  -1   14.85    1.73 
  -4   8  -1   14.23    1.78 
  -4   8  -1   16.85    1.86 
   4   8   1   14.94    1.65 
   4   8   1   16.63    1.93 
   4   8   1   16.18    1.89 
   4   8   1   12.67    1.72 
   4   8   1   14.68    1.76 
   4   8   1   14.64    1.87 
  -4   8  -1   14.34    1.75 
  -5  -8  -1    0.80    0.58 
  -5  -8  -1    1.83    0.81 
  -5  -8  -1    1.79    0.72 
  -5  -8  -1    1.36    0.71 
  -5  -8  -1    2.33    0.77 
  -5  -8  -1    2.20    0.69 
   5   8   1    3.21    0.88 
   5   8   1    2.40    0.85 
  -5   8  -1    1.01    0.70 
   5   8   1    0.41    0.64 
   5   8   1    2.34    0.77 
  -5   8  -1    2.40    0.84 
   5   8   1    1.29    0.54 
   5   8   1    0.42    0.54 
  -5   8  -1    2.03    0.76 
   5   8   1    1.78    0.72 
  -5   8  -1    2.35    0.81 
   5   8   1    1.03    0.71 
  -6  -8  -1   34.28    2.72 
  -6  -8  -1   39.83    2.66 
  -6  -8  -1   34.68    2.71 
  -6  -8  -1   38.32    2.77 
  -6  -8  -1   33.66    2.88 
  -6  -8  -1   34.86    2.65 
   6   8   1   36.83    2.51 
   6   8   1   39.37    2.91 
  -6   8  -1   36.41    2.61 
   6   8   1   38.37    2.86 
   6   8   1   40.60    2.85 
  -6   8  -1   45.83    2.82 
   6   8   1   41.20    2.94 
  -6   8  -1   40.51    2.76 
   6   8   1   37.59    2.73 
   6   8   1   41.27    2.97 
  -5  -9   1  102.91    5.09 
  -5  -9   1  101.36    5.45 
  -5  -9   1   99.40    5.26 
  -5  -9   1   94.02    5.27 
  -5  -9   1   96.48    4.94 
   5   9  -1   97.67    5.02 
   5   9  -1  101.97    5.33 
  -5   9   1   97.74    5.21 
   5   9  -1  101.63    4.91 
  -5   9   1   95.76    5.15 
  -5   9   1  103.03    5.31 
   5   9  -1  101.86    5.21 
   5   9  -1  102.26    5.42 
   5   9  -1  100.20    5.26 
   5   9  -1   90.64    5.25 
   5   9  -1   89.15    5.24 
  -5   9   1   96.41    4.96 
  -4  -9   1   43.41    2.89 
  -4  -9   1   44.67    3.10 
   4  -9  -1   44.53    3.00 
  -4  -9   1   51.14    3.38 
  -4  -9   1   50.24    3.36 
   4  -9  -1   51.67    3.24 
  -4  -9   1   44.21    2.84 
  -4   9   1   49.89    3.13 
   4   9  -1   48.08    3.30 
  -4   9   1   47.84    3.24 
   4   9  -1   47.62    3.28 
   4   9  -1   51.01    3.15 
   4   9  -1   52.42    3.32 
  -4   9   1   50.40    3.35 
   4   9  -1   57.87    3.49 
  -4   9   1   50.39    3.29 
   4   9  -1   47.80    3.21 
   4   9  -1   55.43    2.98 
  -4   9   1   51.50    3.15 
   4   9  -1   49.17    2.96 
  -3  -9   1   80.83    4.04 
  -3  -9   1   55.84    4.02 
  -3  -9   1   77.09    4.46 
   3  -9  -1   70.56    4.06 
  -3  -9   1   77.60    4.53 
   3  -9  -1   79.97    4.35 
  -3  -9   1   77.79    3.93 
  -3  -9   1   79.91    4.19 
  -3  -9   1   78.66    4.44 
  -3  -9   1   71.76    4.14 
  -3   9   1   73.99    4.29 
   3   9  -1   80.18    3.82 
   3   9  -1   80.31    4.34 
   3   9  -1   73.71    4.33 
  -3   9   1   76.66    4.13 
  -3   9   1   79.39    4.23 
   3   9  -1   76.45    4.21 
   3   9  -1   73.30    4.00 
   3   9  -1   78.12    3.87 
  -3   9   1   81.35    4.46 
   3   9  -1   78.28    4.37 
  -3   9   1   72.65    4.28 
   3   9  -1   82.11    4.43 
  -2  -9   1   22.51    1.88 
  -2  -9   1   23.78    2.28 
   2  -9  -1   20.66    2.26 
  -2  -9   1   22.02    1.67 
  -2  -9   1   21.51    2.36 
  -2  -9   1   25.19    2.30 
  -2  -9   1   21.27    2.34 
  -2  -9   1   23.05    1.80 
   2  -9  -1   28.46    2.17 
  -2  -9   1   22.32    2.05 
   2   9  -1   26.61    2.11 
   2   9  -1   27.16    1.91 
   2   9  -1   25.31    1.68 
  -2   9   1   20.99    2.18 
  -2   9   1   19.53    2.17 
   2   9  -1   26.37    2.16 
   2   9  -1   22.79    2.34 
  -2   9   1   26.22    2.20 
   2   9  -1   22.47    1.90 
   2   9  -1   24.10    2.44 
   1  -9  -1   39.95    2.78 
  -1  -9   1   38.22    2.84 
   1  -9  -1   40.67    2.90 
  -1  -9   1   40.42    2.73 
  -1  -9   1   43.93    2.92 
  -1  -9   1   43.41    2.82 
   1   9  -1   43.39    2.95 
   1   9  -1   48.45    2.96 
   1   9  -1   41.94    2.63 
  -1   9   1   39.47    2.69 
   1   9  -1   37.01    2.76 
  -1   9   1   46.06    3.03 
   1   9  -1   34.60    2.53 
  -1   9   1   42.67    2.56 
  -1   9   1   42.75    2.93 
   1   9  -1   37.73    2.36 
   0  -9  -1   39.47    2.85 
   0  -9  -1   40.61    2.83 
   0  -9   1   39.22    2.73 
   0  -9   1   35.76    2.76 
   0  -9   1   38.61    2.78 
   0  -9  -1   42.67    2.78 
   0  -9  -1   38.41    2.78 
   0   9   1   42.54    2.91 
   0   9   1   43.99    2.44 
   0   9  -1   43.19    2.57 
   0   9  -1   41.12    2.93 
   0   9  -1   40.85    2.79 
   0   9  -1   42.17    2.63 
   0   9   1   43.50    2.99 
   0   9   1   40.50    2.75 
   0   9   1   45.45    2.54 
   0   9  -1   42.32    2.91 
   0   9   1   44.79    2.68 
  -1  -9  -1   66.22    3.83 
  -1  -9  -1   64.32    3.85 
   1  -9   1   56.91    3.72 
  -1  -9  -1   57.38    3.64 
  -1  -9  -1   66.32    3.43 
   1  -9   1   66.91    3.76 
  -1   9  -1   63.36    3.38 
  -1   9  -1   66.17    3.68 
   1   9   1   62.48    3.35 
  -1   9  -1   58.57    3.75 
   1   9   1   56.79    3.65 
  -1   9  -1   66.87    3.76 
   1   9   1   60.31    3.78 
  -1   9  -1   63.15    3.86 
   1   9   1   68.50    3.66 
  -1   9  -1   64.05    3.79 
   1   9   1   63.54    3.44 
   1   9   1   68.76    3.80 
  -2  -9  -1   23.00    2.37 
  -2  -9  -1   21.57    2.06 
   2  -9   1   27.12    2.11 
  -2  -9  -1   25.33    1.94 
   2  -9   1   17.82    2.13 
  -2  -9  -1   21.70    2.33 
  -2  -9  -1   24.76    1.91 
  -2  -9  -1   22.54    1.68 
   2  -9   1   22.35    2.16 
   2   9   1   21.56    2.23 
   2   9   1   24.81    1.92 
  -2   9  -1   23.86    2.43 
   2   9   1   22.16    1.69 
   2   9   1   22.17    2.34 
  -2   9  -1   23.32    1.98 
   2   9   1   24.52    1.88 
   2   9   1   28.05    2.22 
  -2   9  -1   18.44    2.17 
  -2   9  -1   24.45    2.15 
   2   9   1   23.89    2.45 
   3  -9   1   69.25    3.70 
  -3  -9  -1   63.88    3.96 
  -3  -9  -1   65.71    3.47 
  -3  -9  -1   67.53    4.14 
  -3  -9  -1   67.29    3.76 
   3  -9   1   64.92    3.71 
  -3  -9  -1   61.11    3.89 
  -3  -9  -1   65.18    3.69 
   3   9   1   61.75    3.91 
   3   9   1   60.92    3.80 
  -3   9  -1   70.17    4.08 
  -3   9  -1   70.93    4.05 
  -3   9  -1   72.82    3.92 
   3   9   1   65.71    3.56 
   3   9   1   66.06    3.73 
  -3   9  -1   67.16    3.99 
   3   9   1   72.61    3.91 
   3   9   1   62.92    3.88 
   3   9   1   67.82    3.99 
  -4  -9  -1   20.67    2.54 
   4  -9   1   24.74    2.23 
  -4  -9  -1   21.37    2.17 
  -4  -9  -1   21.75    2.21 
   4  -9   1   16.79    1.90 
  -4  -9  -1   21.80    2.36 
  -4  -9  -1   18.38    2.22 
  -4  -9  -1   19.15    1.93 
   4   9   1   21.92    2.34 
  -4   9  -1   21.32    2.21 
   4   9   1   19.14    2.20 
  -4   9  -1   17.02    2.09 
  -4   9  -1   24.24    1.99 
   4   9   1   18.93    2.10 
   4   9   1   23.27    1.90 
   4   9   1   17.58    2.24 
   4   9   1   17.62    2.20 
   4   9   1   18.96    1.78 
   4   9   1   19.18    2.10 
  -4   9  -1   20.97    2.34 
  -4   9  -1   23.34    2.44 
  -5  -9  -1   16.23    2.10 
  -5  -9  -1   14.33    1.71 
  -5  -9  -1   14.32    1.93 
  -5  -9  -1   16.02    1.93 
  -5  -9  -1   16.63    2.14 
  -5  -9  -1   14.01    2.24 
   5   9   1   17.57    2.13 
  -5   9  -1   16.70    2.02 
   5   9   1   18.21    1.81 
   5   9   1   14.81    1.95 
   5   9   1   11.27    1.60 
  -5   9  -1   19.99    2.28 
  -5   9  -1   15.29    2.02 
   5   9   1   18.42    2.26 
   5   9   1   14.82    1.93 
   5   9   1   12.51    1.79 
  -5   9  -1   17.41    2.06 
   5   9   1   16.21    2.11 
  -3 -10   1    0.63    0.67 
   3 -10  -1   -0.21    0.54 
   3 -10  -1    0.07    0.56 
  -3 -10   1   -0.44    0.66 
  -3 -10   1    0.36    0.66 
  -3 -10   1   -0.06    0.58 
  -3  10   1    0.41    0.64 
   3  10  -1    0.15    0.61 
   3  10  -1    0.15    0.62 
   3  10  -1   -0.21    0.56 
  -3  10   1    0.81    0.74 
   3  10  -1   -0.43    0.46 
  -3  10   1    0.10    0.60 
  -3  10   1   -0.61    0.52 
   3  10  -1   -0.14    0.56 
   3  10  -1    0.79    0.63 
  -3  10   1    0.08    0.50 
   2 -10  -1    1.42    0.82 
  -2 -10   1    0.14    0.58 
  -2 -10   1    0.84    0.71 
   2 -10  -1    0.19    0.52 
  -2 -10   1   -0.20    0.50 
  -2 -10   1    0.62    0.61 
  -2  10   1    0.00    0.62 
   2  10  -1    0.16    0.54 
  -2  10   1   -0.02    0.59 
   2  10  -1    0.51    0.60 
   2  10  -1    0.64    0.66 
  -2  10   1    0.64    0.62 
  -2  10   1    0.45    0.69 
   2  10  -1   -0.39    0.51 
   2  10  -1    0.39    0.59 
  -2  10   1   -0.13    0.57 
   2  10  -1   -0.28    0.50 
  -1 -10   1    4.25    1.08 
  -1 -10   1    8.71    1.55 
   1 -10  -1    5.87    1.31 
   1 -10  -1    6.26    1.30 
  -1 -10   1    6.85    1.45 
   1  10  -1   10.76    1.76 
   1  10  -1    6.23    1.29 
   1  10  -1    7.11    1.23 
  -1  10   1    4.89    1.24 
   1  10  -1    7.37    1.37 
  -1  10   1    8.13    1.53 
   1  10  -1    8.55    1.50 
  -1  10   1    7.05    1.33 
   1  10  -1    5.94    1.46 
   0 -10   1   13.36    2.00 
   0 -10  -1   12.66    1.81 
   0 -10   1   11.02    1.72 
   0 -10   1   13.49    1.80 
   0 -10  -1   11.67    1.75 
   0  10  -1   13.28    1.92 
   0  10  -1   14.91    2.10 
   0  10   1   13.98    1.72 
   0  10  -1    9.86    1.70 
   0  10   1   11.48    1.70 
   0  10   1   11.11    1.78 
   0  10   1   11.42    1.74 
   0  10  -1   10.44    1.53 
   0  10  -1   12.98    1.80 
  -1 -10  -1    9.75    1.60 
  -1 -10  -1   10.81    1.78 
   1 -10   1    9.13    1.63 
   1 -10   1    8.84    1.50 
   1 -10   1   11.22    1.59 
   1  10   1    8.23    1.41 
   1  10   1   10.98    1.70 
   1  10   1   11.55    1.73 
  -1  10  -1   11.24    1.80 
  -1  10  -1    9.33    1.61 
   1  10   1    7.56    1.48 
  -1  10  -1    8.89    1.66 
  -1  10  -1   11.70    1.72 
  -2 -10  -1    4.26    1.13 
  -2 -10  -1    4.75    1.29 
   2 -10   1    3.61    0.97 
   2 -10   1    5.56    1.20 
  -2 -10  -1    4.42    1.14 
  -2 -10  -1    4.96    1.06 
  -2  10  -1    5.54    1.32 
  -2  10  -1    3.03    1.05 
   2  10   1    2.66    0.91 
  -2  10  -1    5.80    1.20 
  -2  10  -1    3.58    1.07 
   2  10   1    3.76    1.08 
   2  10   1    5.21    1.15 
   2  10   1    6.02    1.26 
   2  10   1    5.32    1.24 
   2  10   1    5.62    1.25 
   3 -10   1   11.04    1.62 
   3 -10   1   11.40    1.65 
  -3 -10  -1    9.77    1.53 
  -3 -10  -1    9.00    1.64 
  -3 -10  -1   11.73    1.96 
  -3 -10  -1   11.16    1.86 
  -3  10  -1   11.58    1.85 
   3  10   1   11.34    1.58 
   3  10   1   11.34    1.73 
  -3  10  -1   10.01    1.65 
   3  10   1   10.37    1.75 
  -3  10  -1    8.35    1.48 
   3  10   1   12.87    2.10 
   3  10   1   10.94    1.61 
   3  10   1   11.56    1.86 
  -3  10  -1    8.44    1.64 
 -10   0   2  123.72    6.72 
  10   0  -2  137.13    6.13 
  10   0  -2  123.03    6.18 
  10   0  -2  122.62    6.28 
  10   0  -2  125.82    6.73 
 -10   0   2  127.07    6.02 
  10   0  -2  124.33    6.02 
  10   0  -2  120.44    6.53 
 -10   0   2  131.10    7.01 
  10   0  -2  114.66    5.85 
 -10   0   2  126.97    5.89 
 -10   0   2  125.86    7.39 
  10   0  -2  128.16    6.40 
 -10   0   2  124.60    5.92 
   9   0  -2    0.39    0.43 
  -9   0   2    0.04    0.52 
  -9   0   2    0.01    0.36 
  -9   0   2    0.48    0.40 
   9   0  -2   -0.10    0.36 
   9   0  -2    0.19    0.37 
   9   0  -2    0.33    0.47 
  -9   0   2   -0.03    0.27 
   9   0  -2    0.73    0.52 
   9   0  -2    0.17    0.38 
   9   0  -2    0.59    0.47 
  -9   0   2   -0.12    0.39 
   9   0  -2    0.03    0.35 
  -9   0   2   -0.03    0.38 
  -8   0   2  219.60   10.04 
  -8   0   2  218.96    9.91 
  -8   0   2  226.66    9.16 
   8   0  -2  222.99    9.75 
  -8   0   2  228.06    9.06 
   8   0  -2  232.44    9.33 
   8   0  -2  229.82    9.33 
   8   0  -2  232.31    9.65 
   8   0  -2  220.09    9.85 
  -8   0   2  236.22    9.37 
   8   0  -2  212.99    9.20 
   8   0  -2  225.31    9.55 
  -8   0   2  221.55   10.45 
  -8   0   2  230.31    9.23 
   8   0  -2  224.36    9.45 
  -7   0   2   -0.24    0.21 
  -7   0   2    0.04    0.27 
   7   0  -2   -0.10    0.20 
   7   0  -2   -0.01    0.30 
   7   0  -2    0.03    0.31 
   7   0  -2    0.31    0.37 
   7   0  -2    0.03    0.28 
  -7   0   2    0.53    0.31 
   7   0  -2    0.08    0.25 
  -7   0   2   -0.23    0.28 
  -7   0   2    0.14    0.43 
   7   0  -2    0.24    0.28 
  -7   0   2    0.20    0.16 
  -7   0   2   -0.22    0.22 
  -7   0   2    0.14    0.33 
   7   0  -2   -0.21    0.24 
   7   0  -2    0.23    0.36 
   6   0  -2  184.48    7.40 
   6   0  -2  184.12    6.82 
   6   0  -2  186.85    7.42 
   6   0  -2  170.19    7.57 
  -6   0   2  182.41    7.45 
   6   0  -2  193.79    6.91 
   6   0  -2  189.10    7.55 
  -6   0   2  183.27    8.27 
  -6   0   2  181.36    7.88 
   6   0  -2  181.79    7.40 
   6   0  -2  186.93    7.85 
   6   0  -2  181.55    7.00 
  -6   0   2  180.98    7.97 
  -6   0   2  183.41    7.35 
  -6   0   2  181.10    6.96 
   6   0  -2  177.96    7.57 
   6   0  -2  186.37    7.77 
  -6   0   2  182.94    7.22 
   6   0  -2  164.01    7.48 
  -6   0   2  187.66    7.35 
   5   0  -2    0.31    0.20 
   5   0  -2   -0.27    0.15 
  -5   0   2    0.07    0.19 
  -5   0   2   -0.23    0.13 
  -5   0   2   -0.07    0.18 
   5   0  -2    0.40    0.25 
   5   0  -2   -0.07    0.14 
   5   0  -2    0.00    0.22 
  -5   0   2    0.17    0.17 
   5   0  -2    0.02    0.16 
  -5   0   2    0.14    0.15 
  -5   0   2   -0.19    0.19 
   5   0  -2   -0.07    0.17 
   5   0  -2    0.06    0.10 
  -5   0   2    0.15    0.34 
   5   0  -2    0.07    0.22 
  -5   0   2    0.43    0.20 
  -5   0   2    0.33    0.12 
   5   0  -2    0.31    0.15 
   5   0  -2    0.30    0.29 
  -5   0   2   -0.07    0.26 
   5   0  -2   -0.21    0.13 
   5   0  -2    0.62    0.35 
  -4   0   2  527.53   19.21 
   4   0  -2  528.05   19.37 
   4   0  -2  517.10   19.40 
   4   0  -2  487.19   19.09 
   4   0  -2  523.07   19.74 
  -4   0   2  514.48   19.28 
   4   0  -2  524.91   19.34 
  -4   0   2  522.77   19.11 
   4   0  -2  529.93   18.96 
  -4   0   2  523.87   19.19 
   4   0  -2  541.30   19.28 
   4   0  -2  474.14   19.37 
  -4   0   2  519.34   18.92 
  -4   0   2  527.98   19.19 
  -4   0   2  521.52   19.88 
  -4   0   2  527.68   19.05 
   4   0  -2  522.98   19.48 
   4   0  -2  502.41   18.99 
   4   0  -2  533.48   19.57 
   4   0  -2  528.62   19.23 
  -4   0   2  515.27   19.60 
  -4   0   2  527.87   19.07 
   4   0  -2  543.89   19.25 
  -4   0   2  522.32   19.67 
   3   0  -2    0.24    0.11 
  -3   0   2    0.22    0.14 
   3   0  -2    0.12    0.15 
   3   0  -2    0.14    0.17 
  -3   0   2    0.19    0.20 
   3   0  -2    0.31    0.16 
  -3   0   2    0.14    0.12 
  -3   0   2    0.38    0.16 
  -3   0   2    0.17    0.13 
   3   0  -2    0.41    0.18 
   3   0  -2    0.66    0.26 
  -3   0   2    0.14    0.11 
  -3   0   2   -0.03    0.15 
  -3   0   2    0.43    0.24 
  -3   0   2    0.37    0.23 
  -3   0   2    0.61    0.25 
  -3   0   2    0.23    0.15 
  -3   0   2    0.33    0.08 
   3   0  -2   -0.08    0.11 
  -3   0   2    0.09    0.21 
  -3   0   2    0.19    0.17 
   3   0  -2    0.53    0.10 
   3   0  -2    0.13    0.06 
  -3   0   2    0.06    0.12 
   3   0  -2    0.20    0.19 
   3   0  -2    0.39    0.23 
   3   0  -2   -0.03    0.10 
   3   0  -2    0.03    0.15 
   3   0  -2    0.17    0.15 
   3   0  -2    0.35    0.16 
   3   0  -2    0.15    0.19 
   3   0  -2   -0.12    0.12 
   3   0  -2    0.44    0.19 
  -3   0   2    0.08    0.10 
  -3   0   2    0.20    0.14 
   2   0  -2  574.96   20.31 
   2   0  -2  548.55   20.46 
   2   0  -2  557.81   20.36 
   2   0  -2  569.70   20.29 
  -2   0   2  564.25   20.26 
   2   0  -2  526.40   20.32 
   2   0  -2  541.50   20.31 
   2   0  -2  564.48   20.38 
   2   0  -2  532.49   20.18 
  -2   0   2  557.59   20.64 
  -2   0   2  566.90   20.40 
  -2   0   2  564.91   20.29 
  -2   0   2  550.55   20.16 
  -2   0   2  564.24   20.37 
   2   0  -2  554.90   20.21 
   2   0  -2  532.89   20.26 
  -2   0   2  561.77   20.41 
  -2   0   2  557.11   20.53 
   2   0  -2  578.16   20.24 
  -2   0   2  609.21   20.42 
  -2   0   2  580.79   20.46 
   2   0  -2  582.27   20.49 
   2   0  -2  531.73   20.47 
   2   0  -2  545.07   20.19 
  -2   0   2  555.83   20.46 
  -2   0   2  560.63   20.28 
   2   0  -2  576.05   20.42 
   2   0  -2  570.77   20.65 
   2   0  -2  564.61   20.59 
  -2   0   2  541.89   20.17 
   2   0  -2  534.80   20.16 
   2   0  -2  561.22   20.28 
  -2   0   2  563.98   20.46 
  -2   0   2  539.90   20.27 
  -2   0   2  584.69   20.36 
  -2   0   2  569.49   20.38 
  -2   0   2  563.21   20.29 
  -2   0   2  554.21   20.55 
  -2   0   2  560.00   20.29 
   2   0  -2  545.70   20.43 
   2   0  -2  570.27   20.39 
  -1   0   2    0.03    0.08 
   1   0  -2    0.12    0.09 
   1   0  -2    0.02    0.06 
   1   0  -2    0.13    0.09 
  -1   0   2    0.20    0.07 
  -1   0   2    0.44    0.11 
   1   0  -2    0.03    0.06 
  -1   0   2    0.12    0.10 
  -1   0   2    0.23    0.13 
   1   0  -2    0.32    0.11 
  -1   0   2    0.28    0.12 
   1   0  -2    0.14    0.09 
   1   0  -2    0.09    0.05 
   1   0  -2    0.10    0.09 
   1   0  -2    0.05    0.08 
  -1   0   2    0.28    0.10 
  -1   0   2    0.18    0.11 
   1   0  -2    0.14    0.10 
  -1   0   2    0.29    0.12 
  -1   0   2    0.06    0.07 
   1   0  -2    0.00    0.04 
   1   0  -2    0.07    0.07 
  -1   0   2    0.09    0.08 
   1   0  -2    0.33    0.14 
   1   0  -2    0.26    0.11 
  -1   0   2    0.33    0.09 
   1   0  -2    0.01    0.05 
  -1   0   2    0.20    0.05 
  -1   0   2    0.21    0.09 
   1   0  -2    0.11    0.13 
   1   0  -2   -0.01    0.04 
  -1   0   2    0.08    0.09 
  -1   0   2    0.33    0.05 
  -1   0   2    0.21    0.14 
   1   0  -2   -0.02    0.08 
   1   0  -2    0.13    0.10 
  -1   0   2    0.39    0.09 
  -1   0   2    0.17    0.08 
  -1   0   2    0.25    0.09 
  -1   0   2    0.19    0.14 
  -1   0   2    0.15    0.11 
  -1   0  -2    0.14    0.10 
  -1   0  -2    0.51    0.11 
  -1   0  -2    0.11    0.09 
  -1   0  -2    0.13    0.09 
   1   0   2    0.05    0.09 
  -1   0  -2    0.04    0.05 
   1   0   2    0.18    0.06 
  -1   0  -2    0.17    0.11 
   1   0   2    0.03    0.11 
   1   0   2    0.06    0.09 
   1   0   2    0.05    0.09 
   1   0   2   -0.13    0.07 
  -1   0  -2    0.01    0.07 
   1   0   2    0.15    0.07 
   1   0   2   -0.02    0.07 
  -1   0  -2    0.07    0.11 
  -1   0  -2    0.05    0.11 
   1   0   2    0.08    0.07 
   1   0   2    0.30    0.10 
   1   0   2    0.11    0.12 
  -1   0  -2    0.01    0.07 
  -1   0  -2    0.05    0.09 
   1   0   2    0.15    0.08 
  -1   0  -2   -0.08    0.08 
  -1   0  -2    0.13    0.17 
  -1   0  -2    0.20    0.10 
  -1   0  -2    0.07    0.10 
  -1   0  -2    0.20    0.13 
   1   0   2    0.13    0.08 
  -1   0  -2    0.04    0.09 
   1   0   2    0.14    0.07 
  -1   0  -2    0.09    0.13 
   1   0   2    0.11    0.09 
  -1   0  -2    0.00    0.07 
   1   0   2    0.06    0.10 
   1   0   2    0.20    0.11 
  -2   0  -2   92.94    3.65 
   2   0   2   88.48    3.81 
   2   0   2   88.92    3.56 
   2   0   2   92.19    3.60 
   2   0   2   93.76    3.39 
  -2   0  -2   94.19    3.65 
   2   0   2   93.16    3.72 
  -2   0  -2   93.33    3.55 
   2   0   2   87.27    3.53 
   2   0   2   88.21    3.62 
  -2   0  -2   91.81    3.60 
  -2   0  -2   89.30    3.50 
  -2   0  -2   90.84    3.65 
  -2   0  -2   90.00    3.69 
   2   0   2   93.27    3.63 
  -2   0  -2   91.91    3.42 
   2   0   2   91.22    3.64 
  -2   0  -2   94.16    3.82 
  -2   0  -2   93.32    3.63 
   2   0   2   93.28    3.74 
   2   0   2   79.55    3.62 
  -2   0  -2   93.26    3.74 
  -2   0  -2   89.03    3.55 
  -2   0  -2   88.68    3.60 
   2   0   2   92.87    3.37 
  -2   0  -2   93.03    3.55 
  -2   0  -2   91.23    3.65 
   2   0   2   89.55    3.40 
   2   0   2   94.24    3.65 
  -2   0  -2   88.40    3.61 
   2   0   2   91.18    3.68 
   2   0   2   91.25    3.55 
   2   0   2   91.31    3.36 
   2   0   2   92.40    3.74 
   2   0   2   93.39    3.66 
  -2   0  -2   94.69    3.73 
  -2   0  -2   79.77    3.36 
   2   0   2   88.69    3.48 
   2   0   2   89.97    3.51 
  -2   0  -2   91.67    3.60 
  -2   0  -2   91.62    3.59 
   3   0   2    0.00    0.06 
   3   0   2    0.10    0.15 
   3   0   2    0.15    0.05 
  -3   0  -2    0.02    0.09 
   3   0   2    0.18    0.12 
   3   0   2    0.06    0.13 
  -3   0  -2    0.14    0.17 
   3   0   2    0.09    0.11 
   3   0   2   -0.10    0.16 
   3   0   2    0.03    0.14 
  -3   0  -2    0.08    0.13 
   3   0   2   -0.04    0.12 
   3   0   2    0.04    0.15 
  -3   0  -2   -0.12    0.09 
   3   0   2   -0.05    0.14 
   3   0   2    0.06    0.14 
  -3   0  -2    0.16    0.15 
   3   0   2    0.16    0.20 
  -3   0  -2    0.16    0.21 
   3   0   2    0.39    0.16 
  -3   0  -2   -0.01    0.05 
  -3   0  -2    0.07    0.16 
   3   0   2    0.05    0.13 
   3   0   2    0.06    0.06 
  -3   0  -2   -0.17    0.13 
  -3   0  -2    0.02    0.12 
   3   0   2   -0.05    0.12 
   3   0   2    0.40    0.27 
   3   0   2    0.02    0.07 
  -3   0  -2    0.07    0.12 
  -3   0  -2    0.15    0.13 
   4   0   2  330.64   12.52 
   4   0   2  326.94   12.30 
  -4   0  -2  331.75   12.28 
  -4   0  -2  333.55   12.55 
  -4   0  -2  343.60   12.13 
   4   0   2  297.77   12.45 
  -4   0  -2  321.09   12.44 
   4   0   2  331.35   12.60 
   4   0   2  328.50   12.02 
  -4   0  -2  334.23   12.25 
   4   0   2  327.26   12.04 
  -4   0  -2  331.75   12.02 
   4   0   2  338.96   12.83 
   4   0   2  330.47   12.12 
  -4   0  -2  340.82   12.54 
   4   0   2  327.07   12.63 
  -4   0  -2  337.38   12.41 
   4   0   2  325.87   12.23 
   4   0   2  334.31   12.51 
   4   0   2  343.39   12.43 
   4   0   2  331.31   13.00 
  -4   0  -2  337.14   12.86 
   4   0   2  331.50   12.65 
   4   0   2  344.49   12.76 
  -5   0  -2   -0.01    0.18 
   5   0   2    0.42    0.25 
   5   0   2    0.01    0.09 
  -5   0  -2    0.14    0.10 
   5   0   2    0.01    0.23 
   5   0   2    0.23    0.15 
  -5   0  -2   -0.07    0.22 
   5   0   2    0.05    0.19 
   5   0   2    0.09    0.23 
  -5   0  -2    0.00    0.18 
   5   0   2    0.17    0.11 
  -5   0  -2    0.22    0.23 
  -5   0  -2    0.07    0.07 
   5   0   2    0.00    0.18 
  -5   0  -2    0.28    0.15 
   5   0   2    0.08    0.19 
   5   0   2   -0.08    0.09 
   5   0   2    0.25    0.26 
   5   0   2   -0.07    0.17 
  -5   0  -2    0.06    0.17 
   5   0   2   -0.02    0.15 
   5   0   2    0.09    0.19 
   6   0   2  142.63    5.85 
  -6   0  -2  136.33    5.79 
   6   0   2  143.42    5.30 
   6   0   2  142.00    6.27 
   6   0   2  135.62    6.13 
   6   0   2  145.36    6.02 
  -6   0  -2  136.53    5.37 
   6   0   2  144.56    5.39 
  -6   0  -2  146.92    6.02 
   6   0   2  148.39    6.45 
  -6   0  -2  140.47    5.96 
   6   0   2  131.42    6.07 
   6   0   2  141.30    6.06 
   6   0   2  139.72    5.23 
   6   0   2  141.59    5.53 
  -6   0  -2  137.36    6.35 
   6   0   2  139.91    5.21 
   6   0   2  138.16    5.55 
   6   0   2  143.58    5.28 
   6   0   2  139.98    5.96 
  -6   0  -2  137.11    5.86 
   7   0   2   -0.25    0.31 
   7   0   2    0.31    0.31 
  -7   0  -2   -0.05    0.32 
  -7   0  -2    0.54    0.48 
   7   0   2    0.46    0.43 
   7   0   2    0.30    0.32 
   7   0   2    0.54    0.33 
  -7   0  -2   -0.10    0.23 
  -7   0  -2    0.32    0.39 
   7   0   2    0.03    0.32 
   7   0   2    0.29    0.26 
  -7   0  -2    0.18    0.32 
   7   0   2    0.27    0.39 
  -7   0  -2   -0.20    0.31 
  -8   0  -2    5.91    1.49 
   8   0   2    8.09    1.27 
   8   0   2    7.75    1.14 
   8   0   2    7.47    1.20 
  -8   0  -2    7.90    1.11 
   8   0   2    6.44    1.14 
  -8   0  -2    6.14    1.05 
   8   0   2    7.19    1.01 
   8   0   2    5.31    1.00 
  -8   0  -2    5.53    1.20 
   8   0   2    7.32    1.38 
  -8   0  -2    8.48    1.09 
  -8   0  -2    7.12    1.10 
   8   0   2    8.07    1.34 
   9   0   2    0.39    0.55 
   9   0   2    0.09    0.46 
   9   0   2   -0.25    0.36 
  -9   0  -2    0.30    0.69 
   9   0   2   -0.03    0.44 
  -9   0  -2   -0.21    0.37 
  -9   0  -2   -0.16    0.48 
  -9   0  -2    0.10    0.47 
   9   0   2    0.38    0.42 
   9   0   2    0.16    0.38 
  -9   0  -2    0.25    0.46 
   9   0   2   -0.15    0.47 
   9   0   2    0.37    0.41 
 -10   0  -2    1.10    0.59 
  10   0   2   -0.14    0.57 
 -10   0  -2    0.54    0.70 
  10   0   2    0.55    0.64 
  10   0   2    0.99    0.78 
 -10   0  -2    0.44    0.85 
  10   0   2    0.24    0.57 
  10   0   2    0.59    0.58 
 -10   0  -2    0.95    0.58 
 -10   0  -2    0.55    0.71 
  10   0   2    0.99    0.62 
 -10   0  -2    0.82    0.58 
  10   0   2    1.02    0.65 
 -10  -1   2    8.39    1.95 
 -10  -1   2    6.47    1.51 
  10  -1  -2    7.07    1.37 
  10  -1  -2    5.83    1.13 
  10  -1  -2    6.89    1.33 
 -10  -1   2    5.33    1.14 
  10  -1  -2    5.80    1.16 
 -10  -1   2    6.26    1.19 
 -10  -1   2    6.29    1.18 
  10  -1  -2   10.68    1.82 
  10  -1  -2    6.29    1.46 
 -10  -1   2    6.84    1.62 
  10   1  -2    8.49    1.41 
  10   1  -2    6.06    1.22 
  10   1  -2    7.83    1.48 
  10   1  -2    7.01    1.33 
 -10   1   2    7.83    1.74 
  10   1  -2    7.35    1.33 
  10   1  -2    6.78    1.42 
 -10   1   2    6.72    1.15 
 -10   1   2    6.93    1.81 
 -10   1   2    6.90    1.22 
  10   1  -2    6.91    1.48 
  10   1  -2    6.67    1.50 
 -10   1   2    7.91    1.64 
  -9  -1   2   28.28    1.92 
  -9  -1   2   27.52    1.98 
   9  -1  -2   26.19    1.89 
   9  -1  -2   23.59    2.54 
  -9  -1   2   23.80    3.06 
   9  -1  -2   25.95    2.13 
   9  -1  -2   24.59    2.10 
   9  -1  -2   24.56    1.88 
  -9  -1   2   22.56    2.30 
   9  -1  -2   23.77    1.86 
  -9  -1   2   26.78    2.44 
  -9  -1   2   25.33    2.00 
   9  -1  -2   26.14    2.01 
   9  -1  -2   24.90    2.28 
  -9  -1   2   22.28    1.83 
  -9   1   2   25.21    2.64 
   9   1  -2   24.17    2.60 
   9   1  -2   27.15    2.02 
   9   1  -2   25.96    2.03 
   9   1  -2   22.24    2.29 
  -9   1   2   23.54    1.73 
  -9   1   2   24.98    1.89 
   9   1  -2   23.24    2.62 
  -9   1   2   23.70    2.30 
  -9   1   2   24.28    1.82 
   9   1  -2   28.07    2.20 
   9   1  -2   22.83    1.89 
   9   1  -2   23.42    2.41 
  -9   1   2   24.65    2.39 
  -8  -1   2    1.00    0.47 
   8  -1  -2    1.92    0.74 
   8  -1  -2    1.14    0.47 
  -8  -1   2    2.62    0.97 
  -8  -1   2    0.56    0.41 
  -8  -1   2    0.92    0.63 
   8  -1  -2    1.26    0.59 
  -8  -1   2    1.38    0.67 
  -8  -1   2    1.13    0.52 
   8  -1  -2    1.43    0.59 
   8  -1  -2    2.11    0.60 
  -8  -1   2    1.48    0.53 
   8  -1  -2    1.35    0.56 
   8  -1  -2    0.16    0.36 
   8  -1  -2    1.13    0.57 
  -8   1   2    1.94    0.57 
   8   1  -2    1.51    0.58 
   8   1  -2    0.64    0.46 
  -8   1   2    1.77    0.72 
   8   1  -2    2.63    0.67 
  -8   1   2    1.07    0.53 
   8   1  -2    1.69    0.71 
   8   1  -2    2.54    0.83 
  -8   1   2    1.34    0.53 
   8   1  -2    1.29    0.54 
  -8   1   2    1.03    0.64 
  -8   1   2    1.37    0.47 
   8   1  -2    0.84    0.54 
  -8   1   2    1.78    0.80 
   8   1  -2    1.13    0.60 
   7  -1  -2    5.86    1.11 
   7  -1  -2    6.12    0.86 
  -7  -1   2    5.50    1.23 
  -7  -1   2    7.39    1.01 
  -7  -1   2    5.33    0.82 
  -7  -1   2    6.23    1.14 
   7  -1  -2    6.65    1.01 
   7  -1  -2    7.54    1.06 
  -7  -1   2    8.34    1.36 
   7  -1  -2    8.14    1.16 
  -7  -1   2    4.50    0.77 
  -7  -1   2    7.95    1.03 
   7  -1  -2    8.42    1.23 
   7  -1  -2    6.70    0.53 
   7  -1  -2    7.22    0.92 
   7  -1  -2    5.98    0.87 
   7  -1  -2    8.32    0.70 
  -7  -1   2    7.27    0.73 
  -7   1   2    6.68    0.85 
   7   1  -2    7.73    1.04 
  -7   1   2    7.08    1.25 
   7   1  -2    7.87    1.11 
  -7   1   2    7.43    1.38 
   7   1  -2    6.76    0.77 
  -7   1   2    7.37    0.81 
   7   1  -2    8.99    1.21 
  -7   1   2    7.17    1.22 
   7   1  -2    6.81    1.16 
  -7   1   2    5.77    0.81 
   7   1  -2    7.59    1.24 
   7   1  -2    5.26    0.95 
  -7   1   2    7.64    0.99 
   7   1  -2    7.43    1.11 
   7   1  -2    5.90    0.93 
   7   1  -2    7.24    1.00 
   6  -1  -2   22.35    1.42 
  -6  -1   2   22.58    1.83 
  -6  -1   2   21.69    1.98 
   6  -1  -2   22.39    1.62 
   6  -1  -2   21.64    1.52 
   6  -1  -2   22.47    1.89 
  -6  -1   2   23.96    1.86 
   6  -1  -2   22.17    1.68 
  -6  -1   2   24.36    1.55 
   6  -1  -2   21.08    1.29 
   6  -1  -2   22.62    1.58 
  -6  -1   2   22.20    1.50 
   6  -1  -2   23.55    1.78 
   6  -1  -2   24.27    1.50 
  -6  -1   2   22.91    1.28 
   6  -1  -2   22.94    1.45 
  -6  -1   2   24.31    1.60 
  -6  -1   2   22.51    1.47 
   6  -1  -2   22.60    1.11 
   6   1  -2   26.75    1.64 
   6   1  -2   22.53    1.65 
   6   1  -2   23.79    1.32 
   6   1  -2   20.24    1.57 
   6   1  -2   23.16    1.62 
  -6   1   2   22.96    1.38 
  -6   1   2   24.82    1.45 
   6   1  -2   21.66    1.33 
   6   1  -2   22.69    1.75 
   6   1  -2   22.40    1.06 
  -6   1   2   22.65    1.85 
   6   1  -2   21.37    1.54 
  -6   1   2   24.14    1.16 
  -6   1   2   23.72    1.82 
   6   1  -2   21.45    1.69 
  -6   1   2   25.54    1.11 
   6   1  -2   23.15    1.09 
   6   1  -2   23.01    1.58 
   6   1  -2   21.10    1.49 
  -6   1   2   21.22    1.46 
  -6   1   2   22.22    1.01 
   6   1  -2   23.74    1.02 
  -6   1   2   21.01    1.26 
  -6   1   2   22.89    1.13 
  -6   1   2   24.14    2.06 
   5  -1  -2   25.04    1.41 
  -5  -1   2   22.93    1.89 
  -5  -1   2   24.88    1.55 
   5  -1  -2   27.72    1.49 
  -5  -1   2   26.03    1.11 
   5  -1  -2   26.68    1.57 
   5  -1  -2   24.83    1.84 
   5  -1  -2   24.68    1.10 
   5  -1  -2   25.14    1.68 
  -5  -1   2   26.04    1.51 
  -5  -1   2   23.50    1.32 
  -5  -1   2   24.18    1.75 
   5  -1  -2   26.43    1.42 
  -5  -1   2   24.78    1.47 
   5  -1  -2   24.30    1.14 
   5  -1  -2   26.69    1.75 
   5  -1  -2   25.77    1.59 
   5  -1  -2   27.06    1.47 
  -5  -1   2   23.91    1.77 
   5  -1  -2   24.39    1.60 
  -5  -1   2   25.72    1.53 
  -5   1   2   27.22    1.38 
  -5   1   2   24.42    1.78 
   5   1  -2   26.30    1.57 
  -5   1   2   21.90    1.84 
   5   1  -2   26.54    1.16 
  -5   1   2   24.83    1.27 
   5   1  -2   24.45    1.33 
   5   1  -2   25.00    1.56 
   5   1  -2   26.73    1.52 
   5   1  -2   26.19    1.64 
   5   1  -2   24.48    1.66 
   5   1  -2   26.58    1.57 
   5   1  -2   24.48    1.71 
  -5   1   2   24.68    1.36 
   5   1  -2   25.34    1.17 
  -5   1   2   25.59    1.76 
   5   1  -2   28.17    1.51 
   5   1  -2   27.02    1.43 
  -5   1   2   26.09    1.51 
   5   1  -2   24.72    1.15 
   5   1  -2   27.69    1.63 
   5   1  -2   24.81    1.50 
  -5   1   2   26.30    1.36 
  -5   1   2   25.31    1.41 
   5   1  -2   27.07    1.68 
   5   1  -2   25.11    1.16 
   5   1  -2   25.32    1.11 
  -4  -1   2   47.39    1.95 
   4  -1  -2   46.97    2.57 
   4  -1  -2   47.29    2.28 
   4  -1  -2   47.32    2.11 
  -4  -1   2   49.62    2.14 
  -4  -1   2   49.11    2.54 
   4  -1  -2   48.40    2.39 
   4  -1  -2   48.23    2.20 
  -4  -1   2   44.91    2.50 
  -4  -1   2   49.13    1.95 
  -4  -1   2   47.69    2.24 
  -4  -1   2   51.07    2.30 
   4  -1  -2   43.71    2.14 
   4  -1  -2   48.92    2.09 
  -4  -1   2   50.56    2.25 
   4  -1  -2   46.44    1.92 
   4  -1  -2   43.81    2.40 
  -4  -1   2   47.47    2.12 
  -4  -1   2   50.09    2.34 
   4  -1  -2   44.81    1.86 
   4  -1  -2   46.72    2.15 
  -4  -1   2   47.33    2.70 
   4  -1  -2   47.06    2.26 
   4  -1  -2   46.07    2.32 
   4   1  -2   48.44    2.33 
   4   1  -2   45.93    2.13 
  -4   1   2   46.05    2.52 
   4   1  -2   47.42    2.35 
  -4   1   2   51.06    2.11 
  -4   1   2   48.86    2.24 
  -4   1   2   48.84    1.80 
   4   1  -2   47.18    1.93 
  -4   1   2   47.61    1.99 
   4   1  -2   44.13    2.31 
   4   1  -2   46.24    2.44 
  -4   1   2   45.38    2.10 
   4   1  -2   49.04    1.97 
  -4   1   2   52.61    2.22 
  -4   1   2   45.15    2.06 
  -4   1   2   48.89    2.50 
  -4   1   2   46.33    1.93 
   4   1  -2   46.27    2.09 
   4   1  -2   41.39    2.19 
  -4   1   2   44.77    2.29 
   4   1  -2   50.27    2.32 
   4   1  -2   50.44    2.46 
   4   1  -2   39.56    2.07 
   4   1  -2   49.14    2.19 
   4   1  -2   50.01    2.21 
  -4   1   2   46.89    1.98 
  -4   1   2   50.18    2.72 
   4   1  -2   46.08    2.28 
   4   1  -2   47.76    2.61 
  -4   1   2   48.73    2.06 
   4   1  -2   47.12    1.84 
  -4   1   2   46.23    2.06 
  -3  -1   2   60.54    2.68 
  -3  -1   2   61.53    2.47 
  -3  -1   2   60.92    3.04 
  -3  -1   2   58.81    2.64 
  -3  -1   2   69.90    2.77 
   3  -1  -2   63.30    2.54 
   3  -1  -2   64.88    2.63 
  -3  -1   2   64.40    2.94 
   3  -1  -2   64.17    2.81 
   3  -1  -2   61.93    2.34 
  -3  -1   2   63.92    2.92 
   3  -1  -2   63.44    2.84 
   3  -1  -2   60.48    2.66 
   3  -1  -2   64.51    2.96 
  -3  -1   2   59.21    2.64 
  -3  -1   2   64.85    2.64 
   3  -1  -2   64.74    2.74 
   3  -1  -2   63.18    2.69 
   3  -1  -2   64.81    2.51 
   3  -1  -2   58.46    2.45 
  -3  -1   2   68.67    2.98 
  -3  -1   2   59.95    2.91 
  -3  -1   2   60.61    2.65 
  -3  -1   2   62.34    2.49 
   3  -1  -2   63.33    2.52 
   3  -1  -2   64.88    2.75 
   3  -1  -2   62.45    2.57 
   3  -1  -2   61.81    2.67 
  -3  -1   2   60.91    2.56 
  -3  -1   2   62.77    2.75 
   3  -1  -2   60.96    2.36 
  -3   1   2   61.78    2.80 
   3   1  -2   58.85    2.76 
  -3   1   2   63.65    2.42 
  -3   1   2   58.58    2.58 
  -3   1   2   61.65    2.39 
  -3   1   2   61.44    2.53 
  -3   1   2   62.49    2.79 
   3   1  -2   61.13    2.56 
  -3   1   2   61.97    2.39 
   3   1  -2   65.58    2.69 
  -3   1   2   64.88    2.51 
  -3   1   2   60.98    2.71 
   3   1  -2   60.42    2.70 
  -3   1   2   62.45    3.01 
  -3   1   2   62.22    2.92 
   3   1  -2   66.11    2.78 
   3   1  -2   63.61    2.76 
  -3   1   2   60.79    2.30 
   3   1  -2   60.76    2.65 
  -3   1   2   61.42    2.65 
  -3   1   2   61.66    2.89 
   3   1  -2   62.58    2.59 
   3   1  -2   61.76    2.95 
  -3   1   2   63.76    2.66 
   3   1  -2   60.76    2.73 
  -3   1   2   62.69    2.50 
  -3   1   2   61.92    2.31 
   3   1  -2   65.62    2.73 
   3   1  -2   60.84    2.47 
   3   1  -2   61.52    2.61 
  -3   1   2   61.45    2.32 
  -3   1   2   61.55    2.73 
   3   1  -2   60.63    2.41 
  -3   1   2   61.36    2.55 
   3   1  -2   67.53    2.97 
   3   1  -2   63.33    2.84 
  -3   1   2   62.20    2.60 
  -3   1   2   62.71    2.45 
   3   1  -2   62.87    2.49 
   3   1  -2   63.34    2.60 
   2  -1  -2    7.67    0.55 
   2  -1  -2    7.05    0.52 
  -2  -1   2    6.73    0.52 
  -2  -1   2    6.93    0.53 
  -2  -1   2    7.27    0.53 
   2  -1  -2    7.16    0.56 
  -2  -1   2    7.69    0.57 
   2  -1  -2    7.26    0.63 
  -2  -1   2    7.28    0.54 
  -2  -1   2    6.92    0.53 
  -2  -1   2    7.21    0.45 
  -2  -1   2    7.55    0.47 
  -2  -1   2    6.99    0.53 
   2  -1  -2    6.28    0.53 
   2  -1  -2    7.04    0.41 
  -2  -1   2    7.06    0.66 
  -2  -1   2    7.22    0.61 
  -2  -1   2    6.98    0.47 
   2  -1  -2    7.34    0.49 
   2  -1  -2    7.29    0.42 
   2  -1  -2    6.94    0.38 
  -2  -1   2    8.36    0.52 
   2  -1  -2    7.22    0.43 
  -2  -1   2    6.60    0.60 
   2  -1  -2    8.23    0.67 
   2  -1  -2    6.85    0.41 
  -2  -1   2    8.03    0.56 
  -2  -1   2    7.35    0.60 
  -2  -1   2    7.37    0.54 
   2  -1  -2    6.14    0.48 
   2  -1  -2    6.92    0.53 
   2  -1  -2    7.19    0.45 
   2  -1  -2    7.38    0.38 
  -2  -1   2    8.04    0.53 
   2   1  -2    7.72    0.55 
  -2   1   2    7.10    0.38 
   2   1  -2    7.39    0.51 
   2   1  -2    7.67    0.52 
  -2   1   2    7.39    0.48 
  -2   1   2    7.21    0.41 
  -2   1   2    7.80    0.65 
   2   1  -2    7.68    0.55 
  -2   1   2    6.88    0.42 
   2   1  -2    7.14    0.48 
  -2   1   2    7.87    0.40 
   2   1  -2    7.02    0.46 
  -2   1   2    6.95    0.48 
   2   1  -2    6.56    0.44 
  -2   1   2    6.61    0.53 
   2   1  -2    6.52    0.55 
   2   1  -2    7.24    0.51 
   2   1  -2    7.52    0.54 
   2   1  -2    7.23    0.45 
   2   1  -2    7.49    0.54 
   2   1  -2    7.10    0.68 
  -2   1   2    7.27    0.51 
  -2   1   2    7.14    0.42 
   2   1  -2    6.55    0.51 
  -2   1   2    7.44    0.48 
  -2   1   2    7.54    0.51 
  -2   1   2    7.78    0.57 
   2   1  -2    7.18    0.54 
   2   1  -2    8.14    0.54 
  -2   1   2    7.40    0.51 
   2   1  -2    6.53    0.54 
  -2   1   2    8.18    0.63 
   2   1  -2    7.32    0.56 
   2   1  -2    8.04    0.65 
  -2   1   2    7.15    0.42 
  -2   1   2    7.05    0.62 
  -2   1   2    7.25    0.35 
  -2   1   2    7.12    0.59 
  -2   1   2    7.20    0.34 
  -2   1   2    6.61    0.54 
  -2   1   2    7.59    0.53 
   1  -1  -2    5.58    0.43 
   1  -1  -2    5.94    0.29 
   1  -1  -2    6.33    0.53 
  -1  -1   2    6.85    0.45 
   1  -1  -2    7.13    0.47 
   1  -1  -2    6.30    0.40 
  -1  -1   2    5.46    0.39 
  -1  -1   2    6.07    0.40 
  -1  -1   2    6.17    0.42 
  -1  -1   2    6.36    0.44 
  -1  -1   2    5.98    0.51 
   1  -1  -2    6.47    0.38 
  -1  -1   2    6.28    0.42 
  -1  -1   2    6.05    0.42 
   1  -1  -2    6.16    0.40 
   1  -1  -2    6.43    0.40 
  -1  -1   2    5.86    0.44 
  -1  -1   2    6.25    0.44 
   1  -1  -2    6.28    0.53 
  -1  -1   2    6.40    0.54 
   1  -1  -2    6.52    0.33 
   1  -1  -2    6.70    0.30 
  -1  -1   2    6.18    0.41 
  -1  -1   2    5.88    0.39 
   1  -1  -2    6.09    0.44 
   1  -1  -2    6.24    0.34 
   1  -1  -2    5.96    0.42 
  -1  -1   2    7.02    0.46 
   1  -1  -2    6.22    0.48 
  -1  -1   2    6.62    0.43 
  -1  -1   2    7.12    0.42 
  -1  -1   2    6.05    0.42 
  -1   1   2    6.90    0.59 
  -1   1   2    6.63    0.43 
   1   1  -2    7.85    0.49 
   1   1  -2    5.43    0.39 
  -1   1   2    5.94    0.32 
   1   1  -2    7.03    0.45 
   1   1  -2    6.39    0.43 
  -1   1   2    6.64    0.28 
   1   1  -2    6.71    0.54 
   1   1  -2    6.87    0.43 
  -1   1   2    6.70    0.29 
   1   1  -2    6.11    0.42 
  -1   1   2    6.83    0.47 
  -1   1   2    6.36    0.34 
   1   1  -2    7.08    0.47 
  -1   1   2    5.96    0.57 
   1   1  -2    6.26    0.44 
   1   1  -2    6.08    0.54 
  -1   1   2    6.81    0.47 
  -1   1   2    6.60    0.34 
  -1   1   2    6.22    0.45 
  -1   1   2    6.05    0.37 
  -1   1   2    5.42    0.45 
   1   1  -2    6.24    0.42 
  -1   1   2    6.54    0.41 
   1   1  -2    6.25    0.41 
   1   1  -2    5.88    0.42 
   1   1  -2    7.33    0.46 
   1   1  -2    6.05    0.40 
   1   1  -2    6.65    0.41 
  -1   1   2    6.38    0.42 
   1   1  -2    6.74    0.41 
   1   1  -2    6.28    0.39 
   1   1  -2    7.14    0.44 
   1   1  -2    5.66    0.38 
   1   1  -2    6.70    0.45 
  -1   1   2    5.38    0.46 
  -1   1   2    6.70    0.44 
  -1   1   2    6.32    0.41 
   0  -1   2    2.41    0.30 
   0  -1  -2    4.25    0.32 
   0  -1  -2    3.62    0.55 
   0  -1  -2    4.67    0.35 
   0  -1   2    4.71    0.67 
   0  -1   2    5.11    0.45 
   0  -1   2    2.53    0.41 
   0  -1  -2    4.18    0.36 
   0  -1   2    3.80    0.30 
   0  -1  -2    4.53    0.28 
   0  -1  -2    4.44    0.33 
   0  -1   2    4.30    0.32 
   0  -1  -2    3.21    0.21 
   0  -1   2    4.45    0.35 
   0  -1  -2    3.61    0.31 
   0  -1  -2    4.40    0.29 
   0  -1   2    2.14    0.47 
   0  -1  -2    4.14    0.34 
   0  -1  -2    4.10    0.27 
   0  -1  -2    3.44    0.22 
   0  -1  -2    5.00    0.39 
   0  -1   2    2.37    0.55 
   0  -1  -2    3.97    0.29 
   0  -1  -2    4.58    0.35 
   0   1   2    3.92    0.33 
   0   1  -2    4.74    0.65 
   0   1   2    4.33    0.33 
   0   1   2    3.51    0.59 
   0   1  -2    4.17    0.31 
   0   1   2    4.77    0.28 
   0   1  -2    2.44    0.57 
   0   1   2    3.84    0.29 
   0   1   2    3.58    0.32 
   0   1  -2    4.74    0.33 
   0   1  -2    4.76    0.33 
   0   1   2    4.61    0.29 
   0   1  -2    3.96    0.22 
   0   1   2    4.51    0.34 
   0   1  -2    4.67    0.34 
   0   1   2    3.59    0.30 
   0   1   2    4.62    0.28 
   0   1   2    4.11    0.33 
   0   1   2    2.94    0.64 
   0   1  -2    3.23    0.57 
   0   1   2    4.63    0.35 
   0   1   2    4.37    0.30 
   0   1   2    2.44    0.42 
   0   1  -2    3.40    0.48 
   0   1  -2    4.70    0.29 
   0   1   2    4.26    0.23 
   0   1  -2    3.87    0.31 
   0   1  -2    4.16    0.31 
   0   1   2    4.52    0.38 
   0   1   2    5.37    0.51 
   0   1   2    4.46    0.28 
   0   1   2    2.55    0.42 
   0   1  -2    4.34    0.26 
   0   1  -2    3.69    0.33 
   0   1   2    4.82    0.39 
   0   1  -2    4.70    0.33 
   0   1  -2    4.80    0.45 
   0   1   2    4.07    0.35 
  -1  -1  -2  113.11    4.41 
   1  -1   2  117.34    4.35 
   1  -1   2  112.47    4.23 
   1  -1   2  116.74    4.41 
   1  -1   2  101.08    4.56 
  -1  -1  -2  116.24    4.44 
   1  -1   2  117.75    4.27 
   1  -1   2  115.42    4.41 
  -1  -1  -2  110.58    4.40 
  -1  -1  -2  115.01    4.38 
  -1  -1  -2  111.25    4.41 
  -1  -1  -2  120.64    4.85 
  -1  -1  -2  114.75    4.40 
  -1  -1  -2  118.50    4.42 
  -1  -1  -2  127.55    4.44 
   1  -1   2  116.86    4.20 
   1  -1   2  112.53    4.41 
  -1  -1  -2  114.69    4.36 
   1  -1   2  117.76    4.34 
   1  -1   2  106.30    4.22 
   1  -1   2  112.57    4.33 
  -1  -1  -2  116.19    4.35 
  -1  -1  -2  112.45    4.48 
  -1  -1  -2  120.49    4.53 
  -1  -1  -2  115.09    4.35 
   1  -1   2  116.21    4.21 
  -1  -1  -2  113.23    4.33 
   1  -1   2  117.18    4.63 
  -1  -1  -2  116.69    4.43 
  -1  -1  -2  113.52    4.40 
  -1  -1  -2  114.34    4.35 
  -1  -1  -2  122.43    4.52 
   1  -1   2  108.81    4.60 
   1   1   2  114.80    4.42 
  -1   1  -2  119.82    4.66 
  -1   1  -2  117.65    4.35 
   1   1   2  117.78    4.43 
  -1   1  -2  118.48    4.81 
  -1   1  -2  112.21    4.41 
   1   1   2  117.76    4.40 
   1   1   2  115.38    4.40 
  -1   1  -2  101.32    4.51 
   1   1   2  117.43    4.34 
   1   1   2  110.61    4.41 
   1   1   2  110.44    4.38 
   1   1   2  115.80    4.35 
  -1   1  -2  109.01    4.32 
  -1   1  -2  116.88    4.23 
  -1   1  -2  117.36    4.33 
  -1   1  -2  121.82    4.43 
   1   1   2  113.60    4.37 
   1   1   2  119.13    4.38 
  -1   1  -2  117.98    4.36 
   1   1   2  115.82    4.37 
  -1   1  -2  116.38    4.42 
   1   1   2  114.55    4.41 
   1   1   2  113.53    4.49 
  -1   1  -2  115.39    4.29 
   1   1   2  112.48    4.50 
  -1   1  -2  112.71    4.41 
   1   1   2  113.49    4.38 
  -1   1  -2  113.84    4.30 
   1   1   2  113.74    4.43 
   1   1   2  114.80    4.41 
   1   1   2  115.24    4.43 
   1   1   2  113.55    4.35 
  -1   1  -2  113.43    4.21 
  -1   1  -2  111.74    4.41 
  -1   1  -2  116.67    4.20 
   2  -1   2   11.29    0.58 
  -2  -1  -2   10.55    0.68 
   2  -1   2   10.85    0.57 
   2  -1   2   11.37    0.53 
   2  -1   2   10.23    0.79 
  -2  -1  -2   10.22    0.66 
  -2  -1  -2   10.81    0.71 
  -2  -1  -2    9.74    0.67 
   2  -1   2   11.20    0.67 
   2  -1   2    9.72    0.56 
  -2  -1  -2   11.09    0.72 
  -2  -1  -2   10.75    0.61 
   2  -1   2   11.26    0.70 
   2  -1   2   10.58    0.58 
  -2  -1  -2   11.15    0.71 
  -2  -1  -2   11.55    0.74 
  -2  -1  -2   11.45    0.65 
   2  -1   2    9.70    0.72 
   2  -1   2   11.36    0.74 
   2  -1   2   11.67    0.73 
  -2  -1  -2    9.86    0.67 
   2  -1   2   10.72    0.71 
  -2  -1  -2   11.89    0.83 
   2  -1   2   10.38    0.71 
   2  -1   2   10.76    0.65 
  -2  -1  -2   11.09    0.65 
  -2  -1  -2   10.24    0.71 
   2  -1   2   11.36    0.46 
  -2  -1  -2   10.60    0.73 
  -2  -1  -2   10.42    0.80 
  -2  -1  -2   12.18    0.76 
   2   1   2    9.54    0.74 
   2   1   2    9.60    0.66 
  -2   1  -2    9.36    0.76 
   2   1   2   10.92    0.61 
  -2   1  -2   10.88    0.89 
   2   1   2   10.65    0.70 
   2   1   2   12.48    0.80 
   2   1   2   10.47    0.67 
   2   1   2   11.10    0.68 
  -2   1  -2   10.32    0.52 
   2   1   2   10.22    0.72 
  -2   1  -2   10.74    0.65 
  -2   1  -2   10.32    0.69 
   2   1   2   10.09    0.82 
  -2   1  -2   10.82    0.69 
  -2   1  -2   10.58    0.58 
  -2   1  -2   10.68    0.65 
   2   1   2   10.53    0.64 
  -2   1  -2   10.59    0.67 
   2   1   2   10.17    0.70 
   2   1   2   10.11    0.74 
  -2   1  -2    9.85    0.70 
   2   1   2   10.76    0.69 
   2   1   2   10.15    0.67 
  -2   1  -2   10.22    0.68 
  -2   1  -2   10.46    0.57 
  -2   1  -2   10.31    0.70 
   2   1   2   10.82    0.68 
   2   1   2   10.93    0.62 
   2   1   2   11.20    0.71 
   2   1   2   10.45    0.68 
   2   1   2   11.12    0.80 
   2   1   2   11.16    0.74 
  -2   1  -2    9.84    0.68 
   2   1   2    9.96    0.64 
  -2   1  -2    9.75    0.57 
  -2   1  -2   10.45    0.44 
  -2   1  -2   10.82    0.57 
  -2   1  -2   11.06    0.68 
  -2   1  -2   10.28    0.60 
   3  -1   2  300.61   11.48 
   3  -1   2  296.70   11.04 
  -3  -1  -2  302.76   11.16 
  -3  -1  -2  309.34   11.62 
   3  -1   2  306.15   11.22 
  -3  -1  -2  303.77   11.33 
   3  -1   2  301.76   11.40 
  -3  -1  -2  304.10   11.18 
   3  -1   2  305.80   11.66 
  -3  -1  -2  310.31   11.38 
   3  -1   2  299.94   11.19 
   3  -1   2  298.79   11.41 
  -3  -1  -2  303.71   11.13 
   3  -1   2  299.16   11.40 
   3  -1   2  304.71   11.37 
   3  -1   2  307.55   11.20 
  -3  -1  -2  303.72   11.41 
   3  -1   2  309.15   11.32 
  -3  -1  -2  315.92   11.38 
   3  -1   2  294.18   11.09 
  -3  -1  -2  305.53   11.57 
   3  -1   2  297.44   11.50 
  -3   1  -2  314.95   11.90 
   3   1   2  300.14   11.42 
   3   1   2  304.56   11.14 
   3   1   2  302.88   11.27 
  -3   1  -2  308.80   11.18 
  -3   1  -2  306.40   11.05 
  -3   1  -2  292.22   11.28 
   3   1   2  298.43   11.14 
  -3   1  -2  299.55   11.61 
  -3   1  -2  288.44   11.20 
   3   1   2  301.92   11.24 
   3   1   2  302.40   11.40 
  -3   1  -2  283.68   11.39 
   3   1   2  303.83   11.28 
  -3   1  -2  285.78   11.29 
   3   1   2  310.88   11.30 
   3   1   2  299.20   11.49 
   3   1   2  303.28   11.13 
   3   1   2  300.49   11.32 
  -3   1  -2  295.57   11.17 
  -3   1  -2  294.87   11.45 
   3   1   2  296.05   11.16 
   3   1   2  297.72   11.51 
  -3   1  -2  302.13   11.17 
  -3   1  -2  313.64   11.49 
   3   1   2  305.34   11.34 
   3   1   2  300.74   11.40 
   3   1   2  295.92   11.36 
  -3   1  -2  299.74   11.29 
  -3   1  -2  305.87   11.28 
   3   1   2  311.85   11.46 
  -4  -1  -2    0.59    0.27 
  -4  -1  -2    0.67    0.20 
  -4  -1  -2    0.31    0.23 
   4  -1   2    0.68    0.21 
  -4  -1  -2    0.56    0.17 
   4  -1   2    0.56    0.28 
   4  -1   2    0.51    0.14 
   4  -1   2    0.65    0.21 
   4  -1   2    0.48    0.28 
   4  -1   2    0.48    0.23 
   4  -1   2    0.75    0.32 
   4  -1   2    0.50    0.24 
   4  -1   2    0.48    0.22 
  -4  -1  -2    0.41    0.17 
   4  -1   2    0.62    0.25 
   4  -1   2    0.49    0.29 
  -4  -1  -2    0.81    0.30 
  -4  -1  -2    0.19    0.26 
  -4  -1  -2    0.20    0.21 
   4   1   2    0.05    0.21 
  -4   1  -2    0.60    0.23 
   4   1   2    0.55    0.27 
   4   1   2    0.34    0.24 
  -4   1  -2    0.66    0.26 
   4   1   2    0.57    0.30 
   4   1   2    0.81    0.20 
  -4   1  -2    0.49    0.14 
   4   1   2    0.36    0.22 
   4   1   2    1.01    0.22 
  -4   1  -2    0.74    0.29 
   4   1   2    0.79    0.21 
   4   1   2    0.71    0.21 
   4   1   2    0.51    0.26 
  -4   1  -2    0.26    0.22 
  -4   1  -2    0.63    0.29 
   4   1   2    0.31    0.20 
   4   1   2    0.49    0.25 
   4   1   2    0.36    0.24 
   4   1   2    0.49    0.23 
   4   1   2    0.68    0.24 
  -4   1  -2    0.27    0.18 
  -4   1  -2    0.81    0.22 
   4   1   2    0.36    0.30 
   5  -1   2  121.89    5.30 
   5  -1   2  128.16    4.75 
   5  -1   2  130.89    5.57 
  -5  -1  -2  128.35    5.45 
  -5  -1  -2  128.21    5.75 
  -5  -1  -2  124.34    4.92 
  -5  -1  -2  125.82    5.34 
  -5  -1  -2  127.75    5.39 
  -5  -1  -2  128.82    4.99 
   5  -1   2  131.79    5.71 
   5  -1   2  131.17    5.53 
   5  -1   2  131.98    5.42 
   5  -1   2  130.28    5.50 
   5  -1   2  126.68    4.98 
   5  -1   2  129.58    5.87 
  -5  -1  -2  125.90    4.94 
   5  -1   2  123.58    5.12 
   5  -1   2  128.63    5.29 
  -5  -1  -2  123.93    5.34 
  -5   1  -2  126.74    5.16 
  -5   1  -2  128.94    5.34 
  -5   1  -2  128.40    5.21 
  -5   1  -2  122.37    5.29 
   5   1   2  129.83    5.44 
   5   1   2  135.47    4.97 
  -5   1  -2  121.27    5.60 
   5   1   2  128.04    5.52 
  -5   1  -2  129.60    5.04 
  -5   1  -2  132.39    4.78 
   5   1   2  128.53    5.19 
   5   1   2  127.50    5.38 
   5   1   2  120.80    5.22 
  -5   1  -2  125.95    4.77 
   5   1   2  128.67    5.50 
   5   1   2  127.38    5.68 
  -5   1  -2  127.35    5.10 
   5   1   2  125.64    5.33 
   5   1   2  132.54    5.01 
   5   1   2  129.37    4.93 
   5   1   2  129.27    5.51 
   5   1   2  135.72    5.73 
   6  -1   2    7.45    0.97 
  -6  -1  -2    7.70    0.53 
   6  -1   2    8.64    0.99 
  -6  -1  -2    6.94    0.55 
  -6  -1  -2    7.18    0.94 
   6  -1   2    7.46    1.14 
  -6  -1  -2    7.80    0.77 
  -6  -1  -2    7.50    1.18 
   6  -1   2    7.46    0.60 
  -6  -1  -2    8.66    1.00 
   6  -1   2    7.46    1.01 
  -6  -1  -2    7.99    1.37 
  -6  -1  -2    7.40    0.96 
   6  -1   2    7.21    1.07 
  -6  -1  -2    6.94    0.96 
   6  -1   2    7.28    0.94 
   6  -1   2    8.70    1.00 
   6  -1   2    6.97    1.01 
   6  -1   2    6.85    0.78 
   6   1   2    7.44    1.03 
   6   1   2    8.20    0.55 
  -6   1  -2    8.25    0.59 
   6   1   2    7.66    0.58 
   6   1   2    7.61    0.77 
  -6   1  -2    6.10    0.83 
   6   1   2    8.27    0.65 
  -6   1  -2    8.17    0.98 
   6   1   2    7.82    0.57 
   6   1   2    6.08    0.95 
   6   1   2    7.06    0.78 
   6   1   2    6.99    0.98 
  -6   1  -2    6.78    1.07 
   6   1   2    6.72    0.91 
  -6   1  -2    8.10    0.84 
   6   1   2    8.74    1.02 
  -6   1  -2    8.17    0.89 
  -6   1  -2    8.26    0.84 
   6   1   2    8.96    1.27 
   6   1   2    8.26    1.17 
   6   1   2    8.42    1.11 
   7  -1   2  146.17    6.14 
  -7  -1  -2  150.16    7.36 
  -7  -1  -2  150.30    6.23 
   7  -1   2  144.55    6.59 
   7  -1   2  145.34    6.23 
  -7  -1  -2  135.73    6.71 
  -7  -1  -2  141.28    6.21 
  -7  -1  -2  138.92    6.30 
  -7  -1  -2  140.82    6.26 
   7  -1   2  139.68    6.27 
   7  -1   2  145.74    6.76 
   7  -1   2  134.94    6.39 
   7  -1   2  149.35    6.26 
   7  -1   2  144.67    6.44 
   7  -1   2  139.82    5.95 
  -7   1  -2  144.00    6.19 
   7   1   2  146.00    6.47 
  -7   1  -2  143.36    6.20 
   7   1   2  148.45    6.25 
  -7   1  -2  150.22    6.74 
   7   1   2  145.69    6.38 
   7   1   2  136.89    6.68 
   7   1   2  142.37    5.79 
  -7   1  -2  146.60    6.09 
  -7   1  -2  148.68    7.35 
   7   1   2  148.70    6.31 
  -7   1  -2  146.92    5.96 
   7   1   2  142.43    6.63 
   7   1   2  142.29    6.41 
   7   1   2  134.97    6.41 
   8  -1   2   18.15    1.40 
   8  -1   2   14.62    1.78 
  -8  -1  -2   20.54    1.65 
  -8  -1  -2   19.13    1.57 
   8  -1   2   18.97    1.95 
   8  -1   2   20.51    1.66 
  -8  -1  -2   14.34    1.99 
  -8  -1  -2   19.63    1.64 
   8  -1   2   19.87    1.58 
  -8  -1  -2   16.76    1.72 
   8  -1   2   16.86    1.98 
  -8  -1  -2   17.29    2.45 
   8  -1   2   17.38    1.75 
   8  -1   2   16.49    2.07 
  -8   1  -2   19.36    2.57 
  -8   1  -2   15.76    2.35 
   8   1   2   18.69    1.97 
   8   1   2   17.26    1.74 
   8   1   2   16.80    2.13 
   8   1   2   14.98    1.77 
   8   1   2   19.89    1.71 
  -8   1  -2   17.95    1.47 
   8   1   2   16.63    1.73 
  -8   1  -2   18.36    2.13 
   8   1   2   18.03    2.11 
  -8   1  -2   19.39    1.56 
   8   1   2   16.88    1.88 
  -8   1  -2   18.44    1.52 
  -9  -1  -2  108.12    6.08 
  -9  -1  -2  114.63    5.45 
   9  -1   2  109.33    5.92 
  -9  -1  -2  112.94    5.47 
   9  -1   2  112.56    5.81 
   9  -1   2  123.85    6.30 
   9  -1   2  106.70    5.53 
  -9  -1  -2  113.98    5.58 
   9  -1   2  118.08    5.55 
   9  -1   2  107.74    5.45 
   9  -1   2  112.80    5.73 
  -9  -1  -2  118.50    5.65 
  -9  -1  -2  114.69    6.79 
  -9   1  -2  116.52    5.49 
  -9   1  -2  118.11    5.47 
  -9   1  -2  104.62    6.59 
   9   1   2  110.98    5.62 
   9   1   2  118.17    5.51 
  -9   1  -2  113.61    6.06 
  -9   1  -2  117.46    6.86 
   9   1   2  121.62    5.81 
   9   1   2  123.27    6.32 
   9   1   2  113.88    5.80 
   9   1   2  123.53    5.90 
   9   1   2  115.79    6.06 
   9   1   2  123.77    5.64 
  -9   1  -2  113.87    5.34 
  10  -1   2    5.29    1.26 
  10  -1   2    4.91    1.34 
 -10  -1  -2    3.87    0.97 
  10  -1   2    4.04    1.16 
  10  -1   2    7.69    1.42 
  10  -1   2    7.74    1.40 
 -10  -1  -2    6.69    1.80 
 -10  -1  -2    6.19    1.21 
 -10  -1  -2    5.54    1.16 
 -10  -1  -2    5.23    1.46 
  10  -1   2    6.12    1.19 
  10   1   2    6.50    1.35 
  10   1   2    6.23    1.30 
  10   1   2    6.09    1.33 
 -10   1  -2    7.15    1.57 
 -10   1  -2    4.94    1.12 
 -10   1  -2    9.57    1.95 
 -10   1  -2    6.14    1.14 
  10   1   2    6.36    1.19 
 -10   1  -2    4.93    1.64 
  10   1   2    6.26    1.30 
 -10   1  -2    7.36    1.92 
  10   1   2    7.39    1.63 
  10   1   2    4.77    1.34 
  10   1   2    6.96    1.28 
 -10  -2   2  104.79    6.06 
  10  -2  -2  105.39    5.62 
 -10  -2   2  105.22    5.31 
 -10  -2   2  100.43    5.27 
  10  -2  -2  101.81    5.25 
 -10  -2   2   96.37    5.28 
 -10  -2   2  108.82    6.65 
  10  -2  -2  112.74    5.88 
  10  -2  -2  104.42    5.48 
  10  -2  -2  100.13    5.11 
 -10  -2   2  100.99    6.06 
  10   2  -2  100.65    5.34 
 -10   2   2  101.04    4.99 
  10   2  -2  107.56    5.59 
  10   2  -2  106.36    5.40 
  10   2  -2  112.95    5.59 
 -10   2   2  110.46    6.62 
 -10   2   2   98.81    5.79 
  10   2  -2  110.60    5.71 
  10   2  -2  111.20    5.92 
 -10   2   2  102.90    6.10 
 -10   2   2  101.90    5.07 
  10   2  -2  109.69    5.99 
  10   2  -2  103.07    5.60 
   9  -2  -2   25.02    2.06 
   9  -2  -2   23.41    1.92 
   9  -2  -2   28.51    2.43 
  -9  -2   2   24.12    2.38 
  -9  -2   2   23.45    2.57 
  -9  -2   2   23.32    1.95 
  -9  -2   2   24.09    1.95 
  -9  -2   2   25.56    2.43 
   9  -2  -2   24.24    1.86 
   9  -2  -2   25.79    2.16 
   9  -2  -2   26.06    2.25 
  -9  -2   2   23.97    1.98 
   9   2  -2   25.88    2.28 
   9   2  -2   22.73    2.23 
  -9   2   2   23.98    1.76 
  -9   2   2   23.83    2.59 
  -9   2   2   27.06    1.93 
   9   2  -2   23.97    2.39 
   9   2  -2   21.88    2.30 
  -9   2   2   23.77    2.24 
   9   2  -2   24.71    2.28 
  -9   2   2   21.95    2.68 
   9   2  -2   26.05    2.18 
   9   2  -2   26.48    2.14 
   9   2  -2   27.24    2.17 
   8  -2  -2   82.03    3.91 
   8  -2  -2   82.40    3.93 
  -8  -2   2   76.81    3.97 
  -8  -2   2   82.73    4.17 
   8  -2  -2   76.85    3.83 
   8  -2  -2   80.17    4.17 
  -8  -2   2   88.23    4.76 
   8  -2  -2   75.23    4.41 
  -8  -2   2   77.87    4.60 
  -8  -2   2   79.96    4.07 
   8  -2  -2   82.67    4.42 
   8  -2  -2   78.31    4.23 
  -8  -2   2   79.45    4.97 
  -8  -2   2   83.19    4.13 
   8  -2  -2   75.90    4.00 
   8   2  -2   83.55    4.53 
   8   2  -2   84.87    4.34 
   8   2  -2   80.21    4.09 
   8   2  -2   83.18    4.30 
  -8   2   2   80.50    3.93 
   8   2  -2   84.22    4.26 
   8   2  -2   85.01    4.36 
  -8   2   2   75.49    3.66 
   8   2  -2   81.79    3.77 
  -8   2   2   78.53    4.45 
   8   2  -2   78.45    4.41 
  -8   2   2   80.71    4.93 
   8   2  -2   81.07    4.17 
  -8   2   2   86.23    4.76 
  -8   2   2   78.68    3.82 
   8   2  -2   83.96    4.22 
   7  -2  -2   36.60    2.55 
  -7  -2   2   40.99    2.37 
   7  -2  -2   38.92    2.45 
  -7  -2   2   40.27    2.31 
   7  -2  -2   39.02    2.14 
   7  -2  -2   38.62    2.53 
   7  -2  -2   37.95    1.99 
  -7  -2   2   37.18    1.99 
  -7  -2   2   41.67    2.79 
   7  -2  -2   40.35    2.40 
   7  -2  -2   38.77    2.29 
  -7  -2   2   39.04    2.37 
  -7  -2   2   41.51    3.03 
   7  -2  -2   38.96    2.17 
  -7  -2   2   36.12    2.66 
  -7  -2   2   38.07    2.29 
   7  -2  -2   39.74    2.16 
   7   2  -2   38.33    2.56 
  -7   2   2   37.62    1.86 
   7   2  -2   40.50    2.42 
  -7   2   2   36.98    2.17 
   7   2  -2   41.46    2.38 
  -7   2   2   37.30    1.99 
   7   2  -2   37.54    2.56 
   7   2  -2   38.19    2.32 
   7   2  -2   35.83    2.10 
  -7   2   2   36.01    2.84 
   7   2  -2   41.52    2.48 
   7   2  -2   38.00    2.42 
   7   2  -2   36.80    2.43 
   7   2  -2   39.99    2.49 
  -7   2   2   38.55    2.59 
  -7   2   2   38.60    2.10 
  -7   2   2   31.29    2.52 
   6  -2  -2  124.61    5.36 
  -6  -2   2  126.24    6.31 
   6  -2  -2  133.81    5.36 
   6  -2  -2  132.29    6.13 
   6  -2  -2  130.91    4.93 
  -6  -2   2  128.26    5.61 
  -6  -2   2  128.57    5.32 
  -6  -2   2  138.01    6.11 
   6  -2  -2  126.70    5.51 
   6  -2  -2  129.23    5.15 
   6  -2  -2  127.48    5.60 
   6  -2  -2  124.36    5.77 
   6  -2  -2  133.64    5.39 
  -6  -2   2  128.53    5.64 
   6  -2  -2  129.26    5.69 
   6  -2  -2  130.43    5.90 
  -6  -2   2  131.38    5.58 
  -6  -2   2  123.03    5.97 
  -6  -2   2  128.19    5.55 
  -6   2   2  135.86    5.48 
   6   2  -2  120.47    5.10 
   6   2  -2  135.61    5.76 
   6   2  -2  128.30    5.82 
  -6   2   2  128.47    5.91 
   6   2  -2  132.31    5.69 
   6   2  -2  130.67    4.95 
   6   2  -2  124.23    5.73 
   6   2  -2  133.29    5.12 
  -6   2   2  122.43    4.91 
  -6   2   2  120.16    5.27 
   6   2  -2  132.60    5.06 
  -6   2   2  136.07    4.99 
  -6   2   2  130.19    5.04 
  -6   2   2  131.63    6.05 
  -6   2   2  131.85    5.22 
   6   2  -2  123.36    5.56 
  -6   2   2  130.74    4.81 
  -6   2   2  129.95    6.28 
   6   2  -2  121.36    5.69 
   6   2  -2  131.17    5.90 
  -6   2   2  141.84    5.24 
   6   2  -2  128.75    5.47 
   6   2  -2  129.46    5.71 
   6   2  -2  131.56    5.14 
  -6   2   2  131.93    5.06 
   6   2  -2  131.28    5.57 
  -5  -2   2  104.26    4.20 
   5  -2  -2  103.85    4.35 
   5  -2  -2  100.35    4.09 
  -5  -2   2   97.68    4.32 
  -5  -2   2   99.94    3.99 
  -5  -2   2   98.76    4.39 
   5  -2  -2   97.58    4.13 
   5  -2  -2   96.81    4.14 
  -5  -2   2  102.33    4.72 
   5  -2  -2  102.29    4.06 
  -5  -2   2   98.54    4.37 
  -5  -2   2  100.86    4.70 
   5  -2  -2   99.54    3.81 
   5  -2  -2   96.89    4.27 
   5  -2  -2  100.24    4.41 
   5  -2  -2  100.31    4.50 
   5  -2  -2   94.01    4.70 
   5  -2  -2  101.11    4.58 
  -5  -2   2   99.52    4.34 
  -5  -2   2   97.48    4.92 
  -5   2   2   96.87    4.66 
   5   2  -2   97.48    4.45 
   5   2  -2   95.67    3.96 
  -5   2   2  100.30    3.84 
  -5   2   2   96.42    3.82 
   5   2  -2   98.14    4.43 
   5   2  -2  102.46    4.31 
  -5   2   2  101.14    4.00 
   5   2  -2  105.87    4.39 
   5   2  -2   97.49    4.04 
  -5   2   2   99.52    3.85 
  -5   2   2   98.06    4.86 
   5   2  -2   99.28    4.52 
   5   2  -2   99.32    4.56 
  -5   2   2  101.16    4.24 
  -5   2   2  102.74    4.10 
   5   2  -2  104.08    4.31 
  -5   2   2   99.32    3.66 
   5   2  -2   96.87    3.98 
  -5   2   2  102.92    3.91 
   5   2  -2  102.11    4.47 
   5   2  -2   97.12    4.40 
  -5   2   2   87.34    3.72 
  -5   2   2   99.36    4.01 
  -5   2   2   99.08    3.84 
  -5   2   2  100.87    4.61 
   5   2  -2  105.06    4.44 
   5   2  -2   99.49    3.90 
  -5   2   2   95.96    4.20 
  -4  -2   2  400.07   15.00 
  -4  -2   2  386.44   14.41 
   4  -2  -2  391.89   14.78 
  -4  -2   2  376.90   14.64 
   4  -2  -2  401.41   14.46 
   4  -2  -2  380.94   14.46 
  -4  -2   2  400.85   14.59 
   4  -2  -2  399.84   14.22 
  -4  -2   2  379.09   15.20 
   4  -2  -2  397.95   14.39 
  -4  -2   2  383.68   14.68 
  -4  -2   2  403.42   14.44 
  -4  -2   2  386.13   14.71 
   4  -2  -2  404.54   14.72 
   4  -2  -2  388.48   15.03 
   4  -2  -2  390.79   14.23 
   4  -2  -2  400.57   14.63 
  -4  -2   2  389.95   14.72 
   4  -2  -2  387.38   14.58 
   4  -2  -2  391.96   14.51 
   4  -2  -2  392.80   14.86 
  -4  -2   2  395.25   14.36 
  -4  -2   2  387.82   14.98 
  -4   2   2  401.67   14.35 
   4   2  -2  401.96   14.88 
   4   2  -2  387.53   14.74 
   4   2  -2  385.67   14.76 
   4   2  -2  406.77   14.76 
  -4   2   2  392.13   14.30 
  -4   2   2  384.89   14.31 
  -4   2   2  394.52   14.44 
   4   2  -2  371.42   14.41 
   4   2  -2  389.26   14.76 
   4   2  -2  386.90   14.75 
  -4   2   2  392.84   14.13 
  -4   2   2  392.30   14.23 
  -4   2   2  386.67   14.31 
   4   2  -2  388.09   14.41 
  -4   2   2  378.57   14.66 
   4   2  -2  396.62   14.36 
   4   2  -2  385.92   14.81 
  -4   2   2  406.92   15.20 
   4   2  -2  396.31   14.75 
  -4   2   2  392.00   14.18 
   4   2  -2  375.95   14.64 
  -4   2   2  327.28   14.73 
   4   2  -2  403.07   14.63 
  -4   2   2  345.41   14.44 
  -4   2   2  392.59   14.25 
   4   2  -2  421.03   14.73 
  -4   2   2  388.07   14.12 
  -4   2   2  400.88   14.56 
   4   2  -2  389.24   14.41 
  -4   2   2  396.23   14.98 
  -4   2   2  390.84   14.39 
  -3  -2   2  252.34    9.35 
   3  -2  -2  245.04    9.37 
   3  -2  -2  242.52    8.84 
   3  -2  -2  228.76    9.04 
   3  -2  -2  244.05    8.88 
  -3  -2   2  242.93    9.70 
   3  -2  -2  232.48    9.02 
  -3  -2   2  243.39    9.14 
   3  -2  -2  238.80    8.87 
  -3  -2   2  236.97    8.96 
   3  -2  -2  228.88    9.02 
  -3  -2   2  236.15    9.49 
   3  -2  -2  243.91    9.17 
  -3  -2   2  240.01    9.16 
   3  -2  -2  238.16    9.19 
   3  -2  -2  234.41    9.01 
  -3  -2   2  233.47    8.93 
   3  -2  -2  241.11    9.00 
   3  -2  -2  238.57    9.08 
  -3  -2   2  234.58    9.09 
  -3  -2   2  241.36    9.30 
  -3  -2   2  237.11    9.09 
  -3  -2   2  229.16    9.01 
  -3  -2   2  239.69    8.99 
  -3   2   2  236.13    8.97 
   3   2  -2  239.22    9.17 
   3   2  -2  241.34    8.96 
   3   2  -2  243.87    9.10 
  -3   2   2  237.10    8.82 
   3   2  -2  231.79    9.09 
  -3   2   2  245.15    9.23 
   3   2  -2  236.34    9.17 
  -3   2   2  236.85    8.84 
  -3   2   2  240.95    9.33 
  -3   2   2  237.53    8.91 
  -3   2   2  237.97    9.28 
   3   2  -2  234.81    9.13 
  -3   2   2  236.62    8.77 
  -3   2   2  246.87    8.88 
   3   2  -2  247.07    9.21 
   3   2  -2  238.15    8.93 
  -3   2   2  237.11    8.75 
  -3   2   2  243.56    8.74 
   3   2  -2  246.99    9.20 
  -3   2   2  241.13    8.91 
  -3   2   2  232.28    8.80 
   3   2  -2  231.04    8.96 
   3   2  -2  238.71    8.97 
  -3   2   2  236.99    9.08 
   3   2  -2  237.82    9.06 
  -3   2   2  245.66    9.43 
  -3   2   2  232.06    8.91 
   3   2  -2  243.38    9.15 
  -3   2   2  240.68    9.19 
  -3   2   2  241.58    8.92 
  -3   2   2  239.33    9.06 
  -3   2   2  243.58    9.15 
   3   2  -2  233.74    9.13 
   3   2  -2  242.04    9.21 
   2  -2  -2  378.60   14.29 
   2  -2  -2  394.57   14.25 
   2  -2  -2  402.34   14.53 
  -2  -2   2  380.38   14.35 
   2  -2  -2  390.07   14.17 
  -2  -2   2  387.14   14.46 
  -2  -2   2  381.39   14.39 
  -2  -2   2  390.30   14.30 
   2  -2  -2  392.25   14.41 
  -2  -2   2  396.12   14.34 
  -2  -2   2  379.07   14.32 
  -2  -2   2  382.54   14.67 
  -2  -2   2  376.12   14.47 
  -2  -2   2  386.58   14.40 
  -2  -2   2  399.48   14.32 
  -2  -2   2  388.14   14.29 
  -2  -2   2  371.79   14.29 
  -2  -2   2  389.89   14.33 
  -2  -2   2  391.81   14.32 
  -2  -2   2  396.46   14.45 
   2  -2  -2  388.00   14.25 
   2  -2  -2  381.46   14.08 
  -2  -2   2  383.82   14.60 
  -2  -2   2  403.17   14.41 
   2  -2  -2  378.85   14.34 
  -2  -2   2  392.17   14.32 
  -2  -2   2  384.89   14.34 
  -2   2   2  378.99   14.36 
  -2   2   2  390.35   14.27 
   2   2  -2  409.63   14.40 
   2   2  -2  374.40   14.32 
  -2   2   2  408.56   14.30 
  -2   2   2  382.68   14.07 
  -2   2   2  383.30   14.40 
   2   2  -2  387.03   14.29 
  -2   2   2  400.21   14.20 
  -2   2   2  391.25   14.15 
   2   2  -2  379.01   14.36 
  -2   2   2  383.18   14.48 
  -2   2   2  387.72   14.17 
  -2   2   2  387.91   14.23 
  -2   2   2  384.42   13.98 
   2   2  -2  394.26   14.34 
   2   2  -2  394.35   14.33 
  -2   2   2  393.29   14.47 
  -2   2   2  384.21   14.27 
  -2   2   2  396.81   13.96 
   2   2  -2  384.71   14.39 
  -2   2   2  389.27   14.04 
   2   2  -2  390.17   14.48 
   2   2  -2  394.29   14.33 
   2   2  -2  406.32   14.63 
   2   2  -2  390.33   14.39 
  -2   2   2  381.20   14.19 
  -2   2   2  390.50   14.34 
   2   2  -2  397.59   14.33 
  -2   2   2  392.18   14.17 
  -2   2   2  407.85   14.37 
  -2   2   2  390.25   14.27 
   2   2  -2  386.44   14.33 
   2   2  -2  397.42   14.34 
   2   2  -2  377.89   14.39 
  -2   2   2  355.64   14.60 
  -2   2   2  374.57   14.24 
   2   2  -2  375.30   14.31 
  -2   2   2  385.99   14.25 
  -1  -2   2   52.34    2.24 
  -1  -2   2   52.43    2.24 
   1  -2  -2   46.13    2.51 
   1  -2  -2   54.14    2.24 
   1  -2  -2   51.96    2.27 
   1  -2  -2   52.04    2.17 
  -1  -2   2   51.74    2.16 
   1  -2  -2   50.37    1.96 
  -1  -2   2   53.59    2.17 
   1  -2  -2   50.87    2.03 
  -1  -2   2   51.13    2.19 
   1  -2  -2   53.24    1.97 
  -1  -2   2   53.53    2.10 
  -1  -2   2   54.27    2.13 
  -1  -2   2   49.05    2.20 
   1  -2  -2   54.54    2.50 
   1  -2  -2   51.36    2.22 
  -1  -2   2   50.80    2.15 
   1  -2  -2   52.25    2.28 
  -1  -2   2   52.78    2.20 
  -1  -2   2   53.16    2.18 
  -1  -2   2   52.59    2.41 
   1  -2  -2   53.17    2.15 
  -1  -2   2   51.05    2.33 
  -1  -2   2   53.26    2.27 
  -1  -2   2   55.39    2.24 
  -1  -2   2   50.27    2.20 
  -1  -2   2   52.84    2.16 
  -1  -2   2   52.96    2.13 
  -1  -2   2   52.26    2.14 
   1  -2  -2   53.80    2.24 
  -1  -2   2   52.86    2.26 
   1   2  -2   53.19    2.26 
   1   2  -2   50.73    2.23 
  -1   2   2   55.38    2.19 
  -1   2   2   51.56    2.22 
   1   2  -2   52.09    2.14 
   1   2  -2   52.31    2.15 
  -1   2   2   53.59    2.06 
  -1   2   2   54.30    2.13 
   1   2  -2   49.60    2.24 
   1   2  -2   53.10    2.14 
  -1   2   2   51.97    2.32 
   1   2  -2   52.65    2.17 
   1   2  -2   50.49    2.09 
  -1   2   2   54.78    2.31 
  -1   2   2   50.52    1.98 
   1   2  -2   50.98    2.21 
   1   2  -2   58.18    2.22 
  -1   2   2   50.56    2.02 
  -1   2   2   51.33    2.14 
  -1   2   2   52.53    2.45 
  -1   2   2   50.92    2.21 
  -1   2   2   51.93    1.96 
   1   2  -2   53.17    2.43 
   1   2  -2   55.64    2.26 
   1   2  -2   53.05    2.24 
   1   2  -2   50.10    2.18 
   1   2  -2   55.53    2.21 
   1   2  -2   52.38    2.21 
   1   2  -2   53.22    2.26 
  -1   2   2   51.68    2.16 
   1   2  -2   54.63    2.22 
  -1   2   2   55.36    2.39 
  -1   2   2   51.50    1.97 
  -1   2   2   52.58    2.22 
   1   2  -2   53.27    2.34 
  -1   2   2   53.68    2.25 
  -1   2   2   52.01    2.27 
   1   2  -2   52.12    2.16 
   0  -2   2   90.82    3.66 
   0  -2  -2   89.77    3.42 
   0  -2   2   95.53    3.88 
   0  -2   2   93.81    3.72 
   0  -2  -2   93.10    3.68 
   0  -2   2   88.09    3.62 
   0  -2  -2   93.86    3.76 
   0  -2   2   90.53    3.52 
   0  -2   2   94.92    3.59 
   0  -2  -2   90.86    3.60 
   0  -2  -2   89.81    3.71 
   0  -2  -2   93.21    3.71 
   0  -2  -2   86.91    3.45 
   0  -2  -2   88.32    3.43 
   0  -2   2  103.66    3.98 
   0  -2  -2   90.00    3.73 
   0  -2  -2   80.51    4.01 
   0  -2   2   91.42    3.68 
   0  -2   2   94.35    3.56 
   0  -2  -2   95.45    3.54 
   0  -2  -2   91.67    3.71 
   0  -2   2   93.83    3.71 
   0  -2  -2   92.47    3.64 
   0  -2   2   99.93    3.67 
   0  -2   2   92.70    4.19 
   0  -2  -2   92.63    3.56 
   0  -2   2   96.26    3.61 
   0  -2  -2   92.60    3.44 
   0  -2  -2   90.41    3.48 
   0  -2  -2   97.47    3.73 
   0  -2   2   90.90    3.67 
   0  -2   2   92.53    3.45 
   0  -2  -2   92.85    3.57 
   0  -2  -2   98.51    4.13 
   0  -2   2   94.63    3.47 
   0  -2  -2   88.58    3.74 
   0  -2   2   90.82    3.68 
   0   2  -2   91.13    3.60 
   0   2   2   94.57    3.56 
   0   2  -2   90.57    3.70 
   0   2  -2   92.77    3.52 
   0   2   2   94.91    3.73 
   0   2   2   89.97    3.41 
   0   2   2   86.11    3.45 
   0   2  -2   98.39    3.95 
   0   2   2   90.27    3.69 
   0   2  -2   88.66    3.73 
   0   2  -2   89.84    3.46 
   0   2   2   91.93    3.62 
   0   2   2   90.21    3.66 
   0   2  -2  104.61    4.03 
   0   2  -2   92.25    3.45 
   0   2  -2   90.61    3.63 
   0   2   2   97.26    4.12 
   0   2   2   89.03    3.74 
   0   2   2   99.78    3.73 
   0   2   2   92.54    3.57 
   0   2  -2  101.42    3.69 
   0   2  -2   90.90    3.68 
   0   2   2   91.03    3.64 
   0   2   2   90.47    3.64 
   0   2  -2   96.06    3.83 
   0   2  -2   92.16    3.67 
   0   2   2   94.93    3.48 
   0   2   2   93.63    3.65 
   0   2  -2   89.89    3.64 
   0   2   2   95.89    3.73 
   0   2  -2  104.67    4.04 
   0   2  -2   89.64    3.61 
   0   2  -2   93.62    3.71 
   0   2   2  105.97    3.92 
   0   2   2   92.36    3.74 
  -1  -2  -2   14.02    1.05 
  -1  -2  -2   13.54    0.82 
   1  -2   2   15.57    0.79 
  -1  -2  -2   15.04    0.75 
  -1  -2  -2   15.78    0.85 
   1  -2   2   16.34    1.06 
   1  -2   2   14.44    0.67 
  -1  -2  -2   13.24    0.86 
  -1  -2  -2   13.98    0.85 
  -1  -2  -2   14.95    0.78 
  -1  -2  -2   16.22    0.87 
  -1  -2  -2   14.75    0.86 
  -1  -2  -2   14.78    0.84 
  -1  -2  -2   15.35    0.89 
   1  -2   2   12.92    1.10 
  -1  -2  -2   13.90    0.91 
  -1  -2  -2   15.43    0.88 
  -1  -2  -2   13.93    0.71 
   1  -2   2   14.25    0.80 
  -1  -2  -2   16.36    0.98 
   1  -2   2   15.50    0.85 
  -1  -2  -2   13.99    0.74 
   1  -2   2   13.87    0.77 
  -1  -2  -2   15.09    0.86 
   1  -2   2   14.86    0.63 
  -1  -2  -2   15.51    0.80 
  -1  -2  -2   13.53    0.83 
   1   2   2   14.78    0.77 
  -1   2  -2   13.45    0.83 
   1   2   2   13.15    0.85 
  -1   2  -2   14.77    0.66 
  -1   2  -2   14.03    0.83 
   1   2   2   14.67    0.79 
   1   2   2   13.95    0.83 
   1   2   2   15.23    0.88 
   1   2   2   14.60    0.83 
   1   2   2   13.88    0.74 
   1   2   2   15.24    0.85 
  -1   2  -2   15.69    1.16 
  -1   2  -2   15.09    0.79 
   1   2   2   13.38    0.81 
  -1   2  -2   14.58    0.77 
   1   2   2   14.50    0.86 
   1   2   2   14.90    0.76 
  -1   2  -2   15.45    0.89 
  -1   2  -2   14.92    0.71 
   1   2   2   14.87    0.88 
  -1   2  -2   14.67    0.97 
   1   2   2   15.21    0.95 
   1   2   2   16.28    0.88 
   1   2   2   15.42    0.84 
   1   2   2   15.26    0.88 
  -1   2  -2   14.93    0.82 
  -1   2  -2   13.64    0.83 
  -1   2  -2   12.61    1.09 
  -1   2  -2   15.10    1.04 
  -1   2  -2   15.10    0.59 
  -1   2  -2   13.88    0.79 
   1   2   2   15.64    0.93 
  -1   2  -2   15.31    0.68 
  -1   2  -2   15.27    0.92 
  -1   2  -2   14.47    0.73 
   1   2   2   14.95    0.85 
   1   2   2   15.34    0.73 
   2  -2   2  147.85    5.67 
   2  -2   2  150.11    5.48 
   2  -2   2  145.72    5.90 
   2  -2   2  143.08    5.70 
  -2  -2  -2  147.54    5.63 
  -2  -2  -2  149.26    5.77 
   2  -2   2  145.49    5.54 
  -2  -2  -2  149.46    5.66 
  -2  -2  -2  147.30    5.70 
  -2  -2  -2  146.74    5.75 
  -2  -2  -2  146.43    5.67 
   2  -2   2  125.87    5.80 
  -2  -2  -2  148.78    5.73 
   2  -2   2  144.30    5.41 
   2  -2   2  150.17    5.68 
  -2  -2  -2  141.85    5.67 
  -2  -2  -2  146.46    5.66 
   2  -2   2  148.28    5.62 
  -2  -2  -2  143.47    5.68 
  -2  -2  -2  137.36    5.69 
  -2  -2  -2  141.00    5.73 
  -2  -2  -2  138.49    5.61 
   2  -2   2  150.24    5.60 
  -2  -2  -2  152.96    5.92 
  -2   2  -2  143.93    5.56 
   2   2   2  141.36    5.67 
  -2   2  -2  145.22    5.62 
   2   2   2  144.59    5.63 
  -2   2  -2  143.25    5.70 
   2   2   2  146.17    5.72 
  -2   2  -2  152.18    5.63 
  -2   2  -2  150.13    5.50 
   2   2   2  146.23    5.69 
   2   2   2  146.19    5.76 
   2   2   2  144.19    5.62 
  -2   2  -2  143.43    5.68 
  -2   2  -2  150.52    6.02 
  -2   2  -2  146.89    6.03 
  -2   2  -2  148.66    5.68 
  -2   2  -2  144.56    5.67 
   2   2   2  146.28    5.87 
  -2   2  -2  147.21    5.62 
   2   2   2  149.63    5.72 
  -2   2  -2  143.38    5.66 
   2   2   2  153.30    5.96 
   2   2   2  149.45    5.67 
   2   2   2  147.22    5.73 
  -2   2  -2  142.87    5.54 
   2   2   2  148.83    5.77 
  -2   2  -2  148.96    5.39 
  -2   2  -2  150.97    5.39 
   2   2   2  144.73    5.76 
  -2   2  -2  148.21    5.60 
  -2   2  -2  143.85    5.37 
   2   2   2  154.01    5.75 
   2   2   2  148.54    5.67 
   2   2   2  144.56    5.67 
  -2   2  -2  138.79    5.76 
  -2   2  -2  145.67    5.47 
  -2   2  -2  146.04    5.34 
  -2   2  -2  143.73    5.68 
  -3  -2  -2    6.96    0.76 
   3  -2   2    6.25    0.81 
   3  -2   2    6.98    0.57 
   3  -2   2    7.71    0.77 
   3  -2   2    7.76    0.77 
  -3  -2  -2    6.83    0.58 
  -3  -2  -2    6.33    0.70 
   3  -2   2    7.14    0.49 
   3  -2   2    8.01    0.53 
  -3  -2  -2    7.76    0.61 
   3  -2   2    7.28    0.41 
  -3  -2  -2    7.27    0.59 
   3  -2   2    7.32    0.40 
   3  -2   2    7.08    0.63 
   3  -2   2    8.04    0.62 
  -3  -2  -2    6.99    0.71 
  -3  -2  -2    5.29    0.68 
   3  -2   2    6.04    0.72 
  -3  -2  -2    7.83    0.92 
   3   2   2    7.51    0.52 
  -3   2  -2    7.34    0.60 
  -3   2  -2    6.68    0.52 
   3   2   2    6.62    0.76 
   3   2   2    7.33    0.76 
   3   2   2    7.57    0.91 
  -3   2  -2    6.88    0.47 
   3   2   2    6.49    0.56 
   3   2   2    5.75    0.64 
   3   2   2    7.49    0.76 
   3   2   2    7.27    0.76 
  -3   2  -2    8.31    0.45 
  -3   2  -2    6.68    0.53 
   3   2   2    6.85    0.56 
  -3   2  -2    6.35    0.61 
   3   2   2    6.17    0.74 
   3   2   2    7.55    0.79 
  -3   2  -2    7.53    0.40 
  -3   2  -2    8.10    0.88 
   3   2   2    7.89    0.63 
  -3   2  -2    6.29    0.47 
  -3   2  -2    6.89    0.60 
   3   2   2    7.70    0.76 
  -3   2  -2    7.11    0.45 
  -3   2  -2    7.16    0.43 
  -3   2  -2    7.18    0.50 
  -3   2  -2    7.15    0.70 
   3   2   2    6.76    0.78 
  -3   2  -2    7.43    0.59 
  -3   2  -2    7.51    0.45 
  -3   2  -2    7.34    0.49 
   3   2   2    7.25    0.64 
   3   2   2    7.85    0.78 
   4  -2   2  176.13    7.22 
  -4  -2  -2  180.42    7.19 
   4  -2   2  178.62    6.94 
   4  -2   2  178.07    7.35 
  -4  -2  -2  183.95    6.99 
  -4  -2  -2  177.36    6.94 
   4  -2   2  179.35    7.04 
  -4  -2  -2  181.05    7.28 
   4  -2   2  182.88    7.23 
   4  -2   2  178.51    6.72 
   4  -2   2  181.19    7.51 
   4  -2   2  175.10    7.21 
  -4  -2  -2  185.03    6.97 
  -4  -2  -2  182.34    7.52 
   4  -2   2  177.86    6.92 
   4  -2   2  182.46    6.91 
   4  -2   2  178.21    6.76 
   4  -2   2  175.37    7.21 
   4  -2   2  174.01    7.06 
  -4  -2  -2  185.93    7.24 
  -4  -2  -2  179.38    7.18 
   4   2   2  184.45    7.21 
   4   2   2  180.42    7.37 
   4   2   2  182.49    6.99 
   4   2   2  179.05    7.00 
  -4   2  -2  177.94    7.05 
  -4   2  -2  177.03    6.86 
   4   2   2  174.72    7.02 
   4   2   2  187.69    7.17 
  -4   2  -2  181.00    7.76 
   4   2   2  178.32    7.29 
  -4   2  -2  178.19    6.88 
   4   2   2  181.37    7.37 
   4   2   2  182.82    7.24 
   4   2   2  181.08    7.24 
   4   2   2  180.11    7.24 
  -4   2  -2  179.34    6.92 
   4   2   2  183.52    7.27 
  -4   2  -2  182.02    7.09 
  -4   2  -2  178.16    6.88 
  -4   2  -2  184.84    7.30 
   4   2   2  180.05    6.76 
  -4   2  -2  182.75    6.81 
   4   2   2  181.05    7.15 
  -4   2  -2  184.64    6.84 
  -4   2  -2  176.41    7.02 
   5  -2   2   29.30    1.65 
   5  -2   2   26.03    1.72 
   5  -2   2   26.77    1.37 
   5  -2   2   27.61    1.18 
   5  -2   2   26.52    1.93 
   5  -2   2   25.97    1.52 
  -5  -2  -2   27.08    1.69 
   5  -2   2   25.74    1.70 
  -5  -2  -2   26.55    2.09 
  -5  -2  -2   29.57    1.47 
   5  -2   2   28.75    1.79 
  -5  -2  -2   27.58    1.44 
   5  -2   2   27.63    1.87 
  -5  -2  -2   27.55    1.97 
  -5  -2  -2   29.54    1.51 
  -5  -2  -2   29.98    1.75 
  -5  -2  -2   28.00    1.70 
   5  -2   2   28.20    1.72 
  -5  -2  -2   26.01    1.72 
   5  -2   2   24.27    1.49 
  -5   2  -2   26.45    1.47 
   5   2   2   27.47    1.71 
  -5   2  -2   28.73    1.61 
  -5   2  -2   28.70    1.56 
  -5   2  -2   28.09    2.17 
   5   2   2   28.09    1.64 
   5   2   2   21.91    1.63 
   5   2   2   30.24    1.95 
   5   2   2   27.63    1.76 
  -5   2  -2   27.86    1.51 
  -5   2  -2   29.10    1.85 
   5   2   2   27.81    1.20 
   5   2   2   27.46    1.68 
   5   2   2   25.21    1.73 
   5   2   2   27.02    1.50 
   5   2   2   28.46    1.88 
  -5   2  -2   27.70    1.57 
  -5   2  -2   28.46    1.32 
  -5   2  -2   27.43    1.37 
   5   2   2   26.06    1.72 
  -5   2  -2   26.54    1.61 
  -5   2  -2   28.32    1.27 
   5   2   2   27.03    1.73 
  -6  -2  -2   69.66    3.52 
   6  -2   2   70.00    3.54 
   6  -2   2   69.00    3.86 
   6  -2   2   71.44    3.74 
  -6  -2  -2   65.97    3.77 
  -6  -2  -2   74.38    3.50 
   6  -2   2   68.96    3.56 
   6  -2   2   68.18    3.24 
   6  -2   2   68.92    3.04 
   6  -2   2   71.59    3.53 
   6  -2   2   73.53    3.22 
  -6  -2  -2   68.38    3.04 
   6  -2   2   67.93    3.32 
  -6  -2  -2   70.90    3.45 
  -6  -2  -2   66.60    4.05 
  -6  -2  -2   72.73    2.99 
   6  -2   2   62.78    3.34 
  -6  -2  -2   69.12    3.42 
   6   2   2   69.46    3.54 
   6   2   2   75.77    3.81 
  -6   2  -2   66.14    3.60 
   6   2   2   72.87    3.47 
  -6   2  -2   65.32    2.73 
   6   2   2   62.27    3.21 
   6   2   2   72.85    3.74 
  -6   2  -2   69.37    4.13 
   6   2   2   69.51    3.21 
   6   2   2   69.28    3.50 
  -6   2  -2   69.03    3.00 
  -6   2  -2   68.26    2.66 
   6   2   2   72.91    3.57 
  -6   2  -2   70.46    3.04 
  -6   2  -2   69.40    3.15 
   6   2   2   72.08    3.02 
  -6   2  -2   68.42    3.24 
  -6   2  -2   69.69    3.30 
   6   2   2   68.55    3.41 
   6   2   2   63.00    3.48 
   7  -2   2    2.07    0.51 
  -7  -2  -2    2.79    0.66 
   7  -2   2    1.66    0.55 
  -7  -2  -2    2.25    0.62 
  -7  -2  -2    2.83    0.49 
  -7  -2  -2    2.62    0.68 
  -7  -2  -2    1.32    0.66 
   7  -2   2    2.60    0.63 
   7  -2   2    1.55    0.66 
  -7  -2  -2    1.54    0.70 
  -7  -2  -2    1.95    0.61 
   7  -2   2    2.04    0.67 
   7  -2   2    2.35    0.64 
   7  -2   2    2.97    0.69 
   7  -2   2    1.92    0.68 
   7  -2   2    1.99    0.47 
   7   2   2    2.25    0.58 
   7   2   2    1.65    0.61 
   7   2   2    2.91    0.81 
   7   2   2    2.83    0.77 
  -7   2  -2    3.54    0.69 
   7   2   2    1.72    0.57 
  -7   2  -2    1.95    0.64 
   7   2   2    2.41    0.69 
   7   2   2    2.92    0.78 
  -7   2  -2    2.04    0.84 
  -7   2  -2    2.79    0.51 
   7   2   2    2.24    0.63 
  -7   2  -2    2.34    0.60 
   7   2   2    2.52    0.67 
   7   2   2    3.07    0.75 
  -7   2  -2    3.01    1.01 
  -7   2  -2    2.46    0.54 
   8  -2   2    1.16    0.57 
   8  -2   2    1.75    0.55 
   8  -2   2    0.51    0.45 
   8  -2   2    0.93    0.62 
  -8  -2  -2    0.86    0.47 
   8  -2   2    0.79    0.56 
  -8  -2  -2    0.14    0.43 
  -8  -2  -2    0.99    0.67 
   8  -2   2    2.01    0.67 
   8  -2   2    0.61    0.47 
  -8  -2  -2    0.63    0.44 
  -8  -2  -2    0.06    0.40 
  -8  -2  -2    0.36    0.42 
  -8   2  -2    0.68    0.69 
  -8   2  -2    0.91    0.45 
   8   2   2    0.60    0.55 
   8   2   2    0.01    0.29 
   8   2   2   -0.22    0.31 
   8   2   2    0.95    0.60 
  -8   2  -2    0.16    0.44 
   8   2   2    1.33    0.63 
  -8   2  -2    1.37    0.51 
   8   2   2    0.91    0.50 
  -8   2  -2    0.76    0.72 
   8   2   2    0.48    0.44 
   8   2   2    0.30    0.47 
  -8   2  -2    0.78    0.44 
   8   2   2    1.05    0.57 
  -9  -2  -2    2.05    0.96 
   9  -2   2    2.88    1.00 
   9  -2   2    3.85    0.88 
  -9  -2  -2    1.27    0.64 
   9  -2   2    1.02    0.69 
  -9  -2  -2    2.23    0.99 
   9  -2   2    2.22    0.76 
   9  -2   2    1.41    0.71 
  -9  -2  -2    2.26    0.72 
  -9  -2  -2    1.99    0.68 
   9  -2   2    2.65    0.83 
  -9  -2  -2    1.63    0.63 
  -9   2  -2    2.29    0.67 
   9   2   2    1.70    0.73 
   9   2   2    2.70    0.98 
  -9   2  -2    2.66    0.70 
   9   2   2    2.02    0.70 
   9   2   2    2.08    0.88 
   9   2   2    2.60    0.90 
  -9   2  -2    2.43    0.91 
  -9   2  -2    1.88    0.77 
   9   2   2    4.25    0.97 
  -9   2  -2    2.39    1.09 
   9   2   2    2.20    0.80 
  -9   2  -2    2.16    0.96 
   9   2   2    2.09    0.80 
  10  -3  -2   14.03    1.67 
 -10  -3   2   17.06    2.01 
 -10  -3   2   12.34    1.73 
 -10  -3   2   14.59    2.34 
  10   3  -2    9.89    1.70 
  10   3  -2   12.09    1.75 
  -9  -3   2   19.25    2.05 
   9  -3  -2   18.99    2.13 
   9  -3  -2   21.82    2.48 
  -9  -3   2   19.50    2.49 
  -9  -3   2   22.54    2.28 
   9  -3  -2   20.03    1.90 
   9  -3  -2   22.49    2.24 
  -9  -3   2   24.39    2.26 
  -9  -3   2   18.39    2.41 
   9  -3  -2   19.99    2.32 
   9  -3  -2   20.13    2.02 
  -9  -3   2   22.46    3.05 
   9   3  -2   21.77    2.31 
   9   3  -2   22.41    2.36 
  -9   3   2   19.22    1.62 
  -9   3   2   20.18    1.60 
   9   3  -2   18.67    2.17 
   9   3  -2   22.50    2.36 
   9   3  -2   21.29    2.23 
  -9   3   2   20.65    2.54 
   9   3  -2   22.60    2.25 
  -9   3   2   19.13    2.66 
  -9   3   2   22.19    2.52 
   9   3  -2   20.26    2.43 
  -9   3   2   18.61    2.74 
   9   3  -2   16.60    2.19 
   8  -3  -2    9.54    1.24 
  -8  -3   2    7.62    1.48 
  -8  -3   2    9.28    1.35 
   8  -3  -2    6.85    0.99 
   8  -3  -2   12.25    1.49 
  -8  -3   2   10.62    1.64 
  -8  -3   2   11.30    1.39 
   8  -3  -2    9.63    1.52 
  -8  -3   2    6.36    1.46 
   8  -3  -2   10.31    1.39 
  -8  -3   2    9.08    1.32 
   8  -3  -2   10.22    1.50 
   8   3  -2    8.86    1.36 
   8   3  -2    9.57    1.33 
   8   3  -2   11.44    1.52 
   8   3  -2    9.31    1.49 
   8   3  -2    8.65    1.44 
  -8   3   2    9.16    1.16 
  -8   3   2    9.18    1.50 
   8   3  -2    8.25    1.30 
  -8   3   2   10.63    1.70 
  -8   3   2    9.49    1.69 
   8   3  -2    9.93    1.23 
   8   3  -2    9.26    1.38 
   8   3  -2   10.76    1.51 
   8   3  -2    9.40    1.40 
   8   3  -2   10.01    1.44 
  -8   3   2   10.24    1.15 
  -7  -3   2    0.98    0.56 
   7  -3  -2    0.37    0.34 
  -7  -3   2    0.36    0.47 
   7  -3  -2    0.36    0.31 
  -7  -3   2    0.92    0.59 
  -7  -3   2    1.21    0.44 
   7  -3  -2    0.91    0.56 
   7  -3  -2    0.42    0.37 
   7  -3  -2    0.84    0.41 
  -7  -3   2    1.33    0.45 
   7  -3  -2    0.50    0.42 
   7  -3  -2    1.09    0.47 
   7  -3  -2    0.71    0.40 
  -7  -3   2    2.05    0.62 
  -7  -3   2    0.32    0.41 
   7   3  -2    0.14    0.32 
   7   3  -2    0.43    0.45 
  -7   3   2    1.22    0.58 
  -7   3   2    1.01    0.59 
   7   3  -2    0.94    0.51 
   7   3  -2    0.77    0.43 
  -7   3   2    0.68    0.35 
   7   3  -2    0.49    0.36 
  -7   3   2    0.84    0.32 
   7   3  -2    0.16    0.36 
   7   3  -2    1.61    0.59 
   7   3  -2    0.58    0.42 
   7   3  -2    1.16    0.53 
  -7   3   2    0.12    0.42 
   7   3  -2    1.02    0.45 
  -7   3   2    1.54    0.49 
  -6  -3   2    0.02    0.36 
   6  -3  -2    0.73    0.31 
   6  -3  -2    0.16    0.25 
  -6  -3   2    0.66    0.41 
   6  -3  -2    0.48    0.37 
   6  -3  -2   -0.03    0.35 
  -6  -3   2   -0.09    0.27 
   6  -3  -2    0.31    0.38 
  -6  -3   2   -0.04    0.26 
   6  -3  -2    0.15    0.27 
   6  -3  -2    0.33    0.29 
  -6  -3   2    0.07    0.36 
  -6  -3   2    0.09    0.31 
  -6  -3   2   -0.14    0.29 
  -6  -3   2    0.48    0.33 
   6  -3  -2    0.44    0.30 
   6  -3  -2    0.83    0.48 
   6  -3  -2    0.11    0.21 
   6   3  -2    0.03    0.20 
   6   3  -2    0.36    0.30 
   6   3  -2    0.92    0.44 
  -6   3   2    0.65    0.31 
   6   3  -2    0.41    0.36 
  -6   3   2    0.38    0.20 
  -6   3   2    0.46    0.27 
   6   3  -2   -0.04    0.27 
  -6   3   2    0.03    0.16 
   6   3  -2    0.31    0.33 
  -6   3   2    0.56    0.42 
  -6   3   2    0.19    0.35 
  -6   3   2    0.13    0.21 
   6   3  -2    0.53    0.43 
  -6   3   2    0.21    0.15 
   6   3  -2    0.63    0.40 
   6   3  -2    0.16    0.32 
  -6   3   2    0.36    0.16 
   6   3  -2   -0.19    0.15 
  -6   3   2    0.27    0.24 
   6   3  -2   -0.04    0.27 
  -6   3   2   -0.04    0.33 
   6   3  -2    0.10    0.31 
   5  -3  -2    3.78    0.62 
   5  -3  -2    4.10    0.62 
  -5  -3   2    4.14    0.83 
  -5  -3   2    4.58    0.76 
  -5  -3   2    4.41    0.59 
  -5  -3   2    4.17    0.93 
  -5  -3   2    4.78    0.66 
   5  -3  -2    4.49    0.69 
  -5  -3   2    4.17    0.68 
   5  -3  -2    4.31    0.56 
   5  -3  -2    4.31    0.89 
   5  -3  -2    4.12    0.62 
  -5  -3   2    4.74    0.69 
   5  -3  -2    3.92    0.72 
  -5  -3   2    6.21    0.87 
   5  -3  -2    3.17    0.61 
  -5  -3   2    3.72    0.67 
   5  -3  -2    3.93    0.74 
  -5  -3   2    4.65    0.86 
   5  -3  -2    4.47    0.58 
  -5   3   2    3.76    0.78 
   5   3  -2    6.06    0.88 
  -5   3   2    4.39    0.45 
  -5   3   2    4.73    0.35 
   5   3  -2    3.80    0.70 
   5   3  -2    5.30    0.79 
  -5   3   2    4.94    0.57 
   5   3  -2    4.13    0.57 
   5   3  -2    4.97    0.80 
   5   3  -2    3.84    0.67 
  -5   3   2    4.92    0.78 
  -5   3   2    3.60    0.71 
  -5   3   2    4.72    0.31 
  -5   3   2    3.71    0.83 
  -5   3   2    4.80    0.52 
  -5   3   2    5.27    0.45 
  -5   3   2    5.15    0.65 
  -5   3   2    3.70    0.56 
   5   3  -2    3.87    0.73 
  -5   3   2    5.83    0.58 
  -5   3   2    5.17    0.56 
   5   3  -2    3.98    0.74 
   5   3  -2    4.74    0.59 
   5   3  -2    5.20    0.85 
  -5   3   2    4.63    0.51 
   5   3  -2    3.64    0.64 
   5   3  -2    3.95    0.68 
  -5   3   2    4.53    0.28 
   4  -3  -2   21.32    1.13 
   4  -3  -2   21.52    1.26 
   4  -3  -2   20.38    1.38 
  -4  -3   2   22.32    1.40 
  -4  -3   2   19.94    1.24 
   4  -3  -2   22.09    1.25 
   4  -3  -2   19.93    1.12 
  -4  -3   2   20.24    1.40 
   4  -3  -2   22.26    1.55 
   4  -3  -2   20.02    1.12 
  -4  -3   2   21.59    1.53 
  -4  -3   2   23.08    1.27 
  -4  -3   2   21.14    1.48 
  -4  -3   2   22.61    1.68 
  -4  -3   2   20.10    1.32 
   4  -3  -2   21.42    1.31 
   4  -3  -2   20.33    1.37 
  -4  -3   2   22.24    1.38 
   4  -3  -2   22.17    1.39 
   4  -3  -2   20.65    1.24 
   4  -3  -2   20.88    1.26 
  -4   3   2   21.23    1.11 
   4   3  -2   19.94    1.37 
  -4   3   2   20.79    1.14 
  -4   3   2   20.14    1.13 
  -4   3   2   21.09    0.96 
  -4   3   2   21.32    1.08 
  -4   3   2   21.81    1.14 
  -4   3   2   19.22    1.46 
   4   3  -2   22.02    1.36 
  -4   3   2   20.52    1.18 
  -4   3   2   21.12    1.48 
  -4   3   2   20.50    1.55 
   4   3  -2   21.39    1.40 
   4   3  -2   20.89    1.34 
  -4   3   2   19.86    1.12 
   4   3  -2   20.99    1.37 
   4   3  -2   20.70    1.39 
  -4   3   2   19.53    0.98 
  -4   3   2   19.80    1.43 
   4   3  -2   23.46    1.50 
  -4   3   2   21.61    1.19 
   4   3  -2   21.55    1.41 
   4   3  -2   20.75    1.37 
  -4   3   2   20.03    1.20 
   4   3  -2   20.34    1.39 
  -4   3   2   21.50    1.14 
   4   3  -2   20.89    1.21 
   4   3  -2   22.53    1.26 
  -4   3   2   21.58    1.03 
  -3  -3   2    9.40    0.95 
   3  -3  -2   10.38    0.77 
  -3  -3   2   10.09    0.88 
  -3  -3   2   10.96    0.87 
   3  -3  -2    8.66    0.68 
  -3  -3   2    8.69    0.85 
  -3  -3   2    8.19    0.86 
   3  -3  -2    8.66    0.69 
   3  -3  -2    9.82    0.62 
   3  -3  -2   10.03    0.67 
  -3  -3   2    9.71    0.74 
  -3  -3   2    8.33    0.74 
   3  -3  -2    8.97    0.68 
  -3  -3   2    7.34    0.82 
  -3  -3   2   10.16    0.79 
   3  -3  -2    9.29    0.70 
   3  -3  -2    8.13    0.69 
   3  -3  -2    8.20    0.82 
  -3   3   2    9.42    0.64 
   3   3  -2    9.95    0.78 
  -3   3   2    9.87    0.62 
  -3   3   2   10.01    0.71 
   3   3  -2    9.59    0.79 
  -3   3   2    9.48    0.72 
   3   3  -2    9.87    0.93 
  -3   3   2    9.16    0.64 
   3   3  -2    8.61    0.72 
  -3   3   2    8.95    0.85 
  -3   3   2   10.05    0.55 
  -3   3   2    8.33    1.08 
  -3   3   2    9.57    0.63 
  -3   3   2    8.94    0.72 
   3   3  -2   11.89    0.85 
  -3   3   2    9.85    0.89 
  -3   3   2   10.67    1.52 
  -3   3   2    8.95    0.67 
  -3   3   2    9.91    0.70 
   3   3  -2    9.47    0.78 
  -3   3   2    9.05    0.55 
  -3   3   2    9.46    0.48 
   3   3  -2    9.03    0.77 
  -3   3   2    9.41    0.81 
   3   3  -2    9.96    0.78 
  -3   3   2    8.71    0.66 
   3   3  -2    9.27    0.75 
   3   3  -2    9.76    0.96 
   3   3  -2   10.76    0.85 
  -3   3   2    9.26    0.43 
   3   3  -2    8.21    0.89 
   2  -3  -2    2.08    0.39 
   2  -3  -2    2.18    0.28 
  -2  -3   2    2.48    0.43 
  -2  -3   2    2.41    0.39 
   2  -3  -2    2.82    0.33 
   2  -3  -2    1.83    0.38 
  -2  -3   2    2.71    0.52 
   2  -3  -2    2.77    0.55 
  -2  -3   2    2.66    0.38 
  -2  -3   2    2.20    0.37 
   2  -3  -2    2.63    0.45 
  -2  -3   2    1.74    0.32 
  -2  -3   2    2.57    0.44 
   2  -3  -2    2.49    0.28 
  -2  -3   2    2.28    0.40 
  -2  -3   2    2.30    0.36 
   2  -3  -2    2.24    0.38 
   2  -3  -2    2.91    0.52 
  -2  -3   2    2.57    0.45 
  -2  -3   2    2.73    0.43 
  -2  -3   2    1.79    0.36 
  -2  -3   2    2.89    0.43 
  -2  -3   2    2.48    0.38 
  -2  -3   2    1.91    0.47 
  -2   3   2    2.00    0.36 
  -2   3   2    2.26    0.41 
  -2   3   2    2.46    0.36 
  -2   3   2    2.32    0.26 
  -2   3   2    2.48    0.24 
   2   3  -2    2.44    0.40 
  -2   3   2    2.74    0.40 
   2   3  -2    2.73    0.45 
  -2   3   2    2.70    0.38 
  -2   3   2    2.41    0.39 
   2   3  -2    2.27    0.42 
  -2   3   2    2.42    0.18 
  -2   3   2    2.35    0.40 
  -2   3   2    1.64    0.34 
   2   3  -2    2.62    0.40 
   2   3  -2    1.61    0.30 
  -2   3   2    2.39    0.44 
   2   3  -2    2.20    0.40 
   2   3  -2    2.96    0.45 
  -2   3   2    2.38    0.39 
   2   3  -2    3.02    0.44 
   2   3  -2    2.12    0.37 
  -2   3   2    2.09    0.44 
   2   3  -2    2.13    0.38 
   2   3  -2    2.19    0.46 
  -2   3   2    2.22    0.36 
  -2   3   2    2.40    0.22 
   2   3  -2    2.57    0.38 
  -2   3   2    2.50    0.37 
  -2   3   2    3.18    0.34 
  -2   3   2    2.18    0.21 
  -2   3   2    2.04    0.28 
  -2   3   2    3.03    0.41 
  -2   3   2    2.76    0.39 
  -2   3   2    3.01    0.48 
  -2   3   2    2.18    0.40 
  -1  -3   2   22.51    1.29 
  -1  -3   2   21.67    1.21 
  -1  -3   2   19.61    1.18 
  -1  -3   2   22.02    1.00 
   1  -3  -2   22.14    0.90 
   1  -3  -2   23.38    1.26 
  -1  -3   2   21.63    1.17 
   1  -3  -2   22.03    0.99 
   1  -3  -2   25.22    1.48 
  -1  -3   2   21.44    1.23 
  -1  -3   2   21.13    1.05 
   1  -3  -2   23.48    1.19 
  -1  -3   2   20.94    1.04 
  -1  -3   2   20.88    1.25 
  -1  -3   2   22.27    1.22 
  -1  -3   2   21.79    1.35 
   1  -3  -2   20.83    1.19 
  -1  -3   2   22.36    1.10 
   1  -3  -2   21.40    1.22 
  -1  -3   2   21.96    1.11 
  -1  -3   2   21.25    1.08 
  -1  -3   2   22.23    1.09 
   1  -3  -2   23.10    1.34 
   1  -3  -2   21.85    1.05 
   1  -3  -2   20.65    1.24 
  -1  -3   2   21.33    1.27 
  -1  -3   2   22.88    1.27 
   1  -3  -2   23.42    1.19 
   1  -3  -2   22.32    1.07 
  -1  -3   2   22.90    1.33 
  -1  -3   2   21.39    1.00 
  -1  -3   2   22.74    1.27 
  -1   3   2   22.73    0.97 
  -1   3   2   21.13    1.22 
  -1   3   2   21.26    1.01 
   1   3  -2   21.62    1.08 
  -1   3   2   21.75    1.06 
  -1   3   2   21.09    0.86 
   1   3  -2   21.82    1.08 
  -1   3   2   21.97    1.20 
  -1   3   2   21.55    1.06 
  -1   3   2   21.39    0.90 
   1   3  -2   20.62    1.23 
   1   3  -2   23.66    1.18 
   1   3  -2   22.59    1.25 
   1   3  -2   22.83    1.26 
  -1   3   2   21.72    1.16 
   1   3  -2   23.90    1.37 
  -1   3   2   22.87    1.32 
   1   3  -2   21.41    1.00 
  -1   3   2   21.70    1.25 
   1   3  -2   22.21    1.09 
   1   3  -2   23.45    1.38 
  -1   3   2   21.87    0.90 
   1   3  -2   22.39    1.16 
   1   3  -2   22.55    1.09 
  -1   3   2   25.61    1.47 
  -1   3   2   22.28    1.00 
  -1   3   2   21.69    0.88 
  -1   3   2   21.68    1.16 
  -1   3   2   22.31    1.00 
  -1   3   2   23.04    1.17 
   1   3  -2   22.50    1.15 
   1   3  -2   21.02    1.20 
  -1   3   2   22.12    0.98 
  -1   3   2   22.88    1.22 
   0  -3   2    0.29    0.28 
   0  -3   2    0.46    0.13 
   0  -3   2    0.55    0.30 
   0  -3   2    0.33    0.16 
   0  -3  -2    0.13    0.11 
   0  -3  -2    0.03    0.17 
   0  -3  -2    0.18    0.16 
   0  -3  -2    0.11    0.16 
   0  -3   2    0.26    0.08 
   0  -3  -2    0.20    0.14 
   0  -3   2    0.21    0.09 
   0  -3  -2    0.51    0.23 
   0  -3  -2    0.38    0.13 
   0  -3  -2    0.50    0.21 
   0  -3   2    0.18    0.17 
   0  -3   2    0.25    0.19 
   0  -3   2    0.38    0.12 
   0  -3   2    0.27    0.19 
   0  -3  -2    0.24    0.19 
   0  -3   2    0.02    0.15 
   0  -3  -2    0.45    0.18 
   0  -3  -2    0.22    0.14 
   0  -3   2   -0.03    0.15 
   0  -3  -2    0.35    0.28 
   0  -3   2    0.38    0.15 
   0  -3  -2    0.16    0.25 
   0  -3  -2    0.48    0.23 
   0  -3  -2    0.36    0.11 
   0  -3   2    0.08    0.14 
   0  -3  -2    0.40    0.21 
   0  -3   2    0.16    0.16 
   0  -3   2    0.58    0.17 
   0  -3  -2    0.14    0.13 
   0   3  -2    0.35    0.19 
   0   3   2    0.45    0.12 
   0   3   2   -0.02    0.13 
   0   3   2    0.36    0.13 
   0   3   2    0.22    0.16 
   0   3  -2    0.39    0.12 
   0   3  -2    0.47    0.18 
   0   3   2    0.19    0.20 
   0   3   2    0.47    0.17 
   0   3   2    0.34    0.16 
   0   3   2    0.35    0.11 
   0   3  -2    0.24    0.10 
   0   3   2    0.23    0.11 
   0   3   2    0.41    0.16 
   0   3   2    0.51    0.20 
   0   3  -2    0.49    0.24 
   0   3  -2    0.21    0.14 
   0   3  -2    0.18    0.18 
   0   3  -2    0.36    0.14 
   0   3  -2    0.21    0.10 
   0   3  -2    0.38    0.17 
   0   3  -2    0.10    0.17 
   0   3  -2    0.37    0.15 
   0   3  -2    0.12    0.17 
   0   3  -2    0.27    0.20 
   0   3   2    0.32    0.18 
   0   3   2    0.40    0.22 
   0   3   2    0.27    0.19 
   0   3   2    0.23    0.18 
   0   3  -2    0.35    0.21 
   0   3   2    0.35    0.09 
   0   3   2    0.30    0.19 
   0   3  -2    0.22    0.17 
   1  -3   2  164.55    6.45 
   1  -3   2  174.05    6.14 
   1  -3   2  160.98    6.17 
   1  -3   2  162.03    6.41 
  -1  -3  -2  167.21    6.29 
  -1  -3  -2  162.74    6.23 
  -1  -3  -2  167.75    6.38 
   1  -3   2  159.86    6.11 
  -1  -3  -2  157.97    6.10 
  -1  -3  -2  169.50    6.57 
  -1  -3  -2  167.99    6.44 
  -1  -3  -2  158.22    6.17 
  -1  -3  -2  157.56    6.46 
  -1  -3  -2  171.30    6.22 
  -1  -3  -2  162.63    6.24 
   1  -3   2  169.29    6.38 
  -1  -3  -2  164.05    6.25 
   1  -3   2  161.61    6.34 
  -1  -3  -2  163.96    6.46 
  -1  -3  -2  166.66    6.39 
  -1  -3  -2  160.57    6.39 
   1  -3   2  177.44    6.78 
  -1  -3  -2  167.84    6.72 
  -1   3  -2  167.87    6.35 
   1   3   2  161.03    6.44 
  -1   3  -2  165.26    6.57 
   1   3   2  165.22    6.47 
  -1   3  -2  164.11    5.97 
  -1   3  -2  166.23    6.06 
  -1   3  -2  165.43    6.20 
   1   3   2  170.97    6.23 
   1   3   2  167.15    6.25 
  -1   3  -2  161.92    5.97 
   1   3   2  162.67    6.36 
   1   3   2  166.01    6.37 
   1   3   2  162.22    6.56 
   1   3   2  164.87    6.39 
  -1   3  -2  167.00    6.00 
  -1   3  -2  166.17    6.20 
  -1   3  -2  161.38    6.33 
  -1   3  -2  166.04    6.25 
   1   3   2  164.98    6.49 
  -1   3  -2  166.68    6.31 
  -1   3  -2  161.32    5.98 
  -1   3  -2  166.09    6.75 
   1   3   2  167.89    6.42 
   1   3   2  160.11    6.34 
  -1   3  -2  158.24    6.27 
   1   3   2  163.12    6.19 
  -1   3  -2  162.58    6.49 
   1   3   2  165.83    6.11 
  -1   3  -2  160.75    6.05 
  -1   3  -2  163.38    5.98 
   1   3   2  165.58    6.21 
  -1   3  -2  161.74    6.44 
  -1   3  -2  177.12    6.74 
  -1   3  -2  160.17    6.42 
  -1   3  -2  161.90    6.40 
  -2  -3  -2   56.51    2.57 
  -2  -3  -2   55.78    2.72 
  -2  -3  -2   57.03    2.71 
   2  -3   2   60.95    2.93 
   2  -3   2   65.01    2.71 
  -2  -3  -2   63.94    3.22 
  -2  -3  -2   58.03    2.71 
   2  -3   2   61.88    2.61 
   2  -3   2   58.51    2.60 
  -2  -3  -2   61.07    2.78 
  -2  -3  -2   66.28    2.79 
  -2  -3  -2   60.19    2.76 
  -2  -3  -2   62.82    2.64 
  -2  -3  -2   61.20    2.73 
   2  -3   2   64.57    3.00 
  -2  -3  -2   62.60    2.89 
  -2  -3  -2   58.87    2.53 
   2  -3   2   58.98    2.48 
   2  -3   2   58.22    2.55 
  -2  -3  -2   59.46    2.64 
  -2   3  -2   60.44    2.70 
  -2   3  -2   59.44    2.46 
   2   3   2   59.53    2.74 
  -2   3  -2   60.66    2.74 
  -2   3  -2   59.99    2.38 
  -2   3  -2   63.93    2.84 
   2   3   2   59.19    2.90 
  -2   3  -2   60.08    2.59 
  -2   3  -2   61.01    2.29 
  -2   3  -2   61.18    3.08 
   2   3   2   61.77    2.78 
  -2   3  -2   62.25    2.75 
  -2   3  -2   62.08    2.62 
  -2   3  -2   64.58    2.61 
   2   3   2   61.31    2.73 
  -2   3  -2   61.16    2.62 
   2   3   2   60.88    2.73 
   2   3   2   56.85    2.72 
  -2   3  -2   62.87    2.63 
   2   3   2   62.49    2.63 
  -2   3  -2   60.04    2.27 
  -2   3  -2   60.26    2.59 
   2   3   2   62.76    2.65 
   2   3   2   63.09    2.56 
  -2   3  -2   52.29    2.85 
  -2   3  -2   61.61    2.55 
  -2   3  -2   60.45    2.48 
   2   3   2   60.05    2.77 
   2   3   2   57.74    2.59 
  -2   3  -2   61.06    2.66 
  -3  -3  -2  145.00    5.91 
  -3  -3  -2  149.85    5.82 
   3  -3   2  143.68    5.51 
  -3  -3  -2  140.18    5.89 
   3  -3   2  131.91    5.95 
   3  -3   2  149.71    5.60 
   3  -3   2  144.48    5.74 
  -3  -3  -2  141.60    5.84 
   3  -3   2  143.63    5.45 
  -3  -3  -2  140.79    5.78 
   3  -3   2  145.76    5.84 
   3  -3   2  141.11    5.68 
  -3  -3  -2  149.03    6.12 
  -3  -3  -2  146.21    6.11 
  -3  -3  -2  148.26    5.82 
  -3   3  -2  137.76    5.69 
   3   3   2  142.41    6.12 
  -3   3  -2  142.91    5.84 
   3   3   2  141.33    5.91 
  -3   3  -2  155.09    5.84 
  -3   3  -2  144.44    5.49 
  -3   3  -2  147.56    5.33 
  -3   3  -2  148.24    5.72 
   3   3   2  143.42    5.76 
   3   3   2  141.65    5.93 
   3   3   2  140.72    5.79 
   3   3   2  147.04    5.91 
  -3   3  -2  140.88    6.23 
  -3   3  -2  146.06    5.56 
  -3   3  -2  145.96    5.58 
  -3   3  -2  144.73    5.39 
  -3   3  -2  144.54    5.78 
   3   3   2  144.32    5.67 
  -3   3  -2  131.05    5.46 
   3   3   2  149.14    5.94 
  -3   3  -2  142.82    5.40 
   3   3   2  145.23    5.88 
   3   3   2  142.11    5.83 
   3   3   2  145.65    5.74 
  -3   3  -2  141.31    5.33 
   3   3   2  150.57    5.82 
  -4  -3  -2   79.36    4.06 
  -4  -3  -2   84.31    3.80 
   4  -3   2   80.73    3.89 
  -4  -3  -2   86.96    4.04 
  -4  -3  -2   86.72    3.80 
   4  -3   2   79.90    3.75 
  -4  -3  -2   78.46    3.66 
  -4  -3  -2   78.76    3.55 
   4  -3   2   80.42    3.62 
   4  -3   2   81.22    3.20 
   4  -3   2   80.04    3.19 
   4  -3   2   84.10    3.93 
   4  -3   2   83.52    3.37 
   4  -3   2   83.32    3.61 
   4  -3   2   82.07    3.31 
  -4  -3  -2   84.56    3.74 
  -4  -3  -2   80.60    3.59 
   4  -3   2   81.10    3.53 
   4   3   2   81.45    3.41 
  -4   3  -2   79.83    3.45 
   4   3   2   81.65    3.72 
  -4   3  -2   78.95    3.31 
   4   3   2   77.21    3.67 
  -4   3  -2   82.13    3.27 
   4   3   2   76.49    3.77 
  -4   3  -2   83.09    3.48 
  -4   3  -2   82.74    3.17 
   4   3   2   80.81    3.82 
   4   3   2   78.13    3.73 
   4   3   2   81.29    3.58 
  -4   3  -2   81.67    3.21 
  -4   3  -2   90.76    3.35 
  -4   3  -2   83.31    3.56 
  -4   3  -2   75.06    3.28 
  -4   3  -2   83.65    3.68 
   4   3   2   81.96    3.75 
   4   3   2   84.67    3.66 
   4   3   2   80.44    3.65 
  -4   3  -2   80.60    3.28 
  -4   3  -2   77.86    4.12 
  -4   3  -2   86.30    3.48 
   4   3   2   85.38    3.81 
  -4   3  -2   81.90    3.17 
   4   3   2   85.49    3.77 
   5  -3   2   88.53    3.57 
  -5  -3  -2   91.05    4.17 
   5  -3   2   85.92    3.76 
  -5  -3  -2   86.11    4.09 
  -5  -3  -2   81.17    4.36 
   5  -3   2   91.05    3.54 
   5  -3   2   87.55    4.34 
  -5  -3  -2   89.88    4.21 
  -5  -3  -2   86.98    3.90 
  -5  -3  -2   88.45    3.86 
   5  -3   2   92.79    4.44 
  -5  -3  -2   89.65    4.11 
   5  -3   2   84.67    4.07 
   5  -3   2   85.31    4.06 
  -5  -3  -2   88.47    4.63 
   5  -3   2   89.26    3.99 
   5  -3   2   87.76    4.24 
   5  -3   2   88.85    3.85 
  -5   3  -2   91.18    3.73 
  -5   3  -2   86.61    3.82 
   5   3   2   87.81    4.14 
  -5   3  -2   93.24    3.49 
  -5   3  -2   88.68    3.65 
  -5   3  -2   89.17    3.69 
   5   3   2   83.91    4.13 
   5   3   2   96.63    4.12 
  -5   3  -2   89.93    3.93 
  -5   3  -2   92.03    4.19 
   5   3   2   87.14    4.07 
  -5   3  -2   92.99    3.82 
   5   3   2   94.84    4.37 
  -5   3  -2   94.95    4.78 
  -5   3  -2   90.72    3.90 
   5   3   2   90.14    3.90 
   5   3   2   87.31    4.22 
   5   3   2   93.39    4.15 
   5   3   2   88.54    4.15 
   5   3   2   81.97    4.18 
   5   3   2   90.09    3.65 
   5   3   2   91.51    4.22 
  -5   3  -2   90.87    3.73 
  -6  -3  -2  105.04    4.92 
   6  -3   2  109.38    5.34 
   6  -3   2  108.58    4.59 
   6  -3   2  107.06    4.94 
   6  -3   2  102.45    5.12 
  -6  -3  -2  102.60    4.93 
   6  -3   2  109.59    5.01 
   6  -3   2  105.97    4.77 
  -6  -3  -2  104.65    4.92 
  -6  -3  -2  104.79    5.01 
  -6  -3  -2  105.64    5.34 
   6  -3   2  111.33    5.19 
   6  -3   2  108.78    4.38 
   6  -3   2  111.32    4.63 
  -6  -3  -2  106.45    4.55 
  -6  -3  -2  113.16    4.67 
  -6  -3  -2  105.95    5.61 
  -6   3  -2  104.46    5.62 
  -6   3  -2  108.48    4.71 
   6   3   2  109.80    4.91 
  -6   3  -2  105.74    4.31 
  -6   3  -2  115.13    5.14 
   6   3   2  115.63    5.10 
   6   3   2  107.37    5.18 
   6   3   2  108.11    4.86 
   6   3   2  107.12    4.23 
   6   3   2  111.43    5.01 
  -6   3  -2  108.09    4.81 
   6   3   2  102.30    4.98 
   6   3   2  106.08    4.61 
  -6   3  -2  107.53    4.37 
   6   3   2  109.74    5.11 
   6   3   2  110.98    5.22 
  -6   3  -2  108.98    4.51 
   6   3   2  109.69    5.02 
   6   3   2  108.37    4.99 
  -6   3  -2  107.38    4.63 
   7  -3   2   46.01    2.40 
   7  -3   2   51.35    2.97 
   7  -3   2   44.52    2.98 
  -7  -3  -2   48.74    3.23 
  -7  -3  -2   45.75    2.41 
  -7  -3  -2   45.85    2.77 
   7  -3   2   48.06    2.98 
  -7  -3  -2   44.38    3.39 
  -7  -3  -2   46.58    2.87 
   7  -3   2   46.25    2.81 
  -7  -3  -2   48.76    2.83 
   7  -3   2   47.88    2.67 
  -7  -3  -2   46.53    2.82 
   7  -3   2   48.61    2.55 
  -7   3  -2   49.49    2.62 
  -7   3  -2   51.36    3.02 
  -7   3  -2   51.33    2.57 
  -7   3  -2   51.59    2.47 
   7   3   2   44.61    2.36 
   7   3   2   49.99    3.10 
   7   3   2   45.84    2.76 
  -7   3  -2   49.68    3.55 
   7   3   2   43.92    2.87 
   7   3   2   46.36    2.83 
   7   3   2   47.80    2.90 
   7   3   2   43.82    2.76 
   7   3   2   45.79    2.86 
   7   3   2   46.37    3.04 
   7   3   2   47.16    2.86 
  -7   3  -2   48.56    3.49 
   7   3   2   50.20    2.71 
  -8  -3  -2   65.66    4.59 
   8  -3   2   70.00    3.97 
  -8  -3  -2   68.47    3.82 
   8  -3   2   73.98    3.95 
  -8  -3  -2   72.41    3.99 
  -8  -3  -2   75.73    3.93 
   8  -3   2   70.28    3.59 
   8  -3   2   73.94    4.11 
   8  -3   2   70.83    3.70 
  -8  -3  -2   74.06    4.43 
   8  -3   2   73.12    4.25 
  -8  -3  -2   68.69    3.84 
   8   3   2   71.80    4.22 
   8   3   2   76.47    4.14 
   8   3   2   71.16    3.62 
  -8   3  -2   71.14    3.42 
  -8   3  -2   76.48    3.59 
   8   3   2   71.14    3.83 
  -8   3  -2   74.77    3.66 
   8   3   2   67.96    3.85 
   8   3   2   72.54    3.99 
  -8   3  -2   69.14    4.06 
  -8   3  -2   68.10    4.69 
  -8   3  -2   69.81    4.71 
   8   3   2   72.93    4.25 
   8   3   2   67.77    3.93 
   8   3   2   59.76    3.79 
   9  -3   2   70.54    4.47 
  -9  -3  -2   68.57    4.03 
   9  -3   2   73.20    4.18 
  -9  -3  -2   75.36    4.09 
  -9  -3  -2   79.27    4.29 
  -9  -3  -2   70.91    4.06 
   9  -3   2   74.53    3.95 
  -9  -3  -2   77.99    4.77 
   9  -3   2   68.32    4.18 
  -9  -3  -2   69.93    4.97 
  -9   3  -2   64.92    4.87 
  -9   3  -2   74.95    4.39 
   9   3   2   75.15    4.23 
  -9   3  -2   67.66    3.75 
   9   3   2   73.06    4.25 
   9   3   2   72.81    4.09 
   9   3   2   73.25    4.47 
   9   3   2   78.59    4.14 
   9   3   2   71.00    4.47 
   9   3   2   73.64    4.29 
  -9   3  -2   75.77    5.18 
   9   3   2   68.77    4.13 
  -9  -4   2   90.99    5.07 
  -9  -4   2  107.65    5.20 
   9  -4  -2  118.45    5.46 
  -9  -4   2   92.65    5.55 
   9  -4  -2   94.36    5.01 
  -9  -4   2   96.89    5.16 
  -9  -4   2  100.39    6.18 
   9  -4  -2   95.85    5.26 
  -9  -4   2   97.85    5.72 
   9   4  -2   92.04    5.21 
  -9   4   2  106.51    6.14 
  -9   4   2  102.56    5.47 
   9   4  -2   99.89    5.33 
   9   4  -2   99.36    5.26 
   9   4  -2   99.91    5.35 
   9   4  -2   95.90    4.87 
  -9   4   2  103.07    6.17 
  -9   4   2  100.45    5.71 
   9   4  -2  103.17    5.53 
   9   4  -2   97.73    5.11 
   9   4  -2  102.19    5.30 
  -8  -4   2   21.91    2.56 
   8  -4  -2   23.27    1.85 
  -8  -4   2   23.43    1.97 
   8  -4  -2   22.50    1.68 
   8  -4  -2   20.73    1.90 
   8  -4  -2   25.87    1.88 
  -8  -4   2   24.48    1.74 
   8  -4  -2   24.61    1.95 
  -8  -4   2   25.40    2.29 
  -8  -4   2   24.27    1.96 
  -8  -4   2   22.78    2.46 
  -8  -4   2   25.79    2.03 
   8   4  -2   24.31    2.11 
   8   4  -2   22.72    2.25 
  -8   4   2   24.43    2.11 
  -8   4   2   28.69    2.66 
   8   4  -2   25.36    2.13 
   8   4  -2   25.09    2.15 
   8   4  -2   25.80    2.13 
   8   4  -2   22.54    2.29 
   8   4  -2   21.08    1.80 
  -8   4   2   23.31    2.21 
  -8   4   2   22.77    1.64 
   8   4  -2   25.83    2.02 
  -8   4   2   24.12    2.39 
   8   4  -2   23.93    2.37 
   8   4  -2   24.88    2.01 
  -7  -4   2   82.91    4.58 
   7  -4  -2   77.73    4.28 
   7  -4  -2   82.09    4.13 
  -7  -4   2   85.75    4.93 
  -7  -4   2   78.67    4.07 
  -7  -4   2   81.92    4.19 
   7  -4  -2   78.54    3.91 
   7  -4  -2   82.67    4.22 
   7  -4  -2   83.14    3.81 
  -7  -4   2   76.47    4.39 
  -7  -4   2   76.77    4.14 
  -7  -4   2   85.63    3.97 
   7  -4  -2   79.47    3.98 
   7   4  -2   80.71    4.31 
  -7   4   2   82.92    3.76 
  -7   4   2   78.71    3.73 
  -7   4   2   81.13    4.47 
  -7   4   2   85.61    4.82 
  -7   4   2   79.33    3.60 
   7   4  -2   78.11    4.22 
   7   4  -2   79.32    4.14 
   7   4  -2   86.15    4.31 
  -7   4   2   85.24    4.34 
   7   4  -2   82.72    4.32 
   7   4  -2   82.47    4.14 
   7   4  -2   86.03    4.30 
   7   4  -2   88.67    4.20 
   7   4  -2   82.28    4.14 
  -7   4   2   80.48    4.29 
  -7   4   2   81.21    4.70 
   7   4  -2   79.83    4.30 
   6  -4  -2   30.85    1.65 
   6  -4  -2   32.14    1.88 
   6  -4  -2   27.35    1.95 
   6  -4  -2   29.08    1.83 
  -6  -4   2   32.45    2.03 
  -6  -4   2   30.39    2.01 
   6  -4  -2   29.17    1.71 
  -6  -4   2   33.70    1.96 
   6  -4  -2   29.37    2.05 
   6  -4  -2   32.16    2.28 
  -6  -4   2   25.37    2.11 
  -6  -4   2   28.63    2.13 
  -6  -4   2   29.34    1.73 
  -6  -4   2   31.39    2.47 
   6  -4  -2   30.76    1.95 
   6  -4  -2   27.37    1.87 
  -6  -4   2   26.28    1.95 
  -6   4   2   31.49    2.18 
  -6   4   2   28.62    2.04 
  -6   4   2   28.08    1.53 
  -6   4   2   30.59    1.72 
  -6   4   2   29.56    1.71 
  -6   4   2   26.23    2.20 
   6   4  -2   29.77    2.05 
   6   4  -2   29.24    2.04 
   6   4  -2   34.25    2.12 
   6   4  -2   29.54    2.03 
   6   4  -2   30.12    1.71 
   6   4  -2   29.07    2.04 
  -6   4   2   29.66    2.16 
   6   4  -2   29.02    1.71 
   6   4  -2   30.41    2.01 
  -6   4   2   29.26    1.63 
  -6   4   2   26.12    1.52 
   6   4  -2   29.02    2.02 
  -6   4   2   28.68    2.28 
  -6   4   2   33.35    1.78 
   6   4  -2   31.31    2.01 
   6   4  -2   28.62    1.93 
   6   4  -2   30.78    2.14 
  -6   4   2   27.38    1.87 
  -5  -4   2  130.21    5.94 
   5  -4  -2  140.54    5.51 
   5  -4  -2  144.76    5.64 
  -5  -4   2  134.87    6.17 
  -5  -4   2  136.96    6.08 
   5  -4  -2  133.68    6.13 
   5  -4  -2  134.74    5.75 
   5  -4  -2  139.49    5.75 
   5  -4  -2  139.09    5.68 
   5  -4  -2  137.93    5.56 
  -5  -4   2  144.29    6.49 
  -5  -4   2  135.57    5.84 
   5  -4  -2  138.96    5.96 
  -5  -4   2  139.63    5.88 
  -5  -4   2  132.62    5.88 
   5  -4  -2  137.30    5.87 
  -5  -4   2  128.81    5.67 
  -5  -4   2  137.33    5.68 
   5   4  -2  136.92    5.90 
  -5   4   2  143.14    5.58 
  -5   4   2  137.67    5.51 
   5   4  -2  146.22    5.70 
   5   4  -2  137.49    5.95 
   5   4  -2  141.31    5.69 
   5   4  -2  132.34    5.83 
   5   4  -2  132.49    5.97 
   5   4  -2  132.66    5.93 
  -5   4   2  134.29    5.58 
   5   4  -2  136.71    5.85 
   5   4  -2  138.69    5.97 
  -5   4   2  137.22    5.61 
  -5   4   2  137.31    5.15 
  -5   4   2  140.51    6.27 
   5   4  -2  131.61    6.02 
  -5   4   2  129.68    5.58 
  -5   4   2  137.92    6.26 
   5   4  -2  143.13    6.00 
  -5   4   2  115.39    6.06 
  -5   4   2  139.07    5.54 
  -5   4   2  139.86    6.09 
  -5   4   2  136.52    5.36 
  -5   4   2  141.86    5.69 
   5   4  -2  136.18    5.96 
  -5   4   2  139.61    5.99 
  -4  -4   2  108.48    4.93 
   4  -4  -2  115.71    4.60 
  -4  -4   2  114.22    5.18 
  -4  -4   2  108.76    4.81 
   4  -4  -2  110.61    4.50 
  -4  -4   2  107.78    4.73 
  -4  -4   2  106.77    4.66 
  -4  -4   2  110.89    4.79 
   4  -4  -2  114.31    4.58 
  -4  -4   2  110.73    4.75 
  -4  -4   2  104.23    4.60 
   4  -4  -2  110.81    4.91 
   4  -4  -2  114.34    4.63 
   4  -4  -2  107.72    4.52 
  -4  -4   2  114.25    4.88 
   4  -4  -2  109.81    4.48 
   4   4  -2  103.77    4.60 
  -4   4   2  105.94    4.58 
   4   4  -2  108.48    4.76 
   4   4  -2  111.05    4.78 
   4   4  -2  106.34    4.72 
  -4   4   2  111.26    4.68 
   4   4  -2  105.62    4.65 
  -4   4   2  109.20    4.53 
   4   4  -2  107.07    4.74 
  -4   4   2  113.70    4.06 
   4   4  -2  104.35    4.68 
  -4   4   2  106.05    4.35 
  -4   4   2  109.47    4.81 
   4   4  -2  109.24    4.72 
   4   4  -2  102.50    4.83 
  -4   4   2  108.93    4.91 
  -4   4   2  110.04    4.24 
  -4   4   2  108.10    4.49 
  -4   4   2  107.17    4.13 
   4   4  -2  112.03    4.82 
  -4   4   2  109.84    4.55 
  -4   4   2  105.77    4.04 
  -4   4   2  106.07    4.56 
  -4   4   2  100.02    4.88 
  -4   4   2  111.98    4.97 
   4   4  -2  107.84    4.64 
  -4   4   2  108.08    4.27 
   4   4  -2  115.63    4.89 
  -3  -4   2  164.84    6.85 
  -3  -4   2  169.23    6.75 
  -3  -4   2  169.97    6.82 
  -3  -4   2  160.73    6.71 
   3  -4  -2  165.97    6.74 
   3  -4  -2  170.87    6.52 
   3  -4  -2  167.96    6.84 
  -3  -4   2  178.43    6.79 
  -3  -4   2  169.69    6.87 
   3  -4  -2  167.37    6.49 
  -3  -4   2  166.80    7.04 
   3  -4  -2  162.85    6.66 
   3  -4  -2  171.15    6.71 
  -3  -4   2  171.78    6.74 
   3  -4  -2  168.62    6.69 
  -3  -4   2  165.56    6.85 
  -3   4   2  165.60    6.15 
   3   4  -2  166.99    6.64 
  -3   4   2  174.15    6.67 
  -3   4   2  167.23    6.50 
   3   4  -2  168.76    6.84 
  -3   4   2  164.66    6.40 
   3   4  -2  175.81    6.80 
  -3   4   2  165.62    6.80 
  -3   4   2  166.97    6.29 
   3   4  -2  168.35    6.74 
  -3   4   2  169.76    6.63 
  -3   4   2  167.32    6.16 
   3   4  -2  165.96    6.76 
  -3   4   2  174.03    6.82 
   3   4  -2  173.20    6.79 
  -3   4   2  168.64    6.49 
   3   4  -2  165.95    6.90 
  -3   4   2  151.51    6.78 
   3   4  -2  164.28    6.78 
  -3   4   2  170.21    6.74 
  -3   4   2  167.47    6.22 
  -3   4   2  174.38    6.27 
   3   4  -2  164.33    6.71 
   3   4  -2  178.41    6.73 
  -3   4   2  167.61    6.78 
  -3   4   2  171.06    6.77 
  -3   4   2  161.96    6.23 
   3   4  -2  169.62    6.88 
  -3   4   2  171.53    6.63 
  -2  -4   2  232.34    8.93 
  -2  -4   2  230.32    9.07 
  -2  -4   2  227.82    9.01 
  -2  -4   2  226.44    8.77 
   2  -4  -2  228.12    9.03 
  -2  -4   2  233.41    9.16 
   2  -4  -2  234.76    8.66 
  -2  -4   2  223.44    9.10 
  -2  -4   2  235.13    8.97 
   2  -4  -2  233.58    8.91 
  -2  -4   2  230.71    8.73 
   2  -4  -2  230.78    9.07 
   2  -4  -2  240.67    9.04 
  -2  -4   2  224.05    8.90 
  -2  -4   2  232.12    8.83 
  -2  -4   2  231.62    8.95 
   2  -4  -2  237.41    9.01 
  -2  -4   2  243.48    9.19 
  -2  -4   2  234.95    8.82 
  -2   4   2  235.08    8.75 
   2   4  -2  229.10    8.94 
  -2   4   2  238.11    8.55 
   2   4  -2  233.78    9.10 
  -2   4   2  242.72    8.99 
  -2   4   2  243.84    9.32 
   2   4  -2  234.71    8.81 
  -2   4   2  228.07    8.91 
   2   4  -2  227.81    8.98 
  -2   4   2  238.12    8.66 
  -2   4   2  234.50    8.51 
   2   4  -2  232.32    9.07 
  -2   4   2  224.32    8.88 
  -2   4   2  225.24    8.95 
   2   4  -2  236.48    8.96 
   2   4  -2  232.43    9.07 
  -2   4   2  242.69    8.86 
   2   4  -2  236.44    9.09 
   2   4  -2  216.53    8.86 
   2   4  -2  226.48    8.91 
   2   4  -2  232.58    8.81 
  -2   4   2  238.61    8.81 
  -2   4   2  240.45    9.11 
  -2   4   2  227.09    8.51 
  -2   4   2  236.41    9.11 
  -2   4   2  224.54    8.60 
  -2   4   2  232.50    8.56 
  -2   4   2  229.36    8.90 
  -2   4   2  238.18    8.84 
   1  -4  -2  264.41    9.98 
   1  -4  -2  246.98    9.79 
  -1  -4   2  257.79    9.80 
  -1  -4   2  253.86    9.52 
  -1  -4   2  263.24   10.09 
   1  -4  -2  255.60    9.59 
  -1  -4   2  259.98   10.05 
  -1  -4   2  259.58   10.17 
  -1  -4   2  256.61    9.69 
  -1  -4   2  252.81    9.66 
  -1  -4   2  257.79    9.46 
   1  -4  -2  255.57    9.98 
  -1  -4   2  258.05    9.99 
  -1  -4   2  256.44    9.79 
  -1  -4   2  256.19    9.58 
   1  -4  -2  255.45    9.86 
   1  -4  -2  258.41   10.04 
  -1  -4   2  268.94    9.58 
  -1  -4   2  251.56    9.92 
  -1  -4   2  255.87    9.90 
   1   4  -2  267.84    9.53 
  -1   4   2  250.68   10.17 
   1   4  -2  252.94    9.68 
   1   4  -2  248.77    9.97 
  -1   4   2  265.28    9.63 
  -1   4   2  279.72    9.69 
  -1   4   2  259.48    9.86 
  -1   4   2  263.91    9.59 
  -1   4   2  257.18    9.36 
  -1   4   2  263.35    9.37 
  -1   4   2  265.99   10.05 
   1   4  -2  255.98    9.64 
   1   4  -2  254.91    9.67 
   1   4  -2  255.30    9.89 
   1   4  -2  247.67    9.94 
  -1   4   2  255.24    9.71 
   1   4  -2  261.22    9.64 
  -1   4   2  247.45    9.42 
  -1   4   2  253.49    9.46 
  -1   4   2  254.66    9.88 
   1   4  -2  258.48    9.77 
  -1   4   2  268.13   10.12
[truncated: 2,168,526 more chars]
