# Supplementary material
Source: MDPI journal article supplement (https://www.mdpi.com/2073-4352/13/7/1043)
Supplement: s1 [file s1 › 6 Eu Ha2019_96_0m_a.cif]

 
data_Ha2019_96_0m_a 
  
_audit_creation_method            'SHELXL-2014/7' 
_shelx_SHELXL_version_number      '2014/7' 
_chemical_name_systematic         ? 
_chemical_name_common             ? 
_chemical_melting_point           ? 
_chemical_formula_moiety          ? 
_chemical_formula_sum 
 'C4 H12 Br Eu O7' 
_chemical_formula_weight          404.01 
  
loop_ 
 _atom_type_symbol 
 _atom_type_description 
 _atom_type_scat_dispersion_real 
 _atom_type_scat_dispersion_imag 
 _atom_type_scat_source 
 'C'  'C'   0.0033   0.0016 
 'International Tables Vol C Tables 4.2.6.8 and 6.1.1.4' 
 'H'  'H'   0.0000   0.0000 
 'International Tables Vol C Tables 4.2.6.8 and 6.1.1.4' 
 'O'  'O'   0.0106   0.0060 
 'International Tables Vol C Tables 4.2.6.8 and 6.1.1.4' 
 'Br'  'Br'  -0.2901   2.4595 
 'International Tables Vol C Tables 4.2.6.8 and 6.1.1.4' 
 'Eu'  'Eu'  -0.1578   3.6682 
 'International Tables Vol C Tables 4.2.6.8 and 6.1.1.4' 
  
_space_group_crystal_system       monoclinic 
_space_group_IT_number            14 
_space_group_name_H-M_alt         'P 21/n' 
_space_group_name_Hall            '-P 2yn' 
  
_shelx_space_group_comment 
; 
The symmetry employed for this shelxl refinement is uniquely defined 
by the following loop, which should always be used as a source of 
symmetry information in preference to the above space-group names. 
They are only intended as comments. 
; 
  
loop_ 
 _space_group_symop_operation_xyz 
 'x, y, z' 
 '-x+1/2, y+1/2, -z+1/2' 
 '-x, -y, -z' 
 'x-1/2, -y-1/2, z-1/2' 
  
_cell_length_a                    7.8318(3) 
_cell_length_b                    8.0121(3) 
_cell_length_c                    17.8214(7) 
_cell_angle_alpha                 90 
_cell_angle_beta                  95.972(2) 
_cell_angle_gamma                 90 
_cell_volume                      1112.21(7) 
_cell_formula_units_Z             4 
_cell_measurement_temperature     100(2) 
_cell_measurement_reflns_used     9538 
_cell_measurement_theta_min       2.74 
_cell_measurement_theta_max       27.58 
  
_exptl_crystal_description        prism 
_exptl_crystal_colour             colourless 
_exptl_crystal_density_meas       ? 
_exptl_crystal_density_method     ? 
_exptl_crystal_density_diffrn     2.413 
_exptl_crystal_F_000              760 
_exptl_transmission_factor_min    ? 
_exptl_transmission_factor_max    ? 
_exptl_crystal_size_max           0.243 
_exptl_crystal_size_mid           0.067 
_exptl_crystal_size_min           0.050 
_exptl_absorpt_coefficient_mu     9.236 
_shelx_estimated_absorpt_T_min    0.212 
_shelx_estimated_absorpt_T_max    0.655 
_exptl_absorpt_correction_type    multi-scan 
_exptl_absorpt_correction_T_min   0.484 
_exptl_absorpt_correction_T_max   0.792 
_exptl_absorpt_process_details    'Bruker SADABS' 
_exptl_absorpt_special_details    ? 
_diffrn_ambient_temperature       100(2) 
_diffrn_radiation_wavelength      0.71073 
_diffrn_radiation_type            MoK\a 
_diffrn_source                    ? 
_diffrn_measurement_device_type   'Bruker APEX-II CCD' 
_diffrn_measurement_method        '\f and \w scans' 
_diffrn_detector_area_resol_mean  ? 
_diffrn_reflns_number             118192 
_diffrn_reflns_av_unetI/netI      0.0119 
_diffrn_reflns_av_R_equivalents   0.0516 
_diffrn_reflns_limit_h_min        -10 
_diffrn_reflns_limit_h_max        10 
_diffrn_reflns_limit_k_min        -10 
_diffrn_reflns_limit_k_max        10 
_diffrn_reflns_limit_l_min        -23 
_diffrn_reflns_limit_l_max        23 
_diffrn_reflns_theta_min          2.745 
_diffrn_reflns_theta_max          27.993 
_diffrn_reflns_theta_full         25.242 
_diffrn_measured_fraction_theta_max   1.000 
_diffrn_measured_fraction_theta_full  1.000 
_diffrn_reflns_Laue_measured_fraction_max    1.000 
_diffrn_reflns_Laue_measured_fraction_full   1.000 
_diffrn_reflns_point_group_measured_fraction_max   1.000 
_diffrn_reflns_point_group_measured_fraction_full  1.000 
_reflns_number_total              2696 
_reflns_number_gt                 2488 
_reflns_threshold_expression      'I > 2\s(I)' 
_reflns_Friedel_coverage          0.000 
_reflns_Friedel_fraction_max      . 
_reflns_Friedel_fraction_full     . 
  
_reflns_special_details 
; 
 Reflections were merged by SHELXL according to the crystal 
 class for the calculation of statistics and refinement. 
  
 _reflns_Friedel_fraction is defined as the number of unique 
 Friedel pairs measured divided by the number that would be 
 possible theoretically, ignoring centric projections and 
 systematic absences. 
; 
  
_computing_data_collection        'Bruker APEX2' 
_computing_cell_refinement        'Bruker SAINT' 
_computing_data_reduction         'Bruker SAINT' 
_computing_structure_solution     'SHELXS-97 (Sheldrick 2008)' 
_computing_structure_refinement 'SHELXL-2014/7 (Sheldrick, 2014)' 
_computing_molecular_graphics     'Bruker SHELXTL' 
_computing_publication_material   'Bruker SHELXTL' 
_refine_special_details           ? 
_refine_ls_structure_factor_coef  Fsqd 
_refine_ls_matrix_type            full 
_refine_ls_weighting_scheme       calc 
_refine_ls_weighting_details 
'w=1/[\s^2^(Fo^2^)+(0.0114P)^2^+1.3005P] where P=(Fo^2^+2Fc^2^)/3' 
_atom_sites_solution_primary      direct
_atom_sites_solution_secondary    ? 
_atom_sites_solution_hydrogens    mixed 
_refine_ls_hydrogen_treatment     constr
_refine_ls_extinction_method      none 
_refine_ls_extinction_coef        . 
_refine_ls_number_reflns          2696 
_refine_ls_number_parameters      125 
_refine_ls_number_restraints      0 
_refine_ls_R_factor_all           0.0157 
_refine_ls_R_factor_gt            0.0131 
_refine_ls_wR_factor_ref          0.0309 
_refine_ls_wR_factor_gt           0.0300 
_refine_ls_goodness_of_fit_ref    1.100 
_refine_ls_restrained_S_all       1.100 
_refine_ls_shift/su_max           0.006 
_refine_ls_shift/su_mean          0.000 
  
loop_ 
 _atom_site_label 
 _atom_site_type_symbol 
 _atom_site_fract_x 
 _atom_site_fract_y 
 _atom_site_fract_z 
 _atom_site_U_iso_or_equiv 
 _atom_site_adp_type 
 _atom_site_occupancy 
 _atom_site_site_symmetry_order 
 _atom_site_calc_flag 
 _atom_site_refinement_flags_posn 
 _atom_site_refinement_flags_adp 
 _atom_site_refinement_flags_occupancy 
 _atom_site_disorder_assembly 
 _atom_site_disorder_group 
Eu1 Eu 0.25994(2) 0.46007(2) 0.53541(2) 0.01034(3) Uani 1 1 d . . . . . 
Br1 Br 0.39437(3) 0.96166(3) 0.68631(2) 0.01739(5) Uani 1 1 d . . . . . 
O11 O -0.01161(18) 0.33792(19) 0.53313(9) 0.0159(3) Uani 1 1 d . . . . . 
O12 O -0.28089(18) 0.26431(19) 0.52247(9) 0.0164(3) Uani 1 1 d . . . . . 
C11 C -0.1272(3) 0.2335(3) 0.54587(12) 0.0130(4) Uani 1 1 d . . . . . 
C12 C -0.0822(3) 0.0760(3) 0.58861(14) 0.0223(5) Uani 1 1 d . . . . . 
H12A H -0.0870 0.0956 0.6426 0.087(9) Uiso 1 1 calc R U . . . 
H12B H 0.0340 0.0410 0.5799 0.087(9) Uiso 1 1 calc R U . . . 
H12C H -0.1641 -0.0118 0.5713 0.087(9) Uiso 1 1 calc R U . . . 
O21 O 0.54082(18) 0.55352(19) 0.57344(8) 0.0133(3) Uani 1 1 d . . . . . 
O22 O 0.81132(18) 0.6185(2) 0.59755(8) 0.0163(3) Uani 1 1 d . . . . . 
C21 C 0.6703(3) 0.5846(3) 0.62165(12) 0.0131(4) Uani 1 1 d . . . . . 
C22 C 0.6531(3) 0.5762(3) 0.70399(13) 0.0208(5) Uani 1 1 d . . . . . 
H22A H 0.7661 0.5565 0.7316 0.045(7) Uiso 0.65(4) 1 d R U P . . 
H22B H 0.5755 0.4847 0.7139 0.045(7) Uiso 0.65(4) 1 d R U P . . 
H22C H 0.6063 0.6819 0.7206 0.045(7) Uiso 0.65(4) 1 d R U P . . 
H22D H 0.7548 0.6191 0.7347 0.045(7) Uiso 0.35(4) 1 d R U P . . 
H22E H 0.5501 0.6312 0.7190 0.045(7) Uiso 0.35(4) 1 d R U P . . 
H22F H 0.6442 0.4555 0.7115 0.045(7) Uiso 0.35(4) 1 d R U P . . 
O1W O 0.38629(18) 0.18201(18) 0.53125(8) 0.0146(3) Uani 1 1 d . . . . . 
H11W H 0.3826 0.1002 0.5704 0.050(7) Uiso 1 1 d R U . . . 
H12W H 0.5039 0.1842 0.5206 0.050(7) Uiso 1 1 d R U . . . 
O2W O 0.15670(18) 0.65074(19) 0.62499(9) 0.0158(3) Uani 1 1 d . . . . . 
H21W H 0.0373 0.6689 0.6300 0.047(7) Uiso 1 1 d R U . . . 
H22W H 0.2135 0.7499 0.6448 0.047(7) Uiso 1 1 d R U . . . 
O3W O 0.2829(2) 0.3441(2) 0.66146(9) 0.0194(3) Uani 1 1 d . . . . . 
H31W H 0.2338 0.3927 0.7035 0.044(6) Uiso 1 1 d R U . . . 
H32W H 0.3158 0.2333 0.6776 0.044(6) Uiso 1 1 d R U . . . 
  
loop_ 
 _atom_site_aniso_label 
 _atom_site_aniso_U_11 
 _atom_site_aniso_U_22 
 _atom_site_aniso_U_33 
 _atom_site_aniso_U_23 
 _atom_site_aniso_U_13 
 _atom_site_aniso_U_12 
Eu1 0.00652(5) 0.01264(6) 0.01190(5) 0.00047(4) 0.00121(3) -0.00113(4) 
Br1 0.02010(11) 0.01477(11) 0.01700(11) 0.00194(8) 0.00046(8) -0.00230(8) 
O11 0.0108(7) 0.0181(8) 0.0190(8) 0.0020(6) 0.0027(6) -0.0034(6) 
O12 0.0086(7) 0.0176(8) 0.0232(8) 0.0047(6) 0.0019(6) -0.0004(6) 
C11 0.0118(9) 0.0141(10) 0.0135(10) -0.0019(8) 0.0035(7) -0.0009(8) 
C12 0.0217(11) 0.0196(12) 0.0251(12) 0.0075(10) -0.0003(9) 0.0004(9) 
O21 0.0091(6) 0.0165(8) 0.0141(7) 0.0002(6) 0.0001(5) -0.0014(6) 
O22 0.0095(7) 0.0229(8) 0.0164(8) -0.0014(7) 0.0003(6) -0.0025(6) 
C21 0.0111(9) 0.0135(10) 0.0142(10) -0.0007(8) -0.0007(7) 0.0016(7) 
C22 0.0162(10) 0.0331(14) 0.0128(10) -0.0003(9) 0.0005(8) 0.0033(9) 
O1W 0.0113(7) 0.0151(7) 0.0179(8) 0.0019(6) 0.0037(6) 0.0000(6) 
O2W 0.0116(7) 0.0169(8) 0.0186(8) -0.0034(6) 0.0008(6) -0.0004(6) 
O3W 0.0257(8) 0.0171(8) 0.0163(8) 0.0016(6) 0.0070(6) 0.0041(7) 
  
_geom_special_details 
; 
 All esds (except the esd in the dihedral angle between two l.s. planes) 
 are estimated using the full covariance matrix.  The cell esds are taken 
 into account individually in the estimation of esds in distances, angles 
 and torsion angles; correlations between esds in cell parameters are only 
 used when they are defined by crystal symmetry.  An approximate (isotropic) 
 treatment of cell esds is used for estimating esds involving l.s. planes. 
; 
  
loop_ 
 _geom_bond_atom_site_label_1 
 _geom_bond_atom_site_label_2 
 _geom_bond_distance 
 _geom_bond_site_symmetry_2 
 _geom_bond_publ_flag 
Eu1 O11 2.3376(14) . ? 
Eu1 O21 2.3555(14) . ? 
Eu1 O2W 2.4092(15) . ? 
Eu1 O3W 2.4203(15) . ? 
Eu1 O1W 2.4419(15) . ? 
Eu1 O12 2.4501(15) 3_566 ? 
Eu1 O22 2.4592(15) 3_666 ? 
Eu1 O21 2.6153(14) 3_666 ? 
Eu1 O11 2.7203(15) 3_566 ? 
O11 C11 1.270(2) . ? 
O12 C11 1.257(2) . ? 
C11 C12 1.497(3) . ? 
C12 H12A 0.9800 . ? 
C12 H12B 0.9800 . ? 
C12 H12C 0.9800 . ? 
O21 C21 1.283(2) . ? 
O22 C21 1.256(3) . ? 
C21 C22 1.489(3) . ? 
C22 H22A 0.9800 . ? 
C22 H22B 0.9800 . ? 
C22 H22C 0.9800 . ? 
C22 H22D 0.9800 . ? 
C22 H22E 0.9800 . ? 
C22 H22F 0.9800 . ? 
O1W H11W 0.9600 . ? 
O1W H12W 0.9600 . ? 
O2W H21W 0.9600 . ? 
O2W H22W 0.9600 . ? 
O3W H31W 0.9600 . ? 
O3W H32W 0.9600 . ? 
  
loop_ 
 _geom_angle_atom_site_label_1 
 _geom_angle_atom_site_label_2 
 _geom_angle_atom_site_label_3 
 _geom_angle 
 _geom_angle_site_symmetry_1 
 _geom_angle_site_symmetry_3 
 _geom_angle_publ_flag 
O11 Eu1 O21 163.49(5) . . ? 
O11 Eu1 O2W 84.81(5) . . ? 
O21 Eu1 O2W 88.60(5) . . ? 
O11 Eu1 O3W 80.50(5) . . ? 
O21 Eu1 O3W 83.00(5) . . ? 
O2W Eu1 O3W 68.04(5) . . ? 
O11 Eu1 O1W 89.33(5) . . ? 
O21 Eu1 O1W 85.96(5) . . ? 
O2W Eu1 O1W 139.79(5) . . ? 
O3W Eu1 O1W 71.75(5) . . ? 
O11 Eu1 O12 118.08(5) . 3_566 ? 
O21 Eu1 O12 74.53(5) . 3_566 ? 
O2W Eu1 O12 75.48(5) . 3_566 ? 
O3W Eu1 O12 137.31(5) . 3_566 ? 
O1W Eu1 O12 139.85(5) . 3_566 ? 
O11 Eu1 O22 76.19(5) . 3_666 ? 
O21 Eu1 O22 118.04(5) . 3_666 ? 
O2W Eu1 O22 137.95(5) . 3_666 ? 
O3W Eu1 O22 141.58(6) . 3_666 ? 
O1W Eu1 O22 77.83(5) . 3_666 ? 
O12 Eu1 O22 81.00(5) 3_566 3_666 ? 
O11 Eu1 O21 125.57(5) . 3_666 ? 
O21 Eu1 O21 67.37(6) . 3_666 ? 
O2W Eu1 O21 141.73(5) . 3_666 ? 
O3W Eu1 O21 132.85(5) . 3_666 ? 
O1W Eu1 O21 70.40(5) . 3_666 ? 
O12 Eu1 O21 69.76(5) 3_566 3_666 ? 
O22 Eu1 O21 50.78(4) 3_666 3_666 ? 
O11 Eu1 O11 68.57(6) . 3_566 ? 
O21 Eu1 O11 122.87(5) . 3_566 ? 
O2W Eu1 O11 69.31(5) . 3_566 ? 
O3W Eu1 O11 128.74(5) . 3_566 ? 
O1W Eu1 O11 143.34(5) . 3_566 ? 
O12 Eu1 O11 49.51(4) 3_566 3_566 ? 
O22 Eu1 O11 68.88(5) 3_666 3_566 ? 
O21 Eu1 O11 98.37(5) 3_666 3_566 ? 
Eu1 Eu1 Eu1 140.418(5) 3_666 3_566 ? 
C11 O11 Eu1 159.49(14) . . ? 
C11 O11 Eu1 89.00(12) . 3_566 ? 
Eu1 O11 Eu1 111.43(6) . 3_566 ? 
C11 O12 Eu1 102.29(13) . 3_566 ? 
O12 C11 O11 119.16(19) . . ? 
O12 C11 C12 120.06(19) . . ? 
O11 C11 C12 120.78(19) . . ? 
C11 C12 H12A 109.5 . . ? 
C11 C12 H12B 109.5 . . ? 
H12A C12 H12B 109.5 . . ? 
C11 C12 H12C 109.5 . . ? 
H12A C12 H12C 109.5 . . ? 
H12B C12 H12C 109.5 . . ? 
C21 O21 Eu1 154.61(14) . . ? 
C21 O21 Eu1 90.80(12) . 3_666 ? 
Eu1 O21 Eu1 112.63(6) . 3_666 ? 
C21 O22 Eu1 98.90(13) . 3_666 ? 
O22 C21 O21 118.34(19) . . ? 
O22 C21 C22 121.33(19) . . ? 
O21 C21 C22 120.31(19) . . ? 
C21 C22 H22A 109.4 . . ? 
C21 C22 H22B 109.5 . . ? 
H22A C22 H22B 109.5 . . ? 
C21 C22 H22C 109.5 . . ? 
H22A C22 H22C 109.5 . . ? 
H22B C22 H22C 109.5 . . ? 
C21 C22 H22D 112.5 . . ? 
C21 C22 H22E 114.2 . . ? 
H22D C22 H22E 109.5 . . ? 
C21 C22 H22F 101.2 . . ? 
H22D C22 H22F 109.5 . . ? 
H22E C22 H22F 109.5 . . ? 
Eu1 O1W H11W 123.9 . . ? 
Eu1 O1W H12W 112.9 . . ? 
H11W O1W H12W 105.0 . . ? 
Eu1 O2W H21W 123.8 . . ? 
Eu1 O2W H22W 126.5 . . ? 
H21W O2W H22W 105.0 . . ? 
Eu1 O3W H31W 124.9 . . ? 
Eu1 O3W H32W 128.7 . . ? 
H31W O3W H32W 105.0 . . ? 
  
loop_ 
 _geom_hbond_atom_site_label_D 
 _geom_hbond_atom_site_label_H 
 _geom_hbond_atom_site_label_A 
 _geom_hbond_distance_DH 
 _geom_hbond_distance_HA 
 _geom_hbond_distance_DA 
 _geom_hbond_angle_DHA 
 _geom_hbond_site_symmetry_A 
O1W H11W Br1  0.96 2.34 3.2744(15) 164.7 1_545 
O1W H12W O12  0.96 1.80 2.709(2) 156.7 1_655 
O2W H21W O22  0.96 1.85 2.711(2) 148.0 1_455 
O2W H22W Br1  0.96 2.28 3.2313(15) 169.2 . 
O3W H31W Br1  0.96 2.36 3.3102(15) 169.6 2_546 
O3W H32W Br1  0.96 2.26 3.2042(16) 166.5 1_545 
  
_refine_diff_density_max    0.408 
_refine_diff_density_min   -0.408 
_refine_diff_density_rms    0.085 
  
_shelx_res_file 
; 
  
    Ha2019_96_0m_a.res created by SHELXL-2014/7 
  
  
TITL Ha2019_96_0m_a.res in P2(1)/n 
CELL  0.71073   7.8318   8.0121  17.8214   90.000   95.972   90.000 
ZERR    4.000   0.0003   0.0003   0.0007    0.000    0.002    0.000 
LATT 1 
SYMM 1/2-X, 1/2+Y, 1/2-Z 
SFAC C  H  O  Br Eu 
UNIT 16 48 28 4 4 
LIST 4 ! automatically inserted. Change 6 to 4 for CHECKCIF!! 
OMIT -3 56 
ACTA 
BOND $H 
rem DFIX 0.96  0.0001 O1w H11w O1w H12w O2w H21w O2w H22w O3w H31w O3w H32w 
rem dfix 1.523  0.0001 H11w H12w H21w H22w H31w H32w 
FREE Eu1 C21_$6 
FREE Eu1 C11_$7 
EQIV $6 1-x, 1-y, 1-z 
BIND Eu1 Eu1_$6 
BIND Eu1 Eu1_$7 
EQIV $7 -x,1-y,1-z 
BIND Eu1 O11_$7 
HTAB 
L.S. 10 
EQIV $1 -x+3/2, y-1/2, -z+3/2 
EQIV $2 x, y-1, z 
HTAB O1W Br1_$2 
EQIV $3 x+1, y, z 
HTAB O1W O12_$3 
EQIV $4 x-1, y, z 
HTAB O2W O22_$4 
HTAB O2W Br1 
EQIV $5 -x+1/2, y-1/2, -z+3/2 
HTAB O3W Br1_$5 
HTAB O3W Br1_$2 
SIZE 0.074  0.120  0.465 
FMAP 2 
SIZE 0.050  0.067  0.243 
rem DFIX 0.98  0.0001 C22 H22d C22 H22e C22 H22f 
rem dfix 1.601 0.0001 H22d H22e H22d H22f H22e H22f 
PLAN 6 
TEMP -173 
WGHT    0.011400    1.300500 
FVAR       0.27046   0.08693   0.04495   0.05020   0.04678   0.04420   0.64685 
EU1   5    0.259943    0.460067    0.535413    11.00000    0.00652    0.01264 = 
         0.01190    0.00047    0.00121   -0.00113 
BR1   4    0.394370    0.961657    0.686312    11.00000    0.02010    0.01477 = 
         0.01700    0.00194    0.00046   -0.00230 
O11   3   -0.011610    0.337919    0.533133    11.00000    0.01076    0.01810 = 
         0.01896    0.00197    0.00272   -0.00338 
O12   3   -0.280885    0.264313    0.522466    11.00000    0.00857    0.01759 = 
         0.02324    0.00468    0.00189   -0.00045 
C11   1   -0.127191    0.233517    0.545869    11.00000    0.01181    0.01410 = 
         0.01354   -0.00190    0.00351   -0.00088 
C12   1   -0.082204    0.075957    0.588609    11.00000    0.02170    0.01961 = 
         0.02512    0.00747   -0.00026    0.00036 
AFIX 137 
H12A  2   -0.087042    0.095578    0.642624    11.00000   21.00000 
H12B  2    0.034001    0.041008    0.579873    11.00000   21.00000 
H12C  2   -0.164129   -0.011836    0.571302    11.00000   21.00000 
AFIX   0 
O21   3    0.540819    0.553519    0.573437    11.00000    0.00911    0.01652 = 
         0.01406    0.00023    0.00007   -0.00144 
O22   3    0.811317    0.618513    0.597553    11.00000    0.00950    0.02294 = 
         0.01638   -0.00141    0.00031   -0.00250 
C21   1    0.670286    0.584632    0.621651    11.00000    0.01113    0.01355 = 
         0.01420   -0.00072   -0.00067    0.00156 
C22   1    0.653054    0.576242    0.703990    11.00000    0.01624    0.03308 = 
         0.01277   -0.00031    0.00046    0.00333 
AFIX   3 
H22A  2    0.766081    0.556550    0.731630    71.00000   31.00000 
H22B  2    0.575475    0.484735    0.713924    71.00000   31.00000 
H22C  2    0.606317    0.681862    0.720612    71.00000   31.00000 
  
H22D  2    0.754751    0.619078    0.734664   -71.00000   31.00000 
H22E  2    0.550096    0.631166    0.719009   -71.00000   31.00000 
H22F  2    0.644237    0.455497    0.711478   -71.00000   31.00000 
AFIX   0 
O1W   3    0.386290    0.182014    0.531248    11.00000    0.01133    0.01505 = 
         0.01794    0.00189    0.00375   -0.00004 
AFIX   3 
H11W  2    0.382617    0.100155    0.570384    11.00000   41.00000 
H12W  2    0.503914    0.184218    0.520576    11.00000   41.00000 
AFIX   0 
O2W   3    0.156698    0.650739    0.624986    11.00000    0.01158    0.01687 = 
         0.01865   -0.00342    0.00077   -0.00042 
AFIX   3 
H21W  2    0.037271    0.668899    0.630033    11.00000   51.00000 
H22W  2    0.213471    0.749915    0.644846    11.00000   51.00000 
AFIX   0 
O3W   3    0.282866    0.344084    0.661459    11.00000    0.02574    0.01706 = 
         0.01625    0.00160    0.00695    0.00408 
AFIX   3 
H31W  2    0.233763    0.392730    0.703518    11.00000   61.00000 
H32W  2    0.315767    0.233293    0.677593    11.00000   61.00000 
AFIX   0 
HKLF 4 
  
REM  Ha2019_96_0m_a.res in P2(1)/n 
REM R1 =  0.0131 for    2488 Fo > 4sig(Fo)  and  0.0157 for all    2696 data 
REM    125 parameters refined using      0 restraints 
  
END 
  
WGHT      0.0114      1.3005 
  
REM Instructions for potential hydrogen bonds 
HTAB C22 Br1_$1 
HTAB C22 O3W 
HTAB C22 Br1 
HTAB O1W Br1_$2 
HTAB O1W O12_$3 
HTAB O2W O22_$4 
HTAB O2W Br1 
HTAB O3W Br1_$5 
HTAB O3W Br1_$2 
  
REM Highest difference peak  0.408,  deepest hole -0.408,  1-sigma level  0.085 
Q1    1   0.4705  0.1838  0.5384  11.00000  0.05    0.41 
Q2    1  -0.1842  0.0474  0.6109  11.00000  0.05    0.39 
Q3    1   0.6585  0.5668  0.6603  11.00000  0.05    0.38 
Q4    1   0.2063  0.6229  0.5915  11.00000  0.05    0.36 
Q5    1   0.2372  0.4571  0.4857  11.00000  0.05    0.36 
Q6    1   0.0758  0.6409  0.6235  11.00000  0.05    0.34 
; 
_shelx_res_checksum   57091 
  
_shelx_hkl_file 
; 
   1   0   0    1.10    1.10 
   1   0   0    2.40    1.20 
   1   0   0    4.30    1.10 
   1   0   0   -1.00    0.60 
   1   0   0    0.10    0.90 
  -1   0   0    0.80    0.80 
  -1   0   0   -0.50    0.40 
  -1   0   0   -0.80    0.60 
  -1   0   0   -0.10    0.70 
  -1   0   0    3.10    1.40 
  -1   0   0    1.30    0.90 
  -1   0   0   -0.40    0.70 
  -1   0   0    2.50    1.30 
  -1   0   0    0.50    0.70 
  -1   0   0    0.40    0.80 
  -1   0   0    0.10    0.60 
  -1   0   0    0.10    0.80 
  -1   0   0    0.20    0.60 
  -1   0   0   -0.60    0.50 
  -1   0   0   -0.10    0.70 
  -1   0   0   -0.40    0.60 
  -1   0   0    1.40    1.20 
  -1   0   0    1.20    1.10 
  -1   0   0    0.60    0.90 
   1   0   0    1.90    1.00 
   1   0   0    3.20    1.00 
   1   0   0    4.70    0.90 
   1   0   0    4.50    1.20 
   1   0   0    2.80    1.00 
   1   0   0    1.00    0.80 
   1   0   0    2.60    1.30 
   1   0   0    5.20    1.50 
   1   0   0    3.30    0.80 
   1   0   0   -0.20    0.70 
   1   0   0   -0.30    0.60 
   1   0   0    0.50    0.80 
   1   0   0    7.40    1.80 
   1   0   0   -0.10    0.70 
   1   0   0    3.50    1.50 
   1   0   0    4.70    0.80 
   1   0   0    4.00    1.50 
   1   0   0    3.50    1.40 
   1   0   0    0.60    0.80 
   1   0   0    2.70    1.10 
   1   0   0    4.50    1.70 
   1   0   0    8.40    1.80 
   1   0   0    0.70    0.80 
   2   0   0 3994.00  145.59 
   2   0   0 3844.62  145.79 
   2   0   0 3750.32  142.09 
   2   0   0 3960.70  146.19 
   2   0   0 3877.51  146.49 
   2   0   0 3837.32  145.89 
   2   0   0 3904.21  145.99 
   2   0   0 3917.91  145.79 
   2   0   0 3939.01  144.79 
   2   0   0 3862.11  145.39 
   2   0   0 3899.41  145.59 
   2   0   0 3928.61  146.29 
   2   0   0 3877.41  145.09 
   2   0   0 3810.72  142.99 
   2   0   0 3907.91  146.29 
   2   0   0 3844.12  147.29 
  -2   0   0 3869.41  142.99 
  -2   0   0 3935.61  146.49 
  -2   0   0 3917.31  147.29 
  -2   0   0 3971.60  145.39 
   2   0   0 3774.62  144.79 
   2   0   0 3806.92  142.99 
   2   0   0 3953.20  142.49 
   2   0   0 3838.32  146.79 
   2   0   0 3737.13  143.89 
   2   0   0 3909.21  143.79 
   2   0   0 3881.01  144.99 
  -2   0   0 3852.21  145.99 
  -2   0   0 3848.21  146.19 
  -2   0   0 3885.51  145.39 
  -2   0   0 3805.92  146.09 
   2   0   0 3847.82  145.39 
   2   0   0 3948.60  145.99 
   2   0   0 3841.52  146.39 
   2   0   0 3943.11  145.59 
   2   0   0 3932.11  144.79 
   2   0   0 3852.01  141.89 
  -2   0   0 3884.61  145.69 
  -2   0   0 3728.23  146.09 
  -2   0   0 3853.01  144.99 
  -2   0   0 3873.91  141.79 
  -2   0   0 3829.82  143.09 
  -2   0   0 3900.31  142.39 
  -2   0   0 3832.02  143.39 
  -2   0   0 3842.42  143.39 
  -2   0   0 3819.22  144.99 
  -2   0   0 3870.71  145.89 
  -2   0   0 3839.52  144.79 
  -2   0   0 3937.91  146.19 
  -2   0   0 3828.52  144.79 
  -2   0   0 3830.32  145.79 
  -2   0   0 3819.72  146.29 
  -2   0   0 3907.21  146.19 
   3   0   0    8.00    3.60 
   3   0   0    1.00    2.60 
   3   0   0   -1.90    2.50 
   3   0   0    2.60    2.50 
   3   0   0    6.00    2.70 
   3   0   0    2.80    1.80 
   3   0   0   -1.50    2.50 
   3   0   0    3.20    2.90 
  -3   0   0   -1.70    2.40 
  -3   0   0   -0.30    2.60 
  -3   0   0    4.10    3.50 
   3   0   0    6.70    3.70 
  -3   0   0   -0.20    2.40 
  -3   0   0    1.90    3.10 
  -3   0   0   -1.80    2.10 
  -3   0   0    6.30    3.60 
  -3   0   0    0.70    2.20 
  -3   0   0    3.30    1.20 
  -3   0   0    0.30    3.10 
  -3   0   0    0.90    1.60 
  -3   0   0    3.30    2.00 
  -3   0   0    4.10    3.80 
   3   0   0    1.10    2.70 
   3   0   0    0.50    2.40 
   3   0   0    0.70    1.70 
   3   0   0    0.40    2.60 
   3   0   0    4.80    3.50 
   3   0   0    7.00    4.30 
  -3   0   0   -0.70    2.30 
  -3   0   0    3.60    1.90 
  -3   0   0    1.80    3.20 
  -3   0   0   -0.80    1.60 
  -3   0   0    1.40    1.40 
  -3   0   0    1.20    2.50 
   3   0   0    0.80    2.70 
  -3   0   0    5.30    3.70 
  -3   0   0    2.60    2.50 
   3   0   0    1.60    1.40 
   3   0   0    5.70    3.40 
   3   0   0    2.40    1.60 
  -3   0   0    4.60    3.10 
   3   0   0    3.20    1.70 
   3   0   0    1.90    1.30 
   3   0   0    1.90    2.90 
   3   0   0    0.80    1.70 
   3   0   0    3.20    3.30 
  -3   0   0    1.30    2.60 
   3   0   0   -5.10    2.10 
   3   0   0   -0.40    2.30 
   3   0   0   -3.30    2.00 
  -4   0   0  633.34   33.10 
  -4   0   0  645.64   34.20 
   4   0   0  663.13   32.90 
  -4   0   0  690.73   32.20 
  -4   0   0  663.83   28.60 
   4   0   0  667.43   26.70 
  -4   0   0  680.73   34.30 
   4   0   0  658.83   34.40 
   4   0   0  646.54   25.90 
   4   0   0  660.43   28.50 
   4   0   0  649.04   27.30 
   4   0   0  639.14   34.80 
  -4   0   0  644.04   31.80 
  -4   0   0  652.33   28.40 
  -4   0   0  592.44   31.40 
  -4   0   0  654.43   33.80 
  -4   0   0  632.44   33.80 
   4   0   0  673.43   26.90 
   4   0   0  642.04   35.70 
   4   0   0  659.93   32.90 
  -4   0   0  695.13   34.50 
  -4   0   0  663.13   34.00 
  -4   0   0  620.94   33.10 
   4   0   0  619.94   31.70 
   4   0   0  647.64   32.00 
  -4   0   0  639.94   27.10 
  -4   0   0  647.44   25.70 
  -4   0   0  750.82   34.30 
  -4   0   0  632.04   34.20 
   4   0   0  666.23   30.90 
  -4   0   0  632.24   28.30 
   4   0   0  673.83   34.70 
   4   0   0  652.83   27.50 
   4   0   0  674.83   28.60 
  -4   0   0  584.44   33.50 
  -4   0   0  646.14   28.30 
  -5   0   0    0.30    2.50 
  -5   0   0   -2.70    3.30 
   5   0   0    6.20    5.50 
  -5   0   0    0.50    2.30 
   5   0   0    1.40    3.70 
  -5   0   0   -0.40    4.10 
   5   0   0    0.40    3.80 
  -5   0   0   -2.20    3.90 
   5   0   0    4.50    3.80 
  -5   0   0    2.10    5.00 
   5   0   0   -4.00    1.50 
   5   0   0   -0.90    3.40 
   5   0   0   -0.80    1.60 
   5   0   0   -5.70    3.30 
   5   0   0    2.60    4.10 
   5   0   0   -0.50    2.30 
   5   0   0   -1.10    4.40 
   5   0   0    2.30    2.20 
   5   0   0    0.90    4.60 
  -5   0   0   -0.60    4.40 
  -5   0   0   -0.30    3.50 
  -5   0   0    3.80    4.20 
  -5   0   0   -0.70    3.60 
  -5   0   0    0.90    1.20 
   5   0   0    4.40    2.40 
   5   0   0   -2.10    2.30 
  -5   0   0    2.60    2.50 
  -5   0   0    0.70    4.10 
  -5   0   0   -3.40    3.70 
   5   0   0   -0.10    1.30 
  -5   0   0    6.60    5.10 
  -5   0   0   -2.80    1.80 
  -5   0   0    1.40    4.10 
  -5   0   0    2.10    2.00 
   6   0   0 1884.91   71.79 
  -6   0   0 1884.71   82.09 
  -6   0   0 1909.71   85.49 
  -6   0   0 1933.61   86.59 
   6   0   0 1906.01   86.19 
  -6   0   0 1904.81   73.09 
  -6   0   0 1868.91   72.89 
   6   0   0 1886.41   87.59 
   6   0   0 1887.11   74.79 
   6   0   0 1897.01   71.59 
  -6   0   0 1779.02   83.29 
  -6   0   0 1833.92   85.69 
  -6   0   0 1915.01   86.29 
   6   0   0 1879.01   81.59 
   6   0   0 1863.31   75.09 
  -6   0   0 1916.21   75.39 
  -6   0   0 1861.21   72.49 
   6   0   0 1931.51   91.39 
   6   0   0 1841.72   72.69 
   6   0   0 1856.21   71.39 
   6   0   0 1942.01   83.59 
   6   0   0 1809.62   81.49 
   6   0   0 1886.41   80.39 
   6   0   0 1913.81   86.39 
   6   0   0 1801.22   87.89 
   6   0   0 1847.82   83.09 
  -6   0   0 1812.62   84.39 
  -6   0   0 1822.42   84.89 
  -6   0   0 1870.11   84.49 
  -6   0   0 1751.82   80.49 
  -6   0   0 2038.10   85.49 
  -6   0   0 1751.92   84.99 
   6   0   0 1922.51   72.89 
   7   0   0    1.10    7.70 
  -7   0   0   -3.40    6.10 
  -7   0   0   -3.40    6.20 
  -7   0   0   -4.10    5.90 
   7   0   0   -9.10    3.10 
  -7   0   0    7.00    7.00 
  -7   0   0   -5.30    5.10 
  -7   0   0    0.40    6.10 
  -7   0   0    3.20    7.40 
  -7   0   0   -2.80    6.00 
   7   0   0   11.90    9.90 
   7   0   0   -3.50    5.60 
   7   0   0    0.30    7.30 
   7   0   0   -2.10    6.30 
  -7   0   0    4.00    7.30 
  -7   0   0   -2.10    5.00 
  -7   0   0   -3.90    5.70 
   7   0   0   -2.70    7.60 
   7   0   0   -3.60    5.80 
  -7   0   0   -1.00    6.00 
   7   0   0   -4.30    6.20 
   7   0   0    0.50    5.10 
   7   0   0   -3.00    5.30 
   7   0   0    6.20    4.20 
  -8   0   0 1233.08   64.39 
   8   0   0 1330.77   70.49 
  -8   0   0 1311.37   69.49 
   8   0   0 1322.27   67.19 
  -8   0   0 1266.87   69.39 
   8   0   0 1220.28   72.99 
  -8   0   0 1217.38   69.19 
   8   0   0 1127.29   72.89 
   8   0   0 1397.26   73.49 
  -8   0   0 1273.97   67.29 
  -8   0   0 1265.67   68.39 
  -8   0   0 1130.59   67.19 
  -8   0   0 1252.07   68.59 
   8   0   0 1322.07   63.59 
   8   0   0 1376.06   65.19 
  -8   0   0 1334.57   69.09 
   8   0   0 1247.78   69.79 
   8   0   0 1288.07   64.39 
   8   0   0 1249.47   72.49 
   8   0   0 1295.67   66.69 
  -8   0   0 1213.08   62.89 
  -8   0   0 1191.28   66.49 
  -9   0   0    6.00   10.40 
  -9   0   0   -0.70    9.80 
   9   0   0   -1.00   10.90 
  -9   0   0   -8.40    6.80 
   9   0   0   -5.90    9.80 
   9   0   0   -1.70    8.10 
  -9   0   0   -0.10    8.10 
  -9   0   0    5.70   10.50 
  -9   0   0    6.10    9.00 
   9   0   0   -3.80    8.40 
  -9   0   0    0.80    6.90 
   9   0   0    7.30   11.10 
   9   0   0   -4.20    6.70 
   9   0   0    8.40   13.40 
   9   0   0   -1.40    7.40 
   9   0   0    2.10    9.10 
  -9   0   0   -3.10    9.00 
  -9   0   0    4.60    9.20 
  -9   0   0    6.00    9.80 
   9   0   0  -12.90    7.40 
  10   0   0  169.58   33.10 
 -10   0   0  159.08   28.00 
 -10   0   0  174.18   29.80 
  10   0   0  162.68   25.00 
  10   0   0  172.98   34.90 
 -10   0   0  168.18   29.10 
 -10   0   0  146.39   26.90 
 -10   0   0  191.68   27.50 
  10   0   0  159.08   31.20 
 -10   0   0  183.18   29.40 
 -10   0   0  168.48   27.40 
 -10   0   0  155.68   27.10 
  10   0   0  106.59   25.00 
  10   0   0  195.08   31.80 
  10   0   0   99.69   21.80 
 -10   0   0  155.58   28.60 
  10   0   0  151.28   27.80 
  10   0   0  176.58   27.60 
   0  -1   0    2.90    1.10 
   0  -1   0    9.30    1.90 
   0  -1   0    0.50    1.30 
   0  -1   0    0.90    0.90 
   0  -1   0    0.90    0.80 
   0  -1   0    0.90    0.80 
   0  -1   0   -0.40    0.70 
   0  -1   0   -0.30    0.60 
   0  -1   0    1.20    1.10 
   0  -1   0    0.30    0.60 
   0   1   0    6.60    1.70 
   0   1   0    2.30    1.40 
   0   1   0    2.50    1.30 
   0   1   0    6.30    1.40 
   0   1   0    3.60    1.40 
   0   1   0   12.00    2.20 
   0   1   0    7.80    1.90 
   0   1   0    5.50    1.60 
   0   1   0    5.40    1.60 
   0   1   0    4.40    1.60 
   0   1   0    0.90    1.20 
   0   1   0    0.10    1.30 
   0   1   0   -0.40    0.70 
   0   1   0    5.20    1.70 
   0   1   0    4.90    1.50 
  -1  -1   0  214.98   10.90 
   1  -1   0  225.98   11.00 
   1  -1   0  224.78   11.50 
   1  -1   0  218.38   11.00 
   1  -1   0  221.08   11.80 
   1  -1   0  220.68   11.90 
   1  -1   0  230.08   10.80 
  -1  -1   0  220.78   10.70 
   1  -1   0  219.78   11.00 
   1  -1   0  172.18   10.70 
   1  -1   0  243.28   10.80 
   1  -1   0  224.28   11.40 
   1  -1   0  241.68   10.50 
  -1  -1   0  227.78   10.80 
  -1  -1   0  213.88   10.80 
  -1  -1   0  212.58   10.30 
  -1  -1   0  203.88   10.10 
   1  -1   0  211.68   10.90 
   1  -1   0  216.78   11.90 
   1  -1   0  202.28   11.30 
   1  -1   0  216.48   11.20 
   1  -1   0  233.08   11.70 
   1  -1   0  204.38   11.20 
   1  -1   0  237.18   12.20 
   1  -1   0  232.48   11.50 
   1  -1   0  200.68   10.90 
   1  -1   0  236.48   11.20 
   1  -1   0  233.88   11.90 
   1  -1   0  219.18   10.70 
   1  -1   0  212.88   11.60 
  -1   1   0  214.08   11.00 
   1   1   0  225.28   10.90 
   1   1   0  235.18   10.50 
   1   1   0  222.68   10.10 
   1   1   0  219.88   11.00 
  -1   1   0  206.38   10.70 
  -1   1   0  224.18   11.30 
  -1   1   0  238.58   11.00 
  -1   1   0  253.97   12.30 
  -1   1   0  233.68   11.60 
  -1   1   0  220.88   11.30 
  -1   1   0  232.38   11.70 
   1   1   0  238.88   10.90 
  -1   1   0  222.78   10.50 
   1   1   0  220.68   11.00 
   1   1   0  215.38   10.10 
  -1   1   0  199.28   11.10 
   1   1   0  236.98   10.90 
   1   1   0  216.08   10.80 
   1   1   0  225.08   10.90 
  -1   1   0  225.28   10.80 
   1   1   0  237.38   11.40 
  -1   1   0  215.78   11.00 
  -1   1   0  230.58   11.90 
   1   1   0  219.48    9.60 
   1   1   0  230.98   11.20 
  -1   1   0  238.28   12.00 
  -1   1   0  233.38   11.60 
   1   1   0  233.08   10.50 
   1   1   0  227.48   11.60 
  -1   1   0  231.48   11.10 
  -1   1   0  239.18   11.70 
   1   1   0  219.38   10.50 
  -1   1   0  227.98   11.50 
  -1   1   0  224.48   11.20 
   1   1   0  220.58    9.40 
   1   1   0  236.28   11.20 
  -1   1   0  215.28   11.80 
   1   1   0  221.18    9.70 
   1   1   0  228.98   10.70 
  -1   1   0  224.98   11.90 
   1   1   0  216.08   10.00 
   1   1   0  212.38   10.80 
   1   1   0  221.58   10.50 
   1   1   0  234.08   11.00 
  -1   1   0  228.08   11.50 
  -1   1   0  242.68   11.50 
  -1   1   0  223.18   11.00 
  -1   1   0  222.38   10.80 
  -1   1   0  228.48   11.00 
  -1   1   0  232.38   11.70 
   1   1   0  224.68   10.20 
   1   1   0  213.48   10.80 
  -1   1   0  248.18   11.80 
  -1   1   0  238.78   11.20 
   1   1   0  229.38   10.90 
   2  -1   0  277.17   15.60 
  -2  -1   0  289.87   14.00 
   2  -1   0  326.47   16.30 
   2  -1   0  279.57   15.90 
   2  -1   0  306.07   15.90 
  -2  -1   0  311.77   13.70 
   2  -1   0  309.17   13.60 
   2  -1   0  303.67   16.40 
  -2  -1   0  293.57   15.40 
  -2  -1   0  299.37   14.50 
  -2  -1   0  278.87   15.30 
  -2  -1   0  300.37   15.90 
  -2  -1   0  274.87   15.00 
  -2  -1   0  291.17   13.40 
   2  -1   0  295.97   17.00 
   2  -1   0  336.97   16.80 
   2  -1   0  322.47   16.60 
   2  -1   0  318.47   17.20 
   2  -1   0  328.77   16.10 
  -2  -1   0  292.37   14.90 
  -2  -1   0  292.87   16.10 
   2  -1   0  355.76   14.90 
  -2  -1   0  288.37   16.20 
  -2  -1   0  295.57   13.70 
   2  -1   0  306.17   16.90 
   2  -1   0  304.97   15.10 
  -2  -1   0  293.67   14.70 
   2  -1   0  306.77   14.90 
   2  -1   0  336.17   18.30 
   2  -1   0  279.67   14.30 
   2  -1   0  314.47   16.30 
   2  -1   0  292.27   16.10 
   2  -1   0  307.47   15.90 
   2  -1   0  293.67   16.20 
   2  -1   0  302.37   16.40 
   2  -1   0  308.47   16.20 
   2  -1   0  305.77   16.20 
   2  -1   0  275.87   15.60 
   2  -1   0  307.17   13.90 
   2  -1   0  318.67   16.30 
   2  -1   0  313.07   16.00 
   2  -1   0  319.07   17.00 
   2  -1   0  294.67   16.20 
  -2  -1   0  293.67   14.10 
   2  -1   0  301.87   16.50 
  -2  -1   0  328.77   16.50 
  -2  -1   0  303.27   13.40 
   2  -1   0  321.17   17.00 
  -2  -1   0  295.47   16.00 
  -2  -1   0  272.57   15.50 
  -2  -1   0  293.97   16.00 
   2   1   0  293.47   15.20 
   2   1   0  272.57   15.00 
   2   1   0  297.87   13.70 
  -2   1   0  300.17   13.80 
   2   1   0  284.07   15.40 
   2   1   0  286.47   15.70 
   2   1   0  318.97   16.40 
   2   1   0  293.87   15.70 
  -2   1   0  300.37   15.70 
   2   1   0  285.77   15.90 
  -2   1   0  274.17   16.10 
   2   1   0  307.37   14.10 
  -2   1   0  321.77   16.90 
   2   1   0  301.57   15.40 
  -2   1   0  303.57   16.60 
  -2   1   0  333.67   16.20 
   2   1   0  305.57   15.10 
   2   1   0  295.87   13.30 
  -2   1   0  339.07   16.60 
  -2   1   0  284.07   13.40 
  -2   1   0  309.47   16.50 
  -2   1   0  302.87   17.00 
   2   1   0  286.27   11.80 
   2   1   0  300.37   11.80 
  -2   1   0  291.87   16.40 
  -2   1   0  353.46   17.60 
   2   1   0  312.97   14.50 
  -2   1   0  302.67   16.10 
  -2   1   0  327.67   14.50 
   2   1   0  314.87   16.20 
   2   1   0  291.17   13.40 
   2   1   0  306.57   13.40 
   2   1   0  326.87   17.00 
   2   1   0  328.77   17.20 
   2   1   0  295.07   14.80 
  -2   1   0  307.87   16.20 
  -2   1   0  298.67   15.80 
  -2   1   0  273.17   14.10 
  -2   1   0  299.97   13.40 
   2   1   0  293.67   13.50 
  -2   1   0  295.47   16.20 
   2   1   0  292.67   14.20 
  -2   1   0  322.17   13.80 
  -2   1   0  272.17   14.40 
  -2   1   0  331.67   16.50 
  -2   1   0  277.67   16.10 
   2   1   0  286.87   13.80 
   2   1   0  309.57   14.00 
   2   1   0  294.17   15.90 
  -2   1   0  293.17   16.10 
   2   1   0  322.87   16.20 
   2   1   0  288.97   13.50 
  -2   1   0  293.37   13.90 
  -2   1   0  313.27   16.10 
  -2   1   0  281.67   16.40 
  -2   1   0  310.87   16.20 
   2   1   0  296.07   15.00 
   2   1   0  331.37   15.10 
   3  -1   0    8.30    5.10 
  -3  -1   0    8.00    3.60 
   3  -1   0    8.50    3.30 
   3  -1   0   13.50    4.60 
   3  -1   0    5.80    2.80 
   3  -1   0    9.60    3.90 
   3  -1   0   10.40    4.70 
   3  -1   0    6.70    4.00 
  -3  -1   0   25.30    5.80 
   3  -1   0    0.60    3.20 
   3  -1   0   10.50    3.00 
   3  -1   0   11.00    4.50 
   3  -1   0    9.50    4.00 
   3  -1   0    5.90    4.10 
   3  -1   0    5.30    2.90 
   3  -1   0    5.90    3.70 
   3  -1   0   11.70    4.60 
  -3  -1   0    2.80    3.50 
  -3  -1   0    3.10    2.60 
   3  -1   0   10.10    4.40 
  -3  -1   0   10.20    3.10 
  -3  -1   0    9.60    2.30 
  -3  -1   0    6.40    2.40 
  -3  -1   0    6.50    3.30 
  -3  -1   0    6.30    3.80 
  -3  -1   0    0.50    3.10 
  -3  -1   0   13.10    4.50 
  -3  -1   0    8.80    3.70 
  -3  -1   0   -1.90    2.40 
   3  -1   0    9.80    4.20 
   3  -1   0    5.10    3.50 
  -3  -1   0   13.10    4.00 
   3  -1   0   12.90    4.90 
  -3  -1   0    5.70    2.60 
   3  -1   0    6.40    3.70 
   3  -1   0    5.80    3.80 
   3  -1   0    5.60    3.60 
  -3  -1   0    7.00    4.10 
   3  -1   0    9.30    2.30 
  -3  -1   0    5.70    2.80 
   3  -1   0    8.40    2.50 
  -3  -1   0    2.90    3.60 
  -3   1   0    6.20    3.30 
   3   1   0   12.40    3.00 
   3   1   0    9.40    2.70 
  -3   1   0   10.80    3.60 
   3   1   0    9.50    2.70 
   3   1   0   10.70    2.40 
  -3   1   0   12.70    4.70 
   3   1   0    5.60    3.50 
  -3   1   0   11.20    2.40 
  -3   1   0    5.90    3.90 
  -3   1   0    9.40    3.80 
   3   1   0    5.00    4.00 
   3   1   0    7.20    3.30 
   3   1   0    7.10    2.10 
  -3   1   0    4.40    3.50 
   3   1   0   10.00    4.30 
  -3   1   0   15.30    3.80 
  -3   1   0    2.00    3.30 
  -3   1   0   12.80    4.50 
  -3   1   0   11.90    4.50 
   3   1   0    7.10    2.10 
   3   1   0    4.30    3.80 
  -3   1   0    8.30    2.40 
   3   1   0   14.10    3.90 
  -3   1   0    7.70    1.90 
  -3   1   0   12.70    2.20 
  -3   1   0    7.60    3.70 
  -3   1   0   10.00    2.50 
  -3   1   0   11.60    3.30 
  -3   1   0   14.10    4.90 
   3   1   0    7.40    3.10 
  -3   1   0   13.40    4.90 
   3   1   0   12.20    4.20 
   3   1   0    3.30    2.90 
   3   1   0   11.00    3.20 
   3   1   0    6.70    2.20 
   3   1   0    0.30    2.70 
   3   1   0    8.70    2.10 
  -3   1   0    8.60    3.80 
  -3   1   0   12.80    3.10 
  -3   1   0   12.00    4.60 
  -3   1   0    4.10    3.40 
  -3   1   0    8.30    4.50 
   3   1   0    8.80    1.90 
   3   1   0   12.30    2.80 
  -3   1   0    2.90    3.20 
  -3   1   0    2.00    3.00 
  -3   1   0    7.90    2.60 
   3   1   0    9.00    4.00 
  -3   1   0   10.30    4.20 
   3   1   0    5.00    2.90 
   3   1   0    4.70    3.70 
  -3   1   0    6.40    4.00 
   3   1   0    8.00    4.10 
   3   1   0    2.30    2.30 
   3   1   0    8.90    3.50 
  -4  -1   0    2.60    4.20 
   4  -1   0    7.80    5.40 
  -4  -1   0    8.60    5.20 
  -4  -1   0    8.50    5.90 
  -4  -1   0    6.00    4.10 
   4  -1   0    6.30    3.40 
  -4  -1   0    6.10    5.10 
  -4  -1   0   11.70    4.00 
  -4  -1   0    3.20    3.80 
  -4  -1   0    6.40    3.50 
   4  -1   0    4.60    3.10 
   4  -1   0   -2.70    3.90 
  -4  -1   0   10.20    3.80 
   4  -1   0    9.70    6.20 
   4  -1   0    1.80    4.80 
   4  -1   0    5.00    3.60 
  -4  -1   0   10.40    3.10 
  -4  -1   0    9.00    4.50 
   4  -1   0    3.20    2.50 
  -4  -1   0    6.40    4.90 
   4  -1   0    0.10    3.80 
   4  -1   0    3.80    4.40 
   4  -1   0    2.20    4.80 
   4  -1   0   11.80    6.10 
  -4  -1   0    5.50    5.10 
  -4  -1   0    9.00    2.50 
   4  -1   0    4.10    5.10 
  -4  -1   0    6.60    5.20 
   4  -1   0    5.20    2.20 
  -4  -1   0   11.50    4.50 
   4  -1   0    2.60    4.10 
   4  -1   0    4.80    2.70 
  -4  -1   0    2.80    3.80 
  -4   1   0    7.90    2.70 
   4   1   0    1.70    2.40 
  -4   1   0   10.50    3.70 
  -4   1   0    2.70    4.80 
  -4   1   0   14.30    6.30 
  -4   1   0    5.20    1.50 
  -4   1   0    9.70    4.10 
   4   1   0    7.40    2.90 
  -4   1   0    6.60    5.20 
  -4   1   0    6.10    4.80 
   4   1   0    6.60    2.70 
   4   1   0    7.70    2.20 
   4   1   0    6.20    5.60 
  -4   1   0    6.00    2.40 
  -4   1   0    7.20    5.30 
  -4   1   0    6.00    5.00 
   4   1   0    6.10    3.00 
   4   1   0    7.10    2.80 
  -4   1   0    0.90    3.90 
   4   1   0    7.80    3.30 
  -4   1   0    2.90    4.10 
  -4   1   0    4.20    2.50 
  -4   1   0    6.50    3.90 
  -4   1   0   11.00    2.70 
  -4   1   0    2.80    4.10 
  -4   1   0    1.90    4.30 
  -4   1   0    2.20    1.70 
   4   1   0    3.70    3.70 
  -4   1   0    0.50    4.30 
   4   1   0    3.90    3.90 
   4   1   0    2.90    4.60 
   4   1   0    2.60    4.80 
  -4   1   0    5.90    3.30 
   4   1   0    5.00    1.60 
   4   1   0    3.50    3.30 
   4   1   0    1.30    4.20 
   4   1   0    6.30    4.40 
  -4   1   0    5.00    5.00 
   4   1   0    8.00    3.80 
   4   1   0    9.00    2.40 
   4   1   0    1.40    2.90 
  -5  -1   0 1023.40   47.20 
   5  -1   0  956.20   48.50 
  -5  -1   0 1030.50   49.50 
  -5  -1   0 1033.90   51.29 
   5  -1   0 1005.90   40.50 
  -5  -1   0 1091.69   51.19 
   5  -1   0  998.80   42.70 
   5  -1   0 1024.50   50.09 
   5  -1   0 1004.20   51.29 
   5  -1   0 1041.40   53.59 
   5  -1   0 1018.20   49.99 
   5  -1   0 1092.19   52.79 
  -5  -1   0 1054.39   51.69 
   5  -1   0 1034.20   49.80 
  -5  -1   0 1017.90   50.39 
  -5  -1   0 1021.60   50.69 
   5  -1   0 1057.99   44.70 
  -5  -1   0 1007.50   49.40 
  -5  -1   0 1004.20   50.89 
   5  -1   0 1049.89   44.80 
   5  -1   0  989.70   51.69 
   5  -1   0 1044.10   48.80 
   5  -1   0  993.20   54.39 
  -5  -1   0 1000.00   46.00 
  -5  -1   0  993.10   40.20 
  -5  -1   0  962.10   49.50 
   5  -1   0 1060.79   40.50 
  -5  -1   0 1017.40   48.80 
  -5  -1   0 1018.30   49.70 
   5  -1   0 1001.90   42.60 
  -5   1   0  984.30   50.69 
  -5   1   0 1034.70   45.80 
   5   1   0 1054.89   42.10 
  -5   1   0  989.00   50.49 
   5   1   0 1002.80   42.20 
  -5   1   0 1045.30   50.39 
  -5   1   0 1037.60   49.40 
  -5   1   0 1004.50   50.09 
  -5   1   0 1025.30   40.50 
   5   1   0 1124.09   54.19 
  -5   1   0 1036.50   40.30 
   5   1   0 1015.10   50.39 
   5   1   0  999.70   45.90 
   5   1   0  966.50   48.00 
   5   1   0 1026.60   40.00 
   5   1   0  986.50   41.70 
   5   1   0 1013.40   40.70 
  -5   1   0 1044.40   50.99 
   5   1   0 1020.80   52.19 
   5   1   0 1020.50   46.60 
  -5   1   0 1010.70   51.19 
  -5   1   0 1055.59   44.70 
  -5   1   0 1032.20   44.80 
  -5   1   0 1057.19   50.79 
   5   1   0 1028.50   44.60 
   5   1   0 1014.70   42.80 
   5   1   0 1029.50   42.70 
   5   1   0 1003.80   48.00 
   5   1   0 1027.20   53.89 
  -5   1   0 1101.49   49.90 
  -5   1   0 1040.30   50.89 
  -5   1   0  934.71   50.09 
   5   1   0 1061.19   40.80 
   5   1   0  955.10   49.99 
  -5   1   0  994.70   50.69 
  -5   1   0 1032.30   41.50 
   6  -1   0    0.50    4.90 
   6  -1   0    5.00    7.40 
   6  -1   0   -3.60    5.00 
  -6  -1   0    8.40    6.60 
   6  -1   0    2.70    3.30 
   6  -1   0   13.00    6.60 
   6  -1   0    0.10    5.90 
  -6  -1   0    1.10    5.00 
  -6  -1   0    8.30    6.60 
   6  -1   0    6.00    3.40 
   6  -1   0    4.50    2.30 
   6  -1   0   -1.90    5.30 
  -6  -1   0    2.30    6.20 
   6  -1   0    2.90    4.20 
   6  -1   0    2.40    3.50 
  -6  -1   0    0.40    4.90 
  -6  -1   0    5.30    6.60 
  -6  -1   0    2.20    6.30 
  -6  -1   0    1.00    4.30 
  -6  -1   0    5.30    6.70 
  -6  -1   0    6.30    6.00 
  -6  -1   0   -1.20    5.40 
   6  -1   0    2.60    6.40 
   6  -1   0   -2.30    4.90 
  -6  -1   0    3.10    4.90 
  -6  -1   0   12.40    6.60 
   6  -1   0    0.60    5.40 
   6  -1   0   -8.20    4.60 
  -6  -1   0    0.20    2.00 
   6   1   0   -3.20    5.40 
   6   1   0   -2.10    2.50 
  -6   1   0    8.00    6.30 
  -6   1   0    6.90    6.20 
   6   1   0    4.90    1.60 
   6   1   0   -5.60    6.10 
  -6   1   0    8.50    7.20 
  -6   1   0    4.00    5.80 
   6   1   0   13.20    6.00 
  -6   1   0    0.60    5.20 
   6   1   0   -0.50    1.90 
   6   1   0    3.60    6.60 
   6   1   0   -3.90    2.90 
  -6   1   0    1.00    5.40 
  -6   1   0    1.80    1.60 
   6   1   0    7.30    1.90 
  -6   1   0   -5.70    4.60 
  -6   1   0   -1.00    5.50 
   6   1   0    1.10    2.00 
   6   1   0   -1.10    2.50 
  -6   1   0   -1.00    5.10 
  -6   1   0    4.10    2.60 
   6   1   0   -1.40    3.00 
   6   1   0    1.40    5.20 
  -6   1   0    2.90    4.10 
   6   1   0   -7.30    4.90 
  -6   1   0   -3.20    5.70 
   6   1   0    0.00    6.80 
  -6   1   0    4.70    6.00 
   6   1   0   -4.50    3.90 
  -6   1   0    1.60    3.70 
   6   1   0   -1.10    4.60 
   6   1   0    1.40    2.90 
  -6   1   0   -1.70    5.40 
   6   1   0   -1.10    2.60 
   6   1   0    0.10    4.00 
  -6   1   0    2.60    1.80 
  -7  -1   0  295.07   29.00 
   7  -1   0  312.27   36.00 
  -7  -1   0  285.07   25.90 
  -7  -1   0  240.78   28.20 
   7  -1   0  269.57   15.60 
  -7  -1   0  260.37   28.80 
  -7  -1   0  269.07   21.20 
  -7  -1   0  250.77   25.50 
   7  -1   0  287.87   23.30 
   7  -1   0  287.27   18.40 
   7  -1   0  243.28   28.40 
   7  -1   0  240.08   30.40 
   7  -1   0  302.97   25.20 
   7  -1   0  276.97   30.50 
  -7  -1   0  249.68   26.50 
  -7  -1   0  281.47   30.20 
   7  -1   0  275.27   31.80 
  -7  -1   0  286.97   28.50 
   7  -1   0  300.07   29.00 
   7  -1   0  277.27   30.70 
   7  -1   0  286.77   28.00 
   7  -1   0  320.57   29.90 
  -7  -1   0  294.57   30.10 
   7  -1   0  283.07   16.80 
  -7  -1   0  217.38   26.20 
  -7  -1   0  240.08   27.30 
   7   1   0  200.78   25.30 
  -7   1   0  257.17   28.10 
  -7   1   0  273.97   30.00 
  -7   1   0  255.57   27.50 
  -7   1   0  281.07   30.50 
  -7   1   0  274.77   29.60 
  -7   1   0  287.77   30.50 
  -7   1   0  246.98   17.70 
   7   1   0  276.17   33.70 
   7   1   0  271.37   16.30 
  -7   1   0  269.77   28.70 
   7   1   0  266.37   30.30 
   7   1   0  255.17   21.30 
   7   1   0  304.17   31.20 
  -7   1   0  273.57   18.00 
   7   1   0  253.37   31.20 
   7   1   0  271.87   20.40 
  -7   1   0  296.17   30.20 
  -7   1   0  276.57   28.40 
   7   1   0  273.97   21.80 
  -7   1   0  230.68   26.80 
   7   1   0  274.17   16.40 
   7   1   0  296.67   33.50 
  -7   1   0  305.07   28.40 
   7   1   0  279.37   27.30 
   7   1   0  318.57   28.80 
  -7   1   0  261.87   28.50 
  -8  -1   0   -6.80    5.90 
   8  -1   0    7.00    8.70 
   8  -1   0    6.20    8.90 
   8  -1   0   10.00    9.80 
  -8  -1   0   -0.70    6.80 
  -8  -1   0   16.70   10.50 
   8  -1   0    2.30    9.00 
  -8  -1   0    2.40    7.40 
  -8  -1   0    5.80    7.10 
  -8  -1   0   11.70   10.00 
   8  -1   0    8.10    8.90 
   8  -1   0    7.70    9.60 
  -8  -1   0   -2.50    7.30 
  -8  -1   0    8.00    8.00 
  -8  -1   0   -0.70    6.90 
   8  -1   0   15.20   11.20 
   8  -1   0   24.20   14.60 
   8  -1   0   18.90   11.80 
   8  -1   0    9.50    8.70 
  -8  -1   0    3.20    7.10 
  -8  -1   0    9.00    9.50 
   8  -1   0    7.50    8.30 
   8   1   0    7.00    7.30 
  -8   1   0   13.90    9.60 
   8   1   0   22.20   14.30 
  -8   1   0   26.80   11.40 
  -8   1   0    5.90    8.40 
  -8   1   0    1.50    8.10 
  -8   1   0    4.10    9.20 
  -8   1   0    9.40    8.50 
  -8   1   0    6.80    7.90 
  -8   1   0   -0.30    7.70 
   8   1   0   14.70   11.60 
   8   1   0   10.00   10.80 
   8   1   0   -1.40    6.10 
  -8   1   0   -0.40    7.10 
   8   1   0    0.70    7.30 
   8   1   0   -0.80    6.40 
   8   1   0   15.30   11.10 
  -8   1   0    9.10    8.10 
   8   1   0   -6.50    7.60 
   8   1   0    0.80    8.30 
   8   1   0   -0.70    7.50 
  -8   1   0    8.20    8.50 
   9  -1   0   19.20   13.60 
  -9  -1   0   24.30   12.00 
  -9  -1   0   13.20    9.50 
   9  -1   0    8.60    9.10 
   9  -1   0   13.50   11.50 
   9  -1   0    9.90   10.00 
  -9  -1   0   11.80   11.30 
   9  -1   0    8.40   10.50 
   9  -1   0   17.20   14.40 
   9  -1   0   18.10   11.60 
  -9  -1   0   13.20    9.10 
  -9  -1   0   24.40   12.80 
   9  -1   0    1.20    7.80 
   9  -1   0   -1.00   10.40 
  -9  -1   0    8.70    9.70 
   9  -1   0   12.20    9.70 
   9  -1   0   14.50   10.70 
  -9  -1   0   13.50    9.40 
  -9  -1   0    2.20    9.60 
  -9  -1   0    3.00    9.70 
  -9  -1   0   17.00   12.70 
  -9  -1   0   -2.10    9.50 
  -9   1   0   12.80   10.20 
   9   1   0   -2.00    7.20 
   9   1   0    7.90    9.20 
  -9   1   0  -10.90    9.20 
   9   1   0   19.20   12.20 
   9   1   0   12.10   12.50 
   9   1   0   -3.90   10.70 
  -9   1   0   -3.00    7.60 
  -9   1   0    5.60   10.60 
  -9   1   0   13.80   11.10 
   9   1   0   24.20   11.80 
   9   1   0  -11.10    8.40 
   9   1   0   13.70   13.80 
  -9   1   0    8.80    9.20 
  -9   1   0   -0.90    9.40 
  -9   1   0   23.30   12.20 
  -9   1   0    0.20    9.10 
   9   1   0    5.00   10.40 
   9   1   0    6.80   11.60 
  -9   1   0    3.60    9.40 
 -10  -1   0   16.30   12.00 
 -10  -1   0   40.40   16.30 
  10  -1   0    9.60   12.90 
  10  -1   0   21.70   16.00 
  10  -1   0   39.40   14.70 
 -10  -1   0   38.50   15.10 
 -10  -1   0   31.30   16.10 
 -10  -1   0   33.40   14.20 
  10  -1   0   15.70   14.60 
 -10  -1   0   24.30   15.30 
  10  -1   0   11.20   12.00 
  10  -1   0   41.50   19.10 
 -10  -1   0   36.20   15.50 
  10  -1   0   -1.10   12.10 
 -10  -1   0   15.50   12.40 
  10  -1   0   20.20   15.20 
  10  -1   0   22.90   13.00 
 -10  -1   0   -1.30    9.40 
 -10   1   0   10.20   11.60 
  10   1   0   17.80   17.00 
 -10   1   0   39.80   17.30 
  10   1   0   32.40   16.80 
  10   1   0   39.90   17.70 
  10   1   0   21.50   15.60 
  10   1   0   21.40   17.80 
  10   1   0   10.00   13.00 
  10   1   0   36.60   13.80 
 -10   1   0   48.00   17.60 
  10   1   0   28.10   14.00 
 -10   1   0   20.70   15.50 
 -10   1   0   24.00   13.60 
 -10   1   0   -4.80   11.40 
  10   1   0   26.00   16.80 
 -10   1   0   21.30   14.50 
  10   1   0   38.60   13.30 
 -10   1   0   17.60   13.90 
 -10   1   0   33.70   14.10 
 -10   1   0   22.70   12.60 
   0  -2   0 5369.46  193.88 
   0  -2   0 4918.91  195.98 
   0  -2   0 5266.07  193.98 
   0  -2   0 5207.18  193.68 
   0  -2   0 5278.87  194.18 
   0  -2   0 5146.59  198.28 
   0  -2   0 5200.48  193.68 
   0  -2   0 5374.66  195.28 
   0  -2   0 5366.96  194.38 
   0  -2   0 5083.09  193.38 
   0  -2   0 4719.43  194.38 
   0  -2   0 5316.37  194.78 
   0  -2   0 5280.97  196.68 
   0  -2   0 5321.07  195.88 
   0  -2   0 5190.68  195.58 
   0  -2   0 4687.73  193.08 
   0  -2   0 5284.27  196.08 
   0  -2   0 5280.97  195.58 
   0  -2   0 5270.37  195.48 
   0   2   0 5234.88  194.28 
   0   2   0 5331.37  194.68 
   0   2   0 5248.98  192.78 
   0   2   0 5217.88  191.48 
   0   2   0 5328.67  194.78 
   0   2   0 5322.07  193.48 
   0   2   0 5189.68  194.08 
   0   2   0 5304.07  194.98 
   0   2   0 5433.36  194.38 
   0   2   0 5287.87  194.48 
   0   2   0 5409.36  194.38 
   0   2   0 5395.26  195.78 
   0   2   0 5151.78  192.08 
   0   2   0 5379.26  195.78 
   0   2   0 5222.48  193.88 
   0   2   0 5266.57  193.08 
   0   2   0 5098.19  195.68 
   0   2   0 5194.58  192.88 
   0   2   0 5220.68  193.18 
   0   2   0 5307.37  196.58 
   0   2   0 5314.57  193.38 
   0   2   0 5230.28  193.28 
   0   2   0 5206.78  191.58 
   0   2   0 5239.98  198.38 
   0   2   0 5153.68  191.38 
   0   2   0 5232.18  195.18 
   0   2   0 5206.18  195.28 
   0   2   0 5419.66  195.98 
   1  -2   0 2736.63  100.99 
   1  -2   0 2616.84  101.09 
  -1  -2   0 2589.74   98.79 
   1  -2   0 2712.33  100.39 
  -1  -2   0 2609.54  101.49 
  -1  -2   0 2600.84   98.59 
   1  -2   0 2614.64   99.49 
  -1  -2   0 2612.34  100.09 
   1  -2   0 2747.33  102.99 
  -1  -2   0 2592.64  100.49 
  -1  -2   0 2694.13  101.09 
  -1  -2   0 2635.64   99.59 
  -1  -2   0 2701.23  101.29 
   1  -2   0 2636.14  100.99 
   1  -2   0 2696.13  101.89 
  -1  -2   0 2618.34   98.49 
   1  -2   0 2652.63  101.09 
   1  -2   0 2662.33   99.09 
   1  -2   0 2666.53  101.09 
   1  -2   0 2609.64  101.39 
   1  -2   0 2719.93  100.79 
   1  -2   0 2697.63  101.99 
   1  -2   0 2598.64  100.59 
   1  -2   0 2663.93  101.59 
   1  -2   0 2607.04  102.89 
   1  -2   0 2618.44  101.19 
   1  -2   0 2645.94   99.79 
  -1  -2   0 2625.14   99.19 
   1  -2   0 2746.23  102.29 
   1  -2   0 2683.13  101.29 
  -1  -2   0 2634.34  100.79 
  -1  -2   0 2588.44   99.59 
   1  -2   0 2755.42  101.89 
   1  -2   0 2618.84  100.89 
  -1  -2   0 2692.03   99.29 
   1  -2   0 2715.33   99.09 
  -1  -2   0 2618.84  102.49 
  -1  -2   0 2588.74  101.69 
   1  -2   0 2671.73   98.69 
   1  -2   0 2603.34  100.29 
   1  -2   0 2645.24  102.19 
   1  -2   0 2672.93   99.89 
   1  -2   0 2562.64  101.09 
   1  -2   0 2644.54  102.39 
   1  -2   0 2693.53  101.69 
   1   2   0 2456.45  103.09 
   1   2   0 2687.33  101.89 
   1   2   0 2620.24  100.09 
   1   2   0 2581.14   99.29 
   1   2   0 2613.44   99.19 
  -1   2   0 2689.73   99.69 
  -1   2   0 2630.34  101.49 
  -1   2   0 2775.92  100.89 
  -1   2   0 2694.23  102.09 
  -1   2   0 2655.93  100.69 
  -1   2   0 2684.33  103.19 
   1   2   0 2570.04   98.79 
   1   2   0 2609.44  100.59 
  -1   2   0 2600.24  101.69 
  -1   2   0 2765.82  101.39 
  -1   2   0 2618.94  100.59 
   1   2   0 2536.05  100.29 
  -1   2   0 2603.24  101.59 
  -1   2   0 2658.83   98.89 
   1   2   0 2627.74   99.59 
  -1   2   0 2648.64  101.29 
  -1   2   0 2726.53  101.19 
  -1   2   0 2619.74  101.69 
   1   2   0 2590.24   98.59 
  -1   2   0 2631.64  101.09 
  -1   2   0 2671.83  102.39 
  -1   2   0 2715.43  102.49 
   1   2   0 2613.94   98.59 
   1   2   0 2459.55   99.49 
  -1   2   0 2727.03  100.29 
  -1   2   0 2645.14  100.79 
  -1   2   0 2667.23  100.09 
  -1   2   0 2700.43   99.79 
  -1   2   0 2649.53  102.39 
  -1   2   0 2725.83   98.89 
   1   2   0 2698.93  101.59 
   1   2   0 2568.04  102.29 
   1   2   0 2597.04  100.79 
   1   2   0 2453.25  100.99 
   1   2   0 2677.03   98.29 
  -1   2   0 2609.74  101.59 
  -1   2   0 2603.44  101.59 
   1   2   0 2652.13   98.89 
  -1   2   0 2751.22  101.39 
  -1   2   0 2616.74  100.49 
  -1   2   0 2734.03  102.19 
   1   2   0 2591.74   98.39 
   1   2   0 2668.03   99.09 
   1   2   0 2694.83   98.49 
   1   2   0 2666.93  100.99 
   1   2   0 2582.34   98.49 
  -1   2   0 2613.94  100.89 
   1   2   0 2625.74  101.29 
   1   2   0 2631.14   98.89 
   1   2   0 2617.94  100.69 
  -1   2   0 2584.44  101.49 
  -1   2   0 2612.74   99.49 
  -2  -2   0 1083.29   44.10 
   2  -2   0 1138.09   48.10 
  -2  -2   0 1123.19   45.70 
   2  -2   0 1159.38   46.40 
   2  -2   0 1131.59   49.30 
   2  -2   0 1113.59   46.90 
  -2  -2   0 1076.99   46.20 
  -2  -2   0 1094.79   45.60 
   2  -2   0 1163.08   47.00 
   2  -2   0 1121.09   48.90 
   2  -2   0 1131.69   46.50 
   2  -2   0 1139.79   46.40 
  -2  -2   0 1105.69   46.70 
  -2  -2   0 1141.19   46.60 
  -2  -2   0 1086.89   43.30 
   2  -2   0 1093.79   48.70 
  -2  -2   0 1132.89   46.80 
  -2  -2   0 1097.19   46.50 
   2  -2   0 1174.98   48.10 
   2  -2   0 1083.19   47.50 
   2  -2   0 1142.39   46.80 
  -2  -2   0 1172.68   47.20 
  -2  -2   0 1111.09   47.20 
   2  -2   0 1138.69   46.90 
   2  -2   0 1121.19   45.90 
  -2  -2   0 1100.79   46.20 
  -2  -2   0 1134.69   46.20 
   2  -2   0 1207.68   49.00 
   2  -2   0 1181.18   47.10 
  -2  -2   0 1149.19   46.80 
   2  -2   0 1116.69   48.00 
   2  -2   0 1174.38   48.30 
  -2  -2   0 1117.49   43.40 
   2  -2   0 1136.69   46.80 
   2  -2   0 1114.19   48.60 
   2  -2   0 1125.69   47.40 
   2  -2   0 1155.88   48.00 
  -2  -2   0 1117.29   45.20 
   2  -2   0 1131.19   47.60 
   2  -2   0 1130.89   46.10 
   2  -2   0 1149.08   46.80 
  -2  -2   0 1072.69   45.40 
   2  -2   0 1095.09   47.30 
   2  -2   0 1136.09   48.60 
   2  -2   0 1131.69   48.30 
   2  -2   0 1119.29   46.70 
  -2  -2   0 1106.59   44.60 
   2   2   0 1152.48   46.50 
   2   2   0 1087.99   43.50 
   2   2   0 1110.69   42.40 
   2   2   0 1077.69   44.80 
   2   2   0 1149.98   46.90 
  -2   2   0 1157.48   47.90 
  -2   2   0 1178.88   47.60 
  -2   2   0 1147.39   46.90 
  -2   2   0 1098.79   48.80 
  -2   2   0 1072.99   45.50 
  -2   2   0 1189.18   48.00 
   2   2   0 1056.89   44.70 
   2   2   0 1083.19   47.80 
  -2   2   0 1090.89   48.70 
   2   2   0 1105.69   46.70 
   2   2   0 1129.19   45.30 
  -2   2   0 1073.09   46.60 
  -2   2   0 1130.49   46.70 
   2   2   0 1093.59   46.40 
   2   2   0 1117.99   46.40 
  -2   2   0 1110.19   46.30 
  -2   2   0 1159.08   49.20 
   2   2   0 1102.09   46.00 
   2   2   0 1073.19   45.80 
   2   2   0 1121.99   46.90 
   2   2   0 1127.19   46.30 
  -2   2   0 1159.28   46.30 
  -2   2   0 1107.59   47.80 
  -2   2   0 1108.09   46.30 
   2   2   0 1116.69   45.60 
   2   2   0 1068.69   46.30 
  -2   2   0 1099.49   45.50 
  -2   2   0 1132.79   46.60 
  -2   2   0 1146.09   48.20 
   2   2   0 1149.89   46.60 
  -2   2   0 1157.48   47.70 
   2   2   0 1137.69   45.60 
   2   2   0 1092.29   44.40 
   2   2   0 1090.89   43.60 
  -2   2   0 1155.28   47.00 
   2   2   0 1102.09   46.80 
  -2   2   0 1126.99   46.80 
   2   2   0 1152.28   46.70 
   2   2   0 1102.99   44.50 
   2   2   0 1105.99   44.80 
   2   2   0 1068.69   45.10 
   2   2   0 1098.09   47.10 
   2   2   0 1121.59   43.60 
  -2   2   0 1087.19   48.00 
  -2   2   0 1102.79   47.80 
  -2   2   0 1141.89   47.40 
  -2   2   0 1116.09   47.40 
   2   2   0 1119.49   43.00 
   2   2   0 1134.79   44.00 
  -2   2   0 1145.59   48.10 
  -2   2   0 1106.09   45.50 
   2   2   0 1136.19   47.10 
  -2   2   0 1117.59   46.40 
  -2   2   0 1118.49   48.20 
  -2   2   0 1103.59   47.90 
   3  -2   0  369.46   19.60 
  -3  -2   0  399.06   18.60 
   3  -2   0  372.96   19.90 
  -3  -2   0  363.66   18.70 
  -3  -2   0  353.36   19.70 
  -3  -2   0  365.96   17.10 
   3  -2   0  347.97   21.00 
   3  -2   0  355.36   22.60 
  -3  -2   0  381.36   21.60 
   3  -2   0  366.86   17.80 
  -3  -2   0  406.56   20.90 
   3  -2   0  376.96   18.70 
  -3  -2   0  362.26   20.80 
  -3  -2   0  356.56   21.00 
  -3  -2   0  377.46   20.90 
  -3  -2   0  344.07   20.90 
   3  -2   0  368.86   23.30 
   3  -2   0  366.96   22.80 
   3  -2   0  405.96   22.60 
   3  -2   0  341.47   21.00 
  -3  -2   0  392.06   20.00 
   3  -2   0  368.26   21.00 
  -3  -2   0  382.46   21.30 
  -3  -2   0  343.37   20.30 
   3  -2   0  409.76   20.00 
   3  -2   0  346.97   22.50 
  -3  -2   0  357.36   18.30 
   3  -2   0  388.26   21.90 
   3  -2   0  368.96   20.20 
   3  -2   0  371.26   22.50 
   3  -2   0  349.17   22.10 
   3  -2   0  401.66   21.30 
  -3  -2   0  371.56   18.00 
   3  -2   0  365.56   21.00 
   3   2   0  353.26   17.50 
   3   2   0  359.86   18.70 
  -3   2   0  370.36   19.30 
  -3   2   0  357.36   20.80 
   3   2   0  363.26   18.60 
   3   2   0  359.16   20.20 
  -3   2   0  381.46   20.70 
   3   2   0  369.26   18.60 
   3   2   0  353.46   19.20 
  -3   2   0  344.17   18.50 
   3   2   0  350.86   19.00 
  -3   2   0  400.16   22.50 
   3   2   0  336.57   20.10 
  -3   2   0  357.76   20.70 
  -3   2   0  350.56   22.20 
  -3   2   0  348.67   21.00 
  -3   2   0  393.46   23.30 
   3   2   0  341.27   17.30 
   3   2   0  391.36   21.90 
   3   2   0  344.87   20.20 
  -3   2   0  387.16   21.90 
  -3   2   0  393.86   18.30 
   3   2   0  378.36   19.10 
   3   2   0  301.47   21.50 
   3   2   0  362.06   16.10 
   3   2   0  326.57   17.60 
  -3   2   0  377.46   18.30 
  -3   2   0  393.86   19.90 
  -3   2   0  395.56   18.70 
  -3   2   0  337.77   20.60 
  -3   2   0  362.46   21.30 
   3   2   0  359.66   19.00 
   3   2   0  374.96   16.90 
   3   2   0  357.06   21.10 
   3   2   0  392.26   22.00 
  -3   2   0  394.96   22.20 
   3   2   0  355.56   17.90 
   3   2   0  373.06   17.10 
  -3   2   0  385.26   22.40 
  -3   2   0  371.06   21.20 
  -3   2   0  363.26   17.90 
  -3   2   0  383.56   25.10 
   3   2   0  376.56   22.90 
   3   2   0  353.96   20.60 
   3   2   0  376.26   18.10 
   3   2   0  358.46   19.90 
  -3   2   0  352.16   20.70 
   3   2   0  378.06   19.30 
  -3   2   0  372.36   21.00 
  -3   2   0  362.96   19.30 
   4  -2   0  448.46   23.20 
   4  -2   0  431.16   26.50 
  -4  -2   0  454.35   25.50 
  -4  -2   0  498.95   25.00 
   4  -2   0  500.55   28.70 
  -4  -2   0  473.25   27.40 
  -4  -2   0  438.96   21.20 
   4  -2   0  426.46   29.00 
   4  -2   0  484.95   27.90 
  -4  -2   0  468.05   21.90 
  -4  -2   0  477.35   27.50 
   4  -2   0  436.76   23.90 
  -4  -2   0  454.45   25.70 
   4  -2   0  456.45   28.10 
  -4  -2   0  459.65   22.30 
   4  -2   0  475.95   21.50 
   4  -2   0  473.05   26.70 
   4  -2   0  463.75   23.60 
  -4  -2   0  447.66   26.40 
   4  -2   0  467.85   27.10 
  -4  -2   0  439.66   25.10 
  -4  -2   0  467.15   23.70 
  -4  -2   0  469.05   27.10 
   4  -2   0  460.55   27.00 
  -4  -2   0  441.96   25.90 
   4  -2   0  453.55   28.40 
  -4  -2   0  461.75   27.00 
   4  -2   0  455.85   24.60 
   4  -2   0  474.15   22.40 
   4  -2   0  446.66   28.40 
  -4  -2   0  487.05   26.90 
   4   2   0  439.26   26.70 
  -4   2   0  452.45   27.50 
   4   2   0  471.75   22.20 
   4   2   0  441.66   23.00 
   4   2   0  435.46   25.90 
  -4   2   0  480.85   28.00 
   4   2   0  470.15   22.20 
   4   2   0  446.86   21.60 
   4   2   0  452.85   21.20 
  -4   2   0  441.86   22.30 
  -4   2   0  443.26   28.20 
   4   2   0  447.86   22.70 
   4   2   0  480.15   24.40 
   4   2   0  457.25   20.20 
  -4   2   0  457.15   24.90 
  -4   2   0  461.35   21.10 
  -4   2   0  480.15   27.20 
  -4   2   0  431.86   21.10 
  -4   2   0  533.35   28.40 
  -4   2   0  410.36   25.70 
   4   2   0  483.65   25.10 
  -4   2   0  482.55   26.40 
  -4   2   0  475.25   26.70 
  -4   2   0  472.55   27.90 
   4   2   0  442.16   28.60 
  -4   2   0  456.25   27.60 
   4   2   0  482.55   22.70 
   4   2   0  398.76   23.90 
   4   2   0  443.06   21.00 
  -4   2   0  440.56   26.20 
   4   2   0  473.55   22.60 
  -4   2   0  441.96   23.60 
   4   2   0  486.75   28.30 
   4   2   0  491.55   24.80 
   4   2   0  435.36   27.50 
  -4   2   0  464.05   21.70 
   4   2   0  470.35   29.40 
  -4   2   0  468.75   21.70 
  -4   2   0  459.35   26.60 
  -4   2   0  512.45   26.70 
   4   2   0  460.75   21.00 
   4   2   0  453.55   22.50 
  -4   2   0  435.36   21.90 
  -4   2   0  475.65   27.10 
  -4   2   0  528.45   28.50 
   4   2   0  465.85   22.00 
  -5  -2   0  468.45   28.70 
  -5  -2   0  420.56   26.50 
   5  -2   0  404.96   23.50 
   5  -2   0  433.06   30.00 
  -5  -2   0  404.06   20.60 
  -5  -2   0  437.86   25.50 
  -5  -2   0  467.05   24.90 
   5  -2   0  422.06   28.80 
  -5  -2   0  431.66   28.30 
   5  -2   0  424.86   27.60 
   5  -2   0  456.45   28.20 
   5  -2   0  425.26   29.60 
   5  -2   0  445.76   29.50 
   5  -2   0  412.76   30.70 
   5  -2   0  466.55   29.50 
  -5  -2   0  442.76   26.60 
  -5  -2   0  450.35   28.50 
  -5  -2   0  420.56   27.60 
  -5  -2   0  415.66   22.60 
  -5  -2   0  524.25   29.10 
  -5  -2   0  458.55   28.70 
   5  -2   0  392.96   22.20 
   5  -2   0  426.86   27.10 
  -5  -2   0  424.86   27.40 
  -5  -2   0  445.36   22.20 
   5  -2   0  455.55   23.40 
   5  -2   0  419.06   27.20 
   5  -2   0  426.76   21.10 
  -5  -2   0  406.06   26.30 
  -5   2   0  387.16   27.50 
  -5   2   0  416.16   19.70 
  -5   2   0  457.55   25.00 
   5   2   0  410.76   23.10 
   5   2   0  455.75   21.90 
   5   2   0  415.36   22.50 
  -5   2   0  435.66   21.30 
   5   2   0  418.26   21.50 
  -5   2   0  422.26   25.80 
   5   2   0  397.66   26.90 
  -5   2   0  423.16   19.40 
   5   2   0  437.36   20.90 
  -5   2   0  410.06   27.10 
  -5   2   0  472.35   28.70 
   5   2   0  437.26   19.70 
   5   2   0  422.16   29.20 
  -5   2   0  410.66   20.60 
  -5   2   0  469.85   29.40 
  -5   2   0  443.66   28.40 
  -5   2   0  424.86   27.90 
  -5   2   0  441.76   27.80 
   5   2   0  424.16   20.50 
   5   2   0  435.96   25.70 
  -5   2   0  439.06   28.50 
   5   2   0  451.35   22.10 
   5   2   0  431.26   21.30 
  -5   2   0  434.86   21.40 
  -5   2   0  453.55   28.00 
   5   2   0  451.05   19.90 
   5   2   0  469.25   25.80 
   5   2   0  424.96   21.20 
   5   2   0  438.66   21.50 
   5   2   0  430.76   27.70 
   5   2   0  375.66   27.80 
  -5   2   0  364.96   27.00 
  -5   2   0  465.65   29.40 
   5   2   0  441.46   22.20 
  -5   2   0  422.76   29.10 
  -5   2   0  445.06   27.50 
   5   2   0  485.55   31.60 
  -5   2   0  425.66   20.40 
   5   2   0  417.56   22.40 
  -6  -2   0 1673.13   78.29 
   6  -2   0 1623.34   76.79 
  -6  -2   0 1579.64   76.69 
   6  -2   0 1679.13   68.29 
   6  -2   0 1608.54   82.09 
   6  -2   0 1702.43   78.69 
   6  -2   0 1597.44   75.79 
  -6  -2   0 1624.24   76.99 
   6  -2   0 1622.74   70.19 
  -6  -2   0 1638.64   76.29 
   6  -2   0 1644.04   68.59 
  -6  -2   0 1685.23   76.69 
   6  -2   0 1632.44   80.79 
  -6  -2   0 1675.83   78.19 
  -6  -2   0 1681.13   75.29 
  -6  -2   0 1642.04   73.69 
   6  -2   0 1522.55   78.09 
  -6  -2   0 1683.83   69.89 
  -6  -2   0 1583.74   64.89 
  -6  -2   0 1676.73   75.69 
  -6  -2   0 1753.92   76.49 
   6  -2   0 1673.23   65.29 
   6  -2   0 1650.63   76.19 
   6  -2   0 1677.93   79.39 
   6  -2   0 1656.33   78.99 
   6  -2   0 1793.42   77.49 
  -6  -2   0 1719.83   72.29 
  -6   2   0 1646.54   77.99 
   6   2   0 1622.74   68.89 
   6   2   0 1626.64   63.59 
   6   2   0 1717.83   78.79 
  -6   2   0 1686.83   72.69 
  -6   2   0 1650.23   76.89 
   6   2   0 1660.63   67.09 
   6   2   0 1708.53   65.79 
   6   2   0 1642.84   66.39 
  -6   2   0 1653.73   68.59 
  -6   2   0 1582.44   78.69 
   6   2   0 1646.64   70.79 
  -6   2   0 1553.24   76.89 
   6   2   0 1729.83   80.09 
  -6   2   0 1583.64   62.69 
  -6   2   0 1662.13   78.09 
  -6   2   0 1545.65   77.59 
  -6   2   0 1612.14   76.89 
  -6   2   0 1653.53   77.19 
   6   2   0 1644.04   68.19 
   6   2   0 1605.14   62.79 
   6   2   0 1694.73   77.09 
   6   2   0 1682.43   77.69 
   6   2   0 1638.64   67.99 
  -6   2   0 1671.03   76.29 
  -6   2   0 1615.44   65.49 
  -6   2   0 1634.44   64.59 
   6   2   0 1650.03   62.39 
  -6   2   0 1566.84   76.79 
  -6   2   0 1607.24   62.59 
   6   2   0 1540.35   78.69 
   6   2   0 1631.64   67.89 
  -6   2   0 1684.93   71.19 
   6   2   0 1652.13   63.99 
   6   2   0 1797.32   83.19 
   6   2   0 1636.24   73.29 
   6   2   0 1730.43   74.59 
  -6   2   0 1694.13   76.99 
   6   2   0 1664.93   66.99 
  -6   2   0 1691.93   65.29 
  -6   2   0 1714.83   77.19 
  -7  -2   0  348.87   26.10 
   7  -2   0  292.27   29.60 
  -7  -2   0  374.56   25.60 
  -7  -2   0  403.56   30.10 
   7  -2   0  317.37   19.30 
   7  -2   0  343.67   35.20 
  -7  -2   0  338.67   32.40 
  -7  -2   0  334.07   22.60 
  -7  -2   0  405.16   31.10 
   7  -2   0  315.17   30.50 
   7  -2   0  307.77   19.60 
   7  -2   0  296.17   34.30 
   7  -2   0  318.77   33.20 
   7  -2   0  333.57   38.00 
  -7  -2   0  298.57   29.20 
   7  -2   0  379.66   28.50 
   7  -2   0  371.86   22.80 
   7  -2   0  282.47   29.90 
  -7  -2   0  357.06   27.80 
   7  -2   0  250.87   29.10 
   7  -2   0  279.47   31.70 
  -7  -2   0  370.66   27.40 
  -7  -2   0  311.47   30.90 
  -7  -2   0  349.67   34.10 
   7   2   0  338.37   36.20 
  -7   2   0  340.37   33.00 
   7   2   0  360.66   28.90 
   7   2   0  318.47   25.00 
  -7   2   0  339.27   31.50 
  -7   2   0  361.56   34.30 
  -7   2   0  324.17   32.50 
  -7   2   0  295.57   29.70 
  -7   2   0  353.46   33.20 
  -7   2   0  279.97   31.40 
  -7   2   0  285.77   30.30 
   7   2   0  342.17   22.00 
   7   2   0  321.57   36.60 
   7   2   0  337.47   19.90 
   7   2   0  341.17   34.60 
   7   2   0  347.27   35.70 
  -7   2   0  336.27   32.70 
   7   2   0  369.16   29.30 
  -7   2   0  349.96   22.50 
  -7   2   0  362.96   24.30 
   7   2   0  353.46   22.10 
   7   2   0  330.57   25.90 
   7   2   0  304.67   22.50 
  -7   2   0  355.16   34.50 
   7   2   0  329.77   18.80 
   7   2   0  249.28   30.70 
  -7   2   0  349.07   33.70 
   8  -2   0  649.83   49.90 
  -8  -2   0  657.53   43.80 
   8  -2   0  658.23   43.30 
   8  -2   0  695.83   44.60 
  -8  -2   0  715.33   45.60 
  -8  -2   0  727.63   44.70 
  -8  -2   0  658.83   44.90 
   8  -2   0  625.84   42.50 
  -8  -2   0  592.34   44.40 
   8  -2   0  712.73   50.19 
   8  -2   0  668.13   46.60 
   8  -2   0  678.23   44.90 
   8  -2   0  680.83   47.40 
  -8  -2   0  625.14   42.40 
  -8  -2   0  632.54   36.90 
  -8  -2   0  640.84   39.30 
  -8  -2   0  610.34   44.30 
   8  -2   0  702.93   47.80 
   8  -2   0  687.53   44.20 
  -8  -2   0  653.53   44.20 
  -8  -2   0  645.94   41.40 
   8  -2   0  630.54   47.70 
   8   2   0  707.93   47.50 
  -8   2   0  722.13   45.30 
  -8   2   0  697.63   45.60 
  -8   2   0  667.53   45.70 
  -8   2   0  645.44   45.50 
   8   2   0  654.23   41.60 
   8   2   0  622.54   49.90 
   8   2   0  654.63   47.60 
  -8   2   0  544.55   40.90 
  -8   2   0  678.53   36.80 
  -8   2   0  670.23   46.40 
  -8   2   0  638.54   45.70 
   8   2   0  691.23   45.30 
   8   2   0  731.73   50.99 
  -8   2   0  689.93   46.40 
   8   2   0  659.83   38.00 
  -8   2   0  589.64   43.40 
   8   2   0  726.53   42.00 
   8   2   0  647.44   47.30 
  -8   2   0  604.84   41.90 
  -8   2   0  596.34   43.60 
   8   2   0  673.33   45.80 
   9  -2   0   29.10   14.90 
  -9  -2   0   40.90   14.00 
   9  -2   0   38.90   13.00 
  -9  -2   0   29.60   11.60 
   9  -2   0   62.29   18.00 
  -9  -2   0   42.70   15.50 
   9  -2   0   56.39   21.30 
   9  -2   0   30.50   14.50 
  -9  -2   0   45.80   12.70 
  -9  -2   0   49.50   15.40 
   9  -2   0   59.69   16.40 
  -9  -2   0   44.30   15.50 
  -9  -2   0   48.90   16.70 
   9  -2   0   20.60   13.40 
  -9  -2   0   66.29   18.00 
  -9  -2   0   39.50   13.60 
   9  -2   0   42.60   13.80 
   9  -2   0   46.10   15.00 
   9  -2   0   59.69   17.30 
   9  -2   0   47.50   16.20 
  -9   2   0   47.40   15.70 
  -9   2   0   42.00   14.20 
  -9   2   0   41.40   15.50 
   9   2   0   49.90   17.10 
  -9   2   0   61.19   17.20 
   9   2   0   46.80   17.70 
  -9   2   0   11.20    9.50 
  -9   2   0   47.60   15.40 
   9   2   0   44.50   13.80 
  -9   2   0   46.80   16.70 
  -9   2   0   32.00   13.90 
  -9   2   0   37.20   14.10 
   9   2   0   34.10   11.20 
   9   2   0   29.20   16.60 
   9   2   0   56.59   18.00 
   9   2   0   33.50   15.30 
   9   2   0   46.20   14.00 
   9   2   0   55.09   18.20 
   9   2   0   32.60   14.70 
  -9   2   0   19.90   13.00 
  10  -2   0  214.68   39.00 
 -10  -2   0  161.68   26.60 
  10  -2   0  158.88   33.50 
  10  -2   0  137.29   27.90 
  10  -2   0  157.98   29.60 
  10  -2   0  191.18   32.00 
 -10  -2   0  243.58   34.40 
  10  -2   0  181.78   34.50 
 -10  -2   0  183.38   29.30 
 -10  -2   0  250.57   33.20 
 -10  -2   0  216.78   33.00 
 -10  -2   0  210.68   28.20 
  10  -2   0  248.08   33.50 
  10  -2   0  162.88   28.70 
  10  -2   0  186.18   29.50 
 -10  -2   0  187.58   31.10 
  10  -2   0  157.28   28.80 
  10  -2   0  143.69   26.40 
 -10  -2   0  172.88   24.50 
 -10   2   0  213.78   33.00 
 -10   2   0  173.58   27.10 
  10   2   0  157.68   31.10 
 -10   2   0  259.07   36.20 
  10   2   0  244.78   37.40 
 -10   2   0  186.88   32.60 
  10   2   0  199.98   36.70 
  10   2   0  168.18   29.20 
 -10   2   0  195.18   32.00 
  10   2   0  142.59   27.70 
 -10   2   0  195.08   31.00 
 -10   2   0  143.49   27.40 
  10   2   0  245.68   36.30 
 -10   2   0  144.19   27.60 
  10   2   0  247.68   41.60 
 -10   2   0  184.78   28.50 
 -10   2   0  194.28   32.40 
  10   2   0  216.68   28.70 
  10   2   0  232.08   31.20 
   0  -3   0    5.50    2.90 
   0  -3   0    1.00    3.00 
   0  -3   0   -0.80    3.00 
   0  -3   0   -1.00    2.30 
   0  -3   0    0.70    3.60 
   0  -3   0    2.50    3.10 
   0  -3   0    1.00    3.80 
   0  -3   0   -0.40    3.60 
   0  -3   0   -1.30    2.30 
   0  -3   0   -1.90    3.00 
   0  -3   0   -0.50    2.10 
   0  -3   0    1.00    2.70 
   0  -3   0    1.10    2.60 
   0  -3   0    0.90    2.30 
   0  -3   0    0.50    2.60 
   0  -3   0    2.00    2.20 
   0  -3   0   -1.50    2.40 
   0  -3   0   -0.20    3.20 
   0  -3   0    4.10    3.30 
   0  -3   0    2.20    2.40 
   0  -3   0    1.10    2.20 
   0  -3   0   -0.70    2.60 
   0   3   0    1.00    3.40 
   0   3   0    0.40    2.20 
   0   3   0    2.30    2.60 
   0   3   0    4.40    2.30 
   0   3   0    0.10    2.40 
   0   3   0   -1.10    2.10 
   0   3   0    1.80    1.90 
   0   3   0    1.70    2.50 
   0   3   0    1.80    2.60 
   0   3   0   -2.40    2.50 
   0   3   0    9.00    3.90 
   0   3   0   -0.60    3.10 
   0   3   0    7.80    4.80 
   0   3   0   -0.70    2.00 
   0   3   0    2.00    1.10 
   0   3   0   -1.10    2.10 
   0   3   0    3.60    2.00 
   0   3   0    2.50    2.80 
   0   3   0   -1.20    1.70 
   0   3   0    1.40    2.10 
   0   3   0   -0.20    1.70 
   0   3   0    0.40    1.30 
   0   3   0    1.00    1.30 
   0   3   0   -2.40    2.10 
   0   3   0    0.50    2.00 
   0   3   0    0.60    1.80 
   0   3   0   -1.70    2.00 
   0   3   0   -2.50    2.00 
   0   3   0    1.80    2.70 
   0   3   0    2.20    1.10 
   1  -3   0    7.80    2.70 
  -1  -3   0   21.60    4.40 
   1  -3   0   18.40    3.20 
  -1  -3   0   14.20    2.50 
   1  -3   0   10.80    3.60 
  -1  -3   0   18.50    6.50 
   1  -3   0   26.50    6.60 
   1  -3   0   12.30    4.00 
   1  -3   0   20.00    2.90 
   1  -3   0   16.80    4.70 
   1  -3   0   15.90    3.90 
   1  -3   0   14.70    4.80 
   1  -3   0   21.10    5.80 
   1  -3   0   21.70    4.50 
   1  -3   0   17.30    4.90 
  -1  -3   0   26.30    6.30 
  -1  -3   0   14.60    3.10 
  -1  -3   0   21.50    5.30 
  -1  -3   0   17.10    3.90 
   1  -3   0   21.80    5.70 
   1  -3   0   18.70    2.90 
  -1  -3   0   16.00    4.90 
  -1  -3   0   16.90    3.70 
  -1  -3   0   17.30    3.60 
   1  -3   0   11.80    4.30 
   1  -3   0   19.70    4.90 
  -1  -3   0   14.10    4.30 
   1  -3   0   16.00    3.80 
   1  -3   0   21.40    5.20 
   1  -3   0   20.70    4.70 
   1  -3   0   12.90    4.00 
  -1  -3   0   25.00    5.70 
   1  -3   0   14.60    3.80 
   1  -3   0   18.30    6.10 
   1  -3   0   24.70    4.30 
   1  -3   0   14.00    4.70 
   1  -3   0   23.80    5.90 
  -1  -3   0   28.20    6.00 
  -1  -3   0   16.80    4.60 
   1  -3   0   18.10    5.30 
   1  -3   0   22.50    5.10 
   1  -3   0   10.80    4.10 
  -1  -3   0   13.10    2.60 
   1   3   0   15.10    3.40 
   1   3   0   14.10    2.90 
  -1   3   0    7.40    3.90 
  -1   3   0   20.30    3.70 
  -1   3   0   15.80    4.90 
   1   3   0   20.80    3.90 
   1   3   0   22.50    2.90 
   1   3   0   16.40    2.90 
   1   3   0   18.30    5.20 
   1   3   0   20.20    3.80 
   1   3   0   21.20    5.50 
  -1   3   0    9.40    4.30 
   1   3   0   23.50    4.10 
   1   3   0   18.10    3.30 
  -1   3   0   19.40    4.70 
  -1   3   0   19.40    4.40 
   1   3   0   17.30    4.40 
  -1   3   0   18.40    5.00 
   1   3   0   16.70    4.10 
  -1   3   0   14.20    4.20 
   1   3   0   17.00    4.90 
  -1   3   0   13.00    2.60 
  -1   3   0   13.40    4.70 
  -1   3   0   12.90    4.40 
   1   3   0   15.30    4.60 
  -1   3   0   18.70    5.10 
   1   3   0   10.30    3.90 
   1   3   0    5.50    4.60 
   1   3   0   24.20    3.80 
   1   3   0   22.90    5.80 
   1   3   0   14.70    5.10 
  -1   3   0   22.30    6.00 
   1   3   0   15.80    4.40 
  -1   3   0   24.10    5.20 
   1   3   0   22.60    3.20 
  -1   3   0   14.20    3.80 
   1   3   0   22.50    4.30 
  -1   3   0   18.40    4.40 
  -1   3   0   17.90    5.30 
  -1   3   0   22.20    4.50 
  -1   3   0   13.00    4.40 
   1   3   0   19.70    5.00 
  -1   3   0   13.20    3.30 
  -1   3   0   18.80    4.70 
  -1   3   0   15.10    4.00 
   1   3   0   16.80    3.50 
   1   3   0   18.90    3.40 
   1   3   0   18.80    5.80 
  -1   3   0   20.70    5.50 
  -1   3   0   21.50    5.30 
  -1   3   0   16.10    3.40 
   1   3   0   24.60    5.10 
   1   3   0   19.00    3.30 
   1   3   0   18.80    3.20 
  -1   3   0   18.70    5.10 
   1   3   0   14.00    5.10 
  -1   3   0   21.30    3.60 
  -1   3   0   26.00    5.20 
  -1   3   0   17.50    4.90 
  -1   3   0   12.30    4.80 
   2  -3   0   40.60    6.10 
   2  -3   0   34.30    6.50 
   2  -3   0   34.30    7.40 
  -2  -3   0   23.80    5.80 
  -2  -3   0   20.10    4.20 
  -2  -3   0   32.60    6.10 
   2  -3   0   34.80    7.00 
  -2  -3   0   30.50    4.40 
   2  -3   0   25.40    6.60 
  -2  -3   0   28.60    5.10 
   2  -3   0   25.40    5.40 
   2  -3   0   38.90    6.40 
  -2  -3   0   36.70    6.30 
   2  -3   0   39.00    7.40 
   2  -3   0   32.40    5.90 
   2  -3   0   27.50    6.00 
  -2  -3   0   33.70    5.20 
  -2  -3   0   32.30    4.90 
  -2  -3   0   21.00    5.20 
  -2  -3   0   35.50    5.90 
   2  -3   0   38.10    6.90 
   2  -3   0   31.60    6.20 
   2   3   0   35.20    6.40 
   2   3   0   31.00    5.90 
   2   3   0   35.90    5.50 
   2   3   0   34.70    5.40 
   2   3   0   33.60    8.20 
   2   3   0   38.70    6.80 
  -2   3   0   48.40    6.40 
  -2   3   0   60.49    7.70 
   2   3   0   29.60    5.10 
   2   3   0   16.60    4.70 
   2   3   0   30.80    6.40 
   2   3   0   27.90    5.10 
  -2   3   0   43.10    6.40 
   2   3   0   34.70    4.50 
   2   3   0   40.50    6.00 
   2   3   0   29.80    6.20 
  -2   3   0   44.20    7.50 
   2   3   0   45.20    7.50 
  -2   3   0   48.90    8.60 
   2   3   0   37.00    7.10 
   2   3   0   36.40    4.80 
   2   3   0   32.90    4.10 
   2   3   0   34.10    5.50 
   2   3   0   34.50    3.90 
  -2   3   0   47.00    8.10 
   2   3   0   25.70    5.90 
   2   3   0   33.30    3.70 
  -2   3   0   40.40    7.10 
  -2   3   0   50.09    7.10 
  -2   3   0   56.59    8.40 
  -2   3   0   21.80    6.70 
   2   3   0   44.40    6.80 
   2   3   0   34.70    6.00 
  -2   3   0   57.89    6.60 
  -2   3   0   45.70    8.10 
  -2   3   0   50.09    8.30 
   2   3   0   27.00    5.50 
  -2   3   0   56.09    8.00 
   2   3   0   28.70    4.10 
   2   3   0   30.80    4.60 
  -2   3   0   45.40    5.90 
   2   3   0   36.20    4.50 
   2   3   0   34.90    5.60 
   2   3   0   31.50    5.40 
   2   3   0   25.10    3.80 
  -2   3   0   40.20    6.10 
   2   3   0   31.60    4.40 
   2   3   0   39.80    7.80 
  -3  -3   0    8.60    4.30 
   3  -3   0    1.10    4.10 
   3  -3   0    6.10    4.00 
   3  -3   0    8.40    5.10 
   3  -3   0    3.10    4.00 
   3  -3   0    3.20    4.10 
   3  -3   0    7.80    3.80 
   3  -3   0   -0.40    4.20 
   3  -3   0   14.90    6.60 
   3  -3   0    5.00    3.90 
  -3  -3   0    6.10    4.10 
   3  -3   0   15.20    5.20 
  -3  -3   0    1.40    3.40 
  -3  -3   0    5.70    3.40 
   3  -3   0    4.20    4.60 
   3  -3   0   -1.90    2.90 
  -3  -3   0    3.20    3.30 
   3  -3   0    4.30    3.70 
   3  -3   0    7.30    4.20 
  -3  -3   0    8.70    4.20 
  -3  -3   0    9.80    3.30 
  -3  -3   0    3.00    2.00 
  -3  -3   0    3.60    3.20 
  -3  -3   0    2.20    3.20 
   3  -3   0    7.20    4.50 
  -3   3   0    7.50    4.80 
  -3   3   0    5.70    4.60 
   3   3   0    2.60    2.10 
   3   3   0    3.10    3.40 
  -3   3   0    6.90    5.40 
   3   3   0    5.80    3.80 
  -3   3   0    0.90    3.80 
   3   3   0   -1.50    2.70 
   3   3   0   -3.30    2.50 
   3   3   0    5.90    4.20 
   3   3   0    5.30    4.00 
   3   3   0    4.20    3.40 
   3   3   0    2.50    2.80 
   3   3   0    3.70    2.30 
   3   3   0   10.40    3.20 
  -3   3   0    4.90    3.70 
  -3   3   0    1.40    3.70 
  -3   3   0    9.30    4.50 
  -3   3   0    2.10    3.60 
  -3   3   0    1.60    4.10 
  -3   3   0    1.90    4.10 
   3   3   0    8.30    3.50 
   3   3   0    1.70    3.80 
   3   3   0    8.50    3.20 
   3   3   0    4.80    4.40 
   3   3   0    9.90    4.20 
  -3   3   0   -2.50    4.40 
   3   3   0    2.60    3.20 
   3   3   0    3.80    2.00 
  -3   3   0   -1.80    3.10 
   3   3   0    8.30    3.70 
  -3   3   0    5.10    3.20 
   3   3   0    9.20    3.60 
   3   3   0   10.20    2.80 
   3   3   0   11.80    3.50 
  -3   3   0    2.20    3.40 
  -3   3   0    6.60    3.80 
   3   3   0    6.40    3.00 
   3   3   0   13.20    5.60 
  -3   3   0    4.30    4.10 
  -3   3   0    4.90    4.20 
   3   3   0    2.00    3.70 
  -3   3   0    0.80    4.40 
   4  -3   0  181.08   20.40 
  -4  -3   0  199.48   15.10 
  -4  -3   0  185.68   11.30 
  -4  -3   0  240.68   14.60 
   4  -3   0  180.98   18.70 
   4  -3   0  223.58   19.50 
   4  -3   0  179.78   17.50 
  -4  -3   0  198.48   15.50 
  -4  -3   0  192.58   14.70 
   4  -3   0  200.88   18.20 
   4  -3   0  202.88   16.80 
   4  -3   0  221.08   21.70 
   4  -3   0  186.58   20.40 
  -4  -3   0  185.58   13.10 
  -4  -3   0  162.88   16.70 
  -4  -3   0  197.48   15.80 
  -4  -3   0  181.78   12.90 
  -4  -3   0  201.08   19.30 
  -4  -3   0  170.28   17.30 
  -4  -3   0  224.08   16.90 
   4  -3   0  209.68   15.40 
   4  -3   0  212.18   18.50 
   4  -3   0  194.58   14.80 
   4  -3   0  238.18   17.80 
  -4   3   0  170.78   18.20 
  -4   3   0  207.78   19.90 
   4   3   0  177.28   13.30 
   4   3   0  187.98   13.50 
   4   3   0  184.68   13.80 
   4   3   0  200.18   14.50 
  -4   3   0  197.58   16.00 
   4   3   0  241.18   18.20 
   4   3   0  214.48   13.10 
  -4   3   0  232.18   22.20 
  -4   3   0  199.38   14.10 
   4   3   0  197.98   14.40 
  -4   3   0  181.48   20.10 
  -4   3   0  203.18   13.60 
   4   3   0  194.08   19.00 
   4   3   0  199.38    9.40 
   4   3   0  194.98   14.50 
   4   3   0  212.68   17.20 
   4   3   0  202.68   13.50 
   4   3   0  164.58   18.80 
   4   3   0  197.38   11.80 
  -4   3   0  216.18   16.60 
  -4   3   0  219.28   14.90 
   4   3   0  192.88   16.70 
  -4   3   0  166.98   19.60 
  -4   3   0  201.88   18.70 
   4   3   0  179.08   11.30 
   4   3   0  222.58   14.70 
  -4   3   0  178.58   19.10 
  -4   3   0  147.79   16.10 
  -4   3   0  159.98   17.50 
   4   3   0  177.38   12.80 
  -4   3   0  196.58   15.90 
  -4   3   0  205.88   16.30 
  -4   3   0  209.38   13.20 
  -4   3   0  216.78   21.00 
   4   3   0  194.58   11.10 
  -4   3   0  176.58   12.90 
   4   3   0  190.18   11.90 
   4   3   0  196.58    9.30 
  -5  -3   0  529.25   32.80 
   5  -3   0  579.64   33.90 
   5  -3   0  474.95   27.80 
   5  -3   0  575.04   35.70 
  -5  -3   0  503.65   32.10 
   5  -3   0  513.35   34.00 
  -5  -3   0  532.25   31.50 
   5  -3   0  559.64   33.30 
  -5  -3   0  482.55   31.40 
  -5  -3   0  495.25   25.10 
  -5  -3   0  552.74   26.90 
  -5  -3   0  575.74   30.70 
   5  -3   0  547.25   36.00 
   5  -3   0  559.74   34.10 
  -5  -3   0  598.54   31.70 
  -5  -3   0  511.15   30.40 
   5  -3   0  537.15   32.00 
   5  -3   0  518.45   34.50 
   5  -3   0  548.95   33.30 
  -5  -3   0  509.45   31.40 
  -5  -3   0  541.15   32.20 
  -5  -3   0  531.95   27.80 
   5  -3   0  530.35   29.60 
   5  -3   0  533.15   29.10 
   5  -3   0  546.75   35.20 
  -5   3   0  484.45   32.40 
  -5   3   0  547.05   32.20 
   5   3   0  490.75   32.50 
  -5   3   0  519.05   32.40 
  -5   3   0  577.74   32.70 
   5   3   0  583.04   36.20 
   5   3   0  550.04   23.90 
   5   3   0  570.34   26.40 
  -5   3   0  542.75   25.90 
  -5   3   0  508.95   31.80 
  -5   3   0  514.05   33.70 
  -5   3   0  576.74   32.90 
  -5   3   0  526.35   27.50 
   5   3   0  545.95   27.90 
   5   3   0  532.55   26.40 
   5   3   0  538.95   33.10 
   5   3   0  573.24   25.70 
   5   3   0  531.15   25.50 
   5   3   0  544.75   33.80 
   5   3   0  556.84   29.80 
  -5   3   0  483.25   32.70 
  -5   3   0  453.45   28.20 
  -5   3   0  508.15   26.20 
   5   3   0  512.35   26.70 
   5   3   0  543.15   28.80 
   5   3   0  491.85   31.50 
   5   3   0  522.05   27.00 
  -5   3   0  575.84   32.90 
  -5   3   0  489.05   34.00 
   5   3   0  490.75   24.90 
   5   3   0  556.04   28.90 
   5   3   0  576.84   27.80 
  -5   3   0  503.95   33.20 
   5   3   0  550.14   25.20 
  -5   3   0  513.45   30.50 
  -5   3   0  542.25   33.50 
   5   3   0  525.35   31.60 
   5   3   0  514.55   23.30 
  -5   3   0  511.75   32.30 
  -5   3   0  555.04   26.60 
  -6  -3   0  521.55   33.90 
  -6  -3   0  492.85   32.70 
   6  -3   0  542.65   36.90 
   6  -3   0  486.55   34.90 
   6  -3   0  468.55   32.10 
  -6  -3   0  487.45   26.00 
  -6  -3   0  469.15   29.20 
   6  -3   0  566.04   30.50 
  -6  -3   0  523.35   29.10 
   6  -3   0  490.35   37.30 
   6  -3   0  519.65   35.10 
   6  -3   0  518.15   34.70 
   6  -3   0  511.25   28.30 
   6  -3   0  503.45   33.60 
  -6  -3   0  558.84   35.00 
   6  -3   0  602.24   39.00 
  -6  -3   0  493.25   31.60 
   6  -3   0  463.75   28.00 
   6  -3   0  449.46   34.80 
  -6  -3   0  489.95   25.50 
   6  -3   0  502.15   33.30 
  -6  -3   0  492.15   33.50 
  -6  -3   0  461.95   33.00 
  -6  -3   0  466.85   32.00 
  -6  -3   0  516.45   32.30 
  -6  -3   0  564.04   32.40 
  -6   3   0  558.54   34.70 
   6   3   0  491.85   24.50 
  -6   3   0  503.95   26.50 
  -6   3   0  463.75   25.00 
   6   3   0  552.14   27.20 
  -6   3   0  509.95   35.00 
  -6   3   0  532.25   33.80 
   6   3   0  524.15   34.50 
   6   3   0  489.25   23.80 
   6   3   0  526.05   27.50 
   6   3   0  511.85   32.90 
  -6   3   0  546.65   35.20 
   6   3   0  515.95   35.10 
   6   3   0  458.65   27.20 
  -6   3   0  547.95   35.10 
  -6   3   0  480.85   30.30 
   6   3   0  494.35   24.90 
   6   3   0  462.15   29.70 
  -6   3   0  470.25   35.30 
  -6   3   0  519.45   24.70 
  -6   3   0  542.45   34.10 
   6   3   0  468.05   34.50 
   6   3   0  511.75   29.80 
   6   3   0  498.05   36.80 
   6   3   0  523.65   33.80 
  -6   3   0  474.25   33.90 
  -6   3   0  538.35   34.40 
  -6   3   0  507.25   33.50 
  -6   3   0  512.15   32.10 
  -6   3   0  513.75   33.70 
   6   3   0  507.65   26.40 
  -6   3   0  512.85   35.10 
   6   3   0  505.25   25.70 
   7  -3   0   25.70   11.30 
   7  -3   0   31.90    8.60 
  -7  -3   0   20.60    9.10 
   7  -3   0   22.80   11.50 
  -7  -3   0   39.80   13.00 
  -7  -3   0   34.40   10.80 
  -7  -3   0   11.30    8.30 
  -7  -3   0   14.40    8.00 
   7  -3   0   22.90   10.90 
   7  -3   0    9.50   10.50 
   7  -3   0   34.90    8.00 
   7  -3   0   29.00    8.70 
  -7  -3   0   42.30   13.00 
  -7  -3   0   20.90    6.40 
  -7  -3   0   29.50   10.80 
   7  -3   0   23.00   11.00 
   7  -3   0   20.80   11.20 
   7  -3   0   18.60    9.90 
  -7  -3   0   19.80    8.20 
  -7  -3   0   22.30   10.30 
   7  -3   0   21.80   10.00 
  -7  -3   0   21.30    9.10 
   7  -3   0   13.40    9.50 
  -7   3   0   26.10   10.10 
   7   3   0   16.50   10.00 
  -7   3   0   14.80    8.90 
  -7   3   0   27.10   11.30 
  -7   3   0   21.20    9.90 
  -7   3   0   19.10    8.00 
   7   3   0   24.40   10.40 
  -7   3   0   15.70    9.20 
   7   3   0   39.70   14.40 
   7   3   0   27.40   11.90 
   7   3   0   37.00    9.90 
  -7   3   0   28.80   10.40 
   7   3   0   21.00    7.00 
   7   3   0   41.40   12.40 
  -7   3   0    8.70    9.20 
  -7   3   0   -2.60    6.50 
   7   3   0   16.50   10.30 
   7   3   0   13.70    7.40 
   7   3   0   21.20    7.60 
  -7   3   0   29.00    9.30 
  -7   3   0   26.00   11.50 
  -7   3   0   14.60   10.20 
  -7   3   0   30.30   12.30 
   8  -3   0    1.60    8.60 
  -8  -3   0  -10.60    5.80 
   8  -3   0  -14.10    7.30 
   8  -3   0   14.80   10.30 
  -8  -3   0    1.60    7.90 
  -8  -3   0   21.60    8.60 
  -8  -3   0    8.60    9.80 
   8  -3   0   14.30    9.40 
   8  -3   0   -1.10    8.20 
   8  -3   0    3.80    8.20 
   8  -3   0    0.90    7.00 
   8  -3   0   -4.40    8.30 
  -8  -3   0   -5.40    7.10 
  -8  -3   0   13.10    9.30 
  -8  -3   0    6.70    7.20 
   8  -3   0   -6.20    7.80 
   8  -3   0    9.60   10.90 
  -8  -3   0    7.00    8.10 
  -8  -3   0   -1.00    8.20 
   8  -3   0   -1.60    8.70 
  -8   3   0    7.10   10.50 
  -8   3   0   -5.00    7.00 
   8   3   0   -0.70    6.50 
  -8   3   0   16.40   11.10 
  -8   3   0   16.10   10.70 
   8   3   0   -2.20    8.00 
  -8   3   0    4.50    7.90 
  -8   3   0   -4.50    7.60 
   8   3   0   17.80   12.00 
   8   3   0   12.90   11.60 
   8   3   0   12.60    8.50 
   8   3   0    8.80   11.90 
  -8   3   0    4.80    8.20 
   8   3   0  -10.50    7.00 
   8   3   0    5.90    9.40 
   8   3   0   15.30    9.00 
  -8   3   0   16.40   11.30 
  -8   3   0    2.30    8.90 
  -8   3   0   12.90   10.50 
  -8   3   0    9.10   10.40 
   8   3   0   10.30   12.40 
  -8   3   0    0.90    6.40 
  -9  -3   0    3.70    8.10 
   9  -3   0   -1.60    9.80 
  -9  -3   0   -2.30    8.50 
   9  -3   0   15.60   11.40 
  -9  -3   0   23.70   12.50 
  -9  -3   0   10.00    9.20 
  -9  -3   0    3.50    9.90 
   9  -3   0   -8.10    8.40 
  -9  -3   0   -9.60    9.70 
   9  -3   0   13.10   10.60 
   9  -3   0    7.70   11.20 
   9  -3   0    1.50   11.20 
  -9  -3   0   19.50   12.70 
   9  -3   0    1.30    8.80 
   9  -3   0    9.50    8.90 
   9  -3   0    1.60   10.90 
   9  -3   0   11.90   10.90 
   9  -3   0   37.50   18.70 
  -9  -3   0    2.90   11.70 
  -9   3   0   21.90   13.80 
  -9   3   0  -11.10    8.90 
   9   3   0   -6.40   11.60 
   9   3   0   12.30   12.50 
  -9   3   0   15.30   10.90 
   9   3   0   -6.80    9.60 
   9   3   0    4.70    8.70 
   9   3   0   -3.30    7.60 
   9   3   0   -0.30    9.80 
  -9   3   0    2.50    9.60 
  -9   3   0   22.30   14.30 
  -9   3   0   -0.10    9.80 
  -9   3   0    8.40   12.10 
  -9   3   0   27.10   14.50 
   9   3   0   16.10   12.70 
   9   3   0    4.30   12.00 
  -9   3   0    3.40    8.90 
  -9   3   0    5.20   11.30 
   9   3   0   -3.10   10.80 
   0  -4   0  944.21   42.90 
   0  -4   0  903.91   42.40 
   0  -4   0  888.01   42.80 
   0  -4   0  871.11   43.60 
   0  -4   0  946.21   42.00 
   0  -4   0  936.01   38.30 
   0  -4   0  998.60   42.10 
   0  -4   0  908.71   40.80 
   0  -4   0  930.81   38.40 
   0  -4   0  912.81   39.50 
   0  -4   0  864.71   41.00 
   0  -4   0  917.31   45.00 
   0  -4   0  918.51   44.00 
   0  -4   0  983.50   46.40 
   0  -4   0  878.11   43.30 
   0  -4   0  846.72   45.40 
   0  -4   0  951.70   42.00 
   0  -4   0  956.10   42.40 
   0   4   0  926.51   41.50 
   0   4   0  925.61   40.90 
   0   4   0  897.91   37.70 
   0   4   0  919.31   38.80 
   0   4   0  902.21   44.10 
   0   4   0  924.01   38.70 
   0   4   0  959.80   41.00 
   0   4   0  951.00   41.10 
   0   4   0  923.91   39.90 
   0   4   0  931.51   39.20 
   0   4   0  919.31   43.20 
   0   4   0  924.61   34.90 
   0   4   0  883.91   41.50 
   0   4   0  893.01   43.50 
   0   4   0  898.41   40.10 
   0   4   0  945.71   44.30 
   0   4   0  923.91   35.90 
   0   4   0  929.31   38.40 
   0   4   0  968.80   44.60 
   0   4   0  920.51   40.80 
   0   4   0  911.21   47.80 
   0   4   0  963.40   37.90 
   0   4   0  887.61   39.00 
   0   4   0  982.90   41.70 
   0   4   0  957.70   45.60 
   0   4   0  959.40   40.00 
   0   4   0  899.61   37.00 
   1  -4   0 4061.49  157.58 
   1  -4   0 4111.09  157.08 
   1  -4   0 4198.08  161.38 
   1  -4   0 4095.59  158.38 
   1  -4   0 4102.99  156.18 
   1  -4   0 4120.09  159.88 
   1  -4   0 4068.69  155.08 
  -1  -4   0 4236.38  160.38 
  -1  -4   0 4100.99  154.78 
   1  -4   0 4269.87  159.08 
   1  -4   0 4020.40  157.78 
  -1  -4   0 4133.79  154.48 
   1  -4   0 4133.09  159.48 
  -1  -4   0 4153.88  154.98 
   1  -4   0 4259.77  158.28 
  -1  -4   0 4111.99  152.18 
  -1  -4   0 4118.59  152.18 
   1  -4   0 4234.78  160.08 
  -1  -4   0 4089.89  156.88 
  -1  -4   0 4208.58  159.08 
   1  -4   0 4196.98  151.78 
  -1  -4   0 4156.08  161.18 
  -1  -4   0 3747.73  159.58 
   1  -4   0 4154.98  153.68 
   1  -4   0 4164.38  161.18 
   1  -4   0 4138.39  153.98 
  -1  -4   0 4027.60  160.78 
  -1  -4   0 4202.68  160.78 
  -1  -4   0 4429.16  158.38 
   1  -4   0 4103.39  151.98 
   1  -4   0 4242.38  156.18 
   1  -4   0 4286.37  161.58 
   1  -4   0 4192.38  161.38 
   1  -4   0 4195.78  160.28 
  -1   4   0 4207.88  160.18 
   1   4   0 3802.52  159.78 
   1   4   0 4070.39  154.48 
   1   4   0 4207.58  152.68 
   1   4   0 4131.09  152.28 
  -1   4   0 4193.88  154.78 
   1   4   0 3393.46  160.38 
   1   4   0 4118.19  152.88 
  -1   4   0 4141.29  156.18 
   1   4   0 4182.38  153.18 
   1   4   0 4096.09  151.78 
   1   4   0 4115.89  155.38 
  -1   4   0 4156.88  152.48 
  -1   4   0 4201.58  157.38 
   1   4   0 4142.89  162.48 
  -1   4   0 4197.68  154.48 
   1   4   0 4255.87  153.18 
  -1   4   0 4106.99  160.88 
   1   4   0 4193.58  156.58 
   1   4   0 3947.51  153.68 
   1   4   0 4274.07  160.88 
  -1   4   0 4177.78  154.98 
  -1   4   0 4233.18  159.68 
   1   4   0 4095.49  154.58 
   1   4   0 4143.19  153.68 
  -1   4   0 4132.79  159.98 
   1   4   0 4120.09  154.28 
   1   4   0 3503.65  154.38 
   1   4   0 3701.43  159.18 
   1   4   0 4284.47  158.48 
   1   4   0 4018.00  158.48 
   1   4   0 4107.49  154.78 
   1   4   0 3893.61  159.08 
  -1   4   0 4249.67  158.48 
   1   4   0 4060.99  161.68 
  -1   4   0 4133.19  162.28 
   1   4   0 4089.59  154.78 
  -1   4   0 4166.98  161.38 
   1   4   0 4139.69  152.08 
  -1   4   0 4135.19  156.78 
  -1   4   0 4256.17  159.88 
  -1   4   0 4177.88  160.68 
  -1   4   0 4222.38  156.68 
  -1   4   0 4056.89  158.18 
  -1   4   0 4245.78  157.08 
   1   4   0 4156.48  160.18 
  -1   4   0 4183.58  159.38 
  -1   4   0 4172.48  163.48 
   1   4   0 4085.09  156.38 
   1   4   0 4007.10  164.68 
  -1   4   0 4234.58  154.18 
   1   4   0 4150.68  161.38 
   2  -4   0  399.96   21.00 
   2  -4   0  470.05   23.50 
  -2  -4   0  393.16   22.20 
   2  -4   0  433.66   26.50 
   2  -4   0  427.66   24.90 
  -2  -4   0  370.96   23.10 
  -2  -4   0  417.26   22.00 
   2  -4   0  402.26   22.30 
  -2  -4   0  388.66   19.30 
   2  -4   0  463.25   27.20 
   2  -4   0  393.16   25.10 
   2  -4   0  385.26   24.30 
   2  -4   0  412.96   21.70 
   2  -4   0  375.06   21.60 
  -2  -4   0  369.26   23.70 
   2  -4   0  439.56   24.20 
   2  -4   0  368.76   22.70 
   2  -4   0  422.66   24.20 
   2  -4   0  446.66   23.50 
  -2  -4   0  448.16   24.20 
   2  -4   0  439.96   26.30 
   2  -4   0  414.46   24.90 
  -2  -4   0  418.26   20.10 
   2  -4   0  394.46   20.20 
  -2  -4   0  408.66   20.60 
  -2  -4   0  398.96   19.40 
  -2  -4   0  396.26   21.00 
   2  -4   0  411.86   19.70 
   2  -4   0  404.46   23.80 
   2  -4   0  426.76   23.10 
   2  -4   0  416.26   20.40 
  -2  -4   0  367.36   21.50 
   2   4   0  391.46   18.80 
   2   4   0  417.46   24.90 
   2   4   0  354.66   23.20 
   2   4   0  421.26   20.40 
  -2   4   0  432.46   23.50 
   2   4   0  412.86   20.80 
  -2   4   0  410.26   26.70 
  -2   4   0  405.76   21.90 
   2   4   0  409.16   18.70 
   2   4   0  405.76   22.50 
  -2   4   0  424.36   23.00 
   2   4   0  370.16   21.70 
   2   4   0  396.06   27.00 
  -2   4   0  428.76   22.40 
   2   4   0  385.16   23.30 
   2   4   0  381.66   22.90 
   2   4   0  402.36   20.10 
   2   4   0  411.46   25.20 
   2   4   0  393.06   20.70 
  -2   4   0  406.36   21.20 
  -2   4   0  414.16   21.40 
   2   4   0  414.76   22.20 
   2   4   0  423.36   20.40 
  -2   4   0  366.36   24.50 
  -2   4   0  461.95   24.40 
  -2   4   0  439.26   25.30 
  -2   4   0  428.66   20.10 
   2   4   0  402.16   20.30 
   2   4   0  389.26   24.00 
  -2   4   0  416.76   23.70 
  -2   4   0  415.36   25.70 
   2   4   0  429.16   25.50 
   2   4   0  383.16   23.90 
  -2   4   0  385.46   24.10 
  -2   4   0  435.96   20.30 
   2   4   0  392.16   18.90 
   2   4   0  330.37   19.50 
  -2   4   0  401.86   22.70 
   2   4   0  400.06   21.60 
   2   4   0  385.46   25.00 
   2   4   0  397.06   18.70 
  -2   4   0  381.06   24.20 
   2   4   0  432.66   23.80 
  -2   4   0  405.76   21.20 
   2   4   0  391.86   19.30 
   2   4   0  383.86   23.20 
   2   4   0  415.86   18.80 
   2   4   0  416.06   20.50 
   2   4   0  426.56   19.00 
  -2   4   0  367.66   24.10 
   2   4   0  431.76   25.30 
  -2   4   0  416.36   23.90 
   2   4   0  401.96   20.20 
  -2   4   0  418.96   23.80 
  -3  -4   0   89.39   12.30 
   3  -4   0  121.19   14.70 
  -3  -4   0  123.49   13.50 
   3  -4   0  119.69   15.70 
  -3  -4   0  125.69   13.70 
  -3  -4   0  123.39   12.50 
   3  -4   0  112.59   12.70 
  -3  -4   0  119.49   12.80 
   3  -4   0  101.49   13.20 
   3  -4   0  122.29   16.90 
   3  -4   0  128.09   15.20 
   3  -4   0  136.89   16.90 
   3  -4   0  101.49   13.90 
   3  -4   0  149.88   15.80 
   3  -4   0  156.48   14.10 
  -3  -4   0  113.89    8.60 
   3  -4   0  134.49   14.00 
  -3  -4   0  128.59   10.20 
   3  -4   0  108.99   14.40 
   3  -4   0  133.19   16.30 
  -3  -4   0  113.29    8.20 
  -3  -4   0  130.99   13.60 
   3  -4   0   95.99   11.40 
  -3   4   0  122.99   16.10 
   3   4   0  106.59    9.80 
  -3   4   0  127.79   14.70 
  -3   4   0  108.89   12.50 
   3   4   0  106.49   12.90 
   3   4   0  111.39    8.00 
   3   4   0  119.39   13.40 
   3   4   0  110.19    7.40 
   3   4   0  100.99   11.80 
   3   4   0  122.79   12.30 
  -3   4   0  140.39   16.60 
   3   4   0  106.29   12.10 
  -3   4   0  124.79   15.10 
  -3   4   0  149.99   13.70 
   3   4   0  115.69    7.40 
   3   4   0  119.69   14.30 
   3   4   0  111.99    6.10 
   3   4   0  126.79    8.00 
   3   4   0  118.69   12.90 
  -3   4   0  101.39   14.10 
  -3   4   0  111.09   12.50 
  -3   4   0  123.89   12.30 
  -3   4   0  101.09   13.10 
  -3   4   0  114.39   12.60 
   3   4   0  112.19    8.10 
   3   4   0  116.69   14.00 
   3   4   0  141.19   14.80 
   3   4   0  131.09    9.50 
   3   4   0  103.69   12.00 
   3   4   0  124.49   12.10 
   3   4   0  122.19   11.90 
   3   4   0  120.59   16.80 
   3   4   0  139.99   15.50 
  -3   4   0  138.59   15.10 
   3   4   0  129.09    9.00 
  -3   4   0  126.19   17.00 
  -3   4   0   96.09   13.60 
  -3   4   0  108.49   12.60 
  -3   4   0  106.79   13.00 
  -3   4   0  120.29   14.70 
   3   4   0  105.89    8.50 
   3   4   0  122.69    7.30 
   3   4   0  112.69   12.90 
   3   4   0  122.69   16.00 
   4  -4   0  132.39   15.70 
   4  -4   0  150.98   19.30 
  -4  -4   0  170.38   15.90 
  -4  -4   0  126.89   14.70 
   4  -4   0  152.68   18.00 
  -4  -4   0  134.29   13.50 
  -4  -4   0  138.99   15.70 
   4  -4   0  142.99   17.80 
   4  -4   0  152.38   18.90 
   4  -4   0  157.18   18.50 
   4  -4   0  119.59   16.80 
  -4  -4   0  142.79   12.60 
  -4  -4   0  147.29   15.10 
   4  -4   0  159.38   16.90 
   4  -4   0  132.39   18.70 
  -4  -4   0  135.29   15.00 
   4  -4   0  156.28   16.70 
  -4  -4   0  132.69   14.50 
   4  -4   0  151.08   16.70 
   4  -4   0  161.08   20.80 
  -4   4   0  166.28   16.60 
   4   4   0  140.19    9.30 
  -4   4   0  118.99   18.00 
  -4   4   0  122.59   16.30 
   4   4   0  137.89   17.60 
   4   4   0  139.19   10.20 
   4   4   0  140.59   14.10 
   4   4   0  133.09   13.60 
  -4   4   0  109.29   15.50 
   4   4   0  130.29   13.90 
   4   4   0  146.79   17.60 
   4   4   0  152.58   11.30 
   4   4   0  129.09   15.10 
   4   4   0  158.08   12.00 
   4   4   0  141.59    7.90 
  -4   4   0  145.49   16.00 
  -4   4   0  138.29   16.00 
   4   4   0  112.09   14.50 
   4   4   0  132.59   15.60 
  -4   4   0  147.59   15.70 
   4   4   0  129.49    8.50 
  -4   4   0  134.89   16.90 
   4   4   0  136.39   17.00 
  -4   4   0  131.39   15.40 
  -4   4   0  133.99   18.20 
  -4   4   0  128.49   13.90 
   4   4   0  169.58   20.80 
   4   4   0  140.79    9.10 
   4   4   0  138.09    7.80 
  -4   4   0  168.88   18.80 
  -4   4   0  150.38   17.90 
  -4   4   0  146.89   14.60 
   4   4   0  133.29   10.70 
  -4   4   0  110.59   15.60 
  -4   4   0  152.48   16.30 
  -4   4   0  140.89   17.60 
   4   4   0  115.39   14.40 
   5  -4   0  725.83   38.10 
   5  -4   0  728.93   43.00 
   5  -4   0  707.23   37.50 
  -5  -4   0  690.43   37.20 
   5  -4   0  718.93   41.10 
   5  -4   0  744.13   44.40 
   5  -4   0  665.43   40.30 
   5  -4   0  693.43   43.70 
   5  -4   0  688.23   43.60 
  -5  -4   0  731.73   34.30 
  -5  -4   0  723.93   39.00 
  -5  -4   0  756.92   39.10 
   5  -4   0  697.03   39.80 
   5  -4   0  724.63   42.60 
   5  -4   0  667.03   41.60 
  -5  -4   0  688.63   39.00 
  -5  -4   0  709.53   35.50 
  -5  -4   0  700.53   36.70 
   5  -4   0  710.93   39.40 
  -5  -4   0  731.13   35.30 
   5   4   0  680.73   42.00 
  -5   4   0  691.03   38.80 
  -5   4   0  700.13   40.10 
   5   4   0  679.93   39.80 
   5   4   0  671.23   39.80 
   5   4   0  696.53   35.60 
  -5   4   0  704.63   39.90 
   5   4   0  776.82   41.70 
   5   4   0  683.93   31.50 
  -5   4   0  732.33   40.00 
   5   4   0  722.23   29.70 
   5   4   0  694.53   30.70 
  -5   4   0  743.63   39.50 
  -5   4   0  609.74   41.00 
   5   4   0  702.43   29.40 
  -5   4   0  683.43   41.40 
  -5   4   0  703.73   36.50 
  -5   4   0  646.94   39.70 
  -5   4   0  651.83   40.00 
   5   4   0  711.73   38.60 
  -5   4   0  736.63   39.70 
   5   4   0  688.33   36.20 
  -5   4   0  723.13   39.60 
   5   4   0  689.33   30.00 
   5   4   0  721.93   36.80 
  -5   4   0  740.03   42.70 
  -5   4   0  730.53   42.30 
  -5   4   0  675.13   35.00 
   5   4   0  721.23   34.90 
  -5   4   0  647.54   42.40 
   5   4   0  651.93   39.40 
  -5   4   0  694.83   35.20 
   5   4   0  700.13   37.00 
   5   4   0  677.63   34.20 
   6  -4   0  759.62   40.40 
   6  -4   0  796.92   46.20 
   6  -4   0  706.83   44.60 
  -6  -4   0  794.72   44.80 
   6  -4   0  755.42   49.10 
  -6  -4   0  777.72   38.20 
   6  -4   0  788.02   48.40 
   6  -4   0  761.32   48.60 
   6  -4   0  810.92   48.70 
  -6  -4   0  759.92   43.60 
  -6  -4   0  828.22   46.10 
   6  -4   0  772.32   41.20 
   6  -4   0  756.92   47.00 
  -6  -4   0  787.02   38.70 
  -6  -4   0  798.92   43.40 
   6  -4   0  731.23   48.00 
   6  -4   0  786.92   46.30 
  -6  -4   0  751.22   42.20 
   6  -4   0  795.52   44.90 
  -6  -4   0  745.03   41.30 
   6   4   0  763.72   46.00 
  -6   4   0  726.53   46.10 
  -6   4   0  784.32   45.00 
  -6   4   0  733.93   46.60 
   6   4   0  786.82   44.60 
  -6   4   0  777.92   44.90 
  -6   4   0  770.12   37.50 
   6   4   0  793.92   49.00 
   6   4   0  781.02   37.30 
  -6   4   0  805.12   39.40 
   6   4   0  766.42   39.50 
   6   4   0  784.12   38.90 
   6   4   0  844.22   44.60 
   6   4   0  820.62   41.30 
   6   4   0  723.23   38.50 
  -6   4   0  765.62   47.30 
  -6   4   0  766.02   44.60 
  -6   4   0  806.02   45.10 
   6   4   0  769.02   36.10 
  -6   4   0  807.12   45.90 
  -6   4   0  800.32   46.60 
   6   4   0  757.72   40.90 
  -6   4   0  788.02   43.70 
   6   4   0  741.73   37.10 
  -6   4   0  787.32   44.60 
   6   4   0  802.52   39.70 
  -6   4   0  806.92   45.50 
  -6   4   0  816.02   48.70 
   6   4   0  760.12   40.40 
  -6   4   0  762.82   48.80 
  -6   4   0  770.62   37.60 
   6   4   0  786.82   46.30 
   6   4   0  759.62   45.60 
   7  -4   0  962.60   61.09 
   7  -4   0  973.40   49.00 
   7  -4   0 1015.80   56.69 
   7  -4   0  836.52   52.29 
  -7  -4   0  997.10   52.89 
  -7  -4   0  973.80   54.89 
   7  -4   0  969.60   47.70 
   7  -4   0  998.40   56.59 
  -7  -4   0  876.91   53.59 
  -7  -4   0  987.80   47.90 
   7  -4   0 1007.50   59.09 
  -7  -4   0  897.31   52.69 
   7  -4   0  839.82   56.19 
   7  -4   0  899.61   58.19 
  -7  -4   0  971.20   51.79 
  -7  -4   0  975.90   52.89 
   7  -4   0  947.71   56.89 
   7  -4   0 1028.00   60.39 
   7  -4   0  991.70   56.49 
   7   4   0  995.10   57.59 
  -7   4   0 1030.70   56.29 
   7   4   0  932.01   56.49 
  -7   4   0  964.90   54.59 
  -7   4   0  958.90   57.19 
  -7   4   0  953.80   56.39 
  -7   4   0  941.71   56.79 
  -7   4   0 1008.20   56.29 
  -7   4   0  918.41   50.79 
  -7   4   0  989.50   53.59 
  -7   4   0  893.81   55.79 
   7   4   0 1044.50   57.59 
   7   4   0  947.71   48.80 
   7   4   0  983.00   48.30 
   7   4   0  996.90   60.39 
  -7   4   0  980.70   55.39 
   7   4   0 1002.80   50.89 
  -7   4   0  971.50   54.79 
  -7   4   0  986.20   59.59 
   7   4   0 1015.90   54.09 
  -7   4   0  975.00   57.19 
   7   4   0  968.90   54.69 
  -7   4   0  899.11   53.49 
  -8  -4   0  429.76   33.20 
   8  -4   0  464.85   38.70 
   8  -4   0  456.55   46.70 
  -8  -4   0  371.46   31.10 
   8  -4   0  434.76   44.30 
   8  -4   0  339.27   36.00 
   8  -4   0  361.56   42.10 
   8  -4   0  379.76   44.20 
   8  -4   0  328.27   36.50 
   8  -4   0  385.46   39.50 
  -8  -4   0  411.76   40.80 
  -8  -4   0  394.26   32.20 
   8  -4   0  320.97   39.70 
   8  -4   0  402.56   43.30 
   8  -4   0  388.16   41.40 
  -8  -4   0  507.35   37.70 
  -8   4   0  369.66   39.90 
  -8   4   0  349.77   37.60 
  -8   4   0  321.47   33.00 
   8   4   0  423.76   44.90 
   8   4   0  383.36   43.40 
  -8   4   0  433.66   43.10 
   8   4   0  366.56   37.20 
   8   4   0  399.46   35.70 
  -8   4   0  377.16   38.40 
   8   4   0  388.26   28.80 
  -8   4   0  363.66   40.50 
  -8   4   0  408.16   39.90 
  -8   4   0  429.46   41.20 
  -8   4   0  414.86   42.20 
   8   4   0  517.15   36.00 
   8   4   0  410.76   31.10 
   8   4   0  406.96   42.20 
  -8   4   0  391.96   39.00 
  -8   4   0  467.35   54.39 
   8   4   0  352.56   39.00 
  -8   4   0  397.06   39.30 
   9  -4   0  278.97   38.20 
   9  -4   0  243.68   35.40 
   9  -4   0  267.07   34.90 
  -9  -4   0  309.87   34.70 
   9  -4   0  246.88   33.30 
   9  -4   0  391.56   47.10 
   9  -4   0  338.27   38.30 
  -9  -4   0  358.16   39.90 
   9  -4   0  285.17   39.00 
   9  -4   0  300.07   40.60 
   9  -4   0  223.18   35.90 
   9  -4   0  328.77   36.80 
  -9  -4   0  264.87   34.70 
   9  -4   0  343.17   46.20 
  -9  -4   0  282.17   32.70 
  -9   4   0  299.77   35.80 
  -9   4   0  350.36   39.30 
  -9   4   0  262.57   35.30 
   9   4   0  267.97   37.30 
  -9   4   0  274.17   38.60 
  -9   4   0  301.37   38.10 
  -9   4   0  360.56   41.20 
  -9   4   0  225.78   34.10 
   9   4   0  345.17   41.00 
   9   4   0  315.77   33.50 
   9   4   0  352.96   43.60 
  -9   4   0  312.07   39.10 
   9   4   0  299.07   36.10 
  -9   4   0  301.57   36.60 
  -9   4   0  300.07   36.70 
   9   4   0  238.28   35.10 
   9   4   0  297.27   34.90 
  -9   4   0  324.17   32.10 
   9   4   0  258.97   38.80 
   0  -5   0    5.10    2.70 
   0  -5   0    4.60    4.60 
   0  -5   0   -4.70    3.40 
   0  -5   0    2.90    2.10 
   0  -5   0    1.50    5.20 
   0  -5   0    5.70    5.60 
   0  -5   0    2.40    1.90 
   0  -5   0    5.90    4.20 
   0  -5   0   -4.50    4.10 
   0  -5   0   -4.90    4.60 
   0  -5   0    1.00    3.70 
   0  -5   0    6.80    4.00 
   0  -5   0   -0.20    3.80 
   0  -5   0    5.70    4.10 
   0  -5   0    0.10    2.90 
   0   5   0   -6.10    4.20 
   0   5   0    2.70    3.70 
   0   5   0    1.10    2.10 
   0   5   0    0.90    2.40 
   0   5   0    4.00    5.50 
   0   5   0    3.40    3.70 
   0   5   0   -0.60    4.60 
   0   5   0    2.90    3.30 
   0   5   0    0.30    2.60 
   0   5   0    3.00    2.80 
   0   5   0   -1.40    3.40 
   0   5   0    2.40    1.50 
   0   5   0   -4.90    3.80 
   0   5   0    2.70    3.40 
   0   5   0   -1.50    3.40 
   0   5   0   -2.80    2.20 
   0   5   0   -2.80    3.90 
   0   5   0   -1.10    2.90 
   0   5   0   -4.20    2.30 
   0   5   0    3.50    3.70 
   0   5   0    3.10    3.00 
   0   5   0   -2.60    4.40 
   0   5   0   -0.70    2.70 
   1  -5   0  105.69   14.80 
   1  -5   0   86.09   13.50 
   1  -5   0  138.99   15.70 
   1  -5   0   98.29   14.10 
  -1  -5   0  115.89    8.80 
   1  -5   0  124.49   15.90 
   1  -5   0  112.29   11.90 
   1  -5   0   92.89   14.20 
   1  -5   0   91.09   11.20 
  -1  -5   0  120.99   14.80 
   1  -5   0  123.49   13.20 
  -1  -5   0  134.19   14.60 
   1  -5   0  116.69   15.20 
  -1  -5   0  116.69   13.00 
   1  -5   0   95.69   13.60 
  -1  -5   0  122.29   15.80 
   1  -5   0   86.99   11.90 
  -1  -5   0  102.59   14.50 
  -1  -5   0  113.99    8.40 
  -1  -5   0  119.29   15.60 
   1  -5   0  130.29   13.60 
  -1  -5   0  100.79    8.20 
   1  -5   0  108.19   15.00 
   1  -5   0  113.09   13.70 
  -1  -5   0  132.79   16.40 
   1   5   0  106.49   15.00 
  -1   5   0  104.79    9.40 
  -1   5   0  109.99   12.50 
  -1   5   0  126.79   14.30 
  -1   5   0   98.89   11.40 
  -1   5   0   95.59   13.80 
  -1   5   0  106.79   13.90 
   1   5   0  103.99    9.90 
   1   5   0  120.79   18.70 
  -1   5   0  101.79   12.20 
  -1   5   0  125.79   14.50 
   1   5   0  140.79   15.60 
   1   5   0  118.29    9.20 
   1   5   0  111.29   12.80 
   1   5   0  120.39    8.50 
   1   5   0  108.39    8.50 
  -1   5   0   99.09   13.00 
   1   5   0   98.39    8.00 
  -1   5   0  111.79   15.70 
   1   5   0  114.39   10.20 
   1   5   0  124.09   11.40 
   1   5   0  102.09    8.00 
   1   5   0  114.69   14.80 
   1   5   0  107.59    6.60 
   1   5   0  100.89    9.20 
   1   5   0  129.69   10.30 
   1   5   0  100.89   15.00 
  -1   5   0  105.19   14.30 
  -1   5   0  102.89    8.40 
   1   5   0  121.09   15.30 
  -1   5   0  116.89   11.50 
   1   5   0  104.39    5.70 
  -1   5   0   96.09   10.80 
   1   5   0  102.79   15.10 
   1   5   0  123.69   12.50 
  -1   5   0   90.59   12.80 
  -1   5   0  106.39   15.10 
   1   5   0  137.89   14.10 
  -1   5   0  122.49    9.00 
  -1   5   0  112.59    8.10 
  -1   5   0  129.79   18.10 
   1   5   0  113.29    7.00 
  -1   5   0  112.29    6.00 
   1   5   0  102.59   11.80 
   1   5   0  103.89    9.40 
  -2  -5   0  204.58   12.10 
  -2  -5   0  209.28   20.70 
  -2  -5   0  209.68   13.50 
   2  -5   0  199.78   11.50 
   2  -5   0  232.88   15.40 
   2  -5   0  218.98   15.20 
   2  -5   0  208.38   21.70 
   2  -5   0  204.88   20.90 
   2  -5   0  206.78   13.40 
  -2  -5   0  196.98   18.90 
   2  -5   0  201.28   12.10 
  -2  -5   0  205.98   14.70 
   2  -5   0  206.88   14.80 
   2  -5   0  198.98   14.20 
   2  -5   0  227.48   18.30 
  -2  -5   0  196.88   18.30 
   2  -5   0  158.48   19.50 
   2  -5   0  169.08   19.30 
  -2  -5   0  191.68   12.80 
   2  -5   0  169.58   17.90 
  -2  -5   0  221.78   17.60 
   2  -5   0  197.98   16.60 
   2  -5   0  192.38   18.50 
   2  -5   0  226.78   15.80 
  -2  -5   0  203.58   15.50 
   2  -5   0  230.08   17.60 
   2  -5   0  189.58   12.60 
  -2   5   0  209.58   18.60 
  -2   5   0  206.88   16.50 
   2   5   0  175.08   19.80 
   2   5   0  210.68   17.30 
   2   5   0  207.78   19.50 
  -2   5   0  199.28   12.00 
  -2   5   0  205.78   13.60 
   2   5   0  166.58   19.00 
  -2   5   0  186.38   18.30 
   2   5   0  195.48   11.60 
   2   5   0  209.18   22.00 
  -2   5   0  185.18   13.30 
  -2   5   0  187.48   18.90 
   2   5   0  209.48   13.00 
   2   5   0  173.18   17.80 
   2   5   0  204.58   12.70 
   2   5   0  198.68   17.00 
   2   5   0  204.98   11.90 
  -2   5   0  192.98   19.20 
  -2   5   0  186.48   19.10 
  -2   5   0  234.08   22.70 
   2   5   0  205.88   13.90 
   2   5   0  236.48   14.30 
   2   5   0  203.48   11.80 
  -2   5   0  211.48   21.20 
   2   5   0  202.18   10.70 
  -2   5   0  202.28   14.90 
   2   5   0  193.08   20.50 
   2   5   0  191.08   24.00 
   2   5   0  187.58   11.10 
   2   5   0  133.79   14.40 
   2   5   0  162.68   18.40 
   2   5   0  201.48   21.70 
   2   5   0  203.68   13.20 
   2   5   0  186.18   12.90 
   2   5   0  193.28   12.30 
   2   5   0  200.58   12.80 
   2   5   0  180.78   11.70 
  -2   5   0  182.58   18.10 
  -2   5   0  193.48   19.90 
   2   5   0  200.48   13.00 
   2   5   0  222.48   11.10 
   2   5   0  205.18   12.90 
  -2   5   0  187.98   20.60 
   2   5   0  194.68   12.00 
  -2   5   0  221.18   15.90 
   2   5   0  187.68   11.60 
  -2   5   0  193.28   22.30 
   3  -5   0    0.10    5.10 
   3  -5   0   -2.10    4.40 
  -3  -5   0   -1.50    3.10 
   3  -5   0    3.40    5.10 
  -3  -5   0   -1.90    4.40 
   3  -5   0    4.40    5.90 
  -3  -5   0    1.00    4.00 
   3  -5   0   -2.40    4.80 
  -3  -5   0   -0.70    2.50 
  -3  -5   0   -4.30    4.20 
   3  -5   0   -3.40    3.10 
  -3  -5   0    0.50    3.30 
  -3  -5   0    5.40    4.90 
   3  -5   0   -2.50    3.30 
   3  -5   0    1.70    4.10 
   3  -5   0    2.10    6.30 
   3  -5   0    8.70    6.80 
   3  -5   0    2.40    5.20 
   3  -5   0    1.40    4.60 
   3  -5   0   -2.40    5.20 
   3  -5   0    1.50    4.00 
  -3  -5   0   -2.60    3.10 
   3   5   0    1.80    3.00 
   3   5   0    1.10    3.30 
   3   5   0   -0.30    2.60 
  -3   5   0    0.80    4.30 
  -3   5   0   12.20    6.90 
   3   5   0    3.60    2.70 
   3   5   0    0.20    1.90 
   3   5   0   -7.60    4.20 
   3   5   0    7.10    4.40 
   3   5   0   -0.80    3.90 
  -3   5   0    1.10    5.70 
  -3   5   0   -7.40    3.50 
  -3   5   0    1.70    6.00 
   3   5   0    9.80    3.50 
  -3   5   0   -2.20    3.40 
   3   5   0   -0.50    2.60 
  -3   5   0    3.30    4.30 
   3   5   0   -0.10    5.30 
   3   5   0    1.90    2.30 
  -3   5   0   -5.60    3.80 
  -3   5   0   -0.80    4.60 
   3   5   0   -1.60    4.70 
   3   5   0   -1.80    5.50 
   3   5   0    6.00    5.30 
  -3   5   0    2.90    4.20 
   3   5   0    3.90    4.20 
   3   5   0    1.00    2.10 
  -3   5   0    1.60    4.60 
   3   5   0    1.50    2.70 
  -3   5   0    1.60    5.40 
  -3   5   0    7.80    5.20 
   3   5   0   -0.90    2.10 
   3   5   0    1.90    2.60 
   3   5   0    6.40    6.20 
  -3   5   0   -0.90    4.90 
   3   5   0   -1.30    3.40 
  -3   5   0   -3.50    4.60 
  -3   5   0   -5.30    5.30 
   3   5   0    1.80    2.90 
   3   5   0   -0.60    2.90 
   3   5   0   -6.90    4.30 
   3   5   0    4.40    5.50 
   4  -5   0  174.08   18.10 
   4  -5   0  191.08   15.80 
   4  -5   0  168.68   19.40 
  -4  -5   0  171.28   15.60 
   4  -5   0  209.68   23.90 
   4  -5   0  174.68   20.10 
  -4  -5   0  200.18   19.70 
   4  -5   0  139.09   19.40 
   4  -5   0  136.29   18.10 
   4  -5   0  189.68   22.60 
   4  -5   0  193.98   24.30 
   4  -5   0  159.58   21.40 
   4  -5   0  162.28   19.70 
  -4  -5   0  158.58   16.20 
  -4  -5   0  170.28   18.00 
  -4  -5   0  168.88   17.90 
  -4  -5   0  187.28   18.30 
   4  -5   0  165.78   19.10 
   4   5   0  149.49   16.80 
   4   5   0  161.98    9.60 
  -4   5   0  120.29   18.60 
  -4   5   0  157.88   20.30 
  -4   5   0  147.19   18.10 
  -4   5   0  171.18   16.90 
  -4   5   0  211.68   21.80 
  -4   5   0  136.19   18.40 
  -4   5   0  185.78   19.20 
  -4   5   0  166.58   21.10 
  -4   5   0  167.68   17.80 
   4   5   0  180.78   12.10 
   4   5   0  181.98   11.30 
  -4   5   0  198.08   15.80 
   4   5   0  172.18   18.20 
   4   5   0  163.58   19.00 
   4   5   0  138.79   10.10 
  -4   5   0  163.38   17.10 
   4   5   0  170.08   13.70 
   4   5   0  132.79   17.20 
   4   5   0  167.78   20.70 
   4   5   0  157.58   12.30 
   4   5   0  141.69   16.00 
   4   5   0  150.58    8.00 
   4   5   0  103.79   18.80 
   4   5   0  198.58   23.10 
  -4   5   0  126.49   18.40 
  -4   5   0  171.68   23.10 
   4   5   0  157.18   17.20 
  -4   5   0  156.38   18.90 
  -4   5   0  148.19   16.50 
  -4   5   0  154.68   16.90 
   4   5   0  186.98   14.60 
   4   5   0  166.98   10.20 
  -4   5   0  172.48   20.00 
   4   5   0  175.58   20.10 
   5  -5   0  129.79   20.60 
   5  -5   0  129.29   19.70 
   5  -5   0  103.49   15.80 
   5  -5   0   99.99   15.10 
   5  -5   0  139.99   19.90 
  -5  -5   0  119.09   14.60 
  -5  -5   0  147.49   17.60 
   5  -5   0   87.89   16.20 
   5  -5   0  133.89   19.50 
  -5  -5   0  116.89   15.10 
   5  -5   0  145.49   22.70 
  -5  -5   0  111.19   14.40 
   5  -5   0  153.48   24.00 
  -5  -5   0  131.79   16.70 
  -5  -5   0  118.39   15.50 
   5  -5   0  111.59   16.40 
  -5  -5   0  137.49   17.70 
   5  -5   0  131.69   19.20 
   5  -5   0  110.39   17.20 
   5   5   0   94.19   18.20 
  -5   5   0  125.49   16.70 
   5   5   0  122.09    8.90 
  -5   5   0  140.99   20.50 
   5   5   0  120.69   16.50 
   5   5   0  120.59   15.20 
  -5   5   0  110.79   17.60 
  -5   5   0  128.79   19.90 
  -5   5   0  124.19   18.40 
  -5   5   0  158.28   18.60 
   5   5   0   95.49   17.00 
  -5   5   0  123.89   15.30 
  -5   5   0  127.09   18.30 
   5   5   0  105.49   13.00 
   5   5   0  124.89   15.20 
  -5   5   0  135.69   19.30 
   5   5   0  124.79   12.70 
  -5   5   0   90.79   13.90 
  -5   5   0   90.09   14.80 
   5   5   0  169.68   21.50 
   5   5   0  142.29   17.80 
  -5   5   0  170.58   19.90 
  -5   5   0  129.39   16.60 
   5   5   0  117.19   16.70 
   5   5   0  155.58   17.20 
  -5   5   0  135.99   21.20 
   5   5   0  114.09   17.50 
   5   5   0  121.09   17.10 
  -5   5   0  130.79   22.00 
  -5   5   0  106.99   17.70 
  -5   5   0  103.09   15.50 
  -6  -5   0  385.56   26.40 
   6  -5   0  312.87   30.90 
   6  -5   0  361.26   36.60 
   6  -5   0  401.96   32.80 
  -6  -5   0  400.36   28.60 
  -6  -5   0  360.56   28.70 
  -6  -5   0  363.16   25.00 
   6  -5   0  383.86   33.50 
  -6  -5   0  367.96   28.20 
  -6  -5   0  386.96   26.80 
   6  -5   0  374.26   36.00 
   6  -5   0  386.66   38.60 
   6  -5   0  358.06   26.80 
   6  -5   0  364.36   29.10 
   6  -5   0  411.06   28.80 
  -6  -5   0  405.26   25.50 
   6  -5   0  409.86   34.60 
   6  -5   0  407.26   37.40 
   6  -5   0  390.66   39.40 
   6   5   0  351.86   29.30 
   6   5   0  415.56   27.40 
   6   5   0  443.06   26.50 
   6   5   0  363.36   30.20 
  -6   5   0  409.56   32.40 
  -6   5   0  469.55   26.70 
  -6   5   0  444.96   40.00 
  -6   5   0  397.66   29.00 
   6   5   0  335.57   22.90 
   6   5   0  450.15   34.60 
   6   5   0  373.46   27.90 
   6   5   0  409.06   27.90 
  -6   5   0  397.96   29.60 
  -6   5   0  394.06   25.40 
  -6   5   0  349.96   33.10 
   6   5   0  361.56   30.30 
  -6   5   0  371.76   28.60 
   6   5   0  378.66   29.00 
  -6   5   0  361.46   37.10 
   6   5   0  419.66   31.20 
   6   5   0  377.76   24.80 
   6   5   0  397.56   28.00 
   6   5   0  383.36   24.50 
  -6   5   0  356.56   36.00 
  -6   5   0  378.16   26.90 
   6   5   0  389.46   26.40 
  -6   5   0  420.46   33.90 
  -6   5   0  458.25   33.30 
  -6   5   0  343.77   33.60 
  -6   5   0  400.36   31.50 
  -6   5   0  411.46   30.00 
   6   5   0  333.97   25.20 
  -6   5   0  409.66   30.00 
   6   5   0  461.75   42.70 
  -7  -5   0   33.90   10.70 
  -7  -5   0   40.70   11.30 
   7  -5   0   34.40   14.50 
   7  -5   0   22.10   13.40 
   7  -5   0   34.50   13.30 
   7  -5   0   28.50   10.00 
   7  -5   0   21.90   12.60 
  -7  -5   0   58.09   14.40 
  -7  -5   0   53.99   14.60 
   7  -5   0   43.40   15.70 
   7  -5   0   51.59   16.60 
   7  -5   0   18.20    9.70 
   7  -5   0   33.90   13.10 
   7  -5   0   43.30   13.20 
   7  -5   0   30.90   10.50 
   7  -5   0   33.40   12.40 
  -7  -5   0   27.00   11.20 
  -7   5   0   32.60   11.90 
   7   5   0   36.10   12.10 
  -7   5   0   36.30   13.00 
  -7   5   0   39.60   14.70 
   7   5   0   40.60   10.80 
  -7   5   0   14.40   11.90 
   7   5   0   33.40   14.80 
   7   5   0   39.70   12.80 
  -7   5   0   30.00   12.30 
   7   5   0   42.60   10.80 
  -7   5   0   49.50   14.00 
   7   5   0   35.40   13.30 
  -7   5   0   35.40   13.60 
   7   5   0   30.70    9.90 
  -7   5   0   38.80   14.20 
  -7   5   0   49.80   15.50 
  -7   5   0   47.00   13.80 
   7   5   0   42.60   12.90 
  -7   5   0   47.00   14.50 
   7   5   0   35.70   13.50 
   7   5   0   23.70   11.30 
  -7   5   0   78.39   17.90 
  -7   5   0   33.80   12.50 
   7   5   0   22.00   13.40 
   7   5   0   15.10   10.10 
   8  -5   0   -4.20    8.70 
   8  -5   0    7.20    8.20 
  -8  -5   0    5.00    8.40 
   8  -5   0   -5.60    8.80 
   8  -5   0    0.70   11.10 
   8  -5   0    3.70   11.00 
   8  -5   0    0.70    8.10 
   8  -5   0    8.70   10.80 
  -8  -5   0    0.70    8.80 
  -8  -5   0    7.50    8.70 
   8  -5   0   -0.40    9.30 
   8  -5   0    2.70    9.00 
   8  -5   0    2.70    8.40 
   8  -5   0   -5.80    8.50 
  -8  -5   0   -1.40    7.60 
  -8   5   0   15.90   11.50 
   8   5   0    6.30    9.90 
   8   5   0   10.60   11.30 
  -8   5   0    0.70    8.10 
  -8   5   0   10.60   10.80 
   8   5   0    9.80   11.80 
  -8   5   0    7.20   10.10 
  -8   5   0    1.30   10.70 
   8   5   0   -3.80    9.80 
   8   5   0   -1.10   11.00 
  -8   5   0   15.40   12.80 
   8   5   0    4.40    8.50 
   8   5   0   10.80   13.10 
  -8   5   0    6.60    9.80 
  -8   5   0    6.10    8.50 
  -8   5   0   13.00   11.40 
   8   5   0   -5.00    8.50 
  -8   5   0   13.00   10.90 
  -8   5   0   13.20   11.80 
  -8   5   0   -9.70    9.40 
   9  -5   0   18.70   14.10 
  -9  -5   0    3.80    9.60 
   9  -5   0    7.60   13.30 
   9  -5   0   -9.50    8.80 
   9  -5   0   10.10   12.80 
  -9  -5   0    1.70   10.50 
   9  -5   0   -0.10   12.20 
   9  -5   0  -10.90    8.60 
   9  -5   0    7.90   11.50 
   9  -5   0   -6.80    9.50 
  -9  -5   0    0.00    9.50 
   9  -5   0   -5.60   10.60 
   9  -5   0   -5.50   11.50 
   9  -5   0   17.80   13.80 
   9   5   0   -3.40   10.80 
   9   5   0    1.40   10.50 
  -9   5   0   -1.40   10.10 
  -9   5   0    0.70    9.00 
  -9   5   0   -3.30    9.90 
   9   5   0    7.20   12.40 
  -9   5   0  -16.00    9.70 
   9   5   0   -0.10   13.00 
  -9   5   0   14.90   14.50 
   9   5   0  -13.50   11.60 
  -9   5   0   -8.80    9.80 
   9   5   0   -3.20   12.10 
  -9   5   0    7.00   12.30 
   9   5   0    8.90   13.80 
  -9   5   0    9.60   13.60 
  -9   5   0   -1.80   10.70 
  -9   5   0    2.90   12.00 
  -9   5   0    8.60   13.10 
   0  -6   0   15.80    3.30 
   0  -6   0    2.60    4.90 
   0  -6   0   19.10    7.40 
   0  -6   0   14.10    7.60 
   0  -6   0   15.30    4.00 
   0  -6   0   24.00    7.70 
   0  -6   0   21.90    7.50 
   0  -6   0   16.60    6.70 
   0  -6   0    7.40    7.10 
   0  -6   0    3.80    6.00 
   0  -6   0   14.10    5.90 
   0  -6   0   10.00    6.30 
   0  -6   0   21.60    9.80 
   0  -6   0   19.30    8.10 
   0  -6   0   17.30    9.10 
   0   6   0   15.50    6.80 
   0   6   0   15.20    6.10 
   0   6   0   33.70    7.50 
   0   6   0    1.60    6.30 
   0   6   0   10.30    6.50 
   0   6   0   22.10    4.30 
   0   6   0   18.60    5.60 
   0   6   0   24.60    5.20 
   0   6   0   12.80    7.60 
   0   6   0   21.00    3.80 
   0   6   0   19.30    8.60 
   0   6   0   26.20    9.60 
   0   6   0   12.40    6.10 
   0   6   0   19.20    5.90 
   0   6   0    9.60    4.20 
   0   6   0   14.30    5.30 
   0   6   0   12.10    5.10 
   0   6   0   16.80    5.00 
   0   6   0   14.70    6.70 
   0   6   0    9.60    5.60 
  -1  -6   0 2193.98   85.09 
   1  -6   0 2245.58   84.89 
   1  -6   0 2300.47   96.19 
   1  -6   0 2195.88   85.19 
  -1  -6   0 2194.88   94.99 
   1  -6   0 2147.29   96.39 
   1  -6   0 2131.79   92.99 
   1  -6   0 2233.18   95.39 
   1  -6   0 2276.87   93.19 
   1  -6   0 2163.88   95.89 
   1  -6   0 2132.49   87.59 
  -1  -6   0 2289.37   95.39 
  -1  -6   0 2164.98   85.39 
   1  -6   0 2211.58   90.79 
   1  -6   0 2109.39   93.89 
   1  -6   0 2309.17   86.39 
   1  -6   0 2283.37   97.39 
   1  -6   0 2237.58   96.79 
  -1  -6   0 2201.38   92.29 
   1  -6   0 2194.58   92.09 
   1  -6   0 2211.68   90.89 
  -1  -6   0 2263.97   96.99 
  -1  -6   0 2287.67   94.59 
   1  -6   0 1931.21   89.79 
  -1  -6   0 2153.28   95.69 
   1  -6   0 2197.28   96.89 
   1  -6   0 2288.07   94.89 
  -1  -6   0 2213.08   91.09 
   1   6   0 2187.78   89.99 
  -1   6   0 2214.78   94.39 
   1   6   0 2207.58   88.89 
   1   6   0 2227.08   95.39 
   1   6   0 2248.08   85.09 
  -1   6   0 2196.98   97.29 
   1   6   0 2163.38   84.19 
   1   6   0 2313.77   88.89 
  -1   6   0 2242.18   93.19 
   1   6   0 2101.89   85.89 
   1   6   0 2175.48   94.69 
  -1   6   0 2162.28   85.69 
   1   6   0 2200.28  101.99 
  -1   6   0 2158.68   94.69 
   1   6   0 2145.19   89.19 
   1   6   0 2121.09   97.19 
   1   6   0 2183.58   87.29 
  -1   6   0 2183.08   90.89 
   1   6   0 2224.88   97.29 
   1   6   0 2104.39   88.19 
   1   6   0 2213.28   86.09 
   1   6   0 2229.98   86.09 
  -1   6   0 2177.48   88.79 
  -1   6   0 2156.08   89.39 
  -1   6   0 2166.38   90.99 
   1   6   0 2188.18   90.99 
  -1   6   0 1990.20   93.69 
  -1   6   0 2228.88   86.89 
  -1   6   0 2147.09   92.49 
   1   6   0 2114.29   81.99 
  -1   6   0 2092.59   83.79 
  -1   6   0 2265.37   99.49 
   1   6   0 2066.39   84.39 
  -1   6   0 2231.98   96.69 
  -1   6   0 2187.38   85.19 
  -1   6   0 2217.28   88.29 
   1   6   0 2197.38   84.59 
   1   6   0 2186.88   85.29 
  -1   6   0 2277.17   97.79 
   1   6   0 2024.40   94.89 
  -1   6   0 2108.59   93.79 
   1   6   0 2208.08   97.99 
   1   6   0 2187.48   86.89 
   2  -6   0    5.50    2.70 
   2  -6   0    1.40    1.80 
   2  -6   0    3.10    4.30 
   2  -6   0   -1.20    5.20 
   2  -6   0    0.30    2.20 
  -2  -6   0   -2.20    4.20 
   2  -6   0   -3.50    4.10 
   2  -6   0    3.00    3.40 
   2  -6   0   -0.80    4.90 
   2  -6   0    2.30    6.00 
   2  -6   0    1.80    5.90 
   2  -6   0    5.80    4.00 
  -2  -6   0   -3.80    3.60 
  -2  -6   0    1.50    3.30 
  -2  -6   0    3.00    4.90 
   2  -6   0    0.50    4.60 
   2  -6   0   -2.20    3.70 
   2  -6   0   -0.20    5.60 
  -2  -6   0   -2.30    5.50 
   2  -6   0    0.00    3.90 
   2  -6   0   -1.80    4.60 
  -2  -6   0    0.20    3.10 
   2  -6   0    7.30    6.40 
  -2  -6   0   -0.10    4.70 
   2  -6   0   -2.30    3.80 
   2  -6   0    4.50    3.30 
   2  -6   0    2.30    2.90 
   2  -6   0   -1.30    5.00 
   2   6   0   -5.00    2.50 
   2   6   0    4.30    6.70 
   2   6   0    2.50    3.50 
   2   6   0   -2.80    4.60 
  -2   6   0   -1.30    4.80 
   2   6   0    0.10    2.60 
  -2   6   0   -1.90    5.00 
   2   6   0    0.20    5.20 
   2   6   0    0.30    2.60 
   2   6   0   -3.80    2.60 
   2   6   0    4.70    3.10 
   2   6   0    2.20    3.50 
   2   6   0    4.30    5.70 
   2   6   0   -0.80    5.10 
   2   6   0    2.20    2.40 
   2   6   0   13.80   12.70 
  -2   6   0    2.20    3.50 
  -2   6   0    0.30    4.60 
   2   6   0    1.20    3.70 
   2   6   0    2.50    3.50 
  -2   6   0    0.90    5.00 
   2   6   0    0.70    2.70 
   2   6   0    2.30    3.60 
  -2   6   0    5.70    6.00 
  -2   6   0    3.50    6.70 
  -2   6   0    1.30    4.80 
  -2   6   0   -3.20    3.40 
   2   6   0    3.70    3.00 
  -2   6   0    8.50    5.90 
  -2   6   0    2.50    6.10 
   2   6   0    5.70    5.50 
  -2   6   0   -6.30    3.80 
   2   6   0    2.00    2.80 
   2   6   0   -8.30    4.10 
   2   6   0    3.50    5.40 
   2   6   0   -0.10    2.00 
   2   6   0   -0.20    1.80 
   2   6   0   -0.10    1.70 
   2   6   0   -6.00    6.20 
   2   6   0   -0.30    1.60 
  -2   6   0    1.60    5.60 
  -2   6   0    1.70    5.20 
   2   6   0   -2.90    2.20 
   2   6   0   -0.20    2.50 
  -2   6   0    2.30    6.30 
  -2   6   0   -0.10    3.20 
   2   6   0    2.00    2.70 
   2   6   0    2.00    3.30 
  -3  -6   0  194.48   15.00 
   3  -6   0  158.08   19.50 
   3  -6   0  174.68   21.20 
   3  -6   0  164.88   21.00 
   3  -6   0  187.98   21.50 
  -3  -6   0  190.98   11.90 
  -3  -6   0  189.68   21.30 
   3  -6   0  193.78   17.10 
   3  -6   0  173.28   21.30 
   3  -6   0  220.18   20.30 
  -3  -6   0  184.28   20.80 
   3  -6   0  217.88   23.00 
  -3  -6   0  205.78   15.90 
   3  -6   0  155.18   20.40 
   3  -6   0  197.08   23.90 
  -3  -6   0  233.28   17.10 
   3  -6   0  177.38   23.90 
  -3  -6   0  187.98   13.70 
  -3  -6   0  181.38   21.30 
   3  -6   0  206.68   14.30 
   3  -6   0  161.38   19.80 
   3   6   0  187.48   21.10 
   3   6   0  192.28   23.20 
  -3   6   0  202.98   23.70 
   3   6   0  180.28   23.30 
   3   6   0  205.88   11.80 
  -3   6   0  214.18   14.20 
  -3   6   0  209.48   15.70 
   3   6   0  181.78   13.70 
  -3   6   0  216.18   21.70 
  -3   6   0  181.28   19.60 
  -3   6   0  227.78   23.90 
   3   6   0  222.98   28.40 
  -3   6   0  190.48   20.90 
   3   6   0  207.18   15.30 
   3   6   0  149.88   18.70 
  -3   6   0  206.38   21.50 
   3   6   0  196.38   14.30 
  -3   6   0  187.28   17.10 
   3   6   0  248.78   21.20 
  -3   6   0  196.78   21.90 
   3   6   0  181.98   14.70 
  -3   6   0  193.78   23.20 
   3   6   0  186.88   11.30 
   3   6   0  185.38   11.30 
   3   6   0  184.88   11.30 
   3   6   0  193.28   23.20 
   3   6   0  202.48   22.50 
  -3   6   0  197.48   25.00 
  -3   6   0  171.88   22.60 
   3   6   0  178.88   13.20 
  -3   6   0  177.18   20.10 
  -3   6   0  185.08   18.10 
  -3   6   0  178.98   20.80 
   3   6   0  226.98   24.60 
   3   6   0  208.88   11.70 
   4  -6   0    1.50    6.00 
   4  -6   0   18.00    9.20 
  -4  -6   0   12.30    6.30 
  -4  -6   0   15.60    7.70 
   4  -6   0   -1.30    5.00 
   4  -6   0   11.00    7.90 
   4  -6   0   10.60    7.80 
  -4  -6   0    1.50    4.90 
   4  -6   0   10.30    7.30 
   4  -6   0    0.30    7.00 
  -4  -6   0    0.80    4.40 
   4  -6   0    7.40    7.70 
   4  -6   0   13.00    6.20 
   4  -6   0    5.40    7.50 
  -4  -6   0    1.20    4.50 
   4  -6   0    9.10    6.20 
   4  -6   0   16.20    9.00 
  -4   6   0   -3.60    4.90 
  -4   6   0   18.70    7.50 
   4   6   0    1.30    6.90 
  -4   6   0    5.10    5.90 
  -4   6   0    0.30    5.80 
   4   6   0    4.80    4.10 
   4   6   0    3.50    7.40 
  -4   6   0   13.20    8.60 
  -4   6   0    8.00    5.30 
  -4   6   0   14.30    8.20 
   4   6   0    5.70    6.20 
   4   6   0   10.30    7.60 
   4   6   0    2.00    4.50 
   4   6   0   10.80    6.80 
  -4   6   0    7.80    6.80 
  -4   6   0   11.10    8.60 
   4   6   0    7.80    8.00 
   4   6   0    3.10    3.60 
   4   6   0    5.30    5.60 
   4   6   0    2.60    6.00 
   4   6   0    0.70    6.40 
   4   6   0    7.40    8.00 
   4   6   0    4.50    5.80 
   4   6   0   13.30   10.30 
   4   6   0    5.90    3.70 
  -4   6   0    8.80    6.00 
  -4   6   0    6.20    7.50 
  -4   6   0    2.80    7.20 
  -4   6   0    9.30    5.50 
  -4   6   0    7.60    8.20 
  -4   6   0   -1.10    5.70 
  -4   6   0    5.10    7.10 
   5  -6   0  694.33   48.30 
  -5  -6   0  732.73   41.80 
   5  -6   0  754.12   47.30 
   5  -6   0  766.92   44.70 
   5  -6   0  792.02   49.50 
  -5  -6   0  726.83   42.00 
   5  -6   0  687.13   44.20 
   5  -6   0  808.92   48.20 
   5  -6   0  800.42   44.10 
   5  -6   0  672.03   44.10 
  -5  -6   0  717.33   40.70 
   5  -6   0  760.32   41.80 
  -5  -6   0  814.02   42.70 
   5  -6   0  728.13   47.60 
  -5  -6   0  733.33   40.60 
   5  -6   0  807.72   47.20 
   5  -6   0  836.12   46.00 
   5   6   0  669.63   42.20 
  -5   6   0  787.52   42.90 
  -5   6   0  785.72   47.70 
  -5   6   0  756.82   41.70 
  -5   6   0  793.02   50.59 
  -5   6   0  810.82   47.50 
  -5   6   0  775.12   44.60 
   5   6   0  792.22   46.90 
   5   6   0  777.62   43.30 
   5   6   0  848.22   48.00 
  -5   6   0  765.42   42.20 
  -5   6   0  752.52   42.20 
  -5   6   0  669.13   43.60 
   5   6   0  762.52   44.20 
   5   6   0  784.92   44.50 
   5   6   0  745.93   36.60 
  -5   6   0  713.93   40.40 
   5   6   0  709.93   41.20 
  -5   6   0  658.73   44.40 
  -5   6   0  799.42   46.50 
   5   6   0  770.72   42.00 
   5   6   0  784.42   50.49 
  -5   6   0  792.02   49.70 
  -5   6   0  714.33   44.60 
  -5   6   0  742.43   41.90 
  -5   6   0  738.73   47.00 
   5   6   0  765.42   41.70 
   5   6   0  735.33   46.00 
  -6  -6   0   -0.70    7.60 
  -6  -6   0    9.80    7.50 
   6  -6   0   -8.30    6.80 
  -6  -6   0    4.30    7.00 
   6  -6   0    3.10    7.70 
   6  -6   0    0.80    6.90 
  -6  -6   0    6.30    7.20 
   6  -6   0   16.00    9.80 
   6  -6   0    6.60    9.50 
   6  -6   0    3.80    7.80 
   6  -6   0   -3.80    8.60 
  -6  -6   0   10.30    7.70 
   6  -6   0    3.60    7.20 
   6  -6   0   10.00   10.30 
   6  -6   0   -2.60    7.90 
   6  -6   0   -1.80    7.50 
   6  -6   0   11.20    8.10 
  -6   6   0   -7.50    8.10 
  -6   6   0   -0.10    8.20 
  -6   6   0    7.40    7.50 
   6   6   0   10.00    7.30 
  -6   6   0   14.60    9.10 
   6   6   0   11.90    8.80 
  -6   6   0    2.50    8.40 
  -6   6   0    8.30    8.20 
  -6   6   0   -2.70    6.30 
  -6   6   0   -1.40    7.20 
   6   6   0    2.50    7.10 
  -6   6   0   11.10    9.00 
   6   6   0   -5.80    7.30 
   6   6   0   -3.60    7.60 
   6   6   0    9.10    7.90 
   6   6   0    3.30    7.40 
  -6   6   0   -3.40    7.10 
  -6   6   0   -0.90    7.40 
   6   6   0    5.10    8.20 
   6   6   0    1.40    6.60 
   6   6   0    9.40   10.60 
  -6   6   0   13.30    7.50 
   6   6   0   -0.60    6.70 
  -6   6   0   -8.70    7.60 
  -6   6   0   -4.80    7.00 
   6   6   0   23.40   11.90 
  -6   6   0    0.50    7.80 
   6   6   0    2.60    8.10 
  -6   6   0   15.20    8.20 
   6   6   0    0.70    5.20 
   6   6   0    3.00    8.00 
   7  -6   0 1026.40   57.89 
  -7  -6   0 1151.18   60.59 
  -7  -6   0 1202.48   63.09 
   7  -6   0 1145.49   67.39 
   7  -6   0 1092.39   64.89 
   7  -6   0 1136.89   63.39 
   7  -6   0 1191.08   66.79 
   7  -6   0 1153.58   63.19 
   7  -6   0 1107.59   65.09 
   7  -6   0 1066.39   66.49 
   7  -6   0 1040.20   66.09 
   7  -6   0 1138.29   69.49 
   7  -6   0 1163.98   69.59 
   7  -6   0 1070.99   59.99 
   7  -6   0 1097.59   69.59 
  -7  -6   0 1047.50   60.29 
   7   6   0 1244.18   67.49 
  -7   6   0 1182.18   66.59 
  -7   6   0 1157.88   67.29 
   7   6   0 1125.39   70.49 
   7   6   0 1270.47   67.69 
  -7   6   0 1107.49   64.69 
   7   6   0 1055.29   60.09 
  -7   6   0 1006.30   63.19 
   7   6   0 1209.88   68.49 
   7   6   0 1177.08   66.59 
  -7   6   0 1078.59   65.09 
  -7   6   0 1179.98   62.49 
  -7   6   0 1055.39   59.89 
  -7   6   0 1116.89   69.09 
   7   6   0 1159.38   60.09 
  -7   6   0 1180.18   62.99 
  -7   6   0 1130.79   62.39 
   7   6   0 1135.99   63.39 
  -7   6   0 1003.40   62.09 
   7   6   0 1161.98   58.59 
   7   6   0 1236.98   69.69 
   7   6   0 1151.78   64.29 
  -7   6   0 1109.19   66.79 
  -7   6   0 1220.58   71.09 
   8  -6   0   26.80   14.90 
   8  -6   0   30.80   16.50 
   8  -6   0   34.30   14.10 
   8  -6   0   34.10   15.50 
  -8  -6   0   24.80   12.80 
   8  -6   0   51.19   18.00 
  -8  -6   0    4.80   10.70 
   8  -6   0   50.39   18.90 
   8  -6   0   36.70   15.30 
   8  -6   0   54.79   20.00 
   8  -6   0   26.00   13.10 
   8  -6   0   21.00   13.50 
   8  -6   0    9.60   11.30 
   8   6   0   21.60   14.60 
   8   6   0   13.80   13.80 
  -8   6   0   44.70   17.00 
  -8   6   0   23.20   14.30 
  -8   6   0   41.70   15.90 
  -8   6   0   23.80   13.90 
  -8   6   0   36.80   15.30 
  -8   6   0   56.99   16.30 
   8   6   0    6.90   13.00 
   8   6   0   33.30   15.50 
   8   6   0   29.10   16.60 
  -8   6   0   15.90   12.60 
  -8   6   0   66.59   17.70 
  -8   6   0   21.30   13.40 
  -8   6   0   19.00   12.20 
  -8   6   0   51.29   20.00 
   8   6   0   70.19   19.50 
   8   6   0   21.60   14.70 
  -8   6   0   30.90   14.80 
   0  -7   0    0.80    5.60 
   0  -7   0   -4.60    6.10 
   0  -7   0    6.20    7.10 
   0  -7   0    2.00    5.60 
   0  -7   0   -7.10    6.40 
   0  -7   0   16.30    6.80 
   0  -7   0   -1.80    6.70 
   0  -7   0    1.30    6.70 
   0  -7   0    6.70    6.10 
   0  -7   0    2.90    2.60 
   0  -7   0   -2.00    4.70 
   0   7   0    8.70    6.40 
   0   7   0    2.90    5.40 
   0   7   0    3.90    5.60 
   0   7   0   -2.70    5.10 
   0   7   0    8.20    5.30 
   0   7   0    0.50    2.40 
   0   7   0   -1.50    6.10 
   0   7   0    3.90    4.70 
   0   7   0    3.20    4.70 
   0   7   0   -0.60    4.30 
   0   7   0    7.20    6.20 
   0   7   0   -5.10    4.70 
   0   7   0   -0.40    6.30 
   0   7   0   -0.10    6.70 
   0   7   0   -0.40    3.40 
   0   7   0   -9.70    4.80 
   1  -7   0   39.70   10.90 
   1  -7   0   54.19   12.90 
   1  -7   0   42.10    7.20 
   1  -7   0   38.00   11.50 
   1  -7   0   27.50    9.60 
  -1  -7   0   38.00   12.70 
  -1  -7   0   45.90    6.10 
   1  -7   0   44.50   12.70 
   1  -7   0   48.90    9.00 
   1  -7   0   36.30    9.50 
   1  -7   0   22.10    9.00 
   1  -7   0   34.90   11.40 
   1  -7   0   37.80    8.50 
   1  -7   0   39.90   10.20 
   1  -7   0   35.10   11.90 
  -1  -7   0   35.00    9.90 
   1  -7   0   40.60   12.10 
  -1  -7   0   46.80   12.20 
  -1  -7   0   30.90   10.70 
  -1  -7   0   49.99   11.30 
  -1  -7   0   33.60   10.40 
   1  -7   0   36.90    9.50 
   1   7   0   37.70    7.00 
  -1   7   0   43.90    8.30 
  -1   7   0   51.79   11.60 
  -1   7   0   38.90   11.00 
  -1   7   0   37.00    8.80 
  -1   7   0   35.10   11.60 
   1   7   0   43.20   12.20 
   1   7   0   42.30    9.80 
   1   7   0   37.00    8.30 
   1   7   0   43.90    6.20 
  -1   7   0   47.90    6.10 
  -1   7   0   45.30   12.60 
  -1   7   0   53.99   13.10 
  -1   7   0   47.20    8.90 
  -1   7   0   15.20    9.90 
   1   7   0   38.90    5.50 
   1   7   0   37.70    8.60 
   1   7   0   61.49   10.90 
   1   7   0   30.80   11.40 
   1   7   0   47.40    8.10 
  -1   7   0   39.80    9.70 
   1   7   0   38.30    8.50 
  -1   7   0   35.20   10.30 
   1   7   0   24.40   10.60 
  -1   7   0   43.50    9.70 
  -1   7   0   24.70   11.10 
   1   7   0   30.90   10.80 
   1   7   0   49.30    9.40 
  -1   7   0   36.50   10.70 
  -1   7   0   38.00    5.80 
  -1   7   0   38.40   11.10 
   1   7   0   33.50   11.80 
   1   7   0   34.30   11.80 
   1   7   0   41.70   14.00 
   2  -7   0   90.89   14.90 
  -2  -7   0   52.49   13.00 
   2  -7   0   46.40   11.90 
  -2  -7   0   79.99   14.70 
  -2  -7   0   70.99    9.90 
   2  -7   0   83.29   14.10 
   2  -7   0   44.10   11.40 
   2  -7   0   98.39   17.30 
   2  -7   0  102.59   14.20 
   2  -7   0   51.89   13.10 
   2  -7   0   82.49   16.20 
   2  -7   0   76.89   16.20 
  -2  -7   0   47.90   13.00 
   2  -7   0   51.99   12.50 
  -2  -7   0   77.09   13.50 
   2  -7   0   88.09   16.50 
  -2  -7   0   84.29   12.60 
   2  -7   0   62.39   14.10 
   2  -7   0   88.49   16.90 
  -2  -7   0   73.19    8.80 
   2  -7   0   68.39   14.60 
  -2   7   0   78.29   16.50 
   2   7   0   79.19   10.10 
  -2   7   0   87.09   15.30 
  -2   7   0   67.39   12.40 
  -2   7   0   70.69    9.10 
   2   7   0   95.39   17.90 
   2   7   0   67.09   12.40 
  -2   7   0   56.19   13.40 
  -2   7   0   95.49   15.90 
  -2   7   0   81.09   11.50 
  -2   7   0   66.89   15.70 
   2   7   0   71.89   10.80 
  -2   7   0   95.69   16.50 
   2   7   0   82.19   12.40 
   2   7   0   79.99    8.30 
   2   7   0   70.59   14.10 
   2   7   0   82.59   16.10 
  -2   7   0   74.99    9.30 
  -2   7   0   68.89   13.10 
  -2   7   0   68.59   14.40 
   2   7   0   70.39   18.30 
   2   7   0   75.09   15.60 
   2   7   0   76.69   12.40 
  -2   7   0   81.19   13.00 
   2   7   0   65.89   15.00 
   2   7   0   60.09   14.90 
   2   7   0   65.59    8.20 
   2   7   0   47.70   12.30 
  -2   7   0   66.89   14.10 
  -2   7   0   72.99   11.60 
   2   7   0   81.49   10.40 
   3  -7   0   10.60    8.70 
   3  -7   0   16.90    9.60 
  -3  -7   0   19.60    8.40 
  -3  -7   0   17.10    6.70 
   3  -7   0   11.70    7.20 
   3  -7   0   30.10   10.50 
   3  -7   0   28.80   10.20 
  -3  -7   0   21.50    9.90 
  -3  -7   0   11.20    8.40 
   3  -7   0   12.40    9.80 
   3  -7   0    3.30    7.50 
   3  -7   0   12.30    7.40 
   3  -7   0   32.00   10.10 
  -3  -7   0   12.20    9.60 
   3  -7   0   16.40    9.60 
   3  -7   0   22.20    9.10 
   3  -7   0    4.20    7.50 
  -3  -7   0   17.90    6.30 
   3   7   0   23.90    9.50 
   3   7   0   16.00    9.20 
  -3   7   0   19.50    6.60 
  -3   7   0   18.00    7.90 
  -3   7   0   11.80    8.30 
   3   7   0    2.80    7.50 
  -3   7   0   19.70    7.30 
  -3   7   0   22.40   10.60 
  -3   7   0   16.10    9.50 
   3   7   0   16.40    6.70 
  -3   7   0   16.00    7.80 
   3   7   0    7.00    8.20 
  -3   7   0   25.50    9.60 
   3   7   0   17.40    9.40 
  -3   7   0   33.20   10.60 
   3   7   0   19.50    9.60 
   3   7   0   23.70   11.20 
  -3   7   0    3.40    8.00 
  -3   7   0   35.10    7.90 
  -3   7   0   15.20    9.60 
   3   7   0    8.90    7.50 
   3   7   0   23.50    9.80 
  -3   7   0    8.30    9.00 
  -3   7   0   24.00   11.80 
   3   7   0   41.10   15.40 
  -3   7   0   25.00   10.70 
   4  -7   0  236.08   28.70 
  -4  -7   0  194.58   20.50 
   4  -7   0  202.08   23.10 
  -4  -7   0  161.68   22.40 
   4  -7   0  219.28   26.40 
  -4  -7   0  239.38   26.20 
   4  -7   0  149.99   25.60 
   4  -7   0  176.78   24.20 
   4  -7   0  246.08   24.50 
   4  -7   0  233.98   28.60 
  -4  -7   0  211.38   20.20 
   4  -7   0  187.28   26.20 
   4  -7   0  203.58   24.20 
   4  -7   0  207.68   25.90 
   4  -7   0  209.88   26.50 
  -4   7   0  200.38   26.30 
  -4   7   0  208.98   20.30 
   4   7   0  191.88   26.10 
   4   7   0  212.98   25.50 
  -4   7   0  194.58   23.50 
  -4   7   0  177.98   22.10 
   4   7   0  220.68   27.70 
   4   7   0  242.78   26.20 
  -4   7   0  211.88   28.60 
   4   7   0  199.08   23.30 
   4   7   0  250.97   26.90 
   4   7   0  208.38   26.20 
  -4   7   0  215.38   24.20 
   4   7   0  171.78   23.80 
  -4   7   0  230.18   25.70 
   4   7   0  203.28   29.70 
  -4   7   0  201.48   26.70 
  -4   7   0  256.47   30.40 
  -4   7   0  164.08   19.60 
  -4   7   0  207.38   23.80 
  -4   7   0  212.68   27.00 
   4   7   0  172.88   24.40 
  -4   7   0  211.98   20.60 
  -4   7   0  217.48   25.80 
  -4   7   0  237.68   27.10 
   5  -7   0   29.70   12.40 
  -5  -7   0    8.50    9.00 
   5  -7   0   31.30   13.20 
  -5  -7   0   33.90   10.00 
   5  -7   0   35.90   14.80 
   5  -7   0   26.00   10.80 
   5  -7   0   24.90   12.00 
   5  -7   0   67.49   17.00 
   5  -7   0   18.90   12.70 
   5  -7   0    5.50    9.50 
   5  -7   0   11.20    9.50 
   5  -7   0   20.90    9.00 
  -5  -7   0   20.70    9.80 
   5  -7   0   21.10   11.30 
  -5  -7   0   25.20   10.40 
  -5   7   0   32.30   12.10 
   5   7   0   16.40    9.90 
  -5   7   0   31.30   12.80 
   5   7   0   26.80   12.60 
  -5   7   0   17.50   10.40 
  -5   7   0   39.30   11.20 
  -5   7   0   50.69   14.10 
   5   7   0   20.30   11.30 
   5   7   0   23.90   10.00 
   5   7   0   26.00   11.00 
   5   7   0   40.40   11.80 
  -5   7   0    5.20    9.30 
  -5   7   0   25.70    9.70 
   5   7   0   22.40   11.60 
  -5   7   0   27.10    9.50 
  -5   7   0   26.80   12.90 
  -5   7   0    8.00    9.40 
   5   7   0   29.00   11.00 
  -5   7   0   34.70   11.90 
   5   7   0   45.50   18.10 
  -5   7   0   16.00   12.00 
  -5   7   0   29.20   10.60 
  -5   7   0   27.80   11.70 
   5   7   0   24.60   11.80 
  -5   7   0   35.90   12.90 
   6  -7   0  414.86   32.20 
   6  -7   0  422.66   41.70 
   6  -7   0  408.26   33.00 
   6  -7   0  398.96   34.30 
   6  -7   0  391.96   44.30 
   6  -7   0  414.26   33.40 
   6  -7   0  452.25   44.00 
   6  -7   0  464.25   36.20 
   6  -7   0  341.37   41.40 
   6  -7   0  419.56   41.80 
   6  -7   0  431.76   60.29 
  -6  -7   0  424.46   31.70 
   6  -7   0  450.35   38.30 
   6   7   0  398.86   30.70 
   6   7   0  454.75   33.30 
  -6   7   0  430.66   42.80 
  -6   7   0  433.66   42.40 
   6   7   0  421.96   45.90 
  -6   7   0  463.95   33.30 
  -6   7   0  429.26   31.60 
  -6   7   0  382.16   30.60 
   6   7   0  457.05   34.30 
  -6   7   0  387.76   38.80 
   6   7   0  453.65   34.30 
  -6   7   0  431.86   42.30 
   6   7   0  464.15   37.40 
  -6   7   0  416.76   31.10 
  -6   7   0  435.96   40.60 
  -6   7   0  407.36   40.60 
   6   7   0  369.66   41.30 
  -6   7   0  377.36   42.90 
  -6   7   0  405.06   31.50 
  -6   7   0  390.36   42.50 
  -6   7   0  456.35   34.60 
  -6   7   0  367.16   37.80 
   7  -7   0  -16.10    7.30 
   7  -7   0    5.20   10.10 
   7  -7   0   -4.70    8.40 
   7  -7   0    0.00    9.00 
   7  -7   0   -1.60   10.40 
   7  -7   0    4.50    9.60 
   7  -7   0    2.80   10.40 
   7  -7   0    5.30   10.20 
   7  -7   0   -3.60    5.60 
   7  -7   0   12.60   14.00 
   7  -7   0   -9.30    6.20 
   7  -7   0   11.80   11.40 
   7   7   0   -6.30    9.80 
  -7   7   0   -7.50    8.50 
   7   7   0   -6.00   13.60 
  -7   7   0   -6.80   10.60 
  -7   7   0    4.80   10.30 
  -7   7   0    5.10   10.70 
   7   7   0    6.10    9.20 
   7   7   0   -9.90   10.30 
   7   7   0    2.80    9.20 
  -7   7   0   -5.60    9.10 
  -7   7   0    0.10   10.10 
  -7   7   0   -1.30   10.00 
  -7   7   0   -7.90    8.20 
  -7   7   0    1.00    9.00 
  -7   7   0    0.20   10.70 
  -7   7   0   -3.50    8.50 
  -7   7   0    8.90   11.70 
   0  -8   0  406.66   32.00 
   0  -8   0  360.66   35.70 
   0  -8   0  309.97   32.20 
   0  -8   0  350.86   28.60 
   0  -8   0  345.57   28.60 
   0  -8   0  385.36   28.80 
   0   8   0  403.46   23.60 
   0   8   0  427.16   33.30 
   0   8   0  354.46   23.80 
   0   8   0  352.86   27.30 
   0   8   0  400.66   25.60 
   0   8   0  383.56   39.00 
   0   8   0  387.16   36.00 
   0   8   0  321.57   35.10 
   0   8   0  381.86   35.90 
   0   8   0  369.86   36.80 
   0   8   0  399.66   27.00 
   0   8   0  358.86   28.50 
   1  -8   0 1090.79   61.69 
  -1  -8   0 1101.09   60.59 
  -1  -8   0 1006.60   58.09 
   1  -8   0 1039.80   60.99 
  -1  -8   0 1123.59   54.49 
   1  -8   0 1122.49   61.09 
   1  -8   0 1105.49   60.19 
   1  -8   0 1090.19   59.69 
  -1  -8   0 1071.99   55.79 
  -1  -8   0 1072.79   60.89 
   1  -8   0 1133.99   61.69 
   1  -8   0 1142.39   58.89 
   1  -8   0 1113.99   62.29 
   1  -8   0 1157.98   60.19 
   1  -8   0 1038.70   55.59 
   1  -8   0 1066.49   56.09 
  -1   8   0 1061.39   61.69 
   1   8   0 1070.59   51.49 
   1   8   0 1125.59   61.39 
  -1   8   0 1078.09   53.49 
   1   8   0 1110.79   62.99 
  -1   8   0  953.50   57.29 
   1   8   0 1013.20   60.89 
   1   8   0 1094.09   51.69 
   1   8   0 1122.89   60.79 
   1   8   0 1125.79   59.99 
  -1   8   0 1208.08   65.09 
  -1   8   0 1130.89   58.19 
   1   8   0 1042.40   61.49 
  -1   8   0 1019.60   60.69 
  -1   8   0 1120.69   56.69 
  -1   8   0 1109.59   51.89 
  -1   8   0 1050.19   53.19 
  -1   8   0 1052.89   58.19 
  -1   8   0 1129.79   53.69 
  -1   8   0 1017.90   58.79 
   1   8   0  983.60   54.39 
   1   8   0 1090.69   60.39 
   1   8   0 1050.29   54.49 
   2  -8   0   43.30   13.40 
   2  -8   0   59.79   15.80 
   2  -8   0   35.90   12.70 
   2  -8   0   15.30   11.80 
   2  -8   0   41.40   14.00 
  -2  -8   0   31.50   10.20 
   2  -8   0   47.60   13.80 
   2  -8   0   10.40    8.90 
   2  -8   0   45.20   11.80 
  -2  -8   0   25.30   10.40 
   2  -8   0   46.70   14.20 
  -2  -8   0   30.70   11.40 
  -2  -8   0   35.60   13.10 
   2  -8   0   38.00   10.60 
   2   8   0   31.90    9.50 
  -2   8   0   25.10   12.80 
   2   8   0   34.20   12.40 
  -2   8   0   31.70   11.40 
  -2   8   0   25.30   11.90 
   2   8   0   27.40   10.90 
  -2   8   0   13.70   10.40 
  -2   8   0   36.10   12.60 
  -2   8   0   45.00   10.80 
   2   8   0   26.00   12.60 
  -2   8   0   34.50   12.40 
   2   8   0   19.50   13.40 
  -2   8   0   41.80   11.10 
  -2   8   0   33.30   10.60 
  -2   8   0   22.70    9.70 
  -2   8   0   24.70    9.00 
   2   8   0   29.30   12.80 
   2   8   0   44.20   14.50 
  -2   8   0   40.50   12.60 
   2   8   0   23.80   12.60 
  -2   8   0   50.09   10.40 
   2   8   0   22.80   11.70 
   3  -8   0  342.07   38.00 
   3  -8   0  384.26   37.60 
  -3  -8   0  285.87   32.60 
  -3  -8   0  305.67   32.60 
   3  -8   0  298.47   30.60 
   3  -8   0  301.57   33.70 
  -3  -8   0  311.67   32.70 
   3  -8   0  258.07   31.60 
   3  -8   0  313.07   33.10 
   3  -8   0  266.37   29.40 
   3  -8   0  277.07   33.70 
   3  -8   0  319.57   34.40 
   3   8   0  322.57   34.40 
  -3   8   0  290.37   30.20 
  -3   8   0  308.77   24.40 
   3   8   0  269.07   36.70 
  -3   8   0  305.77   33.70 
   3   8   0  308.27   31.80 
  -3   8   0  244.78   31.40 
   3   8   0  303.07   33.00 
  -3   8   0  337.87   37.90 
   3   8   0  250.47   32.10 
  -3   8   0  270.77   31.40 
  -3   8   0  294.87   29.90 
   3   8   0  312.17   32.80 
  -3   8   0  345.47   30.60 
  -3   8   0  294.47   31.90 
   3   8   0  259.17   32.10 
  -3   8   0  250.47   28.40 
  -3   8   0  249.97   28.70 
  -3   8   0  293.27   33.10 
  -3   8   0  307.67   29.30 
  -4  -8   0   26.70   11.30 
   4  -8   0   50.99   13.70 
   4  -8   0   23.30   13.00 
   4  -8   0   54.99   15.70 
   4  -8   0   33.90   13.10 
  -4  -8   0   43.10   13.20 
   4  -8   0   33.00   10.70 
   4  -8   0   30.00   13.10 
   4  -8   0   41.40   14.20 
   4  -8   0   36.60   12.90 
   4  -8   0   36.10   12.30 
   4   8   0   30.30   12.30 
  -4   8   0   41.70   14.00 
   4   8   0   41.90   13.10 
   4   8   0   39.60   13.10 
  -4   8   0   13.90   11.40 
  -4   8   0   17.80   10.00 
  -4   8   0   35.60   12.30 
   4   8   0   36.30   15.50 
  -4   8   0   66.39   15.80 
  -4   8   0   36.30   14.80 
  -4   8   0   26.60   11.20 
   4   8   0   39.80   12.90 
  -4   8   0   33.50   12.40 
  -4   8   0   24.50   12.60 
  -4   8   0   34.10   11.50 
  -4   8   0   23.30   12.80 
   4   8   0   29.20   12.90 
   4   8   0   17.40   12.40 
   4   8   0   42.20   13.80 
  -4   8   0   17.40   13.80 
  -5  -8   0  605.74   41.10 
   5  -8   0  592.04   42.20 
   5  -8   0  585.64   42.80 
   5  -8   0  629.24   47.00 
   5  -8   0  526.75   42.20 
   5  -8   0  586.14   39.40 
  -5  -8   0  535.55   39.10 
   5  -8   0  567.24   44.00 
   5  -8   0  506.45   44.20 
   5  -8   0  611.04   43.70 
   5  -8   0  584.74   44.10 
  -5   8   0  563.54   39.50 
  -5   8   0  553.84   44.20 
   5   8   0  586.04   40.20 
  -5   8   0  589.94   41.00 
  -5   8   0  625.14   48.20 
   5   8   0  720.43   49.80 
   5   8   0  584.24   40.20 
   5   8   0  550.64   41.50 
   5   8   0  574.44   41.90 
  -5   8   0  561.94   44.90 
  -5   8   0  597.34   40.20 
  -5   8   0  626.04   44.00 
  -5   8   0  531.05   42.00 
  -5   8   0  630.04   45.60 
   5   8   0  642.34   50.49 
  -5   8   0  562.14   41.00 
   5   8   0  539.75   43.00 
   5   8   0  518.95   39.30 
  -5   8   0  595.94   45.10 
  -5   8   0  674.63   42.40 
   6  -8   0  156.18   26.30 
   6  -8   0  147.39   22.70 
  -6  -8   0  173.28   24.20 
   6  -8   0  171.48   30.50 
   6  -8   0  104.49   20.80 
   6  -8   0  183.68   30.40 
   6  -8   0  160.08   28.70 
   6  -8   0  189.98   27.70 
   6  -8   0  132.29   25.30 
   6  -8   0  119.89   23.60 
  -6   8   0  153.78   27.90 
   6   8   0  189.78   26.10 
   6   8   0  120.99   25.40 
  -6   8   0  141.29   24.40 
   6   8   0  174.38   24.20 
   6   8   0  145.69   25.90 
  -6   8   0  110.39   23.50 
  -6   8   0  131.69   24.80 
   6   8   0  161.78   25.30 
   6   8   0  167.78   30.40 
  -6   8   0  162.18   22.80 
  -6   8   0  159.68   29.00 
  -6   8   0  213.88   28.70 
  -6   8   0  139.59   23.70 
  -6   8   0  131.59   27.30 
   6   8   0  165.48   26.20 
  -6   8   0  147.49   23.90 
  -6   8   0  175.58   27.90 
   0  -9   0    4.40    9.30 
   0  -9   0    7.40    9.30 
   0  -9   0   -0.80    7.00 
   0  -9   0   12.50    8.30 
   0   9   0    0.80    6.90 
   0   9   0    9.20    9.10 
   0   9   0   -0.40    8.90 
   0   9   0    3.50    8.90 
   0   9   0   -1.50    9.30 
   0   9   0  -10.30    7.30 
   0   9   0    9.70   10.70 
   0   9   0    5.90    8.90 
   0   9   0    1.10    7.50 
   0   9   0  -10.90    7.60 
   1  -9   0   14.50   11.90 
  -1  -9   0   34.70   13.70 
   1  -9   0   37.60   12.70 
  -1  -9   0   29.70   13.00 
   1  -9   0   29.00   13.70 
   1  -9   0   28.30   11.30 
   1  -9   0   33.90   14.50 
   1  -9   0   38.10   13.80 
  -1  -9   0   18.90   11.90 
   1   9   0   12.30   10.60 
  -1   9   0   34.60   13.80 
   1   9   0   12.70   10.80 
  -1   9   0   17.70   10.70 
  -1   9   0   26.30   10.80 
  -1   9   0   20.10   12.90 
  -1   9   0   33.60   13.80 
   1   9   0   12.80   11.00 
   1   9   0   43.80   12.10 
   1   9   0    9.00   10.50 
   1   9   0   60.69   17.80 
   1   9   0   19.30   12.20 
   1   9   0   57.19   16.10 
  -1   9   0   40.20   12.90 
   1   9   0   27.50   13.00 
  -1   9   0   27.30   13.20 
  -1   9   0   36.50   12.40 
  -2  -9   0  107.99   22.60 
   2  -9   0   88.79   19.00 
   2  -9   0   87.09   19.70 
   2  -9   0  110.99   20.30 
  -2  -9   0   86.49   19.30 
   2  -9   0   75.99   19.30 
   2  -9   0  103.39   20.80 
  -2  -9   0   56.09   15.50 
   2  -9   0   82.59   19.90 
   2  -9   0   51.79   16.10 
   2  -9   0   99.59   19.10 
   2   9   0   93.29   19.10 
  -2   9   0   84.19   17.40 
  -2   9   0   66.49   17.00 
  -2   9   0  122.59   20.50 
   2   9   0  113.69   25.70 
   2   9   0   94.89   20.50 
  -2   9   0   78.29   20.30 
  -2   9   0   76.79   18.60 
   2   9   0   55.69   16.50 
   2   9   0  103.19   22.50 
  -2   9   0   61.59   13.20 
  -2   9   0   91.49   21.10 
   2   9   0   79.59   18.10 
   2   9   0   99.09   20.70 
  -2   9   0   93.09   20.90 
   2   9   0   84.99   20.10 
  -2   9   0   75.89   17.20 
  -2   9   0   71.59   15.00 
  -3  -9   0   -4.00    6.90 
   3  -9   0    3.70    8.50 
   3  -9   0    8.60   10.60 
   3  -9   0    1.70    9.10 
  -3  -9   0   10.30   10.70 
   3  -9   0    9.00   16.60 
   3  -9   0    1.00    8.60 
   3  -9   0    4.10    6.70 
   3  -9   0    6.80   11.80 
  -3  -9   0   -5.20    8.30 
   3  -9   0    3.80    9.50 
  -3   9   0   12.70    9.70 
  -3   9   0    5.80   10.40 
  -3   9   0   -5.00    8.50 
   3   9   0   13.80   11.10 
  -3   9   0    1.50    8.70 
  -3   9   0    0.60    8.00 
  -3   9   0    8.40   11.80 
   3   9   0    6.60    8.70 
   3   9   0   -7.00    9.80 
   3   9   0   22.50   15.20 
   3   9   0   -3.00    9.60 
   3   9   0    1.00   10.00 
  -3   9   0   11.30   10.10 
  -3   9   0    0.90    9.20 
   3   9   0   11.00   12.10 
  -3   9   0   -3.40    9.60 
   3   9   0   -1.80    8.00 
  -3   9   0    1.60   10.70 
  -3   9   0    1.00    7.90 
  -4  -9   0   39.60   14.70 
   4  -9   0   62.39   17.10 
   4  -9   0   52.49   18.00 
   4  -9   0   56.19   16.50 
   4  -9   0   47.10   15.90 
   4  -9   0   29.30   13.70 
  -4  -9   0   49.90   15.40 
   4  -9   0   62.59   19.10 
   4  -9   0   46.00   17.60 
   4  -9   0   97.09   23.80 
   4  -9   0   51.79   15.70 
   4   9   0   54.19   15.50 
   4   9   0   72.29   19.00 
   4   9   0   26.80   15.00 
  -4   9   0   68.29   16.90 
  -4   9   0   61.49   18.10 
  -4   9   0   52.09   15.80 
   4   9   0   55.59   16.20 
  -4   9   0   45.30   15.80 
   4   9   0   50.09   20.80 
   4   9   0   44.60   16.00 
  -4   9   0   52.49   17.20 
  -4   9   0   48.60   17.00 
  -4   9   0   62.59   15.70 
  -4   9   0   85.09   19.10 
  -4   9   0   30.60   15.70 
  -4   9   0   42.90   12.50 
   4   9   0   68.79   17.30 
  -4   9   0   49.80   18.40 
   4   9   0   59.39   17.80 
   5  -9   0  127.09   24.80 
   5  -9   0  141.29   27.00 
   5  -9   0  111.19   22.20 
   5  -9   0  113.09   25.00 
   5  -9   0  111.89   25.20 
   5  -9   0  133.09   25.60 
  -5  -9   0  117.29   22.00 
   5  -9   0  123.79   23.60 
   5  -9   0  147.99   25.70 
  -5  -9   0  116.69   22.10 
   5  -9   0  154.68   27.30 
  -5   9   0  134.39   27.20 
  -5   9   0  142.39   23.70 
   5   9   0   97.29   25.10 
  -5   9   0  111.69   22.30 
   5   9   0  117.99   27.70 
  -5   9   0  192.08   28.50 
   5   9   0  137.99   26.40 
  -5   9   0  145.49   24.10 
  -5   9   0  135.89   27.10 
   5   9   0  129.59   24.80 
  -5   9   0  149.88   23.70 
   5   9   0  114.09   23.90 
  -5   9   0  146.29   26.10 
  -5   9   0   95.09   22.00 
  -5   9   0  115.69   25.20 
   5   9   0   89.69   22.70 
   5   9   0  144.49   26.50 
   5   9   0  127.79   22.50 
  -5   9   0  109.79   24.10 
   0 -10   0 1022.00   62.29 
   0 -10   0  870.71   59.49 
   0 -10   0  946.81   58.39 
   0  10   0  851.11   59.99 
   0  10   0  896.61   60.39 
   0  10   0  966.90   62.09 
   0  10   0  882.31   57.39 
   0  10   0  921.31   58.79 
   0  10   0  786.52   56.59 
   0  10   0  921.31   56.19 
   0  10   0  910.31   61.09 
  -1 -10   0  286.47   36.80 
   1 -10   0  313.07   38.40 
   1 -10   0  340.07   38.10 
  -1 -10   0  303.27   36.50 
  -1 -10   0  304.47   38.00 
   1 -10   0  242.48   35.40 
   1 -10   0  301.57   35.10 
  -1  10   0  308.37   38.60 
  -1  10   0  220.08   30.60 
  -1  10   0  293.07   32.80 
  -1  10   0  252.07   34.20 
   1  10   0  248.08   34.50 
   1  10   0  293.87   37.30 
  -1  10   0  288.17   34.90 
   1  10   0  317.47   38.40 
  -1  10   0  205.28   29.60 
  -1  10   0  331.67   40.70 
   1  10   0  286.77   35.70 
  -1  10   0  249.48   33.10 
   1  10   0  265.67   35.90 
   1  10   0  301.97   34.60 
   1  10   0  260.17   32.80 
  -2 -10   0  198.48   29.10 
  -2 -10   0  208.88   30.80 
   2 -10   0  255.87   32.40 
  -2 -10   0  191.78   30.20 
   2 -10   0  169.48   28.40 
   2 -10   0  207.78   30.90 
   2  10   0  200.88   28.70 
   2  10   0  214.08   31.70 
   2  10   0  169.98   30.60 
  -2  10   0  200.28   29.50 
  -2  10   0  283.97   38.70 
   2  10   0  262.47   37.00 
  -2  10   0  219.38   29.60 
  -2  10   0  209.28   29.60 
  -2  10   0  286.17   35.00 
  -2  10   0  255.07   31.10 
  -2  10   0  223.88   30.90 
  -2  10   0  245.78   34.10 
  -2  10   0  200.98   31.50 
   2  10   0  270.37   37.20 
   2  10   0  235.88   31.80 
   2  10   0  258.37   33.90 
   3 -10   0   33.50   14.90 
   3 -10   0   31.10   16.40 
  -3 -10   0   32.80   13.00 
   3 -10   0   31.10   14.30 
  -3 -10   0   16.60   12.60 
   3 -10   0   38.20   20.00 
   3 -10   0   30.30   14.00 
   3 -10   0   21.30   12.60 
  -3 -10   0   42.70   19.00 
   3  10   0    5.40   13.80 
  -3  10   0   26.90   15.80 
  -3  10   0   33.70   14.60 
   3  10   0   26.40   16.40 
   3  10   0   36.70   16.40 
   3  10   0   35.10   15.90 
   3  10   0   29.80   13.70 
  -3  10   0   36.50   16.50 
  -3  10   0   12.70   12.60 
   3  10   0   17.30   13.20 
  -3  10   0   39.80   15.80 
  -3  10   0   10.60   12.90 
  -3  10   0    8.70   14.40 
   3  10   0   30.90   15.30 
  -3  10   0   67.49   18.80 
   3  10   0   28.40   16.10 
  -3  10   0   35.10   14.50 
 -10   0   1    3.20   10.90 
 -10   0   1    1.50   10.80 
  10   0  -1    2.40   12.40 
 -10   0   1    2.00   11.70 
  10   0  -1    6.30   12.80 
  10   0  -1   -2.30    9.90 
  10   0  -1   -9.80    9.50 
  10   0  -1   -8.20    8.30 
 -10   0   1   12.90   11.10 
  10   0  -1   10.20   15.20 
 -10   0   1  -13.70    8.30 
 -10   0   1  -10.10    7.70 
  10   0  -1    9.90   10.50 
 -10   0   1    0.40   10.50 
  10   0  -1   -5.80    9.10 
  10   0  -1   -2.10    9.00 
 -10   0   1    5.40   10.50 
 -10   0   1    0.90    9.70 
 -10   0   1   -6.10    9.50 
  -9   0   1  285.27   34.20 
   9   0  -1  295.77   37.70 
  -9   0   1  328.77   32.80 
   9   0  -1  349.57   44.90 
   9   0  -1  312.57   36.70 
   9   0  -1  323.57   33.70 
  -9   0   1  314.57   36.20 
  -9   0   1  348.27   37.70 
   9   0  -1  395.96   37.80 
  -9   0   1  299.77   34.30 
   9   0  -1  360.16   35.40 
   9   0  -1  331.87   39.90 
  -9   0   1  237.78   33.10 
  -9   0   1  285.07   32.20 
  -9   0   1  292.37   36.20 
   9   0  -1  299.77   33.70 
   9   0  -1  275.07   38.10 
  -9   0   1  273.87   34.20 
  -9   0   1  335.17   36.20 
   9   0  -1  343.77   41.90 
   8   0  -1    0.70    8.40 
   8   0  -1    2.20    9.50 
  -8   0   1   -1.40    5.80 
  -8   0   1    0.00    7.70 
   8   0  -1    3.10    6.90 
  -8   0   1    9.10   10.00 
  -8   0   1   -4.30    6.50 
  -8   0   1   -0.40    8.10 
  -8   0   1    1.50    8.00 
   8   0  -1    3.60    7.70 
  -8   0   1    4.20    6.70 
   8   0  -1    1.20    6.90 
   8   0  -1    2.00   10.30 
  -8   0   1   -5.10    6.90 
  -8   0   1    3.90    9.20 
   8   0  -1    1.40    7.20 
   8   0  -1   -4.80    6.30 
   8   0  -1   -0.60    7.90 
   8   0  -1   11.50   10.40 
  -8   0   1    3.90    8.90 
  -8   0   1   -7.40    5.70 
   8   0  -1   -4.90    6.70 
  -7   0   1   18.70    9.30 
  -7   0   1    9.80    7.80 
  -7   0   1   21.60    9.80 
   7   0  -1   37.30   12.60 
   7   0  -1   13.50    8.30 
  -7   0   1    6.80    7.20 
   7   0  -1   20.50    9.20 
   7   0  -1   17.20    5.80 
   7   0  -1   11.30    7.40 
   7   0  -1   21.10   10.40 
  -7   0   1    7.30    6.60 
  -7   0   1    0.30    6.40 
   7   0  -1   41.20   13.00 
   7   0  -1   22.20    4.40 
  -7   0   1   31.90   10.80 
   7   0  -1   17.60    9.20 
  -7   0   1   11.50    7.90 
  -7   0   1   14.30    8.30 
   7   0  -1   -3.80    7.20 
  -7   0   1   22.40    9.20 
  -7   0   1   14.90    8.80 
  -7   0   1   22.50    9.60 
   7   0  -1   29.90    9.90 
   7   0  -1   19.60    7.20 
   6   0  -1   -4.20    4.70 
   6   0  -1    2.30    2.80 
   6   0  -1    3.90    5.40 
  -6   0   1   -3.20    4.50 
  -6   0   1    3.40    5.80 
   6   0  -1   -1.80    1.60 
   6   0  -1    3.40    7.60 
   6   0  -1   -0.80    1.60 
  -6   0   1   -2.90    4.50 
   6   0  -1   -2.60    4.60 
  -6   0   1   -4.10    4.90 
  -6   0   1    1.60    5.10 
   6   0  -1   -2.60    3.10 
  -6   0   1    2.80    2.40 
  -6   0   1   -1.40    4.60 
  -6   0   1   -2.70    3.90 
   6   0  -1   -4.30    3.70 
  -6   0   1    4.60    6.20 
  -6   0   1    0.10    5.60 
   6   0  -1   -2.00    4.90 
  -6   0   1   -1.00    5.60 
  -6   0   1   -1.00    5.80 
   6   0  -1   -3.30    4.90 
   6   0  -1    2.80    6.00 
   6   0  -1   -0.60    1.90 
   6   0  -1   -0.10    2.50 
  -6   0   1   -0.30    1.80 
   6   0  -1   -0.50    4.60 
   6   0  -1  -10.80    3.30 
  -6   0   1   -6.20    5.10 
  -5   0   1   -0.10    4.10 
   5   0  -1    8.70    4.90 
  -5   0   1    9.20    5.50 
   5   0  -1    6.80    2.10 
  -5   0   1    8.40    5.70 
  -5   0   1    0.10    4.00 
  -5   0   1    2.10    5.10 
   5   0  -1    4.50    4.50 
  -5   0   1    3.50    4.90 
  -5   0   1    2.80    4.30 
  -5   0   1    6.90    2.00 
   5   0  -1    4.30    3.70 
   5   0  -1    4.80    1.50 
   5   0  -1    4.80    5.20 
   5   0  -1    7.20    5.60 
  -5   0   1    4.70    4.60 
  -5   0   1    8.60    5.80 
   5   0  -1    6.20    6.00 
   5   0  -1    8.30    3.90 
   5   0  -1    0.30    4.50 
  -5   0   1    3.70    2.60 
  -5   0   1   11.50    6.40 
   5   0  -1   -5.50    3.50 
   5   0  -1    8.30    2.70 
  -5   0   1   -0.20    4.40 
   5   0  -1    6.50    2.00 
  -5   0   1    8.80    3.70 
  -5   0   1    2.50    2.10 
  -5   0   1   -0.20    3.60 
   5   0  -1    6.00    2.70 
   5   0  -1    6.90    6.40 
   5   0  -1    4.60    2.50 
   5   0  -1    6.90    5.20 
  -5   0   1    8.60    2.90 
  -4   0   1    5.10    4.50 
   4   0  -1    1.40    1.60 
   4   0  -1   -0.30    1.80 
   4   0  -1    3.60    1.20 
   4   0  -1    3.70    4.50 
   4   0  -1    7.00    5.10 
   4   0  -1    1.10    1.50 
   4   0  -1    9.00    4.40 
   4   0  -1    5.50    4.00 
   4   0  -1   -0.50    2.90 
  -4   0   1    3.50    3.80 
   4   0  -1    8.40    5.80 
   4   0  -1    2.40    1.30 
   4   0  -1    2.80    3.40 
   4   0  -1    7.20    4.60 
  -4   0   1    3.70    4.20 
   4   0  -1    2.80    4.10 
   4   0  -1    4.50    3.50 
   4   0  -1    8.00    2.60 
   4   0  -1   -3.10    4.00 
   4   0  -1    4.70    3.00 
  -3   0   1  524.75   20.70 
  -3   0   1  507.15   25.60 
  -3   0   1  508.15   23.20 
   3   0  -1  530.65   20.70 
  -3   0   1  553.04   26.60 
   3   0  -1  523.45   26.60 
   3   0  -1  521.05   27.90 
  -3   0   1  547.65   26.70 
  -3   0   1  487.55   26.10 
   3   0  -1  522.35   26.90 
   3   0  -1  516.95   25.00 
   3   0  -1  520.75   25.60 
   3   0  -1  519.45   25.80 
  -3   0   1  511.55   20.40 
   3   0  -1  535.75   26.30 
  -3   0   1  523.55   25.20 
  -3   0   1  500.05   22.20 
   3   0  -1  517.65   20.40 
   3   0  -1  542.25   25.20 
   3   0  -1  495.95   28.50 
  -3   0   1  506.05   21.40 
  -3   0   1  511.75   26.80 
   3   0  -1  500.45   26.40 
   3   0  -1  529.65   25.90 
  -3   0   1  510.45   24.90 
   3   0  -1  516.85   25.10 
   3   0  -1  531.25   26.60 
   3   0  -1  503.35   20.00 
   3   0  -1  523.05   26.20 
   3   0  -1  544.95   25.70 
   3   0  -1  505.55   23.30 
  -3   0   1  546.55   26.30 
   3   0  -1  517.85   22.00 
   3   0  -1  499.55   25.30 
   3   0  -1  521.45   20.40 
  -3   0   1  541.05   26.90 
   3   0  -1  525.25   21.50 
  -3   0   1  498.15   26.00 
  -3   0   1  501.75   24.90 
   3   0  -1  498.95   26.10 
  -3   0   1  519.65   25.30 
  -3   0   1  537.65   22.40 
   3   0  -1  528.05   23.80 
  -3   0   1  518.85   25.50 
  -3   0   1  527.75   27.10 
   3   0  -1  515.25   23.50 
   3   0  -1  497.05   25.70 
  -3   0   1  531.65   26.20 
  -2   0   1    0.90    2.30 
   2   0  -1    3.20    2.70 
   2   0  -1    2.30    1.80 
  -2   0   1   -2.00    1.80 
  -2   0   1    1.40    1.00 
   2   0  -1    7.30    2.80 
   2   0  -1    6.20    2.80 
  -2   0   1    1.10    2.00 
   2   0  -1    2.50    2.30 
   2   0  -1    2.20    2.70 
  -2   0   1    2.60    1.40 
  -2   0   1    2.70    2.20 
   2   0  -1    8.10    2.50 
   2   0  -1    4.90    2.70 
   2   0  -1    5.60    2.70 
   2   0  -1    2.30    2.30 
  -2   0   1    2.50    2.80 
  -2   0   1   -0.30    1.80 
  -2   0   1    3.30    2.40 
  -2   0   1    6.10    2.80 
   2   0  -1    1.50    1.30 
  -2   0   1    4.80    1.80 
  -2   0   1    4.90    1.40 
   2   0  -1   -0.80    1.80 
   2   0  -1   -0.50    2.50 
  -2   0   1    3.00    0.90 
  -2   0   1    5.70    2.70 
   2   0  -1    4.30    2.30 
   2   0  -1    2.80    2.30 
   2   0  -1   -0.10    2.10 
  -2   0   1    3.70    2.70 
   2   0  -1    1.40    2.10 
   2   0  -1    4.30    0.90 
   2   0  -1    2.80    0.80 
   2   0  -1    2.50    2.30 
   2   0  -1    2.30    2.40 
  -2   0   1    3.90    2.60 
   2   0  -1    1.60    1.50 
   2   0  -1    0.80    2.20 
   2   0  -1    3.00    2.50 
   2   0  -1    0.90    2.40 
  -2   0   1    4.80    2.60 
   2   0  -1    2.00    2.10 
  -2   0   1    1.40    2.10 
  -2   0   1    2.20    2.50 
  -2   0   1    5.90    2.70 
  -2   0   1    3.20    2.50 
  -2   0   1    2.30    1.80 
   2   0  -1    2.20    1.10 
   2   0  -1    2.90    2.10 
  -2   0   1   -1.80    2.00 
   2   0  -1    1.10    2.30 
   2   0  -1    1.60    2.20 
   2   0  -1    6.40    2.10 
   2   0  -1    2.00    2.30 
  -2   0   1    4.80    2.70 
   1   0  -1  312.67   15.80 
   1   0  -1  393.26   14.90 
   1   0  -1  289.77   15.80 
   1   0  -1  361.76   15.70 
   1   0  -1  383.86   16.30 
   1   0  -1  391.26   15.90 
   1   0  -1  386.96   15.20 
   1   0  -1  373.86   16.00 
   1   0  -1  389.66   14.30 
   1   0  -1  365.16   17.00 
   1   0  -1  344.17   15.10 
   1   0  -1  373.96   16.00 
   1   0  -1  380.66   15.20 
   1   0  -1  384.46   16.00 
   1   0  -1  382.16   16.20 
   1   0  -1  366.86   15.00 
   1   0   1 1613.74   64.19 
  -1   0  -1 1724.43   64.49 
   1   0   1 1673.73   64.49 
   1   0   1 1751.52   64.39 
   1   0   1 1519.45   63.89 
   1   0   1 1688.63   63.49 
  -1   0  -1 1709.73   64.49 
  -1   0  -1 1751.62   64.79 
   1   0   1 1722.53   62.39 
   1   0   1 1720.43   61.79 
   1   0   1 1736.33   63.19 
   1   0   1 1769.02   63.79 
   1   0   1 1677.43   61.59 
  -1   0  -1 1503.65   63.49 
   1   0   1 1713.33   62.99 
  -1   0  -1 1400.16   63.79 
  -1   0  -1 1767.22   65.29 
  -1   0  -1 1691.83   64.29 
   1   0   1 1544.75   63.49 
   1   0   1 1709.43   63.39 
   1   0   1 1762.02   63.59 
   1   0   1 1679.73   64.39 
  -1   0  -1 1576.74   63.79 
   1   0   1 1742.43   64.29 
   1   0   1 1740.03   63.39 
   1   0   1 1795.22   63.49 
  -1   0  -1 1694.83   64.89 
  -2   0  -1    2.90    1.90 
   2   0   1    3.50    2.80 
   2   0   1    3.70    2.40 
   2   0   1    7.30    2.70 
  -2   0  -1   10.80    3.70 
  -2   0  -1    4.60    1.90 
   2   0   1    4.80    3.00 
   2   0   1    1.10    2.30 
   2   0   1    3.90    2.40 
   2   0   1    5.60    2.70 
  -2   0  -1    4.90    2.60 
   2   0   1    1.70    1.60 
  -2   0  -1    1.70    2.00 
   2   0   1    0.10    1.60 
   2   0   1    2.20    2.30 
   2   0   1   11.00    3.40 
  -2   0  -1    5.20    3.20 
   2   0   1    3.60    1.30 
  -2   0  -1    2.50    1.20 
  -2   0  -1    6.10    2.00 
   2   0   1    2.60    0.90 
  -2   0  -1    5.20    1.80 
  -2   0  -1    1.70    2.40 
  -2   0  -1    0.30    2.30 
  -2   0  -1    3.20    3.10 
  -2   0  -1    3.20    2.70 
   2   0   1   -1.60    1.50 
  -2   0  -1    4.50    2.20 
   2   0   1    0.10    2.00 
  -2   0  -1    1.50    1.00 
  -2   0  -1    5.20    2.80 
  -2   0  -1    4.30    1.70 
  -2   0  -1    1.50    2.00 
   2   0   1    2.70    1.90 
   2   0   1    2.70    3.10 
  -2   0  -1    2.80    1.80 
   2   0   1    1.70    2.30 
   2   0   1    5.50    2.80 
  -2   0  -1    3.90    2.10 
   2   0   1    1.80    2.10 
   2   0   1    4.20    2.50 
  -2   0  -1    7.10    3.30 
  -2   0  -1    8.30    3.10 
   2   0   1   -0.40    2.10 
   2   0   1    7.00    3.10 
   2   0   1    8.20    2.50 
  -2   0  -1    1.80    2.00 
   2   0   1    2.30    2.40 
  -2   0  -1    4.70    2.80 
   2   0   1    4.50    2.50 
  -2   0  -1    4.80    2.40 
  -2   0  -1    2.40    2.60 
   2   0   1    1.00    2.60 
  -2   0  -1   -0.60    2.40 
  -2   0  -1    1.00    2.30 
  -3   0  -1  144.19    7.70 
  -3   0  -1  124.09   12.50 
  -3   0  -1  127.89    9.80 
   3   0   1  155.18   10.80 
  -3   0  -1  147.69   11.90 
   3   0   1  130.59   13.30 
  -3   0  -1  110.89   12.00 
  -3   0  -1  127.29   12.40 
   3   0   1  138.09    7.60 
  -3   0  -1  125.09   12.60 
  -3   0  -1  136.39    8.30 
   3   0   1  151.78   11.70 
  -3   0  -1  108.59   11.70 
   3   0   1  118.49    8.60 
   3   0   1  125.59   12.90 
  -3   0  -1  131.29   10.30 
   3   0   1  117.49   11.40 
   3   0   1  140.49   12.80 
  -3   0  -1  143.29   10.70 
   3   0   1  166.38   11.40 
   3   0   1  142.09   13.30 
  -3   0  -1  135.69    9.80 
   3   0   1  124.39    8.40 
   3   0   1   95.49   11.60 
   3   0   1  123.69   13.40 
  -3   0  -1  142.99   11.80 
   3   0   1  120.09   12.70 
   3   0   1  148.39   10.50 
   3   0   1  142.09   11.20 
   3   0   1  121.79    9.60 
  -3   0  -1  137.99    8.80 
  -3   0  -1  135.29    7.70 
  -3   0  -1  136.09   12.10 
  -3   0  -1  151.98   11.90 
  -3   0  -1  155.88   11.70 
  -3   0  -1  140.49    8.10 
   3   0   1  132.59   13.00 
  -3   0  -1  148.49   10.60 
   3   0   1  131.29    6.40 
  -3   0  -1  140.99    8.90 
  -3   0  -1  140.59    6.40 
   3   0   1  131.29    8.00 
  -3   0  -1  140.89    9.10 
  -3   0  -1  146.79   10.40 
   3   0   1  119.89   11.90 
  -3   0  -1  135.79   13.30 
  -3   0  -1  152.68   11.70 
   3   0   1  131.59    8.40 
   3   0   1  136.69    9.90 
  -4   0  -1   -4.70    3.10 
   4   0   1    1.30    4.40 
   4   0   1   -1.60    1.80 
  -4   0  -1    3.70    4.30 
  -4   0  -1    1.70    1.80 
  -4   0  -1   -6.30    2.60 
   4   0   1    5.50    5.00 
   4   0   1   -0.10    2.00 
  -4   0  -1    7.20    5.10 
  -4   0  -1    2.80    3.80 
   4   0   1    2.00    2.70 
   4   0   1    3.00    3.70 
   4   0   1    0.20    1.80 
  -4   0  -1    0.50    3.40 
  -4   0  -1    2.50    2.00 
   4   0   1   -1.60    3.70 
  -4   0  -1   -1.80    3.90 
   4   0   1   -1.70    1.10 
  -4   0  -1    1.20    3.00 
   4   0   1    3.50    2.50 
  -4   0  -1    0.80    2.30 
  -4   0  -1   -5.10    2.90 
  -4   0  -1   -5.00    3.20 
  -4   0  -1    0.80    4.00 
   4   0   1    0.00    3.00 
  -4   0  -1    0.90    3.40 
  -4   0  -1   -0.10    2.30 
  -4   0  -1   -3.90    3.60 
   4   0   1   -2.10    4.10 
   4   0   1   -1.00    3.70 
  -4   0  -1   -0.70    1.90 
  -4   0  -1   -4.70    3.10 
   4   0   1    5.70    3.80 
   4   0   1   -0.60    3.40 
  -4   0  -1    1.10    2.30 
   4   0   1   -2.40    2.80 
  -5   0  -1  105.29   15.30 
  -5   0  -1  123.99   15.30 
  -5   0  -1  117.09   15.40 
   5   0   1  119.09   14.60 
  -5   0  -1  110.59   13.00 
  -5   0  -1  111.79    8.70 
  -5   0  -1  114.59   15.20 
   5   0   1  118.79   13.20 
   5   0   1  133.09    9.70 
   5   0   1   96.49   14.60 
  -5   0  -1  128.69   16.50 
   5   0   1  129.59   14.80 
  -5   0  -1  127.29   16.40 
   5   0   1  116.69   16.90 
  -5   0  -1  112.69    9.00 
  -5   0  -1  108.59    7.30 
  -5   0  -1  148.69   16.80 
  -5   0  -1  107.79   14.80 
  -5   0  -1  112.59   10.90 
   5   0   1  118.39    8.60 
  -5   0  -1  123.79   17.20 
   5   0   1  124.39   15.10 
  -5   0  -1  123.39   14.30 
  -5   0  -1  109.89    8.90 
  -5   0  -1  104.59   14.40 
   5   0   1  112.59   16.50 
  -5   0  -1   83.19   13.20 
   5   0   1  118.59    8.40 
  -5   0  -1  130.99    8.90 
   5   0   1  143.09   14.80 
   5   0   1  115.59   16.10 
   5   0   1  123.29    6.20 
   5   0   1  121.39   10.00 
   5   0   1  109.69   16.80 
   5   0   1  128.89    9.30 
   6   0   1    0.20    2.80 
  -6   0  -1    2.60    6.40 
   6   0   1   -7.90    3.90 
  -6   0  -1    0.00    5.10 
   6   0   1    2.30    6.80 
  -6   0  -1    3.10    5.30 
   6   0   1    0.00    2.80 
   6   0   1    3.40    3.30 
   6   0   1    1.90    2.70 
  -6   0  -1    2.70    4.60 
  -6   0  -1    7.70    5.60 
   6   0   1   -2.10    3.00 
  -6   0  -1   -4.90    5.40 
  -6   0  -1   -0.10    5.40 
   6   0   1   -7.70    4.60 
  -6   0  -1   -2.40    2.50 
  -6   0  -1   -4.90    4.50 
   6   0   1   -0.70    5.20 
   6   0   1   -5.30    5.40 
  -6   0  -1   -2.40    2.40 
   6   0   1   -1.30    5.00 
   6   0   1   -2.70    6.00 
  -6   0  -1   -2.60    5.50 
   6   0   1   -3.60    4.60 
  -6   0  -1   -0.30    6.30 
  -6   0  -1    2.50    6.10 
   6   0   1   -4.20    5.70 
  -6   0  -1    0.60    2.00 
   6   0   1   -7.50    5.10 
  -6   0  -1    2.60    2.80 
  -6   0  -1    7.70    6.00 
   7   0   1 1849.02   87.29 
  -7   0  -1 1934.01   89.39 
  -7   0  -1 1925.51   90.79 
  -7   0  -1 1946.91   73.89 
   7   0   1 1925.71   76.29 
  -7   0  -1 1910.41   86.39 
   7   0   1 1952.10   94.79 
  -7   0  -1 1796.02   89.79 
   7   0   1 1815.12   93.99 
  -7   0  -1 1885.71   90.99 
  -7   0  -1 1846.22   84.69 
   7   0   1 2003.70   93.79 
  -7   0  -1 1866.71   88.99 
   7   0   1 1960.50   91.99 
   7   0   1 1903.81   84.89 
   7   0   1 2004.90   92.19 
   7   0   1 1904.21   76.09 
  -7   0  -1 1938.91   89.29 
   7   0   1 1991.70   88.49 
   7   0   1 1859.81   85.09 
   7   0   1 1893.81   76.19 
  -7   0  -1 1956.00   90.79 
   7   0   1 1990.70   97.89 
  -7   0  -1 1914.11   90.69 
   7   0   1 1894.01   85.29 
  -7   0  -1 2002.60   92.19 
   8   0   1   20.30   13.20 
  -8   0  -1   29.70   10.60 
  -8   0  -1    9.60    9.20 
   8   0   1    1.30    7.00 
   8   0   1   10.00    8.70 
  -8   0  -1   18.90   10.40 
   8   0   1    8.50    8.40 
   8   0   1    9.60    9.00 
   8   0   1   16.20    9.70 
  -8   0  -1   12.30    7.30 
   8   0   1   12.80    9.50 
   8   0   1    9.00    7.80 
  -8   0  -1   10.00    7.00 
  -8   0  -1   20.40    9.60 
  -8   0  -1    8.70    9.80 
  -8   0  -1   19.50   10.20 
  -8   0  -1    7.00    8.40 
   8   0   1   10.40    7.90 
   8   0   1   -0.80    8.30 
  -8   0  -1   33.70   12.10 
   8   0   1    7.80    7.10 
  -8   0  -1   28.40   10.80 
   9   0   1  500.35   36.50 
  -9   0  -1  498.05   35.50 
   9   0   1  516.45   38.30 
  -9   0  -1  471.65   44.80 
  -9   0  -1  495.85   39.40 
   9   0   1  523.05   44.80 
  -9   0  -1  494.95   40.60 
   9   0   1  444.16   47.80 
   9   0   1  515.15   38.60 
   9   0   1  537.95   39.60 
  -9   0  -1  438.06   46.30 
  -9   0  -1  533.05   42.20 
  -9   0  -1  550.04   49.99 
   9   0   1  599.24   50.29 
  -9   0  -1  376.66   41.20 
  -9   0  -1  567.84   42.80 
  -9   0  -1  435.36   35.40 
   9   0   1  509.85   42.20 
  -9   0  -1  519.15   49.30 
   9   0   1  553.74   37.50 
   9   0   1  460.75   50.09 
   9   0   1  413.56   45.50 
 -10   0  -1   -3.70    8.90 
  10   0   1   -5.40    8.80 
  10   0   1  -21.40   10.20 
  10   0   1    2.60   10.50 
  10   0   1    0.70   10.10 
 -10   0  -1   -5.30    8.50 
 -10   0  -1    4.50   11.10 
 -10   0  -1   -9.00    9.00 
 -10   0  -1   -7.20    9.80 
 -10   0  -1    4.70   11.50 
  10   0   1   -8.60   11.60 
  10   0   1    7.10   13.80 
 -10   0  -1   -9.10   12.80 
  10   0   1   -9.70   11.40 
 -10   0  -1    4.70   11.70 
  10   0   1   -2.10   12.70 
  10   0   1    1.20   12.10 
 -10   0  -1    5.50   12.00 
  10   0   1  -12.50    7.70 
 -10  -1   1  684.53   49.70 
 -10  -1   1  674.43   45.60 
  10  -1  -1  630.44   45.60 
 -10  -1   1  650.63   50.49 
  10  -1  -1  648.04   51.79 
  10  -1  -1  628.24   48.80 
 -10  -1   1  599.14   47.80 
 -10  -1   1  673.03   51.99 
  10  -1  -1  683.93   56.69 
  10  -1  -1  762.62   54.29 
  10  -1  -1  625.74   56.19 
  10  -1  -1  589.64   52.39 
 -10  -1   1  790.22   52.39 
  10  -1  -1  591.54   50.59 
  10  -1  -1  670.23   48.30 
 -10  -1   1  607.84   48.20 
 -10  -1   1  660.13   47.40 
  10  -1  -1  695.23   49.00 
 -10  -1   1  709.33   52.99 
 -10   1   1  650.33   50.99 
  10   1  -1  694.03   55.39 
 -10   1   1  676.43   52.69 
  10   1  -1  677.13   58.49 
  10   1  -1  697.03   47.90 
  10   1  -1  621.34   50.89 
 -10   1   1  718.03   49.00 
  10   1  -1  695.13   57.79 
 -10   1   1  711.83   52.09 
 -10   1   1  677.03   50.59 
  10   1  -1  647.14   43.70 
  10   1  -1  727.33   51.99 
 -10   1   1  603.04   45.80 
  10   1  -1  542.45   56.99 
 -10   1   1  645.84   51.09 
 -10   1   1  702.63   51.39 
 -10   1   1  503.95   51.69 
 -10   1   1  705.23   50.99 
  10   1  -1  589.54   50.29 
  10   1  -1  766.02   50.09 
   9  -1  -1   14.80   10.70 
   9  -1  -1   19.20   12.50 
   9  -1  -1   17.40   12.20 
  -9  -1   1    8.50   10.30 
   9  -1  -1   16.30   11.70 
  -9  -1   1   27.80   12.70 
  -9  -1   1   27.00   12.80 
   9  -1  -1   21.40   11.30 
  -9  -1   1    8.50    9.50 
  -9  -1   1    0.00    9.50 
   9  -1  -1    0.60    9.40 
  -9  -1   1   13.20    9.40 
  -9  -1   1   -5.10    7.90 
  -9  -1   1   20.30   11.40 
   9  -1  -1    1.90    8.10 
   9  -1  -1    7.70   13.10 
  -9  -1   1   26.60   12.80 
   9  -1  -1   15.30   11.20 
  -9  -1   1   13.60   10.20 
   9  -1  -1    7.10    8.50 
   9  -1  -1    6.20   12.90 
  -9   1   1   22.60   11.20 
  -9   1   1   15.70   11.50 
  -9   1   1    0.20    8.10 
  -9   1   1    5.30    9.10 
  -9   1   1   11.80   10.70 
  -9   1   1   21.40   11.40 
  -9   1   1   15.30   10.50 
   9   1  -1   11.50   13.40 
  -9   1   1   24.20   13.60 
   9   1  -1    3.20    9.80 
  -9   1   1   21.50   11.10 
   9   1  -1   35.80   16.90 
   9   1  -1   39.50   12.70 
   9   1  -1   18.50   13.80 
   9   1  -1   16.00   10.60 
   9   1  -1    1.80   10.30 
  -9   1   1   -8.20    6.60 
   9   1  -1   40.20   16.20 
   9   1  -1    8.50   10.30 
  -9   1   1   16.20   11.40 
  -8  -1   1  314.77   31.50 
  -8  -1   1  298.87   33.00 
  -8  -1   1  291.57   28.90 
  -8  -1   1  372.16   35.60 
   8  -1  -1  346.57   39.80 
   8  -1  -1  359.56   41.90 
  -8  -1   1  388.36   27.90 
   8  -1  -1  376.96   39.20 
   8  -1  -1  402.36   40.60 
   8  -1  -1  381.96   26.50 
  -8  -1   1  320.47   34.50 
  -8  -1   1  365.76   37.40 
  -8  -1   1  378.26   35.90 
   8  -1  -1  341.97   37.40 
  -8  -1   1  337.17   36.20 
   8  -1  -1  313.17   32.30 
   8  -1  -1  355.66   35.50 
  -8  -1   1  329.87   34.70 
   8  -1  -1  414.06   30.10 
   8  -1  -1  394.16   30.20 
  -8  -1   1  326.87   33.60 
  -8  -1   1  375.36   38.00 
   8  -1  -1  325.17   38.00 
   8  -1  -1  318.17   33.30 
  -8   1   1  380.76   36.50 
   8   1  -1  410.26   32.90 
  -8   1   1  320.07   31.80 
   8   1  -1  371.36   40.10 
  -8   1   1  331.17   34.20 
  -8   1   1  350.26   36.00 
  -8   1   1  374.86   36.80 
   8   1  -1  338.57   25.70 
  -8   1   1  411.76   30.70 
  -8   1   1  342.07   35.10 
   8   1  -1  411.26   44.50 
   8   1  -1  366.96   36.80 
  -8   1   1  404.06   37.90 
   8   1  -1  391.56   42.00 
   8   1  -1  366.76   29.20 
  -8   1   1  355.06   36.60 
   8   1  -1  348.37   39.10 
   8   1  -1  392.96   30.10 
  -8   1   1  460.75   41.80 
  -8   1   1  324.17   35.50 
   8   1  -1  346.47   26.70 
   8   1  -1  378.66   28.00 
  -7  -1   1   45.20   13.10 
  -7  -1   1  100.09   17.20 
  -7  -1   1   57.39   11.70 
   7  -1  -1   67.39   13.10 
  -7  -1   1   50.99   11.60 
   7  -1  -1   63.39   15.30 
   7  -1  -1   74.49    9.10 
  -7  -1   1   73.39   14.30 
   7  -1  -1   91.19   16.20 
  -7  -1   1   70.69   14.80 
   7  -1  -1   85.89   11.70 
  -7  -1   1   77.09   16.30 
   7  -1  -1   56.29   13.90 
  -7  -1   1   73.59   14.30 
   7  -1  -1   69.49   14.40 
   7  -1  -1   93.59   18.20 
  -7  -1   1   66.99   14.00 
  -7  -1   1   61.79   11.50 
  -7  -1   1   52.39   14.00 
   7  -1  -1   59.39   15.50 
   7  -1  -1   59.89   16.70 
   7  -1  -1   89.09   16.10 
  -7  -1   1   75.59   16.00 
   7  -1  -1   93.69   15.80 
  -7   1   1   76.59    9.80 
   7   1  -1   51.39   15.20 
   7   1  -1   72.89   16.90 
  -7   1   1   77.89   10.10 
  -7   1   1   72.59   15.50 
   7   1  -1   61.89    9.10 
  -7   1   1   80.19   14.60 
  -7   1   1   87.59   15.80 
  -7   1   1   77.89   15.50 
   7   1  -1   63.89   13.10 
   7   1  -1   74.19   15.10 
   7   1  -1   78.99   16.40 
   7   1  -1   66.69   12.40 
  -7   1   1   66.49   14.90 
  -7   1   1   92.19   16.20 
   7   1  -1   67.29   14.60 
  -7   1   1   73.39   15.00 
  -7   1   1   65.39   14.40 
  -7   1   1   63.99   15.40 
   7   1  -1   82.29   12.20 
  -7   1   1   66.79   13.20 
   7   1  -1   60.89   12.80 
   7   1  -1   94.99   19.20 
   7   1  -1   80.49   13.20 
  -7   1   1   93.19   17.30 
   6  -1  -1 1660.03   77.69 
   6  -1  -1 1784.92   76.29 
   6  -1  -1 1742.23   66.69 
   6  -1  -1 1553.14   82.89 
   6  -1  -1 1693.53   77.99 
  -6  -1   1 1747.13   79.59 
   6  -1  -1 1716.23   80.69 
  -6  -1   1 1705.63   74.19 
  -6  -1   1 1682.43   78.49 
  -6  -1   1 1726.23   79.99 
   6  -1  -1 1721.63   71.49 
  -6  -1   1 1626.54   78.39 
  -6  -1   1 1799.02   78.39 
  -6  -1   1 1682.93   77.69 
   6  -1  -1 1712.03   77.09 
  -6  -1   1 1661.83   79.49 
   6  -1  -1 1689.83   69.09 
   6  -1  -1 1764.32   66.69 
   6  -1  -1 1733.73   69.69 
   6  -1  -1 1797.82   81.19 
   6  -1  -1 1784.52   83.39 
   6  -1  -1 1625.74   76.99 
   6  -1  -1 1721.53   81.09 
  -6  -1   1 1813.32   76.09 
  -6  -1   1 1828.02   80.69 
  -6  -1   1 1779.02   78.59 
  -6  -1   1 1628.14   75.79 
   6   1  -1 1695.03   66.59 
  -6   1   1 1735.03   79.09 
  -6   1   1 1672.43   79.19 
  -6   1   1 1690.03   79.49 
  -6   1   1 1728.63   78.89 
  -6   1   1 1749.43   78.79 
   6   1  -1 1711.23   84.39 
  -6   1   1 1747.23   79.69 
   6   1  -1 1731.93   70.19 
   6   1  -1 1676.43   65.89 
  -6   1   1 1724.43   71.19 
   6   1  -1 1717.43   66.79 
   6   1  -1 1737.03   65.19 
   6   1  -1 1751.82   71.99 
   6   1  -1 1707.63   66.89 
   6   1  -1 1725.43   76.89 
   6   1  -1 1722.93   76.49 
  -6   1   1 1669.03   79.39 
  -6   1   1 1668.23   64.59 
   6   1  -1 1739.03   74.79 
   6   1  -1 1712.63   79.19 
   6   1  -1 1813.52   79.49 
  -6   1   1 1706.53   79.99 
  -6   1   1 1504.65   75.59 
  -6   1   1 1786.02   77.79 
  -6   1   1 1640.84   79.09 
   6   1  -1 1674.83   65.89 
   6   1  -1 1752.22   67.19 
  -6   1   1 1710.03   79.59 
   6   1  -1 1716.23   81.29 
   6   1  -1 1742.53   65.39 
  -6   1   1 1710.33   69.69 
   6   1  -1 1740.33   74.19 
   6   1  -1 1520.45   80.19 
   5  -1  -1  324.77   22.90 
  -5  -1   1  305.77   22.90 
   5  -1  -1  357.56   27.50 
  -5  -1   1  319.57   22.90 
  -5  -1   1  341.77   21.30 
   5  -1  -1  327.67   24.00 
   5  -1  -1  341.47   24.50 
  -5  -1   1  311.27   22.30 
  -5  -1   1  291.67   22.60 
   5  -1  -1  298.37   17.20 
   5  -1  -1  321.87   21.30 
   5  -1  -1  329.97   15.90 
   5  -1  -1  363.46   23.60 
  -5  -1   1  328.67   20.10 
   5  -1  -1  335.27   16.30 
   5  -1  -1  336.57   25.20 
  -5  -1   1  331.67   23.30 
  -5  -1   1  348.57   23.40 
  -5  -1   1  328.17   22.10 
   5  -1  -1  356.16   19.50 
  -5  -1   1  318.27   21.50 
  -5  -1   1  292.17   22.70 
   5  -1  -1  310.67   23.70 
   5  -1  -1  262.77   20.70 
  -5  -1   1  311.27   13.40 
   5  -1  -1  305.87   21.60 
   5  -1  -1  330.17   17.80 
  -5  -1   1  341.77   23.00 
  -5   1   1  296.67   21.30 
   5   1  -1  316.97   18.10 
   5   1  -1  291.57   23.80 
   5   1  -1  305.07   16.10 
  -5   1   1  350.56   23.30 
   5   1  -1  319.47   16.00 
   5   1  -1  321.57   14.40 
   5   1  -1  319.87   20.30 
  -5   1   1  319.57   22.80 
  -5   1   1  283.17   22.60 
  -5   1   1  325.17   23.40 
   5   1  -1  284.17   22.10 
   5   1  -1  282.87   20.80 
   5   1  -1  361.96   23.50 
  -5   1   1  342.87   22.60 
  -5   1   1  328.27   13.40 
   5   1  -1  335.27   18.00 
  -5   1   1  316.77   17.80 
  -5   1   1  320.07   13.40 
   5   1  -1  320.27   14.90 
  -5   1   1  351.96   19.70 
  -5   1   1  330.57   23.20 
   5   1  -1  331.47   15.20 
  -5   1   1  336.37   23.50 
  -5   1   1  361.16   24.50 
   5   1  -1  358.96   20.50 
  -5   1   1  330.97   14.60 
  -5   1   1  313.77   13.50 
   5   1  -1  330.87   15.40 
  -5   1   1  340.37   23.60 
  -5   1   1  358.66   24.40 
   5   1  -1  289.77   24.80 
  -5   1   1  315.77   23.70 
   5   1  -1  319.17   15.90 
   5   1  -1  323.87   24.30 
   5   1  -1  286.97   20.60 
   4  -1  -1 5524.35  215.88 
  -4  -1   1 5635.74  210.78 
  -4  -1   1 5693.43  214.18 
  -4  -1   1 5556.54  215.08 
   4  -1  -1 5720.63  207.88 
  -4  -1   1 5637.34  213.18 
  -4  -1   1 5614.94  205.58 
  -4  -1   1 5676.83  214.08 
   4  -1  -1 5620.14  214.38 
  -4  -1   1 5609.94  215.18 
   4  -1  -1 5667.73  210.38 
   4  -1  -1 5654.23  209.08 
   4  -1  -1 5487.65  212.88 
   4  -1  -1 5585.94  207.28 
  -4  -1   1 5553.94  211.18 
  -4  -1   1 5720.63  212.58 
  -4  -1   1 5582.64  211.08 
   4  -1  -1 5681.13  209.28 
  -4  -1   1 5603.44  213.88 
  -4  -1   1 5604.04  211.98 
   4  -1  -1 5738.73  214.08 
   4  -1  -1 5740.93  216.78 
  -4  -1   1 5591.44  215.28 
  -4  -1   1 5554.14  213.78 
  -4  -1   1 5447.35  214.18 
   4  -1  -1 5522.65  217.58 
   4  -1  -1 5559.34  216.18 
   4  -1  -1 5715.23  214.08 
  -4  -1   1 5654.83  215.08 
   4  -1  -1 5744.33  215.08 
   4  -1  -1 5581.84  219.18 
  -4   1   1 5523.75  214.78 
   4   1  -1 5485.95  212.48 
   4   1  -1 5369.56  206.58 
   4   1  -1 5638.44  210.88 
   4   1  -1 5490.65  214.28 
   4   1  -1 5606.84  206.38 
  -4   1   1 5609.44  207.98 
   4   1  -1 5592.74  207.28 
   4   1  -1 5764.42  210.68 
  -4   1   1 5667.33  215.68 
   4   1  -1 5593.84  212.88 
  -4   1   1 5631.24  215.38 
   4   1  -1 5578.34  208.08 
   4   1  -1 5750.92  211.48 
   4   1  -1 5543.15  207.78 
  -4   1   1 5568.54  214.08 
  -4   1   1 5542.55  215.08 
  -4   1   1 5618.34  213.68 
  -4   1   1 5562.94  205.18 
  -4   1   1 5592.54  209.18 
  -4   1   1 5556.64  214.98 
  -4   1   1 5509.25  214.08 
  -4   1   1 5621.14  211.08 
  -4   1   1 5757.62  214.88 
  -4   1   1 5552.84  205.88 
   4   1  -1 5595.64  213.88 
   4   1  -1 5514.15  216.18 
   4   1  -1 5626.44  207.58 
  -4   1   1 5582.14  210.28 
  -4   1   1 5533.55  204.88 
  -4   1   1 5543.05  205.38 
   4   1  -1 5481.45  216.78 
  -4   1   1 5538.25  210.88 
   4   1  -1 5594.24  205.48 
  -4   1   1 5655.53  205.98 
   4   1  -1 5457.45  211.48 
  -4   1   1 5500.45  214.58 
  -4   1   1 5550.15  214.88 
   4   1  -1 5460.15  206.08 
   4   1  -1 5696.33  209.38 
   4   1  -1 5576.74  204.78 
   4   1  -1 5547.25  212.98 
  -4   1   1 5692.63  215.88 
   4   1  -1 5593.84  206.58 
   3  -1  -1  356.86   21.00 
   3  -1  -1  360.26   16.60 
  -3  -1   1  381.46   19.10 
   3  -1  -1  398.06   21.90 
   3  -1  -1  378.56   20.70 
   3  -1  -1  387.06   18.00 
  -3  -1   1  354.76   20.50 
  -3  -1   1  384.56   20.20 
  -3  -1   1  368.16   20.00 
   3  -1  -1  368.76   17.20 
   3  -1  -1  341.37   20.10 
   3  -1  -1  354.76   20.00 
   3  -1  -1  348.57   22.70 
   3  -1  -1  324.07   20.40 
   3  -1  -1  365.66   18.00 
   3  -1  -1  374.76   20.80 
   3  -1  -1  408.86   22.80 
  -3  -1   1  370.16   19.10 
  -3  -1   1  387.56   20.70 
   3  -1  -1  353.46   19.90 
   3  -1  -1  380.56   20.40 
   3  -1  -1  389.46   21.20 
   3  -1  -1  332.87   20.90 
   3  -1  -1  390.66   18.90 
  -3  -1   1  352.76   20.50 
  -3  -1   1  370.46   15.70 
   3  -1  -1  349.17   20.40 
   3  -1  -1  372.96   21.70 
  -3  -1   1  366.86   18.30 
  -3  -1   1  345.07   19.80 
   3  -1  -1  380.16   20.10 
  -3  -1   1  366.26   19.40 
   3  -1  -1  335.57   20.30 
  -3  -1   1  382.96   18.80 
  -3  -1   1  355.06   20.40 
  -3  -1   1  346.87   18.30 
  -3  -1   1  373.96   20.30 
  -3  -1   1  370.76   21.10 
   3  -1  -1  361.66   20.90 
  -3  -1   1  365.16   21.00 
   3   1  -1  359.06   18.20 
  -3   1   1  371.56   19.30 
   3   1  -1  349.37   15.40 
   3   1  -1  354.36   16.80 
  -3   1   1  338.17   19.50 
  -3   1   1  343.27   19.80 
   3   1  -1  354.66   19.90 
   3   1  -1  372.16   20.50 
  -3   1   1  342.67   15.60 
  -3   1   1  329.47   20.30 
   3   1  -1  377.16   20.70 
  -3   1   1  359.66   15.60 
   3   1  -1  367.66   16.60 
   3   1  -1  339.87   21.20 
   3   1  -1  407.56   21.20 
   3   1  -1  355.46   18.10 
   3   1  -1  383.46   16.60 
   3   1  -1  372.96   16.10 
   3   1  -1  389.06   21.10 
  -3   1   1  358.36   19.90 
  -3   1   1  355.36   17.80 
  -3   1   1  374.46   15.60 
   3   1  -1  367.16   15.90 
   3   1  -1  380.16   18.00 
   3   1  -1  396.56   18.90 
  -3   1   1  374.06   20.50 
  -3   1   1  361.36   16.70 
  -3   1   1  381.96   21.10 
  -3   1   1  370.66   17.40 
   3   1  -1  387.16   19.90 
  -3   1   1  372.26   20.50 
   3   1  -1  373.96   15.80 
  -3   1   1  380.26   20.70 
   3   1  -1  379.86   18.30 
   3   1  -1  348.37   19.80 
   3   1  -1  371.16   19.60 
   3   1  -1  372.06   15.60 
  -3   1   1  353.36   20.90 
  -3   1   1  357.76   20.50 
   3   1  -1  368.26   19.20 
  -3   1   1  365.96   19.10 
  -3   1   1  341.27   20.30 
   3   1  -1  350.46   19.60 
  -3   1   1  345.27   20.80 
   3   1  -1  376.86   18.90 
  -3   1   1  365.56   16.10 
  -3   1   1  349.96   20.80 
  -3   1   1  355.96   20.60 
  -3   1   1  355.06   15.30 
   3   1  -1  368.76   15.70 
  -3   1   1  375.66   21.50 
  -3   1   1  366.76   20.60 
   3   1  -1  389.76   20.10 
  -3   1   1  363.66   20.30 
   3   1  -1  369.66   18.80 
  -3   1   1  373.76   18.60 
  -2  -1   1  579.44   24.90 
  -2  -1   1  549.95   26.00 
   2  -1  -1  618.34   27.90 
   2  -1  -1  588.34   26.30 
  -2  -1   1  569.04   26.80 
   2  -1  -1  575.94   26.60 
   2  -1  -1  567.54   27.40 
   2  -1  -1  575.74   24.30 
  -2  -1   1  572.84   26.20 
  -2  -1   1  558.34   23.60 
   2  -1  -1  573.34   23.70 
  -2  -1   1  590.54   26.00 
  -2  -1   1  560.34   24.60 
   2  -1  -1  564.04   28.50 
   2  -1  -1  603.84   26.60 
  -2  -1   1  601.14   26.80 
  -2  -1   1  589.04   25.30 
   2  -1  -1  620.84   27.40 
   2  -1  -1  579.24   26.70 
   2  -1  -1  588.84   25.70 
   2  -1  -1  587.94   27.70 
  -2  -1   1  597.84   23.90 
   2  -1  -1  617.04   26.50 
   2  -1  -1  605.24   26.90 
  -2  -1   1  566.74   25.70 
  -2  -1   1  593.84   26.60 
   2  -1  -1  598.34   27.00 
   2  -1  -1  585.24   25.30 
   2  -1  -1  581.84   24.70 
   2  -1  -1  596.04   27.20 
   2  -1  -1  584.24   26.30 
   2  -1  -1  571.54   26.80 
  -2  -1   1  584.54   26.20 
  -2  -1   1  568.04   26.40 
   2  -1  -1  568.84   25.00 
   2  -1  -1  591.24   26.70 
   2  -1  -1  588.64   27.90 
  -2  -1   1  568.24   24.70 
   2  -1  -1  566.54   26.60 
  -2  -1   1  595.84   25.40 
  -2  -1   1  595.34   26.70 
   2  -1  -1  566.94   27.30 
   2  -1  -1  585.14   26.30 
   2  -1  -1  556.24   26.40 
   2  -1  -1  623.84   26.90 
  -2  -1   1  582.24   24.50 
  -2  -1   1  591.04   25.90 
   2   1  -1  600.44   25.10 
  -2   1   1  597.14   27.50 
   2   1  -1  584.54   24.30 
  -2   1   1  562.34   27.20 
   2   1  -1  571.54   25.60 
  -2   1   1  585.74   27.70 
   2   1  -1  583.44   25.80 
  -2   1   1  584.54   26.80 
   2   1  -1  562.64   24.50 
   2   1  -1  606.04   26.20 
   2   1  -1  558.34   26.40 
  -2   1   1  573.04   26.30 
  -2   1   1  586.64   23.70 
  -2   1   1  604.44   25.70 
   2   1  -1  571.44   26.00 
   2   1  -1  575.74   24.50 
   2   1  -1  543.05   24.50 
  -2   1   1  601.54   27.20 
   2   1  -1  551.84   24.30 
   2   1  -1  554.04   25.50 
  -2   1   1  603.44   27.20 
  -2   1   1  578.94   26.50 
  -2   1   1  596.24   26.50 
   2   1  -1  603.04   23.80 
  -2   1   1  602.34   27.70 
   2   1  -1  571.74   25.00 
   2   1  -1  577.74   25.90 
  -2   1   1  580.74   26.20 
  -2   1   1  596.54   24.40 
   2   1  -1  584.94   25.20 
   2   1  -1  591.04   24.80 
  -2   1   1  586.54   26.60 
   2   1  -1  561.94   23.50 
  -2   1   1  618.34   27.10 
   2   1  -1  601.14   26.50 
   2   1  -1  618.04   25.80 
  -2   1   1  591.44   23.60 
   2   1  -1  562.64   25.60 
   2   1  -1  591.14   25.10 
  -2   1   1  569.94   23.90 
  -2   1   1  584.14   26.90 
   2   1  -1  597.74   26.50 
  -2   1   1  586.14   26.30 
  -2   1   1  596.64   23.40 
  -2   1   1  598.94   27.00 
   2   1  -1  569.94   24.30 
  -2   1   1  619.64   27.00 
   2   1  -1  601.94   26.20 
   2   1  -1  574.74   26.40 
  -2   1   1  588.14   26.70 
  -2   1   1  600.74   26.20 
  -2   1   1  604.74   25.40 
  -2   1   1  563.64   28.20 
  -2   1   1  587.64   27.40 
   2   1  -1  599.14   26.20 
   2   1  -1  570.44   26.60 
  -2   1   1  587.24   24.90 
   1  -1  -1   39.20    4.90 
   1  -1  -1   32.30    3.50 
   1  -1  -1   25.90    3.60 
  -1  -1   1   19.90    3.30 
  -1  -1   1   29.70    3.60 
   1  -1  -1   29.00    4.60 
   1  -1  -1   34.70    4.40 
   1  -1  -1   35.20    4.90 
   1  -1  -1   15.90    2.80 
   1  -1  -1   28.30    3.70 
   1  -1  -1   26.20    3.50 
  -1  -1   1   34.50    4.10 
   1  -1  -1   23.10    3.40 
   1  -1  -1   32.50    4.30 
   1  -1  -1   40.90    4.70 
  -1  -1   1   28.70    3.10 
   1  -1  -1   29.20    4.30 
   1  -1  -1   25.50    3.50 
   1  -1  -1   35.10    4.20 
   1  -1  -1   32.70    3.00 
   1  -1  -1   36.60    4.40 
   1  -1  -1   16.10    2.70 
   1  -1  -1   28.70    3.90 
  -1  -1   1   27.90    3.30 
   1  -1  -1   37.90    4.90 
   1  -1  -1   39.80    4.60 
   1  -1  -1   16.10    2.70 
  -1  -1   1   34.90    3.90 
  -1  -1   1   33.60    3.60 
  -1  -1   1   34.20    3.60 
   1  -1  -1   26.90    4.40 
   1  -1  -1   32.50    3.90 
   1  -1  -1   34.70    3.60 
   1  -1  -1   27.40    3.50 
  -1  -1   1   24.70    3.30 
   1  -1  -1   23.60    3.80 
   1  -1  -1   38.50    4.30 
   1  -1  -1   22.00    3.50 
  -1   1   1   39.70    5.40 
  -1   1   1   33.30    4.40 
  -1   1   1   39.90    4.60 
  -1   1   1   34.00    3.60 
  -1   1   1   30.40    3.70 
  -1   1   1   35.70    4.20 
   1   1  -1   29.90    2.10 
  -1   1   1   33.50    3.80 
   1   1  -1   35.20    3.90 
   1   1  -1   30.80    4.10 
  -1   1   1   36.70    4.70 
  -1   1   1   29.80    3.90 
   1   1  -1   30.50    3.00 
  -1   1   1   38.90    4.30 
   1   1  -1   26.30    3.30 
   1   1  -1   30.10    3.10 
   1   1  -1   25.30    3.40 
   1   1  -1   31.60    3.70 
  -1   1   1   38.10    5.00 
  -1   1   1   30.50    3.70 
  -1   1   1   31.90    4.10 
  -1   1   1   26.30    3.30 
   1   1  -1   33.00    3.80 
   1   1  -1   32.50    3.50 
   1   1  -1   27.60    3.30 
   1   1  -1   32.60    3.60 
   1   1  -1   32.70    3.80 
  -1   1   1   33.80    3.90 
  -1   1   1   24.80    4.10 
  -1   1   1   35.50    4.30 
  -1   1   1   27.90    3.70 
  -1   1   1   27.20    3.90 
  -1   1   1   30.90    4.20 
  -1   1   1   30.00    4.40 
   1   1  -1   30.40    3.90 
   1   1  -1   26.50    3.40 
  -1   1   1   37.30    4.50 
  -1   1   1   28.70    3.70 
  -1   1   1   41.00    5.30 
  -1   1   1   28.20    4.10 
  -1   1   1   27.80    4.00 
   1   1  -1   34.30    2.60 
   1   1  -1   30.90    3.50 
   1   1  -1   32.60    3.40 
  -1   1   1   32.20    4.00 
   1   1  -1   31.40    3.70 
   1   1  -1   32.30    3.60 
  -1   1   1   28.80    3.60 
   1   1  -1   27.50    3.00 
  -1   1   1   20.90    3.60 
   1   1  -1   26.70    3.30 
   1   1  -1   32.30    4.10 
  -1   1   1   30.20    3.20 
   0  -1   1 4321.07  156.68 
   0  -1  -1 4095.59  157.18 
   0  -1   1 3913.61  155.78 
   0  -1  -1 4173.78  156.78 
   0  -1  -1 4305.87  156.28 
   0   1   1 4462.75  154.08 
   0   1  -1 4049.09  156.48 
   0   1  -1 3971.40  156.78 
   0   1   1 4314.47  155.98 
   0   1  -1 4405.56  154.78 
   0   1  -1 4143.99  156.88 
   0   1  -1 4085.69  156.08 
   0   1   1 4434.76  154.58 
   0   1   1 4009.90  158.08 
   0   1   1 4153.08  155.98 
   0   1   1 4357.86  155.48 
   0   1   1 4442.86  153.88 
   0   1  -1 4283.67  154.18 
   0   1  -1 4041.80  156.78 
   0   1   1 4382.26  155.98 
   0   1  -1 4332.47  155.08 
   0   1  -1 4245.58  156.28 
   0   1   1 4293.57  156.28 
   0   1   1 3660.13  156.58 
   0   1   1 4327.57  155.88 
   0   1  -1 4475.15  154.18 
   0   1  -1 4199.38  154.68 
   0   1   1 4568.44  155.08 
   0   1   1 4394.66  155.88 
   0   1  -1 4136.39  157.28 
   0   1  -1 3880.21  158.18 
   0   1  -1 4356.36  156.18 
   0   1  -1 4388.16  155.58 
   0   1   1 4297.47  155.68 
   0   1  -1 4102.59  158.08 
   0   1   1 4311.27  157.98 
   0   1  -1 4255.57  156.48 
   0   1   1 3662.03  159.58 
   0   1  -1 4323.97  155.98 
   0   1   1 3818.42  156.28 
   0   1   1 4466.95  154.28 
   0   1  -1 4171.18  156.18 
   0   1  -1 4245.48  156.28 
   1  -1   1  340.97   15.50 
   1  -1   1  358.86   16.20 
   1  -1   1  368.56   16.80 
   1  -1   1  337.97   16.40 
   1  -1   1  346.87   16.60 
   1  -1   1  337.97   16.50 
  -1  -1  -1  344.57   15.90 
  -1  -1  -1  346.27   14.20 
  -1  -1  -1  334.57   16.90 
   1  -1   1  349.57   15.40 
   1  -1   1  366.86   16.50 
   1  -1   1  370.56   16.70 
   1  -1   1  371.36   16.30 
   1  -1   1  372.26   16.30 
   1  -1   1  392.76   16.70 
  -1  -1  -1  323.67   16.50 
  -1  -1  -1  353.56   16.60 
  -1  -1  -1  317.47   16.40 
   1  -1   1  360.66   15.50 
  -1  -1  -1  354.46   15.00 
   1  -1   1  325.77   15.90 
   1  -1   1  349.17   16.60 
   1  -1   1  322.57   16.50 
   1  -1   1  361.66   15.70 
  -1  -1  -1  347.77   15.50 
  -1  -1  -1  338.57   14.50 
   1  -1   1  328.37   15.70 
  -1  -1  -1  350.86   15.80 
   1  -1   1  346.97   16.40 
   1  -1   1  351.16   16.40 
  -1  -1  -1  352.26   16.60 
   1  -1   1  346.47   16.00 
   1  -1   1  344.07   16.40 
   1  -1   1  318.07   16.60 
   1  -1   1  351.56   15.50 
   1  -1   1  335.07   16.90 
  -1  -1  -1  366.36   16.00 
   1  -1   1  335.77   15.40 
  -1  -1  -1  340.27   14.90 
  -1  -1  -1  357.36   14.60 
  -1  -1  -1  332.27   16.00 
  -1   1  -1  341.47   16.30 
   1   1   1  356.16   16.00 
  -1   1  -1  358.46   15.70 
   1   1   1  335.17   15.80 
   1   1   1  335.47   15.30 
   1   1   1  340.67   14.60 
  -1   1  -1  347.27   15.60 
   1   1   1  337.17   15.80 
  -1   1  -1  353.16   15.70 
   1   1   1  363.26   16.90 
  -1   1  -1  345.77   15.60 
  -1   1  -1  325.97   15.80 
  -1   1  -1  344.27   16.40 
   1   1   1  336.47   16.60 
   1   1   1  360.26   15.00 
   1   1   1  345.77   15.30 
  -1   1  -1  353.46   16.10 
  -1   1  -1  376.86   16.60 
  -1   1  -1  350.16   15.40 
  -1   1  -1  352.26   16.40 
  -1   1  -1  352.36   16.30 
   1   1   1  347.07   15.50 
   1   1   1  340.67   14.20 
  -1   1  -1  350.06   16.80 
  -1   1  -1  366.56   15.50 
   1   1   1  370.36   16.80 
   1   1   1  353.16   14.20 
  -1   1  -1  336.47   16.40 
  -1   1  -1  340.57   17.00 
  -1   1  -1  352.96   16.40 
  -1   1  -1  337.87   15.90 
  -1   1  -1  340.87   16.00 
  -1   1  -1  361.26   16.90 
   1   1   1  339.07   14.60 
  -1   1  -1  342.17   16.10 
   1   1   1  325.37   16.60 
   1   1   1  331.37   13.40 
   1   1   1  352.56   13.90 
   1   1   1  381.86   16.10 
  -1   1  -1  349.47   15.60 
  -1   1  -1  346.77   16.10 
   1   1   1  330.87   17.00 
   1   1   1  341.57   14.50 
  -1   1  -1  375.96   15.70 
   1   1   1  357.06   17.00 
  -1   1  -1  357.36   16.90 
  -1   1  -1  343.97   16.60 
  -1   1  -1  328.67   16.60 
  -1   1  -1  362.26   16.70 
   1   1   1  368.06   16.70 
  -1   1  -1  333.87   15.50 
   1   1   1  351.56   16.30 
   2  -1   1 9767.52  351.96 
   2  -1   1 9647.53  352.86 
  -2  -1  -1 9726.53  354.06 
   2  -1   1 9071.49  352.86 
   2  -1   1 9681.53  353.56 
  -2  -1  -1 9443.25  349.47 
   2  -1   1 9662.03  353.86 
  -2  -1  -1 9519.55  350.66 
   2  -1   1 9437.36  353.96 
   2  -1   1 9686.73  351.16 
   2  -1   1 9835.32  353.46 
   2  -1   1 9818.22  353.46 
  -2  -1  -1 9366.46  353.36 
  -2  -1  -1 9537.55  353.56 
   2  -1   1 9594.04  353.26 
  -2  -1  -1 9697.73  353.76 
  -2  -1  -1 9319.27  350.16 
   2  -1   1 9716.93  354.46 
   2  -1   1 9570.74  353.86 
   2  -1   1 9456.05  352.36 
   2  -1   1 9436.76  353.36 
   2  -1   1 9343.87  353.16 
  -2  -1  -1 9727.03  350.26 
   2  -1   1 9546.44  354.36 
  -2  -1  -1 9516.65  351.96 
   2  -1   1 9375.06  352.96 
  -2  -1  -1 9416.36  351.66 
   2  -1   1 9645.33  350.76 
   2  -1   1 9549.84  353.56 
   2  -1   1 9865.01  354.06 
   2  -1   1 9468.45  353.96 
  -2  -1  -1 9615.34  351.26 
   2  -1   1 9728.43  354.06 
  -2  -1  -1 9600.54  351.46 
   2  -1   1 9310.87  354.36 
  -2  -1  -1 9620.94  354.06 
  -2  -1  -1 9460.05  353.56 
   2  -1   1 9700.43  353.46 
  -2  -1  -1 9415.56  353.86 
   2  -1   1 9600.34  350.86 
   2  -1   1 9642.94  349.96 
  -2  -1  -1 9458.15  352.36 
   2  -1   1 9515.65  352.96 
  -2  -1  -1 9466.05  350.66 
   2  -1   1 9800.72  355.26 
   2  -1   1 9667.33  353.16 
  -2  -1  -1 9999.00  353.96 
  -2  -1  -1 9475.15  350.06 
  -2  -1  -1 9415.36  349.77 
  -2  -1  -1 9321.57  353.86 
  -2  -1  -1 9661.43  352.56 
  -2   1  -1 9736.13  353.26 
   2   1   1 9737.13  355.46 
   2   1   1 9651.93  353.46 
   2   1   1 9585.44  352.16 
   2   1   1 9678.43  354.16 
   2   1   1 9599.04  350.16 
  -2   1  -1 9731.33  352.56 
   2   1   1 9581.74  353.86 
  -2   1  -1 9721.33  353.06 
  -2   1  -1 9840.02  354.06 
   2   1   1 9659.83  351.36 
   2   1   1 9813.92  349.87 
  -2   1  -1 9484.45  353.16 
  -2   1  -1 9643.54  350.76 
   2   1   1 9700.73  353.36 
   2   1   1 9354.16  351.36 
  -2   1  -1 9565.74  354.86 
  -2   1  -1 9874.91  353.56 
  -2   1  -1 9516.25  353.06 
  -2   1  -1 9513.55  352.96 
   2   1   1 9679.53  353.76 
   2   1   1 9646.33  353.66 
  -2   1  -1 9666.23  351.16 
  -2   1  -1 9220.38  352.86 
  -2   1  -1 9319.97  353.46 
  -2   1  -1 9442.66  353.16 
  -2   1  -1 9796.92  351.86 
   2   1   1 9469.45  350.26 
  -2   1  -1 9607.64  354.46 
  -2   1  -1 9758.02  354.26 
   2   1   1 9564.04  353.06 
   2   1   1 9380.36  352.36 
   2   1   1 9716.13  354.26 
  -2   1  -1 9446.96  353.36 
  -2   1  -1 9305.87  350.96 
  -2   1  -1 9553.04  353.46 
   2   1   1 9510.45  350.06 
   2   1   1 9483.15  349.57 
   2   1   1 9461.95  353.46 
   2   1   1 9596.54  351.76 
  -2   1  -1 9735.63  353.76 
   2   1   1 9560.74  354.16 
   2   1   1 9600.44  349.87 
  -2   1  -1 9358.56  354.56 
   2   1   1 9340.97  350.56 
  -2   1  -1 9738.63  354.06 
  -2   1  -1 8709.23  353.46 
  -2   1  -1 9563.94  353.96 
   2   1   1 9570.14  353.56 
  -2   1  -1 9608.64  353.66 
   2   1   1 9352.06  349.77 
   2   1   1 9374.46  351.66 
   2   1   1 9714.13  353.76 
  -2   1  -1 9707.83  353.36 
  -2   1  -1 9603.74  353.36 
  -2   1  -1 9505.05  353.86 
   2   1   1 9704.73  350.66 
   2   1   1 9428.46  351.76 
  -2   1  -1 9464.15  349.96 
  -2   1  -1 9523.75  350.76 
   3  -1   1   59.39    8.70 
   3  -1   1   55.59   10.00 
  -3  -1  -1   60.49    8.70 
  -3  -1  -1   74.09    8.40 
   3  -1   1   61.59    9.00 
   3  -1   1   68.19    9.50 
   3  -1   1   73.69    7.70 
   3  -1   1   58.69    5.80 
  -3  -1  -1   55.49    5.70 
  -3  -1  -1   47.10    8.00 
   3  -1   1   75.99    9.70 
  -3  -1  -1   54.19    7.40 
   3  -1   1   72.49    9.10 
   3  -1   1   63.09    9.70 
  -3  -1  -1   58.59    8.50 
  -3  -1  -1   58.89    7.90 
  -3  -1  -1   65.99    4.80 
   3  -1   1   62.19    8.60 
  -3  -1  -1   62.99    6.70 
  -3  -1  -1   58.79    7.20 
   3  -1   1   71.09   10.70 
   3  -1   1   69.29    9.00 
  -3  -1  -1   55.89    6.30 
   3  -1   1   71.59   10.00 
   3  -1   1   55.99    7.90 
   3  -1   1   60.19    8.50 
  -3  -1  -1   56.59    8.90 
  -3  -1  -1   58.79    8.80 
  -3  -1  -1   56.39    8.40 
  -3  -1  -1   73.99    7.20 
   3  -1   1   52.89    7.00 
   3  -1   1   58.89    4.60 
  -3  -1  -1   54.99    6.60 
   3  -1   1   57.89    9.20 
   3  -1   1   55.29    5.90 
  -3  -1  -1   65.59    9.10 
  -3  -1  -1   85.19   10.30 
  -3  -1  -1   64.19    8.40 
   3  -1   1   57.59    8.40 
   3  -1   1   63.69    6.70 
  -3  -1  -1   50.09    8.60 
  -3  -1  -1   63.29    6.50 
   3   1   1   49.80    5.90 
  -3   1  -1   77.09    9.70 
  -3   1  -1   67.49    7.90 
  -3   1  -1   61.79    9.30 
  -3   1  -1   46.20    7.90 
   3   1   1   56.99    7.30 
   3   1   1   61.59    8.90 
   3   1   1   52.19    6.20 
   3   1   1   82.99   10.20 
   3   1   1   66.79    9.10 
  -3   1  -1   58.39    8.00 
   3   1   1   72.99    8.70 
  -3   1  -1   67.09    6.40 
   3   1   1   60.89    4.70 
  -3   1  -1   63.89    9.50 
   3   1   1   32.50    7.50 
   3   1   1   62.29    6.30 
  -3   1  -1   59.69    8.80 
  -3   1  -1   62.79    8.40 
  -3   1  -1   54.29    8.50 
  -3   1  -1   58.99    8.80 
   3   1   1   53.49    5.70 
   3   1   1   57.49    9.20 
   3   1   1   55.39    6.40 
  -3   1  -1   67.29    8.80 
  -3   1  -1   64.19    7.50 
  -3   1  -1   57.49    8.80 
   3   1   1   52.99    5.90 
   3   1   1   60.89    4.80 
  -3   1  -1   71.79    6.80 
   3   1   1   62.09    8.90 
   3   1   1   55.29    6.30 
   3   1   1   52.79    8.10 
  -3   1  -1   61.59   11.20 
  -3   1  -1   67.59    8.60 
  -3   1  -1   78.79    7.80 
   3   1   1   50.09    6.20 
  -3   1  -1   64.79    6.70 
  -3   1  -1   53.19    8.70 
  -3   1  -1   58.19    8.10 
   3   1   1   64.79    4.80 
   3   1   1   69.69    7.50 
  -3   1  -1   55.29    8.40 
   3   1   1   90.69   11.30 
   3   1   1   62.09    9.30 
   3   1   1   62.59    7.50 
   3   1   1   68.19    6.80 
   3   1   1   66.99    3.70 
   3   1   1   54.39    8.20 
  -3   1  -1   58.69    7.80 
  -3   1  -1   70.29    5.60 
  -3   1  -1   52.79    8.00 
  -3   1  -1   65.89    8.90 
  -3   1  -1   62.79    4.60 
   4  -1   1 2029.20   77.99 
  -4  -1  -1 2078.29   81.59 
  -4  -1  -1 1955.00   84.59 
  -4  -1  -1 2034.10   84.69 
   4  -1   1 2098.19   86.79 
   4  -1   1 2002.50   83.29 
  -4  -1  -1 2031.90   80.49 
  -4  -1  -1 2037.80   85.59 
   4  -1   1 1909.21   83.49 
  -4  -1  -1 2023.60   85.39 
   4  -1   1 2033.20   80.99 
  -4  -1  -1 1929.81   84.59 
   4  -1   1 2019.20   84.29 
  -4  -1  -1 2091.79   79.29 
  -4  -1  -1 2031.20   77.59 
  -4  -1  -1 1994.00   80.09 
  -4  -1  -1 1903.11   84.89 
  -4  -1  -1 2010.30   84.59 
   4  -1   1 2013.20   78.99 
   4  -1   1 1984.90   83.29 
  -4  -1  -1 2068.29   83.69 
   4  -1   1 2117.99   79.79 
   4  -1   1 1988.70   87.29 
   4  -1   1 1993.70   85.79 
  -4  -1  -1 1927.81   83.29 
  -4  -1  -1 1964.10   83.09 
   4  -1   1 2054.39   84.89 
   4  -1   1 2077.19   75.79 
  -4  -1  -1 1995.80   84.79 
  -4  -1  -1 1987.40   79.79 
   4  -1   1 1998.10   77.79 
   4  -1   1 1966.60   85.89 
  -4   1  -1 2072.09   81.89 
   4   1   1 2027.90   75.29 
  -4   1  -1 2012.60   84.59 
   4   1   1 2051.89   75.49 
   4   1   1 2058.09   86.59 
   4   1   1 2005.90   82.29 
   4   1   1 2047.40   79.69 
   4   1   1 2064.29   80.89 
   4   1   1 2029.80   80.19 
  -4   1  -1 2051.29   84.69 
  -4   1  -1 2039.10   83.89 
   4   1   1 1997.10   79.19 
  -4   1  -1 2038.40   89.89 
  -4   1  -1 1994.10   85.79 
   4   1   1 2046.40   75.99 
  -4   1  -1 2031.80   85.59 
  -4   1  -1 2062.59   81.09 
  -4   1  -1 2091.39   85.49 
   4   1   1 1988.30   82.59 
   4   1   1 1992.90   87.89 
  -4   1  -1 2020.90   85.09 
   4   1   1 1941.41   78.39 
  -4   1  -1 2014.50   85.19 
   4   1   1 2025.50   76.89 
   4   1   1 1959.70   86.49 
  -4   1  -1 2079.09   85.49 
  -4   1  -1 2013.40   83.59 
  -4   1  -1 1993.20   75.79 
   4   1   1 1974.30   85.29 
   4   1   1 2016.60   75.89 
  -4   1  -1 2045.50   79.09 
   4   1   1 2029.50   79.29 
   4   1   1 2059.59   85.49 
  -4   1  -1 2089.89   76.09 
  -4   1  -1 2056.49   77.89 
  -4   1  -1 1985.70   78.49 
  -4   1  -1 2011.30   84.99 
  -4   1  -1 1953.20   85.09 
   4   1   1 1949.60   79.99 
   5  -1   1    3.40    5.00 
  -5  -1  -1   -1.00    2.70 
  -5  -1  -1    9.00    6.80 
   5  -1   1    2.50    4.60 
  -5  -1  -1   -0.80    2.00 
   5  -1   1    5.70    5.50 
  -5  -1  -1   -0.80    4.10 
   5  -1   1    2.90    3.10 
   5  -1   1    3.50    4.40 
  -5  -1  -1    0.80    3.90 
  -5  -1  -1   -3.50    3.60 
   5  -1   1    2.20    3.10 
  -5  -1  -1   -1.00    4.10 
  -5  -1  -1    2.80    5.10 
   5  -1   1    1.70    2.50 
  -5  -1  -1    0.90    4.50 
   5  -1   1    6.90    5.80 
   5  -1   1   -2.40    4.50 
  -5  -1  -1    1.90    4.60 
   5  -1   1    0.70    3.50 
  -5  -1  -1    6.60    5.40 
   5  -1   1    1.90    5.90 
   5  -1   1    0.80    5.00 
   5  -1   1    3.40    5.40 
  -5  -1  -1   -5.10    4.40 
  -5  -1  -1    3.00    3.60 
   5  -1   1    0.60    2.30 
  -5  -1  -1   -1.30    4.10 
  -5  -1  -1    2.30    5.20 
  -5   1  -1    1.30    3.30 
   5   1   1    2.10    5.20 
  -5   1  -1   -1.30    1.80 
  -5   1  -1   -4.20    4.00 
   5   1   1    0.20    5.20 
  -5   1  -1   -2.40    3.90 
  -5   1  -1    0.70    4.50 
   5   1   1   -2.30    3.10 
  -5   1  -1   -0.90    3.30 
  -5   1  -1   -5.50    4.00 
   5   1   1    5.20    5.50 
  -5   1  -1    7.00    6.00 
   5   1   1   -1.70    2.90 
  -5   1  -1    4.80    2.70 
   5   1   1   -1.50    3.70 
   5   1   1   -0.60    3.60 
   5   1   1    5.10    6.00 
  -5   1  -1    7.00    5.40 
  -5   1  -1    3.20    2.70 
  -5   1  -1    1.80    4.80 
  -5   1  -1    0.90    5.20 
   5   1   1   -0.40    2.70 
  -5   1  -1   -4.40    4.20 
   5   1   1    0.50    2.10 
   5   1   1    2.00    2.90 
  -5   1  -1    5.40    4.90 
   5   1   1   -1.50    4.10 
  -5   1  -1   -1.90    4.00 
  -5   1  -1   -2.20    2.10 
   5   1   1    3.50    5.90 
  -5   1  -1   -5.70    3.80 
   5   1   1    0.00    2.80 
   6  -1   1   55.09    6.50 
   6  -1   1   67.49   15.10 
  -6  -1  -1   38.60   10.30 
   6  -1   1   43.60    7.10 
   6  -1   1   25.00    8.30 
   6  -1   1   35.20    9.90 
   6  -1   1   53.59   11.50 
   6  -1   1   50.79   11.20 
   6  -1   1   52.09   12.00 
  -6  -1  -1   51.89    5.80 
   6  -1   1   40.60   12.20 
  -6  -1  -1   58.39   12.00 
  -6  -1  -1   36.40    9.70 
   6  -1   1   48.40    6.30 
   6  -1   1   34.80   11.70 
  -6  -1  -1   42.70    8.80 
  -6  -1  -1   47.10   11.40 
   6  -1   1   54.49   14.50 
   6  -1   1   54.89    8.20 
  -6  -1  -1   44.30   11.50 
   6  -1   1   36.00   10.50 
  -6  -1  -1   59.89   12.00 
   6  -1   1   42.00   11.10 
   6   1   1   41.10    8.80 
  -6   1  -1   46.20   11.70 
   6   1   1   46.70   10.40 
   6   1   1   66.69    8.00 
  -6   1  -1   40.10   11.00 
  -6   1  -1   37.60   10.50 
   6   1   1   53.09    7.80 
  -6   1  -1   41.80   11.20 
  -6   1  -1   39.60   11.50 
  -6   1  -1   41.70    9.70 
   6   1   1   66.49   10.30 
  -6   1  -1   57.19    8.90 
   6   1   1   49.90    6.50 
  -6   1  -1   44.40   12.20 
  -6   1  -1   38.70   10.00 
  -6   1  -1   63.09   13.20 
  -6   1  -1   51.19    5.90 
   6   1   1   43.30   12.10 
  -6   1  -1   30.20   10.70 
   6   1   1   58.89   13.90 
   6   1   1   49.50   10.10 
  -6   1  -1   42.90    7.30 
   6   1   1   47.50    6.90 
  -6   1  -1   41.90   10.60 
  -6   1  -1   36.60    8.60 
   6   1   1   32.10   10.20 
  -6   1  -1   33.40    9.60 
   6   1   1   53.09    7.80 
  -6   1  -1   61.89    6.30 
   6   1   1   50.19    6.90 
  -6   1  -1   47.30    8.70 
  -7  -1  -1   10.70    8.30 
  -7  -1  -1    2.10    5.50 
   7  -1   1    8.60    9.00 
   7  -1   1   25.80    9.70 
   7  -1   1    3.40    7.10 
   7  -1   1   12.90    5.00 
   7  -1   1    9.90    7.50 
  -7  -1  -1    3.00    7.90 
   7  -1   1   16.00    8.90 
   7  -1   1    9.30    8.40 
   7  -1   1    5.30    7.90 
   7  -1   1   11.50    5.10 
  -7  -1  -1   21.00   10.20 
  -7  -1  -1   23.70    8.70 
   7  -1   1   12.60    9.30 
   7  -1   1   18.10    8.80 
  -7  -1  -1   16.90    7.60 
  -7  -1  -1   10.70    8.30 
  -7  -1  -1   24.00   10.20 
   7  -1   1   25.20   13.40 
   7  -1   1   12.70    9.70 
  -7  -1  -1   13.60    7.70 
  -7  -1  -1    3.50    7.80 
  -7  -1  -1    2.20    7.60 
  -7   1  -1   10.90    9.60 
   7   1   1    9.10    7.20 
   7   1   1   16.90   10.50 
  -7   1  -1   14.20    8.90 
   7   1   1    6.00    5.70 
  -7   1  -1   -3.10    7.40 
   7   1   1   22.10   11.20 
  -7   1  -1    8.20    9.10 
  -7   1  -1   12.00    7.40 
   7   1   1    8.40    6.50 
  -7   1  -1   10.30    9.10 
  -7   1  -1   16.30    6.40 
  -7   1  -1   27.70   10.70 
  -7   1  -1   -2.10    6.40 
  -7   1  -1    8.90    7.60 
   7   1   1   11.00    6.90 
  -7   1  -1   14.80    9.10 
  -7   1  -1    3.80    7.20 
   7   1   1   14.50    5.00 
   7   1   1    2.40    8.30 
   7   1   1    8.40    6.70 
   7   1   1    2.10    8.80 
   7   1   1   16.00    4.80 
   7   1   1    3.50    6.70 
   7   1   1   13.70    9.00 
   8  -1   1  566.94   46.60 
   8  -1   1  515.85   43.20 
  -8  -1  -1  540.55   40.30 
  -8  -1  -1  610.84   42.60 
   8  -1   1  575.74   40.20 
  -8  -1  -1  627.94   43.70 
  -8  -1  -1  662.33   42.40 
  -8  -1  -1  563.14   41.10 
  -8  -1  -1  657.83   37.00 
   8  -1   1  628.14   40.50 
  -8  -1  -1  536.65   40.40 
  -8  -1  -1  549.45   39.70 
  -8  -1  -1  562.54   39.10 
   8  -1   1  598.34   39.20 
   8  -1   1  643.84   41.30 
   8  -1   1  607.94   44.10 
   8  -1   1  583.14   38.90 
  -8  -1  -1  537.45   41.40 
  -8  -1  -1  606.44   37.80 
   8  -1   1  598.54   43.50 
   8  -1   1  592.34   43.70 
   8  -1   1  564.64   45.40 
   8   1   1  666.13   40.60 
   8   1   1  597.24   44.70 
  -8   1  -1  523.55   39.60 
   8   1   1  580.54   47.50 
  -8   1  -1  580.44   42.40 
   8   1   1  657.03   37.10 
   8   1   1  743.53   46.80 
  -8   1  -1  597.94   43.30 
  -8   1  -1  590.74   42.40 
  -8   1  -1  587.84   38.90 
   8   1   1  564.74   42.00 
   8   1   1  610.34   36.70 
   8   1   1  560.04   35.80 
  -8   1  -1  581.64   41.40 
  -8   1  -1  534.05   41.50 
   8   1   1  653.13   41.10 
  -8   1  -1  519.35   40.40 
  -8   1  -1  561.34   39.10 
   8   1   1  586.54   45.90 
   8   1   1  616.94   43.70 
   8   1   1  624.84   45.80 
  -8   1  -1  583.24   42.30 
  -8   1  -1  614.84   42.90 
  -9  -1  -1   30.00   14.60 
   9  -1   1   16.80   15.40 
  -9  -1  -1   30.10   14.60 
   9  -1   1   62.89   16.50 
  -9  -1  -1   43.30   14.90 
   9  -1   1    0.10    9.50 
   9  -1   1   27.70   14.80 
  -9  -1  -1   53.59   15.90 
  -9  -1  -1   22.00   13.50 
   9  -1   1   19.40   12.40 
   9  -1   1   17.50   12.10 
  -9  -1  -1   34.00   14.30 
   9  -1   1   36.30   12.30 
  -9  -1  -1   26.30   11.10 
   9  -1   1   30.40   13.80 
   9  -1   1   14.80   12.20 
  -9  -1  -1   32.00   13.90 
   9  -1   1    9.10   11.80 
   9  -1   1   47.60   16.10 
  -9  -1  -1    5.50   10.50 
  -9  -1  -1   17.80   11.20 
  -9   1  -1   20.50   11.30 
   9   1   1   40.90   18.20 
  -9   1  -1   25.40   13.40 
   9   1   1   13.50   10.70 
   9   1   1   22.90   10.10 
  -9   1  -1   16.20   10.50 
  -9   1  -1   26.00   14.60 
   9   1   1    9.90   11.90 
  -9   1  -1   22.00   13.80 
   9   1   1   18.50   13.30 
  -9   1  -1   27.20   14.30 
  -9   1  -1   16.10   11.10 
   9   1   1   36.80   15.20 
   9   1   1    2.50   10.90 
   9   1   1   35.30   18.60 
  -9   1  -1   10.70   12.10 
   9   1   1    8.80   11.90 
  -9   1  -1   35.20   13.80 
   9   1   1   43.50   13.80 
 -10  -1  -1  461.45   49.30 
  10  -1   1  530.45   57.99 
  10  -1   1  482.65   45.60 
 -10  -1  -1  492.95   49.30 
  10  -1   1  622.64   66.59 
 -10  -1  -1  424.16   47.20 
  10  -1   1  570.84   52.09 
  10  -1   1  484.65   52.99 
  10  -1   1  541.25   54.69 
 -10  -1  -1  590.64   43.10 
 -10  -1  -1  432.16   47.10 
 -10  -1  -1  554.84   56.29 
 -10  -1  -1  491.95   48.00 
  10  -1   1  477.75   54.39 
  10  -1   1  545.85   55.59 
 -10  -1  -1  490.85   49.99 
 -10  -1  -1  457.35   42.70 
  10  -1   1  504.45   48.80 
  10   1   1  513.95   57.59 
  10   1   1  450.25   51.69 
 -10   1  -1  594.74   55.39 
  10   1   1  497.05   46.50 
  10   1   1  505.45   52.69 
 -10   1  -1  499.55   50.59 
 -10   1  -1  491.45   49.20 
 -10   1  -1  485.45   38.50 
  10   1   1  491.55   59.39 
 -10   1  -1  544.05   53.69 
 -10   1  -1  437.26   47.20 
  10   1   1  509.45   51.19 
 -10   1  -1  579.14   46.00 
  10   1   1  502.45   52.99 
 -10   1  -1  554.04   42.20 
  10   1   1  489.75   55.69 
 -10   1  -1  515.85   51.69 
 -10   1  -1  505.05   51.39 
  10   1   1  427.16   44.60 
 -10  -2   1   96.09   22.40 
 -10  -2   1   99.09   23.30 
  10  -2  -1  140.09   27.30 
  10  -2  -1  114.29   30.30 
  10  -2  -1  142.39   25.30 
 -10  -2   1  122.09   24.70 
 -10  -2   1   96.89   22.10 
 -10  -2   1  155.98   24.10 
  10  -2  -1  123.29   29.20 
 -10  -2   1  134.59   26.70 
  10  -2  -1  164.38   27.50 
  10  -2  -1  145.59   25.50 
  10  -2  -1  126.69   25.00 
  10  -2  -1   68.79   20.80 
  10  -2  -1  129.89   26.90 
  10  -2  -1  101.79   26.80 
  10  -2  -1  143.89   26.10 
 -10  -2   1  164.58   27.90 
 -10   2   1  130.29   28.20 
  10   2  -1  121.79   27.90 
 -10   2   1  155.18   28.90 
 -10   2   1  125.09   25.70 
  10   2  -1  110.39   21.80 
  10   2  -1   97.89   25.00 
  10   2  -1  138.39   24.40 
 -10   2   1  150.28   28.10 
 -10   2   1  124.29   25.00 
  10   2  -1  122.19   25.60 
  10   2  -1  162.78   28.80 
  10   2  -1   83.79   25.90 
 -10   2   1  106.19   22.40 
  10   2  -1   79.09   25.90 
 -10   2   1   97.69   24.00 
 -10   2   1  105.69   21.60 
  10   2  -1  128.69   26.10 
 -10   2   1  157.18   28.00 
 -10   2   1  108.49   24.10 
  -9  -2   1   98.99   19.60 
   9  -2  -1   91.79   21.30 
   9  -2  -1  173.28   25.90 
  -9  -2   1  150.38   25.50 
   9  -2  -1  124.99   26.70 
   9  -2  -1  138.49   22.30 
   9  -2  -1  117.99   27.50 
   9  -2  -1  100.59   22.50 
  -9  -2   1  145.39   21.20 
   9  -2  -1  159.18   25.40 
  -9  -2   1  123.19   22.60 
  -9  -2   1  148.19   22.50 
  -9  -2   1  168.28   26.20 
  -9  -2   1  105.09   22.60 
  -9  -2   1   88.59   20.50 
   9  -2  -1  142.99   24.60 
  -9  -2   1  125.79   22.60 
   9  -2  -1  130.49   22.50 
  -9  -2   1  138.49   23.60 
   9  -2  -1  132.59   24.90 
   9  -2  -1  124.19   25.90 
   9   2  -1  173.98   27.60 
   9   2  -1  161.78   29.00 
   9   2  -1  144.09   24.10 
  -9   2   1  125.49   24.10 
  -9   2   1   81.99   19.70 
  -9   2   1  174.98   28.80 
   9   2  -1  154.58   28.30 
   9   2  -1  156.18   24.20 
   9   2  -1  102.99   19.40 
  -9   2   1  128.39   24.90 
  -9   2   1  137.29   24.90 
   9   2  -1  178.98   22.80 
  -9   2   1  140.19   24.60 
  -9   2   1   85.79   18.80 
  -9   2   1  126.59   23.30 
  -9   2   1  121.49   22.50 
  -9   2   1  119.89   23.50 
  -9   2   1  161.78   26.00 
   9   2  -1  145.59   29.70 
   9   2  -1   96.89   22.20 
   9   2  -1  133.69   25.10 
  -8  -2   1    7.40    8.70 
  -8  -2   1   15.60    8.60 
  -8  -2   1    8.40    9.00 
   8  -2  -1   20.00   11.20 
   8  -2  -1   24.50    8.00 
   8  -2  -1   -5.40    5.70 
  -8  -2   1   24.10   12.20 
  -8  -2   1    7.00    8.70 
   8  -2  -1    8.30    9.00 
   8  -2  -1   23.60   14.40 
   8  -2  -1   17.80   11.40 
  -8  -2   1   31.20   11.50 
   8  -2  -1   17.30   11.80 
  -8  -2   1   30.90   13.70 
   8  -2  -1   20.20   10.10 
  -8  -2   1   16.60    8.10 
   8  -2  -1   26.40   12.10 
  -8  -2   1   13.50   10.00 
   8  -2  -1   11.90   10.60 
  -8  -2   1   12.20   10.00 
   8  -2  -1   12.00    9.80 
  -8  -2   1   28.50   10.80 
   8   2  -1   26.10   12.80 
  -8   2   1   19.80    7.40 
   8   2  -1   13.30    8.70 
   8   2  -1   12.70   10.60 
   8   2  -1    9.30   11.50 
  -8   2   1   12.10   10.10 
   8   2  -1   13.10    9.20 
  -8   2   1    8.00   10.70 
  -8   2   1   16.70   10.60 
  -8   2   1   13.50   10.60 
   8   2  -1   17.60   12.00 
  -8   2   1    4.80    9.00 
   8   2  -1   15.80   10.70 
  -8   2   1   27.40   12.00 
  -8   2   1   -1.20    7.20 
  -8   2   1    9.70   10.20 
  -8   2   1   25.80   11.80 
   8   2  -1    5.50    7.40 
   8   2  -1    6.30   10.60 
   8   2  -1    8.20   12.10 
  -8   2   1   12.80    8.90 
  -8   2   1   12.70   10.20 
   7  -2  -1  146.29   23.30 
  -7  -2   1  160.88   21.40 
  -7  -2   1  118.29   17.70 
  -7  -2   1  127.29   20.10 
  -7  -2   1  163.38   19.30 
  -7  -2   1  142.19   19.60 
  -7  -2   1  171.78   23.60 
  -7  -2   1  158.58   21.30 
   7  -2  -1  141.99   20.20 
  -7  -2   1  128.29   16.90 
  -7  -2   1  153.98   22.70 
   7  -2  -1  135.79   21.50 
  -7  -2   1  121.29   19.00 
   7  -2  -1  121.29   19.70 
  -7  -2   1  143.99   21.50 
  -7  -2   1  135.09   16.30 
   7  -2  -1  178.68   22.40 
   7  -2  -1  153.18   26.50 
   7  -2  -1  136.89   22.60 
   7  -2  -1  160.68   15.60 
   7  -2  -1  124.99   20.50 
   7  -2  -1  146.59   20.60 
   7  -2  -1  153.68   17.40 
   7  -2  -1  149.88   20.30 
  -7   2   1  112.29   19.20 
   7   2  -1  134.39   18.40 
  -7   2   1  154.38   21.30 
  -7   2   1  131.69   21.00 
   7   2  -1  153.18   17.50 
   7   2  -1  164.68   20.90 
  -7   2   1  131.69   20.70 
   7   2  -1  174.68   25.30 
  -7   2   1  133.09   20.50 
   7   2  -1  140.19   22.00 
   7   2  -1  159.48   22.60 
  -7   2   1  140.59   21.70 
  -7   2   1  149.19   16.00 
   7   2  -1  151.08   14.70 
   7   2  -1  169.78   25.10 
  -7   2   1  130.99   20.80 
  -7   2   1  135.39   20.90 
   7   2  -1  123.09   19.70 
  -7   2   1  147.39   21.30 
  -7   2   1  143.39   21.10 
   7   2  -1  151.38   15.40 
   7   2  -1  161.08   26.50 
   7   2  -1  142.29   16.20 
   7   2  -1  141.19   12.70 
  -7   2   1  146.89   20.90 
  -7   2   1  192.28   19.50 
   6  -2  -1   27.40   10.10 
  -6  -2   1   25.20    8.90 
   6  -2  -1   24.10   10.20 
  -6  -2   1   41.20   11.60 
   6  -2  -1   26.10    5.70 
   6  -2  -1   27.10    9.30 
   6  -2  -1   34.10   11.10 
   6  -2  -1   41.80   13.40 
  -6  -2   1   16.70    8.20 
  -6  -2   1   37.50   10.30 
   6  -2  -1   36.40   10.80 
  -6  -2   1   32.70   10.20 
  -6  -2   1   24.60    7.80 
   6  -2  -1   23.80    5.80 
  -6  -2   1   13.10    7.50 
   6  -2  -1   37.90   11.30 
  -6  -2   1   28.70    4.60 
   6  -2  -1   32.30    8.40 
   6  -2  -1   44.80    8.40 
  -6  -2   1   31.30   10.10 
  -6  -2   1   32.90    9.00 
  -6  -2   1   27.50   10.50 
  -6  -2   1   43.40    9.80 
  -6  -2   1   36.50   10.50 
   6  -2  -1   18.90    8.10 
  -6  -2   1   25.20    6.90 
   6  -2  -1   49.99   11.30 
   6  -2  -1   21.80    9.70 
  -6   2   1   27.60    4.40 
   6   2  -1   50.69   10.30 
  -6   2   1   34.70    9.90 
   6   2  -1   37.70    7.30 
  -6   2   1   33.40    5.10 
   6   2  -1   23.40    4.20 
   6   2  -1   28.80    5.20 
  -6   2   1   25.70   10.00 
   6   2  -1   30.20   11.80 
  -6   2   1   19.50    8.40 
   6   2  -1   39.00    9.70 
  -6   2   1   13.80    7.90 
  -6   2   1   26.60    3.40 
  -6   2   1   24.00    9.70 
  -6   2   1   37.90   10.40 
   6   2  -1   26.20   10.20 
  -6   2   1   22.10    7.20 
  -6   2   1   25.50    5.60 
   6   2  -1   36.50    8.30 
   6   2  -1   22.60    5.10 
  -6   2   1   18.30    8.00 
   6   2  -1   25.00    4.70 
  -6   2   1   50.59   12.10 
  -6   2   1   32.20    4.30 
  -6   2   1   25.90    9.80 
   6   2  -1   29.90    6.30 
   6   2  -1   26.70    5.80 
   6   2  -1   25.40    6.30 
   6   2  -1   29.00   10.00 
   6   2  -1   20.10    6.30 
  -6   2   1   28.80   10.60 
   6   2  -1   38.40    6.50 
  -6   2   1   35.20   10.40 
   6   2  -1   25.20    8.50 
  -6   2   1   30.40    7.20 
  -6   2   1   37.80    4.40 
   6   2  -1   19.60    9.20 
   6   2  -1   19.50   10.00 
   5  -2  -1    1.80    2.90 
   5  -2  -1   -7.50    3.10 
  -5  -2   1    2.10    4.70 
  -5  -2   1   -4.80    3.10 
  -5  -2   1    0.10    3.70 
  -5  -2   1    0.50    4.40 
  -5  -2   1    0.40    4.10 
  -5  -2   1    1.80    3.80 
   5  -2  -1    5.40    5.70 
  -5  -2   1   -1.00    2.20 
   5  -2  -1   -1.70    3.00 
  -5  -2   1    3.40    5.10 
   5  -2  -1   -1.80    5.80 
  -5  -2   1    2.10    5.10 
   5  -2  -1    4.60    5.30 
  -5  -2   1    1.00    3.70 
   5  -2  -1   -7.10    3.20 
   5  -2  -1    2.00    5.20 
  -5  -2   1    1.90    3.90 
   5  -2  -1   -1.60    5.20 
  -5  -2   1   -3.60    4.40 
   5  -2  -1    2.10    4.90 
  -5  -2   1    1.80    4.50 
   5  -2  -1   -3.00    3.70 
   5  -2  -1    7.40    3.70 
  -5  -2   1    2.00    4.50 
   5  -2  -1   -2.50    3.40 
   5  -2  -1    0.20    3.60 
  -5   2   1   -6.10    3.10 
   5   2  -1   -0.60    4.40 
  -5   2   1   -0.80    2.00 
   5   2  -1   -1.40    1.90 
   5   2  -1    1.90    2.80 
   5   2  -1    2.80    2.50 
  -5   2   1    5.60    2.50 
  -5   2   1    1.60    5.60 
   5   2  -1   -0.50    3.70 
   5   2  -1    0.40    4.60 
  -5   2   1    2.20    2.70 
   5   2  -1    0.00    2.00 
  -5   2   1   -0.40    3.30 
  -5   2   1    8.10    5.80 
  -5   2   1   -3.30    3.90 
  -5   2   1    4.00    3.20 
   5   2  -1    1.30    2.40 
   5   2  -1    4.30    2.80 
  -5   2   1   -7.20    3.60 
   5   2  -1    0.50    2.70 
  -5   2   1    7.60    5.60 
   5   2  -1    5.70    4.60 
   5   2  -1    2.20    3.10 
   5   2  -1    1.00    2.10 
  -5   2   1    6.00    5.50 
  -5   2   1    5.60    2.50 
  -5   2   1    3.10    2.30 
  -5   2   1    0.90    4.30 
   5   2  -1   -1.10    2.50 
  -5   2   1   -2.30    3.90 
  -5   2   1    5.00    4.50 
  -5   2   1   -2.10    4.40 
  -5   2   1   -0.20    2.30 
  -5   2   1    7.60    6.00 
   5   2  -1   -0.60    2.20 
   5   2  -1   -1.00    3.50 
   5   2  -1    0.00    2.90 
   5   2  -1    3.60    3.50 
  -5   2   1    3.50    4.70 
   5   2  -1    2.20    4.80 
   5   2  -1    2.90    4.60 
   5   2  -1   -2.60    4.40 
   4  -2  -1    3.30    4.00 
  -4  -2   1   -1.10    2.10 
   4  -2  -1   -1.00    4.00 
   4  -2  -1   -4.60    3.40 
   4  -2  -1   -1.00    2.60 
   4  -2  -1   -4.80    3.20 
  -4  -2   1   -3.80    2.60 
  -4  -2   1   -2.30    2.70 
  -4  -2   1    0.10    3.70 
  -4  -2   1    1.20    3.70 
   4  -2  -1   -2.40    3.10 
   4  -2  -1   -1.60    4.10 
   4  -2  -1   -1.00    3.50 
   4  -2  -1    3.40    3.20 
  -4  -2   1    2.10    2.50 
  -4  -2   1    9.90    5.20 
   4  -2  -1    6.30    4.40 
  -4  -2   1   -2.10    2.50 
   4  -2  -1   -0.40    3.80 
   4  -2  -1    0.70    2.60 
  -4  -2   1   -5.10    3.40 
   4  -2  -1    1.70    5.10 
   4  -2  -1   -2.10    3.70 
  -4  -2   1    1.20    4.60 
   4  -2  -1    1.20    2.80 
  -4  -2   1   -1.00    3.50 
  -4  -2   1   -0.80    3.40 
  -4  -2   1    1.10    3.60 
  -4  -2   1    1.90    3.80 
   4   2  -1   -0.50    2.10 
  -4   2   1    0.80    2.20 
   4   2  -1   -0.20    2.30 
   4   2  -1   -0.40    3.50 
   4   2  -1   -4.60    2.00 
   4   2  -1   -1.90    3.60 
  -4   2   1    3.20    2.30 
  -4   2   1    2.00    2.60 
   4   2  -1    1.20    1.50 
  -4   2   1    3.40    2.40 
  -4   2   1   -2.50    2.90 
  -4   2   1    0.90    2.80 
   4   2  -1    5.30    3.30 
  -4   2   1   -2.80    3.90 
  -4   2   1    0.50    4.40 
  -4   2   1   -3.70    3.80 
   4   2  -1    5.00    4.50 
   4   2  -1    2.30    3.20 
   4   2  -1    1.00    2.80 
  -4   2   1   -0.30    3.90 
   4   2  -1    0.90    2.80 
   4   2  -1   -0.70    3.30 
   4   2  -1   -1.20    2.10 
  -4   2   1    0.50    4.80 
  -4   2   1   -0.70    3.10 
  -4   2   1   -1.00    2.10 
   4   2  -1    1.80    2.40 
   4   2  -1   -0.10    2.00 
  -4   2   1   -3.10    3.90 
   4   2  -1    1.80    3.40 
  -4   2   1    7.10    4.80 
  -4   2   1    3.00    4.40 
   4   2  -1   -0.60    3.20 
   4   2  -1    1.70    4.00 
  -4   2   1    1.00    3.80 
   4   2  -1    1.40    2.30 
   4   2  -1    4.80    3.00 
  -4   2   1    0.20    4.10 
   4   2  -1    6.20    3.40 
  -4   2   1   -3.80    3.00 
   4   2  -1    4.00    4.30 
  -4   2   1   -3.60    3.20 
   4   2  -1   -0.80    1.30 
  -4   2   1    2.50    2.20 
   3  -2  -1  203.38   12.00 
   3  -2  -1  221.48   16.90 
  -3  -2   1  198.78   11.90 
  -3  -2   1  208.08   13.80 
  -3  -2   1  225.38   12.80 
  -3  -2   1  215.48   14.80 
   3  -2  -1  229.38   16.70 
   3  -2  -1  196.78   13.40 
  -3  -2   1  167.48   13.70 
  -3  -2   1  187.08   14.00 
   3  -2  -1  221.28   16.60 
   3  -2  -1  195.08   12.60 
  -3  -2   1  198.88   12.00 
   3  -2  -1  210.48   13.80 
   3  -2  -1  202.78   14.10 
   3  -2  -1  214.58   15.30 
  -3  -2   1  187.38   12.80 
  -3  -2   1  193.58   14.00 
  -3  -2   1  223.68   14.10 
  -3  -2   1  198.98   14.30 
   3  -2  -1  205.48   13.50 
   3  -2  -1  197.78   16.30 
  -3  -2   1  216.58   14.80 
  -3  -2   1  202.48   12.80 
  -3  -2   1  213.68   14.00 
   3  -2  -1  210.08   14.60 
  -3  -2   1  209.98   13.40 
   3  -2  -1  221.38   15.90 
  -3  -2   1  209.18   12.00 
   3  -2  -1  199.58   15.90 
   3  -2  -1  192.18   12.70 
   3  -2  -1  212.28   14.90 
   3  -2  -1  214.08   15.90 
  -3  -2   1  231.18   14.20 
   3  -2  -1  220.28   17.00 
  -3   2   1  183.38   13.90 
   3   2  -1  215.38   12.20 
   3   2  -1  207.88   15.20 
   3   2  -1  248.98   15.20 
  -3   2   1  206.98   15.40 
  -3   2   1  219.08   13.60 
  -3   2   1  207.38   15.00 
  -3   2   1  228.08   13.20 
   3   2  -1  206.18   13.30 
  -3   2   1  200.58   11.90 
   3   2  -1  200.48   13.30 
   3   2  -1  202.98   12.80 
   3   2  -1  219.48   11.90 
   3   2  -1  219.98   11.40 
  -3   2   1  222.78   16.60 
  -3   2   1  216.88   14.90 
   3   2  -1  212.88   13.70 
  -3   2   1  216.78   15.70 
   3   2  -1  199.58   11.60 
   3   2  -1  221.68   13.30 
   3   2  -1  221.88   13.50 
   3   2  -1  212.78   14.40 
  -3   2   1  223.68   15.00 
  -3   2   1  200.38   14.40 
  -3   2   1  223.58   14.30 
   3   2  -1  207.48   12.60 
  -3   2   1  182.78   14.40 
  -3   2   1  211.78   15.20 
  -3   2   1  214.88   15.70 
  -3   2   1  212.48   12.00 
   3   2  -1  215.38   15.30 
  -3   2   1  210.18   11.60 
  -3   2   1  201.58   11.70 
   3   2  -1  212.08   12.00 
   3   2  -1  197.38   12.00 
   3   2  -1  193.08   13.80 
   3   2  -1  201.38   13.40 
  -3   2   1  195.48   12.90 
   3   2  -1  178.68   13.70 
   3   2  -1  212.78   12.00 
   3   2  -1  210.48   15.10 
  -3   2   1  190.38   14.40 
   3   2  -1  183.78   11.60 
   3   2  -1  214.38   12.20 
  -3   2   1  164.28   12.70 
   3   2  -1  185.68   12.40 
   2  -2  -1   15.10    4.20 
   2  -2  -1   15.70    4.70 
   2  -2  -1   21.30    4.80 
   2  -2  -1   12.50    4.00 
  -2  -2   1   12.00    3.70 
   2  -2  -1   18.20    4.20 
  -2  -2   1   17.80    4.10 
   2  -2  -1   21.70    4.90 
  -2  -2   1   29.10    4.70 
  -2  -2   1   10.00    3.40 
   2  -2  -1   11.70    3.50 
   2  -2  -1   15.70    4.60 
   2  -2  -1   29.70    6.60 
   2  -2  -1   15.20    3.70 
   2  -2  -1   14.00    3.20 
   2  -2  -1   11.20    3.70 
   2  -2  -1   18.10    4.40 
  -2  -2   1   17.00    3.50 
   2  -2  -1   11.10    4.20 
   2  -2  -1   26.10    4.70 
  -2  -2   1   10.80    3.20 
  -2  -2   1   10.20    3.30 
   2  -2  -1   13.10    4.30 
   2  -2  -1    9.00    4.00 
  -2  -2   1   11.50    3.70 
   2  -2  -1   12.50    4.20 
  -2  -2   1   21.30    4.10 
   2  -2  -1   19.70    5.40 
   2  -2  -1   12.40    4.90 
   2  -2  -1   20.90    4.80 
  -2  -2   1   20.60    4.50 
   2  -2  -1   21.00    4.30 
   2  -2  -1   18.60    4.70 
   2  -2  -1   13.20    4.90 
   2  -2  -1   21.90    5.60 
   2  -2  -1   14.30    4.40 
  -2  -2   1   15.40    3.90 
   2  -2  -1   16.60    4.50 
  -2  -2   1   14.30    3.80 
  -2  -2   1   20.30    3.70 
  -2  -2   1   11.60    3.60 
  -2  -2   1   17.00    3.40 
   2  -2  -1   19.60    4.80 
  -2  -2   1   19.50    4.30 
  -2  -2   1   13.60    3.70 
  -2  -2   1   19.60    3.90 
   2  -2  -1   21.40    5.80 
   2  -2  -1   21.20    4.20 
  -2   2   1   19.20    4.30 
   2   2  -1   17.30    3.90 
  -2   2   1   13.40    4.40 
  -2   2   1   15.30    3.90 
  -2   2   1   13.60    4.50 
   2   2  -1   15.20    3.80 
   2   2  -1   16.80    3.40 
   2   2  -1   12.50    3.90 
   2   2  -1   24.20    4.90 
   2   2  -1   20.90    4.10 
  -2   2   1   14.80    4.10 
  -2   2   1   15.70    4.30 
  -2   2   1   16.00    5.00 
  -2   2   1   22.90    5.80 
  -2   2   1   25.90    5.50 
  -2   2   1   10.00    3.60 
   2   2  -1   17.70    2.70 
   2   2  -1   16.60    3.70 
   2   2  -1   14.80    3.70 
  -2   2   1   18.60    5.40 
   2   2  -1   29.20    4.70 
  -2   2   1   16.90    5.10 
  -2   2   1   23.10    5.00 
   2   2  -1   19.30    3.40 
  -2   2   1   14.10    4.00 
   2   2  -1    9.90    2.80 
  -2   2   1   16.10    3.70 
  -2   2   1   15.10    4.20 
   2   2  -1   23.30    4.60 
   2   2  -1   18.70    4.30 
  -2   2   1   20.10    4.50 
  -2   2   1   21.00    5.40 
   2   2  -1   18.10    3.50 
   2   2  -1   18.10    3.70 
  -2   2   1   20.40    4.60 
   2   2  -1   26.30    4.80 
  -2   2   1   26.50    5.20 
  -2   2   1   16.10    4.30 
   2   2  -1   14.90    3.50 
   2   2  -1   14.80    3.30 
   2   2  -1   15.50    3.70 
  -2   2   1   11.80    3.20 
   2   2  -1   12.70    3.40 
   2   2  -1   15.40    3.50 
  -2   2   1   22.40    6.40 
  -2   2   1   15.40    4.20 
  -2   2   1    8.00    4.10 
  -2   2   1   18.70    4.20 
  -2   2   1   17.10    3.80 
   2   2  -1   14.60    3.60 
  -2   2   1   11.90    4.50 
  -1  -2   1    9.50    2.90 
  -1  -2   1    9.50    3.00 
   1  -2  -1    1.80    2.50 
   1  -2  -1    6.80    3.30 
   1  -2  -1    7.30    2.60 
  -1  -2   1    3.40    1.80 
  -1  -2   1    3.70    2.80 
   1  -2  -1    6.60    2.70 
   1  -2  -1    7.50    2.30 
   1  -2  -1   11.70    2.60 
   1  -2  -1    8.20    2.50 
   1  -2  -1    3.40    2.60 
   1  -2  -1    7.90    3.40 
  -1  -2   1    7.80    3.50 
   1  -2  -1    5.70    3.30 
   1  -2  -1    7.20    4.00 
   1  -2  -1    5.70    3.00 
   1  -2  -1    7.30    3.90 
  -1  -2   1   11.90    3.30 
   1  -2  -1    2.00    2.10 
   1  -2  -1    9.20    3.00 
  -1  -2   1    4.20    2.80 
   1  -2  -1    4.30    2.70 
   1  -2  -1    5.10    2.90 
   1  -2  -1    3.30    2.40 
  -1  -2   1    8.70    2.20 
  -1  -2   1    7.80    2.50 
   1  -2  -1    9.10    3.30 
   1  -2  -1    4.90    3.20 
   1  -2  -1    6.80    2.80 
  -1  -2   1    7.80    2.20 
  -1  -2   1    4.70    2.70 
   1  -2  -1    7.00    2.60 
  -1  -2   1   -0.20    2.30 
   1  -2  -1    5.90    3.00 
  -1  -2   1    3.90    2.60 
  -1  -2   1    8.90    2.30 
   1  -2  -1    8.80    2.70 
  -1   2   1    3.10    2.90 
  -1   2   1    7.10    3.10 
  -1   2   1    8.00    3.40 
  -1   2   1    5.40    2.30 
   1   2  -1    9.20    2.40 
   1   2  -1   11.30    2.70 
   1   2  -1    5.40    2.70 
   1   2  -1   10.10    2.60 
  -1   2   1    9.30    3.20 
  -1   2   1    3.80    2.60 
   1   2  -1    7.00    2.60 
   1   2  -1    6.40    2.10 
   1   2  -1   14.50    3.30 
   1   2  -1   10.10    2.70 
  -1   2   1    3.80    3.20 
   1   2  -1    6.50    2.50 
   1   2  -1    9.90    2.40 
  -1   2   1    3.50    3.10 
   1   2  -1    6.60    2.80 
  -1   2   1    6.50    3.30 
  -1   2   1    2.60    2.30 
   1   2  -1   10.60    3.20 
   1   2  -1    8.00    2.70 
   1   2  -1    1.90    1.80 
   1   2  -1    4.00    2.70 
  -1   2   1   15.30    4.60 
  -1   2   1    2.00    2.90 
   1   2  -1    7.30    2.10 
  -1   2   1    6.00    2.90 
  -1   2   1    8.50    3.90 
   1   2  -1   13.50    4.40 
  -1   2   1   11.60    3.40 
   1   2  -1    4.30    2.30 
  -1   2   1    5.50    3.00 
   1   2  -1    5.30    3.00 
   1   2  -1   11.50    3.60 
   1   2  -1    7.70    2.70 
   1   2  -1    9.90    2.70 
  -1   2   1    2.90    2.90 
  -1   2   1    9.90    3.10 
   1   2  -1    4.10    3.30 
   1   2  -1    6.20    1.30 
   1   2  -1   11.60    2.40 
   1   2  -1   11.70    3.90 
   1   2  -1    9.60    2.20 
   1   2  -1    1.80    2.50 
   0  -2  -1   22.90    4.00 
   0  -2   1   16.50    3.80 
   0  -2  -1   21.00    3.30 
   0  -2   1   25.20    4.90 
   0  -2   1   22.90    5.10 
   0  -2   1   12.90    2.50 
   0  -2  -1   11.20    5.30 
   0  -2   1   18.90    4.20 
   0  -2   1   23.00    4.50 
   0  -2   1   15.40    3.90 
   0  -2   1   20.20    4.40 
   0  -2   1   20.00    3.60 
   0  -2  -1   21.00    2.10 
   0  -2   1   19.90    4.70 
   0  -2  -1   18.50    4.00 
   0  -2  -1   16.60    3.50 
   0  -2   1   26.60    6.00 
   0  -2   1   21.60    3.50 
   0  -2   1   16.80    4.20 
   0  -2   1   21.60    4.10 
   0  -2  -1   17.00    5.70 
   0  -2  -1   19.70    2.60 
   0  -2  -1   23.60    4.50 
   0  -2   1   25.20    4.40 
   0  -2  -1   23.10    4.40 
   0  -2   1   24.60    3.70 
   0  -2   1   11.60    3.70 
   0  -2  -1   18.60    2.40 
   0  -2  -1   17.10    4.50 
   0  -2   1   12.00    3.10 
   0  -2   1    9.70    4.60 
   0  -2  -1   20.50    3.40 
   0  -2  -1   25.00    5.80 
   0  -2  -1   18.70    6.00 
   0  -2  -1   27.30    3.40 
   0  -2  -1   25.20    5.80 
   0  -2  -1   20.60    3.10 
   0  -2   1   17.50    4.10 
   0  -2   1   21.00    5.40 
   0  -2  -1   20.60    4.20 
   0  -2  -1   20.40    4.80 
   0  -2   1   17.30    3.40 
   0  -2  -1   24.30    3.30 
   0  -2  -1   11.80    5.50 
   0  -2  -1   18.00    5.60 
   0  -2   1   23.90    3.80 
   0   2  -1   22.50    4.70 
   0   2   1   20.60    1.80 
   0   2  -1   20.10    3.80 
   0   2   1   24.00    4.60 
   0   2   1   27.60    5.60 
   0   2   1   22.50    2.70 
   0   2   1   30.50    6.60 
   0   2  -1   25.00    4.70 
   0   2   1   22.10    2.80 
   0   2   1   19.60    2.30 
   0   2  -1   22.50    3.70 
   0   2   1   15.60    3.50 
   0   2  -1   18.80    1.70 
   0   2  -1   16.00    3.70 
   0   2  -1   17.30    2.80 
   0   2  -1   23.10    4.40 
   0   2   1   22.30    4.90 
   0   2   1   21.50    3.40 
   0   2   1   18.90    5.40 
   0   2  -1   21.50    4.20 
   0   2  -1   20.90    4.10 
   0   2  -1   23.60    4.00 
   0   2   1   25.70    4.40 
   0   2  -1   25.30    4.60 
   0   2   1   21.60    4.90 
   0   2   1   24.80    2.30 
   0   2  -1   17.50    3.50 
   0   2  -1   19.80    3.70 
   0   2  -1   23.90    4.00 
   0   2  -1   19.80    3.10 
   0   2  -1   18.80    3.90 
   0   2   1   23.40    3.50 
   0   2  -1   19.50    3.30 
   0   2  -1   21.70    3.60 
   0   2  -1   22.50    5.50 
   0   2   1   25.00    4.30 
   0   2  -1   19.70    2.90 
   0   2   1   21.20    4.20 
   0   2   1   21.70    4.10 
   0   2  -1   16.80    4.10 
   0   2  -1   21.80    3.10 
   0   2  -1   18.80    4.40 
   0   2  -1   14.40    3.40 
   0   2   1   20.10    4.70 
   0   2  -1   22.70    4.60 
   0   2   1   23.90    5.80 
   0   2  -1   22.90    2.90 
   0   2   1   23.10    3.20 
   0   2  -1   19.80    2.10 
   0   2   1   19.40    3.30 
   0   2   1   21.30    4.40 
   0   2  -1   23.40    1.90 
   0   2   1   18.40    3.70 
   0   2   1   18.00    3.50 
   0   2   1   27.20    4.10 
   1  -2   1 1241.48   51.49 
   1  -2   1 1230.28   51.09 
  -1  -2  -1 1182.58   51.89 
  -1  -2  -1 1223.58   46.70 
  -1  -2  -1 1284.97   47.20 
  -1  -2  -1 1221.68   49.20 
   1  -2   1 1204.68   48.90 
   1  -2   1 1270.97   51.39 
   1  -2   1 1259.27   50.19 
   1  -2   1 1359.56   52.29 
  -1  -2  -1 1267.37   51.09 
  -1  -2  -1 1273.47   47.60 
   1  -2   1 1237.38   50.99 
  -1  -2  -1 1299.17   52.29 
   1  -2   1 1223.78   51.09 
  -1  -2  -1 1253.67   50.59 
   1  -2   1 1255.87   51.59 
   1  -2   1 1218.68   50.09 
   1  -2   1 1185.48   51.19 
   1  -2   1 1285.37   48.80 
   1  -2   1 1296.87   51.09 
  -1  -2  -1 1247.68   49.00 
  -1  -2  -1 1238.28   47.30 
   1  -2   1 1265.37   51.49 
   1  -2   1 1247.28   50.59 
  -1  -2  -1 1209.88   47.50 
   1  -2   1 1277.97   52.59 
  -1  -2  -1 1282.97   50.49 
   1  -2   1 1255.67   51.19 
  -1  -2  -1 1255.67   47.90 
   1  -2   1 1206.48   50.99 
  -1  -2  -1 1237.68   50.49 
   1  -2   1 1271.97   48.40 
   1  -2   1 1280.97   52.39 
   1  -2   1 1312.97   50.69 
   1  -2   1 1284.27   48.60 
   1  -2   1 1303.87   50.09 
   1  -2   1 1241.48   49.70 
   1  -2   1 1269.47   50.39 
  -1  -2  -1 1280.27   50.59 
   1  -2   1 1223.08   48.70 
   1  -2   1 1318.37   49.20 
   1  -2   1 1222.18   50.59 
  -1  -2  -1 1219.68   51.09 
   1  -2   1 1303.07   51.09 
   1  -2   1 1285.87   50.39 
  -1  -2  -1 1230.48   50.99 
  -1   2  -1 1232.58   50.89 
   1   2   1 1282.97   50.79 
   1   2   1 1248.48   50.49 
  -1   2  -1 1259.07   51.49 
  -1   2  -1 1232.38   51.39 
   1   2   1 1291.77   53.39 
  -1   2  -1 1267.67   52.49 
  -1   2  -1 1251.67   48.90 
   1   2   1 1257.47   48.40 
   1   2   1 1253.07   50.09 
  -1   2  -1 1197.68   50.89 
  -1   2  -1 1271.47   51.99 
   1   2   1 1266.97   51.19 
   1   2   1 1181.98   52.19 
  -1   2  -1 1264.47   48.90 
   1   2   1 1194.68   48.40 
   1   2   1 1233.98   46.80 
   1   2   1 1235.68   47.80 
   1   2   1 1231.48   53.19 
  -1   2  -1 1273.67   51.29 
  -1   2  -1 1284.47   51.29 
   1   2   1 1213.48   52.29 
  -1   2  -1 1226.58   49.90 
  -1   2  -1 1249.18   51.19 
   1   2   1 1258.07   46.90 
   1   2   1 1216.78   50.99 
   1   2   1 1285.57   47.30 
   1   2   1 1254.97   52.89 
  -1   2  -1 1283.77   50.79 
   1   2   1 1244.78   46.50 
  -1   2  -1 1260.07   50.79 
  -1   2  -1 1209.38   50.69 
  -1   2  -1 1264.17   52.39 
  -1   2  -1 1245.38   50.49 
   1   2   1 1270.47   49.40 
   1   2   1 1226.58   47.00 
  -1   2  -1 1246.98   48.70 
   1   2   1 1253.97   47.50 
   1   2   1 1225.28   47.10 
   1   2   1 1246.18   46.90 
  -1   2  -1 1272.17   50.69 
  -1   2  -1 1361.06   51.19 
  -1   2  -1 1288.87   51.59 
  -1   2  -1 1310.07   50.29 
  -1   2  -1 1259.57   51.69 
   1   2   1 1218.18   49.60 
  -1   2  -1 1272.77   48.40 
  -1   2  -1 1270.57   50.79 
  -1   2  -1 1234.98   49.80 
   1   2   1 1231.68   46.50 
   1   2   1 1260.17   47.40 
  -1   2  -1 1275.67   48.50 
   1   2   1 1295.37   52.19 
  -1   2  -1 1248.68   51.09 
  -1   2  -1 1214.38   51.39 
   1   2   1 1192.98   50.79 
   1   2   1 1199.38   50.99 
  -1   2  -1 1291.67   50.19 
  -2  -2  -1   92.59    6.00 
   2  -2   1  116.89    8.40 
  -2  -2  -1   99.69    7.40 
  -2  -2  -1  104.69    8.60 
   2  -2   1  105.29    8.10 
   2  -2   1  103.39   10.80 
  -2  -2  -1  104.69    8.20 
   2  -2   1  118.69    9.50 
   2  -2   1  113.59    9.00 
   2  -2   1  100.09    9.80 
  -2  -2  -1  100.39    7.40 
   2  -2   1   86.69    9.40 
  -2  -2  -1  112.99    9.80 
  -2  -2  -1   97.29    7.50 
   2  -2   1  107.29    8.40 
   2  -2   1  113.19    8.40 
   2  -2   1  111.29   12.10 
  -2  -2  -1   81.49    9.20 
   2  -2   1   97.69    9.50 
  -2  -2  -1   80.59    9.10 
  -2  -2  -1   97.49    9.10 
   2  -2   1  119.99   11.40 
  -2  -2  -1   93.69    9.30 
   2  -2   1   92.79    9.60 
   2  -2   1   74.59    9.60 
   2  -2   1   82.49    9.90 
   2  -2   1   99.79   10.90 
   2  -2   1   86.39   10.10 
   2  -2   1   92.39   10.00 
   2  -2   1   96.59   10.60 
   2  -2   1  104.99   11.20 
  -2  -2  -1   84.09    9.30 
   2  -2   1   83.89    8.90 
   2  -2   1  104.09    8.20 
   2  -2   1  106.99    8.30 
   2  -2   1  109.09   11.50 
   2  -2   1  114.09    8.60 
   2  -2   1   98.89    9.70 
  -2  -2  -1   97.99    7.10 
  -2   2  -1   84.39    9.60 
  -2   2  -1   98.79    9.80 
  -2   2  -1  110.29   10.60 
  -2   2  -1   94.99   10.20 
   2   2   1   99.19    5.40 
  -2   2  -1   89.69    9.10 
  -2   2  -1   97.89   10.50 
  -2   2  -1  108.29   10.50 
  -2   2  -1  102.29    9.90 
   2   2   1   97.99    7.40 
   2   2   1  115.99   10.90 
  -2   2  -1  103.49    8.30 
   2   2   1  100.99    5.10 
   2   2   1   98.79    6.50 
   2   2   1   99.29    5.60 
  -2   2  -1  113.39    8.60 
   2   2   1  103.19    6.00 
   2   2   1   90.29    9.50 
   2   2   1  118.89    9.00 
  -2   2  -1  101.69   10.70 
  -2   2  -1   95.29   11.20 
   2   2   1   80.99    8.70 
   2   2   1  104.19    8.00 
   2   2   1   96.79    7.00 
  -2   2  -1  113.19    8.30 
   2   2   1  111.39   10.20 
   2   2   1  114.99   11.70 
  -2   2  -1   99.69   10.80 
   2   2   1  113.19   10.60 
  -2   2  -1   87.89   10.40 
   2   2   1  105.69   10.70 
  -2   2  -1  100.59   10.40 
   2   2   1   79.39    9.30 
  -2   2  -1  111.39    8.60 
   2   2   1  109.39   10.90 
  -2   2  -1  136.69   12.60 
   2   2   1  100.79    6.90 
   2   2   1  101.39    7.80 
   2   2   1   88.99    5.00 
   2   2   1   99.79    6.50 
   2   2   1  113.29    8.40 
  -2   2  -1  111.19   10.80 
   2   2   1  103.29   10.60 
   2   2   1  100.89    6.90 
  -2   2  -1  105.19   10.00 
   2   2   1   91.89    7.60 
   2   2   1  103.69   11.20 
  -2   2  -1   91.79   10.60 
  -2   2  -1  114.29   10.80 
   2   2   1  109.59    8.00 
  -2   2  -1  110.09    8.60 
  -2   2  -1   84.99    9.70 
   2   2   1  101.99    9.60 
  -2   2  -1   75.09    9.30 
  -2   2  -1  114.39    8.60 
  -2   2  -1  101.19    9.30 
  -2   2  -1  108.99    8.30 
   2   2   1   86.19    8.90 
  -2   2  -1  115.89    8.40 
  -3  -2  -1   -0.30    2.90 
  -3  -2  -1    6.10    4.20 
  -3  -2  -1   -2.60    3.00 
   3  -2   1    0.00    3.00 
   3  -2   1    3.60    3.70 
   3  -2   1    2.50    2.70 
   3  -2   1    4.00    4.20 
   3  -2   1    4.70    3.30 
   3  -2   1    6.70    3.00 
   3  -2   1   -1.00    3.50 
   3  -2   1    0.20    3.10 
  -3  -2  -1    5.90    3.50 
   3  -2   1   -0.10    3.30 
  -3  -2  -1    6.80    2.20 
   3  -2   1    0.80    3.40 
  -3  -2  -1    4.40    2.80 
  -3  -2  -1    4.20    3.40 
  -3  -2  -1   -2.40    2.90 
   3  -2   1    6.60    3.50 
   3  -2   1    1.70    2.90 
  -3  -2  -1    6.00    3.30 
  -3  -2  -1   -0.30    2.00 
   3  -2   1    2.80    2.90 
   3  -2   1    5.90    3.80 
   3  -2   1    3.60    2.70 
  -3  -2  -1    1.20    2.00 
   3  -2   1    2.70    3.90 
   3  -2   1    5.60    3.40 
  -3  -2  -1    3.00    3.50 
   3  -2   1    5.80    4.60 
   3   2   1    1.60    2.00 
  -3   2  -1    3.40    4.20 
  -3   2  -1    2.30    3.00 
   3   2   1    6.60    3.70 
  -3   2  -1    6.00    4.20 
   3   2   1    7.90    4.80 
   3   2   1    4.50    2.30 
   3   2   1    4.60    4.60 
   3   2   1    3.70    3.80 
   3   2   1    5.10    2.50 
  -3   2  -1    3.30    3.50 
   3   2   1    3.30    1.60 
  -3   2  -1    5.30    3.60 
   3   2   1    1.10    2.60 
   3   2   1    4.10    2.90 
  -3   2  -1    0.00    3.70 
   3   2   1    4.20    2.70 
  -3   2  -1    6.20    3.00 
   3   2   1    2.30    1.70 
   3   2   1    2.20    2.20 
   3   2   1   -2.20    2.60 
   3   2   1    6.60    2.00 
   3   2   1    0.60    2.30 
  -3   2  -1    8.10    4.70 
   3   2   1    2.20    3.60 
   3   2   1    1.90    3.00 
  -3   2  -1    6.60    3.90 
   3   2   1    8.80    3.80 
  -3   2  -1    9.30    4.60 
   3   2   1    5.10    3.30 
  -3   2  -1    4.50    3.00 
   3   2   1    1.60    2.50 
   3   2   1    2.20    1.80 
  -3   2  -1    0.40    2.70 
  -3   2  -1    4.50    4.80 
  -3   2  -1    3.60    2.60 
  -3   2  -1    2.10    4.20 
  -3   2  -1    1.10    3.60 
  -3   2  -1    3.60    3.70 
   3   2   1    1.40    1.80 
   3   2   1    1.00    2.80 
  -3   2  -1    4.80    2.80 
   3   2   1    2.80    2.60 
  -3   2  -1    3.20    4.20 
   3   2   1    5.70    3.70 
  -3   2  -1    3.40    2.90 
  -3   2  -1    2.60    2.90 
  -3   2  -1    0.00    3.40 
  -3   2  -1    9.70    5.10 
  -4  -2  -1   71.29    7.90 
   4  -2   1   64.39   10.10 
   4  -2   1   59.79   10.30 
  -4  -2  -1   51.89    9.30 
  -4  -2  -1   59.79   10.40 
  -4  -2  -1   51.09    8.40 
   4  -2   1   93.29   14.50 
   4  -2   1   56.19   10.80 
   4  -2   1   64.99    8.30 
   4  -2   1   68.09   11.40 
   4  -2   1   59.09    8.40 
   4  -2   1   59.59   11.20 
  -4  -2  -1   64.99   10.60 
  -4  -2  -1   47.20    9.30 
  -4  -2  -1   63.39    9.10 
  -4  -2  -1   78.89   11.50 
   4  -2   1   59.79   11.30 
  -4  -2  -1   50.89    9.50 
  -4  -2  -1   67.19    7.60 
  -4  -2  -1   63.79    6.90 
   4  -2   1   81.29    8.10 
   4  -2   1   48.40    9.20 
  -4  -2  -1   58.99    7.80 
  -4  -2  -1   62.79    6.40 
   4  -2   1   69.59   11.20 
   4  -2   1   93.69   14.00 
  -4  -2  -1   56.39    9.80 
   4  -2   1   63.29    8.70 
   4  -2   1   59.79    7.30 
  -4  -2  -1   63.59    9.30 
   4   2   1   67.89   11.30 
   4   2   1   51.19   10.00 
  -4   2  -1   77.69   12.30 
   4   2   1   54.89    8.60 
  -4   2  -1   67.39    8.60 
  -4   2  -1   94.49   12.00 
  -4   2  -1   65.49    8.50 
   4   2   1   54.69    7.00 
  -4   2  -1   60.59   11.10 
  -4   2  -1   69.69   10.70 
  -4   2  -1   55.29   10.90 
   4   2   1   68.99    7.10 
   4   2   1   61.79   10.60 
   4   2   1   66.19    6.90 
  -4   2  -1   53.79    6.10 
  -4   2  -1   77.49    8.00 
   4   2   1   49.90    9.70 
  -4   2  -1   68.89   11.00 
  -4   2  -1   56.59    9.70 
   4   2   1   66.09    7.50 
  -4   2  -1   50.59    9.20 
   4   2   1   62.09    5.80 
  -4   2  -1   60.99   10.50 
  -4   2  -1   37.70    8.70 
   4   2   1   56.99    7.60 
  -4   2  -1   74.39    9.20 
  -4   2  -1   73.09    8.10 
   4   2   1   84.29    7.90 
   4   2   1   57.89    6.10 
  -4   2  -1   63.59   10.80 
   4   2   1   80.49    7.50 
   4   2   1   78.79    9.90 
   4   2   1   60.29   10.90 
   4   2   1   69.19    9.20 
   4   2   1   68.89    8.90 
   4   2   1   75.79    7.60 
  -4   2  -1   45.50    9.40 
  -4   2  -1   77.29   11.70 
  -4   2  -1   67.49    7.90 
  -4   2  -1   94.79   12.50 
  -4   2  -1   68.59    7.30 
   4   2   1   69.19    8.60 
  -4   2  -1   52.99    8.80 
   4   2   1   48.40   10.50 
   4   2   1   69.89    8.00 
  -5  -2  -1   86.19   13.40 
  -5  -2  -1  112.99   16.20 
   5  -2   1  109.09   12.00 
  -5  -2  -1  103.99   13.20 
   5  -2   1   93.59   14.80 
   5  -2   1  134.19   16.80 
  -5  -2  -1   88.49   14.10 
  -5  -2  -1  100.89   14.60 
  -5  -2  -1  105.49   10.10 
   5  -2   1   98.69   17.30 
  -5  -2  -1   71.29   12.30 
  -5  -2  -1   88.49   12.20 
   5  -2   1   90.49   13.40 
   5  -2   1  131.49   18.80 
  -5  -2  -1   98.69   11.70 
  -5  -2  -1   90.69   14.70 
   5  -2   1  127.59   16.80 
   5  -2   1   79.09   13.40 
   5  -2   1  125.79   10.90 
  -5  -2  -1  106.09   15.30 
   5  -2   1  102.09   14.20 
   5  -2   1  123.89   12.80 
  -5  -2  -1  104.09    8.80 
   5  -2   1   99.69   10.70 
  -5  -2  -1  103.39   10.40 
   5  -2   1  107.29   16.40 
  -5  -2  -1   97.29   13.30 
   5  -2   1  141.69   18.50 
  -5   2  -1  109.99    7.10 
   5   2   1  110.09    9.00 
  -5   2  -1  105.59    7.80 
  -5   2  -1  113.39   15.60 
   5   2   1  100.69    9.20 
   5   2   1  100.09    9.20 
   5   2   1   94.29   10.40 
  -5   2  -1  109.29   13.40 
  -5   2  -1   86.29   11.90 
   5   2   1  101.19   11.00 
  -5   2  -1  115.19   17.30 
   5   2   1  106.59   11.30 
   5   2   1  122.99    9.70 
  -5   2  -1   94.29   13.50 
  -5   2  -1   91.89   13.80 
   5   2   1  122.59   16.30 
   5   2   1   85.59   14.90 
  -5   2  -1  123.89   11.00 
   5   2   1  120.99    8.10 
  -5   2  -1  100.99    9.80 
   5   2   1  143.69   18.30 
  -5   2  -1   91.09   13.90 
  -5   2  -1   87.29   13.80 
  -5   2  -1   85.59   13.90 
   5   2   1  107.79    6.10 
  -5   2  -1  111.79   16.00 
   5   2   1   89.59   14.90 
  -5   2  -1  101.19    8.10 
   5   2   1   88.89   12.10 
  -5   2  -1  118.49   16.30 
   5   2   1  100.09   16.20 
  -5   2  -1   98.89   14.90 
   5   2   1   89.59    9.70 
  -5   2  -1   88.19   14.20 
   5   2   1  108.49    7.60 
   5   2   1  107.79   11.10 
   5   2   1  100.39    7.90 
  -5   2  -1  101.59    6.80 
   5   2   1   99.49   15.40 
  -5   2  -1  117.69   16.00 
   5   2   1   93.19   12.30 
   5   2   1  122.09   10.80 
   6  -2   1  448.36   23.40 
  -6  -2  -1  432.36   21.70 
  -6  -2  -1  437.36   30.50 
  -6  -2  -1  457.85   29.40 
   6  -2   1  473.55   30.30 
  -6  -2  -1  420.76   30.10 
   6  -2   1  456.75   34.90 
  -6  -2  -1  428.76   30.40 
  -6  -2  -1  381.56   28.40 
   6  -2   1  494.25   34.10 
   6  -2   1  433.86   24.40 
   6  -2   1  429.76   30.10 
  -6  -2  -1  444.76   28.60 
   6  -2   1  485.85   32.30 
  -6  -2  -1  433.46   24.50 
  -6  -2  -1  427.76   28.60 
   6  -2   1  471.45   30.60 
   6  -2   1  421.46   31.50 
   6  -2   1  436.76   31.60 
   6  -2   1  414.76   24.40 
   6  -2   1  412.66   29.10 
  -6  -2  -1  492.75   32.70 
  -6  -2  -1  423.86   30.00 
  -6  -2  -1  456.75   26.60 
   6  -2   1  423.76   32.90 
  -6  -2  -1  459.15   31.50 
  -6   2  -1  465.95   31.50 
  -6   2  -1  423.46   19.40 
   6   2   1  488.95   29.00 
   6   2   1  451.05   20.30 
   6   2   1  461.25   32.90 
  -6   2  -1  426.76   30.40 
   6   2   1  429.46   23.80 
  -6   2  -1  441.56   30.60 
  -6   2  -1  431.66   31.20 
  -6   2  -1  412.26   26.10 
  -6   2  -1  447.66   29.90 
  -6   2  -1  428.56   21.50 
  -6   2  -1  424.06   29.90 
   6   2   1  403.36   31.20 
  -6   2  -1  438.26   19.30 
   6   2   1  460.75   24.70 
  -6   2  -1  445.26   27.60 
  -6   2  -1  435.86   20.00 
   6   2   1  420.56   33.20 
   6   2   1  429.86   19.20 
   6   2   1  424.96   25.20 
  -6   2  -1  456.75   32.20 
  -6   2  -1  465.35   31.70 
  -6   2  -1  431.06   30.70 
  -6   2  -1  473.15   32.00 
   6   2   1  416.16   27.20 
   6   2   1  431.86   19.00 
  -6   2  -1  441.66   30.50 
   6   2   1  466.65   31.80 
   6   2   1  421.66   21.00 
   6   2   1  397.86   30.50 
   6   2   1  414.56   30.80 
   6   2   1  434.86   24.30 
   6   2   1  443.96   19.60 
  -6   2  -1  393.66   30.90 
   7  -2   1  737.83   50.69 
  -7  -2  -1  762.52   40.70 
  -7  -2  -1  741.13   45.00 
   7  -2   1  787.62   36.80 
  -7  -2  -1  767.02   38.50 
   7  -2   1  750.12   35.10 
  -7  -2  -1  790.12   47.00 
   7  -2   1  678.83   48.10 
  -7  -2  -1  724.33   43.80 
   7  -2   1  813.72   46.50 
  -7  -2  -1  778.32   47.00 
   7  -2   1  795.62   38.00 
   7  -2   1  701.63   43.60 
  -7  -2  -1  739.23   45.90 
   7  -2   1  719.43   43.80 
  -7  -2  -1  723.43   46.30 
  -7  -2  -1  809.72   48.40 
   7  -2   1  775.02   48.00 
   7  -2   1  753.02   49.70 
   7  -2   1  798.42   46.50 
  -7  -2  -1  735.33   43.60 
   7  -2   1  753.32   48.00 
  -7  -2  -1  783.92   46.40 
   7  -2   1  804.32   45.60 
   7  -2   1  772.72   48.50 
  -7  -2  -1  753.42   43.00 
  -7   2  -1  750.82   46.30 
  -7   2  -1  776.12   39.60 
  -7   2  -1  856.31   49.99 
   7   2   1  705.83   38.80 
   7   2   1  709.83   46.80 
  -7   2  -1  757.82   46.10 
   7   2   1  724.33   36.20 
   7   2   1  768.02   48.30 
  -7   2  -1  756.42   46.80 
   7   2   1  773.92   42.60 
  -7   2  -1  720.93   45.50 
  -7   2  -1  711.73   45.90 
   7   2   1  720.43   42.70 
  -7   2  -1  680.83   45.60 
   7   2   1  779.22   37.90 
  -7   2  -1  729.33   44.20 
   7   2   1  675.43   46.90 
  -7   2  -1  764.22   45.70 
   7   2   1  764.62   50.89 
  -7   2  -1  812.42   41.10 
  -7   2  -1  790.72   47.30 
   7   2   1  772.62   46.50 
   7   2   1  651.13   37.40 
  -7   2  -1  787.12   45.70 
   7   2   1  761.02   46.90 
   8  -2   1  143.19   25.60 
   8  -2   1  156.98   26.60 
   8  -2   1  139.39   21.50 
   8  -2   1   89.79   20.40 
   8  -2   1  145.59   23.00 
  -8  -2  -1  133.09   21.90 
  -8  -2  -1  138.49   20.80 
  -8  -2  -1  132.09   21.70 
   8  -2   1  149.49   26.80 
  -8  -2  -1  119.59   17.50 
  -8  -2  -1  129.59   21.30 
  -8  -2  -1  121.69   21.70 
  -8  -2  -1  119.29   21.10 
   8  -2   1  141.79   24.40 
  -8  -2  -1  108.09   22.40 
   8  -2   1  119.39   21.30 
   8  -2   1  105.69   21.20 
   8  -2   1  136.89   22.40 
  -8  -2  -1  161.38   23.10 
  -8  -2  -1  112.19   20.60 
   8  -2   1  146.09   22.20 
  -8   2  -1  131.49   22.70 
  -8   2  -1  130.39   21.80 
  -8   2  -1  121.89   21.90 
   8   2   1   75.39   19.30 
   8   2   1  115.99   21.50 
  -8   2  -1  114.39   21.10 
  -8   2  -1  102.49   20.20 
   8   2   1  151.68   18.90 
  -8   2  -1  161.48   18.20 
   8   2   1  141.19   21.10 
  -8   2  -1  148.79   22.70 
   8   2   1  123.29   22.60 
  -8   2  -1  101.99   20.50 
   8   2   1  117.79   24.90 
  -8   2  -1  106.09   20.10 
   8   2   1  114.99   21.60 
  -8   2  -1  101.09   20.40 
   8   2   1  139.49   25.50 
  -8   2  -1  116.39   20.40 
   8   2   1  151.68   20.60 
   8   2   1  111.89   22.10 
  -9  -2  -1  277.97   35.00 
  -9  -2  -1  222.08   30.90 
   9  -2   1  183.58   28.10 
   9  -2   1  152.98   29.30 
  -9  -2  -1  175.28   28.40 
   9  -2   1  264.77   39.20 
  -9  -2  -1  181.08   25.00 
  -9  -2  -1  203.68   30.20 
  -9  -2  -1  236.68   30.70 
   9  -2   1  201.18   33.00 
  -9  -2  -1  188.08   27.40 
  -9  -2  -1  302.47   29.90 
   9  -2   1  225.48   29.90 
   9  -2   1  209.18   30.40 
   9  -2   1  179.88   26.20 
   9  -2   1  186.88   29.90 
   9  -2   1  216.68   32.70 
   9  -2   1  216.28   32.10 
   9  -2   1  240.98   30.90 
  -9  -2  -1  197.98   28.70 
   9   2   1  195.98   32.00 
   9   2   1  253.87   34.70 
  -9   2  -1  183.38   28.50 
   9   2   1  232.08   31.90 
  -9   2  -1  199.08   30.80 
  -9   2  -1  222.48   31.30 
  -9   2  -1  225.28   31.00 
  -9   2  -1  236.18   29.80 
   9   2   1  237.68   29.00 
  -9   2  -1  190.38   29.00 
   9   2   1  163.78   27.90 
  -9   2  -1  236.18   33.90 
  -9   2  -1  235.18   29.80 
  -9   2  -1  198.58   31.20 
  -9   2  -1  215.08   29.50 
   9   2   1  233.48   35.70 
   9   2   1  208.98   34.00 
   9   2   1  267.77   34.90 
   9   2   1  200.78   26.30 
 -10  -2  -1   23.80   13.50 
 -10  -2  -1   39.70   17.90 
 -10  -2  -1    3.90    9.60 
  10  -2   1   38.40   17.70 
  10  -2   1   -2.30   10.10 
 -10  -2  -1   27.60   15.90 
  10  -2   1   14.90   12.10 
  10  -2   1   16.70   12.90 
 -10  -2  -1   62.89   19.00 
 -10  -2  -1   27.40   13.80 
  10  -2   1   37.10   16.00 
  10  -2   1   26.70   15.90 
  10  -2   1   16.90   13.90 
 -10  -2  -1   25.70   15.10 
  10  -2   1   53.69   19.40 
 -10  -2  -1   54.89   18.20 
  10  -2   1   46.30   16.10 
 -10  -2  -1   30.80   15.60 
  10  -2   1   22.50   15.30 
  10  -2   1   11.60   13.60 
 -10   2  -1   36.40   16.20 
 -10   2  -1   29.00   15.00 
 -10   2  -1   22.40   14.00 
 -10   2  -1   17.10   15.40 
 -10   2  -1    7.10   11.90 
 -10   2  -1   27.30   14.30 
  10   2   1   30.80   18.00 
 -10   2  -1   19.70   12.60 
 -10   2  -1   49.70   18.90 
  10   2   1    8.60   14.60 
  10   2   1   -0.50   10.00 
  10   2   1   23.30   15.70 
  10   2   1   22.80   13.60 
  10   2   1   18.30   14.60 
  10   2   1   22.80   17.80 
  10   2   1   32.90   17.80 
 -10   2  -1   23.20   15.10 
 -10   2  -1   18.60   14.70 
  10   2   1   60.29   20.00 
  10  -3  -1  305.77   42.70 
 -10  -3   1  276.57   35.20 
 -10  -3   1  291.27   35.40 
 -10  -3   1  299.07   38.60 
  10  -3  -1  303.47   40.30 
 -10  -3   1  258.27   34.30 
  10  -3  -1  328.67   40.10 
 -10  -3   1  291.47   39.40 
 -10   3   1  295.27   36.40 
 -10   3   1  246.38   37.10 
 -10   3   1  265.77   36.00 
 -10   3   1  312.37   39.70 
 -10   3   1  321.17   42.00 
 -10   3   1  399.16   45.20 
  10   3  -1  310.47   38.00 
 -10   3   1  256.77   36.60 
 -10   3   1  249.58   37.70 
 -10   3   1  230.78   34.80 
  10   3  -1  347.17   41.70 
 -10   3   1  285.97   38.30 
  -9  -3   1  229.88   30.30 
   9  -3  -1  251.07   36.70 
   9  -3  -1  220.08   32.20 
   9  -3  -1  196.58   30.60 
  -9  -3   1  243.78   30.30 
  -9  -3   1  225.48   31.60 
  -9  -3   1  221.58   26.20 
   9  -3  -1  222.58   33.10 
  -9  -3   1  207.78   30.80 
  -9  -3   1  237.98   31.20 
   9  -3  -1  252.47   37.50 
   9  -3  -1  210.38   28.90 
   9  -3  -1  209.18   30.50 
   9  -3  -1  169.58   32.90 
  -9  -3   1  226.78   32.30 
   9  -3  -1  285.67   33.80 
   9  -3  -1  219.38   30.50 
   9  -3  -1  232.18   34.80 
  -9  -3   1  256.27   33.80 
  -9   3   1  285.97   34.40 
  -9   3   1  239.58   31.40 
  -9   3   1  213.08   29.90 
  -9   3   1  273.37   34.40 
  -9   3   1  212.18   31.50 
  -9   3   1  260.17   34.60 
  -9   3   1  198.58   30.20 
   9   3  -1  184.88   27.90 
  -9   3   1  187.28   30.40 
   9   3  -1  287.87   31.40 
   9   3  -1  276.87   37.50 
   9   3  -1  257.87   36.40 
   9   3  -1  212.68   29.00 
  -9   3   1  287.67   34.20 
   9   3  -1  195.58   30.80 
   9   3  -1  219.18   35.90 
   9   3  -1  284.57   36.50 
   9   3  -1  231.68   27.70 
  -9   3   1  348.47   39.60 
  -9   3   1  252.97   33.20 
  -8  -3   1  146.19   21.80 
   8  -3  -1  145.39   18.60 
  -8  -3   1  139.59   21.00 
   8  -3  -1  175.08   28.20 
   8  -3  -1  156.68   23.00 
   8  -3  -1  159.28   24.50 
  -8  -3   1  154.78   23.40 
   8  -3  -1  153.48   25.00 
  -8  -3   1  127.09   19.00 
  -8  -3   1  167.38   25.50 
  -8  -3   1  151.78   19.90 
   8  -3  -1  180.48   26.60 
   8  -3  -1  144.39   24.60 
   8  -3  -1  115.79   21.00 
  -8  -3   1  128.39   21.10 
  -8  -3   1  195.98   26.60 
   8  -3  -1  129.59   24.50 
  -8  -3   1  106.79   20.80 
  -8  -3   1  175.98   25.70 
   8  -3  -1  153.18   23.70 
   8  -3  -1  167.68   29.90 
  -8   3   1  142.79   22.50 
   8   3  -1  158.08   28.30 
   8   3  -1  166.88   19.20 
  -8   3   1  156.48   24.80 
  -8   3   1  157.58   24.60 
  -8   3   1  160.08   24.50 
  -8   3   1  160.68   20.10 
  -8   3   1  110.99   20.20 
  -8   3   1  130.19   22.70 
   8   3  -1  147.69   24.10 
   8   3  -1  162.18   21.30 
  -8   3   1  195.88   27.40 
  -8   3   1  171.48   25.10 
  -8   3   1  125.49   22.30 
   8   3  -1  147.19   26.30 
  -8   3   1  180.28   27.00 
   8   3  -1  191.08   29.40 
   8   3  -1  179.58   25.20 
   8   3  -1  173.28   24.30 
   8   3  -1  102.19   21.40 
  -8   3   1  175.68   26.50 
   8   3  -1  183.28   22.90 
   7  -3  -1  173.38   28.20 
  -7  -3   1  217.08   24.80 
   7  -3  -1  227.18   21.10 
   7  -3  -1  198.28   24.80 
   7  -3  -1  253.27   31.20 
  -7  -3   1  213.78   25.60 
  -7  -3   1  251.77   23.90 
   7  -3  -1  249.28   30.60 
   7  -3  -1  265.37   29.30 
   7  -3  -1  231.28   27.80 
  -7  -3   1  217.68   26.90 
   7  -3  -1  200.88   16.10 
  -7  -3   1  232.38   25.40 
  -7  -3   1  218.58   27.00 
  -7  -3   1  218.58   17.20 
  -7  -3   1  240.58   28.00 
  -7  -3   1  246.68   22.70 
   7  -3  -1  181.78   24.90 
   7  -3  -1  234.98   29.60 
   7  -3  -1  223.38   25.80 
   7  -3  -1  232.08   28.50 
  -7  -3   1  198.38   23.20 
  -7  -3   1  227.38   25.10 
   7  -3  -1  205.38   21.40 
  -7   3   1  234.28   26.40 
  -7   3   1  315.07   30.90 
   7   3  -1  223.38   28.50 
   7   3  -1  210.98   15.70 
  -7   3   1  190.28   24.90 
   7   3  -1  219.28   29.50 
   7   3  -1  235.98   31.10 
   7   3  -1  201.38   26.60 
   7   3  -1  217.38   16.50 
  -7   3   1  217.18   26.90 
   7   3  -1  209.68   20.10 
   7   3  -1  167.48   22.00 
   7   3  -1  234.08   23.90 
   7   3  -1  240.68   23.60 
  -7   3   1  220.88   23.10 
  -7   3   1  241.48   28.50 
  -7   3   1  239.18   27.90 
  -7   3   1  204.18   25.50 
  -7   3   1  233.98   28.50 
  -7   3   1  201.08   26.00 
  -7   3   1  211.58   21.50 
   7   3  -1  223.78   26.40 
  -7   3   1  272.67   27.90 
   7   3  -1  227.08   26.70 
   7   3  -1  250.17   17.10 
  -7   3   1  229.98   29.20 
   6  -3  -1 1000.60   55.59 
   6  -3  -1 1052.59   58.99 
   6  -3  -1 1113.89   48.90 
  -6  -3   1 1147.29   55.19 
  -6  -3   1 1058.49   55.69 
  -6  -3   1 1007.40   55.79 
   6  -3  -1 1049.30   50.59 
   6  -3  -1 1059.99   56.29 
   6  -3  -1 1003.00   55.59 
   6  -3  -1 1116.79   57.79 
  -6  -3   1 1056.49   52.89 
   6  -3  -1 1131.29   52.39 
  -6  -3   1 1145.09   55.89 
   6  -3  -1 1027.30   54.69 
  -6  -3   1 1059.99   46.30 
  -6  -3   1 1123.79   54.89 
  -6  -3   1 1118.09   51.29 
  -6  -3   1 1119.49   51.09 
  -6  -3   1 1019.30   55.59 
  -6  -3   1 1088.89   56.09 
  -6  -3   1 1027.30   47.90 
  -6  -3   1 1080.59   55.79 
   6  -3  -1 1084.49   58.89 
   6  -3  -1 1071.69   59.19 
  -6  -3   1 1088.59   54.19 
   6  -3  -1 1034.20   57.89 
   6  -3  -1 1089.49   61.79 
  -6   3   1 1050.39   57.69 
  -6   3   1 1076.89   56.49 
  -6   3   1 1131.59   56.69 
   6   3  -1 1081.19   45.40 
   6   3  -1 1103.69   52.09 
   6   3  -1 1084.29   49.40 
  -6   3   1 1136.29   45.90 
  -6   3   1 1057.99   56.69 
   6   3  -1 1143.99   60.39 
   6   3  -1 1030.60   48.60 
   6   3  -1 1057.09   48.80 
  -6   3   1 1049.30   57.19 
   6   3  -1 1156.58   61.49 
  -6   3   1 1068.29   56.89 
   6   3  -1 1090.29   58.09 
   6   3  -1 1077.29   45.10 
   6   3  -1 1075.19   47.40 
  -6   3   1 1093.09   55.89 
   6   3  -1 1139.59   58.79 
  -6   3   1 1088.49   48.80 
   6   3  -1 1116.99   45.40 
   6   3  -1 1104.19   48.90 
  -6   3   1 1107.39   52.29 
   6   3  -1 1083.09   56.69 
   6   3  -1 1073.49   46.20 
  -6   3   1 1049.49   45.20 
  -6   3   1 1055.49   53.59 
  -6   3   1 1150.88   56.89 
   6   3  -1 1092.29   54.39 
   6   3  -1 1085.29   52.79 
   6   3  -1 1063.79   54.99 
  -6   3   1 1061.39   57.29 
  -6   3   1 1046.70   55.69 
  -6   3   1 1106.29   59.79 
  -6   3   1 1073.09   55.59 
   5  -3  -1 1761.42   81.29 
  -5  -3   1 1710.93   75.09 
   5  -3  -1 1602.54   74.09 
   5  -3  -1 1561.34   77.69 
  -5  -3   1 1554.44   67.49 
   5  -3  -1 1598.74   69.59 
  -5  -3   1 1586.54   73.39 
  -5  -3   1 1624.14   75.09 
  -5  -3   1 1653.33   70.19 
  -5  -3   1 1672.83   73.09 
  -5  -3   1 1658.33   72.19 
  -5  -3   1 1728.03   68.19 
   5  -3  -1 1729.33   76.69 
  -5  -3   1 1694.23   73.59 
   5  -3  -1 1672.83   72.39 
   5  -3  -1 1544.45   77.19 
  -5  -3   1 1691.03   69.99 
  -5  -3   1 1629.74   74.69 
  -5  -3   1 1673.73   73.39 
  -5  -3   1 1659.23   74.79 
   5  -3  -1 1688.23   75.99 
   5  -3  -1 1650.23   71.39 
   5  -3  -1 1711.73   76.99 
   5  -3  -1 1618.24   77.49 
   5  -3  -1 1715.83   78.59 
   5  -3  -1 1596.34   75.19 
  -5  -3   1 1665.83   75.39 
  -5   3   1 1724.13   67.69 
   5   3  -1 1651.93   65.89 
   5   3  -1 1623.04   63.59 
  -5   3   1 1686.73   74.49 
  -5   3   1 1708.33   67.79 
  -5   3   1 1675.03   74.89 
  -5   3   1 1708.63   77.39 
   5   3  -1 1581.74   71.49 
   5   3  -1 1652.63   70.09 
  -5   3   1 1573.94   75.89 
  -5   3   1 1798.72   73.79 
   5   3  -1 1738.83   68.49 
   5   3  -1 1736.43   67.99 
   5   3  -1 1581.14   67.49 
   5   3  -1 1674.93   68.79 
   5   3  -1 1623.54   68.79 
   5   3  -1 1652.13   75.19 
  -5   3   1 1581.34   74.49 
   5   3  -1 1717.33   77.19 
  -5   3   1 1670.13   77.39 
  -5   3   1 1682.93   75.39 
   5   3  -1 1730.73   73.59 
   5   3  -1 1620.74   67.29 
   5   3  -1 1717.73   69.79 
  -5   3   1 1714.33   70.09 
  -5   3   1 1685.03   75.29 
   5   3  -1 1662.33   76.49 
  -5   3   1 1695.53   75.19 
  -5   3   1 1785.12   79.69 
   5   3  -1 1735.63   78.79 
  -5   3   1 1596.94   76.29 
   5   3  -1 1655.23   63.39 
   5   3  -1 1637.94   69.69 
  -5   3   1 1767.52   76.79 
   5   3  -1 1591.34   70.79 
  -5   3   1 1633.14   74.29 
  -5   3   1 1691.33   67.39 
   5   3  -1 1661.03   73.99 
  -5   3   1 1672.93   67.69 
   5   3  -1 1623.64   69.89 
   4  -3  -1 1436.76   60.59 
   4  -3  -1 1368.36   63.89 
  -4  -3   1 1277.77   60.79 
  -4  -3   1 1391.16   57.69 
  -4  -3   1 1352.66   59.69 
  -4  -3   1 1489.15   57.89 
   4  -3  -1 1331.27   62.29 
   4  -3  -1 1513.65   62.09 
  -4  -3   1 1387.66   59.99 
  -4  -3   1 1372.26   60.89 
   4  -3  -1 1336.17   61.79 
   4  -3  -1 1391.16   62.49 
  -4  -3   1 1419.36   60.29 
  -4  -3   1 1429.76   60.89 
   4  -3  -1 1428.66   64.19 
   4  -3  -1 1359.56   60.49 
  -4  -3   1 1275.67   60.39 
  -4  -3   1 1316.37   58.89 
   4  -3  -1 1413.26   59.19 
  -4  -3   1 1341.67   57.79 
   4  -3  -1 1309.57   63.79 
   4  -3  -1 1383.26   65.29 
  -4  -3   1 1345.77   55.79 
  -4  -3   1 1345.57   61.29 
   4  -3  -1 1392.26   65.99 
  -4  -3   1 1426.96   61.99 
  -4   3   1 1436.36   62.29 
   4   3  -1 1297.67   55.89 
   4   3  -1 1372.66   58.39 
  -4   3   1 1329.27   60.69 
   4   3  -1 1371.96   63.79 
   4   3  -1 1384.76   57.29 
  -4   3   1 1338.17   63.59 
   4   3  -1 1417.46   58.99 
  -4   3   1 1349.86   60.99 
   4   3  -1 1429.66   59.69 
   4   3  -1 1369.06   57.09 
   4   3  -1 1379.86   59.69 
  -4   3   1 1402.16   57.49 
  -4   3   1 1389.66   62.29 
   4   3  -1 1364.46   62.49 
   4   3  -1 1363.86   56.09 
  -4   3   1 1343.47   56.79 
   4   3  -1 1356.46   53.99 
   4   3  -1 1358.86   59.09 
   4   3  -1 1338.17   55.99 
  -4   3   1 1448.76   62.59 
   4   3  -1 1344.37   61.19 
   4   3  -1 1327.37   61.89 
  -4   3   1 1309.47   62.09 
  -4   3   1 1366.46   62.09 
  -4   3   1 1440.66   63.99 
   4   3  -1 1387.46   58.29 
   4   3  -1 1374.76   57.19 
  -4   3   1 1304.67   56.69 
  -4   3   1 1448.66   64.59 
  -4   3   1 1371.46   61.19 
  -4   3   1 1341.67   62.99 
   4   3  -1 1338.67   58.89 
   4   3  -1 1405.86   56.49 
  -4   3   1 1385.26   59.19 
   4   3  -1 1377.36   55.29 
  -4   3   1 1290.67   64.29 
  -4   3   1 1376.36   61.09 
  -4   3   1 1396.26   57.09 
   4   3  -1 1400.76   58.99 
   3  -3  -1 1479.45   59.79 
   3  -3  -1 1506.45   65.39 
   3  -3  -1 1498.65   60.89 
  -3  -3   1 1452.45   61.19 
   3  -3  -1 1433.06   65.79 
   3  -3  -1 1444.56   65.69 
  -3  -3   1 1472.85   60.79 
   3  -3  -1 1486.35   61.99 
  -3  -3   1 1408.96   60.29 
  -3  -3   1 1453.35   59.99 
  -3  -3   1 1434.66   61.69 
   3  -3  -1 1463.35   61.89 
  -3  -3   1 1444.16   59.39 
  -3  -3   1 1453.55   60.59 
  -3  -3   1 1463.85   62.29 
  -3  -3   1 1483.55   61.39 
   3  -3  -1 1426.76   61.69 
   3  -3  -1 1451.55   65.69 
  -3  -3   1 1475.55   60.79 
   3  -3  -1 1501.65   62.99 
   3  -3  -1 1464.25   63.29 
  -3  -3   1 1541.85   62.29 
   3  -3  -1 1490.45   65.19 
  -3  -3   1 1385.26   60.99 
   3  -3  -1 1533.85   64.09 
  -3  -3   1 1436.06   58.09 
  -3  -3   1 1455.85   61.49 
  -3  -3   1 1502.65   61.79 
   3  -3  -1 1532.25   64.29 
   3   3  -1 1453.45   58.69 
   3   3  -1 1429.76   62.09 
  -3   3   1 1425.56   60.09 
   3   3  -1 1473.85   61.89 
   3   3  -1 1467.85   57.59 
   3   3  -1 1471.65   62.49 
  -3   3   1 1431.96   62.99 
   3   3  -1 1479.55   59.89 
   3   3  -1 1431.66   59.89 
  -3   3   1 1492.75   62.79 
  -3   3   1 1435.26   61.59 
   3   3  -1 1472.45   58.39 
   3   3  -1 1487.05   63.29 
   3   3  -1 1415.76   57.09 
  -3   3   1 1458.65   62.99 
   3   3  -1 1448.06   61.29 
  -3   3   1 1517.65   63.89 
   3   3  -1 1432.56   60.19 
  -3   3   1 1392.46   62.39 
   3   3  -1 1488.95   56.99 
   3   3  -1 1481.15   59.59 
   3   3  -1 1435.66   58.49 
  -3   3   1 1467.35   64.29 
   3   3  -1 1408.16   63.19 
   3   3  -1 1466.95   61.99 
  -3   3   1 1503.65   64.19 
  -3   3   1 1494.55   66.39 
  -3   3   1 1447.46   64.39 
   3   3  -1 1460.95   58.39 
   3   3  -1 1458.25   61.59 
  -3   3   1 1519.25   61.89 
  -3   3   1 1457.55   61.59 
   3   3  -1 1510.75   60.69 
   3   3  -1 1550.84   60.49 
   3   3  -1 1396.86   60.29 
  -3   3   1 1506.45   64.79 
  -3   3   1 1419.66   60.49 
  -3   3   1 1444.36   65.49 
   3   3  -1 1433.66   60.59 
   3   3  -1 1487.45   61.39 
  -3   3   1 1372.96   59.89 
  -3   3   1 1551.74   60.39 
   3   3  -1 1432.46   60.39 
   3   3  -1 1362.46   60.79 
   3   3  -1 1440.86   62.49 
   3   3  -1 1421.66   62.19 
  -3   3   1 1539.05   62.49 
   2  -3  -1  267.87   18.50 
   2  -3  -1  309.67   17.30 
   2  -3  -1  272.47   16.00 
  -2  -3   1  310.07   18.00 
   2  -3  -1  262.97   18.30 
   2  -3  -1  261.27   18.50 
  -2  -3   1  283.67   15.60 
  -2  -3   1  269.87   15.70 
   2  -3  -1  345.67   19.30 
   2  -3  -1  313.47   16.70 
   2  -3  -1  254.77   16.30 
   2  -3  -1  290.07   17.90 
  -2  -3   1  311.67   16.40 
   2  -3  -1  256.67   16.70 
   2  -3  -1  305.27   16.60 
   2  -3  -1  317.87   17.10 
   2  -3  -1  280.47   17.90 
   2  -3  -1  300.77   17.80 
  -2  -3   1  299.97   15.80 
   2  -3  -1  291.97   19.80 
   2  -3  -1  303.17   16.10 
   2  -3  -1  297.07   18.40 
   2  -3  -1  282.67   15.40 
  -2  -3   1  295.77   17.80 
   2  -3  -1  275.47   18.20 
   2  -3  -1  320.37   18.70 
  -2  -3   1  318.67   16.00 
   2  -3  -1  302.17   19.70 
  -2  -3   1  312.97   17.50 
  -2  -3   1  292.97   15.90 
  -2  -3   1  271.47   15.50 
  -2  -3   1  305.37   16.10 
   2  -3  -1  290.27   17.30 
   2  -3  -1  288.67   17.10 
  -2   3   1  267.27   15.70 
   2   3  -1  310.47   15.70 
  -2   3   1  272.37   19.50 
   2   3  -1  298.87   15.10 
  -2   3   1  279.17   18.10 
   2   3  -1  271.87   15.40 
  -2   3   1  286.97   17.50 
  -2   3   1  332.37   19.50 
  -2   3   1  277.17   19.20 
  -2   3   1  292.27   18.40 
   2   3  -1  306.57   15.30 
   2   3  -1  273.47   16.70 
   2   3  -1  285.77   17.00 
  -2   3   1  284.07   17.20 
  -2   3   1  321.67   17.40 
   2   3  -1  291.47   18.20 
   2   3  -1  308.97   16.70 
  -2   3   1  254.87   17.90 
   2   3  -1  292.97   20.20 
  -2   3   1  284.87   16.60 
   2   3  -1  283.07   16.10 
   2   3  -1  289.97   15.30 
   2   3  -1  287.77   16.60 
  -2   3   1  285.27   18.60 
  -2   3   1  301.17   17.50 
   2   3  -1  290.97   17.40 
   2   3  -1  289.77   16.20 
  -2   3   1  292.87   17.10 
   2   3  -1  280.27   15.90 
   2   3  -1  283.27   16.00 
  -2   3   1  297.77   16.80 
   2   3  -1  304.57   17.20 
   2   3  -1  306.77   15.90 
  -2   3   1  295.17   16.00 
   2   3  -1  278.27   16.60 
   2   3  -1  271.17   15.00 
  -2   3   1  304.27   17.40 
  -2   3   1  291.07   18.70 
   2   3  -1  279.27   13.00 
   2   3  -1  308.07   17.10 
   2   3  -1  310.47   15.70 
   2   3  -1  289.27   16.20 
  -2   3   1  288.07   16.00 
   2   3  -1  273.77   15.30 
  -2   3   1  323.67   16.50 
   2   3  -1  277.57   16.80 
   2   3  -1  272.97   14.50 
   2   3  -1  331.27   16.00 
   2   3  -1  284.77   18.30 
  -2   3   1  335.87   18.90 
  -1  -3   1  678.63   27.40 
  -1  -3   1  654.13   27.00 
  -1  -3   1  696.73   35.40 
   1  -3  -1  680.03   29.60 
   1  -3  -1  664.03   31.20 
   1  -3  -1  645.24   33.30 
  -1  -3   1  693.93   28.60 
   1  -3  -1  613.94   34.00 
   1  -3  -1  652.53   30.60 
   1  -3  -1  648.54   32.20 
   1  -3  -1  671.43   29.80 
   1  -3  -1  667.53   33.10 
   1  -3  -1  691.13   32.20 
  -1  -3   1  641.84   31.20 
   1  -3  -1  674.03   27.30 
  -1  -3   1  670.63   33.10 
  -1  -3   1  645.44   31.70 
   1  -3  -1  658.73   32.00 
  -1  -3   1  683.83   30.80 
  -1  -3   1  636.74   31.70 
   1  -3  -1  675.63   31.30 
  -1  -3   1  679.93   30.10 
   1  -3  -1  710.63   28.60 
   1  -3  -1  625.94   31.00 
  -1  -3   1  692.63   31.10 
  -1  -3   1  685.33   28.70 
   1  -3  -1  658.83   32.70 
   1  -3  -1  671.73   31.40 
   1  -3  -1  663.33   32.60 
  -1  -3   1  693.23   33.20 
   1  -3  -1  662.63   28.20 
   1  -3  -1  670.53   30.60 
   1  -3  -1  712.53   33.20 
   1  -3  -1  685.73   29.10 
   1  -3  -1  698.13   29.90 
   1  -3  -1  647.14   32.10 
   1  -3  -1  676.33   29.40 
  -1  -3   1  684.23   29.60 
   1  -3  -1  678.73   28.40 
   1  -3  -1  680.03   28.10 
   1  -3  -1  672.63   27.80 
   1   3  -1  636.34   30.00 
   1   3  -1  658.83   27.00 
  -1   3   1  721.53   32.00 
   1   3  -1  693.13   30.80 
   1   3  -1  652.23   28.60 
   1   3  -1  651.13   27.30 
   1   3  -1  652.73   29.70 
   1   3  -1  660.33   27.80 
   1   3  -1  696.33   31.90 
  -1   3   1  662.33   30.20 
  -1   3   1  694.43   33.10 
   1   3  -1  666.83   32.50 
  -1   3   1  693.43   31.60 
   1   3  -1  711.13   29.60 
   1   3  -1  631.84   34.10 
   1   3  -1  680.93   30.40 
  -1   3   1  714.63   31.20 
   1   3  -1  644.34   28.50 
   1   3  -1  641.04   31.40 
  -1   3   1  674.33   32.40 
   1   3  -1  660.13   27.00 
   1   3  -1  677.43   29.90 
  -1   3   1  660.03   31.70 
  -1   3   1  664.13   29.10 
   1   3  -1  633.84   31.20 
  -1   3   1  645.34   31.80 
  -1   3   1  663.63   30.90 
  -1   3   1  726.63   31.70 
  -1   3   1  679.33   29.70 
   1   3  -1  657.13   29.70 
  -1   3   1  645.94   32.40 
  -1   3   1  721.53   29.70 
   1   3  -1  666.73   32.60 
  -1   3   1  672.23   31.30 
   1   3  -1  633.84   30.80 
  -1   3   1  655.83   31.20 
  -1   3   1  660.13   29.60 
  -1   3   1  635.64   30.80 
   1   3  -1  670.33   29.30 
  -1   3   1  675.93   28.20 
   1   3  -1  660.03   29.20 
   1   3  -1  680.03   28.70 
   1   3  -1  674.53   26.70 
  -1   3   1  688.23   31.80 
   1   3  -1  664.23   29.60 
  -1   3   1  670.83   31.10 
   1   3  -1  661.03   30.60 
  -1   3   1  683.33   34.10 
   1   3  -1  664.53   27.30 
   1   3  -1  685.63   28.80 
   1   3  -1  670.23   33.00 
   1   3  -1  697.63   28.60 
  -1   3   1  694.33   27.80 
  -1   3   1  709.13   31.70 
   1   3  -1  631.24   30.70 
  -1   3   1  626.34   31.70 
  -1   3   1  662.03   31.70 
   1   3  -1  667.73   31.10 
  -1   3   1  663.33   28.00 
   0  -3  -1  451.25   23.30 
   0  -3  -1  436.76   23.80 
   0  -3   1  490.75   24.70 
   0  -3  -1  447.36   20.40 
   0  -3   1  417.66   23.70 
   0  -3  -1  459.25   21.40 
   0  -3   1  422.26   22.50 
   0  -3  -1  462.85   20.50 
   0  -3   1  366.26   23.70 
   0  -3  -1  449.76   18.20 
   0  -3   1  444.76   26.60 
   0  -3   1  449.26   22.70 
   0  -3   1  456.85   19.90 
   0  -3   1  436.76   24.60 
   0  -3  -1  480.65   21.20 
   0  -3  -1  453.85   27.40 
   0  -3  -1  442.26   27.10 
   0  -3   1  454.05   19.00 
   0  -3  -1  410.06   24.10 
   0  -3  -1  443.96   18.40 
   0  -3  -1  431.76   26.50 
   0  -3  -1  460.05   25.30 
   0  -3   1  431.16   23.00 
   0  -3   1  448.16   24.00 
   0  -3   1  462.05   24.00 
   0  -3  -1  413.56   24.70 
   0  -3   1  447.96   22.60 
   0  -3  -1  468.75   27.20 
   0  -3   1  487.85   24.60 
   0  -3   1  493.65   23.70 
   0  -3   1  428.16   23.30 
   0  -3   1  479.15   21.10 
   0  -3   1  446.26   24.60 
   0  -3   1  401.66   23.10 
   0  -3  -1  432.16   25.90 
   0  -3  -1  469.95   22.80 
   0  -3   1  437.96   24.40 
   0  -3  -1  443.96   19.80 
   0  -3   1  460.45   18.80 
   0  -3   1  465.95   23.30 
   0  -3  -1  480.35   24.00 
   0  -3  -1  441.56   25.20 
   0  -3   1  457.75   23.10 
   0  -3   1  437.26   23.10 
   0   3  -1  477.25   20.70 
   0   3  -1  470.35   22.70 
   0   3   1  456.35   19.60 
   0   3   1  470.85   23.70 
   0   3  -1  473.55   22.20 
   0   3  -1  428.46   24.00 
   0   3   1  440.46   19.00 
   0   3  -1  482.05   23.50 
   0   3   1  457.25   23.30 
   0   3  -1  501.75   27.10 
   0   3  -1  437.46   20.60 
   0   3   1  446.86   21.30 
   0   3  -1  478.35   20.50 
   0   3   1  447.76   18.10 
   0   3   1  434.16   23.80 
   0   3   1  491.55   24.60 
   0   3   1  444.36   22.30 
   0   3   1  510.15   23.20 
   0   3  -1  444.36   20.70 
   0   3  -1  436.66   24.00 
   0   3  -1  464.35   20.90 
   0   3  -1  491.55   23.70 
   0   3  -1  458.45   20.30 
   0   3   1  473.25   23.50 
   0   3   1  448.86   21.50 
   0   3   1  441.96   23.50 
   0   3   1  452.95   20.00 
   0   3   1  453.45   23.30 
   0   3  -1  473.75   24.70 
   0   3   1  456.25   20.50 
   0   3  -1  468.25   20.90 
   0   3  -1  471.65   18.80 
   0   3  -1  489.85   22.80 
   0   3  -1  487.85   22.50 
   0   3   1  519.15   28.40 
   0   3  -1  459.85   18.60 
   0   3  -1  465.15   23.50 
   0   3  -1  414.26   24.10 
   0   3  -1  440.46   21.70 
   0   3  -1  460.35   23.80 
   0   3  -1  489.95   22.00 
   0   3   1  471.95   22.00 
   0   3  -1  460.25   18.30 
   0   3   1  451.35   20.60 
   0   3  -1  442.76   20.60 
   0   3   1  450.05   23.50 
   0   3   1  458.45   25.20 
   0   3   1  480.65   24.00 
   0   3  -1  429.46   21.70 
   0   3   1  478.15   24.60 
   0   3   1  464.35   22.40 
   0   3   1  457.55   23.70 
   0   3   1  454.55   23.00 
  -1  -3  -1 3960.30  147.89 
  -1  -3  -1 3980.90  150.78 
   1  -3   1 3923.31  149.39 
   1  -3   1 4112.09  150.98 
  -1  -3  -1 3930.91  152.58 
   1  -3   1 3847.42  151.78 
   1  -3   1 3999.30  150.88 
  -1  -3  -1 4055.39  148.79 
   1  -3   1 4034.70  147.09 
   1  -3   1 3853.71  149.29 
   1  -3   1 4082.09  152.18 
  -1  -3  -1 4047.00  148.19 
  -1  -3  -1 4002.90  154.08 
   1  -3   1 3942.31  151.88 
   1  -3   1 3922.01  152.48 
   1  -3   1 4039.40  152.68 
   1  -3   1 4058.39  154.18 
  -1  -3  -1 4024.50  151.98 
   1  -3   1 3982.60  153.18 
   1  -3   1 3939.31  146.89 
   1  -3   1 4083.29  151.08 
   1  -3   1 4050.79  151.08 
   1  -3   1 3893.71  153.18 
   1  -3   1 3868.71  155.28 
   1  -3   1 3921.81  152.48 
   1  -3   1 3949.80  149.39 
   1  -3   1 3994.60  150.48 
  -1  -3  -1 3851.51  150.08 
  -1  -3  -1 3909.01  147.69 
   1  -3   1 3926.11  150.08 
   1  -3   1 3908.71  148.09 
  -1  -3  -1 4150.08  152.18 
   1  -3   1 3910.81  149.79 
   1  -3   1 4039.10  151.88 
  -1  -3  -1 3991.40  148.79 
   1  -3   1 4048.70  147.79 
   1  -3   1 3930.01  152.18 
  -1  -3  -1 3786.52  154.38 
  -1  -3  -1 3749.62  155.18 
   1  -3   1 3984.80  154.18 
   1  -3   1 4003.00  147.69 
  -1  -3  -1 3970.10  148.09 
  -1  -3  -1 3915.71  154.38 
   1  -3   1 3879.21  152.58 
   1   3   1 3924.51  145.69 
   1   3   1 4033.50  148.89 
  -1   3  -1 3862.61  151.38 
   1   3   1 3870.81  148.89 
  -1   3  -1 4020.10  154.28 
  -1   3  -1 4003.80  151.48 
   1   3   1 4024.80  147.39 
  -1   3  -1 4026.80  151.08 
  -1   3  -1 3989.60  150.18 
   1   3   1 3959.70  151.68 
  -1   3  -1 3886.71  151.68 
  -1   3  -1 4080.49  149.79 
   1   3   1 4094.19  154.68 
   1   3   1 3724.13  155.38 
   1   3   1 4063.39  154.28 
  -1   3  -1 4056.49  147.79 
  -1   3  -1 3930.11  151.08 
   1   3   1 3890.61  155.78 
   1   3   1 3984.50  148.19 
   1   3   1 3954.70  151.98 
  -1   3  -1 4056.69  153.58 
   1   3   1 4012.00  148.59 
   1   3   1 4028.50  151.38 
  -1   3  -1 4025.30  152.58 
  -1   3  -1 4035.30  149.29 
   1   3   1 3838.32  146.49 
   1   3   1 3893.61  154.68 
   1   3   1 3914.21  146.59 
  -1   3  -1 3983.00  150.98 
  -1   3  -1 3949.60  152.58 
  -1   3  -1 4090.39  146.89 
  -1   3  -1 4091.89  150.98 
  -1   3  -1 4035.70  152.98 
   1   3   1 3865.81  152.48 
   1   3   1 3923.11  152.48 
   1   3   1 3669.13  146.69 
   1   3   1 3949.90  147.19 
   1   3   1 3846.42  153.78 
  -1   3  -1 4000.20  150.28 
   1   3   1 3926.21  151.38 
   1   3   1 4054.89  156.28 
  -1   3  -1 3985.50  152.28 
   1   3   1 4036.50  148.29 
  -1   3  -1 3988.80  151.68 
   1   3   1 3853.41  152.98 
   1   3   1 4034.50  152.98 
  -1   3  -1 3958.90  153.58 
   1   3   1 3932.61  146.19 
   1   3   1 3899.71  145.39 
   1   3   1 4077.59  145.69 
  -1   3  -1 4031.00  152.38 
  -1   3  -1 4079.19  151.68 
  -1   3  -1 4138.59  149.99 
  -1   3  -1 4005.50  148.69 
   1   3   1 3980.10  146.39 
   1   3   1 3932.71  146.69 
  -1   3  -1 3963.60  152.58 
   2  -3   1 2440.26   98.09 
   2  -3   1 2458.65  100.29 
   2  -3   1 2399.06   95.29 
   2  -3   1 2439.46   98.09 
   2  -3   1 2511.15   99.29 
   2  -3   1 2566.64   98.19 
  -2  -3  -1 2464.45   92.69 
  -2  -3  -1 2384.46   91.59 
  -2  -3  -1 2451.35   96.39 
  -2  -3  -1 2314.37   96.09 
  -2  -3  -1 2472.45   97.59 
   2  -3   1 2397.96   94.89 
   2  -3   1 2476.85   95.39 
   2  -3   1 2518.25   97.89 
  -2  -3  -1 2313.57   94.59 
   2  -3   1 2564.94   98.09 
  -2  -3  -1 2387.46   97.29 
  -2  -3  -1 2418.76   97.49 
   2  -3   1 2491.85   97.19 
   2  -3   1 2387.06   96.99 
   2  -3   1 2462.45   98.29 
   2  -3   1 2377.46   97.49 
  -2  -3  -1 2547.84   96.89 
  -2  -3  -1 2374.46   91.29 
  -2  -3  -1 2444.36   93.19 
   2  -3   1 2462.15   94.99 
  -2  -3  -1 2321.57   97.09 
   2  -3   1 2454.75   94.29 
   2  -3   1 2535.25   96.79 
   2  -3   1 2470.05   97.29 
   2  -3   1 2402.16   98.69 
   2  -3   1 2509.75   94.59 
  -2   3  -1 2409.16   98.69 
  -2   3  -1 2482.35   94.49 
  -2   3  -1 2406.36   98.89 
   2   3   1 2446.36   97.09 
   2   3   1 2480.85   92.99 
   2   3   1 2368.36   92.19 
  -2   3  -1 2408.96   96.99 
   2   3   1 2349.06   96.09 
   2   3   1 2434.76   91.49 
   2   3   1 2432.86   95.09 
  -2   3  -1 2392.06   94.89 
   2   3   1 2465.75   96.19 
  -2   3  -1 2490.95   95.99 
   2   3   1 2377.96   94.59 
  -2   3  -1 2441.66   97.49 
  -2   3  -1 2442.96   97.89 
  -2   3  -1 2410.56   96.49 
   2   3   1 2404.86   92.69 
  -2   3  -1 2469.15   96.09 
   2   3   1 2430.06   95.89 
   2   3   1 2255.47   97.99 
  -2   3  -1 2516.05   94.59 
   2   3   1 2433.36   90.99 
   2   3   1 2452.55   92.99 
  -2   3  -1 2517.05   97.29 
  -2   3  -1 2508.15   96.69 
  -2   3  -1 2530.55   98.99 
   2   3   1 2498.45   95.49 
   2   3   1 2439.46   90.39 
   2   3   1 2537.15   99.49 
   2   3   1 2470.75   97.29 
  -2   3  -1 2529.35   97.69 
  -2   3  -1 2533.45   99.29 
   2   3   1 2454.85   92.19 
   2   3   1 2496.75   99.69 
  -2   3  -1 2526.35   99.59 
   2   3   1 2402.96   97.09 
   2   3   1 2511.45   96.69 
   2   3   1 2466.95   95.69 
   2   3   1 2396.66   90.69 
   2   3   1 2393.06   97.29 
   2   3   1 2390.16  100.49 
  -2   3  -1 2444.46   95.19 
   2   3   1 2391.16   89.99 
   2   3   1 2406.36   89.99 
  -2   3  -1 2410.86   97.39 
   2   3   1 2477.65   98.79 
   2   3   1 2437.56   97.49 
   2   3   1 2456.95   93.79 
  -2   3  -1 2386.66   99.89 
   2   3   1 2469.95   90.09 
   2   3   1 2461.65   98.79 
   2   3   1 2454.75   92.39 
  -3  -3  -1 2180.18   86.49 
   3  -3   1 2250.27   86.29 
   3  -3   1 2116.59   83.59 
   3  -3   1 2052.89   88.49 
   3  -3   1 2044.70   85.69 
  -3  -3  -1 1978.00   84.39 
  -3  -3  -1 2062.69   85.89 
   3  -3   1 2047.30   87.99 
   3  -3   1 2124.49   88.19 
   3  -3   1 2039.30   89.29 
  -3  -3  -1 2119.69   84.09 
   3  -3   1 2133.89   87.99 
  -3  -3  -1 2033.00   80.19 
   3  -3   1 2218.48   86.29 
   3  -3   1 2099.99   87.49 
   3  -3   1 2153.48   88.39 
  -3  -3  -1 2137.39   83.49 
   3  -3   1 2120.99   87.19 
  -3  -3  -1 2044.80   82.89 
   3  -3   1 2096.69   87.29 
   3  -3   1 2039.30   85.19 
   3  -3   1 2059.09   84.29 
  -3  -3  -1 2039.10   82.19 
  -3   3  -1 2040.90   86.49 
   3   3   1 2086.39   77.89 
  -3   3  -1 2112.49   87.49 
  -3   3  -1 2120.29   87.79 
   3   3   1 2031.80   77.49 
  -3   3  -1 2048.79   87.79 
  -3   3  -1 2090.59   83.89 
   3   3   1 2100.19   81.89 
  -3   3  -1 2105.99   84.99 
   3   3   1 2105.69   85.49 
  -3   3  -1 2194.88   85.19 
   3   3   1 2056.49   85.99 
   3   3   1 2122.79   83.99 
   3   3   1 2151.28   88.89 
   3   3   1 2108.09   79.99 
   3   3   1 2120.59   82.49 
   3   3   1 2131.69   83.09 
   3   3   1 2115.99   81.89 
   3   3   1 2090.29   80.99 
  -3   3  -1 2000.30   87.69 
   3   3   1 2058.49   84.29 
  -3   3  -1 2060.99   84.39 
  -3   3  -1 2095.19   87.09 
  -3   3  -1 2104.19   84.59 
   3   3   1 2076.89   78.29 
   3   3   1 2186.18   87.99 
   3   3   1 2189.48   86.59 
   3   3   1 2083.89   83.49 
  -3   3  -1 2094.09   85.39 
   3   3   1 2050.79   78.79 
   3   3   1 2041.50   84.99 
   3   3   1 2065.79   78.99 
  -3   3  -1 2083.79   88.99 
  -3   3  -1 2096.89   86.99 
  -3   3  -1 2075.59   86.99 
  -3   3  -1 1956.50   88.09 
  -3   3  -1 1994.80   84.19 
   3   3   1 2074.49   81.29 
  -3   3  -1 2233.68   84.49 
   4  -3   1  470.15   30.40 
   4  -3   1  514.65   26.00 
   4  -3   1  459.05   29.80 
   4  -3   1  478.95   30.10 
   4  -3   1  429.86   29.40 
   4  -3   1  453.05   28.20 
  -4  -3  -1  431.16   22.80 
   4  -3   1  473.45   29.10 
  -4  -3  -1  488.55   25.80 
  -4  -3  -1  453.85   20.10 
  -4  -3  -1  448.06   27.40 
  -4  -3  -1  478.75   23.00 
   4  -3   1  489.15   27.80 
  -4  -3  -1  522.35   28.40 
   4  -3   1  462.05   29.00 
   4  -3   1  475.95   28.10 
  -4  -3  -1  432.76   24.50 
  -4  -3  -1  471.35   27.20 
   4  -3   1  465.65   26.20 
  -4  -3  -1  442.36   27.00 
  -4  -3  -1  503.65   24.80 
   4  -3   1  473.55   25.80 
   4  -3   1  426.06   27.80 
   4   3   1  468.35   22.50 
   4   3   1  460.45   23.80 
  -4   3  -1  437.66   28.70 
  -4   3  -1  475.15   27.20 
  -4   3  -1  449.95   27.50 
   4   3   1  485.55   24.80 
   4   3   1  401.76   27.40 
   4   3   1  495.65   28.60 
  -4   3  -1  481.85   27.90 
   4   3   1  454.25   29.90 
   4   3   1  421.96   20.00 
   4   3   1  436.36   27.80 
  -4   3  -1  448.26   23.70 
   4   3   1  484.35   24.80 
  -4   3  -1  464.85   27.90 
  -4   3  -1  469.95   24.30 
  -4   3  -1  483.75   24.70 
   4   3   1  457.15   21.30 
   4   3   1  467.15   20.60 
  -4   3  -1  455.85   27.20 
  -4   3  -1  504.75   30.80 
  -4   3  -1  503.45   29.30 
  -4   3  -1  449.46   27.40 
  -4   3  -1  479.65   28.80 
   4   3   1  458.95   22.30 
   4   3   1  457.15   23.40 
   4   3   1  436.66   24.20 
   4   3   1  448.76   20.00 
  -4   3  -1  422.06   26.30 
  -4   3  -1  459.95   26.90 
   4   3   1  447.26   23.50 
   4   3   1  433.76   25.10 
  -4   3  -1  401.76   27.70 
   4   3   1  466.55   20.70 
  -4   3  -1  467.65   29.70 
   5  -3   1  168.88   16.40 
   5  -3   1  153.28   20.40 
  -5  -3  -1  158.98   14.50 
  -5  -3  -1  153.58   16.70 
  -5  -3  -1  165.08   18.50 
  -5  -3  -1  199.68   20.80 
   5  -3   1  148.49   18.50 
  -5  -3  -1  118.09   15.90 
  -5  -3  -1  148.79   16.40 
   5  -3   1  196.28   21.10 
   5  -3   1  169.18   22.20 
  -5  -3  -1  174.28   19.30 
   5  -3   1  142.89   19.90 
   5  -3   1  141.49   18.20 
  -5  -3  -1  148.69   18.30 
  -5  -3  -1  187.48   11.10 
   5  -3   1  155.18   20.00 
   5  -3   1  162.78   21.30 
  -5  -3  -1  169.88   12.90 
   5  -3   1  142.79   18.20 
  -5  -3  -1  201.48   21.00 
   5  -3   1  172.98   16.70 
   5  -3   1  158.38   18.30 
  -5   3  -1  151.38   18.20 
   5   3   1  154.58   11.70 
  -5   3  -1  228.48   23.50 
   5   3   1  167.78   11.00 
   5   3   1  204.08   15.50 
  -5   3  -1  183.98   22.20 
  -5   3  -1  180.78   20.70 
  -5   3  -1  129.39   17.30 
   5   3   1  160.28   10.30 
   5   3   1  167.38   19.90 
   5   3   1  125.59   13.70 
  -5   3  -1  166.28   12.30 
   5   3   1  180.38   16.60 
  -5   3  -1  156.68   12.40 
   5   3   1  163.98   12.20 
   5   3   1  179.78   21.70 
   5   3   1  182.68   21.20 
   5   3   1  158.68   12.60 
  -5   3  -1  142.49   19.70 
  -5   3  -1  181.28   11.80 
  -5   3  -1  137.19   17.50 
   5   3   1  129.29   17.70 
  -5   3  -1  144.09   18.60 
   5   3   1  152.88   10.40 
  -5   3  -1  172.88   19.70 
  -5   3  -1  170.58   19.20 
  -5   3  -1  145.39   17.70 
   5   3   1  157.68   10.60 
  -5   3  -1  155.88   18.20 
  -5   3  -1  146.09   17.00 
   5   3   1  174.18   16.80 
  -5   3  -1  169.08   19.10 
   5   3   1  166.78   11.80 
   5   3   1  173.78   20.50 
  -5   3  -1  142.59   13.70 
   6  -3   1  359.46   23.20 
  -6  -3  -1  342.37   27.50 
  -6  -3  -1  397.36   23.60 
   6  -3   1  305.67   32.40 
   6  -3   1  364.26   28.10 
  -6  -3  -1  387.36   26.10 
   6  -3   1  383.16   30.20 
   6  -3   1  385.86   30.00 
   6  -3   1  376.56   23.00 
  -6  -3  -1  357.96   27.90 
  -6  -3  -1  381.46   20.30 
   6  -3   1  326.57   29.20 
  -6  -3  -1  343.07   27.40 
   6  -3   1  352.96   28.20 
   6  -3   1  400.96   32.50 
  -6  -3  -1  374.26   27.20 
   6  -3   1  331.57   27.60 
   6  -3   1  345.27   31.50 
  -6  -3  -1  323.47   26.90 
  -6  -3  -1  342.67   20.60 
  -6  -3  -1  409.46   27.20 
   6  -3   1  382.16   28.10 
  -6  -3  -1  391.96   28.50 
   6   3   1  370.06   28.50 
  -6   3  -1  332.57   20.00 
  -6   3  -1  319.57   27.30 
   6   3   1  398.46   30.40 
   6   3   1  360.56   28.40 
  -6   3  -1  392.46   28.40 
   6   3   1  408.46   30.60 
  -6   3  -1  348.67   28.50 
   6   3   1  375.56   31.60 
   6   3   1  374.86   20.40 
  -6   3  -1  369.46   19.90 
  -6   3  -1  348.77   27.50 
  -6   3  -1  355.06   26.10 
  -6   3  -1  407.46   19.20 
  -6   3  -1  390.46   28.00 
   6   3   1  362.56   20.50 
   6   3   1  375.66   25.20 
  -6   3  -1  392.16   21.20 
  -6   3  -1  367.86   25.40 
  -6   3  -1  376.96   28.00 
  -6   3  -1  365.26   35.00 
   6   3   1  378.46   24.40 
   6   3   1  382.86   20.10 
  -6   3  -1  366.76   28.90 
   6   3   1  364.16   28.00 
  -6   3  -1  299.17   30.10 
   6   3   1  352.26   20.50 
  -6   3  -1  342.27   27.50 
   6   3   1  374.06   21.60 
  -6   3  -1  370.36   29.40 
  -6   3  -1  354.96   27.40 
   6   3   1  332.07   22.50 
   6   3   1  355.96   19.60 
   7  -3   1  168.58   25.90 
   7  -3   1  122.59   23.30 
  -7  -3  -1  101.49   18.80 
  -7  -3  -1  161.88   23.10 
  -7  -3  -1  119.69   15.40 
   7  -3   1  135.29   20.30 
   7  -3   1  107.09   19.70 
   7  -3   1  125.09   21.00 
   7  -3   1  123.69   14.60 
   7  -3   1  159.88   22.70 
  -7  -3  -1  129.99   20.40 
   7  -3   1  140.99   22.40 
  -7  -3  -1  143.19   20.00 
   7  -3   1  118.69   21.30 
   7  -3   1  139.29   20.20 
   7  -3   1  121.89   22.70 
  -7  -3  -1  104.49   18.20 
   7  -3   1  121.69   19.80 
  -7  -3  -1  154.68   20.30 
  -7  -3  -1  111.49   18.30 
   7  -3   1  118.39   14.80 
  -7  -3  -1   88.59   17.10 
  -7   3  -1   84.49   18.50 
   7   3   1  114.19   20.50 
  -7   3  -1  115.69   18.80 
  -7   3  -1  149.09   18.60 
   7   3   1  102.49   18.70 
   7   3   1  122.99   14.80 
  -7   3  -1  147.99   22.00 
  -7   3  -1  133.99   20.90 
   7   3   1  144.89   15.50 
   7   3   1  140.89   17.80 
   7   3   1  136.99   22.60 
   7   3   1  117.39   22.20 
  -7   3  -1  151.68   22.10 
  -7   3  -1  128.29   18.20 
   7   3   1  135.49   22.10 
  -7   3  -1  148.39   22.00 
   7   3   1  103.49   18.50 
  -7   3  -1  142.49   21.30 
  -7   3  -1  124.29   21.20 
  -7   3  -1  157.58   22.70 
  -7   3  -1  148.69   21.60 
   7   3   1  135.39   18.40 
  -8  -3  -1  499.75   39.90 
  -8  -3  -1  402.56   41.20 
  -8  -3  -1  522.25   39.70 
   8  -3   1  536.35   39.90 
   8  -3   1  503.55   42.20 
  -8  -3  -1  556.24   39.50 
   8  -3   1  603.24   42.30 
  -8  -3  -1  559.94   34.20 
   8  -3   1  522.75   38.90 
   8  -3   1  614.24   44.60 
   8  -3   1  634.94   44.30 
  -8  -3  -1  567.64   38.90 
  -8  -3  -1  576.64   41.00 
   8  -3   1  470.65   39.80 
   8  -3   1  553.64   44.50 
   8  -3   1  565.44   39.70 
   8  -3   1  531.45   42.50 
  -8  -3  -1  532.25   40.00 
   8  -3   1  586.84   46.40 
  -8  -3  -1  518.85   37.20 
  -8   3  -1  515.45   34.80 
  -8   3  -1  578.64   41.70 
   8   3   1  516.25   41.90 
  -8   3  -1  502.15   40.60 
  -8   3  -1  545.95   41.70 
   8   3   1  535.35   44.40 
  -8   3  -1  563.14   38.90 
   8   3   1  512.45   41.50 
  -8   3  -1  574.24   41.50 
   8   3   1  524.55   44.90 
   8   3   1  556.24   42.50 
  -8   3  -1  567.14   40.90 
  -8   3  -1  471.95   39.10 
  -8   3  -1  602.94   41.00 
   8   3   1  528.95   35.30 
  -8   3  -1  563.64   43.40 
  -8   3  -1  453.85   44.10 
  -8   3  -1  509.35   39.60 
   8   3   1  535.65   40.90 
   8   3   1  625.14   42.30 
   8   3   1  577.94   37.70 
   9  -3   1  358.56   38.60 
   9  -3   1  289.77   40.80 
  -9  -3  -1  461.85   46.60 
   9  -3   1  292.67   41.40 
  -9  -3  -1  287.07   35.60 
   9  -3   1  383.56   41.40 
  -9  -3  -1  368.66   37.90 
  -9  -3  -1  377.26   41.30 
   9  -3   1  352.36   43.50 
   9  -3   1  327.17   37.40 
  -9  -3  -1  317.17   38.00 
   9  -3   1  286.17   37.80 
  -9  -3  -1  383.76   37.50 
  -9  -3  -1  321.37   35.90 
   9  -3   1  327.67   37.10 
   9  -3   1  321.87   42.20 
   9  -3   1  229.18   33.40 
   9  -3   1  363.56   41.40 
  -9   3  -1  391.86   41.70 
   9   3   1  322.37   39.50 
   9   3   1  325.17   34.20 
  -9   3  -1  300.47   37.50 
  -9   3  -1  297.27   36.00 
   9   3   1  397.96   35.80 
  -9   3  -1  374.26   40.60 
  -9   3  -1  354.46   40.70 
  -9   3  -1  361.56   40.10 
  -9   3  -1  328.87   40.60 
  -9   3  -1  399.86   41.80 
  -9   3  -1  301.37   37.40 
  -9   3  -1  337.47   37.40 
   9   3   1  367.46   40.30 
   9   3   1  394.96   47.40 
   9   3   1  345.37   41.10 
   9   3   1  308.67   44.60 
   9   3   1  361.06   41.00 
   9   3   1  368.86   44.20 
   9  -4  -1   47.00   16.80 
   9  -4  -1   87.99   22.40 
   9  -4  -1   72.19   20.60 
   9  -4  -1   54.89   17.50 
   9  -4  -1   71.09   21.80 
   9  -4  -1   64.29   17.50 
   9  -4  -1   69.99   21.80 
   9  -4  -1   61.59   19.90 
  -9  -4   1   93.29   20.20 
   9  -4  -1   57.19   17.80 
  -9  -4   1   64.89   18.00 
  -9  -4   1   82.49   18.60 
   9  -4  -1   90.09   20.00 
   9  -4  -1   87.99   23.00 
  -9  -4   1   98.59   19.40 
  -9  -4   1   88.99   21.20 
  -9   4   1   73.19   19.20 
   9   4  -1   57.89   20.40 
  -9   4   1  100.39   22.70 
  -9   4   1   69.89   15.80 
   9   4  -1   70.79   20.30 
   9   4  -1   59.89   19.00 
   9   4  -1   47.20   19.70 
  -9   4   1   98.19   22.50 
  -9   4   1   64.39   18.80 
  -9   4   1   71.89   19.30 
  -9   4   1  104.69   21.30 
  -9   4   1   77.39   19.60 
   9   4  -1   82.19   21.60 
  -9   4   1   87.79   20.50 
   9   4  -1  109.39   22.50 
  -9   4   1  145.59   27.20 
   9   4  -1   61.99   15.80 
  -9   4   1  101.59   24.10 
  -8  -4   1    9.00    9.50 
  -8  -4   1    3.90    8.70 
  -8  -4   1   13.00   10.50 
   8  -4  -1   11.30   11.60 
   8  -4  -1   11.90   11.40 
  -8  -4   1   11.90   11.20 
   8  -4  -1    9.50   10.80 
   8  -4  -1    3.10    8.60 
  -8  -4   1    8.00    8.40 
   8  -4  -1    7.60   10.80 
   8  -4  -1    9.60   10.40 
  -8  -4   1   24.50   11.50 
   8  -4  -1   22.60   11.10 
   8  -4  -1   14.20   13.50 
   8  -4  -1   23.00   11.40 
  -8  -4   1   -7.00    5.30 
   8  -4  -1   11.90   10.30 
   8   4  -1   14.90    8.70 
   8   4  -1   15.00   12.30 
   8   4  -1    5.00    9.30 
   8   4  -1   16.70   11.00 
  -8   4   1   19.20   10.40 
   8   4  -1    6.10   10.80 
  -8   4   1   16.60   11.10 
  -8   4   1    3.80   11.50 
  -8   4   1   17.40   11.70 
   8   4  -1   13.10   11.10 
   8   4  -1   24.20   10.20 
  -8   4   1    9.10    9.90 
  -8   4   1   18.10   11.10 
  -8   4   1   22.70   12.80 
   8   4  -1   15.10   13.20 
  -8   4   1    7.80   10.00 
  -8   4   1   17.00   12.00 
  -8   4   1   -2.00    9.70 
  -8   4   1   19.00   12.30 
  -8   4   1   25.40   13.30 
   8   4  -1   12.60   12.00 
  -7  -4   1   -2.10    6.00 
   7  -4  -1    3.70    5.30 
  -7  -4   1    3.30    6.80 
   7  -4  -1   -2.00    6.80 
  -7  -4   1    1.00    6.50 
   7  -4  -1    6.80   10.70 
   7  -4  -1    7.50    7.50 
   7  -4  -1   -1.20    6.80 
   7  -4  -1    6.50    9.90 
  -7  -4   1   -0.90    6.30 
   7  -4  -1    9.40    9.60 
   7  -4  -1    7.10    8.60 
  -7  -4   1   -1.00    7.40 
  -7  -4   1    7.30    7.80 
   7  -4  -1    3.30    7.00 
   7  -4  -1    2.20    6.20 
  -7  -4   1    6.10    7.10 
  -7  -4   1   -2.40    6.10 
   7  -4  -1   -9.30    7.10 
   7  -4  -1    0.90    7.30 
  -7  -4   1   -1.50    5.20 
   7  -4  -1  -12.70    6.40 
   7   4  -1   -5.90    6.70 
   7   4  -1    7.20    8.90 
  -7   4   1    0.60    7.00 
  -7   4   1    6.10    8.90 
   7   4  -1    3.40    8.10 
   7   4  -1    9.70   10.00 
  -7   4   1   -9.30    5.70 
  -7   4   1    1.80    8.00 
   7   4  -1   -5.00    5.40 
   7   4  -1    1.80    7.00 
  -7   4   1    4.40    6.80 
  -7   4   1   -7.30    7.10 
   7   4  -1    1.10    5.20 
   7   4  -1    4.90    7.00 
   7   4  -1   -3.00    5.70 
   7   4  -1   -0.80    7.50 
   7   4  -1   -7.70    7.20 
  -7   4   1   10.00    7.80 
  -7   4   1   14.10   10.50 
   7   4  -1   -0.80    9.10 
  -7   4   1    7.40    7.70 
  -7   4   1  -11.80    6.20 
   7   4  -1   11.10    6.40 
   7   4  -1   -2.60    5.10 
  -7   4   1    3.40    8.20 
  -7   4   1   -6.90    6.70 
  -7   4   1    3.70    8.20 
  -7   4   1    6.50    9.40 
   6  -4  -1   68.49   13.10 
   6  -4  -1   72.39   16.00 
   6  -4  -1   46.20   12.10 
  -6  -4   1   71.99   10.80 
   6  -4  -1   73.29   15.00 
   6  -4  -1   86.39   13.80 
   6  -4  -1   85.59   18.60 
   6  -4  -1   82.69   17.70 
   6  -4  -1   61.39   15.80 
   6  -4  -1   82.99   15.80 
  -6  -4   1   81.79   10.00 
  -6  -4   1   63.49   11.00 
   6  -4  -1   52.39   10.50 
  -6  -4   1   64.59   12.50 
  -6  -4   1   69.29   13.60 
   6  -4  -1   74.99   14.80 
   6  -4  -1   78.29   14.60 
  -6  -4   1   47.00   11.30 
  -6  -4   1   57.99   13.20 
  -6  -4   1   70.39   13.00 
   6  -4  -1   53.19   14.10 
  -6  -4   1   81.59   13.30 
  -6  -4   1   75.39   14.20 
  -6  -4   1   56.09   13.50 
   6   4  -1   89.39   15.40 
  -6   4   1   34.80   11.10 
  -6   4   1   66.49   13.90 
   6   4  -1   77.99   15.30 
   6   4  -1   72.69   11.60 
   6   4  -1   87.89   16.30 
  -6   4   1   65.99   13.60 
  -6   4   1   80.69   16.00 
  -6   4   1   54.09   13.40 
   6   4  -1   96.79   18.20 
  -6   4   1   66.99   14.40 
   6   4  -1   46.70   10.60 
   6   4  -1   87.09   13.00 
   6   4  -1   93.99   13.20 
   6   4  -1   77.49   10.30 
  -6   4   1   60.39   15.30 
  -6   4   1   53.19   13.50 
   6   4  -1   97.39   14.20 
  -6   4   1   70.89   15.00 
  -6   4   1   60.99   12.60 
   6   4  -1   70.19   10.00 
   6   4  -1   75.89   10.30 
   6   4  -1   75.69   14.80 
  -6   4   1   99.69   13.60 
   6   4  -1   66.49   11.00 
  -6   4   1   76.49   10.40 
  -6   4   1   79.29   15.10 
   6   4  -1   68.79   12.90 
  -6   4   1   80.09   10.30 
   6   4  -1   69.39    9.60 
  -6   4   1   96.19   17.90 
  -6   4   1   63.99   13.30 
  -6   4   1   58.49   13.10 
  -5  -4   1   28.00    8.60 
   5  -4  -1   28.20    8.80 
   5  -4  -1   31.60    8.60 
   5  -4  -1   29.00    8.40 
  -5  -4   1   37.20    8.70 
  -5  -4   1   36.80    8.10 
   5  -4  -1   31.50   10.30 
   5  -4  -1   48.10   12.40 
  -5  -4   1   37.90    8.00 
  -5  -4   1   38.60    9.70 
  -5  -4   1   31.90    8.40 
  -5  -4   1   42.80    8.60 
   5  -4  -1   42.40   10.40 
  -5  -4   1   37.60    9.10 
   5  -4  -1   33.40   10.90 
   5  -4  -1   14.30    8.50 
   5  -4  -1   51.79   10.60 
   5  -4  -1   34.80   11.30 
   5  -4  -1   28.90   11.20 
   5  -4  -1   27.20    8.90 
   5  -4  -1   39.10   10.80 
   5   4  -1   33.40    7.60 
   5   4  -1   33.50    6.40 
   5   4  -1   38.40    6.80 
  -5   4   1   28.10    6.90 
  -5   4   1   45.90   12.40 
   5   4  -1   29.60    7.40 
  -5   4   1   35.00   10.90 
  -5   4   1   32.50   10.40 
  -5   4   1   49.60   10.00 
  -5   4   1   48.60   11.40 
   5   4  -1   37.70    9.00 
   5   4  -1   37.60   10.30 
  -5   4   1   32.40    9.00 
   5   4  -1   32.60    9.60 
  -5   4   1   37.70   10.40 
   5   4  -1   23.20    7.50 
   5   4  -1   37.10    9.10 
   5   4  -1   34.80    8.70 
  -5   4   1   41.40    7.90 
  -5   4   1   38.40    9.60 
   5   4  -1   35.50    7.50 
   5   4  -1   32.70   10.30 
   5   4  -1   32.60    8.80 
   5   4  -1   36.50    8.90 
  -5   4   1   19.20    9.00 
  -5   4   1   44.40   10.80 
  -5   4   1   28.30   10.90 
   5   4  -1   39.20    9.80 
  -5   4   1   31.00    9.40 
   5   4  -1   31.20    9.10 
   5   4  -1   47.80    7.80 
  -5   4   1   31.70    9.60 
  -5   4   1   44.20   11.50 
   5   4  -1   33.50    5.90 
  -5   4   1   32.30    9.00 
   5   4  -1   25.10    5.40 
   5   4  -1   37.20    7.50 
   4  -4  -1  144.39   18.90 
  -4  -4   1  159.68   16.10 
   4  -4  -1  161.48   18.60 
  -4  -4   1  158.88   10.60 
   4  -4  -1  172.18   20.80 
  -4  -4   1  149.79   14.70 
  -4  -4   1  153.88   15.60 
   4  -4  -1  133.39   16.50 
   4  -4  -1  138.99   15.40 
   4  -4  -1  149.49   16.90 
   4  -4  -1  105.89   16.50 
  -4  -4   1  142.39   15.00 
  -4  -4   1  133.59   14.30 
   4  -4  -1  149.29   14.30 
   4  -4  -1  160.18   17.60 
   4  -4  -1  129.19   17.50 
  -4  -4   1  131.99   14.50 
   4  -4  -1  125.09   17.30 
   4  -4  -1  146.29   15.80 
  -4  -4   1  159.38   17.00 
   4  -4  -1  155.88   18.50 
   4  -4  -1  164.48   18.30 
  -4  -4   1  157.38   15.60 
   4   4  -1  155.08   17.90 
   4   4  -1  183.48   18.10 
  -4   4   1  143.29   14.90 
   4   4  -1  157.28   10.80 
   4   4  -1  141.59   15.50 
   4   4  -1  158.78   10.30 
   4   4  -1  173.28   19.00 
  -4   4   1  128.29   13.80 
   4   4  -1  158.48   10.80 
  -4   4   1  172.48   17.30 
  -4   4   1  164.68   17.90 
   4   4  -1  153.08   16.70 
   4   4  -1  150.48    9.90 
   4   4  -1  162.18    8.40 
   4   4  -1  143.49   16.60 
   4   4  -1  132.09   14.30 
  -4   4   1  139.89   19.50 
   4   4  -1  150.78   15.60 
  -4   4   1  162.38   18.50 
   4   4  -1  157.78   12.30 
   4   4  -1  173.68   11.10 
  -4   4   1  145.29   17.20 
  -4   4   1  153.28   18.40 
  -4   4   1  160.78   16.50 
  -4   4   1  142.99   15.90 
  -4   4   1  161.98   19.10 
  -4   4   1  182.08   17.70 
   4   4  -1  161.58   14.80 
   4   4  -1  146.19   14.10 
  -4   4   1  136.49   18.90 
  -4   4   1  157.88   16.40 
   4   4  -1  156.78   20.00 
  -4   4   1  161.98   18.50 
  -4   4   1  144.19   16.50 
   4   4  -1  142.39    8.30 
  -4   4   1  140.89   17.80 
   4   4  -1  132.39   14.20 
   4   4  -1  165.28   13.20 
   4   4  -1  140.99   16.50 
   3  -4  -1  153.28   12.40 
  -3  -4   1  132.19   10.30 
  -3  -4   1  121.29   10.50 
  -3  -4   1  137.89   13.50 
   3  -4  -1  166.98   18.60 
  -3  -4   1  119.59   14.20 
  -3  -4   1  161.28   16.40 
   3  -4  -1  142.79   14.30 
   3  -4  -1  116.79   15.50 
  -3  -4   1  154.48   15.00 
  -3  -4   1  169.08   12.40 
   3  -4  -1  169.48   17.60 
   3  -4  -1  147.29   17.70 
   3  -4  -1  152.68   17.80 
   3  -4  -1  169.58   17.20 
   3  -4  -1  130.29   14.80 
   3  -4  -1  134.89   15.90 
   3  -4  -1  168.28   17.10 
   3  -4  -1  162.48   12.80 
   3  -4  -1  136.99   17.70 
   3  -4  -1  156.98   15.70 
   3  -4  -1  146.19   14.30 
  -3  -4   1  157.48   12.20 
  -3  -4   1  143.59   11.70 
   3  -4  -1  119.29   14.20 
  -3  -4   1  136.29   12.90 
  -3   4   1  143.49   16.80 
  -3   4   1  131.99   14.10 
   3   4  -1  123.89   12.60 
   3   4  -1  142.99   14.50 
   3   4  -1  149.88   14.60 
  -3   4   1  151.88   15.90 
   3   4  -1  136.19   10.10 
  -3   4   1  165.08   18.80 
   3   4  -1  167.18   11.20 
  -3   4   1  148.69   14.80 
  -3   4   1  134.89   13.80 
   3   4  -1  153.48   11.90 
  -3   4   1  131.99   14.20 
  -3   4   1  135.69   13.40 
   3   4  -1  123.79   14.80 
  -3   4   1  149.69   16.70 
   3   4  -1  140.09   14.90 
   3   4  -1  141.59   12.20 
   3   4  -1  152.88   14.70 
  -3   4   1  125.19   15.20 
   3   4  -1  164.58   12.20 
  -3   4   1  127.79   15.60 
  -3   4   1  163.28   19.00 
   3   4  -1  124.09    9.30 
   3   4  -1  152.88    8.70 
  -3   4   1  138.09   14.80 
   3   4  -1  142.59   11.90 
  -3   4   1  161.08   15.00 
   3   4  -1  162.18   14.90 
   3   4  -1  136.49    9.80 
   3   4  -1  140.89    9.00 
   3   4  -1  177.78   12.70 
   3   4  -1  165.18   16.30 
   3   4  -1  171.78   13.00 
  -3   4   1  153.18   12.30 
   3   4  -1  151.48   12.70 
   3   4  -1  137.89   10.00 
   3   4  -1  131.29   17.70 
   3   4  -1  136.89   15.00 
  -3   4   1  123.69   15.30 
  -3   4   1  109.79   14.50 
   3   4  -1  147.09   16.30 
  -2  -4   1  185.58   15.40 
  -2  -4   1  177.78   12.80 
   2  -4  -1  206.98   14.40 
   2  -4  -1  172.48   15.40 
  -2  -4   1  175.68   11.40 
   2  -4  -1  202.48   19.40 
  -2  -4   1  211.68   12.30 
   2  -4  -1  191.98   12.10 
   2  -4  -1  167.28   17.20 
   2  -4  -1  198.38   20.10 
   2  -4  -1  203.58   15.00 
   2  -4  -1  194.28   19.40 
   2  -4  -1  176.88   12.10 
  -2  -4   1  191.98   12.00 
  -2  -4   1  198.68   15.50 
  -2  -4   1  168.18   16.30 
   2  -4  -1  187.88   12.60 
   2  -4  -1  198.28   14.10 
   2  -4  -1  204.08   13.10 
   2  -4  -1  184.88   14.00 
  -2  -4   1  185.88   12.40 
   2  -4  -1  210.98   11.90 
   2  -4  -1  178.78   13.10 
   2  -4  -1  209.58   15.40 
  -2  -4   1  205.58   13.90 
   2  -4  -1  203.08   19.00 
   2  -4  -1  176.68   12.70 
   2  -4  -1  208.58   15.10 
  -2  -4   1  200.28   14.50 
   2   4  -1  199.68   13.10 
  -2   4   1  189.28   14.30 
   2   4  -1  197.08   14.60 
   2   4  -1  183.38   12.50 
  -2   4   1  185.48   18.50 
  -2   4   1  180.08   13.90 
   2   4  -1  212.98   12.30 
   2   4  -1  162.98   13.40 
   2   4  -1  182.48   12.10 
   2   4  -1  151.18   16.60 
  -2   4   1  162.08   15.40 
   2   4  -1  179.88   13.20 
   2   4  -1  179.28   17.20 
   2   4  -1  193.58   15.90 
  -2   4   1  193.28   15.30 
  -2   4   1  185.68   14.50 
   2   4  -1  187.18   13.30 
  -2   4   1  193.68   12.20 
   2   4  -1  204.08   11.90 
  -2   4   1  214.38   15.70 
  -2   4   1  189.68   13.40 
   2   4  -1  215.98   15.50 
   2   4  -1  197.98   13.20 
   2   4  -1  186.78   21.10 
   2   4  -1  185.68   11.80 
  -2   4   1  205.38   16.80 
   2   4  -1  192.78   11.90 
   2   4  -1  183.08   11.60 
   2   4  -1  157.48   12.40 
  -2   4   1  211.38   16.30 
   2   4  -1  175.28   13.10 
   2   4  -1  187.08    9.80 
   2   4  -1  177.28   11.50 
   2   4  -1  171.88   14.20 
   2   4  -1  185.08    9.50 
  -2   4   1  172.98   12.40 
   2   4  -1  228.78   17.70 
   2   4  -1  197.28   12.10 
  -2   4   1  148.59   17.70 
  -2   4   1  132.79   15.30 
   2   4  -1  186.58   12.90 
   2   4  -1  178.78   11.90 
  -2   4   1  195.78   12.50 
   2   4  -1  146.99   15.30 
   2   4  -1  169.68   15.80 
   2   4  -1  188.38   11.70 
   2   4  -1  202.38   13.20 
   2   4  -1  193.28   11.40 
  -2   4   1  185.88   13.70 
  -2   4   1  185.98   15.40 
   2   4  -1  196.98   13.60 
   1  -4  -1    5.00    2.70 
  -1  -4   1    0.80    1.80 
  -1  -4   1    6.60    4.60 
   1  -4  -1    5.30    4.70 
   1  -4  -1   -3.90    1.90 
   1  -4  -1    1.80    2.20 
   1  -4  -1    8.10    5.30 
  -1  -4   1    0.10    2.90 
   1  -4  -1    4.80    2.60 
   1  -4  -1    7.70    5.00 
   1  -4  -1   -1.90    4.10 
   1  -4  -1    3.20    2.40 
   1  -4  -1    2.80    1.80 
   1  -4  -1    4.30    3.60 
   1  -4  -1    0.80    2.10 
  -1  -4   1    1.90    2.90 
   1  -4  -1    7.30    4.80 
   1  -4  -1    4.40    3.30 
   1  -4  -1    1.30    3.70 
   1  -4  -1    3.40    4.80 
  -1  -4   1    7.00    4.00 
   1  -4  -1    4.30    1.90 
   1  -4  -1    7.90    3.20 
   1  -4  -1    0.80    4.10 
   1  -4  -1    8.30    3.90 
   1  -4  -1    8.70    4.90 
  -1  -4   1   -6.30    2.30 
  -1  -4   1    3.50    4.90 
  -1  -4   1    2.70    2.30 
  -1  -4   1    1.10    3.30 
  -1  -4   1    0.90    4.20 
   1  -4  -1    3.30    4.50 
  -1  -4   1    3.70    3.20 
   1  -4  -1    5.60    3.50 
  -1   4   1    7.10    3.90 
   1   4  -1    2.00    3.30 
  -1   4   1    7.60    4.30 
  -1   4   1    5.70    4.70 
   1   4  -1    1.50    2.10 
   1   4  -1    4.20    3.50 
  -1   4   1    0.50    3.40 
   1   4  -1    0.80    2.80 
  -1   4   1    3.20    3.10 
   1   4  -1    4.80    4.40 
   1   4  -1    1.30    2.00 
   1   4  -1    1.50    3.70 
   1   4  -1    0.60    1.80 
   1   4  -1    3.20    3.10 
  -1   4   1    6.60    3.70 
   1   4  -1    4.50    5.50 
   1   4  -1    0.60    2.90 
  -1   4   1   11.60    4.90 
  -1   4   1    2.50    2.20 
   1   4  -1   -1.60    2.70 
   1   4  -1    0.90    3.10 
   1   4  -1    2.80    3.80 
  -1   4   1    1.80    2.10 
   1   4  -1    2.70    4.20 
  -1   4   1    1.20    3.70 
  -1   4   1    5.30    4.60 
   1   4  -1    6.00    3.50 
   1   4  -1    3.30    4.00 
   1   4  -1    4.50    2.20 
   1   4  -1    3.40    1.70 
  -1   4   1    0.30    4.80 
   1   4  -1    8.20    3.60 
  -1   4   1    3.80    3.20 
   1   4  -1    0.70    2.70 
  -1   4   1    5.80    2.60 
  -1   4   1    5.10    3.80 
  -1   4   1    2.50    3.40 
  -1   4   1    0.60    4.20 
  -1   4   1    4.70    2.80 
  -1   4   1    1.40    2.70 
   1   4  -1    3.40    4.70 
  -1   4   1   -0.80    3.40 
   1   4  -1    3.40    4.10 
   1   4  -1    4.40    3.30 
   1   4  -1    2.30    4.10 
   1   4  -1   -0.10    2.50 
  -1   4   1    6.20    4.70 
   1   4  -1    3.00    4.30 
  -1   4   1   -0.40    3.60 
   1   4  -1    1.10    1.60 
   1   4  -1   -3.90    3.10 
   1   4  -1    7.00    3.20 
   0  -4   1  362.86   21.80 
   0  -4   1  387.26   23.50 
   0  -4  -1  404.96   21.70 
   0  -4  -1  396.76   22.30 
   0  -4  -1  360.66   24.30 
   0  -4   1  377.76   23.10 
   0  -4  -1  351.76   21.30 
   0  -4   1  377.96   21.60 
   0  -4   1  391.76   23.60 
   0  -4   1  360.36   22.40 
   0  -4   1  368.86   22.00 
   0  -4  -1  332.97   19.30 
   0  -4   1  379.86   22.70 
   0  -4  -1  379.06   20.10 
   0  -4   1  381.76   22.50 
   0  -4  -1  397.46   22.70 
   0  -4  -1  341.67   22.50 
   0  -4   1  366.76   23.40 
   0  -4   1  389.16   19.60 
   0  -4  -1  381.76   19.60 
   0  -4  -1  366.96   20.00 
   0  -4   1  390.76   16.70 
   0  -4   1  372.46   23.00 
   0  -4   1  354.26   21.20 
   0  -4   1  404.66   24.80 
   0  -4  -1  382.56   26.80 
   0  -4  -1  390.76   24.40 
   0  -4  -1  387.06   19.30 
   0  -4   1  424.86   23.40 
   0  -4   1  378.46   23.40 
   0  -4  -1  397.26   26.10 
   0  -4  -1  391.56   20.60 
   0  -4  -1  377.56   20.80 
   0  -4  -1  427.76   23.70 
   0  -4  -1  389.16   26.60 
   0   4   1  381.86   23.60 
   0   4  -1  371.36   16.10 
   0   4  -1  374.16   18.40 
   0   4  -1  391.36   20.00 
   0   4  -1  389.16   19.60 
   0   4  -1  360.56   17.60 
   0   4  -1  408.86   19.10 
   0   4  -1  383.26   23.00 
   0   4  -1  399.06   16.90 
   0   4   1  406.06   21.70 
   0   4  -1  386.96   26.30 
   0   4   1  370.56   19.80 
   0   4   1  380.16   21.60 
   0   4  -1  379.16   21.10 
   0   4  -1  400.06   19.40 
   0   4  -1  357.86   20.10 
   0   4   1  397.56   21.40 
   0   4   1  387.76   17.30 
   0   4  -1  399.66   20.80 
   0   4   1  384.16   19.20 
   0   4  -1  374.26   17.50 
   0   4   1  383.46   23.40 
   0   4   1  414.06   24.50 
   0   4  -1  379.26   23.80 
   0   4   1  413.56   20.60 
   0   4  -1  332.87   21.20 
   0   4   1  375.66   16.00 
   0   4   1  372.96   17.10 
   0   4   1  359.36   22.70 
   0   4   1  391.56   18.50 
   0   4   1  361.26   19.90 
   0   4  -1  407.76   20.00 
   0   4  -1  347.57   23.00 
   0   4   1  373.56   24.40 
   0   4   1  375.76   22.60 
   0   4   1  390.86   20.40 
   0   4  -1  390.06   19.60 
   0   4   1  383.76   26.80 
   0   4  -1  384.76   22.50 
   0   4  -1  336.87   22.80 
   0   4   1  401.96   20.40 
   0   4  -1  379.06   21.10 
   0   4  -1  334.67   20.80 
   0   4  -1  312.87   18.90 
   0   4   1  391.76   18.10 
   0   4  -1  405.26   24.10 
   0   4  -1  378.36   19.00 
   0   4   1  413.06   22.00 
   1  -4   1  477.65   20.40 
   1  -4   1  491.25   25.40 
   1  -4   1  476.45   28.00 
   1  -4   1  505.35   23.40 
   1  -4   1  469.75   27.10 
  -1  -4  -1  485.45   24.20 
   1  -4   1  530.25   23.50 
  -1  -4  -1  483.85   24.20 
   1  -4   1  505.25   27.40 
   1  -4   1  530.85   27.60 
  -1  -4  -1  503.35   25.50 
  -1  -4  -1  487.55   21.20 
  -1  -4  -1  517.15   24.80 
  -1  -4  -1  531.85   30.70 
  -1  -4  -1  534.35   24.10 
   1  -4   1  516.35   25.00 
   1  -4   1  509.45   27.20 
   1  -4   1  505.25   21.90 
   1  -4   1  495.15   26.10 
   1  -4   1  501.75   23.80 
   1  -4   1  502.75   26.60 
  -1  -4  -1  475.05   26.90 
   1  -4   1  486.15   25.20 
   1  -4   1  515.05   20.80 
   1  -4   1  531.95   25.70 
  -1  -4  -1  491.25   27.80 
   1  -4   1  535.35   27.40 
   1  -4   1  504.85   26.00 
  -1  -4  -1  497.85   24.60 
   1  -4   1  485.85   21.10 
  -1  -4  -1  546.95   29.30 
   1  -4   1  506.25   28.40 
  -1  -4  -1  457.85   26.80 
   1  -4   1  490.95   28.50 
   1   4   1  516.85   22.80 
  -1   4  -1  483.65   23.30 
  -1   4  -1  464.95   24.90 
  -1   4  -1  496.15   25.00 
   1   4   1  510.55   29.50 
   1   4   1  561.04   29.80 
  -1   4  -1  475.55   25.10 
   1   4   1  514.25   20.20 
  -1   4  -1  521.05   27.40 
  -1   4  -1  501.35   23.60 
   1   4   1  468.65   31.00 
   1   4   1  479.25   21.80 
  -1   4  -1  507.35   27.30 
  -1   4  -1  486.45   21.80 
  -1   4  -1  489.55   24.90 
  -1   4  -1  483.35   27.30 
  -1   4  -1  512.25   27.30 
  -1   4  -1  475.55   27.10 
   1   4   1  551.24   30.20 
   1   4   1  417.56   28.40 
  -1   4  -1  484.45   25.30 
   1   4   1  498.55   21.70 
   1   4   1  484.95   23.60 
   1   4   1  479.15   19.00 
   1   4   1  495.45   20.70 
  -1   4  -1  498.05   28.50 
   1   4   1  523.85   28.60 
   1   4   1  418.46   29.90 
   1   4   1  479.15   23.20 
  -1   4  -1  493.55   25.60 
   1   4   1  490.95   19.20 
   1   4   1  511.75   21.20 
  -1   4  -1  515.85   23.40 
   1   4   1  502.85   23.90 
   1   4   1  491.05   22.80 
  -1   4  -1  543.15   26.20 
   1   4   1  480.25   23.30 
  -1   4  -1  485.95   23.70 
  -1   4  -1  500.25   29.20 
   1   4   1  496.65   20.30 
   1   4   1  502.15   29.90 
   1   4   1  510.55   22.40 
   1   4   1  444.76   26.50 
  -1   4  -1  501.05   28.40 
  -1   4  -1  499.85   28.60 
   1   4   1  451.75   27.10 
   1   4   1  495.15   24.60 
   1   4   1  482.65   20.20 
   2  -4   1  392.86   20.40 
  -2  -4  -1  399.76   21.90 
   2  -4   1  416.46   20.00 
   2  -4   1  417.46   23.10 
   2  -4   1  421.46   21.20 
   2  -4   1  429.96   22.50 
   2  -4   1  408.56   22.20 
   2  -4   1  433.16   23.00 
  -2  -4  -1  397.26   17.50 
   2  -4   1  416.16   25.00 
  -2  -4  -1  388.86   20.40 
  -2  -4  -1  372.16   23.00 
   2  -4   1  420.86   20.70 
   2  -4   1  435.66   25.80 
  -2  -4  -1  418.56   23.90 
  -2  -4  -1  400.06   23.60 
   2  -4   1  369.96   23.00 
   2  -4   1  391.26   19.60 
  -2  -4  -1  414.56   24.70 
   2  -4   1  389.76   23.60 
   2  -4   1  421.06   25.50 
  -2  -4  -1  413.96   24.30 
  -2  -4  -1  404.16   18.70 
   2  -4   1  409.96   24.40 
  -2  -4  -1  402.46   22.60 
   2  -4   1  439.36   26.70 
  -2  -4  -1  435.96   20.60 
   2  -4   1  432.76   23.70 
   2  -4   1  428.46   24.40 
  -2  -4  -1  406.66   18.80 
   2  -4   1  394.16   24.90 
   2  -4   1  423.66   23.00 
   2   4   1  378.06   17.50 
  -2   4  -1  447.66   27.00 
   2   4   1  401.16   19.10 
   2   4   1  411.26   20.80 
   2   4   1  405.46   17.00 
  -2   4  -1  394.36   23.70 
   2   4   1  382.26   19.70 
   2   4   1  393.26   17.40 
  -2   4  -1  429.56   25.40 
   2   4   1  324.17   18.10 
   2   4   1  400.26   19.80 
  -2   4  -1  447.66   23.10 
  -2   4  -1  425.56   20.00 
  -2   4  -1  396.36   21.60 
  -2   4  -1  389.66   19.70 
  -2   4  -1  422.36   25.20 
  -2   4  -1  392.66   23.50 
   2   4   1  406.26   21.80 
  -2   4  -1  408.76   23.40 
  -2   4  -1  426.66   23.90 
   2   4   1  407.66   18.40 
  -2   4  -1  411.66   24.90 
   2   4   1  394.96   17.20 
   2   4   1  374.46   24.00 
   2   4   1  417.56   18.30 
   2   4   1  367.96   24.30 
  -2   4  -1  410.26   25.50 
  -2   4  -1  419.56   23.40 
   2   4   1  320.37   23.70 
   2   4   1  388.16   17.30 
   2   4   1  400.26   26.00 
   2   4   1  426.26   24.80 
  -2   4  -1  401.16   25.00 
   2   4   1  403.76   17.10 
   2   4   1  388.06   26.30 
  -2   4  -1  378.96   20.40 
  -2   4  -1  416.46   24.70 
   2   4   1  372.96   26.70 
   2   4   1  409.66   19.90 
  -2   4  -1  387.46   21.10 
   2   4   1  375.06   23.20 
   2   4   1  427.76   21.00 
   2   4   1  423.06   18.40 
   2   4   1  422.56   21.70 
   2   4   1  381.96   22.80 
  -2   4  -1  389.66   23.70 
   2   4   1  421.56   17.70 
   3  -4   1   -2.40    3.50 
   3  -4   1    0.80    3.20 
  -3  -4  -1    2.90    1.70 
   3  -4   1    2.10    4.00 
   3  -4   1   -2.30    2.60 
   3  -4   1   -6.10    3.90 
  -3  -4  -1   -2.40    3.40 
   3  -4   1   -4.60    2.90 
   3  -4   1   -1.00    4.20 
  -3  -4  -1    3.70    4.00 
  -3  -4  -1    1.20    2.60 
  -3  -4  -1    2.30    2.60 
   3  -4   1   -4.10    4.40 
   3  -4   1   -4.10    3.60 
  -3  -4  -1   -2.30    2.90 
  -3  -4  -1   -0.10    3.30 
   3  -4   1    4.90    4.20 
   3  -4   1   -3.50    3.80 
   3  -4   1    2.90    4.00 
   3  -4   1   -3.10    3.10 
  -3  -4  -1   -1.70    3.30 
  -3   4  -1    1.40    3.20 
   3   4   1    3.90    2.50 
  -3   4  -1   -4.10    4.40 
   3   4   1    4.50    2.40 
   3   4   1    4.40    5.00 
   3   4   1   -0.20    3.80 
   3   4   1    1.90    4.50 
   3   4   1    1.10    4.10 
   3   4   1    3.30    5.70 
   3   4   1   -0.10    2.00 
  -3   4  -1    1.90    3.40 
  -3   4  -1    0.30    3.50 
   3   4   1    0.70    4.80 
  -3   4  -1   -0.40    4.60 
   3   4   1   -0.90    2.60 
   3   4   1   -1.50    2.70 
   3   4   1   -3.30    3.10 
  -3   4  -1    0.00    3.90 
  -3   4  -1   -6.60    3.40 
   3   4   1   -0.50    2.30 
  -3   4  -1    0.70    4.50 
  -3   4  -1    0.10    4.50 
  -3   4  -1   -0.40    4.70 
  -3   4  -1   -5.70    4.20 
   3   4   1   -0.50    1.80 
   3   4   1    0.30    1.30 
   3   4   1   -1.40    2.30 
  -3   4  -1   -4.30    4.30 
   3   4   1    2.70    4.50 
  -3   4  -1    1.00    4.70 
   3   4   1   -0.50    2.60 
   3   4   1   -2.40    3.30 
  -3   4  -1   -2.10    4.80 
  -3   4  -1    1.70    4.20 
   3   4   1   -0.70    2.50 
  -3   4  -1   -5.70    3.10 
  -3   4  -1    7.30    4.80 
  -3   4  -1   -4.10    3.00 
   3   4   1    0.80    3.20 
   3   4   1    1.80    1.60 
   4  -4   1   14.70    7.90 
   4  -4   1   10.70    6.00 
  -4  -4  -1   14.40    5.70 
  -4  -4  -1   21.40    6.80 
   4  -4   1    7.90    5.40 
  -4  -4  -1   15.40    6.30 
   4  -4   1   10.50    6.60 
  -4  -4  -1   20.20    7.00 
  -4  -4  -1   14.80    5.10 
   4  -4   1   24.00    7.80 
   4  -4   1    6.90    5.70 
   4  -4   1    7.70    5.50 
   4  -4   1   12.40    6.40 
  -4  -4  -1   17.40    4.30 
  -4  -4  -1   13.80    5.40 
   4  -4   1   18.80    7.50 
   4  -4   1   10.20    5.80 
   4  -4   1   17.50    8.30 
   4  -4   1   14.90    7.30 
  -4  -4  -1   15.00    5.60 
   4   4   1   21.20    8.70 
  -4   4  -1   31.10    7.50 
  -4   4  -1   12.70    5.80 
   4   4   1   12.90    4.00 
   4   4   1   12.30    2.10 
   4   4   1   14.50    4.70 
  -4   4  -1   15.90    7.00 
  -4   4  -1    8.00    6.30 
   4   4   1   25.90    7.70 
   4   4   1   13.00    5.70 
   4   4   1   28.50    9.70 
   4   4   1   14.00    7.20 
  -4   4  -1   19.30    6.10 
  -4   4  -1    4.30    5.20 
  -4   4  -1   19.70    7.60 
  -4   4  -1    7.10    7.30 
   4   4   1   12.50    3.60 
  -4   4  -1   17.70    6.50 
   4   4   1   21.00    5.20 
  -4   4  -1    6.90    6.30 
   4   4   1   14.90    6.30 
  -4   4  -1    9.30    6.40 
   4   4   1   14.70    3.50 
  -4   4  -1   14.40    6.10 
   4   4   1   28.40    8.60 
   4   4   1   13.60    6.20 
  -4   4  -1    8.60    5.60 
   4   4   1   17.10    3.10 
  -4   4  -1   23.70    8.10 
  -4   4  -1    7.50    6.00 
   4   4   1   18.50    5.30 
   4   4   1    5.70    4.60 
  -4   4  -1   28.00    8.80 
  -4   4  -1   13.90    6.20 
   5  -4   1   90.49   15.40 
  -5  -4  -1   76.29   13.60 
   5  -4   1   78.39   15.20 
   5  -4   1   50.69   13.00 
  -5  -4  -1   82.09   13.90 
   5  -4   1   78.09   14.30 
  -5  -4  -1   76.99    9.80 
   5  -4   1   91.89   17.40 
   5  -4   1   87.79   15.20 
  -5  -4  -1   93.89   12.40 
   5  -4   1   70.49   14.80 
  -5  -4  -1   80.79   11.50 
  -5  -4  -1   68.59   12.30 
   5  -4   1  111.89   14.60 
  -5  -4  -1   81.99   10.80 
   5  -4   1   87.09   14.10 
  -5  -4  -1   69.89   11.40 
   5  -4   1  100.69   16.80 
   5  -4   1   91.69   16.50 
   5  -4   1   87.49   13.70 
  -5   4  -1   71.59   13.00 
  -5   4  -1   64.49   10.70 
  -5   4  -1   80.59   14.60 
   5   4   1   78.29    5.60 
   5   4   1   80.99    6.00 
  -5   4  -1   98.39   17.40 
  -5   4  -1   89.39   11.30 
  -5   4  -1   63.99   12.30 
   5   4   1   85.99    8.70 
   5   4   1   83.79   14.10 
   5   4   1   83.59   11.30 
   5   4   1   66.69   13.50 
   5   4   1   80.89   11.60 
   5   4   1   99.09   13.80 
  -5   4  -1   82.59   15.80 
  -5   4  -1   85.19   13.60 
  -5   4  -1   99.09   16.00 
  -5   4  -1   92.79   14.90 
   5   4   1   73.49   11.10 
  -5   4  -1   95.79   15.70 
   5   4   1   79.49   11.00 
  -5   4  -1   84.99   14.40 
   5   4   1   70.69   10.00 
   5   4   1   81.29   11.70 
  -5   4  -1   84.59   15.00 
   5   4   1   80.09   15.50 
   5   4   1   84.09   11.20 
  -5   4  -1   80.89   11.90 
   5   4   1  103.09   16.10 
   5   4   1   80.29    8.00 
  -5   4  -1   86.99   13.90 
  -5   4  -1   74.99   13.60 
  -5   4  -1   77.79   15.50 
   5   4   1   86.19    5.70 
  -6  -4  -1  410.96   27.90 
   6  -4   1  415.56   27.00 
  -6  -4  -1  378.46   26.60 
   6  -4   1  384.06   32.30 
   6  -4   1  413.36   31.60 
  -6  -4  -1  413.46   24.10 
   6  -4   1  443.26   31.90 
   6  -4   1  417.36   33.80 
  -6  -4  -1  406.16   30.40 
   6  -4   1  391.46   26.80 
  -6  -4  -1  431.16   30.20 
   6  -4   1  445.56   31.90 
   6  -4   1  360.06   28.50 
  -6  -4  -1  369.36   29.00 
   6  -4   1  358.46   30.90 
   6  -4   1  461.85   34.90 
   6  -4   1  432.46   32.90 
  -6  -4  -1  388.36   24.20 
   6  -4   1  459.35   35.40 
  -6  -4  -1  411.46   29.60 
  -6   4  -1  451.75   30.90 
  -6   4  -1  435.36   32.40 
  -6   4  -1  443.16   33.00 
  -6   4  -1  413.56   24.30 
   6   4   1  370.66   32.70 
  -6   4  -1  408.66   31.70 
  -6   4  -1  395.76   29.90 
  -6   4  -1  441.66   30.20 
   6   4   1  403.66   26.90 
  -6   4  -1  432.86   25.00 
  -6   4  -1  415.66   33.70 
   6   4   1  414.46   25.10 
  -6   4  -1  396.66   29.60 
   6   4   1  465.65   33.20 
  -6   4  -1  387.26   24.60 
   6   4   1  404.66   25.10 
   6   4   1  422.36   30.00 
  -6   4  -1  408.36   33.40 
   6   4   1  438.36   24.70 
   6   4   1  399.46   26.60 
  -6   4  -1  430.16   31.20 
  -6   4  -1  397.06   29.50 
   6   4   1  431.66   32.20 
   6   4   1  417.06   31.10 
  -6   4  -1  410.56   37.50 
  -6   4  -1  451.25   31.30 
   6   4   1  407.16   21.70 
  -6   4  -1  434.86   30.70 
   6   4   1  380.16   23.40 
   7  -4   1  294.37   34.60 
   7  -4   1  258.07   21.80 
   7  -4   1  284.67   33.30 
   7  -4   1  240.38   29.40 
  -7  -4  -1  289.07   20.90 
  -7  -4  -1  263.27   28.90 
  -7  -4  -1  299.17   33.00 
  -7  -4  -1  330.77   33.00 
   7  -4   1  289.87   31.90 
   7  -4   1  342.87   37.70 
   7  -4   1  278.57   32.60 
  -7  -4  -1  339.67   26.00 
   7  -4   1  315.97   23.10 
  -7  -4  -1  323.77   30.10 
   7  -4   1  303.57   35.20 
   7  -4   1  273.27   33.50 
   7  -4   1  403.96   35.80 
   7  -4   1  302.47   36.80 
  -7  -4  -1  299.67   31.50 
   7  -4   1  247.18   31.00 
   7   4   1  265.27   33.90 
   7   4   1  284.97   30.70 
  -7   4  -1  293.67   31.00 
  -7   4  -1  231.68   29.10 
  -7   4  -1  330.07   26.20 
   7   4   1  248.88   24.00 
   7   4   1  280.67   22.30 
  -7   4  -1  284.27   34.20 
  -7   4  -1  317.97   34.00 
   7   4   1  273.07   31.60 
  -7   4  -1  318.77   31.90 
   7   4   1  310.77   31.60 
  -7   4  -1  344.17   34.70 
  -7   4  -1  254.77   29.10 
   7   4   1  315.87   34.00 
   7   4   1  306.67   27.40 
  -7   4  -1  284.27   32.40 
  -7   4  -1  292.37   30.60 
  -7   4  -1  352.26   33.80 
  -7   4  -1  318.97   31.50 
   7   4   1  356.86   30.70 
   8  -4   1  549.65   42.80 
  -8  -4  -1  592.34   39.10 
   8  -4   1  643.24   43.80 
   8  -4   1  565.54   43.20 
   8  -4   1  535.25   40.30 
  -8  -4  -1  518.25   40.90 
  -8  -4  -1  578.04   40.70 
   8  -4   1  612.44   45.50 
   8  -4   1  603.34   46.30 
   8  -4   1  515.95   41.00 
   8  -4   1  518.75   42.70 
   8  -4   1  663.23   48.40 
  -8  -4  -1  550.44   39.00 
   8  -4   1  592.14   47.50 
  -8  -4  -1  545.15   40.00 
  -8  -4  -1  654.43   45.00 
  -8   4  -1  567.64   43.80 
  -8   4  -1  615.24   40.10 
   8   4   1  663.63   46.10 
   8   4   1  613.64   42.10 
  -8   4  -1  537.45   41.30 
  -8   4  -1  567.64   43.70 
  -8   4  -1  550.64   41.40 
   8   4   1  571.84   47.50 
  -8   4  -1  484.45   40.00 
   8   4   1  579.34   38.00 
   8   4   1  579.04   36.00 
  -8   4  -1  560.24   37.50 
  -8   4  -1  562.64   43.10 
   8   4   1  566.04   43.60 
   8   4   1  538.15   47.20 
   8   4   1  526.75   43.60 
  -8   4  -1  640.84   47.50 
  -8   4  -1  586.74   43.40 
   8   4   1  483.95   40.10 
  -8   4  -1  580.84   42.20 
  -8   4  -1  568.34   41.50 
   9  -4   1   48.80   18.20 
   9  -4   1   98.89   25.00 
   9  -4   1   65.79   18.20 
   9  -4   1   76.39   19.30 
   9  -4   1   49.70   19.00 
  -9  -4  -1   80.59   20.30 
  -9  -4  -1   95.29   19.30 
   9  -4   1   99.69   23.10 
  -9  -4  -1   49.99   15.60 
   9  -4   1   98.39   24.30 
   9  -4   1   86.09   22.60 
   9  -4   1   66.19   20.50 
   9  -4   1   77.89   21.10 
  -9  -4  -1   90.09   20.50 
   9  -4   1   79.39   20.50 
   9   4   1   92.69   22.90 
  -9   4  -1   86.59   20.90 
  -9   4  -1   78.99   19.70 
   9   4   1   57.79   20.50 
   9   4   1   58.29   18.40 
  -9   4  -1   61.99   19.00 
  -9   4  -1   90.59   20.40 
   9   4   1   51.49   17.50 
  -9   4  -1   64.69   17.70 
   9   4   1   67.99   15.70 
  -9   4  -1   78.49   21.20 
  -9   4  -1   94.59   23.90 
  -9   4  -1   83.29   21.90 
  -9   4  -1  112.79   24.20 
  -9   4  -1   50.59   15.10 
   9   4   1  100.99   24.00 
  -9   4  -1   71.69   20.60 
   9   4   1   82.99   22.60 
   9   4   1   79.99   20.40 
   9  -5  -1  427.46   47.30 
  -9  -5   1  393.46   43.50 
  -9  -5   1  369.16   37.50 
   9  -5  -1  390.86   42.80 
   9  -5  -1  297.17   41.10 
   9  -5  -1  465.25   49.80 
  -9  -5   1  412.36   44.00 
   9  -5  -1  393.36   43.00 
   9  -5  -1  414.96   51.19 
   9  -5  -1  394.56   41.80 
   9  -5  -1  336.67   44.10 
   9  -5  -1  366.36   41.80 
   9  -5  -1  431.46   49.40 
   9  -5  -1  474.55   52.49 
   9   5  -1  392.06   47.70 
  -9   5   1  380.26   45.60 
  -9   5   1  410.96   39.70 
  -9   5   1  384.06   42.80 
   9   5  -1  440.26   46.40 
   9   5  -1  383.76   40.40 
   9   5  -1  432.56   50.29 
  -9   5   1  329.47   39.10 
  -9   5   1  368.36   42.70 
  -9   5   1  379.46   41.50 
  -9   5   1  459.45   46.10 
  -9   5   1  542.35   49.40 
   9   5  -1  377.46   46.60 
  -9   5   1  377.16   43.90 
  -9   5   1  414.26   44.70 
   9   5  -1  397.36   45.20 
   9   5  -1  359.86   42.40 
  -9   5   1  412.36   46.40 
   8  -5  -1    7.10   11.70 
  -8  -5   1   23.70   12.60 
   8  -5  -1   23.00   14.90 
   8  -5  -1   10.30   11.00 
   8  -5  -1   14.80   11.60 
   8  -5  -1   17.20   12.60 
   8  -5  -1    1.30   11.30 
  -8  -5   1    5.20    9.70 
   8  -5  -1   22.10   11.80 
  -8  -5   1   -4.70    8.90 
   8  -5  -1    7.90    9.10 
   8  -5  -1   11.90   11.20 
   8  -5  -1   10.90   10.30 
   8   5  -1   11.60   11.30 
  -8   5   1   11.00   11.20 
   8   5  -1   15.80   11.90 
   8   5  -1    6.50   10.60 
  -8   5   1   17.10   12.30 
  -8   5   1    9.30    9.30 
   8   5  -1   17.90   10.10 
   8   5  -1   16.30   11.60 
   8   5  -1    2.10   10.10 
   8   5  -1   19.50   18.40 
  -8   5   1   11.60   10.90 
  -8   5   1    1.70    9.80 
  -8   5   1    0.50    9.00 
  -8   5   1   24.50   12.70 
  -8   5   1   12.30   16.30 
  -8   5   1   18.50   12.60 
  -8   5   1   25.40   12.90 
  -8   5   1    8.10   11.10 
  -8   5   1   19.70   12.10 
   8   5  -1    5.50   11.80 
  -8   5   1   29.10   13.20 
   8   5  -1    5.00   11.20 
  -8   5   1   15.90   11.40 
   8   5  -1    4.90   10.40 
   7  -5  -1  284.07   31.90 
   7  -5  -1  342.97   40.50 
   7  -5  -1  272.27   33.80 
   7  -5  -1  281.27   28.70 
   7  -5  -1  309.37   23.90 
   7  -5  -1  315.27   34.70 
  -7  -5   1  292.67   28.60 
   7  -5  -1  298.67   36.90 
   7  -5  -1  243.58   32.30 
  -7  -5   1  276.87   28.10 
   7  -5  -1  253.57   31.80 
   7  -5  -1  347.57   34.90 
  -7  -5   1  289.57   31.10 
   7  -5  -1  244.88   28.50 
  -7  -5   1  339.27   32.20 
  -7  -5   1  294.57   30.60 
   7  -5  -1  245.78   34.00 
   7   5  -1  281.37   22.50 
   7   5  -1  269.57   29.00 
  -7   5   1  330.27   32.10 
   7   5  -1  319.37   33.80 
   7   5  -1  282.67   31.70 
  -7   5   1  318.37   35.80 
  -7   5   1  196.58   28.80 
  -7   5   1  260.07   32.40 
  -7   5   1  252.27   33.30 
   7   5  -1  315.77   33.60 
   7   5  -1  252.87   25.80 
   7   5  -1  345.07   39.10 
   7   5  -1  297.67   28.40 
  -7   5   1  270.67   30.90 
  -7   5   1  292.57   31.20 
  -7   5   1  308.77   32.00 
   7   5  -1  313.77   36.10 
  -7   5   1  293.67   31.50 
   7   5  -1  250.27   30.60 
   7   5  -1  289.27   34.30 
   7   5  -1  280.07   25.40 
  -7   5   1  314.27   32.30 
   7   5  -1  353.86   33.00 
  -7   5   1  335.97   32.90 
  -7   5   1  276.57   32.80 
   7   5  -1  351.36   24.80 
  -7   5   1  283.57   32.00 
  -7   5   1  283.27   32.20 
   6  -5  -1  266.07   30.30 
   6  -5  -1  230.18   28.60 
   6  -5  -1  197.18   26.20 
   6  -5  -1  233.98   30.10 
   6  -5  -1  156.98   22.60 
  -6  -5   1  216.78   24.30 
   6  -5  -1  232.08   29.20 
  -6  -5   1  215.18   20.60 
   6  -5  -1  213.48   24.30 
  -6  -5   1  243.18   25.80 
  -6  -5   1  201.08   22.00 
  -6  -5   1  241.18   23.10 
   6  -5  -1  206.48   28.10 
   6  -5  -1  221.28   24.40 
  -6  -5   1  215.88   21.10 
  -6  -5   1  213.08   23.20 
   6  -5  -1  227.78   22.50 
   6  -5  -1  224.48   25.30 
   6  -5  -1  194.08   27.30 
   6   5  -1  165.58   25.70 
   6   5  -1  184.68   18.00 
  -6   5   1  157.78   25.10 
  -6   5   1  252.37   25.90 
   6   5  -1  223.58   21.60 
  -6   5   1  207.28   20.00 
   6   5  -1  193.88   20.70 
  -6   5   1  218.38   24.10 
  -6   5   1  167.68   23.10 
   6   5  -1  183.88   22.00 
  -6   5   1  229.08   28.40 
   6   5  -1  215.78   25.00 
  -6   5   1  203.68   24.60 
   6   5  -1  247.98   25.10 
   6   5  -1  188.58   25.00 
  -6   5   1  168.18   23.20 
   6   5  -1  168.88   17.90 
  -6   5   1  201.38   25.80 
   6   5  -1  220.48   23.80 
   6   5  -1  228.78   28.40 
  -6   5   1  220.98   27.20 
   6   5  -1  235.08   26.20 
   6   5  -1  209.98   19.50 
   6   5  -1  228.78   22.90 
   6   5  -1  198.98   21.20 
  -6   5   1  182.28   24.80 
  -6   5   1  210.18   24.50 
  -6   5   1  214.38   24.40 
  -6   5   1  186.98   18.80 
  -6   5   1  218.18   23.10 
   6   5  -1  212.98   20.50 
  -6   5   1  216.38   24.40 
  -6   5   1  231.58   26.00 
   6   5  -1  237.68   26.60 
   6   5  -1  236.88   23.10 
   6   5  -1  208.18   24.60 
   5  -5  -1 2073.39   97.19 
   5  -5  -1 2042.00   94.99 
  -5  -5   1 2062.29   91.29 
   5  -5  -1 2221.78   95.59 
   5  -5  -1 2183.78   99.19 
   5  -5  -1 2172.38   98.19 
  -5  -5   1 2049.99   89.09 
  -5  -5   1 2221.18   91.29 
   5  -5  -1 2117.29   99.29 
  -5  -5   1 2095.19   89.59 
   5  -5  -1 2128.69   93.59 
   5  -5  -1 2123.99   92.49 
   5  -5  -1 2161.88   92.29 
  -5  -5   1 1962.60   89.09 
   5  -5  -1 2160.58   92.79 
  -5  -5   1 2046.30   90.89 
   5  -5  -1 2178.18   96.39 
   5  -5  -1 2132.19  100.49 
   5   5  -1 2122.49   95.39 
  -5   5   1 2176.98   95.69 
   5   5  -1 2079.59   87.39 
   5   5  -1 2070.49   83.49 
  -5   5   1 2073.09   89.29 
  -5   5   1 2045.70   93.79 
  -5   5   1 2212.28   91.99 
   5   5  -1 2097.59   86.49 
  -5   5   1 2162.18   93.29 
   5   5  -1 1966.20   88.79 
   5   5  -1 2142.39   90.89 
   5   5  -1 2039.90   93.89 
   5   5  -1 2043.10   95.09 
   5   5  -1 2064.09   88.19 
   5   5  -1 2166.78   93.59 
   5   5  -1 2143.59   83.39 
  -5   5   1 2000.30   97.89 
  -5   5   1 2141.09   89.29 
  -5   5   1 2155.08   91.59 
  -5   5   1 2224.78   94.99 
   5   5  -1 2098.39   98.29 
  -5   5   1 2145.59   96.39 
  -5   5   1 2185.08   97.89 
   5   5  -1 2080.29   91.49 
  -5   5   1 2131.69   92.19 
  -5   5   1 2074.79   91.99 
   5   5  -1 2079.29   91.69 
   5   5  -1 2139.89   90.59 
  -5   5   1 1965.90   91.09 
  -5   5   1 2127.49   97.09 
   5   5  -1 2101.89   89.09 
  -5   5   1 2046.70   95.39 
   5   5  -1 2163.48   93.19 
   5   5  -1 2134.19   93.69 
  -5   5   1 2064.09   98.69 
  -4  -5   1  404.36   27.60 
   4  -5  -1  460.45   27.30 
   4  -5  -1  458.45   31.20 
   4  -5  -1  396.96   31.30 
   4  -5  -1  416.56   31.20 
   4  -5  -1  457.05   29.30 
  -4  -5   1  416.26   26.60 
   4  -5  -1  413.36   28.90 
   4  -5  -1  419.06   30.40 
  -4  -5   1  484.05   28.50 
  -4  -5   1  467.25   26.00 
  -4  -5   1  439.76   23.40 
  -4  -5   1  444.16   25.90 
   4  -5  -1  414.06   26.10 
   4  -5  -1  499.95   30.70 
  -4  -5   1  411.26   25.50 
   4  -5  -1  433.16   30.80 
   4  -5  -1  412.96   28.20 
   4  -5  -1  464.15   29.00 
  -4  -5   1  428.46   21.80 
   4   5  -1  460.65   29.40 
  -4   5   1  436.16   26.20 
   4   5  -1  415.46   26.30 
  -4   5   1  415.06   29.70 
   4   5  -1  431.56   23.50 
  -4   5   1  444.76   28.90 
   4   5  -1  436.36   26.60 
  -4   5   1  415.56   29.60 
   4   5  -1  406.56   26.70 
  -4   5   1  398.26   26.50 
   4   5  -1  473.55   27.70 
  -4   5   1  478.55   27.30 
   4   5  -1  448.36   20.40 
   4   5  -1  407.76   28.30 
  -4   5   1  465.75   29.10 
   4   5  -1  389.36   31.10 
  -4   5   1  418.46   31.40 
  -4   5   1  438.26   27.90 
  -4   5   1  425.16   29.50 
   4   5  -1  454.35   22.00 
   4   5  -1  421.06   28.20 
   4   5  -1  425.36   19.80 
   4   5  -1  424.56   28.10 
   4   5  -1  457.75   28.60 
  -4   5   1  443.76   26.70 
  -4   5   1  459.35   27.80 
   4   5  -1  450.85   25.90 
   4   5  -1  444.76   20.80 
   4   5  -1  418.76   29.20 
  -4   5   1  396.66   29.40 
   4   5  -1  435.36   19.80 
  -4   5   1  428.76   30.30 
   4   5  -1  435.46   26.30 
  -4   5   1  452.45   29.00 
  -4   5   1  420.36   31.80 
   4   5  -1  446.96   23.20 
   4   5  -1  433.56   21.40 
   3  -5  -1  772.32   40.50 
   3  -5  -1  750.02   41.90 
  -3  -5   1  748.73   36.70 
   3  -5  -1  743.03   36.90 
   3  -5  -1  763.32   40.40 
  -3  -5   1  733.83   36.70 
  -3  -5   1  783.02   36.70 
   3  -5  -1  814.72   38.90 
   3  -5  -1  783.02   43.60 
   3  -5  -1  806.82   45.20 
   3  -5  -1  839.72   43.90 
  -3  -5   1  767.22   40.90 
  -3  -5   1  802.22   40.80 
  -3  -5   1  766.92   37.50 
  -3  -5   1  778.92   41.60 
   3  -5  -1  800.42   42.20 
   3  -5  -1  783.22   39.70 
  -3  -5   1  749.73   36.30 
   3  -5  -1  860.71   41.50 
   3  -5  -1  771.92   44.80 
   3  -5  -1  772.12   41.60 
  -3  -5   1  852.21   36.40 
   3   5  -1  786.82   39.80 
   3   5  -1  762.92   42.10 
  -3   5   1  783.52   43.60 
   3   5  -1  769.02   34.60 
  -3   5   1  815.62   37.30 
   3   5  -1  808.02   35.20 
   3   5  -1  836.62   34.50 
   3   5  -1  781.32   33.90 
  -3   5   1  755.42   39.60 
   3   5  -1  801.12   44.90 
   3   5  -1  810.62   31.90 
   3   5  -1  774.02   37.50 
   3   5  -1  817.82   40.40 
   3   5  -1  765.42   38.50 
   3   5  -1  736.53   37.80 
   3   5  -1  794.02   37.90 
   3   5  -1  798.52   34.80 
   3   5  -1  721.63   40.50 
   3   5  -1  768.92   41.60 
  -3   5   1  810.02   39.90 
  -3   5   1  789.92   45.10 
   3   5  -1  820.12   38.00 
   3   5  -1  760.82   34.80 
  -3   5   1  730.53   39.50 
   3   5  -1  785.32   35.30 
  -3   5   1  818.42   43.40 
   3   5  -1  786.52   31.70 
  -3   5   1  795.22   43.20 
   3   5  -1  844.12   38.40 
  -3   5   1  799.32   40.60 
  -3   5   1  820.92   42.60 
  -3   5   1  848.02   45.00 
   3   5  -1  780.32   36.60 
   3   5  -1  803.42   37.70 
  -3   5   1  785.92   37.70 
   3   5  -1  807.02   37.60 
   3   5  -1  843.22   43.60 
   3   5  -1  781.52   40.20 
   3   5  -1  810.72   37.70 
  -3   5   1  787.42   40.70 
  -3   5   1  824.12   42.40 
   3   5  -1  817.32   46.60 
  -3   5   1  773.12   42.10 
   3   5  -1  793.82   40.50 
  -3   5   1  828.72   39.10 
   2  -5  -1   31.00    8.70 
   2  -5  -1   28.80    6.10 
   2  -5  -1   34.70    8.20 
  -2  -5   1   27.80    5.10 
   2  -5  -1   31.40    6.30 
   2  -5  -1   31.70    6.20 
   2  -5  -1   26.10    8.90 
  -2  -5   1   35.40    8.20 
   2  -5  -1   38.20    5.70 
   2  -5  -1   29.30    7.10 
  -2  -5   1   24.10    6.10 
  -2  -5   1   38.40    9.00 
   2  -5  -1   25.60    8.30 
   2  -5  -1   28.30    6.10 
   2  -5  -1   33.90    6.90 
  -2  -5   1   21.60    5.40 
  -2  -5   1   22.20    4.70 
  -2  -5   1   31.80    7.90 
  -2  -5   1   23.70    7.70 
   2  -5  -1   45.20   10.50 
   2  -5  -1   30.30    7.60 
   2  -5  -1   31.70    9.40 
   2  -5  -1   37.40    6.30 
   2  -5  -1   41.30    8.00 
   2  -5  -1   19.70    6.80 
   2  -5  -1   49.10    6.00 
   2  -5  -1   37.50    9.10 
  -2   5   1   38.10    9.30 
  -2   5   1   42.90    7.20 
   2   5  -1   39.00    8.30 
  -2   5   1   33.60    8.40 
   2   5  -1   26.30    7.90 
  -2   5   1   35.00    6.80 
   2   5  -1   23.80    6.80 
   2   5  -1   30.30    8.40 
   2   5  -1   22.00    7.30 
  -2   5   1   46.20    9.60 
   2   5  -1   23.70    6.50 
  -2   5   1   29.20    7.10 
   2   5  -1   35.70   10.90 
   2   5  -1   20.00    4.60 
   2   5  -1   45.70    7.50 
   2   5  -1   29.90    6.00 
   2   5  -1   31.70    5.90 
  -2   5   1   38.60    7.30 
  -2   5   1   23.80    8.50 
   2   5  -1   34.00    6.20 
   2   5  -1   18.90    6.90 
   2   5  -1   35.30    5.10 
   2   5  -1   26.30    6.00 
  -2   5   1   27.00    8.00 
   2   5  -1   29.10    3.90 
   2   5  -1   31.50    5.20 
   2   5  -1   42.60    8.30 
   2   5  -1   47.30    8.60 
   2   5  -1   26.40    5.60 
  -2   5   1   21.60    6.20 
   2   5  -1   28.30    5.70 
  -2   5   1   27.60    8.40 
   2   5  -1   27.80    7.70 
   2   5  -1   25.90    8.20 
   2   5  -1   26.40    5.00 
   2   5  -1   29.30    5.40 
   2   5  -1   22.20    5.50 
  -2   5   1   19.50    6.80 
   2   5  -1   32.30    5.70 
   2   5  -1   29.20    5.80 
   2   5  -1   30.00    5.80 
   2   5  -1   34.60    5.30 
   2   5  -1   20.00    7.80 
  -2   5   1   26.20    5.60 
   2   5  -1   49.90    9.20 
   2   5  -1   37.50    7.30 
   2   5  -1   29.80    9.30 
  -2   5   1   23.10    7.20 
  -2   5   1   39.10    5.90 
   2   5  -1   36.30    7.10 
   2   5  -1   36.00    7.30 
  -2   5   1   25.00    7.50 
  -2   5   1   20.90    7.70 
   1  -5  -1   75.29    5.40 
  -1  -5   1   74.69   12.00 
   1  -5  -1   55.69   12.90 
  -1  -5   1  103.39   15.60 
  -1  -5   1  107.49   11.30 
   1  -5  -1   70.99   12.00 
  -1  -5   1   90.49    6.80 
   1  -5  -1   89.49    6.90 
  -1  -5   1   56.09   11.20 
   1  -5  -1   77.89   10.10 
  -1  -5   1   80.79    6.00 
   1  -5  -1   90.99    9.40 
   1  -5  -1   92.79   13.40 
   1  -5  -1   79.79   13.70 
   1  -5  -1   89.29   11.70 
  -1  -5   1   75.49   12.40 
   1  -5  -1   86.29   14.20 
   1  -5  -1   75.99   12.60 
   1  -5  -1   86.29    4.60 
   1  -5  -1  119.39   14.90 
  -1  -5   1   95.49   11.90 
   1  -5  -1  103.49   14.70 
   1  -5  -1   86.89    8.70 
  -1  -5   1   88.79   12.20 
   1   5  -1   77.49    7.80 
   1   5  -1  106.39   18.70 
   1   5  -1   89.19    6.50 
  -1   5   1   78.39   10.80 
   1   5  -1   99.39   11.40 
   1   5  -1   85.09    8.60 
  -1   5   1   88.89   13.30 
   1   5  -1   61.69    9.60 
  -1   5   1   88.49    6.60 
   1   5  -1   88.69    9.80 
  -1   5   1  101.59   11.80 
  -1   5   1   80.39    9.10 
   1   5  -1   90.49   10.50 
  -1   5   1   91.29   10.50 
   1   5  -1   71.59   13.00 
   1   5  -1   75.49    9.10 
  -1   5   1   84.49   12.50 
   1   5  -1   92.89   14.40 
  -1   5   1   94.69   12.10 
  -1   5   1  101.19   11.60 
   1   5  -1   84.99    9.40 
  -1   5   1   93.39   13.30 
   1   5  -1   95.69    8.70 
  -1   5   1   85.69   11.50 
   1   5  -1   82.49    6.20 
   1   5  -1   73.79   12.40 
  -1   5   1   81.19    9.50 
  -1   5   1   76.89   11.30 
  -1   5   1   71.19   12.20 
   1   5  -1   94.19   13.10 
   1   5  -1   76.39    9.00 
  -1   5   1   76.89    7.80 
   1   5  -1   92.29    7.30 
  -1   5   1   86.89    6.30 
  -1   5   1   88.99   12.00 
   1   5  -1   70.09   12.30 
  -1   5   1   75.59   12.20 
  -1   5   1   66.69    8.40 
   1   5  -1   94.19   10.70 
   1   5  -1  100.59    9.00 
  -1   5   1   96.79   15.50 
  -1   5   1   80.89   11.80 
   1   5  -1  101.29   13.90 
   1   5  -1   82.09    8.40 
   0  -5   1   28.80    9.30 
   0  -5  -1   39.10    9.20 
   0  -5   1   39.70    9.00 
   0  -5   1   43.70    6.90 
   0  -5   1   41.50    9.30 
   0  -5  -1   35.80    6.60 
   0  -5   1   35.00    7.60 
   0  -5   1   22.60    7.30 
   0  -5   1   21.10    7.60 
   0  -5  -1   38.80    7.10 
   0  -5   1   42.40    8.60 
   0  -5  -1   38.20    7.00 
   0  -5   1   39.80    9.30 
   0  -5   1   31.90    3.90 
   0  -5  -1   45.50    8.20 
   0  -5  -1   28.80   10.10 
   0  -5  -1   29.60    6.30 
   0  -5  -1   40.50    7.80 
   0  -5   1   31.60    7.20 
   0  -5   1   31.70    8.40 
   0  -5  -1   46.40   11.40 
   0  -5   1   26.10    8.20 
   0  -5  -1   44.10    9.40 
   0  -5  -1   30.80    7.70 
   0  -5   1   36.30    9.40 
   0  -5  -1   40.70   11.80 
   0  -5  -1   35.80    8.00 
   0  -5  -1   43.60   10.50 
   0  -5   1   30.60    9.00 
   0  -5  -1   27.80    8.30 
   0  -5  -1   33.20    7.70 
   0   5   1   33.90    8.60 
   0   5  -1   36.00    4.40 
   0   5   1   39.00   11.40 
   0   5  -1   24.90    6.50 
   0   5   1   35.60    9.00 
   0   5  -1   28.70    5.00 
   0   5  -1   28.60    5.90 
   0   5  -1   26.70    8.00 
   0   5   1   40.10    6.00 
   0   5   1   48.90   10.80 
   0   5   1   30.50    6.40 
   0   5  -1   42.50    9.20 
   0   5   1   26.60    6.90 
   0   5   1   22.30    6.40 
   0   5  -1   36.40    4.80 
   0   5   1   33.10    3.70 
   0   5   1   38.40    7.50 
   0   5  -1   46.00   10.80 
   0   5  -1   30.40    6.40 
   0   5   1   38.40    6.50 
   0   5  -1   35.80    9.20 
   0   5  -1   35.30    5.90 
   0   5   1   29.80    5.80 
   0   5  -1   27.40    6.70 
   0   5   1   32.80    6.50 
   0   5   1   38.40    8.80 
   0   5   1   28.50    7.10 
   0   5   1   35.80    8.20 
   0   5  -1   43.40    6.90 
   0   5   1   29.40    5.80 
   0   5   1   41.20    4.10 
   0   5  -1   30.40    5.90 
   0   5  -1   44.90    9.90 
   0   5   1   30.50    6.50 
   0   5  -1   27.50    5.90 
   0   5   1   36.50    7.40 
   0   5  -1   42.80    4.10 
   0   5   1   33.00    5.30 
   0   5  -1   29.60    7.10 
   0   5  -1   27.90    8.00 
   0   5  -1   43.20    6.60 
   0   5  -1   33.00    4.10 
   0   5  -1   33.00    6.30 
   0   5   1   40.70    5.20 
   0   5  -1   30.90    6.20 
  -1  -5  -1 2389.76  101.39 
  -1  -5  -1 2464.15   96.89 
  -1  -5  -1 2437.26   96.99 
  -1  -5  -1 2292.87  103.09 
  -1  -5  -1 2381.06   99.99 
  -1  -5  -1 2280.07   97.69 
   1  -5   1 2407.16  102.09 
  -1  -5  -1 2484.95  101.49 
   1  -5   1 2222.98   97.59 
   1  -5   1 2462.05   99.99 
   1  -5   1 2363.56  101.69 
   1  -5   1 2428.66   91.69 
   1  -5   1 2394.56   98.39 
   1  -5   1 2260.17   98.59 
  -1  -5  -1 2367.46   89.79 
   1  -5   1 2345.77  101.19 
   1  -5   1 2516.15   99.39 
   1  -5   1 2095.19   92.29 
   1  -5   1 2461.65   99.39 
   1  -5   1 2441.66  100.39 
   1  -5   1 2434.06  100.39 
  -1  -5  -1 2421.06   94.89 
   1  -5   1 2380.06   97.79 
  -1  -5  -1 2285.17   94.39 
   1  -5   1 2463.85  101.29 
   1  -5   1 2399.36   99.29 
  -1  -5  -1 2425.36  100.89 
   1  -5   1 2473.35  100.79 
  -1   5  -1 2407.96   99.19 
   1   5   1 2366.86   91.39 
  -1   5  -1 2382.16   96.79 
   1   5   1 2399.16   96.59 
   1   5   1 2481.85  103.69 
   1   5   1 2331.67   91.39 
  -1   5  -1 2418.76  102.09 
  -1   5  -1 2398.36   96.99 
  -1   5  -1 2370.06   91.49 
  -1   5  -1 2422.86   99.59 
   1   5   1 2433.16   93.99 
   1   5   1 2598.94  102.59 
   1   5   1 2445.26   96.99 
   1   5   1 2545.95  103.29 
   1   5   1 2371.46   89.69 
   1   5   1 2340.97  100.89 
  -1   5  -1 2467.85   96.69 
  -1   5  -1 2414.06   94.09 
  -1   5  -1 2531.95  100.99 
  -1   5  -1 2282.97   99.39 
   1   5   1 2441.86  106.79 
   1   5   1 2380.66   99.39 
  -1   5  -1 2435.96   99.69 
  -1   5  -1 2457.95   96.39 
   1   5   1 2453.05   94.19 
  -1   5  -1 2469.75   94.39 
  -1   5  -1 2446.06   93.29 
   1   5   1 2424.26   92.79 
   1   5   1 2447.76   91.59 
   1   5   1 2412.06   89.89 
   1   5   1 2406.66   94.59 
  -1   5  -1 2419.96   93.09 
   1   5   1 2398.66   95.49 
   1   5   1 2462.45   89.99 
  -1   5  -1 2368.76   99.69 
   1   5   1 2451.55  100.69 
   1   5   1 2399.66   90.89 
   1   5   1 2445.26  102.29 
  -1   5  -1 2297.17  101.59 
  -1   5  -1 2576.44   97.39 
  -1   5  -1 2416.26  103.29 
  -1   5  -1 2423.56  101.99 
   1   5   1 2286.87   99.89 
   2  -5   1  249.08   22.00 
  -2  -5  -1  279.17   13.80 
   2  -5   1  245.78   18.20 
   2  -5   1  284.47   21.90 
  -2  -5  -1  286.77   15.60 
   2  -5   1  280.87   16.20 
   2  -5   1  270.57   18.80 
   2  -5   1  296.07   17.90 
   2  -5   1  271.57   21.00 
   2  -5   1  268.37   15.10 
   2  -5   1  262.67   20.00 
  -2  -5  -1  264.57   20.00 
   2  -5   1  258.17   17.20 
   2  -5   1  255.37   16.60 
   2  -5   1  267.17   21.10 
   2  -5   1  273.57   20.40 
   2  -5   1  265.57   19.80 
   2  -5   1  307.77   20.00 
   2  -5   1  301.07   22.00 
  -2  -5  -1  279.67   21.20 
  -2  -5  -1  258.57   17.20 
   2  -5   1  286.97   19.00 
   2  -5   1  293.17   20.90 
  -2  -5  -1  291.97   21.10 
   2  -5   1  261.47   15.30 
   2  -5   1  266.67   14.60 
   2  -5   1  286.37   21.90 
  -2  -5  -1  309.07   18.80 
  -2  -5  -1  330.27   21.70 
   2   5   1  291.07   22.60 
   2   5   1  286.87   13.10 
  -2   5  -1  299.97   17.50 
   2   5   1  279.47   12.70 
   2   5   1  269.67   21.30 
  -2   5  -1  229.18   23.60 
   2   5   1  294.17   15.30 
  -2   5  -1  266.17   16.10 
   2   5   1  326.97   21.90 
   2   5   1  298.07   14.50 
   2   5   1  284.37   16.80 
   2   5   1  288.67   13.30 
  -2   5  -1  304.37   22.10 
   2   5   1  278.37   13.00 
   2   5   1  285.87   17.60 
   2   5   1  284.07   14.50 
  -2   5  -1  282.07   21.50 
   2   5   1  280.17   13.00 
  -2   5  -1  301.87   22.00 
   2   5   1  275.77   22.90 
   2   5   1  340.87   23.10 
   2   5   1  324.57   25.60 
   2   5   1  300.17   16.40 
  -2   5  -1  288.77   17.90 
   2   5   1  269.97   22.20 
   2   5   1  265.27   16.00 
  -2   5  -1  294.07   21.40 
   2   5   1  283.57   17.10 
   2   5   1  278.37   17.10 
   2   5   1  301.47   14.20 
   2   5   1  269.77   16.00 
  -2   5  -1  235.38   19.30 
  -2   5  -1  313.97   20.50 
  -2   5  -1  301.27   17.60 
   2   5   1  293.37   13.70 
   2   5   1  275.17   13.50 
   2   5   1  287.97   14.60 
   2   5   1  279.57   12.50 
  -2   5  -1  273.67   19.20 
   2   5   1  302.67   16.10 
  -2   5  -1  288.07   20.30 
  -2   5  -1  247.38   20.70 
  -2   5  -1  292.17   19.50 
   2   5   1  295.17   15.50 
   2   5   1  256.27   20.30 
  -2   5  -1  273.77   22.80 
  -2   5  -1  285.57   20.50 
   3  -5   1 2463.95  102.99 
   3  -5   1 2447.16  103.49 
  -3  -5  -1 2437.96  101.09 
   3  -5   1 2291.67  103.69 
   3  -5   1 2552.94  103.19 
  -3  -5  -1 2434.16   98.79 
   3  -5   1 2349.76   95.89 
   3  -5   1 2458.35  104.69 
   3  -5   1 2403.46  102.79 
  -3  -5  -1 2475.75  102.79 
   3  -5   1 2325.87  105.99 
  -3  -5  -1 2484.05  101.29 
   3  -5   1 2390.36  101.39 
   3  -5   1 2437.16  101.39 
  -3  -5  -1 2409.36   92.39 
   3  -5   1 2569.94  103.79 
  -3  -5  -1 2480.65   96.89 
   3  -5   1 2429.56   97.19 
   3  -5   1 2287.67  103.29 
   3  -5   1 2523.25  100.49 
  -3  -5  -1 2491.15  100.49 
   3   5   1 2407.26  107.99 
   3   5   1 2433.86  105.79 
   3   5   1 2429.36   93.59 
   3   5   1 2422.66   93.19 
  -3   5  -1 2439.86   98.59 
  -3   5  -1 2496.45  101.49 
   3   5   1 2386.36   90.39 
  -3   5  -1 2491.45   98.49 
  -3   5  -1 2443.16  104.89 
   3   5   1 2222.48   94.59 
  -3   5  -1 2409.56  104.79 
  -3   5  -1 2367.26   96.99 
  -3   5  -1 2432.96  103.79 
  -3   5  -1 2371.36  103.69 
  -3   5  -1 2471.45  102.89 
   3   5   1 2345.37   89.39 
  -3   5  -1 2412.36  101.49 
   3   5   1 2529.05  101.79 
  -3   5  -1 2374.86  100.69 
  -3   5  -1 2430.26  102.59 
  -3   5  -1 2507.25  101.79 
   3   5   1 2427.66   91.39 
  -3   5  -1 2530.35   96.39 
   3   5   1 2473.35   95.89 
   3   5   1 2415.96  104.79 
   3   5   1 2346.67   94.49 
   3   5   1 2353.06   92.39 
  -3   5  -1 2377.56  100.79 
   3   5   1 2411.56  102.49 
   3   5   1 2336.47   91.69 
   3   5   1 2363.26   94.99 
  -3   5  -1 2337.07  105.89 
   3   5   1 2454.95  103.99 
   3   5   1 2311.67  101.59 
   3   5   1 2336.07   92.19 
  -3   5  -1 2423.26  103.89 
   3   5   1 2421.86  100.59 
   3   5   1 2386.26   96.19 
   3   5   1 2408.56   98.49 
  -4  -5  -1  187.18   18.50 
   4  -5   1  216.08   23.40 
   4  -5   1  198.18   22.20 
   4  -5   1  271.77   25.00 
  -4  -5  -1  234.58   16.20 
   4  -5   1  264.97   20.20 
   4  -5   1  208.48   23.30 
  -4  -5  -1  199.68   20.70 
  -4  -5  -1  221.18   17.80 
   4  -5   1  206.18   22.30 
   4  -5   1  294.17   28.30 
   4  -5   1  225.18   27.10 
  -4  -5  -1  254.87   19.50 
   4  -5   1  200.88   23.60 
   4  -5   1  243.68   18.70 
   4  -5   1  188.48   22.10 
  -4  -5  -1  237.38   21.70 
   4  -5   1  232.08   24.00 
  -4   5  -1  237.28   19.00 
   4   5   1  225.18   25.20 
  -4   5  -1  210.28   25.20 
  -4   5  -1  239.18   23.20 
  -4   5  -1  243.28   18.80 
   4   5   1  240.58   18.30 
   4   5   1  271.17   22.90 
  -4   5  -1  250.47   25.20 
   4   5   1  241.88   14.00 
  -4   5  -1  200.78   21.50 
   4   5   1  240.98   16.30 
   4   5   1  233.38   13.50 
   4   5   1  214.48   20.60 
   4   5   1  254.67   26.20 
  -4   5  -1  250.67   25.40 
   4   5   1  235.98   15.10 
   4   5   1  209.78   22.00 
  -4   5  -1  218.68   24.00 
  -4   5  -1  234.48   17.80 
   4   5   1  206.78   25.80 
   4   5   1  243.18   14.90 
  -4   5  -1  201.18   21.60 
  -4   5  -1  179.28   22.20 
   4   5   1  226.98   22.30 
   4   5   1  220.98   12.30 
  -4   5  -1  266.57   19.30 
  -4   5  -1  228.28   21.20 
  -4   5  -1  255.17   19.60 
   4   5   1  241.68   19.40 
  -4   5  -1  189.48   21.30 
  -4   5  -1  213.28   25.20 
   4   5   1  198.78   19.80 
  -5  -5  -1  321.57   21.30 
  -5  -5  -1  259.67   20.70 
   5  -5   1  264.87   29.80 
  -5  -5  -1  298.67   22.90 
   5  -5   1  194.58   24.90 
  -5  -5  -1  256.97   25.50 
   5  -5   1  316.87   24.10 
   5  -5   1  309.77   29.90 
   5  -5   1  305.97   26.60 
  -5  -5  -1  263.77   25.90 
   5  -5   1  342.17   35.30 
   5  -5   1  290.27   31.60 
  -5  -5  -1  308.37   20.30 
   5  -5   1  316.17   31.10 
   5  -5   1  302.57   23.90 
   5  -5   1  316.37   26.60 
   5  -5   1  337.57   24.70 
  -5  -5  -1  310.97   21.50 
   5  -5   1  270.07   22.50 
   5   5   1  303.87   17.90 
   5   5   1  296.17   23.60 
  -5   5  -1  333.87   30.90 
   5   5   1  286.67   22.90 
  -5   5  -1  302.57   23.70 
  -5   5  -1  284.57   30.80 
   5   5   1  273.27   18.80 
   5   5   1  298.37   21.60 
  -5   5  -1  253.87   24.70 
  -5   5  -1  325.57   23.60 
   5   5   1  335.47   32.70 
  -5   5  -1  313.47   22.10 
  -5   5  -1  245.58   27.40 
   5   5   1  318.07   31.40 
  -5   5  -1  295.57   23.60 
  -5   5  -1  258.47   26.50 
  -5   5  -1  338.87   26.50 
   5   5   1  270.27   30.40 
  -5   5  -1  323.67   25.90 
   5   5   1  243.88   27.80 
   5   5   1  271.77   20.00 
   5   5   1  340.57   25.40 
   5   5   1  290.47   22.30 
  -5   5  -1  329.47   23.60 
  -5   5  -1  249.78   23.60 
  -5   5  -1  295.87   28.90 
  -5   5  -1  275.77   30.10 
  -5   5  -1  209.18   25.70 
   6  -5   1   45.80   14.20 
   6  -5   1   22.60   10.20 
   6  -5   1   44.10   11.40 
   6  -5   1   42.80   11.30 
   6  -5   1   30.90   13.00 
  -6  -5  -1   31.10   10.50 
   6  -5   1   29.20   12.30 
  -6  -5  -1   49.30   10.60 
  -6  -5  -1   38.90   10.80 
  -6  -5  -1   52.09   11.40 
   6  -5   1   45.70   15.00 
   6  -5   1   30.60   13.00 
   6  -5   1   24.00   11.90 
   6  -5   1   35.60   12.50 
  -6  -5  -1   28.90    8.70 
  -6  -5  -1   54.49   13.60 
   6  -5   1   42.90   14.60 
   6  -5   1   26.00   10.00 
  -6   5  -1   18.70    8.70 
  -6   5  -1   40.70   10.20 
  -6   5  -1   43.30   13.10 
   6   5   1   34.30   12.50 
   6   5   1   30.20   13.30 
  -6   5  -1   28.20    8.60 
  -6   5  -1   23.40   10.70 
   6   5   1   24.20   11.80 
   6   5   1   30.30    9.10 
  -6   5  -1   36.10   12.30 
  -6   5  -1   36.80   12.40 
   6   5   1   33.90    8.80 
  -6   5  -1   42.20   12.40 
   6   5   1   38.70    9.60 
   6   5   1   53.99   10.40 
   6   5   1   34.90   10.50 
  -6   5  -1   37.00    9.80 
   6   5   1   33.90   10.80 
  -6   5  -1   31.40   12.00 
  -6   5  -1   35.10   11.90 
  -6   5  -1   30.80   11.60 
   6   5   1   37.80   10.50 
  -6   5  -1   31.80   12.50 
  -6   5  -1   33.00   12.30 
  -6   5  -1   52.69   13.40 
   6   5   1   51.69   14.50 
   6   5   1   25.50   10.90 
   6   5   1   28.70    7.60 
   6   5   1   48.50   12.80 
  -6   5  -1   32.30   11.10 
   6   5   1   36.20    9.70 
   7  -5   1  201.68   29.50 
   7  -5   1  183.08   22.50 
  -7  -5  -1  160.48   22.90 
  -7  -5  -1  161.58   24.00 
   7  -5   1  135.59   24.30 
  -7  -5  -1  163.68   21.30 
   7  -5   1  186.98   28.20 
   7  -5   1  193.28   29.20 
   7  -5   1  220.38   24.30 
  -7  -5  -1  141.39   19.10 
   7  -5   1  177.08   24.60 
   7  -5   1  179.68   28.30 
   7  -5   1  192.78   25.20 
   7  -5   1  206.48   29.10 
   7  -5   1  192.78   29.90 
  -7  -5  -1  164.88   23.70 
   7  -5   1  157.28   24.80 
   7  -5   1  193.88   28.00 
  -7   5  -1  203.58   25.30 
  -7   5  -1  149.29   22.60 
  -7   5  -1  166.58   24.20 
  -7   5  -1  242.98   31.60 
   7   5   1  221.88   26.70 
   7   5   1  129.09   18.60 
   7   5   1  105.09   21.20 
  -7   5  -1  188.58   27.00 
   7   5   1  184.08   20.40 
  -7   5  -1  183.18   25.50 
  -7   5  -1  195.68   26.20 
   7   5   1  262.57   30.10 
   7   5   1  167.08   27.60 
  -7   5  -1  169.58   23.40 
   7   5   1  182.58   23.70 
  -7   5  -1  178.18   26.60 
   7   5   1  152.68   25.40 
  -7   5  -1  172.38   26.10 
  -7   5  -1  193.98   25.60 
  -7   5  -1  153.58   26.00 
  -7   5  -1  149.49   23.30 
   7   5   1  146.59   22.80 
   8  -5   1  101.99   23.60 
  -8  -5  -1   45.00   15.60 
   8  -5   1  110.09   22.40 
   8  -5   1   91.69   21.60 
   8  -5   1   65.19   17.50 
   8  -5   1   87.69   18.80 
   8  -5   1   73.29   20.30 
  -8  -5  -1   58.09   16.80 
   8  -5   1   97.19   24.30 
  -8  -5  -1  114.99   20.60 
   8  -5   1   64.69   17.60 
   8  -5   1   77.09   20.00 
   8  -5   1  106.49   24.90 
  -8  -5  -1   84.49   16.90 
   8  -5   1  106.29   23.10 
  -8   5  -1  100.39   19.90 
  -8   5  -1   90.39   19.40 
  -8   5  -1   89.79   17.90 
   8   5   1  101.79   17.70 
   8   5   1   79.79   22.80 
  -8   5  -1  141.49   22.80 
   8   5   1   92.39   21.00 
   8   5   1   96.69   21.20 
   8   5   1   54.89   19.30 
   8   5   1  103.99   19.80 
  -8   5  -1   79.99   20.10 
  -8   5  -1   93.89   22.30 
  -8   5  -1  114.79   21.80 
  -8   5  -1   93.39   20.00 
  -8   5  -1  131.19   24.60 
  -8   5  -1   82.49   19.50 
  -8   5  -1   69.19   19.70 
   8   5   1   81.29   20.70 
   8   5   1  102.39   22.60 
  -8   5  -1  141.99   23.90 
   8   5   1   55.59   15.90 
  -9  -5  -1  611.84   47.20 
  -9  -5  -1  647.64   48.10 
   9  -5   1  637.04   51.29 
   9  -5   1  590.84   49.50 
   9  -5   1  567.24   54.79 
   9  -5   1  603.64   48.10 
   9  -5   1  669.33   55.29 
   9  -5   1  510.55   51.99 
  -9  -5  -1  632.74   44.00 
   9  -5   1  512.95   49.90 
   9  -5   1  617.84   50.09 
   9  -5   1  624.94   48.80 
   9  -5   1  552.64   57.19 
   9  -5   1  638.74   51.29 
   9  -5   1  508.85   56.19 
  -9   5  -1  654.73   48.70 
   9   5   1  624.64   50.39 
  -9   5  -1  647.64   49.20 
   9   5   1  697.23   49.50 
  -9   5  -1  598.74   47.10 
   9   5   1  706.33   56.39 
  -9   5  -1  651.23   48.60 
  -9   5  -1  576.24   46.80 
  -9   5  -1  651.23   50.69 
   9   5   1  634.74   51.19 
  -9   5  -1  741.33   54.19 
  -9   5  -1  652.83   51.39 
  -9   5  -1  661.73   51.09 
   9   5   1  586.74   49.30 
   9   5   1  578.84   59.79 
  -9   5  -1  610.04   60.39 
   9   5   1  692.83   52.69 
  -9   5  -1  677.43   46.30 
   8  -6  -1   26.50   12.90 
   8  -6  -1   12.70   13.80 
   8  -6  -1   23.50   15.70 
   8  -6  -1   18.30   12.20 
   8  -6  -1    8.10   12.50 
   8  -6  -1   14.40   11.80 
  -8  -6   1   33.40   13.20 
   8  -6  -1   17.80   15.80 
   8  -6  -1    7.20   13.40 
   8  -6  -1   25.90   13.20 
   8  -6  -1   25.30   13.20 
   8  -6  -1   16.00   12.50 
  -8  -6   1   13.20   11.20 
   8   6  -1    8.70   10.60 
  -8   6   1    5.50   12.80 
  -8   6   1   24.20   14.00 
  -8   6   1   35.50   15.90 
  -8   6   1    1.30   11.70 
   8   6  -1   12.10   12.50 
  -8   6   1   13.00   12.00 
   8   6  -1   34.60   15.90 
   8   6  -1   32.20   15.40 
   8   6  -1   18.60   13.60 
  -8   6   1    0.30    8.30 
  -8   6   1   20.30   13.90 
  -8   6   1   42.30   16.70 
  -8   6   1    8.20   12.50 
  -8   6   1   18.70   12.40 
  -8   6   1    7.10   11.90 
   8   6  -1    8.50   16.00 
   8   6  -1    2.50   11.50 
  -8   6   1   28.60   14.10 
   7  -6  -1   10.20   11.30 
   7  -6  -1    0.20   10.90 
   7  -6  -1   -2.60    8.70 
   7  -6  -1   -0.50    7.70 
  -7  -6   1    1.70    7.70 
   7  -6  -1    1.50    8.70 
   7  -6  -1   12.20   11.90 
   7  -6  -1    3.60    8.80 
   7  -6  -1    3.80    8.80 
  -7  -6   1    1.80    8.70 
  -7  -6   1    7.30    7.50 
   7  -6  -1    4.10    9.70 
   7  -6  -1   -3.90    6.80 
   7  -6  -1   -2.10    7.70 
  -7  -6   1    6.60    8.80 
   7  -6  -1    0.40    8.30 
   7   6  -1   -8.10    9.50 
  -7   6   1    9.90    9.40 
  -7   6   1   -5.50    8.10 
  -7   6   1    3.40   10.10 
  -7   6   1    4.90    8.90 
   7   6  -1    3.20    9.60 
  -7   6   1    2.00   10.10 
   7   6  -1    3.70    8.80 
  -7   6   1   11.20   10.60 
  -7   6   1    2.20   10.70 
  -7   6   1    9.60   11.60 
  -7   6   1    9.90   11.00 
  -7   6   1    6.70    9.70 
   7   6  -1    2.10   10.80 
  -7   6   1   13.10    9.80 
  -7   6   1    7.60    8.20 
   7   6  -1    1.40    9.20 
   7   6  -1   11.30    8.60 
   7   6  -1   -8.90    7.90 
   7   6  -1   -7.20   12.50 
   7   6  -1    4.90    8.90 
   7   6  -1    7.60    8.30 
  -7   6   1    4.70   10.70 
   7   6  -1   12.40   11.10 
   7   6  -1   -9.80    7.80 
   6  -6  -1   -2.30    8.30 
   6  -6  -1   11.60   10.20 
  -6  -6   1   12.70    7.00 
   6  -6  -1    0.10    7.10 
   6  -6  -1   17.00    9.10 
  -6  -6   1   17.40    8.50 
   6  -6  -1    3.20    8.80 
   6  -6  -1    7.90    9.70 
   6  -6  -1   -1.40    6.60 
   6  -6  -1    6.40    8.00 
   6  -6  -1    1.40    8.30 
  -6  -6   1   11.60    8.80 
  -6  -6   1   16.00    8.10 
   6  -6  -1    9.10    8.90 
  -6  -6   1    9.70    7.30 
   6  -6  -1   -2.00    8.20 
   6  -6  -1   21.40   10.50 
  -6   6   1    3.30    7.10 
   6   6  -1   17.10    9.90 
   6   6  -1   13.40    8.90 
   6   6  -1   28.60   11.40 
   6   6  -1    4.50    6.80 
  -6   6   1   -5.90    6.80 
  -6   6   1   15.80    9.20 
  -6   6   1   27.30   12.20 
   6   6  -1    0.90    8.70 
   6   6  -1   19.10    8.20 
  -6   6   1   17.50    9.30 
  -6   6   1   11.60   10.00 
   6   6  -1    9.70    8.90 
   6   6  -1    6.90    7.40 
  -6   6   1   35.70   13.70 
   6   6  -1   20.70    8.80 
  -6   6   1   14.80    9.10 
  -6   6   1   23.00   11.60 
  -6   6   1   14.10   10.60 
  -6   6   1    2.90    9.00 
   6   6  -1    8.80   11.00 
   6   6  -1   21.10    9.20 
   6   6  -1    9.30   10.70 
   6   6  -1    2.30    7.00 
  -6   6   1   25.20    9.00 
  -6   6   1    6.70   10.50 
   6   6  -1   19.20   10.60 
  -6   6   1   14.50    8.00 
  -6   6   1   19.60    9.80 
   6   6  -1   11.10    8.20 
  -6   6   1    5.70    6.60 
   6   6  -1   20.10   10.70 
   6   6  -1    4.60    5.70 
   5  -6  -1   22.70   11.20 
   5  -6  -1   18.90    9.50 
  -5  -6   1   21.40    8.70 
   5  -6  -1   30.20    9.70 
   5  -6  -1   39.80   12.80 
   5  -6  -1   29.40   11.60 
   5  -6  -1   17.90    8.40 
   5  -6  -1   19.30   10.50 
  -5  -6   1   31.20    9.40 
   5  -6  -1   12.20    7.30 
   5  -6  -1    9.70    7.90 
  -5  -6   1   16.20    7.40 
   5  -6  -1   20.80   12.40 
   5  -6  -1   19.50   10.60 
  -5  -6   1   18.90    7.80 
   5  -6  -1   22.60   10.10 
  -5  -6   1   18.50    8.50 
   5   6  -1   17.30   10.80 
   5   6  -1   26.80   10.20 
  -5   6   1   28.00   11.90 
   5   6  -1   17.30    9.10 
  -5   6   1   16.80    9.50 
   5   6  -1   14.70    7.90 
   5   6  -1   21.50    6.70 
  -5   6   1   33.40   11.00 
  -5   6   1    3.50    6.60 
   5   6  -1   34.40    9.10 
  -5   6   1   19.80    9.50 
   5   6  -1   10.80    7.60 
   5   6  -1    5.10    9.20 
   5   6  -1   10.60    7.00 
   5   6  -1   14.20    7.70 
   5   6  -1   23.20   10.90 
  -5   6   1   23.20   12.20 
  -5   6   1   28.50    9.00 
   5   6  -1   16.60    9.30 
   5   6  -1   22.50    8.80 
   5   6  -1   21.80    9.60 
  -5   6   1   27.90   10.90 
  -5   6   1   23.80    8.80 
  -5   6   1   32.40   12.00 
  -5   6   1   23.70    9.20 
   5   6  -1   10.70    7.00 
  -5   6   1   11.80    8.30 
   5   6  -1    2.60    7.80 
  -5   6   1   21.40    9.40 
  -5   6   1   20.10   10.20 
  -5   6   1   19.40    9.70 
  -5   6   1   19.30    8.00 
   4  -6  -1   83.89   16.10 
   4  -6  -1  111.29   17.60 
   4  -6  -1   89.89   17.80 
   4  -6  -1  120.19   19.50 
   4  -6  -1  118.99   16.60 
   4  -6  -1  102.69   14.70 
   4  -6  -1  128.09   20.30 
  -4  -6   1   85.79   15.00 
  -4  -6   1   85.39   14.00 
  -4  -6   1  113.89   17.10 
   4  -6  -1  116.89   15.90 
  -4  -6   1  102.59   10.80 
  -4  -6   1  111.49   13.70 
  -4  -6   1  110.29   11.20 
   4  -6  -1   95.19   15.30 
   4  -6  -1   92.59   16.40 
   4  -6  -1  113.49   14.20 
  -4  -6   1  124.69   14.60 
  -4  -6   1  100.09   13.20 
   4  -6  -1  105.79   19.10 
   4   6  -1  108.79   13.80 
  -4   6   1  121.89   18.40 
  -4   6   1  106.89   16.00 
  -4   6   1  112.59   15.50 
   4   6  -1  111.59   18.00 
  -4   6   1   75.09   13.90 
   4   6  -1  114.29   18.30 
  -4   6   1  135.19   15.90 
  -4   6   1  137.59   21.00 
   4   6  -1  104.39   13.90 
   4   6  -1  124.29   17.40 
  -4   6   1  125.29   18.70 
  -4   6   1  109.59   15.90 
   4   6  -1  101.39   19.60 
   4   6  -1  127.39   16.90 
   4   6  -1  120.79   17.20 
  -4   6   1  112.39   17.20 
   4   6  -1  118.39   16.30 
   4   6  -1  120.89   11.90 
   4   6  -1  102.59   18.50 
  -4   6   1  106.49   19.10 
   4   6  -1   90.79   10.50 
   4   6  -1  131.19   16.90 
   4   6  -1  114.29   10.20 
  -4   6   1  119.39   20.10 
  -4   6   1  112.69   15.80 
   4   6  -1  101.79   14.80 
  -4   6   1  109.99   18.50 
  -4   6   1  113.69   14.00 
   4   6  -1  101.69   16.00 
  -4   6   1   88.59   15.00 
  -4   6   1  113.69   18.50 
   4   6  -1   95.99   16.50 
  -3  -6   1    3.00    6.20 
   3  -6  -1    7.10    7.60 
   3  -6  -1   18.50    8.90 
  -3  -6   1   19.20    5.50 
   3  -6  -1   12.20    5.80 
  -3  -6   1   22.20    7.60 
  -3  -6   1   17.90    8.60 
   3  -6  -1   22.20    8.70 
   3  -6  -1   23.70    7.80 
   3  -6  -1   12.00    5.10 
  -3  -6   1    9.50    5.40 
   3  -6  -1   14.80    8.20 
   3  -6  -1   11.40    6.20 
   3  -6  -1   16.20    8.80 
  -3  -6   1   27.90    6.40 
  -3  -6   1   24.70   10.00 
   3  -6  -1   21.30   10.10 
   3  -6  -1    4.80    7.50 
   3  -6  -1    6.80    5.80 
   3  -6  -1   17.80    6.50 
  -3   6   1   19.40    8.20 
  -3   6   1   19.70    8.30 
   3   6  -1   11.50    7.60 
   3   6  -1   18.20    5.20 
  -3   6   1   18.00    5.50 
   3   6  -1   12.70    4.90 
  -3   6   1   11.40    7.90 
  -3   6   1   19.70    6.40 
  -3   6   1   16.60    8.40 
   3   6  -1   22.80    6.20 
   3   6  -1   16.10    8.70 
   3   6  -1    6.50    5.90 
  -3   6   1   22.10    6.70 
   3   6  -1   24.00    8.90 
   3   6  -1   12.30    7.90 
  -3   6   1   17.50    7.30 
  -3   6   1   20.40    7.90 
  -3   6   1   17.60    7.10 
   3   6  -1   12.10    7.50 
   3   6  -1    8.90    7.00 
  -3   6   1   -5.60    5.50 
   3   6  -1   17.10    4.80 
  -3   6   1   30.60   10.60 
  -3   6   1    8.30    6.40 
   3   6  -1    0.50    7.10 
   3   6  -1    0.10    8.20 
   3   6  -1   28.30    9.50 
  -3   6   1   20.00    8.80 
   3   6  -1   10.40    6.00 
   3   6  -1   11.30    4.00 
   3   6  -1    7.00    5.40 
  -3   6   1    6.50    7.50 
  -3   6   1   16.70    7.40 
   3   6  -1   14.20    2.60 
   2  -6  -1    8.70    6.80 
  -2  -6   1   18.70    4.10 
   2  -6  -1   21.70    9.00 
   2  -6  -1   18.90    6.30 
  -2  -6   1   11.10    4.00 
   2  -6  -1   22.80    9.00 
   2  -6  -1   30.20    8.60 
  -2  -6   1    9.10    6.50 
   2  -6  -1   24.90    6.00 
   2  -6  -1   20.30    6.00 
  -2  -6   1   20.40    8.30 
  -2  -6   1   17.60    7.10 
  -2  -6   1   14.10    6.00 
   2  -6  -1    3.00    4.50 
   2  -6  -1   21.00    6.10 
   2  -6  -1   23.70    4.60 
   2  -6  -1   15.20    7.40 
   2  -6  -1   20.90    8.80 
   2  -6  -1   18.60    4.70 
   2  -6  -1   13.50    8.80 
  -2  -6   1   17.40    5.80 
   2  -6  -1   16.90    4.40 
  -2  -6   1   29.50    9.20 
   2  -6  -1    4.90    5.50 
   2  -6  -1   30.90    8.90 
   2  -6  -1   12.40    6.90 
   2  -6  -1   15.00    3.50 
   2  -6  -1   11.50    3.20 
  -2   6   1   12.70    7.40 
   2   6  -1   18.00    3.80 
   2   6  -1   12.20    4.40 
   2   6  -1   18.80    3.80 
   2   6  -1    7.70    8.50 
  -2   6   1   25.10    9.40 
  -2   6   1   18.80    7.30 
  -2   6   1   12.50    5.20 
   2   6  -1   13.20    6.50 
  -2   6   1   20.20    6.80 
   2   6  -1   22.90    8.70 
   2   6  -1   15.90    5.80 
  -2   6   1   18.80    7.90 
  -2   6   1    9.60    6.20 
  -2   6   1   24.40    7.10 
   2   6  -1   21.50    5.20 
  -2   6   1   19.90    5.00 
  -2   6   1   13.90    7.30 
   2   6  -1   11.90    7.80 
   2   6  -1   15.40    4.10 
   2   6  -1   22.70    8.00 
   2   6  -1   20.30    5.70 
   2   6  -1   17.20    3.80 
   2   6  -1   12.70    5.30 
  -2   6   1    6.50    6.00 
   2   6  -1    6.10    6.90 
   2   6  -1   10.90    5.70 
   2   6  -1   18.00    5.60 
   2   6  -1   19.40    5.10 
   2   6  -1   19.30    5.90 
   2   6  -1   14.60    3.60 
   2   6  -1   13.30    5.20 
   2   6  -1   14.90    5.10 
  -2   6   1   19.20    6.80 
   2   6  -1   12.40    7.50 
  -2   6   1   21.40    9.10 
  -2   6   1   10.60    3.60 
   2   6  -1   12.00    3.60 
   2   6  -1   13.20    7.90 
   2   6  -1   18.40    3.90 
  -2   6   1   28.00   10.50 
   2   6  -1   26.80    5.70 
  -2   6   1   22.30    8.00 
   2   6  -1   15.30    3.90 
   2   6  -1   24.90    5.90 
   2   6  -1   19.90    8.10 
   1  -6  -1  111.89   17.20 
   1  -6  -1  105.19   15.20 
   1  -6  -1   96.69   16.80 
  -1  -6   1  145.89   19.20 
  -1  -6   1   92.89   15.20 
   1  -6  -1  118.29   15.50 
   1  -6  -1  108.09   16.50 
   1  -6  -1  118.89   17.90 
   1  -6  -1  111.79   17.90 
  -1  -6   1  106.09   14.10 
   1  -6  -1   95.59   13.40 
  -1  -6   1  104.89    6.90 
   1  -6  -1   80.49   13.90 
  -1  -6   1   87.49   13.70 
  -1  -6   1  100.79   15.50 
   1  -6  -1  109.89   16.60 
  -1  -6   1  105.29   12.00 
   1  -6  -1   91.99   14.30 
   1  -6  -1   99.49   12.70 
   1  -6  -1   94.29   15.40 
  -1  -6   1  103.39   15.90 
   1  -6  -1  147.69   14.30 
   1  -6  -1  125.69   12.80 
   1  -6  -1  128.39   15.20 
   1  -6  -1  108.09    7.60 
  -1  -6   1  123.39   13.10 
  -1  -6   1  117.69    7.20 
   1   6  -1  122.29   14.20 
   1   6  -1  100.39   18.40 
  -1   6   1   90.49   15.10 
  -1   6   1   98.49   10.30 
  -1   6   1  117.49   14.80 
   1   6  -1  103.19    6.80 
  -1   6   1  150.48   17.90 
   1   6  -1  117.59   12.30 
   1   6  -1   88.89    9.40 
  -1   6   1   82.69   13.40 
   1   6  -1  105.59   17.40 
  -1   6   1   87.49   14.10 
   1   6  -1  108.09   12.50 
   1   6  -1  124.29   11.80 
   1   6  -1  115.39   14.00 
   1   6  -1  112.49    8.60 
  -1   6   1  107.79   16.70 
   1   6  -1  107.89   16.80 
  -1   6   1   87.19   15.30 
  -1   6   1  121.29   17.30 
  -1   6   1  104.29   12.10 
   1   6  -1  109.79    7.40 
  -1   6   1  109.49   14.30 
  -1   6   1  115.29   11.40 
   1   6  -1  107.59   11.30 
   1   6  -1   70.99   13.20 
  -1   6   1   89.19   12.10 
   1   6  -1  102.09   10.50 
  -1   6   1   93.49   12.80 
   1   6  -1   99.89    6.90 
   1   6  -1  105.89   10.50 
   1   6  -1  116.59    6.90 
   1   6  -1  118.49   16.40 
   1   6  -1   99.69   10.60 
  -1   6   1   88.29   16.40 
   1   6  -1  109.09   16.10 
   1   6  -1  104.89    8.10 
  -1   6   1   94.29    6.00 
   1   6  -1  112.29   17.30 
  -1   6   1  107.89    9.50 
  -1   6   1  117.79    7.40 
   0  -6   1  659.83   28.90 
   0  -6   1  583.54   36.90 
   0  -6  -1  700.63   34.10 
   0  -6   1  692.33   38.60 
   0  -6   1  664.93   38.20 
   0  -6  -1  670.73   40.80 
   0  -6  -1  722.43   42.50 
   0  -6   1  637.04   25.90 
   0  -6   1  630.14   35.60 
   0  -6   1  602.44   37.30 
   0  -6   1  663.63   35.80 
   0  -6  -1  529.85   35.20 
   0  -6  -1  652.03   33.60 
   0  -6   1  607.04   36.50 
   0  -6  -1  659.43   36.20 
   0  -6  -1  610.34   34.40 
   0  -6  -1  640.64   38.20 
   0  -6  -1  698.33   34.70 
   0  -6   1  755.42   40.20 
   0  -6  -1  698.73   36.10 
   0  -6  -1  660.53   42.40 
   0  -6  -1  639.64   30.10 
   0  -6   1  660.83   38.80 
   0  -6  -1  591.34   37.20 
   0  -6  -1  619.34   30.90 
   0  -6   1  671.43   37.70 
   0  -6   1  668.93   36.70 
   0  -6   1  627.34   25.70 
   0   6   1  639.24   29.50 
   0   6  -1  629.04   37.00 
   0   6   1  620.94   33.40 
   0   6  -1  665.83   27.20 
   0   6   1  644.54   26.00 
   0   6  -1  646.74   29.10 
   0   6   1  640.84   32.80 
   0   6   1  714.13   32.70 
   0   6   1  631.74   36.90 
   0   6  -1  651.73   39.50 
   0   6  -1  675.83   39.30 
   0   6   1  622.14   37.20 
   0   6  -1  651.13   37.50 
   0   6  -1  661.13   31.60 
   0   6   1  639.34   30.40 
   0   6  -1  660.93   31.20 
   0   6  -1  600.84   37.70 
   0   6   1  616.94   33.20 
   0   6  -1  646.44   25.70 
   0   6   1  659.53   35.80 
   0   6  -1  695.73   35.60 
   0   6   1  717.23   40.20 
   0   6  -1  591.74   30.30 
   0   6  -1  647.74   31.70 
   0   6   1  654.63   40.50 
   0   6   1  602.94   33.50 
   0   6  -1  663.03   32.40 
   0   6   1  628.64   38.30 
   0   6  -1  636.04   32.10 
   0   6   1  648.94   34.60 
   0   6   1  630.64   30.00 
   0   6  -1  622.44   38.40 
   0   6  -1  674.23   35.00 
   0   6  -1  650.13   34.30 
   0   6  -1  653.93   35.40 
   0   6   1  625.94   28.20 
   0   6   1  596.94   37.40 
   1  -6   1   59.59   12.00 
  -1  -6  -1   62.79    8.50 
   1  -6   1   86.59   13.80 
  -1  -6  -1   84.59   15.20 
   1  -6   1   61.19   12.40 
   1  -6   1   84.49   14.00 
   1  -6   1   57.49   12.20 
  -1  -6  -1   69.29   14.10 
   1  -6   1   68.79   10.60 
   1  -6   1   72.39   12.90 
   1  -6   1   90.09   13.00 
   1  -6   1   75.59   13.00 
  -1  -6  -1   72.89   13.80 
  -1  -6  -1   76.59   12.30 
   1  -6   1   81.79   14.70 
   1  -6   1   68.69    6.70 
  -1  -6  -1   76.09    9.10 
  -1  -6  -1   86.69   14.40 
   1  -6   1   83.59   11.20 
  -1  -6  -1   67.99   10.80 
   1  -6   1   66.69    5.70 
   1  -6   1   82.39    9.80 
   1  -6   1   81.99   14.60 
   1  -6   1   73.39   13.10 
   1  -6   1   74.59   14.50 
   1  -6   1  106.09   15.20 
   1   6   1   79.59   14.30 
   1   6   1   78.89    5.30 
  -1   6  -1   63.99   10.20 
   1   6   1   64.59   10.30 
   1   6   1   50.09   11.70 
  -1   6  -1   78.19   11.00 
   1   6   1   86.79    9.20 
   1   6   1   73.79    9.70 
   1   6   1   81.49    7.50 
   1   6   1   76.09    7.70 
   1   6   1   70.39   12.60 
   1   6   1   78.09    7.10 
  -1   6  -1   72.09    9.20 
  -1   6  -1   80.19   13.90 
  -1   6  -1   70.99   12.20 
  -1   6  -1   59.59    9.40 
  -1   6  -1   64.59   12.30 
  -1   6  -1   41.90   11.40 
   1   6   1   69.19   13.90 
   1   6   1   59.49   10.50 
   1   6   1   71.79   12.60 
   1   6   1   71.69    5.70 
  -1   6  -1   99.59   12.20 
  -1   6  -1   86.39   15.30 
  -1   6  -1   49.60   10.80 
  -1   6  -1   53.89   11.70 
  -1   6  -1   71.99   14.10 
   1   6   1   74.39    9.70 
  -1   6  -1   80.69    9.20 
   1   6   1   76.49   10.70 
   1   6   1   76.49   16.30 
  -1   6  -1   62.29    6.50 
   1   6   1   71.89   13.60 
  -1   6  -1   64.89   11.70 
  -1   6  -1   68.39   11.80 
   1   6   1  112.59   14.20 
  -1   6  -1   73.49    8.10 
   1   6   1   62.19   13.90 
  -1   6  -1   74.49    7.70 
   1   6   1   72.09    4.90 
   2  -6   1  222.98   25.50 
   2  -6   1  234.58   13.10 
  -2  -6  -1  224.88   15.60 
   2  -6   1  188.38   22.20 
  -2  -6  -1  271.07   20.60 
   2  -6   1  211.48   23.40 
  -2  -6  -1  209.38   12.60 
   2  -6   1  207.08   18.00 
   2  -6   1  241.48   11.90 
   2  -6   1  238.68   24.00 
   2  -6   1  229.18   22.60 
   2  -6   1  236.38   21.40 
   2  -6   1  237.98   17.00 
   2  -6   1  246.88   25.10 
   2  -6   1  177.48   20.50 
   2  -6   1  219.08   15.90 
   2  -6   1  205.18   23.20 
   2  -6   1  189.68   21.30 
   2  -6   1  231.88   12.90 
  -2  -6  -1  210.88   23.60 
  -2  -6  -1  241.18   24.80 
   2  -6   1  201.98   15.90 
  -2  -6  -1  238.48   12.60 
   2  -6   1  238.78   18.90 
  -2  -6  -1  210.88   22.10 
   2  -6   1  233.58   14.30 
  -2  -6  -1  255.77   18.50 
   2   6   1  219.98   11.40 
   2   6   1  260.47   21.20 
  -2   6  -1  203.88   23.80 
   2   6   1  218.68   10.60 
  -2   6  -1  227.68   23.50 
  -2   6  -1  228.18   15.60 
   2   6   1  212.48   26.80 
   2   6   1  214.98   22.80 
   2   6   1  228.18   15.60 
   2   6   1  213.28   11.50 
   2   6   1  244.18   15.10 
  -2   6  -1  247.28   19.40 
   2   6   1  227.88   13.30 
   2   6   1  240.88   24.80 
   2   6   1  238.08   15.80 
   2   6   1  269.87   27.50 
  -2   6  -1  198.08   22.50 
  -2   6  -1  221.18   14.00 
  -2   6  -1  226.48   17.90 
   2   6   1  205.08   15.20 
   2   6   1  246.78   14.20 
  -2   6  -1  185.68   21.30 
  -2   6  -1  246.68   24.90 
   2   6   1  216.78   16.50 
  -2   6  -1  275.17   19.70 
  -2   6  -1  219.98   18.00 
  -2   6  -1  216.48   15.40 
  -2   6  -1  201.88   21.20 
   2   6   1  249.28   27.10 
   2   6   1  195.68   23.40 
   2   6   1  234.28   14.80 
   2   6   1  238.58   12.30 
  -2   6  -1  199.18   21.50 
   2   6   1  235.18   12.60 
   2   6   1  189.68   21.50 
  -2   6  -1  223.48   15.70 
   2   6   1  175.48   21.10 
  -2   6  -1  242.58   26.70 
   2   6   1  241.98   14.00 
  -2   6  -1  233.18   23.00 
   3  -6   1    1.60    5.10 
   3  -6   1    0.70    4.70 
  -3  -6  -1   -3.50    3.40 
   3  -6   1    4.60    6.60 
   3  -6   1    7.10    6.80 
   3  -6   1   -1.30    5.70 
   3  -6   1   -1.40    5.50 
   3  -6   1    1.00    6.40 
  -3  -6  -1  -10.70    4.50 
   3  -6   1   -6.00    3.10 
  -3  -6  -1    3.10    5.60 
   3  -6   1   -1.30    4.90 
  -3  -6  -1    0.10    3.70 
   3  -6   1   -0.90    4.50 
   3  -6   1    1.90    6.90 
  -3  -6  -1    3.60    3.70 
  -3  -6  -1   -3.60    3.60 
  -3  -6  -1   -3.40    4.50 
   3  -6   1   -3.80    4.20 
   3  -6   1    0.10    3.50 
  -3   6  -1    1.80    5.80 
   3   6   1    0.40    3.70 
   3   6   1   -0.10    1.60 
  -3   6  -1    2.20    6.60 
  -3   6  -1   -5.30    4.50 
   3   6   1    2.50    2.80 
  -3   6  -1   -3.70    4.50 
   3   6   1   -2.20    4.60 
   3   6   1   -1.00    2.20 
  -3   6  -1   -2.40    5.30 
   3   6   1    0.80    5.70 
   3   6   1    2.20    3.60 
   3   6   1   -1.20    6.30 
  -3   6  -1   11.70    5.50 
   3   6   1   -2.00    3.70 
   3   6   1    1.20    5.90 
   3   6   1    2.90    7.30 
  -3   6  -1    0.10    6.70 
   3   6   1    0.50    6.20 
   3   6   1   -3.60    3.90 
  -3   6  -1    0.70    5.90 
  -3   6  -1   -0.70    5.60 
  -3   6  -1   -0.30    3.90 
  -3   6  -1   -3.20    4.00 
   3   6   1    6.20    7.20 
  -3   6  -1    1.80    4.30 
  -3   6  -1   -0.10    6.10 
   3   6   1    0.90    5.40 
  -3   6  -1   -5.80    6.20 
  -3   6  -1   -6.90    4.50 
   3   6   1   -2.60    6.40 
  -3   6  -1   -0.90    6.00 
   3   6   1   -0.40    3.00 
   4  -6   1   -2.00    6.30 
   4  -6   1    3.80    5.90 
  -4  -6  -1   -5.90    4.80 
   4  -6   1    6.50    7.10 
   4  -6   1    9.20    8.10 
  -4  -6  -1    4.60    6.40 
   4  -6   1    3.40    8.10 
   4  -6   1   10.50    8.70 
   4  -6   1    9.20    6.70 
  -4  -6  -1    8.20    5.60 
  -4  -6  -1    8.50    6.20 
   4  -6   1    9.60    5.40 
   4  -6   1    3.60    5.70 
   4  -6   1   20.70    8.80 
  -4  -6  -1   14.10    6.90 
   4  -6   1    4.40    6.40 
   4  -6   1    0.30    6.90 
  -4   6  -1    4.10    7.40 
   4   6   1    6.90    7.30 
  -4   6  -1   -4.20    4.60 
   4   6   1    2.30    5.80 
  -4   6  -1    8.40    6.10 
   4   6   1    3.00    3.90 
  -4   6  -1    0.00    7.70 
   4   6   1    7.70    9.10 
   4   6   1    0.30    7.40 
  -4   6  -1    6.10    7.00 
  -4   6  -1    0.80    7.30 
  -4   6  -1    1.10    5.00 
  -4   6  -1    7.60    6.60 
  -4   6  -1   -0.90    6.20 
  -4   6  -1    1.40    7.30 
  -4   6  -1   19.70    8.70 
   4   6   1    5.40    3.50 
   4   6   1   -3.70    5.00 
   4   6   1    1.60    6.60 
   4   6   1   13.60    9.50 
   4   6   1   -0.30    5.40 
  -4   6  -1    2.40    5.80 
  -4   6  -1    3.70    7.60 
  -4   6  -1    3.90    6.90 
   4   6   1    6.00    5.30 
   4   6   1    0.70    6.30 
  -4   6  -1   11.50    7.00 
   4   6   1    7.10    6.50 
  -4   6  -1    5.20    6.90 
   5  -6   1   38.80   12.20 
  -5  -6  -1   74.49   14.10 
  -5  -6  -1   99.99   15.60 
   5  -6   1   89.49   18.00 
   5  -6   1   67.69   15.80 
   5  -6   1   79.39   16.60 
   5  -6   1   55.09   13.70 
   5  -6   1   78.89   17.10 
   5  -6   1   88.09   15.80 
  -5  -6  -1  101.49   14.90 
   5  -6   1   92.89   15.10 
   5  -6   1   97.89   17.30 
   5  -6   1   92.49   17.80 
   5  -6   1   64.29   15.60 
   5  -6   1   65.69   14.30 
  -5  -6  -1   75.89   11.90 
   5  -6   1   88.99   18.80 
  -5  -6  -1   93.29   15.40 
  -5  -6  -1   93.59   15.10 
   5   6   1   94.69   20.20 
   5   6   1   61.09   13.50 
  -5   6  -1   91.99   17.70 
  -5   6  -1   87.39   16.70 
  -5   6  -1   90.39   18.00 
  -5   6  -1   84.99   14.50 
   5   6   1   74.39   14.90 
  -5   6  -1   83.29   14.80 
  -5   6  -1   71.99   13.50 
  -5   6  -1   77.79   16.80 
  -5   6  -1   69.89   14.40 
   5   6   1   87.79   14.10 
   5   6   1  102.49   18.70 
  -5   6  -1   83.19   17.20 
  -5   6  -1   70.49   13.30 
   5   6   1   86.29   15.00 
   5   6   1   88.59   18.20 
  -5   6  -1   95.89   19.70 
  -5   6  -1   81.09   15.70 
  -5   6  -1   67.29   15.20 
  -5   6  -1   96.99   14.70 
   5   6   1   89.79   15.60 
   5   6   1   75.09   16.20 
   5   6   1   78.09   13.80 
  -5   6  -1   71.39   13.50 
  -5   6  -1   77.39   17.40 
   6  -6   1  443.16   33.30 
   6  -6   1  476.55   37.90 
   6  -6   1  489.55   39.40 
   6  -6   1  468.85   43.00 
  -6  -6  -1  461.55   30.40 
   6  -6   1  419.46   44.50 
   6  -6   1  477.45   37.80 
   6  -6   1  477.55   37.30 
   6  -6   1  473.15   37.20 
  -6  -6  -1  463.55   33.20 
   6  -6   1  473.35   35.40 
   6  -6   1  468.95   33.30 
   6  -6   1  529.25   35.20 
  -6  -6  -1  459.55   31.20 
  -6  -6  -1  476.35   32.40 
   6  -6   1  352.46   37.60 
   6  -6   1  498.25   34.80 
   6  -6   1  537.95   39.40 
  -6  -6  -1  510.85   33.90 
  -6   6  -1  471.45   36.10 
  -6   6  -1  539.25   38.80 
  -6   6  -1  464.05   31.20 
  -6   6  -1  450.55   35.00 
   6   6   1  468.25   32.00 
  -6   6  -1  479.45   32.70 
  -6   6  -1  447.66   35.90 
  -6   6  -1  536.65   39.50 
   6   6   1  391.26   39.30 
   6   6   1  468.05   36.80 
   6   6   1  459.05   37.70 
   6   6   1  473.65   33.60 
   6   6   1  484.65   33.20 
  -6   6  -1  481.65   33.30 
  -6   6  -1  403.56   34.90 
   6   6   1  453.45   34.70 
   6   6   1  464.75   30.50 
  -6   6  -1  478.35   39.40 
  -6   6  -1  513.45   34.50 
  -6   6  -1  482.75   37.10 
   6   6   1  460.05   46.80 
   6   6   1  478.25   37.40 
  -6   6  -1  424.46   30.20 
   6   6   1  439.26   29.80 
  -6   6  -1  388.36   41.10 
  -6   6  -1  488.45   34.20 
   6   6   1  452.45   33.20 
  -6   6  -1  486.95   32.40 
   7  -6   1    9.10    9.20 
   7  -6   1    3.70   10.10 
   7  -6   1   -2.10   10.20 
   7  -6   1   15.20   12.50 
  -7  -6  -1   -4.50    7.10 
  -7  -6  -1    1.30    8.40 
   7  -6   1    2.70    8.00 
   7  -6   1    4.90    9.10 
   7  -6   1   16.20   11.80 
   7  -6   1  -10.50    7.40 
   7  -6   1   -6.30    8.10 
   7  -6   1   -3.50    7.50 
   7  -6   1    3.50   11.90 
   7  -6   1    1.10    8.10 
   7  -6   1   -5.60    6.40 
  -7  -6  -1    0.80    8.00 
   7  -6   1   -2.90    5.90 
  -7   6  -1    4.50   10.10 
   7   6   1    6.60   11.50 
   7   6   1   -8.20    7.60 
   7   6   1    1.80   11.00 
  -7   6  -1    8.90    9.80 
  -7   6  -1   -4.40    8.20 
   7   6   1    1.80    9.10 
  -7   6  -1    8.80   11.10 
  -7   6  -1   28.20   12.40 
   7   6   1   -1.50    7.40 
  -7   6  -1   13.20   12.50 
  -7   6  -1   -9.00    8.30 
   7   6   1    0.70    9.60 
  -7   6  -1   -5.10    6.90 
  -7   6  -1   15.10    9.90 
  -7   6  -1   11.00   10.30 
  -7   6  -1    9.60   11.80 
   7   6   1   10.50   11.20 
   7   6   1    2.60   10.20 
  -7   6  -1   -7.30    8.80 
  -7   6  -1    8.60   12.10 
   8  -6   1  417.26   45.40 
   8  -6   1  411.66   44.70 
   8  -6   1  556.34   41.30 
   8  -6   1  431.06   47.20 
   8  -6   1  533.65   55.89 
   8  -6   1  416.46   47.10 
   8  -6   1  445.86   46.20 
   8  -6   1  459.85   47.50 
  -8  -6  -1  472.05   38.00 
  -8  -6  -1  483.35   45.70 
   8  -6   1  395.26   41.90 
   8  -6   1  453.65   46.80 
  -8  -6  -1  496.35   38.20 
   8  -6   1  508.85   53.29 
   8  -6   1  549.15   55.59 
   8   6   1  503.15   56.09 
  -8   6  -1  432.86   41.20 
  -8   6  -1  474.65   43.80 
  -8   6  -1  402.26   41.50 
  -8   6  -1  406.46   42.10 
  -8   6  -1  433.56   48.10 
  -8   6  -1  458.25   48.50 
  -8   6  -1  443.26   44.30 
  -8   6  -1  478.75   44.30 
   8   6   1  519.95   53.39 
  -8   6  -1  430.16   44.60 
   8   6   1  452.75   37.40 
   8   6   1  435.06   48.20 
  -8   6  -1  474.05   44.00 
   8   6   1  541.75   51.49 
   8   6   1  574.64   45.10 
   8   6   1  406.66   44.30 
  -8   6  -1  362.96   42.40 
  -8   6  -1  552.64   49.90 
  -8   6  -1  433.06   47.10 
   7  -7  -1  483.85   47.00 
   7  -7  -1  393.56   45.50 
   7  -7  -1  443.96   47.50 
   7  -7  -1  516.35   51.69 
   7  -7  -1  361.86   37.80 
   7  -7  -1  472.05   50.19 
   7  -7  -1  522.55   38.40 
   7  -7  -1  483.35   45.70 
   7  -7  -1  419.06   38.00 
  -7   7   1  510.75   40.60 
  -7   7   1  513.65   51.49 
  -7   7   1  463.95   46.40 
  -7   7   1  431.76   48.70 
  -7   7   1  447.96   35.60 
  -7   7   1  499.05   48.10 
   7   7  -1  525.35   37.70 
  -7   7   1  479.55   47.70 
   7   7  -1  496.05   48.40 
   7   7  -1  452.95   35.40 
   7   7  -1  540.55   41.50 
  -7   7   1  498.65   47.10 
   7   7  -1  464.65   50.29 
  -7   7   1  464.55   46.00 
  -7   7   1  453.45   41.30 
  -7   7   1  381.76   39.50 
  -7   7   1  505.55   37.70 
   6  -7  -1    6.60   10.00 
   6  -7  -1   15.90    9.80 
   6  -7  -1   20.80   13.90 
   6  -7  -1   10.10    9.90 
   6  -7  -1   14.40   10.40 
   6  -7  -1   13.70   10.60 
   6  -7  -1    8.30    9.90 
  -6  -7   1   17.00    9.70 
   6  -7  -1   11.90   11.40 
   6  -7  -1   20.70   10.20 
   6  -7  -1   19.90   10.40 
  -6   7   1   29.40   12.10 
  -6   7   1    2.70    8.60 
  -6   7   1    4.90    8.90 
  -6   7   1   12.00    9.70 
  -6   7   1   22.10   11.70 
  -6   7   1   13.60    9.60 
  -6   7   1    5.90   10.80 
  -6   7   1   -0.70    9.20 
   6   7  -1   21.10   11.10 
  -6   7   1    7.90    7.50 
   6   7  -1    3.60    9.50 
   6   7  -1   13.10    9.10 
   6   7  -1   11.00   12.60 
  -6   7   1   26.20   13.60 
  -6   7   1   15.30    8.90 
   6   7  -1   -2.30    8.50 
  -6   7   1   17.30   12.10 
  -6   7   1   25.60   14.30 
   6   7  -1   11.90    9.80 
  -6   7   1   16.30    9.50 
   6   7  -1    3.70    9.10 
   6   7  -1   17.90   10.30 
   6   7  -1   27.30   13.80 
  -6   7   1    5.30    8.60 
   5  -7  -1 1694.83   82.79 
   5  -7  -1 1589.84   86.09 
   5  -7  -1 1663.23   84.59 
   5  -7  -1 1672.83   87.89 
   5  -7  -1 1651.53   81.29 
   5  -7  -1 1589.54   81.69 
   5  -7  -1 1545.85   79.89 
  -5  -7   1 1643.54   78.09 
  -5  -7   1 1556.84   78.89 
   5  -7  -1 1721.03   80.39 
   5  -7  -1 1727.53   85.49 
   5  -7  -1 1694.43   77.99 
  -5   7   1 1646.04   75.69 
  -5   7   1 1710.63   79.19 
  -5   7   1 1636.74   81.69 
   5   7  -1 1665.73   81.39 
  -5   7   1 1596.14   79.89 
   5   7  -1 1622.54   87.99 
  -5   7   1 1686.83   83.59 
  -5   7   1 1632.14   81.49 
  -5   7   1 1623.14   83.49 
   5   7  -1 1694.63   81.49 
   5   7  -1 1757.62   80.49 
  -5   7   1 1585.64   75.89 
  -5   7   1 1667.23   88.59 
   5   7  -1 1652.63   77.59 
  -5   7   1 1494.65   82.39 
  -5   7   1 1772.02   80.79 
  -5   7   1 1652.53   77.69 
   5   7  -1 1710.83   83.19 
  -5   7   1 1543.55   82.79 
   5   7  -1 1591.44   77.79 
  -5   7   1 1549.94   76.99 
  -5   7   1 1689.23   86.69 
   5   7  -1 1745.13   87.29 
   4  -7  -1   47.70   13.10 
   4  -7  -1   41.60   12.60 
   4  -7  -1   46.90   12.70 
   4  -7  -1   57.69   16.60 
  -4  -7   1   33.60   11.30 
   4  -7  -1   57.09   15.40 
   4  -7  -1   60.39   12.00 
  -4  -7   1   60.19   15.10 
   4  -7  -1   47.80   14.50 
   4  -7  -1   44.90   12.80 
  -4  -7   1   51.79   11.10 
   4  -7  -1   49.80   13.80 
   4  -7  -1   63.19   15.40 
  -4  -7   1   52.79   12.80 
  -4  -7   1   56.79   11.20 
   4  -7  -1   57.59   12.40 
  -4   7   1   68.69   16.30 
   4   7  -1   53.59   14.10 
   4   7  -1   92.09   16.80 
  -4   7   1   67.09   12.00 
  -4   7   1   54.59   12.60 
   4   7  -1   72.19   15.10 
  -4   7   1   49.90   12.50 
  -4   7   1   68.39   15.40 
  -4   7   1   66.99   14.00 
  -4   7   1   58.89   11.60 
  -4   7   1   56.99   15.80 
   4   7  -1   61.19   14.10 
  -4   7   1   59.19   17.30 
   4   7  -1   35.90   13.50 
   4   7  -1   56.39   16.00 
   4   7  -1   59.89   14.80 
  -4   7   1   51.99   13.20 
  -4   7   1   33.10   12.30 
  -4   7   1   51.69   11.80 
  -4   7   1   66.69   13.80 
   4   7  -1   41.60   13.00 
  -4   7   1   59.79   13.60 
   4   7  -1   37.90   15.30 
   3  -7  -1  886.51   45.00 
  -3  -7   1  938.81   50.39 
   3  -7  -1  893.91   45.30 
   3  -7  -1  843.12   53.09 
   3  -7  -1  857.21   51.39 
  -3  -7   1  935.41   51.29 
  -3  -7   1  888.01   42.70 
   3  -7  -1  866.51   50.59 
  -3  -7   1  982.80   52.79 
  -3  -7   1  762.32   45.90 
  -3  -7   1  935.71   43.80 
   3  -7  -1  943.41   53.29 
   3  -7  -1  950.80   53.29 
   3  -7  -1  940.21   50.59 
   3  -7  -1  851.51   51.19 
   3  -7  -1  867.81   53.19 
   3  -7  -1  896.61   48.60 
   3  -7  -1  922.11   49.80 
   3   7  -1  954.10   51.29 
  -3   7   1  942.21   50.19 
  -3   7   1  916.71   42.40 
  -3   7   1  948.81   50.99 
   3   7  -1  899.81   52.29 
   3   7  -1  920.41   50.69 
  -3   7   1  917.91   43.70 
   3   7  -1  890.51   46.10 
   3   7  -1  947.11   52.79 
  -3   7   1  908.41   51.09 
  -3   7   1  868.41   48.60 
  -3   7   1  849.52   51.39 
  -3   7   1  953.20   53.29 
   3   7  -1  904.91   51.99 
  -3   7   1  868.81   47.00 
  -3   7   1  906.51   46.40 
   3   7  -1  892.11   53.69 
  -3   7   1  903.11   53.09 
   3   7  -1  862.91   55.79 
  -3   7   1  839.02   53.79 
   3   7  -1  921.61   43.60 
   3   7  -1  815.32   48.90 
  -3   7   1  877.11   51.59 
  -3   7   1  984.30   46.50 
  -3   7   1  971.80   50.39 
   2  -7  -1    4.10    6.90 
  -2  -7   1    0.90    6.40 
   2  -7  -1   24.20   11.00 
  -2  -7   1    9.50    6.90 
   2  -7  -1   14.30    8.70 
  -2  -7   1   23.30    9.00 
  -2  -7   1    4.30    6.00 
  -2  -7   1   11.50    5.30 
   2  -7  -1    8.90    6.40 
   2  -7  -1    3.10    7.00 
   2  -7  -1   16.90    9.90 
   2  -7  -1    6.00    5.50 
  -2  -7   1   12.90    6.70 
   2  -7  -1    5.40    8.40 
   2  -7  -1   -4.90    5.00 
   2  -7  -1    5.30    5.90 
   2  -7  -1   10.80    7.10 
   2  -7  -1    3.80    7.30 
   2  -7  -1   11.20    7.90 
   2   7  -1   15.20    5.50 
   2   7  -1    3.90    6.70 
  -2   7   1   19.80    9.60 
  -2   7   1    1.80    6.50 
  -2   7   1    4.50    4.40 
  -2   7   1    1.50    5.60 
   2   7  -1    8.50    7.70 
   2   7  -1    6.80    5.40 
  -2   7   1   -2.40    4.50 
  -2   7   1    7.40    5.70 
   2   7  -1    3.40    7.10 
   2   7  -1   16.10    9.00 
  -2   7   1   10.80    6.20 
  -2   7   1   -1.80    8.00 
   2   7  -1    5.10    4.70 
   2   7  -1   12.60    5.50 
   2   7  -1    6.60    5.40 
  -2   7   1    0.20    7.10 
  -2   7   1    7.70    7.70 
  -2   7   1    5.80    6.30 
  -2   7   1    6.20    3.90 
  -2   7   1   10.30    8.40 
   2   7  -1   10.00    9.10 
   2   7  -1    2.10    6.30 
  -2   7   1   26.50    9.00 
   2   7  -1    1.90    6.50 
   2   7  -1   15.40    6.60 
  -2   7   1   16.80    8.00 
   2   7  -1    5.50    4.10 
   2   7  -1   11.70    5.20 
   1  -7  -1  319.27   24.00 
  -1  -7   1  351.16   27.90 
  -1  -7   1  347.97   27.60 
   1  -7  -1  380.26   29.10 
   1  -7  -1  328.67   21.90 
   1  -7  -1  351.66   26.20 
   1  -7  -1  397.36   30.70 
  -1  -7   1  409.56   30.60 
  -1  -7   1  323.77   25.30 
   1  -7  -1  395.96   32.00 
   1  -7  -1  313.77   22.10 
  -1  -7   1  373.56   24.00 
   1  -7  -1  388.06   30.80 
   1  -7  -1  307.27   31.00 
   1  -7  -1  337.27   24.40 
   1  -7  -1  355.56   26.00 
   1  -7  -1  342.77   27.30 
   1  -7  -1  347.97   32.40 
  -1  -7   1  346.17   27.80 
   1  -7  -1  377.66   25.20 
   1   7  -1  392.26   28.80 
   1   7  -1  336.97   22.80 
   1   7  -1  371.36   25.10 
  -1   7   1  360.36   35.70 
   1   7  -1  353.46   34.30 
   1   7  -1  365.16   19.50 
   1   7  -1  363.26   19.70 
   1   7  -1  336.07   22.70 
  -1   7   1  375.76   28.10 
   1   7  -1  353.26   28.90 
   1   7  -1  348.07   37.30 
   1   7  -1  324.07   19.40 
   1   7  -1  387.56   20.80 
  -1   7   1  363.96   24.60 
  -1   7   1  346.77   19.50 
   1   7  -1  393.56   22.30 
  -1   7   1  361.86   22.60 
  -1   7   1  348.57   25.60 
   1   7  -1  353.26   24.10 
  -1   7   1  393.06   30.30 
  -1   7   1  333.07   22.60 
  -1   7   1  289.07   29.80 
  -1   7   1  285.27   28.90 
  -1   7   1  340.57   24.50 
   1   7  -1  339.27   20.60 
   1   7  -1  372.76   30.10 
   1   7  -1  383.06   22.30 
   1   7  -1  411.36   28.90 
  -1   7   1  327.37   26.50 
  -1   7   1  369.36   29.10 
  -1   7   1  338.77   20.30 
   1   7  -1  322.57   31.50 
  -1   7   1  346.47   27.60 
   0  -7   1   -1.20    6.40 
   0  -7  -1   -5.50    7.10 
   0  -7  -1    0.90    7.80 
   0  -7   1    3.40    5.50 
   0  -7  -1    3.50    8.00 
   0  -7   1   -2.00    5.60 
   0  -7   1   12.00    8.70 
   0  -7  -1    7.70    3.80 
   0  -7  -1    2.50    5.20 
   0  -7   1   11.40    8.40 
   0  -7  -1    1.00    6.90 
   0  -7  -1    3.30    5.60 
   0  -7   1    8.70    7.30 
   0  -7  -1    0.00    4.50 
   0  -7  -1   -2.30    6.50 
   0  -7   1    4.40    7.60 
   0  -7  -1    0.30    5.90 
   0  -7  -1    0.10    5.50 
   0  -7   1    2.80    7.70 
   0   7   1    0.20    4.60 
   0   7   1    7.30    4.30 
   0   7  -1   11.30    7.00 
   0   7   1   -2.60    5.40 
   0   7   1   -5.10    4.50 
   0   7   1    7.50    3.60 
   0   7   1    3.10    5.60 
   0   7  -1   11.70    5.80 
   0   7  -1    4.10    7.80 
   0   7   1    9.80    7.20 
   0   7   1    2.60    4.30 
   0   7  -1    2.10    5.40 
   0   7  -1    7.20    6.80 
   0   7   1   -3.60    6.40 
   0   7  -1   -6.80    6.00 
   0   7  -1    3.60    7.30 
   0   7  -1    9.40    5.10 
   0   7   1   -2.00    7.30 
   0   7   1   -2.10    6.50 
   0   7   1    4.30    4.90 
   0   7  -1    5.50    7.50 
   0   7  -1   -3.00    5.30 
   0   7  -1    5.40    4.10 
   0   7   1   11.10    6.50 
   0   7   1   -1.20    6.60 
   0   7  -1   12.90    5.50 
   0   7   1   10.00    9.00 
   0   7  -1    1.60    4.30 
   0   7  -1    5.60    4.90 
   0   7  -1    4.00    6.20 
   0   7   1    5.80    3.90 
   0   7  -1    1.40    6.00 
   1  -7   1 1721.93   82.99 
  -1  -7  -1 1655.43   76.59 
   1  -7   1 1731.13   73.99 
   1  -7   1 1774.82   83.59 
  -1  -7  -1 1770.72   70.79 
   1  -7   1 1916.51   82.49 
   1  -7   1 1822.32   82.99 
   1  -7   1 1769.72   80.99 
   1  -7   1 1753.12   82.89 
  -1  -7  -1 1811.42   81.19 
   1  -7   1 1750.92   82.19 
  -1  -7  -1 1759.92   81.49 
   1  -7   1 1712.03   79.29 
   1  -7   1 1773.02   82.29 
  -1  -7  -1 1623.34   82.19 
   1  -7   1 1646.44   80.39 
  -1  -7  -1 1827.72   83.19 
  -1  -7  -1 1753.12   76.49 
   1  -7   1 1805.92   80.59 
   1  -7   1 1833.32   79.69 
  -1   7  -1 1772.62   79.19 
   1   7   1 1838.52   78.49 
   1   7   1 1756.32   82.99 
   1   7   1 1642.94   80.29 
  -1   7  -1 1620.44   82.89 
  -1   7  -1 1703.33   75.29 
  -1   7  -1 1734.73   73.79 
   1   7   1 1768.72   77.79 
   1   7   1 1740.73   72.79 
  -1   7  -1 1756.52   75.89 
   1   7   1 1766.22   81.79 
   1   7   1 1685.23   75.29 
   1   7   1 1835.92   71.39 
   1   7   1 1697.53   88.49 
  -1   7  -1 1757.12   71.89 
   1   7   1 1706.53   83.59 
   1   7   1 1739.13   83.69 
   1   7   1 1817.72   83.29 
  -1   7  -1 1692.33   80.49 
  -1   7  -1 1667.33   79.89 
   1   7   1 1708.23   73.29 
  -1   7  -1 1640.64   78.49 
  -1   7  -1 1687.93   83.19 
  -1   7  -1 1655.23   74.49 
  -1   7  -1 1895.51   82.89 
   1   7   1 1670.43   71.19 
   1   7   1 1727.33   76.39 
  -1   7  -1 1739.73   79.09 
   1   7   1 1755.42   69.29 
  -1   7  -1 1718.03   68.59 
   1   7   1 1613.24   83.59 
  -1   7  -1 1655.83   83.79
[truncated: 3,373,338 more chars]
