# Supplementary material
Source: MDPI journal article supplement (https://www.mdpi.com/2073-4352/13/7/1043)
Supplement: s1 [file s1 › 7 Gd Ha2019_99h_0m_a.cif]

 
data_Ha2019_99h_0m_a 
  
_audit_creation_method            'SHELXL-2014/7' 
_shelx_SHELXL_version_number      '2014/7' 
_chemical_name_systematic         ? 
_chemical_name_common             ? 
_chemical_melting_point           ? 
_chemical_formula_moiety          ? 
_chemical_formula_sum 
 'C4 H12 Cl Gd O7' 
_chemical_formula_weight          364.84 
  
loop_ 
 _atom_type_symbol 
 _atom_type_description 
 _atom_type_scat_dispersion_real 
 _atom_type_scat_dispersion_imag 
 _atom_type_scat_source 
 'C'  'C'   0.0033   0.0016 
 'International Tables Vol C Tables 4.2.6.8 and 6.1.1.4' 
 'H'  'H'   0.0000   0.0000 
 'International Tables Vol C Tables 4.2.6.8 and 6.1.1.4' 
 'O'  'O'   0.0106   0.0060 
 'International Tables Vol C Tables 4.2.6.8 and 6.1.1.4' 
 'Cl'  'Cl'   0.1484   0.1585 
 'International Tables Vol C Tables 4.2.6.8 and 6.1.1.4' 
 'Gd'  'Gd'  -0.1653   3.9035 
 'International Tables Vol C Tables 4.2.6.8 and 6.1.1.4' 
  
_space_group_crystal_system       monoclinic 
_space_group_IT_number            14 
_space_group_name_H-M_alt         'P 21/n' 
_space_group_name_Hall            '-P 2yn' 
  
_shelx_space_group_comment 
; 
The symmetry employed for this shelxl refinement is uniquely defined 
by the following loop, which should always be used as a source of 
symmetry information in preference to the above space-group names. 
They are only intended as comments. 
; 
  
loop_ 
 _space_group_symop_operation_xyz 
 'x, y, z' 
 '-x+1/2, y+1/2, -z+1/2' 
 '-x, -y, -z' 
 'x-1/2, -y-1/2, z-1/2' 
  
_cell_length_a                    7.8219(4) 
_cell_length_b                    7.8592(4) 
_cell_length_c                    17.4434(8) 
_cell_angle_alpha                 90 
_cell_angle_beta                  98.265(2) 
_cell_angle_gamma                 90 
_cell_volume                      1061.18(9) 
_cell_formula_units_Z             4 
_cell_measurement_temperature     100(2) 
_cell_measurement_reflns_used     9993 
_cell_measurement_theta_min       2.36 
_cell_measurement_theta_max       28.29 
  
_exptl_crystal_description        prism 
_exptl_crystal_colour             colourless 
_exptl_crystal_density_meas       ? 
_exptl_crystal_density_method     ? 
_exptl_crystal_density_diffrn     2.284 
_exptl_crystal_F_000              692 
_exptl_transmission_factor_min    ? 
_exptl_transmission_factor_max    ? 
_exptl_crystal_size_max           0.368 
_exptl_crystal_size_mid           0.096 
_exptl_crystal_size_min           0.041 
_exptl_absorpt_coefficient_mu     6.506 
_shelx_estimated_absorpt_T_min    0.198 
_shelx_estimated_absorpt_T_max    0.776 
_exptl_absorpt_correction_type    multi-scan 
_exptl_absorpt_correction_T_min   0.443 
_exptl_absorpt_correction_T_max   0.746 
_exptl_absorpt_process_details    'Bruker SADABS' 
_exptl_absorpt_special_details    ? 
_diffrn_ambient_temperature       100(2) 
_diffrn_radiation_wavelength      0.71073 
_diffrn_radiation_type            MoK\a 
_diffrn_source                    ? 
_diffrn_measurement_device_type   'Bruker APEX-II CCD' 
_diffrn_measurement_method        '\f and \w scans' 
_diffrn_detector_area_resol_mean  ? 
_diffrn_reflns_number             122742 
_diffrn_reflns_av_unetI/netI      0.0074 
_diffrn_reflns_av_R_equivalents   0.0358 
_diffrn_reflns_limit_h_min        -10 
_diffrn_reflns_limit_h_max        10 
_diffrn_reflns_limit_k_min        -10 
_diffrn_reflns_limit_k_max        10 
_diffrn_reflns_limit_l_min        -23 
_diffrn_reflns_limit_l_max        23 
_diffrn_reflns_theta_min          2.725 
_diffrn_reflns_theta_max          27.998 
_diffrn_reflns_theta_full         25.242 
_diffrn_measured_fraction_theta_max   0.999 
_diffrn_measured_fraction_theta_full  0.999 
_diffrn_reflns_Laue_measured_fraction_max    0.999 
_diffrn_reflns_Laue_measured_fraction_full   0.999 
_diffrn_reflns_point_group_measured_fraction_max   0.999 
_diffrn_reflns_point_group_measured_fraction_full  0.999 
_reflns_number_total              2569 
_reflns_number_gt                 2487 
_reflns_threshold_expression      'I > 2\s(I)' 
_reflns_Friedel_coverage          0.000 
_reflns_Friedel_fraction_max      . 
_reflns_Friedel_fraction_full     . 
  
_reflns_special_details 
; 
 Reflections were merged by SHELXL according to the crystal 
 class for the calculation of statistics and refinement. 
  
 _reflns_Friedel_fraction is defined as the number of unique 
 Friedel pairs measured divided by the number that would be 
 possible theoretically, ignoring centric projections and 
 systematic absences. 
; 
  
_computing_data_collection        'Bruker APEX2' 
_computing_cell_refinement        'Bruker SAINT' 
_computing_data_reduction         'Bruker SAINT' 
_computing_structure_solution     'SHELXS-97 (Sheldrick 2008)' 
_computing_structure_refinement 'SHELXL-2014/7 (Sheldrick, 2014)' 
_computing_molecular_graphics     'Bruker SHELXTL' 
_computing_publication_material   'Bruker SHELXTL' 
_refine_special_details           ? 
_refine_ls_structure_factor_coef  Fsqd 
_refine_ls_matrix_type            full 
_refine_ls_weighting_scheme       calc 
_refine_ls_weighting_details 
'w=1/[\s^2^(Fo^2^)+(0.0052P)^2^+1.0564P] where P=(Fo^2^+2Fc^2^)/3' 
_atom_sites_solution_primary      direct
_atom_sites_solution_secondary    ? 
_atom_sites_solution_hydrogens    mixed 
_refine_ls_hydrogen_treatment     constr 
_refine_ls_extinction_method      'SHELXL-2014/7 (Sheldrick 2014' 
_refine_ls_extinction_coef        0.00122(7) 
_refine_ls_extinction_expression 
 'Fc^*^=kFc[1+0.001xFc^2^\l^3^/sin(2\q)]^-1/4^' 
_refine_ls_number_reflns          2569 
_refine_ls_number_parameters      126 
_refine_ls_number_restraints      0 
_refine_ls_R_factor_all           0.0100 
_refine_ls_R_factor_gt            0.0094 
_refine_ls_wR_factor_ref          0.0208 
_refine_ls_wR_factor_gt           0.0206 
_refine_ls_goodness_of_fit_ref    1.090 
_refine_ls_restrained_S_all       1.090 
_refine_ls_shift/su_max           0.002 
_refine_ls_shift/su_mean          0.000 
  
loop_ 
 _atom_site_label 
 _atom_site_type_symbol 
 _atom_site_fract_x 
 _atom_site_fract_y 
 _atom_site_fract_z 
 _atom_site_U_iso_or_equiv 
 _atom_site_adp_type 
 _atom_site_occupancy 
 _atom_site_site_symmetry_order 
 _atom_site_calc_flag 
 _atom_site_refinement_flags_posn 
 _atom_site_refinement_flags_adp 
 _atom_site_refinement_flags_occupancy 
 _atom_site_disorder_assembly 
 _atom_site_disorder_group 
Gd1 Gd 0.26452(2) 0.46040(2) 0.53745(2) 0.00914(3) Uani 1 1 d . . . . . 
Cl1 Cl 0.38281(5) 0.97010(5) 0.68964(2) 0.01572(7) Uani 1 1 d . . . . . 
O11 O -0.00617(13) 0.33737(14) 0.53609(6) 0.0151(2) Uani 1 1 d . . . . . 
O12 O -0.27751(13) 0.26490(14) 0.52618(6) 0.0154(2) Uani 1 1 d . . . . . 
C11 C -0.12124(18) 0.23171(19) 0.54933(8) 0.0120(3) Uani 1 1 d . . . . . 
C12 C -0.0731(2) 0.0702(2) 0.59198(10) 0.0211(3) Uani 1 1 d . . . . . 
H12A H -0.1517 -0.0208 0.5708 0.033(5) Uiso 0.60(2) 1 d R U P . . 
H12B H -0.0817 0.0858 0.6470 0.033(5) Uiso 0.60(2) 1 d R U P . . 
H12C H 0.0457 0.0394 0.5861 0.033(5) Uiso 0.60(2) 1 d R U P . . 
H12D H 0.0288 0.0812 0.6315 0.033(5) Uiso 0.40(2) 1 d R U P . . 
H12E H -0.0489 -0.0115 0.5525 0.033(5) Uiso 0.40(2) 1 d R U P . . 
H12F H -0.1711 0.0297 0.6162 0.033(5) Uiso 0.40(2) 1 d R U P . . 
O21 O 0.54694(13) 0.56081(13) 0.57388(6) 0.0125(2) Uani 1 1 d . . . . . 
O22 O 0.82002(13) 0.62829(14) 0.59725(6) 0.0143(2) Uani 1 1 d . . . . . 
C21 C 0.67998(18) 0.59837(19) 0.62249(9) 0.0119(3) Uani 1 1 d . . . . . 
C22 C 0.6691(2) 0.6059(2) 0.70704(9) 0.0190(3) Uani 1 1 d . . . . . 
H22A H 0.7843 0.5888 0.7364 0.052(4) Uiso 1 1 calc R U . . . 
H22B H 0.5912 0.5165 0.7204 0.052(4) Uiso 1 1 calc R U . . . 
H22C H 0.6247 0.7174 0.7198 0.052(4) Uiso 1 1 calc R U . . . 
O1W O 0.39208(13) 0.17916(13) 0.53729(6) 0.0138(2) Uani 1 1 d . . . . . 
H11W H 0.3898 0.0994 0.5788 0.049(5) Uiso 1 1 d R U . . . 
H12W H 0.5112 0.1853 0.5298 0.049(5) Uiso 1 1 d R U . . . 
O2W O 0.16865(13) 0.66000(14) 0.62574(6) 0.0144(2) Uani 1 1 d . . . . . 
H21W H 0.0491 0.6726 0.6316 0.044(5) Uiso 1 1 d R U . . . 
H22W H 0.2230 0.7631 0.6463 0.044(5) Uiso 1 1 d R U . . . 
O3W O 0.30018(14) 0.35082(14) 0.66830(6) 0.0173(2) Uani 1 1 d . . . . . 
H31W H 0.2462 0.4009 0.7089 0.054(5) Uiso 1 1 d R U . . . 
H32W H 0.3197 0.2342 0.6834 0.054(5) Uiso 1 1 d R U . . . 
  
loop_ 
 _atom_site_aniso_label 
 _atom_site_aniso_U_11 
 _atom_site_aniso_U_22 
 _atom_site_aniso_U_33 
 _atom_site_aniso_U_23 
 _atom_site_aniso_U_13 
 _atom_site_aniso_U_12 
Gd1 0.00645(4) 0.01028(4) 0.01083(4) 0.00026(3) 0.00173(2) -0.00110(3) 
Cl1 0.01747(16) 0.01295(16) 0.01651(17) 0.00140(14) 0.00166(13) -0.00146(13) 
O11 0.0113(5) 0.0169(5) 0.0178(5) -0.0003(4) 0.0040(4) -0.0039(4) 
O12 0.0085(5) 0.0166(5) 0.0211(6) 0.0048(4) 0.0026(4) 0.0000(4) 
C11 0.0106(6) 0.0138(7) 0.0122(7) -0.0007(5) 0.0033(5) 0.0003(5) 
C12 0.0230(8) 0.0168(8) 0.0228(8) 0.0071(6) 0.0009(7) 0.0023(6) 
O21 0.0093(4) 0.0152(5) 0.0128(5) 0.0002(4) 0.0007(4) -0.0011(4) 
O22 0.0090(5) 0.0188(5) 0.0150(5) -0.0013(4) 0.0015(4) -0.0023(4) 
C21 0.0110(6) 0.0107(6) 0.0139(7) 0.0003(5) 0.0006(5) 0.0012(5) 
C22 0.0149(7) 0.0293(9) 0.0124(7) -0.0011(7) 0.0006(6) 0.0019(6) 
O1W 0.0118(5) 0.0139(5) 0.0165(5) 0.0020(4) 0.0047(4) 0.0002(4) 
O2W 0.0106(5) 0.0142(5) 0.0182(5) -0.0035(4) 0.0015(4) -0.0002(4) 
O3W 0.0241(6) 0.0140(5) 0.0152(5) 0.0020(4) 0.0070(4) 0.0038(4) 
  
_geom_special_details 
; 
 All esds (except the esd in the dihedral angle between two l.s. planes) 
 are estimated using the full covariance matrix.  The cell esds are taken 
 into account individually in the estimation of esds in distances, angles 
 and torsion angles; correlations between esds in cell parameters are only 
 used when they are defined by crystal symmetry.  An approximate (isotropic) 
 treatment of cell esds is used for estimating esds involving l.s. planes. 
; 
  
loop_ 
 _geom_bond_atom_site_label_1 
 _geom_bond_atom_site_label_2 
 _geom_bond_distance 
 _geom_bond_site_symmetry_2 
 _geom_bond_publ_flag 
Gd1 O11 2.3246(10) . ? 
Gd1 O21 2.3459(10) . ? 
Gd1 O2W 2.3931(10) . ? 
Gd1 O3W 2.4178(11) . ? 
Gd1 O1W 2.4253(11) . ? 
Gd1 O12 2.4363(11) 3_566 ? 
Gd1 O22 2.4490(10) 3_666 ? 
Gd1 O21 2.6071(10) 3_666 ? 
Gd1 O11 2.7404(11) 3_566 ? 
O11 C11 1.2700(18) . ? 
O12 C11 1.2583(17) . ? 
C11 C12 1.492(2) . ? 
C12 H12A 0.9800 . ? 
C12 H12B 0.9800 . ? 
C12 H12C 0.9800 . ? 
C12 H12D 0.9800 . ? 
C12 H12E 0.9800 . ? 
C12 H12F 0.9800 . ? 
O21 C21 1.2788(17) . ? 
O22 C21 1.2600(17) . ? 
C21 C22 1.491(2) . ? 
C22 H22A 0.9800 . ? 
C22 H22B 0.9800 . ? 
C22 H22C 0.9800 . ? 
O1W H11W 0.9600 . ? 
O1W H12W 0.9600 . ? 
O2W H21W 0.9600 . ? 
O2W H22W 0.9600 . ? 
O3W H31W 0.9600 . ? 
O3W H32W 0.9600 . ? 
  
loop_ 
 _geom_angle_atom_site_label_1 
 _geom_angle_atom_site_label_2 
 _geom_angle_atom_site_label_3 
 _geom_angle 
 _geom_angle_site_symmetry_1 
 _geom_angle_site_symmetry_3 
 _geom_angle_publ_flag 
O11 Gd1 O21 164.48(4) . . ? 
O11 Gd1 O2W 84.84(4) . . ? 
O21 Gd1 O2W 88.58(4) . . ? 
O11 Gd1 O3W 80.96(4) . . ? 
O21 Gd1 O3W 83.56(4) . . ? 
O2W Gd1 O3W 68.30(4) . . ? 
O11 Gd1 O1W 89.72(4) . . ? 
O21 Gd1 O1W 86.29(4) . . ? 
O2W Gd1 O1W 139.92(4) . . ? 
O3W Gd1 O1W 71.63(4) . . ? 
O11 Gd1 O12 117.48(4) . 3_566 ? 
O21 Gd1 O12 74.10(4) . 3_566 ? 
O2W Gd1 O12 75.51(4) . 3_566 ? 
O3W Gd1 O12 137.65(4) . 3_566 ? 
O1W Gd1 O12 139.73(3) . 3_566 ? 
O11 Gd1 O22 75.64(4) . 3_666 ? 
O21 Gd1 O22 118.00(3) . 3_666 ? 
O2W Gd1 O22 137.53(4) . 3_666 ? 
O3W Gd1 O22 141.53(4) . 3_666 ? 
O1W Gd1 O22 78.10(4) . 3_666 ? 
O12 Gd1 O22 80.69(4) 3_566 3_666 ? 
O11 Gd1 O21 125.29(4) . 3_666 ? 
O21 Gd1 O21 67.16(4) . 3_666 ? 
O2W Gd1 O21 141.66(3) . 3_666 ? 
O3W Gd1 O21 132.80(3) . 3_666 ? 
O1W Gd1 O21 70.37(3) . 3_666 ? 
O12 Gd1 O21 69.65(3) 3_566 3_666 ? 
O22 Gd1 O21 51.01(3) 3_666 3_666 ? 
O11 Gd1 O11 68.11(4) . 3_566 ? 
O21 Gd1 O11 122.28(3) . 3_566 ? 
O2W Gd1 O11 69.08(3) . 3_566 ? 
O3W Gd1 O11 128.74(3) . 3_566 ? 
O1W Gd1 O11 143.50(3) . 3_566 ? 
O12 Gd1 O11 49.39(3) 3_566 3_566 ? 
O22 Gd1 O11 68.70(3) 3_666 3_566 ? 
O21 Gd1 O11 98.42(3) 3_666 3_566 ? 
Gd1 Gd1 Gd1 139.698(4) 3_666 3_566 ? 
C11 O11 Gd1 159.79(10) . . ? 
C11 O11 Gd1 88.29(8) . 3_566 ? 
Gd1 O11 Gd1 111.89(4) . 3_566 ? 
C11 O12 Gd1 103.16(9) . 3_566 ? 
O12 C11 O11 119.16(14) . . ? 
O12 C11 C12 120.02(13) . . ? 
O11 C11 C12 120.82(13) . . ? 
C11 C12 H12A 109.4 . . ? 
C11 C12 H12B 109.5 . . ? 
H12A C12 H12B 109.5 . . ? 
C11 C12 H12C 109.5 . . ? 
H12A C12 H12C 109.5 . . ? 
H12B C12 H12C 109.5 . . ? 
C11 C12 H12D 113.4 . . ? 
C11 C12 H12E 105.5 . . ? 
H12D C12 H12E 109.4 . . ? 
C11 C12 H12F 109.5 . . ? 
H12D C12 H12F 109.4 . . ? 
H12E C12 H12F 109.4 . . ? 
C21 O21 Gd1 154.44(10) . . ? 
C21 O21 Gd1 90.87(8) . 3_666 ? 
Gd1 O21 Gd1 112.84(4) . 3_666 ? 
C21 O22 Gd1 98.84(9) . 3_666 ? 
O22 C21 O21 118.48(13) . . ? 
O22 C21 C22 120.95(13) . . ? 
O21 C21 C22 120.56(13) . . ? 
C21 C22 H22A 109.5 . . ? 
C21 C22 H22B 109.5 . . ? 
H22A C22 H22B 109.5 . . ? 
C21 C22 H22C 109.5 . . ? 
H22A C22 H22C 109.5 . . ? 
H22B C22 H22C 109.5 . . ? 
Gd1 O1W H11W 122.8 . . ? 
Gd1 O1W H12W 111.2 . . ? 
H11W O1W H12W 105.0 . . ? 
Gd1 O2W H21W 122.4 . . ? 
Gd1 O2W H22W 129.1 . . ? 
H21W O2W H22W 105.0 . . ? 
Gd1 O3W H31W 123.2 . . ? 
Gd1 O3W H32W 126.3 . . ? 
H31W O3W H32W 105.0 . . ? 
  
loop_ 
 _geom_hbond_atom_site_label_D 
 _geom_hbond_atom_site_label_H 
 _geom_hbond_atom_site_label_A 
 _geom_hbond_distance_DH 
 _geom_hbond_distance_HA 
 _geom_hbond_distance_DA 
 _geom_hbond_angle_DHA 
 _geom_hbond_site_symmetry_A 
O1W H11W Cl1  0.96 2.19 3.1341(11) 166.8 1_545 
O1W H12W O12  0.96 1.78 2.7046(14) 161.5 1_655 
O2W H21W O22  0.96 1.84 2.7122(14) 149.7 1_455 
O2W H22W Cl1  0.96 2.12 3.0743(11) 170.3 . 
O3W H31W Cl1  0.96 2.23 3.1761(11) 169.9 2_546 
O3W H32W Cl1  0.96 2.13 3.0724(12) 165.9 1_545 
  
_refine_diff_density_max    0.348 
_refine_diff_density_min   -0.474 
_refine_diff_density_rms    0.058 
  
_shelx_res_file 
; 
  
    Ha2019_99h_0m_a.res created by SHELXL-2014/7 
  
  
TITL Ha2019_99h_0m_a.res in P2(1)/n 
CELL  0.71073   7.8219   7.8592  17.4434   90.000   98.265   90.000 
ZERR    4.000   0.0004   0.0004   0.0008    0.000    0.002    0.000 
LATT 1 
SYMM 1/2-X, 1/2+Y, 1/2-Z 
SFAC C  H  O  Cl Gd 
UNIT 16 48 28 4 4 
LIST 4 ! automatically inserted. Change 6 to 4 for CHECKCIF!! 
OMIT 0 1 1 
OMIT -3 56 
L.S. 10 
rem DFIX 0.96  0.0001 O1w H11w O1w H12w O2w H21w O2w H22w O3w H31w O3w H32w 
rem dfix 1.523  0.0001 H11w H12w H21w H22w H31w H32w 
FREE Gd1 C21_$6 
FREE Gd1 C11_$7 
EQIV $6 1-x, 1-y, 1-z 
BIND Gd1 Gd1_$6 
BIND Gd1 Gd1_$7 
EQIV $7 -x,1-y,1-z 
BIND Gd1 O11_$7 
ACTA 
HTAB 
EQIV $1 -x+3/2, y-1/2, -z+3/2 
EQIV $2 x, y-1, z 
HTAB O1W Cl1_$2 
EQIV $3 x+1, y, z 
HTAB O1W O12_$3 
EQIV $4 x-1, y, z 
HTAB O2W O22_$4 
HTAB O2W Cl1 
EQIV $5 -x+1/2, y-1/2, -z+3/2 
HTAB O3W Cl1_$5 
HTAB O3W Cl1_$2 
SIZE 0.041  0.096  0.368 
BOND $H 
rem DFIX 0.98  0.0001 C12 H12d C12 H12e C12 H12f 
rem dfix 1.6  0.0001 H12d H12e H12d H12f H12e H12f 
FMAP 2 
PLAN 10 
TEMP -173 
WGHT    0.005200    1.056400 
EXTI    0.001216 
FVAR       0.34865   0.03292   0.05171   0.04949   0.04355   0.05378   0.60498 
GD1   5    0.264515    0.460401    0.537452    11.00000    0.00645    0.01028 = 
         0.01083    0.00026    0.00173   -0.00110 
CL1   4    0.382806    0.970100    0.689641    11.00000    0.01747    0.01295 = 
         0.01651    0.00140    0.00166   -0.00146 
O11   3   -0.006166    0.337371    0.536091    11.00000    0.01131    0.01686 = 
         0.01782   -0.00028    0.00403   -0.00393 
O12   3   -0.277508    0.264897    0.526179    11.00000    0.00853    0.01661 = 
         0.02113    0.00476    0.00264    0.00003 
C11   1   -0.121241    0.231709    0.549327    11.00000    0.01061    0.01376 = 
         0.01224   -0.00074    0.00329    0.00029 
C12   1   -0.073090    0.070176    0.591981    11.00000    0.02303    0.01679 = 
         0.02284    0.00706    0.00087    0.00232 
AFIX   3 
H12A  2   -0.151716   -0.020768    0.570786    71.00000   21.00000 
H12B  2   -0.081680    0.085795    0.647037    71.00000   21.00000 
H12C  2    0.045725    0.039355    0.586091    71.00000   21.00000 
  
H12D  2    0.028791    0.081168    0.631531   -71.00000   21.00000 
H12E  2   -0.048859   -0.011524    0.552485   -71.00000   21.00000 
H12F  2   -0.171129    0.029738    0.616185   -71.00000   21.00000 
AFIX   0 
O21   3    0.546941    0.560807    0.573878    11.00000    0.00933    0.01524 = 
         0.01279    0.00019    0.00074   -0.00106 
O22   3    0.820018    0.628285    0.597252    11.00000    0.00900    0.01881 = 
         0.01503   -0.00134    0.00150   -0.00232 
C21   1    0.679976    0.598373    0.622486    11.00000    0.01096    0.01065 = 
         0.01389    0.00027    0.00059    0.00117 
C22   1    0.669114    0.605891    0.707042    11.00000    0.01488    0.02925 = 
         0.01235   -0.00111    0.00059    0.00193 
AFIX 137 
H22A  2    0.784332    0.588767    0.736439    11.00000   31.00000 
H22B  2    0.591213    0.516499    0.720438    11.00000   31.00000 
H22C  2    0.624655    0.717350    0.719837    11.00000   31.00000 
AFIX   0 
O1W   3    0.392084    0.179162    0.537289    11.00000    0.01180    0.01387 = 
         0.01648    0.00199    0.00473    0.00022 
AFIX   3 
H11W  2    0.389825    0.099375    0.578803    11.00000   41.00000 
H12W  2    0.511164    0.185307    0.529837    11.00000   41.00000 
AFIX   0 
O2W   3    0.168651    0.659997    0.625740    11.00000    0.01065    0.01423 = 
         0.01818   -0.00348    0.00152   -0.00023 
AFIX   3 
H21W  2    0.049142    0.672623    0.631600    11.00000   51.00000 
H22W  2    0.222957    0.763104    0.646270    11.00000   51.00000 
AFIX   0 
O3W   3    0.300180    0.350817    0.668299    11.00000    0.02407    0.01401 = 
         0.01516    0.00197    0.00703    0.00377 
AFIX   3 
H31W  2    0.246235    0.400935    0.708934    11.00000   61.00000 
H32W  2    0.319723    0.234182    0.683420    11.00000   61.00000 
AFIX   0 
HKLF 4 
  
REM  Ha2019_99h_0m_a.res in P2(1)/n 
REM R1 =  0.0094 for    2487 Fo > 4sig(Fo)  and  0.0100 for all    2569 data 
REM    126 parameters refined using      0 restraints 
  
END 
  
WGHT      0.0052      1.0564 
  
REM Instructions for potential hydrogen bonds 
HTAB C12 Cl1_$2 
HTAB C22 Cl1_$1 
HTAB C22 Cl1 
HTAB O1W Cl1_$2 
HTAB O1W O12_$3 
HTAB O2W O22_$4 
HTAB O2W Cl1 
HTAB O3W Cl1_$5 
HTAB O3W Cl1_$2 
  
REM Highest difference peak  0.348,  deepest hole -0.474,  1-sigma level  0.058 
Q1    1   0.6771  0.6001  0.6689  11.00000  0.05    0.35 
Q2    1  -0.0953  0.1580  0.5774  11.00000  0.05    0.30 
Q3    1   0.4730  0.1865  0.5370  11.00000  0.05    0.29 
Q4    1  -0.1995  0.2331  0.5227  11.00000  0.05    0.28 
Q5    1   0.4530  0.5712  0.5776  11.00000  0.05    0.25 
Q6    1   0.5639  0.6412  0.7207  11.00000  0.05    0.24 
Q7    1   0.3845  0.1261  0.5605  11.00000  0.05    0.24 
Q8    1   0.8126  0.6205  0.5527  11.00000  0.05    0.23 
Q9    1   0.3080  0.2726  0.6725  11.00000  0.05    0.23 
Q10   1  -0.2850  0.3217  0.4922  11.00000  0.05    0.23 
; 
_shelx_res_checksum   97855 
  
_shelx_hkl_file 
; 
   1   0   0    9.50    1.30 
   1   0   0    5.20    1.10 
   1   0   0    6.20    1.20 
   1   0   0    5.40    1.00 
   1   0   0    3.70    1.00 
   1   0   0    2.80    0.90 
   1   0   0    5.00    1.20 
   1   0   0    9.20    1.20 
   1   0   0    7.60    1.00 
   1   0   0    3.10    0.90 
   1   0   0    5.20    1.10 
   1   0   0    2.90    0.90 
   1   0   0    3.30    1.00 
   1   0   0    4.70    1.10 
   1   0   0    9.50    1.50 
   1   0   0    7.70    1.30 
   1   0   0    7.50    1.30 
   1   0   0    4.50    1.20 
   1   0   0    6.30    1.00 
   1   0   0    6.60    1.30 
   1   0   0    6.50    1.10 
   1   0   0   10.10    1.30 
   1   0   0    5.20    1.20 
   1   0   0    3.60    1.10 
   1   0   0    9.00    1.40 
   1   0   0    8.00    1.40 
   1   0   0    5.20    1.20 
   1   0   0    4.50    1.10 
   1   0   0    5.40    0.60 
  -1   0   0    2.70    1.00 
  -1   0   0    6.20    1.60 
  -1   0   0    2.90    1.00 
  -1   0   0    2.10    0.90 
  -1   0   0    4.60    1.10 
  -1   0   0    4.80    1.20 
   1   0   0    4.20    1.20 
   1   0   0    9.60    0.90 
  -2   0   0 6474.75  190.28 
  -2   0   0 7385.86  191.88 
   2   0   0 6688.33  189.88 
   2   0   0 7138.09  189.78 
   2   0   0 6671.93  190.18 
   2   0   0 7130.19  188.58 
   2   0   0 7532.25  190.98 
   2   0   0 7346.56  189.78 
   2   0   0 7190.68  189.58 
  -2   0   0 6264.37  192.08 
  -2   0   0 6670.93  189.28 
  -2   0   0 7387.06  190.38 
  -2   0   0 7293.97  190.08 
  -2   0   0 6844.62  190.88 
   2   0   0 7202.48  190.88 
   2   0   0 6900.71  189.08 
   2   0   0 7258.57  190.18 
   2   0   0 7208.18  190.48 
   2   0   0 7223.98  189.98 
   2   0   0 6998.50  189.68 
   2   0   0 6814.52  190.48 
   2   0   0 6174.88  190.38 
   2   0   0 7066.69  191.68 
   2   0   0 7532.75  190.88 
   2   0   0 7676.13  190.38 
   2   0   0 6780.72  188.98 
   2   0   0 7092.49  189.88 
   2   0   0 7399.06  191.08 
   2   0   0 7229.28  194.08 
   2   0   0 7292.57  190.38 
   2   0   0 7173.98  192.88 
   2   0   0 7377.16  190.18 
   2   0   0 7292.37  188.98 
   2   0   0 6765.32  189.68 
  -2   0   0 7032.00  188.68 
  -2   0   0 7168.48  190.78 
  -2   0   0 6969.90  189.68 
  -2   0   0 7146.58  188.58 
   2   0   0 7170.08  190.98 
   2   0   0 7127.19  189.68 
   2   0   0 7013.40  189.18 
   2   0   0 6401.76  189.38 
  -2   0   0 7213.28  189.88 
  -2   0   0 6571.74  189.18 
  -2   0   0 7142.69  189.98 
  -2   0   0 6889.01  189.68 
  -2   0   0 7355.96  189.98 
  -2   0   0 7252.87  189.38 
  -2   0   0 7077.19  190.38 
  -2   0   0 7120.29  190.08 
  -2   0   0 7004.50  191.28 
  -2   0   0 7166.98  188.88 
  -2   0   0 7115.39  193.58 
  -2   0   0 7022.30  190.48 
  -2   0   0 6688.53  189.68 
  -2   0   0 7226.28  190.48 
  -2   0   0 7209.18  189.98 
  -2   0   0 7010.20  192.08 
  -2   0   0 7197.58  191.18 
   3   0   0    2.60    1.30 
   3   0   0    1.50    1.00 
   3   0   0    1.50    1.30 
   3   0   0    2.80    2.00 
   3   0   0    6.40    2.50 
   3   0   0    1.30    1.80 
   3   0   0    1.20    1.80 
   3   0   0    4.80    2.30 
   3   0   0    1.30    2.10 
   3   0   0    7.30    1.90 
   3   0   0    2.90    1.30 
   3   0   0    5.30    2.30 
   3   0   0    1.60    1.60 
   3   0   0    2.20    1.50 
   3   0   0    1.20    1.20 
   3   0   0    4.00    2.20 
   3   0   0    2.80    1.80 
  -3   0   0    3.10    1.60 
  -3   0   0    2.10    2.20 
  -3   0   0    3.10    2.10 
   3   0   0    1.30    1.80 
   3   0   0   -0.40    1.20 
  -3   0   0    1.10    1.90 
  -3   0   0    1.60    1.90 
  -3   0   0    4.00    2.50 
  -3   0   0    1.90    1.70 
   3   0   0    2.10    1.50 
   3   0   0    1.90    1.80 
   3   0   0    1.90    1.80 
  -3   0   0    4.90    1.80 
   3   0   0   -0.60    2.00 
  -3   0   0    1.80    1.30 
  -3   0   0   -1.70    1.30 
  -3   0   0    0.90    1.80 
  -3   0   0   -0.70    1.50 
  -3   0   0    2.10    2.00 
  -3   0   0    2.40    1.80 
  -3   0   0    1.50    2.30 
  -3   0   0    2.00    1.60 
  -3   0   0    2.80    2.20 
  -3   0   0    2.00    2.60 
  -3   0   0    2.20    1.90 
  -3   0   0   -0.20    1.60 
  -3   0   0    4.30    2.50 
  -3   0   0    1.30    2.40 
  -3   0   0    2.40    1.40 
  -3   0   0    0.00    1.50 
   3   0   0    1.40    2.00 
   3   0   0    0.90    1.30 
   3   0   0    6.20    2.20 
  -3   0   0    1.20    1.80 
   3   0   0    3.60    2.00 
   3   0   0    2.40    1.90 
   3   0   0    3.60    2.00 
   3   0   0    3.20    2.00 
  -4   0   0 2158.48   66.09 
   4   0   0 2213.68   61.89 
   4   0   0 2221.48   66.09 
  -4   0   0 2145.79   66.59 
  -4   0   0 2228.58   64.39 
   4   0   0 2257.37   63.99 
   4   0   0 2226.98   63.19 
  -4   0   0 2145.39   66.59 
   4   0   0 2198.28   66.49 
  -4   0   0 2222.08   69.29 
   4   0   0 2182.38   69.69 
  -4   0   0 2112.09   69.09 
  -4   0   0 2220.08   64.49 
  -4   0   0 2225.38   66.69 
  -4   0   0 2201.68   71.99 
  -4   0   0 2138.69   66.19 
  -4   0   0 2115.99   67.09 
  -4   0   0 2153.68   68.69 
  -4   0   0 2113.99   66.69 
   4   0   0 2264.97   64.89 
   4   0   0 2178.18   63.59 
   4   0   0 2197.38   66.79 
   4   0   0 2182.38   62.99 
   4   0   0 2197.08   66.49 
   4   0   0 2115.49   62.29 
   4   0   0 2227.08   62.19 
   4   0   0 2249.77   65.09 
   4   0   0 2182.88   64.09 
  -4   0   0 2118.19   62.09 
  -4   0   0 2142.09   62.39 
  -4   0   0 2094.89   67.59 
  -4   0   0 2145.39   66.89 
  -4   0   0 2127.09   68.09 
  -4   0   0 2198.98   65.49 
   4   0   0 2247.78   67.69 
   4   0   0 2174.58   66.49 
   4   0   0 2149.78   66.19 
   4   0   0 2151.38   65.79 
   4   0   0 2253.07   64.29 
   4   0   0 2171.08   65.69 
   4   0   0 2219.18   64.09 
  -4   0   0 2177.88   67.69 
  -4   0   0 2299.87   67.09 
  -4   0   0 2145.39   69.19 
   5   0   0    1.90    2.00 
   5   0   0   -1.20    2.50 
   5   0   0    3.60    1.90 
   5   0   0    2.80    1.70 
   5   0   0    0.70    1.50 
   5   0   0   -0.40    1.40 
   5   0   0   -0.80    1.40 
  -5   0   0    2.10    2.20 
  -5   0   0    0.40    2.60 
   5   0   0    1.20    2.20 
  -5   0   0   -0.90    2.30 
  -5   0   0   -1.90    2.20 
  -5   0   0   -3.60    2.30 
  -5   0   0    1.90    1.70 
  -5   0   0   -0.40    1.40 
  -5   0   0    4.80    3.30 
   5   0   0   -0.90    1.80 
   5   0   0    1.50    1.70 
   5   0   0    2.20    2.10 
   5   0   0    2.30    2.40 
   5   0   0   -1.30    2.00 
   5   0   0    0.80    2.10 
  -5   0   0    1.90    2.60 
  -5   0   0    0.30    2.30 
  -5   0   0    1.60    2.90 
  -5   0   0    0.00    1.90 
  -5   0   0    1.70    2.50 
  -5   0   0   -0.50    2.90 
  -5   0   0   -1.80    1.90 
  -5   0   0    2.20    2.00 
   5   0   0    2.30    1.90 
   5   0   0   -1.10    2.30 
   5   0   0   -0.50    2.20 
  -5   0   0    1.30    1.90 
   5   0   0    3.10    2.60 
  -5   0   0   -1.90    1.90 
  -5   0   0   -0.70    2.10 
   5   0   0    1.10    2.90 
   6   0   0 1524.85   49.60 
   6   0   0 1590.94   45.80 
   6   0   0 1493.05   52.89 
   6   0   0 1528.65   47.80 
   6   0   0 1522.15   53.69 
   6   0   0 1471.15   54.29 
   6   0   0 1507.65   52.99 
  -6   0   0 1562.74   51.79 
   6   0   0 1474.15   51.89 
  -6   0   0 1537.95   50.69 
  -6   0   0 1502.25   60.69 
   6   0   0 1484.85   50.29 
   6   0   0 1481.45   56.69 
  -6   0   0 1473.95   56.69 
  -6   0   0 1561.94   54.59 
   6   0   0 1531.95   46.10 
   6   0   0 1542.25   46.70 
  -6   0   0 1529.25   55.69 
  -6   0   0 1567.04   53.89 
  -6   0   0 1537.85   54.79 
  -6   0   0 1553.74   56.29 
  -6   0   0 1521.35   53.89 
  -6   0   0 1509.85   50.19 
   6   0   0 1442.66   56.99 
   6   0   0 1470.65   51.69 
  -6   0   0 1544.65   46.20 
  -6   0   0 1457.25   56.59 
  -6   0   0 1462.05   53.49 
  -6   0   0 1527.95   54.29 
  -6   0   0 1547.25   57.29 
   6   0   0 1541.65   53.39 
   6   0   0 1482.85   50.39 
   6   0   0 1524.45   53.09 
  -6   0   0 1560.14   57.79 
   7   0   0    0.90    3.30 
  -7   0   0    3.30    4.00 
  -7   0   0    4.50    5.80 
  -7   0   0   -0.10    3.70 
  -7   0   0    9.00    5.00 
  -7   0   0    7.60    3.90 
  -7   0   0    3.50    2.30 
  -7   0   0   -1.20    2.90 
  -7   0   0   -1.90    2.90 
  -7   0   0   -3.80    3.00 
  -7   0   0    2.30    2.90 
   7   0   0    2.80    3.90 
   7   0   0   -0.80    2.70 
  -7   0   0    0.60    3.50 
   7   0   0   -0.90    3.40 
   7   0   0    1.00    2.00 
   7   0   0   -0.90    2.90 
   7   0   0   -1.40    2.20 
  -7   0   0    0.10    3.70 
  -7   0   0    2.80    4.00 
   7   0   0   -0.10    1.90 
   7   0   0    4.20    5.00 
   7   0   0    1.80    3.30 
   7   0   0    5.30    3.50 
   7   0   0   -1.00    2.70 
   7   0   0   -1.10    3.30 
   7   0   0   -1.30    2.70 
  -7   0   0    0.90    4.20 
   7   0   0    5.30    3.90 
   7   0   0   -0.30    2.80 
   7   0   0    2.10    3.70 
   8   0   0 1060.69   49.60 
   8   0   0 1112.49   51.29 
   8   0   0 1080.99   44.00 
  -8   0   0 1119.79   47.10 
  -8   0   0 1095.79   47.60 
  -8   0   0 1080.69   50.99 
  -8   0   0 1054.89   48.10 
   8   0   0 1097.39   44.50 
  -8   0   0  996.00   45.50 
  -8   0   0 1117.39   47.70 
   8   0   0 1044.70   41.60 
   8   0   0 1021.90   45.50 
   8   0   0 1048.00   45.10 
  -8   0   0 1083.19   42.60 
  -8   0   0 1049.89   54.39 
   8   0   0 1084.69   45.30 
  -8   0   0 1105.99   42.00 
   8   0   0 1104.29   43.90 
  -8   0   0 1114.89   47.50 
  -8   0   0 1135.99   47.30 
  -8   0   0 1153.58   51.49 
  -8   0   0 1097.49   51.49 
   8   0   0 1084.29   40.40 
   8   0   0 1030.40   47.00 
   8   0   0 1037.80   45.10 
   8   0   0 1089.69   45.10 
   8   0   0 1097.79   41.80 
  -9   0   0   -4.30    4.30 
   9   0   0   -5.10    4.00 
  -9   0   0    1.80    4.90 
  -9   0   0    5.70    5.30 
  -9   0   0    4.10    5.30 
   9   0   0   -4.50    3.40 
  -9   0   0    7.00    6.70 
   9   0   0    3.00    5.90 
  -9   0   0    0.20    5.50 
  -9   0   0   -5.10    3.10 
   9   0   0   -2.80    4.00 
   9   0   0   -0.40    3.90 
   9   0   0    2.40    6.30 
   9   0   0   -0.20    4.90 
   9   0   0   -0.10    4.10 
  -9   0   0    4.00    6.20 
  -9   0   0    2.60    7.00 
   9   0   0    4.10    5.60 
   9   0   0   -0.80    4.20 
  -9   0   0   -4.30    3.10 
   9   0   0    4.60    5.40 
   9   0   0    0.50    4.70 
   9   0   0    0.50    4.30 
 -10   0   0  257.77   27.20 
  10   0   0  258.77   30.10 
  10   0   0  192.78   27.50 
 -10   0   0  213.18   25.00 
  10   0   0  234.18   29.20 
 -10   0   0  287.07   29.70 
 -10   0   0  246.58   30.60 
 -10   0   0  220.58   29.40 
  10   0   0  233.38   27.10 
  10   0   0  277.57   26.70 
  10   0   0  222.68   23.40 
  10   0   0  206.18   23.00 
 -10   0   0  273.57   35.10 
 -10   0   0  243.28   26.60 
  10   0   0  217.38   25.20 
  10   0   0  302.57   24.10 
  10   0   0  272.27   21.70 
   0  -1   0   -0.10    0.40 
   0  -1   0    4.10    0.90 
   0  -1   0    5.80    1.40 
   0  -1   0    0.80    0.60 
   0  -1   0    4.10    1.10 
   0  -1   0    3.80    1.10 
   0  -1   0    2.90    0.90 
   0  -1   0    0.20    0.50 
   0  -1   0    2.90    0.90 
   0  -1   0    2.80    0.90 
   0  -1   0    1.50    0.70 
   0  -1   0    2.20    0.80 
   0  -1   0    1.70    0.70 
   0  -1   0   -0.10    0.50 
   0  -1   0    1.80    0.70 
   0   1   0   -0.20    0.50 
   0   1   0   -0.50    0.30 
   0   1   0    4.50    1.10 
   0   1   0    0.40    0.60 
   0   1   0    0.50    0.50 
   0   1   0   -0.60    0.30 
   0   1   0    1.10    0.60 
   0   1   0   -0.10    0.40 
   0   1   0    0.70    0.60 
   0   1   0    0.00    0.40 
   0   1   0    3.00    0.90 
   0   1   0   -0.40    0.30 
   0   1   0   -0.30    0.50 
   1  -1   0    4.80    1.70 
  -1  -1   0    3.30    1.20 
  -1  -1   0    9.10    1.60 
  -1  -1   0    9.70    1.90 
  -1  -1   0    9.60    1.90 
  -1  -1   0    3.70    1.50 
   1  -1   0    7.30    1.20 
   1  -1   0    6.00    1.30 
  -1  -1   0    6.50    1.80 
  -1  -1   0    4.70    1.60 
  -1  -1   0    5.30    1.70 
  -1  -1   0    3.30    1.30 
  -1  -1   0    4.50    1.30 
   1  -1   0    3.00    1.10 
   1  -1   0    5.20    1.30 
   1  -1   0   10.20    2.10 
   1  -1   0    4.60    1.00 
   1  -1   0    2.30    1.40 
   1  -1   0    4.30    1.10 
   1  -1   0    7.80    1.80 
   1  -1   0    4.50    1.90 
   1  -1   0    8.00    1.70 
  -1  -1   0    5.20    1.60 
  -1  -1   0    3.50    1.10 
  -1  -1   0    4.60    1.30 
   1  -1   0    5.60    1.50 
   1  -1   0    4.00    1.40 
   1  -1   0    8.90    2.40 
   1  -1   0    6.80    1.30 
   1  -1   0    3.70    1.30 
   1  -1   0    5.70    1.40 
   1  -1   0    8.60    1.80 
   1  -1   0    5.40    1.40 
   1  -1   0    9.10    1.90 
   1  -1   0    6.60    1.30 
   1  -1   0    7.40    1.60 
  -1  -1   0    7.10    1.70 
   1  -1   0    3.70    1.70 
  -1  -1   0    4.40    1.50 
  -1  -1   0    4.80    1.40 
  -1  -1   0    2.90    1.40 
  -1  -1   0    4.80    1.50 
  -1  -1   0    8.70    1.80 
  -1  -1   0    3.30    0.70 
   1  -1   0    9.10    1.90 
  -1  -1   0    8.70    1.90 
  -1  -1   0    7.40    1.70 
  -1  -1   0    5.70    1.50 
  -1  -1   0    6.20    1.80 
  -1  -1   0   19.10    2.30 
  -1  -1   0    1.80    1.30 
  -1  -1   0    5.70    1.30 
   1  -1   0    7.50    1.40 
   1  -1   0    5.40    1.10 
   1  -1   0    6.20    1.50 
   1  -1   0    2.00    1.10 
   1  -1   0    4.80    1.30 
   1  -1   0    6.00    1.60 
  -1  -1   0    1.50    1.20 
  -1  -1   0    3.90    1.30 
  -1  -1   0    7.30    1.70 
  -1  -1   0    7.90    2.00 
   1  -1   0    4.30    1.40 
   1  -1   0    4.10    1.20 
  -1  -1   0    3.30    1.40 
  -1   1   0    2.10    0.90 
   1   1   0    4.60    1.70 
  -1   1   0    3.60    1.40 
  -1   1   0    2.30    0.90 
  -1   1   0    4.80    1.70 
  -1   1   0    2.10    0.90 
  -1   1   0    5.60    1.30 
  -1   1   0    1.70    0.90 
   1   1   0    6.10    1.60 
  -1   1   0    4.40    2.00 
  -1   1   0    1.50    1.10 
   1   1   0    4.40    1.50 
   1   1   0    4.40    1.50 
   1   1   0    3.80    1.40 
   1   1   0    3.30    0.80 
  -1   1   0    5.00    1.00 
   1   1   0    4.70    1.40 
   1   1   0    7.80    1.90 
   1   1   0    5.90    1.70 
   1   1   0    3.80    1.40 
  -1   1   0    4.80    1.20 
  -1   1   0    4.80    1.40 
  -1   1   0    2.20    1.10 
   1   1   0    4.20    1.60 
   1   1   0    3.10    1.50 
   1   1   0    5.70    1.50 
   1   1   0   10.50    2.10 
   1   1   0    3.30    1.50 
   1   1   0    5.60    1.60 
   1   1   0    2.20    1.00 
   1   1   0    4.10    1.10 
   1   1   0    6.40    1.70 
   1   1   0    4.80    1.70 
   1   1   0    5.30    1.70 
   1   1   0    6.30    1.70 
   1   1   0    5.50    1.60 
   1   1   0    5.60    1.50 
   1   1   0    4.70    1.60 
   1   1   0    6.00    1.70 
  -1   1   0    4.80    1.40 
  -1   1   0    1.40    0.80 
  -1   1   0    5.60    1.40 
   1   1   0    5.20    1.70 
   1   1   0    5.70    1.70 
  -1   1   0    1.70    1.30 
  -1   1   0    5.10    1.30 
  -1   1   0   11.20    1.90 
  -1   1   0   13.20    2.30 
  -1   1   0    2.70    1.00 
   1   1   0    3.90    1.30 
   1   1   0    3.40    1.20 
   1   1   0    4.50    1.50 
   1   1   0    5.90    1.70 
   1   1   0    2.70    1.20 
   1   1   0    5.60    1.40 
   1   1   0    8.00    1.90 
   1   1   0    5.20    1.30 
   2  -1   0  847.52   29.20 
   2  -1   0  903.91   25.60 
   2  -1   0  866.11   25.80 
   2  -1   0  870.21   28.80 
  -2  -1   0  883.31   29.20 
   2  -1   0  864.71   27.90 
   2  -1   0  905.11   31.10 
  -2  -1   0  864.01   26.50 
  -2  -1   0  856.21   26.80 
  -2  -1   0  892.01   28.30 
  -2  -1   0  909.91   28.10 
   2  -1   0  863.41   25.50 
   2  -1   0  862.71   29.10 
   2  -1   0  879.01   26.90 
   2  -1   0  914.31   28.00 
   2  -1   0  885.51   27.60 
   2  -1   0  851.61   27.70 
   2  -1   0  867.81   26.40 
   2  -1   0  864.01   28.70 
   2  -1   0  870.01   25.80 
   2  -1   0  880.91   27.80 
   2  -1   0  892.01   28.40 
   2  -1   0  876.71   28.20 
  -2  -1   0  855.21   26.70 
  -2  -1   0  873.51   27.80 
  -2  -1   0  884.01   29.20 
  -2  -1   0  859.11   28.00 
  -2  -1   0  844.52   27.80 
  -2  -1   0  850.61   26.70 
  -2  -1   0  886.81   28.20 
   2  -1   0  848.12   27.20 
  -2  -1   0  876.41   28.40 
  -2  -1   0  889.01   28.30 
  -2  -1   0  857.31   28.70 
  -2  -1   0  885.01   28.30 
  -2  -1   0  893.81   28.30 
   2  -1   0  856.21   27.90 
   2  -1   0  870.31   28.90 
   2  -1   0  832.62   28.00 
   2  -1   0  892.91   27.00 
   2  -1   0  865.41   24.60 
  -2  -1   0  903.51   28.30 
   2  -1   0  857.51   27.40 
  -2  -1   0  862.21   28.10 
  -2  -1   0  872.81   28.30 
  -2  -1   0  922.51   27.60 
  -2  -1   0  864.51   27.50 
  -2  -1   0  914.71   29.40 
  -2  -1   0  905.11   29.70 
  -2  -1   0  897.21   28.60 
   2  -1   0  872.91   27.70 
   2  -1   0  912.41   28.30 
   2  -1   0  880.91   29.50 
   2  -1   0  853.41   28.10 
   2  -1   0  825.72   26.90 
  -2  -1   0  866.31   28.00 
  -2  -1   0  900.41   28.20 
  -2  -1   0  861.01   25.50 
   2  -1   0  923.31   27.50 
  -2  -1   0  859.21   28.60 
  -2   1   0  879.91   26.60 
   2   1   0  888.21   28.70 
   2   1   0  903.31   29.10 
   2   1   0  913.01   28.20 
  -2   1   0  864.61   27.70 
  -2   1   0  891.71   27.50 
  -2   1   0  867.71   28.00 
  -2   1   0  869.11   28.40 
  -2   1   0  867.61   26.50 
  -2   1   0  904.81   28.70 
  -2   1   0  877.11   28.40 
  -2   1   0  886.41   27.50 
  -2   1   0  874.41   24.70 
  -2   1   0  881.91   27.50 
  -2   1   0  852.71   27.80 
  -2   1   0  905.51   31.40 
   2   1   0  926.61   29.40 
   2   1   0  861.21   28.10 
  -2   1   0  895.71   27.70 
  -2   1   0  848.12   25.20 
   2   1   0  847.12   26.80 
   2   1   0  903.81   27.20 
  -2   1   0  853.31   29.30 
  -2   1   0  842.02   28.90 
   2   1   0  871.31   26.00 
   2   1   0  906.91   28.90 
   2   1   0  926.91   28.40 
   2   1   0  898.11   28.70 
   2   1   0  921.01   28.30 
   2   1   0  943.11   29.40 
   2   1   0  869.41   27.50 
   2   1   0  948.51   28.60 
   2   1   0  877.41   28.10 
  -2   1   0  885.61   28.90 
  -2   1   0  895.41   28.00 
   2   1   0  844.72   27.60 
  -2   1   0  859.51   29.10 
   2   1   0  898.51   28.10 
   2   1   0  883.51   27.40 
   2   1   0  870.71   28.60 
   2   1   0  922.41   28.80 
  -2   1   0  860.61   27.50 
  -2   1   0  891.81   27.60 
  -2   1   0  837.82   27.60 
   2   1   0  874.81   28.00 
   2   1   0  877.01   28.10 
   2   1   0  899.71   28.60 
   2   1   0  888.31   28.60 
   2   1   0  888.41   28.10 
  -2   1   0  873.01   28.30 
   2   1   0  890.01   28.30 
   2   1   0  905.51   28.00 
   2   1   0  902.41   29.20 
   2   1   0  842.42   27.30 
   2   1   0  891.31   28.20 
   2   1   0  903.61   28.60 
  -2   1   0  819.02   27.40 
   2   1   0  936.41   30.20 
   2   1   0  879.81   28.30 
   2   1   0  863.21   27.90 
   3  -1   0   85.89    6.10 
  -3  -1   0   78.89    7.60 
   3  -1   0   75.29    5.60 
   3  -1   0   90.89    6.60 
   3  -1   0   80.19    6.30 
  -3  -1   0   71.99    7.20 
   3  -1   0   82.49    4.00 
  -3  -1   0   78.09    4.80 
  -3  -1   0   80.49    4.20 
  -3  -1   0   81.09    6.60 
  -3  -1   0   82.99    5.80 
  -3  -1   0   76.69    7.80 
  -3  -1   0   79.99    8.40 
  -3  -1   0   59.89    6.70 
   3  -1   0   85.09    5.20 
  -3  -1   0   88.89    7.20 
   3  -1   0   83.99    6.60 
   3  -1   0   90.29    6.60 
  -3  -1   0   88.99    7.70 
  -3  -1   0   88.99    7.10 
   3  -1   0   82.59    4.30 
   3  -1   0   84.79    6.50 
   3  -1   0   76.79    4.80 
   3  -1   0   78.99    4.40 
   3  -1   0   85.39    6.10 
   3  -1   0   91.69    5.20 
   3  -1   0   74.69    8.40 
  -3  -1   0   81.49    6.50 
  -3  -1   0   86.59    6.80 
  -3  -1   0   84.79    8.30 
  -3  -1   0   76.99    7.30 
   3  -1   0   75.29    6.00 
   3  -1   0   78.79    6.10 
  -3  -1   0   81.79    6.70 
  -3  -1   0   66.79    7.70 
   3  -1   0   72.09    7.20 
   3  -1   0   85.49    8.60 
   3  -1   0   86.59    6.80 
   3  -1   0   79.19    6.00 
   3  -1   0   76.99    6.10 
  -3  -1   0   63.69    7.60 
  -3  -1   0   88.69    5.80 
  -3  -1   0   77.29    6.40 
  -3  -1   0   69.59    8.90 
  -3  -1   0   80.39    5.10 
  -3  -1   0   67.19    6.70 
   3  -1   0   71.89    4.90 
  -3  -1   0   81.39    5.30 
   3  -1   0   80.29    5.70 
   3  -1   0   84.19    6.40 
  -3  -1   0   80.49    6.40 
   3  -1   0   83.79    7.00 
   3  -1   0   93.69    6.60 
   3  -1   0   76.99    7.00 
   3  -1   0   92.29    8.70 
   3   1   0   84.39    5.80 
   3   1   0   96.49    7.50 
  -3   1   0   81.19    6.60 
   3   1   0   71.89    7.80 
   3   1   0   90.79    7.00 
   3   1   0   92.89    7.10 
   3   1   0   76.69    6.30 
   3   1   0   80.39    6.70 
  -3   1   0   94.99    7.80 
   3   1   0   76.59    7.70 
   3   1   0   79.49    7.80 
   3   1   0   66.69    7.50 
  -3   1   0   78.99    9.60 
   3   1   0   91.29    9.60 
   3   1   0   60.69    6.80 
  -3   1   0   84.29    6.80 
  -3   1   0   87.59    6.70 
  -3   1   0   72.09    8.20 
  -3   1   0   78.29    5.40 
  -3   1   0   86.69    6.40 
  -3   1   0   69.19    7.30 
   3   1   0   81.59    6.30 
   3   1   0  109.29    8.60 
   3   1   0   70.89    7.70 
   3   1   0   83.59    6.80 
  -3   1   0   62.89    6.60 
   3   1   0   84.99    6.50 
   3   1   0   77.49    9.60 
  -3   1   0   78.79    6.30 
  -3   1   0   70.19    7.30 
  -3   1   0   95.29    7.90 
  -3   1   0   84.59    8.70 
  -3   1   0   86.49    5.40 
  -3   1   0   89.29    7.20 
   3   1   0   91.69    6.60 
   3   1   0   70.49    7.50 
   3   1   0   84.39    6.70 
   3   1   0   81.19    5.50 
   3   1   0   69.59    7.10 
   3   1   0   79.39    6.10 
  -3   1   0   87.09    6.50 
  -3   1   0   83.29    7.00 
  -3   1   0   85.69    6.40 
  -3   1   0   77.49    4.50 
   3   1   0   88.49    7.20 
   3   1   0   80.19    5.50 
   3   1   0   69.69    7.10 
  -3   1   0   77.69    7.40 
   3   1   0   72.39    5.80 
  -3   1   0   81.79    5.70 
   3   1   0   95.39    6.30 
   3   1   0   76.99    6.20 
   3   1   0   73.49    8.10 
  -3   1   0   81.79    7.90 
  -3   1   0   95.79    7.10 
  -3   1   0   84.39    6.50 
   3   1   0   81.69    3.30 
   3   1   0   69.49    7.00 
  -4  -1   0   13.30    3.80 
  -4  -1   0   15.00    4.20 
  -4  -1   0   22.40    5.00 
   4  -1   0   23.70    4.60 
   4  -1   0   18.20    2.00 
   4  -1   0   15.10    2.10 
   4  -1   0   15.70    4.20 
  -4  -1   0   18.20    4.40 
  -4  -1   0   18.10    4.50 
  -4  -1   0   19.30    4.40 
  -4  -1   0   14.70    4.80 
  -4  -1   0   15.70    3.50 
  -4  -1   0   16.20    4.50 
   4  -1   0   16.80    4.40 
  -4  -1   0   13.90    1.80 
  -4  -1   0   11.50    4.30 
   4  -1   0   20.10    3.30 
   4  -1   0   18.10    4.00 
   4  -1   0   13.00    4.30 
   4  -1   0   18.70    3.10 
   4  -1   0   17.20    2.40 
  -4  -1   0   10.20    4.20 
  -4  -1   0   23.40    5.10 
   4  -1   0   18.50    4.00 
   4  -1   0   14.80    3.20 
  -4  -1   0   14.30    2.20 
  -4  -1   0   19.90    4.90 
  -4  -1   0   11.30    5.00 
  -4  -1   0   18.10    4.40 
  -4  -1   0   24.90    5.50 
   4  -1   0   19.30    4.00 
   4  -1   0   14.80    3.10 
   4  -1   0   15.00    2.90 
   4  -1   0   13.50    3.60 
   4  -1   0   21.70    4.60 
   4  -1   0   24.00    4.30 
   4  -1   0   24.10    4.40 
   4  -1   0   17.60    4.00 
   4  -1   0   16.60    3.90 
   4  -1   0   19.40    4.80 
  -4  -1   0   19.70    4.70 
  -4  -1   0   12.90    2.60 
  -4   1   0   15.20    4.10 
   4   1   0    3.30    2.70 
  -4   1   0   15.90    2.90 
  -4   1   0   19.40    6.00 
  -4   1   0   17.10    4.40 
   4   1   0   14.70    3.90 
  -4   1   0   11.70    3.00 
   4   1   0   19.00    2.20 
   4   1   0   16.50    4.10 
  -4   1   0   19.90    4.40 
   4   1   0   11.10    3.70 
   4   1   0   26.90    5.20 
   4   1   0   16.10    4.70 
  -4   1   0   16.90    4.40 
   4   1   0   13.80    4.20 
   4   1   0   15.80    4.50 
  -4   1   0   15.90    4.50 
  -4   1   0   15.60    5.00 
  -4   1   0   19.80    3.40 
  -4   1   0   16.90    3.60 
  -4   1   0   21.50    4.40 
   4   1   0   16.00    1.70 
   4   1   0   18.20    4.60 
   4   1   0   13.00    3.40 
  -4   1   0   13.90    4.50 
   4   1   0   18.50    4.10 
  -4   1   0   21.10    5.00 
  -4   1   0   21.10    4.60 
   4   1   0   13.40    3.50 
   4   1   0   18.60    3.80 
  -4   1   0   23.00    4.90 
   4   1   0   12.80    4.00 
  -4   1   0   16.60    4.20 
   4   1   0   13.90    5.00 
  -4   1   0   22.00    5.40 
  -4   1   0   17.80    4.60 
   4   1   0   16.70    4.50 
  -4   1   0   14.60    4.30 
  -4   1   0   10.70    4.30 
   5  -1   0 1116.79   40.50 
  -5  -1   0 1148.19   42.60 
  -5  -1   0 1153.08   47.60 
  -5  -1   0 1197.88   44.40 
   5  -1   0 1134.19   33.90 
  -5  -1   0 1182.58   42.80 
   5  -1   0 1138.49   36.40 
   5  -1   0 1159.88   40.20 
   5  -1   0 1148.99   36.90 
   5  -1   0 1136.49   36.10 
  -5  -1   0 1181.98   42.50 
  -5  -1   0 1082.09   40.70 
   5  -1   0 1153.38   39.60 
   5  -1   0 1110.59   37.20 
   5  -1   0 1158.08   37.90 
  -5  -1   0 1158.08   43.10 
   5  -1   0 1094.19   38.70 
  -5  -1   0 1190.78   44.70 
  -5  -1   0 1209.08   42.60 
   5  -1   0 1144.59   39.50 
   5  -1   0 1131.19   36.00 
  -5  -1   0 1078.69   40.00 
  -5  -1   0 1114.79   41.70 
   5  -1   0 1120.49   40.50 
   5  -1   0 1134.19   34.40 
  -5  -1   0 1157.88   37.20 
  -5  -1   0 1129.49   44.10 
  -5  -1   0 1130.19   39.90 
   5  -1   0 1166.78   43.00 
  -5  -1   0 1140.59   41.30 
  -5  -1   0 1178.18   40.60 
   5  -1   0 1120.19   39.60 
   5   1   0 1158.98   40.40 
  -5   1   0 1136.89   40.30 
   5   1   0 1147.79   41.20 
  -5   1   0 1084.29   43.50 
   5   1   0 1141.09   44.80 
  -5   1   0 1119.69   42.50 
  -5   1   0 1187.98   36.80 
  -5   1   0 1090.49   40.90 
  -5   1   0 1157.98   40.40 
  -5   1   0 1179.88   38.90 
  -5   1   0 1187.28   45.00 
  -5   1   0 1120.49   37.80 
   5   1   0 1100.09   41.00 
  -5   1   0 1147.89   41.90 
  -5   1   0 1126.49   42.90 
  -5   1   0 1147.19   41.20 
   5   1   0 1177.78   42.40 
   5   1   0 1129.89   42.10 
   5   1   0 1148.49   33.60 
   5   1   0 1122.59   43.70 
  -5   1   0 1167.18   47.80 
   5   1   0 1165.18   37.90 
  -5   1   0 1069.29   43.40 
   5   1   0 1160.88   39.80 
  -5   1   0 1233.58   36.60 
  -5   1   0 1157.38   40.70 
  -5   1   0 1128.69   41.30 
  -5   1   0 1115.59   41.10 
   5   1   0 1130.59   41.80 
  -5   1   0 1107.79   43.60 
   5   1   0 1195.58   41.50 
   5   1   0 1168.08   40.00 
   5   1   0 1201.18   42.50 
   5   1   0 1143.79   31.50 
   5   1   0 1192.78   32.10 
  -5   1   0 1130.69   41.40 
   5   1   0 1205.48   39.30 
  -6  -1   0   30.20    7.10 
   6  -1   0   26.10    5.50 
  -6  -1   0   23.70    6.90 
  -6  -1   0   29.80    8.80 
   6  -1   0   22.90    4.20 
  -6  -1   0   15.50    5.80 
  -6  -1   0   25.00    6.20 
  -6  -1   0   22.20    7.00 
  -6  -1   0   16.40    6.10 
   6  -1   0   27.50    4.90 
   6  -1   0   15.40    4.80 
   6  -1   0   26.80    4.80 
   6  -1   0   25.40    6.20 
   6  -1   0   23.60    4.70 
   6  -1   0   22.90    3.30 
  -6  -1   0   31.70    6.50 
  -6  -1   0   28.20    7.10 
  -6  -1   0   19.90    6.30 
   6  -1   0   27.20    6.50 
  -6  -1   0   19.40    6.10 
  -6  -1   0   16.80    6.50 
   6  -1   0   28.10    7.50 
   6  -1   0   23.60    5.40 
   6  -1   0   34.60    4.70 
  -6  -1   0   21.60    6.80 
  -6  -1   0   26.50    4.60 
   6  -1   0   16.50    4.50 
   6  -1   0   29.80    6.80 
   6  -1   0   22.30    6.30 
   6  -1   0   32.00    6.50 
   6  -1   0   22.60    5.50 
   6  -1   0   33.10    5.50 
  -6  -1   0   22.90    6.20 
   6  -1   0   28.60    5.00 
   6   1   0   19.40    5.70 
   6   1   0   26.30    5.00 
  -6   1   0   24.80    6.50 
  -6   1   0   27.10    6.20 
   6   1   0   14.30    5.20 
  -6   1   0   26.50    4.80 
  -6   1   0   16.50    6.00 
  -6   1   0   20.40    6.00 
   6   1   0   17.80    5.80 
   6   1   0   29.40    3.60 
   6   1   0   15.00    5.50 
  -6   1   0   21.80    7.70 
   6   1   0   15.10    4.90 
  -6   1   0   17.30    5.50 
   6   1   0   23.90    6.00 
  -6   1   0   35.60    8.40 
  -6   1   0   19.30    6.70 
  -6   1   0   23.30    5.10 
  -6   1   0   14.80    5.30 
  -6   1   0   24.90    7.40 
   6   1   0   23.90    7.00 
   6   1   0   31.00    6.30 
   6   1   0   26.20    5.60 
  -6   1   0   29.90    7.30 
  -6   1   0   26.40    6.60 
   6   1   0   13.40    5.80 
  -6   1   0   34.90    7.30 
   6   1   0   17.90    5.10 
   6   1   0   21.00    5.90 
  -6   1   0   31.50    5.90 
   6   1   0   20.90    6.20 
  -6   1   0   29.40    7.00 
  -7  -1   0 1210.78   49.10 
   7  -1   0 1261.27   46.70 
  -7  -1   0 1309.27   58.29 
  -7  -1   0 1286.67   47.70 
   7  -1   0 1245.28   45.10 
   7  -1   0 1254.17   43.00 
   7  -1   0 1257.27   44.10 
   7  -1   0 1255.77   52.69 
  -7  -1   0 1202.98   49.99 
   7  -1   0 1321.97   53.99 
  -7  -1   0 1299.07   50.19 
   7  -1   0 1340.37   47.30 
   7  -1   0 1266.17   48.90 
   7  -1   0 1314.87   45.50 
  -7  -1   0 1244.78   50.39 
  -7  -1   0 1285.27   53.89 
  -7  -1   0 1284.87   50.69 
  -7  -1   0 1312.57   52.09 
   7  -1   0 1264.07   49.10 
   7  -1   0 1216.98   52.99 
   7  -1   0 1211.28   47.40 
   7  -1   0 1286.07   46.10 
   7  -1   0 1304.67   48.70 
   7  -1   0 1311.47   51.09 
   7  -1   0 1323.77   48.20 
  -7  -1   0 1281.97   51.69 
  -7  -1   0 1376.66   54.59 
  -7  -1   0 1282.17   40.60 
  -7  -1   0 1221.18   52.79 
  -7  -1   0 1264.67   47.20 
  -7   1   0 1259.07   51.79 
  -7   1   0 1327.07   45.70 
   7   1   0 1340.97   47.20 
  -7   1   0 1285.77   57.79 
  -7   1   0 1302.57   54.59 
   7   1   0 1325.87   43.80 
   7   1   0 1304.57   53.59 
  -7   1   0 1291.87   49.40 
   7   1   0 1367.06   47.50 
   7   1   0 1222.38   49.60 
   7   1   0 1240.28   50.59 
   7   1   0 1316.77   50.39 
  -7   1   0 1303.77   50.09 
  -7   1   0 1334.57   43.80 
  -7   1   0 1210.48   52.59 
  -7   1   0 1240.78   49.70 
  -7   1   0 1239.88   49.10 
  -7   1   0 1222.88   49.50 
   7   1   0 1332.97   55.29 
   7   1   0 1290.47   48.80 
  -7   1   0 1268.77   50.19 
  -7   1   0 1335.27   54.49 
   7   1   0 1279.27   48.80 
   7   1   0 1239.28   45.90 
   7   1   0 1334.77   48.00 
   7   1   0 1269.37   49.40 
  -7   1   0 1378.96   46.50 
   7   1   0 1288.57   49.10 
   7   1   0 1342.17   50.99 
  -7   1   0 1271.97   53.59 
   8  -1   0    9.90    4.70 
   8  -1   0   16.80    6.80 
   8  -1   0    9.20    6.60 
  -8  -1   0    9.10    5.50 
  -8  -1   0   14.40    7.40 
  -8  -1   0   17.60    7.30 
  -8  -1   0    7.10    5.40 
   8  -1   0   11.00    6.30 
  -8  -1   0   17.10    8.50 
  -8  -1   0   11.50    6.20 
   8  -1   0   16.80    7.50 
  -8  -1   0    9.30    6.50 
   8  -1   0   17.30    5.50 
  -8  -1   0   17.20    6.60 
   8  -1   0   11.70    5.50 
   8  -1   0   37.10    8.70 
   8  -1   0   11.50    5.20 
  -8  -1   0    8.90    5.60 
   8  -1   0   17.80    5.70 
   8  -1   0   25.10    9.40 
   8  -1   0   24.40    7.00 
  -8  -1   0   15.60    7.00 
   8  -1   0   22.40    8.60 
   8  -1   0   11.50    6.90 
  -8  -1   0   14.90    7.30 
  -8  -1   0    7.50    7.00 
   8  -1   0   14.90    4.90 
   8  -1   0   16.60    6.10 
   8  -1   0   14.60    6.20 
  -8  -1   0   15.80    6.60 
   8  -1   0   20.30    6.60 
  -8   1   0   14.60    7.50 
  -8   1   0    6.10    5.30 
  -8   1   0   12.70    7.90 
  -8   1   0   17.10    7.30 
  -8   1   0    3.00    4.30 
  -8   1   0   28.80    8.10 
   8   1   0   21.10    8.60 
   8   1   0   10.00    5.80 
   8   1   0   18.50    6.20 
  -8   1   0   19.00    7.70 
   8   1   0   16.60    5.80 
  -8   1   0   10.40    5.90 
   8   1   0   10.70    5.90 
   8   1   0    8.80    4.90 
  -8   1   0   16.10    7.10 
  -8   1   0    7.30    6.10 
   8   1   0   13.20    6.40 
   8   1   0    9.60    5.40 
   8   1   0    9.10    5.80 
   8   1   0   17.80    6.90 
  -8   1   0   14.70    6.20 
   8   1   0   24.50    7.60 
   8   1   0   16.50    7.80 
   8   1   0   12.40    5.90 
   9  -1   0  304.97   31.90 
   9  -1   0  304.97   20.70 
   9  -1   0  305.07   21.90 
  -9  -1   0  325.07   27.30 
   9  -1   0  296.77   23.20 
   9  -1   0  272.47   27.10 
  -9  -1   0  292.57   22.80 
  -9  -1   0  333.77   24.70 
  -9  -1   0  305.47   25.00 
   9  -1   0  331.77   26.40 
  -9  -1   0  282.57   34.10 
  -9  -1   0  333.97   24.70 
   9  -1   0  308.37   26.60 
  -9  -1   0  304.37   23.60 
   9  -1   0  358.96   22.30 
   9  -1   0  301.37   30.80 
  -9  -1   0  332.47   25.00 
  -9  -1   0  289.37   30.30 
  -9  -1   0  363.26   25.60 
   9  -1   0  288.07   21.10 
   9  -1   0  317.07   23.20 
  -9  -1   0  287.37   20.50 
   9  -1   0  293.57   21.70 
  -9   1   0  317.17   27.00 
   9   1   0  251.07   27.80 
   9   1   0  279.87   21.80 
  -9   1   0  333.27   26.70 
  -9   1   0  323.77   24.00 
  -9   1   0  330.97   24.20 
  -9   1   0  284.77   23.20 
   9   1   0  322.07   24.00 
   9   1   0  304.57   21.00 
  -9   1   0  317.67   35.20 
   9   1   0  303.47   22.00 
  -9   1   0  285.47   22.90 
   9   1   0  293.87   22.60 
   9   1   0  317.87   22.90 
   9   1   0  318.97   24.40 
   9   1   0  306.07   22.80 
   9   1   0  320.27   21.40 
  -9   1   0  312.47   32.00 
   9   1   0  240.88   25.10 
   9   1   0  290.97   30.90 
  -9   1   0  311.17   23.20 
   9   1   0  295.37   22.30 
  10  -1   0   10.60    8.90 
  10  -1   0   16.20    7.30 
 -10  -1   0   22.60    9.10 
 -10  -1   0   38.20   14.10 
 -10  -1   0   39.50   13.60 
 -10  -1   0   19.70    8.20 
  10  -1   0   16.90    8.60 
  10  -1   0   21.40    9.00 
  10  -1   0   43.70   14.00 
 -10  -1   0   23.10    9.20 
 -10  -1   0   21.40    9.50 
 -10  -1   0   27.30   10.60 
  10  -1   0   29.30   12.00 
 -10  -1   0   37.10   15.40 
  10  -1   0   35.40   13.30 
  10  -1   0   18.10   10.40 
  10   1   0   23.60    9.70 
  10   1   0   41.90   14.20 
 -10   1   0   33.10   10.80 
 -10   1   0   39.80   15.00 
  10   1   0   19.80    8.60 
  10   1   0   18.10    9.80 
 -10   1   0   13.40    7.70 
 -10   1   0   22.00    8.40 
  10   1   0   30.30    9.70 
 -10   1   0   31.80   12.40 
 -10   1   0   20.50    9.80 
 -10   1   0   18.20    8.30 
  10   1   0   26.40   11.10 
  10   1   0   19.40    8.90 
  10   1   0   26.00    9.30 
   0  -2   0 4384.76  129.59 
   0  -2   0 4534.45  128.59 
   0  -2   0 4712.03  128.49 
   0  -2   0 4888.71  128.69 
   0  -2   0 4744.03  128.59 
   0  -2   0 4866.71  129.19 
   0  -2   0 4787.32  128.49 
   0  -2   0 4590.14  129.39 
   0  -2   0 4911.51  129.59 
   0  -2   0 4676.73  129.19 
   0  -2   0 4940.41  129.09 
   0  -2   0 4912.51  129.79 
   0  -2   0 4807.12  129.29 
   0  -2   0 4806.82  128.79 
   0  -2   0 4830.82  129.29 
   0  -2   0 4795.72  127.49 
   0  -2   0 4742.13  129.79 
   0  -2   0 4630.24  129.49 
   0  -2   0 4765.62  128.29 
   0  -2   0 4651.63  128.99 
   0  -2   0 4767.32  129.59 
   0  -2   0 4798.82  129.49 
   0  -2   0 4669.33  129.49 
   0   2   0 4792.52  128.79 
   0   2   0 4643.34  128.79 
   0   2   0 4431.36  130.39 
   0   2   0 4624.64  130.29 
   0   2   0 4991.80  128.99 
   0   2   0 4647.23  129.19 
   0   2   0 4732.23  128.99 
   0   2   0 4817.02  129.19 
   0   2   0 4816.72  128.59 
   0   2   0 4848.02  128.69 
   0   2   0 4580.74  129.29 
   0   2   0 4727.23  127.49 
   0   2   0 4950.50  129.29 
   0   2   0 4811.02  129.19 
   0   2   0 4516.45  130.89 
   0   2   0 4806.02  129.59 
   0   2   0 4720.63  129.59 
   0   2   0 4604.04  129.49 
   0   2   0 4925.81  129.89 
   0   2   0 4834.12  129.79 
  -1  -2   0 3574.54  100.49 
  -1  -2   0 3535.15   98.89 
  -1  -2   0 3600.34  100.69 
   1  -2   0 3637.94   99.79 
  -1  -2   0 3581.64  100.29 
   1  -2   0 3612.74  100.09 
   1  -2   0 3771.22   97.49 
   1  -2   0 3739.13   98.09 
  -1  -2   0 3686.13  100.39 
   1  -2   0 3457.95  102.89 
   1  -2   0 3463.25   98.09 
   1  -2   0 3290.67  100.49 
   1  -2   0 3119.29  102.39 
  -1  -2   0 3662.23   98.89 
   1  -2   0 3537.45   99.49 
  -1  -2   0 3619.84  101.19 
   1  -2   0 3725.73  101.99 
   1  -2   0 3747.23   97.29 
   1  -2   0 3640.14  100.79 
  -1  -2   0 3495.95  100.59 
  -1  -2   0 3615.94  100.19 
  -1  -2   0 3790.92  101.49 
   1  -2   0 3521.85  100.99 
   1  -2   0 3486.95  101.29 
   1  -2   0 3596.94   99.39 
  -1  -2   0 3730.83  100.79 
  -1  -2   0 3683.93   97.69 
  -1  -2   0 3779.12  101.49 
  -1  -2   0 3705.33  100.49 
  -1  -2   0 3755.22  101.59 
  -1  -2   0 3590.64  101.29 
  -1  -2   0 3602.34  101.09 
   1  -2   0 3687.53  100.79 
   1  -2   0 3568.64   98.69 
  -1  -2   0 3750.82  100.69 
  -1  -2   0 3569.94   97.49 
  -1  -2   0 3675.83  100.39 
   1  -2   0 3594.74  100.09 
  -1  -2   0 3578.94  101.19 
  -1  -2   0 3851.61  100.79 
  -1  -2   0 3832.22  101.29 
  -1  -2   0 3579.84   99.19 
  -1  -2   0 3551.44   98.29 
   1  -2   0 3678.93   99.29 
   1  -2   0 3580.74   96.59 
  -1  -2   0 3662.03  100.79 
  -1  -2   0 3665.03  100.19 
  -1  -2   0 3845.92   99.69 
   1  -2   0 3641.34   98.59 
   1  -2   0 3682.33   97.99 
   1  -2   0 3630.44   97.39 
   1  -2   0 3618.24   98.49 
  -1  -2   0 3588.74  100.09 
   1  -2   0 3708.03   98.99 
  -1  -2   0 3893.21  101.19 
  -1  -2   0 3571.44  100.39 
   1  -2   0 3615.64  100.39 
  -1  -2   0 3648.93  100.39 
   1  -2   0 3126.69  102.79 
   1  -2   0 3370.66   99.99 
   1  -2   0 3615.64   97.39 
   1  -2   0 3395.36  101.39 
   1   2   0 3803.82  101.49 
  -1   2   0 3656.03  100.99 
  -1   2   0 3676.53   98.19 
   1   2   0 3711.83   97.39 
  -1   2   0 3646.74   98.79 
  -1   2   0 3637.64   99.59 
  -1   2   0 3623.44   98.79 
   1   2   0 3658.03  100.79 
   1   2   0 3685.73  101.39 
   1   2   0 3703.23  100.19 
   1   2   0 3840.02  100.99 
   1   2   0 3697.03  100.79 
  -1   2   0 3579.34   97.19 
   1   2   0 3500.55  100.59 
   1   2   0 3711.03  100.89 
  -1   2   0 3638.94   99.69 
   1   2   0 3658.13  100.89 
   1   2   0 3578.24   97.69 
   1   2   0 3692.33   99.09 
   1   2   0 3721.53  100.59 
  -1   2   0 3603.14   99.49 
   1   2   0 3698.23  101.79 
  -1   2   0 3606.64  101.99 
  -1   2   0 3577.14   98.79 
  -1   2   0 3585.44  101.79 
   1   2   0 3750.12   97.79 
   1   2   0 3613.54  100.49 
   1   2   0 3652.73  101.19 
   1   2   0 3581.44  101.09 
  -1   2   0 3747.62  102.19 
   1   2   0 3703.13  100.69 
  -1   2   0 3278.37   98.99 
  -1   2   0 3642.74   97.39 
  -1   2   0 3607.24  103.19 
   1   2   0 3681.83  100.59 
   1   2   0 3588.44  100.59 
  -1   2   0 3530.15   99.29 
  -1   2   0 3692.43  100.39 
  -1   2   0 3605.34   98.59 
  -1   2   0 3575.74   99.29 
  -1   2   0 3453.95   99.09 
  -1   2   0 3679.23   97.59 
  -1   2   0 3229.08  101.39 
   1   2   0 3675.03  100.29 
   1   2   0 3723.83  101.39 
   1   2   0 3604.44  101.09 
   1   2   0 3572.24  100.39 
  -1   2   0 3735.33  101.39 
  -1   2   0 3720.33   96.99 
   1   2   0 3658.23  100.89 
  -1   2   0 3471.55   96.99 
  -1   2   0 3564.24   99.09 
  -1   2   0 3476.75   99.99 
   2  -2   0 2348.97   68.69 
   2  -2   0 2417.06   70.09 
  -2  -2   0 2373.26   70.79 
  -2  -2   0 2485.65   65.79 
  -2  -2   0 2391.36   68.79 
   2  -2   0 2378.36   68.59 
   2  -2   0 2257.07   67.89 
  -2  -2   0 2426.56   68.99 
   2  -2   0 2446.66   68.89 
   2  -2   0 2374.36   67.99 
   2  -2   0 2527.15   71.79 
   2  -2   0 2419.56   67.79 
   2  -2   0 2288.47   71.49 
  -2  -2   0 2398.76   70.79 
  -2  -2   0 2335.37   68.89 
  -2  -2   0 2476.95   70.19 
   2  -2   0 2393.16   67.49 
  -2  -2   0 2518.85   70.89 
  -2  -2   0 2434.46   70.49 
  -2  -2   0 2403.16   68.99 
   2  -2   0 2396.96   66.09 
   2  -2   0 2457.85   69.09 
  -2  -2   0 2357.46   70.39 
   2  -2   0 2328.67   68.19 
   2  -2   0 2484.35   69.89 
   2  -2   0 2337.57   67.99 
   2  -2   0 2349.17   64.29 
   2  -2   0 2481.05   64.09 
  -2  -2   0 2506.25   68.09 
   2  -2   0 2380.86   68.79 
   2  -2   0 2472.85   68.39 
   2  -2   0 2392.86   67.19 
   2  -2   0 2404.06   71.39 
  -2  -2   0 2418.56   71.19 
   2  -2   0 2285.27   70.19 
   2  -2   0 2410.66   69.29 
  -2  -2   0 2358.56   70.09 
   2  -2   0 2436.26   67.09 
   2  -2   0 2392.66   68.99 
  -2  -2   0 2532.15   72.09 
   2  -2   0 2335.57   71.79 
  -2  -2   0 2482.05   70.59 
   2  -2   0 2365.56   67.89 
  -2  -2   0 2442.36   71.59 
  -2  -2   0 2402.86   68.89 
   2  -2   0 2283.37   69.79 
   2  -2   0 2301.87   66.09 
  -2  -2   0 2454.25   70.29 
   2  -2   0 2315.87   69.79 
   2  -2   0 2409.16   69.19 
  -2  -2   0 2417.96   71.39 
   2  -2   0 2382.26   66.29 
   2  -2   0 2272.57   68.39 
  -2  -2   0 2421.46   65.49 
   2  -2   0 2517.85   66.49 
   2  -2   0 2416.06   69.39 
  -2  -2   0 2372.36   70.29 
  -2  -2   0 2163.88   67.09 
  -2  -2   0 2512.35   71.99 
   2  -2   0 2230.68   71.19 
  -2  -2   0 2491.85   70.49 
  -2  -2   0 2421.96   68.59 
   2  -2   0 2479.75   67.99 
  -2  -2   0 2389.16   69.49 
  -2  -2   0 2417.76   70.69 
  -2   2   0 2300.77   69.99 
  -2   2   0 2236.88   70.69 
  -2   2   0 2476.65   68.19 
   2   2   0 2467.95   70.19 
   2   2   0 2526.95   69.59 
   2   2   0 2354.96   70.39 
   2   2   0 2455.25   70.49 
  -2   2   0 2404.26   69.19 
   2   2   0 2484.25   70.79 
   2   2   0 2474.55   72.09 
  -2   2   0 2423.76   67.89 
   2   2   0 2470.95   71.09 
   2   2   0 2394.86   69.49 
   2   2   0 2502.95   70.49 
   2   2   0 2504.05   70.39 
   2   2   0 2383.26   69.79 
  -2   2   0 2267.17   71.59 
   2   2   0 2358.46   68.29 
   2   2   0 2385.86   70.29 
  -2   2   0 2176.48   70.99 
   2   2   0 2458.85   68.89 
   2   2   0 2585.74   71.69 
   2   2   0 2550.94   71.29 
   2   2   0 2492.75   68.99 
   2   2   0 2372.46   70.49 
   2   2   0 2567.04   70.89 
  -2   2   0 2287.37   68.39 
   2   2   0 2489.85   69.79 
  -2   2   0 2335.47   67.19 
   2   2   0 2424.86   70.39 
  -2   2   0 2423.96   68.79 
   2   2   0 2487.15   67.69 
   2   2   0 2368.76   70.69 
  -2   2   0 2502.55   67.99 
  -2   2   0 2421.16   70.29 
   2   2   0 2416.06   70.49 
  -2   2   0 2232.98   67.99 
  -2   2   0 2454.85   69.99 
   2   2   0 2408.16   68.19 
   2   2   0 2478.45   70.49 
   2   2   0 2491.15   71.19 
   2   2   0 2466.15   68.59 
  -2   2   0 2471.75   68.29 
  -2   2   0 2414.96   70.09 
  -2   2   0 2298.27   69.89 
   2   2   0 2411.66   67.69 
  -3  -2   0  999.10   35.00 
   3  -2   0  951.20   32.20 
   3  -2   0  993.80   32.20 
  -3  -2   0  970.70   33.40 
  -3  -2   0  981.10   31.90 
  -3  -2   0  946.41   27.70 
  -3  -2   0  961.20   35.20 
   3  -2   0  966.80   30.20 
  -3  -2   0 1015.90   33.60 
   3  -2   0  959.50   33.00 
   3  -2   0  982.10   31.50 
   3  -2   0  958.50   26.60 
  -3  -2   0  945.81   32.20 
   3  -2   0  997.20   27.60 
   3  -2   0  979.50   31.10 
  -3  -2   0  993.20   34.30 
   3  -2   0 1014.00   28.40 
   3  -2   0  947.51   32.40 
  -3  -2   0  998.10   32.60 
   3  -2   0  989.20   33.20 
  -3  -2   0 1021.30   34.90 
   3  -2   0  954.10   28.80 
   3  -2   0  970.60   35.60 
   3  -2   0  966.80   36.20 
   3  -2   0  984.90   32.80 
  -3  -2   0  979.50   33.40 
   3  -2   0  969.20   33.30 
   3  -2   0  905.11   34.30 
   3  -2   0  922.31   35.50 
  -3  -2   0 1005.90   34.10 
   3  -2   0  995.00   34.90 
   3  -2   0 1007.00   32.50 
  -3  -2   0  969.80   28.50 
   3  -2   0  955.30   33.30 
   3  -2   0 1030.30   35.60 
   3  -2   0  987.20   32.00 
  -3  -2   0  933.21   31.70 
  -3  -2   0  951.90   32.60 
  -3  -2   0  941.81   34.30 
   3  -2   0  995.90   30.10 
  -3  -2   0  940.81   34.70 
  -3  -2   0  987.10   32.30 
   3  -2   0 1013.10   35.80 
   3  -2   0  928.71   28.30 
  -3  -2   0 1018.90   31.10 
   3  -2   0  955.80   31.90 
   3  -2   0  955.90   33.20 
   3  -2   0  975.20   31.30 
  -3  -2   0  962.60   34.90 
   3  -2   0  988.50   32.40 
   3   2   0  947.21   32.90 
   3   2   0 1050.29   33.30 
  -3   2   0 1022.60   32.80 
  -3   2   0 1022.70   32.90 
  -3   2   0 1049.49   33.30 
  -3   2   0  989.90   33.00 
  -3   2   0  983.80   34.60 
   3   2   0 1025.70   34.20 
   3   2   0  936.61   33.90 
   3   2   0  967.10   31.90 
   3   2   0  982.90   29.10 
  -3   2   0  998.60   32.50 
   3   2   0  946.11   34.50 
  -3   2   0  969.40   32.60 
  -3   2   0  956.90   32.80 
   3   2   0  932.51   33.50 
   3   2   0  993.20   36.20 
   3   2   0  945.91   32.10 
   3   2   0  958.30   33.80 
   3   2   0  970.90   33.90 
   3   2   0 1010.40   35.50 
  -3   2   0 1023.20   35.00 
  -3   2   0  988.70   33.20 
   3   2   0  979.60   34.40 
  -3   2   0 1015.90   35.40 
   3   2   0  952.00   34.20 
  -3   2   0  988.40   29.60 
  -3   2   0 1008.00   33.80 
  -3   2   0 1064.79   35.20 
   3   2   0 1022.40   31.80 
  -3   2   0 1020.20   38.80 
  -3   2   0  975.40   30.90 
   3   2   0 1007.90   33.90 
   3   2   0  996.50   35.30 
   4  -2   0 1542.65   49.60 
   4  -2   0 1492.45   51.09 
   4  -2   0 1607.94   45.20 
  -4  -2   0 1574.94   52.89 
  -4  -2   0 1567.74   51.09 
  -4  -2   0 1578.54   53.79 
   4  -2   0 1565.64   43.90 
   4  -2   0 1531.15   46.70 
   4  -2   0 1586.04   46.10 
  -4  -2   0 1496.85   56.99 
  -4  -2   0 1537.15   48.70 
  -4  -2   0 1556.04   47.90 
   4  -2   0 1569.64   50.89 
   4  -2   0 1581.84   45.80 
  -4  -2   0 1595.64   49.50 
  -4  -2   0 1600.54   52.29 
  -4  -2   0 1606.24   51.99 
  -4  -2   0 1568.74   53.99 
   4  -2   0 1577.74   46.40 
   4  -2   0 1512.35   50.79 
   4  -2   0 1595.54   50.19 
   4  -2   0 1579.94   46.70 
   4  -2   0 1607.84   48.80 
  -4  -2   0 1569.94   46.60 
  -4  -2   0 1524.75   51.29 
   4  -2   0 1571.84   43.10 
   4  -2   0 1628.74   47.00 
   4  -2   0 1558.24   52.29 
   4  -2   0 1603.84   54.89 
  -4  -2   0 1557.74   51.99 
  -4  -2   0 1574.14   53.29 
  -4  -2   0 1555.74   51.99 
   4  -2   0 1535.65   49.20 
   4  -2   0 1599.64   54.09 
   4  -2   0 1565.44   49.40 
  -4  -2   0 1461.35   51.29 
  -4  -2   0 1612.74   50.79 
   4  -2   0 1537.25   54.49 
   4  -2   0 1507.85   50.59 
   4  -2   0 1558.64   49.30 
   4  -2   0 1576.44   43.60 
  -4   2   0 1598.84   50.69 
   4   2   0 1560.24   51.19 
   4   2   0 1522.95   52.19 
  -4   2   0 1565.24   52.19 
   4   2   0 1595.54   51.29 
   4   2   0 1625.14   52.59 
   4   2   0 1591.54   53.99 
  -4   2   0 1579.74   50.89 
  -4   2   0 1609.84   51.39 
  -4   2   0 1640.24   51.99 
   4   2   0 1625.84   52.29 
  -4   2   0 1633.94   53.69 
  -4   2   0 1570.24   45.00 
  -4   2   0 1551.74   54.79 
  -4   2   0 1613.84   53.89 
   4   2   0 1587.24   47.30 
  -4   2   0 1495.05   57.09 
   4   2   0 1620.94   52.29 
   4   2   0 1652.73   49.80 
  -4   2   0 1583.44   50.59 
  -4   2   0 1591.84   51.49 
  -4   2   0 1564.34   51.19 
   4   2   0 1624.94   49.20 
  -4   2   0 1558.34   49.90 
   4   2   0 1598.44   52.69 
  -4   2   0 1583.74   50.99 
   4   2   0 1573.54   51.89 
   4   2   0 1599.24   50.29 
  -4   2   0 1633.84   48.00 
  -4   2   0 1574.74   51.09 
  -4   2   0 1574.54   51.09 
  -4   2   0 1564.54   50.59 
   4   2   0 1648.24   55.59 
   4   2   0 1608.34   53.29 
   5  -2   0  555.04   19.30 
   5  -2   0  520.75   23.00 
  -5  -2   0  524.75   18.20 
   5  -2   0  548.05   23.30 
  -5  -2   0  499.25   21.70 
   5  -2   0  523.95   22.90 
  -5  -2   0  503.85   29.00 
   5  -2   0  507.45   17.20 
   5  -2   0  512.75   18.40 
   5  -2   0  539.35   19.60 
   5  -2   0  542.75   18.10 
   5  -2   0  512.05   22.10 
   5  -2   0  549.85   23.40 
   5  -2   0  522.35   26.40 
  -5  -2   0  554.34   20.90 
   5  -2   0  525.35   16.00 
  -5  -2   0  485.75   25.70 
  -5  -2   0  503.45   23.40 
  -5  -2   0  513.35   24.60 
  -5  -2   0  526.15   25.10 
  -5  -2   0  520.65   25.50 
  -5  -2   0  528.45   24.80 
   5  -2   0  506.05   22.30 
   5  -2   0  508.05   26.00 
   5  -2   0  516.75   24.10 
   5  -2   0  562.14   27.70 
   5  -2   0  499.85   19.70 
   5  -2   0  539.05   19.40 
   5  -2   0  518.15   16.20 
  -5  -2   0  517.55   24.00 
   5  -2   0  504.65   22.30 
  -5  -2   0  558.74   27.40 
  -5  -2   0  533.85   24.80 
  -5  -2   0  528.75   19.40 
  -5  -2   0  538.05   24.20 
  -5  -2   0  490.35   23.90 
  -5  -2   0  504.45   25.10 
   5   2   0  493.25   24.30 
  -5   2   0  553.44   24.90 
  -5   2   0  482.55   23.30 
   5   2   0  554.94   25.80 
   5   2   0  514.05   24.40 
   5   2   0  510.25   23.50 
  -5   2   0  538.95   22.90 
   5   2   0  511.05   22.40 
   5   2   0  485.85   26.50 
  -5   2   0  500.25   17.70 
   5   2   0  542.15   26.60 
  -5   2   0  535.35   27.30 
  -5   2   0  507.45   20.70 
   5   2   0  550.44   25.00 
   5   2   0  508.35   24.70 
   5   2   0  523.65   24.80 
   5   2   0  525.45   21.30 
  -5   2   0  522.95   23.60 
  -5   2   0  540.35   23.60 
   5   2   0  487.65   24.20 
  -5   2   0  558.84   24.20 
   5   2   0  565.24   24.80 
  -5   2   0  553.24   30.20 
  -5   2   0  524.95   25.90 
  -5   2   0  508.15   20.70 
  -5   2   0  473.85   25.80 
  -5   2   0  555.84   26.70 
  -5   2   0  507.75   23.50 
   5   2   0  501.95   21.40 
   5   2   0  548.85   23.90 
  -5   2   0  588.84   24.40 
  -5   2   0  544.35   23.40 
  -6  -2   0 1623.14   66.49 
   6  -2   0 1677.23   57.29 
  -6  -2   0 1665.83   62.49 
   6  -2   0 1678.33   46.20 
  -6  -2   0 1665.63   48.60 
   6  -2   0 1636.74   55.59 
  -6  -2   0 1720.93   61.29 
  -6  -2   0 1695.53   60.19 
   6  -2   0 1715.13   55.59 
  -6  -2   0 1694.93   59.79 
  -6  -2   0 1762.82   61.09 
  -6  -2   0 1633.24   49.70 
   6  -2   0 1737.53   53.29 
  -6  -2   0 1606.74   58.59 
   6  -2   0 1719.63   56.39 
   6  -2   0 1740.33   62.99 
  -6  -2   0 1708.73   54.59 
   6  -2   0 1789.92   50.49 
   6  -2   0 1793.62   58.19 
  -6  -2   0 1769.62   58.79 
  -6  -2   0 1744.83   58.89 
  -6  -2   0 1707.83   48.00 
  -6  -2   0 1679.23   48.40 
   6  -2   0 1684.43   51.79 
   6  -2   0 1681.43   63.29 
   6  -2   0 1737.53   57.79 
   6  -2   0 1677.93   62.19 
   6  -2   0 1670.33   55.29 
   6  -2   0 1649.44   56.09 
  -6  -2   0 1765.62   59.49 
   6  -2   0 1706.43   52.49 
  -6  -2   0 1618.94   58.99 
  -6  -2   0 1745.63   61.79 
   6  -2   0 1707.53   48.90 
   6  -2   0 1706.73   58.49 
   6  -2   0 1705.33   51.99 
   6  -2   0 1680.43   49.20 
  -6  -2   0 1688.13   62.69 
  -6   2   0 1732.53   57.69 
  -6   2   0 1685.93   67.49 
  -6   2   0 1718.63   64.09 
   6   2   0 1683.43   59.49 
   6   2   0 1720.93   59.79 
   6   2   0 1641.64   63.59 
   6   2   0 1657.53   58.39 
   6   2   0 1608.24   59.29 
   6   2   0 1677.33   59.49 
  -6   2   0 1694.93   56.89 
   6   2   0 1753.52   58.09 
   6   2   0 1690.13   54.69 
  -6   2   0 1754.82   63.89 
  -6   2   0 1656.93   58.29 
   6   2   0 1699.73   60.69 
  -6   2   0 1593.04   57.79 
  -6   2   0 1737.83   57.59 
  -6   2   0 1679.13   53.89 
   6   2   0 1602.84   58.79 
   6   2   0 1753.22   58.09 
   6   2   0 1738.53   60.49 
   6   2   0 1671.53   53.89 
  -6   2   0 1661.53   53.59 
  -6   2   0 1745.53   59.29 
  -6   2   0 1677.73   62.39 
  -6   2   0 1659.23   57.89 
  -6   2   0 1710.93   50.39 
   6   2   0 1653.83   59.89 
  -6   2   0 1624.24   58.89 
   6   2   0 1617.24   55.29 
  -6   2   0 1699.63   62.29 
  -6   2   0 1642.14   58.39 
   6   2   0 1624.54   61.99 
   7  -2   0  157.08   11.40 
  -7  -2   0  107.09   13.80 
   7  -2   0  147.69   18.70 
  -7  -2   0  115.29   18.70 
  -7  -2   0  122.49   14.50 
  -7  -2   0  144.69   16.90 
  -7  -2   0  159.48   17.30 
   7  -2   0  122.39   12.30 
   7  -2   0  128.09   13.10 
  -7  -2   0  142.79   10.10 
   7  -2   0  179.48   20.10 
  -7  -2   0  135.99   15.30 
   7  -2   0  137.59    9.70 
   7  -2   0  138.39   14.90 
   7  -2   0  130.89   14.30 
  -7  -2   0  139.19   16.40 
   7  -2   0  138.89    9.90 
   7  -2   0  129.29   16.50 
   7  -2   0  100.99   12.10 
   7  -2   0  132.59   14.30 
   7  -2   0  139.19   15.10 
  -7  -2   0  110.39   16.20 
  -7  -2   0  133.39   16.10 
   7  -2   0  129.39   17.70 
   7  -2   0  140.49    9.50 
   7  -2   0  123.99   13.80 
   7  -2   0  142.89   14.10 
  -7  -2   0  163.18   19.30 
  -7  -2   0  117.99   15.80 
  -7  -2   0  146.09   16.30 
  -7   2   0  111.49   18.50 
   7   2   0  135.49   18.60 
  -7   2   0  142.39   18.00 
  -7   2   0  148.09   15.80 
   7   2   0  122.49   16.60 
   7   2   0  159.28   17.60 
  -7   2   0  131.09   14.30 
   7   2   0  163.68   17.00 
   7   2   0  139.49   15.60 
   7   2   0  151.38   11.70 
  -7   2   0  128.59   15.10 
  -7   2   0  122.19   15.10 
   7   2   0  109.19   14.80 
   7   2   0  132.79   15.50 
   7   2   0  132.39   14.00 
  -7   2   0  121.69   14.60 
  -7   2   0  163.08   20.20 
   7   2   0  156.38   17.40 
  -7   2   0  137.59   10.40 
   7   2   0  130.79   15.10 
   7   2   0  148.69   11.30 
   7   2   0  130.79   14.80 
   7   2   0  147.79   17.10 
  -7   2   0  134.19   17.40 
  -7   2   0  134.69   10.60 
  -7   2   0  121.19   14.70 
  -7   2   0  126.89   14.90 
  -7   2   0  153.58   15.80 
   7   2   0  113.49   13.40 
  -8  -2   0  738.63   35.50 
  -8  -2   0  719.63   43.90 
   8  -2   0  701.83   40.20 
   8  -2   0  747.53   38.70 
   8  -2   0  718.73   40.00 
   8  -2   0  701.33   38.40 
   8  -2   0  755.12   34.90 
  -8  -2   0  813.22   38.50 
   8  -2   0  767.42   35.40 
  -8  -2   0  710.93   37.90 
   8  -2   0  712.63   32.90 
  -8  -2   0  709.13   36.90 
  -8  -2   0  774.42   39.00 
   8  -2   0  822.92   31.80 
  -8  -2   0  720.03   39.80 
   8  -2   0  701.43   32.00 
   8  -2   0  731.93   32.40 
   8  -2   0  747.33   34.10 
  -8  -2   0  762.32   36.70 
   8  -2   0  686.93   33.10 
   8  -2   0  716.33   39.60 
  -8  -2   0  734.23   36.90 
  -8  -2   0  719.63   39.80 
  -8  -2   0  691.73   36.90 
   8  -2   0  733.73   31.40 
   8  -2   0  764.12   34.30 
  -8  -2   0  705.13   34.70 
  -8   2   0  779.62   37.40 
  -8   2   0  744.73   35.60 
  -8   2   0  700.73   39.10 
  -8   2   0  737.13   44.70 
   8   2   0  703.43   39.10 
  -8   2   0  741.13   34.30 
   8   2   0  790.02   37.20 
   8   2   0  748.33   36.20 
   8   2   0  767.22   37.00 
  -8   2   0  769.22   36.90 
   8   2   0  675.03   35.20 
   8   2   0  744.03   37.70 
   8   2   0  698.33   40.40 
  -8   2   0  773.02   40.40 
   8   2   0  710.63   37.00 
   8   2   0  722.73   36.80 
   8   2   0  771.72   35.80 
   8   2   0  772.82   34.30 
   8   2   0  726.53   37.50 
  -8   2   0  743.83   41.30 
   8   2   0  728.53   33.80 
  -8   2   0  666.83   35.20 
  -8   2   0  735.23   36.40 
   8   2   0  737.53   31.40 
  -9  -2   0   91.99   17.00 
   9  -2   0   86.39   16.40 
  -9  -2   0   62.49   11.60 
   9  -2   0   79.79   15.50 
  -9  -2   0   76.69   16.10 
   9  -2   0   55.69   11.90 
  -9  -2   0   75.99   14.50 
  -9  -2   0   70.59   14.50 
   9  -2   0   63.29   12.00 
  -9  -2   0   64.99   16.40 
   9  -2   0   94.29   14.10 
  -9  -2   0   79.09   15.20 
  -9  -2   0   50.59   12.20 
   9  -2   0   89.69   15.80 
  -9  -2   0   78.29   15.10 
  -9  -2   0  105.79   17.20 
  -9  -2   0   96.89   14.90 
   9  -2   0   89.99   17.60 
  -9  -2   0   64.09   13.40 
   9  -2   0   69.39   15.60 
   9  -2   0   66.29   14.50 
   9   2   0  108.19   15.90 
  -9   2   0   69.49   15.30 
   9   2   0   49.90   12.30 
   9   2   0   53.59   12.40 
   9   2   0   81.59   14.40 
   9   2   0   70.59   13.10 
   9   2   0   80.09   14.40 
   9   2   0   69.79   13.90 
  -9   2   0   58.09   12.00 
   9   2   0   65.89   11.60 
  -9   2   0   56.19   11.60 
  -9   2   0   77.59   14.70 
  -9   2   0   53.99   13.10 
  -9   2   0   67.69   13.50 
  -9   2   0   70.49   18.10 
   9   2   0   87.39   17.10 
  -9   2   0   73.99   16.10 
   9   2   0   59.59   11.90 
   9   2   0   66.79   13.60 
   9   2   0   67.79   13.30 
   9   2   0   75.09   15.90 
 -10  -2   0  408.66   30.20 
  10  -2   0  380.36   30.70 
 -10  -2   0  384.36   29.60 
 -10  -2   0  336.07   27.10 
 -10  -2   0  379.96   32.10 
  10  -2   0  410.26   30.50 
 -10  -2   0  376.76   37.40 
 -10  -2   0  405.66   44.30 
 -10  -2   0  459.85   31.80 
  10  -2   0  411.66   32.90 
  10  -2   0  463.65   28.50 
  10  -2   0  460.15   29.20 
 -10  -2   0  415.66   30.80 
  10  -2   0  397.26   26.60 
  10  -2   0  371.16   37.90 
  10  -2   0  420.56   33.80 
 -10  -2   0  393.36   29.60 
  10   2   0  381.36   26.40 
  10   2   0  377.76   32.20 
  10   2   0  430.26   33.50 
 -10   2   0  399.96   28.90 
 -10   2   0  396.66   43.50 
  10   2   0  405.06   28.60 
 -10   2   0  357.56   27.60 
 -10   2   0  340.47   27.30 
  10   2   0  412.86   29.30 
  10   2   0  440.56   30.80 
  10   2   0  417.66   29.90 
  10   2   0  346.17   26.90 
 -10   2   0  342.27   30.00 
 -10   2   0  438.66   30.00 
  10   2   0  298.37   31.10 
  10   2   0  355.06   28.60 
   0  -3   0   -0.80    1.50 
   0  -3   0    0.40    1.70 
   0  -3   0    2.80    1.90 
   0  -3   0   -1.20    1.40 
   0  -3   0   -0.70    1.60 
   0  -3   0    7.70    2.90 
   0  -3   0    0.50    1.80 
   0  -3   0    1.00    1.60 
   0  -3   0   -1.70    1.70 
   0  -3   0    3.60    2.00 
   0  -3   0    2.70    2.00 
   0  -3   0   -3.10    1.10 
   0  -3   0    0.90    1.90 
   0  -3   0    3.60    2.40 
   0  -3   0    0.50    2.10 
   0  -3   0    0.40    1.50 
   0  -3   0   -0.10    1.80 
   0  -3   0    5.10    2.10 
   0  -3   0   -0.80    1.40 
   0  -3   0   -0.60    1.10 
   0  -3   0    2.60    2.00 
   0   3   0   -0.40    1.90 
   0   3   0   -1.30    1.70 
   0   3   0    0.50    1.60 
   0   3   0    0.00    1.90 
   0   3   0    0.30    1.90 
   0   3   0    0.50    1.30 
   0   3   0   -0.20    1.60 
   0   3   0    0.90    2.10 
   0   3   0    0.20    1.90 
   0   3   0   -1.90    2.00 
   0   3   0    3.40    2.20 
   0   3   0    1.00    2.00 
   0   3   0    0.60    1.50 
   0   3   0    0.60    1.50 
   0   3   0   -0.90    1.10 
   0   3   0    0.90    1.60 
   0   3   0    1.00    2.20 
   0   3   0    5.30    2.40 
   0   3   0    0.40    1.60 
   1  -3   0  245.78   11.70 
   1  -3   0  234.08    8.90 
   1  -3   0  238.98    8.60 
  -1  -3   0  231.78   11.30 
  -1  -3   0  231.48   12.10 
  -1  -3   0  234.58    8.70 
   1  -3   0  255.67   12.60 
  -1  -3   0  225.18   10.50 
  -1  -3   0  247.38   12.00 
  -1  -3   0  242.98   11.60 
  -1  -3   0  243.88   12.60 
  -1  -3   0  234.38   11.80 
   1  -3   0  241.48   11.60 
   1  -3   0  242.78    9.10 
   1  -3   0  231.98   10.00 
   1  -3   0  240.08   11.60 
   1  -3   0  255.27   12.40 
   1  -3   0  239.98   14.40 
   1  -3   0  238.98   11.50 
  -1  -3   0  236.78   12.50 
   1  -3   0  229.68   13.00 
  -1  -3   0  242.48   11.80 
  -1  -3   0  234.48   12.00 
  -1  -3   0  250.07   12.90 
   1  -3   0  242.18    9.00 
   1  -3   0  234.68   10.30 
  -1  -3   0  256.87   10.10 
  -1  -3   0  228.98   11.50 
   1  -3   0  243.28   11.00 
  -1  -3   0  242.68   12.50 
   1  -3   0  249.68   11.70 
  -1  -3   0  240.38   12.70 
  -1  -3   0  228.38    8.70 
  -1  -3   0  208.38   11.80 
  -1  -3   0  240.58   12.60 
   1  -3   0  249.78   11.80 
  -1  -3   0  250.37   12.60 
  -1  -3   0  237.08   12.60 
   1  -3   0  237.28   11.40 
  -1  -3   0  243.98   12.90 
  -1  -3   0  235.48   12.60 
   1  -3   0  242.98   11.20 
   1  -3   0  231.38   12.10 
   1  -3   0  225.58   11.10 
   1  -3   0  230.28   13.10 
   1  -3   0  229.58   10.80 
  -1  -3   0  224.98   11.60 
   1  -3   0  234.68   10.60 
  -1  -3   0  228.98   11.40 
   1  -3   0  226.78   12.00 
   1  -3   0  239.58   12.60 
   1  -3   0  244.58   14.00 
  -1  -3   0  229.48   12.20 
   1  -3   0  230.28   10.10 
   1  -3   0  229.48    8.20 
   1  -3   0  248.48   11.90 
   1   3   0  245.78   12.60 
  -1   3   0  219.68   15.10 
   1   3   0  250.67   12.80 
  -1   3   0  230.78   11.10 
   1   3   0  220.38   12.20 
   1   3   0  262.77   12.50 
  -1   3   0  235.28    9.90 
   1   3   0  234.08   12.40 
   1   3   0  225.88   10.90 
   1   3   0  231.58   12.70 
  -1   3   0  235.38   10.90 
  -1   3   0  244.58   11.60 
  -1   3   0  236.08   14.10 
   1   3   0  237.38   12.70 
  -1   3   0  234.88    8.70 
  -1   3   0  236.58   13.50 
  -1   3   0  253.97   12.30 
  -1   3   0  243.58    9.30 
  -1   3   0  234.98   10.70 
  -1   3   0  239.48    9.60 
  -1   3   0  212.08   13.60 
  -1   3   0  267.77   12.70 
   1   3   0  228.88   12.00 
   1   3   0  238.08   12.10 
  -1   3   0  243.88   11.40 
   1   3   0  247.68   12.30 
   1   3   0  247.78   12.20 
   1   3   0  231.48   12.50 
  -1   3   0  257.17   11.90 
  -1   3   0  204.88   14.40 
  -1   3   0  247.18    8.40 
  -1   3   0  258.67   12.40 
  -1   3   0  245.28   12.70 
  -1   3   0  226.88   13.40 
  -1   3   0  218.78   11.10 
  -1   3   0  243.18   16.40 
   1   3   0  256.07   13.40 
   1   3   0  243.78    8.50 
  -1   3   0  234.18   11.50 
   1   3   0  236.58    8.80 
   1   3   0  225.88   12.00 
  -1   3   0  241.28   10.70 
  -1   3   0  251.57   13.40 
  -1   3   0  240.38   12.00 
  -1   3   0  243.48   12.30 
   1   3   0  225.78   12.00 
   1   3   0  247.98   11.60 
  -1   3   0  250.67   11.30 
  -1   3   0  269.97   13.20 
   2  -3   0   71.09    5.20 
   2  -3   0   79.69   10.80 
   2  -3   0   86.19   11.20 
   2  -3   0   80.19    8.80 
  -2  -3   0   69.69    8.30 
  -2  -3   0   74.59    5.90 
   2  -3   0   70.99    7.50 
   2  -3   0   77.59    6.20 
  -2  -3   0   68.29    8.30 
  -2  -3   0   74.39    8.40 
   2  -3   0   82.89    3.80 
   2  -3   0   83.29    6.50 
   2  -3   0   66.09    5.10 
   2  -3   0   76.29    7.80 
  -2  -3   0   72.79    5.10 
   2  -3   0   84.99    8.60 
   2  -3   0   71.59    4.90 
   2  -3   0   94.79    7.80 
   2  -3   0   79.99    5.40 
  -2  -3   0   63.69    7.60 
  -2  -3   0   76.29    5.30 
  -2  -3   0   75.99    8.60 
   2  -3   0   92.49    6.20 
  -2  -3   0   90.49    5.80 
  -2  -3   0   75.49    8.10 
   2  -3   0   79.99    4.30 
  -2  -3   0   79.09    6.50 
   2  -3   0   71.29    8.70 
   2  -3   0   75.19    5.10 
   2  -3   0   96.99    8.80 
   2  -3   0   79.29    5.00 
   2  -3   0   80.49    9.40 
   2  -3   0   77.59    5.50 
   2  -3   0   82.49    6.10 
   2  -3   0   70.99    9.40 
  -2  -3   0   85.89    8.60 
  -2  -3   0   63.99    6.70 
   2  -3   0   75.99    6.40 
   2  -3   0   80.49    5.70 
  -2  -3   0   72.19    7.50 
   2  -3   0   67.09    7.90 
   2  -3   0   78.69    8.50 
   2  -3   0   82.89    5.80 
   2  -3   0   89.59    6.00 
  -2  -3   0   71.19    5.70 
  -2  -3   0   70.79    8.10 
  -2  -3   0   77.49    8.30 
  -2  -3   0   64.89    7.20 
  -2  -3   0   74.29    5.30 
   2  -3   0   85.39    8.50 
  -2  -3   0   80.69    5.50 
   2  -3   0   83.09    6.50 
  -2  -3   0   74.39    5.50 
  -2  -3   0   90.79    9.40 
   2  -3   0   77.19    5.40 
  -2  -3   0   87.59    8.60 
   2   3   0   65.69    7.50 
   2   3   0   79.09    8.40 
  -2   3   0   74.99    5.30 
   2   3   0   85.89    5.80 
  -2   3   0   80.19    6.20 
   2   3   0   85.59    9.50 
   2   3   0   69.99    8.10 
   2   3   0   73.09    5.80 
   2   3   0   83.99    8.80 
  -2   3   0   81.69    5.20 
  -2   3   0   70.89    8.10 
   2   3   0   80.39    8.10 
  -2   3   0   81.49    5.60 
  -2   3   0   76.79    6.20 
  -2   3   0   76.39    9.20 
  -2   3   0   85.19    8.70 
   2   3   0   67.29    7.70 
   2   3   0   65.09    7.60 
  -2   3   0   69.19    8.10 
   2   3   0   76.59    7.60 
   2   3   0   73.39    8.20 
  -2   3   0   82.69   10.00 
  -2   3   0   76.29    5.70 
  -2   3   0   93.59    7.00 
   2   3   0   61.89    7.30 
  -2   3   0   73.09    7.90 
  -2   3   0   87.49    6.30 
  -2   3   0   82.89    6.80 
   2   3   0   77.89    8.60 
  -2   3   0   80.19    5.40 
   2   3   0   78.99    7.80 
  -2   3   0   85.49    6.90 
   2   3   0   77.29    5.20 
  -2   3   0   78.19    6.00 
   2   3   0   82.09    6.50 
   2   3   0   72.29    8.20 
  -2   3   0   83.59    4.00 
   2   3   0   75.69    5.40 
   3  -3   0    9.90    3.20 
  -3  -3   0    7.20    1.90 
   3  -3   0    8.90    4.00 
   3  -3   0    5.60    3.00 
   3  -3   0    9.90    2.90 
   3  -3   0   12.00    4.30 
   3  -3   0    8.90    2.30 
   3  -3   0    3.70    2.80 
  -3  -3   0    6.70    2.70 
  -3  -3   0    1.00    2.50 
  -3  -3   0    2.20    2.20 
   3  -3   0   12.10    3.00 
   3  -3   0    4.00    2.10 
   3  -3   0    8.70    3.10 
  -3  -3   0   17.80    4.90 
   3  -3   0    4.10    1.80 
   3  -3   0    6.30    2.90 
   3  -3   0   12.20    3.50 
   3  -3   0    6.10    3.40 
  -3  -3   0    5.50    2.60 
   3  -3   0    8.70    1.90 
   3  -3   0   10.50    3.30 
   3  -3   0    4.50    3.70 
   3  -3   0   14.80    3.40 
   3  -3   0    9.40    2.10 
   3  -3   0    7.70    4.30 
  -3  -3   0    3.40    2.80 
   3  -3   0    6.70    2.70 
   3  -3   0    9.10    2.60 
   3  -3   0    8.30    2.30 
  -3  -3   0    8.40    3.50 
  -3  -3   0    9.50    3.60 
  -3  -3   0    4.00    3.00 
  -3  -3   0    8.10    3.80 
  -3  -3   0    4.40    2.30 
  -3  -3   0    6.50    3.10 
  -3  -3   0    7.30    3.40 
  -3  -3   0    4.40    2.00 
  -3  -3   0    7.50    1.80 
   3  -3   0    8.90    2.90 
  -3  -3   0    7.80    3.40 
   3  -3   0    5.10    2.70 
  -3  -3   0    8.90    2.90 
  -3  -3   0    3.40    2.60 
   3  -3   0    8.10    2.70 
   3   3   0    9.80    3.90 
  -3   3   0    9.40    3.40 
   3   3   0   13.80    4.40 
  -3   3   0    6.40    2.70 
  -3   3   0   11.40    3.20 
  -3   3   0    4.80    2.50 
   3   3   0    8.90    2.80 
   3   3   0    4.80    2.80 
  -3   3   0    8.00    2.90 
   3   3   0    7.20    3.40 
   3   3   0    1.00    2.30 
   3   3   0    6.30    3.20 
   3   3   0    5.80    2.80 
   3   3   0    3.20    2.90 
  -3   3   0    7.10    2.80 
  -3   3   0    6.50    2.50 
  -3   3   0    5.60    2.50 
   3   3   0    4.70    3.10 
  -3   3   0    9.30    3.90 
  -3   3   0    3.70    3.00 
   3   3   0    8.30    3.40 
  -3   3   0    8.40    2.80 
  -3   3   0    5.80    2.70 
  -3   3   0    4.60    3.50 
  -3   3   0    7.20    2.60 
   3   3   0    3.80    3.10 
   3   3   0    4.20    3.10 
   3   3   0    9.60    2.80 
  -3   3   0   11.00    3.70 
  -3   3   0   14.30    4.40 
   3   3   0    6.90    3.40 
   3   3   0    7.40    3.50 
  -4  -3   0  257.97   14.80 
   4  -3   0  250.17   14.90 
  -4  -3   0  285.67   17.30 
   4  -3   0  260.47   13.80 
   4  -3   0  243.58   12.60 
   4  -3   0  258.57    9.70 
  -4  -3   0  260.47   15.70 
   4  -3   0  215.68   16.40 
   4  -3   0  265.17   13.40 
  -4  -3   0  229.48   15.00 
  -4  -3   0  248.28   15.60 
   4  -3   0  230.18   13.30 
   4  -3   0  253.17   16.20 
   4  -3   0  227.78   16.20 
   4  -3   0  264.47   15.30 
  -4  -3   0  239.98   12.60 
  -4  -3   0  256.37    8.80 
   4  -3   0  249.97   10.10 
   4  -3   0  247.28   10.10 
  -4  -3   0  239.08   15.80 
  -4  -3   0  233.18   13.60 
  -4  -3   0  246.78   14.00 
  -4  -3   0  267.27   16.00 
  -4  -3   0  266.87   16.60 
   4  -3   0  241.48   11.00 
  -4  -3   0  261.47   14.20 
   4  -3   0  245.48   13.70 
   4  -3   0  241.58   11.40 
  -4  -3   0  237.78    8.60 
  -4  -3   0  257.07   14.60 
   4  -3   0  246.68   14.00 
   4  -3   0  232.38   16.00 
  -4  -3   0  252.27   13.20 
   4  -3   0  260.47   13.20 
   4  -3   0  235.58    9.80 
  -4  -3   0  237.98   14.20 
   4  -3   0  244.98   11.50 
  -4  -3   0  253.07   13.80 
   4   3   0  263.67   12.50 
  -4   3   0  255.97   15.20 
  -4   3   0  281.57   16.70 
   4   3   0  269.57   16.00 
   4   3   0  219.08   14.60 
  -4   3   0  236.88   13.40 
   4   3   0  253.07   16.10 
  -4   3   0  236.08   10.70 
   4   3   0  231.48   15.10 
   4   3   0  291.37   16.20 
   4   3   0  243.28   16.00 
   4   3   0  247.08   13.40 
  -4   3   0  232.98   15.50 
   4   3   0  236.88   15.40 
  -4   3   0  252.57   15.40 
   4   3   0  227.68   14.30 
   4   3   0  248.38   15.20 
   4   3   0  257.77   15.60 
  -4   3   0  254.27   12.10 
  -4   3   0  254.27   14.10 
   4   3   0  257.87   16.10 
  -4   3   0  238.48   13.80 
  -4   3   0  260.17   13.80 
  -4   3   0  258.07   13.90 
  -4   3   0  256.07   14.00 
  -4   3   0  262.67   14.30 
  -4   3   0  248.88   15.90 
   4   3   0  256.27   17.10 
   4   3   0  244.28   14.70 
  -4   3   0  276.37   14.30 
   5  -3   0  613.44   30.50 
   5  -3   0  593.24   24.60 
  -5  -3   0  597.74   28.80 
   5  -3   0  585.74   22.70 
   5  -3   0  555.94   27.40 
   5  -3   0  560.04   25.10 
  -5  -3   0  640.64   26.20 
  -5  -3   0  569.74   25.80 
  -5  -3   0  592.54   24.50 
   5  -3   0  528.35   23.30 
   5  -3   0  586.44   24.10 
   5  -3   0  592.44   18.90 
  -5  -3   0  581.44   29.70 
  -5  -3   0  619.94   27.20 
   5  -3   0  573.64   17.40 
   5  -3   0  585.44   26.50 
  -5  -3   0  590.74   26.70 
   5  -3   0  572.44   29.80 
  -5  -3   0  557.74   27.10 
  -5  -3   0  561.54   27.20 
   5  -3   0  588.84   18.90 
   5  -3   0  564.94   26.60 
   5  -3   0  560.34   22.20 
   5  -3   0  579.54   22.10 
   5  -3   0  579.14   21.10 
  -5  -3   0  597.04   28.80 
  -5  -3   0  581.94   25.10 
   5  -3   0  559.64   28.60 
   5  -3   0  586.14   18.00 
   5  -3   0  576.04   17.50 
   5  -3   0  570.34   17.20 
   5  -3   0  582.24   20.70 
   5  -3   0  543.35   26.00 
  -5  -3   0  613.04   28.50 
   5  -3   0  565.24   19.60 
  -5  -3   0  575.94   26.70 
  -5  -3   0  540.55   21.90 
   5  -3   0  609.44   20.60 
  -5  -3   0  566.04   32.40 
  -5  -3   0  567.54   27.00 
   5   3   0  559.14   27.50 
   5   3   0  534.25   27.80 
  -5   3   0  537.85   27.30 
   5   3   0  545.85   27.30 
   5   3   0  598.34   24.10 
   5   3   0  579.84   27.10 
  -5   3   0  553.14   25.10 
   5   3   0  586.74   30.00 
  -5   3   0  588.14   25.80 
   5   3   0  567.74   26.60 
  -5   3   0  610.34   25.90 
  -5   3   0  566.24   25.50 
  -5   3   0  605.34   27.00 
   5   3   0  539.05   25.20 
  -5   3   0  578.74   26.00 
  -5   3   0  588.24   25.60 
  -5   3   0  578.34   22.00 
  -5   3   0  579.14   26.60 
  -5   3   0  596.84   19.10 
  -5   3   0  528.55   27.40 
   5   3   0  538.25   26.70 
  -5   3   0  607.44   24.90 
   5   3   0  531.25   26.70 
   5   3   0  590.84   26.70 
   5   3   0  550.54   26.50 
   5   3   0  532.35   27.50 
   5   3   0  577.94   27.30 
  -5   3   0  551.84   26.80 
  -5   3   0  574.94   25.20 
  -6  -3   0  993.60   37.90 
   6  -3   0 1009.60   43.90 
  -6  -3   0 1027.30   43.00 
  -6  -3   0  964.20   40.50 
  -6  -3   0  995.30   35.90 
  -6  -3   0  941.21   42.30 
   6  -3   0 1010.80   45.00 
  -6  -3   0  957.10   40.40 
   6  -3   0  997.30   38.90 
   6  -3   0  976.80   31.60 
   6  -3   0  992.20   40.30 
   6  -3   0  966.90   37.90 
   6  -3   0 1031.40   38.70 
   6  -3   0 1022.60   41.90 
   6  -3   0 1005.70   32.90 
  -6  -3   0 1004.60   44.00 
   6  -3   0  997.20   32.00 
  -6  -3   0  973.40   41.20 
  -6  -3   0  953.40   38.80 
   6  -3   0 1000.50   30.10 
   6  -3   0 1025.40   39.50 
  -6  -3   0 1030.80   40.50 
   6  -3   0 1003.60   41.70 
  -6  -3   0 1008.00   41.80 
  -6  -3   0  967.70   43.10 
  -6  -3   0  969.50   40.60 
   6  -3   0  948.11   36.80 
   6  -3   0 1026.80   37.60 
  -6  -3   0  910.21   47.00 
  -6  -3   0  970.60   40.90 
   6  -3   0  939.41   43.70 
   6   3   0 1039.70   39.30 
  -6   3   0 1017.20   49.10 
   6   3   0  939.71   40.70 
  -6   3   0 1058.79   40.00 
  -6   3   0 1022.00   39.70 
   6   3   0  937.31   42.90 
   6   3   0  954.50   44.80 
  -6   3   0 1061.29   35.00 
  -6   3   0  993.20   39.60 
   6   3   0 1037.60   41.80 
   6   3   0 1004.50   40.40 
   6   3   0 1008.00   40.20 
   6   3   0  981.20   41.60 
  -6   3   0  935.61   42.00 
   6   3   0 1029.00   41.60 
  -6   3   0 1031.70   38.10 
  -6   3   0 1143.89   42.60 
  -6   3   0  995.20   39.40 
   6   3   0  938.91   41.90 
   6   3   0 1009.90   41.70 
   6   3   0  982.80   41.30 
   6   3   0  996.30   36.40 
  -6   3   0 1010.00   43.50 
   6   3   0 1018.60   42.40 
  -6   3   0  926.21   38.90 
   7  -3   0  281.67   22.80 
  -7  -3   0  318.67   20.30 
   7  -3   0  306.07   20.50 
   7  -3   0  274.17   17.30 
  -7  -3   0  302.97   20.90 
   7  -3   0  280.97   16.80 
   7  -3   0  282.87   17.70 
   7  -3   0  315.27   19.40 
   7  -3   0  284.07   22.40 
  -7  -3   0  317.97   26.60 
  -7  -3   0  328.47   22.00 
   7  -3   0  275.37   14.90 
  -7  -3   0  312.07   21.30 
  -7  -3   0  312.57   17.90 
   7  -3   0  288.77   18.80 
   7  -3   0  292.07   18.00 
  -7  -3   0  260.67   21.70 
   7  -3   0  310.67   20.60 
   7  -3   0  292.97   17.80 
  -7  -3   0  312.87   22.50 
  -7  -3   0  276.77   19.80 
   7  -3   0  275.77   22.50 
  -7  -3   0  270.27   19.60 
  -7  -3   0  321.17   21.60 
   7  -3   0  270.67   18.90 
   7  -3   0  318.97   17.70 
  -7  -3   0  284.77   21.30 
  -7  -3   0  260.87   21.70 
   7   3   0  292.87   20.80 
  -7   3   0  286.07   22.00 
   7   3   0  311.67   21.30 
  -7   3   0  279.77   19.20 
  -7   3   0  280.67   18.40 
   7   3   0  286.37   20.70 
   7   3   0  320.57   17.20 
  -7   3   0  273.67   19.80 
   7   3   0  303.67   22.70 
   7   3   0  275.47   20.80 
   7   3   0  319.47   22.50 
   7   3   0  297.67   21.00 
  -7   3   0  293.87   19.80 
  -7   3   0  250.57   20.60 
  -7   3   0  317.97   18.70 
   7   3   0  312.27   21.10 
  -7   3   0  284.07   19.20 
   7   3   0  320.47   21.40 
   7   3   0  299.87   18.60 
   7   3   0  311.27   20.00 
  -7   3   0  304.07   20.00 
   7   3   0  292.57   19.40 
  -7   3   0  321.67   32.70 
  -7   3   0  284.77   15.30 
   7   3   0  289.67   23.50 
   8  -3   0  266.67   19.20 
  -8  -3   0  306.37   21.50 
   8  -3   0  267.17   19.40 
   8  -3   0  249.48   17.60 
   8  -3   0  245.28   22.30 
   8  -3   0  237.48   19.60 
   8  -3   0  253.27   26.80 
  -8  -3   0  270.27   26.70 
  -8  -3   0  262.17   21.00 
   8  -3   0  235.68   18.30 
  -8  -3   0  309.67   22.70 
  -8  -3   0  246.98   26.90 
   8  -3   0  273.17   27.70 
  -8  -3   0  305.07   22.00 
   8  -3   0  301.77   20.80 
   8  -3   0  249.88   27.30 
  -8  -3   0  253.07   21.30 
  -8  -3   0  245.48   20.60 
  -8  -3   0  261.97   31.10 
  -8  -3   0  254.57   19.80 
   8  -3   0  288.77   20.60 
  -8  -3   0  277.97   23.60 
   8  -3   0  277.87   18.30 
  -8  -3   0  268.47   20.50 
   8  -3   0  212.68   23.20 
   8   3   0  269.87   22.10 
  -8   3   0  233.18   25.60 
   8   3   0  247.08   19.70 
  -8   3   0  255.67   19.70 
   8   3   0  261.17   19.50 
   8   3   0  243.68   23.40 
   8   3   0  255.37   20.70 
   8   3   0  232.18   24.10 
   8   3   0  220.28   16.90 
   8   3   0  238.78   20.00 
  -8   3   0  257.87   19.90 
  -8   3   0  244.48   17.50 
   8   3   0  249.38   19.00 
  -8   3   0  229.48   22.80 
   8   3   0  227.38   25.40 
  -8   3   0  257.17   22.20 
   8   3   0  274.37   21.50 
   8   3   0  277.07   21.10 
  -8   3   0  268.67   31.50 
  -8   3   0  238.08   22.50 
  -8   3   0  249.97   24.20 
   8   3   0  283.47   29.50 
   9  -3   0  186.18   19.50 
   9  -3   0  190.68   25.40 
   9  -3   0  188.78   22.50 
   9  -3   0  191.08   20.90 
  -9  -3   0  134.19   24.60 
   9  -3   0  189.68   21.90 
   9  -3   0  207.48   25.50 
  -9  -3   0  203.58   23.20 
  -9  -3   0  165.58   20.50 
   9  -3   0  195.18   26.30 
  -9  -3   0  224.18   22.80 
  -9  -3   0  183.58   21.30 
   9  -3   0  220.58   22.00 
   9  -3   0  228.08   26.50 
  -9  -3   0  212.78   24.80 
  -9  -3   0  179.18   22.60 
  -9  -3   0  251.77   28.60 
  -9  -3   0  150.38   22.70 
   9  -3   0  176.18   23.60 
   9  -3   0  196.28   24.60 
  -9  -3   0  192.38   23.10 
  -9  -3   0  173.48   21.80 
  -9  -3   0  186.18   23.80 
   9   3   0  159.58   20.00 
  -9   3   0  201.98   22.50 
  -9   3   0  197.18   21.80 
   9   3   0  209.08   24.20 
  -9   3   0  172.58   20.80 
   9   3   0  204.28   23.40 
   9   3   0  200.08   22.80 
   9   3   0  216.18   23.50 
   9   3   0  201.98   20.90 
   9   3   0  181.58   22.40 
  -9   3   0  210.08   25.80 
  -9   3   0  166.48   20.40 
  -9   3   0  194.78   29.10 
   9   3   0  214.88   24.40 
   9   3   0  234.98   24.20 
   9   3   0  178.68   25.20 
   9   3   0  176.68   20.10 
   9   3   0  148.99   21.50 
  -9   3   0  226.28   26.40 
   9   3   0  167.98   23.10 
   0  -4   0  785.22   29.30 
   0  -4   0  749.33   29.90 
   0  -4   0  751.62   29.00 
   0  -4   0  782.22   29.70 
   0  -4   0  803.82   28.50 
   0  -4   0  791.62   28.00 
   0  -4   0  796.62   30.00 
   0  -4   0  794.62   29.60 
   0  -4   0  796.82   29.50 
   0  -4   0  821.52   30.40 
   0  -4   0  810.22   30.20 
   0  -4   0  753.52   29.20 
   0  -4   0  736.83   28.60 
   0   4   0  793.22   32.00 
   0   4   0  801.12   32.60 
   0   4   0  787.92   28.70 
   0   4   0  802.42   30.50 
   0   4   0  753.52   29.00 
   0   4   0  791.92   26.90 
   0   4   0  832.32   30.60 
   0   4   0  765.92   28.80 
   0   4   0  815.22   30.20 
   0   4   0  829.02   29.60 
   0   4   0  823.02   28.80 
   0   4   0  830.72   30.70 
   0   4   0  797.72   33.70 
   0   4   0  837.82   30.00 
   0   4   0  810.92   28.60 
   0   4   0  855.71   33.60 
   0   4   0  784.42   30.30 
  -1  -4   0 4981.60  141.79 
  -1  -4   0 4997.30  136.29 
   1  -4   0 5143.49  138.99 
  -1  -4   0 4957.10  141.19 
   1  -4   0 5003.00  143.79 
   1  -4   0 4920.81  132.79 
   1  -4   0 5098.49  140.79 
  -1  -4   0 4912.61  140.19 
  -1  -4   0 5246.38  141.19 
   1  -4   0 5031.00  140.49 
  -1  -4   0 5059.19  142.19 
  -1  -4   0 5155.98  133.79 
  -1  -4   0 4981.70  142.49 
  -1  -4   0 4884.41  142.19 
  -1  -4   0 5115.79  142.39 
  -1  -4   0 5253.37  141.09 
   1  -4   0 4990.10  140.69 
  -1  -4   0 4982.10  139.59 
  -1  -4   0 5229.38  143.49 
   1  -4   0 4946.60  143.29 
   1  -4   0 5114.89  137.89 
   1  -4   0 5062.19  140.09 
   1  -4   0 5037.50  134.89 
  -1  -4   0 5049.59  142.49 
  -1  -4   0 4992.20  141.89 
   1  -4   0 4922.41  134.29 
  -1  -4   0 5015.50  142.59 
  -1  -4   0 5073.89  140.59 
   1  -4   0 4944.21  141.59 
   1  -4   0 5167.58  138.09 
  -1  -4   0 5028.10  137.99 
   1  -4   0 5025.70  142.49 
  -1  -4   0 5119.69  133.89 
  -1   4   0 5163.58  142.69 
   1   4   0 4914.91  142.39 
   1   4   0 4925.61  143.99 
  -1   4   0 5047.19  133.89 
   1   4   0 5096.89  141.69 
  -1   4   0 5151.48  140.39 
  -1   4   0 4875.91  144.29 
   1   4   0 5028.70  139.69 
  -1   4   0 4935.31  139.49 
  -1   4   0 5126.89  137.19 
   1   4   0 5093.99  133.39 
  -1   4   0 4684.93  150.58 
  -1   4   0 4237.08  144.29 
   1   4   0 5055.69  141.49 
   1   4   0 4941.41  141.59 
   1   4   0 5026.90  141.79 
  -1   4   0 4793.62  142.29 
   1   4   0 5092.19  141.59 
   1   4   0 5200.88  141.89 
  -1   4   0 4955.20  138.89 
  -1   4   0 4967.80  141.29 
  -1   4   0 4871.81  138.69 
  -1   4   0 5158.08  138.79 
  -1   4   0 5025.60  141.99 
   1   4   0 5068.19  133.89 
  -1   4   0 4994.00  139.89 
   1   4   0 4943.51  142.19 
  -1   4   0 4753.82  141.89 
  -1   4   0 4997.20  140.49 
   1   4   0 5092.49  141.99 
  -1   4   0 4776.52  142.09 
  -1   4   0 4691.93  136.29 
   1   4   0 4955.70  142.99 
  -1   4   0 5032.00  142.59 
  -1   4   0 5057.99  136.29 
  -2  -4   0  811.22   26.30 
   2  -4   0  782.72   33.00 
  -2  -4   0  781.02   31.50 
   2  -4   0  840.92   28.10 
   2  -4   0  817.22   24.10 
   2  -4   0  776.52   29.00 
  -2  -4   0  781.52   31.70 
   2  -4   0  823.82   31.30 
   2  -4   0  800.22   25.90 
  -2  -4   0  801.52   26.30 
   2  -4   0  811.72   27.50 
  -2  -4   0  859.41   28.40 
   2  -4   0  843.62   26.90 
   2  -4   0  798.72   26.90 
   2  -4   0  801.12   28.90 
  -2  -4   0  842.72   28.10 
   2  -4   0  860.01   30.40 
  -2  -4   0  808.32   30.60 
  -2  -4   0  826.02   30.70 
   2  -4   0  847.02   36.40 
  -2  -4   0  844.62   32.00 
  -2  -4   0  802.72   28.60 
  -2  -4   0  779.92   29.30 
  -2  -4   0  790.32   27.40 
  -2  -4   0  784.62   28.10 
  -2  -4   0  774.22   30.80 
   2  -4   0  830.92   29.80 
   2  -4   0  780.02   25.60 
  -2  -4   0  829.12   32.60 
  -2  -4   0  804.22   30.70 
  -2  -4   0  818.62   32.50 
   2  -4   0  811.32   25.80 
  -2  -4   0  838.22   33.00 
   2  -4   0  816.32   26.90 
   2  -4   0  836.42   32.50 
   2  -4   0  817.22   25.50 
  -2  -4   0  845.92   32.60 
   2   4   0  807.12   25.70 
   2   4   0  841.52   32.10 
  -2   4   0  845.72   30.10 
   2   4   0  828.52   26.50 
  -2   4   0  806.42   26.90 
  -2   4   0  836.32   34.40 
   2   4   0  822.42   30.80 
   2   4   0  759.72   30.70 
   2   4   0  823.62   32.20 
   2   4   0  796.02   32.50 
  -2   4   0  854.41   29.50 
  -2   4   0  774.92   26.40 
  -2   4   0  765.02   28.30 
   2   4   0  784.02   31.20 
  -2   4   0  836.52   28.90 
  -2   4   0  826.42   29.80 
   2   4   0  817.32   31.70 
   2   4   0  779.32   31.30 
   2   4   0  789.72   31.60 
  -2   4   0  855.61   31.00 
  -2   4   0  788.82   33.00 
   2   4   0  807.52   30.50 
  -2   4   0  826.22   28.70 
  -2   4   0  816.22   29.30 
  -2   4   0  842.32   34.00 
   2   4   0  762.22   32.80 
   2   4   0  786.82   31.70 
  -2   4   0  845.22   30.40 
  -2   4   0  858.01   32.50 
  -2   4   0  813.32   31.10 
  -2   4   0  800.12   24.80 
  -2   4   0  826.32   31.70 
   2   4   0  801.22   31.20 
  -2   4   0  825.82   26.20 
   3  -4   0  957.00   27.20 
  -3  -4   0  976.30   32.70 
   3  -4   0  985.60   37.10 
   3  -4   0  961.70   35.00 
  -3  -4   0  948.61   37.90 
  -3  -4   0  911.01   37.80 
   3  -4   0  891.31   36.10 
  -3  -4   0  923.31   37.70 
  -3  -4   0  876.71   36.40 
   3  -4   0  979.70   32.50 
  -3  -4   0  992.40   33.70 
   3  -4   0 1021.40   41.40 
  -3  -4   0  943.41   32.80 
  -3  -4   0  972.20   35.10 
   3  -4   0 1007.10   32.60 
   3  -4   0  931.61   38.50 
  -3  -4   0  984.20   37.40 
   3  -4   0  987.90   40.90 
  -3  -4   0  913.21   36.00 
  -3  -4   0 1003.60   37.00 
   3  -4   0  980.30   37.90 
   3  -4   0 1021.40   33.50 
   3  -4   0  979.50   33.90 
   3  -4   0 1019.50   32.70 
  -3  -4   0  955.10   31.10 
  -3  -4   0  953.90   31.00 
   3  -4   0  981.00   31.80 
   3  -4   0  991.30   30.10 
   3  -4   0  895.81   34.40 
   3  -4   0  919.31   31.20 
  -3  -4   0  970.80   32.30 
  -3  -4   0  991.20   34.30 
   3  -4   0 1039.60   37.90 
  -3  -4   0  918.41   36.90 
  -3  -4   0  984.60   36.40 
  -3  -4   0  938.91   38.20 
   3  -4   0 1011.00   31.50 
   3  -4   0  957.20   27.50 
   3   4   0  975.90   31.90 
  -3   4   0  986.00   35.10 
   3   4   0  917.41   36.70 
   3   4   0  975.50   37.50 
  -3   4   0  971.80   37.40 
   3   4   0  957.00   37.80 
   3   4   0  950.40   36.60 
   3   4   0  931.11   36.30 
  -3   4   0  983.70   33.80 
  -3   4   0  968.00   34.50 
   3   4   0  938.51   38.80 
   3   4   0  930.91   36.10 
  -3   4   0  988.50   32.00 
   3   4   0 1012.10   35.60 
  -3   4   0  957.30   39.70 
  -3   4   0  948.21   34.30 
   3   4   0  878.21   34.70 
   3   4   0  963.30   37.40 
   3   4   0  922.31   37.30 
  -3   4   0  973.50   37.20 
  -3   4   0  948.11   37.70 
  -3   4   0  966.90   32.50 
  -3   4   0  992.10   37.10 
   3   4   0  993.00   37.30 
   3   4   0  996.90   37.80 
  -3   4   0  950.30   34.80 
  -3   4   0  930.51   32.10 
  -3   4   0 1006.00   33.70 
  -3   4   0  971.60   35.40 
   3   4   0  912.81   36.50 
  -4  -4   0  486.75   24.00 
   4  -4   0  468.65   14.70 
  -4  -4   0  450.25   16.20 
  -4  -4   0  440.36   21.00 
   4  -4   0  458.95   19.70 
   4  -4   0  463.55   22.60 
   4  -4   0  506.85   27.30 
   4  -4   0  470.15   25.10 
   4  -4   0  434.86   23.80 
  -4  -4   0  431.66   23.30 
   4  -4   0  425.46   21.80 
  -4  -4   0  451.45   19.90 
   4  -4   0  466.35   20.30 
  -4  -4   0  453.85   23.50 
  -4  -4   0  467.75   23.90 
  -4  -4   0  451.05   22.10 
   4  -4   0  446.46   16.00 
   4  -4   0  451.15   19.20 
  -4  -4   0  445.86   21.40 
  -4  -4   0  424.16   20.40 
   4  -4   0  491.25   18.40 
  -4  -4   0  451.85   24.40 
   4  -4   0  472.65   22.50 
   4  -4   0  488.55   18.90 
  -4  -4   0  442.56   24.40 
  -4  -4   0  454.55   21.90 
   4  -4   0  497.95   22.60 
   4  -4   0  464.95   16.90 
  -4  -4   0  427.16   20.10 
  -4  -4   0  496.25   24.20 
  -4  -4   0  452.15   15.20 
  -4  -4   0  426.36   21.10 
   4  -4   0  490.95   26.30 
  -4  -4   0  449.56   14.40 
   4   4   0  444.76   23.10 
   4   4   0  434.56   23.10 
   4   4   0  408.56   23.20 
   4   4   0  472.95   23.60 
  -4   4   0  428.96   22.70 
   4   4   0  473.15   22.50 
  -4   4   0  411.46   19.50 
  -4   4   0  493.85   21.40 
  -4   4   0  479.65   20.80 
  -4   4   0  452.85   22.70 
  -4   4   0  470.65   20.10 
   4   4   0  396.46   22.10 
   4   4   0  472.95   25.70 
  -4   4   0  476.55   24.60 
   4   4   0  461.15   24.20 
   4   4   0  465.75   24.20 
  -4   4   0  442.06   20.00 
  -4   4   0  466.45   19.90 
  -4   4   0  475.75   25.10 
   4   4   0  455.75   22.70 
  -4   4   0  472.15   21.10 
   4   4   0  468.35   21.30 
   4   4   0  442.76   23.20 
   4   4   0  469.35   23.80 
  -4   4   0  427.16   19.20 
  -4   4   0  484.85   24.40 
   4   4   0  410.56   23.20 
  -4   4   0  467.75   22.50 
  -5  -4   0 1316.07   47.60 
   5  -4   0 1260.37   54.49 
   5  -4   0 1317.37   51.69 
  -5  -4   0 1260.57   50.09 
  -5  -4   0 1295.87   46.50 
  -5  -4   0 1332.97   51.19 
   5  -4   0 1318.97   40.70 
   5  -4   0 1300.77   44.60 
  -5  -4   0 1285.67   49.80 
   5  -4   0 1391.46   53.69 
   5  -4   0 1239.48   48.20 
  -5  -4   0 1322.17   47.60 
   5  -4   0 1310.77   38.50 
   5  -4   0 1337.47   44.50 
   5  -4   0 1289.07   44.70 
   5  -4   0 1269.67   47.20 
  -5  -4   0 1319.07   50.59 
  -5  -4   0 1330.97   46.10 
  -5  -4   0 1353.96   50.89 
  -5  -4   0 1268.27   51.19 
   5  -4   0 1285.67   48.70 
   5  -4   0 1274.57   53.69 
   5  -4   0 1259.07   51.49 
  -5  -4   0 1318.07   47.30 
  -5  -4   0 1372.56   48.70 
  -5  -4   0 1373.06   52.69 
   5  -4   0 1309.57   43.70 
  -5  -4   0 1303.37   44.20 
  -5  -4   0 1331.57   47.50 
  -5   4   0 1370.86   46.90 
   5   4   0 1352.86   50.29 
  -5   4   0 1300.97   46.00 
  -5   4   0 1304.37   42.30 
   5   4   0 1357.86   48.80 
   5   4   0 1339.97   50.09 
   5   4   0 1286.67   50.79 
  -5   4   0 1311.27   50.69 
  -5   4   0 1245.68   49.99 
   5   4   0 1273.27   49.00 
  -5   4   0 1304.17   50.29 
   5   4   0 1403.86   49.90 
   5   4   0 1288.57   52.99 
   5   4   0 1334.67   51.59 
   5   4   0 1294.87   50.09 
  -5   4   0 1248.18   49.20 
  -5   4   0 1348.07   46.50 
  -5   4   0 1362.96   47.00 
   5   4   0 1269.67   45.50 
   5   4   0 1276.77   50.49 
  -5   4   0 1310.87   49.60 
  -5   4   0 1332.77   46.10 
   5   4   0 1367.16   52.29 
  -5   4   0 1333.27   40.20 
  -5   4   0 1265.07   45.90 
   5   4   0 1341.27   50.69 
  -5   4   0 1372.06   47.30 
   5   4   0 1333.97   49.90 
  -6  -4   0 1100.99   42.80 
   6  -4   0 1231.98   47.10 
  -6  -4   0 1159.08   48.40 
  -6  -4   0 1152.88   49.40 
   6  -4   0 1081.49   40.40 
  -6  -4   0 1039.60   47.20 
   6  -4   0 1099.69   36.40 
   6  -4   0 1119.09   41.50 
   6  -4   0  998.90   47.50 
   6  -4   0 1127.89   44.70 
  -6  -4   0 1081.89   53.39 
  -6  -4   0 1089.69   46.50 
  -6  -4   0 1194.08   47.80 
  -6  -4   0 1142.09   47.30 
   6  -4   0 1100.99   47.30 
  -6  -4   0 1123.99   44.80 
  -6  -4   0 1108.29   41.90 
   6  -4   0 1241.08   45.00 
   6  -4   0 1127.19   49.30 
  -6  -4   0 1132.99   44.10 
   6  -4   0 1179.98   51.19 
   6  -4   0 1026.60   44.30 
  -6  -4   0 1110.29   43.30 
  -6  -4   0 1129.39   46.40 
  -6  -4   0 1143.79   45.00 
  -6  -4   0 1173.38   45.60 
   6  -4   0 1081.89   40.30 
   6   4   0 1135.49   45.90 
  -6   4   0 1089.89   45.30 
   6   4   0 1100.09   47.60 
   6   4   0 1152.58   45.80 
   6   4   0  995.00   47.00 
   6   4   0 1073.59   45.70 
  -6   4   0 1100.59   37.20 
  -6   4   0 1176.58   46.30 
  -6   4   0 1133.69   47.50 
   6   4   0 1183.68   48.00 
   6   4   0 1094.49   46.40 
   6   4   0 1066.79   49.60 
  -6   4   0 1138.29   41.50 
   6   4   0 1169.58   48.30 
  -6   4   0 1125.39   43.20 
  -6   4   0 1112.49   43.00 
  -6   4   0 1085.99   46.30 
   6   4   0 1087.29   45.80 
   6   4   0 1110.09   46.20 
   6   4   0 1059.19   45.00 
  -6   4   0 1097.99   43.20 
  -6   4   0 1132.79   43.00 
  -6   4   0 1127.79   44.90 
   6   4   0 1138.89   44.30 
   6   4   0 1127.49   41.20 
  -7  -4   0  796.52   33.30 
  -7  -4   0  922.21   41.80 
   7  -4   0  900.41   44.10 
   7  -4   0  842.62   40.30 
  -7  -4   0  791.42   40.80 
   7  -4   0  811.02   32.90 
  -7  -4   0  863.51   39.70 
  -7  -4   0  850.51   40.50 
  -7  -4   0  828.22   42.60 
  -7  -4   0  816.52   37.50 
   7  -4   0  758.82   34.40 
   7  -4   0  840.92   36.70 
  -7  -4   0  857.91   40.90 
   7  -4   0  851.21   34.00 
   7  -4   0  811.62   38.30 
   7  -4   0  766.92   42.40 
   7  -4   0  803.52   33.80 
  -7  -4   0  788.52   40.90 
  -7  -4   0  892.21   39.70 
  -7  -4   0  822.82   36.70 
  -7  -4   0  879.81   39.70 
  -7  -4   0  832.42   47.90 
  -7  -4   0  811.32   40.40 
   7  -4   0  854.11   37.80 
   7  -4   0  806.92   39.30 
   7  -4   0  823.62   35.20 
   7  -4   0  836.12   43.00 
  -7   4   0  901.61   42.00 
  -7   4   0  832.42   36.20 
   7   4   0  805.32   38.30 
   7   4   0  846.62   40.20 
  -7   4   0  857.21   39.00 
   7   4   0  864.61   40.80 
   7   4   0  769.72   42.70 
   7   4   0  781.82   38.80 
  -7   4   0  869.01   37.40 
  -7   4   0  803.22   34.20 
   7   4   0  909.31   43.80 
  -7   4   0  865.91   41.60 
   7   4   0  849.72   33.90 
   7   4   0  756.52   39.60 
  -7   4   0  835.42   37.40 
   7   4   0  932.71   39.90 
  -7   4   0  791.62   36.60 
   7   4   0  894.61   41.10 
   7   4   0  787.22   38.90 
   7   4   0  782.12   36.40 
   7   4   0  784.22   40.40 
   7   4   0  811.82   39.20 
  -8  -4   0  637.74   35.60 
  -8  -4   0  711.73   38.60 
   8  -4   0  734.33   41.50 
   8  -4   0  659.83   36.40 
  -8  -4   0  703.53   37.30 
   8  -4   0  691.63   40.50 
   8  -4   0  623.54   31.60 
  -8  -4   0  672.53   37.00 
  -8  -4   0  662.83   35.80 
   8  -4   0  640.34   32.80 
  -8  -4   0  686.43   39.20 
  -8  -4   0  646.14   37.90 
   8  -4   0  644.64   34.10 
   8  -4   0  681.83   31.50 
  -8  -4   0  584.84   41.80 
  -8  -4   0  632.04   38.80 
   8  -4   0  686.33   36.30 
  -8  -4   0  651.13   35.90 
   8  -4   0  721.33   38.10 
  -8  -4   0  634.54   34.00 
  -8  -4   0  675.33   35.70 
   8  -4   0  707.63   41.40 
  -8   4   0  730.23   39.40 
  -8   4   0  678.03   35.40 
   8   4   0  664.93   38.00 
   8   4   0  655.03   36.30 
   8   4   0  713.93   37.50 
   8   4   0  597.34   35.20 
   8   4   0  750.62   36.30 
  -8   4   0  722.23   35.50 
   8   4   0  689.23   37.10 
   8   4   0  669.33   33.20 
   8   4   0  686.43   37.00 
   8   4   0  649.43   40.40 
  -8   4   0  696.13   34.90 
   8   4   0  689.13   35.70 
  -8   4   0  689.33   38.50 
   8   4   0  690.53   38.30 
  -8   4   0  640.34   34.20 
   8   4   0  658.13   36.40 
   8   4   0  724.73   40.90 
  -9  -4   0  427.36   44.50 
  -9  -4   0  403.06   28.40 
   9  -4   0  458.45   32.00 
   9  -4   0  418.46   32.50 
   9  -4   0  382.16   27.60 
   9  -4   0  396.86   29.70 
  -9  -4   0  402.76   27.90 
   9  -4   0  394.86   28.70 
  -9  -4   0  430.66   30.00 
  -9  -4   0  411.16   30.60 
  -9  -4   0  376.16   30.30 
   9  -4   0  366.96   37.20 
   9  -4   0  441.16   30.70 
  -9  -4   0  352.36   27.60 
  -9  -4   0  411.66   28.90 
   9  -4   0  438.46   33.70 
   9  -4   0  405.26   25.50 
  -9  -4   0  478.55   30.10 
   9  -4   0  381.56   25.30 
  -9  -4   0  361.36   36.10 
  -9  -4   0  408.56   30.30 
  -9   4   0  368.76   26.50 
  -9   4   0  472.45   28.80 
   9   4   0  388.06   28.30 
   9   4   0  343.57   26.50 
  -9   4   0  399.86   27.50 
   9   4   0  388.26   29.80 
   9   4   0  421.56   29.60 
   9   4   0  449.16   28.40 
   9   4   0  316.67   26.20 
  -9   4   0  429.36   31.40 
   9   4   0  357.46   31.10 
  -9   4   0  381.76   27.10 
   9   4   0  385.16   31.20 
   9   4   0  383.76   29.70 
   9   4   0  419.06   30.20 
   9   4   0  423.66   27.30 
  -9   4   0  415.76   30.90 
   9   4   0  418.36   29.40 
   9   4   0  413.36   29.50 
   0  -5   0    0.70    2.80 
   0  -5   0    1.50    2.60 
   0  -5   0   -2.90    1.50 
   0  -5   0   -1.10    2.40 
   0  -5   0   -0.70    1.80 
   0  -5   0    0.00    2.10 
   0  -5   0    2.70    2.90 
   0  -5   0    2.00    2.80 
   0  -5   0    5.50    3.00 
   0  -5   0   -1.20    2.30 
   0  -5   0    1.80    2.50 
   0  -5   0    1.70    2.40 
   0   5   0    1.80    2.30 
   0   5   0    8.50    3.60 
   0   5   0    3.40    2.10 
   0   5   0   -3.10    1.50 
   0   5   0    2.40    2.50 
   0   5   0    3.10    4.10 
   0   5   0    9.80    5.10 
   0   5   0    1.20    2.90 
   0   5   0   -2.30    1.90 
   0   5   0    5.20    3.70 
   0   5   0    6.30    3.70 
   0   5   0    2.00    3.10 
   0   5   0    1.00    1.90 
   0   5   0   -1.10    1.80 
   0   5   0    7.20    4.00 
   0   5   0    2.80    3.80 
   1  -5   0  143.39   11.20 
   1  -5   0  137.39    6.00 
   1  -5   0  120.09   12.60 
  -1  -5   0  145.09    7.90 
  -1  -5   0  133.69   10.30 
  -1  -5   0  146.59   11.70 
  -1  -5   0  139.39    9.00 
   1  -5   0  140.79    9.30 
  -1  -5   0  128.59   10.70 
   1  -5   0  134.79    9.30 
  -1  -5   0  141.39   11.60 
  -1  -5   0  128.79   13.00 
   1  -5   0  143.09   10.80 
  -1  -5   0  125.79   10.50 
  -1  -5   0  164.58   12.30 
  -1  -5   0  134.89    7.90 
  -1  -5   0  124.49   12.40 
  -1  -5   0  121.89   12.40 
   1  -5   0  135.29   10.40 
   1  -5   0  143.99   10.50 
  -1  -5   0  138.79    5.40 
  -1  -5   0  139.19   11.50 
   1  -5   0  114.09   10.00 
  -1  -5   0  139.19   11.30 
  -1  -5   0  149.79   11.60 
   1  -5   0  146.19    7.00 
  -1  -5   0  172.48   10.90 
   1  -5   0  144.19   10.70 
   1  -5   0  124.09   13.40 
  -1  -5   0  138.59   11.80 
  -1   5   0  140.39    8.20 
   1   5   0  114.29   12.30 
   1   5   0  134.59   10.90 
  -1   5   0  151.38   14.40 
  -1   5   0  145.39   11.80 
   1   5   0   97.69   11.90 
  -1   5   0  137.69   13.30 
   1   5   0  172.98   13.60 
  -1   5   0  138.29   11.50 
  -1   5   0  138.69    5.70 
  -1   5   0  145.09    8.40 
  -1   5   0  151.38   12.20 
  -1   5   0  153.98   12.20 
  -1   5   0  143.49   16.40 
   1   5   0  156.78   13.40 
  -1   5   0  153.38   12.20 
   1   5   0  131.59   12.70 
  -1   5   0  149.99   10.70 
   1   5   0  134.39   13.50 
  -1   5   0  131.09    8.80 
   1   5   0  133.09   10.80 
  -1   5   0  152.18   10.30 
   1   5   0  138.49    5.40 
  -1   5   0  118.09    9.60 
   1   5   0  138.39    5.00 
  -1   5   0  103.59   15.80 
  -1   5   0  100.19   16.00 
   1   5   0  139.59    9.90 
  -1   5   0  148.09   10.90 
  -1   5   0  144.39   18.90 
  -1   5   0  136.79   10.80 
   1   5   0  129.69   13.00 
   1   5   0  153.68   14.60 
  -1   5   0  142.79   10.00 
   1   5   0  127.59   14.30 
   1   5   0  110.89   11.60 
   1   5   0  118.79   12.30 
  -1   5   0  128.29    8.90 
   2  -5   0    4.90    2.50 
  -2  -5   0    4.30    3.50 
   2  -5   0    6.40    4.00 
  -2  -5   0    2.30    3.30 
  -2  -5   0    2.10    1.60 
   2  -5   0    5.70    2.50 
  -2  -5   0    4.20    2.50 
  -2  -5   0    0.20    1.60 
  -2  -5   0   10.60    4.30 
  -2  -5   0    4.40    3.50 
   2  -5   0    5.50    3.70 
  -2  -5   0    1.50    3.00 
   2  -5   0    2.30    2.40 
   2  -5   0    5.70    3.00 
   2  -5   0   -1.40    2.10 
  -2  -5   0    2.50    2.30 
  -2  -5   0    4.60    3.40 
  -2  -5   0    2.40    3.40 
  -2  -5   0    5.50    3.20 
  -2  -5   0    4.20    2.80 
  -2  -5   0   -4.70    1.90 
   2  -5   0    4.20    1.70 
   2  -5   0    3.80    2.50 
  -2  -5   0    3.40    3.20 
  -2  -5   0    2.70    1.70 
   2  -5   0    3.60    1.80 
  -2  -5   0    0.50    1.90 
   2  -5   0    5.40    3.10 
  -2  -5   0    2.30    3.10 
  -2   5   0    4.30    1.80 
  -2   5   0    3.90    4.40 
  -2   5   0    6.80    2.60 
   2   5   0    0.10    2.60 
   2   5   0   -3.20    1.90 
   2   5   0    4.10    1.60 
  -2   5   0    2.20    2.70 
   2   5   0   -0.60    2.10 
   2   5   0    6.00    3.60 
  -2   5   0    4.50    3.00 
   2   5   0    5.60    2.10 
  -2   5   0    1.30    2.80 
  -2   5   0    2.40    2.20 
  -2   5   0    3.60    2.90 
  -2   5   0   -0.10    2.60 
  -2   5   0    2.70    3.00 
  -2   5   0   -2.10    2.70 
  -2   5   0    4.50    5.70 
  -2   5   0    1.10    2.70 
   2   5   0    3.50    3.30 
   2   5   0    2.00    3.20 
  -2   5   0    4.80    2.60 
   2   5   0    2.10    2.90 
  -2   5   0    8.00    2.40 
   2   5   0   -1.10    2.30 
  -2   5   0   -0.30    1.90 
   2   5   0    3.50    3.30 
   2   5   0    7.10    3.70 
  -2   5   0    4.10    2.00 
   2   5   0    2.40    2.70 
   2   5   0    8.50    4.30 
  -2   5   0    8.80    4.50 
  -3  -5   0    2.80    2.70 
   3  -5   0    1.50    2.70 
   3  -5   0    1.40    1.90 
  -3  -5   0    3.30    2.30 
  -3  -5   0    4.20    3.90 
   3  -5   0    3.90    2.30 
  -3  -5   0   -3.50    2.20 
  -3  -5   0    0.30    2.70 
   3  -5   0    4.20    5.40 
  -3  -5   0   -0.60    2.00 
   3  -5   0    0.90    2.70 
   3  -5   0    1.20    1.80 
  -3  -5   0    6.30    3.90 
  -3  -5   0    2.90    3.00 
  -3  -5   0    1.30    2.20 
  -3  -5   0    0.20    2.00 
   3  -5   0    5.90    2.40 
  -3  -5   0    0.20    2.20 
  -3  -5   0   -2.50    2.20 
  -3  -5   0   -2.30    2.60 
  -3  -5   0    2.60    3.10 
  -3  -5   0   -2.30    2.20 
   3  -5   0    1.70    3.10 
  -3  -5   0    4.80    4.10 
   3  -5   0    1.90    2.40 
   3  -5   0   -2.30    2.10 
   3  -5   0   -2.50    2.30 
   3  -5   0   -4.40    2.60 
  -3  -5   0   -0.80    3.20 
  -3  -5   0   -1.20    2.00 
   3  -5   0    2.40    3.40 
   3  -5   0    1.20    1.40 
  -3   5   0    0.30    2.10 
   3   5   0    2.60    3.50 
   3   5   0   -1.50    2.90 
   3   5   0    1.00    3.00 
  -3   5   0    1.60    1.80 
   3   5   0    3.30    3.50 
  -3   5   0    0.20    1.80 
   3   5   0    0.20    3.00 
  -3   5   0    0.80    2.30 
  -3   5   0   -2.70    2.40 
   3   5   0   -0.90    1.80 
   3   5   0   -1.30    2.60 
   3   5   0    2.20    3.50 
  -3   5   0    0.60    3.30 
   3   5   0   -1.70    2.80 
   3   5   0    3.60    3.40 
   3   5   0   -0.30    2.70 
   3   5   0    0.10    2.90 
  -3   5   0    1.20    2.80 
  -3   5   0   -2.00    2.90 
  -3   5   0    1.50    2.20 
  -3   5   0   -1.10    2.40 
   3   5   0    3.00    3.20 
  -3   5   0    1.30    2.10 
  -3   5   0   -0.30    2.50 
   3   5   0   -1.00    2.30 
  -4  -5   0   92.49    9.90 
   4  -5   0  103.79   11.10 
   4  -5   0   96.29   14.90 
   4  -5   0   98.59    8.10 
   4  -5   0   93.19   14.40 
   4  -5   0  105.79   13.50 
  -4  -5   0  105.49   13.50 
  -4  -5   0  121.99   15.20 
  -4  -5   0  121.19   10.00 
  -4  -5   0   95.09   12.90 
  -4  -5   0  135.99    9.10 
  -4  -5   0   94.59   10.70 
  -4  -5   0  110.39   13.40 
   4  -5   0   97.49   11.50 
   4  -5   0  124.29   14.70 
   4  -5   0  106.49    8.00 
   4  -5   0   99.89   13.30 
  -4  -5   0  112.09   13.70 
   4  -5   0   93.39   13.40 
   4  -5   0  108.09   13.00 
   4   5   0  111.49   13.80 
  -4   5   0  107.29   12.20 
  -4   5   0   94.09   11.10 
  -4   5   0  108.29   16.00 
  -4   5   0  113.69   14.30 
  -4   5   0  107.59    8.70 
  -4   5   0  119.59    9.20 
  -4   5   0  112.59   12.30 
   4   5   0   76.99   11.70 
  -4   5   0  110.59   10.30 
   4   5   0   97.99   13.00 
   4   5   0  111.19   13.30 
  -4   5   0  113.39    9.60 
  -4   5   0   88.19   10.30 
  -4   5   0   95.99   12.70 
  -4   5   0  102.99   13.80 
  -4   5   0  133.59   15.30 
   4   5   0   99.09   14.30 
  -5  -5   0   90.09   11.30 
   5  -5   0  114.29   15.70 
   5  -5   0   77.19   13.90 
  -5  -5   0   71.99   11.90 
  -5  -5   0   90.19   11.30 
   5  -5   0   99.29   14.20 
   5  -5   0  111.39    8.10 
  -5  -5   0  110.89   13.70 
   5  -5   0  117.49   17.20 
   5  -5   0  103.19   14.00 
   5  -5   0   78.59   12.20 
   5  -5   0  118.09   11.90 
  -5  -5   0  103.09   13.80 
  -5  -5   0  101.79   14.90 
  -5  -5   0   97.39   11.50 
  -5  -5   0  106.19   14.60 
  -5  -5   0   77.79   13.00 
   5  -5   0   86.49   12.90 
  -5  -5   0   82.19   10.40 
  -5  -5   0   97.09   12.60 
  -5  -5   0  102.69   13.80 
   5  -5   0   82.09   11.20 
  -5  -5   0   99.59   14.50 
   5  -5   0   92.49   10.10 
  -5  -5   0   87.99   11.00 
   5   5   0   85.19   12.00 
   5   5   0   93.39   11.50 
   5   5   0   77.29   13.00 
  -5   5   0   92.59   11.10 
   5   5   0   92.59   13.60 
  -5   5   0   97.79    9.80 
  -5   5   0   79.69   10.10 
  -5   5   0  107.09   14.20 
  -5   5   0  115.59   15.20 
   5   5   0   97.59   13.70 
   5   5   0   82.39   12.70 
   5   5   0   77.29   12.40 
  -5   5   0   95.59   10.80 
  -5   5   0  106.19   12.50 
  -5   5   0   92.89   10.70 
   5   5   0   96.59   14.60 
   5   5   0   94.29   13.30 
  -5   5   0   85.79   12.80 
  -5   5   0   99.79   15.10 
   5   5   0   90.79   13.20 
   5   5   0   73.39   13.20 
  -5   5   0   99.99   11.40 
   5   5   0   78.39   12.70 
  -5   5   0   93.49   12.80 
   5   5   0   81.39   11.90 
  -5   5   0   94.89    9.50 
   5   5   0   93.19   13.20 
   6  -5   0  667.53   32.30 
  -6  -5   0  659.63   35.90 
  -6  -5   0  612.84   33.70 
   6  -5   0  702.23   38.30 
  -6  -5   0  648.04   30.80 
  -6  -5   0  632.34   31.40 
  -6  -5   0  663.73   34.20 
   6  -5   0  646.64   28.10 
  -6  -5   0  675.93   31.50 
   6  -5   0  689.73   35.20 
   6  -5   0  680.13   33.40 
  -6  -5   0  667.23   34.50 
  -6  -5   0  635.64   33.70 
  -6  -5   0  633.04   34.00 
  -6  -5   0  608.64   29.50 
   6  -5   0  663.33   37.90 
  -6  -5   0  627.44   34.80 
  -6  -5   0  675.63   32.00 
   6  -5   0  636.74   27.50 
   6  -5   0  637.34   31.00 
   6  -5   0  625.24   27.70 
   6  -5   0  585.04   33.10 
   6  -5   0  696.43   36.20 
  -6   5   0  635.94   29.40 
   6   5   0  593.24   32.40 
  -6   5   0  635.04   33.40 
  -6   5   0  606.44   33.20 
   6   5   0  672.73   29.70 
   6   5   0  587.34   32.30 
   6   5   0  677.43   33.10 
   6   5   0  660.73   33.90 
  -6   5   0  630.64   32.80 
   6   5   0  676.33   33.60 
   6   5   0  621.04   34.10 
  -6   5   0  644.64   33.50 
  -6   5   0  644.24   29.80 
   6   5   0  608.54   31.80 
   6   5   0  640.44   34.10 
   6   5   0  615.04   33.40 
  -6   5   0  622.84   29.80 
  -6   5   0  664.73   29.00 
   6   5   0  634.64   36.40 
   6   5   0  689.43   36.00 
   6   5   0  578.04   33.60 
  -6   5   0  640.54   32.90 
   6   5   0  699.73   35.50 
  -6   5   0  717.53   30.80 
  -7  -5   0   90.19   15.50 
   7  -5   0  110.89   18.10 
   7  -5   0   74.99   13.50 
   7  -5   0   84.29   16.70 
  -7  -5   0   61.19   12.70 
   7  -5   0  115.49   15.80 
  -7  -5   0   83.89   12.90 
   7  -5   0  108.19   13.00 
  -7  -5   0  107.69   13.60 
  -7  -5   0   88.09   15.70 
   7  -5   0   89.49   15.90 
  -7  -5   0   86.99   14.40 
  -7  -5   0   72.59   12.70 
   7  -5   0   83.99   14.80 
   7  -5   0  110.89   16.90 
  -7  -5   0  126.29   18.00 
  -7  -5   0   85.59   19.20 
  -7  -5   0   94.09   15.50 
  -7  -5   0   97.29   14.40 
  -7  -5   0   99.19   16.40 
   7   5   0   97.89   15.40 
   7   5   0   68.19   12.70 
   7   5   0   89.79   15.50 
   7   5   0  106.29   15.80 
   7   5   0   94.79   14.70 
  -7   5   0   98.49   13.40 
   7   5   0   75.59   13.90 
  -7   5   0   71.69   11.60 
  -7   5   0  106.29   16.60 
   7   5   0   88.49   15.50 
   7   5   0  104.49   16.20 
  -7   5   0   74.69   13.30 
   7   5   0  129.59   17.40 
   7   5   0   93.49   17.10 
   7   5   0   74.29   14.30 
   7   5   0   84.89   14.00 
  -7   5   0  100.99   15.50 
  -7   5   0   99.09   15.50 
   7   5   0  102.89   14.50 
   8  -5   0  358.96   29.70 
  -8  -5   0  299.97   22.90 
  -8  -5   0  318.87   37.70 
   8  -5   0  313.37   25.40 
  -8  -5   0  320.37   25.00 
   8  -5   0  368.16   29.80 
   8  -5   0  348.77   24.30 
   8  -5   0  288.47   29.90 
   8  -5   0  327.27   21.10 
  -8  -5   0  306.67   23.90 
  -8  -5   0  347.07   28.30 
  -8  -5   0  310.27   30.50 
  -8  -5   0  272.17   29.70 
  -8  -5   0  319.77   26.70 
  -8  -5   0  361.36   26.70 
  -8  -5   0  306.47   23.80 
   8  -5   0  355.66   23.30 
  -8  -5   0  317.97   25.50 
   8  -5   0  350.26   26.60 
   8   5   0  305.57   30.70 
  -8   5   0  367.66   24.10 
   8   5   0  340.57   25.70 
   8   5   0  308.47   25.00 
   8   5   0  322.07   24.50 
  -8   5   0  349.07   24.60 
   8   5   0  337.77   26.70 
   8   5   0  374.56   27.00 
   8   5   0  300.97   24.10 
  -8   5   0  323.97   26.00 
   8   5   0  346.37   29.10 
   8   5   0  303.77   24.00 
   8   5   0  354.46   23.90 
  -8   5   0  344.17   26.00 
   8   5   0  316.17   26.20 
  -8   5   0  370.46   24.30 
   8   5   0  311.07   29.10 
   8   5   0  334.07   26.40 
   8   5   0  353.36   27.90 
  -9  -5   0   33.80   11.60 
   9  -5   0   38.20   13.40 
  -9  -5   0   34.40   13.10 
  -9  -5   0   54.19   14.00 
   9  -5   0   40.20   20.40 
  -9  -5   0   51.89   12.70 
  -9  -5   0   40.10   15.10 
   9  -5   0   27.90   10.90 
  -9  -5   0   38.20   11.10 
   9  -5   0   41.90   15.10 
  -9  -5   0   38.50   10.70 
   9  -5   0   24.30   10.00 
  -9  -5   0   47.80   13.80 
  -9  -5   0   41.90   12.10 
   9  -5   0   29.90   11.10 
  -9  -5   0   35.30   11.20 
  -9  -5   0   36.30   12.50 
   9   5   0   45.60   13.40 
   9   5   0   50.29   14.10 
   9   5   0   50.99   13.60 
  -9   5   0   26.10    9.00 
   9   5   0   38.30   12.20 
   9   5   0   71.79   15.30 
   9   5   0   37.30   11.20 
   9   5   0   34.90    9.60 
   9   5   0   34.70   11.80 
   9   5   0   37.50   11.60 
   9   5   0   37.10   11.00 
  -9   5   0   45.40   12.50 
   9   5   0   47.50   13.00 
   9   5   0   29.60   10.50 
   9   5   0   45.20   12.10 
  -9   5   0   29.60   10.50 
  -9   5   0   31.90   10.00 
   9   5   0   38.80   12.30 
   0  -6   0   68.59   10.00 
   0  -6   0   66.79    9.70 
   0  -6   0   87.49   10.50 
   0  -6   0   90.09    9.60 
   0  -6   0   71.09   10.50 
   0  -6   0   61.79    9.70 
   0  -6   0   81.19   10.80 
   0  -6   0   93.19   11.10 
   0  -6   0   80.89   10.60 
   0  -6   0   88.39   11.20 
   0  -6   0   78.59   10.50 
   0  -6   0   83.79   11.10 
   0  -6   0   73.89   10.80 
   0  -6   0   82.49   11.00 
   0   6   0   79.49    8.70 
   0   6   0   87.79   11.60 
   0   6   0   89.09   15.10 
   0   6   0   81.49   11.40 
   0   6   0   94.69   15.00 
   0   6   0   84.59   10.80 
   0   6   0   49.80   10.90 
   0   6   0   73.49   10.40 
   0   6   0   64.59   10.60 
   0   6   0   89.29   11.60 
   0   6   0   73.79    9.80 
   0   6   0   95.39   12.40 
   0   6   0   81.19   14.60 
   0   6   0   65.19   11.00 
   0   6   0   71.09    9.70 
   0   6   0   89.79    9.90 
   0   6   0   67.09   10.70 
   0   6   0   64.89    9.30 
   1  -6   0 2290.37   75.89 
  -1  -6   0 2275.87   76.29 
   1  -6   0 2353.56   74.59 
  -1  -6   0 2318.27   72.89 
   1  -6   0 2359.86   77.79 
  -1  -6   0 2303.17   75.19 
  -1  -6   0 2303.17   76.49 
   1  -6   0 2340.87   74.89 
  -1  -6   0 2319.27   76.59 
  -1  -6   0 2225.18   77.49 
  -1  -6   0 2449.05   76.39 
  -1  -6   0 2436.66   68.09 
   1  -6   0 2337.97   75.49 
  -1  -6   0 2579.24   78.69 
   1  -6   0 2306.87   74.89 
   1  -6   0 2342.67   72.09 
   1  -6   0 2276.87   74.89 
  -1  -6   0 2429.06   77.49 
  -1  -6   0 2347.27   77.29 
   1  -6   0 2388.76   74.79 
   1  -6   0 2234.48   78.19 
  -1  -6   0 2263.47   76.39 
   1  -6   0 2386.66   65.69 
  -1  -6   0 2317.57   76.69 
  -1  -6   0 2397.86   67.69 
   1  -6   0 2237.98   75.79 
  -1  -6   0 2331.77   76.29 
  -1  -6   0 2349.56   74.39 
  -1   6   0 2452.65   77.99 
   1   6   0 2376.26   76.19 
   1   6   0 2357.86   75.79 
  -1   6   0 2419.96   75.49 
  -1   6   0 2073.39   84.89 
   1   6   0 2447.26   79.69 
  -1   6   0 2317.47   70.89 
  -1   6   0 2380.96   75.69 
  -1   6   0 2403.46   74.69 
  -1   6   0 2360.96   76.69 
  -1   6   0 2251.37   82.29 
   1   6   0 2449.55   77.19 
  -1   6   0 2344.67   73.39 
   1   6   0 2380.56   77.39 
  -1   6   0 2177.58   85.39 
  -1   6   0 2148.78   86.99 
  -1   6   0 2369.46   78.09 
  -1   6   0 2462.05   69.99 
  -1   6   0 2314.17   73.69 
  -1   6   0 2309.07   74.69 
   1   6   0 2176.58   76.49 
   1   6   0 2351.56   76.29 
   1   6   0 2322.87   75.19 
  -1   6   0 2346.07   78.09 
  -1   6   0 2334.37   68.69 
  -1   6   0 2457.15   77.59 
   1   6   0 2329.77   81.19 
   1   6   0 2357.46   81.49 
   1   6   0 2083.39   75.19 
  -1   6   0 2338.47   78.59 
   1   6   0 2418.86   73.59 
   1   6   0 2333.47   80.59 
   1   6   0 2415.76   76.49 
   1   6   0 2441.06   78.49 
  -1   6   0 2339.87   71.19 
  -1   6   0 2262.27   75.19 
   2  -6   0    1.80    3.50 
  -2  -6   0    3.10    3.10 
   2  -6   0    4.60    1.80 
   2  -6   0    1.80    2.90 
   2  -6   0    4.50    2.30 
  -2  -6   0    0.40    3.50 
   2  -6   0    2.20    2.80 
   2  -6   0    6.90    2.80 
  -2  -6   0    1.40    2.50 
  -2  -6   0    2.90    3.70 
  -2  -6   0   -1.60    2.80 
  -2  -6   0    6.20    4.60 
  -2  -6   0   -0.60    3.30 
  -2  -6   0    6.70    4.10 
  -2  -6   0    4.20    4.00 
   2  -6   0    1.30    4.40 
  -2  -6   0   -0.90    3.10 
   2  -6   0    3.10    3.60 
   2  -6   0    5.80    3.50 
  -2  -6   0   -0.20    3.30 
   2  -6   0    4.90    3.70 
   2  -6   0    2.30    3.80 
  -2  -6   0    1.70    1.60 
  -2  -6   0    3.50    2.30 
  -2  -6   0   -0.70    1.70 
  -2  -6   0    4.90    3.60 
  -2  -6   0    3.80    3.60 
  -2  -6   0    4.80    3.30 
   2  -6   0    4.50    3.40 
   2  -6   0    4.80    4.00 
  -2   6   0    6.70    3.60 
  -2   6   0    7.90    4.40 
  -2   6   0    4.30    5.30 
   2   6   0    2.60    3.50 
  -2   6   0    0.80    3.40 
   2   6   0    3.60    3.90 
   2   6   0    0.90    3.30 
  -2   6   0    2.50    2.50 
  -2   6   0    3.30    3.50 
  -2   6   0    0.10    1.80 
   2   6   0    5.00    4.60 
  -2   6   0    6.00    2.50 
   2   6   0    7.00    4.00 
  -2   6   0   17.00    6.30 
  -2   6   0    4.00    2.70 
  -2   6   0    0.90    2.90 
   2   6   0    3.60    3.50 
   2   6   0    5.20    4.30 
   2   6   0   11.10    2.10 
  -2   6   0    3.80    2.70 
   2   6   0    7.40    4.10 
  -2   6   0    3.40    4.30 
   2   6   0    2.70    1.70 
   2   6   0    2.90    3.90 
  -2   6   0    4.70    1.80 
  -2   6   0    6.00    4.60 
   2   6   0    6.20    4.10 
  -2   6   0   -0.20    3.00 
   2   6   0    4.60    4.30 
   2   6   0   -1.90    2.70 
   3  -6   0  980.20   42.90 
   3  -6   0 1007.80   32.30 
   3  -6   0  967.30   45.30 
   3  -6   0  978.60   40.60 
  -3  -6   0 1006.20   35.50 
  -3  -6   0 1048.70   41.00 
  -3  -6   0  997.00   43.40 
  -3  -6   0  982.80   43.90 
  -3  -6   0 1041.10   37.60 
   3  -6   0 1035.90   38.20 
  -3  -6   0 1051.59   36.80 
   3  -6   0 1034.00   38.80 
  -3  -6   0  993.10   41.70 
  -3  -6   0 1028.50   33.80 
   3  -6   0 1007.50   44.70 
   3  -6   0  965.00   37.40 
  -3  -6   0  988.90   42.10 
  -3  -6   0 1035.20   43.40 
  -3  -6   0  973.90   39.30 
   3  -6   0 1031.90   38.20 
  -3  -6   0 1042.30   42.90 
  -3  -6   0 1034.20   43.20 
  -3  -6   0 1030.30   43.70 
  -3  -6   0  997.20   36.50 
  -3  -6   0  921.61   39.40 
   3   6   0 1014.20   40.80 
  -3   6   0  999.30   36.60 
   3   6   0 1024.10   42.80 
   3   6   0 1061.39   43.30 
   3   6   0 1037.60   40.90 
   3   6   0  963.80   41.30 
  -3   6   0  964.80   37.70 
   3   6   0  963.70   41.60 
  -3   6   0  966.70   41.60 
   3   6   0 1032.10   42.50 
  -3   6   0 1039.40   38.80 
  -3   6   0 1047.50   47.40 
  -3   6   0 1057.89   43.60 
  -3   6   0 1087.79   39.60 
  -3   6   0 1023.50   43.80 
   3   6   0 1015.60   45.20 
  -3   6   0  947.51   42.10 
  -3   6   0 1047.30   34.30 
   3   6   0  937.91   42.00 
  -3   6   0 1016.00   33.40 
  -3   6   0  987.50   32.10 
   3   6   0 1019.50   42.50 
   3   6   0  981.20   42.40 
  -3   6   0 1086.99   40.40 
   3   6   0  936.11   42.80 
  -4  -6   0    6.10    4.70 
   4  -6   0    0.50    2.80 
  -4  -6   0    0.40    3.10 
   4  -6   0    1.00    3.80 
   4  -6   0    6.00    4.70 
  -4  -6   0   -2.30    3.30 
  -4  -6   0    2.90    3.20 
  -4  -6   0    0.00    3.40 
  -4  -6   0    3.30    2.70 
  -4  -6   0    3.40    3.20 
  -4  -6   0   10.60    6.10 
   4  -6   0    4.10    6.10 
   4  -6   0    3.50    3.30 
  -4  -6   0   -1.10    2.00 
   4  -6   0    3.60    2.80 
  -4  -6   0    3.40    3.80 
   4  -6   0   -0.90    4.10 
   4  -6   0    1.30    4.50 
  -4  -6   0    3.20    4.20 
   4  -6   0    1.90    3.40 
  -4  -6   0    6.60    4.60 
  -4  -6   0    3.60    3.20 
   4  -6   0   -1.40    2.50 
  -4  -6   0    2.00    3.70 
  -4   6   0    1.80    2.40 
  -4   6   0    2.00    4.20 
   4   6   0    0.40    4.00 
  -4   6   0    4.00    2.70 
  -4   6   0    6.40    5.90 
   4   6   0   -3.10    2.80 
   4   6   0    3.10    3.50 
   4   6   0    2.30    4.20 
   4   6   0    2.30    4.10 
  -4   6   0    0.50    3.70 
   4   6   0    3.20    4.70 
   4   6   0   -3.00    2.60 
   4   6   0    2.30    4.00 
  -4   6   0    4.60    4.80 
   4   6   0   -0.60    3.20 
  -4   6   0    1.60    3.40 
  -4   6   0    7.50    5.00 
   4   6   0   -2.40    3.20 
  -4   6   0    3.20    3.00 
  -4   6   0    1.00    3.90 
  -4   6   0    0.70    2.70 
   4   6   0    5.40    4.20 
   4   6   0   -0.60    3.00 
  -4   6   0    1.10    3.10 
   4   6   0    0.40    4.00 
  -5  -6   0 1407.66   56.59 
   5  -6   0 1393.16   61.29 
   5  -6   0 1410.16   49.90 
  -5  -6   0 1423.16   54.49 
   5  -6   0 1294.87   61.49 
  -5  -6   0 1439.26   57.39 
   5  -6   0 1324.27   48.60 
   5  -6   0 1444.46   47.00 
  -5  -6   0 1413.66   55.39 
  -5  -6   0 1402.26   50.09 
   5  -6   0 1421.06   54.99 
   5  -6   0 1415.86   57.39 
  -5  -6   0 1451.45   51.89 
  -5  -6   0 1324.17   55.79 
  -5  -6   0 1435.46   49.30 
   5  -6   0 1271.47   57.29 
  -5  -6   0 1378.26   57.49 
  -5  -6   0 1310.57   54.19 
  -5  -6   0 1280.17   51.89 
   5  -6   0 1410.46   52.29 
  -5  -6   0 1397.66   54.09 
   5  -6   0 1374.76   56.69 
  -5  -6   0 1362.66   57.39 
  -5   6   0 1501.35   59.99 
   5   6   0 1411.96   56.39 
   5   6   0 1330.47   56.39 
   5   6   0 1402.86   56.99 
  -5   6   0 1290.87   55.09 
  -5   6   0 1394.96   58.79 
   5   6   0 1319.77   55.09 
   5   6   0 1327.17   59.09 
  -5   6   0 1417.06   48.30 
   5   6   0 1364.86   55.99 
  -5   6   0 1460.65   53.59 
   5   6   0 1310.17   54.49 
  -5   6   0 1388.46   49.10 
   5   6   0 1385.56   56.09 
  -5   6   0 1374.56   55.29 
   5   6   0 1315.67   54.39 
  -5   6   0 1402.36   49.90 
   5   6   0 1392.66   51.89 
   5   6   0 1403.66   56.79 
   5   6   0 1298.47   54.19 
   5   6   0 1255.87   55.99 
  -5   6   0 1423.56   48.60 
  -5   6   0 1468.15   53.89 
  -6  -6   0   -4.90    2.70 
  -6  -6   0    0.20    4.40 
  -6  -6   0    4.30    4.50 
   6  -6   0    1.10    5.50 
   6  -6   0   -2.60    4.80 
  -6  -6   0    1.40    4.40 
  -6  -6   0   11.00    6.30 
   6  -6   0    3.50    4.00 
  -6  -6   0   -3.70    3.20 
  -6  -6   0    7.10    5.60 
  -6  -6   0    6.70    4.40 
   6  -6   0    1.90    6.30 
   6  -6   0    6.60    6.10 
  -6  -6   0   -1.00    3.90 
  -6  -6   0   -1.50    3.80 
   6  -6   0   -1.80    3.90 
  -6  -6   0    4.50    4.90 
  -6  -6   0   -0.90    3.60 
   6  -6   0   -0.70    3.40 
   6   6   0    1.20    4.40 
  -6   6   0   -0.90    5.30 
   6   6   0   -1.70    4.70 
   6   6   0    0.90    4.70 
   6   6   0    2.10    5.00 
  -6   6   0   -0.30    3.10 
  -6   6   0    8.10    5.80 
   6   6   0   -0.20    4.40 
   6   6   0   -2.40    4.40 
   6   6   0    0.10    3.90 
   6   6   0   -3.30    3.00 
  -6   6   0    2.60    4.00 
  -6   6   0    0.80    4.40 
   6   6   0   -0.50    4.60 
   6   6   0   -6.60    2.60 
  -6   6   0   -1.00    3.40 
   6   6   0   -0.80    4.50 
   6   6   0    0.70    4.30 
   6   6   0   -1.50    3.80 
   7  -6   0 1325.77   56.39 
  -7  -6   0 1283.17   57.39 
  -7  -6   0 1270.77   50.49 
  -7  -6   0 1208.28   65.59 
   7  -6   0 1152.38   60.49 
   7  -6   0 1272.27   58.19 
   7  -6   0 1201.68   55.99 
  -7  -6   0 1255.97   56.69 
  -7  -6   0 1274.87   52.99 
  -7  -6   0 1214.28   55.49 
  -7  -6   0 1247.08   50.89 
  -7  -6   0 1325.47   59.79 
   7  -6   0 1369.96   63.39 
  -7  -6   0 1262.07   58.49 
  -7  -6   0 1230.68   56.29 
  -7  -6   0 1199.68   55.09 
  -7  -6   0 1256.97   51.69 
  -7   6   0 1237.78   49.70 
  -7   6   0 1231.38   54.19 
   7   6   0 1304.77   58.39 
   7   6   0 1230.68   54.69 
  -7   6   0 1307.57   56.09 
   7   6   0 1258.27   58.19 
   7   6   0 1166.08   55.79 
   7   6   0 1324.37   58.99 
   7   6   0 1298.27   58.19 
   7   6   0 1248.08   53.69 
   7   6   0 1253.97   60.79 
   7   6   0 1243.18   55.29 
  -7   6   0 1252.27   55.79 
   7   6   0 1223.68   55.69 
  -7   6   0 1391.76   56.29 
   7   6   0 1257.17   56.59 
   7   6   0 1298.07   55.99 
   7   6   0 1187.38   54.69 
   8  -6   0   47.40   15.50 
  -8  -6   0   34.20   10.50 
  -8  -6   0   68.29   14.60 
  -8  -6   0   44.30   10.90 
  -8  -6   0   55.69   14.60 
  -8  -6   0   57.69   18.40 
   8  -6   0   41.90   15.00 
  -8  -6   0   55.09   13.90 
  -8  -6   0   48.70   12.30 
   8  -6   0   53.79   15.70 
  -8  -6   0   77.99   13.50 
   8  -6   0   38.70   11.30 
   8  -6   0   64.59   15.00 
  -8  -6   0   42.60   12.90 
  -8  -6   0   63.39   15.00 
   8  -6   0   44.50   11.60 
  -8  -6   0   35.30   11.30 
   8   6   0   43.70   11.20 
  -8   6   0   50.89   12.60 
  -8   6   0   41.50    9.80 
   8   6   0   48.60   13.40 
   8   6   0   43.10   14.20 
   8   6   0   43.30   11.90 
   8   6   0   39.50   11.50 
   8   6   0   62.69   14.80 
   8   6   0   40.20   12.10 
  -8   6   0   50.09   12.30 
   8   6   0   37.10   11.90 
   8   6   0   34.40   11.60 
   8   6   0   53.29   13.50 
   8   6   0   53.09   14.10 
   8   6   0   65.49   14.20 
   8   6   0   59.89   14.30 
   8   6   0   37.60   12.30 
   0  -7   0   -1.60    3.10 
   0  -7   0    2.70    3.80 
   0  -7   0    1.70    3.20 
   0  -7   0   -0.60    2.90 
   0  -7   0    4.80    4.50 
   0  -7   0    1.10    3.60 
   0  -7   0   -0.30    3.20 
   0  -7   0   -4.30    2.60 
   0  -7   0   -0.80    3.10 
   0  -7   0   13.20    5.30 
   0  -7   0   -1.80    2.60 
   0  -7   0    4.10    3.80 
   0  -7   0    0.30    3.10 
   0  -7   0    0.60    4.20 
   0  -7   0    1.90    3.90 
   0  -7   0   -0.30    1.50 
   0  -7   0    0.00    1.90 
   0   7   0   -2.10    5.50 
   0   7   0   -1.30    4.00 
   0   7   0   -2.30    4.50 
   0   7   0    0.20    3.00 
   0   7   0    2.20    3.30 
   0   7   0   -6.50    3.50 
   0   7   0    4.50    5.50 
   0   7   0    1.20    3.20 
   0   7   0   -0.20    2.60 
   0   7   0   -2.70    2.90 
   0   7   0   -4.90    2.40 
   0   7   0   -1.40    3.60 
   0   7   0   -3.10    1.90 
   0   7   0   -1.10    3.50 
   0   7   0   -0.50    3.00 
   0   7   0    0.10    3.00 
   0   7   0   -0.40    2.50 
   0   7   0    0.30    3.30 
  -1  -7   0  116.69   13.80 
  -1  -7   0  123.99   15.20 
   1  -7   0  113.69   14.20 
   1  -7   0  136.09   14.50 
   1  -7   0  118.09   15.00 
   1  -7   0  117.29   14.20 
   1  -7   0  133.49   13.30 
  -1  -7   0  138.79    8.30 
   1  -7   0  119.09   14.50 
  -1  -7   0  120.99   14.80 
  -1  -7   0   98.89   12.70 
   1  -7   0  115.19   13.60 
  -1  -7   0  121.99   15.50 
   1  -7   0  135.49   14.80 
  -1  -7   0  101.89   13.90 
  -1  -7   0  140.49    8.20 
  -1  -7   0  119.69   14.70 
  -1  -7   0  107.99   13.50 
   1  -7   0  108.79   13.40 
  -1  -7   0  110.79   14.80 
  -1  -7   0  138.19   16.60 
   1  -7   0  124.49   16.90 
  -1  -7   0  136.19   15.80 
  -1  -7   0  110.69   12.10 
  -1  -7   0  130.19   16.30 
   1  -7   0  122.09   14.40 
  -1  -7   0  118.09   13.50 
   1  -7   0  117.09   15.40 
  -1  -7   0  144.89   16.10 
  -1   7   0  137.29   16.40 
   1   7   0  108.69   17.10 
   1   7   0  128.09   15.80 
  -1   7   0  133.79   15.80 
  -1   7   0  131.49   14.00 
  -1   7   0  120.99    8.40 
  -1   7   0  117.39   18.30 
  -1   7   0  139.79   21.30 
   1   7   0  134.09   18.60 
  -1   7   0  144.59   23.30 
   1   7   0  111.69   15.00 
  -1   7   0  121.69    9.80 
   1   7   0  145.19   17.00 
  -1   7   0  153.68   17.90 
   1   7   0  131.39   15.70 
   1   7   0  138.99   15.80 
   1   7   0  137.19   15.80 
  -1   7   0  127.19   14.50 
  -1   7   0  102.29   13.60 
   1   7   0  150.28   19.80 
  -1   7   0  117.09   19.10 
  -1   7   0  140.19   10.00 
   1   7   0  117.69   14.60 
  -1   7   0  117.09   15.40 
  -1   7   0  152.28   16.20 
  -1   7   0  108.19   13.10 
   1   7   0  134.29   13.40 
   1   7   0  133.59   15.70 
  -1   7   0  136.59   15.10 
  -1   7   0  129.29   15.00 
   1   7   0  141.99   15.70 
  -1   7   0  126.69   10.50 
  -1   7   0  118.79   13.60 
   1   7   0  150.88   17.00 
   1   7   0  102.09   13.10 
   1   7   0  129.49   16.30 
   2  -7   0    5.10    3.90 
  -2  -7   0    2.20    4.50 
   2  -7   0    9.30    3.70 
   2  -7   0   11.60    6.30 
   2  -7   0    7.80    3.90 
  -2  -7   0    7.40    4.80 
  -2  -7   0   17.30    6.60 
  -2  -7   0    6.10    3.80 
  -2  -7   0   14.80    6.60 
  -2  -7   0   11.30    5.90 
   2  -7   0   15.60    5.40 
  -2  -7   0   13.80    5.90 
  -2  -7   0   11.60    6.00 
  -2  -7   0    3.00    3.50 
   2  -7   0   12.80    5.20 
   2  -7   0   17.60    6.40 
  -2  -7   0   11.90    4.90 
   2  -7   0    3.90    3.90 
  -2  -7   0   16.30    6.40 
  -2  -7   0    9.10    3.10 
  -2  -7   0    4.70    3.90 
  -2  -7   0    9.10    3.40 
  -2  -7   0   20.10    7.20 
   2  -7   0    1.70    4.00 
   2  -7   0    8.70    4.30 
   2  -7   0    7.50    5.60 
  -2  -7   0   10.10    4.90 
   2  -7   0    8.70    5.00 
   2   7   0    3.70    5.20 
  -2   7   0   12.30    6.30 
   2   7   0    2.30    3.30 
   2   7   0    8.00    4.90 
  -2   7   0   13.80    3.70 
  -2   7   0   15.20    5.50 
   2   7   0    9.90    6.20 
  -2   7   0   10.80    4.30 
   2   7   0   14.80    6.20 
  -2   7   0    9.50    2.90 
  -2   7   0   13.80    4.50 
  -2   7   0   16.10    5.70 
   2   7   0    5.20    6.10 
  -2   7   0    9.30    6.30 
   2   7   0    8.10    5.30 
  -2   7   0   11.40    5.10 
  -2   7   0   11.50    5.70 
  -2   7   0    7.10    4.90 
   2   7   0    7.50    4.80 
   2   7   0   13.60    6.20 
   2   7   0   10.40    5.10 
   2   7   0    2.00    4.00 
   2   7   0    9.80    5.90 
   2   7   0    3.40    4.70 
  -2   7   0    9.60    4.00 
  -2   7   0   12.20    5.20 
  -2   7   0   14.10    6.00 
  -2   7   0   25.00    8.90 
   2   7   0    7.00    5.80 
  -3  -7   0   23.70    7.80 
   3  -7   0   10.00    6.70 
   3  -7   0   30.00    7.30 
   3  -7   0   19.60    5.60 
   3  -7   0   29.60    6.70 
   3  -7   0   12.20    5.30 
   3  -7   0   15.40    6.90 
   3  -7   0   26.20    6.60 
   3  -7   0   24.30    8.10 
   3  -7   0   31.80    8.70 
   3  -7   0   27.50    6.70 
   3   7   0   11.10    5.60 
  -3   7   0   28.20    6.30 
   3   7   0   14.70    6.40 
  -3   7   0   17.80    7.10 
  -3   7   0   21.20    5.20 
  -3   7   0   20.70    7.90 
  -3   7   0   26.80    9.90 
   3   7   0   21.70    7.60 
  -3   7   0   31.80    7.70 
   3   7   0   28.00    7.90 
   3   7   0   26.10    7.60 
  -3   7   0   32.50    9.10 
  -3   7   0   23.80    7.70 
  -3   7   0   20.30    6.30 
   3   7   0   27.40    7.90 
  -3   7   0   24.50    7.00 
   3   7   0   16.90    7.20 
   3   7   0    9.10    5.20 
  -4  -7   0  215.68   22.80 
   4  -7   0  248.98   24.60 
   4  -7   0  216.18   14.70 
   4  -7   0  187.98   15.10 
  -4  -7   0  242.38   14.80 
  -4  -7   0  203.58   22.00 
  -4  -7   0  232.88   19.10 
  -4  -7   0  241.78   18.60 
  -4  -7   0  241.88   24.20 
   4  -7   0  227.48   25.70 
   4  -7   0  192.58   22.50 
   4  -7   0  196.58   15.00 
   4  -7   0  269.57   19.00 
  -4  -7   0  211.48   22.20 
  -4  -7   0  235.18   23.90 
  -4  -7   0  235.58   18.70 
  -4  -7   0  240.18   14.70 
  -4  -7   0  246.18   15.80 
   4  -7   0  195.48   15.10 
  -4  -7   0  199.38   16.90 
   4  -7   0  212.98   14.30 
  -4   7   0  183.38   22.30 
   4   7   0  182.48   20.70 
   4   7   0  215.28   22.10 
  -4   7   0  214.28   20.50 
   4   7   0  214.58   22.60 
  -4   7   0  212.38   15.60 
   4   7   0  230.38   22.30 
   4   7   0  234.68   18.20 
  -4   7   0  211.78   22.40 
   4   7   0  202.58   21.90 
  -4   7   0  219.58   15.80 
   4   7   0  221.88   24.90 
  -4   7   0  220.18   23.50 
   4   7   0  210.48   22.00 
   4   7   0  233.18   23.00 
   4   7   0  175.38   20.30 
   4   7   0  216.48   17.70 
  -4   7   0  182.18   24.50 
  -4   7   0  202.38   21.70 
   4   7   0  241.68   20.00 
   4   7   0  194.88   22.50 
   5  -7   0   15.40    5.80 
   5  -7   0   18.20    9.10 
   5  -7   0    7.70    6.50 
   5  -7   0    7.80    6.70 
  -5  -7   0   22.00    8.00 
  -5  -7   0   17.20    7.10 
  -5  -7   0   16.60    7.50 
  -5  -7   0   23.00    8.70 
   5  -7   0   18.10    9.90 
  -5  -7   0   28.90    9.80 
  -5  -7   0    8.70    6.20 
   5  -7   0    8.10    6.90 
  -5  -7   0   19.90    7.80 
  -5  -7   0   18.40    8.80 
  -5  -7   0   14.90    5.90 
  -5  -7   0   16.00    7.00 
  -5  -7   0   14.20    5.90 
  -5   7   0   23.30    8.20 
   5   7   0   11.00    6.20 
   5   7   0   21.40    8.80 
   5   7   0   20.20    8.60 
  -5   7   0   20.20    9.10 
   5   7   0    9.10    6.10 
   5   7   0   31.00    9.90 
   5   7   0   16.40    7.50 
   5   7   0   17.40    7.60 
  -5   7   0    9.10    7.70 
  -5   7   0   15.60    6.20 
   5   7   0    8.00    6.80 
   5   7   0   15.10    7.10 
   5   7   0   18.70    8.00 
   5   7   0   18.90    7.00 
  -5   7   0   26.50   10.20 
   5   7   0    9.00    6.40 
   5   7   0   11.30    7.10 
   5   7   0    9.10    7.00 
  -6  -7   0  691.73   36.10 
  -6  -7   0  686.33   38.80 
   6  -7   0  614.54   34.70 
   6  -7   0  762.62   42.20 
   6  -7   0  607.24   37.40 
  -6  -7   0  664.43   36.50 
  -6  -7   0  735.13   46.50 
  -6  -7   0  671.83   39.40 
  -6  -7   0  685.73   38.30 
  -6  -7   0  658.13   33.20 
   6  -7   0  710.03   43.30 
  -6  -7   0  760.82   41.40 
  -6  -7   0  657.93   36.30 
  -6  -7   0  716.03   38.00 
   6  -7   0  701.03   44.60 
  -6  -7   0  672.43   38.50 
   6   7   0  686.23   33.70 
  -6   7   0  638.74   36.10 
   6   7   0  722.13   42.60 
   6   7   0  640.84   38.30 
  -6   7   0  647.44   34.10 
   6   7   0  617.14   36.60 
   6   7   0  704.43   37.70 
   6   7   0  555.64   35.60 
   6   7   0  632.84   37.60 
   6   7   0  571.54   35.00 
   6   7   0  642.04   36.30 
   6   7   0  612.34   37.60 
   6   7   0  702.13   38.40 
   6   7   0  723.03   40.50 
   6   7   0  581.84   36.60 
  -6   7   0  648.34   38.60 
   6   7   0  656.83   37.70 
  -6   7   0  657.83   37.90 
  -7  -7   0   17.00    7.70 
  -7  -7   0   14.90    7.90 
  -7  -7   0    0.60    4.90 
   7  -7   0    2.40    6.70 
  -7  -7   0    8.30    6.80 
  -7  -7   0   15.90    8.70 
  -7  -7   0   -5.70    5.50 
   7  -7   0   22.40   12.40 
  -7  -7   0   10.40    6.50 
  -7  -7   0   17.50    8.60 
   7  -7   0    0.40    7.60 
   7  -7   0    3.30    7.00 
  -7  -7   0    7.20    6.10 
   7  -7   0   13.10    8.50 
  -7   7   0   13.20    7.20 
   7   7   0   17.10    9.10 
   7   7   0    8.40    7.40 
   7   7   0   12.90    8.50 
  -7   7   0    5.20    5.70 
   7   7   0   17.90    9.50 
   7   7   0    7.20    7.50 
   7   7   0   22.00   10.00 
   7   7   0   16.90    8.90 
   7   7   0   14.70    9.40 
   7   7   0   26.20    9.30 
   7   7   0   11.30    8.50 
  -7   7   0    1.10    5.40 
   7   7   0    5.40    6.60 
   7   7   0    7.10    7.10 
   7   7   0   12.80    7.00 
   0  -8   0  240.38   19.80 
   0  -8   0  239.28   19.00 
   0  -8   0  244.58   19.70 
   0  -8   0  282.07   18.20 
   0  -8   0  215.08   22.00 
   0  -8   0  227.38   18.30 
   0  -8   0  228.98   19.60 
   0  -8   0  225.38   18.30 
   0  -8   0  249.38   19.40 
   0  -8   0  234.08   18.50 
   0  -8   0  249.78   16.00 
   0  -8   0  269.47   18.30 
   0  -8   0  257.57   19.20 
   0  -8   0  272.77   19.70 
   0  -8   0  237.78   19.00 
   0  -8   0  234.68   19.30 
   0   8   0  243.28   24.30 
   0   8   0  268.07   22.60 
   0   8   0  241.18   19.20 
   0   8   0  212.28   14.90 
   0   8   0  241.18   22.90 
   0   8   0  239.78   20.00 
   0   8   0  235.88   28.00 
   0   8   0  226.78   18.40 
   0   8   0  244.38   26.40 
   0   8   0  243.18   17.00 
   0   8   0  252.27   21.10 
   0   8   0  282.97   19.70 
   0   8   0  271.17   31.30 
   0   8   0  276.57   19.90 
   0   8   0  287.27   32.10 
   0   8   0  215.38   22.60 
   0   8   0  298.27   19.60 
   0   8   0  273.77   19.30 
  -1  -8   0 1431.86   56.09 
   1  -8   0 1428.96   55.59 
   1  -8   0 1523.25   55.29 
  -1  -8   0 1483.05   57.99 
  -1  -8   0 1413.06   57.59 
  -1  -8   0 1538.05   58.39 
  -1  -8   0 1574.54   53.89 
  -1  -8   0 1420.26   57.89 
   1  -8   0 1452.95   56.69 
   1  -8   0 1522.45   56.49 
   1  -8   0 1509.15   61.59 
  -1  -8   0 1478.65   58.49 
   1  -8   0 1546.05   56.39 
  -1  -8   0 1448.26   56.99 
   1  -8   0 1515.25   57.69 
  -1  -8   0 1525.45   58.69 
   1  -8   0 1523.05   59.69 
   1  -8   0 1458.45   57.39 
   1  -8   0 1507.55   50.89 
   1  -8   0 1426.46   60.49 
   1  -8   0 1522.65   58.19 
   1  -8   0 1420.76   56.89 
  -1  -8   0 1538.95   59.29 
  -1  -8   0 1432.16   54.09 
  -1  -8   0 1452.25   55.59 
   1  -8   0 1519.85   53.39 
  -1  -8   0 1470.35   58.69 
  -1  -8   0 1437.06   59.29 
   1  -8   0 1566.24   57.59 
  -1  -8   0 1471.55   58.49 
  -1   8   0 1492.85   66.19 
   1   8   0 1478.85   59.19 
  -1   8   0 1588.74   61.99 
   1   8   0 1591.44   62.19 
  -1   8   0 1438.46   59.99 
   1   8   0 1470.55   61.29 
  -1   8   0 1482.95   57.79 
  -1   8   0 1393.56   57.89 
  -1   8   0 1521.35   56.59 
   1   8   0 1545.35   59.39 
  -1   8   0 1401.96   66.49 
   1   8   0 1418.06   55.79 
   1   8   0 1557.44   61.89 
   1   8   0 1545.15   66.09 
   1   8   0 1503.05   53.89 
   1   8   0 1500.05   65.49 
   1   8   0 1342.67   55.99 
   1   8   0 1441.46   58.89 
   1   8   0 1498.35   66.19 
  -1   8   0 1453.85   63.69 
  -1   8   0 1453.45   54.69 
   1   8   0 1457.05   57.29 
  -1   8   0 1527.95   57.19 
   1   8   0 1457.75   56.99 
  -1   8   0 1527.95   56.19 
  -1   8   0 1457.75   59.89 
  -1   8   0 1465.35   55.99 
   1   8   0 1476.35   58.29 
  -1   8   0 1596.24   58.99 
   1   8   0 1383.76   58.39 
   1   8   0 1429.96   57.79 
  -1   8   0 1343.97   68.09 
  -1   8   0 1504.35   51.99 
  -1   8   0 1453.45   56.79 
  -2  -8   0   62.89   11.40 
  -2  -8   0   51.09   11.30 
  -2  -8   0   52.89   12.20 
   2  -8   0   43.30    8.80 
  -2  -8   0   48.20   10.60 
   2  -8   0   48.60   10.40 
   2  -8   0   55.29    9.90 
   2  -8   0   50.69    9.80 
  -2  -8   0   52.29   11.20 
  -2  -8   0   48.50   11.00 
   2  -8   0   46.80    9.80 
  -2  -8   0   62.79   10.10 
   2  -8   0   54.19   12.30 
   2  -8   0   60.79   10.90 
   2  -8   0   75.79   14.70 
  -2  -8   0   66.09   12.70 
   2  -8   0   56.59   11.90 
  -2  -8   0   60.39   10.40 
   2  -8   0   54.29   10.60 
  -2  -8   0   52.79   10.30 
   2  -8   0   58.49    8.90 
   2  -8   0   55.49   11.30 
  -2  -8   0   66.59   11.70 
  -2  -8   0   67.99   11.90 
  -2  -8   0   80.09   11.90 
  -2  -8   0   57.89   11.80 
  -2   8   0   49.40   11.70 
   2   8   0   52.59   11.60 
   2   8   0   61.19   13.90 
   2   8   0   52.79   10.80 
  -2   8   0   71.19   12.20 
   2   8   0   69.89   13.00 
  -2   8   0   53.59   10.20 
   2   8   0   61.49   11.90 
  -2   8   0   45.80   11.00 
   2   8   0   76.39   13.20 
  -2   8   0   56.89   13.00 
   2   8   0   62.19   12.40 
   2   8   0   55.39   10.90 
   2   8   0   31.60    9.00 
  -2   8   0   42.90   10.40 
   2   8   0   25.90    8.00 
   2   8   0   56.89   11.40 
   2   8   0   76.89   11.90 
  -2   8   0   56.29   12.40 
  -2   8   0   66.89   11.60 
  -2   8   0   52.69   16.00 
   2   8   0   55.09   13.70 
  -2   8   0   34.60   11.10 
   2   8   0   70.89   15.00 
   2   8   0   50.09   11.70 
   2   8   0   55.69   11.70 
   3  -8   0  964.80   43.60 
  -3  -8   0 1043.00   47.80 
  -3  -8   0 1100.89   48.30 
  -3  -8   0  919.41   41.80 
   3  -8   0 1008.30   42.20 
   3  -8   0 1024.00   49.80 
  -3  -8   0  979.80   45.80 
   3  -8   0  914.81   39.60 
  -3  -8   0  946.71   45.20 
  -3  -8   0  982.60   46.10 
  -3  -8   0  954.90   46.70 
  -3  -8   0  960.70   44.10 
   3  -8   0  967.70   40.10 
  -3  -8   0  997.80   46.80 
  -3  -8   0 1005.70   43.70 
  -3  -8   0 1026.10   43.40 
   3  -8   0  923.61   46.30 
  -3  -8   0  979.10   40.30 
   3  -8   0 1030.40   43.10 
   3  -8   0 1028.00   41.80 
   3  -8   0 1068.29   41.20 
   3  -8   0  998.40   50.49 
   3   8   0  913.31   44.80 
   3   8   0  953.80   45.00 
   3   8   0 1023.20   51.29 
   3   8   0 1008.50   46.30 
   3   8   0  971.00   50.09 
   3   8   0  989.10   46.10 
  -3   8   0 1055.19   47.70 
   3   8   0  996.30   49.70 
  -3   8   0  989.50   47.10 
   3   8   0  947.21   45.40 
  -3   8   0  979.50   47.10 
  -3   8   0  994.50   46.50 
   3   8   0 1021.80   46.00 
   3   8   0 1018.90   48.40 
   3   8   0 1030.90   45.80 
   3   8   0  963.70   46.50 
   3   8   0  961.40   46.60 
  -3   8   0 1030.10   52.89 
   3   8   0  938.41   45.20 
   3   8   0  953.40   42.90 
  -3   8   0  995.30   42.70 
  -4  -8   0  220.38   22.10 
  -4  -8   0  180.88   21.80 
   4  -8   0  149.49   21.50 
   4  -8   0  198.58   23.80 
  -4  -8   0  155.38   20.70 
  -4  -8   0  158.38   20.20 
   4  -8   0  212.98   26.20 
  -4  -8   0  183.78   22.00 
   4  -8   0  183.68   20.90 
  -4  -8   0  193.08   22.90 
   4  -8   0  189.88   18.40 
  -4  -8   0  196.98   23.30 
   4  -8   0  193.18   18.60 
  -4  -8   0  217.98   21.50 
   4   8   0  164.28   20.00 
  -4   8   0  202.38   23.60 
   4   8   0  154.48   19.40 
   4   8   0  212.28   24.50 
  -4   8   0  215.78   24.50 
   4   8   0  192.08   20.90 
   4   8   0  203.48   24.10 
  -4   8   0  179.48   21.70 
   4   8   0  200.88   23.50 
   4   8   0  196.78   22.30 
   4   8   0  158.58   20.10 
   4   8   0  205.58   21.90 
   4   8   0  153.68   19.40 
   4   8   0  150.28   20.30 
  -4   8   0  195.08   27.50 
   4   8   0  177.78   21.60 
   4   8   0  130.99   18.60 
   4   8   0  251.27   27.80 
   5  -8   0  770.12   39.50 
  -5  -8   0  819.82   42.50 
   5  -8   0  879.31   47.90 
  -5  -8   0  795.42   44.00 
  -5  -8   0  906.41   45.30 
  -5  -8   0  859.81   45.70 
  -5  -8   0  847.02   41.80 
  -5  -8   0  845.42   42.40 
  -5  -8   0  832.12   44.10 
   5  -8   0  730.63   46.10 
   5  -8   0  873.51   45.70 
  -5  -8   0  806.92   43.40 
  -5  -8   0  746.13   39.70 
   5   8   0  821.12   40.20 
   5   8   0  810.52   42.70 
   5   8   0  839.02   45.30 
   5   8   0  904.61   45.80 
  -5   8   0  762.12   46.70 
   5   8   0  886.61   43.90 
   5   8   0  836.82   44.20 
   5   8   0  897.41   48.80 
  -5   8   0  737.53   42.30 
   5   8   0  805.82   43.30 
   5   8   0  791.12   42.30 
   5   8   0  794.82   43.10 
   5   8   0  856.41   44.50 
   5   8   0  832.62   42.10 
  -5   8   0  847.62   42.10 
   5   8   0  870.11   44.40 
   5   8   0  770.62   42.70 
  -6  -8   0  180.48   24.10 
  -6  -8   0  203.98   25.40 
  -6  -8   0  217.08   24.40 
   6  -8   0  185.28   24.60 
  -6  -8   0  152.88   20.60 
  -6  -8   0  232.58   27.70 
   6  -8   0  191.28   25.60 
  -6  -8   0  226.68   26.50 
  -6  -8   0  214.08   26.40 
   6  -8   0  192.88   27.10 
  -6  -8   0  166.58   22.40 
  -6  -8   0  193.08   22.90 
   6  -8   0  186.88   23.50 
   6   8   0  170.38   23.00 
   6   8   0  195.48   23.40 
   6   8   0  164.08   25.20 
   6   8   0  184.18   23.90 
   6   8   0  220.58   26.20 
   6   8   0  223.98   27.10 
   6   8   0  213.18   24.50 
   6   8   0  190.58   24.00 
   6   8   0  215.48   26.10 
   6   8   0  214.78   24.80 
  -6   8   0  163.08   22.20 
   6   8   0  200.78   30.90 
   6   8   0  199.28   25.30 
   6   8   0  197.68   25.00 
   6   8   0  179.68   23.30 
   0  -9   0   -5.40    4.10 
   0  -9   0    3.70    5.60 
   0  -9   0   -2.10    4.10 
   0  -9   0    1.50    5.20 
   0  -9   0    2.10    5.40 
   0  -9   0   -1.00    4.70 
   0  -9   0    5.30    5.10 
   0  -9   0   -0.40    4.50 
   0  -9   0    1.20    4.80 
   0  -9   0    1.50    4.70 
   0  -9   0    3.30    5.50 
   0  -9   0    5.20    4.70 
   0  -9   0    3.20    5.30 
   0  -9   0    0.00    4.90 
   0   9   0    0.30    4.40 
   0   9   0    1.50    5.10 
   0   9   0    8.00    5.40 
   0   9   0    0.60    5.00 
   0   9   0    4.90    5.40 
   0   9   0   -0.10    7.20 
   0   9   0   -2.20    6.60 
   0   9   0   -5.10    5.20 
   0   9   0   -3.90    6.30 
   0   9   0    0.90    4.60 
   0   9   0   -0.40    4.20 
   0   9   0    3.20    5.80 
   0   9   0   -4.20    4.20 
   0   9   0   -0.20    5.00 
   0   9   0   -0.90    4.30 
   0   9   0    0.70    4.20 
  -1  -9   0    2.50    5.80 
  -1  -9   0    7.30    6.30 
   1  -9   0    8.20    5.90 
  -1  -9   0   -1.00    4.80 
   1  -9   0    3.00    4.30 
  -1  -9   0   -2.30    4.90 
   1  -9   0   12.60    6.70 
   1  -9   0    1.70    5.40 
  -1  -9   0    0.00    4.90 
  -1  -9   0    2.90    4.70 
   1  -9   0    7.60    5.20 
   1  -9   0   -3.10    4.10 
   1  -9   0    1.20    4.50 
   1  -9   0   -2.00    4.20 
  -1  -9   0   -0.50    4.70 
   1  -9   0    2.10    4.70 
   1  -9   0   -2.20    5.40 
   1  -9   0    0.30    4.60 
   1  -9   0   -1.30    5.60 
  -1  -9   0   -5.00    4.30 
   1  -9   0    4.40    5.00 
  -1  -9   0   -0.60    4.10 
  -1  -9   0    9.00    6.70 
   1  -9   0   -5.30    3.60 
  -1  -9   0   13.00    6.90 
  -1  -9   0   -4.20    3.80 
  -1  -9   0   -3.40    4.90 
  -1   9   0    2.00    5.10 
   1   9   0    1.00    5.00 
   1   9   0    9.70    5.60 
   1   9   0    3.30    7.10 
  -1   9   0    8.80    7.60 
   1   9   0    2.50    4.50 
   1   9   0   -3.00    6.60 
   1   9   0    0.00    4.60 
   1   9   0    4.80    4.80 
  -1   9   0   -2.80    4.20 
   1   9   0    1.00    4.30 
   1   9   0    3.80    8.20 
  -1   9   0    1.30   12.60 
  -1   9   0   -1.40    5.60 
   1   9   0    2.70    5.30 
  -1   9   0    1.60    5.90 
   1   9   0   -5.30    4.00 
   1   9   0   -0.80    5.80 
   1   9   0   -0.30    5.70 
   1   9   0    3.70    5.80 
  -1   9   0   -0.80    8.20 
   1   9   0    1.90    5.30 
   1   9   0   -0.60    4.60 
  -1   9   0    1.80    5.10 
  -1   9   0    3.40    4.20 
  -1   9   0   -3.30    6.10 
  -1   9   0    1.90    4.80 
  -1   9   0    1.80    5.10 
   1   9   0    2.80    5.80 
   2  -9   0   18.80    8.20 
   2  -9   0   17.40    9.20 
   2  -9   0   19.50    7.80 
   2  -9   0   26.60    8.40 
  -2  -9   0   22.10    8.20 
  -2  -9   0    6.90    6.70 
  -2  -9   0   37.20   10.70 
  -2  -9   0   15.70    8.00 
  -2  -9   0   25.10    8.40 
   2  -9   0   27.00    9.80 
  -2  -9   0   22.20    8.00 
   2  -9   0   36.40    9.60 
  -2  -9   0   23.90    9.40 
   2  -9   0   16.90    7.60 
  -2  -9   0   43.20   10.80 
  -2  -9   0   22.30    8.80 
  -2  -9   0   21.80    8.70 
   2  -9   0    3.70    6.20 
   2  -9   0   15.20    7.80 
  -2  -9   0   24.40    7.80 
   2  -9   0   28.10    9.80 
   2  -9   0   24.60    8.10 
   2  -9   0   14.40    7.00 
  -2  -9   0   17.40    7.20 
  -2   9   0   23.20    9.10 
   2   9   0   24.10   10.80 
   2   9   0   23.80   11.30 
   2   9   0   21.80    8.20 
  -2   9   0   17.00    7.20 
   2   9   0   32.10   10.20 
  -2   9   0   30.60    9.70 
   2   9   0   29.00    9.40 
   2   9   0   19.20    7.30 
  -2   9   0   19.80    9.70 
   2   9   0   28.50    9.00 
  -2   9   0   30.70    9.40 
   2   9   0   30.00    9.30 
   2   9   0    7.90    6.50 
   2   9   0   17.40    7.80 
   2   9   0   20.40    8.30 
  -2   9   0   18.00    8.00 
   2   9   0    1.50    6.40 
   2   9   0   12.40    7.20 
   2   9   0   35.00    9.90 
   2   9   0   19.50    7.90 
  -2   9   0   11.80    8.80 
   2   9   0    7.00    6.40 
   2   9   0   13.30    8.30 
   3  -9   0   12.00    7.30 
  -3  -9   0   10.80    7.10 
  -3  -9   0   11.40    7.10 
   3  -9   0    9.40    8.10 
  -3  -9   0    0.20    5.10 
  -3  -9   0    7.70    6.80 
  -3  -9   0   10.40    6.20 
   3  -9   0    6.90    6.00 
   3  -9   0   16.10    8.30 
   3  -9   0   14.00    6.90 
  -3  -9   0    1.90    5.60 
   3  -9   0   -1.50    4.40 
   3  -9   0    6.70    7.00 
   3  -9   0    6.10    6.00 
  -3  -9   0    6.30    6.00 
   3  -9   0    7.30    5.70 
  -3  -9   0   10.50    7.70 
   3  -9   0    9.50    6.90 
  -3   9   0    2.70    5.70 
   3   9   0    7.80    5.90 
   3   9   0    5.50    5.70 
   3   9   0   -1.80    5.30 
  -3   9   0   -3.80    4.20 
   3   9   0    8.20    5.90 
   3   9   0   -1.30    4.40 
   3   9   0    0.10    5.70 
   3   9   0    3.90    5.90 
   3   9   0    4.10    5.60 
  -3   9   0    7.20    8.20 
   3   9   0    4.90    5.70 
   3   9   0   -1.10    4.20 
   3   9   0    9.50    7.10 
   3   9   0    0.80    5.80 
   3   9   0    9.70    8.40 
   3   9   0    4.20    6.60 
  -3   9   0    4.50    6.80 
   3   9   0   12.50    6.40 
   3   9   0    8.50    7.30 
   4  -9   0   77.89   14.40 
  -4  -9   0   62.19   14.60 
  -4  -9   0  110.79   18.30 
  -4  -9   0   86.79   15.90 
   4  -9   0  108.69   16.40 
  -4  -9   0  125.39   20.00 
   4  -9   0   60.79   14.40 
   4  -9   0   86.29   17.40 
   4  -9   0   99.39   17.00 
  -4  -9   0   80.49   15.80 
   4  -9   0  103.79   19.80 
  -4  -9   0  113.29   18.40 
  -4  -9   0   98.49   15.40 
   4   9   0   93.19   17.20 
  -4   9   0   95.39   17.20 
   4   9   0   74.69   15.00 
   4   9   0   99.19   19.80 
   4   9   0  100.09   17.10 
   4   9   0   82.69   17.90 
   4   9   0  112.59   17.90 
   4   9   0   88.59   16.90 
   4   9   0  106.39   17.80 
   4   9   0  131.69   17.90 
  -4   9   0   91.39   20.30 
   4   9   0  106.09   16.90 
   4   9   0  106.49   20.10 
   4   9   0  106.49   19.00 
   4   9   0  112.99   17.90 
   4   9   0   78.59   15.80 
   4   9   0  103.99   18.80 
   5  -9   0   51.99   15.80 
  -5  -9   0  111.49   19.30 
  -5  -9   0   80.99   17.00 
   5  -9   0   73.19   16.90 
  -5  -9   0   68.79   16.00 
  -5  -9   0   68.09   13.70 
  -5  -9   0   52.89   13.60 
   5  -9   0   66.99   15.70 
   5  -9   0   67.69   15.40 
  -5  -9   0   69.79   15.20 
  -5  -9   0   43.20   13.30 
  -5  -9   0   62.19   15.00 
   5   9   0   51.49   13.30 
   5   9   0  124.59   19.80 
   5   9   0   83.49   16.40 
   5   9   0   66.59   13.80 
   5   9   0   75.99   15.60 
   5   9   0   66.19   15.40 
   5   9   0   52.19   13.90 
   5   9   0   53.69   13.00 
   5   9   0   73.19   15.30 
   5   9   0   51.99   13.00 
   5   9   0   81.69   18.60 
  -5   9   0   83.59   16.70 
   5   9   0   77.99   15.90 
   5   9   0   75.49   19.00 
   5   9   0   61.69   15.40 
   0 -10   0  917.91   47.40 
   0 -10   0  968.30   46.70 
   0 -10   0 1052.09   48.80 
   0 -10   0  878.61   48.10 
   0 -10   0  979.30   45.90 
   0 -10   0  990.20   47.80 
   0 -10   0  977.80   49.40 
   0 -10   0  876.81   46.30 
   0 -10   0 1008.50   47.00 
   0 -10   0 1020.90   48.20 
   0 -10   0 1038.00   53.99 
   0 -10   0  951.70   48.30 
   0  10   0  933.01   49.50 
   0  10   0  948.51   46.40 
   0  10   0  966.50   48.70 
   0  10   0  941.51   47.60 
   0  10   0  873.91   45.70 
   0  10   0  960.80   49.90 
   0  10   0  939.41   48.00 
   0  10   0  946.21   58.59 
   0  10   0  870.61   48.80 
   0  10   0  939.71   46.10 
   1 -10   0  610.74   35.20 
   1 -10   0  581.24   33.90 
  -1 -10   0  567.14   35.10 
  -1 -10   0  594.24   35.70 
   1 -10   0  605.34   38.90 
   1 -10   0  638.64   34.80 
   1 -10   0  562.94   34.70 
  -1 -10   0  629.94   36.90 
  -1 -10   0  572.44   35.80 
  -1 -10   0  673.53   37.60 
   1 -10   0  609.14   37.50 
  -1 -10   0  584.04   34.00 
  -1 -10   0  527.75   33.80 
   1 -10   0  582.64   35.20 
   1 -10   0  565.84   34.20 
   1 -10   0  599.14   35.30 
  -1 -10   0  607.54   36.50 
  -1 -10   0  633.54   35.20 
   1 -10   0  574.14   38.10 
  -1 -10   0  585.34   35.80 
   1 -10   0  602.34   36.10 
   1  10   0  567.74   37.50 
  -1  10   0  584.94   34.70 
   1  10   0  567.34   38.20 
   1  10   0  673.93   38.90 
  -1  10   0  666.83   41.00 
   1  10   0  518.55   34.40 
   1  10   0  612.04   36.10 
   1  10   0  601.44   37.50 
   1  10   0  580.14   37.50 
   1  10   0  611.24   73.79 
  -1  10   0  649.93   37.20 
  -1  10   0  689.53   41.00 
   1  10   0  562.24   35.70 
  -1  10   0  587.14   38.00 
   1  10   0  627.94   36.90 
   1  10   0  630.14   41.10 
   1  10   0  620.64   36.00 
   1  10   0  653.83   45.50 
   2 -10   0  514.75   36.40 
   2 -10   0  520.95   31.20 
   2 -10   0  594.54   32.10 
   2 -10   0  491.35   33.20 
   2 -10   0  465.55   30.10 
   2 -10   0  479.55   31.90 
  -2 -10   0  510.15   33.30 
   2 -10   0  559.64   33.20 
   2 -10   0  530.15   35.40 
  -2 -10   0  571.34   35.80 
  -2 -10   0  536.75   34.50 
  -2 -10   0  503.25   33.40 
   2 -10   0  523.85   32.30 
   2 -10   0  475.55   31.10 
  -2 -10   0  483.65   33.70 
  -2 -10   0  487.55   29.90 
   2 -10   0  559.14   38.20 
  -2 -10   0  494.95   32.70 
   2  10   0  473.05   38.50 
  -2  10   0  493.35   37.20 
   2  10   0  517.55   34.20 
   2  10   0  512.95   33.50 
  -2  10   0  511.85   35.00 
   2  10   0  519.95   33.40 
   2  10   0  567.64   34.10 
   2  10   0  508.75   33.70 
   2  10   0  530.75   37.00 
  -2  10   0  434.46   33.00 
   2  10   0  542.95   34.90 
   2  10   0  470.05   32.50 
   2  10   0  523.55   36.60 
   2  10   0  469.15   33.70 
   2  10   0  512.75   35.70 
   2  10   0  495.55   31.80 
   2  10   0  517.55   39.80 
   2  10   0  503.85   34.70 
  -2  10   0  482.85   31.20 
  -3 -10   0  124.29   20.70 
   3 -10   0  125.89   19.70 
  -3 -10   0  157.28   22.00 
   3 -10   0  169.18   25.60 
   3 -10   0  123.49   19.60 
  -3 -10   0  151.98   22.70 
   3 -10   0  139.09   20.80 
  -3 -10   0  178.58   23.40 
   3 -10   0  137.89   19.70 
  -3 -10   0  110.39   19.30 
   3 -10   0  138.09   21.30 
   3 -10   0  166.78   24.80 
  -3 -10   0  139.49   20.30 
   3  10   0  153.88   21.90 
  -3  10   0  125.79   20.80 
   3  10   0  147.59   22.30 
   3  10   0  113.09   18.80 
   3  10   0  137.29   21.60 
   3  10   0  133.19   20.80 
   3  10   0  122.29   22.80 
   3  10   0  124.49   21.40 
   3  10   0  128.09   18.20 
   3  10   0  141.49   20.50 
   3  10   0  127.49   19.70 
  -3  10   0  142.59   21.90 
   3  10   0  135.99   20.70 
   3  10   0  131.39   21.20 
   3  10   0  163.68   27.20 
   3  10   0  139.19   20.40 
   3  10   0  140.89   22.50 
   3  10   0  180.88   24.10 
  10   0  -1   -3.60    4.60 
  10   0  -1    2.30    6.40 
  10   0  -1   -3.00    4.50 
 -10   0   1    4.00    6.30 
  10   0  -1   -1.80    5.20 
 -10   0   1   -2.70    4.30 
  10   0  -1    4.50    5.90 
  10   0  -1    1.40    6.60 
 -10   0   1   -0.90    5.50 
 -10   0   1   -3.30    4.20 
 -10   0   1    4.70    8.60 
  10   0  -1   -0.60    5.90 
 -10   0   1   -0.20    6.50 
  10   0  -1    4.00    7.10 
 -10   0   1   -3.00    3.80 
 -10   0   1   -0.90    7.00 
  10   0  -1    3.40    6.90 
  10   0  -1   -4.70    5.30 
  -9   0   1  498.65   31.00 
   9   0  -1  532.25   28.90 
  -9   0   1  578.34   34.10 
   9   0  -1  564.94   35.30 
   9   0  -1  525.75   27.20 
   9   0  -1  541.25   29.20 
  -9   0   1  493.65   30.60 
  -9   0   1  500.05   34.60 
   9   0  -1  555.44   31.10 
  -9   0   1  507.85   34.20 
   9   0  -1  486.25   31.20 
  -9   0   1  562.14   32.60 
   9   0  -1  524.05   30.10 
   9   0  -1  541.45   29.10 
  -9   0   1  491.35   30.50 
   9   0  -1  519.45   29.30 
  -9   0   1  474.25   31.10 
   9   0  -1  544.25   31.40 
  -9   0   1  496.65   30.80 
  -9   0   1  509.95   38.30 
   9   0  -1  553.24   35.50 
  -8   0   1   -1.60    4.10 
   8   0  -1    3.40    5.20 
  -8   0   1    4.70    5.20 
   8   0  -1    3.40    3.50 
  -8   0   1    2.80    5.60 
   8   0  -1   -1.50    3.50 
   8   0  -1    0.50    3.60 
  -8   0   1    3.50    4.60 
   8   0  -1    6.00    5.10 
   8   0  -1    4.90    4.80 
   8   0  -1    6.50    5.20 
   8   0  -1   -4.10    3.40 
   8   0  -1    5.80    4.50 
  -8   0   1    1.20    4.40 
  -8   0   1   -0.60    4.20 
   8   0  -1    4.50    4.30 
   8   0  -1   -1.40    3.50 
  -8   0   1    6.90    4.80 
   8   0  -1    1.50    3.40 
  -8   0   1   -3.60    3.30 
  -8   0   1    1.40    3.80 
  -8   0   1    4.20    4.70 
   8   0  -1   10.20    6.20 
  -8   0   1   -2.10    3.90 
  -8   0   1   -0.80    3.10 
   8   0  -1    1.00    3.50 
  -8   0   1   -6.60    2.70 
   8   0  -1   -0.10    3.90 
  -7   0   1  229.48   16.70 
   7   0  -1  244.98   16.70 
   7   0  -1  252.97   15.70 
   7   0  -1  245.18   12.80 
   7   0  -1  218.28   16.50 
   7   0  -1  223.28   19.00 
  -7   0   1  222.58   18.60 
  -7   0   1  215.98   15.20 
   7   0  -1  242.48   18.10 
  -7   0   1  237.88   19.50 
  -7   0   1  214.88   16.60 
   7   0  -1  259.57   17.00 
  -7   0   1  250.67   18.00 
   7   0  -1  234.98   16.40 
   7   0  -1  256.57   13.50 
  -7   0   1  221.78   17.90 
  -7   0   1  219.68   17.30 
  -7   0   1  237.98   17.60 
  -7   0   1  208.78   16.70 
   7   0  -1  222.38   16.80 
   7   0  -1  253.57   11.10 
  -7   0   1  232.68   19.10 
   7   0  -1  228.98   15.30 
  -7   0   1  252.47   19.10 
  -7   0   1  245.88   26.10 
   7   0  -1  253.97   16.30 
   7   0  -1  223.58   15.60 
   7   0  -1  237.98   14.30 
   7   0  -1  211.58   15.10 
   7   0  -1  232.88   14.60 
  -7   0   1  231.28   15.10 
  -7   0   1  256.07   13.10 
   7   0  -1  233.18   18.90 
   6   0  -1   -1.90    2.40 
  -6   0   1   -0.30    3.10 
  -6   0   1    3.90    3.70 
  -6   0   1    0.80    2.80 
  -6   0   1   -2.00    4.10 
   6   0  -1    1.40    3.60 
  -6   0   1   -0.70    2.50 
   6   0  -1    3.20    2.90 
   6   0  -1    0.10    2.40 
  -6   0   1   -4.10    1.80 
  -6   0   1   -2.40    2.20 
   6   0  -1    0.00    2.50 
  -6   0   1    2.90    3.50 
   6   0  -1    6.60    3.90 
   6   0  -1    2.00    1.80 
  -6   0   1    0.10    2.50 
   6   0  -1    2.10    2.50 
  -6   0   1    0.90    2.60 
   6   0  -1    2.40    3.10 
  -6   0   1   -0.20    2.80 
  -6   0   1    3.10    4.00 
   6   0  -1    4.60    3.70 
   6   0  -1   -1.90    2.40 
  -6   0   1   -2.10    2.20 
   6   0  -1    3.60    2.70 
  -6   0   1    0.60    3.30 
   6   0  -1    2.00    2.80 
  -6   0   1   -1.30    1.80 
   6   0  -1    0.20    2.10 
   6   0  -1   -1.40    2.20 
   6   0  -1   -0.50    1.80 
   6   0  -1   -0.30    1.70 
   6   0  -1    0.60    2.20 
   6   0  -1    0.80    3.10 
   6   0  -1    0.50    2.10 
  -5   0   1  219.58   13.70 
  -5   0   1  206.68   13.40 
   5   0  -1  162.38    9.60 
  -5   0   1  185.28   11.90 
   5   0  -1  197.58   10.60 
  -5   0   1  174.48   10.00 
  -5   0   1  188.78   14.00 
   5   0  -1  190.38   14.30 
   5   0  -1  165.88    9.60 
   5   0  -1  181.48   11.90 
   5   0  -1  198.58   10.90 
   5   0  -1  164.18   11.00 
  -5   0   1  162.58   13.10 
   5   0  -1  187.08   12.10 
  -5   0   1  180.38   13.50 
   5   0  -1  183.08   12.40 
  -5   0   1  194.78   12.80 
   5   0  -1  142.39   12.40 
  -5   0   1  206.28   11.70 
   5   0  -1  164.18   12.00 
  -5   0   1  175.48   13.20 
   5   0  -1  191.88    8.60 
  -5   0   1  178.78   13.00 
   5   0  -1  187.98    9.80 
   5   0  -1  203.08   13.60 
   5   0  -1  165.88   10.70 
  -5   0   1  204.98   12.00 
  -5   0   1  174.58   11.40 
   5   0  -1  190.38    8.60 
  -5   0   1  167.38   10.60 
   5   0  -1  181.88   11.40 
   5   0  -1  175.88   11.90 
  -5   0   1  155.48   17.10 
  -5   0   1  169.58   12.80 
   5   0  -1  195.28   11.60 
  -5   0   1  175.38   12.60 
  -5   0   1  191.88   14.30 
   5   0  -1  182.28    8.80 
   5   0  -1  200.88   11.90 
  -5   0   1  194.68   13.40 
   4   0  -1    4.20    2.40 
   4   0  -1    2.30    2.60 
   4   0  -1   -0.50    1.80 
  -4   0   1    1.30    2.90 
   4   0  -1   -0.50    1.50 
   4   0  -1    2.30    1.20 
   4   0  -1    0.70    1.80 
  -4   0   1    0.20    3.10 
   4   0  -1   -0.90    2.20 
   4   0  -1    2.50    1.40 
  -4   0   1   -3.30    2.00 
   4   0  -1    6.40    3.10 
  -4   0   1    0.20    1.70 
   4   0  -1   -0.50    2.00 
  -4   0   1   -1.00    1.80 
   4   0  -1    1.30    1.70 
  -4   0   1    0.90    2.20 
   4   0  -1   -0.70    1.80 
  -4   0   1   -0.80    2.40 
  -4   0   1    3.30    1.90 
   4   0  -1   -0.20    1.40 
   4   0  -1   -0.40    1.90 
  -4   0   1   -0.70    2.40 
   4   0  -1   -0.60    2.10 
  -4   0   1    0.10    2.20 
  -4   0   1    0.00    2.50 
  -4   0   1   -0.50    1.70 
   4   0  -1    0.60    1.70 
   4   0  -1    0.10    1.70 
  -4   0   1    2.30    2.20 
   4   0  -1   -1.60    1.40 
   4   0  -1    5.00    2.20 
  -4   0   1    0.00    1.40 
   4   0  -1    0.30    1.30 
  -4   0   1    0.80    2.40 
   4   0  -1   -1.70    2.30 
   4   0  -1   -0.40    1.60 
   4   0  -1    5.90    2.10 
  -4   0   1    0.10    1.70 
  -4   0   1   -0.70    2.00 
  -4   0   1   -0.80    1.70 
   4   0  -1    4.60    2.60 
   4   0  -1   -0.70    1.70 
  -4   0   1    2.30    2.00 
  -4   0   1    1.70    2.00 
  -4   0   1   -0.70    1.80 
  -3   0   1  261.67   11.70 
  -3   0   1  257.47   11.30 
   3   0  -1  253.77   10.40 
   3   0  -1  237.68   12.00 
   3   0  -1  253.77   12.10 
   3   0  -1  249.28    8.70 
   3   0  -1  259.57    8.90 
   3   0  -1  242.38   12.20 
   3   0  -1  247.38   12.10 
  -3   0   1  262.47   13.50 
   3   0  -1  251.57   11.70 
  -3   0   1  265.47   11.30 
   3   0  -1  267.77   12.00 
   3   0  -1  272.87   11.30 
  -3   0   1  253.27   11.30 
   3   0  -1  240.88   12.20 
  -3   0   1  250.77   12.60 
  -3   0   1  249.97   12.80 
   3   0  -1  263.07   11.90 
  -3   0   1  254.47   11.50 
   3   0  -1  260.87   12.40 
   3   0  -1  269.37   11.40 
   3   0  -1  262.27   13.40 
   3   0  -1  244.58   11.20 
   3   0  -1  284.77   10.90 
  -3   0   1  273.37   11.70 
  -3   0   1  222.08   13.90 
   3   0  -1  250.47   12.30 
  -3   0   1  244.98   12.20 
  -3   0   1  252.17   13.30 
   3   0  -1  278.77   11.80 
   3   0  -1  266.47   11.70 
  -3   0   1  243.48   12.70 
   3   0  -1  268.87   12.00 
   3   0  -1  269.07   11.00 
  -3   0   1  267.57   12.40 
  -3   0   1  255.77   12.60 
  -3   0   1  251.17   11.50 
  -3   0   1  260.27   12.90 
  -3   0   1  266.17    8.50 
   3   0  -1  245.58   13.00 
  -3   0   1  255.87   12.70 
   3   0  -1  255.27   13.40 
   3   0  -1  251.87   12.20 
   3   0  -1  246.08   11.20 
  -3   0   1  225.18   12.40 
   3   0  -1  267.37   11.50 
  -3   0   1  242.28   13.10 
  -3   0   1  250.77   13.30 
  -3   0   1  275.37   11.70 
   3   0  -1  257.57   11.30 
   3   0  -1  252.37   10.10 
   3   0  -1  259.67   12.70 
   3   0  -1  242.08   12.90 
  -3   0   1  259.17   11.20 
   3   0  -1  249.78   11.60 
  -3   0   1  289.27   12.90 
  -2   0   1    0.00    1.20 
   2   0  -1    3.40    1.40 
   2   0  -1    6.20    1.30 
   2   0  -1    7.10    2.00 
  -2   0   1    2.10    1.30 
   2   0  -1    4.10    1.90 
  -2   0   1    7.30    2.20 
  -2   0   1    5.70    1.90 
   2   0  -1    3.00    1.30 
   2   0  -1    4.20    2.00 
  -2   0   1    7.70    2.30 
  -2   0   1    5.40    1.50 
   2   0  -1    4.50    0.90 
   2   0  -1    5.60    2.00 
  -2   0   1    3.90    2.00 
  -2   0   1    5.40    1.80 
   2   0  -1    6.30    2.10 
  -2   0   1    1.90    1.80 
  -2   0   1    7.70    2.80 
   2   0  -1    9.80    2.30 
  -2   0   1    0.60    1.20 
   2   0  -1    4.10    1.90 
   2   0  -1    3.70    1.90 
   2   0  -1    4.10    1.90 
   2   0  -1    4.60    1.40 
   2   0  -1    4.50    1.70 
  -2   0   1    3.50    1.10 
  -2   0   1    1.30    1.40 
   2   0  -1    2.90    1.30 
   2   0  -1    2.40    1.60 
   2   0  -1    4.30    1.10 
   2   0  -1    4.00    1.60 
  -2   0   1   11.00    2.60 
   2   0  -1    4.80    1.70 
  -2   0   1    2.70    1.60 
   2   0  -1    5.50    2.00 
   2   0  -1    4.20    1.50 
   2   0  -1    4.80    1.90 
  -2   0   1    5.10    2.10 
   2   0  -1    6.00    1.90 
  -2   0   1    3.90    1.80 
   2   0  -1    6.70    2.30 
  -2   0   1    3.60    1.80 
  -2   0   1    2.90    1.40 
   2   0  -1    3.50    1.70 
   2   0  -1    6.30    1.90 
   2   0  -1    1.90    1.50 
  -2   0   1    0.00    1.40 
  -2   0   1    5.60    1.90 
   2   0  -1    7.40    1.30 
   2   0  -1    6.30    1.70 
  -2   0   1    2.60    1.30 
   2   0  -1    4.20    1.90 
  -2   0   1    4.40    1.80 
  -2   0   1    6.30    2.00 
   2   0  -1    7.70    1.80 
   2   0  -1    6.80    2.10 
  -2   0   1    3.50    1.50 
   2   0  -1    2.40    1.40 
   2   0  -1    5.90    2.50 
   2   0  -1    5.40    1.50 
   2   0  -1    2.40    1.40 
   2   0  -1    2.00    1.30 
  -2   0   1    5.00    1.60 
  -2   0   1    5.10    2.10 
   2   0  -1    2.30    1.50 
   2   0  -1    4.60    1.80 
   2   0  -1    8.30    2.10 
  -2   0   1    4.60    1.40 
  -2   0   1    2.80    1.60 
   2   0  -1    7.10    2.30 
   2   0  -1    4.90    1.90 
   1   0  -1  402.16   12.50 
   1   0  -1  302.87   11.50 
   1   0  -1  397.96   11.10 
   1   0  -1  395.26   12.20 
   1   0  -1  393.16   10.50 
   1   0  -1  389.16   12.60 
   1   0  -1  397.06   12.00 
   1   0  -1  385.86   12.20 
   1   0  -1  345.77   11.60 
   1   0  -1  348.97   11.30 
   1   0  -1  321.47   11.70 
   1   0  -1  396.26   10.80 
   1   0  -1  390.76   11.10 
   1   0  -1  392.76   10.40 
   1   0  -1  383.76   11.90 
   1   0  -1  332.27   11.70 
   1   0  -1  361.16   12.40 
   1   0  -1  380.56   11.10 
   1   0  -1  381.46   11.70 
   1   0  -1  367.06   12.40 
   1   0  -1  389.46   10.60 
   1   0  -1  321.97   12.00 
   0   0   1    0.40    0.40 
   1   0   1 1275.47   34.10 
   1   0   1 1290.07   35.20 
   1   0   1 1189.48   36.10 
   1   0   1 1289.67   34.30 
   1   0   1 1297.77   34.40 
   1   0   1 1207.98   36.30 
   1   0   1 1296.77   35.50 
   1   0   1 1281.97   35.50 
   1   0   1 1134.99   35.90 
  -1   0  -1 1322.67   37.10 
   1   0   1 1282.67   36.30 
   1   0   1 1287.27   36.70 
   1   0   1 1042.50   35.80 
   1   0   1 1283.27   34.80 
   1   0   1 1270.07   35.20 
   1   0   1 1295.57   34.80 
   1   0   1 1257.67   36.00 
   1   0   1 1135.89   35.80 
   1   0   1 1300.87   35.00 
   1   0   1 1282.07   36.30 
  -1   0  -1 1292.57   36.50 
   1   0   1 1245.88   34.20 
   1   0   1 1246.78   36.20 
   1   0   1 1284.07   34.90 
   1   0   1 1239.48   35.60 
   1   0   1 1230.78   35.20 
  -1   0  -1 1268.97   36.50 
   2   0   1    0.90    1.00 
   2   0   1    3.40    1.80 
  -2   0  -1    2.20    1.20 
  -2   0  -1    5.50    2.30 
   2   0   1    0.80    1.60 
  -2   0  -1    8.00    2.00 
   2   0   1    2.20    1.60 
  -2   0  -1    4.10    2.10 
  -2   0  -1    1.80    0.90 
   2   0   1    1.10    1.00 
  -2   0  -1    3.80    2.50 
   2   0   1    1.10    1.40 
   2   0   1    4.50    1.60 
   2   0   1   -1.80    1.00 
   2   0   1    2.10    1.00 
   2   0   1    2.40    1.50 
  -2   0  -1    4.00    0.80 
   2   0   1    3.20    1.80 
  -2   0  -1    3.10    1.30 
   2   0   1    1.80    1.70 
  -2   0  -1    0.70    1.70 
  -2   0  -1    2.10    1.40 
   2   0   1    1.40    1.70 
  -2   0  -1    3.20    2.10 
  -2   0  -1    2.40    1.70 
  -2   0  -1    2.20    1.00 
   2   0   1    5.70    2.30 
  -2   0  -1    1.60    1.80 
   2   0   1    8.20    2.30 
   2   0   1    4.40    2.30 
   2   0   1    1.40    1.40 
  -2   0  -1    1.80    1.70 
   2   0   1    0.80    1.40 
   2   0   1    3.10    1.20 
  -2   0  -1    5.00    0.90 
   2   0   1    6.10    2.30 
   2   0   1    8.20    2.50 
  -2   0  -1   -0.40    1.40 
   2   0   1    4.40    2.20 
   2   0   1    3.10    1.30 
  -2   0  -1    1.50    1.50 
   2   0   1    2.20    1.80 
  -2   0  -1    1.10    1.40 
  -2   0  -1    3.60    2.00 
  -2   0  -1    2.00    1.30 
   2   0   1    2.50    2.30 
  -2   0  -1    4.30    1.90 
  -2   0  -1    8.30    2.10 
   2   0   1    2.20    1.70 
  -2   0  -1    0.80    1.50 
   2   0   1    1.70    1.30 
   2   0   1    1.80    0.90 
   2   0   1    5.90    1.50 
   2   0   1    2.00    1.70 
  -2   0  -1    7.50    2.20 
  -2   0  -1    4.90    1.90 
   2   0   1    1.80    1.60 
  -2   0  -1    8.10    2.40 
  -2   0  -1    1.80    1.20 
   2   0   1    0.90    1.40 
  -2   0  -1    4.60    1.40 
   2   0   1    1.80    1.20 
   3   0   1 1319.17   42.70 
  -3   0  -1 1384.36   40.70 
   3   0   1 1332.77   42.80 
  -3   0  -1 1399.16   41.40 
   3   0   1 1342.17   40.40 
   3   0   1 1388.46   40.60 
   3   0   1 1361.96   40.40 
   3   0   1 1323.27   44.20 
  -3   0  -1 1382.06   43.60 
   3   0   1 1418.16   43.30 
  -3   0  -1 1373.56   43.00 
   3   0   1 1414.96   43.30 
  -3   0  -1 1389.56   40.80 
   3   0   1 1341.57   40.20 
   3   0   1 1360.96   41.00 
  -3   0  -1 1440.26   44.00 
   3   0   1 1403.16   43.80 
   3   0   1 1348.97   44.20 
   3   0   1 1374.96   40.30 
  -3   0  -1 1312.17   46.50 
   3   0   1 1374.16   43.30 
  -3   0  -1 1452.85   44.40 
  -3   0  -1 1435.36   45.10 
   3   0   1 1340.77   43.50 
   3   0   1 1387.76   43.10 
  -3   0  -1 1401.66   45.30 
  -3   0  -1 1447.86   44.50 
  -3   0  -1 1407.16   43.50 
   3   0   1 1416.96   39.90 
  -3   0  -1 1330.67   45.10 
   3   0   1 1330.37   43.00 
   3   0   1 1378.76   43.60 
  -3   0  -1 1371.56   43.20 
  -3   0  -1 1376.06   41.20 
   3   0   1 1372.66   43.10 
  -3   0  -1 1372.46   43.30 
   3   0   1 1363.36   39.30 
  -3   0  -1 1312.47   44.80 
  -3   0  -1 1339.47   43.50 
  -3   0  -1 1373.66   38.50 
  -3   0  -1 1300.47   42.80 
  -3   0  -1 1389.76   44.40 
  -3   0  -1 1377.56   43.60 
   3   0   1 1453.25   44.00 
   3   0   1 1343.77   38.50 
  -3   0  -1 1379.86   39.40 
   3   0   1 1346.77   44.90 
  -3   0  -1 1413.96   42.60 
  -3   0  -1 1347.87   44.10 
   3   0   1 1338.47   42.40 
   3   0   1 1353.76   41.10 
   3   0   1 1390.26   44.60 
  -3   0  -1 1375.76   44.90 
   4   0   1   -0.50    1.40 
   4   0   1    1.20    1.40 
  -4   0  -1    0.30    2.40 
  -4   0  -1   -0.50    2.40 
  -4   0  -1   -0.70    1.90 
  -4   0  -1    0.50    2.30 
   4   0   1    0.70    2.00 
   4   0   1    0.20    1.70 
   4   0   1    0.60    2.00 
  -4   0  -1    0.90    2.40 
   4   0   1    1.40    1.90 
  -4   0  -1    1.90    2.00 
  -4   0  -1    5.40    4.10 
  -4   0  -1   -0.40    2.30 
   4   0   1    4.40    2.30 
   4   0   1   -0.10    2.00 
  -4   0  -1    0.00    2.20 
   4   0   1    1.40    2.90 
  -4   0  -1   -0.10    1.10 
  -4   0  -1   -1.50    0.90 
   4   0   1    1.40    2.10 
  -4   0  -1    3.10    2.60 
  -4   0  -1   -0.60    1.80 
  -4   0  -1    2.20    2.80 
  -4   0  -1    3.20    2.00 
   4   0   1    1.60    2.60 
   4   0   1    1.80    2.20 
   4   0   1    0.40    1.40 
   4   0   1    3.60    2.50 
   4   0   1    0.90    1.30 
  -4   0  -1    0.20    2.40 
  -4   0  -1    4.50    3.40 
   4   0   1    1.40    1.60 
   4   0   1   -0.90    2.00 
  -4   0  -1    0.30    2.50 
  -4   0  -1    1.40    2.70 
   4   0   1    0.40    1.20 
  -4   0  -1    0.00    1.60 
  -4   0  -1   -0.10    2.00 
   4   0   1   -0.50    2.10 
   4   0   1    0.00    1.50 
  -4   0  -1   -0.30    1.90 
   5   0   1  657.03   22.10 
  -5   0  -1  634.44   28.40 
   5   0   1  594.84   29.50 
   5   0   1  634.24   26.00 
   5   0   1  646.54   20.70 
  -5   0  -1  631.84   27.30 
   5   0   1  654.83   23.40 
  -5   0  -1  621.44   31.60 
   5   0   1  642.04   26.50 
  -5   0  -1  658.03   29.80 
   5   0   1  636.24   21.80 
   5   0   1  650.73   24.00 
   5   0   1  630.34   27.10 
  -5   0  -1  672.23   28.80 
   5   0   1  634.94   27.20 
   5   0   1  684.43   23.10 
  -5   0  -1  578.24   28.70 
  -5   0  -1  598.14   28.90 
   5   0   1  632.54   26.80 
  -5   0  -1  651.63   26.80 
  -5   0  -1  625.44   24.40 
   5   0   1  625.64   26.80 
  -5   0  -1  634.24   27.50 
  -5   0  -1  643.24   22.20 
   5   0   1  615.54   23.20 
  -5   0  -1  671.93   26.70 
  -5   0  -1  656.53   27.80 
  -5   0  -1  662.93   27.90 
  -5   0  -1  664.43   20.80 
  -5   0  -1  622.94   29.50 
  -5   0  -1  645.84   24.30 
   5   0   1  633.14   23.30 
  -5   0  -1  579.14   26.60 
   5   0   1  682.93   27.20 
   5   0   1  607.34   26.60 
  -5   0  -1  628.74   27.30 
   5   0   1  614.14   24.50 
   6   0   1   -1.00    2.50 
   6   0   1    6.80    4.00 
  -6   0  -1    5.50    4.10 
  -6   0  -1    0.70    1.50 
   6   0   1    0.50    2.20 
  -6   0  -1    1.90    2.90 
   6   0   1   -1.10    1.30 
  -6   0  -1   -1.10    2.20 
   6   0   1   -1.00    2.10 
   6   0   1    1.80    3.60 
   6   0   1    2.50    3.80 
  -6   0  -1    0.50    3.50 
  -6   0  -1    1.60    2.40 
  -6   0  -1    2.50    4.10 
   6   0   1   -1.00    1.80 
   6   0   1    0.20    2.90 
   6   0   1    0.20    3.30 
  -6   0  -1    1.90    3.20 
  -6   0  -1    0.50    3.30 
   6   0   1    3.10    2.00 
  -6   0  -1    1.20    2.70 
   6   0   1   -0.30    2.50 
   6   0   1    0.30    1.90 
  -6   0  -1    5.10    5.30 
  -6   0  -1    0.20    2.80 
  -6   0  -1    3.30    3.20 
   6   0   1   -1.20    2.40 
  -6   0  -1    0.40    3.10 
   6   0   1    0.10    3.00 
  -6   0  -1    3.00    4.10 
   6   0   1    1.00    2.70 
  -6   0  -1   -6.00    1.70 
  -6   0  -1   -2.60    2.00 
  -6   0  -1    2.90    2.40 
  -7   0  -1 2596.14   96.29 
  -7   0  -1 2657.73   88.19 
  -7   0  -1 2728.83   87.59 
  -7   0  -1 2671.43   92.89 
   7   0   1 2671.33   87.49 
   7   0   1 2753.82   86.69 
   7   0   1 2790.82   84.89 
   7   0   1 2657.33   91.69 
   7   0   1 2689.83   87.59 
  -7   0  -1 2601.44   91.89 
  -7   0  -1 2726.53   85.79 
   7   0   1 2698.83   82.99 
   7   0   1 2623.04   86.29 
  -7   0  -1 2657.33   88.49 
  -7   0  -1 2742.43   89.29 
  -7   0  -1 2672.33   88.69 
  -7   0  -1 2663.63   93.19 
  -7   0  -1 2674.73   82.79 
  -7   0  -1 2600.44   89.89 
   7   0   1 2734.43   81.49 
   7   0   1 2662.63   86.29 
   7   0   1 2621.84   87.29 
  -7   0  -1 2607.44   92.39 
  -7   0  -1 2684.03   88.99 
   7   0   1 2639.04   77.09 
   7   0   1 2759.12   79.89 
  -7   0  -1 2736.23   82.99 
   7   0   1 2556.74   88.49 
   7   0   1 2690.03   87.49 
   7   0   1 2572.84   92.79 
  -8   0  -1   -2.80    3.60 
  -8   0  -1    1.30    4.20 
   8   0   1   -0.20    3.90 
   8   0   1    1.80    3.90 
   8   0   1   -1.80    3.80 
   8   0   1   -1.70    2.70 
   8   0   1    4.30    4.50 
   8   0   1    1.20    4.10 
   8   0   1    4.70    4.50 
   8   0   1   -1.30    3.20 
   8   0   1   -2.30    3.50 
   8   0   1    3.20    4.70 
   8   0   1    4.40    4.60 
  -8   0  -1    1.00    5.30 
  -8   0  -1   -2.20    3.60 
  -8   0  -1   -0.20    4.40 
  -8   0  -1   -0.30    4.60 
  -8   0  -1   -1.60    3.90 
  -8   0  -1    1.20    4.30 
   8   0   1   -2.10    3.90 
  -8   0  -1   -0.70    4.60 
   8   0   1    3.80    5.00 
  -8   0  -1   -1.40    3.40 
   8   0   1    5.10    6.00 
  -8   0  -1   -2.30    3.30 
   8   0   1   -6.00    3.20 
  -8   0  -1    7.70    5.20 
   9   0   1 1396.96   63.89 
  -9   0  -1 1379.56   59.89 
   9   0   1 1446.46   65.19 
   9   0   1 1519.85   57.79 
   9   0   1 1462.45   57.79 
   9   0   1 1406.56   59.29 
   9   0   1 1393.86   57.99 
   9   0   1 1550.64   58.19 
  -9   0  -1 1343.87   59.59 
   9   0   1 1350.26   58.29 
  -9   0  -1 1377.66   59.29 
  -9   0  -1 1423.26   69.99 
  -9   0  -1 1361.56   58.39 
  -9   0  -1 1446.76   64.69 
   9   0   1 1472.45   57.09 
  -9   0  -1 1472.95   61.19 
   9   0   1 1478.25   57.69 
   9   0   1 1519.25   65.19 
   9   0   1 1438.06   61.09 
  -9   0  -1 1499.55   61.29 
  -9   0  -1 1422.56   65.09 
  -9   0  -1 1402.66   64.69 
   9   0   1 1536.15   59.89 
  10   0   1   -0.20    4.70 
 -10   0  -1    0.50    4.70 
  10   0   1   -5.80    6.20 
 -10   0  -1   -0.10    7.10 
 -10   0  -1   -2.10    6.10 
  10   0   1   -1.80    4.20 
 -10   0  -1   -0.90    5.70 
  10   0   1    4.10    7.00 
 -10   0  -1    3.20    5.70 
  10   0   1   -5.70    4.60 
  10   0   1   -4.50    5.40 
 -10   0  -1    8.60    9.50 
  10   0   1   -0.60    6.60 
  10   0   1    0.20    5.00 
 -10   0  -1    5.60    5.90 
  10   0   1    5.60    5.70 
 -10   0  -1   -3.50    4.70 
  10   0   1   -3.30    6.30 
  10  -1  -1  630.34   40.90 
 -10  -1   1  596.04   37.70 
  10  -1  -1  649.54   36.60 
 -10  -1   1  630.94   38.50 
  10  -1  -1  650.83   35.80 
 -10  -1   1  643.74   37.20 
  10  -1  -1  593.14   40.50 
 -10  -1   1  654.33   38.20 
  10  -1  -1  647.54   41.30 
  10  -1  -1  676.93   39.40 
 -10  -1   1  607.24   45.10 
  10  -1  -1  626.44   40.00 
 -10  -1   1  560.64   40.00 
 -10  -1   1  667.13   42.40 
 -10  -1   1  633.04   37.70 
  10  -1  -1  599.14   33.70 
 -10  -1   1  614.84   38.80 
  10   1  -1  611.14   37.40 
  10   1  -1  675.23   35.60 
  10   1  -1  629.04   37.30 
 -10   1   1  564.64   39.90 
 -10   1   1  563.04   40.00 
  10   1  -1  585.94   34.60 
  10   1  -1  582.34   40.10 
 -10   1   1  613.84   36.80 
 -10   1   1  661.83   38.60 
  10   1  -1  614.54   36.30 
 -10   1   1  583.34   36.20 
 -10   1   1  674.53   47.30 
  10   1  -1  654.53   35.70 
  10   1  -1  629.84   40.50 
  10   1  -1  631.44   36.50 
 -10   1   1  667.53   38.20 
  -9  -1   1   26.90    7.60 
   9  -1  -1   21.50    9.70 
   9  -1  -1    1.80    5.10 
   9  -1  -1   23.60    9.30 
  -9  -1   1   11.80    7.90 
  -9  -1   1   17.90    7.60 
   9  -1  -1   20.10    7.20 
   9  -1  -1   10.20    6.50 
   9  -1  -1   13.10    5.90 
  -9  -1   1   19.80    7.20 
  -9  -1   1   14.70    7.20 
  -9  -1   1   20.40    8.30 
  -9  -1   1   25.10    8.60 
   9  -1  -1   31.80   10.60 
   9  -1  -1   16.30    6.60 
   9  -1  -1   15.00    7.20 
  -9  -1   1   23.70    8.70 
  -9  -1   1   12.20    7.20 
  -9  -1   1    3.60    7.40 
  -9  -1   1   21.30    8.20 
   9  -1  -1   29.50   10.20 
  -9  -1   1    9.90    7.30 
   9  -1  -1   22.10    8.50 
   9  -1  -1   15.40    6.80 
   9   1  -1    8.20    6.50 
   9   1  -1    9.20    6.70 
  -9   1   1   23.40    9.10 
  -9   1   1   18.40    7.70 
   9   1  -1   15.60    7.70 
   9   1  -1   11.10    6.00 
   9   1  -1   19.40    7.40 
   9   1  -1   11.20    6.50 
  -9   1   1   13.90    7.20 
  -9   1   1   18.90    9.60 
   9   1  -1   20.60    7.20 
  -9   1   1   17.60    7.30 
   9   1  -1   19.20    7.00 
   9   1  -1   10.00    7.60 
   9   1  -1   15.50    8.00 
   9   1  -1   27.00    7.60 
   9   1  -1   15.90    7.30 
  -9   1   1   15.50    9.00 
  -9   1   1   15.90    6.90 
  -9   1   1   20.40    7.90 
   9   1  -1   20.30    7.10 
  -9   1   1   13.70    8.90 
  -8  -1   1  876.41   38.10 
  -8  -1   1  787.42   42.80 
   8  -1  -1  887.91   36.80 
  -8  -1   1  924.61   41.00 
   8  -1  -1  866.11   34.00 
   8  -1  -1  866.71   35.80 
   8  -1  -1  830.82   40.60 
   8  -1  -1  887.11   35.90 
  -8  -1   1  859.61   43.60 
   8  -1  -1  874.71   43.20 
  -8  -1   1  813.62   39.90 
  -8  -1   1  760.12   40.20 
   8  -1  -1  870.91   36.30 
   8  -1  -1  877.61   39.70 
  -8  -1   1  844.12   40.60 
  -8  -1   1  919.61   42.40 
   8  -1  -1  846.12   38.10 
  -8  -1   1  895.11   40.10 
   8  -1  -1  906.51   38.10 
   8  -1  -1  873.61   43.70 
   8  -1  -1  870.71   40.40 
  -8  -1   1  889.91   48.50 
   8  -1  -1  949.60   45.20 
  -8  -1   1  968.60   43.50 
  -8  -1   1  903.21   38.80 
   8  -1  -1  903.61   39.50 
   8  -1  -1  882.61   35.70 
   8  -1  -1  983.10   36.20 
   8  -1  -1  825.62   37.30 
   8   1  -1  832.62   38.70 
  -8   1   1  906.61   41.30 
   8   1  -1  868.61   36.70 
  -8   1   1  861.91   48.00 
  -8   1   1  856.91   40.50 
   8   1  -1  862.71   41.40 
   8   1  -1  922.91   38.90 
   8   1  -1  841.02   37.50 
   8   1  -1  856.41   38.80 
  -8   1   1  895.41   41.40 
   8   1  -1  882.01   39.30 
  -8   1   1  899.31   45.20 
  -8   1   1  879.31   40.50 
   8   1  -1  867.11   40.60 
   8   1  -1  953.60   46.10 
   8   1  -1  854.01   40.40 
   8   1  -1  842.72   33.40 
   8   1  -1  884.81   40.30 
   8   1  -1  885.81   35.90 
  -8   1   1  858.71   40.20 
   8   1  -1  943.01   39.90 
  -8   1   1  932.11   39.20 
  -8   1   1  877.41   36.70 
   8   1  -1  946.81   44.80 
  -8   1   1  854.91   43.40 
  -8   1   1  870.41   42.30 
  -8   1   1  859.71   44.00 
  -7  -1   1  114.79   14.60 
  -7  -1   1  101.89   14.30 
   7  -1  -1  118.29   12.10 
  -7  -1   1  103.89   13.30 
   7  -1  -1   83.69   12.90 
  -7  -1   1  112.19   14.20 
  -7  -1   1  102.99   14.10 
  -7  -1   1  105.79   13.70 
   7  -1  -1  111.99    8.70 
   7  -1  -1  119.09   12.20 
  -7  -1   1  100.09   13.30 
   7  -1  -1  116.09   11.30 
   7  -1  -1  129.89   13.00 
  -7  -1   1   97.09   16.70 
   7  -1  -1  114.79   14.50 
   7  -1  -1  137.59   15.10 
  -7  -1   1  104.39   14.20 
   7  -1  -1  109.09   13.10 
  -7  -1   1   97.89   14.70 
  -7  -1   1   91.89   14.30 
   7  -1  -1  117.29   12.00 
   7  -1  -1  117.49   16.20 
   7  -1  -1  111.79   15.10 
  -7  -1   1  100.79   12.40 
   7  -1  -1  121.69   13.70 
   7  -1  -1   99.69   10.60 
  -7  -1   1  122.39    9.00 
   7  -1  -1  107.49   11.60 
   7  -1  -1  100.09   12.20 
   7  -1  -1  100.19    7.00 
   7  -1  -1  114.59   11.70 
   7  -1  -1  129.99   13.50 
  -7  -1   1  105.99   12.60 
   7   1  -1   94.19   10.90 
   7   1  -1   82.79   11.10 
   7   1  -1  121.39   14.20 
   7   1  -1  106.89   13.70 
   7   1  -1   93.29   10.00 
   7   1  -1   96.19   13.20 
   7   1  -1  100.59   13.30 
  -7   1   1  125.29   16.30 
  -7   1   1  101.19   10.30 
  -7   1   1  123.19   12.70 
  -7   1   1  100.79   17.20 
  -7   1   1  116.59   14.10 
   7   1  -1  116.39   13.50 
  -7   1   1  104.09   13.70 
  -7   1   1  117.69    8.90 
   7   1  -1  103.99   11.70 
  -7   1   1  124.19   17.10 
   7   1  -1  128.49   16.70 
  -7   1   1  122.89   15.50 
   7   1  -1  107.09   15.70 
   7   1  -1  103.39   12.70 
   7   1  -1  105.89   14.20 
  -7   1   1   97.69   14.80 
  -7   1   1  104.09   14.40 
  -7   1   1   92.19   12.70 
  -7   1   1   97.49   13.20 
  -7   1   1  130.09   14.40 
   7   1  -1  113.39   13.10 
   7   1  -1  114.79   12.70 
  -7   1   1  113.79   14.50 
  -7   1   1  128.09   16.50 
  -6  -1   1 2165.58   72.79 
   6  -1  -1 2264.57   71.79 
  -6  -1   1 2204.98   71.79 
   6  -1  -1 2197.88   68.09 
  -6  -1   1 2259.27   73.69 
  -6  -1   1 2296.77   74.79 
   6  -1  -1 2190.18   69.49 
   6  -1  -1 2186.28   70.59 
   6  -1  -1 2177.88   63.89 
  -6  -1   1 2256.97   71.39 
  -6  -1   1 2222.88   75.99 
   6  -1  -1 2230.08   70.09 
   6  -1  -1 2095.39   75.29 
   6  -1  -1 2225.68   68.89 
   6  -1  -1 2217.08   75.39 
   6  -1  -1 2118.89   67.99 
   6  -1  -1 2252.67   69.29 
  -6  -1   1 2189.28   74.39 
   6  -1  -1 2160.58   67.19 
  -6  -1   1 2146.99   75.59 
  -6  -1   1 2317.17   75.39 
   6  -1  -1 2188.48   71.89 
   6  -1  -1 2273.07   62.79 
  -6  -1   1 2231.48   67.59 
  -6  -1   1 2273.57   72.99 
   6  -1  -1 2264.07   68.09 
   6  -1  -1 2248.88   68.89 
   6  -1  -1 2190.98   70.99 
   6  -1  -1 2197.18   67.59 
  -6  -1   1 2262.07   76.99 
   6  -1  -1 2200.88   73.59 
  -6  -1   1 2174.38   71.09 
  -6  -1   1 2242.78   80.99 
  -6  -1   1 2237.68   74.39 
   6  -1  -1 2283.97   66.59 
   6   1  -1 2266.97   73.59 
   6   1  -1 2213.78   71.29 
   6   1  -1 2239.98   66.59 
   6   1  -1 2312.17   72.59 
  -6   1   1 2182.68   75.69 
  -6   1   1 2228.08   76.09 
   6   1  -1 2242.28   68.69 
   6   1  -1 2236.28   70.49 
  -6   1   1 2178.28   75.69 
  -6   1   1 2300.97   67.09 
   6   1  -1 2286.27   69.49 
  -6   1   1 2198.18   67.69 
  -6   1   1 2220.98   72.89 
   6   1  -1 2204.88   67.89 
   6   1  -1 2159.68   71.39 
   6   1  -1 2260.07   62.99 
  -6   1   1 2218.58   72.59 
  -6   1   1 2104.79   72.39 
  -6   1   1 2286.47   71.69 
  -6   1   1 2259.47   70.19 
  -6   1   1 2326.77   75.59 
  -6   1   1 2175.68   74.29 
  -6   1   1 2206.28   69.59 
   6   1  -1 2074.69   76.29 
   6   1  -1 2228.58   73.69 
  -6   1   1 2306.67   81.59 
   6   1  -1 2147.59   71.39 
   6   1  -1 2266.37   64.09 
   6   1  -1 2167.88   73.39 
  -6   1   1 2241.88   67.29 
  -6   1   1 2210.38   76.69 
   6   1  -1 2191.88   71.09 
  -6   1   1 2171.88   72.89 
   6   1  -1 2151.38   75.69 
   6   1  -1 2122.39   72.29 
  -6   1   1 2264.57   73.69 
   5  -1  -1  301.17   14.40 
  -5  -1   1  287.77   20.60 
   5  -1  -1  300.37   14.20 
  -5  -1   1  294.27   17.40 
  -5  -1   1  323.07   16.90 
  -5  -1   1  291.67   16.90 
   5  -1  -1  288.27   15.70 
  -5  -1   1  307.97   10.50 
   5  -1  -1  294.27   15.30 
   5  -1  -1  310.27   10.10 
  -5  -1   1  310.07   17.90 
  -5  -1   1  357.66   19.00 
   5  -1  -1  309.37   15.30 
  -5  -1   1  318.17   19.00 
   5  -1  -1  332.77   18.30 
  -5  -1   1  331.97   19.10 
  -5  -1   1  320.47   18.30 
   5  -1  -1  296.27   14.10 
  -5  -1   1  318.67   17.20 
   5  -1  -1  333.57   12.70 
   5  -1  -1  317.57   15.70 
   5  -1  -1  316.47   13.70 
   5  -1  -1  310.97   15.20 
   5  -1  -1  317.57   14.70 
   5  -1  -1  322.97   17.30 
  -5  -1   1  306.17   16.40 
   5  -1  -1  316.07   16.70 
  -5  -1   1  327.67   15.60 
   5  -1  -1  308.17   10.90 
   5  -1  -1  281.47   13.80 
  -5  -1   1  317.67   19.10 
   5  -1  -1  299.77   16.60 
   5  -1  -1  319.37   16.10 
   5  -1  -1  336.97   15.10 
  -5  -1   1  306.37   10.00 
  -5  -1   1  311.67   17.40 
   5  -1  -1  324.57   19.00 
  -5  -1   1  335.17   16.90 
   5  -1  -1  305.77   10.10 
   5  -1  -1  335.17   15.40 
  -5   1   1  316.37   18.90 
   5   1  -1  299.07   13.80 
   5   1  -1  331.67   19.20 
   5   1  -1  311.57   14.90 
   5   1  -1  326.27   17.80 
   5   1  -1  288.07   17.20 
   5   1  -1  299.47   16.60 
   5   1  -1  314.97   16.50 
   5   1  -1  298.37   16.50 
  -5   1   1  360.66   19.80 
  -5   1   1  311.87   17.10 
  -5   1   1  314.37   14.20 
   5   1  -1  340.77   16.00 
   5   1  -1  314.37   11.90 
  -5   1   1  323.77   21.40 
   5   1  -1  311.97   17.40 
   5   1  -1  317.07   14.90 
  -5   1   1  316.37   15.60 
  -5   1   1  314.27   17.10 
  -5   1   1  330.17   17.80 
   5   1  -1  285.17   16.10 
   5   1  -1  324.97   12.60 
   5   1  -1  320.47   19.60 
  -5   1   1  304.67   18.70 
   5   1  -1  334.57   16.60 
  -5   1   1  331.97   18.70 
  -5   1   1  312.57   17.20 
  -5   1   1  325.47   16.60 
  -5   1   1  318.27   18.10 
   5   1  -1  318.67   16.80 
  -5   1   1  292.87   15.40 
  -5   1   1  305.07   14.50 
  -5   1   1  304.57   14.40 
   5   1  -1  318.67   17.70 
  -5   1   1  334.27   17.30 
  -5   1   1  315.87   18.70 
  -5   1   1  351.36   18.70 
   5   1  -1  330.17   14.30 
  -5   1   1  321.57   17.40 
  -4  -1   1 5826.62  177.18 
  -4  -1   1 6142.89  173.88 
   4  -1  -1 6338.97  168.78 
   4  -1  -1 5892.61  167.88 
   4  -1  -1 6188.18  168.38 
   4  -1  -1 6288.77  169.58 
  -4  -1   1 5840.72  164.98 
  -4  -1   1 6095.89  170.08 
  -4  -1   1 6335.27  175.28 
   4  -1  -1 5960.30  170.38 
  -4  -1   1 6249.47  171.48 
   4  -1  -1 6185.88  171.18 
   4  -1  -1 6373.16  173.68 
   4  -1  -1 6096.99  170.18 
   4  -1  -1 5798.62  170.78 
   4  -1  -1 6272.27  168.98 
   4  -1  -1 6447.35  171.18 
   4  -1  -1 6298.17  171.48 
  -4  -1   1 6268.57  173.48 
  -4  -1   1 6207.58  173.28 
  -4  -1   1 6112.59  172.58 
  -4  -1   1 5914.41  165.48 
  -4  -1   1 6242.28  172.38 
  -4  -1   1 6136.49  170.38 
   4  -1  -1 6413.66  167.18 
   4  -1  -1 6013.90  168.78 
   4  -1  -1 5794.42  165.48 
  -4  -1   1 6108.39  164.48 
   4  -1  -1 5972.70  168.18 
  -4  -1   1 6140.59  171.28 
  -4  -1   1 6113.39  171.88 
  -4  -1   1 6301.77  174.68 
  -4  -1   1 6316.67  173.38 
  -4  -1   1 6336.77  171.88 
   4  -1  -1 6151.28  170.68 
   4  -1  -1 6315.77  168.38 
   4  -1  -1 6168.98  166.18 
  -4  -1   1 6102.69  172.98 
   4  -1  -1 6252.87  168.88 
   4  -1  -1 5693.13  169.78 
   4  -1  -1 6007.10  168.48 
   4  -1  -1 6251.87  168.68 
  -4  -1   1 6482.55  175.38 
  -4  -1   1 6055.39  170.98 
   4   1  -1 6243.18  171.58 
  -4   1   1 6234.08  171.98 
  -4   1   1 5863.61  177.38 
  -4   1   1 6339.57  172.18 
  -4   1   1 6056.89  171.78 
   4   1  -1 6191.98  171.28 
   4   1  -1 6209.38  169.38 
   4   1  -1 6250.17  175.68 
  -4   1   1 6237.08  167.68 
   4   1  -1 6151.38  164.98 
   4   1  -1 6055.09  165.68 
   4   1  -1 6279.57  171.48 
   4   1  -1 6191.08  171.58 
  -4   1   1 6221.38  173.58 
   4   1  -1 6139.79  172.68 
  -4   1   1 6381.46  169.08 
  -4   1   1 6053.69  172.88 
  -4   1   1 6231.58  173.48 
   4   1  -1 6228.98  170.08 
  -4   1   1 5967.20  170.08 
  -4   1   1 6315.57  169.88 
  -4   1   1 6273.17  174.28 
   4   1  -1 6272.97  168.08 
  -4   1   1 6198.78  173.98 
   4   1  -1 6132.99  168.88 
  -4   1   1 6193.68  174.48 
   4   1  -1 6201.98  174.48 
  -4   1   1 6282.17  169.68 
   4   1  -1 6184.08  171.48 
   4   1  -1 6437.16  170.08 
   4   1  -1 6394.66  172.78 
  -4   1   1 6209.88  172.58 
   4   1  -1 6368.36  167.98 
  -4   1   1 6080.39  169.68 
  -4   1   1 6216.28  173.28 
   4   1  -1 6136.09  170.98 
  -4   1   1 6286.77  171.58 
   4   1  -1 6250.27  168.38 
  -4   1   1 6257.27  172.98 
  -4   1   1 6170.48  172.18 
  -4   1   1 6302.37  168.08 
  -4   1   1 6170.18  171.58 
  -4   1   1 6140.09  173.98 
   4   1  -1 6038.10  172.48 
   4   1  -1 6110.39  172.38 
  -3  -1   1  498.45   19.20 
  -3  -1   1  498.35   18.80 
  -3  -1   1  479.15   20.10 
  -3  -1   1  477.25   19.60 
   3  -1  -1  470.45   18.30 
  -3  -1   1  486.75   18.90 
   3  -1  -1  481.45   19.90 
   3  -1  -1  497.45   17.50 
   3  -1  -1  465.45   16.90 
   3  -1  -1  470.45   17.60 
  -3  -1   1  471.15   18.70 
   3  -1  -1  467.75   15.90 
  -3  -1   1  489.35   19.90 
  -3  -1   1  497.75   18.40 
   3  -1  -1  456.15   18.20 
   3  -1  -1  498.55   18.10 
   3  -1  -1  480.85   18.60 
   3  -1  -1  469.05   16.60 
  -3  -1   1  455.05   19.70 
  -3  -1   1  459.65   19.50 
   3  -1  -1  478.35   21.50 
   3  -1  -1  463.15   15.80 
   3  -1  -1  480.15   17.10 
   3  -1  -1  465.45   18.20 
  -3  -1   1  487.95   16.20 
   3  -1  -1  445.96   16.80 
   3  -1  -1  502.05   19.20 
   3  -1  -1  461.05   18.40 
  -3  -1   1  449.16   17.70 
  -3  -1   1  453.65   19.10 
  -3  -1   1  462.25   21.80 
  -3  -1   1  473.15   20.50 
   3  -1  -1  487.95   16.00 
   3  -1  -1  476.15   16.80 
  -3  -1   1  456.35   15.70 
  -3  -1   1  476.55   18.80 
   3  -1  -1  484.75   17.30 
   3  -1  -1  485.15   17.20 
  -3  -1   1  482.45   19.20 
  -3  -1   1  471.95   18.80 
  -3  -1   1  491.25   20.70 
  -3  -1   1  494.65   19.00 
  -3  -1   1  444.66   17.70 
  -3  -1   1  472.25   18.80 
   3  -1  -1  487.05   19.90 
   3  -1  -1  456.15   18.50 
  -3  -1   1  469.85   18.70 
   3  -1  -1  492.95   18.40 
   3  -1  -1  469.75   17.10 
   3  -1  -1  490.75   17.20 
   3  -1  -1  482.15   19.00 
   3   1  -1  462.25   18.60 
   3   1  -1  444.06   18.80 
   3   1  -1  461.75   18.60 
   3   1  -1  473.35   18.40 
   3   1  -1  480.55   16.00 
  -3   1   1  512.95   19.60 
  -3   1   1  489.35   19.90 
  -3   1   1  499.75   20.10 
  -3   1   1  449.36   17.60 
   3   1  -1  455.55   18.70 
   3   1  -1  509.25   21.30 
   3   1  -1  510.15   18.20 
  -3   1   1  486.75   17.80 
   3   1  -1  484.15   18.00 
  -3   1   1  481.45   16.30 
   3   1  -1  448.06   19.60 
  -3   1   1  487.35   19.10 
   3   1  -1  462.55   18.70 
  -3   1   1  454.75   21.60 
  -3   1   1  482.55   17.50 
  -3   1   1  483.95   15.70 
  -3   1   1  469.45   17.60 
   3   1  -1  484.95   18.70 
  -3   1   1  473.35   20.00 
   3   1  -1  493.15   18.60 
  -3   1   1  443.26   18.90 
  -3   1   1  460.25   19.00 
  -3   1   1  502.05   19.10 
   3   1  -1  520.25   19.10 
   3   1  -1  476.05   17.30 
  -3   1   1  463.35   18.50 
  -3   1   1  490.15   19.00 
   3   1  -1  500.85   19.30 
  -3   1   1  494.45   17.50 
   3   1  -1  472.75   16.90 
   3   1  -1  485.25   16.90 
  -3   1   1  466.55   16.30 
   3   1  -1  471.75   16.90 
   3   1  -1  476.95   18.80 
   3   1  -1  492.65   19.40 
   3   1  -1  485.15   18.80 
   3   1  -1  463.25   19.40 
  -3   1   1  471.65   19.50 
   3   1  -1  485.75   18.30 
  -3   1   1  488.45   18.60 
  -3   1   1  478.45   19.80 
   3   1  -1  481.35   19.30 
   3   1  -1  497.25   19.70 
  -3   1   1  495.35   16.40 
   3   1  -1  475.25   15.40 
   3   1  -1  470.75   18.80 
  -3   1   1  493.55   19.90 
  -3   1   1  457.95   17.80 
   3   1  -1  476.95   19.30 
  -3   1   1  482.55   19.00 
   3   1  -1  476.75   18.70 
   3   1  -1  472.55   19.40 
   3   1  -1  499.95   21.00 
   3   1  -1  477.05   20.30 
  -2  -1   1 2749.32   74.29 
  -2  -1   1 2702.83   74.79 
   2  -1  -1 2579.44   73.09 
   2  -1  -1 2652.23   74.29 
  -2  -1   1 2648.73   74.49 
   2  -1  -1 2695.83   74.59 
   2  -1  -1 2614.04   72.49 
   2  -1  -1 2562.84   77.09 
   2  -1  -1 2594.84   73.79 
  -2  -1   1 2732.93   74.89 
  -2  -1   1 2657.83   75.89 
   2  -1  -1 2719.83   71.19 
  -2  -1   1 2517.65   72.49 
   2  -1  -1 2495.15   71.59 
   2  -1  -1 2599.94   74.19 
  -2  -1   1 2712.53   73.89 
  -2  -1   1 2622.54   74.69 
   2  -1  -1 2767.72   74.49 
  -2  -1   1 2684.93   76.19 
   2  -1  -1 2556.24   72.79 
  -2  -1   1 2659.83   74.89 
   2  -1  -1 2615.04   74.09 
   2  -1  -1 2633.54   73.89 
  -2  -1   1 2714.33   74.79 
  -2  -1   1 2671.53   74.89 
   2  -1  -1 2627.44   74.89 
   2  -1  -1 2506.15   73.79 
   2  -1  -1 2455.35   73.79 
   2  -1  -1 2506.95   73.99 
   2  -1  -1 2613.04   74.69 
  -2  -1   1 2610.54   74.09 
  -2  -1   1 2691.13   74.69 
   2  -1  -1 2636.24   72.59 
   2  -1  -1 2723.43   74.59 
  -2  -1   1 2717.73   74.89 
   2  -1  -1 2679.23   75.19 
   2  -1  -1 2563.34   71.49 
  -2  -1   1 2741.43   75.69 
  -2  -1   1 2682.93   74.49 
   2  -1  -1 2557.94   73.29 
  -2  -1   1 2640.54   73.99 
  -2  -1   1 2599.24   73.99 
   2  -1  -1 2693.83   73.79 
   2  -1  -1 2645.84   74.89 
   2  -1  -1 2650.33   74.09 
  -2  -1   1 2740.33   75.09 
  -2  -1   1 2616.14   74.89 
  -2  -1   1 2668.63   74.39 
  -2  -1   1 2723.53   75.69 
  -2  -1   1 2630.34   74.39 
  -2  -1   1 2695.83   74.29 
   2  -1  -1 2661.73   75.29 
  -2  -1   1 2663.93   74.39 
   2  -1  -1 2602.64   72.39 
  -2  -1   1 2558.24   72.69 
   2  -1  -1 2551.64   72.79 
   2  -1  -1 2505.05   72.99 
  -2  -1   1 2563.44   75.39 
  -2  -1   1 2552.54   73.89 
  -2   1   1 2571.44   74.69 
  -2   1   1 2576.84   72.39 
  -2   1   1 2611.54   71.99 
   2   1  -1 2669.43   73.99 
   2   1  -1 2523.65   73.39 
   2   1  -1 2673.33   74.89 
   2   1  -1 2706.13   74.29 
  -2   1   1 2566.24   72.99 
   2   1  -1 2731.13   74.69 
  -2   1   1 2639.24   73.99 
  -2   1   1 2693.63   74.89 
  -2   1   1 2593.74   74.89 
   2   1  -1 2669.33   73.89 
   2   1  -1 2502.65   71.29 
  -2   1   1 2627.94   73.69 
  -2   1   1 2623.74   72.39 
  -2   1   1 2461.35   72.69 
  -2   1   1 2623.34   72.39 
  -2   1   1 2641.14   75.09 
   2   1  -1 2707.63   74.79 
  -2   1   1 2607.94   71.29 
   2   1  -1 2683.73   73.99 
   2   1  -1 2736.93   74.99 
   2   1  -1 2691.93   74.79 
   2   1  -1 2759.12   75.59 
  -2   1   1 2620.54   75.09 
  -2   1   1 2677.63   74.59 
  -2   1   1 2506.05   77.19 
   2   1  -1 2677.53   75.09 
   2   1  -1 2605.64   75.19 
   2   1  -1 2746.83   74.89 
  -2   1   1 2676.63   74.39 
  -2   1   1 2508.25   74.29 
   2   1  -1 2691.53   74.89 
   2   1  -1 2750.02   75.99 
  -2   1   1 2502.15   74.19 
   2   1  -1 2483.05   71.79 
   2   1  -1 2594.54   73.09 
   2   1  -1 2687.03   73.69 
  -2   1   1 2508.35   73.89 
   2   1  -1 2777.72   75.29 
   2   1  -1 2641.84   74.59 
  -2   1   1 2625.24   74.39 
   2   1  -1 2757.62   74.59 
   2   1  -1 2711.63   75.79 
  -2   1   1 2564.04   74.69 
  -2   1   1 2687.43   73.39 
  -2   1   1 2721.13   74.19 
   2   1  -1 2572.34   75.19 
   2   1  -1 2702.03   74.19 
   2   1  -1 2620.14   75.79 
  -2   1   1 2600.74   74.69 
   2   1  -1 2683.43   74.09 
   2   1  -1 2705.43   74.19 
   2   1  -1 2629.54   74.49 
  -2   1   1 2750.32   74.09 
   2   1  -1 2696.53   74.69 
   2   1  -1 2614.74   74.79 
   2   1  -1 2528.35   70.49 
   2   1  -1 2584.54   71.89 
   2   1  -1 2776.52   74.49 
   2   1  -1 2626.44   74.39 
   2   1  -1 2670.83   76.29 
  -2   1   1 2714.33   74.19 
   2   1  -1 2727.73   74.69 
  -1  -1   1  209.78    8.70 
   1  -1  -1  209.68    7.20 
  -1  -1   1  214.58    8.60 
  -1  -1   1  211.58    8.90 
   1  -1  -1  226.98   10.10 
  -1  -1   1  215.38    8.60 
   1  -1  -1  217.68    9.50 
  -1  -1   1  229.68    8.80 
  -1  -1   1  212.18    8.40 
  -1  -1   1  204.78    8.60 
   1  -1  -1  220.08    9.20 
   1  -1  -1  229.88    9.10 
   1  -1  -1  216.98    8.10 
  -1  -1   1  213.48    8.60 
  -1  -1   1  217.78    7.60 
  -1  -1   1  197.18    9.10 
  -1  -1   1  221.38    8.90 
  -1  -1   1  224.38    9.20 
   1  -1  -1  214.78    8.40 
  -1  -1   1  201.48    8.90 
  -1  -1   1  212.18    8.70 
   1  -1  -1  200.38    8.70 
  -1  -1   1  232.48    8.70 
   1  -1  -1  213.88    8.70 
   1  -1  -1  202.68    7.60 
   1  -1  -1  216.38    8.20 
   1  -1  -1  209.28    7.20 
   1  -1  -1  213.28    8.10 
   1  -1  -1  211.08    8.00 
  -1  -1   1  207.08    8.50 
  -1  -1   1  205.18    7.90 
  -1  -1   1  220.88    9.30 
   1  -1  -1  218.68    8.10 
   1  -1  -1  219.48    7.00 
  -1  -1   1  214.98    8.70 
  -1  -1   1  206.88    8.30 
  -1  -1   1  203.28    8.50 
  -1  -1   1  214.58    7.90 
   1  -1  -1  219.88    8.30 
   1  -1  -1  202.08    7.90 
  -1  -1   1  226.68    8.80 
   1  -1  -1  210.58    8.40 
  -1  -1   1  229.48    8.50 
   1  -1  -1  223.88    8.50 
   1  -1  -1  222.08    7.10 
   1  -1  -1  200.98    8.20 
  -1  -1   1  211.48    7.80 
  -1  -1   1  220.28    8.80 
   1  -1  -1  219.28    8.20 
   1  -1  -1  213.68    8.30 
  -1  -1   1  212.38    9.10 
  -1  -1   1  216.98    8.60 
   1  -1  -1  222.68    9.70 
  -1  -1   1  230.78    9.10 
   1  -1  -1  204.58    7.90 
   1  -1  -1  216.98    8.70 
   1  -1  -1  217.28    6.50 
   1  -1  -1  213.48    7.90 
   1  -1  -1  218.38    6.50 
  -1  -1   1  215.18    8.20 
   1  -1  -1  218.18    6.70 
   1  -1  -1  212.28    9.00 
  -1   1   1  223.58    8.50 
  -1   1   1  220.48    8.70 
   1   1  -1  194.88    8.20 
  -1   1   1  209.28    8.10 
   1   1  -1  198.08    8.50 
   1   1  -1  208.78    9.00 
  -1   1   1  212.48    8.90 
   1   1  -1  212.38    7.90 
   1   1  -1  201.78    8.30 
   1   1  -1  211.18    8.60 
   1   1  -1  209.28    8.40 
   1   1  -1  214.48    8.20 
  -1   1   1  221.18    9.40 
  -1   1   1  211.78    8.00 
  -1   1   1  210.38    8.90 
   1   1  -1  219.58    7.70 
  -1   1   1  203.48    8.30 
   1   1  -1  225.18    8.70 
   1   1  -1  202.28    8.80 
   1   1  -1  207.98    8.60 
   1   1  -1  218.78    6.70 
  -1   1   1  196.88    9.10 
   1   1  -1  205.28    8.70 
   1   1  -1  203.98    9.20 
   1   1  -1  211.28    8.80 
   1   1  -1  223.78    8.60 
   1   1  -1  205.28    8.70 
  -1   1   1  184.88    8.40 
  -1   1   1  209.78    8.80 
   1   1  -1  204.28    8.80 
   1   1  -1  214.68    9.00 
   1   1  -1  191.38    8.50 
   1   1  -1  209.38    9.00 
   1   1  -1  231.68    9.30 
   1   1  -1  201.18    7.80 
   1   1  -1  223.78    9.00 
   1   1  -1  204.28    8.60 
  -1   1   1  206.48    7.80 
   1   1  -1  173.18    8.60 
   1   1  -1  200.98    7.70 
   1   1  -1  218.38    8.40 
   1   1  -1  206.88    7.50 
   1   1  -1  210.78    8.70 
   0  -1   1 6995.20  193.88 
   0  -1   1 7210.18  199.88 
   0  -1   1 7552.54  197.18 
   0  -1   1 6693.43  204.78 
   0  -1   1 7484.75  200.98 
   0  -1   1 6974.40  200.38 
   0  -1   1 7912.81  201.88 
   0  -1   1 7721.53  196.58 
   0  -1   1 6705.93  198.68 
   0  -1  -1 7205.88  196.88 
   0  -1   1 6388.96  197.38 
   0  -1  -1 7544.04  203.38 
   0  -1  -1 7218.58  200.08 
   0  -1   1 7008.70  198.78 
   0  -1   1 6700.63  196.78 
   0  -1  -1 7199.88  197.38 
   0  -1  -1 7321.07  199.08 
   0  -1  -1 7315.97  201.18 
   0  -1   1 6734.43  199.48 
   0  -1   1 8121.09  198.78 
   0  -1  -1 7014.50  196.68 
   0  -1  -1 7570.54  201.98 
   0  -1  -1 7508.75  200.18 
   0  -1  -1 7576.74  197.18 
   0  -1  -1 7465.35  202.18 
   0  -1   1 7709.43  195.08 
   0  -1  -1 7550.34  199.68 
   0  -1   1 6621.04  199.48 
   0  -1   1 7306.97  204.18 
   0  -1  -1 7619.74  199.48 
   0  -1   1 7494.55  199.28 
   0  -1  -1 6953.70  194.48 
   0  -1  -1 7121.39  200.58 
   0  -1   1 7004.30  200.58 
   0  -1  -1 7661.43  202.68 
   0  -1   1 8052.09  200.38 
   0  -1   1 8100.89  202.68 
   0   1  -1 7717.23  203.28 
   0   1   1 7377.06  199.98 
   0   1  -1 7700.73  200.08 
   0   1   1 6638.84  200.28 
   0   1   1 6983.80  200.28 
   0   1   1 6758.22  199.28 
   0   1  -1 7555.74  202.48 
  -1  -1  -1  421.76   14.70 
  -1  -1  -1  415.86   15.00 
  -1  -1  -1  429.96   14.80 
  -1  -1  -1  415.96   14.30 
   1  -1   1  430.86   12.90 
   1  -1   1  403.66   12.40 
  -1  -1  -1  397.86   14.50 
   1  -1   1  442.06   14.80 
   1  -1   1  383.56   13.80 
   1  -1   1  432.16   15.80 
  -1  -1  -1  412.16   13.70 
  -1  -1  -1  415.86   14.60 
  -1  -1  -1  399.96   14.20 
  -1  -1  -1  420.56   14.60 
   1  -1   1  394.26   15.90 
  -1  -1  -1  413.06   14.60 
  -1  -1  -1  418.96   14.80 
  -1  -1  -1  404.76   14.40 
   1  -1   1  405.96   14.60 
   1  -1   1  432.96   15.70 
   1  -1   1  435.46   13.00 
   1  -1   1  430.76   13.00 
   1  -1   1  430.76   12.90 
   1  -1   1  431.26   14.50 
   1  -1   1  432.36   11.90 
   1  -1   1  435.16   16.30 
   1  -1   1  403.86   15.00 
  -1  -1  -1  434.06   14.30 
  -1  -1  -1  409.66   14.70 
   1  -1   1  395.46   15.90 
  -1  -1  -1  435.86   14.90 
  -1  -1  -1  410.36   14.60 
   1  -1   1  446.66   15.10 
  -1  -1  -1  418.06   14.70 
   1  -1   1  422.96   13.40 
   1  -1   1  401.96   15.00 
   1  -1   1  420.76   12.70 
   1  -1   1  422.66   15.00 
   1  -1   1  426.66   14.70 
  -1  -1  -1  422.66   14.10 
   1  -1   1  416.86   15.00 
  -1  -1  -1  416.86   13.50 
   1  -1   1  427.16   12.00 
   1  -1   1  389.96   12.80 
  -1  -1  -1  457.55   14.90 
   1  -1   1  412.96   12.00 
  -1  -1  -1  431.96   13.10 
   1  -1   1  397.46   12.50 
   1  -1   1  416.66   13.00 
  -1  -1  -1  416.16   14.20 
  -1  -1  -1  411.76   13.30 
  -1  -1  -1  418.36   14.40 
   1  -1   1  428.26   15.80 
  -1  -1  -1  397.56   14.70 
  -1  -1  -1  391.36   14.80 
  -1   1  -1  433.56   15.90 
  -1   1  -1  409.66   15.40 
   1   1   1  421.46   14.30 
   1   1   1  424.36   14.20 
   1   1   1  402.06   14.10 
   1   1   1  405.46   14.40 
   1   1   1  409.66   14.80 
   1   1   1  405.86   14.60 
   1   1   1  427.76   14.70 
  -1   1  -1  435.96   14.80 
  -1   1  -1  391.06   14.60 
   1   1   1  433.06   14.80 
  -1   1  -1  427.76   13.90 
  -1   1  -1  349.77   13.40 
   1   1   1  402.66   13.50 
   1   1   1  417.36   13.80 
  -1   1  -1  421.76   14.70 
  -1   1  -1  412.86   15.20 
   1   1   1  433.46   12.90 
   1   1   1  419.46   14.50 
  -1   1  -1  392.96   12.60 
   1   1   1  376.46   14.40 
  -1   1  -1  422.56   12.30 
   1   1   1  423.76   15.00 
   1   1   1  403.86   13.20 
  -1   1  -1  380.56   12.80 
   1   1   1  433.86   14.50 
   1   1   1  427.16   14.40 
   1   1   1  434.66   14.50 
   1   1   1  419.16   14.70 
  -1   1  -1  390.76   13.30 
   1   1   1  388.16   13.30 
   1   1   1  406.36   14.40 
  -1   1  -1  427.86   15.50 
   1   1   1  403.56   14.10 
  -1   1  -1  421.46   15.90 
  -1   1  -1  430.66   15.00 
  -1   1  -1  399.56   12.40 
   1   1   1  404.36   14.80 
  -1   1  -1  392.26   14.70 
  -1   1  -1  433.66   15.60 
   1   1   1  386.46   13.50 
   1   1   1  420.36   13.90 
  -1   1  -1  438.86   13.00 
   1   1   1  405.06   14.50 
   1   1   1  428.36   14.60 
  -1   1  -1  413.96   16.00 
   1   1   1  425.36   14.50 
   1   1   1  449.86   14.90 
   1   1   1  438.06   15.00 
   1   1   1  427.26   14.70 
   1   1   1  404.16   14.60 
  -2  -1  -1 9465.55  247.58 
   2  -1   1 9661.73  246.98 
   2  -1   1 8252.57  247.68 
  -2  -1  -1 9656.53  247.48 
  -2  -1  -1 9670.83  248.28 
  -2  -1  -1 9363.46  252.87 
   2  -1   1 7942.41  249.48 
   2  -1   1 8642.44  250.97 
   2  -1   1 9497.15  248.38 
   2  -1   1 9044.29  249.88 
  -2  -1  -1 9439.86  248.18 
  -2  -1  -1 9463.55  251.17 
  -2  -1  -1 9706.73  247.98 
   2  -1   1 9701.73  248.18 
   2  -1   1 8153.78  248.18 
   2  -1   1 9036.30  247.38 
  -2  -1  -1 9357.16  248.18 
  -2  -1  -1 9354.56  247.98 
   2  -1   1 9853.81  248.28 
   2  -1   1 9548.54  245.98 
  -2  -1  -1 8120.69  246.68 
  -2  -1  -1 9309.47  248.38 
   2  -1   1 9524.35  250.87 
  -2  -1  -1 9549.25  249.38 
  -2  -1  -1 9906.11  250.97 
   2  -1   1 9466.05  246.38 
   2  -1   1 8301.87  248.68 
   2  -1   1 8793.22  249.18 
   2  -1   1 8859.21  247.38 
   2  -1   1 9490.65  247.08 
   2  -1   1 8400.56  245.18 
  -2  -1  -1 8143.59  246.98 
  -2  -1  -1 9697.03  247.68 
  -2  -1  -1 9821.82  247.68 
  -2  -1  -1 9416.56  246.98 
  -2  -1  -1 9506.45  246.98 
  -2  -1  -1 9527.55  248.58 
   2  -1   1 9314.87  250.17 
  -2  -1  -1 9365.86  251.17 
   2  -1   1 8601.44  248.78 
   2  -1   1 9358.26  247.48 
   2  -1   1 9798.92  249.97 
   2  -1   1 8227.88  248.08 
   2  -1   1 7916.81  247.68 
   2  -1   1 9999.00  247.38 
   2  -1   1 7949.80  247.38 
   2  -1   1 8050.49  248.48 
   2  -1   1 9409.96  248.78 
  -2  -1  -1 9544.15  248.38 
   2  -1   1 9291.17  248.98 
  -2  -1  -1 9594.64  248.18 
  -2  -1  -1 9469.05  248.98 
  -2  -1  -1 9506.35  247.78 
  -2  -1  -1 9803.12  248.48 
  -2  -1  -1 9554.64  248.08 
   2  -1   1 7901.41  248.88 
   2  -1   1 9843.32  248.08 
   2  -1   1 9305.77  247.68 
  -2  -1  -1 8899.91  253.47 
  -2  -1  -1 9298.07  247.88 
   2  -1   1 9181.38  245.28 
  -2  -1  -1 9818.02  247.58 
  -2  -1  -1 9733.13  249.88 
   2  -1   1 9766.72  246.98 
  -2  -1  -1 9240.08  248.28 
   2  -1   1 8010.10  246.88 
  -2  -1  -1 9693.33  248.88 
   2   1   1 9631.84  248.08 
   2   1   1 9620.14  247.98 
   2   1   1 9911.71  247.58 
   2   1   1 9619.14  248.68 
   2   1   1 9755.62  248.38 
   2   1   1 9181.28  247.28 
   2   1   1 8247.77  247.38 
  -2   1  -1 9585.34  246.58 
  -2   1  -1 9273.17  247.58 
   2   1   1 9786.02  247.58 
   2   1   1 9460.05  247.98 
  -2   1  -1 8267.37  247.58 
   2   1   1 9457.45  248.78 
   2   1   1 9677.13  247.68 
   2   1   1 9599.74  247.98 
  -2   1  -1 8390.16  246.68 
   2   1   1 9844.71  248.78 
  -2   1  -1 8208.68  250.17 
   2   1   1 9550.24  247.08 
  -2   1  -1 8358.16  248.78 
   2   1   1 9633.84  246.78 
   2   1   1 9183.88  247.78 
  -2   1  -1 8126.49  249.08 
   2   1   1 8208.28  246.38 
  -2   1  -1 9790.12  247.08 
  -2   1  -1 9291.47  247.78 
  -2   1  -1 8601.44  247.68 
   2   1   1 9468.25  247.88 
   2   1   1 9467.65  246.68 
   2   1   1 8413.66  244.68 
   2   1   1 9484.55  246.98 
  -2   1  -1 9221.98  246.18 
   2   1   1 9370.86  248.08 
   2   1   1 9649.23  247.58 
  -2   1  -1 9689.93  247.28 
  -2   1  -1 9365.86  246.28 
   2   1   1 9685.23  248.68 
  -2   1  -1 9160.18  248.78 
  -2   1  -1 8251.47  248.38 
   2   1   1 9639.44  247.28 
   2   1   1 9570.64  248.58 
   2   1   1 9671.03  248.38 
   2   1   1 9908.81  248.68 
   2   1   1 9273.87  249.68 
  -2   1  -1 9431.16  249.28 
   2   1   1 9637.54  248.88 
   2   1   1 9628.64  246.88 
  -2   1  -1 8480.35  247.68 
   2   1   1 9432.26  246.38 
  -2   1  -1 8340.97  248.78 
  -2   1  -1 9538.65  246.58 
   2   1   1 9814.12  248.98 
   2   1   1 9491.55  247.88 
  -2   1  -1 8566.84  247.78 
   2   1   1 9563.64  248.38 
   3  -1   1    2.10    1.20 
   3  -1   1    4.20    2.10 
   3  -1   1    4.00    2.40 
   3  -1   1    6.50    2.20 
  -3  -1  -1    2.80    2.40 
   3  -1   1    7.30    1.70 
  -3  -1  -1    4.70    2.70 
  -3  -1  -1    3.80    1.30 
   3  -1   1    6.30    2.80 
  -3  -1  -1    3.90    2.00 
   3  -1   1   14.20    3.80 
   3  -1   1    8.10    3.30 
   3  -1   1    3.40    1.20 
  -3  -1  -1    2.70    1.80 
   3  -1   1    7.30    2.40 
   3  -1   1    6.60    2.70 
   3  -1   1    4.50    1.80 
   3  -1   1    3.80    2.30 
  -3  -1  -1    7.20    2.80 
  -3  -1  -1    7.80    3.00 
  -3  -1  -1    4.00    2.20 
   3  -1   1    7.20    2.50 
   3  -1   1    2.90    1.40 
   3  -1   1    5.00    1.30 
   3  -1   1    1.00    1.60 
  -3  -1  -1    1.30    2.90 
  -3  -1  -1    1.90    1.60 
  -3  -1  -1    2.00    2.20 
   3  -1   1    3.70    0.70 
   3  -1   1    3.50    2.10 
   3  -1   1    2.50    2.10 
   3  -1   1    2.80    1.20 
  -3  -1  -1    1.60    1.60 
   3  -1   1    5.40    1.30 
   3  -1   1    2.30    2.00 
  -3  -1  -1    6.90    3.30 
  -3  -1  -1    3.60    2.50 
  -3  -1  -1    7.00    3.00 
  -3  -1  -1    3.90    2.50 
  -3  -1  -1    2.90    1.40 
  -3  -1  -1    2.70    2.10 
   3  -1   1    5.60    2.40 
  -3  -1  -1    5.20    2.60 
  -3  -1  -1    4.30    2.60 
  -3  -1  -1    5.80    1.80 
  -3  -1  -1    2.90    2.40 
   3  -1   1    4.90    3.00 
  -3  -1  -1    5.80    2.80 
   3  -1   1    2.30    1.80 
   3  -1   1    9.60    3.60 
   3  -1   1    1.00    2.40 
  -3  -1  -1   14.70    3.70 
  -3  -1  -1    1.10    1.80 
   3  -1   1    1.80    3.20 
  -3  -1  -1    4.40    2.50 
  -3  -1  -1    7.30    2.60 
   3  -1   1    2.50    2.70 
   3  -1   1    4.90    2.90 
   3   1   1    4.10    2.70 
   3   1   1    2.60    1.90 
   3   1   1    4.80    2.50 
  -3   1  -1    3.30    2.20 
   3   1   1    8.10    3.00 
  -3   1  -1    0.10    2.20 
   3   1   1    3.40    1.10 
   3   1   1    0.10    1.90 
   3   1   1    5.60    2.80 
   3   1   1    8.40    2.60 
  -3   1  -1    0.20    1.80 
  -3   1  -1   10.60    3.60 
  -3   1  -1   -0.50    1.50 
   3   1   1    1.20    1.60 
   3   1   1    3.10    2.20 
  -3   1  -1    5.10    2.60 
  -3   1  -1    5.00    3.00 
  -3   1  -1    1.50    1.30 
   3   1   1    4.80    2.60 
   3   1   1   -0.20    2.00 
   3   1   1    0.80    2.30 
   3   1   1    0.30    2.10 
   3   1   1    8.80    2.50 
   3   1   1    2.30    2.10 
  -3   1  -1    3.90    2.20 
  -3   1  -1    3.20    1.40 
  -3   1  -1    5.10    2.30 
  -3   1  -1    3.20    2.60 
   3   1   1    2.40    2.00 
   3   1   1    1.70    2.10 
   3   1   1    6.00    2.60 
   3   1   1    5.70    2.70 
  -3   1  -1    6.90    3.10 
   3   1   1    5.90    2.40 
  -3   1  -1    5.80    2.10 
   3   1   1    1.60    1.90 
  -3   1  -1    8.90    3.10 
   3   1   1    3.40    2.80 
  -3   1  -1    3.50    3.40 
   3   1   1    7.50    3.00 
   3   1   1    4.10    2.80 
   3   1   1    4.60    2.90 
   3   1   1    4.00    1.40 
  -3   1  -1    4.70    2.60 
   3   1   1   -0.60    2.40 
  -4  -1  -1 3304.27   94.09 
   4  -1   1 3193.38   94.69 
  -4  -1  -1 3210.38   96.49 
  -4  -1  -1 3316.17   96.39 
   4  -1   1 3303.87   97.99 
   4  -1   1 3232.68   93.49 
   4  -1   1 3258.57   91.39 
   4  -1   1 3216.38   89.29 
  -4  -1  -1 3231.28   95.89 
   4  -1   1 3187.48   94.19 
   4  -1   1 3339.17   92.79 
  -4  -1  -1 3225.88   87.49 
   4  -1   1 3284.37   89.59 
  -4  -1  -1 3247.18  101.29 
  -4  -1  -1 3220.08   97.69 
  -4  -1  -1 3271.77   93.19 
   4  -1   1 3318.47   94.59 
   4  -1   1 3293.67   90.99 
   4  -1   1 3260.67   95.69 
  -4  -1  -1 3214.68   98.59 
  -4  -1  -1 3276.97   95.59 
  -4  -1  -1 3344.97   96.29 
  -4  -1  -1 3301.97   98.39 
  -4  -1  -1 3327.87   96.49 
   4  -1   1 3187.68   87.19 
  -4  -1  -1 3237.78   96.69 
   4  -1   1 3339.57   89.99 
  -4  -1  -1 3336.77   96.49 
   4  -1   1 3118.39   97.39 
  -4  -1  -1 3151.68   90.49 
   4  -1   1 3170.88   96.29 
   4  -1   1 3283.97   95.59 
  -4  -1  -1 3228.78   98.19 
   4  -1   1 3277.17   94.69 
  -4  -1  -1 3350.66   97.29 
  -4  -1  -1 3321.57   89.59 
   4  -1   1 3242.78   90.29 
   4  -1   1 3297.27   87.49 
   4  -1   1 3300.77   90.19 
   4  -1   1 3206.78   98.19 
  -4  -1  -1 3276.67   94.69 
   4  -1   1 3227.78   89.39 
  -4  -1  -1 3118.19   90.69 
  -4   1  -1 3201.48   96.89 
  -4   1  -1 3270.87   98.39 
   4   1   1 3335.87   94.79 
  -4   1  -1 3313.47   95.49 
   4   1   1 3299.37   88.19 
   4   1   1 3181.28   93.99 
   4   1   1 3244.68   93.59 
  -4   1  -1 3263.17   90.29 
   4   1   1 3315.87   96.29 
  -4   1  -1 3265.47   95.69 
  -4   1  -1 3137.49  101.29 
  -4   1  -1 3189.78   98.79 
  -4   1  -1 3315.07   99.19 
  -4   1  -1 3281.87   96.49 
   4   1   1 3191.78   95.79 
  -4   1  -1 3194.08   98.59 
   4   1   1 3203.28   97.79 
  -4   1  -1 3303.77   95.79 
   4   1   1 3229.48   99.29 
   4   1   1 3249.67   96.79 
  -4   1  -1 3269.37   95.59 
   4   1   1 3238.08   88.79 
   4   1   1 3249.48   93.29 
  -4   1  -1 3284.77   93.69 
   4   1   1 3280.87   95.99 
   4   1   1 3365.76   96.69 
   4   1   1 3353.46   92.49 
  -4   1  -1 3280.07   91.09 
  -4   1  -1 3294.57   95.19 
  -4   1  -1 3300.57   97.39 
   4   1   1 3320.17   96.29 
  -4   1  -1 3239.48   96.59 
   4   1   1 3246.38   95.19 
   4   1   1 3347.27   93.79 
  -4   1  -1 3260.97   93.89 
   5  -1   1    6.30    2.30 
   5  -1   1    6.60    3.40 
  -5  -1  -1    4.70    3.60 
   5  -1   1    7.70    3.50 
   5  -1   1    8.00    2.70 
  -5  -1  -1    5.20    3.50 
   5  -1   1    6.20    2.20 
   5  -1   1    4.20    2.70 
  -5  -1  -1    7.90    2.40 
  -5  -1  -1    3.70    4.30 
   5  -1   1    7.70    3.30 
  -5  -1  -1    2.30    2.60 
  -5  -1  -1    4.90    1.20 
  -5  -1  -1    7.00    4.10 
   5  -1   1    2.60    2.80 
  -5  -1  -1    5.10    2.90 
  -5  -1  -1    4.30    3.60 
  -5  -1  -1    3.30    3.10 
   5  -1   1    7.70    3.20 
  -5  -1  -1    8.40    3.80 
   5  -1   1    4.10    2.30 
   5  -1   1    6.90    4.00 
   5  -1   1    8.20    3.60 
  -5  -1  -1   10.50    3.90 
  -5  -1  -1    9.10    3.90 
   5  -1   1    6.10    2.30 
   5  -1   1    8.00    1.60 
  -5  -1  -1    5.50    4.00 
   5  -1   1    6.70    4.10 
  -5  -1  -1    6.10    3.40 
  -5  -1  -1    2.90    2.70 
   5  -1   1    7.50    2.30 
   5  -1   1    4.90    2.30 
   5  -1   1    5.00    3.60 
  -5  -1  -1    5.10    3.50 
   5  -1   1    5.90    2.50 
  -5   1  -1    3.30    4.40 
   5   1   1    5.40    3.20 
  -5   1  -1    9.50    4.60 
  -5   1  -1    7.40    3.70 
  -5   1  -1    9.30    4.20 
   5   1   1    6.60    3.30 
   5   1   1    6.60    3.50 
   5   1   1    5.00    3.20 
  -5   1  -1   14.10    4.60 
   5   1   1    8.40    3.90 
  -5   1  -1    8.10    3.00 
   5   1   1    8.20    3.80 
   5   1   1   10.30    3.60 
  -5   1  -1   -1.10    2.40 
   5   1   1    6.20    2.50 
   5   1   1    5.80    1.70 
   5   1   1    2.90    3.00 
   5   1   1   -0.30    2.40 
  -5   1  -1    7.90    3.20 
  -5   1  -1    3.70    3.50 
  -5   1  -1    2.10    2.80 
   5   1   1    4.90    3.20 
   5   1   1    5.20    4.20 
   5   1   1    8.20    3.90 
   5   1   1    3.00    2.90 
   5   1   1    8.30    2.00 
  -5   1  -1    5.00    3.20 
  -5   1  -1    6.10    3.40 
  -5   1  -1    2.80    1.90 
  -5   1  -1   11.00    4.60 
  -5   1  -1    5.70    3.10 
  -5   1  -1    3.90    2.80 
  -5   1  -1   11.20    4.70 
  -5   1  -1    3.60    3.30 
   6  -1   1  305.17   20.90 
   6  -1   1  308.47   19.90 
  -6  -1  -1  342.57   20.60 
  -6  -1  -1  312.97   19.40 
  -6  -1  -1  314.17   19.70 
  -6  -1  -1  307.57   17.60 
  -6  -1  -1  304.27   23.10 
   6  -1   1  340.47   22.10 
  -6  -1  -1  271.67   18.60 
   6  -1   1  310.47   18.40 
   6  -1   1  308.47   18.50 
  -6  -1  -1  287.87   18.40 
   6  -1   1  338.47   18.50 
   6  -1   1  294.47   19.00 
   6  -1   1  328.37   13.90 
  -6  -1  -1  309.97   18.40 
  -6  -1  -1  311.07   18.90 
  -6  -1  -1  337.57   21.80 
   6  -1   1  293.97   13.50 
   6  -1   1  324.07   14.70 
   6  -1   1  318.57   18.00 
  -6  -1  -1  327.27   21.30 
  -6  -1  -1  330.87   19.80 
  -6  -1  -1  322.17   17.40 
  -6  -1  -1  328.17   12.90 
   6  -1   1  311.27   15.40 
   6  -1   1  308.47   14.10 
   6  -1   1  322.27   13.80 
   6  -1   1  318.37   17.70 
   6  -1   1  334.37   18.10 
  -6  -1  -1  329.67   21.60 
   6  -1   1  332.47   17.30 
   6  -1   1  316.37   11.40 
   6   1   1  283.27   18.30 
   6   1   1  357.06   18.80 
   6   1   1  324.47   19.20 
  -6   1  -1  311.87   15.50 
   6   1   1  315.97   15.40 
  -6   1  -1  379.66   23.60 
   6   1   1  321.67   22.00 
  -6   1  -1  328.77   19.20 
  -6   1  -1  314.77   19.20 
   6   1   1  307.27   18.90 
  -6   1  -1  303.57   18.80 
  -6   1  -1  356.56   22.30 
  -6   1  -1  337.27   15.30 
   6   1   1  277.77   18.70 
   6   1   1  329.57   19.60 
  -6   1  -1  348.37   18.00 
  -6   1  -1  313.37   21.00 
   6   1   1  313.97   12.10 
   6   1   1  337.17   19.60 
  -6   1  -1  318.27   20.10 
   6   1   1  342.87   17.50 
   6   1   1  284.37   17.00 
  -6   1  -1  331.87   19.40 
   6   1   1  294.87   17.60 
   6   1   1  319.17   11.60 
   6   1   1  298.27   20.50 
  -6   1  -1  331.37   18.30 
  -6   1  -1  312.77   18.50 
  -6   1  -1  295.47   22.80 
   6   1   1  363.96   20.80 
  -6   1  -1  354.96   22.80 
  -6   1  -1  311.47   19.40 
  -7  -1  -1    6.00    4.60 
   7  -1   1    5.00    4.80 
  -7  -1  -1   -1.40    3.80 
  -7  -1  -1   14.40    6.60 
   7  -1   1    4.70    2.90 
   7  -1   1    7.00    5.40 
  -7  -1  -1    0.20    3.60 
  -7  -1  -1    3.50    3.50 
   7  -1   1    4.10    4.00 
   7  -1   1    1.80    4.10 
   7  -1   1    8.20    4.60 
   7  -1   1    1.60    3.20 
   7  -1   1   -0.90    3.40 
   7  -1   1   13.60    7.10 
   7  -1   1    3.60    3.80 
  -7  -1  -1   12.10    6.20 
  -7  -1  -1    8.10    5.00 
   7  -1   1    4.00    3.60 
   7  -1   1    3.50    3.30 
  -7  -1  -1   10.30    6.80 
   7  -1   1    2.20    4.20 
  -7  -1  -1    1.20    3.20 
   7  -1   1    3.20    4.20 
  -7  -1  -1    9.30    5.20 
  -7  -1  -1    3.70    4.00 
  -7  -1  -1    4.30    4.10 
   7  -1   1    0.50    3.20 
   7  -1   1    5.60    5.40 
  -7  -1  -1    6.40    4.90 
   7   1   1   10.00    6.20 
   7   1   1    5.00    4.40 
   7   1   1    8.70    4.70 
  -7   1  -1    3.20    4.50 
  -7   1  -1    7.20    4.50 
  -7   1  -1    3.70    3.30 
   7   1   1    3.40    4.70 
   7   1   1    4.90    3.00 
  -7   1  -1    5.70    4.60 
  -7   1  -1    1.30    3.50 
  -7   1  -1    6.10    4.30 
   7   1   1    3.40    3.90 
  -7   1  -1    1.70    3.70 
  -7   1  -1    8.70    6.60 
   7   1   1    4.40    3.60 
   7   1   1   11.10    5.10 
  -7   1  -1    9.40    5.00 
  -7   1  -1    5.30    4.40 
  -7   1  -1    2.60    4.20 
   7   1   1    7.90    5.20 
   7   1   1    3.90    3.30 
  -7   1  -1    5.50    5.00 
  -7   1  -1   10.00    6.30 
  -7   1  -1    0.50    3.50 
   7   1   1    7.90    4.60 
  -7   1  -1    8.20    3.50 
   7   1   1    3.00    4.10 
   7   1   1    5.90    4.50 
   7   1   1    5.20    4.90 
  -7   1  -1    4.90    4.30 
  -8  -1  -1  296.07   22.50 
   8  -1   1  261.47   18.70 
   8  -1   1  240.48   19.80 
   8  -1   1  273.07   21.30 
   8  -1   1  251.67   24.30 
   8  -1   1  274.67   19.20 
   8  -1   1  305.47   17.00 
   8  -1   1  302.57   19.80 
   8  -1   1  301.27   21.00 
   8  -1   1  296.57   19.10 
  -8  -1  -1  301.97   24.20 
   8  -1   1  248.78   26.70 
  -8  -1  -1  271.07   18.30 
  -8  -1  -1  277.07   20.90 
   8  -1   1  326.77   25.20 
   8  -1   1  308.37   24.40 
  -8  -1  -1  298.57   24.40 
  -8  -1  -1  267.67   21.30 
  -8  -1  -1  307.07   22.40 
  -8  -1  -1  292.57   21.40 
   8  -1   1  257.47   19.50 
  -8  -1  -1  276.07   23.50 
   8  -1   1  277.27   23.50 
  -8  -1  -1  251.87   29.60 
   8  -1   1  302.97   20.50 
  -8  -1  -1  297.57   21.80 
  -8  -1  -1  267.97   18.70 
  -8  -1  -1  254.27   20.70 
   8  -1   1  281.67   18.20 
   8   1   1  302.47   21.80 
   8   1   1  256.37   27.30 
  -8   1  -1  271.17   22.80 
   8   1   1  320.57   24.30 
  -8   1  -1  277.47   20.80 
   8   1   1  294.27   19.10 
   8   1   1  256.47   18.40 
  -8   1  -1  268.87   20.40 
   8   1   1  260.37   20.50 
  -8   1  -1  311.07   24.90 
   8   1   1  326.77   21.50 
  -8   1  -1  257.47   20.30 
  -8   1  -1  276.17   20.70 
   8   1   1  295.37   21.90 
   8   1   1  310.57   21.30 
   8   1   1  237.58   19.30 
  -8   1  -1  306.97   21.60 
  -8   1  -1  280.87   18.30 
   8   1   1  261.57   19.80 
  -8   1  -1  276.07   30.40 
  -8   1  -1  310.67   24.90 
  -8   1  -1  336.57   24.90 
   8   1   1  270.47   20.40 
  -8   1  -1  301.07   20.60 
   8   1   1  299.47   18.20 
   9  -1   1   12.50    6.70 
   9  -1   1   11.30    6.50 
   9  -1   1   -2.20    4.70 
   9  -1   1    6.90    4.90 
  -9  -1  -1    8.30    6.00 
   9  -1   1    6.20    5.50 
  -9  -1  -1    9.70    6.00 
  -9  -1  -1   11.70    7.50 
  -9  -1  -1   -8.00    5.60 
  -9  -1  -1    1.00    5.10 
  -9  -1  -1    2.00    4.90 
   9  -1   1   10.50    8.50 
   9  -1   1    6.30    6.30 
   9  -1   1    8.20    5.80 
  -9  -1  -1    3.70    6.20 
   9  -1   1   12.80    7.40 
   9  -1   1    4.10    5.80 
   9  -1   1   12.90    6.60 
  -9  -1  -1    7.50    5.90 
  -9  -1  -1    9.90    8.30 
  -9  -1  -1    8.10    5.50 
   9  -1   1    0.00    4.40 
   9  -1   1    1.30    5.50 
  -9  -1  -1   12.50    7.30 
   9   1   1   14.30    6.90 
  -9   1  -1    8.70    9.00 
  -9   1  -1    7.60    6.70 
  -9   1  -1   15.30    8.80 
   9   1   1    2.80    4.60 
   9   1   1    4.90    8.60 
   9   1   1   10.70    6.60 
   9   1   1    4.60    5.60 
   9   1   1    1.90    5.30 
  -9   1  -1    7.50    6.70 
   9   1   1    0.30    4.10 
   9   1   1   10.10    7.60 
   9   1   1    2.90    5.20 
  -9   1  -1    4.40    4.90 
   9   1   1    0.70    4.80 
  -9   1  -1    3.10    7.00 
  -9   1  -1    7.20    5.40 
  -9   1  -1    1.90    5.40 
   9   1   1    5.90    5.90 
  -9   1  -1    9.60    6.10 
 -10  -1  -1  310.07   34.50 
  10  -1   1  330.97   25.10 
  10  -1   1  313.17   35.10 
 -10  -1  -1  299.77   38.60 
  10  -1   1  257.87   28.90 
  10  -1   1  312.67   33.70 
 -10  -1  -1  310.37   25.80 
 -10  -1  -1  280.77   29.40 
  10  -1   1  250.37   30.40 
 -10  -1  -1  296.77   33.80 
 -10  -1  -1  270.47   28.50 
 -10  -1  -1  337.77   26.10 
  10  -1   1  292.07   32.70 
  10  -1   1  290.27   27.80 
 -10  -1  -1  308.67   31.30 
  10  -1   1  242.48   24.60 
  10   1   1  329.47   30.30 
 -10   1  -1  325.87   26.30 
 -10   1  -1  292.07   34.40 
  10   1   1  339.47   33.10 
  10   1   1  255.37   26.20 
 -10   1  -1  355.76   26.70 
  10   1   1  291.57   32.60 
 -10   1  -1  304.37   30.10 
 -10   1  -1  279.57   32.20 
 -10   1  -1  238.58   33.60 
  10   1   1  311.47   33.40 
  10   1   1  313.37   29.70 
  10   1   1  305.67   24.10 
 -10   1  -1  239.88   26.60 
  10   1   1  301.87   34.20 
  10   1   1  305.77   30.40 
 -10  -2   1  175.18   24.80 
  10  -2  -1  169.08   26.00 
 -10  -2   1  122.59   19.30 
  10  -2  -1  158.18   23.90 
 -10  -2   1  132.99   19.80 
 -10  -2   1  124.59   20.00 
 -10  -2   1  204.38   25.60 
  10  -2  -1  193.88   26.90 
  10  -2  -1  153.98   20.30 
 -10  -2   1  148.39   27.00 
 -10  -2   1  151.98   21.20 
  10  -2  -1  176.78   24.90 
  10  -2  -1  151.88   19.20 
  10  -2  -1  188.28   24.10 
 -10  -2   1  153.08   22.50 
 -10  -2   1  151.98   24.70 
  10  -2  -1  184.58   20.80 
 -10   2   1  176.98   22.50 
 -10   2   1  154.08   21.10 
  10   2  -1  179.38   23.00 
  10   2  -1  157.88   20.70 
  10   2  -1  180.28   23.20 
  10   2  -1  188.38   25.70 
  10   2  -1  168.68   21.20 
 -10   2   1  129.49   24.60 
  10   2  -1  195.58   28.30 
 -10   2   1  169.18   23.90 
 -10   2   1  160.18   21.50 
  10   2  -1  170.68   20.40 
  10   2  -1  170.28   23.20 
  10   2  -1  169.48   22.60 
 -10   2   1  169.78   22.00 
  10   2  -1  180.68   21.80 
   9  -2  -1  188.48   23.80 
  -9  -2   1  179.68   20.90 
   9  -2  -1  191.18   24.90 
  -9  -2   1  261.87   28.70 
  -9  -2   1  161.78   20.90 
  -9  -2   1  222.38   23.70 
   9  -2  -1  193.18   20.30 
  -9  -2   1  163.18   19.60 
  -9  -2   1  185.28   22.20 
   9  -2  -1  214.18   20.60 
   9  -2  -1  201.48   22.80 
   9  -2  -1  233.28   24.60 
  -9  -2   1  221.38   22.40 
   9  -2  -1  231.28   21.20 
  -9  -2   1  209.58   25.90 
  -9  -2   1  234.18   24.90 
   9  -2  -1  178.58   24.30 
   9  -2  -1  206.38   21.80 
  -9  -2   1  233.68   24.20 
  -9  -2   1  230.58   25.50 
  -9  -2   1  170.38   26.00 
   9  -2  -1  225.38   26.10 
   9   2  -1  218.18   24.10 
   9   2  -1  186.98   21.10 
   9   2  -1  186.38   22.30 
   9   2  -1  202.38   21.30 
   9   2  -1  168.08   23.10 
   9   2  -1  167.38   20.00 
   9   2  -1  200.28   21.10 
   9   2  -1  220.38   22.90 
  -9   2   1  218.18   30.00 
  -9   2   1  208.08   22.40 
  -9   2   1  182.88   25.30 
   9   2  -1  168.98   20.80 
  -9   2   1  182.18   24.40 
   9   2  -1  203.68   23.80 
  -9   2   1  189.48   21.70 
  -9   2   1  191.48   24.60 
   9   2  -1  179.08   24.70 
   9   2  -1  210.88   21.00 
  -9   2   1  241.08   24.80 
   9   2  -1  198.48   22.30 
  -9   2   1  220.58   22.90 
   8  -2  -1    1.40    4.00 
   8  -2  -1   11.70    6.00 
   8  -2  -1    5.40    5.50 
  -8  -2   1    6.20    6.00 
  -8  -2   1   -1.10    3.90 
   8  -2  -1    4.90    3.60 
  -8  -2   1   -1.30    4.50 
  -8  -2   1    6.70    5.70 
  -8  -2   1    1.00    3.70 
   8  -2  -1   -2.00    2.80 
   8  -2  -1    9.40    4.80 
   8  -2  -1    6.80    4.10 
  -8  -2   1   -3.30    3.60 
   8  -2  -1    7.10    5.10 
   8  -2  -1   11.10    6.70 
  -8  -2   1   11.40    5.40 
   8  -2  -1    6.50    6.70 
  -8  -2   1    3.80    6.90 
  -8  -2   1    0.80    4.70 
  -8  -2   1    3.00    5.40 
   8  -2  -1    7.50    5.10 
   8  -2  -1    5.20    3.80 
  -8  -2   1   -1.00    4.20 
  -8  -2   1    3.90    4.50 
   8  -2  -1    7.30    5.80 
   8  -2  -1    3.10    5.80 
  -8  -2   1    0.70    4.20 
   8  -2  -1    0.80    5.10 
  -8   2   1    0.20    3.80 
  -8   2   1    3.30    4.80 
  -8   2   1    9.40    5.40 
   8   2  -1   14.10    6.70 
   8   2  -1    4.30    5.20 
  -8   2   1    0.00    3.80 
   8   2  -1    8.20    6.50 
   8   2  -1    1.80    4.30 
   8   2  -1    0.30    4.00 
   8   2  -1   10.60    5.80 
   8   2  -1    2.90    4.40 
   8   2  -1    6.20    4.40 
   8   2  -1    2.90    5.20 
   8   2  -1    6.90    6.00 
   8   2  -1    2.30    4.20 
  -8   2   1   -2.90    4.50 
  -8   2   1    0.40    4.40 
   8   2  -1    5.70    5.50 
  -8   2   1    6.80    4.60 
  -8   2   1    5.60    6.80 
   8   2  -1    5.60    4.10 
  -8   2   1    3.20    5.10 
  -8   2   1    3.80    5.20 
   8   2  -1    1.80    4.30 
  -8   2   1   10.60    6.90 
   8   2  -1    3.00    3.90 
   7  -2  -1    2.90    3.90 
   7  -2  -1   -2.30    2.60 
  -7  -2   1   -3.50    2.80 
   7  -2  -1    3.10    3.00 
  -7  -2   1    0.90    3.50 
   7  -2  -1    7.70    6.50 
   7  -2  -1    4.50    3.50 
  -7  -2   1   -2.20    2.30 
   7  -2  -1    3.30    3.00 
  -7  -2   1    1.10    3.70 
  -7  -2   1    0.70    3.70 
   7  -2  -1    2.70    3.50 
  -7  -2   1    4.10    4.20 
  -7  -2   1    7.20    5.10 
   7  -2  -1    3.00    4.50 
   7  -2  -1    3.10    3.60 
   7  -2  -1    0.00    3.10 
   7  -2  -1    1.60    2.80 
   7  -2  -1   -0.70    2.90 
   7  -2  -1    4.90    4.60 
   7  -2  -1   -2.00    3.80 
   7  -2  -1   11.20    4.70 
   7  -2  -1    3.30    3.00 
   7  -2  -1    2.60    3.20 
   7  -2  -1    3.80    3.10 
  -7  -2   1    3.20    5.90 
  -7  -2   1    0.30    4.30 
  -7  -2   1    6.70    4.50 
  -7  -2   1   -1.20    3.40 
  -7  -2   1    1.80    4.70 
   7  -2  -1    4.70    2.80 
  -7  -2   1    2.50    4.00 
  -7  -2   1   13.80    4.80 
   7  -2  -1    3.60    3.80 
  -7   2   1    8.40    5.20 
  -7   2   1    0.70    4.70 
  -7   2   1    6.80    4.30 
   7   2  -1    0.10    3.60 
   7   2  -1    0.70    3.40 
  -7   2   1    3.50    3.90 
   7   2  -1    1.90    2.90 
   7   2  -1   21.50    7.30 
  -7   2   1    4.20    4.00 
   7   2  -1    4.00    4.20 
   7   2  -1   12.60    5.40 
   7   2  -1   12.90    5.60 
   7   2  -1   -0.10    3.70 
  -7   2   1    6.50    4.00 
   7   2  -1    0.90    4.30 
   7   2  -1    7.20    4.70 
  -7   2   1    3.60    3.20 
  -7   2   1    9.70    5.40 
  -7   2   1   12.60    7.40 
  -7   2   1    7.00    5.20 
   7   2  -1    1.70    4.00 
   7   2  -1   -2.00    3.00 
   7   2  -1    0.20    3.60 
  -7   2   1    4.00    2.90 
   7   2  -1    5.30    3.60 
  -7   2   1    0.20    3.10 
  -7   2   1    6.40    4.60 
  -7   2   1    3.30    3.60 
   7   2  -1    1.20    3.40 
   6  -2  -1   46.00    3.20 
   6  -2  -1   47.50    7.30 
  -6  -2   1   39.60    9.10 
   6  -2  -1   37.50    7.30 
  -6  -2   1   37.00    8.00 
  -6  -2   1   44.90    8.40 
   6  -2  -1   49.00    7.80 
   6  -2  -1   49.10    7.10 
   6  -2  -1   56.19    7.20 
   6  -2  -1   55.19    8.20 
  -6  -2   1   41.40    8.10 
   6  -2  -1   40.70    7.60 
   6  -2  -1   42.10    6.00 
  -6  -2   1   42.50    8.40 
  -6  -2   1   48.90    4.10 
   6  -2  -1   59.09    7.70 
  -6  -2   1   41.60    7.60 
  -6  -2   1   38.80    7.80 
   6  -2  -1   48.50    6.00 
  -6  -2   1   50.29   11.30 
  -6  -2   1   51.59    5.40 
   6  -2  -1   39.60    8.60 
   6  -2  -1   69.09   11.30 
  -6  -2   1   49.20    9.50 
  -6  -2   1   38.40    7.70 
   6  -2  -1   35.90    6.00 
   6  -2  -1   37.30    7.00 
   6  -2  -1   47.30    4.50 
   6  -2  -1   39.30    6.40 
  -6  -2   1   47.90    7.60 
  -6  -2   1   43.60    8.90 
  -6  -2   1   46.10    5.20 
  -6  -2   1   47.20    9.80 
  -6  -2   1   47.50    8.50 
   6  -2  -1   50.99    6.60 
   6  -2  -1   44.80    5.30 
   6  -2  -1   39.70    4.90 
   6  -2  -1   48.50   10.00 
   6  -2  -1   50.49    6.30 
  -6  -2   1   52.79    4.20 
  -6   2   1   49.40    9.40 
  -6   2   1   48.80    7.40 
  -6   2   1   41.30    8.40 
  -6   2   1   56.39   10.30 
  -6   2   1   47.10    6.20 
   6   2  -1   52.39   10.50 
   6   2  -1   63.89    5.80 
  -6   2   1   36.80    7.50 
   6   2  -1   35.30    7.40 
   6   2  -1   44.30    8.70 
  -6   2   1   47.90    8.30 
   6   2  -1   44.20    8.70 
  -6   2   1   50.09    8.50 
   6   2  -1   41.30    6.10 
  -6   2   1   48.00    9.10 
  -6   2   1   55.99    8.20 
  -6   2   1   56.19   10.40 
  -6   2   1   59.79    6.30 
  -6   2   1   56.59    9.00 
   6   2  -1   49.70    9.20 
   6   2  -1   45.30    8.30 
  -6   2   1   47.00    7.20 
   6   2  -1   47.10    8.60 
   6   2  -1   51.29    9.30 
  -6   2   1   49.50    8.80 
  -6   2   1   56.39    8.00 
   6   2  -1   39.20    8.80 
  -6   2   1   38.90    8.00 
   6   2  -1   28.70    7.20 
  -6   2   1   39.80   10.20 
  -6   2   1   43.30    9.40 
   6   2  -1   50.79    7.90 
   6   2  -1   41.70    7.80 
   6   2  -1   51.99    9.00 
   6   2  -1   37.50    7.30 
   5  -2  -1  170.58    8.00 
   5  -2  -1  176.98   13.80 
   5  -2  -1  187.28   13.10 
   5  -2  -1  179.38    9.90 
   5  -2  -1  198.08   12.50 
   5  -2  -1  180.18   14.30 
   5  -2  -1  180.38   10.50 
  -5  -2   1  183.78   12.70 
  -5  -2   1  185.88   12.20 
   5  -2  -1  175.18   11.10 
   5  -2  -1  182.88   11.90 
  -5  -2   1  182.68   12.80 
  -5  -2   1  167.28   13.20 
  -5  -2   1  180.58   13.90 
  -5  -2   1  201.78   13.50 
  -5  -2   1  182.68    9.20 
   5  -2  -1  190.08    9.80 
   5  -2  -1  182.58   14.30 
  -5  -2   1  179.38    8.80 
  -5  -2   1  159.98   12.30 
   5  -2  -1  184.98   10.00 
  -5  -2   1  198.98   15.10 
  -5  -2   1  181.68   14.40 
   5  -2  -1  180.88   11.10 
  -5  -2   1  192.18   13.10 
  -5  -2   1  178.98   12.90 
   5  -2  -1  180.88    8.30 
   5  -2  -1  171.18    9.10 
  -5  -2   1  181.28   13.30 
  -5  -2   1  182.28   13.20 
   5  -2  -1  167.68   10.20 
  -5  -2   1  178.08   19.40 
   5  -2  -1  189.28    9.80 
   5  -2  -1  150.18   11.20 
   5  -2  -1  180.08   11.00 
   5  -2  -1  177.48   11.10 
  -5  -2   1  193.08   10.10 
   5  -2  -1  158.78   10.40 
   5  -2  -1  159.78    8.60 
   5  -2  -1  182.08   10.30 
   5   2  -1  174.58   10.00 
  -5   2   1  166.28   12.40 
  -5   2   1  161.38   13.20 
   5   2  -1  187.88   14.50 
   5   2  -1  218.88   13.10 
   5   2  -1  176.18   13.10 
  -5   2   1  163.08    8.70 
   5   2  -1  176.08    9.10 
  -5   2   1  200.08   13.00 
  -5   2   1  173.38   12.30 
  -5   2   1  172.28   12.80 
  -5   2   1  177.58   11.10 
   5   2  -1  161.08   13.00 
   5   2  -1  172.98   13.00 
   5   2  -1  192.38   13.30 
  -5   2   1  200.18   13.40 
  -5   2   1  186.18   11.60 
  -5   2   1  158.18   12.50 
  -5   2   1  185.78   14.50 
   5   2  -1  188.88   13.20 
  -5   2   1  174.78   18.80 
  -5   2   1  184.78    9.80 
   5   2  -1  178.48   12.90 
   5   2  -1  166.98   12.50 
  -5   2   1  183.18   13.20 
   5   2  -1  170.38   10.70 
  -5   2   1  175.58   13.10 
  -5   2   1  173.28   13.20 
   5   2  -1  149.79   12.60 
  -5   2   1  196.98   13.00 
  -5   2   1  185.78   11.50 
   5   2  -1  183.88   12.00 
   5   2  -1  160.58   12.30 
  -5   2   1  170.98   12.70 
   5   2  -1  148.19   15.90 
  -5   2   1  195.48   14.80 
   5   2  -1  182.78   12.70 
  -5   2   1  188.68   11.40 
  -5   2   1  184.18   14.00 
  -5   2   1  166.78   12.10 
  -4  -2   1    8.50    3.60 
  -4  -2   1   12.30    3.60 
  -4  -2   1    9.40    3.30 
   4  -2  -1    9.00    2.90 
   4  -2  -1   10.00    3.60 
  -4  -2   1   19.20    4.70 
   4  -2  -1   12.10    2.80 
  -4  -2   1   10.50    3.80 
   4  -2  -1   19.20    4.30 
   4  -2  -1   12.00    4.70 
  -4  -2   1   22.10    5.80 
   4  -2  -1    7.90    3.60 
  -4  -2   1    8.20    3.80 
   4  -2  -1   17.50    3.70 
   4  -2  -1   18.60    3.70 
   4  -2  -1    6.60    3.40 
   4  -2  -1   11.70    3.30 
   4  -2  -1   15.50    4.00 
  -4  -2   1    5.90    2.60 
   4  -2  -1    6.80    3.00 
  -4  -2   1    9.50    3.80 
   4  -2  -1   11.10    2.70 
  -4  -2   1   10.40    4.00 
   4  -2  -1    7.70    2.90 
   4  -2  -1   12.90    2.20 
   4  -2  -1   15.90    3.10 
   4  -2  -1    9.10    4.10 
  -4  -2   1   12.40    4.10 
   4  -2  -1   12.90    3.60 
  -4  -2   1   14.10    4.40 
  -4  -2   1    9.60    5.30 
  -4  -2   1   16.40    3.40 
   4  -2  -1   12.10    2.20 
  -4  -2   1   10.90    4.40 
  -4  -2   1   11.50    4.00 
   4  -2  -1   18.50    5.00 
   4  -2  -1   19.00    2.90 
  -4   2   1    9.50    4.10 
  -4   2   1   14.20    4.20 
  -4   2   1   14.80    4.30 
  -4   2   1    7.30    3.40 
  -4   2   1    8.40    3.90 
  -4   2   1   11.10    3.80 
  -4   2   1   12.40    3.90 
  -4   2   1    8.00    3.80 
   4   2  -1   13.30    4.30 
  -4   2   1    6.00    2.90 
   4   2  -1   11.30    2.30 
  -4   2   1   13.00    4.20 
   4   2  -1   11.40    4.30 
  -4   2   1   11.60    3.70 
   4   2  -1   18.10    5.30 
  -4   2   1   26.00    7.10 
   4   2  -1   13.90    4.40 
  -4   2   1    8.20    3.30 
   4   2  -1   10.90    4.30 
  -4   2   1   13.30    4.20 
   4   2  -1   15.10    4.50 
   4   2  -1    9.60    3.70 
  -4   2   1    8.40    3.50 
  -4   2   1   15.30    3.90 
  -4   2   1    8.50    3.80 
   4   2  -1   11.50    3.40 
  -4   2   1   11.20    2.60 
   4   2  -1   11.60    3.60 
   4   2  -1    9.20    3.30 
   4   2  -1    9.40    3.80 
   4   2  -1    5.20    3.20 
   4   2  -1   14.40    4.50 
   4   2  -1   12.80    3.20 
  -4   2   1   13.70    2.80 
  -4   2   1   12.40    3.10 
   4   2  -1   13.50    4.10 
   4   2  -1   11.20    4.00 
   4   2  -1   11.90    3.00 
  -4   2   1   11.80    3.50 
  -4   2   1    7.40    3.10 
   3  -2  -1   58.19    6.20 
  -3  -2   1   46.70    6.90 
   3  -2  -1   56.19    6.90 
  -3  -2   1   50.49    7.20 
  -3  -2   1   48.70    6.40 
   3  -2  -1   54.49    6.00 
   3  -2  -1   61.19    6.40 
   3  -2  -1   52.89    7.20 
   3  -2  -1   55.79    5.80 
  -3  -2   1   55.99    6.40 
  -3  -2   1   63.99    8.10 
   3  -2  -1   60.29    5.90 
   3  -2  -1   45.10    5.50 
   3  -2  -1   61.09    7.30 
   3  -2  -1   56.69    5.90 
   3  -2  -1   48.20    6.00 
  -3  -2   1   49.80    6.60 
   3  -2  -1   52.19    6.90 
   3  -2  -1   48.90    2.50 
   3  -2  -1   49.99    4.00 
   3  -2  -1   54.79    6.20 
  -3  -2   1   48.30    4.70 
   3  -2  -1   51.29    3.20 
  -3  -2   1   61.59    6.70 
  -3  -2   1   57.99    6.10 
   3  -2  -1   65.09    6.70 
   3  -2  -1   50.89    5.50 
   3  -2  -1   48.50    6.60 
   3  -2  -1   54.89    5.30 
   3  -2  -1   50.49    2.60 
  -3  -2   1   42.90    5.90 
   3  -2  -1   51.19    6.80 
   3  -2  -1   58.09    7.70 
  -3  -2   1   44.50    5.60 
  -3  -2   1   49.90    6.70 
   3  -2  -1   56.19    6.60 
   3  -2  -1   55.09    4.40 
  -3  -2   1   52.79    6.80 
  -3  -2   1   53.59    6.10 
   3  -2  -1   40.50    6.30 
  -3  -2   1   62.19    6.90 
  -3  -2   1   46.10    6.00 
   3  -2  -1   49.80    6.80 
   3  -2  -1   61.69    6.70 
   3  -2  -1   58.09    6.70 
  -3  -2   1   59.69    7.00 
  -3  -2   1   48.30    5.70 
  -3   2   1   45.40    6.00 
  -3   2   1   49.50    6.20 
  -3   2   1   50.79    6.00 
   3   2  -1   42.10    5.70 
   3   2  -1   36.60    6.20 
   3   2  -1   57.49    7.10 
   3   2  -1   50.49    6.80 
  -3   2   1   42.00    5.50 
   3   2  -1   49.80    5.20 
  -3   2   1   55.89    7.00 
  -3   2   1   48.20    5.90 
  -3   2   1   53.69    8.70 
  -3   2   1   55.49    6.30 
   3   2  -1   48.80    6.40 
   3   2  -1   56.39    7.90 
  -3   2   1   61.89    6.70 
  -3   2   1   59.29    7.10 
  -3   2   1   51.19    6.50 
  -3   2   1   50.19    5.20 
  -3   2   1   54.69    6.60 
  -3   2   1   56.69    4.00 
  -3   2   1   52.49    6.60 
   3   2  -1   63.59    7.40 
  -3   2   1   53.79    7.00 
  -3   2   1   52.99    7.20 
   3   2  -1   48.60    6.50 
   3   2  -1   53.89    7.20 
   3   2  -1   45.30    6.20 
   3   2  -1   49.70    6.50 
  -3   2   1   49.80    6.30 
   3   2  -1   52.59    4.20 
  -3   2   1   55.89    6.10 
   3   2  -1   50.89    6.30 
   3   2  -1   43.60    5.50 
   3   2  -1   46.10    6.30 
   3   2  -1   52.39    6.10 
  -3   2   1   58.89    5.80 
   3   2  -1   46.50    5.60 
   3   2  -1   54.59    7.00 
   3   2  -1   52.89    2.60 
   2  -2  -1    2.10    2.00 
  -2  -2   1    2.20    1.60 
  -2  -2   1    1.40    1.70 
  -2  -2   1    1.70    1.80 
  -2  -2   1    4.50    2.10 
   2  -2  -1   -0.40    1.30 
   2  -2  -1    1.60    1.80 
  -2  -2   1    2.70    1.80 
   2  -2  -1    6.60    2.30 
   2  -2  -1    3.90    1.40 
   2  -2  -1    3.10    1.60 
  -2  -2   1    2.30    1.50 
   2  -2  -1    3.50    1.70 
  -2  -2   1    6.50    2.70 
   2  -2  -1    2.00    2.20 
   2  -2  -1    0.90    1.80 
  -2  -2   1    2.40    2.00 
   2  -2  -1    2.60    1.80 
   2  -2  -1    2.00    1.70 
  -2  -2   1    1.60    1.60 
   2  -2  -1    2.60    1.70 
  -2  -2   1    1.60    1.60 
  -2  -2   1    0.10    1.50 
   2  -2  -1    1.60    2.00 
  -2  -2   1    3.40    1.70 
  -2  -2   1    2.00    1.90 
  -2  -2   1    1.90    1.80 
   2  -2  -1    2.30    1.50 
  -2  -2   1    2.20    1.90 
   2  -2  -1    2.50    1.80 
   2  -2  -1    3.70    0.80 
  -2  -2   1    4.30    2.00 
   2  -2  -1    2.40    2.00 
   2  -2  -1    2.20    1.40 
  -2  -2   1    5.40    2.10 
  -2  -2   1    3.10    2.20 
   2  -2  -1    2.40    1.50 
   2  -2  -1    2.80    2.00 
   2  -2  -1    2.60    1.60 
   2  -2  -1    3.40    1.90 
  -2  -2   1    1.40    1.70 
   2  -2  -1    2.00    2.10 
  -2  -2   1    1.90    1.60 
  -2  -2   1    5.10    2.30 
   2  -2  -1    1.60    1.60 
  -2  -2   1    3.00    1.70 
  -2  -2   1    3.70    2.00 
  -2  -2   1    3.00    2.10 
   2  -2  -1    6.60    2.80 
  -2  -2   1    3.30    1.40 
   2  -2  -1    4.50    1.80 
   2  -2  -1    3.40    1.80 
   2  -2  -1    2.10    1.60 
   2  -2  -1    3.40    1.50 
  -2  -2   1    2.40    0.60 
  -2  -2   1    1.20    2.00 
   2  -2  -1    4.70    2.40 
   2  -2  -1    1.20    1.30 
   2  -2  -1    4.50    1.90 
   2  -2  -1    0.70    1.40 
  -2  -2   1    4.00    2.50 
   2  -2  -1    1.40    1.60 
  -2  -2   1    1.10    1.80 
   2  -2  -1    1.70    1.20 
   2   2  -1    0.30    1.40 
  -2   2   1    1.90    1.70 
   2   2  -1    2.20    2.10 
   2   2  -1    4.50    2.50 
   2   2  -1    2.70    2.10 
  -2   2   1    3.10    1.80 
   2   2  -1    6.70    2.50 
  -2   2   1    4.60    1.90 
  -2   2   1   -0.20    1.50 
   2   2  -1    4.60    2.60 
   2   2  -1    6.70    2.40 
   2   2  -1    2.30    2.20 
   2   2  -1    0.90    1.90 
  -2   2   1    0.40    1.50 
   2   2  -1   -0.30    1.30 
  -2   2   1    3.90    1.90 
  -2   2   1    0.50    1.40 
   2   2  -1    3.30    1.70 
   2   2  -1    3.90    2.10 
   2   2  -1    4.10    2.10 
   2   2  -1    2.70    2.00 
  -2   2   1   10.10    2.50 
  -2   2   1    5.50    2.40 
  -2   2   1    2.70    2.10 
   2   2  -1    7.50    2.90 
  -2   2   1    2.50    1.60 
   2   2  -1    2.00    1.60 
   2   2  -1    2.70    2.00 
   2   2  -1    1.60    2.20 
   2   2  -1    4.40    1.80 
   2   2  -1    2.40    1.80 
   2   2  -1    1.90    1.00 
  -2   2   1    4.80    1.90 
  -2   2   1    3.80    1.80 
  -2   2   1    1.20    1.30 
  -2   2   1    2.00    2.00 
   2   2  -1    2.40    1.90 
   2   2  -1   11.30    3.10 
   2   2  -1    0.90    1.70 
  -2   2   1    5.80    2.20 
  -2   2   1    4.10    1.90 
   2   2  -1    1.80    1.90 
   2   2  -1    1.80    1.60 
  -2   2   1    4.80    2.50 
   2   2  -1    1.00    1.80 
   2   2  -1    1.90    1.80 
   2   2  -1    0.10    1.40 
  -2   2   1    4.60    2.40 
   2   2  -1    0.70    1.10 
  -2   2   1    3.60    2.10 
   2   2  -1    0.10    1.40 
  -2   2   1    1.80    1.40 
   2   2  -1    4.80    2.20 
   1  -2  -1    7.50    1.90 
  -1  -2   1    9.30    2.60 
  -1  -2   1    7.80    2.50 
   1  -2  -1   11.70    2.70 
   1  -2  -1    6.10    1.30 
   1  -2  -1    4.20    1.70 
  -1  -2   1    4.30    1.50 
  -1  -2   1    6.60    2.20 
   1  -2  -1    8.90    2.30 
  -1  -2   1    9.30    2.60 
  -1  -2   1    8.20    2.50 
  -1  -2   1    7.50    2.50 
   1  -2  -1   10.70    1.90 
  -1  -2   1    6.60    2.30 
   1  -2  -1   13.40    3.20 
  -1  -2   1    9.60    1.70 
   1  -2  -1    2.90    2.00 
   1  -2  -1    5.40    1.40 
   1  -2  -1   12.20    3.90 
  -1  -2   1    9.60    2.30 
   1  -2  -1    8.30    2.90 
  -1  -2   1    5.70    1.70 
  -1  -2   1   10.20    2.70 
  -1  -2   1    6.80    2.10 
  -1  -2   1    4.50    2.20 
   1  -2  -1    7.70    1.40 
   1  -2  -1   11.30    1.80 
   1  -2  -1    9.70    3.40 
  -1  -2   1   11.60    2.50 
  -1  -2   1    6.40    2.20 
  -1  -2   1    7.20    1.50 
   1  -2  -1    5.70    2.10 
   1  -2  -1    9.90    2.80 
  -1  -2   1    5.50    1.80 
  -1  -2   1    4.30    2.00 
  -1  -2   1    8.40    2.50 
   1  -2  -1    6.90    2.90 
  -1  -2   1    4.00    1.90 
   1  -2  -1    7.90    2.00 
   1  -2  -1    9.30    3.40 
   1  -2  -1    9.70    2.20 
  -1  -2   1    6.60    1.70 
  -1  -2   1    6.10    1.80 
  -1  -2   1   10.00    2.70 
   1  -2  -1   14.60    3.50 
  -1  -2   1    7.90    2.70 
   1  -2  -1    6.80    1.50 
  -1  -2   1    9.50    2.60 
  -1  -2   1    8.50    2.40 
   1  -2  -1    9.10    2.30 
  -1  -2   1    5.10    2.10 
   1  -2  -1    7.20    1.50 
   1  -2  -1   11.60    3.30 
   1  -2  -1    6.40    2.10 
  -1  -2   1    3.30    2.00 
  -1  -2   1    6.30    1.40 
   1  -2  -1   13.40    2.20 
   1  -2  -1    6.00    2.00 
  -1  -2   1    5.70    2.10 
   1  -2  -1    8.80    2.10 
   1  -2  -1    7.40    1.80 
   1  -2  -1    5.70    1.80 
  -1  -2   1   11.50    2.70 
  -1  -2   1    4.70    2.30 
   1   2  -1    8.10    2.60 
  -1   2   1    8.60    1.80 
   1   2  -1    9.80    2.60 
  -1   2   1    8.20    2.00 
  -1   2   1    6.30    2.00 
  -1   2   1    7.20    1.00 
   1   2  -1    8.70    1.60 
  -1   2   1    6.80    2.00 
   1   2  -1   10.40    2.70 
   1   2  -1    6.20    1.40 
  -1   2   1   11.20    2.90 
  -1   2   1   10.10    2.40 
  -1   2   1    8.40    2.70 
  -1   2   1    4.90    2.40 
  -1   2   1    5.00    1.90 
   1   2  -1    7.70    2.50 
   1   2  -1    7.50    2.50 
   1   2  -1    7.90    2.30 
   1   2  -1    7.10    2.40 
  -1   2   1   15.40    2.80 
   1   2  -1   11.50    2.70 
   1   2  -1    6.10    2.20 
   1   2  -1    8.00    2.80 
   1   2  -1    7.10    2.30 
   1   2  -1    9.00    2.60 
  -1   2   1   15.50    4.10 
   1   2  -1    7.90    2.00 
   1   2  -1    5.90    2.00 
   1   2  -1    7.90    1.80 
  -1   2   1    7.50    2.20 
  -1   2   1    8.10    1.60 
  -1   2   1   13.20    2.00 
  -1   2   1    5.00    1.30 
   1   2  -1   15.90    3.30 
  -1   2   1    5.50    2.60 
   1   2  -1    5.00    1.90 
   1   2  -1   10.90    2.80 
   1   2  -1    6.50    2.00 
  -1   2   1   11.70    2.60 
   1   2  -1    6.80    2.20 
  -1   2   1    5.50    1.80 
  -1   2   1    8.60    3.40 
   1   2  -1    7.50    2.30 
   1   2  -1    7.20    2.40 
  -1   2   1    9.70    2.90 
  -1   2   1    3.40    1.10 
   1   2  -1   13.10    2.90 
  -1   2   1    6.50    2.30 
   1   2  -1    8.90    1.70 
   1   2  -1    1.40    1.60 
  -1   2   1    4.50    1.50 
   1   2  -1    5.60    2.10 
   1   2  -1    6.30    2.40 
  -1   2   1   13.30    3.00 
   1   2  -1    8.10    2.30 
  -1   2   1    9.30    2.40 
   0  -2   1   33.80    4.00 
   0  -2   1   44.20    5.50 
   0  -2   1   43.60    4.20 
   0  -2  -1   45.40    4.70 
   0  -2  -1   40.60    4.30 
   0  -2   1   42.50    4.80 
   0  -2   1   49.90    3.90 
   0  -2   1   50.89    4.00 
   0  -2  -1   53.29    5.00 
   0  -2   1   41.30    4.20 
   0  -2   1   40.10    4.10 
   0  -2   1   45.70    4.60 
   0  -2  -1   37.90    4.20 
   0  -2   1   44.40    4.80 
   0  -2   1   39.80    4.40 
   0  -2  -1   35.20    4.30 
   0  -2  -1   41.80    3.40 
   0  -2  -1   41.90    3.40 
   0  -2  -1   44.90    4.20 
   0  -2  -1   39.40    4.30 
   0  -2  -1   38.40    4.20 
   0  -2  -1   53.29    5.00 
   0  -2  -1   47.30    4.90 
   0  -2  -1   42.90    5.00 
   0  -2  -1   44.40    4.80 
   0  -2   1   44.40    3.40 
   0  -2   1   40.10    4.40 
   0  -2   1   42.30    3.40 
   0  -2   1   46.20    5.30 
   0  -2  -1   46.60    4.90 
   0  -2   1   38.20    4.10 
   0  -2   1   48.30    5.00 
   0  -2   1   41.80    4.70 
   0  -2   1   37.40    4.40 
   0  -2  -1   43.60    3.50 
   0  -2  -1   48.40    5.00 
   0  -2  -1   44.30    4.60 
   0  -2   1   45.70    4.70 
   0  -2  -1   47.60    5.00 
   0  -2  -1   50.19    4.90 
   0  -2  -1   44.30    4.50 
   0  -2  -1   34.90    4.00 
   0  -2   1   50.99    3.70 
   0   2  -1   45.70    3.70 
   0   2  -1   51.69    4.80 
   0   2   1   39.90    3.90 
   0   2  -1   39.90    4.70 
   0   2  -1   48.30    4.40 
   0   2  -1   41.20    4.40 
   0   2   1   51.09    5.10 
   0   2   1   38.30    4.50 
   0   2  -1   45.00    4.40 
   0   2   1   48.90    6.20 
   0   2   1   47.00    4.60 
   0   2  -1   51.79    5.10 
   0   2  -1   37.20    4.30 
   0   2   1   42.90    4.70 
   0   2  -1   33.30    4.40 
   0   2   1   41.60    4.40 
   0   2  -1   49.60    3.80 
   0   2   1   50.59    4.10 
   0   2  -1   39.30    4.70 
   0   2  -1   35.20    3.60 
   0   2  -1   41.90    4.60 
   0   2  -1   50.69    6.50 
   0   2   1   45.20    4.60 
   0   2  -1   49.30    4.00 
   0   2   1   39.70    5.00 
   0   2   1   33.90    4.30 
   0   2   1   53.09    5.70 
   0   2   1   46.40    4.90 
   0   2  -1   52.49    5.20 
   0   2   1   45.40    3.50 
   0   2   1   41.30    5.20 
   0   2   1   32.50    4.10 
   0   2  -1   45.50    4.70 
   0   2   1   40.50    4.40 
   0   2   1   58.09    5.70 
   0   2  -1   49.40    5.10 
   0   2  -1   36.60    4.60 
   0   2   1   47.10    4.40 
   0   2  -1   40.20    5.60 
   0   2  -1   41.70    3.50 
   0   2  -1   46.00    4.70 
   0   2   1   41.60    4.60 
   0   2   1   40.70    4.40 
  -1  -2  -1 1205.38   36.70 
   1  -2   1 1171.88   40.20 
   1  -2   1 1179.88   36.60 
   1  -2   1 1103.29   37.20 
  -1  -2  -1 1123.49   36.50 
  -1  -2  -1 1210.48   36.40 
   1  -2   1 1193.28   36.20 
  -1  -2  -1 1156.28   33.20 
   1  -2   1 1258.37   38.60 
  -1  -2  -1 1158.98   36.60 
  -1  -2  -1 1142.59   36.40 
  -1  -2  -1 1214.98   36.00 
   1  -2   1 1204.48   34.10 
  -1  -2  -1 1222.38   36.60 
  -1  -2  -1 1226.08   34.30 
   1  -2   1 1163.58   37.80 
  -1  -2  -1 1190.38   35.50 
   1  -2   1 1095.79   40.30 
   1  -2   1 1194.88   32.80 
   1  -2   1 1194.38   33.50 
   1  -2   1 1168.18   33.30 
   1  -2   1 1228.38   34.50 
   1  -2   1 1133.79   35.40 
   1  -2   1 1205.38   33.20 
  -1  -2  -1 1149.29   35.30 
   1  -2   1 1212.38   35.40 
  -1  -2  -1 1227.68   37.00 
   1  -2   1 1252.67   36.80 
   1  -2   1 1144.29   34.20 
  -1  -2  -1 1216.18   36.80 
   1  -2   1 1164.88   35.30 
  -1  -2  -1 1147.79   37.30 
  -1  -2  -1 1127.09   36.00 
   1  -2   1 1156.88   33.20 
  -1  -2  -1 1143.59   36.40 
  -1  -2  -1 1206.48   34.30 
  -1  -2  -1 1199.48   36.60 
  -1  -2  -1 1177.68   36.10 
   1  -2   1 1133.29   40.30 
  -1  -2  -1 1150.88   36.40 
   1  -2   1 1119.29   35.00 
  -1  -2  -1 1185.58   35.70 
   1  -2   1 1169.48   34.80 
  -1  -2  -1 1240.38   37.70 
   1  -2   1 1223.58   34.20 
   1  -2   1 1180.68   36.70 
  -1  -2  -1 1183.68   33.70 
   1  -2   1 1196.08   36.50 
  -1  -2  -1 1215.98   36.40 
   1  -2   1 1155.48   33.70 
   1  -2   1 1197.88   37.00 
  -1  -2  -1 1200.38   34.70 
  -1  -2  -1 1173.08   37.00 
   1  -2   1 1160.58   34.40 
  -1  -2  -1 1061.69   36.70 
   1  -2   1 1200.38   33.30 
   1  -2   1 1165.68   35.00 
  -1  -2  -1 1183.08   36.70 
   1  -2   1 1217.38   34.90 
  -1  -2  -1 1181.68   36.70 
   1  -2   1 1154.58   33.00 
   1  -2   1 1153.88   35.90 
   1   2   1 1234.68   34.70 
  -1   2  -1 1188.18   33.70 
   1   2   1 1051.19   36.50 
   1   2   1 1239.88   36.70 
  -1   2  -1 1034.00   36.30 
  -1   2  -1 1180.98   33.20 
  -1   2  -1 1139.89   32.90 
   1   2   1 1199.98   36.60 
  -1   2  -1 1172.48   35.40 
   1   2   1 1223.98   33.60 
   1   2   1 1211.18   36.70 
   1   2   1 1181.38   36.80 
   1   2   1 1202.98   35.90 
   1   2   1 1181.68   35.60 
  -1   2  -1 1165.68   33.10 
   1   2   1 1131.29   37.00 
  -1   2  -1 1197.48   33.80 
   1   2   1 1145.49   34.20 
   1   2   1 1172.28   36.50 
   1   2   1 1120.99   33.10 
   1   2   1 1191.68   35.80 
  -1   2  -1 1121.29   40.20 
   1   2   1 1195.68   36.20 
   1   2   1 1195.48   36.40 
  -1   2  -1 1193.48   34.30 
  -1   2  -1 1178.78   32.90 
  -1   2  -1 1172.08   36.70 
  -1   2  -1 1154.08   34.50 
  -1   2  -1 1189.18   34.20 
  -1   2  -1 1049.89   35.70 
   1   2   1 1145.19   36.40 
   1   2   1 1176.48   36.60 
   1   2   1 1182.58   37.00 
   1   2   1 1216.08   36.60 
  -1   2  -1 1168.68   37.00 
  -1   2  -1 1181.38   39.40 
   1   2   1 1199.58   36.60 
  -1   2  -1 1215.78   37.70 
  -1   2  -1 1225.98   38.10 
   1   2   1 1201.68   36.60 
  -1   2  -1 1175.08   36.60 
  -1   2  -1 1183.38   36.20 
  -1   2  -1 1200.28   34.40 
  -1   2  -1 1199.78   36.30 
  -1   2  -1 1132.49   33.50 
  -1   2  -1 1215.08   36.50 
  -1   2  -1 1195.58   34.80 
   1   2   1 1182.28   36.80 
   1   2   1 1158.98   36.90 
  -1   2  -1 1149.39   33.20 
   1   2   1 1188.38   33.80 
   1   2   1 1172.08   36.80 
   1   2   1 1216.58   36.70 
   1   2   1 1136.09   36.70 
  -1   2  -1 1173.18   34.30 
   2  -2   1  174.58    9.40 
  -2  -2  -1  146.39    8.40 
  -2  -2  -1  164.78    8.40 
  -2  -2  -1  158.78    9.40 
  -2  -2  -1  154.88    9.20 
   2  -2   1  155.18    9.80 
   2  -2   1  173.38    9.80 
   2  -2   1  175.28   11.00 
   2  -2   1  154.98    6.50 
   2  -2   1  157.88    7.80 
  -2  -2  -1  164.68    9.70 
  -2  -2  -1  166.58    6.20 
  -2  -2  -1  157.18    7.90 
   2  -2   1  163.38    6.60 
   2  -2   1  162.98    7.50 
   2  -2   1  160.18    8.50 
   2  -2   1  150.48    9.10 
  -2  -2  -1  137.99    9.10 
  -2  -2  -1  133.99    9.00 
  -2  -2  -1  146.29    8.10 
   2  -2   1  160.68    7.30 
   2  -2   1  151.48   10.90 
  -2  -2  -1  166.38    9.50 
   2  -2   1  164.78    5.60 
  -2  -2  -1  158.28    6.90 
  -2  -2  -1  146.49    8.10 
   2  -2   1  166.58    9.80 
  -2  -2  -1  148.49    8.80 
   2  -2   1  163.58    8.20 
   2  -2   1  155.98   10.80 
   2  -2   1  160.58   10.30 
   2  -2   1  160.18    9.20 
  -2  -2  -1  166.98    9.70 
   2  -2   1  150.78    7.90 
   2  -2   1  149.29    6.80 
  -2  -2  -1  171.28   10.20 
  -2  -2  -1  174.28    9.80 
   2  -2   1  151.88    7.90 
   2  -2   1  169.98    8.30 
   2  -2   1  167.08    9.40 
   2  -2   1  165.28    8.00 
   2  -2   1  165.58    6.40 
   2  -2   1  174.78    9.10 
  -2  -2  -1  144.09    8.80 
   2  -2   1  153.38    7.70 
  -2  -2  -1  173.78    8.60 
  -2  -2  -1  149.19    9.60 
  -2  -2  -1  152.68    8.80 
   2  -2   1  156.98    6.20 
   2  -2   1  158.28    9.00 
  -2  -2  -1  154.28    9.60 
   2  -2   1  176.88   10.40 
  -2  -2  -1  153.78    9.70 
   2  -2   1  154.18    8.20 
   2  -2   1  168.08    8.40 
  -2  -2  -1  158.28    9.80 
   2  -2   1  160.48    7.50 
   2  -2   1  165.48   10.90 
  -2  -2  -1  145.39    9.70 
   2  -2   1  171.38   11.30 
   2  -2   1  165.78    9.10 
  -2  -2  -1  185.98   10.80 
  -2  -2  -1  173.88    9.40 
   2   2   1  153.28    7.70 
   2   2   1  167.58    9.90 
   2   2   1  158.28    8.20 
   2   2   1  179.48    9.90 
  -2   2  -1  162.98    7.90 
   2   2   1  153.08    9.20 
  -2   2  -1  154.08    7.60 
   2   2   1  162.78    9.40 
  -2   2  -1  157.58    6.40 
   2   2   1  157.48    7.80 
  -2   2  -1  141.79   10.50 
   2   2   1  159.98    9.00 
  -2   2  -1  165.58    9.60 
   2   2   1  157.38    9.30 
   2   2   1  162.68    9.70 
  -2   2  -1  161.68    7.30 
   2   2   1  174.28    9.80 
   2   2   1  160.68    9.50 
   2   2   1  137.79    9.00 
   2   2   1  167.78    9.80 
  -2   2  -1  166.68    9.90 
  -2   2  -1  153.78    7.70 
  -2   2  -1  157.78   10.00 
  -2   2  -1  152.98    8.20 
   2   2   1  151.68    8.80 
   2   2   1  172.08   10.30 
  -2   2  -1  142.09    9.20 
   2   2   1  167.48    9.50 
   2   2   1  153.18    9.70 
   2   2   1  154.08    9.40 
   2   2   1  156.28    8.50 
   2   2   1  164.48    9.80 
  -2   2  -1  150.88    7.60 
   2   2   1  162.98    9.70 
  -2   2  -1  159.88   10.60 
   2   2   1  166.18    8.80 
  -2   2  -1  151.98    7.50 
   2   2   1  153.78    9.90 
  -2   2  -1  181.78   10.60 
   2   2   1  149.29    8.40 
   2   2   1  168.88    9.90 
  -2   2  -1  174.78    8.20 
  -2   2  -1  151.78   10.70 
  -2   2  -1  156.58   10.00 
   2   2   1  172.88   10.20 
   2   2   1  165.08    9.50 
  -2   2  -1  171.28    9.70 
   2   2   1  156.18    8.20 
  -2   2  -1  174.48    6.80 
   2   2   1  161.48    8.50 
  -2   2  -1  154.68    9.40 
  -3  -2  -1  376.16   12.60 
  -3  -2  -1  354.96   16.30 
  -3  -2  -1  349.07   16.90 
  -3  -2  -1  370.76   14.00 
   3  -2   1  353.76   18.60 
   3  -2   1  360.86   15.80 
   3  -2   1  373.76   14.40 
   3  -2   1  363.56   16.20 
   3  -2   1  359.56   15.40 
   3  -2   1  346.67   17.20 
  -3  -2  -1  398.26   18.70 
  -3  -2  -1  382.66   17.40 
   3  -2   1  358.36   12.40 
   3  -2   1  366.26   10.80 
   3  -2   1  376.36   19.30 
   3  -2   1  363.96   15.70 
   3  -2   1  371.06   11.40 
   3  -2   1  369.96   17.30 
   3  -2   1  393.76   18.90 
   3  -2   1  346.07   13.40 
  -3  -2  -1  355.96   17.30 
  -3  -2  -1  350.06   15.10 
  -3  -2  -1  357.06   15.80 
  -3  -2  -1  349.17   16.00 
  -3  -2  -1  359.36   16.00 
  -3  -2  -1  371.26   17.20 
  -3  -2  -1  366.56   16.80 
   3  -2   1  367.26   12.10 
   3  -2   1  356.96   12.40 
   3  -2   1  344.67   14.80 
   3  -2   1  360.76   15.70 
  -3  -2  -1  392.46   15.90 
  -3  -2  -1  351.06   16.10 
  -3  -2  -1  364.16   17.60 
   3  -2   1  346.27   17.80 
  -3  -2  -1  372.46   17.20 
  -3  -2  -1  365.36   17.50 
   3  -2   1  366.66   15.40 
   3  -2   1  366.66   15.10 
   3  -2   1  345.17   17.90 
   3  -2   1  351.26   14.50 
   3  -2   1  365.66   11.70 
  -3  -2  -1  350.76   14.60 
   3  -2   1  359.76   14.70 
  -3  -2  -1  375.96   17.60 
   3  -2   1  369.26   19.00 
   3  -2   1  357.96   14.70 
   3  -2   1  343.27   16.50 
  -3  -2  -1  389.26   17.00 
  -3  -2  -1  355.96   14.30 
   3  -2   1  334.97   13.60 
  -3   2  -1  381.16   18.50 
   3   2   1  371.56   17.30 
  -3   2  -1  343.37   18.00 
  -3   2  -1  384.96   16.20 
  -3   2  -1  356.16   15.20 
   3   2   1  379.46   17.90 
  -3   2  -1  368.66   18.50 
   3   2   1  360.16   16.90 
  -3   2  -1  374.06   20.70 
  -3   2  -1  387.96   15.40 
   3   2   1  378.76   16.20 
   3   2   1  378.66   16.20 
   3   2   1  387.76   16.70 
   3   2   1  375.36   17.40 
  -3   2  -1  380.36   17.40 
  -3   2  -1  352.16   15.50 
  -3   2  -1  370.06   11.60 
   3   2   1  359.46   18.40 
   3   2   1  354.46   17.20 
  -3   2  -1  375.36   17.00 
  -3   2  -1  350.56   15.60 
   3   2   1  378.06   14.80 
   3   2   1  326.97   17.10 
   3   2   1  363.36   16.60 
   3   2   1  379.56   19.00 
  -3   2  -1  352.66   15.40 
   3   2   1  366.76   17.50 
   3   2   1  359.16   17.00 
   3   2   1  379.66   15.60 
  -3   2  -1  376.96   17.90 
  -3   2  -1  348.07   15.40 
   3   2   1  368.46   16.10 
  -3   2  -1  347.47   15.10 
   4  -2   1  549.54   19.70 
  -4  -2  -1  520.65   23.70 
  -4  -2  -1  526.55   23.00 
   4  -2   1  480.95   20.50 
  -4  -2  -1  461.85   22.90 
   4  -2   1  515.45   23.10 
   4  -2   1  529.55   18.50 
  -4  -2  -1  512.65   20.60 
  -4  -2  -1  515.55   18.80 
   4  -2   1  547.45   26.00 
   4  -2   1  540.45   20.40 
  -4  -2  -1  502.65   19.70 
   4  -2   1  504.35   17.00 
  -4  -2  -1  544.25   20.10 
  -4  -2  -1  507.15   22.70 
   4  -2   1  502.25   16.70 
   4  -2   1  511.75   18.70 
  -4  -2  -1  452.95   23.40 
  -4  -2  -1  516.45   22.60 
   4  -2   1  514.35   25.00 
  -4  -2  -1  469.75   21.80 
   4  -2   1  515.95   20.20 
  -4  -2  -1  513.85   22.80 
  -4  -2  -1  476.25   21.40 
   4  -2   1  521.35   22.40 
   4  -2   1  489.15   21.50 
   4  -2   1  533.25   15.50 
   4  -2   1  499.75   24.40 
  -4  -2  -1  540.25   23.30 
   4  -2   1  529.75   16.80 
  -4  -2  -1  504.45   23.50 
   4  -2   1  538.25   25.70 
  -4  -2  -1  507.25   26.70 
  -4  -2  -1  502.95   18.30 
   4  -2   1  536.75   23.40 
   4  -2   1  515.85   17.40 
  -4  -2  -1  517.25   22.30 
   4  -2   1  501.95   16.90 
  -4  -2  -1  542.65   24.50 
   4   2   1  532.95   21.30 
  -4   2  -1  532.25   24.80 
  -4   2  -1  510.45   15.40 
   4   2   1  526.85   23.30 
  -4   2  -1  517.05   20.80 
  -4   2  -1  512.85   20.60 
   4   2   1  538.05   23.00 
   4   2   1  501.05   23.10 
  -4   2  -1  556.34   24.60 
  -4   2  -1  518.05   27.30 
   4   2   1  518.95   22.90 
   4   2   1  518.45   23.10 
  -4   2  -1  532.95   22.50 
   4   2   1  486.65   22.70 
  -4   2  -1  496.65   23.60 
   4   2   1  500.45   21.90 
  -4   2  -1  552.94   24.60 
  -4   2  -1  540.35   22.50 
  -4   2  -1  564.94   21.90 
  -4   2  -1  508.45   21.40 
  -4   2  -1  522.05   22.20 
   4   2   1  500.75   23.90 
   4   2   1  491.65   22.30 
   4   2   1  529.75   21.40 
   4   2   1  518.05   25.20 
   4   2   1  529.95   24.00 
   4   2   1  524.85   23.80 
  -4   2  -1  489.45   22.50 
  -4   2  -1  516.45   21.90 
   5  -2   1  581.64   28.90 
   5  -2   1  544.55   28.20 
  -5  -2  -1  601.84   20.10 
   5  -2   1  607.34   26.70 
  -5  -2  -1  570.94   27.30 
   5  -2   1  584.94   20.50 
  -5  -2  -1  661.93   23.60 
   5  -2   1  610.84   19.90 
   5  -2   1  615.64   25.20 
   5  -2   1  578.84   24.70 
   5  -2   1  577.54   19.60 
  -5  -2  -1  589.74   28.10 
  -5  -2  -1  571.64   21.60 
  -5  -2  -1  577.34   23.00 
  -5  -2  -1  592.44   27.30 
   5  -2   1  584.24   20.30 
  -5  -2  -1  586.14   25.80 
  -5  -2  -1  610.44   31.80 
  -5  -2  -1  603.44   27.40 
   5  -2   1  595.44   17.90 
   5  -2   1  603.44   24.00 
   5  -2   1  586.14   26.20 
   5  -2   1  610.44   30.20 
  -5  -2  -1  591.84   26.90 
   5  -2   1  561.34   21.90 
  -5  -2  -1  593.34   25.80 
  -5  -2  -1  593.44   27.80 
  -5  -2  -1  610.74   22.20 
  -5  -2  -1  612.04   27.40 
  -5  -2  -1  634.34   27.10 
   5  -2   1  577.54   23.30 
  -5  -2  -1  575.44   28.30 
   5  -2   1  622.04   20.20 
   5  -2   1  587.44   26.10 
   5  -2   1  613.74   20.00 
   5  -2   1  609.94   26.50 
  -5  -2  -1  573.94   28.60 
  -5  -2  -1  586.14   26.40 
  -5   2  -1  615.74   25.10 
   5   2   1  631.74   24.80 
   5   2   1  589.84   26.90 
   5   2   1  568.04   26.80 
   5   2   1  619.34   29.10 
  -5   2  -1  580.14   26.10 
   5   2   1  566.44   27.50 
  -5   2  -1  601.64   27.20 
   5   2   1  586.14   27.30 
  -5   2  -1  585.24   25.60 
   5   2   1  590.14   25.50 
  -5   2  -1  589.14   27.60 
  -5   2  -1  610.44   30.40 
  -5   2  -1  593.94   28.70 
   5   2   1  620.14   27.70 
   5   2   1  567.44   26.60 
   5   2   1  597.64   26.00 
  -5   2  -1  600.44   25.60 
   5   2   1  626.44   30.40 
   5   2   1  577.94   26.10 
  -5   2  -1  629.84   24.30 
  -5   2  -1  609.94   19.10 
   5   2   1  565.64   26.00 
  -5   2  -1  593.64   32.10 
   5   2   1  547.65   26.40 
  -5   2  -1  622.14   26.20 
  -5   2  -1  581.64   26.00 
  -5   2  -1  590.54   28.90 
  -5   2  -1  568.04   25.80 
  -6  -2  -1  732.93   22.70 
  -6  -2  -1  701.03   33.50 
  -6  -2  -1  687.23   31.40 
   6  -2   1  765.12   32.20 
   6  -2   1  761.42   30.00 
  -6  -2  -1  712.73   33.40 
  -6  -2  -1  731.33   26.90 
  -6  -2  -1  723.53   25.60 
   6  -2   1  749.33   32.20 
  -6  -2  -1  714.63   38.40 
  -6  -2  -1  713.73   35.10 
   6  -2   1  749.42   31.10 
   6  -2   1  734.53   22.70 
   6  -2   1  679.43   35.50 
   6  -2   1  752.62   32.30 
  -6  -2  -1  708.43   22.00 
   6  -2   1  741.73   21.30 
  -6  -2  -1  700.53   31.80 
   6  -2   1  768.32   31.70 
  -6  -2  -1  730.33   33.20 
   6  -2   1  716.43   30.20 
   6  -2   1  715.03   35.10 
   6  -2   1  752.22   36.10 
   6  -2   1  733.63   24.50 
  -6  -2  -1  759.12   33.90 
   6  -2   1  774.62   25.50 
   6  -2   1  733.63   25.80 
   6  -2   1  764.32   32.50 
  -6  -2  -1  750.32   35.40 
   6  -2   1  795.32   31.90 
  -6  -2  -1  709.23   32.40 
  -6  -2  -1  685.73   34.00 
  -6  -2  -1  705.73   31.10 
  -6  -2  -1  740.03   33.30 
   6   2   1  705.23   29.00 
   6   2   1  755.92   33.70 
   6   2   1  751.12   34.10 
   6   2   1  708.23   32.50 
  -6   2  -1  712.73   32.00 
  -6   2  -1  759.02   35.90 
   6   2   1  710.73   31.60 
   6   2   1  691.53   34.50 
   6   2   1  741.73   30.80 
   6   2   1  731.23   31.00 
  -6   2  -1  681.73   31.30 
  -6   2  -1  749.82   35.40 
   6   2   1  783.92   33.80 
  -6   2  -1  756.72   32.70 
   6   2   1  727.23   33.00 
  -6   2  -1  727.13   29.10 
  -6   2  -1  701.43   31.30 
  -6   2  -1  685.43   32.90 
  -6   2  -1  765.22   32.60 
   6   2   1  756.02   33.60 
  -6   2  -1  761.32   37.20 
   6   2   1  768.12   33.80 
   6   2   1  789.92   32.90 
  -6   2  -1  743.23   32.50 
  -6   2  -1  712.03   31.20 
  -6   2  -1  773.22   40.00 
   6   2   1  737.63   36.70 
  -6   2  -1  753.52   30.90 
  -6   2  -1  773.12   24.40 
  -7  -2  -1 1049.79   42.40 
  -7  -2  -1 1145.49   45.00 
  -7  -2  -1 1040.60   45.10 
  -7  -2  -1 1045.40   46.10 
  -7  -2  -1 1119.79   44.10 
  -7  -2  -1  988.40   44.50 
   7  -2   1 1152.68   49.80 
   7  -2   1 1064.59   41.30 
   7  -2   1 1025.30   35.30 
   7  -2   1 1096.49   49.80 
   7  -2   1 1022.00   43.10 
  -7  -2  -1 1096.99   45.30 
  -7  -2  -1 1015.50   51.69 
   7  -2   1 1094.99   42.90 
   7  -2   1 1104.39   47.60 
  -7  -2  -1 1033.50   45.10 
   7  -2   1 1049.89   40.90 
   7  -2   1 1088.09   43.60 
  -7  -2  -1  984.00   46.80 
   7  -2   1 1062.59   36.10 
   7  -2   1 1046.30   42.30 
  -7  -2  -1 1115.19   48.20 
   7  -2   1 1072.99   41.50 
  -7  -2  -1 1105.29   48.70 
   7  -2   1 1058.39   41.90 
   7  -2   1 1134.89   42.60 
  -7  -2  -1 1048.90   45.10 
   7   2   1 1058.89   49.10 
   7   2   1 1055.69   39.50 
   7   2   1  992.80   44.90 
  -7   2  -1 1098.19   50.19 
   7   2   1 1058.99   47.90 
   7   2   1 1104.09   43.30 
  -7   2  -1 1152.08   45.10 
  -7   2  -1 1061.09   44.20 
   7   2   1 1100.19   45.40 
  -7   2  -1 1004.90   47.20 
  -7   2  -1 1042.70   42.50 
  -7   2  -1 1053.49   42.40 
  -7   2  -1 1065.99   44.40 
  -7   2  -1 1019.40   43.20 
  -7   2  -1 1078.59   45.60 
  -7   2  -1 1040.50   47.50 
   7   2   1 1114.39   45.50 
   7   2   1 1066.69   44.40 
  -7   2  -1 1121.29   53.69 
   7   2   1 1130.19   43.90 
   7   2   1 1033.20   41.50 
   7   2   1 1005.30   44.50 
  -7   2  -1 1034.60   39.50 
  -7   2  -1 1122.59   43.60 
   7   2   1 1075.89   44.90 
  -7   2  -1 1112.29   44.30 
   7   2   1 1248.68   45.90 
   7   2   1 1025.50   44.50 
  -8  -2  -1  314.67   24.90 
  -8  -2  -1  334.77   23.90 
  -8  -2  -1  354.96   21.90 
  -8  -2  -1  324.07   23.30 
   8  -2   1  346.67   26.50 
  -8  -2  -1  373.56   23.00 
   8  -2   1  311.27   20.00 
  -8  -2  -1  337.47   23.80 
   8  -2   1  350.96   21.30 
   8  -2   1  313.77   25.10 
   8  -2   1  289.57   19.00 
   8  -2   1  329.47   26.90 
  -8  -2  -1  300.57   32.30 
   8  -2   1  338.67   19.60 
   8  -2   1  351.06   25.30 
   8  -2   1  323.27   20.70 
   8  -2   1  315.77   20.10 
  -8  -2  -1  322.37   23.90 
   8  -2   1  337.77   21.00 
  -8  -2  -1  334.07   25.90 
  -8  -2  -1  346.57   23.90 
   8  -2   1  315.87   21.60 
  -8  -2  -1  348.67   23.20 
  -8  -2  -1  352.76   24.20 
   8  -2   1  297.27   23.90 
   8  -2   1  294.47   20.40 
   8  -2   1  294.57   20.90 
   8   2   1  332.47   22.90 
  -8   2  -1  339.67   32.70 
   8   2   1  368.36   22.70 
  -8   2  -1  272.27   21.30 
  -8   2  -1  316.77   18.90 
   8   2   1  310.07   20.60 
   8   2   1  292.17   22.70 
  -8   2  -1  341.97   34.60 
   8   2   1  344.87   23.30 
  -8   2  -1  312.97   24.80 
  -8   2  -1  285.57   21.90 
  -8   2  -1  303.37   21.70 
   8   2   1  316.27   20.20 
  -8   2  -1  274.57   20.80 
  -8   2  -1  337.77   21.60 
   8   2   1  369.26   24.30 
  -8   2  -1  336.27   23.00 
   8   2   1  268.37   23.10 
   8   2   1  306.67   26.00 
   8   2   1  341.77   23.90 
  -8   2  -1  271.37   23.20 
  -8   2  -1  334.57   22.30 
   8   2   1  305.37   22.30 
   8   2   1  307.97   18.20 
  -8   2  -1  260.17   19.60 
   8   2   1  286.77   21.80 
  -9  -2  -1  882.71   48.00 
  -9  -2  -1  883.01   41.30 
  -9  -2  -1  877.11   44.30 
  -9  -2  -1  868.31   44.60 
  -9  -2  -1  821.22   50.89 
  -9  -2  -1  846.02   45.70 
   9  -2   1  817.42   46.40 
  -9  -2  -1  869.91   48.10 
  -9  -2  -1  860.51   44.00 
   9  -2   1  872.51   48.80 
   9  -2   1  858.61   45.10 
   9  -2   1  819.12   40.40 
  -9  -2  -1  836.82   44.40 
  -9  -2  -1  859.31   43.90 
   9  -2   1  908.21   40.10 
   9  -2   1  880.31   44.30 
   9  -2   1  861.71   47.50 
   9  -2   1  819.82   40.50 
   9  -2   1  872.91   39.50 
   9  -2   1  852.81   46.20 
  -9  -2  -1  923.91   43.80 
   9  -2   1  910.11   41.10 
  -9   2  -1  860.31   42.70 
  -9   2  -1  902.01   43.70 
  -9   2  -1  872.41   42.80 
   9   2   1  888.61   43.00 
   9   2   1  945.71   50.19 
   9   2   1  913.71   43.60 
   9   2   1  822.42   42.60 
  -9   2  -1  866.41   46.90 
   9   2   1  851.01   39.80 
   9   2   1  918.61   45.10 
  -9   2  -1  898.71   43.90 
   9   2   1  877.41   39.00 
   9   2   1  873.51   44.60 
  -9   2  -1  916.51   53.39 
   9   2   1  900.31   43.40 
  -9   2  -1  828.62   46.30 
   9   2   1  870.41   40.80 
   9   2   1  867.21   42.90 
   9   2   1  843.22   46.40 
 -10  -2  -1  142.89   23.50 
 -10  -2  -1  100.29   21.80 
 -10  -2  -1  151.58   22.30 
 -10  -2  -1  168.78   23.20 
 -10  -2  -1  144.69   21.80 
  10  -2   1  103.99   19.50 
 -10  -2  -1  172.68   23.10 
 -10  -2  -1  189.38   25.10 
  10  -2   1  148.19   19.40 
  10  -2   1  178.48   26.90 
 -10  -2  -1  131.69   19.90 
 -10  -2  -1  142.39   23.40 
  10  -2   1  149.49   21.70 
  10  -2   1  163.18   25.20 
  10  -2   1  137.29   22.70 
  10   2   1  151.08   20.90 
 -10   2  -1  147.99   21.20 
 -10   2  -1  119.49   19.00 
  10   2   1  141.29   21.50 
  10   2   1  120.39   18.40 
  10   2   1  182.58   23.60 
  10   2   1  148.69   24.40 
  10   2   1  119.59   19.40 
 -10   2  -1  161.98   21.70 
 -10   2  -1  123.09   21.50 
  10   2   1  150.48   23.10 
  10   2   1  161.48   22.00 
  10   2   1  160.88   21.60 
  10   2   1  169.38   22.20 
 -10   2  -1  137.09   20.10 
 -10   2  -1  176.88   29.00 
  10   2   1  181.58   23.90 
  -9  -3   1  346.77   26.30 
  -9  -3   1  390.16   40.80 
   9  -3  -1  404.46   24.80 
   9  -3  -1  373.96   24.00 
  -9  -3   1  358.36   25.80 
  -9  -3   1  296.87   25.70 
   9  -3  -1  366.96   26.10 
   9  -3  -1  298.67   25.80 
  -9  -3   1  422.56   29.00 
   9  -3  -1  366.36   25.90 
  -9  -3   1  345.97   28.70 
  -9  -3   1  397.56   27.80 
  -9  -3   1  351.76   25.40 
   9  -3  -1  428.96   29.90 
   9  -3  -1  453.85   31.20 
   9  -3  -1  397.66   30.70 
  -9  -3   1  372.16   30.00 
   9  -3  -1  412.66   28.00 
   9  -3  -1  396.36   25.40 
  -9  -3   1  403.66   28.90 
  -9  -3   1  406.86   27.20 
  -9  -3   1  465.65   29.20 
   9  -3  -1  355.86   28.90 
   9  -3  -1  436.46   30.50 
   9   3  -1  365.86   29.10 
   9   3  -1  363.56   25.40 
  -9   3   1  361.86   26.10 
   9   3  -1  351.36   26.70 
   9   3  -1  396.46   25.60 
  -9   3   1  399.16   29.00 
  -9   3   1  359.26   25.80 
   9   3  -1  441.36   31.00 
  -9   3   1  389.26   40.90 
   9   3  -1  390.76   28.10 
  -9   3   1  372.86   26.60 
  -9   3   1  380.16   29.20 
   9   3  -1  407.76   27.10 
   9   3  -1  378.46   30.60 
   9   3  -1  388.66   27.00 
   9   3  -1  374.36   26.90 
   9   3  -1  332.27   26.50 
  -9   3   1  376.26   25.90 
   9   3  -1  430.96   28.90 
   9   3  -1  386.46   26.60 
   8  -3  -1  588.34   33.40 
   8  -3  -1  518.05   29.60 
  -8  -3   1  496.25   29.30 
  -8  -3   1  496.15   31.50 
  -8  -3   1  526.95   29.60 
  -8  -3   1  546.75   30.70 
   8  -3  -1  581.34   28.50 
   8  -3  -1  600.64   34.20 
   8  -3  -1  533.85   30.00 
   8  -3  -1  560.54   31.60 
   8  -3  -1  541.65   32.50 
   8  -3  -1  540.65   27.80 
  -8  -3   1  521.65   30.90 
   8  -3  -1  549.65   33.60 
  -8  -3   1  547.35   34.00 
   8  -3  -1  570.24   27.30 
   8  -3  -1  568.64   34.80 
  -8  -3   1  512.95   30.50 
  -8  -3   1  505.85   31.80 
  -8  -3   1  555.64   34.30 
   8  -3  -1  560.74   34.50 
   8  -3  -1  544.35   30.50 
  -8  -3   1  499.35   30.60 
   8  -3  -1  544.15   28.90 
  -8  -3   1  591.24   32.00 
  -8  -3   1  478.65   36.60 
   8   3  -1  529.95   30.40 
   8   3  -1  539.25   30.70 
   8   3  -1  529.65   31.70 
  -8   3   1  543.35   30.10 
   8   3  -1  476.95   32.10 
   8   3  -1  556.14   28.80 
  -8   3   1  541.15   29.70 
   8   3  -1  522.65   31.20 
   8   3  -1  581.24   30.50 
  -8   3   1  556.14   30.50 
   8   3  -1  553.34   35.10 
  -8   3   1  582.24   33.90 
   8   3  -1  575.74   28.00 
  -8   3   1  547.05   33.20 
   8   3  -1  570.04   31.60 
  -8   3   1  595.04   31.20 
  -8   3   1  505.55   37.30 
   8   3  -1  551.24   31.00 
   8   3  -1  537.95   31.70 
   8   3  -1  545.95   30.50 
  -8   3   1  526.25   30.30 
   8   3  -1  539.35   32.00 
  -7  -3   1  564.74   29.80 
  -7  -3   1  592.04   30.00 
  -7  -3   1  527.55   35.10 
   7  -3  -1  540.65   24.10 
  -7  -3   1  518.15   28.30 
  -7  -3   1  501.45   30.70 
   7  -3  -1  538.95   28.60 
   7  -3  -1  525.45   28.90 
  -7  -3   1  511.75   29.60 
   7  -3  -1  580.44   31.20 
   7  -3  -1  497.35   25.20 
  -7  -3   1  522.45   31.30 
   7  -3  -1  524.75   26.50 
   7  -3  -1  530.45   31.20 
   7  -3  -1  534.65   21.70 
   7  -3  -1  537.55   23.70 
   7  -3  -1  536.65   31.70 
   7  -3  -1  530.35   24.10 
   7  -3  -1  537.55   23.70 
  -7  -3   1  555.54   29.70 
  -7  -3   1  552.24   30.80 
  -7  -3   1  454.25   26.70 
   7  -3  -1  506.05   23.70 
   7  -3  -1  538.25   28.10 
   7  -3  -1  519.65   23.30 
  -7  -3   1  602.84   30.10 
  -7  -3   1  513.65   27.20 
  -7  -3   1  528.85   28.90 
  -7  -3   1  512.85   25.80 
   7  -3  -1  527.45   31.00 
   7  -3  -1  561.14   26.80 
   7  -3  -1  501.55   21.70 
   7  -3  -1  562.94   26.50 
   7   3  -1  526.35   28.50 
   7   3  -1  576.44   33.40 
  -7   3   1  518.65   27.50 
  -7   3   1  481.95   26.70 
  -7   3   1  529.15   35.40 
   7   3  -1  467.55   28.10 
   7   3  -1  480.15   27.60 
  -7   3   1  499.45   27.00 
   7   3  -1  519.75   29.60 
  -7   3   1  552.54   28.10 
   7   3  -1  550.14   29.10 
   7   3  -1  504.45   27.60 
   7   3  -1  534.35   22.80 
  -7   3   1  545.25   30.70 
  -7   3   1  524.25   24.60 
   7   3  -1  523.45   29.10 
   7   3  -1  501.25   28.30 
   7   3  -1  518.45   30.90 
   7   3  -1  536.45   26.40 
  -7   3   1  497.25   24.10 
   7   3  -1  585.34   29.90 
   7   3  -1  512.55   29.60 
   7   3  -1  597.04   28.20 
  -7   3   1  495.15   27.40 
  -7   3   1  561.34   31.00 
  -6  -3   1 2240.18   75.19 
   6  -3  -1 2027.00   70.49 
   6  -3  -1 2062.39   60.79 
   6  -3  -1 2023.50   64.79 
  -6  -3   1 2038.20   71.79 
   6  -3  -1 2020.90   70.19 
   6  -3  -1 2042.10   66.49 
  -6  -3   1 2101.19   70.89 
   6  -3  -1 1942.11   72.49 
   6  -3  -1 1995.70   73.79 
   6  -3  -1 1953.40   70.69 
   6  -3  -1 2123.09   64.39 
   6  -3  -1 2084.49   63.59 
  -6  -3   1 2111.09   69.19 
  -6  -3   1 2038.40   73.39 
   6  -3  -1 1971.00   66.89 
   6  -3  -1 2042.20   57.29 
  -6  -3   1 2011.60   63.59 
   6  -3  -1 2120.49   62.79 
  -6  -3   1 2053.09   79.09 
   6  -3  -1 2080.99   62.09 
  -6  -3   1 2012.40   68.19 
  -6  -3   1 1914.11   66.99 
  -6  -3   1 2010.00   69.49 
   6  -3  -1 2082.09   69.09 
  -6  -3   1 2101.69   70.59 
  -6  -3   1 1996.40   69.69 
   6  -3  -1 2074.19   63.29 
  -6  -3   1 2093.79   70.49 
   6  -3  -1 2047.40   60.99 
  -6  -3   1 2082.79   70.99 
   6  -3  -1 2048.30   65.79 
   6  -3  -1 1984.90   72.39 
  -6  -3   1 2056.09   72.69 
   6  -3  -1 2046.80   57.09 
   6   3  -1 2010.90   70.19 
  -6   3   1 2108.79   68.89 
  -6   3   1 1961.50   71.29 
  -6   3   1 2104.09   65.19 
  -6   3   1 2053.09   69.49 
   6   3  -1 2095.59   71.89 
   6   3  -1 2047.10   63.49 
  -6   3   1 2078.19   68.69 
   6   3  -1 2018.10   68.09 
   6   3  -1 2007.90   69.29 
  -6   3   1 1971.00   68.19 
  -6   3   1 2224.68   80.99 
  -6   3   1 2157.68   70.69 
   6   3  -1 2130.09   72.99 
  -6   3   1 2102.99   61.19 
   6   3  -1 2054.79   73.49 
   6   3  -1 1990.80   70.09 
  -6   3   1 1990.20   71.49 
   6   3  -1 1998.60   70.29 
  -6   3   1 1951.60   67.89 
   6   3  -1 2029.50   75.09 
   6   3  -1 2113.49   70.79 
  -6   3   1 2093.59   69.49 
   6   3  -1 2005.50   70.39 
  -6   3   1 2092.19   69.29 
   6   3  -1 1974.20   69.59 
   6   3  -1 2117.39   68.09 
  -6   3   1 2036.60   68.29 
   6   3  -1 1964.80   70.19 
  -6   3   1 2235.18   66.79 
   5  -3  -1 1583.24   55.09 
  -5  -3   1 1632.04   51.19 
  -5  -3   1 1676.73   55.09 
   5  -3  -1 1657.23   47.80 
   5  -3  -1 1676.33   50.79 
  -5  -3   1 1665.83   53.09 
  -5  -3   1 1556.94   56.89 
   5  -3  -1 1621.74   49.20 
  -5  -3   1 1635.24   56.09 
   5  -3  -1 1616.64   51.49 
   5  -3  -1 1635.44   47.40 
   5  -3  -1 1626.54   45.90 
   5  -3  -1 1610.64   59.09 
   5  -3  -1 1584.34   47.90 
   5  -3  -1 1591.34   54.29 
   5  -3  -1 1670.23   51.89 
   5  -3  -1 1689.43   61.19 
   5  -3  -1 1745.13   55.29 
   5  -3  -1 1648.44   50.59 
   5  -3  -1 1656.13   48.70 
   5  -3  -1 1677.43   58.29 
  -5  -3   1 1689.13   56.59 
   5  -3  -1 1620.74   49.50 
   5  -3  -1 1637.54   57.29 
  -5  -3   1 1664.83   59.69 
  -5  -3   1 1725.63   58.59 
   5  -3  -1 1672.23   58.99 
   5  -3  -1 1648.04   51.09 
   5  -3  -1 1644.64   57.59 
  -5  -3   1 1644.34   55.19 
   5  -3  -1 1614.04   49.40 
  -5  -3   1 1671.83   59.69 
  -5  -3   1 1574.44   56.89 
  -5  -3   1 1580.64   54.99 
  -5  -3   1 1619.94   58.99 
  -5  -3   1 1728.03   57.19 
   5  -3  -1 1701.33   54.39 
  -5  -3   1 1655.43   57.19 
   5   3  -1 1624.44   57.29 
  -5   3   1 1591.54   54.09 
   5   3  -1 1641.44   57.19 
   5   3  -1 1605.24   55.49 
  -5   3   1 1695.03   57.99 
  -5   3   1 1682.43   56.69 
  -5   3   1 1673.83   55.79 
   5   3  -1 1627.14   59.39 
  -5   3   1 1659.23   54.89 
  -5   3   1 1629.14   54.89 
  -5   3   1 1634.14   55.69 
   5   3  -1 1615.84   60.59 
   5   3  -1 1707.73   57.59 
  -5   3   1 1631.84   56.09 
  -5   3   1 1692.13   49.20 
   5   3  -1 1585.04   56.59 
  -5   3   1 1635.84   55.59 
  -5   3   1 1531.35   57.19 
  -5   3   1 1632.34   55.59 
   5   3  -1 1651.23   58.59 
   5   3  -1 1710.83   57.89 
   5   3  -1 1610.24   51.69 
  -5   3   1 1606.84   55.39 
   5   3  -1 1679.33   49.99 
  -5   3   1 1692.13   52.49 
   5   3  -1 1601.94   55.19 
  -5   3   1 1649.73   49.10 
   5   3  -1 1519.65   56.99 
   5   3  -1 1640.74   57.49 
   5   3  -1 1724.53   57.39 
   5   3  -1 1571.34   56.49 
  -5   3   1 1630.54   54.89 
   4  -3  -1 1536.05   50.79 
   4  -3  -1 1488.75   43.10 
  -4  -3   1 1464.45   52.19 
  -4  -3   1 1581.14   54.39 
   4  -3  -1 1475.55   52.79 
   4  -3  -1 1491.15   47.90 
  -4  -3   1 1482.85   53.19 
  -4  -3   1 1612.74   50.09 
  -4  -3   1 1478.85   50.19 
  -4  -3   1 1505.85   52.09 
  -4  -3   1 1628.04   55.09 
   4  -3  -1 1452.55   44.40 
  -4  -3   1 1544.35   49.50 
   4  -3  -1 1515.15   47.00 
  -4  -3   1 1525.15   49.70 
  -4  -3   1 1566.34   50.69 
   4  -3  -1 1527.35   47.60 
  -4  -3   1 1563.84   52.69 
   4  -3  -1 1545.15   44.90 
   4  -3  -1 1516.25   52.09 
   4  -3  -1 1555.24   48.00 
   4  -3  -1 1531.45   53.49 
   4  -3  -1 1545.75   55.69 
  -4  -3   1 1508.65   50.69 
  -4  -3   1 1563.64   52.39 
   4  -3  -1 1482.95   48.30 
   4  -3  -1 1540.35   45.60 
  -4  -3   1 1482.65   46.20 
  -4  -3   1 1512.95   50.69 
   4  -3  -1 1433.26   51.99 
   4  -3  -1 1522.15   48.00 
   4  -3  -1 1496.85   41.40 
   4  -3  -1 1520.35   47.30 
   4  -3  -1 1541.25   53.49 
  -4   3   1 1629.34   51.59 
  -4   3   1 1561.94   52.09 
  -4   3   1 1498.95   49.20 
   4   3  -1 1515.55   55.19 
  -4   3   1 1534.65   49.50 
   4   3  -1 1529.25   51.79 
   4   3  -1 1553.34   52.09 
   4   3  -1 1532.35   52.69 
  -4   3   1 1517.55   45.00 
  -4   3   1 1508.25   49.90 
   4   3  -1 1452.55   51.79 
   4   3  -1 1516.55   52.49 
  -4   3   1 1545.45   52.39 
   4   3  -1 1552.44   45.60 
   4   3  -1 1640.44   53.49 
  -4   3   1 1560.84   50.29 
   4   3  -1 1507.45   51.19 
  -4   3   1 1596.34   49.99 
  -4   3   1 1539.05   48.10 
  -4   3   1 1563.94   51.19 
   4   3  -1 1465.65   53.59 
   4   3  -1 1485.15   52.39 
  -4   3   1 1538.25   51.19 
   4   3  -1 1530.95   52.19 
  -4   3   1 1524.25   47.20 
   4   3  -1 1494.45   52.99 
  -4   3   1 1537.85   51.39 
  -4   3   1 1556.04   51.39 
   4   3  -1 1467.45   50.79 
   4   3  -1 1555.64   51.89 
   4   3  -1 1585.04   48.30 
  -3  -3   1 2335.97   66.49 
  -3  -3   1 2256.17   67.19 
   3  -3  -1 2249.57   64.19 
   3  -3  -1 2212.88   63.59 
   3  -3  -1 2193.28   63.89 
  -3  -3   1 2173.98   67.99 
  -3  -3   1 2199.88   68.49 
   3  -3  -1 2193.58   70.39 
  -3  -3   1 2208.98   61.09 
   3  -3  -1 2126.39   69.29 
   3  -3  -1 2145.79   68.29 
  -3  -3   1 2083.99   64.69 
   3  -3  -1 2134.69   67.99 
   3  -3  -1 2200.88   68.89 
   3  -3  -1 2217.88   69.29 
   3  -3  -1 2159.88   65.79 
   3  -3  -1 2222.88   64.69 
   3  -3  -1 2046.20   66.29 
  -3  -3   1 2275.87   66.19 
   3  -3  -1 2215.98   64.39 
   3  -3  -1 2158.38   63.09 
   3  -3  -1 2209.88   64.69 
  -3  -3   1 2249.27   66.69 
  -3  -3   1 2196.58   69.89 
  -3  -3   1 2158.38   62.29 
   3  -3  -1 2117.09   67.49 
   3  -3  -1 2266.17   64.69 
   3  -3  -1 2194.98   58.59 
  -3  -3   1 2200.18   68.69 
   3  -3  -1 2163.68   60.39 
  -3  -3   1 2265.37   69.59 
   3  -3  -1 2249.68   65.49 
   3  -3  -1 2229.18   62.99 
  -3  -3   1 2183.18   67.29 
   3  -3  -1 2193.68   58.69 
   3  -3  -1 2211.88   69.99 
   3  -3  -1 2164.78   62.19 
   3  -3  -1 2065.09   65.79 
   3  -3  -1 2294.27   64.99 
   3  -3  -1 2193.38   67.09 
   3  -3  -1 2183.58   64.69 
   3  -3  -1 2164.48   62.89 
   3  -3  -1 2166.68   66.79 
  -3  -3   1 2302.87   70.69 
   3  -3  -1 2202.98   64.59 
  -3  -3   1 2084.29   68.29 
  -3  -3   1 2191.78   65.09 
  -3   3   1 2217.68   63.59 
  -3   3   1 2255.97   64.99 
  -3   3   1 2240.68   64.89 
   3   3  -1 2231.58   67.49 
   3   3  -1 2205.08   68.59 
   3   3  -1 2263.47   69.79 
   3   3  -1 2186.08   65.19 
  -3   3   1 2252.27   67.49 
   3   3  -1 2233.18   62.59 
   3   3  -1 2133.99   64.39 
   3   3  -1 2212.98   68.29 
   3   3  -1 2139.59   69.09 
   3   3  -1 2180.88   67.89 
  -3   3   1 2216.08   67.99 
   3   3  -1 2259.57   68.39 
  -3   3   1 2108.39   68.29 
  -3   3   1 2286.77   68.19 
  -3   3   1 2073.39   66.99 
   3   3  -1 2184.58   68.69 
  -3   3   1 2236.18   66.99 
  -3   3   1 2174.68   67.39 
  -3   3   1 2267.77   66.09 
  -3   3   1 2194.88   66.89 
   3   3  -1 2267.87   68.89 
  -3   3   1 2233.08   65.89 
  -3   3   1 2278.17   65.49 
   3   3  -1 2203.58   67.39 
   3   3  -1 2244.98   69.19 
   3   3  -1 2105.39   70.39 
   3   3  -1 2146.99   66.99 
   3   3  -1 2202.68   65.59 
   3   3  -1 2194.68   67.89 
   3   3  -1 2196.68   68.39 
  -3   3   1 2217.48   66.19 
  -3   3   1 2141.99   65.59 
   2  -3  -1 1100.19   35.50 
  -2  -3   1 1156.98   36.20 
   2  -3  -1 1055.19   34.80 
   2  -3  -1 1074.99   38.40 
   2  -3  -1 1068.69   34.00 
   2  -3  -1 1088.99   33.70 
   2  -3  -1 1161.38   38.90 
   2  -3  -1 1089.89   33.30 
  -2  -3   1 1061.69   37.40 
   2  -3  -1 1130.69   34.40 
   2  -3  -1 1077.19   34.60 
   2  -3  -1 1080.39   32.30 
   2  -3  -1 1123.39   36.00 
   2  -3  -1 1095.99   36.50 
  -2  -3   1 1104.19   33.70 
   2  -3  -1 1089.59   38.00 
   2  -3  -1 1094.79   38.90 
  -2  -3   1 1061.29   34.30 
  -2  -3   1 1110.19   37.70 
   2  -3  -1 1085.89   34.90 
   2  -3  -1 1118.79   40.20 
   2  -3  -1 1097.79   32.10 
  -2  -3   1 1140.19   34.50 
   2  -3  -1 1074.19   37.80 
   2  -3  -1 1082.09   34.30 
   2  -3  -1 1100.09   36.70 
  -2  -3   1 1125.59   38.60 
  -2  -3   1 1144.49   36.70 
   2  -3  -1 1072.09   35.40 
  -2  -3   1 1129.99   35.40 
  -2  -3   1 1071.99   38.10 
   2  -3  -1 1145.09   35.30 
   2  -3  -1 1089.69   34.40 
   2  -3  -1 1117.69   33.40 
  -2  -3   1 1043.40   37.40 
   2  -3  -1 1052.99   32.90 
   2  -3  -1 1088.09   38.90 
   2  -3  -1 1145.89   34.10 
  -2  -3   1 1101.29   37.60 
   2  -3  -1 1055.99   40.10 
  -2  -3   1 1049.49   37.30 
  -2  -3   1 1020.30   37.80 
   2  -3  -1 1118.69   40.00 
   2  -3  -1 1080.19   35.60 
   2  -3  -1 1067.89   38.60 
   2  -3  -1 1039.70   33.50 
  -2  -3   1 1103.99   38.50 
   2  -3  -1 1114.79   34.90 
   2  -3  -1 1144.59   35.70 
  -2  -3   1 1202.78   39.10 
  -2  -3   1 1088.69   39.70 
  -2  -3   1 1108.19   35.90 
  -2  -3   1 1086.39   36.90 
  -2  -3   1 1076.69   34.20 
   2  -3  -1 1052.99   38.50 
  -2  -3   1 1055.69   34.10 
   2  -3  -1 1167.58   34.20 
   2   3  -1 1087.69   33.80 
  -2   3   1 1125.49   33.60 
  -2   3   1 1044.50   38.70 
  -2   3   1 1068.19   34.80 
   2   3  -1 1166.98   37.80 
  -2   3   1 1086.09   36.10 
  -2   3   1 1070.29   35.00 
  -2   3   1 1053.09   35.90 
   2   3  -1 1136.79   38.60 
  -2   3   1 1096.09   39.00 
   2   3  -1 1041.80   36.50 
  -2   3   1 1091.09   37.10 
  -2   3   1 1102.29   33.80 
  -2   3   1 1078.69   35.80 
   2   3  -1 1122.29   38.30 
   2   3  -1 1071.19   37.20 
  -2   3   1 1124.19   36.50 
  -2   3   1 1086.69   33.30 
   2   3  -1 1087.99   37.20 
   2   3  -1 1100.49   37.50 
   2   3  -1 1068.69   33.60 
   2   3  -1 1155.18   37.20 
   2   3  -1 1039.20   37.10 
   2   3  -1 1113.29   34.50 
  -2   3   1 1105.79   35.30 
   2   3  -1 1067.99   35.60 
   2   3  -1 1079.99   33.40 
   2   3  -1 1125.39   38.60 
  -2   3   1 1142.39   36.10 
  -2   3   1 1047.90   34.60 
   2   3  -1 1071.39   33.40 
  -2   3   1 1064.39   36.00 
   2   3  -1 1080.39   39.20 
   2   3  -1 1141.09   36.80 
  -2   3   1 1090.69   38.00 
  -2   3   1 1089.19   36.00 
   2   3  -1 1090.19   33.50 
   2   3  -1 1101.69   37.30 
   2   3  -1 1103.29   37.70 
  -2   3   1 1093.09   29.80 
  -2   3   1 1038.60   38.00 
  -2   3   1 1123.19   37.60 
   1  -3  -1 2597.34   74.69 
   1  -3  -1 2569.34   72.39 
   1  -3  -1 2599.04   71.69 
  -1  -3   1 2531.75   70.09 
   1  -3  -1 2622.64   75.29 
  -1  -3   1 2656.23   75.09 
  -1  -3   1 2532.65   75.49 
  -1  -3   1 2592.34   74.89 
   1  -3  -1 2603.24   69.99 
   1  -3  -1 2596.94   73.49 
   1  -3  -1 2538.15   74.59 
   1  -3  -1 2607.14   72.49 
   1  -3  -1 2602.04   72.79 
   1  -3  -1 2406.26   74.29 
   1  -3  -1 2584.14   69.29 
  -1  -3   1 2267.77   72.39 
   1  -3  -1 2535.85   71.19 
  -1  -3   1 2447.96   74.59 
   1  -3  -1 2498.15   75.19 
  -1  -3   1 2687.33   76.39 
   1  -3  -1 2609.24   74.19 
  -1  -3   1 2573.64   74.39 
  -1  -3   1 2768.02   76.39 
   1  -3  -1 2515.45   74.99 
  -1  -3   1 2670.03   76.19 
  -1  -3   1 2612.44   74.39 
  -1  -3   1 2679.83   73.89 
  -1  -3   1 2494.95   75.69 
  -1  -3   1 2627.74   74.29 
   1  -3  -1 2573.44   74.69 
  -1  -3   1 2599.44   70.29 
   1  -3  -1 2576.74   72.79 
   1  -3  -1 2570.84   76.09 
  -1  -3   1 2613.94   72.69 
  -1  -3   1 2519.55   74.49 
   1  -3  -1 2492.85   69.19 
   1  -3  -1 2507.65   73.29 
  -1  -3   1 2424.56   73.99 
   1  -3  -1 2595.54   73.49 
   1  -3  -1 2626.54   76.69 
   1  -3  -1 2553.74   73.09 
  -1  -3   1 2679.53   75.69 
  -1  -3   1 2534.55   74.69 
  -1  -3   1 2512.25   68.99 
   1  -3  -1 2569.84   70.49 
  -1  -3   1 2482.95   74.29 
  -1  -3   1 2485.25   73.89 
  -1  -3   1 2582.34   74.99 
  -1  -3   1 2568.64   72.69 
  -1  -3   1 2693.33   71.89 
   1  -3  -1 2626.34   75.09 
  -1  -3   1 2520.25   74.79 
   1  -3  -1 2471.85   72.69 
  -1   3   1 2564.04   76.99 
  -1   3   1 2572.64   73.69 
  -1   3   1 2379.86   76.99 
  -1   3   1 2592.34   78.39 
   1   3  -1 2500.15   68.99 
  -1   3   1 2557.04   71.89 
   1   3  -1 2556.84   75.19 
   1   3  -1 2557.04   73.39 
   1   3  -1 2550.94   74.59 
   1   3  -1 2491.65   69.49 
  -1   3   1 2612.44   73.09 
   1   3  -1 2551.44   74.59 
  -1   3   1 2495.85   73.19 
   1   3  -1 2447.46   74.29 
  -1   3   1 2069.19   76.49 
  -1   3   1 2133.39   79.49 
  -1   3   1 2529.75   69.49 
  -1   3   1 2514.85   73.89 
   1   3  -1 2510.05   72.09 
   1   3  -1 2570.14   74.19 
   1   3  -1 2588.24   75.19 
   1   3  -1 2538.65   76.79 
  -1   3   1 2655.23   75.59 
   1   3  -1 2548.25   73.19 
  -1   3   1 2524.85   74.19 
   1   3  -1 2553.04   75.69 
   1   3  -1 2588.84   74.19 
   1   3  -1 2508.35   74.49 
   1   3  -1 2512.05   74.49 
  -1   3   1 2643.24   75.39 
  -1   3   1 2447.76   73.79 
   1   3  -1 2553.94   74.79 
  -1   3   1 2170.28   77.39 
  -1   3   1 2606.64   69.39 
   1   3  -1 2560.74   73.99 
   1   3  -1 2500.25   74.09 
   1   3  -1 2547.84   74.19 
  -1   3   1 2567.94   68.79 
  -1   3   1 2234.58   78.29 
  -1   3   1 2499.75   73.39 
  -1   3   1 2499.15   72.39 
  -1   3   1 2712.13   74.29 
  -1   3   1 2548.15   74.99 
  -1   3   1 2488.85   70.99 
  -1   3   1 2608.04   71.19 
  -1   3   1 2532.55   73.29 
  -1   3   1 2587.14   77.29 
   1   3  -1 2635.14   74.89 
  -1   3   1 2170.08   72.39 
   0  -3   1 1005.30   33.20 
   0  -3   1  958.80   32.70 
   0  -3  -1  960.80   32.80 
   0  -3   1  987.00   31.70 
   0  -3   1  967.90   31.00 
   0  -3  -1  966.60   32.10 
   0  -3  -1  946.31   30.60 
   0  -3  -1  953.70   31.50 
   0  -3  -1  916.41   31.40 
   0  -3   1  955.70   31.50 
   0  -3  -1  958.30   30.80 
   0  -3  -1  952.40   32.50 
   0  -3  -1  976.00   32.90 
   0  -3   1  957.80   33.00 
   0  -3  -1  953.20   32.60 
   0  -3  -1  987.60   31.90 
   0  -3  -1  936.41   32.60 
   0  -3   1  962.50   30.50 
   0  -3  -1  984.60   31.80 
   0  -3   1  934.71   31.70 
   0  -3  -1  931.71   31.80 
   0  -3   1  959.70   30.30 
   0  -3   1  892.51   31.30 
   0  -3  -1  942.31   30.20 
   0  -3  -1  975.70   31.40 
   0  -3   1  996.60   34.00 
   0  -3  -1  976.20   32.00 
   0  -3   1  938.61   31.70 
   0  -3   1  973.70   30.00 
   0  -3   1  954.00   32.20 
   0  -3   1  950.30   32.40 
   0  -3   1  862.11   30.80 
   0  -3  -1 1017.20   32.20 
   0  -3  -1  942.51   30.40 
   0  -3   1  924.81   31.80 
   0  -3   1  964.80   31.60 
   0  -3   1  989.80   31.50 
   0  -3   1  966.30   31.30 
   0  -3  -1  938.81   31.50 
   0  -3  -1  980.00   31.90 
   0  -3  -1  978.60   32.60 
   0   3   1  954.20   32.80 
   0   3   1  966.70   32.80 
   0   3   1  977.60   32.10 
   0   3  -1  984.50   31.10 
   0   3  -1  989.40   31.90 
   0   3  -1  944.51   30.70 
   0   3  -1  960.50   32.20 
   0   3   1  986.20   30.90 
   0   3  -1 1011.60   32.20 
   0   3   1  944.31   32.30 
   0   3   1  955.80   33.20 
   0   3   1  939.91   33.20 
   0   3  -1  960.20   31.70 
   0   3   1  972.10   31.40 
   0   3   1  944.21   30.90 
   0   3   1  939.41   32.00 
   0   3  -1  962.20   31.30 
   0   3   1 1063.19   33.90 
   0   3  -1  973.50   32.30 
   0   3   1  946.81   31.70 
   0   3   1  962.60   29.60 
   0   3   1  945.11   32.30 
   0   3   1  921.21   34.60 
   0   3   1  939.11   33.20 
   0   3  -1  916.01   32.20 
   0   3  -1  993.50   36.40 
   0   3  -1  940.51   30.80 
   0   3  -1  916.51   32.30 
   0   3   1  957.60   33.50 
   0   3   1  935.81   32.30 
   0   3  -1  983.80   33.20 
   0   3  -1  998.10   30.50 
   0   3  -1  972.80   35.50 
   0   3  -1  956.90   32.60 
   0   3   1  925.01   31.20 
   0   3  -1  938.51   31.50 
   0   3  -1  975.10   32.80 
   0   3  -1  942.21   31.50 
   1  -3   1 5154.38  146.59 
   1  -3   1 5344.97  140.59 
  -1  -3  -1 5231.48  142.79 
   1  -3   1 5125.79  148.09 
   1  -3   1 4509.95  148.19 
   1  -3   1 5306.47  142.59 
  -1  -3  -1 5365.36  146.09 
  -1  -3  -1 5450.55  145.99 
  -1  -3  -1 5075.39  144.29 
   1  -3   1 5282.57  142.69 
   1  -3   1 5212.68  144.19 
   1  -3   1 4985.00  143.99 
   1  -3   1 5246.88  142.19 
  -1  -3  -1 5431.46  139.89 
   1  -3   1 5198.38  141.09 
  -1  -3  -1 5244.88  144.79 
   1  -3   1 5406.16  142.69 
  -1  -3  -1 4825.12  143.09 
  -1  -3  -1 5288.17  140.79 
   1  -3   1 5243.78  140.09 
  -1  -3  -1 5123.29  143.39 
   1  -3   1 5185.98  143.69 
   1  -3   1 4918.51  144.99 
  -1  -3  -1 5270.27  144.69 
  -1  -3  -1 5271.07  143.79 
  -1  -3  -1 5134.39  144.79 
  -1  -3  -1 5250.47  144.19 
   1  -3   1 5416.76  148.09 
   1  -3   1 5357.76  142.09 
  -1  -3  -1 5267.67  144.69 
  -1  -3  -1 5351.66  145.19 
  -1  -3  -1 5320.07  142.69 
   1  -3   1 5160.98  143.79 
   1  -3   1 5178.48  138.09 
   1  -3   1 5387.46  146.99 
  -1  -3  -1 5260.17  144.49 
  -1  -3  -1 5306.97  145.99 
  -1  -3  -1 5281.07  147.59 
   1  -3   1 5255.87  140.39 
   1  -3   1 4688.83  147.89 
  -1  -3  -1 5328.47  142.39 
  -1  -3  -1 5182.08  144.29 
   1  -3   1 5342.07  141.79 
   1  -3   1 5332.47  138.49 
  -1  -3  -1 5370.66  142.79 
   1  -3   1 5237.58  141.79 
  -1  -3  -1 5132.89  144.49 
  -1  -3  -1 5310.97  139.59 
  -1  -3  -1 5232.38  144.59 
  -1  -3  -1 5244.38  143.39 
   1   3   1 5145.89  143.09 
  -1   3  -1 5087.99  140.69 
   1   3   1 5308.57  145.69 
   1   3   1 5100.79  144.19 
   1   3   1 5196.18  143.99 
  -1   3  -1 4949.90  141.19 
   1   3   1 5261.47  144.79 
  -1   3  -1 5276.17  142.69 
  -1   3  -1 5096.29  140.69 
  -1   3  -1 4879.41  140.99 
  -1   3  -1 5029.20  144.69 
  -1   3  -1 4556.74  143.29 
  -1   3  -1 4930.21  145.39 
  -1   3  -1 5055.99  138.89 
   1   3   1 5136.79  144.79 
   1   3   1 5362.26  138.79 
   1   3   1 5373.56  144.09 
  -1   3  -1 5172.38  138.19 
   1   3   1 5209.68  144.99 
  -1   3  -1 5337.17  142.39 
  -1   3  -1 5382.46  139.99 
  -1   3  -1 5305.77  145.29 
   1   3   1 5206.38  144.59 
  -1   3  -1 4635.74  149.09 
   1   3   1 5224.08  143.99 
   1   3   1 5257.57  144.89 
   1   3   1 5299.07  143.49 
   1   3   1 5089.99  144.39 
   1   3   1 5211.38  143.59 
  -1   3  -1 5044.90  143.29 
  -1   3  -1 5090.89  143.99 
   1   3   1 5322.77  143.89 
  -1   3  -1 4931.51  142.79 
  -1   3  -1 4802.42  151.78 
  -1   3  -1 5157.28  142.09 
  -1   3  -1 5271.17  140.79 
   1   3   1 5213.18  142.89 
  -1   3  -1 5392.66  140.59 
  -1   3  -1 5233.08  145.29 
  -1   3  -1 5299.67  146.09 
   1   3   1 5261.57  148.49 
   1   3   1 5486.15  138.39 
   1   3   1 5292.67  145.49 
   1   3   1 5221.18  145.89 
   2  -3   1 2316.87   63.59 
   2  -3   1 2214.48   75.79 
  -2  -3  -1 2248.28   70.49 
   2  -3   1 2275.07   69.89 
   2  -3   1 2286.67   73.49 
   2  -3   1 2400.96   67.19 
  -2  -3  -1 2392.36   71.59 
   2  -3   1 2260.17   69.79 
   2  -3   1 2427.46   66.29 
  -2  -3  -1 2343.67   70.39 
   2  -3   1 2313.77   69.19 
  -2  -3  -1 2348.86   66.69 
  -2  -3  -1 2370.76   67.79 
  -2  -3  -1 2341.17   67.19 
   2  -3   1 2305.37   65.49 
   2  -3   1 2372.96   72.59 
  -2  -3  -1 2435.96   71.69 
   2  -3   1 2349.26   69.69 
   2  -3   1 2347.47   65.09 
   2  -3   1 2384.46   71.19 
   2  -3   1 2309.57   68.89 
   2  -3   1 2181.18   68.79 
   2  -3   1 2348.27   68.39 
   2  -3   1 2279.27   65.89 
  -2  -3  -1 2454.45   69.19 
   2  -3   1 2341.67   67.99 
   2  -3   1 2365.06   67.89 
   2  -3   1 2396.86   66.69 
   2  -3   1 2346.97   64.39 
   2  -3   1 2325.67   68.39 
   2  -3   1 2294.87   72.19 
   2  -3   1 2328.77   67.69 
  -2  -3  -1 2308.67   69.79 
  -2  -3  -1 2311.27   70.89 
  -2  -3  -1 2384.56   66.29 
  -2  -3  -1 2384.46   72.79 
  -2  -3  -1 2324.47   71.29 
   2  -3   1 2397.06   65.99 
   2  -3   1 2417.46   66.49 
  -2  -3  -1 2260.77   67.99 
  -2  -3  -1 2300.07   70.19 
   2  -3   1 2326.17   68.89 
   2  -3   1 2358.06   68.29 
   2  -3   1 2313.87   76.69 
  -2  -3  -1 2346.87   67.19 
  -2  -3  -1 2272.57   71.69 
  -2  -3  -1 2406.06   66.49 
   2  -3   1 2281.77   75.09 
   2  -3   1 2306.07   69.89 
  -2  -3  -1 2343.37   66.79 
  -2  -3  -1 2329.87   69.49 
   2  -3   1 2348.36   65.99 
   2  -3   1 2393.86   66.69 
  -2  -3  -1 2394.86   72.19 
  -2  -3  -1 2322.97   69.69 
  -2  -3  -1 2306.17   69.59 
  -2   3  -1 2331.67   66.49 
  -2   3  -1 2373.66   71.29 
   2   3   1 2381.96   66.79 
  -2   3  -1 2335.37   68.29 
  -2   3  -1 2426.96   69.59 
   2   3   1 2429.06   68.59 
   2   3   1 2318.27   70.99 
  -2   3  -1 2266.07   73.49 
   2   3   1 2487.55   72.09 
   2   3   1 2273.17   70.19 
  -2   3  -1 2340.27   65.69 
  -2   3  -1 2385.16   71.89 
   2   3   1 2326.37   70.29 
   2   3   1 2267.37   67.29 
   2   3   1 2408.96   72.19 
  -2   3  -1 2404.86   66.09 
   2   3   1 2343.27   70.79 
  -2   3  -1 2295.17   67.29 
   2   3   1 2372.06   67.49 
   2   3   1 2350.46   71.39 
  -2   3  -1 2369.76   74.49 
  -2   3  -1 2373.86   67.09 
   2   3   1 2391.06   72.29 
   2   3   1 2305.27   67.99 
  -2   3  -1 2381.46   66.89 
   2   3   1 2408.16   70.19 
   2   3   1 2361.16   71.19 
  -2   3  -1 2329.77   66.99 
   2   3   1 2357.06   68.59 
   2   3   1 2304.57   70.29 
  -2   3  -1 2377.36   70.39 
  -2   3  -1 2214.08   67.19 
  -2   3  -1 2342.87   66.49 
  -2   3  -1 2420.26   71.59 
   2   3   1 2347.47   65.99 
  -2   3  -1 2422.16   65.99 
  -2   3  -1 2356.56   66.29 
   2   3   1 2298.37   71.19 
   3  -3   1 2201.68   60.69 
  -3  -3  -1 1982.50   62.79 
  -3  -3  -1 2050.59   65.19 
  -3  -3  -1 2108.09   66.99 
   3  -3   1 2109.09   63.89 
   3  -3   1 2098.79   64.49 
   3  -3   1 2075.49   60.29 
   3  -3   1 2109.89   64.39 
   3  -3   1 2093.79   64.39 
   3  -3   1 2090.19   62.29 
   3  -3   1 2126.79   64.39 
   3  -3   1 2166.58   65.79 
   3  -3   1 2126.59   69.89 
  -3  -3  -1 2158.58   64.29 
  -3  -3  -1 2163.08   68.89 
   3  -3   1 2177.48   62.19 
  -3  -3  -1 2200.78   68.79 
   3  -3   1 2130.29   61.29 
   3  -3   1 2156.38   68.79 
  -3  -3  -1 2109.39   63.99 
  -3  -3  -1 2106.19   67.19 
  -3  -3  -1 2129.39   67.39 
  -3  -3  -1 2188.38   60.79 
   3  -3   1 2164.58   59.69 
  -3  -3  -1 2250.77   64.89 
  -3  -3  -1 2247.88   63.59 
  -3  -3  -1 2100.39   58.79 
   3  -3   1 2049.70   63.89 
   3  -3   1 2187.68   62.59 
   3  -3   1 2121.79   62.99 
  -3  -3  -1 2230.68   68.29 
  -3  -3  -1 2040.30   67.19 
   3  -3   1 2149.69   65.49 
  -3  -3  -1 2109.59   68.09 
   3  -3   1 2219.88   58.49 
   3  -3   1 2160.18   70.79 
  -3  -3  -1 2182.48   66.99 
  -3  -3  -1 2114.39   66.79 
   3  -3   1 2106.89   64.89 
   3  -3   1 2232.68   66.09 
   3  -3   1 2103.49   61.39 
   3  -3   1 2140.49   62.29 
   3  -3   1 2210.18   65.19 
  -3  -3  -1 2146.59   64.39 
   3  -3   1 2105.79   57.69 
  -3  -3  -1 2154.98   65.99 
   3  -3   1 2076.09   69.59 
   3  -3   1 2104.69   65.59 
  -3   3  -1 2241.68   63.19 
   3   3   1 2178.18   67.59 
  -3   3  -1 2061.09   62.59 
   3   3   1 2157.08   62.99 
   3   3   1 2228.18   67.29 
   3   3   1 2141.79   68.19 
   3   3   1 2171.08   67.59 
  -3   3  -1 2200.98   67.59 
   3   3   1 2131.19   65.19 
  -3   3  -1 2022.60   65.59 
   3   3   1 2201.28   64.09 
  -3   3  -1 2079.59   61.49 
  -3   3  -1 1999.90   67.59 
  -3   3  -1 2130.99   63.29 
  -3   3  -1 2182.58   63.49 
  -3   3  -1 2192.48   63.29 
  -3   3  -1 2162.18   68.69 
  -3   3  -1 2034.20   69.69 
   3   3   1 2101.29   66.69 
   3   3   1 2284.07   68.59 
  -3   3  -1 2176.28   67.29 
  -3   3  -1 2104.09   69.29 
  -3   3  -1 2221.88   64.39 
  -3   3  -1 2205.38   63.59 
   3   3   1 2208.18   65.79 
   3   3   1 2083.89   68.79 
   3   3   1 2114.69   67.59 
   3   3   1 2129.49   66.09 
   3   3   1 2128.89   67.29 
   3   3   1 2105.79   66.99 
   4  -3   1  883.71   37.20 
  -4  -3  -1  883.31   34.70 
  -4  -3  -1  828.72   30.70 
  -4  -3  -1  807.52   33.70 
   4  -3   1  809.52   31.30 
   4  -3   1  850.11   37.00 
  -4  -3  -1  787.02   30.60 
   4  -3   1  880.81   32.40 
  -4  -3  -1  826.52   34.70 
  -4  -3  -1  958.70   33.00 
  -4  -3  -1  815.02   33.20 
  -4  -3  -1  824.12   31.90 
   4  -3   1  844.82   31.80 
   4  -3   1  886.41   24.40 
   4  -3   1  883.81   30.30 
  -4  -3  -1  838.42   32.10 
   4  -3   1  858.61   26.00 
   4  -3   1  851.21   28.80 
   4  -3   1  867.41   25.30 
   4  -3   1  883.91   26.80 
  -4  -3  -1  816.62   34.00 
   4  -3   1  815.42   32.10 
  -4  -3  -1  849.32   31.90 
   4  -3   1  859.91   27.00 
   4  -3   1  849.72   26.80 
   4  -3   1  859.81   30.90 
  -4  -3  -1  859.21   32.50 
   4  -3   1  828.22   34.60 
  -4  -3  -1  850.71   27.20 
   4  -3   1  837.72   24.70 
   4  -3   1  854.41   24.90 
  -4  -3  -1  819.32   29.70 
   4  -3   1  841.82   29.50 
  -4  -3  -1  819.52   32.50 
   4  -3   1  857.31   29.90 
   4  -3   1  820.72   35.70 
  -4  -3  -1  851.01   25.90 
  -4  -3  -1  884.71   36.20 
  -4  -3  -1  848.92   34.30 
   4  -3   1  835.72   29.90 
  -4   3  -1  889.11   31.50 
  -4   3  -1  877.01   33.60 
   4   3   1  857.51   32.50 
   4   3   1  883.61   35.00 
   4   3   1  821.82   34.10 
   4   3   1  842.82   33.70 
   4   3   1  876.61   31.90 
  -4   3  -1  822.92   35.20 
  -4   3  -1  883.81   31.10 
   4   3   1  825.72   33.90 
  -4   3  -1  837.32   31.60 
   4   3   1  859.81   34.00 
  -4   3  -1  857.91   34.60 
  -4   3  -1  834.82   31.10 
  -4   3  -1  855.01   25.50 
  -4   3  -1  892.71   34.10 
  -4   3  -1  844.02   30.60 
  -4   3  -1  874.61   31.00 
  -4   3  -1  863.61   35.70 
   4   3   1  789.72   34.10 
   4   3   1  815.02   34.40 
   4   3   1  854.41   33.50 
  -4   3  -1  837.02   35.30 
   4   3   1  831.72   33.50 
   4   3   1  913.91   33.40 
   4   3   1  807.12   35.70 
  -4   3  -1  836.12   30.70 
   5  -3   1  651.03   20.00 
  -5  -3  -1  654.23   28.50 
  -5  -3  -1  614.74   21.50 
   5  -3   1  631.94   23.90 
  -5  -3  -1  688.13   26.60 
  -5  -3  -1  672.63   30.70 
  -5  -3  -1  641.54   23.90 
  -5  -3  -1  594.64   26.60 
  -5  -3  -1  675.83   31.10 
   5  -3   1  641.64   25.10 
  -5  -3  -1  607.24   30.60 
   5  -3   1  645.04   32.30 
   5  -3   1  639.44   29.90 
   5  -3   1  638.54   20.80 
   5  -3   1  618.24   21.30 
  -5  -3  -1  641.74   34.50 
   5  -3   1  628.64   31.30 
   5  -3   1  615.84   21.80 
   5  -3   1  682.23   27.50 
  -5  -3  -1  688.03   30.30 
   5  -3   1  627.24   24.90 
   5  -3   1  624.24   32.40 
   5  -3   1  652.23   20.10 
  -5  -3  -1  647.14   29.00 
   5  -3   1  633.14   26.40 
  -5  -3  -1  670.93   26.80 
  -5  -3  -1  624.84   28.60 
   5  -3   1  607.44   27.00 
  -5  -3  -1  588.04   29.50 
   5  -3   1  647.94   21.60 
   5  -3   1  617.74   23.80 
  -5  -3  -1  623.94   29.50 
  -5  -3  -1  603.34   27.50 
   5  -3   1  627.84   29.10 
   5  -3   1  626.14   25.70 
  -5   3  -1  629.14   25.10 
  -5   3  -1  633.14   30.90 
   5   3   1  624.14   28.70 
   5   3   1  609.94   27.00 
   5   3   1  619.74   30.00 
   5   3   1  621.64   26.40 
  -5   3  -1  669.53   30.60 
   5   3   1  580.84   28.70 
  -5   3  -1  644.14   30.30 
  -5   3  -1  603.24   26.40 
   5   3   1  647.84   30.00 
  -5   3  -1  642.34   27.70 
  -5   3  -1  652.53   27.70 
   5   3   1  637.44   30.70 
   5   3   1  628.34   22.20 
   5   3   1  649.83   30.40 
   5   3   1  677.03   29.80 
   5   3   1  635.34   31.80 
  -5   3  -1  675.83   27.20 
  -5   3  -1  619.94   28.90 
   5   3   1  642.24   28.60 
   5   3   1  634.24   28.90 
  -5   3  -1  735.83   28.70 
   5   3   1  628.04   28.40 
  -5   3  -1  615.84   29.80 
   6  -3   1  877.11   41.80 
   6  -3   1  924.21   36.80 
  -6  -3  -1  875.91   38.00 
   6  -3   1 1012.60   39.70 
  -6  -3  -1  912.51   39.50 
   6  -3   1  967.60   36.70 
  -6  -3  -1  942.21   46.60 
   6  -3   1  948.91   44.00 
  -6  -3  -1  921.81   40.70 
  -6  -3  -1  989.80   35.50 
   6  -3   1  953.10   29.20 
  -6  -3  -1  901.61   34.90 
  -6  -3  -1  934.81   39.50 
  -6  -3  -1  903.21   40.80 
   6  -3   1  949.60   34.90 
  -6  -3  -1 1021.30   38.90 
  -6  -3  -1  913.91   40.10 
  -6  -3  -1  884.41   38.20 
   6  -3   1  919.71   37.50 
   6  -3   1  911.51   36.90 
   6  -3   1  953.60   29.80 
   6  -3   1  932.91   38.20 
  -6  -3  -1  914.31   41.50 
  -6  -3  -1  952.40   42.70 
  -6  -3  -1  932.11   39.20 
   6  -3   1  917.61   39.60 
   6  -3   1  944.61   43.50 
  -6   3  -1  903.01   41.80 
   6   3   1  921.71   39.10 
  -6   3  -1  961.10   37.70 
   6   3   1  935.51   42.00 
   6   3   1  920.11   38.40 
   6   3   1  969.00   37.40 
  -6   3  -1  910.01   41.00 
   6   3   1  871.81   40.40 
  -6   3  -1  936.11   40.40 
  -6   3  -1  914.51   37.20 
  -6   3  -1  961.30   38.30 
   6   3   1 1027.20   40.20 
   6   3   1  888.01   42.70 
   6   3   1  921.91   35.80 
   6   3   1  896.51   39.80 
   6   3   1  914.91   40.40 
   6   3   1  915.21   39.50 
  -6   3  -1  970.30   38.00 
  -6   3  -1  967.70   39.70 
   6   3   1  939.11   39.50 
  -6   3  -1  881.41   37.70 
   6   3   1  982.60   40.30 
   6   3   1  931.31   31.20 
  -6   3  -1  922.61   46.90 
  -6   3  -1  912.11   34.10 
   6   3   1  971.50   41.00 
   7  -3   1  191.38   22.20 
   7  -3   1  227.38   16.40 
   7  -3   1  182.18   14.00 
  -7  -3  -1  226.08   24.10 
   7  -3   1  196.38   16.00 
   7  -3   1  194.58   16.30 
  -7  -3  -1  203.28   19.30 
  -7  -3  -1  165.18   19.40 
  -7  -3  -1  145.69   17.20 
   7  -3   1  184.08   17.40 
   7  -3   1  160.18   15.90 
   7  -3   1  151.38   16.90 
  -7  -3  -1  186.38   19.40 
  -7  -3  -1  177.28   19.60 
  -7  -3  -1  182.68   20.20 
   7  -3   1  178.58   14.70 
  -7  -3  -1  206.38   25.50 
  -7  -3  -1  220.08   20.60 
  -7  -3  -1  165.28   12.40 
  -7  -3  -1  182.48   19.30 
   7  -3   1  217.28   24.10 
   7  -3   1  188.48   21.80 
   7  -3   1  178.28   13.30 
  -7  -3  -1  199.28   16.20 
  -7  -3  -1  191.38   21.40 
   7  -3   1  179.28   14.80 
   7   3   1  189.68   19.80 
  -7   3  -1  186.08   15.50 
  -7   3  -1  179.28   18.00 
   7   3   1  185.38   19.70 
   7   3   1  151.38   17.70 
   7   3   1  194.78   15.70 
  -7   3  -1  199.98   15.80 
  -7   3  -1  194.48   13.10 
   7   3   1  159.38   19.40 
   7   3   1  187.18   18.50 
   7   3   1  199.18   22.80 
   7   3   1  203.18   16.60 
  -7   3  -1  200.68   22.50 
   7   3   1  209.88   20.50 
   7   3   1  188.98   20.60 
  -7   3  -1  166.28   16.60 
   7   3   1  183.28   14.30 
  -7   3  -1  202.78   15.70 
  -7   3  -1  179.58   24.20 
   7   3   1  153.78   18.10 
   7   3   1  180.58   19.60 
  -7   3  -1  213.28   22.10 
  -7   3  -1  215.48   21.20 
  -7   3  -1  189.98   19.10 
   7   3   1  206.18   14.40 
   8  -3   1  443.66   31.70 
   8  -3   1  466.05   31.60 
  -8  -3  -1  422.76   28.20 
   8  -3   1  435.36   24.90 
  -8  -3  -1  461.55   28.60 
   8  -3   1  467.95   26.60 
  -8  -3  -1  442.76   27.10 
   8  -3   1  433.76   30.30 
   8  -3   1  418.66   26.30 
  -8  -3  -1  387.26   27.50 
   8  -3   1  440.36   30.20 
  -8  -3  -1  413.26   26.00 
   8  -3   1  446.66   24.30 
  -8  -3  -1  513.85   36.60 
   8  -3   1  467.85   30.90 
   8  -3   1  409.26   25.00 
  -8  -3  -1  429.96   28.50 
  -8  -3  -1  423.36   27.30 
   8  -3   1  435.06   23.60 
  -8  -3  -1  385.16   29.00 
   8  -3   1  418.06   23.50 
  -8  -3  -1  467.65   27.30 
   8  -3   1  450.05   26.50 
  -8  -3  -1  422.16   27.30 
  -8  -3  -1  476.75   31.10 
  -8   3  -1  408.56   29.00 
   8   3   1  443.36   29.20 
  -8   3  -1  460.75   25.40 
  -8   3  -1  439.66   34.60 
   8   3   1  403.86   26.90 
   8   3   1  409.46   23.30 
   8   3   1  482.95   29.10 
  -8   3  -1  457.65   28.20 
   8   3   1  447.06   26.40 
   8   3   1  380.56   26.50 
   8   3   1  403.56   26.40 
   8   3   1  458.65   28.80 
   8   3   1  467.15   32.10 
  -8   3  -1  443.26   26.30 
   8   3   1  488.25   29.40 
  -8   3  -1  437.56   26.90 
   8   3   1  462.85   26.40 
  -8   3  -1  462.15   25.70 
  -8   3  -1  435.06   26.90 
   8   3   1  437.26   30.20 
  -8   3  -1  393.36   28.70 
   8   3   1  504.85   29.40 
  -8   3  -1  476.25   27.50 
  -9  -3  -1  102.39   18.60 
  -9  -3  -1  171.18   20.70 
  -9  -3  -1  122.09   18.40 
  -9  -3  -1  164.88   20.20 
  -9  -3  -1  172.08   20.70 
   9  -3   1  120.49   19.60 
   9  -3   1  143.99   21.90 
  -9  -3  -1  173.88   21.70 
   9  -3   1  132.39   17.70 
   9  -3   1  123.99   16.90 
  -9  -3  -1  156.38   21.40 
  -9  -3  -1  131.79   21.70 
  -9  -3  -1  150.48   20.90 
   9  -3   1  120.89   16.80 
   9  -3   1  139.59   22.00 
  -9  -3  -1  172.28   22.60 
   9  -3   1  133.39   22.50 
  -9  -3  -1  118.49   22.70 
   9  -3   1  140.59   23.20 
  -9  -3  -1  169.28   22.50 
  -9   3  -1  126.99   17.90 
   9   3   1  167.78   21.60 
  -9   3  -1  183.78   21.40 
   9   3   1  149.88   20.30 
  -9   3  -1  132.99   19.60 
   9   3   1  138.39   19.60 
   9   3   1  115.09   19.20 
   9   3   1  130.19   20.20 
  -9   3  -1  154.28   19.50 
  -9   3  -1  159.58   26.20 
   9   3   1  129.79   16.90 
  -9   3  -1  160.98   22.90 
   9   3   1  152.08   23.70 
  -9   3  -1  121.29   19.60 
  -9   3  -1  132.69   18.20 
   9   3   1  135.29   17.40 
   9   3   1  130.39   18.50 
   9   3   1  144.99   19.80 
   9   3   1  188.28   21.50 
  -9  -4   1   85.29   16.00 
   9  -4  -1  115.19   18.90 
  -9  -4   1   88.79   16.30 
  -9  -4   1  120.69   19.70 
   9  -4  -1   98.39   18.70 
  -9  -4   1   94.29   17.60 
  -9  -4   1  122.89   18.10 
   9  -4  -1  124.99   19.90 
   9  -4  -1   85.29   15.40 
  -9  -4   1   85.99   15.70 
   9  -4  -1  135.79   22.10 
  -9  -4   1  126.99   24.40 
   9  -4  -1  133.29   20.80 
   9  -4  -1  124.49   18.70 
  -9  -4   1  132.29   18.90 
   9  -4  -1   97.09   18.40 
  -9  -4   1  145.99   19.80 
   9  -4  -1  112.19   15.50 
  -9  -4   1  107.79   19.50 
   9  -4  -1   80.19   15.20 
  -9  -4   1  128.49   21.40 
  -9   4   1   94.59   15.20 
   9   4  -1  115.89   19.30 
   9   4  -1  111.39   17.20 
   9   4  -1  119.89   18.40 
   9   4  -1   97.39   17.80 
   9   4  -1  108.09   17.50 
   9   4  -1  105.49   16.50 
   9   4  -1   84.89   14.40 
  -9   4   1  129.89   20.30 
   9   4  -1  106.59   17.40 
  -9   4   1   83.29   14.90 
   9   4  -1  100.49   19.30 
  -9   4   1  106.29   16.30 
   9   4  -1  102.69   14.70 
  -9   4   1   98.09   17.40 
   9   4  -1   81.59   15.70 
  -9   4   1  106.69   16.40 
   9   4  -1  134.89   20.40 
   9   4  -1  117.59   20.10 
   9   4  -1  118.29   17.80 
  -8  -4   1  151.08   19.80 
   8  -4  -1  125.09   16.50 
   8  -4  -1  121.79   17.40 
  -8  -4   1  134.79   19.10 
  -8  -4   1  123.89   17.30 
  -8  -4   1  133.09   17.50 
   8  -4  -1  133.79   15.70 
  -8  -4   1  159.58   19.20 
   8  -4  -1  136.19   18.90 
   8  -4  -1  131.19   20.40 
  -8  -4   1  106.09   16.90 
  -8  -4   1  119.29   22.40 
   8  -4  -1  112.69   16.40 
  -8  -4   1  150.78   20.90 
  -8  -4   1  125.79   17.50 
   8  -4  -1  157.28   17.30 
   8  -4  -1  145.39   19.80 
  -8  -4   1  120.49   19.30 
   8  -4  -1  151.18   16.20 
  -8  -4   1  119.29   17.60 
   8  -4  -1  173.48   22.60 
   8  -4  -1  131.59   20.60 
   8  -4  -1  143.09   16.40 
   8   4  -1   97.69   17.00 
   8   4  -1  150.58   18.80 
   8   4  -1  118.69   17.20 
   8   4  -1  120.69   17.40 
   8   4  -1  132.89   17.90 
  -8   4   1  129.89   18.90 
  -8   4   1  139.39   16.90 
   8   4  -1  122.49   15.90 
  -8   4   1  141.49   17.30 
   8   4  -1  127.89   17.50 
  -8   4   1  150.88   17.70 
  -8   4   1  153.38   20.20 
   8   4  -1  122.49   18.30 
   8   4  -1  134.59   20.70 
   8   4  -1  154.18   20.50 
   8   4  -1  136.89   16.40 
   8   4  -1  111.19   16.80 
   8   4  -1  120.19   16.30 
  -8   4   1  137.89   17.30 
   8   4  -1  134.99   19.70 
  -7  -4   1   64.49   12.70 
  -7  -4   1   46.10   10.20 
   7  -4  -1   58.89   11.50 
  -7  -4   1   51.59   11.40 
  -7  -4   1   49.60   10.60 
  -7  -4   1   51.99   10.50 
   7  -4  -1   39.20   10.30 
   7  -4  -1   25.00    7.00 
   7  -4  -1   60.59   12.90 
   7  -4  -1   41.00   10.30 
   7  -4  -1   39.00    8.00 
  -7  -4   1   33.40   11.60 
  -7  -4   1   47.70   11.30 
   7  -4  -1   40.80   11.40 
  -7  -4   1   49.70   10.10 
   7  -4  -1   46.20   10.60 
  -7  -4   1   47.60    9.80 
  -7  -4   1   36.80    9.20 
   7  -4  -1   40.90    9.50 
  -7  -4   1   74.09    9.70 
   7  -4  -1   65.99   12.30 
  -7  -4   1   47.40   11.70 
  -7  -4   1   46.90    9.50 
  -7  -4   1   34.70    9.30 
   7   4  -1   33.20    9.60 
   7   4  -1   49.70   11.10 
   7   4  -1   41.90    9.80 
   7   4  -1   51.69   10.50 
   7   4  -1   45.20   10.10 
   7   4  -1   39.10    9.70 
  -7   4   1   56.49   11.30 
   7   4  -1   42.80   10.70 
  -7   4   1   62.69   10.80 
  -7   4   1   45.40    9.60 
   7   4  -1   27.00    8.20 
  -7   4   1   44.50    9.20 
  -7   4   1   45.90    9.10 
   7   4  -1   50.19   12.10 
  -7   4   1   47.80    7.90 
   7   4  -1   45.50   11.20 
  -7   4   1   58.99   11.80 
   7   4  -1   38.90    9.60 
   7   4  -1   50.19    9.60 
   7   4  -1   47.00    9.50 
   7   4  -1   45.90   11.60 
   7   4  -1   54.69   11.30 
  -6  -4   1   72.69   11.80 
   6  -4  -1   54.09   12.00 
  -6  -4   1   65.09    9.20 
   6  -4  -1   59.69   11.30 
   6  -4  -1   69.29    8.80 
  -6  -4   1   51.79   10.20 
  -6  -4   1   58.29   10.00 
  -6  -4   1   61.49    9.70 
   6  -4  -1   69.69    7.50 
  -6  -4   1   69.29   11.70 
   6  -4  -1   66.59   10.20 
   6  -4  -1   74.09   12.10 
   6  -4  -1   58.89   11.50 
  -6  -4   1   67.69   10.70 
   6  -4  -1   70.59    8.10 
  -6  -4   1   70.39   11.80 
  -6  -4   1   62.69   11.90 
  -6  -4   1   75.89   11.50 
  -6  -4   1   80.09   13.10 
  -6  -4   1   60.29   13.70 
   6  -4  -1   81.19   10.50 
  -6  -4   1   63.09   10.50 
   6  -4  -1   68.09   11.60 
   6  -4  -1   48.90   10.70 
   6  -4  -1   76.49   11.50 
  -6  -4   1   58.19   11.20 
   6  -4  -1   59.79    6.20 
   6  -4  -1   74.19   10.10 
   6  -4  -1   64.39   11.80 
   6   4  -1   69.09   11.20 
   6   4  -1   65.59   11.30 
  -6   4   1   70.29    9.90 
   6   4  -1   70.79   12.40 
  -6   4   1   60.09    9.40 
   6   4  -1   60.59   10.40 
   6   4  -1   38.20   10.00 
   6   4  -1   60.69   11.30 
   6   4  -1   38.40    8.90 
  -6   4   1   69.69   10.90 
  -6   4   1   56.79   10.80 
   6   4  -1   58.39   10.90 
  -6   4   1   59.69    8.80 
  -6   4   1   53.59    9.70 
  -6   4   1   60.09    8.30 
   6   4  -1   68.89   11.40 
   6   4  -1   50.89    9.30 
  -6   4   1   54.59    9.50 
  -6   4   1   88.29   12.40 
   6   4  -1   77.19   13.40 
  -6   4   1   57.69    9.60 
   6   4  -1   78.99   12.30 
  -6   4   1   64.39   11.20 
   6   4  -1   56.09   10.80 
  -6   4   1   61.79   10.10 
  -6   4   1   52.99    9.10 
   6   4  -1   58.19    8.20 
   5  -4  -1  192.68   15.70 
  -5  -4   1  186.58   15.50 
   5  -4  -1  237.38   14.60 
  -5  -4   1  193.18   14.30 
   5  -4  -1  222.68   18.80 
  -5  -4   1  222.08   15.00 
   5  -4  -1  218.88   16.70 
   5  -4  -1  253.67   17.20 
  -5  -4   1  180.98   15.20 
   5  -4  -1  238.78   12.50 
   5  -4  -1  209.28   12.40 
  -5  -4   1  218.88   16.40 
  -5  -4   1  224.58   16.50 
   5  -4  -1  211.88   17.00 
  -5  -4   1  230.78   17.50 
  -5  -4   1  204.08   13.90 
   5  -4  -1  233.98   10.80 
  -5  -4   1  181.38   14.00 
  -5  -4   1  225.88   17.20 
  -5  -4   1  233.28   15.70 
  -5  -4   1  199.48   16.70 
   5  -4  -1  220.58    7.70 
   5  -4  -1  206.68   11.50 
   5  -4  -1  235.98   17.40 
   5  -4  -1  195.98   15.00 
  -5  -4   1  218.08   14.60 
   5  -4  -1  199.38   16.80 
   5  -4  -1  221.78    8.20 
   5  -4  -1  220.98   11.00 
  -5  -4   1  218.78   11.60 
   5  -4  -1  232.18   12.90 
   5   4  -1  216.48   17.00 
   5   4  -1  221.18   13.40 
   5   4  -1  227.18   16.50 
  -5   4   1  238.48   16.10 
  -5   4   1  221.38   15.10 
  -5   4   1  201.58   15.70 
   5   4  -1  219.68   16.00 
   5   4  -1  197.68   15.50 
   5   4  -1  230.78   17.60 
   5   4  -1  247.68   17.20 
  -5   4   1  234.28   16.10 
  -5   4   1  234.08   10.70 
   5   4  -1  219.28   16.60 
  -5   4   1  213.88   13.00 
  -5   4   1  188.48   13.40 
   5   4  -1  258.47   17.60 
  -5   4   1  234.68   14.50 
  -5   4   1  237.08   12.10 
   5   4  -1  233.18   16.00 
   5   4  -1  202.38   15.20 
  -5   4   1  217.98   15.80 
  -5   4   1  222.88   14.40 
   5   4  -1  196.68   15.90 
  -5   4   1  217.38   14.90 
   5   4  -1  173.58   17.90 
  -5   4   1  215.58   14.40 
   5   4  -1  216.58   11.90 
   5   4  -1  202.58   17.60 
  -4  -4   1  146.89    8.10 
   4  -4  -1  143.39   14.70 
  -4  -4   1  155.48   13.00 
  -4  -4   1  160.38   12.20 
  -4  -4   1  156.88   15.40 
   4  -4  -1  147.49   11.00 
   4  -4  -1  166.08   13.00 
  -4  -4   1  164.38   13.70 
   4  -4  -1  161.88   13.30 
  -4  -4   1  145.69   10.80 
  -4  -4   1  173.88   11.70 
   4  -4  -1  138.99   14.20 
   4  -4  -1  183.08   14.50 
   4  -4  -1  156.88   17.40 
  -4  -4   1  161.78    7.60 
  -4  -4   1  160.38   13.00 
  -4  -4   1  158.58   10.70 
   4  -4  -1  150.28    8.90 
  -4  -4   1  161.28   13.10 
  -4  -4   1  153.18   11.50 
   4  -4  -1  154.38    9.80 
  -4  -4   1  136.39   10.20 
   4  -4  -1  154.98   10.00 
   4  -4  -1  153.78   12.70 
  -4  -4   1  153.48   12.50 
  -4  -4   1  170.48   14.20 
   4  -4  -1  147.99    8.60 
  -4  -4   1  146.69   11.70 
   4  -4  -1  152.38    8.30 
   4  -4  -1  168.78   10.00 
   4  -4  -1  152.38   13.50 
  -4   4   1  162.48   12.00 
  -4   4   1  142.99   10.10 
   4   4  -1  132.59   15.20 
   4   4  -1  142.49    8.60 
  -4   4   1  157.58   11.80 
  -4   4   1  148.09   12.10 
   4   4  -1  180.48   14.10 
   4   4  -1  131.29   13.80 
  -4   4   1  145.49   10.60 
  -4   4   1  150.78   10.90 
  -4   4   1  150.38   10.50 
  -4   4   1  170.08   11.90 
  -4   4   1  154.78   11.60 
   4   4  -1  150.28   14.80 
   4   4  -1  171.08   12.90 
  -4   4   1  139.79    8.60 
  -4   4   1  152.78   12.80 
   4   4  -1  165.38   13.50 
   4   4  -1  168.08   13.30 
  -4   4   1  179.08   13.60 
   4   4  -1  164.08   12.90 
  -4   4   1  155.68   10.80 
   4   4  -1  170.48   13.20 
   4   4  -1  160.78   12.40 
   4   4  -1  132.79   14.30 
   4   4  -1  136.69   10.30 
   4   4  -1  145.29   14.50 
  -4   4   1  159.18   12.60 
  -4   4   1  169.88   10.90 
   4   4  -1  139.29   13.90 
  -3  -4   1   70.09    7.30 
   3  -4  -1   56.29    6.30 
  -3  -4   1   64.39    9.10 
   3  -4  -1   64.69    9.90 
   3  -4  -1   71.69    7.80 
  -3  -4   1   71.59    9.60 
   3  -4  -1   75.49    9.10 
  -3  -4   1   83.29    5.70 
  -3  -4   1   53.69    6.60 
   3  -4  -1   78.69    5.90 
   3  -4  -1   64.09    6.60 
  -3  -4   1   71.59    8.00 
  -3  -4   1   61.39    5.90 
   3  -4  -1   75.99    7.20 
   3  -4  -1   71.89    9.90 
  -3  -4   1   79.59   10.20 
   3  -4  -1   87.29   11.80 
  -3  -4   1   65.79    8.60 
  -3  -4   1   75.89    9.90 
  -3  -4   1   68.29    4.60 
  -3  -4   1   68.19    9.60 
   3  -4  -1   60.29    7.00 
   3  -4  -1   70.99   10.20 
  -3  -4   1   69.69    8.00 
   3  -4  -1   63.49    4.80 
  -3  -4   1   69.99    9.70 
   3  -4  -1   57.59    6.60 
  -3  -4   1   78.29    6.30 
   3  -4  -1   77.39    6.00 
   3  -4  -1   70.69    4.40 
   3  -4  -1   63.49    9.70 
  -3  -4   1   70.79    8.00 
   3  -4  -1   69.09    9.40 
  -3  -4   1   71.79    9.40 
   3   4  -1   61.69    8.90 
   3   4  -1  108.79   11.70 
   3   4  -1   74.79    9.60 
  -3   4   1   60.69    8.70 
   3   4  -1   73.39    9.30 
   3   4  -1   62.69    9.10 
   3   4  -1   61.29    8.90 
  -3   4   1   60.79    8.50 
   3   4  -1   67.09   10.10 
  -3   4   1   58.09    8.60 
   3   4  -1   59.59    8.60 
  -3   4   1   62.79    8.00 
  -3   4   1   75.99    8.70 
   3   4  -1   62.29    6.60 
   3   4  -1   63.99    9.40 
  -3   4   1   76.79    9.50 
  -3   4   1   74.79    9.10 
  -3   4   1   70.29    7.80 
  -3   4   1   76.29   11.10 
  -3   4   1   59.89    8.40 
   3   4  -1   66.59    8.00 
   3   4  -1   60.99    9.10 
   3   4  -1   70.49    9.90 
   3   4  -1   60.99    6.40 
   3   4  -1   70.09    9.10 
  -3   4   1   79.09    8.60 
  -3   4   1   79.99    8.10 
  -3   4   1   68.09    6.90 
  -3   4   1   75.19    7.40 
   2  -4  -1   33.50    6.60 
  -2  -4   1   27.90    5.90 
  -2  -4   1   32.00    5.10 
  -2  -4   1   31.20    6.10 
  -2  -4   1   44.50    7.40 
  -2  -4   1   37.40    6.50 
   2  -4  -1   37.80    4.20 
   2  -4  -1   32.60    5.90 
   2  -4  -1   45.40    7.00 
   2  -4  -1   51.09    5.20 
  -2  -4   1   38.30    7.10 
   2  -4  -1   34.70    4.30 
  -2  -4   1   28.30    6.20 
   2  -4  -1   29.90    6.90 
   2  -4  -1   40.50    5.80 
   2  -4  -1   33.80    5.20 
  -2  -4   1   41.50    6.00 
   2  -4  -1   41.40    4.60 
  -2  -4   1   34.90    6.40 
   2  -4  -1   41.50    4.40 
   2  -4  -1   36.00    4.80 
   2  -4  -1   34.70    5.70 
   2  -4  -1   38.90    6.30 
  -2  -4   1   36.30    6.30 
   2  -4  -1   44.20    5.10 
   2  -4  -1   41.60    7.00 
   2  -4  -1   55.09    8.40 
  -2  -4   1   38.50    4.30 
  -2  -4   1   40.70    7.20 
  -2  -4   1   35.90    4.80 
   2  -4  -1   44.90    7.90 
  -2  -4   1   32.20    5.20 
  -2  -4   1   34.70    4.30 
  -2  -4   1   45.80    7.50 
   2  -4  -1   50.79    5.80 
  -2  -4   1   36.20    6.70 
   2  -4  -1   36.30    7.70 
  -2  -4   1   31.30    4.90 
   2  -4  -1   36.40    5.60 
   2  -4  -1   41.10    6.00 
   2   4  -1   33.50    5.90 
   2   4  -1   36.00    6.00 
  -2   4   1   41.30    6.10 
  -2   4   1   35.70    6.00 
   2   4  -1   53.89    6.90 
   2   4  -1   37.90    6.60 
  -2   4   1   26.40    4.80 
  -2   4   1   42.10    6.90 
  -2   4   1   31.10    4.70 
  -2   4   1   37.90    7.00 
   2   4  -1   27.00    5.70 
   2   4  -1   42.60    7.00 
  -2   4   1   38.20    8.20 
  -2   4   1   39.50    3.80 
  -2   4   1   45.10    7.10 
  -2   4   1   40.30    7.00 
  -2   4   1   37.30    3.10 
   2   4  -1   34.30    6.60 
   2   4  -1   32.20    6.30 
  -2   4   1   38.90    6.10 
  -2   4   1   32.50    5.20 
  -2   4   1   28.20    4.60 
   2   4  -1   39.10    6.60 
  -2   4   1   36.30    5.80 
  -2   4   1   39.80    4.40 
   2   4  -1   40.90    4.50 
  -2   4   1   36.10    4.00 
   2   4  -1   36.60    6.90 
   2   4  -1   30.70    4.00 
  -2   4   1   37.40    6.60 
   2   4  -1   31.90    6.80 
   2   4  -1   23.60    5.50 
  -2   4   1   50.09    8.50 
   2   4  -1   36.60    6.40 
   2   4  -1   43.40    7.50 
  -2   4   1   39.90    6.40 
  -1  -4   1   21.70    3.10 
  -1  -4   1   35.10    6.40 
  -1  -4   1   27.10    5.40 
  -1  -4   1   26.80    4.30 
  -1  -4   1   26.60    5.00 
   1  -4  -1   26.90    5.10 
   1  -4  -1   25.60    5.80 
   1  -4  -1   18.50    4.50 
  -1  -4   1   30.00    5.70 
   1  -4  -1   32.50    4.40 
  -1  -4   1   20.70    4.80 
  -1  -4   1   26.70    4.80 
   1  -4  -1   24.60    4.20 
  -1  -4   1   27.40    3.10 
   1  -4  -1   33.60    5.80 
  -1  -4   1   26.50    5.50 
  -1  -4   1   23.50    5.30 
   1  -4  -1   29.70    5.60 
  -1  -4   1   25.00    5.00 
  -1  -4   1   29.60    4.70 
  -1  -4   1   24.30    5.00 
   1  -4  -1   24.30    4.70 
   1  -4  -1   23.80    5.10 
   1  -4  -1   19.20    4.90 
   1  -4  -1   30.60    2.80 
  -1  -4   1   22.00    2.20 
  -1  -4   1   21.90    5.30 
   1  -4  -1   26.50    2.50 
  -1  -4   1   25.10    5.10 
   1  -4  -1   24.50    4.50 
  -1  -4   1   26.00    5.40 
   1  -4  -1   22.60    4.00 
   1  -4  -1   21.00    4.30 
  -1   4   1   25.70    3.90 
   1   4  -1   33.30    6.20 
   1   4  -1   28.70    5.50 
   1   4  -1   27.80    5.40 
  -1   4   1   41.20    9.10 
  -1   4   1   21.50    4.10 
   1   4  -1   23.10    5.10 
  -1   4   1   21.40    5.20 
  -1   4   1   30.70    8.30 
  -1   4   1   23.80    2.20 
  -1   4   1   26.00    6.20 
  -1   4   1   20.90    5.00 
  -1   4   1   18.60    6.00 
  -1   4   1   32.70    6.10 
   1   4  -1   25.10    4.80 
   1   4  -1   31.50    6.50 
   1   4  -1   17.00    4.40 
   1   4  -1   20.80    5.10 
   1   4  -1   22.90    5.40 
  -1   4   1   28.90    5.20 
  -1   4   1   37.20    8.60 
  -1   4   1   27.50    7.30 
  -1   4   1   19.00    4.40 
   1   4  -1   21.70    4.80 
   1   4  -1   21.30    4.90 
  -1   4   1   29.40    5.50 
  -1   4   1   31.30    5.60 
  -1   4   1   28.40    7.70 
   1   4  -1   25.50    2.40 
   1   4  -1   22.20    5.00 
  -1   4   1   28.10    2.70 
  -1   4   1   21.20    4.10 
  -1   4   1   21.40    6.00 
   1   4  -1   32.70    5.80 
  -1   4   1   16.80    4.50 
  -1   4   1   26.40    4.90 
  -1   4   1   21.80    3.90 
   1   4  -1   27.30    2.90 
  -1   4   1   26.20    3.50 
  -1   4   1   25.60    7.60 
   0  -4  -1  196.98   12.40 
   0  -4   1  187.88   10.00 
   0  -4   1  203.88   11.30 
   0  -4  -1  190.98   12.20 
   0  -4  -1  190.68   11.80 
   0  -4   1  208.68   11.40 
   0  -4  -1  206.68   12.20 
   0  -4   1  215.88   12.10 
   0  -4  -1  226.18   13.30 
   0  -4   1  189.08   11.80 
   0  -4  -1  192.58   10.50 
   0  -4  -1  188.28   11.70 
   0  -4   1  205.78   11.70 
   0  -4  -1  195.58   12.50 
   0  -4   1  196.18   12.00 
   0  -4  -1  202.08   11.40 
   0  -4   1  206.08   12.80 
   0  -4   1  194.88   12.50 
   0  -4   1  167.68   11.40 
   0  -4  -1  198.58   12.30 
   0  -4  -1  205.88   10.90 
   0  -4  -1  183.98   10.60 
   0  -4   1  200.88   12.30 
   0  -4  -1  189.38   11.50 
   0  -4  -1  203.78   10.90 
   0  -4  -1  198.18   12.00 
   0  -4   1  214.98   12.00 
   0  -4   1  197.08   12.90 
   0  -4  -1  196.78   11.70 
   0   4  -1  227.58   13.40 
   0   4  -1  211.98   12.30 
   0   4   1  210.88   12.30 
   0   4   1  171.48   10.40 
   0   4   1  218.48   13.70 
   0   4   1  178.38   10.80 
   0   4   1  185.98   11.40 
   0   4   1  197.58   10.00 
   0   4   1  205.28   12.90 
   0   4   1  210.88   12.60 
   0   4  -1  178.88   11.30 
   0   4   1  227.18   14.90 
   0   4  -1  215.58   12.20 
   0   4   1  213.08   12.60 
   0   4   1  198.68   12.00 
   0   4  -1  180.78   10.90 
   0   4  -1  215.08   15.90 
   0   4   1  196.68   11.50 
   0   4  -1  226.48   11.70 
   0   4   1  188.98   14.20 
   0   4   1  210.28   14.40 
   0   4  -1  201.38   11.80 
   0   4  -1  191.78   11.50 
   0   4  -1  179.98   12.10 
   0   4  -1  209.38   10.70 
   0   4  -1  189.08   12.30 
   0   4  -1  226.58   13.70 
   0   4   1  189.78   12.90 
   0   4   1  196.88   12.20 
   0   4  -1  208.28   12.10 
   0   4  -1  205.78   11.10 
   0   4  -1  197.08   12.20 
   0   4  -1  218.98   12.60 
   0   4   1  200.18   13.70 
   0   4  -1  197.68   14.80 
   0   4  -1  199.18   13.00 
   1  -4   1  481.65   19.90 
  -1  -4  -1  490.45   16.00 
  -1  -4  -1  477.05   22.00 
   1  -4   1  455.05   14.60 
   1  -4   1  482.05   19.20 
  -1  -4  -1  526.15   21.50 
   1  -4   1  427.36   21.60 
  -1  -4  -1  494.75   16.30 
  -1  -4  -1  493.65   19.90 
  -1  -4  -1  502.35   22.40 
   1  -4   1  431.96   20.80 
   1  -4   1  463.55   19.20 
  -1  -4  -1  467.15   20.90 
  -1  -4  -1  494.15   21.40 
  -1  -4  -1  500.65   21.80 
  -1  -4  -1  478.45   22.20 
   1  -4   1  508.35   19.30 
   1  -4   1  442.76   17.60 
   1  -4   1  472.75   22.70 
  -1  -4  -1  460.55   21.10 
  -1  -4  -1  491.45   21.30 
   1  -4   1  503.65   18.40 
   1  -4   1  489.65   19.60 
   1  -4   1  484.45   20.70 
   1  -4   1  465.75   18.20 
  -1  -4  -1  454.25   19.30 
  -1  -4  -1  472.75   20.40 
   1  -4   1  481.25   17.10 
  -1  -4  -1  491.35   17.80 
   1  -4   1  503.95   22.10 
  -1  -4  -1  471.25   21.00 
  -1  -4  -1  471.55   19.40 
  -1  -4  -1  497.65   21.50 
  -1  -4  -1  511.35   20.70 
   1  -4   1  478.55   19.60 
  -1   4  -1  483.55   17.90 
   1   4   1  499.65   20.90 
  -1   4  -1  478.65   16.10 
  -1   4  -1  493.85   20.10 
  -1   4  -1  499.15   16.20 
   1   4   1  488.45   20.70 
  -1   4  -1  380.26   22.80 
  -1   4  -1  472.05   20.10 
  -1   4  -1  477.85   19.60 
   1   4   1  503.85   22.20 
   1   4   1  494.45   19.80 
   1   4   1  466.35   20.60 
  -1   4  -1  443.46   21.30 
  -1   4  -1  479.25   18.20 
  -1   4  -1  495.45   19.90 
  -1   4  -1  445.56   19.80 
  -1   4  -1  483.95   18.50 
   1   4   1  483.35   21.70 
  -1   4  -1  527.95   22.80 
  -1   4  -1  442.26   21.90 
   1   4   1  421.46   20.50 
  -1   4  -1  459.15   27.50 
  -1   4  -1  507.25   21.30 
   1   4   1  479.45   21.50 
  -1   4  -1  473.65   19.70 
  -1   4  -1  436.86   22.40 
   1   4   1  503.35   22.30 
  -1   4  -1  404.16   26.70 
  -1   4  -1  483.45   22.00 
  -1   4  -1  469.25   19.20 
  -1   4  -1  492.85   18.20 
  -1   4  -1  462.85   21.10 
  -1   4  -1  521.65   22.50 
   1   4   1  492.05   21.50 
   1   4   1  488.35   21.90 
  -1   4  -1  492.55   19.70 
   1   4   1  461.15   22.00 
   2  -4   1  930.51   28.10 
   2  -4   1  876.41   36.00 
   2  -4   1  877.81   31.50 
  -2  -4  -1  953.30   31.10 
  -2  -4  -1  978.00   30.30 
  -2  -4  -1  926.01   36.30 
   2  -4   1  921.41   28.20 
   2  -4   1  911.01   35.60 
   2  -4   1  928.41   32.40 
   2  -4   1  939.01   29.40 
  -2  -4  -1  889.61   31.60 
   2  -4   1  876.41   30.80 
   2  -4   1  922.81   28.70 
   2  -4   1  918.71   28.70 
  -2  -4  -1  966.90   36.80 
   2  -4   1  966.40   30.90 
   2  -4   1  922.91   31.20 
  -2  -4  -1  912.41   35.00 
   2  -4   1  914.51   33.00 
  -2  -4  -1  946.41   32.30 
  -2  -4  -1  890.61   34.30 
  -2  -4  -1  970.70   35.50 
   2  -4   1  907.31   30.80 
   2  -4   1  918.11   37.40 
  -2  -4  -1  928.71   29.80 
  -2  -4  -1  923.51   36.00 
  -2  -4  -1  883.41   34.60 
   2  -4   1  904.31   35.10 
  -2  -4  -1  903.11   33.40 
   2  -4   1  923.91   31.40 
   2  -4   1  841.82   39.40 
   2  -4   1  948.11   28.50 
   2  -4   1  893.41   31.00 
  -2  -4  -1  895.11   31.00 
  -2  -4  -1  943.11   33.40 
  -2  -4  -1  882.01   31.20 
  -2  -4  -1  899.41   34.00 
  -2  -4  -1  889.81   35.00 
   2   4   1  990.70   36.70 
   2   4   1  913.01   34.80 
   2   4   1  966.80   36.60 
   2   4   1  907.61   28.40 
  -2   4  -1  960.90   30.50 
  -2   4  -1  901.91   34.50 
  -2   4  -1  910.81   28.80 
   2   4   1  940.81   34.40 
   2   4   1  903.51   31.00 
  -2   4  -1  903.01   39.20 
  -2   4  -1  956.50   31.30 
   2   4   1  924.41   34.20 
  -2   4  -1  964.40   37.80 
  -2   4  -1  962.70   35.10 
   2   4   1  895.61   34.10 
  -2   4  -1  950.00   35.10 
   2   4   1  896.71   34.90 
   2   4   1  933.31   35.20 
  -2   4  -1  998.20   35.80 
   2   4   1  882.11   34.40 
   2   4   1  931.61   29.90 
  -2   4  -1  864.41   34.70 
  -2   4  -1  919.91   28.50 
   2   4   1  972.40   35.30 
  -2   4  -1  945.71   31.30 
  -2   4  -1  924.31   32.40 
  -2   4  -1  942.01   31.60 
  -2   4  -1  947.91   29.00 
   2   4   1  846.42   34.50 
   2   4   1  896.21   33.40 
  -2   4  -1  949.51   32.20 
  -2   4  -1  942.91   30.70 
  -2   4  -1  947.61   32.90 
  -2   4  -1  925.91   31.10 
  -2   4  -1  916.21   33.50 
   2   4   1  927.61   29.30 
  -2   4  -1  952.70   29.90 
   2   4   1  919.61   34.40 
  -3  -4  -1   99.39   11.50 
   3  -4   1   75.59    5.90 
   3  -4   1   96.69    5.30 
   3  -4   1   87.79    9.00 
   3  -4   1   78.99   10.10 
  -3  -4  -1   87.49    6.70 
   3  -4   1   83.49    7.10 
   3  -4   1   98.79   10.50 
  -3  -4  -1   86.39   10.60 
   3  -4   1   75.69   10.60 
   3  -4   1   87.99    6.10 
  -3  -4  -1   96.29    7.60 
  -3  -4  -1   86.99   10.90 
  -3  -4  -1   87.59   10.60 
   3  -4   1   95.49    7.30 
  -3  -4  -1   85.09   11.10 
  -3  -4  -1   80.59    9.20 
   3  -4   1   82.49   11.90 
   3  -4   1   84.39   11.00 
  -3  -4  -1   80.19   10.60 
   3  -4   1  108.79   10.30 
   3  -4   1   81.39    9.10 
  -3  -4  -1   83.49   11.10 
  -3  -4  -1   88.99    7.00 
   3  -4   1   76.99    6.30 
   3  -4   1   90.09    4.90 
   3  -4   1   88.19    6.40 
   3  -4   1  105.09   11.00 
  -3  -4  -1   92.29    6.50 
   3  -4   1   82.59   12.70 
  -3  -4  -1   90.29    6.20 
  -3  -4  -1   71.79    9.60 
  -3  -4  -1   85.59   10.60 
  -3  -4  -1   83.79   10.00 
  -3  -4  -1   80.09    9.50 
  -3  -4  -1   84.29    7.80 
   3  -4   1   87.09    6.30 
   3  -4   1   90.19    9.50 
  -3  -4  -1   85.89    8.50 
   3  -4   1   81.39    9.30 
   3  -4   1   83.09    6.20 
  -3   4  -1   81.29   10.40 
   3   4   1   73.79    9.90 
  -3   4  -1   69.09    9.00 
  -3   4  -1   92.19   11.60 
   3   4   1   73.39    9.80 
   3   4   1   70.69    9.70 
   3   4   1   86.19   10.50 
   3   4   1   80.29    9.00 
  -3   4  -1   81.09    6.40 
   3   4   1   68.99    9.50 
  -3   4  -1   85.29    6.60 
   3   4   1   78.69   10.40 
  -3   4  -1   86.69    6.90 
  -3   4  -1   92.79   10.50 
   3   4   1   88.69   10.70 
  -3   4  -1   89.49   11.60 
  -3   4  -1   93.39    7.00 
  -3   4  -1   86.89    7.20 
   3   4   1   88.09   11.50 
   3   4   1   82.99   10.80 
   3   4   1   72.19    9.30 
   3   4   1   79.59   10.00 
   3   4   1   84.19    9.80 
  -3   4  -1   74.89   11.80 
  -3   4  -1   87.39    9.10 
   3   4   1   60.99    8.60 
   3   4   1   84.19    6.50 
  -3   4  -1   83.29   11.60 
  -3   4  -1   70.39    7.50 
   4  -4   1  152.28   11.40 
   4  -4   1  156.18    7.50 
   4  -4   1  133.39    7.40 
   4  -4   1  130.29   15.10 
  -4  -4  -1  137.09   10.40 
  -4  -4  -1  136.39   14.60 
   4  -4   1  147.89    5.90 
  -4  -4  -1  146.79   14.70 
  -4  -4  -1  160.28   10.50 
  -4  -4  -1  149.39    8.10 
   4  -4   1  129.69   10.80 
   4  -4   1  152.38    9.50 
   4  -4   1  143.69    5.90 
  -4  -4  -1  145.89   11.80 
  -4  -4  -1  143.49   12.20 
  -4  -4  -1  136.59   14.00 
   4  -4   1  131.99   16.00 
  -4  -4  -1  134.19   14.50 
  -4  -4  -1  144.89   15.40 
  -4  -4  -1  133.79   14.40 
   4  -4   1  144.39   10.10 
   4  -4   1  133.69   10.50 
  -4  -4  -1  144.79   10.60 
  -4  -4  -1  137.69    8.20 
  -4  -4  -1  144.39   15.10 
  -4  -4  -1  142.99   14.70 
   4  -4   1  138.29    9.10 
   4  -4   1  187.68   18.80 
  -4  -4  -1  150.58   11.70 
   4  -4   1  137.49   15.60 
   4  -4   1  148.79    9.10 
   4  -4   1  143.59    8.00 
   4  -4   1  165.98   11.40 
   4  -4   1  150.68    8.20 
  -4   4  -1  167.08    9.50 
  -4   4  -1  172.68   17.90 
   4   4   1  149.49   14.40 
  -4   4  -1  154.28   10.70 
  -4   4  -1  131.29    9.70 
   4   4   1  129.59   10.80 
   4   4   1  144.09   14.10 
   4   4   1  140.79   14.30 
   4   4   1  133.69   14.20 
  -4   4  -1  134.49   14.40 
   4   4   1  135.29   14.20 
   4   4   1  169.88   13.50 
   4   4   1  128.59   14.40 
  -4   4  -1  142.59   16.00 
   4   4   1  135.49   13.90 
  -4   4  -1  143.99   10.00 
  -4   4  -1  143.79   11.10 
  -4   4  -1  140.69   15.00 
  -4   4  -1  141.79   15.60 
  -4   4  -1  153.68   10.30 
  -4   4  -1  151.18   10.00 
   4   4   1  156.98   15.20 
   4   4   1  149.88   15.50 
   4   4   1  143.59   14.60 
  -4   4  -1  127.89   13.50 
   4   4   1  158.58   16.60 
   4   4   1  161.88   13.00 
  -4   4  -1  147.49   10.10 
  -5  -4  -1  230.08   17.60 
  -5  -4  -1  290.47   16.60 
   5  -4   1  284.67   21.40 
   5  -4   1  300.87   18.00 
  -5  -4  -1  260.97   18.50 
  -5  -4  -1  236.68   18.20 
  -5  -4  -1  270.77   16.40 
   5  -4   1  267.87   14.70 
   5  -4   1  266.57   14.30 
  -5  -4  -1  293.87   18.10 
   5  -4   1  299.87   16.90 
  -5  -4  -1  265.87   15.90 
  -5  -4  -1  272.47   16.70 
  -5  -4  -1  260.57   18.50 
   5  -4   1  262.97   16.00 
  -5  -4  -1  262.77   16.70 
   5  -4   1  268.17   20.60 
  -5  -4  -1  268.77   16.90 
   5  -4   1  261.47   10.80 
   5  -4   1  271.77    9.10 
  -5  -4  -1  300.67   20.50 
   5  -4   1  279.67   20.80 
   5  -4   1  279.67   19.70 
  -5  -4  -1  261.87   18.10 
   5  -4   1  290.07   10.00 
  -5  -4  -1  252.47   18.30 
   5  -4   1  303.07   17.60 
  -5   4  -1  271.27   16.40 
   5   4   1  275.27   19.30 
  -5   4  -1  268.17   18.40 
  -5   4  -1  281.57   20.10 
   5   4   1  261.27   18.40 
  -5   4  -1  253.57   16.80 
  -5   4  -1  264.87   15.60 
   5   4   1  282.97   18.40 
  -5   4  -1  282.47   16.20 
  -5   4  -1  265.07   10.20 
   5   4   1  243.38   17.90 
   5   4   1  251.27   17.80 
   5   4   1  272.07   20.40 
   5   4   1  284.87   17.90 
   5   4   1  264.07   18.20 
  -5   4  -1  289.37   16.00 
   5   4   1  234.78   18.10 
  -5   4  -1  265.57   18.20 
   5   4   1  286.57   18.10 
  -5   4  -1  257.47   14.60 
  -5   4  -1  269.77   16.10 
   5   4   1  282.67   18.70 
   5   4   1  261.17   18.90 
  -5   4  -1  246.38   18.90 
   5   4   1  252.67   16.00 
  -5   4  -1  252.67   18.80 
   5   4   1  297.77   19.80 
  -6  -4  -1  627.14   33.30 
  -6  -4  -1  697.73   31.90 
  -6  -4  -1  637.64   29.10 
   6  -4   1  676.13   36.40 
   6  -4   1  653.83   26.90 
   6  -4   1  717.73   31.80 
   6  -4   1  691.83   36.70 
   6  -4   1  696.43   32.30 
   6  -4   1  664.93   30.00 
  -6  -4  -1  645.94   30.80 
   6  -4   1  703.83   34.80 
  -6  -4  -1  634.74   38.40 
  -6  -4  -1  649.54   32.40 
  -6  -4  -1  631.24   33.80 
   6  -4   1  703.63   37.40 
   6  -4   1  649.74   32.30 
  -6  -4  -1  605.84   32.30 
  -6  -4  -1  660.43   33.50 
  -6  -4  -1  668.93   35.10 
  -6  -4  -1  661.33   31.90 
   6  -4   1  627.84   27.80 
  -6  -4  -1  653.33   29.60 
  -6  -4  -1  628.14   33.00 
   6  -4   1  656.73   29.20 
  -6  -4  -1  683.63   30.40 
   6   4   1  641.94   35.80 
   6   4   1  644.84   34.30 
   6   4   1  677.93   34.10 
   6   4   1  651.63   32.40 
  -6   4  -1  613.44   29.40 
  -6   4  -1  644.24   33.50 
  -6   4  -1  707.63   35.40 
   6   4   1  653.63   34.30 
  -6   4  -1  681.43   30.90 
   6   4   1  694.23   29.70 
   6   4   1  668.13   32.20 
  -6   4  -1  727.73   27.30 
  -6   4  -1  666.73   30.20 
  -6   4  -1  720.53   34.70 
   6   4   1  712.53   31.70 
   6   4   1  632.34   33.40 
   6   4   1  648.34   32.80 
   6   4   1  692.43   33.70 
   6   4   1  626.84   32.40 
   6   4   1  655.83   33.00 
  -6   4  -1  674.73   33.50 
  -6   4  -1  652.63   32.60 
  -6   4  -1  650.43   29.50 
   6   4   1  662.63   32.10 
   7  -4   1  345.77   21.80 
  -7  -4  -1  408.46   25.00 
  -7  -4  -1  370.56   23.50 
   7  -4   1  311.87   22.60 
  -7  -4  -1  330.27   24.00 
   7  -4   1  329.37   21.60 
  -7  -4  -1  326.77   22.80 
  -7  -4  -1  318.57   25.00 
  -7  -4  -1  347.47   25.00 
   7  -4   1  372.56   28.10 
   7  -4   1  388.06   21.30 
   7  -4   1  360.66   20.70 
   7  -4   1  367.16   27.50 
  -7  -4  -1  371.36   22.60 
   7  -4   1  333.27   18.70 
  -7  -4  -1  357.46   23.30 
  -7  -4  -1  386.66   25.80 
   7  -4   1  320.27   23.10 
   7  -4   1  391.16   28.40 
  -7  -4  -1  381.76   25.20 
   7  -4   1  371.76   23.20 
  -7  -4  -1  318.27   33.30 
  -7  -4  -1  368.26   20.20 
  -7  -4  -1  343.77   24.80 
   7  -4   1  341.57   25.20 
   7   4   1  334.27   25.10 
  -7   4  -1  358.46   21.90 
   7   4   1  391.66   25.10 
   7   4   1  313.27   23.50 
   7   4   1  350.86   21.90 
   7   4   1  359.16   24.30 
   7   4   1  335.67   26.40 
   7   4   1  376.86   20.70 
   7   4   1  366.16   23.40 
   7   4   1  324.87   23.50 
   7   4   1  368.86   23.60 
  -7   4  -1  327.67   22.50 
  -7   4  -1  322.17   21.30 
  -7   4  -1  295.47   23.60 
   7   4   1  358.36   25.00 
  -7   4  -1  361.16   24.30 
   7   4   1  341.77   25.00 
  -7   4  -1  327.27   24.30 
  -7   4  -1  361.46   22.00 
  -7   4  -1  322.87   21.60 
   7   4   1  332.57   23.60 
   7   4   1  365.76   23.90 
  -7   4  -1  369.36   21.50 
  -8  -4  -1 1083.89   51.49 
  -8  -4  -1 1184.48   60.69 
  -8  -4  -1 1126.19   50.19 
   8  -4   1 1113.59   44.80 
  -8  -4  -1 1014.90   51.39 
  -8  -4  -1 1093.49   48.60 
  -8  -4  -1 1152.28   50.89 
   8  -4   1 1096.79   54.79 
  -8  -4  -1 1121.69   49.50 
  -8  -4  -1 1206.08   54.19 
   8  -4   1 1081.89   54.39 
   8  -4   1 1081.99   54.69 
  -8  -4  -1 1072.79   47.10 
  -8  -4  -1 1136.79   54.49 
   8  -4   1 1121.29   50.39 
   8  -4   1 1146.79   48.00 
   8  -4   1 1119.89   50.29 
  -8  -4  -1 1055.19   48.50 
  -8  -4  -1 1087.69   51.09 
   8   4   1 1126.59   52.69 
   8   4   1 1140.69   56.09 
  -8   4  -1 1088.09   47.10 
  -8   4  -1 1063.09   47.60 
   8   4   1 1091.29   50.59 
   8   4   1 1148.39   50.69 
  -8   4  -1 1119.99   49.90 
   8   4   1 1101.09   49.70 
   8   4   1 1120.89   50.99 
   8   4   1 1155.28   51.09 
   8   4   1 1073.39   45.40 
  -8   4  -1 1106.49   52.49 
  -8   4  -1 1120.89   48.10 
   8   4   1 1141.09   54.29 
   8   4   1 1132.89   48.90 
  -8   4  -1 1086.09   46.90 
  -8   4  -1 1054.09   52.19 
   8   4   1 1060.49   50.89 
   8   4   1 1097.79   50.49 
   8   4   1 1097.49   48.30 
   9  -4   1  324.37   35.60 
  -9  -4  -1  320.37   25.60 
  -9  -4  -1  285.07   32.10 
  -9  -4  -1  334.17   25.80 
   9  -4   1  328.67   28.50 
  -9  -4  -1  338.37   25.60 
   9  -4   1  341.97   29.00 
  -9  -4  -1  336.27   25.60 
   9  -4   1  342.17   26.50 
   9  -4   1  293.07   33.40 
  -9  -4  -1  285.07   30.30 
  -9  -4  -1  283.87   22.80 
  -9  -4  -1  317.47   30.90 
   9  -4   1  265.67   23.00 
  -9  -4  -1  316.67   25.00 
  -9  -4  -1  310.87   32.60 
  -9  -4  -1  318.27   26.60 
  -9  -4  -1  322.07   38.60 
   9  -4   1  309.77   22.10 
   9  -4   1  283.77   22.10 
  -9   4  -1  303.77   24.00 
   9   4   1  344.87   34.80 
   9   4   1  303.57   29.80 
   9   4   1  283.67   22.80 
   9   4   1  300.97   33.90 
   9   4   1  324.97   24.00 
   9   4   1  243.18   27.10 
  -9   4  -1  296.17   23.00 
   9   4   1  268.57   28.10 
   9   4   1  296.47   24.00 
  -9   4  -1  313.47   32.90 
   9   4   1  315.57   25.50 
   9   4   1  392.56   29.30 
  -9   4  -1  335.47   24.90 
   9   4   1  296.57   25.20 
   9   4   1  310.17   30.80 
  -9   4  -1  283.57   30.90 
  -9   4  -1  283.47   28.40 
   9  -5  -1  719.63   45.30 
  -9  -5   1  661.43   48.60 
  -9  -5   1  696.53   40.30 
   9  -5  -1  709.33   40.50 
  -9  -5   1  661.73   38.50 
  -9  -5   1  746.93   44.80 
  -9  -5   1  627.44   40.60 
  -9  -5   1  742.23   42.00 
  -9  -5   1  673.53   41.30 
  -9  -5   1  697.03   42.60 
  -9  -5   1  695.53   37.80 
   9  -5  -1  716.93   40.60 
  -9  -5   1  625.44   37.60 
  -9  -5   1  735.03   41.70 
   9  -5  -1  597.04   37.90 
   9  -5  -1  755.12   39.50 
   9  -5  -1  735.83   45.60 
   9  -5  -1  737.73   41.90 
   9   5  -1  614.64   39.70 
   9   5  -1  649.14   38.10 
   9   5  -1  610.24   39.50 
   9   5  -1  666.93   41.60 
  -9   5   1  682.13   37.00 
   9   5  -1  606.14   38.40 
   9   5  -1  704.43   40.00 
   9   5  -1  611.54   38.50 
   9   5  -1  721.33   40.50 
   9   5  -1  659.33   36.00 
   9   5  -1  695.73   37.80 
   9   5  -1  665.03   39.40 
  -9   5   1  665.43   40.20 
  -9   5   1  678.73   36.80 
   9   5  -1  595.84   38.50 
   9   5  -1  678.83   44.30 
  -9   5   1  685.63   40.70 
   9   5  -1  654.63   42.20 
  -8  -5   1   47.00   14.40 
  -8  -5   1   57.79   13.20 
  -8  -5   1   54.29   13.20 
  -8  -5   1   53.59   12.60 
  -8  -5   1   55.49   14.10 
   8  -5  -1   59.19   12.80 
   8  -5  -1   69.99   14.60 
  -8  -5   1   62.29   14.20 
  -8  -5   1   67.49   14.50 
   8  -5  -1   67.59   15.80 
  -8  -5   1   67.29   12.70 
   8  -5  -1   95.99   15.10 
   8  -5  -1   80.29   15.70 
   8  -5  -1   65.59   15.50 
  -8  -5   1   79.09   14.00 
  -8  -5   1   53.39   13.00 
  -8  -5   1   84.39   14.30 
   8  -5  -1   83.89   12.70 
   8  -5  -1   67.59   14.20 
   8   5  -1   65.19   14.90 
  -8   5   1   67.19   12.30 
  -8   5   1   67.89   12.30 
   8   5  -1   81.49   16.20 
   8   5  -1   66.19   14.20 
   8   5  -1   54.39   11.90 
   8   5  -1   64.89   13.90 
   8   5  -1   65.29   13.20 
   8   5  -1   73.39   14.90 
  -8   5   1   68.09   14.30 
   8   5  -1   49.80   11.80 
  -8   5   1   66.29   12.40 
  -8   5   1   66.99   13.80 
   8   5  -1   56.39   13.70 
   8   5  -1   56.39   13.00 
   8   5  -1   56.49   12.70 
   8   5  -1   62.29   13.10 
   8   5  -1   50.89   12.50 
   8   5  -1   49.40   11.60 
  -7  -5   1  732.43   35.20 
  -7  -5   1  767.82   39.00 
   7  -5  -1  721.03   38.20 
  -7  -5   1  751.62   39.20 
  -7  -5   1  779.82   37.20 
   7  -5  -1  750.42   33.30 
  -7  -5   1  742.03   33.50 
   7  -5  -1  749.03   32.70 
  -7  -5   1  721.03   36.00 
   7  -5  -1  762.22   40.00 
  -7  -5   1  646.94   44.00 
  -7  -5   1  698.13   40.00 
   7  -5  -1  695.53   38.00 
   7  -5  -1  716.73   37.90 
  -7  -5   1  764.32   40.40 
  -7  -5   1  746.03   36.90 
   7  -5  -1  738.93   36.40 
   7  -5  -1  827.42   38.80 
  -7  -5   1  843.92   42.30 
  -7  -5   1  828.72   40.80 
   7  -5  -1  693.63   41.60 
  -7  -5   1  780.12   39.50 
   7  -5  -1  731.93   41.30 
  -7   5   1  784.42   35.50 
  -7   5   1  778.22   35.80 
  -7   5   1  768.22   36.50 
   7   5  -1  760.02   42.50 
   7   5  -1  808.72   38.20 
   7   5  -1  774.52   38.60 
   7   5  -1  797.92   41.00 
   7   5  -1  761.52   39.40 
   7   5  -1  772.72   37.10 
   7   5  -1  683.93   36.70 
  -7   5   1  705.13   36.70 
   7   5  -1  677.23   38.10 
   7   5  -1  791.52   39.40 
  -7   5   1  819.52   35.80 
   7   5  -1  672.33   38.60 
   7   5  -1  761.92   41.00 
   7   5  -1  779.02   39.30 
   7   5  -1  791.62   39.10 
  -7   5   1  717.93   37.60 
  -7   5   1  807.02   39.60 
   7   5  -1  792.42   39.70 
  -6  -5   1  326.77   24.90 
  -6  -5   1  407.76   23.00 
   6  -5  -1  396.96   26.40 
  -6  -5   1  349.37   24.10 
   6  -5  -1  415.96   21.10 
  -6  -5   1  354.36   23.00 
  -6  -5   1  424.56   23.70 
  -6  -5   1  403.26   25.40 
   6  -5  -1  420.76   25.70 
   6  -5  -1  399.46   24.40 
  -6  -5   1  389.36   23.00 
   6  -5  -1  403.86   24.60 
  -6  -5   1  387.36   25.80 
   6  -5  -1  382.56   27.20 
  -6  -5   1  352.46   21.70 
  -6  -5   1  395.76   25.50 
  -6  -5   1  383.16   21.90 
  -6  -5   1  386.76   26.30 
  -6  -5   1  370.16   24.80 
   6  -5  -1  364.56   24.30 
   6  -5  -1  363.86   18.90 
   6  -5  -1  374.96   27.70 
   6  -5  -1  351.96   24.50 
  -6   5   1  400.16   24.10 
   6   5  -1  361.86   24.30 
   6   5  -1  394.06   24.90 
  -6   5   1  410.96   21.80 
   6   5  -1  400.36   25.50 
   6   5  -1  433.16   26.80 
  -6   5   1  384.66   22.40 
  -6   5   1  419.56   22.50 
  -6   5   1  411.16   23.00 
  -6   5   1  372.86   21.30 
  -6   5   1  393.56   24.40 
   6   5  -1  418.56   24.50 
   6   5  -1  374.46   23.80 
   6   5  -1  366.66   24.20 
   6   5  -1  398.06   26.50 
  -6   5   1  398.06   23.90 
  -6   5   1  398.36   19.70 
   6   5  -1  390.76   20.70 
   6   5  -1  392.86   25.70 
   6   5  -1  404.46   24.70 
   6   5  -1  363.06   26.70 
  -6   5   1  364.66   23.70 
   6   5  -1  346.07   25.00 
  -6   5   1  384.96   23.50 
   6   5  -1  418.36   25.80 
   6   5  -1  415.96   26.60 
  -5  -5   1 2326.97   82.29 
  -5  -5   1 2399.26   76.29 
  -5  -5   1 2355.46   74.39 
   5  -5  -1 2374.66   78.29 
   5  -5  -1 2247.28   84.59 
   5  -5  -1 2314.47   82.39 
   5  -5  -1 2252.77   78.09 
  -5  -5   1 2307.37   80.19 
   5  -5  -1 2389.86   71.19 
   5  -5  -1 2364.96   72.39 
  -5  -5   1 2355.96   76.19 
   5  -5  -1 2335.97   80.49 
   5  -5  -1 2305.07   79.79 
  -5  -5   1 2336.97   77.09 
  -5  -5   1 2439.36   80.09 
  -5  -5   1 2301.07   72.09 
  -5  -5   1 2182.48   77.29 
  -5  -5   1 2304.47   80.59 
   5  -5  -1 2260.37   83.39 
  -5  -5   1 2396.96   82.59 
  -5  -5   1 2337.57   80.79 
  -5  -5   1 2346.87   80.49 
  -5  -5   1 2351.76   75.29 
   5  -5  -1 2333.97   80.99 
  -5   5   1 2296.57   73.09 
  -5   5   1 2290.47   80.09 
  -5   5   1 2429.26   76.69 
  -5   5   1 2420.46   74.19 
  -5   5   1 2352.26   79.49 
   5   5  -1 2397.46   80.89 
  -5   5   1 2338.17   79.09 
   5   5  -1 2361.26   79.99 
  -5   5   1 2392.76   73.79 
  -5   5   1 2430.46   68.39 
   5   5  -1 2204.38   78.59 
  -5   5   1 2381.86   79.89 
   5   5  -1 2347.67   79.69 
  -5   5   1 2352.36   77.59 
  -5   5   1 2340.57   74.29 
   5   5  -1 2394.16   81.89 
   5   5  -1 2457.35   75.19 
   5   5  -1 2336.67   80.19 
  -5   5   1 2374.96   73.89 
   5   5  -1 2228.08   81.09 
   5   5  -1 2333.27   84.39 
   5   5  -1 2323.97   81.29 
   5   5  -1 2286.17   80.39 
   5   5  -1 2407.06   79.39 
   5   5  -1 2226.18   79.39 
  -5   5   1 2375.66   76.19 
  -4  -5   1  632.34   22.30 
  -4  -5   1  659.43   23.70 
  -4  -5   1  618.74   31.30 
  -4  -5   1  592.04   30.20 
   4  -5  -1  615.84   23.30 
  -4  -5   1  592.34   28.50 
   4  -5  -1  600.64   17.60 
  -4  -5   1  649.04   29.10 
   4  -5  -1  646.64   28.60 
   4  -5  -1  618.94   25.00 
   4  -5  -1  564.54   32.10 
  -4  -5   1  645.34   26.60 
   4  -5  -1  552.74   31.70 
  -4  -5   1  558.94   30.00 
  -4  -5   1  607.54   26.30 
  -4  -5   1  646.44   30.50 
   4  -5  -1  610.94   31.70 
   4  -5  -1  644.24   31.20 
  -4  -5   1  623.44   25.70 
  -4  -5   1  614.34   27.20 
   4  -5  -1  616.74   17.90 
  -4  -5   1  624.54   29.10 
  -4  -5   1  582.24   29.30 
   4  -5  -1  581.94   29.50 
  -4  -5   1  559.84   29.30 
   4  -5  -1  629.94   31.40 
  -4  -5   1  605.74   24.80 
   4  -5  -1  606.14   24.80 
   4  -5  -1  588.94   28.10 
  -4   5   1  600.94   28.50 
  -4   5   1  633.44   30.00 
   4   5  -1  608.04   30.80 
   4   5  -1  594.04   29.70 
  -4   5   1  607.24   27.50 
   4   5  -1  651.13   30.40 
   4   5  -1  540.65   28.60 
   4   5  -1  604.84   29.30 
  -4   5   1  598.44   24.30 
   4   5  -1  565.44   29.10 
  -4   5   1  594.64   24.90 
   4   5  -1  607.34   32.30 
  -4   5   1  691.43   29.20 
   4   5  -1  596.24   29.80 
  -4   5   1  602.94   29.40 
  -4   5   1  637.84   27.80 
  -4   5   1  605.04   26.60 
   4   5  -1  547.65   28.30 
   4   5  -1  580.24   28.70 
   4   5  -1  624.14   30.60 
  -4   5   1  633.84   27.40 
   4   5  -1  615.14   26.90 
  -4   5   1  596.64   31.10 
  -4   5   1  617.64   25.50 
   4   5  -1  643.54   31.40 
   3  -5  -1 1468.75   44.10 
  -3  -5   1 1474.35   53.49 
  -3  -5   1 1552.64   51.79 
  -3  -5   1 1449.95   54.09 
  -3  -5   1 1464.45   46.40 
   3  -5  -1 1500.85   52.29 
   3  -5  -1 1563.34   49.50 
  -3  -5   1 1470.85   49.20 
   3  -5  -1 1452.55   50.89 
  -3  -5   1 1479.15   45.10 
   3  -5  -1 1457.65   45.10 
  -3  -5   1 1488.15   46.00 
  -3  -5   1 1409.36   47.60 
  -3  -5   1 1471.85   53.19 
   3  -5  -1 1425.16   56.79 
  -3  -5   1 1409.26   53.79 
   3  -5  -1 1497.45   46.20 
  -3  -5   1 1513.45   48.10 
   3  -5  -1 1415.36   54.99 
   3  -5  -1 1553.24   51.79 
  -3  -5   1 1454.15   48.20 
   3  -5  -1 1342.97   55.59 
   3  -5  -1 1453.25   47.80 
   3  -5  -1 1523.65   54.49 
  -3  -5   1 1465.95   46.10 
  -3  -5   1 1463.15   46.60 
  -3  -5   1 1474.55   52.79 
   3  -5  -1 1506.65   43.90 
  -3  -5   1 1258.87   50.69 
  -3  -5   1 1486.55   53.39 
   3  -5  -1 1482.15   48.50 
   3   5  -1 1491.45   56.39 
  -3   5   1 1489.55   45.60 
   3   5  -1 1476.45   50.59 
   3   5  -1 1482.25   54.69 
  -3   5   1 1316.07   54.79 
   3   5  -1 1549.94   54.09 
  -3   5   1 1524.85   47.80 
  -3   5   1 1495.05   48.70 
   3   5  -1 1495.05   52.09 
   3   5  -1 1414.76   52.39 
  -3   5   1 1470.55   52.69 
  -3   5   1 1497.95   49.10 
   3   5  -1 1504.15   53.99 
   3   5  -1 1472.65   45.50 
  -3   5   1 1445.16   53.39 
  -3   5   1 1495.35   50.09 
  -3   5   1 1524.25   52.69 
   3   5  -1 1515.95   53.39 
   3   5  -1 1485.05   54.49 
  -3   5   1 1464.95   45.80 
  -3   5   1 1469.75   52.39 
  -3   5   1 1535.15   52.29 
   3   5  -1 1474.25   53.09 
   3   5  -1 1403.26   52.99 
   3   5  -1 1417.06   52.89 
   3   5  -1 1573.34   54.09 
  -3   5   1 1451.95   49.40 
  -2  -5   1  109.79   12.50 
  -2  -5   1  132.69   13.50 
   2  -5  -1  116.69    7.50 
   2  -5  -1  111.59   11.50 
  -2  -5   1  146.19   14.30 
   2  -5  -1  114.89    6.80 
  -2  -5   1  131.79    8.30 
  -2  -5   1  124.59   13.60 
   2  -5  -1  108.59   11.50 
  -2  -5   1  128.39   13.00 
   2  -5  -1  122.29    6.40 
  -2  -5   1  113.69   13.10 
  -2  -5   1  102.09   12.00 
  -2  -5   1  113.59    8.60 
   2  -5  -1  123.39    8.20 
   2  -5  -1  131.99   13.80 
   2  -5  -1  126.69    8.00 
  -2  -5   1  132.99   10.10 
  -2  -5   1  124.79   13.20 
   2  -5  -1  118.39    9.20 
   2  -5  -1  128.39    7.50 
   2  -5  -1   97.19   12.40 
  -2  -5   1  113.39    7.00 
  -2  -5   1  120.79    8.50 
   2  -5  -1  132.09    9.90 
  -2  -5   1  137.59   14.40 
  -2  -5   1  117.39   12.50 
  -2  -5   1  130.09   11.10 
   2  -5  -1  129.79   10.20 
  -2  -5   1  133.29    6.80 
  -2  -5   1  113.99    9.30 
   2  -5  -1  126.89    9.60 
  -2  -5   1  114.29    9.60 
   2   5  -1  149.88   12.00 
  -2   5   1  121.29    7.00 
  -2   5   1  126.09    8.50 
  -2   5   1  126.89    9.80 
   2   5  -1   94.89   11.60 
  -2   5   1  120.79    6.50 
  -2   5   1  116.29   12.80 
   2   5  -1  144.49   14.10 
   2   5  -1  135.79   13.10 
  -2   5   1  137.59   11.10 
  -2   5   1  127.79   14.30 
  -2   5   1  138.59   15.10 
  -2   5   1  126.19   10.30 
   2   5  -1  112.59   12.30 
   2   5  -1   98.49   11.60 
  -2   5   1  134.29   15.80 
  -2   5   1  126.19   10.20 
  -2   5   1  134.49    9.80 
   2   5  -1  148.89   14.50 
   2   5  -1  114.79    6.60 
   2   5  -1  113.09   12.40 
  -2   5   1  133.89    7.10 
  -2   5   1  143.99   11.10 
   2   5  -1   99.69   10.80 
  -2   5   1  133.69    9.50 
   2   5  -1  146.09   16.00 
   2   5  -1  114.59   12.40 
  -2   5   1  128.19    8.80 
   2   5  -1   89.99   11.30 
   2   5  -1  130.79   13.80 
  -2   5   1  113.49    6.50 
   2   5  -1  121.19    6.70 
  -1  -5   1  872.11   33.50 
   1  -5  -1  831.22   33.90 
   1  -5  -1  824.62   28.80 
   1  -5  -1  841.22   32.30 
  -1  -5   1  843.12   33.60 
  -1  -5   1  851.51   32.10 
   1  -5  -1  830.52   34.60 
   1  -5  -1  850.41   26.40 
   1  -5  -1  821.02   31.40 
   1  -5  -1  818.42   32.70 
  -1  -5   1  834.82   34.20 
  -1  -5   1  840.22   33.50 
  -1  -5   1  819.52   33.00 
   1  -5  -1  806.12   23.40 
  -1  -5   1  838.42   33.00 
  -1  -5   1  839.32   25.00 
  -1  -5   1  819.62   26.30 
  -1  -5   1  835.42   32.90 
   1  -5  -1  832.72   30.10 
   1  -5  -1  827.82   32.10 
  -1  -5   1  875.51   32.90 
  -1  -5   1  832.92   32.70 
  -1  -5   1  851.31   33.30 
   1  -5  -1  800.02   32.30 
  -1  -5   1  847.52   30.30 
   1  -5  -1  806.52   31.60 
  -1  -5   1  839.22   34.10 
  -1  -5   1  867.71   34.20 
  -1   5   1  796.12   29.60 
  -1   5   1  801.02   31.30 
   1   5  -1  812.12   30.80 
   1   5  -1  856.41   36.80 
  -1   5   1  829.32   28.80 
   1   5  -1  814.62   24.40 
   1   5  -1  807.02   32.90 
  -1   5   1  842.02   32.80 
  -1   5   1  793.22   27.20 
   1   5  -1  843.62   32.70 
  -1   5   1  850.41   38.80 
  -1   5   1  857.21   32.30 
  -1   5   1  768.62   39.40 
  -1   5   1  836.02   23.70 
  -1   5   1  889.91   28.40 
  -1   5   1  845.22   30.80 
   1   5  -1  820.02   34.30 
  -1   5   1  878.71   33.90 
   1   5  -1  776.52   32.40 
   1   5  -1  784.52   32.40 
   1   5  -1  825.22   32.30 
  -1   5   1  829.52   32.10 
  -1   5   1  777.22   32.60 
  -1   5   1  791.62   36.00 
  -1   5   1  776.22   40.40 
  -1   5   1  736.73   37.70 
   1   5  -1  811.32   36.10 
   1   5  -1  822.72   33.20 
  -1   5   1  861.71   32.50 
  -1   5   1  791.12   32.50 
  -1   5   1  904.21   30.20 
   1   5  -1  838.02   32.90 
   1   5  -1  833.72   33.00 
   1   5  -1  846.22   32.60 
  -1   5   1  809.12   33.90 
   0  -5   1  102.49   11.50 
   0  -5   1   91.29   11.20 
   0  -5   1   88.89    9.90 
   0  -5   1   82.39    9.80 
   0  -5  -1  100.59   11.50 
   0  -5  -1  100.69   11.20 
   0  -5   1  116.49    9.60 
   0  -5  -1   80.39   10.00 
   0  -5  -1   95.09   11.30 
   0  -5   1   87.89    4.60 
   0  -5  -1   80.09    9.50 
   0  -5   1   85.99   10.10 
   0  -5   1   91.79    7.10 
   0  -5  -1   68.99    9.30 
   0  -5  -1  100.19   11.00 
   0  -5  -1   95.39    8.00 
   0  -5  -1   80.69    9.30 
   0  -5   1   94.89   11.20 
   0  -5  -1   91.09   10.40 
   0  -5  -1   86.29   10.00 
   0  -5   1   98.99   10.40 
   0  -5   1   81.19    9.60 
   0  -5  -1   99.09    8.10 
   0  -5   1   89.39   10.40 
   0  -5   1   88.79   10.50 
   0  -5  -1   91.89   10.50 
   0  -5   1   80.39    8.90 
   0   5  -1   80.29    9.60 
   0   5  -1   98.09   14.40 
   0   5  -1   77.09    8.70 
   0   5  -1   77.19    9.50 
   0   5   1   86.09   10.20 
   0   5  -1   74.69    9.60 
   0   5   1   84.69    9.00 
   0   5  -1   77.39   10.40 
   0   5   1   78.79    9.30 
   0   5   1   85.89   10.20 
   0   5   1   99.09   13.00 
   0   5   1   97.39   10.10 
   0   5   1  106.99   12.80 
   0   5  -1  101.69   14.10 
   0   5  -1   97.69    7.70 
   0   5  -1   84.09    9.50 
   0   5  -1   80.19   10.30 
   0   5  -1  108.89   13.20 
   0   5  -1  102.39   11.50 
   0   5   1   83.09   10.30 
   0   5   1   80.49   12.40 
   0   5  -1   85.59   10.40 
   0   5  -1   86.99    9.70 
   0   5  -1   74.49   10.30 
   0   5   1   78.09    9.40 
   0   5   1   97.59   11.50 
   0   5  -1   94.99   10.30 
   0   5   1   68.19    8.90 
   0   5   1  103.19    7.50 
   0   5   1   85.79   10.60 
   0   5   1  104.39   11.20 
   0   5   1  102.59   13.80 
   1  -5   1 2695.83   81.79 
   1  -5   1 2867.61   85.79 
  -1  -5  -1 2696.93   85.69 
   1  -5   1 2689.93   81.59 
  -1  -5  -1 2819.02   75.09 
  -1  -5  -1 2794.92   78.89 
   1  -5   1 2793.32   80.29 
   1  -5   1 2659.43   86.99 
  -1  -5  -1 2679.83   82.19 
  -1  -5  -1 2739.73   86.19 
  -1  -5  -1 2757.12   76.19 
   1  -5   1 2778.12   74.09 
  -1  -5  -1 2700.93   81.59 
  -1  -5  -1 2736.93   84.19 
  -1  -5  -1 2705.03   84.39 
   1  -5   1 2834.22   76.19 
  -1  -5  -1 2761.62   84.89 
  -1  -5  -1 2687.43   83.59 
  -1  -5  -1 2714.23   84.49 
   1  -5   1 2713.63   83.19 
   1  -5   1 2709.93   77.99 
  -1  -5  -1 2705.23   82.79 
   1  -5   1 2855.11   83.39 
  -1  -5  -1 2751.62   84.19 
  -1  -5  -1 2793.62   84.99 
  -1  -5  -1 2745.43   85.89 
   1  -5   1 2806.92   82.29 
  -1  -5  -1 2697.93   84.39 
   1  -5   1 2759.02   87.19 
   1  -5   1 2848.31   86.19 
   1  -5   1 2794.32   83.99 
  -1  -5  -1 2869.31   85.69 
  -1   5  -1 2763.82   83.39 
  -1   5  -1 2752.32   82.69 
   1   5   1 2687.43   85.89 
   1   5   1 2740.23   87.19 
   1   5   1 2730.93   83.89 
  -1   5  -1 2818.92   97.39 
  -1   5  -1 2862.11   83.29 
  -1   5  -1 2306.37   85.39 
   1   5   1 2862.71   86.19 
  -1   5  -1 2759.42   85.09 
  -1   5  -1 2798.52   82.59 
  -1   5  -1 2232.88   92.89 
   1   5   1 2721.63   83.99 
  -1   5  -1 2358.56   86.49 
   1   5   1 2681.53   84.49 
  -1   5  -1 2719.43   75.29 
   1   5   1 2833.92   83.99 
   1   5   1 2672.43   85.39 
   1   5   1 2799.12   85.69 
  -1   5  -1 2830.92   76.49 
  -1   5  -1 2677.03   85.99 
  -1   5  -1 2661.03   80.79 
   1   5   1 2758.72   88.79 
  -1   5  -1 2773.42   82.39 
  -1   5  -1 2690.13   85.69 
   1   5   1 2808.42   75.19 
  -1   5  -1 2808.02   86.59 
   1   5   1 2728.73   85.79 
   1   5   1 2666.53   84.39 
  -1   5  -1 2750.62   82.69 
  -1   5  -1 2792.52   80.09 
   1   5   1 2762.92   81.89 
   1   5   1 2645.64   86.09 
  -1   5  -1 2690.73   79.09 
  -1   5  -1 2825.62   82.89 
  -1   5  -1 2760.52   84.29 
  -1   5  -1 2746.93   82.79 
   1   5   1 2668.13   84.49 
  -2  -5  -1  437.66   18.50 
  -2  -5  -1  426.96   22.10 
  -2  -5  -1  388.26   15.60 
   2  -5   1  422.66   16.80 
  -2  -5  -1  423.26   21.60 
   2  -5   1  413.96   18.30 
   2  -5   1  406.96   19.90 
   2  -5   1  411.66   19.50 
  -2  -5  -1  456.35   21.50 
   2  -5   1  391.16   23.30 
  -2  -5  -1  426.16   23.00 
   2  -5   1  423.26   14.30 
  -2  -5  -1  397.76   19.40 
  -2  -5  -1  408.36   21.40 
  -2  -5  -1  339.17   21.10 
   2  -5   1  405.66   23.00 
  -2  -5  -1  368.46   19.70 
   2  -5   1  436.96   16.70 
  -2  -5  -1  413.76   22.50 
   2  -5   1  403.36   21.40 
   2  -5   1  409.06   18.50 
   2  -5   1  395.46   14.50 
  -2  -5  -1  419.76   18.70 
  -2  -5  -1  428.16   16.50 
  -2  -5  -1  412.46   19.30 
  -2  -5  -1  375.36   19.20 
   2  -5   1  433.96   18.70 
   2  -5   1  416.16   16.30 
  -2  -5  -1  349.77   20.30 
  -2  -5  -1  394.46   21.60 
   2  -5   1  403.56   15.10 
   2  -5   1  471.35   23.20 
   2  -5   1  387.26   18.50 
  -2   5  -1  403.26   17.90 
   2   5   1  405.46   15.90 
   2   5   1  409.46   21.20 
  -2   5  -1  392.56   16.10 
   2   5   1  407.66   21.10 
  -2   5  -1  449.76   19.20 
   2   5   1  448.26   22.80 
   2   5   1  427.36   21.80 
  -2   5  -1  412.46   18.40 
   2   5   1  403.66   17.50 
  -2   5  -1  427.76   20.70 
  -2   5  -1  454.05   24.50 
  -2   5  -1  399.66   22.80 
   2   5   1  386.06   20.80 
   2   5   1  457.05   23.60 
  -2   5  -1  427.16   22.10 
   2   5   1  425.56   21.80 
   2   5   1  408.06   22.40 
  -2   5  -1  407.06   15.20 
  -2   5  -1  395.16   17.10 
   2   5   1  407.56   14.40 
   2   5   1  419.06   20.30 
  -2   5  -1  438.86   21.30 
  -2   5  -1  403.86   21.20 
   2   5   1  430.06   22.20 
  -2   5  -1  447.16   27.00 
  -2   5  -1  404.96   19.70 
  -2   5  -1  413.16   18.80 
  -2   5  -1  395.96   18.50 
   2   5   1  393.06   20.70 
  -2   5  -1  374.06   19.90 
  -2   5  -1  382.26   21.60 
  -2   5  -1  407.26   15.80 
  -2   5  -1  392.86   17.10 
  -3  -5  -1 2797.32   89.29 
   3  -5   1 2907.61   94.59 
   3  -5   1 2780.72   79.39 
  -3  -5  -1 2888.51   90.39 
  -3  -5  -1 2924.11   88.79 
   3  -5   1 2760.82   83.29 
  -3  -5  -1 2862.81   88.59 
  -3  -5  -1 2794.92   86.79 
   3  -5   1 2852.11   93.09 
  -3  -5  -1 2776.92   89.29 
  -3  -5  -1 2663.13   90.09 
   3  -5   1 2857.31   76.99 
  -3  -5  -1 2681.23   90.19 
   3  -5   1 2780.72   89.19 
   3  -5   1 2846.12   90.29 
  -3  -5  -1 2576.24   89.39 
   3  -5   1 2783.72   82.89 
  -3  -5  -1 2822.32   82.29 
   3  -5   1 2895.81   86.09 
  -3  -5  -1 2879.81   82.59 
   3  -5   1 2670.53   78.29 
   3  -5   1 2826.82   82.19 
   3  -5   1 2835.22   77.19 
  -3  -5  -1 2932.01   87.89 
   3  -5   1 2637.54   95.89 
   3  -5   1 2758.82   80.49 
  -3  -5  -1 2791.52   84.29 
  -3  -5  -1 2948.80   82.79 
  -3  -5  -1 2804.62   84.59 
   3  -5   1 2788.52   82.59 
  -3  -5  -1 2758.12   81.69 
  -3  -5  -1 2847.81   89.89 
   3   5   1 2732.13   87.39 
   3   5   1 2801.42   89.59 
  -3   5  -1 2721.13   83.39 
   3   5   1 2889.21   89.39 
   3   5   1 2808.02   88.39 
  -3   5  -1 2847.62   89.99 
   3   5   1 2886.91   87.99 
   3   5   1 2809.72   80.19 
   3   5   1 2866.31   89.59 
  -3   5  -1 2740.13   80.09 
  -3   5  -1 2819.62   91.29 
   3   5   1 2690.03   89.39 
  -3   5  -1 2967.50   93.79 
  -3   5  -1 2727.13   84.79 
  -3   5  -1 2898.01   86.89 
  -3   5  -1 2819.12   82.09 
  -3   5  -1 2651.03   93.59 
  -3   5  -1 2805.52   80.39 
   3   5   1 2884.91   90.19 
  -3   5  -1 2870.11   83.59 
   3   5   1 2895.61   92.39 
   3   5   1 2866.71   89.09 
  -3   5  -1 2861.71   81.69 
  -3   5  -1 2715.43   77.29 
   3   5   1 2656.03   88.29 
   3   5   1 2653.73   90.09 
  -3   5  -1 2692.23   89.19 
  -3   5  -1 2867.51   87.29 
   3   5   1 2755.12   89.19 
   4  -5   1  417.96   25.30 
  -4  -5  -1  399.96   22.90 
  -4  -5  -1  413.96   21.00 
  -4  -5  -1  372.46   19.10 
  -4  -5  -1  410.66   22.50 
  -4  -5  -1  427.66   24.60 
  -4  -5  -1  439.36   24.20 
  -4  -5  -1  361.06   18.50 
   4  -5   1  419.26   17.30 
  -4  -5  -1  413.56   23.10 
   4  -5   1  383.66   20.60 
  -4  -5  -1  384.46   23.70 
   4  -5   1  396.56   23.70 
   4  -5   1  381.96   25.70 
  -4  -5  -1  399.26   23.30 
   4  -5   1  417.16   28.10 
  -4  -5  -1  403.46   17.00 
   4  -5   1  362.86   18.50 
   4  -5   1  392.96   20.20 
  -4  -5  -1  399.16   22.10 
  -4  -5  -1  353.66   23.00 
   4  -5   1  387.06   23.50 
  -4  -5  -1  385.66   15.50 
  -4  -5  -1  401.06   23.80 
   4  -5   1  415.06   22.50 
  -4   5  -1  404.26   19.00 
   4   5   1  409.16   23.60 
   4   5   1  399.16   22.70 
  -4   5  -1  364.36   23.70 
   4   5   1  419.46   24.10 
   4   5   1  422.16   23.80 
   4   5   1  402.16   23.70 
  -4   5  -1  340.47   25.00 
   4   5   1  391.86   22.80 
  -4   5  -1  394.96   22.00 
   4   5   1  417.76   21.80 
  -4   5  -1  412.56   18.40 
  -4   5  -1  423.66   18.50 
  -4   5  -1  405.66   18.70 
  -4   5  -1  407.16   24.60 
  -4   5  -1  374.16   22.90 
  -4   5  -1  408.16   19.10 
   4   5   1  416.86   23.40 
   4   5   1  413.56   25.20 
   4   5   1  412.86   22.90 
   4   5   1  362.66   20.60 
  -4   5  -1  375.46   21.70 
   4   5   1  431.96   23.30 
   4   5   1  344.57   22.70 
  -4   5  -1  378.86   19.00 
  -4   5  -1  383.66   24.10 
   4   5   1  434.16   23.90 
   5  -5   1 1023.70   38.30 
   5  -5   1 1106.39   47.10 
  -5  -5  -1 1066.19   41.90 
   5  -5   1  990.90   41.50 
  -5  -5  -1  985.90   39.40 
  -5  -5  -1 1043.90   42.20 
   5  -5   1 1025.70   41.30 
  -5  -5  -1 1007.40   39.30 
   5  -5   1 1026.30   33.60 
  -5  -5  -1 1073.99   41.90 
   5  -5   1 1063.79   39.60 
  -5  -5  -1 1025.70   38.30 
  -5  -5  -1 1071.99   46.20 
  -5  -5  -1 1011.50   43.80 
  -5  -5  -1 1046.70   43.70 
   5  -5   1 1010.30   44.90 
   5  -5   1  998.40   48.60 
  -5  -5  -1  986.70   40.80 
  -5  -5  -1 1016.00   44.50 
  -5  -5  -1 1036.90   46.10 
   5  -5   1 1031.60   36.50 
   5  -5   1 1026.60   48.30 
  -5  -5  -1 1090.99   45.40 
  -5  -5  -1 1032.00   44.20 
   5   5   1 1053.89   43.00 
  -5   5  -1 1086.59   43.30 
  -5   5  -1 1071.59   38.60 
   5   5   1 1010.30   44.70 
  -5   5  -1 1033.90   38.40 
   5   5   1 1052.59   40.80 
  -5   5  -1 1017.10   43.00 
   5   5   1 1039.40   43.80 
  -5   5  -1  983.80   46.10 
  -5   5  -1 1022.10   45.20 
   5   5   1  972.30   42.80 
   5   5   1  969.80   44.40 
  -5   5  -1  992.20   43.80 
   5   5   1 1018.90   43.90 
   5   5   1  997.20   43.80 
  -5   5  -1 1059.09   38.80 
  -5   5  -1 1027.90   39.10 
   5   5   1 1068.79   45.30 
   5   5   1 1067.19   42.00 
  -5   5  -1 1091.49   38.60 
   5   5   1  994.20   46.20 
   5   5   1  990.50   44.20 
   5   5   1 1017.50   43.50 
  -5   5  -1 1028.90   46.60 
   5   5   1  963.60   43.00 
  -6  -5  -1   32.90    9.10 
  -6  -5  -1   30.30    8.00 
   6  -5   1   38.10    6.80 
  -6  -5  -1   38.20    8.40 
  -6  -5  -1   37.30   10.40 
  -6  -5  -1   22.60    6.60 
  -6  -5  -1   49.99   11.30 
   6  -5   1   30.00    8.90 
  -6  -5  -1   19.80    7.30 
   6  -5   1   42.20    9.40 
  -6  -5  -1   30.80    9.30 
  -6  -5  -1   31.50    8.20 
   6  -5   1   45.70    7.60 
  -6  -5  -1   17.50    6.40 
   6  -5   1   25.40    9.60 
   6  -5   1   43.60    9.30 
  -6  -5  -1   39.50    8.50 
   6  -5   1   35.30   10.50 
   6  -5   1   33.90   10.40 
  -6  -5  -1   23.20    8.20 
   6  -5   1   35.90    7.60 
  -6  -5  -1   46.20   10.30 
  -6   5  -1   42.20    7.80 
   6   5   1   39.00   10.10 
   6   5   1   20.80    7.90 
   6   5   1   44.10   10.50 
   6   5   1   22.00    8.00 
   6   5   1   44.20   10.80 
   6   5   1   29.40    9.40 
   6   5   1   34.20    8.30 
  -6   5  -1   47.30   10.40 
  -6   5  -1   36.20    7.90 
   6   5   1   38.90    9.70 
   6   5   1   45.20   10.10 
  -6   5  -1   33.30    8.90 
  -6   5  -1   31.70    7.90 
  -6   5  -1   33.70    9.70 
  -6   5  -1   32.60    8.90 
   6   5   1   46.20   10.10 
   6   5   1   35.60    8.00 
  -6   5  -1   49.70   11.40 
   6   5   1   35.70    9.00 
   6   5   1   38.00    8.60 
  -6   5  -1   33.40    7.70 
  -6   5  -1   34.00    7.30 
   6   5   1   38.10    9.80 
   7  -5   1  259.67   24.90 
  -7  -5  -1  238.48   18.70 
  -7  -5  -1  232.08   24.70 
   7  -5   1  244.78   27.70 
  -7  -5  -1  252.57   27.00 
   7  -5   1  263.17   20.50 
  -7  -5  -1  292.07   20.90 
   7  -5   1  284.87   30.80 
  -7  -5  -1  244.58   31.20 
   7  -5   1  259.47   16.90 
  -7  -5  -1  224.18   23.80 
  -7  -5  -1  224.28   24.30 
  -7  -5  -1  246.48   18.30 
  -7  -5  -1  267.57   20.60 
  -7  -5  -1  256.17   25.40 
   7  -5   1  293.87   23.20 
   7  -5   1  295.77   23.10 
  -7  -5  -1  230.58   17.50 
   7  -5   1  266.07   27.50 
  -7  -5  -1  244.68   24.40 
  -7  -5  -1  276.67   28.00 
  -7   5  -1  291.77   19.20 
   7   5   1  259.17   28.20 
   7   5   1  194.98   21.50 
   7   5   1  220.38   22.40 
   7   5   1  255.77   25.90 
  -7   5  -1  238.68   17.80 
  -7   5  -1  246.58   25.80 
   7   5   1  284.37   27.50 
   7   5   1  246.58   24.30 
  -7   5  -1  241.28   20.70 
   7   5   1  260.27   20.60 
   7   5   1  238.88   24.00 
  -7   5  -1  232.98   17.90 
   7   5   1  274.07   18.30 
   7   5   1  234.68   24.40 
   7   5   1  251.57   19.40 
   7   5   1  217.68   23.80 
   7   5   1  224.48   25.20 
  -7   5  -1  255.87   26.00 
   7   5   1  236.08   24.10 
  -8  -5  -1   88.79   15.10 
  -8  -5  -1   90.59   15.00 
  -8  -5  -1   87.59   18.90 
   8  -5   1   56.99   12.80 
  -8  -5  -1   88.49   16.60 
   8  -5   1   80.99   16.30 
  -8  -5  -1   75.89   16.50 
  -8  -5  -1   65.59   12.80 
   8  -5   1  110.09   20.50 
  -8  -5  -1   62.49   13.60 
   8  -5   1   69.19   16.30 
  -8  -5  -1   76.29   15.00 
  -8  -5  -1   78.19   14.70 
  -8  -5  -1   85.39   15.90 
  -8  -5  -1   76.99   15.60 
   8  -5   1   94.09   16.70 
   8   5   1   52.69   13.90 
   8   5   1   67.19   12.20 
   8   5   1   78.89   14.90 
   8   5   1   78.49   16.10 
   8   5   1   75.89   15.50 
  -8   5  -1   90.49   16.70 
   8   5   1   98.69   17.50 
   8   5   1   91.19   16.10 
   8   5   1   94.89   15.40 
  -8   5  -1   94.19   16.00 
   8   5   1   74.09   14.60 
   8   5   1   73.39   14.20 
  -8   5  -1   80.09   13.60 
   8   5   1   85.29   15.10 
  -8   5  -1   89.19   13.50 
   8   5   1   89.29   16.80 
  -8   5  -1   89.49   16.80 
   8   5   1  101.89   17.00 
  -8   5  -1   90.19   13.90 
  -9  -5  -1  330.87   34.20 
   9  -5   1  276.37   29.50 
   9  -5   1  307.07   33.70 
  -9   5  -1  331.77   28.50 
   9   5   1  308.87   30.50 
   9   5   1  328.97   36.70 
   9   5   1  340.97   25.80 
   9   5   1  355.36   42.00 
   9   5   1  351.66   35.60 
  -9   5  -1  359.16   47.40 
  -8  -6   1  130.19   20.10 
  -8  -6   1  127.29   20.20 
  -8  -6   1  128.29   19.60 
  -8  -6   1   96.39   15.10 
  -8  -6   1  150.98   22.80 
  -8  -6   1  132.29   17.90 
   8  -6  -1  118.19   21.60 
   8  -6  -1  116.09   19.00 
  -8  -6   1  164.68   28.50 
  -8  -6   1  140.19   20.50 
   8  -6  -1  134.29   19.10 
   8  -6  -1  140.99   21.00 
  -8  -6   1  110.19   16.00 
   8  -6  -1  108.49   20.90 
  -8  -6   1  125.59   20.00 
  -8  -6   1  114.39   19.90 
   8   6  -1  115.99   18.40 
   8   6  -1   93.59   17.90 
   8   6  -1  127.39   18.80 
   8   6  -1   98.09   17.10 
  -8   6   1  112.29   18.70 
   8   6  -1  127.09   20.00 
  -8   6   1  118.79   18.80 
   8   6  -1   97.39   17.60 
   8   6  -1  140.09   20.70 
   8   6  -1   98.99   17.80 
   8   6  -1  111.09   20.00 
   8   6  -1  123.69   18.70 
   8   6  -1  113.39   16.90 
   8   6  -1   88.69   18.70 
   8   6  -1   97.09   18.00 
  -8   6   1  143.09   17.90 
  -7  -6   1    5.50    4.90 
   7  -6  -1    2.20    5.20 
   7  -6  -1   -3.30    5.00 
  -7  -6   1    7.60    6.20 
   7  -6  -1   -4.70    5.00 
  -7  -6   1   -0.20    5.00 
  -7  -6   1    2.60    4.20 
  -7  -6   1    0.00    4.40 
  -7  -6   1   -1.50    4.20 
  -7  -6   1   -1.90    4.40 
  -7  -6   1    1.30    5.20 
  -7  -6   1    2.80    5.50 
  -7  -6   1    2.00    4.20 
  -7  -6   1    6.30    5.90 
   7  -6  -1    6.40    7.10 
  -7  -6   1    5.70    5.20 
   7  -6  -1    1.50    5.70 
   7  -6  -1   -2.70    5.50 
  -7   6   1    3.80    5.80 
   7   6  -1   -1.20    4.50 
   7   6  -1   -2.70    4.40 
   7   6  -1    4.20    5.70 
  -7   6   1    3.30    4.70 
  -7   6   1    4.50    4.60 
   7   6  -1    2.10    5.20 
   7   6  -1   -2.30    4.80 
   7   6  -1   -1.00    4.80 
   7   6  -1    2.60    5.70 
   7   6  -1    2.30    5.40 
   7   6  -1   -1.60    4.60 
  -7   6   1    7.40    5.90 
   7   6  -1    6.80    6.80 
   7   6  -1    2.10    5.20 
  -7   6   1    0.20    4.80 
   7   6  -1    5.80    6.80 
   7   6  -1    1.50    5.50 
  -6  -6   1  138.09   18.60 
   6  -6  -1  136.59   19.10 
  -6  -6   1  171.28   19.60 
   6  -6  -1  180.38   20.60 
   6  -6  -1  163.18   22.90 
  -6  -6   1  158.78   20.90 
   6  -6  -1  143.59   21.40 
  -6  -6   1  157.48   15.80 
  -6  -6   1  186.68   20.50 
  -6  -6   1  169.08   21.10 
   6  -6  -1  168.68   20.70 
  -6  -6   1  169.28   20.70 
  -6  -6   1  153.58   17.40 
   6  -6  -1  166.18   18.70 
   6  -6  -1  147.39   19.70 
  -6  -6   1  158.38   19.40 
  -6  -6   1  165.78   17.10 
  -6  -6   1  157.98   19.80 
   6  -6  -1  166.78   15.40 
  -6  -6   1  143.49   16.20 
  -6   6   1  181.58   20.10 
  -6   6   1  168.18   18.20 
   6   6  -1  120.29   16.70 
   6   6  -1  158.68   16.10 
   6   6  -1  139.19   18.70 
   6   6  -1  198.48   22.10 
  -6   6   1  159.08   15.30 
  -6   6   1  165.98   19.30 
   6   6  -1  161.78   20.00 
  -6   6   1  158.98   16.70 
   6   6  -1  177.88   20.60 
   6   6  -1  162.68   20.40 
   6   6  -1  138.59   17.70 
   6   6  -1  137.49   18.00 
   6   6  -1  130.39   18.30 
   6   6  -1  170.48   20.40 
   6   6  -1  182.68   21.70 
   6   6  -1  181.38   23.60 
  -6   6   1  164.68   13.90 
   6   6  -1  162.88   19.20 
  -6   6   1  216.68   22.40 
  -6   6   1  191.18   15.50 
  -5  -6   1   43.40    7.80 
   5  -6  -1   50.99   12.80 
  -5  -6   1   57.79   10.80 
   5  -6  -1   55.29   12.10 
   5  -6  -1   57.99   11.30 
  -5  -6   1   40.10    9.60 
  -5  -6   1   48.40   11.00 
   5  -6  -1   52.19   12.90 
  -5  -6   1   38.00    9.70 
   5  -6  -1   42.40    8.50 
  -5  -6   1   50.09    8.30 
  -5  -6   1   41.50    9.50 
  -5  -6   1   45.90   11.10 
   5  -6  -1   59.59    8.60 
   5  -6  -1   59.49    9.20 
  -5  -6   1   37.10    9.50 
   5  -6  -1   60.99   12.60 
   5  -6  -1   44.90    9.80 
   5  -6  -1   55.99    8.50 
  -5  -6   1   38.90    9.30 
  -5  -6   1   39.70    8.20 
   5  -6  -1   54.19   11.60 
  -5  -6   1   47.20    9.90 
  -5  -6   1   35.50    7.70 
   5   6  -1   57.69    9.80 
   5   6  -1   54.09   11.40 
   5   6  -1   32.60    9.10 
   5   6  -1   47.10   10.20 
   5   6  -1   49.20   11.20 
  -5   6   1   61.89    9.60 
  -5   6   1   51.89    9.30 
   5   6  -1   48.50   10.90 
   5   6  -1   60.69   11.20 
   5   6  -1   47.70   11.10 
  -5   6   1   43.90   10.20 
  -5   6   1   60.09    8.90 
  -5   6   1   36.50    8.40 
   5   6  -1   49.40   10.80 
   5   6  -1   29.60    8.40 
   5   6  -1   70.39   12.70 
  -5   6   1   61.29   10.00 
   5   6  -1   42.70   11.60 
  -5   6   1   54.59    9.50 
  -5   6   1   59.49   12.10 
   5   6  -1   57.19   11.60 
   5   6  -1   42.10   10.30 
  -5   6   1   48.00    7.90 
  -5   6   1   33.00    9.80 
  -5   6   1   45.00    9.50 
   4  -6  -1  153.08   11.90 
   4  -6  -1  115.39   12.20 
  -4  -6   1  134.19   11.10 
   4  -6  -1  113.29   17.00 
  -4  -6   1  163.48   18.30 
  -4  -6   1  131.49   16.20 
   4  -6  -1  132.39   10.90 
  -4  -6   1  143.59   10.60 
   4  -6  -1  138.69   14.60 
   4  -6  -1  125.49   14.60 
  -4  -6   1  119.39   16.00 
  -4  -6   1  138.69    9.80 
   4  -6  -1  137.99   16.90 
   4  -6  -1  189.28   22.00 
  -4  -6   1  126.59   15.30 
   4  -6  -1  160.48   16.10 
  -4  -6   1  140.29   16.50 
  -4  -6   1  141.19   10.20 
  -4  -6   1  145.69   16.70 
  -4  -6   1  145.49   17.50 
  -4  -6   1  136.09   15.10 
  -4  -6   1  137.99   10.40 
  -4  -6   1  138.39   15.40 
  -4  -6   1  117.59   14.60 
  -4  -6   1  162.68   12.00 
   4  -6  -1  165.18   19.50 
  -4   6   1  141.69   17.00 
  -4   6   1  122.29   15.60 
   4   6  -1  147.99   16.40 
  -4   6   1  127.79   14.20 
   4   6  -1  117.29   15.30 
  -4   6   1  144.19   15.00 
  -4   6   1  138.69   11.90 
  -4   6   1  138.19   11.60 
   4   6  -1  106.49   13.50 
   4   6  -1  134.79   16.30 
   4   6  -1  103.99   14.40 
   4   6  -1  169.88   18.00 
  -4   6   1  159.78   17.80 
   4   6  -1  119.99   15.80 
   4   6  -1  135.79   17.00 
  -4   6   1  132.19   10.50 
   4   6  -1  133.49   14.30 
   4   6  -1  115.69   15.20 
  -4   6   1  154.18   20.20 
   4   6  -1  139.09   18.30 
   4   6  -1  149.09   17.40 
  -4   6   1  169.78   17.50 
   4   6  -1  152.98   18.70 
   4   6  -1  131.99   16.30 
  -4   6   1  134.89    9.70 
  -4   6   1  150.98   16.00 
  -3  -6   1   47.60    8.10 
  -3  -6   1   26.10    6.20 
   3  -6  -1   38.70    7.00 
   3  -6  -1   32.00    7.30 
  -3  -6   1   30.00    6.10 
  -3  -6   1   24.70    6.80 
  -3  -6   1   27.00    7.80 
  -3  -6   1   25.20    5.20 
  -3  -6   1   36.60    7.50 
  -3  -6   1   24.20    7.30 
   3  -6  -1   28.00    6.50 
   3  -6  -1   26.00    7.90 
   3  -6  -1   30.30    4.60 
  -3  -6   1   24.80    5.10 
   3  -6  -1   23.30    7.50 
  -3  -6   1   27.20    4.70 
   3  -6  -1   39.20    8.00 
  -3  -6   1   23.70    4.40 
  -3  -6   1   19.60    4.60 
  -3  -6   1   31.30    7.70 
  -3  -6   1   32.10    8.10 
  -3  -6   1   33.30    7.90 
   3  -6  -1   38.50    7.20 
  -3  -6   1   29.70    7.90 
   3   6  -1   22.40    6.80 
  -3   6   1   23.30    7.10 
   3   6  -1   19.90    6.70 
   3   6  -1   23.90    7.50 
   3   6  -1   36.90    8.30 
  -3   6   1   37.00    7.30 
  -3   6   1   36.00    7.20 
  -3   6   1   30.80    5.30 
   3   6  -1   35.80    8.20 
   3   6  -1   33.90    8.30 
   3   6  -1   31.70    7.70 
  -3   6   1   24.40    6.90 
  -3   6   1   28.50    4.60 
  -3   6   1   42.00    8.80 
   3   6  -1   29.10    7.50 
  -3   6   1   23.00    7.30 
  -3   6   1   38.70    6.70 
   3   6  -1   31.30    7.80 
  -3   6   1   37.30    8.40 
  -3   6   1   31.60    6.60 
   3   6  -1   17.90    6.20 
   3   6  -1   26.90    7.70 
   3   6  -1   36.00    9.90 
   3   6  -1   24.40    7.30 
  -3   6   1   20.20    8.00 
   2  -6  -1   17.00    5.00 
   2  -6  -1   18.60    5.30 
  -2  -6   1   21.30    6.70 
   2  -6  -1   20.00    4.60 
  -2  -6   1   14.10    5.70 
  -2  -6   1   17.70    4.80 
  -2  -6   1   21.80    4.40 
  -2  -6   1   20.70    6.40 
  -2  -6   1   15.80    5.80 
   2  -6  -1   26.20    6.10 
  -2  -6   1   20.40    5.70 
   2  -6  -1   14.00    5.90 
   2  -6  -1   24.60    7.20 
  -2  -6   1   20.80    6.70 
   2  -6  -1   20.40    4.30 
  -2  -6   1   17.00    6.10 
  -2  -6   1   11.70    5.60 
  -2  -6   1   16.30    5.80 
  -2  -6   1   27.30    6.70 
   2  -6  -1   20.50    3.70 
  -2  -6   1   17.20    5.10 
   2  -6  -1   20.40    6.20 
   2  -6  -1   23.60    3.30 
  -2  -6   1   22.80    6.40 
  -2  -6   1   12.70    3.40 
  -2  -6   1   20.30    6.40 
  -2  -6   1   17.10    5.40 
  -2  -6   1   25.20    3.60 
   2  -6  -1   21.20    5.60 
  -2   6   1   23.70    6.30 
   2   6  -1   18.90    6.40 
   2   6  -1   14.90    6.00 
  -2   6   1   28.20    5.00 
  -2   6   1   14.50    5.10 
  -2   6   1    9.70    4.40 
   2   6  -1   14.00    5.10 
  -2   6   1   26.70    4.20 
   2   6  -1   22.70    6.40 
  -2   6   1   23.70    7.80 
  -2   6   1   24.80    5.00 
   2   6  -1   18.70    3.00 
   2   6  -1   17.40    5.90 
   2   6  -1   27.40    8.50 
  -2   6   1   27.40    5.90 
  -2   6   1   14.40    6.00 
   2   6  -1   26.40    6.80 
   2   6  -1   23.40    6.50 
  -2   6   1   26.10    6.00 
   2   6  -1   20.50    2.90 
   2   6  -1   18.70    6.40 
  -2   6   1   20.20    3.90 
  -2   6   1   13.60    5.50 
   2   6  -1   18.00    5.80 
  -2   6   1   25.00    6.70 
   2   6  -1   18.90    6.00 
   2   6  -1   20.50    6.70 
   2   6  -1   36.60    8.10 
  -2   6   1   13.40    5.20 
  -2   6   1   33.00    9.70 
  -1  -6   1  175.88   13.50 
  -1  -6   1  195.68   14.10 
   1  -6  -1  174.58   13.80 
  -1  -6   1  182.58   14.20 
   1  -6  -1  187.18    9.00 
  -1  -6   1  149.69   15.70 
   1  -6  -1  159.08   16.30 
   1  -6  -1  192.48   12.50 
  -1  -6   1  176.38   14.70 
  -1  -6   1  169.18   14.10 
  -1  -6   1  179.78   12.00 
  -1  -6   1  168.68   14.20 
  -1  -6   1  187.38   14.30 
  -1  -6   1  202.88   14.80 
  -1  -6   1  194.08    6.50 
   1  -6  -1  209.58   16.20 
  -1  -6   1  173.48   13.50 
   1  -6  -1  162.38   13.00 
   1  -6  -1  179.38   13.30 
   1  -6  -1  196.88   14.20 
   1  -6  -1  202.68   14.30 
  -1  -6   1  199.38   10.90 
  -1  -6   1  210.08   15.30 
   1  -6  -1  171.98   13.60 
   1  -6  -1  174.28   13.70 
   1  -6  -1  181.58   13.10 
  -1  -6   1  203.88   14.30 
  -1  -6   1  184.48   15.00 
  -1  -6   1  182.98    9.00 
  -1  -6   1  158.18   13.30 
  -1   6   1  183.28   13.80 
   1   6  -1  186.88   14.80 
  -1   6   1  218.58   15.20 
   1   6  -1  191.98   15.60 
   1   6  -1  177.88   15.40 
  -1   6   1  180.48   11.70 
  -1   6   1  203.18   12.70 
   1   6  -1  160.28   16.00 
  -1   6   1  172.88   13.30 
   1   6  -1  191.48   14.10 
  -1   6   1  185.58   24.20 
   1   6  -1  155.68   12.10 
  -1   6   1  177.18   14.10 
  -1   6   1  198.28   13.30 
   1   6  -1  186.38   14.30 
  -1   6   1  190.18   14.90 
  -1   6   1  187.78   14.70 
   1   6  -1  184.28   19.90 
  -1   6   1  191.48   22.10 
  -1   6   1  203.88   24.00 
   1   6  -1  190.08   15.30 
  -1   6   1  207.98   11.90 
  -1   6   1  198.38   14.40 
   1   6  -1  174.38   19.40 
   1   6  -1  177.08   14.50 
  -1   6   1  167.78   20.20 
  -1   6   1  181.18   10.50 
  -1   6   1  181.38   10.50 
   1   6  -1  187.78   14.00 
  -1   6   1  154.38   16.10 
  -1   6   1  188.38   13.50 
   1   6  -1  184.68   14.50 
   1   6  -1  182.58    6.30 
   1   6  -1  192.18   14.60 
   1   6  -1  164.48   13.50 
  -1   6   1  187.98   16.10 
   0  -6  -1  427.26   23.20 
   0  -6   1  452.55   23.10 
   0  -6   1  431.56   22.70 
   0  -6   1  467.55   24.20 
   0  -6  -1  430.86   21.40 
   0  -6   1  426.46   21.70 
   0  -6  -1  425.96   22.90 
   0  -6  -1  436.06   20.40 
   0  -6   1  456.05   19.20 
   0  -6   1  415.26   14.00 
   0  -6   1  443.76   22.30 
   0  -6   1  399.66   21.80 
   0  -6  -1  437.26   22.60 
   0  -6   1  406.56   22.80 
   0  -6  -1  450.85   22.90 
   0  -6   1  369.06   21.70 
   0  -6  -1  422.86   15.00 
   0  -6  -1  420.96   22.70 
   0  -6  -1  431.66   22.20 
   0  -6  -1  441.36   22.70 
   0  -6   1  435.96   22.70 
   0  -6  -1  449.56   22.90 
   0  -6   1  466.55   21.50 
   0  -6  -1  394.46   21.50 
   0  -6   1  420.16   23.30 
   0  -6  -1  412.86   23.10 
   0  -6   1  399.86   21.40 
   0  -6   1  384.56   22.80 
   0  -6  -1  404.66   22.70 
   0   6  -1  446.66   24.20 
   0   6  -1  455.25   21.30 
   0   6   1  403.36   28.60 
   0   6   1  476.85   23.90 
   0   6   1  452.65   23.00 
   0   6  -1  436.36   28.00 
   0   6   1  460.05   23.20 
   0   6   1  404.76   23.00 
   0   6   1  496.45   22.20 
   0   6  -1  409.26   21.90 
   0   6  -1  430.76   22.70 
   0   6   1  400.96   26.60 
   0   6   1  460.45   23.60 
   0   6  -1  407.86   23.10 
   0   6   1  424.16   20.70 
   0   6  -1  402.16   23.30 
   0   6  -1  494.55   30.90 
   0   6  -1  438.76   21.50 
   0   6   1  410.36   18.90 
   0   6  -1  450.15   22.50 
   0   6   1  443.76   25.30 
   0   6  -1  386.96   23.30 
   0   6  -1  429.76   26.00 
   0   6  -1  434.06   19.90 
   0   6  -1  452.95   27.40 
   0   6   1  401.26   23.20 
   0   6  -1  444.56   24.20 
   0   6  -1  374.96   21.10 
   0   6   1  405.86   21.70 
   0   6  -1  392.86   21.70 
   0   6   1  416.86   22.10 
   0   6   1  420.36   21.30 
   0   6   1  465.35   28.30 
   0   6   1  436.46   26.80 
   0   6  -1  440.66   22.10 
  -1  -6  -1  167.68   16.40 
   1  -6   1  116.79    5.90 
   1  -6   1  119.19    4.90 
  -1  -6  -1  125.39   14.30 
   1  -6   1  123.89   10.50 
   1  -6   1  122.49    9.80 
  -1  -6  -1  129.79   14.00 
   1  -6   1  102.19   13.50 
  -1  -6  -1  103.49   11.70 
  -1  -6  -1  120.89   14.50 
   1  -6   1  125.09   13.50 
  -1  -6  -1  134.09   10.50 
  -1  -6  -1  124.39   13.60 
  -1  -6  -1  123.99    6.70 
  -1  -6  -1  105.59   12.90 
  -1  -6  -1  120.49   13.10 
   1  -6   1  103.49   11.40 
  -1  -6  -1   90.69   11.70 
  -1  -6  -1  132.39   12.80 
  -1  -6  -1  128.59   13.30 
  -1  -6  -1  101.49   12.60 
   1  -6   1  114.09   13.20 
   1  -6   1  113.19   12.20 
  -1  -6  -1   98.49   12.60 
   1  -6   1  124.29   12.40 
   1  -6   1  108.99   12.20 
   1  -6   1  116.49   13.60 
   1  -6   1  103.69   13.60 
  -1  -6  -1  118.09    4.90 
   1  -6   1  132.49   14.70 
  -1   6  -1  106.89   15.30 
  -1   6  -1  106.39   11.90 
  -1   6  -1  118.39    9.30 
   1   6   1   98.39   12.20 
  -1   6  -1  106.29    6.90 
   1   6   1  103.49   12.20 
   1   6   1   94.99   12.10 
   1   6   1  128.99   14.50 
  -1   6  -1  134.19   10.80 
  -1   6  -1  129.89   15.00 
  -1   6  -1  122.49   10.60 
  -1   6  -1  103.49    8.50 
   1   6   1  106.59   14.90 
   1   6   1  124.59   13.30 
   1   6   1  119.29   13.20 
  -1   6  -1  119.09   13.20 
   1   6   1  103.89   13.50 
  -1   6  -1  116.79   12.40 
   1   6   1  113.99   14.80 
  -1   6  -1  116.09   12.60 
   1   6   1  125.19    4.90 
   1   6   1  127.39   14.20 
   1   6   1  107.49   11.10 
  -1   6  -1  154.68   16.00 
   1   6   1  121.99   13.90 
  -1   6  -1  146.19   21.40 
  -1   6  -1  139.29   18.60 
  -1   6  -1  115.59   12.90 
   1   6   1  107.39   12.20 
  -1   6  -1  131.19    5.70 
  -1   6  -1  120.89   10.70 
  -1   6  -1  135.99   14.70 
   1   6   1  126.49   14.70 
  -1   6  -1  133.09   21.50 
   1   6   1   99.09   14.00 
  -1   6  -1  139.79   13.50 
  -1   6  -1  114.99   11.60 
  -1   6  -1  101.09   13.10 
  -2  -6  -1  509.45   27.00 
   2  -6   1  451.05   25.20 
   2  -6   1  501.95   18.70 
  -2  -6  -1  491.25   23.60 
  -2  -6  -1  514.65   24.20 
  -2  -6  -1  499.65   25.00 
   2  -6   1  488.25   16.10 
  -2  -6  -1  513.35   21.50 
   2  -6   1  498.35   27.80 
   2  -6   1  492.15   19.80 
  -2  -6  -1  514.65   23.10 
   2  -6   1  485.05   23.70 
   2  -6   1  503.15   22.50 
   2  -6   1  493.05   20.20 
   2  -6   1  448.76   22.60 
  -2  -6  -1  471.25   25.40 
  -2  -6  -1  515.95   26.30 
   2  -6   1  486.55   28.30 
  -2  -6  -1  510.25   27.00 
   2  -6   1  488.15   22.40 
  -2  -6  -1  467.25   25.30 
   2  -6   1  523.45   24.80 
   2  -6   1  494.75   22.60 
  -2  -6  -1  502.55   27.50 
  -2  -6  -1  529.25   25.10 
  -2  -6  -1  500.15   18.00 
  -2  -6  -1  520.75   19.10 
   2  -6   1  503.25   26.60 
  -2  -6  -1  504.25   26.30 
  -2  -6  -1  452.65   25.60 
  -2   6  -1  525.45   27.10 
   2   6   1  538.05   27.40 
   2   6   1  543.45   27.30 
   2   6   1  547.15   27.80 
   2   6   1  512.65   26.40 
  -2   6  -1  546.55   22.10 
   2   6   1  488.25   18.00 
  -2   6  -1  502.35   23.40 
  -2   6  -1  488.55   26.70 
  -2   6  -1  491.25   20.80 
   2   6   1  492.65   25.50 
   2   6   1  478.65   28.40 
  -2   6  -1  492.65   23.00 
  -2   6  -1  516.35   25.20 
   2   6   1  467.55   25.20 
  -2   6  -1  474.45   20.80 
  -2   6  -1  518.75   23.60 
  -2   6  -1  490.55   24.90 
   2   6   1  507.95   26.30 
  -2   6  -1  503.55   18.10 
   2   6   1  509.95   27.90 
  -2   6  -1  587.54   33.70 
  -2   6  -1  470.75   19.80 
   2   6   1  475.95   25.20 
  -2   6  -1  506.95   23.30 
   2   6   1  491.95   23.90 
  -2   6  -1  531.05   26.30 
  -2   6  -1  494.65   17.90 
   2   6   1  464.85   24.90 
  -2   6  -1  468.95   28.00 
  -2   6  -1  524.95   26.10 
   2   6   1  533.65   26.50 
   2   6   1  523.55   27.50 
  -3  -6  -1    2.70    4.10 
   3  -6   1   -2.60    3.80 
  -3  -6  -1    4.80    3.80 
  -3  -6  -1   -3.30    2.90 
   3  -6   1   -2.20    2.40 
  -3  -6  -1    0.30    3.00 
  -3  -6  -1    1.90    3.70 
  -3  -6  -1   -1.20    3.10 
  -3  -6  -1    0.40    2.10 
   3  -6   1    3.50    4.30 
   3  -6   1   -0.90    1.40 
   3  -6   1    2.40    2.50 
   3  -6   1   -4.30    2.40 
  -3  -6  -1   -4.30    2.60 
   3  -6   1    2.30    5.60 
  -3  -6  -1    0.30    2.90 
  -3  -6  -1   -1.90    2.50 
   3  -6   1    4.90    4.50 
  -3  -6  -1   -2.10    2.40 
  -3  -6  -1   -4.50    2.90 
   3  -6   1    7.30    3.40 
  -3  -6  -1   -1.00    3.70 
  -3  -6  -1   -0.30    2.40 
  -3  -6  -1    4.50    3.20 
  -3  -6  -1   -0.60    3.10 
   3  -6   1    0.50    2.60 
   3  -6   1    7.40    3.80 
   3  -6   1    1.80    2.80 
   3   6   1   -2.20    3.00 
  -3   6  -1   -1.80    1.80 
   3   6   1    0.50    3.50 
  -3   6  -1    0.20    2.80 
  -3   6  -1    0.90    4.60 
   3   6   1    4.00    4.70 
  -3   6  -1   -0.40    2.00 
   3   6   1   -4.40    2.20 
   3   6   1   -0.10    3.60
[truncated: 3,541,488 more chars]
