# Supplementary material
Source: MDPI journal article supplement (https://www.mdpi.com/2073-4352/13/7/1043)
Supplement: s1 [file s1 › 7 Gd Ha2020_2_0m_a.cif]

 
data_Ha2020_2_0m_a 
  
_audit_creation_method            'SHELXL-2014/7' 
_shelx_SHELXL_version_number      '2014/7' 
_chemical_name_systematic         ? 
_chemical_name_common             ? 
_chemical_melting_point           ? 
_chemical_formula_moiety          ? 
_chemical_formula_sum 
 'C4 H12 Br Gd O7' 
_chemical_formula_weight          409.30 
  
loop_ 
 _atom_type_symbol 
 _atom_type_description 
 _atom_type_scat_dispersion_real 
 _atom_type_scat_dispersion_imag 
 _atom_type_scat_source 
 'C'  'C'   0.0033   0.0016 
 'International Tables Vol C Tables 4.2.6.8 and 6.1.1.4' 
 'H'  'H'   0.0000   0.0000 
 'International Tables Vol C Tables 4.2.6.8 and 6.1.1.4' 
 'O'  'O'   0.0106   0.0060 
 'International Tables Vol C Tables 4.2.6.8 and 6.1.1.4' 
 'Br'  'Br'  -0.2901   2.4595 
 'International Tables Vol C Tables 4.2.6.8 and 6.1.1.4' 
 'Gd'  'Gd'  -0.1653   3.9035 
 'International Tables Vol C Tables 4.2.6.8 and 6.1.1.4' 
  
_space_group_crystal_system       monoclinic 
_space_group_IT_number            14 
_space_group_name_H-M_alt         'P 21/n' 
_space_group_name_Hall            '-P 2yn' 
  
_shelx_space_group_comment 
; 
The symmetry employed for this shelxl refinement is uniquely defined 
by the following loop, which should always be used as a source of 
symmetry information in preference to the above space-group names. 
They are only intended as comments. 
; 
  
loop_ 
 _space_group_symop_operation_xyz 
 'x, y, z' 
 '-x+1/2, y+1/2, -z+1/2' 
 '-x, -y, -z' 
 'x-1/2, -y-1/2, z-1/2' 
  
_cell_length_a                    7.8191(2) 
_cell_length_b                    8.0130(2) 
_cell_length_c                    17.7804(6) 
_cell_angle_alpha                 90 
_cell_angle_beta                  95.929(2) 
_cell_angle_gamma                 90 
_cell_volume                      1108.06(5) 
_cell_formula_units_Z             4 
_cell_measurement_temperature     100(2) 
_cell_measurement_reflns_used     9681 
_cell_measurement_theta_min       2.30 
_cell_measurement_theta_max       28.30 
  
_exptl_crystal_description        prism 
_exptl_crystal_colour             colourless 
_exptl_crystal_density_meas       ? 
_exptl_crystal_density_method     ? 
_exptl_crystal_density_diffrn     2.453 
_exptl_crystal_F_000              764 
_exptl_transmission_factor_min    ? 
_exptl_transmission_factor_max    ? 
_exptl_crystal_size_max           0.418 
_exptl_crystal_size_mid           0.112 
_exptl_crystal_size_min           0.078 
_exptl_absorpt_coefficient_mu     9.595 
_shelx_estimated_absorpt_T_min    0.108 
_shelx_estimated_absorpt_T_max    0.522 
_exptl_absorpt_correction_type    multi-scan 
_exptl_absorpt_correction_T_min   0.333 
_exptl_absorpt_correction_T_max   0.714 
_exptl_absorpt_process_details    'Bruker SADABS'
_exptl_absorpt_special_details    ? 
_diffrn_ambient_temperature       100(2) 
_diffrn_radiation_wavelength      0.71073 
_diffrn_radiation_type            MoK\a 
_diffrn_source                    ? 
_diffrn_measurement_device_type   'Bruker APEX-II CCD' 
_diffrn_measurement_method        '\f and \w scans' 
_diffrn_detector_area_resol_mean  ? 
_diffrn_reflns_number             132199 
_diffrn_reflns_av_unetI/netI      0.0089 
_diffrn_reflns_av_R_equivalents   0.0410 
_diffrn_reflns_limit_h_min        -10 
_diffrn_reflns_limit_h_max        10 
_diffrn_reflns_limit_k_min        -10 
_diffrn_reflns_limit_k_max        10 
_diffrn_reflns_limit_l_min        -23 
_diffrn_reflns_limit_l_max        23 
_diffrn_reflns_theta_min          2.750 
_diffrn_reflns_theta_max          27.999 
_diffrn_reflns_theta_full         25.242 
_diffrn_measured_fraction_theta_max   1.000 
_diffrn_measured_fraction_theta_full  1.000 
_diffrn_reflns_Laue_measured_fraction_max    1.000 
_diffrn_reflns_Laue_measured_fraction_full   1.000 
_diffrn_reflns_point_group_measured_fraction_max   1.000 
_diffrn_reflns_point_group_measured_fraction_full  1.000 
_reflns_number_total              2690 
_reflns_number_gt                 2568 
_reflns_threshold_expression      'I > 2\s(I)' 
_reflns_Friedel_coverage          0.000 
_reflns_Friedel_fraction_max      . 
_reflns_Friedel_fraction_full     . 
  
_reflns_special_details 
; 
 Reflections were merged by SHELXL according to the crystal 
 class for the calculation of statistics and refinement. 
  
 _reflns_Friedel_fraction is defined as the number of unique 
 Friedel pairs measured divided by the number that would be 
 possible theoretically, ignoring centric projections and 
 systematic absences. 
; 
  
_computing_data_collection        'Bruker APEX2' 
_computing_cell_refinement        'Bruker SAINT' 
_computing_data_reduction         'Bruker SAINT' 
_computing_structure_solution     'SHELXS-97 (Sheldrick 2008)' 
_computing_structure_refinement 'SHELXL-2014/7 (Sheldrick, 2014)' 
_computing_molecular_graphics     'Bruker SHELXTL' 
_computing_publication_material   'Bruker SHELXTL' 
_refine_special_details           ? 
_refine_ls_structure_factor_coef  Fsqd 
_refine_ls_matrix_type            full 
_refine_ls_weighting_scheme       calc 
_refine_ls_weighting_details 
'w=1/[\s^2^(Fo^2^)+(0.0225P)^2^+1.2833P] where P=(Fo^2^+2Fc^2^)/3' 
_atom_sites_solution_primary      direct 
_atom_sites_solution_secondary    ? 
_atom_sites_solution_hydrogens    mixed 
_refine_ls_hydrogen_treatment     constr 
_refine_ls_extinction_method      none 
_refine_ls_extinction_coef        . 
_refine_ls_number_reflns          2690 
_refine_ls_number_parameters      125 
_refine_ls_number_restraints      0 
_refine_ls_R_factor_all           0.0168 
_refine_ls_R_factor_gt            0.0155 
_refine_ls_wR_factor_ref          0.0410 
_refine_ls_wR_factor_gt           0.0403 
_refine_ls_goodness_of_fit_ref    1.134 
_refine_ls_restrained_S_all       1.134 
_refine_ls_shift/su_max           0.002 
_refine_ls_shift/su_mean          0.000 
  
loop_ 
 _atom_site_label 
 _atom_site_type_symbol 
 _atom_site_fract_x 
 _atom_site_fract_y 
 _atom_site_fract_z 
 _atom_site_U_iso_or_equiv 
 _atom_site_adp_type 
 _atom_site_occupancy 
 _atom_site_site_symmetry_order 
 _atom_site_calc_flag 
 _atom_site_refinement_flags_posn 
 _atom_site_refinement_flags_adp 
 _atom_site_refinement_flags_occupancy 
 _atom_site_disorder_assembly 
 _atom_site_disorder_group 
Gd1 Gd 0.26036(2) 0.45965(2) 0.53546(2) 0.01002(4) Uani 1 1 d . . . . . 
Br1 Br 0.39372(3) 0.96112(3) 0.68581(2) 0.01713(6) Uani 1 1 d . . . . . 
O11 O -0.0098(2) 0.3379(2) 0.53332(9) 0.0158(3) Uani 1 1 d . . . . . 
O12 O -0.2803(2) 0.2664(2) 0.52272(9) 0.0161(3) Uani 1 1 d . . . . . 
C11 C -0.1264(3) 0.2345(3) 0.54602(13) 0.0134(4) Uani 1 1 d . . . . . 
C12 C -0.0822(3) 0.0762(3) 0.58879(16) 0.0221(5) Uani 1 1 d . . . . . 
H12A H -0.0608 0.1010 0.6429 0.037(8) Uiso 0.55(4) 1 d R U P . . 
H12B H 0.0212 0.0267 0.5712 0.037(8) Uiso 0.55(4) 1 d R U P . . 
H12C H -0.1781 -0.0026 0.5802 0.037(8) Uiso 0.55(4) 1 d R U P . . 
H12D H 0.0283 0.0727 0.6203 0.037(8) Uiso 0.45(4) 1 d R U P . . 
H12E H -0.1760 0.0603 0.6206 0.037(8) Uiso 0.45(4) 1 d R U P . . 
H12F H -0.0858 -0.0126 0.5508 0.037(8) Uiso 0.45(4) 1 d R U P . . 
O21 O 0.5400(2) 0.55326(19) 0.57315(9) 0.0132(3) Uani 1 1 d . . . . . 
O22 O 0.8114(2) 0.6178(2) 0.59717(9) 0.0159(3) Uani 1 1 d . . . . . 
C21 C 0.6698(3) 0.5839(3) 0.62150(13) 0.0122(4) Uani 1 1 d . . . . . 
C22 C 0.6536(3) 0.5761(4) 0.70457(14) 0.0206(5) Uani 1 1 d . . . . . 
H22A H 0.7667 0.5549 0.7320 0.080(9) Uiso 1 1 calc R U . . . 
H22B H 0.5746 0.4859 0.7148 0.080(9) Uiso 1 1 calc R U . . . 
H22C H 0.6087 0.6826 0.7213 0.080(9) Uiso 1 1 calc R U . . . 
O1W O 0.3869(2) 0.1838(2) 0.53091(9) 0.0146(3) Uani 1 1 d . . . . . 
H11W H 0.3850 0.1063 0.5720 0.047(7) Uiso 1 1 d R U . . . 
H12W H 0.5044 0.1859 0.5198 0.047(7) Uiso 1 1 d R U . . . 
O2W O 0.1568(2) 0.6495(2) 0.62459(9) 0.0156(3) Uani 1 1 d . . . . . 
H21W H 0.0366 0.6666 0.6287 0.030(6) Uiso 1 1 d R U . . . 
H22W H 0.2119 0.7494 0.6447 0.030(6) Uiso 1 1 d R U . . . 
O3W O 0.2836(2) 0.3443(2) 0.66137(9) 0.0186(3) Uani 1 1 d . . . . . 
H31W H 0.2378 0.3941 0.7041 0.040(7) Uiso 1 1 d R U . . . 
H32W H 0.3143 0.2327 0.6771 0.040(7) Uiso 1 1 d R U . . . 
  
loop_ 
 _atom_site_aniso_label 
 _atom_site_aniso_U_11 
 _atom_site_aniso_U_22 
 _atom_site_aniso_U_33 
 _atom_site_aniso_U_23 
 _atom_site_aniso_U_13 
 _atom_site_aniso_U_12 
Gd1 0.00588(6) 0.01251(6) 0.01175(6) 0.00035(4) 0.00124(4) -0.00126(3) 
Br1 0.01948(12) 0.01462(11) 0.01700(12) 0.00189(8) 0.00046(9) -0.00222(8) 
O11 0.0105(7) 0.0184(8) 0.0189(8) 0.0006(6) 0.0030(6) -0.0040(6) 
O12 0.0087(7) 0.0189(8) 0.0208(8) 0.0043(7) 0.0017(6) -0.0007(6) 
C11 0.0099(9) 0.0162(10) 0.0143(10) -0.0014(8) 0.0030(8) -0.0008(8) 
C12 0.0204(12) 0.0204(12) 0.0250(13) 0.0080(10) -0.0001(10) 0.0011(10) 
O21 0.0086(7) 0.0175(8) 0.0130(7) 0.0001(6) -0.0010(6) -0.0009(6) 
O22 0.0091(7) 0.0224(8) 0.0159(8) -0.0020(7) 0.0007(6) -0.0028(6) 
C21 0.0103(9) 0.0117(9) 0.0142(10) -0.0009(8) -0.0002(8) 0.0003(8) 
C22 0.0154(11) 0.0334(14) 0.0130(11) -0.0001(10) 0.0008(9) 0.0036(10) 
O1W 0.0115(7) 0.0152(7) 0.0178(8) 0.0025(6) 0.0045(6) 0.0000(6) 
O2W 0.0105(7) 0.0170(8) 0.0191(8) -0.0034(6) 0.0005(6) 0.0001(6) 
O3W 0.0251(9) 0.0167(8) 0.0147(8) 0.0026(6) 0.0060(7) 0.0039(7) 
  
_geom_special_details 
; 
 All esds (except the esd in the dihedral angle between two l.s. planes) 
 are estimated using the full covariance matrix.  The cell esds are taken 
 into account individually in the estimation of esds in distances, angles 
 and torsion angles; correlations between esds in cell parameters are only 
 used when they are defined by crystal symmetry.  An approximate (isotropic) 
 treatment of cell esds is used for estimating esds involving l.s. planes. 
; 
  
loop_ 
 _geom_bond_atom_site_label_1 
 _geom_bond_atom_site_label_2 
 _geom_bond_distance 
 _geom_bond_site_symmetry_2 
 _geom_bond_publ_flag 
Gd1 O11 2.3236(15) . ? 
Gd1 O21 2.3428(16) . ? 
Gd1 O2W 2.3976(16) . ? 
Gd1 O3W 2.4115(16) . ? 
Gd1 O1W 2.4264(16) . ? 
Gd1 O12 2.4386(17) 3_566 ? 
Gd1 O22 2.4470(16) 3_666 ? 
Gd1 O21 2.6078(16) 3_666 ? 
Gd1 O11 2.7331(16) 3_566 ? 
O11 C11 1.269(3) . ? 
O12 C11 1.258(3) . ? 
C11 C12 1.501(3) . ? 
C12 H12A 0.9800 . ? 
C12 H12B 0.9800 . ? 
C12 H12C 0.9800 . ? 
C12 H12D 0.9800 . ? 
C12 H12E 0.9800 . ? 
C12 H12F 0.9800 . ? 
O21 C21 1.285(3) . ? 
O22 C21 1.259(3) . ? 
C21 C22 1.497(3) . ? 
C22 H22A 0.9800 . ? 
C22 H22B 0.9800 . ? 
C22 H22C 0.9800 . ? 
O1W H11W 0.9600 . ? 
O1W H12W 0.9600 . ? 
O2W H21W 0.9600 . ? 
O2W H22W 0.9600 . ? 
O3W H31W 0.9600 . ? 
O3W H32W 0.9600 . ? 
  
loop_ 
 _geom_angle_atom_site_label_1 
 _geom_angle_atom_site_label_2 
 _geom_angle_atom_site_label_3 
 _geom_angle 
 _geom_angle_site_symmetry_1 
 _geom_angle_site_symmetry_3 
 _geom_angle_publ_flag 
O11 Gd1 O21 163.54(6) . . ? 
O11 Gd1 O2W 84.75(6) . . ? 
O21 Gd1 O2W 88.67(6) . . ? 
O11 Gd1 O3W 80.52(6) . . ? 
O21 Gd1 O3W 83.03(6) . . ? 
O2W Gd1 O3W 68.14(6) . . ? 
O11 Gd1 O1W 89.44(6) . . ? 
O21 Gd1 O1W 85.96(5) . . ? 
O2W Gd1 O1W 140.08(6) . . ? 
O3W Gd1 O1W 71.94(5) . . ? 
O11 Gd1 O12 117.96(6) . 3_566 ? 
O21 Gd1 O12 74.60(5) . 3_566 ? 
O2W Gd1 O12 75.51(6) . 3_566 ? 
O3W Gd1 O12 137.46(6) . 3_566 ? 
O1W Gd1 O12 139.62(5) . 3_566 ? 
O11 Gd1 O22 76.12(5) . 3_666 ? 
O21 Gd1 O22 118.12(5) . 3_666 ? 
O2W Gd1 O22 137.61(5) . 3_666 ? 
O3W Gd1 O22 141.74(6) . 3_666 ? 
O1W Gd1 O22 77.90(6) . 3_666 ? 
O12 Gd1 O22 80.68(6) 3_566 3_666 ? 
O11 Gd1 O21 125.74(5) . 3_666 ? 
O21 Gd1 O21 67.18(6) . 3_666 ? 
O2W Gd1 O21 141.60(5) . 3_666 ? 
O3W Gd1 O21 132.76(5) . 3_666 ? 
O1W Gd1 O21 70.23(5) . 3_666 ? 
O12 Gd1 O21 69.65(5) 3_566 3_666 ? 
O22 Gd1 O21 51.07(5) 3_666 3_666 ? 
O11 Gd1 O11 68.49(6) . 3_566 ? 
O21 Gd1 O11 122.86(5) . 3_566 ? 
O2W Gd1 O11 69.12(5) . 3_566 ? 
O3W Gd1 O11 128.65(5) . 3_566 ? 
O1W Gd1 O11 143.29(5) . 3_566 ? 
O12 Gd1 O11 49.47(5) 3_566 3_566 ? 
O22 Gd1 O11 68.71(5) 3_666 3_566 ? 
O21 Gd1 O11 98.54(5) 3_666 3_566 ? 
Gd1 Gd1 Gd1 140.308(5) 3_666 3_566 ? 
C11 O11 Gd1 159.98(15) . . ? 
C11 O11 Gd1 88.41(13) . 3_566 ? 
Gd1 O11 Gd1 111.51(6) . 3_566 ? 
C11 O12 Gd1 102.81(14) . 3_566 ? 
O12 C11 O11 119.3(2) . . ? 
O12 C11 C12 120.1(2) . . ? 
O11 C11 C12 120.7(2) . . ? 
C11 C12 H12A 109.4 . . ? 
C11 C12 H12B 109.5 . . ? 
H12A C12 H12B 109.5 . . ? 
C11 C12 H12C 109.5 . . ? 
H12A C12 H12C 109.5 . . ? 
H12B C12 H12C 109.5 . . ? 
C11 C12 H12D 117.2 . . ? 
C11 C12 H12E 104.8 . . ? 
H12D C12 H12E 109.5 . . ? 
C11 C12 H12F 106.0 . . ? 
H12D C12 H12F 109.5 . . ? 
H12E C12 H12F 109.5 . . ? 
C21 O21 Gd1 154.48(15) . . ? 
C21 O21 Gd1 90.62(13) . 3_666 ? 
Gd1 O21 Gd1 112.82(6) . 3_666 ? 
C21 O22 Gd1 98.86(13) . 3_666 ? 
O22 C21 O21 118.3(2) . . ? 
O22 C21 C22 121.0(2) . . ? 
O21 C21 C22 120.7(2) . . ? 
C21 C22 H22A 109.5 . . ? 
C21 C22 H22B 109.5 . . ? 
H22A C22 H22B 109.5 . . ? 
C21 C22 H22C 109.5 . . ? 
H22A C22 H22C 109.5 . . ? 
H22B C22 H22C 109.5 . . ? 
Gd1 O1W H11W 121.7 . . ? 
Gd1 O1W H12W 113.2 . . ? 
H11W O1W H12W 105.0 . . ? 
Gd1 O2W H21W 122.8 . . ? 
Gd1 O2W H22W 127.3 . . ? 
H21W O2W H22W 105.0 . . ? 
Gd1 O3W H31W 125.3 . . ? 
Gd1 O3W H32W 128.3 . . ? 
H31W O3W H32W 105.0 . . ? 
  
loop_ 
 _geom_hbond_atom_site_label_D 
 _geom_hbond_atom_site_label_H 
 _geom_hbond_atom_site_label_A 
 _geom_hbond_distance_DH 
 _geom_hbond_distance_HA 
 _geom_hbond_distance_DA 
 _geom_hbond_angle_DHA 
 _geom_hbond_site_symmetry_A 
O1W H11W Br1  0.96 2.33 3.2776(16) 169.3 1_545 
O1W H12W O12  0.96 1.80 2.703(2) 155.9 1_655 
O2W H21W O22  0.96 1.83 2.706(2) 149.6 1_455 
O2W H22W Br1  0.96 2.28 3.2302(16) 168.1 . 
O3W H31W Br1  0.96 2.36 3.3105(17) 168.4 2_546 
O3W H32W Br1  0.96 2.26 3.2065(17) 166.9 1_545 
  
_refine_diff_density_max    0.695 
_refine_diff_density_min   -0.977 
_refine_diff_density_rms    0.111 
  
_shelx_res_file 
; 
  
    Ha2020_2_0m_a.res created by SHELXL-2014/7 
  
  
TITL Ha2020_2_0m_a.res in P2(1)/n 
CELL  0.71073   7.8191   8.0130  17.7804   90.000   95.929   90.000 
ZERR    4.000   0.0002   0.0002   0.0006    0.000    0.002    0.000 
LATT 1 
SYMM 1/2-X, 1/2+Y, 1/2-Z 
SFAC C  H  O  Br Gd 
UNIT 16 48 28 4 4 
LIST 4 ! automatically inserted. Change 6 to 4 for CHECKCIF!! 
OMIT -3 56 
L.S. 10 
ACTA 
ACTA 
BOND $H 
rem DFIX 0.96  0.0001 O1w H11w O1w H12w O2w H21w O2w H22w O3w H31w O3w H32w 
rem dfix 1.523  0.0001 H11w H12w H21w H22w H31w H32w 
FREE Gd1 C21_$6 
FREE Gd1 C11_$7 
EQIV $6 1-x, 1-y, 1-z 
BIND Gd1 Gd1_$6 
BIND Gd1 Gd1_$7 
EQIV $7 -x,1-y,1-z 
BIND Gd1 O11_$7 
ACTA 
HTAB 
EQIV $1 -x+3/2, y-1/2, -z+3/2 
EQIV $2 x, y-1, z 
HTAB O1W Br1_$2 
EQIV $3 x+1, y, z 
HTAB O1W O12_$3 
EQIV $4 x-1, y, z 
HTAB O2W O22_$4 
HTAB O2W Br1 
EQIV $5 -x+1/2, y-1/2, -z+3/2 
HTAB O3W Br1_$5 
HTAB O3W Br1_$2 
SIZE 0.074  0.120  0.465 
FMAP 2 
SIZE 0.078  0.112  0.418 
rem DFIX 0.98  0.0001 C12 H12d C12 H12e C12 H12f 
rem dfix 1.601 0.0001 H12d H12e H12d H12f H12e H12f 
PLAN 8 
TEMP -173 
WGHT    0.022500    1.283300 
FVAR       0.08384   0.03727   0.07982   0.04680   0.02973   0.04010   0.55263 
GD1   5    0.260362    0.459651    0.535456    11.00000    0.00588    0.01251 = 
         0.01175    0.00035    0.00124   -0.00126 
BR1   4    0.393724    0.961115    0.685809    11.00000    0.01948    0.01462 = 
         0.01700    0.00189    0.00046   -0.00222 
O11   3   -0.009815    0.337917    0.533324    11.00000    0.01049    0.01841 = 
         0.01888    0.00061    0.00296   -0.00399 
O12   3   -0.280294    0.266384    0.522721    11.00000    0.00871    0.01888 = 
         0.02080    0.00427    0.00168   -0.00066 
C11   1   -0.126394    0.234498    0.546017    11.00000    0.00994    0.01621 = 
         0.01429   -0.00143    0.00299   -0.00077 
C12   1   -0.082191    0.076168    0.588789    11.00000    0.02041    0.02042 = 
         0.02499    0.00803   -0.00007    0.00108 
AFIX   3 
H12A  2   -0.060799    0.100997    0.642913    71.00000   21.00000 
H12B  2    0.021150    0.026723    0.571166    71.00000   21.00000 
H12C  2   -0.178133   -0.002570    0.580237    71.00000   21.00000 
H12D  2    0.028256    0.072674    0.620292   -71.00000   21.00000 
H12E  2   -0.176032    0.060348    0.620612   -71.00000   21.00000 
H12F  2   -0.085801   -0.012647    0.550765   -71.00000   21.00000 
AFIX   0 
  
O21   3    0.539958    0.553261    0.573147    11.00000    0.00861    0.01753 = 
         0.01299    0.00010   -0.00099   -0.00094 
O22   3    0.811412    0.617833    0.597170    11.00000    0.00912    0.02242 = 
         0.01595   -0.00195    0.00071   -0.00280 
C21   1    0.669845    0.583872    0.621504    11.00000    0.01030    0.01169 = 
         0.01421   -0.00089   -0.00020    0.00028 
C22   1    0.653567    0.576147    0.704570    11.00000    0.01536    0.03339 = 
         0.01301   -0.00006    0.00078    0.00361 
AFIX 137 
H22A  2    0.766744    0.554911    0.731974    11.00000   31.00000 
H22B  2    0.574609    0.485909    0.714814    11.00000   31.00000 
H22C  2    0.608691    0.682562    0.721311    11.00000   31.00000 
AFIX   0 
O1W   3    0.386913    0.183814    0.530905    11.00000    0.01155    0.01524 = 
         0.01777    0.00250    0.00451    0.00004 
AFIX   3 
H11W  2    0.384983    0.106278    0.571968    11.00000   41.00000 
H12W  2    0.504447    0.185857    0.519773    11.00000   41.00000 
AFIX   0 
O2W   3    0.156767    0.649542    0.624591    11.00000    0.01047    0.01696 = 
         0.01910   -0.00344    0.00045    0.00008 
AFIX   3 
H21W  2    0.036574    0.666634    0.628714    11.00000   51.00000 
H22W  2    0.211929    0.749350    0.644695    11.00000   51.00000 
AFIX   0 
O3W   3    0.283558    0.344314    0.661368    11.00000    0.02511    0.01672 = 
         0.01469    0.00258    0.00604    0.00393 
AFIX   3 
H31W  2    0.237813    0.394088    0.704141    11.00000   61.00000 
H32W  2    0.314261    0.232726    0.677109    11.00000   61.00000 
AFIX   0 
HKLF 4 
  
REM  Ha2020_2_0m_a.res in P2(1)/n 
REM R1 =  0.0155 for    2568 Fo > 4sig(Fo)  and  0.0168 for all    2690 data 
REM    125 parameters refined using      0 restraints 
  
END 
  
WGHT      0.0225      1.2833 
  
REM Instructions for potential hydrogen bonds 
HTAB C12 Br1_$2 
HTAB C22 Br1_$1 
HTAB C22 O3W 
HTAB C22 Br1 
HTAB O1W Br1_$2 
HTAB O1W O12_$3 
HTAB O2W O22_$4 
HTAB O2W Br1 
HTAB O3W Br1_$5 
HTAB O3W Br1_$2 
  
REM Highest difference peak  0.695,  deepest hole -0.977,  1-sigma level  0.111 
Q1    1   0.2634  0.5420  0.5616  11.00000  0.05    0.70 
Q2    1   0.2441  0.4391  0.4904  11.00000  0.05    0.64 
Q3    1   0.2704  0.4119  0.5779  11.00000  0.05    0.63 
Q4    1   0.2558  0.5331  0.5026  11.00000  0.05    0.60 
Q5    1   0.3820  0.9377  0.6389  11.00000  0.05    0.52 
Q6    1   0.1254  0.4560  0.5370  11.00000  0.05    0.47 
Q7    1   0.6220  0.5522  0.5279  11.00000  0.05    0.46 
Q8    1   0.4023  0.8985  0.7244  11.00000  0.05    0.45 
; 
_shelx_res_checksum   82639 
  
_shelx_hkl_file 
; 
  -1   0   0    0.31    0.07 
  -1   0   0    0.44    0.05 
  -1   0   0    0.49    0.10 
  -1   0   0    0.37    0.08 
  -1   0   0    0.45    0.10 
   1   0   0    0.22    0.07 
   1   0   0    0.28    0.09 
  -1   0   0    0.15    0.06 
   1   0   0    0.27    0.08 
   1   0   0    0.48    0.08 
  -1   0   0    0.13    0.08 
  -1   0   0    0.07    0.05 
   1   0   0    0.18    0.06 
  -1   0   0    0.35    0.08 
   1   0   0   -0.01    0.04 
  -1   0   0    0.58    0.08 
  -1   0   0    0.37    0.07 
   1   0   0    0.17    0.05 
  -1   0   0    0.10    0.05 
   1   0   0    0.14    0.06 
  -1   0   0    0.46    0.06 
  -1   0   0    0.12    0.07 
   1   0   0    0.19    0.09 
  -1   0   0    0.15    0.05 
  -1   0   0    0.39    0.07 
  -1   0   0    0.31    0.07 
  -1   0   0    0.20    0.07 
   1   0   0    0.14    0.06 
   1   0   0    0.20    0.06 
  -1   0   0    0.06    0.05 
  -1   0   0    0.52    0.07 
  -1   0   0    0.53    0.09 
   1   0   0    0.06    0.05 
  -1   0   0    0.42    0.07 
  -1   0   0    0.26    0.09 
  -1   0   0    0.15    0.07 
   1   0   0    0.32    0.09 
  -1   0   0    0.38    0.07 
  -1   0   0    0.41    0.06 
  -1   0   0    0.11    0.05 
  -1   0   0    0.46    0.08 
  -1   0   0    0.03    0.04 
  -2   0   0  391.92   13.86 
  -2   0   0  399.04   14.04 
   2   0   0  387.92   13.84 
   2   0   0  399.21   13.80 
  -2   0   0  405.78   13.98 
  -2   0   0  403.45   13.84 
  -2   0   0  408.23   13.87 
  -2   0   0  391.11   13.84 
  -2   0   0  397.14   13.98 
   2   0   0  384.65   13.95 
  -2   0   0  421.88   13.99 
   2   0   0  400.01   13.89 
  -2   0   0  416.19   13.94 
   2   0   0  391.07   13.92 
   2   0   0  395.79   13.89 
   2   0   0  404.36   14.04 
   2   0   0  397.23   13.86 
   2   0   0  398.15   13.85 
   2   0   0  396.13   13.84 
   2   0   0  408.47   13.96 
  -2   0   0  397.04   14.00 
   2   0   0  400.31   14.00 
  -2   0   0  391.34   13.88 
  -2   0   0  393.83   13.91 
   2   0   0  390.39   13.92 
  -2   0   0  404.07   13.92 
  -2   0   0  418.85   14.01 
  -2   0   0  375.82   13.85 
  -2   0   0  391.39   14.30 
  -2   0   0  409.54   14.32 
   2   0   0  401.70   13.97 
   2   0   0  409.09   13.82 
  -2   0   0  385.29   13.83 
  -2   0   0  392.41   13.91 
  -2   0   0  387.28   13.93 
   2   0   0  405.61   13.87 
  -2   0   0  405.47   13.89 
   2   0   0  400.58   14.29 
   2   0   0  391.70   13.92 
  -2   0   0  403.03   13.95 
   2   0   0  395.00   13.87 
  -2   0   0  405.54   14.04 
   2   0   0  389.51   14.04 
  -2   0   0  399.35   13.95 
   2   0   0  401.58   13.86 
   2   0   0  411.95   13.99 
   2   0   0  406.80   13.84 
   2   0   0  424.80   14.05 
  -2   0   0  393.40   14.07 
   2   0   0  397.67   13.87 
  -2   0   0  392.58   13.86 
   2   0   0  398.49   13.86 
  -2   0   0  410.64   13.95 
  -2   0   0  389.46   13.98 
   2   0   0  393.57   14.01 
  -2   0   0  395.46   13.83 
  -2   0   0  392.58   13.82 
   3   0   0    0.42    0.14 
   3   0   0    0.25    0.19 
   3   0   0    0.09    0.10 
  -3   0   0    0.04    0.10 
  -3   0   0    0.22    0.22 
   3   0   0    0.03    0.11 
   3   0   0    0.35    0.19 
  -3   0   0    0.19    0.21 
   3   0   0    0.07    0.19 
  -3   0   0    0.22    0.20 
  -3   0   0    0.17    0.14 
   3   0   0    0.26    0.16 
   3   0   0    0.06    0.12 
  -3   0   0   -0.06    0.13 
  -3   0   0    0.08    0.17 
  -3   0   0    0.24    0.12 
  -3   0   0    0.38    0.21 
  -3   0   0    0.07    0.13 
  -3   0   0    0.24    0.16 
   3   0   0   -0.03    0.16 
  -3   0   0   -0.03    0.16 
   3   0   0   -0.12    0.16 
   3   0   0    0.21    0.21 
  -3   0   0    0.18    0.14 
  -3   0   0   -0.05    0.20 
   3   0   0    0.26    0.19 
   3   0   0   -0.02    0.15 
  -3   0   0    0.09    0.27 
   3   0   0    0.68    0.24 
   3   0   0   -0.13    0.10 
   3   0   0    0.38    0.16 
   3   0   0    0.40    0.16 
  -3   0   0    0.10    0.15 
   3   0   0    0.37    0.18 
  -3   0   0    0.34    0.18 
   3   0   0   -0.06    0.16 
  -3   0   0   -0.04    0.18 
   3   0   0    0.24    0.09 
   3   0   0    0.25    0.11 
   3   0   0    0.01    0.12 
   3   0   0    0.16    0.07 
   3   0   0    0.08    0.09 
   3   0   0    0.23    0.21 
   3   0   0    0.34    0.11 
  -3   0   0    0.23    0.12 
  -3   0   0    0.37    0.13 
  -3   0   0    0.08    0.28 
  -3   0   0    0.30    0.19 
  -3   0   0    0.17    0.07 
  -3   0   0    0.49    0.16 
   3   0   0    0.33    0.14 
   3   0   0    0.15    0.23 
   3   0   0    0.45    0.22 
   3   0   0    0.57    0.21 
   4   0   0   69.35    2.59 
   4   0   0   73.85    2.73 
  -4   0   0   73.71    2.87 
   4   0   0   70.13    3.09 
  -4   0   0   71.10    2.72 
  -4   0   0   74.76    2.75 
  -4   0   0   74.75    2.96 
   4   0   0   71.28    2.68 
   4   0   0   72.81    2.63 
   4   0   0   72.36    3.01 
  -4   0   0   71.20    2.88 
  -4   0   0   70.97    2.79 
   4   0   0   72.25    2.68 
  -4   0   0   71.68    2.66 
  -4   0   0   71.01    2.96 
   4   0   0   69.91    2.55 
   4   0   0   69.27    2.70 
   4   0   0   69.89    3.02 
   4   0   0   68.75    2.88 
   4   0   0   68.10    2.64 
  -4   0   0   68.14    3.44 
  -4   0   0   72.10    2.88 
   4   0   0   70.37    2.74 
  -4   0   0   70.35    2.67 
   4   0   0   68.48    2.83 
   4   0   0   70.58    2.79 
  -4   0   0   76.07    2.91 
  -4   0   0   72.28    2.72 
   4   0   0   71.73    2.75 
   4   0   0   71.43    2.85 
   4   0   0   72.11    2.70 
   4   0   0   70.87    2.72 
  -4   0   0   74.86    3.09 
   4   0   0   70.34    2.86 
   4   0   0   75.52    2.78 
  -4   0   0   70.59    3.46 
   4   0   0   71.42    2.91 
   4   0   0   69.85    2.91 
  -4   0   0   70.05    2.69 
  -4   0   0   73.79    2.78 
   4   0   0   68.43    2.97 
  -4   0   0   73.07    3.54 
  -4   0   0   68.98    2.93 
  -4   0   0   68.46    2.63 
   4   0   0   68.85    2.64 
  -5   0   0    0.25    0.16 
   5   0   0    0.36    0.32 
   5   0   0    0.16    0.24 
   5   0   0    0.08    0.14 
  -5   0   0    0.40    0.26 
  -5   0   0   -0.14    0.24 
  -5   0   0   -0.21    0.29 
   5   0   0    0.15    0.26 
  -5   0   0   -0.09    0.26 
   5   0   0   -0.17    0.18 
   5   0   0    0.07    0.15 
  -5   0   0   -0.07    0.43 
  -5   0   0    0.21    0.29 
   5   0   0    0.07    0.17 
  -5   0   0   -0.11    0.14 
   5   0   0   -0.46    0.26 
   5   0   0    0.26    0.18 
  -5   0   0   -0.04    0.15 
   5   0   0    0.44    0.31 
   5   0   0   -0.04    0.15 
  -5   0   0   -0.08    0.20 
   5   0   0    0.40    0.16 
   5   0   0    0.37    0.22 
  -5   0   0    0.48    0.30 
   5   0   0    0.06    0.09 
   5   0   0    0.09    0.32 
   5   0   0    0.00    0.12 
  -5   0   0   -0.05    0.19 
  -5   0   0    0.06    0.26 
  -5   0   0    0.17    0.41 
  -5   0   0    0.31    0.31 
  -5   0   0    0.03    0.13 
   5   0   0    0.15    0.29 
  -5   0   0    0.20    0.29 
  -5   0   0   -0.14    0.38 
  -5   0   0    0.07    0.21 
   5   0   0   -0.07    0.25 
   5   0   0   -0.33    0.24 
   5   0   0    0.62    0.36 
   6   0   0  195.00    6.92 
  -6   0   0  192.67    7.31 
   6   0   0  198.24    7.00 
  -6   0   0  190.90    6.96 
  -6   0   0  194.52    7.14 
   6   0   0  191.80    6.88 
   6   0   0  192.66    7.11 
   6   0   0  189.17    7.27 
  -6   0   0  197.31    7.30 
  -6   0   0  188.93    8.33 
   6   0   0  189.41    6.84 
   6   0   0  188.01    7.17 
   6   0   0  193.69    7.36 
   6   0   0  186.53    7.11 
   6   0   0  193.93    6.97 
   6   0   0  191.38    7.53 
  -6   0   0  188.57    6.88 
   6   0   0  193.89    7.29 
  -6   0   0  191.06    7.61 
  -6   0   0  192.20    8.34 
  -6   0   0  194.97    7.43 
   6   0   0  200.59    7.30 
  -6   0   0  197.59    7.17 
   6   0   0  198.54    7.39 
  -6   0   0  185.36    8.31 
  -6   0   0  190.91    7.31 
  -6   0   0  194.34    7.42 
   6   0   0  187.15    7.34 
  -6   0   0  199.33    7.36 
  -6   0   0  194.74    7.08 
  -6   0   0  197.20    7.05 
   6   0   0  188.63    7.50 
  -6   0   0  193.21    7.45 
  -7   0   0    0.22    0.41 
  -7   0   0    0.45    0.30 
  -7   0   0    0.68    0.42 
  -7   0   0    0.44    0.26 
   7   0   0   -0.02    0.38 
   7   0   0    0.58    0.33 
   7   0   0    0.01    0.21 
   7   0   0    0.40    0.42 
   7   0   0    0.13    0.28 
   7   0   0    0.55    0.43 
  -7   0   0    0.58    0.43 
  -7   0   0    0.55    0.34 
  -7   0   0    0.03    0.44 
   7   0   0    0.46    0.48 
   7   0   0    0.52    0.45 
  -7   0   0    0.15    0.38 
  -7   0   0    0.24    0.42 
   7   0   0    0.09    0.31 
  -7   0   0    0.74    0.49 
   7   0   0    0.06    0.23 
  -7   0   0    0.58    0.36 
  -7   0   0    0.75    0.73 
  -7   0   0    0.52    0.77 
   7   0   0    0.24    0.42 
  -7   0   0    0.01    0.51 
   7   0   0    0.36    0.45 
   7   0   0    0.05    0.39 
  -7   0   0    0.42    0.33 
  -7   0   0    0.69    0.80 
   7   0   0    0.18    0.23 
  -8   0   0  142.88    5.55 
   8   0   0  130.30    5.57 
  -8   0   0  133.52    5.71 
  -8   0   0  129.93    6.82 
  -8   0   0  133.37    5.48 
   8   0   0  131.76    5.59 
  -8   0   0  137.43    5.31 
  -8   0   0  137.67    5.19 
  -8   0   0  133.64    6.84 
   8   0   0  133.49    5.85 
  -8   0   0  133.56    5.93 
   8   0   0  130.29    5.20 
  -8   0   0  132.66    7.12 
  -8   0   0  130.76    5.62 
  -8   0   0  133.41    6.89 
   8   0   0  126.42    5.45 
  -8   0   0  131.99    5.13 
   8   0   0  136.04    5.50 
   8   0   0  125.06    5.44 
   8   0   0  127.71    5.53 
  -8   0   0  130.49    5.51 
  -8   0   0  141.86    5.30 
  -8   0   0  130.40    5.65 
   8   0   0  137.20    5.28 
   8   0   0  134.47    5.49 
  -8   0   0  128.78    6.77 
   8   0   0  133.38    5.81 
  -8   0   0  131.50    5.51 
   9   0   0   -0.68    0.49 
  -9   0   0    0.52    0.51 
   9   0   0    0.65    0.57 
  -9   0   0    0.34    0.58 
  -9   0   0   -0.49    0.44 
  -9   0   0    0.13    0.45 
   9   0   0    0.32    0.57 
   9   0   0   -0.75    0.37 
  -9   0   0   -0.56    0.71 
  -9   0   0   -0.38    0.61 
   9   0   0   -0.22    0.48 
  -9   0   0    0.46    0.45 
   9   0   0    0.56    0.53 
   9   0   0    0.13    0.54 
  -9   0   0    0.13    0.61 
   9   0   0   -0.16    0.45 
   9   0   0   -0.12    0.56 
   9   0   0    1.05    0.69 
  -9   0   0    0.28    1.07 
  -9   0   0    0.26    0.91 
  -9   0   0    0.56    0.88 
  -9   0   0   -0.03    0.55 
  -9   0   0   -0.13    0.74 
  -9   0   0    0.07    0.53 
 -10   0   0   15.60    1.86 
  10   0   0   20.76    1.96 
 -10   0   0   17.29    1.85 
  10   0   0   13.27    1.87 
  10   0   0   17.99    1.88 
 -10   0   0   17.25    1.73 
 -10   0   0   15.52    2.67 
 -10   0   0   14.78    2.63 
 -10   0   0   18.85    1.85 
 -10   0   0   12.73    1.86 
 -10   0   0   14.43    2.60 
 -10   0   0   20.22    1.86 
  10   0   0   14.74    1.62 
 -10   0   0   16.78    3.16 
 -10   0   0   13.45    2.51 
  10   0   0   16.58    1.75 
 -10   0   0   16.44    1.50 
 -10   0   0   17.36    1.96 
  10   0   0   15.38    1.75 
   0  -1   0    0.15    0.06 
   0   1   0    0.85    0.09 
   0   1   0    0.46    0.09 
   0   1   0    0.52    0.08 
   0   1   0    0.73    0.07 
   0   1   0    0.23    0.07 
   0   1   0    0.57    0.08 
   0   1   0    0.95    0.13 
   0   1   0    0.25    0.06 
   0   1   0    0.67    0.10 
   0   1   0    0.38    0.08 
   0   1   0    0.38    0.07 
   0   1   0    0.25    0.07 
   0   1   0    0.49    0.09 
   0   1   0    0.58    0.09 
   0   1   0    0.43    0.07 
   0   1   0    1.19    0.18 
   0   1   0    0.49    0.07 
   0   1   0    0.65    0.09 
   0   1   0    0.41    0.07 
   0   1   0    1.55    0.39 
   0   1   0    0.45    0.08 
   0   1   0    0.75    0.10 
   0   1   0    0.49    0.05 
   0   1   0    0.69    0.09 
   0   1   0    0.34    0.07 
  -1  -1   0   20.20    0.83 
  -1  -1   0   20.70    0.79 
  -1  -1   0   16.63    0.84 
  -1  -1   0   17.40    0.87 
  -1  -1   0   21.00    0.80 
  -1  -1   0   21.01    0.85 
   1  -1   0   16.17    0.80 
  -1  -1   0   19.59    0.81 
   1  -1   0   18.54    0.79 
  -1  -1   0   18.43    0.79 
  -1  -1   0   20.57    0.82 
  -1  -1   0   19.19    0.87 
   1  -1   0   19.03    0.86 
  -1  -1   0   18.63    0.93 
  -1  -1   0   21.55    0.83 
  -1  -1   0   20.30    0.81 
  -1  -1   0   20.23    0.80 
  -1  -1   0   17.93    0.95 
  -1  -1   0   18.85    0.80 
  -1  -1   0   19.39    0.80 
   1  -1   0   16.61    0.79 
  -1  -1   0   19.41    0.83 
   1  -1   0   16.03    0.80 
  -1  -1   0   21.64    0.85 
  -1  -1   0   19.27    0.78 
  -1  -1   0   19.98    0.82 
   1   1   0   19.46    0.87 
   1   1   0   20.30    0.97 
  -1   1   0   19.89    0.80 
  -1   1   0   20.24    0.95 
   1   1   0   19.73    0.79 
   1   1   0   19.20    0.79 
   1   1   0   20.52    0.81 
  -1   1   0   19.74    0.94 
   1   1   0   21.12    0.77 
  -1   1   0   20.61    0.78 
   1   1   0   20.74    0.79 
   1   1   0   20.51    0.95 
  -1   1   0   20.51    0.80 
   1   1   0   20.08    0.81 
   1   1   0   20.32    0.85 
   1   1   0   20.53    0.86 
  -1   1   0   20.71    0.78 
  -1   1   0   20.86    0.83 
  -1   1   0   20.66    0.73 
  -1   1   0   21.45    0.81 
  -1   1   0   20.05    0.74 
  -1   1   0   20.90    0.84 
   1   1   0   19.30    0.83 
  -1   1   0   21.74    0.81 
  -1   1   0   21.38    0.83 
   1   1   0   20.64    0.81 
  -1   1   0   20.25    0.75 
  -1   1   0   19.99    0.79 
  -1   1   0   20.21    0.85 
  -1   1   0   21.72    0.84 
   1   1   0   21.43    0.83 
  -1   1   0   19.54    0.89 
   1   1   0   20.48    0.81 
  -1   1   0   20.49    0.72 
  -1   1   0   19.80    0.74 
  -1   1   0   20.60    0.78 
  -1   1   0   21.21    0.77 
  -1   1   0   20.66    0.77 
  -1   1   0   20.59    0.86 
   1   1   0   19.95    0.83 
   1   1   0   20.26    0.80 
   1   1   0   19.06    0.85 
   1   1   0   19.65    0.82 
  -1   1   0   21.91    0.92 
   1   1   0   20.37    0.79 
   1   1   0   20.10    0.85 
  -1   1   0   20.53    0.80 
  -1   1   0   21.08    0.83 
   1   1   0   20.26    0.84 
  -1   1   0   19.52    0.80 
   1   1   0   20.68    0.84 
  -1   1   0   19.20    0.78 
   1   1   0   20.12    0.81 
   1   1   0   20.02    0.79 
  -2  -1   0   29.09    1.49 
   2  -1   0   28.68    1.48 
  -2  -1   0   29.25    1.21 
   2  -1   0   28.89    1.31 
   2  -1   0   28.47    1.11 
  -2  -1   0   29.63    1.22 
  -2  -1   0   29.58    1.20 
  -2  -1   0   30.14    1.27 
   2  -1   0   28.84    1.18 
  -2  -1   0   29.93    1.20 
   2  -1   0   28.60    1.05 
  -2  -1   0   30.43    1.22 
  -2  -1   0   28.09    1.28 
  -2  -1   0   30.52    1.29 
   2  -1   0   28.78    1.18 
  -2  -1   0   29.34    1.22 
   2  -1   0   29.09    1.29 
  -2  -1   0   29.92    1.35 
  -2  -1   0   30.60    1.30 
  -2  -1   0   27.33    1.20 
  -2  -1   0   30.79    1.27 
   2  -1   0   29.22    1.29 
  -2  -1   0   28.21    1.15 
  -2  -1   0   30.30    1.23 
  -2  -1   0   30.79    1.30 
  -2  -1   0   28.31    1.50 
   2  -1   0   28.60    1.23 
  -2  -1   0   29.58    1.27 
   2  -1   0   28.67    1.06 
   2  -1   0   28.03    1.21 
  -2  -1   0   29.17    1.19 
   2  -1   0   28.41    1.05 
  -2  -1   0   29.91    1.12 
  -2  -1   0   30.28    1.20 
  -2  -1   0   30.66    1.51 
   2  -1   0   30.15    1.23 
  -2  -1   0   29.16    1.24 
   2  -1   0   27.32    1.24 
  -2  -1   0   29.62    1.23 
   2  -1   0   29.20    1.22 
  -2  -1   0   28.74    1.50 
  -2  -1   0   30.31    1.19 
   2  -1   0   29.63    1.12 
   2  -1   0   29.33    1.15 
  -2  -1   0   28.82    1.22 
   2  -1   0   28.57    1.27 
   2  -1   0   29.33    1.20 
  -2  -1   0   28.88    1.22 
  -2  -1   0   30.86    1.33 
  -2  -1   0   29.69    1.19 
   2  -1   0   28.46    1.19 
   2  -1   0   30.35    1.25 
  -2  -1   0   30.32    1.32 
  -2  -1   0   28.60    1.17 
   2  -1   0   29.29    1.21 
  -2   1   0   28.55    1.04 
  -2   1   0   28.48    1.18 
  -2   1   0   28.66    1.22 
  -2   1   0   28.99    1.25 
   2   1   0   29.87    1.17 
  -2   1   0   29.78    1.14 
   2   1   0   30.07    1.29 
  -2   1   0   29.24    1.20 
  -2   1   0   28.80    1.25 
   2   1   0   30.06    1.12 
   2   1   0   28.51    1.16 
  -2   1   0   27.95    1.08 
  -2   1   0   28.21    1.16 
  -2   1   0   29.44    1.12 
  -2   1   0   29.51    1.26 
  -2   1   0   28.78    1.22 
  -2   1   0   29.13    1.13 
   2   1   0   27.31    1.29 
  -2   1   0   29.34    1.05 
  -2   1   0   29.38    1.11 
   2   1   0   28.04    1.29 
   2   1   0   28.73    1.21 
   2   1   0   30.15    1.18 
  -2   1   0   28.91    1.29 
   2   1   0   30.09    1.20 
   2   1   0   27.69    1.21 
   2   1   0   29.35    1.22 
  -2   1   0   28.62    1.19 
   2   1   0   29.64    1.20 
   2   1   0   28.30    1.18 
   2   1   0   30.14    1.24 
   2   1   0   29.71    1.26 
   2   1   0   28.11    1.19 
  -2   1   0   28.06    1.11 
  -2   1   0   28.15    1.06 
   2   1   0   29.22    1.19 
  -2   1   0   29.67    1.29 
   2   1   0   28.83    1.28 
  -2   1   0   29.75    1.18 
  -2   1   0   28.18    1.48 
   2   1   0   28.89    1.21 
   2   1   0   29.15    1.27 
   2   1   0   28.17    1.20 
  -2   1   0   28.80    1.26 
  -2   1   0   29.14    1.29 
   2   1   0   29.25    1.20 
  -2   1   0   28.43    1.15 
   2   1   0   29.62    1.23 
  -2   1   0   28.94    1.15 
   2   1   0   30.35    1.21 
   2   1   0   29.40    1.23 
   2   1   0   30.13    1.19 
  -2   1   0   28.40    1.22 
   2   1   0   28.00    1.26 
   2   1   0   28.99    1.20 
  -2   1   0   27.21    1.30 
   2   1   0   28.24    1.11 
  -2   1   0   29.86    1.33 
   2   1   0   28.07    1.22 
  -2   1   0   29.81    1.21 
   2   1   0   29.45    1.49 
  -2   1   0   29.91    1.52 
  -2   1   0   29.98    1.25 
  -3  -1   0    0.76    0.20 
  -3  -1   0    0.70    0.28 
  -3  -1   0    0.68    0.18 
  -3  -1   0    0.40    0.20 
   3  -1   0    0.71    0.23 
  -3  -1   0    0.90    0.27 
   3  -1   0    0.82    0.13 
   3  -1   0    0.50    0.25 
   3  -1   0    1.43    0.29 
   3  -1   0    0.59    0.12 
   3  -1   0    0.91    0.15 
  -3  -1   0    0.96    0.28 
  -3  -1   0    0.52    0.15 
   3  -1   0    0.21    0.18 
   3  -1   0    0.46    0.12 
  -3  -1   0    0.66    0.25 
  -3  -1   0    0.60    0.22 
  -3  -1   0    0.85    0.21 
   3  -1   0    0.86    0.24 
  -3  -1   0    0.71    0.37 
  -3  -1   0    0.94    0.20 
   3  -1   0    0.65    0.24 
  -3  -1   0    0.22    0.18 
  -3  -1   0    0.72    0.23 
   3  -1   0    0.75    0.28 
  -3  -1   0    0.87    0.21 
  -3  -1   0    0.83    0.23 
  -3  -1   0    0.61    0.35 
  -3  -1   0    0.52    0.20 
   3  -1   0    0.79    0.27 
  -3  -1   0    1.01    0.28 
  -3  -1   0    1.04    0.24 
   3  -1   0    0.77    0.16 
   3  -1   0    0.76    0.13 
   3  -1   0    0.98    0.29 
  -3  -1   0    0.55    0.33 
   3  -1   0    0.74    0.18 
  -3  -1   0    0.71    0.40 
   3  -1   0    0.72    0.22 
   3  -1   0    0.83    0.13 
   3  -1   0    0.70    0.18 
  -3  -1   0    0.77    0.25 
  -3  -1   0    0.75    0.14 
  -3  -1   0    0.26    0.16 
  -3  -1   0    1.05    0.34 
   3  -1   0    0.37    0.22 
   3  -1   0    0.67    0.20 
   3  -1   0    0.71    0.25 
  -3  -1   0    0.67    0.22 
   3  -1   0    1.14    0.24 
   3  -1   0    0.40    0.20 
  -3  -1   0    0.82    0.31 
   3   1   0    0.26    0.16 
  -3   1   0    1.02    0.19 
   3   1   0    0.74    0.20 
   3   1   0    0.43    0.17 
  -3   1   0    0.65    0.15 
  -3   1   0    0.62    0.11 
   3   1   0    0.53    0.22 
  -3   1   0    0.68    0.13 
  -3   1   0    1.42    0.21 
   3   1   0    0.79    0.25 
  -3   1   0    0.58    0.19 
   3   1   0    0.63    0.18 
   3   1   0    0.69    0.19 
   3   1   0    0.53    0.28 
   3   1   0    1.25    0.24 
  -3   1   0    0.73    0.20 
   3   1   0    0.52    0.22 
  -3   1   0    0.76    0.14 
   3   1   0    0.90    0.24 
   3   1   0    0.81    0.20 
  -3   1   0    0.54    0.20 
   3   1   0    0.38    0.22 
   3   1   0    0.48    0.22 
   3   1   0    0.77    0.13 
  -3   1   0    0.38    0.25 
   3   1   0    0.54    0.18 
   3   1   0    0.34    0.19 
  -3   1   0    0.88    0.26 
  -3   1   0    0.53    0.17 
  -3   1   0    1.15    0.24 
   3   1   0    0.73    0.26 
  -3   1   0    0.81    0.25 
   3   1   0    0.81    0.15 
   3   1   0    0.53    0.20 
   3   1   0    1.19    0.23 
  -3   1   0    0.73    0.15 
   3   1   0    0.33    0.20 
  -3   1   0    0.93    0.16 
   3   1   0    0.80    0.19 
   3   1   0    0.16    0.21 
  -3   1   0    0.82    0.24 
   3   1   0    1.02    0.27 
  -3   1   0    0.65    0.26 
  -3   1   0    0.64    0.25 
  -3   1   0    0.82    0.14 
   3   1   0    0.62    0.26 
  -3   1   0    0.77    0.25 
   3   1   0    1.03    0.24 
  -3   1   0    0.40    0.31 
  -3   1   0    0.71    0.26 
   3   1   0    0.62    0.17 
  -3   1   0    0.25    0.34 
  -3   1   0    0.87    0.23 
  -4  -1   0    0.48    0.31 
  -4  -1   0    0.53    0.30 
   4  -1   0    0.93    0.19 
   4  -1   0    0.96    0.37 
   4  -1   0    1.15    0.32 
  -4  -1   0    1.05    0.22 
   4  -1   0    0.78    0.21 
   4  -1   0    0.77    0.16 
   4  -1   0    0.62    0.21 
  -4  -1   0    0.19    0.44 
   4  -1   0    0.94    0.18 
   4  -1   0    0.92    0.15 
   4  -1   0    1.35    0.23 
   4  -1   0    0.34    0.26 
   4  -1   0    0.79    0.26 
   4  -1   0    0.83    0.34 
   4  -1   0    0.49    0.31 
  -4  -1   0    1.11    0.54 
   4  -1   0    0.84    0.18 
   4  -1   0    0.80    0.15 
  -4  -1   0    0.78    0.33 
  -4  -1   0    0.55    0.28 
  -4  -1   0    1.18    0.53 
   4  -1   0    0.46    0.30 
  -4  -1   0    0.64    0.34 
   4  -1   0    0.96    0.29 
  -4  -1   0    0.49    0.25 
  -4  -1   0    0.73    0.36 
  -4  -1   0    0.83    0.29 
   4  -1   0    1.18    0.25 
  -4  -1   0    0.86    0.26 
  -4  -1   0    0.39    0.20 
   4  -1   0    1.32    0.39 
   4  -1   0    1.01    0.32 
   4  -1   0    0.69    0.29 
  -4  -1   0    0.72    0.26 
   4  -1   0    0.38    0.28 
  -4  -1   0    1.11    0.34 
  -4  -1   0    0.78    0.28 
  -4  -1   0    0.54    0.32 
  -4  -1   0    0.63    0.25 
  -4  -1   0    0.84    0.16 
  -4   1   0    0.43    0.20 
  -4   1   0    0.80    0.23 
  -4   1   0    1.56    0.64 
  -4   1   0    1.23    0.23 
  -4   1   0    0.67    0.31 
   4   1   0    0.76    0.22 
  -4   1   0    0.83    0.36 
   4   1   0    0.88    0.27 
   4   1   0    0.99    0.25 
  -4   1   0    0.87    0.30 
  -4   1   0    1.08    0.23 
   4   1   0    0.65    0.33 
  -4   1   0    0.96    0.20 
  -4   1   0    0.54    0.39 
   4   1   0    1.13    0.28 
  -4   1   0    0.27    0.25 
   4   1   0    0.74    0.34 
   4   1   0    0.66    0.22 
   4   1   0    0.87    0.24 
   4   1   0    0.86    0.35 
  -4   1   0    0.85    0.20 
   4   1   0    0.81    0.33 
   4   1   0    0.82    0.31 
   4   1   0    1.01    0.34 
   4   1   0    1.40    0.41 
   4   1   0    0.60    0.29 
  -4   1   0    0.69    0.33 
  -4   1   0    0.77    0.16 
  -4   1   0    1.04    0.23 
  -4   1   0    0.56    0.30 
  -4   1   0    0.98    0.15 
   4   1   0    0.88    0.37 
   4   1   0    0.67    0.28 
   4   1   0    0.70    0.24 
  -4   1   0    0.32    0.47 
   4   1   0    0.84    0.15 
   5  -1   0  107.91    3.97 
  -5  -1   0  110.85    3.86 
  -5  -1   0  112.07    4.22 
  -5  -1   0  107.89    4.38 
   5  -1   0  107.45    4.28 
   5  -1   0  108.93    3.86 
  -5  -1   0  105.60    4.10 
  -5  -1   0  109.07    4.25 
   5  -1   0  113.70    4.27 
   5  -1   0  108.28    3.95 
   5  -1   0  108.96    4.55 
   5  -1   0  107.76    4.11 
   5  -1   0  105.44    3.85 
   5  -1   0  108.74    4.04 
   5  -1   0  111.92    4.26 
   5  -1   0  106.81    3.98 
  -5  -1   0  106.97    4.25 
  -5  -1   0  110.95    4.56 
  -5  -1   0  113.04    4.44 
  -5  -1   0  102.84    4.37 
   5  -1   0  108.12    4.12 
  -5  -1   0  106.33    4.12 
  -5  -1   0  106.39    4.01 
   5  -1   0  108.08    4.25 
   5  -1   0  108.42    4.34 
  -5  -1   0  116.56    4.40 
  -5  -1   0  111.03    4.39 
  -5  -1   0  110.07    4.20 
   5  -1   0  108.56    4.45 
   5  -1   0  109.09    3.95 
   5  -1   0  110.74    4.36 
  -5  -1   0  113.39    5.17 
  -5  -1   0  111.22    5.13 
  -5  -1   0  107.40    4.29 
   5  -1   0  108.36    4.33 
  -5  -1   0  109.59    4.14 
   5  -1   0  111.84    4.52 
  -5   1   0  110.04    4.35 
  -5   1   0  110.08    4.41 
   5   1   0  108.46    4.33 
  -5   1   0  104.51    3.99 
   5   1   0  110.25    4.61 
   5   1   0  106.47    4.28 
  -5   1   0  112.24    4.43 
  -5   1   0  112.01    4.08 
  -5   1   0  111.83    5.15 
   5   1   0  104.47    4.50 
   5   1   0  106.97    4.03 
  -5   1   0  110.18    3.86 
   5   1   0  109.53    4.28 
  -5   1   0  109.42    4.07 
   5   1   0  102.89    4.32 
   5   1   0  111.24    4.28 
   5   1   0  112.10    4.12 
  -5   1   0  111.68    4.03 
   5   1   0  110.03    4.36 
  -5   1   0  107.13    4.25 
   5   1   0  108.39    3.85 
   5   1   0  108.31    4.47 
  -5   1   0  105.96    3.94 
   5   1   0  112.18    4.15 
  -5   1   0  111.92    5.11 
   5   1   0  103.54    4.43 
  -5   1   0  112.99    4.38 
   5   1   0  111.71    4.19 
  -5   1   0  102.89    4.03 
  -5   1   0  109.18    4.24 
  -5   1   0  111.50    4.01 
  -5   1   0  112.88    4.55 
  -5   1   0  104.67    5.06 
   5   1   0  108.16    4.16 
  -5   1   0  110.90    4.26 
   5   1   0  109.04    4.22 
  -6  -1   0    0.62    0.40 
   6  -1   0    1.56    0.46 
  -6  -1   0    0.09    0.41 
  -6  -1   0    0.17    0.19 
  -6  -1   0    0.50    0.37 
   6  -1   0    1.61    0.47 
  -6  -1   0    0.57    0.31 
   6  -1   0    1.21    0.41 
  -6  -1   0    0.57    0.40 
   6  -1   0    1.75    0.49 
  -6  -1   0   -0.14    0.39 
  -6  -1   0    0.70    0.30 
  -6  -1   0    0.43    0.61 
  -6  -1   0    0.48    0.39 
  -6  -1   0    0.30    0.61 
  -6  -1   0    0.33    0.32 
   6  -1   0    0.88    0.34 
   6  -1   0    1.83    0.53 
   6  -1   0    1.51    0.42 
   6  -1   0    0.37    0.37 
  -6  -1   0    0.25    0.33 
  -6  -1   0    0.03    0.28 
  -6  -1   0    0.88    0.42 
   6  -1   0    1.76    0.37 
  -6  -1   0    0.10    0.57 
  -6  -1   0    0.58    0.35 
   6  -1   0    1.01    0.45 
  -6  -1   0   -0.14    0.23 
   6  -1   0    0.96    0.31 
   6   1   0    0.46    0.23 
  -6   1   0    0.61    0.31 
  -6   1   0    1.06    0.30 
   6   1   0    1.35    0.52 
   6   1   0    0.31    0.29 
  -6   1   0    0.72    0.42 
  -6   1   0    1.06    0.42 
  -6   1   0    0.71    0.67 
  -6   1   0    0.87    0.28 
  -6   1   0    1.23    0.47 
   6   1   0    0.35    0.25 
  -6   1   0    0.24    0.45 
  -6   1   0    0.89    0.40 
   6   1   0    0.26    0.33 
   6   1   0   -0.02    0.35 
   6   1   0   -0.23    0.31 
   6   1   0    0.91    0.43 
   6   1   0    0.28    0.39 
  -6   1   0    0.16    0.57 
   6   1   0    0.20    0.34 
   6   1   0    0.66    0.33 
   6   1   0    0.16    0.36 
  -6   1   0    0.46    0.43 
  -6   1   0    0.79    0.38 
   6   1   0    0.77    0.45 
  -6   1   0    0.78    0.25 
   6   1   0    0.25    0.38 
  -6   1   0    0.45    0.34 
   6   1   0    0.16    0.25 
  -6   1   0    0.30    0.56 
   7  -1   0   32.63    1.99 
   7  -1   0   31.10    1.85 
  -7  -1   0   31.80    1.72 
  -7  -1   0   28.84    2.57 
  -7  -1   0   27.99    1.55 
   7  -1   0   30.81    1.61 
  -7  -1   0   33.21    2.12 
  -7  -1   0   30.22    1.53 
   7  -1   0   29.33    1.84 
  -7  -1   0   27.62    1.87 
   7  -1   0   34.71    1.80 
  -7  -1   0   30.50    1.68 
  -7  -1   0   29.95    1.77 
  -7  -1   0   33.36    1.94 
   7  -1   0   29.46    1.74 
  -7  -1   0   32.11    1.90 
   7  -1   0   31.09    1.31 
   7  -1   0   34.59    2.09 
  -7  -1   0   31.35    2.59 
   7  -1   0   30.95    1.78 
  -7  -1   0   30.76    1.82 
   7  -1   0   30.49    1.80 
  -7  -1   0   32.09    2.71 
  -7  -1   0   31.19    1.86 
   7  -1   0   30.65    1.85 
  -7  -1   0   33.30    1.97 
  -7  -1   0   29.64    1.64 
   7  -1   0   33.80    1.50 
  -7  -1   0   29.84    1.53 
   7   1   0   30.69    1.43 
  -7   1   0   32.96    1.94 
  -7   1   0   31.56    1.94 
   7   1   0   30.55    1.65 
   7   1   0   29.45    1.69 
   7   1   0   30.30    1.78 
   7   1   0   31.01    1.66 
   7   1   0   30.23    2.01 
   7   1   0   30.30    1.53 
   7   1   0   29.21    1.76 
  -7   1   0   34.46    1.79 
  -7   1   0   33.60    1.96 
   7   1   0   30.32    1.52 
   7   1   0   29.58    1.94 
  -7   1   0   34.30    1.58 
  -7   1   0   29.94    1.46 
  -7   1   0   31.74    2.63 
  -7   1   0   32.71    1.52 
  -7   1   0   29.73    1.73 
  -7   1   0   30.12    2.66 
   7   1   0   31.51    1.82 
  -7   1   0   32.68    1.80 
  -7   1   0   32.69    2.68 
  -7   1   0   31.14    2.05 
   7   1   0   30.46    1.86 
  -7   1   0   36.11    1.68 
   7   1   0   30.74    1.84 
  -7   1   0   31.26    1.86 
   7   1   0   30.34    1.86 
   7   1   0   34.65    2.05 
   7   1   0   31.76    1.57 
   8  -1   0    0.74    0.59 
  -8  -1   0    0.40    0.50 
  -8  -1   0    0.29    0.37 
  -8  -1   0   -0.12    0.51 
  -8  -1   0    0.54    0.54 
  -8  -1   0    0.26    0.83 
   8  -1   0    0.72    0.52 
  -8  -1   0    0.33    0.38 
  -8  -1   0    0.28    0.52 
  -8  -1   0    0.10    0.68 
  -8  -1   0    0.08    0.40 
  -8  -1   0    0.62    0.68 
   8  -1   0    0.40    0.54 
   8  -1   0    0.68    0.54 
   8  -1   0   -0.02    0.54 
   8  -1   0    0.25    0.48 
  -8  -1   0    0.93    0.49 
  -8  -1   0    0.53    0.49 
   8  -1   0    0.18    0.46 
  -8  -1   0    0.66    0.55 
   8  -1   0    0.79    0.53 
  -8  -1   0    0.73    0.86 
  -8  -1   0    0.28    0.33 
   8  -1   0    0.35    0.46 
  -8  -1   0    0.22    0.79 
   8  -1   0    0.07    0.36 
  -8  -1   0    0.85    0.47 
   8   1   0    0.84    0.39 
  -8   1   0    0.15    0.42 
   8   1   0    0.35    0.56 
   8   1   0    0.22    0.34 
   8   1   0    0.05    0.46 
   8   1   0    1.22    0.49 
  -8   1   0    0.27    0.45 
   8   1   0    0.69    0.59 
  -8   1   0    0.59    0.54 
   8   1   0    0.42    0.47 
  -8   1   0    0.92    0.37 
  -8   1   0    0.32    0.80 
   8   1   0    1.39    0.62 
   8   1   0    0.27    0.48 
   8   1   0    0.46    0.51 
  -8   1   0    0.12    0.44 
   8   1   0    0.32    0.38 
  -8   1   0    0.62    0.43 
  -8   1   0    0.38    0.35 
   8   1   0    0.39    0.58 
  -8   1   0   -0.24    0.54 
  -8   1   0    0.46    0.67 
  -8   1   0    0.14    0.81 
  -8   1   0    0.50    0.53 
   8   1   0    0.56    0.48 
  -8   1   0    0.33    0.79 
  -8   1   0    0.15    0.52 
  -8   1   0    0.90    0.93 
  -8   1   0    0.10    0.77 
  -9  -1   0    1.91    0.80 
   9  -1   0    1.46    0.84 
  -9  -1   0    1.15    0.54 
  -9  -1   0    0.46    0.92 
  -9  -1   0    0.79    0.65 
  -9  -1   0    1.83    0.60 
  -9  -1   0    1.81    0.68 
   9  -1   0    2.08    0.75 
  -9  -1   0    2.05    1.18 
  -9  -1   0    3.34    0.79 
  -9  -1   0    1.45    0.71 
  -9  -1   0    2.14    0.63 
  -9  -1   0    0.68    0.68 
  -9  -1   0    1.23    1.01 
   9  -1   0    1.56    0.74 
  -9  -1   0    2.23    0.88 
   9  -1   0    2.04    0.71 
  -9  -1   0    0.85    1.18 
   9  -1   0    1.07    0.65 
   9  -1   0    1.46    0.65 
  -9  -1   0    1.39    1.05 
  -9  -1   0    1.32    0.54 
  -9  -1   0    1.20    0.68 
   9  -1   0    0.60    0.58 
   9  -1   0    1.66    0.71 
  -9   1   0    1.45    0.67 
  -9   1   0    1.10    0.68 
  -9   1   0    1.23    0.74 
  -9   1   0    1.93    0.59 
   9   1   0    2.18    0.74 
  -9   1   0    1.02    1.03 
   9   1   0    2.59    0.75 
   9   1   0    1.85    0.70 
  -9   1   0    1.41    0.64 
  -9   1   0    1.30    1.07 
   9   1   0    1.88    0.61 
  -9   1   0    2.55    1.40 
   9   1   0    2.03    0.82 
  -9   1   0    0.59    0.80 
  -9   1   0    2.22    0.68 
  -9   1   0    1.53    1.06 
   9   1   0    1.68    0.77 
   9   1   0    1.01    0.67 
   9   1   0    1.81    0.76 
  -9   1   0    0.98    1.19 
   9   1   0    2.04    0.72 
  -9   1   0    1.92    0.77 
  -9   1   0    2.67    0.74 
 -10  -1   0    2.97    1.64 
  10  -1   0    3.48    0.93 
 -10  -1   0    1.36    1.24 
  10  -1   0    3.23    0.85 
 -10  -1   0    2.45    1.47 
  10  -1   0    2.48    0.93 
 -10  -1   0    2.75    0.96 
  10  -1   0    2.08    0.81 
 -10  -1   0    3.49    1.20 
 -10  -1   0    3.71    0.82 
 -10  -1   0    2.41    1.31 
 -10  -1   0    2.52    1.37 
  10  -1   0    3.50    0.90 
  10  -1   0    2.30    0.91 
 -10  -1   0    2.25    0.86 
 -10  -1   0    2.01    0.78 
 -10  -1   0    2.09    0.76 
 -10  -1   0    3.11    1.00 
  10  -1   0    2.35    0.94 
 -10  -1   0    2.19    0.89 
 -10   1   0    1.54    1.26 
 -10   1   0    2.10    1.41 
 -10   1   0    3.04    0.99 
 -10   1   0    3.29    1.73 
 -10   1   0    4.98    1.16 
 -10   1   0    1.62    0.92 
  10   1   0    1.98    0.86 
 -10   1   0    2.82    1.52 
  10   1   0    3.03    0.91 
 -10   1   0    2.94    1.16 
 -10   1   0    2.60    1.34 
  10   1   0    2.32    0.83 
  10   1   0    1.39    0.79 
 -10   1   0    4.18    0.98 
  10   1   0    3.31    1.08 
 -10   1   0    1.74    0.75 
  10   1   0    4.36    0.98 
   0  -2   0  517.16   17.80 
   0  -2   0  495.78   17.85 
   0  -2   0  517.35   17.79 
   0  -2   0  513.65   17.78 
   0  -2   0  510.63   17.80 
   0  -2   0  520.17   17.81 
   0  -2   0  496.60   17.76 
   0  -2   0  522.76   17.82 
   0  -2   0  533.70   17.80 
   0  -2   0  524.79   17.83 
   0  -2   0  519.03   17.83 
   0  -2   0  521.93   17.84 
   0  -2   0  515.30   17.79 
   0  -2   0  512.55   17.78 
   0  -2   0  504.34   17.82 
   0  -2   0  501.50   17.83 
   0  -2   0  525.17   17.91 
   0  -2   0  512.13   17.83 
   0  -2   0  496.05   18.10 
   0   2   0  501.30   17.82 
   0   2   0  505.89   17.79 
   0   2   0  488.91   17.68 
   0   2   0  532.79   17.82 
   0   2   0  499.84   17.68 
   0   2   0  520.15   17.80 
   0   2   0  520.57   17.79 
   0   2   0  508.89   17.77 
   0   2   0  529.73   17.83 
   0   2   0  505.84   17.81 
   0   2   0  514.61   17.79 
   0   2   0  501.96   17.79 
   0   2   0  530.49   17.84 
   0   2   0  514.35   17.78 
   0   2   0  520.46   17.78 
   0   2   0  518.06   17.68 
   0   2   0  510.42   17.81 
   0   2   0  514.01   17.80 
   0   2   0  518.17   17.76 
   0   2   0  494.92   17.83 
   0   2   0  510.77   17.88 
   0   2   0  510.86   17.77 
   0   2   0  503.57   18.05 
   0   2   0  502.07   17.80 
   0   2   0  489.79   18.00 
   0   2   0  503.62   17.82 
   0   2   0  520.42   17.88 
   0   2   0  528.20   17.89 
   0   2   0  500.27   17.78 
   0   2   0  530.62   17.70 
  -1  -2   0  271.90    9.12 
  -1  -2   0  252.89    9.19 
  -1  -2   0  259.40    9.13 
   1  -2   0  262.08    8.97 
   1  -2   0  220.71    9.08 
   1  -2   0  255.78    9.05 
   1  -2   0  265.59    9.04 
  -1  -2   0  269.27    9.12 
  -1  -2   0  263.18    9.18 
   1  -2   0  257.60    9.03 
  -1  -2   0  253.50    9.07 
  -1  -2   0  256.50    9.14 
  -1  -2   0  254.32    9.01 
   1  -2   0  269.70    9.08 
  -1  -2   0  254.95    9.23 
  -1  -2   0  256.14    8.99 
   1  -2   0  258.21    9.09 
  -1  -2   0  262.65    9.07 
   1  -2   0  249.68    9.04 
   1  -2   0  259.21    9.04 
  -1  -2   0  264.42    9.10 
  -1  -2   0  265.60    9.10 
  -1  -2   0  262.26    9.25 
  -1  -2   0  264.21    9.03 
  -1  -2   0  254.80    9.10 
   1  -2   0  253.89    8.99 
   1  -2   0  261.42    8.98 
   1  -2   0  255.12    8.99 
  -1  -2   0  268.18    9.18 
  -1  -2   0  259.83    9.25 
  -1  -2   0  254.49    9.07 
  -1  -2   0  266.47    9.04 
   1  -2   0  252.02    9.03 
   1  -2   0  250.43    9.13 
   1  -2   0  255.66    8.99 
  -1  -2   0  259.04    8.99 
  -1  -2   0  260.26    9.16 
  -1  -2   0  265.01    9.43 
  -1  -2   0  246.07    9.08 
  -1  -2   0  252.99    9.14 
   1  -2   0  258.48    8.95 
   1  -2   0  258.85    9.01 
   1  -2   0  255.84    9.02 
   1  -2   0  260.22    9.05 
  -1  -2   0  258.41    9.04 
  -1  -2   0  265.01    9.08 
  -1  -2   0  251.48    9.00 
  -1  -2   0  250.36    9.07 
   1  -2   0  262.36    8.97 
  -1  -2   0  257.66    9.17 
   1  -2   0  253.85    9.05 
  -1  -2   0  262.55    9.21 
  -1  -2   0  253.85    9.09 
  -1  -2   0  237.65    9.03 
  -1  -2   0  250.82    9.05 
  -1  -2   0  250.66    8.98 
  -1  -2   0  262.22    8.98 
  -1  -2   0  262.02    9.12 
   1  -2   0  260.07    9.00 
  -1  -2   0  253.84    9.00 
  -1   2   0  253.97    8.99 
   1   2   0  256.13    9.13 
  -1   2   0  257.12    9.00 
  -1   2   0  266.79    9.09 
   1   2   0  257.70    9.11 
   1   2   0  261.92    9.11 
  -1   2   0  261.79    9.21 
  -1   2   0  265.32    8.99 
   1   2   0  257.27    9.10 
  -1   2   0  259.04    9.03 
  -1   2   0  259.74    9.00 
  -1   2   0  257.41    9.02 
  -1   2   0  261.68    9.03 
   1   2   0  265.66    9.04 
   1   2   0  263.35    9.06 
  -1   2   0  248.54    9.14 
  -1   2   0  262.55    9.25 
  -1   2   0  253.82    8.96 
   1   2   0  265.93    9.35 
  -1   2   0  257.39    9.06 
   1   2   0  263.79    9.11 
   1   2   0  254.31    9.12 
  -1   2   0  250.96    8.94 
   1   2   0  260.93    9.09 
   1   2   0  251.67    9.06 
   1   2   0  260.96    9.08 
  -1   2   0  265.44    9.03 
   1   2   0  263.42    9.00 
   1   2   0  260.79    9.10 
  -1   2   0  261.09    8.95 
  -1   2   0  266.38    9.03 
   1   2   0  262.23    9.15 
  -1   2   0  255.76    9.00 
   1   2   0  260.63    8.99 
   1   2   0  257.76    8.96 
  -1   2   0  257.49    9.00 
  -1   2   0  250.70    9.01 
   1   2   0  266.76    9.09 
   1   2   0  256.00    9.11 
   1   2   0  249.29    9.09 
  -1   2   0  248.96    9.02 
   1   2   0  249.23    9.13 
   1   2   0  272.75    9.10 
   1   2   0  265.59    9.08 
  -1   2   0  252.07    8.96 
   1   2   0  256.29    9.02 
  -1   2   0  250.68    9.01 
   1   2   0  253.51    9.03 
   1   2   0  266.87    9.14 
   1   2   0  266.71    9.02 
   1   2   0  260.46    9.18 
  -1   2   0  252.45    9.06 
   1   2   0  258.89    8.99 
  -1   2   0  262.81    9.05 
  -1   2   0  258.46    9.00 
   1   2   0  260.91    9.09 
  -1   2   0  226.97    9.25 
  -1   2   0  248.57    9.06 
   1   2   0  270.66    8.97 
  -1   2   0  262.11    9.08 
   1   2   0  264.24    9.08 
   1   2   0  264.26    9.20 
  -1   2   0  255.18    9.17 
  -1   2   0  264.09    8.97 
   1   2   0  262.28    9.00 
  -2  -2   0  117.10    4.59 
  -2  -2   0  114.17    4.24 
  -2  -2   0  115.40    4.21 
   2  -2   0  113.51    4.16 
   2  -2   0  113.93    4.17 
   2  -2   0  112.09    4.24 
  -2  -2   0  120.10    4.30 
   2  -2   0  113.06    4.19 
  -2  -2   0  116.88    4.17 
  -2  -2   0  114.38    4.20 
  -2  -2   0  118.55    4.29 
  -2  -2   0  116.99    4.23 
   2  -2   0  113.93    4.06 
  -2  -2   0  120.24    4.34 
   2  -2   0  115.74    4.20 
   2  -2   0  114.70    4.25 
   2  -2   0  117.71    4.35 
  -2  -2   0  116.53    4.22 
  -2  -2   0  114.18    4.52 
  -2  -2   0  117.70    4.34 
   2  -2   0  113.31    4.18 
  -2  -2   0  115.30    4.53 
  -2  -2   0  114.76    4.20 
  -2  -2   0  112.81    4.21 
   2  -2   0  116.07    4.20 
  -2  -2   0  120.47    4.28 
  -2  -2   0  114.85    4.18 
  -2  -2   0  115.09    4.13 
  -2  -2   0  119.64    4.54 
   2  -2   0  113.42    4.13 
   2  -2   0  114.70    4.27 
  -2  -2   0  119.76    4.38 
  -2  -2   0  118.48    4.57 
   2  -2   0  114.52    4.16 
  -2  -2   0  115.94    4.31 
  -2  -2   0  114.32    4.51 
  -2  -2   0  120.62    4.25 
  -2  -2   0  117.31    4.24 
  -2  -2   0  112.47    4.22 
  -2  -2   0  116.66    4.19 
  -2  -2   0  114.43    4.19 
  -2  -2   0  112.46    4.28 
   2  -2   0  116.41    4.08 
  -2  -2   0  114.79    4.32 
  -2  -2   0  114.06    4.25 
   2  -2   0  116.49    4.21 
  -2  -2   0  110.83    4.20 
  -2  -2   0  114.55    4.17 
  -2  -2   0  114.59    4.34 
  -2  -2   0  113.46    4.17 
  -2  -2   0  116.67    4.18 
   2  -2   0  112.00    4.12 
  -2  -2   0  118.29    4.27 
   2  -2   0  114.20    4.05 
  -2  -2   0  112.33    4.19 
   2   2   0  115.49    4.30 
  -2   2   0  118.56    4.16 
   2   2   0  114.82    4.17 
  -2   2   0  115.21    4.06 
  -2   2   0  115.40    4.18 
   2   2   0  116.84    4.23 
   2   2   0  111.90    4.20 
  -2   2   0  117.72    4.14 
  -2   2   0  115.34    4.23 
   2   2   0  111.20    4.35 
   2   2   0  116.53    4.31 
  -2   2   0  112.00    4.18 
   2   2   0  114.58    4.58 
  -2   2   0  110.24    4.17 
  -2   2   0  110.69    4.14 
   2   2   0  111.60    4.34 
   2   2   0  110.82    4.22 
  -2   2   0  118.27    4.53 
  -2   2   0  115.83    4.27 
  -2   2   0  116.23    4.26 
  -2   2   0  114.17    4.07 
   2   2   0  113.07    4.18 
   2   2   0  114.34    4.27 
   2   2   0  113.53    4.21 
  -2   2   0  110.09    4.41 
  -2   2   0  113.81    4.06 
   2   2   0  114.36    4.25 
  -2   2   0  116.11    4.11 
  -2   2   0  114.87    4.19 
  -2   2   0  116.47    4.19 
   2   2   0  116.40    4.25 
   2   2   0  114.68    4.25 
   2   2   0  117.67    4.22 
  -2   2   0  115.03    4.19 
  -2   2   0  115.79    4.16 
   2   2   0  115.17    4.21 
   2   2   0  116.30    4.17 
   2   2   0  119.70    4.19 
  -2   2   0  114.26    4.24 
   2   2   0  112.83    4.18 
  -2   2   0  113.25    4.13 
   2   2   0  117.54    4.31 
   2   2   0  116.87    4.13 
  -2   2   0  120.43    4.64 
  -2   2   0  112.77    4.22 
  -2   2   0  117.59    4.25 
   2   2   0  117.88    4.28 
  -2   2   0  121.01    4.46 
  -2   2   0  122.14    4.30 
  -2   2   0  115.84    4.09 
   2   2   0  117.46    4.20 
  -2   2   0  120.86    4.28 
  -2   2   0  114.53    4.53 
   2   2   0  116.04    4.19 
   2   2   0  110.85    4.25 
   2   2   0  119.43    4.23 
  -2   2   0  112.40    4.15 
  -2   2   0  117.11    4.13 
  -2   2   0  116.64    4.04 
  -2   2   0  112.13    4.28 
   2   2   0  120.84    4.22 
   3  -2   0   37.03    1.60 
  -3  -2   0   36.10    2.00 
  -3  -2   0   37.75    1.74 
  -3  -2   0   36.24    1.51 
   3  -2   0   35.92    1.34 
   3  -2   0   36.42    1.57 
  -3  -2   0   35.38    1.99 
  -3  -2   0   37.80    1.72 
  -3  -2   0   37.82    1.67 
   3  -2   0   37.02    1.52 
   3  -2   0   36.56    1.52 
  -3  -2   0   33.52    1.51 
  -3  -2   0   36.74    1.57 
  -3  -2   0   38.28    1.72 
   3  -2   0   37.66    1.51 
   3  -2   0   36.18    1.43 
  -3  -2   0   37.65    1.73 
   3  -2   0   35.58    1.45 
  -3  -2   0   36.02    1.63 
  -3  -2   0   36.18    1.57 
  -3  -2   0   36.82    2.01 
  -3  -2   0   35.25    1.92 
  -3  -2   0   34.36    1.59 
  -3  -2   0   36.20    1.62 
  -3  -2   0   37.19    1.64 
   3  -2   0   35.69    1.66 
   3  -2   0   38.44    1.67 
  -3  -2   0   36.31    1.48 
  -3  -2   0   36.63    2.00 
   3  -2   0   36.97    1.70 
  -3  -2   0   37.10    1.52 
  -3  -2   0   37.13    1.58 
   3  -2   0   36.01    1.59 
  -3  -2   0   37.51    1.90 
  -3  -2   0   37.02    1.58 
   3  -2   0   34.75    1.63 
   3  -2   0   37.94    1.61 
   3  -2   0   37.00    1.76 
  -3  -2   0   36.13    1.61 
   3  -2   0   35.96    1.54 
  -3   2   0   36.63    1.72 
  -3   2   0   37.22    1.63 
  -3   2   0   34.61    1.60 
   3   2   0   37.36    1.62 
   3   2   0   36.05    1.51 
   3   2   0   37.52    1.58 
   3   2   0   35.45    1.56 
  -3   2   0   36.45    1.56 
  -3   2   0   37.99    1.70 
   3   2   0   35.90    1.56 
  -3   2   0   35.96    1.72 
  -3   2   0   36.78    1.56 
  -3   2   0   37.63    1.51 
   3   2   0   34.47    1.72 
  -3   2   0   35.42    1.32 
  -3   2   0   37.57    1.48 
  -3   2   0   35.55    1.79 
  -3   2   0   37.73    2.04 
  -3   2   0   37.16    1.68 
  -3   2   0   37.12    1.99 
   3   2   0   38.49    1.67 
   3   2   0   35.20    1.54 
   3   2   0   34.23    1.59 
  -3   2   0   35.92    1.46 
   3   2   0   35.03    1.57 
   3   2   0   39.08    1.63 
  -3   2   0   36.95    1.47 
   3   2   0   37.75    1.92 
   3   2   0   36.49    1.59 
  -3   2   0   37.26    1.52 
  -3   2   0   36.13    1.46 
   3   2   0   38.22    1.55 
   3   2   0   35.58    1.56 
  -3   2   0   37.10    1.57 
  -3   2   0   34.75    1.56 
   3   2   0   37.26    1.71 
  -3   2   0   38.22    1.54 
  -3   2   0   37.61    1.49 
   3   2   0   35.97    1.48 
   3   2   0   35.53    1.56 
  -3   2   0   35.51    1.57 
   3   2   0   35.54    1.59 
   3   2   0   35.89    1.58 
  -3   2   0   38.62    1.51 
   3   2   0   36.62    1.46 
  -4  -2   0   47.39    1.99 
  -4  -2   0   47.22    2.11 
   4  -2   0   48.69    2.11 
   4  -2   0   46.25    1.98 
  -4  -2   0   47.47    2.05 
  -4  -2   0   44.49    2.57 
  -4  -2   0   51.01    2.30 
   4  -2   0   49.81    2.04 
   4  -2   0   48.57    2.09 
   4  -2   0   46.27    1.74 
   4  -2   0   49.92    2.28 
   4  -2   0   50.06    2.25 
  -4  -2   0   48.64    2.64 
  -4  -2   0   48.81    2.09 
   4  -2   0   47.76    1.84 
   4  -2   0   47.98    1.78 
  -4  -2   0   49.43    2.03 
   4  -2   0   45.02    2.13 
  -4  -2   0   48.20    2.63 
  -4  -2   0   46.84    2.15 
   4  -2   0   48.34    1.84 
  -4  -2   0   47.52    2.18 
  -4  -2   0   45.51    2.03 
  -4  -2   0   49.56    2.22 
   4  -2   0   47.78    2.00 
   4  -2   0   48.67    2.05 
   4  -2   0   47.93    2.08 
   4  -2   0   47.50    2.18 
  -4  -2   0   44.51    2.05 
  -4  -2   0   46.91    1.85 
  -4  -2   0   49.54    2.10 
  -4  -2   0   47.14    2.01 
  -4  -2   0   49.45    2.22 
   4  -2   0   47.09    2.09 
  -4  -2   0   46.42    1.93 
  -4   2   0   47.07    1.78 
  -4   2   0   48.41    1.73 
   4   2   0   48.21    2.10 
  -4   2   0   45.29    2.60 
   4   2   0   46.58    1.97 
  -4   2   0   45.62    2.10 
  -4   2   0   46.45    1.96 
  -4   2   0   44.85    2.12 
   4   2   0   50.81    2.12 
   4   2   0   48.74    2.04 
   4   2   0   47.13    2.04 
  -4   2   0   49.15    2.14 
  -4   2   0   49.51    2.01 
   4   2   0   46.51    2.00 
   4   2   0   44.91    2.23 
   4   2   0   46.19    2.06 
  -4   2   0   45.36    1.84 
   4   2   0   48.06    2.05 
  -4   2   0   47.36    2.01 
   4   2   0   47.96    2.05 
   4   2   0   48.10    2.05 
  -4   2   0   49.17    1.86 
  -4   2   0   46.42    2.60 
   4   2   0   47.36    1.87 
   4   2   0   47.81    1.97 
   4   2   0   45.74    2.15 
   4   2   0   46.94    1.84 
  -4   2   0   50.01    2.31 
  -4   2   0   46.81    2.16 
  -4   2   0   48.14    1.88 
  -4   2   0   47.67    1.93 
  -4   2   0   46.19    1.93 
   4   2   0   46.49    2.07 
  -4   2   0   45.94    2.19 
  -5  -2   0   43.16    1.98 
  -5  -2   0   42.76    2.15 
   5  -2   0   44.14    1.99 
   5  -2   0   43.62    1.73 
   5  -2   0   47.85    2.10 
  -5  -2   0   41.88    2.23 
   5  -2   0   43.52    1.96 
  -5  -2   0   42.80    2.04 
   5  -2   0   45.48    2.08 
   5  -2   0   45.40    2.18 
   5  -2   0   42.78    2.01 
  -5  -2   0   43.42    2.01 
  -5  -2   0   42.73    1.71 
  -5  -2   0   42.88    2.69 
  -5  -2   0   41.96    2.66 
   5  -2   0   42.78    1.65 
   5  -2   0   46.22    2.27 
   5  -2   0   43.17    1.70 
  -5  -2   0   44.26    2.15 
  -5  -2   0   44.27    1.95 
  -5  -2   0   42.61    1.95 
  -5  -2   0   42.20    2.05 
   5  -2   0   44.85    2.08 
  -5  -2   0   43.20    1.99 
  -5  -2   0   44.35    2.72 
   5  -2   0   43.80    1.96 
  -5  -2   0   46.13    2.19 
  -5  -2   0   42.10    2.13 
  -5  -2   0   41.23    1.92 
  -5  -2   0   45.31    2.08 
   5  -2   0   45.62    2.27 
   5   2   0   44.78    2.09 
   5   2   0   43.90    2.22 
  -5   2   0   44.41    2.12 
   5   2   0   45.11    1.90 
   5   2   0   43.12    2.16 
   5   2   0   42.38    1.69 
  -5   2   0   44.12    1.79 
  -5   2   0   43.02    2.21 
   5   2   0   42.27    2.06 
  -5   2   0   42.68    1.66 
   5   2   0   43.82    2.06 
   5   2   0   44.76    2.05 
  -5   2   0   42.65    1.58 
   5   2   0   42.23    1.98 
   5   2   0   44.61    2.02 
  -5   2   0   44.89    1.73 
  -5   2   0   43.25    1.71 
  -5   2   0   41.04    1.72 
  -5   2   0   44.76    2.71 
   5   2   0   44.35    1.98 
   5   2   0   42.89    2.00 
  -5   2   0   42.43    1.95 
   5   2   0   44.42    1.77 
  -5   2   0   45.47    2.78 
  -5   2   0   45.98    2.17 
   5   2   0   44.67    1.96 
  -5   2   0   41.88    2.06 
   5   2   0   43.49    1.96 
  -5   2   0   43.18    1.96 
  -5   2   0   46.62    2.14 
  -5   2   0   43.53    2.68 
   5   2   0   43.71    1.88 
  -5   2   0   41.44    1.83 
   5   2   0   43.55    2.25 
  -6  -2   0  164.21    7.34 
  -6  -2   0  158.18    6.32 
  -6  -2   0  162.33    6.15 
   6  -2   0  157.43    6.23 
  -6  -2   0  162.53    6.14 
   6  -2   0  169.57    5.89 
   6  -2   0  156.09    6.33 
  -6  -2   0  162.13    6.22 
   6  -2   0  161.12    6.21 
  -6  -2   0  158.39    6.45 
  -6  -2   0  163.07    6.31 
  -6  -2   0  165.94    6.47 
  -6  -2   0  165.72    6.27 
  -6  -2   0  163.34    6.18 
  -6  -2   0  168.48    6.51 
  -6  -2   0  164.13    5.82 
  -6  -2   0  163.65    6.47 
  -6  -2   0  160.55    6.35 
  -6  -2   0  160.10    7.31 
   6  -2   0  155.61    6.57 
  -6  -2   0  161.70    7.34 
  -6  -2   0  163.27    6.23 
   6  -2   0  162.52    6.51 
  -6  -2   0  168.77    6.69 
   6  -2   0  154.85    6.31 
   6  -2   0  162.57    6.36 
   6  -2   0  169.11    6.25 
   6  -2   0  167.26    5.82 
   6  -2   0  161.29    6.29 
   6   2   0  160.45    6.28 
   6   2   0  165.09    6.20 
   6   2   0  173.21    5.90 
  -6   2   0  161.52    6.59 
   6   2   0  164.45    6.39 
   6   2   0  173.85    6.40 
  -6   2   0  169.03    5.84 
  -6   2   0  166.44    6.24 
  -6   2   0  165.88    7.34 
  -6   2   0  165.09    5.74 
   6   2   0  156.50    6.61 
  -6   2   0  161.41    5.90 
  -6   2   0  161.64    6.17 
   6   2   0  171.65    6.36 
   6   2   0  173.24    6.58 
   6   2   0  168.51    6.38 
   6   2   0  158.95    6.24 
  -6   2   0  163.77    7.34 
  -6   2   0  167.51    6.43 
   6   2   0  159.03    6.19 
  -6   2   0  169.53    6.41 
  -6   2   0  163.37    5.93 
  -6   2   0  168.13    5.86 
   6   2   0  167.66    6.31 
   6   2   0  165.58    6.13 
   6   2   0  161.67    6.19 
  -6   2   0  167.41    6.45 
  -6   2   0  160.17    6.00 
  -6   2   0  158.24    6.44 
   6   2   0  160.84    6.56 
   6   2   0  163.72    6.06 
  -6   2   0  159.27    7.32 
  -6   2   0  160.47    6.20 
  -6   2   0  157.35    7.50 
  -7  -2   0   33.99    1.89 
  -7  -2   0   33.98    1.95 
  -7  -2   0   35.17    2.04 
  -7  -2   0   34.38    2.05 
   7  -2   0   30.65    1.93 
  -7  -2   0   35.41    2.10 
   7  -2   0   32.56    1.83 
   7  -2   0   32.68    1.79 
  -7  -2   0   31.99    2.02 
  -7  -2   0   34.80    1.85 
  -7  -2   0   33.57    2.71 
  -7  -2   0   35.93    2.77 
   7  -2   0   30.44    1.83 
   7  -2   0   35.31    2.19 
   7  -2   0   34.23    1.96 
  -7  -2   0   34.01    2.76 
  -7  -2   0   31.62    2.68 
  -7  -2   0   34.99    1.74 
  -7  -2   0   34.59    1.76 
   7  -2   0   33.58    1.93 
   7  -2   0   34.10    2.08 
  -7  -2   0   34.32    2.21 
  -7  -2   0   34.37    1.83 
  -7  -2   0   33.07    1.82 
  -7  -2   0   33.02    1.93 
   7  -2   0   32.55    1.85 
  -7  -2   0   35.33    1.72 
   7   2   0   34.61    1.95 
   7   2   0   31.96    1.71 
  -7   2   0   34.48    1.79 
  -7   2   0   32.96    2.69 
  -7   2   0   35.47    1.70 
  -7   2   0   35.05    1.83 
   7   2   0   31.05    1.86 
   7   2   0   34.58    1.63 
   7   2   0   36.15    2.19 
  -7   2   0   34.98    1.86 
   7   2   0   33.13    1.75 
  -7   2   0   31.69    1.96 
   7   2   0   36.89    1.97 
  -7   2   0   34.42    1.58 
   7   2   0   29.87    1.81 
  -7   2   0   31.30    1.94 
  -7   2   0   35.11    2.04 
   7   2   0   35.70    1.81 
   7   2   0   32.79    1.70 
   7   2   0   35.01    2.19 
   7   2   0   34.43    1.80 
   7   2   0   35.38    2.13 
  -7   2   0   33.69    2.75 
  -7   2   0   32.12    2.91 
   7   2   0   37.25    1.88 
  -7   2   0   33.45    2.17 
   7   2   0   32.03    1.95 
  -7   2   0   32.46    2.78 
  -7   2   0   33.60    1.53 
  -7   2   0   31.83    2.00 
   7   2   0   32.49    1.91 
  -8  -2   0   66.67    3.43 
  -8  -2   0   64.92    4.30 
   8  -2   0   70.43    3.27 
  -8  -2   0   63.34    3.56 
  -8  -2   0   68.23    4.40 
  -8  -2   0   60.59    3.34 
  -8  -2   0   65.61    3.16 
  -8  -2   0   66.48    3.35 
   8  -2   0   66.23    3.16 
   8  -2   0   60.92    3.22 
   8  -2   0   65.31    3.45 
  -8  -2   0   70.30    3.18 
  -8  -2   0   66.97    2.96 
  -8  -2   0   69.89    3.13 
   8  -2   0   69.63    3.61 
  -8  -2   0   65.51    3.30 
  -8  -2   0   65.53    3.22 
   8  -2   0   61.27    3.22 
  -8  -2   0   69.92    3.00 
  -8  -2   0   65.61    3.09 
   8  -2   0   67.97    3.29 
   8  -2   0   68.78    3.20 
  -8  -2   0   66.65    2.97 
  -8  -2   0   70.15    3.39 
  -8  -2   0   69.59    4.47 
  -8  -2   0   68.07    4.37 
  -8   2   0   65.78    4.36 
  -8   2   0   68.00    3.36 
   8   2   0   67.84    3.26 
   8   2   0   66.66    3.22 
   8   2   0   70.06    3.03 
  -8   2   0   70.79    3.19 
  -8   2   0   67.82    4.67 
   8   2   0   65.89    3.28 
  -8   2   0   67.47    3.09 
   8   2   0   67.64    3.22 
   8   2   0   67.67    3.47 
   8   2   0   65.79    3.59 
  -8   2   0   68.99    3.59 
   8   2   0   66.00    3.15 
   8   2   0   67.36    3.31 
  -8   2   0   67.77    3.08 
   8   2   0   71.56    2.99 
   8   2   0   69.46    3.57 
  -8   2   0   69.48    2.96 
   8   2   0   69.88    3.10 
  -8   2   0   68.06    4.36 
   8   2   0   68.69    3.11 
  -8   2   0   69.06    3.41 
  -8   2   0   72.73    4.47 
   8   2   0   68.31    3.29 
  -8   2   0   64.38    3.30 
  -8   2   0   71.34    4.53 
  -8   2   0   66.00    3.39 
  -9  -2   0    6.44    1.12 
  -9  -2   0    5.66    0.95 
   9  -2   0    7.23    1.12 
  -9  -2   0    3.53    0.79 
   9  -2   0    5.65    1.23 
   9  -2   0    4.84    1.00 
   9  -2   0    5.05    1.06 
  -9  -2   0    6.81    1.24 
   9  -2   0    4.80    0.91 
  -9  -2   0    5.77    0.90 
  -9  -2   0    5.06    1.80 
  -9  -2   0    3.48    1.37 
   9  -2   0    5.16    0.96 
  -9  -2   0    5.27    0.95 
  -9  -2   0    6.92    0.92 
  -9  -2   0    3.74    0.83 
  -9  -2   0    3.17    1.36 
  -9  -2   0    4.36    1.02 
   9  -2   0    3.72    0.88 
  -9  -2   0    4.38    1.11 
  -9  -2   0    6.10    1.18 
  -9  -2   0    4.82    0.94 
  -9  -2   0    2.74    1.22 
  -9  -2   0    5.95    1.62 
  -9   2   0    5.73    1.08 
  -9   2   0    6.48    1.67 
   9   2   0    5.75    0.96 
   9   2   0    4.59    0.99 
   9   2   0    4.62    0.98 
  -9   2   0    5.91    0.88 
  -9   2   0    4.39    0.95 
   9   2   0    4.80    0.97 
   9   2   0    4.26    0.92 
  -9   2   0    2.97    1.48 
   9   2   0    5.11    0.88 
  -9   2   0    4.30    0.85 
  -9   2   0    5.80    1.63 
  -9   2   0    4.79    1.12 
  -9   2   0    6.47    1.16 
   9   2   0    4.82    1.13 
   9   2   0    6.34    0.98 
  -9   2   0    5.17    1.05 
  -9   2   0    5.38    1.58 
   9   2   0    5.06    0.97 
  -9   2   0    5.14    1.58 
  10  -2   0   20.19    1.89 
 -10  -2   0   18.22    1.75 
  10  -2   0   22.28    2.17 
 -10  -2   0   20.99    2.03 
  10  -2   0   22.80    2.44 
 -10  -2   0   20.08    2.66 
 -10  -2   0   23.06    2.23 
 -10  -2   0   22.03    3.21 
 -10  -2   0   20.17    3.00 
 -10  -2   0   19.54    2.98 
  10  -2   0   18.74    1.82 
 -10  -2   0   18.50    2.10 
  10  -2   0   20.65    1.99 
 -10  -2   0   17.61    2.00 
 -10  -2   0   20.16    1.70 
 -10  -2   0   18.58    2.23 
  10  -2   0   18.32    1.89 
  10  -2   0   21.71    2.00 
 -10  -2   0   19.36    1.81 
 -10  -2   0   21.12    1.63 
 -10  -2   0   23.28    3.62 
 -10   2   0   18.71    1.99 
 -10   2   0   19.65    3.12 
 -10   2   0   21.58    2.85 
 -10   2   0   21.09    3.12 
  10   2   0   22.14    1.66 
 -10   2   0   22.66    1.93 
  10   2   0   20.91    1.99 
 -10   2   0   20.12    2.04 
  10   2   0   23.83    1.84 
  10   2   0   23.92    1.90 
 -10   2   0   21.87    3.20 
 -10   2   0   21.84    2.23 
 -10   2   0   20.12    1.72 
  10   2   0   16.77    1.83 
  10   2   0   22.06    2.18 
  10   2   0   22.98    2.45 
 -10   2   0   19.79    1.89 
 -10   2   0   18.98    3.19 
   0  -3   0    0.08    0.17 
   0  -3   0    0.12    0.15 
   0  -3   0    0.42    0.18 
   0  -3   0    0.14    0.16 
   0  -3   0   -0.08    0.14 
   0  -3   0    0.34    0.16 
   0  -3   0   -0.02    0.15 
   0  -3   0    0.01    0.15 
   0  -3   0    0.26    0.31 
   0  -3   0    0.27    0.37 
   0  -3   0    0.08    0.15 
   0  -3   0    0.07    0.15 
   0  -3   0   -0.05    0.16 
   0  -3   0    0.20    0.33 
   0  -3   0    0.02    0.16 
   0  -3   0    0.26    0.22 
   0  -3   0    0.03    0.14 
   0  -3   0    0.15    0.15 
   0  -3   0    0.17    0.18 
   0  -3   0    0.07    0.18 
   0  -3   0    0.23    0.08 
   0  -3   0    0.05    0.11 
   0   3   0    0.07    0.28 
   0   3   0    0.25    0.10 
   0   3   0    0.50    0.19 
   0   3   0    0.12    0.16 
   0   3   0    0.04    0.07 
   0   3   0    0.09    0.45 
   0   3   0    0.07    0.15 
   0   3   0    0.16    0.15 
   0   3   0    0.05    0.07 
   0   3   0   -0.11    0.13 
   0   3   0    0.11    0.18 
   0   3   0    0.38    0.15 
   0   3   0    0.04    0.13 
   0   3   0    0.00    0.14 
   0   3   0    0.02    0.15 
   0   3   0    0.37    0.16 
   0   3   0    0.10    0.13 
   0   3   0    0.13    0.16 
   0   3   0   -0.08    0.19 
   0   3   0    0.07    0.07 
   0   3   0    0.42    0.20 
   0   3   0   -0.22    0.12 
   0   3   0   -0.02    0.13 
   0   3   0    0.18    0.15 
   0   3   0    0.47    0.19 
   0   3   0   -0.10    0.13 
  -1  -3   0    2.41    0.30 
  -1  -3   0    1.28    0.26 
   1  -3   0    1.98    0.23 
   1  -3   0    1.77    0.20 
   1  -3   0    2.43    0.30 
  -1  -3   0    1.46    0.17 
   1  -3   0    2.25    0.33 
  -1  -3   0    1.71    0.32 
   1  -3   0    1.93    0.29 
   1  -3   0    1.91    0.23 
  -1  -3   0    1.85    0.30 
  -1  -3   0    1.58    0.18 
  -1  -3   0    1.71    0.27 
  -1  -3   0    2.90    0.69 
  -1  -3   0    1.89    0.31 
   1  -3   0    1.29    0.24 
  -1  -3   0    1.50    0.23 
   1  -3   0    2.32    0.34 
   1  -3   0    1.87    0.24 
  -1  -3   0    1.52    0.19 
  -1  -3   0    1.53    0.32 
  -1  -3   0    2.95    0.44 
   1  -3   0    1.79    0.30 
  -1  -3   0    1.56    0.30 
  -1  -3   0    2.44    0.24 
  -1  -3   0    1.37    0.25 
  -1  -3   0    1.62    0.31 
   1  -3   0    1.66    0.21 
  -1  -3   0    1.84    0.21 
  -1  -3   0    2.77    0.23 
   1  -3   0    1.79    0.17 
  -1  -3   0    1.75    0.29 
  -1  -3   0    2.34    0.29 
  -1  -3   0    2.31    0.33 
  -1  -3   0    2.02    0.33 
   1  -3   0    2.43    0.30 
  -1  -3   0    2.18    0.38 
  -1  -3   0    1.65    0.33 
  -1  -3   0    2.06    0.38 
   1  -3   0    2.11    0.25 
   1  -3   0    1.93    0.19 
  -1  -3   0    1.44    0.30 
   1  -3   0    1.82    0.31 
  -1  -3   0    1.85    0.24 
  -1  -3   0    1.92    0.25 
  -1  -3   0    1.32    0.25 
  -1  -3   0    1.65    0.31 
  -1  -3   0    2.81    0.50 
   1  -3   0    2.17    0.29 
  -1  -3   0    2.09    0.35 
  -1  -3   0    1.47    0.26 
   1   3   0    2.00    0.35 
   1   3   0    1.49    0.32 
  -1   3   0    2.19    0.27 
  -1   3   0    1.67    0.28 
  -1   3   0    1.91    0.25 
   1   3   0    2.16    0.37 
   1   3   0    1.99    0.21 
   1   3   0    2.37    0.36 
  -1   3   0    2.58    0.30 
  -1   3   0    1.95    0.22 
  -1   3   0    3.72    0.46 
  -1   3   0    2.26    0.42 
   1   3   0    1.59    0.21 
   1   3   0    2.04    0.23 
  -1   3   0    2.23    0.28 
  -1   3   0    2.27    0.23 
   1   3   0    1.93    0.19 
   1   3   0    2.04    0.23 
   1   3   0    1.95    0.34 
   1   3   0    1.89    0.25 
   1   3   0    1.79    0.33 
  -1   3   0    1.90    0.25 
  -1   3   0    1.80    0.28 
  -1   3   0    1.92    0.23 
  -1   3   0    2.48    0.21 
  -1   3   0    1.82    0.17 
   1   3   0    1.59    0.29 
  -1   3   0    2.21    0.55 
   1   3   0    1.66    0.23 
   1   3   0    1.73    0.30 
  -1   3   0    2.17    0.33 
   1   3   0    2.19    0.29 
  -1   3   0    1.89    0.23 
  -1   3   0    2.14    0.15 
  -1   3   0    1.86    0.19 
  -1   3   0    1.90    0.26 
  -1   3   0    2.45    0.36 
   1   3   0    1.82    0.32 
  -1   3   0    2.17    0.23 
  -1   3   0    2.00    0.20 
  -1   3   0    2.64    0.31 
  -1   3   0    2.15    0.23 
  -1   3   0    1.94    0.24 
   1   3   0    1.96    0.20 
   1   3   0    2.02    0.15 
  -1   3   0    1.26    0.41 
  -1   3   0    1.60    0.24 
  -1   3   0    2.51    0.27 
  -1   3   0    2.17    0.31 
   1   3   0    2.82    0.35 
  -1   3   0    2.06    0.14 
  -1   3   0    2.95    0.33 
  -1   3   0    1.71    0.21 
  -1   3   0    1.67    0.32 
  -1   3   0    1.96    0.27 
  -1   3   0    1.92    0.19 
  -1   3   0    2.01    0.26 
   1   3   0    1.76    0.30 
  -1   3   0    1.66    0.34 
   1   3   0    2.00    0.32 
   1   3   0    1.73    0.30 
   1   3   0    2.39    0.34 
   1   3   0    2.35    0.49 
   1   3   0    2.73    0.26 
   1   3   0    2.10    0.33 
  -1   3   0    3.17    0.75 
   1   3   0    1.76    0.31 
   2  -3   0    2.35    0.30 
  -2  -3   0    3.16    0.51 
  -2  -3   0    3.28    0.63 
   2  -3   0    2.90    0.27 
   2  -3   0    3.12    0.31 
   2  -3   0    3.90    0.46 
  -2  -3   0    3.12    0.43 
   2  -3   0    3.31    0.39 
  -2  -3   0    2.90    0.32 
  -2  -3   0    3.66    0.42 
  -2  -3   0    2.75    0.33 
  -2  -3   0    3.10    0.49 
  -2  -3   0    3.52    0.34 
  -2  -3   0    3.76    0.50 
  -2  -3   0    3.23    0.32 
  -2  -3   0    3.46    0.44 
  -2  -3   0    3.35    0.33 
  -2  -3   0    2.73    0.31 
   2  -3   0    2.92    0.30 
   2  -3   0    2.46    0.32 
  -2  -3   0    3.10    0.45 
  -2  -3   0    3.56    0.50 
  -2  -3   0    2.86    0.38 
  -2  -3   0    2.74    0.35 
  -2  -3   0    3.19    0.32 
  -2  -3   0    3.03    0.39 
  -2  -3   0    2.69    0.50 
  -2  -3   0    3.33    0.39 
   2  -3   0    3.17    0.38 
  -2  -3   0    3.44    0.37 
   2  -3   0    2.82    0.21 
   2  -3   0    2.09    0.31 
  -2  -3   0    3.33    0.31 
   2  -3   0    3.06    0.37 
   2  -3   0    3.04    0.34 
  -2  -3   0    3.15    0.37 
  -2  -3   0    2.91    0.41 
  -2  -3   0    3.83    0.46 
   2  -3   0    3.08    0.34 
   2  -3   0    2.99    0.33 
  -2  -3   0    3.07    0.43 
  -2  -3   0    3.09    0.42 
  -2  -3   0    3.33    0.45 
  -2  -3   0    3.86    0.45 
   2  -3   0    3.21    0.26 
   2  -3   0    2.96    0.33 
  -2  -3   0    3.11    0.50 
  -2  -3   0    2.68    0.58 
   2   3   0    2.84    0.57 
  -2   3   0    3.24    0.33 
   2   3   0    2.71    0.38 
  -2   3   0    2.55    0.53 
   2   3   0    3.13    0.38 
  -2   3   0    2.73    0.30 
  -2   3   0    2.96    0.32 
   2   3   0    3.40    0.41 
  -2   3   0    2.87    0.29 
   2   3   0    4.16    0.39 
  -2   3   0    2.88    0.39 
   2   3   0    3.75    0.29 
  -2   3   0    3.74    0.40 
   2   3   0    3.19    0.29 
  -2   3   0    3.31    0.36 
  -2   3   0    4.03    0.60 
  -2   3   0    2.64    0.24 
  -2   3   0    2.77    0.30 
  -2   3   0    2.63    0.29 
  -2   3   0    2.75    0.32 
  -2   3   0    2.72    0.37 
   2   3   0    2.87    0.39 
   2   3   0    2.99    0.35 
  -2   3   0    3.33    0.37 
  -2   3   0    3.16    0.20 
  -2   3   0    2.78    0.49 
  -2   3   0    2.80    0.25 
  -2   3   0    2.11    0.35 
  -2   3   0    3.11    0.28 
  -2   3   0    2.85    0.27 
  -2   3   0    2.97    0.38 
  -2   3   0    2.87    0.29 
   2   3   0    3.33    0.37 
   2   3   0    3.37    0.46 
   2   3   0    2.79    0.44 
   2   3   0    3.41    0.33 
   2   3   0    3.80    0.36 
   2   3   0    3.40    0.42 
   2   3   0    3.13    0.53 
   2   3   0    3.22    0.33 
  -2   3   0    2.98    0.32 
  -2   3   0    2.61    0.26 
  -2   3   0    2.67    0.35 
  -2   3   0    3.48    0.37 
   2   3   0    3.23    0.33 
  -2   3   0    2.59    0.18 
   2   3   0    3.35    0.36 
  -2   3   0    2.09    0.41 
   2   3   0    2.59    0.34 
  -2   3   0    3.67    0.35 
  -2   3   0    4.11    0.62 
   2   3   0    3.47    0.40 
  -2   3   0    2.88    0.28 
   3  -3   0    0.47    0.23 
   3  -3   0    0.63    0.12 
   3  -3   0    0.51    0.22 
  -3  -3   0    0.58    0.27 
  -3  -3   0    0.34    0.27 
   3  -3   0    0.34    0.13 
  -3  -3   0    0.46    0.23 
  -3  -3   0    0.45    0.20 
  -3  -3   0    0.28    0.30 
  -3  -3   0    0.54    0.35 
   3  -3   0    0.38    0.25 
   3  -3   0    0.25    0.23 
  -3  -3   0    0.93    0.30 
  -3  -3   0    0.31    0.22 
  -3  -3   0    0.67    0.33 
  -3  -3   0   -0.22    0.34 
  -3  -3   0    0.63    0.32 
  -3  -3   0    0.27    0.26 
  -3  -3   0    0.40    0.22 
  -3  -3   0    0.76    0.29 
  -3  -3   0   -0.03    0.37 
   3  -3   0    0.19    0.20 
  -3  -3   0    0.83    0.37 
   3  -3   0    0.64    0.20 
   3  -3   0    0.52    0.28 
   3  -3   0    0.41    0.26 
  -3  -3   0    0.38    0.32 
  -3  -3   0    0.34    0.38 
   3  -3   0    0.91    0.27 
   3  -3   0    0.20    0.26 
  -3  -3   0    0.43    0.34 
   3  -3   0    0.42    0.27 
  -3   3   0    0.38    0.09 
   3   3   0    0.46    0.31 
   3   3   0    0.29    0.23 
  -3   3   0    0.47    0.26 
  -3   3   0    0.79    0.42 
   3   3   0    0.53    0.27 
  -3   3   0    0.73    0.19 
  -3   3   0    0.94    0.17 
  -3   3   0    0.98    0.29 
   3   3   0    0.36    0.28 
  -3   3   0    0.55    0.21 
  -3   3   0    0.63    0.27 
   3   3   0    1.16    0.36 
  -3   3   0    0.54    0.15 
   3   3   0    0.39    0.26 
  -3   3   0    0.59    0.40 
  -3   3   0    0.17    0.38 
  -3   3   0    0.28    0.18 
   3   3   0    0.63    0.22 
  -3   3   0    0.31    0.27 
  -3   3   0    0.26    0.19 
   3   3   0    0.46    0.23 
  -3   3   0    0.12    0.28 
  -3   3   0    0.89    0.30 
   3   3   0    0.19    0.23 
   3   3   0    0.99    0.29 
  -3   3   0    0.47    0.12 
  -3   3   0    0.09    0.25 
   3   3   0    0.78    0.29 
   3   3   0    0.76    0.28 
  -3   3   0    0.51    0.17 
  -3   3   0    0.48    0.23 
  -3   3   0    0.23    0.19 
  -3   3   0    0.39    0.13 
  -3   3   0    0.78    0.41 
   3   3   0    0.58    0.30 
  -3   3   0    0.65    0.18 
  -3   3   0    0.42    0.20 
   3   3   0    0.93    0.48 
   3   3   0    0.43    0.27 
   3   3   0    0.54    0.19 
   3   3   0    0.29    0.25 
  -3   3   0    1.26    0.26 
  -3   3   0    0.48    0.27 
  -3   3   0    0.35    0.31 
   4  -3   0   20.21    1.06 
  -4  -3   0   20.80    1.16 
   4  -3   0   21.90    1.16 
  -4  -3   0   21.93    1.65 
   4  -3   0   20.07    1.29 
   4  -3   0   19.83    1.20 
  -4  -3   0   21.57    1.16 
  -4  -3   0   21.59    1.05 
   4  -3   0   20.90    1.15 
  -4  -3   0   21.85    1.18 
   4  -3   0   21.09    1.17 
  -4  -3   0   22.49    1.23 
  -4  -3   0   20.60    1.30 
   4  -3   0   21.53    1.02 
  -4  -3   0   20.79    1.22 
  -4  -3   0   21.01    1.32 
   4  -3   0   21.02    1.03 
  -4  -3   0   22.14    1.34 
  -4  -3   0   20.20    1.18 
  -4  -3   0   20.54    1.04 
   4  -3   0   20.77    1.10 
  -4  -3   0   20.47    1.59 
   4  -3   0   18.65    1.11 
  -4  -3   0   20.71    1.22 
  -4  -3   0   21.07    1.61 
  -4  -3   0   21.21    1.18 
   4  -3   0   20.28    1.26 
  -4  -3   0   21.43    1.25 
  -4  -3   0   20.78    1.13 
  -4   3   0   20.29    1.04 
   4   3   0   19.12    1.20 
   4   3   0   21.14    1.19 
  -4   3   0   21.03    1.20 
   4   3   0   20.84    1.15 
   4   3   0   22.56    1.19 
  -4   3   0   21.24    1.12 
  -4   3   0   21.45    1.20 
  -4   3   0   22.30    1.27 
  -4   3   0   20.82    1.05 
   4   3   0   20.24    1.12 
   4   3   0   22.05    1.15 
  -4   3   0   20.42    1.09 
  -4   3   0   19.54    1.56 
  -4   3   0   20.74    1.04 
  -4   3   0   20.01    1.60 
   4   3   0   21.27    1.17 
   4   3   0   20.65    1.29 
   4   3   0   21.89    1.13 
  -4   3   0   20.59    1.45 
   4   3   0   21.62    1.13 
   4   3   0   19.22    1.15 
  -4   3   0   20.04    1.03 
  -4   3   0   21.28    1.72 
   4   3   0   21.46    1.16 
  -4   3   0   21.48    1.12 
   4   3   0   21.03    1.33 
   4   3   0   20.77    1.14 
   4   3   0   20.07    0.99 
  -4   3   0   20.12    1.06 
  -4   3   0   20.76    1.25 
   4   3   0   21.47    1.16 
  -5  -3   0   54.66    2.29 
   5  -3   0   55.22    2.44 
  -5  -3   0   53.95    2.51 
  -5  -3   0   53.06    2.44 
  -5  -3   0   53.07    2.58 
  -5  -3   0   50.18    2.60 
  -5  -3   0   52.57    2.17 
  -5  -3   0   53.21    2.46 
  -5  -3   0   54.73    2.62 
   5  -3   0   53.81    2.42 
  -5  -3   0   52.89    3.07 
   5  -3   0   57.37    2.43 
  -5  -3   0   53.54    2.36 
  -5  -3   0   53.75    2.49 
   5  -3   0   52.03    2.51 
   5  -3   0   55.38    2.17 
  -5  -3   0   53.92    3.12 
   5  -3   0   52.66    2.23 
   5  -3   0   54.00    2.43 
   5  -3   0   55.17    2.36 
   5  -3   0   53.71    2.63 
  -5  -3   0   52.29    2.40 
  -5  -3   0   53.46    2.37 
  -5  -3   0   53.53    3.11 
   5  -3   0   51.44    2.30 
  -5  -3   0   56.63    2.47 
   5  -3   0   56.54    2.62 
  -5  -3   0   54.78    2.41 
   5   3   0   55.23    2.45 
   5   3   0   52.96    2.41 
  -5   3   0   58.87    2.64 
  -5   3   0   52.67    2.72 
   5   3   0   51.65    2.39 
  -5   3   0   55.36    2.57 
  -5   3   0   48.48    2.99 
  -5   3   0   52.97    2.28 
   5   3   0   51.97    2.39 
  -5   3   0   51.58    2.50 
  -5   3   0   52.49    3.12 
   5   3   0   52.97    2.37 
   5   3   0   52.93    2.44 
  -5   3   0   57.30    2.32 
   5   3   0   55.34    2.15 
   5   3   0   51.62    2.36 
  -5   3   0   54.06    2.47 
   5   3   0   56.17    2.41 
   5   3   0   52.53    2.36 
  -5   3   0   54.52    2.47 
   5   3   0   54.82    2.43 
  -5   3   0   55.33    3.13 
  -5   3   0   54.19    2.21 
  -5   3   0   51.40    2.30 
   5   3   0   54.36    2.68 
   5   3   0   55.32    2.56 
   5   3   0   53.30    2.32 
  -5   3   0   54.30    2.26 
  -5   3   0   54.62    3.29 
   5   3   0   52.16    2.31 
  -6  -3   0   52.49    2.48 
  -6  -3   0   51.09    2.45 
  -6  -3   0   51.01    2.48 
  -6  -3   0   52.99    2.78 
   6  -3   0   57.23    2.51 
  -6  -3   0   51.57    2.64 
   6  -3   0   53.50    2.52 
   6  -3   0   52.92    2.64 
   6  -3   0   50.80    2.40 
  -6  -3   0   53.13    2.12 
   6  -3   0   52.27    2.10 
  -6  -3   0   51.31    3.29 
  -6  -3   0   51.02    2.37 
  -6  -3   0   45.69    2.43 
  -6  -3   0   55.05    2.70 
  -6  -3   0   49.13    3.24 
   6  -3   0   52.48    2.27 
   6  -3   0   53.00    2.37 
  -6  -3   0   47.68    3.18 
  -6  -3   0   55.74    2.65 
  -6  -3   0   55.92    2.48 
  -6  -3   0   50.26    2.52 
   6  -3   0   53.07    2.73 
  -6  -3   0   52.72    2.39 
  -6  -3   0   53.34    3.28 
   6  -3   0   51.64    2.72 
   6  -3   0   53.04    2.50 
  -6  -3   0   50.95    2.33 
   6  -3   0   53.07    2.50 
   6   3   0   54.39    2.36 
   6   3   0   53.46    2.33 
  -6   3   0   51.69    1.95 
   6   3   0   53.71    2.54 
   6   3   0   51.52    2.43 
   6   3   0   50.33    2.42 
  -6   3   0   52.20    2.33 
  -6   3   0   52.12    2.15 
  -6   3   0   53.24    3.28 
   6   3   0   50.00    2.42 
  -6   3   0   49.72    2.34 
  -6   3   0   56.53    3.43 
   6   3   0   52.73    2.50 
   6   3   0   53.36    2.64 
   6   3   0   49.79    2.42 
  -6   3   0   52.17    2.56 
   6   3   0   45.83    2.63 
  -6   3   0   52.79    2.26 
   6   3   0   52.09    2.39 
   6   3   0   51.69    2.49 
   6   3   0   53.20    2.50 
   6   3   0   53.42    2.45 
  -6   3   0   56.15    3.58 
  -6   3   0   52.65    2.53 
   6   3   0   53.06    2.78 
  -6   3   0   51.41    2.58 
  -6   3   0   53.20    2.65 
  -6   3   0   52.86    3.32 
  -6   3   0   49.79    2.64 
   7  -3   0    2.63    0.63 
  -7  -3   0    3.19    0.77 
  -7  -3   0    3.14    0.62 
  -7  -3   0    2.90    0.71 
   7  -3   0    2.56    0.66 
   7  -3   0    2.58    0.67 
  -7  -3   0    3.50    0.65 
   7  -3   0    3.36    0.69 
  -7  -3   0    2.63    0.63 
  -7  -3   0    2.30    0.96 
  -7  -3   0    1.94    0.52 
  -7  -3   0    1.68    1.00 
  -7  -3   0    2.44    0.99 
   7  -3   0    2.40    0.69 
  -7  -3   0    1.61    0.52 
   7  -3   0    2.79    0.52 
   7  -3   0    3.38    0.65 
  -7  -3   0    2.48    0.96 
   7  -3   0    3.02    0.81 
  -7  -3   0    3.10    0.69 
  -7  -3   0    3.34    0.82 
  -7  -3   0    3.67    0.79 
  -7  -3   0    4.19    0.83 
  -7  -3   0    1.80    0.57 
  -7  -3   0    2.62    0.68 
   7  -3   0    2.84    0.72 
  -7   3   0    2.86    0.53 
  -7   3   0    3.23    0.63 
  -7   3   0    1.89    0.95 
  -7   3   0    2.63    1.07 
   7   3   0    2.34    0.66 
   7   3   0    2.72    0.60 
  -7   3   0    3.09    0.81 
   7   3   0    2.99    0.56 
  -7   3   0    2.51    0.97 
  -7   3   0    2.97    0.72 
  -7   3   0    3.02    0.71 
   7   3   0    2.19    0.62 
   7   3   0    2.73    0.80 
   7   3   0    2.65    0.63 
  -7   3   0    3.37    1.26 
   7   3   0    3.26    0.73 
  -7   3   0    2.42    0.65 
   7   3   0    3.49    0.70 
  -7   3   0    3.08    0.47 
   7   3   0    3.17    0.74 
   7   3   0    2.94    0.60 
   7   3   0    2.94    0.63 
   7   3   0    3.47    0.62 
   7   3   0    3.44    0.70 
   7   3   0    2.31    0.56 
  -7   3   0    2.32    0.73 
  -7   3   0    3.82    0.64 
   7   3   0    1.64    0.65 
  -8  -3   0    0.64    0.49 
   8  -3   0    1.55    0.62 
  -8  -3   0    1.38    0.53 
  -8  -3   0    0.59    0.87 
   8  -3   0    1.51    0.59 
  -8  -3   0    0.54    0.42 
  -8  -3   0    0.36    0.64 
  -8  -3   0    0.34    0.57 
  -8  -3   0    0.65    0.61 
  -8  -3   0    0.71    0.50 
   8  -3   0    0.40    0.53 
  -8  -3   0    0.85    0.48 
  -8  -3   0    1.23    1.02 
  -8  -3   0    1.08    0.60 
  -8  -3   0    0.53    0.51 
  -8  -3   0    1.14    0.71 
  -8  -3   0    0.21    0.76 
   8  -3   0    1.27    0.59 
  -8  -3   0    0.69    0.84 
   8  -3   0    0.73    0.65 
  -8  -3   0    0.43    0.69 
   8  -3   0    1.28    0.59 
   8  -3   0    0.89    0.65 
  -8  -3   0    1.20    0.65 
   8   3   0    1.04    0.69 
  -8   3   0    0.25    0.46 
   8   3   0    0.12    0.47 
   8   3   0    0.45    0.50 
   8   3   0    0.85    0.55 
   8   3   0    0.87    0.58 
  -8   3   0    0.09    0.52 
   8   3   0    0.69    0.55 
  -8   3   0    0.88    0.86 
   8   3   0    1.46    0.62 
   8   3   0    0.61    0.64 
   8   3   0    0.58    0.49 
  -8   3   0    0.90    0.62 
  -8   3   0    1.17    0.44 
  -8   3   0    0.29    0.52 
   8   3   0    0.77    0.54 
  -8   3   0    0.24    0.93 
  -8   3   0    1.02    0.91 
   8   3   0    0.50    0.50 
  -8   3   0    0.47    0.60 
   8   3   0    0.55    0.37 
   8   3   0    0.76    0.45 
   8   3   0    0.65    0.57 
  -8   3   0    0.32    0.85 
  -8   3   0    1.27    0.69 
  -8   3   0   -0.16    0.76 
   9  -3   0    0.34    0.60 
   9  -3   0    1.62    0.77 
  -9  -3   0    1.11    1.25 
   9  -3   0    1.14    0.77 
   9  -3   0    1.43    0.63 
   9  -3   0    1.17    0.63 
  -9  -3   0    0.49    0.59 
  -9  -3   0    1.27    0.58 
  -9  -3   0    1.43    0.60 
  -9  -3   0    0.26    0.71 
  -9  -3   0    1.32    0.68 
   9  -3   0    0.73    0.62 
  -9  -3   0    1.43    0.75 
  -9  -3   0    0.73    0.53 
  -9  -3   0    0.72    0.64 
  -9  -3   0    0.84    1.00 
  -9  -3   0    0.87    1.13 
  -9  -3   0    0.53    0.58 
  -9  -3   0    1.19    0.79 
  -9  -3   0    0.66    0.92 
  -9  -3   0    0.58    0.50 
  -9  -3   0    0.10    0.70 
  -9  -3   0    1.25    1.07 
   9  -3   0    1.20    0.75 
  -9   3   0   -0.06    1.10 
  -9   3   0    0.53    0.55 
  -9   3   0    1.48    1.23 
   9   3   0    1.20    0.76 
   9   3   0    0.19    0.48 
  -9   3   0    0.45    0.66 
   9   3   0    0.88    0.68 
  -9   3   0    0.27    0.69 
  -9   3   0    0.01    0.99 
   9   3   0    0.81    0.61 
   9   3   0    0.66    0.60 
   9   3   0    1.07    0.51 
   9   3   0    1.31    0.71 
   9   3   0    0.58    0.57 
   9   3   0    0.94    0.78 
  -9   3   0    1.60    1.14 
   9   3   0    1.08    0.66 
   9   3   0    0.91    0.62 
  -9   3   0    0.49    0.64 
  -9   3   0    0.69    0.60 
  -9   3   0    1.12    1.02 
  -9   3   0    0.39    0.64 
   9   3   0    0.36    0.56 
   0  -4   0   86.52    3.38 
   0  -4   0   84.50    3.29 
   0  -4   0   85.86    3.28 
   0  -4   0   89.03    4.28 
   0  -4   0   85.26    3.34 
   0  -4   0   85.96    3.37 
   0  -4   0   83.76    3.27 
   0  -4   0   78.48    3.44 
   0  -4   0   86.68    3.31 
   0  -4   0   86.10    3.25 
   0  -4   0   83.47    3.34 
   0  -4   0   84.79    3.37 
   0  -4   0   83.44    3.27 
   0  -4   0   87.42    3.50 
   0  -4   0   85.22    3.33 
   0  -4   0   90.34    3.30 
   0   4   0   85.12    4.44 
   0   4   0   86.61    3.49 
   0   4   0   83.57    3.37 
   0   4   0   87.16    3.03 
   0   4   0   85.86    3.35 
   0   4   0   82.25    3.04 
   0   4   0   82.45    3.29 
   0   4   0   88.62    3.53 
   0   4   0   84.92    3.26 
   0   4   0   85.25    3.68 
   0   4   0   90.49    3.33 
   0   4   0   90.17    3.24 
   0   4   0   86.83    3.07 
   0   4   0   85.81    3.04 
   0   4   0   89.46    3.33 
   0   4   0   87.31    3.14 
   0   4   0   87.50    3.56 
   0   4   0   84.39    3.26 
   0   4   0   87.76    3.30 
   0   4   0   85.23    3.32 
   0   4   0   83.14    3.27 
   0   4   0   83.94    3.05 
   0   4   0   88.23    3.25 
  -1  -4   0  414.28   14.46 
  -1  -4   0  419.36   14.23 
   1  -4   0  414.56   14.35 
   1  -4   0  411.21   14.45 
   1  -4   0  416.17   14.43 
  -1  -4   0  416.88   14.49 
  -1  -4   0  399.75   14.49 
   1  -4   0  405.65   14.22 
  -1  -4   0  417.36   14.46 
   1  -4   0  421.96   14.38 
  -1  -4   0  420.42   14.57 
   1  -4   0  424.88   14.50 
  -1  -4   0  413.33   14.55 
   1  -4   0  420.13   14.57 
  -1  -4   0  417.35   14.31 
   1  -4   0  398.38   14.33 
   1  -4   0  423.54   14.55 
   1  -4   0  400.74   14.50 
  -1  -4   0  396.59   14.54 
  -1  -4   0  422.20   14.51 
  -1  -4   0  415.24   14.48 
  -1  -4   0  411.94   14.58 
  -1  -4   0  401.82   14.46 
  -1  -4   0  409.30   14.36 
   1  -4   0  407.90   14.41 
  -1  -4   0  410.79   14.30 
  -1  -4   0  414.25   14.34 
  -1  -4   0  419.81   14.50 
   1  -4   0  412.96   14.17 
  -1  -4   0  411.44   14.29 
  -1  -4   0  407.67   14.16 
  -1  -4   0  411.71   14.48 
  -1  -4   0  413.97   14.32 
   1  -4   0  395.61   14.34 
   1  -4   0  417.52   14.46 
  -1  -4   0  410.89   14.60 
  -1  -4   0  419.03   14.45 
  -1  -4   0  418.94   14.52 
  -1  -4   0  420.17   14.48 
   1  -4   0  400.69   14.26 
  -1  -4   0  415.44   14.55 
   1   4   0  421.40   14.33 
  -1   4   0  402.62   14.36 
  -1   4   0  418.40   14.34 
  -1   4   0  409.07   14.29 
   1   4   0  404.99   14.28 
  -1   4   0  381.72   14.15 
  -1   4   0  407.55   14.99 
  -1   4   0  358.08   14.92 
  -1   4   0  418.09   14.23 
   1   4   0  409.59   14.24 
   1   4   0  405.76   14.25 
   1   4   0  408.59   14.28 
   1   4   0  400.37   14.53 
  -1   4   0  412.19   14.31 
  -1   4   0  399.59   14.47 
   1   4   0  412.77   14.26 
  -1   4   0  408.94   14.25 
   1   4   0  418.78   14.28 
   1   4   0  410.93   14.39 
  -1   4   0  402.19   14.47 
  -1   4   0  399.13   14.50 
  -1   4   0  409.24   14.30 
  -1   4   0  416.36   14.57 
   1   4   0  404.46   14.43 
  -1   4   0  415.21   14.31 
   1   4   0  413.46   14.46 
  -1   4   0  348.64   14.66 
  -1   4   0  399.94   14.21 
   1   4   0  399.91   14.46 
  -1   4   0  406.08   14.41 
   1   4   0  395.00   14.48 
   1   4   0  423.02   14.19 
   1   4   0  409.93   14.49 
  -1   4   0  410.50   14.38 
  -1   4   0  396.25   14.39 
   1   4   0  419.83   15.00 
  -1   4   0  416.91   14.29 
  -1   4   0  418.60   14.44 
  -1   4   0  409.27   14.32 
  -1   4   0  411.14   14.34 
   1   4   0  417.37   14.72 
   1   4   0  405.57   14.63 
  -1   4   0  402.49   14.17 
  -1   4   0  403.40   14.28 
  -1   4   0  415.78   14.44 
   2  -4   0   37.77    1.64 
  -2  -4   0   38.75    1.58 
   2  -4   0   40.59    1.58 
  -2  -4   0   38.19    1.84 
  -2  -4   0   41.09    1.87 
   2  -4   0   39.27    1.68 
  -2  -4   0   41.13    1.81 
  -2  -4   0   38.69    1.98 
   2  -4   0   41.88    1.75 
   2  -4   0   39.63    1.60 
   2  -4   0   37.62    1.54 
  -2  -4   0   38.67    1.86 
  -2  -4   0   40.79    1.95 
  -2  -4   0   38.56    1.73 
  -2  -4   0   38.43    1.56 
  -2  -4   0   38.41    1.80 
   2  -4   0   40.41    1.75 
  -2  -4   0   37.93    1.86 
   2  -4   0   38.66    1.76 
   2  -4   0   39.46    1.57 
   2  -4   0   38.26    1.51 
  -2  -4   0   37.99    1.60 
   2  -4   0   38.14    1.80 
  -2  -4   0   39.32    1.83 
  -2  -4   0   38.91    1.86 
   2  -4   0   38.11    1.67 
  -2  -4   0   38.93    1.65 
  -2  -4   0   37.79    2.34 
  -2  -4   0   37.76    1.74 
  -2  -4   0   37.01    1.54 
  -2  -4   0   39.35    2.40 
  -2  -4   0   37.91    1.80 
  -2  -4   0   40.46    1.63 
  -2  -4   0   39.48    1.65 
  -2  -4   0   39.79    1.59 
  -2  -4   0   38.96    1.76 
  -2  -4   0   38.78    1.74 
   2  -4   0   38.02    1.48 
   2  -4   0   38.09    1.63 
  -2  -4   0   40.38    1.74 
  -2  -4   0   41.07    1.77 
  -2  -4   0   38.20    1.53 
  -2  -4   0   39.91    1.72 
   2  -4   0   37.06    1.60 
  -2  -4   0   40.87    1.78 
   2  -4   0   39.09    1.52 
   2   4   0   38.48    1.79 
   2   4   0   39.60    1.64 
  -2   4   0   39.37    1.60 
  -2   4   0   41.09    1.63 
  -2   4   0   37.86    1.45 
   2   4   0   39.43    1.56 
  -2   4   0   37.79    1.71 
  -2   4   0   38.51    1.59 
  -2   4   0   39.14    1.89 
  -2   4   0   38.98    1.56 
  -2   4   0   38.83    1.61 
  -2   4   0   39.45    1.62 
  -2   4   0   38.59    1.52 
  -2   4   0   37.59    1.49 
  -2   4   0   39.81    1.76 
  -2   4   0   39.18    2.05 
  -2   4   0   38.79    1.81 
  -2   4   0   41.85    1.71 
  -2   4   0   38.37    1.48 
   2   4   0   38.43    1.55 
   2   4   0   39.59    1.50 
   2   4   0   39.63    1.71 
  -2   4   0   37.24    2.25 
  -2   4   0   43.63    2.70 
  -2   4   0   37.69    1.55 
  -2   4   0   37.55    1.50 
   2   4   0   39.70    1.56 
   2   4   0   39.66    1.62 
   2   4   0   37.76    1.58 
  -2   4   0   38.81    1.79 
  -2   4   0   39.33    1.56 
  -2   4   0   36.78    1.63 
   2   4   0   41.57    1.91 
  -2   4   0   38.55    1.83 
   2   4   0   38.80    1.76 
   2   4   0   37.36    1.75 
  -2   4   0   38.43    1.76 
  -2   4   0   38.14    1.57 
  -2   4   0   38.17    1.68 
   2   4   0   40.11    1.78 
   2   4   0   39.40    2.12 
   2   4   0   40.07    1.70 
  -2   4   0   38.84    1.62 
  -2   4   0   38.24    1.46 
  -2   4   0   39.17    1.60 
  -2   4   0   37.99    1.96 
   2   4   0   38.65    1.62 
   2   4   0   39.11    1.66 
  -2   4   0   39.88    1.69 
  -2   4   0   36.86    1.56 
   3  -4   0   14.23    0.82 
  -3  -4   0   14.58    0.77 
  -3  -4   0   16.00    0.91 
   3  -4   0   12.95    0.82 
   3  -4   0   15.51    0.84 
  -3  -4   0   12.26    0.83 
   3  -4   0   15.34    0.90 
  -3  -4   0   13.55    0.96 
   3  -4   0   14.69    0.74 
  -3  -4   0   13.99    0.88 
  -3  -4   0   13.74    1.12 
  -3  -4   0   13.65    0.94 
  -3  -4   0   13.02    0.92 
  -3  -4   0   13.78    0.78 
  -3  -4   0   12.29    0.98 
  -3  -4   0   14.43    0.97 
  -3  -4   0   15.36    1.15 
   3  -4   0   12.62    0.70 
   3  -4   0   13.28    0.85 
   3  -4   0   13.76    0.85 
   3  -4   0   14.62    0.98 
  -3  -4   0   13.18    0.86 
  -3  -4   0   12.93    0.90 
  -3  -4   0   14.26    1.12 
  -3  -4   0   12.00    1.15 
   3  -4   0   14.84    0.76 
  -3  -4   0   13.95    0.79 
  -3  -4   0   14.15    1.00 
   3  -4   0   14.52    0.81 
  -3  -4   0   12.90    1.03 
  -3  -4   0   13.84    0.93 
  -3  -4   0   14.50    1.04 
  -3  -4   0   15.00    1.16 
   3  -4   0   13.58    0.66 
  -3   4   0   14.61    0.79 
  -3   4   0   13.50    0.91 
  -3   4   0   14.97    0.93 
   3   4   0   14.46    0.85 
  -3   4   0   14.80    0.71 
  -3   4   0   12.85    0.69 
   3   4   0   14.97    0.99 
   3   4   0   14.83    0.92 
   3   4   0   14.20    0.85 
   3   4   0   13.27    0.79 
  -3   4   0   14.78    0.91 
   3   4   0   14.32    0.81 
  -3   4   0   14.39    0.80 
   3   4   0   15.26    0.82 
   3   4   0   13.77    0.89 
  -3   4   0   14.61    0.70 
  -3   4   0   13.59    0.70 
   3   4   0   13.51    0.92 
   3   4   0   14.44    0.93 
  -3   4   0   14.33    0.83 
  -3   4   0   16.49    1.31 
  -3   4   0   13.89    0.68 
  -3   4   0   13.97    0.64 
  -3   4   0   13.00    0.69 
   3   4   0   13.63    0.89 
  -3   4   0   14.53    1.26 
  -3   4   0   13.79    1.15 
  -3   4   0   13.22    0.75 
  -3   4   0   14.61    1.08 
  -3   4   0   14.40    0.86 
   3   4   0   13.95    1.02 
  -3   4   0   13.97    0.72 
  -3   4   0   14.61    1.13 
   3   4   0   14.89    1.28 
   3   4   0   13.91    0.99 
   3   4   0   13.71    0.70 
  -3   4   0   13.48    0.87 
  -3   4   0   12.90    0.81 
   3   4   0   14.01    0.80 
   4  -4   0   14.39    1.05 
  -4  -4   0   14.60    0.89 
  -4  -4   0   13.48    1.00 
  -4  -4   0   13.67    0.97 
  -4  -4   0   13.53    1.27 
   4  -4   0   13.78    0.79 
  -4  -4   0   12.78    1.08 
   4  -4   0   13.43    0.91 
  -4  -4   0   13.86    0.98 
   4  -4   0   14.02    0.86 
  -4  -4   0   12.33    1.05 
   4  -4   0   13.66    0.90 
  -4  -4   0   13.74    1.31 
   4  -4   0   14.37    0.85 
  -4  -4   0   13.85    0.95 
  -4  -4   0   14.74    0.87 
   4  -4   0   14.90    0.91 
  -4  -4   0   14.12    1.05 
  -4  -4   0   15.21    1.01 
  -4  -4   0   13.06    1.04 
  -4  -4   0   13.54    0.80 
  -4  -4   0   14.92    1.32 
  -4  -4   0   12.30    0.97 
  -4  -4   0   13.18    1.28 
   4  -4   0   13.43    0.98 
   4  -4   0   13.96    0.80 
   4  -4   0   13.09    0.95 
  -4  -4   0   13.56    1.03 
  -4  -4   0   14.93    0.98 
   4  -4   0   15.91    0.94 
  -4   4   0   14.13    0.94 
  -4   4   0   13.18    0.94 
   4   4   0   13.43    0.88 
  -4   4   0   12.82    0.64 
   4   4   0   13.46    0.88 
  -4   4   0   13.04    0.73 
   4   4   0   13.30    1.08 
  -4   4   0   14.10    0.72 
   4   4   0   12.69    0.93 
  -4   4   0   13.18    1.39 
   4   4   0   13.06    1.00 
  -4   4   0   12.93    0.83 
  -4   4   0   14.32    0.94 
   4   4   0   14.95    0.99 
  -4   4   0   14.68    1.01 
  -4   4   0   13.01    0.77 
  -4   4   0   12.26    0.62 
   4   4   0   14.27    1.08 
   4   4   0   13.60    0.94 
   4   4   0   12.55    0.92 
  -4   4   0   14.05    0.79 
  -4   4   0   14.03    1.27 
  -4   4   0   13.54    0.56 
  -4   4   0   12.92    0.95 
   4   4   0   13.90    0.89 
   4   4   0   13.23    0.91 
   4   4   0   13.43    0.88 
   4   4   0   13.53    0.93 
  -4   4   0   14.19    0.86 
  -4   4   0   14.40    0.66 
  -4   4   0   13.86    1.29 
  -4   4   0   12.19    1.26 
   4   4   0   14.26    0.92 
  -4   4   0   12.33    1.27 
  -5  -4   0   70.20    3.12 
  -5  -4   0   73.62    3.17 
  -5  -4   0   66.99    3.68 
  -5  -4   0   74.13    3.31 
  -5  -4   0   75.44    3.19 
  -5  -4   0   72.53    3.05 
   5  -4   0   70.44    3.24 
  -5  -4   0   71.76    3.08 
  -5  -4   0   71.71    3.06 
  -5  -4   0   73.02    2.88 
  -5  -4   0   66.88    3.14 
  -5  -4   0   71.92    2.88 
  -5  -4   0   70.59    3.70 
  -5  -4   0   69.78    3.73 
  -5  -4   0   70.19    3.28 
  -5  -4   0   68.16    3.70 
   5  -4   0   71.01    2.81 
   5  -4   0   70.36    2.87 
   5  -4   0   70.13    3.03 
   5  -4   0   73.85    2.94 
   5  -4   0   72.67    3.03 
  -5  -4   0   70.59    3.07 
   5  -4   0   70.49    3.12 
   5  -4   0   70.78    2.85 
   5  -4   0   70.82    3.02 
   5  -4   0   68.63    3.00 
   5  -4   0   68.06    3.17 
  -5  -4   0   71.87    3.29 
  -5  -4   0   73.58    2.99 
  -5   4   0   72.55    3.19 
  -5   4   0   70.77    3.18 
  -5   4   0   69.98    3.93 
   5   4   0   69.80    2.98 
   5   4   0   65.67    3.01 
  -5   4   0   72.87    3.18 
  -5   4   0   62.45    3.29 
  -5   4   0   72.99    3.08 
   5   4   0   70.89    3.07 
   5   4   0   72.99    3.02 
   5   4   0   67.47    3.09 
   5   4   0   72.29    2.99 
   5   4   0   70.13    3.04 
   5   4   0   73.86    3.04 
  -5   4   0   67.93    3.74 
  -5   4   0   74.53    3.80 
   5   4   0   67.87    3.01 
  -5   4   0   72.49    3.74 
   5   4   0   74.04    3.40 
   5   4   0   70.33    3.01 
  -5   4   0   67.09    3.52 
  -5   4   0   72.19    3.09 
   5   4   0   73.19    3.06 
  -5   4   0   72.16    2.90 
   5   4   0   69.52    3.04 
   5   4   0   69.87    3.27 
  -5   4   0   71.26    2.94 
  -5   4   0   66.86    2.92 
  -5   4   0   67.70    2.85 
  -6  -4   0   75.03    3.27 
  -6  -4   0   78.75    3.32 
   6  -4   0   80.38    3.04 
  -6  -4   0   73.44    3.12 
  -6  -4   0   76.36    3.04 
   6  -4   0   80.69    3.36 
   6  -4   0   75.11    3.15 
   6  -4   0   78.11    3.03 
  -6  -4   0   78.37    3.30 
  -6  -4   0   73.27    3.43 
  -6  -4   0   75.39    3.60 
  -6  -4   0   75.42    3.60 
   6  -4   0   74.47    3.43 
  -6  -4   0   76.76    3.45 
  -6  -4   0   71.08    3.29 
   6  -4   0   76.01    3.21 
  -6  -4   0   73.63    4.09 
  -6  -4   0   72.67    3.55 
  -6  -4   0   75.31    4.17 
   6  -4   0   77.31    3.31 
  -6  -4   0   75.36    4.19 
  -6  -4   0   75.90    3.35 
   6  -4   0   71.81    3.29 
  -6  -4   0   73.20    3.36 
   6  -4   0   76.19    3.55 
  -6  -4   0   78.56    4.25 
  -6  -4   0   74.30    3.39 
  -6   4   0   72.93    2.97 
  -6   4   0   76.01    3.17 
   6   4   0   75.92    3.31 
   6   4   0   73.70    3.22 
  -6   4   0   74.92    3.15 
   6   4   0   75.47    3.26 
  -6   4   0   74.07    3.36 
   6   4   0   69.79    3.61 
  -6   4   0   78.87    4.20 
  -6   4   0   73.74    3.36 
  -6   4   0   77.46    3.54 
  -6   4   0   73.67    3.46 
   6   4   0   76.48    3.31 
  -6   4   0   74.33    3.11 
  -6   4   0   73.14    3.47 
   6   4   0   77.84    3.31 
  -6   4   0   77.46    4.22 
  -6   4   0   79.51    3.11 
  -6   4   0   75.72    4.24 
   6   4   0   72.42    3.23 
   6   4   0   74.30    3.24 
  -6   4   0   71.84    3.71 
   6   4   0   72.58    3.31 
   6   4   0   76.63    3.33 
   6   4   0   76.36    3.31 
   6   4   0   74.53    3.30 
   6   4   0   75.89    3.37 
  -6   4   0   81.27    4.54 
   6   4   0   76.14    3.36 
  -7  -4   0  101.01    4.37 
   7  -4   0   99.20    4.27 
  -7  -4   0   98.71    4.59 
  -7  -4   0  100.25    5.36 
  -7  -4   0   99.59    4.26 
  -7  -4   0   99.03    4.09 
  -7  -4   0  100.71    4.46 
   7  -4   0  102.62    4.13 
  -7  -4   0   98.25    4.34 
  -7  -4   0   99.94    4.30 
   7  -4   0   95.47    4.51 
  -7  -4   0  100.01    4.68 
   7  -4   0   99.81    4.29 
   7  -4   0  104.69    4.52 
  -7  -4   0   98.13    4.22 
  -7  -4   0  104.24    5.41 
   7  -4   0  100.90    4.18 
   7  -4   0  106.39    4.35 
  -7  -4   0   97.49    5.30 
  -7  -4   0  102.58    5.35 
  -7  -4   0   94.85    4.24 
  -7  -4   0   99.67    4.57 
  -7  -4   0   94.79    4.17 
  -7  -4   0   97.83    4.40 
   7   4   0   99.49    4.34 
   7   4   0   96.87    4.30 
   7   4   0   96.20    4.27 
   7   4   0  100.69    4.15 
   7   4   0  100.29    4.30 
  -7   4   0   99.97    4.82 
   7   4   0   98.77    4.28 
  -7   4   0  103.70    4.59 
  -7   4   0  100.14    4.50 
   7   4   0   99.12    4.23 
  -7   4   0   94.20    5.23 
   7   4   0   97.22    4.25 
   7   4   0   99.45    4.27 
   7   4   0   98.44    4.24 
   7   4   0   96.48    4.70 
  -7   4   0  105.68    5.44 
   7   4   0  100.15    4.15 
  -7   4   0  100.56    4.46 
  -7   4   0   99.99    4.37 
  -7   4   0  103.51    4.13 
  -7   4   0  101.25    4.36 
   7   4   0  100.51    4.68 
  -7   4   0   98.22    5.35 
  -7   4   0  103.21    5.48 
  -7   4   0  104.01    5.73 
   7   4   0  101.20    4.24 
   7   4   0  101.09    4.25 
   8  -4   0   38.29    2.25 
  -8  -4   0   38.90    2.51 
   8  -4   0   39.27    2.30 
  -8  -4   0   36.08    2.06 
  -8  -4   0   37.91    3.24 
  -8  -4   0   36.95    2.53 
   8  -4   0   41.59    2.53 
  -8  -4   0   41.58    2.45 
  -8  -4   0   40.05    3.21 
  -8  -4   0   40.13    2.17 
   8  -4   0   39.35    2.13 
   8  -4   0   37.47    2.15 
   8  -4   0   37.01    2.26 
   8  -4   0   42.17    2.52 
  -8  -4   0   39.29    2.25 
  -8  -4   0   41.16    2.21 
  -8  -4   0   40.47    3.23 
  -8  -4   0   37.15    2.21 
  -8  -4   0   40.17    2.31 
  -8  -4   0   36.76    2.54 
  -8  -4   0   37.27    2.23 
  -8  -4   0   32.30    2.21 
  -8  -4   0   37.75    2.32 
  -8  -4   0   35.35    3.14 
   8   4   0   41.72    2.29 
   8   4   0   42.35    2.69 
  -8   4   0   39.35    2.54 
   8   4   0   43.89    2.33 
  -8   4   0   38.43    2.31 
   8   4   0   40.75    2.22 
  -8   4   0   40.32    2.37 
  -8   4   0   38.74    3.22 
   8   4   0   39.27    2.24 
   8   4   0   36.62    2.27 
   8   4   0   40.58    2.33 
  -8   4   0   40.85    3.29 
   8   4   0   39.75    2.33 
  -8   4   0   40.22    2.14 
   8   4   0   43.38    2.30 
   8   4   0   38.18    2.61 
   8   4   0   40.05    2.30 
   8   4   0   36.55    2.07 
  -8   4   0   41.47    3.26 
   8   4   0   39.40    2.21 
  -8   4   0   34.90    2.34 
  -8   4   0   36.28    3.25 
  -8   4   0   42.64    3.68 
   8   4   0   37.98    2.19 
  -8   4   0   39.77    2.51 
  -9  -4   0   27.54    1.86 
   9  -4   0   31.99    2.00 
  -9  -4   0   30.56    2.41 
  -9  -4   0   30.16    3.14 
  -9  -4   0   30.41    2.14 
  -9  -4   0   28.89    2.11 
  -9  -4   0   27.98    2.98 
  -9  -4   0   29.37    3.00 
   9  -4   0   26.88    2.17 
   9  -4   0   30.72    1.92 
  -9  -4   0   27.42    3.00 
   9  -4   0   31.75    2.11 
  -9  -4   0   29.88    1.95 
  -9  -4   0   30.53    2.09 
   9  -4   0   30.67    2.11 
  -9  -4   0   29.93    2.35 
   9  -4   0   31.15    2.31 
   9  -4   0   31.83    2.09 
  -9  -4   0   26.74    2.13 
  -9  -4   0   28.74    1.98 
  -9  -4   0   27.67    3.25 
  -9  -4   0   30.99    2.38 
  -9  -4   0   29.78    2.06 
   9   4   0   29.92    1.97 
  -9   4   0   28.32    2.19 
   9   4   0   28.41    2.41 
   9   4   0   27.36    1.96 
  -9   4   0   29.48    2.17 
   9   4   0   26.25    2.02 
   9   4   0   30.21    2.01 
  -9   4   0   29.39    3.36 
   9   4   0   32.86    2.02 
  -9   4   0   29.86    2.35 
  -9   4   0   31.01    1.95 
   9   4   0   31.36    2.46 
  -9   4   0   33.66    2.30 
  -9   4   0   30.04    2.10 
  -9   4   0   30.90    3.07 
   9   4   0   27.82    1.85 
  -9   4   0   28.88    3.05 
   9   4   0   26.88    2.06 
  -9   4   0   30.87    3.19 
   9   4   0   28.87    2.02 
  -9   4   0   30.14    3.04 
   9   4   0   30.35    2.00 
   9   4   0   30.64    2.10 
   0  -5   0    0.36    0.33 
   0  -5   0   -0.21    0.21 
   0  -5   0    0.64    0.28 
   0  -5   0   -0.28    0.22 
   0  -5   0   -0.08    0.23 
   0  -5   0    0.08    0.19 
   0  -5   0    0.15    0.25 
   0  -5   0   -0.20    0.26 
   0  -5   0    0.30    0.23 
   0  -5   0    0.22    0.24 
   0  -5   0    0.00    0.38 
   0  -5   0    0.04    0.22 
   0  -5   0    0.48    0.23 
   0  -5   0    0.29    0.27 
   0   5   0    0.21    0.43 
   0   5   0    0.05    0.09 
   0   5   0    0.10    0.26 
   0   5   0    0.37    0.28 
   0   5   0    0.15    0.08 
   0   5   0    0.17    0.26 
   0   5   0   -0.03    0.22 
   0   5   0   -0.09    0.26 
   0   5   0    0.06    0.23 
   0   5   0    0.66    0.29 
   0   5   0    0.41    0.60 
   0   5   0    0.22    0.23 
   0   5   0    0.06    0.20 
   0   5   0    0.05    0.09 
   0   5   0    0.14    0.25 
   0   5   0   -0.25    0.31 
   0   5   0    0.06    0.24 
   0   5   0    0.07    0.11 
  -1  -5   0    9.66    0.61 
   1  -5   0    9.55    0.83 
   1  -5   0   10.95    0.74 
   1  -5   0    9.54    0.76 
  -1  -5   0   10.23    0.81 
  -1  -5   0   11.04    0.80 
  -1  -5   0    9.92    0.81 
  -1  -5   0    8.07    0.89 
  -1  -5   0    7.31    1.51 
  -1  -5   0    9.67    0.54 
   1  -5   0    9.46    0.68 
  -1  -5   0    8.39    0.82 
   1  -5   0    9.29    0.79 
  -1  -5   0   10.55    0.83 
  -1  -5   0   10.04    0.88 
  -1  -5   0    9.23    0.69 
  -1  -5   0   11.25    0.82 
  -1  -5   0   10.09    0.63 
  -1  -5   0    8.86    0.84 
  -1  -5   0   11.04    0.70 
   1  -5   0    9.54    0.76 
  -1  -5   0   11.29    0.82 
   1  -5   0    9.69    0.66 
  -1  -5   0    7.54    0.72 
   1  -5   0    9.92    0.67 
   1  -5   0    9.70    0.46 
  -1  -5   0    9.80    0.48 
  -1  -5   0   11.04    0.77 
  -1  -5   0   10.99    0.77 
   1  -5   0    8.96    0.83 
  -1  -5   0   10.17    0.80 
   1  -5   0    9.62    0.52 
   1  -5   0   10.36    0.75 
   1  -5   0   10.00    0.70 
  -1  -5   0   10.00    0.81 
   1   5   0   10.03    0.71 
  -1   5   0    9.24    0.61 
  -1   5   0    9.91    0.47 
  -1   5   0   10.53    0.86 
  -1   5   0   10.44    0.98 
  -1   5   0   10.13    0.66 
   1   5   0   10.46    0.78 
  -1   5   0    9.13    1.16 
  -1   5   0    9.59    0.62 
  -1   5   0    8.66    0.57 
   1   5   0    9.76    0.54 
   1   5   0   10.86    0.84 
   1   5   0    9.72    0.74 
  -1   5   0   10.77    0.52 
   1   5   0    9.86    0.82 
  -1   5   0    9.70    0.77 
  -1   5   0    9.31    0.62 
  -1   5   0    9.94    0.55 
  -1   5   0   10.48    0.67 
   1   5   0   10.21    0.83 
   1   5   0   10.06    0.53 
   1   5   0   10.22    0.77 
   1   5   0   11.43    1.16 
   1   5   0   10.96    0.85 
   1   5   0    9.56    0.54 
   1   5   0   10.85    0.66 
  -1   5   0    6.76    1.65 
   1   5   0   10.11    0.57 
  -1   5   0    9.31    0.72 
  -1   5   0   10.23    0.75 
  -1   5   0   10.29    0.67 
  -1   5   0   10.99    0.67 
   1   5   0    9.88    0.81 
   1   5   0    9.00    0.44 
  -1   5   0    9.74    0.74 
  -1   5   0   10.14    0.73 
   1   5   0    9.41    0.56 
  -2  -5   0   19.13    1.12 
   2  -5   0   19.49    0.94 
  -2  -5   0   16.21    1.06 
   2  -5   0   18.57    1.07 
   2  -5   0   18.57    1.07 
  -2  -5   0   17.25    1.05 
  -2  -5   0   17.64    1.04 
  -2  -5   0   18.39    1.25 
  -2  -5   0   16.39    0.80 
  -2  -5   0   18.57    1.12 
  -2  -5   0   17.07    0.83 
  -2  -5   0   18.90    1.15 
  -2  -5   0   17.96    1.17 
   2  -5   0   18.16    1.15 
   2  -5   0   18.41    0.88 
   2  -5   0   18.31    1.01 
   2  -5   0   16.25    0.88 
  -2  -5   0   17.36    0.80 
   2  -5   0   18.96    1.04 
  -2  -5   0   20.33    1.18 
  -2  -5   0   18.09    1.00 
  -2  -5   0   17.77    1.12 
  -2  -5   0   17.35    1.08 
  -2  -5   0   18.04    0.90 
  -2  -5   0   16.64    1.16 
   2  -5   0   17.83    0.89 
  -2  -5   0   19.16    1.22 
  -2  -5   0   16.83    0.93 
   2  -5   0   19.58    1.05 
  -2  -5   0   17.79    1.10 
  -2  -5   0   19.53    1.11 
  -2  -5   0   18.19    0.88 
   2  -5   0   18.65    1.10 
   2  -5   0   20.90    1.15 
   2  -5   0   17.92    0.83 
   2  -5   0   17.09    0.87 
  -2  -5   0   18.68    0.97 
  -2  -5   0   16.85    1.07 
  -2  -5   0   18.78    1.27 
  -2  -5   0   17.23    0.99 
  -2   5   0   17.65    0.98 
  -2   5   0   18.17    1.08 
  -2   5   0   17.62    0.82 
  -2   5   0   18.83    1.10 
  -2   5   0   17.83    0.83 
  -2   5   0   17.06    0.91 
   2   5   0   18.13    1.12 
  -2   5   0   17.66    0.85 
   2   5   0   18.05    0.90 
   2   5   0   18.44    0.79 
  -2   5   0   18.24    0.95 
  -2   5   0   17.49    0.97 
  -2   5   0   19.04    1.18 
  -2   5   0   17.99    1.04 
   2   5   0   17.22    1.09 
  -2   5   0   18.90    1.18 
   2   5   0   17.92    1.11 
  -2   5   0   17.75    0.76 
   2   5   0   16.84    1.39 
  -2   5   0   17.51    1.04 
  -2   5   0   18.27    0.84 
  -2   5   0   18.71    0.92 
  -2   5   0   17.72    0.81 
  -2   5   0   17.46    0.84 
  -2   5   0   17.05    1.51 
  -2   5   0   18.30    1.04 
   2   5   0   18.60    0.92 
   2   5   0   16.85    1.16 
   2   5   0   18.48    1.12 
  -2   5   0   16.49    0.95 
   2   5   0   18.41    0.96 
  -2   5   0   18.27    1.05 
  -2   5   0   17.19    0.82 
  -2   5   0   18.86    1.48 
  -2   5   0   18.02    0.93 
   2   5   0   17.62    1.07 
  -2   5   0   16.83    0.88 
  -2   5   0   13.32    1.11 
  -2   5   0   16.85    1.99 
   2   5   0   17.74    0.87 
   2   5   0   18.06    1.09 
   2   5   0   18.60    1.06 
  -2   5   0   17.95    1.49 
  -2   5   0   17.61    1.12 
   2   5   0   18.02    0.84 
  -2   5   0   16.48    0.83 
   3  -5   0   -0.17    0.24 
  -3  -5   0   -0.79    0.34 
  -3  -5   0   -0.50    0.37 
  -3  -5   0   -0.30    0.35 
  -3  -5   0   -0.17    0.31 
   3  -5   0    0.62    0.21 
  -3  -5   0   -0.09    0.31 
   3  -5   0   -0.33    0.22 
  -3  -5   0    0.14    0.43 
  -3  -5   0   -0.14    0.20 
   3  -5   0    0.09    0.33 
  -3  -5   0   -0.36    0.35 
  -3  -5   0   -0.26    0.30 
  -3  -5   0    0.08    0.22 
  -3  -5   0   -0.16    0.31 
   3  -5   0    0.27    0.26 
  -3  -5   0   -0.90    0.34 
   3  -5   0    0.54    0.32 
   3  -5   0   -0.30    0.24 
   3  -5   0   -0.10    0.22 
  -3  -5   0   -0.43    0.35 
  -3  -5   0   -0.64    0.31 
  -3  -5   0   -0.60    0.29 
  -3  -5   0    0.21    0.31 
  -3  -5   0   -0.34    0.25 
  -3  -5   0   -0.32    0.34 
  -3  -5   0   -0.24    0.26 
  -3  -5   0   -0.22    0.35 
  -3  -5   0   -0.59    0.34 
   3  -5   0   -0.06    0.18 
   3  -5   0    0.86    0.29 
  -3   5   0    0.04    0.27 
  -3   5   0    0.35    0.21 
   3   5   0    0.47    0.35 
  -3   5   0    0.24    0.24 
  -3   5   0    0.02    0.17 
  -3   5   0    0.29    0.31 
  -3   5   0    0.51    0.21 
  -3   5   0    0.13    0.34 
   3   5   0    0.24    0.33 
  -3   5   0   -0.40    0.24 
   3   5   0    0.04    0.26 
  -3   5   0    0.27    0.14 
   3   5   0   -0.05    0.31 
   3   5   0    0.05    0.34 
   3   5   0   -0.37    0.30 
  -3   5   0   -0.05    0.18 
  -3   5   0    0.15    0.23 
  -3   5   0   -0.01    0.15 
  -3   5   0   -0.20    0.25 
  -3   5   0    0.47    0.40 
  -3   5   0   -0.45    0.28 
   3   5   0   -0.38    0.20 
  -3   5   0    0.40    0.43 
  -3   5   0    0.50    0.26 
   3   5   0   -0.06    0.36 
  -3   5   0   -0.05    0.20 
  -3   5   0    0.94    0.39 
  -3   5   0    0.12    0.31 
   3   5   0    0.29    0.25 
  -3   5   0    0.07    0.57 
  -3   5   0   -0.48    0.29 
   3   5   0    0.37    0.35 
  -3   5   0   -0.30    0.31 
  -3   5   0    0.55    0.26 
  -3   5   0    1.40    0.54 
   3   5   0   -0.27    0.23 
   3   5   0    0.44    0.18 
   3   5   0    0.06    0.27 
   3   5   0    0.17    0.35 
   3   5   0    0.13    0.36 
  -3   5   0    0.26    0.25 
  -3   5   0    0.24    0.41 
   3   5   0    0.29    0.49 
  -3   5   0    0.44    0.46 
  -3   5   0    0.35    0.29 
  -3   5   0   -0.05    0.29 
   4  -5   0   17.09    0.75 
  -4  -5   0   16.50    1.09 
  -4  -5   0   16.90    1.44 
   4  -5   0   15.05    0.99 
  -4  -5   0   17.30    1.29 
  -4  -5   0   16.82    1.20 
  -4  -5   0   16.37    1.42 
   4  -5   0   16.66    1.10 
  -4  -5   0   16.53    1.15 
  -4  -5   0   17.17    0.97 
   4  -5   0   16.12    1.05 
   4  -5   0   17.57    1.09 
   4  -5   0   16.71    0.98 
  -4  -5   0   17.61    1.20 
  -4  -5   0   18.94    1.04 
  -4  -5   0   17.63    1.57 
  -4  -5   0   16.40    1.29 
   4  -5   0   15.81    1.05 
   4  -5   0   18.45    1.22 
  -4  -5   0   17.10    1.13 
   4  -5   0   16.30    0.89 
  -4  -5   0   16.34    1.08 
  -4  -5   0   17.29    1.31 
  -4  -5   0   16.03    1.19 
  -4  -5   0   16.91    1.44 
  -4  -5   0   18.40    1.47 
  -4  -5   0   19.31    1.32 
   4  -5   0   17.46    0.96 
  -4  -5   0   17.41    1.25 
  -4  -5   0   16.78    1.15 
   4   5   0   16.27    1.16 
   4   5   0   16.08    1.22 
  -4   5   0   16.42    1.59 
   4   5   0   17.27    1.16 
  -4   5   0   16.55    1.42 
  -4   5   0   16.23    1.16 
  -4   5   0   17.09    1.21 
  -4   5   0   17.05    0.79 
   4   5   0   17.54    1.29 
   4   5   0   18.52    1.34 
   4   5   0   15.60    1.57 
  -4   5   0   16.43    0.85 
  -4   5   0   16.32    0.94 
  -4   5   0   16.45    1.08 
   4   5   0   15.48    1.05 
  -4   5   0   17.33    0.74 
  -4   5   0   17.59    1.16 
   4   5   0   16.84    1.02 
  -4   5   0   16.32    0.86 
  -4   5   0   18.31    1.66 
   4   5   0   16.19    1.01 
  -4   5   0   16.65    1.44 
  -4   5   0   18.48    1.49 
  -4   5   0   15.30    0.94 
   4   5   0   16.15    1.01 
   4   5   0   15.58    1.00 
  -4   5   0   17.16    1.04 
   4   5   0   17.85    1.09 
  -4   5   0   16.41    0.73 
   4   5   0   15.86    1.16 
   4   5   0   15.30    1.13 
  -4   5   0   17.61    1.51 
   4   5   0   16.11    1.12 
   4   5   0   16.61    1.13 
  -4   5   0   16.60    0.83 
  -4   5   0   17.25    1.04 
  -4   5   0   17.39    1.09 
  -5  -5   0   12.21    1.41 
   5  -5   0   11.49    0.95 
  -5  -5   0   10.94    1.36 
  -5  -5   0   13.15    1.45 
  -5  -5   0   10.97    1.24 
  -5  -5   0   11.68    1.09 
  -5  -5   0   10.72    1.47 
  -5  -5   0   10.68    1.12 
  -5  -5   0   11.41    1.19 
  -5  -5   0   12.00    0.85 
   5  -5   0   11.91    0.89 
   5  -5   0   12.73    1.07 
  -5  -5   0   10.55    1.51 
  -5  -5   0   11.43    1.28 
  -5  -5   0   11.58    1.16 
   5  -5   0   13.35    0.98 
  -5  -5   0   12.80    1.08 
   5  -5   0   10.22    0.99 
  -5  -5   0   11.64    0.93 
  -5  -5   0   10.94    0.89 
  -5  -5   0   10.88    1.12 
  -5  -5   0   12.68    1.27 
  -5  -5   0   13.58    1.21 
   5  -5   0   10.88    0.80 
   5  -5   0   10.64    0.99 
   5  -5   0   10.18    0.80 
   5  -5   0   11.86    1.09 
   5  -5   0   11.05    0.90 
  -5  -5   0    9.98    1.00 
  -5   5   0   11.86    0.92 
  -5   5   0   11.93    0.81 
   5   5   0   12.19    1.38 
   5   5   0   11.70    0.96 
   5   5   0   13.68    1.10 
   5   5   0   12.39    0.95 
  -5   5   0   11.61    0.93 
  -5   5   0   12.19    0.97 
   5   5   0   12.16    1.18 
  -5   5   0   13.49    0.94 
  -5   5   0   12.01    1.40 
  -5   5   0   10.29    1.43 
   5   5   0   11.40    0.97 
  -5   5   0   11.56    1.43 
  -5   5   0   11.86    1.59 
   5   5   0   11.46    1.12 
  -5   5   0   10.94    1.42 
  -5   5   0   13.05    1.07 
  -5   5   0   13.01    1.24 
   5   5   0   12.12    0.94 
   5   5   0   11.25    1.09 
  -5   5   0   10.50    1.51 
   5   5   0   11.57    0.92 
   5   5   0   12.63    1.03 
  -5   5   0   11.61    0.75 
  -5   5   0   11.20    1.16 
   5   5   0   12.88    1.21 
  -5   5   0   11.16    1.01 
   5   5   0   10.77    1.12 
   5   5   0    9.14    0.97 
   5   5   0   12.06    1.13 
  -6  -5   0   40.03    2.46 
  -6  -5   0   40.00    1.96 
   6  -5   0   42.81    2.27 
  -6  -5   0   39.11    2.43 
  -6  -5   0   41.97    2.41 
  -6  -5   0   39.03    2.29 
   6  -5   0   42.34    1.98 
   6  -5   0   42.57    2.35 
   6  -5   0   42.61    2.04 
  -6  -5   0   41.07    2.84 
   6  -5   0   41.30    2.14 
  -6  -5   0   42.45    2.00 
  -6  -5   0   42.59    2.23 
  -6  -5   0   42.79    2.28 
  -6  -5   0   39.83    2.07 
  -6  -5   0   40.49    2.85 
  -6  -5   0   40.55    2.83 
  -6  -5   0   40.57    2.86 
  -6  -5   0   40.00    2.19 
   6  -5   0   45.16    2.18 
  -6  -5   0   39.45    2.16 
  -6  -5   0   37.86    2.14 
  -6  -5   0   39.92    2.84 
   6  -5   0   40.70    2.13 
  -6  -5   0   43.96    2.35 
   6  -5   0   42.39    1.97 
   6  -5   0   42.28    2.31 
  -6  -5   0   42.27    2.31 
   6   5   0   41.34    2.12 
  -6   5   0   44.02    3.17 
   6   5   0   40.36    2.21 
  -6   5   0   40.63    2.02 
  -6   5   0   41.85    2.34 
  -6   5   0   42.70    2.18 
  -6   5   0   42.70    2.89 
   6   5   0   41.32    2.14 
   6   5   0   39.92    2.23 
  -6   5   0   40.99    1.95 
   6   5   0   43.54    2.22 
   6   5   0   44.27    2.14 
  -6   5   0   42.88    2.04 
   6   5   0   44.09    2.23 
  -6   5   0   45.51    3.03 
   6   5   0   41.53    2.24 
   6   5   0   41.81    2.16 
  -6   5   0   40.06    2.28 
  -6   5   0   40.79    2.77 
   6   5   0   44.04    2.59 
   6   5   0   45.98    2.15 
  -6   5   0   41.45    2.34 
   6   5   0   45.90    2.24 
  -6   5   0   42.68    2.33 
  -6   5   0   44.62    2.94 
   6   5   0   41.72    2.20 
  -6   5   0   41.38    2.21 
   6   5   0   43.99    2.20 
  -6   5   0   43.37    2.91 
   7  -5   0    4.62    0.91 
  -7  -5   0    3.95    0.78 
  -7  -5   0    4.25    1.20 
  -7  -5   0    4.00    0.85 
  -7  -5   0    2.75    0.90 
  -7  -5   0    3.77    1.20 
  -7  -5   0    2.93    1.10 
  -7  -5   0    4.23    0.84 
  -7  -5   0    3.30    0.94 
   7  -5   0    3.65    0.78 
  -7  -5   0    4.52    1.27 
   7  -5   0    4.80    0.76 
  -7  -5   0    4.18    0.89 
  -7  -5   0    3.27    0.73 
   7  -5   0    2.66    0.60 
  -7  -5   0    3.20    0.88 
  -7  -5   0    2.48    0.75 
   7  -5   0    4.03    0.79 
  -7  -5   0    3.37    0.71 
  -7  -5   0    3.65    0.82 
   7  -5   0    3.07    0.68 
  -7  -5   0    4.10    0.84 
  -7  -5   0    4.00    1.20 
   7  -5   0    5.04    0.94 
   7   5   0    3.31    0.77 
   7   5   0    2.27    0.91 
   7   5   0    3.34    0.72 
  -7   5   0    3.75    1.19 
   7   5   0    3.38    0.68 
  -7   5   0    2.48    0.55 
  -7   5   0    3.65    0.97 
   7   5   0    4.18    0.81 
   7   5   0    3.80    0.74 
   7   5   0    3.17    0.72 
   7   5   0    2.84    0.74 
  -7   5   0    2.82    1.10 
  -7   5   0    3.61    1.26 
   7   5   0    2.86    0.74 
  -7   5   0    2.79    0.82 
  -7   5   0    3.25    1.31 
   7   5   0    3.97    0.82 
   7   5   0    3.67    0.77 
   7   5   0    4.03    0.78 
  -7   5   0    2.88    0.73 
  -7   5   0    2.80    0.80 
   7   5   0    3.35    0.76 
  -7   5   0    3.70    0.76 
   7   5   0    4.19    0.80 
  -7   5   0    4.16    1.24 
  -7   5   0    2.84    0.79 
  -8  -5   0    1.07    1.12 
  -8  -5   0    1.12    0.80 
  -8  -5   0    1.21    1.03 
   8  -5   0    1.44    0.67 
   8  -5   0    1.16    0.57 
  -8  -5   0    0.56    0.60 
  -8  -5   0    1.41    0.75 
   8  -5   0   -0.37    0.52 
   8  -5   0    0.67    0.59 
  -8  -5   0    0.68    0.66 
  -8  -5   0    0.90    0.73 
   8  -5   0    1.19    0.71 
  -8  -5   0    1.10    0.76 
   8  -5   0    0.48    0.53 
  -8  -5   0    1.75    0.78 
  -8  -5   0    0.95    0.94 
   8  -5   0    0.80    0.61 
  -8  -5   0    1.23    0.65 
  -8  -5   0    0.37    0.85 
  -8  -5   0    0.10    0.77 
  -8  -5   0   -0.34    0.90 
  -8  -5   0   -0.43    0.50 
  -8  -5   0    0.35    0.55 
  -8  -5   0    0.00    0.56 
  -8  -5   0    0.36    0.60 
  -8   5   0    1.26    0.64 
   8   5   0    1.24    0.57 
  -8   5   0    0.35    0.79 
   8   5   0    0.19    0.50 
   8   5   0    0.74    0.58 
   8   5   0    0.94    0.61 
  -8   5   0    0.71    1.12 
   8   5   0    0.93    0.57 
  -8   5   0    0.55    0.65 
  -8   5   0    0.66    0.65 
   8   5   0    2.25    0.88 
   8   5   0    1.08    0.60 
   8   5   0    0.83    0.61 
   8   5   0    0.94    0.63 
   8   5   0    0.06    0.67 
  -8   5   0    1.08    0.90 
  -8   5   0    0.47    0.59 
  -8   5   0    0.83    0.63 
   8   5   0    1.49    0.68 
  -8   5   0    1.05    0.95 
   8   5   0    3.09    0.79 
   8   5   0    1.42    0.68 
  -8   5   0    1.22    1.08 
   9  -5   0   -0.04    0.62 
  -9  -5   0   -0.30    0.97 
  -9  -5   0    0.45    0.96 
  -9  -5   0    0.28    0.70 
  -9  -5   0    0.02    0.70 
   9  -5   0    0.53    0.61 
  -9  -5   0    0.06    0.71 
  -9  -5   0    0.19    0.53 
  -9  -5   0   -0.35    0.60 
  -9  -5   0    0.59    0.74 
  -9  -5   0    0.65    1.07 
  -9  -5   0    0.06    0.64 
   9  -5   0    0.34    0.60 
  -9  -5   0    0.35    0.94 
  -9  -5   0    0.60    0.63 
   9  -5   0    0.56    0.66 
  -9  -5   0   -0.19    0.87 
  -9  -5   0    0.52    0.87 
  -9  -5   0    0.31    1.00 
   9  -5   0    0.43    0.66 
  -9  -5   0    0.26    1.21 
  -9  -5   0   -0.19    0.76 
   9   5   0    1.35    0.68 
  -9   5   0   -0.52    0.59 
   9   5   0   -0.49    0.51 
  -9   5   0    0.24    0.79 
   9   5   0    0.44    0.62 
  -9   5   0   -0.70    0.67 
   9   5   0    0.81    0.67 
   9   5   0    0.34    0.63 
  -9   5   0    0.00    1.20 
  -9   5   0   -0.67    0.91 
   9   5   0    0.78    0.84 
   9   5   0    0.63    0.60 
   9   5   0    0.72    0.65 
  -9   5   0    0.68    0.73 
   9   5   0    0.05    0.62 
  -9   5   0   -1.20    0.80 
  -9   5   0    0.43    0.71 
  -9   5   0   -0.63    0.92 
   9   5   0    0.01    0.62 
   9   5   0    1.33    0.72 
   9   5   0   -0.48    0.69 
  -9   5   0    0.64    1.01 
   0  -6   0    1.02    0.45 
   0  -6   0    0.18    0.37 
   0  -6   0    0.90    0.36 
   0  -6   0    0.63    0.44 
   0  -6   0    1.13    0.46 
   0  -6   0    0.66    0.37 
   0  -6   0    0.32    0.35 
   0  -6   0    0.81    0.38 
   0  -6   0    1.01    0.21 
   0  -6   0    0.36    0.33 
   0  -6   0    0.41    0.34 
   0   6   0    0.93    0.22 
   0   6   0    0.83    0.35 
   0   6   0    1.29    0.38 
   0   6   0    1.08    0.14 
   0   6   0    1.25    0.44 
   0   6   0    1.00    0.76 
   0   6   0    0.83    0.39 
   0   6   0    0.45    0.35 
   0   6   0    1.18    0.46 
   0   6   0    1.62    0.61 
   0   6   0    0.67    0.35 
   0   6   0    1.44    0.47 
   0   6   0    0.73    0.34 
   1  -6   0  214.74    7.88 
   1  -6   0  225.00    8.10 
  -1  -6   0  208.55    7.98 
   1  -6   0  216.58    7.95 
   1  -6   0  216.27    7.93 
   1  -6   0  213.84    8.02 
  -1  -6   0  213.66    7.96 
   1  -6   0  209.14    7.52 
  -1  -6   0  212.38    7.79 
   1  -6   0  213.73    7.83 
   1  -6   0  217.53    7.86 
   1  -6   0  215.67    7.98 
  -1  -6   0  214.38    8.01 
  -1  -6   0  215.81    8.08 
   1  -6   0  215.59    7.85 
  -1  -6   0  216.61    7.95 
   1  -6   0  212.93    8.00 
  -1  -6   0  239.88    8.22 
  -1  -6   0  212.89    7.98 
  -1  -6   0  221.13    8.01 
  -1  -6   0  220.39    8.14 
  -1  -6   0  214.61    8.06 
   1  -6   0  228.45    8.19 
  -1  -6   0  180.68    7.87 
  -1  -6   0  203.23    7.99 
  -1   6   0  210.48    8.00 
  -1   6   0  221.23    7.92 
  -1   6   0  221.21    8.24 
   1   6   0  216.90    7.86 
   1   6   0  202.89    7.95 
   1   6   0  223.49    7.97 
   1   6   0  210.18    7.61 
  -1   6   0  211.32    7.88 
   1   6   0  220.77    7.62 
  -1   6   0  214.62    7.64 
  -1   6   0  218.39    7.94 
  -1   6   0  210.39    7.78 
  -1   6   0  213.04    8.60 
  -1   6   0  212.73    7.93 
   1   6   0  216.16    8.19 
   1   6   0  214.22    8.01 
  -1   6   0  211.00    7.63 
   1   6   0  214.26    7.63 
  -1   6   0  215.30    7.79 
  -1   6   0  212.61    8.31 
   1   6   0  216.61    7.92 
   1   6   0  219.21    7.59 
   1   6   0  220.57    8.13 
   1   6   0  212.80    7.55 
  -1   6   0  209.16    7.81 
   1   6   0  221.46    8.03 
   1   6   0  224.23    7.74 
   1   6   0  205.00    8.01 
   1   6   0  218.81    8.67 
  -1   6   0  215.13    8.05 
  -2  -6   0    0.19    0.22 
   2  -6   0   -0.18    0.25 
  -2  -6   0    0.01    0.30 
  -2  -6   0   -0.10    0.23 
   2  -6   0    0.36    0.19 
  -2  -6   0    0.04    0.23 
   2  -6   0    0.27    0.25 
  -2  -6   0   -0.05    0.24 
  -2  -6   0    0.19    0.35 
  -2  -6   0    0.21    0.24 
   2  -6   0    0.15    0.33 
  -2  -6   0    0.22    0.40 
  -2  -6   0   -0.01    0.29 
  -2  -6   0    0.27    0.33 
   2  -6   0    0.09    0.29 
  -2  -6   0    0.35    0.18 
  -2  -6   0   -0.07    0.29 
   2  -6   0    0.22    0.34 
  -2  -6   0    0.11    0.40 
  -2  -6   0    0.19    0.37 
   2  -6   0    0.34    0.37 
  -2  -6   0   -0.56    0.30 
   2  -6   0   -0.12    0.20 
  -2  -6   0   -0.07    0.37 
   2  -6   0   -0.05    0.20 
   2  -6   0   -0.15    0.28 
  -2  -6   0   -0.11    0.37 
   2  -6   0    0.24    0.18 
  -2  -6   0    0.14    0.12 
   2  -6   0    0.04    0.28 
  -2  -6   0    0.33    0.36 
  -2  -6   0   -0.16    0.22 
  -2  -6   0   -0.05    0.31 
  -2  -6   0    0.15    0.35 
  -2   6   0   -0.50    0.25 
  -2   6   0    0.20    0.34 
  -2   6   0   -0.01    0.31 
  -2   6   0   -0.29    0.34 
   2   6   0    0.17    0.20 
   2   6   0    0.52    0.40 
  -2   6   0    0.22    0.27 
   2   6   0   -0.08    0.44 
  -2   6   0    0.06    0.28 
  -2   6   0    0.22    0.14 
  -2   6   0    0.12    0.31 
  -2   6   0    0.02    0.40 
  -2   6   0    0.06    0.24 
  -2   6   0    0.07    0.36 
  -2   6   0    0.23    0.25 
   2   6   0   -0.04    0.29 
  -2   6   0   -0.11    0.23 
   2   6   0    0.00    0.41 
   2   6   0   -0.18    0.28 
   2   6   0    0.14    0.20 
  -2   6   0    0.30    0.17 
  -2   6   0    0.33    0.28 
   2   6   0    0.18    0.33 
  -2   6   0    0.33    0.65 
   2   6   0   -0.08    0.31 
  -2   6   0   -0.34    0.20 
  -2   6   0    0.02    0.19 
   2   6   0   -0.09    0.17 
  -2   6   0    0.64    0.28 
  -2   6   0    0.10    0.19 
   2   6   0    0.04    0.34 
  -2   6   0    0.10    0.18 
  -2   6   0    0.15    0.40 
  -2   6   0    0.00    0.30 
   2   6   0    0.20    0.23 
   2   6   0    0.23    0.34 
  -2   6   0    0.15    0.17 
  -2   6   0    0.09    0.34 
   2   6   0    0.11    0.34 
  -2   6   0    0.15    0.73 
  -3  -6   0   22.05    1.35 
   3  -6   0   21.26    1.09 
   3  -6   0   17.77    1.25 
  -3  -6   0   21.06    1.27 
  -3  -6   0   19.88    1.34 
   3  -6   0   20.54    1.04 
  -3  -6   0   22.19    1.36 
   3  -6   0   20.90    1.06 
  -3  -6   0   19.73    1.41 
  -3  -6   0   21.94    1.36 
  -3  -6   0   20.34    1.40 
   3  -6   0   21.69    1.11 
  -3  -6   0   19.92    1.36 
  -3  -6   0   22.76    1.22 
  -3  -6   0   21.23    1.59 
  -3  -6   0   21.59    1.49 
  -3  -6   0   20.35    1.30 
  -3  -6   0   19.79    1.47 
  -3  -6   0   19.91    1.35 
   3  -6   0   20.37    1.19 
  -3  -6   0   22.45    1.46 
  -3  -6   0   22.36    1.22 
  -3  -6   0   22.95    1.47 
  -3  -6   0   21.38    1.41 
   3  -6   0   21.19    1.37 
   3  -6   0   21.83    1.22 
  -3   6   0   21.71    1.12 
  -3   6   0   21.23    1.05 
  -3   6   0   21.02    1.31 
  -3   6   0   20.29    1.14 
   3   6   0   19.18    1.25 
  -3   6   0   22.24    1.42 
   3   6   0   19.92    1.35 
   3   6   0   19.99    1.11 
  -3   6   0   20.33    1.24 
  -3   6   0   22.89    1.47 
  -3   6   0   20.74    1.06 
  -3   6   0   16.73    1.92 
   3   6   0   20.81    1.05 
   3   6   0   20.91    1.14 
  -3   6   0   21.68    2.51 
  -3   6   0   21.53    1.38 
   3   6   0   20.63    1.38 
   3   6   0   20.05    1.35 
   3   6   0   21.75    1.09 
  -3   6   0   23.91    1.36 
   3   6   0   21.52    1.46 
   3   6   0   20.37    1.35 
  -3   6   0   22.49    1.36 
  -3   6   0   21.08    1.40 
  -3   6   0   20.75    1.11 
  -3   6   0   18.69    1.22 
   3   6   0   21.02    1.72 
  -3   6   0   22.39    1.25 
  -3   6   0   22.05    1.86 
   3   6   0   19.34    1.38 
  -3   6   0   21.15    1.08 
   3   6   0   19.80    1.37 
  -3   6   0   20.33    1.11 
   3   6   0   20.77    1.29 
  -3   6   0   20.42    1.36 
  -3   6   0   19.99    1.45 
  -3   6   0   20.60    1.83 
   4  -6   0    0.42    0.32 
  -4  -6   0    0.18    0.48 
  -4  -6   0    0.83    0.59 
  -4  -6   0    0.51    0.46 
  -4  -6   0    0.29    0.37 
  -4  -6   0    0.88    0.44 
   4  -6   0    0.67    0.34 
   4  -6   0    0.55    0.47 
  -4  -6   0    0.68    0.51 
   4  -6   0    0.88    0.42 
  -4  -6   0    0.55    0.52 
  -4  -6   0    0.64    0.52 
   4  -6   0    0.94    0.26 
  -4  -6   0    0.50    0.50 
  -4  -6   0    0.76    0.47 
  -4  -6   0    0.80    0.47 
   4  -6   0    0.73    0.25 
   4  -6   0    0.34    0.34 
  -4  -6   0    0.80    0.46 
  -4  -6   0    0.36    0.34 
  -4  -6   0    0.49    0.45 
   4  -6   0    0.69    0.29 
  -4  -6   0   -0.15    0.32 
   4  -6   0    0.72    0.36 
   4  -6   0    0.08    0.24 
  -4  -6   0    0.24    0.29 
  -4  -6   0    0.42    0.51 
  -4  -6   0    0.02    0.37 
  -4  -6   0    0.96    0.46 
  -4  -6   0    0.25    0.44 
  -4   6   0    0.57    0.48 
  -4   6   0    0.42    0.43 
  -4   6   0    0.10    0.36 
   4   6   0    1.23    0.53 
  -4   6   0   -0.18    0.51 
   4   6   0    0.61    0.43 
   4   6   0    0.31    0.29 
  -4   6   0    0.48    0.30 
  -4   6   0    0.47    0.27 
   4   6   0    0.40    0.34 
   4   6   0    0.33    0.44 
   4   6   0    0.83    0.47 
  -4   6   0    0.14    0.54 
  -4   6   0    0.64    0.34 
  -4   6   0    0.31    0.52 
  -4   6   0    0.09    0.46 
   4   6   0    0.74    0.64 
   4   6   0    0.45    0.31 
  -4   6   0    0.23    0.47 
  -4   6   0    0.53    0.34 
  -4   6   0    0.14    0.33 
  -4   6   0    0.22    0.45 
  -4   6   0    0.11    0.40 
  -4   6   0    0.65    0.28 
  -4   6   0    1.18    0.64 
   4   6   0    0.21    0.41 
  -4   6   0    0.71    0.54 
  -4   6   0    0.37    0.30 
   4   6   0    0.85    0.52 
  -4   6   0    0.76    0.30 
  -4   6   0    0.45    0.32 
  -4   6   0    0.19    0.36 
  -4   6   0    0.36    0.23 
  -4   6   0    0.48    0.86 
  -4   6   0    0.17    0.46 
   4   6   0    0.46    0.44 
   4   6   0    0.84    0.49 
   4   6   0    0.10    0.31 
   4   6   0    0.32    0.43 
  -5  -6   0   68.72    3.77 
  -5  -6   0   70.88    3.91 
   5  -6   0   71.84    3.13 
  -5  -6   0   74.41    3.85 
  -5  -6   0   70.60    3.22 
  -5  -6   0   69.81    3.61 
  -5  -6   0   73.39    3.21 
  -5  -6   0   76.08    3.45 
  -5  -6   0   71.14    3.29 
   5  -6   0   66.78    3.12 
  -5  -6   0   71.60    3.48 
   5  -6   0   71.67    3.19 
   5  -6   0   73.07    3.10 
   5  -6   0   74.62    3.24 
  -5  -6   0   69.45    3.30 
  -5  -6   0   66.52    3.39 
  -5  -6   0   72.19    3.76 
  -5  -6   0   70.13    3.38 
   5  -6   0   76.54    3.01 
  -5  -6   0   72.40    3.57 
  -5  -6   0   72.35    3.80 
   5  -6   0   71.48    3.35 
  -5  -6   0   73.64    3.26 
  -5  -6   0   70.86    3.29 
   5  -6   0   71.79    2.97 
  -5   6   0   79.55    4.99 
   5   6   0   76.14    3.52 
  -5   6   0   75.55    3.19 
  -5   6   0   67.87    3.69 
  -5   6   0   73.70    3.13 
  -5   6   0   76.33    3.22 
  -5   6   0   73.16    3.42 
  -5   6   0   72.15    3.22 
  -5   6   0   70.68    3.19 
   5   6   0   77.10    3.12 
  -5   6   0   78.15    4.27 
  -5   6   0   72.67    3.81 
  -5   6   0   76.31    3.95 
   5   6   0   79.95    3.40 
   5   6   0   75.61    3.10 
  -5   6   0   72.11    3.78 
   5   6   0   71.25    3.37 
  -5   6   0   75.94    3.37 
   5   6   0   71.63    3.29 
  -5   6   0   75.66    3.85 
  -5   6   0   75.88    3.24 
   5   6   0   76.30    3.20 
  -5   6   0   73.94    3.83 
  -5   6   0   72.43    3.25 
   5   6   0   73.33    3.33 
   5   6   0   74.04    3.28 
   5   6   0   71.33    3.18 
   5   6   0   71.87    3.39 
   5   6   0   70.55    3.28 
   5   6   0   76.90    3.67 
  -5   6   0   73.94    3.37 
  -5   6   0   63.68    3.99 
  -6  -6   0    0.13    0.48 
  -6  -6   0    0.59    0.66 
   6  -6   0    0.62    0.48 
   6  -6   0    0.24    0.49 
  -6  -6   0    0.21    0.64 
   6  -6   0   -0.35    0.33 
  -6  -6   0   -1.03    0.47 
  -6  -6   0   -0.61    0.58 
  -6  -6   0   -0.29    0.36 
   6  -6   0   -0.37    0.37 
  -6  -6   0    0.31    0.64 
   6  -6   0   -0.14    0.40 
  -6  -6   0    0.06    0.67 
  -6  -6   0    0.50    0.57 
  -6  -6   0    0.24    0.49 
   6  -6   0   -0.04    0.44 
  -6  -6   0    0.23    0.58 
  -6  -6   0    0.19    0.68 
  -6  -6   0   -0.45    0.56 
  -6  -6   0   -0.05    0.72 
  -6  -6   0    0.35    0.64 
  -6  -6   0    0.29    0.47 
  -6  -6   0    0.04    0.49 
   6   6   0    0.15    0.43 
   6   6   0    0.00    0.41 
  -6   6   0   -0.18    0.43 
   6   6   0   -0.05    0.44 
  -6   6   0   -0.09    0.39 
   6   6   0    0.16    0.50 
   6   6   0    1.19    0.54 
   6   6   0    0.18    0.51 
  -6   6   0    0.81    0.58 
  -6   6   0   -0.15    0.63 
  -6   6   0   -0.02    0.46 
   6   6   0    0.14    0.44 
   6   6   0    0.07    0.48 
  -6   6   0    0.26    0.61 
   6   6   0   -0.08    0.41 
  -6   6   0   -0.12    0.42 
   6   6   0    0.60    0.53 
  -6   6   0    0.05    0.70 
   6   6   0    0.93    0.56 
  -6   6   0    0.50    0.53 
   6   6   0    0.51    0.42 
  -6   6   0   -0.16    0.58 
   6   6   0   -0.21    0.49 
  -6   6   0    0.62    0.41 
  -6   6   0    0.63    0.78 
  -6   6   0   -0.28    0.62 
  -7  -6   0  106.78    4.81 
  -7  -6   0  110.32    5.02 
   7  -6   0  113.40    4.93 
  -7  -6   0  110.70    5.71 
  -7  -6   0  117.33    5.02 
   7  -6   0  114.23    4.89 
   7  -6   0  111.45    4.56 
  -7  -6   0  110.46    4.83 
  -7  -6   0  112.94    5.15 
  -7  -6   0  112.92    5.84 
  -7  -6   0  110.07    5.72 
  -7  -6   0  110.78    5.79 
  -7  -6   0  110.18    4.98 
  -7  -6   0  103.29    5.13 
   7  -6   0  116.66    4.73 
  -7  -6   0  116.61    5.28 
  -7  -6   0  111.38    5.79 
  -7  -6   0  108.55    4.86 
  -7  -6   0  105.10    4.76 
  -7  -6   0  110.59    4.84 
   7  -6   0  118.18    4.82 
   7   6   0  112.34    4.69 
   7   6   0  106.81    4.77 
   7   6   0  111.34    4.84 
   7   6   0  110.29    4.67 
  -7   6   0  111.94    4.60 
  -7   6   0  117.84    6.34 
   7   6   0  110.92    4.77 
  -7   6   0  111.68    4.76 
   7   6   0  113.17    4.88 
   7   6   0  112.50    5.35 
  -7   6   0  102.95    4.89 
  -7   6   0  109.36    4.93 
   7   6   0  110.81    4.70 
  -7   6   0  108.90    4.98 
   7   6   0  113.71    4.79 
  -7   6   0  111.76    5.78 
  -7   6   0  114.92    4.84 
   7   6   0  110.78    4.88 
  -7   6   0  114.20    5.93 
  -7   6   0  112.61    5.82 
  -7   6   0  107.45    5.73 
   7   6   0  113.79    4.95 
   7   6   0  118.69    4.85 
   7   6   0  114.73    4.87 
  -8  -6   0    1.63    0.81 
  -8  -6   0    1.55    0.77 
  -8  -6   0    3.15    1.20 
  -8  -6   0    1.81    0.82 
   8  -6   0    2.83    0.80 
  -8  -6   0    2.91    0.88 
   8  -6   0    3.29    0.83 
  -8  -6   0    5.51    1.25 
  -8  -6   0    2.45    0.79 
  -8  -6   0    2.19    0.83 
  -8  -6   0    3.26    1.07 
  -8  -6   0    3.36    1.02 
  -8  -6   0    4.26    0.89 
  -8  -6   0    2.46    1.16 
  -8  -6   0    1.46    1.11 
  -8  -6   0    2.84    1.17 
   8  -6   0    2.90    0.82 
  -8  -6   0    3.34    1.30 
  -8  -6   0    2.07    1.38 
  -8  -6   0    4.45    0.98 
  -8   6   0    2.44    1.15 
   8   6   0    2.86    0.98 
  -8   6   0    1.64    1.23 
   8   6   0    1.54    0.73 
   8   6   0    3.15    0.80 
   8   6   0    2.09    0.77 
   8   6   0    2.61    0.84 
   8   6   0    3.61    0.86 
   8   6   0    2.44    0.80 
  -8   6   0    2.40    0.86 
  -8   6   0    1.37    1.12 
   8   6   0    3.34    1.07 
  -8   6   0    3.71    1.61 
   8   6   0    3.39    0.79 
   8   6   0    2.86    0.83 
   8   6   0    1.96    0.75 
  -8   6   0    3.00    0.84 
   8   6   0    3.34    0.84 
  -8   6   0    1.85    0.89 
  -8   6   0    2.86    1.21 
   8   6   0    3.39    0.87 
   0  -7   0    0.60    0.37 
   0  -7   0    0.56    0.46 
   0  -7   0    0.67    0.40 
   0  -7   0    0.41    0.35 
   0  -7   0    0.24    0.35 
   0  -7   0    0.50    0.38 
   0  -7   0    0.60    0.38 
   0  -7   0   -0.02    0.37 
   0  -7   0    0.53    0.42 
   0  -7   0    0.78    0.44 
   0   7   0    0.49    0.44 
   0   7   0    0.83    0.36 
   0   7   0    0.34    0.66 
   0   7   0    0.39    0.36 
   0   7   0    0.72    0.42 
   0   7   0   -0.23    0.37 
   0   7   0    0.31    0.18 
   0   7   0    0.06    0.34 
   0   7   0    1.09    0.44 
   0   7   0    0.87    0.66 
   0   7   0    0.07    0.34 
   0   7   0   -0.06    0.34 
   0   7   0    0.49    0.44 
   1  -7   0    1.92    0.63 
   1  -7   0    3.33    0.61 
   1  -7   0    5.12    0.82 
  -1  -7   0    2.83    0.71 
  -1  -7   0    3.67    0.67 
   1  -7   0    3.70    0.62 
  -1  -7   0    3.41    0.64 
  -1  -7   0    2.81    0.63 
  -1  -7   0    3.05    0.65 
   1  -7   0    3.15    0.55 
  -1  -7   0    2.15    0.69 
   1  -7   0    2.92    0.61 
   1  -7   0    1.83    0.64 
  -1  -7   0    2.80    0.66 
  -1  -7   0    2.31    0.67 
  -1  -7   0    2.23    0.61 
   1  -7   0    2.45    0.54 
   1  -7   0    1.88    0.61 
  -1  -7   0    3.65    0.72 
  -1  -7   0    3.18    0.62 
   1  -7   0    1.79    0.50 
  -1   7   0    2.91    0.60 
  -1   7   0    3.33    0.80 
   1   7   0    2.24    0.61 
  -1   7   0    3.77    0.99 
  -1   7   0    3.13    0.68 
  -1   7   0    4.08    0.62 
   1   7   0    1.69    0.56 
  -1   7   0    2.35    1.27 
  -1   7   0    3.71    0.54 
  -1   7   0    2.24    0.56 
  -1   7   0    2.96    0.45 
   1   7   0    3.94    1.00 
   1   7   0    3.42    0.32 
  -1   7   0    1.71    0.58 
   1   7   0    3.78    0.63 
   1   7   0    2.39    0.58 
  -1   7   0    2.90    0.60 
  -1   7   0    3.48    0.68 
   1   7   0    3.47    0.73 
   1   7   0    3.85    0.67 
   1   7   0    2.77    0.56 
   1   7   0    3.64    0.66 
   1   7   0    3.78    0.70 
  -1   7   0    3.62    0.66 
   1   7   0    3.59    0.35 
   1   7   0    1.06    0.60 
  -1   7   0    2.65    0.52 
  -2  -7   0    6.13    0.66 
   2  -7   0    6.66    0.65 
   2  -7   0    5.41    0.76 
   2  -7   0    6.54    0.68 
  -2  -7   0    7.11    0.80 
  -2  -7   0    7.91    0.92 
  -2  -7   0    6.74    0.88 
   2  -7   0    7.35    0.96 
   2  -7   0    5.32    0.78 
  -2  -7   0    6.35    0.82 
   2  -7   0    7.23    0.91 
  -2  -7   0    5.74    0.87 
   2  -7   0    6.88    0.71 
  -2  -7   0    5.89    0.90 
   2  -7   0    8.70    0.92 
  -2  -7   0    6.51    0.87 
  -2  -7   0    7.44    0.91 
  -2  -7   0    7.16    0.95 
  -2  -7   0    4.49    0.75 
   2  -7   0    6.20    0.84 
  -2  -7   0    7.73    0.89 
  -2  -7   0    6.72    0.90 
  -2   7   0    7.04    0.93 
   2   7   0    7.33    0.84 
   2   7   0    6.82    0.92 
  -2   7   0    6.05    0.77 
   2   7   0    5.95    0.84 
   2   7   0    7.15    0.92 
   2   7   0    6.49    0.90 
  -2   7   0    7.08    1.05 
   2   7   0    8.11    0.85 
  -2   7   0    4.99    1.69 
  -2   7   0    6.45    0.61 
  -2   7   0    7.76    0.86 
   2   7   0    6.12    0.53 
  -2   7   0    7.76    1.33 
  -2   7   0    6.13    0.72 
   2   7   0    5.87    0.52 
   2   7   0    6.34    0.84 
  -2   7   0    5.76    0.71 
   2   7   0    6.03    0.90 
  -2   7   0    9.61    0.89 
  -2   7   0    5.98    0.97 
  -2   7   0    7.77    0.90 
   2   7   0    6.75    0.57 
  -2   7   0    6.13    0.67 
   2   7   0    7.54    1.24 
   2   7   0    7.17    0.94 
  -2   7   0    6.72    0.69 
  -2   7   0    5.43    0.76 
   3  -7   0    1.02    0.57 
  -3  -7   0    2.80    0.63 
  -3  -7   0    1.36    0.60 
  -3  -7   0    1.39    0.49 
   3  -7   0   -0.46    0.48 
   3  -7   0    2.57    0.55 
  -3  -7   0    2.00    0.55 
   3  -7   0    2.80    0.46 
  -3  -7   0    2.35    0.66 
  -3  -7   0    1.83    0.63 
  -3  -7   0    1.62    0.46 
  -3  -7   0    0.82    0.61 
  -3  -7   0    1.72    0.64 
  -3  -7   0    0.60    0.59 
  -3  -7   0    0.83    0.59 
  -3  -7   0    1.50    0.45 
  -3   7   0    1.91    0.43 
   3   7   0    0.73    0.61 
   3   7   0    1.52    0.59 
   3   7   0    2.19    0.66 
   3   7   0    2.52    0.47 
  -3   7   0    2.62    0.48 
  -3   7   0    1.64    0.52 
   3   7   0    2.68    0.66 
   3   7   0    2.05    0.82 
  -3   7   0    2.54    0.81 
  -3   7   0    4.15    1.18 
  -3   7   0    1.03    0.67 
   3   7   0    1.83    0.65 
  -3   7   0    2.74    1.39 
   3   7   0    2.01    0.58 
  -3   7   0    2.89    0.58 
  -3   7   0    1.85    0.64 
  -3   7   0    2.64    0.62 
  -3   7   0    3.54    0.60 
  -3   7   0    3.35    0.70 
   3   7   0    1.61    0.54 
  -3   7   0    2.10    0.50 
  -3   7   0    3.05    0.64 
  -3   7   0    1.22    0.48 
   3   7   0    1.90    0.41 
  -3   7   0    3.53    0.68 
   3   7   0    2.16    0.65 
   3   7   0    1.63    0.57 
  -3   7   0    1.48    0.56 
   3   7   0    1.15    0.35 
  -3   7   0    1.27    0.43 
  -4  -7   0   19.83    1.41 
  -4  -7   0   20.98    1.47 
  -4  -7   0   19.88    1.64 
  -4  -7   0   21.29    1.61 
  -4  -7   0   17.04    1.49 
  -4  -7   0   20.27    1.31 
   4  -7   0   19.33    1.24 
  -4  -7   0   20.56    1.41 
   4  -7   0   18.61    1.35 
  -4  -7   0   20.93    1.50 
  -4  -7   0   20.90    1.46 
  -4  -7   0   18.55    1.41 
  -4  -7   0   19.56    1.30 
   4  -7   0   18.30    1.45 
  -4  -7   0   19.49    1.74 
  -4  -7   0   20.79    1.58 
  -4   7   0   17.67    2.09 
  -4   7   0   20.05    1.15 
  -4   7   0   19.00    1.54 
  -4   7   0   20.50    1.35 
  -4   7   0   15.35    1.68 
  -4   7   0   19.84    1.09 
  -4   7   0   19.33    1.28 
  -4   7   0   20.76    1.35 
  -4   7   0   15.37    2.04 
   4   7   0   19.78    1.88 
   4   7   0   19.90    1.53 
   4   7   0   20.59    1.45 
   4   7   0   19.95    1.21 
  -4   7   0   18.32    1.46 
   4   7   0   23.26    1.71 
  -4   7   0   20.62    1.39 
   4   7   0   19.91    1.23 
  -4   7   0   20.80    2.79 
  -4   7   0   19.76    1.28 
  -4   7   0   19.53    1.41 
   4   7   0   19.79    1.38 
  -4   7   0   16.62    1.31 
   4   7   0   21.20    1.51 
   4   7   0   22.12    1.20 
   4   7   0   20.61    1.53 
  -4   7   0   17.58    2.15 
  -4   7   0   20.10    1.17 
   4   7   0   18.33    1.41 
   4   7   0   18.79    1.14 
   4   7   0   21.10    1.53 
  -4   7   0   20.48    1.39 
   4   7   0   21.26    1.55 
  -5  -7   0    3.02    0.67 
  -5  -7   0    4.35    0.76 
  -5  -7   0    4.06    0.81 
  -5  -7   0    4.20    0.85 
  -5  -7   0    3.71    0.81 
  -5  -7   0    3.56    1.05 
  -5  -7   0    3.43    0.88 
  -5  -7   0    4.41    0.97 
  -5  -7   0    4.13    0.91 
   5  -7   0    4.09    0.76 
  -5  -7   0    3.67    0.75 
  -5  -7   0    2.89    0.78 
   5  -7   0    2.91    0.71 
  -5  -7   0    3.16    0.86 
  -5  -7   0    3.78    0.93 
   5   7   0    3.11    0.74 
   5   7   0    4.00    0.84 
   5   7   0    4.05    0.65 
  -5   7   0    4.13    0.73 
   5   7   0    3.45    0.61 
  -5   7   0    4.72    0.85 
   5   7   0    3.87    0.78 
  -5   7   0    3.62    0.65 
  -5   7   0    3.75    1.13 
   5   7   0    2.64    0.80 
   5   7   0    4.34    0.83 
  -5   7   0    6.00    1.02 
  -5   7   0    3.92    0.82 
   5   7   0    4.12    0.89 
   5   7   0    4.22    0.68 
  -5   7   0    5.14    0.78 
  -5   7   0    2.93    0.68 
  -5   7   0    4.03    0.93 
   5   7   0    3.61    0.75 
  -5   7   0    3.79    0.74 
   5   7   0    4.56    0.98 
  -5   7   0    5.55    1.84 
   5   7   0    3.89    0.91 
  -5   7   0    3.17    1.11 
   5   7   0    3.44    0.68 
  -6  -7   0   44.11    2.39 
  -6  -7   0   44.88    2.81 
  -6  -7   0   44.83    2.67 
   6  -7   0   43.99    2.26 
  -6  -7   0   42.50    3.41 
  -6  -7   0   43.38    2.61 
  -6  -7   0   45.04    2.58 
  -6  -7   0   45.60    3.14 
  -6  -7   0   47.92    2.93 
  -6  -7   0   40.98    2.41 
  -6  -7   0   45.39    2.51 
  -6  -7   0   47.44    2.67 
  -6  -7   0   42.18    2.44 
  -6  -7   0   47.62    2.36 
  -6  -7   0   44.02    2.37 
   6  -7   0   43.62    2.44 
   6   7   0   41.93    2.40 
   6   7   0   43.32    2.45 
  -6   7   0   41.01    2.33 
   6   7   0   44.32    2.81 
   6   7   0   44.04    2.48 
   6   7   0   40.07    2.47 
   6   7   0   46.34    2.32 
  -6   7   0   43.92    2.49 
  -6   7   0   30.01    3.01 
   6   7   0   42.52    2.41 
  -6   7   0   41.64    2.27 
   6   7   0   42.52    2.43 
  -6   7   0   42.76    2.56 
   6   7   0   42.88    2.53 
  -6   7   0   45.63    2.34 
   6   7   0   44.74    2.22 
  -6   7   0   46.02    2.55 
   6   7   0   43.96    2.33 
   6   7   0   43.52    2.47 
  -6   7   0   44.45    4.10 
  -6   7   0   45.83    2.28 
  -7  -7   0    0.85    0.67 
  -7  -7   0   -0.13    0.55 
  -7  -7   0    0.20    0.76 
  -7  -7   0    0.24    0.60 
  -7  -7   0    0.20    0.77 
  -7  -7   0   -0.90    0.68 
  -7  -7   0    0.60    0.65 
  -7  -7   0   -0.28    0.73 
  -7  -7   0    0.27    0.75 
   7  -7   0    0.39    0.85 
  -7  -7   0   -0.72    0.54 
  -7  -7   0   -0.44    0.63 
  -7  -7   0   -0.89    0.44 
   7   7   0    0.14    0.48 
   7   7   0    0.24    0.64 
   7   7   0    0.65    0.68 
   7   7   0    0.11    0.54 
  -7   7   0   -0.20    0.64 
  -7   7   0    0.06    0.62 
   7   7   0   -0.26    0.59 
   7   7   0    0.34    0.57 
  -7   7   0    0.97    1.44 
   7   7   0    0.03    0.53 
   7   7   0    0.16    0.60 
   7   7   0    0.01    0.55 
   7   7   0   -0.01    0.55 
   7   7   0   -0.01    0.56 
  -7   7   0    0.23    0.76 
   0  -8   0   40.81    2.11 
   0  -8   0   39.95    2.13 
   0  -8   0   35.49    2.13 
   0  -8   0   43.69    2.19 
   0  -8   0   44.89    2.86 
   0  -8   0   40.34    2.28 
   0  -8   0   42.86    2.12 
   0  -8   0   40.34    2.11 
   0  -8   0   39.31    2.08 
   0  -8   0   38.23    2.24 
   0   8   0   40.53    2.18 
   0   8   0   44.13    2.30 
   0   8   0   39.25    2.23 
   0   8   0   37.58    1.94 
   0   8   0   41.61    2.95 
   0   8   0   39.66    2.22 
   0   8   0   40.05    2.02 
   0   8   0   38.91    2.12 
   0   8   0   38.35    2.16 
   0   8   0   40.86    2.05 
   0   8   0   44.02    2.17 
   1  -8   0  108.68    4.56 
  -1  -8   0  107.31    4.52 
  -1  -8   0  106.07    4.62 
  -1  -8   0  110.08    4.52 
  -1  -8   0  102.54    4.43 
  -1  -8   0  107.73    4.69 
   1  -8   0  111.76    4.34 
   1  -8   0  103.76    4.59 
   1  -8   0  104.37    4.35 
  -1  -8   0  109.71    4.46 
   1  -8   0  104.99    4.44 
  -1  -8   0  109.66    4.56 
  -1  -8   0  108.71    4.51 
   1  -8   0  104.14    4.43 
   1  -8   0  108.37    4.35 
  -1  -8   0  109.58    4.50 
   1  -8   0  101.82    4.53 
  -1  -8   0  107.13    4.62 
   1   8   0  105.64    4.58 
  -1   8   0  109.03    4.41 
  -1   8   0  104.59    4.62 
  -1   8   0  106.30    5.13 
   1   8   0  104.46    4.50 
  -1   8   0  107.12    4.45 
  -1   8   0  107.65    4.21 
  -1   8   0  108.77    4.54 
   1   8   0  110.22    5.16 
   1   8   0  100.69    4.49 
  -1   8   0  109.66    4.46 
  -1   8   0  109.47    6.05 
  -1   8   0  107.99    4.45 
   1   8   0  110.81    4.33 
   1   8   0  109.21    4.59 
   1   8   0  103.13    4.36 
  -1   8   0  103.28    4.57 
   1   8   0  103.86    4.54 
   1   8   0  107.69    4.39 
   1   8   0  107.24    4.65 
  -1   8   0  105.68    4.52 
  -1   8   0  111.46    4.31 
  -1   8   0  104.16    4.28 
  -2  -8   0    4.17    0.86 
   2  -8   0    3.48    0.73 
  -2  -8   0    3.12    0.77 
   2  -8   0    3.69    0.72 
  -2  -8   0    3.03    0.75 
  -2  -8   0    4.97    0.81 
  -2  -8   0    3.64    0.77 
   2  -8   0    3.52    0.63 
  -2  -8   0    3.51    0.74 
   2  -8   0    3.85    0.74 
   2  -8   0    3.23    0.68 
  -2  -8   0    4.41    0.87 
  -2  -8   0    5.17    0.85 
  -2  -8   0    3.55    0.87 
  -2  -8   0    4.32    0.81 
  -2   8   0    4.46    0.66 
  -2   8   0    3.71    0.68 
   2   8   0    5.06    0.86 
  -2   8   0    4.33    1.69 
   2   8   0    4.58    0.82 
  -2   8   0    4.15    0.69 
  -2   8   0    4.93    0.82 
  -2   8   0    5.55    0.66 
  -2   8   0    3.87    0.81 
   2   8   0    5.32    0.83 
  -2   8   0    4.53    0.81 
   2   8   0    3.22    0.78 
   2   8   0    3.62    0.77 
   2   8   0    5.66    1.12 
  -2   8   0    4.18    0.69 
   2   8   0    5.75    0.81 
   2   8   0    3.63    0.81 
  -2   8   0    5.71    0.76 
   2   8   0    5.15    0.89 
  -2   8   0    4.82    1.00 
  -2   8   0    5.06    1.25 
  -2   8   0    4.36    0.74 
  -2   8   0    3.81    0.82 
   2   8   0    4.94    0.76 
  -3  -8   0   28.15    1.82 
  -3  -8   0   28.50    1.94 
  -3  -8   0   27.94    1.92 
  -3  -8   0   29.74    2.05 
  -3  -8   0   26.91    1.97 
  -3  -8   0   30.15    1.88 
   3  -8   0   28.09    1.84 
  -3  -8   0   27.63    1.80 
  -3  -8   0   28.61    1.89 
  -3  -8   0   29.80    1.90 
   3  -8   0   27.64    1.75 
  -3   8   0   28.82    1.81 
   3   8   0   29.37    1.82 
   3   8   0   33.30    1.98 
  -3   8   0   29.07    1.78 
   3   8   0   29.27    1.97 
  -3   8   0   27.54    2.03 
  -3   8   0   35.16    1.81 
  -3   8   0   30.48    1.65 
  -3   8   0   29.49    1.81 
  -3   8   0   33.49    1.89 
  -3   8   0   30.51    1.86 
  -3   8   0   31.59    1.55 
  -3   8   0   28.29    1.62 
   3   8   0   30.48    1.99 
   3   8   0   27.30    1.85 
  -3   8   0   28.68    1.54 
  -3   8   0   30.47    1.73 
   3   8   0   31.28    2.32 
  -3   8   0   35.30    2.15 
  -3   8   0   31.44    1.70 
   3   8   0   29.19    1.87 
   3   8   0   31.04    1.87 
   3   8   0   27.46    1.90 
  -3   8   0   26.69    2.44 
   3   8   0   30.37    1.75 
  -3   8   0   22.59    3.85 
  -4  -8   0    4.05    0.81 
  -4  -8   0    3.54    0.83 
  -4  -8   0    3.50    0.83 
  -4  -8   0    4.33    0.99 
  -4  -8   0    3.43    0.79 
  -4  -8   0    4.96    1.06 
  -4  -8   0    3.58    0.86 
  -4  -8   0    4.80    0.89 
  -4  -8   0    3.93    0.98 
   4  -8   0    3.87    0.79 
  -4  -8   0    2.84    0.75 
  -4   8   0    4.08    1.91 
  -4   8   0    4.38    1.28 
  -4   8   0    4.54    0.86 
   4   8   0    3.08    0.77 
  -4   8   0    3.94    0.95 
   4   8   0    4.18    0.88 
  -4   8   0    5.18    0.85 
   4   8   0    4.99    0.90 
  -4   8   0    5.14    0.79 
   4   8   0    3.96    0.97 
  -4   8   0    4.29    0.88 
  -4   8   0    4.28    1.17 
  -4   8   0    3.70    0.79 
   4   8   0    3.98    0.87 
   4   8   0    3.66    0.79 
   4   8   0    4.57    0.93 
  -4   8   0    3.21    0.73 
   4   8   0    3.76    0.87 
   4   8   0    4.51    0.90 
  -4   8   0    4.56    0.80 
  -5  -8   0   52.33    2.68 
  -5  -8   0   59.05    3.25 
   5  -8   0   52.27    2.75 
  -5  -8   0   59.20    3.14 
   5  -8   0   54.39    2.90 
  -5  -8   0   55.56    3.37 
  -5  -8   0   61.70    2.97 
  -5  -8   0   53.34    2.81 
  -5  -8   0   52.01    2.98 
  -5  -8   0   50.20    2.81 
  -5  -8   0   51.11    3.04 
  -5  -8   0   53.70    2.90 
  -5   8   0   57.24    2.80 
   5   8   0   57.80    2.87 
   5   8   0   54.45    3.19 
  -5   8   0   39.14    3.41 
  -5   8   0   53.81    2.84 
   5   8   0   59.28    2.98 
  -5   8   0   50.20    3.62 
   5   8   0   64.42    3.05 
  -5   8   0   57.92    2.76 
  -5   8   0   54.21    3.01 
   5   8   0   54.89    2.95 
  -5   8   0   60.21    2.66 
   5   8   0   54.84    3.02 
   5   8   0   55.21    3.01 
   5   8   0   56.69    2.82 
   5   8   0   55.42    2.99 
  -5   8   0   48.18    4.74 
  -5   8   0   56.21    2.84 
  -6  -8   0   16.91    1.78 
  -6  -8   0   15.78    1.79 
  -6  -8   0   15.76    1.69 
  -6  -8   0   15.07    1.57 
  -6  -8   0   16.09    1.49 
  -6  -8   0   16.09    1.99 
  -6  -8   0   17.58    1.47 
  -6  -8   0   14.70    1.58 
  -6  -8   0   14.31    1.52 
  -6  -8   0   14.42    1.76 
   6  -8   0   12.98    1.36 
   6   8   0   18.60    2.05 
   6   8   0   15.65    1.59 
  -6   8   0   20.07    2.61 
   6   8   0   16.25    1.72 
   6   8   0   16.40    1.68 
   6   8   0   11.77    1.46 
  -6   8   0   19.13    1.69 
  -6   8   0   14.15    3.06 
   6   8   0   17.49    1.72 
  -6   8   0   13.93    1.43 
   6   8   0   17.79    1.73 
  -6   8   0    8.00    1.85 
   6   8   0   18.48    1.72 
  -6   8   0   16.57    1.82 
  -6   8   0   19.61    1.81 
   0  -9   0   -0.01    0.56 
   0  -9   0    0.21    0.55 
   0  -9   0    0.22    0.46 
   0  -9   0    0.48    0.53 
   0  -9   0   -0.57    0.51 
   0  -9   0    0.41    0.50 
   0  -9   0   -0.12    0.54 
   0  -9   0    0.37    0.51 
   0  -9   0    0.43    0.50 
   0   9   0    0.07    0.59 
   0   9   0   -0.15    0.54 
   0   9   0    0.09    0.46 
   0   9   0   -0.04    0.51 
   0   9   0    0.31    0.48 
   0   9   0    0.12    0.45 
   0   9   0   -0.24    0.52 
   0   9   0   -0.16    0.51 
   0   9   0   -0.16    0.58 
  -1  -9   0    3.93    0.79 
  -1  -9   0    2.48    0.70 
  -1  -9   0    3.43    0.79 
  -1  -9   0    2.08    0.80 
   1  -9   0    3.53    0.82 
   1  -9   0    2.14    0.63 
  -1  -9   0    2.25    0.81 
  -1  -9   0    3.37    0.79 
  -1  -9   0    2.88    0.76 
   1  -9   0    2.42    0.79 
  -1  -9   0    3.54    0.80 
  -1  -9   0    1.80    0.70 
   1  -9   0    2.64    0.66 
   1  -9   0    1.78    0.61 
   1  -9   0    3.10    0.73 
  -1   9   0    2.84    0.68 
  -1   9   0    2.66    0.74 
  -1   9   0    2.97    0.75 
  -1   9   0    1.86    0.72 
  -1   9   0    2.88    0.61 
   1   9   0    3.22    0.82 
   1   9   0    3.46    0.86 
   1   9   0    2.65    0.78 
  -1   9   0    3.02    0.75 
  -1   9   0    3.53    0.81 
   1   9   0    2.75    0.74 
  -1   9   0    2.06    0.72 
  -1   9   0    1.98    0.96 
   1   9   0    3.51    0.86 
   1   9   0    2.51    0.77 
   1   9   0    3.16    0.68 
  -1   9   0    2.42    0.78 
   1   9   0    2.33    0.67 
  -1   9   0    4.23    0.87 
   2  -9   0    9.24    1.14 
   2  -9   0    7.31    1.03 
  -2  -9   0    7.47    1.18 
  -2  -9   0    9.99    1.21 
  -2  -9   0    7.14    1.03 
  -2  -9   0    8.08    1.10 
  -2  -9   0    7.95    1.16 
   2  -9   0    7.95    1.08 
  -2  -9   0    8.57    1.26 
  -2  -9   0    7.25    1.06 
  -2  -9   0    5.33    1.00 
   2  -9   0    8.12    1.14 
  -2   9   0    7.40    0.89 
  -2   9   0    8.04    1.59 
   2   9   0    6.09    1.07 
  -2   9   0    7.72    1.07 
  -2   9   0   10.45    1.31 
   2   9   0    6.17    1.08 
   2   9   0    7.29    0.97 
  -2   9   0    7.18    0.97 
   2   9   0    8.26    1.08 
  -2   9   0    6.54    0.92 
   2   9   0    8.65    1.21 
   2   9   0    9.74    1.13 
  -2   9   0    8.45    1.35 
  -2   9   0    6.75    0.94 
  -2   9   0    9.86    1.09 
   2   9   0    8.84    1.19 
   2   9   0    7.78    1.18 
  -2   9   0    7.76    1.05 
  -2   9   0    8.54    1.17 
  -2   9   0    7.42    1.10 
   2   9   0    7.13    1.08 
  -3  -9   0    0.18    0.59 
  -3  -9   0    0.92    0.67 
  -3  -9   0    0.80    0.67 
  -3  -9   0    0.20    0.62 
  -3  -9   0    0.43    0.58 
  -3  -9   0   -0.25    0.65 
  -3  -9   0    0.00    0.61 
   3  -9   0    0.52    0.60 
  -3  -9   0    0.54    0.69 
   3   9   0    0.81    0.62 
  -3   9   0    0.32    0.54 
  -3   9   0    1.22    0.97 
  -3   9   0    0.55    0.68 
  -3   9   0    0.87    0.60 
  -3   9   0    0.93    0.56 
   3   9   0    0.00    0.51 
   3   9   0    0.79    0.63 
   3   9   0    0.32    0.61 
   3   9   0    0.82    0.59 
   3   9   0    1.51    0.76 
   3   9   0    0.26    0.58 
   3   9   0    0.83    0.72 
   3   9   0    0.74    0.62 
  -3   9   0    0.30    0.58 
  -3   9   0    0.83    0.62 
  -3   9   0    0.65    0.61 
  -4  -9   0    5.53    1.08 
  -4  -9   0    6.33    1.02 
  -4  -9   0    6.15    1.18 
  -4  -9   0    7.55    1.19 
  -4  -9   0    5.50    1.07 
  -4  -9   0    5.66    1.16 
  -4  -9   0    6.59    1.10 
   4  -9   0    6.29    1.00 
  -4  -9   0    5.82    1.08 
   4   9   0    5.38    1.09 
   4   9   0    7.69    1.18 
   4   9   0    5.72    1.01 
   4   9   0    8.40    1.30 
  -4   9   0    3.22    2.66 
  -4   9   0    5.39    1.50 
  -4   9   0    7.58    1.17 
   4   9   0    5.88    1.12 
  -4   9   0    5.15    1.29 
  -4   9   0    6.54    1.05 
   4   9   0    5.63    0.96 
  -4   9   0    6.55    1.27 
  -4   9   0    5.55    1.01 
  -4   9   0    6.79    1.04 
  -4   9   0    5.67    0.98 
   4   9   0    4.77    1.02 
   4   9   0    6.05    1.08 
  -4   9   0    5.95    0.93 
   4   9   0    7.67    1.20 
  -5  -9   0   14.49    1.62 
  -5  -9   0   13.62    1.50 
  -5  -9   0   16.82    1.88 
  -5  -9   0   14.07    1.64 
  -5  -9   0   12.15    1.68 
  -5  -9   0   12.25    1.53 
   5  -9   0   14.24    1.51 
  -5  -9   0   13.78    1.50 
  -5  -9   0   14.57    1.65 
   5   9   0   11.34    1.44 
   5   9   0   15.37    1.67 
  -5   9   0   15.43    1.55 
   5   9   0   10.57    1.60 
   5   9   0   12.90    1.56 
  -5   9   0    9.32    1.83 
   5   9   0   18.51    1.62 
  -5   9   0   14.35    1.57 
   5   9   0   12.03    1.54 
  -5   9   0   14.07    2.21 
   5   9   0   13.03    1.62 
  -5   9   0   14.26    1.53 
   5   9   0   16.44    1.73 
   5   9   0   14.38    1.65 
  -5   9   0   14.83    1.46 
  -5   9   0   14.69    1.74 
   0 -10   0   91.42    4.37 
   0 -10   0   95.91    4.34 
   0 -10   0   92.57    4.17 
   0 -10   0   90.01    4.22 
   0  10   0   91.87    4.06 
   0  10   0   90.35    4.24 
   0  10   0   94.75    4.37 
   0  10   0   93.59    4.36 
   0  10   0   94.01    4.24 
   0  10   0   95.85    4.31 
   0  10   0   91.90    3.92 
   0  10   0   86.22    4.14 
   1 -10   0   26.89    1.88 
   1 -10   0   24.20    1.89 
   1 -10   0   26.84    1.82 
  -1 -10   0   25.22    1.90 
  -1 -10   0   24.91    1.82 
  -1 -10   0   25.92    1.87 
   1 -10   0   25.48    1.83 
  -1 -10   0   25.64    1.87 
  -1 -10   0   23.11    1.97 
  -1  10   0   24.89    1.68 
  -1  10   0   25.22    1.85 
  -1  10   0   25.28    1.81 
  -1  10   0   22.96    1.78 
  -1  10   0   27.92    1.93 
   1  10   0   24.47    1.72 
   1  10   0   24.42    1.89 
   1  10   0   25.85    1.66 
   1  10   0   24.35    1.93 
  -1  10   0   25.21    1.88 
  -1  10   0   27.07    1.99 
   1  10   0   25.56    1.90 
  -1  10   0   26.20    1.99 
  -1  10   0   22.52    1.94 
   1  10   0   25.69    1.92 
   1  10   0   26.18    1.93 
   2 -10   0   24.81    1.81 
   2 -10   0   24.27    1.86 
   2 -10   0   20.46    1.73 
  -2 -10   0   21.11    1.77 
  -2 -10   0   25.65    1.98 
  -2 -10   0   23.07    2.00 
  -2 -10   0   21.70    1.81 
  -2 -10   0   21.59    1.77 
  -2 -10   0   26.08    1.85 
  -2 -10   0   24.23    1.97 
   2  10   0   22.32    1.88 
  -2  10   0   22.72    1.76 
  -2  10   0   25.29    1.92 
  -2  10   0   26.58    1.94 
   2  10   0   22.49    1.74 
  -2  10   0   27.06    1.96 
  -2  10   0   27.70    2.89 
   2  10   0   22.36    1.82 
   2  10   0   27.52    1.75 
   2  10   0   25.31    1.94 
  -2  10   0   26.70    1.83 
   2  10   0   21.76    1.84 
  -2  10   0   22.27    1.91 
   2  10   0   24.71    1.93 
  -3 -10   0    4.17    1.04 
  -3 -10   0    2.24    0.82 
  -3 -10   0    3.50    1.00 
   3 -10   0    3.60    0.92 
  -3 -10   0    3.32    1.01 
  -3 -10   0    1.77    0.84 
  -3 -10   0    2.31    0.92 
  -3 -10   0    3.45    1.03 
  -3 -10   0    3.18    0.93 
   3  10   0    3.18    0.95 
   3  10   0    2.44    0.90 
   3  10   0    3.68    0.92 
  -3  10   0    4.06    0.90 
   3  10   0    2.99    0.98 
  -3  10   0    3.11    0.93 
   3  10   0    3.10    0.98 
  -3  10   0    4.53    1.48 
  -3  10   0    2.23    0.86 
   3  10   0    3.14    0.83 
  -3  10   0    3.91    0.97 
  -3  10   0    2.79    1.04 
   3  10   0    3.43    0.86 
   3  10   0    3.16    0.91 
 -10   0   1   -0.18    0.48 
  10   0  -1   -0.21    0.61 
  10   0  -1    0.07    0.55 
 -10   0   1    0.52    0.68 
 -10   0   1    0.28    0.75 
  10   0  -1    0.36    0.62 
  10   0  -1   -0.22    0.54 
 -10   0   1   -0.17    0.89 
 -10   0   1   -0.06    0.67 
 -10   0   1    0.40    0.65 
 -10   0   1   -0.03    1.15 
 -10   0   1   -0.71    0.81 
  10   0  -1    0.45    0.61 
 -10   0   1   -0.43    0.77 
 -10   0   1   -0.49    1.06 
 -10   0   1    0.34    0.68 
  10   0  -1   -0.35    0.55 
 -10   0   1   -0.42    0.59 
  10   0  -1   -0.03    0.58 
 -10   0   1   -0.44    0.51 
 -10   0   1   -0.40    0.84 
  -9   0   1   35.88    2.15 
  -9   0   1   35.25    2.16 
  -9   0   1   34.12    1.87 
  -9   0   1   30.20    2.06 
   9   0  -1   33.21    2.14 
  -9   0   1   32.26    3.10 
  -9   0   1   30.12    1.84 
  -9   0   1   31.10    2.16 
  -9   0   1   32.87    2.26 
  -9   0   1   29.37    2.33 
   9   0  -1   28.97    2.26 
   9   0  -1   33.32    2.17 
  -9   0   1   33.72    3.16 
  -9   0   1   36.35    3.52 
   9   0  -1   36.10    2.15 
   9   0  -1   33.11    2.13 
  -9   0   1   36.03    3.20 
  -9   0   1   29.49    2.97 
   9   0  -1   34.17    2.11 
   9   0  -1   30.00    2.04 
  -9   0   1   33.90    2.11 
  -9   0   1   32.49    2.27 
  -8   0   1    0.35    0.51 
  -8   0   1    0.28    0.77 
   8   0  -1   -0.23    0.47 
  -8   0   1   -0.37    0.73 
  -8   0   1    0.45    0.80 
  -8   0   1    0.42    0.58 
  -8   0   1    0.28    0.46 
  -8   0   1    0.04    0.33 
  -8   0   1    0.59    0.52 
   8   0  -1    0.77    0.52 
   8   0  -1   -0.51    0.42 
  -8   0   1    0.48    0.52 
   8   0  -1    0.05    0.48 
  -8   0   1   -0.10    0.36 
  -8   0   1   -0.55    0.48 
   8   0  -1   -0.29    0.35 
  -8   0   1    0.27    0.47 
   8   0  -1    0.11    0.42 
  -8   0   1    0.15    0.37 
  -8   0   1    0.18    0.72 
  -8   0   1    0.05    0.49 
   8   0  -1   -0.19    0.45 
   8   0  -1   -0.23    0.36 
   8   0  -1   -0.06    0.47 
  -8   0   1   -0.03    0.39 
   8   0  -1    0.29    0.47 
  -7   0   1    1.83    0.38 
  -7   0   1    0.97    0.50 
  -7   0   1    1.93    0.36 
  -7   0   1    1.15    0.47 
  -7   0   1    1.70    0.84 
  -7   0   1    1.37    0.68 
   7   0  -1    1.47    0.45 
   7   0  -1    1.87    0.35 
  -7   0   1    1.08    0.49 
  -7   0   1    0.98    0.76 
  -7   0   1    1.47    0.40 
  -7   0   1    1.39    0.44 
   7   0  -1    1.20    0.31 
   7   0  -1    1.39    0.55 
  -7   0   1    1.59    0.53 
  -7   0   1    0.82    0.52 
   7   0  -1    0.56    0.45 
   7   0  -1    1.51    0.58 
  -7   0   1    1.44    0.82 
   7   0  -1    0.45    0.46 
  -7   0   1    0.54    0.37 
   7   0  -1    1.57    0.40 
   7   0  -1    1.56    0.56 
   7   0  -1    0.78    0.48 
   7   0  -1    1.42    0.40 
   7   0  -1    1.61    0.51 
   7   0  -1    1.25    0.26 
  -7   0   1    1.41    0.96 
  -7   0   1    1.71    0.59 
  -7   0   1    1.75    0.64 
   7   0  -1    1.04    0.47 
  -6   0   1    0.50    0.48 
   6   0  -1    0.52    0.24 
   6   0  -1    1.14    0.42 
  -6   0   1    0.98    0.41 
  -6   0   1    1.04    0.45 
  -6   0   1    0.98    0.71 
   6   0  -1    0.83    0.25 
   6   0  -1    0.76    0.37 
   6   0  -1    1.27    0.42 
  -6   0   1    1.21    0.46 
   6   0  -1    0.36    0.29 
  -6   0   1    0.91    0.26 
  -6   0   1    0.03    0.36 
   6   0  -1    0.99    0.32 
  -6   0   1    1.02    0.72 
   6   0  -1    0.50    0.37 
  -6   0   1    1.39    0.31 
   6   0  -1    1.23    0.46 
  -6   0   1    1.23    0.22 
  -6   0   1    1.01    0.74 
   6   0  -1    1.05    0.47 
   6   0  -1    0.91    0.25 
  -6   0   1    1.41    0.39 
   6   0  -1    0.98    0.41 
  -6   0   1    0.78    0.42 
  -6   0   1    0.90    0.36 
   6   0  -1    1.38    0.47 
  -6   0   1    0.47    0.43 
  -6   0   1    1.06    0.33 
  -6   0   1    1.11    0.49 
   6   0  -1    0.92    0.33 
   6   0  -1    0.91    0.34 
  -6   0   1    1.37    0.33 
  -5   0   1    0.40    0.21 
   5   0  -1    0.00    0.26 
   5   0  -1    0.36    0.17 
  -5   0   1    0.39    0.14 
   5   0  -1    0.22    0.16 
   5   0  -1    0.74    0.36 
   5   0  -1    0.26    0.18 
   5   0  -1    0.35    0.19 
  -5   0   1    0.30    0.30 
   5   0  -1    0.46    0.31 
  -5   0   1    0.32    0.20 
  -5   0   1    0.61    0.27 
  -5   0   1    0.38    0.46 
  -5   0   1    0.25    0.30 
   5   0  -1    0.16    0.15 
  -5   0   1    0.50    0.17 
  -5   0   1    0.26    0.44 
  -5   0   1    0.04    0.31 
  -5   0   1    0.11    0.44 
   5   0  -1    0.44    0.29 
  -5   0   1    0.01    0.24 
   5   0  -1   -0.07    0.23 
   5   0  -1    0.31    0.28 
  -5   0   1    0.30    0.31 
   5   0  -1    0.50    0.22 
   5   0  -1    0.24    0.29 
   5   0  -1    0.41    0.16 
   5   0  -1    1.40    0.40 
  -5   0   1   -0.14    0.28 
  -5   0   1    0.26    0.23 
   5   0  -1    0.21    0.14 
  -5   0   1    0.62    0.19 
  -5   0   1    1.00    0.41 
  -5   0   1    0.45    0.18 
   5   0  -1    0.72    0.21 
   5   0  -1    0.15    0.19 
   5   0  -1    0.53    0.29 
   5   0  -1    0.35    0.16 
   5   0  -1    0.37    0.15 
   4   0  -1    0.37    0.15 
   4   0  -1    0.31    0.27 
   4   0  -1    0.01    0.16 
   4   0  -1    0.28    0.15 
  -4   0   1    0.65    0.23 
  -4   0   1    0.20    0.22 
  -4   0   1    0.49    0.13 
  -4   0   1    0.95    0.31 
  -4   0   1    0.21    0.15 
  -4   0   1    0.07    0.24 
   4   0  -1   -0.05    0.16 
  -4   0   1    0.16    0.16 
  -4   0   1    0.24    0.24 
   4   0  -1    0.64    0.28 
   4   0  -1    0.39    0.18 
   4   0  -1    0.26    0.16 
   4   0  -1   -0.20    0.15 
   4   0  -1    0.01    0.20 
   4   0  -1    0.13    0.28 
  -4   0   1    0.00    0.39 
   4   0  -1    0.01    0.12 
   4   0  -1    0.10    0.12 
   4   0  -1    0.03    0.22 
  -4   0   1    0.52    0.21 
  -4   0   1    0.23    0.15 
   4   0  -1    0.17    0.13 
  -4   0   1    0.34    0.13 
   4   0  -1    0.97    0.32 
   4   0  -1    0.08    0.14 
   4   0  -1    0.28    0.16 
  -4   0   1    0.27    0.38 
  -4   0   1    0.19    0.14 
  -4   0   1    0.00    0.27 
  -4   0   1    0.83    0.34 
  -4   0   1    0.25    0.16 
   4   0  -1    0.08    0.15 
  -4   0   1    0.26    0.29 
  -4   0   1    0.04    0.40 
   4   0  -1    0.17    0.17 
  -4   0   1    0.11    0.30 
   4   0  -1    0.30    0.28 
   4   0  -1    0.45    0.17 
   4   0  -1    0.06    0.28 
   4   0  -1    0.19    0.25 
   3   0  -1   53.15    2.16 
   3   0  -1   53.68    2.30 
  -3   0   1   54.22    1.98 
   3   0  -1   57.04    2.08 
  -3   0   1   52.67    2.19 
  -3   0   1   55.42    2.00 
  -3   0   1   53.86    2.15 
   3   0  -1   54.28    2.08 
   3   0  -1   56.15    2.06 
   3   0  -1   53.68    2.01 
   3   0  -1   56.96    2.23 
  -3   0   1   56.11    2.10 
   3   0  -1   53.00    2.30 
   3   0  -1   53.31    2.01 
   3   0  -1   55.74    2.12 
  -3   0   1   54.09    2.09 
  -3   0   1   53.43    2.24 
   3   0  -1   57.20    2.04 
  -3   0   1   57.00    2.34 
   3   0  -1   54.55    2.24 
  -3   0   1   56.78    2.66 
  -3   0   1   53.95    2.23 
  -3   0   1   52.11    2.01 
  -3   0   1   51.83    2.18 
  -3   0   1   54.44    2.05 
   3   0  -1   54.83    2.06 
   3   0  -1   54.33    2.24 
   3   0  -1   54.38    2.03 
   3   0  -1   57.08    2.25 
   3   0  -1   56.29    2.19 
   3   0  -1   51.53    2.26 
  -3   0   1   55.98    2.24 
   3   0  -1   54.77    2.21 
  -3   0   1   53.91    2.05 
  -3   0   1   56.54    2.13 
  -3   0   1   55.86    2.04 
   3   0  -1   56.14    2.39 
  -3   0   1   51.61    2.17 
   3   0  -1   53.87    2.05 
   3   0  -1   55.09    2.11 
  -3   0   1   55.98    2.11 
  -3   0   1   54.32    2.03 
  -3   0   1   52.82    2.23 
  -3   0   1   55.00    2.25 
   3   0  -1   55.63    2.22 
   3   0  -1   54.63    2.03 
  -3   0   1   55.09    2.37 
   3   0  -1   53.02    2.16 
   3   0  -1   54.94    2.18 
  -2   0   1    0.14    0.11 
   2   0  -1    0.25    0.10 
   2   0  -1    0.22    0.12 
   2   0  -1    0.21    0.15 
   2   0  -1    0.16    0.09 
   2   0  -1    0.03    0.15 
  -2   0   1    0.20    0.11 
  -2   0   1    0.52    0.08 
  -2   0   1    0.59    0.16 
  -2   0   1    0.05    0.12 
   2   0  -1    0.25    0.10 
  -2   0   1    0.17    0.17 
  -2   0   1    0.18    0.15 
   2   0  -1    0.54    0.11 
  -2   0   1    0.39    0.10 
  -2   0   1    0.32    0.16 
  -2   0   1    0.23    0.09 
   2   0  -1    0.03    0.14 
  -2   0   1   -0.01    0.18 
   2   0  -1    0.19    0.11 
  -2   0   1    0.41    0.16 
  -2   0   1    0.54    0.13 
   2   0  -1    0.26    0.09 
   2   0  -1   -0.04    0.12 
   2   0  -1    0.46    0.15 
   2   0  -1    0.43    0.16 
   2   0  -1    0.26    0.17 
   2   0  -1    0.66    0.12 
   2   0  -1    0.40    0.09 
   2   0  -1    0.34    0.11 
   2   0  -1    0.07    0.14 
  -2   0   1    0.07    0.22 
  -2   0   1    0.11    0.14 
  -2   0   1    0.24    0.13 
  -2   0   1    0.21    0.09 
   2   0  -1    0.40    0.08 
  -2   0   1    0.13    0.12 
   2   0  -1    0.96    0.22 
  -2   0   1    0.14    0.10 
   2   0  -1    0.25    0.20 
  -2   0   1    0.12    0.10 
  -2   0   1    0.12    0.18 
   2   0  -1    0.55    0.17 
   2   0  -1    0.09    0.17 
   2   0  -1    0.06    0.15 
   2   0  -1    0.08    0.09 
   2   0  -1    0.38    0.12 
  -2   0   1    0.30    0.18 
  -2   0   1    0.46    0.09 
  -2   0   1    0.52    0.18 
   2   0  -1    0.10    0.12 
  -2   0   1    0.52    0.18 
  -2   0   1    0.11    0.24 
  -2   0   1    0.42    0.16 
  -2   0   1    0.50    0.18 
  -2   0   1    0.46    0.20 
   2   0  -1    0.26    0.14 
  -2   0   1    0.22    0.14 
   2   0  -1    0.38    0.13 
  -2   0   1    0.12    0.14 
   2   0  -1    0.15    0.13 
  -2   0   1    0.46    0.18 
  -1   0   1   30.45    1.24 
  -1   0   1   34.26    1.22 
  -1   0   1   34.81    1.28 
  -1   0   1   36.02    1.21 
  -1   0   1   31.32    1.22 
  -1   0   1   37.00    1.20 
  -1   0   1   37.84    1.22 
  -1   0   1   37.17    1.23 
  -1   0   1   29.57    1.23 
  -1   0   1   33.99    1.22 
  -1   0   1   37.08    1.19 
  -1   0   1   31.76    1.26 
  -1   0   1   29.17    1.23 
  -1   0   1   29.31    1.31 
  -1   0   1   32.89    1.22 
  -1   0   1   33.79    1.28 
  -1   0   1   34.64    1.21 
  -1   0  -1  176.30    5.81 
   1   0   1  143.38    6.00 
  -1   0  -1  173.11    5.80 
  -1   0  -1  166.91    5.88 
  -1   0  -1  176.84    5.81 
   1   0   1  142.62    5.87 
  -1   0  -1  177.55    5.81 
  -1   0  -1  173.86    5.85 
  -1   0  -1  169.05    5.82 
  -1   0  -1  178.73    5.78 
   1   0   1  150.91    5.85 
   1   0   1  145.92    5.83 
  -1   0  -1  175.85    5.81 
  -1   0  -1  168.88    5.83 
   1   0   1  150.15    5.84 
  -1   0  -1  173.26    5.84 
  -1   0  -1  171.66    5.84 
  -1   0  -1  167.25    5.82 
  -1   0  -1  153.00    5.82 
  -1   0  -1  178.66    5.84 
  -1   0  -1  166.53    5.85 
  -1   0  -1  171.10    5.83 
   2   0   1    0.55    0.17 
  -2   0  -1    0.21    0.15 
   2   0   1    0.68    0.14 
  -2   0  -1    0.43    0.13 
   2   0   1    0.51    0.12 
   2   0   1    0.57    0.16 
   2   0   1    0.45    0.16 
  -2   0  -1    0.36    0.15 
  -2   0  -1    0.37    0.13 
  -2   0  -1    0.45    0.13 
   2   0   1    0.23    0.13 
  -2   0  -1    0.62    0.12 
   2   0   1    0.45    0.16 
   2   0   1    0.50    0.15 
   2   0   1    0.32    0.14 
  -2   0  -1    0.58    0.14 
  -2   0  -1    0.49    0.17 
   2   0   1    0.48    0.14 
  -2   0  -1    0.75    0.20 
  -2   0  -1    0.40    0.13 
   2   0   1    0.63    0.13 
  -2   0  -1    0.36    0.13 
   2   0   1    0.76    0.21 
   2   0   1    0.42    0.22 
  -2   0  -1    0.45    0.24 
  -2   0  -1    0.41    0.14 
  -2   0  -1    0.76    0.17 
   2   0   1    0.60    0.15 
  -2   0  -1    0.74    0.19 
   2   0   1    0.30    0.09 
   2   0   1    0.31    0.15 
  -2   0  -1    0.43    0.14 
   2   0   1    0.51    0.17 
   2   0   1    0.41    0.25 
   2   0   1    0.48    0.16 
   2   0   1    0.21    0.09 
   2   0   1    0.70    0.16 
   2   0   1    0.52    0.12 
  -2   0  -1    0.39    0.15 
   2   0   1    0.20    0.17 
  -2   0  -1    0.49    0.12 
  -2   0  -1    0.71    0.31 
  -2   0  -1    0.36    0.13 
   2   0   1    0.48    0.17 
  -2   0  -1    0.48    0.15 
  -2   0  -1    0.43    0.18 
  -2   0  -1    0.55    0.16 
  -2   0  -1    0.45    0.10 
  -2   0  -1    0.35    0.15 
   2   0   1    0.26    0.16 
  -2   0  -1    0.27    0.13 
   2   0   1    0.64    0.15 
   2   0   1    0.46    0.15 
  -2   0  -1    0.46    0.19 
  -2   0  -1    0.34    0.15 
  -2   0  -1    0.37    0.18 
   2   0   1    0.14    0.16 
  -2   0  -1    0.59    0.22 
  -2   0  -1    0.47    0.13 
  -3   0  -1   15.37    0.75 
  -3   0  -1   15.35    0.82 
  -3   0  -1   14.95    0.76 
  -3   0  -1   17.69    0.99 
   3   0   1   16.77    0.79 
   3   0   1   15.60    0.68 
   3   0   1   16.29    0.74 
   3   0   1   16.46    0.81 
   3   0   1   17.16    0.95 
   3   0   1   15.76    0.87 
   3   0   1   15.91    0.96 
  -3   0  -1   15.34    0.73 
  -3   0  -1   15.69    0.77 
   3   0   1   16.19    0.75 
   3   0   1   16.38    0.79 
  -3   0  -1   15.87    0.78 
  -3   0  -1   15.33    0.69 
  -3   0  -1   15.82    0.86 
  -3   0  -1   16.19    1.00 
   3   0   1   16.53    0.87 
   3   0   1   15.57    0.75 
  -3   0  -1   16.43    0.91 
   3   0   1   15.23    0.90 
  -3   0  -1   16.58    0.80 
   3   0   1   16.00    0.74 
   3   0   1   15.90    0.84 
  -3   0  -1   16.34    0.84 
   3   0   1   15.52    0.91 
  -3   0  -1   14.31    0.75 
  -3   0  -1   16.80    1.21 
   3   0   1   15.76    0.84 
  -3   0  -1   15.19    0.74 
   3   0   1   14.57    0.70 
   3   0   1   15.78    0.83 
   3   0   1   15.52    0.84 
   3   0   1   15.57    0.78 
   3   0   1   15.26    0.96 
   3   0   1   15.60    0.69 
   3   0   1   16.36    0.88 
  -3   0  -1   17.18    0.91 
   3   0   1   15.96    1.17 
  -3   0  -1   16.17    0.92 
  -3   0  -1   15.59    0.79 
  -3   0  -1   16.74    0.84 
  -3   0  -1   16.81    0.90 
   3   0   1   16.61    0.88 
   3   0   1   16.42    0.82 
   3   0   1   15.51    0.66 
   3   0   1   15.37    0.83 
  -3   0  -1   14.93    1.17 
  -3   0  -1   15.90    0.88 
  -3   0  -1   16.83    0.87 
   3   0   1   15.86    0.77 
   4   0   1    0.25    0.16 
  -4   0  -1    0.25    0.20 
  -4   0  -1   -0.04    0.33 
  -4   0  -1    0.03    0.39 
  -4   0  -1    0.27    0.12 
  -4   0  -1    0.15    0.17 
   4   0   1    0.03    0.21 
  -4   0  -1    0.51    0.30 
   4   0   1   -0.05    0.18 
   4   0   1   -0.09    0.12 
   4   0   1    0.17    0.25 
   4   0   1    0.04    0.18 
  -4   0  -1    0.34    0.21 
  -4   0  -1   -0.03    0.21 
   4   0   1    0.13    0.14 
   4   0   1    0.05    0.23 
   4   0   1    0.65    0.32 
  -4   0  -1    0.23    0.15 
   4   0   1    0.27    0.21 
   4   0   1   -0.09    0.20 
   4   0   1    0.20    0.15 
   4   0   1    0.01    0.18 
   4   0   1   -0.26    0.21 
   4   0   1   -0.19    0.23 
  -4   0  -1    0.26    0.25 
   4   0   1    0.13    0.30 
  -4   0  -1   -0.33    0.22 
   4   0   1    0.26    0.23 
  -4   0  -1    0.20    0.23 
  -4   0  -1    0.18    0.25 
  -4   0  -1   -0.09    0.25 
   4   0   1    0.01    0.11 
   4   0   1    0.08    0.15 
   4   0   1   -0.21    0.25 
  -4   0  -1    0.12    0.29 
  -4   0  -1    0.04    0.19 
  -4   0  -1    0.30    0.17 
  -4   0  -1   -0.02    0.16 
   4   0   1   -0.05    0.14 
   4   0   1    0.32    0.28 
   4   0   1    0.41    0.23 
   4   0   1    0.20    0.25 
   4   0   1    0.01    0.10 
  -5   0  -1   14.52    0.98 
   5   0   1   15.06    0.98 
  -5   0  -1   14.44    0.98 
   5   0   1   14.72    0.74 
   5   0   1   13.71    0.89 
  -5   0  -1   12.34    1.01 
  -5   0  -1   15.40    0.86 
   5   0   1   13.42    0.65 
  -5   0  -1   14.66    0.87 
   5   0   1   13.31    0.92 
   5   0   1   14.15    1.07 
  -5   0  -1   14.70    0.84 
   5   0   1   14.23    1.17 
   5   0   1   14.30    0.61 
   5   0   1   12.92    0.97 
  -5   0  -1   14.59    1.48 
   5   0   1   15.32    1.01 
   5   0   1   13.18    1.13 
   5   0   1   13.78    0.88 
   5   0   1   13.99    0.95 
  -5   0  -1   13.31    0.74 
  -5   0  -1   14.74    1.03 
   5   0   1   14.19    0.69 
   5   0   1   12.48    0.96 
   5   0   1   14.11    0.82 
  -5   0  -1   13.16    0.61 
  -5   0  -1   15.30    1.15 
   5   0   1   15.00    0.79 
  -5   0  -1   13.01    0.92 
  -5   0  -1   12.97    0.99 
  -5   0  -1   14.63    0.78 
  -5   0  -1   13.65    1.41 
   5   0   1   13.71    1.04 
  -5   0  -1   12.59    0.87 
   5   0   1   14.66    0.86 
  -5   0  -1   13.78    0.96 
   5   0   1   14.09    0.71 
   5   0   1   14.17    1.10 
  -6   0  -1    0.19    0.35 
   6   0   1    0.33    0.35 
  -6   0  -1    0.30    0.28 
   6   0   1    0.45    0.39 
  -6   0  -1    1.24    0.47 
  -6   0  -1    0.36    0.23 
  -6   0  -1    1.15    0.33 
   6   0   1   -0.05    0.32 
   6   0   1    0.45    0.34 
  -6   0  -1    0.28    0.55 
   6   0   1    0.01    0.31 
   6   0   1   -0.03    0.33 
   6   0   1   -0.17    0.35 
   6   0   1    0.18    0.17 
  -6   0  -1    0.02    0.29 
   6   0   1    0.05    0.17 
  -6   0  -1    0.28    0.26 
   6   0   1    0.08    0.35 
   6   0   1    0.23    0.15 
  -6   0  -1    0.29    0.35 
   6   0   1    0.11    0.27 
   6   0   1   -0.03    0.44 
  -6   0  -1    0.37    0.20 
  -6   0  -1   -0.05    0.36 
  -6   0  -1    0.61    0.47 
  -6   0  -1    0.42    0.38 
  -6   0  -1    0.56    0.40 
   6   0   1   -0.14    0.18 
  -6   0  -1    0.37    0.33 
   6   0   1    0.07    0.19 
  -6   0  -1   -0.04    0.53 
  -6   0  -1    0.04    0.51 
   6   0   1    0.14    0.21 
   6   0   1   -0.10    0.39 
   6   0   1    0.71    0.38 
   6   0   1    0.39    0.28 
  -7   0  -1  193.95    7.96 
   7   0   1  206.70    7.63 
   7   0   1  199.24    7.75 
  -7   0  -1  209.89    9.14 
  -7   0  -1  202.92    7.94 
   7   0   1  204.19    7.78 
  -7   0  -1  203.60    7.82 
   7   0   1  205.25    8.10 
  -7   0  -1  204.21    9.37 
  -7   0  -1  202.40    9.05 
   7   0   1  202.97    7.46 
   7   0   1  204.97    7.86 
  -7   0  -1  205.58    7.81 
  -7   0  -1  205.54    9.09 
  -7   0  -1  209.48    7.53 
  -7   0  -1  199.48    7.75 
   7   0   1  205.22    8.13 
   7   0   1  203.62    7.88 
   7   0   1  196.03    7.77 
   7   0   1  199.43    7.63 
  -7   0  -1  200.42    7.39 
   7   0   1  202.90    7.88 
  -7   0  -1  210.43    7.80 
  -7   0  -1  199.04    7.89 
  -7   0  -1  205.93    7.65 
  -7   0  -1  201.10    7.51 
  -7   0  -1  206.25    8.20 
   7   0   1  192.91    7.39 
   7   0   1  206.34    7.46 
  -7   0  -1  201.03    7.58 
   7   0   1  204.15    7.83 
  -8   0  -1    0.12    0.32 
   8   0   1    0.17    0.49 
  -8   0  -1    0.63    0.79 
  -8   0  -1   -0.63    0.45 
  -8   0  -1    0.02    0.45 
   8   0   1    0.37    0.49 
   8   0   1   -0.48    0.36 
  -8   0  -1   -0.53    0.47 
   8   0   1    0.32    0.39 
  -8   0  -1    0.14    0.90 
  -8   0  -1    0.73    0.56 
  -8   0  -1   -0.35    0.31 
   8   0   1   -0.17    0.46 
  -8   0  -1   -0.19    0.46 
  -8   0  -1   -0.11    0.68 
  -8   0  -1    0.02    0.36 
  -8   0  -1    0.52    0.82 
   8   0   1    0.66    0.43 
   8   0   1   -0.03    0.42 
   8   0   1    0.21    0.45 
   8   0   1    0.03    0.43 
   8   0   1    0.13    0.43 
  -8   0  -1   -0.60    0.38 
  -8   0  -1   -0.29    0.36 
  -8   0  -1   -0.15    0.46 
  -8   0  -1    1.00    0.59 
   8   0   1   -0.34    0.47 
  -9   0  -1   52.51    4.08 
   9   0   1   57.53    2.95 
   9   0   1   53.06    2.97 
   9   0   1   59.26    3.30 
   9   0   1   54.53    2.91 
   9   0   1   53.24    2.87 
  -9   0  -1   54.49    4.09 
   9   0   1   59.26    3.38 
  -9   0  -1   54.65    4.17 
  -9   0  -1   53.30    4.09 
  -9   0  -1   58.50    2.91 
  -9   0  -1   56.89    3.35 
  -9   0  -1   50.06    2.67 
  -9   0  -1   59.29    2.98 
  -9   0  -1   54.23    2.94 
  -9   0  -1   57.69    2.96 
   9   0   1   55.84    3.05 
   9   0   1   52.90    2.88 
  -9   0  -1   52.54    2.99 
  -9   0  -1   55.88    4.49 
   9   0   1   55.11    2.72 
  -9   0  -1   53.99    3.12 
  -9   0  -1   55.26    3.10 
  10   0   1    0.99    0.67 
 -10   0  -1    0.48    0.69 
 -10   0  -1    0.22    0.69 
 -10   0  -1   -0.61    0.67 
  10   0   1   -0.09    0.66 
 -10   0  -1    0.38    0.75 
 -10   0  -1    0.01    0.70 
 -10   0  -1   -0.50    0.48 
  10   0   1   -0.02    0.57 
 -10   0  -1   -0.63    0.92 
 -10   0  -1    0.14    0.91 
 -10   0  -1    0.17    0.61 
 -10   0  -1    0.56    1.04 
  10   0   1   -0.12    0.60 
 -10   0  -1   -0.45    1.04 
 -10   0  -1   -0.09    0.95 
 -10   0  -1   -0.15    0.46 
  10   0   1    0.64    0.64 
  10   0   1    0.33    0.60 
  10   0   1    0.04    0.70 
 -10  -1   1   65.18    3.38 
 -10  -1   1   58.47    3.74 
  10  -1  -1   69.01    3.40 
 -10  -1   1   64.30    4.87 
 -10  -1   1   66.35    3.63 
  10  -1  -1   61.22    3.72 
  10  -1  -1   65.38    3.48 
  10  -1  -1   65.80    3.47 
 -10  -1   1   63.40    3.12 
 -10  -1   1   64.50    3.38 
 -10  -1   1   61.25    3.57 
 -10  -1   1   64.64    3.48 
 -10  -1   1   70.58    4.97 
 -10  -1   1   64.99    3.51 
 -10  -1   1   61.67    5.05 
 -10  -1   1   68.31    4.87 
 -10  -1   1   70.64    4.95 
  10  -1  -1   65.73    3.41 
 -10  -1   1   65.10    3.56 
  10  -1  -1   62.27    3.49 
  10  -1  -1   64.83    3.36 
 -10   1   1   62.71    4.72 
  10   1  -1   64.60    3.78 
  10   1  -1   63.29    3.37 
 -10   1   1   63.23    3.33 
  10   1  -1   64.29    3.49 
 -10   1   1   64.87    3.65 
 -10   1   1   68.75    4.92 
 -10   1   1   60.02    3.75 
  10   1  -1   62.90    3.43 
 -10   1   1   60.34    3.51 
 -10   1   1   59.91    4.70 
  10   1  -1   64.78    3.38 
 -10   1   1   62.17    3.41 
 -10   1   1   69.67    3.64 
 -10   1   1   66.32    5.21 
  10   1  -1   68.05    3.45 
  10   1  -1   62.72    3.49 
 -10   1   1   64.23    3.59 
 -10   1   1   64.77    4.78 
  -9  -1   1    1.09    0.75 
  -9  -1   1    1.20    0.68 
  -9  -1   1    0.73    0.52 
  -9  -1   1    1.17    0.67 
  -9  -1   1    1.36    0.70 
  -9  -1   1    1.53    0.76 
  -9  -1   1    0.68    0.96 
  -9  -1   1    1.48    0.58 
  -9  -1   1    2.17    1.12 
   9  -1  -1    1.13    0.58 
  -9  -1   1    1.20    0.75 
   9  -1  -1    0.68    0.59 
   9  -1  -1    1.76    0.82 
  -9  -1   1    2.64    0.71 
  -9  -1   1    1.66    0.70 
   9  -1  -1    2.08    0.80 
  -9  -1   1    1.56    1.10 
  -9  -1   1    1.45    1.06 
  -9  -1   1    1.90    0.59 
   9  -1  -1    1.98    0.72 
   9  -1  -1    1.59    0.67 
   9  -1  -1    1.24    0.67 
   9  -1  -1    1.91    0.75 
  -9   1   1    0.37    0.66 
   9   1  -1    1.61    0.79 
   9   1  -1    1.75    0.60 
  -9   1   1    1.45    0.67 
  -9   1   1    1.55    1.04 
  -9   1   1    2.09    0.57 
  -9   1   1    2.08    0.69 
  -9   1   1    1.34    0.75 
   9   1  -1    2.94    0.85 
   9   1  -1    0.82    0.54 
  -9   1   1   -0.10    0.98 
  -9   1   1    1.92    0.79 
  -9   1   1    1.50    1.26 
  -9   1   1    2.52    0.73 
   9   1  -1    1.23    0.67 
  -9   1   1    1.49    0.86 
   9   1  -1    2.82    0.77 
   9   1  -1    0.72    0.59 
  -9   1   1    0.63    0.53 
   9   1  -1    1.01    0.63 
  -9   1   1    0.56    0.96 
   9   1  -1    1.93    0.71 
  -9   1   1    0.69    0.94 
  -8  -1   1   37.11    2.31 
   8  -1  -1   35.87    2.33 
  -8  -1   1   38.00    3.12 
  -8  -1   1   39.20    2.32 
  -8  -1   1   38.17    1.88 
   8  -1  -1   41.72    2.47 
  -8  -1   1   42.11    2.58 
  -8  -1   1   38.78    2.06 
   8  -1  -1   38.06    2.22 
  -8  -1   1   40.81    1.87 
  -8  -1   1   40.28    2.02 
   8  -1  -1   40.96    2.23 
  -8  -1   1   34.90    3.06 
  -8  -1   1   35.86    2.24 
  -8  -1   1   37.88    2.29 
   8  -1  -1   37.91    2.15 
  -8  -1   1   36.91    3.07 
  -8  -1   1   39.76    2.04 
   8  -1  -1   36.56    2.04 
   8  -1  -1   39.99    2.18 
  -8  -1   1   37.40    3.18 
  -8  -1   1   37.95    2.21 
   8  -1  -1   39.57    2.27 
   8  -1  -1   39.10    2.26 
  -8  -1   1   39.43    2.18 
  -8  -1   1   38.56    2.28 
   8  -1  -1   41.55    1.95 
   8   1  -1   38.17    2.37 
  -8   1   1   38.88    3.24 
  -8   1   1   39.68    2.36 
   8   1  -1   41.06    1.84 
  -8   1   1   37.06    2.26 
  -8   1   1   38.48    2.13 
  -8   1   1   38.41    3.13 
  -8   1   1   36.84    2.30 
  -8   1   1   40.68    2.27 
  -8   1   1   38.14    2.16 
   8   1  -1   37.53    2.13 
   8   1  -1   34.80    2.20 
   8   1  -1   38.71    2.06 
  -8   1   1   35.70    2.43 
   8   1  -1   38.39    1.86 
  -8   1   1   38.58    3.13 
   8   1  -1   39.15    2.25 
   8   1  -1   36.56    1.94 
  -8   1   1   38.12    3.18 
   8   1  -1   36.27    2.14 
  -8   1   1   36.69    2.10 
  -8   1   1   41.90    1.96 
   8   1  -1   38.86    2.40 
   8   1  -1   39.67    2.20 
  -8   1   1   39.21    1.90 
   8   1  -1   38.59    1.98 
   8   1  -1   38.21    2.25 
  -7  -1   1    6.28    1.39 
   7  -1  -1    7.11    0.95 
   7  -1  -1    7.38    1.00 
  -7  -1   1    7.46    0.74 
  -7  -1   1    5.90    1.01 
   7  -1  -1    8.86    1.07 
   7  -1  -1    7.31    0.89 
   7  -1  -1    7.60    0.59 
  -7  -1   1    8.22    0.95 
  -7  -1   1    6.02    0.93 
  -7  -1   1    4.79    0.85 
  -7  -1   1    9.29    0.73 
  -7  -1   1    9.47    1.02 
  -7  -1   1    8.16    0.86 
   7  -1  -1    8.25    0.79 
  -7  -1   1    8.81    1.09 
  -7  -1   1    7.86    0.82 
   7  -1  -1    6.70    0.88 
   7  -1  -1    7.77    0.86 
  -7  -1   1    8.15    0.87 
   7  -1  -1    8.93    1.01 
  -7  -1   1    7.87    1.55 
   7  -1  -1    9.18    1.17 
  -7  -1   1    8.83    1.06 
  -7  -1   1    6.59    1.39 
  -7  -1   1    7.64    1.44 
  -7  -1   1    8.53    0.70 
  -7  -1   1    8.41    1.01 
   7  -1  -1    7.08    0.98 
   7   1  -1    7.99    0.89 
   7   1  -1    6.90    0.92 
  -7   1   1    7.72    0.77 
  -7   1   1    6.46    0.92 
  -7   1   1    6.97    0.67 
  -7   1   1    7.69    0.53 
  -7   1   1    7.95    0.96 
  -7   1   1    6.31    0.92 
   7   1  -1    8.09    0.82 
  -7   1   1    7.34    0.91 
  -7   1   1    6.72    1.05 
  -7   1   1    7.46    0.88 
   7   1  -1    7.18    0.93 
   7   1  -1    8.78    0.84 
  -7   1   1    8.64    1.56 
   7   1  -1    7.78    0.67 
  -7   1   1    9.22    1.04 
   7   1  -1    8.85    1.12 
   7   1  -1    7.01    0.96 
  -7   1   1    6.69    1.41 
   7   1  -1    8.15    1.02 
   7   1  -1    7.43    0.61 
   7   1  -1    9.69    1.05 
  -7   1   1    8.10    0.70 
  -7   1   1    7.88    1.03 
   7   1  -1    6.22    0.83 
   7   1  -1    8.54    0.69 
  -7   1   1    8.24    0.76 
  -7   1   1    7.92    1.51 
   7   1  -1    6.82    1.00 
  -7   1   1    6.76    1.47 
   7   1  -1    7.03    0.70 
  -6  -1   1  180.46    7.90 
   6  -1  -1  182.58    6.43 
  -6  -1   1  182.17    7.88 
  -6  -1   1  181.45    6.97 
  -6  -1   1  177.68    6.74 
   6  -1  -1  183.86    6.48 
   6  -1  -1  187.19    7.14 
   6  -1  -1  187.75    6.65 
   6  -1  -1  182.90    6.85 
  -6  -1   1  174.45    7.88 
  -6  -1   1  179.24    6.65 
  -6  -1   1  187.63    8.00 
   6  -1  -1  177.59    6.49 
  -6  -1   1  178.42    6.81 
  -6  -1   1  180.02    6.99 
   6  -1  -1  183.94    6.94 
  -6  -1   1  173.22    7.00 
  -6  -1   1  175.38    6.74 
  -6  -1   1  181.52    6.89 
   6  -1  -1  183.70    6.59 
  -6  -1   1  177.01    7.19 
   6  -1  -1  168.85    6.91 
   6  -1  -1  180.12    6.46 
   6  -1  -1  181.83    6.84 
  -6  -1   1  180.27    6.86 
  -6  -1   1  180.68    6.63 
   6  -1  -1  183.17    6.32 
  -6  -1   1  179.93    6.65 
   6  -1  -1  181.15    6.39 
  -6  -1   1  183.68    7.04 
   6  -1  -1  176.02    7.07 
  -6  -1   1  181.53    6.48 
   6  -1  -1  182.65    6.43 
  -6  -1   1  181.22    6.99 
   6  -1  -1  179.64    6.94 
   6  -1  -1  176.73    6.86 
   6  -1  -1  183.69    6.78 
  -6   1   1  175.86    6.39 
  -6   1   1  180.20    6.56 
  -6   1   1  180.23    6.63 
  -6   1   1  177.74    6.99 
   6   1  -1  180.80    6.62 
  -6   1   1  181.53    6.88 
   6   1  -1  179.03    6.95 
  -6   1   1  175.58    6.49 
   6   1  -1  174.75    6.92 
   6   1  -1  184.36    7.11 
  -6   1   1  175.22    7.00 
  -6   1   1  186.57    7.02 
   6   1  -1  180.48    7.09 
   6   1  -1  173.68    6.76 
   6   1  -1  185.53    7.21 
   6   1  -1  183.93    6.94 
  -6   1   1  181.57    7.93 
  -6   1   1  178.03    7.92 
  -6   1   1  181.93    6.94 
   6   1  -1  174.37    6.57 
   6   1  -1  189.66    6.74 
   6   1  -1  180.52    6.87 
   6   1  -1  184.02    6.70 
  -6   1   1  182.08    6.55 
   6   1  -1  187.53    6.68 
  -6   1   1  183.12    7.21 
  -6   1   1  177.32    6.65 
   6   1  -1  178.16    6.86 
   6   1  -1  187.82    6.87 
  -6   1   1  180.57    6.43 
  -6   1   1  181.66    6.84 
   6   1  -1  183.59    6.56 
  -6   1   1  183.56    7.92 
  -5  -1   1   35.14    2.36 
   5  -1  -1   35.33    1.67 
   5  -1  -1   35.59    1.36 
   5  -1  -1   37.79    1.53 
   5  -1  -1   33.22    1.48 
  -5  -1   1   32.33    1.52 
  -5  -1   1   35.55    1.67 
  -5  -1   1   32.79    2.29 
   5  -1  -1   36.97    1.75 
   5  -1  -1   35.71    1.41 
   5  -1  -1   34.43    1.75 
   5  -1  -1   34.87    1.75 
   5  -1  -1   35.20    1.62 
   5  -1  -1   37.52    1.73 
  -5  -1   1   36.00    1.77 
   5  -1  -1   34.62    1.34 
  -5  -1   1   36.03    1.63 
   5  -1  -1   35.50    1.69 
  -5  -1   1   35.48    1.82 
  -5  -1   1   34.13    1.80 
  -5  -1   1   34.57    1.63 
  -5  -1   1   33.51    1.92 
  -5  -1   1   36.53    1.72 
  -5  -1   1   32.75    2.30 
  -5  -1   1   34.78    1.42 
  -5  -1   1   33.85    1.54 
   5  -1  -1   33.87    1.37 
   5  -1  -1   33.07    1.80 
   5  -1  -1   34.28    1.36 
  -5  -1   1   35.16    1.70 
   5  -1  -1   33.61    1.38 
  -5  -1   1   34.09    1.55 
  -5  -1   1   32.57    1.77 
   5  -1  -1   35.40    1.31 
   5  -1  -1   35.36    1.41 
  -5  -1   1   33.05    1.78 
   5  -1  -1   35.48    1.85 
  -5   1   1   36.17    1.79 
   5   1  -1   32.54    1.56 
  -5   1   1   36.51    1.56 
   5   1  -1   34.73    1.69 
   5   1  -1   35.97    1.78 
  -5   1   1   37.47    1.71 
   5   1  -1   35.15    1.69 
  -5   1   1   37.05    1.48 
   5   1  -1   33.90    1.87 
  -5   1   1   35.12    1.76 
  -5   1   1   34.43    2.32 
  -5   1   1   35.59    1.52 
   5   1  -1   33.42    1.69 
  -5   1   1   35.69    2.38 
   5   1  -1   37.77    1.87 
  -5   1   1   33.27    1.36 
   5   1  -1   34.59    1.56 
  -5   1   1   35.00    1.79 
  -5   1   1   34.16    1.42 
   5   1  -1   33.82    1.62 
  -5   1   1   37.65    1.86 
   5   1  -1   30.86    1.69 
   5   1  -1   32.79    1.47 
   5   1  -1   31.00    1.47 
  -5   1   1   34.72    1.90 
  -5   1   1   34.18    2.31 
   5   1  -1   34.53    1.56 
   5   1  -1   34.50    1.53 
  -5   1   1   33.62    1.45 
  -5   1   1   35.94    1.37 
   5   1  -1   34.05    1.84 
   5   1  -1   37.70    1.78 
  -5   1   1   37.03    1.74 
   5   1  -1   35.25    1.56 
   5   1  -1   35.58    1.70 
   4  -1  -1  567.94   19.81 
  -4  -1   1  575.61   20.09 
   4  -1  -1  551.61   19.83 
   4  -1  -1  576.61   19.80 
  -4  -1   1  576.33   19.77 
   4  -1  -1  576.65   20.16 
  -4  -1   1  554.61   20.20 
  -4  -1   1  575.91   20.10 
   4  -1  -1  586.77   20.26 
   4  -1  -1  578.68   20.15 
   4  -1  -1  580.68   20.08 
   4  -1  -1  582.45   19.77 
  -4  -1   1  572.10   19.88 
  -4  -1   1  572.47   20.13 
   4  -1  -1  582.10   19.85 
   4  -1  -1  573.85   20.14 
  -4  -1   1  560.75   20.90 
   4  -1  -1  587.56   20.20 
   4  -1  -1  571.92   20.10 
  -4  -1   1  554.20   20.32 
   4  -1  -1  568.36   19.85 
  -4  -1   1  563.36   20.82 
   4  -1  -1  584.90   19.92 
  -4  -1   1  591.74   20.07 
   4  -1  -1  577.77   19.88 
   4  -1  -1  571.93   19.93 
   4  -1  -1  566.02   19.82 
  -4  -1   1  570.35   19.98 
  -4  -1   1  570.79   20.22 
  -4  -1   1  568.01   20.22 
   4  -1  -1  560.41   20.33 
   4  -1  -1  565.40   20.07 
  -4  -1   1  582.56   20.01 
  -4  -1   1  585.73   20.89 
  -4  -1   1  578.62   20.05 
  -4  -1   1  577.70   19.98 
  -4  -1   1  550.00   19.92 
   4  -1  -1  572.67   19.78 
   4  -1  -1  585.44   20.03 
  -4  -1   1  571.47   20.01 
  -4  -1   1  584.78   20.17 
   4  -1  -1  553.52   20.23 
   4  -1  -1  568.72   19.83 
   4  -1  -1  582.22   19.78 
  -4   1   1  539.43   20.17 
   4   1  -1  589.05   19.96 
   4   1  -1  576.65   20.05 
  -4   1   1  586.96   20.15 
  -4   1   1  560.18   19.96 
   4   1  -1  561.56   20.15 
  -4   1   1  590.78   20.91 
   4   1  -1  552.30   20.08 
   4   1  -1  557.59   20.13 
  -4   1   1  588.48   20.09 
  -4   1   1  553.59   19.84 
  -4   1   1  572.85   19.89 
   4   1  -1  591.87   20.02 
   4   1  -1  572.36   20.24 
   4   1  -1  559.92   19.76 
  -4   1   1  558.66   20.16 
   4   1  -1  535.06   20.23 
  -4   1   1  576.78   20.30 
   4   1  -1  575.00   20.11 
   4   1  -1  568.22   20.15 
  -4   1   1  548.25   20.82 
  -4   1   1  578.51   19.77 
   4   1  -1  571.65   20.11 
  -4   1   1  571.10   20.22 
  -4   1   1  563.78   20.19 
   4   1  -1  568.28   19.92 
  -4   1   1  587.97   19.83 
  -4   1   1  577.02   19.88 
   4   1  -1  578.96   19.80 
   4   1  -1  575.34   20.05 
   4   1  -1  576.95   20.00 
   4   1  -1  582.25   19.98 
  -4   1   1  609.37   20.36 
   4   1  -1  567.14   19.94 
   4   1  -1  575.61   20.07 
  -4   1   1  577.34   19.89 
  -4   1   1  568.57   19.93 
   4   1  -1  588.09   20.01 
  -4   1   1  563.68   19.88 
   4   1  -1  562.85   20.34 
  -4   1   1  581.99   19.81 
  -4   1   1  563.57   20.80 
  -3  -1   1   36.60    1.52 
   3  -1  -1   37.29    1.56 
   3  -1  -1   36.14    1.40 
  -3  -1   1   37.02    1.61 
  -3  -1   1   37.19    1.54 
   3  -1  -1   38.09    1.67 
  -3  -1   1   38.22    1.67 
   3  -1  -1   36.16    1.73 
  -3  -1   1   37.89    1.51 
   3  -1  -1   36.80    1.37 
   3  -1  -1   36.47    1.33 
  -3  -1   1   34.93    1.54 
   3  -1  -1   37.67    1.44 
  -3  -1   1   37.15    2.00 
   3  -1  -1   38.16    1.51 
   3  -1  -1   36.34    1.63 
   3  -1  -1   37.81    1.58 
  -3  -1   1   36.91    1.38 
  -3  -1   1   37.37    1.54 
   3  -1  -1   38.22    1.39 
   3  -1  -1   36.90    1.34 
   3  -1  -1   37.10    1.41 
   3  -1  -1   36.22    1.37 
  -3  -1   1   37.32    1.73 
   3  -1  -1   37.24    1.40 
  -3  -1   1   35.76    1.54 
  -3  -1   1   37.22    1.67 
  -3  -1   1   38.68    1.60 
   3  -1  -1   38.21    1.77 
   3  -1  -1   37.09    1.60 
   3  -1  -1   37.82    1.55 
  -3  -1   1   36.39    1.56 
  -3  -1   1   36.98    1.44 
   3  -1  -1   35.91    1.65 
  -3  -1   1   37.12    1.68 
  -3  -1   1   38.12    1.59 
  -3  -1   1   33.77    1.95 
  -3  -1   1   37.56    1.51 
   3  -1  -1   35.76    1.60 
   3  -1  -1   36.72    1.70 
  -3  -1   1   37.75    1.52 
  -3  -1   1   35.98    1.98 
  -3  -1   1   38.30    1.57 
  -3  -1   1   36.44    1.59 
  -3  -1   1   36.54    1.47 
  -3  -1   1   34.75    1.74 
  -3  -1   1   36.97    1.47 
   3  -1  -1   38.23    1.65 
   3  -1  -1   35.82    1.42 
   3  -1  -1   37.61    1.56 
   3  -1  -1   38.92    1.61 
  -3  -1   1   37.28    1.59 
   3  -1  -1   37.67    1.36 
  -3   1   1   37.75    1.34 
   3   1  -1   40.05    1.54 
  -3   1   1   37.93    1.61 
   3   1  -1   36.75    1.53 
   3   1  -1   38.77    1.62 
   3   1  -1   35.35    1.66 
   3   1  -1   36.78    1.37 
   3   1  -1   38.72    1.52 
  -3   1   1   37.61    1.48 
   3   1  -1   39.51    1.55 
   3   1  -1   38.66    1.76 
   3   1  -1   36.12    1.66 
  -3   1   1   39.54    1.57 
   3   1  -1   36.96    1.62 
  -3   1   1   35.34    1.37 
   3   1  -1   38.48    1.50 
   3   1  -1   36.03    1.70 
  -3   1   1   37.48    2.00 
  -3   1   1   36.88    1.41 
  -3   1   1   37.45    1.58 
   3   1  -1   36.27    1.52 
  -3   1   1   38.68    1.64 
  -3   1   1   38.00    1.62 
   3   1  -1   36.47    1.57 
   3   1  -1   36.75    1.59 
  -3   1   1   36.38    1.63 
  -3   1   1   38.36    1.45 
   3   1  -1   37.67    1.58 
   3   1  -1   38.28    1.46 
   3   1  -1   38.15    1.39 
  -3   1   1   38.89    1.67 
   3   1  -1   36.00    1.67 
  -3   1   1   37.83    2.01 
  -3   1   1   37.40    1.35 
  -3   1   1   36.20    1.39 
  -3   1   1   36.94    1.64 
  -3   1   1   38.09    1.76 
  -3   1   1   35.44    1.42 
  -3   1   1   38.18    1.42 
  -3   1   1   36.73    1.59 
   3   1  -1   37.45    1.52 
  -3   1   1   37.45    1.38 
  -3   1   1   38.63    1.61 
   3   1  -1   32.65    1.68 
   3   1  -1   37.98    1.58 
   3   1  -1   35.74    1.54 
  -3   1   1   36.99    1.43 
  -3   1   1   38.27    1.56 
   3   1  -1   35.18    1.57 
   3   1  -1   36.73    1.48 
   3   1  -1   37.31    1.67 
   3   1  -1   39.65    1.53 
  -3   1   1   39.15    1.73 
   3   1  -1   35.37    1.59 
  -2  -1   1   62.72    2.34 
   2  -1  -1   63.06    2.38 
  -2  -1   1   63.30    2.35 
   2  -1  -1   62.27    2.21 
  -2  -1   1   63.27    2.35 
  -2  -1   1   64.36    2.39 
   2  -1  -1   62.18    2.37 
   2  -1  -1   62.12    2.25 
  -2  -1   1   64.05    2.37 
   2  -1  -1   63.14    2.37 
  -2  -1   1   63.41    2.37 
  -2  -1   1   64.16    2.47 
   2  -1  -1   64.32    2.41 
  -2  -1   1   62.98    2.36 
  -2  -1   1   62.15    2.37 
  -2  -1   1   62.10    2.32 
  -2  -1   1   62.16    2.32 
  -2  -1   1   60.37    2.35 
  -2  -1   1   63.37    2.31 
  -2  -1   1   61.02    2.33 
   2  -1  -1   62.81    2.28 
  -2  -1   1   64.06    2.42 
   2  -1  -1   63.76    2.49 
   2  -1  -1   63.17    2.44 
   2  -1  -1   61.03    2.34 
   2  -1  -1   60.99    2.28 
  -2  -1   1   62.08    2.69 
  -2  -1   1   62.48    2.34 
  -2  -1   1   64.09    2.69 
   2  -1  -1   61.87    2.34 
  -2  -1   1   61.17    2.41 
  -2  -1   1   59.86    2.33 
   2  -1  -1   63.58    2.44 
   2  -1  -1   63.64    2.36 
  -2  -1   1   61.78    2.24 
   2  -1  -1   62.57    2.24 
   2  -1  -1   57.02    2.39 
   2  -1  -1   63.49    2.53 
  -2  -1   1   63.96    2.42 
   2  -1  -1   61.49    2.24 
  -2  -1   1   60.58    2.33 
  -2  -1   1   61.75    2.29 
  -2  -1   1   62.65    2.37 
  -2  -1   1   63.14    2.69 
  -2  -1   1   63.36    2.25 
   2  -1  -1   60.42    2.33 
  -2  -1   1   60.75    2.40 
  -2  -1   1   64.56    2.45 
  -2  -1   1   60.91    2.49 
   2  -1  -1   61.80    2.40 
  -2  -1   1   60.95    2.32 
   2  -1  -1   61.42    2.32 
  -2  -1   1   62.28    2.36 
   2  -1  -1   61.37    2.24 
   2  -1  -1   61.38    2.24 
  -2  -1   1   65.53    2.46 
  -2   1   1   64.82    2.23 
   2   1  -1   61.58    2.35 
  -2   1   1   62.80    2.25 
   2   1  -1   58.94    2.35 
   2   1  -1   62.89    2.72 
  -2   1   1   59.79    2.34 
   2   1  -1   62.29    2.45 
   2   1  -1   61.51    2.45 
   2   1  -1   61.93    2.50 
   2   1  -1   60.84    2.36 
  -2   1   1   61.82    2.36 
   2   1  -1   62.85    2.32 
   2   1  -1   64.75    2.25 
   2   1  -1   60.85    2.44 
   2   1  -1   60.95    2.34 
   2   1  -1   62.56    2.32 
  -2   1   1   60.93    2.39 
   2   1  -1   62.66    2.34 
  -2   1   1   65.44    2.56 
  -2   1   1   63.13    2.67 
   2   1  -1   61.88    2.41 
   2   1  -1   61.89    2.40 
  -2   1   1   64.64    2.41 
  -2   1   1   58.34    2.25 
  -2   1   1   63.01    2.45 
  -2   1   1   61.01    2.37 
  -2   1   1   64.50    2.33 
  -2   1   1   66.27    2.42 
   2   1  -1   63.91    2.35 
  -2   1   1   62.09    2.36 
   2   1  -1   58.18    2.34 
   2   1  -1   64.43    2.38 
   2   1  -1   61.81    2.28 
   2   1  -1   62.72    2.37 
   2   1  -1   62.84    2.35 
   2   1  -1   64.74    2.34 
  -2   1   1   63.77    2.30 
   2   1  -1   58.72    2.41 
  -2   1   1   61.39    2.47 
  -2   1   1   64.91    2.42 
  -2   1   1   61.58    2.22 
   2   1  -1   62.58    2.34 
  -2   1   1   65.05    2.34 
   2   1  -1   61.46    2.31 
  -2   1   1   60.09    2.38 
  -2   1   1   62.97    2.43 
   2   1  -1   65.44    2.34 
  -2   1   1   61.33    2.25 
  -2   1   1   62.49    2.33 
   2   1  -1   63.51    2.33 
   2   1  -1   62.42    2.37 
  -2   1   1   63.25    2.24 
  -2   1   1   59.69    2.22 
  -2   1   1   60.90    2.24 
  -2   1   1   65.32    2.71 
   2   1  -1   64.34    2.30 
  -2   1   1   61.94    2.33 
  -2   1   1   60.53    2.26 
   2   1  -1   62.89    2.43 
   2   1  -1   59.96    2.24 
   2   1  -1   65.52    2.68 
  -2   1   1   60.53    2.26 
  -1  -1   1    3.60    0.23 
  -1  -1   1    3.31    0.22 
  -1  -1   1    3.14    0.25 
   1  -1  -1    2.42    0.20 
  -1  -1   1    2.45    0.28 
  -1  -1   1    3.74    0.22 
  -1  -1   1    3.27    0.27 
   1  -1  -1    2.85    0.20 
   1  -1  -1    2.42    0.21 
  -1  -1   1    3.20    0.32 
   1  -1  -1    3.33    0.22 
  -1  -1   1    3.12    0.24 
  -1  -1   1    3.37    0.22 
  -1  -1   1    3.44    0.23 
  -1  -1   1    3.27    0.33 
  -1  -1   1    3.37    0.25 
  -1  -1   1    3.32    0.34 
  -1  -1   1    2.95    0.23 
  -1  -1   1    3.45    0.25 
  -1  -1   1    3.79    0.27 
   1  -1  -1    2.84    0.21 
  -1  -1   1    3.06    0.28 
  -1  -1   1    3.43    0.25 
   1  -1  -1    3.60    0.36 
  -1  -1   1    3.03    0.21 
   1  -1  -1    3.00    0.20 
  -1  -1   1    3.69    0.24 
   1  -1  -1    3.21    0.21 
  -1  -1   1    3.64    0.23 
  -1  -1   1    2.95    0.26 
  -1  -1   1    2.33    0.26 
  -1  -1   1    3.29    0.27 
  -1  -1   1    2.75    0.27 
  -1  -1   1    3.48    0.39 
   1   1  -1    3.05    0.22 
   1   1  -1    3.38    0.21 
  -1   1   1    3.43    0.23 
  -1   1   1    3.29    0.22 
  -1   1   1    3.67    0.29 
   1   1  -1    2.87    0.24 
   1   1  -1    3.38    0.23 
  -1   1   1    3.68    0.22 
  -1   1   1    3.58    0.22 
  -1   1   1    3.37    0.21 
   1   1  -1    3.44    0.25 
   1   1  -1    3.35    0.24 
  -1   1   1    3.34    0.23 
  -1   1   1    3.30    0.15 
  -1   1   1    3.33    0.21 
   1   1  -1    3.02    0.25 
   1   1  -1    3.30    0.23 
  -1   1   1    3.36    0.34 
   1   1  -1    3.43    0.24 
   1   1  -1    3.95    0.41 
   1   1  -1    3.27    0.28 
   1   1  -1    3.37    0.26 
  -1   1   1    3.52    0.23 
  -1   1   1    3.32    0.33 
  -1   1   1    4.11    0.28 
  -1   1   1    3.43    0.27 
   1   1  -1    3.51    0.25 
  -1   1   1    3.20    0.19 
   1   1  -1    3.51    0.26 
  -1   1   1    3.41    0.22 
   1   1  -1    3.61    0.25 
  -1   1   1    3.20    0.22 
   1   1  -1    3.40    0.33 
  -1   1   1    3.37    0.21 
   1   1  -1    3.88    0.26 
  -1   1   1    4.02    0.18 
   1   1  -1    3.45    0.24 
   1   1  -1    4.16    0.24 
   1   1  -1    3.23    0.28 
  -1   1   1    3.41    0.17 
  -1   1   1    3.77    0.22 
   1   1  -1    3.13    0.25 
   1   1  -1    3.72    0.25 
   1   1  -1    3.54    0.23 
  -1   1   1    3.66    0.34 
   1   1  -1    3.64    0.24 
  -1   1   1    3.28    0.22 
  -1   1   1    3.31    0.23 
  -1   1   1    3.26    0.18 
   1   1  -1    3.86    0.35 
   1   1  -1    3.48    0.23 
  -1   1   1    3.24    0.21 
  -1   1   1    3.77    0.34 
   1   1  -1    2.80    0.24 
  -1   1   1    3.24    0.25 
  -1   1   1    3.42    0.17 
   1   1  -1    3.56    0.28 
   1   1  -1    3.50    0.25 
   1   1  -1    3.18    0.25 
  -1   1   1    3.50    0.16 
  -1   1   1    3.54    0.25 
   0  -1   1  352.82   14.26 
   0   1  -1  420.75   14.14 
   0   1  -1  421.58   14.21 
   0   1   1  407.98   14.10 
   0   1   1  427.79   14.13 
   0   1  -1  401.03   14.29 
   0   1   1  412.54   14.14 
   0   1  -1  412.97   14.12 
   0   1  -1  412.33   14.23 
   0   1  -1  407.93   14.23 
   0   1  -1  413.85   14.20 
   0   1  -1  345.03   14.11 
   0   1   1  416.76   14.17 
   0   1  -1  434.05   14.23 
   0   1   1  404.71   14.62 
   0   1  -1  340.56   14.46 
   0   1   1  402.35   14.14 
   0   1  -1  425.38   14.18 
   0   1   1  408.86   14.26 
   0   1   1  425.19   14.10 
   0   1   1  422.45   14.12 
   0   1  -1  410.17   14.14 
   0   1  -1  422.94   14.19 
   0   1  -1  441.49   14.60 
   0   1   1  387.18   14.29 
   0   1   1  409.54   14.63 
   0   1   1  411.15   14.12 
   0   1   1  371.04   14.43 
   0   1  -1  431.82   14.26 
   0   1   1  406.23   14.17 
   0   1  -1  447.43   14.50 
   0   1   1  405.15   14.15 
   0   1   1  425.12   14.41 
   0   1  -1  409.11   14.16 
   0   1   1  416.10   14.13 
   0   1  -1  419.15   14.13 
   0   1  -1  423.84   14.30 
   0   1   1  346.23   14.10 
   0   1   1  414.95   14.11 
   0   1  -1  414.00   14.12 
   0   1   1  411.27   14.27 
   0   1  -1  406.79   14.36 
   0   1  -1  416.42   14.19 
   0   1  -1  412.35   14.20 
   0   1   1  410.70   14.14 
   0   1   1  401.54   14.19 
   0   1   1  387.09   14.21 
   0   1  -1  420.05   14.12 
   0   1  -1  384.56   14.60 
  -1  -1  -1   34.25    1.31 
   1  -1   1   32.21    1.28 
   1  -1   1   33.58    1.56 
  -1  -1  -1   30.03    1.29 
  -1  -1  -1   35.51    1.41 
  -1  -1  -1   37.34    1.40 
  -1  -1  -1   35.27    1.29 
   1  -1   1   30.09    1.27 
  -1  -1  -1   34.92    1.35 
  -1  -1  -1   35.13    1.36 
  -1  -1  -1   36.60    1.36 
  -1  -1  -1   36.84    1.40 
   1  -1   1   29.31    1.49 
  -1  -1  -1   34.47    1.33 
   1  -1   1   34.17    1.50 
  -1  -1  -1   34.24    1.33 
  -1  -1  -1   33.32    1.31 
  -1  -1  -1   33.34    1.44 
  -1  -1  -1   33.74    1.33 
  -1  -1  -1   34.63    1.30 
   1  -1   1   33.40    1.38 
  -1  -1  -1   30.89    1.37 
   1  -1   1   30.72    1.27 
  -1  -1  -1   34.97    1.34 
   1  -1   1   32.96    1.33 
  -1  -1  -1   33.45    1.33 
  -1  -1  -1   35.35    1.33 
  -1  -1  -1   35.60    1.32 
  -1  -1  -1   34.88    1.33 
   1  -1   1   33.86    1.48 
  -1  -1  -1   34.15    1.34 
   1  -1   1   34.90    1.36 
   1  -1   1   29.22    1.28 
  -1  -1  -1   35.19    1.32 
  -1  -1  -1   32.83    1.48 
  -1  -1  -1   35.16    1.32 
  -1  -1  -1   35.09    1.36 
  -1  -1  -1   30.46    1.55 
  -1  -1  -1   35.22    1.34 
   1  -1   1   35.49    1.34 
  -1  -1  -1   31.86    1.25 
   1  -1   1   34.85    1.32 
  -1   1  -1   35.60    1.52 
  -1   1  -1   35.11    1.28 
  -1   1  -1   34.96    1.39 
  -1   1  -1   34.71    1.27 
   1   1   1   35.91    1.49 
   1   1   1   35.44    1.32 
   1   1   1   34.40    1.38 
  -1   1  -1   34.23    1.33 
   1   1   1   35.87    1.33 
   1   1   1   36.50    1.42 
   1   1   1   34.90    1.31 
   1   1   1   36.40    1.34 
  -1   1  -1   34.21    1.30 
   1   1   1   35.47    1.32 
   1   1   1   36.27    1.34 
   1   1   1   35.20    1.39 
   1   1   1   35.10    1.33 
   1   1   1   35.26    1.33 
   1   1   1   35.05    1.34 
   1   1   1   35.49    1.30 
  -1   1  -1   33.65    1.27 
  -1   1  -1   36.22    1.35 
  -1   1  -1   34.52    1.46 
   1   1   1   36.33    1.38 
  -1   1  -1   33.86    1.33 
  -1   1  -1   34.79    1.25 
   1   1   1   35.59    1.33 
  -1   1  -1   34.78    1.38 
  -1   1  -1   34.83    1.32 
   1   1   1   34.52    1.35 
   1   1   1   34.47    1.34 
   1   1   1   34.88    1.49 
  -1   1  -1   35.80    1.50 
   1   1   1   34.38    1.38 
   1   1   1   34.19    1.49 
   1   1   1   35.83    1.35 
  -1   1  -1   35.86    1.30 
  -1   1  -1   34.81    1.32 
  -1   1  -1   33.33    1.28 
   1   1   1   33.97    1.37 
   1   1   1   34.87    1.31 
  -1   1  -1   33.94    1.22 
  -1   1  -1   36.48    1.36 
  -1   1  -1   35.95    1.28 
  -1   1  -1   35.54    1.32 
  -1   1  -1   34.40    1.30 
  -1   1  -1   35.40    1.28 
  -1   1  -1   36.62    1.60 
  -1   1  -1   34.37    1.29 
   1   1   1   35.41    1.31 
  -1   1  -1   34.55    1.25 
   1   1   1   33.87    1.33 
   1   1   1   34.38    1.31 
   1   1   1   33.05    1.49 
  -1   1  -1   35.72    1.35 
  -1   1  -1   35.25    1.33 
   1   1   1   34.09    1.35 
  -1   1  -1   34.46    1.37 
   1   1   1   35.48    1.51 
   1   1   1   36.31    1.36 
   2  -1   1  967.44   32.77 
  -2  -1  -1  941.35   32.50 
   2  -1   1  913.83   32.58 
  -2  -1  -1  923.82   32.53 
  -2  -1  -1  932.26   32.64 
   2  -1   1  939.08   32.46 
  -2  -1  -1  941.69   32.37 
  -2  -1  -1  963.42   32.49 
  -2  -1  -1  958.48   32.67 
  -2  -1  -1  967.56   32.69 
  -2  -1  -1  950.80   32.40 
   2  -1   1  936.12   32.58 
   2  -1   1  891.41   32.49 
  -2  -1  -1  964.30   32.51 
  -2  -1  -1  952.60   32.43 
  -2  -1  -1  928.04   32.62 
   2  -1   1  935.13   33.40 
   2  -1   1  928.77   32.56 
   2  -1   1  927.34   32.54 
  -2  -1  -1  944.36   32.36 
   2  -1   1  914.02   32.49 
  -2  -1  -1  923.79   32.78 
  -2  -1  -1  952.08   32.39 
  -2  -1  -1  913.41   32.45 
  -2  -1  -1  934.90   32.35 
  -2  -1  -1  933.22   32.35 
  -2  -1  -1  948.18   32.39 
  -2  -1  -1  985.99   32.53 
  -2  -1  -1  941.97   32.45 
   2  -1   1  915.61   32.37 
  -2  -1  -1  948.05   32.45 
   2  -1   1  900.57   32.36 
   2  -1   1  920.97   32.42 
  -2  -1  -1  934.01   32.65 
   2  -1   1  927.27   32.40 
   2  -1   1  920.66   32.44 
   2  -1   1  931.00   33.06 
   2  -1   1  934.27   32.40 
  -2  -1  -1  919.57   32.48 
   2  -1   1  902.57   32.35 
  -2  -1  -1  946.69   33.38 
  -2  -1  -1  950.66   32.51 
  -2  -1  -1  926.07   32.47 
  -2  -1  -1  931.95   32.33 
  -2  -1  -1  948.30   32.54 
  -2  -1  -1  913.15   32.34 
  -2  -1  -1  930.03   32.37 
  -2  -1  -1  935.46   32.64 
   2  -1   1  929.36   32.67 
  -2  -1  -1  903.07   32.33 
   2  -1   1  927.79   32.39 
  -2  -1  -1  961.32   32.78 
   2  -1   1  910.61   32.44 
   2  -1   1  941.00   32.39 
   2  -1   1  960.60   32.53 
   2  -1   1  922.80   32.80 
   2  -1   1  950.80   32.43 
  -2  -1  -1  948.73   32.45 
   2  -1   1  960.79   32.58 
   2   1   1  950.60   32.40 
  -2   1  -1  954.97   32.40 
   2   1   1  953.26   32.47 
  -2   1  -1 1000.00   32.42 
   2   1   1  925.82   32.38 
  -2   1  -1  932.57   32.44 
  -2   1  -1  928.05   32.38 
   2   1   1  960.75   32.35 
  -2   1  -1  977.76   32.63 
  -2   1  -1  933.64   32.45 
  -2   1  -1  890.91   32.56 
   2   1   1  942.55   32.91 
  -2   1  -1  909.80   32.54 
  -2   1  -1  949.99   32.47 
   2   1   1  942.52   32.45 
  -2   1  -1  937.80   32.50 
   2   1   1  960.89   32.48 
   2   1   1  951.19   33.52 
  -2   1  -1  928.15   33.49 
  -2   1  -1  896.00   32.37 
  -2   1  -1  888.40   32.51 
  -2   1  -1  970.86   32.44 
  -2   1  -1  966.69   32.63 
   2   1   1  954.28   32.37 
   2   1   1  942.06   32.82 
   2   1   1  962.92   32.37 
   2   1   1  905.75   32.70 
   2   1   1  914.15   32.66 
   2   1   1  931.45   32.51 
  -2   1  -1  916.73   32.51 
  -2   1  -1  906.32   32.36 
  -2   1  -1  843.76   32.52 
  -2   1  -1  922.53   32.51 
  -2   1  -1  944.69   32.77 
  -2   1  -1  875.68   32.40 
  -2   1  -1  935.86   32.54 
  -2   1  -1  929.72   32.39 
  -2   1  -1  941.76   32.49 
   2   1   1  947.56   32.38 
   2   1   1  935.96   32.36 
  -2   1  -1  939.93   32.61 
   2   1   1  927.08   32.80 
   2   1   1  973.43   32.47 
  -2   1  -1  898.06   32.50 
   2   1   1  913.44   32.48 
  -2   1  -1  893.12   32.44 
   2   1   1  943.67   32.39 
   2   1   1  934.91   32.36 
  -2   1  -1  961.79   32.35 
  -2   1  -1  964.47   32.34 
   2   1   1  934.58   32.60 
   2   1   1  921.17   32.60 
   2   1   1  903.97   32.65 
   2   1   1  953.71   32.39 
   2   1   1  946.31   32.46 
   2   1   1  934.79   32.39 
  -2   1  -1  934.26   32.48 
   2   1   1  921.40   32.37 
   2   1   1  918.10   33.05 
  -2   1  -1  953.21   33.70 
   2   1   1  927.86   32.44 
   3  -1   1    6.13    0.70 
  -3  -1  -1    6.98    0.85 
  -3  -1  -1    7.69    0.49 
  -3  -1  -1    6.85    0.54 
  -3  -1  -1    7.15    0.57 
  -3  -1  -1    7.19    0.40 
   3  -1   1    7.15    0.54 
   3  -1   1    7.60    0.57 
  -3  -1  -1    7.47    0.52 
   3  -1   1    6.55    0.51 
  -3  -1  -1    7.11    0.47 
  -3  -1  -1    6.25    0.51 
  -3  -1  -1    6.91    0.50 
  -3  -1  -1    6.60    0.53 
  -3  -1  -1    7.47    0.82 
   3  -1   1    6.36    0.38 
  -3  -1  -1    6.56    0.59 
  -3  -1  -1    6.88    0.59 
   3  -1   1    6.84    0.48 
   3  -1   1    6.54    0.31 
   3  -1   1    6.77    0.55 
  -3  -1  -1    6.80    0.59 
   3  -1   1    7.36    0.78 
   3  -1   1    6.94    0.45 
   3  -1   1    7.35    0.49 
   3  -1   1    5.96    0.52 
  -3  -1  -1    6.74    0.47 
   3  -1   1    6.41    0.63 
  -3  -1  -1    6.90    0.45 
  -3  -1  -1    6.07    0.55 
   3  -1   1    6.13    0.66 
   3  -1   1    7.00    0.48 
   3  -1   1    6.73    0.38 
   3  -1   1    7.27    0.60 
  -3  -1  -1    8.35    0.56 
  -3  -1  -1    7.15    0.55 
   3  -1   1    6.57    0.38 
   3  -1   1    6.69    0.48 
   3  -1   1    6.20    0.57 
  -3  -1  -1    7.20    0.51 
   3  -1   1    6.57    0.39 
   3  -1   1    6.93    0.50 
  -3  -1  -1    6.51    0.45 
   3  -1   1    6.76    0.53 
  -3  -1  -1    6.26    0.61 
  -3  -1  -1    8.10    0.52 
  -3  -1  -1    6.47    0.50 
  -3  -1  -1    8.04    0.61 
   3  -1   1    6.47    0.53 
   3  -1   1    6.41    0.37 
   3   1   1    6.06    0.53 
   3   1   1    7.89    0.51 
  -3   1  -1    6.62    0.47 
  -3   1  -1    6.69    0.80 
  -3   1  -1    7.02    0.50 
   3   1   1    6.29    0.52 
   3   1   1    6.60    0.55 
   3   1   1    6.72    0.43 
   3   1   1    6.41    0.53 
  -3   1  -1    7.22    0.49 
   3   1   1    8.34    0.54 
  -3   1  -1    6.90    0.58 
  -3   1  -1    6.68    0.35 
   3   1   1    6.43    0.51 
   3   1   1    6.39    0.47 
   3   1   1    6.24    0.47 
   3   1   1    6.99    0.60 
   3   1   1    7.24    0.56 
   3   1   1    6.84    0.50 
   3   1   1    6.83    0.49 
  -3   1  -1    6.87    0.56 
  -3   1  -1    7.03    0.54 
  -3   1  -1    5.55    0.45 
  -3   1  -1    6.60    0.59 
  -3   1  -1    6.40    0.46 
  -3   1  -1    7.84    0.65 
   3   1   1    7.90    0.51 
  -3   1  -1    6.62    0.40 
  -3   1  -1    6.99    0.86 
  -3   1  -1    5.88    0.46 
  -3   1  -1    6.62    0.40 
  -3   1  -1    6.73    0.35 
   3   1   1    7.32    0.64 
  -3   1  -1    6.55    0.38 
   3   1   1    6.45    0.56 
   3   1   1    5.94    0.49 
  -3   1  -1    6.22    0.46 
  -3   1  -1    5.86    0.60 
  -3   1  -1    7.00    0.81 
   3   1   1    7.17    0.43 
  -3   1  -1    6.11    0.37 
   3   1   1    8.41    0.77 
   3   1   1    6.50    0.75 
   3   1   1    7.26    0.47 
  -3   1  -1    7.18    0.44 
   3   1   1    6.01    0.53 
   3   1   1    6.16    0.52 
  -3   1  -1    6.89    0.54 
   3   1   1    7.45    0.79 
   3   1   1    6.69    0.52 
  -3   1  -1    7.17    0.58 
   3   1   1    7.05    0.48 
   3   1   1    7.06    0.48 
   4  -1   1  215.74    7.51 
  -4  -1  -1  214.66    7.64 
  -4  -1  -1  211.40    7.83 
  -4  -1  -1  216.14    7.82 
   4  -1   1  214.82    7.70 
  -4  -1  -1  213.72    7.63 
   4  -1   1  215.06    7.52 
   4  -1   1  207.79    7.46 
  -4  -1  -1  212.54    7.72 
  -4  -1  -1  212.74    7.97 
   4  -1   1  211.70    7.78 
   4  -1   1  207.71    7.88 
  -4  -1  -1  214.93    7.48 
  -4  -1  -1  209.09    7.70 
   4  -1   1  208.53    7.40 
  -4  -1  -1  211.71    8.46 
   4  -1   1  213.90    7.75 
  -4  -1  -1  208.77    7.66 
   4  -1   1  216.74    7.52 
   4  -1   1  213.75    7.79 
  -4  -1  -1  218.10    7.70 
  -4  -1  -1  211.32    7.70 
  -4  -1  -1  199.17    8.40 
   4  -1   1  215.28    7.67 
  -4  -1  -1  203.20    7.57 
   4  -1   1  212.66    7.61 
  -4  -1  -1  207.52    7.84 
   4  -1   1  213.55    7.79 
   4  -1   1  210.62    7.71 
   4  -1   1  213.97    7.76 
   4  -1   1  212.78    7.71 
   4  -1   1  210.08    7.52 
   4  -1   1  216.88    7.79 
   4  -1   1  212.84    7.57 
   4  -1   1  211.12    7.50 
  -4  -1  -1  216.76    7.81 
  -4  -1  -1  213.96    7.76 
  -4  -1  -1  217.96    7.84 
   4  -1   1  218.38    7.52 
   4  -1   1  223.94    7.66 
   4  -1   1  213.60    7.97 
   4  -1   1  209.64    7.97 
  -4   1  -1  210.90    7.69 
   4   1   1  208.64    7.69 
   4   1   1  201.88    7.86 
  -4   1  -1  213.91    7.59 
   4   1   1  206.42    7.90 
  -4   1  -1  208.84    7.61 
   4   1   1  213.39    7.65 
  -4   1  -1  207.38    7.62 
  -4   1  -1  214.79    7.78 
  -4   1  -1  209.17    7.54 
   4   1   1  206.51    7.72 
   4   1   1  212.52    7.78 
   4   1   1  216.02    7.60 
   4   1   1  217.88    7.64 
   4   1   1  214.54    7.98 
   4   1   1  212.37    7.46 
   4   1   1  216.39    7.74 
   4   1   1  208.53    7.98 
  -4   1  -1  211.42    7.58 
  -4   1  -1  206.83    7.84 
   4   1   1  207.91    7.54 
   4   1   1  214.11    7.68 
   4   1   1  213.78    7.66 
  -4   1  -1  223.76    7.97 
   4   1   1  207.31    7.73 
  -4   1  -1  205.17    7.65 
  -4   1  -1  210.55    7.51 
  -4   1  -1  217.46    7.86 
  -4   1  -1  215.45    8.49 
   4   1   1  213.43    7.78 
   4   1   1  218.08    7.69 
  -4   1  -1  214.87    7.48 
  -4   1  -1  220.09    7.69 
  -4   1  -1  206.87    8.44 
   4   1   1  208.33    7.78 
  -5  -1  -1    0.28    0.23 
  -5  -1  -1    0.51    0.34 
   5  -1   1    0.29    0.16 
  -5  -1  -1   -0.01    0.24 
   5  -1   1   -0.03    0.27 
   5  -1   1    0.39    0.31 
  -5  -1  -1    0.04    0.40 
   5  -1   1    0.03    0.30 
   5  -1   1    0.11    0.10 
  -5  -1  -1    0.06    0.22 
  -5  -1  -1    0.23    0.48 
   5  -1   1    0.12    0.27 
   5  -1   1    0.19    0.12 
  -5  -1  -1    0.05    0.29 
   5  -1   1    0.19    0.16 
  -5  -1  -1    0.89    0.32 
  -5  -1  -1    0.28    0.31 
  -5  -1  -1    0.32    0.35 
  -5  -1  -1    0.11    0.34 
  -5  -1  -1    0.51    0.30 
   5  -1   1    0.19    0.25 
   5  -1   1    0.39    0.32 
   5  -1   1    0.26    0.34 
  -5  -1  -1    0.10    0.13 
   5  -1   1    0.17    0.28 
   5  -1   1    0.21    0.23 
   5  -1   1    0.53    0.38 
  -5  -1  -1    0.49    0.18 
   5  -1   1   -0.17    0.26 
  -5  -1  -1   -0.07    0.20 
   5  -1   1    0.11    0.30 
  -5  -1  -1    0.05    0.25 
  -5  -1  -1    0.45    0.50 
  -5  -1  -1    0.05    0.31 
   5  -1   1    0.36    0.23 
   5  -1   1    0.37    0.18 
   5  -1   1    0.14    0.17 
  -5  -1  -1   -0.12    0.26 
   5  -1   1    0.07    0.16 
  -5   1  -1    0.28    0.31 
  -5   1  -1    0.12    0.18 
  -5   1  -1    0.21    0.35 
   5   1   1   -0.02    0.30 
   5   1   1    0.31    0.24 
   5   1   1   -0.16    0.30 
  -5   1  -1    0.43    0.38 
   5   1   1    0.29    0.33 
  -5   1  -1    0.13    0.24 
   5   1   1   -0.02    0.19 
  -5   1  -1    0.16    0.56 
  -5   1  -1    0.18    0.19 
   5   1   1    0.45    0.36 
  -5   1  -1    0.46    0.24 
  -5   1  -1    0.17    0.15 
  -5   1  -1    0.48    0.32 
  -5   1  -1   -0.05    0.17 
  -5   1  -1    0.28    0.31 
   5   1   1    0.20    0.25 
  -5   1  -1    0.64    0.34 
   5   1   1    0.05    0.17 
  -5   1  -1    0.04    0.56 
  -5   1  -1    0.15    0.17 
   5   1   1    0.70    0.36 
   5   1   1    0.06    0.29 
  -5   1  -1    0.15    0.25 
   5   1   1    0.25    0.22 
   5   1   1    0.04    0.30 
   5   1   1    0.23    0.29 
   5   1   1    0.31    0.14 
   5   1   1    0.18    0.28 
  -5   1  -1    0.19    0.12 
   5   1   1   -0.26    0.22 
   5   1   1    0.53    0.41 
  -5   1  -1   -0.25    0.39 
   6  -1   1    3.32    0.63 
   6  -1   1    4.54    0.68 
  -6  -1  -1    5.07    0.33 
  -6  -1  -1    5.18    0.70 
   6  -1   1    5.23    0.69 
  -6  -1  -1    4.85    0.79 
   6  -1   1    5.14    0.89 
   6  -1   1    4.60    0.59 
  -6  -1  -1    5.57    0.91 
   6  -1   1    4.51    0.84 
   6  -1   1    3.77    0.64 
   6  -1   1    4.90    0.32 
   6  -1   1    4.67    0.31 
  -6  -1  -1    4.04    0.56 
  -6  -1  -1    4.64    0.55 
  -6  -1  -1    4.35    0.55 
  -6  -1  -1    7.98    0.91 
  -6  -1  -1    4.45    1.06 
  -6  -1  -1    5.24    0.73 
   6  -1   1    4.93    0.68 
   6  -1   1    5.33    0.62 
  -6  -1  -1    4.46    1.14 
  -6  -1  -1    4.01    0.63 
   6  -1   1    4.46    0.70 
  -6  -1  -1    4.03    0.58 
   6  -1   1    5.34    0.49 
  -6  -1  -1    4.46    0.72 
  -6  -1  -1    4.76    0.64 
  -6  -1  -1    5.01    0.65 
   6  -1   1    5.27    0.68 
   6  -1   1    5.31    0.80 
   6  -1   1    5.35    0.44 
  -6  -1  -1    5.06    1.11 
   6   1   1    5.69    0.75 
  -6   1  -1    4.90    0.35 
  -6   1  -1    5.05    0.45 
   6   1   1    3.83    0.74 
   6   1   1    4.22    0.64 
  -6   1  -1    4.54    0.70 
  -6   1  -1    4.74    1.29 
  -6   1  -1    4.54    0.63 
  -6   1  -1    4.67    1.11 
  -6   1  -1    5.39    0.68 
  -6   1  -1    4.70    0.32 
   6   1   1    5.04    0.60 
   6   1   1    4.32    0.79 
  -6   1  -1    5.92    0.83 
  -6   1  -1    5.50    0.80 
  -6   1  -1    4.40    0.74 
   6   1   1    5.03    0.32 
   6   1   1    4.56    0.66 
  -6   1  -1    5.17    0.85 
  -6   1  -1    5.48    0.53 
   6   1   1    4.52    0.76 
  -6   1  -1    5.16    0.60 
  -6   1  -1    3.77    0.58 
  -6   1  -1    5.58    1.24 
   6   1   1    6.76    0.78 
   6   1   1    4.55    0.71 
   6   1   1    4.57    0.71 
  -6   1  -1    3.89    0.51 
  -6   1  -1    4.11    0.50 
   6   1   1    4.03    0.69 
  -6   1  -1    4.91    1.09 
   6   1   1    5.47    0.67 
  -6   1  -1    4.97    0.52 
   6   1   1    5.45    0.67 
   6   1   1    5.06    0.58 
   6   1   1    4.87    0.34 
   6   1   1    4.74    0.48 
   7  -1   1    0.68    0.53 
   7  -1   1    0.65    0.44 
  -7  -1  -1    1.58    0.91 
   7  -1   1    1.09    0.38 
  -7  -1  -1    0.79    0.77 
  -7  -1  -1    1.43    0.56 
   7  -1   1    0.79    0.59 
  -7  -1  -1    1.28    0.59 
  -7  -1  -1    0.82    0.46 
   7  -1   1    1.25    0.49 
  -7  -1  -1    0.80    0.45 
  -7  -1  -1    1.55    0.57 
  -7  -1  -1    1.14    0.45 
   7  -1   1    1.09    0.52 
   7  -1   1    1.15    0.26 
  -7  -1  -1    1.14    0.41 
  -7  -1  -1    0.97    0.36 
  -7  -1  -1    0.84    0.50 
  -7  -1  -1    1.09    0.46 
   7  -1   1    1.31    0.30 
  -7  -1  -1    0.61    0.71 
  -7  -1  -1    1.01    0.42 
   7  -1   1    0.45    0.43 
  -7  -1  -1    0.46    0.55 
  -7  -1  -1    0.93    0.50 
   7  -1   1    0.92    0.41 
   7  -1   1    1.06    0.49 
   7  -1   1    1.19    0.53 
   7  -1   1    0.76    0.49 
  -7   1  -1    1.24    0.53 
  -7   1  -1    0.88    0.64 
  -7   1  -1    0.71    0.34 
  -7   1  -1    1.20    0.46 
  -7   1  -1    0.81    0.80 
   7   1   1    0.69    0.41 
  -7   1  -1    0.85    0.41 
   7   1   1    1.47    0.49 
   7   1   1    0.91    0.28 
  -7   1  -1    0.59    0.76 
  -7   1  -1    0.85    0.36 
   7   1   1    0.46    0.48 
   7   1   1    1.03    0.55 
  -7   1  -1    0.67    0.42 
   7   1   1    1.13    0.38 
   7   1   1    1.11    0.52 
   7   1   1    0.71    0.48 
   7   1   1    1.49    0.49 
   7   1   1    1.11    0.58 
   7   1   1    0.92    0.43 
   7   1   1    0.81    0.50 
  -7   1  -1    1.24    0.56 
  -7   1  -1    0.72    0.54 
  -7   1  -1    1.15    0.90 
  -7   1  -1    1.59    0.53 
   7   1   1    0.59    0.45 
  -7   1  -1    2.17    0.98 
  -7   1  -1    0.16    0.52 
   7   1   1    1.16    0.40 
   7   1   1    1.20    0.49 
  -7   1  -1    1.30    0.34 
   8  -1   1   56.13    2.84 
   8  -1   1   57.53    2.67 
   8  -1   1   63.15    3.02 
  -8  -1  -1   56.36    2.54 
  -8  -1  -1   64.27    2.82 
  -8  -1  -1   56.35    2.99 
  -8  -1  -1   57.23    3.03 
  -8  -1  -1   59.99    4.33 
   8  -1   1   59.51    3.24 
  -8  -1  -1   57.52    2.90 
  -8  -1  -1   55.42    4.02 
  -8  -1  -1   57.34    2.67 
  -8  -1  -1   53.66    2.86 
  -8  -1  -1   58.88    2.78 
  -8  -1  -1   61.00    3.30 
  -8  -1  -1   53.28    2.79 
  -8  -1  -1   57.03    2.96 
   8  -1   1   55.30    2.92 
  -8  -1  -1   59.95    4.06 
   8  -1   1   58.95    2.88 
  -8  -1  -1   47.50    2.94 
   8  -1   1   58.62    2.85 
   8  -1   1   54.71    2.83 
  -8  -1  -1   61.04    2.65 
   8  -1   1   62.36    3.05 
   8  -1   1   57.03    3.13 
  -8  -1  -1   56.53    4.03 
  -8   1  -1   53.96    2.56 
   8   1   1   55.24    2.92 
  -8   1  -1   55.23    4.22 
   8   1   1   59.97    2.55 
   8   1   1   61.08    3.19 
  -8   1  -1   56.02    3.99 
   8   1   1   59.43    2.75 
   8   1   1   58.48    2.95 
  -8   1  -1   58.97    4.00 
  -8   1  -1   55.05    2.79 
   8   1   1   60.04    2.76 
   8   1   1   62.25    2.93 
  -8   1  -1   54.13    2.94 
  -8   1  -1   58.62    2.96 
  -8   1  -1   58.60    3.09 
   8   1   1   55.78    2.57 
  -8   1  -1   58.08    2.54 
  -8   1  -1   58.59    3.24 
  -8   1  -1   56.53    4.04 
  -8   1  -1   59.08    2.78 
  -8   1  -1   56.87    2.67 
   8   1   1   55.68    2.88 
  -8   1  -1   58.60    3.07 
   8   1   1   53.04    2.73 
   8   1   1   59.11    2.98 
  -8   1  -1   61.19    2.84 
   8   1   1   60.44    3.23 
   8   1   1   60.39    2.91 
  -9  -1  -1    1.92    1.29 
  -9  -1  -1    2.32    0.67 
   9  -1   1    3.00    0.76 
  -9  -1  -1    2.82    0.87 
  -9  -1  -1    1.15    1.02 
  -9  -1  -1    2.30    0.99 
   9  -1   1    2.45    0.84 
   9  -1   1    2.84    0.79 
  -9  -1  -1    2.79    1.43 
  -9  -1  -1    2.49    0.75 
  -9  -1  -1    3.56    0.98 
  -9  -1  -1    1.33    1.10 
  -9  -1  -1    2.62    0.68 
  -9  -1  -1    3.47    1.35 
  -9  -1  -1    3.27    0.89 
   9  -1   1    3.01    0.83 
   9  -1   1    3.16    0.90 
  -9  -1  -1    2.57    0.67 
  -9  -1  -1    1.58    0.58 
  -9  -1  -1    2.06    0.68 
   9  -1   1    4.58    0.95 
  -9  -1  -1    2.72    0.83 
   9  -1   1    3.04    1.00 
  -9   1  -1    2.50    0.79 
   9   1   1    2.57    0.76 
  -9   1  -1    2.40    0.64 
  -9   1  -1    2.14    0.72 
  -9   1  -1    1.94    1.36 
   9   1   1    1.66    0.70 
  -9   1  -1    1.77    0.75 
   9   1   1    2.86    0.91 
  -9   1  -1    2.71    1.28 
  -9   1  -1    2.33    1.22 
  -9   1  -1    2.86    1.30 
  -9   1  -1    3.18    1.39 
   9   1   1    2.24    0.71 
  -9   1  -1    2.99    0.80 
   9   1   1    1.42    0.68 
   9   1   1    3.22    0.94 
  -9   1  -1    3.15    1.05 
   9   1   1    3.14    0.74 
  -9   1  -1    1.92    0.81 
   9   1   1    4.45    0.95 
  -9   1  -1    2.20    0.79 
   9   1   1    2.97    0.82 
 -10  -1  -1   49.54    4.50 
 -10  -1  -1   53.87    2.72 
 -10  -1  -1   45.74    3.00 
 -10  -1  -1   49.30    3.02 
 -10  -1  -1   50.93    4.24 
  10  -1   1   56.06    3.05 
  10  -1   1   50.77    2.87 
 -10  -1  -1   47.33    4.11 
  10  -1   1   51.81    2.89 
 -10  -1  -1   48.40    2.80 
 -10  -1  -1   49.73    2.96 
 -10  -1  -1   46.84    3.03 
 -10  -1  -1   49.36    4.17 
 -10  -1  -1   51.20    2.91 
  10  -1   1   47.76    3.24 
  10  -1   1   54.35    3.28 
 -10  -1  -1   52.35    3.41 
  10  -1   1   50.69    3.01 
  10  -1   1   46.42    2.83 
 -10  -1  -1   47.82    4.15 
  10   1   1   47.25    2.82 
 -10   1  -1   48.36    2.96 
 -10   1  -1   47.05    4.09 
  10   1   1   49.35    2.95 
  10   1   1   48.60    3.25 
  10   1   1   52.08    3.21 
 -10   1  -1   49.25    3.08 
  10   1   1   50.03    3.01 
  10   1   1   49.11    2.87 
 -10   1  -1   48.26    3.26 
 -10   1  -1   45.58    4.11 
 -10   1  -1   49.42    4.13 
  10   1   1   53.38    2.95 
 -10   1  -1   46.25    2.74 
 -10   1  -1   47.96    4.26 
 -10   1  -1   51.38    3.15 
 -10   1  -1   44.60    4.40 
 -10   1  -1   47.52    2.90 
 -10   1  -1   46.83    3.05 
 -10  -2   1   13.95    1.65 
 -10  -2   1   13.09    1.49 
  10  -2  -1   15.98    1.71 
  10  -2  -1   12.86    1.50 
  10  -2  -1   12.95    1.65 
 -10  -2   1   14.09    1.70 
 -10  -2   1   14.31    1.86 
 -10  -2   1   14.66    1.50 
  10  -2  -1   10.84    1.71 
 -10  -2   1   14.01    1.79 
 -10  -2   1   14.39    2.55 
 -10  -2   1   15.18    2.73 
 -10  -2   1   11.83    2.31 
 -10  -2   1   12.47    2.38 
 -10  -2   1   13.49    1.53 
  10  -2  -1   15.58    1.67 
  10  -2  -1   14.44    1.57 
 -10  -2   1   13.07    1.87 
 -10  -2   1   12.85    2.77 
 -10  -2   1   15.24    1.78 
 -10   2   1   12.67    2.54 
  10   2  -1   14.39    1.68 
  10   2  -1   14.81    1.91 
  10   2  -1   14.85    1.63 
 -10   2   1   15.22    2.00 
  10   2  -1   17.18    1.84 
  10   2  -1   11.86    1.43 
  10   2  -1   12.67    1.55 
 -10   2   1   13.07    2.39 
 -10   2   1   14.91    1.71 
 -10   2   1   12.78    2.43 
 -10   2   1   15.35    1.63 
 -10   2   1   12.98    1.70 
  10   2  -1   13.23    1.55 
 -10   2   1   12.44    1.62 
 -10   2   1   11.41    1.59 
 -10   2   1   14.41    2.86 
 -10   2   1   15.21    2.62 
  10   2  -1   15.08    1.68 
  -9  -2   1   13.53    2.31 
  -9  -2   1   14.79    1.68 
   9  -2  -1   16.44    1.90 
  -9  -2   1   14.05    1.37 
  -9  -2   1   14.39    1.17 
  -9  -2   1   17.67    1.80 
   9  -2  -1   12.87    1.41 
   9  -2  -1   15.99    1.52 
   9  -2  -1   10.29    1.28 
  -9  -2   1   12.63    1.33 
  -9  -2   1   14.77    1.65 
  -9  -2   1   12.66    1.36 
  -9  -2   1   16.84    1.38 
   9  -2  -1   12.07    1.44 
  -9  -2   1   11.93    2.16 
   9  -2  -1   11.74    1.40 
  -9  -2   1   10.75    1.44 
  -9  -2   1   15.52    1.67 
   9  -2  -1   12.14    1.45 
  -9  -2   1   12.17    1.67 
  -9  -2   1   14.80    1.61 
  -9  -2   1   15.42    2.44 
  -9  -2   1   12.93    1.46 
   9  -2  -1   15.49    1.74 
  -9  -2   1   14.66    2.33 
   9   2  -1   13.06    1.46 
   9   2  -1   17.66    1.64 
  -9   2   1   13.23    1.58 
  -9   2   1   15.36    1.50 
  -9   2   1   15.44    2.51 
   9   2  -1   15.70    1.47 
   9   2  -1   10.92    1.55 
  -9   2   1   14.82    1.65 
  -9   2   1   17.92    2.91 
   9   2  -1   15.96    1.68 
  -9   2   1   11.36    1.62 
  -9   2   1   13.66    1.62 
   9   2  -1   15.79    1.57 
  -9   2   1   15.66    1.57 
  -9   2   1   13.35    2.26 
   9   2  -1   12.38    1.46 
  -9   2   1   12.73    2.21 
   9   2  -1   10.88    1.37 
   9   2  -1   13.35    1.35 
  -9   2   1   13.47    1.54 
  -9   2   1   13.18    2.31 
  -8  -2   1    2.01    1.00 
  -8  -2   1    1.78    0.62 
  -8  -2   1    0.79    0.87 
  -8  -2   1    1.15    0.47 
  -8  -2   1    1.69    0.66 
   8  -2  -1    1.20    0.66 
  -8  -2   1    1.97    1.03 
  -8  -2   1    2.02    0.57 
   8  -2  -1    0.95    0.59 
  -8  -2   1    2.23    1.09 
  -8  -2   1    1.01    0.53 
   8  -2  -1    0.82    0.55 
  -8  -2   1    1.23    0.53 
   8  -2  -1    1.20    0.56 
   8  -2  -1    1.60    0.60 
  -8  -2   1    1.27    0.65 
   8  -2  -1    0.62    0.56 
  -8  -2   1    1.00    0.60 
  -8  -2   1    1.13    0.50 
  -8  -2   1    0.35    0.47 
  -8  -2   1    2.12    0.71 
   8  -2  -1    1.33    0.64 
   8  -2  -1    0.30    0.49 
  -8  -2   1    1.30    0.48 
  -8  -2   1    1.82    0.50 
  -8  -2   1    1.27    0.78 
  -8   2   1    1.51    0.64 
   8   2  -1    0.94    0.42 
   8   2  -1    1.16    0.56 
   8   2  -1    2.59    0.69 
  -8   2   1    1.12    0.55 
  -8   2   1    1.15    0.69 
   8   2  -1    1.07    0.43 
   8   2  -1    1.59    0.56 
   8   2  -1    1.85    0.56 
   8   2  -1    1.25    0.54 
  -8   2   1    0.90    0.58 
  -8   2   1    2.14    0.61 
  -8   2   1    1.04    0.91 
  -8   2   1    0.74    1.03 
   8   2  -1    1.44    0.64 
   8   2  -1    0.98    0.55 
   8   2  -1    1.28    0.49 
  -8   2   1    1.87    1.11 
  -8   2   1    1.51    0.94 
  -8   2   1    1.51    0.78 
  -8   2   1    1.69    0.99 
   8   2  -1    1.13    0.64 
  -8   2   1    1.84    0.46 
   8   2  -1    0.97    0.60 
  -8   2   1    0.86    0.55 
   8   2  -1    1.21    0.68 
  -8   2   1    1.09    0.57 
  -7  -2   1   13.20    2.00 
   7  -2  -1   11.39    1.28 
  -7  -2   1   14.80    1.00 
   7  -2  -1   13.95    1.14 
  -7  -2   1   14.25    1.12 
  -7  -2   1   14.68    1.31 
  -7  -2   1   13.89    1.10 
  -7  -2   1   11.51    1.09 
  -7  -2   1   13.76    1.30 
   7  -2  -1   15.87    1.23 
   7  -2  -1   13.77    1.01 
  -7  -2   1   12.53    1.46 
   7  -2  -1   10.92    1.09 
  -7  -2   1   14.38    1.83 
   7  -2  -1   16.06    1.28 
  -7  -2   1   14.49    1.31 
  -7  -2   1   13.60    1.20 
  -7  -2   1   14.11    1.77 
  -7  -2   1   11.56    0.95 
  -7  -2   1   14.08    1.14 
   7  -2  -1   13.62    1.47 
  -7  -2   1   13.56    1.25 
  -7  -2   1   11.19    1.30 
   7  -2  -1   13.99    1.31 
  -7  -2   1   13.93    1.00 
   7  -2  -1   14.74    1.17 
  -7  -2   1   11.42    1.75 
   7   2  -1   14.86    1.37 
  -7   2   1   12.75    1.08 
  -7   2   1   13.45    1.24 
  -7   2   1   14.31    0.82 
   7   2  -1   13.50    1.00 
   7   2  -1   14.45    0.95 
   7   2  -1   12.50    1.13 
  -7   2   1   14.46    0.95 
   7   2  -1   12.82    1.22 
  -7   2   1   13.61    1.04 
   7   2  -1   14.11    0.93 
   7   2  -1   13.14    1.16 
   7   2  -1   12.63    1.14 
  -7   2   1   14.29    1.26 
  -7   2   1   14.32    1.85 
  -7   2   1   13.92    1.89 
  -7   2   1   12.15    1.84 
  -7   2   1   11.92    1.03 
   7   2  -1   14.72    1.31 
   7   2  -1   10.70    1.17 
  -7   2   1   13.27    1.31 
   7   2  -1   13.93    1.00 
   7   2  -1   12.52    1.22 
  -7   2   1   13.32    1.21 
  -7   2   1   13.39    1.34 
   7   2  -1   12.32    1.45 
   7   2  -1   15.85    1.16 
   7   2  -1   14.57    1.03 
  -7   2   1   12.54    1.89 
  -7   2   1   12.98    0.83 
  -6  -2   1    3.62    0.70 
  -6  -2   1    3.83    0.71 
   6  -2  -1    3.15    0.58 
   6  -2  -1    3.16    0.55 
  -6  -2   1    2.75    0.60 
   6  -2  -1    3.22    0.31 
   6  -2  -1    3.57    0.29 
  -6  -2   1    2.70    0.92 
  -6  -2   1    3.81    0.64 
   6  -2  -1    3.65    0.64 
  -6  -2   1    2.04    0.84 
   6  -2  -1    3.06    0.58 
  -6  -2   1    2.52    0.50 
   6  -2  -1    2.94    0.67 
   6  -2  -1    3.71    0.61 
  -6  -2   1    3.88    0.81 
   6  -2  -1    2.71    0.61 
  -6  -2   1    3.26    0.69 
  -6  -2   1    3.95    0.55 
  -6  -2   1    2.97    0.52 
  -6  -2   1    2.62    0.58 
  -6  -2   1    2.54    0.88 
  -6  -2   1    3.05    0.64 
  -6  -2   1    2.66    0.56 
  -6  -2   1    3.48    0.98 
  -6  -2   1    2.26    0.49 
  -6  -2   1    3.26    0.52 
   6  -2  -1    2.30    0.57 
   6  -2  -1    4.20    0.57 
  -6   2   1    3.46    0.37 
  -6   2   1    3.29    0.93 
   6   2  -1    3.51    0.67 
  -6   2   1    3.42    0.98 
  -6   2   1    2.88    0.39 
   6   2  -1    3.31    0.72 
   6   2  -1    3.03    0.59 
  -6   2   1    3.36    1.07 
  -6   2   1    2.61    0.62 
   6   2  -1    3.92    0.31 
   6   2  -1    3.81    0.67 
   6   2  -1    2.65    0.49 
  -6   2   1    1.68    0.58 
  -6   2   1    3.53    0.59 
   6   2  -1    2.47    0.44 
   6   2  -1    2.90    0.58 
   6   2  -1    2.86    0.50 
  -6   2   1    3.95    0.68 
   6   2  -1    3.51    0.49 
  -6   2   1    4.26    0.68 
   6   2  -1    3.43    0.52 
  -6   2   1    3.46    0.35 
   6   2  -1    2.18    0.46 
   6   2  -1    2.90    0.53 
  -6   2   1    3.36    0.57 
   6   2  -1    3.16    0.61 
   6   2  -1    2.50    0.54 
  -6   2   1    4.04    0.42 
   6   2  -1    3.64    0.75 
  -6   2   1    3.72    0.29 
   6   2  -1    3.32    0.71 
  -6   2   1    3.25    0.66 
   5  -2  -1    0.38    0.14 
   5  -2  -1    0.74    0.37 
  -5  -2   1    0.04    0.30 
  -5  -2   1    0.58    0.29 
  -5  -2   1    0.03    0.25 
  -5  -2   1    0.16    0.38 
  -5  -2   1   -0.16    0.25 
  -5  -2   1   -0.13    0.43 
   5  -2  -1    0.23    0.28 
   5  -2  -1    0.38    0.16 
  -5  -2   1    0.11    0.44 
   5  -2  -1    0.66    0.34 
  -5  -2   1   -0.10    0.39 
  -5  -2   1   -0.04    0.23 
   5  -2  -1    0.55    0.35 
  -5  -2   1    0.07    0.29 
   5  -2  -1    0.15    0.23 
  -5  -2   1   -0.13    0.31 
  -5  -2   1    0.03    0.27 
  -5  -2   1   -0.12    0.27 
   5  -2  -1    0.26    0.29 
  -5  -2   1    0.13    0.46 
  -5  -2   1    0.16    0.31 
  -5  -2   1   -0.22    0.28 
  -5  -2   1    0.02    0.14 
   5  -2  -1    0.20    0.30 
  -5  -2   1    0.41    0.27 
  -5  -2   1   -0.01    0.29 
   5  -2  -1    0.31    0.29 
   5  -2  -1    0.27    0.10 
   5  -2  -1    0.76    0.38 
   5   2  -1    0.19    0.25 
   5   2  -1   -0.18    0.30 
   5   2  -1    0.35    0.31 
  -5   2   1    0.50    0.57 
  -5   2   1    0.34    0.19 
   5   2  -1    0.07    0.29 
   5   2  -1    0.08    0.14 
  -5   2   1    0.42    0.31 
  -5   2   1    0.40    0.16 
   5   2  -1    0.44    0.35 
  -5   2   1    0.19    0.14 
  -5   2   1    0.40    0.30 
   5   2  -1   -0.10    0.28 
   5   2  -1   -0.21    0.25 
  -5   2   1    0.69    0.23 
  -5   2   1    0.41    0.16 
   5   2  -1    0.08    0.25 
  -5   2   1   -0.04    0.31 
   5   2  -1   -0.09    0.23 
  -5   2   1    0.35    0.29 
   5   2  -1    0.67    0.37 
  -5   2   1    0.28    0.46 
  -5   2   1    0.22    0.17 
  -5   2   1    0.42    0.16 
   5   2  -1   -0.23    0.26 
   5   2  -1    0.20    0.22 
   5   2  -1    0.04    0.26 
   5   2  -1    0.13    0.25 
  -5   2   1    0.17    0.49 
   5   2  -1    0.12    0.12 
  -5   2   1    0.41    0.32 
   5   2  -1   -0.11    0.20 
  -5   2   1    0.30    0.17 
  -5   2   1    0.56    0.41 
  -5   2   1    0.08    0.30 
  -4  -2   1    0.49    0.36 
   4  -2  -1    0.02    0.24 
  -4  -2   1    0.41    0.27 
   4  -2  -1    0.60    0.32 
   4  -2  -1   -0.17    0.22 
  -4  -2   1    0.14    0.23 
  -4  -2   1   -0.06    0.26 
  -4  -2   1   -0.09    0.38 
  -4  -2   1    0.14    0.23 
   4  -2  -1    0.28    0.27 
   4  -2  -1    0.13    0.18 
  -4  -2   1    0.31    0.24 
   4  -2  -1   -0.23    0.24 
   4  -2  -1   -0.09    0.23 
   4  -2  -1    0.11    0.23 
  -4  -2   1    0.06    0.37 
  -4  -2   1    0.11    0.27 
  -4  -2   1    0.52    0.32 
  -4  -2   1   -0.03    0.24 
   4  -2  -1    0.43    0.30 
  -4  -2   1    0.06    0.25 
  -4  -2   1   -0.29    0.22 
   4  -2  -1    0.35    0.26 
   4  -2  -1    0.24    0.32 
  -4  -2   1    0.18    0.31 
   4  -2  -1    0.23    0.12 
  -4  -2   1    0.06    0.29 
  -4  -2   1    0.30    0.23 
  -4  -2   1   -0.02    0.26 
  -4  -2   1   -0.01    0.42 
  -4  -2   1    0.15    0.15 
   4  -2  -1   -0.06    0.14 
  -4   2   1    0.06    0.23 
   4   2  -1    0.31    0.27 
   4   2  -1    0.27    0.27 
   4   2  -1    0.18    0.26 
  -4   2   1   -0.20    0.26 
  -4   2   1   -0.20    0.33 
  -4   2   1    0.19    0.13 
  -4   2   1    0.54    0.36 
  -4   2   1   -0.09    0.24 
  -4   2   1    0.12    0.14 
  -4   2   1    0.07    0.22 
  -4   2   1    0.23    0.19 
  -4   2   1    0.38    0.28 
   4   2  -1   -0.03    0.31 
   4   2  -1    0.18    0.21 
  -4   2   1    0.03    0.38 
  -4   2   1   -0.28    0.14 
  -4   2   1    0.20    0.47 
  -4   2   1    0.09    0.13 
  -4   2   1   -0.08    0.23 
   4   2  -1    0.21    0.29 
   4   2  -1   -0.04    0.24 
   4   2  -1    0.19    0.27 
   4   2  -1    0.36    0.16 
  -4   2   1   -0.27    0.13 
   4   2  -1    0.37    0.22 
  -4   2   1   -0.05    0.14 
   4   2  -1    0.27    0.22 
   4   2  -1    0.38    0.25 
  -4   2   1   -0.01    0.31 
   4   2  -1    0.28    0.26 
   4   2  -1   -0.08    0.22 
  -4   2   1   -0.01    0.09 
  -4   2   1   -0.04    0.17 
   4   2  -1    0.06    0.12 
  -4   2   1    0.14    0.15 
   4   2  -1   -0.02    0.18 
  -3  -2   1   20.62    0.96 
   3  -2  -1   19.86    1.09 
  -3  -2   1   20.05    1.02 
  -3  -2   1   19.73    0.90 
  -3  -2   1   19.94    1.01 
  -3  -2   1   20.74    1.40 
  -3  -2   1   18.74    1.10 
   3  -2  -1   19.97    0.91 
  -3  -2   1   20.55    1.15 
   3  -2  -1   19.33    0.97 
   3  -2  -1   20.44    0.95 
   3  -2  -1   20.43    1.14 
   3  -2  -1   21.11    1.01 
   3  -2  -1   21.50    1.03 
   3  -2  -1   21.24    1.13 
   3  -2  -1   21.92    0.91 
   3  -2  -1   21.19    1.03 
  -3  -2   1   21.44    1.06 
   3  -2  -1   23.15    1.13 
  -3  -2   1   21.43    1.09 
  -3  -2   1   20.22    0.91 
  -3  -2   1   18.35    1.16 
  -3  -2   1   21.20    1.09 
  -3  -2   1   20.07    1.36 
  -3  -2   1   19.72    1.02 
  -3  -2   1   20.68    1.60 
   3  -2  -1   19.59    1.02 
   3  -2  -1   19.19    1.05 
  -3  -2   1   21.52    1.05 
   3  -2  -1   20.16    0.97 
  -3  -2   1   21.22    1.13 
  -3  -2   1   20.78    1.07 
  -3  -2   1   21.16    1.02 
  -3  -2   1   20.22    1.00 
  -3  -2   1   19.87    1.00 
  -3  -2   1   21.26    1.17 
   3  -2  -1   19.95    0.80 
   3  -2  -1   20.47    1.18 
  -3  -2   1   19.88    1.36 
   3  -2  -1   18.78    0.88 
   3  -2  -1   20.03    1.16 
  -3  -2   1   21.38    0.98 
  -3   2   1   20.90    1.00 
   3   2  -1   21.22    1.01 
   3   2  -1   21.05    1.05 
  -3   2   1   20.21    0.86 
  -3   2   1   19.57    0.85 
  -3   2   1   18.99    0.88 
  -3   2   1   19.60    0.80 
  -3   2   1   20.37    1.11 
  -3   2   1   20.21    1.04 
  -3   2   1   19.18    0.89 
   3   2  -1   19.40    0.90 
  -3   2   1   19.44    1.36 
   3   2  -1   20.65    1.01 
  -3   2   1   20.58    1.15 
  -3   2   1   20.86    1.09 
   3   2  -1   21.18    1.02 
  -3   2   1   20.06    0.83 
  -3   2   1   20.39    0.83 
   3   2  -1   20.69    1.16 
   3   2  -1   19.82    1.09 
   3   2  -1   19.76    1.02 
  -3   2   1   19.81    1.07 
  -3   2   1   20.97    1.28 
   3   2  -1   21.65    0.98 
  -3   2   1   19.95    1.37 
   3   2  -1   19.79    1.03 
   3   2  -1   19.30    1.11 
  -3   2   1   20.26    0.91 
   3   2  -1   18.64    1.12 
   3   2  -1   20.13    1.02 
  -3   2   1   19.04    1.05 
  -3   2   1   20.99    0.89 
   3   2  -1   20.07    1.00 
  -3   2   1   19.37    1.00 
   3   2  -1   20.99    1.04 
  -3   2   1   20.49    1.37 
  -3   2   1   21.86    1.14 
  -3   2   1   19.64    0.92 
   3   2  -1   20.39    0.98 
   3   2  -1   21.38    1.46 
  -3   2   1   20.80    0.98 
  -3   2   1   20.44    0.88 
  -3   2   1   22.30    0.96 
  -3   2   1   20.05    0.96 
   3   2  -1   21.21    0.96 
  -3   2   1   21.08    1.08 
   3   2  -1   20.00    0.88 
   3   2  -1   20.26    0.99 
  -2  -2   1    1.38    0.37 
  -2  -2   1    2.08    0.28 
  -2  -2   1    1.90    0.32 
   2  -2  -1    1.87    0.25 
  -2  -2   1    1.90    0.24 
   2  -2  -1    1.69    0.23 
  -2  -2   1    2.14    0.29 
  -2  -2   1    1.71    0.30 
  -2  -2   1    2.20    0.27 
  -2  -2   1    1.36    0.37 
   2  -2  -1    2.11    0.29 
  -2  -2   1    1.57    0.25 
  -2  -2   1    1.89    0.31 
  -2  -2   1    1.91    0.30 
  -2  -2   1    1.46    0.28 
  -2  -2   1    1.22    0.28 
   2  -2  -1    2.15    0.25 
  -2  -2   1    1.82    0.25 
   2  -2  -1    1.48    0.23 
  -2  -2   1    1.71    0.26 
  -2  -2   1    1.84    0.33 
   2  -2  -1    1.77    0.20 
  -2  -2   1    1.38    0.27 
   2  -2  -1    1.86    0.20 
  -2  -2   1    1.93    0.26 
  -2  -2   1    1.42    0.28 
  -2  -2   1    1.97    0.26 
  -2  -2   1    1.23    0.21 
   2  -2  -1    1.71    0.28 
  -2  -2   1    1.15    0.36 
  -2  -2   1    1.97    0.47 
  -2  -2   1    1.64    0.24 
   2  -2  -1    2.07    0.31 
  -2  -2   1    2.06    0.29 
  -2  -2   1    1.67    0.29 
  -2  -2   1    1.72    0.29 
   2  -2  -1    1.58    0.25 
   2  -2  -1    1.60    0.30 
  -2  -2   1    2.38    0.28 
  -2  -2   1    1.87    0.28 
  -2  -2   1    2.12    0.36 
  -2  -2   1    1.69    0.23 
  -2  -2   1    1.81    0.32 
   2  -2  -1    1.69    0.23 
   2  -2  -1    2.11    0.24 
  -2  -2   1    2.02    0.25 
  -2  -2   1    1.57    0.27 
   2  -2  -1    1.87    0.26 
  -2  -2   1    1.26    0.23 
   2   2  -1    1.45    0.24 
  -2   2   1    1.60    0.31 
  -2   2   1    2.08    0.22 
   2   2  -1    1.72    0.25 
   2   2  -1    1.95    0.33 
  -2   2   1    2.68    0.43 
  -2   2   1    1.60    0.20 
  -2   2   1    1.49    0.37 
  -2   2   1    1.13    0.34 
   2   2  -1    1.65    0.38 
   2   2  -1    1.70    0.26 
  -2   2   1    1.77    0.25 
   2   2  -1    2.11    0.48 
   2   2  -1    1.57    0.24 
   2   2  -1    2.10    0.34 
  -2   2   1    1.57    0.14 
   2   2  -1    2.12    0.25 
  -2   2   1    1.63    0.12 
   2   2  -1    2.00    0.35 
  -2   2   1    1.37    0.21 
   2   2  -1    1.32    0.25 
   2   2  -1    1.47    0.25 
  -2   2   1    1.91    0.27 
   2   2  -1    2.09    0.45 
   2   2  -1    1.87    0.29 
  -2   2   1    1.74    0.24 
   2   2  -1    1.67    0.27 
   2   2  -1    1.85    0.31 
  -2   2   1    2.02    0.25 
  -2   2   1    1.72    0.22 
  -2   2   1    1.72    0.26 
   2   2  -1    2.34    0.30 
  -2   2   1    1.74    0.17 
  -2   2   1    1.87    0.22 
  -2   2   1    1.64    0.23 
  -2   2   1    1.74    0.12 
  -2   2   1    2.07    0.17 
  -2   2   1    1.75    0.14 
  -2   2   1    1.59    0.21 
   2   2  -1    1.96    0.27 
  -2   2   1    1.65    0.28 
  -2   2   1    1.69    0.28 
   2   2  -1    1.99    0.29 
  -2   2   1    1.46    0.21 
   2   2  -1    1.15    0.23 
   2   2  -1    1.76    0.31 
   2   2  -1    1.60    0.26 
  -2   2   1    2.18    0.22 
  -2   2   1    1.43    0.23 
   2   2  -1    1.44    0.24 
   2   2  -1    1.70    0.25 
  -2   2   1    1.66    0.23 
   2   2  -1    1.70    0.26 
   2   2  -1    1.78    0.24 
  -2   2   1    2.10    0.20 
  -2   2   1    1.93    0.26 
   2   2  -1    1.70    0.31 
   2   2  -1    1.93    0.27 
   2   2  -1    1.87    0.26 
  -2   2   1    1.85    0.27 
  -2   2   1    1.90    0.26 
  -2   2   1    1.98    0.31 
   2   2  -1    1.50    0.28 
   1  -2  -1    0.61    0.12 
  -1  -2   1    0.52    0.10 
   1  -2  -1    0.68    0.14 
  -1  -2   1    1.41    0.22 
  -1  -2   1    0.88    0.17 
   1  -2  -1    0.66    0.15 
  -1  -2   1    0.92    0.18 
  -1  -2   1    0.70    0.20 
  -1  -2   1    0.69    0.20 
  -1  -2   1    1.05    0.20 
   1  -2  -1    0.62    0.14 
  -1  -2   1    0.40    0.17 
  -1  -2   1    1.16    0.19 
  -1  -2   1    0.54    0.13 
  -1  -2   1    1.15    0.21 
   1  -2  -1    0.51    0.12 
  -1  -2   1    0.86    0.19 
  -1  -2   1    0.56    0.18 
   1  -2  -1    0.68    0.13 
  -1  -2   1    1.26    0.23 
  -1  -2   1    0.79    0.14 
   1  -2  -1    0.84    0.19 
  -1  -2   1    0.96    0.20 
   1  -2  -1    0.84    0.17 
  -1  -2   1    1.15    0.19 
  -1  -2   1    1.61    0.27 
   1  -2  -1    0.70    0.18 
   1  -2  -1    0.47    0.12 
  -1  -2   1    1.37    0.39 
  -1  -2   1    0.82    0.21 
  -1  -2   1    0.88    0.21 
  -1  -2   1    0.71    0.20 
  -1  -2   1    0.50    0.14 
  -1  -2   1    1.97    0.35 
   1  -2  -1    0.68    0.12 
  -1  -2   1    0.85    0.19 
   1  -2  -1    0.93    0.14 
   1  -2  -1    0.64    0.11 
   1  -2  -1    1.71    0.32 
   1  -2  -1    0.61    0.11 
  -1  -2   1    0.68    0.13 
  -1  -2   1    0.62    0.15 
   1  -2  -1    1.00    0.13 
   1  -2  -1    1.07    0.15 
   1  -2  -1    0.50    0.12 
  -1  -2   1    0.47    0.15 
  -1  -2   1    1.04    0.25 
   1  -2  -1    0.71    0.12 
  -1  -2   1    0.90    0.14 
  -1  -2   1    0.83    0.19 
  -1  -2   1    0.83    0.15 
   1  -2  -1    0.28    0.11 
   1  -2  -1    1.20    0.20 
  -1  -2   1    0.68    0.24 
   1  -2  -1    0.96    0.15 
  -1  -2   1    0.42    0.17 
  -1   2   1    0.74    0.11 
  -1   2   1    0.49    0.10 
   1   2  -1    0.37    0.16 
   1   2  -1    0.94    0.21 
   1   2  -1    1.11    0.17 
  -1   2   1    0.78    0.12 
  -1   2   1    0.74    0.18 
   1   2  -1    0.81    0.20 
  -1   2   1    0.66    0.12 
  -1   2   1    0.96    0.14 
   1   2  -1    1.24    0.22 
  -1   2   1    0.78    0.19 
   1   2  -1    0.77    0.14 
  -1   2   1    0.56    0.11 
  -1   2   1    0.65    0.19 
   1   2  -1    1.19    0.20 
  -1   2   1    0.72    0.12 
   1   2  -1    0.80    0.18 
   1   2  -1    0.62    0.14 
   1   2  -1    0.94    0.16 
   1   2  -1    0.47    0.14 
  -1   2   1    0.49    0.12 
   1   2  -1    0.84    0.18 
  -1   2   1    0.87    0.19 
  -1   2   1    0.76    0.12 
   1   2  -1    0.86    0.19 
   1   2  -1    1.01    0.20 
   1   2  -1    1.54    0.20 
   1   2  -1    0.86    0.18 
  -1   2   1    1.93    0.23 
   1   2  -1    1.16    0.24 
  -1   2   1    0.60    0.13 
  -1   2   1    0.73    0.19 
  -1   2   1    1.17    0.26 
   1   2  -1    0.99    0.19 
  -1   2   1    0.80    0.14 
   1   2  -1    0.95    0.34 
   1   2  -1    0.83    0.23 
  -1   2   1    0.51    0.18 
   1   2  -1    0.97    0.20 
   1   2  -1    0.79    0.18 
  -1   2   1    0.98    0.20 
  -1   2   1    0.84    0.16 
  -1   2   1    0.82    0.13 
  -1   2   1    0.55    0.12 
  -1   2   1    0.83    0.13 
  -1   2   1    0.72    0.12 
   1   2  -1    1.06    0.19 
  -1   2   1    1.15    0.19 
  -1   2   1    1.00    0.14 
  -1   2   1    0.48    0.10 
  -1   2   1    0.71    0.12 
   1   2  -1    0.72    0.18 
   1   2  -1    0.63    0.19 
   1   2  -1    1.10    0.20 
   1   2  -1    0.90    0.19 
  -1   2   1    0.68    0.12 
   1   2  -1    0.78    0.15 
   1   2  -1    0.61    0.17 
  -1   2   1    0.74    0.12 
   0  -2  -1    2.11    0.15 
   0  -2   1    2.01    0.34 
   0  -2  -1    2.46    0.55 
   0  -2  -1    2.28    0.28 
   0  -2   1    1.97    0.37 
   0  -2   1    0.88    0.42 
   0  -2   1    2.82    0.28 
   0  -2  -1    2.07    0.26 
   0  -2   1    2.73    0.26 
   0  -2   1    1.71    0.44 
   0  -2  -1    1.85    0.22 
   0  -2   1    2.22    0.40 
   0  -2   1    2.49    0.29 
   0  -2  -1    1.95    0.25 
   0  -2   1    1.31    0.23 
   0  -2   1    2.08    0.36 
   0  -2   1    2.57    0.27 
   0  -2   1    2.08    0.27 
   0  -2   1    1.97    0.23 
   0  -2  -1    2.13    0.40 
   0  -2   1    2.28    0.25 
   0  -2   1    2.29    0.14 
   0  -2   1    1.60    0.64 
   0  -2   1    1.93    0.24 
   0  -2   1    2.15    0.29 
   0  -2  -1    2.30    0.25 
   0  -2   1    1.64    0.22 
   0  -2   1    2.26    0.27 
   0  -2  -1    2.39    0.42 
   0  -2  -1    2.37    0.21 
   0  -2   1    1.87    0.34 
   0  -2   1    2.13    0.33 
   0  -2   1    2.54    0.23 
   0  -2   1    2.71    0.45 
   0  -2  -1    2.84    0.48 
   0  -2  -1    2.77    0.25 
   0  -2  -1    1.96    0.23 
   0  -2   1    1.69    0.26 
   0  -2  -1    3.63    0.52 
   0  -2  -1    2.36    0.24 
   0  -2   1    2.72    0.33 
   0  -2  -1    2.08    0.18 
   0  -2   1    3.05    0.47 
   0  -2  -1    2.08    0.25 
   0  -2   1    2.13    0.26 
   0  -2  -1    2.32    0.22 
   0  -2  -1    1.63    0.24 
   0  -2  -1    2.44    0.24 
   0  -2  -1    1.98    0.23 
   0  -2   1    2.73    0.24 
   0  -2  -1    2.34    0.22 
   0  -2   1    1.73    0.22 
   0  -2  -1    2.03    0.38 
   0   2  -1    2.72    0.32 
   0   2   1    2.48    0.27 
   0   2  -1    1.88    0.25 
   0   2   1    2.55    0.27 
   0   2   1    1.80    0.21 
   0   2  -1    2.76    0.15 
   0   2   1    2.41    0.21 
   0   2  -1    2.14    0.24 
   0   2   1    2.42    0.18 
   0   2   1    2.19    0.22 
   0   2  -1    2.59    0.45 
   0   2   1    2.53    0.33 
   0   2  -1    2.37    0.27 
   0   2  -1    2.30    0.28 
   0   2   1    2.14    0.26 
   0   2  -1    2.20    0.27 
   0   2   1    2.08    0.23 
   0   2  -1    1.70    0.24 
   0   2   1    2.46    0.25 
   0   2  -1    2.48    0.31 
   0   2   1    2.85    0.29 
   0   2   1    2.00    0.19 
   0   2  -1    2.48    0.27 
   0   2   1    2.68    0.28 
   0   2   1    2.58    0.25 
   0   2   1    2.66    0.27 
   0   2  -1    2.81    0.31 
   0   2  -1    2.83    0.40 
   0   2  -1    2.75    0.41 
   0   2   1    1.93    0.42 
   0   2  -1    2.45    0.27 
   0   2   1    2.39    0.26 
   0   2  -1    2.44    0.29 
   0   2  -1    1.84    0.24 
   0   2  -1    1.69    0.21 
   0   2  -1    2.32    0.25 
   0   2  -1    2.44    0.32 
   0   2  -1    1.81    0.13 
   0   2   1    2.60    0.24 
   0   2   1    2.30    0.37 
   0   2  -1    1.76    0.21 
   0   2  -1    2.51    0.27 
   0   2  -1    2.36    0.26 
   0   2   1    2.87    0.32 
   0   2   1    2.27    0.26 
   0   2  -1    2.97    0.34 
   0   2   1    1.94    0.27 
   0   2   1    1.60    0.47 
   0   2  -1    2.92    0.37 
   0   2  -1    2.16    0.24 
   0   2  -1    1.82    0.24 
   0   2   1    2.50    0.26 
   0   2  -1    1.19    0.63 
   0   2   1    2.28    0.26 
   0   2   1    2.18    0.23 
   0   2   1    2.68    0.26 
   0   2  -1    2.35    0.25 
   0   2  -1    2.05    0.24 
   0   2   1    2.46    0.22 
   0   2   1    2.21    0.20 
   1  -2   1  120.63    4.25 
  -1  -2  -1  123.53    4.55 
   1  -2   1  120.22    4.47 
   1  -2   1  120.47    4.38 
  -1  -2  -1  127.52    4.41 
  -1  -2  -1  125.46    4.52 
   1  -2   1  121.07    4.23 
   1  -2   1  122.36    4.37 
  -1  -2  -1  119.36    4.35 
  -1  -2  -1  121.72    4.55 
   1  -2   1  120.81    4.34 
  -1  -2  -1  119.18    4.26 
  -1  -2  -1  122.91    4.51 
  -1  -2  -1  118.86    4.27 
   1  -2   1  119.12    4.45 
  -1  -2  -1  126.95    4.43 
  -1  -2  -1  117.45    4.40 
  -1  -2  -1  120.11    4.30 
   1  -2   1  117.18    4.29 
  -1  -2  -1  124.22    4.54 
  -1  -2  -1  128.80    4.37 
   1  -2   1  120.89    4.25 
  -1  -2  -1  127.27    4.47 
   1  -2   1  117.51    4.39 
  -1  -2  -1  121.21    4.38 
   1  -2   1  117.02    4.29 
  -1  -2  -1  123.10    4.37 
   1  -2   1  120.35    4.29 
  -1  -2  -1  117.01    4.37 
   1  -2   1  119.44    4.37 
  -1  -2  -1  120.25    4.36 
   1  -2   1  102.79    4.25 
  -1  -2  -1  123.26    4.36 
   1  -2   1  120.17    4.35 
  -1  -2  -1  119.58    4.36 
   1  -2   1  121.30    4.22 
   1  -2   1  126.37    4.37 
   1  -2   1  117.62    4.21 
  -1  -2  -1  120.33    4.28 
  -1  -2  -1  119.11    4.35 
   1  -2   1  118.92    4.29 
  -1  -2  -1  119.04    4.37 
  -1  -2  -1  122.78    4.34 
   1  -2   1  124.24    4.30 
  -1  -2  -1  123.59    4.29 
  -1  -2  -1  123.02    4.47 
  -1  -2  -1  120.48    4.27 
   1  -2   1  118.60    4.49 
  -1  -2  -1  123.34    4.39 
  -1  -2  -1  124.50    4.55 
  -1  -2  -1  127.16    4.40 
  -1  -2  -1  118.63    4.54 
   1  -2   1  120.71    4.60 
   1  -2   1  122.14    4.32 
  -1  -2  -1  119.30    4.31 
  -1  -2  -1  116.96    4.32 
   1  -2   1  119.18    4.33 
  -1  -2  -1  123.06    4.38 
  -1  -2  -1  119.38    4.42 
  -1  -2  -1  124.64    4.35 
   1   2   1  118.18    4.37 
  -1   2  -1  121.42    4.37 
   1   2   1  113.91    4.29 
   1   2   1  118.68    4.28 
   1   2   1  125.25    4.38 
   1   2   1  119.14    4.32 
   1   2   1  123.59    4.42 
  -1   2  -1  124.27    4.35 
   1   2   1  122.56    4.41 
  -1   2  -1  118.46    4.38 
   1   2   1  125.36    4.38 
   1   2   1  117.44    4.37 
   1   2   1  119.96    4.38 
   1   2   1  118.48    4.45 
  -1   2  -1  120.37    4.37 
   1   2   1  123.02    4.36 
  -1   2  -1  118.62    4.29 
  -1   2  -1  117.76    4.20 
   1   2   1  119.86    4.39 
  -1   2  -1  117.68    4.31 
  -1   2  -1  119.56    4.32 
   1   2   1  124.66    4.31 
   1   2   1  118.24    4.27 
  -1   2  -1  118.57    4.31 
   1   2   1  119.03    4.53 
  -1   2  -1  117.58    4.24 
   1   2   1  117.97    4.41 
  -1   2  -1  119.06    4.31 
  -1   2  -1  121.74    4.33 
   1   2   1  121.73    4.27 
  -1   2  -1  121.69    4.36 
   1   2   1  118.24    4.48 
   1   2   1  124.72    4.42 
   1   2   1  118.63    4.47 
  -1   2  -1  122.18    4.28 
  -1   2  -1  138.52    5.13 
  -1   2  -1  125.38    4.71 
  -1   2  -1  124.11    4.48 
   1   2   1  120.32    4.29 
  -1   2  -1  114.84    4.33 
   1   2   1  123.42    4.33 
   1   2   1  123.02    4.37 
   1   2   1  121.33    4.44 
   1   2   1  119.51    4.33 
  -1   2  -1  109.77    4.64 
  -1   2  -1  122.51    4.53 
  -1   2  -1  120.30    4.30 
  -1   2  -1  120.63    4.35 
  -1   2  -1  118.56    4.30 
   1   2   1  120.11    4.28 
  -1   2  -1  121.28    4.48 
  -1   2  -1  121.82    4.33 
   1   2   1  119.22    4.35 
   1   2   1  119.61    4.58 
  -1   2  -1  123.28    4.53 
   1   2   1  122.12    4.37 
  -1   2  -1  118.42    4.25 
   1   2   1  126.66    4.39 
  -1   2  -1  117.29    4.35 
  -1   2  -1  116.83    4.29 
  -1   2  -1  122.21    4.33 
   1   2   1  122.14    4.52 
   1   2   1  121.97    4.36 
  -1   2  -1  119.71    4.21 
  -1   2  -1  123.48    4.42 
  -1   2  -1  124.82    4.31 
  -1   2  -1  119.00    4.29 
   1   2   1  123.28    4.50 
  -1   2  -1  120.84    4.30 
   1   2   1  116.77    4.38 
  -2  -2  -1   11.33    0.68 
   2  -2   1   10.79    0.64 
   2  -2   1   11.31    0.49 
  -2  -2  -1   11.53    0.64 
  -2  -2  -1   10.79    0.52 
   2  -2   1   10.96    0.62 
  -2  -2  -1   11.20    0.60 
  -2  -2  -1   10.00    0.60 
  -2  -2  -1   12.05    0.73 
  -2  -2  -1   10.76    0.82 
  -2  -2  -1   10.72    0.59 
   2  -2   1   10.61    0.78 
  -2  -2  -1   11.24    0.83 
   2  -2   1   11.74    0.63 
  -2  -2  -1   11.29    0.83 
   2  -2   1   10.87    0.56 
   2  -2   1   11.32    0.54 
  -2  -2  -1   10.72    0.61 
  -2  -2  -1   11.55    0.67 
  -2  -2  -1   11.34    0.83 
   2  -2   1   10.36    0.73 
   2  -2   1   11.52    0.57 
  -2  -2  -1   10.58    0.60 
  -2  -2  -1   11.38    0.65 
  -2  -2  -1   11.13    0.62 
  -2  -2  -1   11.05    0.60 
   2  -2   1   10.72    0.82 
  -2  -2  -1   10.60    0.66 
   2  -2   1   11.36    0.53 
  -2  -2  -1   11.01    0.57 
  -2  -2  -1   10.63    0.59 
  -2  -2  -1   10.45    0.80 
  -2  -2  -1    9.87    0.58 
  -2  -2  -1    9.66    0.62 
  -2  -2  -1   10.56    0.58 
  -2  -2  -1   10.71    0.70 
  -2  -2  -1   11.31    0.60 
   2  -2   1   10.99    0.60 
  -2  -2  -1   11.22    0.59 
   2  -2   1   10.85    0.49 
   2  -2   1   10.18    0.60 
   2  -2   1   10.33    0.67 
   2  -2   1   11.32    0.63 
  -2  -2  -1   11.28    0.67 
  -2  -2  -1   10.29    0.63 
  -2  -2  -1   11.01    0.60 
  -2  -2  -1    9.29    0.64 
   2  -2   1   11.25    0.58 
  -2  -2  -1   11.90    0.65 
   2  -2   1   10.55    0.62 
   2  -2   1   10.96    0.50 
  -2  -2  -1   10.81    0.68 
   2  -2   1   11.66    0.64 
  -2   2  -1   10.35    0.65 
   2   2   1   10.72    0.62 
  -2   2  -1   11.25    0.87 
  -2   2  -1   11.07    0.67 
   2   2   1   11.48    0.64 
   2   2   1   11.74    0.74 
   2   2   1   10.97    0.59 
   2   2   1   11.14    0.63 
  -2   2  -1   10.74    0.79 
  -2   2  -1   11.20    0.54 
  -2   2  -1   10.18    0.57 
  -2   2  -1   11.70    0.58 
   2   2   1   11.24    0.60 
  -2   2  -1   11.85    0.62 
   2   2   1   11.29    0.71 
  -2   2  -1   11.24    0.51 
  -2   2  -1   11.18    0.61 
  -2   2  -1   11.06    0.67 
   2   2   1   10.99    0.60 
  -2   2  -1   11.15    0.49 
  -2   2  -1   10.77    0.59 
  -2   2  -1   10.72    0.63 
   2   2   1   11.34    0.62 
  -2   2  -1   10.51    0.62 
   2   2   1   11.01    0.65 
   2   2   1   10.85    0.63 
  -2   2  -1   10.60    0.90 
  -2   2  -1   11.22    0.56 
   2   2   1   11.10    0.65 
   2   2   1   10.54    0.63 
   2   2   1   10.94    0.62 
   2   2   1   10.31    0.71 
  -2   2  -1   10.99    0.64 
  -2   2  -1   11.38    0.60 
   2   2   1   11.19    0.59 
   2   2   1   10.92    0.61 
  -2   2  -1   10.53    0.48 
  -2   2  -1   11.06    0.49 
  -2   2  -1   10.75    0.67 
   2   2   1   11.21    0.63 
   2   2   1   10.59    0.68 
  -2   2  -1   11.18    0.59 
   2   2   1   10.75    0.57 
  -2   2  -1   11.40    0.60 
   2   2   1   10.98    0.60 
  -2   2  -1   10.90    0.53 
   2   2   1   11.73    0.67 
  -2   2  -1   11.32    0.83 
   2   2   1   10.33    0.67 
  -2   2  -1   11.46    0.59 
   2   2   1   11.67    0.63 
   2   2   1   11.41    0.71 
  -2   2  -1   10.37    0.59 
   2   2   1   10.15    0.62 
   2   2   1   10.71    0.82 
  -2   2  -1   12.13    0.77 
   2   2   1   11.06    0.58 
  -2   2  -1   10.05    0.50 
   3  -2   1    0.29    0.15 
  -3  -2  -1    0.10    0.29 
   3  -2   1    0.83    0.27 
   3  -2   1    0.25    0.10 
   3  -2   1    0.10    0.14 
  -3  -2  -1    0.57    0.28 
  -3  -2  -1    0.10    0.15 
  -3  -2  -1    0.34    0.24 
  -3  -2  -1    0.06    0.28 
  -3  -2  -1    0.77    0.26 
  -3  -2  -1    0.08    0.22 
   3  -2   1    0.27    0.18 
  -3  -2  -1   -0.03    0.15 
  -3  -2  -1    0.58    0.30 
  -3  -2  -1    0.26    0.26 
  -3  -2  -1   -0.15    0.26 
  -3  -2  -1    0.27    0.23 
   3  -2   1    0.58    0.30 
   3  -2   1    0.09    0.20 
  -3  -2  -1    0.01    0.18 
  -3  -2  -1    0.09    0.24 
   3  -2   1    0.33    0.21 
  -3  -2  -1    0.32    0.32 
  -3  -2  -1    0.15    0.21 
   3  -2   1    0.07    0.19 
   3  -2   1    0.23    0.17 
   3  -2   1    0.12    0.20 
   3  -2   1    0.30    0.22 
   3  -2   1    0.13    0.18 
   3  -2   1    0.35    0.20 
   3  -2   1    0.01    0.18 
   3  -2   1    0.67    0.16 
   3  -2   1    0.10    0.22 
  -3  -2  -1    0.01    0.16 
  -3  -2  -1    0.24    0.22 
  -3  -2  -1    0.33    0.24 
   3  -2   1    0.16    0.27 
  -3  -2  -1   -0.13    0.16 
  -3  -2  -1    0.04    0.21 
  -3  -2  -1    0.16    0.24 
  -3   2  -1    0.26    0.25 
  -3   2  -1    0.66    0.24 
   3   2   1    0.52    0.22 
   3   2   1    0.08    0.18 
   3   2   1    0.51    0.24 
  -3   2  -1    0.09    0.22 
   3   2   1    0.04    0.18 
   3   2   1    0.08    0.21 
  -3   2  -1    0.11    0.17 
  -3   2  -1    0.53    0.12 
  -3   2  -1    0.04    0.17 
  -3   2  -1    0.18    0.15 
   3   2   1    0.32    0.26 
  -3   2  -1    0.34    0.19 
   3   2   1   -0.06    0.18 
  -3   2  -1   -0.08    0.30 
   3   2   1    0.05    0.15 
  -3   2  -1    0.37    0.18 
  -3   2  -1    0.28    0.15 
  -3   2  -1    0.07    0.23 
   3   2   1    0.05    0.20 
  -3   2  -1    0.22    0.25 
  -3   2  -1    0.05    0.30 
   3   2   1    0.34    0.19 
   3   2   1    0.01    0.20 
  -3   2  -1    0.22    0.38 
   3   2   1    0.03    0.14 
  -3   2  -1    0.41    0.28 
   3   2   1    0.61    0.25 
   3   2   1    0.14    0.19 
  -3   2  -1    0.26    0.10 
   3   2   1    0.04    0.20 
  -3   2  -1    0.23    0.22 
  -3   2  -1    0.24    0.17 
   3   2   1    0.12    0.23 
   3   2   1    0.08    0.25 
  -3   2  -1    0.13    0.15 
  -3   2  -1   -0.06    0.18 
  -3   2  -1    0.30    0.21 
   3   2   1    0.04    0.20 
  -3   2  -1    0.39    0.12 
   4  -2   1    7.95    0.67 
   4  -2   1    7.56    0.48 
   4  -2   1    8.04    0.67 
  -4  -2  -1    7.90    0.66 
  -4  -2  -1    8.12    0.82 
   4  -2   1    7.62    0.63 
   4  -2   1    7.98    0.62 
  -4  -2  -1    7.83    0.72 
  -4  -2  -1    5.49    0.58 
  -4  -2  -1    6.85    0.65 
  -4  -2  -1    7.00    0.65 
   4  -2   1    7.43    0.61 
  -4  -2  -1    6.79    1.02 
  -4  -2  -1    8.67    0.85 
  -4  -2  -1    6.77    0.49 
  -4  -2  -1    7.47    0.71 
  -4  -2  -1    7.39    0.59 
  -4  -2  -1    7.99    0.73 
   4  -2   1    7.20    0.36 
   4  -2   1    6.69    0.67 
  -4  -2  -1    7.60    1.00 
   4  -2   1    5.70    0.74 
   4  -2   1    7.75    0.47 
   4  -2   1    7.17    0.49 
  -4  -2  -1    8.14    0.99 
   4  -2   1    6.82    0.83 
   4  -2   1    7.29    0.64 
   4  -2   1    7.66    0.69 
   4  -2   1    7.88    0.37 
  -4  -2  -1    7.37    0.84 
  -4  -2  -1    7.20    0.64 
  -4  -2  -1    6.84    0.73 
   4  -2   1    8.17    0.64 
  -4  -2  -1    5.75    0.70 
   4   2   1    6.64    0.68 
  -4   2  -1    7.17    0.66 
   4   2   1    7.76    0.65 
  -4   2  -1    7.71    0.47 
  -4   2  -1    7.73    0.35 
  -4   2  -1    6.97    0.48 
   4   2   1    7.72    0.62 
   4   2   1    8.30    0.65 
   4   2   1    8.59    0.67 
   4   2   1    7.95    0.64 
   4   2   1    7.02    0.51 
  -4   2  -1    7.22    0.59 
   4   2   1    6.88    0.65 
  -4   2  -1    7.25    0.56 
  -4   2  -1    7.80    0.39 
  -4   2  -1    7.27    0.50 
  -4   2  -1    8.52    0.60 
   4   2   1    7.19    0.81 
  -4   2  -1    7.65    0.74 
  -4   2  -1    6.70    1.00 
  -4   2  -1    7.73    0.77 
   4   2   1    6.47    0.69 
  -4   2  -1    7.28    0.41 
   4   2   1    7.33    0.77 
  -4   2  -1    7.38    0.49 
  -4   2  -1    7.86    1.12 
   4   2   1    7.28    0.61 
  -4   2  -1    8.20    0.74 
  -4   2  -1    6.53    0.55 
   4   2   1    6.83    0.67 
   4   2   1    7.39    0.57 
   4   2   1    6.69    0.57 
  -4   2  -1    6.79    0.74 
  -4   2  -1    7.48    0.59 
  -4   2  -1    8.18    1.07 
   4   2   1    7.48    0.48 
  -4   2  -1    7.35    0.53 
  -5  -2  -1   12.31    0.91 
   5  -2   1   12.17    0.91 
   5  -2   1   12.51    0.92 
  -5  -2  -1   11.60    0.92 
   5  -2   1   14.24    1.14 
  -5  -2  -1   11.98    1.05 
  -5  -2  -1   10.66    0.97 
   5  -2   1   12.22    0.85 
   5  -2   1   11.03    0.85 
  -5  -2  -1   10.93    0.87 
  -5  -2  -1   12.33    1.44 
  -5  -2  -1   11.44    0.96 
   5  -2   1   11.12    0.88 
  -5  -2  -1   11.25    0.87 
  -5  -2  -1   11.32    0.64 
  -5  -2  -1   12.13    0.99 
   5  -2   1   12.10    0.97 
   5  -2   1   12.09    0.61 
  -5  -2  -1   12.04    1.00 
   5  -2   1   11.70    0.52 
   5  -2   1   11.55    0.63 
  -5  -2  -1   11.32    0.83 
  -5  -2  -1   11.76    1.33 
   5  -2   1   11.86    1.04 
  -5  -2  -1   11.18    0.81 
  -5  -2  -1   12.15    1.01 
  -5  -2  -1   11.72    0.82 
  -5  -2  -1   11.17    0.84 
   5  -2   1   12.24    0.91 
   5  -2   1   11.01    0.88 
   5  -2   1   11.09    0.86 
  -5  -2  -1   10.40    1.30 
  -5   2  -1   10.85    0.75 
   5   2   1   10.62    0.85 
  -5   2  -1   12.55    1.35 
   5   2   1   12.11    0.92 
   5   2   1   10.89    0.90 
  -5   2  -1   10.39    0.62 
  -5   2  -1   12.37    1.43 
   5   2   1   11.96    0.84 
   5   2   1   11.66    0.92 
   5   2   1   11.51    0.84 
   5   2   1   11.58    0.63 
   5   2   1   11.73    0.70 
   5   2   1   11.64    0.93 
   5   2   1   11.70    0.89 
  -5   2  -1   10.09    0.93 
   5   2   1   11.17    0.82 
  -5   2  -1   11.13    0.82 
  -5   2  -1   11.45    0.55 
  -5   2  -1   11.28    0.94 
  -5   2  -1   12.00    0.75 
   5   2   1   12.62    0.82 
   5   2   1   12.82    1.06 
  -5   2  -1   11.17    1.48 
  -5   2  -1   11.26    0.76 
   5   2   1   11.20    0.75 
  -5   2  -1   11.24    0.91 
   5   2   1   11.53    1.17 
  -5   2  -1   10.97    0.57 
   5   2   1   11.81    0.96 
   5   2   1   12.47    0.88 
  -5   2  -1   12.52    0.99 
  -5   2  -1   11.58    1.05 
  -5   2  -1   12.14    0.80 
  -5   2  -1   11.70    0.62 
  -6  -2  -1   41.40    2.15 
   6  -2   1   44.85    2.35 
  -6  -2  -1   42.04    2.05 
  -6  -2  -1   40.93    2.89 
  -6  -2  -1   46.32    2.15 
   6  -2   1   45.57    2.11 
  -6  -2  -1   42.52    2.42 
  -6  -2  -1   42.72    2.94 
   6  -2   1   44.10    2.45 
   6  -2   1   45.20    2.22 
   6  -2   1   45.92    2.15 
  -6  -2  -1   44.57    2.09 
  -6  -2  -1   43.89    2.16 
   6  -2   1   46.68    2.21 
  -6  -2  -1   44.52    2.14 
   6  -2   1   46.09    2.17 
  -6  -2  -1   42.55    2.21 
  -6  -2  -1   44.23    2.29 
  -6  -2  -1   45.80    2.31 
   6  -2   1   41.88    2.19 
   6  -2   1   41.59    1.74 
  -6  -2  -1   42.96    1.76 
  -6  -2  -1   47.80    2.35 
  -6  -2  -1   46.80    2.36 
  -6  -2  -1   46.90    2.09 
   6  -2   1   46.64    2.25 
  -6  -2  -1   42.73    2.02 
  -6  -2  -1   45.19    3.01 
   6  -2   1   46.59    2.50 
   6   2   1   47.11    2.20 
  -6   2  -1   45.86    1.77 
  -6   2  -1   49.03    3.13 
  -6   2  -1   42.25    2.28 
   6   2   1   41.17    2.17 
  -6   2  -1   42.41    2.02 
  -6   2  -1   43.94    2.03 
   6   2   1   43.57    2.10 
   6   2   1   43.37    2.44 
   6   2   1   44.26    2.34 
  -6   2  -1   43.14    2.95 
  -6   2  -1   43.34    2.21 
  -6   2  -1   41.87    2.24 
   6   2   1   43.94    1.94 
   6   2   1   42.87    2.05 
  -6   2  -1   43.15    1.95 
  -6   2  -1   43.28    1.69 
   6   2   1   45.92    2.15 
   6   2   1   44.14    2.18 
  -6   2  -1   44.34    1.88 
   6   2   1   45.20    2.23 
   6   2   1   43.05    2.14 
  -6   2  -1   43.60    3.16 
  -6   2  -1   45.28    1.82 
   6   2   1   42.81    2.40 
   6   2   1   44.04    2.23 
  -6   2  -1   47.90    2.15 
   6   2   1   45.44    1.88 
  -6   2  -1   43.36    2.93 
  -6   2  -1   43.18    2.28 
  -6   2  -1   45.88    2.45 
   6   2   1   44.03    2.09 
   6   2   1   43.40    2.03 
  -7  -2  -1   75.67    3.53 
  -7  -2  -1   78.77    4.57 
   7  -2   1   82.18    3.45 
   7  -2   1   77.68    3.39 
   7  -2   1   76.03    3.47 
  -7  -2  -1   79.13    4.58 
   7  -2   1   77.14    3.42 
   7  -2   1   76.84    3.52 
  -7  -2  -1   74.97    3.48 
  -7  -2  -1   78.85    3.64 
  -7  -2  -1   76.48    3.26 
  -7  -2  -1   76.36    3.38 
  -7  -2  -1   78.19    3.63 
  -7  -2  -1   75.98    4.52 
   7  -2   1   76.01    3.53 
  -7  -2  -1   81.83    3.34 
  -7  -2  -1   75.70    3.37 
   7  -2   1   74.40    3.50 
  -7  -2  -1   76.94    3.39 
  -7  -2  -1   80.34    3.47 
  -7  -2  -1   77.07    3.82 
   7  -2   1   74.16    3.78 
  -7  -2  -1   77.81    3.29 
  -7  -2  -1   73.32    3.62 
   7  -2   1   78.42    3.73 
   7   2   1   77.85    3.50 
   7   2   1   77.75    3.78 
  -7   2  -1   78.27    4.80 
  -7   2  -1   77.79    3.06 
   7   2   1   79.80    3.85 
  -7   2  -1   77.43    3.53 
  -7   2  -1   78.51    3.17 
  -7   2  -1   81.19    3.33 
  -7   2  -1   77.21    3.31 
   7   2   1   78.49    3.47 
   7   2   1   75.72    3.35 
   7   2   1   82.84    3.35 
   7   2   1   79.03    3.15 
   7   2   1   77.25    3.45 
  -7   2  -1   75.80    3.61 
   7   2   1   77.27    3.54 
   7   2   1   80.25    3.37 
   7   2   1   76.24    3.50 
  -7   2  -1   78.31    4.56 
  -7   2  -1   79.12    3.79 
  -7   2  -1   80.69    3.42 
  -7   2  -1   74.07    4.45 
   7   2   1   81.17    3.32 
   7   2   1   78.89    3.55 
  -7   2  -1   79.16    4.56 
   7   2   1   80.82    3.42 
  -7   2  -1   74.98    3.61 
  -7   2  -1   80.65    3.61 
   7   2   1   76.92    3.69 
  -7   2  -1   74.03    3.03 
   8  -2   1   13.06    1.68 
   8  -2   1   14.63    1.23 
  -8  -2  -1   14.99    1.12 
  -8  -2  -1   14.57    1.14 
  -8  -2  -1   13.62    1.44 
  -8  -2  -1   14.62    1.68 
  -8  -2  -1   16.34    1.25 
   8  -2   1   13.70    1.42 
  -8  -2  -1   15.60    1.57 
   8  -2   1   15.24    1.45 
  -8  -2  -1   15.43    2.08 
  -8  -2  -1   13.89    2.41 
   8  -2   1   15.40    1.47 
   8  -2   1   13.39    1.46 
  -8  -2  -1   14.58    1.58 
  -8  -2  -1   15.14    2.31 
   8  -2   1   11.24    1.43 
  -8  -2  -1   14.32    2.14 
  -8  -2  -1   15.83    1.30 
   8  -2   1   13.18    1.31 
  -8  -2  -1   13.75    1.41 
  -8  -2  -1   14.11    1.33 
  -8  -2  -1   10.87    1.36 
  -8  -2  -1   15.02    1.25 
   8   2   1   16.67    1.35 
   8   2   1   15.40    1.78 
   8   2   1   14.68    1.32 
  -8   2  -1   16.02    2.57 
   8   2   1   14.28    1.41 
   8   2   1   18.48    1.67 
  -8   2  -1   16.01    1.66 
   8   2   1   15.19    1.33 
  -8   2  -1   14.74    1.52 
  -8   2  -1   15.64    2.37 
  -8   2  -1   15.96    1.21 
  -8   2  -1   17.41    1.51 
   8   2   1   17.60    1.65 
   8   2   1   15.95    1.25 
  -8   2  -1   15.57    2.03 
  -8   2  -1   15.44    2.10 
   8   2   1   13.61    1.56 
  -8   2  -1   15.39    1.54 
   8   2   1   14.66    1.14 
  -8   2  -1   13.83    1.50 
   8   2   1   12.79    1.38 
   8   2   1   12.59    1.58 
  -8   2  -1   14.11    1.12 
  -8   2  -1   13.70    1.45 
   8   2   1   14.45    1.12 
  -8   2  -1   13.26    1.28 
   8   2   1   15.21    1.41 
  -8   2  -1   14.26    1.14 
  -9  -2  -1   23.21    2.70 
  -9  -2  -1   25.05    1.73 
   9  -2   1   22.95    1.77 
  -9  -2  -1   21.15    1.62 
   9  -2   1   21.63    2.06 
  -9  -2  -1   25.09    1.92 
  -9  -2  -1   23.91    1.58 
  -9  -2  -1   23.87    1.72 
  -9  -2  -1   26.49    2.27 
   9  -2   1   26.22    1.95 
   9  -2   1   24.80    2.01 
  -9  -2  -1   25.99    1.89 
  -9  -2  -1   25.35    2.82 
  -9  -2  -1   24.88    2.78 
  -9  -2  -1   26.17    1.98 
   9  -2   1   23.79    1.78 
  -9  -2  -1   24.18    2.85 
  -9  -2  -1   24.71    3.04 
   9  -2   1   23.21    1.84 
  -9  -2  -1   25.27    1.98 
  -9  -2  -1   26.08    1.59 
  -9  -2  -1   26.01    1.75 
   9  -2   1   25.19    1.79 
  -9  -2  -1   26.41    2.04 
  -9   2  -1   25.76    2.13 
  -9   2  -1   22.07    1.83 
   9   2   1   26.75    1.94 
   9   2   1   24.67    1.86 
  -9   2  -1   24.36    1.97 
   9   2   1   22.74    1.76 
  -9   2  -1   23.63    3.05 
   9   2   1   24.63    2.12 
  -9   2  -1   26.61    2.87 
  -9   2  -1   24.74    2.89 
   9   2   1   24.49    1.68 
  -9   2  -1   25.21    2.84 
  -9   2  -1   25.58    1.78 
   9   2   1   28.02    2.08 
  -9   2  -1   27.62    2.08 
  -9   2  -1   25.74    2.81 
   9   2   1   24.14    1.82 
   9   2   1   22.78    1.69 
   9   2   1   21.00    1.75 
  -9   2  -1   25.59    1.91 
  -9   2  -1   23.76    1.57 
 -10  -2  -1    4.26    1.71 
 -10  -2  -1    4.96    1.17 
  10  -2   1    4.06    0.98 
 -10  -2  -1    2.01    0.92 
 -10  -2  -1    3.23    0.83 
 -10  -2  -1    2.91    1.06 
 -10  -2  -1    2.70    0.95 
  10  -2   1    4.61    1.13 
 -10  -2  -1    2.03    1.54 
  10  -2   1    3.22    1.13 
 -10  -2  -1    3.33    1.03 
  10  -2   1    2.96    0.89 
 -10  -2  -1    3.50    1.46 
 -10  -2  -1    3.55    0.87 
  10  -2   1    2.74    0.84 
 -10  -2  -1    5.79    1.81 
 -10  -2  -1    3.85    1.18 
  10  -2   1    2.59    0.86 
  10  -2   1    1.62    0.88 
 -10  -2  -1    2.40    0.84 
 -10   2  -1    4.40    1.10 
 -10   2  -1    4.11    1.57 
 -10   2  -1    2.55    0.95 
 -10   2  -1    3.11    1.48 
  10   2   1    3.88    0.99 
 -10   2  -1    3.83    1.77 
  10   2   1    4.09    1.00 
 -10   2  -1    4.24    1.27 
  10   2   1    4.58    1.02 
 -10   2  -1    3.52    0.99 
 -10   2  -1    3.79    1.73 
  10   2   1    1.60    0.82 
  10   2   1    7.30    1.24 
 -10   2  -1    3.45    0.97 
  10   2   1    4.78    0.95 
 -10   2  -1    2.28    0.80 
  10   2   1    2.51    1.01 
 -10   2  -1    1.80    1.34 
 -10  -3   1   27.60    2.51 
 -10  -3   1   27.95    2.05 
  10  -3  -1   29.68    2.16 
  10   3  -1   26.36    2.13 
 -10   3   1   26.94    2.44 
 -10   3   1   26.02    3.46 
   9  -3  -1   24.77    1.74 
  -9  -3   1   22.24    1.74 
  -9  -3   1   21.57    2.62 
  -9  -3   1   20.98    2.67 
   9  -3  -1   20.28    1.63 
   9  -3  -1   20.48    1.71 
   9  -3  -1   24.92    1.99 
  -9  -3   1   22.50    2.06 
  -9  -3   1   26.22    1.60 
   9  -3  -1   23.77    2.02 
  -9  -3   1   19.73    2.47 
  -9  -3   1   19.36    1.81 
  -9  -3   1   21.57    2.66 
  -9  -3   1   22.14    1.94 
  -9  -3   1   19.71    1.57 
  -9  -3   1   23.56    1.83 
   9  -3  -1   20.11    1.69 
  -9  -3   1   20.59    1.91 
  -9  -3   1   20.99    1.66 
  -9  -3   1   24.95    1.73 
  -9  -3   1   22.50    1.80 
  -9  -3   1   23.92    1.56 
  -9   3   1   22.62    1.96 
   9   3  -1   22.36    1.77 
  -9   3   1   21.75    1.83 
   9   3  -1   25.51    2.11 
  -9   3   1   20.34    2.61 
   9   3  -1   20.42    1.74 
  -9   3   1   24.42    3.00 
  -9   3   1   17.82    1.86 
   9   3  -1   21.47    1.58 
  -9   3   1   22.97    2.68 
   9   3  -1   25.10    1.57 
   9   3  -1   24.70    1.71 
   9   3  -1   23.12    1.80 
  -9   3   1   23.37    1.67 
   9   3  -1   22.91    1.60 
   9   3  -1   24.33    1.78 
  -9   3   1   21.55    1.96 
  -9   3   1   24.02    2.75 
   9   3  -1   19.75    1.65 
   9   3  -1   23.90    1.85 
  -9   3   1   23.82    2.64 
  -9   3   1   23.04    1.85 
  -8  -3   1   16.17    1.46 
  -8  -3   1   13.48    1.42 
   8  -3  -1   16.17    1.33 
   8  -3  -1   13.73    1.40 
  -8  -3   1   16.08    1.21 
  -8  -3   1   17.16    1.58 
  -8  -3   1   15.73    2.14 
  -8  -3   1   15.98    1.25 
  -8  -3   1   16.14    1.21 
  -8  -3   1   14.47    1.36 
  -8  -3   1   16.01    2.12 
  -8  -3   1   14.20    1.60 
  -8  -3   1   17.76    1.56 
  -8  -3   1   15.87    1.62 
  -8  -3   1   16.18    1.71 
   8  -3  -1   16.63    1.78 
  -8  -3   1   17.90    1.35 
   8  -3  -1   13.88    1.42 
  -8  -3   1   16.69    2.37 
  -8  -3   1   12.59    2.05 
   8  -3  -1   15.79    1.43 
   8  -3  -1   17.85    1.43 
   8  -3  -1   15.60    1.45 
  -8  -3   1   17.21    1.31 
   8  -3  -1   17.55    1.37 
  -8   3   1   14.75    1.23 
   8   3  -1   14.69    1.53 
  -8   3   1   13.77    2.15 
   8   3  -1   16.41    1.59 
   8   3  -1   16.79    1.38 
   8   3  -1   16.77    1.35 
  -8   3   1   16.75    1.46 
  -8   3   1   16.54    1.46 
   8   3  -1   17.19    1.34 
   8   3  -1   16.05    1.15 
  -8   3   1   17.56    2.40 
  -8   3   1   16.66    1.48 
   8   3  -1   19.50    1.72 
   8   3  -1   18.52    1.30 
   8   3  -1   16.36    1.38 
  -8   3   1   16.91    2.23 
  -8   3   1   15.50    1.28 
  -8   3   1   15.68    2.27 
   8   3  -1   16.55    1.25 
  -8   3   1   14.64    1.59 
   8   3  -1   16.64    1.37 
  -8   3   1   15.32    1.74 
   8   3  -1   15.23    1.17 
   8   3  -1   12.97    1.40 
   8   3  -1   15.28    1.79 
  -8   3   1   14.90    2.27 
  -7  -3   1   22.82    1.55 
  -7  -3   1   26.14    1.87 
  -7  -3   1   25.24    1.46 
  -7  -3   1   26.30    2.36 
   7  -3  -1   25.17    1.71 
  -7  -3   1   22.66    2.22 
  -7  -3   1   23.46    1.74 
  -7  -3   1   24.11    1.52 
  -7  -3   1   23.97    1.76 
  -7  -3   1   24.30    1.46 
   7  -3  -1   22.51    1.73 
   7  -3  -1   24.03    1.56 
  -7  -3   1   22.05    2.20 
   7  -3  -1   24.00    1.61 
  -7  -3   1   23.30    1.53 
   7  -3  -1   24.41    1.68 
  -7  -3   1   24.77    1.73 
   7  -3  -1   21.51    1.54 
   7  -3  -1   22.78    1.49 
  -7  -3   1   22.26    1.55 
  -7  -3   1   24.21    1.48 
  -7  -3   1   26.33    1.65 
   7  -3  -1   27.12    1.51 
  -7  -3   1   22.62    1.42 
  -7  -3   1   24.24    1.72 
   7  -3  -1   23.00    1.56 
  -7  -3   1   24.47    2.30 
  -7   3   1   25.35    1.67 
   7   3  -1   22.88    1.77 
  -7   3   1   24.06    2.31 
  -7   3   1   26.90    2.61 
   7   3  -1   24.55    1.38 
   7   3  -1   25.69    1.56 
  -7   3   1   21.37    2.19 
   7   3  -1   24.36    1.56 
   7   3  -1   25.69    1.83 
   7   3  -1   22.68    1.56 
   7   3  -1   25.98    1.57 
  -7   3   1   23.81    1.75 
  -7   3   1   23.65    1.65 
  -7   3   1   24.20    1.29 
  -7   3   1   26.79    1.73 
   7   3  -1   23.43    1.43 
  -7   3   1   23.52    2.26 
   7   3  -1   22.59    1.55 
  -7   3   1   24.64    2.39 
   7   3  -1   23.18    1.38 
   7   3  -1   24.76    1.48 
   7   3  -1   24.39    1.49 
  -7   3   1   24.48    1.48 
   7   3  -1   25.25    1.63 
  -7   3   1   25.05    1.41 
   7   3  -1   21.47    1.57 
  -7   3   1   25.13    1.50 
   7   3  -1   24.27    1.49 
  -7   3   1   20.63    1.62 
   6  -3  -1  110.92    4.39 
  -6  -3   1  112.35    4.50 
  -6  -3   1  108.29    4.82 
   6  -3  -1  109.64    4.09 
  -6  -3   1  112.16    4.76 
  -6  -3   1  109.47    4.64 
   6  -3  -1  113.14    4.21 
  -6  -3   1  106.94    4.53 
  -6  -3   1  108.98    4.39 
  -6  -3   1  110.79    4.60 
  -6  -3   1  112.16    4.48 
  -6  -3   1  108.74    4.41 
  -6  -3   1  110.17    5.45 
   6  -3  -1  115.27    4.55 
   6  -3  -1  110.86    4.75 
   6  -3  -1  112.32    4.68 
  -6  -3   1  112.32    4.76 
  -6  -3   1  112.35    4.11 
  -6  -3   1  109.12    5.39 
  -6  -3   1  109.84    4.38 
  -6  -3   1  107.70    5.44 
  -6  -3   1  110.71    4.51 
  -6  -3   1  104.41    4.66 
   6  -3  -1  106.24    4.52 
   6  -3  -1  108.31    4.42 
   6  -3  -1  109.12    4.52 
  -6  -3   1  113.01    4.54 
   6  -3  -1  112.64    4.50 
  -6  -3   1  109.93    5.43 
   6   3  -1  110.48    4.57 
   6   3  -1  108.01    4.52 
  -6   3   1  114.60    4.60 
   6   3  -1  110.95    4.48 
   6   3  -1  110.10    4.55 
   6   3  -1  107.16    4.45 
   6   3  -1  109.19    4.46 
  -6   3   1  111.04    5.48 
   6   3  -1  109.09    4.44 
  -6   3   1  113.71    5.49 
  -6   3   1  110.44    4.60 
   6   3  -1  115.54    4.89 
  -6   3   1  114.28    4.42 
  -6   3   1  112.49    5.44 
   6   3  -1  116.00    4.45 
   6   3  -1  115.78    4.38 
  -6   3   1  108.74    3.99 
  -6   3   1  113.43    4.71 
  -6   3   1  109.27    4.15 
  -6   3   1  104.75    5.32 
   6   3  -1  113.35    4.48 
  -6   3   1  112.44    4.46 
   6   3  -1  116.47    4.36 
   6   3  -1  108.66    4.39 
  -6   3   1  113.63    4.77 
   6   3  -1  115.06    4.55 
  -6   3   1  118.17    4.68 
  -6   3   1  111.68    5.68 
  -6   3   1  109.66    4.07 
  -5  -3   1  175.11    6.74 
   5  -3  -1  174.74    6.38 
   5  -3  -1  172.93    6.18 
   5  -3  -1  175.48    6.47 
   5  -3  -1  176.38    6.43 
  -5  -3   1  165.49    6.32 
  -5  -3   1  164.61    6.48 
   5  -3  -1  171.63    6.46 
   5  -3  -1  174.74    6.17 
  -5  -3   1  163.27    7.24 
  -5  -3   1  171.45    6.64 
  -5  -3   1  173.85    6.41 
  -5  -3   1  168.12    6.54 
  -5  -3   1  170.68    7.27 
  -5  -3   1  165.01    6.64 
  -5  -3   1  166.40    6.46 
  -5  -3   1  173.25    7.26 
  -5  -3   1  168.44    6.44 
   5  -3  -1  174.76    6.67 
  -5  -3   1  165.80    6.67 
   5  -3  -1  164.86    6.31 
  -5  -3   1  169.80    6.56 
   5  -3  -1  172.24    6.48 
  -5  -3   1  169.49    6.18 
  -5  -3   1  172.81    6.43 
  -5  -3   1  170.57    6.44 
   5  -3  -1  176.19    6.60 
  -5  -3   1  169.85    6.48 
  -5  -3   1  174.65    7.32 
  -5  -3   1  172.30    6.38 
   5   3  -1  159.28    6.63 
  -5   3   1  167.32    6.23 
  -5   3   1  161.48    6.26 
   5   3  -1  171.41    6.47 
   5   3  -1  173.07    6.42 
   5   3  -1  169.97    6.46 
   5   3  -1  169.26    6.49 
  -5   3   1  177.28    6.68 
  -5   3   1  170.40    6.19 
   5   3  -1  170.26    6.32 
  -5   3   1  167.76    6.26 
  -5   3   1  166.36    7.21 
   5   3  -1  168.40    6.45 
  -5   3   1  171.35    7.33 
  -5   3   1  169.41    6.19 
   5   3  -1  177.33    6.40 
   5   3  -1  167.62    6.41 
  -5   3   1  167.76    6.42 
  -5   3   1  168.71    6.33 
  -5   3   1  176.70    6.63 
   5   3  -1  169.45    6.15 
  -5   3   1  169.99    6.92 
   5   3  -1  170.01    6.41 
  -5   3   1  169.40    6.49 
  -5   3   1  172.07    6.54 
   5   3  -1  173.83    6.77 
  -5   3   1  172.67    7.23 
  -5   3   1  166.93    5.97 
   5   3  -1  172.81    6.36 
   5   3  -1  174.56    6.46 
  -5   3   1  175.22    7.31 
   5   3  -1  173.47    6.43 
  -5   3   1  169.49    6.55 
   5   3  -1  169.31    6.39 
   4  -3  -1  134.46    4.97 
  -4  -3   1  133.77    5.24 
  -4  -3   1  139.73    5.74 
  -4  -3   1  132.10    5.23 
  -4  -3   1  136.45    5.01 
  -4  -3   1  133.15    4.89 
  -4  -3   1  138.16    5.24 
  -4  -3   1  131.46    5.11 
  -4  -3   1  128.71    5.66 
   4  -3  -1  137.16    5.14 
  -4  -3   1  135.38    5.03 
  -4  -3   1  138.65    5.14 
  -4  -3   1  129.11    5.13 
  -4  -3   1  132.49    5.05 
   4  -3  -1  133.19    5.18 
  -4  -3   1  136.43    5.07 
  -4  -3   1  136.62    5.30 
  -4  -3   1  131.40    5.12 
   4  -3  -1  130.45    5.00 
   4  -3  -1  134.62    4.87 
   4  -3  -1  134.63    5.05 
  -4  -3   1  136.71    5.70 
  -4  -3   1  132.32    4.94 
  -4  -3   1  129.35    5.03 
   4  -3  -1  139.78    5.05 
   4  -3  -1  131.58    5.16 
  -4  -3   1  135.97    5.09 
  -4  -3   1  135.86    5.67 
   4  -3  -1  133.77    4.83 
   4  -3  -1  136.28    5.04 
   4  -3  -1  134.38    4.93 
   4   3  -1  133.31    4.98 
  -4   3   1  131.45    4.76 
  -4   3   1  130.27    5.50 
  -4   3   1  133.16    4.93 
   4   3  -1  132.49    4.99 
  -4   3   1  133.52    5.65 
  -4   3   1  130.65    4.93 
  -4   3   1  126.07    4.74 
  -4   3   1  131.85    5.17 
   4   3  -1  136.05    5.02 
  -4   3   1  131.21    4.76 
   4   3  -1  129.78    5.04 
   4   3  -1  131.51    5.03 
  -4   3   1  134.67    5.07 
  -4   3   1  128.66    5.12 
   4   3  -1  131.54    4.86 
  -4   3   1  137.20    4.89 
  -4   3   1  131.02    4.89 
  -4   3   1  133.48    4.80 
  -4   3   1  130.98    4.79 
  -4   3   1  133.63    4.68 
   4   3  -1  134.98    5.02 
  -4   3   1  131.37    4.96 
  -4   3   1  124.59    4.85 
   4   3  -1  130.83    5.07 
  -4   3   1  137.18    5.20 
   4   3  -1  130.88    5.28 
   4   3  -1  129.56    5.03 
  -4   3   1  134.34    5.08 
   4   3  -1  130.14    5.00 
   4   3  -1  134.70    5.05 
   4   3  -1  133.45    5.04 
  -4   3   1  129.49    5.68 
   4   3  -1  125.64    5.20 
  -4   3   1  134.04    4.94 
   4   3  -1  136.35    5.05 
  -4   3   1  130.78    5.66 
  -4   3   1  133.54    4.87 
  -4   3   1  133.62    5.12 
  -3  -3   1  149.04    5.65 
  -3  -3   1  150.35    5.54 
   3  -3  -1  146.98    5.38 
   3  -3  -1  146.53    5.31 
   3  -3  -1  149.27    5.46 
  -3  -3   1  149.74    5.60 
  -3  -3   1  146.04    5.56 
  -3  -3   1  151.05    5.51 
  -3  -3   1  143.19    5.43 
   3  -3  -1  150.86    5.46 
  -3  -3   1  148.20    5.55 
   3  -3  -1  154.42    5.47 
  -3  -3   1  150.08    5.51 
  -3  -3   1  150.49    5.63 
   3  -3  -1  149.89    5.42 
   3  -3  -1  149.42    5.55 
   3  -3  -1  148.58    5.44 
  -3  -3   1  147.42    5.92 
  -3  -3   1  150.35    5.53 
  -3  -3   1  150.16    5.98 
  -3  -3   1  150.47    5.97 
   3  -3  -1  148.83    5.34 
   3  -3  -1  147.66    5.47 
  -3  -3   1  156.09    6.01 
   3  -3  -1  150.79    5.54 
  -3  -3   1  147.19    5.41 
  -3  -3   1  152.08    5.43 
   3  -3  -1  148.19    5.40 
  -3  -3   1  150.73    5.61 
  -3  -3   1  150.44    5.42 
   3  -3  -1  152.86    5.61 
  -3  -3   1  152.03    5.45 
  -3  -3   1  143.98    5.71 
  -3  -3   1  150.37    5.68 
  -3  -3   1  152.08    5.63 
  -3   3   1  142.89    5.24 
   3   3  -1  145.83    5.45 
  -3   3   1  134.74    5.34 
   3   3  -1  160.08    5.53 
  -3   3   1  135.81    5.48 
   3   3  -1  154.85    5.51 
   3   3  -1  152.25    5.48 
  -3   3   1  152.58    5.48 
   3   3  -1  150.12    5.49 
  -3   3   1  155.49    5.61 
  -3   3   1  150.17    5.93 
  -3   3   1  154.93    5.59 
  -3   3   1  147.69    5.38 
  -3   3   1  141.13    5.70 
  -3   3   1  149.52    5.98 
  -3   3   1  150.69    5.43 
   3   3  -1  144.70    5.64 
  -3   3   1  146.12    5.35 
  -3   3   1  146.82    5.45 
   3   3  -1  147.07    5.70 
  -3   3   1  141.67    5.40 
   3   3  -1  145.43    5.40 
   3   3  -1  148.59    5.51 
   3   3  -1  150.71    5.49 
  -3   3   1  152.20    5.96 
  -3   3   1  156.18    5.70 
   3   3  -1  148.91    5.44 
  -3   3   1  149.48    5.48 
  -3   3   1  148.05    5.37 
  -3   3   1  154.29    5.99 
  -3   3   1  151.92    5.59 
   3   3  -1  149.35    6.12 
  -3   3   1  150.97    5.35 
  -3   3   1  146.42    5.21 
  -3   3   1  143.61    5.42 
  -3   3   1  148.06    5.32 
  -3   3   1  145.79    5.56 
  -3   3   1  151.05    5.38 
   3   3  -1  151.06    5.51 
   3   3  -1  153.96    5.54 
  -3   3   1  141.11    5.48 
   3   3  -1  149.66    5.55 
   3   3  -1  150.05    5.47 
  -3   3   1  147.19    5.28 
  -3   3   1  152.00    5.46 
  -3   3   1  147.89    5.21 
   3   3  -1  148.68    5.38 
  -3   3   1  146.32    5.59 
  -2  -3   1   27.62    1.34 
   2  -3  -1   28.61    1.32 
  -2  -3   1   29.79    1.38 
  -2  -3   1   27.45    1.47 
   2  -3  -1   28.61    1.29 
  -2  -3   1   28.32    1.25 
  -2  -3   1   29.82    1.30 
   2  -3  -1   29.09    1.21 
   2  -3  -1   27.94    1.20 
  -2  -3   1   28.99    1.32 
  -2  -3   1   26.03    1.53 
  -2  -3   1   27.53    1.46 
  -2  -3   1   28.70    1.19 
   2  -3  -1   28.31    1.20 
   2  -3  -1   27.00    1.21 
  -2  -3   1   28.44    1.19 
  -2  -3   1   29.07    1.28 
   2  -3  -1   28.28    1.16 
  -2  -3   1   28.30    1.51 
  -2  -3   1   28.40    1.23 
   2  -3  -1   29.81    1.22 
  -2  -3   1   29.74    1.33 
   2  -3  -1   29.32    1.29 
  -2  -3   1   28.53    1.15 
  -2  -3   1   30.39    1.81 
  -2  -3   1   30.32    1.35 
   2  -3  -1   27.83    1.21 
  -2  -3   1   27.24    1.38 
   2  -3  -1   28.52    1.24 
  -2  -3   1   28.07    1.21 
  -2  -3   1   29.29    1.40 
   2  -3  -1   28.65    1.31 
  -2  -3   1   29.18    1.32 
  -2  -3   1   30.10    1.30 
  -2  -3   1   28.76    1.36 
   2  -3  -1   29.72    1.22 
  -2  -3   1   29.54    1.23 
   2  -3  -1   27.97    1.12 
  -2  -3   1   29.04    1.30 
  -2  -3   1   27.89    1.35 
   2  -3  -1   29.32    1.25 
  -2  -3   1   27.06    1.46 
   2  -3  -1   27.27    1.26 
   2  -3  -1   28.21    1.18 
   2  -3  -1   29.34    1.20 
  -2  -3   1   28.90    1.39 
   2  -3  -1   28.48    1.12 
  -2  -3   1   29.32    1.27 
  -2  -3   1   27.95    1.56 
  -2   3   1   28.26    1.11 
  -2   3   1   29.16    1.48 
  -2   3   1   28.43    1.11 
  -2   3   1   28.05    1.23 
  -2   3   1   29.82    1.28 
  -2   3   1   28.43    1.09 
   2   3  -1   26.55    1.30 
  -2   3   1   29.46    1.24 
  -2   3   1   28.58    1.26 
   2   3  -1   29.63    1.31 
   2   3  -1   29.44    1.29 
  -2   3   1   28.87    1.24 
  -2   3   1   27.96    1.12 
   2   3  -1   28.59    1.50 
  -2   3   1   30.62    1.19 
   2   3  -1   27.61    1.29 
  -2   3   1   30.17    1.32 
  -2   3   1   28.37    1.18 
   2   3  -1   29.04    1.25 
  -2   3   1   28.71    1.37 
  -2   3   1   27.58    1.26 
   2   3  -1   28.87    1.22 
   2   3  -1   29.38    1.70 
   2   3  -1   29.86    1.19 
   2   3  -1   29.50    1.30 
   2   3  -1   29.81    1.25 
  -2   3   1   29.61    1.16 
  -2   3   1   26.89    1.60 
   2   3  -1   28.65    1.31 
  -2   3   1   28.52    1.29 
  -2   3   1   29.73    1.27 
   2   3  -1   28.89    1.23 
  -2   3   1   28.10    1.14 
  -2   3   1   28.60    1.16 
   2   3  -1   28.94    1.22 
  -2   3   1   28.57    1.19 
   2   3  -1   27.54    1.24 
   2   3  -1   27.85    1.26 
  -2   3   1   29.78    1.16 
  -2   3   1   29.47    1.51 
  -2   3   1   28.25    1.47 
  -2   3   1   29.14    1.54 
   2   3  -1   29.67    1.21 
  -2   3   1   29.50    1.51 
  -2   3   1   28.39    1.18 
  -2   3   1   28.26    1.25 
  -2   3   1   27.94    1.15 
   2   3  -1   29.63    1.36 
  -2   3   1   26.96    1.17 
  -2   3   1   28.70    1.22 
   2   3  -1   29.15    1.35 
  -2   3   1   29.73    1.21 
  -2   3   1   27.97    1.20 
  -2   3   1   29.34    1.19 
  -2   3   1   29.58    1.48 
   2   3  -1   28.59    1.39 
   2   3  -1   28.14    1.31 
   2   3  -1   29.63    1.40 
  -1  -3   1   65.69    2.46 
   1  -3  -1   62.63    2.37 
  -1  -3   1   65.79    2.55 
  -1  -3   1   64.92    2.64 
   1  -3  -1   66.00    2.75 
  -1  -3   1   64.58    2.82 
  -1  -3   1   67.83    2.64 
   1  -3  -1   65.77    2.38 
  -1  -3   1   65.33    2.57 
  -1  -3   1   66.16    2.69 
   1  -3  -1   65.13    2.55 
   1  -3  -1   65.77    2.39 
  -1  -3   1   66.79    2.57 
   1  -3  -1   66.20    2.59 
  -1  -3   1   65.03    2.47 
   1  -3  -1   68.58    2.50 
  -1  -3   1   64.26    2.62 
  -1  -3   1   68.49    2.68 
   1  -3  -1   70.31    2.59 
   1  -3  -1   64.47    2.38 
  -1  -3   1   65.92    2.59 
  -1  -3   1   69.20    2.58 
   1  -3  -1   70.77    2.61 
   1  -3  -1   66.13    2.46 
   1  -3  -1   66.30    2.47 
  -1  -3   1   66.76    2.53 
   1  -3  -1   67.81    2.55 
  -1  -3   1   66.83    2.61 
  -1  -3   1   66.09    2.57 
  -1  -3   1   68.33    2.45 
  -1  -3   1   65.21    2.40 
  -1  -3   1   65.28    2.51 
  -1  -3   1   64.94    2.38 
   1  -3  -1   66.75    2.47 
  -1  -3   1   67.47    2.69 
  -1  -3   1   64.34    2.42 
  -1  -3   1   66.48    2.56 
  -1  -3   1   68.30    2.59 
  -1  -3   1   65.60    2.61 
  -1  -3   1   66.24    2.54 
  -1  -3   1   71.34    2.61 
  -1  -3   1   66.16    2.40 
  -1  -3   1   62.32    3.36 
   1  -3  -1   63.66    2.51 
   1  -3  -1   65.70    2.48 
   1  -3  -1   67.53    2.51 
  -1  -3   1   65.55    2.66 
   1  -3  -1   66.96    2.46 
  -1  -3   1   67.58    2.60 
  -1  -3   1   67.22    2.80 
  -1  -3   1   67.27    2.74 
   1   3  -1   67.61    2.63 
  -1   3   1   67.02    2.37 
  -1   3   1   71.90    3.25 
   1   3  -1   73.17    2.58 
   1   3  -1   66.91    2.68 
  -1   3   1   65.85    2.36 
   1   3  -1   67.24    2.62 
   1   3  -1   67.02    2.38 
  -1   3   1   63.71    2.37 
  -1   3   1   64.59    2.37 
  -1   3   1   66.52    2.55 
   1   3  -1   66.71    2.59 
  -1   3   1   66.08    2.52 
  -1   3   1   57.48    2.48 
   1   3  -1   64.42    2.56 
  -1   3   1   63.67    2.38 
  -1   3   1   68.19    2.53 
  -1   3   1   53.14    3.02 
   1   3  -1   68.82    3.11 
  -1   3   1   66.73    2.37 
   1   3  -1   67.69    2.49 
  -1   3   1   67.26    2.54 
   1   3  -1   64.46    2.44 
   1   3  -1   65.19    2.62 
   1   3  -1   66.88    2.57 
   1   3  -1   67.62    2.46 
  -1   3   1   65.90    2.44 
   1   3  -1   66.93    2.57 
  -1   3   1   65.41    2.40 
  -1   3   1   67.44    2.51 
  -1   3   1   64.23    2.63 
  -1   3   1   64.68    2.52 
  -1   3   1   64.53    2.46 
   1   3  -1   65.13    2.57 
  -1   3   1   64.64    2.51 
  -1   3   1   66.15    2.50 
   1   3  -1   67.95    2.63 
   1   3  -1   64.25    2.39 
   1   3  -1   68.74    2.54 
  -1   3   1   66.55    2.89 
  -1   3   1   67.67    2.51 
   1   3  -1   62.72    2.53 
  -1   3   1   64.12    2.54 
  -1   3   1   64.90    2.46 
   1   3  -1   67.33    2.43 
  -1   3   1   66.15    2.55 
  -1   3   1   67.15    2.56 
  -1   3   1   68.85    2.46 
  -1   3   1   65.14    2.46 
  -1   3   1   65.93    2.45 
   1   3  -1   64.45    2.57 
  -1   3   1   67.05    2.56 
   1   3  -1   68.91    2.61 
   1   3  -1   67.44    2.57 
  -1   3   1   68.97    2.64 
  -1   3   1   65.67    2.40 
   1   3  -1   64.49    2.43 
  -1   3   1   65.72    2.44 
  -1   3   1   65.20    2.57 
  -1   3   1   66.31    2.49 
   0  -3  -1   44.31    1.74 
   0  -3  -1   45.04    1.77 
   0  -3   1   44.83    1.65 
   0  -3   1   43.76    1.80 
   0  -3   1   42.44    2.15 
   0  -3   1   43.09    1.58 
   0  -3   1   39.80    2.20 
   0  -3  -1   40.34    1.75 
   0  -3  -1   41.79    1.58 
   0  -3   1   44.82    1.75 
   0  -3  -1   46.96    1.82 
   0  -3  -1   37.15    2.07 
   0  -3  -1   46.26    2.19 
   0  -3  -1   43.55    1.76 
   0  -3   1   43.65    1.76 
   0  -3  -1   45.84    2.29 
   0  -3  -1   42.70    2.47 
   0  -3  -1   43.00    1.79 
   0  -3   1   46.44    1.80 
   0  -3  -1   43.06    1.70 
   0  -3  -1   46.64    1.83 
   0  -3   1   47.32    1.79 
   0  -3  -1   43.29    1.82 
   0  -3  -1   48.15    1.85 
   0  -3  -1   46.29    1.82 
   0  -3   1   43.07    1.59 
   0  -3   1   43.48    1.68 
   0  -3   1   35.61    2.19 
   0  -3   1   42.73    1.95 
   0  -3   1   43.76    1.82 
   0  -3   1   45.47    1.77 
   0  -3   1   47.31    1.76 
   0  -3   1   46.62    1.85 
   0  -3  -1   43.57    1.72 
   0  -3   1   39.50    2.74 
   0  -3   1   45.63    1.83 
   0  -3   1   40.47    2.08 
   0  -3   1   42.91    1.82 
   0  -3  -1   43.97    1.75 
   0  -3  -1   47.00    1.80 
   0  -3   1   44.26    1.75 
   0  -3  -1   41.64    1.81 
   0  -3  -1   46.87    1.80 
   0  -3   1   44.09    1.77 
   0  -3  -1   45.22    1.85 
   0   3  -1   42.17    1.76 
   0   3   1   44.31    1.72 
   0   3  -1   43.69    1.81 
   0   3   1   45.03    1.80 
   0   3  -1   42.71    1.58 
   0   3   1   44.65    1.80 
   0   3   1   43.41    1.62 
   0   3  -1   45.73    1.75 
   0   3  -1   43.62    1.76 
   0   3  -1   40.11    1.77 
   0   3   1   43.87    1.59 
   0   3  -1   42.31    1.81 
   0   3  -1   46.69    1.86 
   0   3  -1   44.11    1.81 
   0   3  -1   42.43    1.74 
   0   3   1   45.92    1.84 
   0   3   1   44.55    1.79 
   0   3  -1   44.21    1.69 
   0   3  -1   43.29    1.57 
   0   3   1   46.38    1.76 
   0   3   1   44.67    1.83 
   0   3  -1   44.44    1.96 
   0   3   1   45.71    1.76 
   0   3   1   43.87    1.69 
   0   3  -1   47.04    1.83 
   0   3  -1   48.00    2.18 
   0   3   1   43.59    1.72 
   0   3   1   43.63    1.65 
   0   3  -1   41.30    1.87 
   0   3   1   43.27    1.75 
   0   3  -1   44.43    1.85 
   0   3   1   41.81    2.41 
   0   3  -1   45.01    1.86 
   0   3   1   44.37    1.79 
   0   3   1   45.23    1.74 
   0   3  -1   44.39    1.91 
   0   3   1   43.33    1.76 
   0   3  -1   46.13    1.87 
   0   3   1   44.00    2.14 
   0   3   1   44.44    1.86 
   0   3  -1   43.60    1.74 
   0   3  -1   33.52    2.73 
   0   3   1   43.27    1.80 
   0   3   1   43.73    2.01 
   0   3  -1   45.41    1.59 
   0   3   1   44.54    1.66 
   0   3   1   47.18    1.86 
   0   3  -1   43.75    1.83 
   0   3   1   44.12    1.80 
   0   3   1   44.06    1.77 
   0   3  -1   44.53    1.84 
   0   3   1   43.80    1.76 
   0   3  -1   43.71    1.73 
   0   3   1   44.22    1.72 
   0   3   1   45.38    1.82 
   0   3  -1   45.26    1.78 
   0   3  -1   43.45    1.75 
   1  -3   1  391.17   13.40 
   1  -3   1  384.37   13.46 
  -1  -3  -1  378.91   13.29 
  -1  -3  -1  388.70   13.56 
   1  -3   1  376.37   13.46 
  -1  -3  -1  391.63   13.57 
   1  -3   1  381.74   13.40 
  -1  -3  -1  394.86   13.52 
  -1  -3  -1  382.79   13.29 
  -1  -3  -1  384.82   13.40 
  -1  -3  -1  385.68   13.48 
  -1  -3  -1  382.09   13.61 
  -1  -3  -1  389.30   13.65 
  -1  -3  -1  390.44   13.53 
  -1  -3  -1  331.25   13.42 
   1  -3   1  387.74   13.51 
   1  -3   1  394.23   13.45 
  -1  -3  -1  384.37   13.32 
   1  -3   1  396.89   13.50 
  -1  -3  -1  385.28   13.46 
   1  -3   1  400.07   13.50 
   1  -3   1  384.65   13.26 
  -1  -3  -1  386.79   13.34 
  -1  -3  -1  355.97   14.01 
   1  -3   1  388.05   13.60 
  -1  -3  -1  371.51   13.40 
  -1  -3  -1  373.05   13.42 
   1  -3   1  387.04   13.47 
  -1  -3  -1  387.51   13.49 
  -1  -3  -1  396.02   13.50 
   1  -3   1  383.61   13.35 
  -1  -3  -1  371.38   13.54 
   1  -3   1  387.01   13.68 
  -1  -3  -1  375.84   13.50 
  -1  -3  -1  386.96   13.41 
   1  -3   1  374.83   13.38 
  -1  -3  -1  387.39   13.49 
   1  -3   1  381.13   13.46 
  -1  -3  -1  389.62   13.46 
  -1  -3  -1  387.53   13.65 
  -1  -3  -1  375.42   13.46 
  -1  -3  -1  377.81   13.30 
  -1  -3  -1  364.83   13.70 
  -1  -3  -1  388.92   13.47 
  -1  -3  -1  361.32   13.43 
  -1  -3  -1  372.41   13.46 
   1  -3   1  381.37   13.32 
   1  -3   1  381.52   13.52 
   1  -3   1  394.81   13.35 
  -1  -3  -1  397.95   13.51 
  -1  -3  -1  399.26   13.68 
  -1  -3  -1  391.09   13.59 
   1   3   1  396.90   13.57 
  -1   3  -1  388.91   13.63 
   1   3   1  384.64   13.37 
  -1   3  -1  384.12   13.49 
  -1   3  -1  378.15   13.35 
   1   3   1  384.91   13.31 
  -1   3  -1  388.15   13.41 
  -1   3  -1  377.21   13.36 
  -1   3  -1  382.24   13.34 
  -1   3  -1  383.55   13.41 
  -1   3  -1  389.62   13.27 
  -1   3  -1  382.39   13.51 
   1   3   1  376.44   13.51 
  -1   3  -1  377.18   13.30 
  -1   3  -1  397.05   13.43 
  -1   3  -1  379.01   13.44 
  -1   3  -1  373.06   14.70 
   1   3   1  377.48   13.30 
  -1   3  -1  388.19   13.43 
   1   3   1  385.91   13.71 
  -1   3  -1  363.68   14.05 
   1   3   1  377.84   13.52 
  -1   3  -1  371.25   13.38 
   1   3   1  381.40   13.49 
  -1   3  -1  384.36   13.40 
  -1   3  -1  381.39   13.43 
  -1   3  -1  378.67   13.30 
  -1   3  -1  388.57   13.48 
   1   3   1  385.44   13.48 
   1   3   1  374.61   13.50 
  -1   3  -1  387.39   13.57 
   1   3   1  395.49   13.42 
  -1   3  -1  360.51   13.39 
   1   3   1  400.68   13.35 
  -1   3  -1  378.58   13.30 
   1   3   1  383.16   13.50 
   1   3   1  379.32   13.52 
  -1   3  -1  389.21   13.38 
   1   3   1  377.73   13.54 
   1   3   1  385.77   13.64 
   1   3   1  388.98   13.32 
   1   3   1  387.35   13.32 
  -1   3  -1  378.29   13.32 
  -1   3  -1  381.96   13.70 
   1   3   1  389.72   13.49 
   1   3   1  385.37   13.53 
  -1   3  -1  378.48   13.46 
  -1   3  -1  384.45   13.32 
   1   3   1  395.53   13.39 
   1   3   1  383.53   13.29 
   1   3   1  375.55   13.42 
   1   3   1  386.12   13.49 
  -1   3  -1  373.45   13.50 
   1   3   1  390.75   13.46 
   1   3   1  383.20   13.45 
  -1   3  -1  391.92   13.44 
   1   3   1  390.83   13.70 
  -1   3  -1  382.76   13.50 
   1   3   1  388.74   13.73 
   1   3   1  384.01   13.49 
   2  -3   1  227.19    8.33 
   2  -3   1  230.99    8.11 
  -2  -3  -1  235.18    8.60 
   2  -3   1  230.60    8.35 
  -2  -3  -1  235.02    8.61 
   2  -3   1  243.49    8.61 
  -2  -3  -1  236.48    8.43 
  -2  -3  -1  238.31    8.41 
  -2  -3  -1  235.61    8.76 
  -2  -3  -1  238.34    8.33 
   2  -3   1  235.47    8.34 
  -2  -3  -1  232.01    8.39 
   2  -3   1  232.27    8.39 
  -2  -3  -1  227.15    8.38 
   2  -3   1  230.16    8.27 
  -2  -3  -1  242.48    8.48 
  -2  -3  -1  228.45    8.23 
  -2  -3  -1  230.95    8.54 
  -2  -3  -1  234.10    8.17 
  -2  -3  -1  230.34    8.50 
  -2  -3  -1  233.29    8.25 
   2  -3   1  237.56    8.24 
   2  -3   1  226.87    8.20 
  -2  -3  -1  239.62    8.34 
   2  -3   1  233.98    8.17 
  -2  -3  -1  238.80    8.46 
  -2  -3  -1  233.71    8.45 
  -2  -3  -1  233.91    8.43 
  -2  -3  -1  238.05    8.28 
  -2  -3  -1  238.36    8.38 
   2  -3   1  230.69    8.15 
  -2  -3  -1  231.45    8.38 
   2  -3   1  226.20    8.20 
  -2  -3  -1  235.45    8.25 
  -2  -3  -1  236.06    8.26 
  -2  -3  -1  231.56    8.64 
   2  -3   1  231.25    8.29 
  -2  -3  -1  236.69    8.26 
  -2  -3  -1  236.70    8.42 
   2  -3   1  237.92    8.52 
  -2  -3  -1  235.55    8.73 
  -2  -3  -1  233.57    8.30 
   2  -3   1  234.46    8.33 
  -2  -3  -1  233.37    8.36 
  -2   3  -1  236.85    8.68 
   2   3   1  234.00    8.25 
  -2   3  -1  232.64    8.20 
  -2   3  -1  229.68    8.27 
   2   3   1  242.19    8.14 
   2   3   1  226.61    8.30 
  -2   3  -1  231.88    8.36 
   2   3   1  236.52    8.26 
  -2   3  -1  236.16    8.30 
  -2   3  -1  232.89    8.28 
  -2   3  -1  232.80    8.32 
  -2   3  -1  235.03    8.22 
  -2   3  -1  231.61    8.32 
   2   3   1  234.03    8.24 
   2   3   1  236.98    8.26 
  -2   3  -1  224.79    8.29 
   2   3   1  233.06    8.57 
  -2   3  -1  229.44    8.23 
  -2   3  -1  238.95    8.63 
   2   3   1  234.21    8.42 
  -2   3  -1  224.49    8.32 
  -2   3  -1  214.69    8.50 
   2   3   1  231.05    8.32 
  -2   3  -1  233.61    8.24 
   2   3   1  238.70    8.29 
  -2   3  -1  233.39    8.21 
   2   3   1  231.86    8.38 
   2   3   1  237.07    8.45 
  -2   3  -1  237.62    8.87 
   2   3   1  232.30    8.33 
  -2   3  -1  234.65    8.29 
   2   3   1  232.72    8.25 
   2   3   1  234.97    8.32 
   2   3   1  233.43    8.33 
  -2   3  -1  219.85    8.67 
   2   3   1  233.17    8.37 
  -2   3  -1  229.27    8.31 
  -2   3  -1  230.10    8.39 
  -2   3  -1  235.04    8.46 
   2   3   1  227.08    8.38 
  -2   3  -1  237.91    8.36 
   2   3   1  231.07    8.37 
  -2   3  -1  233.84    8.31 
   2   3   1  237.74    8.64 
  -2   3  -1  230.22    8.22 
   2   3   1  241.48    8.42 
  -2   3  -1  233.28    8.34 
  -2   3  -1  235.07    8.17 
  -2   3  -1  231.82    8.18 
  -2   3  -1  232.29    8.16 
   2   3   1  225.35    8.31 
   2   3   1  236.85    8.69 
  -3  -3  -1  210.93    7.70 
  -3  -3  -1  213.20    7.60 
  -3  -3  -1  210.74    7.47 
   3  -3   1  211.54    7.39 
  -3  -3  -1  210.23    7.59 
  -3  -3  -1  210.11    7.72 
  -3  -3  -1  208.20    7.67 
   3  -3   1  214.51    7.77 
   3  -3   1  210.82    7.70 
  -3  -3  -1  213.34    7.76 
  -3  -3  -1  209.16    7.60 
  -3  -3  -1  209.04    7.67 
  -3  -3  -1  210.01    7.67 
  -3  -3  -1  218.38    7.82 
   3  -3   1  216.21    7.64 
  -3  -3  -1  213.30    7.76 
   3  -3   1  213.38    7.88 
  -3  -3  -1  214.54    8.16 
   3  -3   1  209.90    7.54 
  -3  -3  -1  202.07    7.81 
   3  -3   1  211.58    7.68 
  -3  -3  -1  207.61    7.66 
  -3  -3  -1  205.45    7.72 
   3  -3   1  213.31    7.60 
  -3  -3  -1  214.43    7.67 
   3  -3   1  208.26    7.39 
   3  -3   1  215.93    7.64 
  -3  -3  -1  207.54    7.82 
   3  -3   1  205.11    7.49 
   3  -3   1  208.40    7.40 
   3  -3   1  206.29    7.56 
   3  -3   1  214.26    7.62 
  -3  -3  -1  213.74    8.12 
  -3  -3  -1  214.16    8.12 
  -3  -3  -1  204.59    8.44 
  -3   3  -1  191.40    7.44 
  -3   3  -1  203.13    7.44 
  -3   3  -1  216.07    7.66 
  -3   3  -1  205.50    7.48 
  -3   3  -1  206.60    7.86 
  -3   3  -1  214.41    8.34 
   3   3   1  207.44    7.63 
   3   3   1  213.09    7.60 
  -3   3  -1  214.37    7.64 
   3   3   1  207.80    7.72 
   3   3   1  206.18    7.76 
  -3   3  -1  208.81    7.97 
   3   3   1  209.36    7.58 
   3   3   1  216.42    7.58 
   3   3   1  214.41    7.59 
  -3   3  -1  211.27    7.74 
   3   3   1  214.46    7.66 
   3   3   1  214.69    7.64 
  -3   3  -1  210.55    8.16 
   3   3   1  217.58    7.67 
  -3   3  -1  200.45    7.39 
   3   3   1  214.13    7.63 
  -3   3  -1  214.18    7.39 
  -3   3  -1  215.63    7.41 
   3   3   1  201.63    7.67 
  -3   3  -1  213.98    7.70 
  -3   3  -1  211.32    7.78 
  -3   3  -1  213.76    8.13 
   3   3   1  207.79    7.63 
   3   3   1  227.60    8.26 
  -3   3  -1  212.21    7.59 
   3   3   1  212.52    7.66 
  -3   3  -1  212.12    7.49 
  -3   3  -1  209.82    7.43 
   3   3   1  211.97    7.66 
  -3   3  -1  218.16    7.73 
   3   3   1  210.60    7.60 
  -3   3  -1  208.67    7.58 
  -3   3  -1  207.21    7.45 
  -3   3  -1  214.01    7.38 
   3   3   1  202.57    7.87 
  -4  -3  -1   47.56    2.31 
  -4  -3  -1   50.19    2.16 
   4  -3   1   49.11    2.21 
  -4  -3  -1   47.66    2.21 
   4  -3   1   46.80    2.01 
   4  -3   1   48.98    2.36 
  -4  -3  -1   44.50    2.25 
  -4  -3  -1   49.90    2.20 
  -4  -3  -1   47.71    2.30 
   4  -3   1   45.63    2.09 
  -4  -3  -1   51.43    2.71 
   4  -3   1   47.29    1.98 
  -4  -3  -1   48.34    2.12 
   4  -3   1   48.86    2.12 
   4  -3   1   47.68    1.78 
  -4  -3  -1   47.18    2.10 
   4  -3   1   49.22    2.12 
   4  -3   1   47.91    2.02 
  -4  -3  -1   48.07    1.99 
  -4  -3  -1   50.13    2.11 
  -4  -3  -1   46.89    2.17 
  -4  -3  -1   45.59    2.11 
  -4  -3  -1   46.58    1.95 
  -4  -3  -1   46.45    2.63 
   4  -3   1   48.57    1.96 
  -4  -3  -1   47.00    2.17 
   4  -3   1   47.45    2.26 
  -4  -3  -1   47.04    2.65 
  -4   3  -1   45.78    2.10 
  -4   3  -1   45.96    2.20 
   4   3   1   51.07    2.11 
  -4   3  -1   45.10    1.97 
   4   3   1   47.21    2.09 
  -4   3  -1   47.80    1.73 
   4   3   1   49.46    2.11 
   4   3   1   45.59    2.08 
   4   3   1   46.79    2.11 
   4   3   1   47.10    2.07 
  -4   3  -1   47.62    2.05 
  -4   3  -1   47.80    1.94 
  -4   3  -1   45.15    1.97 
  -4   3  -1   46.21    1.86 
   4   3   1   46.05    2.08 
   4   3   1   47.26    2.05 
  -4   3  -1   47.68    1.74 
  -4   3  -1   48.06    2.84 
   4   3   1   47.78    2.14 
  -4   3  -1   49.33    2.18 
  -4   3  -1   49.57    2.23 
  -4   3  -1   46.89    2.38 
   4   3   1   47.60    2.11 
   4   3   1   51.80    2.10 
   4   3   1   43.21    2.14 
  -4   3  -1   49.27    2.71 
   4   3   1   46.05    2.13 
  -4   3  -1   50.11    2.22 
   4   3   1   48.85    2.36 
  -4   3  -1   47.16    2.64 
   5  -3   1   19.07    1.07 
  -5  -3  -1   18.35    1.21 
   5  -3   1   17.76    1.14 
   5  -3   1   18.36    1.36 
  -5  -3  -1   17.67    0.95 
  -5  -3  -1   17.47    1.14 
  -5  -3  -1   17.12    1.65 
  -5  -3  -1   17.49    1.16 
  -5  -3  -1   17.89    1.14 
  -5  -3  -1   20.15    1.20 
   5  -3   1   17.58    1.08 
   5  -3   1   17.27    1.15 
  -5  -3  -1   17.43    1.29 
   5  -3   1   18.08    1.32 
   5  -3   1   18.64    0.77 
  -5  -3  -1   17.24    1.66 
   5  -3   1   17.22    0.93 
  -5  -3  -1   18.13    1.29 
  -5  -3  -1   17.65    1.32 
   5  -3   1   20.46    1.29 
   5  -3   1   17.62    1.14 
  -5  -3  -1   17.60    1.11 
  -5  -3  -1   18.08    1.68 
  -5  -3  -1   18.56    1.03 
  -5  -3  -1   17.10    1.12 
  -5  -3  -1   17.51    1.19 
   5  -3   1   18.04    1.06 
  -5  -3  -1   19.74    1.26 
   5  -3   1   17.43    1.15 
  -5   3  -1   16.10    1.03 
  -5   3  -1   17.71    0.93 
   5   3   1   16.47    1.30 
  -5   3  -1   19.37    1.71 
   5   3   1   18.24    1.15 
   5   3   1   17.41    1.15 
  -5   3  -1   16.45    1.21 
   5   3   1   16.08    1.05 
   5   3   1   19.10    1.16 
  -5   3  -1   17.65    1.66 
   5   3   1   16.89    1.11 
   5   3   1   16.62    1.21 
  -5   3  -1   18.83    1.02 
  -5   3  -1   18.64    1.34 
  -5   3  -1   17.13    0.92 
   5   3   1   18.03    1.16 
   5   3   1   17.65    1.16 
  -5   3  -1   18.66    1.24 
   5   3   1   16.79    1.05 
   5   3   1   16.28    1.08 
   5   3   1   18.38    1.12 
  -5   3  -1   15.78    1.24 
   5   3   1   18.26    1.14 
  -5   3  -1   19.06    1.07 
  -5   3  -1   18.67    1.84 
   5   3   1   21.07    1.21 
  -5   3  -1   17.75    1.18 
  -6  -3  -1   34.63    1.86 
   6  -3   1   37.14    1.82 
  -6  -3  -1   37.43    1.78 
   6  -3   1   36.72    1.95 
  -6  -3  -1   34.23    1.80 
   6  -3   1   34.59    2.16 
   6  -3   1   36.32    2.06 
  -6  -3  -1   37.11    2.12 
   6  -3   1   36.73    1.85 
  -6  -3  -1   36.42    2.07 
  -6  -3  -1   36.60    2.69 
  -6  -3  -1   32.07    2.57 
   6  -3   1   35.45    1.94 
  -6  -3  -1   39.98    1.99 
   6  -3   1   35.18    1.39 
  -6  -3  -1   35.86    1.92 
  -6  -3  -1   34.31    1.83 
   6  -3   1   36.08    1.91 
   6  -3   1   37.60    1.79 
  -6  -3  -1   36.30    1.96 
   6  -3   1   35.33    1.56 
  -6  -3  -1   34.00    2.60 
  -6  -3  -1   37.65    1.92 
  -6  -3  -1   34.08    1.92 
  -6  -3  -1   36.67    1.59 
  -6  -3  -1   36.15    2.20 
  -6  -3  -1   36.00    2.04 
   6  -3   1   39.18    2.21 
  -6   3  -1   38.18    1.81 
  -6   3  -1   33.65    2.57 
   6   3   1   37.96    1.90 
  -6   3  -1   36.04    1.93 
  -6   3  -1   37.92    1.68 
   6   3   1   32.91    1.89 
   6   3   1   33.79    1.89 
  -6   3  -1   34.83    2.83 
   6   3   1   34.36    1.74 
  -6   3  -1   40.32    2.13 
   6   3   1   35.01    1.80 
   6   3   1   37.23    1.87 
  -6   3  -1   35.86    1.69 
  -6   3  -1   36.77    2.01 
   6   3   1   37.28    1.96 
   6   3   1   35.63    1.89 
  -6   3  -1   35.94    2.02 
   6   3   1   35.97    1.87 
   6   3   1   33.37    1.84 
  -6   3  -1   33.57    1.70 
  -6   3  -1   36.16    2.09 
   6   3   1   35.20    2.12 
  -6   3  -1   35.04    2.62 
  -6   3  -1   34.62    2.68 
   6   3   1   34.70    1.85 
   6   3   1   36.20    1.92 
   6   3   1   39.57    2.24 
   6   3   1   37.62    2.06 
  -7  -3  -1   12.52    1.36 
  -7  -3  -1   15.89    2.17 
  -7  -3  -1   12.41    1.89 
  -7  -3  -1   12.80    1.25 
  -7  -3  -1   12.69    1.35 
   7  -3   1   13.85    1.03 
   7  -3   1   14.59    1.44 
  -7  -3  -1   12.50    1.03 
  -7  -3  -1   10.54    1.14 
  -7  -3  -1   13.11    1.17 
  -7  -3  -1   11.93    1.22 
   7  -3   1   14.19    1.33 
   7  -3   1   11.49    1.19 
   7  -3   1   13.77    1.11 
   7  -3   1   13.80    1.55 
  -7  -3  -1   10.86    1.09 
   7  -3   1   12.57    1.21 
  -7  -3  -1   11.91    1.19 
   7  -3   1   12.10    1.23 
  -7  -3  -1   11.51    1.42 
   7  -3   1   10.41    1.25 
  -7  -3  -1   12.00    1.13 
  -7  -3  -1   14.15    1.46 
  -7  -3  -1   11.39    1.19 
  -7  -3  -1   12.22    1.89 
  -7   3  -1   13.43    1.21 
  -7   3  -1   12.80    1.05 
   7   3   1   12.58    0.96 
   7   3   1   14.36    1.38 
  -7   3  -1   11.66    2.04 
  -7   3  -1   12.67    1.34 
   7   3   1   10.57    1.36 
  -7   3  -1   11.38    1.29 
   7   3   1   13.13    1.29 
   7   3   1   11.67    1.23 
   7   3   1    9.86    1.13 
  -7   3  -1   11.61    1.84 
  -7   3  -1   12.88    1.44 
  -7   3  -1   13.43    2.03 
   7   3   1   13.33    1.21 
  -7   3  -1   10.98    0.86 
  -7   3  -1   11.53    0.91 
   7   3   1   12.04    1.17 
   7   3   1   12.59    1.06 
   7   3   1   13.47    1.27 
   7   3   1   11.62    1.13 
   7   3   1   10.19    1.10 
   7   3   1   13.22    1.24 
  -7   3  -1   12.95    0.98 
   7   3   1   12.25    1.03 
  -7   3  -1   14.28    1.40 
  -7   3  -1   11.68    1.84 
   7   3   1   11.44    1.38 
   8  -3   1   54.98    2.70 
  -8  -3  -1   51.02    2.76 
  -8  -3  -1   54.02    2.98 
  -8  -3  -1   52.69    2.70 
  -8  -3  -1   52.34    2.77 
  -8  -3  -1   47.03    2.50 
   8  -3   1   54.12    2.76 
   8  -3   1   49.45    2.72 
  -8  -3  -1   51.00    2.57 
  -8  -3  -1   62.56    4.37 
   8  -3   1   53.10    2.64 
  -8  -3  -1   52.50    2.76 
  -8  -3  -1   50.19    2.87 
  -8  -3  -1   51.83    3.79 
   8  -3   1   47.32    3.03 
   8  -3   1   50.84    2.75 
  -8  -3  -1   50.79    3.81 
  -8  -3  -1   51.75    2.56 
  -8  -3  -1   53.12    3.83 
  -8  -3  -1   53.17    2.98 
  -8  -3  -1   53.82    3.88 
   8  -3   1   52.59    2.95 
  -8  -3  -1   54.75    3.18 
  -8  -3  -1   47.79    2.61 
  -8  -3  -1   54.77    2.59 
   8   3   1   51.51    2.78 
   8   3   1   52.81    2.61 
  -8   3  -1   53.20    3.84 
   8   3   1   49.34    2.67 
  -8   3  -1   52.12    3.76 
   8   3   1   56.47    3.03 
  -8   3  -1   51.65    2.60 
   8   3   1   55.86    2.45 
   8   3   1   53.21    2.59 
   8   3   1   53.91    3.11 
  -8   3  -1   53.16    2.88 
  -8   3  -1   48.42    2.95 
   8   3   1   53.40    2.70 
   8   3   1   50.86    2.77 
   8   3   1   49.70    3.09 
   8   3   1   53.86    2.68 
  -8   3  -1   55.42    4.18 
   8   3   1   54.66    2.66 
  -8   3  -1   50.13    2.87 
  -8   3  -1   50.95    3.85 
   8   3   1   50.47    2.62 
  -8   3  -1   50.19    2.85 
  -8   3  -1   50.99    2.76 
   8   3   1   50.01    2.75 
  -9  -3  -1   33.53    2.25 
  -9  -3  -1   34.86    2.07 
  -9  -3  -1   31.70    2.56 
  -9  -3  -1   31.22    2.06 
   9  -3   1   35.02    2.47 
  -9  -3  -1   37.26    3.42 
   9  -3   1   34.99    2.24 
   9  -3   1   36.54    2.19 
  -9  -3  -1   32.53    3.17 
  -9  -3  -1   39.62    2.35 
  -9  -3  -1   33.08    2.37 
  -9  -3  -1   32.98    1.99 
  -9  -3  -1   31.51    3.21 
   9  -3   1   37.56    2.35 
  -9  -3  -1   34.35    2.02 
  -9  -3  -1   27.63    2.03 
  -9  -3  -1   34.50    3.54 
  -9  -3  -1   36.78    2.50 
   9  -3   1   34.95    2.11 
  -9  -3  -1   31.12    3.09 
   9  -3   1   34.18    2.55 
  -9  -3  -1   30.71    2.30 
  -9  -3  -1   35.79    2.22 
   9  -3   1   34.64    2.31 
  -9   3  -1   34.03    3.57 
   9   3   1   34.82    2.56 
   9   3   1   35.12    2.26 
  -9   3  -1   30.81    2.36 
   9   3   1   33.49    1.97 
   9   3   1   36.12    2.24 
  -9   3  -1   34.45    2.49 
  -9   3  -1   31.82    3.19 
  -9   3  -1   37.57    2.43 
  -9   3  -1   38.31    3.52 
   9   3   1   31.16    2.20 
   9   3   1   34.10    2.13 
  -9   3  -1   37.32    3.40 
  -9   3  -1   37.86    2.14 
   9   3   1   36.90    2.15 
  -9   3  -1   36.68    3.41 
  -9   3  -1   33.23    2.30 
   9   3   1   31.46    1.99 
   9   3   1   32.71    2.15 
   9   3   1   33.03    2.11 
   9   3   1   33.20    2.53 
   9   3   1   37.53    2.34 
  -9   3  -1   30.79    2.18 
  -9  -4   1    6.94    1.03 
  -9  -4   1    6.14    1.72 
  -9  -4   1    5.76    1.42 
  -9  -4   1    7.43    1.21 
  -9  -4   1    8.88    1.40 
   9  -4  -1    8.23    1.16 
  -9  -4   1    8.66    1.25 
  -9  -4   1    6.41    1.67 
  -9  -4   1    6.12    1.54 
   9  -4  -1    7.44    1.17 
   9  -4  -1    8.71    1.24 
  -9  -4   1    8.38    1.37 
  -9  -4   1    7.50    1.12 
  -9  -4   1    7.54    1.79 
  -9  -4   1    7.27    1.11 
  -9  -4   1    7.14    1.19 
   9  -4  -1    8.42    1.15 
  -9  -4   1    9.73    1.55 
   9  -4  -1    9.39    1.16 
  -9  -4   1    7.39    1.43 
  -9  -4   1    7.75    1.06 
  -9  -4   1    7.42    1.82 
  -9   4   1    7.54    2.06 
   9   4  -1    9.24    1.14 
  -9   4   1    7.30    1.83 
  -9   4   1    7.30    1.34 
  -9   4   1    5.36    1.07 
   9   4  -1    7.20    1.07 
   9   4  -1    7.29    1.13 
   9   4  -1    6.42    1.09 
  -9   4   1    7.96    1.84 
  -9   4   1    6.45    1.17 
   9   4  -1    6.49    1.13 
   9   4  -1    8.23    1.47 
   9   4  -1   11.11    1.35 
  -9   4   1    8.37    1.38 
   9   4  -1    8.41    1.16 
   9   4  -1    7.33    1.13 
  -9   4   1    7.46    1.83 
   9   4  -1    7.85    1.12 
  -9   4   1    5.85    1.67 
   9   4  -1    4.61    0.97 
  -9   4   1    7.68    1.19 
  -9   4   1    6.82    1.00 
   9   4  -1    6.89    1.36 
  -8  -4   1    2.80    1.22 
  -8  -4   1    1.59    1.08 
  -8  -4   1    1.95    0.69 
  -8  -4   1    1.33    0.59 
   8  -4  -1    1.60    0.61 
   8  -4  -1    1.39    0.68 
  -8  -4   1    1.08    0.63 
  -8  -4   1    0.31    0.59 
  -8  -4   1    1.71    0.64 
  -8  -4   1    1.99    0.73 
   8  -4  -1    1.41    0.61 
  -8  -4   1    1.14    1.00 
   8  -4  -1    1.52    0.65 
  -8  -4   1    1.41    0.94 
  -8  -4   1    3.33    0.76 
  -8  -4   1    1.82    1.05 
   8  -4  -1    1.93    0.70 
   8  -4  -1    0.87    0.65 
   8  -4  -1    1.39    0.57 
  -8  -4   1    1.83    0.74 
  -8  -4   1    2.65    0.63 
  -8  -4   1    2.75    0.88 
  -8  -4   1    1.08    0.52 
  -8  -4   1    1.92    0.75 
  -8  -4   1    1.30    0.78 
   8   4  -1    1.08    0.63 
   8   4  -1    2.43    0.67 
   8   4  -1    1.60    0.68 
   8   4  -1    1.98    0.68 
  -8   4   1    0.92    0.53 
  -8   4   1    2.28    0.76 
  -8   4   1    1.49    1.12 
   8   4  -1    1.66    0.60 
  -8   4   1    3.09    0.83 
   8   4  -1    0.90    0.58 
   8   4  -1    1.45    0.55 
  -8   4   1    1.39    1.03 
   8   4  -1    1.05    0.58 
   8   4  -1    2.00    0.67 
   8   4  -1    1.54    0.62 
  -8   4   1    1.47    0.67 
  -8   4   1    1.45    0.77 
  -8   4   1    1.42    0.96 
   8   4  -1    3.10    0.79 
  -8   4   1    1.82    0.77 
  -8   4   1    1.68    1.22 
  -8   4   1    1.69    1.10 
   8   4  -1    0.67    0.63 
   8   4  -1    0.97    0.56 
   8   4  -1    2.60    0.86 
   7  -4  -1   -0.03    0.44 
  -7  -4   1    0.20    0.69 
   7  -4  -1   -0.39    0.40 
   7  -4  -1   -0.50    0.34 
  -7  -4   1   -0.37    0.60 
  -7  -4   1   -0.18    0.67 
   7  -4  -1    0.30    0.50 
  -7  -4   1    0.47    0.50 
  -7  -4   1   -0.12    0.54 
  -7  -4   1    0.21    0.50 
   7  -4  -1    0.16    0.46 
  -7  -4   1    0.58    0.58 
  -7  -4   1    0.24    0.45 
  -7  -4   1    0.35    0.40 
   7  -4  -1    0.28    0.49 
   7  -4  -1   -0.47    0.43 
  -7  -4   1    0.98    0.54 
  -7  -4   1    0.60    0.44 
  -7  -4   1    0.12    0.54 
  -7  -4   1    0.03    0.48 
  -7  -4   1   -0.26    0.40 
   7  -4  -1    0.09    0.44 
  -7  -4   1   -0.25    0.76 
  -7  -4   1    0.18    0.51 
  -7  -4   1    0.07    0.44 
   7   4  -1    0.10    0.43 
  -7   4   1   -0.18    0.56 
  -7   4   1   -0.40    0.65 
   7   4  -1   -0.55    0.39 
   7   4  -1   -0.16    0.41 
   7   4  -1    0.55    0.42 
  -7   4   1    0.09    0.72 
   7   4  -1   -0.23    0.40 
   7   4  -1    0.67    0.56 
   7   4  -1    0.84    0.44 
  -7   4   1    0.59    0.46 
   7   4  -1    0.08    0.40 
  -7   4   1   -0.20    0.36 
   7   4  -1    0.29    0.45 
  -7   4   1    0.11    0.71 
  -7   4   1    0.53    0.55 
   7   4  -1   -0.25    0.41 
  -7   4   1    0.41    0.51 
   7   4  -1   -0.04    0.40 
  -7   4   1    0.40    0.49 
   7   4  -1    0.43    0.48 
   7   4  -1    0.05    0.49 
   7   4  -1    0.42    0.49 
  -7   4   1    0.22    0.82 
  -7   4   1    0.64    0.42 
  -7   4   1   -0.05    0.78 
  -6  -4   1    4.92    0.73 
   6  -4  -1    5.01    0.77 
   6  -4  -1    7.86    0.87 
  -6  -4   1    5.63    1.22 
  -6  -4   1    6.02    0.97 
  -6  -4   1    6.84    0.93 
   6  -4  -1    7.81    0.63 
   6  -4  -1    6.14    0.75 
  -6  -4   1    5.79    0.98 
   6  -4  -1    7.00    0.94 
   6  -4  -1    5.82    0.70 
  -6  -4   1    6.27    0.93 
  -6  -4   1    5.25    0.81 
  -6  -4   1    5.29    1.16 
  -6  -4   1    5.06    1.17 
   6  -4  -1    6.06    0.80 
  -6  -4   1    6.45    0.95 
   6  -4  -1    6.00    0.81 
  -6  -4   1    6.94    0.78 
  -6  -4   1    6.81    0.82 
  -6  -4   1    5.48    0.78 
   6  -4  -1    6.58    0.92 
  -6  -4   1    5.58    0.85 
  -6  -4   1    4.62    0.74 
  -6  -4   1    6.66    0.64 
   6  -4  -1    5.30    0.53 
  -6  -4   1    6.17    1.27 
  -6  -4   1    5.91    0.85 
  -6   4   1    7.77    0.76 
   6   4  -1    5.10    0.79 
  -6   4   1    6.29    1.33 
   6   4  -1    5.68    0.78 
  -6   4   1    7.32    0.67 
  -6   4   1    5.70    0.71 
   6   4  -1    5.41    0.73 
   6   4  -1    5.42    0.77 
   6   4  -1    6.29    0.76 
  -6   4   1    6.29    0.97 
   6   4  -1    6.30    0.87 
  -6   4   1    5.58    0.89 
   6   4  -1    5.23    0.77 
  -6   4   1    5.09    1.19 
  -6   4   1    7.19    1.47 
  -6   4   1    7.35    1.21 
  -6   4   1    5.20    0.80 
  -6   4   1    6.30    0.86 
  -6   4   1    7.84    1.37 
   6   4  -1    6.61    0.87 
   6   4  -1    5.13    0.79 
   6   4  -1    6.65    0.82 
   6   4  -1    5.58    0.75 
  -6   4   1    7.24    0.82 
  -6   4   1    6.70    1.31 
   6   4  -1    6.55    0.86 
   6   4  -1    5.65    0.81 
  -6   4   1    7.29    0.94 
   6   4  -1    5.98    0.99 
   5  -4  -1    3.71    0.42 
  -5  -4   1    3.32    0.93 
   5  -4  -1    4.09    0.58 
  -5  -4   1    3.07    0.65 
  -5  -4   1    3.61    0.62 
   5  -4  -1    4.53    0.63 
  -5  -4   1    2.79    0.52 
  -5  -4   1    3.60    0.72 
  -5  -4   1    3.02    0.85 
   5  -4  -1    3.04    0.56 
  -5  -4   1    3.80    0.77 
  -5  -4   1    4.84    0.82 
  -5  -4   1    3.53    0.90 
  -5  -4   1    4.32    0.70 
  -5  -4   1    3.07    0.83 
  -5  -4   1    3.61    0.51 
   5  -4  -1    3.98    0.65 
  -5  -4   1    4.66    0.67 
   5  -4  -1    3.30    0.55 
  -5  -4   1    3.34    0.54 
   5  -4  -1    3.77    0.51 
  -5  -4   1    2.52    0.82 
  -5  -4   1    4.66    0.66 
   5  -4  -1    4.07    0.49 
   5  -4  -1    3.53    0.54 
  -5  -4   1    3.02    0.62 
  -5  -4   1    3.58    0.66 
   5  -4  -1    3.75    0.65 
  -5  -4   1    3.09    0.60 
  -5  -4   1    4.24    0.52 
   5   4  -1    3.28    0.55 
   5   4  -1    3.93    0.60 
  -5   4   1    5.17    0.68 
  -5   4   1    4.25    1.06 
   5   4  -1    3.52    0.60 
  -5   4   1    3.14    0.89 
   5   4  -1    2.75    0.56 
   5   4  -1    4.66    0.69 
   5   4  -1    4.04    0.76 
   5   4  -1    3.85    0.61 
  -5   4   1    3.41    0.65 
  -5   4   1    4.99    0.71 
   5   4  -1    4.15    0.57 
   5   4  -1    2.73    0.56 
   5   4  -1    3.11    0.58 
   5   4  -1    3.18    0.64 
  -5   4   1    4.15    0.52 
  -5   4   1    2.78    0.82 
  -5   4   1    3.90    0.96 
  -5   4   1    3.89    0.69 
  -5   4   1    5.61    0.76 
   5   4  -1    3.63    0.61 
   5   4  -1    2.64    0.54 
  -5   4   1    3.83    0.60 
   5   4  -1    4.02    0.75 
  -5   4   1    3.74    0.52 
  -5   4   1    3.30    0.87 
  -5   4   1    4.82    0.56 
  -5   4   1    2.79    0.78 
   5   4  -1    2.78    0.56 
  -4  -4   1   16.60    1.43 
   4  -4  -1   15.86    0.93 
  -4  -4   1   15.68    1.09 
  -4  -4   1   15.68    1.18 
  -4  -4   1   15.68    0.95 
   4  -4  -1   15.19    0.97 
  -4  -4   1   15.49    1.05 
  -4  -4   1   16.68    1.39 
   4  -4  -1   16.46    0.84 
   4  -4  -1   16.72    1.09 
  -4  -4   1   16.24    1.10 
  -4  -4   1   17.52    0.95 
  -4  -4   1   16.07    1.38 
  -4  -4   1   17.85    1.25 
   4  -4  -1   15.66    0.89 
  -4  -4   1   15.65    1.06 
   4  -4  -1   17.05    1.06 
   4  -4  -1   15.10    0.95 
   4  -4  -1   15.80    1.04 
  -4  -4   1   13.22    1.07 
  -4  -4   1   14.03    1.08 
   4  -4  -1   17.37    0.99 
   4  -4  -1   16.49    0.93 
  -4  -4   1   16.56    1.41 
  -4  -4   1   15.94    1.13 
  -4  -4   1   15.15    1.02 
  -4  -4   1   17.43    1.08 
  -4  -4   1   15.68    1.02 
   4  -4  -1   16.78    1.00 
  -4  -4   1   16.47    1.45 
  -4  -4   1   15.41    0.92 
   4   4  -1   15.71    0.96 
  -4   4   1   16.90    1.00 
  -4   4   1   17.66    1.49 
  -4   4   1   16.86    0.76 
  -4   4   1   17.62    1.45 
   4   4  -1   15.82    1.03 
   4   4  -1   16.60    1.03 
   4   4  -1   15.93    1.09 
   4   4  -1   15.71    0.98 
  -4   4   1   16.82    0.86 
  -4   4   1   17.02    1.42 
  -4   4   1   15.96    1.11 
   4   4  -1   15.65    1.05 
  -4   4   1   16.66    1.12 
   4   4  -1   15.82    1.04 
  -4   4   1   15.82    0.69 
  -4   4   1   17.37    1.14 
  -4   4   1   16.08    1.07 
   4   4  -1   15.55    0.95 
   4   4  -1   16.92    1.56 
   4   4  -1   14.50    1.14 
  -4   4   1   16.27    1.00 
   4   4  -1   16.76    0.98 
  -4   4   1   17.52    1.11 
   4   4  -1   14.80    0.98 
  -4   4   1   16.11    0.87 
  -4   4   1   16.43    1.41 
   4   4  -1   17.41    1.05 
  -4   4   1   16.05    0.88 
  -4   4   1   16.30    1.39 
  -4   4   1   16.17    0.90 
   4   4  -1   15.85    1.17 
   4   4  -1   16.72    1.06 
  -4   4   1   15.53    0.95 
  -4   4   1   17.13    1.52 
  -4   4   1   13.52    0.92 
   3  -4  -1   14.00    0.76 
   3  -4  -1   13.37    0.79 
  -3  -4   1   14.80    1.01 
  -3  -4   1   14.72    0.99 
  -3  -4   1   13.14    0.90 
   3  -4  -1   14.56    0.73 
   3  -4  -1   12.91    0.82 
   3  -4  -1   12.67    0.82 
  -3  -4   1   13.54    1.10 
  -3  -4   1   14.07    0.91 
   3  -4  -1   13.44    0.79 
   3  -4  -1   14.21    0.80 
  -3  -4   1   14.58    0.73 
   3  -4  -1   12.88    0.83 
   3  -4  -1   13.54    0.90 
   3  -4  -1   12.51    0.84 
  -3  -4   1   12.95    0.89 
  -3  -4   1   13.43    0.76 
  -3  -4   1   12.21    0.83 
   3  -4  -1   12.66    0.61 
  -3  -4   1   13.99    1.00 
   3  -4  -1   13.63    0.75 
  -3  -4   1   13.94    1.12 
  -3  -4   1   13.44    0.83 
   3  -4  -1   12.80    0.72 
   3  -4  -1   12.87    0.77 
  -3  -4   1   12.45    1.18 
  -3  -4   1   12.86    0.91 
  -3  -4   1   12.75    0.83 
  -3  -4   1   11.43    0.82 
  -3  -4   1   13.56    1.13 
  -3  -4   1   13.94    1.13 
  -3  -4   1   13.77    0.88 
  -3  -4   1   14.27    0.97 
  -3  -4   1   13.13    0.89 
   3  -4  -1   14.54    0.76 
  -3  -4   1   12.78    0.97 
   3   4  -1   13.69    0.98 
   3   4  -1   15.72    0.96 
  -3   4   1   12.68    0.77 
  -3   4   1   14.12    0.92 
  -3   4   1   13.30    0.79 
  -3   4   1   13.86    0.70 
   3   4  -1   12.03    0.85 
  -3   4   1   13.81    1.13 
  -3   4   1   15.08    1.24 
   3   4  -1   14.28    1.02 
  -3   4   1   13.72    0.86 
  -3   4   1   13.36    0.70 
   3   4  -1   14.40    0.74 
  -3   4   1   12.56    1.11 
  -3   4   1   14.13    0.77 
   3   4  -1   13.79    0.81 
   3   4  -1   15.98    0.95 
  -3   4   1   14.35    0.72 
  -3   4   1   13.69    0.87 
  -3   4   1   14.59    1.14 
   3   4  -1   14.27    0.84 
  -3   4   1   13.01    1.08 
  -3   4   1   12.88    0.66 
  -3   4   1   13.08    0.61 
  -3   4   1   13.96    0.72 
  -3   4   1   13.45    0.80 
  -3   4   1   13.68    0.76 
  -3   4   1   13.05    0.76 
  -3   4   1   13.71    1.19 
  -3   4   1   12.98    0.54 
  -3   4   1   13.95    0.85 
   3   4  -1   12.98    0.78 
  -3   4   1   12.92    0.68 
   3   4  -1   13.17    0.79 
  -3   4   1   12.77    0.64 
   3   4  -1   12.02    0.89 
  -3   4   1   13.36    0.66 
  -3   4   1   13.95    0.93 
   3   4  -1   12.04    0.86 
   3   4  -1   12.97    0.82 
   3   4  -1   12.98    1.27 
   3   4  -1   13.94    0.78 
   3   4  -1   13.86    0.88 
  -3   4   1   13.04    1.10 
  -2  -4   1   19.72    0.95 
  -2  -4   1   17.05    0.99 
  -2  -4   1   19.60    1.10 
  -2  -4   1   19.69    1.19 
   2  -4  -1   18.45    0.96 
   2  -4  -1   17.64    0.96 
  -2  -4   1   18.33    1.11 
   2  -4  -1   18.72    1.04 
   2  -4  -1   19.30    0.87 
  -2  -4   1   19.70    1.10 
   2  -4  -1   19.26    0.89 
  -2  -4   1   18.63    1.10 
   2  -4  -1   18.62    0.86 
   2  -4  -1   19.74    0.94 
  -2  -4   1   18.30    1.00 
  -2  -4   1   19.67    0.91 
   2  -4  -1   19.27    0.95 
  -2  -4   1   18.28    1.02 
  -2  -4   1   20.29    1.07 
  -2  -4   1   17.20    0.84 
  -2  -4   1   20.04    1.29 
  -2  -4   1   18.38    1.04 
   2  -4  -1   19.15    0.85 
  -2  -4   1   18.35    0.85 
  -2  -4   1   18.95    0.87 
  -2  -4   1   18.83    0.98 
  -2  -4   1   21.01    1.16 
   2  -4  -1   19.00    0.87 
   2  -4  -1   17.67    1.04 
  -2  -4   1   20.13    1.09 
   2  -4  -1   19.31    0.96 
  -2  -4   1   17.85    1.12 
   2  -4  -1   18.63    0.84 
   2  -4  -1   18.59    0.86 
  -2  -4   1   18.35    0.94 
   2  -4  -1   18.92    0.92 
   2  -4  -1   17.72    0.93 
  -2  -4   1   19.07    0.80 
  -2  -4   1   19.43    1.13 
   2  -4  -1   19.09    1.00 
   2  -4  -1   19.20    1.04 
  -2  -4   1   17.59    0.97 
  -2  -4   1   20.69    1.19 
   2  -4  -1   20.07    1.07 
   2  -4  -1   18.51    0.85 
   2  -4  -1   17.83    0.88 
  -2   4   1   18.22    0.89 
  -2   4   1   19.47    0.91 
   2   4  -1   18.07    1.03 
  -2   4   1   17.35    0.89 
   2   4  -1   18.88    1.02 
   2   4  -1   19.50    1.44 
  -2   4   1   17.87    1.09 
  -2   4   1   19.52    0.80 
  -2   4   1   21.03    1.01 
   2   4  -1   19.04    1.08 
  -2   4   1   18.52    0.86 
  -2   4   1   18.09    0.86 
  -2   4   1   18.43    0.86 
  -2   4   1   19.44    1.54 
  -2   4   1   18.68    1.13 
  -2   4   1   19.87    1.13 
  -2   4   1   17.53    0.86 
   2   4  -1   19.68    1.06 
  -2   4   1   17.58    0.85 
   2   4  -1   19.29    0.93 
  -2   4   1   19.09    0.93 
  -2   4   1   19.23    0.88 
  -2   4   1   18.64    0.85 
  -2   4   1   19.51    0.88 
  -2   4   1   18.66    1.15 
  -2   4   1   19.53    0.95 
  -2   4   1   18.74    0.92 
  -2   4   1   18.27    0.83 
   2   4  -1   19.89    0.87 
  -2   4   1   17.27    0.82 
  -2   4   1   18.27    0.82 
  -2   4   1   18.34    0.81 
   2   4  -1   19.20    0.93 
  -2   4   1   18.58    0.80 
   2   4  -1   19.21    0.87 
   2   4  -1   19.18    1.13 
   2   4  -1   18.76    0.91 
   2   4  -1   19.05    0.88 
  -2   4   1   18.23    0.97 
  -2   4   1   19.41    0.91 
   2   4  -1   20.25    1.12 
  -2   4   1   18.38    1.10 
   2   4  -1   19.08    0.92 
   2   4  -1   19.00    1.05 
  -2   4   1   16.94    1.08 
  -2   4   1   16.89    0.85 
  -2   4   1   19.72    0.98 
  -2   4   1   18.91    0.95 
  -2   4   1   17.33    1.16 
  -2   4   1   20.24    1.68 
  -2   4   1   18.70    1.13 
  -2   4   1   19.73    0.98 
   2   4  -1   18.39    1.04 
  -1  -4   1    0.19    0.30 
  -1  -4   1    0.02    0.29 
   1  -4  -1    0.50    0.23 
   1  -4  -1    0.27    0.26 
  -1  -4   1    0.02    0.12 
  -1  -4   1    0.20    0.31 
   1  -4  -1   -0.56    0.27 
  -1  -4   1   -0.16    0.28 
  -1  -4   1    0.15    0.21 
   1  -4  -1    0.20    0.24 
   1  -4  -1   -0.12    0.26 
  -1  -4   1    0.64    0.32 
  -1  -4   1    0.00    0.21 
  -1  -4   1    0.56    0.27 
  -1  -4   1    0.30    0.57 
  -1  -4   1    0.27    0.28 
   1  -4  -1   -0.10    0.21 
  -1  -4   1    0.07    0.25 
   1  -4  -1    0.28    0.20 
   1  -4  -1    0.12    0.19 
  -1  -4   1    0.50    0.28 
  -1  -4   1    0.02    0.30 
  -1  -4   1    0.00    0.15 
  -1  -4   1    0.75    0.24 
   1  -4  -1    0.09    0.20 
   1  -4  -1    0.50    0.31 
   1  -4  -1    0.46    0.21 
  -1  -4   1    0.31    0.26 
  -1  -4   1    0.27    0.12 
  -1  -4   1    0.26    0.29 
  -1  -4   1    0.27    0.18 
   1  -4  -1    0.05    0.21 
  -1  -4   1    0.59    0.26 
  -1  -4   1   -0.02    0.22 
  -1  -4   1    0.22    0.31 
  -1  -4   1   -0.10    0.15 
   1  -4  -1    0.24    0.10 
  -1  -4   1    0.08    0.14 
  -1  -4   1   -0.04    0.16 
   1  -4  -1    0.19    0.15 
  -1  -4   1    0.26    0.27 
  -1  -4   1    0.13    0.26 
   1   4  -1    1.40    0.37 
  -1   4   1    0.58    0.21 
  -1   4   1   -0.22    0.23 
  -1   4   1    0.22    0.29 
  -1   4   1    0.23    0.37 
   1   4  -1    0.78    0.50 
  -1   4   1    0.21    0.19 
  -1   4   1    0.09    0.20 
  -1   4   1   -0.06    0.24 
  -1   4   1    0.37    0.22 
   1   4  -1    0.56    0.27 
   1   4  -1    0.45    0.27 
  -1   4   1    0.44    0.26 
  -1   4   1    0.02    0.19 
   1   4  -1    1.66    0.24 
  -1   4   1    0.01    0.11 
  -1   4   1    0.34    0.22 
  -1   4   1    0.88    0.31 
   1   4  -1    0.49    0.28 
  -1   4   1   -0.28    0.20 
   1   4  -1    1.17    0.31 
  -1   4   1   -0.10    0.18 
   1   4  -1    1.36    0.23 
  -1   4   1    0.38    0.12 
   1   4  -1    0.38    0.32 
  -1   4   1   -0.07    0.19 
   1   4  -1    0.87    0.17 
  -1   4   1    0.18    0.14 
  -1   4   1   -0.24    0.18 
   1   4  -1    1.53    0.27 
   1   4  -1    1.11    0.22 
  -1   4   1    0.13    0.18 
   1   4  -1    1.32    0.31 
   1   4  -1    1.48    0.39 
  -1   4   1    0.21    0.09 
  -1   4   1    0.27    0.11 
  -1   4   1    0.55    0.13 
  -1   4   1    0.05    0.13 
  -1   4   1    0.00    0.16 
   1   4  -1    1.80    0.38 
  -1   4   1    0.26    0.17 
  -1   4   1    0.27    0.27 
  -1   4   1    0.42    0.18 
   1   4  -1    1.32    0.35 
  -1   4   1    0.47    0.28 
  -1   4   1   -0.05    0.10 
   1   4  -1    0.67    0.26 
  -1   4   1   -0.04    0.22 
  -1   4   1    0.87    0.46 
  -1   4   1    0.29    0.13 
  -1   4   1    0.24    0.57 
   1   4  -1    1.61    0.33 
   0  -4   1   37.10    1.62 
   0  -4   1   37.26    1.69 
   0  -4   1   38.71    1.61 
   0  -4  -1   35.23    1.36 
   0  -4  -1   38.60    1.71 
   0  -4   1   35.39    1.67 
   0  -4  -1   36.24    1.71 
   0  -4  -1   38.20    1.63 
   0  -4  -1   39.08    1.72 
   0  -4  -1   29.83    1.92 
   0  -4  -1   35.90    1.67 
   0  -4   1   36.74    1.86 
   0  -4   1   32.93    1.92 
   0  -4   1   37.99    1.48 
   0  -4   1   37.94    1.61 
   0  -4   1   35.29    1.67 
   0  -4   1   37.84    2.69 
   0  -4   1   38.72    1.68 
   0  -4   1   33.83    1.58 
   0  -4   1   38.27    1.61 
   0  -4  -1   35.17    1.49 
   0  -4  -1   39.06    2.18 
   0  -4  -1   35.12    1.52 
   0  -4  -1   37.17    1.62 
   0  -4   1   38.19    2.27 
   0  -4  -1   36.93    1.68 
   0  -4  -1   37.88    1.59 
   0  -4   1   36.09    1.61 
   0  -4   1   40.57    1.67 
   0  -4   1   38.92    1.91 
   0  -4  -1   36.75    1.66 
   0  -4  -1   37.17    1.62 
   0  -4  -1   36.53    1.61 
   0  -4  -1   39.02    1.61 
   0   4   1   38.27    1.68 
   0   4   1   37.65    1.43 
   0   4   1   40.50    1.79 
   0   4  -1   37.58    1.70 
   0   4  -1   36.50    1.42 
   0   4   1   38.07    1.63 
   0   4  -1   39.84    1.59 
   0   4   1   33.31    1.61 
   0   4  -1   37.05    1.68 
   0   4  -1   36.39    1.85 
   0   4   1   36.47    1.68 
   0   4  -1   37.03    1.64 
   0   4  -1   36.61    1.63 
   0   4   1   36.36    1.60 
   0   4  -1   36.47    1.57 
   0   4  -1   37.47    1.57 
   0   4   1   36.90    1.55 
   0   4  -1   39.07    2.08 
   0   4   1   36.34    1.56 
   0   4   1   37.22    1.57 
   0   4  -1   38.27    1.47 
   0   4   1   37.49    1.52 
   0   4   1   36.91    1.91 
   0   4   1   36.56    1.58 
   0   4   1   35.83    1.63 
   0   4   1   37.53    1.71 
   0   4   1   39.47    1.65 
   0   4  -1   34.59    1.34 
   0   4  -1   35.71    1.71 
   0   4   1   38.96    2.00 
   0   4  -1   34.07    2.77 
   0   4   1   36.10    1.40 
   0   4  -1   39.08    1.69 
   0   4  -1   36.11    1.34 
   0   4   1   37.30    1.40 
   0   4  -1   39.08    1.55 
   0   4  -1   37.45    1.63 
   0   4  -1   36.64    1.68 
   0   4   1   37.36    2.34 
   0   4  -1   38.46    1.73 
   0   4   1   37.06    1.59 
   0   4  -1   37.95    1.59 
  -1  -4  -1   48.14    2.17 
   1  -4   1   45.12    1.91 
  -1  -4  -1   47.16    1.80 
   1  -4   1   50.30    1.96 
  -1  -4  -1   48.29    2.00 
  -1  -4  -1   47.24    2.06 
   1  -4   1   47.54    1.92 
   1  -4   1   47.70    1.98 
  -1  -4  -1   48.38    2.03 
   1  -4   1   47.43    2.01 
  -1  -4  -1   49.75    2.11 
  -1  -4  -1   46.05    2.03 
   1  -4   1   43.51    1.85 
  -1  -4  -1   44.30    1.71 
  -1  -4  -1   46.98    1.75 
  -1  -4  -1   48.81    2.01 
   1  -4   1   46.49    2.08 
  -1  -4  -1   48.43    2.00 
  -1  -4  -1   48.81    1.87 
  -1  -4  -1   45.45    1.95 
   1  -4   1   45.07    1.86 
  -1  -4  -1   46.69    2.01 
   1  -4   1   46.37    1.75 
  -1  -4  -1   46.92    2.09 
   1  -4   1   44.44    1.99 
  -1  -4  -1   47.96    1.91 
  -1  -4  -1   45.93    1.74 
   1  -4   1   46.44    1.81 
  -1  -4  -1   46.35    1.91 
   1  -4   1   50.64    2.14 
  -1  -4  -1   49.12    2.05 
  -1  -4  -1   47.56    1.98 
  -1  -4  -1   46.61    2.18 
  -1  -4  -1   47.08    1.85 
   1  -4   1   48.12    1.99 
  -1  -4  -1   48.81    2.03 
  -1  -4  -1   50.43    1.93 
  -1  -4  -1   47.48    1.89 
  -1  -4  -1   47.68    1.83 
  -1  -4  -1   45.74    2.09 
   1  -4   1   45.84    1.96 
   1  -4   1   44.70    2.02 
  -1  -4  -1   47.83    1.99 
  -1  -4  -1   45.39    2.06 
  -1   4  -1   46.88    1.81 
   1   4   1   45.88    2.20 
  -1   4  -1   46.46    1.99 
   1   4   1   50.11    2.29 
  -1   4  -1   45.41    1.84 
  -1   4  -1   44.81    2.21 
   1   4   1   48.12    1.97 
  -1   4  -1   45.08    1.88 
   1   4   1   47.99    1.76 
  -1   4  -1   48.55    2.13 
  -1   4  -1   48.01    2.12 
  -1   4  -1   43.06    2.06 
   1   4   1   48.83    1.80 
  -1   4  -1   44.80    1.96 
   1   4   1   44.03    2.00 
  -1   4  -1   44.85    1.92 
  -1   4  -1   44.18    1.85 
   1   4   1   46.70    1.75 
  -1   4  -1   48.44    2.01 
   1   4   1   47.87    1.76 
  -1   4  -1   44.61    2.11 
   1   4   1   48.52    2.06 
  -1   4  -1   43.69    1.82 
  -1   4  -1   43.86    2.44 
   1   4   1   47.23    2.06 
   1   4   1   46.66    1.84 
   1   4   1   46.40    1.85 
  -1   4  -1   48.03    2.09 
  -1   4  -1   43.22    2.24 
   1   4   1   46.93    2.00 
  -1   4  -1   47.55    1.91 
  -1   4  -1   46.62    1.91 
  -1   4  -1   44.76    1.83 
   1   4   1   47.55    1.91 
  -1   4  -1   45.65    1.74 
  -1   4  -1   47.13    2.02 
   1   4   1   44.76    2.01 
   1   4   1   46.33    1.95 
   1   4   1   49.62    1.83 
  -1   4  -1   46.80    1.80 
   1   4   1   46.68    1.73 
  -1   4  -1   48.62    1.95 
  -2  -4  -1   43.24    1.92 
  -2  -4  -1   43.39    1.98 
   2  -4   1   43.02    1.71 
   2  -4   1   42.71    1.84 
  -2  -4  -1   41.54    1.66 
  -2  -4  -1   42.09    1.72 
  -2  -4  -1   43.35    1.98 
  -2  -4  -1   44.04    1.96 
  -2  -4  -1   39.50    1.89 
   2  -4   1   42.91    1.77 
   2  -4   1   41.70    1.62 
   2  -4   1   43.75    1.63 
  -2  -4  -1   40.66    1.95 
  -2  -4  -1   41.03    1.92 
  -2  -4  -1   43.79    1.80 
  -2  -4  -1   40.77    1.66 
  -2  -4  -1   42.95    1.88 
  -2  -4  -1   41.35    2.38 
   2  -4   1   42.46    1.85 
  -2  -4  -1   42.01    1.75 
  -2  -4  -1   42.25    2.03 
   2  -4   1   41.38    1.69 
  -2  -4  -1   42.42    2.01 
  -2  -4  -1   40.33    1.69 
   2  -4   1   42.14    1.81 
  -2  -4  -1   43.25    1.89 
  -2  -4  -1   43.86    2.13 
  -2  -4  -1   43.32    1.89 
  -2  -4  -1   41.57    2.09 
   2  -4   1   41.13    1.57 
  -2  -4  -1   41.55    1.85 
   2  -4   1   44.49    2.00 
   2  -4   1   41.68    1.62 
  -2  -4  -1   44.42    1.82 
   2  -4   1   42.57    1.84 
  -2  -4  -1   42.55    1.89 
  -2  -4  -1   42.49    1.98 
  -2  -4  -1   41.48    1.69 
  -2  -4  -1   38.74    1.80 
   2  -4   1   45.53    1.93 
  -2  -4  -1   41.75    2.10 
   2  -4   1   41.71    1.76 
  -2  -4  -1   44.57    1.87 
   2   4   1   42.90    1.72 
  -2   4  -1   42.59    1.69 
   2   4   1   43.30    1.70 
  -2   4  -1   42.16    1.83 
  -2   4  -1   41.24    1.75 
   2   4   1   39.52    1.86 
  -2   4  -1   42.59    1.99 
  -2   4  -1   41.57    1.54 
  -2   4  -1   41.22    2.18 
  -2   4  -1   42.21    1.73 
  -2   4  -1   42.86    1.74 
   2   4   1   39.68    1.86 
  -2   4  -1   43.30    1.63 
  -2   4  -1   43.32    1.70 
   2   4   1   43.81    1.91 
  -2   4  -1   42.56    1.95 
  -2   4  -1   42.11    1.67 
  -2   4  -1   42.43    1.80 
   2   4   1   43.74    1.68 
  -2   4  -1   43.29    1.86 
   2   4   1   43.98    1.77 
  -2   4  -1   41.66    1.72 
   2   4   1   42.33    1.85 
  -2   4  -1   46.47    1.86 
  -2   4  -1   41.00    1.70 
   2   4   1   42.06    1.64 
  -2   4  -1   42.81    2.08 
   2   4   1   43.15    1.90 
  -2   4  -1   41.90    1.71 
   2   4   1   43.73    1.79 
   2   4   1   42.21    1.81 
   2   4   1   42.13    1.94 
  -2   4  -1   41.64    1.61 
  -2   4  -1   40.33    1.55 
   2   4   1   41.69    2.06 
  -2   4  -1   43.66    1.70 
  -2   4  -1   40.44    1.70 
   2   4   1   42.43    1.69 
   2   4   1   41.85    1.83 
  -2   4  -1   43.60    1.84 
  -2   4  -1   41.69    2.03 
  -2   4  -1   44.57    2.92 
   2   4   1   43.17    1.76 
  -2   4  -1   41.49    2.32 
   2   4   1   42.52    2.15 
  -2   4  -1   42.91    1.72 
  -2   4  -1   42.65    2.35 
   3  -4   1    0.20    0.22 
   3  -4   1   -0.12    0.18 
   3  -4   1    0.13    0.25 
   3  -4   1   -0.31    0.15 
   3  -4   1    0.16    0.22 
   3  -4   1   -0.16    0.25 
  -3  -4  -1   -0.01    0.15 
  -3  -4  -1   -0.09    0.33 
  -3  -4  -1   -0.54    0.21 
  -3  -4  -1   -0.09    0.31 
  -3  -4  -1   -0.30    0.22 
  -3  -4  -1   -0.01    0.25 
  -3  -4  -1    0.12    0.27 
   3  -4   1   -0.10    0.14 
  -3  -4  -1   -0.03    0.20 
   3  -4   1   -0.08    0.16 
  -3  -4  -1    0.12    0.33 
   3  -4   1   -0.12    0.20 
  -3  -4  -1   -0.20    0.28 
  -3  -4  -1    0.33    0.30 
  -3  -4  -1    0.18    0.20 
  -3  -4  -1   -0.48    0.28 
  -3  -4  -1    0.11    0.25 
  -3  -4  -1    0.37    0.31 
  -3  -4  -1   -0.47    0.30 
  -3  -4  -1   -0.17    0.28 
   3  -4   1   -0.27    0.21 
   3  -4   1   -0.05    0.23 
  -3  -4  -1   -0.21    0.30 
  -3  -4  -1    0.00    0.32 
  -3   4  -1    0.03    0.16 
  -3   4  -1    0.13    0.38 
  -3   4  -1   -0.18    0.13 
   3   4   1    0.08    0.27 
   3   4   1    0.04    0.23 
   3   4   1    0.17    0.22 
   3   4   1   -0.04    0.25 
   3   4   1    0.03    0.22 
   3   4   1    0.18    0.26 
  -3   4  -1   -0.01    0.23 
  -3   4  -1    0.18    0.37 
   3   4   1    0.12    0.20 
  -3   4  -1    0.05    0.20 
   3   4   1   -0.10    0.17 
   3   4   1   -0.08    0.28 
   3   4   1    0.06    0.36 
  -3   4  -1   -0.44    0.22 
  -3   4  -1    0.34    0.25 
   3   4   1    0.12    0.21 
  -3   4  -1   -0.09    0.25 
   3   4   1    0.16    0.26 
  -3   4  -1    0.01    0.13 
  -3   4  -1    0.15    0.23 
  -3   4  -1   -0.23    0.22 
  -3   4  -1    0.12    0.16 
   3   4   1    0.05    0.28 
  -3   4  -1   -0.06    0.14 
   3   4   1   -0.25    0.23 
  -3   4  -1   -0.11    0.14 
  -3   4  -1    0.02    0.15 
  -3   4  -1    0.08    0.34 
  -3   4  -1    0.19    0.17 
  -3   4  -1    0.06    0.13 
   3   4   1   -0.12    0.21 
   3   4   1    0.23    0.28 
  -3   4  -1    0.14    0.17 
  -3   4  -1   -0.08    0.29 
  -4  -4  -1    0.67    0.51 
  -4  -4  -1    0.84    0.37 
  -4  -4  -1    0.95    0.33 
   4  -4   1    1.18    0.18 
  -4  -4  -1    0.61    0.40 
   4  -4   1    1.01    0.30 
  -4  -4  -1    1.14    0.39 
  -4  -4  -1    0.86    0.55 
   4  -4   1    0.90    0.42 
   4  -4   1    1.02    0.19 
  -4  -4  -1    0.56    0.24 
  -4  -4  -1    1.11    0.55 
  -4  -4  -1    0.75    0.48 
   4  -4   1    1.05    0.35 
  -4  -4  -1    1.35    0.43 
  -4  -4  -1    0.66    0.39 
   4  -4   1    1.02    0.36 
  -4  -4  -1    0.95    0.33 
  -4  -4  -1    0.73    0.38 
   4  -4   1    1.84    0.39 
  -4  -4  -1    0.15    0.38 
  -4  -4  -1    0.92    0.38 
   4  -4   1    1.06    0.34 
   4  -4   1    1.41    0.34 
  -4  -4  -1    1.07    0.40 
  -4  -4  -1    1.34    0.41 
   4  -4   1    0.94    0.31 
   4  -4   1    1.06    0.29 
   4  -4   1    1.25    0.42 
  -4   4  -1    1.37    0.33 
   4   4   1    0.84    0.31 
   4   4   1    0.81    0.34 
  -4   4  -1    1.02    0.34 
   4   4   1    0.83    0.36 
  -4   4  -1    1.24    0.20 
   4   4   1    0.67    0.37 
   4   4   1    0.63    0.34 
  -4   4  -1    0.92    0.36 
   4   4   1    0.87    0.35 
   4   4   1    0.88    0.34 
  -4   4  -1    1.25    0.17 
  -4   4  -1    1.12    0.51 
  -4   4  -1    0.74    0.36 
   4   4   1    0.92    0.39 
  -4   4  -1    1.10    0.61 
   4   4   1    0.99    0.36 
  -4   4  -1    1.24    0.23 
  -4   4  -1    1.09    0.21 
   4   4   1    0.95    0.31 
  -4   4  -1    1.57    0.62 
   4   4   1    1.12    0.45 
   4   4   1    1.97    0.47 
   4   4   1    1.17    0.38 
  -4   4  -1    1.34    0.38 
  -4   4  -1    0.98    0.20 
   4   4   1    0.84    0.34 
  -4   4  -1    1.30    0.26 
  -4   4  -1    1.06    0.38 
  -4   4  -1    0.53    0.23 
  -4   4  -1    1.04    0.20 
  -4   4  -1    0.74    0.50 
  -4   4  -1    1.16    0.23 
  -4   4  -1    1.13    0.16 
   4   4   1    0.78    0.42 
   5  -4   1    7.97    0.97 
  -5  -4  -1    7.44    0.98 
  -5  -4  -1    8.95    0.96 
  -5  -4  -1    8.13    1.32 
  -5  -4  -1    8.54    0.88 
  -5  -4  -1    9.82    0.76 
  -5  -4  -1    7.13    0.79 
  -5  -4  -1    8.35    0.93 
   5  -4   1    9.30    0.83 
   5  -4   1    7.75    0.83 
  -5  -4  -1    7.99    0.88 
  -5  -4  -1    8.58    0.89 
   5  -4   1    8.76    0.88 
  -5  -4  -1    8.12    1.03 
  -5  -4  -1    7.41    1.22 
  -5  -4  -1   10.04    1.18 
   5  -4   1    8.28    0.74 
  -5  -4  -1    7.41    0.66 
  -5  -4  -1    7.74    0.91 
  -5  -4  -1    8.65    0.90 
  -5  -4  -1    7.37    1.28 
   5  -4   1    7.37    0.70 
   5  -4   1    9.91    0.73 
   5  -4   1    8.06    0.83 
  -5  -4  -1    7.12    0.87 
   5  -4   1    8.77    0.96 
   5  -4   1    9.97    1.12 
   5   4   1    9.74    0.88 
  -5   4  -1    8.78    0.84 
  -5   4  -1    8.40    0.69 
   5   4   1    7.97    0.84 
  -5   4  -1    7.72    0.89 
   5   4   1    9.32    0.88 
  -5   4  -1    8.53    0.53 
  -5   4  -1    8.75    0.88 
  -5   4  -1    7.02    0.88 
  -5   4  -1    8.42    1.30 
   5   4   1    7.91    0.85 
   5   4   1    8.22    0.91 
  -5   4  -1    9.21    1.02 
  -5   4  -1    8.32    1.35 
   5   4   1    7.18    0.85 
  -5   4  -1   11.19    0.75 
   5   4   1    8.39    0.92 
  -5   4  -1    9.68    1.55 
  -5   4  -1    7.39    1.09 
   5   4   1    8.95    1.10 
   5   4   1    7.80    0.87 
   5   4   1   10.22    0.98 
   5   4   1    9.15    0.89 
   5   4   1    7.85    0.84 
   5   4   1    8.18    0.87 
  -5   4  -1    8.05    0.72 
  -6  -4  -1   42.96    2.45 
   6  -4   1   44.52    2.36 
   6  -4   1   43.43    2.21 
  -6  -4  -1   43.40    2.19 
  -6  -4  -1   43.36    2.51 
  -6  -4  -1   46.77    3.04 
  -6  -4  -1   46.23    2.37 
  -6  -4  -1   43.41    1.97 
  -6  -4  -1   42.92    2.20 
  -6  -4  -1   48.71    2.31 
   6  -4   1   45.73    2.49 
  -6  -4  -1   43.84    2.45 
  -6  -4  -1   43.99    2.93 
   6  -4   1   41.72    2.05 
   6  -4   1   44.37    2.46 
  -6  -4  -1   42.46    2.22 
   6  -4   1   39.70    2.08 
  -6  -4  -1   44.65    2.30 
  -6  -4  -1   42.69    2.18 
   6  -4   1   45.53    1.97 
   6  -4   1   42.88    2.23 
   6  -4   1   43.92    2.01 
  -6  -4  -1   42.74    2.98 
  -6  -4  -1   44.38    2.97 
  -6  -4  -1   45.37    2.38 
  -6  -4  -1   42.37    2.29 
  -6  -4  -1   44.50    2.03 
   6  -4   1   48.85    2.29 
  -6   4  -1   39.06    2.06 
  -6   4  -1   46.18    2.55 
  -6   4  -1   45.51    2.39 
   6   4   1   41.45    2.21 
  -6   4  -1   43.92    3.23 
   6   4   1   46.83    2.25 
   6   4   1   46.60    2.24 
   6   4   1   44.39    2.17 
   6   4   1   47.57    2.30 
  -6   4  -1   44.94    2.38 
  -6   4  -1   43.21    2.97 
  -6   4  -1   43.95    1.99 
   6   4   1   42.39    2.33 
   6   4   1   45.25    2.57 
   6   4   1   45.07    2.27 
  -6   4  -1   44.24    2.23 
  -6   4  -1   41.42    2.04 
  -6   4  -1   43.52    2.28 
   6   4   1   42.75    2.17 
  -6   4  -1   45.57    1.99 
  -6   4  -1   43.06    2.19 
   6   4   1   44.13    2.17 
   6   4   1   44.15    2.22 
   6   4   1   44.97    2.23 
   6   4   1   46.31    2.17 
   6   4   1   45.09    2.27 
  -6   4  -1   43.91    2.95 
  -6   4  -1   44.52    2.42 
  -6   4  -1   42.72    3.02 
   7  -4   1   30.70    1.66 
  -7  -4  -1   29.90    2.63 
   7  -4   1   26.80    1.79 
  -7  -4  -1   25.87    1.94 
  -7  -4  -1   28.63    1.60 
  -7  -4  -1   30.43    1.86 
  -7  -4  -1   25.11    1.71 
  -7  -4  -1   30.14    2.58 
  -7  -4  -1   29.02    2.10 
  -7  -4  -1   30.93    1.84 
   7  -4   1   26.48    1.67 
   7  -4   1   26.19    1.95 
  -7  -4  -1   27.92    1.73 
  -7  -4  -1   31.43    1.82 
  -7  -4  -1   26.85    2.46 
  -7  -4  -1   29.15    1.93 
  -7  -4  -1   27.63    1.78 
  -7  -4  -1   30.16    1.75 
   7  -4   1   30.38    1.81 
   7  -4   1   28.87    1.81 
  -7  -4  -1   30.10    2.06 
  -7  -4  -1   29.63    1.91 
  -7  -4  -1   27.35    2.53 
   7  -4   1   26.58    1.85 
   7   4   1   27.68    1.76 
  -7   4  -1   27.91    1.98 
  -7   4  -1   27.11    1.93 
  -7   4  -1   27.68    2.47 
   7   4   1   30.83    1.76 
   7   4   1   26.24    1.70 
  -7   4  -1   30.96    1.92 
  -7   4  -1   31.89    2.99 
   7   4   1   30.70    1.85 
   7   4   1   30.41    1.82 
  -7   4  -1   27.91    2.62 
  -7   4  -1   31.11    1.67 
   7   4   1   30.21    1.77 
   7   4   1   28.68    1.76 
   7   4   1   25.87    1.66 
  -7   4  -1   26.72    1.87 
   7   4   1   25.20    1.76 
  -7   4  -1   27.92    2.58 
   7   4   1   26.75    1.74 
   7   4   1   29.27    2.13 
   7   4   1   27.36    2.05 
   7   4   1   27.93    1.75 
  -7   4  -1   28.39    1.79 
   7   4   1   29.22    1.66 
  -8  -4  -1   64.67    3.39 
  -8  -4  -1   56.87    2.81 
  -8  -4  -1   57.85    4.13 
  -8  -4  -1   61.32    3.03 
  -8  -4  -1   61.60    2.99 
  -8  -4  -1   59.42    3.08 
   8  -4   1   59.68    2.95 
  -8  -4  -1   60.85    3.32 
  -8  -4  -1   63.79    3.48 
  -8  -4  -1   61.10    3.13 
  -8  -4  -1   63.15    3.25 
  -8  -4  -1   56.88    4.02 
  -8  -4  -1   58.29    3.04 
  -8  -4  -1   60.64    4.50 
   8  -4   1   63.31    3.14 
  -8  -4  -1   58.15    3.01 
   8  -4   1   62.62    3.10 
  -8  -4  -1   65.01    4.23 
   8  -4   1   59.54    3.28 
  -8  -4  -1   63.50    4.24 
   8  -4   1   63.36    3.09 
   8  -4   1   62.75    2.92 
   8  -4   1   61.15    3.39 
  -8  -4  -1   63.26    3.20 
  -8  -4  -1   58.50    2.93 
  -8   4  -1   60.18    2.89 
   8   4   1   62.23    3.11 
  -8   4  -1   63.50    4.23 
   8   4   1   61.24    3.03 
   8   4   1   57.18    3.07 
  -8   4  -1   60.60    3.19 
   8   4   1   63.49    3.15 
   8   4   1   62.06    3.04 
  -8   4  -1   58.86    3.27 
   8   4   1   64.70    3.01 
  -8   4  -1   61.72    3.36 
   8   4   1   61.95    2.86 
  -8   4  -1   61.06    4.25 
   8   4   1   59.39    3.15 
   8   4   1   62.04    3.02 
  -8   4  -1   62.58    4.22 
   8   4   1   56.76    2.96 
   8   4   1   62.09    3.05 
   8   4   1   57.48    2.98 
  -8   4  -1   59.20    3.21 
   8   4   1   65.98    3.55 
  -8   4  -1   57.97    4.13 
   8   4   1   55.65    3.42 
  -8   4  -1   58.63    4.44 
  -8   4  -1   67.59    3.17 
  -9  -4  -1    8.02    1.82 
  -9  -4  -1    9.91    1.51 
  -9  -4  -1    7.21    1.08 
   9  -4   1    7.81    1.16 
  -9  -4  -1    9.32    2.05 
   9  -4   1    9.07    1.17 
  -9  -4  -1   10.54    1.68 
  -9  -4  -1    8.23    1.97 
  -9  -4  -1    8.11    1.33 
  -9  -4  -1    9.60    2.23 
   9  -4   1    8.28    1.41 
  -9  -4  -1    7.03    1.18 
   9  -4   1   10.02    1.35 
   9  -4   1    8.36    1.22 
  -9  -4  -1    8.44    1.22 
  -9  -4  -1    7.70    1.21 
  -9  -4  -1    9.63    1.26 
  -9  -4  -1    8.79    1.15 
  -9  -4  -1    9.36    2.06 
   9  -4   1    7.63    1.32 
  -9  -4  -1    9.56    1.46 
   9  -4   1    7.18    1.08 
  -9  -4  -1    7.83    1.22 
  -9   4  -1    9.08    2.00 
  -9   4  -1    9.01    2.02 
  -9   4  -1    7.66    1.36 
  -9   4  -1    8.22    1.34 
   9   4   1    7.98    1.16 
   9   4   1    7.72    1.48 
  -9   4  -1   11.06    1.50 
  -9   4  -1    9.24    1.13 
  -9   4  -1    8.19    1.43 
   9   4   1    8.89    1.22 
   9   4   1    9.95    1.28 
  -9   4  -1    8.55    1.96 
  -9   4  -1    8.00    1.21 
   9   4   1    8.83    1.28 
  -9   4  -1   13.13    2.66 
   9   4   1    9.04    1.22 
   9   4   1    8.08    1.31 
  -9   4  -1    9.63    2.14 
   9   4   1   10.40    1.26 
   9   4   1    9.81    1.34 
   9   4   1    9.74    1.36 
   9   4   1    7.53    1.38 
   9   4   1   10.23    1.21 
  -9  -5   1   39.62    3.61 
   9  -5  -1   41.26    2.47 
  -9  -5   1   39.86    2.81 
  -9  -5   1   37.43    3.40 
   9  -5  -1   40.72    2.46 
  -9  -5   1   38.19    2.80 
  -9  -5   1   37.70    3.76 
  -9  -5   1   40.53    2.54 
  -9  -5   1   39.68    2.79 
  -9  -5   1   37.24    3.41 
  -9  -5   1   39.95    2.32 
   9  -5  -1   40.50    2.31 
  -9  -5   1   35.69    2.44 
  -9  -5   1   36.56    2.56 
  -9  -5   1   36.77    2.40 
  -9  -5   1   35.71    2.52 
  -9  -5   1   39.67    3.53 
  -9  -5   1   40.89    2.43 
  -9  -5   1   35.98    3.30 
  -9  -5   1   41.68    2.37 
   9  -5  -1   45.16    2.53 
  -9   5   1   39.21    2.63 
  -9   5   1   42.52    3.69 
  -9   5   1   39.29    2.51 
  -9   5   1   39.09    2.70 
   9   5  -1   36.36    2.40 
   9   5  -1   36.98    2.44 
  -9   5   1   36.13    3.34 
   9   5  -1   38.42    2.47 
  -9   5   1   42.05    3.54 
  -9   5   1   37.13    2.51 
   9   5  -1   39.38    2.86 
   9   5  -1   40.83    2.88 
   9   5  -1   37.71    2.44 
   9   5  -1   37.59    2.35 
   9   5  -1   41.91    2.44 
   9   5  -1   37.32    2.39 
   9   5  -1   44.27    2.48 
  -9   5   1   39.35    3.89 
  -9   5   1   40.10    2.65 
   9   5  -1   37.80    2.34 
  -9   5   1   40.24    3.52 
   9   5  -1   40.56    2.45 
   8  -5  -1    0.95    0.67 
  -8  -5   1    1.78    0.88 
  -8  -5   1    1.47    0.73 
  -8  -5   1    2.35    1.13 
  -8  -5   1    1.83    0.66 
  -8  -5   1    0.24    0.95 
   8  -5  -1    2.39    0.76 
   8  -5  -1    1.96    0.64 
  -8  -5   1    2.03    0.69 
   8  -5  -1    1.10    0.61 
  -8  -5   1    0.68    0.63 
  -8  -5   1    1.03    0.94 
   8  -5  -1    1.45    0.71 
  -8  -5   1    1.87    0.90 
  -8  -5   1    1.02    0.98 
  -8  -5   1    1.49    0.72 
  -8  -5   1    1.64    0.84 
   8  -5  -1    0.37    0.53 
  -8  -5   1    1.74    1.01 
  -8  -5   1    1.20    0.70 
  -8  -5   1    1.69    0.66 
  -8  -5   1    1.17    0.66 
   8  -5  -1    1.76    0.61 
  -8  -5   1    2.28    0.69 
  -8   5   1    2.41    1.34 
   8   5  -1    1.50    0.67 
   8   5  -1    1.50    0.62 
   8   5  -1    1.40    0.65 
  -8   5   1    0.61    0.61 
   8   5  -1    1.57    0.67 
   8   5  -1    1.31    0.64 
  -8   5   1    1.40    0.66 
   8   5  -1    1.57    0.59 
  -8   5   1    1.95    0.77 
  -8   5   1    0.78    0.67 
   8   5  -1    1.26    0.61 
   8   5  -1    2.01    0.80 
  -8   5   1    0.61    0.92 
   8   5  -1    2.05    0.74 
  -8   5   1    1.24    1.08 
   8   5  -1    0.95    0.60 
  -8   5   1    1.31    1.00 
   8   5  -1    2.03    0.67 
   8   5  -1    1.69    0.76 
  -8   5   1    1.16    0.97 
   8   5  -1    1.27    0.69 
   8   5  -1    1.29    0.62 
  -8   5   1    0.81    0.67 
   7  -5  -1   29.32    1.66 
  -7  -5   1   29.53    2.58 
  -7  -5   1   25.56    2.48 
  -7  -5   1   30.58    1.93 
  -7  -5   1   29.74    1.84 
  -7  -5   1   32.56    2.07 
  -7  -5   1   29.65    1.97 
   7  -5  -1   28.02    1.78 
  -7  -5   1   27.17    1.76 
  -7  -5   1   31.25    2.68 
  -7  -5   1   30.58    2.59 
   7  -5  -1   31.44    1.97 
  -7  -5   1   29.86    1.88 
   7  -5  -1   32.22    1.76 
   7  -5  -1   31.58    1.86 
  -7  -5   1   29.58    1.77 
  -7  -5   1   27.58    1.89 
   7  -5  -1   33.59    1.89 
  -7  -5   1   30.60    2.18 
  -7  -5   1   34.07    2.71 
  -7  -5   1   29.24    1.90 
  -7  -5   1   30.26    2.15 
  -7  -5   1   30.08    2.10 
   7  -5  -1   30.02    1.93 
  -7  -5   1   30.13    2.14 
  -7   5   1   29.80    2.00 
   7   5  -1   29.68    1.81 
  -7   5   1   31.50    1.88 
  -7   5   1   29.30    2.34 
   7   5  -1   29.44    1.82 
   7   5  -1   28.93    1.81 
   7   5  -1   28.33    1.83 
  -7   5   1   29.88    1.98 
  -7   5   1   30.44    2.61 
   7   5  -1   30.26    1.84 
   7   5  -1   28.54    1.78 
  -7   5   1   33.98    2.80 
   7   5  -1   27.93    1.83 
   7   5  -1   31.92    1.93 
  -7   5   1   34.80    2.01 
   7   5  -1   31.46    1.92 
   7   5  -1   29.10    2.15 
  -7   5   1   32.65    1.70 
   7   5  -1   28.44    1.79 
   7   5  -1   30.46    1.88 
  -7   5   1   29.66    2.60 
   7   5  -1   28.72    1.76 
  -7   5   1   30.65    2.91 
  -7   5   1   30.35    2.00 
  -7   5   1   27.74    2.51 
   7   5  -1   29.16    1.90 
  -6  -5   1   20.50    1.97 
   6  -5  -1   18.88    1.17 
  -6  -5   1   19.83    1.50 
  -6  -5   1   19.60    1.20 
  -6  -5   1   18.71    1.27 
  -6  -5   1   20.87    1.26 
   6  -5  -1   21.48    1.37 
  -6  -5   1   20.50    1.43 
  -6  -5   1   20.31    1.38 
  -6  -5   1   18.83    1.48 
  -6  -5   1   20.16    1.59 
   6  -5  -1   21.14    1.28 
   6  -5  -1   19.27    1.21 
  -6  -5   1   18.34    1.95 
  -6  -5   1   19.77    1.59 
  -6  -5   1   18.81    1.57 
  -6  -5   1   18.97    1.92 
   6  -5  -1   22.11    1.39 
   6  -5  -1   19.08    1.39 
  -6  -5   1   21.09    2.01 
  -6  -5   1   16.94    1.43 
   6  -5  -1   19.97    1.46 
  -6  -5   1   19.77    1.95 
  -6  -5   1   19.66    1.42 
  -6  -5   1   18.19    1.41 
  -6  -5   1   18.44    1.39 
  -6   5   1   19.24    1.17 
  -6   5   1   19.39    1.43 
   6   5  -1   17.97    1.31 
  -6   5   1   20.48    1.54 
   6   5  -1   21.65    1.36 
  -6   5   1   22.58    1.40 
   6   5  -1   20.54    1.42 
  -6   5   1   20.64    2.03 
   6   5  -1   20.01    1.43 
  -6   5   1   18.82    1.90 
   6   5  -1   20.96    1.35 
   6   5  -1   18.47    1.59 
  -6   5   1   22.07    1.54 
   6   5  -1   20.64    1.40 
  -6   5   1   17.42    1.86 
   6   5  -1   21.37    1.39 
  -6   5   1   19.57    1.47 
  -6   5   1   21.19    1.95 
   6   5  -1   19.90    1.45 
   6   5  -1   19.03    1.36 
   6   5  -1   19.19    1.40 
   6   5  -1   20.28    1.41 
   6   5  -1   20.90    1.45 
  -6   5   1   19.85    1.26 
   6   5  -1   20.43    1.34 
   6   5  -1   19.89    1.66 
  -6   5   1   20.39    1.95 
  -6   5   1   18.68    2.11 
  -6   5   1   20.52    1.34 
  -5  -5   1  207.11    7.91 
   5  -5  -1  213.12    7.83 
  -5  -5   1  212.56    8.67 
  -5  -5   1  207.86    7.97 
  -5  -5   1  215.48    8.72 
  -5  -5   1  215.79    8.16 
   5  -5  -1  207.52    7.93 
  -5  -5   1  207.94    8.11 
  -5  -5   1  206.58    7.75 
  -5  -5   1  204.61    7.94 
   5  -5  -1  205.31    7.98 
  -5  -5   1  209.49    8.02 
  -5  -5   1  212.70    8.25 
  -5  -5   1  208.04    8.20 
   5  -5  -1  218.93    7.78 
  -5  -5   1  205.94    7.96 
   5  -5  -1  213.62    7.83 
   5  -5  -1  205.84    7.71 
  -5  -5   1  210.92    8.07 
  -5  -5   1  212.36    7.94 
   5  -5  -1  207.20    7.66 
  -5  -5   1  215.25    8.70 
  -5  -5   1  203.91    8.67 
  -5  -5   1  211.17    8.10 
  -5  -5   1  212.49    8.63 
   5  -5  -1  213.66    7.60 
  -5  -5   1  208.71    7.79 
   5  -5  -1  212.73    7.85 
  -5  -5   1  220.63    7.76 
  -5   5   1  208.00    7.95 
  -5   5   1  211.83    7.85 
   5   5  -1  206.95    7.86 
  -5   5   1  214.39    7.78 
   5   5  -1  213.18    8.21 
   5   5  -1  203.08    8.27 
  -5   5   1  190.91    7.66 
   5   5  -1  213.90    7.98 
   5   5  -1  215.10    7.84 
  -5   5   1  213.15    8.64 
  -5   5   1  215.73    8.71 
   5   5  -1  212.31    7.90 
   5   5  -1  211.63    7.83 
  -5   5   1  213.24    8.01 
  -5   5   1  217.61    8.96 
   5   5  -1  210.53    7.95 
  -5   5   1  211.97    7.45 
  -5   5   1  216.54    8.07 
   5   5  -1  205.71    7.78 
   5   5  -1  199.30    7.91 
  -5   5   1  197.48    8.76 
  -5   5   1  204.44    8.59 
   5   5  -1  210.72    7.92 
   5   5  -1  208.85    7.93 
  -5   5   1  216.75    7.85 
  -5   5   1  207.20    8.71 
   5   5  -1  206.52    8.05 
   5   5  -1  212.53    7.84 
  -5   5   1  211.36    8.01 
   5   5  -1  216.99    8.02 
  -5   5   1  211.66    7.65 
  -5   5   1  214.52    8.06 
  -4  -5   1   39.12    1.95 
  -4  -5   1   43.61    2.46 
   4  -5  -1   42.36    1.80 
  -4  -5   1   41.40    2.06 
   4  -5  -1   42.44    1.79 
  -4  -5   1   42.31    2.19 
  -4  -5   1   37.72    2.05 
  -4  -5   1   40.56    2.08 
   4  -5  -1   43.12    1.88 
  -4  -5   1   39.39    2.21 
  -4  -5   1   42.83    2.05 
  -4  -5   1   40.37    2.36 
   4  -5  -1   41.88    1.76 
  -4  -5   1   39.82    2.14 
   4  -5  -1   39.76    1.89 
   4  -5  -1   41.15    2.04 
  -4  -5   1   40.31    2.02 
  -4  -5   1   43.24    2.54 
   4  -5  -1   41.89    1.94 
  -4  -5   1   38.80    1.91 
  -4  -5   1   41.66    1.97 
  -4  -5   1   40.67    2.22 
   4  -5  -1   42.45    1.87 
   4  -5  -1   41.18    1.93 
  -4  -5   1   41.16    1.79 
  -4  -5   1   39.92    2.38 
  -4  -5   1   41.72    2.00 
  -4  -5   1   42.31    2.14 
  -4  -5   1   42.40    2.42 
  -4   5   1   42.05    1.73 
   4   5  -1   41.15    1.86 
  -4   5   1   43.28    2.15 
  -4   5   1   43.48    2.00 
  -4   5   1   42.83    2.58 
   4   5  -1   41.06    1.93 
   4   5  -1   40.99    2.02 
   4   5  -1   42.46    2.02 
   4   5  -1   42.86    1.90 
   4   5  -1   38.66    2.09 
   4   5  -1   41.04    1.93 
  -4   5   1   41.51    2.38 
  -4   5   1   41.32    2.40 
  -4   5   1   41.03    2.43 
  -4   5   1   40.94    2.37 
  -4   5   1   38.48    1.62 
   4   5  -1   43.00    2.03 
  -4   5   1   43.60    1.99 
  -4   5   1   40.58    1.85 
  -4   5   1   39.63    1.85 
  -4   5   1   40.45    1.64 
   4   5  -1   42.00    1.89 
  -4   5   1   41.60    1.72 
  -4   5   1   41.21    1.74 
  -4   5   1   44.66    2.69 
   4   5  -1   42.71    2.05 
  -4   5   1   42.19    2.07 
   4   5  -1   42.48    2.68 
  -4   5   1   42.83    2.41 
  -4   5   1   40.55    1.62 
   4   5  -1   40.14    2.04 
  -4   5   1   43.14    2.08 
   4   5  -1   42.47    2.19 
  -4   5   1   41.30    2.06 
   4   5  -1   41.91    2.07 
   4   5  -1   40.28    2.22 
  -4   5   1   41.38    1.88 
  -4   5   1   41.96    1.66 
  -4   5   1   41.77    2.24 
   3  -5  -1   79.13    3.02 
   3  -5  -1   75.42    3.23 
  -3  -5   1   80.02    3.55 
  -3  -5   1   81.95    3.72 
   3  -5  -1   83.03    3.15 
   3  -5  -1   78.80    3.18 
   3  -5  -1   78.05    3.32 
  -3  -5   1   80.46    3.20 
  -3  -5   1   86.23    3.43 
   3  -5  -1   80.79    3.03 
  -3  -5   1   80.29    3.55 
  -3  -5   1   79.90    3.26 
  -3  -5   1   82.07    3.54 
  -3  -5   1   82.62    3.49 
   3  -5  -1   75.76    3.26 
  -3  -5   1   81.93    3.01 
   3  -5  -1   81.91    3.14 
  -3  -5   1   79.98    3.51 
  -3  -5   1   83.41    3.34 
  -3  -5   1   80.60    3.59 
  -3  -5   1   75.13    3.38 
  -3  -5   1   75.81    3.26 
  -3  -5   1   78.44    3.33 
  -3  -5   1   83.89    3.48 
   3  -5  -1   79.88    3.08 
  -3  -5   1   81.85    3.39 
   3  -5  -1   82.11    3.15 
  -3  -5   1   81.78    3.31 
  -3  -5   1   69.98    3.17 
   3  -5  -1   77.35    2.98 
  -3  -5   1   77.59    3.30 
  -3  -5   1   83.10    3.25 
   3   5  -1   81.01    3.37 
  -3   5   1   81.38    3.11 
  -3   5   1   78.06    3.68 
   3   5  -1   81.56    3.16 
  -3   5   1   82.69    3.53 
   3   5  -1   77.88    3.25 
  -3   5   1   79.63    2.96 
   3   5  -1   81.08    3.01 
  -3   5   1   78.05    3.02 
  -3   5   1   78.67    2.88 
   3   5  -1   80.81    3.13 
  -3   5   1   78.48    3.00 
  -3   5   1   82.02    3.04 
  -3   5   1   81.63    3.52 
  -3   5   1   80.39    3.27 
  -3   5   1   75.21    3.48 
  -3   5   1   85.34    3.43 
   3   5  -1   81.03    3.94 
  -3   5   1   81.37    3.05 
  -3   5   1   80.36    3.23 
   3   5  -1   82.04    3.44 
  -3   5   1   79.67    3.49 
  -3   5   1   78.66    3.55 
  -3   5   1   77.74    3.26 
   3   5  -1   81.51    3.32 
  -3   5   1   81.16    3.20 
  -3   5   1   78.85    2.96 
  -3   5   1   79.34    2.97 
  -3   5   1   81.05    3.54 
  -3   5   1   81.19    3.08 
   3   5  -1   83.31    3.39 
  -3   5   1   84.59    4.50 
  -3   5   1   77.61    3.18 
   3   5  -1   77.51    3.07 
   3   5  -1   80.31    3.32 
  -3   5   1   86.35    3.95 
  -3   5   1   79.16    3.16 
   3   5  -1   78.72    3.47 
   3   5  -1   79.52    3.16 
  -3   5   1   81.17    3.06 
  -3   5   1   79.69    3.01 
   3   5  -1   80.32    3.10 
  -3   5   1   80.20    3.36 
  -3   5   1   78.63    2.88 
   3   5  -1   75.35    3.26 
  -2  -5   1    4.03    0.48 
  -2  -5   1    2.91    0.49 
   2  -5  -1    2.61    0.30 
  -2  -5   1    2.41    0.54 
  -2  -5   1    2.17    0.35 
   2  -5  -1    3.19    0.37 
  -2  -5   1    3.23    0.31 
   2  -5  -1    2.53    0.44 
   2  -5  -1    2.98    0.51 
  -2  -5   1    2.60    0.39 
  -2  -5   1    4.27    0.64 
   2  -5  -1    3.99    0.44 
   2  -5  -1    2.63    0.41 
  -2  -5   1    2.56    0.53 
   2  -5  -1    2.90    0.46 
  -2  -5   1    3.40    0.33 
  -2  -5   1    4.12    0.42 
  -2  -5   1    3.51    0.52 
  -2  -5   1    4.41    0.61 
   2  -5  -1    3.30    0.52 
  -2  -5   1    3.43    0.49 
   2  -5  -1    3.64    0.52 
  -2  -5   1    3.64    0.56 
  -2  -5   1    2.98    0.32 
   2  -5  -1    3.45    0.46 
  -2  -5   1    2.10    0.50 
  -2  -5   1    3.61    0.65 
  -2  -5   1    2.49    0.43 
  -2  -5   1    2.88    0.53 
   2  -5  -1    3.79    0.49 
  -2  -5   1    3.44    0.46 
  -2  -5   1    2.57    0.49 
   2  -5  -1    3.34    0.38 
  -2  -5   1    3.81    0.54 
  -2  -5   1    3.59    0.69 
   2  -5  -1    3.22    0.38 
   2  -5  -1    3.45    0.60 
  -2  -5   1    2.56    0.49 
  -2   5   1    3.40    0.47 
  -2   5   1    3.03    0.37 
  -2   5   1    3.93    0.47 
  -2   5   1    2.92    0.82 
  -2   5   1    3.49    0.67 
  -2   5   1    3.85    0.60 
   2   5  -1    3.40    0.39 
  -2   5   1    2.77    0.37 
   2   5  -1    3.83    0.59 
  -2   5   1    3.34    0.48 
  -2   5   1    2.77    0.47 
  -2   5   1    2.97    0.29 
  -2   5   1    3.16    0.28 
  -2   5   1    2.99    0.37 
   2   5  -1    2.51    0.51 
  -2   5   1    2.91    0.30 
   2   5  -1    3.83    0.38 
  -2   5   1    3.86    0.53 
  -2   5   1    3.21    0.30 
  -2   5   1    3.10    0.30 
   2   5  -1    3.59    0.39 
  -2   5   1    2.61    0.35 
  -2   5   1    3.22    0.44 
  -2   5   1    3.36    0.34 
  -2   5   1    2.72    0.43 
  -2   5   1    2.62    0.93 
  -2   5   1    3.32    0.34 
  -2   5   1    3.72    0.56 
   2   5  -1    2.84    0.47 
   2   5  -1    3.15    0.50 
  -2   5   1    3.61    0.49 
  -2   5   1    3.46    0.42 
  -2   5   1    2.81    0.32 
   2   5  -1    3.29    0.54 
  -2   5   1    3.26    0.50 
   2   5  -1    3.20    0.78 
   2   5  -1    4.26    0.60 
   2   5  -1    3.78    0.55 
  -2   5   1    3.09    0.24 
  -2   5   1    3.71    0.51 
   2   5  -1    2.02    0.47 
  -2   5   1    2.05    0.47 
  -2   5   1    3.27    0.78 
  -2   5   1    2.91    0.43 
  -2   5   1    3.50    0.38 
   2   5  -1    4.17    0.55 
  -2   5   1    3.36    0.34 
   2   5  -1    3.44    0.33 
   2   5  -1    3.15    0.37 
  -2   5   1    2.85    0.40 
  -2   5   1    2.78    0.44 
   2   5  -1    3.63    0.34 
   1  -5  -1   10.74    0.69 
   1  -5  -1    9.45    0.68 
  -1  -5   1   11.07    0.88 
  -1  -5   1   10.02    0.74 
  -1  -5   1    8.54    0.86 
   1  -5  -1   12.05    0.95 
   1  -5  -1   10.39    0.70 
   1  -5  -1    8.20    0.79 
   1  -5  -1    9.03    0.65 
  -1  -5   1   11.09    0.88 
  -1  -5   1    8.98    0.82 
  -1  -5   1   10.99    0.60 
  -1  -5   1    9.95    0.58 
  -1  -5   1    7.66    0.98 
  -1  -5   1   10.93    0.81 
  -1  -5   1   10.64    0.76 
  -1  -5   1   10.84    0.82 
  -1  -5   1    9.95    0.78 
   1  -5  -1    9.49    0.69 
  -1  -5   1    9.20    0.77 
  -1  -5   1    9.87    0.82 
  -1  -5   1   14.34    0.91 
   1  -5  -1    9.34    0.72 
   1  -5  -1   10.13    0.84 
  -1  -5   1    9.97    0.54 
   1  -5  -1    9.45    0.76 
  -1  -5   1   11.06    0.81 
   1  -5  -1   10.34    0.80 
  -1  -5   1   10.19    0.77 
   1   5  -1   12.76    1.34 
  -1   5   1    9.82    0.67 
  -1   5   1   10.43    0.68 
  -1   5   1   12.68    1.69 
  -1   5   1    9.86    0.64 
  -1   5   1   10.43    0.76 
   1   5  -1   10.16    0.80 
  -1   5   1    9.54    1.17 
  -1   5   1    9.91    0.79 
   1   5  -1   10.92    0.80 
   1   5  -1    9.58    0.72 
  -1   5   1   10.96    0.84 
  -1   5   1   11.29    0.75 
   1   5  -1   10.16    0.54 
   1   5  -1   10.19    0.73 
   1   5  -1   10.88    0.81 
   1   5  -1   13.49    0.60 
  -1   5   1   10.54    0.84 
  -1   5   1   10.37    0.65 
  -1   5   1   10.45    0.51 
  -1   5   1    9.91    0.70 
   1   5  -1   10.95    0.79 
  -1   5   1    9.89    0.71 
  -1   5   1    9.60    0.60 
  -1   5   1    9.96    0.71 
   1   5  -1   10.02    0.80 
  -1   5   1    9.84    0.45 
  -1   5   1    8.87    0.72 
   1   5  -1   10.28    0.56 
  -1   5   1   10.19    0.52 
   1   5  -1   10.52    0.61 
   1   5  -1   10.29    0.83 
   1   5  -1   11.87    0.85 
   1   5  -1   10.74    0.60 
   1   5  -1    9.05    0.75 
  -1   5   1   10.00    0.63 
  -1   5   1   10.27    1.25 
  -1   5   1    9.85    0.63 
   0  -5  -1    3.38    0.45 
   0  -5  -1    3.12    0.50 
   0  -5   1    2.55    0.44 
   0  -5   1    2.96    0.43 
   0  -5  -1    3.88    0.48 
   0  -5   1    3.35    0.48 
   0  -5  -1    3.63    0.53 
   0  -5   1    3.19    0.45 
   0  -5   1    2.16    0.46 
   0  -5  -1    3.77    0.49 
   0  -5  -1    3.02    0.45 
   0  -5   1    3.24    0.51 
   0  -5  -1    2.82    0.49 
   0  -5   1    2.48    0.41 
   0  -5  -1    2.72    0.44 
   0  -5  -1    4.13    0.87 
   0  -5   1    2.26    0.49 
   0  -5  -1    2.77    0.49 
   0  -5  -1    2.67    0.56 
   0  -5   1    2.87    0.43 
   0  -5   1    2.89    0.44 
   0  -5   1    3.05    0.49 
   0  -5   1    3.39    0.26 
   0  -5  -1    2.43    0.47 
   0  -5   1    2.78    0.41 
   0  -5  -1    3.97    0.66 
   0  -5   1    3.28    0.49 
   0  -5  -1    3.37    0.45 
   0   5   1    2.72    0.23 
   0   5   1    2.68    0.38 
   0   5  -1    3.70    0.51 
   0   5   1    3.54    0.50 
   0   5   1    2.37    0.42 
   0   5   1    3.50    0.67 
   0   5   1    5.27    0.78 
   0   5  -1    3.71    0.82 
   0   5   1    3.17    0.27 
   0   5  -1    2.80    0.48 
   0   5  -1    2.68    0.26 
   0   5  -1    3.86    0.50 
   0   5  -1    3.41    0.54 
   0   5   1    3.22    0.46 
   0   5   1    2.00    0.37 
   0   5   1    3.10    0.27 
   0   5  -1    3.01    0.46 
   0   5  -1    3.32    0.32 
   0   5  -1    4.19    1.24 
   0   5   1    3.22    0.26 
   0   5  -1    3.56    0.47 
   0   5   1    2.22    0.43 
   0   5   1    2.93    0.45 
   0   5  -1    3.20    0.44 
   0   5   1    2.78    0.48 
   0   5   1    3.28    0.60 
   0   5   1    3.39    0.43 
   0   5   1    2.43    0.43 
   0   5  -1    3.60    0.49 
   0   5   1    2.90    0.51 
   0   5   1    2.63    0.83 
  -1  -5  -1  241.24    8.65 
  -1  -5  -1  246.65    8.80 
  -1  -5  -1  240.53    8.57 
  -1  -5  -1  246.56    8.90 
   1  -5   1  238.61    8.37 
   1  -5   1  240.77    8.78 
  -1  -5  -1  245.29    8.77 
   1  -5   1  247.30    8.76 
  -1  -5  -1  242.22    9.07 
  -1  -5  -1  218.36    8.66 
  -1  -5  -1  240.64    8.75 
   1  -5   1  239.04    8.67 
  -1  -5  -1  239.26    8.53 
   1  -5   1  232.66    8.58 
  -1  -5  -1  235.79    8.79 
   1  -5   1  245.44    8.77 
  -1  -5  -1  240.00    8.83 
  -1  -5  -1  245.46    8.73 
   1  -5   1  239.81    8.83 
  -1  -5  -1  242.43    8.79 
  -1  -5  -1  246.92    8.90 
   1  -5   1  243.73    8.62 
  -1  -5  -1  245.00    8.84 
  -1  -5  -1  246.28    8.77 
   1  -5   1  238.24    8.47 
   1  -5   1  241.33    8.74 
   1  -5   1  243.51    8.74 
   1  -5   1  248.08    8.81 
  -1  -5  -1  241.06    8.54 
  -1  -5  -1  249.60    8.55 
   1  -5   1  249.78    8.63 
  -1  -5  -1  240.95    8.89 
  -1  -5  -1  250.39    8.83 
  -1   5  -1  238.51    8.69 
  -1   5  -1  240.53    9.05 
   1   5   1  244.24    8.80 
   1   5   1  241.15    8.77 
   1   5   1  233.05    8.41 
   1   5   1  252.70    8.45 
   1   5   1  245.81    8.89 
   1   5   1  242.60    8.65 
   1   5   1  242.29    8.40 
  -1   5  -1  237.19    9.05 
  -1   5  -1  246.25    8.83 
   1   5   1  242.39    9.07 
  -1   5  -1  231.87    9.38 
  -1   5  -1  235.16    8.57 
  -1   5  -1  240.49    8.48 
  -1   5  -1  238.53    8.64 
   1   5   1  231.28    8.51 
  -1   5  -1  234.73    8.58 
  -1   5  -1  239.29    8.95 
   1   5   1  244.59    8.50 
  -1   5  -1  208.42    8.71 
  -1   5  -1  235.71    8.51 
  -1   5  -1  234.46    8.56 
   1   5   1  244.28    8.54 
  -1   5  -1  251.09    8.66 
   1   5   1  237.56    8.70 
  -1   5  -1  246.43    8.74 
  -1   5  -1  238.70    9.01 
   1   5   1  248.98    9.19 
  -1   5  -1  234.62    8.76 
   1   5   1  230.82    8.69 
  -1   5  -1  255.47    8.60 
   1   5   1  234.51    8.80 
   1   5   1  237.30    8.83 
  -1   5  -1  249.05    8.82 
   1   5   1  235.56    8.43 
  -1   5  -1  238.83    8.70 
  -2  -5  -1   23.36    1.43 
  -2  -5  -1   26.86    1.42 
  -2  -5  -1   27.03    1.34 
  -2  -5  -1   24.69    1.30 
  -2  -5  -1   22.72    1.33 
  -2  -5  -1   24.76    1.21 
  -2  -5  -1   24.00    1.31 
   2  -5   1   24.35    1.08 
   2  -5   1   23.83    1.06 
  -2  -5  -1   23.53    1.07 
  -2  -5  -1   23.95    1.56 
  -2  -5  -1   27.20    1.42 
  -2  -5  -1   23.83    1.45 
   2  -5   1   24.36    1.13 
  -2  -5  -1   23.93    1.31 
  -2  -5  -1   23.06    1.33 
   2  -5   1   22.73    1.21 
   2  -5   1   24.86    1.33 
  -2  -5  -1   23.74    1.01 
  -2  -5  -1   25.10    1.30 
  -2  -5  -1   23.69    1.08 
  -2  -5  -1   25.13    1.32 
   2  -5   1   24.09    1.08 
  -2  -5  -1   24.24    1.25 
  -2  -5  -1   23.34    1.46 
   2  -5   1   26.12    1.29 
  -2  -5  -1   20.65    1.95 
  -2  -5  -1   26.13    1.36 
   2  -5   1   25.03    1.33 
  -2  -5  -1   22.49    1.90 
   2  -5   1   24.48    1.11 
  -2  -5  -1   24.15    1.35 
   2  -5   1   24.94    1.41 
   2  -5   1   24.66    1.19 
   2  -5   1   22.95    0.97 
  -2  -5  -1   24.21    1.15 
   2  -5   1   27.52    1.32 
   2  -5   1   24.61    1.16 
  -2  -5  -1   22.24    1.02 
  -2  -5  -1   23.94    1.39 
  -2  -5  -1   24.15    1.28 
  -2   5  -1   22.81    1.29 
  -2   5  -1   20.76    2.35 
  -2   5  -1   23.43    1.28 
   2   5   1   22.52    1.26 
   2   5   1   24.92    1.35 
   2   5   1   23.60    0.97 
   2   5   1   24.74    1.50 
   2   5   1   24.99    1.21 
   2   5   1   26.43    1.39 
  -2   5  -1   22.24    1.66 
   2   5   1   24.72    1.33 
  -2   5  -1   18.33    1.45 
   2   5   1   24.86    1.10 
  -2   5  -1   24.03    1.32 
  -2   5  -1   25.08    1.06 
   2   5   1   24.03    1.07 
  -2   5  -1   24.01    1.06 
   2   5   1   23.27    1.39 
  -2   5  -1   23.78    1.21 
  -2   5  -1   21.06    1.82 
   2   5   1   23.02    1.23 
  -2   5  -1   25.93    1.29 
  -2   5  -1   24.71    1.19 
  -2   5  -1   23.58    1.03 
   2   5   1   24.79    1.07 
  -2   5  -1   22.74    1.04 
   2   5   1   25.33    1.60 
  -2   5  -1   24.51    1.42 
  -2   5  -1   23.49    1.17 
  -2   5  -1   23.40    1.18 
  -2   5  -1   24.10    1.15 
   2   5   1   24.05    1.33 
  -2   5  -1   21.91    1.44 
  -2   5  -1   24.28    1.20 
   2   5   1   24.26    1.15 
  -2   5  -1   23.51    1.22 
  -2   5  -1   24.81    1.48 
  -2   5  -1   24.68    1.10 
  -2   5  -1   24.50    1.84 
  -2   5  -1   24.37    1.30 
  -2   5  -1   23.35    1.11 
  -3  -5  -1  244.00    9.23 
  -3  -5  -1  246.28    8.88 
  -3  -5  -1  242.94    9.30 
  -3  -5  -1  243.52    9.09 
  -3  -5  -1  239.96    9.12 
   3  -5   1  246.44    8.92 
  -3  -5  -1  248.11    9.32 
   3  -5   1  248.51    9.12 
  -3  -5  -1  245.40    9.21 
   3  -5   1  242.84    8.74 
  -3  -5  -1  243.41    8.96 
   3  -5   1  245.84    8.76 
   3  -5   1  239.52    8.83 
  -3  -5  -1  245.32    8.97 
  -3  -5  -1  241.35    9.02 
   3  -5   1  236.71    8.57 
  -3  -5  -1  241.92    9.18 
   3  -5   1  247.10    8.90 
  -3  -5  -1  243.17    9.05 
  -3  -5  -1  252.05    9.01 
   3  -5   1  249.48    8.88 
   3  -5   1  236.81    8.51 
   3  -5   1  247.61    8.64 
  -3  -5  -1  246.22    8.84 
   3  -5   1  240.03    8.66 
  -3  -5  -1  240.79    9.18 
  -3  -5  -1  245.21    9.40 
  -3  -5  -1  251.67    8.99 
  -3  -5  -1  248.57    9.02 
  -3  -5  -1  237.82    8.85 
  -3   5  -1  246.75    8.90 
  -3   5  -1  246.40    8.84 
   3   5   1  241.27    9.00 
   3   5   1  243.77    8.72 
  -3   5  -1  225.79    9.24 
  -3   5  -1  257.11   10.71 
  -3   5  -1  243.83    8.88 
  -3   5  -1  239.83    8.72 
  -3   5  -1  246.46    9.37 
  -3   5  -1  238.99    8.53 
   3   5   1  238.93    8.99 
   3   5   1  245.73    8.97 
  -3   5  -1  243.05    8.78 
  -3   5  -1  249.87    9.78 
   3   5   1  248.82    8.79 
   3   5   1  245.27    9.46 
  -3   5  -1  247.67    8.81 
   3   5   1  251.32    9.00 
   3   5   1  238.16    8.73 
   3   5   1  249.71    8.74 
  -3   5  -1  243.88    8.91 
   3   5   1  237.36    8.89 
   3   5   1  249.35    9.29 
  -3   5  -1  235.99    8.90 
  -3   5  -1  241.35    8.74 
   3   5   1  241.45    8.82 
  -3   5  -1  238.02    9.07 
  -3   5  -1  247.87    8.81 
  -3   5  -1  248.92    9.26 
  -3   5  -1  247.72    8.72 
  -3   5  -1  246.03    8.72 
  -3   5  -1  223.24    9.34 
   3   5   1  243.57    9.03 
   3   5   1  244.99    9.09 
   4  -5   1   22.67    1.27 
   4  -5   1   23.57    1.48 
  -4  -5  -1   21.44    1.42 
   4  -5   1   23.31    1.31 
  -4  -5  -1   21.75    1.66 
   4  -5   1   21.16    0.98 
  -4  -5  -1   23.58    1.41 
  -4  -5  -1   23.39    1.71 
  -4  -5  -1   24.38    1.35 
  -4  -5  -1   21.19    1.66 
  -4  -5  -1   22.20    1.46 
   4  -5   1   22.17    1.35 
  -4  -5  -1   22.52    1.23 
   4  -5   1   22.11    1.14 
  -4  -5  -1   20.34    1.27 
   4  -5   1   23.20    1.24 
  -4  -5  -1   24.19    1.40 
  -4  -5  -1   19.03    1.50 
  -4  -5  -1   22.44    1.49 
  -4  -5  -1   21.37    1.44 
   4  -5   1   21.62    1.05 
  -4  -5  -1   20.58    1.11 
  -4  -5  -1   20.75    1.28 
  -4  -5  -1   20.80    1.53 
  -4  -5  -1   22.91    1.79 
  -4  -5  -1   21.31    1.34 
  -4  -5  -1   23.83    1.73 
   4  -5   1   23.04    1.08 
   4  -5   1   22.86    1.34 
   4  -5   1   23.11    1.24 
  -4   5  -1   22.15    1.28 
  -4   5  -1   21.40    1.04 
  -4   5  -1   21.94    1.12 
  -4   5  -1   23.39    1.39 
  -4   5  -1   24.44    1.32 
   4   5   1   20.64    1.38 
  -4   5  -1   21.52    0.99 
   4   5   1   20.93    1.19 
   4   5   1   23.10    1.36 
   4   5   1   23.91    1.35 
   4   5   1   24.11    1.59 
  -4   5  -1   22.14    1.28 
  -4   5  -1   23.07    1.09 
  -4   5  -1   22.00    1.74 
   4   5   1   21.45    1.20 
  -4   5  -1   20.23    1.73 
  -4   5  -1   23.63    1.33 
  -4   5  -1   21.50    1.28 
  -4   5  -1   20.71    1.74 
   4   5   1   22.49    1.48 
  -4   5  -1   24.43    2.40 
   4   5   1   22.57    1.36 
  -4   5  -1   23.88    1.99 
   4   5   1   22.27    1.28 
   4   5   1   22.62    1.38 
   4   5   1   22.57    1.34 
  -4   5  -1   23.14    1.31 
  -4   5  -1   25.72    1.52 
  -4   5  -1   22.49    1.05 
   4   5   1   23.63    1.22 
   4   5   1   24.87    1.30 
  -4   5  -1   21.64    1.66 
  -4   5  -1   22.96    1.28 
  -5  -5  -1   31.24    1.83 
  -5  -5  -1   31.89    1.72 
  -5  -5  -1   30.62    1.83 
  -5  -5  -1   27.75    1.77 
  -5  -5  -1   30.86    1.94 
  -5  -5  -1   29.66    1.42 
  -5  -5  -1   26.43    2.12 
   5  -5   1   30.36    1.51 
   5  -5   1   28.71    1.65 
  -5  -5  -1   28.65    2.15 
  -5  -5  -1   31.38    1.59 
   5  -5   1   27.77    1.53 
  -5  -5  -1   30.15    1.73 
  -5  -5  -1   29.05    1.69 
  -5  -5  -1   28.70    1.56 
  -5  -5  -1   29.69    1.70 
   5  -5   1   30.58    1.50 
   5  -5   1   30.87    1.61 
   5  -5   1   29.62    1.71 
  -5  -5  -1   32.18    1.99 
   5  -5   1   30.67    1.77 
  -5  -5  -1   29.95    1.71 
   5  -5   1   27.65    1.79 
  -5  -5  -1   29.65    2.18 
   5  -5   1   29.51    1.42 
  -5  -5  -1   28.43    1.83 
  -5  -5  -1   30.91    2.22 
   5   5   1   29.79    1.69 
  -5   5  -1   28.56    2.16 
  -5   5  -1   28.19    1.74 
   5   5   1   30.23    1.59 
   5   5   1   32.09    2.00 
   5   5   1   29.18    1.68 
  -5   5  -1   31.53    2.49 
   5   5   1   30.30    1.72 
   5   5   1   30.15    1.64 
  -5   5  -1   29.29    2.25 
  -5   5  -1   28.46    1.64 
  -5   5  -1   26.41    2.13 
  -5   5  -1   30.83    1.73 
  -5   5  -1   29.46    1.49 
   5   5   1   29.91    1.74 
   5   5   1   29.58    1.69 
   5   5   1   30.91    1.58 
  -5   5  -1   30.76    1.42 
  -5   5  -1   29.99    1.64 
   5   5   1   29.95    1.65 
  -5   5  -1   28.32    1.60 
  -5   5  -1   26.83    1.51 
   5   5   1   28.16    1.65 
  -5   5  -1   31.07    2.22 
   5   5   1   29.07    1.58 
   6  -5   1    3.89    0.71 
   6  -5   1    3.48    0.69 
  -6  -5  -1    3.56    0.76 
  -6  -5  -1    2.84    0.63 
  -6  -5  -1    3.67    0.60 
   6  -5   1    3.82    0.58 
  -6  -5  -1    4.30    0.79 
   6  -5   1    3.90    0.81 
  -6  -5  -1    3.91    0.77 
  -6  -5  -1    3.09    0.78 
  -6  -5  -1    3.18    0.71 
  -6  -5  -1    2.72    0.61 
  -6  -5  -1    2.40    0.92 
  -6  -5  -1    2.60    0.82 
   6  -5   1    3.98    0.58 
  -6  -5  -1    3.80    0.74 
  -6  -5  -1    2.95    0.53 
  -6  -5  -1    2.91    0.67 
   6  -5   1    3.69    0.67 
  -6  -5  -1    3.33    1.03 
  -6  -5  -1    5.36    1.19 
   6  -5   1    4.13    0.85 
   6  -5   1    4.48    0.69 
  -6  -5  -1    3.55    0.90 
   6  -5   1    3.68    0.57 
  -6  -5  -1    3.72    1.08 
  -6  -5  -1    4.38    0.88 
   6  -5   1    3.00    0.68 
   6   5   1    3.94    0.77 
  -6   5  -1    3.38    0.78 
  -6   5  -1    3.75    0.70 
   6   5   1    2.89    0.64 
  -6   5  -1    3.66    0.72 
  -6   5  -1    3.10    0.74 
  -6   5  -1    3.31    1.04 
   6   5   1    3.87    0.67 
   6   5   1    3.17    0.65 
   6   5   1    2.95    0.66 
  -6   5  -1    3.65    0.81 
  -6   5  -1    2.49    0.47 
  -6   5  -1    2.87    0.53 
  -6   5  -1    3.92    1.00 
  -6   5  -1    4.29    0.73 
   6   5   1    4.34    0.69 
   6   5   1    3.93    0.73 
   6   5   1    4.15    0.76 
   6   5   1    4.53    0.79 
   6   5   1    3.41    0.85 
   6   5   1    2.66    0.63 
  -6   5  -1    2.67    0.99 
   6   5   1    1.74    0.61 
  -6   5  -1    2.65    0.92 
  -6   5  -1    5.05    1.36 
   6   5   1    3.73    0.71 
  -7  -5  -1   15.76    1.54 
   7  -5   1   14.99    1.23 
   7  -5   1   15.21    1.42 
  -7  -5  -1   15.72    1.32 
  -7  -5  -1   13.32    1.47 
  -7  -5  -1   15.23    1.96 
  -7  -5  -1   15.61    2.00 
   7  -5   1   15.54    1.35 
  -7  -5  -1   17.15    1.57 
  -7  -5  -1   15.84    1.50 
  -7  -5  -1   16.24    1.32 
  -7  -5  -1   14.84    1.42 
  -7  -5  -1   17.53    2.06 
   7  -5   1   16.51    1.68 
  -7  -5  -1   17.48    2.31 
  -7  -5  -1   15.92    1.55 
  -7  -5  -1   17.15    1.60 
   7  -5   1   15.87    1.34 
  -7  -5  -1   17.28    1.77 
  -7  -5  -1   15.63    1.70 
   7  -5   1   14.23    1.36 
  -7  -5  -1   19.33    1.54 
   7  -5   1   17.37    1.21 
  -7  -5  -1   15.00    1.94 
  -7   5  -1   17.09    1.71 
   7   5   1   14.58    1.26 
  -7   5  -1   17.45    2.30 
   7   5   1   15.48    1.48 
   7   5   1   17.96    1.40 
   7   5   1   14.82    1.69 
  -7   5  -1   17.69    1.51 
   7   5   1   17.10    1.40 
   7   5   1   16.34    1.84 
  -7   5  -1   16.18    2.01 
  -7   5  -1   16.05    1.36 
  -7   5  -1   16.28    1.54 
   7   5   1   16.31    1.35 
   7   5   1   18.25    1.40 
   7   5   1   17.98    1.38 
   7   5   1   16.35    1.53 
   7   5   1   14.73    1.36 
   7   5   1   18.40    1.41 
  -7   5  -1   16.89    2.04 
   7   5   1   15.68    1.49 
  -7   5  -1   17.50    2.02 
   7   5   1   15.35    1.25 
  -7   5  -1   19.85    1.48 
  -7   5  -1   16.49    2.08 
  -7   5  -1   15.46    1.15 
  -8  -5  -1    6.41    1.19 
  -8  -5  -1    9.27    1.84 
  -8  -5  -1    9.09    2.05 
  -8  -5  -1    9.34    1.19 
  -8  -5  -1    9.31    1.86 
  -8  -5  -1    9.16    1.85 
  -8  -5  -1    7.90    1.13 
  -8  -5  -1    7.81    1.37 
   8  -5   1    8.73    1.04 
   8  -5   1    9.39    1.12 
  -8  -5  -1    9.30    1.20 
  -8  -5  -1    6.57    1.27 
   8  -5   1    8.69    1.14 
   8  -5   1    7.42    1.12 
  -8  -5  -1   10.33    1.32 
   8  -5   1    9.54    1.37 
  -8  -5  -1    7.76    1.10 
   8  -5   1    8.98    1.21 
  -8  -5  -1    8.24    1.22 
  -8  -5  -1    7.75    1.27 
  -8  -5  -1    9.62    1.30 
   8  -5   1    9.04    1.24 
  -8  -5  -1    6.99    1.68 
  -8  -5  -1    7.91    1.15 
  -8   5  -1    9.17    2.12 
  -8   5  -1   10.03    1.97 
   8   5   1    9.39    1.51 
   8   5   1    7.95    1.10 
  -8   5  -1    7.92    1.27 
   8   5   1    7.91    1.14 
  -8   5  -1    7.25    1.69 
  -8   5  -1    8.10    1.21 
   8   5   1    8.52    1.18 
  -8   5  -1    6.37    1.61 
  -8   5  -1    7.27    1.09 
   8   5   1    8.59    1.10 
  -8   5  -1    7.18    1.21 
  -8   5  -1    7.35    1.69 
   8   5   1    6.09    1.19 
   8   5   1    9.94    1.23 
   8   5   1    8.37    1.22 
   8   5   1    8.18    1.17 
   8   5   1    8.75    1.21 
  -8   5  -1    9.52    1.37 
   8   5   1    8.93    1.12 
   8   5   1   10.39    1.26 
   8   5   1    6.05    1.03 
   8   5   1    7.74    1.10 
  -9  -5  -1   60.41    3.11 
  -9  -5  -1   59.95    3.12 
  -9  -5  -1   56.99    3.14 
  -9  -5  -1   61.92    3.73 
  -9  -5  -1   60.37    4.82 
  -9  -5  -1   58.85    4.36 
  -9  -5  -1   56.89    3.23 
  -9  -5  -1   58.69    4.34 
   9  -5   1   54.95    3.16 
  -9  -5  -1   59.23    3.62 
  -9  -5  -1   61.66    3.43 
   9  -5   1   56.15    3.02 
   9  -5   1   62.61    3.47 
  -9  -5  -1   64.43    4.49 
  -9  -5  -1   61.44    3.32 
   9  -5   1   62.74    3.25 
  -9  -5  -1   59.94    3.37 
  -9  -5  -1   62.74    3.66 
  -9  -5  -1   62.28    4.35 
  -9  -5  -1   60.52    4.44 
   9  -5   1   60.14    3.23 
   9   5   1   57.54    3.71 
  -9   5  -1   55.89    3.40 
  -9   5  -1   54.95    3.14 
   9   5   1   57.28    3.66 
  -9   5  -1   62.00    3.48 
   9   5   1   65.09    3.29 
  -9   5  -1   62.45    4.98 
   9   5   1   62.55    3.18 
  -9   5  -1   61.38    4.38 
   9   5   1   63.04    3.23 
   9   5   1   58.64    3.12 
  -9   5  -1   61.25    3.36 
   9   5   1   58.24    3.23 
   9   5   1   59.53    3.16 
   9   5   1   65.24    3.25 
   9   5   1   64.37    3.24 
  -9   5  -1   61.70    4.48 
  -9   5  -1   60.71    3.52 
  -9   5  -1   62.17    4.61 
   9   5   1   59.06    3.19 
   9   5   1   61.33    3.27 
  -9   5  -1   61.44    4.49 
  -8  -6   1    1.93    1.13 
  -8  -6   1    1.73    0.97 
  -8  -6   1    1.96    0.86 
  -8  -6   1    0.88    0.80 
  -8  -6   1    0.73    0.96 
   8  -6  -1    1.52    0.67 
  -8  -6   1    1.39    0.81 
  -8  -6   1    1.72    0.77 
   8  -6  -1    1.37    0.93 
  -8  -6   1    1.82    0.73 
  -8  -6   1    1.41    0.72 
  -8  -6   1    1.61    0.76 
   8  -6  -1    2.76    0.75 
  -8  -6   1    0.92    0.67 
  -8  -6   1    2.11    0.81 
  -8  -6   1    0.60    1.10 
  -8  -6   1    3.47    1.26 
  -8  -6   1    1.86    1.13 
  -8  -6   1    4.66    0.95 
   8  -6  -1    2.44    0.75 
  -8   6   1    1.44    1.20 
   8   6  -1    1.74    0.71 
  -8   6   1    1.56    0.71 
   8   6  -1    1.60    0.71 
  -8   6   1    1.28    1.06 
   8   6  -1    1.83    0.78 
   8   6  -1    3.89    1.10 
   8   6  -1    1.99    0.70 
   8   6  -1    1.47    0.66 
  -8   6   1    3.45    1.27 
  -8   6   1    2.24    1.36 
   8   6  -1    2.88    0.84 
   8   6  -1    1.81    0.74 
  -8   6   1    2.15    0.85 
  -8   6   1    1.69    0.81 
   8   6  -1    1.59    0.66 
   8   6  -1    0.68    0.57 
  -8   6   1    1.98    1.15 
   8   6  -1    1.22    0.66 
   7  -6  -1    0.27    0.47 
  -7  -6   1    0.12    0.56 
   7  -6  -1   -0.09    0.52 
  -7  -6   1    0.05    0.72 
  -7  -6   1    0.60    0.67 
   7  -6  -1   -0.01    0.49 
  -7  -6   1    0.79    0.58 
  -7  -6   1   -0.45    0.74 
  -7  -6   1    0.02    0.76 
   7  -6  -1    0.32    0.48 
  -7  -6   1    0.87    0.63 
  -7  -6   1    0.36    0.74 
   7  -6  -1    0.03    0.48 
  -7  -6   1    0.82    0.61 
  -7  -6   1    0.60    0.70 
  -7  -6   1   -0.22    0.71 
  -7  -6   1   -0.36    0.55 
  -7  -6   1    1.75    0.68 
  -7  -6   1    0.49    0.73 
  -7  -6   1   -0.23    0.78 
  -7  -6   1   -0.44    0.53 
   7   6  -1    1.11    0.60 
   7   6  -1    0.21    0.45 
  -7   6   1    0.17    0.75 
   7   6  -1    0.62    0.59 
   7   6  -1   -0.40    0.55 
   7   6  -1    0.70    0.50 
  -7   6   1   -0.46    0.54 
  -7   6   1   -0.57    0.76 
   7   6  -1   -0.26    0.44 
  -7   6   1   -0.39    0.52 
  -7   6   1    0.00    0.52 
   7   6  -1   -0.10    0.54 
  -7   6   1   -0.05    0.84 
   7   6  -1    0.50    0.61 
  -7   6   1    0.02    0.92 
  -7   6   1    0.72    0.84 
   7   6  -1    0.90    0.59 
  -7   6   1    0.14    0.82 
   7   6  -1    0.25    0.58 
  -7   6   1   -0.54    0.67 
  -7   6   1    0.35    0.65 
   7   6  -1    0.06    0.50 
   7   6  -1    0.57    0.56 
  -7   6   1   -0.44    0.46 
   7   6  -1   -0.19    0.46 
  -6  -6   1    0.01    0.47 
  -6  -6   1    0.62    0.75 
   6  -6  -1    0.46    0.48 
  -6  -6   1    0.93    0.62 
  -6  -6   1    0.98    0.52 
  -6  -6   1    0.84    0.55 
   6  -6  -1   -0.03    0.37 
  -6  -6   1    1.13    0.57 
   6  -6  -1    1.09    0.45 
  -6  -6   1    1.02    0.59 
  -6  -6   1    0.02    0.65 
   6  -6  -1    0.59    0.46 
  -6  -6   1    0.17    0.59 
  -6  -6   1    0.56    0.61 
   6  -6  -1    1.04    0.49 
   6  -6  -1    0.61    0.45 
   6  -6  -1    0.49    0.44 
  -6  -6   1    0.80    0.65 
  -6  -6   1    0.48    0.70 
  -6  -6   1    0.56    0.42 
  -6  -6   1    0.45    0.68 
  -6  -6   1    0.24    0.59 
  -6  -6   1   -0.04    0.55 
  -6  -6   1    0.32    0.69 
  -6   6   1    0.50    0.38 
   6   6  -1    0.81    0.45 
  -6   6   1    0.36    0.43 
  -6   6   1    1.43    0.48 
  -6   6   1    0.94    0.74 
  -6   6   1    0.50    0.65 
   6   6  -1    0.50    0.65 
   6   6  -1    0.52    0.52 
   6   6  -1    0.65    0.48 
  -6   6   1   -0.06    0.63 
   6   6  -1    1.09    0.56 
  -6   6   1    0.32    0.48 
  -6   6   1    0.77    0.76 
   6   6  -1    1.05    0.56 
   6   6  -1    0.33    0.50 
  -6   6   1    1.43    0.62 
   6   6  -1    0.60    0.44 
   6   6  -1    0.83    0.48 
  -6   6   1    1.18    0.80 
  -6   6   1    0.78    0.59 
   6   6  -1    0.39    0.55 
   6   6  -1    0.52    0.48 
  -6   6   1    0.13    0.72 
   6   6  -1    1.03    0.56 
   6   6  -1   -0.21    0.55 
   6   6  -1    0.76    0.44 
  -6   6   1    0.41    0.79 
  -6   6   1    0.87    0.53 
   5  -6  -1    1.62    0.46 
  -5  -6   1    1.10    0.77 
  -5  -6   1    1.38    0.65 
  -5  -6   1    1.32    0.69 
  -5  -6   1    2.79    0.64 
   5  -6  -1    1.41    0.49 
   5  -6  -1    1.38    0.38 
  -5  -6   1    1.78    0.55 
  -5  -6   1    2.30    0.61 
   5  -6  -1    1.93    0.53 
   5  -6  -1    2.00    0.51 
  -5  -6   1    1.30    0.61 
  -5  -6   1    0.99    0.68 
  -5  -6   1    1.42    0.75 
   5  -6  -1    1.09    0.49 
  -5  -6   1    1.27    0.51 
  -5  -6   1    0.69    0.56 
  -5  -6   1    2.17    0.62 
   5  -6  -1    2.24    0.60 
  -5  -6   1    1.74    0.62 
  -5  -6   1    0.82    0.69 
  -5  -6   1    1.36    0.61 
  -5  -6   1    2.25    0.75 
   5  -6  -1    1.19    0.37 
  -5  -6   1    1.26    0.74 
  -5  -6   1    2.14    0.75 
   5   6  -1    2.29    0.64
[truncated: 3,823,356 more chars]
