# Supplementary material
Source: MDPI journal article supplement (https://www.mdpi.com/2073-4352/13/7/1043)
Supplement: s1 [file s1 › 8 Tb Ha2019_98_0m_a.cif]

 
data_Ha2019_98_0m_a 
  
_audit_creation_method            'SHELXL-2014/7' 
_shelx_SHELXL_version_number      '2014/7' 
_chemical_name_systematic         ? 
_chemical_name_common             ? 
_chemical_melting_point           ? 
_chemical_formula_moiety          ? 
_chemical_formula_sum 
 'C4 H12 Cl O7 Tb' 
_chemical_formula_weight          366.51 
  
loop_ 
 _atom_type_symbol 
 _atom_type_description 
 _atom_type_scat_dispersion_real 
 _atom_type_scat_dispersion_imag 
 _atom_type_scat_source 
 'C'  'C'   0.0033   0.0016 
 'International Tables Vol C Tables 4.2.6.8 and 6.1.1.4' 
 'H'  'H'   0.0000   0.0000 
 'International Tables Vol C Tables 4.2.6.8 and 6.1.1.4' 
 'O'  'O'   0.0106   0.0060 
 'International Tables Vol C Tables 4.2.6.8 and 6.1.1.4' 
 'Cl'  'Cl'   0.1484   0.1585 
 'International Tables Vol C Tables 4.2.6.8 and 6.1.1.4' 
 'Tb'  'Tb'  -0.1723   4.1537 
 'International Tables Vol C Tables 4.2.6.8 and 6.1.1.4' 
  
_space_group_crystal_system       monoclinic 
_space_group_IT_number            14 
_space_group_name_H-M_alt         'P 21/n' 
_space_group_name_Hall            '-P 2yn' 
  
_shelx_space_group_comment 
; 
The symmetry employed for this shelxl refinement is uniquely defined 
by the following loop, which should always be used as a source of 
symmetry information in preference to the above space-group names. 
They are only intended as comments. 
; 
  
loop_ 
 _space_group_symop_operation_xyz 
 'x, y, z' 
 '-x+1/2, y+1/2, -z+1/2' 
 '-x, -y, -z' 
 'x-1/2, -y-1/2, z-1/2' 
  
_cell_length_a                    7.8003(2) 
_cell_length_b                    7.8539(2) 
_cell_length_c                    17.3942(5) 
_cell_angle_alpha                 90 
_cell_angle_beta                  98.075(2) 
_cell_angle_gamma                 90 
_cell_volume                      1055.05(5) 
_cell_formula_units_Z             4 
_cell_measurement_temperature     100(2) 
_cell_measurement_reflns_used     9690 
_cell_measurement_theta_min       2.37 
_cell_measurement_theta_max       28.16 
  
_exptl_crystal_description        prism 
_exptl_crystal_colour             colourless 
_exptl_crystal_density_meas       ? 
_exptl_crystal_density_method     ? 
_exptl_crystal_density_diffrn     2.307 
_exptl_crystal_F_000              696 
_exptl_transmission_factor_min    ? 
_exptl_transmission_factor_max    ? 
_exptl_crystal_size_max           0.325 
_exptl_crystal_size_mid           0.102 
_exptl_crystal_size_min           0.050 
_exptl_absorpt_coefficient_mu     6.960 
_shelx_estimated_absorpt_T_min    0.211 
_shelx_estimated_absorpt_T_max    0.722 
_exptl_absorpt_correction_type    multi-scan 
_exptl_absorpt_correction_T_min   0.486 
_exptl_absorpt_correction_T_max   0.761 
_exptl_absorpt_process_details    'Bruker SADABS'
_exptl_absorpt_special_details    ? 
_diffrn_ambient_temperature       100(2) 
_diffrn_radiation_wavelength      0.71073 
_diffrn_radiation_type            MoK\a 
_diffrn_source                    ? 
_diffrn_measurement_device_type   'Bruker APEX-II CCD' 
_diffrn_measurement_method        '\f and \w scans' 
_diffrn_detector_area_resol_mean  ? 
_diffrn_reflns_number             126109 
_diffrn_reflns_av_unetI/netI      0.0108 
_diffrn_reflns_av_R_equivalents   0.0517 
_diffrn_reflns_limit_h_min        -10 
_diffrn_reflns_limit_h_max        10 
_diffrn_reflns_limit_k_min        -10 
_diffrn_reflns_limit_k_max        10 
_diffrn_reflns_limit_l_min        -22 
_diffrn_reflns_limit_l_max        22 
_diffrn_reflns_theta_min          2.735 
_diffrn_reflns_theta_max          27.995 
_diffrn_reflns_theta_full         25.242 
_diffrn_measured_fraction_theta_max   1.000 
_diffrn_measured_fraction_theta_full  0.999 
_diffrn_reflns_Laue_measured_fraction_max    1.000 
_diffrn_reflns_Laue_measured_fraction_full   0.999 
_diffrn_reflns_point_group_measured_fraction_max   1.000 
_diffrn_reflns_point_group_measured_fraction_full  0.999 
_reflns_number_total              2551 
_reflns_number_gt                 2366 
_reflns_threshold_expression      'I > 2\s(I)' 
_reflns_Friedel_coverage          0.000 
_reflns_Friedel_fraction_max      . 
_reflns_Friedel_fraction_full     . 
  
_reflns_special_details 
; 
 Reflections were merged by SHELXL according to the crystal 
 class for the calculation of statistics and refinement. 
  
 _reflns_Friedel_fraction is defined as the number of unique 
 Friedel pairs measured divided by the number that would be 
 possible theoretically, ignoring centric projections and 
 systematic absences. 
; 
  
_computing_data_collection        'Bruker APEX2' 
_computing_cell_refinement        'Bruker SAINT' 
_computing_data_reduction         'Bruker SAINT' 
_computing_structure_solution     'SHELXS-97 (Sheldrick 2008)' 
_computing_structure_refinement 'SHELXL-2014/7 (Sheldrick, 2014)' 
_computing_molecular_graphics     'Bruker SHELXTL' 
_computing_publication_material   'Bruker SHELXTL' 
_refine_special_details           ? 
_refine_ls_structure_factor_coef  Fsqd 
_refine_ls_matrix_type            full 
_refine_ls_weighting_scheme       calc 
_refine_ls_weighting_details 
'w=1/[\s^2^(Fo^2^)+(0.0094P)^2^+1.0809P] where P=(Fo^2^+2Fc^2^)/3' 
_atom_sites_solution_primary      direct 
_atom_sites_solution_secondary    ? 
_atom_sites_solution_hydrogens    mixed 
_refine_ls_hydrogen_treatment     constr 
_refine_ls_extinction_method      none 
_refine_ls_extinction_coef        . 
_refine_ls_number_reflns          2551 
_refine_ls_number_parameters      125 
_refine_ls_number_restraints      0 
_refine_ls_R_factor_all           0.0131 
_refine_ls_R_factor_gt            0.0108 
_refine_ls_wR_factor_ref          0.0253 
_refine_ls_wR_factor_gt           0.0245 
_refine_ls_goodness_of_fit_ref    1.054 
_refine_ls_restrained_S_all       1.054 
_refine_ls_shift/su_max           0.001 
_refine_ls_shift/su_mean          0.000 
  
loop_ 
 _atom_site_label 
 _atom_site_type_symbol 
 _atom_site_fract_x 
 _atom_site_fract_y 
 _atom_site_fract_z 
 _atom_site_U_iso_or_equiv 
 _atom_site_adp_type 
 _atom_site_occupancy 
 _atom_site_site_symmetry_order 
 _atom_site_calc_flag 
 _atom_site_refinement_flags_posn 
 _atom_site_refinement_flags_adp 
 _atom_site_refinement_flags_occupancy 
 _atom_site_disorder_assembly 
 _atom_site_disorder_group 
Tb1 Tb 0.26630(2) 0.45796(2) 0.53826(2) 0.00946(3) Uani 1 1 d . . . . . 
Cl1 Cl 0.38142(6) 0.96786(6) 0.68852(3) 0.01587(9) Uani 1 1 d . . . . . 
O11 O -0.00007(16) 0.33361(17) 0.53730(8) 0.0166(3) Uani 1 1 d . . . . . 
O12 O -0.27483(15) 0.27079(17) 0.52621(8) 0.0153(3) Uani 1 1 d . . . . . 
C11 C -0.1197(2) 0.2325(2) 0.54975(10) 0.0118(3) Uani 1 1 d . . . . . 
C12 C -0.0792(3) 0.0684(3) 0.59171(12) 0.0217(4) Uani 1 1 d . . . . . 
H12A H -0.1340 -0.0257 0.5603 0.033(6) Uiso 0.57(3) 1 d R U P . . 
H12B H -0.1236 0.0717 0.6417 0.033(6) Uiso 0.57(3) 1 d R U P . . 
H12C H 0.0464 0.0514 0.6006 0.033(6) Uiso 0.57(3) 1 d R U P . . 
H12D H -0.1832 0.0126 0.6055 0.033(6) Uiso 0.43(3) 1 d R U P . . 
H12E H -0.0006 0.0955 0.6392 0.033(6) Uiso 0.43(3) 1 d R U P . . 
H12F H -0.0210 -0.0083 0.5592 0.033(6) Uiso 0.43(3) 1 d R U P . . 
O21 O 0.54494(15) 0.56183(16) 0.57413(7) 0.0119(2) Uani 1 1 d . . . . . 
O22 O 0.81861(15) 0.62811(17) 0.59573(7) 0.0141(3) Uani 1 1 d . . . . . 
C21 C 0.6792(2) 0.5989(2) 0.62215(11) 0.0118(3) Uani 1 1 d . . . . . 
C22 C 0.6700(2) 0.6059(3) 0.70705(11) 0.0183(4) Uani 1 1 d . . . . . 
H22A H 0.7858 0.5884 0.7359 0.045(5) Uiso 1 1 calc R U . . . 
H22B H 0.5920 0.5166 0.7208 0.045(5) Uiso 1 1 calc R U . . . 
H22C H 0.6260 0.7175 0.7203 0.045(5) Uiso 1 1 calc R U . . . 
O1W O 0.39482(16) 0.17990(16) 0.53719(7) 0.0138(3) Uani 1 1 d . . . . . 
H11W H 0.3912 0.0999 0.5787 0.049(6) Uiso 1 1 d R U . . . 
H12W H 0.5147 0.1865 0.5305 0.049(6) Uiso 1 1 d R U . . . 
O2W O 0.16805(16) 0.65614(16) 0.62522(8) 0.0143(3) Uani 1 1 d . . . . . 
H21W H 0.0474 0.6696 0.6293 0.039(5) Uiso 1 1 d R U . . . 
H22W H 0.2216 0.7596 0.6459 0.039(5) Uiso 1 1 d R U . . . 
O3W O 0.30362(17) 0.34999(17) 0.66877(8) 0.0175(3) Uani 1 1 d . . . . . 
H31W H 0.2484 0.3990 0.7095 0.050(6) Uiso 1 1 d R U . . . 
H32W H 0.3245 0.2334 0.6838 0.050(6) Uiso 1 1 d R U . . . 
  
loop_ 
 _atom_site_aniso_label 
 _atom_site_aniso_U_11 
 _atom_site_aniso_U_22 
 _atom_site_aniso_U_33 
 _atom_site_aniso_U_23 
 _atom_site_aniso_U_13 
 _atom_site_aniso_U_12 
Tb1 0.00698(4) 0.00973(4) 0.01187(4) -0.00016(3) 0.00200(3) -0.00165(3) 
Cl1 0.0178(2) 0.0125(2) 0.0171(2) 0.00142(17) 0.00172(16) -0.00117(17) 
O11 0.0118(6) 0.0182(7) 0.0207(7) -0.0028(5) 0.0054(5) -0.0054(5) 
O12 0.0089(6) 0.0158(7) 0.0215(7) 0.0038(5) 0.0029(5) 0.0008(5) 
C11 0.0106(8) 0.0125(8) 0.0126(8) -0.0014(7) 0.0031(6) -0.0008(7) 
C12 0.0254(10) 0.0166(10) 0.0222(10) 0.0052(8) 0.0000(8) 0.0040(8) 
O21 0.0091(5) 0.0135(6) 0.0128(6) -0.0002(5) 0.0003(5) -0.0014(5) 
O22 0.0085(6) 0.0168(7) 0.0170(6) -0.0019(5) 0.0015(5) -0.0017(5) 
C21 0.0109(8) 0.0089(8) 0.0154(9) -0.0006(7) 0.0012(6) 0.0016(6) 
C22 0.0157(9) 0.0269(11) 0.0122(9) -0.0011(8) 0.0013(7) 0.0019(8) 
O1W 0.0124(6) 0.0125(6) 0.0172(6) 0.0022(5) 0.0047(5) 0.0003(5) 
O2W 0.0108(6) 0.0127(6) 0.0192(7) -0.0039(5) 0.0019(5) -0.0002(5) 
O3W 0.0244(7) 0.0133(6) 0.0163(7) 0.0020(5) 0.0079(5) 0.0036(5) 
  
_geom_special_details 
; 
 All esds (except the esd in the dihedral angle between two l.s. planes) 
 are estimated using the full covariance matrix.  The cell esds are taken 
 into account individually in the estimation of esds in distances, angles 
 and torsion angles; correlations between esds in cell parameters are only 
 used when they are defined by crystal symmetry.  An approximate (isotropic) 
 treatment of cell esds is used for estimating esds involving l.s. planes. 
; 
  
loop_ 
 _geom_bond_atom_site_label_1 
 _geom_bond_atom_site_label_2 
 _geom_bond_distance 
 _geom_bond_site_symmetry_2 
 _geom_bond_publ_flag 
Tb1 O11 2.2937(12) . ? 
Tb1 O21 2.3233(12) . ? 
Tb1 O2W 2.3714(13) . ? 
Tb1 O3W 2.4025(13) . ? 
Tb1 O1W 2.4041(12) . ? 
Tb1 O12 2.4128(13) 3_566 ? 
Tb1 O22 2.4277(13) 3_666 ? 
Tb1 O21 2.6120(12) 3_666 ? 
Tb1 O11 2.8201(13) 3_566 ? 
O11 C11 1.267(2) . ? 
O12 C11 1.258(2) . ? 
C11 C12 1.493(3) . ? 
C12 H12A 0.9800 . ? 
C12 H12B 0.9800 . ? 
C12 H12C 0.9800 . ? 
C12 H12D 0.9800 . ? 
C12 H12E 0.9800 . ? 
C12 H12F 0.9800 . ? 
O21 C21 1.278(2) . ? 
O22 C21 1.259(2) . ? 
C21 C22 1.490(2) . ? 
C22 H22A 0.9800 . ? 
C22 H22B 0.9800 . ? 
C22 H22C 0.9800 . ? 
O1W H11W 0.9600 . ? 
O1W H12W 0.9600 . ? 
O2W H21W 0.9600 . ? 
O2W H22W 0.9600 . ? 
O3W H31W 0.9600 . ? 
O3W H32W 0.9600 . ? 
  
loop_ 
 _geom_angle_atom_site_label_1 
 _geom_angle_atom_site_label_2 
 _geom_angle_atom_site_label_3 
 _geom_angle 
 _geom_angle_site_symmetry_1 
 _geom_angle_site_symmetry_3 
 _geom_angle_publ_flag 
O11 Tb1 O21 164.52(5) . . ? 
O11 Tb1 O2W 84.87(4) . . ? 
O21 Tb1 O2W 88.40(4) . . ? 
O11 Tb1 O3W 81.14(5) . . ? 
O21 Tb1 O3W 83.43(4) . . ? 
O2W Tb1 O3W 68.66(4) . . ? 
O11 Tb1 O1W 89.51(4) . . ? 
O21 Tb1 O1W 86.88(4) . . ? 
O2W Tb1 O1W 140.68(4) . . ? 
O3W Tb1 O1W 72.02(4) . . ? 
O11 Tb1 O12 117.17(4) . 3_566 ? 
O21 Tb1 O12 74.27(4) . 3_566 ? 
O2W Tb1 O12 75.49(4) . 3_566 ? 
O3W Tb1 O12 138.01(5) . 3_566 ? 
O1W Tb1 O12 139.44(4) . 3_566 ? 
O11 Tb1 O22 75.51(4) . 3_666 ? 
O21 Tb1 O22 118.32(4) . 3_666 ? 
O2W Tb1 O22 136.56(4) . 3_666 ? 
O3W Tb1 O22 142.13(5) . 3_666 ? 
O1W Tb1 O22 78.32(4) . 3_666 ? 
O12 Tb1 O22 79.71(5) 3_566 3_666 ? 
O11 Tb1 O21 125.07(4) . 3_666 ? 
O21 Tb1 O21 67.51(5) . 3_666 ? 
O2W Tb1 O21 141.54(4) . 3_666 ? 
O3W Tb1 O21 132.84(4) . 3_666 ? 
O1W Tb1 O21 70.16(4) . 3_666 ? 
O12 Tb1 O21 69.48(4) 3_566 3_666 ? 
O22 Tb1 O21 51.05(4) 3_666 3_666 ? 
O11 Tb1 O11 68.70(5) . 3_566 ? 
O21 Tb1 O11 121.41(4) . 3_566 ? 
O2W Tb1 O11 68.50(4) . 3_566 ? 
O3W Tb1 O11 128.96(4) . 3_566 ? 
O1W Tb1 O11 143.54(4) . 3_566 ? 
O12 Tb1 O11 48.51(4) 3_566 3_566 ? 
O22 Tb1 O11 68.32(4) 3_666 3_566 ? 
O21 Tb1 O11 98.13(4) 3_666 3_566 ? 
Tb1 Tb1 Tb1 138.586(5) 3_666 3_566 ? 
C11 O11 Tb1 162.53(12) . . ? 
C11 O11 Tb1 86.07(10) . 3_566 ? 
Tb1 O11 Tb1 111.30(5) . 3_566 ? 
C11 O12 Tb1 105.92(11) . 3_566 ? 
O12 C11 O11 119.51(17) . . ? 
O12 C11 C12 119.55(16) . . ? 
O11 C11 C12 120.94(16) . . ? 
C11 C12 H12A 109.5 . . ? 
C11 C12 H12B 109.5 . . ? 
H12A C12 H12B 109.5 . . ? 
C11 C12 H12C 109.5 . . ? 
H12A C12 H12C 109.5 . . ? 
H12B C12 H12C 109.5 . . ? 
C11 C12 H12D 112.3 . . ? 
C11 C12 H12E 106.7 . . ? 
H12D C12 H12E 109.4 . . ? 
C11 C12 H12F 109.4 . . ? 
H12D C12 H12F 109.4 . . ? 
H12E C12 H12F 109.4 . . ? 
C21 O21 Tb1 154.87(12) . . ? 
C21 O21 Tb1 90.35(10) . 3_666 ? 
Tb1 O21 Tb1 112.49(5) . 3_666 ? 
C21 O22 Tb1 99.58(11) . 3_666 ? 
O22 C21 O21 118.25(16) . . ? 
O22 C21 C22 121.30(16) . . ? 
O21 C21 C22 120.45(16) . . ? 
C21 C22 H22A 109.5 . . ? 
C21 C22 H22B 109.5 . . ? 
H22A C22 H22B 109.5 . . ? 
C21 C22 H22C 109.5 . . ? 
H22A C22 H22C 109.5 . . ? 
H22B C22 H22C 109.5 . . ? 
Tb1 O1W H11W 122.2 . . ? 
Tb1 O1W H12W 111.5 . . ? 
H11W O1W H12W 105.0 . . ? 
Tb1 O2W H21W 121.9 . . ? 
Tb1 O2W H22W 129.2 . . ? 
H21W O2W H22W 105.0 . . ? 
Tb1 O3W H31W 123.3 . . ? 
Tb1 O3W H32W 125.9 . . ? 
H31W O3W H32W 105.0 . . ? 
  
loop_ 
 _geom_hbond_atom_site_label_D 
 _geom_hbond_atom_site_label_H 
 _geom_hbond_atom_site_label_A 
 _geom_hbond_distance_DH 
 _geom_hbond_distance_HA 
 _geom_hbond_distance_DA 
 _geom_hbond_angle_DHA 
 _geom_hbond_site_symmetry_A 
O1W H11W Cl1  0.96 2.18 3.1290(13) 167.4 1_545 
O1W H12W O12  0.96 1.78 2.7064(17) 160.8 1_655 
O2W H21W O22  0.96 1.83 2.7108(17) 151.7 1_455 
O2W H22W Cl1  0.96 2.13 3.0760(13) 170.0 . 
O3W H31W Cl1  0.96 2.23 3.1794(14) 170.3 2_546 
O3W H32W Cl1  0.96 2.13 3.0716(14) 166.1 1_545 
  
_refine_diff_density_max    0.486 
_refine_diff_density_min   -0.392 
_refine_diff_density_rms    0.074 
  
_shelx_res_file 
; 
  
    Ha2019_98_0m_a.res created by SHELXL-2014/7 
  
  
TITL Ha2019_98_0m_a.res in P2(1)/n 
CELL  0.71073   7.8003   7.8539  17.3942   90.000   98.075   90.000 
ZERR    4.000   0.0002   0.0002   0.0005    0.000    0.002    0.000 
LATT 1 
SYMM 1/2-X, 1/2+Y, 1/2-Z 
SFAC C  H  O  Cl Tb 
UNIT 16 48 28 4 4 
LIST 4 ! automatically inserted. Change 6 to 4 for CHECKCIF!! 
OMIT -3 56 
L.S. 10 
ACTA 
BOND $H 
FMAP 2 
rem DFIX 0.96  0.0001 O1w H11w O1w H12w O2w H21w O2w H22w O3w H31w O3w H32w 
rem dfix 1.523  0.0001 H11w H12w H21w H22w H31w H32w 
FREE Tb1 C21_$6 
FREE Tb1 C11_$7 
EQIV $6 1-x, 1-y, 1-z 
BIND Tb1 Tb1_$6 
BIND Tb1 Tb1_$7 
EQIV $7 -x,1-y,1-z 
BIND Tb1 O11_$7 
ACTA 
HTAB 
EQIV $1 -x+3/2, y-1/2, -z+3/2 
EQIV $2 x, y-1, z 
HTAB O1W Cl1_$2 
EQIV $3 x+1, y, z 
HTAB O1W O12_$3 
EQIV $4 x-1, y, z 
HTAB O2W O22_$4 
HTAB O2W Cl1 
EQIV $5 -x+1/2, y-1/2, -z+3/2 
HTAB O3W Cl1_$5 
HTAB O3W Cl1_$2 
SIZE 0.034  0.163  0.462 
rem dfix 0.98 0.0001 C12 H12d C12 H12e C12 H12f 
rem dfix 1.6 0.0001 H12d H12e H12d H12f H12e H12f 
BOND $H 
FMAP 2 
PLAN 5 
SIZE 0.050  0.102  0.325 
TEMP -173 
WGHT    0.009400    1.080900 
FVAR       0.33516   0.03269   0.04500   0.04910   0.03898   0.04955   0.56823 
TB1   5    0.266300    0.457957    0.538256    11.00000    0.00698    0.00973 = 
         0.01187   -0.00016    0.00200   -0.00165 
CL1   4    0.381419    0.967863    0.688524    11.00000    0.01782    0.01246 = 
         0.01711    0.00142    0.00172   -0.00117 
O11   3   -0.000065    0.333610    0.537299    11.00000    0.01184    0.01816 = 
         0.02067   -0.00276    0.00539   -0.00543 
O12   3   -0.274831    0.270785    0.526212    11.00000    0.00890    0.01581 = 
         0.02147    0.00382    0.00287    0.00080 
C11   1   -0.119749    0.232510    0.549753    11.00000    0.01062    0.01250 = 
         0.01265   -0.00139    0.00312   -0.00077 
C12   1   -0.079250    0.068363    0.591707    11.00000    0.02535    0.01661 = 
         0.02220    0.00518    0.00002    0.00400 
AFIX   3 
H12A  2   -0.134004   -0.025702    0.560342    71.00000   21.00000 
H12B  2   -0.123577    0.071668    0.641685    71.00000   21.00000 
H12C  2    0.046442    0.051366    0.600605    71.00000   21.00000 
  
H12D  2   -0.183155    0.012603    0.605461   -71.00000   21.00000 
H12E  2   -0.000630    0.095502    0.639152   -71.00000   21.00000 
H12F  2   -0.020952   -0.008295    0.559238   -71.00000   21.00000 
AFIX   0 
O21   3    0.544939    0.561829    0.574133    11.00000    0.00914    0.01349 = 
         0.01275   -0.00022    0.00030   -0.00142 
O22   3    0.818608    0.628111    0.595732    11.00000    0.00849    0.01678 = 
         0.01704   -0.00186    0.00153   -0.00172 
C21   1    0.679237    0.598884    0.622149    11.00000    0.01087    0.00893 = 
         0.01545   -0.00058    0.00120    0.00162 
C22   1    0.669969    0.605928    0.707050    11.00000    0.01568    0.02690 = 
         0.01222   -0.00109    0.00125    0.00193 
AFIX 137 
H22A  2    0.785813    0.588372    0.735933    11.00000   31.00000 
H22B  2    0.592002    0.516564    0.720789    11.00000   31.00000 
H22C  2    0.625995    0.717481    0.720281    11.00000   31.00000 
AFIX   0 
O1W   3    0.394817    0.179904    0.537191    11.00000    0.01237    0.01250 = 
         0.01719    0.00225    0.00468    0.00033 
AFIX   3 
H11W  2    0.391191    0.099894    0.578655    11.00000   41.00000 
H12W  2    0.514716    0.186478    0.530490    11.00000   41.00000 
AFIX   0 
O2W   3    0.168055    0.656138    0.625218    11.00000    0.01081    0.01272 = 
         0.01918   -0.00390    0.00194   -0.00023 
AFIX   3 
H21W  2    0.047364    0.669606    0.629345    11.00000   51.00000 
H22W  2    0.221608    0.759574    0.645899    11.00000   51.00000 
AFIX   0 
O3W   3    0.303624    0.349988    0.668772    11.00000    0.02438    0.01325 = 
         0.01632    0.00201    0.00786    0.00360 
AFIX   3 
H31W  2    0.248444    0.398986    0.709526    11.00000   61.00000 
H32W  2    0.324476    0.233355    0.683757    11.00000   61.00000 
AFIX   0 
HKLF 4 
  
REM  Ha2019_98_0m_a.res in P2(1)/n 
REM R1 =  0.0108 for    2366 Fo > 4sig(Fo)  and  0.0131 for all    2551 data 
REM    125 parameters refined using      0 restraints 
  
END 
  
WGHT      0.0094      1.0712 
  
REM Instructions for potential hydrogen bonds 
HTAB C12 Cl1_$2 
HTAB C22 Cl1_$1 
HTAB C22 O3W 
HTAB C22 Cl1 
HTAB O1W Cl1_$2 
HTAB O1W O12_$3 
HTAB O2W O22_$4 
HTAB O2W Cl1 
HTAB O3W Cl1_$5 
HTAB O3W Cl1_$2 
  
REM Highest difference peak  0.486,  deepest hole -0.392,  1-sigma level  0.074 
Q1    1   0.3403  0.3855  0.5455  11.00000  0.05    0.49 
Q2    1   0.1853  0.3908  0.5380  11.00000  0.05    0.40 
Q3    1   0.1810  0.5270  0.5438  11.00000  0.05    0.35 
Q4    1  -0.0809  0.1534  0.5748  11.00000  0.05    0.33 
Q5    1   0.3368  0.2774  0.6811  11.00000  0.05    0.31 
; 
_shelx_res_checksum   49332 
  
_shelx_hkl_file 
; 
  -1   0   0    0.00    1.50 
  -1   0   0    6.50    1.60 
  -1   0   0    3.70    2.40 
  -1   0   0    4.90    1.80 
  -1   0   0    4.50    2.20 
  -1   0   0    5.70    2.20 
  -1   0   0   12.90    2.50 
  -1   0   0    4.60    2.00 
  -1   0   0    8.40    2.50 
  -1   0   0    6.80    1.90 
  -1   0   0    0.70    1.70 
  -1   0   0    4.50    2.20 
  -1   0   0    7.80    1.70 
  -1   0   0   14.30    2.30 
  -1   0   0    0.80    2.60 
  -1   0   0    4.60    2.00 
  -1   0   0    6.60    2.00 
  -1   0   0    5.90    1.70 
  -1   0   0    3.90    1.50 
  -1   0   0    4.80    2.10 
  -1   0   0    6.50    2.20 
  -1   0   0    9.90    2.60 
  -1   0   0    9.50    2.80 
  -1   0   0    9.10    2.50 
  -1   0   0   12.70    2.80 
  -1   0   0    3.50    1.80 
  -1   0   0    2.80    1.60 
  -1   0   0    7.40    2.50 
  -1   0   0    3.10    2.00 
   1   0   0    0.90    1.40 
   1   0   0    3.40    1.50 
   1   0   0    2.40    1.50 
   1   0   0    1.10    1.40 
   1   0   0    1.70    1.20 
   1   0   0    1.10    1.30 
   1   0   0   -1.10    1.20 
  -1   0   0    7.40    2.20 
   2   0   0 7048.90  247.38 
   2   0   0 6992.70  250.27 
   2   0   0 7067.69  248.48 
   2   0   0 6953.70  249.38 
   2   0   0 7177.08  250.07 
   2   0   0 7153.18  250.77 
   2   0   0 6651.93  243.88 
   2   0   0 6841.92  248.28 
   2   0   0 7277.47  248.58 
   2   0   0 7405.76  249.58 
   2   0   0 6979.50  249.88 
   2   0   0 7054.69  250.37 
   2   0   0 6931.81  248.78 
   2   0   0 7106.29  246.08 
   2   0   0 6746.02  245.88 
   2   0   0 7064.49  249.68 
   2   0   0 7106.19  248.28 
   2   0   0 6931.41  248.08 
   2   0   0 7019.50  245.08 
   2   0   0 6984.80  246.28 
   2   0   0 7186.18  249.97 
   2   0   0 7158.88  249.78 
   2   0   0 6983.40  245.18 
   2   0   0 7369.36  249.58 
   2   0   0 7098.49  246.08 
   2   0   0 7140.39  249.88 
   2   0   0 6801.22  249.78 
   2   0   0 7071.69  249.38 
   2   0   0 6603.64  248.88 
   2   0   0 7208.88  249.18 
   2   0   0 7121.89  245.28 
   2   0   0 7038.30  250.47 
   2   0   0 6928.81  246.88 
  -2   0   0 7186.88  250.27 
  -2   0   0 7318.67  250.07 
  -2   0   0 7111.49  249.18 
  -2   0   0 7163.98  250.27 
  -2   0   0 7159.88  249.78 
  -2   0   0 6933.91  249.28 
  -2   0   0 6999.80  249.48 
  -2   0   0 7144.59  248.98 
  -2   0   0 7387.76  249.68 
  -2   0   0 7395.66  250.67 
  -2   0   0 7382.66  249.28 
  -2   0   0 7306.07  250.37 
  -2   0   0 6999.90  248.28 
   2   0   0 7002.70  249.58 
   2   0   0 7370.26  250.47 
   2   0   0 7101.09  246.08 
  -2   0   0 7165.18  246.58 
  -2   0   0 7323.77  250.07 
  -2   0   0 7359.06  250.57 
  -2   0   0 7351.96  249.18 
  -2   0   0 7061.29  246.08 
  -2   0   0 6856.21  245.68 
   2   0   0 6906.11  249.28 
  -2   0   0 7116.99  248.88 
  -2   0   0 7147.18  248.38 
  -2   0   0 6613.14  244.98 
  -2   0   0 7001.40  246.08 
  -2   0   0 7201.78  250.47 
  -2   0   0 7030.60  243.68 
  -2   0   0 7182.38  248.38 
  -2   0   0 6937.01  248.08 
  -2   0   0 7267.77  249.78 
  -2   0   0 6859.51  249.38 
  -2   0   0 7071.59  246.08 
  -2   0   0 6924.01  248.88 
  -2   0   0 7062.69  249.58 
  -2   0   0 7250.27  250.57 
  -2   0   0 7094.59  249.48 
  -2   0   0 7031.50  249.48 
  -3   0   0   -0.50    5.60 
  -3   0   0    0.00    4.60 
  -3   0   0    1.40    1.80 
  -3   0   0    4.90    5.30 
  -3   0   0   -5.70    3.60 
  -3   0   0   -1.70    5.10 
   3   0   0    1.30    5.10 
   3   0   0    0.00    4.80 
  -3   0   0   -1.90    4.10 
  -3   0   0   -5.00    3.80 
  -3   0   0    3.30    3.90 
  -3   0   0   -4.50    4.00 
  -3   0   0    8.60    5.80 
   3   0   0   -0.40    4.70 
  -3   0   0    4.80    3.30 
   3   0   0   -0.80    3.60 
   3   0   0   -3.70    4.30 
   3   0   0    6.00    5.60 
   3   0   0    5.10    5.60 
   3   0   0    1.60    5.50 
   3   0   0    5.70    6.00 
  -3   0   0    6.10    5.30 
   3   0   0   -7.40    2.60 
   3   0   0    2.30    4.00 
   3   0   0   -1.90    4.50 
  -3   0   0    2.50    4.90 
   3   0   0    2.50    4.40 
   3   0   0    3.60    4.00 
   3   0   0    2.80    4.50 
   3   0   0    0.30    2.60 
   3   0   0   -3.20    3.30 
   3   0   0    3.70    4.80 
   3   0   0    0.90    2.80 
   3   0   0    2.30    4.90 
   3   0   0    1.20    3.30 
   3   0   0    0.10    5.10 
   3   0   0   -0.10    6.00 
   3   0   0    2.80    6.00 
   3   0   0    2.20    5.40 
   3   0   0    5.50    3.20 
   3   0   0    3.30    5.50 
   3   0   0    0.40    4.20 
  -3   0   0    3.40    3.30 
  -3   0   0   -1.40    3.60 
  -3   0   0    3.90    4.90 
  -3   0   0    3.40    5.20 
  -3   0   0   -1.80    3.00 
  -3   0   0    4.60    3.30 
  -3   0   0   -3.10    5.00 
  -3   0   0   -2.00    5.00 
  -3   0   0    0.80    4.40 
  -3   0   0   -0.10    4.70 
  -3   0   0   -5.90    3.90 
  -3   0   0    0.50    5.90 
  -3   0   0    2.70    5.00 
  -3   0   0    5.80    5.90 
  -3   0   0   -4.30    3.40 
  -3   0   0   -2.60    3.40 
   3   0   0   -1.60    5.00 
   3   0   0   -6.00    4.00 
   3   0   0    1.50    5.30 
   3   0   0   -0.30    2.90 
   3   0   0   -1.30    5.40 
   4   0   0 2083.29   82.69 
   4   0   0 1983.00   76.99 
   4   0   0 2062.69   85.19 
  -4   0   0 2088.79   83.19 
  -4   0   0 1991.30   77.39 
   4   0   0 2149.39   85.49 
  -4   0   0 1956.50   82.79 
  -4   0   0 2011.30   74.19 
  -4   0   0 2061.59   77.69 
  -4   0   0 2008.90   85.19 
  -4   0   0 2143.79   85.69 
  -4   0   0 1911.11   84.49 
  -4   0   0 2013.80   84.09 
   4   0   0 2177.38   82.99 
   4   0   0 1973.90   84.49 
   4   0   0 2036.80   85.89 
   4   0   0 2054.89   77.49 
   4   0   0 2059.39   76.09 
   4   0   0 2155.18   80.69 
   4   0   0 2027.70   81.29 
   4   0   0 2083.49   81.89 
  -4   0   0 2101.59   75.89 
   4   0   0 1985.20   84.79 
   4   0   0 2105.89   86.19 
   4   0   0 1977.50   83.59 
  -4   0   0 2015.30   81.49 
   4   0   0 2018.20   75.49 
   4   0   0 1990.20   85.89 
   4   0   0 1952.60   83.19 
   4   0   0 2030.60   74.19 
   4   0   0 2112.19   78.29 
   4   0   0 1971.40   75.39 
   4   0   0 1959.90   83.69 
   4   0   0 2110.89   77.59 
   4   0   0 2023.50   84.29 
   4   0   0 2061.89   85.89 
  -4   0   0 1978.10   85.19 
  -4   0   0 2000.00   77.19 
  -4   0   0 2020.70   82.99 
  -4   0   0 1996.10   82.29 
  -4   0   0 1970.30   85.69 
  -4   0   0 2003.50   81.19 
  -4   0   0 2076.89   84.89 
  -4   0   0 2012.10   78.19 
   4   0   0 2086.19   83.09 
   4   0   0 2067.39   78.49 
  -5   0   0    3.20    8.00 
  -5   0   0    4.30    7.20 
  -5   0   0    4.70    7.20 
  -5   0   0   -2.80    3.70 
   5   0   0   -3.40    3.20 
  -5   0   0   -3.60    7.70 
   5   0   0    1.90    4.10 
   5   0   0   -2.30    6.50 
   5   0   0   -1.20    6.10 
   5   0   0    3.80    6.00 
  -5   0   0    1.90    6.40 
  -5   0   0  -11.20    5.80 
  -5   0   0    0.40    6.10 
  -5   0   0    0.30    5.10 
  -5   0   0    0.00    6.40 
  -5   0   0    2.20    4.30 
  -5   0   0   -0.90    4.20 
  -5   0   0   -0.10    6.40 
  -5   0   0    4.80    3.50 
   5   0   0   10.90    7.50 
  -5   0   0    0.90    7.60 
   5   0   0   -1.20    7.50 
   5   0   0    2.80    5.40 
   5   0   0   -2.30    6.00 
   5   0   0    1.40    7.00 
   5   0   0    3.20    6.40 
   5   0   0   -0.70    3.50 
   5   0   0   -5.10    5.60 
   5   0   0   -0.20    3.90 
  -5   0   0   -1.00    7.30 
   5   0   0   10.10   10.00 
   5   0   0    4.70    7.10 
   5   0   0   -3.70    5.50 
   5   0   0    3.50    7.50 
   5   0   0    0.60    4.00 
   5   0   0    1.30    6.90 
   5   0   0   -0.90    4.10 
   5   0   0    6.60    7.30 
  -5   0   0    2.10    6.50 
   5   0   0   -0.40    2.80 
   5   0   0    2.10    4.60 
   6   0   0 1234.98   65.29 
   6   0   0 1245.18   64.79 
   6   0   0 1305.07   54.39 
  -6   0   0 1300.17   65.49 
   6   0   0 1357.06   68.89 
   6   0   0 1336.57   64.49 
   6   0   0 1254.67   65.19 
   6   0   0 1416.76   68.99 
  -6   0   0 1352.26   67.39 
  -6   0   0 1256.47   65.09 
   6   0   0 1293.37   59.89 
   6   0   0 1249.57   59.99 
   6   0   0 1259.17   51.39 
   6   0   0 1153.28   63.09 
   6   0   0 1254.17   51.49 
  -6   0   0 1335.17   67.09 
   6   0   0 1265.27   67.19 
   6   0   0 1217.88   65.89 
   6   0   0 1407.66   63.39 
   6   0   0 1369.16   56.69 
   6   0   0 1232.98   64.99 
  -6   0   0 1285.87   62.19 
  -6   0   0 1353.86   67.99 
  -6   0   0 1173.08   61.59 
  -6   0   0 1384.86   61.69 
   6   0   0 1239.18   51.99 
   6   0   0 1324.17   54.99 
  -6   0   0 1279.07   55.89 
  -6   0   0 1267.97   63.39 
  -6   0   0 1307.67   55.09 
  -6   0   0 1343.27   51.09 
  -6   0   0 1296.47   63.79 
  -6   0   0 1134.69   64.69 
  -6   0   0 1309.47   65.39 
   6   0   0 1228.58   51.19 
   6   0   0 1296.27   67.29 
   7   0   0   -5.80    8.80 
  -7   0   0    5.90   10.50 
   7   0   0   -0.10    9.40 
   7   0   0   -6.20    6.50 
  -7   0   0    4.40    9.50 
   7   0   0   20.70   11.70 
   7   0   0    7.80    9.90 
   7   0   0    3.20    8.20 
  -7   0   0   -0.20   10.60 
   7   0   0   -0.60    8.10 
  -7   0   0    3.10    6.20 
   7   0   0   -6.60    8.30 
   7   0   0   -8.30    8.80 
   7   0   0   -6.60    8.60 
   7   0   0   -2.80    8.80 
  -7   0   0   -3.60    5.90 
  -7   0   0   -0.30   10.10 
  -7   0   0   -2.80   11.60 
  -7   0   0   -4.00    9.60 
  -7   0   0    5.60   10.20 
  -7   0   0    4.40   10.00 
  -7   0   0    4.70   11.00 
   7   0   0   -1.10    9.80 
   7   0   0   -4.90    8.50 
  -7   0   0   -6.70    8.30 
  -7   0   0   14.70   12.40 
   7   0   0   -2.20    5.70 
   7   0   0   -7.90    9.30 
  -7   0   0    3.20   11.10 
   8   0   0  833.82   49.50 
   8   0   0  863.21   57.99 
  -8   0   0  847.32   55.89 
  -8   0   0  822.52   51.39 
   8   0   0  847.72   55.19 
   8   0   0  929.51   53.99 
  -8   0   0  864.61   54.99 
  -8   0   0  848.82   55.49 
  -8   0   0  884.51   58.69 
  -8   0   0  933.91   58.19 
   8   0   0  820.52   55.69 
   8   0   0  927.21   60.89 
   8   0   0  739.13   55.69 
   8   0   0  946.41   61.39 
  -8   0   0  989.10   60.79 
   8   0   0  892.51   59.29 
   8   0   0  915.21   57.59 
  -8   0   0  875.51   56.79 
   8   0   0  781.72   55.99 
   8   0   0  963.10   58.89 
  -8   0   0  975.40   62.49 
  -8   0   0  908.71   54.39 
  -8   0   0  966.30   61.19 
  -8   0   0  834.62   50.29 
  -9   0   0   25.60   16.10 
  -9   0   0   -7.50   11.50 
  -9   0   0    0.10   11.70 
   9   0   0  -10.30    7.70 
   9   0   0   10.60   12.60 
   9   0   0   -9.90   10.10 
   9   0   0    4.80   13.30 
   9   0   0   11.80   14.00 
   9   0   0    8.60   11.00 
   9   0   0  -15.10    8.00 
   9   0   0   -6.60   13.20 
   9   0   0    3.80   10.80 
  -9   0   0   11.70   14.70 
  -9   0   0   12.60   12.60 
  -9   0   0  -16.60   11.20 
  -9   0   0   -7.80   11.00 
   9   0   0  -10.80    9.50 
  -9   0   0   -8.20    9.60 
  -9   0   0  -14.50    8.20 
  -9   0   0   -8.10   12.50 
  -9   0   0    1.50   13.20 
 -10   0   0  192.58   35.40 
 -10   0   0  176.58   33.50 
 -10   0   0  133.19   29.80 
  10   0   0  104.59   27.60 
  10   0   0  184.68   34.40 
 -10   0   0  177.58   34.60 
 -10   0   0  111.99   27.80 
 -10   0   0  156.78   33.80 
 -10   0   0  145.09   32.10 
  10   0   0   99.29   27.00 
  10   0   0  105.49   26.00 
 -10   0   0  179.18   33.70 
  10   0   0  104.19   28.60 
  10   0   0  161.98   32.40 
  10   0   0  160.98   33.60 
 -10   0   0  144.39   31.30 
  10   0   0  123.29   29.00 
 -10   0   0  150.78   30.90 
   0  -1   0    2.90    1.80 
   0  -1   0   -0.50    0.90 
   0  -1   0   -1.30    1.00 
   0  -1   0    4.20    2.00 
   0  -1   0    0.30    1.30 
   0   1   0    5.80    2.00 
   0   1   0    4.60    1.90 
   0   1   0    4.30    2.00 
   0   1   0    0.70    1.80 
   0   1   0    2.90    1.90 
   0   1   0    5.70    1.60 
   0   1   0    2.00    2.10 
   0   1   0   -1.40    1.20 
   0   1   0    2.20    1.50 
   0   1   0    2.80    1.30 
   0   1   0    2.20    1.60 
   0   1   0    7.60    2.50 
   0   1   0    6.40    1.60 
   0   1   0   -0.40    1.40 
   0   1   0    4.50    1.30 
   0   1   0    2.60    1.10 
   0   1   0    3.20    1.30 
   0   1   0    0.20    1.40 
   0   1   0    5.90    1.30 
   0   1   0   -0.10    1.30 
   0   1   0    1.90    1.60 
  -1  -1   0    9.10    3.10 
  -1  -1   0   14.20    3.60 
   1  -1   0    9.20    3.20 
  -1  -1   0    9.60    4.20 
  -1  -1   0    7.40    3.00 
  -1  -1   0    8.40    3.20 
  -1  -1   0    8.90    3.00 
  -1  -1   0    6.50    3.70 
  -1  -1   0    7.10    3.30 
   1  -1   0    6.30    2.60 
  -1  -1   0   15.80    4.50 
  -1  -1   0    8.30    4.00 
  -1  -1   0    9.30    4.10 
  -1  -1   0   10.20    2.90 
  -1  -1   0   10.40    4.20 
  -1  -1   0    9.40    3.90 
  -1  -1   0   13.90    4.20 
  -1  -1   0    7.70    3.90 
  -1  -1   0   12.60    3.50 
  -1  -1   0   16.30    5.20 
  -1  -1   0    3.30    3.80 
  -1  -1   0    7.70    3.00 
  -1  -1   0   13.00    4.00 
   1  -1   0   14.70    3.60 
  -1  -1   0   14.80    4.80 
  -1  -1   0   12.60    4.40 
  -1  -1   0    4.70    3.70 
  -1  -1   0    3.80    4.00 
   1  -1   0    7.10    3.10 
   1  -1   0    9.30    2.70 
  -1  -1   0    6.20    3.10 
  -1  -1   0   10.30    3.70 
   1  -1   0   14.70    3.20 
  -1  -1   0    8.10    4.30 
  -1   1   0   10.70    3.10 
  -1   1   0    9.30    1.90 
  -1   1   0   11.30    3.20 
  -1   1   0    9.60    2.70 
  -1   1   0   10.00    2.70 
   1   1   0    5.50    2.90 
   1   1   0   13.30    3.70 
  -1   1   0    2.40    2.80 
  -1   1   0    6.20    2.90 
  -1   1   0    8.90    3.10 
  -1   1   0   15.30    3.70 
  -1   1   0    8.40    3.20 
  -1   1   0   10.60    2.70 
  -1   1   0   10.30    2.50 
   1   1   0   18.10    4.00 
  -1   1   0    7.10    3.40 
  -1   1   0    9.50    3.10 
  -1   1   0    9.60    2.20 
  -1   1   0   10.40    3.30 
  -1   1   0    1.10    3.60 
   1   1   0    7.80    3.90 
  -1   1   0   12.40    3.00 
  -1   1   0   11.30    2.80 
   1   1   0   13.60    3.50 
   1   1   0    7.40    2.70 
  -1   1   0    6.10    3.00 
  -1   1   0    5.40    3.40 
   1   1   0   12.10    5.30 
  -1   1   0   11.00    2.60 
   1   1   0   13.60    4.30 
   1   1   0    7.50    3.10 
   1   1   0    9.70    4.10 
   1   1   0    5.20    4.00 
   1   1   0    6.70    3.90 
   1   1   0    8.50    4.50 
   1   1   0   14.50    4.20 
   1   1   0    8.20    4.00 
  -1   1   0   14.30    3.30 
   1   1   0   11.80    4.00 
  -1   1   0    9.30    2.40 
  -1   1   0    7.90    3.20 
   1   1   0   13.00    3.40 
   1   1   0   12.00    3.40 
   1   1   0    9.10    3.80 
   1   1   0   15.00    4.00 
   1   1   0   12.30    3.90 
   1   1   0   19.20    4.60 
  -1   1   0    8.90    3.00 
   1   1   0   11.00    3.50 
   1   1   0    3.50    3.40 
   1   1   0   10.40    3.90 
  -1   1   0   12.10    3.30 
   1   1   0   15.80    4.30 
   1   1   0    9.50    3.50 
   1   1   0    9.80    3.40 
  -1   1   0    3.90    2.30 
   1   1   0   12.80    4.20 
   1   1   0    4.70    4.00 
   1   1   0   14.60    4.50 
  -1   1   0   11.60    3.20 
  -2  -1   0  901.41   37.20 
  -2  -1   0  867.81   36.60 
   2  -1   0  881.51   36.10 
  -2  -1   0  837.42   37.10 
   2  -1   0  839.32   36.40 
   2  -1   0  885.21   35.40 
   2  -1   0  817.42   35.30 
  -2  -1   0  871.01   37.60 
   2  -1   0  808.42   35.20 
   2  -1   0  845.12   35.10 
  -2  -1   0  885.51   37.40 
   2  -1   0  857.01   36.90 
  -2  -1   0  831.12   36.40 
  -2  -1   0  835.12   35.50 
  -2  -1   0  916.41   36.90 
   2  -1   0  828.42   35.10 
  -2  -1   0  906.81   37.80 
   2  -1   0  824.72   34.20 
   2  -1   0  799.52   30.70 
  -2  -1   0  892.41   36.90 
  -2  -1   0  871.11   37.40 
  -2  -1   0  949.40   38.00 
  -2  -1   0  889.01   37.10 
  -2  -1   0  824.32   36.00 
  -2  -1   0  855.31   37.10 
  -2  -1   0  840.62   37.00 
  -2  -1   0  825.12   36.40 
  -2  -1   0  887.21   35.80 
   2  -1   0  832.82   35.70 
  -2  -1   0  829.62   35.90 
   2  -1   0  828.52   35.70 
   2  -1   0  862.21   37.40 
  -2  -1   0  854.51   36.80 
  -2  -1   0  839.82   36.50 
  -2  -1   0  897.51   38.00 
  -2  -1   0  861.61   37.10 
   2  -1   0  784.12   35.80 
   2  -1   0  810.82   33.30 
  -2  -1   0  905.71   37.40 
  -2  -1   0  931.41   34.90 
  -2  -1   0  809.32   37.10 
   2  -1   0  823.62   35.10 
   2  -1   0  857.31   33.20 
  -2  -1   0  888.31   37.10 
  -2  -1   0  874.51   33.20 
  -2  -1   0  868.41   37.30 
  -2  -1   0  873.61   35.80 
  -2  -1   0  853.01   36.90 
  -2  -1   0  878.21   37.80 
  -2  -1   0  935.11   36.20 
   2  -1   0  809.22   35.50 
   2  -1   0  833.52   36.40 
  -2  -1   0  908.11   37.00 
   2  -1   0  826.82   30.50 
  -2   1   0  894.51   37.00 
   2   1   0  875.71   37.10 
   2   1   0  899.71   38.00 
   2   1   0  907.91   36.90 
   2   1   0  825.92   36.60 
   2   1   0  953.10   38.30 
   2   1   0  855.71   37.80 
   2   1   0  884.11   36.20 
  -2   1   0  818.72   34.60 
  -2   1   0  821.22   33.40 
  -2   1   0  850.01   35.80 
  -2   1   0  875.01   36.40 
  -2   1   0  818.62   33.20 
  -2   1   0  833.22   34.60 
  -2   1   0  853.61   32.50 
   2   1   0  841.12   37.40 
   2   1   0  873.91   33.90 
   2   1   0  787.82   36.70 
  -2   1   0  815.92   35.30 
  -2   1   0  848.82   33.10 
  -2   1   0  806.62   35.60 
  -2   1   0  774.02   34.50 
  -2   1   0  813.32   33.00 
  -2   1   0  849.61   32.80 
  -2   1   0  807.72   33.40 
  -2   1   0  849.72   31.60 
  -2   1   0  875.21   36.90 
  -2   1   0  821.62   35.00 
  -2   1   0  842.22   36.10 
  -2   1   0  830.02   36.00 
   2   1   0  807.82   36.50 
  -2   1   0  834.32   36.50 
  -2   1   0  807.32   34.80 
  -2   1   0  854.51   36.40 
  -2   1   0  839.02   36.00 
   2   1   0  858.01   37.50 
  -2   1   0  885.81   36.00 
  -2   1   0  842.92   36.40 
   2   1   0  881.71   36.20 
   2   1   0  813.02   34.60 
   2   1   0  890.21   37.40 
   2   1   0  827.72   37.10 
   2   1   0  856.81   34.00 
   2   1   0  852.81   35.70 
   2   1   0  863.61   36.70 
   2   1   0  842.82   33.40 
   2   1   0  812.42   36.40 
   2   1   0  895.11   37.30 
  -2   1   0  852.71   31.00 
  -2   1   0  810.62   36.60 
  -2   1   0  786.92   35.00 
   2   1   0  854.21   37.40 
   2   1   0  881.11   37.10 
   2   1   0  860.91   35.50 
   2   1   0  807.02   36.00 
  -2   1   0  872.31   35.70 
   2   1   0  807.82   35.60 
   2   1   0  918.51   37.70 
   2   1   0  864.61   37.10 
   2   1   0  830.22   33.00 
   2   1   0  843.92   37.30 
   2   1   0  855.21   36.80 
  -2   1   0  854.11   35.70 
  -2   1   0  829.32   35.10 
   2   1   0  864.01   35.90 
   2   1   0  808.52   36.30 
  -2   1   0  838.42   37.80 
   2   1   0  885.61   37.90 
   2   1   0  842.22   36.50 
   3  -1   0  126.69   12.80 
   3  -1   0  139.69    9.50 
   3  -1   0  151.38   13.30 
   3  -1   0  125.59   14.80 
   3  -1   0  134.19    9.70 
  -3  -1   0  113.09   14.10 
  -3  -1   0  132.79   14.50 
  -3  -1   0  134.99   13.80 
  -3  -1   0  127.69   11.40 
  -3  -1   0  130.29   15.00 
  -3  -1   0  126.89   12.90 
  -3  -1   0  166.28   17.20 
  -3  -1   0  137.19   15.80 
  -3  -1   0  127.49   15.80 
  -3  -1   0  104.19   13.30 
   3  -1   0  146.09   15.90 
   3  -1   0  123.99   13.50 
   3  -1   0  132.59   13.30 
   3  -1   0  123.99   14.10 
  -3  -1   0  103.39   12.20 
   3  -1   0  101.59   14.20 
   3  -1   0  132.79   15.10 
  -3  -1   0  117.49   15.40 
  -3  -1   0  132.39    8.80 
  -3  -1   0  115.59   15.20 
  -3  -1   0  109.89   11.80 
  -3  -1   0  113.19   14.10 
   3  -1   0  137.39    8.80 
   3  -1   0  117.19   14.20 
   3  -1   0  123.69   13.20 
   3  -1   0  125.29    7.10 
   3  -1   0  102.89   13.00 
   3  -1   0  116.19   11.70 
   3  -1   0  135.49    9.50 
  -3  -1   0  114.39   13.80 
  -3  -1   0  125.49   14.20 
   3  -1   0  131.29   15.10 
  -3  -1   0  112.59   13.60 
  -3  -1   0  129.89   14.80 
  -3  -1   0  147.39   15.00 
   3  -1   0  142.09   14.20 
   3  -1   0  124.79   13.50 
  -3  -1   0  147.89   16.00 
  -3  -1   0  128.29   14.70 
   3  -1   0  146.99   10.40 
  -3  -1   0  154.08   16.30 
   3  -1   0  124.19   12.70 
   3  -1   0  126.89   14.40 
   3  -1   0  114.19   13.70 
   3  -1   0  125.09   14.10 
  -3  -1   0  140.09   15.70 
  -3  -1   0  133.19   15.00 
   3  -1   0  124.19   14.10 
   3  -1   0  122.39    6.80 
   3   1   0  135.09   14.80 
   3   1   0  130.49   15.00 
   3   1   0  156.18   16.00 
   3   1   0  148.49   17.10 
   3   1   0  134.39   15.80 
   3   1   0  124.79   14.20 
   3   1   0  148.89   13.40 
  -3   1   0  146.99   14.50 
  -3   1   0  142.69   14.40 
  -3   1   0  127.09   13.50 
  -3   1   0  129.69   15.10 
  -3   1   0  141.69   15.30 
   3   1   0  129.99   15.70 
  -3   1   0  106.99   13.90 
   3   1   0  115.49   12.30 
   3   1   0  112.09   12.10 
   3   1   0  124.09    8.70 
   3   1   0  123.79    8.40 
  -3   1   0  128.79   13.50 
  -3   1   0  119.59   13.70 
   3   1   0  124.59   11.00 
  -3   1   0  131.89   14.60 
  -3   1   0  118.49   15.30 
  -3   1   0  123.09   14.50 
  -3   1   0  119.79   13.50 
  -3   1   0  117.19   11.70 
   3   1   0  132.09   15.00 
   3   1   0  109.09   13.60 
   3   1   0  131.19    9.60 
   3   1   0  129.89   14.70 
   3   1   0  131.89   14.70 
   3   1   0  113.89   12.60 
   3   1   0  106.89   13.40 
   3   1   0  116.69   14.20 
  -3   1   0  115.59    8.70 
  -3   1   0  135.19   15.10 
  -3   1   0  110.49   12.00 
  -3   1   0  125.99    6.80 
  -3   1   0  120.59   11.10 
  -3   1   0  106.09   10.60 
  -3   1   0  140.29   11.30 
  -3   1   0  123.39   11.50 
  -3   1   0  119.39   10.30 
  -3   1   0  114.29    7.80 
  -3   1   0  130.49   14.90 
  -3   1   0  122.09   11.70 
  -3   1   0  126.19   10.30 
  -3   1   0  111.99   12.90 
  -3   1   0  159.68   15.80 
   3   1   0  110.09   13.60 
  -3   1   0  138.29    9.50 
   3   1   0  140.49   15.20 
  -3   1   0  114.49   12.70 
   3   1   0  106.39   14.20 
   3   1   0  121.49   13.90 
   3   1   0  111.79   12.60 
   3   1   0  131.79   15.20 
  -3   1   0  112.19   13.00 
  -3   1   0  123.29    8.40 
   3   1   0  143.59   12.80 
   3   1   0  125.89   13.30 
   3   1   0  157.58   17.20 
   3   1   0  114.39   12.30 
   3   1   0  118.79   14.40 
   3   1   0  136.99   15.10 
   4  -1   0   29.50    6.90 
   4  -1   0   39.70   10.80 
  -4  -1   0   29.90    9.50 
  -4  -1   0   38.80   11.30 
  -4  -1   0   36.80   10.80 
   4  -1   0   46.30    5.40 
  -4  -1   0   36.00   11.20 
  -4  -1   0   31.00   11.10 
   4  -1   0   33.90    9.60 
   4  -1   0   37.60    6.70 
   4  -1   0   40.80    5.30 
  -4  -1   0   32.00    8.60 
   4  -1   0   49.70   11.00 
   4  -1   0   46.40    9.90 
   4  -1   0   42.30   11.30 
  -4  -1   0   37.10    5.00 
  -4  -1   0   47.40   12.40 
  -4  -1   0   34.00    8.50 
   4  -1   0   32.50    7.50 
   4  -1   0   18.80    8.20 
   4  -1   0   36.60   10.40 
  -4  -1   0   36.00    7.60 
  -4  -1   0   36.20    8.30 
   4  -1   0   26.90    9.00 
   4  -1   0   43.60   10.90 
   4  -1   0   24.10    8.60 
   4  -1   0   30.40    4.60 
   4  -1   0   34.40    8.30 
  -4  -1   0   34.80   10.10 
  -4  -1   0   38.00    8.50 
   4  -1   0   27.50    6.50 
  -4  -1   0   32.80   10.20 
   4  -1   0   33.70   10.30 
  -4  -1   0   38.10   11.40 
  -4  -1   0   33.80   11.20 
   4  -1   0   41.90    9.00 
  -4  -1   0   27.40   10.40 
   4  -1   0   24.30    8.00 
  -4  -1   0   28.50   10.00 
   4  -1   0   35.50   10.50 
   4  -1   0   36.10    9.60 
  -4   1   0   47.80   11.10 
  -4   1   0   42.00    9.00 
  -4   1   0   23.20    8.10 
   4   1   0   43.30   11.20 
   4   1   0   29.50    9.90 
  -4   1   0   39.10    4.90 
   4   1   0   24.40    9.80 
  -4   1   0   28.10    6.10 
  -4   1   0   21.50    8.40 
  -4   1   0   33.50   10.80 
  -4   1   0   33.10    5.40 
   4   1   0   43.30   11.20 
  -4   1   0   37.80    9.30 
   4   1   0   37.40    8.80 
   4   1   0   41.10   10.30 
   4   1   0   41.70   11.70 
  -4   1   0   31.40    8.40 
  -4   1   0   39.30    9.10 
  -4   1   0   42.90    7.80 
   4   1   0   46.30   11.30 
   4   1   0   13.50    8.20 
  -4   1   0   23.10    9.40 
  -4   1   0   28.40    9.50 
  -4   1   0   26.30   10.70 
   4   1   0   34.70    9.90 
   4   1   0   37.60   10.20 
   4   1   0   36.10    8.40 
  -4   1   0   39.70    6.00 
   4   1   0   26.90    8.10 
  -4   1   0   35.20    4.90 
   4   1   0   24.60   12.10 
   4   1   0   33.40    4.60 
   4   1   0   36.90    8.10 
  -4   1   0   30.50    8.80 
   4   1   0   42.10    8.50 
   4   1   0   41.50    5.50 
   4   1   0   36.80    8.70 
   4   1   0   40.30   11.50 
  -4   1   0   18.70   10.60 
  -4   1   0   46.70    8.50 
   4   1   0   43.20   11.20 
   4   1   0   47.50   11.10 
   4   1   0   41.90    6.50 
   4   1   0   42.40    8.20 
  -4   1   0   45.60   11.90 
   4   1   0   44.30   11.40 
  -5  -1   0 1302.37   61.19 
   5  -1   0 1203.38   60.79 
   5  -1   0 1272.17   60.89 
   5  -1   0 1197.88   57.09 
   5  -1   0 1298.87   60.49 
   5  -1   0 1321.77   59.99 
   5  -1   0 1225.68   47.50 
   5  -1   0 1240.48   52.49 
   5  -1   0 1186.98   59.09 
   5  -1   0 1153.08   60.49 
   5  -1   0 1288.77   58.79 
   5  -1   0 1270.27   59.29 
   5  -1   0 1348.97   56.89 
   5  -1   0 1288.57   62.49 
   5  -1   0 1210.38   54.29 
   5  -1   0 1293.47   50.79 
   5  -1   0 1258.77   52.19 
  -5  -1   0 1278.47   61.39 
  -5  -1   0 1277.97   54.59 
  -5  -1   0 1231.78   59.89 
  -5  -1   0 1234.38   55.19 
  -5  -1   0 1259.87   61.89 
  -5  -1   0 1275.17   58.79 
  -5  -1   0 1267.97   50.59 
   5  -1   0 1373.56   62.39 
  -5  -1   0 1125.99   58.49 
  -5  -1   0 1186.68   61.39 
  -5  -1   0 1190.28   55.09 
   5  -1   0 1197.18   58.09 
  -5  -1   0 1204.38   60.99 
  -5  -1   0 1215.98   60.19 
  -5  -1   0 1201.58   57.49 
   5  -1   0 1238.18   47.90 
  -5  -1   0 1256.27   60.99 
  -5  -1   0 1150.68   57.79 
   5   1   0 1240.98   53.49 
   5   1   0 1319.07   60.39 
  -5   1   0 1228.88   56.79 
  -5   1   0 1131.29   55.69 
  -5   1   0 1241.38   54.49 
  -5   1   0 1275.97   51.79 
   5   1   0 1145.59   58.79 
   5   1   0 1233.38   54.69 
   5   1   0 1228.48   61.19 
   5   1   0 1232.78   60.79 
   5   1   0 1220.78   61.79 
   5   1   0 1183.98   53.39 
  -5   1   0 1283.37   47.80 
  -5   1   0 1179.68   45.80 
  -5   1   0 1229.08   45.40 
  -5   1   0 1253.37   50.09 
   5   1   0 1219.68   50.59 
   5   1   0 1254.17   62.39 
  -5   1   0 1181.68   58.19 
   5   1   0 1260.67   59.49 
   5   1   0 1095.39   59.29 
  -5   1   0 1256.57   60.89 
   5   1   0 1194.18   60.89 
  -5   1   0 1241.98   50.69 
   5   1   0 1171.88   58.09 
   5   1   0 1175.58   58.19 
  -5   1   0 1242.38   57.89 
  -5   1   0 1263.17   59.89 
  -5   1   0 1231.18   48.80 
   5   1   0 1258.17   61.79 
  -5   1   0 1250.47   54.69 
  -5   1   0 1234.18   61.59 
  -5   1   0 1318.27   59.79 
   5   1   0 1212.58   54.79 
   5   1   0 1239.98   61.59 
  -5   1   0 1245.78   60.59 
   5   1   0 1271.87   55.69 
  -5   1   0 1214.58   60.59 
   5   1   0 1215.98   46.90 
   5   1   0 1223.98   60.69 
  -5   1   0 1326.97   60.09 
  -6  -1   0   22.20   11.00 
  -6  -1   0   44.50   14.80 
  -6  -1   0   48.20   10.90 
   6  -1   0   25.00   10.70 
  -6  -1   0   39.10   12.90 
  -6  -1   0   15.70    8.80 
   6  -1   0   27.30   12.40 
   6  -1   0   37.00   13.10 
  -6  -1   0   19.40   10.20 
   6  -1   0   23.00    8.50 
  -6  -1   0   37.20   13.60 
   6  -1   0   29.40    6.40 
   6  -1   0   16.80    8.30 
   6  -1   0   39.80    9.40 
  -6  -1   0   41.90   13.10 
   6  -1   0   19.70    7.50 
  -6  -1   0   -1.00    9.40 
   6  -1   0   43.70    6.80 
  -6  -1   0   27.20   12.00 
  -6  -1   0   48.00   14.80 
   6  -1   0   31.20   11.00 
   6  -1   0   36.10   12.50 
   6  -1   0    8.40    9.50 
   6  -1   0   37.60   13.50 
  -6  -1   0   35.30   13.50 
  -6  -1   0   29.90   12.40 
  -6  -1   0   31.10   11.80 
   6  -1   0   48.80   13.60 
   6  -1   0   39.00   13.40 
  -6  -1   0   17.40    6.70 
   6  -1   0   32.50   11.00 
   6  -1   0   16.50   10.40 
  -6  -1   0   40.10   10.30 
   6   1   0   42.90   13.30 
  -6   1   0   49.40   13.50 
  -6   1   0   24.10   10.30 
   6   1   0   32.30   12.00 
   6   1   0   58.79   15.20 
   6   1   0   29.10   12.30 
   6   1   0   45.50   10.20 
   6   1   0   18.80    9.90 
   6   1   0   41.00   13.40 
   6   1   0   24.90   11.70 
   6   1   0   29.80    9.30 
   6   1   0   17.60   11.10 
  -6   1   0   35.70   12.70 
  -6   1   0   18.10    9.00 
  -6   1   0   43.50    8.20 
   6   1   0   32.60   10.00 
  -6   1   0   34.10    8.70 
   6   1   0   23.90   11.90 
  -6   1   0   20.60   11.80 
   6   1   0   36.30    9.30 
  -6   1   0   29.00   12.00 
  -6   1   0   17.20   10.90 
  -6   1   0   25.20    5.80 
   6   1   0   56.99   15.60 
  -6   1   0   30.50   13.00 
  -6   1   0   32.20   13.00 
  -6   1   0   25.70   12.60 
  -6   1   0   35.30   13.50 
   6   1   0   27.20   12.80 
   6   1   0   32.90    6.80 
  -6   1   0   21.30    9.80 
   6   1   0   34.00    9.40 
   6   1   0   68.39   18.50 
   6   1   0   32.50   13.10 
   6   1   0   48.10   13.10 
  -6   1   0   14.50    5.60 
   6   1   0   37.20   12.20 
  -7  -1   0 1396.16   68.99 
   7  -1   0 1456.55   63.59 
   7  -1   0 1333.27   70.29 
  -7  -1   0 1370.56   74.49 
   7  -1   0 1275.07   71.69 
   7  -1   0 1457.55   72.89 
  -7  -1   0 1428.06   70.39 
   7  -1   0 1393.96   60.69 
  -7  -1   0 1326.67   73.29 
  -7  -1   0 1340.17   73.39 
  -7  -1   0 1448.66   74.59 
  -7  -1   0 1398.96   72.89 
   7  -1   0 1356.96   74.09 
  -7  -1   0 1296.37   62.39 
   7  -1   0 1404.76   70.99 
  -7  -1   0 1157.78   70.29 
  -7  -1   0 1348.86   71.79 
  -7  -1   0 1394.56   62.69 
   7  -1   0 1308.07   58.29 
   7  -1   0 1307.17   70.29 
   7  -1   0 1382.26   72.49 
   7  -1   0 1421.46   73.09 
  -7  -1   0 1342.57   72.19 
  -7  -1   0 1345.57   67.69 
   7  -1   0 1351.96   74.09 
   7  -1   0 1305.07   73.29 
  -7  -1   0 1365.06   71.09 
   7   1   0 1370.66   73.19 
   7   1   0 1292.27   68.29 
   7   1   0 1404.56   74.49 
   7   1   0 1336.67   69.69 
  -7   1   0 1418.56   68.99 
  -7   1   0 1376.06   64.29 
   7   1   0 1340.47   74.79 
   7   1   0 1416.66   74.19 
   7   1   0 1442.16   63.79 
   7   1   0 1388.06   60.59 
  -7   1   0 1304.17   72.09 
  -7   1   0 1383.36   71.19 
   7   1   0 1370.06   63.69 
  -7   1   0 1393.86   73.49 
  -7   1   0 1428.26   71.89 
   7   1   0 1463.95   75.19 
   7   1   0 1401.26   76.49 
  -7   1   0 1368.16   73.39 
  -7   1   0 1372.96   68.39 
  -7   1   0 1367.76   67.19 
   7   1   0 1296.97   71.09 
   7   1   0 1433.46   75.09 
   7   1   0 1420.16   71.39 
   7   1   0 1339.77   72.79 
  -7   1   0 1410.56   59.09 
  -7   1   0 1314.77   67.89 
   7   1   0 1503.35   71.89 
  -7   1   0 1288.57   73.09 
   7   1   0 1308.37   71.49 
   7   1   0 1326.47   59.19 
  -7   1   0 1340.17   70.19 
  -8  -1   0   80.39   20.60 
   8  -1   0   27.10   13.70 
   8  -1   0   15.20   13.80 
  -8  -1   0   26.60   15.60 
   8  -1   0   13.30   13.60 
  -8  -1   0   33.80   15.40 
  -8  -1   0   43.90   17.30 
   8  -1   0   53.89   18.70 
  -8  -1   0   32.40   15.00 
   8  -1   0   37.00   14.60 
   8  -1   0   22.80   13.70 
  -8  -1   0   46.80   17.30 
  -8  -1   0   15.80   14.50 
  -8  -1   0   18.30   13.60 
   8  -1   0   50.19   16.60 
  -8  -1   0   24.30   14.10 
   8  -1   0   35.90   15.90 
  -8  -1   0   11.10   12.70 
  -8  -1   0   19.40   13.70 
   8  -1   0   40.50   16.60 
  -8  -1   0   29.90   11.70 
   8  -1   0   17.90   12.10 
   8   1   0   38.90   14.70 
  -8   1   0   12.50   11.70 
  -8   1   0    1.90   11.60 
   8   1   0   57.29   18.00 
   8   1   0   27.40   14.20 
  -8   1   0   53.09   17.60 
   8   1   0    0.90   10.60 
   8   1   0   31.50   15.60 
  -8   1   0   25.50   14.00 
   8   1   0   17.60    9.50 
   8   1   0   20.20   12.10 
   8   1   0   38.80   14.80 
  -8   1   0   28.10   13.10 
   8   1   0   48.50   21.00 
  -8   1   0   40.80   15.40 
   8   1   0   30.10   14.80 
   8   1   0   36.40   15.00 
   8   1   0   22.20   15.20 
   8   1   0   28.00   15.60 
  -8   1   0   20.00   11.30 
  -8   1   0   15.70   14.30 
  -8   1   0   32.80   17.30 
   8   1   0   50.99   17.40 
  -8   1   0   36.80   16.70 
   8   1   0   28.00   15.50 
   8   1   0   35.30   12.60 
  -8   1   0   48.30   16.90 
  -8   1   0   51.59   17.20 
  -9  -1   0  385.46   39.90 
  -9  -1   0  418.86   43.30 
  -9  -1   0  423.56   45.70 
  -9  -1   0  426.26   49.80 
   9  -1   0  373.56   46.70 
  -9  -1   0  367.86   44.60 
   9  -1   0  403.96   47.60 
  -9  -1   0  385.56   48.80 
   9  -1   0  310.67   39.90 
   9  -1   0  395.86   44.20 
   9  -1   0  495.65   50.49 
  -9  -1   0  349.87   44.20 
  -9  -1   0  406.26   47.00 
   9  -1   0  366.46   46.20 
   9  -1   0  385.56   44.80 
  -9  -1   0  308.87   42.10 
   9  -1   0  407.96   47.80 
  -9  -1   0  315.37   40.70 
   9  -1   0  400.96   47.60 
  -9  -1   0  404.36   47.80 
   9   1   0  433.76   49.30 
  -9   1   0  349.07   43.70 
   9   1   0  386.06   40.00 
  -9   1   0  372.26   43.90 
   9   1   0  404.36   44.60 
  -9   1   0  433.66   48.80 
  -9   1   0  407.56   42.40 
  -9   1   0  394.96   48.60 
   9   1   0  406.26   48.00 
   9   1   0  403.26   45.50 
   9   1   0  381.66   42.30 
  -9   1   0  432.76   48.80 
   9   1   0  413.46   49.70 
   9   1   0  359.96   43.00 
  -9   1   0  449.86   46.20 
   9   1   0  313.17   42.40 
  -9   1   0  463.25   48.30 
  -9   1   0  397.06   40.90 
  -9   1   0  404.36   45.00 
   9   1   0  316.77   42.20 
   9   1   0  302.17   41.90 
  -9   1   0  434.66   46.10 
 -10  -1   0   20.10   17.60 
  10  -1   0   25.20   16.90 
  10  -1   0   26.50   15.70 
 -10  -1   0   22.80   19.40 
  10  -1   0   42.30   21.60 
 -10  -1   0   18.30   16.50 
 -10  -1   0   38.60   18.60 
 -10  -1   0    9.90   16.50 
  10  -1   0   16.30   17.30 
 -10  -1   0   20.30   16.60 
  10  -1   0   16.60   17.10 
  10  -1   0   41.80   17.80 
 -10  -1   0   16.50   16.60 
  10  -1   0    6.60   15.10 
 -10  -1   0   27.70   20.70 
  10  -1   0   18.40   18.40 
 -10  -1   0    6.30   14.10 
 -10  -1   0    8.20   18.50 
  10   1   0   22.80   17.60 
 -10   1   0   11.20   14.00 
  10   1   0   19.70   17.00 
 -10   1   0    2.60   15.20 
  10   1   0   14.20   15.90 
  10   1   0    2.40   13.20 
 -10   1   0   22.30   16.80 
 -10   1   0   24.80   18.70 
 -10   1   0   25.50   16.00 
 -10   1   0   -3.00   16.20 
  10   1   0   33.80   20.90 
 -10   1   0   -7.00   13.20 
 -10   1   0   45.00   18.70 
  10   1   0   39.20   20.30 
  10   1   0   25.40   18.20 
  10   1   0   12.50   13.90 
 -10   1   0    5.70   12.50 
 -10   1   0   30.10   21.30 
   0  -2   0 4845.02  168.58 
   0  -2   0 4787.72  168.98 
   0  -2   0 4750.92  170.88 
   0  -2   0 4892.71  166.28 
   0  -2   0 4751.72  165.58 
   0  -2   0 4600.04  164.48 
   0  -2   0 4609.24  167.78 
   0  -2   0 4651.73  165.08 
   0  -2   0 4597.94  165.38 
   0  -2   0 4867.11  165.88 
   0  -2   0 4568.84  169.98 
   0  -2   0 4748.52  169.38 
   0  -2   0 4880.01  164.48 
   0  -2   0 4770.42  169.48 
   0  -2   0 4819.72  165.68 
   0  -2   0 4736.93  169.88 
   0  -2   0 5005.80  166.18 
   0  -2   0 4818.52  168.78 
   0  -2   0 4792.82  168.48 
   0  -2   0 4707.03  169.18 
   0  -2   0 4684.43  170.08 
   0   2   0 4787.42  163.18 
   0   2   0 4593.64  168.18 
   0   2   0 4544.25  168.78 
   0   2   0 4726.53  165.68 
   0   2   0 4524.15  168.78 
   0   2   0 4726.63  170.98 
   0   2   0 4560.34  169.68 
   0   2   0 4712.83  169.78 
   0   2   0 4669.73  168.78 
   0   2   0 4860.11  163.78 
   0   2   0 4511.45  166.98 
   0   2   0 4670.43  169.78 
   0   2   0 4909.91  168.18 
   0   2   0 4962.70  168.48 
   0   2   0 4632.14  165.08 
   0   2   0 4772.82  165.78 
   0   2   0 4901.11  165.18 
   0   2   0 4743.43  169.68 
   0   2   0 4697.43  168.28 
   0   2   0 4735.43  169.98 
   0   2   0 4720.63  163.08 
   0   2   0 4766.42  168.78 
   0   2   0 4622.34  166.98 
   0   2   0 4707.13  165.38 
   0   2   0 4617.04  164.38 
   0   2   0 4745.62  164.18 
   0   2   0 4613.14  163.78 
   0   2   0 4668.23  164.28 
   0   2   0 4630.24  169.18 
  -1  -2   0 4138.99  143.59 
  -1  -2   0 3881.71  138.49 
  -1  -2   0 3993.40  141.99 
  -1  -2   0 4066.69  142.09 
  -1  -2   0 3983.80  140.69 
   1  -2   0 3748.53  141.09 
   1  -2   0 3867.21  139.99 
   1  -2   0 3804.52  140.99 
   1  -2   0 3839.22  137.29 
  -1  -2   0 4041.60  142.19 
  -1  -2   0 4029.20  139.99 
   1  -2   0 3774.62  140.69 
  -1  -2   0 4013.20  140.89 
  -1  -2   0 4062.69  141.69 
  -1  -2   0 3921.91  137.29 
  -1  -2   0 4038.70  144.39 
  -1  -2   0 3977.20  141.89 
  -1  -2   0 4065.19  138.19 
  -1  -2   0 3944.71  141.79 
  -1  -2   0 4036.60  142.39 
  -1  -2   0 4017.70  140.89 
   1  -2   0 3717.23  137.09 
  -1  -2   0 3927.01  139.89 
  -1  -2   0 3990.30  138.19 
   1  -2   0 3835.92  142.09 
   1  -2   0 3823.12  138.09 
  -1  -2   0 3904.91  137.49 
   1  -2   0 3855.01  137.29 
   1  -2   0 3916.71  140.69 
   1  -2   0 3978.50  140.39 
   1  -2   0 3696.03  137.09 
   1  -2   0 3983.50  139.39 
  -1  -2   0 3921.31  142.69 
   1  -2   0 3713.03  137.19 
   1  -2   0 3826.42  136.99 
   1  -2   0 3833.02  137.79 
  -1  -2   0 3991.50  137.89 
  -1  -2   0 3949.70  142.59 
  -1  -2   0 3998.10  138.49 
   1  -2   0 3734.23  136.99 
  -1  -2   0 3987.60  139.09 
  -1  -2   0 3940.71  138.79 
  -1  -2   0 4024.30  141.09 
  -1  -2   0 3945.71  143.49 
  -1  -2   0 3836.72  139.19 
  -1  -2   0 3946.51  141.49 
  -1  -2   0 4119.19  140.09 
  -1  -2   0 3956.90  142.49 
   1  -2   0 3704.63  138.19 
  -1  -2   0 3903.91  142.29 
   1  -2   0 3746.63  135.99 
   1  -2   0 3838.62  139.19 
  -1  -2   0 4072.29  137.19 
   1   2   0 3947.71  139.79 
   1   2   0 3882.71  141.29 
  -1   2   0 3889.71  141.29 
  -1   2   0 3714.33  137.29 
   1   2   0 3991.80  142.59 
   1   2   0 3949.50  143.79 
  -1   2   0 3638.74  141.29 
   1   2   0 3876.61  138.49 
   1   2   0 4015.70  142.19 
  -1   2   0 3834.22  136.99 
  -1   2   0 3837.82  141.99 
  -1   2   0 3740.73  136.99 
  -1   2   0 3635.44  137.69 
   1   2   0 3967.10  139.29 
   1   2   0 4050.09  137.89 
   1   2   0 3880.61  141.99 
  -1   2   0 3719.73  138.49 
   1   2   0 3953.40  142.69 
  -1   2   0 3781.02  137.19 
   1   2   0 3992.20  137.59 
   1   2   0 4011.30  141.39 
  -1   2   0 3810.12  139.99 
  -1   2   0 3842.02  137.79 
  -1   2   0 3744.13  137.79 
   1   2   0 3933.31  139.49 
  -1   2   0 3832.32  137.09 
  -1   2   0 3709.53  137.39 
   1   2   0 3903.91  143.09 
  -1   2   0 3844.82  139.09 
  -1   2   0 3766.52  137.39 
   1   2   0 4026.70  142.09 
   1   2   0 3994.70  142.29 
   1   2   0 3944.41  141.99 
   1   2   0 3994.60  142.09 
   1   2   0 3836.62  141.09 
   1   2   0 3883.31  141.09 
  -1   2   0 3798.52  139.69 
  -1   2   0 3644.64  140.79 
   1   2   0 4158.08  142.39 
  -1   2   0 3982.90  140.89 
   1   2   0 4049.49  143.29 
   1   2   0 3946.11  143.79 
   1   2   0 3952.80  140.49 
   1   2   0 3932.61  143.39 
   1   2   0 4121.89  140.09 
   1   2   0 3999.00  137.99 
   1   2   0 4000.70  137.39 
   1   2   0 3960.50  141.99 
   1   2   0 4017.50  142.39 
  -1   2   0 3589.34  137.39 
  -1   2   0 3831.32  139.19 
   1   2   0 3973.40  137.89 
   1   2   0 3918.81  138.49 
   1   2   0 3968.60  139.09 
  -1   2   0 4007.40  142.09 
  -1   2   0 3711.83  139.29 
  -1   2   0 3812.12  140.49 
  -1   2   0 3902.31  137.19 
   1   2   0 4148.69  139.99 
   1   2   0 4026.60  142.59 
  -1   2   0 3917.11  136.99 
  -1   2   0 3856.11  137.59 
  -1   2   0 3848.21  136.39 
  -1   2   0 3819.32  138.29 
  -2  -2   0 2541.85   95.39 
   2  -2   0 2410.96   92.09 
  -2  -2   0 2467.55   93.09 
  -2  -2   0 2528.85   91.59 
   2  -2   0 2351.76   87.59 
  -2  -2   0 2367.16   97.29 
  -2  -2   0 2427.46   94.19 
  -2  -2   0 2553.84   94.19 
  -2  -2   0 2520.45   93.79 
  -2  -2   0 2464.25   91.69 
  -2  -2   0 2466.95   94.39 
   2  -2   0 2325.07   90.19 
  -2  -2   0 2420.86   91.99 
   2  -2   0 2397.66   90.19 
   2  -2   0 2349.56   91.19 
  -2  -2   0 2589.64   92.29 
  -2  -2   0 2539.85   92.09 
   2  -2   0 2386.16   91.19 
  -2  -2   0 2538.55   93.09 
  -2  -2   0 2441.16   90.29 
  -2  -2   0 2535.45   96.09 
   2  -2   0 2396.86   90.99 
   2  -2   0 2443.26   91.19 
  -2  -2   0 2508.85   94.49 
   2  -2   0 2344.87   87.59 
  -2  -2   0 2437.66   92.09 
  -2  -2   0 2566.14   95.49 
  -2  -2   0 2503.85   92.29 
   2  -2   0 2412.66   91.29 
  -2  -2   0 2488.35   94.39 
  -2  -2   0 2484.05   93.99 
  -2  -2   0 2447.26   93.39 
  -2  -2   0 2427.66   93.69 
   2  -2   0 2320.97   91.19 
  -2  -2   0 2514.55   94.19 
  -2  -2   0 2595.84   92.89 
   2  -2   0 2527.75   90.59 
   2  -2   0 2355.16   90.19 
  -2  -2   0 2511.35   93.39 
  -2  -2   0 2471.85   90.99 
  -2  -2   0 2476.85   94.29 
   2  -2   0 2366.96   90.69 
   2  -2   0 2300.97   90.49 
  -2  -2   0 2552.04   92.89 
  -2  -2   0 2459.45   93.59 
   2  -2   0 2358.96   91.79 
  -2  -2   0 2435.86   91.19 
  -2  -2   0 2512.85   92.19 
  -2  -2   0 2484.45   91.49 
  -2  -2   0 2463.35   94.39 
   2  -2   0 2378.86   90.99 
  -2  -2   0 2555.34   92.79 
   2  -2   0 2257.17   89.39 
   2   2   0 2382.76   92.89 
  -2   2   0 2380.56   89.49 
  -2   2   0 2356.26   91.99 
   2   2   0 2469.95   93.59 
   2   2   0 2438.46   95.39 
  -2   2   0 2429.36   90.49 
  -2   2   0 2413.96   91.59 
   2   2   0 2399.26   94.49 
  -2   2   0 2419.46   90.99 
   2   2   0 2406.96   90.39 
   2   2   0 2525.25   94.59 
  -2   2   0 2434.56   91.09 
   2   2   0 2557.24   93.99 
   2   2   0 2578.84   94.29 
   2   2   0 2459.15   93.19 
   2   2   0 2507.55   91.39 
  -2   2   0 2332.67   89.99 
   2   2   0 2530.15   92.19 
   2   2   0 2392.46   91.19 
   2   2   0 2537.05   94.19 
   2   2   0 2475.55   92.99 
   2   2   0 2452.95   97.39 
   2   2   0 2558.04   95.29 
  -2   2   0 2425.76   90.59 
  -2   2   0 2391.06   90.79 
   2   2   0 2527.05   95.59 
  -2   2   0 2403.06   90.19 
  -2   2   0 2397.46   88.59 
  -2   2   0 2413.86   89.39 
  -2   2   0 2391.26   91.69 
  -2   2   0 2322.97   89.59 
   2   2   0 2454.25   94.79 
  -2   2   0 2365.36   88.19 
  -2   2   0 2397.56   90.99 
   2   2   0 2419.96   93.99 
   2   2   0 2476.65   91.79 
   2   2   0 2505.85   92.39 
  -2   2   0 2495.05   94.19 
  -2   2   0 2279.17   89.09 
  -2   2   0 2403.46   90.89 
   2   2   0 2463.35   92.69 
   2   2   0 2521.75   91.69 
  -2   2   0 2447.16   90.59 
  -2   2   0 2373.56   86.19 
  -2   2   0 2422.06   91.79 
  -2   2   0 2437.06   88.29 
   2   2   0 2509.35   91.39 
   2   2   0 2370.26   94.89 
  -2   2   0 2374.86   90.59 
   2   2   0 2473.15   92.59 
  -2   2   0 2377.66   90.99 
   2   2   0 2494.15   92.49 
  -2   2   0 2386.06   87.59 
  -2   2   0 2292.87   91.69 
  -2   2   0 2364.86   90.09 
   2   2   0 2480.75   93.69 
   2   2   0 2495.65   91.69 
   2   2   0 2534.25   93.39 
  -2   2   0 2373.76   91.09 
   2   2   0 2484.25   94.39 
   2   2   0 2480.15   92.89 
  -2   2   0 2569.74   93.79 
  -2   2   0 2304.27   88.79 
  -2   2   0 2426.16   87.69 
   2   2   0 2523.95   93.19 
  -2   2   0 2359.36   90.09 
  -2   2   0 2379.06   89.39 
  -3  -2   0 1002.80   48.70 
  -3  -2   0  983.30   46.10 
   3  -2   0 1014.60   41.80 
  -3  -2   0  891.51   42.90 
  -3  -2   0 1027.00   47.30 
  -3  -2   0 1000.00   44.60 
   3  -2   0  954.00   41.50 
  -3  -2   0  944.21   44.40 
   3  -2   0  996.40   43.60 
   3  -2   0  906.41   41.30 
  -3  -2   0  945.51   46.60 
  -3  -2   0  989.90   40.90 
  -3  -2   0 1036.40   47.80 
  -3  -2   0 1003.30   47.30 
   3  -2   0  969.00   43.00 
   3  -2   0  951.10   44.80 
   3  -2   0  947.41   44.10 
   3  -2   0  941.11   44.00 
   3  -2   0  996.70   44.60 
   3  -2   0  911.61   44.30 
  -3  -2   0 1026.30   47.40 
  -3  -2   0  888.81   45.30 
  -3  -2   0  943.61   44.30 
  -3  -2   0  999.40   46.90 
  -3  -2   0  982.20   45.40 
   3  -2   0  943.51   43.20 
  -3  -2   0 1018.10   45.20 
   3  -2   0  942.01   43.20 
  -3  -2   0 1073.09   46.80 
   3  -2   0  983.90   43.50 
  -3  -2   0  899.01   44.10 
   3  -2   0 1014.20   44.20 
   3  -2   0  975.10   41.20 
   3  -2   0  947.31   38.50 
  -3  -2   0  968.20   42.70 
   3  -2   0  989.10   42.70 
   3  -2   0  989.00   45.80 
  -3   2   0  924.01   42.60 
  -3   2   0  934.11   37.80 
   3   2   0  870.61   46.10 
   3   2   0  971.30   44.90 
  -3   2   0  945.41   42.20 
   3   2   0  980.80   45.20 
   3   2   0  931.91   44.50 
  -3   2   0  985.60   42.50 
  -3   2   0  937.61   47.90 
   3   2   0  964.50   44.10 
   3   2   0  990.30   43.80 
   3   2   0  904.01   46.00 
   3   2   0 1012.40   41.30 
   3   2   0  961.40   46.30 
   3   2   0  992.00   41.40 
   3   2   0 1031.40   45.20 
  -3   2   0  972.80   38.30 
  -3   2   0  926.91   37.70 
  -3   2   0  956.80   41.60 
  -3   2   0  908.11   43.70 
   3   2   0  959.90   46.90 
   3   2   0  928.01   44.90 
  -3   2   0  944.21   35.60 
   3   2   0  994.80   42.30 
   3   2   0  991.20   45.90 
   3   2   0  954.50   46.10 
  -3   2   0  938.01   46.20 
  -3   2   0  936.71   41.40 
  -3   2   0  956.40   44.70 
  -3   2   0  961.30   37.40 
  -3   2   0  911.11   42.60 
   3   2   0  980.30   44.60 
  -3   2   0  942.21   41.70 
  -3   2   0  970.40   42.40 
  -3   2   0  968.10   40.80 
  -3   2   0 1008.60   44.10 
   3   2   0 1000.00   46.30 
  -3   2   0 1002.90   44.50 
   3   2   0 1045.50   48.90 
   3   2   0  985.30   46.40 
  -3   2   0  952.10   43.00 
  -3   2   0  961.10   35.60 
   3   2   0  975.30   46.90 
   3   2   0  973.20   42.00 
  -3   2   0  937.81   39.70 
  -3   2   0  950.40   44.00 
  -3   2   0  948.01   37.30 
  -3   2   0  967.60   41.70 
  -3   2   0  958.50   42.10 
   3   2   0  996.70   43.40 
  -3   2   0  966.20   44.00 
  -3   2   0  958.90   44.20 
  -3   2   0  954.30   42.50 
  -3   2   0  933.01   44.80 
  -3   2   0  937.81   40.90 
  -3   2   0 1047.60   45.90 
   3   2   0  999.10   45.80 
  -3   2   0  971.30   41.40 
  -4  -2   0 1457.55   64.29 
   4  -2   0 1395.96   55.39 
  -4  -2   0 1455.05   63.29 
   4  -2   0 1472.85   63.39 
  -4  -2   0 1415.76   64.79 
   4  -2   0 1452.95   62.19 
  -4  -2   0 1505.45   64.19 
   4  -2   0 1382.16   55.69 
  -4  -2   0 1326.77   59.59 
  -4  -2   0 1447.46   64.39 
   4  -2   0 1335.77   56.49 
   4  -2   0 1385.66   63.49 
   4  -2   0 1341.87   58.59 
   4  -2   0 1318.27   61.69 
  -4  -2   0 1397.66   54.99 
  -4  -2   0 1419.86   63.09 
   4  -2   0 1306.47   60.29 
   4  -2   0 1371.56   62.59 
  -4  -2   0 1393.86   63.19 
  -4  -2   0 1349.86   62.39 
   4  -2   0 1391.86   60.29 
   4  -2   0 1338.07   60.59 
  -4  -2   0 1446.66   65.09 
   4  -2   0 1351.16   60.59 
  -4  -2   0 1405.76   64.69 
  -4  -2   0 1365.76   62.09 
  -4  -2   0 1379.76   61.59 
   4  -2   0 1413.96   61.09 
   4  -2   0 1492.65   64.79 
   4  -2   0 1337.27   60.59 
   4  -2   0 1380.56   62.49 
  -4  -2   0 1465.85   62.79 
   4  -2   0 1357.76   59.59 
  -4  -2   0 1362.16   63.29 
  -4   2   0 1372.56   59.59 
   4   2   0 1394.56   65.29 
  -4   2   0 1380.26   56.29 
  -4   2   0 1393.06   62.99 
   4   2   0 1386.76   55.49 
  -4   2   0 1394.76   61.59 
  -4   2   0 1444.76   61.29 
  -4   2   0 1387.06   54.89 
   4   2   0 1450.35   64.29 
  -4   2   0 1323.07   58.59 
   4   2   0 1419.76   61.29 
   4   2   0 1384.76   61.49 
  -4   2   0 1354.16   50.89 
  -4   2   0 1299.57   61.49 
  -4   2   0 1380.36   59.99 
  -4   2   0 1327.37   57.69 
   4   2   0 1320.67   63.89 
   4   2   0 1466.15   65.09 
   4   2   0 1393.16   60.99 
   4   2   0 1345.57   63.19 
   4   2   0 1262.87   61.29 
   4   2   0 1376.76   62.09 
  -4   2   0 1348.97   53.19 
   4   2   0 1421.06   64.59 
   4   2   0 1385.96   63.39 
  -4   2   0 1283.47   55.09 
   4   2   0 1363.06   64.49 
  -4   2   0 1398.96   55.99 
   4   2   0 1296.37   60.29 
  -4   2   0 1335.27   56.19 
   4   2   0 1474.35   57.09 
   4   2   0 1393.16   57.19 
   4   2   0 1371.96   54.89 
  -4   2   0 1310.27   64.19 
  -4   2   0 1348.47   58.49 
  -4   2   0 1357.96   58.09 
  -4   2   0 1350.86   55.99 
   4   2   0 1500.35   59.89 
  -4   2   0 1414.86   63.49 
  -4   2   0 1423.96   64.09 
   4   2   0 1462.95   63.69 
   4   2   0 1415.26   62.89 
  -4   2   0 1280.97   61.49 
   4   2   0 1335.17   62.59 
  -4   2   0 1342.97   55.49 
  -4   2   0 1367.46   61.39 
  -4   2   0 1396.76   57.29 
   4   2   0 1461.15   65.39 
  -5  -2   0  493.35   33.40 
  -5  -2   0  502.45   34.00 
  -5  -2   0  531.75   34.00 
  -5  -2   0  516.05   34.00 
   5  -2   0  477.95   30.10 
  -5  -2   0  531.05   30.80 
  -5  -2   0  494.75   34.10 
   5  -2   0  462.45   32.70 
   5  -2   0  508.15   27.30 
   5  -2   0  493.95   31.80 
  -5  -2   0  458.95   31.50 
   5  -2   0  517.65   34.40 
   5  -2   0  490.35   31.80 
  -5  -2   0  504.25   33.70 
   5  -2   0  499.05   31.20 
   5  -2   0  542.45   33.90 
   5  -2   0  417.96   30.40 
  -5  -2   0  498.75   24.10 
  -5  -2   0  506.25   35.10 
   5  -2   0  518.15   32.30 
  -5  -2   0  484.05   34.60 
  -5  -2   0  514.35   33.80 
  -5  -2   0  531.85   34.10 
   5  -2   0  454.95   32.30 
   5  -2   0  462.85   23.70 
  -5  -2   0  511.45   35.10 
   5  -2   0  523.85   26.80 
   5  -2   0  535.05   35.10 
  -5  -2   0  457.15   33.40 
  -5  -2   0  517.15   31.90 
   5  -2   0  494.65   32.10 
  -5   2   0  532.35   34.10 
  -5   2   0  482.45   23.60 
   5   2   0  560.74   35.50 
   5   2   0  511.25   24.50 
   5   2   0  492.05   34.70 
   5   2   0  498.65   33.50 
   5   2   0  474.35   34.20 
  -5   2   0  436.76   30.20 
   5   2   0  463.35   33.10 
  -5   2   0  531.95   34.10 
   5   2   0  541.75   28.40 
  -5   2   0  501.75   34.40 
  -5   2   0  519.05   26.90 
   5   2   0  489.65   33.30 
  -5   2   0  534.05   34.80 
  -5   2   0  510.15   26.20 
   5   2   0  514.85   35.20 
   5   2   0  524.25   30.60 
   5   2   0  473.45   33.80 
  -5   2   0  508.85   25.20 
   5   2   0  497.15   33.40 
   5   2   0  481.45   34.00 
   5   2   0  506.95   25.90 
  -5   2   0  521.75   30.30 
  -5   2   0  516.55   28.10 
  -5   2   0  529.35   29.10 
  -5   2   0  505.95   26.80 
   5   2   0  482.05   30.90 
   5   2   0  481.35   30.80 
   5   2   0  511.45   36.50 
   5   2   0  465.55   33.40 
   5   2   0  351.76   30.50 
  -5   2   0  500.75   32.90 
  -5   2   0  510.65   20.90 
   5   2   0  464.05   30.30 
  -5   2   0  442.96   30.20 
  -5   2   0  465.95   26.30 
  -5   2   0  532.05   28.60 
  -5   2   0  511.75   33.00 
  -5   2   0  475.95   31.40 
   5   2   0  503.75   24.30 
   5   2   0  482.25   33.00 
   5   2   0  488.55   31.80 
   6  -2   0 1312.47   66.69 
   6  -2   0 1284.97   69.29 
  -6  -2   0 1342.97   62.49 
  -6  -2   0 1377.36   65.69 
   6  -2   0 1465.95   71.19 
   6  -2   0 1340.77   68.29 
   6  -2   0 1259.27   67.69 
  -6  -2   0 1453.85   68.49 
   6  -2   0 1413.26   69.59 
  -6  -2   0 1348.97   68.29 
  -6  -2   0 1385.66   66.39 
   6  -2   0 1443.16   66.79 
   6  -2   0 1298.57   66.39 
   6  -2   0 1284.27   57.89 
   6  -2   0 1260.87   65.49 
  -6  -2   0 1410.46   70.29 
  -6  -2   0 1270.57   63.59 
  -6  -2   0 1213.78   68.89 
  -6  -2   0 1301.37   67.99 
   6  -2   0 1192.28   64.49 
  -6  -2   0 1429.66   70.79 
  -6  -2   0 1326.47   68.79 
  -6  -2   0 1352.66   68.79 
  -6  -2   0 1383.06   70.89 
  -6  -2   0 1302.37   68.49 
  -6   2   0 1360.96   68.99 
  -6   2   0 1346.77   65.49 
   6   2   0 1293.87   61.89 
  -6   2   0 1493.45   67.39 
   6   2   0 1409.66   70.09 
   6   2   0 1375.96   52.49 
  -6   2   0 1370.86   68.49 
  -6   2   0 1334.47   52.89 
  -6   2   0 1352.06   57.69 
  -6   2   0 1389.06   51.89 
  -6   2   0 1418.86   59.49 
   6   2   0 1350.06   69.19 
   6   2   0 1252.77   66.99 
   6   2   0 1402.96   69.59 
   6   2   0 1422.46   71.39 
   6   2   0 1283.37   69.19 
  -6   2   0 1352.16   66.59 
  -6   2   0 1302.47   68.19 
   6   2   0 1275.67   69.79 
  -6   2   0 1336.97   65.69 
   6   2   0 1329.47   67.89 
   6   2   0 1344.97   54.89 
  -6   2   0 1317.67   54.89 
  -6   2   0 1374.76   63.29 
  -6   2   0 1369.46   62.59 
   6   2   0 1258.17   62.39 
   6   2   0 1262.47   65.49 
   6   2   0 1351.06   70.29 
   6   2   0 1388.76   68.89 
   6   2   0 1374.56   64.39 
  -6   2   0 1350.46   51.49 
  -6   2   0 1428.56   60.69 
   6   2   0 1393.26   68.99 
   6   2   0 1330.17   52.09 
   6   2   0 1353.76   69.19 
  -6   2   0 1274.97   68.59 
   6   2   0 1451.55   65.09 
  -6   2   0 1335.17   67.59 
   6   2   0 1382.26   72.69 
  -7  -2   0   94.29   20.60 
  -7  -2   0  106.79   21.30 
   7  -2   0  121.59   23.50 
  -7  -2   0   87.19   21.50 
   7  -2   0   99.39   19.30 
  -7  -2   0  102.39   21.40 
   7  -2   0  138.09   23.70 
  -7  -2   0   94.89   21.20 
  -7  -2   0  155.08   21.60 
  -7  -2   0  141.79   26.20 
  -7  -2   0   98.99   18.30 
   7  -2   0   91.19   21.30 
  -7  -2   0  130.99   23.60 
  -7  -2   0   97.69   20.60 
   7  -2   0   65.09   19.40 
   7  -2   0  124.89   22.80 
  -7  -2   0   93.89   16.50 
  -7  -2   0  112.99   22.80 
   7  -2   0  144.59   16.40 
  -7  -2   0  103.59   21.50 
   7  -2   0  106.79   21.60 
  -7  -2   0   74.29   19.20 
   7  -2   0   90.19   19.40 
   7  -2   0  102.89   21.90 
   7  -2   0   85.79   18.70 
  -7   2   0   77.29   17.70 
  -7   2   0   96.99   19.50 
   7   2   0  120.19   22.20 
   7   2   0   96.99   21.00 
  -7   2   0  129.89   23.30 
   7   2   0  135.39   23.60 
   7   2   0   85.29   19.40 
   7   2   0  108.59   22.60 
  -7   2   0  109.69   20.10 
   7   2   0  129.29   23.80 
  -7   2   0   88.29   20.00 
   7   2   0  148.49   26.40 
  -7   2   0  101.89   16.60 
   7   2   0  112.69   17.10 
   7   2   0   82.29   19.70 
  -7   2   0  107.69   18.60 
  -7   2   0   85.29   21.90 
   7   2   0  145.49   25.60 
   7   2   0   81.89   16.60 
  -7   2   0  122.99   23.50 
   7   2   0  135.19   26.40 
  -7   2   0  131.89   15.40 
   7   2   0  111.49   18.00 
  -7   2   0   78.99   16.80 
   7   2   0   88.89   17.40 
   7   2   0  106.79   22.30 
   7   2   0   93.99   23.50 
   7   2   0   95.19   16.80 
  -7   2   0   85.09   19.70 
   7   2   0  110.49   20.30 
   7   2   0   96.29   20.20 
  -7   2   0  131.29   21.50 
  -8  -2   0  608.54   48.30 
  -8  -2   0  552.04   39.00 
  -8  -2   0  590.64   55.09 
  -8  -2   0  513.95   52.49 
  -8  -2   0  564.94   43.60 
  -8  -2   0  646.24   47.40 
  -8  -2   0  626.84   44.90 
  -8  -2   0  595.44   47.20 
  -8  -2   0  519.85   50.99 
   8  -2   0  526.95   41.30 
   8  -2   0  570.54   43.60 
   8  -2   0  623.04   48.10 
  -8  -2   0  620.44   47.40 
  -8  -2   0  542.35   53.69 
  -8  -2   0  593.94   46.70 
   8  -2   0  571.04   44.70 
  -8  -2   0  632.34   38.70 
   8  -2   0  627.84   47.10 
   8  -2   0  594.44   44.20 
   8  -2   0  595.74   48.00 
   8  -2   0  466.45   48.10 
   8  -2   0  533.35   52.49 
   8   2   0  558.44   46.00 
   8   2   0  598.94   41.50 
   8   2   0  635.14   40.40 
  -8   2   0  586.54   45.30 
   8   2   0  572.64   50.49 
  -8   2   0  623.44   42.30 
   8   2   0  528.75   37.50 
   8   2   0  525.65   52.79 
  -8   2   0  554.84   40.30 
   8   2   0  569.84   45.00 
   8   2   0  591.34   46.70 
  -8   2   0  612.34   41.40 
  -8   2   0  573.74   43.50 
   8   2   0  610.34   46.40 
   8   2   0  628.34   45.80 
   8   2   0  584.14   45.40 
   8   2   0  520.25   51.49 
   8   2   0  643.34   48.20 
   8   2   0  561.84   54.99 
   8   2   0  625.64   46.80 
  -8   2   0  593.74   54.99 
  -8   2   0  553.14   42.90 
  -8   2   0  581.94   46.10 
   8   2   0  494.95   51.49 
  -8   2   0  551.94   42.10 
   8   2   0  635.24   58.79 
  -8   2   0  579.94   47.50 
  -8   2   0  488.15   40.30 
   9  -2   0   49.20   20.40 
   9  -2   0   41.60   21.80 
  -9  -2   0   31.00   20.30 
   9  -2   0   67.19   21.80 
  -9  -2   0   65.59   22.60 
  -9  -2   0   24.50   16.80 
  -9  -2   0   80.49   21.40 
   9  -2   0   47.80   17.70 
  -9  -2   0  101.09   25.60 
  -9  -2   0   61.09   20.10 
  -9  -2   0   64.09   22.70 
  -9  -2   0   48.90   18.30 
   9  -2   0   78.09   24.30 
   9  -2   0   86.59   22.00 
   9  -2   0   54.29   18.40 
  -9  -2   0   59.09   21.60 
  -9  -2   0   37.10   17.20 
   9  -2   0   54.49   19.10 
  -9  -2   0   90.09   25.40 
   9  -2   0   81.49   21.20 
   9   2   0   61.19   21.20 
   9   2   0   65.09   22.70 
  -9   2   0   83.69   23.80 
  -9   2   0   82.39   22.80 
   9   2   0   74.29   21.20 
  -9   2   0   61.79   18.60 
   9   2   0   48.70   18.40 
   9   2   0   91.59   27.50 
  -9   2   0   81.19   23.70 
  -9   2   0   87.39   23.30 
   9   2   0   67.19   21.30 
   9   2   0   48.30   19.70 
  -9   2   0   76.09   20.20 
  -9   2   0   73.39   21.30 
  -9   2   0   53.99   19.70 
  -9   2   0   93.49   23.90 
   9   2   0   88.79   22.20 
   9   2   0   79.89   24.40 
   9   2   0   62.99   20.40 
   9   2   0   69.99   21.90 
   9   2   0   77.59   22.90 
 -10  -2   0  223.18   39.90 
  10  -2   0  233.98   40.20 
  10  -2   0  253.17   43.20 
  10  -2   0  310.77   41.50 
 -10  -2   0  322.57   45.40 
  10  -2   0  284.27   43.90 
 -10  -2   0  271.17   43.00 
  10  -2   0  289.07   40.80 
 -10  -2   0  235.38   39.60 
 -10  -2   0  248.48   38.80 
 -10  -2   0  214.88   37.90 
 -10  -2   0  261.07   41.60 
 -10  -2   0  142.09   31.20 
 -10  -2   0  257.27   42.00 
  10  -2   0  310.47   45.80 
 -10  -2   0  219.28   34.60 
 -10  -2   0  256.77   40.00 
  10  -2   0  313.77   40.90 
  10  -2   0  241.28   39.80 
  10   2   0  275.17   44.00 
  10   2   0  293.67   43.40 
 -10   2   0  240.68   37.40 
  10   2   0  223.88   39.00 
  10   2   0  277.07   43.60 
 -10   2   0  252.67   40.00 
  10   2   0  342.47   41.80 
 -10   2   0  252.57   42.40 
  10   2   0  305.37   44.20 
  10   2   0  244.88   38.50 
 -10   2   0  257.57   40.50 
  10   2   0  307.17   43.70 
  10   2   0  264.67   40.70 
 -10   2   0  174.08   34.20 
 -10   2   0  263.57   40.40 
  10   2   0  166.58   34.70 
 -10   2   0  214.28   34.80 
 -10   2   0  295.77   41.30 
   0  -3   0    8.50    6.20 
   0  -3   0    2.40    3.70 
   0  -3   0   -2.30    4.50 
   0  -3   0   -0.80    4.70 
   0  -3   0   10.40    5.30 
   0  -3   0    8.10    5.80 
   0  -3   0    6.50    5.70 
   0  -3   0   -3.90    5.40 
   0  -3   0    5.00    5.30 
   0  -3   0    2.70    4.60 
   0  -3   0    6.50    6.00 
   0  -3   0    5.50    5.40 
   0  -3   0    2.10    1.90 
   0  -3   0  -11.20    4.40 
   0  -3   0    2.20    3.60 
   0  -3   0    4.70    4.80 
   0  -3   0    3.40    3.50 
   0  -3   0   -0.30    3.20 
   0  -3   0   -3.80    4.60 
   0   3   0   13.40    6.90 
   0   3   0    6.60    4.90 
   0   3   0   -1.10    3.20 
   0   3   0    1.40    2.80 
   0   3   0   -2.20    4.30 
   0   3   0    3.90    5.30 
   0   3   0    0.00    4.30 
   0   3   0   -3.20    2.00 
   0   3   0    5.50    5.30 
   0   3   0   -0.20    1.20 
   0   3   0   -1.90    3.70 
   0   3   0    0.90    2.30 
   0   3   0   -1.90    4.00 
   0   3   0    5.50    6.90 
   0   3   0   -0.80    2.50 
   0   3   0    0.60    2.60 
   0   3   0    0.30    1.60 
   0   3   0   -0.30    4.10 
   0   3   0    1.60    2.90 
   0   3   0   -0.20    2.00 
   0   3   0   -0.80    4.70 
   0   3   0    0.90    2.80 
   0   3   0    9.40    5.00 
   0   3   0    2.00    2.50 
   0   3   0   -1.40    3.30 
   0   3   0   -0.20    3.10 
   0   3   0   -0.40    4.70 
   0   3   0    6.40    6.20 
   1  -3   0  227.68   11.70 
  -1  -3   0  222.58   12.80 
  -1  -3   0  234.08   14.10 
  -1  -3   0  277.77   19.20 
  -1  -3   0  251.77   12.70 
  -1  -3   0  219.18   17.50 
   1  -3   0  254.77   12.60 
  -1  -3   0  252.47   18.80 
  -1  -3   0  263.77   14.90 
  -1  -3   0  286.07   18.70 
   1  -3   0  208.78   16.50 
  -1  -3   0  246.78   16.20 
  -1  -3   0  257.07   16.70 
  -1  -3   0  263.77   13.40 
  -1  -3   0  259.97   18.80 
   1  -3   0  206.98   20.50 
  -1  -3   0  255.77   16.50 
  -1  -3   0  250.27   15.70 
  -1  -3   0  231.18   18.50 
   1  -3   0  248.98   12.50 
   1  -3   0  214.38   19.70 
   1  -3   0  194.58   16.40 
  -1  -3   0  251.37   16.10 
  -1  -3   0  244.38   14.40 
   1  -3   0  254.07   11.80 
   1  -3   0  238.78   21.40 
  -1  -3   0  241.28   19.60 
   1  -3   0  247.28   18.00 
  -1  -3   0  238.58   12.40 
  -1  -3   0  239.88   13.30 
  -1  -3   0  244.68   12.20 
  -1  -3   0  246.18   15.30 
  -1  -3   0  245.08   11.80 
  -1  -3   0  232.38   18.80 
   1  -3   0  192.28   14.80 
   1  -3   0  242.98   12.60 
  -1  -3   0  229.48   11.60 
  -1  -3   0  276.57   20.60 
   1  -3   0  218.18   16.00 
  -1  -3   0  261.17   19.30 
  -1  -3   0  258.87   14.30 
  -1  -3   0  235.18   18.70 
  -1   3   0  235.38   16.50 
  -1   3   0  231.88   15.50 
  -1   3   0  238.68   22.60 
   1   3   0  252.17   12.80 
   1   3   0  252.27   18.30 
   1   3   0  271.27   19.50 
  -1   3   0  198.48   16.30 
   1   3   0  247.68   13.70 
   1   3   0  216.68   18.50 
  -1   3   0  241.08   12.00 
  -1   3   0  250.67   12.50 
  -1   3   0  230.58   17.30 
   1   3   0  239.88   18.30 
  -1   3   0  219.88   17.80 
  -1   3   0  221.88   12.50 
   1   3   0  240.08   17.10 
   1   3   0  246.48   14.50 
  -1   3   0  234.28   15.50 
   1   3   0  250.87   20.50 
  -1   3   0  252.77   17.40 
  -1   3   0  241.58   12.20 
  -1   3   0  225.78   11.80 
   1   3   0  226.58   12.60 
  -1   3   0  228.88   11.50 
  -1   3   0  250.17   16.90 
  -1   3   0  232.08   18.90 
   1   3   0  242.78   12.10 
   1   3   0  248.88   22.90 
   1   3   0  232.18   14.90 
   1   3   0  263.17   12.80 
  -1   3   0  226.08   15.20 
   1   3   0  231.48   13.30 
   1   3   0  253.67   19.20 
   1   3   0  233.08   15.60 
   1   3   0  262.07   18.10 
  -1   3   0  223.88   11.50 
   1   3   0  261.47   14.40 
  -1   3   0  233.18   12.20 
   1   3   0  245.98   18.60 
  -1   3   0  256.57   15.20 
   1   3   0  260.77   19.80 
   1   3   0  252.87   15.40 
  -1   3   0  227.18   11.70 
  -1   3   0  244.48   12.50 
  -1   3   0  248.68   15.10 
  -1   3   0  226.68   11.60 
   1   3   0  237.08   16.90 
   1   3   0  277.37   17.60 
  -1   3   0  238.28   11.70 
  -1   3   0  248.08   16.00 
  -1   3   0  232.68   16.10 
   1   3   0  230.48   14.60 
   1   3   0  247.88   17.80 
  -1   3   0  252.67   13.50 
  -1   3   0  222.98   17.70 
  -1   3   0  229.18   16.40 
   1   3   0  247.68   18.90 
  -1   3   0  231.58   11.40 
  -1   3   0  227.88   11.70 
   2  -3   0   87.89   13.60 
  -2  -3   0   84.49   10.60 
  -2  -3   0  111.69   12.20 
   2  -3   0   81.69    9.80 
  -2  -3   0   99.49   10.70 
  -2  -3   0   79.49   13.20 
  -2  -3   0   87.49   15.10 
  -2  -3   0  128.89   16.90 
  -2  -3   0   92.89   10.30 
   2  -3   0  107.69   10.40 
   2  -3   0   93.89   10.90 
   2  -3   0  110.59   12.60 
  -2  -3   0  109.69   11.50 
  -2  -3   0   90.39   11.10 
  -2  -3   0  114.59   12.80 
   2  -3   0   98.09   10.80 
  -2  -3   0  102.49   14.80 
  -2  -3   0  131.29   16.00 
   2  -3   0   71.69    9.60 
  -2  -3   0   91.19   12.70 
   2  -3   0  110.99   12.20 
   2  -3   0  107.89   10.20 
  -2  -3   0  118.19   15.40 
  -2  -3   0   93.09   14.00 
   2  -3   0  116.79   13.50 
   2  -3   0   88.09   10.30 
  -2  -3   0  113.69   10.60 
   2  -3   0   87.49   10.00 
  -2  -3   0  105.29   11.40 
   2  -3   0   88.39   10.80 
  -2  -3   0   98.89   11.70 
  -2  -3   0   94.79   11.20 
   2  -3   0   76.39   12.20 
  -2  -3   0   82.79   13.40 
  -2  -3   0   67.59   11.30 
  -2  -3   0   94.79   12.00 
  -2  -3   0  119.99   13.70 
   2  -3   0   94.59   12.10 
   2  -3   0   93.79   12.90 
   2  -3   0  105.29   10.20 
  -2  -3   0   80.39   13.60 
  -2  -3   0  109.09   12.50 
  -2  -3   0  104.49   13.50 
   2  -3   0   85.99   10.70 
   2  -3   0   96.49   12.60 
   2  -3   0   82.99    9.40 
  -2   3   0  124.29   10.80 
   2   3   0  106.19   13.30 
  -2   3   0   92.99    9.40 
  -2   3   0   95.39    9.50 
  -2   3   0   79.49    7.60 
  -2   3   0   78.39   10.10 
   2   3   0  113.79   12.70 
   2   3   0   77.99   12.00 
  -2   3   0   99.89   10.90 
   2   3   0   81.99   13.50 
  -2   3   0  102.79   11.30 
  -2   3   0   97.09    9.40 
   2   3   0  112.79   16.20 
  -2   3   0   97.49   10.60 
  -2   3   0   86.09    9.60 
   2   3   0  110.59   11.20 
   2   3   0  110.39   15.60 
   2   3   0   86.99   14.20 
   2   3   0  105.49   14.40 
  -2   3   0   98.99   14.60 
  -2   3   0  100.29   10.30 
  -2   3   0   98.39    9.50 
  -2   3   0   91.39   10.60 
  -2   3   0   72.59   11.80 
  -2   3   0  103.69   10.20 
  -2   3   0   77.39   11.40 
   2   3   0  111.39   16.00 
   2   3   0  123.29   12.50 
  -2   3   0  115.19   11.90 
   2   3   0  109.39   11.60 
  -2   3   0  120.09   16.40 
  -2   3   0  102.19   11.20 
  -2   3   0  105.99   10.80 
   2   3   0  109.19   15.40 
  -2   3   0  104.29   11.20 
  -2   3   0   88.59   10.70 
   2   3   0  108.09   10.90 
  -2   3   0   80.49   10.10 
   2   3   0  103.29   17.30 
   2   3   0  108.89   12.00 
  -2   3   0   66.99   10.00 
   2   3   0   78.09   12.20 
   2   3   0  108.29   13.60 
  -2   3   0   91.99   10.20 
  -2   3   0   99.39   10.90 
  -2   3   0   93.89   11.50 
  -2   3   0   98.59    9.30 
  -2   3   0  109.39   10.40 
  -2   3   0   94.29   13.40 
  -2   3   0   87.49   11.10 
  -2   3   0  111.89   11.10 
   2   3   0  109.59   12.80 
   2   3   0   94.39   13.90 
   3  -3   0    6.50    5.90 
   3  -3   0    1.90    6.00 
  -3  -3   0   18.90    8.90 
  -3  -3   0    6.50    6.20 
   3  -3   0    5.40    6.10 
   3  -3   0    6.90    5.50 
   3  -3   0   13.50    6.10 
  -3  -3   0   -2.40    5.70 
  -3  -3   0   15.20    8.30 
  -3  -3   0   16.20    6.20 
   3  -3   0   17.00    6.20 
   3  -3   0   10.60    6.40 
  -3  -3   0    6.00    6.60 
  -3  -3   0    4.60    8.10 
   3  -3   0    5.00    5.90 
   3  -3   0    8.00    7.10 
   3  -3   0    5.10    4.90 
   3  -3   0   10.90    4.10 
   3  -3   0   -1.30    5.50 
   3  -3   0    7.90    5.80 
  -3  -3   0   11.30    6.60 
   3  -3   0   12.90    7.40 
  -3  -3   0    9.70    8.90 
  -3  -3   0   13.40    8.00 
  -3  -3   0   13.60    7.40 
  -3  -3   0   18.90    9.50 
  -3  -3   0    5.60    6.40 
  -3  -3   0    1.80    7.50 
   3  -3   0    2.90    5.90 
  -3  -3   0   14.20    8.40 
  -3  -3   0    8.00    6.80 
  -3  -3   0    7.30    7.90 
  -3  -3   0   19.60    9.50 
   3  -3   0    3.70    6.10 
   3   3   0   -8.20    9.10 
  -3   3   0    9.40    3.10 
  -3   3   0   10.30    5.00 
   3   3   0   13.40   10.00 
  -3   3   0   14.30    6.70 
  -3   3   0    1.30    5.40 
   3   3   0   10.30    6.50 
   3   3   0   15.50    9.00 
   3   3   0   13.20    6.40 
  -3   3   0    7.10    5.10 
   3   3   0    2.90    7.80 
   3   3   0    7.40    6.20 
  -3   3   0    1.20    4.80 
  -3   3   0   21.00    8.10 
  -3   3   0   10.00    5.10 
  -3   3   0    2.10    5.30 
  -3   3   0    6.90    5.30 
   3   3   0    9.60    8.00 
  -3   3   0   -4.90    4.50 
   3   3   0   16.10    8.90 
  -3   3   0   11.70    8.40 
  -3   3   0    3.30    6.80 
  -3   3   0    9.30    5.40 
  -3   3   0    9.00    5.10 
   3   3   0    4.70    7.20 
   3   3   0   22.60    7.60 
   3   3   0   -7.20    6.00 
  -3   3   0    2.10    5.20 
  -3   3   0    5.60    5.50 
  -3   3   0   24.30    8.80 
  -3   3   0    9.90    9.40 
   3   3   0    2.30    5.60 
   3   3   0   14.50    6.90 
  -3   3   0    7.90    4.20 
  -3   3   0    4.30    6.30 
   3   3   0    4.80    8.50 
  -3   3   0    5.00    4.30 
   3   3   0   -4.90    6.40 
   3   3   0   13.00    9.00 
  -3   3   0   -3.20    5.10 
  -3   3   0    8.30    6.30 
   3   3   0   -0.50    6.70 
   3   3   0    8.60    7.00 
  -3   3   0   37.60   12.40 
  -3   3   0   -4.60    5.20 
  -3   3   0    4.10    4.70 
   3   3   0    6.30    7.00 
  -3   3   0    9.60    3.30 
   3   3   0    5.80    6.30 
  -3   3   0    9.80    4.60 
  -3   3   0    9.20    5.00 
   4  -3   0  335.57   24.10 
  -4  -3   0  423.56   28.60 
  -4  -3   0  349.07   27.50 
  -4  -3   0  263.17   28.00 
  -4  -3   0  311.07   23.80 
  -4  -3   0  335.47   24.50 
  -4  -3   0  327.97   25.20 
   4  -3   0  354.76   23.70 
   4  -3   0  328.97   22.90 
   4  -3   0  338.77   24.50 
   4  -3   0  315.67   21.00 
   4  -3   0  344.27   24.50 
  -4  -3   0  352.26   27.20 
   4  -3   0  336.27   23.10 
   4  -3   0  355.56   25.70 
   4  -3   0  315.47   22.10 
   4  -3   0  341.47   24.30 
  -4  -3   0  327.57   24.30 
  -4  -3   0  334.07   25.70 
  -4  -3   0  316.57   28.90 
  -4  -3   0  346.37   27.00 
  -4  -3   0  338.27   26.20 
   4  -3   0  286.67   21.40 
  -4  -3   0  321.57   30.60 
  -4  -3   0  354.86   22.20 
   4  -3   0  345.37   22.90 
  -4  -3   0  306.87   24.20 
   4  -3   0  282.77   21.80 
  -4   3   0  325.97   23.10 
  -4   3   0  290.67   20.90 
  -4   3   0  303.37   30.90 
  -4   3   0  346.07   16.90 
   4   3   0  299.07   24.40 
  -4   3   0  311.87   23.70 
  -4   3   0  306.67   15.00 
   4   3   0  367.06   27.90 
   4   3   0  236.78   26.80 
  -4   3   0  337.07   15.10 
   4   3   0  340.77   26.50 
   4   3   0  332.17   25.60 
   4   3   0  362.36   28.10 
   4   3   0  360.96   25.20 
   4   3   0  303.57   29.80 
   4   3   0  362.86   25.60 
   4   3   0  344.57   23.80 
  -4   3   0  305.87   21.70 
  -4   3   0  309.07   20.70 
  -4   3   0  320.07   18.80 
   4   3   0  342.47   26.60 
  -4   3   0  313.27   20.80 
   4   3   0  334.77   23.90 
   4   3   0  352.46   25.40 
  -4   3   0  334.77   21.20 
  -4   3   0  333.77   17.80 
  -4   3   0  322.47   21.40 
  -4   3   0  322.67   23.30 
   4   3   0  325.37   31.90 
   4   3   0  334.37   25.20 
   4   3   0  373.36   24.50 
   4   3   0  343.47   22.10 
  -4   3   0  332.77   30.80 
  -4   3   0  338.37   22.20 
  -4   3   0  324.87   17.10 
   4   3   0  363.56   27.00 
   4   3   0  305.87   24.50 
  -4   3   0  366.86   24.60 
  -4   3   0  330.97   25.70 
   4   3   0  344.37   23.00 
  -4   3   0  352.06   17.70 
  -4   3   0  355.16   22.80 
  -4   3   0  332.87   25.30 
   4   3   0  360.06   25.20 
  -4   3   0  318.97   22.10 
  -4   3   0  333.77   16.60 
  -5  -3   0  606.74   38.90 
   5  -3   0  498.55   33.10 
   5  -3   0  539.65   34.50 
  -5  -3   0  590.14   38.20 
   5  -3   0  585.04   35.20 
   5  -3   0  534.55   30.20 
  -5  -3   0  549.74   38.10 
  -5  -3   0  547.35   38.30 
  -5  -3   0  569.34   37.80 
   5  -3   0  536.95   35.20 
  -5  -3   0  601.14   37.60 
  -5  -3   0  519.65   35.30 
  -5  -3   0  586.14   30.30 
   5  -3   0  502.15   36.00 
  -5  -3   0  528.65   36.10 
  -5  -3   0  547.95   37.70 
  -5  -3   0  626.04   37.80 
   5  -3   0  532.85   35.60 
  -5  -3   0  551.54   34.80 
  -5  -3   0  613.74   37.50 
   5  -3   0  539.95   35.50 
  -5  -3   0  597.34   39.90 
   5  -3   0  600.34   36.80 
   5  -3   0  566.64   25.30 
   5  -3   0  549.45   34.20 
   5  -3   0  581.84   34.10 
  -5  -3   0  526.85   38.10 
   5  -3   0  574.14   35.00 
   5  -3   0  563.04   30.30 
   5   3   0  550.04   36.80 
  -5   3   0  520.15   30.10 
   5   3   0  559.04   34.80 
  -5   3   0  553.54   32.70 
  -5   3   0  569.74   33.20 
   5   3   0  571.54   38.90 
   5   3   0  630.24   39.30 
   5   3   0  522.95   36.10 
  -5   3   0  560.24   29.10 
   5   3   0  514.05   37.20 
   5   3   0  621.34   39.30 
   5   3   0  604.44   36.60 
  -5   3   0  606.24   37.10 
  -5   3   0  512.25   34.10 
  -5   3   0  566.44   40.80 
  -5   3   0  589.54   31.80 
   5   3   0  573.54   39.70 
  -5   3   0  523.05   37.30 
  -5   3   0  548.15   36.60 
   5   3   0  642.84   38.20 
   5   3   0  564.74   39.10 
   5   3   0  556.04   35.20 
   5   3   0  573.04   32.00 
  -5   3   0  516.25   31.30 
   5   3   0  634.04   37.50 
  -5   3   0  539.35   30.90 
  -5   3   0  555.84   28.30 
   5   3   0  519.75   35.60 
   5   3   0  653.83   39.30 
  -5   3   0  532.05   33.50 
   5   3   0  599.34   36.50 
  -5   3   0  509.25   32.40 
  -5   3   0  566.14   21.80 
   5   3   0  601.14   42.20 
   5   3   0  522.55   30.00 
  -5   3   0  512.05   34.70 
   5   3   0  598.24   39.90 
   5   3   0  556.34   35.90 
  -5   3   0  547.05   36.70 
   6  -3   0  941.81   56.89 
  -6  -3   0 1157.98   60.99 
   6  -3   0 1067.79   57.49 
   6  -3   0 1175.08   57.79 
  -6  -3   0 1203.48   61.79 
  -6  -3   0 1159.18   64.19 
  -6  -3   0 1028.80   58.99 
  -6  -3   0 1153.48   61.39 
   6  -3   0 1104.79   59.89 
  -6  -3   0 1343.27   66.29 
   6  -3   0 1197.98   59.19 
  -6  -3   0 1058.69   61.49 
   6  -3   0 1092.09   57.89 
  -6  -3   0 1120.19   63.49 
   6  -3   0 1086.39   50.29 
   6  -3   0 1211.48   61.89 
  -6  -3   0 1028.90   59.49 
   6  -3   0 1170.98   61.49 
   6  -3   0  968.00   59.49 
  -6  -3   0  992.20   61.19 
  -6  -3   0 1165.18   60.09 
  -6  -3   0 1112.79   60.59 
  -6  -3   0 1098.09   60.79 
  -6  -3   0 1149.29   57.59 
   6  -3   0 1063.69   57.49 
  -6   3   0 1090.19   59.99 
   6   3   0 1112.89   61.39 
   6   3   0 1114.79   58.19 
   6   3   0 1125.99   60.79 
   6   3   0  983.00   61.09 
   6   3   0 1273.17   65.29 
   6   3   0 1074.49   58.39 
   6   3   0 1028.10   60.49 
   6   3   0 1129.59   58.79 
   6   3   0 1080.49   62.19 
   6   3   0 1064.89   64.49 
   6   3   0 1157.68   63.19 
  -6   3   0 1069.29   57.09 
  -6   3   0 1076.69   59.09 
   6   3   0 1077.09   61.89 
  -6   3   0 1140.49   49.90 
  -6   3   0 1064.59   55.79 
   6   3   0 1110.09   60.59 
  -6   3   0 1107.29   59.09 
   6   3   0 1111.99   56.79 
   6   3   0 1197.28   51.99 
  -6   3   0 1178.78   51.89 
  -6   3   0 1073.99   55.49 
  -6   3   0 1158.58   62.99 
   6   3   0 1245.58   61.59 
   6   3   0 1124.39   62.59 
  -6   3   0 1031.10   51.49 
  -6   3   0 1123.89   59.79 
  -6   3   0 1156.38   60.19 
   6   3   0 1083.49   60.29 
  -6   3   0 1043.00   60.89 
   6   3   0 1046.80   61.69 
  -6   3   0 1041.50   53.59 
   6   3   0 1122.49   59.09 
  -6   3   0 1108.29   51.79 
   7  -3   0  320.67   37.90 
  -7  -3   0  351.46   36.80 
  -7  -3   0  255.27   33.60 
  -7  -3   0  234.78   32.10 
  -7  -3   0  288.27   35.40 
  -7  -3   0  311.47   32.90 
  -7  -3   0  280.37   34.00 
  -7  -3   0  264.07   35.20 
  -7  -3   0  338.77   36.70 
   7  -3   0  392.96   39.90 
   7  -3   0  336.47   35.30 
   7  -3   0  280.27   35.90 
  -7  -3   0  261.47   35.20 
   7  -3   0  309.87   36.00 
  -7  -3   0  354.06   33.90 
  -7  -3   0  320.87   38.40 
   7  -3   0  265.67   31.50 
   7  -3   0  383.26   37.00 
  -7  -3   0  328.87   36.30 
   7  -3   0  328.07   35.70 
  -7  -3   0  365.16   38.70 
   7  -3   0  269.07   33.30 
  -7  -3   0  336.87   35.20 
   7  -3   0  321.27   34.10 
   7   3   0  304.17   33.10 
   7   3   0  373.86   36.10 
  -7   3   0  358.96   37.90 
   7   3   0  367.46   33.00 
  -7   3   0  305.57   38.00 
   7   3   0  374.96   39.60 
   7   3   0  334.57   37.80 
  -7   3   0  387.86   37.90 
   7   3   0  301.87   34.80 
   7   3   0  394.06   43.50 
   7   3   0  301.57   35.70 
  -7   3   0  320.87   37.00 
  -7   3   0  369.96   28.50 
  -7   3   0  393.66   35.60 
  -7   3   0  355.06   35.80 
   7   3   0  300.47   36.90 
   7   3   0  335.27   38.50 
   7   3   0  293.87   35.90 
  -7   3   0  322.47   30.50 
  -7   3   0  321.47   33.30 
   7   3   0  312.47   37.00 
   7   3   0  385.26   41.40 
  -7   3   0  305.87   29.80 
   7   3   0  297.67   32.40 
   7   3   0  317.87   37.90 
   7   3   0  267.27   32.70 
  -7   3   0  293.67   33.50 
   7   3   0  316.27   37.70 
   7   3   0  364.66   36.20 
  -7   3   0  310.77   34.80 
   7   3   0  366.36   34.30 
   8  -3   0  350.46   39.50 
  -8  -3   0  278.67   37.40 
  -8  -3   0  298.07   37.70 
  -8  -3   0  316.47   41.60 
  -8  -3   0  300.37   37.90 
   8  -3   0  388.86   40.70 
  -8  -3   0  317.57   35.80 
  -8  -3   0  289.27   40.70 
  -8  -3   0  372.76   37.80 
   8  -3   0  311.47   40.20 
  -8  -3   0  236.28   35.00 
  -8  -3   0  299.47   38.10 
   8  -3   0  315.07   40.00 
  -8  -3   0  399.06   36.40 
   8  -3   0  300.47   36.60 
   8  -3   0  335.67   39.00 
   8  -3   0  243.48   34.50 
  -8  -3   0  326.37   37.10 
  -8  -3   0  350.06   39.60 
  -8  -3   0  346.17   43.90 
   8  -3   0  304.37   39.50 
  -8  -3   0  329.17   40.00 
   8  -3   0  311.77   36.90 
  -8   3   0  379.96   35.20 
   8   3   0  286.17   38.10 
   8   3   0  272.97   32.50 
   8   3   0  323.27   41.10 
   8   3   0  376.56   35.10 
   8   3   0  413.56   40.00 
  -8   3   0  303.27   38.10 
   8   3   0  364.56   42.50 
  -8   3   0  316.17   34.90 
  -8   3   0  312.07   34.10 
  -8   3   0  347.47   37.50 
   8   3   0  305.07   39.20 
   8   3   0  307.47   37.70 
  -8   3   0  369.66   42.00 
  -8   3   0  276.47   37.60 
  -8   3   0  369.56   38.70 
   8   3   0  280.47   37.50 
   8   3   0  274.87   38.80 
   8   3   0  326.87   40.70 
  -8   3   0  336.57   38.40 
   8   3   0  377.96   44.30 
   8   3   0  305.17   34.10 
   8   3   0  258.97   36.60 
  -8   3   0  287.37   37.70 
   8   3   0  305.37   43.10 
   8   3   0  272.67   38.40 
  -9  -3   0  151.88   30.30 
  -9  -3   0  207.58   36.10 
  -9  -3   0  231.18   36.90 
   9  -3   0  189.98   35.10 
  -9  -3   0  267.87   37.20 
  -9  -3   0  225.48   34.60 
   9  -3   0  148.99   27.80 
  -9  -3   0  194.38   35.10 
  -9  -3   0  228.98   35.80 
  -9  -3   0  251.57   37.70 
  -9  -3   0  192.98   32.90 
   9  -3   0  132.89   27.30 
   9  -3   0  233.28   36.60 
   9  -3   0  180.18   31.80 
   9  -3   0  254.77   38.10 
   9  -3   0  182.68   29.00 
  -9  -3   0  194.88   34.40 
  -9  -3   0  203.48   34.40 
   9  -3   0  207.68   33.70 
   9  -3   0  175.88   29.60 
   9   3   0  183.88   31.70 
   9   3   0  174.68   33.20 
   9   3   0  230.28   35.10 
  -9   3   0  269.07   38.80 
   9   3   0  168.98   30.90 
   9   3   0  274.77   40.10 
   9   3   0  242.38   39.10 
   9   3   0  214.68   38.40 
  -9   3   0  175.98   33.80 
  -9   3   0  180.78   35.70 
  -9   3   0  232.18   36.70 
   9   3   0  226.58   37.60 
  -9   3   0  197.58   30.70 
   9   3   0  215.68   36.30 
  -9   3   0  157.18   32.10 
   9   3   0  265.77   46.80 
  -9   3   0  205.58   31.40 
  -9   3   0  179.98   31.90 
   9   3   0  192.28   32.70 
   9   3   0  150.18   30.30 
  -9   3   0  244.78   37.00 
  -9   3   0  206.68   32.60 
   9   3   0  250.37   38.20 
   0  -4   0  604.54   33.10 
   0  -4   0  570.14   28.30 
   0  -4   0  571.64   34.40 
   0  -4   0  637.64   28.50 
   0  -4   0  591.94   33.00 
   0  -4   0  598.54   34.20 
   0  -4   0  561.34   34.70 
   0  -4   0  620.24   33.10 
   0  -4   0  607.44   28.00 
   0  -4   0  543.75   32.60 
   0  -4   0  621.44   27.90 
   0  -4   0  606.04   28.80 
   0  -4   0  564.84   34.00 
   0  -4   0  613.34   29.00 
   0   4   0  549.85   32.00 
   0   4   0  537.55   30.60 
   0   4   0  561.64   24.50 
   0   4   0  562.64   26.40 
   0   4   0  528.85   31.20 
   0   4   0  586.74   23.50 
   0   4   0  559.34   36.40 
   0   4   0  622.24   30.50 
   0   4   0  619.24   36.80 
   0   4   0  579.24   28.50 
   0   4   0  580.14   27.00 
   0   4   0  567.34   25.20 
   0   4   0  568.54   21.40 
   0   4   0  568.24   26.20 
   0   4   0  581.44   31.80 
   0   4   0  640.84   36.00 
   0   4   0  537.45   33.90 
   0   4   0  601.64   28.80 
   0   4   0  595.54   24.40 
   0   4   0  556.74   23.20 
   0   4   0  574.24   25.40 
   1  -4   0 5229.88  186.98 
   1  -4   0 5127.19  199.18 
  -1  -4   0 5720.33  201.58 
  -1  -4   0 5219.08  200.48 
  -1  -4   0 5399.76  189.38 
   1  -4   0 5251.57  197.48 
  -1  -4   0 5406.76  200.48 
  -1  -4   0 5674.73  192.58 
  -1  -4   0 5535.05  187.58 
  -1  -4   0 5602.54  195.88 
  -1  -4   0 5442.96  193.48 
   1  -4   0 5485.65  190.68 
   1  -4   0 5297.07  201.88 
   1  -4   0 5191.88  198.38 
  -1  -4   0 5692.33  193.28 
   1  -4   0 5278.77  199.48 
  -1  -4   0 5550.34  187.38 
  -1  -4   0 5521.15  202.48 
  -1  -4   0 5538.35  201.88 
   1  -4   0 5155.08  195.78 
  -1  -4   0 5439.56  187.88 
   1  -4   0 5696.83  204.38 
  -1  -4   0 5350.96  194.18 
   1  -4   0 5013.30  202.18 
  -1  -4   0 5580.94  190.38 
  -1  -4   0 5457.45  203.88 
  -1  -4   0 5534.05  188.98 
   1  -4   0 5090.89  199.68 
  -1  -4   0 5533.25  187.38 
   1  -4   0 5443.76  188.98 
  -1  -4   0 5369.26  186.98 
   1  -4   0 5680.43  191.28 
  -1  -4   0 5409.46  189.48 
  -1  -4   0 5579.54  199.38 
   1   4   0 5692.23  187.68 
  -1   4   0 5342.27  197.28 
  -1   4   0 4776.52  188.88 
   1   4   0 5487.85  191.18 
   1   4   0 5517.65  194.68 
  -1   4   0 5299.97  188.48 
  -1   4   0 5300.37  202.58 
   1   4   0 5432.96  190.38 
  -1   4   0 5392.36  187.08 
  -1   4   0 5405.56  194.48 
   1   4   0 5463.45  192.48 
  -1   4   0 5414.46  187.08 
   1   4   0 5378.66  201.48 
  -1   4   0 5389.16  189.58 
  -1   4   0 5362.56  190.88 
   1   4   0 5508.85  190.98 
  -1   4   0 5295.57  196.28 
   1   4   0 5477.75  193.48 
  -1   4   0 5551.74  201.18 
   1   4   0 5383.06  192.98 
   1   4   0 5458.25  199.18 
  -1   4   0 5306.87  196.18 
  -1   4   0 5439.06  187.28 
  -1   4   0 5287.77  188.78 
   1   4   0 5290.37  202.08 
  -1   4   0 5320.97  188.38 
  -1   4   0 5200.28  189.18 
  -1   4   0 5228.78  195.88 
  -1   4   0 5066.59  188.18 
  -1   4   0 5322.67  186.58 
  -1   4   0 5341.07  188.28 
  -1   4   0 5246.67  196.48 
  -1   4   0 5188.18  193.78 
  -1   4   0 5349.36  186.68 
   1   4   0 5487.15  200.28 
  -1   4   0 5201.88  190.88 
  -1   4   0 5164.98  200.08 
   1   4   0 5410.56  204.48 
  -1   4   0 5213.08  187.58 
   1   4   0 5403.86  196.78 
  -1   4   0 5123.29  187.58 
  -1   4   0 5200.48  203.28 
  -1   4   0 5196.28  188.98 
  -1   4   0 5528.05  188.48 
  -1   4   0 5099.49  198.68 
   1   4   0 5617.94  192.68 
  -1   4   0 5313.77  187.88 
   1   4   0 5659.63  188.38 
   1   4   0 5679.33  199.58 
   1   4   0 5518.85  202.98 
   1   4   0 5419.86  201.18 
  -1   4   0 5481.05  190.38 
  -2  -4   0  657.23   30.80 
  -2  -4   0  600.34   28.00 
  -2  -4   0  554.24   34.90 
  -2  -4   0  606.54   38.40 
  -2  -4   0  559.04   34.00 
  -2  -4   0  574.44   35.00 
  -2  -4   0  598.94   30.90 
  -2  -4   0  605.04   28.00 
   2  -4   0  539.05   31.10 
   2  -4   0  525.25   33.90 
  -2  -4   0  634.34   36.50 
   2  -4   0  615.04   31.80 
  -2  -4   0  644.94   29.60 
  -2  -4   0  609.74   34.70 
  -2  -4   0  651.23   32.60 
   2  -4   0  548.55   29.00 
  -2  -4   0  661.93   34.20 
  -2  -4   0  592.34   30.80 
   2  -4   0  555.44   32.00 
   2  -4   0  599.24   34.30 
   2  -4   0  586.44   27.40 
   2  -4   0  540.15   34.40 
  -2  -4   0  580.44   26.80 
  -2  -4   0  627.54   30.30 
  -2  -4   0  601.24   29.00 
   2  -4   0  556.94   30.50 
  -2  -4   0  657.33   29.30 
  -2  -4   0  641.44   28.70 
   2  -4   0  581.94   26.80 
  -2  -4   0  627.34   35.30 
   2  -4   0  585.94   27.00 
  -2  -4   0  599.94   27.20 
  -2  -4   0  643.24   32.90 
  -2  -4   0  614.24   36.00 
   2  -4   0  579.34   24.00 
  -2  -4   0  562.74   32.50 
  -2   4   0  606.34   29.30 
  -2   4   0  590.94   34.20 
  -2   4   0  573.74   25.00 
  -2   4   0  580.64   29.90 
  -2   4   0  586.84   28.60 
   2   4   0  600.94   31.00 
  -2   4   0  588.44   28.10 
  -2   4   0  634.94   35.70 
   2   4   0  657.23   36.70 
  -2   4   0  615.04   27.80 
   2   4   0  621.24   37.10 
   2   4   0  632.14   28.60 
   2   4   0  581.94   27.50 
   2   4   0  563.74   34.90 
  -2   4   0  620.14   32.10 
   2   4   0  555.44   30.80 
  -2   4   0  587.94   27.20 
  -2   4   0  561.24   26.80 
   2   4   0  640.14   35.20 
  -2   4   0  586.34   24.00 
  -2   4   0  591.84   28.70 
  -2   4   0  559.54   28.70 
  -2   4   0  580.34   33.50 
  -2   4   0  592.54   32.20 
  -2   4   0  617.94   27.70 
  -2   4   0  624.14   29.90 
  -2   4   0  590.14   26.60 
  -2   4   0  546.35   26.00 
   2   4   0  584.64   30.30 
   2   4   0  587.14   35.30 
  -2   4   0  570.04   27.30 
   2   4   0  563.64   36.40 
   2   4   0  601.84   34.70 
  -2   4   0  575.34   31.20 
  -2   4   0  591.14   29.10 
  -2   4   0  586.34   27.00 
  -2   4   0  597.74   28.60 
   2   4   0  588.04   29.20 
   2   4   0  601.04   31.70 
  -2   4   0  599.14   27.20 
   2   4   0  598.04   35.30 
  -2   4   0  616.64   25.00 
   2   4   0  635.14   38.70 
  -2   4   0  590.24   30.10 
  -2   4   0  568.34   24.20 
  -2   4   0  564.74   25.70 
   2   4   0  585.64   34.90 
  -2   4   0  607.44   31.60 
  -2   4   0  592.24   30.30 
   2   4   0  601.04   30.80 
   3  -4   0 1124.49   48.00 
   3  -4   0 1110.59   51.69 
   3  -4   0 1092.39   47.30 
  -3  -4   0 1229.68   51.49 
   3  -4   0 1136.09   48.90 
  -3  -4   0 1095.99   58.79 
   3  -4   0 1096.89   52.79 
   3  -4   0 1055.99   47.30 
   3  -4   0 1138.29   51.29 
  -3  -4   0 1162.88   56.29 
  -3  -4   0 1146.79   56.49 
  -3  -4   0 1168.08   55.89 
  -3  -4   0 1132.39   53.39 
  -3  -4   0 1167.18   51.69 
   3  -4   0 1064.79   51.99 
  -3  -4   0 1125.79   49.20 
  -3  -4   0 1134.99   49.60 
   3  -4   0  989.00   52.39 
   3  -4   0 1030.90   49.70 
   3  -4   0 1109.49   48.80 
   3  -4   0 1052.49   50.19 
  -3  -4   0 1172.08   55.69 
  -3  -4   0 1084.69   56.39 
  -3  -4   0 1122.99   53.29 
  -3  -4   0 1089.79   54.59 
   3  -4   0 1094.19   47.70 
   3  -4   0 1048.50   49.00 
  -3  -4   0 1087.39   49.90 
  -3  -4   0 1102.79   48.40 
   3  -4   0 1095.89   48.10 
  -3  -4   0 1144.69   53.09 
  -3  -4   0 1160.98   54.19 
  -3   4   0 1103.89   46.10 
  -3   4   0 1102.29   48.50 
  -3   4   0 1138.89   53.19 
  -3   4   0 1075.49   46.30 
  -3   4   0 1095.09   50.59 
  -3   4   0 1099.59   46.80 
  -3   4   0 1047.30   48.00 
   3   4   0 1119.39   57.99 
   3   4   0 1142.89   57.79 
   3   4   0 1105.99   48.90 
   3   4   0 1141.49   56.09 
   3   4   0 1099.69   51.99 
   3   4   0 1079.49   54.39 
  -3   4   0 1039.50   44.30 
   3   4   0 1143.59   54.59 
  -3   4   0 1078.99   47.40 
  -3   4   0 1045.70   53.39 
  -3   4   0 1057.39   48.40 
   3   4   0 1136.69   55.29 
  -3   4   0 1213.18   56.59 
  -3   4   0 1098.69   47.40 
  -3   4   0 1047.60   47.20 
  -3   4   0 1016.50   54.09 
   3   4   0 1103.09   49.30 
  -3   4   0 1084.19   44.30 
  -3   4   0 1102.99   48.90 
  -3   4   0 1095.39   48.40 
  -3   4   0 1040.70   48.20 
  -3   4   0 1052.49   43.60 
  -3   4   0 1068.89   46.40 
  -3   4   0 1112.59   47.40 
   3   4   0 1157.48   53.49 
  -3   4   0 1072.99   45.50 
   3   4   0 1091.79   54.79 
  -3   4   0 1050.39   46.10 
  -3   4   0 1117.19   53.99 
  -3   4   0 1079.59   49.40 
  -3   4   0 1111.29   46.70 
  -3   4   0 1050.29   46.90 
  -3   4   0 1118.99   48.40 
   3   4   0 1149.78   52.19 
   3   4   0 1199.48   51.69 
   3   4   0 1130.69   55.99 
   3   4   0 1131.09   57.59 
  -3   4   0 1131.39   49.30 
  -3   4   0 1163.18   56.99 
  -3   4   0 1089.39   49.10 
   3   4   0 1076.29   48.40 
  -3   4   0 1148.39   49.60 
   3   4   0 1278.37   57.59 
   3   4   0 1194.28   52.59 
   3   4   0 1073.59   55.59 
  -3   4   0 1148.09   58.19 
  -4  -4   0  398.36   30.00 
  -4  -4   0  396.76   26.50 
   4  -4   0  391.16   24.50 
  -4  -4   0  413.66   27.70 
   4  -4   0  443.46   27.00 
  -4  -4   0  385.16   35.70 
   4  -4   0  379.56   24.60 
  -4  -4   0  406.36   26.80 
   4  -4   0  305.67   24.30 
   4  -4   0  322.97   24.80 
   4  -4   0  359.16   25.10 
   4  -4   0  344.07   24.00 
  -4  -4   0  421.26   31.50 
   4  -4   0  374.46   25.60 
  -4  -4   0  384.86   26.20 
  -4  -4   0  369.36   27.20 
   4  -4   0  310.17   22.20 
  -4  -4   0  391.66   28.40 
   4  -4   0  364.96   26.00 
  -4  -4   0  379.36   28.90 
  -4  -4   0  379.16   31.30 
   4  -4   0  372.16   27.00 
  -4  -4   0  376.06   34.20 
  -4  -4   0  410.46   31.60 
   4  -4   0  345.57   26.00 
   4  -4   0  313.27   23.00 
  -4  -4   0  403.16   30.40 
  -4  -4   0  399.46   29.90 
   4   4   0  347.27   25.70 
  -4   4   0  362.06   25.70 
   4   4   0  413.46   30.00 
   4   4   0  373.66   29.80 
  -4   4   0  370.76   21.80 
   4   4   0  337.77   32.30 
   4   4   0  386.96   27.30 
  -4   4   0  335.17   35.80 
   4   4   0  336.87   26.30 
   4   4   0  400.16   28.00 
  -4   4   0  352.56   21.00 
  -4   4   0  342.17   26.50 
  -4   4   0  383.66   23.10 
  -4   4   0  403.56   36.50 
   4   4   0  379.66   29.10 
   4   4   0  352.96   34.80 
   4   4   0  467.15   30.90 
   4   4   0  354.56   29.60 
  -4   4   0  398.26   27.20 
   4   4   0  378.06   34.90 
  -4   4   0  389.26   26.50 
   4   4   0  416.26   26.60 
   4   4   0  363.86   27.90 
  -4   4   0  347.67   18.70 
  -4   4   0  313.67   21.10 
  -4   4   0  351.86   15.30 
   4   4   0  379.26   30.00 
  -4   4   0  340.47   19.50 
  -4   4   0  339.17   16.20 
  -4   4   0  355.16   22.10 
  -4   4   0  381.76   24.00 
  -4   4   0  332.27   16.80 
   4   4   0  335.17   34.70 
   4   4   0  375.56   25.60 
  -4   4   0  366.26   23.80 
  -4   4   0  364.76   23.10 
   4   4   0  412.76   27.80 
  -4   4   0  346.57   19.60 
  -4   4   0  367.96   26.40 
  -4   4   0  342.47   20.20 
  -4   4   0  327.87   18.50 
  -4   4   0  330.37   32.50 
  -4   4   0  348.47   25.10 
   4   4   0  365.16   34.40 
  -4   4   0  360.16   21.10 
  -4   4   0  320.27   24.20 
  -5  -4   0 1325.17   64.59 
  -5  -4   0 1254.17   66.99 
  -5  -4   0 1389.66   59.89 
   5  -4   0 1223.38   59.59 
  -5  -4   0 1276.67   67.69 
   5  -4   0 1242.18   62.59 
   5  -4   0 1305.07   62.79 
   5  -4   0 1246.48   61.99 
  -5  -4   0 1211.38   65.69 
   5  -4   0 1364.66   60.99 
   5  -4   0 1219.28   61.39 
  -5  -4   0 1306.97   68.19 
   5  -4   0 1242.08   57.09 
  -5  -4   0 1295.27   63.29 
   5  -4   0 1209.28   61.59 
  -5  -4   0 1317.47   64.99 
  -5  -4   0 1326.67   69.49 
   5  -4   0 1264.67   60.19 
   5  -4   0 1320.37   61.19 
  -5  -4   0 1366.06   65.19 
   5  -4   0 1253.47   60.59 
  -5  -4   0 1285.97   66.39 
  -5  -4   0 1317.47   66.79 
   5  -4   0 1317.27   60.29 
   5  -4   0 1243.88   64.09 
  -5  -4   0 1313.07   63.99 
  -5  -4   0 1231.58   66.09 
  -5  -4   0 1272.37   66.09 
  -5   4   0 1254.37   62.79 
  -5   4   0 1261.57   47.90 
  -5   4   0 1212.78   61.29 
  -5   4   0 1319.57   57.09 
   5   4   0 1260.97   61.69 
   5   4   0 1305.87   65.69 
   5   4   0 1262.07   63.29 
  -5   4   0 1134.29   64.59 
  -5   4   0 1252.67   62.09 
   5   4   0 1395.26   66.29 
  -5   4   0 1209.28   66.89 
  -5   4   0 1205.58   50.49 
  -5   4   0 1301.17   57.89 
  -5   4   0 1195.88   57.09 
  -5   4   0 1284.77   59.49 
  -5   4   0 1274.67   52.49 
  -5   4   0 1184.68   62.79 
   5   4   0 1295.77   65.39 
  -5   4   0 1227.58   59.69 
   5   4   0 1257.17   65.89 
  -5   4   0 1313.37   71.59 
  -5   4   0 1222.38   59.19 
   5   4   0 1259.07   69.59 
   5   4   0 1350.46   64.19 
  -5   4   0 1269.47   48.70 
   5   4   0 1477.95   67.09 
   5   4   0 1319.97   67.79 
   5   4   0 1366.36   66.29 
   5   4   0 1405.76   68.59 
  -5   4   0 1283.77   58.49 
   5   4   0 1348.37   63.39 
   5   4   0 1353.26   65.09 
   5   4   0 1291.97   68.39 
   5   4   0 1243.78   60.79 
  -5   4   0 1262.07   60.09 
   5   4   0 1206.28   66.29 
   5   4   0 1217.88   68.99 
   5   4   0 1220.48   66.99 
  -6  -4   0 1002.80   58.79 
  -6  -4   0  943.71   58.19 
   6  -4   0  827.62   49.10 
  -6  -4   0  876.21   53.49 
   6  -4   0  880.81   50.29 
  -6  -4   0  995.60   58.89 
   6  -4   0  921.01   50.49 
   6  -4   0  873.41   52.39 
   6  -4   0  815.62   49.80 
  -6  -4   0  964.80   58.69 
  -6  -4   0  995.50   56.49 
   6  -4   0  957.40   45.50 
   6  -4   0  904.61   51.39 
   6  -4   0  926.71   46.80 
  -6  -4   0  866.01   55.89 
   6  -4   0 1037.30   55.09 
   6  -4   0  942.81   55.39 
  -6  -4   0  972.20   57.69 
  -6  -4   0  906.11   46.00 
  -6  -4   0  882.21   52.99 
  -6  -4   0  902.81   53.69 
  -6  -4   0 1049.99   55.49 
  -6  -4   0  914.71   55.09 
   6  -4   0  921.01   53.19 
  -6  -4   0  849.72   54.99 
  -6  -4   0  987.40   55.29 
   6   4   0  929.11   55.29 
  -6   4   0  952.30   49.40 
  -6   4   0  988.50   56.29 
   6   4   0  922.41   58.39 
  -6   4   0  976.90   48.30 
   6   4   0  994.50   57.69 
  -6   4   0  877.51   53.39 
  -6   4   0  964.80   60.59 
   6   4   0  865.81   58.69 
  -6   4   0  906.81   47.10 
   6   4   0  899.51   52.89 
   6   4   0  954.30   54.59 
   6   4   0  946.11   57.49 
  -6   4   0  896.61   51.09 
   6   4   0  893.11   53.99 
   6   4   0  905.01   52.59 
   6   4   0  854.91   51.49 
  -6   4   0  925.51   52.89 
   6   4   0  984.30   49.60 
  -6   4   0  860.71   52.29 
   6   4   0  911.11   55.69 
   6   4   0  837.42   55.19 
   6   4   0  836.22   52.29 
  -6   4   0  929.41   44.90 
  -6   4   0  864.61   53.79 
  -6   4   0  839.42   46.10 
  -6   4   0  976.90   47.20 
  -6   4   0  858.71   46.80 
   6   4   0  927.61   53.79 
   6   4   0 1009.70   56.99 
  -6   4   0  900.91   56.29 
  -6   4   0  923.51   47.30 
   6   4   0  854.61   54.79 
  -6   4   0  904.21   50.39 
   6   4   0  856.51   55.89 
   6   4   0  850.41   56.69 
  -7  -4   0  820.32   52.59 
  -7  -4   0  844.12   51.09 
   7  -4   0  790.82   52.59 
  -7  -4   0  782.72   53.59 
   7  -4   0  875.61   50.89 
  -7  -4   0  837.32   56.69 
   7  -4   0  833.52   50.89 
   7  -4   0  739.73   53.29 
   7  -4   0  825.22   51.99 
  -7  -4   0  863.81   54.59 
  -7  -4   0  861.91   54.79 
  -7  -4   0  842.82   53.99 
  -7  -4   0  847.22   55.79 
  -7  -4   0  881.21   58.09 
   7  -4   0  821.22   50.89 
   7  -4   0  857.41   54.19 
   7  -4   0  850.91   53.79 
  -7  -4   0  826.42   55.29 
  -7  -4   0  862.41   55.19 
   7  -4   0  895.31   53.09 
  -7  -4   0  731.93   54.39 
  -7  -4   0  827.72   55.29 
  -7  -4   0  771.62   57.29 
  -7   4   0  769.12   52.89 
   7   4   0  799.62   56.09 
   7   4   0  686.03   52.89 
   7   4   0  819.02   54.09 
   7   4   0  888.31   57.39 
   7   4   0  792.32   53.99 
  -7   4   0  811.82   47.20 
  -7   4   0  794.72   55.59 
   7   4   0  837.62   55.09 
  -7   4   0  812.92   51.19 
   7   4   0  775.02   49.60 
  -7   4   0  814.92   46.20 
   7   4   0  771.62   53.29 
   7   4   0  934.61   58.19 
   7   4   0  866.61   54.89 
  -7   4   0  838.72   53.09 
  -7   4   0  810.02   53.09 
  -7   4   0  826.32   49.00 
   7   4   0  807.82   52.49 
  -7   4   0  841.62   53.19 
   7   4   0  829.82   57.09 
   7   4   0  876.71   54.59 
  -7   4   0  816.52   50.29 
   7   4   0  746.13   58.09 
   7   4   0  824.92   56.59 
  -7   4   0  773.42   53.39 
  -7   4   0  893.11   54.59 
   7   4   0  903.81   53.09 
   7   4   0  883.21   54.09 
  -8  -4   0  497.95   48.80 
  -8  -4   0  619.54   49.20 
  -8  -4   0  644.64   50.09 
   8  -4   0  546.45   50.69 
   8  -4   0  499.75   48.40 
  -8  -4   0  660.03   48.10 
   8  -4   0  588.04   48.50 
  -8  -4   0  567.94   53.69 
   8  -4   0  581.04   46.50 
  -8  -4   0  546.75   56.39 
  -8  -4   0  515.55   53.79 
   8  -4   0  575.14   43.70 
   8  -4   0  532.65   49.00 
   8  -4   0  567.04   46.50 
  -8  -4   0  601.24   47.20 
  -8  -4   0  655.13   49.00 
  -8  -4   0  609.84   57.19 
  -8  -4   0  435.06   44.10 
   8  -4   0  658.83   49.30 
  -8  -4   0  560.34   55.29 
  -8  -4   0  588.44   48.80 
  -8  -4   0  538.75   53.39 
   8   4   0  587.04   47.70 
   8   4   0  518.45   52.29 
  -8   4   0  569.24   53.69 
   8   4   0  514.35   59.29 
   8   4   0  571.64   44.70 
   8   4   0  594.44   44.20 
  -8   4   0  523.75   43.70 
  -8   4   0  673.93   50.69 
   8   4   0  528.75   53.89 
   8   4   0  623.44   48.20 
  -8   4   0  594.74   47.30 
  -8   4   0  597.54   42.50 
  -8   4   0  531.45   53.89 
   8   4   0  480.95   54.29 
   8   4   0  494.85   53.09 
   8   4   0  551.74   54.39 
  -8   4   0  576.14   43.90 
   8   4   0  576.14   42.50 
   8   4   0  605.04   49.60 
   8   4   0  554.34   44.40 
   8   4   0  518.15   53.49 
  -8   4   0  529.35   54.39 
  -8   4   0  509.65   50.49 
   8   4   0  518.45   51.49 
   8   4   0  651.63   50.49 
   9  -4   0  277.57   37.30 
   9  -4   0  341.77   45.10 
  -9  -4   0  302.97   41.00 
  -9  -4   0  325.37   46.80 
  -9  -4   0  306.47   43.50 
   9  -4   0  221.78   38.50 
  -9  -4   0  260.87   39.60 
  -9  -4   0  263.87   41.80 
   9  -4   0  240.28   38.30 
  -9  -4   0  280.67   43.00 
  -9  -4   0  355.16   42.60 
   9  -4   0  318.77   43.90 
  -9  -4   0  268.17   42.20 
  -9  -4   0  296.27   40.30 
   9  -4   0  352.96   41.80 
   9  -4   0  278.67   39.20 
  -9  -4   0  390.86   46.40 
  -9  -4   0  355.16   42.30 
  -9  -4   0  281.37   39.60 
  -9  -4   0  265.97   41.50 
  -9  -4   0  343.57   45.40 
   9  -4   0  318.57   40.70 
   9   4   0  300.17   41.20 
  -9   4   0  329.17   42.30 
  -9   4   0  329.17   40.60 
   9   4   0  366.26   52.29 
   9   4   0  276.57   42.10 
   9   4   0  237.78   36.50 
   9   4   0  264.07   39.70 
   9   4   0  260.87   40.40 
  -9   4   0  364.66   45.80 
   9   4   0  277.77   42.20 
  -9   4   0  397.26   40.50 
  -9   4   0  298.77   42.20 
  -9   4   0  292.37   39.20 
   9   4   0  361.16   40.90 
   9   4   0  318.87   43.80 
   9   4   0  281.17   37.00 
   9   4   0  337.57   45.10 
  -9   4   0  280.27   41.40 
   9   4   0  325.07   45.30 
   9   4   0  282.37   42.30 
  -9   4   0  316.07   41.70 
   9   4   0  315.97   44.20 
   0  -5   0   -7.20    6.50 
   0  -5   0    3.30    7.30 
   0  -5   0    3.10    4.80 
   0  -5   0    8.10    9.30 
   0  -5   0   -0.80    6.10 
   0  -5   0   -7.60    4.20 
   0  -5   0    3.00    4.40 
   0  -5   0   -2.40    6.70 
   0  -5   0    5.50    4.50 
   0  -5   0    0.70    6.00 
   0  -5   0    4.90    8.20 
   0   5   0   -2.70    6.70 
   0   5   0    0.90    2.30 
   0   5   0  -10.60    4.80 
   0   5   0   14.30   10.40 
   0   5   0    0.50    8.80 
   0   5   0   -1.60    7.10 
   0   5   0    0.40    3.00 
   0   5   0   -3.40    2.30 
   0   5   0    5.50    3.60 
   0   5   0    4.00    3.80 
   0   5   0    6.80    7.70 
   0   5   0    2.70    5.10 
   0   5   0    1.50    2.20 
   0   5   0    6.80    4.30 
   0   5   0   -7.20    5.30 
   0   5   0    3.90    8.50 
   0   5   0    6.40    7.60 
   0   5   0    2.10    3.80 
  -1  -5   0  129.59    6.10 
   1  -5   0  138.69   17.40 
   1  -5   0  114.89   16.90 
   1  -5   0  123.49   19.90 
  -1  -5   0  107.69    8.20 
   1  -5   0  129.29   12.00 
   1  -5   0  130.89    8.70 
   1  -5   0  126.99   12.50 
  -1  -5   0  129.19   19.00 
  -1  -5   0  134.69   10.60 
  -1  -5   0  128.79   19.40 
   1  -5   0  119.69   17.40 
  -1  -5   0  136.29   14.70 
   1  -5   0  155.98   24.20 
   1  -5   0  108.49   17.60 
   1  -5   0  124.79   18.10 
  -1  -5   0  120.69   13.70 
  -1  -5   0  127.79   14.50 
  -1  -5   0  143.09   21.10 
  -1  -5   0  116.29   19.10 
  -1  -5   0  128.49   15.30 
   1  -5   0   93.39   17.00 
  -1  -5   0  155.78   14.60 
  -1  -5   0  128.49   18.50 
  -1  -5   0  144.59   20.60 
  -1  -5   0  144.79   13.10 
  -1   5   0  106.59    8.90 
   1   5   0  121.29   14.20 
  -1   5   0  129.29    8.80 
   1   5   0  130.69   13.40 
   1   5   0  115.89   10.60 
  -1   5   0  113.19   13.70 
   1   5   0  124.79   17.60 
  -1   5   0  126.39   14.90 
  -1   5   0  129.29    7.80 
   1   5   0  111.99   19.50 
   1   5   0  131.59   14.90 
   1   5   0  132.49   10.80 
  -1   5   0  120.89   19.20 
   1   5   0  133.39   20.00 
   1   5   0  139.39   10.90 
   1   5   0  138.29   20.50 
   1   5   0  137.39   20.80 
   1   5   0  134.99   18.50 
  -1   5   0  113.19   11.70 
   1   5   0   98.19   15.60 
  -1   5   0  115.39    7.20 
  -1   5   0  123.29    7.60 
  -1   5   0  132.39    7.00 
   1   5   0  138.19   12.90 
  -1   5   0  184.88   20.40 
  -1   5   0  110.29   18.10 
  -1   5   0  120.59    9.70 
  -1   5   0  128.89   16.10 
  -1   5   0  124.29    8.80 
   1   5   0  113.09   16.00 
  -1   5   0  121.69    7.80 
  -1   5   0  104.19   16.10 
  -1   5   0  146.09   13.40 
  -1   5   0  124.29   15.60 
  -1   5   0  162.68   23.30 
  -1   5   0  137.19    9.20 
   1   5   0  145.99   23.30 
  -1   5   0  153.58    8.60 
  -1   5   0  122.99   16.00 
   1   5   0  130.19    7.10 
   1   5   0  142.69   19.50 
  -1   5   0  107.29   15.40 
  -1   5   0  127.29   16.50 
  -1   5   0  138.79    8.10 
  -1   5   0  132.89   19.50 
   1   5   0  122.59   12.70 
   1   5   0  120.89   18.90 
   2  -5   0    7.10    3.60 
   2  -5   0   -1.00    7.60 
  -2  -5   0    1.50    3.40 
   2  -5   0    5.00    7.20 
  -2  -5   0   -2.00    3.00 
   2  -5   0   10.10    7.40 
  -2  -5   0    4.40    9.10 
  -2  -5   0    2.20    8.90 
  -2  -5   0    1.70    7.50 
   2  -5   0   -8.70    4.60 
  -2  -5   0    8.40    5.70 
  -2  -5   0    4.90    5.80 
  -2  -5   0    4.40    8.90 
  -2  -5   0  -10.50    6.70 
   2  -5   0    7.20    7.90 
  -2  -5   0   -4.90    4.40 
  -2  -5   0    8.50    5.20 
   2  -5   0    0.00    5.20 
  -2  -5   0   -1.10    3.90 
  -2  -5   0   -3.60    3.60 
  -2  -5   0    9.60    5.40 
   2  -5   0   -2.40    2.80 
  -2  -5   0    4.30    4.20 
  -2  -5   0    3.20    3.40 
   2  -5   0    0.80    7.40 
  -2  -5   0    2.10    6.40 
  -2  -5   0    1.50    4.50 
  -2  -5   0   -1.10    5.80 
  -2  -5   0    2.30    7.60 
  -2  -5   0    1.90    6.40 
  -2   5   0    3.00    2.10 
   2   5   0    1.50    5.80 
  -2   5   0    1.20    3.60 
  -2   5   0    2.10    4.10 
   2   5   0    5.80    7.50 
   2   5   0    1.10    5.50 
   2   5   0    6.80    7.60 
  -2   5   0   -3.70    3.40 
  -2   5   0    2.00    3.90 
  -2   5   0    0.80    3.80 
  -2   5   0    5.00    6.00 
  -2   5   0    1.70    2.70 
  -2   5   0    7.00    8.70 
  -2   5   0   11.60    6.70 
  -2   5   0   -5.00    6.40 
   2   5   0   13.10    8.20 
  -2   5   0    6.40    3.20 
  -2   5   0    5.20    6.90 
  -2   5   0    1.00    3.70 
  -2   5   0    4.70    3.70 
   2   5   0    5.40    9.10 
  -2   5   0    7.60    6.00 
   2   5   0   -2.50    3.40 
  -2   5   0    4.80    6.30 
  -2   5   0   -0.50    2.90 
   2   5   0   -0.80    4.30 
  -2   5   0   -0.90    3.20 
  -2   5   0    5.10    4.10 
  -2   5   0    0.70    5.10 
  -2   5   0   -3.00    5.80 
  -2   5   0    0.60    3.70 
   2   5   0    1.10    4.50 
  -2   5   0    1.00    6.50 
   2   5   0   -4.50    9.50 
  -2   5   0    4.10    4.00 
  -2   5   0    1.00    2.10 
  -2   5   0   -4.00    2.80 
   2   5   0    3.20    7.20 
  -2   5   0   -7.50    4.60 
  -2   5   0    5.80    5.60 
  -2   5   0    4.70    3.70 
   2   5   0    8.50    4.40 
   2   5   0    1.50    8.30 
   2   5   0    2.90    8.00 
  -2   5   0    2.40    7.00 
  -2   5   0    0.30    4.50 
   2   5   0   -9.60    5.50 
  -2   5   0    1.00    3.30 
  -2   5   0    2.40    2.00 
   2   5   0   10.20    9.00 
   2   5   0   -5.40    4.50 
  -2   5   0    4.10    8.90 
  -2   5   0   -1.00    6.60 
  -2   5   0   10.20   10.20 
  -3  -5   0   -9.60    6.00 
  -3  -5   0   -2.50    4.80 
  -3  -5   0   -2.20    6.90 
  -3  -5   0   -2.20    4.40 
  -3  -5   0    1.60    8.10 
  -3  -5   0    5.90    7.30 
   3  -5   0    7.90    6.50 
  -3  -5   0   -1.10    5.50 
  -3  -5   0   18.30    9.80 
  -3  -5   0    3.70    9.70 
  -3  -5   0   -6.40    8.40 
  -3  -5   0   -8.40    6.70 
  -3  -5   0  -10.80    6.80 
   3  -5   0    1.60    4.50 
  -3  -5   0  -12.00    5.80 
   3  -5   0   -6.90    4.70 
   3  -5   0   -5.60    3.70 
  -3  -5   0    9.20    7.10 
  -3  -5   0   -4.90    7.90 
   3  -5   0   -3.20    8.30 
  -3  -5   0    2.20    8.30 
  -3  -5   0    5.20    6.50 
   3  -5   0   -2.70    7.50 
   3  -5   0   -1.70    5.20 
   3  -5   0    4.40    8.40 
   3  -5   0    5.70    5.90 
  -3   5   0   -8.90    5.60 
   3   5   0    7.10    9.40 
   3   5   0   -1.50    5.90 
  -3   5   0    0.10    4.80 
  -3   5   0   -1.60    4.60 
   3   5   0   -4.00    6.00 
  -3   5   0    9.40    7.40 
  -3   5   0    0.30    4.80 
  -3   5   0   -1.80    5.10 
   3   5   0   -5.30    7.60 
   3   5   0   -3.90    5.30 
   3   5   0   -4.50    9.10 
  -3   5   0    1.00    5.00 
  -3   5   0   -7.40    5.10 
   3   5   0   -3.30    5.90 
  -3   5   0    0.00    3.00 
  -3   5   0    8.90    5.10 
  -3   5   0   13.80    7.80 
  -3   5   0   -0.80    7.90 
  -3   5   0    6.20    6.30 
   3   5   0    4.50    8.70 
   3   5   0   -2.00    7.80 
  -3   5   0    2.80    6.70 
  -3   5   0    0.20    2.70 
  -3   5   0    1.30    8.40 
  -3   5   0    4.80    5.50 
   3   5   0   -1.70    6.60 
  -3   5   0   12.50    4.60 
  -3   5   0    3.70    8.10 
  -3   5   0   -3.40    4.70 
  -3   5   0   -6.40    4.80 
   3   5   0   -4.90    7.00 
  -3   5   0    6.90    5.00 
   3   5   0    4.50    8.30 
   3   5   0    9.30   10.30 
  -3   5   0    9.20   10.00 
   3   5   0    2.80    7.00 
  -3   5   0   -0.20    3.80 
   3   5   0   -6.40    7.70 
  -3   5   0    5.70    4.10 
  -3   5   0    6.70    3.40 
   3   5   0   -5.00   11.90 
  -3   5   0    0.60    3.70 
  -3   5   0   -2.80    7.30 
   3   5   0   -1.00    5.00 
   3   5   0   11.00    8.10 
  -3   5   0    0.80    5.50 
   4  -5   0  111.69   18.80 
  -4  -5   0  158.38   23.30 
   4  -5   0  159.48   18.70 
  -4  -5   0  173.98   25.10 
  -4  -5   0  154.28   21.80 
   4  -5   0  135.29   16.20 
  -4  -5   0  120.79   20.00 
  -4  -5   0  148.39   22.30 
   4  -5   0  127.09   15.90 
   4  -5   0  162.58   21.50 
  -4  -5   0  169.38   19.60 
  -4  -5   0  173.38   24.30 
   4  -5   0  160.68   19.50 
  -4  -5   0  118.39   19.40 
  -4  -5   0  158.58   20.40 
   4  -5   0  150.68   17.20 
  -4  -5   0  143.89   23.10 
  -4  -5   0  140.69   18.00 
  -4  -5   0  168.18   24.50 
  -4  -5   0  195.68   21.00 
   4  -5   0  187.88   19.90 
  -4  -5   0  152.48   25.30 
   4  -5   0  157.68   19.60 
  -4   5   0  142.89   11.90 
  -4   5   0  160.38   17.10 
  -4   5   0  165.08   18.20 
  -4   5   0  162.38   16.10 
   4   5   0  171.78   25.70 
  -4   5   0  137.49   20.30 
  -4   5   0  126.39   17.70 
   4   5   0  174.18   23.40 
  -4   5   0  161.18   15.90 
   4   5   0  152.18   24.40 
   4   5   0  166.98   24.10 
   4   5   0  197.38   29.60 
   4   5   0  131.39   21.90 
   4   5   0  146.19   25.10 
  -4   5   0  144.99   14.50 
  -4   5   0  135.99   21.80 
   4   5   0  155.68   20.50 
  -4   5   0  135.09   15.60 
  -4   5   0  138.29   24.20 
   4   5   0  154.78   21.20 
  -4   5   0  161.68   17.80 
  -4   5   0  136.69   20.30 
  -4   5   0  157.88   18.80 
   4   5   0  145.39   21.80 
  -4   5   0  170.08   17.40 
  -4   5   0  163.68   19.40 
   4   5   0  104.29   17.40 
  -4   5   0  139.19   11.20 
  -4   5   0  180.98   24.50 
  -4   5   0  142.19   17.80 
  -4   5   0  127.79   16.80 
  -4   5   0  170.08   18.40 
  -4   5   0  150.98   24.20 
   4   5   0  151.68   23.50 
  -4   5   0  174.18   20.10 
   4   5   0  178.48   25.50 
  -4   5   0  139.69   15.30 
  -4   5   0  138.69   26.00 
   4   5   0  153.18   23.00 
   4   5   0  156.48   20.70 
   4   5   0   96.79   20.70 
   4   5   0  147.49   18.00 
  -4   5   0  172.78   23.00 
   4   5   0  164.48   19.50 
  -4   5   0  118.79   16.00 
   5  -5   0   42.80   13.70 
  -5  -5   0   51.59   16.10 
   5  -5   0   76.59   15.70 
  -5  -5   0   69.19   15.90 
  -5  -5   0   51.79   16.40 
  -5  -5   0   29.70   14.70 
  -5  -5   0   64.39   17.20 
  -5  -5   0   79.49   18.60 
  -5  -5   0   85.29   18.10 
   5  -5   0   62.29   13.30 
   5  -5   0   48.50   13.00 
   5  -5   0   54.69   14.10 
   5  -5   0   48.10   13.80 
   5  -5   0   64.09   12.70 
  -5  -5   0   75.29   15.90 
  -5  -5   0   64.99   17.10 
  -5  -5   0   33.10   15.30 
   5  -5   0   71.99   14.20 
  -5  -5   0   95.49   21.50 
  -5  -5   0   79.99   17.10 
   5  -5   0   54.29   14.60 
  -5  -5   0   59.09   14.10 
  -5  -5   0   80.49   16.80 
   5  -5   0   66.19   13.90 
   5   5   0   63.59   17.40 
  -5   5   0   76.99   16.50 
  -5   5   0   48.50   11.80 
  -5   5   0   45.70   13.00 
   5   5   0   66.59   16.10 
   5   5   0   91.89   17.80 
  -5   5   0   49.20   13.10 
  -5   5   0   68.19   11.80 
  -5   5   0   39.90   13.40 
   5   5   0   79.19   20.80 
  -5   5   0   63.99   15.30 
   5   5   0   50.29   15.40 
  -5   5   0   41.00   17.90 
   5   5   0   63.09   15.90 
   5   5   0   54.39   18.30 
   5   5   0   75.09   15.60 
   5   5   0   48.80   17.40 
   5   5   0   64.09   18.80 
  -5   5   0   53.79   12.00 
  -5   5   0   73.19   11.00 
  -5   5   0   73.69   11.90 
   5   5   0   66.99   14.80 
   5   5   0   78.79   19.50 
   5   5   0   55.69   16.00 
  -5   5   0   53.29   20.80 
   5   5   0   69.39   17.70 
   5   5   0   85.49   22.20 
  -5   5   0   73.79   10.90 
  -5   5   0   44.10   13.20 
  -5   5   0   56.89   11.60 
  -5   5   0   96.09   17.90 
  -5   5   0   63.99   14.80 
   5   5   0   58.69   14.90 
  -5   5   0   43.90   13.50 
  -5   5   0   60.99   11.90 
  -5   5   0   75.99   20.40 
   5   5   0   67.39   17.20 
  -5   5   0   83.29   14.50 
  -6  -5   0  768.12   51.99 
  -6  -5   0  847.72   56.89 
  -6  -5   0  797.52   53.59 
  -6  -5   0  855.01   53.69 
   6  -5   0  853.61   50.19 
  -6  -5   0  837.02   54.49 
  -6  -5   0  780.02   54.49 
  -6  -5   0  742.73   48.80 
  -6  -5   0  824.72   55.49 
  -6  -5   0  775.12   56.09 
  -6  -5   0  804.52   51.09 
   6  -5   0  814.72   49.50 
   6  -5   0  800.92   46.80 
   6  -5   0  769.82   46.80 
   6  -5   0  760.02   46.00 
   6  -5   0  772.82   49.00 
  -6  -5   0  836.42   55.09 
   6  -5   0  772.02   48.90 
   6  -5   0  812.42   43.80 
  -6  -5   0  845.92   46.80 
  -6  -5   0  801.02   50.09 
  -6  -5   0  837.32   51.39 
   6  -5   0  760.12   50.69 
   6  -5   0  779.12   46.20 
   6  -5   0  837.42   49.70 
   6   5   0  899.21   61.29 
   6   5   0  848.22   49.10 
  -6   5   0  766.52   43.70 
  -6   5   0  871.01   50.19 
   6   5   0  844.82   52.19 
   6   5   0  763.02   51.89 
  -6   5   0  838.32   50.69 
   6   5   0  923.41   52.39 
   6   5   0  806.22   49.50 
  -6   5   0  753.72   48.50 
   6   5   0  882.91   56.69 
   6   5   0  921.31   55.19 
   6   5   0  843.92   55.59 
   6   5   0  877.51   55.89 
  -6   5   0  854.41   47.90 
   6   5   0  825.72   52.19 
   6   5   0  811.92   53.29 
  -6   5   0  829.42   43.40 
   6   5   0  882.51   58.09 
  -6   5   0  758.72   45.70 
  -6   5   0  819.12   47.40 
  -6   5   0  865.51   47.50 
  -6   5   0  775.02   49.40 
   6   5   0  821.32   50.89 
  -6   5   0  799.92   59.19 
   6   5   0  848.12   53.49 
  -6   5   0  885.71   56.49 
  -6   5   0  813.72   49.00 
  -6   5   0  802.02   46.20 
   6   5   0  890.31   57.29 
   6   5   0  882.31   56.29 
   6   5   0  824.92   52.49 
  -6   5   0  800.62   55.79 
   7  -5   0   57.99   15.40 
  -7  -5   0   87.19   24.30 
   7  -5   0   53.59   16.60 
  -7  -5   0   78.29   22.40 
   7  -5   0   28.40   14.50 
  -7  -5   0   68.09   17.60 
  -7  -5   0   93.49   23.60 
   7  -5   0   78.79   20.60 
  -7  -5   0   70.89   19.90 
  -7  -5   0   80.29   22.60 
   7  -5   0   78.19   19.20 
  -7  -5   0   75.99   20.80 
  -7  -5   0  100.09   21.80 
   7  -5   0   57.69   16.90 
   7  -5   0   69.99   17.70 
  -7  -5   0   61.69   18.50 
   7  -5   0   82.99   20.30 
  -7  -5   0   70.89   19.30 
  -7  -5   0   81.79   20.50 
  -7  -5   0   73.29   22.10 
  -7  -5   0   63.49   20.40 
  -7   5   0   56.29   15.00 
   7   5   0   64.29   20.40 
   7   5   0   45.60   19.30 
   7   5   0   77.49   20.90 
  -7   5   0   51.99   17.10 
  -7   5   0   77.69   19.60 
  -7   5   0   76.59   24.30 
   7   5   0   68.89   21.40 
  -7   5   0   30.90   15.60 
   7   5   0   62.69   20.30 
  -7   5   0   60.69   15.80 
  -7   5   0   50.79   15.40 
   7   5   0   72.59   21.70 
   7   5   0   85.79   21.30 
  -7   5   0   90.09   23.70 
   7   5   0   24.30   18.60 
   7   5   0   55.29   18.00 
   7   5   0   53.29   19.20 
   7   5   0   72.39   19.60 
   7   5   0   76.39   20.10 
  -7   5   0   88.29   24.60 
   7   5   0   47.00   16.10 
   7   5   0   94.39   21.00 
   7   5   0   95.99   25.20 
   7   5   0   42.40   16.30 
   7   5   0   83.49   21.50 
  -7   5   0   55.69   17.20 
  -7   5   0   42.60   15.10 
   7   5   0   27.00   15.80 
   8  -5   0  411.36   43.90 
  -8  -5   0  483.45   50.69 
   8  -5   0  455.95   46.70 
  -8  -5   0  412.86   46.10 
  -8  -5   0  497.05   53.99 
  -8  -5   0  572.74   52.59 
  -8  -5   0  500.05   55.49 
   8  -5   0  464.05   49.20 
   8  -5   0  490.15   48.20 
  -8  -5   0  516.45   48.60 
  -8  -5   0  516.85   53.49 
  -8  -5   0  457.75   52.29 
  -8  -5   0  456.15   49.10 
   8  -5   0  502.25   39.50 
  -8  -5   0  446.36   48.00 
  -8  -5   0  487.65   51.29 
   8  -5   0  459.25   48.30 
  -8  -5   0  413.46   50.89 
  -8  -5   0  498.85   51.99 
  -8  -5   0  393.16   44.70 
   8   5   0  481.25   54.99 
  -8   5   0  452.15   47.30 
   8   5   0  377.56   46.80 
   8   5   0  487.95   49.99 
  -8   5   0  395.36   41.30 
   8   5   0  524.35   49.80 
   8   5   0  478.85   50.89 
   8   5   0  459.75   57.69 
   8   5   0  487.65   51.99 
   8   5   0  554.04   53.89 
  -8   5   0  460.65   49.80 
  -8   5   0  480.55   54.19 
  -8   5   0  396.56   44.30 
  -8   5   0  494.55   49.20 
   8   5   0  495.35   49.90 
  -8   5   0  467.15   49.60 
   8   5   0  363.76   46.00 
  -8   5   0  486.05   47.80 
   8   5   0  645.04   58.99 
   8   5   0  501.85   49.40 
   8   5   0  466.55   52.09 
   8   5   0  401.06   48.70 
   8   5   0  440.76   49.60 
   8   5   0  425.46   51.59 
   9  -5   0   18.90   17.20 
  -9  -5   0   64.89   22.40 
  -9  -5   0   31.30   18.50 
   9  -5   0   53.29   20.80 
  -9  -5   0   59.39   22.60 
  -9  -5   0   41.60   18.10 
  -9  -5   0   29.70   18.10 
  -9  -5   0   27.40   17.50 
   9  -5   0   54.29   19.60 
  -9  -5   0   41.50   20.50 
  -9  -5   0   27.40   19.40 
   9  -5   0   15.60   15.90 
  -9  -5   0   28.60   19.10 
  -9  -5   0   35.20   17.90 
  -9  -5   0  -18.20   14.70 
  -9  -5   0   19.70   16.10 
   9   5   0   41.10   18.90 
   9   5   0   35.70   18.20 
   9   5   0   -1.50   18.60 
   9   5   0   21.00   17.10 
  -9   5   0   66.49   21.20 
   9   5   0   26.10   17.30 
  -9   5   0   68.79   23.30 
   9   5   0    0.10   16.10 
  -9   5   0   49.40   19.40 
   9   5   0   50.39   20.60 
  -9   5   0   10.90   15.70 
   9   5   0   36.20   20.60 
   9   5   0    9.90   16.20 
   9   5   0   48.50   27.80 
   9   5   0   54.69   20.90 
  -9   5   0   40.50   18.00 
   9   5   0   37.00   21.70 
  -9   5   0   15.10   16.20 
   9   5   0   22.30   18.40 
   9   5   0   12.70   14.00 
   0  -6   0   17.10   11.20 
   0  -6   0    9.30   10.30 
   0  -6   0   23.20    5.40 
   0  -6   0   10.70    7.50 
   0  -6   0    2.10    9.80 
   0  -6   0   18.20   10.20 
   0  -6   0    9.80   10.50 
   0  -6   0    8.80    6.70 
   0  -6   0    8.90   11.00 
   0  -6   0   19.90    5.30 
   0   6   0   12.40   12.50 
   0   6   0   11.10    3.70 
   0   6   0    8.40    8.40 
   0   6   0   -0.20    7.80 
   0   6   0   18.60   12.60 
   0   6   0    4.90   10.30 
   0   6   0   13.40    4.50 
   0   6   0   18.20   11.90 
   0   6   0    6.60    5.30 
   0   6   0   15.60    5.20 
   0   6   0   -2.80    8.00 
   0   6   0    3.40    6.80 
   0   6   0    9.70    8.20 
   0   6   0   15.90   10.60 
   0   6   0   10.50    7.60 
   0   6   0    9.80    9.70 
   0   6   0   12.10    5.60 
   0   6   0   14.30    4.30 
  -1  -6   0 2390.66   94.79 
  -1  -6   0 2297.67   87.99 
  -1  -6   0 2432.26  103.09 
   1  -6   0 2415.36   88.69 
   1  -6   0 2370.66  103.79 
  -1  -6   0 2474.15   94.49 
   1  -6   0 2505.95   88.69 
  -1  -6   0 2415.06   94.49 
  -1  -6   0 2471.85  104.19 
  -1  -6   0 2476.85   94.89 
  -1  -6   0 2391.96  105.59 
   1  -6   0 2333.97   84.19 
   1  -6   0 2213.18  106.09 
   1  -6   0 2159.88  104.49 
  -1  -6   0 2494.35  108.79 
  -1  -6   0 2407.16  104.99 
  -1  -6   0 2425.36   95.79 
  -1  -6   0 2454.25   95.19 
   1  -6   0 2193.78   97.89 
  -1  -6   0 2421.06  106.79 
   1  -6   0 2202.18  103.39 
  -1  -6   0 2447.76   95.69 
   1  -6   0 2317.67  103.49 
   1   6   0 2398.86   86.39 
  -1   6   0 2260.47  102.89 
  -1   6   0 2311.07  104.59 
  -1   6   0 2283.87   98.99 
  -1   6   0 2326.67   98.59 
   1   6   0 2519.05  106.89 
  -1   6   0 2309.97   98.99 
  -1   6   0 2373.46   91.59 
   1   6   0 2399.96   87.39 
   1   6   0 2189.58  102.29 
  -1   6   0 2240.98   85.39 
   1   6   0 2200.68   96.99 
  -1   6   0 2289.17   85.39 
  -1   6   0 2287.67   82.69 
  -1   6   0 2202.78   97.49 
   1   6   0 2356.86  106.39 
   1   6   0 2364.56   91.19 
   1   6   0 2393.86  106.89 
   1   6   0 2319.37  101.09 
   1   6   0 2381.06   88.09 
   1   6   0 2345.87  100.19 
  -1   6   0 2363.46   82.89 
   1   6   0 2371.56  106.49 
   1   6   0 2422.86  109.29 
  -1   6   0 2237.98   83.89 
   1   6   0 2388.66  102.89 
  -1   6   0 2257.67  107.39 
   1   6   0 2341.97   90.39 
   1   6   0 2481.25   94.69 
  -1   6   0 2302.97  106.49 
  -1   6   0 2276.57   86.79 
  -1   6   0 2169.18   97.79 
   1   6   0 2368.96  102.79 
  -1   6   0 2328.67   97.39 
  -1   6   0 2310.77  104.29 
  -1   6   0 2427.66  101.89 
   1   6   0 2413.56   89.99 
  -1   6   0 2348.07   85.19 
  -2  -6   0   13.20    8.80 
  -2  -6   0    3.50   10.40 
  -2  -6   0   11.10    7.40 
   2  -6   0   -9.20    6.10 
   2  -6   0   16.10   10.10 
  -2  -6   0   10.20   10.80 
   2  -6   0   -2.90    9.50 
   2  -6   0   -0.30    3.40 
  -2  -6   0   14.60    5.80 
   2  -6   0   14.70   10.50 
  -2  -6   0   11.50   10.60 
  -2  -6   0   12.40    6.70 
  -2  -6   0   -0.40    3.30 
  -2  -6   0   -7.40    8.50 
  -2  -6   0   15.20   11.70 
  -2  -6   0   13.60   11.50 
  -2  -6   0    9.50    6.00 
  -2  -6   0    8.00    7.50 
   2  -6   0    8.30    7.50 
  -2  -6   0    5.70    3.90 
  -2  -6   0    9.60    4.90 
  -2  -6   0    5.30    4.10 
  -2  -6   0    8.40    3.90 
   2  -6   0   13.60   11.00 
  -2  -6   0    4.70    3.50 
  -2  -6   0    0.80    7.00 
   2  -6   0   14.40    9.60 
  -2   6   0   -2.50   10.90 
  -2   6   0    2.20    3.40 
  -2   6   0   12.50    9.10 
   2   6   0   12.80   10.20 
  -2   6   0   10.10    8.80 
   2   6   0   -6.00   12.00 
   2   6   0    9.90    9.10 
   2   6   0   16.10    5.20 
   2   6   0    8.80    6.30 
  -2   6   0    7.10    7.70 
   2   6   0    9.90   10.80 
  -2   6   0    2.30    4.90 
  -2   6   0    3.30   10.20 
  -2   6   0   11.10    7.80 
   2   6   0    3.20    9.70 
   2   6   0    0.40    6.80 
  -2   6   0    3.00    4.50 
  -2   6   0   10.90    3.90 
  -2   6   0    7.60    2.90 
  -2   6   0   -1.40    8.40 
  -2   6   0   16.00    8.40 
  -2   6   0    6.40    5.20 
  -2   6   0    3.60    4.50 
   2   6   0   10.30    5.80 
  -2   6   0    7.40    3.10 
   2   6   0    1.70    8.40 
  -2   6   0    4.00    3.30 
  -2   6   0    5.50    7.90 
  -2   6   0    5.50    6.10 
   2   6   0   -1.00    9.00 
  -2   6   0    7.60    4.40 
  -2   6   0    4.10    3.10 
   2   6   0    4.90    6.00 
   2   6   0   10.70    8.10 
  -2   6   0   12.20    4.10 
  -2   6   0    2.00    3.80 
  -2   6   0    9.10    4.60 
  -2   6   0    9.90    4.20 
   2   6   0    8.10   10.00 
  -2   6   0   13.30    8.70 
  -2   6   0   18.70    7.70 
  -2   6   0   13.50   12.90 
   2   6   0    7.00   11.20 
  -2   6   0    9.00    3.80 
  -2   6   0    6.80    4.20 
   2   6   0    8.80   12.20 
  -3  -6   0 1097.99   58.29 
   3  -6   0  967.20   50.79 
  -3  -6   0 1010.30   54.39 
  -3  -6   0  970.40   51.69 
  -3  -6   0  971.80   48.90 
  -3  -6   0 1025.90   47.10 
   3  -6   0  954.20   55.69 
  -3  -6   0 1020.10   61.89 
  -3  -6   0 1016.60   58.59 
  -3  -6   0  991.70   44.20 
  -3  -6   0  990.10   57.09 
   3  -6   0  920.81   56.69 
   3  -6   0  929.71   42.00 
  -3  -6   0 1047.40   58.99 
  -3  -6   0 1016.10   57.89 
   3  -6   0  922.41   54.29 
  -3  -6   0  991.60   46.50 
  -3  -6   0 1049.99   52.79 
  -3  -6   0 1002.20   44.50 
   3  -6   0  998.90   48.50 
   3  -6   0  850.31   50.99 
   3   6   0 1049.99   61.59 
  -3   6   0  954.10   48.30 
   3   6   0  943.91   49.20 
   3   6   0 1009.40   57.79 
  -3   6   0  950.00   55.69 
  -3   6   0  963.10   43.50 
   3   6   0  954.80   56.79 
  -3   6   0  914.81   54.69 
   3   6   0  972.50   55.89 
   3   6   0 1084.49   60.79 
   3   6   0 1056.59   44.30 
   3   6   0 1070.39   59.69 
  -3   6   0  968.60   46.60 
  -3   6   0  893.71   48.60 
   3   6   0  949.60   56.09 
   3   6   0 1118.69   52.79 
  -3   6   0  975.30   50.39 
   3   6   0 1049.00   47.70 
   3   6   0 1083.09   56.09 
   3   6   0  907.31   58.49 
  -3   6   0  981.80   39.60 
  -3   6   0  969.40   60.29 
  -3   6   0 1001.50   49.60 
  -3   6   0  956.20   43.40 
  -3   6   0  967.90   59.09 
   3   6   0 1054.09   51.39 
  -3   6   0  926.21   40.10 
   3   6   0 1005.00   44.80 
  -3   6   0  942.31   50.99 
   3   6   0  909.71   55.59 
  -3   6   0  982.60   44.80 
   3   6   0 1069.99   57.49 
  -3   6   0  895.01   47.10 
  -3   6   0 1045.70   58.99 
  -3   6   0  936.31   48.70 
  -3   6   0  918.71   42.20 
  -3   6   0  954.80   50.89 
   3   6   0  994.50   48.80 
  -3   6   0  967.40   42.20 
  -3   6   0  921.01   50.79 
   4  -6   0   15.40    9.70 
  -4  -6   0   16.90    8.20 
  -4  -6   0    7.30    8.40 
  -4  -6   0    3.40   10.10 
  -4  -6   0   -4.10   10.50 
   4  -6   0    7.60    7.00 
  -4  -6   0    7.00    8.40 
  -4  -6   0   -0.10   10.30 
  -4  -6   0   -4.60   10.80 
   4  -6   0   -1.80   10.00 
  -4  -6   0   17.70   12.70 
  -4  -6   0   11.80   10.10 
  -4  -6   0    9.30    8.10 
  -4  -6   0   10.50   10.00 
  -4  -6   0   -0.20    9.50 
  -4  -6   0   15.90    8.30 
  -4  -6   0   27.60   14.10 
  -4   6   0    9.40    5.70 
  -4   6   0    4.90    7.90 
   4   6   0   14.00    8.30 
  -4   6   0   14.60    9.10 
   4   6   0    4.00   10.80 
  -4   6   0    8.70   11.30 
  -4   6   0    4.40    7.20 
  -4   6   0    0.20    6.00 
  -4   6   0   19.60   10.70 
  -4   6   0    4.00    6.40 
   4   6   0   10.80   10.10 
   4   6   0    1.40    9.70 
  -4   6   0  -10.10    7.80 
  -4   6   0   13.40    7.80 
  -4   6   0   10.40   11.70 
  -4   6   0   -0.20   11.90 
   4   6   0   27.30   14.80 
   4   6   0    1.20    6.90 
   4   6   0   24.10   13.50 
   4   6   0    0.80    8.80 
  -4   6   0    7.70    6.00 
  -4   6   0   12.70    6.60 
  -4   6   0   13.70    9.30 
  -4   6   0   11.20    8.40 
  -4   6   0  -16.50    9.50 
   4   6   0   -3.10   14.60 
  -4   6   0   14.50   12.60 
  -4   6   0    8.20    6.30 
  -4   6   0   -5.30   10.60 
   4   6   0   12.40    8.60 
  -4   6   0   15.30   12.50 
   4   6   0   15.50   11.20 
  -4   6   0   -8.90   10.10 
   4   6   0   -8.40   11.00 
  -4   6   0   12.20    9.50 
  -4   6   0   10.30    6.90 
   4   6   0   -4.60    8.90 
   4   6   0    1.40   10.20 
   4   6   0    7.40    7.60 
   4   6   0   -1.70    9.20 
  -4   6   0   10.30    8.50 
   4   6   0   -8.10    9.20 
   4   6   0   11.30   12.00 
  -5  -6   0 1268.57   70.39 
  -5  -6   0 1235.18   69.79 
  -5  -6   0 1222.48   62.59 
  -5  -6   0 1209.78   67.09 
  -5  -6   0 1170.88   66.09 
  -5  -6   0 1253.87   61.19 
   5  -6   0 1170.98   60.59 
   5  -6   0 1096.79   58.59 
   5  -6   0 1227.58   60.29 
   5  -6   0 1100.49   64.29 
  -5  -6   0 1321.67   75.99 
  -5  -6   0 1280.97   71.89 
  -5  -6   0 1135.29   69.19 
   5  -6   0 1174.18   57.89 
  -5  -6   0 1234.48   64.49 
  -5  -6   0 1299.17   61.49 
  -5  -6   0 1265.77   63.39 
  -5  -6   0 1188.88   67.89 
  -5  -6   0 1310.47   64.89 
   5   6   0 1353.96   68.89 
  -5   6   0 1273.77   70.49 
  -5   6   0 1173.68   64.79 
   5   6   0 1267.87   74.19 
   5   6   0 1190.28   70.39 
  -5   6   0 1190.28   66.59 
   5   6   0 1236.68   69.69 
  -5   6   0 1158.88   61.19 
   5   6   0 1292.37   64.29 
  -5   6   0 1196.08   74.69 
   5   6   0 1279.67   70.09 
   5   6   0 1189.28   64.29 
   5   6   0 1157.68   68.29 
  -5   6   0 1176.98   56.89 
   5   6   0 1250.17   60.69 
   5   6   0 1267.37   65.89 
   5   6   0 1081.19   71.99 
   5   6   0 1296.97   71.89 
  -5   6   0 1110.79   69.19 
   5   6   0 1281.17   61.49 
   5   6   0 1170.38   66.29 
  -5   6   0 1152.38   71.79 
  -5   6   0 1149.78   59.39 
  -5   6   0 1290.77   60.39 
   5   6   0 1238.48   70.89 
  -5   6   0 1202.08   66.09 
  -5   6   0 1317.97   62.49 
  -5   6   0 1128.09   64.39 
   5   6   0 1192.08   71.49 
   5   6   0 1246.08   69.49 
  -5   6   0 1213.98   64.49 
   5   6   0 1191.08   64.79 
  -5   6   0 1262.77   60.99 
  -6  -6   0   16.00   12.10 
   6  -6   0  -11.80    7.30 
  -6  -6   0    2.80   12.00 
  -6  -6   0   26.50   14.00 
   6  -6   0    9.90    9.00 
  -6  -6   0   12.00   11.70 
  -6  -6   0   10.40   13.30 
  -6  -6   0    5.60   13.50 
  -6  -6   0    8.20    9.60 
  -6  -6   0    1.10    9.40 
  -6  -6   0   20.80   14.10 
   6  -6   0    0.70    9.70 
  -6  -6   0   28.80   12.00 
  -6  -6   0   32.80   13.40 
  -6  -6   0   16.80   15.30 
   6  -6   0    1.20   10.70 
  -6  -6   0   14.20   15.40 
  -6  -6   0    7.40   12.90 
  -6  -6   0   11.30   12.60 
  -6   6   0   -4.20    7.80 
   6   6   0   33.10   16.50 
  -6   6   0   29.20   18.30 
  -6   6   0   26.90   18.20 
   6   6   0   -2.60   16.70 
  -6   6   0   -3.40    8.20 
  -6   6   0    5.40   11.80 
   6   6   0   27.50   14.90 
  -6   6   0   10.80   11.80 
   6   6   0    3.20   11.80 
  -6   6   0   -5.40   12.00 
  -6   6   0   18.10   11.70 
   6   6   0   -1.20   11.20 
  -6   6   0   -2.00   10.30 
  -6   6   0   -0.60   10.70 
   6   6   0   12.60   12.50 
   6   6   0   20.50   12.20 
   6   6   0   17.80   11.10 
  -6   6   0   12.80   11.00 
   6   6   0   -6.80   10.60 
   6   6   0    9.60   12.40 
   6   6   0   -0.10   15.40 
   6   6   0   -4.30    9.70 
   6   6   0   15.40   12.10 
  -6   6   0   12.40   11.90 
   6   6   0    4.40   13.70 
   6   6   0   21.20   16.10 
   6   6   0    1.30   11.70 
  -6   6   0   22.60   13.70 
   6   6   0    7.90   10.50 
  -6   6   0    9.00   10.40 
   6   6   0    9.10   11.80 
   6   6   0   17.90   14.20 
  -7  -6   0 1071.89   64.69 
  -7  -6   0 1186.78   71.79 
  -7  -6   0 1105.69   70.59 
   7  -6   0 1121.89   66.49 
  -7  -6   0 1125.39   65.29 
  -7  -6   0 1093.79   69.89 
   7  -6   0 1092.99   63.59 
  -7  -6   0 1192.88   67.19 
  -7  -6   0 1168.58   69.49 
  -7  -6   0 1133.29   67.49 
  -7  -6   0 1040.00   69.79 
  -7  -6   0 1160.58   65.39 
  -7  -6   0 1152.98   74.29 
  -7  -6   0 1133.19   72.59 
  -7  -6   0 1214.18   76.99 
  -7  -6   0 1077.39   69.59 
   7   6   0 1239.48   72.59 
  -7   6   0 1018.40   95.29 
   7   6   0 1076.59   64.09 
   7   6   0 1176.48   73.89 
   7   6   0 1175.68   70.19 
   7   6   0 1181.08   74.49 
   7   6   0 1255.67   74.49 
   7   6   0  997.80   67.09 
   7   6   0 1021.80   65.99 
   7   6   0 1270.57   70.49 
  -7   6   0 1091.09   70.89 
  -7   6   0 1020.80   63.29 
   7   6   0 1117.19   75.19 
   7   6   0 1148.69   71.29 
   7   6   0 1159.78   69.09 
   7   6   0  984.50   70.09 
   7   6   0 1122.69   72.49 
   7   6   0 1029.00   67.09 
  -7   6   0 1089.19   63.59 
  -7   6   0 1140.59   66.69 
   7   6   0 1090.79   63.99 
  -7   6   0  918.51   73.99 
   7   6   0 1112.19   66.69 
   7   6   0 1136.79   78.09 
  -7   6   0 1040.30   62.89 
  -8  -6   0   21.10   16.50 
  -8  -6   0    6.30   15.90 
  -8  -6   0   12.90   15.50 
  -8  -6   0   35.40   20.20 
   8  -6   0    5.40   14.50 
  -8  -6   0    8.10   11.80 
  -8  -6   0   29.10   15.70 
  -8  -6   0    8.60   13.70 
  -8  -6   0   18.60   13.90 
  -8  -6   0   12.70   15.30 
  -8  -6   0   44.60   19.30 
  -8  -6   0   36.10   17.20 
  -8  -6   0    6.20   17.20 
  -8  -6   0   19.50   16.00 
  -8  -6   0    1.80   15.70 
   8   6   0   21.40   15.20 
   8   6   0   13.50   14.30 
  -8   6   0   27.00   14.50 
   8   6   0   18.00   15.80 
   8   6   0    5.20   13.80 
   8   6   0   13.70   21.60 
   8   6   0   21.00   18.90 
   8   6   0   31.60   18.80 
   8   6   0   -6.50   13.80 
   8   6   0   -4.30   14.60 
   8   6   0   38.80   17.30 
  -8   6   0   12.60   14.60 
   8   6   0    0.20   13.80 
  -8   6   0   -7.20   13.30 
   8   6   0    8.50   13.50 
   8   6   0   32.70   20.80 
   8   6   0    6.00   14.00 
   8   6   0   22.40   18.10 
   8   6   0   17.60   15.00 
   0  -7   0    2.50   11.90 
   0  -7   0    2.10    9.70 
   0  -7   0   -7.20   11.30 
   0  -7   0  -13.80    7.60 
   0  -7   0   -3.20    9.40 
   0  -7   0    7.60    9.90 
   0  -7   0    1.50    8.00 
   0   7   0    1.10    6.80 
   0   7   0   -3.10   11.10 
   0   7   0    8.20   11.60 
   0   7   0    2.40    8.60 
   0   7   0   21.30   11.50 
   0   7   0   -1.60   11.20 
   0   7   0   -8.80    9.50 
   0   7   0   17.40   11.10 
   0   7   0    2.00    8.40 
   0   7   0   -8.80   12.20 
   0   7   0  -11.80    6.30 
   0   7   0    0.40    3.80 
   0   7   0   -1.60   10.10 
  -1  -7   0   83.89   15.20 
   1  -7   0  118.69   23.90 
   1  -7   0  137.29   21.80 
  -1  -7   0   76.99   20.50 
  -1  -7   0   93.79   21.80 
  -1  -7   0  126.69   23.50 
  -1  -7   0  140.29   23.90 
   1  -7   0  110.59   23.40 
  -1  -7   0  111.19   23.10 
  -1  -7   0  136.19   16.90 
   1  -7   0  121.89   22.10 
   1  -7   0  121.49   24.30 
  -1  -7   0  103.49   16.20 
   1  -7   0  107.39   21.30 
  -1  -7   0   92.19   22.10 
  -1   7   0  117.39   22.80 
   1   7   0   78.19   19.40 
  -1   7   0  110.49   15.50 
   1   7   0  114.49   13.70 
   1   7   0  134.99   22.90 
  -1   7   0  119.99   25.90 
   1   7   0   89.19   22.80 
   1   7   0   95.99   21.50 
   1   7   0  113.19   21.50 
   1   7   0  101.09   24.20 
  -1   7   0   90.19   17.90 
  -1   7   0  126.19   24.70 
  -1   7   0  172.58   28.30 
  -1   7   0  119.09   19.50 
   1   7   0  116.49   23.50 
   1   7   0   97.89   19.20 
   1   7   0   81.99   16.70 
   1   7   0  117.59   13.60 
  -1   7   0   89.29   18.90 
  -1   7   0  117.79   22.30 
  -1   7   0   81.59   16.70 
   1   7   0  104.59   22.80 
  -1   7   0  100.69   21.70 
   1   7   0  126.39   24.00 
   1   7   0  142.69   22.30 
   1   7   0  100.89   16.10 
  -1   7   0   87.59   16.60 
   2  -7   0   15.00    9.90 
  -2  -7   0   28.40   14.50 
  -2  -7   0    1.00   11.20 
   2  -7   0   33.30   14.60 
  -2  -7   0   -5.50   10.00 
  -2  -7   0    8.70    9.00 
  -2  -7   0    6.80    7.90 
  -2  -7   0    2.90   10.90 
  -2  -7   0    4.00    8.20 
   2  -7   0   10.00   12.60 
   2  -7   0    0.10    9.20 
   2  -7   0   13.40   10.10 
  -2  -7   0   24.90   11.00 
   2  -7   0   17.70   10.00 
  -2  -7   0   12.00   12.10 
  -2  -7   0    9.90   12.20 
   2   7   0   -7.10    8.40 
  -2   7   0    4.60   13.70 
   2   7   0   -0.50    9.60 
   2   7   0   18.40   10.40 
   2   7   0   13.30   12.80 
  -2   7   0   -4.60   13.20 
   2   7   0    5.20   13.00 
   2   7   0   -6.50    9.60 
   2   7   0   16.10   10.30 
   2   7   0   23.90    8.70 
  -2   7   0    7.00    8.70 
  -2   7   0   25.50   15.70 
   2   7   0    7.70   10.60 
   2   7   0   -0.40    9.10 
  -2   7   0   -1.90    7.40 
   2   7   0    9.40    8.30 
  -2   7   0    2.50   11.10 
  -2   7   0    2.20   10.00 
   2   7   0    7.50    6.40 
   2   7   0   12.80   13.10 
  -2   7   0   -0.50    8.60 
  -2   7   0    0.60    8.70 
   2   7   0   -0.60    9.80 
   2   7   0    3.40    5.90 
   2   7   0   -0.40   13.60 
  -2   7   0    4.60    8.00 
  -2   7   0   -0.60    8.30 
  -2   7   0    1.10    8.10 
   3  -7   0   45.80   11.80 
  -3  -7   0   41.20   14.60 
  -3  -7   0   59.19   19.00 
  -3  -7   0   79.29   20.50 
  -3  -7   0   55.99   12.80 
   3  -7   0   37.20   12.60 
   3  -7   0   57.99   18.30 
  -3  -7   0   41.80   16.90 
   3  -7   0   58.99   18.20 
  -3  -7   0   42.50   17.30 
  -3  -7   0   58.39   14.70 
  -3  -7   0   57.79   18.40 
  -3  -7   0   44.60   13.90 
   3  -7   0    8.50   14.00 
  -3  -7   0   55.79   18.70 
   3   7   0   35.20   17.80 
  -3   7   0   44.10   12.40 
  -3   7   0   36.40   14.90 
  -3   7   0   47.80   18.60 
   3   7   0   16.60   11.20 
  -3   7   0   40.20   12.70 
  -3   7   0   35.70   16.90 
  -3   7   0   45.10   12.40 
  -3   7   0    9.50   15.20 
   3   7   0   61.69   17.70 
   3   7   0   57.59   19.20 
  -3   7   0   54.89   13.60 
   3   7   0   40.20   10.50 
   3   7   0   64.99   18.50 
  -3   7   0   69.19   16.10 
   3   7   0   51.79   17.90 
   3   7   0   40.20   15.10 
  -3   7   0   72.39   19.50 
   3   7   0   31.00   12.00 
   3   7   0   31.30   11.60 
  -3   7   0   50.29   15.10 
   3   7   0   24.60   11.10 
   3   7   0   48.50   19.00 
  -3   7   0   16.80   10.90 
   3   7   0   25.90   14.80 
  -3   7   0   69.69   21.00 
   3   7   0   52.59   12.20 
  -3   7   0   35.00   11.60 
   3   7   0   54.89   17.90 
   3   7   0   39.00   15.70 
   3   7   0   33.90   16.60 
  -4  -7   0  261.27   30.60 
  -4  -7   0  228.08   32.30 
  -4  -7   0  170.08   26.00 
  -4  -7   0  273.17   35.80 
  -4  -7   0  179.18   30.10 
   4  -7   0  178.88   29.10 
  -4  -7   0  179.38   26.40 
  -4  -7   0  212.78   33.70 
  -4  -7   0  187.28   31.00 
  -4  -7   0  255.97   28.00 
  -4   7   0  256.97   33.10 
  -4   7   0  237.18   33.80 
   4   7   0  185.88   30.40 
  -4   7   0  229.28   26.60 
  -4   7   0  186.88   24.60 
  -4   7   0  189.48   32.50 
  -4   7   0  203.28   25.30 
   4   7   0  219.28   31.50 
   4   7   0  247.48   33.70 
  -4   7   0  208.78   24.10 
   4   7   0  223.88   33.40 
  -4   7   0  199.88   28.90 
   4   7   0  209.68   31.00 
   4   7   0  208.48   31.50 
   4   7   0  262.87   37.30 
  -4   7   0  237.38   36.20 
   4   7   0  239.18   27.00 
   4   7   0  226.88   34.70 
   4   7   0  220.98   31.80 
   4   7   0  231.28   34.30 
  -4   7   0  178.68   29.40 
   4   7   0  198.98   28.50 
   4   7   0  213.98   31.70 
   4   7   0  267.97   26.50 
  -4   7   0  231.08   28.00 
   4   7   0  189.68   25.30 
  -4   7   0  227.68   32.20 
  -4   7   0  197.98   33.50 
   4   7   0  234.18   28.40 
   4   7   0  230.78   27.30 
  -4   7   0  204.88   30.70 
  -5  -7   0   57.69   18.00 
  -5  -7   0   46.90   18.20 
   5  -7   0   44.70   15.80 
  -5  -7   0   41.70   17.70 
  -5  -7   0   37.20   14.50 
  -5  -7   0   42.50   18.90 
   5  -7   0   50.39   14.70 
  -5  -7   0   26.00   15.20 
  -5  -7   0   39.00   16.20 
  -5  -7   0   41.00   18.00 
  -5  -7   0   49.10   18.10 
   5   7   0   54.09   17.70 
  -5   7   0   21.60   14.70 
   5   7   0   33.40   15.10 
   5   7   0   48.80   21.60 
  -5   7   0   55.69   19.50 
   5   7   0   73.29   21.10 
   5   7   0   56.79   17.60 
   5   7   0   45.60   15.10 
   5   7   0   67.69   21.40 
   5   7   0   36.50   16.80 
  -5   7   0   61.89   18.70 
   5   7   0   41.30   17.00 
  -5   7   0   11.90   12.50 
   5   7   0   62.09   20.60 
   5   7   0   21.30   16.90 
  -5   7   0   13.00   17.00 
  -5   7   0   67.29   24.70 
   5   7   0   56.39   20.70 
   5   7   0   98.69   19.70 
  -5   7   0   62.29   22.00 
  -5   7   0   69.59   23.80 
   5   7   0   59.89   20.80 
   5   7   0   49.99   19.60 
   5   7   0   40.40   13.70 
   5   7   0   53.29   22.50 
  -6  -7   0  725.73   52.39 
  -6  -7   0  706.33   57.99 
  -6  -7   0  650.03   53.29 
  -6  -7   0  654.63   51.79 
  -6  -7   0  744.03   53.99 
  -6  -7   0  795.72   50.49 
  -6  -7   0  557.64   58.19 
  -6  -7   0  654.53   62.19 
  -6   7   0  687.33   48.60 
   6   7   0  615.94   63.49 
   6   7   0  746.63   70.69 
  -6   7   0  628.24   68.29 
  -6   7   0  705.03   66.19 
   6   7   0  735.13   50.29 
   6   7   0  751.32   52.19 
   6   7   0  738.03   54.49 
   6   7   0  665.03   49.00 
   6   7   0  703.03   53.89 
  -6   7   0  646.34   49.40 
   6   7   0  790.92   57.19 
   6   7   0  557.64   60.79 
   6   7   0  828.22   57.09 
  -6   7   0  780.92   50.89 
   6   7   0  630.54   51.49 
  -6   7   0  689.53   67.69 
   6   7   0  729.13   65.79 
   6   7   0  676.03   49.20 
   6   7   0  642.84   46.20 
   6   7   0  752.62   55.39 
   6   7   0  700.13   54.99 
  -6   7   0  686.33   50.09 
   6   7   0  712.03   51.49 
  -7  -7   0   21.00   16.50 
  -7  -7   0   46.00   18.60 
  -7  -7   0   65.09   23.80 
  -7  -7   0   57.49   22.60 
  -7  -7   0   33.10   21.60 
  -7  -7   0   57.19   21.50 
  -7  -7   0   39.50   17.30 
  -7  -7   0   39.00   18.00 
  -7  -7   0   12.70   16.80 
   7   7   0   40.50   17.10 
   7   7   0    4.60   14.90 
   7   7   0   28.40   14.90 
   7   7   0   12.00   14.80 
   7   7   0   54.79   25.00 
   7   7   0   12.80   19.90 
  -7   7   0   15.00   24.10 
   7   7   0   43.60   19.20 
  -7   7   0   37.20   20.50 
   7   7   0   29.70   19.60 
   7   7   0   36.80   19.70 
   7   7   0   43.00   18.90 
   7   7   0   32.40   18.00 
   7   7   0   24.80   17.20 
  -7   7   0   56.09   24.90 
   7   7   0   38.40   16.90 
   7   7   0   53.39   21.90 
   7   7   0   71.09   25.70 
   7   7   0   50.19   21.30 
   0  -8   0  528.45   49.80 
   0  -8   0  430.16   47.20 
   0  -8   0  465.55   47.30 
   0  -8   0  436.96   48.20 
   0  -8   0  460.45   43.90 
   0  -8   0  443.16   48.20 
   0   8   0  400.26   40.20 
   0   8   0  427.26   32.20 
   0   8   0  454.75   45.60 
   0   8   0  405.56   30.50 
   0   8   0  416.56   46.60 
   0   8   0  370.96   44.50 
   0   8   0  458.55   43.90 
   0   8   0  486.65   35.50 
   0   8   0  441.76   42.40 
   0   8   0  443.46   46.40 
   0   8   0  376.36   44.20 
   0   8   0  448.56   50.59 
   0   8   0  508.45   38.00 
   1  -8   0 1222.38   75.09 
  -1  -8   0 1077.99   71.19 
   1  -8   0 1266.87   74.89 
  -1  -8   0 1390.66   74.19 
   1  -8   0 1302.17   69.59 
   1  -8   0 1172.78   72.29 
  -1  -8   0 1256.57   73.89 
  -1  -8   0 1396.06   79.49 
  -1  -8   0 1244.88   74.19 
   1  -8   0 1341.17   74.89 
  -1  -8   0 1355.76   77.39 
   1  -8   0 1343.87   74.89 
  -1   8   0 1414.86   77.39 
   1   8   0 1210.78   77.29 
  -1   8   0 1390.06   76.79 
   1   8   0 1345.77   77.89 
   1   8   0 1287.17   69.79 
   1   8   0 1161.38   74.89 
   1   8   0 1296.67   74.19 
   1   8   0 1453.95   74.39 
   1   8   0 1220.88   75.69 
  -1   8   0 1266.27   67.99 
  -1   8   0 1271.37   68.59 
  -1   8   0 1290.47   68.49 
   1   8   0 1381.56   73.19 
  -1   8   0 1219.18   64.99 
  -1   8   0 1366.86   78.29 
   1   8   0 1303.07   60.79 
  -1   8   0 1268.87   71.19 
   1   8   0 1244.58   71.69 
   1   8   0 1321.87   76.89 
  -1   8   0 1279.17   66.99 
  -1   8   0 1315.57   78.89 
   1   8   0 1414.76   68.29 
   1   8   0 1298.87   69.19 
   1   8   0 1357.76   64.99 
  -2  -8   0  137.99   21.60 
  -2  -8   0  102.29   23.90 
  -2  -8   0  123.19   26.20 
   2  -8   0  150.18   28.00 
   2  -8   0  154.78   29.00 
  -2  -8   0  156.08   29.80 
  -2  -8   0  147.09   26.90 
  -2  -8   0   98.09   24.50 
  -2  -8   0  118.19   24.70 
  -2  -8   0  124.19   20.70 
  -2  -8   0  116.29   21.90 
   2  -8   0  155.18   26.00 
   2  -8   0  144.19   27.60 
  -2   8   0  149.19   28.40 
  -2   8   0   81.39   18.70 
  -2   8   0  164.98   30.20 
   2   8   0  151.48   26.70 
   2   8   0   88.79   22.00 
   2   8   0  173.98   32.20 
   2   8   0  132.49   24.00 
   2   8   0  129.19   27.70 
  -2   8   0  140.79   21.60 
  -2   8   0  148.59   25.90 
   2   8   0  150.08   27.20 
  -2   8   0  145.69   23.20 
  -2   8   0  144.89   21.50 
   2   8   0  119.79   25.50 
   2   8   0  130.59   23.80 
   2   8   0  107.09   20.20 
  -2   8   0  125.49   22.80 
  -2   8   0  134.69   28.60 
  -2   8   0  142.09   28.10 
  -2   8   0  125.49   24.60 
  -2   8   0  103.29   19.70 
   2   8   0  123.29   25.20 
   2   8   0  122.99   23.40 
   2   8   0  127.39   28.70 
   2   8   0  145.89   19.50 
  -3  -8   0  883.81   52.79 
   3  -8   0  731.83   53.49 
  -3  -8   0  857.51   57.79 
  -3  -8   0  854.21   62.79 
   3  -8   0  818.82   58.79 
  -3  -8   0  819.32   57.69 
  -3  -8   0  848.22   59.19 
  -3  -8   0  891.41   59.29 
  -3  -8   0  913.01   51.89 
  -3   8   0  789.72   51.59 
  -3   8   0  749.42   58.99 
  -3   8   0  869.31   49.50 
   3   8   0  830.02   48.50 
   3   8   0  791.12   58.49 
   3   8   0 1001.20   61.69 
   3   8   0  741.73   59.49 
  -3   8   0  853.21   63.49 
  -3   8   0  785.22   56.19 
   3   8   0  926.71   61.59 
  -3   8   0  876.91   49.20 
   3   8   0  681.83   57.89 
   3   8   0  812.22   57.19 
  -3   8   0  808.32   59.19 
  -3   8   0  786.32   55.99 
   3   8   0  808.62   57.99 
   3   8   0  867.41   60.19 
  -3   8   0  789.52   58.99 
   3   8   0  811.82   55.09 
  -3   8   0  821.92   53.39 
   3   8   0 1009.50   56.49 
   3   8   0  846.82   56.39 
   3   8   0  899.01   57.99 
  -4  -8   0  246.78   36.70 
  -4  -8   0  254.27   34.00 
   4  -8   0  267.17   37.80 
  -4  -8   0  267.87   41.30 
  -4  -8   0  292.47   33.80 
  -4  -8   0  300.07   40.50 
  -4  -8   0  271.27   39.40 
  -4  -8   0  272.87   38.10 
   4   8   0  253.77   34.70 
   4   8   0  306.87   39.70 
  -4   8   0  267.77   37.40 
   4   8   0  355.36   42.30 
   4   8   0  230.08   36.30 
   4   8   0  231.08   34.90 
  -4   8   0  254.67   36.10 
   4   8   0  297.37   40.30 
   4   8   0  312.27   41.80 
  -4   8   0  306.47   38.80 
  -4   8   0  293.67   42.80 
  -4   8   0  343.37   41.70 
   4   8   0  315.57   33.50 
  -4   8   0  224.08   38.90 
  -4   8   0  163.88   32.80 
   4   8   0  314.07   40.70 
   4   8   0  343.47   47.80 
   4   8   0  267.97   41.60 
   4   8   0  268.37   41.40 
   4   8   0  253.67   30.30 
   4   8   0  236.48   36.00 
   4   8   0  234.88   35.60 
  -4   8   0  295.67   42.60 
  -5  -8   0  709.93   59.99 
  -5  -8   0  679.93   64.89 
  -5  -8   0  632.24   51.69 
  -5  -8   0  760.02   54.19 
  -5  -8   0  730.73   50.99 
  -5  -8   0  711.73   57.19 
  -5  -8   0  638.34   62.59 
   5  -8   0  649.24   51.99 
  -5   8   0  729.93   53.59 
  -5   8   0  765.22   71.09 
   5   8   0  754.92   49.70 
   5   8   0  713.83   65.69 
   5   8   0  634.34   45.70 
  -5   8   0  698.33   68.49 
   5   8   0  645.64   66.79 
   5   8   0  767.02   57.09 
   5   8   0  794.42   56.79 
   5   8   0  802.62   61.39 
   5   8   0  643.34   54.49 
   5   8   0  751.32   60.49 
   5   8   0  661.03   52.39 
   5   8   0  804.52   58.09 
   5   8   0  754.72   56.09 
   5   8   0  665.83   62.89 
  -5   8   0  643.64   53.99 
   5   8   0  649.93   47.50 
  -5   8   0  629.14   50.19 
  -5   8   0  677.83   70.69 
   5   8   0  763.72   56.99 
  -5   8   0  707.83   53.89 
  -5   8   0  638.64   64.79 
  -6  -8   0  284.17   42.40 
  -6  -8   0  228.38   40.50 
  -6  -8   0  278.27   41.30 
  -6  -8   0  257.17   37.40 
  -6  -8   0  362.66   50.29 
  -6  -8   0  232.18   38.20 
   6   8   0  336.27   45.90 
   6   8   0  246.08   39.20 
   6   8   0  266.07   41.60 
   6   8   0  321.27   42.50 
   6   8   0  387.96   53.29 
   6   8   0  358.36   41.20 
   6   8   0  296.27   42.90 
  -6   8   0  273.17   46.80 
   6   8   0  249.18   41.40 
   6   8   0  244.88   42.30 
   6   8   0  302.87   38.00 
  -6   8   0  275.97   44.80 
   6   8   0  258.37   34.80 
  -6   8   0  239.48   36.20 
   6   8   0  289.47   41.70 
  -6   8   0  296.07   39.30 
   6   8   0  255.57   41.00 
   6   8   0  277.97   42.90 
  -6   8   0  248.58   42.10 
  -6   8   0  250.07   41.80 
   6   8   0  321.07   44.20 
   0  -9   0    2.20   13.60 
   0  -9   0  -18.60   11.80 
   0  -9   0  -11.30   10.50 
   0  -9   0   -7.90   10.00 
   0  -9   0   20.80   17.10 
   0   9   0    7.80   12.40 
   0   9   0    4.80   18.50 
   0   9   0    4.90   15.40 
   0   9   0   -2.60   15.80 
   0   9   0  -17.20   10.10 
   0   9   0  -12.90    9.30 
   0   9   0   -0.30   10.60 
   0   9   0    0.40   11.60 
   0   9   0  -11.80    9.10 
   0   9   0   -8.20    8.90 
   0   9   0    6.40   12.90 
   1  -9   0   10.40   13.40 
  -1  -9   0   14.60   13.70 
   1  -9   0    2.20   15.80 
  -1  -9   0   -4.40   10.20 
  -1  -9   0   18.30   17.10 
   1  -9   0   21.30   15.00 
  -1  -9   0   -2.00   11.00 
   1  -9   0   -3.30    9.50 
   1  -9   0   16.80   17.00 
  -1  -9   0    9.90   14.70 
  -1  -9   0  -14.60   10.10 
  -1   9   0   34.70   16.70 
   1   9   0    5.90   15.90 
   1   9   0   11.20   13.50 
  -1   9   0    8.70   12.30 
   1   9   0   -2.30   10.70 
   1   9   0   20.80   16.50 
  -1   9   0   12.60   11.00 
   1   9   0  -13.50   16.00 
   1   9   0   12.90   13.20 
   1   9   0    2.80   12.10 
   1   9   0   -6.50   10.10 
   1   9   0  -15.20    9.20 
  -1   9   0   -0.80    9.40 
   1   9   0   -6.80    9.80 
   1   9   0   -9.70   12.50 
  -1   9   0   -7.20   11.10 
  -1   9   0    5.10   15.00 
  -1   9   0    1.00   12.00 
  -1   9   0  -15.90   11.10 
  -1   9   0   10.90   12.00 
  -1   9   0   -9.70   11.90 
  -1   9   0   -7.50   15.60 
   1   9   0   14.70   16.60 
  -2  -9   0   12.90   14.10 
   2  -9   0   18.80   17.80 
   2  -9   0   10.10   13.30 
  -2  -9   0   24.20   17.80 
  -2  -9   0   10.50   15.50 
   2  -9   0   18.00   16.60 
  -2  -9   0   23.90   16.50 
  -2  -9   0   14.10   15.00 
  -2   9   0   -7.80   12.50 
   2   9   0   19.80   16.30 
  -2   9   0   19.50   18.60 
  -2   9   0   15.40   16.10 
  -2   9   0   23.30   18.00 
  -2   9   0   10.40   17.90 
   2   9   0   25.20   19.80 
   2   9   0   -3.70   12.40 
  -2   9   0   -9.80   10.30 
   2   9   0   32.00   20.20 
   2   9   0   -0.20   12.20 
   2   9   0    7.60   12.50 
  -2   9   0   19.40   11.60 
   2   9   0   -8.80   11.50 
  -2   9   0   16.50   12.10 
  -2   9   0    4.00   13.90 
   2   9   0   14.10   14.30 
   2   9   0   12.00   13.50 
   2   9   0   25.60   20.00 
   2   9   0    5.80   12.40 
  -2   9   0   18.90   14.60 
   2   9   0    7.30   10.50 
  -2   9   0   21.90   15.60 
  -3  -9   0   10.20   15.30 
   3  -9   0    7.90   16.10 
  -3  -9   0   31.10   16.10 
  -3  -9   0   10.50   14.70 
  -3  -9   0   41.80   19.70 
   3  -9   0   -4.00   12.20 
  -3  -9   0   21.00   18.00 
  -3   9   0   20.60   18.90 
   3   9   0   17.60   13.30 
  -3   9   0    8.80   16.40 
   3   9   0   11.80   14.20 
   3   9   0   -6.10   12.10 
   3   9   0    3.90   13.90 
  -3   9   0   -7.80   13.90 
   3   9   0   -4.00   16.70 
  -3   9   0    6.60   15.60 
   3   9   0   30.20   17.00 
   3   9   0    7.80   14.40 
   3   9   0   -7.30   14.10 
  -3   9   0   22.40   18.80 
   3   9   0    4.60   14.60 
   3   9   0   20.50   19.40 
  -3   9   0   34.30   17.00 
   3   9   0    9.60   13.80 
  -3   9   0    1.80   14.70 
   3   9   0   33.80   17.70 
  -4  -9   0   39.20   20.60 
  -4  -9   0  118.29   29.80 
  -4  -9   0   82.89   25.00 
   4  -9   0  127.89   28.40 
  -4  -9   0  147.59   30.10 
  -4  -9   0   96.29   28.70 
   4   9   0  154.78   31.10 
   4   9   0  103.09   28.90 
  -4   9   0   75.89   26.00 
   4   9   0   72.19   21.30 
   4   9   0   23.70   21.40 
   4   9   0  115.69   30.60 
  -4   9   0   62.59   24.80 
   4   9   0  138.59   30.80 
   4   9   0   48.40   21.40 
  -4   9   0   80.09   23.70 
  -4   9   0  108.69   28.20 
   4   9   0   56.79   21.30 
  -4   9   0   79.19   24.70 
  -4   9   0  112.59   29.20 
  -4   9   0   85.29   24.80 
   4   9   0  111.89   30.40 
   4   9   0  114.29   27.60 
   4   9   0   89.79   24.80 
  -4   9   0   97.99   29.30 
   4   9   0   72.99   22.70 
  -5  -9   0  131.29   31.50 
  -5  -9   0  108.39   30.50 
  -5  -9   0   93.99   28.30 
  -5  -9   0  182.08   49.60 
  -5  -9   0  148.09   34.30 
  -5   9   0  153.38   37.70 
   5   9   0   78.39   25.30 
   5   9   0  142.49   34.00 
   5   9   0  149.79   33.60 
   5   9   0  139.29   31.10 
   5   9   0  185.08   33.70 
  -5   9   0   59.29   25.00 
   5   9   0  103.59   28.30 
  -5   9   0  191.38   33.10 
   5   9   0  144.89   36.10 
  -5   9   0   90.79   25.60 
  -5   9   0  102.79   27.60 
   5   9   0  137.19   31.20 
   5   9   0  130.29   29.60 
   5   9   0   65.59   24.50 
  -5   9   0  126.29   34.50 
  -5   9   0  136.99   29.30 
  -5   9   0  178.58   37.50 
   5   9   0  148.29   35.60 
   5   9   0  153.68   35.30 
   0 -10   0 1008.80   67.89 
   0 -10   0  980.10   72.59 
   0 -10   0 1182.68   78.29 
   0  10   0 1157.88   72.29 
   0  10   0 1109.49   76.39 
   0  10   0 1105.99   74.19 
   0  10   0 1083.89   69.49 
   0  10   0 1200.88   79.49 
   0  10   0 1026.00   74.59 
   0  10   0 1054.29   69.69 
   0  10   0 1064.69   78.79 
   0  10   0 1169.28   80.09 
   1 -10   0  342.77   47.40 
  -1 -10   0  313.67   45.80 
  -1 -10   0  448.16   50.49 
  -1 -10   0  431.56   54.39 
   1 -10   0  316.77   47.20 
   1 -10   0  327.47   45.30 
  -1  10   0  388.66   56.89 
  -1  10   0  340.87   48.20 
  -1  10   0  481.65   55.89 
  -1  10   0  365.86   50.49 
  -1  10   0  430.66   46.20 
   1  10   0  332.47   43.90 
   1  10   0  403.76   53.69 
   1  10   0  360.76   49.30 
   1  10   0  428.16   49.40 
   1  10   0  372.06   47.20 
  -1  10   0  414.36   52.49 
  -1  10   0  435.76   46.10 
   1  10   0  430.86   46.60 
   1  10   0  313.37   49.30 
  -1  10   0  385.76   48.20 
   1  10   0  262.47   44.00 
   1  10   0  441.96   55.79 
  -1  10   0  421.76   44.30 
  -1  10   0  315.97   47.90 
   2 -10   0  511.25   58.99 
   2 -10   0  483.15   55.09 
  -2 -10   0  533.25   61.99 
  -2 -10   0  641.04   64.19 
   2 -10   0  694.83   66.59 
  -2 -10   0  504.75   58.29 
   2  10   0  605.04   49.10 
   2  10   0  758.82   73.79 
  -2  10   0  677.03   61.59 
  -2  10   0  627.44   64.19 
   2  10   0  540.85   56.69 
  -2  10   0  563.14   64.69 
  -2  10   0  629.24   68.49 
   2  10   0  673.33   66.39 
  -2  10   0  592.44   65.89 
   2  10   0  722.13   67.09 
  -2  10   0  609.04   69.79 
  -2  10   0  591.44   62.79 
   2  10   0  637.34   67.59 
   2  10   0  546.25   59.99 
  -2  10   0  585.74   60.09 
   2  10   0  664.53   68.19 
   2  10   0  642.94   60.39 
   2  10   0  519.85   63.39 
  -3 -10   0   64.19   23.60 
  -3 -10   0   66.69   24.70 
  -3 -10   0   54.09   25.00 
   3 -10   0   88.19   26.80 
  -3  10   0   39.60   24.30 
   3  10   0   41.20   23.80 
  -3  10   0   63.59   25.00 
   3  10   0   49.80   22.80 
   3  10   0   19.70   17.70 
   3  10   0  114.39   27.70 
   3  10   0   98.89   27.10 
   3  10   0   71.99   24.80 
   3  10   0   74.79   23.80 
  -3  10   0  114.19   31.40 
  -3  10   0   75.79   29.30 
   3  10   0   78.29   28.20 
   3  10   0   57.69   25.60 
   3  10   0   79.99   24.90 
   3  10   0   17.50   24.00 
  -3  10   0   97.79   28.80 
  -3  10   0   57.99   27.20 
 -10   0   1  -14.40   13.90 
 -10   0   1   -5.40   12.40 
 -10   0   1   -4.80   13.60 
 -10   0   1    3.30   13.40 
 -10   0   1   -2.50   14.10 
 -10   0   1   -1.60   14.20 
 -10   0   1  -19.00   11.60 
 -10   0   1    5.30   14.30 
  10   0  -1   19.20   14.60 
 -10   0   1   -2.70   13.60 
 -10   0   1   22.80   16.80 
  10   0  -1   15.80   15.90 
  10   0  -1   21.90   16.60 
  10   0  -1  -20.90    7.90 
  10   0  -1   35.10   18.20 
  10   0  -1   24.20   15.30 
  10   0  -1   34.90   17.10 
  10   0  -1   -8.20    9.70 
   9   0  -1  607.74   55.59 
  -9   0   1  515.95   54.99 
  -9   0   1  524.05   41.10 
  -9   0   1  632.24   48.00 
   9   0  -1  475.45   51.59 
  -9   0   1  556.04   54.19 
   9   0  -1  574.94   58.29 
   9   0  -1  492.15   55.39 
   9   0  -1  480.35   49.99 
   9   0  -1  547.55   56.49 
  -9   0   1  548.45   54.49 
  -9   0   1  437.86   49.40 
  -9   0   1  527.95   48.00 
  -9   0   1  516.25   51.39 
  -9   0   1  549.05   54.79 
  -9   0   1  481.95   50.39 
   9   0  -1  619.84   49.50 
  -9   0   1  531.55   55.09 
   9   0  -1  540.25   53.29 
  -9   0   1  531.55   49.80 
  -9   0   1  529.95   40.50 
   9   0  -1  546.65   54.29 
   8   0  -1    3.00    9.70 
  -8   0   1   15.90   13.70 
   8   0  -1   -0.20   10.30 
   8   0  -1   -6.30    9.30 
  -8   0   1   -1.70   10.40 
   8   0  -1    5.70   10.00 
  -8   0   1  -11.90    8.80 
  -8   0   1  -26.10    7.80 
  -8   0   1    3.10   10.60 
   8   0  -1   -7.20    7.70 
   8   0  -1   -5.10   10.50 
  -8   0   1   13.30   13.60 
  -8   0   1   13.10   12.00 
   8   0  -1   -3.10   10.50 
  -8   0   1   -0.30   11.20 
  -8   0   1    4.00   12.50 
   8   0  -1   14.00   13.80 
  -8   0   1  -19.70   10.90 
  -8   0   1   -7.60   10.20 
   8   0  -1  -11.80    7.00 
   8   0  -1  -17.00    8.80 
   8   0  -1   18.00   11.40 
  -8   0   1  -12.60    8.60 
   8   0  -1  -15.10    8.50 
   7   0  -1  361.56   38.50 
  -7   0   1  399.46   37.60 
   7   0  -1  281.57   34.00 
  -7   0   1  386.06   37.40 
  -7   0   1  245.08   33.00 
   7   0  -1  368.86   24.20 
   7   0  -1  383.96   39.20 
  -7   0   1  369.46   34.30 
   7   0  -1  303.77   35.10 
   7   0  -1  358.96   27.30 
  -7   0   1  368.26   36.10 
  -7   0   1  405.26   23.40 
   7   0  -1  366.06   23.00 
   7   0  -1  364.66   37.10 
  -7   0   1  408.06   41.90 
  -7   0   1  323.67   33.40 
  -7   0   1  342.37   37.00 
   7   0  -1  326.87   34.70 
  -7   0   1  408.26   39.30 
  -7   0   1  358.16   33.60 
   7   0  -1  345.47   28.10 
   7   0  -1  365.76   37.50 
   7   0  -1  290.37   36.20 
  -7   0   1  385.26   39.40 
   7   0  -1  298.27   35.70 
   7   0  -1  338.87   36.90 
  -7   0   1  372.16   36.70 
   7   0  -1  344.07   33.00 
   6   0  -1   -4.20    4.10 
  -6   0   1   -3.90    6.80 
  -6   0   1    3.70    6.00 
  -6   0   1   -6.70    7.30 
   6   0  -1   15.80    6.40 
   6   0  -1    7.20    8.40 
   6   0  -1    2.30    3.90 
  -6   0   1   -3.10   10.50 
   6   0  -1    2.00    6.90 
  -6   0   1   -4.30    7.60 
   6   0  -1    1.10   11.50 
  -6   0   1   -5.20    7.60 
   6   0  -1    3.20    7.50 
  -6   0   1   -6.00    7.60 
  -6   0   1   -3.50    4.80 
   6   0  -1   -1.50    7.60 
  -6   0   1   -9.80    4.10 
  -6   0   1  -12.10    7.30 
  -6   0   1    1.80    5.40 
  -6   0   1    0.90    4.80 
  -6   0   1    3.50    8.20 
   6   0  -1   -3.10    4.50 
   6   0  -1   -6.30    7.90 
   6   0  -1    8.70    7.50 
   6   0  -1   -6.60    7.00 
   6   0  -1    4.70    8.50 
  -6   0   1    2.00    9.00 
   6   0  -1    0.90    4.20 
   6   0  -1   -1.30   10.20 
   6   0  -1    5.10    4.10 
   6   0  -1   -8.10    7.00 
  -6   0   1   -8.20    7.70 
   6   0  -1    0.80    7.00 
   6   0  -1   -6.40    7.20 
  -6   0   1    0.00    8.50 
  -6   0   1   -8.60    7.70 
   6   0  -1    1.90    8.00 
   6   0  -1   -2.20    8.20 
   6   0  -1    7.40    5.60 
   6   0  -1    1.50    4.90 
   5   0  -1  237.48   25.50 
   5   0  -1  338.77   23.40 
  -5   0   1  273.57   17.10 
   5   0  -1  264.87   17.10 
   5   0  -1  330.07   25.60 
   5   0  -1  275.67   27.60 
  -5   0   1  220.28   24.50 
   5   0  -1  309.67   30.10 
   5   0  -1  287.17   26.80 
  -5   0   1  269.77   16.30 
   5   0  -1  242.38   20.20 
  -5   0   1  281.77   16.90 
  -5   0   1  265.47   22.10 
  -5   0   1  288.37   22.60 
  -5   0   1  238.38   24.20 
   5   0  -1  232.18   25.70 
  -5   0   1  284.27   16.90 
   5   0  -1  264.27   15.90 
  -5   0   1  291.37   27.90 
  -5   0   1  306.37   26.70 
   5   0  -1  249.38   15.70 
   5   0  -1  276.37   25.50 
   5   0  -1  272.47   16.20 
  -5   0   1  267.37   17.50 
  -5   0   1  216.68   22.50 
   5   0  -1  292.07   23.10 
   5   0  -1  274.97   17.20 
   5   0  -1  234.28   25.10 
   5   0  -1  308.57   27.30 
   5   0  -1  298.87   19.60 
   5   0  -1  263.27   14.90 
   5   0  -1  244.78   16.00 
  -5   0   1  242.98   26.30 
  -5   0   1  228.48   23.70 
   5   0  -1  252.97   20.60 
   5   0  -1  261.57   17.10 
   5   0  -1  230.38   26.00 
  -5   0   1  262.67   17.50 
  -5   0   1  307.27   28.90 
  -5   0   1  263.27   25.10 
   5   0  -1  270.97   17.50 
   4   0  -1    0.00    7.10 
  -4   0   1   -3.70    6.70 
   4   0  -1    8.70    6.80 
   4   0  -1   -9.40    6.20 
   4   0  -1    4.50    6.40 
   4   0  -1    8.00    4.70 
   4   0  -1   -9.80    5.00 
  -4   0   1   11.30    6.60 
   4   0  -1    3.90    5.10 
  -4   0   1    0.30    5.90 
   4   0  -1    4.80    6.60 
   4   0  -1   14.10    6.70 
   4   0  -1    7.00    7.90 
  -4   0   1    6.30    5.70 
  -4   0   1    3.10    7.80 
  -4   0   1   -0.90    4.10 
   4   0  -1   -1.70    5.10 
   4   0  -1   -3.00    4.10 
   4   0  -1   16.40    9.00 
  -4   0   1    2.60    4.60 
   4   0  -1    7.70    8.20 
  -4   0   1    4.30    8.40 
  -4   0   1    2.30    7.40 
   4   0  -1    2.10    4.50 
   4   0  -1   -0.70    7.20 
   4   0  -1   -2.90    5.30 
  -4   0   1   -7.70    5.00 
  -4   0   1    5.90    4.10 
  -4   0   1  -10.00    7.20 
   4   0  -1    0.80    4.30 
  -4   0   1   -1.80    5.90 
   4   0  -1    2.10    4.70 
  -4   0   1  -10.50    8.80 
   4   0  -1    2.20    6.30 
   4   0  -1    5.10    4.20 
   4   0  -1    6.90   10.70 
  -4   0   1    4.90    4.60 
   4   0  -1   -2.10    7.30 
  -4   0   1    6.80    8.00 
   4   0  -1   -2.70    3.90 
   4   0  -1   -0.60    6.00 
   4   0  -1   -2.70    6.00 
   4   0  -1   -5.20    4.50 
  -4   0   1    7.60    7.10 
  -4   0   1    1.10    4.90 
  -4   0   1   -2.10    8.10 
   4   0  -1   11.70    6.60 
   4   0  -1   -7.60    3.10 
  -3   0   1  317.37   19.20 
  -3   0   1  277.67   14.50 
  -3   0   1  286.57   18.90 
   3   0  -1  295.47   20.20 
   3   0  -1  272.27   19.80 
  -3   0   1  247.88   18.60 
  -3   0   1  291.77   18.10 
  -3   0   1  280.27   16.80 
   3   0  -1  267.77   19.80 
   3   0  -1  301.87   15.20 
   3   0  -1  311.37   20.00 
  -3   0   1  284.07   18.40 
  -3   0   1  290.37   18.20 
   3   0  -1  293.37   17.50 
  -3   0   1  282.67   20.30 
  -3   0   1  272.47   18.70 
  -3   0   1  322.37   21.30 
  -3   0   1  269.67   18.50 
   3   0  -1  287.37   18.70 
  -3   0   1  297.07   20.60 
   3   0  -1  279.87   19.60 
  -3   0   1  348.87   20.80 
  -3   0   1  320.97   20.40 
  -3   0   1  328.77   18.40 
  -3   0   1  321.97   15.30 
   3   0  -1  306.47   16.20 
   3   0  -1  286.87   14.00 
   3   0  -1  314.67   19.50 
   3   0  -1  303.37   14.60 
   3   0  -1  309.07   18.90 
  -3   0   1  278.47   14.70 
   3   0  -1  303.57   20.60 
  -3   0   1  288.27   19.40 
  -3   0   1  307.17   16.80 
   3   0  -1  299.17   19.90 
  -3   0   1  293.97   19.10 
   3   0  -1  271.37   18.90 
  -3   0   1  310.07   18.60 
  -3   0   1  278.37   19.40 
   3   0  -1  303.27   17.80 
   3   0  -1  282.27   17.80 
  -3   0   1  264.27   18.70 
   3   0  -1  298.67   15.80 
   3   0  -1  304.67   18.90 
  -3   0   1  284.17   15.50 
  -3   0   1  317.77   17.70 
  -3   0   1  295.97   17.60 
   3   0  -1  271.67   19.10 
   3   0  -1  284.27   21.80 
   3   0  -1  279.17   19.80 
   3   0  -1  279.37   19.10 
   3   0  -1  295.67   19.00 
   3   0  -1  311.87   17.50 
  -3   0   1  276.87   15.20 
  -3   0   1  301.17   20.10 
  -3   0   1  346.87   20.70 
   3   0  -1  292.27   15.30 
   3   0  -1  297.97   19.10 
   3   0  -1  262.47   17.50 
   3   0  -1  292.77   15.20 
  -2   0   1    7.10    5.00 
   2   0  -1    5.00    4.10 
   2   0  -1    5.10    2.30 
   2   0  -1    7.50    4.20 
  -2   0   1   11.60    4.00 
   2   0  -1    9.30    4.80 
   2   0  -1    9.10    4.20 
  -2   0   1    3.40    3.70 
   2   0  -1   -2.70    3.90 
   2   0  -1    2.10    2.70 
   2   0  -1    4.80    2.40 
  -2   0   1    4.10    4.10 
   2   0  -1    5.50    4.10 
  -2   0   1   -1.10    3.30 
   2   0  -1   -2.60    2.80 
   2   0  -1    1.40    4.10 
  -2   0   1    5.20    4.40 
  -2   0   1    5.50    4.00 
   2   0  -1    6.30    3.50 
   2   0  -1   -0.70    2.60 
  -2   0   1    0.60    4.20 
  -2   0   1    0.40    2.80 
  -2   0   1    2.20    6.10 
   2   0  -1    2.70    4.10 
  -2   0   1   -5.60    3.30 
  -2   0   1    2.50    3.60 
   2   0  -1    2.60    5.50 
  -2   0   1    5.10    4.00 
  -2   0   1    1.70    4.00 
  -2   0   1    4.90    3.80 
   2   0  -1    6.30    2.80 
   2   0  -1    3.40    4.30 
   2   0  -1    5.50    4.30 
  -2   0   1    4.10    2.70 
   2   0  -1    0.50    2.70 
   2   0  -1    3.30    3.60 
   2   0  -1    1.40    4.30 
  -2   0   1    2.10    4.40 
  -2   0   1    1.00    4.40 
  -2   0   1    1.80    3.50 
  -2   0   1    5.60    3.00 
  -2   0   1    2.00    3.30 
   2   0  -1   -2.30    4.20 
  -2   0   1    1.80    4.10 
   2   0  -1    2.40    4.00 
  -2   0   1    4.40    2.40 
  -2   0   1   -3.00    3.40 
   2   0  -1    9.00    3.90 
  -2   0   1    3.60    2.40 
  -2   0   1    5.50    4.40 
   2   0  -1    3.80    2.50 
  -2   0   1    5.10    3.90 
   2   0  -1   -0.30    2.90 
   2   0  -1    1.70    3.60 
   2   0  -1   -3.60    3.60 
  -2   0   1    7.20    4.00 
   2   0  -1    5.40    4.30 
  -2   0   1   -0.10    3.90 
  -2   0   1    2.30    3.50 
   2   0  -1    3.50    3.80 
   2   0  -1    1.90    3.80 
   2   0  -1    1.60    3.50 
   2   0  -1    6.00    3.80 
  -2   0   1    6.80    4.00 
  -2   0   1   -2.70    4.60 
   2   0  -1   -0.60    3.40 
  -2   0   1    4.00    2.80 
  -2   0   1   11.60    4.10 
  -1   0   1  341.67   15.20 
  -1   0   1  335.27   14.70 
  -1   0   1  332.27   14.60 
  -1   0   1  257.97   14.80 
  -1   0   1  329.17   14.50 
  -1   0   1  371.96   13.20 
  -1   0   1  277.07   14.20 
  -1   0   1  323.37   15.20 
  -1   0   1  317.17   13.70 
  -1   0   1  338.77   15.00 
  -1   0   1  330.37   13.30 
  -1   0   1  330.17   12.40 
  -1   0   1  332.47   13.30 
  -1   0   1  360.16   15.50 
  -1   0   1  352.96   15.40 
  -1   0   1  323.77   15.10 
  -1   0   1  339.67   15.30 
  -1   0   1  328.97   14.80 
  -1   0   1  346.17   14.20 
  -1   0   1  327.67   14.10 
  -1   0   1  341.17   13.90 
  -1   0   1  356.76   15.20 
  -1   0   1  353.26   13.50 
  -1   0   1  322.07   15.20 
  -1   0   1  335.97   15.20 
  -1   0   1  345.97   15.20 
   1   0   1 1346.57   50.19 
  -1   0  -1 1417.46   51.19 
  -1   0  -1 1387.46   48.30 
  -1   0  -1 1335.87   49.99 
  -1   0  -1 1310.67   48.00 
  -1   0  -1 1384.06   49.50 
  -1   0  -1 1305.47   49.00 
  -1   0  -1 1400.96   49.30 
  -1   0  -1 1383.66   49.99 
  -1   0  -1 1373.26   50.09 
  -1   0  -1 1334.07   50.09 
  -1   0  -1 1345.07   50.19 
  -1   0  -1 1379.26   50.39 
   1   0   1 1100.59   49.70 
  -1   0  -1 1364.76   48.90 
  -1   0  -1 1327.47   50.29 
   1   0   1 1357.86   50.39 
  -1   0  -1 1353.06   49.99 
   1   0   1 1356.66   49.90 
   1   0   1 1301.77   50.29 
  -1   0  -1 1343.17   50.49 
  -1   0  -1 1357.26   50.49 
  -1   0  -1 1359.76   49.80 
  -1   0  -1 1300.77   50.29 
  -1   0  -1 1317.77   49.99 
  -1   0  -1 1336.57   48.00 
  -1   0  -1 1338.97   49.99 
  -1   0  -1 1367.06   50.19 
  -1   0  -1 1297.77   48.80 
  -1   0  -1 1412.56   49.80 
  -1   0  -1 1354.76   48.70 
  -1   0  -1 1243.18   50.09 
   1   0   1 1286.27   50.09 
   2   0   1    1.80    3.30 
   2   0   1    3.80    3.90 
   2   0   1    2.90    3.70 
  -2   0  -1    9.00    4.60 
  -2   0  -1    1.70    3.40 
  -2   0  -1   -1.10    3.10 
   2   0   1    0.50    3.50 
  -2   0  -1    1.10    3.50 
  -2   0  -1    1.70    3.50 
  -2   0  -1    1.90    3.70 
  -2   0  -1   -1.70    2.90 
   2   0   1    1.20    3.10 
  -2   0  -1    4.10    1.50 
   2   0   1    1.50    3.40 
   2   0   1   -2.20    3.50 
   2   0   1    2.10    3.60 
  -2   0  -1   -2.10    3.10 
   2   0   1    0.90    2.60 
   2   0   1   -1.90    3.90 
  -2   0  -1    5.70    4.00 
  -2   0  -1    2.20    2.70 
  -2   0  -1    2.60    2.90 
  -2   0  -1    3.10    3.30 
  -2   0  -1    3.60    4.50 
  -2   0  -1    1.10    3.40 
   2   0   1   -0.90    3.90 
   2   0   1    9.30    4.00 
  -2   0  -1    4.50    3.90 
  -2   0  -1    5.70    3.80 
   2   0   1    1.90    4.10 
  -2   0  -1    3.90    4.90 
   2   0   1    0.30    3.40 
   2   0   1    1.10    3.80 
  -2   0  -1    4.50    3.50 
   2   0   1   -4.50    3.10 
  -2   0  -1    3.00    2.60 
  -2   0  -1    5.60    4.80 
   2   0   1    1.80    3.70 
   2   0   1   10.30    3.80 
  -2   0  -1   -2.50    4.10 
  -2   0  -1    1.30    3.70 
   2   0   1    3.50    4.00 
  -2   0  -1    6.60    3.20 
   2   0   1    1.10    3.50 
   2   0   1    0.90    2.70 
   2   0   1    3.90    3.10 
   2   0   1   -0.30    2.30 
  -2   0  -1   -1.30    2.80 
  -2   0  -1    0.30    3.10 
   2   0   1    2.00    3.90 
   2   0   1    4.90    2.90 
   2   0   1    3.70    4.70 
  -2   0  -1   11.20    5.00 
  -2   0  -1   10.20    4.90 
  -2   0  -1    5.50    4.00 
  -2   0  -1   -1.20    3.60 
  -2   0  -1    9.90    4.30 
  -2   0  -1    4.70    2.50 
  -2   0  -1   14.00    5.00 
   2   0   1    9.00    4.80 
   2   0   1   -0.30    2.70 
   2   0   1    0.60    3.60 
  -2   0  -1    5.40    4.00 
   2   0   1   -2.00    3.40 
   2   0   1    2.20    2.20 
   2   0   1    0.60    3.50 
   2   0   1    3.70    4.90 
   2   0   1    6.40    4.50 
  -2   0  -1    1.20    3.40 
  -2   0  -1    5.80    4.70 
   3   0   1 1425.86   56.69 
   3   0   1 1372.56   54.29 
  -3   0  -1 1361.96   58.59 
   3   0   1 1354.46   58.19 
   3   0   1 1322.17   57.59 
  -3   0  -1 1382.86   56.79 
  -3   0  -1 1340.67   58.09 
  -3   0  -1 1340.47   57.99 
   3   0   1 1308.37   58.79 
   3   0   1 1369.26   56.19 
  -3   0  -1 1375.16   58.79 
  -3   0  -1 1371.36   58.19 
   3   0   1 1399.26   55.39 
   3   0   1 1363.66   58.39 
   3   0   1 1457.15   56.89 
   3   0   1 1441.66   52.89 
  -3   0  -1 1381.46   49.50 
   3   0   1 1384.36   57.39 
   3   0   1 1344.57   53.39 
  -3   0  -1 1385.06   55.29 
  -3   0  -1 1306.37   54.59 
  -3   0  -1 1405.36   59.99 
  -3   0  -1 1446.56   51.69 
  -3   0  -1 1413.66   57.99 
   3   0   1 1389.76   56.69 
   3   0   1 1369.16   53.29 
   3   0   1 1352.26   59.19 
  -3   0  -1 1408.56   59.59 
  -3   0  -1 1345.77   53.29 
  -3   0  -1 1354.26   58.99 
   3   0   1 1307.07   58.09 
  -3   0  -1 1391.56   55.09 
   3   0   1 1470.55   59.49 
   3   0   1 1376.56   51.79 
   3   0   1 1436.66   57.69 
  -3   0  -1 1330.47   58.09 
  -3   0  -1 1391.16   57.49 
  -3   0  -1 1433.16   56.19 
   3   0   1 1319.17   58.29 
   3   0   1 1325.27   51.39 
   3   0   1 1392.76   49.80 
   3   0   1 1371.66   58.19 
   3   0   1 1333.87   52.09 
   3   0   1 1408.86   55.89 
  -3   0  -1 1294.67   57.09 
  -3   0  -1 1345.97   58.19 
  -3   0  -1 1345.47   58.49 
   3   0   1 1437.46   58.09 
   3   0   1 1307.27   58.49 
  -3   0  -1 1378.96   56.79 
  -3   0  -1 1307.87   53.49 
  -3   0  -1 1459.85   60.19 
   3   0   1 1391.26   58.79 
  -3   0  -1 1338.37   56.29 
   3   0   1 1292.17   57.49 
   3   0   1 1364.06   53.29 
  -3   0  -1 1381.06   57.99 
   3   0   1 1328.27   58.09 
   3   0   1 1338.47   50.69 
  -3   0  -1 1379.56   50.09 
  -3   0  -1 1337.47   57.69 
   3   0   1 1487.75   56.99 
   3   0   1 1362.86   57.39 
  -4   0  -1   -4.70    3.00 
   4   0   1   -0.70    6.30 
   4   0   1   -0.60    3.90 
  -4   0  -1   -8.80    6.30 
   4   0   1  -10.80    5.60 
  -4   0  -1   -2.30    7.50 
   4   0   1    3.60    5.60 
   4   0   1    7.60    7.80 
   4   0   1   -2.80    3.30 
   4   0   1    1.20    4.30 
   4   0   1    4.10    5.70 
  -4   0  -1   -0.20    6.70 
  -4   0  -1   -1.40    5.70 
  -4   0  -1    2.00    6.10 
   4   0   1   -9.30    5.30 
   4   0   1   -2.00    5.00 
  -4   0  -1    3.50    6.90 
  -4   0  -1   -4.50    5.60 
   4   0   1    5.40    4.70 
  -4   0  -1   -1.20    7.50 
  -4   0  -1   -3.10    5.20 
  -4   0  -1    0.60    3.10 
  -4   0  -1   -3.40    7.20 
   4   0   1  -12.30    5.50 
   4   0   1    5.50    4.70 
   4   0   1    6.80    7.90 
  -4   0  -1   -4.50    2.40 
   4   0   1    1.00    6.50 
   4   0   1    3.10    7.50 
  -4   0  -1   -0.90    6.20 
   4   0   1  -11.80    5.80 
   4   0   1    1.80    6.00 
   4   0   1    9.80    7.10 
  -4   0  -1   -4.80    6.60 
  -4   0  -1    5.90    4.70 
   4   0   1   -4.20    6.70 
  -4   0  -1    5.90    5.30 
  -4   0  -1    5.90    7.70 
   4   0   1   -6.10    6.30 
   4   0   1    0.50    2.50 
   4   0   1   -1.90    7.10 
   4   0   1   -3.70    6.80 
   4   0   1   -3.20    3.40 
   4   0   1    3.90    8.70 
   4   0   1   -7.10    6.10 
  -4   0  -1    0.70    7.50 
   4   0   1   -7.00    5.30 
  -5   0  -1  738.03   28.90 
  -5   0  -1  776.62   43.00 
   5   0   1  701.13   41.80 
  -5   0  -1  756.72   43.70 
   5   0   1  727.53   43.20 
  -5   0  -1  733.63   41.60 
   5   0   1  809.12   40.50 
   5   0   1  780.92   43.00 
  -5   0  -1  781.92   40.80 
   5   0   1  699.93   41.40 
  -5   0  -1  722.03   40.90 
  -5   0  -1  736.03   35.20 
   5   0   1  690.83   37.90 
   5   0   1  653.33   40.60 
  -5   0  -1  770.82   44.10 
   5   0   1  745.83   36.10 
  -5   0  -1  693.53   42.20 
   5   0   1  695.43   42.70 
   5   0   1  762.42   43.70 
   5   0   1  725.83   41.10 
   5   0   1  714.93   31.60 
   5   0   1  743.73   34.70 
  -5   0  -1  720.33   36.70 
   5   0   1  763.72   42.90 
   5   0   1  741.63   42.90 
   5   0   1  758.62   42.60 
  -5   0  -1  709.43   34.50 
  -5   0  -1  763.62   29.10 
   5   0   1  714.83   40.10 
   5   0   1  760.12   33.70 
  -5   0  -1  706.33   42.80 
   5   0   1  764.42   42.00 
   5   0   1  752.62   31.70 
   5   0   1  732.63   33.90 
  -5   0  -1  720.33   37.60 
  -5   0  -1  698.33   41.20 
  -5   0  -1  770.42   39.10 
  -5   0  -1  707.93   41.80 
   6   0   1    4.70    8.80 
   6   0   1    9.80    9.60 
  -6   0  -1    0.10    8.60 
   6   0   1    1.10    7.90 
  -6   0  -1   -3.70    7.00 
  -6   0  -1   14.50    9.80 
   6   0   1    0.70    8.10 
  -6   0  -1    1.70    7.70 
  -6   0  -1   -3.70    6.40 
  -6   0  -1   -0.60    2.50 
  -6   0  -1    2.60    7.90 
   6   0   1   -2.40    3.90 
   6   0   1    5.30    8.10 
  -6   0  -1    7.50    9.30 
   6   0   1   16.40   10.50 
   6   0   1    0.00    5.10 
  -6   0  -1    3.80    9.20 
   6   0   1   -4.80    8.80 
  -6   0  -1    5.10    7.80 
   6   0   1   -8.10    6.90 
  -6   0  -1   -2.30    5.20 
  -6   0  -1   -0.70    8.40 
  -6   0  -1   -3.80    7.40 
   6   0   1   -5.10    7.70 
   6   0   1   10.90    9.70 
   6   0   1    1.90    6.00 
   6   0   1   -7.20    6.50 
  -6   0  -1   -0.40    9.20 
   6   0   1  -12.80    6.80 
   6   0   1   -0.60    4.10 
   6   0   1   16.00   10.50 
   6   0   1    2.80    5.10 
   6   0   1    2.30    7.40 
  -6   0  -1   -3.70    8.60 
   7   0   1 2685.83  119.49 
  -7   0  -1 2727.33  116.19 
  -7   0  -1 2713.33  114.89 
   7   0   1 2713.13  104.39 
   7   0   1 2750.62  119.29 
  -7   0  -1 2633.64  110.99 
   7   0   1 2690.23  121.49 
  -7   0  -1 2589.94  119.69 
   7   0   1 2701.73  106.99 
  -7   0  -1 2689.03  118.99 
  -7   0  -1 2626.14  109.89 
  -7   0  -1 2792.92  107.49 
  -7   0  -1 2482.75  119.19 
   7   0   1 2506.65  117.79 
   7   0   1 2625.74  112.59 
   7   0   1 2696.23  120.29 
   7   0   1 2608.04  120.19 
   7   0   1 2568.14  121.09 
   7   0   1 2597.34  118.09 
  -7   0  -1 2706.73  116.89 
   7   0   1 2612.04  116.19 
  -7   0  -1 2832.22  119.59 
   7   0   1 2605.24  117.49 
  -7   0  -1 2635.84  118.09 
   7   0   1 2759.72  115.59 
   7   0   1 2718.93  111.19 
  -7   0  -1 2404.76  118.79 
  -7   0  -1 2643.64  104.19 
  -7   0  -1 2571.54  118.99 
   8   0   1   -7.70    9.80 
   8   0   1    3.80   11.10 
  -8   0  -1   47.00   16.90 
  -8   0  -1   -1.60   11.60 
   8   0   1  -12.90    9.10 
   8   0   1   -9.80    9.00 
   8   0   1  -11.90    9.50 
  -8   0  -1  -13.00    7.90 
   8   0   1    0.30    9.00 
   8   0   1    3.30   10.30 
  -8   0  -1    8.30   12.00 
   8   0   1   -4.30    9.60 
   8   0   1    6.30   10.80 
   8   0   1   -4.40    8.50 
  -8   0  -1    8.70   12.40 
  -8   0  -1   -9.30    9.40 
  -8   0  -1    4.80   11.80 
  -8   0  -1   -7.60    9.80 
   8   0   1   12.90   13.90 
  -8   0  -1   26.20   14.60 
   8   0   1   -1.40   10.40 
  -8   0  -1   -1.60   12.60 
  -8   0  -1   -9.40    8.20 
  -9   0  -1 1436.46   83.89 
  -9   0  -1 1579.34   85.09 
   9   0   1 1417.96   83.29 
  -9   0  -1 1491.65   87.69 
  -9   0  -1 1560.04   87.29 
  -9   0  -1 1416.36   81.89 
   9   0   1 1451.55   79.89 
   9   0   1 1545.25   89.49 
   9   0   1 1327.77   80.89 
  -9   0  -1 1479.05   85.89 
   9   0   1 1482.75   86.09 
  -9   0  -1 1452.85   79.69 
   9   0   1 1539.75   86.39 
  -9   0  -1 1443.06   86.59 
   9   0   1 1390.06   80.99 
   9   0   1 1625.44   88.69 
   9   0   1 1432.16   86.29 
   9   0   1 1406.96   84.09 
  -9   0  -1 1393.46   83.49 
  -9   0  -1 1415.86   80.09 
 -10   0  -1   -6.80   10.90 
  10   0   1   15.50   16.50 
 -10   0  -1    3.60   13.40 
  10   0   1   12.70   17.30 
 -10   0  -1   -4.70   13.30 
  10   0   1    1.80   14.00 
 -10   0  -1   13.50   15.20 
 -10   0  -1   16.10   17.60 
 -10   0  -1   -2.60   13.00 
 -10   0  -1    6.30   15.00 
  10   0   1   13.20   16.40 
  10   0   1    6.50   13.50 
  10   0   1   -4.00   10.70 
 -10   0  -1   -5.10   15.10 
  10   0   1   11.70   14.80 
  10   0   1   21.80   17.60 
 -10   0  -1   -1.60   13.80 
 -10   0  -1   -5.80   13.10 
  10   0   1  -13.50   10.10 
 -10  -1   1  487.95   51.69 
 -10  -1   1  440.36   55.39 
 -10  -1   1  538.25   57.29 
 -10  -1   1  502.65   55.69 
  10  -1  -1  509.15   55.89 
  10  -1  -1  482.85   56.19 
  10  -1  -1  526.35   56.19 
  10  -1  -1  433.76   53.39 
 -10  -1   1  514.65   55.99 
  10  -1  -1  456.15   50.19 
 -10  -1   1  390.86   50.99 
  10  -1  -1  476.85   54.19 
 -10  -1   1  359.96   48.80 
 -10  -1   1  502.55   57.19 
 -10  -1   1  387.86   49.50 
 -10  -1   1  559.44   57.49 
  10  -1  -1  325.37   46.60 
  10  -1  -1  407.96   49.00 
 -10   1   1  532.95   52.79 
 -10   1   1  423.56   52.09 
 -10   1   1  513.15   54.99 
 -10   1   1  586.34   56.69 
 -10   1   1  489.55   55.79 
 -10   1   1  465.65   51.99 
 -10   1   1  546.35   59.09 
  10   1  -1  473.85   53.99 
  10   1  -1  442.06   51.09 
  10   1  -1  432.56   53.09 
 -10   1   1  452.45   53.59 
  10   1  -1  325.37   45.30 
  10   1  -1  416.76   51.09 
 -10   1   1  396.16   47.00 
  10   1  -1  444.06   54.79 
 -10   1   1  446.36   54.39 
  10   1  -1  456.15   54.29 
  10   1  -1  480.15   55.59 
  -9  -1   1   22.50   17.50 
   9  -1  -1   -5.80   10.40 
  -9  -1   1   18.60   14.10 
   9  -1  -1   10.00   14.40 
  -9  -1   1   10.40   14.20 
  -9  -1   1    1.50   13.40 
  -9  -1   1    3.90   14.00 
  -9  -1   1  -13.70   13.80 
  -9  -1   1   19.20   14.70 
   9  -1  -1   14.80   14.20 
   9  -1  -1    0.40   12.60 
  -9  -1   1    8.00   15.10 
   9  -1  -1   14.10   13.70 
   9  -1  -1   -2.80   10.70 
  -9  -1   1   16.70   14.60 
  -9  -1   1    3.00   11.40 
   9  -1  -1   13.80   12.80 
  -9  -1   1   24.70   15.30 
   9  -1  -1    3.60   13.90 
   9  -1  -1    5.30   10.30 
  -9  -1   1   23.20   17.50 
   9   1  -1    8.90   13.30 
  -9   1   1    4.90   12.30 
   9   1  -1   14.70   13.30 
   9   1  -1    2.40   11.60 
  -9   1   1   21.30   15.00 
   9   1  -1   15.70   14.50 
   9   1  -1    5.20   12.40 
  -9   1   1   46.70   19.90 
  -9   1   1    9.50   12.30 
   9   1  -1   13.30   14.30 
  -9   1   1   38.60   17.30 
  -9   1   1    6.60   12.70 
   9   1  -1   22.40   14.50 
  -9   1   1    7.80   12.40 
   9   1  -1   17.00   15.40 
  -9   1   1   24.40   14.50 
  -9   1   1   -0.70   10.80 
   9   1  -1    6.50   14.40 
   9   1  -1   20.10   15.10 
  -9   1   1   -9.80   10.80 
   9   1  -1   -1.80   10.60 
  -9   1   1   15.20   14.90 
  -9   1   1   29.60   14.40 
  -8  -1   1  754.42   52.89 
   8  -1  -1  768.32   51.39 
   8  -1  -1  651.63   51.09 
  -8  -1   1  730.73   48.00 
  -8  -1   1  767.92   47.50 
   8  -1  -1  601.64   49.10 
  -8  -1   1  711.03   51.99 
  -8  -1   1  700.63   51.89 
   8  -1  -1  736.23   51.79 
   8  -1  -1  763.42   51.59 
  -8  -1   1  699.23   52.49 
  -8  -1   1  769.62   51.49 
   8  -1  -1  759.02   50.69 
  -8  -1   1  799.92   54.79 
  -8  -1   1  739.43   51.89 
   8  -1  -1  807.62   53.79 
  -8  -1   1  767.42   53.69 
   8  -1  -1  755.82   51.89 
   8  -1  -1  742.23   53.89 
  -8  -1   1  782.32   51.49 
  -8  -1   1  790.92   50.29 
   8  -1  -1  727.73   49.70 
  -8   1   1  711.93   53.19 
   8   1  -1  741.53   52.09 
   8   1  -1  712.53   48.20 
  -8   1   1  641.34   46.50 
   8   1  -1  805.72   54.49 
  -8   1   1  796.22   46.50 
   8   1  -1  734.33   53.89 
  -8   1   1  710.93   47.90 
   8   1  -1  759.12   52.39 
  -8   1   1  692.93   49.30 
   8   1  -1  709.33   55.29 
   8   1  -1  647.64   48.00 
   8   1  -1  697.63   51.49 
  -8   1   1  750.32   47.10 
   8   1  -1  722.43   41.30 
   8   1  -1  772.22   50.29 
   8   1  -1  707.73   47.90 
   8   1  -1  732.23   53.49 
   8   1  -1  753.72   42.40 
   8   1  -1  746.43   51.49 
   8   1  -1  744.23   53.19 
  -8   1   1  750.92   50.19 
  -8   1   1  719.63   51.49 
  -8   1   1  743.83   49.20 
  -8   1   1  820.42   56.19 
  -8   1   1  644.34   48.90 
  -8   1   1  704.63   51.39 
   8   1  -1  757.02   52.79 
   7  -1  -1   84.29   13.40 
  -7  -1   1  127.89   21.40 
   7  -1  -1   81.99   19.20 
   7  -1  -1  101.79   19.60 
  -7  -1   1   74.19   14.10 
  -7  -1   1  119.09   15.60 
   7  -1  -1   67.29   17.90 
  -7  -1   1   71.19   18.10 
   7  -1  -1   83.09   13.50 
  -7  -1   1  107.49   22.40 
  -7  -1   1   58.39   16.30 
  -7  -1   1   69.59   18.60 
  -7  -1   1   62.19   18.30 
  -7  -1   1   82.19   20.30 
  -7  -1   1   72.49   17.90 
   7  -1  -1   86.69   18.10 
  -7  -1   1   73.49   19.60 
  -7  -1   1   88.89   19.30 
  -7  -1   1   30.30   14.10 
   7  -1  -1  104.89   17.70 
  -7  -1   1   57.89   16.00 
  -7  -1   1   85.99   15.00 
   7  -1  -1   70.59   18.30 
   7  -1  -1   81.99   17.80 
   7  -1  -1   77.69   18.60 
   7  -1  -1  114.09   19.30 
   7  -1  -1   80.39   18.80 
   7  -1  -1   83.69   19.30 
   7  -1  -1   76.39   17.90 
  -7   1   1   77.59   16.80 
   7   1  -1   88.49   20.00 
  -7   1   1   60.39   17.60 
  -7   1   1   96.69   19.60 
   7   1  -1   59.49   21.70 
   7   1  -1   95.99   15.90 
  -7   1   1   88.79   16.90 
   7   1  -1   80.79   20.10 
   7   1  -1   93.29   19.80 
   7   1  -1  102.99   14.20 
  -7   1   1   86.29   19.10 
   7   1  -1   71.19   18.80 
   7   1  -1   64.19   16.50 
  -7   1   1   66.59   17.10 
   7   1  -1  104.29   16.40 
   7   1  -1   91.49   14.70 
   7   1  -1   54.39   11.30 
   7   1  -1   95.09   19.30 
  -7   1   1   76.99   18.40 
  -7   1   1  102.39   18.70 
  -7   1   1   92.09   18.40 
   7   1  -1   38.60   14.90 
  -7   1   1   92.49   21.10 
   7   1  -1  126.99   23.60 
   7   1  -1   94.89   20.90 
   7   1  -1   83.79   15.90 
  -7   1   1   65.79   18.60 
   7   1  -1   85.19   18.70 
  -7   1   1   85.59   18.20 
   7   1  -1   95.89   20.10 
  -7   1   1   89.19   11.50 
   7   1  -1   73.49   18.70 
   7   1  -1   85.49   17.90 
  -6  -1   1 1886.21   89.49 
  -6  -1   1 2008.80   91.59 
  -6  -1   1 2099.79   81.29 
   6  -1  -1 2021.70   76.39 
   6  -1  -1 2043.10   92.39 
  -6  -1   1 1891.71   91.19 
  -6  -1   1 1920.81   89.79 
   6  -1  -1 1968.90   79.89 
  -6  -1   1 2021.10   87.39 
   6  -1  -1 1972.80   89.79 
  -6  -1   1 2052.39   89.19 
   6  -1  -1 2014.60   74.29 
   6  -1  -1 2107.99   84.59 
  -6  -1   1 1905.91   82.99 
   6  -1  -1 1873.71   89.99 
   6  -1  -1 1953.40   80.49 
  -6  -1   1 1998.90   93.99 
  -6  -1   1 2163.08   93.29 
   6  -1  -1 2271.37   92.39 
   6  -1  -1 1981.00   79.89 
   6  -1  -1 1961.00   88.89 
   6  -1  -1 2046.70   89.09 
  -6  -1   1 1945.41   91.89 
  -6  -1   1 1999.50   88.69 
   6  -1  -1 1949.10   73.79 
  -6  -1   1 2019.80   90.59 
   6  -1  -1 1940.61   91.89 
   6  -1  -1 1986.30   92.59 
   6  -1  -1 2137.69   93.19 
  -6  -1   1 1975.10   82.99 
   6  -1  -1 1982.30   90.59 
  -6  -1   1 1999.20   90.39 
   6   1  -1 2021.40   81.59 
   6   1  -1 2055.69   92.79 
   6   1  -1 2085.69   78.69 
  -6   1   1 1891.71   88.29 
  -6   1   1 2082.79   76.99 
  -6   1   1 1975.50   79.39 
   6   1  -1 2084.59   83.29 
   6   1  -1 2046.30   88.79 
   6   1  -1 1989.70   92.19 
   6   1  -1 1976.20   81.89 
   6   1  -1 1979.20   91.09 
  -6   1   1 1925.21   85.79 
  -6   1   1 1864.71   90.39 
   6   1  -1 1913.11   89.79 
  -6   1   1 1959.50   84.79 
   6   1  -1 2065.49   94.09 
   6   1  -1 1992.60   76.59 
  -6   1   1 2025.70   89.09 
   6   1  -1 2018.40   79.99 
  -6   1   1 2027.10   77.99 
  -6   1   1 2036.80   88.09 
  -6   1   1 2022.50   91.69 
   6   1  -1 1993.60   88.59 
   6   1  -1 1956.60   91.99 
   6   1  -1 1969.60   87.89 
   6   1  -1 1990.30   91.09 
  -6   1   1 1892.21   90.49 
  -6   1   1 1885.21   85.59 
   6   1  -1 2042.60   95.09 
  -6   1   1 1950.70   88.19 
   6   1  -1 2115.09   92.79 
  -6   1   1 1833.72   90.99 
   6   1  -1 1978.00   82.59 
   6   1  -1 1861.61   88.09 
   6   1  -1 1930.11   90.59 
  -6   1   1 2017.40   90.19 
  -5  -1   1  354.96   26.80 
   5  -1  -1  342.07   16.50 
   5  -1  -1  332.57   22.10 
   5  -1  -1  317.47   24.60 
   5  -1  -1  361.36   14.70 
  -5  -1   1  357.26   27.50 
   5  -1  -1  354.96   26.70 
  -5  -1   1  356.86   21.70 
  -5  -1   1  369.36   25.80 
  -5  -1   1  341.07   26.30 
  -5  -1   1  353.86   22.40 
   5  -1  -1  348.77   27.50 
   5  -1  -1  370.06   21.10 
   5  -1  -1  362.46   28.00 
   5  -1  -1  327.67   16.30 
   5  -1  -1  367.06   21.20 
  -5  -1   1  341.97   23.10 
   5  -1  -1  361.66   27.20 
  -5  -1   1  321.67   26.70 
  -5  -1   1  342.97   22.80 
   5  -1  -1  302.77   24.50 
   5  -1  -1  334.17   15.20 
  -5  -1   1  359.96   28.10 
   5  -1  -1  349.57   27.50 
   5  -1  -1  326.67   26.40 
   5  -1  -1  337.37   27.30 
  -5  -1   1  321.97   29.70 
   5  -1  -1  327.07   20.10 
  -5  -1   1  314.77   25.50 
   5  -1  -1  307.77   28.10 
   5  -1  -1  361.76   18.00 
  -5  -1   1  361.76   26.80 
   5  -1  -1  339.17   24.90 
  -5  -1   1  364.06   27.40 
   5  -1  -1  322.87   20.00 
  -5  -1   1  329.37   27.20 
   5   1  -1  349.17   21.20 
   5   1  -1  356.46   27.20 
  -5   1   1  336.87   24.70 
   5   1  -1  342.67   25.80 
  -5   1   1  369.36   25.80 
   5   1  -1  334.37   22.60 
   5   1  -1  316.17   25.30 
   5   1  -1  372.26   28.20 
  -5   1   1  310.67   30.40 
   5   1  -1  294.07   21.30 
   5   1  -1  309.87   29.50 
  -5   1   1  274.37   27.10 
  -5   1   1  365.76   22.10 
  -5   1   1  353.96   18.70 
  -5   1   1  351.66   27.20 
   5   1  -1  347.97   27.30 
  -5   1   1  386.06   27.10 
  -5   1   1  359.76   27.10 
   5   1  -1  327.17   21.40 
   5   1  -1  332.37   23.20 
   5   1  -1  354.76   26.00 
   5   1  -1  385.26   29.60 
  -5   1   1  316.07   24.50 
   5   1  -1  384.16   23.70 
   5   1  -1  315.27   29.30 
   5   1  -1  370.26   34.30 
  -5   1   1  311.47   22.90 
   5   1  -1  395.66   28.60 
   5   1  -1  296.67   29.10 
  -5   1   1  389.76   23.40 
   5   1  -1  323.57   19.20 
   5   1  -1  382.86   24.40 
  -5   1   1  333.37   21.00 
  -5   1   1  346.77   24.20 
  -5   1   1  340.87   26.40 
   5   1  -1  353.16   26.10 
   5   1  -1  414.06   29.30 
   4  -1  -1 5885.71  217.48 
  -4  -1   1 5872.31  210.88 
  -4  -1   1 6202.58  215.08 
  -4  -1   1 6141.39  219.38 
   4  -1  -1 5849.11  206.28 
   4  -1  -1 5957.60  210.18 
   4  -1  -1 5854.11  216.18 
   4  -1  -1 5679.73  210.78 
  -4  -1   1 6076.89  213.68 
   4  -1  -1 5714.43  218.78 
  -4  -1   1 5908.21  219.28 
   4  -1  -1 5990.50  210.68 
  -4  -1   1 5975.40  219.68 
   4  -1  -1 5885.01  206.58 
  -4  -1   1 5797.32  218.78 
  -4  -1   1 6067.49  212.88 
   4  -1  -1 5975.00  217.38 
  -4  -1   1 5717.53  218.48 
   4  -1  -1 5960.70  206.48 
  -4  -1   1 6015.70  218.38 
   4  -1  -1 5831.32  218.38 
   4  -1  -1 6006.40  220.28 
   4  -1  -1 5919.51  219.08 
   4  -1  -1 5758.52  218.68 
   4  -1  -1 5867.81  219.58 
  -4  -1   1 6087.09  212.48 
  -4  -1   1 6243.28  219.08 
  -4  -1   1 6036.70  220.68 
   4  -1  -1 5900.71  210.28 
   4  -1  -1 5764.02  207.38 
   4  -1  -1 5995.50  217.38 
   4  -1  -1 5931.81  210.78 
  -4  -1   1 6036.50  218.98 
   4  -1  -1 5901.41  220.08 
  -4  -1   1 6064.69  220.48 
  -4  -1   1 5861.01  216.18 
   4  -1  -1 5919.41  218.28 
   4  -1  -1 5896.61  205.88 
   4  -1  -1 5872.61  212.28 
   4  -1  -1 5860.01  217.68 
  -4  -1   1 5964.50  215.48 
  -4   1   1 5827.02  212.68 
   4   1  -1 6237.38  218.18 
   4   1  -1 5922.51  219.98 
  -4   1   1 5876.31  213.08 
   4   1  -1 6031.00  219.58 
  -4   1   1 5620.34  213.28 
  -4   1   1 5752.42  214.08 
  -4   1   1 5813.72  208.98 
   4   1  -1 5989.90  220.38 
  -4   1   1 5869.41  218.88 
   4   1  -1 5938.91  212.88 
   4   1  -1 5910.61  217.98 
   4   1  -1 6065.69  206.08 
  -4   1   1 5838.22  217.08 
   4   1  -1 5807.62  213.18 
  -4   1   1 5901.51  206.68 
  -4   1   1 5889.61  218.88 
  -4   1   1 5874.21  215.98 
  -4   1   1 5858.51  217.18 
  -4   1   1 5695.93  206.88 
   4   1  -1 5732.23  218.68 
   4   1  -1 5845.12  213.98 
   4   1  -1 5998.00  217.78 
  -4   1   1 6083.49  211.78 
   4   1  -1 6084.59  206.98 
   4   1  -1 5848.01  221.08 
  -4   1   1 6124.99  215.68 
   4   1  -1 6002.50  215.38 
   4   1  -1 6026.80  218.08 
   4   1  -1 5995.70  219.68 
   4   1  -1 6043.60  220.98 
   4   1  -1 5967.20  219.78 
   4   1  -1 6005.50  206.28 
  -4   1   1 6206.08  220.18 
  -4   1   1 5844.31  205.78 
   4   1  -1 5919.21  219.28 
  -4   1   1 5937.31  219.28 
  -4   1   1 5944.01  206.38 
   4   1  -1 5840.62  215.28 
   4   1  -1 5994.60  220.88 
   4   1  -1 5958.10  214.08 
  -4   1   1 6068.59  219.08 
   4   1  -1 5962.20  218.68 
   4   1  -1 5998.10  219.68 
  -4   1   1 6088.59  216.68 
  -4   1   1 5938.31  206.28 
   4   1  -1 6092.19  213.38 
  -4   1   1 5951.20  216.88 
   4   1  -1 6178.38  214.18 
  -3  -1   1  457.95   24.30 
   3  -1  -1  477.15   25.60 
   3  -1  -1  470.75   25.10 
  -3  -1   1  452.05   19.40 
  -3  -1   1  502.85   26.90 
  -3  -1   1  473.25   26.70 
   3  -1  -1  438.96   17.20 
  -3  -1   1  448.86   26.00 
  -3  -1   1  468.45   22.90 
   3  -1  -1  500.15   25.70 
   3  -1  -1  450.75   25.40 
  -3  -1   1  425.06   25.50 
   3  -1  -1  418.06   25.20 
  -3  -1   1  527.45   24.10 
   3  -1  -1  482.55   25.30 
   3  -1  -1  435.66   17.10 
  -3  -1   1  438.36   23.00 
  -3  -1   1  470.15   22.70 
  -3  -1   1  455.15   24.90 
  -3  -1   1  408.46   24.90 
  -3  -1   1  446.06   25.90 
   3  -1  -1  461.35   26.70 
   3  -1  -1  447.76   18.50 
   3  -1  -1  427.26   20.00 
  -3  -1   1  440.86   26.10 
  -3  -1   1  451.65   24.40 
   3  -1  -1  437.56   26.30 
  -3  -1   1  413.26   24.50 
   3  -1  -1  436.36   21.40 
   3  -1  -1  436.36   18.00 
   3  -1  -1  451.45   24.70 
  -3  -1   1  415.86   26.40 
  -3  -1   1  473.95   27.40 
  -3  -1   1  481.65   28.00 
   3  -1  -1  451.65   25.60 
  -3  -1   1  484.65   26.80 
   3  -1  -1  417.06   25.20 
  -3  -1   1  431.86   25.60 
   3  -1  -1  433.36   19.60 
  -3  -1   1  477.25   26.90 
   3  -1  -1  431.06   25.20 
   3  -1  -1  440.56   23.70 
   3  -1  -1  465.25   26.20 
  -3  -1   1  402.56   25.20 
  -3  -1   1  475.55   24.90 
   3  -1  -1  498.45   25.80 
   3  -1  -1  458.05   24.80 
  -3  -1   1  496.75   26.30 
  -3  -1   1  446.36   24.80 
   3  -1  -1  442.96   20.50 
   3  -1  -1  417.06   19.00 
   3  -1  -1  475.95   26.70 
  -3  -1   1  498.05   26.70 
   3  -1  -1  466.95   21.50 
   3  -1  -1  407.46   20.20 
   3   1  -1  436.56   23.70 
   3   1  -1  430.56   19.50 
  -3   1   1  465.75   23.60 
   3   1  -1  469.35   26.50 
   3   1  -1  460.75   24.60 
  -3   1   1  426.06   25.40 
   3   1  -1  416.26   24.50 
   3   1  -1  463.05   23.70 
   3   1  -1  511.25   26.80 
  -3   1   1  438.66   19.30 
  -3   1   1  482.45   28.40 
  -3   1   1  434.56   24.20 
  -3   1   1  447.26   17.20 
  -3   1   1  478.55   24.70 
   3   1  -1  442.06   19.40 
   3   1  -1  449.95   19.10 
   3   1  -1  454.55   23.50 
  -3   1   1  463.85   23.50 
  -3   1   1  440.96   24.60 
  -3   1   1  435.76   22.10 
   3   1  -1  471.55   25.50 
  -3   1   1  451.95   23.90 
   3   1  -1  434.56   25.20 
  -3   1   1  388.26   23.10 
  -3   1   1  416.96   23.50 
   3   1  -1  421.66   26.10 
   3   1  -1  431.76   25.40 
  -3   1   1  447.46   19.30 
  -3   1   1  470.75   25.20 
   3   1  -1  433.66   26.00 
   3   1  -1  460.65   25.70 
   3   1  -1  479.05   26.80 
   3   1  -1  449.06   23.10 
   3   1  -1  433.76   26.40 
   3   1  -1  458.75   26.10 
  -3   1   1  483.25   24.90 
   3   1  -1  460.95   25.20 
  -3   1   1  430.76   25.40 
   3   1  -1  443.56   25.70 
   3   1  -1  489.15   26.70 
  -3   1   1  451.05   17.40 
  -3   1   1  435.66   22.60 
   3   1  -1  414.76   25.30 
  -3   1   1  463.15   25.30 
   3   1  -1  433.26   26.20 
  -3   1   1  457.55   22.20 
  -3   1   1  457.55   22.60 
   3   1  -1  438.86   26.30 
   3   1  -1  419.76   26.10 
  -3   1   1  433.96   20.60 
  -3   1   1  429.16   21.80 
  -3   1   1  419.96   19.00 
   3   1  -1  474.45   27.20 
   3   1  -1  465.15   23.00 
   3   1  -1  447.46   26.50 
  -3   1   1  442.66   25.70 
  -3   1   1  484.55   26.00 
  -3   1   1  432.06   26.70 
  -3   1   1  443.16   24.60 
  -3   1   1  436.06   25.60 
  -3   1   1  444.36   25.50 
  -3   1   1  458.85   25.00 
   3   1  -1  446.16   23.20 
   3   1  -1  468.65   28.30 
   3   1  -1  506.85   25.20 
   3   1  -1  446.86   26.30 
   2  -1  -1 2512.55   93.19 
   2  -1  -1 2586.14   92.39 
   2  -1  -1 2587.94   97.29 
   2  -1  -1 2565.24   97.19 
  -2  -1   1 2844.22  100.49 
  -2  -1   1 2850.91   98.99 
   2  -1  -1 2590.94   95.79 
   2  -1  -1 2580.74   98.49 
   2  -1  -1 2573.34   96.19 
   2  -1  -1 2614.94   93.69 
  -2  -1   1 2636.04   98.19 
  -2  -1   1 2732.93   98.59 
  -2  -1   1 2769.82   94.79 
   2  -1  -1 2573.44   97.99 
   2  -1  -1 2662.13   98.19 
  -2  -1   1 2712.43   99.19 
  -2  -1   1 2725.33   99.39 
  -2  -1   1 2673.23   98.99 
  -2  -1   1 2596.34   97.49 
  -2  -1   1 2678.93   98.89 
  -2  -1   1 2785.32   99.99 
  -2  -1   1 2529.35   97.49 
   2  -1  -1 2613.54   95.99 
   2  -1  -1 2607.34   98.79 
   2  -1  -1 2570.54   97.09 
  -2  -1   1 2703.03   98.89 
  -2  -1   1 2692.43   98.19 
   2  -1  -1 2633.54   96.79 
  -2  -1   1 2766.12   99.39 
  -2  -1   1 2694.63   98.79 
  -2  -1   1 2663.53   96.59 
   2  -1  -1 2599.54   94.49 
  -2  -1   1 2610.54   96.59 
  -2  -1   1 2580.04   98.99 
  -2  -1   1 2674.53   98.19 
  -2  -1   1 2798.62   99.19 
  -2  -1   1 2723.53   98.69 
   2  -1  -1 2490.15   97.89 
   2  -1  -1 2509.45   98.59 
  -2  -1   1 2730.03   97.29 
   2  -1  -1 2473.85   92.09 
  -2  -1   1 2747.93   98.19 
  -2  -1   1 2633.44   98.79 
   2  -1  -1 2476.25   97.79 
   2  -1  -1 2475.05   97.49 
  -2  -1   1 2857.01   97.99 
  -2  -1   1 2597.14   98.49 
   2  -1  -1 2561.34   94.79 
   2  -1  -1 2587.74   96.99 
  -2  -1   1 2737.33   99.59 
  -2  -1   1 2755.72   99.59 
  -2  -1   1 2637.84   98.59 
  -2  -1   1 2746.93   98.79 
   2  -1  -1 2605.94   96.79 
   2  -1  -1 2720.63   98.99 
  -2  -1   1 2693.53   99.79 
  -2  -1   1 2793.82   99.39 
  -2  -1   1 2626.74   94.89 
   2   1  -1 2673.03   98.29 
   2   1  -1 2676.53   96.79 
   2   1  -1 2679.23   94.59 
  -2   1   1 2634.84   97.19 
   2   1  -1 2723.93   95.09 
   2   1  -1 2659.33   98.89 
   2   1  -1 2815.42   99.89 
  -2   1   1 2570.64   98.49 
   2   1  -1 2674.73   98.59 
   2   1  -1 2703.23   97.49 
   2   1  -1 2846.52  100.29 
  -2   1   1 2612.94   98.19 
  -2   1   1 2617.44   99.99 
   2   1  -1 2672.13   98.59 
  -2   1   1 2580.64   96.99 
   2   1  -1 2679.33   98.79 
  -2   1   1 2592.84   96.59 
   2   1  -1 2802.92   99.79 
   2   1  -1 2736.13   97.89 
   2   1  -1 2757.52   98.99 
  -2   1   1 2651.93   98.59 
  -2   1   1 2538.15   96.39 
   2   1  -1 2797.62   98.29 
   2   1  -1 2649.73   98.99 
   2   1  -1 2701.53   99.39 
  -2   1   1 2676.73   98.49 
   2   1  -1 2653.93   98.89 
  -2   1   1 2514.55   96.29 
   2   1  -1 2620.44   97.59 
  -2   1   1 2441.96   94.19 
  -2   1   1 2572.34   97.79 
  -2   1   1 2598.14   93.79 
  -2   1   1 2649.83   94.59 
  -2   1   1 2569.64   97.39 
   2   1  -1 2592.94   97.49 
  -2   1   1 2609.84   92.29 
  -2   1   1 2591.84   94.69 
   2   1  -1 2798.92   99.19 
  -2   1   1 2520.15   97.39 
  -2   1   1 2634.84   94.69 
   2   1  -1 2584.24   98.79 
  -2   1   1 2585.64   97.69 
   2   1  -1 2742.23   98.39 
  -2   1   1 2613.74   97.39 
   2   1  -1 2602.54   97.99 
  -2   1   1 2664.23   98.19 
  -2   1   1 2664.13   96.49 
  -2   1   1 2625.74   96.29 
  -2   1   1 2737.23   98.99 
   2   1  -1 2584.14   98.99 
   2   1  -1 2647.04   99.09 
   2   1  -1 2768.62   99.39 
   2   1  -1 2639.84  100.29 
  -2   1   1 2601.24   97.89 
   2   1  -1 2619.34   96.39 
  -2   1   1 2623.24   93.59 
  -2   1   1 2624.04   94.89 
   2   1  -1 2691.23   98.79 
  -2   1   1 2570.14   96.99 
   2   1  -1 2669.73   97.29 
  -2   1   1 2722.33   97.79 
  -2   1   1 2559.04   98.29 
   2   1  -1 2657.33   99.09 
   2   1  -1 2790.22   99.59 
  -2   1   1 2588.04   95.59 
  -2   1   1 2620.84   94.49 
  -2   1   1 2570.14   97.79 
   2   1  -1 2710.73   98.69 
   2   1  -1 2928.51   99.59 
  -2   1   1 2535.55   93.19 
  -2   1   1 2608.04   94.29 
  -1  -1   1  248.88   13.00 
  -1  -1   1  278.97   13.60 
  -1  -1   1  245.48   13.30 
   1  -1  -1  235.88   12.60 
  -1  -1   1  259.37   14.00 
   1  -1  -1  239.28   12.60 
  -1  -1   1  258.77   14.50 
  -1  -1   1  250.97   14.10 
  -1  -1   1  256.67   13.20 
  -1  -1   1  262.17   13.30 
  -1  -1   1  270.07   14.10 
  -1  -1   1  266.57   14.70 
  -1  -1   1  248.48   13.90 
   1  -1  -1  232.48   12.70 
   1  -1  -1  256.77   12.00 
  -1  -1   1  263.97   13.10 
  -1  -1   1  275.77   12.80 
  -1  -1   1  258.17   14.90 
  -1  -1   1  229.58   12.90 
  -1  -1   1  265.57   14.20 
  -1  -1   1  240.68   13.60 
  -1  -1   1  248.78   12.40 
  -1  -1   1  234.38   13.00 
  -1  -1   1  258.97   14.10 
  -1  -1   1  259.67   14.60 
  -1  -1   1  262.67   13.70 
   1  -1  -1  247.38   12.60 
  -1  -1   1  278.07   14.50 
  -1  -1   1  249.68   12.70 
  -1  -1   1  261.67   14.00 
  -1  -1   1  258.67   14.80 
   1   1  -1  269.97   13.50 
  -1   1   1  260.37   12.80 
   1   1  -1  267.87   13.30 
  -1   1   1  239.48   12.60 
   1   1  -1  269.37   15.40 
   1   1  -1  259.07   13.50 
  -1   1   1  225.18   11.80 
  -1   1   1  248.38   11.70 
  -1   1   1  251.07   13.00 
   1   1  -1  230.78   14.00 
   1   1  -1  228.98   13.50 
  -1   1   1  259.47   12.90 
   1   1  -1  244.48   13.30 
   1   1  -1  252.77   13.00 
  -1   1   1  237.78   11.30 
   1   1  -1  244.68   14.20 
  -1   1   1  235.08   12.70 
   1   1  -1  253.27   13.60 
   1   1  -1  237.68   13.30 
  -1   1   1  260.27   11.40 
   1   1  -1  251.77   13.50 
   1   1  -1  238.08   12.50 
  -1   1   1  273.57   13.60 
  -1   1   1  239.68   10.30 
  -1   1   1  247.68   12.40 
  -1   1   1  234.28   10.70 
  -1   1   1  260.37   12.40 
  -1   1   1  259.67   12.10 
   1   1  -1  261.27   13.20 
   1   1  -1  266.17   14.30 
  -1   1   1  267.27   14.90 
  -1   1   1  238.08   12.70 
  -1   1   1  255.17   13.10 
   1   1  -1  250.47   12.90 
  -1   1   1  244.98   12.80 
   1   1  -1  232.38   13.40 
  -1   1   1  230.98   11.80 
  -1   1   1  242.58   11.50 
  -1   1   1  247.88   11.20 
   1   1  -1  269.37   14.70 
   1   1  -1  263.47   13.00 
  -1   1   1  248.78   10.80 
  -1   1   1  242.48    9.80 
  -1   1   1  256.27   11.60 
   1   1  -1  267.97   13.20 
   1   1  -1  244.08   13.30 
   1   1  -1  260.37   12.60 
  -1   1   1  257.17   14.60 
  -1   1   1  244.68   11.00 
  -1   1   1  282.57   14.90 
   1   1  -1  248.58   13.20 
  -1   1   1  262.47   11.70 
   1   1  -1  257.77   14.00 
   1   1  -1  263.97   14.30 
   1   1  -1  247.48   13.90 
   1   1  -1  246.08   13.10 
  -1   1   1  243.38   12.50 
   1   1  -1  268.37   14.30 
   1   1  -1  271.67   14.00 
   1   1  -1  270.67   14.70 
  -1   1   1  261.47   12.60 
  -1   1   1  240.88   10.20 
   0  -1  -1 7529.85  276.27 
   0  -1   1 8425.26  276.37 
   0  -1  -1 7808.02  276.37 
   0  -1  -1 7740.03  275.87 
   0  -1  -1 8030.50  276.17 
   0   1   1 7808.22  283.47 
   0   1  -1 8096.69  276.47 
   0   1  -1 7967.60  279.77 
   0   1  -1 6781.52  275.37 
   0   1  -1 8543.25  275.97 
   0   1  -1 7716.73  275.47 
   0   1  -1 7954.20  278.57 
   0   1  -1 7980.20  276.17 
   0   1  -1 7357.26  276.47 
   0   1   1 8263.07  276.37 
   0   1  -1 7828.12  275.67 
   0   1  -1 7797.32  275.97 
   0   1   1 8114.09  280.87 
   0   1   1 7874.91  276.37 
   0   1  -1 8424.26  274.97 
   0   1  -1 7967.10  274.27 
   0   1   1 8333.37  277.57 
   0   1   1 7856.61  279.17 
   0   1  -1 8353.36  276.97 
   0   1   1 7907.31  274.67 
   0   1   1 8188.38  280.57 
   0   1   1 7953.30  274.77 
   0   1  -1 7271.47  274.57 
   0   1  -1 7567.94  275.27 
   0   1   1 8343.67  275.07 
   0   1   1 7896.51  275.37 
   0   1  -1 8345.46  276.97 
   0   1   1 7881.61  279.27 
   0   1  -1 8426.86  276.37 
   0   1  -1 8237.18  275.97 
   0   1   1 7831.52  277.47 
   0   1   1 8122.89  276.57 
   0   1  -1 7862.71  276.37 
   0   1   1 8197.88  276.67 
   0   1   1 8161.48  279.87 
   0   1   1 7482.25  275.17 
   0   1   1 8258.97  276.57 
   0   1   1 8169.48  275.67 
   0   1   1 7927.71  278.37 
   0   1   1 8343.26  275.17 
   0   1   1 8300.67  280.27 
   0   1  -1 7756.52  275.47 
   0   1  -1 8370.36  276.47 
   0   1   1 6818.52  275.07 
   0   1   1 6932.91  275.07 
   0   1  -1 8232.58  275.77 
  -1  -1  -1  467.15   20.20 
   1  -1   1  440.76   20.00 
  -1  -1  -1  496.25   22.50 
   1  -1   1  451.25   21.10 
  -1  -1  -1  460.35   21.10 
   1  -1   1  466.55   20.10 
  -1  -1  -1  465.85   21.10 
  -1  -1  -1  465.85   21.10 
  -1  -1  -1  467.75   22.30 
  -1  -1  -1  465.45   20.30 
   1  -1   1  461.25   20.00 
  -1  -1  -1  491.95   21.80 
  -1  -1  -1  487.25   21.40 
  -1  -1  -1  472.75   21.30 
  -1  -1  -1  460.55   20.50 
   1  -1   1  426.16   19.10 
  -1  -1  -1  442.46   21.70 
  -1  -1  -1  488.05   25.60 
  -1  -1  -1  504.05   22.40 
  -1  -1  -1  473.65   21.50 
   1  -1   1  475.05   24.20 
   1  -1   1  447.06   20.40 
  -1  -1  -1  480.55   20.30 
  -1  -1  -1  502.35   21.70 
  -1  -1  -1  495.65   22.10 
  -1  -1  -1  462.55   21.50 
  -1  -1  -1  450.95   21.30 
   1  -1   1  465.95   20.50 
  -1  -1  -1  476.85   21.20 
  -1  -1  -1  482.85   20.60 
  -1  -1  -1  475.95   22.20 
  -1  -1  -1  485.75   21.80 
  -1  -1  -1  492.95   21.50 
   1  -1   1  440.36   19.70 
  -1  -1  -1  447.06   20.10 
  -1  -1  -1  461.05   21.60 
  -1  -1  -1  488.35   20.20 
  -1  -1  -1  489.35   21.90 
   1  -1   1  439.06   19.00 
  -1  -1  -1  461.15   21.20 
  -1  -1  -1  468.35   21.70 
  -1   1  -1  433.96   19.60 
   1   1   1  404.66   20.90 
  -1   1  -1  467.25   19.80 
  -1   1  -1  468.95   18.40 
  -1   1  -1  459.75   20.40 
  -1   1  -1  455.55   20.80 
   1   1   1  487.05   19.90 
   1   1   1  465.15   20.40 
  -1   1  -1  433.06   19.90 
  -1   1  -1  466.75   18.50 
  -1   1  -1  455.95   19.00 
   1   1   1  466.15   21.60 
  -1   1  -1  436.26   20.70 
   1   1   1  506.95   21.70 
  -1   1  -1  450.75   19.30 
  -1   1  -1  463.85   17.90 
   1   1   1  493.95   20.40 
  -1   1  -1  450.95   20.70 
   1   1   1  458.45   21.30 
   1   1   1  473.55   21.70 
   1   1   1  476.55   20.20 
  -1   1  -1  458.05   20.00 
   1   1   1  488.75   21.60 
   1   1   1  487.05   22.20 
  -1   1  -1  453.35   20.30 
  -1   1  -1  463.65   21.50 
   1   1   1  480.75   22.40 
  -1   1  -1  454.35   20.80 
   1   1   1  451.35   21.50 
   1   1   1  455.15   20.60 
  -1   1  -1  455.25   23.00 
   1   1   1  475.25   20.40 
   1   1   1  484.95   21.20 
   1   1   1  423.76   20.30 
   1   1   1  467.45   22.10 
  -1   1  -1  445.36   20.80 
   1   1   1  494.85   21.60 
   1   1   1  455.45   20.60 
   1   1   1  441.46   21.40 
   1   1   1  463.95   21.50 
  -1   1  -1  429.56   19.20 
  -1   1  -1  472.95   21.20 
   1   1   1  469.45   21.90 
   1   1   1  486.85   22.20 
  -1   1  -1  461.55   19.00 
  -1   1  -1  432.96   20.10 
   1   1   1  465.75   21.30 
   1   1   1  486.75   20.80 
  -1   1  -1  438.66   19.80 
  -1   1  -1  460.85   21.30 
  -1   1  -1  444.66   20.70 
   1   1   1  474.15   21.00 
  -1   1  -1  439.06   17.60 
  -1   1  -1  452.35   20.80 
   1   1   1  436.46   20.10 
   1   1   1  476.65   21.60 
   1   1   1  480.85   20.40 
   1   1   1  450.15   21.50 
   1   1   1  493.85   20.90 
  -1   1  -1  449.46   19.60 
   1   1   1  486.75   21.60 
   1   1   1  494.25   21.80 
  -1   1  -1  450.65   18.40 
  -1   1  -1  451.65   19.00 
  -1   1  -1  477.05   21.00 
  -2  -1  -1 9714.53  332.47 
  -2  -1  -1 9913.71  332.67 
  -2  -1  -1 9803.42  334.07 
   2  -1   1 9627.84  330.57 
   2  -1   1 9499.25  332.17 
  -2  -1  -1 9778.42  333.07 
  -2  -1  -1 9880.71  334.27 
  -2  -1  -1 9569.24  332.37 
   2  -1   1 8828.32  327.47 
  -2  -1  -1 9559.44  329.87 
  -2  -1  -1 9679.93  331.77 
   2  -1   1 9446.96  332.17 
   2  -1   1 9688.73  332.07 
   2  -1   1 9543.75  329.57 
  -2  -1  -1 9500.15  332.47 
   2  -1   1 9150.08  330.07 
   2  -1   1 9517.05  332.17 
   2  -1   1 9216.28  331.87 
  -2  -1  -1 9644.54  333.57 
  -2  -1  -1 9514.55  331.97 
  -2  -1  -1 9369.66  328.67 
   2  -1   1 9561.34  331.17 
  -2  -1  -1 9449.25  332.57 
  -2  -1  -1 9318.67  333.27 
   2  -1   1 9346.07  332.77 
  -2  -1  -1 9494.75  328.97 
  -2  -1  -1 9605.54  332.87 
  -2  -1  -1 9763.02  333.17 
  -2  -1  -1 9489.05  333.87 
  -2  -1  -1 9750.82  332.87 
  -2  -1  -1 9922.01  333.37 
   2  -1   1 9339.27  331.37 
  -2  -1  -1 9624.24  331.37 
  -2  -1  -1 9376.76  332.87 
  -2  -1  -1 9451.25  332.07 
   2  -1   1 9741.53  333.47 
   2  -1   1 9572.54  327.97 
   2  -1   1 9565.94  329.57 
  -2  -1  -1 9822.52  333.57 
   2  -1   1 9347.06  331.87 
  -2  -1  -1 9427.76  333.47 
  -2  -1  -1 9585.34  332.87 
  -2  -1  -1 9577.74  333.47 
   2  -1   1 9279.97  332.17 
   2  -1   1 8918.71  328.47 
  -2  -1  -1 9862.31  333.27 
   2  -1   1 9625.54  332.27 
   2  -1   1 9270.87  331.77 
   2  -1   1 9497.15  334.67 
  -2  -1  -1 9156.78  332.87 
   2  -1   1 9220.68  331.87 
   2  -1   1 9321.97  327.37 
  -2  -1  -1 9973.10  334.27 
  -2  -1  -1 9214.28  331.27 
  -2  -1  -1 9576.84  331.87 
   2  -1   1 9268.27  326.67 
   2  -1   1 9244.28  329.27 
  -2  -1  -1 9646.93  331.17 
   2  -1   1 9087.49  328.37 
  -2  -1  -1 9196.88  331.77 
  -2  -1  -1 9581.44  332.17 
   2  -1   1 9534.55  331.67 
   2  -1   1 9401.76  327.07 
  -2   1  -1 9129.49  331.47 
   2   1   1 9786.32  333.17 
   2   1   1 9183.08  331.47 
   2   1   1 9462.15  333.47 
   2   1   1 9450.85  333.57 
  -2   1  -1 9193.08  326.47 
   2   1   1 9180.48  332.37 
   2   1   1 9378.06  328.97 
   2   1   1 9441.25  333.27 
   2   1   1 9519.15  331.67 
   2   1   1 9211.18  332.47 
   2   1   1 9546.64  332.57 
  -2   1  -1 9638.44  329.17 
  -2   1  -1 9474.25  328.67 
  -2   1  -1 9623.64  330.57 
   2   1   1 9137.39  333.27 
  -2   1  -1 9099.59  331.97 
   2   1   1 9799.32  332.27 
   2   1   1 9557.74  330.87 
   2   1   1 9481.15  332.37 
  -2   1  -1 9675.13  331.57 
  -2   1  -1 9547.25  332.97 
  -2   1  -1 9386.76  329.27 
   2   1   1 9246.88  333.17 
  -2   1  -1 9930.41  332.37 
  -2   1  -1 9588.44  332.17 
   2   1   1 9908.21  330.37 
   2   1   1 9630.44  333.27 
   2   1   1 9448.75  332.67 
  -2   1  -1 9331.77  328.77 
   2   1   1 9736.93  329.47 
  -2   1  -1 9549.14  331.87 
   2   1   1 9733.33  332.47 
  -2   1  -1 9064.89  329.47 
  -2   1  -1 9500.95  330.47 
   2   1   1 8564.04  332.17 
  -2   1  -1 9437.86  326.87 
  -2   1  -1 9448.35  325.87 
   2   1   1 9145.29  332.27 
  -2   1  -1 9614.24  332.17 
  -2   1  -1 9074.29  328.17 
  -2   1  -1 9389.96  332.77 
  -2   1  -1 9333.37  332.77 
  -2   1  -1 9137.89  331.37 
  -2   1  -1 9480.75  332.47 
   2   1   1 9858.11  334.07 
  -2   1  -1 9575.44  331.77 
  -2   1  -1 9280.87  334.77 
  -2   1  -1 9657.23  332.07 
   2   1   1 9768.72  329.27 
   2   1   1 9428.86  332.67 
   2   1   1 9999.00  332.97 
  -2   1  -1 9452.85  329.07 
   2   1   1 9366.86  332.47 
   2   1   1 9580.94  332.47 
   2   1   1 9823.12  334.07 
  -2   1  -1 9315.07  330.57 
  -2   1  -1 9590.34  332.17 
   2   1   1 9757.62  332.47 
  -2   1  -1 9108.39  327.47 
   2   1   1 9040.30  331.07 
   2   1   1 9648.43  333.07 
  -2   1  -1 9545.54  330.87 
  -2   1  -1 9003.50  329.97 
   2   1   1 9550.64  333.27 
  -2   1  -1 9349.17  330.37 
   2   1   1 9812.02  332.07 
  -2   1  -1 9335.47  332.57 
   2   1   1 9716.83  331.77 
  -2   1  -1 9321.57  329.47 
  -2   1  -1 9634.14  332.07 
   2   1   1 9422.96  333.47 
  -3  -1  -1   -0.60    6.40 
   3  -1   1   10.20    6.50 
   3  -1   1    3.30    6.20 
  -3  -1  -1   -1.80    6.00 
  -3  -1  -1   13.80    6.60 
   3  -1   1    6.60    6.60 
  -3  -1  -1    2.60    4.00 
  -3  -1  -1    7.40    5.20 
  -3  -1  -1    0.60    6.40 
   3  -1   1    8.10    5.80 
  -3  -1  -1    7.10    7.50 
  -3  -1  -1   13.30    6.40 
  -3  -1  -1   -0.80    6.70 
  -3  -1  -1    4.40    6.20 
   3  -1   1    5.60    3.80 
   3  -1   1    6.30    4.80 
   3  -1   1   12.40    6.50 
   3  -1   1    2.70    3.30 
   3  -1   1   13.40    6.30 
   3  -1   1    2.60    4.80 
  -3  -1  -1    6.50    4.20 
   3  -1   1    2.00    5.80 
  -3  -1  -1   15.00    7.20 
  -3  -1  -1    5.30    6.40 
  -3  -1  -1    5.30    6.30 
  -3  -1  -1    2.10    5.40 
  -3  -1  -1    6.60    8.10 
   3  -1   1    4.90    3.80 
   3  -1   1    4.80    5.30 
   3  -1   1    5.10    4.20 
  -3  -1  -1    9.70    7.30 
   3  -1   1    4.60    5.00 
   3  -1   1    7.70    5.10 
  -3  -1  -1    3.00    5.20 
   3  -1   1   -2.30    5.10 
  -3  -1  -1    4.40    6.00 
   3  -1   1    5.30    5.90 
   3  -1   1   21.30    7.70 
  -3  -1  -1   -0.10    6.50 
   3  -1   1    2.50    2.00 
  -3  -1  -1   -6.70    6.50 
   3  -1   1    3.70    3.90 
  -3  -1  -1    3.90    5.90 
   3  -1   1    4.60    6.40 
   3  -1   1    6.90    6.70 
   3  -1   1    6.40    6.30 
   3  -1   1    3.60    6.60 
  -3  -1  -1   11.00    6.40 
  -3  -1  -1   14.60    6.50 
   3  -1   1   -1.00    5.20 
   3  -1   1    3.70    4.80 
  -3  -1  -1   -0.10    3.80 
  -3  -1  -1   -1.30    4.50 
   3   1   1    7.80    5.10 
   3   1   1   -1.80    4.90 
   3   1   1    6.80    6.40 
   3   1   1   -4.50    6.10 
   3   1   1    0.80    5.90 
   3   1   1   -1.30    6.00 
  -3   1  -1   -4.20    3.70 
  -3   1  -1    4.40    5.60 
  -3   1  -1    5.00    5.90 
  -3   1  -1   -2.60    4.50 
   3   1   1    2.90    4.90 
  -3   1  -1    1.10    5.90 
  -3   1  -1    4.10    7.10 
   3   1   1   -1.30    6.10 
   3   1   1    5.20    4.90 
  -3   1  -1   10.40    6.50 
   3   1   1    7.10    6.20 
   3   1   1    6.90    4.80 
  -3   1  -1    8.60    5.50 
  -3   1  -1    6.60    3.20 
   3   1   1    4.00    8.00 
   3   1   1    6.40    7.10 
   3   1   1   13.00    7.30 
  -3   1  -1    3.40    3.40 
   3   1   1    6.20    5.60 
  -3   1  -1    5.90    2.70 
  -3   1  -1   13.40    6.90 
  -3   1  -1    5.60    3.60 
  -3   1  -1    2.10    4.60 
   3   1   1   10.50    6.90 
  -3   1  -1    4.90    6.80 
   3   1   1    4.30    5.30 
   3   1   1    4.80    6.20 
  -3   1  -1    7.80    6.20 
   3   1   1   12.00    7.80 
   3   1   1    0.70    6.00 
   3   1   1    4.00    3.50 
  -3   1  -1    3.90    5.60 
  -3   1  -1   15.90    7.10 
   3   1   1   -6.20    5.60 
   3   1   1    7.50    6.20 
   3   1   1   11.70    7.00 
  -3   1  -1    6.60    4.90 
  -3   1  -1    5.50    6.90 
  -3   1  -1    3.20    5.00 
  -3   1  -1    2.80    4.50 
   3   1   1    2.40    4.10 
   3   1   1   -7.20    6.10 
  -3   1  -1    5.90    5.70 
  -3   1  -1    4.00    6.90 
   3   1   1    0.10    3.70 
  -3   1  -1    0.70    4.60 
  -3   1  -1    2.80    7.10 
  -3   1  -1    2.60    4.80 
  -3   1  -1    7.30    5.00 
  -3   1  -1   -0.70    4.30 
   3   1   1    4.70    5.10 
  -3   1  -1   -1.50    5.70 
  -3   1  -1    8.30    6.10 
  -3   1  -1    5.50    4.70 
   3   1   1   15.10    7.20 
  -3   1  -1   10.20    4.40 
   3   1   1    0.00    6.30 
   3   1   1    6.20    6.20 
   4  -1   1 2995.10  120.69 
  -4  -1  -1 2786.32  119.09 
   4  -1   1 2928.81  119.29 
  -4  -1  -1 3030.30  121.39 
   4  -1   1 3065.89  109.39 
  -4  -1  -1 3032.00  108.79 
   4  -1   1 3191.58  113.19 
  -4  -1  -1 3146.89  121.59 
   4  -1   1 3002.30  118.99 
   4  -1   1 3051.09  118.89 
   4  -1   1 3084.49  112.89 
  -4  -1  -1 3177.68  117.19 
   4  -1   1 3034.50  118.39 
  -4  -1  -1 3015.40  120.69 
  -4  -1  -1 2944.91  110.09 
  -4  -1  -1 3120.19  119.69 
  -4  -1  -1 3020.70  116.69 
   4  -1   1 2982.60  116.29 
   4  -1   1 3067.69  120.49 
  -4  -1  -1 2984.90  120.19 
   4  -1   1 3004.00  121.19 
  -4  -1  -1 3033.60  110.09 
   4  -1   1 2918.81  106.79 
   4  -1   1 3076.19  116.49 
   4  -1   1 2954.80  112.19 
  -4  -1  -1 3098.39  118.09 
   4  -1   1 2983.60  119.79 
  -4  -1  -1 3147.59  120.29 
   4  -1   1 3110.29  117.09 
   4  -1   1 2963.60  118.89 
   4  -1   1 3097.29  117.09 
   4  -1   1 3041.60  118.99 
   4  -1   1 3130.39  114.69 
  -4  -1  -1 3158.38  116.19 
  -4  -1  -1 3056.99  119.59 
  -4  -1  -1 3091.49  116.29 
   4  -1   1 2968.70  109.19 
   4  -1   1 3057.39  118.99 
   4  -1   1 3074.29  115.29 
  -4  -1  -1 2952.70  120.29 
  -4  -1  -1 2982.40  120.39 
   4  -1   1 3046.70  109.29 
  -4   1  -1 3081.99  116.09 
  -4   1  -1 3055.09  109.09 
   4   1   1 3066.49  120.39 
   4   1   1 2955.80  114.29 
   4   1   1 3098.09  121.19 
   4   1   1 2911.31  120.39 
   4   1   1 3053.49  112.19 
   4   1   1 3079.79  119.39 
   4   1   1 2992.70  109.09 
  -4   1  -1 3030.80  108.69 
   4   1   1 3106.09  120.29 
  -4   1  -1 3065.69  120.09 
   4   1   1 3048.69  115.59 
  -4   1  -1 3066.09  120.69 
   4   1   1 2986.10  113.39 
   4   1   1 3142.69  119.79 
  -4   1  -1 3013.70  112.39 
  -4   1  -1 3165.48  120.59 
  -4   1  -1 3077.99  119.09 
   4   1   1 2999.20  119.79 
   4   1   1 3029.90  120.89 
   4   1   1 3078.89  120.09 
  -4   1  -1 3008.60  110.99 
  -4   1  -1 3011.70  109.59 
  -4   1  -1 3059.99  115.69 
   4   1   1 3180.18  122.69 
  -4   1  -1 2997.80  112.79 
  -4   1  -1 3123.49  119.29 
  -4   1  -1 3101.09  116.39 
   4   1   1 2934.61  120.39 
  -4   1  -1 3059.29  109.29 
  -4   1  -1 2998.90  118.09 
   4   1   1 3119.79  110.59 
   4   1   1 3008.80  118.19 
   4   1   1 3094.49  109.99 
  -4   1  -1 2970.10  120.29 
   4   1   1 3171.18  112.29 
   4   1   1 3138.29  123.39 
   4   1   1 2947.91  115.69 
  -4   1  -1 2981.20  120.79 
   4   1   1 2878.01  119.49 
  -4   1  -1 3001.60  110.79 
  -4   1  -1 2975.60  115.29 
   4   1   1 3118.79  121.19 
   4   1   1 3096.79  116.39 
  -5  -1  -1   28.90    9.90 
  -5  -1  -1   14.60    8.90 
   5  -1   1    7.30    5.50 
   5  -1   1    4.30    6.50 
  -5  -1  -1   17.00    6.80 
   5  -1   1    7.60    7.40 
  -5  -1  -1   19.60    8.30 
   5  -1   1    7.10    5.80 
   5  -1   1   41.20   10.20 
   5  -1   1   16.30    9.00 
  -5  -1  -1    7.40    7.80 
  -5  -1  -1    9.70    4.30 
   5  -1   1  -12.90    5.30 
  -5  -1  -1    6.50    8.30 
   5  -1   1   10.10    5.80 
  -5  -1  -1   17.30    8.80 
   5  -1   1    8.20    8.60 
   5  -1   1   -9.80    4.70 
   5  -1   1   13.20    8.10 
   5  -1   1   11.60    4.60 
  -5  -1  -1    1.50    6.50 
   5  -1   1   16.70    9.10 
   5  -1   1    8.10    8.10 
   5  -1   1    4.10    6.20 
   5  -1   1    4.40    8.10 
  -5  -1  -1    8.20    8.30 
  -5  -1  -1   11.80    3.30 
   5  -1   1   24.30   10.00 
  -5  -1  -1   22.80   10.50 
   5  -1   1   12.30    8.40 
   5  -1   1   10.80    3.00 
  -5  -1  -1    9.20    8.50 
  -5  -1  -1    6.40    8.20 
  -5  -1  -1    2.40    7.60 
  -5  -1  -1    3.50    5.60 
   5  -1   1   13.20    3.40 
  -5  -1  -1   -3.70    7.30 
   5  -1   1   11.00    4.30 
   5   1   1    7.30    7.60 
   5   1   1   12.50    4.50 
   5   1   1    7.80    6.00 
  -5   1  -1    6.70    7.00 
  -5   1  -1    6.90    6.30 
   5   1   1   13.60    4.40 
   5   1   1   35.10   11.70 
   5   1   1   14.20    8.60 
   5   1   1    8.90    8.60 
  -5   1  -1   14.20    7.00 
  -5   1  -1   17.40    9.70 
   5   1   1   10.80    3.20 
  -5   1  -1    0.60    8.00 
   5   1   1   18.20   10.50 
   5   1   1   17.50    9.80 
  -5   1  -1   14.50    4.50 
   5   1   1    4.60    5.60 
  -5   1  -1    7.80    3.20 
  -5   1  -1   18.60    5.50 
   5   1   1    8.60    8.20 
  -5   1  -1    3.90    6.20 
   5   1   1    8.30    8.50 
   5   1   1   13.70    9.00 
   5   1   1   13.00    8.10 
   5   1   1   11.70    6.90 
  -5   1  -1   10.20    7.70 
  -5   1  -1   22.70    5.90 
  -5   1  -1    9.20   10.10 
  -5   1  -1    1.90    6.20 
  -5   1  -1  -13.30    6.80 
   5   1   1    8.00    8.60 
  -5   1  -1    9.80    4.40 
  -5   1  -1   16.50   10.20 
  -5   1  -1    7.00    3.60 
   5   1   1    6.50    7.70 
  -5   1  -1   10.80    3.60 
  -5   1  -1   30.10    9.50 
  -5   1  -1   12.00    8.70 
   5   1   1    6.30    5.20 
   5   1   1   -2.30    5.50 
   5   1   1   10.10    9.30 
   5   1   1   17.00    9.10 
   5   1   1   17.50    6.50 
   6  -1   1  219.58   27.80 
   6  -1   1  205.28   19.80 
   6  -1   1  228.08   20.60 
   6  -1   1  262.27   31.30 
  -6  -1  -1  226.38   28.30 
  -6  -1  -1  199.18   23.50 
  -6  -1  -1  200.58   25.40 
  -6  -1  -1  212.98   26.70 
   6  -1   1  210.78   26.30 
  -6  -1  -1  271.97   28.70 
  -6  -1  -1  193.68   20.80 
   6  -1   1  191.28   26.60 
   6  -1   1  210.78   11.50 
   6  -1   1  208.28   22.50 
   6  -1   1  189.98   25.40 
   6  -1   1  251.87   27.70 
   6  -1   1  197.88   25.10 
   6  -1   1  242.28   15.10 
  -6  -1  -1  150.48   22.20 
  -6  -1  -1  213.78   27.20 
   6  -1   1  228.28   26.20 
   6  -1   1  226.88   27.60 
   6  -1   1  221.08   20.40 
   6  -1   1  211.18   26.60 
  -6  -1  -1  238.08   22.80 
  -6  -1  -1  237.38   29.80 
  -6  -1  -1  230.68   28.50 
  -6  -1  -1  231.38   13.70 
  -6  -1  -1  219.78   26.30 
  -6  -1  -1  244.08   28.50 
   6   1   1  209.08   15.30 
   6   1   1  151.48   24.40 
  -6   1  -1  216.98   27.50 
  -6   1  -1  214.88   20.80 
   6   1   1  201.58   26.50 
  -6   1  -1  207.58   23.40 
  -6   1  -1  214.58   25.20 
   6   1   1  232.28   18.80 
   6   1   1  234.78   24.60 
   6   1   1  240.28   22.80 
   6   1   1  211.38   27.00 
   6   1   1  228.68   28.00 
  -6   1  -1  212.28   11.00 
   6   1   1  219.68   27.80 
  -6   1  -1  245.48   27.70 
   6   1   1  209.18   24.90 
   6   1   1  223.08   26.80 
  -6   1  -1  207.38   10.80 
  -6   1  -1  169.58   25.40 
  -6   1  -1  182.68   22.80 
   6   1   1  206.88   26.40 
   6   1   1  230.38   23.00 
  -6   1  -1  230.98   26.30 
  -6   1  -1  211.18   26.90 
  -6   1  -1  209.88   26.50 
   6   1   1  193.18   25.60 
   6   1   1  237.28   29.50 
   6   1   1  174.08   25.00 
   6   1   1  232.08   11.60 
  -6   1  -1  211.18   22.90 
   6   1   1  157.58   24.60 
  -6   1  -1  273.47   30.90 
   6   1   1  217.08   27.10 
  -6   1  -1  218.98   14.40 
  -6   1  -1  199.98   15.50 
   6   1   1  234.78   11.10 
  -6   1  -1  184.68   19.60 
   6   1   1  178.78   23.80 
   7  -1   1   -1.60    9.40 
   7  -1   1   16.60   11.80 
   7  -1   1   -5.20    8.50 
  -7  -1  -1    7.70   12.00 
  -7  -1  -1  -14.90    9.40 
   7  -1   1   13.30    8.20 
  -7  -1  -1    6.10   10.50 
  -7  -1  -1   -1.40    8.60 
  -7  -1  -1   -3.60   10.40 
   7  -1   1   -4.50    8.70 
  -7  -1  -1    6.50   11.70 
  -7  -1  -1    0.70    8.50 
   7  -1   1    4.20   11.30 
  -7  -1  -1   -2.20    9.60 
  -7  -1  -1   -3.30    7.00 
   7  -1   1   -2.80    8.30 
   7  -1   1   -3.10    8.00 
   7  -1   1   10.10   11.30 
  -7  -1  -1    2.60    8.30 
  -7  -1  -1    8.80   12.00 
  -7  -1  -1   -3.30    9.10 
   7  -1   1   17.80   11.80 
   7  -1   1   -4.20    7.50 
  -7  -1  -1  -11.30   10.40 
   7  -1   1   -8.50    5.70 
   7   1   1   11.00   10.50 
  -7   1  -1   14.30   11.30 
   7   1   1   18.00   14.90 
  -7   1  -1   -2.80    9.10 
  -7   1  -1    6.70   10.60 
  -7   1  -1    0.90    9.50 
   7   1   1    2.70    9.90 
   7   1   1    3.40   10.30 
  -7   1  -1   -3.70    7.70 
   7   1   1    2.70   10.40 
   7   1   1    0.80    8.00 
   7   1   1    5.10    8.80 
   7   1   1    1.50    8.30 
  -7   1  -1    1.20    9.40 
  -7   1  -1   -5.40    9.30 
   7   1   1    8.90   11.70 
   7   1   1   18.10   12.60 
  -7   1  -1    8.50    9.70 
   7   1   1  -11.40    6.10 
  -7   1  -1   14.80   10.70 
   7   1   1    0.20    9.30 
  -7   1  -1    5.90   11.30 
   7   1   1    5.30    7.30 
  -7   1  -1   13.20    7.80 
  -7   1  -1   -2.30   10.30 
   7   1   1    2.20    7.80 
   7   1   1    7.90   10.10 
   7   1   1  -10.70    7.90 
   7   1   1  -13.70    7.00 
  -7   1  -1   -2.40    7.60 
   7   1   1   -6.90    8.60 
   8  -1   1  128.59   26.20 
  -8  -1  -1  228.38   25.30 
  -8  -1  -1  205.08   32.70 
   8  -1   1  219.38   31.60 
   8  -1   1  161.08   26.00 
   8  -1   1  225.28   32.10 
  -8  -1  -1  186.28   31.50 
  -8  -1  -1  212.68   26.50 
  -8  -1  -1  180.98   30.40 
   8  -1   1  157.38   27.40 
  -8  -1  -1  163.08   28.00 
  -8  -1  -1  107.79   22.80 
  -8  -1  -1  162.58   28.30 
  -8  -1  -1  151.28   26.50 
   8  -1   1  116.89   24.40 
   8  -1   1  159.38   28.30 
  -8  -1  -1  168.58   28.40 
   8  -1   1  154.18   26.90 
  -8  -1  -1  140.49   26.60 
  -8  -1  -1  169.68   28.60 
  -8  -1  -1  180.88   23.10 
   8  -1   1  139.69   27.70 
   8   1   1  170.28   21.40 
  -8   1  -1  127.69   24.00 
   8   1   1  156.48   28.10 
   8   1   1  220.58   32.80 
   8   1   1  165.68   29.50 
   8   1   1  143.19   27.90 
  -8   1  -1  139.89   25.30 
   8   1   1  168.28   29.60 
   8   1   1  165.18   22.70 
   8   1   1  154.88   25.20 
   8   1   1  153.08   27.10 
   8   1   1  114.69   23.50 
  -8   1  -1  193.08   31.20 
  -8   1  -1  179.68   25.60 
  -8   1  -1  181.78   28.30 
  -8   1  -1  165.48   29.00 
   8   1   1  223.98   31.10 
  -8   1  -1  151.58   25.50 
   8   1   1  171.98   27.70 
   8   1   1  178.38   26.80 
  -8   1  -1  165.28   30.60 
   8   1   1  206.08   32.90 
  -8   1  -1  170.68   29.80 
   8   1   1  149.88   29.00 
  -8   1  -1  200.98   29.60 
  -8   1  -1  164.88   23.50 
   9  -1   1   16.90   14.10 
   9  -1   1   15.80   13.80 
  -9  -1  -1    0.60   11.70 
   9  -1   1    1.70   12.00 
   9  -1   1    8.90   12.60 
  -9  -1  -1    3.40   13.70 
   9  -1   1    6.00   11.70 
   9  -1   1   14.10   13.40 
  -9  -1  -1   -8.40   11.20 
  -9  -1  -1    1.00   14.50 
  -9  -1  -1    8.40   15.50 
  -9  -1  -1    4.60   13.70 
   9  -1   1    6.50   13.60 
  -9  -1  -1   24.30   15.30 
  -9  -1  -1   12.80   14.10 
   9  -1   1    5.30   13.50 
   9  -1   1   -0.20   15.30 
  -9  -1  -1  -12.20    9.30 
  -9  -1  -1    0.90   11.80 
  -9  -1  -1    1.30   12.70 
  -9   1  -1   -8.40   10.90 
   9   1   1    2.40   12.60 
   9   1   1   -1.30   11.80 
   9   1   1    4.70   11.90 
   9   1   1    8.00   12.30 
   9   1   1   24.20   14.40 
  -9   1  -1    1.30   12.50 
  -9   1  -1   11.00   14.40 
  -9   1  -1   -3.10   11.00 
  -9   1  -1  -12.50   10.80 
  -9   1  -1  -13.50   10.40 
  -9   1  -1   -3.60   12.90 
   9   1   1    0.20   11.70 
   9   1   1   14.20   12.50 
   9   1   1   -4.00   11.50 
  -9   1  -1    8.60   12.80 
   9   1   1   17.90   13.80 
  -9   1  -1  -14.60   10.90 
   9   1   1   13.20   12.30 
   9   1   1   16.70   17.10 
  -9   1  -1    8.10   12.80 
  10  -1   1  207.88   37.50 
 -10  -1  -1  164.98   31.40 
  10  -1   1  132.59   29.40 
 -10  -1  -1  218.28   37.20 
 -10  -1  -1  200.48   36.40 
 -10  -1  -1  174.78   34.50 
  10  -1   1  211.08   37.40 
  10  -1   1  179.58   35.70 
  10  -1   1  143.39   29.60 
 -10  -1  -1  175.58   34.50 
  10  -1   1  133.29   30.40 
 -10  -1  -1  193.58   36.20 
 -10  -1  -1  206.88   34.10 
 -10  -1  -1  174.88   34.30 
  10  -1   1  145.09   30.30 
  10  -1   1  142.79   31.20 
 -10  -1  -1  174.68   34.70 
  10  -1   1  160.98   31.90 
 -10  -1  -1  215.78   37.00 
  10   1   1  143.89   31.80 
  10   1   1  144.89   30.30 
 -10   1  -1  189.88   36.60 
 -10   1  -1  189.18   31.30 
  10   1   1  170.88   34.80 
  10   1   1  157.88   34.80 
 -10   1  -1  218.38   38.30 
  10   1   1  195.48   34.20 
 -10   1  -1  148.29   31.30 
 -10   1  -1  170.68   31.70 
 -10   1  -1  179.28   34.00 
 -10   1  -1  309.07   43.70 
  10   1   1  182.18   34.50 
  10   1   1  234.28   38.50 
 -10   1  -1  218.08   38.30 
  10   1   1  143.19   30.80 
  10   1   1  167.78   33.90 
 -10   1  -1  123.79   31.40 
  10  -2  -1  227.48   36.00 
  10  -2  -1  171.08   33.90 
 -10  -2   1  172.48   31.30 
  10  -2  -1  149.19   32.30 
 -10  -2   1  201.58   34.30 
  10  -2  -1  170.78   33.30 
 -10  -2   1  167.48   35.20 
 -10  -2   1  148.49   32.50 
 -10  -2   1  181.48   34.20 
  10  -2  -1  149.69   29.00 
 -10  -2   1  226.18   37.20 
  10  -2  -1  155.28   34.00 
 -10  -2   1  199.08   35.20 
  10  -2  -1  107.99   27.60 
  10  -2  -1  136.79   29.20 
 -10  -2   1  134.49   32.30 
 -10  -2   1  232.68   39.90 
 -10  -2   1  216.98   38.40 
 -10  -2   1  256.97   41.20 
 -10   2   1  198.78   37.70 
  10   2  -1  143.39   33.50 
 -10   2   1  135.09   30.90 
 -10   2   1  237.88   38.30 
 -10   2   1  272.07   42.00 
  10   2  -1  224.28   39.80 
  10   2  -1  192.38   36.20 
  10   2  -1  131.99   32.40 
  10   2  -1  168.88   30.10 
  10   2  -1  144.39   31.30 
 -10   2   1  156.78   31.20 
  10   2  -1  252.57   43.60 
 -10   2   1  177.78   33.80 
 -10   2   1  241.68   37.10 
 -10   2   1  266.77   38.60 
  10   2  -1  138.89   31.50 
 -10   2   1  156.48   30.00 
  10   2  -1  225.58   36.70 
  10   2  -1  187.88   38.00 
  -9  -2   1  167.78   31.80 
  -9  -2   1  231.98   35.10 
  -9  -2   1  247.48   37.80 
  -9  -2   1  219.18   36.00 
   9  -2  -1  270.07   37.90 
  -9  -2   1  174.38   32.40 
  -9  -2   1  269.07   37.60 
   9  -2  -1  234.48   36.30 
   9  -2  -1  260.37   36.90 
   9  -2  -1  237.98   36.90 
  -9  -2   1  170.88   32.90 
   9  -2  -1  219.58   36.00 
  -9  -2   1  272.67   38.50 
  -9  -2   1  199.18   31.80 
  -9  -2   1  220.38   35.40 
   9  -2  -1  287.37   36.60 
  -9  -2   1  302.17   36.80 
   9  -2  -1  256.67   35.30 
   9  -2  -1  196.08   33.10 
  -9  -2   1  289.47   39.70 
   9  -2  -1  308.07   41.90 
  -9   2   1  179.68   31.70 
   9   2  -1  245.28   37.30 
   9   2  -1  262.67   37.70 
  -9   2   1  197.38   30.20 
   9   2  -1  188.28   33.70 
   9   2  -1  199.08   32.70 
   9   2  -1  177.38   32.30 
   9   2  -1  222.78   36.20 
  -9   2   1  268.17   37.40 
  -9   2   1  228.38   35.40 
   9   2  -1  268.57   39.30 
   9   2  -1  227.78   40.10 
   9   2  -1  251.87   37.10 
  -9   2   1  269.87   35.90 
   9   2  -1  253.57   36.70 
  -9   2   1  216.28   30.70 
   9   2  -1  167.68   31.40 
  -9   2   1  242.68   33.20 
   9   2  -1  169.48   32.20 
   9   2  -1  201.28   31.50 
  -9   2   1  287.07   40.30 
  -9   2   1  273.97   38.10 
   8  -2  -1   -5.80    8.30 
  -8  -2   1   -3.80    8.20 
  -8  -2   1   -1.80   10.10 
   8  -2  -1    7.90   12.30 
  -8  -2   1   -4.80   11.60 
   8  -2  -1   -7.30    8.80 
  -8  -2   1   20.50   14.20 
  -8  -2   1   -7.80    9.40 
  -8  -2   1    4.30   10.50 
   8  -2  -1   -1.60    9.20 
  -8  -2   1  -10.60   10.50 
  -8  -2   1  -12.00    8.40 
   8  -2  -1    2.50   10.20 
   8  -2  -1  -13.90    9.00 
   8  -2  -1    4.50   12.50 
   8  -2  -1    1.30    9.40 
   8  -2  -1   -9.70    8.30 
  -8  -2   1    0.00   11.30 
  -8  -2   1   -0.10    9.20 
  -8  -2   1   17.50   13.30 
  -8  -2   1   -4.90   10.00 
  -8  -2   1   -8.80    9.80 
   8  -2  -1   -0.50   11.60 
   8   2  -1   -6.80    9.80 
   8   2  -1   10.60   11.10 
  -8   2   1   -3.40    9.80 
   8   2  -1   18.30   14.20 
   8   2  -1   10.70   12.60 
  -8   2   1    1.40   12.00 
  -8   2   1   -7.90    8.10 
  -8   2   1    6.50   10.70 
  -8   2   1    2.30   12.20 
   8   2  -1   13.00   12.80 
   8   2  -1   -6.30   10.00 
  -8   2   1   10.60   14.20 
   8   2  -1    1.30   11.70 
   8   2  -1   26.70   11.50 
  -8   2   1   12.00   14.90 
  -8   2   1    8.90   11.70 
   8   2  -1   10.60   12.50 
  -8   2   1   -2.50    9.20 
   8   2  -1   22.90   12.10 
   8   2  -1    5.90   11.10 
  -8   2   1  -13.40    9.00 
   8   2  -1   30.10   15.60 
  -8   2   1   19.60   12.00 
   8   2  -1    3.70   15.30 
  -8   2   1   27.90   13.40 
   8   2  -1  -12.30    9.50 
   8   2  -1    7.90    9.50 
   8   2  -1    4.30   11.00 
  -8   2   1  -19.50    8.30 
   7  -2  -1   26.20   11.90 
  -7  -2   1   -5.90    7.50 
  -7  -2   1   16.20   13.20 
  -7  -2   1   -1.30   10.50 
  -7  -2   1    6.70   11.90 
  -7  -2   1    2.50    9.60 
   7  -2  -1    7.00    9.20 
   7  -2  -1    4.20    8.20 
   7  -2  -1   20.90   12.00 
  -7  -2   1    2.10    9.80 
   7  -2  -1   -1.20    9.70 
  -7  -2   1    4.80   10.90 
  -7  -2   1   11.10   12.00 
  -7  -2   1    9.70    8.70 
  -7  -2   1    2.70    9.70 
   7  -2  -1    9.90   11.60 
   7  -2  -1   14.30   10.20 
  -7  -2   1   15.70   10.60 
  -7  -2   1   10.30   10.60 
  -7  -2   1    3.10   10.30 
  -7  -2   1    3.50   10.60 
   7  -2  -1    1.90    9.70 
   7  -2  -1    0.00   10.00 
  -7  -2   1    8.20    9.70 
   7  -2  -1   13.60   11.80 
   7   2  -1    3.60   11.30 
   7   2  -1    3.60    9.90 
   7   2  -1   14.10   12.00 
   7   2  -1    8.90   12.20 
   7   2  -1   14.60   12.70 
  -7   2   1   17.40   10.30 
   7   2  -1   14.50   13.50 
   7   2  -1   11.00   10.10 
  -7   2   1   19.60   12.90 
   7   2  -1   15.90   12.20 
   7   2  -1    7.80    7.70 
   7   2  -1    1.20   10.50 
  -7   2   1    8.20    9.40 
  -7   2   1   12.60   12.20 
  -7   2   1    8.40   11.00 
   7   2  -1    1.50    9.80 
   7   2  -1   21.00   12.10 
   7   2  -1    6.00    8.60 
   7   2  -1   16.50   12.10 
  -7   2   1    5.00    8.50 
  -7   2   1    0.70   10.60 
   7   2  -1   18.80   17.20 
  -7   2   1   20.60   10.90 
  -7   2   1    4.30   10.20 
  -7   2   1   21.70   11.50 
   7   2  -1   12.50    9.70 
   7   2  -1   30.60   13.10 
  -7   2   1   21.90   13.30 
  -7   2   1    4.10   11.10 
   7   2  -1    3.40    8.20 
   7   2  -1   38.40   15.30 
  -6  -2   1   60.29   14.90 
   6  -2  -1   48.10   13.00 
  -6  -2   1   90.39   16.70 
  -6  -2   1   61.09   15.50 
  -6  -2   1   72.99   18.70 
  -6  -2   1   79.79   14.90 
   6  -2  -1   41.40   12.20 
  -6  -2   1   68.39   17.50 
   6  -2  -1   66.69    9.80 
   6  -2  -1   56.29   15.20 
   6  -2  -1   63.49   14.70 
  -6  -2   1   55.99   15.00 
  -6  -2   1   58.89   16.80 
   6  -2  -1   89.39   17.70 
   6  -2  -1   58.49   14.80 
   6  -2  -1   62.09   15.70 
  -6  -2   1   44.50   15.00 
   6  -2  -1   69.79   16.50 
   6  -2  -1   63.89   10.50 
  -6  -2   1   54.99   15.20 
  -6  -2   1   49.80   15.50 
  -6  -2   1   62.19   12.90 
  -6  -2   1   57.09   15.70 
  -6  -2   1   61.39   17.60 
   6  -2  -1   81.19   17.60 
  -6  -2   1   87.89   17.90 
   6  -2  -1   64.79   14.20 
  -6   2   1   50.09   14.20 
   6   2  -1   74.49   17.10 
   6   2  -1   67.69   13.30 
   6   2  -1   64.69   13.60 
  -6   2   1   80.79   17.30 
  -6   2   1   56.69    8.60 
   6   2  -1   85.49   16.40 
  -6   2   1   59.79   13.00 
   6   2  -1   53.69   15.20 
  -6   2   1   87.69   18.50 
  -6   2   1   67.19    7.00 
   6   2  -1   70.69    7.20 
  -6   2   1   82.69   14.30 
   6   2  -1   55.59   12.00 
  -6   2   1   52.19   15.90 
   6   2  -1   72.79   16.80 
   6   2  -1   62.09   15.20 
   6   2  -1   67.09   13.80 
  -6   2   1   58.99   13.80 
   6   2  -1   60.29    7.10 
  -6   2   1   29.90   13.80 
   6   2  -1   50.99   15.00 
   6   2  -1   57.29   16.00 
   6   2  -1   86.69   17.70 
  -6   2   1   65.39    9.70 
   6   2  -1   76.09    8.90 
   6   2  -1   69.29   16.30 
   6   2  -1   48.90   15.70 
  -6   2   1   55.79   14.90 
   6   2  -1   71.29   16.90 
   6   2  -1   55.99   15.30 
   6   2  -1   47.20   17.60 
  -6   2   1   42.80    7.20 
   6   2  -1   41.00   14.00 
   6   2  -1   48.80   15.40 
  -6   2   1   70.09   14.60 
  -6   2   1   72.69   15.00 
  -6   2   1   68.09   10.90 
   6   2  -1   71.79   14.50 
  -6   2   1   30.60   10.80 
   6   2  -1   60.69   15.90 
  -6   2   1   69.09   15.20 
  -6   2   1   71.69    7.80 
  -5  -2   1  278.17   25.60 
   5  -2  -1  273.77   26.00 
   5  -2  -1  284.27   27.10 
  -5  -2   1  259.07   25.70 
  -5  -2   1  239.38   24.20 
   5  -2  -1  259.47   15.70 
   5  -2  -1  241.88   24.60 
  -5  -2   1  252.87   27.40 
  -5  -2   1  239.68   24.50 
   5  -2  -1  194.38   21.70 
   5  -2  -1  250.57   16.10 
   5  -2  -1  275.17   28.10 
  -5  -2   1  288.67   27.90 
  -5  -2   1  219.78   23.90 
   5  -2  -1  246.68   26.50 
   5  -2  -1  266.57   27.60 
  -5  -2   1  274.27   27.50 
  -5  -2   1  269.47   29.10 
   5  -2  -1  199.68   22.80 
  -5  -2   1  244.78   26.60 
  -5  -2   1  227.68   25.90 
   5  -2  -1  330.07   25.70 
  -5  -2   1  266.17   20.40 
   5  -2  -1  251.67   26.30 
  -5  -2   1  257.67   26.70 
  -5  -2   1  251.17   26.60 
   5  -2  -1  257.77   20.50 
   5  -2  -1  233.58   25.10 
   5   2  -1  225.68   26.30 
  -5   2   1  222.58   14.80 
   5   2  -1  263.87   24.40 
   5   2  -1  292.77   29.20 
  -5   2   1  234.18   25.20 
  -5   2   1  244.98   15.60 
   5   2  -1  263.27   19.60 
   5   2  -1  242.08   23.30 
   5   2  -1  261.87   26.50 
  -5   2   1  222.98   22.50 
   5   2  -1  242.18   26.40 
  -5   2   1  240.58   26.30 
   5   2  -1  232.08   26.20 
   5   2  -1  286.17   27.60 
  -5   2   1  237.78   15.30 
   5   2  -1  255.67   26.30 
  -5   2   1  261.27   23.80 
  -5   2   1  231.28   14.40 
  -5   2   1  261.07   24.10 
  -5   2   1  248.68   15.80 
  -5   2   1  193.58   21.50 
  -5   2   1  216.38   21.00 
  -5   2   1  270.57   19.60 
  -5   2   1  246.88   27.20 
  -5   2   1  247.78   16.20 
   5   2  -1  258.77   27.60 
   5   2  -1  314.77   30.30 
   5   2  -1  258.37   27.40 
   5   2  -1  242.58   15.80 
  -5   2   1  239.68   18.60 
   5   2  -1  232.68   25.30 
   5   2  -1  255.97   15.50 
  -5   2   1  282.97   26.90 
  -5   2   1  234.38   25.50 
   5   2  -1  230.08   22.60 
  -5   2   1  269.57   25.40 
   5   2  -1  218.98   24.00 
   5   2  -1  215.98   22.90 
   5   2  -1  220.78   25.00 
   5   2  -1  265.47   25.20 
  -5   2   1  244.28   25.00 
   5   2  -1  238.88   14.90 
   5   2  -1  239.28   28.70 
   4  -2  -1   32.40   10.20 
   4  -2  -1   22.10    8.80 
   4  -2  -1   23.60    7.90 
  -4  -2   1   31.90   10.40 
  -4  -2   1   17.30    8.20 
   4  -2  -1   35.80    9.50 
  -4  -2   1   26.90   10.30 
   4  -2  -1   39.10   10.10 
  -4  -2   1   51.39   12.40 
  -4  -2   1   46.40   12.50 
   4  -2  -1   38.50    5.90 
   4  -2  -1   31.60    6.60 
  -4  -2   1   43.00    9.70 
   4  -2  -1   29.60    8.50 
  -4  -2   1   32.40   10.20 
   4  -2  -1   20.60    8.80 
   4  -2  -1   22.10    8.50 
  -4  -2   1   39.90   10.30 
  -4  -2   1   43.40    7.60 
   4  -2  -1   32.60    8.20 
   4  -2  -1   32.70    9.80 
   4  -2  -1   48.10   11.20 
  -4  -2   1   44.30   11.90 
  -4  -2   1   37.10   10.50 
   4  -2  -1   40.90   10.90 
   4  -2  -1   26.60    6.40 
  -4  -2   1   40.80   11.40 
  -4  -2   1   23.00   10.30 
  -4  -2   1   45.20   10.40 
  -4  -2   1   42.80    9.90 
   4   2  -1   50.09    8.30 
  -4   2   1   33.70   12.30 
  -4   2   1   44.60    9.20 
  -4   2   1   46.00   11.70 
   4   2  -1   50.89   12.00 
  -4   2   1   30.90    8.20 
   4   2  -1   61.69   12.10 
  -4   2   1   36.80    7.10 
  -4   2   1   31.70    6.10 
  -4   2   1   42.60    7.70 
   4   2  -1   43.80   11.80 
   4   2  -1   35.70   10.80 
  -4   2   1   62.49    9.10 
   4   2  -1   32.50    8.90 
   4   2  -1   31.00   10.20 
   4   2  -1   37.80    9.90 
  -4   2   1   41.10    9.70 
  -4   2   1   29.40    9.30 
   4   2  -1   36.00   10.40 
   4   2  -1   40.90   10.60 
   4   2  -1   35.30   10.40 
  -4   2   1   32.90    7.00 
  -4   2   1   37.10   10.10 
  -4   2   1   39.10    7.40 
   4   2  -1   33.40   10.20 
  -4   2   1   26.10    8.80 
   4   2  -1   46.50   11.20 
  -4   2   1   42.90    8.50 
  -4   2   1   35.90    7.20 
  -4   2   1   42.30    9.80 
   4   2  -1   35.40    6.90 
  -4   2   1   63.19   11.50 
   4   2  -1   43.80   11.20 
   4   2  -1   57.79   10.40 
   4   2  -1   31.30    9.60 
   4   2  -1   50.39   12.60 
  -4   2   1   39.00    6.70 
   4   2  -1   35.00   10.60 
  -4   2   1   41.60   10.70 
   4   2  -1   43.20   11.10 
  -4   2   1   27.90    7.10 
  -4   2   1   26.80    8.60 
  -4   2   1   32.80   11.30 
   4   2  -1   48.50   14.00 
   4   2  -1   37.90    7.20 
  -3  -2   1   58.39   11.50 
   3  -2  -1   62.09    5.00 
  -3  -2   1   74.49   12.20 
   3  -2  -1   49.99   10.00 
  -3  -2   1   66.49   13.60 
  -3  -2   1   66.99   10.70 
   3  -2  -1   61.59   11.70 
  -3  -2   1   68.49   11.80 
  -3  -2   1   71.59   11.50 
  -3  -2   1   49.90   11.80 
  -3  -2   1   62.99   13.10 
  -3  -2   1   83.79   12.80 
   3  -2  -1   65.19    9.20 
  -3  -2   1   40.80    9.10 
   3  -2  -1   71.79    9.40 
   3  -2  -1   51.89   10.50 
   3  -2  -1   56.09    7.60 
  -3  -2   1   63.99   11.60 
   3  -2  -1   53.19    9.70 
  -3  -2   1   55.29   12.10 
   3  -2  -1   55.09   10.30 
   3  -2  -1   58.29    9.00 
  -3  -2   1   72.59   12.70 
   3  -2  -1   70.49    6.40 
   3  -2  -1   63.89   11.10 
  -3  -2   1   55.19    8.80 
   3  -2  -1   43.50    7.90 
  -3  -2   1   61.69   10.90 
  -3  -2   1   67.49   12.10 
  -3  -2   1   51.59   11.40 
   3  -2  -1   57.89    9.60 
  -3  -2   1   56.79   12.70 
   3  -2  -1   52.29    9.40 
   3  -2  -1   61.79   10.90 
   3  -2  -1   78.79   12.40 
   3  -2  -1   57.79    9.70 
   3  -2  -1   46.30   10.60 
   3  -2  -1   53.29   11.00 
  -3  -2   1   70.19    9.70 
   3  -2  -1   52.69    9.30 
  -3   2   1   60.29    9.20 
   3   2  -1   39.40   10.10 
   3   2  -1   63.09   11.70 
   3   2  -1   62.19   11.50 
   3   2  -1   64.39   12.20 
  -3   2   1   44.50    9.40 
  -3   2   1   64.39    5.30 
  -3   2   1   55.09   10.90 
  -3   2   1   56.69    9.50 
   3   2  -1   51.09    8.70 
   3   2  -1   68.29   12.70 
   3   2  -1   79.29   12.90 
   3   2  -1   63.49   11.40 
  -3   2   1   64.09    7.30 
   3   2  -1   44.30    9.90 
  -3   2   1   58.89   13.40 
  -3   2   1   53.29    3.90 
  -3   2   1   51.29   10.80 
  -3   2   1   73.39    7.20 
   3   2  -1   75.79   12.30 
  -3   2   1   46.80   11.80 
  -3   2   1   54.39    9.10 
   3   2  -1   50.19   12.00 
   3   2  -1   67.49   10.90 
  -3   2   1   55.79    9.00 
   3   2  -1   59.69    9.10 
  -3   2   1   96.29   13.70 
  -3   2   1   57.19    9.70 
  -3   2   1   58.39   11.50 
  -3   2   1   53.89    8.70 
  -3   2   1   68.09    6.90 
   3   2  -1   62.79   11.60 
  -3   2   1   55.49    8.20 
   3   2  -1   64.49   11.50 
  -3   2   1   56.59   10.50 
  -3   2   1   61.79    6.80 
  -3   2   1   60.69    4.70 
  -3   2   1   55.69   10.90 
  -3   2   1   72.19    9.60 
   3   2  -1   51.59   15.20 
  -3   2   1   56.49    6.80 
  -3   2   1   58.09    9.40 
  -3   2   1   63.59    8.10 
   3   2  -1   69.69   11.10 
   3   2  -1   68.89   11.80 
   3   2  -1   31.10   10.00 
  -3   2   1   52.99    9.30 
   3   2  -1   50.39   10.60 
  -3   2   1   58.39   11.50 
  -3   2   1   60.49    3.80 
  -3   2   1   40.20    7.80 
   3   2  -1   92.09   14.50 
  -3   2   1   71.59   12.30 
  -3   2   1   65.39   11.00 
   3   2  -1   55.69   11.80 
  -3   2   1   65.29   11.10 
  -3   2   1   61.79   10.20 
   3   2  -1   53.79    8.80 
  -2  -2   1    8.10    4.90 
  -2  -2   1    2.90    4.50 
  -2  -2   1   -2.20    4.20 
   2  -2  -1    3.20    3.10 
  -2  -2   1    8.70    5.80 
  -2  -2   1    8.80    4.60 
  -2  -2   1   -1.40    3.20 
   2  -2  -1    1.20    3.80 
   2  -2  -1    4.40    3.60 
  -2  -2   1    5.80    4.00 
   2  -2  -1    8.20    4.20 
  -2  -2   1    1.30    4.60 
  -2  -2   1    6.60    4.60 
  -2  -2   1    4.80    3.80 
  -2  -2   1    6.90    5.30 
   2  -2  -1   13.10    5.70 
   2  -2  -1    8.80    4.40 
  -2  -2   1   14.70    5.70 
   2  -2  -1    7.20    3.50 
  -2  -2   1   -6.30    4.90 
  -2  -2   1    1.00    4.40 
  -2  -2   1   -0.90    4.70 
  -2  -2   1    1.90    3.70 
   2  -2  -1    9.90    4.30 
  -2  -2   1    1.30    3.90 
   2  -2  -1    2.10    3.20 
   2  -2  -1    7.20    4.40 
  -2  -2   1    2.00    4.90 
  -2  -2   1    2.10    4.40 
  -2  -2   1    4.10    5.40 
  -2  -2   1   -1.50    4.10 
   2  -2  -1    0.40    4.10 
  -2  -2   1    3.10    5.30 
   2  -2  -1   -3.70    3.60 
  -2  -2   1    4.90    4.10 
   2  -2  -1    0.20    2.00 
   2  -2  -1    2.30    3.20 
  -2  -2   1    9.10    5.90 
  -2  -2   1    0.00    3.60 
   2  -2  -1    4.00    4.50 
   2  -2  -1    4.90    3.50 
   2  -2  -1    1.90    3.50 
  -2  -2   1    3.70    4.60 
  -2  -2   1   -1.70    3.30 
  -2  -2   1    6.90    4.80 
   2  -2  -1    1.00    3.60 
   2  -2  -1    6.10    3.50 
  -2  -2   1    2.80    4.50 
   2  -2  -1    9.40    3.30 
  -2  -2   1   -2.30    5.20 
  -2  -2   1   -0.70    4.30 
  -2   2   1    1.10    2.50 
   2   2  -1    0.70    3.90 
  -2   2   1    4.30    3.20 
  -2   2   1    5.10    3.90 
  -2   2   1    3.80    3.90 
   2   2  -1    6.30    4.40 
  -2   2   1    4.40    2.90 
   2   2  -1    2.90    4.40 
  -2   2   1    5.20    2.90 
  -2   2   1    4.50    3.70 
  -2   2   1    6.10    2.30 
   2   2  -1    0.70    4.70 
   2   2  -1    1.10    3.60 
   2   2  -1    9.90    4.60 
  -2   2   1    0.30    5.00 
   2   2  -1    4.10    5.20 
  -2   2   1    0.20    3.20 
   2   2  -1   -1.80    4.40 
  -2   2   1    2.40    3.10 
  -2   2   1    3.70    3.70 
   2   2  -1    5.20    5.00 
  -2   2   1    4.40    2.10 
  -2   2   1    3.80    3.30 
  -2   2   1   -1.30    3.40 
   2   2  -1    1.30    4.60 
   2   2  -1    5.80    4.40 
  -2   2   1   -2.40    3.50 
   2   2  -1    2.80    4.30 
  -2   2   1    3.40    3.90 
  -2   2   1    2.60    3.40 
   2   2  -1    8.70    6.00 
   2   2  -1   -8.40    3.00 
   2   2  -1    7.70    5.00 
  -2   2   1    6.30    3.80 
   2   2  -1    2.50    5.40 
   2   2  -1    5.60    6.70 
  -2   2   1    6.40    4.10 
  -2   2   1    2.00    5.60 
   2   2  -1   -1.60    4.60 
   2   2  -1    2.50    4.40 
   2   2  -1    0.30    4.60 
   2   2  -1    4.00    4.70 
  -2   2   1    8.50    4.80 
   2   2  -1    2.80    4.40 
   2   2  -1    1.20    4.70 
  -2   2   1    4.70    4.00 
  -2   2   1    1.00    2.70 
  -2   2   1    5.10    2.60 
   2   2  -1   -0.90    4.90 
   2   2  -1    5.10    3.90 
   2   2  -1    5.10    4.00 
   2   2  -1   12.20    4.90 
  -2   2   1    5.70    4.00 
   2   2  -1    6.80    6.30 
  -2   2   1    0.00    5.90 
  -2   2   1   -2.50    3.30 
   2   2  -1   -1.70    4.80 
  -2   2   1    3.80    3.50 
  -2   2   1    2.40    3.40 
   2   2  -1    3.90    5.40 
   2   2  -1    4.70    4.40 
   2   2  -1    5.10    5.10 
  -2   2   1    3.10    2.30 
   2   2  -1    2.20    5.90 
   2   2  -1    2.40    4.70 
  -2   2   1    1.50    4.70 
  -2   2   1    3.00    3.10 
  -2   2   1    4.40    4.80 
  -2   2   1    5.40    4.70 
   1  -2  -1    0.70    3.00 
  -1  -2   1    2.80    4.60 
   1  -2  -1    1.20    1.70 
  -1  -2   1    8.30    3.80 
  -1  -2   1    5.40    2.70 
   1  -2  -1    5.70    4.40 
   1  -2  -1    4.80    5.80 
   1  -2  -1    5.00    3.50 
  -1  -2   1    4.50    4.90 
  -1  -2   1    6.60    4.70 
  -1  -2   1    5.00    3.20 
  -1  -2   1    9.80    3.70 
  -1  -2   1    5.90    4.20 
   1  -2  -1   13.10    5.00 
  -1  -2   1    4.90    3.10 
  -1  -2   1    7.60    4.40 
  -1  -2   1    2.20    2.40 
  -1  -2   1   13.00    4.30 
  -1  -2   1   14.40    5.10 
   1  -2  -1    4.50    3.10 
  -1  -2   1    7.70    4.90 
  -1  -2   1    5.60    2.70 
  -1  -2   1    1.40    2.50 
   1  -2  -1    7.90    3.40 
   1  -2  -1    4.20    2.60 
  -1  -2   1    1.00    3.80 
  -1  -2   1    2.50    3.80 
  -1  -2   1    3.40    3.60 
   1  -2  -1    2.10    1.70 
   1  -2  -1    6.80    3.80 
  -1  -2   1    7.00    5.10 
  -1  -2   1   11.20    4.90 
   1  -2  -1    3.30    2.80 
  -1  -2   1    2.60    2.40 
  -1  -2   1    4.40    3.10 
  -1  -2   1    9.10    4.70 
  -1  -2   1    4.90    3.10 
   1  -2  -1    8.20    3.10 
  -1  -2   1    6.00    3.80 
  -1  -2   1   10.10    3.40 
   1  -2  -1    2.10    2.10 
   1  -2  -1    7.80    4.20 
  -1  -2   1    3.80    2.50 
  -1  -2   1    2.10    2.90 
   1  -2  -1    3.10    2.40 
  -1  -2   1    5.50    4.50 
   1  -2  -1    1.70    3.30 
  -1  -2   1   -0.20    4.10 
  -1  -2   1    3.60    4.30 
   1  -2  -1    7.40    2.50 
   1  -2  -1    2.80    3.10 
  -1  -2   1   12.40    4.00 
   1   2  -1    7.30    4.90 
   1   2  -1    5.20    4.50 
   1   2  -1   13.00    4.00 
   1   2  -1    0.20    3.50 
  -1   2   1    9.60    4.80 
   1   2  -1    3.70    3.90 
  -1   2   1    4.70    1.70 
   1   2  -1    7.60    3.30 
   1   2  -1    6.00    3.90 
  -1   2   1    4.30    5.30 
   1   2  -1    1.20    4.10 
  -1   2   1    1.20    2.10 
  -1   2   1   11.50    3.00 
  -1   2   1    5.60    2.20 
   1   2  -1    1.40    4.10 
  -1   2   1    3.00    3.60 
   1   2  -1    5.40    4.00 
  -1   2   1    3.20    3.20 
  -1   2   1   20.00    5.70 
  -1   2   1    3.20    2.30 
   1   2  -1    2.00    5.60 
   1   2  -1   18.20    5.50 
   1   2  -1   -0.30    3.90 
   1   2  -1    6.60    3.20 
  -1   2   1    4.50    2.80 
  -1   2   1    4.60    2.90 
  -1   2   1    3.90    2.90 
  -1   2   1    4.10    3.30 
  -1   2   1    4.40    3.00 
   1   2  -1    3.90    3.40 
   1   2  -1    2.40    4.20 
   1   2  -1    6.10    5.00 
  -1   2   1    5.90    2.40 
  -1   2   1    3.80    2.90 
   1   2  -1    2.90    2.50 
   1   2  -1    3.10    3.20 
   1   2  -1    3.00    4.50 
   1   2  -1    2.90    4.00 
   1   2  -1    3.70    3.50 
   1   2  -1    7.90    5.70 
  -1   2   1    4.50    1.70 
  -1   2   1    6.60    2.60 
  -1   2   1    8.50    3.70 
  -1   2   1    4.80    2.00 
  -1   2   1    3.80    2.70 
   1   2  -1    6.30    3.20 
   1   2  -1    5.60    4.60 
  -1   2   1    8.70    2.50 
   1   2  -1   -0.70    2.50 
  -1   2   1   18.60    5.30 
  -1   2   1    6.50    3.70 
   1   2  -1   -2.80    4.20 
  -1   2   1    1.10    2.70 
   1   2  -1    6.70    4.70 
   1   2  -1   13.80    4.60 
  -1   2   1    8.30    2.90 
   1   2  -1    4.80    4.10 
  -1   2   1    4.10    3.00 
  -1   2   1    3.70    2.50 
  -1   2   1    6.60    4.90 
   1   2  -1   -2.40    2.60 
   1   2  -1    7.30    3.50 
  -1   2   1    4.10    4.10 
   1   2  -1    2.70    4.20 
  -1   2   1    2.90    2.40 
   0  -2  -1   26.80    5.40 
   0  -2  -1   23.40    2.20 
   0  -2  -1   37.30    7.10 
   0  -2   1   33.70    6.20 
   0  -2  -1   23.10    6.30 
   0  -2   1   18.50    5.20 
   0  -2   1   30.50    7.00 
   0  -2   1   17.50    5.30 
   0  -2   1   28.00    6.80 
   0  -2   1   21.80    5.30 
   0  -2   1   21.30    5.80 
   0  -2  -1   29.80    3.10 
   0  -2  -1   36.70    7.00 
   0  -2  -1   27.20    4.20 
   0  -2   1   28.70    2.70 
   0  -2   1   23.30    3.40 
   0  -2  -1   26.10    5.50 
   0  -2  -1   12.70    5.00 
   0  -2   1   25.50    6.30 
   0  -2   1   23.30    4.40 
   0  -2   1   25.60    6.30 
   0  -2  -1   23.20    2.90 
   0  -2   1   33.80    6.90 
   0  -2   1   23.70    5.40 
   0  -2  -1   23.70    5.30 
   0  -2  -1   20.30    4.80 
   0  -2   1   19.90    6.50 
   0  -2   1   32.10    6.80 
   0  -2  -1   29.60    3.60 
   0  -2   1   22.30    3.40 
   0  -2  -1   24.00    6.70 
   0  -2  -1   27.00    5.90 
   0  -2   1   25.20    4.10 
   0  -2  -1   20.60    5.70 
   0  -2  -1   21.20    6.10 
   0  -2  -1   11.70    5.50 
   0  -2  -1   21.30    3.70 
   0  -2  -1   27.70    5.90 
   0  -2   1   23.10    3.40 
   0  -2  -1   18.40    4.70 
   0  -2  -1   25.00    5.00 
   0  -2   1   30.00    6.40 
   0  -2   1   32.10    7.40 
   0  -2   1   23.20    5.90 
   0  -2  -1   26.10    3.10 
   0  -2  -1   26.00    6.40 
   0  -2  -1   21.80    4.70 
   0  -2  -1   29.10    5.30 
   0  -2   1   27.90    4.00 
   0   2   1   22.80    2.20 
   0   2   1   31.70    6.30 
   0   2   1   25.90    6.30 
   0   2  -1   19.20    5.70 
   0   2  -1   19.60    5.70 
   0   2  -1   27.00    2.80 
   0   2   1   23.00    5.70 
   0   2  -1   19.70    5.60 
   0   2   1   22.00    5.70 
   0   2  -1   26.70    2.50 
   0   2  -1   26.50    3.40 
   0   2  -1   32.50    5.70 
   0   2   1   29.00    3.70 
   0   2   1   23.20    3.30 
   0   2   1   19.10    6.10 
   0   2   1   32.40    6.00 
   0   2   1   29.80    2.70 
   0   2   1   21.70    4.50 
   0   2   1   36.00    5.70 
   0   2  -1   22.00    4.00 
   0   2  -1   27.90    4.60 
   0   2  -1   29.50    4.60 
   0   2  -1   29.00    4.90 
   0   2  -1   22.00    5.40 
   0   2   1   18.70    4.60 
   0   2  -1   21.70    6.50 
   0   2  -1   26.70    6.30 
   0   2  -1   28.70    4.50 
   0   2  -1   34.60    7.40 
   0   2  -1   25.70    6.30 
   0   2   1   23.30    4.40 
   0   2   1   29.00    6.40 
   0   2  -1   21.40    2.30 
   0   2  -1   30.00    6.40 
   0   2   1   26.60    4.70 
   0   2   1   19.70    6.80 
   0   2   1   24.70    6.20 
   0   2  -1   29.60    5.30 
   0   2  -1   17.00    5.40 
   0   2   1   29.10    5.40 
   0   2  -1   28.70    3.80 
   0   2   1   33.60    6.40 
   0   2  -1   27.90    6.60 
   0   2  -1   19.40    6.00 
   0   2  -1   23.90    6.00 
   0   2  -1   14.10    6.70 
   0   2  -1   26.50    5.00 
   0   2   1   23.30    6.80 
   0   2   1   21.30    2.70 
   0   2   1   25.40    4.10 
   0   2  -1   30.20    6.10 
   0   2   1   17.10    5.00 
   0   2   1   31.20    6.10 
   0   2   1   23.30    5.60 
  -1  -2  -1 1279.87   49.90 
  -1  -2  -1 1252.77   45.30 
  -1  -2  -1 1182.88   47.30 
   1  -2   1 1202.18   50.19 
  -1  -2  -1 1175.78   45.30 
  -1  -2  -1 1238.08   48.90 
  -1  -2  -1 1222.98   46.60 
   1  -2   1 1176.78   49.30 
  -1  -2  -1 1155.08   49.70 
   1  -2   1 1162.18   45.70 
  -1  -2  -1 1206.88   50.59 
  -1  -2  -1 1246.08   50.39 
   1  -2   1 1167.88   46.00 
   1  -2   1 1207.98   49.50 
  -1  -2  -1 1170.98   45.60 
  -1  -2  -1 1281.07   49.50 
  -1  -2  -1 1332.97   51.39 
   1  -2   1 1181.58   45.60 
   1  -2   1 1173.88   43.40 
  -1  -2  -1 1224.58   48.80 
  -1  -2  -1 1235.18   49.70 
  -1  -2  -1 1212.78   46.20 
  -1  -2  -1 1222.08   48.10 
  -1  -2  -1 1264.57   50.29 
  -1  -2  -1 1258.47   46.00 
  -1  -2  -1 1242.38   46.30 
  -1  -2  -1 1254.67   46.40 
   1  -2   1 1189.28   49.99 
   1  -2   1 1128.39   46.70 
   1  -2   1 1197.28   47.80 
  -1  -2  -1 1234.78   51.59 
   1  -2   1 1130.29   47.60 
  -1  -2  -1 1256.77   49.60 
  -1  -2  -1 1256.67   47.20 
  -1  -2  -1 1271.77   46.20 
   1  -2   1 1133.99   49.00 
   1  -2   1 1145.69   46.60 
  -1  -2  -1 1236.58   47.00 
  -1  -2  -1 1264.67   49.20 
  -1  -2  -1 1290.47   50.79 
  -1  -2  -1 1262.57   49.70 
  -1  -2  -1 1148.89   49.80 
   1  -2   1 1169.58   45.00 
   1  -2   1 1222.68   50.49 
  -1  -2  -1 1246.88   49.30 
  -1  -2  -1 1206.18   51.79 
   1  -2   1 1149.89   45.10 
  -1  -2  -1 1215.38   50.49 
  -1  -2  -1 1229.78   46.90 
   1  -2   1 1154.48   44.40 
   1   2   1 1247.68   50.09 
   1   2   1 1226.48   49.99 
   1   2   1 1237.68   49.10 
  -1   2  -1 1183.78   49.80 
  -1   2  -1 1200.28   47.90 
   1   2   1 1241.18   46.30 
   1   2   1 1239.68   49.30 
  -1   2  -1 1195.88   48.30 
   1   2   1 1250.27   45.60 
  -1   2  -1 1172.48   43.90 
  -1   2  -1 1225.48   45.40 
  -1   2  -1 1187.98   47.10 
  -1   2  -1 1146.59   47.80 
   1   2   1 1240.48   48.10 
  -1   2  -1 1208.48   47.00 
  -1   2  -1 1196.88   44.50 
   1   2   1 1235.78   49.30 
   1   2   1 1191.18   46.50 
  -1   2  -1 1200.18   47.90 
   1   2   1 1213.98   49.40 
   1   2   1 1287.87   50.29 
  -1   2  -1 1145.59   49.60 
   1   2   1 1279.97   48.80 
  -1   2  -1 1110.19   48.70 
   1   2   1 1226.48   50.09 
   1   2   1 1258.17   51.09 
   1   2   1 1255.17   46.60 
  -1   2  -1 1187.28   45.20 
  -1   2  -1 1170.98   45.20 
   1   2   1 1256.57   50.19 
  -1   2  -1 1199.68   46.50 
  -1   2  -1 1176.28   48.80 
  -1   2  -1 1188.98   49.20 
   1   2   1 1277.87   47.30 
   1   2   1 1280.47   46.40 
   1   2   1 1217.88   49.70 
  -1   2  -1 1196.98   46.90 
  -1   2  -1 1204.28   46.50 
  -1   2  -1 1196.68   48.60 
   1   2   1 1243.68   50.99 
   1   2   1 1218.38   51.49 
  -1   2  -1 1161.68   46.60 
   1   2   1 1277.07   47.60 
   1   2   1 1163.28   49.60 
   1   2   1 1238.78   49.80 
   1   2   1 1249.47   49.50 
  -1   2  -1 1156.88   51.79 
  -1   2  -1 1187.18   49.00 
   1   2   1 1204.48   49.70 
   1   2   1 1233.08   48.70 
  -1   2  -1 1180.68   43.30 
  -1   2  -1 1200.38   46.70 
   1   2   1 1220.58   49.20 
   1   2   1 1285.07   48.90 
   1   2   1 1273.37   49.50 
   1   2   1 1223.08   50.29 
   1   2   1 1234.48   45.20 
  -1   2  -1 1067.69   47.30 
   1   2   1 1250.67   47.10 
  -1   2  -1 1218.98   45.90 
  -1   2  -1 1186.38   46.90 
   1   2   1 1151.98   49.90 
  -1   2  -1 1209.98   45.90 
  -1   2  -1 1153.48   47.50 
  -2  -2  -1  202.68   15.00 
  -2  -2  -1  221.18   13.90 
  -2  -2  -1  195.78   14.30 
  -2  -2  -1  207.88   15.50 
  -2  -2  -1  174.58   16.40 
   2  -2   1  165.28   12.50 
  -2  -2  -1  205.98   16.70 
  -2  -2  -1  191.78   14.10 
  -2  -2  -1  178.88   17.90 
   2  -2   1  190.38   13.70 
  -2  -2  -1  213.38   15.90 
  -2  -2  -1  211.28   15.70 
  -2  -2  -1  212.18   16.10 
   2  -2   1  181.18   16.30 
  -2  -2  -1  210.88   13.00 
  -2  -2  -1  189.48   18.40 
   2  -2   1  203.68   14.30 
  -2  -2  -1  160.08   16.00 
  -2  -2  -1  245.18   16.70 
  -2  -2  -1  203.78   14.70 
  -2  -2  -1  191.38   13.80 
  -2  -2  -1  228.18   14.00 
  -2  -2  -1  216.98   14.30 
   2  -2   1  191.68   12.10 
   2  -2   1  208.38   13.60 
   2  -2   1  188.88   11.50 
   2  -2   1  197.28   12.50 
   2  -2   1  198.48   14.60 
   2  -2   1  178.18   11.00 
  -2  -2  -1  230.38   14.60 
  -2  -2  -1  211.08   15.60 
  -2  -2  -1  183.98   16.60 
   2  -2   1  199.78   12.70 
  -2  -2  -1  207.58   13.90 
   2  -2   1  168.98   10.80 
   2  -2   1  140.09   14.30 
  -2  -2  -1  208.68   17.00 
  -2  -2  -1  212.88   15.20 
  -2  -2  -1  176.48   13.20 
  -2  -2  -1  212.58   16.40 
   2  -2   1  185.98   13.40 
  -2  -2  -1  213.88   15.80 
  -2  -2  -1  187.28   14.20 
  -2  -2  -1  220.28   14.40 
  -2  -2  -1  168.78   16.70 
   2  -2   1  197.58   13.60 
   2  -2   1  181.68   14.00 
  -2  -2  -1  190.48   14.20 
   2  -2   1  185.38   14.10 
   2   2   1  196.88   17.70 
  -2   2  -1  220.18   14.40 
  -2   2  -1  178.58   11.80 
  -2   2  -1  197.48   14.10 
  -2   2  -1  210.38   14.10 
   2   2   1  197.38   16.40 
   2   2   1  202.08   15.40 
   2   2   1  216.28   16.30 
   2   2   1  268.67   18.20 
  -2   2  -1  166.78   12.40 
   2   2   1  190.68   18.40 
   2   2   1  182.68   14.20 
   2   2   1  191.68   15.60 
   2   2   1  204.38   14.20 
   2   2   1  199.78   15.30 
  -2   2  -1  209.18   13.60 
  -2   2  -1  194.58   10.40 
   2   2   1  211.08   14.40 
  -2   2  -1  196.58   13.60 
  -2   2  -1  205.18   13.70 
  -2   2  -1  182.28   13.20 
  -2   2  -1  168.78   13.90 
  -2   2  -1  197.58    9.70 
   2   2   1  195.48   15.20 
  -2   2  -1  200.78   13.50 
  -2   2  -1  185.18   10.70 
  -2   2  -1  182.28   13.70 
   2   2   1  194.58   17.30 
   2   2   1  202.48   15.50 
  -2   2  -1  177.98   11.20 
  -2   2  -1  198.98   12.90 
  -2   2  -1  190.18   13.40 
  -2   2  -1  240.88   15.50 
   2   2   1  226.08   14.30 
  -2   2  -1  178.68   11.30 
  -2   2  -1  191.28   12.20 
  -2   2  -1  180.58   13.90 
   2   2   1  196.08   13.80 
   2   2   1  220.78   17.00 
   2   2   1  224.08   16.50 
   2   2   1  217.58   14.60 
  -2   2  -1  202.18   14.30 
   2   2   1  210.68   14.70 
  -2   2  -1  195.68    8.90 
   2   2   1  194.68   13.50 
   2   2   1  193.58   14.00 
   2   2   1  192.88   15.00 
   2   2   1  188.28   12.70 
   2   2   1  208.68   14.60 
   2   2   1  209.28   14.60 
  -2   2  -1  185.78   11.00 
   2   2   1  195.18   13.60 
  -2   2  -1  171.08   18.20 
  -2   2  -1  185.48   12.50 
   2   2   1  207.88   15.70 
   2   2   1  216.08   16.80 
  -2   2  -1  187.98   13.10 
  -2   2  -1  204.98   10.70 
  -2   2  -1  212.48   13.70 
  -2   2  -1  193.58   13.60 
  -2   2  -1  180.98   11.20 
  -2   2  -1  224.38   15.10 
   2   2   1  208.98   15.20 
   2   2   1  218.98   15.00 
  -2   2  -1  188.18   13.40 
  -2   2  -1  182.68   12.60 
  -2   2  -1  173.28   10.90 
  -2   2  -1  183.48   12.90 
  -2   2  -1  193.88   15.90 
  -2   2  -1  225.38   14.60 
  -3  -2  -1  433.76   26.40 
  -3  -2  -1  406.76   27.40 
  -3  -2  -1  431.66   25.70 
   3  -2   1  447.26   25.60 
  -3  -2  -1  438.76   23.10 
  -3  -2  -1  393.56   27.20 
   3  -2   1  383.36   23.10 
   3  -2   1  448.66   25.30 
   3  -2   1  413.06   24.50 
  -3  -2  -1  419.46   27.70 
   3  -2   1  442.16   25.20 
   3  -2   1  376.86   25.30 
  -3  -2  -1  441.86   26.20 
   3  -2   1  401.86   16.40 
  -3  -2  -1  439.66   25.70 
   3  -2   1  398.86   18.70 
  -3  -2  -1  446.46   27.20 
  -3  -2  -1  421.16   27.00 
   3  -2   1  404.66   24.60 
  -3  -2  -1  503.95   26.20 
   3  -2   1  443.26   26.30 
   3  -2   1  409.96   24.40 
   3  -2   1  358.96   23.30 
  -3  -2  -1  417.26   27.50 
   3  -2   1  400.16   22.10 
  -3  -2  -1  443.36   25.70 
  -3  -2  -1  449.95   28.00 
   3  -2   1  404.46   22.70 
  -3  -2  -1  441.86   27.60 
  -3  -2  -1  399.36   24.10 
   3  -2   1  404.06   23.00 
  -3  -2  -1  410.66   26.20 
   3  -2   1  428.56   23.90 
   3  -2   1  437.46   22.80 
   3  -2   1  419.56   24.00 
   3  -2   1  387.66   24.70 
  -3  -2  -1  442.76   26.50 
  -3  -2  -1  444.96   23.20 
  -3   2  -1  400.36   24.00 
   3   2   1  434.16   24.40 
   3   2   1  462.35   30.40 
   3   2   1  371.96   24.90 
   3   2   1  422.76   27.00 
  -3   2  -1  432.86   20.20 
  -3   2  -1  413.66   26.00 
  -3   2  -1  382.66   24.60 
  -3   2  -1  400.66   20.80 
  -3   2  -1  389.36   20.50 
  -3   2  -1  421.36   24.10 
   3   2   1  414.16   27.20 
  -3   2  -1  424.16   23.70 
  -3   2  -1  374.36   23.00 
   3   2   1  417.06   22.60 
  -3   2  -1  370.16   22.60 
   3   2   1  391.36   26.50 
   3   2   1  473.45   29.20 
  -3   2  -1  427.46   26.80 
  -3   2  -1  411.86   16.90 
   3   2   1  391.86   26.40 
   3   2   1  434.36   22.50 
  -3   2  -1  419.76   21.50 
  -3   2  -1  397.56   24.40 
   3   2   1  442.96   26.10 
   3   2   1  418.06   24.30 
  -3   2  -1  456.15   24.50 
   3   2   1  416.56   27.30 
   3   2   1  458.65   27.00 
   3   2   1  416.46   25.60 
   3   2   1  423.86   25.80 
  -3   2  -1  407.66   20.80 
   3   2   1  438.96   26.10 
   3   2   1  425.86   25.50 
  -3   2  -1  458.15   24.50 
  -3   2  -1  391.06   25.20 
  -3   2  -1  452.25   23.40 
   3   2   1  425.46   25.70 
   3   2   1  406.06   28.10 
  -3   2  -1  403.76   25.20 
   3   2   1  399.96   25.50 
  -3   2  -1  424.16   25.00 
  -3   2  -1  421.06   23.20 
  -3   2  -1  357.66   28.90 
   3   2   1  471.05   24.60 
  -3   2  -1  395.56   22.20 
  -3   2  -1  435.06   22.70 
  -3   2  -1  414.16   22.20 
  -3   2  -1  425.46   22.20 
   3   2   1  411.76   22.60 
   3   2   1  397.36   26.00 
  -3   2  -1  424.86   26.80 
  -3   2  -1  385.56   16.30 
  -3   2  -1  396.16   17.60 
  -3   2  -1  394.66   26.40 
  -3   2  -1  417.96   24.50 
  -3   2  -1  413.76   17.10 
   3   2   1  434.26   27.60 
  -3   2  -1  398.26   20.50 
  -4  -2  -1  610.54   34.10 
   4  -2   1  587.24   33.40 
  -4  -2  -1  591.84   35.30 
   4  -2   1  527.95   34.10 
   4  -2   1  615.14   29.60 
   4  -2   1  595.14   31.40 
  -4  -2  -1  588.64   34.80 
  -4  -2  -1  621.64   34.40 
   4  -2   1  636.14   34.40 
  -4  -2  -1  575.64   36.40 
  -4  -2  -1  609.04   35.60 
   4  -2   1  520.25   33.50 
   4  -2   1  596.14   30.60 
  -4  -2  -1  674.63   37.30 
  -4  -2  -1  594.94   36.70 
  -4  -2  -1  597.64   29.60 
  -4  -2  -1  660.53   35.90 
   4  -2   1  616.74   34.50 
   4  -2   1  620.54   35.40 
  -4  -2  -1  644.04   36.60 
  -4  -2  -1  576.64   33.80 
  -4  -2  -1  610.14   28.90 
   4  -2   1  640.84   30.00 
   4  -2   1  600.84   33.80 
  -4  -2  -1  655.43   36.10 
   4  -2   1  546.45   34.60 
   4  -2   1  566.44   31.40 
   4  -2   1  517.25   32.80 
  -4  -2  -1  596.04   36.50 
   4  -2   1  546.85   31.20 
   4  -2   1  603.04   33.10 
   4  -2   1  667.53   34.40 
  -4  -2  -1  646.94   35.10 
  -4   2  -1  598.84   28.70 
   4   2   1  663.83   36.70 
  -4   2  -1  641.44   30.40 
   4   2   1  645.34   36.20 
   4   2   1  616.04   29.30 
  -4   2  -1  604.34   30.50 
   4   2   1  608.54   33.80 
  -4   2  -1  655.03   31.10 
   4   2   1  501.75   29.40 
  -4   2  -1  605.84   28.40 
   4   2   1  609.24   35.00 
  -4   2  -1  586.34   33.10 
   4   2   1  648.34   34.60 
  -4   2  -1  664.53   32.90 
   4   2   1  617.84   35.10 
   4   2   1  589.54   36.30 
   4   2   1  572.64   36.00 
  -4   2  -1  581.24   24.10 
  -4   2  -1  621.54   36.40 
   4   2   1  617.64   36.10 
   4   2   1  623.24   37.00 
  -4   2  -1  624.74   28.80 
  -4   2  -1  595.54   34.90 
   4   2   1  644.24   31.10 
  -4   2  -1  614.84   33.00 
  -4   2  -1  570.44   37.80 
  -4   2  -1  582.64   31.90 
  -4   2  -1  595.94   35.30 
   4   2   1  563.94   36.00 
   4   2   1  615.34   29.10 
   4   2   1  644.14   36.50 
   4   2   1  705.73   35.30 
  -4   2  -1  618.44   28.30 
   4   2   1  617.44   29.30 
  -4   2  -1  623.04   34.10 
   4   2   1  633.04   34.40 
   4   2   1  587.34   34.60 
   4   2   1  616.84   34.80 
  -4   2  -1  616.24   34.10 
  -4   2  -1  553.44   32.80 
  -4   2  -1  568.54   30.10 
  -4   2  -1  592.34   26.40 
  -4   2  -1  546.45   33.20 
   4   2   1  577.24   35.60 
   4   2   1  618.14   36.80 
  -4   2  -1  564.14   29.50 
  -5  -2  -1  652.83   39.50 
   5  -2   1  629.24   39.70 
  -5  -2  -1  735.63   41.30 
   5  -2   1  683.33   34.90 
  -5  -2  -1  679.03   38.20 
   5  -2   1  733.73   41.20 
  -5  -2  -1  663.53   42.20 
   5  -2   1  672.33   35.40 
   5  -2   1  652.23   39.30 
   5  -2   1  716.93   41.50 
   5  -2   1  653.23   40.80 
  -5  -2  -1  669.23   39.20 
  -5  -2  -1  632.74   40.20 
   5  -2   1  640.04   34.30 
   5  -2   1  689.53   31.30 
  -5  -2  -1  677.23   38.60 
  -5  -2  -1  642.14   40.40 
   5  -2   1  633.54   39.00 
   5  -2   1  613.94   38.20 
  -5  -2  -1  624.24   41.70 
  -5  -2  -1  685.83   40.90 
  -5  -2  -1  779.82   39.50 
  -5  -2  -1  669.53   40.80 
   5  -2   1  641.14   38.40 
  -5  -2  -1  722.63   42.90 
   5  -2   1  674.93   38.70 
   5  -2   1  653.93   38.80 
  -5  -2  -1  658.43   40.60 
   5  -2   1  640.94   38.10 
  -5  -2  -1  654.73   30.40 
   5   2   1  650.83   41.80 
  -5   2  -1  697.03   35.80 
   5   2   1  652.83   34.50 
  -5   2  -1  649.54   39.60 
  -5   2  -1  678.13   31.40 
  -5   2  -1  620.54   32.10 
  -5   2  -1  641.54   32.20 
  -5   2  -1  645.64   37.80 
   5   2   1  696.93   37.90 
  -5   2  -1  645.24   31.90 
   5   2   1  654.13   30.70 
   5   2   1  689.23   40.40 
  -5   2  -1  681.33   39.10 
   5   2   1  652.23   41.60 
  -5   2  -1  643.54   36.70 
   5   2   1  672.93   41.60 
   5   2   1  714.83   41.40 
   5   2   1  681.23   41.00 
  -5   2  -1  579.84   38.90 
  -5   2  -1  707.73   29.40 
   5   2   1  649.14   38.30 
  -5   2  -1  683.23   37.70 
   5   2   1  694.53   41.40 
   5   2   1  700.83   38.60 
   5   2   1  687.73   41.70 
   5   2   1  805.72   43.40 
   5   2   1  644.94   40.10 
   5   2   1  656.33   40.10 
  -5   2  -1  682.43   34.60 
   5   2   1  671.63   39.60 
  -5   2  -1  671.43   30.50 
   5   2   1  702.53   33.10 
   5   2   1  669.33   38.30 
  -5   2  -1  599.84   40.50 
  -5   2  -1  652.53   33.60 
   5   2   1  700.93   31.70 
  -5   2  -1  661.43   39.20 
  -5   2  -1  663.03   35.30 
  -5   2  -1  699.63   41.90 
   5   2   1  606.34   32.60 
   5   2   1  692.13   42.70 
  -6  -2  -1  751.82   43.50 
  -6  -2  -1  689.63   47.10 
  -6  -2  -1  770.02   48.30 
   6  -2   1  697.33   38.50 
   6  -2   1  733.53   45.20 
   6  -2   1  755.32   45.30 
  -6  -2  -1  725.13   45.50 
   6  -2   1  677.93   44.90 
   6  -2   1  660.93   45.40 
  -6  -2  -1  825.22   43.70 
  -6  -2  -1  674.03   41.30 
  -6  -2  -1  675.73   47.10 
   6  -2   1  685.93   46.00 
   6  -2   1  715.43   44.30 
  -6  -2  -1  699.83   45.50 
  -6  -2  -1  767.92   31.80 
  -6  -2  -1  755.32   46.50 
  -6  -2  -1  850.61   47.30 
  -6  -2  -1  690.63   45.80 
  -6  -2  -1  754.42   44.30 
   6  -2   1  757.52   44.70 
  -6  -2  -1  726.83   46.50 
   6  -2   1  686.93   43.40 
   6  -2   1  700.93   31.30 
   6  -2   1  660.83   44.20 
  -6  -2  -1  695.93   46.20 
   6  -2   1  711.23   44.90 
   6  -2   1  719.83   45.90 
  -6   2  -1  710.93   43.70 
  -6   2  -1  761.22   48.00 
   6   2   1  823.72   47.80 
   6   2   1  654.33   45.30 
  -6   2  -1  694.13   42.40 
  -6   2  -1  762.82   47.20 
   6   2   1  777.52   42.00 
   6   2   1  723.43   46.80 
   6   2   1  757.22   46.60 
   6   2   1  762.82   49.50 
  -6   2  -1  727.03   44.40 
   6   2   1  703.63   42.00 
   6   2   1  770.82   44.30 
   6   2   1  724.33   46.00 
   6   2   1  735.53   48.20 
   6   2   1  714.53   46.10 
  -6   2  -1  720.93   36.60 
  -6   2  -1  646.44   43.50 
  -6   2  -1  761.42   42.40 
  -6   2  -1  673.43   46.30 
   6   2   1  685.63   38.40 
  -6   2  -1  783.12   47.10 
   6   2   1  777.92   46.40 
  -6   2  -1  712.53   40.20 
  -6   2  -1  776.22   31.90 
   6   2   1  733.33   46.70 
  -6   2  -1  726.43   33.70 
   6   2   1  736.53   47.80 
   6   2   1  787.82   46.70 
   6   2   1  741.03   36.20 
   6   2   1  714.83   41.60 
   6   2   1  695.63   44.60 
  -6   2  -1  756.02   41.60 
   7  -2   1 1041.30   51.89 
  -7  -2  -1 1079.89   61.69 
   7  -2   1 1040.70   62.79 
  -7  -2  -1 1152.98   56.59 
   7  -2   1 1022.90   60.49 
   7  -2   1  962.80   60.49 
   7  -2   1 1116.79   60.89 
  -7  -2  -1 1141.69   62.29 
  -7  -2  -1 1098.99   63.89 
   7  -2   1 1061.39   62.89 
  -7  -2  -1 1032.50   62.19 
  -7  -2  -1 1105.29   63.79 
  -7  -2  -1 1076.89   62.79 
   7  -2   1 1068.69   60.89 
  -7  -2  -1  955.50   61.39 
   7  -2   1 1037.40   59.79 
  -7  -2  -1 1030.00   61.09 
  -7  -2  -1 1104.89   65.29 
   7  -2   1 1039.10   61.19 
  -7  -2  -1 1061.79   63.89 
  -7  -2  -1 1033.20   56.09 
  -7  -2  -1 1154.08   59.49 
   7  -2   1 1076.29   63.69 
   7   2   1 1159.78   57.09 
  -7   2  -1  969.60   61.99 
   7   2   1 1113.39   57.19 
  -7   2  -1 1081.89   62.19 
   7   2   1  976.40   60.39 
   7   2   1 1098.59   63.89 
  -7   2  -1  940.51   60.39 
  -7   2  -1 1069.29   55.39 
   7   2   1 1175.68   65.69 
   7   2   1 1141.69   61.29 
  -7   2  -1 1072.99   55.89 
  -7   2  -1 1088.79   62.69 
   7   2   1 1170.38   63.69 
   7   2   1 1049.70   62.49 
   7   2   1 1022.50   63.89 
   7   2   1 1020.60   62.69 
   7   2   1 1036.90   54.09 
   7   2   1 1213.68   65.39 
  -7   2  -1 1116.09   50.59 
  -7   2  -1 1097.49   57.29 
  -7   2  -1 1027.70   59.79 
   7   2   1  954.10   60.69 
   7   2   1 1055.49   64.49 
  -7   2  -1 1003.70   58.39 
   7   2   1 1049.49   60.59 
  -7   2  -1  953.20   57.29 
  -7   2  -1 1097.49   62.49 
   7   2   1 1042.30   62.39 
  -7   2  -1 1076.49   50.69 
  -8  -2  -1  375.06   42.30 
  -8  -2  -1  306.47   37.70 
   8  -2   1  300.77   36.30 
  -8  -2  -1  349.77   41.10 
  -8  -2  -1  448.46   33.00 
   8  -2   1  293.87   36.90 
  -8  -2  -1  430.06   32.10 
  -8  -2  -1  412.16   45.40 
   8  -2   1  383.46   42.70 
  -8  -2  -1  356.36   42.90 
   8  -2   1  356.96   42.20 
  -8  -2  -1  408.26   44.90 
   8  -2   1  288.47   36.80 
  -8  -2  -1  446.46   47.60 
   8  -2   1  284.47   37.40 
   8  -2   1  389.16   43.70 
  -8  -2  -1  326.77   34.80 
   8  -2   1  345.67   42.40 
   8  -2   1  294.77   36.70 
  -8  -2  -1  333.67   38.60 
  -8  -2  -1  376.86   41.00 
  -8  -2  -1  345.07   41.40 
   8   2   1  316.97   40.40 
  -8   2  -1  355.36   39.90 
   8   2   1  356.36   34.20 
   8   2   1  487.05   39.20 
   8   2   1  416.06   46.10 
   8   2   1  339.67   41.30 
   8   2   1  291.17   38.20 
  -8   2  -1  308.37   39.20 
  -8   2  -1  358.96   40.50 
  -8   2  -1  327.07   34.00 
   8   2   1  385.76   44.30 
   8   2   1  354.66   41.00 
   8   2   1  376.36   37.90 
   8   2   1  412.06   37.80 
  -8   2  -1  376.46   37.60 
   8   2   1  400.86   47.40 
  -8   2  -1  407.06   42.30 
  -8   2  -1  397.26   35.50 
  -8   2  -1  393.66   43.50 
   8   2   1  282.97   38.40 
   8   2   1  402.76   42.10 
  -8   2  -1  412.06   46.60 
   8   2   1  424.56   44.40 
  -8   2  -1  334.07   37.50 
  -8   2  -1  346.57   40.40 
   8   2   1  274.27   37.50 
   9  -2   1  887.51   62.69 
  -9  -2  -1  869.51   62.79 
  -9  -2  -1  881.11   63.49 
   9  -2   1  795.22   57.69 
   9  -2   1  979.80   63.49 
   9  -2   1  903.51   60.69 
  -9  -2  -1  842.22   61.89 
   9  -2   1  749.82   57.39 
   9  -2   1  880.31   63.39 
   9  -2   1 1004.30   63.19 
  -9  -2  -1  901.71   61.49 
   9  -2   1  812.82   60.29 
   9  -2   1  975.00   66.79 
  -9  -2  -1  833.02   58.69 
  -9  -2  -1  786.92   60.99 
  -9  -2  -1  927.71   60.49 
  -9  -2  -1  894.31   64.69 
  -9  -2  -1  892.51   64.79 
  -9  -2  -1  858.31   62.29 
  -9  -2  -1  904.11   56.59 
   9   2   1  875.31   61.99 
   9   2   1  882.61   59.89 
  -9   2  -1  946.51   64.99 
   9   2   1  770.02   60.19 
   9   2   1  896.61   64.29 
   9   2   1  869.61   62.99 
   9   2   1  789.62   63.09 
   9   2   1  876.81   62.69 
  -9   2  -1  917.21   60.69 
  -9   2  -1  864.71   59.49 
  -9   2  -1  693.33   58.79 
   9   2   1  924.61   65.99 
   9   2   1  883.21   64.59 
  -9   2  -1  946.11   63.29 
   9   2   1  923.91   63.69 
   9   2   1  901.61   58.89 
  -9   2  -1  859.61   59.19 
   9   2   1  864.81   59.79 
  -9   2  -1  874.51   54.49 
  -9   2  -1  844.82   58.39 
  -9   2  -1  892.71   62.49 
 -10  -2  -1  154.38   33.60 
  10  -2   1  165.88   31.90 
  10  -2   1  160.28   33.80 
 -10  -2  -1  152.08   30.90 
  10  -2   1  157.58   34.30 
  10  -2   1  126.09   28.20 
 -10  -2  -1  145.79   32.10 
 -10  -2  -1  186.68   35.80 
 -10  -2  -1  130.39   30.20 
  10  -2   1  146.89   33.20 
 -10  -2  -1  160.98   34.90 
  10  -2   1  145.39   29.80 
  10  -2   1  133.99   29.50 
 -10  -2  -1  155.68   31.70 
  10  -2   1  180.58   32.90 
  10  -2   1  146.19   33.10 
 -10  -2  -1  121.29   31.40 
 -10  -2  -1  202.48   32.60 
 -10  -2  -1  157.08   32.40 
  10   2   1  165.58   33.50 
  10   2   1  163.48   34.90 
 -10   2  -1  176.38   36.50 
  10   2   1  129.59   28.80 
  10   2   1  177.38   36.40 
  10   2   1  136.19   28.40 
  10   2   1  198.88   38.40 
 -10   2  -1  199.48   36.40 
 -10   2  -1  126.49   29.30 
 -10   2  -1  158.58   33.30 
  10   2   1  122.29   28.60 
 -10   2  -1  132.69   31.20 
  10   2   1  236.18   39.80 
 -10   2  -1  184.18   31.30 
 -10   2  -1  146.19   31.30 
  10   2   1  149.49   33.20 
 -10   2  -1  181.78   33.50 
  10   2   1   93.79   27.70 
 -10   2  -1  149.59   32.10 
   9  -3  -1  337.37   43.40 
  -9  -3   1  340.87   46.50 
   9  -3  -1  375.26   42.80 
   9  -3  -1  374.36   46.40 
  -9  -3   1  346.27   44.40 
  -9  -3   1  310.97   41.70 
  -9  -3   1  392.76   46.10 
  -9  -3   1  428.46   47.90 
   9  -3  -1  322.37   38.10 
  -9  -3   1  365.16   45.40 
   9  -3  -1  293.17   38.50 
   9  -3  -1  383.76   44.20 
  -9  -3   1  403.96   47.30 
   9  -3  -1  399.66   47.10 
  -9  -3   1  356.16   41.60 
  -9  -3   1  426.16   47.60 
  -9  -3   1  388.16   43.10 
  -9  -3   1  337.57   45.00 
   9  -3  -1  412.96   49.70 
  -9  -3   1  260.97   40.90 
   9   3  -1  392.06   48.60 
  -9   3   1  345.17   39.80 
   9   3  -1  308.47   40.50 
   9   3  -1  361.86   44.80 
  -9   3   1  415.56   46.50 
   9   3  -1  398.16   47.30 
   9   3  -1  464.85   52.79 
  -9   3   1  284.07   38.30 
   9   3  -1  339.57   45.10 
  -9   3   1  309.37   42.10 
   9   3  -1  388.56   46.90 
  -9   3   1  366.16   38.40 
  -9   3   1  314.17   41.60 
  -9   3   1  365.66   40.60 
   9   3  -1  394.26   51.39 
   9   3  -1  296.47   41.70 
  -9   3   1  286.67   40.90 
   9   3  -1  351.36   44.90 
  -9   3   1  329.57   42.30 
   9   3  -1  331.07   44.20 
   9   3  -1  423.26   47.90 
   8  -3  -1  445.96   43.50 
  -8  -3   1  388.86   43.80 
  -8  -3   1  397.96   47.10 
   8  -3  -1  486.85   49.90 
  -8  -3   1  400.16   32.60 
  -8  -3   1  371.26   41.30 
   8  -3  -1  486.75   48.10 
  -8  -3   1  481.05   37.50 
  -8  -3   1  490.35   50.39 
   8  -3  -1  441.96   48.00 
   8  -3  -1  501.75   48.80 
  -8  -3   1  415.36   45.50 
  -8  -3   1  384.36   45.00 
  -8  -3   1  501.95   51.49 
  -8  -3   1  435.76   46.30 
   8  -3  -1  363.06   42.50 
  -8  -3   1  480.55   45.80 
  -8  -3   1  396.56   44.60 
   8  -3  -1  394.16   41.50 
   8  -3  -1  404.86   42.50 
   8  -3  -1  425.56   43.40 
  -8  -3   1  426.36   46.80 
  -8  -3   1  370.76   39.70 
   8  -3  -1  417.06   41.10 
   8   3  -1  396.06   45.60 
   8   3  -1  431.36   45.50 
  -8   3   1  414.36   40.90 
   8   3  -1  541.65   50.69 
  -8   3   1  408.46   45.20 
   8   3  -1  447.66   46.70 
   8   3  -1  440.16   46.80 
   8   3  -1  404.96   47.10 
   8   3  -1  367.56   35.30 
  -8   3   1  480.25   51.29 
  -8   3   1  452.35   42.20 
   8   3  -1  495.55   37.20 
  -8   3   1  400.86   41.80 
   8   3  -1  452.85   47.00 
  -8   3   1  476.05   44.80 
  -8   3   1  413.46   44.60 
  -8   3   1  434.46   39.80 
   8   3  -1  447.46   48.70 
  -8   3   1  476.75   44.20 
   8   3  -1  416.86   49.70 
   8   3  -1  477.05   36.70 
  -8   3   1  418.86   43.40 
  -8   3   1  445.96   46.30 
   8   3  -1  487.85   50.49 
   8   3  -1  434.96   41.00 
   8   3  -1  407.86   44.30 
   8   3  -1  515.95   52.49 
   8   3  -1  408.86   45.60 
   7  -3  -1  564.84   37.70 
  -7  -3   1  550.74   43.40 
  -7  -3   1  554.64   41.70 
   7  -3  -1  416.46   40.10 
  -7  -3   1  605.84   43.90 
   7  -3  -1  543.85   41.50 
  -7  -3   1  481.55   34.50 
  -7  -3   1  533.15   43.30 
   7  -3  -1  515.15   38.20 
  -7  -3   1  474.55   38.60 
   7  -3  -1  574.14   40.00 
   7  -3  -1  414.46   43.90 
  -7  -3   1  485.05   37.30 
   7  -3  -1  506.55   38.40 
   7  -3  -1  563.24   41.50 
  -7  -3   1  521.25   39.90 
  -7  -3   1  509.05   40.00 
  -7  -3   1  481.25   39.70 
   7  -3  -1  546.75   40.70 
  -7  -3   1  534.65   41.30 
  -7  -3   1  467.95   45.90 
  -7  -3   1  556.94   43.90 
  -7  -3   1  426.26   43.60 
   7  -3  -1  557.94   41.70 
  -7   3   1  534.55   41.40 
   7   3  -1  498.15   40.20 
   7   3  -1  568.34   38.50 
   7   3  -1  511.75   41.10 
   7   3  -1  493.45   35.30 
   7   3  -1  550.04   41.40 
  -7   3   1  546.85   34.00 
   7   3  -1  510.45   37.60 
   7   3  -1  551.54   43.40 
  -7   3   1  540.05   40.50 
   7   3  -1  601.44   43.70 
  -7   3   1  516.05   41.00 
   7   3  -1  519.55   42.40 
  -7   3   1  583.84   38.00 
  -7   3   1  537.15   34.40 
   7   3  -1  537.55   50.69 
  -7   3   1  570.54   41.30 
  -7   3   1  504.05   37.30 
   7   3  -1  575.24   42.80 
  -7   3   1  528.75   46.60 
  -7   3   1  434.16   43.70 
  -7   3   1  530.25   39.90 
  -7   3   1  485.85   36.30 
   7   3  -1  540.05   42.80 
   7   3  -1  490.25   47.70 
  -7   3   1  555.04   38.20 
   7   3  -1  470.35   45.90 
   7   3  -1  560.64   39.00 
   7   3  -1  520.75   40.90 
   7   3  -1  588.04   56.09 
   7   3  -1  546.15   39.90 
  -6  -3   1 1734.03   84.99 
   6  -3  -1 1826.22   82.59 
  -6  -3   1 1820.62   85.69 
  -6  -3   1 1706.63   85.99 
   6  -3  -1 1925.11   83.89 
  -6  -3   1 1922.61   88.89 
   6  -3  -1 1709.73   84.09 
  -6  -3   1 1849.21   88.79 
  -6  -3   1 1692.73   79.89 
  -6  -3   1 1775.92   88.29 
   6  -3  -1 1828.92   72.39 
   6  -3  -1 1594.24   82.79 
  -6  -3   1 1788.62   84.19 
   6  -3  -1 1755.52   82.29 
  -6  -3   1 1883.41   86.39 
  -6  -3   1 1743.93   82.99 
   6  -3  -1 1893.41   80.89 
  -6  -3   1 1908.31   86.99 
   6  -3  -1 1731.93   86.09 
  -6  -3   1 1913.41   86.99 
  -6  -3   1 1889.11   86.69 
   6  -3  -1 1717.43   83.89 
   6  -3  -1 1795.42   82.99 
   6  -3  -1 1763.12   84.99 
  -6  -3   1 1813.62   88.09 
  -6   3   1 1625.14   83.29 
   6   3  -1 1823.42   88.09 
  -6   3   1 1762.12   80.49 
  -6   3   1 1759.12   82.29 
  -6   3   1 1715.63   83.19 
   6   3  -1 1869.21   88.19 
   6   3  -1 1879.31   83.79 
  -6   3   1 1822.82   75.99 
   6   3  -1 1945.31   75.19 
  -6   3   1 1823.72   79.89 
   6   3  -1 1828.92   86.89 
  -6   3   1 1800.42   73.29 
   6   3  -1 1972.10   83.89 
   6   3  -1 1713.13   85.09 
  -6   3   1 1777.62   84.69 
   6   3  -1 1919.41   89.59 
   6   3  -1 1918.11   90.49 
  -6   3   1 1845.92   77.99 
  -6   3   1 1826.62   86.09 
  -6   3   1 1851.61   78.09 
   6   3  -1 1874.41   84.69 
  -6   3   1 1667.23   79.29 
   6   3  -1 1805.02   85.49 
   6   3  -1 1936.81   92.79 
   6   3  -1 1742.63   87.59 
   6   3  -1 1768.32   82.49 
  -6   3   1 1690.63   80.79 
   6   3  -1 1908.21   85.59 
   6   3  -1 1910.51   82.19 
  -6   3   1 1785.92   84.69 
   6   3  -1 1711.63   85.59 
  -6   3   1 1890.81   87.49 
   6   3  -1 1897.21   86.59 
   6   3  -1 1768.82   86.69 
   6   3  -1 1753.32   85.99 
   5  -3  -1 1738.63   76.89 
  -5  -3   1 1879.11   83.19 
  -5  -3   1 1758.92   79.79 
   5  -3  -1 1630.94   77.79 
  -5  -3   1 1759.42   79.79 
   5  -3  -1 1727.63   74.39 
   5  -3  -1 1638.84   77.69 
  -5  -3   1 1733.53   77.09 
  -5  -3   1 1818.22   79.79 
  -5  -3   1 1851.21   83.09 
  -5  -3   1 1689.33   79.09 
  -5  -3   1 1760.82   81.09 
   5  -3  -1 1759.52   79.19 
   5  -3  -1 1753.32   76.49 
  -5  -3   1 1827.02   80.19 
  -5  -3   1 1775.72   82.39 
  -5  -3   1 1762.42   79.79 
  -5  -3   1 1739.63   81.59 
  -5  -3   1 1890.81   83.99 
  -5  -3   1 1598.54   80.09 
   5  -3  -1 1787.52   79.39 
   5  -3  -1 1688.13   69.29 
   5  -3  -1 1638.54   76.09 
   5  -3  -1 1759.72   80.39 
   5   3  -1 1732.03   81.89 
  -5   3   1 1743.03   69.89 
  -5   3   1 1704.43   66.89 
  -5   3   1 1731.73   82.29 
   5   3  -1 1758.42   81.59 
   5   3  -1 1832.12   79.79 
   5   3  -1 1873.41   79.69 
   5   3  -1 1842.12   85.49 
  -5   3   1 1774.72   77.99 
  -5   3   1 1719.23   77.79 
  -5   3   1 1740.33   82.19 
  -5   3   1 1667.83   72.19 
   5   3  -1 1631.04   80.99 
   5   3  -1 1748.33   71.79 
   5   3  -1 1916.91   73.89 
   5   3  -1 1733.73   80.39 
   5   3  -1 1695.33   78.89 
   5   3  -1 1707.33   79.99 
   5   3  -1 1929.81   83.09 
  -5   3   1 1771.02   72.29 
  -5   3   1 1795.82   80.19 
  -5   3   1 1682.43   73.49 
   5   3  -1 1811.62   79.99 
  -5   3   1 1764.92   75.49 
  -5   3   1 1655.43   73.99 
  -5   3   1 1661.73   74.09 
   5   3  -1 1767.22   83.09 
   5   3  -1 1672.33   76.99 
   5   3  -1 1730.73   82.79 
  -5   3   1 1694.23   71.59 
   5   3  -1 1776.92   81.09 
   5   3  -1 1826.22   82.19 
  -5   3   1 1763.12   78.89 
  -5   3   1 1692.93   77.89 
  -5   3   1 1753.12   72.19 
   5   3  -1 1781.72   79.09 
   5   3  -1 1846.12   80.89 
  -5   3   1 1725.03   74.49 
  -5   3   1 1727.53   75.99 
  -4  -3   1 1273.87   60.99 
  -4  -3   1 1310.77   61.79 
  -4  -3   1 1321.67   62.59 
   4  -3  -1 1254.17   58.09 
  -4  -3   1 1237.38   58.79 
   4  -3  -1 1294.87   56.59 
  -4  -3   1 1383.56   64.29 
   4  -3  -1 1201.38   55.09 
   4  -3  -1 1254.87   58.99 
   4  -3  -1 1282.67   54.99 
  -4  -3   1 1281.77   61.79 
  -4  -3   1 1269.67   56.09 
   4  -3  -1 1209.38   56.29 
  -4  -3   1 1398.86   60.09 
   4  -3  -1 1252.87   55.69 
  -4  -3   1 1353.16   55.59 
   4  -3  -1 1293.37   59.79 
  -4  -3   1 1320.07   62.19 
   4  -3  -1 1258.97   56.99 
   4  -3  -1 1305.07   58.89 
  -4  -3   1 1338.07   60.09 
   4  -3  -1 1193.28   57.79 
   4  -3  -1 1263.67   58.49 
  -4  -3   1 1360.56   60.59 
   4  -3  -1 1280.97   56.99 
   4  -3  -1 1285.87   53.19 
  -4  -3   1 1302.27   62.49 
  -4  -3   1 1364.96   61.89 
  -4  -3   1 1357.96   63.39 
   4   3  -1 1319.07   60.59 
   4   3  -1 1320.07   61.19 
  -4   3   1 1265.67   56.09 
  -4   3   1 1247.78   49.90 
  -4   3   1 1249.28   49.40 
  -4   3   1 1237.28   54.99 
  -4   3   1 1236.48   59.69 
  -4   3   1 1285.07   49.90 
   4   3  -1 1369.26   61.79 
  -4   3   1 1260.77   58.59 
  -4   3   1 1298.27   58.89 
  -4   3   1 1297.07   63.79 
   4   3  -1 1356.06   65.29 
   4   3  -1 1287.47   61.49 
   4   3  -1 1371.86   60.39 
  -4   3   1 1258.77   56.19 
   4   3  -1 1348.57   63.19 
  -4   3   1 1271.07   59.39 
  -4   3   1 1290.77   49.99 
  -4   3   1 1204.38   45.90 
   4   3  -1 1295.47   63.19 
   4   3  -1 1294.17   56.79 
   4   3  -1 1335.57   60.99 
   4   3  -1 1331.57   59.39 
  -4   3   1 1243.28   45.70 
  -4   3   1 1160.48   61.69 
  -4   3   1 1245.48   55.79 
   4   3  -1 1396.76   63.19 
  -4   3   1 1366.56   53.69 
  -4   3   1 1203.28   48.00 
  -4   3   1 1289.27   56.69 
   4   3  -1 1238.98   57.99 
  -4   3   1 1216.18   55.99 
  -4   3   1 1181.18   55.69 
  -4   3   1 1282.67   48.70 
  -4   3   1 1310.37   55.09 
  -4   3   1 1279.57   56.99 
  -4   3   1 1279.27   53.29 
   4   3  -1 1345.17   56.49 
  -4   3   1 1284.27   58.69 
  -4   3   1 1252.37   57.49 
   4   3  -1 1294.97   63.99 
   4   3  -1 1314.67   59.19 
   4   3  -1 1246.18   61.99 
   4   3  -1 1276.97   60.39 
   4   3  -1 1362.56   62.29 
  -4   3   1 1261.07   49.90 
   3  -3  -1 2102.79   88.79 
  -3  -3   1 2477.85   95.69 
   3  -3  -1 2365.06   91.69 
  -3  -3   1 2412.66   95.79 
   3  -3  -1 2280.87   92.99 
   3  -3  -1 2231.78   89.59 
   3  -3  -1 2301.97   89.39 
  -3  -3   1 2250.97   95.99 
  -3  -3   1 2420.16   96.39 
   3  -3  -1 2324.87   92.09 
   3  -3  -1 2299.67   89.69 
  -3  -3   1 2408.46   93.59 
  -3  -3   1 2436.16   92.89 
  -3  -3   1 2526.25   93.29 
  -3  -3   1 2504.15   94.59 
  -3  -3   1 2495.15   99.89 
  -3  -3   1 2336.07   96.59 
   3  -3  -1 2218.58   86.89 
   3  -3  -1 2293.77   90.79 
  -3  -3   1 2451.55   93.79 
  -3  -3   1 2342.87   92.49 
   3  -3  -1 2262.47   91.09 
  -3  -3   1 2451.05   97.19 
   3  -3  -1 2307.07   92.19 
   3  -3  -1 2258.67   90.79 
   3  -3  -1 2309.17   92.29 
  -3  -3   1 2279.17   96.29 
   3  -3  -1 2319.47   91.99 
   3  -3  -1 2355.56   92.99 
  -3  -3   1 2303.67   91.19 
  -3  -3   1 2515.15   96.19 
   3  -3  -1 2349.17   92.19 
   3   3  -1 2370.26   91.89 
  -3   3   1 2288.87   95.89 
   3   3  -1 2494.35   96.79 
  -3   3   1 2326.47   86.19 
   3   3  -1 2404.06   98.49 
  -3   3   1 2335.97   83.99 
  -3   3   1 2213.38   95.79 
   3   3  -1 2499.55   93.19 
   3   3  -1 2494.25   94.79 
   3   3  -1 2518.35   95.79 
  -3   3   1 2366.56   90.09 
  -3   3   1 2317.17   87.89 
  -3   3   1 2229.68   93.39 
   3   3  -1 2432.36   94.49 
   3   3  -1 2461.65   98.79 
  -3   3   1 2305.47   91.79 
  -3   3   1 2396.66   88.99 
  -3   3   1 2305.47   91.09 
  -3   3   1 2289.47   86.39 
  -3   3   1 2361.06   87.79 
  -3   3   1 2229.88   89.39 
  -3   3   1 2495.45   98.29 
   3   3  -1 2410.46   99.49 
  -3   3   1 2367.76   91.59 
  -3   3   1 2291.87   84.99 
   3   3  -1 2489.85   98.69 
   3   3  -1 2448.66   97.39 
  -3   3   1 2343.67   96.99 
  -3   3   1 2316.77   92.39 
  -3   3   1 2315.37   87.29 
  -3   3   1 2313.27   89.69 
  -3   3   1 2311.37   86.99 
  -3   3   1 2387.46   91.99 
  -3   3   1 2464.65   94.29 
   3   3  -1 2352.86   95.59 
   3   3  -1 2428.86   93.29 
   3   3  -1 2436.36   95.09 
  -3   3   1 2226.68   88.79 
  -3   3   1 2196.18   92.19 
  -3   3   1 2343.97   85.59 
  -3   3   1 2289.17   83.89 
  -3   3   1 2296.57   91.59 
  -3   3   1 2261.77   94.79 
   3   3  -1 2486.45   97.89 
   3   3  -1 2311.87   94.59 
   3   3  -1 2378.86   92.79 
  -3   3   1 2377.56   91.09 
  -3   3   1 2366.66   90.39 
  -3   3   1 2331.77   88.29 
   3   3  -1 2471.05   94.29 
  -3   3   1 2348.86   90.99 
  -3   3   1 2407.76   92.59 
  -3   3   1 2297.67   89.79 
  -2  -3   1  943.71   42.10 
   2  -3  -1  914.01   39.80 
   2  -3  -1 1027.10   44.20 
  -2  -3   1  909.51   45.20 
  -2  -3   1  901.51   44.80 
   2  -3  -1  931.31   38.00 
  -2  -3   1  987.70   40.30 
   2  -3  -1  855.41   38.80 
   2  -3  -1  954.40   40.10 
  -2  -3   1  952.80   39.80 
  -2  -3   1  971.60   44.20 
  -2  -3   1  969.90   47.70 
   2  -3  -1  872.31   37.50 
  -2  -3   1  944.21   43.10 
   2  -3  -1  878.91   39.40 
   2  -3  -1  889.81   39.80 
  -2  -3   1  972.60   39.00 
  -2  -3   1  979.40   40.90 
   2  -3  -1  922.11   43.90 
   2  -3  -1  936.61   39.00 
   2  -3  -1  845.02   37.60 
  -2  -3   1  957.40   44.70 
  -2  -3   1  952.20   41.00 
   2  -3  -1  880.71   42.50 
  -2  -3   1  916.51   41.30 
   2  -3  -1  909.11   40.60 
  -2  -3   1  961.70   42.10 
  -2  -3   1  976.20   41.50 
  -2  -3   1  961.00   43.10 
   2  -3  -1  904.91   36.80 
  -2  -3   1  945.71   42.00 
   2  -3  -1  866.01   39.10 
   2  -3  -1  888.71   39.90 
  -2  -3   1  942.81   43.30 
   2  -3  -1  893.21   38.40 
   2  -3  -1  886.61   39.70 
  -2  -3   1  938.71   39.80 
  -2  -3   1  952.90   44.20 
  -2  -3   1  982.80   39.40 
   2  -3  -1  922.41   37.80 
   2  -3  -1  914.11   37.30 
  -2  -3   1  940.91   38.60 
   2  -3  -1  873.91   41.00 
  -2  -3   1  925.81   43.90 
   2   3  -1  918.21   44.90 
  -2   3   1  883.71   37.10 
   2   3  -1  941.21   46.80 
   2   3  -1  959.20   48.00 
  -2   3   1  892.51   37.70 
   2   3  -1  894.81   41.90 
  -2   3   1  871.41   39.00 
   2   3  -1  859.21   42.80 
   2   3  -1  959.90   43.00 
   2   3  -1  907.11   39.90 
  -2   3   1  930.21   41.30 
   2   3  -1  946.71   41.20 
   2   3  -1  945.11   45.40 
  -2   3   1  916.21   39.70 
  -2   3   1  868.21   40.50 
  -2   3   1  836.22   37.20 
  -2   3   1  910.91   35.80 
   2   3  -1  933.21   44.50 
   2   3  -1  900.21   39.20 
   2   3  -1  941.71   41.10 
  -2   3   1  880.81   40.40 
  -2   3   1  855.21   41.80 
  -2   3   1  947.01   38.50 
   2   3  -1  989.80   43.10 
  -2   3   1  867.41   37.30 
  -2   3   1  849.32   37.70 
  -2   3   1  907.51   39.60 
  -2   3   1  880.41   42.70 
  -2   3   1  862.81   38.70 
  -2   3   1  892.21   37.30 
  -2   3   1  853.61   37.40 
  -2   3   1  900.31   38.70 
  -2   3   1  950.40   38.80 
  -2   3   1  931.11   39.70 
   2   3  -1 1001.40   39.80 
  -2   3   1  962.90   38.50 
  -2   3   1  929.61   38.30 
  -2   3   1  902.61   39.20 
   2   3  -1  914.41   41.60 
  -2   3   1  869.91   37.50 
   2   3  -1  942.01   39.10 
  -2   3   1  969.10   36.60 
   2   3  -1  948.61   45.20 
   2   3  -1  871.81   43.70 
  -2   3   1  885.91   38.40 
   2   3  -1  919.61   46.00 
  -2   3   1  843.42   45.50 
  -2   3   1  876.41   41.30 
  -2   3   1  883.01   36.00 
   2   3  -1  984.90   41.80 
  -2   3   1  967.00   38.10 
  -2   3   1  977.70   39.10 
  -2   3   1  873.71   37.60 
  -1  -3   1 2704.33   96.29 
  -1  -3   1 2716.03   95.59 
  -1  -3   1 2637.84   95.69 
   1  -3  -1 2612.44   95.39 
  -1  -3   1 2899.11  102.39 
  -1  -3   1 2734.93  105.89 
  -1  -3   1 2650.93  103.19 
   1  -3  -1 2363.56  106.79 
  -1  -3   1 2835.62  101.19 
   1  -3  -1 2662.23  100.19 
  -1  -3   1 2626.14  103.99 
  -1  -3   1 2665.13   98.19 
  -1  -3   1 2735.43  106.59 
  -1  -3   1 2702.83  103.69 
  -1  -3   1 2705.13   95.59 
  -1  -3   1 2752.32  100.69 
   1  -3  -1 2610.54  101.59 
  -1  -3   1 2693.73   98.39 
  -1  -3   1 2789.02   99.69 
  -1  -3   1 2688.93  100.09 
  -1  -3   1 2867.21  105.69 
   1  -3  -1 2720.93  100.79 
  -1  -3   1 2739.93   95.89 
  -1  -3   1 2771.12  102.09 
   1  -3  -1 2426.06  102.69 
  -1  -3   1 2812.82  100.39 
  -1  -3   1 2810.22  100.39 
  -1  -3   1 2721.33   96.09 
  -1  -3   1 2765.72  104.09 
   1  -3  -1 2598.34   93.99 
   1  -3  -1 2599.44  102.29 
  -1  -3   1 2741.63   98.79 
   1  -3  -1 2604.54  101.39 
   1  -3  -1 2653.33  100.09 
   1  -3  -1 2715.73  105.09 
   1  -3  -1 2624.64  103.59 
   1  -3  -1 2669.13   96.69 
  -1  -3   1 2753.82  104.59 
   1  -3  -1 2626.54  100.09 
   1  -3  -1 2642.04   95.89 
   1  -3  -1 2781.92  103.09 
  -1  -3   1 2732.53  104.79 
  -1  -3   1 2792.92   97.99 
  -1  -3   1 2718.93   97.29 
  -1   3   1 2722.83   97.79 
  -1   3   1 2505.35   96.09 
  -1   3   1 2610.44   93.89 
   1   3  -1 2706.33  101.49 
  -1   3   1 2637.24   99.79 
   1   3  -1 2640.84  104.39 
   1   3  -1 2790.82   95.89 
   1   3  -1 2722.93   97.29 
  -1   3   1 2641.34  104.09 
   1   3  -1 2791.62  104.19 
   1   3  -1 2578.94  101.39 
  -1   3   1 2675.43   96.99 
  -1   3   1 2699.63   95.69 
  -1   3   1 2590.24   94.69 
  -1   3   1 2651.23  102.49 
  -1   3   1 2655.53   94.69 
  -1   3   1 2672.63  100.09 
   1   3  -1 2727.83   98.79 
  -1   3   1 2660.73   99.99 
  -1   3   1 2599.94  101.79 
   1   3  -1 2728.43   98.69 
   1   3  -1 2693.83  103.99 
  -1   3   1 2837.32  105.19 
  -1   3   1 2564.54   96.09 
  -1   3   1 2594.64   97.29 
   1   3  -1 2740.93  105.19 
   1   3  -1 2756.52   99.89 
  -1   3   1 2736.73   97.99 
  -1   3   1 2569.14  101.99 
  -1   3   1 2645.34   99.19 
  -1   3   1 2696.73   99.79 
  -1   3   1 2558.34   95.89 
   1   3  -1 2577.04  105.29 
   1   3  -1 2722.53  105.99 
   1   3  -1 2681.43  103.49 
   1   3  -1 2676.03  101.89 
   1   3  -1 2677.13  105.39 
   1   3  -1 2709.63  100.39 
   1   3  -1 2766.42   97.59 
   1   3  -1 2736.23  104.79 
  -1   3   1 2720.33   97.09 
  -1   3   1 2648.73   95.89 
  -1   3   1 2628.84   95.69 
  -1   3   1 2625.14   94.49 
  -1   3   1 2443.66   98.69 
  -1   3   1 2678.13  101.29 
   1   3  -1 2732.33  106.49 
  -1   3   1 2660.53  105.69 
   1   3  -1 2711.33  103.89 
   1   3  -1 2725.63   98.69 
   1   3  -1 2768.62   96.89 
   1   3  -1 2787.82   95.69 
  -1   3   1 2616.14   99.29 
  -1   3   1 2684.53   98.19 
  -1   3   1 2581.44   93.49 
   1   3  -1 2760.22   98.29 
  -1   3   1 2589.44   93.89 
  -1   3   1 2636.94   97.19 
   1   3  -1 2721.43  103.89 
   1   3  -1 2841.82  100.09 
   0  -3  -1  802.12   30.50 
   0  -3   1  738.73   37.30 
   0  -3  -1  789.02   34.90 
   0  -3  -1  797.12   33.90 
   0  -3  -1  792.92   30.80 
   0  -3  -1  798.72   37.10 
   0  -3  -1  725.83   38.40 
   0  -3   1  791.32   34.40 
   0  -3   1  755.62   36.00 
   0  -3  -1  817.42   30.30 
   0  -3  -1  793.92   38.40 
   0  -3  -1  740.53   37.20 
   0  -3  -1  720.43   35.50 
   0  -3  -1  671.33   36.50 
   0  -3  -1  784.22   35.40 
   0  -3   1  761.22   28.20 
   0  -3   1  771.82   29.40 
   0  -3   1  781.02   36.90 
   0  -3   1  796.92   31.00 
   0  -3   1  792.62   29.60 
   0  -3   1  695.53   35.80 
   0  -3  -1  736.33   38.00 
   0  -3  -1  772.62   33.60 
   0  -3   1  778.22   38.80 
   0  -3   1  799.42   31.00 
   0  -3   1  704.43   36.30 
   0  -3  -1  828.62   32.70 
   0  -3  -1  810.12   34.40 
   0  -3  -1  767.52   35.40 
   0  -3  -1  762.42   30.00 
   0  -3  -1  766.12   28.50 
   0  -3   1  681.33   35.70 
   0  -3  -1  732.63   35.40 
   0  -3   1  813.02   38.30 
   0  -3  -1  807.92   35.30 
   0  -3   1  786.72   37.30 
   0  -3   1  847.62   38.20 
   0  -3   1  747.93   37.60 
   0  -3  -1  770.62   37.20 
   0   3   1  770.52   38.30 
   0   3   1  708.53   34.10 
   0   3  -1  752.42   29.10 
   0   3   1  716.63   33.70 
   0   3   1  731.83   29.20 
   0   3  -1  788.82   38.00 
   0   3  -1  737.63   38.80 
   0   3  -1  770.12   36.30 
   0   3   1  735.93   35.10 
   0   3   1  779.22   32.80 
   0   3   1  775.32   35.90 
   0   3   1  770.52   32.00 
   0   3   1  733.83   30.00 
   0   3  -1  741.53   36.40 
   0   3  -1  713.83   37.20 
   0   3   1  731.33   35.70 
   0   3   1  749.23   28.20 
   0   3  -1  764.02   32.40 
   0   3   1  782.42   33.00 
   0   3   1  787.82   38.30 
   0   3  -1  733.83   37.20 
   0   3  -1  790.92   31.00 
   0   3  -1  744.43   30.30 
   0   3   1  788.72   39.30 
   0   3  -1  746.03   32.20 
   0   3   1  743.03   35.50 
   0   3   1  792.92   33.40 
   0   3  -1  852.01   38.00 
   0   3  -1  799.92   38.60 
   0   3  -1  814.52   37.20 
   0   3   1  769.62   38.50 
   0   3   1  752.62   32.60 
   0   3  -1  751.62   32.80 
   0   3  -1  775.12   36.40 
   0   3  -1  774.32   33.20 
   0   3  -1  710.43   32.50 
   0   3   1  771.42   36.30 
   0   3   1  793.42   29.20 
   0   3  -1  755.92   37.10 
   0   3  -1  760.42   28.40 
   0   3  -1  773.32   31.80 
   0   3   1  746.23   29.40 
   0   3   1  787.22   37.70 
   0   3   1  782.92   38.40 
   0   3  -1  764.62   37.70 
  -1  -3  -1 5382.36  195.78 
   1  -3   1 5239.28  192.88 
  -1  -3  -1 5605.74  194.48 
  -1  -3  -1 5476.85  189.08 
  -1  -3  -1 5604.44  192.78 
  -1  -3  -1 5321.47  186.68 
   1  -3   1 5236.48  189.18 
  -1  -3  -1 5447.56  196.88 
   1  -3   1 5352.66  196.48 
   1  -3   1 5055.39  189.28 
   1  -3   1 5429.76  194.28 
  -1  -3  -1 5417.26  187.68 
  -1  -3  -1 5383.76  188.38 
  -1  -3  -1 5526.35  196.58 
  -1  -3  -1 5366.16  195.68 
   1  -3   1 5145.99  195.08 
  -1  -3  -1 5405.86  190.88 
  -1  -3  -1 5382.76  196.28 
  -1  -3  -1 5366.16  188.88 
   1  -3   1 5132.99  191.58 
  -1  -3  -1 5464.95  186.78 
  -1  -3  -1 5500.35  198.78 
  -1  -3  -1 5452.85  187.28 
  -1  -3  -1 5377.66  189.78 
   1  -3   1 5199.98  195.08 
  -1  -3  -1 5543.25  188.88 
  -1  -3  -1 5478.45  194.68 
   1  -3   1 5490.15  195.18 
  -1  -3  -1 5532.95  193.88 
  -1  -3  -1 5492.95  188.58 
  -1  -3  -1 5416.66  189.48 
  -1  -3  -1 5455.35  195.58 
  -1  -3  -1 5530.25  193.78 
  -1  -3  -1 5576.94  187.88 
   1  -3   1 5141.29  187.58 
   1  -3   1 5192.68  186.58 
  -1  -3  -1 5579.44  203.18 
  -1  -3  -1 5468.05  192.68 
  -1  -3  -1 5341.67  195.78 
   1   3   1 5339.37  188.58 
   1   3   1 5502.85  195.18 
   1   3   1 5361.46  190.48 
  -1   3  -1 4717.23  194.88 
  -1   3  -1 5144.59  187.28 
   1   3   1 5430.66  188.48 
   1   3   1 5453.25  186.78 
  -1   3  -1 5111.99  193.18 
   1   3   1 5343.07  198.38 
  -1   3  -1 5012.90  192.68 
   1   3   1 5318.67  189.78 
  -1   3  -1 5313.47  189.18 
   1   3   1 5530.75  193.58 
  -1   3  -1 5430.76  193.18 
   1   3   1 5399.86  196.08 
   1   3   1 5374.56  195.58 
   1   3   1 5290.37  192.48 
  -1   3  -1 5295.37  191.58 
   1   3   1 5510.15  194.78 
  -1   3  -1 5168.98  185.28 
  -1   3  -1 5250.07  194.78 
  -1   3  -1 5400.36  189.48 
  -1   3  -1 5295.47  194.48 
  -1   3  -1 5397.66  193.98 
  -1   3  -1 5271.87  186.48 
   1   3   1 5328.17  198.78 
   1   3   1 5657.53  194.48 
  -1   3  -1 5189.88  193.88 
  -1   3  -1 5296.47  189.58 
   1   3   1 5457.85  197.68 
  -1   3  -1 5164.88  189.08 
  -1   3  -1 5408.56  196.08 
   1   3   1 5440.26  186.78 
   1   3   1 5444.15  191.68 
   1   3   1 5525.45  196.28 
  -1   3  -1 5238.78  186.38 
  -1   3  -1 5278.47  192.38 
  -1   3  -1 5222.18  186.58 
  -1   3  -1 5097.29  194.58 
   1   3   1 5403.76  188.58 
  -1   3  -1 5334.67  186.28 
  -1   3  -1 5151.58  192.78 
  -1   3  -1 5382.96  192.98 
  -1   3  -1 5200.48  195.88 
   1   3   1 5550.74  197.08 
   1   3   1 5478.45  190.58 
   1   3   1 5360.66  188.38 
   1   3   1 5513.35  194.68 
   1   3   1 5379.16  191.88 
   1   3   1 5483.65  195.38 
  -1   3  -1 5092.69  187.98 
   1   3   1 5242.68  196.08 
   1   3   1 5409.36  193.58 
   1   3   1 5518.75  190.98 
   1   3   1 5511.25  197.08 
  -1   3  -1 5293.57  188.38 
   1   3   1 5533.95  199.68 
  -1   3  -1 5040.30  193.18 
  -1   3  -1 5262.17  184.48 
   1   3   1 5334.87  201.48 
   2  -3   1 1980.10   76.69 
   2  -3   1 1924.41   75.59 
  -2  -3  -1 1973.80   80.49 
  -2  -3  -1 2019.10   76.09 
  -2  -3  -1 2040.80   82.39 
  -2  -3  -1 1910.51   76.99 
  -2  -3  -1 2108.89   81.19 
   2  -3   1 1945.41   75.29 
   2  -3   1 1903.81   76.69 
  -2  -3  -1 2037.20   77.09 
  -2  -3  -1 2025.30   76.89 
  -2  -3  -1 2049.89   76.09 
   2  -3   1 1984.70   81.99 
  -2  -3  -1 2047.30   77.49 
  -2  -3  -1 2101.19   75.79 
  -2  -3  -1 2093.39   81.99 
  -2  -3  -1 2092.69   77.69 
   2  -3   1 2009.50   80.59 
  -2  -3  -1 2024.20   83.49 
  -2  -3  -1 2029.50   79.29 
   2  -3   1 1920.61   80.09 
   2  -3   1 1916.91   80.19 
   2  -3   1 1980.20   81.39 
  -2  -3  -1 2023.00   81.49 
  -2  -3  -1 2089.39   83.69 
  -2  -3  -1 2054.09   81.69 
  -2  -3  -1 2119.89   78.89 
   2  -3   1 1943.81   75.09 
  -2  -3  -1 2109.59   85.89 
  -2  -3  -1 2040.10   82.79 
  -2  -3  -1 1964.00   77.59 
  -2  -3  -1 2064.09   82.99 
   2  -3   1 1902.61   75.59 
  -2  -3  -1 2051.49   77.59 
   2  -3   1 1878.31   73.19 
   2  -3   1 1904.71   79.09 
  -2  -3  -1 2082.29   82.79 
  -2   3  -1 1930.11   77.09 
  -2   3  -1 1987.60   75.79 
   2   3   1 2071.29   77.49 
   2   3   1 2015.50   82.19 
   2   3   1 2059.19   81.49 
  -2   3  -1 1991.80   76.99 
  -2   3  -1 1947.81   75.69 
  -2   3  -1 1942.61   75.99 
  -2   3  -1 1970.70   77.29 
   2   3   1 2057.59   83.99 
   2   3   1 1997.60   80.19 
  -2   3  -1 1910.41   75.49 
   2   3   1 1983.20   83.89 
   2   3   1 1929.41   80.59 
  -2   3  -1 1908.41   76.79 
   2   3   1 2015.60   77.19 
  -2   3  -1 2041.10   80.19 
  -2   3  -1 1905.61   77.29 
  -2   3  -1 2009.60   75.69 
  -2   3  -1 1932.31   73.89 
  -2   3  -1 1961.00   77.59 
  -2   3  -1 1979.50   77.49 
  -2   3  -1 1921.21   79.69 
   2   3   1 2015.20   77.09 
  -2   3  -1 1965.10   71.29 
  -2   3  -1 1848.72   78.19 
  -2   3  -1 1973.00   76.09 
   2   3   1 2064.09   79.69 
  -2   3  -1 1973.20   74.79 
   2   3   1 2001.50   84.09 
   2   3   1 2085.79   75.79 
   2   3   1 2061.09   82.69 
   2   3   1 2105.39   82.39 
   2   3   1 1991.40   78.29 
  -2   3  -1 1854.51   82.59 
  -2   3  -1 2020.90   78.19 
   2   3   1 2141.49   82.69 
  -2   3  -1 1907.91   75.39 
  -2   3  -1 1906.31   83.19 
  -2   3  -1 2008.50   74.99 
  -2   3  -1 1961.30   78.19 
  -2   3  -1 1975.40   76.09 
   2   3   1 2058.69   80.19 
  -2   3  -1 1937.91   84.29 
   2   3   1 2155.38   83.09 
   2   3   1 2001.90   76.29 
   2   3   1 2039.40   82.29 
  -2   3  -1 1990.50   78.19 
  -2   3  -1 1946.71   72.29 
   2   3   1 2064.49   77.69 
   2   3   1 2100.39   78.99 
  -2   3  -1 1981.10   72.59 
   2   3   1 2120.69   82.19 
  -2   3  -1 1948.61   79.79 
  -2   3  -1 1953.20   80.99 
  -2   3  -1 1919.31   77.09 
   2   3   1 1971.10   84.39 
  -2   3  -1 1950.20   72.89 
   3  -3   1 2161.98   88.99 
  -3  -3  -1 2293.97   94.09 
  -3  -3  -1 2337.27   88.79 
  -3  -3  -1 2251.17   93.39 
   3  -3   1 2216.48   82.09 
  -3  -3  -1 2143.49   93.99 
   3  -3   1 2191.08   84.69 
   3  -3   1 2180.98   88.49 
  -3  -3  -1 2208.88   88.99 
   3  -3   1 2144.69   86.89 
   3  -3   1 2242.08   87.49 
  -3  -3  -1 2301.97   92.39 
  -3  -3  -1 2202.78   92.29 
   3  -3   1 2121.89   87.49 
   3  -3   1 2156.58   86.39 
   3  -3   1 2202.38   88.89 
  -3  -3  -1 2215.98   90.19 
  -3  -3  -1 2356.96   92.69 
   3  -3   1 2288.37   89.59 
   3  -3   1 2132.29   82.99 
  -3  -3  -1 2260.37   91.89 
   3  -3   1 2104.19   86.19 
  -3  -3  -1 2215.78   91.49 
  -3  -3  -1 2158.48   92.39 
  -3  -3  -1 2235.08   92.39 
  -3  -3  -1 2196.18   87.39 
  -3  -3  -1 2272.07   88.39 
   3  -3   1 2174.88   89.19 
  -3  -3  -1 2260.27   88.69 
  -3  -3  -1 2313.47   88.89 
   3  -3   1 2108.59   86.69 
  -3  -3  -1 2252.87   91.59 
  -3  -3  -1 2262.77   87.59 
  -3   3  -1 2117.79   82.39 
  -3   3  -1 2197.28   94.99 
  -3   3  -1 2223.38   86.29 
  -3   3  -1 2249.68   91.69 
   3   3   1 2287.47   89.89 
  -3   3  -1 2375.16   91.19 
  -3   3  -1 2142.09   86.19 
   3   3   1 2299.77   89.29 
   3   3   1 2321.67   92.29 
  -3   3  -1 2251.87   83.89 
  -3   3  -1 2138.39   89.19 
   3   3   1 2248.58   92.09 
   3   3   1 2282.27   93.89 
   3   3   1 2123.99   93.29 
   3   3   1 2198.88   92.09 
  -3   3  -1 2102.39   82.49 
  -3   3  -1 2278.07   84.49 
   3   3   1 2270.37   87.99 
  -3   3  -1 2206.58   83.29 
  -3   3  -1 2076.49   87.89 
  -3   3  -1 2250.37   88.89 
   3   3   1 2307.87   90.19 
  -3   3  -1 2138.79   79.09 
  -3   3  -1 2172.78   88.49 
   3   3   1 2355.26   90.09 
  -3   3  -1 2111.89   87.09 
  -3   3  -1 2096.69   86.59 
  -3   3  -1 2095.79   85.99 
   3   3   1 2319.67   91.29 
  -3   3  -1 2267.87   93.19 
  -3   3  -1 2248.77   87.39 
  -3   3  -1 2183.48   82.79 
   3   3   1 2200.48   92.29 
  -3   3  -1 2138.59   80.09 
   3   3   1 2194.38   91.59 
  -3   3  -1 2059.39   85.59 
  -3   3  -1 2262.77   81.59 
  -3   3  -1 2135.69   80.99 
   3   3   1 2328.47   89.89 
   3   3   1 2152.58   90.79 
   3   3   1 2284.57   86.79 
   3   3   1 2274.77   93.19 
   3   3   1 2318.67   89.29 
   3   3   1 2276.37   88.59 
   3   3   1 2279.67   92.79 
  -3   3  -1 2147.89   83.89 
  -3   3  -1 2265.67   87.59 
  -3   3  -1 2262.87   86.69 
  -3   3  -1 2191.78   85.59 
  -3   3  -1 2216.08   81.39 
   4  -3   1  715.03   38.10 
   4  -3   1  686.53   38.00 
  -4  -3  -1  725.53   40.10 
   4  -3   1  719.03   40.00 
  -4  -3  -1  747.73   41.30 
   4  -3   1  695.43   38.70 
  -4  -3  -1  750.22   42.70 
  -4  -3  -1  777.22   42.10 
   4  -3   1  718.53   35.30 
  -4  -3  -1  753.32   41.60 
   4  -3   1  726.53   40.60 
  -4  -3  -1  836.62   44.20 
  -4  -3  -1  753.62   40.30 
   4  -3   1  730.63   38.70 
   4  -3   1  763.22   40.10 
  -4  -3  -1  796.52   41.80 
   4  -3   1  750.02   38.50 
   4  -3   1  732.53   38.80 
   4  -3   1  708.83   36.80 
   4  -3   1  702.73   32.80 
  -4  -3  -1  740.43   43.20 
  -4  -3  -1  750.42   41.40 
  -4  -3  -1  745.63   43.10 
   4  -3   1  808.42   38.10 
  -4  -3  -1  776.92   40.30 
   4  -3   1  694.83   36.80 
  -4  -3  -1  735.53   43.00 
  -4  -3  -1  700.13   36.10 
  -4  -3  -1  710.73   42.00 
  -4  -3  -1  726.23   40.10 
   4   3   1  712.13   39.00 
   4   3   1  728.53   40.30 
  -4   3  -1  750.52   38.40 
  -4   3  -1  746.03   42.00 
   4   3   1  728.83   40.30 
  -4   3  -1  791.12   36.40 
  -4   3  -1  699.93   32.50 
   4   3   1  721.33   42.70 
   4   3   1  730.93   38.50 
   4   3   1  717.33   42.00 
  -4   3  -1  669.43   37.40 
  -4   3  -1  727.63   32.90 
   4   3   1  742.33   40.80 
   4   3   1  701.33   42.80 
   4   3   1  764.62   40.20 
  -4   3  -1  698.23   29.00 
   4   3   1  706.73   42.10 
   4   3   1  716.43   36.50 
  -4   3  -1  720.83   33.60 
  -4   3  -1  718.73   44.80 
  -4   3  -1  761.82   34.90 
  -4   3  -1  718.93   32.90 
   4   3   1  716.23   37.80 
   4   3   1  723.53   40.70 
  -4   3  -1  644.24   39.50 
   4   3   1  752.22   41.20 
   4   3   1  754.22   41.80 
  -4   3  -1  786.12   35.90 
   4   3   1  764.32   40.10 
  -4   3  -1  703.53   37.00 
   4   3   1  735.43   44.40 
   4   3   1  739.73   41.90 
  -4   3  -1  715.93   32.00 
  -4   3  -1  673.23   38.10 
  -4   3  -1  687.33   32.70 
  -4   3  -1  761.92   53.19 
  -4   3  -1  683.33   39.80 
  -4   3  -1  704.43   35.30 
   4   3   1  735.63   42.20 
  -4   3  -1  739.33   36.50 
   4   3   1  768.42   38.70 
  -4   3  -1  739.83   35.70 
  -4   3  -1  781.12   41.00 
   4   3   1  764.92   43.00 
  -5  -3  -1  647.24   41.00 
  -5  -3  -1  635.44   39.60 
   5  -3   1  650.63   37.00 
  -5  -3  -1  660.33   33.30 
   5  -3   1  599.44   30.30 
   5  -3   1  604.64   39.00 
   5  -3   1  623.94   40.20 
  -5  -3  -1  588.64   38.60 
  -5  -3  -1  638.64   39.20 
  -5  -3  -1  596.74   39.30 
   5  -3   1  607.04   37.30 
  -5  -3  -1  631.14   38.40 
   5  -3   1  688.83   39.00 
  -5  -3  -1  598.44   40.30 
   5  -3   1  601.24   36.60 
  -5  -3  -1  589.34   38.30 
   5  -3   1  667.93   38.80 
  -5  -3  -1  611.84   40.60 
   5  -3   1  569.04   36.30 
  -5  -3  -1  641.94   42.20 
   5  -3   1  623.74   33.40 
  -5  -3  -1  592.34   38.90 
   5  -3   1  694.73   35.10 
   5  -3   1  610.54   38.00 
   5  -3   1  579.24   37.60 
  -5  -3  -1  616.34   40.10 
  -5  -3  -1  603.04   41.40 
  -5  -3  -1  597.04   40.80 
   5   3   1  664.23   42.00 
   5   3   1  619.44   38.60 
   5   3   1  659.83   41.70 
  -5   3  -1  663.83   30.10 
  -5   3  -1  646.14   38.20 
   5   3   1  631.64   40.00 
  -5   3  -1  686.53   32.80 
   5   3   1  586.84   41.10 
   5   3   1  593.34   40.40 
   5   3   1  617.94   39.10 
   5   3   1  612.24   35.60 
  -5   3  -1  643.64   36.90 
  -5   3  -1  637.14   32.90 
  -5   3  -1  585.04   39.50 
   5   3   1  662.93   41.70 
  -5   3  -1  594.24   33.70 
   5   3   1  681.13   35.50 
  -5   3  -1  577.14   43.40 
   5   3   1  645.04   39.30 
   5   3   1  680.43   40.60 
  -5   3  -1  613.64   37.40 
   5   3   1  584.04   38.10 
   5   3   1  613.74   43.20 
  -5   3  -1  603.44   38.10 
   5   3   1  651.33   39.70 
   5   3   1  675.43   39.80 
  -5   3  -1  594.84   38.70 
  -5   3  -1  571.54   33.70 
  -5   3  -1  632.44   33.60 
  -5   3  -1  617.84   32.50 
  -5   3  -1  593.94   39.20 
  -5   3  -1  626.24   30.70 
   5   3   1  644.24   35.30 
  -5   3  -1  583.44   31.90 
  -5   3  -1  649.54   40.20 
   5   3   1  660.93   42.20 
  -5   3  -1  623.04   27.40 
   5   3   1  618.64   38.40 
   5   3   1  675.43   37.90 
  -5   3  -1  614.14   38.40 
   5   3   1  722.33   43.90 
  -6  -3  -1  718.23   44.90 
   6  -3   1  818.52   46.90 
  -6  -3  -1  687.63   46.50 
  -6  -3  -1  764.42   44.90 
  -6  -3  -1  808.52   48.00 
  -6  -3  -1  703.73   46.00 
   6  -3   1  717.23   44.10 
  -6  -3  -1  705.63   48.50 
  -6  -3  -1  791.92   47.80 
   6  -3   1  685.63   38.50 
  -6  -3  -1  786.12   50.49 
   6  -3   1  809.12   45.90 
   6  -3   1  802.72   45.30 
   6  -3   1  731.93   46.30 
   6  -3   1  851.41   46.70 
   6  -3   1  725.03   47.50 
   6  -3   1  768.52   46.20 
   6  -3   1  640.44   44.50 
  -6  -3  -1  741.33   47.70 
   6  -3   1  677.73   35.90 
  -6  -3  -1  706.73   46.30 
   6  -3   1  739.33   44.50 
  -6  -3  -1  704.93   46.50 
  -6  -3  -1  720.33   35.70 
  -6  -3  -1  761.32   50.69 
  -6  -3  -1  754.62   47.50 
   6   3   1  770.62   47.80 
  -6   3  -1  711.33   39.20 
   6   3   1  706.13   43.60 
   6   3   1  698.13   48.40 
  -6   3  -1  807.62   48.30 
  -6   3  -1  641.44   34.60 
  -6   3  -1  691.93   43.70 
   6   3   1  736.43   48.90 
  -6   3  -1  654.73   48.10 
  -6   3  -1  734.83   42.20 
   6   3   1  676.83   45.70 
  -6   3  -1  708.33   42.90 
   6   3   1  740.33   41.80 
   6   3   1  705.93   45.90 
   6   3   1  777.82   45.50 
  -6   3  -1  727.03   37.20 
   6   3   1  778.12   49.40 
  -6   3  -1  681.03   44.90 
  -6   3  -1  706.63   43.60 
   6   3   1  695.93   46.60 
   6   3   1  748.23   48.80 
   6   3   1  663.83   49.80 
  -6   3  -1  795.32   45.60 
  -6   3  -1  759.12   48.20 
   6   3   1  684.03   45.20 
   6   3   1  689.33   45.40 
  -6   3  -1  750.82   39.90 
   6   3   1  677.13   43.70 
   6   3   1  620.64   45.60 
   6   3   1  701.53   43.70 
  -6   3  -1  729.03   46.20 
  -6   3  -1  742.73   35.40 
   6   3   1  788.52   39.90 
   7  -3   1   88.39   19.30 
  -7  -3  -1  166.28   26.90 
  -7  -3  -1  146.69   24.30 
   7  -3   1  151.38   25.80 
   7  -3   1  171.78   25.80 
   7  -3   1  148.99   23.80 
  -7  -3  -1  140.59   25.20 
   7  -3   1  171.88   27.10 
  -7  -3  -1  110.69   20.50 
  -7  -3  -1   97.69   19.40 
  -7  -3  -1  132.09   26.50 
  -7  -3  -1  122.79   24.10 
  -7  -3  -1  145.49   27.10 
   7  -3   1  102.09   21.80 
  -7  -3  -1  161.28   26.70 
   7  -3   1  181.78   19.60 
   7  -3   1  135.59   23.50 
  -7  -3  -1   96.29   20.90 
   7  -3   1  112.99   23.20 
   7  -3   1  137.29   22.50 
  -7  -3  -1  119.89   22.60 
  -7  -3  -1  206.68   27.50 
  -7  -3  -1  139.79   25.50 
  -7  -3  -1  136.59   25.30 
   7   3   1   91.39   20.50 
   7   3   1  131.29   25.90 
  -7   3  -1  107.69   22.50 
  -7   3  -1  136.69   19.90 
  -7   3  -1  134.49   21.30 
  -7   3  -1  178.28   26.90 
   7   3   1  135.69   24.50 
   7   3   1  116.79   24.60 
  -7   3  -1  144.29   25.50 
   7   3   1  133.89   24.50 
   7   3   1  177.48   31.50 
   7   3   1   93.49   19.50 
  -7   3  -1  150.78   26.60 
  -7   3  -1  126.79   20.80 
   7   3   1   81.49   19.10 
  -7   3  -1  137.69   25.20 
   7   3   1  139.09   23.10 
  -7   3  -1  114.69   21.00 
   7   3   1  187.58   28.50 
  -7   3  -1  160.38   21.40 
   7   3   1  148.19   26.20 
  -7   3  -1  107.09   22.90 
   7   3   1  172.48   24.20 
   7   3   1  146.09   26.30 
   7   3   1   95.79   21.50 
   7   3   1  113.19   22.90 
   7   3   1  116.69   24.10 
   7   3   1  116.79   22.20 
  -7   3  -1  152.48   24.50 
  -8  -3  -1  269.37   38.60 
   8  -3   1  277.17   36.40 
  -8  -3  -1  327.97   41.30 
   8  -3   1  316.37   36.90 
   8  -3   1  245.38   35.50 
  -8  -3  -1  333.27   40.80 
  -8  -3  -1  272.17   35.60 
  -8  -3  -1  247.98   35.10 
  -8  -3  -1  317.37   40.20 
   8  -3   1  316.97   40.80 
   8  -3   1  241.68   33.00 
  -8  -3  -1  220.18   34.50 
  -8  -3  -1  264.77   35.20 
  -8  -3  -1  338.47   36.70 
   8  -3   1  307.17   39.20 
   8  -3   1  261.27   34.30 
   8  -3   1  248.58   33.60 
  -8  -3  -1  256.27   36.60 
   8  -3   1  306.27   36.50 
  -8  -3  -1  282.37   39.70 
  -8  -3  -1  321.37   34.20 
  -8  -3  -1  332.07   35.70 
   8   3   1  332.77   41.20 
   8   3   1  252.47   37.60 
   8   3   1  270.87   37.90 
  -8   3  -1  269.07   36.00 
  -8   3  -1  236.58   32.30 
   8   3   1  330.27   41.10 
  -8   3  -1  304.17   33.80 
   8   3   1  312.97   39.50 
   8   3   1  256.37   32.00 
   8   3   1  254.17   40.00 
   8   3   1  375.26   42.50 
   8   3   1  288.97   37.60 
  -8   3  -1  319.47   40.90 
  -8   3  -1  246.18   33.80 
  -8   3  -1  338.77   40.10 
  -8   3  -1  329.47   37.10 
   8   3   1  288.57   38.60 
   8   3   1  309.07   35.20 
  -8   3  -1  307.17   39.30 
  -8   3  -1  283.67   38.20 
  -8   3  -1  272.57   29.70 
   8   3   1  270.17   30.60 
   8   3   1  415.26   46.60 
   8   3   1  294.67   38.30 
   8   3   1  228.38   31.80 
   8   3   1  274.37   38.60 
   9  -3   1  103.49   23.70 
  -9  -3  -1   89.19   22.30 
  -9  -3  -1  112.79   27.50 
  -9  -3  -1   64.09   23.00 
   9  -3   1   91.49   22.90 
  -9  -3  -1  121.89   29.50 
  -9  -3  -1   76.19   23.80 
  -9  -3  -1   54.59   20.10 
   9  -3   1   95.49   25.50 
   9  -3   1   82.49   22.90 
  -9  -3  -1   99.69   26.00 
   9  -3   1   56.79   20.50 
   9  -3   1   76.99   22.40 
  -9  -3  -1  100.99   27.40 
  -9  -3  -1  112.89   26.40 
   9  -3   1  107.79   26.20 
   9  -3   1  121.09   26.30 
  -9  -3  -1   89.49   25.10 
   9  -3   1  154.98   32.50 
  -9  -3  -1   95.39   24.00 
   9   3   1   79.19   23.50 
   9   3   1  112.19   25.70 
   9   3   1  123.09   32.50 
   9   3   1   89.69   23.90 
  -9   3  -1   86.59   24.10 
   9   3   1   58.79   20.60 
   9   3   1  117.29   23.70 
   9   3   1  125.49   27.90 
   9   3   1  159.48   31.80 
  -9   3  -1  119.09   25.30 
  -9   3  -1  115.09   25.30 
  -9   3  -1  141.79   28.90 
  -9   3  -1  120.69   24.70 
   9   3   1   80.69   22.90 
  -9   3  -1  102.29   26.80 
  -9   3  -1  109.49   25.50 
   9   3   1  122.09   27.80 
   9   3   1   63.69   20.90 
   9   3   1   82.49   25.70 
  -9   3  -1   79.09   24.20 
   9   3   1   99.89   26.80 
  -9   3  -1   93.49   24.10 
  -9  -4   1   90.19   23.30 
   9  -4  -1   66.89   19.80 
   9  -4  -1  142.69   26.80 
  -9  -4   1   61.39   22.00 
  -9  -4   1  125.59   28.90 
   9  -4  -1   94.49   24.30 
  -9  -4   1   46.00   19.60 
  -9  -4   1   80.99   22.90 
   9  -4  -1   82.99   24.20 
  -9  -4   1   93.09   24.10 
  -9  -4   1  113.99   27.30 
  -9  -4   1   65.89   21.80 
  -9  -4   1   67.49   21.90 
   9  -4  -1   79.49   24.00 
  -9  -4   1  122.79   28.70 
   9  -4  -1   77.79   23.00 
  -9  -4   1   73.39   24.90 
   9  -4  -1  114.79   27.60 
  -9  -4   1  108.19   24.10 
   9   4  -1  130.39   29.10 
   9   4  -1   95.99   24.30 
   9   4  -1   57.09   19.60 
  -9   4   1   58.89   21.10 
   9   4  -1   65.59   28.20 
   9   4  -1   98.59   25.60 
   9   4  -1   61.49   19.90 
   9   4  -1  128.09   28.50 
   9   4  -1   99.69   25.30 
  -9   4   1  126.79   26.10 
   9   4  -1   81.99   25.90 
   9   4  -1  125.79   28.90 
   9   4  -1  128.89   29.60 
  -9   4   1  125.99   24.40 
   9   4  -1  136.49   30.70 
  -9   4   1   76.09   23.50 
  -9   4   1  135.29   28.20 
   9   4  -1   80.09   23.10 
   9   4  -1  111.79   27.60 
  -9   4   1   80.89   23.40 
  -9   4   1  104.29   24.60 
  -9   4   1  125.89   28.90 
  -8  -4   1  178.78   31.80 
  -8  -4   1  146.69   25.80 
  -8  -4   1  156.98   30.00 
  -8  -4   1  168.08   28.00 
   8  -4  -1  165.78   28.50 
   8  -4  -1  254.87   36.20 
  -8  -4   1  179.58   31.40 
   8  -4  -1  142.19   25.90 
   8  -4  -1  177.88   28.20 
  -8  -4   1  164.38   30.30 
   8  -4  -1  161.68   26.90 
   8  -4  -1  200.88   31.20 
  -8  -4   1  244.48   33.80 
  -8  -4   1  147.49   30.10 
  -8  -4   1  181.28   29.30 
  -8  -4   1  182.18   30.50 
   8  -4  -1  155.38   28.00 
  -8  -4   1  210.98   33.00 
  -8  -4   1  201.18   31.90 
  -8  -4   1  164.18   30.80 
  -8  -4   1  154.98   28.80 
  -8  -4   1  203.78   27.80 
   8   4  -1  244.18   37.20 
  -8   4   1  189.18   30.10 
   8   4  -1  192.88   31.10 
   8   4  -1  162.68   29.70 
   8   4  -1  164.48   29.70 
   8   4  -1  216.28   34.30 
  -8   4   1  212.58   29.20 
  -8   4   1  177.08   29.70 
   8   4  -1  228.88   32.50 
  -8   4   1  137.59   26.20 
   8   4  -1  178.38   28.00 
  -8   4   1  135.69   27.60 
  -8   4   1  161.78   27.10 
   8   4  -1  175.98   27.20 
   8   4  -1  245.88   41.10 
  -8   4   1  183.28   30.50 
   8   4  -1  201.78   31.80 
  -8   4   1  169.78   29.00 
   8   4  -1  199.78   32.50 
   8   4  -1  200.98   31.00 
   8   4  -1  231.78   32.60 
  -8   4   1  181.38   29.50 
  -8   4   1  152.78   24.30 
   8   4  -1  259.27   38.40 
   8   4  -1  196.08   32.50 
  -8   4   1  217.88   32.50 
  -8   4   1  182.58   25.60 
   8   4  -1  268.17   36.70 
  -7  -4   1   77.39   20.50 
   7  -4  -1   51.79   15.80 
  -7  -4   1   46.50   17.80 
  -7  -4   1   10.00   11.00 
  -7  -4   1   22.30   12.60 
  -7  -4   1   41.20   17.20 
   7  -4  -1   50.09   15.50 
   7  -4  -1   63.99   17.40 
   7  -4  -1   46.80   14.10 
  -7  -4   1   20.20   12.60 
  -7  -4   1   38.70   16.60 
   7  -4  -1   49.60   16.10 
   7  -4  -1   44.20   16.70 
  -7  -4   1   52.99   19.90 
  -7  -4   1   54.99   17.60 
  -7  -4   1   39.90   16.50 
   7  -4  -1   14.40   12.30 
  -7  -4   1   69.29   18.60 
  -7  -4   1   34.00   15.20 
   7  -4  -1   58.09   18.20 
   7  -4  -1   54.09   15.00 
   7  -4  -1   43.20   13.30 
  -7  -4   1   80.19   21.10 
  -7  -4   1   29.30   13.50 
  -7   4   1   30.50   16.30 
   7   4  -1   50.99   18.20 
   7   4  -1   41.50   17.60 
   7   4  -1   81.29   20.00 
  -7   4   1   71.99   19.80 
   7   4  -1   73.19   17.90 
  -7   4   1   44.80   17.90 
   7   4  -1   63.49   17.50 
  -7   4   1   53.39   18.80 
   7   4  -1   40.80   17.30 
  -7   4   1   59.99   17.40 
   7   4  -1   67.19   17.20 
  -7   4   1    8.90   10.40 
  -7   4   1   13.80   13.00 
   7   4  -1   68.09   18.60 
   7   4  -1   71.39   20.50 
   7   4  -1   28.30   15.20 
   7   4  -1   70.39   19.20 
  -7   4   1   41.70   14.20 
   7   4  -1   70.19   18.40 
  -7   4   1   42.50   13.20 
  -7   4   1   39.40   13.10 
   7   4  -1   52.79   15.70 
   7   4  -1   70.99   20.30 
  -7   4   1   67.89   15.60 
  -7   4   1   48.40   16.10 
   7   4  -1   61.89   19.30 
   7   4  -1   34.00   14.60 
  -7   4   1   37.60   14.90 
   7   4  -1   91.49   22.30 
   7   4  -1   55.19   18.50 
   7   4  -1   26.50   18.10 
   6  -4  -1  124.69   19.70 
  -6  -4   1  117.89   23.80 
   6  -4  -1  133.99   15.50 
  -6  -4   1  148.59   25.10 
   6  -4  -1  103.19   18.40 
   6  -4  -1  154.18   24.20 
  -6  -4   1  114.89   22.30 
  -6  -4   1  103.29   20.30 
   6  -4  -1  134.59   22.40 
   6  -4  -1  155.28   23.80 
  -6  -4   1  135.39   22.70 
   6  -4  -1  123.59   20.90 
  -6  -4   1  117.59   21.60 
  -6  -4   1  104.79   20.60 
  -6  -4   1  178.08   26.50 
  -6  -4   1  131.49   23.10 
  -6  -4   1  100.99   20.10 
   6  -4  -1  127.89   21.40 
  -6  -4   1  140.19   24.60 
   6  -4  -1  138.79   20.20 
   6  -4  -1  113.39   19.40 
  -6  -4   1  137.39   24.20 
   6  -4  -1  153.58   20.50 
  -6  -4   1  105.79   22.20 
  -6  -4   1  125.29   20.60 
  -6   4   1  108.79   20.20 
   6   4  -1  115.89   27.20 
  -6   4   1  156.08   23.70 
  -6   4   1  133.79   18.20 
   6   4  -1  110.29   21.00 
  -6   4   1  131.19   17.80 
   6   4  -1  147.19   23.50 
   6   4  -1  140.69   24.70 
   6   4  -1  206.78   26.20 
   6   4  -1  122.79   21.00 
   6   4  -1  176.58   25.70 
  -6   4   1  105.59   17.30 
  -6   4   1  142.19   21.50 
  -6   4   1   95.19   22.90 
   6   4  -1  180.18   21.40 
  -6   4   1  112.39   20.70 
  -6   4   1  144.59   18.70 
   6   4  -1  126.09   20.70 
  -6   4   1   97.59   19.10 
  -6   4   1  115.69   21.80 
   6   4  -1  126.59   24.80 
   6   4  -1   81.09   20.00 
   6   4  -1  131.89   22.60 
   6   4  -1  153.08   23.20 
   6   4  -1  151.68   22.80 
   6   4  -1  134.59   22.20 
  -6   4   1  141.79   17.90 
   6   4  -1  132.69   25.00 
   6   4  -1  131.59   23.60 
   6   4  -1  143.79   24.50 
  -6   4   1  143.39   20.00 
  -6   4   1  125.59   18.90 
  -6   4   1  119.69   18.80 
   6   4  -1  128.99   22.60 
   6   4  -1  139.69   23.60 
  -6   4   1  115.79   20.00 
  -6   4   1  134.69   25.70 
  -5  -4   1  193.48   26.20 
   5  -4  -1  198.18   24.40 
  -5  -4   1  224.08   28.30 
  -5  -4   1  222.08   26.50 
  -5  -4   1  183.68   23.00 
   5  -4  -1  225.88   19.80 
  -5  -4   1  197.08   26.60 
  -5  -4   1  197.98   24.20 
  -5  -4   1  205.48   25.90 
   5  -4  -1  186.08   22.90 
   5  -4  -1  195.58   21.70 
  -5  -4   1  203.68   27.10 
   5  -4  -1  197.98   20.90 
  -5  -4   1  223.98   25.50 
  -5  -4   1  204.68   21.80 
   5  -4  -1  229.88   23.10 
   5  -4  -1  197.28   21.60 
  -5  -4   1  156.08   24.70 
   5  -4  -1  173.48   22.10 
  -5  -4   1  206.18   27.60 
   5  -4  -1  187.98   23.90 
  -5  -4   1  192.08   23.30 
   5  -4  -1  205.08   23.50 
   5  -4  -1  188.58   22.10 
   5  -4  -1  204.28   22.70 
  -5  -4   1  198.18   26.50 
  -5   4   1  196.08   22.60 
   5   4  -1  228.38   26.80 
   5   4  -1  246.48   29.70 
   5   4  -1  258.97   28.50 
   5   4  -1  148.59   22.70 
  -5   4   1  205.78   20.60 
   5   4  -1  201.88   26.90 
  -5   4   1  192.48   21.50 
  -5   4   1  219.98   22.30 
  -5   4   1  195.58   13.40 
  -5   4   1  210.18   23.90 
  -5   4   1  204.58   11.80 
  -5   4   1  190.18   23.10 
  -5   4   1  217.28   22.00 
  -5   4   1  138.49   24.70 
   5   4  -1  189.88   27.50 
   5   4  -1  171.08   20.90 
  -5   4   1  194.48   22.60 
   5   4  -1  253.27   31.90 
  -5   4   1  198.68   20.30 
   5   4  -1  187.28   23.10 
   5   4  -1  194.08   25.30 
   5   4  -1  263.77   32.80 
   5   4  -1  223.28   25.50 
   5   4  -1  176.68   24.50 
  -5   4   1  226.08   24.60 
   5   4  -1  184.68   25.70 
   5   4  -1  173.38   26.20 
  -5   4   1  234.68   25.70 
  -5   4   1  215.98   24.30 
  -5   4   1  180.88   11.90 
  -5   4   1  253.77   32.80 
  -5   4   1  184.28   25.10 
   5   4  -1  178.18   25.70 
   5   4  -1  255.57   27.20 
  -5   4   1  203.28   13.60 
   5   4  -1  171.18   21.70 
  -5   4   1  189.58   13.90 
   5   4  -1  195.98   25.10 
  -5   4   1  198.68   24.90 
   4  -4  -1  174.28   19.00 
  -4  -4   1  219.38   22.00 
   4  -4  -1  199.28   18.90 
   4  -4  -1  161.48   19.60 
  -4  -4   1  225.38   23.10 
   4  -4  -1  222.48   21.50 
   4  -4  -1  232.98   21.70 
  -4  -4   1  233.08   24.50 
   4  -4  -1  189.68   19.70 
  -4  -4   1  148.59   22.40 
   4  -4  -1  201.48   20.90 
   4  -4  -1  176.18   20.40 
  -4  -4   1  162.38   21.90 
  -4  -4   1  182.48   25.10 
  -4  -4   1  200.48   23.70 
  -4  -4   1  203.98   21.90 
  -4  -4   1  229.58   22.20 
  -4  -4   1  199.48   24.10 
  -4  -4   1  173.18   22.00 
  -4  -4   1  150.98   21.80 
  -4  -4   1  183.48   24.40 
  -4  -4   1  212.68   21.20 
   4  -4  -1  187.28   20.50 
   4  -4  -1  165.78   20.10 
   4  -4  -1  160.88   17.80 
   4  -4  -1  219.08   19.60 
   4  -4  -1  226.98   22.60 
  -4  -4   1  181.38   20.10 
   4  -4  -1  205.68   20.60 
   4   4  -1  205.48   24.30 
  -4   4   1  205.18   15.80 
   4   4  -1  212.38   22.80 
  -4   4   1  213.38   14.90 
  -4   4   1  196.58   21.50 
  -4   4   1  181.78   18.90 
  -4   4   1  182.88   12.60 
   4   4  -1  208.58   24.70 
  -4   4   1  249.48   19.50 
  -4   4   1  186.08   10.00 
  -4   4   1  186.78   26.60 
  -4   4   1  206.08   14.50 
   4   4  -1  188.98   22.60 
   4   4  -1  150.78   18.80 
  -4   4   1  197.08   10.30 
  -4   4   1  195.28   14.50 
  -4   4   1  201.08   15.20 
  -4   4   1  198.98   10.90 
  -4   4   1  164.18   11.30 
   4   4  -1  184.78   19.80 
  -4   4   1  167.78   19.60 
   4   4  -1  185.18   26.70 
  -4   4   1  185.58   18.80 
   4   4  -1  219.68   27.60 
  -4   4   1  170.58   19.20 
   4   4  -1  221.28   23.70 
  -4   4   1  204.48   14.50 
  -4   4   1  202.08   13.30 
  -4   4   1  188.18   21.50 
  -4   4   1  193.18   26.40 
   4   4  -1  222.08   23.10 
  -4   4   1  190.18   23.70 
   4   4  -1  211.48   26.20 
   4   4  -1  221.38   25.70 
  -4   4   1  190.58   19.20 
   4   4  -1  217.68   24.10 
   4   4  -1  170.98   24.30 
  -4   4   1  184.28   23.50 
   4   4  -1  211.88   23.60 
   4   4  -1  171.48   23.00 
  -4   4   1  193.48   20.30 
   4   4  -1  249.48   27.80 
  -4   4   1  207.08   21.00 
  -4   4   1  179.18   13.40 
   4   4  -1  214.88   21.40 
  -4   4   1  166.28   17.80 
  -4   4   1  174.08   19.20 
   4   4  -1  231.78   26.90 
   3  -4  -1   62.99   12.00 
   3  -4  -1   41.00   11.00 
   3  -4  -1   76.89    9.90 
  -3  -4   1   80.19   14.60 
   3  -4  -1   71.49   10.80 
  -3  -4   1   67.79   13.30 
   3  -4  -1   46.90    9.60 
  -3  -4   1   59.19   13.40 
   3  -4  -1   53.29    8.70 
  -3  -4   1   58.69   10.60 
  -3  -4   1   49.99   10.00 
   3  -4  -1   80.49   11.30 
   3  -4  -1   80.69   12.20 
   3  -4  -1   57.29    9.90 
  -3  -4   1   81.09   15.90 
  -3  -4   1   70.79   14.50 
   3  -4  -1   41.90   11.60 
   3  -4  -1   61.29   11.40 
  -3  -4   1   65.69   13.40 
   3  -4  -1   61.19   10.80 
   3  -4  -1   77.59   10.50 
  -3  -4   1   43.40    9.80 
  -3  -4   1   71.59   11.60 
  -3  -4   1   79.79   14.90 
  -3  -4   1   81.39   13.80 
  -3  -4   1   71.79   15.20 
   3  -4  -1   74.59   11.90 
   3  -4  -1   39.40    8.80 
   3  -4  -1   71.19    9.70 
  -3  -4   1   63.49   12.60 
  -3  -4   1   73.79   13.60 
   3  -4  -1   65.19   10.50 
  -3  -4   1   95.39   17.30 
  -3  -4   1   68.69   10.60 
   3  -4  -1   82.39   12.20 
  -3   4   1   50.89   10.10 
   3   4  -1   72.09   14.20 
  -3   4   1   59.49    9.50 
  -3   4   1   80.69   12.10 
  -3   4   1   72.39    8.90 
  -3   4   1   59.49    9.80 
  -3   4   1   43.20   13.00 
   3   4  -1   41.50   10.00 
  -3   4   1   77.19   11.00 
  -3   4   1   55.59   12.30 
  -3   4   1   67.29    8.80 
   3   4  -1   62.29   14.10 
  -3   4   1   61.69    9.60 
   3   4  -1   49.40    9.70 
   3   4  -1   70.99   15.10 
   3   4  -1   64.19   12.40 
  -3   4   1   62.79    8.50 
  -3   4   1   63.09    8.70 
   3   4  -1   80.09   15.70 
   3   4  -1   54.79   10.40 
  -3   4   1   76.39    9.60 
  -3   4   1   54.09   11.00 
  -3   4   1   77.19   14.20 
   3   4  -1   68.19   11.80 
   3   4  -1   57.99   14.00 
   3   4  -1   63.49   13.30 
  -3   4   1   62.19   10.00 
  -3   4   1   52.59    9.90 
  -3   4   1   54.19   13.80 
   3   4  -1   66.39   12.00 
  -3   4   1   88.59   10.70 
  -3   4   1   76.39   10.90 
  -3   4   1   61.59    8.20 
   3   4  -1   73.09   15.50 
   3   4  -1   15.80   12.00 
  -3   4   1   65.59    8.20 
  -3   4   1   60.59   15.00 
  -3   4   1   56.49    9.70 
   3   4  -1   48.70   13.20 
  -3   4   1   68.99   10.70 
  -3   4   1   70.69   11.20 
   3   4  -1   72.79   10.90 
  -3   4   1   68.99    8.30 
  -3   4   1   37.50   12.00 
  -3   4   1   62.49   10.10 
  -3   4   1   70.79   10.40 
  -3   4   1   50.59   10.10 
  -3   4   1   86.19    9.50 
  -3   4   1   73.29   10.40 
  -3   4   1   67.79   11.10 
   3   4  -1   78.09   13.70 
  -3   4   1   57.09   12.00 
  -2  -4   1   48.70   12.00 
   2  -4  -1   51.39    6.50 
  -2  -4   1   60.59    8.30 
  -2  -4   1   72.09   10.30 
   2  -4  -1   50.29   12.00 
  -2  -4   1   50.99    8.20 
   2  -4  -1   50.09    6.90 
   2  -4  -1   66.29    9.20 
   2  -4  -1   62.49    9.50 
  -2  -4   1   64.39   13.50 
   2  -4  -1   55.89    8.20 
  -2  -4   1   41.20   10.60 
   2  -4  -1   33.50   10.70 
  -2  -4   1   49.20    7.70 
   2  -4  -1   46.50   10.30 
  -2  -4   1   60.69    8.90 
  -2  -4   1   59.09    9.90 
   2  -4  -1   62.79   10.50 
   2  -4  -1   52.39   10.20 
  -2  -4   1   72.69   13.60 
   2  -4  -1   54.49    7.90 
  -2  -4   1   74.89    9.20 
  -2  -4   1   56.49   13.40 
  -2  -4   1   50.99   13.20 
   2  -4  -1   56.79    7.30 
   2  -4  -1   56.89   10.40 
  -2  -4   1   62.69   11.80 
  -2  -4   1   71.09   11.30 
  -2  -4   1   56.59    8.80 
  -2  -4   1   74.19   14.60 
  -2  -4   1   56.29    9.20 
  -2  -4   1   53.49    7.50 
  -2  -4   1   63.49   11.80 
  -2  -4   1   46.90    9.50 
   2  -4  -1   57.19   12.90 
  -2  -4   1   47.90    9.70 
  -2   4   1   63.59    9.20 
  -2   4   1   32.30    8.30 
  -2   4   1   54.29    8.20 
   2   4  -1   54.29    9.50 
   2   4  -1   50.49   14.50 
   2   4  -1   74.69   14.30 
   2   4  -1   58.09    8.70 
  -2   4   1   46.60    7.60 
   2   4  -1   45.20    7.60 
   2   4  -1   44.70    7.60 
   2   4  -1   78.29   16.80 
  -2   4   1   44.50    7.60 
  -2   4   1   53.49    6.00 
  -2   4   1   61.49   10.80 
  -2   4   1   50.69    8.80 
  -2   4   1   55.89    7.90 
  -2   4   1   53.99    5.80 
  -2   4   1   50.39   11.60 
   2   4  -1   71.29   15.30 
  -2   4   1   47.70    8.50 
   2   4  -1   75.29   10.60 
  -2   4   1   56.29    9.30 
  -2   4   1   64.69    8.60 
   2   4  -1   64.59   12.90 
   2   4  -1   53.09    9.90 
  -2   4   1   64.99    7.80 
   2   4  -1   51.59   13.30 
  -2   4   1   61.49    7.90 
  -2   4   1   50.89    7.30 
  -2   4   1   56.39   12.80 
   2   4  -1   49.30   13.10 
  -2   4   1   59.99    7.80 
  -2   4   1   49.70    7.70 
   2   4  -1   49.40    9.60 
  -2   4   1   47.90    7.70 
  -2   4   1   56.59    8.10 
   2   4  -1   73.69   14.10 
  -2   4   1   53.09    7.70 
  -2   4   1   66.29    8.50 
  -2   4   1   50.49    8.00 
   2   4  -1   44.80   10.30 
   2   4  -1   52.69   12.20 
  -2   4   1   54.49   12.90 
  -2   4   1   48.70    8.90 
  -2   4   1   62.99   10.80 
   2   4  -1   74.29    9.80 
  -2   4   1   63.59    8.40 
  -2   4   1   71.89    9.30 
  -2   4   1   64.59    7.10 
   2   4  -1   74.69   11.20 
  -2   4   1   53.69   11.00 
   1  -4  -1   15.40   11.50 
  -1  -4   1   22.70    7.20 
  -1  -4   1   20.50    3.90 
   1  -4  -1   20.70    2.90 
   1  -4  -1   43.80    9.70 
  -1  -4   1   27.10    4.10 
   1  -4  -1   19.20    4.30 
  -1  -4   1   18.40    4.10 
   1  -4  -1   24.10   10.20 
  -1  -4   1   14.90    6.10 
  -1  -4   1   18.10    4.40 
  -1  -4   1   22.80    6.80 
  -1  -4   1   29.80    6.80 
   1  -4  -1   27.00    8.50 
  -1  -4   1   28.80    9.60 
   1  -4  -1   22.30   10.30 
  -1  -4   1   29.00    7.20 
  -1  -4   1   19.60   10.20 
   1  -4  -1   26.90    9.70 
  -1  -4   1   25.90    7.30 
   1  -4  -1   36.10    8.80 
  -1  -4   1   29.10    5.50 
  -1  -4   1   15.10    9.40 
   1  -4  -1   22.00   10.00 
  -1  -4   1   29.70    4.60 
  -1  -4   1   30.10    8.10 
  -1  -4   1   23.20    7.80 
   1  -4  -1   19.00    7.40 
   1  -4  -1   20.20    8.10 
  -1  -4   1   20.60   10.30 
   1  -4  -1   19.90    7.70 
  -1  -4   1   10.50    8.10 
  -1  -4   1   25.80    4.40 
  -1  -4   1   28.00   11.50 
  -1   4   1   23.40    8.40 
  -1   4   1   25.50    3.10 
  -1   4   1   42.10    8.10 
  -1   4   1   24.10    3.00 
  -1   4   1   22.10    4.10 
  -1   4   1   22.00    5.40 
  -1   4   1   31.40    6.40 
  -1   4   1   23.50    5.10 
  -1   4   1   22.00    3.90 
   1   4  -1   26.80   10.20 
  -1   4   1   24.90    3.10 
   1   4  -1   29.60    6.40 
  -1   4   1   15.80    8.60 
   1   4  -1   25.90   10.20 
   1   4  -1   35.90    7.70 
  -1   4   1   32.40    6.00 
  -1   4   1   34.10   11.40 
  -1   4   1   17.50    7.50 
  -1   4   1   27.30    3.70 
   1   4  -1    3.70    8.10 
   1   4  -1   21.60    5.30 
  -1   4   1   32.00    6.30 
  -1   4   1   19.60    7.60 
  -1   4   1   29.40    6.50 
   1   4  -1   21.90    3.80 
   1   4  -1   22.00    7.80 
   1   4  -1   21.10   11.30 
  -1   4   1   21.10    8.00 
  -1   4   1   16.30   10.40 
  -1   4   1   16.40    4.90 
   1   4  -1   19.70    5.00 
   1   4  -1    6.80    5.00 
  -1   4   1   26.00    7.90 
  -1   4   1   23.10    7.50 
  -1   4   1   24.80    7.50 
  -1   4   1   27.50    6.10 
   1   4  -1   19.30    6.40 
  -1   4   1   19.70    4.10 
   1   4  -1   19.40    9.20 
  -1   4   1   26.00    3.50 
  -1   4   1   22.30   10.50 
  -1   4   1   36.50   12.10 
  -1   4   1   24.50    7.30 
  -1   4   1   27.40    3.60 
  -1   4   1   23.50    3.90 
   1   4  -1   25.00    6.90 
  -1   4   1   35.00    5.00 
  -1   4   1   28.00    3.10 
   1   4  -1   21.00    4.50 
  -1   4   1   32.80    3.30 
   1   4  -1   16.70    9.90 
  -1   4   1   25.50    4.00 
   1   4  -1   34.00   12.70 
   1   4  -1   33.80   12.00 
   1   4  -1   29.50    6.40 
  -1   4   1   27.00    4.10 
   0  -4  -1  196.48   21.50 
   0  -4  -1  234.48   16.80 
   0  -4  -1  203.48   22.40 
   0  -4  -1  179.78   19.70 
   0  -4   1  231.88   23.20 
   0  -4   1  211.28   10.00 
   0  -4  -1  219.48   12.60 
   0  -4   1  198.38   21.30 
   0  -4  -1  199.98   21.70 
   0  -4   1  260.07   19.20 
   0  -4  -1  212.18   12.20 
   0  -4   1  224.88   23.10 
   0  -4  -1  178.88   20.90 
   0  -4  -1  242.38   18.50 
   0  -4   1  234.38   19.00 
   0  -4   1  177.18   21.20 
   0  -4   1  213.38   22.10 
   0  -4   1  220.98   13.60 
   0  -4   1  227.38   20.60 
   0  -4   1  213.48   13.60 
   0  -4  -1  233.28   13.00 
   0  -4  -1  183.58   18.90 
   0  -4  -1  225.28   22.20 
   0  -4  -1  213.18   13.70 
   0  -4   1  229.38   21.40 
   0  -4  -1  218.58   16.10 
   0   4  -1  206.18   13.80 
   0   4   1  233.08   17.50 
   0   4  -1  194.88   17.20 
   0   4  -1  212.58   21.50 
   0   4   1  204.38    9.60 
   0   4   1  216.58   20.10 
   0   4   1  169.08   18.20 
   0   4   1  241.18   13.70 
   0   4   1  210.78   10.00 
   0   4  -1  194.38   14.30 
   0   4  -1  212.28   11.60 
   0   4   1  213.48   13.70 
   0   4   1  209.78   15.60 
   0   4  -1  193.88   23.60 
   0   4   1  201.58   23.20 
   0   4  -1  183.88   19.20 
   0   4  -1  172.98   19.40 
   0   4  -1  216.58   20.70 
   0   4   1  193.78   12.20 
   0   4   1  243.98   22.90 
   0   4   1  215.78   22.90 
   0   4  -1  244.08   12.10 
   0   4  -1  221.88   23.00 
   0   4   1  186.48   21.50 
   0   4   1  218.18   15.40 
   0   4   1  183.28   21.70 
   0   4   1  219.08   14.90 
   0   4  -1  194.18   12.50 
   0   4  -1  172.08   21.20 
   0   4  -1  223.38   15.90 
   0   4  -1  204.08   10.20 
   0   4  -1  212.78   13.00 
   0   4   1  192.28   22.00 
   0   4   1  224.28   11.50 
   0   4  -1  188.18   11.20 
   0   4  -1  241.68   23.10 
   0   4   1  214.48   20.30 
   0   4  -1  201.48   15.30 
   0   4   1  193.48   18.60 
   0   4  -1  186.08   12.70 
   0   4   1  232.58   21.70 
   0   4  -1  196.58   22.40 
   0   4   1  208.98   10.40 
   0   4   1  204.38   15.30 
  -1  -4  -1  382.66   18.90 
  -1  -4  -1  368.86   21.40 
   1  -4   1  372.16   30.40 
  -1  -4  -1  405.86   28.90 
   1  -4   1  383.96   23.90 
  -1  -4  -1  384.96   19.90 
   1  -4   1  383.36   27.00 
  -1  -4  -1  402.46   27.60 
  -1  -4  -1  390.56   16.20 
  -1  -4  -1  396.76   19.10 
   1  -4   1  425.76   20.40 
   1  -4   1  350.86   25.10 
   1  -4   1  413.06   27.90 
  -1  -4  -1  358.26   26.50 
   1  -4   1  390.76   17.60 
   1  -4   1  384.96   27.90 
  -1  -4  -1  385.46   16.20 
   1  -4   1  375.76   19.60 
  -1  -4  -1  391.96   22.80 
  -1  -4  -1  398.66   20.30 
  -1  -4  -1  373.36   27.50 
  -1  -4  -1  407.86   23.60 
  -1  -4  -1  381.56   27.10 
  -1  -4  -1  402.76   18.90 
  -1  -4  -1  425.76   24.70 
  -1  -4  -1  399.26   17.90 
  -1  -4  -1  378.56   16.40 
  -1  -4  -1  307.97   25.40 
   1  -4   1  378.36   26.10 
  -1  -4  -1  391.66   17.20 
  -1  -4  -1  358.06   26.00 
   1  -4   1  326.27   25.20 
  -1  -4  -1  399.26   19.60 
  -1   4  -1  368.16   20.40 
  -1   4  -1  348.97   19.00 
  -1   4  -1  389.76   19.00 
  -1   4  -1  371.26   15.10 
  -1   4  -1  398.96   26.20 
  -1   4  -1  429.16   20.40 
  -1   4  -1  350.66   21.70 
   1   4   1  380.86   26.60 
   1   4   1  355.96   26.90 
  -1   4  -1  369.36   24.50 
  -1   4  -1  383.46   15.70 
   1   4   1  440.46   30.80 
   1   4   1  362.86   21.10 
  -1   4  -1  385.86   16.50 
   1   4   1  382.16   27.60 
   1   4   1  411.06   18.60 
  -1   4  -1  394.16   21.00 
   1   4   1  399.86   18.50 
  -1   4  -1  338.97   18.60 
  -1   4  -1  366.76   16.00 
  -1   4  -1  380.66   18.60 
   1   4   1  399.76   18.90 
   1   4   1  355.76   23.20 
  -1   4  -1  358.46   26.10 
  -1   4  -1  345.67   24.20 
   1   4   1  365.26   24.20 
   1   4   1  365.06   28.60 
  -1   4  -1  419.46   24.40 
   1   4   1  379.66   25.30 
  -1   4  -1  349.17   26.00 
   1   4   1  498.75   29.10 
  -1   4  -1  356.26   26.30 
  -1   4  -1  370.86   25.70 
   1   4   1  387.76   23.00 
   1   4   1  368.46   27.80 
  -1   4  -1  360.26   22.30 
   1   4   1  372.06   18.50 
   1   4   1  383.06   20.30 
  -1   4  -1  351.76   16.50 
  -1   4  -1  388.86   20.80 
   1   4   1  399.96   21.30 
  -1   4  -1  442.76   31.60 
  -1   4  -1  376.36   19.60 
   1   4   1  382.16   25.80 
   1   4   1  374.26   20.80 
  -1   4  -1  356.46   22.90 
   1   4   1  373.96   21.30 
   1   4   1  353.66   22.10 
   1   4   1  385.96   24.70 
   2  -4   1 1043.30   43.60 
  -2  -4  -1 1061.29   50.49 
  -2  -4  -1 1069.79   52.99 
  -2  -4  -1 1181.68   51.29 
  -2  -4  -1 1039.50   55.29 
  -2  -4  -1 1117.79   46.60 
  -2  -4  -1 1030.50   49.40 
   2  -4   1 1024.80   50.79 
   2  -4   1 1066.79   50.19 
  -2  -4  -1 1000.70   51.59 
   2  -4   1 1035.40   48.20 
  -2  -4  -1 1086.09   51.59 
  -2  -4  -1 1099.49   45.80 
  -2  -4  -1 1124.09   43.40 
  -2  -4  -1 1024.50   45.70 
  -2  -4  -1 1076.39   44.70 
  -2  -4  -1 1092.39   46.20 
  -2  -4  -1 1092.39   44.70 
  -2  -4  -1 1094.59   47.00 
  -2  -4  -1 1119.29   53.69 
  -2  -4  -1 1059.69   48.20 
  -2  -4  -1 1086.89   43.70 
   2  -4   1 1020.60   43.00 
  -2  -4  -1 1119.69   53.59 
   2  -4   1 1022.70   52.19 
   2  -4   1  990.00   42.20 
   2  -4   1 1028.00   45.10 
   2  -4   1 1059.89   51.69 
  -2  -4  -1 1077.19   53.39 
  -2  -4  -1 1129.39   45.80 
  -2  -4  -1 1068.39   43.50 
   2  -4   1 1054.09   44.70 
   2   4   1 1008.80   51.59 
   2   4   1 1169.98   48.40 
  -2   4  -1 1033.30   46.80 
  -2   4  -1  992.10   42.80 
  -2   4  -1 1016.60   44.00 
   2   4   1 1098.19   51.39 
  -2   4  -1 1020.70   42.80 
   2   4   1 1126.29   49.20 
  -2   4  -1 1044.30   45.80 
   2   4   1 1029.00   51.49 
  -2   4  -1 1011.90   47.20 
  -2   4  -1 1041.70   45.70 
   2   4   1 1102.19   50.39 
  -2   4  -1 1058.89   44.20 
  -2   4  -1 1073.59   52.49 
  -2   4  -1 1031.80   50.59 
   2   4   1 1065.59   45.50 
   2   4   1 1090.29   53.09 
   2   4   1 1064.29   51.79 
  -2   4  -1  990.90   53.29 
  -2   4  -1 1035.10   44.80 
  -2   4  -1 1030.60   48.40 
  -2   4  -1  998.20   45.00 
   2   4   1 1031.80   53.59 
  -2   4  -1  999.50   43.40 
  -2   4  -1 1006.70   50.39 
  -2   4  -1 1061.29   41.90 
   2   4   1 1075.69   47.10 
   2   4   1 1037.10   54.19 
  -2   4  -1 1093.39   48.10 
   2   4   1 1065.79   51.19 
  -2   4  -1 1072.29   47.00 
  -2   4  -1 1090.89   47.80 
   2   4   1 1158.98   53.99 
   2   4   1 1125.89   45.40 
  -2   4  -1 1063.09   38.60 
   2   4   1 1061.39   47.20 
  -2   4  -1 1020.70   39.50 
  -2   4  -1 1024.40   40.70 
  -2   4  -1 1026.20   48.30 
   2   4   1 1149.78   45.70 
  -2   4  -1 1023.10   44.80 
  -2   4  -1 1013.40   42.90 
  -2   4  -1 1006.60   47.90 
   2   4   1 1099.09   52.69 
   2   4   1 1100.69   43.80 
  -2   4  -1 1051.69   48.80 
   3  -4   1   85.49   11.50 
  -3  -4  -1   70.09   15.60 
  -3  -4  -1   95.09   13.40 
  -3  -4  -1  117.09   17.40 
  -3  -4  -1  129.99   17.90 
   3  -4   1   64.09   10.00 
   3  -4   1   93.39   12.40 
  -3  -4  -1  100.09   16.00 
  -3  -4  -1   90.19   16.20 
  -3  -4  -1   89.79   14.00 
  -3  -4  -1  106.69   17.20 
   3  -4   1   89.79   12.20 
   3  -4   1  107.09   15.70 
  -3  -4  -1   87.79   15.70 
  -3  -4  -1  107.29   13.00 
  -3  -4  -1  104.19   12.90 
   3  -4   1   87.49   10.40 
  -3  -4  -1   98.49   13.10 
  -3  -4  -1  100.59   15.80 
  -3  -4  -1   69.39   11.80 
  -3  -4  -1  117.19   14.10 
   3  -4   1   77.39   13.00 
   3  -4   1  105.89   12.50 
   3  -4   1   99.49   16.30 
   3  -4   1   69.69   14.10 
  -3  -4  -1   77.89   15.80 
  -3  -4  -1  134.99   18.80 
   3   4   1   98.69   13.10 
  -3   4  -1  125.89   16.10 
  -3   4  -1   83.09   16.80 
  -3   4  -1   79.09   12.20 
   3   4   1   80.39   15.00 
  -3   4  -1  107.29   10.90 
   3   4   1  106.99   13.50 
  -3   4  -1   83.19   11.10 
   3   4   1  101.39   16.20 
  -3   4  -1  109.79   18.20 
  -3   4  -1   97.09   10.30 
  -3   4  -1   85.89   11.80 
  -3   4  -1   95.29   11.90 
   3   4   1  127.79   15.30 
   3   4   1   83.49   15.40 
  -3   4  -1   83.59   17.50 
   3   4   1  107.69   12.80 
  -3   4  -1   97.19   13.90 
   3   4   1  135.49   18.30 
  -3   4  -1   85.89   12.20 
   3   4   1   76.49   16.20 
   3   4   1   90.49   14.10 
  -3   4  -1   86.29   11.90 
  -3   4  -1  108.19   15.60 
  -3   4  -1   96.29   13.70 
  -3   4  -1   66.69   12.70 
  -3   4  -1  110.79   11.90 
   3   4   1   96.99   18.70 
   3   4   1   93.19   15.40 
   3   4   1  113.89   17.50 
  -3   4  -1   87.29   14.60 
  -3   4  -1   81.49   11.00 
  -3   4  -1   88.29   12.00 
   3   4   1  115.49   16.10 
  -3   4  -1   85.59    7.90 
  -3   4  -1  109.29   14.60 
  -3   4  -1   96.79   10.30 
   3   4   1   84.39   14.50 
  -3   4  -1   95.09   14.50 
   3   4   1   90.99   16.10 
   3   4   1  103.89   18.30 
   3   4   1  101.59   14.40 
  -3   4  -1   98.79    7.90 
  -3   4  -1   98.59    9.90 
   3   4   1  111.19   19.10 
  -3   4  -1  103.39   12.10 
  -3   4  -1  103.49   11.60 
  -3   4  -1   98.09   12.80 
   4  -4   1  215.58   23.60 
  -4  -4  -1  211.78   23.80 
   4  -4   1  158.28   20.60 
   4  -4   1  183.68   18.20 
   4  -4   1  205.08   21.30 
  -4  -4  -1  231.48   25.90 
  -4  -4  -1  193.48   24.20 
  -4  -4  -1  193.98   26.00 
  -4  -4  -1  183.28   23.90 
   4  -4   1  194.28   20.60 
   4  -4   1  199.88   13.30 
  -4  -4  -1  229.78   23.00 
  -4  -4  -1  223.98   23.90 
   4  -4   1  231.38   23.80 
   4  -4   1  233.08   25.00 
  -4  -4  -1  221.48   27.30 
   4  -4   1  171.48   18.90 
  -4  -4  -1  230.58   27.90 
  -4  -4  -1  194.28   21.80 
   4  -4   1  232.28   22.10 
  -4  -4  -1  221.18   22.40 
  -4  -4  -1  219.38   26.60 
   4  -4   1  190.38   19.90 
  -4  -4  -1  260.07   27.90 
  -4  -4  -1  204.38   21.50 
  -4  -4  -1  170.38   22.90 
   4  -4   1  187.48   19.60 
  -4   4  -1  244.68   27.20 
   4   4   1  250.17   25.40 
  -4   4  -1  198.48   12.30 
  -4   4  -1  206.08   16.20 
  -4   4  -1  237.68   17.00 
  -4   4  -1  213.48   11.30 
  -4   4  -1  210.28   20.50 
   4   4   1  192.18   23.70 
  -4   4  -1  204.98   15.00 
  -4   4  -1  199.98   22.00 
   4   4   1  221.98   25.40 
  -4   4  -1  200.78   13.60 
  -4   4  -1  237.68   18.50 
   4   4   1  254.87   28.00 
  -4   4  -1  192.48   20.40 
   4   4   1  199.48   26.40 
   4   4   1  205.68   22.40 
  -4   4  -1  221.48   14.00 
  -4   4  -1  205.08   12.30 
  -4   4  -1  216.98   14.80 
  -4   4  -1  201.98   15.20 
  -4   4  -1  228.38   22.50 
  -4   4  -1  235.38   30.70 
   4   4   1  223.38   22.50 
   4   4   1  213.78   23.60 
   4   4   1  187.68   22.60 
   4   4   1  209.78   20.60 
  -4   4  -1  210.58   15.10 
   4   4   1  195.68   23.90 
  -4   4  -1  217.88   15.80 
  -4   4  -1  209.68   10.70 
   4   4   1  238.88   27.40 
   4   4   1  193.78   24.50 
  -4   4  -1  228.98   21.20 
  -4   4  -1  211.88   20.20 
  -4   4  -1  182.08   24.80 
   4   4   1  191.38   24.20 
  -4   4  -1  223.48   20.20 
  -4   4  -1  216.48   17.00 
   4   4   1  220.68   24.30 
   4   4   1  214.78   25.80 
   4   4   1  209.18   28.00 
  -4   4  -1  208.18   22.50 
   4   4   1  180.28   21.40 
   4   4   1  232.28   23.60 
  -4   4  -1  231.08   23.50 
   5  -4   1  233.18   26.00 
  -5  -4  -1  233.68   26.50 
   5  -4   1  188.48   24.50 
  -5  -4  -1  257.07   31.20 
   5  -4   1  228.88   22.80 
  -5  -4  -1  226.58   28.30 
   5  -4   1  265.87   26.30 
   5  -4   1  207.58   23.40 
  -5  -4  -1  242.88   29.80 
  -5  -4  -1  271.67   29.80 
   5  -4   1  275.27   26.30 
  -5  -4  -1  272.37   30.80 
  -5  -4  -1  196.58   26.50 
  -5  -4  -1  274.67   28.00 
  -5  -4  -1  228.88   23.00 
   5  -4   1  212.88   25.30 
   5  -4   1  244.68   24.30 
   5  -4   1  230.98   25.00 
  -5  -4  -1  188.48   27.10 
  -5  -4  -1  233.98   30.20 
   5  -4   1  231.48   23.30 
  -5  -4  -1  237.68   27.80 
  -5  -4  -1  296.87   30.20 
  -5  -4  -1  233.88   29.20 
   5  -4   1  219.38   25.30 
   5  -4   1  239.78   26.60 
  -5  -4  -1  265.07   30.40 
  -5  -4  -1  201.58   24.80 
  -5   4  -1  252.97   27.80 
   5   4   1  212.48   27.80 
  -5   4  -1  233.48   29.50 
  -5   4  -1  267.47   34.80 
  -5   4  -1  230.08   15.80 
  -5   4  -1  250.87   24.40 
   5   4   1  178.28   26.90 
  -5   4  -1  247.18   19.50 
   5   4   1  184.78   25.60 
  -5   4  -1  220.88   23.50 
  -5   4  -1  235.18   17.10 
  -5   4  -1  231.18   20.60 
   5   4   1  226.78   26.30 
  -5   4  -1  235.18   28.60 
  -5   4  -1  274.77   26.60 
   5   4   1  216.48   29.90 
   5   4   1  214.18   27.80 
   5   4   1  202.08   25.50 
   5   4   1  270.47   27.20 
   5   4   1  296.87   32.70 
   5   4   1  230.18   28.70 
  -5   4  -1  272.07   28.40 
  -5   4  -1  228.48   17.80 
  -5   4  -1  191.18   23.20 
   5   4   1  208.58   25.40 
   5   4   1  207.58   24.20 
   5   4   1  218.08   23.80 
   5   4   1  227.18   24.90 
  -5   4  -1  242.78   25.80 
   5   4   1  251.27   27.70 
   5   4   1  195.98   26.50 
   5   4   1  222.28   28.30 
  -5   4  -1  216.58   16.40 
   5   4   1  294.37   31.00 
  -5   4  -1  201.68   21.90 
   5   4   1  249.28   28.60 
  -5   4  -1  226.38   22.80 
  -6  -4  -1  889.31   53.89 
  -6  -4  -1  942.61   46.00 
  -6  -4  -1  854.31   52.69 
   6  -4   1  783.22   49.50 
  -6  -4  -1  900.11   54.39 
  -6  -4  -1  879.91   56.89 
  -6  -4  -1  865.41   55.29 
   6  -4   1  857.91   45.80 
  -6  -4  -1  939.31   54.19 
  -6  -4  -1  830.12   55.59 
   6  -4   1  981.50   50.49 
   6  -4   1  814.92   49.70 
  -6  -4  -1  865.11   56.19 
  -6  -4  -1  820.82   54.29 
   6  -4   1  854.61   45.80 
   6  -4   1  880.21   50.39 
   6  -4   1  829.12   50.99 
  -6  -4  -1  916.71   55.49 
   6  -4   1  855.01   53.79 
   6  -4   1  874.61   51.89 
  -6  -4  -1  960.30   54.29 
  -6  -4  -1  897.01   53.09 
   6  -4   1  879.01   52.89 
  -6  -4  -1  879.71   55.99 
   6  -4   1  942.91   53.09 
  -6  -4  -1  870.51   53.59 
  -6  -4  -1  850.51   56.89 
   6  -4   1  886.31   50.29 
  -6   4  -1  903.31   60.49 
   6   4   1  884.51   53.19 
   6   4   1  928.31   48.80 
  -6   4  -1  912.81   44.80 
  -6   4  -1  954.10   45.70 
   6   4   1  977.20   59.09 
  -6   4  -1  890.31   55.49 
   6   4   1  867.31   52.39 
  -6   4  -1  844.12   51.99 
  -6   4  -1  818.42   45.30 
  -6   4  -1  908.91   46.20 
   6   4   1  971.50   57.69 
   6   4   1  877.61   52.89 
  -6   4  -1  922.81   53.89 
  -6   4  -1  850.31   51.79 
  -6   4  -1  917.41   54.19 
   6   4   1 1016.40   56.29 
   6   4   1  977.60   56.19 
  -6   4  -1  863.61   44.50 
  -6   4  -1  876.01   48.40 
   6   4   1  851.51   56.69 
  -6   4  -1  833.92   49.50 
   6   4   1  836.42   52.49 
   6   4   1  922.41   55.59 
   6   4   1 1003.20   55.79 
   6   4   1  848.92   54.89 
  -6   4  -1  830.32   48.90 
  -6   4  -1  906.81   52.89 
   6   4   1  851.91   55.39 
   6   4   1  898.41   52.69 
   6   4   1  908.91   50.79 
   6   4   1  870.41   58.99 
   6   4   1  832.32   49.70 
   6   4   1  936.41   56.89 
   7  -4   1  293.27   32.70 
  -7  -4  -1  332.17   35.60 
  -7  -4  -1  308.97   36.40 
  -7  -4  -1  252.77   33.80 
  -7  -4  -1  311.17   37.50 
  -7  -4  -1  293.37   35.10 
  -7  -4  -1  311.47   38.90 
   7  -4   1  329.97   36.10 
  -7  -4  -1  335.07   37.80 
  -7  -4  -1  282.37   35.80 
   7  -4   1  308.67   38.50 
   7  -4   1  303.67   34.40 
  -7  -4  -1  310.77   39.80 
  -7  -4  -1  281.77   35.90 
   7  -4   1  357.26   39.00 
   7  -4   1  279.57   34.90 
  -7  -4  -1  280.87   34.70 
  -7  -4  -1  281.37   37.60 
  -7  -4  -1  275.17   34.00 
   7  -4   1  261.97   32.60 
   7  -4   1  259.47   31.60 
  -7  -4  -1  312.17   38.70 
  -7  -4  -1  281.87   34.60 
   7  -4   1  331.57   36.20 
   7   4   1  306.37   35.90 
  -7   4  -1  275.57   34.40 
  -7   4  -1  299.07   30.10 
   7   4   1  302.57   38.60 
   7   4   1  244.28   36.00 
  -7   4  -1  362.16   30.30 
  -7   4  -1  314.17   33.70 
  -7   4  -1  249.08   32.40 
  -7   4  -1  351.56   39.70 
   7   4   1  301.57   35.40 
   7   4   1  260.77   32.70 
  -7   4  -1  273.67   30.80 
  -7   4  -1  360.46   36.70 
   7   4   1  364.56   45.70 
   7   4   1  216.38   30.90 
   7   4   1  342.77   39.70 
   7   4   1  294.67   33.40 
   7   4   1  350.36   35.10 
   7   4   1  271.47   36.70 
   7   4   1  228.28   32.40 
   7   4   1  287.77   36.70 
  -7   4  -1  279.77   32.00 
   7   4   1  329.07   38.00 
   7   4   1  216.18   32.60 
  -7   4  -1  271.27   34.90 
  -7   4  -1  244.38   37.80 
   7   4   1  334.47   39.20 
   7   4   1  312.47   36.30 
   8  -4   1 1321.77   70.99 
   8  -4   1 1155.98   68.19 
  -8  -4  -1 1048.80   72.39 
  -8  -4  -1 1163.38   69.09 
   8  -4   1 1227.58   68.39 
  -8  -4  -1 1206.98   72.29 
  -8  -4  -1 1140.89   72.89 
   8  -4   1 1218.38   72.69 
  -8  -4  -1 1284.27   73.39 
   8  -4   1 1223.38   69.49 
  -8  -4  -1 1370.06   72.59 
   8  -4   1 1138.69   72.79 
   8  -4   1 1025.80   68.39 
  -8  -4  -1 1208.28   77.29 
  -8  -4  -1 1277.17   68.69 
  -8  -4  -1 1341.47   78.59 
  -8  -4  -1  976.40   67.59 
  -8  -4  -1 1074.59   69.99 
  -8  -4  -1 1211.08   75.29 
  -8  -4  -1 1224.68   72.59 
   8  -4   1 1169.98   69.79 
  -8  -4  -1 1224.98   74.39 
   8  -4   1 1062.89   68.49 
  -8   4  -1 1117.99   73.89 
  -8   4  -1 1279.57   74.99 
   8   4   1 1229.08   74.29 
  -8   4  -1 1202.98   68.29 
   8   4   1 1126.69   74.29 
   8   4   1 1217.48   75.89 
   8   4   1 1237.78   70.39 
   8   4   1 1230.18   69.59 
  -8   4  -1 1195.18   69.39 
   8   4   1 1249.07   73.89 
   8   4   1 1262.27   76.49 
   8   4   1 1263.87   77.09 
   8   4   1 1118.19   71.09 
  -8   4  -1 1119.99   71.79 
   8   4   1 1106.29   72.59 
   8   4   1 1186.48   72.89 
  -8   4  -1 1299.07   68.39 
   8   4   1 1241.48   72.89 
   8   4   1 1209.78   69.69 
   8   4   1 1114.09   65.69 
   8   4   1 1089.99   69.69 
   8   4   1 1246.58   80.29 
  -8   4  -1 1371.16   74.59 
  -8   4  -1 1233.28   72.99 
  -9  -4  -1  352.56   43.90 
  -9  -4  -1  242.38   37.90 
   9  -4   1  273.27   38.00 
   9  -4   1  231.98   36.60 
  -9  -4  -1  193.28   34.30 
  -9  -4  -1  199.38   35.20 
  -9  -4  -1  258.97   40.80 
  -9  -4  -1  294.97   39.30 
  -9  -4  -1  225.98   34.40 
  -9  -4  -1  299.87   46.20 
  -9  -4  -1  285.67   42.30 
  -9  -4  -1  237.48   36.90 
   9  -4   1  227.28   34.90 
   9  -4   1  308.97   42.60 
   9  -4   1  265.67   36.80 
  -9  -4  -1  230.38   37.00 
   9  -4   1  234.18   36.80 
  -9  -4  -1  263.87   39.30 
  -9  -4  -1  188.38   34.70 
   9  -4   1  225.38   34.80 
   9   4   1  234.18   37.20 
  -9   4  -1  252.87   49.50 
   9   4   1  216.58   37.10 
  -9   4  -1  305.97   44.10 
   9   4   1  216.08   43.30 
  -9   4  -1  226.68   37.30 
  -9   4  -1  262.47   41.10 
   9   4   1  218.38   38.10 
   9   4   1  245.08   34.10 
   9   4   1  257.67   38.70 
   9   4   1  319.97   45.20 
  -9   4  -1  275.67   39.90 
   9   4   1  280.07   36.20 
   9   4   1  222.98   37.40 
  -9   4  -1  237.78   36.40 
  -9   4  -1  261.07   37.40 
   9   4   1  236.08   39.60 
   9   4   1  336.17   48.00 
   9   4   1  244.38   37.90 
  -9   4  -1  213.68   31.60 
   9   4   1  211.78   36.20 
   9   4   1  168.18   33.70 
  -9   4  -1  276.47   37.00 
  -9  -5   1  596.44   58.69 
   9  -5  -1  536.45   59.29 
  -9  -5   1  600.94   59.29 
  -9  -5   1  550.14   56.29 
  -9  -5   1  507.25   58.99 
  -9  -5   1  603.34   66.99 
  -9  -5   1  631.34   59.89 
  -9  -5   1  551.44   56.89 
  -9  -5   1  534.85   58.29 
  -9  -5   1  586.14   61.09 
  -9  -5   1  508.35   59.49 
   9  -5  -1  471.45   53.09 
  -9  -5   1  585.94   80.69 
  -9  -5   1  677.03   63.89 
   9  -5  -1  545.05   54.69 
  -9  -5   1  722.23   65.09 
   9  -5  -1  552.54   57.19 
   9  -5  -1  481.65   52.29 
  -9  -5   1  592.54   62.09 
  -9   5   1  563.64   59.09 
  -9   5   1  482.25   49.30 
   9   5  -1  620.14   57.99 
   9   5  -1  559.84   59.99 
   9   5  -1  664.83   62.59 
   9   5  -1  606.84   62.49 
  -9   5   1  617.44   59.39 
   9   5  -1  622.04   62.49 
   9   5  -1  680.63   66.19 
   9   5  -1  577.64   58.59 
  -9   5   1  617.74   61.39 
  -9   5   1  520.35   54.69 
   9   5  -1  672.83   67.49 
   9   5  -1  489.95   58.89 
   9   5  -1  587.44   57.89 
   9   5  -1  547.75   59.59 
   9   5  -1  563.54   59.49 
   9   5  -1  511.35   63.59 
   9   5  -1  593.84   61.69 
  -9   5   1  571.44   56.69 
  -8  -5   1   22.90   15.50 
  -8  -5   1   35.90   18.70 
  -8  -5   1   50.69   18.10 
  -8  -5   1   63.69   21.60 
  -8  -5   1   29.70   17.40 
  -8  -5   1   27.10   19.80 
  -8  -5   1   71.59   23.90 
  -8  -5   1   46.90   19.10 
   8  -5  -1   31.00   16.30 
   8  -5  -1   48.60   19.20 
   8  -5  -1    6.30   12.90 
  -8  -5   1   37.80   17.20 
   8  -5  -1   36.30   17.50 
  -8  -5   1   26.60   15.60 
  -8  -5   1   33.90   17.90 
  -8  -5   1   14.10   14.00 
   8  -5  -1   17.20   14.50 
  -8  -5   1   36.90   17.50 
  -8  -5   1   33.90   16.90 
  -8  -5   1   44.10   19.00 
   8   5  -1   32.90   17.80 
   8   5  -1   16.30   15.10 
  -8   5   1   48.00   16.40 
   8   5  -1   28.60   16.00 
   8   5  -1   17.50   21.80 
  -8   5   1    1.50   15.40 
  -8   5   1   72.49   22.60 
   8   5  -1   44.10   19.60 
   8   5  -1   49.40   19.00 
  -8   5   1   59.49   17.70 
   8   5  -1   50.29   19.80 
  -8   5   1   36.60   16.90 
   8   5  -1   23.60   15.50 
  -8   5   1   41.20   18.40 
   8   5  -1   53.79   20.20 
   8   5  -1   18.40   16.60 
   8   5  -1   67.89   20.70 
   8   5  -1   39.20   21.00 
  -8   5   1   60.19   18.00 
   8   5  -1   58.59   20.50 
   8   5  -1   68.49   20.00 
   8   5  -1   23.30   16.70 
   8   5  -1   34.40   15.90 
  -8   5   1   48.10   23.90 
  -7  -5   1  744.23   50.99 
  -7  -5   1  734.03   50.49 
   7  -5  -1  724.93   46.00 
   7  -5  -1  746.73   50.59 
   7  -5  -1  710.03   47.90 
  -7  -5   1  744.03   54.59 
  -7  -5   1  673.33   53.19 
  -7  -5   1  779.02   56.49 
  -7  -5   1  818.92   55.49 
  -7  -5   1  809.02   54.59 
   7  -5  -1  687.13   49.50 
  -7  -5   1  875.71   57.99 
   7  -5  -1  694.43   48.60 
   7  -5  -1  737.83   51.59 
  -7  -5   1  710.23   50.49 
  -7  -5   1  793.22   58.19 
  -7  -5   1  746.93   55.29 
   7  -5  -1  645.04   45.90 
  -7  -5   1  743.93   49.90 
  -7  -5   1  684.13   48.60 
  -7  -5   1  744.43   51.29 
  -7  -5   1  691.43   51.69 
  -7   5   1  768.62   50.99 
   7   5  -1  772.92   52.69 
  -7   5   1  694.43   46.60 
  -7   5   1  728.53   66.09 
  -7   5   1  770.32   51.09 
   7   5  -1  654.83   49.40 
   7   5  -1  766.32   51.89 
   7   5  -1  764.62   53.19 
   7   5  -1  569.24   58.49 
   7   5  -1  744.43   59.59 
  -7   5   1  765.42   49.70 
   7   5  -1  759.62   52.79 
  -7   5   1  798.62   54.39 
   7   5  -1  693.53   52.79 
  -7   5   1  826.12   57.49 
  -7   5   1  849.02   53.59 
  -7   5   1  880.11   49.10 
   7   5  -1  865.81   59.99 
   7   5  -1  774.22   54.79 
   7   5  -1  766.42   52.69 
   7   5  -1  778.42   52.39 
  -7   5   1  668.93   47.90 
   7   5  -1  783.82   56.19 
   7   5  -1  771.42   52.09 
   7   5  -1  811.02   54.99 
   7   5  -1  696.83   54.19 
   7   5  -1  783.02   51.49 
   7   5  -1  692.03   48.70 
  -6  -5   1  303.37   33.10 
   6  -5  -1  260.57   31.30 
  -6  -5   1  267.57   37.10 
  -6  -5   1  226.98   29.10 
  -6  -5   1  273.47   34.30 
  -6  -5   1  305.47   32.20 
   6  -5  -1  339.17   32.60 
  -6  -5   1  244.88   33.30 
   6  -5  -1  239.18   26.30 
   6  -5  -1  208.08   25.80 
   6  -5  -1  244.98   29.00 
  -6  -5   1  237.38   28.90 
  -6  -5   1  250.07   34.30 
   6  -5  -1  244.18   30.30 
  -6  -5   1  224.08   30.70 
   6  -5  -1  226.58   22.60 
  -6  -5   1  279.07   34.20 
  -6  -5   1  243.58   30.60 
   6  -5  -1  267.57   31.80 
   6  -5  -1  268.27   28.60 
  -6  -5   1  263.87   34.00 
  -6  -5   1  276.57   33.90 
  -6  -5   1  264.77   34.80 
  -6  -5   1  201.58   28.40 
   6   5  -1  288.67   30.30 
   6   5  -1  233.78   35.20 
   6   5  -1  239.88   28.20 
  -6   5   1  256.87   26.70 
  -6   5   1  266.97   25.10 
   6   5  -1  243.18   33.40 
  -6   5   1  220.48   34.10 
  -6   5   1  325.97   29.40 
  -6   5   1  247.58   30.80 
  -6   5   1  259.27   29.60 
   6   5  -1  291.97   34.70 
   6   5  -1  302.47   36.00 
   6   5  -1  288.27   32.10 
  -6   5   1  341.97   32.00 
   6   5  -1  275.47   33.90 
  -6   5   1  223.48   27.40 
   6   5  -1  265.57   33.30 
  -6   5   1  264.07   29.10 
   6   5  -1  269.37   35.10 
   6   5  -1  283.57   36.70 
   6   5  -1  285.27   30.60 
  -6   5   1  243.78   37.20 
   6   5  -1  209.48   31.70 
  -6   5   1  306.57   31.90 
  -6   5   1  281.17   25.10 
  -6   5   1  267.07   30.70 
   6   5  -1  185.58   33.30 
  -6   5   1  279.87   28.20 
   6   5  -1  284.07   34.70 
  -6   5   1  238.88   31.80 
   6   5  -1  257.77   32.10 
   6   5  -1  215.28   33.00 
   6   5  -1  216.18   29.20 
   6   5  -1  260.57   32.90 
  -6   5   1  246.48   29.60 
  -6   5   1  223.28   26.00 
   6   5  -1  244.48   32.20 
  -6   5   1  253.97   29.00 
  -5  -5   1 2493.45  101.29 
   5  -5  -1 2350.06   98.99 
  -5  -5   1 2356.96  106.69 
   5  -5  -1 2223.38   94.19 
  -5  -5   1 2413.96  107.79 
  -5  -5   1 2274.77  105.89 
   5  -5  -1 2176.28   97.89 
  -5  -5   1 2426.06  105.49 
   5  -5  -1 2256.87   97.69 
   5  -5  -1 2296.57   98.49 
   5  -5  -1 2208.68   96.49 
   5  -5  -1 2254.27   95.89 
  -5  -5   1 2395.76   99.49 
  -5  -5   1 2352.26  109.99 
  -5  -5   1 2383.96   99.69 
   5  -5  -1 2302.47  100.29 
   5  -5  -1 2289.47   94.29 
   5  -5  -1 2137.09   98.79 
  -5  -5   1 2404.06  102.19 
   5  -5  -1 2338.67   98.19 
  -5  -5   1 2480.45  105.59 
  -5  -5   1 2374.16  107.09 
  -5  -5   1 2516.85  102.19 
  -5  -5   1 2230.58  102.89 
  -5  -5   1 2330.57  108.49 
   5  -5  -1 2234.78   96.09 
  -5  -5   1 2288.07   98.39 
  -5  -5   1 2330.87  105.99 
   5   5  -1 2487.65  109.49 
   5   5  -1 2491.95  104.69 
   5   5  -1 2270.57  104.49 
   5   5  -1 2428.46  102.39 
  -5   5   1 2231.28   96.09 
  -5   5   1 2189.48   95.29 
   5   5  -1 2414.16  103.79 
  -5   5   1 2210.18   97.29 
   5   5  -1 2487.05  104.19 
   5   5  -1 2278.07  103.99 
   5   5  -1 2385.76  110.39 
   5   5  -1 2369.06   99.19 
   5   5  -1 2460.55  102.49 
   5   5  -1 2234.98   98.19 
   5   5  -1 2276.47  105.09 
  -5   5   1 2375.06   98.59 
  -5   5   1 2306.47  110.69 
  -5   5   1 2316.47  100.49 
  -5   5   1 2222.58  100.79 
  -5   5   1 2204.48   94.09 
   5   5  -1 2214.98  106.09 
  -5   5   1 2216.18   91.39 
  -5   5   1 2180.58   88.69 
   5   5  -1 2400.86   98.49 
   5   5  -1 2314.27  102.69 
   5   5  -1 2419.56  108.99 
  -5   5   1 2104.99  106.89 
  -5   5   1 2174.58  102.39 
   5   5  -1 2187.08  103.99 
  -5   5   1 2241.98   98.69 
  -5   5   1 2241.68   95.39 
  -5   5   1 2386.36  100.19 
  -5   5   1 2160.38  104.99 
  -5   5   1 2173.88   89.39 
  -5   5   1 2224.08   98.99 
   5   5  -1 2378.06  107.49 
   5   5  -1 2337.67  110.89 
  -5   5   1 2254.67   90.99 
   5   5  -1 2372.96  107.39 
  -5   5   1 2356.26  100.69 
  -5   5   1 2238.98   97.39 
   4  -5  -1  485.05   27.90 
  -4  -5   1  430.86   29.90 
  -4  -5   1  428.26   33.10 
  -4  -5   1  462.95   34.70 
   4  -5  -1  453.45   29.50 
   4  -5  -1  500.05   30.20 
  -4  -5   1  485.95   32.20 
   4  -5  -1  396.66   27.90 
  -4  -5   1  437.36   37.80 
  -4  -5   1  502.05   31.70 
   4  -5  -1  475.55   30.40 
   4  -5  -1  477.05   33.20 
   4  -5  -1  426.86   28.30 
  -4  -5   1  481.05   33.30 
  -4  -5   1  507.85   36.70 
  -4  -5   1  423.56   28.40 
  -4  -5   1  389.06   38.80 
   4  -5  -1  452.05   30.60 
   4  -5  -1  471.45   29.70 
  -4  -5   1  474.55   42.00 
   4  -5  -1  417.76   28.20 
   4  -5  -1  438.76   33.00 
  -4  -5   1  504.25   36.00 
  -4  -5   1  484.45   36.80 
  -4  -5   1  479.65   29.60 
  -4  -5   1  449.56   33.20 
  -4  -5   1  559.14   35.80 
  -4   5   1  451.25   24.10 
   4   5  -1  491.85   31.90 
  -4   5   1  444.56   28.30 
   4   5  -1  372.56   40.50 
   4   5  -1  536.75   30.30 
  -4   5   1  465.25   24.20 
  -4   5   1  429.36   23.70 
   4   5  -1  452.15   34.70 
  -4   5   1  420.76   29.40 
  -4   5   1  459.55   29.30 
   4   5  -1  489.75   36.60 
   4   5  -1  477.65   34.00 
   4   5  -1  422.26   34.60 
  -4   5   1  516.55   35.80 
  -4   5   1  470.45   28.80 
   4   5  -1  487.45   36.80 
  -4   5   1  428.56   33.20 
  -4   5   1  464.95   26.70 
  -4   5   1  466.45   25.50 
  -4   5   1  463.35   27.50 
   4   5  -1  393.96   30.80 
   4   5  -1  459.95   37.20 
  -4   5   1  409.96   26.10 
   4   5  -1  499.35   35.90 
   4   5  -1  462.15   32.30 
  -4   5   1  481.05   44.50 
  -4   5   1  502.25   38.20 
   4   5  -1  486.85   37.90 
  -4   5   1  434.86   32.70 
  -4   5   1  491.35   33.50 
  -4   5   1  413.66   22.00 
  -4   5   1  530.05   37.80 
  -4   5   1  451.75   28.80 
  -4   5   1  430.66   23.90 
   4   5  -1  490.25   30.20 
  -4   5   1  449.56   29.50 
   4   5  -1  509.75   30.20 
  -4   5   1  472.45   32.70 
  -4   5   1  440.36   29.20 
  -4   5   1  429.26   40.70 
  -4   5   1  408.96   26.50 
   4   5  -1  449.36   36.50 
   4   5  -1  531.35   34.00 
   4   5  -1  394.46   38.10 
  -4   5   1  396.76   39.30 
  -4   5   1  438.86   23.60 
   4   5  -1  459.05   32.70 
  -3  -5   1 1605.64   65.49 
   3  -5  -1 1495.35   71.19 
  -3  -5   1 1820.92   77.59 
  -3  -5   1 1551.24   75.49 
  -3  -5   1 1641.14   75.09 
  -3  -5   1 1689.13   68.59 
  -3  -5   1 1573.14   79.69 
   3  -5  -1 1565.64   68.59 
   3  -5  -1 1556.64   64.69 
  -3  -5   1 1689.13   72.99 
  -3  -5   1 1630.24   71.09 
   3  -5  -1 1466.25   66.99 
   3  -5  -1 1556.44   69.99 
  -3  -5   1 1559.74   65.39 
  -3  -5   1 1667.63   77.59 
  -3  -5   1 1733.83   67.49 
   3  -5  -1 1480.05   74.19 
   3  -5  -1 1659.53   70.79 
  -3  -5   1 1593.14   73.89 
  -3  -5   1 1636.34   65.39 
  -3  -5   1 1516.55   73.99 
   3  -5  -1 1527.45   65.09 
  -3  -5   1 1662.83   73.79 
  -3  -5   1 1644.24   69.89 
  -3  -5   1 1689.93   66.89 
   3  -5  -1 1583.24   73.99 
   3   5  -1 1562.34   74.99 
  -3   5   1 1606.54   75.49 
   3   5  -1 1605.24   78.69 
   3   5  -1 1627.24   65.89 
   3   5  -1 1643.24   65.19 
  -3   5   1 1581.64   63.09 
  -3   5   1 1537.15   62.09 
   3   5  -1 1615.54   78.99 
  -3   5   1 1627.84   65.09 
  -3   5   1 1551.54   65.69 
  -3   5   1 1473.15   60.79 
   3   5  -1 1630.14   78.39 
   3   5  -1 1657.53   76.59 
   3   5  -1 1546.05   74.29 
   3   5  -1 1581.74   70.19 
   3   5  -1 1578.34   75.39 
  -3   5   1 1585.74   60.89 
  -3   5   1 1570.34   71.79 
  -3   5   1 1531.85   63.39 
  -3   5   1 1584.24   64.29 
  -3   5   1 1544.15   74.89 
   3   5  -1 1696.53   66.39 
  -3   5   1 1577.14   62.49 
  -3   5   1 1528.65   63.59 
  -3   5   1 1537.85   69.09 
   3   5  -1 1590.34   68.39 
  -3   5   1 1592.44   72.29 
  -3   5   1 1575.74   65.49 
  -3   5   1 1530.45   64.59 
   3   5  -1 1562.04   75.49 
   3   5  -1 1565.84   70.29 
  -3   5   1 1515.05   64.09 
  -3   5   1 1449.55   68.49 
  -3   5   1 1626.44   75.19 
  -3   5   1 1535.35   73.19 
  -3   5   1 1564.84   60.09 
   3   5  -1 1618.34   71.99 
  -3   5   1 1624.14   65.79 
   3   5  -1 1532.35   75.49 
  -3   5   1 1507.05   64.49 
  -3   5   1 1577.14   62.49 
  -3   5   1 1569.24   68.09 
  -3   5   1 1585.54   65.19 
  -3   5   1 1561.84   64.59 
  -3   5   1 1564.34   66.19 
  -3   5   1 1579.34   60.89 
   3   5  -1 1725.03   70.09 
  -3   5   1 1539.15   65.29 
   3   5  -1 1677.83   77.49 
  -3   5   1 1555.64   64.39 
  -3   5   1 1456.75   76.49 
  -2  -5   1   52.19   14.00 
  -2  -5   1   71.99   16.60 
   2  -5  -1   71.79    8.40 
  -2  -5   1   78.29   15.90 
  -2  -5   1   75.39   12.30 
  -2  -5   1   83.19   10.00 
  -2  -5   1   73.39    8.50 
  -2  -5   1   99.99   17.80 
  -2  -5   1   82.29   11.20 
  -2  -5   1   69.79   11.60 
  -2  -5   1   66.79    8.60 
  -2  -5   1   65.59   11.10 
   2  -5  -1   75.19   15.40 
  -2  -5   1   57.89   13.30 
  -2  -5   1   77.49    9.10 
   2  -5  -1   52.99   10.90 
   2  -5  -1   84.49   16.20 
   2  -5  -1   59.09   12.10 
  -2  -5   1   59.89   11.90 
  -2  -5   1   81.39    8.90 
   2  -5  -1   62.39   14.30 
   2  -5  -1   65.49    8.40 
  -2  -5   1   79.09    9.50 
   2  -5  -1   78.49   15.00 
  -2  -5   1   53.59   13.90 
  -2  -5   1   76.39    8.80 
  -2  -5   1   73.09   10.30 
  -2  -5   1   56.59   11.60 
   2  -5  -1   63.89   11.30 
  -2   5   1   78.79   12.40 
  -2   5   1   67.69    8.10 
  -2   5   1   58.59   14.70 
  -2   5   1   63.99   15.40 
  -2   5   1   55.69    7.20 
   2   5  -1   86.69   13.00 
  -2   5   1   88.49   10.90 
  -2   5   1   65.29    6.90 
   2   5  -1   67.79   16.10 
  -2   5   1   79.79    6.40 
  -2   5   1   44.90    9.60 
  -2   5   1   87.29    9.10 
  -2   5   1   75.89    9.70 
   2   5  -1   56.39   13.70 
   2   5  -1   56.29   14.80 
  -2   5   1   71.79    8.80 
  -2   5   1   72.39    8.60 
  -2   5   1   78.39   13.70 
   2   5  -1   54.09   15.90 
  -2   5   1   75.59    5.90 
   2   5  -1   61.99   10.20 
  -2   5   1   54.99   14.10 
  -2   5   1   68.29    8.80 
   2   5  -1   59.29   14.50 
  -2   5   1   62.69    8.20 
   2   5  -1   86.69   14.60 
   2   5  -1   56.49   10.50 
  -2   5   1   68.69   16.30 
   2   5  -1   65.69   15.70 
  -2   5   1   84.19   10.40 
   2   5  -1   57.89    8.10 
  -2   5   1   66.49    7.80 
  -2   5   1   67.89   11.70 
  -2   5   1   92.19    9.50 
  -2   5   1   90.99   11.50 
   2   5  -1   78.59    9.00 
  -2   5   1   83.19   10.40 
   2   5  -1   95.19   17.10 
  -2   5   1   72.89    8.70 
  -2   5   1   69.09    9.90 
  -2   5   1   76.59    7.10 
   2   5  -1   58.19   16.40 
  -2   5   1   77.29    8.80 
  -2   5   1   68.89    5.90 
  -2   5   1   81.89    8.30 
  -2   5   1   74.49   13.30 
   2   5  -1   66.29   12.70 
   2   5  -1   80.59   11.70 
  -2   5   1   74.39    7.80 
   2   5  -1   54.49   13.90 
  -2   5   1   64.99   11.60 
  -2   5   1   78.19    9.30 
  -2   5   1   60.09   10.80 
   2   5  -1   73.99   10.70 
  -2   5   1   77.69   11.00 
   1  -5  -1  928.61   49.99 
   1  -5  -1  855.91   53.19 
  -1  -5   1  866.61   39.40 
   1  -5  -1  894.81   48.90 
  -1  -5   1  929.31   34.20 
   1  -5  -1  851.01   46.20 
   1  -5  -1  840.92   44.50 
  -1  -5   1  832.02   41.10 
   1  -5  -1  891.41   34.30 
   1  -5  -1  897.51   50.19 
  -1  -5   1  929.71   34.40 
   1  -5  -1 1001.00   44.70 
  -1  -5   1  928.51   49.70 
   1  -5  -1  888.41   47.60 
  -1  -5   1 1047.70   48.30 
  -1  -5   1  998.90   52.49 
  -1  -5   1  958.70   43.90 
  -1  -5   1  858.61   48.40 
  -1  -5   1  988.70   44.20 
  -1  -5   1  862.41   42.00 
   1  -5  -1  939.71   43.30 
  -1  -5   1  985.40   43.10 
  -1  -5   1  941.11   50.79 
  -1  -5   1  852.71   47.70 
  -1   5   1  909.11   35.90 
   1   5  -1  910.01   39.60 
   1   5  -1  915.21   47.40 
  -1   5   1  831.42   38.40 
   1   5  -1  962.30   41.40 
  -1   5   1  915.81   44.90 
   1   5  -1  937.91   51.69 
   1   5  -1  946.21   53.39 
  -1   5   1  972.90   44.70 
  -1   5   1  875.21   39.50 
  -1   5   1  889.11   36.90 
  -1   5   1  840.52   42.30 
   1   5  -1  941.41   51.09 
   1   5  -1  872.71   36.40 
   1   5  -1  909.31   34.90 
   1   5  -1  942.01   36.90 
  -1   5   1  909.51   44.90 
   1   5  -1  902.01   49.70 
  -1   5   1  904.31   33.40 
  -1   5   1  858.01   48.40 
  -1   5   1  945.71   38.40 
  -1   5   1  887.21   48.10 
  -1   5   1  900.51   37.90 
   1   5  -1  875.71   38.90 
   1   5  -1  929.61   49.60 
   1   5  -1  878.91   47.30 
  -1   5   1  876.21   42.70 
   1   5  -1  876.81   38.50 
   1   5  -1  864.01   48.40 
   1   5  -1  880.71   41.10 
  -1   5   1  866.31   34.50 
  -1   5   1  963.90   51.19 
   1   5  -1  838.82   38.10 
  -1   5   1  943.11   38.60 
  -1   5   1  925.51   50.89 
   1   5  -1  905.11   44.80 
  -1   5   1  884.31   32.70 
  -1   5   1  867.41   51.39 
  -1   5   1  880.91   44.80 
   1   5  -1 1011.40   48.90 
  -1   5   1  879.01   33.60 
  -1   5   1  927.31   39.10 
   0  -5  -1   35.60   11.80 
   0  -5   1   17.70    7.20 
   0  -5  -1   48.20    5.10 
   0  -5  -1   43.20    9.80 
   0  -5   1   39.40   11.90 
   0  -5   1   56.69   12.50 
   0  -5  -1   39.90   10.70 
   0  -5  -1   38.60    9.40 
   0  -5  -1   43.30   13.00 
   0  -5   1   39.40    8.90 
   0  -5   1   34.00   11.50 
   0  -5   1   34.60   10.80 
   0  -5   1   36.70    7.30 
   0  -5  -1   57.49   13.60 
   0  -5  -1   38.10    4.10 
   0  -5   1   41.00    7.80 
   0  -5   1   48.20   11.70 
   0  -5   1   26.10   11.00 
   0  -5  -1   38.90   11.90 
   0  -5  -1   57.49    5.90 
   0  -5  -1   42.90   11.90 
   0  -5  -1   20.70   10.40 
   0  -5   1   42.10   12.50 
   0  -5  -1   33.70    4.60 
   0   5   1   31.20    8.80 
   0   5   1   55.89    8.80 
   0   5   1   31.50   11.40 
   0   5   1   35.60    4.00 
   0   5  -1   23.70    7.60 
   0   5  -1   53.09   13.80 
   0   5   1   52.49   13.50 
   0   5  -1   47.40   12.40 
   0   5  -1   43.50   14.00 
   0   5  -1   19.40    8.70 
   0   5  -1   49.80    4.60 
   0   5  -1   44.50    5.50 
   0   5  -1   33.80    6.10 
   0   5  -1   33.80    6.40 
   0   5   1   32.00    9.90 
   0   5  -1   38.20    4.10 
   0   5   1   11.80   10.80 
   0   5   1   37.90    5.30 
   0   5  -1   50.59    6.70 
   0   5  -1   56.89    9.00 
   0   5   1   25.70    7.40 
   0   5  -1   38.20    4.10 
   0   5   1   43.90    6.80 
   0   5  -1   34.20    6.80 
   0   5   1   53.69    8.10 
   0   5  -1   43.90   11.50 
   0   5  -1   42.60    7.30 
   0   5   1   50.49   13.70 
   0   5   1   26.80    9.30 
   0   5   1   63.19   15.70 
   0   5  -1   30.20   11.90 
   0   5  -1   53.69    5.50 
   0   5  -1   21.90   10.40 
   0   5   1   42.60    9.20 
   0   5   1   30.90    9.80 
   0   5   1   54.49    7.70 
   0   5   1   33.30    5.90 
   0   5   1   35.90   10.50 
   0   5  -1   46.60   11.20 
   0   5  -1   38.00   13.30 
  -1  -5  -1 2915.41  103.29 
   1  -5   1 2975.80  106.29 
  -1  -5  -1 3004.60  107.69 
  -1  -5  -1 2706.53  107.39 
  -1  -5  -1 3029.40  119.09 
  -1  -5  -1 2859.51  118.29 
  -1  -5  -1 2879.71  117.99 
  -1  -5  -1 2923.61  119.19 
   1  -5   1 2740.03  105.89 
  -1  -5  -1 2969.90  112.19 
   1  -5   1 2717.43  116.79 
  -1  -5  -1 2693.13  117.79 
  -1  -5  -1 2985.60  110.09 
  -1  -5  -1 2960.80  120.89 
  -1  -5  -1 2891.31  103.69 
   1  -5   1 2746.03  101.89 
   1  -5   1 2865.91  120.29 
  -1  -5  -1 2746.83  121.79 
   1  -5   1 2826.42  118.29 
   1  -5   1 2818.92  118.39 
  -1  -5  -1 2836.72  104.99 
   1  -5   1 2697.93  116.29 
  -1  -5  -1 2879.81  106.69 
  -1  -5  -1 2899.11  105.19 
   1  -5   1 2840.32  113.89 
  -1  -5  -1 2983.30  113.59 
   1  -5   1 2713.83  117.29 
  -1   5  -1 2919.01  109.39 
   1   5   1 2974.30  105.09 
   1   5   1 2942.71  120.89 
   1   5   1 2920.21  103.79 
  -1   5  -1 2926.11  114.79 
   1   5   1 2891.51  120.59 
  -1   5  -1 2992.40  118.99 
   1   5   1 2806.52  106.99 
   1   5   1 2844.22  109.59 
  -1   5  -1 2914.31  105.19 
  -1   5  -1 2839.82  106.39 
   1   5   1 3069.09  120.99 
  -1   5  -1 2697.23  113.89 
  -1   5  -1 2918.21  107.09 
   1   5   1 2956.80  103.09 
   1   5   1 2904.51  120.79 
   1   5   1 2958.10  109.29 
   1   5   1 2885.71  116.99 
   1   5   1 3030.00  114.59 
  -1   5  -1 2887.11  106.49 
  -1   5  -1 2881.81  106.79 
   1   5   1 2861.51  109.39 
  -1   5  -1 2879.81  102.09 
  -1   5  -1 2821.32  118.29 
  -1   5  -1 2993.40  123.39 
   1   5   1 2879.31  106.99 
  -1   5  -1 2946.21  109.19 
   1   5   1 3119.39  124.19 
  -1   5  -1 2771.12  114.99 
  -1   5  -1 2905.21  107.49 
  -1   5  -1 2892.61  106.29 
  -1   5  -1 2785.62  103.99 
  -1   5  -1 2894.11  117.69 
  -1   5  -1 2836.72  115.79 
  -1   5  -1 2971.10  115.59 
   1   5   1 2989.90  118.19 
   1   5   1 2944.61  115.19 
  -1   5  -1 2740.53  115.69 
   1   5   1 2873.41  117.99 
   1   5   1 2983.70  116.49 
  -1   5  -1 2628.74  112.49 
  -2  -5  -1  257.27   18.60 
  -2  -5  -1  220.68   23.70 
  -2  -5  -1  267.67   17.70 
   2  -5   1  243.38   24.90 
  -2  -5  -1  275.57   16.80 
   2  -5   1  223.58   18.10 
   2  -5   1  237.98   26.10 
   2  -5   1  253.77   16.50 
  -2  -5  -1  250.97   17.10 
  -2  -5  -1  260.87   27.70 
  -2  -5  -1  256.67   18.10 
   2  -5   1  207.98   14.50 
  -2  -5  -1  246.88   27.70 
  -2  -5  -1  249.68   17.00 
  -2  -5  -1  265.97   24.80 
  -2  -5  -1  282.07   15.40 
  -2  -5  -1  258.87   15.60 
  -2  -5  -1  296.07   21.00 
  -2  -5  -1  283.67   28.50 
  -2  -5  -1  289.27   31.60 
  -2  -5  -1  324.37   31.10 
  -2  -5  -1  287.17   17.00 
   2  -5   1  267.47   22.10 
  -2  -5  -1  261.97   14.90 
  -2  -5  -1  250.87   20.70 
  -2  -5  -1  263.47   14.70 
  -2  -5  -1  262.17   27.60 
   2  -5   1  263.77   28.30 
   2  -5   1  275.17   28.00 
  -2  -5  -1  214.88   26.00 
  -2  -5  -1  246.28   17.80 
  -2   5  -1  323.17   34.40 
   2   5   1  293.07   15.30 
  -2   5  -1  231.08   23.20 
   2   5   1  296.07   22.80 
  -2   5  -1  253.67   25.30 
  -2   5  -1  261.07   18.30 
  -2   5  -1  225.58   13.50 
   2   5   1  248.88   26.80 
  -2   5  -1  195.58   23.60 
   2   5   1  225.98   26.40 
   2   5   1  256.77   25.60 
   2   5   1  277.97   29.30 
   2   5   1  261.47   19.20 
   2   5   1  216.58   21.30 
   2   5   1  254.37   16.80 
   2   5   1  196.68   25.90 
  -2   5  -1  243.38   16.00 
   2   5   1  275.47   27.00 
  -2   5  -1  230.48   14.70 
   2   5   1  253.27   18.30 
  -2   5  -1  229.88   15.40 
  -2   5  -1  243.98   25.30 
  -2   5  -1  239.18   24.20 
  -2   5  -1  243.68   17.30 
  -2   5  -1  255.17   16.40 
  -2   5  -1  238.38   20.10 
   2   5   1  279.87   28.50 
  -2   5  -1  221.88   16.30 
  -2   5  -1  245.88   23.30 
   2   5   1  248.88   16.30 
  -2   5  -1  241.68   14.40 
  -2   5  -1  269.77   14.70 
   2   5   1  288.57   20.10 
   2   5   1  220.28   27.50 
  -2   5  -1  238.68   23.30 
   2   5   1  221.08   25.50 
  -2   5  -1  278.17   15.30 
  -2   5  -1  211.58   21.40 
  -2   5  -1  240.88   16.20 
  -2   5  -1  256.87   23.50 
  -2   5  -1  269.47   24.40 
  -2   5  -1  234.18   14.00 
  -2   5  -1  253.07   12.40 
  -2   5  -1  262.57   26.90 
  -2   5  -1  246.48   17.50 
   2   5   1  225.58   26.70 
  -3  -5  -1 2986.80  117.69 
  -3  -5  -1 3114.39  113.79 
   3  -5   1 2810.32  114.49 
  -3  -5  -1 2935.81  120.39 
  -3  -5  -1 2879.81  120.19 
   3  -5   1 2828.72  118.19 
  -3  -5  -1 3019.40  111.49 
  -3  -5  -1 2823.92  123.29 
   3  -5   1 2805.32  119.99 
  -3  -5  -1 3098.39  115.19 
  -3  -5  -1 2949.00  119.69 
   3  -5   1 2786.32  109.79 
  -3  -5  -1 3047.09  112.99 
  -3  -5  -1 2983.20  128.09 
  -3  -5  -1 3003.30  123.89 
  -3  -5  -1 3025.50  115.19 
   3  -5   1 2939.71  111.69 
  -3  -5  -1 2987.30  124.19 
  -3  -5  -1 3017.40  111.69 
   3  -5   1 2722.83  110.39 
   3  -5   1 2791.92  121.69 
   3  -5   1 2892.71  110.99 
  -3  -5  -1 3191.58  122.79 
  -3  -5  -1 3003.80  124.09 
   3   5   1 3036.50  117.09 
   3   5   1 2974.30  125.79 
  -3   5  -1 2822.32  110.19 
   3   5   1 3139.59  123.29 
  -3   5  -1 2824.92  110.29 
  -3   5  -1 3019.60  116.19 
   3   5   1 2856.71  113.79 
  -3   5  -1 2887.21  110.89 
  -3   5  -1 3004.40  116.79 
  -3   5  -1 2848.01  115.39 
   3   5   1 3130.79  127.39 
   3   5   1 2991.40  121.19 
  -3   5  -1 2995.90  113.39 
  -3   5  -1 2816.42  106.89 
  -3   5  -1 2750.22  102.79 
  -3   5  -1 2783.62  111.19 
  -3   5  -1 2791.62  111.89 
  -3   5  -1 2904.71  110.59 
   3   5   1 3017.50  123.49 
  -3   5  -1 2909.21  121.49 
  -3   5  -1 2801.42  108.39 
   3   5   1 3043.30  116.49 
  -3   5  -1 2866.21  110.09 
   3   5   1 3057.19  118.69 
   3   5   1 2884.51  121.69 
  -3   5  -1 2909.41  118.09 
  -3   5  -1 2871.51  111.09 
   3   5   1 2942.31  122.99 
   3   5   1 3029.20  111.69 
  -3   5  -1 2900.61  113.19 
  -3   5  -1 2826.72  105.19 
   3   5   1 3052.89  113.09 
  -3   5  -1 2873.81  111.49 
  -3   5  -1 2831.72  114.29 
   3   5   1 3044.30  117.19 
  -3   5  -1 2959.80  126.49 
   3   5   1 2928.51  122.99 
  -3   5  -1 2858.51  119.49 
  -3   5  -1 2838.72  112.79 
  -3   5  -1 2774.02  124.39 
  -3   5  -1 2845.72  115.39 
   3   5   1 2952.70  122.89 
  -3   5  -1 2957.00  119.89 
   3   5   1 2868.61  125.19 
   3   5   1 3130.59  123.99 
   4  -5   1  209.98   21.90 
  -4  -5  -1  299.47   33.10 
   4  -5   1  343.67   30.90 
  -4  -5  -1  286.57   31.60 
  -4  -5  -1  289.37   34.40 
   4  -5   1  285.07   20.00 
   4  -5   1  280.57   26.90 
  -4  -5  -1  280.47   31.20 
  -4  -5  -1  279.07   30.40 
  -4  -5  -1  253.17   29.70 
  -4  -5  -1  315.17   30.40 
   4  -5   1  267.57   19.20 
  -4  -5  -1  340.87   32.60 
   4  -5   1  318.17   30.90 
  -4  -5  -1  297.07   32.90 
  -4  -5  -1  237.98   26.50 
  -4  -5  -1  288.17   23.00 
   4  -5   1  245.58   27.50 
  -4  -5  -1  278.77   26.70 
   4  -5   1  275.87   21.60 
   4  -5   1  217.98   21.90 
  -4  -5  -1  279.47   25.70 
  -4  -5  -1  283.67   26.80 
   4  -5   1  240.28   22.70 
  -4   5  -1  265.37   31.60 
  -4   5  -1  284.57   29.10 
   4   5   1  249.88   29.80 
   4   5   1  268.47   31.00 
  -4   5  -1  282.27   28.10 
  -4   5  -1  283.07   19.50 
  -4   5  -1  302.77   16.80 
   4   5   1  237.08   28.60 
  -4   5  -1  267.57   19.50 
  -4   5  -1  231.08   28.80 
   4   5   1  253.77   31.40 
   4   5   1  264.97   27.10 
  -4   5  -1  242.08   23.40 
  -4   5  -1  346.37   35.20 
  -4   5  -1  244.38   23.80 
   4   5   1  252.47   32.20 
  -4   5  -1  264.47   26.10 
   4   5   1  258.97   27.50 
  -4   5  -1  255.97   14.90 
   4   5   1  252.87   30.40 
   4   5   1  271.47   32.00 
  -4   5  -1  288.07   20.20 
   4   5   1  287.27   30.10 
  -4   5  -1  273.57   24.30 
   4   5   1  245.48   24.50 
  -4   5  -1  272.47   19.40 
   4   5   1  299.47   23.00 
  -4   5  -1  256.17   25.50 
   4   5   1  274.17   30.70 
  -4   5  -1  274.77   35.10 
  -4   5  -1  257.77   18.10 
  -4   5  -1  264.17   24.00 
  -4   5  -1  260.37   25.60 
   4   5   1  303.97   29.00 
   4   5   1  315.77   33.30 
   4   5   1  327.07   36.00 
   4   5   1  304.37   24.30 
  -4   5  -1  277.57   21.40 
   4   5   1  285.07   30.10 
  -4   5  -1  303.67   16.40 
  -4   5  -1  339.17   26.80 
  -4   5  -1  244.48   20.00 
  -5  -5  -1  910.91   55.99 
   5  -5   1  840.52   47.50 
   5  -5   1  872.41   48.30 
   5  -5   1  870.91   47.50 
   5  -5   1  944.61   52.89 
  -5  -5  -1  929.11   51.79 
  -5  -5  -1  966.00   56.09 
  -5  -5  -1  915.11   49.90 
  -5  -5  -1  910.71   58.49 
   5  -5   1  787.62   44.40 
   5  -5   1  914.91   48.00 
   5  -5   1  925.51   51.29 
  -5  -5  -1  911.61   53.79 
  -5  -5  -1  846.02   55.29 
  -5  -5  -1  835.72   55.59 
   5  -5   1  814.12   50.89 
  -5  -5  -1  906.71   50.89 
  -5  -5  -1  809.62   53.69 
   5  -5   1  916.01   48.40 
  -5  -5  -1  868.61   55.19 
   5  -5   1  915.91   49.00 
  -5  -5  -1  874.01   49.60 
  -5  -5  -1  901.71   54.49 
  -5  -5  -1  993.70   52.09 
  -5   5  -1  857.71   40.70 
  -5   5  -1  910.11   50.79 
  -5   5  -1  990.00   49.99 
  -5   5  -1  807.12   54.39 
  -5   5  -1  857.01   39.40 
   5   5   1  915.51   60.39 
  -5   5  -1  879.31   45.60 
  -5   5  -1  930.41   51.39 
   5   5   1  936.91   49.70 
  -5   5  -1  940.31   49.90 
   5   5   1  837.92   53.39 
  -5   5  -1  942.91   46.70 
  -5   5  -1  852.71   49.20 
   5   5   1  889.01   56.19 
   5   5   1  989.90   57.59 
   5   5   1  914.11   51.99 
   5   5   1  920.31   58.09 
  -5   5  -1  912.91   51.29 
  -5   5  -1  905.21   49.70 
   5   5   1  922.21   54.59 
  -5   5  -1  922.71   43.80 
  -5   5  -1  907.21   44.40 
  -5   5  -1  910.21   44.20 
   5   5   1  921.01   52.29 
   5   5   1  939.51   53.39 
  -5   5  -1  921.11   44.10 
  -5   5  -1  930.91   44.20 
  -5   5  -1  856.61   56.69 
  -5   5  -1  855.91   60.09 
   5   5   1  983.20   53.59 
  -5   5  -1  933.41   43.40 
   5   5   1  974.80   51.29 
   5   5   1  881.91   50.39 
   5   5   1  931.11   53.49 
   5   5   1  980.90   58.19 
  -5   5  -1  896.71   47.30 
   5   5   1  958.30   56.29 
   5   5   1  839.92   53.59 
   5   5   1  999.10   58.89 
  -6  -5  -1   23.00   12.30 
   6  -5   1    6.90   10.10 
  -6  -5  -1   20.50   13.20 
   6  -5   1   31.30   12.10 
   6  -5   1   13.40   11.10 
   6  -5   1    9.70    9.40 
  -6  -5  -1    5.50   12.50 
  -6  -5  -1   14.80   12.00 
  -6  -5  -1    3.90   11.40 
  -6  -5  -1   30.90   17.00 
  -6  -5  -1   25.20   15.90 
  -6  -5  -1    8.60   12.10 
   6  -5   1   16.60   12.90 
  -6  -5  -1   19.20   13.80 
  -6  -5  -1   20.40   14.20 
  -6  -5  -1   -3.10    9.50 
  -6  -5  -1    6.50   12.60 
   6  -5   1   15.50    9.80 
  -6  -5  -1    7.50   10.50 
  -6  -5  -1   -2.00    9.10 
   6  -5   1   -3.10    8.70 
   6  -5   1   36.70   13.60 
   6  -5   1   19.20   10.50 
   6  -5   1    6.20    9.50 
   6   5   1   25.90   13.40 
   6   5   1   -3.60   11.10 
  -6   5  -1   25.60   16.60 
  -6   5  -1   -3.50   13.10 
  -6   5  -1   24.70   11.00 
   6   5   1   51.29   16.80 
   6   5   1   22.30   15.00 
   6   5   1   21.20   13.70 
  -6   5  -1   27.20   14.20 
  -6   5  -1   23.90   11.70 
  -6   5  -1   -0.50    9.20 
  -6   5  -1   28.90   11.10 
   6   5   1    8.40   11.70 
   6   5   1    4.30   10.90 
  -6   5  -1    6.60   14.40 
   6   5   1   26.20   12.60 
  -6   5  -1   16.30   10.70 
   6   5   1    7.20   12.70 
  -6   5  -1   33.00   12.20 
   6   5   1   16.70   12.60 
   6   5   1   10.90   14.50 
   6   5   1    6.00   15.00 
   6   5   1   33.20   16.60 
  -6   5  -1   20.80   12.90 
   6   5   1    3.20   10.60 
   6   5   1    9.90   10.10 
  -6   5  -1   37.90   13.80 
   6   5   1   17.50   11.70 
  -6   5  -1   20.20   10.60 
   6   5   1   13.30   13.80 
   6   5   1   15.00   12.40 
   7  -5   1  156.28   26.00 
  -7  -5  -1  153.58   28.90 
  -7  -5  -1  168.58   29.70 
   7  -5   1  196.38   29.80 
   7  -5   1  187.88   28.00 
   7  -5   1  153.38   26.30 
  -7  -5  -1  177.28   28.10 
  -7  -5  -1  205.58   32.20 
   7  -5   1  171.98   25.10 
  -7  -5  -1  181.18   31.00 
  -7  -5  -1  209.28   31.60 
   7  -5   1  190.48   27.20 
  -7  -5  -1  205.48   28.80 
  -7  -5  -1  158.58   26.90 
  -7  -5  -1  211.18   30.60 
  -7  -5  -1  141.49   28.20 
  -7  -5  -1  156.28   28.10 
  -7  -5  -1  174.78   32.40 
  -7  -5  -1  127.39   28.10 
  -7   5  -1  132.99   29.20 
   7   5   1  165.58   27.40 
  -7   5  -1  139.99   25.40 
   7   5   1  179.98   30.50 
   7   5   1  196.78   35.20 
  -7   5  -1  203.08   29.50 
  -7   5  -1  165.28   26.90 
  -7   5  -1  201.18   27.40 
   7   5   1  164.18   29.90 
   7   5   1  204.48   32.40 
   7   5   1  176.18   27.60 
   7   5   1  232.88   33.10 
   7   5   1  194.38   30.40 
   7   5   1  177.68   32.00 
  -7   5  -1  153.88   29.30 
   7   5   1  173.58   28.60 
  -7   5  -1  139.49   24.90 
  -7   5  -1  160.28   24.50 
   7   5   1  229.48   32.10 
   7   5   1  226.88   34.40 
  -7   5  -1  220.68   26.70 
   7   5   1  178.78   31.40 
  -7   5  -1  200.68   36.00 
  -7   5  -1  158.98   27.20 
   7   5   1  210.98   30.10 
   7   5   1  205.88   33.40 
   7   5   1  203.78   31.40 
  -8  -5  -1   91.59   24.80 
  -8  -5  -1   42.80   19.00 
   8  -5   1   49.50   19.60 
  -8  -5  -1   61.99   21.50 
  -8  -5  -1   75.99   25.30 
  -8  -5  -1   94.79   24.20 
   8  -5   1   58.79   18.80 
  -8  -5  -1   65.29   21.80 
   8  -5   1   31.90   14.80 
  -8  -5  -1   31.00   17.00 
  -8  -5  -1   64.19   19.70 
  -8  -5  -1   48.90   19.10 
  -8  -5  -1   59.99   21.60 
  -8  -5  -1   51.99   18.50 
   8  -5   1   65.89   19.90 
   8  -5   1   59.99   18.90 
   8  -5   1   50.89   18.70 
  -8  -5  -1   91.99   25.70 
   8   5   1  110.39   26.80 
   8   5   1   29.00   16.10 
   8   5   1   56.09   19.90 
   8   5   1   35.10   18.10 
   8   5   1   50.29   19.00 
  -8   5  -1   75.29   23.30 
  -8   5  -1   49.99   19.40 
   8   5   1   12.60   18.00 
   8   5   1   71.59   20.40 
   8   5   1   87.19   25.30 
   8   5   1   32.10   16.70 
   8   5   1   49.20   27.10 
   8   5   1   66.59   21.90 
   8   5   1   66.79   20.80 
   8   5   1   46.60   18.50 
   8   5   1   69.29   21.90 
  -8   5  -1   56.89   20.10 
  -8   5  -1   88.79   23.90 
  -8   5  -1   68.59   20.60 
  -8   5  -1  114.99   29.50 
   8   5   1   44.00   19.40 
   8   5   1   71.59   22.70 
  -8   5  -1   40.10   16.30 
  -9  -5  -1  111.19   36.20 
  -8  -6   1  149.29   28.90 
  -8  -6   1  160.58   30.10 
  -8  -6   1  170.28   33.00 
  -8  -6   1  142.89   30.80 
  -8  -6   1  196.18   35.70 
  -8  -6   1  152.58   29.10 
  -8  -6   1  135.09   29.60 
  -8  -6   1  192.08   34.20 
  -8  -6   1  162.58   30.90 
  -8  -6   1  109.89   24.00 
  -8  -6   1  197.08   35.10 
  -8  -6   1  125.69   25.50 
   8  -6  -1  131.59   26.80 
  -8  -6   1  119.39   26.50 
  -8  -6   1  145.59   30.10 
   8   6  -1  126.19   28.00 
   8   6  -1  178.58   33.40 
   8   6  -1  150.28   30.20 
   8   6  -1  147.89   30.40 
   8   6  -1  189.38   35.50 
   8   6  -1  184.68   35.40 
   8   6  -1  153.68   28.10 
   8   6  -1  155.48   31.90 
   8   6  -1  130.49   27.40 
   8   6  -1  202.18   35.20 
   8   6  -1  124.19   33.00 
   8   6  -1  203.18   31.30 
  -8   6   1  180.08   32.40 
   8   6  -1  164.98   33.80 
  -8   6   1  189.18   39.60 
   8   6  -1  201.58   38.30 
  -8   6   1  182.88   30.60 
   8   6  -1  158.88   30.00
[truncated: 3,658,488 more chars]
