# Supplementary material
Source: MDPI journal article supplement (https://www.mdpi.com/2073-4352/13/7/1043)
Supplement: s1 [file s1 › 8 Tb Ha2019_99o_0m_a.cif]

 
data_Ha2019_99o_0m_a 
  
_audit_creation_method            'SHELXL-2014/7' 
_shelx_SHELXL_version_number      '2014/7' 
_chemical_name_systematic         ? 
_chemical_name_common             ? 
_chemical_melting_point           ? 
_chemical_formula_moiety          ? 
_chemical_formula_sum 
 'C4 H12 Br O7 Tb' 
_chemical_formula_weight          410.97 
  
loop_ 
 _atom_type_symbol 
 _atom_type_description 
 _atom_type_scat_dispersion_real 
 _atom_type_scat_dispersion_imag 
 _atom_type_scat_source 
 'C'  'C'   0.0033   0.0016 
 'International Tables Vol C Tables 4.2.6.8 and 6.1.1.4' 
 'H'  'H'   0.0000   0.0000 
 'International Tables Vol C Tables 4.2.6.8 and 6.1.1.4' 
 'O'  'O'   0.0106   0.0060 
 'International Tables Vol C Tables 4.2.6.8 and 6.1.1.4' 
 'Br'  'Br'  -0.2901   2.4595 
 'International Tables Vol C Tables 4.2.6.8 and 6.1.1.4' 
 'Tb'  'Tb'  -0.1723   4.1537 
 'International Tables Vol C Tables 4.2.6.8 and 6.1.1.4' 
  
_space_group_crystal_system       monoclinic 
_space_group_IT_number            14 
_space_group_name_H-M_alt         'P 21/n' 
_space_group_name_Hall            '-P 2yn' 
  
_shelx_space_group_comment 
; 
The symmetry employed for this shelxl refinement is uniquely defined 
by the following loop, which should always be used as a source of 
symmetry information in preference to the above space-group names. 
They are only intended as comments. 
; 
  
loop_ 
 _space_group_symop_operation_xyz 
 'x, y, z' 
 '-x+1/2, y+1/2, -z+1/2' 
 '-x, -y, -z' 
 'x-1/2, -y-1/2, z-1/2' 
  
_cell_length_a                    7.7972(3) 
_cell_length_b                    8.0263(3) 
_cell_length_c                    17.7443(8) 
_cell_angle_alpha                 90 
_cell_angle_beta                  95.862(2) 
_cell_angle_gamma                 90 
_cell_volume                      1104.68(8) 
_cell_formula_units_Z             4 
_cell_measurement_temperature     100(2) 
_cell_measurement_reflns_used     9689 
_cell_measurement_theta_min       2.76 
_cell_measurement_theta_max       28.21 
  
_exptl_crystal_description        prism 
_exptl_crystal_colour             colourless 
_exptl_crystal_density_meas       ? 
_exptl_crystal_density_method     ? 
_exptl_crystal_density_diffrn     2.471 
_exptl_crystal_F_000              768 
_exptl_transmission_factor_min    ? 
_exptl_transmission_factor_max    ? 
_exptl_crystal_size_max           0.487 
_exptl_crystal_size_mid           0.172 
_exptl_crystal_size_min           0.070 
_exptl_absorpt_coefficient_mu     10.023 
_shelx_estimated_absorpt_T_min    0.085 
_shelx_estimated_absorpt_T_max    0.540 
_exptl_absorpt_correction_type    multi-scan 
_exptl_absorpt_correction_T_min   0.421 
_exptl_absorpt_correction_T_max   0.746 
_exptl_absorpt_process_details    'Bruker SADABS' 
_exptl_absorpt_special_details    ? 
_diffrn_ambient_temperature       100(2) 
_diffrn_radiation_wavelength      0.71073 
_diffrn_radiation_type            MoK\a 
_diffrn_source                    ? 
_diffrn_measurement_device_type   'Bruker APEX-II CCD' 
_diffrn_measurement_method        '\f and \w scans' 
_diffrn_detector_area_resol_mean  ? 
_diffrn_reflns_number             124829 
_diffrn_reflns_av_unetI/netI      0.0099 
_diffrn_reflns_av_R_equivalents   0.0459 
_diffrn_reflns_limit_h_min        -10 
_diffrn_reflns_limit_h_max        10 
_diffrn_reflns_limit_k_min        -10 
_diffrn_reflns_limit_k_max        10 
_diffrn_reflns_limit_l_min        -23 
_diffrn_reflns_limit_l_max        23 
_diffrn_reflns_theta_min          2.758 
_diffrn_reflns_theta_max          27.998 
_diffrn_reflns_theta_full         25.242 
_diffrn_measured_fraction_theta_max   1.000 
_diffrn_measured_fraction_theta_full  1.000 
_diffrn_reflns_Laue_measured_fraction_max    1.000 
_diffrn_reflns_Laue_measured_fraction_full   1.000 
_diffrn_reflns_point_group_measured_fraction_max   1.000 
_diffrn_reflns_point_group_measured_fraction_full  1.000 
_reflns_number_total              2683 
_reflns_number_gt                 2518 
_reflns_threshold_expression      'I > 2\s(I)' 
_reflns_Friedel_coverage          0.000 
_reflns_Friedel_fraction_max      . 
_reflns_Friedel_fraction_full     . 
  
_reflns_special_details 
; 
 Reflections were merged by SHELXL according to the crystal 
 class for the calculation of statistics and refinement. 
  
 _reflns_Friedel_fraction is defined as the number of unique 
 Friedel pairs measured divided by the number that would be 
 possible theoretically, ignoring centric projections and 
 systematic absences. 
; 
  
_computing_data_collection        'Bruker APEX2' 
_computing_cell_refinement        'Bruker SAINT' 
_computing_data_reduction         'Bruker SAINT' 
_computing_structure_solution     'SHELXS-97 (Sheldrick 2008)' 
_computing_structure_refinement 'SHELXL-2014/7 (Sheldrick, 2014)' 
_computing_molecular_graphics     'Bruker SHELXTL' 
_computing_publication_material   'Bruker SHELXTL' 
_refine_special_details           ? 
_refine_ls_structure_factor_coef  Fsqd 
_refine_ls_matrix_type            full 
_refine_ls_weighting_scheme       calc 
_refine_ls_weighting_details 
'w=1/[\s^2^(Fo^2^)+(0.0113P)^2^+1.4910P] where P=(Fo^2^+2Fc^2^)/3' 
_atom_sites_solution_primary      direct
_atom_sites_solution_secondary    ? 
_atom_sites_solution_hydrogens    mixed 
_refine_ls_hydrogen_treatment     constr 
_refine_ls_extinction_method      none 
_refine_ls_extinction_coef        . 
_refine_ls_number_reflns          2683 
_refine_ls_number_parameters      125 
_refine_ls_number_restraints      0 
_refine_ls_R_factor_all           0.0151 
_refine_ls_R_factor_gt            0.0133 
_refine_ls_wR_factor_ref          0.0305 
_refine_ls_wR_factor_gt           0.0300 
_refine_ls_goodness_of_fit_ref    1.124 
_refine_ls_restrained_S_all       1.124 
_refine_ls_shift/su_max           0.002 
_refine_ls_shift/su_mean          0.000 
  
loop_ 
 _atom_site_label 
 _atom_site_type_symbol 
 _atom_site_fract_x 
 _atom_site_fract_y 
 _atom_site_fract_z 
 _atom_site_U_iso_or_equiv 
 _atom_site_adp_type 
 _atom_site_occupancy 
 _atom_site_site_symmetry_order 
 _atom_site_calc_flag 
 _atom_site_refinement_flags_posn 
 _atom_site_refinement_flags_adp 
 _atom_site_refinement_flags_occupancy 
 _atom_site_disorder_assembly 
 _atom_site_disorder_group 
Tb1 Tb 0.26226(2) 0.45732(2) 0.53621(2) 0.01057(3) Uani 1 1 d . . . . . 
Br1 Br 0.39187(3) 0.95925(3) 0.68482(2) 0.01765(5) Uani 1 1 d . . . . . 
O11 O -0.00404(19) 0.3350(2) 0.53434(9) 0.0168(3) Uani 1 1 d . . . . . 
O12 O -0.27757(19) 0.2724(2) 0.52280(9) 0.0161(3) Uani 1 1 d . . . . . 
C11 C -0.1245(3) 0.2355(3) 0.54617(12) 0.0132(4) Uani 1 1 d . . . . . 
C12 C -0.0877(3) 0.0761(3) 0.58841(15) 0.0231(5) Uani 1 1 d . . . . . 
H12A H 0.0364 0.0533 0.5924 0.096(10) Uiso 1 1 calc R U . . . 
H12B H -0.1501 -0.0153 0.5612 0.096(10) Uiso 1 1 calc R U . . . 
H12C H -0.1253 0.0857 0.6393 0.096(10) Uiso 1 1 calc R U . . . 
O21 O 0.53845(18) 0.55460(19) 0.57340(8) 0.0134(3) Uani 1 1 d . . . . . 
O22 O 0.81071(18) 0.6176(2) 0.59577(9) 0.0157(3) Uani 1 1 d . . . . . 
C21 C 0.6695(3) 0.5850(3) 0.62098(12) 0.0128(4) Uani 1 1 d . . . . . 
C22 C 0.6557(3) 0.5779(3) 0.70428(13) 0.0202(5) Uani 1 1 d . . . . . 
H22A H 0.7726 0.5718 0.7306 0.023(6) Uiso 0.59(3) 1 d R U P . . 
H22B H 0.5904 0.4795 0.7172 0.023(6) Uiso 0.59(3) 1 d R U P . . 
H22C H 0.5987 0.6784 0.7206 0.023(6) Uiso 0.59(3) 1 d R U P . . 
H22D H 0.5334 0.5779 0.7127 0.023(6) Uiso 0.41(3) 1 d R U P . . 
H22E H 0.7122 0.6762 0.7284 0.023(6) Uiso 0.41(3) 1 d R U P . . 
H22F H 0.7109 0.4767 0.7261 0.023(6) Uiso 0.41(3) 1 d R U P . . 
O1W O 0.39000(19) 0.18528(19) 0.53116(9) 0.0151(3) Uani 1 1 d . . . . . 
H11W H 0.3827 0.1073 0.5718 0.052(7) Uiso 1 1 d R U . . . 
H12W H 0.5101 0.1892 0.5237 0.052(7) Uiso 1 1 d R U . . . 
O2W O 0.15675(18) 0.6456(2) 0.62436(9) 0.0152(3) Uani 1 1 d . . . . . 
H21W H 0.0356 0.6585 0.6283 0.040(6) Uiso 1 1 d R U . . . 
H22W H 0.2081 0.7475 0.6440 0.040(6) Uiso 1 1 d R U . . . 
O3W O 0.2880(2) 0.3441(2) 0.66189(9) 0.0192(3) Uani 1 1 d . . . . . 
H31W H 0.2411 0.3945 0.7043 0.048(7) Uiso 1 1 d R U . . . 
H32W H 0.3117 0.2308 0.6770 0.048(7) Uiso 1 1 d R U . . . 
  
loop_ 
 _atom_site_aniso_label 
 _atom_site_aniso_U_11 
 _atom_site_aniso_U_22 
 _atom_site_aniso_U_33 
 _atom_site_aniso_U_23 
 _atom_site_aniso_U_13 
 _atom_site_aniso_U_12 
Tb1 0.00681(5) 0.01307(5) 0.01194(5) -0.00009(4) 0.00146(3) -0.00184(4) 
Br1 0.02064(11) 0.01487(11) 0.01718(11) 0.00177(9) 0.00071(8) -0.00228(8) 
O11 0.0112(7) 0.0206(8) 0.0193(8) -0.0014(6) 0.0045(6) -0.0057(6) 
O12 0.0090(7) 0.0192(8) 0.0201(8) 0.0039(7) 0.0018(6) -0.0001(6) 
C11 0.0124(9) 0.0156(10) 0.0120(10) 0.0000(8) 0.0036(8) -0.0008(8) 
C12 0.0238(12) 0.0198(12) 0.0252(13) 0.0074(10) -0.0001(10) 0.0028(9) 
O21 0.0094(7) 0.0170(8) 0.0136(7) -0.0004(6) 0.0005(5) -0.0011(6) 
O22 0.0091(7) 0.0204(8) 0.0176(8) -0.0009(7) 0.0012(6) -0.0020(6) 
C21 0.0106(9) 0.0126(10) 0.0148(10) -0.0016(8) -0.0001(7) 0.0019(7) 
C22 0.0161(10) 0.0317(13) 0.0124(10) -0.0006(9) -0.0002(8) 0.0035(9) 
O1W 0.0118(7) 0.0159(8) 0.0180(8) 0.0013(6) 0.0040(6) -0.0002(6) 
O2W 0.0104(7) 0.0167(8) 0.0183(8) -0.0038(6) 0.0008(6) -0.0001(6) 
O3W 0.0256(8) 0.0163(8) 0.0168(8) 0.0019(6) 0.0068(6) 0.0040(7) 
  
_geom_special_details 
; 
 All esds (except the esd in the dihedral angle between two l.s. planes) 
 are estimated using the full covariance matrix.  The cell esds are taken 
 into account individually in the estimation of esds in distances, angles 
 and torsion angles; correlations between esds in cell parameters are only 
 used when they are defined by crystal symmetry.  An approximate (isotropic) 
 treatment of cell esds is used for estimating esds involving l.s. planes. 
; 
  
loop_ 
 _geom_bond_atom_site_label_1 
 _geom_bond_atom_site_label_2 
 _geom_bond_distance 
 _geom_bond_site_symmetry_2 
 _geom_bond_publ_flag 
Tb1 O11 2.2941(15) . ? 
Tb1 O21 2.3222(14) . ? 
Tb1 O2W 2.3812(15) . ? 
Tb1 O3W 2.3976(16) . ? 
Tb1 O1W 2.4054(15) . ? 
Tb1 O12 2.4169(16) 3_566 ? 
Tb1 O22 2.4285(15) 3_666 ? 
Tb1 O21 2.6122(15) 3_666 ? 
Tb1 O11 2.8081(16) 3_566 ? 
O11 C11 1.266(3) . ? 
O12 C11 1.258(3) . ? 
C11 C12 1.496(3) . ? 
C12 H12A 0.9800 . ? 
C12 H12B 0.9800 . ? 
C12 H12C 0.9800 . ? 
O21 C21 1.281(3) . ? 
O22 C21 1.258(3) . ? 
C21 C22 1.494(3) . ? 
C22 H22A 0.9822 . ? 
C22 H22B 0.9790 . ? 
C22 H22C 0.9794 . ? 
C22 H22D 0.9800 . ? 
C22 H22E 0.9800 . ? 
C22 H22F 0.9800 . ? 
O1W H11W 0.9600 . ? 
O1W H12W 0.9600 . ? 
O2W H21W 0.9600 . ? 
O2W H22W 0.9600 . ? 
O3W H31W 0.9600 . ? 
O3W H32W 0.9600 . ? 
  
loop_ 
 _geom_angle_atom_site_label_1 
 _geom_angle_atom_site_label_2 
 _geom_angle_atom_site_label_3 
 _geom_angle 
 _geom_angle_site_symmetry_1 
 _geom_angle_site_symmetry_3 
 _geom_angle_publ_flag 
O11 Tb1 O21 163.70(5) . . ? 
O11 Tb1 O2W 84.74(5) . . ? 
O21 Tb1 O2W 88.43(5) . . ? 
O11 Tb1 O3W 80.85(6) . . ? 
O21 Tb1 O3W 82.88(5) . . ? 
O2W Tb1 O3W 68.37(5) . . ? 
O11 Tb1 O1W 89.34(5) . . ? 
O21 Tb1 O1W 86.58(5) . . ? 
O2W Tb1 O1W 140.60(5) . . ? 
O3W Tb1 O1W 72.23(5) . . ? 
O11 Tb1 O12 117.56(5) . 3_566 ? 
O21 Tb1 O12 74.69(5) . 3_566 ? 
O2W Tb1 O12 75.56(5) . 3_566 ? 
O3W Tb1 O12 137.74(5) . 3_566 ? 
O1W Tb1 O12 139.43(5) . 3_566 ? 
O11 Tb1 O22 75.96(5) . 3_666 ? 
O21 Tb1 O22 118.45(5) . 3_666 ? 
O2W Tb1 O22 136.72(5) . 3_666 ? 
O3W Tb1 O22 142.39(6) . 3_666 ? 
O1W Tb1 O22 78.25(5) . 3_666 ? 
O12 Tb1 O22 79.72(5) 3_566 3_666 ? 
O11 Tb1 O21 125.44(5) . 3_666 ? 
O21 Tb1 O21 67.60(6) . 3_666 ? 
O2W Tb1 O21 141.63(5) . 3_666 ? 
O3W Tb1 O21 132.76(5) . 3_666 ? 
O1W Tb1 O21 70.06(5) . 3_666 ? 
O12 Tb1 O21 69.56(5) 3_566 3_666 ? 
O22 Tb1 O21 51.06(5) 3_666 3_666 ? 
O11 Tb1 O11 68.96(6) . 3_566 ? 
O21 Tb1 O11 121.93(5) . 3_566 ? 
O2W Tb1 O11 68.65(5) . 3_566 ? 
O3W Tb1 O11 128.90(5) . 3_566 ? 
O1W Tb1 O11 143.43(5) . 3_566 ? 
O12 Tb1 O11 48.62(5) 3_566 3_566 ? 
O22 Tb1 O11 68.32(5) 3_666 3_566 ? 
O21 Tb1 O11 98.27(5) 3_666 3_566 ? 
Tb1 Tb1 Tb1 139.179(6) 3_666 3_566 ? 
C11 O11 Tb1 162.37(15) . . ? 
C11 O11 Tb1 86.43(12) . 3_566 ? 
Tb1 O11 Tb1 111.04(6) . 3_566 ? 
C11 O12 Tb1 105.48(13) . 3_566 ? 
O12 C11 O11 119.5(2) . . ? 
O12 C11 C12 119.57(19) . . ? 
O11 C11 C12 121.0(2) . . ? 
C11 C12 H12A 109.5 . . ? 
C11 C12 H12B 109.5 . . ? 
H12A C12 H12B 109.5 . . ? 
C11 C12 H12C 109.5 . . ? 
H12A C12 H12C 109.5 . . ? 
H12B C12 H12C 109.5 . . ? 
C21 O21 Tb1 154.91(14) . . ? 
C21 O21 Tb1 90.15(12) . 3_666 ? 
Tb1 O21 Tb1 112.40(6) . 3_666 ? 
C21 O22 Tb1 99.45(13) . 3_666 ? 
O22 C21 O21 118.27(19) . . ? 
O22 C21 C22 120.94(19) . . ? 
O21 C21 C22 120.78(19) . . ? 
C21 C22 H22A 108.4 . . ? 
C21 C22 H22B 110.7 . . ? 
H22A C22 H22B 109.2 . . ? 
C21 C22 H22C 110.0 . . ? 
H22A C22 H22C 109.1 . . ? 
H22B C22 H22C 109.4 . . ? 
C21 C22 H22D 108.7 . . ? 
C21 C22 H22E 109.0 . . ? 
H22D C22 H22E 109.5 . . ? 
C21 C22 H22F 110.5 . . ? 
H22D C22 H22F 109.5 . . ? 
H22E C22 H22F 109.5 . . ? 
Tb1 O1W H11W 120.5 . . ? 
Tb1 O1W H12W 112.9 . . ? 
H11W O1W H12W 105.0 . . ? 
Tb1 O2W H21W 121.7 . . ? 
Tb1 O2W H22W 128.3 . . ? 
H21W O2W H22W 105.0 . . ? 
Tb1 O3W H31W 124.6 . . ? 
Tb1 O3W H32W 127.9 . . ? 
H31W O3W H32W 105.0 . . ? 
  
loop_ 
 _geom_hbond_atom_site_label_D 
 _geom_hbond_atom_site_label_H 
 _geom_hbond_atom_site_label_A 
 _geom_hbond_distance_DH 
 _geom_hbond_distance_HA 
 _geom_hbond_distance_DA 
 _geom_hbond_angle_DHA 
 _geom_hbond_site_symmetry_A 
O1W H11W Br1  0.96 2.33 3.2737(15) 168.8 1_545 
O1W H12W O12  0.96 1.79 2.703(2) 158.7 1_655 
O2W H21W O22  0.96 1.82 2.703(2) 151.8 1_455 
O2W H22W Br1  0.96 2.29 3.2322(15) 166.0 . 
O3W H31W Br1  0.96 2.37 3.3168(16) 167.6 2_546 
O3W H32W Br1  0.96 2.27 3.2083(16) 166.1 1_545 
  
_refine_diff_density_max    0.554 
_refine_diff_density_min   -0.406 
_refine_diff_density_rms    0.085 
  
_shelx_res_file 
; 
  
    Ha2019_99o_0m_a.res created by SHELXL-2014/7 
  
  
TITL Ha2019_99o_0m_a.res in P2(1)/n 
CELL  0.71073   7.7972   8.0263  17.7443   90.000   95.862   90.000 
ZERR    4.000   0.0003   0.0003   0.0008    0.000    0.002    0.000 
LATT 1 
SYMM 1/2-X, 1/2+Y, 1/2-Z 
SFAC C  H  O  Br Tb 
UNIT 16 48 28 4 4 
LIST 4 ! automatically inserted. Change 6 to 4 for CHECKCIF!! 
OMIT -3 56 
L.S. 10 
BOND $H 
ACTA 
FMAP 2 
TEMP -173 
rem DFIX 0.96  0.0001 O1w H11w O1w H12w O2w H21w O2w H22w O3w H31w O3w H32w 
rem dfix 1.523  0.0001 H11w H12w H21w H22w H31w H32w 
FREE Tb1 C21_$6 
FREE Tb1 C11_$7 
EQIV $6 1-x, 1-y, 1-z 
BIND Tb1 Tb1_$6 
BIND Tb1 Tb1_$7 
EQIV $7 -x,1-y,1-z 
BIND Tb1 O11_$7 
  
HTAB 
EQIV $1 -x+3/2, y-1/2, -z+3/2 
EQIV $2 x, y-1, z 
HTAB O1W Br1_$2 
EQIV $3 x+1, y, z 
HTAB O1W O12_$3 
EQIV $4 x-1, y, z 
HTAB O2W O22_$4 
HTAB O2W Br1 
EQIV $5 -x+1/2, y-1/2, -z+3/2 
HTAB O3W Br1_$5 
HTAB O3W Br1_$2 
SIZE 0.072 0.078  0.341 
BOND $H 
rem DFIX 0.98  0.0001 C22 H22d C22 H22e C22 H22f 
rem dfix 1.601 0.0001 H22d H22e H22d H22f H22e H22f 
SIZE 0.070  0.172  0.487 
PLAN 5 
TEMP -173 
WGHT    0.011300    1.491000 
FVAR       0.08435   0.09599   0.02340   0.05211   0.04012   0.04798   0.58579 
TB1   5    0.262256    0.457318    0.536211    11.00000    0.00681    0.01307 = 
         0.01194   -0.00009    0.00146   -0.00184 
BR1   4    0.391867    0.959248    0.684817    11.00000    0.02064    0.01487 = 
         0.01718    0.00177    0.00071   -0.00228 
O11   3   -0.004039    0.334955    0.534336    11.00000    0.01117    0.02064 = 
         0.01930   -0.00138    0.00448   -0.00570 
O12   3   -0.277569    0.272433    0.522803    11.00000    0.00902    0.01916 = 
         0.02006    0.00388    0.00177   -0.00011 
C11   1   -0.124538    0.235549    0.546172    11.00000    0.01240    0.01563 = 
         0.01200    0.00002    0.00360   -0.00081 
C12   1   -0.087717    0.076062    0.588410    11.00000    0.02378    0.01977 = 
         0.02524    0.00742   -0.00006    0.00275 
AFIX 137 
H12A  2    0.036371    0.053332    0.592443    11.00000   21.00000 
H12B  2   -0.150112   -0.015347    0.561181    11.00000   21.00000 
H12C  2   -0.125295    0.085744    0.639272    11.00000   21.00000 
AFIX   0 
O21   3    0.538453    0.554602    0.573395    11.00000    0.00943    0.01700 = 
         0.01364   -0.00036    0.00048   -0.00109 
O22   3    0.810708    0.617632    0.595767    11.00000    0.00910    0.02040 = 
         0.01762   -0.00092    0.00124   -0.00198 
C21   1    0.669499    0.585009    0.620982    11.00000    0.01062    0.01260 = 
         0.01479   -0.00160   -0.00009    0.00189 
C22   1    0.655694    0.577893    0.704283    11.00000    0.01613    0.03168 = 
         0.01238   -0.00056   -0.00021    0.00353 
AFIX   3 
H22A  2    0.772626    0.571800    0.730600    71.00000   31.00000 
H22B  2    0.590368    0.479548    0.717151    71.00000   31.00000 
H22C  2    0.598660    0.678415    0.720624    71.00000   31.00000 
  
H22D  2    0.533413    0.577897    0.712694   -71.00000   31.00000 
H22E  2    0.712184    0.676154    0.728382   -71.00000   31.00000 
H22F  2    0.710873    0.476747    0.726130   -71.00000   31.00000 
AFIX   0 
O1W   3    0.390000    0.185279    0.531161    11.00000    0.01182    0.01593 = 
         0.01795    0.00127    0.00395   -0.00017 
AFIX   3 
H11W  2    0.382720    0.107348    0.571752    11.00000   41.00000 
H12W  2    0.510145    0.189204    0.523680    11.00000   41.00000 
AFIX   0 
O2W   3    0.156749    0.645606    0.624359    11.00000    0.01045    0.01674 = 
         0.01833   -0.00377    0.00083   -0.00011 
AFIX   3 
H21W  2    0.035587    0.658518    0.628294    11.00000   51.00000 
H22W  2    0.208063    0.747484    0.643990    11.00000   51.00000 
AFIX   0 
O3W   3    0.288039    0.344055    0.661888    11.00000    0.02561    0.01627 = 
         0.01681    0.00193    0.00677    0.00397 
AFIX   3 
H31W  2    0.241140    0.394530    0.704342    11.00000   61.00000 
H32W  2    0.311748    0.230836    0.676985    11.00000   61.00000 
AFIX   0 
HKLF 4 
  
REM  Ha2019_99o_0m_a.res in P2(1)/n 
REM R1 =  0.0133 for    2518 Fo > 4sig(Fo)  and  0.0151 for all    2683 data 
REM    125 parameters refined using      0 restraints 
  
END 
  
WGHT      0.0113      1.4910 
  
REM Instructions for potential hydrogen bonds 
HTAB C22 Br1_$1 
HTAB C22 Br1 
HTAB O1W Br1_$2 
HTAB O1W O12_$3 
HTAB O2W O22_$4 
HTAB O2W Br1 
HTAB O3W Br1_$5 
HTAB O3W Br1_$2 
  
REM Highest difference peak  0.554,  deepest hole -0.406,  1-sigma level  0.085 
Q1    1   0.2552  0.4400  0.4854  11.00000  0.05    0.55 
Q2    1   0.2749  0.4458  0.5902  11.00000  0.05    0.49 
Q3    1   0.2417  0.3433  0.5459  11.00000  0.05    0.46 
Q4    1   0.3775  0.9287  0.6384  11.00000  0.05    0.42 
Q5    1   0.6645  0.5623  0.6630  11.00000  0.05    0.41 
; 
_shelx_res_checksum   27901 
  
_shelx_hkl_file 
; 
   1   0   0    0.24    0.10 
   1   0   0    0.40    0.13 
   1   0   0    0.23    0.10 
   1   0   0    0.05    0.06 
   1   0   0    0.00    0.06 
   1   0   0    0.34    0.12 
   1   0   0    0.47    0.11 
   1   0   0    0.10    0.09 
   1   0   0   -0.01    0.07 
   1   0   0    0.26    0.09 
   1   0   0    0.06    0.07 
   1   0   0    0.20    0.08 
   1   0   0    0.60    0.12 
   1   0   0   -0.03    0.04 
   1   0   0    0.17    0.09 
   1   0   0    0.01    0.06 
   1   0   0    0.06    0.06 
   1   0   0    0.19    0.08 
   1   0   0   -0.04    0.04 
   1   0   0    0.09    0.07 
   1   0   0    0.29    0.12 
   1   0   0    0.21    0.09 
   1   0   0    0.11    0.08 
   1   0   0    0.34    0.11 
  -1   0   0    0.05    0.06 
  -1   0   0    0.02    0.05 
  -1   0   0    0.02    0.05 
   1   0   0    0.62    0.14 
   1   0   0   -0.02    0.04 
   1   0   0    0.41    0.11 
  -1   0   0    0.05    0.06 
  -1   0   0    0.00    0.04 
  -1   0   0    0.15    0.07 
  -1   0   0    0.24    0.11 
  -1   0   0    0.05    0.06 
  -1   0   0   -0.02    0.04 
  -1   0   0    0.01    0.05 
  -1   0   0   -0.03    0.04 
  -1   0   0    0.02    0.07 
  -1   0   0    0.33    0.12 
  -1   0   0    0.04    0.06 
  -1   0   0    0.09    0.07 
  -1   0   0    0.01    0.05 
  -1   0   0    0.20    0.09 
  -1   0   0   -0.04    0.04 
  -1   0   0    0.04    0.07 
  -1   0   0    0.36    0.11 
  -1   0   0    0.05    0.06 
   2   0   0  423.20   12.59 
   2   0   0  399.45   12.75 
   2   0   0  427.41   12.56 
   2   0   0  422.37   12.66 
   2   0   0  431.34   12.50 
   2   0   0  396.04   12.58 
   2   0   0  417.54   12.60 
   2   0   0  402.04   12.57 
   2   0   0  402.12   12.49 
   2   0   0  408.98   12.62 
   2   0   0  427.05   12.63 
   2   0   0  417.36   12.66 
   2   0   0  413.49   12.54 
  -2   0   0  420.66   12.47 
  -2   0   0  413.07   12.52 
   2   0   0  416.84   12.57 
   2   0   0  407.43   12.34 
   2   0   0  412.25   12.48 
   2   0   0  409.06   12.49 
  -2   0   0  420.40   12.79 
  -2   0   0  426.55   12.60 
  -2   0   0  411.30   12.49 
  -2   0   0  422.22   12.55 
  -2   0   0  417.40   12.47 
  -2   0   0  414.65   12.47 
   2   0   0  423.87   12.54 
   2   0   0  422.65   12.47 
  -2   0   0  432.99   12.56 
  -2   0   0  416.49   12.57 
  -2   0   0  407.06   12.34 
  -2   0   0  405.44   12.51 
  -2   0   0  415.89   12.51 
  -2   0   0  427.85   12.61 
  -2   0   0  412.67   12.68 
  -2   0   0  414.16   12.56 
  -2   0   0  424.59   12.61 
  -2   0   0  422.82   12.53 
  -2   0   0  427.99   12.67 
  -2   0   0  417.25   12.24 
  -2   0   0  407.89   12.55 
  -2   0   0  423.18   12.76 
  -2   0   0  424.31   12.64 
  -2   0   0  415.66   12.49 
   2   0   0  413.79   12.50 
   2   0   0  416.17   12.52 
   2   0   0  419.57   12.60 
   2   0   0  434.00   12.64 
   2   0   0  388.38   12.44 
   2   0   0  413.99   12.45 
   2   0   0  418.00   12.48 
   2   0   0  413.46   12.55 
   3   0   0    0.11    0.22 
  -3   0   0    0.12    0.17 
   3   0   0    0.12    0.20 
   3   0   0    0.11    0.21 
  -3   0   0    0.26    0.22 
  -3   0   0   -0.07    0.20 
  -3   0   0   -0.13    0.15 
  -3   0   0    0.30    0.20 
  -3   0   0    0.42    0.25 
  -3   0   0    0.06    0.22 
   3   0   0    0.05    0.19 
   3   0   0    0.20    0.30 
   3   0   0    0.01    0.21 
   3   0   0    0.24    0.23 
   3   0   0    0.10    0.22 
   3   0   0   -0.12    0.16 
   3   0   0   -0.12    0.23 
   3   0   0   -0.07    0.18 
   3   0   0    0.67    0.23 
   3   0   0    0.27    0.24 
   3   0   0    0.60    0.30 
   3   0   0    0.40    0.24 
   3   0   0    0.26    0.24 
  -3   0   0    0.11    0.25 
  -3   0   0    0.21    0.15 
  -3   0   0    0.01    0.19 
   3   0   0    0.17    0.20 
   3   0   0    0.44    0.23 
   3   0   0    0.32    0.30 
   3   0   0   -0.09    0.24 
   3   0   0    0.04    0.25 
   3   0   0   -0.19    0.20 
   3   0   0    0.36    0.23 
  -3   0   0    0.40    0.30 
  -3   0   0    0.10    0.29 
   3   0   0    0.20    0.27 
  -3   0   0   -0.02    0.25 
  -3   0   0    0.21    0.22 
  -3   0   0    0.21    0.22 
  -3   0   0   -0.03    0.10 
  -3   0   0    0.69    0.35 
  -3   0   0   -0.08    0.20 
  -3   0   0    0.72    0.33 
  -3   0   0    0.40    0.25 
  -3   0   0    0.40    0.27 
  -3   0   0    0.31    0.24 
  -3   0   0    0.66    0.33 
  -4   0   0   70.40    2.93 
   4   0   0   67.86    2.87 
  -4   0   0   74.48    2.82 
  -4   0   0   75.16    2.92 
  -4   0   0   70.80    2.49 
  -4   0   0   71.39    2.83 
  -4   0   0   67.08    2.67 
   4   0   0   65.44    2.81 
  -4   0   0   66.74    2.85 
   4   0   0   69.92    2.95 
   4   0   0   69.20    2.99 
  -4   0   0   66.44    2.70 
  -4   0   0   69.44    2.69 
   4   0   0   61.08    2.89 
   4   0   0   72.45    2.75 
   4   0   0   69.48    2.78 
  -4   0   0   70.23    2.87 
  -4   0   0   70.83    3.16 
  -4   0   0   71.75    2.76 
  -4   0   0   67.16    2.75 
   4   0   0   68.99    2.70 
   4   0   0   71.42    2.70 
  -4   0   0   69.85    3.00 
   4   0   0   68.56    2.91 
   4   0   0   66.28    2.89 
   4   0   0   70.01    2.68 
   4   0   0   65.94    2.94 
   4   0   0   70.67    2.82 
   4   0   0   68.65    3.17 
  -5   0   0   -0.40    0.36 
  -5   0   0    0.79    0.43 
  -5   0   0   -0.16    0.24 
  -5   0   0    0.18    0.39 
   5   0   0   -0.12    0.35 
  -5   0   0    0.07    0.20 
   5   0   0   -0.03    0.34 
   5   0   0    0.78    0.35 
   5   0   0    0.09    0.41 
  -5   0   0    0.12    0.36 
  -5   0   0    0.25    0.33 
  -5   0   0    0.12    0.36 
   5   0   0    0.04    0.29 
   5   0   0    0.47    0.39 
   5   0   0   -0.14    0.25 
   5   0   0   -0.33    0.27 
   5   0   0   -0.10    0.32 
  -5   0   0    0.36    0.34 
  -5   0   0   -0.26    0.27 
   5   0   0    0.06    0.42 
   5   0   0    0.63    0.37 
   5   0   0    0.62    0.37 
   5   0   0    0.20    0.28 
   5   0   0   -0.17    0.31 
   5   0   0    0.33    0.41 
   6   0   0  168.08    6.21 
  -6   0   0  172.92    6.83 
   6   0   0  170.16    6.89 
   6   0   0  170.19    6.45 
   6   0   0  171.19    6.33 
   6   0   0  171.84    6.02 
   6   0   0  168.16    6.05 
   6   0   0  172.94    6.56 
  -6   0   0  173.26    5.68 
  -6   0   0  171.69    6.34 
  -6   0   0  164.38    6.37 
  -6   0   0  166.45    6.15 
  -6   0   0  158.91    6.48 
  -6   0   0  164.40    6.30 
   6   0   0  163.42    6.79 
   6   0   0  169.81    6.53 
  -6   0   0  172.35    6.19 
  -6   0   0  176.40    6.06 
  -6   0   0  179.45    5.98 
   6   0   0  159.92    6.42 
   6   0   0  175.73    6.20 
   6   0   0  176.64    6.05 
   6   0   0  165.85    5.96 
   6   0   0  163.66    6.34 
  -6   0   0  172.01    6.36 
   6   0   0  166.72    6.54 
   6   0   0  168.57    6.43 
  -7   0   0   -0.38    0.43 
  -7   0   0    0.20    0.53 
  -7   0   0   -0.12    0.51 
  -7   0   0    1.74    0.86 
   7   0   0   -0.46    0.44 
  -7   0   0    0.17    0.46 
  -7   0   0    0.55    0.45 
  -7   0   0   -0.07    0.47 
   7   0   0    0.17    0.42 
   7   0   0    0.42    0.56 
   7   0   0    0.40    0.60 
   7   0   0   -0.04    0.60 
   7   0   0    0.62    0.51 
  -7   0   0    0.43    0.41 
   7   0   0    0.36    0.63 
   7   0   0    0.97    0.52 
   7   0   0   -0.53    0.40 
   7   0   0   -0.02    0.45 
   7   0   0    0.37    0.44 
   7   0   0   -0.03    0.60 
   7   0   0   -0.33    0.44 
   7   0   0    0.02    0.44 
  -7   0   0    0.68    0.65 
   7   0   0    0.32    0.59 
  -7   0   0   -0.30    0.37 
  -7   0   0    0.11    0.32 
   7   0   0   -0.37    0.65 
   7   0   0   -0.21    0.36 
   8   0   0  126.13    5.01 
   8   0   0  131.56    5.16 
   8   0   0  124.39    5.24 
  -8   0   0  131.99    5.62 
  -8   0   0  135.34    5.63 
   8   0   0  130.84    5.05 
   8   0   0  123.02    5.53 
   8   0   0  132.40    6.27 
   8   0   0  118.18    5.29 
   8   0   0  123.30    5.77 
   8   0   0  122.87    5.69 
   8   0   0  119.80    5.04 
  -8   0   0  126.18    5.72 
  -8   0   0  122.40    5.59 
  -8   0   0  129.74    5.36 
  -8   0   0  124.40    5.77 
  -8   0   0  124.69    5.54 
  -8   0   0  126.61    6.13 
  -8   0   0  115.69    4.88 
  -8   0   0  127.97    5.38 
   8   0   0  124.36    5.51 
   8   0   0  118.87    5.54 
   8   0   0  117.59    5.65 
   8   0   0  133.05    5.13 
   8   0   0  122.49    5.57 
   8   0   0  120.83    6.07 
   8   0   0  133.12    6.32 
  -9   0   0   -0.98    0.40 
   9   0   0    0.46    0.75 
   9   0   0    0.08    0.68 
   9   0   0   -0.18    0.88 
   9   0   0   -0.18    0.63 
   9   0   0   -0.28    0.64 
  -9   0   0   -0.41    0.63 
   9   0   0   -0.77    0.67 
   9   0   0   -0.13    0.90 
  -9   0   0   -0.53    0.80 
   9   0   0    0.22    0.79 
   9   0   0   -0.13    0.58 
  -9   0   0   -0.12    0.65 
  -9   0   0    0.10    0.75 
  -9   0   0   -0.11    0.80 
  -9   0   0   -0.38    0.58 
   9   0   0    0.42    0.66 
  -9   0   0   -0.10    0.62 
   9   0   0   -1.08    0.67 
   9   0   0   -0.37    0.72 
  -9   0   0    0.59    0.83 
   9   0   0    0.19    0.65 
   9   0   0   -0.58    0.94 
  -9   0   0    0.58    0.75 
 -10   0   0   15.95    2.30 
  10   0   0   10.59    2.07 
  10   0   0    8.72    1.70 
  10   0   0   10.65    2.16 
  10   0   0   15.28    2.43 
  10   0   0    9.85    2.10 
 -10   0   0   10.13    1.87 
  10   0   0   12.72    2.16 
  10   0   0    9.32    1.69 
 -10   0   0   12.94    2.25 
 -10   0   0   15.03    2.25 
  10   0   0   10.41    2.40 
  10   0   0   10.30    1.71 
 -10   0   0   10.61    1.77 
 -10   0   0    9.12    1.80 
 -10   0   0   10.35    2.15 
 -10   0   0   11.53    2.42 
  10   0   0   12.68    2.02 
  10   0   0   14.24    2.71 
  10   0   0   10.96    2.42 
   0  -1   0    0.03    0.07 
   0  -1   0    0.76    0.19 
   0  -1   0    0.10    0.14 
   0  -1   0    0.16    0.08 
   0   1   0    0.96    0.15 
   0   1   0    0.33    0.10 
   0   1   0    0.23    0.11 
   0   1   0    0.43    0.13 
   0   1   0    0.26    0.09 
   0   1   0    0.49    0.23 
   0   1   0    0.83    0.24 
   0   1   0    0.05    0.07 
   0   1   0    0.67    0.25 
   0   1   0    1.02    0.23 
   0   1   0    0.46    0.12 
   0   1   0    0.33    0.20 
   0   1   0    0.49    0.12 
   0   1   0    0.56    0.09 
   0   1   0    0.07    0.09 
   0   1   0    0.19    0.08 
   0   1   0    0.47    0.11 
   0   1   0    0.41    0.22 
   0   1   0    0.58    0.12 
   0   1   0    0.35    0.10 
   0   1   0    1.33    0.24 
   0   1   0    0.48    0.10 
   0   1   0    0.40    0.09 
   0   1   0    0.48    0.12 
   0   1   0    0.35    0.13 
   0   1   0    0.33    0.13 
   0   1   0    0.05    0.06 
   0   1   0    0.31    0.10 
   0   1   0    0.53    0.11 
   0   1   0    0.12    0.08 
   0   1   0    0.93    0.18 
   0   1   0    0.30    0.10 
   1  -1   0   15.82    0.86 
  -1  -1   0   17.92    0.78 
   1  -1   0   15.64    0.86 
   1  -1   0   18.48    0.82 
  -1  -1   0   17.69    0.86 
  -1  -1   0   17.24    0.77 
  -1  -1   0   17.51    0.89 
  -1  -1   0   18.08    0.80 
  -1  -1   0   17.91    0.79 
   1  -1   0   19.48    1.01 
   1  -1   0   17.95    0.84 
   1  -1   0   17.94    0.83 
   1  -1   0   17.28    0.82 
  -1  -1   0   14.92    0.73 
  -1  -1   0   15.31    0.77 
  -1  -1   0   15.91    0.75 
   1  -1   0   17.29    0.72 
   1  -1   0   17.12    0.82 
   1  -1   0   17.93    0.80 
   1  -1   0   17.78    0.79 
   1  -1   0   18.89    0.84 
  -1  -1   0   15.78    0.73 
  -1  -1   0   18.07    0.89 
   1  -1   0   18.67    0.76 
   1  -1   0   18.59    0.79 
   1  -1   0   18.38    0.84 
   1  -1   0   17.18    0.81 
   1  -1   0   16.29    0.77 
   1  -1   0   17.94    0.82 
  -1  -1   0   16.79    0.69 
   1  -1   0   17.34    0.81 
  -1  -1   0   16.66    0.79 
  -1  -1   0   14.22    0.78 
  -1  -1   0   17.19    0.94 
   1  -1   0   16.93    0.80 
  -1  -1   0   18.21    0.94 
  -1  -1   0   17.80    0.80 
   1   1   0   17.89    0.67 
   1   1   0   17.76    0.85 
   1   1   0   18.37    0.73 
  -1   1   0   18.56    0.94 
   1   1   0   15.67    0.75 
  -1   1   0   18.36    0.83 
  -1   1   0   19.40    0.80 
  -1   1   0   18.77    0.83 
   1   1   0   17.38    0.79 
  -1   1   0   17.96    0.83 
   1   1   0   17.45    0.69 
  -1   1   0   17.29    0.81 
   1   1   0   18.74    0.83 
   1   1   0   18.54    0.79 
   1   1   0   17.16    0.68 
   1   1   0   16.25    0.85 
  -1   1   0   18.70    0.80 
   1   1   0   18.18    0.78 
   1   1   0   18.13    0.82 
   1   1   0   19.47    0.94 
   1   1   0   17.81    0.61 
   1   1   0   17.80    0.80 
   1   1   0   17.53    0.80 
   1   1   0   19.09    0.98 
   1   1   0   17.93    0.73 
  -1   1   0   17.66    0.81 
  -1   1   0   17.51    0.79 
   1   1   0   17.74    0.77 
  -1   1   0   18.36    0.82 
   1   1   0   18.43    0.82 
   1   1   0   17.61    0.71 
  -1   1   0   18.12    0.79 
  -1   1   0   17.20    0.81 
  -1   1   0   17.58    0.82 
  -1   1   0   18.09    0.83 
  -1   1   0   18.78    0.76 
   1   1   0   19.66    0.98 
   1   1   0   17.07    0.77 
  -1   1   0   18.01    0.89 
   1   1   0   16.67    0.76 
   1   1   0   17.69    0.65 
  -1   1   0   17.94    0.79 
   1   1   0   17.49    0.58 
  -1   1   0   17.05    0.82 
  -1   1   0   17.65    0.80 
  -1   1   0   17.62    0.82 
  -1   1   0   18.37    0.73 
   1   1   0   17.40    0.85 
  -1   1   0   17.77    0.89 
  -1   1   0   17.66    0.82 
  -1   1   0   18.02    0.77 
   1   1   0   18.60    0.84 
   2  -1   0   30.81    1.41 
   2  -1   0   30.44    1.40 
  -2  -1   0   29.11    1.22 
  -2  -1   0   30.28    1.52 
  -2  -1   0   32.27    1.41 
  -2  -1   0   29.61    1.25 
   2  -1   0   30.18    1.32 
  -2  -1   0   30.34    1.38 
  -2  -1   0   29.92    1.33 
  -2  -1   0   29.85    1.19 
  -2  -1   0   30.37    1.32 
   2  -1   0   28.27    1.33 
  -2  -1   0   29.90    1.30 
  -2  -1   0   30.01    1.49 
  -2  -1   0   29.51    1.25 
  -2  -1   0   31.30    1.37 
   2  -1   0   31.34    1.33 
   2  -1   0   33.49    1.44 
   2  -1   0   30.95    1.36 
   2  -1   0   30.39    1.11 
   2  -1   0   29.55    1.34 
  -2  -1   0   30.30    1.31 
   2  -1   0   32.13    1.53 
  -2  -1   0   28.73    1.11 
  -2  -1   0   30.00    1.20 
   2  -1   0   29.86    1.30 
   2  -1   0   29.23    1.31 
  -2  -1   0   27.23    1.32 
   2  -1   0   28.68    1.29 
   2  -1   0   30.01    1.04 
   2  -1   0   28.94    1.37 
   2  -1   0   31.76    1.53 
  -2  -1   0   30.58    1.38 
  -2  -1   0   27.33    1.27 
   2  -1   0   29.57    1.36 
  -2  -1   0   30.51    1.23 
   2  -1   0   32.01    1.37 
   2  -1   0   28.58    1.24 
   2  -1   0   29.74    1.32 
  -2  -1   0   30.52    1.27 
  -2  -1   0   29.12    1.14 
   2  -1   0   31.61    1.33 
  -2  -1   0   28.99    1.25 
   2  -1   0   30.97    1.35 
   2  -1   0   27.33    1.45 
  -2  -1   0   31.90    1.48 
  -2  -1   0   31.20    1.29 
   2  -1   0   31.43    1.39 
   2  -1   0   29.78    1.36 
   2  -1   0   31.23    1.35 
   2   1   0   30.77    1.11 
  -2   1   0   28.79    1.36 
  -2   1   0   31.64    1.39 
  -2   1   0   30.18    1.35 
   2   1   0   31.28    1.18 
   2   1   0   29.77    1.25 
  -2   1   0   30.54    1.38 
  -2   1   0   29.37    1.43 
  -2   1   0   29.76    1.37 
   2   1   0   30.78    1.26 
   2   1   0   30.26    1.26 
   2   1   0   30.61    1.27 
   2   1   0   31.27    1.33 
   2   1   0   28.20    1.31 
   2   1   0   31.34    1.24 
   2   1   0   28.58    1.22 
   2   1   0   29.95    1.11 
  -2   1   0   31.23    1.29 
   2   1   0   30.47    1.38 
   2   1   0   32.32    1.34 
   2   1   0   29.91    1.44 
  -2   1   0   29.73    1.34 
  -2   1   0   29.61    1.30 
  -2   1   0   31.42    1.37 
   2   1   0   31.67    1.31 
  -2   1   0   29.10    1.33 
   2   1   0   30.95    1.35 
   2   1   0   32.12    1.24 
   2   1   0   32.15    1.40 
   2   1   0   31.04    1.45 
   2   1   0   32.38    1.54 
  -2   1   0   31.29    1.35 
  -2   1   0   33.03    1.38 
  -2   1   0   35.43    1.57 
  -2   1   0   30.39    1.31 
   2   1   0   31.70    1.31 
  -2   1   0   29.38    1.36 
  -2   1   0   28.15    1.20 
   2   1   0   28.07    1.32 
  -2   1   0   28.70    1.33 
  -2   1   0   30.36    1.31 
   2   1   0   30.27    1.20 
  -2   1   0   29.94    1.38 
   2   1   0   31.20    1.29 
  -2   1   0   30.85    1.38 
   2   1   0   30.27    1.37 
   2   1   0   30.13    1.16 
  -2   1   0   30.60    1.34 
  -2   1   0   26.72    1.32 
   2   1   0   28.13    1.38 
   3  -1   0    0.11    0.26 
   3  -1   0   -0.11    0.24 
   3  -1   0    0.05    0.30 
  -3  -1   0    0.05    0.26 
  -3  -1   0    0.19    0.22 
  -3  -1   0    0.40    0.21 
  -3  -1   0    0.39    0.22 
  -3  -1   0    0.13    0.29 
   3  -1   0   -0.01    0.23 
   3  -1   0   -0.27    0.24 
   3  -1   0    0.12    0.20 
  -3  -1   0    0.35    0.26 
  -3  -1   0   -0.07    0.23 
   3  -1   0   -0.08    0.21 
   3  -1   0    0.21    0.25 
   3  -1   0    0.38    0.27 
   3  -1   0   -0.05    0.17 
  -3  -1   0    0.37    0.37 
  -3  -1   0   -0.32    0.16 
  -3  -1   0    0.02    0.25 
   3  -1   0    0.46    0.30 
   3  -1   0    0.24    0.24 
   3  -1   0   -0.16    0.22 
  -3  -1   0    0.42    0.24 
   3  -1   0    0.07    0.24 
  -3  -1   0   -0.17    0.23 
  -3  -1   0    0.15    0.24 
   3  -1   0    0.14    0.24 
  -3  -1   0    0.26    0.19 
   3  -1   0    0.33    0.29 
  -3  -1   0    0.46    0.27 
  -3  -1   0    0.51    0.35 
  -3  -1   0   -0.03    0.20 
   3  -1   0    0.18    0.30 
   3  -1   0    0.22    0.26 
  -3  -1   0   -0.02    0.16 
  -3  -1   0   -0.17    0.19 
  -3  -1   0    0.17    0.10 
  -3  -1   0    0.00    0.25 
   3  -1   0    0.12    0.16 
   3  -1   0    0.24    0.26 
  -3  -1   0    0.28    0.20 
   3  -1   0   -0.04    0.20 
   3  -1   0    0.15    0.22 
  -3  -1   0    0.24    0.26 
   3   1   0    0.20    0.24 
  -3   1   0    0.09    0.23 
   3   1   0    0.34    0.33 
  -3   1   0    0.25    0.21 
   3   1   0    0.13    0.26 
   3   1   0    0.18    0.22 
  -3   1   0   -0.03    0.21 
  -3   1   0    0.36    0.26 
  -3   1   0   -0.10    0.23 
  -3   1   0   -0.05    0.16 
   3   1   0    0.27    0.20 
  -3   1   0    0.07    0.21 
   3   1   0    0.22    0.16 
  -3   1   0    0.22    0.24 
   3   1   0    0.46    0.29 
   3   1   0   -0.01    0.17 
   3   1   0    0.12    0.23 
   3   1   0    0.65    0.37 
   3   1   0    0.13    0.25 
   3   1   0    0.22    0.25 
   3   1   0    0.44    0.23 
   3   1   0    0.27    0.23 
  -3   1   0    0.11    0.27 
  -3   1   0   -0.07    0.23 
  -3   1   0    0.12    0.29 
   3   1   0    0.42    0.24 
  -3   1   0    0.25    0.25 
  -3   1   0   -0.07    0.16 
  -3   1   0    0.30    0.26 
  -3   1   0   -0.03    0.17 
  -3   1   0    0.37    0.23 
   3   1   0    0.10    0.16 
   3   1   0   -0.04    0.19 
   3   1   0    0.29    0.27 
   3   1   0    0.35    0.23 
   3   1   0    0.11    0.18 
   3   1   0    0.66    0.37 
   3   1   0   -0.07    0.18 
  -3   1   0    0.39    0.30 
  -3   1   0    0.26    0.25 
   3   1   0   -0.01    0.18 
  -3   1   0    0.14    0.21 
  -3   1   0    0.32    0.27 
  -3   1   0    0.06    0.27 
   3   1   0    0.54    0.33 
  -3   1   0    0.08    0.23 
  -3   1   0    0.39    0.27 
  -4  -1   0    2.35    0.56 
   4  -1   0    2.14    0.61 
  -4  -1   0    2.66    0.48 
   4  -1   0    2.04    0.53 
   4  -1   0    2.38    0.56 
  -4  -1   0    2.07    0.46 
  -4  -1   0    2.24    0.45 
   4  -1   0    2.44    0.67 
  -4  -1   0    2.17    0.55 
   4  -1   0    2.28    0.52 
   4  -1   0    2.28    0.41 
   4  -1   0    3.10    0.67 
  -4  -1   0    1.62    0.50 
  -4  -1   0    2.99    0.64 
   4  -1   0    1.57    0.63 
  -4  -1   0    1.48    0.45 
  -4  -1   0    1.49    0.57 
   4  -1   0    1.54    0.55 
  -4  -1   0    1.36    0.47 
  -4  -1   0    2.41    0.43 
  -4  -1   0    1.71    0.51 
  -4  -1   0    2.10    0.47 
   4  -1   0    2.58    0.58 
   4  -1   0    2.27    0.61 
   4  -1   0    2.33    0.53 
   4  -1   0    2.25    0.51 
   4  -1   0    2.69    0.56 
   4  -1   0    1.86    0.53 
   4  -1   0    1.76    0.55 
  -4  -1   0    2.46    0.30 
   4  -1   0    1.66    0.62 
  -4  -1   0    3.09    0.59 
  -4  -1   0    2.25    0.44 
  -4  -1   0    2.65    0.65 
   4  -1   0    2.87    0.53 
   4  -1   0    2.15    0.38 
  -4   1   0    0.84    0.47 
  -4   1   0    1.46    0.48 
  -4   1   0    1.34    0.35 
   4   1   0    2.42    0.44 
   4   1   0    3.53    0.81 
  -4   1   0    2.56    0.54 
  -4   1   0    2.61    0.66 
  -4   1   0    1.68    0.41 
   4   1   0    2.17    0.42 
   4   1   0    2.10    0.43 
   4   1   0    1.78    0.46 
   4   1   0    2.94    0.65 
   4   1   0    1.95    0.51 
   4   1   0    1.89    0.45 
   4   1   0    1.43    0.48 
   4   1   0    1.75    0.62 
   4   1   0    1.94    0.43 
  -4   1   0    3.01    0.64 
  -4   1   0    1.51    0.49 
  -4   1   0    1.98    0.54 
   4   1   0    2.03    0.49 
   4   1   0    2.24    0.46 
   4   1   0    2.40    0.62 
   4   1   0    2.65    0.56 
  -4   1   0    1.50    0.40 
  -4   1   0    2.06    0.61 
  -4   1   0    1.35    0.51 
   4   1   0    1.99    0.49 
   5  -1   0  123.94    4.60 
   5  -1   0  120.19    4.81 
   5  -1   0  130.11    5.28 
   5  -1   0  118.77    4.84 
   5  -1   0  125.72    4.69 
  -5  -1   0  120.00    4.66 
  -5  -1   0  121.47    3.99 
  -5  -1   0  130.24    4.90 
   5  -1   0  123.41    4.92 
  -5  -1   0  123.40    5.11 
  -5  -1   0  122.45    4.45 
   5  -1   0  121.16    4.91 
   5  -1   0  117.48    4.81 
  -5  -1   0  126.16    4.73 
   5  -1   0  129.23    4.66 
   5  -1   0  123.81    4.60 
  -5  -1   0  120.22    4.89 
   5  -1   0  120.56    4.70 
   5  -1   0  125.49    4.29 
   5  -1   0  121.94    5.16 
   5  -1   0  118.58    5.17 
  -5  -1   0  126.87    4.59 
  -5  -1   0  122.60    4.64 
  -5  -1   0  121.90    4.59 
  -5  -1   0  127.12    4.75 
   5  -1   0  124.90    4.70 
   5  -1   0  118.19    4.82 
  -5  -1   0  128.16    4.48 
   5  -1   0  114.19    4.67 
  -5  -1   0  124.31    4.37 
  -5   1   0  123.46    4.91 
   5   1   0  122.58    4.29 
  -5   1   0  123.01    4.73 
   5   1   0  120.91    4.76 
   5   1   0  120.11    4.86 
   5   1   0  123.43    4.51 
  -5   1   0  124.04    4.78 
   5   1   0  127.64    4.72 
  -5   1   0  123.23    4.75 
   5   1   0  120.82    4.65 
   5   1   0  128.60    5.21 
   5   1   0  122.49    4.89 
  -5   1   0  121.92    4.80 
  -5   1   0  123.30    4.85 
  -5   1   0  126.28    5.15 
  -5   1   0  126.53    4.71 
   5   1   0  121.91    4.44 
  -5   1   0  125.28    4.40 
   5   1   0  129.87    4.75 
   5   1   0  127.51    4.90 
   5   1   0  122.04    4.73 
   5   1   0  124.90    4.38 
  -5   1   0  130.99    4.19 
   5   1   0  124.70    4.58 
  -5   1   0  124.76    4.39 
   5   1   0  122.30    4.37 
   6  -1   0    2.20    0.73 
   6  -1   0    3.42    0.99 
   6  -1   0    2.03    0.63 
   6  -1   0    1.65    0.70 
   6  -1   0    1.96    0.68 
   6  -1   0    0.34    0.51 
   6  -1   0    3.15    0.86 
   6  -1   0    2.03    0.49 
   6  -1   0    1.52    0.56 
  -6  -1   0    2.93    0.81 
  -6  -1   0    1.55    0.72 
  -6  -1   0    1.90    0.63 
   6  -1   0    1.13    0.61 
   6  -1   0    1.84    0.59 
   6  -1   0    1.24    0.54 
   6  -1   0    1.70    0.61 
  -6  -1   0    3.25    0.69 
  -6  -1   0    1.24    0.59 
  -6  -1   0    0.92    0.50 
   6  -1   0    1.75    0.60 
   6  -1   0    1.58    0.65 
   6  -1   0    3.15    0.94 
   6  -1   0    1.67    0.75 
  -6  -1   0    1.46    0.57 
  -6  -1   0    2.23    0.73 
  -6  -1   0    2.33    0.62 
   6   1   0    2.16    0.70 
  -6   1   0    1.32    0.64 
  -6   1   0    2.22    0.81 
   6   1   0    2.98    0.68 
   6   1   0    2.93    0.90 
   6   1   0    2.25    0.69 
  -6   1   0    2.15    0.64 
   6   1   0    3.14    0.77 
   6   1   0    2.64    0.59 
  -6   1   0    1.21    0.55 
   6   1   0    4.21    1.01 
   6   1   0    2.42    0.73 
   6   1   0    3.60    0.74 
  -6   1   0    1.78    0.62 
   6   1   0    2.33    0.71 
  -6   1   0    1.41    0.55 
  -6   1   0    1.68    0.68 
   6   1   0    3.03    0.73 
   6   1   0    3.25    0.59 
   6   1   0    3.89    0.85 
  -6   1   0    1.53    0.53 
   6   1   0    3.19    0.63 
  -6   1   0    1.64    0.46 
   6   1   0    4.32    0.70 
   7  -1   0   45.24    2.19 
   7  -1   0   44.89    2.84 
  -7  -1   0   41.96    2.73 
   7  -1   0   42.32    3.07 
  -7  -1   0   46.53    2.41 
   7  -1   0   40.64    2.43 
   7  -1   0   44.04    2.85 
  -7  -1   0   41.94    2.75 
  -7  -1   0   46.29    2.67 
   7  -1   0   46.74    2.50 
   7  -1   0   43.76    2.73 
   7  -1   0   47.27    2.85 
   7  -1   0   41.78    3.05 
  -7  -1   0   44.24    2.50 
  -7  -1   0   46.04    2.49 
   7  -1   0   47.00    2.84 
   7  -1   0   41.65    2.48 
   7  -1   0   43.83    2.58 
   7  -1   0   44.82    3.12 
  -7  -1   0   40.07    2.57 
   7  -1   0   40.86    2.56 
   7  -1   0   41.92    2.38 
  -7  -1   0   40.02    2.49 
  -7  -1   0   48.96    3.17 
  -7  -1   0   39.60    2.09 
   7  -1   0   42.27    2.43 
   7  -1   0   45.28    2.72 
  -7  -1   0   41.08    2.60 
  -7  -1   0   39.27    1.82 
   7   1   0   46.00    2.68 
  -7   1   0   46.92    2.75 
   7   1   0   38.42    2.55 
   7   1   0   41.61    2.24 
   7   1   0   40.12    2.54 
  -7   1   0   40.38    2.50 
  -7   1   0   40.65    2.74 
  -7   1   0   46.77    2.72 
   7   1   0   39.60    3.00 
   7   1   0   47.90    2.48 
   7   1   0   41.58    2.59 
   7   1   0   40.92    2.38 
  -7   1   0   46.13    3.09 
  -7   1   0   39.35    2.57 
   7   1   0   40.26    2.74 
   7   1   0   41.34    2.70 
  -7   1   0   40.78    2.15 
   7   1   0   43.23    2.80 
  -7   1   0   40.29    2.66 
  -7   1   0   46.32    2.63 
   7   1   0   40.52    2.20 
   7   1   0   48.79    2.86 
   7   1   0   44.95    2.18 
  -7   1   0   44.33    2.40 
   7   1   0   41.03    2.23 
   8  -1   0   -0.23    0.55 
   8  -1   0    0.65    0.71 
   8  -1   0    0.36    0.58 
  -8  -1   0    0.57    0.62 
  -8  -1   0   -0.29    0.54 
   8  -1   0    0.07    0.64 
   8  -1   0    0.56    0.58 
   8  -1   0    0.76    0.63 
   8  -1   0   -0.11    0.81 
   8  -1   0   -0.55    0.58 
  -8  -1   0    0.38    0.49 
  -8  -1   0    0.41    0.64 
   8  -1   0   -0.37    0.57 
   8  -1   0   -0.47    0.54 
   8  -1   0    0.28    0.52 
  -8  -1   0    0.28    0.42 
  -8  -1   0    0.28    0.58 
   8  -1   0    0.68    0.85 
  -8  -1   0   -0.65    0.44 
  -8  -1   0    1.09    0.79 
  -8  -1   0   -0.71    0.61 
  -8  -1   0    0.52    0.60 
  -8  -1   0    0.31    0.65 
   8  -1   0    0.15    0.59 
   8  -1   0    0.22    0.61 
   8  -1   0    0.94    0.74 
   8  -1   0    0.66    0.71 
   8   1   0   -0.26    0.48 
   8   1   0    0.25    0.71 
   8   1   0    0.02    0.50 
   8   1   0   -0.20    0.61 
  -8   1   0   -0.42    0.51 
  -8   1   0    0.08    0.65 
   8   1   0    0.33    0.64 
   8   1   0   -0.02    0.48 
   8   1   0   -0.45    0.48 
  -8   1   0   -0.36    0.43 
  -8   1   0   -0.25    0.61 
  -8   1   0    0.93    0.76 
  -8   1   0   -0.50    0.67 
   8   1   0   -0.48    0.51 
   8   1   0   -0.43    0.43 
   8   1   0    0.23    0.84 
  -8   1   0   -0.22    0.40 
   8   1   0   -0.56    0.40 
  -8   1   0    0.68    0.66 
   8   1   0   -0.68    0.46 
   8   1   0    0.36    0.52 
   8   1   0   -0.05    0.63 
   8   1   0    0.37    0.46 
   8   1   0    0.26    0.80 
  -8   1   0   -0.09    0.59 
   8   1   0   -0.84    0.52 
  -8   1   0   -0.07    0.64 
   9  -1   0    3.76    1.24 
   9  -1   0    5.78    1.49 
  -9  -1   0    2.59    0.87 
  -9  -1   0    4.18    1.18 
   9  -1   0    3.11    1.22 
   9  -1   0    2.37    0.97 
   9  -1   0    4.11    1.24 
   9  -1   0    4.60    1.32 
  -9  -1   0    3.98    1.19 
  -9  -1   0    3.32    1.20 
  -9  -1   0    3.88    1.18 
  -9  -1   0    4.37    1.37 
   9  -1   0    6.88    1.58 
   9  -1   0    3.59    1.03 
   9  -1   0    4.30    1.55 
   9  -1   0    5.86    1.77 
   9  -1   0    2.70    1.08 
   9  -1   0    4.09    1.05 
  -9  -1   0    4.43    1.22 
   9  -1   0    3.88    1.02 
   9  -1   0    4.51    1.17 
  -9  -1   0    3.41    1.33 
   9  -1   0    3.44    1.38 
  -9   1   0    2.82    1.29 
   9   1   0    1.47    0.96 
   9   1   0    6.64    1.50 
  -9   1   0    5.34    1.49 
   9   1   0    2.14    1.25 
  -9   1   0    4.25    1.26 
   9   1   0    4.26    1.00 
   9   1   0    4.65    1.55 
   9   1   0    4.54    1.07 
  -9   1   0    4.46    1.45 
   9   1   0    5.30    1.29 
  -9   1   0    3.13    1.17 
  -9   1   0    3.85    1.02 
   9   1   0    3.16    1.23 
  -9   1   0    4.14    1.26 
  -9   1   0    6.63    1.42 
   9   1   0    5.21    1.24 
   9   1   0    4.15    1.32 
   9   1   0    4.65    1.38 
   9   1   0    5.45    1.40 
   9   1   0    4.18    1.07 
  -9   1   0    2.47    1.01 
 -10  -1   0    0.30    0.80 
 -10  -1   0    2.40    1.18 
 -10  -1   0    4.47    1.32 
 -10  -1   0    3.05    1.16 
  10  -1   0    1.48    1.03 
  10  -1   0    2.65    1.42 
  10  -1   0    1.24    0.94 
  10  -1   0    3.27    1.39 
  10  -1   0    1.32    1.37 
  10  -1   0    1.51    1.34 
  10  -1   0    1.39    1.29 
 -10  -1   0    1.17    1.29 
  10  -1   0    1.29    1.14 
  10  -1   0    1.13    1.33 
  10  -1   0    2.51    1.15 
 -10  -1   0    1.40    1.17 
  10  -1   0    3.83    1.41 
  10  -1   0    1.37    0.91 
 -10  -1   0    0.41    1.02 
  10  -1   0    5.60    1.59 
  10   1   0    1.28    0.93 
  10   1   0    1.44    0.96 
 -10   1   0    3.07    1.26 
  10   1   0    1.57    1.46 
  10   1   0    0.58    1.33 
  10   1   0    2.22    0.99 
  10   1   0    0.87    1.14 
 -10   1   0    0.45    1.04 
 -10   1   0    1.94    1.08 
 -10   1   0    1.63    1.10 
 -10   1   0    4.26    1.29 
  10   1   0    2.51    1.17 
 -10   1   0    3.17    1.28 
 -10   1   0    4.54    1.62 
 -10   1   0    0.77    1.02 
  10   1   0    4.53    1.50 
  10   1   0    2.39    1.14 
  10   1   0    4.62    1.79 
  10   1   0    3.14    1.16 
   0  -2   0  508.09   15.64 
   0  -2   0  523.64   15.50 
   0  -2   0  430.98   16.10 
   0  -2   0  532.61   15.36 
   0  -2   0  508.56   15.78 
   0  -2   0  534.41   15.40 
   0  -2   0  525.51   15.33 
   0  -2   0  524.46   15.36 
   0  -2   0  543.74   15.53 
   0  -2   0  497.59   15.56 
   0  -2   0  524.96   15.52 
   0  -2   0  528.00   15.61 
   0  -2   0  517.61   15.60 
   0  -2   0  534.03   15.90 
   0  -2   0  489.61   15.53 
   0  -2   0  527.06   15.72 
   0  -2   0  516.52   15.25 
   0  -2   0  522.20   15.50 
   0  -2   0  505.47   15.93 
   0  -2   0  511.74   15.49 
   0  -2   0  496.74   16.03 
   0  -2   0  527.17   15.62 
   0  -2   0  529.29   15.36 
   0  -2   0  541.51   15.47 
   0  -2   0  511.80   15.37 
   0  -2   0  505.90   15.75 
   0  -2   0  525.95   15.49 
   0   2   0  506.72   15.51 
   0   2   0  497.39   16.11 
   0   2   0  516.24   15.48 
   0   2   0  485.70   15.80 
   0   2   0  500.34   16.04 
   0   2   0  506.10   15.55 
   0   2   0  519.28   15.25 
   0   2   0  520.19   15.36 
   0   2   0  521.02   15.48 
   0   2   0  505.80   15.53 
   0   2   0  525.30   15.39 
   0   2   0  529.24   15.94 
   0   2   0  516.91   15.36 
   0   2   0  525.38   15.55 
   0   2   0  536.74   15.45 
   0   2   0  541.59   15.62 
   0   2   0  513.16   15.66 
   0   2   0  522.50   15.33 
   0   2   0  520.46   15.54 
   0   2   0  526.75   15.48 
   0   2   0  533.16   15.45 
   0   2   0  528.09   15.80 
   0   2   0  507.59   15.62 
   0   2   0  514.65   15.46 
   0   2   0  525.92   15.44 
   0   2   0  517.78   15.58 
   0   2   0  538.25   15.64 
   0   2   0  522.06   15.60 
   0   2   0  508.17   15.41 
   0   2   0  509.07   15.32 
   0   2   0  510.94   15.73 
   0   2   0  531.89   15.50 
   0   2   0  538.02   15.52 
   0   2   0  520.28   15.36 
   1  -2   0  287.12    8.98 
   1  -2   0  289.37    9.28 
  -1  -2   0  299.84    9.01 
  -1  -2   0  303.66    9.08 
  -1  -2   0  299.30    8.93 
  -1  -2   0  280.79    9.28 
   1  -2   0  305.49    9.17 
   1  -2   0  319.29    9.11 
  -1  -2   0  294.18    9.17 
   1  -2   0  304.25    9.20 
  -1  -2   0  292.41    8.76 
   1  -2   0  300.75    9.07 
   1  -2   0  303.98    9.31 
   1  -2   0  306.52    9.13 
   1  -2   0  298.39    8.81 
  -1  -2   0  298.28    9.16 
   1  -2   0  303.21    9.08 
   1  -2   0  301.80    9.36 
   1  -2   0  292.57    9.15 
   1  -2   0  299.54    9.16 
  -1  -2   0  290.81    9.01 
  -1  -2   0  281.08    8.92 
   1  -2   0  300.18    9.33 
  -1  -2   0  286.72    9.27 
   1  -2   0  299.50    9.34 
  -1  -2   0  298.43    9.09 
   1  -2   0  292.23    8.79 
   1  -2   0  294.51    9.07 
   1  -2   0  309.08    9.17 
   1  -2   0  283.58    9.33 
  -1  -2   0  298.51    9.00 
  -1  -2   0  285.40    9.21 
   1  -2   0  293.67    9.12 
   1  -2   0  294.28    9.11 
  -1  -2   0  294.05    9.10 
   1  -2   0  293.78    9.17 
   1  -2   0  295.83    8.71 
  -1  -2   0  279.28    8.87 
   1  -2   0  301.54    9.06 
   1  -2   0  304.35    9.16 
   1  -2   0  300.90    8.93 
   1  -2   0  296.76    8.94 
   1  -2   0  293.45    8.85 
  -1  -2   0  277.64    9.26 
  -1  -2   0  285.31    9.04 
   1  -2   0  303.99    9.16 
   1  -2   0  293.96    9.31 
   1  -2   0  305.93    9.36 
   1  -2   0  292.44    9.66 
  -1  -2   0  304.96    9.12 
  -1  -2   0  299.58    9.05 
  -1  -2   0  283.84    9.34 
  -1  -2   0  295.79    9.03 
   1   2   0  300.01    9.67 
  -1   2   0  303.60    9.08 
   1   2   0  293.00    9.25 
   1   2   0  288.80    9.09 
   1   2   0  286.08    8.85 
   1   2   0  281.53    9.27 
   1   2   0  291.67    9.03 
  -1   2   0  299.95    9.10 
  -1   2   0  306.09    8.88 
   1   2   0  281.33    9.11 
   1   2   0  295.36    9.40 
   1   2   0  298.22    9.35 
   1   2   0  287.05    9.08 
   1   2   0  283.79    9.29 
   1   2   0  292.11    8.88 
  -1   2   0  300.01    9.06 
  -1   2   0  290.53    9.09 
  -1   2   0  302.56    9.10 
   1   2   0  300.01    9.45 
   1   2   0  289.04    8.80 
  -1   2   0  300.82    9.14 
  -1   2   0  291.04    9.19 
  -1   2   0  301.83    9.26 
  -1   2   0  294.05    9.67 
   1   2   0  294.26    9.08 
   1   2   0  295.39    9.34 
  -1   2   0  302.60    9.14 
   1   2   0  293.82    8.96 
   1   2   0  272.27    9.05 
  -1   2   0  296.92    8.92 
   1   2   0  295.43    9.40 
   1   2   0  278.31    9.34 
  -1   2   0  294.72    9.23 
  -1   2   0  311.95    9.06 
   1   2   0  281.69    8.88 
   1   2   0  289.38    8.66 
  -1   2   0  285.96    9.31 
   1   2   0  307.98    9.49 
   1   2   0  293.09    8.72 
  -1   2   0  300.54    9.10 
   1   2   0  297.29    8.82 
   1   2   0  295.75    9.09 
   1   2   0  296.30    9.01 
   1   2   0  294.76    8.99 
   1   2   0  285.49    9.09 
  -1   2   0  292.27    9.12 
  -1   2   0  295.07    9.10 
   1   2   0  297.20    8.68 
  -1   2   0  291.22    8.77 
  -1   2   0  292.79    9.18 
  -1   2   0  295.71    9.11 
  -1   2   0  304.32    9.01 
   1   2   0  285.99    9.25 
   1   2   0  287.73    9.21 
  -1   2   0  292.05    9.07 
  -1   2   0  285.62    9.03 
   1   2   0  295.55    8.93 
  -1   2   0  297.38    9.19 
   1   2   0  294.14    8.99 
  -1   2   0  285.35    9.10 
  -1   2   0  304.63    9.31 
   1   2   0  291.75    9.20 
   1   2   0  288.43    9.17 
   1   2   0  291.79    9.35 
   1   2   0  259.23    9.28 
  -1   2   0  291.33    9.06 
  -1   2   0  295.66    9.13 
  -1   2   0  304.08    9.29 
  -1   2   0  309.02    8.98 
  -2  -2   0  130.12    4.13 
   2  -2   0  128.74    4.49 
  -2  -2   0  131.19    4.35 
  -2  -2   0  119.50    4.30 
   2  -2   0  128.05    4.23 
  -2  -2   0  124.12    4.21 
  -2  -2   0  130.41    4.41 
  -2  -2   0  124.27    4.42 
  -2  -2   0  135.60    4.68 
  -2  -2   0  130.90    4.73 
   2  -2   0  135.24    4.60 
   2  -2   0  125.08    4.55 
   2  -2   0  134.07    4.41 
   2  -2   0  123.11    4.18 
   2  -2   0  126.15    4.37 
  -2  -2   0  130.98    4.05 
   2  -2   0  134.01    4.49 
   2  -2   0  129.20    4.64 
   2  -2   0  130.30    4.45 
   2  -2   0  138.90    4.64 
  -2  -2   0  132.62    4.45 
   2  -2   0  133.71    4.69 
  -2  -2   0  133.98    4.35 
   2  -2   0  136.80    4.48 
  -2  -2   0  121.08    4.73 
  -2  -2   0  132.83    4.49 
  -2  -2   0  132.28    4.11 
   2  -2   0  136.43    4.41 
   2  -2   0  127.29    3.91 
   2  -2   0  124.73    4.32 
  -2  -2   0  129.53    4.40 
  -2  -2   0  127.05    4.34 
   2  -2   0  131.93    4.51 
   2  -2   0  129.41    4.49 
  -2  -2   0  125.73    3.94 
  -2  -2   0  125.39    4.65 
  -2  -2   0  130.32    4.35 
  -2  -2   0  124.51    4.57 
   2  -2   0  131.11    4.44 
   2  -2   0  133.70    4.50 
  -2  -2   0  122.76    4.35 
  -2  -2   0  131.09    4.37 
   2  -2   0  129.27    4.27 
   2  -2   0  132.44    4.50 
  -2  -2   0  124.06    4.55 
   2  -2   0  127.95    4.46 
   2  -2   0  132.19    4.48 
  -2  -2   0  129.60    4.37 
  -2   2   0  122.98    4.42 
   2   2   0  126.82    4.53 
   2   2   0  122.61    4.14 
  -2   2   0  123.99    4.43 
   2   2   0  126.46    4.16 
   2   2   0  127.33    4.52 
   2   2   0  127.05    4.41 
   2   2   0  131.72    4.35 
  -2   2   0  132.49    4.35 
  -2   2   0  126.83    4.44 
   2   2   0  130.93    4.27 
   2   2   0  126.52    4.35 
   2   2   0  130.31    4.27 
  -2   2   0  135.03    4.42 
   2   2   0  127.36    4.33 
   2   2   0  131.65    4.47 
   2   2   0  122.86    4.74 
  -2   2   0  123.08    4.33 
   2   2   0  127.36    4.52 
   2   2   0  130.19    4.15 
   2   2   0  128.87    4.33 
   2   2   0  131.27    4.45 
  -2   2   0  123.70    4.29 
   2   2   0  130.10    4.38 
  -2   2   0  130.42    4.39 
  -2   2   0  120.88    4.37 
   2   2   0  132.00    4.67 
  -2   2   0  131.44    4.35 
  -2   2   0  128.53    4.36 
  -2   2   0  124.58    4.43 
  -2   2   0  130.20    4.45 
  -2   2   0  126.99    4.43 
   2   2   0  131.29    4.18 
  -2   2   0  132.66    4.62 
   2   2   0  131.74    4.10 
   2   2   0  127.14    4.72 
   2   2   0  128.16    4.45 
   2   2   0  124.20    4.03 
  -2   2   0  132.54    4.33 
  -2   2   0  126.88    4.44 
   2   2   0  126.53    4.32 
   2   2   0  123.57    3.86 
  -2   2   0  127.54    4.57 
  -2   2   0  131.14    4.46 
  -2   2   0  130.50    4.69 
  -2   2   0  129.93    4.35 
  -2   2   0  132.67    4.28 
   2   2   0  132.11    4.31 
   2   2   0  131.73    4.32 
   2   2   0  118.20    4.04 
  -2   2   0  129.27    4.45 
  -2   2   0  129.51    4.38 
  -2   2   0  136.49    4.49 
   2   2   0  127.84    4.49 
   3  -2   0   39.16    1.92 
   3  -2   0   40.47    1.86 
   3  -2   0   40.96    1.98 
   3  -2   0   39.30    2.07 
   3  -2   0   35.00    1.82 
   3  -2   0   39.15    1.75 
  -3  -2   0   38.09    2.10 
  -3  -2   0   35.95    1.81 
   3  -2   0   38.07    1.87 
  -3  -2   0   39.77    1.64 
   3  -2   0   39.48    1.96 
  -3  -2   0   39.31    1.44 
  -3  -2   0   38.50    1.86 
  -3  -2   0   39.58    1.62 
   3  -2   0   38.18    1.87 
  -3  -2   0   40.09    1.86 
  -3  -2   0   38.22    1.81 
  -3  -2   0   38.39    1.73 
  -3  -2   0   38.69    2.00 
   3  -2   0   38.37    1.77 
  -3  -2   0   40.79    1.73 
   3  -2   0   35.79    2.05 
   3  -2   0   39.93    2.17 
  -3  -2   0   36.67    2.02 
  -3  -2   0   36.29    1.75 
   3  -2   0   38.76    1.88 
  -3  -2   0   35.28    1.77 
  -3  -2   0   40.79    1.69 
   3  -2   0   38.22    1.94 
   3  -2   0   37.93    1.41 
   3  -2   0   41.42    1.95 
  -3  -2   0   36.49    1.65 
  -3  -2   0   34.53    1.74 
  -3  -2   0   39.50    1.43 
   3  -2   0   39.49    1.90 
   3  -2   0   40.90    2.13 
  -3  -2   0   38.53    1.81 
  -3   2   0   39.76    1.92 
   3   2   0   41.25    1.67 
   3   2   0   38.69    1.70 
   3   2   0   38.52    1.82 
   3   2   0   39.31    1.40 
  -3   2   0   43.50    1.91 
   3   2   0   40.98    1.73 
  -3   2   0   41.04    1.96 
   3   2   0   37.91    1.93 
  -3   2   0   37.38    1.90 
   3   2   0   44.26    2.25 
   3   2   0   38.69    1.63 
  -3   2   0   39.41    1.79 
   3   2   0   37.24    1.83 
   3   2   0   41.05    2.09 
   3   2   0   36.57    1.62 
   3   2   0   40.83    1.79 
  -3   2   0   39.79    1.85 
  -3   2   0   40.38    1.97 
   3   2   0   38.80    1.54 
  -3   2   0   37.87    1.76 
  -3   2   0   39.86    1.72 
  -3   2   0   36.33    1.88 
  -3   2   0   40.67    1.84 
   3   2   0   41.06    1.58 
   3   2   0   37.26    1.44 
   3   2   0   37.32    1.61 
   4  -2   0   44.95    2.24 
   4  -2   0   43.59    1.72 
  -4  -2   0   43.37    2.41 
  -4  -2   0   48.09    2.09 
   4  -2   0   40.27    2.10 
   4  -2   0   42.41    2.20 
   4  -2   0   46.10    2.54 
   4  -2   0   43.57    1.59 
  -4  -2   0   46.36    2.16 
   4  -2   0   46.67    2.26 
   4  -2   0   42.79    2.49 
  -4  -2   0   42.55    2.11 
  -4  -2   0   45.04    2.06 
  -4  -2   0   43.17    2.28 
   4  -2   0   43.42    2.31 
  -4  -2   0   43.72    1.98 
   4  -2   0   45.16    2.53 
  -4  -2   0   46.03    2.13 
  -4  -2   0   45.69    1.95 
   4  -2   0   42.48    1.85 
   4  -2   0   47.41    2.27 
   4  -2   0   43.73    2.18 
  -4  -2   0   44.27    2.09 
  -4  -2   0   44.78    2.04 
   4  -2   0   41.83    2.25 
   4  -2   0   41.03    2.22 
   4  -2   0   48.70    2.37 
   4  -2   0   48.61    2.40 
  -4  -2   0   43.56    2.17 
  -4  -2   0   43.14    1.75 
  -4  -2   0   46.09    2.28 
   4  -2   0   44.50    2.21 
   4  -2   0   45.51    2.14 
   4   2   0   47.87    2.12 
   4   2   0   44.80    2.10 
  -4   2   0   41.43    2.20 
   4   2   0   45.65    2.01 
   4   2   0   43.89    1.83 
   4   2   0   43.28    2.04 
  -4   2   0   44.87    2.29 
  -4   2   0   47.35    2.09 
  -4   2   0   42.75    2.21 
  -4   2   0   44.98    1.95 
  -4   2   0   46.36    2.25 
   4   2   0   47.01    1.75 
  -4   2   0   44.16    2.22 
   4   2   0   47.26    1.90 
  -4   2   0   47.84    2.19 
   4   2   0   43.94    1.70 
   4   2   0   45.24    2.33 
   4   2   0   42.35    2.10 
   4   2   0   43.94    1.80 
   4   2   0   43.03    2.08 
  -4   2   0   44.76    2.20 
   4   2   0   44.36    1.93 
  -4   2   0   44.76    2.21 
   4   2   0   44.86    2.29 
   4   2   0   48.70    2.29 
   4   2   0   44.85    2.49 
   5  -2   0   41.89    1.66 
   5  -2   0   44.51    2.48 
   5  -2   0   43.79    2.33 
  -5  -2   0   47.88    2.70 
   5  -2   0   42.52    2.67 
  -5  -2   0   43.46    2.24 
   5  -2   0   41.86    2.40 
   5  -2   0   44.07    2.69 
   5  -2   0   37.82    2.33 
   5  -2   0   41.27    2.19 
  -5  -2   0   39.68    2.23 
  -5  -2   0   44.44    2.18 
  -5  -2   0   42.14    2.42 
   5  -2   0   41.84    2.27 
  -5  -2   0   44.68    2.20 
   5  -2   0   38.33    2.30 
   5  -2   0   39.67    1.77 
   5  -2   0   42.66    2.25 
   5  -2   0   40.61    2.25 
   5  -2   0   41.23    2.29 
   5  -2   0   43.17    2.67 
  -5  -2   0   44.09    2.42 
   5  -2   0   38.87    2.33 
  -5  -2   0   37.57    2.12 
  -5  -2   0   42.72    1.87 
  -5  -2   0   40.57    2.14 
  -5  -2   0   42.70    2.14 
   5  -2   0   41.58    2.31 
   5  -2   0   42.66    2.24 
   5   2   0   44.44    2.39 
   5   2   0   44.35    2.22 
   5   2   0   45.88    1.77 
   5   2   0   41.27    2.18 
   5   2   0   45.15    2.11 
  -5   2   0   42.69    2.36 
   5   2   0   38.94    1.84 
   5   2   0   42.10    2.21 
   5   2   0   39.24    1.79 
  -5   2   0   44.31    2.33 
  -5   2   0   44.81    2.33 
  -5   2   0   43.12    1.93 
   5   2   0   47.30    2.50 
   5   2   0   40.29    2.05 
  -5   2   0   45.91    2.63 
  -5   2   0   40.36    2.32 
   5   2   0   41.00    1.84 
  -5   2   0   42.03    2.18 
  -5   2   0   44.06    2.32 
   5   2   0   42.49    2.68 
  -5   2   0   43.41    2.33 
   5   2   0   45.44    2.46 
   5   2   0   38.36    2.09 
  -5   2   0   38.37    2.29 
   5   2   0   42.19    2.00 
  -5   2   0   44.02    2.10 
   5   2   0   43.91    2.26 
   6  -2   0  144.31    4.77 
  -6  -2   0  136.45    5.73 
   6  -2   0  145.85    5.86 
   6  -2   0  127.68    5.67 
  -6  -2   0  151.18    5.57 
   6  -2   0  148.31    5.70 
   6  -2   0  146.02    5.52 
   6  -2   0  140.82    5.70 
   6  -2   0  142.15    4.77 
   6  -2   0  145.19    5.60 
   6  -2   0  134.82    6.10 
   6  -2   0  131.61    6.10 
  -6  -2   0  148.07    5.10 
  -6  -2   0  146.20    5.46 
   6  -2   0  140.70    5.78 
  -6  -2   0  144.23    4.82 
   6  -2   0  141.97    5.61 
  -6  -2   0  146.33    5.46 
  -6  -2   0  139.46    5.43 
  -6  -2   0  147.33    5.51 
  -6  -2   0  140.51    5.55 
   6  -2   0  144.96    5.50 
   6  -2   0  141.22    5.54 
   6  -2   0  143.06    6.21 
  -6  -2   0  147.09    5.87 
   6  -2   0  141.11    5.53 
   6  -2   0  135.61    5.81 
   6  -2   0  134.59    5.72 
  -6  -2   0  136.17    6.02 
  -6   2   0  150.27    5.79 
   6   2   0  150.12    4.86 
   6   2   0  144.73    5.56 
  -6   2   0  141.92    5.62 
   6   2   0  144.19    6.14 
  -6   2   0  146.02    5.67 
   6   2   0  141.65    5.18 
   6   2   0  142.31    5.28 
   6   2   0  151.85    5.80 
  -6   2   0  146.80    5.69 
   6   2   0  132.93    5.14 
  -6   2   0  139.06    5.63 
   6   2   0  140.81    5.48 
  -6   2   0  135.50    5.68 
  -6   2   0  142.69    5.00 
   6   2   0  145.30    5.50 
  -6   2   0  139.70    6.04 
   6   2   0  142.30    5.81 
  -6   2   0  128.94    5.64 
   6   2   0  139.34    5.54 
  -6   2   0  148.86    5.30 
   6   2   0  151.19    5.82 
   6   2   0  144.78    4.99 
   6   2   0  141.63    5.48 
  -6   2   0  139.42    5.42 
   6   2   0  141.83    5.02 
  -7  -2   0   33.06    2.18 
   7  -2   0   33.92    2.40 
   7  -2   0   29.85    2.08 
   7  -2   0   30.55    2.68 
  -7  -2   0   31.98    2.42 
   7  -2   0   29.25    2.19 
   7  -2   0   29.95    2.38 
  -7  -2   0   34.95    2.24 
   7  -2   0   35.89    2.34 
   7  -2   0   31.85    2.41 
   7  -2   0   30.34    2.07 
  -7  -2   0   30.16    2.10 
  -7  -2   0   29.40    2.08 
   7  -2   0   26.37    2.08 
   7  -2   0   30.11    2.36 
  -7  -2   0   29.81    1.61 
  -7  -2   0   29.68    2.57 
   7  -2   0   34.08    2.30 
   7  -2   0   36.43    2.86 
  -7  -2   0   32.58    2.45 
   7  -2   0   33.00    2.47 
   7  -2   0   31.19    2.15 
  -7  -2   0   27.72    1.79 
   7  -2   0   32.78    3.16 
   7  -2   0   38.44    2.61 
  -7  -2   0   33.56    2.22 
  -7   2   0   31.84    2.38 
   7   2   0   31.14    1.88 
   7   2   0   33.18    2.23 
  -7   2   0   28.05    2.15 
   7   2   0   35.70    2.03 
   7   2   0   34.27    2.31 
   7   2   0   31.12    2.21 
  -7   2   0   31.29    2.30 
   7   2   0   31.91    1.78 
   7   2   0   33.80    2.75 
   7   2   0   27.90    2.34 
   7   2   0   30.71    2.27 
   7   2   0   32.15    2.15 
  -7   2   0   29.13    2.01 
  -7   2   0   35.05    2.41 
  -7   2   0   34.03    2.29 
   7   2   0   34.63    2.46 
   7   2   0   29.37    1.75 
   7   2   0   31.64    2.04 
   7   2   0   35.53    2.44 
  -7   2   0   31.34    2.25 
  -7   2   0   29.16    2.52 
   7   2   0   31.57    1.62 
  -7   2   0   29.34    2.24 
  -7   2   0   32.91    2.01 
   8  -2   0   61.77    3.75 
   8  -2   0   67.36    3.76 
  -8  -2   0   59.39    3.40 
   8  -2   0   63.90    3.76 
   8  -2   0   66.50    3.52 
  -8  -2   0   64.02    3.07 
  -8  -2   0   68.44    3.86 
  -8  -2   0   65.31    3.85 
   8  -2   0   59.69    3.51 
   8  -2   0   58.50    4.06 
   8  -2   0   57.28    4.07 
   8  -2   0   59.13    3.32 
   8  -2   0   59.34    3.73 
   8  -2   0   60.66    3.73 
   8  -2   0   58.84    3.30 
   8  -2   0   62.82    3.30 
  -8  -2   0   63.50    3.39 
   8  -2   0   69.42    4.37 
   8  -2   0   59.58    3.46 
   8  -2   0   59.28    3.72 
  -8  -2   0   66.32    4.15 
   8  -2   0   59.51    3.49 
  -8  -2   0   62.11    3.39 
   8  -2   0   58.96    4.07 
  -8  -2   0   65.15    4.76 
  -8  -2   0   65.30    3.49 
  -8   2   0   68.24    3.82 
  -8   2   0   55.72    3.44 
   8   2   0   63.17    3.74 
   8   2   0   66.65    2.99 
   8   2   0   64.24    3.64 
  -8   2   0   59.45    3.25 
   8   2   0   59.46    3.71 
   8   2   0   58.73    3.44 
  -8   2   0   58.00    3.45 
   8   2   0   65.95    3.54 
   8   2   0   60.76    3.42 
   8   2   0   58.94    3.57 
   8   2   0   66.19    3.56 
   8   2   0   59.36    3.18 
  -8   2   0   61.44    3.59 
  -8   2   0   66.43    3.15 
  -8   2   0   69.12    3.78 
  -8   2   0   64.18    4.11 
  -8   2   0   66.20    3.66 
   8   2   0   66.53    3.20 
   8   2   0   61.30    4.08 
  -8   2   0   60.06    3.65 
   9  -2   0    5.92    1.29 
   9  -2   0    3.74    1.09 
   9  -2   0    8.33    1.76 
   9  -2   0    5.41    1.61 
   9  -2   0    5.95    1.53 
   9  -2   0    5.41    1.41 
   9  -2   0    5.76    1.66 
   9  -2   0    4.33    1.22 
  -9  -2   0    5.03    1.53 
  -9  -2   0    5.24    1.48 
   9  -2   0    7.71    1.54 
   9  -2   0    6.57    1.50 
  -9  -2   0    4.68    1.37 
  -9  -2   0    5.41    1.25 
   9  -2   0    6.80    1.38 
   9  -2   0    6.03    1.81 
  -9  -2   0    6.12    1.37 
  -9  -2   0    4.52    1.23 
   9  -2   0    4.99    1.53 
   9  -2   0    7.84    1.47 
  -9  -2   0    2.09    1.24 
   9  -2   0    6.62    1.52 
   9  -2   0    6.77    1.70 
   9  -2   0    6.73    1.44 
  -9   2   0    7.70    1.74 
   9   2   0    5.96    1.24 
  -9   2   0    5.18    1.38 
  -9   2   0    6.51    1.43 
   9   2   0    4.09    1.25 
   9   2   0    5.86    1.75 
   9   2   0    6.54    1.62 
  -9   2   0    4.79    1.59 
   9   2   0    4.46    1.35 
   9   2   0    3.36    1.38 
   9   2   0    6.62    1.48 
   9   2   0    4.58    1.37 
   9   2   0    4.86    1.30 
   9   2   0    5.26    1.13 
  -9   2   0    5.40    1.35 
  -9   2   0    7.77    1.73 
   9   2   0    5.13    1.29 
   9   2   0    7.10    1.53 
   9   2   0    6.52    1.42 
  -9   2   0    3.55    1.09 
  -9   2   0    3.77    1.20 
  -9   2   0    5.04    1.18 
 -10  -2   0   15.44    2.24 
  10  -2   0   18.70    3.09 
  10  -2   0   14.83    2.12 
 -10  -2   0   17.26    2.28 
  10  -2   0   15.44    2.23 
  10  -2   0   16.82    2.50 
  10  -2   0   13.14    2.51 
  10  -2   0   15.84    2.29 
  10  -2   0   16.75    2.89 
 -10  -2   0   15.15    2.45 
  10  -2   0   21.07    2.94 
  10  -2   0   21.50    3.39 
 -10  -2   0   16.64    2.63 
  10  -2   0   20.86    2.83 
  10  -2   0   13.81    2.16 
  10  -2   0   12.91    2.27 
 -10  -2   0   12.27    2.51 
  10  -2   0   18.25    2.67 
  10  -2   0   18.41    2.72 
  10  -2   0   17.28    2.19 
  10   2   0   15.93    2.47 
 -10   2   0   19.91    3.08 
  10   2   0   14.56    2.62 
  10   2   0   11.67    2.37 
  10   2   0   22.94    3.01 
 -10   2   0   16.65    2.52 
  10   2   0   18.05    2.61 
  10   2   0   14.02    2.18 
 -10   2   0   17.22    2.49 
 -10   2   0   17.60    2.49 
 -10   2   0   19.38    2.77 
 -10   2   0   16.48    2.47 
  10   2   0   13.80    2.64 
  10   2   0   12.50    2.07 
 -10   2   0   17.68    2.39 
  10   2   0   15.11    2.70 
  10   2   0   13.53    2.13 
 -10   2   0   18.09    2.24 
 -10   2   0   12.65    2.14 
  10   2   0   19.70    2.55 
   0  -3   0   -0.08    0.31 
   0  -3   0    0.42    0.28 
   0  -3   0    1.07    0.31 
   0  -3   0    0.44    0.44 
   0  -3   0    0.05    0.45 
   0  -3   0   -0.03    0.17 
   0  -3   0    0.22    0.21 
   0  -3   0   -0.02    0.18 
   0  -3   0    0.00    0.20 
   0  -3   0   -0.04    0.21 
   0  -3   0    0.08    0.25 
   0  -3   0   -0.15    0.23 
   0  -3   0   -0.04    0.16 
   0  -3   0   -0.20    0.26 
   0  -3   0   -0.32    0.22 
   0  -3   0   -0.22    0.27 
   0  -3   0    0.09    0.35 
   0  -3   0    1.77    0.49 
   0  -3   0    0.39    0.20 
   0  -3   0    0.23    0.33 
   0  -3   0    0.22    0.18 
   0  -3   0   -0.17    0.19 
   0  -3   0    0.43    0.31 
   0  -3   0    0.00    0.20 
   0  -3   0    0.14    0.48 
   0  -3   0    0.24    0.54 
   0  -3   0    0.02    0.22 
   0  -3   0    0.01    0.12 
   0   3   0    0.09    0.09 
   0   3   0    0.12    0.23 
   0   3   0    0.05    0.21 
   0   3   0    0.20    0.18 
   0   3   0    0.04    0.09 
   0   3   0    0.14    0.14 
   0   3   0   -0.16    0.16 
   0   3   0    0.13    0.22 
   0   3   0   -0.09    0.32 
   0   3   0    0.21    0.19 
   0   3   0   -0.06    0.15 
   0   3   0    0.09    0.39 
   0   3   0    1.33    0.33 
   0   3   0   -0.35    0.40 
   0   3   0   -0.10    0.13 
   0   3   0   -0.17    0.15 
   0   3   0   -0.26    0.25 
   0   3   0   -0.32    0.15 
   0   3   0    0.17    0.20 
   0   3   0   -0.19    0.33 
   0   3   0    0.16    0.22 
   0   3   0    0.17    0.18 
   0   3   0   -0.09    0.16 
   0   3   0    0.01    0.23 
   0   3   0    0.40    0.28 
   0   3   0    0.08    0.44 
   0   3   0    0.08    0.28 
   0   3   0   -0.05    0.15 
   0   3   0    0.33    0.14 
   0   3   0   -0.10    0.20 
   0   3   0    0.29    0.21 
   0   3   0    0.32    0.21 
   0   3   0    0.09    0.19 
   0   3   0    0.15    0.17 
   0   3   0    0.07    0.17 
   0   3   0    0.28    0.28 
   1  -3   0    2.59    0.62 
   1  -3   0    2.84    0.48 
  -1  -3   0    2.95    0.48 
   1  -3   0    2.90    0.60 
   1  -3   0    2.11    0.44 
   1  -3   0    2.61    0.29 
   1  -3   0    2.11    0.69 
   1  -3   0    1.68    0.43 
  -1  -3   0    2.24    0.57 
  -1  -3   0    2.10    0.44 
   1  -3   0    2.42    0.55 
   1  -3   0    2.40    0.68 
   1  -3   0    2.48    0.30 
  -1  -3   0    2.33    0.56 
   1  -3   0    2.56    0.52 
   1  -3   0    3.13    0.65 
   1  -3   0    1.99    0.37 
   1  -3   0    1.46    0.39 
   1  -3   0    1.81    0.60 
   1  -3   0    2.67    0.43 
   1  -3   0    2.56    0.52 
   1  -3   0    2.42    0.35 
   1  -3   0    3.40    0.59 
   1  -3   0    2.22    0.22 
  -1  -3   0    2.30    0.43 
   1  -3   0    2.81    0.56 
   1  -3   0    3.34    0.57 
  -1  -3   0    2.05    0.48 
   1  -3   0    3.42    0.57 
   1  -3   0    2.12    0.56 
   1  -3   0    2.03    0.63 
  -1  -3   0    2.59    0.40 
   1  -3   0    3.32    0.55 
   1  -3   0    2.68    0.69 
  -1  -3   0    1.68    0.42 
  -1  -3   0    2.50    0.61 
  -1  -3   0    2.23    0.43 
  -1  -3   0    1.56    0.52 
  -1  -3   0    2.30    0.50 
  -1  -3   0    2.89    0.45 
  -1  -3   0    2.59    0.36 
   1  -3   0    3.14    0.62 
  -1  -3   0    2.89    0.58 
   1  -3   0    3.53    0.50 
  -1  -3   0    2.90    0.43 
  -1  -3   0    1.39    0.37 
  -1  -3   0    2.43    0.43 
  -1  -3   0    1.52    0.38 
   1  -3   0    2.45    0.35 
   1  -3   0    2.10    0.47 
  -1  -3   0    2.33    0.31 
  -1  -3   0    5.47    0.92 
   1   3   0    3.38    0.86 
   1   3   0    2.39    0.50 
   1   3   0    1.44    0.35 
   1   3   0    2.96    0.41 
   1   3   0    2.44    0.42 
  -1   3   0    2.99    0.42 
  -1   3   0    3.40    0.61 
   1   3   0    3.87    0.68 
   1   3   0    1.96    0.39 
  -1   3   0    2.35    0.45 
  -1   3   0    2.72    0.58 
  -1   3   0    2.00    0.45 
   1   3   0    1.88    0.51 
   1   3   0    2.40    0.49 
   1   3   0    2.07    0.66 
   1   3   0    2.39    0.59 
   1   3   0    2.89    0.37 
   1   3   0    1.71    0.24 
   1   3   0    2.84    0.76 
  -1   3   0    2.01    0.61 
   1   3   0    2.83    0.81 
  -1   3   0    3.85    0.56 
  -1   3   0    2.84    0.61 
  -1   3   0    2.79    0.55 
   1   3   0    2.84    0.24 
  -1   3   0    2.63    0.50 
   1   3   0    2.68    0.44 
   1   3   0    1.73    0.42 
  -1   3   0    1.95    0.51 
  -1   3   0    2.03    0.45 
  -1   3   0    2.89    0.46 
  -1   3   0    2.92    0.54 
  -1   3   0    2.37    0.79 
   1   3   0    2.39    0.60 
  -1   3   0    2.35    0.32 
   1   3   0    2.18    0.42 
  -1   3   0    2.52    0.39 
  -1   3   0    2.88    0.60 
  -1   3   0    1.81    0.40 
  -1   3   0    2.72    0.59 
  -1   3   0    2.20    0.43 
  -1   3   0    2.49    0.59 
   1   3   0    1.21    0.54 
   1   3   0    1.96    0.35 
   1   3   0    2.70    0.55 
   1   3   0    2.20    0.60 
  -1   3   0    3.53    0.62 
   1   3   0    1.97    0.38 
  -1   3   0    2.17    0.50 
  -1   3   0    2.04    0.43 
  -1   3   0    2.87    0.53 
  -1   3   0    2.74    0.50 
   1   3   0    2.85    0.71 
   1   3   0    2.09    0.55 
   1   3   0    2.04    0.37 
  -1   3   0    3.12    0.48 
   1   3   0    2.46    0.49 
   1   3   0    1.77    0.42 
   1   3   0    1.78    0.39 
   1   3   0    2.78    0.33 
   1   3   0    2.87    0.39 
  -1   3   0    1.97    0.38 
   1   3   0    2.81    0.67 
  -1   3   0    2.83    0.53 
   1   3   0    2.44    0.34 
  -1   3   0    3.54    0.70 
  -1   3   0    2.22    0.45 
  -1   3   0    1.87    0.72 
   1   3   0    2.59    0.61 
   1   3   0    2.42    0.39 
  -1   3   0    2.38    0.45 
  -1   3   0    2.87    0.33 
  -1   3   0    2.21    0.24 
   1   3   0    2.59    0.49 
  -2  -3   0    3.16    0.55 
   2  -3   0    4.31    0.72 
  -2  -3   0    2.78    0.64 
   2  -3   0    2.95    0.56 
  -2  -3   0    2.14    0.41 
  -2  -3   0    2.45    0.54 
   2  -3   0    2.33    0.59 
   2  -3   0    1.69    0.56 
   2  -3   0    3.39    0.63 
   2  -3   0    2.72    0.25 
   2  -3   0    2.62    0.60 
  -2  -3   0    2.52    0.27 
  -2  -3   0    1.30    0.54 
   2  -3   0    4.09    0.78 
   2  -3   0    1.85    0.45 
   2  -3   0    2.53    0.61 
   2  -3   0    2.69    0.64 
  -2  -3   0    1.79    0.36 
  -2  -3   0    1.78    0.57 
   2  -3   0    1.71    0.49 
  -2  -3   0    2.37    0.58 
  -2  -3   0    2.53    0.54 
  -2  -3   0    2.41    0.52 
  -2  -3   0    2.17    0.47 
   2  -3   0    2.58    0.58 
   2  -3   0    2.06    0.36 
   2  -3   0    2.25    0.55 
   2  -3   0    2.00    0.60 
   2  -3   0    1.65    0.48 
   2  -3   0    3.11    0.66 
   2  -3   0    1.90    0.59 
  -2  -3   0    1.83    0.48 
   2  -3   0    2.68    0.42 
  -2  -3   0    3.30    0.58 
   2  -3   0    2.48    0.60 
   2  -3   0    2.89    0.46 
  -2  -3   0    2.07    0.47 
  -2  -3   0    2.17    0.52 
   2  -3   0    1.84    0.54 
  -2  -3   0    2.74    0.44 
  -2  -3   0    2.30    0.64 
   2  -3   0    2.83    0.53 
   2  -3   0    1.76    0.40 
   2  -3   0    2.39    0.38 
  -2  -3   0    2.01    0.48 
   2  -3   0    2.52    0.58 
  -2   3   0    2.72    0.52 
   2   3   0    2.75    0.52 
   2   3   0    2.89    0.68 
   2   3   0    3.59    0.88 
  -2   3   0    2.93    0.62 
  -2   3   0    3.16    0.66 
  -2   3   0    2.53    0.53 
   2   3   0    2.82    0.62 
  -2   3   0    3.42    0.62 
   2   3   0    2.64    0.55 
   2   3   0    2.21    0.51 
   2   3   0    2.15    0.44 
   2   3   0    2.82    0.43 
  -2   3   0    2.55    0.54 
   2   3   0    2.54    0.31 
   2   3   0    2.90    0.41 
   2   3   0    2.63    0.78 
   2   3   0    2.54    0.57 
   2   3   0    2.17    0.49 
   2   3   0    2.91    0.69 
  -2   3   0    2.39    0.29 
   2   3   0    2.50    0.43 
  -2   3   0    1.35    0.43 
  -2   3   0    1.85    0.47 
  -2   3   0    2.60    0.47 
   2   3   0    2.56    0.60 
   2   3   0    2.82    0.56 
   2   3   0    2.74    0.59 
   2   3   0    3.34    0.79 
   2   3   0    3.86    0.68 
   2   3   0    3.29    0.60 
   2   3   0    2.74    0.44 
  -2   3   0    2.33    0.52 
   2   3   0    2.27    0.39 
   2   3   0    2.95    0.50 
   2   3   0    1.82    0.32 
   2   3   0    2.53    0.38 
  -2   3   0    1.90    0.48 
   2   3   0    2.95    0.58 
  -2   3   0    2.82    0.49 
  -2   3   0    1.83    0.48 
  -2   3   0    2.83    0.57 
   2   3   0    2.16    0.26 
   3  -3   0    0.14    0.34 
   3  -3   0    0.97    0.41 
   3  -3   0    0.46    0.15 
  -3  -3   0   -0.01    0.39 
   3  -3   0    0.63    0.52 
  -3  -3   0    0.36    0.37 
   3  -3   0    0.63    0.38 
   3  -3   0    0.04    0.33 
   3  -3   0    0.24    0.30 
   3  -3   0    0.47    0.32 
   3  -3   0    0.38    0.39 
  -3  -3   0    0.95    0.49 
  -3  -3   0    0.49    0.32 
   3  -3   0    0.24    0.39 
  -3  -3   0    0.23    0.29 
   3  -3   0    0.38    0.39 
  -3  -3   0    0.89    0.53 
  -3  -3   0    0.62    0.42 
  -3  -3   0    0.57    0.41 
   3  -3   0    0.88    0.44 
   3  -3   0    0.50    0.32 
   3  -3   0    0.69    0.39 
   3  -3   0    0.56    0.48 
  -3  -3   0    0.31    0.26 
  -3  -3   0    1.07    0.50 
   3  -3   0    0.18    0.35 
   3  -3   0    0.85    0.47 
  -3  -3   0    1.04    0.49 
  -3  -3   0    0.12    0.29 
   3  -3   0    0.00    0.31 
  -3  -3   0    0.46    0.14 
  -3  -3   0   -0.50    0.32 
  -3  -3   0    0.17    0.20 
   3  -3   0    0.65    0.45 
  -3  -3   0    0.13    0.35 
   3  -3   0    0.91    0.47 
   3  -3   0    0.50    0.44 
   3  -3   0    1.45    0.54 
  -3  -3   0    0.91    0.39 
  -3  -3   0    0.74    0.28 
   3   3   0    0.24    0.25 
  -3   3   0    0.21    0.31 
  -3   3   0    0.16    0.39 
  -3   3   0    0.58    0.44 
  -3   3   0    0.46    0.32 
  -3   3   0    0.52    0.36 
   3   3   0    0.39    0.34 
   3   3   0    0.52    0.38 
   3   3   0    0.51    0.55 
   3   3   0    1.15    0.35 
  -3   3   0    0.73    0.36 
   3   3   0    0.06    0.23 
   3   3   0    0.38    0.25 
   3   3   0    0.66    0.37 
  -3   3   0   -0.20    0.35 
   3   3   0    0.54    0.22 
  -3   3   0   -0.31    0.28 
   3   3   0    0.75    0.27 
   3   3   0    0.83    0.36 
   3   3   0    0.37    0.31 
  -3   3   0    0.17    0.31 
  -3   3   0    0.78    0.40 
   3   3   0    0.26    0.50 
  -3   3   0   -0.40    0.29 
  -4  -3   0   28.69    1.71 
   4  -3   0   27.54    1.82 
   4  -3   0   27.04    1.13 
  -4  -3   0   29.03    1.94 
   4  -3   0   27.89    1.98 
   4  -3   0   25.87    1.90 
  -4  -3   0   25.03    1.67 
   4  -3   0   25.43    1.72 
   4  -3   0   25.05    1.65 
   4  -3   0   26.77    1.85 
   4  -3   0   33.14    2.05 
   4  -3   0   31.41    1.92 
   4  -3   0   29.79    1.36 
   4  -3   0   26.71    1.76 
   4  -3   0   30.25    2.11 
  -4  -3   0   29.48    2.11 
  -4  -3   0   28.91    1.51 
  -4  -3   0   27.33    1.14 
   4  -3   0   30.24    1.82 
   4  -3   0   28.04    1.83 
   4  -3   0   27.06    1.59 
   4  -3   0   31.55    2.12 
  -4  -3   0   28.62    1.64 
  -4  -3   0   28.60    1.38 
   4  -3   0   26.28    1.75 
  -4  -3   0   29.63    1.50 
  -4  -3   0   28.69    1.48 
   4  -3   0   31.49    1.90 
  -4  -3   0   31.39    1.75 
  -4  -3   0   29.91    1.64 
  -4  -3   0   26.08    1.68 
   4  -3   0   27.00    1.76 
  -4  -3   0   28.56    1.75 
  -4  -3   0   26.23    1.67 
  -4  -3   0   27.91    1.14 
  -4  -3   0   29.33    2.00 
   4  -3   0   23.96    1.74 
  -4  -3   0   25.61    1.65 
  -4   3   0   28.24    1.69 
   4   3   0   27.52    1.32 
   4   3   0   29.33    1.53 
  -4   3   0   29.30    1.85 
   4   3   0   26.18    1.79 
   4   3   0   26.62    1.39 
   4   3   0   29.30    1.53 
  -4   3   0   29.22    1.85 
   4   3   0   30.81    1.65 
   4   3   0   28.71    1.20 
   4   3   0   31.06    2.11 
  -4   3   0   29.91    1.78 
  -4   3   0   30.97    1.77 
   4   3   0   29.43    1.46 
  -4   3   0   28.59    1.82 
  -4   3   0   27.37    1.59 
   4   3   0   29.96    1.39 
  -4   3   0   29.52    1.71 
  -4   3   0   30.07    1.72 
   4   3   0   27.95    1.95 
   4   3   0   30.08    1.55 
   4   3   0   30.16    1.75 
   4   3   0   32.41    1.60 
  -4   3   0   26.64    1.74 
   5  -3   0   55.41    2.90 
   5  -3   0   51.38    3.15 
  -5  -3   0   57.93    3.19 
  -5  -3   0   52.82    2.53 
  -5  -3   0   53.41    2.70 
   5  -3   0   52.30    2.83 
  -5  -3   0   51.44    2.10 
   5  -3   0   57.26    2.86 
  -5  -3   0   57.14    2.53 
  -5  -3   0   56.53    2.82 
  -5  -3   0   58.35    2.70 
   5  -3   0   51.84    2.63 
  -5  -3   0   57.16    2.14 
   5  -3   0   55.35    2.98 
   5  -3   0   52.37    2.89 
   5  -3   0   54.17    3.11 
   5  -3   0   53.63    2.92 
  -5  -3   0   57.18    2.77 
   5  -3   0   59.45    2.95 
  -5  -3   0   59.45    2.85 
   5  -3   0   50.77    3.12 
  -5  -3   0   61.68    2.96 
   5  -3   0   53.68    2.86 
   5  -3   0   53.19    2.06 
  -5  -3   0   53.74    2.45 
  -5  -3   0   57.85    2.74 
   5  -3   0   58.59    2.82 
   5  -3   0   54.33    3.21 
   5  -3   0   57.25    3.01 
  -5  -3   0   53.97    2.52 
   5  -3   0   52.62    2.83 
   5  -3   0   52.62    2.83 
   5  -3   0   56.67    3.18 
  -5  -3   0   54.53    3.05 
   5   3   0   60.76    3.33 
   5   3   0   57.47    2.64 
   5   3   0   58.63    2.71 
   5   3   0   58.22    2.52 
   5   3   0   54.87    2.60 
  -5   3   0   56.02    2.80 
  -5   3   0   58.49    2.86 
   5   3   0   58.49    2.44 
  -5   3   0   55.87    2.55 
  -5   3   0   57.45    2.96 
  -5   3   0   53.94    2.89 
   5   3   0   57.52    2.84 
  -5   3   0   46.08    2.71 
  -5   3   0   54.48    2.64 
  -5   3   0   55.87    2.76 
   5   3   0   51.04    2.87 
   5   3   0   56.42    2.21 
   5   3   0   60.63    3.05 
   5   3   0   57.57    2.29 
   5   3   0   55.98    2.64 
  -5   3   0   52.52    2.82 
  -5   3   0   51.23    2.74 
   5   3   0   56.15    2.04 
   6  -3   0   68.76    3.92 
   6  -3   0   67.75    3.43 
   6  -3   0   60.56    3.13 
  -6  -3   0   68.46    3.12 
   6  -3   0   67.45    3.28 
   6  -3   0   74.59    3.58 
   6  -3   0   64.07    3.52 
  -6  -3   0   64.87    3.19 
   6  -3   0   68.16    3.88 
   6  -3   0   64.54    3.40 
  -6  -3   0   71.63    3.84 
  -6  -3   0   66.04    2.38 
  -6  -3   0   69.15    3.13 
  -6  -3   0   62.23    3.54 
  -6  -3   0   63.73    3.01 
   6  -3   0   65.07    3.34 
  -6  -3   0   66.42    2.63 
   6  -3   0   62.42    3.34 
   6  -3   0   64.24    3.74 
   6  -3   0   68.13    3.52 
   6  -3   0   65.50    3.30 
   6  -3   0   65.00    3.55 
   6  -3   0   69.14    3.57 
   6  -3   0   61.38    3.42 
  -6  -3   0   67.54    3.18 
  -6  -3   0   63.54    3.41 
  -6  -3   0   57.30    3.19 
   6  -3   0   64.94    3.87 
  -6  -3   0   65.07    3.24 
  -6   3   0   66.68    3.37 
  -6   3   0   66.33    3.36 
   6   3   0   67.05    3.16 
   6   3   0   69.40    3.24 
   6   3   0   67.33    3.17 
  -6   3   0   61.56    3.32 
  -6   3   0   67.52    3.39 
   6   3   0   70.17    3.27 
   6   3   0   65.57    2.86 
   6   3   0   65.33    3.43 
  -6   3   0   64.02    3.23 
  -6   3   0   63.67    3.41 
   6   3   0   64.08    3.78 
   6   3   0   68.60    3.55 
  -6   3   0   65.34    2.93 
   6   3   0   63.56    2.40 
   6   3   0   64.61    3.13 
  -6   3   0   64.23    3.36 
  -6   3   0   68.84    3.15 
   6   3   0   66.95    2.62 
   6   3   0   65.45    2.99 
   6   3   0   65.16    2.70 
   6   3   0   69.81    3.07 
  -6   3   0   64.44    3.43 
   6   3   0   65.70    3.38 
  -6   3   0   69.27    3.74 
  -7  -3   0    5.34    1.09 
   7  -3   0    5.06    1.09 
   7  -3   0    6.79    1.43 
   7  -3   0    6.52    1.33 
  -7  -3   0    6.72    1.21 
  -7  -3   0    4.63    1.15 
   7  -3   0    3.73    1.24 
   7  -3   0    4.74    1.10 
  -7  -3   0    5.01    1.05 
  -7  -3   0    7.24    1.49 
  -7  -3   0    6.56    1.48 
  -7  -3   0    4.40    1.00 
   7  -3   0    3.58    1.09 
   7  -3   0    5.82    1.33 
   7  -3   0    5.26    1.31 
   7  -3   0    6.26    1.35 
   7  -3   0    6.07    1.25 
   7  -3   0    6.18    1.20 
  -7  -3   0    6.26    1.11 
   7  -3   0    5.87    1.16 
  -7  -3   0    4.13    0.96 
   7  -3   0    3.57    1.01 
   7  -3   0    4.69    1.09 
   7  -3   0    6.20    1.53 
   7  -3   0    5.47    1.46 
   7  -3   0    4.72    1.40 
  -7   3   0    3.56    1.02 
  -7   3   0    5.41    1.17 
   7   3   0    6.36    1.19 
  -7   3   0    3.83    1.21 
   7   3   0    4.18    1.07 
  -7   3   0    5.81    1.22 
   7   3   0    5.46    1.42 
   7   3   0    4.91    0.93 
   7   3   0    4.93    1.01 
   7   3   0    7.53    1.31 
   7   3   0    4.17    1.15 
  -7   3   0    8.03    1.25 
  -7   3   0    4.82    0.87 
   7   3   0    4.08    0.98 
   7   3   0    5.82    0.93 
  -7   3   0    5.84    1.10 
  -7   3   0    7.34    1.39 
   7   3   0    5.02    1.18 
   7   3   0    5.67    0.84 
   7   3   0    5.74    1.08 
  -7   3   0    6.60    1.24 
   7   3   0    4.15    0.82 
  -7   3   0    4.51    1.11 
  -7   3   0    6.17    1.25 
   7   3   0    5.50    1.05 
  -8  -3   0    3.26    0.95 
  -8  -3   0    3.10    0.97 
   8  -3   0    1.45    0.96 
   8  -3   0    2.11    1.15 
   8  -3   0    2.86    0.95 
  -8  -3   0    2.78    1.03 
   8  -3   0    4.49    1.34 
  -8  -3   0    1.91    0.81 
  -8  -3   0    4.63    1.45 
   8  -3   0    1.88    1.11 
   8  -3   0    0.41    0.97 
   8  -3   0    2.95    0.97 
  -8  -3   0    2.10    0.95 
   8  -3   0    0.76    0.74 
   8  -3   0    2.61    1.14 
  -8  -3   0    2.97    1.08 
   8  -3   0    2.33    0.89 
   8  -3   0    3.60    1.37 
   8  -3   0    3.33    1.16 
   8  -3   0    2.21    1.12 
   8  -3   0    3.70    1.24 
   8  -3   0    3.18    0.98 
   8  -3   0    1.65    0.98 
   8  -3   0    3.55    1.15 
  -8  -3   0    3.71    1.25 
   8  -3   0    0.13    0.79 
   8   3   0    1.82    0.90 
  -8   3   0    1.39    0.84 
  -8   3   0    2.59    1.25 
  -8   3   0    2.42    0.83 
  -8   3   0    1.39    0.84 
   8   3   0    1.71    0.78 
  -8   3   0    2.34    0.83 
  -8   3   0    2.08    0.88 
  -8   3   0    2.88    1.14 
   8   3   0    2.65    0.94 
  -8   3   0    1.25    0.77 
   8   3   0    5.22    1.35 
   8   3   0    3.07    1.04 
   8   3   0    2.76    0.81 
   8   3   0    1.48    0.82 
   8   3   0    1.67    0.89 
   8   3   0    1.74    0.77 
  -8   3   0    1.71    0.87 
   8   3   0    1.44    0.82 
  -8   3   0    3.06    1.04 
   8   3   0    3.17    1.32 
   9  -3   0    0.92    0.82 
   9  -3   0    3.89    1.58 
   9  -3   0    1.48    0.87 
  -9  -3   0    0.76    0.79 
   9  -3   0    2.45    1.11 
   9  -3   0    2.36    1.19 
   9  -3   0    1.97    1.15 
   9  -3   0    2.06    1.28 
   9  -3   0    2.06    0.99 
   9  -3   0    1.15    0.93 
   9  -3   0    1.73    1.28 
  -9  -3   0    1.20    1.16 
   9  -3   0    2.69    1.27 
   9  -3   0    2.23    1.08 
   9  -3   0    2.78    1.30 
  -9  -3   0    2.28    1.13 
  -9  -3   0    5.64    1.71 
  -9  -3   0    0.83    0.88 
  -9  -3   0    1.84    0.94 
   9  -3   0    1.24    0.86 
   9  -3   0    1.99    1.01 
   9  -3   0    1.95    1.28 
   9  -3   0    0.15    1.08 
   9  -3   0    1.65    1.13 
   9   3   0    2.26    1.05 
  -9   3   0    3.01    1.35 
   9   3   0    2.36    1.12 
   9   3   0    3.36    1.11 
  -9   3   0    2.04    1.09 
  -9   3   0    3.20    0.97 
   9   3   0    0.60    0.75 
   9   3   0    1.30    0.89 
  -9   3   0    0.37    0.68 
   9   3   0    3.44    1.50 
   9   3   0    3.16    1.30 
   9   3   0    2.19    1.05 
  -9   3   0    3.02    1.18 
  -9   3   0    3.06    1.20 
  -9   3   0    1.35    0.89 
  -9   3   0    3.02    1.02 
   9   3   0    1.83    0.93 
   9   3   0    2.49    0.98 
  -9   3   0    2.17    1.01 
   9   3   0    1.52    1.00 
  -9   3   0    2.86    1.17 
   0  -4   0   71.12    3.20 
   0  -4   0   70.73    2.87 
   0  -4   0   71.40    2.80 
   0  -4   0   65.18    2.91 
   0  -4   0   72.20    2.60 
   0  -4   0   70.35    2.55 
   0  -4   0   68.60    3.62 
   0  -4   0   67.20    3.23 
   0  -4   0   69.89    2.65 
   0  -4   0   73.14    2.96 
   0  -4   0   73.91    2.81 
   0  -4   0   58.50    3.72 
   0  -4   0   74.06    3.08 
   0  -4   0   75.47    2.93 
   0  -4   0   74.92    4.13 
   0  -4   0   72.93    3.34 
   0  -4   0   69.75    2.43 
   0  -4   0   69.87    3.30 
   0  -4   0   71.97    2.61 
   0  -4   0   76.30    3.15 
   0  -4   0   71.81    2.60 
   0  -4   0   75.95    3.30 
   0  -4   0   69.64    2.77 
   0  -4   0   69.43    2.87 
   0  -4   0   71.05    2.94 
   0  -4   0   62.88    3.68 
   0  -4   0   71.58    3.42 
   0   4   0   71.70    2.63 
   0   4   0   64.37    2.78 
   0   4   0   70.96    2.72 
   0   4   0   67.53    2.61 
   0   4   0   69.30    2.75 
   0   4   0   66.98    2.94 
   0   4   0   69.61    2.42 
   0   4   0   70.17    2.94 
   0   4   0   72.53    2.79 
   0   4   0   65.33    3.52 
   0   4   0   69.24    2.89 
   0   4   0   69.11    2.85 
   0   4   0   75.66    2.71 
   0   4   0   70.70    3.01 
   0   4   0   69.41    2.27 
   0   4   0   60.45    3.36 
   0   4   0   74.91    3.28 
   0   4   0   69.92    2.84 
   0   4   0   67.02    2.34 
   0   4   0   71.80    3.26 
   0   4   0   69.73    2.63 
   0   4   0   71.77    2.77 
   0   4   0   68.27    2.83 
   0   4   0   69.35    2.55 
   0   4   0   69.76    2.74 
   0   4   0   57.36    3.48 
   0   4   0   66.19    2.81 
   0   4   0   67.02    2.70 
   0   4   0   73.86    3.44 
   0   4   0   70.35    3.14 
   0   4   0   69.20    2.39 
   0   4   0   66.68    3.03 
   1  -4   0  466.17   15.53 
   1  -4   0  464.65   14.82 
  -1  -4   0  441.64   14.89 
  -1  -4   0  477.49   15.05 
   1  -4   0  471.88   15.34 
   1  -4   0  381.13   15.25 
  -1  -4   0  468.56   14.35 
   1  -4   0  457.97   14.83 
   1  -4   0  456.43   14.96 
   1  -4   0  460.57   14.06 
   1  -4   0  459.76   14.51 
   1  -4   0  480.11   14.49 
  -1  -4   0  474.99   14.20 
   1  -4   0  466.06   14.49 
  -1  -4   0  474.38   14.16 
   1  -4   0  462.69   14.61 
  -1  -4   0  459.92   14.47 
  -1  -4   0  464.49   14.59 
  -1  -4   0  470.24   14.87 
  -1  -4   0  464.45   14.26 
  -1  -4   0  460.76   15.56 
  -1  -4   0  463.42   14.22 
   1  -4   0  448.79   14.59 
  -1  -4   0  464.24   14.97 
   1  -4   0  459.00   14.36 
   1  -4   0  467.46   13.95 
  -1  -4   0  475.63   14.33 
   1  -4   0  414.37   15.28 
   1  -4   0  457.91   14.52 
   1  -4   0  487.35   14.59 
   1  -4   0  475.06   14.47 
   1  -4   0  461.42   14.49 
   1  -4   0  468.77   13.92 
   1  -4   0  473.07   14.91 
   1  -4   0  471.05   13.81 
   1  -4   0  449.55   14.53 
  -1  -4   0  454.35   14.97 
  -1  -4   0  461.08   14.50 
  -1  -4   0  470.68   14.56 
   1  -4   0  474.62   14.43 
   1  -4   0  483.22   14.08 
  -1  -4   0  471.57   14.17 
   1  -4   0  464.73   14.47 
   1  -4   0  462.30   14.60 
  -1  -4   0  470.62   14.35 
  -1   4   0  457.62   14.04 
  -1   4   0  469.44   15.01 
  -1   4   0  477.00   14.36 
  -1   4   0  462.22   14.17 
  -1   4   0  477.39   14.30 
  -1   4   0  472.90   14.39 
  -1   4   0  473.11   13.86 
  -1   4   0  475.68   14.39 
   1   4   0  486.58   14.50 
  -1   4   0  458.05   14.77 
  -1   4   0  455.56   14.32 
  -1   4   0  444.82   15.83 
   1   4   0  462.07   13.82 
  -1   4   0  476.29   14.73 
   1   4   0  458.29   14.68 
   1   4   0  456.71   13.84 
  -1   4   0  448.89   14.64 
   1   4   0  452.52   14.98 
  -1   4   0  463.39   14.02 
   1   4   0  464.27   14.51 
   1   4   0  438.23   14.34 
   1   4   0  464.42   14.25 
   1   4   0  466.85   14.42 
   1   4   0  462.94   14.25 
  -1   4   0  472.34   15.03 
  -1   4   0  458.91   14.32 
   1   4   0  464.81   15.07 
   1   4   0  464.57   14.22 
   1   4   0  458.08   14.56 
   1   4   0  469.35   14.09 
   1   4   0  475.38   14.44 
   1   4   0  462.74   14.18 
   1   4   0  476.59   14.03 
  -1   4   0  459.15   14.46 
  -1   4   0  418.17   14.82 
   1   4   0  465.91   14.07 
   1   4   0  457.23   13.74 
   1   4   0  458.05   13.80 
   1   4   0  457.63   14.07 
   1   4   0  484.46   14.37 
  -1   4   0  475.39   14.06 
   1   4   0  456.89   14.15 
  -1   4   0  456.46   14.17 
  -1   4   0  465.92   14.26 
  -1   4   0  447.79   14.65 
  -1   4   0  456.69   14.66 
  -1   4   0  474.52   14.45 
   1   4   0  461.45   14.57 
   1   4   0  459.77   14.94 
  -1   4   0  475.39   13.87 
   1   4   0  412.80   15.76 
   1   4   0  451.74   14.39 
   1   4   0  415.52   15.09 
   1   4   0  439.34   15.20 
  -1   4   0  460.68   14.73 
   1   4   0  462.06   14.17 
   1   4   0  425.83   15.41 
   1   4   0  471.97   14.18 
   2  -4   0   32.23    1.85 
   2  -4   0   32.42    1.87 
  -2  -4   0   31.63    1.66 
   2  -4   0   34.50    2.21 
  -2  -4   0   33.39    1.76 
   2  -4   0   29.54    1.57 
  -2  -4   0   34.32    1.88 
   2  -4   0   34.34    1.96 
   2  -4   0   32.09    1.87 
   2  -4   0   30.96    2.07 
   2  -4   0   31.66    1.74 
   2  -4   0   31.98    1.86 
   2  -4   0   33.65    1.95 
   2  -4   0   32.98    2.03 
  -2  -4   0   28.38    1.68 
   2  -4   0   33.19    1.84 
   2  -4   0   32.75    2.17 
  -2  -4   0   32.72    1.59 
   2  -4   0   34.70    1.93 
  -2  -4   0   31.76    2.12 
  -2  -4   0   34.37    1.93 
  -2  -4   0   33.04    1.81 
   2  -4   0   31.53    2.09 
  -2  -4   0   32.71    1.87 
  -2  -4   0   32.70    2.12 
  -2  -4   0   31.66    1.63 
   2  -4   0   27.80    1.72 
   2  -4   0   31.30    1.97 
   2  -4   0   31.05    1.34 
  -2  -4   0   29.55    1.63 
   2  -4   0   33.16    1.37 
  -2  -4   0   30.15    1.62 
  -2  -4   0   30.50    1.24 
  -2  -4   0   30.03    1.66 
   2  -4   0   32.02    1.44 
   2  -4   0   33.97    2.22 
  -2  -4   0   35.29    1.83 
  -2  -4   0   30.90    1.39 
   2  -4   0   30.64    1.14 
   2  -4   0   27.18    1.52 
   2  -4   0   32.02    2.20 
  -2  -4   0   33.67    1.52 
  -2   4   0   32.42    1.73 
   2   4   0   33.43    1.48 
   2   4   0   30.86    1.29 
   2   4   0   33.28    1.48 
   2   4   0   27.30    1.91 
  -2   4   0   32.72    1.56 
   2   4   0   32.94    1.57 
   2   4   0   29.59    1.62 
   2   4   0   34.26    2.48 
  -2   4   0   36.15    1.84 
   2   4   0   32.06    1.39 
   2   4   0   34.51    1.89 
   2   4   0   30.09    1.92 
   2   4   0   30.74    1.44 
  -2   4   0   31.71    1.92 
  -2   4   0   32.65    1.78 
  -2   4   0   31.18    1.62 
  -2   4   0   31.40    1.77 
   2   4   0   28.95    1.77 
   2   4   0   29.99    1.44 
  -2   4   0   29.95    1.79 
  -2   4   0   33.56    2.49 
   2   4   0   34.34    1.52 
   2   4   0   32.02    1.45 
  -2   4   0   32.24    1.33 
   2   4   0   32.89    1.59 
   2   4   0   30.54    1.35 
   2   4   0   31.94    2.00 
  -2   4   0   32.49    1.76 
   2   4   0   32.04    2.29 
   2   4   0   22.81    1.73 
   2   4   0   31.52    1.56 
   2   4   0   33.18    1.70 
   2   4   0   32.80    2.40 
  -2   4   0   31.60    1.70 
   2   4   0   34.69    2.26 
   2   4   0   31.48    1.79 
   2   4   0   28.34    2.39 
  -3  -4   0   19.16    1.37 
   3  -4   0   22.94    1.61 
   3  -4   0   17.52    1.78 
   3  -4   0   23.34    1.65 
   3  -4   0   21.87    1.70 
   3  -4   0   23.83    1.66 
   3  -4   0   20.77    1.58 
   3  -4   0   20.95    1.72 
  -3  -4   0   23.88    1.69 
   3  -4   0   22.84    1.69 
   3  -4   0   21.21    1.70 
  -3  -4   0   23.31    1.24 
  -3  -4   0   19.24    1.43 
   3  -4   0   24.14    1.23 
  -3  -4   0   21.66    1.44 
  -3  -4   0   23.16    1.41 
   3  -4   0   21.79    1.30 
  -3  -4   0   17.51    1.88 
   3  -4   0   20.51    1.57 
   3  -4   0   22.07    1.78 
   3  -4   0   21.15    1.29 
  -3  -4   0   19.89    1.37 
  -3  -4   0   18.84    1.40 
  -3  -4   0   21.48    0.83 
   3  -4   0   25.26    1.88 
   3  -4   0   20.91    1.65 
  -3  -4   0   22.97    1.77 
   3  -4   0   20.06    1.46 
  -3  -4   0   21.68    1.40 
   3  -4   0   19.79    1.48 
  -3  -4   0   22.33    1.56 
   3  -4   0   19.73    1.13 
   3  -4   0   21.28    1.58 
   3  -4   0   21.10    1.45 
   3  -4   0   22.79    1.58 
   3  -4   0   19.89    1.54 
  -3  -4   0   20.60    1.46 
  -3  -4   0   21.17    1.15 
   3  -4   0   21.35    1.20 
   3  -4   0   19.44    1.70 
   3   4   0   22.18    2.44 
   3   4   0   20.58    1.32 
   3   4   0   20.75    1.34 
   3   4   0   18.88    1.96 
  -3   4   0   19.91    1.49 
   3   4   0   20.14    1.04 
   3   4   0   21.74    1.23 
   3   4   0   22.15    1.40 
   3   4   0   22.54    1.11 
   3   4   0   21.04    0.93 
   3   4   0   21.11    1.36 
   3   4   0   20.56    0.93 
   3   4   0   20.98    1.54 
   3   4   0   20.86    1.14 
  -3   4   0   19.53    1.41 
  -3   4   0   20.97    1.25 
  -3   4   0   22.04    1.38 
  -3   4   0   20.31    1.39 
  -3   4   0   20.81    1.45 
  -3   4   0   21.87    1.47 
  -3   4   0   22.93    1.61 
  -3   4   0   23.15    1.58 
   3   4   0   23.12    1.20 
  -3   4   0   21.63    1.45 
   3   4   0   21.41    2.23 
  -4  -4   0   15.41    1.86 
   4  -4   0   12.61    1.69 
  -4  -4   0   12.79    0.70 
   4  -4   0   11.52    1.12 
   4  -4   0    9.87    1.30 
   4  -4   0   10.40    1.40 
   4  -4   0   14.39    1.77 
   4  -4   0   11.35    1.44 
   4  -4   0   11.47    1.43 
   4  -4   0   13.68    1.83 
  -4  -4   0   12.56    1.37 
  -4  -4   0   12.35    1.15 
   4  -4   0   11.56    1.38 
   4  -4   0   14.38    1.54 
   4  -4   0   12.33    1.54 
   4  -4   0   11.89    1.37 
   4  -4   0   12.86    1.67 
  -4  -4   0   12.32    1.52 
   4  -4   0   11.62    1.41 
  -4  -4   0   10.01    1.18 
  -4  -4   0   15.23    1.44 
  -4  -4   0   12.66    1.19 
  -4  -4   0   12.59    1.68 
  -4  -4   0   13.38    1.46 
  -4  -4   0   13.52    1.46 
  -4  -4   0   11.54    0.85 
   4  -4   0   13.67    1.57 
   4  -4   0   12.28    1.51 
   4  -4   0   10.60    1.37 
  -4  -4   0   15.63    1.48 
   4  -4   0   10.38    1.39 
  -4  -4   0   11.08    1.28 
   4  -4   0   11.00    1.45 
   4  -4   0   11.77    1.32 
  -4   4   0   12.27    1.47 
  -4   4   0   10.99    1.34 
   4   4   0   12.53    1.73 
   4   4   0   12.90    0.89 
  -4   4   0   11.21    1.20 
   4   4   0    9.15    1.10 
  -4   4   0   13.30    1.45 
   4   4   0   11.73    1.39 
  -4   4   0   13.29    1.37 
  -4   4   0   10.54    1.25 
   4   4   0   11.52    0.74 
   4   4   0   11.60    0.80 
  -4   4   0   11.53    1.29 
   4   4   0   11.00    0.80 
  -4   4   0   14.00    1.46 
   4   4   0   10.87    0.85 
  -4   4   0    9.59    1.18 
  -4   4   0   10.69    1.32 
   4   4   0   13.47    1.05 
   4   4   0   12.31    0.98 
   4   4   0   13.04    1.77 
   4   4   0   11.42    1.24 
   5  -4   0   66.29    3.54 
   5  -4   0   73.15    3.22 
   5  -4   0   79.18    3.87 
   5  -4   0   69.31    3.56 
   5  -4   0   77.08    3.62 
  -5  -4   0   70.65    3.35 
   5  -4   0   73.93    3.53 
  -5  -4   0   77.00    3.53 
   5  -4   0   75.11    3.70 
  -5  -4   0   65.35    3.35 
  -5  -4   0   72.96    3.36 
   5  -4   0   71.64    3.85 
   5  -4   0   72.21    3.96 
   5  -4   0   72.98    3.64 
   5  -4   0   72.47    2.47 
  -5  -4   0   70.14    2.74 
   5  -4   0   73.27    3.48 
   5  -4   0   68.05    3.51 
  -5  -4   0   82.32    4.13 
   5  -4   0   71.74    3.87 
  -5  -4   0   76.73    3.94 
  -5  -4   0   71.97    2.94 
   5  -4   0   72.50    3.71 
  -5  -4   0   66.11    3.26 
  -5  -4   0   67.94    2.97 
  -5  -4   0   69.37    3.47 
   5  -4   0   77.59    4.08 
   5  -4   0   68.32    3.49 
   5  -4   0   73.08    3.66 
  -5  -4   0   73.00    3.40 
  -5  -4   0   72.63    3.75 
   5  -4   0   67.86    3.59 
   5  -4   0   72.66    3.71 
  -5   4   0   71.99    3.34 
   5   4   0   68.84    3.10 
   5   4   0   74.27    2.49 
   5   4   0   77.87    3.12 
  -5   4   0   69.33    3.50 
  -5   4   0   80.27    3.71 
  -5   4   0   69.89    3.42 
   5   4   0   77.38    3.45 
   5   4   0   69.08    3.87 
   5   4   0   69.96    3.59 
   5   4   0   66.76    3.16 
   5   4   0   75.63    2.74 
  -5   4   0   73.69    3.55 
  -5   4   0   74.08    3.63 
  -5   4   0   70.89    3.38 
  -5   4   0   70.58    3.25 
   5   4   0   76.24    3.10 
  -5   4   0   71.66    3.44 
  -5   4   0   79.28    3.43 
   5   4   0   74.93    3.82 
   5   4   0   69.34    2.95 
   5   4   0   72.23    2.80 
   6  -4   0   64.78    3.39 
  -6  -4   0   69.19    3.06 
   6  -4   0   66.19    3.61 
   6  -4   0   66.44    3.54 
   6  -4   0   57.78    3.76 
  -6  -4   0   63.63    3.45 
  -6  -4   0   68.93    4.03 
  -6  -4   0   68.03    3.40 
   6  -4   0   69.04    3.74 
   6  -4   0   63.74    3.52 
   6  -4   0   68.28    3.50 
   6  -4   0   63.74    3.50 
  -6  -4   0   68.96    3.93 
   6  -4   0   65.72    3.20 
   6  -4   0   63.47    3.60 
   6  -4   0   67.56    3.77 
   6  -4   0   64.55    3.68 
   6  -4   0   56.86    3.39 
   6  -4   0   70.26    3.99 
   6  -4   0   68.63    3.70 
  -6  -4   0   66.38    3.29 
   6  -4   0   63.66    3.57 
  -6  -4   0   61.54    3.26 
  -6  -4   0   62.58    3.69 
   6  -4   0   66.09    3.54 
  -6  -4   0   70.16    2.98 
   6  -4   0   57.38    3.78 
  -6  -4   0   63.90    3.30 
  -6  -4   0   60.38    3.34 
   6  -4   0   69.82    3.94 
  -6   4   0   65.23    3.35 
  -6   4   0   59.69    3.39 
  -6   4   0   62.31    3.30 
   6   4   0   55.45    3.67 
  -6   4   0   60.09    3.42 
   6   4   0   68.74    2.56 
   6   4   0   61.55    2.63 
   6   4   0   67.59    3.17 
   6   4   0   66.50    3.62 
  -6   4   0   67.07    3.28 
  -6   4   0   63.91    3.39 
  -6   4   0   67.27    3.42 
   6   4   0   63.15    3.59 
   6   4   0   61.58    3.11 
   6   4   0   63.04    3.18 
   6   4   0   64.18    2.96 
  -6   4   0   63.31    3.50 
  -6   4   0   63.97    3.51 
   6   4   0   69.80    2.91 
  -6   4   0   66.91    3.11 
   6   4   0   67.43    3.16 
   6   4   0   66.63    3.41 
  -7  -4   0  108.58    5.11 
   7  -4   0  101.29    5.08 
   7  -4   0  108.18    5.23 
   7  -4   0   98.26    4.98 
  -7  -4   0  105.18    4.82 
   7  -4   0  111.91    5.12 
   7  -4   0  105.41    5.27 
  -7  -4   0  102.96    5.52 
   7  -4   0  108.94    5.08 
  -7  -4   0  102.04    4.87 
  -7  -4   0  108.90    4.56 
   7  -4   0  108.32    5.31 
   7  -4   0  104.76    4.67 
   7  -4   0  110.64    4.94 
   7  -4   0   99.12    5.54 
  -7  -4   0  106.81    4.72 
  -7  -4   0   97.61    5.34 
   7  -4   0  106.59    4.92 
   7  -4   0  113.53    5.15 
   7  -4   0  105.85    5.02 
   7  -4   0  107.06    5.51 
   7  -4   0  106.16    5.66 
   7  -4   0  107.23    5.54 
  -7  -4   0   96.82    4.30 
   7  -4   0  104.76    5.20 
  -7  -4   0  101.16    4.73 
  -7  -4   0  103.53    5.27 
   7  -4   0  104.89    5.17 
   7   4   0  104.16    4.68 
  -7   4   0  104.28    5.06 
   7   4   0  110.87    4.64 
  -7   4   0  112.26    4.91 
   7   4   0  112.33    4.74 
   7   4   0  103.38    4.91 
  -7   4   0  107.75    4.48 
   7   4   0  105.14    4.47 
  -7   4   0   98.57    4.85 
   7   4   0  114.06    4.30 
  -7   4   0  101.68    4.90 
  -7   4   0  103.50    5.09 
  -7   4   0  105.43    5.34 
   7   4   0  103.68    5.54 
   7   4   0  106.82    5.05 
   7   4   0  108.29    4.43 
  -7   4   0  107.33    5.04 
  -7   4   0  103.05    4.66 
   7   4   0  109.43    4.74 
  -7   4   0  106.97    5.09 
   7   4   0  112.39    5.29 
   7   4   0  108.40    4.63 
  -7   4   0  102.72    4.86 
   8  -4   0   35.88    2.67 
   8  -4   0   34.18    3.36 
   8  -4   0   37.52    2.89 
   8  -4   0   31.42    3.06 
  -8  -4   0   35.99    2.52 
  -8  -4   0   31.26    2.32 
  -8  -4   0   39.41    4.04 
  -8  -4   0   34.02    2.81 
   8  -4   0   27.77    2.95 
  -8  -4   0   36.86    3.86 
  -8  -4   0   37.55    2.37 
   8  -4   0   38.35    3.57 
   8  -4   0   29.97    3.00 
   8  -4   0   33.99    3.74 
   8  -4   0   37.17    2.96 
   8  -4   0   31.45    3.45 
  -8  -4   0   33.80    2.58 
   8  -4   0   36.90    2.77 
   8  -4   0   29.81    2.96 
   8  -4   0   30.51    3.52 
   8  -4   0   32.58    2.47 
  -8  -4   0   30.03    3.28 
   8  -4   0   32.90    3.60 
   8  -4   0   33.44    2.93 
   8  -4   0   36.44    2.96 
   8  -4   0   35.95    2.93 
  -8   4   0   36.52    3.16 
   8   4   0   30.20    2.14 
  -8   4   0   29.27    2.87 
   8   4   0   38.45    2.66 
  -8   4   0   42.69    2.98 
   8   4   0   34.98    2.71 
   8   4   0   35.33    2.95 
   8   4   0   30.05    2.42 
  -8   4   0   33.48    2.67 
   8   4   0   38.09    2.83 
  -8   4   0   32.32    3.14 
   8   4   0   31.78    2.39 
  -8   4   0   34.55    2.47 
   8   4   0   33.18    2.42 
   8   4   0   32.85    2.50 
  -8   4   0   31.96    3.18 
  -8   4   0   32.45    3.07 
  -8   4   0   31.51    3.12 
   8   4   0   32.56    3.55 
  -8   4   0   37.07    2.64 
   9  -4   0   27.89    3.77 
   9  -4   0   29.22    3.13 
   9  -4   0   30.02    3.32 
   9  -4   0   26.93    2.90 
   9  -4   0   25.52    3.40 
   9  -4   0   25.30    3.03 
   9  -4   0   21.77    2.67 
  -9  -4   0   28.00    2.92 
   9  -4   0   32.12    3.23 
   9  -4   0   33.97    3.89 
   9  -4   0   27.01    3.02 
   9  -4   0   27.71    2.84 
   9  -4   0   26.54    3.05 
  -9  -4   0   27.30    3.45 
   9  -4   0   34.40    3.13 
   9  -4   0   24.74    2.69 
  -9  -4   0   24.65    3.08 
  -9  -4   0   31.93    3.31 
   9  -4   0   25.30    3.04 
   9  -4   0   30.63    3.63 
   9  -4   0   24.49    2.80 
  -9  -4   0   24.12    3.27 
   9  -4   0   26.49    3.29 
   9   4   0   32.26    2.97 
  -9   4   0   26.56    3.14 
  -9   4   0   32.62    3.32 
  -9   4   0   31.55    3.22 
   9   4   0   28.53    3.30 
   9   4   0   32.74    3.22 
   9   4   0   25.28    3.18 
  -9   4   0   32.68    3.46 
  -9   4   0   28.31    2.67 
   9   4   0   27.61    3.05 
  -9   4   0   26.44    2.86 
   9   4   0   32.97    2.62 
  -9   4   0   29.79    3.31 
  -9   4   0   29.71    3.56 
  -9   4   0   31.64    3.28 
   9   4   0   34.30    2.72 
  -9   4   0   26.31    2.81 
   0  -5   0    0.00    0.30 
   0  -5   0    0.43    0.45 
   0  -5   0    0.37    0.27 
   0  -5   0    1.17    0.59 
   0  -5   0    0.29    0.47 
   0  -5   0    0.87    0.77 
   0  -5   0    0.37    0.65 
   0  -5   0    0.96    0.50 
   0  -5   0    0.36    0.30 
   0  -5   0    0.56    0.38 
   0  -5   0   -0.09    0.40 
   0  -5   0    0.56    0.47 
   0  -5   0    0.27    0.46 
   0  -5   0    1.57    0.60 
   0  -5   0    0.21    0.25 
   0  -5   0    0.29    0.35 
   0  -5   0    1.01    0.38 
   0  -5   0    0.63    0.31 
   0  -5   0    0.40    0.31 
   0  -5   0   -0.05    0.57 
   0  -5   0   -0.30    0.32 
   0  -5   0   -0.20    0.37 
   0  -5   0    0.31    0.48 
   0   5   0   -0.04    0.29 
   0   5   0    0.28    0.17 
   0   5   0    0.12    0.34 
   0   5   0    0.05    0.15 
   0   5   0    0.40    0.51 
   0   5   0    0.43    0.32 
   0   5   0    0.25    0.26 
   0   5   0    0.24    0.18 
   0   5   0   -0.06    0.33 
   0   5   0    0.01    0.66 
   0   5   0   -0.08    0.21 
   0   5   0    1.32    0.53 
   0   5   0   -0.23    0.26 
   0   5   0    0.01    0.39 
   0   5   0    0.31    0.30 
   0   5   0    0.00    0.24 
   0   5   0    0.34    0.33 
   0   5   0    0.22    0.31 
   1  -5   0    9.23    1.23 
   1  -5   0    8.10    0.98 
   1  -5   0    9.22    1.26 
   1  -5   0    9.56    1.59 
   1  -5   0    5.97    1.06 
  -1  -5   0    8.83    0.99 
   1  -5   0   10.75    1.47 
  -1  -5   0    8.84    0.98 
  -1  -5   0    9.66    1.41 
   1  -5   0    7.53    1.57 
   1  -5   0    8.27    0.99 
  -1  -5   0    8.20    1.15 
  -1  -5   0    9.32    1.24 
   1  -5   0    8.15    0.87 
   1  -5   0    9.14    1.22 
  -1  -5   0    8.42    1.15 
   1  -5   0   11.11    1.84 
   1  -5   0    8.59    1.11 
  -1  -5   0    9.73    1.10 
  -1  -5   0    9.84    1.10 
  -1  -5   0   10.53    1.59 
   1  -5   0    9.64    0.73 
   1  -5   0    9.29    0.67 
   1  -5   0    8.78    1.22 
  -1  -5   0    9.47    1.44 
  -1  -5   0    8.77    1.79 
  -1  -5   0    8.03    1.10 
   1  -5   0   10.63    1.53 
   1  -5   0    8.31    0.77 
   1  -5   0    8.52    1.09 
   1  -5   0    8.94    1.13 
   1  -5   0    9.54    1.15 
   1  -5   0    9.87    1.83 
  -1  -5   0   10.17    1.53 
  -1  -5   0    7.37    0.86 
  -1  -5   0   10.90    1.19 
   1  -5   0    8.40    1.05 
  -1  -5   0    5.73    1.13 
  -1  -5   0   10.51    1.07 
   1  -5   0   10.10    0.96 
   1  -5   0    6.85    1.02 
  -1  -5   0    8.00    1.01 
   1  -5   0    9.70    1.31 
   1  -5   0   10.37    1.52 
   1   5   0    8.89    0.61 
  -1   5   0   10.41    1.18 
  -1   5   0    9.18    0.87 
   1   5   0    8.88    0.60 
   1   5   0    8.08    0.63 
  -1   5   0    7.50    1.00 
  -1   5   0    9.82    1.37 
  -1   5   0    7.72    1.42 
  -1   5   0    8.39    0.99 
   1   5   0   10.54    1.43 
  -1   5   0    9.47    1.18 
  -1   5   0    8.48    1.00 
   1   5   0    9.43    1.12 
  -1   5   0    9.59    1.15 
  -1   5   0   10.56    1.56 
  -1   5   0    8.24    1.12 
  -1   5   0   10.17    1.00 
   1   5   0    9.24    1.05 
   1   5   0    7.19    1.66 
   1   5   0   10.88    1.21 
   1   5   0    9.66    0.95 
   1   5   0    8.71    0.56 
  -1   5   0   10.18    2.01 
   1   5   0    7.28    1.32 
  -1   5   0    9.25    1.13 
  -1   5   0    9.13    1.00 
  -1   5   0    9.81    1.14 
   1   5   0    8.81    0.92 
  -1   5   0    9.86    0.69 
  -1   5   0    9.04    0.98 
  -1   5   0    8.97    1.08 
   1   5   0    5.76    1.31 
  -1   5   0   10.04    0.79 
   1   5   0    8.82    0.53 
   1   5   0    9.04    0.88 
  -1   5   0    9.02    1.12 
   2  -5   0   16.50    0.96 
   2  -5   0   14.60    1.49 
  -2  -5   0   14.79    1.33 
   2  -5   0   14.02    1.63 
  -2  -5   0   15.08    1.23 
  -2  -5   0   16.14    1.18 
   2  -5   0   17.91    1.11 
  -2  -5   0   14.61    0.94 
   2  -5   0   14.06    1.46 
   2  -5   0   14.04    1.52 
  -2  -5   0   14.90    1.27 
   2  -5   0   16.73    1.72 
   2  -5   0   14.12    1.56 
   2  -5   0   17.62    2.31 
  -2  -5   0   16.65    1.21 
   2  -5   0   18.64    0.96 
  -2  -5   0   17.40    1.28 
  -2  -5   0   16.64    1.24 
  -2  -5   0   16.85    1.29 
   2  -5   0   15.91    2.03 
  -2  -5   0   18.95    1.46 
  -2  -5   0   18.34    2.23 
   2  -5   0   17.99    1.46 
   2  -5   0   17.01    2.26 
   2  -5   0   15.83    1.61 
   2  -5   0   17.44    1.56 
   2  -5   0   13.77    1.66 
  -2  -5   0   14.32    1.45 
  -2  -5   0   14.89    1.86 
  -2  -5   0   17.74    1.71 
   2  -5   0   15.79    0.76 
   2  -5   0   16.04    2.07 
   2  -5   0   16.78    1.62 
   2  -5   0   16.76    0.93 
   2  -5   0   16.87    1.75 
   2  -5   0   17.03    1.65 
   2  -5   0   13.72    1.82 
   2  -5   0   15.74    1.82 
   2   5   0   16.45    1.05 
   2   5   0   17.38    1.80 
   2   5   0   15.68    0.97 
  -2   5   0   14.78    1.44 
   2   5   0   15.98    0.83 
  -2   5   0   12.11    1.26 
  -2   5   0   18.20    1.13 
  -2   5   0   14.99    1.45 
   2   5   0   17.05    1.07 
  -2   5   0   16.29    1.31 
   2   5   0   16.61    0.98 
  -2   5   0   16.31    2.37 
   2   5   0   10.52    1.58 
   2   5   0   15.48    2.05 
   2   5   0   15.90    1.08 
   2   5   0   16.00    0.99 
  -2   5   0   14.20    0.93 
   2   5   0   13.73    0.91 
   2   5   0   14.12    2.00 
  -2   5   0   16.42    1.58 
   2   5   0   15.46    0.67 
  -2   5   0   12.44    1.29 
  -2   5   0   13.88    1.10 
   2   5   0   16.83    1.19 
   2   5   0   21.08    2.67 
  -2   5   0   16.72    1.55 
  -2   5   0   13.05    1.45 
   2   5   0   17.02    1.65 
   2   5   0   17.82    1.83 
  -3  -5   0    0.40    0.23 
   3  -5   0    0.26    0.55 
   3  -5   0    0.82    0.63 
  -3  -5   0    1.58    0.75 
  -3  -5   0    1.17    0.69 
   3  -5   0    0.76    0.53 
   3  -5   0    0.26    0.47 
  -3  -5   0    0.92    0.54 
  -3  -5   0    1.17    0.53 
  -3  -5   0    0.39    0.44 
  -3  -5   0    0.39    0.53 
   3  -5   0    0.51    0.34 
   3  -5   0   -0.09    0.49 
   3  -5   0    0.47    0.61 
   3  -5   0    0.58    0.53 
   3  -5   0    1.22    0.69 
   3  -5   0    0.91    0.58 
   3  -5   0    0.87    0.45 
   3  -5   0    0.34    0.26 
   3  -5   0    0.60    0.62 
  -3  -5   0   -0.52    0.38 
   3  -5   0    0.16    0.54 
  -3  -5   0    0.87    0.49 
  -3  -5   0    0.31    0.43 
   3  -5   0    0.44    0.52 
   3  -5   0   -0.20    0.39 
  -3  -5   0    0.26    0.47 
   3  -5   0    0.45    0.29 
   3  -5   0    0.78    0.63 
  -3  -5   0    0.20    0.37 
   3  -5   0    0.19    0.48 
   3  -5   0    0.48    0.64 
   3  -5   0    0.17    0.45 
   3  -5   0    0.30    0.30 
   3  -5   0    1.04    0.47 
   3  -5   0    0.34    0.50 
  -3  -5   0    0.34    0.27 
   3   5   0    0.30    0.26 
   3   5   0    1.07    0.44 
  -3   5   0   -0.34    0.21 
   3   5   0    0.10    0.27 
   3   5   0    0.39    0.26 
   3   5   0    0.12    0.24 
  -3   5   0   -0.31    0.44 
   3   5   0    1.13    0.45 
  -3   5   0   -0.02    0.45 
  -3   5   0    0.00    0.43 
   3   5   0   -0.01    0.49 
  -3   5   0    0.55    0.38 
   3   5   0    0.35    0.73 
  -3   5   0   -0.11    0.28 
  -3   5   0    0.22    0.48 
  -3   5   0    0.32    0.43 
  -3   5   0    0.23    0.43 
   3   5   0    0.59    0.30 
  -3   5   0    0.33    0.18 
   3   5   0   -0.08    0.22 
   3   5   0    0.21    0.35 
   3   5   0    1.03    0.44 
  -3   5   0    0.22    0.42 
   3   5   0    0.54    0.47 
   3   5   0    0.69    0.70 
  -3   5   0   -0.09    0.37 
   3   5   0    0.73    0.31 
   3   5   0    0.83    0.83 
   4  -5   0   19.01    2.01 
   4  -5   0   23.14    1.88 
  -4  -5   0   19.86    1.19 
   4  -5   0   18.87    1.92 
  -4  -5   0   20.65    1.86 
  -4  -5   0   26.16    2.64 
  -4  -5   0   22.91    1.63 
   4  -5   0   19.90    2.17 
   4  -5   0   23.45    2.23 
  -4  -5   0   21.50    1.65 
   4  -5   0   20.74    1.89 
  -4  -5   0   23.63    2.53 
   4  -5   0   21.28    1.31 
  -4  -5   0   19.90    2.02 
   4  -5   0   19.40    2.18 
   4  -5   0   17.05    1.83 
   4  -5   0   18.87    2.28 
   4  -5   0   18.57    2.05 
   4  -5   0   20.72    1.21 
  -4  -5   0   21.82    1.66 
   4  -5   0   25.34    2.67 
   4  -5   0   24.84    2.26 
  -4  -5   0   19.67    1.87 
  -4  -5   0   19.76    1.83 
   4  -5   0   20.67    2.25 
   4  -5   0   19.48    2.03 
   4  -5   0   20.45    2.35 
  -4  -5   0   21.45    1.54 
   4  -5   0   22.50    1.42 
   4  -5   0   21.78    2.34 
   4  -5   0   19.01    1.83 
   4  -5   0   23.29    2.28 
   4  -5   0   19.87    2.38 
   4   5   0   22.19    1.23 
  -4   5   0   21.30    1.65 
  -4   5   0   18.61    1.92 
  -4   5   0   20.18    1.43 
  -4   5   0   23.43    2.07 
  -4   5   0   20.71    1.57 
   4   5   0   20.68    1.09 
  -4   5   0   23.57    1.83 
   4   5   0   23.48    1.58 
   4   5   0   26.09    2.85 
   4   5   0   22.01    2.45 
  -4   5   0   22.26    1.76 
  -4   5   0   18.22    1.80 
   4   5   0   21.96    1.27 
   4   5   0   20.65    1.33 
  -4   5   0   22.49    2.07 
  -4   5   0   18.67    1.80 
   4   5   0   20.41    1.00 
   4   5   0   18.86    1.92 
   4   5   0   20.71    1.41 
   4   5   0   27.87    2.91 
   4   5   0   21.03    1.26 
   4   5   0   19.89    0.87 
   4   5   0   21.62    1.52 
   4   5   0   22.95    1.31 
  -5  -5   0    9.74    1.51 
   5  -5   0   10.69    1.84 
   5  -5   0    9.97    1.60 
   5  -5   0   10.74    1.85 
   5  -5   0    9.25    1.55 
  -5  -5   0    9.18    1.30 
   5  -5   0    7.12    1.29 
   5  -5   0    7.44    1.30 
   5  -5   0    7.83    1.57 
   5  -5   0    6.60    1.39 
  -5  -5   0   11.25    1.86 
   5  -5   0   10.16    1.19 
   5  -5   0   11.17    1.68 
  -5  -5   0    6.77    1.39 
   5  -5   0    8.66    1.61 
   5  -5   0    8.23    1.41 
   5  -5   0    9.83    1.62 
  -5  -5   0    8.70    1.30 
   5  -5   0    6.55    1.21 
   5  -5   0   11.05    1.68 
   5  -5   0    9.82    1.46 
  -5  -5   0    9.14    1.32 
   5  -5   0    9.81    1.54 
   5  -5   0    8.94    1.08 
  -5  -5   0    7.99    1.35 
   5  -5   0   10.10    1.27 
   5  -5   0    8.33    1.53 
   5  -5   0    4.77    1.09 
   5  -5   0   10.72    1.68 
   5  -5   0    8.27    1.46 
  -5  -5   0    9.68    1.44 
  -5  -5   0   10.50    1.42 
  -5   5   0   11.74    1.45 
   5   5   0    8.48    1.01 
  -5   5   0    9.74    1.43 
  -5   5   0    8.00    1.26 
  -5   5   0    8.21    1.18 
   5   5   0   10.41    1.56 
  -5   5   0   10.12    1.51 
   5   5   0   10.54    0.97 
  -5   5   0    9.22    1.45 
   5   5   0   10.02    1.23 
  -5   5   0    9.14    1.33 
  -5   5   0    8.58    1.31 
  -5   5   0   10.29    1.50 
   5   5   0    9.46    1.15 
   5   5   0    8.35    1.66 
   5   5   0   11.25    0.85 
   5   5   0   11.59    1.94 
   5   5   0    8.95    1.27 
   5   5   0    9.60    1.14 
   6  -5   0   58.81    3.56 
  -6  -5   0   59.68    3.17 
  -6  -5   0   52.41    3.11 
   6  -5   0   60.60    3.46 
   6  -5   0   52.73    3.64 
   6  -5   0   57.03    3.61 
   6  -5   0   56.37    3.78 
   6  -5   0   61.06    3.99 
   6  -5   0   54.23    3.37 
   6  -5   0   57.69    3.84 
  -6  -5   0   56.83    3.21 
  -6  -5   0   57.83    3.49 
   6  -5   0   58.14    3.59 
  -6  -5   0   58.35    3.81 
   6  -5   0   56.33    3.64 
   6  -5   0   58.28    3.29 
   6  -5   0   55.34    3.48 
   6  -5   0   58.61    3.42 
   6  -5   0   61.79    3.42 
  -6  -5   0   60.26    3.33 
   6  -5   0   51.45    3.50 
   6  -5   0   54.91    3.44 
   6  -5   0   64.09    3.56 
  -6  -5   0   55.20    3.73 
  -6  -5   0   52.86    3.18 
   6  -5   0   54.35    3.49 
   6  -5   0   56.18    3.43 
   6  -5   0   57.43    2.93 
   6  -5   0   58.60    3.53 
  -6   5   0   59.65    3.49 
   6   5   0   61.40    2.82 
   6   5   0   55.37    3.51 
   6   5   0   58.29    2.64 
   6   5   0   59.27    3.01 
  -6   5   0   58.70    3.40 
  -6   5   0   64.55    3.23 
  -6   5   0   59.52    3.10 
  -6   5   0   64.80    3.61 
  -6   5   0   60.97    3.31 
   6   5   0   54.44    3.79 
   6   5   0   61.07    2.99 
  -6   5   0   60.28    3.23 
  -6   5   0   62.40    3.33 
  -6   5   0   55.99    3.25 
   6   5   0   55.93    3.14 
   6   5   0   52.09    3.17 
   6   5   0   65.11    3.64 
   6   5   0   56.78    2.91 
  -6   5   0   56.61    3.33 
   7  -5   0    5.12    1.54 
  -7  -5   0    4.66    1.17 
   7  -5   0    3.00    1.19 
  -7  -5   0    2.65    1.20 
   7  -5   0    3.94    1.19 
  -7  -5   0    3.73    1.11 
   7  -5   0    1.82    1.11 
   7  -5   0    1.81    1.23 
   7  -5   0    3.31    0.90 
   7  -5   0    3.28    1.08 
   7  -5   0    4.04    1.38 
   7  -5   0    3.67    1.24 
  -7  -5   0    3.48    1.13 
   7  -5   0    2.54    1.24 
   7  -5   0    3.94    1.44 
   7  -5   0    6.15    1.45 
   7  -5   0    3.98    1.21 
   7  -5   0    2.18    1.00 
  -7  -5   0    3.67    1.39 
  -7  -5   0    4.99    1.37 
   7  -5   0    3.65    1.11 
   7  -5   0    5.70    1.43 
   7  -5   0    3.03    1.28 
  -7  -5   0    3.10    0.99 
   7  -5   0    6.65    1.60 
   7  -5   0    5.11    1.41 
   7  -5   0    5.08    1.39 
  -7   5   0    1.48    0.93 
  -7   5   0    3.31    1.07 
  -7   5   0    4.69    1.22 
  -7   5   0    4.74    1.18 
  -7   5   0    2.21    1.04 
  -7   5   0    3.44    1.08 
   7   5   0    2.59    0.85 
  -7   5   0    2.29    1.05 
  -7   5   0    5.70    1.36 
   7   5   0    3.04    0.85 
  -7   5   0    5.78    1.12 
   7   5   0    2.40    0.85 
   7   5   0    3.25    1.30 
  -7   5   0    2.99    1.15 
   7   5   0    2.16    0.99 
   7   5   0    4.34    1.02 
   7   5   0    3.36    0.91 
   7   5   0    2.76    0.97 
   7   5   0    4.06    1.20 
  -8  -5   0    4.82    1.28 
   8  -5   0    5.01    1.49 
   8  -5   0    5.26    1.56 
   8  -5   0    4.06    1.32 
   8  -5   0    4.28    1.59 
  -8  -5   0    3.61    1.10 
   8  -5   0    2.44    1.37 
   8  -5   0    4.08    1.50 
   8  -5   0    3.00    1.16 
   8  -5   0    2.62    1.23 
   8  -5   0    2.96    1.24 
  -8  -5   0    4.39    1.37 
  -8  -5   0    4.38    1.60 
   8  -5   0    1.96    1.18 
   8  -5   0    2.35    1.35 
   8  -5   0    3.16    1.19 
   8  -5   0    2.60    1.37 
   8  -5   0    4.20    1.33 
  -8  -5   0    4.67    1.29 
   8  -5   0    4.31    1.45 
   8  -5   0    4.67    1.40 
   8  -5   0    2.56    1.36 
   8  -5   0    2.11    1.11 
  -8  -5   0    2.29    1.33 
   8  -5   0    7.34    1.74 
  -8   5   0    3.49    1.24 
  -8   5   0    4.66    1.34 
   8   5   0    2.32    1.04 
   8   5   0    4.50    1.64 
   8   5   0    2.51    0.99 
  -8   5   0    2.37    1.12 
   8   5   0    5.42    1.26 
   8   5   0    4.08    1.39 
   8   5   0    2.83    1.04 
   8   5   0    2.53    1.01 
  -8   5   0    4.90    1.45 
  -8   5   0    4.04    1.27 
   8   5   0    1.86    1.01 
  -8   5   0    3.23    1.09 
  -8   5   0    3.08    1.06 
  -8   5   0    3.01    1.21 
  -8   5   0    2.40    1.20 
  -8   5   0    3.96    1.50 
   9  -5   0    0.16    0.94 
  -9  -5   0    1.44    1.09 
   9  -5   0    0.42    1.23 
   9  -5   0    0.58    1.09 
   9  -5   0   -0.26    1.19 
   9  -5   0    1.25    1.12 
   9  -5   0   -0.07    1.05 
   9  -5   0    0.35    0.85 
   9  -5   0    0.61    0.99 
   9  -5   0    0.00    0.92 
  -9  -5   0    0.63    1.00 
   9  -5   0    0.07    1.09 
   9  -5   0    0.78    1.07 
   9  -5   0   -0.77    1.01 
   9  -5   0   -0.93    0.91 
   9  -5   0    1.10    1.07 
  -9  -5   0    0.85    1.20 
  -9  -5   0   -0.10    0.81 
   9  -5   0   -0.36    0.82 
   9  -5   0    1.91    1.10 
   9  -5   0    0.07    1.12 
   9  -5   0    0.54    1.21 
  -9   5   0    0.46    0.89 
  -9   5   0    0.08    0.74 
  -9   5   0   -0.07    0.80 
  -9   5   0   -0.19    0.88 
   9   5   0    0.82    1.01 
   9   5   0    0.27    0.98 
  -9   5   0    0.05    0.88 
  -9   5   0    0.04    0.75 
   9   5   0    0.42    0.94 
   9   5   0    0.30    0.82 
  -9   5   0    0.22    0.79 
  -9   5   0    1.41    1.04 
  -9   5   0    0.82    0.83 
   9   5   0    0.90    1.34 
  -9   5   0   -0.23    1.07 
   0  -6   0    1.01    0.57 
   0  -6   0    0.47    0.35 
   0  -6   0    1.00    0.51 
   0  -6   0    0.62    0.38 
   0  -6   0    0.24    0.38 
   0  -6   0    0.85    0.62 
   0  -6   0    0.58    0.71 
   0  -6   0    0.13    0.50 
   0  -6   0   -0.02    0.49 
   0  -6   0    0.92    0.65 
   0  -6   0    1.02    0.56 
   0  -6   0   -0.07    0.69 
   0  -6   0    0.19    0.45 
   0  -6   0    0.81    0.69 
   0  -6   0   -0.66    0.44 
   0  -6   0    0.84    0.55 
   0  -6   0    0.67    0.67 
   0  -6   0    1.39    0.92 
   0  -6   0    0.38    0.54 
   0  -6   0    0.44    0.41 
   0  -6   0    1.08    0.44 
   0  -6   0    0.42    0.77 
   0   6   0    0.78    0.27 
   0   6   0    0.23    0.48 
   0   6   0    0.43    0.49 
   0   6   0    0.41    0.36 
   0   6   0    0.50    0.41 
   0   6   0    0.74    0.45 
   0   6   0   -0.07    0.42 
   0   6   0    0.73    0.20 
   0   6   0    0.86    0.28 
   0   6   0   -0.14    0.63 
   0   6   0    0.81    0.49 
   0   6   0    1.36    0.79 
   0   6   0    0.56    1.02 
   0   6   0    1.01    0.42 
   0   6   0    0.41    0.45 
   0   6   0    0.03    0.34 
   1  -6   0  225.33    8.47 
   1  -6   0  224.51    8.08 
  -1  -6   0  212.31    8.65 
   1  -6   0  230.67    7.75 
   1  -6   0  244.53    8.13 
  -1  -6   0  224.71    7.77 
   1  -6   0  240.25    9.12 
   1  -6   0  222.25    8.06 
   1  -6   0  232.77    8.03 
  -1  -6   0  218.89    7.50 
   1  -6   0  223.59    7.12 
  -1  -6   0  227.50    8.06 
   1  -6   0  225.95    8.04 
  -1  -6   0  220.67    7.50 
  -1  -6   0  222.35    7.70 
   1  -6   0  226.61    8.41 
  -1  -6   0  226.50    7.76 
   1  -6   0  228.49    7.24 
  -1  -6   0  225.05    7.49 
   1  -6   0  221.19    9.01 
   1  -6   0  220.78    7.84 
   1  -6   0  221.24    7.23 
   1  -6   0  212.97    8.18 
  -1  -6   0  224.54    7.59 
  -1  -6   0  236.70    8.80 
   1  -6   0  224.93    7.66 
   1  -6   0  208.84    9.45 
  -1  -6   0  230.93    8.54 
   1  -6   0  217.93    8.00 
  -1  -6   0  230.62    8.05 
  -1  -6   0  225.44    8.01 
   1  -6   0  216.96    8.52 
   1  -6   0  209.34    9.51 
  -1  -6   0  228.10    8.13 
  -1  -6   0  225.46    8.67 
   1  -6   0  229.06    8.28 
  -1  -6   0  213.69    8.59 
  -1  -6   0  225.39    9.89 
   1  -6   0  215.21    8.65 
   1  -6   0  229.15    8.68 
   1  -6   0  225.98    7.38 
  -1   6   0  229.79    7.83 
  -1   6   0  217.03    6.96 
   1   6   0  214.85    7.84 
   1   6   0  229.69    7.54 
  -1   6   0  226.10    7.31 
   1   6   0  217.99    6.95 
   1   6   0  228.79    7.45 
   1   6   0  230.83    8.41 
  -1   6   0  224.87    8.12 
  -1   6   0  228.47    7.81 
  -1   6   0  239.45    8.04 
  -1   6   0  230.46    7.73 
   1   6   0  221.67    8.80 
  -1   6   0  225.49    8.00 
   1   6   0  215.91    7.14 
   1   6   0  234.45    7.38 
   1   6   0  194.07    9.58 
   1   6   0  215.61    7.95 
   1   6   0  222.03    6.81 
   1   6   0  217.62    7.96 
   1   6   0  221.54    6.91 
  -1   6   0  218.54    7.18 
  -1   6   0  214.00    7.69 
   1   6   0  198.65    7.22 
   1   6   0  224.19    7.78 
  -1   6   0  224.96    7.84 
   1   6   0  191.13    8.73 
  -1   6   0  226.57    7.27 
  -1   6   0  226.53    7.65 
   1   6   0  219.70    7.10 
  -1   6   0  219.82    9.80 
  -2  -6   0    2.41    0.76 
  -2  -6   0    0.48    0.68 
   2  -6   0    1.24    0.93 
   2  -6   0    0.75    0.34 
  -2  -6   0    1.53    0.62 
  -2  -6   0    1.09    0.52 
   2  -6   0    1.67    0.70 
   2  -6   0    1.52    0.63 
  -2  -6   0    1.31    0.95 
   2  -6   0    1.18    0.63 
   2  -6   0    0.90    0.72 
  -2  -6   0    1.70    0.59 
   2  -6   0    0.62    0.59 
  -2  -6   0    0.87    0.52 
   2  -6   0    1.05    0.62 
   2  -6   0    1.29    0.68 
   2  -6   0    1.70    1.07 
  -2  -6   0    1.18    0.56 
   2  -6   0    0.73    0.57 
  -2  -6   0    0.94    0.57 
   2  -6   0    1.18    0.59 
   2  -6   0    0.54    0.51 
   2  -6   0    2.77    1.00 
  -2  -6   0    2.35    0.78 
   2  -6   0    2.76    1.17 
   2  -6   0    0.78    0.83 
  -2  -6   0    1.05    0.54 
   2  -6   0    1.70    0.65 
   2  -6   0    1.08    0.73 
   2  -6   0    1.18    0.28 
  -2  -6   0    0.93    0.57 
  -2  -6   0    1.18    0.52 
   2  -6   0    0.84    0.40 
   2  -6   0   -0.04    0.50 
   2  -6   0    2.11    0.53 
   2  -6   0    2.27    0.88 
   2   6   0    1.31    0.43 
   2   6   0    1.72    0.30 
   2   6   0    1.06    0.64 
  -2   6   0    1.71    0.66 
  -2   6   0    0.88    1.06 
   2   6   0    2.07    0.52 
  -2   6   0    0.80    0.54 
   2   6   0    0.98    0.70 
   2   6   0    1.43    0.37 
   2   6   0    3.34    1.17 
  -2   6   0    1.52    0.68 
  -2   6   0    1.61    0.52 
   2   6   0    1.40    0.34 
   2   6   0    1.66    0.56 
  -2   6   0    1.19    0.63 
  -2   6   0    1.41    0.63 
   2   6   0    1.58    1.03 
  -2   6   0    1.30    0.56 
   2   6   0    0.78    0.82 
  -2   6   0    1.44    0.48 
   2   6   0    1.43    0.43 
   2   6   0    1.93    0.96 
  -2   6   0    1.47    0.61 
  -2   6   0    1.22    0.55 
  -2   6   0    1.46    0.53 
  -2   6   0    1.61    0.46 
   2   6   0    1.20    0.36 
   2   6   0    1.60    0.81 
  -2   6   0    2.11    0.41 
  -2   6   0    1.19    0.55 
   3  -6   0   23.01    2.26 
   3  -6   0   23.54    1.44 
  -3  -6   0   29.11    2.86 
   3  -6   0   26.71    2.09 
  -3  -6   0   25.81    1.90 
   3  -6   0   17.69    2.07 
  -3  -6   0   21.07    2.61 
   3  -6   0   20.21    2.24 
   3  -6   0   23.89    2.23 
  -3  -6   0   25.91    1.75 
   3  -6   0   23.95    1.91 
   3  -6   0   23.73    1.98 
   3  -6   0   26.75    2.02 
   3  -6   0   26.83    3.12 
   3  -6   0   24.17    2.30 
   3  -6   0   15.80    2.03 
  -3  -6   0   22.49    1.61 
   3  -6   0   23.42    1.27 
  -3  -6   0   22.09    1.61 
  -3  -6   0   23.90    2.23 
   3  -6   0   17.08    2.51 
  -3  -6   0   25.39    1.79 
  -3  -6   0   22.82    1.67 
   3  -6   0   18.71    2.42 
   3  -6   0   21.86    2.20 
   3  -6   0   23.59    1.81 
  -3  -6   0   24.24    1.78 
  -3  -6   0   23.97    1.84 
   3  -6   0   23.60    2.86 
   3  -6   0   24.10    2.82 
   3  -6   0   24.00    1.19 
   3  -6   0   24.53    2.30 
   3   6   0   20.66    1.68 
  -3   6   0   23.05    1.83 
  -3   6   0   20.80    2.11 
  -3   6   0   18.03    1.87 
   3   6   0   22.79    1.40 
   3   6   0   20.77    1.49 
   3   6   0   22.72    1.41 
   3   6   0   25.66    2.88 
   3   6   0   21.49    2.20 
   3   6   0   21.76    2.13 
   3   6   0   24.38    1.78 
   3   6   0   19.95    2.69 
  -3   6   0   21.59    1.76 
   3   6   0   22.89    3.03 
  -3   6   0   22.24    1.71 
  -3   6   0   23.42    1.79 
  -3   6   0   24.50    1.78 
  -3   6   0   23.46    1.36 
  -3   6   0   23.47    1.13 
   3   6   0   23.19    1.51 
  -3   6   0   21.74    1.59 
  -3   6   0   20.20    1.49 
  -3   6   0   22.69    1.80 
   3   6   0   18.94    1.21 
   4  -6   0   -0.08    0.25 
  -4  -6   0   -0.63    0.55 
   4  -6   0    0.42    0.66 
   4  -6   0   -0.37    0.56 
   4  -6   0    0.28    0.74 
   4  -6   0   -0.21    0.64 
   4  -6   0    0.31    0.79 
   4  -6   0   -0.61    0.58 
   4  -6   0    0.34    0.53 
   4  -6   0   -0.46    0.63 
   4  -6   0    0.67    0.68 
   4  -6   0   -0.87    0.52 
   4  -6   0    0.30    0.43 
   4  -6   0    0.17    0.29 
   4  -6   0   -0.07    0.33 
   4  -6   0   -0.24    0.51 
  -4  -6   0   -0.10    0.46 
  -4  -6   0   -0.46    0.41 
  -4  -6   0   -0.06    0.57 
   4  -6   0    0.70    0.58 
   4  -6   0   -0.97    0.41 
   4  -6   0    0.21    0.57 
  -4  -6   0    0.34    0.52 
   4  -6   0    0.51    0.61 
   4  -6   0    0.41    0.66 
  -4  -6   0    0.43    0.61 
  -4  -6   0   -0.19    0.43 
  -4  -6   0    0.39    0.49 
   4  -6   0    0.58    0.63 
   4  -6   0    0.59    0.77 
  -4  -6   0    0.21    0.55 
  -4   6   0   -0.23    0.37 
  -4   6   0    0.25    0.50 
   4   6   0    0.76    0.42 
  -4   6   0    0.05    0.49 
   4   6   0   -0.17    0.44 
   4   6   0    0.12    0.41 
   4   6   0    0.55    0.37 
  -4   6   0    0.38    0.49 
   4   6   0    0.25    0.42 
   4   6   0    0.27    0.80 
  -4   6   0    0.22    0.49 
   4   6   0    0.00    0.39 
   4   6   0    0.14    0.29 
   4   6   0   -0.01    0.41 
  -4   6   0    0.46    0.49 
  -4   6   0    0.34    0.51 
   4   6   0    0.25    0.87 
  -4   6   0   -0.08    0.45 
   4   6   0    0.20    0.81 
  -4   6   0   -0.30    0.41 
   4   6   0    0.11    0.37 
  -4   6   0   -0.48    0.46 
  -4   6   0    0.00    0.37 
  -5  -6   0   62.38    3.47 
   5  -6   0   68.31    4.13 
   5  -6   0   66.82    3.28 
   5  -6   0   65.41    4.24 
   5  -6   0   66.68    2.88 
   5  -6   0   60.94    3.51 
   5  -6   0   65.90    3.68 
   5  -6   0   69.04    3.91 
  -5  -6   0   65.09    4.13 
   5  -6   0   62.76    3.88 
  -5  -6   0   65.89    3.41 
   5  -6   0   65.29    3.75 
   5  -6   0   67.37    3.79 
  -5  -6   0   69.22    3.76 
   5  -6   0   60.69    3.62 
   5  -6   0   67.31    3.86 
   5  -6   0   72.32    3.89 
   5  -6   0   62.52    3.75 
  -5  -6   0   66.11    3.45 
  -5  -6   0   70.12    3.56 
   5  -6   0   67.25    4.24 
  -5  -6   0   63.65    3.44 
   5  -6   0   62.30    3.96 
   5  -6   0   65.40    4.01 
   5  -6   0   66.26    3.70 
   5  -6   0   70.75    4.38 
  -5  -6   0   70.41    4.26 
   5  -6   0   59.16    4.06 
  -5  -6   0   67.95    3.46 
  -5   6   0   69.04    3.20 
  -5   6   0   70.27    3.55 
   5   6   0   61.18    3.19 
  -5   6   0   63.56    3.46 
   5   6   0   65.05    2.97 
  -5   6   0   65.17    3.36 
   5   6   0   61.47    2.94 
  -5   6   0   64.03    3.70 
   5   6   0   66.90    2.93 
   5   6   0   70.29    4.37 
  -5   6   0   68.15    3.58 
   5   6   0   64.05    3.16 
  -5   6   0   62.43    3.41 
  -5   6   0   65.44    3.63 
  -5   6   0   63.64    3.62 
  -5   6   0   66.17    3.51 
   5   6   0   65.31    3.71 
   5   6   0   70.75    4.43 
   6  -6   0   -0.86    0.66 
   6  -6   0   -0.68    0.73 
  -6  -6   0   -0.19    0.57 
   6  -6   0    0.28    0.79 
  -6  -6   0    1.21    0.90 
   6  -6   0    0.25    0.67 
   6  -6   0    0.50    0.79 
   6  -6   0   -0.47    0.78 
  -6  -6   0    0.23    0.59 
   6  -6   0   -0.73    0.59 
   6  -6   0    0.54    0.89 
   6  -6   0    0.89    0.98 
   6  -6   0    1.82    1.17 
   6  -6   0    0.63    0.72 
  -6  -6   0   -0.16    0.66 
   6  -6   0    0.32    0.45 
   6  -6   0    0.69    0.70 
   6  -6   0   -0.78    0.54 
   6  -6   0    0.84    0.87 
   6  -6   0    0.28    0.80 
   6  -6   0    0.25    0.92 
  -6  -6   0    0.62    0.74 
  -6  -6   0   -0.35    0.64 
   6  -6   0    0.51    0.91 
  -6  -6   0    0.33    0.64 
   6  -6   0   -0.16    0.68 
   6  -6   0   -0.15    0.72 
  -6  -6   0    0.84    0.97 
   6   6   0   -0.80    0.69 
  -6   6   0   -0.13    0.59 
   6   6   0   -0.17    0.78 
   6   6   0    0.49    0.52 
  -6   6   0    0.04    0.65 
  -6   6   0    0.95    0.74 
  -6   6   0    0.06    0.50 
  -6   6   0   -0.47    0.55 
   6   6   0    0.53    0.57 
   6   6   0    0.01    0.70 
  -6   6   0    0.28    0.64 
  -6   6   0    0.50    0.69 
  -6   6   0    0.57    0.70 
  -6   6   0   -0.60    0.63 
  -6   6   0   -0.15    0.61 
   6   6   0    0.26    0.56 
   7  -6   0  108.53    5.66 
   7  -6   0  112.41    5.66 
   7  -6   0  110.82    5.86 
   7  -6   0  113.48    5.52 
  -7  -6   0  106.82    5.21 
   7  -6   0  109.10    5.43 
   7  -6   0   99.86    5.95 
   7  -6   0  111.97    5.80 
  -7  -6   0  104.90    5.18 
   7  -6   0  103.67    5.37 
   7  -6   0  101.50    5.98 
   7  -6   0  106.93    5.67 
   7  -6   0  107.04    5.61 
  -7  -6   0  104.62    5.07 
   7  -6   0  106.96    5.40 
   7  -6   0  111.94    5.87 
   7  -6   0  104.80    5.95 
  -7  -6   0  100.76    5.30 
   7  -6   0  104.29    5.19 
  -7  -6   0   89.77    5.64 
   7  -6   0  102.92    4.55 
  -7  -6   0   99.68    5.76 
   7  -6   0  109.82    5.66 
   7  -6   0  100.05    5.31 
   7  -6   0  102.20    5.98 
  -7  -6   0  110.12    4.97 
  -7   6   0  103.58    5.10 
  -7   6   0   99.96    4.83 
   7   6   0  104.06    5.39 
  -7   6   0  103.86    4.89 
  -7   6   0   98.04    5.22 
   7   6   0  107.57    5.58 
  -7   6   0  112.95    5.55 
   7   6   0  106.48    4.80 
   7   6   0  107.91    5.63 
  -7   6   0  106.86    5.19 
  -7   6   0  113.81    5.21 
   7   6   0   97.89    4.60 
   7   6   0   99.44    5.86 
  -7   6   0  108.54    5.29 
  -7   6   0  104.36    5.42 
   7   6   0  107.06    5.02 
  -7   6   0   99.80    5.10 
   8  -6   0    0.32    1.20 
   8  -6   0    0.00    0.82 
   8  -6   0    1.73    1.27 
   8  -6   0    0.57    1.02 
   8  -6   0   -0.57    0.82 
   8  -6   0    1.87    1.26 
   8  -6   0   -0.04    1.20 
   8  -6   0   -0.01    1.13 
   8  -6   0   -0.82    0.95 
   8  -6   0    0.72    1.21 
  -8  -6   0    1.42    0.91 
  -8  -6   0    0.90    0.88 
   8  -6   0    0.55    0.90 
   8  -6   0    0.61    1.16 
  -8  -6   0    0.76    1.21 
   8  -6   0    0.63    0.97 
   8  -6   0    0.48    0.97 
   8  -6   0    0.31    0.91 
   8  -6   0    0.74    0.67 
   8  -6   0    0.12    1.06 
  -8  -6   0    0.47    0.95 
   8  -6   0    0.41    0.93 
  -8  -6   0    2.56    1.29 
  -8   6   0    1.27    0.91 
  -8   6   0    0.13    1.01 
  -8   6   0    0.04    0.84 
  -8   6   0    0.05    0.88 
  -8   6   0    0.29    0.79 
   8   6   0    0.06    0.78 
  -8   6   0   -0.12    0.68 
   8   6   0   -0.27    0.98 
  -8   6   0    0.96    0.80 
  -8   6   0    0.79    0.92 
  -8   6   0    0.61    0.83 
  -8   6   0    0.08    0.79 
   8   6   0   -0.10    1.02 
   0  -7   0    0.51    0.62 
   0  -7   0   -0.16    0.42 
   0  -7   0   -0.25    0.56 
   0  -7   0    0.73    0.46 
   0  -7   0    0.69    0.63 
   0  -7   0    0.62    0.94 
   0  -7   0    0.50    0.57 
   0  -7   0    0.73    0.85 
   0  -7   0    0.74    0.88 
   0  -7   0    0.26    0.68 
   0  -7   0    0.01    0.37 
   0  -7   0   -0.67    0.61 
   0  -7   0   -0.36    0.42 
   0  -7   0   -0.07    0.70 
   0  -7   0    0.27    0.39 
   0  -7   0    0.00    0.46 
   0  -7   0   -0.39    0.50 
   0  -7   0    0.35    0.51 
   0  -7   0    0.67    0.72 
   0  -7   0   -0.77    0.31 
   0   7   0    0.63    0.54 
   0   7   0    0.22    0.36 
   0   7   0   -0.09    0.19 
   0   7   0    0.01    0.64 
   0   7   0   -0.20    0.46 
   0   7   0    0.43    0.38 
   0   7   0   -0.48    0.53 
   0   7   0   -0.10    0.30 
   0   7   0   -0.39    0.37 
   0   7   0    0.07    0.40 
   0   7   0   -0.06    0.92 
   0   7   0    0.94    0.51 
   0   7   0    0.16    0.40 
   0   7   0    0.16    0.44 
   0   7   0    0.41    0.49 
   1  -7   0    2.44    0.71 
   1  -7   0    2.47    0.80 
  -1  -7   0    2.25    0.75 
  -1  -7   0    3.45    0.76 
   1  -7   0    2.68    0.61 
  -1  -7   0    2.51    0.74 
   1  -7   0    4.23    1.04 
  -1  -7   0    2.89    0.89 
   1  -7   0    3.16    1.16 
   1  -7   0    3.40    0.83 
   1  -7   0    3.32    0.97 
  -1  -7   0    2.28    1.03 
  -1  -7   0    1.43    1.20 
  -1  -7   0    3.60    0.95 
   1  -7   0    2.10    0.57 
  -1  -7   0    2.46    0.78 
   1  -7   0    2.69    0.61 
   1  -7   0    1.72    0.85 
   1  -7   0    3.49    1.48 
   1  -7   0    1.78    0.95 
  -1  -7   0    3.82    0.90 
   1  -7   0    2.94    1.00 
  -1  -7   0    3.17    1.15 
   1  -7   0    3.14    0.80 
   1  -7   0    3.20    0.90 
   1  -7   0    2.64    0.55 
  -1  -7   0    2.47    0.72 
   1  -7   0    2.72    0.96 
  -1  -7   0    1.93    0.82 
   1  -7   0    2.92    1.03 
   1  -7   0    1.55    1.03 
  -1  -7   0    2.84    0.70 
  -1  -7   0    4.71    1.21 
   1  -7   0    2.80    1.08 
   1  -7   0    2.41    0.87 
   1  -7   0    2.89    1.32 
  -1  -7   0    2.90    0.77 
   1   7   0    2.88    0.59 
  -1   7   0    3.33    1.04 
  -1   7   0    3.04    0.61 
  -1   7   0    2.17    0.72 
   1   7   0    2.04    0.77 
   1   7   0    0.81    0.82 
  -1   7   0    1.98    0.72 
  -1   7   0    2.67    0.76 
   1   7   0    3.33    0.60 
   1   7   0    1.66    0.71 
  -1   7   0    2.59    0.58 
  -1   7   0    0.85    0.62 
   1   7   0    2.23    0.74 
  -1   7   0    2.18    0.71 
   1   7   0    3.34    0.63 
   1   7   0    2.44    0.70 
   1   7   0    3.47    1.33 
   1   7   0    2.12    0.95 
  -1   7   0    2.89    0.86 
   1   7   0    2.31    0.83 
   1   7   0    1.65    1.31 
  -1   7   0    3.59    1.58 
   1   7   0    2.38    0.62 
  -1   7   0    2.78    0.91 
  -1   7   0    3.07    0.88 
  -1   7   0    2.62    0.88 
   2  -7   0    7.40    1.26 
   2  -7   0    6.86    1.66 
  -2  -7   0   10.26    1.83 
   2  -7   0    7.88    1.57 
   2  -7   0    9.24    0.87 
   2  -7   0    5.79    1.10 
  -2  -7   0    6.97    1.08 
  -2  -7   0    6.03    1.22 
   2  -7   0    8.55    1.57 
   2  -7   0    5.28    1.68 
  -2  -7   0    7.70    1.11 
   2  -7   0    3.68    1.15 
   2  -7   0    7.74    1.74 
   2  -7   0    7.80    0.85 
   2  -7   0    7.47    1.35 
  -2  -7   0    7.54    1.17 
  -2  -7   0    8.43    1.20 
  -2  -7   0    6.91    1.25 
   2  -7   0    9.81    1.67 
  -2  -7   0   10.05    2.36 
  -2  -7   0    7.67    1.23 
  -2  -7   0    7.00    1.24 
   2  -7   0    6.53    1.24 
   2  -7   0    4.47    1.63 
   2  -7   0    6.05    1.06 
   2  -7   0    7.29    1.44 
  -2  -7   0    7.74    1.22 
  -2  -7   0    6.05    1.01 
   2  -7   0    6.47    0.65 
   2  -7   0    7.11    0.92 
   2  -7   0    6.22    1.76 
   2  -7   0    5.71    1.24 
   2  -7   0    4.92    1.17 
  -2  -7   0    6.63    1.13 
  -2   7   0    7.61    1.18 
  -2   7   0    6.74    1.26 
   2   7   0    8.49    1.96 
  -2   7   0    7.35    1.01 
   2   7   0    4.28    1.38 
   2   7   0    8.14    1.63 
   2   7   0    6.50    1.70 
  -2   7   0    6.27    1.07 
  -2   7   0    5.18    1.07 
   2   7   0    6.88    1.34 
  -2   7   0    6.45    1.30 
  -2   7   0    9.88    1.50 
   2   7   0    7.43    0.95 
  -2   7   0    8.62    1.05 
   2   7   0    7.20    0.99 
  -2   7   0    6.58    1.19 
  -2   7   0    5.70    1.09 
   2   7   0    5.77    1.36 
  -2   7   0    5.95    1.96 
   2   7   0    8.07    1.02 
   2   7   0    6.26    1.09 
  -2   7   0    6.55    1.35 
   2   7   0    6.30    1.88 
  -2   7   0    8.56    1.37 
  -3  -7   0    2.12    0.84 
   3  -7   0    1.21    0.81 
  -3  -7   0    1.33    0.79 
   3  -7   0    3.74    1.44 
   3  -7   0    2.25    1.31 
  -3  -7   0    3.29    0.91 
  -3  -7   0    2.08    0.73 
   3  -7   0    2.99    0.98 
   3  -7   0    3.02    1.00 
   3  -7   0    1.51    0.92 
  -3  -7   0    2.66    0.83 
   3  -7   0    2.44    1.03 
   3  -7   0    2.51    1.01 
  -3  -7   0    3.25    1.27 
   3  -7   0    3.31    1.03 
   3  -7   0    1.84    0.92 
   3  -7   0    2.97    0.98 
   3  -7   0    2.97    1.39 
   3  -7   0    2.63    0.63 
  -3  -7   0    2.90    0.87 
   3  -7   0    2.21    0.90 
   3  -7   0    2.06    0.81 
   3  -7   0    3.57    1.17 
  -3  -7   0    3.25    0.93 
   3  -7   0    2.96    0.57 
  -3  -7   0    3.87    0.92 
   3  -7   0    3.15    1.08 
   3  -7   0    3.39    0.94 
  -3  -7   0    3.40    1.43 
  -3  -7   0    1.85    0.84 
   3  -7   0    3.87    1.40 
   3   7   0    6.37    1.65 
  -3   7   0    2.83    0.94 
  -3   7   0    3.97    1.02 
  -3   7   0    4.32    0.99 
   3   7   0    2.70    0.91 
  -3   7   0    3.31    1.04 
   3   7   0    2.01    1.35 
  -3   7   0    1.28    0.77 
  -3   7   0    2.32    0.75 
   3   7   0    3.80    0.77 
  -3   7   0    2.75    0.76 
   3   7   0    2.40    0.64 
  -3   7   0    3.22    0.69 
  -3   7   0    2.15    0.81 
  -3   7   0    3.31    0.96 
   3   7   0    2.30    0.80 
   3   7   0    4.13    0.89 
   3   7   0    1.53    1.10 
  -3   7   0    1.49    0.81 
   3   7   0    3.63    1.02 
   3   7   0    2.65    0.59 
  -3   7   0    2.63    0.78 
   3   7   0    3.09    1.08 
   4  -7   0   23.91    2.54 
   4  -7   0   23.44    2.46 
   4  -7   0   19.05    3.01 
  -4  -7   0   22.40    2.34 
  -4  -7   0   23.90    2.15 
   4  -7   0   24.42    2.64 
   4  -7   0   20.59    2.25 
  -4  -7   0   22.41    2.39 
   4  -7   0   22.50    2.44 
  -4  -7   0   19.94    2.04 
   4  -7   0   18.26    2.48 
   4  -7   0   19.23    2.28 
   4  -7   0   17.83    2.66 
  -4  -7   0   22.12    2.21 
   4  -7   0   22.69    2.56 
  -4  -7   0   17.50    2.51 
   4  -7   0   17.32    2.02 
   4  -7   0   18.89    2.76 
   4  -7   0   21.53    2.44 
   4  -7   0   20.47    2.49 
   4  -7   0   21.79    3.05 
  -4  -7   0   21.34    3.07 
   4  -7   0   18.66    2.96 
  -4  -7   0   17.84    1.90 
  -4  -7   0   21.73    2.16 
   4  -7   0   22.67    2.46 
   4  -7   0   22.43    2.70 
  -4   7   0   20.59    2.26 
   4   7   0   18.39    2.77 
   4   7   0   19.04    2.19 
   4   7   0   21.49    3.22 
  -4   7   0   21.28    2.05 
  -4   7   0   22.11    2.51 
   4   7   0   20.91    1.98 
   4   7   0   23.39    2.12 
  -4   7   0   20.69    2.47 
  -4   7   0   20.48    2.31 
  -4   7   0   21.34    2.45 
  -4   7   0   18.99    2.08 
  -4   7   0   21.66    2.06 
  -4   7   0   20.52    2.16 
  -4   7   0   18.96    2.12 
   4   7   0   21.37    1.91 
   4   7   0   20.79    1.60 
  -4   7   0   19.34    2.07 
   4   7   0   14.55    2.37 
  -4   7   0   22.30    2.35 
   5  -7   0    7.02    1.50 
   5  -7   0    9.33    2.13 
   5  -7   0    6.47    1.52 
   5  -7   0    7.23    1.80 
  -5  -7   0    6.64    1.37 
  -5  -7   0   11.32    1.65 
  -5  -7   0    6.82    1.33 
   5  -7   0    6.03    1.88 
   5  -7   0    9.78    1.80 
   5  -7   0    6.47    1.69 
  -5  -7   0    6.42    1.46 
   5  -7   0    4.97    1.27 
   5  -7   0   11.18    2.01 
  -5  -7   0    9.37    1.55 
   5  -7   0    6.37    1.44 
   5  -7   0    8.51    2.04 
   5  -7   0    9.78    2.28 
   5  -7   0   12.52    1.95 
   5  -7   0    9.18    2.11 
  -5  -7   0    5.85    1.22 
   5  -7   0    4.64    1.37 
   5  -7   0    7.12    1.41 
  -5  -7   0    6.45    1.67 
   5  -7   0    7.61    1.62 
   5  -7   0    8.17    1.70 
  -5  -7   0    9.38    1.59 
   5   7   0   11.43    1.46 
   5   7   0    9.22    1.75 
  -5   7   0    8.73    1.52 
  -5   7   0    5.18    1.24 
   5   7   0    9.64    2.23 
  -5   7   0    9.13    1.77 
  -5   7   0    6.09    1.40 
   5   7   0    6.09    1.87 
   5   7   0    8.47    1.28 
  -5   7   0    9.59    1.58 
  -5   7   0    7.50    1.48 
  -5   7   0    8.51    1.53 
  -5   7   0   10.99    1.65 
  -5   7   0    8.11    1.47 
  -5   7   0    8.73    1.42 
   6  -7   0   47.67    4.09 
   6  -7   0   54.67    4.17 
  -6  -7   0   51.22    3.22 
  -6  -7   0   49.22    4.06 
   6  -7   0   54.32    3.70 
   6  -7   0   52.34    3.45 
   6  -7   0   52.88    4.22 
   6  -7   0   48.39    3.39 
   6  -7   0   48.90    3.70 
   6  -7   0   51.72    3.64 
   6  -7   0   51.19    3.67 
   6  -7   0   52.15    4.25 
   6  -7   0   48.53    4.05 
   6  -7   0   42.00    4.28 
  -6  -7   0   50.43    3.39 
  -6  -7   0   49.86    3.99 
   6  -7   0   52.24    3.55 
   6  -7   0   53.16    3.62 
  -6  -7   0   51.38    3.23 
  -6  -7   0   54.19    3.31 
  -6  -7   0   44.88    3.16 
   6  -7   0   50.28    3.66 
  -6  -7   0   48.86    3.16 
   6  -7   0   49.94    3.55 
   6  -7   0   55.22    3.78 
  -6   7   0   44.64    3.14 
  -6   7   0   52.18    3.30 
   6   7   0   53.22    3.05 
  -6   7   0   47.22    3.39 
   6   7   0   48.35    4.01 
  -6   7   0   51.94    3.22 
  -6   7   0   49.32    3.25 
   6   7   0   49.98    3.56 
  -6   7   0   56.34    3.29 
  -6   7   0   51.63    3.26 
  -6   7   0   49.11    3.43 
  -6   7   0   50.49    3.52 
   6   7   0   43.28    3.78 
  -6   7   0   50.53    3.46 
  -7  -7   0    0.91    0.88 
   7  -7   0    0.91    0.97 
   7  -7   0   -0.24    0.85 
  -7  -7   0   -1.03    0.96 
   7  -7   0    0.23    0.81 
   7  -7   0    1.68    1.36 
  -7  -7   0    0.85    1.05 
  -7  -7   0    1.53    0.96 
  -7  -7   0    0.96    0.98 
   7  -7   0   -0.81    0.77 
   7  -7   0    0.63    0.97 
   7  -7   0    2.01    1.43 
   7  -7   0   -0.63    0.81 
   7  -7   0    1.94    1.32 
   7  -7   0   -0.29    1.19 
  -7  -7   0   -0.07    1.03 
   7  -7   0   -0.44    0.84 
   7  -7   0   -0.06    0.79 
   7  -7   0    0.48    0.88 
   7  -7   0    0.59    1.18 
  -7  -7   0    0.79    1.35 
   7  -7   0   -0.21    1.07 
   7  -7   0    1.60    1.38 
   7   7   0    0.72    0.73 
  -7   7   0    0.62    0.83 
  -7   7   0    0.53    0.94 
   7   7   0    0.26    0.97 
  -7   7   0    1.61    0.91 
  -7   7   0   -0.06    0.90 
  -7   7   0   -0.30    0.75 
   7   7   0   -0.40    0.80 
  -7   7   0    0.74    0.82 
  -7   7   0    1.57    1.13 
  -7   7   0    0.43    0.76 
  -7   7   0    0.99    0.89 
   7   7   0    1.08    1.22 
  -7   7   0    0.49    0.81 
   0  -8   0   65.34    4.51 
   0  -8   0   65.02    3.27 
   0  -8   0   64.85    3.62 
   0  -8   0   59.13    2.92 
   0  -8   0   57.20    4.00 
   0  -8   0   65.47    4.48 
   0  -8   0   63.70    3.52 
   0  -8   0   67.15    4.53 
   0  -8   0   60.46    2.83 
   0  -8   0   67.33    3.78 
   0  -8   0   62.88    3.14 
   0  -8   0   58.47    4.05 
   0  -8   0   63.82    4.18 
   0  -8   0   64.43    4.20 
   0  -8   0   57.90    4.21 
   0  -8   0   65.16    2.87 
   0  -8   0   62.46    3.13 
   0  -8   0   66.33    2.89 
   0  -8   0   65.75    3.69 
   0   8   0   57.11    3.14 
   0   8   0   63.92    3.41 
   0   8   0   61.95    3.14 
   0   8   0   60.36    3.73 
   0   8   0   67.76    3.55 
   0   8   0   61.41    5.00 
   0   8   0   64.10    3.20 
   0   8   0   63.76    4.31 
   0   8   0   62.50    3.20 
   0   8   0   63.57    3.51 
   0   8   0   66.16    2.98 
   0   8   0   53.62    3.94 
   1  -8   0  104.07    4.03 
   1  -8   0  108.62    4.38 
   1  -8   0   94.55    4.80 
  -1  -8   0  117.73    5.63 
   1  -8   0   96.96    5.20 
  -1  -8   0   94.89    4.11 
  -1  -8   0   99.21    4.84 
   1  -8   0  103.04    3.89 
   1  -8   0   98.26    4.91 
  -1  -8   0   93.71    4.33 
  -1  -8   0   95.49    4.73 
  -1  -8   0  102.02    4.72 
  -1  -8   0   97.42    4.34 
   1  -8   0  101.24    4.51 
   1  -8   0  104.33    6.35 
  -1  -8   0  102.93    5.14 
  -1  -8   0  102.45    4.47 
   1  -8   0   97.97    5.34 
   1  -8   0   99.17    5.27 
  -1  -8   0  100.71    4.80 
   1  -8   0  102.24    6.01 
   1  -8   0  100.05    5.54 
   1  -8   0  101.66    5.98 
  -1  -8   0  103.88    4.22 
   1  -8   0  101.75    4.29 
   1  -8   0  100.35    4.31 
  -1  -8   0   98.54    4.21 
   1  -8   0  102.80    5.00 
   1  -8   0   97.95    5.42 
  -1  -8   0   97.80    4.13 
   1  -8   0  100.57    4.81 
  -1  -8   0  101.21    5.54 
   1  -8   0  103.31    3.89 
   1  -8   0  106.28    5.17 
   1   8   0  106.05    4.35 
  -1   8   0  106.76    4.53 
  -1   8   0   96.48    4.68 
   1   8   0  101.36    4.80 
   1   8   0   84.05    6.19 
   1   8   0   95.81    4.47 
   1   8   0   97.57    4.55 
   1   8   0   96.88    5.57 
   1   8   0  101.34    5.33 
  -1   8   0   96.88    4.95 
  -1   8   0  113.03    5.52 
   1   8   0   98.37    4.90 
  -1   8   0   94.55    5.39 
  -1   8   0   96.76    6.41 
  -1   8   0  106.70    4.61 
  -1   8   0   98.74    4.77 
   1   8   0  106.74    4.27 
   1   8   0  105.71    4.31 
   1   8   0   94.99    5.72 
  -1   8   0  102.08    4.32 
  -1   8   0  103.25    4.80 
  -1   8   0   92.73    4.53 
   1   8   0  100.80    5.75 
   1   8   0   82.78    6.16 
  -1   8   0  101.71    4.50 
  -1   8   0  103.83    4.48 
  -2  -8   0   10.97    1.75 
   2  -8   0    9.52    2.14 
   2  -8   0    7.31    1.36 
   2  -8   0    7.95    1.65 
   2  -8   0   10.50    1.97 
   2  -8   0    9.71    2.13 
  -2  -8   0   10.95    1.70 
   2  -8   0    7.88    1.62 
  -2  -8   0    9.14    1.28 
   2  -8   0    6.39    1.37 
  -2  -8   0    7.80    1.83 
  -2  -8   0   10.03    1.35 
   2  -8   0   11.07    1.67 
   2  -8   0    9.27    2.35 
   2  -8   0    8.29    1.27 
  -2  -8   0   10.43    1.62 
  -2  -8   0   10.22    2.55 
  -2  -8   0    8.07    1.34 
   2  -8   0   10.56    1.57 
   2  -8   0    9.79    1.41 
  -2  -8   0    9.55    1.42 
  -2  -8   0    6.82    1.29 
   2  -8   0   10.30    1.96 
  -2  -8   0    9.87    1.33 
   2  -8   0    6.48    2.05 
  -2  -8   0   12.39    1.54 
   2  -8   0   11.48    2.15 
   2  -8   0    5.89    1.33 
  -2   8   0   10.85    1.25 
  -2   8   0    9.24    2.42 
  -2   8   0   12.46    1.70 
   2   8   0    6.84    1.75 
   2   8   0    9.06    1.80 
   2   8   0    8.84    1.35 
  -2   8   0    8.05    1.32 
   2   8   0    8.55    1.45 
   2   8   0    8.11    2.04 
  -2   8   0    8.31    1.52 
  -2   8   0    9.22    1.44 
  -2   8   0    8.00    1.34 
   2   8   0    9.94    1.29 
   2   8   0    6.07    1.51 
  -2   8   0    9.50    1.59 
  -2   8   0    9.02    1.36 
  -2   8   0   12.86    1.95 
   2   8   0    6.65    1.87 
   2   8   0    7.35    2.17 
  -2   8   0    9.06    1.56 
  -2   8   0   10.58    1.55 
   2   8   0    8.00    1.41 
  -3  -8   0   25.05    2.29 
  -3  -8   0   26.05    2.13 
   3  -8   0   26.85    3.70 
   3  -8   0   29.51    2.93 
   3  -8   0   23.99    3.05 
   3  -8   0   22.14    2.65 
   3  -8   0   25.25    3.82 
   3  -8   0   27.21    2.65 
   3  -8   0   27.04    3.11 
   3  -8   0   25.69    2.98 
   3  -8   0   33.32    3.78 
   3  -8   0   29.74    2.90 
  -3  -8   0   25.93    2.54 
  -3  -8   0   26.36    2.04 
   3  -8   0   22.14    2.57 
  -3  -8   0   27.28    2.63 
   3  -8   0   28.18    2.77 
  -3  -8   0   26.87    2.61 
  -3  -8   0   26.16    2.47 
   3  -8   0   32.88    2.29 
   3  -8   0   28.29    3.86 
  -3  -8   0   28.13    2.06 
   3  -8   0   32.82    2.66 
  -3  -8   0   23.07    3.02 
   3  -8   0   34.05    3.40 
  -3  -8   0   34.15    4.62 
   3   8   0   36.07    4.36 
   3   8   0   32.93    2.50 
  -3   8   0   26.09    2.61 
   3   8   0   24.13    3.20 
  -3   8   0   29.64    1.97 
   3   8   0   27.00    2.91 
  -3   8   0   24.42    2.54 
   3   8   0   27.48    3.84 
   3   8   0   26.46    2.01 
  -3   8   0   29.38    2.26 
  -3   8   0   28.36    2.90 
  -3   8   0   29.42    2.66 
  -3   8   0   27.44    2.67 
   3   8   0   27.27    2.60 
  -3   8   0   23.43    2.54 
  -3   8   0   29.96    3.11 
  -3   8   0   24.97    2.48 
  -3   8   0   25.09    2.37 
   4  -8   0    7.38    1.61 
  -4  -8   0    7.39    1.40 
   4  -8   0    7.55    1.74 
   4  -8   0    7.78    1.78 
  -4  -8   0    5.81    1.26 
   4  -8   0    6.37    1.88 
   4  -8   0    7.18    1.76 
  -4  -8   0   10.11    1.75 
   4  -8   0    9.86    1.94 
   4  -8   0    7.05    1.91 
   4  -8   0    5.10    1.30 
   4  -8   0    6.66    2.27 
  -4  -8   0    7.76    1.39 
   4  -8   0   11.23    2.50 
   4  -8   0    8.06    1.76 
   4  -8   0    8.67    2.37 
  -4  -8   0   10.38    1.75 
  -4  -8   0    8.66    2.32 
   4  -8   0    8.04    1.60 
  -4  -8   0    5.61    1.72 
  -4  -8   0    6.15    1.26 
   4  -8   0   14.33    2.25 
   4  -8   0   10.54    1.72 
  -4   8   0    8.33    1.37 
   4   8   0    6.55    1.38 
  -4   8   0    9.00    1.66 
   4   8   0    5.47    1.82 
  -4   8   0    9.50    1.48 
   4   8   0    7.07    2.04 
  -4   8   0    8.58    1.72 
  -4   8   0    6.77    1.37 
  -4   8   0    8.05    1.53 
   4   8   0    6.72    2.19 
  -4   8   0    6.32    1.48 
  -4   8   0    8.13    1.57 
   4   8   0    5.93    1.42 
  -4   8   0    6.31    1.41 
  -4   8   0    5.97    1.34 
  -4   8   0    6.57    1.50 
   4   8   0    7.76    1.30 
   5  -8   0   46.67    3.65 
   5  -8   0   53.04    4.25 
   5  -8   0   46.38    5.13 
  -5  -8   0   47.80    3.14 
   5  -8   0   36.40    4.53 
  -5  -8   0   42.14    2.97 
   5  -8   0   48.46    5.28 
   5  -8   0   47.28    3.59 
  -5  -8   0   47.74    3.85 
   5  -8   0   50.25    3.56 
   5  -8   0   51.81    3.66 
  -5  -8   0   48.84    3.04 
   5  -8   0   41.50    4.60 
   5  -8   0   46.65    3.76 
   5  -8   0   59.66    3.76 
  -5  -8   0   51.95    3.32 
   5  -8   0   53.45    3.79 
  -5  -8   0   46.51    3.22 
   5  -8   0   49.70    3.60 
   5  -8   0   47.44    3.76 
   5  -8   0   53.22    3.42 
  -5  -8   0   41.35    3.02 
  -5  -8   0   49.50    5.15 
  -5   8   0   48.01    3.20 
  -5   8   0   46.47    3.20 
  -5   8   0   47.52    2.97 
   5   8   0   44.95    4.83 
  -5   8   0   50.13    3.46 
  -5   8   0   47.98    3.37 
  -5   8   0   48.76    3.50 
  -5   8   0   46.02    3.27 
   5   8   0   44.55    3.34 
  -5   8   0   44.48    2.98 
  -5   8   0   47.07    3.21 
  -5   8   0   44.41    3.43 
   5   8   0   49.94    5.32 
  -5   8   0   50.34    3.20 
   6  -8   0   21.43    3.48 
   6  -8   0   22.81    2.76 
   6  -8   0   30.72    4.20 
  -6  -8   0   25.95    3.97 
   6  -8   0   28.71    3.26 
   6  -8   0   23.67    2.92 
   6  -8   0   23.54    2.89 
   6  -8   0   18.89    2.76 
   6  -8   0   22.25    2.89 
   6  -8   0   30.04    3.59 
  -6  -8   0   21.03    2.54 
  -6  -8   0   23.67    2.63 
   6  -8   0   20.47    3.63 
   6  -8   0   20.86    2.57 
   6  -8   0   24.24    3.24 
  -6  -8   0   25.41    2.70 
   6  -8   0   18.05    2.68 
   6  -8   0   17.87    3.43 
  -6  -8   0   27.73    2.82 
  -6  -8   0   21.87    3.27 
  -6  -8   0   20.84    2.55 
   6   8   0   17.81    3.15 
  -6   8   0   20.39    2.75 
  -6   8   0   24.11    3.03 
  -6   8   0   24.95    3.04 
  -6   8   0   32.71    3.24 
  -6   8   0   24.49    2.89 
  -6   8   0   19.43    2.62 
   6   8   0   25.11    3.69 
  -6   8   0   17.14    2.33 
  -6   8   0   24.08    2.73 
  -6   8   0   27.80    2.89 
  -6   8   0   23.82    2.65 
   6   8   0   20.65    2.79 
  -6   8   0   23.47    2.67 
   0  -9   0   -0.18    0.82 
   0  -9   0   -0.49    0.83 
   0  -9   0    0.44    0.86 
   0  -9   0    0.79    0.85 
   0  -9   0    0.76    0.74 
   0  -9   0    1.21    0.81 
   0  -9   0    0.97    1.19 
   0  -9   0    0.19    0.73 
   0  -9   0   -0.93    0.94 
   0  -9   0    0.20    0.90 
   0  -9   0    0.23    0.67 
   0   9   0    0.01    0.75 
   0   9   0   -0.02    0.56 
   0   9   0   -0.34    0.92 
   0   9   0   -0.41    0.54 
   0   9   0   -0.65    1.10 
   0   9   0    0.57    0.78 
   0   9   0    0.18    0.59 
   0   9   0    0.18    0.67 
   0   9   0    0.68    0.76 
   0   9   0   -0.47    1.15 
   0   9   0    0.32    0.90 
   0   9   0    0.43    0.71 
   0   9   0    0.34    0.57 
  -1  -9   0    2.70    1.02 
   1  -9   0    2.28    1.12 
  -1  -9   0    3.31    1.17 
  -1  -9   0    3.74    1.01 
   1  -9   0    1.83    1.32 
  -1  -9   0    2.25    0.87 
   1  -9   0    5.29    1.62 
   1  -9   0    1.89    1.34 
   1  -9   0    1.59    1.06 
  -1  -9   0    2.51    0.72 
  -1  -9   0    2.32    0.85 
   1  -9   0    2.26    1.26 
   1  -9   0    5.04    1.74 
   1  -9   0    3.41    1.12 
  -1  -9   0    2.07    1.32 
  -1  -9   0    3.64    0.97 
   1  -9   0    3.52    1.49 
   1  -9   0    3.65    1.35 
  -1  -9   0    3.12    0.84 
  -1  -9   0    1.89    1.08 
   1  -9   0    1.91    1.04 
  -1  -9   0    2.44    0.99 
  -1  -9   0    2.46    0.80 
   1   9   0    1.58    1.00 
  -1   9   0    3.34    1.07 
  -1   9   0    4.65    1.37 
  -1   9   0    1.93    0.83 
   1   9   0    2.72    1.31 
  -1   9   0    2.35    0.97 
  -1   9   0    1.84    0.78 
   1   9   0    3.82    1.80 
  -1   9   0    2.24    1.18 
   1   9   0    2.94    0.94 
   1   9   0    3.06    1.46 
   1   9   0    3.00    0.90 
  -1   9   0    1.44    0.88 
   1   9   0    2.02    0.84 
  -1   9   0    2.92    1.11 
  -1   9   0    1.52    1.15 
  -1   9   0    2.39    1.67 
   1   9   0    3.05    1.38 
  -1   9   0    3.96    1.03 
  -1   9   0    3.04    1.11 
   1   9   0    2.89    1.79 
   1   9   0    3.18    1.05 
   1   9   0    2.29    1.40 
  -1   9   0    1.78    0.78 
  -2  -9   0    7.25    1.92 
   2  -9   0    4.70    1.46 
  -2  -9   0    5.31    1.15 
  -2  -9   0    4.83    1.13 
   2  -9   0    7.13    1.73 
   2  -9   0    9.82    1.92 
   2  -9   0    2.95    1.43 
   2  -9   0    5.70    1.44 
  -2  -9   0    6.64    1.24 
   2  -9   0    8.41    1.94 
   2  -9   0    3.19    1.45 
   2  -9   0    7.60    1.98 
  -2  -9   0    6.59    1.31 
  -2  -9   0    7.59    1.69 
  -2  -9   0    7.24    1.52 
   2  -9   0    6.94    2.32 
  -2  -9   0    6.13    1.30 
   2  -9   0    6.19    1.58 
   2  -9   0    8.97    2.30 
   2  -9   0    9.43    2.44 
  -2  -9   0    7.82    1.46 
  -2  -9   0    3.95    0.96 
  -2   9   0    4.50    1.15 
  -2   9   0    6.84    1.66 
   2   9   0    4.16    1.17 
   2   9   0    4.22    1.84 
   2   9   0    8.53    1.55 
   2   9   0    8.74    1.49 
  -2   9   0    8.44    2.00 
  -2   9   0    5.50    1.24 
  -2   9   0    3.94    2.03 
  -2   9   0    5.75    1.29 
   2   9   0    5.62    1.95 
  -2   9   0    5.78    1.23 
  -2   9   0    6.75    1.52 
  -2   9   0    7.06    1.45 
   2   9   0    6.85    1.73 
  -2   9   0    4.55    1.34 
  -2   9   0    6.31    1.26 
   2   9   0    4.25    2.12 
   2   9   0    4.41    1.72 
  -2   9   0    5.00    1.35 
   2   9   0    5.92    1.10 
  -2   9   0    9.76    2.03 
   3  -9   0    1.18    1.52 
  -3  -9   0    1.57    1.21 
  -3  -9   0    1.06    1.48 
  -3  -9   0   -0.04    0.70 
  -3  -9   0    0.64    0.78 
  -3  -9   0   -0.79    0.55 
   3  -9   0    0.24    0.95 
   3  -9   0    1.45    1.24 
  -3  -9   0    0.56    0.91 
   3  -9   0    0.26    0.91 
   3  -9   0    0.49    1.22 
   3  -9   0    2.19    1.52 
  -3  -9   0   -0.07    0.74 
   3  -9   0   -0.79    0.68 
  -3  -9   0    0.47    0.75 
  -3  -9   0   -0.04    0.75 
   3  -9   0    1.37    1.08 
   3  -9   0    1.65    1.17 
   3  -9   0    1.12    1.49 
   3  -9   0    0.19    0.70 
   3  -9   0    1.15    0.94 
   3   9   0    1.25    0.78 
  -3   9   0   -0.57    0.69 
   3   9   0    1.72    1.36 
  -3   9   0    0.78    0.76 
  -3   9   0    0.71    0.83 
   3   9   0    0.98    1.38 
  -3   9   0    1.67    1.07 
   3   9   0   -0.48    0.68 
  -3   9   0    0.61    0.77 
  -3   9   0    1.12    0.94 
  -3   9   0    1.38    0.93 
  -3   9   0    0.72    0.87 
   3   9   0    0.43    0.80 
  -3   9   0    0.17    0.73 
   3   9   0    1.66    1.49 
  -3   9   0   -0.53    0.58 
  -4  -9   0    5.79    1.43 
  -4  -9   0    3.33    1.73 
   4  -9   0    3.39    1.33 
  -4  -9   0    4.72    1.25 
   4  -9   0    7.73    2.10 
   4  -9   0    4.80    1.49 
   4  -9   0    4.75    1.55 
  -4  -9   0    8.60    2.64 
   4  -9   0    5.96    1.51 
   4  -9   0    7.37    2.59 
  -4  -9   0    4.89    1.29 
  -4  -9   0    5.50    1.31 
   4  -9   0    7.76    1.86 
   4  -9   0    3.53    1.83 
   4  -9   0    6.26    1.76 
  -4  -9   0    7.19    1.58 
   4  -9   0    1.26    1.71 
   4  -9   0    3.65    1.42 
  -4  -9   0    6.57    1.40 
   4  -9   0    6.21    1.52 
   4  -9   0    7.11    1.92 
  -4   9   0    4.29    1.32 
   4   9   0    2.68    1.70 
  -4   9   0    5.33    1.51 
   4   9   0    3.09    1.84 
  -4   9   0    7.11    1.74 
   4   9   0    4.70    1.42 
  -4   9   0    6.01    1.51 
  -4   9   0    3.21    1.18 
   4   9   0    3.52    1.74 
  -4   9   0    5.02    1.54 
  -4   9   0    4.02    1.16 
  -4   9   0    4.28    1.26 
  -4   9   0    4.36    1.30 
  -4   9   0    4.20    1.33 
  -5  -9   0   20.07    2.44 
   5  -9   0   18.94    2.52 
   5  -9   0   18.73    3.63 
   5  -9   0   16.82    2.48 
   5  -9   0   22.97    3.88 
   5  -9   0   17.06    2.79 
   5  -9   0   22.63    2.87 
  -5  -9   0   17.78    3.09 
  -5  -9   0   19.78    2.37 
  -5  -9   0   22.67    4.00 
   5  -9   0   21.96    3.43 
   5  -9   0   22.29    3.07 
   5  -9   0   11.58    2.11 
   5  -9   0   23.10    3.09 
  -5  -9   0   20.95    2.55 
  -5  -9   0   24.16    2.76 
   5  -9   0   17.53    2.75 
  -5  -9   0   18.38    2.24 
   5  -9   0   13.49    3.57 
   5  -9   0   18.43    2.80 
  -5   9   0   28.08    3.31 
  -5   9   0   22.56    3.04 
   5   9   0   17.30    3.50 
  -5   9   0   19.49    2.54 
   5   9   0   20.90    3.56 
  -5   9   0   22.92    3.00 
  -5   9   0   17.00    2.38 
  -5   9   0   18.83    2.51 
  -5   9   0   16.17    2.35 
  -5   9   0   16.98    2.65 
  -5   9   0   20.71    2.62 
   5   9   0   25.51    2.96 
  -5   9   0   21.11    2.54 
   0 -10   0   97.53    5.42 
   0  10   0  100.41    6.39 
   0  10   0   98.12    5.83 
   0  10   0  102.82    6.38 
   0  10   0  103.68    5.21 
   0  10   0  103.98    7.46 
   0  10   0  101.13    5.18 
   0  10   0  116.57    7.79 
   0  10   0   99.19    4.87 
   0  10   0  107.85    5.34 
  -1 -10   0   12.84    2.45 
   1 -10   0   20.70    3.18 
   1 -10   0   14.16    2.71 
  -1 -10   0   15.27    2.36 
  -1 -10   0   16.56    2.37 
   1 -10   0    9.93    2.48 
   1 -10   0   15.86    2.85 
   1 -10   0   16.44    3.06 
  -1  10   0   11.45    2.50 
   1  10   0   18.51    2.35 
  -1  10   0   13.97    1.88 
   1  10   0   15.46    2.16 
   1  10   0    9.52    2.49 
   1  10   0   16.71    2.19 
  -1  10   0   15.76    2.07 
  -1  10   0   15.46    2.35 
   1  10   0   14.28    2.83 
   1  10   0   14.61    1.86 
  -1  10   0   15.61    2.49 
  -1  10   0   12.77    3.18 
  -1  10   0   15.29    2.35 
  -1  10   0   15.25    2.11 
  -1  10   0   11.95    2.06 
   1  10   0   13.35    3.20 
  -1  10   0   17.31    2.21 
   1  10   0   14.55    3.25 
  -1  10   0   15.92    2.78 
   2 -10   0   27.93    3.64 
   2 -10   0   28.78    3.82 
  -2 -10   0   27.31    3.10 
   2 -10   0   25.02    3.51 
  -2 -10   0   29.57    3.69 
   2 -10   0   31.01    3.41 
   2 -10   0   31.99    3.94 
  -2 -10   0   29.02    3.13 
   2 -10   0   37.30    4.63 
  -2  10   0   25.93    2.76 
  -2  10   0   24.20    2.97 
  -2  10   0   25.00    3.38 
   2  10   0   24.87    4.15 
   2  10   0   33.71    2.62 
   2  10   0   23.35    3.63 
  -2  10   0   31.53    2.90 
  -2  10   0   30.71    2.99 
  -2  10   0   29.55    3.15 
  -2  10   0   23.29    2.70 
   2  10   0   27.45    2.92 
  -2  10   0   29.03    3.90 
  -2  10   0   32.16    3.27 
   2  10   0   26.37    4.07 
  -2  10   0   34.84    3.44 
  -2  10   0   32.64    3.64 
   2  10   0   28.74    4.67 
  -2  10   0   31.49    5.02 
   3 -10   0    1.70    1.65 
   3 -10   0    1.94    1.90 
   3 -10   0    2.31    1.21 
   3 -10   0    2.38    1.46 
   3 -10   0    0.46    1.36 
  -3 -10   0    2.34    1.23 
  -3 -10   0    1.99    0.97 
  -3 -10   0    2.58    1.23 
   3 -10   0    1.43    1.36 
  -3 -10   0    0.58    1.69 
   3 -10   0    2.66    1.18 
  -3 -10   0    3.49    1.64 
  -3 -10   0    1.89    0.93 
   3 -10   0    2.30    1.56 
  -3 -10   0    2.85    1.30 
   3  10   0    1.13    1.53 
  -3  10   0    1.89    1.21 
   3  10   0    1.85    1.05 
  -3  10   0    1.43    1.01 
  -3  10   0    1.64    1.26 
  -3  10   0    1.65    0.98 
  -3  10   0    2.26    1.09 
  -3  10   0    0.83    0.96 
   3  10   0    2.61    1.69 
  -3  10   0    0.98    0.87 
  -3  10   0    0.92    1.43 
  -3  10   0    1.77    1.12 
  -3  10   0    0.09    0.81 
  -3  10   0    1.09    1.16 
   3  10   0    0.30    0.98 
  -3  10   0    0.20    0.89 
   3  10   0    1.89    1.68 
  10   0  -1    0.11    1.07 
  10   0  -1    0.12    0.82 
 -10   0   1    0.05    0.72 
  10   0  -1    0.11    0.74 
  10   0  -1   -0.26    0.90 
  10   0  -1    0.14    0.88 
  10   0  -1    1.14    0.89 
 -10   0   1   -0.57    0.66 
 -10   0   1   -0.54    0.78 
 -10   0   1   -0.09    0.77 
  10   0  -1    1.24    1.05 
  10   0  -1    0.82    1.23 
 -10   0   1   -0.35    0.91 
 -10   0   1    0.34    1.00 
 -10   0   1    0.47    0.85 
  10   0  -1   -0.23    0.91 
 -10   0   1    0.23    0.83 
  10   0  -1    0.40    0.88 
  10   0  -1   -0.16    1.16 
  10   0  -1   -0.61    0.67 
  10   0  -1   -0.27    0.85 
   9   0  -1   34.31    3.73 
   9   0  -1   40.28    3.42 
   9   0  -1   38.81    2.94 
  -9   0   1   35.04    2.80 
  -9   0   1   34.97    2.80 
   9   0  -1   34.48    2.64 
   9   0  -1   33.58    3.32 
  -9   0   1   38.10    3.38 
   9   0  -1   35.42    2.74 
  -9   0   1   39.05    2.91 
   9   0  -1   40.53    3.64 
   9   0  -1   35.62    2.57 
  -9   0   1   39.37    2.77 
   9   0  -1   35.83    2.48 
  -9   0   1   39.13    2.38 
   9   0  -1   32.97    2.74 
  -9   0   1   41.48    3.13 
   9   0  -1   39.62    2.54 
  -9   0   1   43.01    3.83 
   9   0  -1   35.98    2.89 
  -9   0   1   37.34    2.63 
   9   0  -1   34.76    3.20 
   9   0  -1   40.29    3.15 
  -9   0   1   34.51    3.64 
   8   0  -1    0.04    0.82 
  -8   0   1    0.21    0.55 
   8   0  -1    0.71    0.60 
  -8   0   1    0.47    0.65 
   8   0  -1    1.48    0.98 
  -8   0   1    1.07    0.78 
   8   0  -1    0.25    0.55 
  -8   0   1   -0.34    0.51 
   8   0  -1    0.48    0.59 
   8   0  -1    0.26    0.65 
   8   0  -1    0.16    0.70 
   8   0  -1    0.37    0.73 
   8   0  -1   -0.11    0.46 
  -8   0   1    1.13    0.71 
   8   0  -1    0.20    0.56 
   8   0  -1    0.60    0.59 
   8   0  -1    1.27    0.75 
  -8   0   1    0.18    0.64 
  -8   0   1   -0.24    0.46 
  -8   0   1   -0.01    0.54 
  -8   0   1   -0.02    0.68 
   8   0  -1    1.29    0.85 
  -8   0   1    0.81    0.73 
   8   0  -1    0.15    0.56 
  -8   0   1    0.43    0.69 
   8   0  -1    0.65    0.74 
   8   0  -1   -0.14    0.51 
  -7   0   1    0.18    0.53 
  -7   0   1   -0.73    0.40 
   7   0  -1    0.55    0.66 
  -7   0   1    0.46    0.66 
   7   0  -1    0.65    0.50 
  -7   0   1   -0.17    0.45 
  -7   0   1    0.22    0.30 
   7   0  -1   -0.52    0.41 
  -7   0   1   -0.28    0.40 
  -7   0   1    0.11    0.46 
   7   0  -1   -0.46    0.57 
   7   0  -1   -0.24    0.52 
   7   0  -1   -0.29    0.51 
   7   0  -1    0.01    0.56 
   7   0  -1    0.12    0.66 
  -7   0   1   -0.01    0.40 
   7   0  -1   -0.10    0.52 
   7   0  -1    0.68    0.52 
   7   0  -1    0.17    0.44 
   7   0  -1   -0.28    0.36 
   7   0  -1   -0.44    0.40 
   7   0  -1   -0.63    0.45 
  -7   0   1    0.18    0.45 
  -7   0   1   -0.30    0.45 
   7   0  -1    0.14    0.47 
   7   0  -1    0.83    0.68 
  -7   0   1   -0.10    0.44 
   6   0  -1    0.38    0.39 
  -6   0   1    0.62    0.57 
   6   0  -1    1.56    0.52 
   6   0  -1    0.73    0.52 
   6   0  -1    0.48    0.54 
   6   0  -1    1.08    0.48 
   6   0  -1    1.29    0.68 
  -6   0   1    0.01    0.27 
   6   0  -1    0.95    0.55 
  -6   0   1    0.18    0.46 
   6   0  -1    0.32    0.43 
  -6   0   1    0.29    0.46 
  -6   0   1    0.04    0.40 
   6   0  -1    0.78    0.51 
   6   0  -1    1.62    0.69 
  -6   0   1    0.62    0.46 
   6   0  -1    0.69    0.55 
  -6   0   1    0.21    0.41 
  -6   0   1    0.63    0.49 
  -6   0   1    0.93    0.63 
  -6   0   1    0.65    0.50 
   6   0  -1    0.45    0.37 
   6   0  -1    0.58    0.50 
   6   0  -1    0.44    0.51 
   6   0  -1    1.33    0.58 
  -5   0   1    0.90    0.49 
  -5   0   1    0.41    0.39 
   5   0  -1    0.46    0.46 
   5   0  -1    0.76    0.38 
   5   0  -1    1.13    0.47 
   5   0  -1    0.88    0.49 
  -5   0   1    1.13    0.42 
  -5   0   1    0.87    0.29 
  -5   0   1    1.08    0.51 
  -5   0   1    0.46    0.40 
   5   0  -1    2.37    0.71 
  -5   0   1    0.91    0.44 
  -5   0   1    1.07    0.49 
   5   0  -1    1.22    0.54 
   5   0  -1    0.51    0.37 
   5   0  -1   -0.11    0.38 
  -5   0   1    0.77    0.37 
   5   0  -1    0.91    0.42 
   5   0  -1    0.75    0.41 
   5   0  -1    1.28    0.60 
   5   0  -1    0.39    0.34 
   5   0  -1    0.93    0.50 
  -5   0   1    1.04    0.57 
   5   0  -1    1.07    0.42 
   5   0  -1    1.89    0.57 
   4   0  -1    0.02    0.32 
  -4   0   1   -0.45    0.20 
  -4   0   1   -0.37    0.33 
   4   0  -1    0.05    0.33 
  -4   0   1   -0.26    0.29 
   4   0  -1   -0.19    0.24 
  -4   0   1    0.37    0.33 
   4   0  -1   -0.10    0.25 
   4   0  -1    0.35    0.39 
  -4   0   1    0.05    0.29 
  -4   0   1    0.15    0.32 
   4   0  -1    0.16    0.29 
  -4   0   1   -0.17    0.28 
   4   0  -1    0.29    0.33 
  -4   0   1    0.39    0.33 
   4   0  -1    0.30    0.34 
  -4   0   1    0.55    0.32 
  -4   0   1    0.29    0.15 
  -4   0   1   -0.03    0.34 
   4   0  -1   -0.04    0.29 
   4   0  -1    0.20    0.29 
   4   0  -1    0.57    0.40 
  -4   0   1   -0.44    0.16 
   4   0  -1    0.16    0.32 
   4   0  -1    0.09    0.32 
  -4   0   1   -0.31    0.27 
   4   0  -1   -0.24    0.27 
   4   0  -1   -0.01    0.25 
  -4   0   1   -0.32    0.26 
  -4   0   1   -0.21    0.30 
   4   0  -1   -0.19    0.25 
   4   0  -1   -0.08    0.29 
  -3   0   1   58.90    2.52 
   3   0  -1   65.74    2.49 
  -3   0   1   63.31    2.38 
  -3   0   1   61.82    2.44 
  -3   0   1   61.25    2.46 
   3   0  -1   63.07    2.35 
  -3   0   1   62.33    2.50 
   3   0  -1   64.73    2.41 
  -3   0   1   61.18    2.49 
   3   0  -1   63.99    2.51 
   3   0  -1   64.69    2.56 
   3   0  -1   62.74    2.53 
  -3   0   1   63.42    2.65 
  -3   0   1   65.02    2.40 
   3   0  -1   63.55    2.46 
   3   0  -1   61.69    2.50 
   3   0  -1   62.84    2.29 
  -3   0   1   64.89    2.39 
  -3   0   1   61.90    2.43 
   3   0  -1   61.42    2.70 
   3   0  -1   62.84    2.37 
   3   0  -1   60.40    2.48 
   3   0  -1   63.17    2.56 
  -3   0   1   58.48    2.38 
  -3   0   1   67.78    2.42 
  -3   0   1   63.25    2.31 
  -3   0   1   64.51    2.52 
   3   0  -1   64.15    2.36 
   3   0  -1   67.57    2.54 
  -3   0   1   61.30    2.36 
   3   0  -1   62.11    2.37 
   3   0  -1   61.52    2.36 
   3   0  -1   65.86    2.49 
   3   0  -1   61.33    2.39 
  -3   0   1   62.75    2.48 
   3   0  -1   62.60    2.61 
   3   0  -1   60.96    2.39 
   3   0  -1   62.63    2.43 
   3   0  -1   61.81    2.51 
   3   0  -1   58.03    2.43 
  -3   0   1   57.45    2.60 
  -3   0   1   64.61    2.48 
  -3   0   1   62.18    2.17 
  -3   0   1   56.66    2.40 
  -3   0   1   62.02    2.47 
  -2   0   1    0.10    0.17 
   2   0  -1    0.50    0.19 
   2   0  -1    0.54    0.24 
   2   0  -1    0.47    0.20 
   2   0  -1    0.56    0.28 
  -2   0   1    0.56    0.22 
   2   0  -1    0.48    0.18 
   2   0  -1    0.48    0.19 
  -2   0   1    0.14    0.20 
   2   0  -1    0.59    0.21 
   2   0  -1    0.52    0.23 
   2   0  -1    0.21    0.17 
  -2   0   1    0.47    0.24 
   2   0  -1    0.04    0.16 
   2   0  -1    0.25    0.20 
  -2   0   1   -0.03    0.16 
  -2   0   1    0.17    0.19 
  -2   0   1    0.36    0.24 
   2   0  -1    0.17    0.16 
  -2   0   1    0.49    0.20 
  -2   0   1    0.34    0.20 
  -2   0   1    0.64    0.25 
  -2   0   1    0.23    0.17 
   2   0  -1    0.86    0.30 
   2   0  -1    0.57    0.21 
   2   0  -1    0.56    0.24 
   2   0  -1    0.69    0.25 
  -2   0   1    0.23    0.19 
  -2   0   1    0.38    0.19 
  -2   0   1    0.42    0.21 
   2   0  -1    0.50    0.23 
  -2   0   1    0.13    0.16 
  -2   0   1    0.55    0.21 
  -2   0   1    0.24    0.20 
   2   0  -1    0.24    0.19 
   2   0  -1    0.43    0.21 
  -2   0   1    0.27    0.21 
   2   0  -1    0.10    0.22 
  -2   0   1    0.68    0.27 
  -2   0   1    0.59    0.20 
  -2   0   1    0.45    0.21 
   2   0  -1    0.16    0.17 
   2   0  -1    0.73    0.23 
  -2   0   1    0.54    0.22 
   2   0  -1    1.15    0.27 
   2   0  -1    0.38    0.23 
  -2   0   1    0.77    0.23 
  -2   0   1    0.70    0.25 
   2   0  -1    0.53    0.20 
   2   0  -1    0.36    0.25 
  -2   0   1   -0.06    0.15 
  -1   0   1   32.51    1.11 
  -1   0   1   26.28    1.03 
   1   0  -1   33.79    1.11 
  -1   0   1   26.34    1.02 
  -1   0   1   27.56    1.02 
  -1   0   1   33.32    1.19 
   0   0   1   -0.03    0.04 
   0   0   1    0.00    0.02 
   1   0   1  187.57    5.90 
   1   0   1  183.42    5.73 
   1   0   1  189.29    5.73 
   1   0   1  191.30    5.76 
  -1   0  -1  180.56    5.85 
   1   0   1  190.97    5.68 
   1   0   1  193.40    5.81 
   1   0   1  192.09    5.73 
   1   0   1  190.92    5.82 
   1   0   1  189.45    5.80 
   1   0   1  192.69    5.77 
   1   0   1  194.95    5.77 
   1   0   1  190.71    5.73 
   1   0   1  192.57    5.78 
   1   0   1  191.20    5.74 
   1   0   1  195.09    5.81 
   1   0   1  190.99    5.87 
   1   0   1  192.01    5.74 
   1   0   1  195.60    5.85 
   1   0   1  198.59    5.88 
   1   0   1  189.02    5.79 
   1   0   1  193.77    5.83 
  -2   0  -1   -0.04    0.15 
   2   0   1    0.32    0.12 
  -2   0  -1    0.33    0.20 
   2   0   1    0.14    0.17 
   2   0   1    0.46    0.19 
  -2   0  -1    0.79    0.27 
  -2   0  -1    0.31    0.22 
   2   0   1    0.27    0.16 
  -2   0  -1    0.15    0.21 
   2   0   1    0.18    0.13 
   2   0   1    0.39    0.15 
   2   0   1    0.51    0.27 
  -2   0  -1    0.43    0.21 
   2   0   1    0.28    0.19 
  -2   0  -1    0.76    0.22 
  -2   0  -1    0.29    0.15 
   2   0   1    0.51    0.24 
  -2   0  -1    0.21    0.19 
  -2   0  -1    0.35    0.20 
  -2   0  -1    0.15    0.18 
  -2   0  -1    0.50    0.17 
  -2   0  -1    0.26    0.17 
  -2   0  -1    0.38    0.19 
  -2   0  -1    0.71    0.25 
   2   0   1   -0.06    0.14 
   2   0   1    0.36    0.22 
   2   0   1    0.19    0.17 
   2   0   1    0.15    0.17 
  -2   0  -1    0.40    0.17 
   2   0   1    0.64    0.25 
  -2   0  -1    0.08    0.15 
  -2   0  -1    0.32    0.16 
  -2   0  -1    0.01    0.13 
   2   0   1    0.68    0.21 
  -2   0  -1    0.15    0.22 
   2   0   1    0.17    0.21 
   2   0   1    0.33    0.20 
   2   0   1    0.25    0.17 
   2   0   1    0.53    0.22 
   2   0   1    0.21    0.20 
   2   0   1    0.68    0.21 
   2   0   1    0.29    0.16 
  -2   0  -1    0.28    0.14 
  -2   0  -1    0.55    0.16 
  -2   0  -1    0.18    0.16 
   2   0   1    0.01    0.14 
   2   0   1    0.62    0.23 
   2   0   1    0.29    0.15 
  -2   0  -1    0.40    0.18 
  -2   0  -1    0.14    0.17 
  -2   0  -1    0.09    0.13 
   2   0   1    0.15    0.20 
   3   0   1   20.51    1.25 
  -3   0  -1   21.73    1.14 
  -3   0  -1   19.42    1.17 
  -3   0  -1   21.43    1.08 
   3   0   1   21.19    1.05 
  -3   0  -1   22.46    1.26 
   3   0   1   21.32    1.24 
  -3   0  -1   22.64    1.29 
  -3   0  -1   21.98    1.05 
  -3   0  -1   22.60    1.20 
  -3   0  -1   22.58    1.07 
  -3   0  -1   22.07    1.39 
   3   0   1   23.80    1.42 
  -3   0  -1   22.67    1.00 
   3   0   1   20.16    0.94 
   3   0   1   21.17    1.13 
   3   0   1   19.33    1.16 
  -3   0  -1   21.86    1.12 
   3   0   1   24.24    1.17 
   3   0   1   23.78    1.15 
  -3   0  -1   18.80    1.14 
   3   0   1   20.99    1.19 
  -3   0  -1   21.73    1.15 
  -3   0  -1   21.76    1.08 
   3   0   1   20.84    1.14 
  -3   0  -1   23.55    1.22 
  -3   0  -1   23.61    1.28 
  -3   0  -1   19.52    1.18 
  -3   0  -1   19.87    1.03 
   3   0   1   20.71    1.03 
   3   0   1   21.43    1.21 
   3   0   1   21.80    1.21 
  -3   0  -1   20.85    1.08 
   3   0   1   22.02    1.15 
  -3   0  -1   21.08    1.17 
   3   0   1   22.02    1.09 
   3   0   1   20.03    0.83 
   3   0   1   20.50    1.04 
   3   0   1   22.91    1.29 
   3   0   1   21.78    1.19 
  -3   0  -1   21.10    1.16 
  -3   0  -1   21.90    1.12 
   3   0   1   23.46    1.11 
   3   0   1   20.70    1.11 
   3   0   1   22.02    1.07 
  -3   0  -1   22.72    1.39 
   3   0   1   22.18    1.27 
   3   0   1   24.52    1.25 
   4   0   1    0.03    0.36 
  -4   0  -1    0.13    0.29 
  -4   0  -1    0.29    0.33 
  -4   0  -1    0.06    0.27 
   4   0   1    0.16    0.20 
   4   0   1    0.27    0.27 
   4   0   1    0.23    0.29 
  -4   0  -1    0.06    0.31 
  -4   0  -1   -0.10    0.22 
   4   0   1    0.35    0.32 
  -4   0  -1   -0.07    0.23 
   4   0   1    0.03    0.34 
   4   0   1    0.01    0.21 
  -4   0  -1    0.08    0.37 
  -4   0  -1   -0.20    0.27 
   4   0   1   -0.18    0.21 
  -4   0  -1    0.20    0.27 
   4   0   1   -0.01    0.26 
   4   0   1    0.10    0.24 
   4   0   1   -0.30    0.31 
   4   0   1    0.11    0.28 
   4   0   1   -0.06    0.26 
  -4   0  -1   -0.12    0.19 
  -4   0  -1    0.10    0.19 
  -4   0  -1    0.10    0.22 
  -4   0  -1   -0.02    0.20 
   4   0   1   -0.49    0.25 
  -4   0  -1    0.09    0.27 
  -4   0  -1   -0.22    0.24 
  -4   0  -1    0.36    0.33 
  -4   0  -1   -0.08    0.33 
   4   0   1   -0.47    0.22 
   4   0   1    0.40    0.33 
   5   0   1   18.45    1.45 
  -5   0  -1   19.46    1.41 
  -5   0  -1   17.54    1.54 
  -5   0  -1   18.85    1.16 
  -5   0  -1   17.63    1.04 
   5   0   1   18.55    1.35 
   5   0   1   17.02    1.66 
   5   0   1   17.03    1.25 
   5   0   1   20.04    1.66 
   5   0   1   18.23    1.18 
   5   0   1   16.52    1.18 
   5   0   1   18.55    1.39 
  -5   0  -1   18.08    1.44 
   5   0   1   17.96    1.15 
  -5   0  -1   16.88    1.25 
   5   0   1   18.40    1.19 
   5   0   1   18.86    1.43 
   5   0   1   18.67    1.31 
  -5   0  -1   18.68    1.28 
   5   0   1   17.23    1.20 
  -5   0  -1   17.48    1.23 
  -5   0  -1   17.30    1.38 
  -5   0  -1   14.39    1.16 
   5   0   1   16.29    1.37 
  -5   0  -1   20.38    1.42 
   5   0   1   19.47    1.41 
   5   0   1   18.34    1.90 
   5   0   1   16.00    1.36 
  -5   0  -1   19.14    1.37 
   6   0   1    1.68    0.52 
   6   0   1    1.95    0.76 
   6   0   1    1.04    0.59 
  -6   0  -1    1.04    0.33 
  -6   0  -1    1.16    0.52 
   6   0   1    1.15    0.44 
  -6   0  -1    0.99    0.49 
   6   0   1    1.54    0.59 
  -6   0  -1    0.38    0.46 
  -6   0  -1    0.32    0.44 
   6   0   1    1.55    0.60 
   6   0   1    1.24    0.44 
   6   0   1    1.00    0.57 
   6   0   1    1.34    0.50 
  -6   0  -1    0.66    0.36 
   6   0   1    0.41    0.47 
   6   0   1    1.61    0.65 
   6   0   1    1.38    0.79 
  -6   0  -1    0.20    0.44 
   6   0   1    1.44    0.52 
   6   0   1    0.63    0.41 
   6   0   1    1.45    0.50 
   6   0   1    1.16    0.64 
  -6   0  -1    0.98    0.61 
   6   0   1    0.83    0.51 
  -6   0  -1    1.18    0.54 
  -6   0  -1    1.52    0.55 
  -6   0  -1    0.95    0.46 
   7   0   1  201.40    7.51 
  -7   0  -1  204.72    7.82 
   7   0   1  222.17    7.74 
  -7   0  -1  214.79    7.88 
   7   0   1  196.59    8.28 
   7   0   1  196.12    7.73 
   7   0   1  209.91    7.91 
  -7   0  -1  214.97    7.34 
  -7   0  -1  208.62    8.42 
  -7   0  -1  204.96    7.63 
   7   0   1  217.50    7.95 
   7   0   1  209.98    7.84 
   7   0   1  213.90    7.35 
  -7   0  -1  205.75    7.96 
  -7   0  -1  214.29    7.83 
   7   0   1  208.00    8.01 
  -7   0  -1  219.57    7.64 
   7   0   1  217.68    7.31 
   7   0   1  212.35    7.44 
   7   0   1  206.54    8.45 
   7   0   1  215.36    7.47 
   7   0   1  214.40    8.13 
   7   0   1  224.76    8.27 
  -7   0  -1  207.30    8.11 
   7   0   1  210.21    7.41 
   7   0   1  200.77    8.41 
  -7   0  -1  217.50    7.08 
  -8   0  -1    0.03    0.44 
   8   0   1   -0.48    0.39 
   8   0   1    0.49    0.68 
   8   0   1    0.72    0.94 
   8   0   1    0.39    0.74 
   8   0   1   -0.16    0.55 
   8   0   1    0.07    0.51 
   8   0   1   -0.20    0.61 
   8   0   1   -0.38    0.58 
  -8   0  -1   -0.62    0.49 
   8   0   1    1.59    0.77 
  -8   0  -1   -0.59    0.54 
   8   0   1    0.11    0.73 
   8   0   1    0.42    0.54 
   8   0   1    0.34    0.48 
  -8   0  -1   -0.33    0.64 
   8   0   1   -0.52    0.58 
  -8   0  -1    0.82    0.73 
   8   0   1    0.18    0.50 
   8   0   1    0.47    0.91 
   8   0   1    1.01    0.66 
  -8   0  -1    0.23    0.57 
  -8   0  -1    0.10    0.63 
   8   0   1   -0.53    0.48 
  -8   0  -1    0.39    0.54 
  -8   0  -1   -0.55    0.45 
  -8   0  -1    0.59    0.64 
  -9   0  -1   62.06    3.75 
  -9   0  -1   68.06    3.93 
  -9   0  -1   68.16    3.69 
   9   0   1   66.02    3.39 
  -9   0  -1   55.92    3.88 
  -9   0  -1   61.38    4.29 
   9   0   1   73.07    4.61 
   9   0   1   62.60    3.54 
  -9   0  -1   65.85    3.32 
   9   0   1   71.32    4.52 
   9   0   1   65.05    3.84 
   9   0   1   66.48    3.94 
  -9   0  -1   73.50    4.28 
   9   0   1   64.49    4.10 
  -9   0  -1   69.56    3.95 
   9   0   1   70.09    4.60 
   9   0   1   71.30    4.19 
   9   0   1   64.71    3.89 
   9   0   1   69.18    4.02 
   9   0   1   66.96    3.66 
   9   0   1   61.55    3.99 
  -9   0  -1   64.97    3.90 
 -10   0  -1    0.63    0.84 
 -10   0  -1   -0.54    0.70 
  10   0   1    0.37    1.21 
 -10   0  -1   -0.86    0.67 
 -10   0  -1   -0.97    0.85 
  10   0   1    0.87    0.95 
  10   0   1    0.14    0.89 
  10   0   1    0.30    0.96 
 -10   0  -1    0.53    0.89 
 -10   0  -1    0.18    0.76 
  10   0   1   -0.42    0.78 
  10   0   1   -0.64    0.90 
  10   0   1   -1.12    0.71 
  10   0   1   -0.42    1.03 
 -10   0  -1    1.43    1.05 
  10   0   1   -1.01    0.64 
  10   0   1   -0.24    1.11 
  10   0   1    0.28    0.92 
 -10   0  -1   -0.45    0.60 
  10   0   1    1.55    1.05 
 -10  -1   1   50.99    4.12 
  10  -1  -1   54.14    3.33 
 -10  -1   1   58.59    4.04 
  10  -1  -1   47.98    3.44 
  10  -1  -1   57.98    5.66 
  10  -1  -1   50.40    4.89 
  10  -1  -1   53.31    3.92 
  10  -1  -1   45.56    3.36 
 -10  -1   1   49.74    3.52 
  10  -1  -1   52.90    3.82 
 -10  -1   1   56.68    3.70 
  10  -1  -1   57.78    4.50 
  10  -1  -1   54.09    3.58 
  10  -1  -1   51.19    3.81 
  10  -1  -1   46.84    3.62 
 -10  -1   1   52.29    3.61 
 -10  -1   1   54.90    4.02 
  10  -1  -1   45.78    4.06 
  10  -1  -1   53.48    3.99 
  10   1  -1   49.55    3.52 
  10   1  -1   53.70    3.61 
  10   1  -1   52.22    3.25 
 -10   1   1   56.79    3.79 
 -10   1   1   60.02    3.68 
  10   1  -1   46.96    4.11 
  10   1  -1   51.05    4.27 
 -10   1   1   57.92    3.92 
 -10   1   1   48.29    3.05 
 -10   1   1   57.24    4.00 
  10   1  -1   48.11    3.72 
  10   1  -1   57.73    3.80 
 -10   1   1   55.22    3.77 
 -10   1   1   57.88    3.82 
  10   1  -1   51.40    3.64 
  10   1  -1   50.32    3.76 
  10   1  -1   50.80    4.20 
  10   1  -1   50.32    3.37 
  10   1  -1   43.16    4.14 
 -10   1   1   48.90    3.81 
 -10   1   1   52.93    4.19 
   9  -1  -1    1.22    0.90 
  -9  -1   1    0.11    0.77 
  -9  -1   1    4.19    1.18 
   9  -1  -1    1.02    0.95 
   9  -1  -1    1.88    0.81 
   9  -1  -1    1.58    0.90 
  -9  -1   1    0.38    0.74 
  -9  -1   1   -0.07    0.51 
   9  -1  -1    0.23    0.89 
  -9  -1   1    1.91    1.06 
  -9  -1   1    0.64    0.71 
   9  -1  -1    0.83    1.11 
   9  -1  -1    0.87    0.89 
   9  -1  -1    1.71    0.85 
  -9  -1   1    0.36    0.90 
   9  -1  -1    0.08    0.81 
   9  -1  -1    1.32    1.09 
   9  -1  -1    0.25    0.63 
  -9  -1   1    2.63    1.02 
   9  -1  -1    2.32    1.08 
   9  -1  -1    1.37    1.01 
  -9  -1   1    0.27    0.71 
   9  -1  -1    1.03    0.77 
   9  -1  -1    0.45    0.66 
   9  -1  -1    1.07    0.76 
   9   1  -1    0.84    0.79 
   9   1  -1    2.22    0.81 
   9   1  -1    1.69    1.03 
  -9   1   1    0.48    0.66 
  -9   1   1    1.31    0.88 
   9   1  -1    0.98    1.05 
   9   1  -1    2.72    1.04 
   9   1  -1    1.33    0.98 
  -9   1   1    1.33    1.11 
  -9   1   1    0.50    0.83 
  -9   1   1    1.87    1.05 
  -9   1   1    0.28    0.72 
   9   1  -1    1.54    0.79 
   9   1  -1    1.46    1.08 
   9   1  -1    1.63    0.82 
   9   1  -1    1.63    0.86 
  -9   1   1    1.63    0.97 
  -9   1   1    2.34    1.03 
  -9   1   1    2.02    1.06 
   9   1  -1    1.22    0.91 
   9   1  -1    0.85    0.89 
   9   1  -1    1.43    0.83 
  -9   1   1   -0.12    0.58 
   9   1  -1    1.55    0.98 
  -8  -1   1   33.92    2.01 
   8  -1  -1   39.03    2.51 
   8  -1  -1   35.78    2.36 
   8  -1  -1   37.79    3.16 
  -8  -1   1   36.26    2.56 
  -8  -1   1   37.81    2.56 
   8  -1  -1   38.14    2.58 
   8  -1  -1   38.42    2.55 
  -8  -1   1   38.40    2.61 
   8  -1  -1   37.58    2.74 
   8  -1  -1   31.79    2.50 
   8  -1  -1   36.80    2.81 
   8  -1  -1   36.60    3.07 
  -8  -1   1   41.66    2.67 
   8  -1  -1   37.16    2.76 
   8  -1  -1   38.48    2.78 
   8  -1  -1   35.42    2.32 
  -8  -1   1   40.76    2.46 
   8  -1  -1   36.23    3.07 
  -8  -1   1   37.92    2.83 
  -8  -1   1   39.64    2.37 
  -8  -1   1   32.92    2.82 
  -8  -1   1   31.22    2.58 
   8  -1  -1   36.95    2.39 
  -8  -1   1   37.75    2.61 
   8  -1  -1   31.89    2.44 
   8  -1  -1   38.60    2.80 
   8   1  -1   37.61    2.45 
   8   1  -1   38.08    2.28 
   8   1  -1   33.47    2.69 
   8   1  -1   39.76    2.32 
  -8   1   1   36.60    2.64 
  -8   1   1   36.23    2.72 
  -8   1   1   37.40    2.70 
   8   1  -1   35.01    2.09 
   8   1  -1   37.22    2.63 
  -8   1   1   36.00    2.06 
   8   1  -1   35.90    2.68 
  -8   1   1   36.11    2.29 
   8   1  -1   31.56    3.08 
   8   1  -1   38.98    3.19 
   8   1  -1   33.59    2.66 
  -8   1   1   34.66    2.62 
   8   1  -1   39.28    2.69 
   8   1  -1   34.15    2.50 
  -8   1   1   37.20    2.65 
   8   1  -1   39.34    2.28 
  -8   1   1   42.78    2.67 
   8   1  -1   39.74    2.73 
   8   1  -1   39.30    2.46 
  -8   1   1   33.61    2.82 
  -8   1   1   41.74    2.66 
   7  -1  -1    7.69    1.36 
   7  -1  -1    6.11    1.26 
   7  -1  -1    7.82    1.59 
  -7  -1   1    8.00    1.28 
   7  -1  -1    6.94    1.12 
  -7  -1   1    7.96    1.33 
  -7  -1   1    5.15    1.29 
   7  -1  -1    6.80    1.53 
  -7  -1   1    6.06    1.09 
   7  -1  -1    5.36    1.13 
  -7  -1   1    7.01    1.20 
  -7  -1   1    5.59    1.18 
  -7  -1   1    6.32    1.22 
  -7  -1   1    5.76    1.11 
   7  -1  -1    7.99    1.40 
   7  -1  -1    6.38    1.06 
   7  -1  -1    7.37    1.14 
   7  -1  -1    8.47    1.02 
   7  -1  -1    6.96    1.24 
   7  -1  -1    8.68    1.44 
   7  -1  -1    5.50    1.08 
   7  -1  -1    8.69    1.41 
  -7  -1   1    7.02    1.04 
   7  -1  -1    6.02    1.09 
  -7  -1   1    7.43    0.74 
   7  -1  -1    5.63    1.37 
   7  -1  -1    5.87    1.09 
  -7  -1   1    6.37    1.18 
  -7   1   1    6.10    0.90 
  -7   1   1    7.97    1.28 
  -7   1   1    5.03    1.06 
   7   1  -1    6.40    1.02 
   7   1  -1    6.70    0.98 
   7   1  -1    8.04    1.39 
   7   1  -1    7.47    1.26 
   7   1  -1    6.70    0.93 
   7   1  -1    7.21    1.06 
  -7   1   1    7.01    1.27 
   7   1  -1    5.03    1.11 
   7   1  -1    7.13    1.44 
  -7   1   1    8.02    1.33 
   7   1  -1    6.09    1.21 
  -7   1   1    6.97    1.07 
   7   1  -1    7.27    1.34 
   7   1  -1    6.21    1.18 
  -7   1   1    5.69    1.12 
   7   1  -1    5.82    1.05 
  -7   1   1    6.40    1.12 
   7   1  -1    7.22    1.12 
  -7   1   1    7.81    1.55 
  -7   1   1    7.09    1.36 
   7   1  -1    6.52    1.28 
   7   1  -1    6.43    1.25 
  -6  -1   1  176.65    6.57 
   6  -1  -1  178.23    6.82 
   6  -1  -1  181.95    6.89 
   6  -1  -1  183.46    6.53 
  -6  -1   1  182.94    6.35 
  -6  -1   1  185.14    6.52 
  -6  -1   1  185.52    6.95 
  -6  -1   1  192.23    6.73 
   6  -1  -1  181.67    6.56 
   6  -1  -1  180.07    6.66 
  -6  -1   1  177.68    6.65 
  -6  -1   1  186.07    5.76 
  -6  -1   1  168.47    6.84 
  -6  -1   1  184.53    7.20 
   6  -1  -1  180.07    6.95 
   6  -1  -1  187.30    6.72 
   6  -1  -1  181.96    6.55 
   6  -1  -1  182.82    7.34 
   6  -1  -1  180.43    6.87 
   6  -1  -1  174.48    7.21 
   6  -1  -1  188.86    6.99 
  -6  -1   1  185.75    6.69 
   6  -1  -1  174.86    6.74 
  -6  -1   1  174.90    6.68 
   6  -1  -1  186.01    6.75 
   6  -1  -1  180.36    6.60 
  -6   1   1  180.36    5.88 
   6   1  -1  187.65    6.59 
   6   1  -1  181.28    7.26 
   6   1  -1  181.07    6.48 
   6   1  -1  182.46    6.32 
   6   1  -1  179.75    6.77 
   6   1  -1  180.23    6.77 
   6   1  -1  179.98    6.65 
   6   1  -1  175.16    6.85 
  -6   1   1  181.28    6.83 
  -6   1   1  185.53    6.26 
   6   1  -1  184.01    6.45 
  -6   1   1  183.52    7.21 
  -6   1   1  176.56    6.89 
   6   1  -1  187.08    6.76 
  -6   1   1  183.30    6.74 
  -6   1   1  186.34    6.73 
  -6   1   1  188.54    6.85 
   6   1  -1  174.43    6.66 
   6   1  -1  181.56    6.22 
  -6   1   1  182.97    6.21 
   6   1  -1  179.13    6.32 
   6   1  -1  178.01    6.86 
  -6   1   1  170.57    6.58 
  -6   1   1  177.60    6.72 
   6   1  -1  186.18    6.97 
  -5  -1   1   38.29    2.10 
  -5  -1   1   38.89    1.91 
   5  -1  -1   41.12    2.19 
  -5  -1   1   36.88    2.23 
   5  -1  -1   39.24    2.26 
   5  -1  -1   41.35    2.11 
  -5  -1   1   40.69    1.52 
  -5  -1   1   39.69    1.91 
   5  -1  -1   41.18    2.49 
  -5  -1   1   37.80    2.38 
   5  -1  -1   42.18    2.30 
  -5  -1   1   36.14    2.02 
  -5  -1   1   39.72    2.03 
  -5  -1   1   36.03    2.04 
   5  -1  -1   43.93    2.33 
   5  -1  -1   40.81    2.18 
   5  -1  -1   44.66    2.36 
  -5  -1   1   41.42    2.14 
  -5  -1   1   43.17    2.22 
   5  -1  -1   40.39    2.09 
  -5  -1   1   39.00    2.26 
   5  -1  -1   38.11    2.10 
   5  -1  -1   40.67    2.05 
  -5  -1   1   43.61    2.17 
   5  -1  -1   44.11    2.21 
   5  -1  -1   41.99    2.55 
   5  -1  -1   39.25    2.11 
   5  -1  -1   40.75    2.30 
   5   1  -1   40.71    2.03 
   5   1  -1   39.17    1.92 
   5   1  -1   39.85    2.18 
  -5   1   1   37.20    2.12 
   5   1  -1   44.08    2.39 
  -5   1   1   38.04    1.82 
  -5   1   1   36.57    2.16 
  -5   1   1   38.68    1.84 
  -5   1   1   36.25    2.07 
   5   1  -1   39.41    2.47 
   5   1  -1   40.68    2.02 
   5   1  -1   42.31    2.30 
  -5   1   1   41.09    2.29 
   5   1  -1   37.98    2.09 
  -5   1   1   45.81    2.24 
  -5   1   1   37.53    2.10 
   5   1  -1   39.07    1.83 
   5   1  -1   39.95    2.12 
  -5   1   1   38.97    2.21 
   5   1  -1   39.80    2.05 
   5   1  -1   37.55    2.11 
   5   1  -1   38.24    2.14 
   5   1  -1   41.45    1.93 
  -5   1   1   42.01    1.70 
   5   1  -1   42.40    2.28 
  -5   1   1   41.21    2.43 
   4  -1  -1  558.76   17.53 
  -4  -1   1  558.56   17.31 
  -4  -1   1  553.91   17.29 
  -4  -1   1  536.32   17.49 
  -4  -1   1  560.33   17.33 
  -4  -1   1  580.68   17.22 
  -4  -1   1  567.54   17.24 
   4  -1  -1  564.82   17.35 
  -4  -1   1  562.18   17.38 
  -4  -1   1  555.52   17.26 
   4  -1  -1  561.92   17.28 
  -4  -1   1  556.14   17.74 
  -4  -1   1  570.88   17.32 
  -4  -1   1  579.26   17.58 
   4  -1  -1  552.06   17.05 
  -4  -1   1  548.28   17.14 
   4  -1  -1  551.52   17.52 
   4  -1  -1  565.33   17.31 
   4  -1  -1  554.84   17.82 
   4  -1  -1  573.42   17.37 
   4  -1  -1  574.02   17.43 
  -4  -1   1  562.31   16.65 
   4  -1  -1  552.17   17.63 
  -4  -1   1  573.00   17.26 
   4  -1  -1  563.34   17.58 
  -4  -1   1  559.76   17.29 
   4  -1  -1  574.77   17.40 
  -4  -1   1  564.48   17.33 
   4  -1  -1  561.44   16.94 
  -4  -1   1  574.60   17.13 
   4  -1  -1  567.88   17.39 
   4  -1  -1  546.39   17.78 
   4  -1  -1  562.57   17.36 
   4  -1  -1  569.66   17.53 
   4  -1  -1  555.95   17.52 
   4  -1  -1  563.02   17.40 
  -4  -1   1  575.99   17.07 
   4   1  -1  571.78   17.43 
  -4   1   1  558.48   17.71 
   4   1  -1  551.31   17.31 
   4   1  -1  559.31   17.27 
   4   1  -1  575.75   17.12 
   4   1  -1  568.24   17.40 
  -4   1   1  574.53   16.99 
  -4   1   1  562.78   17.08 
  -4   1   1  564.14   16.90 
   4   1  -1  568.98   17.66 
   4   1  -1  552.78   17.42 
  -4   1   1  575.40   17.41 
   4   1  -1  558.47   17.48 
  -4   1   1  555.71   17.39 
  -4   1   1  587.67   17.44 
  -4   1   1  575.28   17.51 
   4   1  -1  566.16   17.51 
  -4   1   1  567.82   17.53 
  -4   1   1  566.09   17.40 
   4   1  -1  552.11   17.82 
   4   1  -1  581.92   17.26 
   4   1  -1  573.43   17.14 
   4   1  -1  570.30   17.30 
   4   1  -1  559.28   17.03 
  -4   1   1  549.23   17.45 
  -3  -1   1   36.94    1.23 
   3  -1  -1   35.88    1.68 
   3  -1  -1   35.51    1.67 
   3  -1  -1   35.50    1.69 
   3  -1  -1   36.69    1.67 
   3  -1  -1   38.09    1.68 
  -3  -1   1   36.67    1.67 
  -3  -1   1   38.40    1.64 
   3  -1  -1   37.26    1.43 
  -3  -1   1   38.40    1.65 
  -3  -1   1   37.90    1.95 
  -3  -1   1   37.63    1.73 
  -3  -1   1   37.63    1.72 
  -3  -1   1   37.15    1.96 
   3  -1  -1   36.15    1.77 
   3  -1  -1   38.85    1.58 
  -3  -1   1   38.05    1.92 
  -3  -1   1   39.48    1.51 
   3  -1  -1   38.88    1.51 
   3  -1  -1   33.69    1.67 
   3  -1  -1   32.70    1.86 
  -3  -1   1   37.52    1.65 
   3  -1  -1   37.22    1.51 
  -3  -1   1   38.88    1.84 
   3  -1  -1   37.88    1.75 
   3  -1  -1   36.01    1.78 
  -3  -1   1   35.81    1.60 
  -3  -1   1   33.67    1.57 
   3  -1  -1   37.52    1.80 
   3  -1  -1   34.72    1.72 
   3  -1  -1   36.73    1.72 
   3  -1  -1   36.30    1.71 
  -3  -1   1   34.51    1.73 
  -3  -1   1   36.82    1.57 
   3  -1  -1   38.06    1.89 
   3  -1  -1   38.03    1.74 
  -3  -1   1   36.03    1.67 
  -3  -1   1   37.45    1.69 
   3  -1  -1   33.40    1.72 
  -3  -1   1   36.59    1.71 
  -3  -1   1   36.93    1.65 
   3  -1  -1   38.03    1.94 
  -3  -1   1   37.14    1.69 
  -3  -1   1   34.36    1.70 
   3  -1  -1   38.21    1.81 
  -3  -1   1   36.56    1.67 
  -3  -1   1   37.84    1.71 
  -3   1   1   35.13    1.68 
   3   1  -1   40.26    1.76 
  -3   1   1   37.91    1.65 
   3   1  -1   34.32    1.59 
   3   1  -1   39.35    1.71 
  -3   1   1   37.03    1.65 
   3   1  -1   42.20    2.05 
   3   1  -1   36.15    1.78 
   3   1  -1   37.15    1.64 
   3   1  -1   37.90    1.74 
  -3   1   1   37.75    1.72 
   3   1  -1   34.94    1.67 
   3   1  -1   37.61    1.66 
  -3   1   1   35.25    1.73 
  -3   1   1   33.80    1.73 
  -3   1   1   36.47    1.85 
  -3   1   1   35.85    1.55 
   3   1  -1   36.78    1.60 
   3   1  -1   37.72    1.57 
  -3   1   1   34.75    1.74 
   3   1  -1   37.65    1.66 
   3   1  -1   34.07    1.63 
   3   1  -1   37.51    1.63 
  -3   1   1   38.41    1.74 
   3   1  -1   36.71    1.61 
  -3   1   1   42.67    1.94 
  -3   1   1   34.99    1.71 
  -3   1   1   40.18    1.74 
  -3   1   1   36.09    1.75 
  -3   1   1   35.70    1.69 
  -3   1   1   35.74    1.70 
  -3   1   1   37.27    1.76 
  -3   1   1   34.79    1.42 
   3   1  -1   36.79    1.57 
   3   1  -1   38.97    1.75 
   3   1  -1   40.05    1.81 
  -3   1   1   37.30    1.81 
   3   1  -1   35.75    1.72 
  -3   1   1   39.23    1.50 
   3   1  -1   35.96    1.65 
  -3   1   1   35.74    1.73 
   3   1  -1   38.54    1.79 
  -3   1   1   35.64    1.69 
   3   1  -1   35.59    1.50 
  -3   1   1   34.09    1.67 
   3   1  -1   35.02    1.84 
  -3   1   1   36.56    1.74 
   2  -1  -1   67.78    2.51 
  -2  -1   1   67.37    2.12 
   2  -1  -1   68.28    2.52 
   2  -1  -1   70.99    2.69 
   2  -1  -1   67.49    2.52 
   2  -1  -1   67.18    2.44 
  -2  -1   1   71.38    2.49 
  -2  -1   1   71.51    2.55 
   2  -1  -1   69.63    2.52 
   2  -1  -1   73.86    2.58 
  -2  -1   1   67.47    2.62 
   2  -1  -1   65.81    2.44 
   2  -1  -1   67.86    2.46 
   2  -1  -1   66.46    2.26 
  -2  -1   1   68.32    2.45 
   2  -1  -1   67.66    2.17 
   2  -1  -1   69.56    2.42 
  -2  -1   1   66.27    2.51 
   2  -1  -1   68.62    2.47 
  -2  -1   1   70.82    2.49 
   2  -1  -1   71.00    2.71 
  -2  -1   1   69.57    2.40 
   2  -1  -1   66.60    2.20 
  -2  -1   1   64.45    2.49 
  -2  -1   1   67.39    2.47 
   2  -1  -1   66.18    2.53 
   2  -1  -1   70.54    2.58 
  -2  -1   1   72.36    2.70 
  -2  -1   1   68.30    2.61 
  -2  -1   1   68.09    2.41 
  -2  -1   1   71.31    2.60 
   2  -1  -1   73.01    2.50 
  -2  -1   1   67.67    2.24 
  -2  -1   1   70.75    2.38 
  -2  -1   1   68.30    2.44 
   2  -1  -1   72.59    2.56 
   2  -1  -1   67.15    2.53 
  -2  -1   1   67.72    2.45 
  -2  -1   1   64.05    2.71 
  -2  -1   1   69.16    2.52 
   2  -1  -1   71.25    2.55 
   2  -1  -1   70.70    2.54 
   2  -1  -1   70.76    2.57 
  -2  -1   1   66.55    2.50 
   2  -1  -1   70.14    2.54 
   2  -1  -1   67.46    2.28 
  -2  -1   1   70.64    2.43 
   2  -1  -1   69.51    2.57 
  -2  -1   1   66.48    2.48 
  -2   1   1   68.72    2.55 
  -2   1   1   69.86    2.48 
  -2   1   1   68.82    2.52 
  -2   1   1   71.73    2.43 
   2   1  -1   67.37    2.56 
   2   1  -1   67.86    2.44 
   2   1  -1   65.15    2.54 
   2   1  -1   69.32    2.45 
   2   1  -1   67.14    2.43 
   2   1  -1   69.00    2.43 
   2   1  -1   66.87    2.46 
   2   1  -1   68.14    2.54 
   2   1  -1   67.05    2.50 
  -2   1   1   66.10    2.53 
  -2   1   1   65.86    2.49 
  -2   1   1   64.89    2.37 
  -2   1   1   68.99    2.54 
   2   1  -1   71.14    2.37 
  -2   1   1   68.42    2.52 
  -2   1   1   67.90    2.53 
  -2   1   1   70.89    2.49 
  -2   1   1   67.28    2.52 
  -2   1   1   71.09    2.66 
  -2   1   1   69.00    2.21 
   2   1  -1   66.85    2.44 
  -2   1   1   67.94    2.52 
  -2   1   1   69.08    2.66 
   2   1  -1   69.67    2.50 
   2   1  -1   72.90    2.59 
  -2   1   1   68.63    2.54 
   2   1  -1   71.76    2.47 
   2   1  -1   71.70    2.49 
   2   1  -1   71.52    2.66 
   2   1  -1   65.78    2.38 
   2   1  -1   68.09    2.49 
  -2   1   1   69.60    2.47 
  -2   1   1   70.06    2.55 
   2   1  -1   70.67    2.51 
  -2   1   1   64.69    2.51 
   2   1  -1   70.32    2.45 
   2   1  -1   73.26    2.58 
  -2   1   1   67.82    2.52 
   2   1  -1   72.70    2.76 
   2   1  -1   65.48    2.36 
  -2   1   1   64.85    2.45 
  -2   1   1   69.50    2.46 
  -2   1   1   67.65    2.51 
   2   1  -1   68.33    2.45 
   2   1  -1   70.72    2.41 
   2   1  -1   69.01    2.73 
   1  -1  -1    4.85    0.39 
  -1  -1   1    4.91    0.54 
  -1  -1   1    5.18    0.48 
   1  -1  -1    5.04    0.39 
   1  -1  -1    4.53    0.35 
   1  -1  -1    3.44    0.37 
  -1  -1   1    4.72    0.51 
  -1  -1   1    4.04    0.47 
  -1  -1   1    4.52    0.42 
   1  -1  -1    5.17    0.38 
  -1  -1   1    5.13    0.38 
  -1  -1   1    5.11    0.38 
  -1  -1   1    4.95    0.30 
   1  -1  -1    5.14    0.39 
   1  -1  -1    4.86    0.45 
  -1  -1   1    6.08    0.50 
   1  -1  -1    5.18    0.41 
  -1  -1   1    4.43    0.55 
   1  -1  -1    3.98    0.47 
  -1  -1   1    4.44    0.26 
   1  -1  -1    3.00    0.37 
  -1  -1   1    5.67    0.45 
  -1  -1   1    4.72    0.51 
   1  -1  -1    4.23    0.42 
  -1  -1   1    4.62    0.49 
  -1  -1   1    5.19    0.55 
   1  -1  -1    5.10    0.41 
   1  -1  -1    4.55    0.37 
   1  -1  -1    5.01    0.47 
  -1  -1   1    4.91    0.50 
   1  -1  -1    4.84    0.45 
   1  -1  -1    5.69    0.45 
  -1  -1   1    6.50    0.67 
  -1  -1   1    5.21    0.38 
   1  -1  -1    4.78    0.54 
  -1  -1   1    5.43    0.62 
   1  -1  -1    2.89    0.37 
  -1  -1   1    4.28    0.41 
   1  -1  -1    5.17    0.39 
  -1  -1   1    5.10    0.49 
  -1  -1   1    5.04    0.49 
   1  -1  -1    4.77    0.40 
  -1  -1   1    5.82    0.46 
  -1   1   1    4.99    0.41 
   1   1  -1    5.39    0.60 
   1   1  -1    5.10    0.39 
   1   1  -1    4.76    0.36 
  -1   1   1    3.59    0.37 
   1   1  -1    4.95    0.54 
   1   1  -1    4.93    0.37 
   1   1  -1    4.35    0.45 
   1   1  -1    5.92    0.53 
  -1   1   1    5.35    0.38 
  -1   1   1    4.79    0.39 
  -1   1   1    4.54    0.34 
   1   1  -1    5.06    0.34 
  -1   1   1    5.03    0.39 
   1   1  -1    4.50    0.27 
   1   1  -1    5.11    0.50 
   1   1  -1    5.80    0.57 
  -1   1   1    4.68    0.46 
  -1   1   1    4.62    0.34 
  -1   1   1    4.89    0.45 
  -1   1   1    5.18    0.39 
   1   1  -1    5.06    0.45 
   1   1  -1    5.75    0.53 
   1   1  -1    5.06    0.40 
  -1   1   1    4.81    0.45 
  -1   1   1    4.85    0.35 
   1   1  -1    5.54    0.66 
  -1   1   1    5.18    0.48 
  -1   1   1    5.18    0.29 
  -1   1   1    4.47    0.29 
   1   1  -1    5.05    0.35 
   1   1  -1    5.10    0.28 
   1   1  -1    4.33    0.50 
  -1   1   1    4.87    0.39 
   1   1  -1    5.24    0.54 
  -1   1   1    4.89    0.51 
   1   1  -1    6.47    0.59 
   1   1  -1    5.16    0.38 
  -1   1   1    5.30    0.39 
   1   1  -1    4.41    0.41 
  -1   1   1    4.86    0.44 
  -1   1   1    4.02    0.42 
   1   1  -1    4.32    0.55 
   1   1  -1    5.15    0.39 
  -1   1   1    4.47    0.39 
   1   1  -1    4.41    0.46 
  -1   1   1    5.28    0.39 
   1   1  -1    4.88    0.48 
   1   1  -1    4.82    0.34 
   0  -1   1  447.43   12.90 
   0  -1   1  373.17   12.83 
   0  -1   1  444.58   12.99 
   0  -1   1  446.67   13.02 
   0   1   1  429.26   13.19 
   0   1  -1  437.61   12.93 
   0   1  -1  444.74   12.87 
   0   1  -1  436.99   12.95 
   0   1   1  437.48   12.75 
   0   1  -1  425.36   13.23 
   0   1   1  429.81   13.09 
   0   1  -1  430.59   13.11 
   0   1   1  441.98   13.00 
   0   1  -1  442.35   12.78 
   0   1  -1  450.03   13.02 
   0   1  -1  453.90   12.83 
   0   1   1  435.00   12.87 
   0   1   1  441.35   12.83 
   0   1   1  375.88   12.99 
   0   1  -1  435.14   12.87 
   0   1  -1  438.08   12.82 
   0   1   1  436.45   12.90 
   0   1   1  414.14   12.89 
   0   1   1  439.52   12.82 
   0   1  -1  436.19   12.88 
   0   1   1  442.66   12.74 
   0   1  -1  425.03   13.18 
   0   1  -1  440.82   13.08 
   0   1  -1  431.93   13.07 
   0   1  -1  454.04   12.94 
   0   1  -1  433.35   12.95 
   0   1   1  452.48   12.77 
   0   1   1  439.73   12.77 
   0   1   1  426.47   12.87 
   0   1   1  423.48   12.95 
   0   1   1  441.48   13.19 
   0   1   1  445.15   12.82 
   0   1  -1  462.82   12.90 
   0   1   1  419.52   12.92 
   0   1   1  427.94   12.97 
   0   1  -1  444.07   12.89 
   0   1   1  393.40   12.84 
   0   1  -1  415.16   13.39 
   0   1  -1  452.16   12.80 
   0   1   1  427.69   12.93 
   0   1   1  429.64   12.81 
   0   1   1  429.41   12.76 
   0   1   1  424.53   12.75 
   0   1   1  436.19   12.76 
   0   1  -1  441.63   13.05 
   0   1   1  433.99   12.83 
   0   1  -1  450.75   12.84 
   0   1   1  440.22   12.87 
  -1  -1  -1   41.24    1.34 
   1  -1   1   41.25    1.54 
  -1  -1  -1   44.09    1.51 
   1  -1   1   41.90    1.53 
   1  -1   1   40.90    1.72 
   1  -1   1   39.31    1.54 
   1  -1   1   43.02    1.62 
   1  -1   1   41.72    1.67 
   1  -1   1   41.01    1.47 
   1  -1   1   41.37    1.68 
  -1  -1  -1   43.24    1.51 
   1  -1   1   38.56    1.49 
   1  -1   1   40.70    1.59 
   1  -1   1   41.13    1.57 
   1  -1   1   41.79    1.55 
   1  -1   1   39.83    1.57 
   1  -1   1   40.73    1.46 
   1  -1   1   40.97    1.48 
   1  -1   1   39.22    1.52 
  -1  -1  -1   40.91    1.62 
  -1  -1  -1   39.45    1.59 
  -1  -1  -1   39.83    1.50 
   1  -1   1   40.18    1.56 
  -1  -1  -1   39.80    1.53 
  -1  -1  -1   38.99    1.63 
   1  -1   1   38.89    1.48 
   1  -1   1   42.29    1.69 
  -1  -1  -1   36.07    1.49 
   1  -1   1   40.21    1.44 
  -1  -1  -1   40.75    1.44 
   1  -1   1   40.65    1.51 
  -1  -1  -1   40.38    1.54 
   1  -1   1   40.10    1.53 
  -1  -1  -1   45.07    1.51 
   1  -1   1   41.95    1.56 
   1  -1   1   43.09    1.52 
  -1  -1  -1   41.60    1.48 
  -1  -1  -1   39.27    1.54 
   1  -1   1   38.88    1.46 
  -1  -1  -1   40.99    1.53 
  -1  -1  -1   39.96    1.39 
   1  -1   1   33.27    1.59 
   1  -1   1   41.06    1.50 
   1  -1   1   41.97    1.65 
   1  -1   1   41.50    1.52 
   1   1   1   40.41    1.36 
   1   1   1   42.59    1.47 
  -1   1  -1   42.16    1.66 
  -1   1  -1   43.94    1.56 
  -1   1  -1   40.62    1.45 
   1   1   1   41.80    1.39 
  -1   1  -1   39.91    1.57 
  -1   1  -1   40.40    1.53 
   1   1   1   42.48    1.63 
   1   1   1   40.24    1.48 
  -1   1  -1   42.00    1.57 
  -1   1  -1   41.00    1.45 
  -1   1  -1   40.31    1.51 
  -1   1  -1   42.46    1.55 
  -1   1  -1   40.82    1.53 
   1   1   1   40.77    1.44 
   1   1   1   40.69    1.53 
   1   1   1   40.16    1.30 
  -1   1  -1   39.85    1.51 
   1   1   1   40.39    1.47 
   1   1   1   40.48    1.27 
   1   1   1   39.86    1.46 
   1   1   1   42.22    1.38 
  -1   1  -1   40.80    1.47 
   1   1   1   38.53    1.56 
  -1   1  -1   35.79    1.43 
  -1   1  -1   41.70    1.54 
   1   1   1   38.96    1.48 
  -1   1  -1   42.92    1.69 
  -1   1  -1   40.07    1.49 
   1   1   1   40.57    1.52 
  -1   1  -1   38.64    1.47 
  -1   1  -1   41.14    1.65 
  -1   1  -1   40.16    1.54 
  -1   1  -1   38.41    1.42 
   1   1   1   40.07    1.37 
   1   1   1   42.87    1.54 
   1   1   1   40.33    1.38 
  -1   1  -1   40.97    1.52 
   1   1   1   42.03    1.56 
   1   1   1   40.70    1.51 
  -1   1  -1   40.55    1.54 
   1   1   1   40.76    1.32 
  -1   1  -1   41.76    1.57 
  -1   1  -1   40.54    1.50 
   1   1   1   41.36    1.37 
  -1   1  -1   38.86    1.64 
  -1   1  -1   42.06    1.62 
  -1   1  -1   38.57    1.64 
  -1   1  -1   39.99    1.50 
   1   1   1   39.23    1.47 
   1   1   1   39.11    1.35 
  -1   1  -1   40.95    1.57 
  -1   1  -1   37.93    1.50 
   2  -1   1  946.92   28.42 
  -2  -1  -1  943.75   28.23 
  -2  -1  -1  932.41   28.31 
  -2  -1  -1  970.92   28.22 
  -2  -1  -1  942.66   28.39 
   2  -1   1  948.09   28.45 
  -2  -1  -1  937.33   28.24 
   2  -1   1  936.18   28.09 
   2  -1   1  978.28   28.32 
  -2  -1  -1  928.37   28.44 
   2  -1   1  958.14   28.39 
   2  -1   1  983.93   28.39 
  -2  -1  -1  961.91   28.30 
   2  -1   1  946.49   28.13 
   2  -1   1  957.89   28.41 
  -2  -1  -1  961.96   28.52 
  -2  -1  -1  953.42   28.58 
   2  -1   1 1000.00   28.40 
  -2  -1  -1  947.78   28.07 
  -2  -1  -1  936.53   28.16 
   2  -1   1  950.03   28.33 
  -2  -1  -1  966.75   28.19 
  -2  -1  -1  953.65   28.06 
   2  -1   1  977.45   28.33 
   2  -1   1  958.84   28.60 
  -2  -1  -1  949.62   28.05 
  -2  -1  -1  942.55   28.43 
   2  -1   1  969.58   28.37 
   2  -1   1  976.98   28.37 
   2  -1   1  962.68   28.46 
  -2  -1  -1  924.39   28.01 
   2  -1   1  884.67   28.56 
  -2  -1  -1  939.69   28.32 
   2  -1   1  912.55   28.61 
   2  -1   1  988.82   28.50 
  -2  -1  -1  934.41   28.32 
  -2  -1  -1  941.96   28.43 
   2  -1   1  949.71   28.19 
   2  -1   1  959.94   28.65 
  -2  -1  -1  937.26   28.16 
   2  -1   1  963.64   28.36 
   2  -1   1  943.92   28.39 
   2  -1   1  961.69   28.36 
   2  -1   1  958.38   28.27 
   2  -1   1  941.06   28.44 
   2  -1   1  966.91   28.39 
  -2  -1  -1  943.45   28.12 
  -2  -1  -1  946.41   28.26 
   2  -1   1  957.55   28.38 
  -2   1  -1  976.61   28.62 
   2   1   1  970.30   28.24 
   2   1   1  896.65   28.09 
   2   1   1  949.19   28.25 
  -2   1  -1  960.28   28.36 
   2   1   1  958.36   28.02 
   2   1   1  977.97   28.24 
  -2   1  -1  927.78   28.34 
  -2   1  -1  961.26   28.63 
  -2   1  -1  956.17   28.37 
   2   1   1  943.89   28.32 
   2   1   1  936.82   28.44 
  -2   1  -1  979.40   28.39 
  -2   1  -1  972.00   28.48 
   2   1   1  957.84   28.28 
  -2   1  -1  990.73   28.43 
  -2   1  -1  987.40   28.38 
   2   1   1  951.20   28.32 
   2   1   1  965.75   28.16 
  -2   1  -1  990.10   28.38 
  -2   1  -1  972.22   28.34 
  -2   1  -1  984.49   28.33 
   2   1   1  936.16   28.01 
   2   1   1  935.72   28.41 
   2   1   1  961.23   28.05 
  -2   1  -1  966.81   28.32 
   2   1   1  974.00   28.56 
   2   1   1  939.33   28.44 
   2   1   1  976.38   28.32 
  -2   1  -1  968.35   28.39 
   2   1   1  956.93   28.05 
  -2   1  -1  986.00   28.43 
  -2   1  -1  991.39   28.46 
  -2   1  -1  960.71   28.42 
   2   1   1  961.54   28.14 
  -2   1  -1  965.12   28.29 
   2   1   1  961.27   28.35 
   2   1   1  971.93   28.38 
  -2   1  -1  980.07   28.44 
   2   1   1  974.33   28.25 
  -2   1  -1  969.03   28.31 
  -2   1  -1  983.87   28.46 
  -2   1  -1  983.17   28.22 
   2   1   1  944.45   28.35 
  -2   1  -1  968.89   28.38 
  -2   1  -1  930.20   28.36 
  -2   1  -1  952.01   28.42 
   2   1   1  955.83   28.22 
   2   1   1  966.21   28.48 
  -3  -1  -1    6.51    0.83 
  -3  -1  -1    7.44    0.52 
  -3  -1  -1    6.24    0.68 
   3  -1   1    6.76    0.75 
   3  -1   1    8.54    0.83 
   3  -1   1    6.57    0.60 
  -3  -1  -1    8.37    0.90 
   3  -1   1    6.14    0.77 
  -3  -1  -1    6.52    0.61 
  -3  -1  -1    7.12    0.75 
   3  -1   1    5.72    0.68 
   3  -1   1    6.80    0.72 
   3  -1   1    6.61    0.51 
   3  -1   1    7.29    0.80 
  -3  -1  -1    7.79    0.77 
  -3  -1  -1    7.50    0.45 
   3  -1   1    5.79    0.72 
  -3  -1  -1    5.74    0.80 
  -3  -1  -1    6.69    0.52 
  -3  -1  -1    7.82    0.83 
   3  -1   1    6.89    0.83 
  -3  -1  -1    8.53    0.99 
   3  -1   1    5.73    0.67 
  -3  -1  -1    8.79    0.66 
   3  -1   1    8.19    0.66 
   3  -1   1    7.19    0.66 
   3  -1   1    5.34    0.79 
  -3  -1  -1    7.88    0.75 
   3  -1   1    7.12    0.80 
  -3  -1  -1    6.42    0.70 
   3  -1   1    6.77    0.91 
   3  -1   1    6.64    0.81 
   3  -1   1    4.39    0.65 
  -3  -1  -1    6.84    0.63 
   3  -1   1    7.69    0.98 
   3  -1   1    6.62    0.71 
  -3  -1  -1    7.56    0.48 
  -3  -1  -1    7.51    0.70 
  -3  -1  -1    6.21    0.69 
  -3  -1  -1    5.91    0.73 
  -3  -1  -1    7.29    0.57 
   3  -1   1    7.89    0.82 
  -3   1  -1    6.00    0.63 
   3   1   1    8.42    0.99 
   3   1   1    8.43    0.68 
  -3   1  -1    8.40    0.84 
  -3   1  -1    7.05    0.82 
   3   1   1    6.41    0.50 
  -3   1  -1    7.32    0.85 
   3   1   1    6.38    0.49 
   3   1   1    6.99    0.90 
   3   1   1    6.61    0.37 
   3   1   1    6.88    0.84 
  -3   1  -1    7.77    0.85 
  -3   1  -1    6.54    0.87 
  -3   1  -1    5.46    0.82 
  -3   1  -1    6.01    0.68 
   3   1   1    7.08    0.55 
  -3   1  -1    8.19    0.86 
   3   1   1    7.18    0.73 
  -3   1  -1    7.35    0.74 
   3   1   1    6.02    0.74 
  -3   1  -1    6.16    0.69 
   3   1   1    7.08    0.66 
   3   1   1    6.40    0.70 
   3   1   1    7.05    0.71 
   3   1   1    6.31    0.62 
   3   1   1    7.08    0.86 
  -3   1  -1    6.84    0.81 
  -3   1  -1    7.70    0.80 
  -3   1  -1    5.75    0.72 
   3   1   1    6.33    0.68 
   3   1   1    6.78    0.49 
  -3   1  -1    7.48    0.77 
  -3   1  -1    5.55    0.67 
   3   1   1    7.17    0.54 
   3   1   1    6.90    0.73 
  -3   1  -1    5.62    0.70 
   3   1   1    5.47    0.56 
  -3   1  -1    7.90    0.76 
  -3   1  -1    7.20    0.79 
  -3   1  -1    6.57    0.77 
  -3   1  -1    6.96    0.54 
   3   1   1    5.56    0.73 
  -3   1  -1    8.52    0.77 
  -3   1  -1    7.21    0.81 
   3   1   1    6.72    0.46 
   3   1   1    7.47    0.74 
  -4  -1  -1  223.52    7.14 
   4  -1   1  221.45    7.35 
   4  -1   1  224.79    7.83 
  -4  -1  -1  224.68    7.38 
   4  -1   1  207.68    7.41 
   4  -1   1  221.65    7.36 
  -4  -1  -1  220.78    7.01 
  -4  -1  -1  225.99    6.93 
  -4  -1  -1  221.75    7.14 
  -4  -1  -1  220.76    7.08 
  -4  -1  -1  222.05    6.90 
   4  -1   1  227.41    7.84 
  -4  -1  -1  213.57    7.18 
  -4  -1  -1  222.27    7.31 
   4  -1   1  221.37    7.76 
  -4  -1  -1  218.42    7.57 
  -4  -1  -1  217.13    7.26 
  -4  -1  -1  215.23    7.36 
  -4  -1  -1  225.56    7.72 
   4  -1   1  215.61    7.46 
   4  -1   1  217.53    7.00 
   4  -1   1  225.26    7.21 
  -4  -1  -1  220.33    7.23 
   4  -1   1  221.59    6.97 
   4  -1   1  220.63    7.30 
  -4  -1  -1  230.77    7.58 
  -4  -1  -1  218.25    6.76 
   4  -1   1  218.11    7.23 
  -4  -1  -1  226.85    7.02 
   4  -1   1  211.04    7.45 
  -4  -1  -1  215.93    7.26 
   4  -1   1  212.40    7.03 
   4  -1   1  224.75    7.30 
   4  -1   1  215.68    7.30 
  -4  -1  -1  216.95    7.09 
   4  -1   1  223.23    7.46 
   4  -1   1  220.88    7.50 
   4  -1   1  215.89    7.49 
  -4   1  -1  213.35    7.22 
   4   1   1  215.19    6.95 
   4   1   1  219.84    7.31 
  -4   1  -1  219.99    7.49 
   4   1   1  220.82    7.69 
   4   1   1  214.50    6.99 
   4   1   1  219.07    7.26 
   4   1   1  219.09    6.88 
  -4   1  -1  220.70    7.50 
  -4   1  -1  222.45    7.29 
   4   1   1  219.46    6.96 
   4   1   1  213.98    7.48 
   4   1   1  216.45    7.07 
   4   1   1  219.73    7.38 
   4   1   1  217.58    7.28 
  -4   1  -1  217.38    7.37 
   4   1   1  213.55    7.49 
  -4   1  -1  219.24    7.38 
  -4   1  -1  228.62    7.13 
   4   1   1  222.03    7.26 
  -4   1  -1  217.87    7.39 
  -4   1  -1  233.04    7.25 
   4   1   1  217.36    6.94 
   4   1   1  219.55    7.13 
   4   1   1  215.23    7.04 
  -4   1  -1  214.59    7.39 
   4   1   1  219.80    7.32 
  -5  -1  -1    0.73    0.40 
   5  -1   1    0.60    0.53 
   5  -1   1    0.54    0.37 
   5  -1   1    0.38    0.38 
  -5  -1  -1    1.07    0.38 
  -5  -1  -1    1.06    0.47 
  -5  -1  -1    0.40    0.50 
   5  -1   1    0.32    0.43 
   5  -1   1    0.13    0.29 
   5  -1   1    0.26    0.47 
  -5  -1  -1    0.42    0.33 
  -5  -1  -1    0.29    0.24 
   5  -1   1    1.45    0.57 
   5  -1   1    0.59    0.52 
   5  -1   1    0.42    0.39 
   5  -1   1   -0.07    0.31 
  -5  -1  -1    1.06    0.54 
  -5  -1  -1    0.28    0.23 
  -5  -1  -1    0.66    0.44 
   5  -1   1   -0.17    0.29 
  -5  -1  -1    0.39    0.28 
   5  -1   1    0.06    0.38 
   5  -1   1   -0.56    0.26 
   5  -1   1    0.18    0.42 
   5  -1   1    0.08    0.50 
  -5  -1  -1    0.33    0.40 
   5  -1   1    0.34    0.38 
   5  -1   1   -0.03    0.31 
  -5  -1  -1    1.30    0.46 
  -5  -1  -1    0.92    0.48 
  -5   1  -1    0.20    0.35 
  -5   1  -1    0.51    0.38 
   5   1   1    0.69    0.32 
  -5   1  -1    0.93    0.38 
   5   1   1    0.16    0.23 
   5   1   1    0.60    0.55 
   5   1   1    0.43    0.28 
   5   1   1    1.51    0.56 
   5   1   1    0.33    0.32 
  -5   1  -1    0.34    0.39 
   5   1   1    0.68    0.42 
   5   1   1    1.15    0.52 
   5   1   1    0.43    0.33 
   5   1   1    0.66    0.51 
   5   1   1    0.54    0.38 
   5   1   1    0.86    0.42 
  -5   1  -1   -0.03    0.31 
  -5   1  -1    0.56    0.49 
   5   1   1    0.29    0.38 
  -5   1  -1    0.53    0.42 
  -5   1  -1    0.10    0.33 
   5   1   1    0.36    0.37 
  -5   1  -1    0.39    0.38 
   5   1   1    0.81    0.33 
  -5   1  -1    0.07    0.38 
  -6  -1  -1    2.91    0.66 
  -6  -1  -1    2.41    0.84 
   6  -1   1    3.54    0.90 
  -6  -1  -1    2.43    0.69 
   6  -1   1    1.52    0.65 
  -6  -1  -1    2.67    0.68 
  -6  -1  -1    2.04    0.62 
   6  -1   1    3.05    0.95 
   6  -1   1    3.04    0.77 
   6  -1   1    2.61    0.63 
   6  -1   1    2.65    0.65 
  -6  -1  -1    2.29    0.77 
   6  -1   1    3.19    1.00 
  -6  -1  -1    2.55    0.72 
   6  -1   1    2.95    0.83 
  -6  -1  -1    1.81    0.72 
  -6  -1  -1    3.37    0.80 
   6  -1   1    3.88    0.68 
   6  -1   1    4.40    1.11 
   6  -1   1    2.80    0.76 
  -6  -1  -1    1.88    0.68 
   6  -1   1    2.41    0.77 
  -6  -1  -1    3.47    0.50 
   6  -1   1    1.61    0.54 
  -6  -1  -1    3.01    0.55 
   6  -1   1    2.04    0.69 
   6  -1   1    2.25    0.66 
   6  -1   1    1.93    0.67 
   6  -1   1    1.61    0.68 
   6   1   1    3.47    0.73 
  -6   1  -1    1.58    0.63 
  -6   1  -1    1.91    0.74 
  -6   1  -1    1.73    0.60 
  -6   1  -1    1.17    0.59 
   6   1   1    2.45    0.80 
   6   1   1    1.69    0.54 
  -6   1  -1    2.86    0.78 
   6   1   1    2.70    0.58 
  -6   1  -1    2.95    0.69 
  -6   1  -1    1.89    0.62 
   6   1   1    1.10    0.73 
  -6   1  -1    1.86    0.51 
   6   1   1    3.55    0.60 
   6   1   1    2.73    0.77 
  -6   1  -1    2.87    0.83 
   6   1   1    2.69    0.88 
   6   1   1    3.89    0.84 
   6   1   1    2.35    0.55 
   6   1   1    2.96    0.75 
  -6   1  -1    4.10    0.95 
   6   1   1    3.45    0.63 
   6   1   1    2.64    0.79 
   6   1   1    2.95    0.77 
   6   1   1    2.55    0.75 
  -7  -1  -1   -0.37    0.43 
   7  -1   1    0.64    0.71 
  -7  -1  -1    0.18    0.48 
  -7  -1  -1   -0.09    0.55 
   7  -1   1    1.03    0.62 
  -7  -1  -1    0.07    0.43 
  -7  -1  -1    0.34    0.52 
   7  -1   1    0.85    0.54 
   7  -1   1    0.58    0.75 
   7  -1   1    0.16    0.49 
   7  -1   1    0.74    0.70 
  -7  -1  -1    0.62    0.55 
  -7  -1  -1    0.24    0.35 
   7  -1   1    0.33    0.59 
   7  -1   1    1.04    0.58 
   7  -1   1    0.43    0.82 
  -7  -1  -1    0.39    0.49 
   7  -1   1    0.81    0.66 
  -7  -1  -1    0.30    0.28 
   7  -1   1    0.49    0.64 
   7  -1   1    0.93    0.69 
  -7  -1  -1   -0.24    0.47 
   7  -1   1    0.49    0.50 
   7  -1   1    0.51    0.47 
   7  -1   1    0.24    0.53 
   7  -1   1    0.64    0.45 
  -7  -1  -1   -0.24    0.50 
   7  -1   1    0.23    0.65 
  -7  -1  -1    0.98    0.63 
  -7   1  -1    0.89    0.64 
   7   1   1    1.08    0.62 
   7   1   1   -0.39    0.46 
  -7   1  -1    0.12    0.38 
  -7   1  -1    0.23    0.67 
  -7   1  -1    0.71    0.49 
   7   1   1    0.19    0.67 
  -7   1  -1    0.14    0.58 
   7   1   1   -0.11    0.50 
  -7   1  -1    0.36    0.51 
   7   1   1    0.09    0.37 
   7   1   1    0.31    0.50 
   7   1   1   -0.15    0.51 
   7   1   1   -0.13    0.49 
  -7   1  -1    0.12    0.51 
   7   1   1    0.28    0.68 
   7   1   1   -0.10    0.43 
   7   1   1    0.48    0.41 
   7   1   1    0.27    0.58 
  -7   1  -1    0.63    0.59 
   7   1   1    0.81    0.71 
   7   1   1    0.43    0.47 
  -7   1  -1    0.52    0.67 
  -7   1  -1    0.08    0.48 
   7   1   1    0.31    0.38 
   7   1   1    0.81    0.48 
   7   1   1    0.93    0.61 
   8  -1   1   42.42    2.69 
  -8  -1  -1   48.05    2.65 
   8  -1   1   43.78    2.77 
  -8  -1  -1   44.77    2.75 
   8  -1   1   38.45    2.79 
  -8  -1  -1   43.63    2.62 
  -8  -1  -1   44.90    2.29 
   8  -1   1   41.04    3.27 
   8  -1   1   47.50    2.54 
   8  -1   1   45.32    3.10 
   8  -1   1   44.88    3.43 
   8  -1   1   40.59    2.91 
  -8  -1  -1   41.81    3.23 
  -8  -1  -1   41.90    2.97 
  -8  -1  -1   44.12    3.02 
   8  -1   1   45.10    2.60 
   8  -1   1   44.23    2.61 
  -8  -1  -1   38.55    2.68 
  -8  -1  -1   44.89    2.87 
   8  -1   1   42.71    2.92 
  -8  -1  -1   45.93    2.91 
   8  -1   1   33.54    2.75 
   8  -1   1   37.94    2.84 
   8  -1   1   45.73    3.34 
   8  -1   1   41.81    2.55 
   8  -1   1   34.56    2.61 
   8   1   1   40.77    3.00 
   8   1   1   44.45    2.38 
  -8   1  -1   42.76    3.24 
  -8   1  -1   47.80    2.88 
  -8   1  -1   40.36    2.76 
  -8   1  -1   41.53    2.46 
   8   1   1   40.57    2.88 
   8   1   1   43.29    3.09 
   8   1   1   39.78    2.56 
   8   1   1   39.36    2.66 
   8   1   1   39.30    2.75 
   8   1   1   37.43    3.12 
   8   1   1   44.90    2.85 
   8   1   1   44.04    2.61 
   8   1   1   41.46    3.17 
   8   1   1   40.50    2.32 
   8   1   1   41.32    2.79 
   8   1   1   46.73    2.56 
  -8   1  -1   44.30    3.00 
   8   1   1   45.32    2.86 
  -8   1  -1   44.43    2.90 
  -8   1  -1   36.12    2.74 
  -8   1  -1   42.52    2.97 
  -8   1  -1   41.84    2.30 
  -8   1  -1   41.60    2.70 
   9  -1   1    1.04    0.90 
   9  -1   1    0.77    0.87 
  -9  -1  -1    3.27    1.11 
  -9  -1  -1    3.11    1.13 
  -9  -1  -1    1.87    0.95 
   9  -1   1    2.29    1.16 
   9  -1   1    3.34    1.06 
   9  -1   1    0.31    0.83 
   9  -1   1    0.24    0.86 
   9  -1   1    3.16    1.40 
  -9  -1  -1    1.09    1.04 
  -9  -1  -1    1.25    0.98 
   9  -1   1    1.98    0.91 
   9  -1   1    1.26    0.78 
  -9  -1  -1    1.50    0.87 
  -9  -1  -1    1.33    0.76 
   9  -1   1    1.47    0.94 
   9  -1   1    3.44    1.00 
   9  -1   1    0.43    0.90 
   9  -1   1    2.80    1.24 
   9  -1   1    1.96    1.28 
  -9  -1  -1    2.20    1.16 
   9  -1   1    4.02    1.06 
  -9   1  -1    1.64    0.86 
  -9   1  -1    2.36    0.92 
   9   1   1    3.01    1.04 
   9   1   1    1.20    0.84 
  -9   1  -1    3.21    1.16 
   9   1   1    1.63    0.93 
   9   1   1    1.09    0.78 
  -9   1  -1    0.39    0.77 
  -9   1  -1    2.34    1.02 
   9   1   1    3.03    1.34 
  -9   1  -1    2.50    1.05 
   9   1   1    2.85    1.21 
   9   1   1    0.76    0.71 
   9   1   1    3.36    1.42 
  -9   1  -1    3.02    0.89 
   9   1   1    1.35    0.91 
  -9   1  -1    3.56    1.33 
   9   1   1    1.75    1.29 
  -9   1  -1    1.19    0.97 
   9   1   1    2.40    1.08 
   9   1   1    1.78    0.80 
   9   1   1    2.67    1.17 
  10  -1   1   41.64    4.43 
  10  -1   1   39.11    3.16 
  10  -1   1   40.25    3.78 
 -10  -1  -1   43.68    3.24 
  10  -1   1   27.75    3.64 
 -10  -1  -1   35.10    3.43 
  10  -1   1   34.98    3.46 
  10  -1   1   39.22    3.89 
  10  -1   1   48.11    4.08 
 -10  -1  -1   40.04    3.97 
  10  -1   1   42.88    4.08 
  10  -1   1   42.01    3.99 
  10  -1   1   38.68    2.74 
  10  -1   1   35.30    3.48 
  10  -1   1   37.28    2.98 
  10  -1   1   35.89    2.89 
 -10  -1  -1   37.32    4.14 
 -10  -1  -1   44.09    3.17 
 -10  -1  -1   47.22    3.60 
 -10  -1  -1   37.71    3.12 
  10  -1   1   36.58    4.32 
 -10   1  -1   39.89    3.26 
  10   1   1   37.42    2.80 
  10   1   1   44.36    3.28 
 -10   1  -1   42.08    4.41 
  10   1   1   52.28    4.83 
  10   1   1   47.30    3.37 
  10   1   1   44.46    4.59 
 -10   1  -1   42.41    3.10 
 -10   1  -1   47.11    3.42 
 -10   1  -1   43.38    3.84 
  10   1   1   28.88    3.33 
 -10   1  -1   38.81    3.91 
  10   1   1   40.91    3.17 
  10   1   1   44.78    3.61 
 -10   1  -1   42.91    3.49 
  10   1   1   42.22    3.79 
  10   1   1   45.99    3.49 
 -10   1  -1   40.17    3.28 
  10   1   1   46.25    3.26 
  10  -2  -1   16.59    2.55 
  10  -2  -1   23.55    3.50 
  10  -2  -1   14.12    2.45 
  10  -2  -1   16.24    2.21 
 -10  -2   1   19.73    2.43 
  10  -2  -1   14.76    2.51 
  10  -2  -1   15.34    2.14 
  10  -2  -1   17.61    2.46 
 -10  -2   1   12.47    2.40 
  10  -2  -1   15.96    2.46 
  10  -2  -1   15.50    2.29 
 -10  -2   1   15.93    2.32 
  10  -2  -1   18.35    2.20 
 -10  -2   1   20.40    3.06 
 -10  -2   1   13.42    2.30 
  10  -2  -1   15.90    2.75 
  10  -2  -1   17.07    2.85 
 -10  -2   1   16.70    2.76 
 -10  -2   1   16.72    2.28 
  10  -2  -1   16.61    2.55 
  10  -2  -1   18.27    3.07 
  10  -2  -1   12.17    2.28 
  10   2  -1   12.49    2.59 
  10   2  -1   17.88    2.57 
 -10   2   1   18.26    2.18 
 -10   2   1   18.47    2.65 
  10   2  -1   18.66    2.29 
  10   2  -1   17.91    2.53 
  10   2  -1   20.24    2.66 
 -10   2   1   16.86    2.45 
  10   2  -1   21.17    3.21 
  10   2  -1   12.84    2.08 
  10   2  -1   15.71    2.26 
 -10   2   1   14.93    2.33 
 -10   2   1   26.92    3.03 
  10   2  -1   19.47    2.80 
  10   2  -1   18.28    2.59 
 -10   2   1   18.55    2.51 
 -10   2   1   17.87    2.50 
 -10   2   1   18.60    2.83 
 -10   2   1   21.85    2.69 
  10   2  -1   15.55    2.34 
  -9  -2   1   16.07    2.03 
   9  -2  -1   16.38    2.11 
   9  -2  -1   16.93    2.07 
   9  -2  -1   15.59    1.99 
  -9  -2   1   21.27    2.43 
   9  -2  -1   16.24    2.33 
   9  -2  -1   23.24    2.73 
  -9  -2   1   24.06    2.47 
  -9  -2   1   14.16    2.40 
  -9  -2   1   15.55    2.24 
   9  -2  -1   18.84    2.54 
  -9  -2   1   15.77    2.39 
   9  -2  -1   15.22    2.53 
   9  -2  -1   19.43    2.68 
   9  -2  -1   16.51    2.02 
  -9  -2   1   17.31    2.12 
   9  -2  -1   17.00    2.22 
   9  -2  -1   15.74    2.28 
   9  -2  -1   16.47    2.01 
   9  -2  -1   13.91    2.35 
   9  -2  -1   16.52    2.17 
   9  -2  -1   17.54    2.28 
   9  -2  -1   13.39    2.33 
  -9   2   1   13.65    2.17 
  -9   2   1   17.81    2.42 
  -9   2   1   18.92    2.40 
   9   2  -1   14.68    1.80 
  -9   2   1   16.31    2.20 
  -9   2   1   16.39    2.24 
   9   2  -1   17.54    2.45 
   9   2  -1   19.11    2.50 
   9   2  -1   15.31    1.91 
  -9   2   1   14.95    2.45 
   9   2  -1   19.07    2.58 
   9   2  -1   16.30    2.12 
   9   2  -1   15.05    2.04 
   9   2  -1   16.08    2.14 
   9   2  -1   16.92    2.22 
   9   2  -1   15.31    2.18 
  -9   2   1   22.96    2.58 
  -9   2   1   18.12    2.08 
  -9   2   1   19.37    2.42 
   9   2  -1   17.46    2.73 
   8  -2  -1    0.87    0.72 
  -8  -2   1    2.00    1.01 
   8  -2  -1    0.98    0.88 
   8  -2  -1    0.41    0.84 
   8  -2  -1    1.95    0.80 
   8  -2  -1    0.79    0.90 
   8  -2  -1    0.57    0.84 
  -8  -2   1    1.02    0.71 
   8  -2  -1    1.56    0.91 
  -8  -2   1    1.29    0.84 
  -8  -2   1    1.75    0.79 
  -8  -2   1    0.93    0.72 
  -8  -2   1    1.17    0.78 
   8  -2  -1    1.27    0.78 
   8  -2  -1    0.86    0.70 
   8  -2  -1    1.28    0.76 
   8  -2  -1    0.66    0.65 
   8  -2  -1    1.66    0.85 
  -8  -2   1    0.41    0.67 
  -8  -2   1    0.16    0.49 
   8  -2  -1    0.43    0.83 
   8  -2  -1    0.16    0.63 
   8  -2  -1    0.58    0.78 
  -8  -2   1    1.13    0.74 
   8  -2  -1    2.73    0.94 
  -8   2   1    0.48    0.76 
   8   2  -1    0.88    0.76 
  -8   2   1   -0.62    0.47 
  -8   2   1    0.41    0.69 
   8   2  -1    0.13    0.70 
  -8   2   1    1.29    0.77 
  -8   2   1    1.63    0.78 
   8   2  -1    0.88    0.67 
   8   2  -1    0.95    0.60 
  -8   2   1    0.65    0.63 
  -8   2   1    0.68    0.71 
   8   2  -1    0.55    0.51 
   8   2  -1    1.40    1.01 
  -8   2   1    1.63    0.67 
  -8   2   1    0.11    0.77 
   8   2  -1    0.13    0.60 
   8   2  -1    0.13    0.69 
   8   2  -1   -0.41    0.55 
   8   2  -1    1.26    0.83 
   8   2  -1    0.27    0.55 
   8   2  -1    0.49    0.69 
   8   2  -1    0.47    0.53 
  -8   2   1    0.72    0.64 
   8   2  -1    0.84    0.77 
   7  -2  -1    7.52    1.28 
  -7  -2   1    8.22    1.26 
   7  -2  -1   12.16    1.55 
   7  -2  -1    8.20    1.40 
   7  -2  -1    7.04    1.18 
   7  -2  -1    7.55    1.36 
  -7  -2   1   10.20    1.65 
  -7  -2   1    8.76    1.45 
  -7  -2   1    9.36    1.37 
  -7  -2   1   12.56    1.24 
   7  -2  -1    9.74    1.53 
   7  -2  -1    9.72    1.44 
   7  -2  -1   10.88    1.60 
   7  -2  -1    7.06    1.52 
   7  -2  -1    9.45    1.40 
   7  -2  -1    8.33    1.32 
   7  -2  -1   10.25    1.43 
   7  -2  -1    7.42    1.28 
   7  -2  -1    7.63    1.60 
  -7  -2   1    9.25    1.39 
   7  -2  -1    7.15    1.51 
  -7  -2   1    9.66    1.38 
  -7  -2   1    8.42    1.34 
  -7  -2   1    9.07    1.70 
   7  -2  -1    7.84    1.41 
   7   2  -1    7.16    1.59 
   7   2  -1    7.60    1.04 
   7   2  -1    9.54    1.22 
  -7   2   1    6.47    1.29 
   7   2  -1   11.02    1.34 
  -7   2   1    6.62    1.27 
   7   2  -1   10.13    1.43 
   7   2  -1   10.88    1.52 
   7   2  -1    9.39    1.12 
   7   2  -1    8.73    1.34 
  -7   2   1    8.50    1.62 
  -7   2   1    9.46    1.03 
   7   2  -1    8.03    1.37 
   7   2  -1   10.67    1.06 
  -7   2   1    8.03    1.31 
  -7   2   1    8.31    1.22 
   7   2  -1    8.97    1.42 
  -7   2   1    7.31    1.06 
  -7   2   1   10.05    1.56 
  -7   2   1   10.33    1.56 
  -7   2   1    6.64    1.22 
   7   2  -1    9.31    1.47 
   7   2  -1   10.41    1.51 
   7   2  -1    7.03    1.24 
  -7   2   1   11.07    1.56 
   7   2  -1    8.74    1.23 
   6  -2  -1    2.78    0.82 
   6  -2  -1    1.36    0.62 
   6  -2  -1    2.18    0.73 
   6  -2  -1    2.54    0.78 
   6  -2  -1    1.44    0.63 
   6  -2  -1    2.56    0.74 
   6  -2  -1    1.44    0.37 
   6  -2  -1    3.03    1.09 
   6  -2  -1    2.33    0.86 
  -6  -2   1    2.73    0.84 
  -6  -2   1    1.52    0.59 
  -6  -2   1    1.20    0.56 
   6  -2  -1    1.75    0.81 
  -6  -2   1    1.94    0.84 
   6  -2  -1    1.79    0.71 
  -6  -2   1    1.71    0.52 
  -6  -2   1    2.12    0.72 
  -6  -2   1    1.37    0.62 
   6  -2  -1    1.50    0.65 
   6  -2  -1    1.60    0.69 
  -6  -2   1    2.50    0.69 
   6  -2  -1    1.12    0.66 
   6  -2  -1    1.52    0.82 
   6  -2  -1    2.03    0.66 
  -6  -2   1    1.68    0.76 
   6  -2  -1    1.47    0.69 
  -6  -2   1    1.53    0.61 
   6  -2  -1    1.94    0.40 
  -6   2   1    1.57    0.65 
  -6   2   1    1.68    0.55 
   6   2  -1    1.87    0.62 
   6   2  -1    2.31    0.80 
  -6   2   1    1.10    0.61 
   6   2  -1    1.82    0.47 
  -6   2   1    1.98    0.81 
   6   2  -1    2.26    0.55 
  -6   2   1    2.56    0.72 
   6   2  -1    2.77    0.76 
   6   2  -1    0.29    0.54 
  -6   2   1    1.52    0.68 
  -6   2   1    1.24    0.69 
  -6   2   1    2.15    0.83 
   6   2  -1    2.50    0.79 
   6   2  -1    1.92    0.68 
  -6   2   1    1.85    0.50 
  -6   2   1    2.76    0.77 
   6   2  -1    2.28    0.70 
   6   2  -1    1.27    0.57 
   6   2  -1    1.88    0.53 
   6   2  -1    1.47    0.55 
   6   2  -1    2.42    0.72 
   6   2  -1    2.46    0.92 
   5  -2  -1    1.50    0.57 
   5  -2  -1    2.15    0.63 
  -5  -2   1    1.74    0.57 
  -5  -2   1    1.72    0.58 
  -5  -2   1    1.83    0.57 
  -5  -2   1    1.48    0.37 
   5  -2  -1    1.14    0.48 
  -5  -2   1    1.27    0.50 
   5  -2  -1    1.81    0.61 
   5  -2  -1    1.07    0.50 
   5  -2  -1    2.00    0.63 
   5  -2  -1    1.23    0.54 
  -5  -2   1    0.90    0.46 
   5  -2  -1    1.13    0.54 
   5  -2  -1    1.15    0.28 
   5  -2  -1    1.83    0.61 
   5  -2  -1    0.49    0.52 
   5  -2  -1    1.01    0.66 
   5  -2  -1    0.86    0.32 
  -5  -2   1    1.28    0.61 
   5  -2  -1    1.09    0.59 
  -5  -2   1    1.99    0.62 
  -5  -2   1    1.77    0.50 
  -5  -2   1    1.67    0.66 
   5  -2  -1    1.26    0.58 
  -5  -2   1    1.47    0.56 
   5  -2  -1    1.57    0.30 
   5  -2  -1    1.16    0.57 
  -5  -2   1    1.35    0.35 
   5  -2  -1    1.67    0.63 
   5  -2  -1    1.84    0.56 
   5   2  -1    1.88    0.62 
   5   2  -1    1.11    0.48 
  -5   2   1    2.99    0.70 
   5   2  -1    1.60    0.53 
  -5   2   1    2.80    0.69 
  -5   2   1    0.89    0.47 
  -5   2   1    1.47    0.43 
   5   2  -1    2.03    0.52 
   5   2  -1    2.51    0.59 
   5   2  -1    1.80    0.70 
   5   2  -1    2.14    0.60 
   5   2  -1    1.88    0.46 
  -5   2   1    2.55    0.74 
  -5   2   1    1.28    0.54 
   5   2  -1    1.75    0.73 
   5   2  -1    0.97    0.31 
   5   2  -1    2.30    0.61 
  -5   2   1    2.50    0.69 
   5   2  -1    1.77    0.61 
  -5   2   1    1.84    0.63 
  -5   2   1    1.62    0.50 
   5   2  -1    2.25    0.50 
  -5   2   1    1.23    0.58 
  -4  -2   1    1.25    0.47 
   4  -2  -1    1.40    0.30 
  -4  -2   1    1.47    0.43 
  -4  -2   1    1.51    0.44 
   4  -2  -1    0.69    0.41 
   4  -2  -1    0.74    0.29 
   4  -2  -1    1.83    0.64 
   4  -2  -1    1.02    0.52 
   4  -2  -1    0.68    0.44 
  -4  -2   1    1.50    0.34 
  -4  -2   1    1.01    0.39 
  -4  -2   1    1.52    0.51 
   4  -2  -1    1.73    0.71 
  -4  -2   1    1.64    0.34 
   4  -2  -1    0.96    0.56 
   4  -2  -1    0.98    0.43 
   4  -2  -1    1.03    0.50 
  -4  -2   1    2.66    0.71 
  -4  -2   1    0.73    0.47 
   4  -2  -1    1.61    0.55 
  -4  -2   1    1.74    0.52 
   4  -2  -1    0.39    0.37 
  -4  -2   1    1.42    0.49 
   4  -2  -1    1.46    0.53 
   4  -2  -1    1.04    0.46 
   4  -2  -1    1.08    0.35 
  -4  -2   1    0.55    0.36 
   4  -2  -1    1.37    0.49 
  -4  -2   1    1.06    0.43 
   4  -2  -1    1.77    0.51 
   4  -2  -1    1.86    0.60 
   4  -2  -1    1.53    0.54 
   4  -2  -1    1.33    0.21 
   4  -2  -1    1.43    0.22 
  -4  -2   1    1.24    0.47 
  -4  -2   1    0.91    0.47 
  -4  -2   1    2.05    0.65 
  -4   2   1    1.23    0.40 
   4   2  -1    1.45    0.45 
   4   2  -1    1.61    0.42 
   4   2  -1    1.53    0.45 
   4   2  -1    0.29    0.34 
  -4   2   1    1.21    0.50 
   4   2  -1    2.19    0.43 
   4   2  -1    1.55    0.35 
   4   2  -1    1.50    0.58 
  -4   2   1    1.30    0.49 
   4   2  -1    1.46    0.54 
  -4   2   1    1.04    0.44 
  -4   2   1    1.52    0.51 
   4   2  -1    1.47    0.50 
  -4   2   1    0.64    0.41 
  -4   2   1    1.27    0.47 
   4   2  -1    1.45    0.37 
   4   2  -1    1.41    0.59 
   4   2  -1    2.10    0.53 
  -4   2   1    1.44    0.51 
   4   2  -1    1.81    0.55 
  -4   2   1    2.02    0.57 
   4   2  -1    1.75    0.45 
   3  -2  -1   23.16    1.38 
  -3  -2   1   20.68    1.27 
  -3  -2   1   21.49    1.29 
   3  -2  -1   20.66    1.35 
  -3  -2   1   23.18    1.52 
   3  -2  -1   20.34    1.35 
   3  -2  -1   20.40    1.35 
   3  -2  -1   23.27    1.39 
   3  -2  -1   22.13    1.38 
  -3  -2   1   20.46    1.26 
  -3  -2   1   23.85    1.46 
  -3  -2   1   24.95    1.37 
   3  -2  -1   24.83    1.37 
  -3  -2   1   23.99    1.16 
   3  -2  -1   23.20    1.02 
  -3  -2   1   23.48    0.93 
   3  -2  -1   21.85    1.49 
   3  -2  -1   22.04    1.35 
  -3  -2   1   21.74    1.05 
  -3  -2   1   23.86    1.22 
   3  -2  -1   20.21    1.30 
   3  -2  -1   22.73    1.26 
  -3  -2   1   24.31    1.56 
   3  -2  -1   23.05    1.51 
   3  -2  -1   25.75    1.45 
  -3  -2   1   19.95    1.56 
   3  -2  -1   22.91    1.58 
   3  -2  -1   23.73    1.29 
   3  -2  -1   23.84    0.91 
   3  -2  -1   24.68    1.46 
   3  -2  -1   22.10    1.23 
  -3  -2   1   21.72    1.25 
  -3  -2   1   20.00    1.28 
  -3  -2   1   22.86    1.36 
  -3  -2   1   24.02    1.15 
   3  -2  -1   21.77    1.52 
  -3  -2   1   22.87    1.37 
  -3  -2   1   21.50    1.31 
  -3  -2   1   22.57    1.21 
  -3  -2   1   19.36    1.30 
   3   2  -1   23.24    1.22 
  -3   2   1   25.43    1.32 
   3   2  -1   23.77    1.61 
   3   2  -1   22.93    1.28 
  -3   2   1   21.04    1.26 
   3   2  -1   24.17    1.42 
  -3   2   1   24.41    1.21 
   3   2  -1   21.73    1.41 
   3   2  -1   22.48    1.14 
   3   2  -1   22.60    1.21 
   3   2  -1   22.43    1.11 
  -3   2   1   25.06    1.42 
  -3   2   1   23.70    1.39 
  -3   2   1   22.95    1.26 
   3   2  -1   22.95    1.10 
   3   2  -1   22.28    1.19 
  -3   2   1   23.32    1.36 
   3   2  -1   25.09    1.19 
  -3   2   1   22.89    1.29 
   3   2  -1   22.91    1.24 
   3   2  -1   23.23    1.63 
   3   2  -1   23.78    1.31 
  -3   2   1   24.12    1.24 
   3   2  -1   21.77    1.19 
  -3   2   1   21.66    1.34 
   3   2  -1   21.82    1.29 
  -2  -2   1    2.55    0.44 
  -2  -2   1    2.14    0.49 
  -2  -2   1    2.40    0.30 
   2  -2  -1    1.65    0.42 
   2  -2  -1    1.86    0.42 
  -2  -2   1    2.46    0.47 
   2  -2  -1    2.85    0.47 
   2  -2  -1    2.08    0.44 
   2  -2  -1    2.85    0.45 
  -2  -2   1    2.47    0.43 
  -2  -2   1    2.36    0.59 
  -2  -2   1    3.11    0.53 
  -2  -2   1    3.57    0.56 
  -2  -2   1    2.82    0.63 
  -2  -2   1    2.39    0.35 
  -2  -2   1    2.26    0.51 
   2  -2  -1    2.60    0.54 
   2  -2  -1    2.18    0.43 
  -2  -2   1    2.34    0.47 
   2  -2  -1    2.17    0.51 
   2  -2  -1    2.90    0.47 
   2  -2  -1    1.88    0.40 
   2  -2  -1    2.97    0.49 
  -2  -2   1    2.63    0.43 
  -2  -2   1    2.74    0.52 
  -2  -2   1    1.63    0.41 
   2  -2  -1    2.34    0.42 
  -2  -2   1    3.10    0.45 
   2  -2  -1    2.27    0.46 
   2  -2  -1    1.64    0.42 
   2  -2  -1    2.16    0.46 
  -2  -2   1    2.15    0.45 
  -2  -2   1    3.35    0.46 
  -2  -2   1    2.50    0.33 
  -2  -2   1    2.83    0.58 
  -2  -2   1    3.37    0.44 
  -2  -2   1    2.69    0.60 
  -2  -2   1    2.55    0.54 
  -2  -2   1    2.75    0.52 
   2  -2  -1    2.32    0.39 
   2  -2  -1    2.18    0.47 
   2  -2  -1    2.13    0.37 
   2  -2  -1    2.49    0.38 
   2  -2  -1    2.48    0.48 
  -2  -2   1    2.75    0.52 
  -2  -2   1    2.64    0.31 
   2  -2  -1    2.49    0.47 
  -2   2   1    2.41    0.45 
   2   2  -1    2.57    0.30 
   2   2  -1    3.04    0.62 
   2   2  -1    2.68    0.38 
   2   2  -1    2.90    0.49 
  -2   2   1    1.87    0.39 
   2   2  -1    1.70    0.41 
  -2   2   1    1.48    0.37 
   2   2  -1    2.41    0.39 
  -2   2   1    1.84    0.44 
  -2   2   1    2.79    0.43 
  -2   2   1    3.00    0.60 
  -2   2   1    2.69    0.43 
   2   2  -1    2.01    0.44 
   2   2  -1    2.17    0.51 
  -2   2   1    2.50    0.43 
   2   2  -1    2.25    0.44 
   2   2  -1    1.49    0.34 
   2   2  -1    1.61    0.50 
  -2   2   1    2.13    0.42 
   2   2  -1    2.59    0.43 
  -2   2   1    2.39    0.43 
  -2   2   1    2.36    0.48 
   2   2  -1    2.45    0.42 
  -2   2   1    2.42    0.48 
  -2   2   1    2.82    0.41 
  -2   2   1    2.02    0.40 
   2   2  -1    2.80    0.40 
   2   2  -1    3.56    0.59 
  -2   2   1    2.50    0.50 
   2   2  -1    3.23    0.57 
  -2   2   1    2.44    0.46 
   2   2  -1    2.81    0.47 
  -2   2   1    2.90    0.50 
   2   2  -1    2.65    0.24 
   2   2  -1    2.67    0.44 
  -2   2   1    2.39    0.35 
   2   2  -1    2.25    0.30 
   2   2  -1    2.18    0.55 
   2   2  -1    2.37    0.38 
   2   2  -1    2.39    0.64 
  -2   2   1    1.88    0.40 
  -2   2   1    2.09    0.46 
  -2   2   1    2.33    0.40 
   2   2  -1    2.69    0.48 
   2   2  -1    2.41    0.43 
  -2   2   1    1.61    0.35 
   2   2  -1    1.91    0.39 
   2   2  -1    2.73    0.50 
   2   2  -1    2.27    0.49 
  -2   2   1    3.71    0.57 
   1  -2  -1    0.58    0.26 
   1  -2  -1    0.47    0.23 
  -1  -2   1    0.60    0.16 
  -1  -2   1    0.81    0.31 
   1  -2  -1    0.19    0.16 
   1  -2  -1    1.11    0.33 
   1  -2  -1    0.57    0.09 
   1  -2  -1    1.22    0.31 
   1  -2  -1    0.54    0.14 
  -1  -2   1    0.67    0.29 
  -1  -2   1    0.54    0.16 
   1  -2  -1    0.65    0.26 
  -1  -2   1    0.62    0.18 
   1  -2  -1    1.04    0.44 
  -1  -2   1    0.56    0.25 
   1  -2  -1    0.48    0.15 
   1  -2  -1    0.77    0.16 
   1  -2  -1    1.10    0.33 
   1  -2  -1    0.63    0.24 
  -1  -2   1    1.11    0.30 
   1  -2  -1    1.03    0.36 
   1  -2  -1    1.22    0.33 
   1  -2  -1    0.99    0.32 
   1  -2  -1    0.86    0.25 
   1  -2  -1    0.55    0.25 
  -1  -2   1    0.54    0.24 
   1  -2  -1    0.79    0.13 
  -1  -2   1    1.04    0.32 
  -1  -2   1    0.87    0.26 
   1  -2  -1    0.71    0.29 
   1  -2  -1    0.48    0.19 
  -1  -2   1    1.47    0.25 
  -1  -2   1    0.49    0.28 
  -1  -2   1    0.96    0.21 
  -1  -2   1    0.33    0.28 
   1  -2  -1    1.19    0.33 
   1  -2  -1    1.16    0.31 
  -1  -2   1    0.62    0.13 
   1  -2  -1    0.66    0.25 
  -1  -2   1    1.15    0.33 
   1  -2  -1    0.46    0.23 
  -1  -2   1    1.15    0.41 
  -1  -2   1    0.59    0.28 
   1  -2  -1    0.34    0.23 
  -1  -2   1    1.05    0.23 
   1  -2  -1    0.59    0.25 
   1  -2  -1    1.16    0.31 
  -1  -2   1    0.98    0.27 
  -1  -2   1    0.67    0.12 
   1  -2  -1    0.95    0.29 
  -1  -2   1    1.10    0.35 
  -1  -2   1    0.91    0.35 
  -1  -2   1    1.91    0.47 
  -1  -2   1    0.93    0.38 
   1  -2  -1    1.20    0.27 
  -1  -2   1    0.72    0.33 
  -1  -2   1    0.58    0.26 
  -1   2   1    0.72    0.24 
  -1   2   1    0.92    0.27 
  -1   2   1    1.01    0.28 
   1   2  -1    0.31    0.14 
   1   2  -1    0.90    0.47 
   1   2  -1    1.14    0.44 
   1   2  -1    0.98    0.30 
   1   2  -1    0.93    0.37 
  -1   2   1    0.55    0.22 
   1   2  -1    0.81    0.17 
  -1   2   1    1.22    0.32 
   1   2  -1    0.54    0.36 
   1   2  -1    0.65    0.24 
  -1   2   1    0.55    0.10 
   1   2  -1    0.48    0.27 
  -1   2   1    0.06    0.22 
  -1   2   1    0.48    0.22 
  -1   2   1    0.62    0.18 
   1   2  -1    1.44    0.47 
  -1   2   1    0.98    0.35 
  -1   2   1    0.87    0.32 
   1   2  -1    1.08    0.30 
  -1   2   1    0.33    0.22 
   1   2  -1    1.34    0.44 
   1   2  -1    1.81    0.39 
  -1   2   1    0.12    0.18 
  -1   2   1    0.82    0.24 
   1   2  -1    0.98    0.34 
  -1   2   1    0.46    0.23 
  -1   2   1    0.73    0.18 
  -1   2   1    0.91    0.19 
   1   2  -1    1.46    0.46 
  -1   2   1    0.47    0.21 
   1   2  -1    0.83    0.39 
  -1   2   1    0.81    0.26 
  -1   2   1    0.80    0.26 
  -1   2   1    0.81    0.25 
   1   2  -1    0.78    0.26 
  -1   2   1    0.67    0.39 
  -1   2   1    0.48    0.21 
   1   2  -1    2.79    0.58 
  -1   2   1    1.48    0.30 
   1   2  -1    0.32    0.30 
  -1   2   1    0.55    0.23 
   1   2  -1    0.84    0.39 
   1   2  -1    0.52    0.18 
   1   2  -1    0.80    0.34 
   1   2  -1    0.81    0.38 
   1   2  -1    0.49    0.29 
   1   2  -1    0.73    0.17 
   1   2  -1    1.00    0.24 
   1   2  -1    1.23    0.36 
  -1   2   1    0.40    0.23 
  -1   2   1    0.54    0.21 
  -1   2   1    0.58    0.24 
   1   2  -1    1.20    0.28 
  -1   2   1    0.64    0.32 
   1   2  -1    1.40    0.40 
  -1   2   1    0.27    0.23 
   1   2  -1    1.33    0.23 
   1   2  -1    0.68    0.13 
   1   2  -1    0.97    0.21 
   1   2  -1    1.26    0.47 
  -1   2   1    0.51    0.20 
   1   2  -1    1.00    0.29 
   1   2  -1    0.72    0.26 
   0  -2  -1    4.06    0.37 
   0  -2   1    4.03    0.43 
   0  -2   1    3.41    0.61 
   0  -2   1    3.20    0.76 
   0  -2  -1    4.00    0.36 
   0  -2   1    3.10    0.40 
   0  -2   1    3.70    0.47 
   0  -2  -1    3.95    0.47 
   0  -2   1    3.55    0.57 
   0  -2   1    3.17    0.45 
   0  -2   1    3.64    0.48 
   0  -2  -1    3.83    0.37 
   0  -2  -1    3.44    0.55 
   0  -2   1    3.50    0.24 
   0  -2   1    3.86    0.47 
   0  -2  -1    5.04    0.63 
   0  -2  -1    3.87    0.33 
   0  -2   1    3.37    0.55 
   0  -2  -1    3.90    0.47 
   0  -2   1    3.80    0.85 
   0  -2  -1    3.18    0.35 
   0  -2   1    4.08    0.58 
   0  -2   1    3.47    0.39 
   0  -2  -1    4.14    0.36 
   0  -2   1    4.19    0.43 
   0  -2  -1    4.02    0.58 
   0  -2   1    4.05    0.40 
   0  -2   1    3.43    0.43 
   0  -2  -1    3.42    0.39 
   0  -2   1    3.82    0.23 
   0  -2   1    3.32    0.80 
   0  -2   1    3.63    0.50 
   0  -2  -1    4.24    0.42 
   0  -2   1    3.29    0.53 
   0  -2  -1    3.88    0.47 
   0  -2  -1    2.78    0.40 
   0  -2  -1    3.02    0.64 
   0  -2  -1    3.73    0.41 
   0  -2  -1    3.72    0.39 
   0  -2   1    3.46    0.40 
   0  -2  -1    3.44    0.56 
   0  -2  -1    4.57    0.51 
   0  -2   1    4.08    0.64 
   0  -2  -1    3.88    0.59 
   0  -2   1    4.15    0.47 
   0  -2   1    6.43    1.14 
   0  -2  -1    2.95    0.70 
   0  -2   1    3.99    0.54 
   0  -2   1    3.33    0.71 
   0  -2  -1    3.38    0.66 
   0  -2   1    3.67    0.42 
   0  -2   1    3.41    0.55 
   0  -2  -1    4.04    0.49 
   0  -2   1    3.40    0.36 
   0  -2   1    3.32    0.52 
   0  -2   1    3.46    0.69 
   0  -2  -1    3.50    0.38 
   0  -2  -1    4.30    0.46 
   0  -2   1    3.86    0.26 
   0  -2  -1    3.62    0.38 
   0   2   1    3.24    0.36 
   0   2  -1    3.81    0.46 
   0   2  -1    3.82    0.84 
   0   2   1    3.15    0.38 
   0   2   1    4.48    0.44 
   0   2   1    3.29    0.63 
   0   2   1    3.52    0.37 
   0   2   1    5.39    0.66 
   0   2   1    2.67    0.35 
   0   2   1    4.91    0.49 
   0   2  -1    3.84    0.57 
   0   2  -1    3.55    0.44 
   0   2  -1    4.27    0.48 
   0   2   1    3.74    0.35 
   0   2  -1    4.16    0.56 
   0   2  -1    3.74    0.39 
   0   2  -1    3.19    0.73 
   0   2   1    4.72    0.63 
   0   2   1    3.60    0.37 
   0   2  -1    5.13    0.94 
   0   2  -1    2.81    0.40 
   0   2  -1    3.59    0.37 
   0   2   1    3.45    0.45 
   0   2  -1    2.44    0.72 
   0   2   1    3.96    0.46 
   0   2  -1    3.26    0.47 
   0   2  -1    4.00    0.73 
   0   2  -1    4.14    0.39 
   0   2  -1    3.77    0.43 
   0   2  -1    3.68    0.26 
   0   2  -1    3.76    0.46 
   0   2   1    5.79    0.73 
   0   2  -1    3.71    0.65 
   0   2   1    4.25    0.54 
   0   2  -1    3.41    0.54 
   0   2  -1    3.93    0.43 
   0   2   1    4.12    0.52 
   0   2   1    2.95    0.37 
   0   2  -1    3.22    0.56 
   0   2  -1    3.47    0.45 
   0   2  -1    3.63    0.46 
   0   2   1    3.77    0.56 
   0   2   1    4.68    0.39 
   0   2  -1    3.24    0.44 
   0   2   1    4.15    0.38 
   0   2   1    3.73    0.41 
   0   2  -1    3.91    0.43 
   0   2   1    3.89    0.40 
   0   2   1    3.97    0.41 
   0   2   1    4.15    0.48 
   0   2  -1    3.61    0.29 
   0   2   1    2.69    0.40 
   0   2  -1    4.22    0.51 
   0   2  -1    3.43    0.48 
   0   2   1    3.86    0.35 
   0   2  -1    4.31    0.56 
   0   2  -1    3.85    0.59 
   0   2  -1    5.23    0.66 
   0   2   1    3.69    0.60 
   0   2   1    3.71    0.35 
   0   2   1    4.48    0.59 
   0   2  -1    4.28    0.51 
   0   2  -1    3.44    0.75 
   0   2  -1    3.62    0.38 
   0   2   1    3.49    0.66 
   0   2  -1    3.77    0.54 
   0   2   1    3.65    0.37 
   1  -2   1  134.11    4.31 
   1  -2   1  136.83    4.49 
   1  -2   1  138.11    4.44 
   1  -2   1  135.52    4.70 
   1  -2   1  135.02    4.73 
  -1  -2  -1  131.62    4.26 
   1  -2   1  131.56    4.18 
   1  -2   1  135.33    4.32 
  -1  -2  -1  132.43    4.37 
   1  -2   1  130.68    4.45 
   1  -2   1  136.49    4.47 
   1  -2   1  135.67    4.43 
   1  -2   1  130.68    4.76 
  -1  -2  -1  128.97    4.00 
   1  -2   1  136.02    4.36 
   1  -2   1  132.92    4.33 
  -1  -2  -1  120.60    4.32 
   1  -2   1  133.14    4.14 
   1  -2   1  133.79    4.44 
  -1  -2  -1  125.26    4.42 
   1  -2   1  129.36    4.09 
   1  -2   1  133.43    4.36 
  -1  -2  -1  130.35    4.06 
  -1  -2  -1  130.21    4.26 
   1  -2   1  127.25    4.63 
   1  -2   1  134.62    4.38 
   1  -2   1  126.50    4.41 
   1  -2   1  137.99    4.74 
   1  -2   1  131.37    4.52 
   1  -2   1  133.05    4.41 
  -1  -2  -1  131.83    4.27 
   1  -2   1  132.22    4.32 
   1  -2   1  132.63    4.32 
   1  -2   1  133.15    4.03 
   1  -2   1  140.20    4.78 
  -1  -2  -1  131.98    4.56 
   1  -2   1  137.49    4.52 
   1  -2   1  143.68    4.45 
  -1  -2  -1  137.60    4.32 
   1  -2   1  143.22    4.82 
  -1  -2  -1  135.84    4.27 
   1  -2   1  130.66    4.69 
  -1  -2  -1  134.30    4.27 
  -1  -2  -1  134.69    4.46 
   1  -2   1  126.14    4.32 
   1  -2   1  128.98    4.24 
   1  -2   1  130.02    4.39 
   1  -2   1  138.07    4.53 
  -1  -2  -1  130.69    4.30 
  -1  -2  -1  130.01    4.31 
  -1  -2  -1  129.29    4.14 
   1  -2   1  131.22    4.87 
  -1  -2  -1  132.03    4.23 
   1   2   1  131.25    4.32 
   1   2   1  130.52    3.97 
  -1   2  -1  132.09    4.33 
   1   2   1  130.93    4.26 
   1   2   1  135.00    4.43 
   1   2   1  126.86    4.06 
  -1   2  -1  121.13    4.68 
   1   2   1  130.24    4.30 
   1   2   1  131.03    4.26 
   1   2   1  123.91    4.33 
   1   2   1  122.60    4.28 
   1   2   1  133.88    4.60 
  -1   2  -1  136.14    4.26 
  -1   2  -1  133.02    4.60 
  -1   2  -1  126.27    4.57 
  -1   2  -1  131.83    4.51 
   1   2   1  128.86    4.22 
   1   2   1  130.41    4.19 
   1   2   1  135.98    4.56 
  -1   2  -1  131.55    4.18 
  -1   2  -1  133.17    4.29 
  -1   2  -1  131.93    4.43 
  -1   2  -1  142.50    4.38 
  -1   2  -1  126.77    4.36 
   1   2   1  128.14    3.95 
   1   2   1  133.15    4.35 
  -1   2  -1  130.36    4.59 
  -1   2  -1  133.36    4.34 
   1   2   1  129.99    4.36 
   1   2   1  129.26    4.05 
   1   2   1  143.49    4.83 
   1   2   1  131.86    4.18 
  -1   2  -1  138.41    4.44 
  -1   2  -1  127.97    4.31 
  -1   2  -1  134.18    4.54 
   1   2   1  131.80    4.33 
   1   2   1  131.74    3.93 
  -1   2  -1  134.08    4.10 
   1   2   1  127.73    4.33 
   1   2   1  128.91    4.35 
  -1   2  -1  135.38    4.44 
  -1   2  -1  130.48    4.52 
   1   2   1  131.69    4.46 
  -1   2  -1  129.49    4.59 
  -1   2  -1  127.47    4.90 
   1   2   1  127.63    4.10 
  -1   2  -1  137.25    4.41 
   1   2   1  134.42    4.31 
  -1   2  -1  134.64    4.43 
   1   2   1  133.75    4.29 
   1   2   1  128.45    4.48 
   1   2   1  129.37    4.40 
  -1   2  -1  133.82    4.42 
   1   2   1  124.96    4.23 
   1   2   1  120.75    4.40 
  -1   2  -1  130.39    4.15 
  -1   2  -1  133.29    4.43 
   1   2   1  135.01    4.26 
  -1   2  -1  129.49    4.52 
   1   2   1  133.89    4.27 
  -1   2  -1  133.60    4.34 
  -1   2  -1  133.88    4.39 
  -1   2  -1  130.16    4.12 
  -1   2  -1  128.97    4.37 
  -1   2  -1  130.79    4.34 
   1   2   1  127.64    4.07 
   1   2   1  116.44    4.39 
   1   2   1  122.24    4.14 
  -1   2  -1  122.94    4.39 
   1   2   1  128.35    4.27 
  -1   2  -1  128.85    4.44 
   2  -2   1   16.37    1.17 
  -2  -2  -1   12.73    0.97 
  -2  -2  -1   13.89    0.71 
   2  -2   1   14.45    1.02 
   2  -2   1   13.89    0.93 
   2  -2   1   12.31    0.90 
   2  -2   1   14.72    0.93 
   2  -2   1   16.08    0.88 
   2  -2   1   13.67    0.86 
   2  -2   1   14.42    0.99 
   2  -2   1   14.52    0.81 
  -2  -2  -1   14.97    0.71 
  -2  -2  -1   14.09    0.80 
  -2  -2  -1   14.69    0.68 
   2  -2   1   14.53    0.97 
   2  -2   1   13.87    0.92 
   2  -2   1   15.52    1.01 
   2  -2   1   13.42    0.85 
   2  -2   1   14.45    0.90 
  -2  -2  -1   14.38    0.88 
  -2  -2  -1   15.81    0.92 
   2  -2   1   15.41    0.97 
   2  -2   1   14.37    0.89 
  -2  -2  -1   14.45    1.08 
  -2  -2  -1   15.75    1.04 
   2  -2   1   14.73    1.07 
  -2  -2  -1   13.79    0.88 
  -2  -2  -1   14.76    0.92 
  -2  -2  -1   15.45    0.88 
  -2  -2  -1   13.81    0.86 
   2  -2   1   16.94    1.09 
   2  -2   1   15.67    1.03 
   2  -2   1   14.90    1.02 
   2  -2   1   15.50    0.95 
   2  -2   1   15.76    1.12 
  -2  -2  -1   15.86    0.98 
  -2  -2  -1   13.88    1.12 
  -2  -2  -1   14.04    1.08 
  -2  -2  -1   13.61    1.00 
   2  -2   1   15.02    0.62 
   2  -2   1   15.31    1.02 
  -2  -2  -1   13.57    0.77 
   2  -2   1   14.50    1.10 
  -2  -2  -1   16.28    0.96 
  -2  -2  -1   15.65    0.95 
   2  -2   1   15.79    1.16 
  -2   2  -1   13.84    0.83 
  -2   2  -1   15.23    0.99 
  -2   2  -1   14.70    0.96 
  -2   2  -1   14.89    0.94 
  -2   2  -1   13.91    0.94 
  -2   2  -1   14.12    0.91 
   2   2   1   13.67    1.08 
  -2   2  -1   14.54    0.99 
   2   2   1   15.86    0.93 
  -2   2  -1   13.43    0.93 
   2   2   1   15.43    0.91 
  -2   2  -1   14.88    0.87 
  -2   2  -1   14.98    0.88 
   2   2   1   13.60    0.80 
   2   2   1   16.16    0.99 
   2   2   1   15.92    0.98 
  -2   2  -1   13.98    0.89 
  -2   2  -1   14.85    1.00 
   2   2   1   13.92    0.59 
   2   2   1   14.00    0.75 
   2   2   1   14.41    0.76 
   2   2   1   15.19    0.91 
  -2   2  -1   14.49    0.64 
   2   2   1   13.71    1.06 
  -2   2  -1   15.12    0.98 
   2   2   1   14.82    0.67 
  -2   2  -1   15.68    1.01 
  -2   2  -1   13.92    1.09 
   2   2   1   15.24    0.95 
  -2   2  -1   15.98    0.96 
  -2   2  -1   15.52    0.97 
   2   2   1   15.48    0.76 
  -2   2  -1   15.39    0.98 
   2   2   1   14.65    0.71 
  -2   2  -1   15.32    0.91 
  -2   2  -1   13.78    1.05 
   2   2   1   13.72    0.88 
  -2   2  -1   15.10    0.89 
   2   2   1   13.80    0.94 
   2   2   1   16.28    0.94 
  -2   2  -1   15.02    0.95 
   2   2   1   16.13    0.84 
   2   2   1   14.12    0.91 
  -2   2  -1   14.73    0.92 
   2   2   1   15.11    0.99 
  -2   2  -1   16.75    1.14 
   2   2   1   14.20    0.80 
   2   2   1   15.17    0.77 
   2   2   1   16.34    1.13 
  -2   2  -1   15.41    0.94 
  -2   2  -1   15.07    0.96 
   2   2   1   15.87    0.96 
  -3  -2  -1    0.06    0.16 
  -3  -2  -1    0.26    0.30 
   3  -2   1    0.23    0.30 
  -3  -2  -1    0.56    0.41 
   3  -2   1    0.07    0.18 
   3  -2   1    0.40    0.36 
  -3  -2  -1    0.62    0.27 
  -3  -2  -1    0.30    0.24 
   3  -2   1    0.56    0.31 
  -3  -2  -1   -0.04    0.28 
   3  -2   1    0.54    0.40 
   3  -2   1    0.57    0.32 
   3  -2   1    0.73    0.22 
   3  -2   1    0.58    0.29 
  -3  -2  -1    0.48    0.20 
   3  -2   1    0.15    0.33 
  -3  -2  -1    0.29    0.12 
  -3  -2  -1    0.56    0.39 
  -3  -2  -1    0.38    0.12 
   3  -2   1   -0.02    0.23 
  -3  -2  -1    0.06    0.26 
   3  -2   1    1.18    0.42 
   3  -2   1    0.77    0.44 
  -3  -2  -1    0.49    0.24 
  -3  -2  -1    0.47    0.37 
  -3  -2  -1    0.58    0.30 
   3  -2   1    0.61    0.41 
   3  -2   1    0.23    0.30 
  -3  -2  -1    0.18    0.27 
   3  -2   1    0.45    0.29 
  -3  -2  -1    0.15    0.20 
  -3  -2  -1    0.09    0.22 
   3  -2   1    0.04    0.39 
  -3  -2  -1    0.36    0.26 
   3  -2   1    0.01    0.30 
   3  -2   1    0.50    0.41 
   3  -2   1    0.68    0.46 
   3  -2   1    1.21    0.41 
   3  -2   1    0.98    0.41 
  -3  -2  -1    0.71    0.37 
  -3  -2  -1    0.76    0.28 
  -3   2  -1    0.30    0.32 
   3   2   1    0.64    0.26 
   3   2   1    0.09    0.33 
  -3   2  -1    0.33    0.28 
  -3   2  -1    0.16    0.26 
  -3   2  -1    0.41    0.33 
  -3   2  -1    0.52    0.33 
  -3   2  -1   -0.07    0.24 
   3   2   1    0.44    0.23 
   3   2   1    0.30    0.42 
   3   2   1    0.40    0.17 
   3   2   1    0.16    0.13 
   3   2   1    0.30    0.20 
   3   2   1    0.35    0.12 
   3   2   1    0.58    0.35 
  -3   2  -1    1.14    0.39 
   3   2   1    0.57    0.33 
   3   2   1    0.23    0.19 
   3   2   1    0.25    0.27 
   3   2   1    0.39    0.27 
   3   2   1    0.30    0.23 
  -3   2  -1    0.62    0.30 
  -3   2  -1    0.11    0.26 
  -3   2  -1   -0.18    0.20 
  -3   2  -1    0.70    0.34 
   3   2   1    0.48    0.28 
   3   2   1    0.20    0.16 
  -3   2  -1    0.21    0.29 
   3   2   1    0.04    0.21 
   3   2   1   -0.05    0.15 
   4  -2   1    8.97    1.06 
   4  -2   1   11.46    1.28 
   4  -2   1   10.02    1.15 
   4  -2   1   11.23    1.19 
   4  -2   1   12.95    1.46 
  -4  -2  -1    9.74    0.79 
   4  -2   1   11.21    0.68 
  -4  -2  -1   10.88    1.01 
  -4  -2  -1   11.51    1.34 
   4  -2   1   11.12    1.18 
   4  -2   1    7.75    1.19 
   4  -2   1    8.96    1.00 
  -4  -2  -1   12.69    1.30 
  -4  -2  -1   10.93    0.76 
  -4  -2  -1   12.00    1.20 
   4  -2   1   10.55    1.08 
  -4  -2  -1    9.21    1.05 
   4  -2   1   11.32    1.24 
  -4  -2  -1   12.91    0.96 
   4  -2   1   11.17    1.37 
  -4  -2  -1   12.85    0.98 
   4  -2   1   12.12    1.25 
  -4  -2  -1   10.49    1.00 
   4  -2   1    9.93    1.15 
  -4  -2  -1   10.52    1.17 
   4  -2   1    7.98    1.00 
   4  -2   1   12.65    1.51 
  -4  -2  -1   12.23    0.81 
   4  -2   1   10.97    1.20 
   4  -2   1   11.41    1.13 
   4  -2   1   10.70    1.10 
   4  -2   1   10.97    0.72 
  -4  -2  -1   12.13    0.92 
  -4  -2  -1   11.11    0.60 
  -4  -2  -1   11.35    1.10 
  -4   2  -1   10.87    1.07 
   4   2   1    9.95    0.69 
  -4   2  -1   12.18    1.19 
  -4   2  -1   11.73    0.87 
  -4   2  -1   10.46    1.23 
   4   2   1   10.42    1.15 
   4   2   1   13.29    0.90 
  -4   2  -1    8.80    1.08 
   4   2   1   11.05    0.59 
  -4   2  -1   11.48    1.23 
   4   2   1   10.64    1.03 
   4   2   1   11.81    0.74 
   4   2   1   12.33    0.90 
  -4   2  -1    8.73    1.03 
   4   2   1   11.54    0.69 
  -4   2  -1   12.58    1.27 
   4   2   1   10.40    1.00 
   4   2   1   11.18    1.37 
   4   2   1   12.99    1.35 
   4   2   1   10.91    0.70 
  -4   2  -1   11.50    1.19 
   4   2   1    9.44    0.75 
   4   2   1   10.51    1.02 
   4   2   1   10.54    1.03 
  -4   2  -1   11.30    1.24 
   4   2   1   11.20    1.22 
   5  -2   1   14.72    1.55 
   5  -2   1   11.88    1.31 
   5  -2   1   13.93    1.69 
   5  -2   1   16.72    1.68 
  -5  -2  -1   15.36    0.85 
   5  -2   1   14.44    1.46 
   5  -2   1   13.35    1.38 
  -5  -2  -1   12.30    1.53 
  -5  -2  -1   15.39    1.18 
   5  -2   1   14.61    1.75 
   5  -2   1   13.45    1.48 
   5  -2   1   15.23    1.24 
   5  -2   1   14.97    1.65 
  -5  -2  -1   15.36    1.25 
  -5  -2  -1   15.82    1.17 
   5  -2   1   14.41    1.71 
  -5  -2  -1   18.72    1.37 
  -5  -2  -1   15.08    1.42 
   5  -2   1   12.80    1.31 
  -5  -2  -1   14.08    1.32 
   5  -2   1   15.33    0.92 
  -5  -2  -1   15.95    1.04 
   5  -2   1   11.61    1.38 
   5  -2   1   15.21    1.81 
  -5  -2  -1   13.38    1.49 
   5  -2   1   18.12    1.39 
  -5  -2  -1   14.87    1.59 
   5  -2   1   16.78    1.71 
  -5  -2  -1   15.46    1.10 
   5  -2   1   16.15    1.48 
   5   2   1   14.66    0.91 
   5   2   1   17.45    1.74 
  -5   2  -1   13.39    1.39 
   5   2   1   18.07    1.43 
   5   2   1   17.80    1.12 
   5   2   1   16.65    1.08 
   5   2   1   14.80    0.96 
  -5   2  -1   10.12    1.23 
  -5   2  -1   14.88    1.54 
   5   2   1   19.30    2.00 
   5   2   1   14.37    1.17 
  -5   2  -1   17.16    1.62 
   5   2   1   18.53    1.40 
   5   2   1   12.36    1.28 
   5   2   1   16.30    0.85 
   5   2   1   15.40    1.11 
  -5   2  -1   18.43    1.75 
  -5   2  -1   15.17    1.06 
  -5   2  -1   14.98    1.50 
   5   2   1   16.49    1.08 
   5   2   1   14.12    0.94 
  -5   2  -1   15.47    1.65 
  -5   2  -1   15.86    1.19 
   5   2   1   15.60    1.46 
   5   2   1   17.73    1.29 
  -5   2  -1   17.01    1.30 
   5   2   1   14.31    1.38 
  -6  -2  -1   48.61    2.51 
   6  -2   1   49.80    3.14 
   6  -2   1   43.88    2.49 
   6  -2   1   47.37    2.81 
  -6  -2  -1   50.30    2.64 
   6  -2   1   45.89    2.80 
   6  -2   1   48.24    2.64 
  -6  -2  -1   55.10    2.54 
   6  -2   1   50.60    3.16 
   6  -2   1   46.50    3.10 
   6  -2   1   47.58    2.75 
  -6  -2  -1   44.67    2.53 
  -6  -2  -1   47.17    2.75 
   6  -2   1   48.95    2.86 
   6  -2   1   47.10    2.62 
  -6  -2  -1   48.99    2.82 
  -6  -2  -1   47.52    1.98 
   6  -2   1   47.35    2.06 
   6  -2   1   42.71    2.68 
  -6  -2  -1   50.19    2.29 
  -6  -2  -1   50.20    2.61 
  -6  -2  -1   46.94    2.97 
   6  -2   1   43.36    2.71 
   6  -2   1   48.23    2.53 
   6  -2   1   45.52    2.59 
  -6  -2  -1   46.87    2.47 
   6  -2   1   45.23    2.56 
   6  -2   1   46.84    3.11 
   6  -2   1   57.28    2.85 
  -6  -2  -1   48.70    2.48 
  -6   2  -1   46.60    2.52 
   6   2   1   46.01    2.74 
  -6   2  -1   49.33    2.75 
   6   2   1   47.64    2.35 
  -6   2  -1   48.69    2.67 
   6   2   1   48.71    2.15 
   6   2   1   46.07    2.18 
  -6   2  -1   50.31    3.09 
  -6   2  -1   52.80    2.49 
  -6   2  -1   48.01    2.73 
   6   2   1   46.91    2.95 
   6   2   1   48.29    2.09 
  -6   2  -1   42.45    2.67 
   6   2   1   49.65    2.31 
   6   2   1   46.24    2.52 
  -6   2  -1   45.42    2.67 
   6   2   1   48.16    1.96 
   6   2   1   47.74    2.67 
   6   2   1   51.95    2.91 
   6   2   1   46.83    2.54 
  -6   2  -1   48.58    2.78 
  -6   2  -1   51.05    2.75 
   6   2   1   47.75    2.49 
   6   2   1   52.25    2.67 
   7  -2   1   78.45    4.09 
  -7  -2  -1   76.52    3.82 
   7  -2   1   81.02    3.79 
   7  -2   1   80.80    3.70 
   7  -2   1   85.97    4.64 
   7  -2   1   79.77    4.10 
  -7  -2  -1   79.05    3.12 
   7  -2   1   90.09    4.07 
  -7  -2  -1   82.73    3.70 
   7  -2   1   91.73    4.13 
  -7  -2  -1   82.57    3.79 
  -7  -2  -1   74.43    4.04 
   7  -2   1   79.08    4.09 
  -7  -2  -1   80.18    3.87 
  -7  -2  -1   85.59    3.83 
   7  -2   1   81.76    4.24 
  -7  -2  -1   81.57    3.82 
   7  -2   1   79.52    3.85 
  -7  -2  -1   81.60    3.50 
   7  -2   1   83.16    4.56 
  -7  -2  -1   77.89    4.36 
   7  -2   1   77.02    3.67 
   7  -2   1   81.64    3.88 
   7  -2   1   77.73    4.50 
  -7  -2  -1   82.59    4.23 
   7  -2   1   90.68    4.29 
   7  -2   1   87.46    4.26 
   7  -2   1   83.61    4.65 
   7  -2   1   81.25    3.94 
   7   2   1   89.53    4.00 
   7   2   1   85.31    4.23 
  -7   2  -1   86.58    3.82 
   7   2   1   82.00    3.60 
  -7   2  -1   80.82    4.09 
  -7   2  -1   73.08    3.79 
   7   2   1   82.00    3.87 
  -7   2  -1   80.95    4.03 
   7   2   1   80.66    3.32 
   7   2   1   83.41    3.91 
   7   2   1   75.03    3.43 
   7   2   1   81.62    3.96 
   7   2   1   79.15    3.25 
  -7   2  -1   83.21    4.03 
   7   2   1   86.54    3.85 
   7   2   1   82.37    3.33 
   7   2   1   84.01    3.57 
  -7   2  -1   85.77    3.65 
   7   2   1   82.78    4.01 
  -7   2  -1   84.57    4.03 
  -7   2  -1   79.99    4.05 
  -7   2  -1   75.08    4.34 
   7   2   1   80.36    4.38 
  -7   2  -1   88.36    4.21 
   7   2   1   88.70    4.27 
   8  -2   1   26.85    2.91 
  -8  -2  -1   17.93    2.03 
  -8  -2  -1   18.86    2.56 
   8  -2   1   23.12    2.56 
   8  -2   1   21.03    2.01 
   8  -2   1   21.86    2.46 
  -8  -2  -1   20.26    2.41 
   8  -2   1   18.61    2.58 
  -8  -2  -1   21.33    2.19 
   8  -2   1   21.16    2.09 
   8  -2   1   21.45    2.34 
  -8  -2  -1   21.45    1.68 
   8  -2   1   18.76    2.06 
   8  -2   1   21.58    2.47 
   8  -2   1   15.75    2.42 
  -8  -2  -1   21.50    2.19 
   8  -2   1   24.20    2.36 
   8  -2   1   17.27    2.55 
   8  -2   1   18.75    2.41 
   8  -2   1   22.28    2.95 
  -8  -2  -1   18.97    2.06 
  -8  -2  -1   20.27    2.47 
  -8  -2  -1   17.01    2.01 
   8  -2   1   18.08    2.14 
   8  -2   1   21.34    2.48 
   8  -2   1   21.36    2.14 
  -8   2  -1   20.65    2.40 
   8   2   1   21.60    2.67 
  -8   2  -1   22.89    2.44 
   8   2   1   22.09    2.49 
   8   2   1   21.97    2.28 
  -8   2  -1   20.72    2.44 
   8   2   1   18.29    2.05 
  -8   2  -1   22.89    2.02 
   8   2   1   19.57    2.12 
  -8   2  -1   22.97    2.18 
  -8   2  -1   24.06    2.37 
   8   2   1   21.81    1.55 
  -8   2  -1   22.39    2.81 
  -8   2  -1   14.43    2.01 
   8   2   1   16.59    2.05 
  -8   2  -1   16.14    2.10 
   8   2   1   21.93    2.27 
   8   2   1   17.87    2.13 
   8   2   1   18.99    2.47 
  -8   2  -1   15.89    2.00 
   8   2   1   21.11    2.50 
   8   2   1   21.47    1.65 
   8   2   1   16.94    1.77 
   8   2   1   23.90    1.93 
   9  -2   1   35.70    3.99 
   9  -2   1   37.33    3.31 
   9  -2   1   34.29    2.67 
  -9  -2  -1   30.54    3.52 
   9  -2   1   36.11    3.89 
  -9  -2  -1   32.62    3.31 
   9  -2   1   37.68    3.02 
   9  -2   1   38.49    3.10 
   9  -2   1   37.84    2.64 
   9  -2   1   32.80    3.72 
   9  -2   1   34.09    2.52 
   9  -2   1   33.40    2.62 
  -9  -2  -1   30.28    3.21 
  -9  -2  -1   29.31    2.80 
   9  -2   1   35.71    3.46 
   9  -2   1   26.13    2.82 
   9  -2   1   32.26    3.58 
   9  -2   1   37.71    3.01 
  -9  -2  -1   34.65    2.71 
  -9  -2  -1   34.25    2.62 
   9  -2   1   36.23    3.52 
   9  -2   1   36.66    2.81 
   9   2   1   34.22    3.68 
  -9   2  -1   30.67    2.55 
  -9   2  -1   40.21    3.06 
  -9   2  -1   28.95    3.53 
   9   2   1   41.89    4.05 
  -9   2  -1   37.20    2.75 
   9   2   1   28.32    3.09 
  -9   2  -1   36.64    2.89 
   9   2   1   29.83    2.47 
   9   2   1   33.72    2.67 
   9   2   1   30.60    2.57 
   9   2   1   32.43    3.25 
   9   2   1   35.61    2.73 
  -9   2  -1   33.10    2.46 
   9   2   1   29.91    2.34 
   9   2   1   38.76    3.62 
  -9   2  -1   33.73    3.15 
   9   2   1   35.51    2.66 
  -9   2  -1   40.02    3.06 
  -9   2  -1   33.82    3.29 
   9   2   1   35.46    2.78 
  10  -2   1    6.02    1.58 
  10  -2   1    6.06    1.70 
 -10  -2  -1    4.66    2.20 
  10  -2   1    8.14    1.93 
  10  -2   1    4.42    1.58 
  10  -2   1    5.01    1.48 
  10  -2   1    3.75    1.79 
  10  -2   1    5.33    1.89 
  10  -2   1    3.42    1.48 
  10  -2   1    4.68    1.52 
 -10  -2  -1    4.14    1.25 
  10  -2   1    6.01    1.97 
 -10  -2  -1    8.32    2.10 
  10  -2   1    5.83    1.69 
  10  -2   1    5.50    1.47 
 -10  -2  -1    6.63    1.74 
  10  -2   1    3.86    1.56 
 -10  -2  -1    5.47    1.49 
  10  -2   1    3.42    1.24 
  10  -2   1    3.45    1.24 
 -10   2  -1    5.60    1.36 
  10   2   1    4.52    1.35 
  10   2   1    5.34    1.81 
 -10   2  -1    4.25    1.42 
  10   2   1    5.61    1.88 
  10   2   1    3.86    1.33 
 -10   2  -1    5.16    1.55 
 -10   2  -1    4.89    1.44 
 -10   2  -1    4.45    1.47 
  10   2   1    6.91    2.03 
 -10   2  -1    4.26    1.31 
  10   2   1    5.44    1.50 
  10   2   1    2.77    1.38 
  10   2   1    4.20    1.53 
  10   2   1    4.09    1.29 
  10   2   1    6.24    1.47 
 -10   2  -1    6.65    1.78 
 -10   2  -1    7.43    2.04 
   9  -3  -1   22.77    2.50 
   9  -3  -1   20.24    2.61 
   9  -3  -1   32.18    3.82 
  -9  -3   1   22.22    2.51 
  -9  -3   1   23.59    3.02 
   9  -3  -1   23.43    2.79 
   9  -3  -1   19.90    2.28 
  -9  -3   1   17.49    2.65 
   9  -3  -1   20.71    2.97 
   9  -3  -1   22.03    2.54 
  -9  -3   1   18.51    2.17 
   9  -3  -1   18.02    2.86 
   9  -3  -1   15.20    2.32 
  -9  -3   1   22.37    2.44 
  -9  -3   1   18.97    2.60 
   9  -3  -1   18.59    2.59 
   9  -3  -1   23.09    2.43 
  -9  -3   1   17.67    2.14 
   9  -3  -1   19.31    2.44 
  -9  -3   1   23.79    2.58 
   9  -3  -1   20.08    2.56 
   9  -3  -1   19.75    2.42 
   9  -3  -1   23.57    2.51 
   9  -3  -1   19.23    2.56 
   9  -3  -1   14.75    2.56 
   9   3  -1   23.65    2.77 
  -9   3   1   20.55    2.48 
  -9   3   1   17.54    2.31 
  -9   3   1   22.78    2.83 
  -9   3   1   20.72    2.59 
  -9   3   1   22.12    2.68 
   9   3  -1   23.12    2.57 
   9   3  -1   24.48    2.60 
  -9   3   1   26.46    3.28 
  -9   3   1   18.46    2.41 
   9   3  -1   22.46    3.10 
  -9   3   1   28.06    2.73 
  -9   3   1   21.99    2.21 
   9   3  -1   19.66    2.13 
   9   3  -1   23.44    2.69 
   9   3  -1   21.88    2.81 
  -9   3   1   19.95    2.57 
   9   3  -1   24.81    2.56 
   9   3  -1   22.40    2.57 
   9   3  -1   24.06    2.75 
   8  -3  -1   14.35    2.34 
   8  -3  -1   18.79    2.08 
   8  -3  -1   12.25    1.89 
   8  -3  -1   15.78    1.98 
  -8  -3   1   12.79    2.09 
   8  -3  -1   13.85    2.41 
  -8  -3   1   12.53    1.94 
   8  -3  -1   16.71    2.27 
   8  -3  -1   11.59    1.74 
   8  -3  -1   12.12    1.94 
   8  -3  -1   14.13    2.01 
  -8  -3   1   11.31    1.59 
   8  -3  -1   14.81    2.19 
  -8  -3   1   15.72    1.85 
   8  -3  -1   14.60    1.86 
   8  -3  -1   12.68    2.24 
  -8  -3   1   17.48    2.09 
   8  -3  -1   11.72    2.09 
  -8  -3   1   13.63    2.34 
   8  -3  -1   11.67    1.90 
  -8  -3   1   15.11    1.93 
   8  -3  -1   12.59    1.68 
   8  -3  -1   15.96    1.99 
   8  -3  -1   14.70    2.02 
   8   3  -1   13.25    2.25 
  -8   3   1   13.78    1.82 
   8   3  -1   14.53    2.04 
  -8   3   1   16.15    2.13 
   8   3  -1   11.93    1.86 
  -8   3   1   12.96    1.80 
   8   3  -1   13.91    1.58 
  -8   3   1   12.06    2.05 
   8   3  -1   13.31    1.84 
   8   3  -1   13.14    1.62 
  -8   3   1   10.48    1.78 
   8   3  -1   11.57    1.40 
  -8   3   1   18.20    2.29 
   8   3  -1   15.46    1.95 
   8   3  -1   14.05    2.08 
  -8   3   1   11.68    1.57 
  -8   3   1   17.01    2.21 
   8   3  -1   15.71    1.97 
   8   3  -1   13.48    1.86 
  -8   3   1   14.57    2.00 
   8   3  -1   13.27    1.78 
  -8   3   1   12.93    1.93 
  -7  -3   1   26.41    1.98 
  -7  -3   1   25.09    2.68 
   7  -3  -1   31.47    3.29 
   7  -3  -1   32.11    2.38 
   7  -3  -1   27.22    3.00 
   7  -3  -1   27.23    2.13 
  -7  -3   1   29.69    2.16 
   7  -3  -1   30.05    2.24 
  -7  -3   1   30.03    2.18 
   7  -3  -1   23.73    2.47 
   7  -3  -1   31.67    2.34 
   7  -3  -1   30.32    2.41 
  -7  -3   1   27.49    2.11 
   7  -3  -1   31.23    2.79 
  -7  -3   1   28.29    2.21 
  -7  -3   1   31.52    2.06 
   7  -3  -1   30.89    2.37 
  -7  -3   1   31.87    2.69 
   7  -3  -1   26.49    2.71 
   7  -3  -1   31.19    2.93 
   7  -3  -1   31.45    2.35 
   7  -3  -1   28.16    2.23 
   7  -3  -1   26.78    2.07 
   7  -3  -1   26.91    2.95 
  -7  -3   1   28.13    2.29 
   7  -3  -1   26.68    2.04 
  -7   3   1   26.52    2.57 
  -7   3   1   26.82    2.81 
  -7   3   1   29.69    2.62 
  -7   3   1   25.91    2.59 
   7   3  -1   30.36    2.15 
   7   3  -1   28.15    1.91 
   7   3  -1   26.19    2.82 
   7   3  -1   29.19    2.33 
   7   3  -1   26.24    2.08 
  -7   3   1   27.32    1.93 
  -7   3   1   28.02    1.75 
   7   3  -1   32.13    1.74 
   7   3  -1   29.87    2.01 
  -7   3   1   31.32    2.34 
   7   3  -1   30.16    1.77 
  -7   3   1   30.62    2.28 
  -7   3   1   29.68    2.14 
  -7   3   1   29.13    2.24 
   7   3  -1   29.77    2.43 
   7   3  -1   27.50    1.84 
   7   3  -1   30.12    2.10 
   7   3  -1   30.67    2.28 
   7   3  -1   24.13    2.00 
  -7   3   1   28.73    2.26 
   7   3  -1   29.38    2.17 
   6  -3  -1  116.58    4.78 
  -6  -3   1  104.80    4.52 
   6  -3  -1  109.03    4.52 
  -6  -3   1  111.57    4.60 
  -6  -3   1  109.67    5.18 
  -6  -3   1  106.09    4.34 
   6  -3  -1  107.43    5.26 
   6  -3  -1  106.89    4.71 
  -6  -3   1  107.64    4.65 
   6  -3  -1  107.06    4.72 
   6  -3  -1  109.32    4.92 
   6  -3  -1  102.35    5.03 
   6  -3  -1  112.26    5.32 
  -6  -3   1  102.68    4.55 
   6  -3  -1  103.46    5.17 
   6  -3  -1  112.36    4.74 
   6  -3  -1  107.01    4.72 
  -6  -3   1  108.10    5.04 
  -6  -3   1  103.15    4.49 
  -6  -3   1  104.47    4.71 
   6  -3  -1  106.07    4.70 
   6  -3  -1  109.40    4.62 
   6  -3  -1  110.68    4.89 
  -6  -3   1  105.97    3.81 
   6  -3  -1  103.88    4.81 
   6  -3  -1  116.94    4.92 
   6  -3  -1  102.42    4.81 
  -6  -3   1  110.90    4.38 
   6   3  -1  105.95    3.79 
  -6   3   1  110.36    4.69 
  -6   3   1  107.63    4.77 
   6   3  -1  110.69    4.36 
   6   3  -1  107.27    4.52 
  -6   3   1  111.72    5.08 
  -6   3   1  101.50    4.34 
   6   3  -1  101.35    5.11 
  -6   3   1  111.82    4.25 
  -6   3   1  111.09    4.77 
   6   3  -1  103.79    4.81 
  -6   3   1  108.02    4.65 
   6   3  -1  114.38    4.58 
   6   3  -1  109.52    4.93 
   6   3  -1  113.64    4.11 
   6   3  -1  109.52    4.03 
   6   3  -1  108.76    4.49 
   6   3  -1  104.83    4.45 
  -6   3   1  115.56    4.80 
   6   3  -1  104.95    4.64 
  -6   3   1  104.90    4.75 
  -6   3   1  105.55    4.75 
  -6   3   1  108.76    4.58 
   6   3  -1  110.97    4.62 
   6   3  -1  110.53    4.27 
   5  -3  -1  194.09    6.98 
   5  -3  -1  194.27    6.95 
  -5  -3   1  192.09    6.89 
  -5  -3   1  189.73    6.98 
   5  -3  -1  195.02    6.01 
  -5  -3   1  189.27    6.85 
  -5  -3   1  192.12    7.02 
   5  -3  -1  180.58    6.97 
  -5  -3   1  190.66    6.86 
   5  -3  -1  195.51    7.53 
   5  -3  -1  190.42    7.52 
   5  -3  -1  188.36    7.06 
   5  -3  -1  192.23    7.19 
  -5  -3   1  193.28    6.05 
   5  -3  -1  180.18    7.09 
   5  -3  -1  190.38    7.02 
   5  -3  -1  196.57    6.79 
  -5  -3   1  193.81    6.93 
  -5  -3   1  190.49    6.83 
  -5  -3   1  189.17    6.61 
   5  -3  -1  183.37    7.00 
   5  -3  -1  199.78    7.09 
  -5  -3   1  191.10    6.93 
  -5  -3   1  184.44    6.24 
   5  -3  -1  187.31    7.10 
   5  -3  -1  186.26    7.09 
   5  -3  -1  193.56    7.59 
  -5  -3   1  191.31    7.43 
  -5  -3   1  178.09    7.25 
   5  -3  -1  191.53    7.05 
   5  -3  -1  195.30    7.41 
  -5  -3   1  197.90    6.61 
   5   3  -1  191.07    6.81 
  -5   3   1  200.13    6.99 
   5   3  -1  192.16    7.17 
  -5   3   1  195.38    6.98 
   5   3  -1  191.26    6.97 
   5   3  -1  193.67    6.19 
  -5   3   1  199.87    7.11 
   5   3  -1  195.07    6.73 
   5   3  -1  194.87    6.67 
   5   3  -1  186.80    6.38 
  -5   3   1  190.81    7.08 
  -5   3   1  182.57    6.83 
   5   3  -1  184.01    7.49 
  -5   3   1  188.92    6.76 
  -5   3   1  184.33    7.01 
  -5   3   1  201.92    6.65 
   5   3  -1  204.96    6.41 
   5   3  -1  192.68    6.56 
   5   3  -1  197.62    7.36 
  -5   3   1  193.23    7.08 
  -5   3   1  190.51    6.90 
   5   3  -1  192.79    6.92 
   5   3  -1  187.10    6.66 
   4  -3  -1  120.18    4.77 
  -4  -3   1  119.19    4.20 
  -4  -3   1  115.31    4.61 
  -4  -3   1  110.96    4.49 
  -4  -3   1  112.09    4.50 
  -4  -3   1  115.39    4.02 
  -4  -3   1  118.19    4.38 
   4  -3  -1  117.55    4.72 
   4  -3  -1  119.71    4.72 
   4  -3  -1  119.18    4.05 
  -4  -3   1  117.07    4.58 
  -4  -3   1  120.56    4.63 
  -4  -3   1  120.07    4.14 
   4  -3  -1  115.69    3.96 
   4  -3  -1  119.54    4.60 
  -4  -3   1  116.57    4.48 
   4  -3  -1  121.44    4.79 
   4  -3  -1  120.47    4.70 
   4  -3  -1  126.71    4.76 
  -4  -3   1  121.98    4.31 
   4  -3  -1  122.74    5.13 
   4  -3  -1  119.28    5.00 
   4  -3  -1  117.62    3.74 
   4  -3  -1  113.50    4.97 
   4  -3  -1  119.40    4.88 
  -4  -3   1  126.54    4.63 
  -4  -3   1  117.18    4.55 
   4  -3  -1  122.50    4.93 
  -4  -3   1  122.98    4.61 
   4  -3  -1  121.28    4.79 
  -4  -3   1  117.63    3.73 
   4  -3  -1  123.23    4.64 
   4  -3  -1  120.48    4.41 
  -4  -3   1  120.24    5.00 
  -4  -3   1  119.60    4.96 
   4  -3  -1  121.50    4.74 
   4  -3  -1  118.79    4.67 
   4  -3  -1  120.12    4.73 
  -4   3   1  125.36    4.61 
   4   3  -1  125.52    4.39 
  -4   3   1  121.20    4.69 
   4   3  -1  121.66    5.09 
   4   3  -1  123.35    4.20 
  -4   3   1  117.78    4.69 
  -4   3   1  123.73    4.57 
   4   3  -1  118.94    4.04 
   4   3  -1  125.17    4.54 
   4   3  -1  123.03    4.81 
   4   3  -1  121.44    4.28 
   4   3  -1  120.05    5.17 
  -4   3   1  121.30    4.74 
   4   3  -1  122.12    4.18 
  -4   3   1  120.07    4.51 
   4   3  -1  116.84    4.32 
   4   3  -1  117.52    4.13 
   4   3  -1  118.60    4.41 
   4   3  -1  121.38    4.52 
  -4   3   1  120.96    4.71 
  -4   3   1  119.03    4.41 
  -4   3   1  121.73    4.54 
  -3  -3   1  163.99    5.98 
  -3  -3   1  158.64    6.11 
  -3  -3   1  169.04    5.28 
   3  -3  -1  166.76    5.92 
  -3  -3   1  160.87    5.70 
  -3  -3   1  158.65    6.10 
   3  -3  -1  182.95    6.26 
   3  -3  -1  163.72    5.77 
   3  -3  -1  165.35    5.98 
  -3  -3   1  162.12    5.47 
   3  -3  -1  161.07    5.51 
   3  -3  -1  157.79    5.80 
  -3  -3   1  162.51    5.86 
   3  -3  -1  167.20    5.86 
   3  -3  -1  170.79    5.84 
  -3  -3   1  159.67    5.62 
  -3  -3   1  162.29    5.18 
   3  -3  -1  162.50    5.84 
   3  -3  -1  165.40    5.48 
   3  -3  -1  170.71    5.95 
  -3  -3   1  155.46    5.70 
  -3  -3   1  168.15    5.25 
  -3  -3   1  166.02    5.81 
   3  -3  -1  171.01    6.04 
   3  -3  -1  162.67    6.08 
   3  -3  -1  160.16    5.88 
   3  -3  -1  169.07    5.93 
   3  -3  -1  168.90    6.14 
   3  -3  -1  164.93    5.87 
   3  -3  -1  171.31    5.55 
  -3  -3   1  162.90    5.80 
  -3  -3   1  170.40    5.74 
   3  -3  -1  166.25    5.89 
  -3  -3   1  148.86    6.16 
  -3  -3   1  165.10    5.73 
  -3  -3   1  168.40    5.96 
   3  -3  -1  164.35    5.89 
  -3  -3   1  168.09    5.83 
   3   3  -1  166.42    5.47 
   3   3  -1  161.88    5.70 
   3   3  -1  168.53    5.42 
   3   3  -1  159.41    5.50 
  -3   3   1  171.13    5.82 
  -3   3   1  161.58    5.69 
  -3   3   1  164.97    5.84 
  -3   3   1  167.06    5.68 
   3   3  -1  177.12    6.15 
  -3   3   1  158.45    5.59 
   3   3  -1  162.18    5.22 
  -3   3   1  163.25    5.88 
  -3   3   1  163.25    5.49 
  -3   3   1  169.39    5.53 
   3   3  -1  161.24    5.59 
  -3   3   1  167.07    5.85 
   3   3  -1  165.75    5.51 
   3   3  -1  170.66    6.42 
   3   3  -1  155.97    6.13 
   3   3  -1  168.26    6.45 
   3   3  -1  170.92    5.70 
  -3   3   1  163.79    5.72 
   3   3  -1  164.51    5.92 
   2  -3  -1   23.95    1.17 
  -2  -3   1   23.55    1.05 
  -2  -3   1   28.33    1.51 
  -2  -3   1   26.06    1.73 
   2  -3  -1   25.11    1.02 
  -2  -3   1   27.34    1.74 
  -2  -3   1   25.14    1.41 
  -2  -3   1   25.87    1.68 
   2  -3  -1   25.39    1.42 
   2  -3  -1   26.65    1.61 
  -2  -3   1   26.71    1.49 
   2  -3  -1   25.78    1.46 
   2  -3  -1   25.76    1.36 
  -2  -3   1   27.08    1.32 
   2  -3  -1   24.76    1.14 
  -2  -3   1   23.06    1.34 
  -2  -3   1   26.46    0.94 
   2  -3  -1   27.07    1.58 
  -2  -3   1   24.50    1.61 
  -2  -3   1   26.36    1.26 
  -2  -3   1   23.67    1.46 
   2  -3  -1   23.91    1.43 
  -2  -3   1   25.33    1.67 
   2  -3  -1   25.90    1.46 
   2  -3  -1   24.55    1.62 
   2  -3  -1   27.43    1.53 
  -2  -3   1   25.14    1.53 
   2  -3  -1   26.33    1.42 
   2  -3  -1   25.58    1.48 
  -2  -3   1   23.07    1.31 
   2  -3  -1   26.61    1.54 
   2  -3  -1   25.11    1.53 
   2  -3  -1   25.46    1.47 
   2  -3  -1   24.02    1.43 
   2  -3  -1   26.72    1.50 
  -2  -3   1   25.77    1.48 
  -2  -3   1   24.51    1.01 
  -2  -3   1   27.08    1.51 
   2  -3  -1   26.87    1.47 
   2  -3  -1   28.02    1.55 
   2  -3  -1   26.20    1.46 
   2  -3  -1   27.62    1.62 
   2  -3  -1   25.52    1.19 
   2  -3  -1   25.72    1.32 
  -2  -3   1   27.34    1.40 
  -2  -3   1   26.99    1.39 
  -2  -3   1   24.26    1.31 
   2   3  -1   26.64    1.54 
   2   3  -1   27.43    1.22 
   2   3  -1   25.21    1.74 
   2   3  -1   25.24    1.62 
   2   3  -1   24.54    1.57 
   2   3  -1   24.60    1.60 
   2   3  -1   25.32    1.20 
  -2   3   1   25.22    1.34 
   2   3  -1   23.80    1.55 
  -2   3   1   23.60    1.40 
   2   3  -1   24.95    1.22 
   2   3  -1   24.27    0.90 
   2   3  -1   24.61    1.23 
  -2   3   1   25.86    1.26 
  -2   3   1   25.78    1.17 
  -2   3   1   25.86    1.37 
   2   3  -1   24.96    1.50 
  -2   3   1   24.11    1.45 
  -2   3   1   25.28    0.95 
  -2   3   1   25.34    1.39 
  -2   3   1   23.68    1.19 
   2   3  -1   23.62    1.53 
   2   3  -1   26.62    1.23 
   2   3  -1   25.43    1.05 
   2   3  -1   27.18    1.39 
  -2   3   1   25.45    1.29 
  -2   3   1   25.64    1.50 
   2   3  -1   24.26    1.67 
  -2   3   1   24.30    1.38 
   2   3  -1   23.42    1.83 
  -2   3   1   26.66    1.43 
  -2   3   1   25.65    1.48 
   2   3  -1   24.23    1.13 
   2   3  -1   27.67    1.47 
  -2   3   1   26.79    1.57 
   2   3  -1   26.58    1.93 
   2   3  -1   24.58    1.52 
   2   3  -1   27.67    1.72 
   2   3  -1   22.85    1.23 
  -2   3   1   26.76    1.42 
  -1  -3   1   75.81    2.64 
  -1  -3   1   72.22    2.45 
  -1  -3   1   78.78    2.79 
   1  -3  -1   78.75    2.85 
   1  -3  -1   74.59    2.85 
  -1  -3   1   79.37    2.84 
   1  -3  -1   71.82    3.31 
  -1  -3   1   78.09    2.97 
   1  -3  -1   81.05    2.88 
   1  -3  -1   76.55    2.57 
   1  -3  -1   76.40    2.91 
   1  -3  -1   76.99    2.93 
  -1  -3   1   76.41    2.83 
   1  -3  -1   78.59    3.18 
  -1  -3   1   75.99    2.96 
   1  -3  -1   79.50    3.24 
  -1  -3   1   75.95    3.09 
   1  -3  -1   77.20    2.50 
   1  -3  -1   84.03    2.98 
   1  -3  -1   80.65    3.07 
  -1  -3   1   76.42    3.16 
   1  -3  -1   74.99    3.30 
   1  -3  -1   78.42    2.91 
   1  -3  -1   70.88    2.89 
   1  -3  -1   78.15    2.76 
  -1  -3   1   75.26    3.28 
  -1  -3   1   75.98    3.34 
  -1  -3   1   74.06    2.76 
   1  -3  -1   77.53    2.88 
  -1  -3   1   76.20    2.95 
   1  -3  -1   82.09    3.01 
  -1  -3   1   75.82    3.47 
  -1  -3   1   80.38    3.41 
   1  -3  -1   72.96    3.17 
   1  -3  -1   75.64    2.43 
  -1  -3   1   74.42    2.62 
  -1  -3   1   77.04    2.56 
  -1  -3   1   73.06    2.90 
   1  -3  -1   74.00    2.93 
  -1  -3   1   77.96    2.76 
   1  -3  -1   78.40    2.97 
  -1  -3   1   75.67    2.85 
   1  -3  -1   75.00    2.67 
  -1  -3   1   77.45    2.82 
   1  -3  -1   80.39    2.96 
  -1  -3   1   82.50    3.50 
  -1  -3   1   74.64    3.09 
   1  -3  -1   78.11    3.22 
   1  -3  -1   77.73    2.48 
   1  -3  -1   76.56    2.83 
  -1  -3   1   69.46    3.07 
   1   3  -1   73.55    3.01 
  -1   3   1   75.67    2.90 
   1   3  -1   71.91    3.43 
  -1   3   1   77.06    2.52 
   1   3  -1   72.30    3.49 
  -1   3   1   79.33    2.87 
   1   3  -1   74.71    3.82 
  -1   3   1   75.99    2.60 
   1   3  -1   72.45    3.26 
   1   3  -1   78.49    2.80 
  -1   3   1   75.80    2.82 
  -1   3   1   74.77    3.59 
   1   3  -1   75.23    2.74 
   1   3  -1   79.04    3.40 
   1   3  -1   79.20    2.99 
   1   3  -1   74.45    2.80 
  -1   3   1   71.20    3.08 
  -1   3   1   74.92    2.90 
   1   3  -1   74.18    2.48 
   1   3  -1   78.87    3.07 
  -1   3   1   77.72    2.84 
   1   3  -1   79.90    3.41 
   1   3  -1   77.45    3.27 
  -1   3   1   70.95    2.87 
  -1   3   1   73.68    2.82 
   1   3  -1   77.60    3.25 
  -1   3   1   71.09    3.08 
   1   3  -1   77.83    3.02 
  -1   3   1   79.19    2.87 
   1   3  -1   74.14    3.21 
   1   3  -1   75.33    2.69 
   1   3  -1   77.25    2.78 
  -1   3   1   75.49    3.00 
  -1   3   1   78.30    2.75 
   1   3  -1   75.80    2.87 
  -1   3   1   76.69    2.85 
   1   3  -1   71.00    2.91 
   1   3  -1   77.72    2.78 
  -1   3   1   74.40    2.93 
  -1   3   1   79.14    2.90 
  -1   3   1   76.60    2.45 
   1   3  -1   75.00    2.79 
   1   3  -1   80.35    2.61 
   1   3  -1   77.28    2.87 
  -1   3   1   74.07    2.56 
   1   3  -1   77.18    3.25 
   1   3  -1   77.59    2.99 
  -1   3   1   75.54    2.82 
  -1   3   1   74.29    2.88 
  -1   3   1   76.36    2.86 
  -1   3   1   79.12    2.51 
   1   3  -1   75.39    3.62 
  -1   3   1   73.79    2.79 
   1   3  -1   74.10    2.52 
   1   3  -1   74.24    2.64 
  -1   3   1   78.40    2.83 
  -1   3   1   77.87    2.79 
   1   3  -1   76.74    3.12 
   1   3  -1   75.30    2.50 
  -1   3   1   70.22    2.69 
  -1   3   1   76.55    2.90 
  -1   3   1   75.59    2.84 
   1   3  -1   70.60    3.66 
   1   3  -1   73.05    2.77 
  -1   3   1   78.02    2.89 
   1   3  -1   78.06    2.97 
  -1   3   1   75.25    2.95 
  -1   3   1   79.57    2.94 
   1   3  -1   75.18    2.49 
  -1   3   1   74.42    2.88 
   1   3  -1   78.42    2.83 
  -1   3   1   74.20    3.54 
   0  -3  -1   38.47    1.75 
   0  -3  -1   35.67    1.73 
   0  -3   1   40.78    2.27 
   0  -3  -1   38.95    2.03 
   0  -3   1   38.48    1.78 
   0  -3   1   40.50    1.96 
   0  -3  -1   34.00    2.18 
   0  -3  -1   39.28    2.00 
   0  -3  -1   43.22    2.01 
   0  -3  -1   47.56    1.92 
   0  -3   1   37.00    1.80 
   0  -3  -1   37.98    1.49 
   0  -3  -1   39.29    1.67 
   0  -3  -1   41.38    1.91 
   0  -3  -1   37.33    1.73 
   0  -3  -1   37.92    1.67 
   0  -3   1   42.47    2.15 
   0  -3   1   35.21    1.89 
   0  -3  -1   40.64    1.59 
   0  -3   1   40.15    2.05 
   0  -3   1   41.89    2.03 
   0  -3   1   39.66    1.87 
   0  -3  -1   37.97    1.51 
   0  -3   1   41.03    2.09 
   0  -3  -1   39.89    1.81 
   0  -3  -1   41.54    1.60 
   0  -3   1   40.95    1.62 
   0  -3   1   40.81    1.84 
   0  -3   1   42.68    2.47 
   0  -3   1   38.13    1.86 
   0  -3   1   39.01    1.60 
   0  -3   1   35.89    1.36 
   0  -3   1   39.99    1.67 
   0  -3  -1   31.46    2.20 
   0  -3   1   40.84    1.62 
   0  -3  -1   38.65    1.50 
   0  -3   1   39.58    1.72 
   0  -3   1   38.05    1.65 
   0  -3   1   38.34    1.55 
   0  -3   1   36.22    1.66 
   0  -3  -1   39.19    2.12 
   0  -3   1   33.08    2.48 
   0  -3  -1   41.13    1.64 
   0  -3   1   38.13    1.62 
   0  -3  -1   39.66    1.62 
   0  -3  -1   38.40    1.66 
   0  -3  -1   38.89    1.47 
   0  -3  -1   36.45    1.66 
   0  -3   1   42.30    1.83 
   0  -3  -1   31.69    2.30 
   0  -3   1   30.95    2.50 
   0  -3   1   37.86    2.32 
   0  -3  -1   43.48    1.88 
   0  -3   1   38.46    1.53 
   0  -3   1   34.17    2.48 
   0   3  -1   39.95    1.79 
   0   3  -1   39.75    1.99 
   0   3  -1   39.21    2.06 
   0   3   1   35.93    1.67 
   0   3  -1   36.89    1.78 
   0   3   1   40.26    1.64 
   0   3   1   38.12    1.76 
   0   3   1   36.82    1.91 
   0   3   1   37.64    1.62 
   0   3  -1   37.98    1.54 
   0   3   1   40.38    1.67 
   0   3  -1   40.38    1.87 
   0   3  -1   51.76    2.17 
   0   3  -1   36.34    1.68 
   0   3  -1   36.50    2.22 
   0   3   1   37.41    1.48 
   0   3   1   41.30    2.00 
   0   3  -1   40.54    1.66 
   0   3   1   40.29    1.72 
   0   3   1   40.14    1.65 
   0   3  -1   39.09    1.41 
   0   3  -1   39.41    1.93 
   0   3  -1   43.20    1.71 
   0   3  -1   38.77    1.83 
   0   3   1   35.32    1.93 
   0   3   1   38.80    1.66 
   0   3   1   40.75    1.66 
   0   3   1   34.39    2.05 
   0   3  -1   39.02    1.73 
   0   3   1   39.36    1.56 
   0   3  -1   38.38    1.55 
   0   3   1   37.84    1.45 
   0   3   1   37.04    1.56 
   0   3   1   39.88    1.83 
   0   3  -1   38.84    1.72 
   0   3  -1   37.76    1.62 
   0   3   1   37.18    1.49 
   0   3   1   37.89    1.84 
   0   3  -1   36.97    2.63 
   0   3   1   39.02    1.69 
   0   3   1   38.55    1.65 
   0   3  -1   38.48    1.63 
   0   3  -1   33.88    2.41 
   0   3   1   38.33    1.60 
   0   3   1   38.78    1.56 
   0   3  -1   39.52    1.38 
   0   3   1   39.73    1.50 
   0   3  -1   39.38    1.72 
   0   3  -1   36.51    1.67 
   0   3  -1   41.12    2.03 
   0   3  -1   38.63    2.38 
   0   3   1   37.71    1.63 
   0   3  -1   40.78    1.75 
   0   3  -1   41.69    2.30 
   0   3   1   35.87    2.00 
   0   3   1   39.39    1.59 
   0   3   1   40.01    1.61 
   0   3   1   37.04    1.64 
   0   3   1   29.13    2.01 
   0   3  -1   38.81    1.60 
   0   3   1   38.76    1.77 
   0   3  -1   40.96    1.57 
   0   3  -1   36.97    1.81 
   0   3  -1   37.22    1.84 
   0   3  -1   47.81    2.10 
   0   3   1   35.79    1.51 
   0   3  -1   27.59    2.20 
   0   3  -1   38.21    1.71 
   1  -3   1  400.34   12.53 
   1  -3   1  420.40   13.05 
  -1  -3  -1  430.53   12.63 
   1  -3   1  411.07   12.30 
   1  -3   1  423.07   12.53 
   1  -3   1  438.78   12.76 
   1  -3   1  376.33   13.36 
  -1  -3  -1  421.13   12.68 
   1  -3   1  384.44   13.56 
  -1  -3  -1  426.60   12.59 
  -1  -3  -1  422.39   12.56 
   1  -3   1  401.88   12.47 
   1  -3   1  414.40   12.25 
   1  -3   1  427.11   12.82 
   1  -3   1  403.94   13.12 
   1  -3   1  403.30   12.12 
   1  -3   1  415.13   13.26 
   1  -3   1  414.46   12.92 
  -1  -3  -1  430.77   12.80 
   1  -3   1  413.38   12.89 
  -1  -3  -1  391.78   13.03 
  -1  -3  -1  411.35   13.13 
  -1  -3  -1  407.62   12.68 
   1  -3   1  407.16   13.58 
  -1  -3  -1  418.62   12.59 
  -1  -3  -1  400.35   12.52 
   1  -3   1  408.85   12.98 
  -1  -3  -1  411.82   12.54 
   1  -3   1  427.51   12.84 
   1  -3   1  434.98   13.54 
  -1  -3  -1  411.72   12.72 
   1  -3   1  417.68   12.80 
   1  -3   1  381.91   12.64 
  -1  -3  -1  412.37   12.66 
   1  -3   1  422.86   12.91 
  -1  -3  -1  406.08   12.70 
   1  -3   1  436.89   12.67 
   1  -3   1  402.77   12.63 
   1  -3   1  403.59   12.78 
  -1  -3  -1  420.73   12.52 
   1  -3   1  404.11   12.89 
  -1  -3  -1  402.47   13.15 
   1  -3   1  402.87   12.74 
   1  -3   1  425.66   12.70 
   1  -3   1  416.55   12.46 
   1  -3   1  434.86   13.42 
   1  -3   1  391.88   12.82 
  -1  -3  -1  413.15   12.74 
   1  -3   1  435.41   13.17 
  -1   3  -1  412.70   13.36 
  -1   3  -1  430.33   12.85 
   1   3   1  395.34   12.78 
  -1   3  -1  431.29   12.77 
  -1   3  -1  422.80   13.17 
   1   3   1  421.42   12.38 
   1   3   1  409.37   13.00 
   1   3   1  415.78   12.29 
   1   3   1  409.49   12.41 
   1   3   1  409.20   12.76 
  -1   3  -1  398.89   12.77 
  -1   3  -1  409.35   12.85 
  -1   3  -1  419.40   12.80 
   1   3   1  421.24   13.21 
  -1   3  -1  432.57   13.23 
   1   3   1  415.78   12.67 
  -1   3  -1  411.55   12.73 
   1   3   1  403.62   12.45 
  -1   3  -1  411.35   12.81 
  -1   3  -1  423.01   12.49 
  -1   3  -1  407.88   13.07 
   1   3   1  410.36   12.55 
   1   3   1  399.01   12.99 
   1   3   1  409.58   12.60 
   1   3   1  402.21   12.63 
   1   3   1  419.30   12.95 
  -1   3  -1  410.85   12.67 
  -1   3  -1  410.58   13.10 
   1   3   1  408.95   12.50 
   1   3   1  395.26   13.00 
  -1   3  -1  407.70   13.26 
   1   3   1  400.68   13.20 
   1   3   1  401.10   12.67 
  -1   3  -1  405.09   12.88 
  -1   3  -1  396.81   13.10 
   1   3   1  401.64   12.40 
   1   3   1  416.15   12.57 
  -1   3  -1  410.32   12.74 
  -1   3  -1  404.99   12.37 
   1   3   1  411.34   12.24 
  -1   3  -1  412.71   12.37 
   1   3   1  395.90   13.07 
   1   3   1  399.83   12.56 
   1   3   1  414.56   13.66 
  -1   3  -1  429.52   12.67 
   1   3   1  421.22   13.15 
  -1   3  -1  412.35   12.43 
  -1   3  -1  409.74   12.74 
  -1   3  -1  401.82   12.22 
  -1   3  -1  406.74   12.75 
  -1   3  -1  411.33   13.88 
   1   3   1  356.46   13.19 
  -1   3  -1  412.61   13.14 
  -1   3  -1  414.78   13.07 
   1   3   1  399.81   12.40 
  -1   3  -1  402.75   13.08 
  -1   3  -1  410.56   12.72 
   1   3   1  419.57   12.43 
   1   3   1  417.31   12.68 
   1   3   1  415.40   12.48 
  -1   3  -1  412.46   12.59 
  -1   3  -1  405.68   12.84 
  -1   3  -1  400.29   12.76 
  -1   3  -1  415.38   12.39 
   1   3   1  413.30   12.46 
   1   3   1  415.06   12.77 
   1   3   1  401.33   12.51 
  -1   3  -1  399.12   12.78 
   1   3   1  417.18   12.55 
   1   3   1  413.79   12.54 
   1   3   1  410.44   12.63 
  -1   3  -1  433.39   12.69 
  -1   3  -1  422.46   12.69 
   1   3   1  400.29   12.76 
  -2  -3  -1  209.05    6.97 
   2  -3   1  216.93    7.21 
  -2  -3  -1  212.91    7.14 
  -2  -3  -1  220.20    7.00 
  -2  -3  -1  213.11    6.62 
   2  -3   1  217.78    7.24 
   2  -3   1  222.54    7.25 
  -2  -3  -1  213.52    6.93 
   2  -3   1  228.08    7.61 
   2  -3   1  209.60    7.20 
  -2  -3  -1  206.14    6.94 
  -2  -3  -1  215.15    7.05 
   2  -3   1  210.08    6.91 
   2  -3   1  216.76    7.19 
  -2  -3  -1  207.67    6.53 
   2  -3   1  223.15    7.57 
  -2  -3  -1  209.74    6.96 
   2  -3   1  212.14    7.14 
   2  -3   1  220.73    7.57 
  -2  -3  -1  209.08    6.97 
   2  -3   1  208.76    7.45 
   2  -3   1  214.52    7.51 
   2  -3   1  219.34    6.77 
  -2  -3  -1  211.35    6.81 
   2  -3   1  217.38    7.16 
   2  -3   1  211.69    7.30 
   2  -3   1  219.38    7.30 
  -2  -3  -1  211.08    7.20 
   2  -3   1  207.81    7.02 
   2  -3   1  192.86    7.18 
  -2  -3  -1  219.77    7.45 
   2  -3   1  213.26    6.96 
   2  -3   1  214.10    6.65 
   2  -3   1  212.34    6.90 
   2  -3   1  210.54    7.15 
   2  -3   1  229.93    7.50 
  -2  -3  -1  219.16    7.33 
   2  -3   1  214.53    6.54 
   2  -3   1  216.56    7.52 
   2  -3   1  212.55    6.94 
   2  -3   1  217.73    7.43 
  -2  -3  -1  209.99    7.19 
   2  -3   1  209.84    7.05 
  -2   3  -1  212.74    6.75 
   2   3   1  218.33    6.90 
   2   3   1  214.66    7.06 
   2   3   1  210.56    6.72 
   2   3   1  207.62    6.33 
  -2   3  -1  214.00    6.61 
   2   3   1  208.23    6.55 
  -2   3  -1  221.60    7.00 
   2   3   1  216.84    7.04 
  -2   3  -1  210.56    7.05 
  -2   3  -1  212.21    7.28 
   2   3   1  208.79    6.53 
   2   3   1  205.54    6.94 
   2   3   1  221.07    7.19 
   2   3   1  216.35    6.54 
   2   3   1  202.89    7.57 
  -2   3  -1  206.74    7.07 
   2   3   1  209.56    7.21 
  -2   3  -1  210.10    6.92 
  -2   3  -1  217.90    6.84 
   2   3   1  214.71    7.26 
   2   3   1  216.27    7.14 
  -2   3  -1  213.94    7.31 
   2   3   1  213.15    6.73 
   2   3   1  216.60    6.61 
   2   3   1  213.86    7.36 
   2   3   1  217.03    7.25 
   2   3   1  210.19    6.58 
   2   3   1  217.08    6.91 
   2   3   1  218.54    6.61 
   2   3   1  217.95    7.44 
  -2   3  -1  214.45    7.05 
  -2   3  -1  215.88    7.03 
   2   3   1  217.36    7.02 
   2   3   1  209.46    7.03 
   2   3   1  205.54    6.44 
   2   3   1  210.20    7.06 
   2   3   1  217.73    7.17 
   2   3   1  210.00    6.53 
   2   3   1  215.17    6.57 
  -2   3  -1  216.98    7.27 
   2   3   1  221.22    6.88 
   2   3   1  212.61    7.59 
  -2   3  -1  213.58    7.15 
  -2   3  -1  214.95    7.04 
   2   3   1  212.03    6.67 
   2   3   1  212.04    6.85 
   3  -3   1  233.23    8.05 
  -3  -3  -1  229.12    7.74 
   3  -3   1  240.28    7.94 
  -3  -3  -1  227.53    7.94 
   3  -3   1  222.83    7.76 
   3  -3   1  244.09    8.08 
  -3  -3  -1  232.24    7.25 
   3  -3   1  232.41    8.04 
   3  -3   1  227.96    7.93 
  -3  -3  -1  222.87    7.39 
   3  -3   1  231.02    7.49 
   3  -3   1  232.78    7.89 
   3  -3   1  239.76    7.79 
   3  -3   1  238.88    8.32 
   3  -3   1  241.70    8.29 
   3  -3   1  229.56    8.15 
   3  -3   1  228.81    8.28 
  -3  -3  -1  235.54    7.73 
  -3  -3  -1  233.81    7.80 
   3  -3   1  231.61    7.97 
  -3  -3  -1  228.11    7.78 
   3  -3   1  237.06    8.01 
   3  -3   1  233.40    7.94 
   3  -3   1  231.03    8.00 
   3  -3   1  242.36    7.16 
  -3  -3  -1  229.78    7.76 
  -3  -3  -1  231.73    7.75 
   3  -3   1  232.02    8.00 
  -3  -3  -1  226.42    7.67 
   3  -3   1  243.99    8.27 
   3  -3   1  237.24    7.59 
  -3  -3  -1  233.34    7.17 
  -3  -3  -1  232.48    8.04 
  -3  -3  -1  230.86    7.72 
  -3  -3  -1  231.45    7.44 
   3  -3   1  238.09    7.91 
  -3  -3  -1  231.55    8.20 
  -3  -3  -1  230.33    8.07 
   3   3   1  241.43    7.08 
   3   3   1  237.68    7.42 
  -3   3  -1  232.15    7.82 
  -3   3  -1  241.12    7.77 
  -3   3  -1  224.64    7.77 
  -3   3  -1  228.09    7.91 
   3   3   1  235.74    7.35 
  -3   3  -1  245.13    7.67 
   3   3   1  236.69    7.92 
   3   3   1  235.61    7.41 
   3   3   1  230.78    7.04 
   3   3   1  235.33    7.21 
   3   3   1  237.34    7.54 
  -3   3  -1  242.35    7.99 
   3   3   1  236.87    7.26 
   3   3   1  226.88    8.16 
   3   3   1  236.62    8.29 
   3   3   1  230.15    6.97 
   3   3   1  227.86    7.23 
  -3   3  -1  231.51    7.71 
   3   3   1  234.56    7.24 
  -3   3  -1  246.57    7.97 
   3   3   1  243.72    7.49 
   3   3   1  230.39    7.06 
   3   3   1  235.12    7.32 
  -3   3  -1  245.13    7.82 
  -3   3  -1  236.07    7.84 
   3   3   1  240.79    7.83 
  -4  -3  -1   46.58    2.61 
  -4  -3  -1   46.46    1.81 
   4  -3   1   49.12    2.54 
   4  -3   1   43.51    2.46 
  -4  -3  -1   44.24    2.36 
   4  -3   1   46.99    2.33 
  -4  -3  -1   45.93    2.50 
   4  -3   1   49.14    2.42 
   4  -3   1   46.22    2.73 
  -4  -3  -1   47.08    2.69 
  -4  -3  -1   45.77    2.23 
  -4  -3  -1   46.82    1.99 
  -4  -3  -1   42.17    2.24 
  -4  -3  -1   47.05    1.98 
   4  -3   1   46.57    2.47 
   4  -3   1   49.70    2.58 
  -4  -3  -1   48.09    2.37 
   4  -3   1   45.06    1.75 
   4  -3   1   49.22    2.46 
  -4  -3  -1   50.42    2.37 
  -4  -3  -1   45.88    1.92 
   4  -3   1   44.51    2.65 
   4  -3   1   48.23    2.48 
   4  -3   1   45.13    2.40 
   4  -3   1   44.93    2.68 
   4  -3   1   50.14    2.58 
  -4  -3  -1   47.39    2.12 
   4  -3   1   44.96    2.34 
   4  -3   1   46.66    2.43 
   4  -3   1   50.68    2.75 
   4  -3   1   44.66    2.19 
  -4  -3  -1   46.91    2.10 
  -4  -3  -1   45.12    2.13 
   4  -3   1   47.27    2.52 
  -4  -3  -1   42.72    2.18 
   4   3   1   47.76    1.74 
   4   3   1   46.66    2.13 
   4   3   1   44.35    1.90 
   4   3   1   46.56    1.66 
  -4   3  -1   44.03    2.39 
  -4   3  -1   43.32    2.40 
  -4   3  -1   45.74    2.19 
   4   3   1   46.23    1.81 
   4   3   1   49.21    2.72 
   4   3   1   53.04    2.48 
   4   3   1   45.12    2.00 
  -4   3  -1   47.63    2.35 
  -4   3  -1   47.66    2.38 
   4   3   1   48.06    1.90 
  -4   3  -1   47.75    2.30 
  -4   3  -1   44.91    2.38 
   4   3   1   45.15    2.44 
  -4   3  -1   47.30    2.45 
   4   3   1   48.19    2.02 
  -4   3  -1   48.48    2.32 
   4   3   1   45.20    2.10 
   4   3   1   43.17    1.64 
   4   3   1   45.11    1.99 
   4   3   1   44.38    2.46 
  -4   3  -1   49.48    2.39 
  -5  -3  -1   14.44    1.56 
   5  -3   1   17.52    1.76 
   5  -3   1   20.40    1.69 
  -5  -3  -1   24.26    1.77 
  -5  -3  -1   19.65    0.93 
   5  -3   1   22.57    1.99 
  -5  -3  -1   21.89    1.46 
   5  -3   1   20.31    1.57 
   5  -3   1   21.92    1.65 
  -5  -3  -1   20.55    1.56 
   5  -3   1   18.65    2.07 
  -5  -3  -1   21.29    1.84 
   5  -3   1   20.89    2.01 
  -5  -3  -1   20.08    1.13 
   5  -3   1   17.23    1.72 
   5  -3   1   19.44    1.52 
  -5  -3  -1   21.35    2.03 
   5  -3   1   19.37    1.95 
   5  -3   1   22.33    2.28 
   5  -3   1   21.43    1.71 
   5  -3   1   20.93    1.64 
   5  -3   1   17.78    2.07 
  -5  -3  -1   21.15    0.84 
  -5  -3  -1   20.31    1.34 
   5  -3   1   20.98    1.51 
   5  -3   1   19.31    1.88 
  -5  -3  -1   19.92    1.32 
  -5  -3  -1   21.25    1.43 
   5  -3   1   24.30    1.74 
   5  -3   1   21.77    2.23 
   5  -3   1   21.82    1.10 
  -5  -3  -1   19.34    1.42 
  -5  -3  -1   21.36    1.31 
  -5  -3  -1   21.47    1.29 
   5   3   1   20.66    1.44 
  -5   3  -1   19.19    1.58 
   5   3   1   20.93    1.43 
   5   3   1   19.04    1.28 
   5   3   1   20.93    1.46 
  -5   3  -1   16.89    1.69 
  -5   3  -1   16.28    1.71 
   5   3   1   25.42    2.39 
  -5   3  -1   20.34    1.61 
  -5   3  -1   18.52    1.43 
   5   3   1   20.85    1.70 
   5   3   1   19.77    1.62 
  -5   3  -1   20.83    1.57 
   5   3   1   21.63    1.67 
   5   3   1   22.55    1.17 
   5   3   1   20.27    1.02 
  -5   3  -1   19.85    1.38 
  -5   3  -1   21.17    1.62 
   5   3   1   21.24    0.84 
   5   3   1   18.15    1.32 
  -5   3  -1   18.21    1.85 
   5   3   1   21.10    1.11 
   5   3   1   20.61    1.42 
  -5   3  -1   21.18    1.55 
   5   3   1   21.86    1.24 
   6  -3   1   28.90    2.13 
  -6  -3  -1   29.57    1.84 
   6  -3   1   29.95    2.26 
   6  -3   1   33.88    2.14 
   6  -3   1   30.96    2.06 
  -6  -3  -1   29.55    1.95 
   6  -3   1   29.63    2.55 
  -6  -3  -1   30.23    1.27 
  -6  -3  -1   32.53    1.99 
   6  -3   1   30.54    2.22 
  -6  -3  -1   30.48    2.21 
   6  -3   1   32.76    2.19 
   6  -3   1   25.99    2.48 
   6  -3   1   31.29    2.32 
  -6  -3  -1   31.11    2.09 
   6  -3   1   30.32    2.53 
  -6  -3  -1   32.08    2.49 
  -6  -3  -1   32.06    2.35 
   6  -3   1   36.12    2.45 
   6  -3   1   32.92    2.35 
   6  -3   1   31.57    2.56 
  -6  -3  -1   32.17    1.96 
   6  -3   1   27.82    2.12 
   6  -3   1   25.25    2.65 
  -6  -3  -1   30.68    1.80 
   6  -3   1   33.00    2.15 
   6  -3   1   33.83    2.61 
  -6  -3  -1   33.20    1.65 
   6  -3   1   28.85    2.14 
   6   3   1   33.17    1.74 
   6   3   1   26.91    1.91 
   6   3   1   29.20    2.14 
   6   3   1   32.57    2.52 
  -6   3  -1   33.47    2.13 
   6   3   1   31.09    1.94 
  -6   3  -1   30.69    2.12 
  -6   3  -1   34.67    2.35 
   6   3   1   30.83    1.91 
  -6   3  -1   28.11    2.16 
   6   3   1   32.33    2.01 
   6   3   1   31.07    1.75 
   6   3   1   37.37    1.90 
   6   3   1   31.66    1.23 
  -6   3  -1   33.86    2.24 
   6   3   1   28.20    1.52 
   6   3   1   29.88    2.26 
  -6   3  -1   33.92    2.25 
  -6   3  -1   29.24    2.09 
   6   3   1   33.53    2.20 
   6   3   1   29.11    1.44 
  -6   3  -1   31.16    1.98 
  -6   3  -1   32.04    2.21 
  -6   3  -1   30.34    1.81 
   6   3   1   32.44    2.04 
   7  -3   1    8.67    1.51 
  -7  -3  -1   11.96    2.00 
  -7  -3  -1   11.57    1.43 
   7  -3   1   13.14    2.15 
   7  -3   1    9.82    1.55 
   7  -3   1    7.94    1.36 
   7  -3   1    7.78    1.28 
   7  -3   1    8.50    1.42 
   7  -3   1    9.96    1.92 
   7  -3   1    5.97    1.52 
   7  -3   1    7.63    1.33 
  -7  -3  -1    8.80    1.35 
   7  -3   1    9.04    1.76 
   7  -3   1   10.12    1.73 
  -7  -3  -1   11.00    1.72 
   7  -3   1   10.14    1.51 
   7  -3   1    7.14    1.47 
  -7  -3  -1    7.51    1.24 
   7  -3   1   12.96    1.90 
   7  -3   1    7.66    1.35 
   7  -3   1    9.13    1.68 
  -7  -3  -1   10.38    1.43 
  -7  -3  -1    9.56    1.36 
   7  -3   1    7.34    1.68 
  -7  -3  -1    8.86    1.59 
   7  -3   1    8.90    1.32 
   7   3   1    7.68    1.55 
   7   3   1    9.20    0.98 
   7   3   1    9.99    1.14 
  -7   3  -1    6.51    1.29 
   7   3   1    8.85    1.32 
   7   3   1    7.14    1.05 
   7   3   1    8.48    1.41 
  -7   3  -1    7.66    1.62 
  -7   3  -1   11.45    1.68 
   7   3   1   10.19    1.39 
  -7   3  -1   11.44    1.69 
  -7   3  -1    7.82    1.41 
   7   3   1   10.75    1.16 
   7   3   1    6.72    1.34 
  -7   3  -1   11.62    1.72 
  -7   3  -1   10.44    1.42 
  -7   3  -1    9.93    1.66 
   7   3   1    8.80    1.25 
  -7   3  -1   12.83    1.54 
   7   3   1    9.82    1.62 
   7   3   1   12.43    1.61 
  -8  -3  -1   39.18    2.57 
   8  -3   1   41.40    3.39 
   8  -3   1   40.53    2.64 
   8  -3   1   38.26    2.90 
   8  -3   1   38.50    3.36 
   8  -3   1   38.12    3.04 
  -8  -3  -1   35.95    2.45 
  -8  -3  -1   37.18    2.98 
   8  -3   1   37.93    2.98 
   8  -3   1   42.28    3.46 
  -8  -3  -1   30.33    2.31 
   8  -3   1   41.91    2.73 
   8  -3   1   47.60    3.03 
   8  -3   1   33.99    2.63 
  -8  -3  -1   37.45    2.64 
   8  -3   1   38.58    2.91 
   8  -3   1   40.66    3.38 
  -8  -3  -1   37.19    2.88 
   8  -3   1   35.50    2.65 
  -8  -3  -1   42.82    2.74 
   8  -3   1   37.68    2.94 
   8  -3   1   38.72    2.80 
  -8  -3  -1   33.45    3.53 
   8  -3   1   39.01    2.76 
   8  -3   1   37.41    2.91 
   8  -3   1   39.26    3.29 
   8   3   1   39.55    2.94 
   8   3   1   38.03    2.73 
   8   3   1   40.16    2.76 
   8   3   1   36.24    2.48 
   8   3   1   42.52    2.40 
   8   3   1   37.83    3.20 
  -8   3  -1   34.03    2.50 
  -8   3  -1   39.36    2.92 
   8   3   1   36.27    2.58 
   8   3   1   39.31    2.79 
   8   3   1   38.53    2.59 
  -8   3  -1   40.08    2.88 
  -8   3  -1   34.86    2.37 
  -8   3  -1   38.43    3.16 
   8   3   1   39.87    2.66 
  -8   3  -1   38.75    2.86 
  -8   3  -1   33.53    2.76 
  -8   3  -1   40.59    2.87 
   8   3   1   36.76    2.82 
  -8   3  -1   33.83    2.63 
  -8   3  -1   40.20    2.80 
   9  -3   1   26.13    3.08 
   9  -3   1   34.34    3.99 
  -9  -3  -1   33.11    2.51 
   9  -3   1   30.65    2.90 
   9  -3   1   28.41    3.05 
   9  -3   1   25.35    2.77 
   9  -3   1   35.70    2.77 
   9  -3   1   27.68    2.83 
  -9  -3  -1   30.84    3.32 
  -9  -3  -1   30.20    2.88 
   9  -3   1   27.99    3.16 
  -9  -3  -1   31.84    3.24 
   9  -3   1   27.86    3.61 
   9  -3   1   34.56    3.97 
   9  -3   1   26.41    2.71 
   9  -3   1   25.64    2.54 
   9  -3   1   32.55    3.79 
   9  -3   1   34.43    3.49 
   9  -3   1   34.62    3.56 
   9  -3   1   36.07    4.05 
   9  -3   1   35.43    3.97 
  -9  -3  -1   33.99    3.18 
  -9  -3  -1   23.71    3.11 
   9  -3   1   26.03    3.11 
   9   3   1   26.49    2.85 
   9   3   1   25.59    3.21 
   9   3   1   30.31    2.98 
  -9   3  -1   34.10    3.31 
  -9   3  -1   29.74    3.12 
   9   3   1   31.86    2.59 
  -9   3  -1   31.99    3.21 
   9   3   1   31.94    2.55 
  -9   3  -1   30.05    3.13 
  -9   3  -1   28.95    2.77 
  -9   3  -1   26.13    2.84 
  -9   3  -1   32.19    2.35 
   9   3   1   31.06    2.46 
  -9   3  -1   30.52    3.19 
   9   3   1   32.65    3.30 
   9   3   1   31.95    3.50 
   9   3   1   27.92    3.02 
  -9   3  -1   31.63    3.55 
   9   3   1   35.52    3.33 
  -9   3  -1   31.50    3.20 
   9  -4  -1    6.53    1.81 
   9  -4  -1    6.54    1.57 
   9  -4  -1    6.61    1.65 
  -9  -4   1    6.72    1.48 
   9  -4  -1    8.08    1.80 
   9  -4  -1    7.64    1.68 
   9  -4  -1    6.44    1.60 
   9  -4  -1   10.24    1.99 
   9  -4  -1    8.49    2.15 
   9  -4  -1    5.51    1.48 
  -9  -4   1    7.61    2.09 
   9  -4  -1    6.93    1.92 
   9  -4  -1    6.17    1.63 
  -9  -4   1    6.19    1.85 
  -9  -4   1    6.53    1.57 
   9  -4  -1   10.28    1.99 
   9  -4  -1    7.64    2.11 
  -9  -4   1   10.45    1.97 
   9  -4  -1    7.82    1.68 
   9  -4  -1    6.28    1.73 
   9  -4  -1   12.31    1.91 
   9  -4  -1    7.98    1.65 
  -9  -4   1    1.69    1.27 
   9   4  -1    4.64    1.71 
  -9   4   1    8.99    1.53 
   9   4  -1    8.29    1.63 
   9   4  -1    8.15    1.76 
  -9   4   1    8.04    1.73 
  -9   4   1    3.30    1.24 
  -9   4   1    6.18    1.68 
  -9   4   1    6.00    1.51 
   9   4  -1    5.15    1.43 
   9   4  -1   10.60    1.79 
   9   4  -1    5.82    1.41 
   9   4  -1    6.46    1.44 
  -9   4   1    6.37    1.40 
  -9   4   1    8.08    1.94 
  -9   4   1    5.83    1.54 
  -9   4   1    6.69    1.54 
  -9   4   1    5.93    1.49 
   9   4  -1    9.16    1.82 
   9   4  -1    6.56    1.62 
  -8  -4   1    1.75    1.29 
   8  -4  -1    5.47    1.43 
   8  -4  -1    3.64    1.17 
  -8  -4   1    1.69    1.20 
   8  -4  -1    1.68    0.99 
   8  -4  -1    4.48    1.36 
   8  -4  -1    2.57    1.23 
   8  -4  -1    1.19    1.15 
  -8  -4   1    4.08    1.15 
   8  -4  -1    4.07    1.15 
  -8  -4   1    4.45    1.05 
   8  -4  -1    4.57    1.35 
  -8  -4   1    4.20    1.09 
   8  -4  -1    2.34    1.21 
  -8  -4   1    3.85    1.18 
  -8  -4   1    4.33    1.52 
   8  -4  -1    4.05    1.47 
   8  -4  -1    3.59    1.19 
  -8  -4   1    3.28    1.12 
   8  -4  -1    3.83    1.27 
   8  -4  -1    3.35    1.24 
   8  -4  -1    2.09    1.00 
   8  -4  -1    2.65    0.92 
   8  -4  -1    3.13    1.04 
   8  -4  -1    3.70    1.36 
  -8  -4   1    3.15    1.07 
   8  -4  -1    4.56    1.55 
   8   4  -1    2.31    1.02 
   8   4  -1    3.62    1.19 
  -8   4   1    5.32    1.37 
  -8   4   1    2.42    1.22 
  -8   4   1    2.81    0.95 
  -8   4   1    3.87    1.21 
  -8   4   1    3.98    1.18 
   8   4  -1    3.34    1.15 
   8   4  -1    4.09    1.14 
  -8   4   1    3.11    1.01 
  -8   4   1    3.14    1.12 
  -8   4   1    4.77    1.39 
   8   4  -1    3.78    1.56 
   8   4  -1    1.74    0.91 
   8   4  -1    4.29    1.00 
   8   4  -1    2.63    0.98 
  -8   4   1    3.64    1.01 
  -8   4   1    4.13    1.19 
   8   4  -1    3.88    1.07 
   8   4  -1    3.14    0.99 
  -8   4   1    3.74    1.30 
   7  -4  -1   -0.12    0.50 
   7  -4  -1    1.26    0.90 
   7  -4  -1    0.07    0.61 
   7  -4  -1    0.44    0.67 
   7  -4  -1    0.86    0.76 
  -7  -4   1    0.01    0.60 
  -7  -4   1   -0.12    0.53 
   7  -4  -1   -0.82    0.69 
  -7  -4   1    0.27    0.60 
  -7  -4   1    0.55    0.70 
   7  -4  -1    0.26    0.66 
   7  -4  -1    0.81    0.85 
  -7  -4   1    0.25    0.78 
   7  -4  -1    1.08    0.80 
   7  -4  -1   -0.51    0.63 
   7  -4  -1    0.18    0.64 
  -7  -4   1    0.36    0.97 
   7  -4  -1   -0.91    0.63 
  -7  -4   1   -0.08    0.65 
   7  -4  -1   -0.11    0.53 
   7  -4  -1    0.93    0.76 
  -7  -4   1    0.47    0.64 
   7  -4  -1   -1.13    0.71 
   7  -4  -1    0.33    0.63 
   7  -4  -1   -0.16    0.67 
  -7  -4   1   -0.93    0.44 
  -7  -4   1   -0.21    0.45 
   7  -4  -1    0.43    0.63 
  -7   4   1   -0.28    0.46 
  -7   4   1   -0.38    0.55 
  -7   4   1   -0.70    0.51 
   7   4  -1   -0.48    0.49 
   7   4  -1    0.95    0.48 
   7   4  -1    0.38    0.57 
   7   4  -1   -0.03    0.60 
  -7   4   1    0.93    0.76 
  -7   4   1   -0.34    0.53 
   7   4  -1   -0.25    0.50 
  -7   4   1    0.46    0.62 
  -7   4   1   -0.45    0.54 
   7   4  -1    0.66    0.67 
  -7   4   1   -0.20    0.59 
  -7   4   1    0.40    0.73 
   7   4  -1    1.03    0.64 
   7   4  -1   -0.13    0.39 
  -7   4   1    0.09    0.60 
   7   4  -1   -0.12    0.58 
  -7   4   1    1.14    0.81 
   7   4  -1    0.59    0.86 
   7   4  -1   -0.76    0.39 
   7   4  -1   -0.16    0.50 
  -6  -4   1    2.61    0.83 
   6  -4  -1    1.74    0.73 
   6  -4  -1    1.94    0.88 
  -6  -4   1    4.19    0.84 
  -6  -4   1    3.64    0.98 
  -6  -4   1    2.05    0.86 
   6  -4  -1    3.24    0.89 
   6  -4  -1    2.89    0.93 
  -6  -4   1    2.66    0.66 
   6  -4  -1    1.96    0.80 
   6  -4  -1    1.17    0.78 
   6  -4  -1    1.09    0.67 
   6  -4  -1    2.45    0.86 
   6  -4  -1    4.06    1.05 
  -6  -4   1    1.62    0.76 
   6  -4  -1    1.51    0.85 
   6  -4  -1    3.11    1.16 
  -6  -4   1    2.18    0.84 
  -6  -4   1    2.90    0.93 
   6  -4  -1    3.17    1.03 
   6  -4  -1    2.70    0.94 
  -6  -4   1    1.95    0.95 
  -6  -4   1    3.68    0.90 
   6  -4  -1    3.10    1.09 
   6  -4  -1    1.88    0.77 
   6  -4  -1    2.68    0.77 
   6  -4  -1    1.43    0.89 
  -6  -4   1    3.27    1.17 
   6  -4  -1    3.61    0.99 
  -6   4   1    2.51    0.87 
   6   4  -1    2.81    0.81 
   6   4  -1    2.72    0.71 
  -6   4   1    1.86    0.66 
   6   4  -1    1.80    0.74 
  -6   4   1    1.90    0.81 
   6   4  -1    1.74    0.86 
   6   4  -1    2.09    1.01 
  -6   4   1    3.01    0.88 
   6   4  -1    2.81    0.78 
  -6   4   1    2.58    0.82 
   6   4  -1    1.06    0.67 
  -6   4   1    2.86    0.81 
  -6   4   1    2.72    0.89 
  -6   4   1    3.68    1.02 
   6   4  -1    1.75    0.54 
   6   4  -1    2.67    0.57 
  -6   4   1    2.86    0.96 
   6   4  -1    2.10    0.62 
   6   4  -1    2.20    0.78 
  -6   4   1    2.11    0.69 
   6   4  -1    1.49    0.68 
   5  -4  -1    4.35    0.91 
  -5  -4   1    6.19    1.27 
   5  -4  -1    3.62    0.93 
   5  -4  -1    3.39    0.91 
  -5  -4   1    5.80    1.28 
   5  -4  -1    4.37    1.04 
  -5  -4   1    3.60    0.72 
   5  -4  -1    4.18    1.12 
  -5  -4   1    4.95    1.13 
  -5  -4   1    4.64    0.74 
   5  -4  -1    4.13    0.94 
  -5  -4   1    3.39    0.86 
   5  -4  -1    4.23    0.99 
   5  -4  -1    4.15    0.78 
   5  -4  -1    4.23    0.78 
   5  -4  -1    4.03    0.96 
   5  -4  -1    5.97    1.14 
   5  -4  -1    6.27    1.28 
   5  -4  -1    4.11    0.93 
   5  -4  -1    4.64    1.04 
  -5  -4   1    4.20    0.45 
   5  -4  -1    3.67    0.91 
  -5  -4   1    6.07    1.12 
   5  -4  -1    6.09    1.35 
  -5  -4   1    4.72    0.97 
   5  -4  -1    2.86    0.87 
   5  -4  -1    4.20    1.06 
  -5  -4   1    5.11    0.67 
   5  -4  -1    4.21    0.97 
  -5  -4   1    5.04    1.02 
  -5  -4   1    5.10    0.99 
  -5  -4   1    3.25    0.86 
   5  -4  -1    3.71    0.94 
   5   4  -1    5.00    0.80 
   5   4  -1    5.76    0.77 
  -5   4   1    4.88    0.93 
  -5   4   1    2.77    0.76 
   5   4  -1    4.23    0.82 
   5   4  -1    5.48    0.92 
  -5   4   1    4.97    0.94 
  -5   4   1    3.98    0.87 
  -5   4   1    3.17    0.86 
  -5   4   1    5.96    1.17 
   5   4  -1    6.10    1.30 
   5   4  -1    6.16    0.93 
   5   4  -1    3.68    0.80 
  -5   4   1    3.29    0.89 
  -5   4   1    3.85    0.91 
   5   4  -1    5.99    0.75 
   5   4  -1    5.76    1.13 
  -5   4   1    5.01    0.97 
   5   4  -1    3.79    1.09 
   5   4  -1    5.17    0.60 
  -5   4   1    5.93    1.03 
   4  -4  -1   21.57    1.72 
  -4  -4   1   22.07    1.62 
  -4  -4   1   20.80    1.51 
  -4  -4   1   22.36    1.58 
  -4  -4   1   20.52    1.50 
   4  -4  -1   21.12    1.64 
  -4  -4   1   23.44    1.95 
   4  -4  -1   23.21    1.38 
   4  -4  -1   20.64    1.69 
   4  -4  -1   24.84    1.81 
   4  -4  -1   19.69    1.90 
   4  -4  -1   24.13    1.70 
   4  -4  -1   25.86    1.85 
   4  -4  -1   20.70    2.20 
   4  -4  -1   22.35    1.05 
   4  -4  -1   24.33    1.87 
  -4  -4   1   22.46    1.08 
   4  -4  -1   23.42    1.72 
  -4  -4   1   20.06    1.27 
   4  -4  -1   20.64    1.55 
  -4  -4   1   21.10    1.57 
   4  -4  -1   19.31    1.57 
   4  -4  -1   22.93    1.90 
   4  -4  -1   24.40    2.29 
   4  -4  -1   21.37    1.62 
  -4  -4   1   20.39    1.44 
  -4  -4   1   25.37    2.46 
  -4  -4   1   21.77    1.62 
   4  -4  -1   20.96    1.78 
   4  -4  -1   23.65    1.78 
   4  -4  -1   20.81    1.70 
  -4  -4   1   22.15    1.69 
  -4  -4   1   23.47    0.97 
  -4  -4   1   22.55    1.20 
  -4  -4   1   25.24    1.93 
  -4  -4   1   20.43    1.42 
  -4   4   1   21.70    1.45 
   4   4  -1   23.50    1.73 
   4   4  -1   22.35    1.37 
   4   4  -1   24.38    1.52 
   4   4  -1   25.66    2.60 
  -4   4   1   24.37    1.57 
   4   4  -1   23.88    1.55 
   4   4  -1   20.71    1.09 
  -4   4   1   21.30    1.62 
   4   4  -1   20.73    1.20 
   4   4  -1   20.89    1.41 
   4   4  -1   22.86    1.34 
  -4   4   1   22.95    1.71 
  -4   4   1   23.06    1.53 
  -4   4   1   21.33    1.57 
   4   4  -1   25.25    2.57 
   4   4  -1   19.29    1.27 
  -4   4   1   21.27    1.61 
  -4   4   1   22.21    1.55 
  -4   4   1   22.38    1.71 
  -4   4   1   21.77    1.56 
   3  -4  -1   14.20    0.76 
   3  -4  -1   10.80    1.26 
   3  -4  -1   11.52    1.33 
   3  -4  -1   12.96    0.93 
  -3  -4   1   13.37    1.04 
  -3  -4   1   12.26    0.99 
   3  -4  -1   13.49    1.46 
  -3  -4   1   14.58    1.48 
  -3  -4   1   14.27    1.03 
   3  -4  -1   10.35    1.40 
   3  -4  -1   12.66    1.49 
  -3  -4   1   13.27    1.62 
  -3  -4   1   13.96    1.36 
   3  -4  -1   13.73    1.51 
   3  -4  -1   13.65    1.46 
   3  -4  -1   12.74    1.56 
  -3  -4   1   13.00    1.30 
  -3  -4   1   12.36    1.35 
   3  -4  -1    9.66    1.18 
   3  -4  -1   13.62    1.63 
  -3  -4   1   10.48    1.22 
   3  -4  -1   13.90    1.60 
   3  -4  -1   11.01    1.22 
  -3  -4   1   14.71    1.51 
   3  -4  -1   12.07    1.43 
   3  -4  -1   11.75    0.92 
   3  -4  -1   12.04    1.17 
  -3  -4   1   15.41    1.60 
   3  -4  -1   13.77    1.59 
   3  -4  -1   11.90    1.34 
   3  -4  -1   11.81    1.33 
  -3  -4   1   10.01    1.34 
   3  -4  -1   13.76    1.31 
  -3  -4   1   17.46    1.54 
   3  -4  -1   11.52    1.30 
   3  -4  -1   16.29    1.60 
  -3  -4   1   11.97    0.68 
   3  -4  -1   12.01    0.87 
  -3  -4   1   10.36    1.42 
  -3   4   1   12.46    1.24 
   3   4  -1   12.63    1.71 
   3   4  -1   14.78    0.96 
  -3   4   1   13.03    1.04 
  -3   4   1   11.19    1.28 
  -3   4   1   12.32    1.26 
  -3   4   1   11.83    1.23 
  -3   4   1   12.93    1.38 
  -3   4   1   13.39    1.31 
   3   4  -1   13.24    1.08 
   3   4  -1   13.22    0.63 
   3   4  -1   11.38    1.22 
  -3   4   1   12.62    0.98 
   3   4  -1   14.80    0.95 
   3   4  -1   13.20    1.00 
   3   4  -1   14.48    0.95 
   3   4  -1   10.94    1.27 
  -3   4   1   11.73    1.18 
   3   4  -1   13.01    1.66 
   3   4  -1   13.59    1.86 
  -3   4   1   11.59    1.28 
   3   4  -1   14.39    1.41 
   3   4  -1   13.97    0.72 
   3   4  -1   14.94    0.80 
   2  -4  -1   22.91    1.44 
   2  -4  -1   24.17    1.55 
   2  -4  -1   22.70    1.53 
   2  -4  -1   22.79    1.51 
   2  -4  -1   22.81    1.74 
   2  -4  -1   22.57    1.02 
   2  -4  -1   22.27    1.14 
  -2  -4   1   24.41    1.52 
  -2  -4   1   20.96    1.60 
   2  -4  -1   22.74    1.15 
   2  -4  -1   20.82    1.15 
  -2  -4   1   23.87    1.61 
   2  -4  -1   22.62    1.71 
  -2  -4   1   22.31    1.36 
  -2  -4   1   24.39    1.35 
   2  -4  -1   23.44    1.74 
   2  -4  -1   24.05    0.96 
   2  -4  -1   23.64    1.61 
  -2  -4   1   22.93    1.40 
   2  -4  -1   23.06    1.49 
   2  -4  -1   22.60    1.44 
   2  -4  -1   22.92    1.70 
  -2  -4   1   22.37    1.21 
   2  -4  -1   21.05    1.63 
   2  -4  -1   25.20    1.56 
   2  -4  -1   22.36    1.48 
  -2  -4   1   21.89    1.56 
  -2  -4   1   23.29    1.86 
  -2  -4   1   23.29    1.07 
  -2  -4   1   22.50    1.21 
  -2  -4   1   19.72    1.40 
  -2  -4   1   23.43    1.45 
  -2  -4   1   20.42    2.01 
  -2  -4   1   23.32    1.39 
  -2  -4   1   23.21    1.38 
  -2  -4   1   24.69    1.54 
   2  -4  -1   21.08    1.60 
  -2  -4   1   19.69    1.35 
   2  -4  -1   24.52    1.80 
   2  -4  -1   22.63    1.48 
  -2  -4   1   23.38    1.49 
   2  -4  -1   22.40    1.53 
   2  -4  -1   21.94    0.95 
   2   4  -1   23.72    1.25 
   2   4  -1   20.34    1.74 
   2   4  -1   23.54    1.29 
  -2   4   1   23.02    1.45 
   2   4  -1   23.03    1.12 
  -2   4   1   25.27    1.47 
  -2   4   1   21.69    1.56 
   2   4  -1   23.15    1.29 
   2   4  -1   25.10    1.75 
   2   4  -1   22.75    1.26 
   2   4  -1   21.75    1.67 
   2   4  -1   21.15    1.20 
  -2   4   1   21.91    1.38 
   2   4  -1   26.59    2.67 
   2   4  -1   23.08    1.97 
   2   4  -1   22.97    1.55 
  -2   4   1   22.50    1.43 
  -2   4   1   21.43    1.04 
   2   4  -1   21.32    1.25 
  -2   4   1   22.75    1.44 
  -2   4   1   24.59    1.39 
   2   4  -1   23.53    1.87 
  -2   4   1   26.79    2.14 
   2   4  -1   22.62    1.12 
   2   4  -1   24.54    1.50 
  -2   4   1   24.59    1.25 
  -2   4   1   22.60    1.33 
   2   4  -1   22.88    1.20 
  -2   4   1   22.61    1.51 
   2   4  -1   20.97    1.13 
   2   4  -1   20.78    1.31 
  -2   4   1   23.52    1.44 
  -1  -4   1    0.36    0.25 
  -1  -4   1    0.25    0.26 
   1  -4  -1    0.75    0.45 
  -1  -4   1    0.61    0.34 
   1  -4  -1    0.19    0.33 
   1  -4  -1    0.30    0.32 
   1  -4  -1    0.19    0.39 
  -1  -4   1    0.55    0.31 
  -1  -4   1    0.39    0.37 
  -1  -4   1    0.34    0.20 
  -1  -4   1   -0.04    0.19 
  -1  -4   1    0.05    0.36 
   1  -4  -1    0.06    0.29 
   1  -4  -1    0.24    0.40 
  -1  -4   1    0.15    0.40 
   1  -4  -1   -0.06    0.33 
   1  -4  -1   -0.15    0.25 
  -1  -4   1    0.71    0.39 
  -1  -4   1    0.26    0.35 
   1  -4  -1    0.23    0.22 
   1  -4  -1    0.63    0.59 
  -1  -4   1   -0.05    0.28 
  -1  -4   1    0.20    0.33 
  -1  -4   1    0.95    0.63 
   1  -4  -1    0.57    0.41 
   1  -4  -1    0.33    0.19 
  -1  -4   1    0.24    0.50 
   1  -4  -1    0.63    0.23 
   1  -4  -1    0.03    0.28 
   1  -4  -1   -0.34    0.21 
   1  -4  -1    0.62    0.40 
   1  -4  -1    0.30    0.58 
   1  -4  -1   -0.25    0.40 
  -1  -4   1    0.11    0.31 
   1  -4  -1    0.30    0.56 
   1  -4  -1   -0.21    0.26 
   1  -4  -1    0.31    0.41 
   1  -4  -1   -0.14    0.17 
  -1  -4   1    3.92    1.08 
  -1  -4   1    0.78    0.61 
  -1  -4   1    0.36    0.38 
   1  -4  -1    0.18    0.26 
   1  -4  -1    0.07    0.32 
  -1  -4   1   -0.01    0.32 
  -1  -4   1    2.56    0.83 
   1  -4  -1    0.41    0.35 
  -1  -4   1    0.20    0.34 
   1  -4  -1   -0.26    0.25 
  -1   4   1    0.60    0.25 
  -1   4   1   -0.23    0.27 
  -1   4   1    0.34    0.34 
  -1   4   1    0.13    0.30 
  -1   4   1    0.17    0.40 
  -1   4   1    1.23    0.53 
   1   4  -1    0.26    0.27 
  -1   4   1   -0.52    0.29 
  -1   4   1    0.00    0.25 
   1   4  -1    0.38    0.16 
  -1   4   1    0.14    0.37 
  -1   4   1   -0.01    0.28 
  -1   4   1    1.40    0.34 
   1   4  -1    0.42    0.28 
   1   4  -1    0.64    0.67 
  -1   4   1    0.26    0.35 
   1   4  -1    0.21    0.27 
  -1   4   1    0.41    0.29 
  -1   4   1    0.15    0.27 
  -1   4   1    0.63    0.36 
   1   4  -1    0.53    0.39 
  -1   4   1    0.38    0.34 
   1   4  -1    0.02    0.26 
  -1   4   1    0.32    0.29 
   1   4  -1    0.37    0.49 
   1   4  -1    0.22    0.18 
  -1   4   1    0.23    0.34 
   1   4  -1    0.33    0.22 
   1   4  -1   -0.24    0.55 
   1   4  -1    0.73    0.51 
   1   4  -1   -0.01    0.18 
   1   4  -1    0.07    0.48 
  -1   4   1    0.70    0.40 
   1   4  -1    0.56    0.39 
  -1   4   1    0.40    0.32 
   1   4  -1   -0.33    0.24 
  -1   4   1    0.33    0.32 
   1   4  -1    0.99    0.91 
   1   4  -1    0.68    0.40 
   1   4  -1    0.56    0.26 
   1   4  -1    0.10    0.31 
   1   4  -1    0.55    0.30 
  -1   4   1    0.66    0.62 
   1   4  -1    0.56    0.72 
   1   4  -1    0.29    0.68 
  -1   4   1    0.07    0.27 
   1   4  -1   -0.08    0.31 
   1   4  -1    0.19    0.17 
  -1   4   1   -0.31    0.29 
  -1   4   1    0.29    0.20 
  -1   4   1    0.61    0.20 
   1   4  -1    0.52    0.27 
   1   4  -1    0.55    0.30 
  -1   4   1    0.34    0.16 
   0  -4   1   42.39    1.79 
   0  -4  -1   37.37    1.67 
   0  -4   1   41.70    2.10 
   0  -4   1   41.11    2.38 
   0  -4   1   39.06    2.10 
   0  -4  -1   42.46    1.80 
   0  -4  -1   39.47    2.27 
   0  -4   1   39.80    1.76 
   0  -4   1   44.25    2.70 
   0  -4   1   39.85    1.99 
   0  -4  -1   43.65    1.70 
   0  -4  -1   41.36    1.86 
   0  -4   1   37.88    2.94 
   0  -4   1   39.94    1.51 
   0  -4   1   40.18    2.03 
   0  -4  -1   42.08    2.21 
   0  -4  -1   38.30    2.52 
   0  -4  -1   40.95    2.00 
   0  -4   1   36.96    2.05 
   0  -4   1   40.25    1.78 
   0  -4   1   34.65    2.75 
   0  -4   1   42.53    2.17 
   0  -4   1   40.79    2.05 
   0  -4  -1   44.07    2.25 
   0  -4  -1   42.33    1.92 
   0  -4   1   41.90    1.86 
   0  -4  -1   36.97    2.65 
   0  -4  -1   36.50    1.61 
   0  -4  -1   40.78    2.03 
   0  -4   1   37.80    2.23 
   0  -4  -1   40.31    2.30 
   0  -4  -1   41.28    1.94 
   0  -4  -1   44.10    2.12 
   0  -4  -1   37.88    1.74 
   0  -4  -1   41.14    1.68 
   0  -4   1   40.49    2.36 
   0  -4  -1   45.59    2.16 
   0  -4  -1   41.47    1.93 
   0  -4   1   42.40    1.72 
   0  -4   1   38.27    2.67 
   0  -4   1   41.27    2.23 
   0  -4  -1   36.13    1.78 
   0  -4   1   43.60    1.76 
   0  -4  -1   43.96    1.96 
   0  -4  -1   34.63    2.67 
   0  -4   1   40.31    2.42 
   0  -4   1   41.24    2.42 
   0  -4   1   41.11    2.00 
   0  -4   1   35.34    2.95 
   0  -4  -1   44.21    2.66 
   0  -4  -1   40.72    2.24 
   0  -4  -1   41.37    2.05 
   0   4   1   40.70    1.81 
   0   4  -1   41.90    1.82 
   0   4   1   41.39    1.70 
   0   4   1   40.75    1.73 
   0   4   1   40.13    1.63 
   0   4  -1   40.89    2.32 
   0   4  -1   40.85    1.72 
   0   4  -1   41.49    2.30 
   0   4   1   40.07    2.14 
   0   4   1   38.84    1.67 
   0   4  -1   43.73    1.84 
   0   4   1   40.31    1.66 
   0   4   1   43.07    2.43 
   0   4  -1   42.62    2.51 
   0   4  -1   39.68    1.49 
   0   4   1   41.16    1.86 
   0   4  -1   40.84    1.95 
   0   4   1   40.94    1.85 
   0   4  -1   31.25    2.57 
   0   4   1   40.31    1.88 
   0   4  -1   40.23    1.81 
   0   4   1   42.72    1.93 
   0   4  -1   40.90    1.86 
   0   4   1   39.50    2.01 
   0   4   1   40.50    1.77 
   0   4   1   40.70    1.58 
   0   4   1   40.30    1.76 
   0   4  -1   38.13    2.08 
   0   4  -1   35.72    2.63 
   0   4   1   40.74    1.85 
   0   4   1   37.49    1.79 
   0   4   1   40.58    1.86 
   0   4  -1   41.20    2.63 
   0   4   1   39.32    1.85 
   0   4  -1   40.38    2.09 
   0   4   1   34.37    2.29 
   0   4   1   41.53    1.76 
   0   4  -1   39.71    1.92 
   0   4   1   35.01    2.39 
   0   4   1   39.95    2.08 
   0   4   1   41.57    1.69 
   0   4   1   43.18    1.93 
   0   4  -1   34.97    2.50 
   0   4   1   42.61    1.90 
   0   4   1   42.99    2.25 
   0   4  -1   41.90    1.85 
   0   4   1   45.26    1.86 
   0   4  -1   43.63    2.47 
   0   4  -1   42.76    1.76 
   0   4   1   42.81    1.99 
   0   4   1   41.04    1.95 
   0   4  -1   40.80    1.92 
   0   4  -1   41.28    2.27 
   0   4  -1   38.71    1.98 
   0   4  -1   43.91    1.57 
  -1  -4  -1   42.12    1.84 
   1  -4   1   43.55    2.26 
  -1  -4  -1   45.06    1.94 
   1  -4   1   43.12    2.15 
   1  -4   1   35.18    2.70 
   1  -4   1   40.16    2.09 
   1  -4   1   40.02    2.17 
  -1  -4  -1   43.99    2.26 
   1  -4   1   41.08    1.76 
  -1  -4  -1   41.40    1.92 
   1  -4   1   43.28    2.89 
  -1  -4  -1   44.88    2.74 
  -1  -4  -1   45.98    2.09 
   1  -4   1   41.13    2.10 
   1  -4   1   43.78    1.93 
  -1  -4  -1   43.04    2.40 
  -1  -4  -1   43.55    1.88 
   1  -4   1   41.25    2.22 
   1  -4   1   39.25    1.62 
  -1  -4  -1   42.71    2.06 
   1  -4   1   39.95    2.14 
   1  -4   1   45.00    2.58 
   1  -4   1   40.47    2.80 
  -1  -4  -1   41.95    2.22 
  -1  -4  -1   42.76    2.16 
   1  -4   1   42.34    2.32 
  -1  -4  -1   42.18    2.46 
   1  -4   1   44.01    2.24 
   1  -4   1   41.79    2.11 
   1  -4   1   43.98    2.06 
  -1  -4  -1   38.55    2.02 
   1  -4   1   50.16    2.53 
  -1  -4  -1   42.61    2.15 
  -1  -4  -1   41.84    2.00 
   1  -4   1   44.93    2.16 
  -1  -4  -1   41.78    1.92 
  -1  -4  -1   41.22    1.86 
  -1  -4  -1   43.82    1.87 
   1  -4   1   43.18    2.76 
   1  -4   1   40.18    2.25 
   1  -4   1   42.54    1.79 
   1  -4   1   44.03    2.24 
   1  -4   1   43.62    1.78 
   1  -4   1   42.63    2.44 
  -1   4  -1   44.90    2.54 
   1   4   1   41.43    2.59 
  -1   4  -1   43.78    2.02 
   1   4   1   41.72    2.42 
   1   4   1   41.30    1.97 
  -1   4  -1   41.22    2.13 
  -1   4  -1   45.87    2.12 
   1   4   1   45.76    1.97 
   1   4   1   43.43    2.99 
   1   4   1   43.36    1.83 
   1   4   1   44.90    1.84 
  -1   4  -1   40.98    1.81 
  -1   4  -1   44.56    2.46 
   1   4   1   40.70    1.85 
   1   4   1   42.46    1.96 
   1   4   1   43.08    1.81 
   1   4   1   39.38    2.28 
   1   4   1   41.18    1.94 
  -1   4  -1   39.68    1.48 
   1   4   1   44.19    1.93 
   1   4   1   46.40    1.79 
  -1   4  -1   38.65    2.46 
  -1   4  -1   42.10    2.05 
  -1   4  -1   37.52    2.51 
  -1   4  -1   44.61    1.99 
  -1   4  -1   41.82    1.68 
   1   4   1   45.47    2.00 
  -1   4  -1   44.14    1.79 
   1   4   1   41.47    1.86 
   1   4   1   41.07    2.13 
   1   4   1   40.79    1.71 
   1   4   1   32.77    2.46 
  -1   4  -1   42.22    2.39 
  -1   4  -1   40.34    1.90 
   1   4   1   35.83    2.36 
   1   4   1   43.12    1.71 
   1   4   1   43.12    1.83 
   1   4   1   43.32    2.00 
  -1   4  -1   41.52    2.10 
   1   4   1   41.63    2.06 
   1   4   1   41.56    1.84 
  -1   4  -1   43.12    3.06 
   1   4   1   41.25    1.96 
   1   4   1   39.10    2.43 
  -1   4  -1   38.70    2.01 
   1   4   1   40.56    1.80 
   1   4   1   45.09    1.93 
   1   4   1   42.21    1.61 
  -1   4  -1   41.93    1.69 
  -1   4  -1   43.31    2.03 
  -1   4  -1   41.03    1.70 
  -1   4  -1   44.28    2.73 
   1   4   1   41.15    1.50 
  -1   4  -1   44.26    1.98 
   1   4   1   43.61    2.26 
   2  -4   1   54.21    2.93 
  -2  -4  -1   57.69    2.53 
   2  -4   1   54.82    1.95 
   2  -4   1   58.13    2.57 
   2  -4   1   57.53    2.23 
  -2  -4  -1   50.58    2.36 
  -2  -4  -1   57.41    2.59 
   2  -4   1   56.68    2.74 
   2  -4   1   55.98    3.08 
  -2  -4  -1   56.09    2.12 
   2  -4   1   51.43    2.52 
   2  -4   1   54.37    2.62 
   2  -4   1   55.24    2.60 
   2  -4   1   54.65    2.64 
   2  -4   1   57.72    2.72 
  -2  -4  -1   58.93    2.41 
   2  -4   1   61.43    2.89 
  -2  -4  -1   51.74    2.82 
   2  -4   1   56.84    2.01 
   2  -4   1   58.26    2.33 
   2  -4   1   57.79    2.10 
   2  -4   1   56.23    2.70 
   2  -4   1   59.26    3.23 
   2  -4   1   57.32    3.06 
   2  -4   1   58.24    3.24 
  -2  -4  -1   53.30    2.41 
   2  -4   1   54.17    2.47 
  -2  -4  -1   55.51    2.24 
   2  -4   1   52.85    2.57 
  -2  -4  -1   54.67    2.00 
  -2  -4  -1   57.52    2.48 
   2  -4   1   55.95    2.69 
  -2  -4  -1   54.89    2.51 
  -2  -4  -1   53.66    2.40 
   2  -4   1   54.22    2.75 
   2  -4   1   56.93    2.51 
   2  -4   1   54.37    3.06 
  -2  -4  -1   60.08    2.96 
  -2  -4  -1   56.91    2.43 
   2  -4   1   52.51    2.97 
  -2  -4  -1   57.34    2.53 
   2   4   1   51.46    2.79 
   2   4   1   55.20    1.94 
  -2   4  -1   57.46    3.21 
   2   4   1   56.49    2.97 
   2   4   1   53.62    1.78 
  -2   4  -1   54.74    2.50 
   2   4   1   56.10    2.04 
   2   4   1   56.29    1.92 
   2   4   1   54.67    2.12 
  -2   4  -1   58.38    2.64 
   2   4   1   56.54    2.10 
   2   4   1   61.22    2.61 
  -2   4  -1   53.55    2.36 
   2   4   1   54.89    3.11 
  -2   4  -1   57.56    2.14 
  -2   4  -1   55.33    2.10 
  -2   4  -1   52.87    2.48 
   2   4   1   55.18    2.10 
   2   4   1   52.64    2.64 
   2   4   1   55.41    2.53 
   2   4   1   55.88    2.45 
   2   4   1   57.47    2.31 
   2   4   1   52.12    1.94 
   2   4   1   55.43    2.27 
   2   4   1   53.26    3.14 
   2   4   1   56.43    2.42 
   2   4   1   56.50    2.99 
   2   4   1   54.28    2.96 
  -2   4  -1   58.85    2.58 
   2   4   1   59.35    2.24 
   2   4   1   56.25    2.91 
   2   4   1   58.47    2.37 
  -2   4  -1   55.06    2.35 
   2   4   1   53.11    2.09 
  -2   4  -1   58.53    2.55 
   2   4   1   55.22    2.60 
   2   4   1   54.56    2.00 
  -2   4  -1   55.07    3.40 
   2   4   1   54.31    2.44 
  -2   4  -1   50.73    2.48 
   2   4   1   57.98    2.30 
   2   4   1   54.85    2.62 
  -2   4  -1   57.14    2.60 
   2   4   1   55.71    2.19 
  -3  -4  -1    0.42    0.53 
   3  -4   1    0.39    0.52 
   3  -4   1    0.38    0.44 
   3  -4   1    0.43    0.50 
   3  -4   1   -0.09    0.36 
   3  -4   1    0.78    0.34 
   3  -4   1    0.59    0.43 
   3  -4   1    0.75    0.56 
   3  -4   1    0.66    0.41 
  -3  -4  -1    0.41    0.30 
   3  -4   1   -0.02    0.34 
   3  -4   1    0.98    0.35 
   3  -4   1   -0.09    0.39 
   3  -4   1    0.44    0.21 
   3  -4   1    0.76    0.43 
  -3  -4  -1    0.80    0.42 
   3  -4   1    0.68    0.55 
  -3  -4  -1    0.62    0.27 
   3  -4   1    0.84    0.57 
   3  -4   1    0.86    0.58 
  -3  -4  -1    0.83    0.44 
  -3  -4  -1    0.50    0.47 
   3  -4   1    0.06    0.43 
   3  -4   1    0.59    0.56 
   3  -4   1    0.72    0.55 
   3  -4   1   -0.25    0.35 
  -3  -4  -1    0.58    0.50 
   3  -4   1    0.21    0.35 
   3  -4   1    0.73    0.37 
  -3  -4  -1    0.49    0.37 
   3  -4   1    0.57    0.50 
  -3  -4  -1    0.55    0.43 
   3  -4   1    0.69    0.57 
  -3  -4  -1    0.55    0.42 
  -3  -4  -1    0.28    0.21 
   3  -4   1    0.16    0.36 
  -3  -4  -1    0.62    0.44 
   3  -4   1    0.60    0.46 
  -3  -4  -1    0.37    0.44 
   3  -4   1    0.48    0.33 
   3   4   1    0.44    0.24 
  -3   4  -1    0.33    0.32 
   3   4   1    0.38    0.22 
  -3   4  -1    0.78    0.42 
  -3   4  -1   -0.06    0.34 
  -3   4  -1    0.31    0.36 
  -3   4  -1    0.03    0.36 
  -3   4  -1    0.73    0.49 
   3   4   1    0.59    0.27 
   3   4   1    0.33    0.17 
   3   4   1    0.43    0.20 
   3   4   1    0.99    0.31 
   3   4   1    0.59    0.49 
   3   4   1    0.03    0.34 
   3   4   1    0.12    0.27 
  -3   4  -1   -0.07    0.36 
   3   4   1   -0.06    0.51 
   3   4   1    0.92    0.40 
  -3   4  -1    0.13    0.26 
   3   4   1    0.09    0.24 
  -3   4  -1    0.22    0.34 
   3   4   1    1.11    0.59 
   3   4   1    0.27    0.35 
  -3   4  -1    0.20    0.36 
   3   4   1    0.32    0.20 
   3   4   1    0.15    0.27 
   3   4   1    0.55    0.20 
   3   4   1    0.46    0.23 
   4  -4   1    0.16    0.44 
   4  -4   1    0.09    0.42 
   4  -4   1    0.59    0.65 
   4  -4   1    0.24    0.46 
   4  -4   1    0.53    0.61 
   4  -4   1   -0.03    0.31 
   4  -4   1    0.85    0.56 
   4  -4   1    0.37    0.47 
  -4  -4  -1   -0.26    0.28 
  -4  -4  -1    0.38    0.26 
  -4  -4  -1    0.20    0.38 
   4  -4   1    0.39    0.45 
   4  -4   1    0.40    0.41 
   4  -4   1    0.31    0.46 
  -4  -4  -1    0.19    0.42 
  -4  -4  -1    0.13    0.39 
   4  -4   1    0.66    0.52 
  -4  -4  -1    0.20    0.24 
   4  -4   1    1.35    0.58 
   4  -4   1   -0.11    0.47 
   4  -4   1    0.33    0.48 
   4  -4   1    0.28    0.47 
  -4  -4  -1    0.46    0.42 
   4  -4   1    0.11    0.44 
   4  -4   1    0.36    0.19 
   4  -4   1    0.53    0.56 
   4  -4   1   -0.08    0.47 
  -4  -4  -1    0.16    0.48 
  -4  -4  -1    0.12    0.46 
   4  -4   1    0.29    0.22 
  -4  -4  -1    0.37    0.42 
  -4  -4  -1    0.04    0.38 
   4  -4   1    0.15    0.45 
  -4  -4  -1    0.30    0.54 
   4  -4   1    0.81    0.55 
  -4  -4  -1    0.11    0.25 
  -4   4  -1    0.05    0.32 
   4   4   1    0.02    0.26 
  -4   4  -1    0.11    0.40 
  -4   4  -1   -0.17    0.32 
   4   4   1    0.54    0.43 
  -4   4  -1    0.02    0.44 
  -4   4  -1    0.29    0.39 
   4   4   1    0.40    0.52 
   4   4   1    0.34    0.34 
  -4   4  -1   -0.13    0.36 
  -4   4  -1    0.33    0.43 
   4   4   1    0.47    0.35 
   4   4   1    0.14    0.40 
   4   4   1    0.35    0.14 
   4   4   1    0.13    0.29 
   4   4   1    0.28    0.29 
   4   4   1    0.61    0.23 
  -4   4  -1    0.15    0.37 
  -4   4  -1    0.56    0.45 
   4   4   1    0.13    0.21 
   4   4   1    0.15    0.21 
  -4   4  -1    0.31    0.42 
   4   4   1    0.17    0.25 
   4   4   1    0.23    0.13 
   4   4   1    0.04    0.44 
  -5  -4  -1    7.26    1.28 
  -5  -4  -1    8.63    1.23 
   5  -4   1    6.97    1.19 
   5  -4   1    7.23    1.31 
  -5  -4  -1    5.62    1.23 
   5  -4   1   10.09    1.36 
  -5  -4  -1    6.96    1.13 
  -5  -4  -1    8.18    1.39 
  -5  -4  -1    7.81    1.13 
   5  -4   1    6.37    0.95 
   5  -4   1    5.69    1.26 
   5  -4   1    8.21    1.49 
  -5  -4  -1    7.15    0.76 
   5  -4   1    7.61    1.27 
   5  -4   1    5.46    1.16 
  -5  -4  -1    8.91    1.51 
   5  -4   1    8.00    1.31 
   5  -4   1    8.78    1.62 
   5  -4   1    5.98    1.10 
   5  -4   1    9.66    1.51 
  -5  -4  -1    8.36    0.90 
  -5  -4  -1    9.49    1.36 
   5  -4   1    7.07    1.17 
   5  -4   1    7.08    1.18 
   5  -4   1    7.10    1.47 
   5  -4   1    8.16    1.41 
   5  -4   1    7.35    1.29 
   5  -4   1    8.73    1.28 
   5  -4   1    4.44    1.00 
  -5  -4  -1    9.77    1.32 
  -5   4  -1    8.51    1.25 
  -5   4  -1    8.21    1.27 
   5   4   1    6.95    1.25 
  -5   4  -1    5.68    1.08 
   5   4   1    8.88    0.96 
  -5   4  -1    5.10    1.05 
   5   4   1    7.69    1.01 
   5   4   1    7.89    0.59 
  -5   4  -1    8.84    1.37 
   5   4   1    7.52    0.99 
  -5   4  -1    8.01    1.21 
   5   4   1    8.47    0.77 
  -5   4  -1    7.37    1.10 
   5   4   1    7.85    1.25 
   5   4   1    9.84    1.59 
   5   4   1    7.65    1.03 
  -5   4  -1    8.61    1.25 
  -5   4  -1    7.14    1.06 
  -5   4  -1    6.57    1.13 
   5   4   1    8.03    1.19 
   5   4   1    8.13    0.85 
  -6  -4  -1   65.38    3.41 
   6  -4   1   57.30    3.31 
   6  -4   1   57.13    3.43 
   6  -4   1   57.82    3.15 
  -6  -4  -1   56.24    3.16 
  -6  -4  -1   57.36    3.00 
  -6  -4  -1   57.29    3.12 
   6  -4   1   62.00    3.08 
  -6  -4  -1   61.93    2.72 
  -6  -4  -1   65.46    3.78 
   6  -4   1   60.13    3.42 
   6  -4   1   54.10    3.13 
   6  -4   1   58.47    3.48 
   6  -4   1   57.60    3.76 
   6  -4   1   62.03    3.56 
   6  -4   1   58.49    3.46 
   6  -4   1   60.48    3.35 
   6  -4   1   59.44    3.47 
   6  -4   1   54.37    3.35 
   6  -4   1   56.80    3.26 
   6  -4   1   67.37    3.99 
  -6  -4  -1   55.54    3.55 
  -6  -4  -1   60.06    3.48 
  -6  -4  -1   59.21    2.98 
   6  -4   1   62.61    3.36 
   6  -4   1   59.20    3.71 
   6  -4   1   54.66    3.62 
   6  -4   1   60.43    3.35 
  -6   4  -1   52.56    3.19 
  -6   4  -1   66.00    3.44 
  -6   4  -1   58.07    3.36 
   6   4   1   58.57    2.88 
  -6   4  -1   58.88    3.14 
   6   4   1   52.20    2.74 
   6   4   1   62.81    3.29 
   6   4   1   61.21    2.99 
   6   4   1   62.48    2.94 
   6   4   1   59.16    2.56 
   6   4   1   58.82    2.38 
  -6   4  -1   58.22    3.13 
  -6   4  -1   63.47    3.31 
  -6   4  -1   56.68    3.02 
   6   4   1   61.86    3.70 
   6   4   1   55.31    2.88 
   6   4   1   64.66    3.52 
  -6   4  -1   52.98    2.84 
  -6   4  -1   62.29    3.40 
   6   4   1   60.64    2.72 
  -6   4  -1   53.29    3.11 
   6   4   1   61.80    3.29 
   7  -4   1   23.33    2.65 
   7  -4   1   29.45    2.41 
   7  -4   1   24.61    2.29 
  -7  -4  -1   25.53    2.68 
   7  -4   1   18.48    2.38 
   7  -4   1   25.11    2.99 
   7  -4   1   23.20    2.55 
  -7  -4  -1   27.32    2.99 
   7  -4   1   23.74    2.52 
   7  -4   1   32.77    3.49 
   7  -4   1   27.93    2.63 
   7  -4   1   22.38    2.49 
   7  -4   1   20.70    2.73 
   7  -4   1   24.18    2.48 
   7  -4   1   23.70    2.57 
  -7  -4  -1   24.82    2.48 
  -7  -4  -1   27.57    1.97 
  -7  -4  -1   23.48    1.73 
  -7  -4  -1   23.56    1.87 
   7  -4   1   28.07    2.49 
   7  -4   1   19.43    2.56 
  -7  -4  -1   24.26    2.60 
  -7  -4  -1   20.27    2.60 
   7  -4   1   30.47    2.80 
   7  -4   1   25.26    2.71 
   7  -4   1   24.48    2.45 
   7  -4   1   25.81    2.13 
  -7  -4  -1   23.00    1.90 
   7   4   1   25.51    2.61 
   7   4   1   28.35    1.98 
  -7   4  -1   28.60    2.67 
  -7   4  -1   26.99    2.65 
  -7   4  -1   25.21    2.11 
   7   4   1   30.38    2.02 
   7   4   1   26.36    2.71 
   7   4   1   24.39    2.11 
   7   4   1   28.45    2.03 
  -7   4  -1   24.33    2.54 
  -7   4  -1   22.30    2.44 
   7   4   1   20.64    2.62 
  -7   4  -1   25.39    2.68 
  -7   4  -1   19.67    2.13 
   7   4   1   20.79    1.60 
   7   4   1   24.50    1.97 
  -7   4  -1   28.02    2.65 
  -7   4  -1   23.72    2.23 
   7   4   1   24.46    1.94 
   8  -4   1   72.96    4.18 
   8  -4   1   81.04    4.97 
   8  -4   1   73.46    3.98 
   8  -4   1   85.91    4.49 
   8  -4   1   76.68    4.20 
  -8  -4  -1   76.48    4.08 
  -8  -4  -1   70.63    4.24 
  -8  -4  -1   66.22    4.53 
   8  -4   1   72.14    3.97 
   8  -4   1   76.46    4.41 
   8  -4   1   74.49    4.03 
   8  -4   1   72.83    4.45 
  -8  -4  -1   76.87    4.78 
   8  -4   1   70.45    4.78 
   8  -4   1   75.51    4.92 
   8  -4   1   79.77    4.55 
   8  -4   1   73.95    4.50 
  -8  -4  -1   72.78    3.73 
  -8  -4  -1   78.87    3.93 
   8  -4   1   83.89    4.62 
   8  -4   1   77.06    4.26 
   8  -4   1   73.76    4.47 
   8  -4   1   68.68    4.41 
  -8  -4  -1   80.63    4.58 
   8  -4   1   80.34    5.08 
   8  -4   1   72.49    4.43 
  -8  -4  -1   81.69    4.27 
  -8   4  -1   81.04    4.13 
  -8   4  -1   73.96    4.69 
   8   4   1   79.18    4.15 
  -8   4  -1   80.68    4.36 
   8   4   1   76.35    3.95 
   8   4   1   81.47    4.41 
  -8   4  -1   75.83    4.26 
   8   4   1   80.01    3.83 
  -8   4  -1   79.90    3.97 
  -8   4  -1   74.16    4.33 
   8   4   1   68.39    3.75 
  -8   4  -1   78.69    4.39 
   8   4   1   70.31    4.38 
   8   4   1   80.98    4.79 
  -8   4  -1   74.70    4.23 
  -8   4  -1   73.41    4.15 
   8   4   1   82.19    4.21 
  -8   4  -1   74.18    4.25 
   8   4   1   74.55    3.97 
   9  -4   1    9.76    2.19 
   9  -4   1    9.29    2.06 
   9  -4   1   10.31    1.82 
  -9  -4  -1    6.48    1.67 
  -9  -4  -1    8.97    2.10 
   9  -4   1   12.01    2.45 
   9  -4   1   12.09    1.93 
   9  -4   1   10.29    1.97 
   9  -4   1   11.62    2.46 
   9  -4   1    8.77    1.66 
   9  -4   1    8.89    2.26 
   9  -4   1   14.33    2.44 
   9  -4   1    7.15    1.70 
   9  -4   1    9.83    1.74 
   9  -4   1    9.78    2.08 
   9  -4   1    7.42    1.77 
  -9  -4  -1    7.58    1.87 
   9  -4   1   10.01    1.68 
  -9  -4  -1    8.63    1.69 
   9  -4   1    9.06    1.82 
   9  -4   1   13.03    2.31 
   9  -4   1    9.25    1.94 
   9  -4   1    8.23    1.81 
   9   4   1    9.57    1.97 
  -9   4  -1    7.73    1.69 
   9   4   1   10.09    1.63 
   9   4   1   11.53    1.89 
   9   4   1   10.04    1.97 
  -9   4  -1    8.87    1.54 
  -9   4  -1    8.74    1.75 
   9   4   1    9.94    1.77 
  -9   4  -1    6.95    1.50 
  -9   4  -1   14.66    2.30 
  -9   4  -1   10.46    1.90 
  -9   4  -1    7.94    1.96 
  -9   4  -1    8.32    1.80 
   9   4   1   10.87    1.78 
   9   4   1   10.83    2.25 
  -9   4  -1    9.75    1.81 
   9   4   1    8.31    1.72 
  -9   4  -1    8.45    1.80 
   9  -5  -1   39.10    4.06 
   9  -5  -1   40.98    4.15 
   9  -5  -1   40.07    4.15 
   9  -5  -1   38.52    4.41 
   9  -5  -1   34.10    3.53 
   9  -5  -1   34.65    4.29 
  -9  -5   1   31.00    3.37 
  -9  -5   1   41.23    3.10 
   9  -5  -1   31.97    3.23 
   9  -5  -1   29.90    3.29 
   9  -5  -1   31.57    3.47 
  -9  -5   1   37.49    4.30 
  -9  -5   1   37.60    4.32 
   9  -5  -1   34.15    3.53 
   9  -5  -1   38.45    3.66 
   9  -5  -1   36.20    4.29 
   9  -5  -1   34.52    2.69 
  -9  -5   1   27.13    3.51 
   9  -5  -1   27.42    3.16 
   9  -5  -1   29.80    3.53 
   9  -5  -1   25.47    3.17 
   9  -5  -1   40.71    4.51 
   9  -5  -1   30.47    3.27 
   9   5  -1   33.86    3.35 
  -9   5   1   38.86    3.82 
  -9   5   1   35.92    3.78 
  -9   5   1   40.04    3.15 
  -9   5   1   32.24    3.45 
  -9   5   1   35.37    2.75 
  -9   5   1   36.17    4.02 
   9   5  -1   33.61    3.51 
  -9   5   1   35.97    3.40 
   9   5  -1   39.02    2.94 
   9   5  -1   39.82    3.73 
  -9   5   1   36.03    3.63 
   9   5  -1   35.12    4.06 
  -9   5   1   30.60    3.30 
  -8  -5   1    0.48    0.83 
   8  -5  -1   -0.40    0.85 
  -8  -5   1    0.39    0.80 
  -8  -5   1    2.19    1.40 
   8  -5  -1    1.72    1.00 
   8  -5  -1    1.32    1.13 
   8  -5  -1    1.10    1.13 
   8  -5  -1    0.51    0.81 
   8  -5  -1    2.65    1.10 
   8  -5  -1   -0.25    0.57 
  -8  -5   1    2.87    1.09 
   8  -5  -1    1.47    1.11 
  -8  -5   1    1.90    1.11 
   8  -5  -1    0.74    0.85 
   8  -5  -1    2.28    1.26 
   8  -5  -1    0.17    0.80 
   8  -5  -1    1.29    1.15 
   8  -5  -1    1.76    1.08 
   8  -5  -1    0.84    0.89 
  -8  -5   1    0.76    0.83 
   8  -5  -1    1.24    0.85 
   8  -5  -1    1.28    1.21 
  -8  -5   1    0.74    1.05 
   8  -5  -1    1.04    1.16 
   8  -5  -1    0.39    0.97 
   8   5  -1    1.75    0.86 
  -8   5   1    0.85    0.85 
   8   5  -1    0.46    0.87 
   8   5  -1    0.78    0.83 
   8   5  -1    0.25    0.73 
  -8   5   1    1.75    0.91 
   8   5  -1    0.53    1.22 
   8   5  -1   -0.18    0.68 
  -8   5   1    0.61    0.80 
   8   5  -1    1.48    0.91 
  -8   5   1    0.26    0.77 
  -8   5   1    0.59    0.70 
  -8   5   1    3.88    1.36 
  -8   5   1    0.98    1.03 
   8   5  -1    1.94    0.91 
  -8   5   1   -0.19    0.52 
  -8   5   1    0.15    0.73 
   8   5  -1    2.57    0.98 
  -8   5   1    0.07    0.84 
  -8   5   1    1.35    0.95 
   7  -5  -1   39.26    3.91 
   7  -5  -1   35.99    3.24 
   7  -5  -1   43.14    2.95 
  -7  -5   1   30.37    3.41 
  -7  -5   1   40.15    2.81 
   7  -5  -1   36.51    2.99 
   7  -5  -1   34.19    3.36 
  -7  -5   1   38.91    3.64 
   7  -5  -1   36.79    3.49 
   7  -5  -1   37.07    2.82 
  -7  -5   1   38.95    2.76 
   7  -5  -1   37.67    2.89 
  -7  -5   1   26.22    3.18 
   7  -5  -1   34.96    2.77 
   7  -5  -1   35.03    2.84 
   7  -5  -1   33.35    2.99 
   7  -5  -1   36.01    2.74 
   7  -5  -1   35.77    2.83 
  -7  -5   1   34.00    2.57 
   7  -5  -1   37.88    2.94 
   7  -5  -1   35.69    2.83 
   7  -5  -1   44.43    3.21 
  -7  -5   1   36.96    2.60 
   7  -5  -1   38.32    3.50 
   7  -5  -1   36.68    2.73 
   7  -5  -1   41.10    3.31 
  -7   5   1   35.43    2.36 
  -7   5   1   40.05    2.72 
  -7   5   1   38.10    2.82 
  -7   5   1   38.22    2.85 
  -7   5   1   36.16    2.96 
  -7   5   1   39.44    2.78 
  -7   5   1   33.33    2.67 
   7   5  -1   35.71    2.26 
  -7   5   1   35.49    3.34 
   7   5  -1   38.04    3.16 
   7   5  -1   37.89    2.94 
   7   5  -1   34.74    2.36 
  -7   5   1   39.44    2.61 
   7   5  -1   34.04    3.63 
   7   5  -1   33.22    2.50 
   7   5  -1   36.21    2.48 
  -7   5   1   34.13    2.52 
   7   5  -1   34.06    2.39 
   7   5  -1   29.55    3.01 
  -7   5   1   38.50    3.32 
   6  -5  -1   14.36    1.97 
   6  -5  -1   12.24    1.87 
   6  -5  -1    9.57    1.76 
   6  -5  -1   16.98    2.42 
   6  -5  -1   18.62    2.35 
   6  -5  -1   14.06    1.81 
   6  -5  -1   14.15    2.04 
   6  -5  -1   10.37    1.64 
   6  -5  -1   10.46    1.63 
  -6  -5   1   13.38    1.73 
   6  -5  -1   15.12    2.06 
   6  -5  -1   15.18    2.06 
  -6  -5   1   16.11    2.07 
  -6  -5   1   15.89    1.90 
  -6  -5   1   12.59    2.11 
  -6  -5   1   11.64    1.58 
   6  -5  -1   14.27    1.97 
  -6  -5   1   13.79    2.03 
   6  -5  -1   14.75    1.89 
   6  -5  -1   14.38    1.81 
  -6  -5   1   11.73    1.64 
   6  -5  -1   13.90    1.95 
   6  -5  -1   13.04    2.21 
  -6  -5   1   14.54    2.23 
  -6  -5   1   11.21    1.68 
   6  -5  -1   12.71    1.88 
   6  -5  -1   16.03    2.30 
  -6   5   1   13.12    1.67 
   6   5  -1   13.35    1.64 
   6   5  -1   12.96    1.22 
  -6   5   1   11.72    1.54 
  -6   5   1   11.59    1.59 
   6   5  -1   13.98    1.64 
  -6   5   1   13.81    1.74 
  -6   5   1   12.12    1.67 
  -6   5   1   12.94    1.79 
  -6   5   1    8.93    1.53 
   6   5  -1    9.99    1.29 
   6   5  -1   14.86    1.45 
   6   5  -1   17.88    2.18 
   6   5  -1   13.09    1.44 
   6   5  -1   15.21    2.18 
  -6   5   1   13.71    1.89 
  -6   5   1   11.95    1.67 
   6   5  -1   12.01    2.02 
   6   5  -1   14.04    1.55 
  -6   5   1   15.47    2.02 
   5  -5  -1  215.83    8.60 
   5  -5  -1  208.52    7.47 
   5  -5  -1  220.53    8.44 
   5  -5  -1  224.62    8.65 
   5  -5  -1  211.35    8.29 
   5  -5  -1  222.98    8.29 
  -5  -5   1  224.91    7.98 
   5  -5  -1  233.86    8.45 
   5  -5  -1  219.09    7.96 
   5  -5  -1  221.35    8.81 
   5  -5  -1  214.51    8.76 
   5  -5  -1  205.12    8.24 
   5  -5  -1  214.24    8.31 
   5  -5  -1  216.54    8.29 
   5  -5  -1  214.80    8.23 
   5  -5  -1  219.64    7.18 
   5  -5  -1  222.68    8.43 
   5  -5  -1  221.21    8.38 
   5  -5  -1  217.29    8.09 
   5  -5  -1  212.10    8.62 
  -5  -5   1  223.49    8.02 
  -5  -5   1  219.02    8.00 
   5  -5  -1  215.56    8.19 
  -5  -5   1  220.13    8.47 
  -5  -5   1  219.21    8.81 
   5  -5  -1  217.11    8.30 
  -5  -5   1  229.57    8.22 
   5  -5  -1  225.69    7.54 
  -5  -5   1  225.17    8.11 
  -5  -5   1  223.16    8.08 
  -5  -5   1  221.10    8.90 
   5  -5  -1  214.37    8.32 
  -5   5   1  229.95    8.08 
   5   5  -1  222.34    7.35 
  -5   5   1  230.99    8.34 
   5   5  -1  226.07    7.61 
   5   5  -1  229.44    9.10 
  -5   5   1  220.29    7.92 
  -5   5   1  212.16    7.78 
   5   5  -1  219.90    7.55 
  -5   5   1  219.18    8.02 
  -5   5   1  220.28    8.09 
   5   5  -1  217.57    8.36 
   5   5  -1  226.12    7.42 
  -5   5   1  213.90    8.19 
   5   5  -1  225.34    7.68 
   5   5  -1  219.05    7.83 
   5   5  -1  207.13    8.94 
   5   5  -1  220.79    7.81 
   5   5  -1  216.71    7.27 
  -5   5   1  229.30    8.39 
   5   5  -1  207.55    7.04 
  -5   5   1  224.45    8.15 
  -5   5   1  220.54    7.93 
   4  -5  -1   33.21    2.51 
   4  -5  -1   31.44    1.87 
  -4  -5   1   34.61    1.75 
   4  -5  -1   36.06    2.55 
  -4  -5   1   30.80    1.90 
  -4  -5   1   30.05    1.21 
   4  -5  -1   30.62    2.21 
  -4  -5   1   35.36    2.62 
   4  -5  -1   30.83    2.22 
   4  -5  -1   33.98    2.37 
   4  -5  -1   29.64    2.29 
  -4  -5   1   30.93    2.09 
   4  -5  -1   35.11    2.29 
  -4  -5   1   36.13    2.44 
  -4  -5   1   24.52    2.60 
   4  -5  -1   32.63    2.49 
   4  -5  -1   29.10    2.01 
   4  -5  -1   29.71    2.11 
   4  -5  -1   29.79    1.57 
  -4  -5   1   29.88    1.97 
   4  -5  -1   29.86    2.27 
   4  -5  -1   34.55    2.34 
   4  -5  -1   30.42    2.17 
  -4  -5   1   32.31    2.23 
  -4  -5   1   34.33    2.18 
  -4  -5   1   32.36    2.01 
   4  -5  -1   31.35    1.39 
   4  -5  -1   30.24    2.39 
   4  -5  -1   35.29    2.32 
   4  -5  -1   33.18    1.65 
   4  -5  -1   32.96    2.28 
   4  -5  -1   29.48    2.34 
   4  -5  -1   31.49    2.14 
  -4  -5   1   28.88    1.99 
   4   5  -1   31.66    1.71 
   4   5  -1   33.73    1.97 
   4   5  -1   33.00    3.35 
  -4   5   1   32.46    2.26 
  -4   5   1   34.11    2.21 
   4   5  -1   32.56    1.87 
  -4   5   1   30.52    2.02 
   4   5  -1   31.15    1.25 
   4   5  -1   34.35    1.59 
   4   5  -1   32.78    2.22 
   4   5  -1   34.42    2.02 
   4   5  -1   32.16    1.61 
   4   5  -1   31.15    3.05 
  -4   5   1   33.06    2.17 
   4   5  -1   31.90    1.25 
   4   5  -1   35.58    2.86 
   4   5  -1   31.22    1.74 
  -4   5   1   31.60    2.03 
  -4   5   1   34.24    2.07 
  -4   5   1   34.64    2.11 
   4   5  -1   34.84    1.86 
  -4   5   1   30.57    2.03 
  -4   5   1   32.97    1.95 
  -4   5   1   31.44    1.84 
   3  -5  -1  100.65    4.49 
   3  -5  -1   90.49    3.42 
   3  -5  -1   91.51    3.03 
   3  -5  -1   95.39    4.53 
   3  -5  -1   94.18    3.43 
  -3  -5   1   89.64    3.79 
   3  -5  -1   96.07    4.15 
   3  -5  -1   90.68    4.37 
  -3  -5   1   90.37    4.20 
  -3  -5   1   90.61    3.80 
  -3  -5   1   89.60    3.93 
   3  -5  -1   86.24    3.91 
   3  -5  -1   96.38    4.11 
   3  -5  -1   84.13    3.42 
  -3  -5   1   94.16    3.98 
   3  -5  -1   94.78    4.11 
   3  -5  -1   92.93    4.52 
   3  -5  -1   90.33    4.07 
  -3  -5   1   90.02    3.99 
   3  -5  -1   93.34    4.08 
   3  -5  -1   88.34    4.07 
   3  -5  -1   92.09    3.19 
   3  -5  -1   92.24    4.45 
  -3  -5   1   91.03    3.09 
   3  -5  -1   90.04    3.13 
  -3  -5   1   86.79    4.50 
   3  -5  -1   86.86    3.95 
  -3  -5   1   87.55    4.44 
   3  -5  -1   91.27    4.40 
   3  -5  -1   93.90    4.18 
   3  -5  -1   97.35    4.19 
  -3  -5   1   94.22    3.91 
  -3  -5   1   87.76    3.94 
  -3  -5   1   86.82    3.40 
   3  -5  -1   86.07    3.83 
   3  -5  -1   91.16    4.27 
  -3  -5   1   94.33    3.62 
  -3  -5   1   92.24    3.83 
   3   5  -1   90.80    3.52 
   3   5  -1  100.13    5.20 
   3   5  -1   89.22    4.92 
   3   5  -1   89.77    3.41 
  -3   5   1   92.62    2.95 
   3   5  -1   97.71    4.03 
   3   5  -1   96.79    4.73 
  -3   5   1   90.76    3.79 
  -3   5   1   90.06    3.93 
   3   5  -1   91.25    3.52 
  -3   5   1   83.95    3.81 
   3   5  -1   98.05    4.17 
  -3   5   1   97.12    4.11 
  -3   5   1   86.02    3.81 
  -3   5   1   87.88    3.92 
   3   5  -1   87.37    3.85 
  -3   5   1   88.79    3.57 
  -3   5   1   89.21    3.89 
  -3   5   1   86.13    2.96 
   3   5  -1   90.86    3.41 
   3   5  -1   91.55    3.55 
   3   5  -1   96.44    4.10 
  -3   5   1   92.68    3.79 
   3   5  -1   95.12    3.22 
   2  -5  -1    2.41    0.67 
  -2  -5   1    1.76    0.68 
   2  -5  -1    1.89    0.66 
   2  -5  -1    1.92    0.26 
   2  -5  -1    1.01    0.56 
  -2  -5   1    2.36    0.60 
  -2  -5   1    1.64    0.51 
   2  -5  -1    2.11    0.60 
  -2  -5   1    2.42    0.48 
  -2  -5   1    1.64    0.63 
  -2  -5   1    1.98    0.76 
   2  -5  -1    2.69    0.72 
   2  -5  -1    1.09    0.74 
   2  -5  -1    2.01    0.76 
   2  -5  -1    2.96    0.73 
   2  -5  -1    2.39    0.94 
  -2  -5   1    2.10    0.92 
  -2  -5   1    2.21    0.49 
  -2  -5   1    4.09    0.81 
   2  -5  -1    3.18    0.71 
   2  -5  -1    2.63    0.72 
  -2  -5   1    2.68    0.65 
  -2  -5   1    2.41    0.61 
   2  -5  -1    3.78    0.93 
   2  -5  -1    2.36    0.45 
  -2  -5   1    2.54    0.69 
   2  -5  -1    1.83    0.57 
  -2  -5   1    1.82    0.64 
   2  -5  -1    3.20    0.44 
  -2  -5   1    3.07    0.73 
   2  -5  -1    2.26    0.85 
   2  -5  -1    1.69    0.47 
   2  -5  -1    2.19    0.36 
   2  -5  -1    2.12    0.66 
   2  -5  -1    2.06    0.74 
  -2  -5   1    2.11    0.66 
   2  -5  -1    3.05    0.81 
   2  -5  -1    1.48    0.59 
  -2  -5   1    2.84    0.43 
   2   5  -1    1.01    0.74 
  -2   5   1    1.97    0.53 
  -2   5   1    1.86    0.50 
   2   5  -1    1.57    0.42 
  -2   5   1    2.01    0.64 
  -2   5   1    1.07    0.48 
  -2   5   1    1.67    0.57 
   2   5  -1    2.33    0.57 
  -2   5   1    2.35    0.66 
   2   5  -1    2.06    0.89 
   2   5  -1    2.24    0.46 
   2   5  -1    2.19    0.80 
   2   5  -1    1.62    0.92 
  -2   5   1    2.46    0.66 
   2   5  -1    1.39    0.73 
  -2   5   1    2.22    0.58 
   2   5  -1    2.44    0.43 
   2   5  -1    2.49    1.11 
   2   5  -1    2.39    0.53 
  -2   5   1    2.21    0.43 
   2   5  -1    2.07    0.27 
  -2   5   1    2.58    1.09 
   2   5  -1    1.68    0.36 
   2   5  -1    1.67    0.67 
  -2   5   1    1.90    0.46 
  -2   5   1    2.41    0.71 
   1  -5  -1   12.92    1.83 
   1  -5  -1   10.97    1.21 
   1  -5  -1   13.23    1.99 
  -1  -5   1   12.44    2.14 
  -1  -5   1   13.82    0.94 
   1  -5  -1   12.10    0.79 
  -1  -5   1   12.53    1.32 
  -1  -5   1   13.99    1.41 
  -1  -5   1   14.20    0.93 
   1  -5  -1   14.63    0.99 
   1  -5  -1   13.07    0.99 
  -1  -5   1   15.09    1.62 
  -1  -5   1   13.17    1.57 
  -1  -5   1   13.97    1.54 
  -1  -5   1   12.43    1.14 
  -1  -5   1   14.99    1.92 
  -1  -5   1   11.46    1.21 
   1  -5  -1   14.71    2.07 
   1  -5  -1   11.98    1.58 
  -1  -5   1   11.08    1.57 
  -1  -5   1   14.43    1.92 
  -1  -5   1   14.29    1.26 
  -1  -5   1   14.84    1.79 
   1  -5  -1   10.45    1.49 
   1  -5  -1   13.64    1.41 
  -1  -5   1   15.85    1.09 
   1  -5  -1   13.19    1.03 
   1  -5  -1   13.24    1.37 
   1  -5  -1   15.77    1.24 
   1  -5  -1   14.81    0.85 
  -1  -5   1   15.20    2.02 
   1  -5  -1   13.40    1.65 
  -1  -5   1   14.12    1.44 
   1  -5  -1   12.11    0.85 
   1  -5  -1   13.78    1.48 
   1  -5  -1   11.78    1.35 
   1  -5  -1   11.27    1.23 
   1  -5  -1   13.96    1.39 
   1  -5  -1   13.83    0.79 
   1  -5  -1   11.46    1.30 
   1  -5  -1   11.94    1.21 
  -1  -5   1   14.80    1.19 
   1  -5  -1   12.07    1.66 
   1  -5  -1   14.02    1.49 
   1  -5  -1   14.04    1.44 
   1   5  -1   11.84    0.79 
   1   5  -1   13.25    0.66 
   1   5  -1   11.96    0.94 
  -1   5   1   14.47    1.54 
  -1   5   1   14.07    0.84 
  -1   5   1   16.33    1.18 
  -1   5   1   16.49    2.36 
   1   5  -1   14.41    0.80 
  -1   5   1   13.45    0.59 
  -1   5   1   14.64    1.46 
  -1   5   1   17.99    1.86 
  -1   5   1   12.23    1.27 
   1   5  -1   13.13    1.64 
  -1   5   1   13.76    0.81 
  -1   5   1   13.37    0.93 
  -1   5   1   13.68    1.05 
  -1   5   1   15.16    1.75 
  -1   5   1   14.19    1.09 
  -1   5   1   13.86    0.95 
   1   5  -1   14.73    1.15 
   1   5  -1   14.42    0.92 
   1   5  -1   15.13    0.89 
   1   5  -1   10.82    1.82 
   1   5  -1   15.16    1.54 
   1   5  -1   12.97    1.43 
  -1   5   1   11.23    1.16 
  -1   5   1   14.71    1.48 
   1   5  -1   12.14    2.14 
   1   5  -1   12.71    1.73 
   1   5  -1   13.04    0.97 
  -1   5   1   14.57    0.79 
  -1   5   1   13.59    1.37 
  -1   5   1   15.35    1.12 
  -1   5   1   15.60    1.67 
  -1   5   1   14.34    1.35 
  -1   5   1   12.57    1.46 
  -1   5   1   14.27    1.14 
   1   5  -1   13.33    0.66 
   0  -5   1    1.30    0.70 
   0  -5  -1    1.16    0.36 
   0  -5   1    1.44    0.70 
   0  -5   1    0.68    0.44 
   0  -5  -1    1.24    0.47 
   0  -5  -1    0.68    0.41 
   0  -5   1    1.26    0.42 
   0  -5  -1    1.24    0.36 
   0  -5  -1    0.68    0.64 
   0  -5   1    1.31    0.69 
   0  -5   1    2.07    0.78 
   0  -5  -1    0.74    0.47 
   0  -5   1    1.39    0.55 
   0  -5  -1    0.85    0.52 
   0  -5  -1    0.93    0.56 
   0  -5  -1    1.04    0.63 
   0  -5   1    1.65    0.70 
   0  -5   1    0.87    0.85 
   0  -5   1    1.50    0.51 
   0  -5   1    1.79    0.46 
   0  -5   1    1.52    0.37 
   0  -5  -1    0.98    0.40 
   0  -5   1    1.45    1.02 
   0  -5  -1    1.49    0.44 
   0  -5  -1    1.04    0.41 
   0  -5  -1    1.69    0.49 
   0  -5  -1    1.17    0.58 
   0  -5   1    0.53    0.56 
   0  -5  -1    1.31    0.35 
   0  -5  -1    1.30    0.38 
   0  -5  -1    1.47    0.54 
   0  -5  -1    1.14    0.55 
   0  -5  -1    0.29    0.33 
   0  -5   1    2.02    0.61 
   0  -5  -1    2.14    0.75 
   0  -5  -1    2.15    0.67 
   0  -5   1    1.82    1.01 
   0  -5   1    0.46    0.39 
   0  -5   1    0.79    0.54 
   0  -5   1    2.32    0.47 
   0  -5   1    0.97    0.49 
   0  -5  -1    1.45    0.66 
   0  -5   1    1.19    0.43 
   0  -5  -1    1.57    0.54 
   0  -5  -1    1.20    0.77 
   0  -5   1    1.60    0.32 
   0  -5  -1    1.10    0.57 
   0  -5   1    1.93    0.65 
   0   5   1    1.42    0.49 
   0   5   1    0.34    0.51 
   0   5   1    1.01    0.38 
   0   5   1    0.57    0.30 
   0   5   1    2.06    0.51 
   0   5   1    1.14    0.64 
   0   5  -1    1.66    0.35 
   0   5  -1    1.09    0.25 
   0   5   1    1.10    0.31 
   0   5  -1    1.99    0.56 
   0   5   1    0.55    0.31 
   0   5  -1    0.67    0.42 
   0   5  -1    1.00    0.36 
   0   5   1    1.43    0.41 
   0   5   1    2.02    0.46 
   0   5  -1    1.96    0.63 
   0   5  -1    0.92    0.83 
   0   5  -1    2.03    0.74 
   0   5   1    1.18    0.43 
   0   5   1    0.48    0.36 
   0   5  -1    0.15    0.43 
   0   5   1    0.76    0.36 
   0   5   1    1.49    0.22 
   0   5   1    1.29    0.31 
   0   5   1    1.89    0.73 
   0   5   1    1.12    0.97 
   0   5  -1    0.68    0.40 
   0   5   1    2.54    0.80 
   0   5   1    0.67    0.52 
   0   5   1    1.12    0.45 
   0   5  -1    1.39    0.49 
   0   5  -1    1.77    0.46 
   0   5   1    1.36    0.76 
   0   5   1    1.51    0.27 
   0   5   1    1.35    0.32 
   0   5  -1    0.71    0.60 
   0   5  -1    1.33    0.50 
   0   5   1    0.79    0.44 
   1  -5   1  230.31    9.97 
   1  -5   1  257.55    8.97 
   1  -5   1  268.23    8.93 
   1  -5   1  259.96    8.32 
  -1  -5  -1  265.97    8.85 
   1  -5   1  271.88    8.98 
   1  -5   1  257.24    8.91 
  -1  -5  -1  262.62    8.57 
   1  -5   1  254.57    9.20 
   1  -5   1  262.97    9.20 
   1  -5   1  241.99   10.25 
   1  -5   1  273.09    9.15 
   1  -5   1  256.33    9.48 
  -1  -5  -1  242.57    8.88 
  -1  -5  -1  274.89    9.25 
  -1  -5  -1  271.22    8.85 
   1  -5   1  269.22    8.81 
  -1  -5  -1  272.67    9.43 
   1  -5   1  259.21    9.95 
  -1  -5  -1  265.88    8.42 
   1  -5   1  259.77    8.15 
   1  -5   1  255.05    8.93 
   1  -5   1  252.35    9.23 
   1  -5   1  271.96    9.34 
  -1  -5  -1  259.10    9.17 
   1  -5   1  266.80    8.31 
  -1  -5  -1  266.73    8.46 
  -1  -5  -1  258.48    8.72 
  -1  -5  -1  244.42   10.16 
   1  -5   1  261.00    8.31 
  -1  -5  -1  267.22    8.60 
  -1  -5  -1  267.42    9.05 
   1  -5   1  271.13    9.67 
  -1  -5  -1  258.38    8.77 
   1  -5   1  253.84   10.23 
   1  -5   1  257.77    8.83 
   1  -5   1  266.98    8.50 
  -1  -5  -1  265.81    8.48 
   1  -5   1  261.42    8.92 
   1  -5   1  259.14    9.07 
  -1  -5  -1  256.70    8.42 
  -1  -5  -1  260.37    9.52 
  -1  -5  -1  264.30    8.54 
  -1   5  -1  253.50    8.08 
   1   5   1  267.30    8.44 
  -1   5  -1  266.86    8.29 
  -1   5  -1  266.14    8.67 
  -1   5  -1  249.33   10.55 
   1   5   1  246.73   10.33 
  -1   5  -1  259.20    7.84 
  -1   5  -1  270.61    9.83 
   1   5   1  256.37    8.26 
  -1   5  -1  262.62    8.70 
  -1   5  -1  258.97    8.66 
  -1   5  -1  268.10    8.54 
   1   5   1  256.95    8.53 
  -1   5  -1  260.13    8.79 
   1   5   1  257.60    8.63 
   1   5   1  264.71    8.19 
   1   5   1  267.81    9.04 
  -1   5  -1  258.30    8.80 
  -1   5  -1  258.27    8.78 
   1   5   1  257.81    7.88 
   1   5   1  267.70    8.15 
  -1   5  -1  263.91    8.25 
  -1   5  -1  261.36    9.01 
  -1   5  -1  253.19    8.43 
  -1   5  -1  253.28    8.88 
  -1   5  -1  267.13    8.19 
   1   5   1  270.11    9.57 
   1   5   1  224.36    9.35 
   1   5   1  268.75    8.71 
   1   5   1  261.92    8.57 
  -1   5  -1  265.86    8.60 
   2  -5   1   16.05    1.04 
   2  -5   1   15.00    0.80 
  -2  -5  -1   15.23    1.20 
   2  -5   1   14.79    1.53 
   2  -5   1   14.77    2.06 
   2  -5   1   17.29    1.57 
   2  -5   1   14.28    1.68 
  -2  -5  -1   16.47    1.55 
   2  -5   1   17.00    1.62 
  -2  -5  -1   13.36    1.35 
   2  -5   1   15.38    1.98 
   2  -5   1   14.66    1.64 
   2  -5   1   13.86    0.76 
   2  -5   1   13.73    2.09 
   2  -5   1   13.85    1.52 
  -2  -5  -1   14.82    1.14 
  -2  -5  -1   17.21    2.07 
   2  -5   1   13.82    1.61 
   2  -5   1   12.96    1.84 
  -2  -5  -1   14.61    1.15 
   2  -5   1   15.70    0.98 
  -2  -5  -1   15.39    1.24 
   2  -5   1   12.84    1.46 
  -2  -5  -1   16.23    1.23 
   2  -5   1   16.66    1.17 
  -2  -5  -1   12.35    1.24 
   2  -5   1   16.22    1.89 
   2  -5   1   14.48    1.60 
   2  -5   1   13.25    2.04 
   2  -5   1   16.15    1.82 
  -2  -5  -1   16.19    1.20 
   2  -5   1   15.17    1.55 
   2  -5   1   13.87    1.54 
   2  -5   1   14.81    0.80 
  -2  -5  -1   14.50    1.42 
  -2  -5  -1   15.55    1.79 
   2  -5   1   11.59    1.33 
   2   5   1   16.85    2.03 
   2   5   1   14.58    0.75 
   2   5   1   12.74    1.62 
   2   5   1   15.10    0.94 
   2   5   1   14.23    0.97 
  -2   5  -1   13.91    1.42 
   2   5   1   15.85    1.15 
  -2   5  -1   11.75    1.37 
   2   5   1   15.02    1.46 
  -2   5  -1   13.36    1.44 
  -2   5  -1   15.37    0.87 
   2   5   1   14.67    1.03 
   2   5   1   16.32    1.59 
   2   5   1   14.06    0.66 
   2   5   1   15.24    1.00 
  -2   5  -1   11.04    1.29 
  -2   5  -1   13.92    1.07 
   2   5   1   15.38    2.15 
   2   5   1   15.71    1.00 
   2   5   1   12.16    1.49 
  -2   5  -1   15.63    1.49 
   2   5   1   13.47    0.87 
   2   5   1   14.85    0.83 
  -2   5  -1   15.51    1.14 
  -2   5  -1   13.14    1.38 
   2   5   1   15.04    2.04 
   2   5   1   14.28    1.11 
  -2   5  -1   14.26    0.95 
  -2   5  -1   13.77    1.38 
  -2   5  -1   13.20    1.38 
   2   5   1   14.76    0.97 
   2   5   1   13.08    1.31 
   2   5   1   13.47    0.93 
  -2   5  -1   18.36    2.68 
   3  -5   1  259.26    9.01 
   3  -5   1  266.76    8.47 
   3  -5   1  263.92    9.41 
   3  -5   1  282.10    8.82 
   3  -5   1  277.57   10.16 
  -3  -5  -1  259.85    8.45 
  -3  -5  -1  274.44    9.10 
   3  -5   1  267.16    9.52 
  -3  -5  -1  266.64    9.16 
   3  -5   1  269.47    9.26 
   3  -5   1  284.70   10.27 
  -3  -5  -1  266.43    9.09 
   3  -5   1  281.46    9.45 
   3  -5   1  274.92   10.30 
   3  -5   1  261.54    9.60 
   3  -5   1  261.12    9.43 
  -3  -5  -1  273.60    9.09 
   3  -5   1  257.62    9.39 
   3  -5   1  266.25    9.54 
  -3  -5  -1  272.93    9.90 
   3  -5   1  266.11    9.07 
  -3  -5  -1  255.50    8.95 
   3  -5   1  269.54    8.60 
   3  -5   1  257.07    9.80 
   3  -5   1  275.94    9.55 
  -3  -5  -1  277.32    9.31 
   3  -5   1  279.80   10.16 
  -3  -5  -1  261.68    8.29 
   3  -5   1  269.98    9.38 
   3  -5   1  253.17    9.89 
  -3  -5  -1  265.21    9.20 
   3  -5   1  269.71    8.13 
  -3  -5  -1  280.29    9.96 
   3  -5   1  273.24   10.26 
   3  -5   1  280.38    8.53 
   3  -5   1  265.61    9.68 
  -3  -5  -1  269.07    9.07 
  -3  -5  -1  257.34    8.68 
  -3   5  -1  287.33    9.52 
   3   5   1  266.71    8.79 
  -3   5  -1  280.07    9.29 
   3   5   1  266.34    8.15 
   3   5   1  271.46    8.65 
  -3   5  -1  277.21    8.69 
   3   5   1  272.24    8.88 
  -3   5  -1  275.30    9.31 
   3   5   1  268.28    8.89 
   3   5   1  265.03    8.40 
  -3   5  -1  268.73    9.20 
   3   5   1  279.06    8.84 
  -3   5  -1  279.72    9.00 
  -3   5  -1  272.18    9.24 
  -3   5  -1  264.56    8.47 
   3   5   1  264.74   10.16 
   3   5   1  258.76    8.32 
  -3   5  -1  281.45    9.41 
   3   5   1  266.94    8.74 
   3   5   1  267.60    8.48 
   3   5   1  273.04    8.46 
  -3   5  -1  270.30    9.21 
   3   5   1  274.18    9.32 
   3   5   1  260.39    9.86 
   3   5   1  269.43    8.37 
   3   5   1  243.49   10.22 
  -3   5  -1  276.52    9.09 
   3   5   1  278.31    8.50 
  -3   5  -1  265.94    9.32 
   3   5   1  271.12    9.00 
   3   5   1  270.03    8.63 
   4  -5   1   17.87    2.21 
   4  -5   1   13.14    1.69 
   4  -5   1   15.07    1.72 
  -4  -5  -1   19.16    2.17 
   4  -5   1   14.73    1.17 
  -4  -5  -1   18.60    1.90 
   4  -5   1   17.90    2.26 
   4  -5   1   18.40    1.26 
   4  -5   1   19.37    1.94 
   4  -5   1   18.06    2.29 
   4  -5   1   19.89    1.98 
   4  -5   1   16.47    1.86 
   4  -5   1   11.87    1.64 
   4  -5   1   17.89    2.18 
  -4  -5  -1   20.51    1.89 
   4  -5   1   17.09    1.99 
   4  -5   1   18.72    1.99 
  -4  -5  -1   16.22    0.94 
   4  -5   1   20.32    2.30 
   4  -5   1   19.22    1.97 
  -4  -5  -1   17.09    1.71 
  -4  -5  -1   17.35    1.72 
   4  -5   1   19.92    1.48 
   4  -5   1   17.77    1.89 
   4  -5   1   17.75    1.92 
  -4  -5  -1   16.66    1.68 
   4  -5   1   20.24    2.17 
  -4  -5  -1   20.41    1.89 
  -4  -5  -1   21.02    2.35 
   4  -5   1   15.70    2.06 
   4  -5   1   18.27    2.18 
   4  -5   1   16.35    1.94 
  -4  -5  -1   20.62    1.88 
   4   5   1   16.67    1.30 
   4   5   1   16.27    1.02 
   4   5   1   16.04    0.90 
  -4   5  -1   17.76    1.77 
  -4   5  -1   16.54    1.89 
  -4   5  -1   18.13    1.82 
   4   5   1   18.22    1.05 
   4   5   1   17.74    0.79 
   4   5   1   16.72    1.15 
  -4   5  -1   19.01    1.83 
   4   5   1   20.85    2.43 
   4   5   1   16.29    1.16 
   4   5   1   17.92    0.88 
   4   5   1   19.22    1.17 
   4   5   1   13.78    1.66 
   4   5   1   16.83    1.10 
  -4   5  -1   18.02    1.72 
  -4   5  -1   19.35    1.87 
   4   5   1   19.25    1.81 
   4   5   1   17.50    1.06 
   4   5   1   18.35    2.29 
   4   5   1   17.35    0.87 
  -4   5  -1   16.90    1.87 
  -4   5  -1   17.82    1.83 
  -4   5  -1   17.32    1.30 
   4   5   1   19.16    1.23 
  -4   5  -1   19.59    1.89 
   5  -5   1   29.13    2.74 
   5  -5   1   24.25    2.62 
  -5  -5  -1   27.99    2.81 
  -5  -5  -1   29.06    2.49 
   5  -5   1   31.36    2.35 
  -5  -5  -1   30.97    2.08 
   5  -5   1   29.84    2.59 
   5  -5   1   29.76    2.41 
   5  -5   1   31.14    2.19 
   5  -5   1   25.10    2.44 
   5  -5   1   31.63    2.23 
   5  -5   1   30.47    2.24 
   5  -5   1   32.36    2.31 
   5  -5   1   36.35    2.81 
   5  -5   1   31.79    3.05 
  -5  -5  -1   29.77    2.09 
   5  -5   1   28.72    1.84 
   5  -5   1   33.14    2.55 
   5  -5   1   29.01    2.34 
  -5  -5  -1   29.65    2.24 
  -5  -5  -1   29.29    2.10 
   5  -5   1   26.83    1.97 
   5  -5   1   33.67    2.79 
   5  -5   1   27.70    1.83 
   5  -5   1   30.96    2.50 
   5  -5   1   23.65    2.71 
   5  -5   1   32.33    2.43 
  -5  -5  -1   30.42    2.16 
  -5  -5  -1   30.08    2.01 
   5  -5   1   27.86    2.23 
   5  -5   1   30.65    2.42 
   5  -5   1   30.66    2.27 
  -5   5  -1   31.95    2.08 
   5   5   1   29.59    1.79 
  -5   5  -1   31.40    2.33 
  -5   5  -1   33.54    2.25 
  -5   5  -1   34.46    2.06 
   5   5   1   31.53    2.10 
   5   5   1   29.77    1.67 
   5   5   1   31.52    2.64 
   5   5   1   29.73    1.86 
  -5   5  -1   27.29    2.12 
   5   5   1   31.62    2.49 
   5   5   1   30.47    1.46 
  -5   5  -1   30.96    2.15 
  -5   5  -1   27.07    2.03 
   5   5   1   28.48    2.21 
   5   5   1   31.31    1.62 
   5   5   1   31.59    1.74 
  -5   5  -1   31.86    2.14 
  -5   5  -1   35.29    2.29 
  -5   5  -1   32.19    2.39 
   6  -5   1    3.19    1.12 
   6  -5   1    3.40    0.97 
   6  -5   1    2.45    0.90 
   6  -5   1    2.81    1.18 
   6  -5   1    2.12    0.70 
   6  -5   1    2.92    1.17 
   6  -5   1    4.65    1.42 
   6  -5   1    2.39    1.05 
   6  -5   1    2.93    1.22 
  -6  -5  -1    2.68    1.12 
  -6  -5  -1    2.77    1.02 
  -6  -5  -1    2.82    0.93 
   6  -5   1    1.86    1.01 
   6  -5   1    2.09    1.05 
   6  -5   1    2.78    1.05 
   6  -5   1    2.73    1.03 
   6  -5   1    2.35    0.90 
  -6  -5  -1    2.69    0.91 
  -6  -5  -1    1.55    0.74 
   6  -5   1    2.67    1.01 
   6  -5   1    3.39    1.19 
   6  -5   1    4.27    1.14 
   6  -5   1    1.80    0.85 
   6  -5   1    4.19    1.06 
   6  -5   1    1.75    0.98 
  -6  -5  -1    2.96    1.09 
   6  -5   1    2.36    1.14 
  -6  -5  -1    2.88    1.04 
  -6   5  -1    1.18    0.76 
  -6   5  -1    3.40    1.07 
   6   5   1    2.50    0.72 
   6   5   1    3.20    0.93 
   6   5   1    2.17    0.93 
  -6   5  -1    3.66    1.07 
   6   5   1    4.43    1.26 
   6   5   1    2.42    0.73 
  -6   5  -1    2.05    0.82 
   6   5   1    1.96    0.58 
  -6   5  -1    2.78    1.03 
  -6   5  -1    3.34    0.92 
   6   5   1    3.94    0.84 
  -6   5  -1    3.56    1.01 
  -6   5  -1    3.36    0.94 
   6   5   1    2.94    1.03 
   6   5   1    2.29    0.84 
  -6   5  -1    1.15    0.73 
  -6   5  -1    3.50    1.09 
   7  -5   1   15.06    2.10 
   7  -5   1    7.59    1.96 
   7  -5   1   11.67    1.96 
   7  -5   1   16.75    2.65 
   7  -5   1   12.10    1.94 
   7  -5   1   11.43    1.94 
   7  -5   1   12.72    1.93 
   7  -5   1   14.48    2.22 
   7  -5   1   12.58    2.22 
   7  -5   1   10.33    1.72 
   7  -5   1   11.48    1.89 
  -7  -5  -1   12.45    1.64 
   7  -5   1    9.56    1.78 
   7  -5   1    7.97    1.63 
   7  -5   1   12.75    2.29 
  -7  -5  -1   11.12    2.15 
   7  -5   1   16.44    2.38 
  -7  -5  -1   14.31    1.87 
   7  -5   1   10.92    1.76 
  -7  -5  -1   10.87    1.76 
   7  -5   1   13.37    2.06 
  -7  -5  -1   14.24    2.29 
  -7  -5  -1   12.99    1.95 
   7  -5   1   11.17    2.02 
   7  -5   1   11.48    1.98 
   7  -5   1   13.45    1.63 
   7   5   1   11.86    1.51 
  -7   5  -1   11.92    1.71 
  -7   5  -1   12.44    1.66 
   7   5   1   10.63    1.68 
   7   5   1   13.37    1.70 
   7   5   1   13.80    1.67 
  -7   5  -1   12.75    1.97 
  -7   5  -1   13.57    2.00 
  -7   5  -1   10.99    1.67 
   7   5   1   11.85    1.59 
  -7   5  -1   14.25    2.11 
  -7   5  -1   12.39    1.88 
  -7   5  -1   15.21    2.01 
  -7   5  -1   13.61    2.01 
   7   5   1   14.42    2.28 
  -7   5  -1   17.64    2.36 
   7   5   1   13.47    2.08 
   7   5   1   10.24    1.40 
   7   5   1   13.58    1.92 
   8  -5   1    5.93    1.59 
   8  -5   1    6.85    1.53 
  -8  -5  -1    4.34    1.27 
  -8  -5  -1    5.45    1.64 
   8  -5   1    7.43    1.74 
   8  -5   1    6.20    1.31 
   8  -5   1    4.31    1.73 
   8  -5   1    5.34    1.57 
  -8  -5  -1    7.43    1.69 
  -8  -5  -1    5.41    1.67 
   8  -5   1    5.24    1.31 
   8  -5   1    4.63    1.55 
   8  -5   1    5.59    1.46 
   8  -5   1    4.62    1.31 
   8  -5   1    6.58    1.75 
   8  -5   1    8.16    1.55 
   8  -5   1    5.30    1.51 
  -8  -5  -1    6.31    1.54 
   8  -5   1    7.59    1.88 
  -8  -5  -1    4.25    1.13 
   8  -5   1    6.62    1.57 
   8  -5   1    7.23    1.72 
   8  -5   1    7.55    2.14 
   8  -5   1    8.01    1.99 
   8  -5   1    7.28    1.93 
   8  -5   1    6.33    1.54 
  -8   5  -1    4.57    1.35 
  -8   5  -1    5.48    1.37 
  -8   5  -1    3.18    1.17 
   8   5   1    5.73    1.70 
   8   5   1    5.47    1.34 
  -8   5  -1    6.66    1.46 
  -8   5  -1    6.13    1.55 
  -8   5  -1    5.55    1.70 
   8   5   1    5.95    1.67 
  -8   5  -1    6.47    1.67 
  -8   5  -1    5.45    1.33 
  -8   5  -1    3.40    1.30 
  -8   5  -1    5.03    1.25 
   8   5   1    6.43    1.50 
   8   5   1    4.06    1.33 
   8   5   1    5.18    1.21 
   9  -5   1   52.55    4.45 
   9  -5   1   49.47    3.75 
   9  -5   1   52.19    3.37 
   9  -5   1   54.03    3.91 
   9  -5   1   56.77    4.16 
  -9  -5  -1   49.08    3.72 
   9  -5   1   55.04    4.22 
  -9  -5  -1   57.05    4.39 
   9  -5   1   53.19    4.44 
   9  -5   1   52.43    3.80 
  -9  -5  -1   50.67    3.56 
   9  -5   1   52.01    3.95 
   9  -5   1   55.27    4.29 
   9  -5   1   46.92    3.81 
   9  -5   1   43.25    3.43 
   9  -5   1   53.22    4.52 
   9  -5   1   49.54    3.86 
  -9  -5  -1   43.97    4.57 
   9  -5   1   47.06    3.56 
   9  -5   1   56.80    4.01 
   9  -5   1   53.83    3.67 
   9  -5   1   50.35    4.40 
   9  -5   1   46.71    3.88 
  -9   5  -1   53.09    3.84 
  -9   5  -1   53.29    3.79 
  -9   5  -1   55.10    3.47 
   9   5   1   58.20    3.81 
  -9   5  -1   49.29    3.72 
  -9   5  -1   53.95    4.29 
  -9   5  -1   52.44    3.91 
  -9   5  -1   51.93    3.48 
  -9   5  -1   47.77    3.73 
   9   5   1   57.71    3.96 
   9   5   1   47.73    3.88 
  -9   5  -1   56.31    3.81 
  -9   5  -1   57.23    3.70 
   9   5   1   48.30    4.11 
   9   5   1   53.43    3.62 
   9   5   1   48.84    3.33 
   8  -6  -1    2.19    1.51 
   8  -6  -1    4.21    1.49 
   8  -6  -1    3.89    1.74 
  -8  -6   1    2.77    1.31 
   8  -6  -1    4.43    1.57 
   8  -6  -1    3.07    1.29 
  -8  -6   1    3.57    1.27 
  -8  -6   1    2.29    1.08 
  -8  -6   1    1.81    1.02 
  -8  -6   1    1.19    0.95 
   8  -6  -1    1.58    1.39 
   8  -6  -1    4.61    1.73 
  -8  -6   1    1.91    1.36 
   8  -6  -1    6.23    1.62 
   8  -6  -1    2.84    0.92 
   8  -6  -1    2.88    1.25 
   8  -6  -1    3.54    1.68 
   8  -6  -1    3.29    1.28 
   8  -6  -1    3.41    1.45 
   8  -6  -1    3.12    1.30 
   8  -6  -1    4.89    1.48 
   8  -6  -1    1.42    1.02 
   8  -6  -1    3.18    1.34 
   8  -6  -1    4.06    1.56 
  -8  -6   1    4.66    1.84 
  -8   6   1    1.93    1.05 
   8   6  -1    2.87    1.14 
   8   6  -1    2.80    1.11 
   8   6  -1    2.57    1.45 
  -8   6   1    4.51    1.41 
  -8   6   1    4.93    1.27 
  -8   6   1    3.43    1.33 
   8   6  -1    2.34    1.18 
  -8   6   1    4.10    1.24 
  -8   6   1    2.30    1.08 
  -8   6   1    4.42    1.42 
  -8   6   1    3.52    1.50 
  -8   6   1    2.99    1.23 
  -8   6   1    3.50    1.13 
  -8   6   1    2.87    1.10 
   8   6  -1    1.44    1.12 
   7  -6  -1   -0.07    0.85 
  -7  -6   1   -0.20    0.68 
   7  -6  -1    1.23    1.08 
   7  -6  -1    1.43    1.01 
   7  -6  -1    0.67    1.07 
  -7  -6   1   -1.18    0.59 
   7  -6  -1    0.43    1.13 
  -7  -6   1    0.79    0.88 
   7  -6  -1    1.47    1.06 
   7  -6  -1   -0.11    0.54 
   7  -6  -1    0.01    1.04 
  -7  -6   1    1.78    1.26 
   7  -6  -1    2.05    1.25 
   7  -6  -1   -0.98    0.76 
   7  -6  -1   -0.30    0.73 
  -7  -6   1   -0.04    0.97 
   7  -6  -1    1.84    1.12 
   7  -6  -1    1.08    1.01 
  -7  -6   1    0.46    0.94 
   7  -6  -1    1.10    1.08 
  -7  -6   1    0.05    0.63 
   7  -6  -1   -0.57    0.83 
   7  -6  -1    0.01    0.86 
   7  -6  -1    0.28    0.79 
   7  -6  -1    0.61    0.94 
  -7  -6   1    0.39    0.74 
   7  -6  -1    0.25    0.93 
  -7   6   1    0.49    0.71 
   7   6  -1   -0.07    0.63 
   7   6  -1   -0.89    0.85 
  -7   6   1    0.52    0.67 
  -7   6   1   -0.59    0.63 
   7   6  -1   -0.14    0.82 
  -7   6   1    0.23    0.69 
   7   6  -1    0.30    0.82 
   7   6  -1    1.28    0.76 
   7   6  -1   -0.04    0.64 
  -7   6   1    0.61    0.69 
  -7   6   1    1.00    0.81 
  -7   6   1    0.58    0.84 
  -7   6   1    0.34    0.85 
  -7   6   1   -0.39    0.72 
  -7   6   1    0.25    0.69 
   6  -6  -1    0.41    0.80 
   6  -6  -1    0.79    0.89 
   6  -6  -1    0.08    0.78 
  -6  -6   1   -0.25    0.73 
   6  -6  -1    0.11    0.66 
   6  -6  -1    0.11    0.71 
  -6  -6   1    0.83    0.69 
   6  -6  -1    0.99    0.88 
   6  -6  -1    0.57    0.81 
   6  -6  -1    0.05    0.77 
  -6  -6   1   -0.48    0.57 
   6  -6  -1   -0.73    0.61 
   6  -6  -1   -0.38    0.72 
   6  -6  -1   -0.48    0.70 
  -6  -6   1    0.22    0.73 
   6  -6  -1   -0.43    0.73 
  -6  -6   1   -0.31    0.59 
  -6  -6   1    0.11    0.80 
   6  -6  -1    1.02    0.95 
  -6  -6   1    1.76    1.01 
   6  -6  -1   -0.01    0.83 
   6  -6  -1    0.84    0.90 
   6  -6  -1    0.68    0.93 
  -6  -6   1    0.10    0.69 
  -6  -6   1    0.44    0.66 
   6  -6  -1    0.04    0.83 
   6  -6  -1   -0.46    0.84 
   6  -6  -1   -0.24    0.39 
  -6   6   1   -0.42    0.44 
   6   6  -1   -0.28    0.48 
  -6   6   1   -0.12    0.56 
  -6   6   1    0.56    0.68 
  -6   6   1   -0.60    0.64 
   6   6  -1   -0.43    0.44 
   6   6  -1    0.51    0.56 
  -6   6   1    0.75    0.71 
  -6   6   1   -0.21    0.54 
   6   6  -1   -0.17    0.87 
   6   6  -1   -0.44    0.78 
  -6   6   1   -0.06    0.56 
  -6   6   1   -0.63    0.49 
  -6   6   1    0.15    0.67 
   6   6  -1   -0.42    0.65 
  -6   6   1    0.00    0.70 
   5  -6  -1    4.18    1.20 
   5  -6  -1    1.11    0.71 
   5  -6  -1    2.44    0.62 
  -5  -6   1    3.20    1.09 
   5  -6  -1    1.23    0.87 
   5  -6  -1    2.42    1.13 
   5  -6  -1    1.89    0.87 
   5  -6  -1    1.95    0.99 
   5  -6  -1    1.56    0.86 
  -5  -6   1    2.31    0.85 
   5  -6  -1    2.03    0.78 
  -5  -6   1    1.69    0.77 
   5  -6  -1    2.26    1.02 
   5  -6  -1    2.17    0.97 
   5  -6  -1    2.97    1.15 
  -5  -6   1    2.24    1.02 
  -5  -6   1    2.61    0.86 
   5  -6  -1    3.20    1.13 
   5  -6  -1    4.12    1.36 
   5  -6  -1    3.49    1.08 
  -5  -6   1    2.68    0.91 
  -5  -6   1    0.90    0.71 
  -5  -6   1    1.98    0.82 
   5  -6  -1    2.90    1.16 
  -5  -6   1    2.13    1.16 
   5  -6  -1    1.68    0.91 
   5  -6  -1    1.34    0.94 
   5  -6  -1    2.35    1.10 
   5  -6  -1    1.31    0.79 
  -5   6   1    1.95    0.82 
  -5   6   1    1.94    0.84 
   5   6  -1    2.15    0.59 
  -5   6   1    1.74    0.77 
  -5   6   1    1.42    0.74 
   5   6  -1    2.39    1.27 
   5   6  -1    2.09    0.97 
  -5   6   1    2.31    0.78 
  -5   6   1    1.10    0.72 
   5   6  -1    2.07    0.75 
  -5   6   1    1.41    0.75 
  -5   6   1    0.81    0.70 
   5   6  -1    1.27    1.10 
   5   6  -1    2.27    0.69 
  -5   6   1    2.22    0.71 
  -5   6   1    1.69    0.86 
   5   6  -1    2.36    0.72 
   5   6  -1    2.32    0.58 
   4  -6  -1   16.99    1.82 
  -4  -6   1   15.92    1.78 
   4  -6  -1   17.01    2.35 
   4  -6  -1   15.95    1.20 
   4  -6  -1   16.52    1.98 
  -4  -6   1   15.39    1.78 
   4  -6  -1   17.90    2.49 
   4  -6  -1   14.14    1.74 
  -4  -6   1   13.20    1.57 
   4  -6  -1   18.75    1.05 
  -4  -6   1   15.84    1.74 
   4  -6  -1   12.32    1.97 
   4  -6  -1   17.46    2.13 
  -4  -6   1   13.06    2.01 
   4  -6  -1   13.33    1.84 
   4  -6  -1   19.15    2.15 
   4  -6  -1   18.94    2.51 
   4  -6  -1   13.51    1.78 
   4  -6  -1   15.09    2.08 
   4  -6  -1   16.03    0.99 
   4  -6  -1   17.36    2.00 
   4  -6  -1   16.49    1.89 
  -4  -6   1   12.23    1.73 
  -4  -6   1   16.05    1.58 
  -4  -6   1   14.11    1.86 
   4  -6  -1   18.36    2.25 
   4  -6  -1   18.51    2.05 
  -4  -6   1   15.15    2.23 
   4  -6  -1   13.75    1.82 
  -4  -6   1   16.43    1.83 
   4  -6  -1   18.56    2.43 
   4   6  -1   15.42    1.93 
   4   6  -1   15.01    1.47 
   4   6  -1   16.60    2.37 
   4   6  -1   16.45    1.74 
  -4   6   1   18.12    2.02 
  -4   6   1   17.22    1.68 
  -4   6   1   14.15    1.63 
  -4   6   1   16.30    1.78 
  -4   6   1   18.23    1.85 
   4   6  -1   14.54    1.66 
   4   6  -1   17.60    1.17 
  -4   6   1   15.03    1.89 
   4   6  -1   16.29    2.45 
   4   6  -1   15.41    1.52 
   4   6  -1   14.79    1.10 
  -4   6   1   16.49    1.28 
   4   6  -1   20.25    3.00 
  -4   6   1   20.57    2.09 
  -4   6   1   20.01    2.02 
  -4   6   1   19.34    2.03 
   4   6  -1   14.58    1.20 
   3  -6  -1    0.58    0.76 
  -3  -6   1    2.29    0.76 
   3  -6  -1    1.24    0.72 
   3  -6  -1    1.43    0.71 
   3  -6  -1    1.00    0.33 
  -3  -6   1    2.47    0.78 
  -3  -6   1    2.57    1.11 
  -3  -6   1    2.56    0.80 
   3  -6  -1    0.43    0.66 
   3  -6  -1   -0.28    0.53 
   3  -6  -1    0.60    0.51 
  -3  -6   1    2.35    0.71 
   3  -6  -1    0.40    0.56 
   3  -6  -1    0.18    0.73 
   3  -6  -1    0.90    0.38 
  -3  -6   1    3.84    1.14 
   3  -6  -1    1.28    0.71 
   3  -6  -1    1.28    0.69 
  -3  -6   1    2.59    0.74 
   3  -6  -1    0.78    0.28 
   3  -6  -1    1.48    0.67 
  -3  -6   1    3.50    0.85 
  -3  -6   1    1.51    0.69 
   3  -6  -1    0.84    0.55 
   3  -6  -1    1.17    0.69 
  -3  -6   1    2.39    0.70 
   3  -6  -1    0.63    0.95 
   3  -6  -1    0.60    0.74 
  -3  -6   1    1.31    0.67 
  -3  -6   1    2.09    0.60 
   3  -6  -1    1.97    0.95 
   3  -6  -1    0.96    0.73 
   3  -6  -1    0.16    0.67 
  -3   6   1    0.53    0.54 
  -3   6   1    0.02    0.50 
   3   6  -1    2.85    0.61 
   3   6  -1    3.08    0.88 
   3   6  -1    2.08    0.77 
   3   6  -1    2.05    0.89 
  -3   6   1   -0.18    0.52 
   3   6  -1    1.99    0.66 
   3   6  -1    2.59    0.68 
  -3   6   1    1.35    0.58 
  -3   6   1    1.11    0.48 
  -3   6   1    0.84    0.51 
   3   6  -1    1.83    0.78 
  -3   6   1    0.52    0.32 
   3   6  -1    1.59    0.60 
   3   6  -1    2.33    1.07 
  -3   6   1    0.34    0.49 
  -3   6   1    0.30    0.49 
   3   6  -1    4.36    1.36 
  -3   6   1    1.84    0.66 
   3   6  -1    2.47    0.53 
  -3   6   1    1.05    0.65 
   3   6  -1    2.41    1.23 
   2  -6  -1    0.85    0.78 
   2  -6  -1    1.66    0.65 
   2  -6  -1    1.82    0.67 
   2  -6  -1    1.63    0.68 
   2  -6  -1    1.40    0.64 
   2  -6  -1    0.53    0.47 
   2  -6  -1    1.43    0.51 
  -2  -6   1    2.05    0.74 
   2  -6  -1    1.39    0.64 
  -2  -6   1    0.57    0.75 
   2  -6  -1    1.29    0.67 
   2  -6  -1    1.87    0.74 
   2  -6  -1    1.05    0.58 
  -2  -6   1    1.63    0.59 
   2  -6  -1    1.71    1.02 
  -2  -6   1    1.16    0.52 
   2  -6  -1    1.49    1.00 
   2  -6  -1    1.38    0.40 
   2  -6  -1    0.97    0.26 
  -2  -6   1    1.97    1.06 
  -2  -6   1    1.73    0.57 
  -2  -6   1    1.54    0.65 
  -2  -6   1    1.14    0.58 
   2  -6  -1    0.91    0.31 
  -2  -6   1    1.69    0.59 
   2  -6  -1    1.64    0.67 
  -2  -6   1    1.38    0.66 
   2  -6  -1    0.37    0.49 
  -2  -6   1    0.84    0.56 
   2  -6  -1    1.15    0.77 
  -2  -6   1    2.47    0.77 
   2  -6  -1    1.52    0.77 
  -2  -6   1    1.05    0.55 
  -2  -6   1    1.54    0.64 
   2  -6  -1    1.59    0.39 
   2  -6  -1    1.90    0.83 
   2   6  -1    2.12    1.04 
  -2   6   1    1.61    0.44 
   2   6  -1    0.47    0.67 
  -2   6   1    0.96    0.50 
   2   6  -1    0.71    0.64 
   2   6  -1    1.86    0.41 
  -2   6   1    0.32    0.47 
   2   6  -1    1.66    0.49 
  -2   6   1    1.50    0.44 
   2   6  -1    0.88    0.49 
   2   6  -1    0.95    0.90 
  -2   6   1    1.12    0.96 
  -2   6   1    1.95    0.75 
  -2   6   1    0.65    0.48 
   2   6  -1    0.98    0.90 
  -2   6   1    0.40    0.49 
   2   6  -1    1.14    0.28 
   2   6  -1    1.32    0.41 
  -2   6   1    0.33    0.39 
  -2   6   1    0.68    0.50 
  -2   6   1    1.64    0.64 
   2   6  -1    2.38    0.91 
  -2   6   1    1.30    0.61 
  -2   6   1    1.69    0.63 
   2   6  -1    1.83    1.26 
  -2   6   1    1.98    0.66 
   2   6  -1    2.19    0.56 
   2   6  -1    1.29    0.35 
  -1  -6   1    7.82    1.31 
  -1  -6   1    7.85    1.04 
  -1  -6   1    5.62    0.91 
  -1  -6   1    9.68    1.25 
   1  -6  -1    8.68    1.18 
   1  -6  -1    7.77    1.12 
  -1  -6   1    9.50    1.31 
  -1  -6   1    9.83    1.12 
  -1  -6   1    7.36    1.15 
   1  -6  -1   11.67    1.95 
  -1  -6   1    7.22    1.98 
   1  -6  -1    6.60    1.11 
   1  -6  -1    9.29    1.08 
  -1  -6   1    8.99    1.68 
   1  -6  -1   10.58    1.40 
   1  -6  -1    8.12    0.98 
   1  -6  -1    8.43    1.41 
   1  -6  -1    9.33    1.18 
   1  -6  -1    8.00    1.34 
  -1  -6   1    8.81    1.19 
  -1  -6   1    7.99    1.02 
   1  -6  -1    8.54    0.82 
   1  -6  -1    6.38    1.06 
  -1  -6   1    8.57    1.66 
   1  -6  -1    6.65    1.08 
  -1  -6   1    5.87    1.25 
  -1  -6   1    8.52    1.20 
   1  -6  -1    9.72    1.40 
  -1  -6   1    8.47    1.30 
   1  -6  -1    6.94    1.41 
   1  -6  -1    8.08    0.76 
   1  -6  -1    8.53    0.89 
   1  -6  -1    4.72    1.44 
   1  -6  -1    4.52    1.00 
   1  -6  -1    7.39    1.26 
   1  -6  -1    9.21    1.45 
   1  -6  -1    9.43    1.94 
   1  -6  -1    7.64    0.78 
   1  -6  -1   11.07    1.47 
  -1  -6   1    6.76    1.43 
  -1   6   1    7.83    1.02 
   1   6  -1    7.38    1.64 
   1   6  -1    8.31    1.22 
   1   6  -1    9.50    1.04 
   1   6  -1    8.28    1.03 
   1   6  -1    9.86    1.46 
   1   6  -1   10.49    1.64 
  -1   6   1    7.64    1.18 
  -1   6   1    6.55    1.00 
  -1   6   1    8.52    1.12 
  -1   6   1    7.77    1.03 
  -1   6   1    7.50    1.07 
  -1   6   1    7.94    1.10 
  -1   6   1    9.53    1.28 
   1   6  -1    7.12    0.78 
  -1   6   1    8.92    0.93 
  -1   6   1    9.69    1.07 
  -1   6   1    7.82    1.08 
  -1   6   1    8.49    0.91 
   1   6  -1    8.67    0.83 
   1   6  -1    7.06    1.14 
   1   6  -1    6.97    1.95 
   1   6  -1    8.74    0.84 
  -1   6   1    8.35    1.97 
  -1   6   1    7.68    1.22 
  -1   6   1    7.39    1.12 
   1   6  -1    6.61    1.39 
  -1   6   1   10.04    0.77 
  -1   6   1    8.13    0.82 
  -1   6   1   10.84    1.48 
   1   6  -1   10.52    1.37 
   0  -6  -1   70.61    2.74 
   0  -6  -1   68.61    2.79 
   0  -6  -1   69.25    3.09 
   0  -6  -1   71.13    3.85 
   0  -6  -1   67.13    4.02 
   0  -6  -1   74.92    3.97 
   0  -6  -1   68.62    2.92 
   0  -6  -1   72.63    3.40 
   0  -6   1   68.51    3.28 
   0  -6  -1   74.23    3.54 
   0  -6   1   61.85    4.35 
   0  -6  -1   71.55    2.96 
   0  -6  -1   74.60    4.28 
   0  -6   1   65.53    2.83 
   0  -6  -1   74.82    3.69 
   0  -6   1   64.18    3.67 
   0  -6   1   70.34    3.64 
   0  -6  -1   68.08    3.70 
   0  -6  -1   73.56    3.37 
   0  -6   1   71.25    3.46 
   0  -6   1   66.82    3.90 
   0  -6  -1   67.68    2.72 
   0  -6   1   70.66    3.38 
   0  -6  -1   73.08    3.47 
   0  -6   1   65.67    3.42 
   0  -6  -1   65.44    3.19 
   0  -6   1   65.32    3.94 
   0  -6  -1   69.02    2.74 
   0  -6   1   74.80    4.43 
   0  -6   1   68.19    2.95 
   0  -6   1   74.42    3.96 
   0  -6   1   71.00    2.88 
   0  -6   1   65.72    3.11 
   0  -6   1   72.57    3.19 
   0  -6  -1   69.94    3.30 
   0  -6  -1   65.66    3.74 
   0  -6   1   71.41    3.93 
   0  -6   1   67.21    3.69 
   0  -6  -1   67.81    2.98 
   0  -6  -1   73.28    3.98 
   0  -6   1   76.81    4.50 
   0  -6   1   69.86    2.79 
   0  -6  -1   63.52    3.14 
   0   6  -1   72.35    3.51 
   0   6   1   66.14    2.50 
   0   6  -1   66.30    3.25 
   0   6   1   65.28    3.14 
   0   6   1   73.20    3.75 
   0   6  -1   65.65    3.15 
   0   6   1   67.96    4.58 
   0   6   1   59.61    2.72 
   0   6   1   70.70    2.95 
   0   6   1   67.60    3.01 
   0   6  -1   65.77    3.25 
   0   6   1   70.57    3.78 
   0   6  -1   71.43    3.86 
   0   6  -1   70.62    3.03 
   0   6   1   69.39    2.97 
   0   6   1   69.52    3.21 
   0   6  -1   66.08    2.81 
   0   6  -1   65.29    3.17 
   0   6  -1   65.53    2.41 
   0   6   1   62.88    2.45 
   0   6   1   66.66    2.34 
   0   6  -1   69.11    3.79 
   0   6   1   68.99    3.03 
   0   6  -1   64.80    2.99 
   0   6  -1   63.00    3.14 
   0   6   1   66.47    3.02 
   0   6  -1   67.92    2.68 
   0   6   1   70.14    2.85 
   0   6   1   70.66    3.35 
   0   6  -1   63.08    4.60 
   1  -6   1    2.14    0.68 
   1  -6   1    2.94    1.02 
   1  -6   1    2.74    0.51 
  -1  -6  -1    3.98    0.91 
  -1  -6  -1    3.27    0.99 
  -1  -6  -1    3.93    0.99 
  -1  -6  -1    2.43    0.63 
   1  -6   1    3.12    0.59 
   1  -6   1    3.89    0.93 
  -1  -6  -1    3.08    0.71 
   1  -6   1    3.91    1.01 
   1  -6   1    3.13    0.85 
   1  -6   1    3.09    0.97 
  -1  -6  -1    3.77    0.78 
   1  -6   1    2.93    0.80 
  -1  -6  -1    1.76    0.60 
  -1  -6  -1    3.35    0.96 
   1  -6   1    3.36    0.63 
   1  -6   1    6.29    1.50 
   1  -6   1    3.59    1.42 
  -1  -6  -1    3.40    1.03 
   1  -6   1    3.89    0.71 
   1  -6   1    3.78    1.27 
  -1  -6  -1    2.71    0.64 
   1  -6   1    1.95    0.81 
   1  -6   1    3.31    0.77 
  -1  -6  -1    2.68    0.64 
  -1  -6  -1    2.34    0.68 
  -1  -6  -1    3.15    0.76 
  -1  -6  -1    3.83    0.83 
   1  -6   1    3.61    0.87 
   1  -6   1    4.25    1.08 
  -1  -6  -1    3.80    1.38 
  -1  -6  -1    5.17    1.24 
  -1  -6  -1    2.80    0.75 
   1  -6   1    3.53    0.85 
   1  -6   1    3.69    1.00 
   1  -6   1    3.48    0.93 
   1  -6   1    3.09    1.10 
   1  -6   1    3.19    1.31 
  -1   6  -1    3.93    0.83 
   1   6   1    2.68    1.39 
   1   6   1    4.20    0.41 
   1   6   1    3.06    0.58 
  -1   6  -1    3.29    1.39 
   1   6   1    3.23    0.34 
   1   6   1    4.01    1.12 
   1   6   1    3.60    0.76 
  -1   6  -1    2.74    0.66 
   1   6   1    2.57    0.52 
  -1   6  -1    3.13    0.85 
   1   6   1    3.37    0.42 
   1   6   1    3.21    0.90 
   1   6   1    2.79    0.62 
   1   6   1    2.93    0.73 
   1   6   1    3.12    0.42 
   1   6   1    3.68    0.82 
  -1   6  -1    3.93    0.85 
  -1   6  -1    3.68    0.75 
   1   6   1    2.79    0.72 
   1   6   1    4.23    1.26 
   1   6   1    1.82    0.66 
  -1   6  -1    3.41    0.67 
  -1   6  -1    4.86    0.98 
  -1   6  -1    3.96    0.60 
  -1   6  -1    1.76    0.66 
   1   6   1    2.27    0.62 
  -1   6  -1    2.93    0.53 
  -1   6  -1    2.68    0.72 
  -1   6  -1    2.60    0.80 
   1   6   1    2.25    0.43 
  -2  -6  -1   30.25    1.75 
   2  -6   1   27.57    3.34 
  -2  -6  -1   31.69    1.92 
  -2  -6  -1   27.52    1.94 
   2  -6   1   25.48    2.63 
   2  -6   1   24.94    1.96 
  -2  -6  -1   31.22    1.88 
   2  -6   1   28.18    2.20 
   2  -6   1   27.00    2.01 
   2  -6   1   27.24    1.91 
   2  -6   1   31.33    2.10 
   2  -6   1   20.95    2.90 
  -2  -6  -1   28.21    2.36 
   2  -6   1   36.56    3.10 
  -2  -6  -1   26.13    3.11 
   2  -6   1   32.70    2.12 
   2  -6   1   31.11    2.27 
   2  -6   1   26.79    2.23 
  -2  -6  -1   28.24    1.74 
   2  -6   1   27.52    1.66 
  -2  -6  -1   27.17    1.77 
   2  -6   1   33.69    2.30 
  -2  -6  -1   27.70    1.74 
   2  -6   1   28.02    2.12 
  -2  -6  -1   28.59    1.95 
   2  -6   1   29.91    1.55 
   2  -6   1   30.89    2.18 
   2  -6   1   30.55    3.39 
  -2  -6  -1   25.60    1.72 
   2  -6   1   26.20    1.26 
   2  -6   1   29.19    2.06 
  -2  -6  -1   27.55    2.00 
   2  -6   1   29.09    1.49 
   2  -6   1   30.59    2.43 
   2   6   1   29.24    1.19 
   2   6   1   28.40    1.21 
   2   6   1   30.87    1.96 
  -2   6  -1   26.84    1.94 
  -2   6  -1   27.99    1.57 
  -2   6  -1   26.82    3.50 
   2   6   1   26.76    1.65 
  -2   6  -1   32.67    2.22 
   2   6   1   27.42    1.41 
   2   6   1   28.01    1.34 
   2   6   1   33.71    3.54 
  -2   6  -1   28.44    1.92 
  -2   6  -1   27.95    1.63 
  -2   6  -1   28.88    2.05 
   2   6   1   24.87    2.60 
  -2   6  -1   30.89    1.95 
   2   6   1   32.95    3.20 
  -2   6  -1   27.65    1.96 
   2   6   1   30.57    1.81 
  -2   6  -1   28.70    1.67 
  -2   6  -1   26.80    1.52 
   2   6   1   28.79    3.06 
  -2   6  -1   29.09    1.28 
   2   6   1   24.70    1.85 
   2   6   1   30.01    1.49 
  -2   6  -1   29.24    2.00 
   2   6   1   25.38    1.98 
   2   6   1   26.76    1.46 
  -2   6  -1   29.46    1.90 
  -2   6  -1   27.17    1.83 
   2   6   1   26.73    1.52 
   2   6   1   32.85    2.27 
   3  -6   1    0.77    0.59 
   3  -6   1   -0.66    0.40 
   3  -6   1    0.19    0.75 
  -3  -6  -1    0.26    0.44 
  -3  -6  -1   -0.15    0.44 
   3  -6   1    0.66    0.78 
   3  -6   1    0.28    0.41 
   3  -6   1    0.07    0.53 
   3  -6   1   -0.01    0.63 
   3  -6   1    0.46    0.54 
   3  -6   1    0.54    0.72 
  -3  -6  -1   -0.01    0.47 
   3  -6   1    0.63    0.56 
  -3  -6  -1    0.33    0.49 
   3  -6   1   -0.07    0.47 
   3  -6   1   -0.16    0.67 
  -3  -6  -1   -0.39    0.42 
   3  -6   1    0.47    0.60 
   3  -6   1    0.63    0.62 
   3  -6   1    0.15    0.18 
   3  -6   1    0.28    0.37 
   3  -6   1   -0.12    0.20 
  -3  -6  -1   -0.06    0.39 
   3  -6   1    0.24    0.32 
   3  -6   1    0.14    0.63 
  -3  -6  -1    0.04    0.67 
   3  -6   1   -0.26    0.59 
  -3  -6  -1    0.15    0.44 
   3  -6   1    0.54    0.61 
   3  -6   1    0.06    0.49 
  -3  -6  -1    0.02    0.40 
  -3  -6  -1   -0.59    0.60 
   3  -6   1    0.28    0.76 
  -3   6  -1    0.20    0.49 
  -3   6  -1    0.19    0.42 
  -3   6  -1    0.25    0.46 
  -3   6  -1   -0.05    0.26 
   3   6   1   -0.03    0.38 
   3   6   1    0.30    0.49 
  -3   6  -1   -0.33    0.44 
   3   6   1   -0.03    0.27 
  -3   6  -1   -0.27    0.42 
  -3   6  -1    0.82    0.56 
   3   6   1   -0.46    0.33 
   3   6   1    1.68    1.05 
   3   6   1    0.31    0.30 
   3   6   1   -0.47    0.37 
   3   6   1    0.12    0.39 
  -3   6  -1   -0.20    0.42 
  -3   6  -1    0.90    0.63 
   3   6   1   -0.15    0.81 
  -3   6  -1   -0.02    0.49 
  -3   6  -1    0.10    0.44 
   3   6   1    0.34    0.77 
   3   6   1    0.35    0.44 
   3   6   1   -0.08    0.27 
   3   6   1    0.03    0.24 
  -3   6  -1    0.22    0.42 
   4  -6   1   -0.16    0.65 
   4  -6   1    1.25    0.83 
   4  -6   1   -0.51    0.80 
  -4  -6  -1   -0.15    0.44 
  -4  -6  -1   -0.24    0.46 
   4  -6   1   -0.37    0.37 
   4  -6   1    0.61    0.65 
  -4  -6  -1    0.53    0.55 
  -4  -6  -1    0.78    0.58 
   4  -6   1   -0.31    0.57 
   4  -6   1   -0.42    0.79 
   4  -6   1    0.51    0.61 
   4  -6   1    1.92    1.05 
   4  -6   1    0.01    0.55 
  -4  -6  -1   -0.32    0.46 
   4  -6   1   -0.03    0.65 
   4  -6   1   -0.24    0.56 
   4  -6   1    0.20    0.55 
   4  -6   1    0.40    0.62 
   4  -6   1    0.70    0.85 
   4  -6   1    0.43    0.40 
   4  -6   1   -0.77    0.64 
   4  -6   1    0.73    0.65 
   4  -6   1   -0.20    0.48 
  -4  -6  -1    0.83    0.65 
  -4  -6  -1   -0.82    0.40 
  -4  -6  -1   -0.15    0.67 
   4  -6   1    0.75    0.67 
   4  -6   1    0.54    0.88 
  -4  -6  -1   -0.26    0.59 
   4   6   1   -0.60    0.76 
  -4   6  -1    0.35    0.54 
   4   6   1    0.15    0.42 
  -4   6  -1    0.08    0.53 
   4   6   1    0.45    0.58 
  -4   6  -1    0.30    0.55 
  -4   6  -1   -0.28    0.40 
   4   6   1   -0.03    0.35 
   4   6   1   -0.17    0.35 
  -4   6  -1   -0.28    0.44 
   4   6   1   -0.25    0.70 
   4   6   1   -0.20    0.37 
  -4   6  -1   -0.16    0.41 
  -4   6  -1   -0.33    0.45 
   4   6   1   -0.28    0.29 
  -4   6  -1    0.78    0.61 
   4   6   1    0.37    0.32 
  -4   6  -1   -0.08    0.37 
  -4   6  -1    0.14    0.56 
  -4   6  -1   -0.55    0.37 
   4   6   1    0.70    0.82 
  -4   6  -1    0.69    0.61 
  -5  -6  -1   10.29    1.48 
   5  -6   1   11.56    1.78 
   5  -6   1    9.16    1.77 
   5  -6   1   10.79    2.03 
   5  -6   1   11.46    1.81 
   5  -6   1   12.81    2.23 
  -5  -6  -1   12.20    1.70 
   5  -6   1    6.72    1.40 
   5  -6   1   10.91    1.31 
   5  -6   1   13.15    2.28 
   5  -6   1   12.75    1.75 
   5  -6   1    8.43    1.47 
  -5  -6  -1   14.83    2.25 
  -5  -6  -1   13.87    1.77 
  -5  -6  -1    9.50    1.89 
   5  -6   1   10.94    1.60 
   5  -6   1    8.84    1.84 
   5  -6   1    9.62    1.58 
  -5  -6  -1    5.54    1.17 
   5  -6   1    8.77    1.57 
   5  -6   1    8.33    1.44 
   5  -6   1   15.13    2.32 
  -5  -6  -1   10.27    1.51 
   5  -6   1   13.98    2.03 
   5  -6   1    9.77    2.09 
   5  -6   1   12.94    1.70 
  -5  -6  -1    9.34    1.50 
   5  -6   1   10.76    1.98 
  -5   6  -1    9.65    1.61 
  -5   6  -1    9.64    1.47 
  -5   6  -1    9.87    1.46 
   5   6   1   12.33    2.01 
  -5   6  -1   10.52    1.34 
  -5   6  -1    9.20    1.47 
  -5   6  -1   11.12    1.78 
   5   6   1   11.03    1.36 
  -5   6  -1   10.05    1.50 
  -5   6  -1   10.65    1.58 
  -5   6  -1   10.40    1.64 
   5   6   1    9.85    1.40 
  -5   6  -1   10.17    1.63 
  -5   6  -1    9.35    1.47 
   5   6   1   10.18    1.92 
   5   6   1    9.60    1.20 
   5   6   1   11.05    1.75 
   6  -6   1   54.09    3.48 
   6  -6   1   52.44    3.77 
   6  -6   1   61.23    3.72 
   6  -6   1   57.71    3.54 
   6  -6   1   50.98    3.41 
  -6  -6  -1   50.98    3.11 
   6  -6   1   44.94    3.41 
   6  -6   1   54.91    3.27 
   6  -6   1   49.37    3.50 
   6  -6   1   51.99    3.39 
  -6  -6  -1   47.23    2.91 
   6  -6   1   48.26    3.67 
  -6  -6  -1   49.52    3.68 
   6  -6   1   43.87    3.61 
   6  -6   1   53.73    4.00 
   6  -6   1   53.58    3.64 
   6  -6   1   53.04    4.00 
   6  -6   1   46.07    3.38 
   6  -6   1   51.51    3.40 
   6  -6   1   53.92    3.99 
  -6  -6  -1   52.38    3.74 
  -6  -6  -1   45.67    3.05 
  -6  -6  -1   50.65    3.14 
   6  -6   1   50.85    3.44 
   6  -6   1   48.80    3.82 
  -6  -6  -1   60.37    3.44 
   6  -6   1   50.92    3.49 
  -6   6  -1   50.88    3.19 
  -6   6  -1   56.84    3.49 
   6   6   1   52.51    3.48 
  -6   6  -1   42.27    2.95 
  -6   6  -1   48.24    3.05 
   6   6   1   51.52    3.02 
  -6   6  -1   47.66    2.97 
  -6   6  -1   56.60    3.51 
  -6   6  -1   53.88    3.40 
   6   6   1   50.77    2.73 
   6   6   1   52.79    3.79 
   6   6   1   48.35    3.28 
  -6   6  -1   46.39    3.10 
   6   6   1   51.58    2.74 
  -6   6  -1   48.91    3.16
[truncated: 3,580,416 more chars]
