# Supplementary material
Source: MDPI journal article supplement (https://www.mdpi.com/2073-4352/13/7/1043)
Supplement: s1 [file s1 › 8 Tb(OAc)2Br x 3H2O_Tabellen.pdf]

Table S1. Crystal data and structure refinement for Tb(OAc)2Br·x\_3H2O.

|                                   |                                                                              |
|-----------------------------------|------------------------------------------------------------------------------|
| Identification code               | Ha2019_99o_0m_a                                                              |
| Empirical formula                 | C4 H12 Br O7 Tb                                                              |
| Formula weight                    | 410.97                                                                       |
| Temperature                       | 100(2) K                                                                     |
| Wavelength                        | 0.71073 Å                                                                    |
| Crystal system, space group       | Monoclinic, P2(1)/n                                                          |
| Unit cell dimensions              | a = 7.7972(3) Å<br>b = 8.0263(3) Å    β = 95.862(2) deg.<br>c = 17.7443(8) Å |
| Volume                            | 1104.68(8) Å <sup>3</sup>                                                    |
| Z, Calculated density             | 4, 2.471 Mg/m <sup>3</sup>                                                   |
| Absorption coefficient            | 10.023 mm <sup>-1</sup>                                                      |
| F(000)                            | 768                                                                          |
| Crystal size                      | 0.487 x 0.172 x 0.070 mm                                                     |
| Theta range for data collection   | 2.758 to 27.998 deg.                                                         |
| Limiting indices                  | -10 ≤ h ≤ 10, -10 ≤ k ≤ 10, -23 ≤ l ≤ 23                                     |
| Reflections collected / unique    | 124829 / 2683 [R(int) = 0.0459]                                              |
| Completeness to theta = 25.242    | 100.0 %                                                                      |
| Absorption correction             | Semi-empirical from equivalents                                              |
| Max. and min. transmission        | 0.746 and 0.421                                                              |
| Refinement method                 | Full-matrix least-squares on F <sup>2</sup>                                  |
| Data / restraints / parameters    | 2683 / 0 / 125                                                               |
| Goodness-of-fit on F <sup>2</sup> | 1.124                                                                        |
| Final R indices [I > 2σ(I)]       | R1 = 0.0133, wR2 = 0.0300                                                    |
| R indices (all data)              | R1 = 0.0151, wR2 = 0.0305                                                    |
| Extinction coefficient            | n/a                                                                          |
| Largest diff. peak and hole       | 0.554 and -0.406 e.Å <sup>-3</sup>                                           |

Table S2. Atomic coordinates ( $\times 10^4$ ) and equivalent isotropic displacement parameters ( $\text{\AA}^2 \times 10^3$ ) for  $\text{Tb}(\text{OAc})_2\text{Br} \cdot 3\text{H}_2\text{O}$ .  $U(\text{eq})$  is defined as one third of the trace of the orthogonalized  $U_{ij}$  tensor.

|       | x        | y       | z       | U (eq) |
|-------|----------|---------|---------|--------|
| Tb(1) | 2623(1)  | 4573(1) | 5362(1) | 11(1)  |
| Br(1) | 3919(1)  | 9592(1) | 6848(1) | 18(1)  |
| O(11) | -40(2)   | 3350(2) | 5343(1) | 17(1)  |
| O(12) | -2776(2) | 2724(2) | 5228(1) | 16(1)  |
| C(11) | -1245(3) | 2355(3) | 5462(1) | 13(1)  |
| C(12) | -877(3)  | 761(3)  | 5884(2) | 23(1)  |
| O(21) | 5384(2)  | 5546(2) | 5734(1) | 13(1)  |
| O(22) | 8107(2)  | 6176(2) | 5958(1) | 16(1)  |
| C(21) | 6695(3)  | 5850(3) | 6210(1) | 13(1)  |
| C(22) | 6557(3)  | 5779(3) | 7043(1) | 20(1)  |
| O(1W) | 3900(2)  | 1853(2) | 5312(1) | 15(1)  |
| O(2W) | 1568(2)  | 6456(2) | 6244(1) | 15(1)  |
| O(3W) | 2880(2)  | 3441(2) | 6619(1) | 19(1)  |

Table S3. Bond lengths [Å] and angles [deg] for Tb(OAc)2Br\_x\_3H2O.

---

|                       |            |
|-----------------------|------------|
| Tb(1)-O(11)           | 2.294(2)   |
| Tb(1)-O(21)           | 2.322(1)   |
| Tb(1)-O(2W)           | 2.381(2)   |
| Tb(1)-O(3W)           | 2.398(2)   |
| Tb(1)-O(1W)           | 2.405(2)   |
| Tb(1)-O(12)#1         | 2.417(2)   |
| Tb(1)-O(22)#2         | 2.429(2)   |
| Tb(1)-O(21)#2         | 2.612(2)   |
| Tb(1)-O(11)#1         | 2.808(2)   |
|                       |            |
| Tb(1)-Tb(1)#2         | 4.1036(2)  |
| Tb(1)-Tb(1)#1         | 4.2158(2)  |
|                       |            |
| O(11)-C(11)           | 1.266(3)   |
| O(12)-C(11)           | 1.258(3)   |
| C(11)-C(12)           | 1.496(3)   |
|                       |            |
| O(21)-C(21)           | 1.281(3)   |
| O(22)-C(21)           | 1.258(3)   |
| C(21)-C(22)           | 1.494(3)   |
|                       |            |
| O(11)-Tb(1)-O(21)     | 163.70(5)  |
| O(11)-Tb(1)-O(2W)     | 84.74(5)   |
| O(21)-Tb(1)-O(2W)     | 88.43(5)   |
| O(11)-Tb(1)-O(3W)     | 80.85(6)   |
| O(21)-Tb(1)-O(3W)     | 82.88(5)   |
| O(2W)-Tb(1)-O(3W)     | 68.37(5)   |
| O(11)-Tb(1)-O(1W)     | 89.34(5)   |
| O(21)-Tb(1)-O(1W)     | 86.58(5)   |
| O(2W)-Tb(1)-O(1W)     | 140.60(5)  |
| O(3W)-Tb(1)-O(1W)     | 72.23(5)   |
| O(11)-Tb(1)-O(12)#1   | 117.56(5)  |
| O(21)-Tb(1)-O(12)#1   | 74.69(5)   |
| O(2W)-Tb(1)-O(12)#1   | 75.56(5)   |
| O(3W)-Tb(1)-O(12)#1   | 137.74(5)  |
| O(1W)-Tb(1)-O(12)#1   | 139.43(5)  |
| O(11)-Tb(1)-O(22)#2   | 75.96(5)   |
| O(21)-Tb(1)-O(22)#2   | 118.45(5)  |
| O(2W)-Tb(1)-O(22)#2   | 136.72(5)  |
| O(3W)-Tb(1)-O(22)#2   | 142.39(6)  |
| O(1W)-Tb(1)-O(22)#2   | 78.25(5)   |
| O(12)#1-Tb(1)-O(22)#2 | 79.72(5)   |
| O(11)-Tb(1)-O(21)#2   | 125.44(5)  |
| O(21)-Tb(1)-O(21)#2   | 67.60(6)   |
| O(2W)-Tb(1)-O(21)#2   | 141.63(5)  |
| O(3W)-Tb(1)-O(21)#2   | 132.76(5)  |
| O(1W)-Tb(1)-O(21)#2   | 70.06(5)   |
| O(12)#1-Tb(1)-O(21)#2 | 69.56(5)   |
| O(22)#2-Tb(1)-O(21)#2 | 51.06(5)   |
| O(11)-Tb(1)-O(11)#1   | 68.96(6)   |
| O(21)-Tb(1)-O(11)#1   | 121.93(5)  |
| O(2W)-Tb(1)-O(11)#1   | 68.65(5)   |
| O(3W)-Tb(1)-O(11)#1   | 128.90(5)  |
| O(1W)-Tb(1)-O(11)#1   | 143.43(5)  |
| O(12)#1-Tb(1)-O(11)#1 | 48.62(5)   |
| O(22)#2-Tb(1)-O(11)#1 | 68.32(5)   |
| O(21)#2-Tb(1)-O(11)#1 | 98.27(5)   |
|                       |            |
| Tb(1)#2-Tb(1)-Tb(1)#1 | 139.179(6) |

|                         |           |
|-------------------------|-----------|
| C (11)-O (11)-Tb (1)    | 162.4 (2) |
| C (11)-O (11)-Tb (1) #1 | 86.4 (1)  |
| Tb (1)-O (11)-Tb (1) #1 | 111.0 (1) |
| C (11)-O (12)-Tb (1) #1 | 105.5 (1) |
| O (12)-C (11)-O (11)    | 119.5 (2) |
| O (12)-C (11)-C (12)    | 119.6 (2) |
| O (11)-C (11)-C (12)    | 121.0 (2) |
| C (21)-O (21)-Tb (1)    | 154.9 (1) |
| C (21)-O (21)-Tb (1) #2 | 90.2 (1)  |
| Tb (1)-O (21)-Tb (1) #2 | 112.4 (1) |
| C (21)-O (22)-Tb (1) #2 | 99.5 (1)  |
| O (22)-C (21)-O (21)    | 118.3 (2) |
| O (22)-C (21)-C (22)    | 120.9 (2) |
| O (21)-C (21)-C (22)    | 120.8 (2) |

---

Symmetry transformations used to generate equivalent atoms:  
#1 -x,-y+1,-z+1      #2 -x+1,-y+1,-z+1

Table S4. Anisotropic displacement parameters ( $\text{\AA}^2 \times 10^3$ ) for  
 $\text{Tb}(\text{OAc})_2\text{Br} \cdot x_3\text{H}_2\text{O}$ .

The anisotropic displacement factor exponent takes the form:  
 $-2 \pi^2 [ h^2 a^{*2} U_{11} + \dots + 2 h k a^* b^* U_{12} ]$

|       | U11   | U22   | U33   | U23   | U13  | U12   |
|-------|-------|-------|-------|-------|------|-------|
| Tb(1) | 7(1)  | 13(1) | 12(1) | 0(1)  | 1(1) | -2(1) |
| Br(1) | 21(1) | 15(1) | 17(1) | 2(1)  | 1(1) | -2(1) |
| O(11) | 11(1) | 21(1) | 19(1) | -1(1) | 4(1) | -6(1) |
| O(12) | 9(1)  | 19(1) | 20(1) | 4(1)  | 2(1) | 0(1)  |
| C(11) | 12(1) | 16(1) | 12(1) | 0(1)  | 4(1) | -1(1) |
| C(12) | 24(1) | 20(1) | 25(1) | 7(1)  | 0(1) | 3(1)  |
| O(21) | 9(1)  | 17(1) | 14(1) | 0(1)  | 1(1) | -1(1) |
| O(22) | 9(1)  | 20(1) | 18(1) | -1(1) | 1(1) | -2(1) |
| C(21) | 11(1) | 13(1) | 15(1) | -2(1) | 0(1) | 2(1)  |
| C(22) | 16(1) | 32(1) | 12(1) | -1(1) | 0(1) | 4(1)  |
| O(1W) | 12(1) | 16(1) | 18(1) | 1(1)  | 4(1) | 0(1)  |
| O(2W) | 10(1) | 17(1) | 18(1) | -4(1) | 1(1) | 0(1)  |
| O(3W) | 26(1) | 16(1) | 17(1) | 2(1)  | 7(1) | 4(1)  |

Table S5. Hydrogen coordinates ( $\times 10^4$ ) and isotropic displacement parameters ( $\text{\AA}^2 \times 10^3$ ) for  $\text{Tb}(\text{OAc})_2\text{Br}\cdot 3\text{H}_2\text{O}$ .

|        | x     | y    | z    | U (eq)  |
|--------|-------|------|------|---------|
| H(12A) | 364   | 533  | 5924 | 96 (10) |
| H(12B) | -1501 | -153 | 5612 | 96 (10) |
| H(12C) | -1253 | 857  | 6393 | 96 (10) |
| H(22A) | 7726  | 5718 | 7306 | 23 (6)  |
| H(22B) | 5904  | 4795 | 7172 | 23 (6)  |
| H(22C) | 5987  | 6784 | 7206 | 23 (6)  |
| H(22D) | 5334  | 5779 | 7127 | 23 (6)  |
| H(22E) | 7122  | 6762 | 7284 | 23 (6)  |
| H(22F) | 7109  | 4767 | 7261 | 23 (6)  |
| H(11W) | 3827  | 1073 | 5718 | 52 (7)  |
| H(12W) | 5101  | 1892 | 5237 | 52 (7)  |
| H(21W) | 356   | 6585 | 6283 | 40 (6)  |
| H(22W) | 2081  | 7475 | 6440 | 40 (6)  |
| H(31W) | 2411  | 3945 | 7043 | 48 (7)  |
| H(32W) | 3117  | 2308 | 6770 | 48 (7)  |

Table S6. Hydrogen bonds for Tb(OAc)<sub>2</sub>Br·x<sub>3</sub>H<sub>2</sub>O [Å and deg.].

| D-H...A                | d(D-H) | d(H...A) | d(D...A) | <(DHA) |
|------------------------|--------|----------|----------|--------|
| O(1W)-H(11W)...Br(1)#3 | 0.96   | 2.33     | 3.274(2) | 168.8  |
| O(1W)-H(12W)...O(12)#4 | 0.96   | 1.79     | 2.703(2) | 158.7  |
| O(2W)-H(21W)...O(22)#5 | 0.96   | 1.82     | 2.703(2) | 151.8  |
| O(2W)-H(22W)...Br(1)   | 0.96   | 2.29     | 3.232(2) | 166.0  |
| O(3W)-H(31W)...Br(1)#6 | 0.96   | 2.37     | 3.317(2) | 167.6  |
| O(3W)-H(32W)...Br(1)#3 | 0.96   | 2.27     | 3.208(2) | 166.1  |

Symmetry transformations used to generate equivalent atoms:

#1 -x,-y+1,-z+1      #2 -x+1,-y+1,-z+1      #3 x,y-1,z  
#4 x+1,y,z      #5 x-1,y,z      #6 -x+1/2,y-1/2,-z+3/2
