# Supplementary material
Source: MDPI journal article supplement (https://www.mdpi.com/2073-4352/13/7/1043)
Supplement: s1 [file s1 › 9 Dy Ha2019_77_0m_a.cif]

 
data_Ha2019_77_0m_a 
  
_audit_creation_method            'SHELXL-2014/7' 
_shelx_SHELXL_version_number      '2014/7' 
_chemical_name_systematic         ? 
_chemical_name_common             ? 
_chemical_melting_point           ? 
_chemical_formula_moiety          ? 
_chemical_formula_sum 
 'C4 H12 Cl Dy O7' 
_chemical_formula_weight          370.09 
  
loop_ 
 _atom_type_symbol 
 _atom_type_description 
 _atom_type_scat_dispersion_real 
 _atom_type_scat_dispersion_imag 
 _atom_type_scat_source 
 'C'  'C'   0.0033   0.0016 
 'International Tables Vol C Tables 4.2.6.8 and 6.1.1.4' 
 'H'  'H'   0.0000   0.0000 
 'International Tables Vol C Tables 4.2.6.8 and 6.1.1.4' 
 'O'  'O'   0.0106   0.0060 
 'International Tables Vol C Tables 4.2.6.8 and 6.1.1.4' 
 'Cl'  'Cl'   0.1484   0.1585 
 'International Tables Vol C Tables 4.2.6.8 and 6.1.1.4' 
 'Dy'  'Dy'  -0.1892   4.4098 
 'International Tables Vol C Tables 4.2.6.8 and 6.1.1.4' 
  
_space_group_crystal_system       monoclinic 
_space_group_IT_number            14 
_space_group_name_H-M_alt         'P 21/n' 
_space_group_name_Hall            '-P 2yn' 
  
_shelx_space_group_comment 
; 
The symmetry employed for this shelxl refinement is uniquely defined 
by the following loop, which should always be used as a source of 
symmetry information in preference to the above space-group names. 
They are only intended as comments. 
; 
  
loop_ 
 _space_group_symop_operation_xyz 
 'x, y, z' 
 '-x+1/2, y+1/2, -z+1/2' 
 '-x, -y, -z' 
 'x-1/2, -y-1/2, z-1/2' 
  
_cell_length_a                    7.8106(4) 
_cell_length_b                    7.8433(4) 
_cell_length_c                    17.3400(8) 
_cell_angle_alpha                 90 
_cell_angle_beta                  97.978(3) 
_cell_angle_gamma                 90 
_cell_volume                      1051.98(9) 
_cell_formula_units_Z             4 
_cell_measurement_temperature     100(2) 
_cell_measurement_reflns_used     9948 
_cell_measurement_theta_min       2.37 
_cell_measurement_theta_max       28.35 
  
_exptl_crystal_description        prism 
_exptl_crystal_colour             colourless 
_exptl_crystal_density_meas       ? 
_exptl_crystal_density_method     ? 
_exptl_crystal_density_diffrn     2.337 
_exptl_crystal_F_000              700 
_exptl_transmission_factor_min    ? 
_exptl_transmission_factor_max    ? 
_exptl_crystal_size_max           0.448 
_exptl_crystal_size_mid           0.112 
_exptl_crystal_size_min           0.076 
_exptl_absorpt_coefficient_mu     7.361 
_shelx_estimated_absorpt_T_min    0.137 
_shelx_estimated_absorpt_T_max    0.605 
_exptl_absorpt_correction_type    multi-scan 
_exptl_absorpt_correction_T_min   0.625 
_exptl_absorpt_correction_T_max   0.783 
_exptl_absorpt_process_details    'Bruker SADABS' 
_exptl_absorpt_special_details    ? 
_diffrn_ambient_temperature       100(2) 
_diffrn_radiation_wavelength      0.71073 
_diffrn_radiation_type            MoK\a 
_diffrn_source                    ? 
_diffrn_measurement_device_type   'Bruker APEX-II CCD' 
_diffrn_measurement_method        '\f and \w scans' 
_diffrn_detector_area_resol_mean  ? 
_diffrn_reflns_number             49237 
_diffrn_reflns_av_unetI/netI      0.0104 
_diffrn_reflns_av_R_equivalents   0.0328 
_diffrn_reflns_limit_h_min        -10 
_diffrn_reflns_limit_h_max        10 
_diffrn_reflns_limit_k_min        -10 
_diffrn_reflns_limit_k_max        10 
_diffrn_reflns_limit_l_min        -22 
_diffrn_reflns_limit_l_max        22 
_diffrn_reflns_theta_min          2.734 
_diffrn_reflns_theta_max          27.996 
_diffrn_reflns_theta_full         25.242 
_diffrn_measured_fraction_theta_max   0.999 
_diffrn_measured_fraction_theta_full  0.999 
_diffrn_reflns_Laue_measured_fraction_max    0.999 
_diffrn_reflns_Laue_measured_fraction_full   0.999 
_diffrn_reflns_point_group_measured_fraction_max   0.999 
_diffrn_reflns_point_group_measured_fraction_full  0.999 
_reflns_number_total              2547 
_reflns_number_gt                 2516 
_reflns_threshold_expression      'I > 2\s(I)' 
_reflns_Friedel_coverage          0.000 
_reflns_Friedel_fraction_max      . 
_reflns_Friedel_fraction_full     . 
  
_reflns_special_details 
; 
 Reflections were merged by SHELXL according to the crystal 
 class for the calculation of statistics and refinement. 
  
 _reflns_Friedel_fraction is defined as the number of unique 
 Friedel pairs measured divided by the number that would be 
 possible theoretically, ignoring centric projections and 
 systematic absences. 
; 
  
_computing_data_collection        'Bruker APEX2' 
_computing_cell_refinement        'Bruker SAINT' 
_computing_data_reduction         'Bruker SAINT' 
_computing_structure_solution     'SHELXS-97 (Sheldrick 2008)' 
_computing_structure_refinement 'SHELXL-2014/7 (Sheldrick, 2014)' 
_computing_molecular_graphics     'Bruker SHELXTL' 
_computing_publication_material   'Bruker SHELXTL' 
_refine_special_details           ? 
_refine_ls_structure_factor_coef  Fsqd 
_refine_ls_matrix_type            full 
_refine_ls_weighting_scheme       calc 
_refine_ls_weighting_details 
'w=1/[\s^2^(Fo^2^)+(0.0035P)^2^+1.6696P] where P=(Fo^2^+2Fc^2^)/3' 
_atom_sites_solution_primary      direct
_atom_sites_solution_secondary    ? 
_atom_sites_solution_hydrogens    mixed 
_refine_ls_hydrogen_treatment     constr 
_refine_ls_extinction_method      'SHELXL-2014/7 (Sheldrick 2014' 
_refine_ls_extinction_coef        0.00450(11) 
_refine_ls_extinction_expression 
 'Fc^*^=kFc[1+0.001xFc^2^\l^3^/sin(2\q)]^-1/4^' 
_refine_ls_number_reflns          2547 
_refine_ls_number_parameters      126 
_refine_ls_number_restraints      0 
_refine_ls_R_factor_all           0.0131 
_refine_ls_R_factor_gt            0.0127 
_refine_ls_wR_factor_ref          0.0267 
_refine_ls_wR_factor_gt           0.0265 
_refine_ls_goodness_of_fit_ref    1.187 
_refine_ls_restrained_S_all       1.187 
_refine_ls_shift/su_max           0.004 
_refine_ls_shift/su_mean          0.000 
  
loop_ 
 _atom_site_label 
 _atom_site_type_symbol 
 _atom_site_fract_x 
 _atom_site_fract_y 
 _atom_site_fract_z 
 _atom_site_U_iso_or_equiv 
 _atom_site_adp_type 
 _atom_site_occupancy 
 _atom_site_site_symmetry_order 
 _atom_site_calc_flag 
 _atom_site_refinement_flags_posn 
 _atom_site_refinement_flags_adp 
 _atom_site_refinement_flags_occupancy 
 _atom_site_disorder_assembly 
 _atom_site_disorder_group 
Dy1 Dy 0.26891(2) 0.45492(2) 0.53909(2) 0.00895(4) Uani 1 1 d . . . . . 
Cl1 Cl 0.38001(6) 0.96420(6) 0.68746(3) 0.01535(10) Uani 1 1 d . . . . . 
O11 O 0.00563(19) 0.3309(2) 0.53881(9) 0.0178(3) Uani 1 1 d . . . . . 
O12 O -0.27089(18) 0.2760(2) 0.52625(9) 0.0146(3) Uani 1 1 d . . . . . 
C11 C -0.1172(3) 0.2331(3) 0.55035(11) 0.0112(4) Uani 1 1 d . . . . . 
C12 C -0.0829(3) 0.0670(3) 0.59153(14) 0.0219(5) Uani 1 1 d . . . . . 
H12A H -0.1030 -0.0266 0.5539 0.081(8) Uiso 1 1 calc R U . . . 
H12B H -0.1606 0.0545 0.6310 0.081(8) Uiso 1 1 calc R U . . . 
H12C H 0.0373 0.0637 0.6168 0.081(8) Uiso 1 1 calc R U . . . 
O21 O 0.54452(17) 0.56215(18) 0.57399(8) 0.0114(3) Uani 1 1 d . . . . . 
O22 O 0.81779(18) 0.6288(2) 0.59472(8) 0.0133(3) Uani 1 1 d . . . . . 
C21 C 0.6794(3) 0.5989(3) 0.62170(12) 0.0110(4) Uani 1 1 d . . . . . 
C22 C 0.6723(3) 0.6048(3) 0.70729(12) 0.0169(4) Uani 1 1 d . . . . . 
H22A H 0.7896 0.5951 0.7356 0.048(6) Uiso 1 1 calc R U . . . 
H22B H 0.6016 0.5100 0.7219 0.048(6) Uiso 1 1 calc R U . . . 
H22C H 0.6211 0.7131 0.7206 0.048(6) Uiso 1 1 calc R U . . . 
O1W O 0.40060(18) 0.18040(19) 0.53742(8) 0.0136(3) Uani 1 1 d . . . . . 
H11W H 0.3938 0.0955 0.5768 0.050(7) Uiso 1 1 d R U . . . 
H12W H 0.5216 0.1905 0.5336 0.050(7) Uiso 1 1 d R U . . . 
O2W O 0.16633(18) 0.65155(19) 0.62508(8) 0.0139(3) Uani 1 1 d . . . . . 
H21W H 0.0452 0.6720 0.6253 0.050(7) Uiso 1 1 d R U . . . 
H22W H 0.2221 0.7559 0.6433 0.050(7) Uiso 1 1 d R U . . . 
O3W O 0.3086(2) 0.34853(19) 0.66962(9) 0.0171(3) Uani 1 1 d . . . . . 
H31W H 0.2562 0.4024 0.7102 0.052(7) Uiso 1 1 d R U . . . 
H32W H 0.3238 0.2316 0.6855 0.052(7) Uiso 1 1 d R U . . . 
  
loop_ 
 _atom_site_aniso_label 
 _atom_site_aniso_U_11 
 _atom_site_aniso_U_22 
 _atom_site_aniso_U_33 
 _atom_site_aniso_U_23 
 _atom_site_aniso_U_13 
 _atom_site_aniso_U_12 
Dy1 0.00685(5) 0.00987(5) 0.01039(5) -0.00037(4) 0.00209(3) -0.00197(3) 
Cl1 0.0178(2) 0.0122(2) 0.0159(2) 0.00116(19) 0.00212(18) -0.00136(19) 
O11 0.0132(7) 0.0217(8) 0.0198(8) -0.0053(6) 0.0069(6) -0.0077(6) 
O12 0.0090(7) 0.0167(7) 0.0184(7) 0.0032(6) 0.0024(6) 0.0010(6) 
C11 0.0110(9) 0.0115(9) 0.0117(9) -0.0019(7) 0.0036(7) -0.0003(7) 
C12 0.0257(12) 0.0166(11) 0.0229(11) 0.0058(9) 0.0013(9) 0.0047(9) 
O21 0.0083(6) 0.0133(7) 0.0122(7) -0.0009(6) 0.0003(5) -0.0020(5) 
O22 0.0090(6) 0.0166(7) 0.0146(7) -0.0012(6) 0.0024(5) -0.0011(6) 
C21 0.0107(9) 0.0081(8) 0.0138(9) -0.0004(7) 0.0002(7) 0.0008(7) 
C22 0.0140(10) 0.0267(12) 0.0099(9) -0.0021(8) 0.0008(7) 0.0023(9) 
O1W 0.0117(7) 0.0134(7) 0.0166(7) 0.0016(6) 0.0049(6) 0.0001(6) 
O2W 0.0110(7) 0.0137(7) 0.0170(7) -0.0027(6) 0.0011(6) -0.0005(6) 
O3W 0.0245(8) 0.0129(7) 0.0155(7) 0.0017(6) 0.0078(6) 0.0036(6) 
  
_geom_special_details 
; 
 All esds (except the esd in the dihedral angle between two l.s. planes) 
 are estimated using the full covariance matrix.  The cell esds are taken 
 into account individually in the estimation of esds in distances, angles 
 and torsion angles; correlations between esds in cell parameters are only 
 used when they are defined by crystal symmetry.  An approximate (isotropic) 
 treatment of cell esds is used for estimating esds involving l.s. planes. 
; 
  
loop_ 
 _geom_bond_atom_site_label_1 
 _geom_bond_atom_site_label_2 
 _geom_bond_distance 
 _geom_bond_site_symmetry_2 
 _geom_bond_publ_flag 
Dy1 O11 2.2743(14) . ? 
Dy1 O21 2.3121(14) . ? 
Dy1 O2W 2.3612(15) . ? 
Dy1 O1W 2.3881(14) . ? 
Dy1 O3W 2.3918(15) . ? 
Dy1 O12 2.3963(15) 3_566 ? 
Dy1 O22 2.4162(14) 3_666 ? 
Dy1 O21 2.6038(14) 3_666 ? 
Dy1 O11 2.9054(16) 3_566 ? 
O11 C11 1.265(2) . ? 
O12 C11 1.261(2) . ? 
C11 C12 1.492(3) . ? 
C12 H12A 0.9800 . ? 
C12 H12B 0.9800 . ? 
C12 H12C 0.9800 . ? 
O21 C21 1.279(2) . ? 
O22 C21 1.258(2) . ? 
C21 C22 1.494(3) . ? 
C22 H22A 0.9800 . ? 
C22 H22B 0.9800 . ? 
C22 H22C 0.9800 . ? 
O1W H11W 0.9600 . ? 
O1W H12W 0.9600 . ? 
O2W H21W 0.9600 . ? 
O2W H22W 0.9600 . ? 
O3W H31W 0.9600 . ? 
O3W H32W 0.9600 . ? 
  
loop_ 
 _geom_angle_atom_site_label_1 
 _geom_angle_atom_site_label_2 
 _geom_angle_atom_site_label_3 
 _geom_angle 
 _geom_angle_site_symmetry_1 
 _geom_angle_site_symmetry_3 
 _geom_angle_publ_flag 
O11 Dy1 O21 164.76(5) . . ? 
O11 Dy1 O2W 83.96(5) . . ? 
O21 Dy1 O2W 88.99(5) . . ? 
O11 Dy1 O1W 90.29(5) . . ? 
O21 Dy1 O1W 86.80(5) . . ? 
O2W Dy1 O1W 141.35(5) . . ? 
O11 Dy1 O3W 81.44(6) . . ? 
O21 Dy1 O3W 83.43(5) . . ? 
O2W Dy1 O3W 68.96(5) . . ? 
O1W Dy1 O3W 72.39(5) . . ? 
O11 Dy1 O12 116.16(5) . 3_566 ? 
O21 Dy1 O12 74.72(5) . 3_566 ? 
O2W Dy1 O12 75.43(5) . 3_566 ? 
O1W Dy1 O12 139.22(5) . 3_566 ? 
O3W Dy1 O12 138.26(5) . 3_566 ? 
O11 Dy1 O22 75.45(5) . 3_666 ? 
O21 Dy1 O22 118.49(5) . 3_666 ? 
O2W Dy1 O22 135.20(5) . 3_666 ? 
O1W Dy1 O22 78.87(5) . 3_666 ? 
O3W Dy1 O22 142.76(5) . 3_666 ? 
O12 Dy1 O22 78.74(5) 3_566 3_666 ? 
O11 Dy1 O21 125.22(5) . 3_666 ? 
O21 Dy1 O21 67.53(5) . 3_666 ? 
O2W Dy1 O21 141.59(5) . 3_666 ? 
O1W Dy1 O21 69.97(5) . 3_666 ? 
O3W Dy1 O21 133.01(5) . 3_666 ? 
O12 Dy1 O21 69.41(5) 3_566 3_666 ? 
O22 Dy1 O21 51.27(4) 3_666 3_666 ? 
O11 Dy1 O11 68.75(6) . 3_566 ? 
O21 Dy1 O11 120.77(5) . 3_566 ? 
O2W Dy1 O11 67.83(5) . 3_566 ? 
O1W Dy1 O11 143.81(5) . 3_566 ? 
O3W Dy1 O11 129.20(5) . 3_566 ? 
O12 Dy1 O11 47.45(4) 3_566 3_566 ? 
O22 Dy1 O11 67.69(5) 3_666 3_566 ? 
O21 Dy1 O11 97.68(4) 3_666 3_566 ? 
Dy1 Dy1 Dy1 137.511(5) 3_666 3_566 ? 
C11 O11 Dy1 164.55(15) . . ? 
C11 O11 Dy1 84.10(12) . 3_566 ? 
Dy1 O11 Dy1 111.25(6) . 3_566 ? 
C11 O12 Dy1 108.85(13) . 3_566 ? 
O12 C11 O11 119.60(19) . . ? 
O12 C11 C12 119.38(19) . . ? 
O11 C11 C12 121.02(19) . . ? 
C11 C12 H12A 109.5 . . ? 
C11 C12 H12B 109.5 . . ? 
H12A C12 H12B 109.5 . . ? 
C11 C12 H12C 109.5 . . ? 
H12A C12 H12C 109.5 . . ? 
H12B C12 H12C 109.5 . . ? 
C21 O21 Dy1 154.79(13) . . ? 
C21 O21 Dy1 90.10(11) . 3_666 ? 
Dy1 O21 Dy1 112.47(5) . 3_666 ? 
C21 O22 Dy1 99.53(12) . 3_666 ? 
O22 C21 O21 118.34(18) . . ? 
O22 C21 C22 121.08(18) . . ? 
O21 C21 C22 120.58(18) . . ? 
C21 C22 H22A 109.5 . . ? 
C21 C22 H22B 109.5 . . ? 
H22A C22 H22B 109.5 . . ? 
C21 C22 H22C 109.5 . . ? 
H22A C22 H22C 109.5 . . ? 
H22B C22 H22C 109.5 . . ? 
Dy1 O1W H11W 123.4 . . ? 
Dy1 O1W H12W 110.9 . . ? 
H11W O1W H12W 105.0 . . ? 
Dy1 O2W H21W 122.2 . . ? 
Dy1 O2W H22W 125.9 . . ? 
H21W O2W H22W 105.0 . . ? 
Dy1 O3W H31W 121.9 . . ? 
Dy1 O3W H32W 126.8 . . ? 
H31W O3W H32W 105.0 . . ? 
  
loop_ 
 _geom_hbond_atom_site_label_D 
 _geom_hbond_atom_site_label_H 
 _geom_hbond_atom_site_label_A 
 _geom_hbond_distance_DH 
 _geom_hbond_distance_HA 
 _geom_hbond_distance_DA 
 _geom_hbond_angle_DHA 
 _geom_hbond_site_symmetry_A 
O1W H11W Cl1  0.96 2.19 3.1284(15) 164.0 1_545 
O1W H12W O12  0.96 1.77 2.706(2) 162.5 1_655 
O2W H21W O22  0.96 1.81 2.706(2) 153.3 1_455 
O2W H22W Cl1  0.96 2.12 3.0769(15) 171.3 . 
O3W H31W Cl1  0.96 2.24 3.1855(15) 166.3 2_546 
O3W H32W Cl1  0.96 2.14 3.0734(16) 163.1 1_545 
  
_refine_diff_density_max    0.489 
_refine_diff_density_min   -0.652 
_refine_diff_density_rms    0.075 
  
_shelx_res_file 
; 
  
    Ha2019_77_0m_a.res created by SHELXL-2014/7 
  
  
TITL Ha2019_77_0m_a.res in P2(1)/n 
CELL  0.71073   7.8106   7.8433  17.3400   90.000   97.978   90.000 
ZERR    4.000   0.0004   0.0004   0.0008    0.000    0.003    0.000 
LATT 1 
SYMM 1/2-X, 1/2+Y, 1/2-Z 
SFAC C  H  O  Cl Dy 
UNIT 16 48 28 4 4 
LIST 4 ! automatically inserted. Change 6 to 4 for CHECKCIF!! 
OMIT 0 1 1 
OMIT -3 56 
L.S. 10 
  
rem DFIX 0.96  0.0001 O1w H11w O1w H12w O2w H21w O2w H22w O3w H31w O3w H32w 
rem dfix 1.523  0.0001 H11w H12w H21w H22w H31w H32w 
FREE Dy1 C21_$6 
EQIV $6 1-x, 1-y, 1-z 
BIND Dy1 Dy1_$6 
BIND Dy1 Dy1_$7 
EQIV $7 -x,1-y,1-z 
BIND Dy1 O11_$7 
  
ACTA 
HTAB 
EQIV $1 -x+3/2, y-1/2, -z+3/2 
EQIV $2 x, y-1, z 
HTAB O1W Cl1_$2 
EQIV $3 x+1, y, z 
HTAB O1W O12_$3 
EQIV $4 x-1, y, z 
HTAB O2W O22_$4 
HTAB O2W Cl1 
EQIV $5 -x+1/2, y-1/2, -z+3/2 
HTAB O3W Cl1_$5 
HTAB O3W Cl1_$2 
SIZE 0.076  0.112  0.448 
BOND $H 
FMAP 2 
PLAN 15 
TEMP -173 
WGHT    0.003500    1.669600 
EXTI    0.004501 
FVAR       0.11663   0.08090   0.04820   0.05046   0.05015   0.05245 
DY1   5    0.268907    0.454924    0.539088    11.00000    0.00685    0.00987 = 
         0.01039   -0.00037    0.00209   -0.00197 
CL1   4    0.380006    0.964196    0.687462    11.00000    0.01784    0.01221 = 
         0.01593    0.00116    0.00212   -0.00136 
O11   3    0.005634    0.330877    0.538810    11.00000    0.01321    0.02175 = 
         0.01980   -0.00532    0.00688   -0.00774 
O12   3   -0.270888    0.276002    0.526246    11.00000    0.00903    0.01666 = 
         0.01836    0.00323    0.00244    0.00100 
C11   1   -0.117156    0.233140    0.550349    11.00000    0.01102    0.01149 = 
         0.01174   -0.00187    0.00360   -0.00028 
C12   1   -0.082905    0.066952    0.591529    11.00000    0.02571    0.01663 = 
         0.02287    0.00581    0.00128    0.00471 
AFIX 137 
H12A  2   -0.102979   -0.026554    0.553872    11.00000   21.00000 
H12B  2   -0.160588    0.054547    0.630965    11.00000   21.00000 
H12C  2    0.037342    0.063739    0.616790    11.00000   21.00000 
AFIX   0 
O21   3    0.544516    0.562150    0.573994    11.00000    0.00833    0.01333 = 
         0.01216   -0.00091    0.00029   -0.00197 
O22   3    0.817793    0.628836    0.594725    11.00000    0.00904    0.01658 = 
         0.01458   -0.00117    0.00237   -0.00112 
C21   1    0.679410    0.598882    0.621704    11.00000    0.01072    0.00814 = 
         0.01381   -0.00040    0.00023    0.00084 
C22   1    0.672281    0.604778    0.707292    11.00000    0.01395    0.02667 = 
         0.00987   -0.00212    0.00079    0.00225 
AFIX 137 
H22A  2    0.789559    0.595096    0.735554    11.00000   31.00000 
H22B  2    0.601553    0.510026    0.721893    11.00000   31.00000 
H22C  2    0.621053    0.713079    0.720587    11.00000   31.00000 
AFIX   0 
O1W   3    0.400598    0.180402    0.537417    11.00000    0.01171    0.01342 = 
         0.01659    0.00164    0.00488    0.00011 
AFIX   3 
H11W  2    0.393806    0.095507    0.576758    11.00000   41.00000 
H12W  2    0.521615    0.190470    0.533574    11.00000   41.00000 
AFIX   0 
O2W   3    0.166328    0.651549    0.625081    11.00000    0.01096    0.01368 = 
         0.01695   -0.00272    0.00109   -0.00052 
AFIX   3 
H21W  2    0.045210    0.672013    0.625278    11.00000   51.00000 
H22W  2    0.222082    0.755924    0.643318    11.00000   51.00000 
AFIX   0 
O3W   3    0.308579    0.348531    0.669616    11.00000    0.02448    0.01286 = 
         0.01549    0.00172    0.00782    0.00360 
AFIX   3 
H31W  2    0.256195    0.402409    0.710218    11.00000   61.00000 
H32W  2    0.323791    0.231627    0.685498    11.00000   61.00000 
AFIX   0 
HKLF 4 
  
REM  Ha2019_77_0m_a.res in P2(1)/n 
REM R1 =  0.0127 for    2516 Fo > 4sig(Fo)  and  0.0131 for all    2547 data 
REM    126 parameters refined using      0 restraints 
  
END 
  
WGHT      0.0035      1.6696 
  
REM Instructions for potential hydrogen bonds 
HTAB C12 Cl1_$2 
HTAB C22 Cl1_$1 
HTAB C22 Cl1 
HTAB O1W Cl1_$2 
HTAB O1W O12_$3 
HTAB O2W O22_$4 
HTAB O2W Cl1 
HTAB O3W Cl1_$5 
HTAB O3W Cl1_$2 
  
REM Highest difference peak  0.489,  deepest hole -0.652,  1-sigma level  0.075 
Q1    1   0.3457  0.4461  0.6975  11.00000  0.05    0.49 
Q2    1   0.6820  0.6103  0.6667  11.00000  0.05    0.39 
Q3    1  -0.1029  0.1438  0.5706  11.00000  0.05    0.39 
Q4    1   0.2484  0.3596  0.6941  11.00000  0.05    0.38 
Q5    1   0.2783  0.2562  0.5392  11.00000  0.05    0.36 
Q6    1  -0.2207  0.0427  0.6212  11.00000  0.05    0.36 
Q7    1   0.3951  0.1285  0.5655  11.00000  0.05    0.33 
Q8    1   0.4765  0.1768  0.5327  11.00000  0.05    0.32 
Q9    1   0.2611  0.4433  0.4851  11.00000  0.05    0.32 
Q10   1   0.8078  0.6351  0.5517  11.00000  0.05    0.32 
Q11   1  -0.0387  0.0871  0.6337  11.00000  0.05    0.32 
Q12   1   0.5870  0.6329  0.7216  11.00000  0.05    0.29 
Q13   1   0.6157  0.5211  0.5999  11.00000  0.05    0.27 
Q14   1  -0.0016  0.0354  0.5804  11.00000  0.05    0.27 
Q15   1   0.5885  0.5597  0.5316  11.00000  0.05    0.27 
; 
_shelx_res_checksum   46857 
  
_shelx_hkl_file 
; 
  -1   0   0    1.00    0.13 
  -1   0   0    1.28    0.13 
  -1   0   0    0.66    0.10 
  -1   0   0    1.28    0.15 
  -2   0   0  746.11   17.05 
  -2   0   0  636.45   17.02 
   2   0   0  698.90   17.17 
   2   0   0  673.80   17.04 
  -2   0   0  714.91   17.26 
  -2   0   0  736.90   17.16 
  -2   0   0  745.52   17.16 
  -2   0   0  723.61   17.25 
   2   0   0  738.99   17.17 
  -2   0   0  697.79   17.17 
   2   0   0  727.84   17.29 
  -2   0   0  688.68   17.02 
  -2   0   0  729.76   17.20 
   2   0   0  687.03   17.23 
   2   0   0  680.41   17.16 
   2   0   0  684.47   17.25 
  -2   0   0  733.29   17.14 
  -2   0   0  726.61   17.29 
  -2   0   0  715.66   17.16 
  -2   0   0  721.88   17.22 
   2   0   0  684.88   17.18 
  -2   0   0  697.92   17.47 
  -2   0   0  713.27   17.31 
   2   0   0  733.80   17.16 
  -2   0   0  698.06   17.34 
  -3   0   0    0.30    0.11 
  -3   0   0    0.60    0.21 
  -3   0   0    0.56    0.30 
   3   0   0    0.23    0.16 
  -3   0   0    0.44    0.18 
   3   0   0    0.38    0.22 
   3   0   0    0.33    0.20 
  -3   0   0    0.21    0.16 
   3   0   0    1.40    0.30 
   3   0   0    1.12    0.29 
  -3   0   0    0.57    0.16 
  -3   0   0    0.69    0.29 
   3   0   0    0.70    0.18 
  -3   0   0    0.64    0.24 
  -3   0   0    0.60    0.18 
  -3   0   0    0.53    0.12 
  -3   0   0    0.46    0.20 
  -3   0   0    0.62    0.28 
   3   0   0    0.69    0.22 
   3   0   0    0.57    0.20 
  -3   0   0    0.65    0.23 
  -3   0   0    0.44    0.19 
  -4   0   0  240.63    6.83 
   4   0   0  235.14    6.59 
  -4   0   0  242.93    6.38 
  -4   0   0  235.83    5.95 
  -4   0   0  238.79    6.22 
  -4   0   0  236.94    7.02 
   4   0   0  231.91    6.62 
  -4   0   0  236.75    5.99 
   4   0   0  234.39    6.22 
  -4   0   0  237.72    6.06 
   4   0   0  239.31    6.52 
   4   0   0  226.37    6.39 
  -4   0   0  241.89    6.65 
   4   0   0  222.38    6.40 
  -4   0   0  240.58    6.50 
   5   0   0    0.02    0.19 
  -5   0   0    0.79    0.28 
   5   0   0    0.28    0.27 
  -5   0   0    0.03    0.31 
  -5   0   0    0.26    0.17 
  -5   0   0    0.51    0.19 
  -5   0   0    0.08    0.21 
   5   0   0    0.10    0.20 
   5   0   0    0.19    0.26 
  -5   0   0    0.22    0.38 
  -5   0   0    1.03    0.33 
  -5   0   0    0.33    0.17 
   5   0   0    0.15    0.20 
  -5   0   0    0.29    0.33 
  -6   0   0  138.40    4.03 
   6   0   0  135.88    4.57 
  -6   0   0  141.32    4.84 
   6   0   0  145.03    4.58 
  -6   0   0  138.73    4.01 
  -6   0   0  140.18    4.46 
   6   0   0  141.21    4.68 
  -6   0   0  144.03    4.28 
  -6   0   0  145.21    5.38 
  -6   0   0  140.24    5.09 
   6   0   0  136.88    4.78 
  -6   0   0  143.04    4.68 
   6   0   0  143.97    4.88 
   7   0   0    0.40    0.36 
  -7   0   0    0.20    0.35 
  -7   0   0   -0.28    0.47 
  -7   0   0   -0.21    0.33 
  -7   0   0    0.02    0.22 
  -7   0   0    0.18    0.23 
  -7   0   0    0.62    0.58 
  -7   0   0    0.44    0.31 
  -7   0   0    0.22    0.28 
   7   0   0    0.30    0.33 
   7   0   0   -0.37    0.31 
   7   0   0    0.77    0.45 
  -8   0   0   86.26    3.15 
  -8   0   0   86.62    3.67 
  -8   0   0   87.38    4.22 
   8   0   0   81.08    3.47 
   8   0   0   78.95    3.78 
  -8   0   0   76.69    4.22 
   8   0   0   85.42    3.61 
  -8   0   0   84.46    3.42 
   8   0   0   80.02    3.60 
  -9   0   0    0.16    0.42 
  -9   0   0   -0.12    0.47 
   9   0   0   -0.25    0.39 
   9   0   0    0.06    0.43 
  -9   0   0   -0.07    0.73 
  -9   0   0    0.77    0.68 
   9   0   0    0.23    0.45 
   9   0   0    0.58    0.50 
  -9   0   0   -0.10    0.43 
  10   0   0    7.69    1.56 
  10   0   0    7.74    1.38 
 -10   0   0    7.25    1.77 
 -10   0   0    7.96    1.48 
 -10   0   0    7.42    1.78 
  10   0   0    8.74    1.43 
   0  -1   0    1.27    0.10 
   0  -1   0    0.80    0.20 
   0  -1   0    0.85    0.12 
   0  -1   0    0.50    0.14 
   0  -1   0    0.89    0.16 
   0  -1   0    0.29    0.12 
   0  -1   0    1.02    0.16 
   0  -1   0    1.74    0.18 
   0  -1   0    0.69    0.11 
   0   1   0    0.72    0.13 
  -1  -1   0    3.12    0.24 
   1  -1   0    3.03    0.28 
   1  -1   0    3.36    0.34 
  -1  -1   0    2.81    0.24 
   1  -1   0    3.47    0.25 
   1  -1   0    5.10    0.37 
   1  -1   0    3.72    0.31 
  -1  -1   0    3.21    0.15 
   1  -1   0    4.20    0.44 
  -1  -1   0    3.76    0.18 
   1  -1   0    2.59    0.28 
  -1  -1   0    3.02    0.27 
   1  -1   0    3.37    0.39 
   1  -1   0    3.22    0.30 
  -1  -1   0    2.59    0.22 
   1  -1   0    3.90    0.28 
   1  -1   0    4.05    0.29 
   1  -1   0    3.77    0.29 
  -1  -1   0    2.88    0.23 
   1  -1   0    2.96    0.35 
  -1   1   0    2.14    0.35 
  -1   1   0    3.11    0.34 
   1   1   0    3.01    0.28 
  -1   1   0    4.76    0.37 
  -1   1   0    2.25    0.32 
  -1   1   0    4.77    0.32 
  -1   1   0    2.67    0.30 
  -1   1   0    3.59    0.28 
  -1   1   0    2.29    0.33 
  -1   1   0    3.28    0.29 
  -1   1   0    3.96    0.29 
   1   1   0    2.66    0.22 
   1   1   0    3.28    0.31 
  -1   1   0    3.23    0.27 
  -1   1   0    3.67    0.27 
  -1   1   0    3.55    0.28 
  -1   1   0    2.97    0.25 
  -2  -1   0  101.77    2.80 
   2  -1   0  105.03    2.91 
  -2  -1   0  105.94    3.08 
   2  -1   0  100.30    2.94 
  -2  -1   0  101.28    2.92 
  -2  -1   0  106.46    2.73 
  -2  -1   0  105.40    2.95 
  -2  -1   0  102.76    2.66 
   2  -1   0  107.61    3.03 
   2  -1   0   88.05    3.04 
   2  -1   0  102.24    2.83 
  -2  -1   0  100.60    2.86 
   2  -1   0  100.61    2.65 
   2  -1   0  106.03    2.81 
   2  -1   0  104.49    2.91 
   2  -1   0  108.91    3.01 
  -2  -1   0   98.96    2.84 
   2  -1   0  106.53    3.24 
   2  -1   0  106.52    2.97 
   2  -1   0   94.28    3.03 
   2  -1   0  102.21    3.02 
   2  -1   0  100.30    3.08 
  -2  -1   0  103.63    2.88 
   2  -1   0  102.64    2.95 
  -2   1   0  101.06    3.23 
   2   1   0  105.11    2.88 
   2   1   0  103.33    2.95 
  -2   1   0  112.43    3.16 
   2   1   0  103.07    2.88 
  -2   1   0  108.08    3.16 
  -2   1   0  107.42    2.98 
   2   1   0   97.50    2.91 
  -2   1   0  104.91    2.92 
  -2   1   0  104.25    2.91 
  -2   1   0   97.29    2.98 
   2   1   0  101.78    2.73 
  -2   1   0  107.01    2.99 
  -2   1   0  106.92    2.84 
  -2   1   0  105.07    3.10 
  -2   1   0  108.48    3.01 
  -2   1   0  103.48    2.94 
  -2   1   0  107.56    3.00 
   2   1   0  100.13    2.84 
  -2   1   0  105.45    3.00 
  -2   1   0  103.84    2.64 
  -2   1   0  103.78    2.87 
  -2   1   0  104.54    2.97 
   3  -1   0   26.82    0.98 
  -3  -1   0   27.49    1.09 
  -3  -1   0   26.81    1.08 
   3  -1   0   30.81    1.31 
  -3  -1   0   29.73    1.00 
   3  -1   0   27.61    1.02 
   3  -1   0   29.09    1.24 
   3  -1   0   26.71    1.26 
  -3  -1   0   25.63    1.15 
  -3  -1   0   24.79    1.10 
   3  -1   0   27.14    1.15 
   3  -1   0   26.50    1.12 
   3  -1   0   26.14    1.22 
  -3  -1   0   25.34    1.19 
  -3  -1   0   25.81    0.98 
  -3  -1   0   27.19    1.05 
  -3  -1   0   26.75    1.13 
   3  -1   0   27.27    1.26 
   3  -1   0   26.39    0.85 
   3  -1   0   27.12    1.54 
   3  -1   0   27.54    1.37 
   3   1   0   26.10    1.11 
  -3   1   0   26.96    1.23 
  -3   1   0   28.66    1.07 
  -3   1   0   27.18    1.22 
  -3   1   0   26.86    1.22 
   3   1   0   28.08    1.24 
  -3   1   0   27.95    1.40 
   3   1   0   26.84    1.16 
   3   1   0   28.07    1.25 
  -3   1   0   29.81    1.43 
  -3   1   0   28.01    1.28 
  -3   1   0   27.46    0.91 
   3   1   0   28.28    1.17 
  -3   1   0   25.96    1.45 
  -3   1   0   30.03    1.16 
  -3   1   0   29.42    1.43 
   3   1   0   26.70    1.05 
  -3   1   0   27.21    1.15 
  -3   1   0   26.02    1.08 
  -4  -1   0    9.01    0.70 
  -4  -1   0    7.55    0.60 
   4  -1   0    8.04    0.65 
   4  -1   0    8.61    0.42 
  -4  -1   0   10.37    1.15 
  -4  -1   0    8.22    0.32 
  -4  -1   0    8.67    0.89 
   4  -1   0    9.15    0.77 
  -4  -1   0    7.88    0.59 
  -4  -1   0    8.79    0.31 
  -4  -1   0    8.67    0.54 
   4  -1   0    7.56    0.83 
   4  -1   0    8.63    0.49 
   4  -1   0    8.44    0.74 
  -4  -1   0    8.01    0.59 
   4  -1   0    8.25    0.75 
   4  -1   0    8.85    0.46 
  -4   1   0    7.48    0.64 
  -4   1   0    8.33    0.66 
   4   1   0    8.36    0.74 
  -4   1   0    7.22    0.79 
   4   1   0    8.99    0.77 
   4   1   0    6.61    0.71 
  -4   1   0    8.87    0.92 
   4   1   0    7.61    0.64 
  -4   1   0    9.19    1.01 
  -4   1   0    7.98    0.70 
  -4   1   0    8.12    0.60 
  -4   1   0    9.59    0.97 
   4   1   0    7.52    0.59 
  -4   1   0    8.02    0.47 
  -5  -1   0  187.71    5.07 
  -5  -1   0  184.55    6.10 
  -5  -1   0  188.00    5.17 
  -5  -1   0  186.64    4.73 
  -5  -1   0  184.33    4.67 
  -5  -1   0  184.00    5.18 
   5  -1   0  180.41    5.21 
  -5  -1   0  184.08    5.85 
   5  -1   0  184.05    5.64 
   5  -1   0  181.46    5.62 
   5  -1   0  182.58    5.70 
  -5  -1   0  189.29    5.46 
   5  -1   0  190.88    5.58 
  -5   1   0  187.59    5.62 
  -5   1   0  181.58    5.31 
  -5   1   0  189.18    4.87 
   5   1   0  184.61    5.68 
   5   1   0  181.51    5.27 
  -5   1   0  182.68    5.79 
  -5   1   0  189.03    6.25 
  -5   1   0  190.14    5.55 
  -5   1   0  193.22    5.20 
   5   1   0  186.81    5.41 
   5   1   0  186.91    5.65 
   5   1   0  181.44    5.46 
  -5   1   0  187.68    5.98 
  -6  -1   0    7.34    0.76 
  -6  -1   0    6.14    1.10 
  -6  -1   0    6.74    0.76 
  -6  -1   0    8.02    0.65 
  -6  -1   0    7.80    0.51 
   6  -1   0    6.09    0.95 
   6  -1   0    5.81    0.85 
   6  -1   0    6.51    0.94 
  -6  -1   0    7.27    0.90 
   6  -1   0    7.12    0.95 
  -6  -1   0    6.10    1.09 
  -6   1   0    5.83    0.91 
   6   1   0    5.76    0.82 
   6   1   0    7.31    0.87 
   6   1   0    6.07    0.82 
  -6   1   0    7.47    0.96 
  -6   1   0    7.33    1.16 
  -6   1   0   10.07    1.51 
  -6   1   0    8.45    1.33 
  -6   1   0    6.83    0.74 
   6   1   0    5.51    0.90 
   6   1   0    6.40    0.93 
  -6   1   0    5.14    0.73 
  -6   1   0    7.89    0.52 
  -7  -1   0  207.55    7.03 
   7  -1   0  204.11    6.50 
  -7  -1   0  205.98    5.83 
   7  -1   0  203.96    6.78 
   7  -1   0  201.86    6.62 
  -7  -1   0  207.54    6.45 
  -7  -1   0  200.10    6.04 
  -7  -1   0  211.49    5.92 
   7  -1   0  207.15    6.60 
  -7  -1   0  205.21    7.34 
  -7   1   0  214.39    7.00 
  -7   1   0  205.22    6.14 
  -7   1   0  205.45    6.43 
  -7   1   0  211.00    7.19 
   7   1   0  199.85    6.20 
   7   1   0  196.28    6.69 
  -7   1   0  206.21    6.57 
   7   1   0  205.86    6.35 
   7   1   0  205.11    6.68 
  -7   1   0  202.17    5.92 
  -7   1   0  200.77    7.41 
   7   1   0  208.55    6.50 
  -8  -1   0    9.30    1.65 
   8  -1   0    9.12    1.37 
   8  -1   0    7.46    1.18 
  -8  -1   0    9.60    1.12 
  -8  -1   0   11.23    1.82 
  -8  -1   0    7.09    1.10 
   8  -1   0    8.50    1.31 
   8  -1   0    7.45    1.15 
   8   1   0    7.79    1.27 
  -8   1   0    9.62    1.35 
  -8   1   0    8.86    1.70 
   8   1   0    7.26    1.11 
  -8   1   0    7.06    1.51 
   8   1   0    8.62    1.14 
  -8   1   0    9.39    1.25 
  -8   1   0    9.18    1.56 
  -8   1   0    8.77    1.08 
   8   1   0    8.64    1.35 
   8   1   0    8.77    1.20 
   9  -1   0   66.94    3.37 
   9  -1   0   67.24    3.50 
  -9  -1   0   68.27    3.96 
  -9  -1   0   65.29    3.31 
  -9  -1   0   70.82    3.96 
   9  -1   0   64.71    3.60 
  -9  -1   0   66.34    4.12 
   9  -1   0   69.37    3.47 
  -9   1   0   70.48    3.13 
  -9   1   0   66.04    3.28 
  -9   1   0   79.90    4.32 
   9   1   0   71.00    3.22 
  -9   1   0   68.70    3.49 
   9   1   0   67.92    3.64 
  -9   1   0   67.17    4.21 
  -9   1   0   70.16    4.03 
   9   1   0   68.13    3.40 
  -9   1   0   81.45    4.40 
 -10  -1   0    2.67    1.07 
 -10  -1   0    3.73    1.06 
  10  -1   0    2.62    0.91 
 -10  -1   0    3.58    1.37 
  10  -1   0    3.40    1.06 
  10  -1   0    2.51    0.87 
 -10  -1   0    2.56    1.08 
 -10   1   0    5.49    1.57 
  10   1   0    2.27    0.80 
  10   1   0    3.38    0.99 
  10   1   0    3.01    0.85 
 -10   1   0    3.36    1.32 
 -10   1   0    1.65    0.70 
 -10   1   0    1.96    0.90 
   0  -2   0  505.11   11.81 
   0  -2   0  508.25   11.60 
   0  -2   0  428.62   12.30 
   0  -2   0  470.75   11.87 
   0  -2   0  473.89   11.77 
   0  -2   0  480.53   11.79 
   0  -2   0  491.05   11.80 
   0  -2   0  477.99   11.98 
   0  -2   0  455.78   12.17 
   0  -2   0  505.35   11.86 
   0  -2   0  476.20   11.89 
   0   2   0  441.31   12.25 
   0   2   0  496.73   11.93 
   0   2   0  505.95   11.83 
   0   2   0  472.88   11.89 
   0   2   0  502.66   11.65 
   0   2   0  502.33   11.68 
   0   2   0  458.79   12.02 
   0   2   0  480.28   11.80 
   0   2   0  452.11   11.81 
   0   2   0  510.33   11.59 
   1  -2   0  464.30   11.14 
   1  -2   0  455.41   11.16 
   1  -2   0  446.94   11.15 
  -1  -2   0  425.65   11.40 
   1  -2   0  474.01   11.31 
  -1  -2   0  414.28   11.00 
  -1  -2   0  450.03   10.71 
   1  -2   0  450.01   11.45 
   1  -2   0  449.02   11.24 
  -1  -2   0  412.84   11.36 
  -1  -2   0  435.32   11.05 
  -1  -2   0  387.73   11.01 
   1  -2   0  469.92   11.03 
   1  -2   0  458.93   11.11 
  -1  -2   0  470.04   10.91 
   1  -2   0  437.25   11.31 
  -1  -2   0  445.13   11.09 
  -1  -2   0  441.95   11.04 
   1  -2   0  445.34   11.22 
   1  -2   0  441.43   11.25 
   1  -2   0  460.40   11.05 
   1  -2   0  453.26   11.10 
  -1  -2   0  457.40   10.95 
   1  -2   0  477.07   11.25 
   1  -2   0  446.24   11.50 
   1  -2   0  473.93   11.18 
  -1  -2   0  440.20   11.04 
   1   2   0  383.15   11.39 
  -1   2   0  437.12   11.50 
  -1   2   0  469.36   11.15 
  -1   2   0  467.77   11.25 
   1   2   0  433.49   10.99 
  -1   2   0  459.87   11.18 
   1   2   0  435.21   11.07 
  -1   2   0  464.49   11.29 
  -1   2   0  444.60   11.22 
  -1   2   0  453.36   11.24 
  -1   2   0  474.40   11.25 
  -1   2   0  469.13   11.16 
  -1   2   0  480.10   11.12 
  -1   2   0  472.65   11.11 
   1   2   0  413.44   10.98 
  -1   2   0  430.32   11.08 
  -1   2   0  478.19   11.03 
   1   2   0  451.01   10.98 
   1   2   0  460.36   11.11 
   1   2   0  452.22   10.77 
  -1   2   0  455.01   11.22 
  -1   2   0  448.64   11.37 
  -1   2   0  410.38   11.47 
   1   2   0  408.32   10.76 
  -2  -2   0  268.65    7.57 
   2  -2   0  280.69    7.48 
   2  -2   0  286.81    7.29 
   2  -2   0  284.46    7.33 
  -2  -2   0  266.45    7.17 
  -2  -2   0  289.71    7.28 
   2  -2   0  288.49    7.38 
   2  -2   0  295.70    7.29 
  -2  -2   0  269.41    6.91 
   2  -2   0  288.84    7.37 
   2  -2   0  287.30    7.55 
  -2  -2   0  287.36    6.83 
   2  -2   0  292.50    7.35 
   2  -2   0  303.31    7.38 
   2  -2   0  276.43    7.54 
  -2  -2   0  268.60    7.17 
  -2  -2   0  272.53    7.26 
   2  -2   0  283.27    7.41 
  -2  -2   0  268.60    7.22 
   2  -2   0  279.45    7.47 
  -2  -2   0  299.81    7.37 
   2  -2   0  277.36    7.08 
  -2  -2   0  278.27    7.23 
   2   2   0  280.65    7.25 
   2   2   0  284.19    7.17 
  -2   2   0  276.14    7.74 
   2   2   0  282.38    6.83 
  -2   2   0  289.76    7.42 
   2   2   0  280.19    7.30 
  -2   2   0  292.74    7.38 
  -2   2   0  290.76    7.39 
  -2   2   0  286.63    7.42 
  -2   2   0  275.46    7.62 
  -2   2   0  279.74    7.44 
  -2   2   0  281.36    7.34 
   2   2   0  267.91    7.24 
   2   2   0  273.79    7.49 
  -2   2   0  293.95    7.32 
  -2   2   0  288.82    7.39 
  -2   2   0  291.88    7.84 
   3  -2   0  118.68    3.58 
  -3  -2   0  125.82    3.27 
  -3  -2   0  124.00    3.12 
  -3  -2   0  120.78    3.27 
   3  -2   0  119.12    3.47 
  -3  -2   0  125.05    3.44 
  -3  -2   0  123.98    3.65 
  -3  -2   0  125.96    3.49 
  -3  -2   0  126.60    3.95 
   3  -2   0  120.68    3.72 
   3  -2   0  124.25    3.84 
   3  -2   0  124.51    3.54 
   3  -2   0  129.34    3.91 
  -3  -2   0  122.19    3.66 
  -3  -2   0  118.51    3.51 
   3  -2   0  120.45    3.68 
   3  -2   0  117.99    3.30 
   3  -2   0  118.03    3.69 
  -3  -2   0  119.12    3.54 
  -3  -2   0  117.79    3.53 
   3  -2   0  123.01    3.95 
  -3   2   0  123.16    3.76 
  -3   2   0  126.07    3.71 
  -3   2   0  119.29    3.64 
   3   2   0  126.42    3.69 
   3   2   0  115.80    3.54 
   3   2   0  124.18    3.26 
  -3   2   0  123.53    3.69 
   3   2   0  121.21    3.64 
  -3   2   0  117.75    3.96 
  -3   2   0  124.70    4.22 
   3   2   0  126.39    3.56 
  -3   2   0  124.96    3.96 
  -3   2   0  123.76    3.77 
  -4  -2   0  149.12    4.82 
  -4  -2   0  149.98    4.03 
   4  -2   0  146.29    4.67 
  -4  -2   0  149.57    3.97 
  -4  -2   0  156.32    4.66 
  -4  -2   0  155.01    4.13 
  -4  -2   0  161.25    4.41 
  -4  -2   0  151.63    4.43 
   4  -2   0  146.02    4.20 
   4  -2   0  148.94    4.29 
   4  -2   0  149.51    3.86 
   4  -2   0  141.35    4.66 
   4  -2   0  149.93    4.60 
   4  -2   0  150.03    4.65 
  -4  -2   0  163.76    4.28 
   4  -2   0  147.29    4.84 
  -4  -2   0  150.39    4.39 
   4   2   0  154.49    4.13 
   4   2   0  148.16    4.53 
  -4   2   0  152.96    4.65 
   4   2   0  149.96    4.41 
  -4   2   0  145.04    4.57 
   4   2   0  152.52    4.47 
   4   2   0  146.38    4.33 
  -4   2   0  145.23    4.44 
  -4   2   0  142.42    4.44 
   4   2   0  148.55    4.58 
  -4   2   0  146.38    4.86 
  -4   2   0  145.76    5.11 
  -4   2   0  148.40    4.86 
  -4   2   0  154.07    4.44 
  -5  -2   0   60.22    1.99 
  -5  -2   0   59.21    2.62 
   5  -2   0   62.83    2.65 
  -5  -2   0   59.55    2.27 
  -5  -2   0   59.96    1.96 
   5  -2   0   59.45    1.67 
   5  -2   0   60.59    2.02 
   5  -2   0   56.21    2.45 
  -5  -2   0   60.54    2.78 
   5  -2   0   60.43    2.10 
   5  -2   0   60.51    2.59 
  -5  -2   0   61.86    2.37 
  -5  -2   0   61.15    2.33 
   5  -2   0   59.88    2.57 
  -5   2   0   60.20    2.78 
   5   2   0   57.76    2.36 
   5   2   0   60.63    2.31 
   5   2   0   63.96    2.59 
   5   2   0   60.07    2.12 
  -5   2   0   58.06    2.27 
  -5   2   0   61.10    2.35 
  -5   2   0   62.57    3.04 
  -5   2   0   62.12    2.54 
  -5   2   0   57.89    2.76 
  -5   2   0   58.64    2.36 
   5   2   0   56.59    2.45 
  -5   2   0   55.62    2.47 
   6  -2   0  137.19    4.61 
  -6  -2   0  134.08    3.83 
   6  -2   0  123.70    3.71 
  -6  -2   0  126.44    4.33 
  -6  -2   0  139.07    4.41 
  -6  -2   0  133.95    5.00 
   6  -2   0  132.74    4.71 
  -6  -2   0  135.76    3.48 
   6  -2   0  136.72    3.67 
   6  -2   0  135.21    4.73 
  -6  -2   0  129.97    3.91 
   6  -2   0  128.94    4.67 
  -6  -2   0  135.26    4.86 
  -6  -2   0  132.22    4.21 
  -6   2   0  137.38    4.41 
  -6   2   0  126.96    5.24 
   6   2   0  129.29    4.57 
  -6   2   0  132.41    4.57 
   6   2   0  133.18    4.11 
   6   2   0  133.51    4.43 
   6   2   0  129.27    4.63 
  -6   2   0  134.54    4.28 
   6   2   0  134.72    4.33 
  -6   2   0  130.97    5.00 
  -6   2   0  131.38    4.25 
  -6   2   0  130.37    4.60 
   7  -2   0    8.36    1.23 
   7  -2   0   11.12    1.33 
  -7  -2   0   11.42    1.66 
   7  -2   0   11.68    1.45 
  -7  -2   0   10.87    1.53 
  -7  -2   0   12.06    1.68 
  -7  -2   0   10.89    0.95 
  -7  -2   0    9.89    0.75 
  -7  -2   0   10.27    1.21 
  -7  -2   0   13.43    1.51 
  -7  -2   0    9.26    0.81 
   7  -2   0   11.74    1.40 
  -7   2   0   11.12    1.23 
  -7   2   0    8.36    1.47 
  -7   2   0   12.32    1.59 
   7   2   0   11.59    1.39 
   7   2   0   10.86    1.26 
  -7   2   0   10.89    0.99 
  -7   2   0   10.34    1.28 
   7   2   0   12.02    1.07 
  -7   2   0   10.49    1.64 
   7   2   0   10.88    0.96 
  -7   2   0    9.24    1.14 
  -7   2   0   11.97    1.43 
   7   2   0   11.48    1.43 
   8  -2   0   53.18    2.81 
  -8  -2   0   48.20    2.32 
  -8  -2   0   51.65    2.64 
   8  -2   0   51.01    2.83 
   8  -2   0   58.03    3.07 
  -8  -2   0   49.73    3.13 
  -8  -2   0   49.71    3.09 
  -8  -2   0   52.52    3.34 
   8  -2   0   49.45    2.85 
  -8  -2   0   53.06    2.67 
   8   2   0   52.22    2.86 
  -8   2   0   51.55    3.44 
   8   2   0   48.72    2.62 
  -8   2   0   56.32    3.25 
  -8   2   0   53.41    2.47 
  -8   2   0   53.23    2.81 
  -8   2   0   54.49    3.30 
  -8   2   0   53.87    2.88 
  -8   2   0   53.50    2.58 
   8   2   0   54.05    2.94 
   8   2   0   52.39    2.41 
  -9  -2   0    5.03    1.39 
   9  -2   0    6.11    1.25 
   9  -2   0    3.93    0.99 
  -9  -2   0    6.40    1.49 
   9  -2   0    6.80    1.27 
  -9  -2   0    5.99    1.13 
   9  -2   0    4.63    1.08 
  -9  -2   0    5.86    1.37 
   9   2   0    6.36    1.04 
  -9   2   0    7.15    1.49 
  -9   2   0    5.37    1.01 
   9   2   0    6.04    1.13 
  -9   2   0    5.68    1.48 
  -9   2   0    6.94    1.28 
  -9   2   0    8.40    1.85 
  -9   2   0    5.86    1.18 
 -10  -2   0   23.11    2.40 
  10  -2   0   17.10    2.17 
  10  -2   0   16.66    2.13 
  10  -2   0   18.90    2.21 
 -10  -2   0   18.21    2.05 
 -10  -2   0   18.72    2.71 
  10  -2   0   22.57    2.59 
 -10   2   0   20.52    3.02 
 -10   2   0   18.38    2.21 
 -10   2   0   17.50    2.19 
 -10   2   0   23.19    2.72 
   0  -3   0    0.43    0.13 
   0  -3   0    0.15    0.25 
   0  -3   0    0.77    0.24 
   0  -3   0    1.18    0.45 
   0  -3   0    0.09    0.18 
   0  -3   0    0.09    0.14 
   0  -3   0    0.19    0.32 
   0  -3   0    0.49    0.25 
   0  -3   0   -0.02    0.12 
   0  -3   0   -0.04    0.15 
   0   3   0    0.04    0.11 
   0   3   0    0.34    0.23 
   0   3   0    0.08    0.18 
   0   3   0    0.60    0.34 
   0   3   0   -0.09    0.26 
   0   3   0    1.75    0.36 
   0   3   0   -0.18    0.15 
   0   3   0    0.46    0.15 
   0   3   0    0.32    0.12 
  -1  -3   0   30.87    1.22 
  -1  -3   0   32.35    1.31 
   1  -3   0   29.66    1.21 
   1  -3   0   33.35    1.50 
   1  -3   0   31.18    1.35 
  -1  -3   0   34.29    1.27 
  -1  -3   0   31.42    1.78 
   1  -3   0   31.01    1.61 
   1  -3   0   32.24    1.48 
   1  -3   0   31.03    1.66 
   1  -3   0   31.73    1.46 
  -1  -3   0   31.99    1.64 
  -1  -3   0   30.80    1.40 
  -1  -3   0   34.00    1.31 
   1  -3   0   31.01    1.35 
  -1  -3   0   32.00    1.35 
  -1  -3   0   29.80    1.41 
   1  -3   0   36.40    1.50 
   1  -3   0   32.98    1.40 
   1  -3   0   33.43    1.35 
   1  -3   0   32.62    1.29 
   1  -3   0   32.90    1.27 
   1  -3   0   32.22    1.56 
  -1  -3   0   34.16    1.37 
  -1   3   0   33.33    1.51 
   1   3   0   33.26    1.30 
   1   3   0   32.69    1.40 
   1   3   0   32.67    1.40 
  -1   3   0   33.98    1.34 
  -1   3   0   33.43    1.85 
   1   3   0   30.66    1.37 
   1   3   0   30.99    1.62 
  -1   3   0   31.19    1.60 
   1   3   0   33.04    0.89 
  -1   3   0   34.36    1.25 
   1   3   0   33.45    1.04 
   1   3   0   31.86    1.42 
   1   3   0   32.96    1.29 
   1   3   0   35.16    1.87 
  -1   3   0   32.65    1.28 
  -1   3   0   34.86    1.76 
  -1   3   0   34.69    1.41 
   1   3   0   32.14    1.56 
   1   3   0   30.73    1.05 
  -1   3   0   33.37    1.41 
  -2  -3   0   18.22    1.36 
  -2  -3   0   17.09    0.91 
   2  -3   0   16.99    1.10 
  -2  -3   0   16.78    0.94 
  -2  -3   0   17.25    0.58 
  -2  -3   0   17.31    1.19 
  -2  -3   0   17.30    0.93 
   2  -3   0   16.93    0.92 
   2  -3   0   17.31    1.12 
  -2  -3   0   18.30    0.90 
  -2  -3   0   17.28    0.77 
  -2  -3   0   17.46    0.81 
   2  -3   0   17.25    1.09 
   2  -3   0   15.59    0.98 
   2  -3   0   16.91    1.13 
   2  -3   0   17.37    0.95 
   2  -3   0   18.49    1.09 
   2  -3   0   17.11    0.97 
  -2  -3   0   17.00    0.91 
   2   3   0   18.11    1.05 
  -2   3   0   16.98    1.12 
  -2   3   0   18.06    1.32 
  -2   3   0   16.76    0.98 
   2   3   0   16.82    0.84 
   2   3   0   16.50    0.97 
  -2   3   0   17.73    1.02 
  -2   3   0   16.25    1.02 
   2   3   0   18.43    1.20 
  -2   3   0   16.04    1.22 
  -2   3   0   16.38    0.98 
   2   3   0   16.20    0.87 
  -2   3   0   17.96    1.10 
  -2   3   0   17.69    1.02 
  -3  -3   0    2.63    0.44 
  -3  -3   0    2.54    0.45 
  -3  -3   0    1.84    0.44 
  -3  -3   0    2.44    0.28 
   3  -3   0    2.32    0.38 
   3  -3   0    2.71    0.55 
   3  -3   0    1.71    0.43 
   3  -3   0    2.33    0.46 
  -3  -3   0    1.87    0.25 
  -3  -3   0    2.90    0.49 
   3  -3   0    2.06    0.50 
  -3  -3   0    2.07    0.31 
   3  -3   0    1.46    0.49 
  -3  -3   0    2.10    0.51 
   3  -3   0    1.58    0.41 
  -3  -3   0    3.00    0.49 
   3  -3   0    2.03    0.41 
  -3  -3   0    1.90    0.19 
  -3   3   0    1.88    0.45 
  -3   3   0    2.05    0.62 
   3   3   0    1.75    0.38 
  -3   3   0    1.39    0.39 
  -3   3   0    1.91    0.56 
   3   3   0    1.76    0.45 
   3   3   0    1.35    0.38 
  -3   3   0    2.24    0.47 
  -3   3   0    2.17    0.60 
  -3   3   0    2.33    0.55 
   3   3   0    2.23    0.37 
  -3   3   0    4.49    0.65 
   4  -3   0   61.41    2.25 
  -4  -3   0   59.72    1.88 
   4  -3   0   60.45    2.43 
  -4  -3   0   57.70    2.35 
  -4  -3   0   62.60    2.18 
  -4  -3   0   57.82    1.69 
  -4  -3   0   60.85    2.13 
  -4  -3   0   63.88    2.72 
   4  -3   0   59.17    2.42 
  -4  -3   0   59.75    1.82 
   4  -3   0   57.93    2.57 
   4  -3   0   61.32    2.71 
   4  -3   0   60.54    2.22 
   4  -3   0   55.80    1.95 
   4  -3   0   59.66    2.57 
   4   3   0   61.61    2.22 
  -4   3   0   60.79    2.96 
  -4   3   0   61.50    2.50 
  -4   3   0   61.26    2.41 
   4   3   0   62.36    2.36 
   4   3   0   61.31    1.83 
  -4   3   0   56.99    2.42 
  -4   3   0   59.14    2.40 
  -4   3   0   57.82    2.41 
  -4   3   0   61.51    2.71 
  -4   3   0   58.82    2.74 
   4   3   0   60.60    2.32 
   5  -3   0   75.68    3.11 
  -5  -3   0   73.64    2.27 
  -5  -3   0   70.61    2.04 
  -5  -3   0   72.42    1.95 
  -5  -3   0   70.52    2.78 
   5  -3   0   69.82    3.07 
  -5  -3   0   73.70    2.66 
   5  -3   0   71.85    2.58 
  -5  -3   0   76.18    2.36 
   5  -3   0   68.03    3.16 
  -5  -3   0   72.97    3.21 
   5  -3   0   68.43    2.06 
   5  -3   0   73.55    2.96 
   5  -3   0   72.52    2.95 
  -5   3   0   73.16    2.83 
   5   3   0   73.37    2.30 
  -5   3   0   78.12    3.62 
  -5   3   0   71.97    3.25 
  -5   3   0   71.48    2.85 
   5   3   0   75.17    2.73 
  -5   3   0   66.58    2.89 
  -5   3   0   75.50    3.32 
   5   3   0   72.47    2.84 
  -5   3   0   69.50    2.83 
  -5   3   0   69.28    2.95 
   6  -3   0  175.46    5.90 
   6  -3   0  165.18    5.63 
  -6  -3   0  169.33    4.84 
   6  -3   0  171.32    5.63 
  -6  -3   0  161.44    5.29 
  -6  -3   0  176.91    5.81 
  -6  -3   0  165.66    4.52 
  -6  -3   0  166.27    4.62 
   6  -3   0  163.63    4.90 
   6  -3   0  166.27    5.77 
  -6  -3   0  165.09    5.96 
  -6  -3   0  172.00    5.26 
  -6   3   0  164.46    5.40 
  -6   3   0  168.76    6.46 
   6   3   0  168.52    5.52 
   6   3   0  174.63    4.86 
  -6   3   0  170.66    6.04 
  -6   3   0  176.38    5.70 
  -6   3   0  161.71    5.62 
  -6   3   0  163.92    6.04 
  -6   3   0  167.27    5.44 
  -6   3   0  176.38    5.43 
  -7  -3   0   50.92    3.00 
   7  -3   0   52.37    1.92 
  -7  -3   0   51.73    2.42 
   7  -3   0   51.70    2.82 
   7  -3   0   53.92    2.74 
  -7  -3   0   53.91    2.15 
   7  -3   0   45.33    2.68 
   7  -3   0   52.21    2.77 
  -7  -3   0   50.44    2.85 
  -7  -3   0   49.72    2.39 
  -7  -3   0   52.62    3.10 
  -7   3   0   48.54    2.43 
  -7   3   0   52.87    2.57 
  -7   3   0   50.30    2.67 
   7   3   0   52.06    2.12 
  -7   3   0   49.03    3.27 
  -7   3   0   46.81    2.97 
  -7   3   0   53.27    2.49 
   7   3   0   49.87    2.60 
  -7   3   0   53.89    2.78 
  -7   3   0   57.76    3.24 
  -8  -3   0   52.51    2.66 
   8  -3   0   58.31    3.17 
   8  -3   0   56.94    3.02 
  -8  -3   0   56.73    2.65 
  -8  -3   0   59.00    3.46 
  -8  -3   0   51.06    3.15 
   8  -3   0   50.86    3.02 
   8  -3   0   53.36    3.08 
  -8  -3   0   52.20    3.35 
  -8   3   0   52.49    3.61 
   8   3   0   53.89    2.91 
  -8   3   0   55.23    3.43 
  -8   3   0   61.24    3.52 
  -8   3   0   58.25    3.10 
  -8   3   0   57.97    2.73 
  -8   3   0   54.34    2.97 
  -8   3   0   57.30    2.80 
  -9  -3   0   31.12    2.64 
   9  -3   0   39.40    2.67 
  -9  -3   0   30.59    2.08 
   9  -3   0   30.00    2.37 
  -9  -3   0   31.42    2.61 
   9  -3   0   32.32    2.50 
  -9  -3   0   24.71    2.50 
   9  -3   0   29.93    2.27 
  -9   3   0   25.29    2.14 
  -9   3   0   26.49    2.59 
  -9   3   0   29.79    2.77 
  -9   3   0   36.78    3.15 
   9   3   0   33.24    2.37 
  -9   3   0   30.32    2.32 
  -9   3   0   29.60    2.10 
 -10   3   0   40.48    3.60 
   0  -4   0   41.81    1.88 
   0  -4   0   41.80    1.75 
   0  -4   0   43.57    1.90 
   0  -4   0   45.49    1.49 
   0  -4   0   46.54    1.93 
   0  -4   0   42.12    1.92 
   0  -4   0   44.85    1.71 
   0  -4   0   41.87    1.86 
   0  -4   0   41.65    2.15 
   0   4   0   44.19    1.47 
   0   4   0   43.94    1.55 
   0   4   0   44.75    2.16 
   0   4   0   42.95    1.96 
   0   4   0   44.26    1.60 
   0   4   0   48.24    1.86 
   0   4   0   46.59    1.92 
   0   4   0   41.74    1.77 
   0   4   0   44.78    1.87 
   0   4   0   50.94    2.78 
   1  -4   0  667.41   16.20 
  -1  -4   0  648.78   16.18 
   1  -4   0  663.86   16.47 
   1  -4   0  664.92   16.40 
   1  -4   0  633.18   15.96 
   1  -4   0  665.08   15.91 
  -1  -4   0  647.01   16.37 
   1  -4   0  649.33   16.21 
  -1  -4   0  662.82   16.01 
   1  -4   0  627.62   16.86 
  -1  -4   0  643.23   16.80 
   1  -4   0  655.88   16.41 
  -1  -4   0  657.29   15.99 
   1  -4   0  648.27   16.41 
   1  -4   0  650.60   16.41 
  -1  -4   0  661.04   16.03 
   1   4   0  646.77   15.41 
   1   4   0  597.26   16.29 
   1   4   0  632.37   16.17 
  -1   4   0  651.27   16.26 
   1   4   0  544.75   16.19 
  -1   4   0  625.04   16.68 
  -1   4   0  685.28   16.09 
   1   4   0  669.69   15.64 
   1   4   0  667.65   16.12 
   1   4   0  598.21   16.83 
   1   4   0  622.50   15.64 
   1   4   0  628.68   16.63 
  -1   4   0  642.78   16.43 
  -1   4   0  676.12   16.32 
   1   4   0  621.09   16.02 
  -1   4   0  598.02   17.34 
  -1   4   0  666.39   16.06 
  -2  -4   0   48.25    1.92 
  -2  -4   0   49.27    1.78 
  -2  -4   0   47.51    1.76 
  -2  -4   0   47.17    1.86 
   2  -4   0   52.74    1.93 
   2  -4   0   49.97    1.94 
   2  -4   0   47.37    2.19 
   2  -4   0   47.96    2.01 
  -2  -4   0   47.89    2.07 
   2  -4   0   52.38    2.27 
   2  -4   0   47.71    2.17 
  -2  -4   0   49.53    1.93 
   2  -4   0   47.89    2.09 
  -2  -4   0   49.45    1.81 
  -2  -4   0   48.49    2.36 
   2  -4   0   51.22    2.25 
   2   4   0   51.83    1.89 
   2   4   0   49.33    1.83 
  -2   4   0   48.40    2.08 
  -2   4   0   45.66    2.35 
  -2   4   0   49.13    2.07 
   2   4   0   51.43    1.44 
   2   4   0   48.65    1.32 
   2   4   0   44.67    1.99 
  -2   4   0   47.73    1.98 
  -2   4   0   49.61    2.21 
  -2   4   0   51.42    2.11 
  -2   4   0   52.56    2.70 
  -3  -4   0  153.54    5.21 
   3  -4   0  155.45    4.78 
  -3  -4   0  154.35    4.23 
   3  -4   0  158.72    4.67 
  -3  -4   0  157.01    4.55 
   3  -4   0  154.39    5.00 
   3  -4   0  157.56    5.12 
  -3  -4   0  156.30    4.52 
  -3  -4   0  153.94    4.70 
  -3  -4   0  153.14    4.56 
   3  -4   0  156.29    5.09 
   3  -4   0  150.49    4.70 
  -3  -4   0  146.75    4.61 
   3  -4   0  150.75    4.69 
  -3  -4   0  155.67    3.77 
  -3  -4   0  150.51    4.25 
   3   4   0  151.52    4.72 
  -3   4   0  149.50    4.76 
   3   4   0  152.76    4.53 
   3   4   0  155.58    4.41 
  -3   4   0  139.07    4.73 
  -3   4   0  158.96    5.31 
  -3   4   0  151.38    4.81 
  -3   4   0  151.52    5.04 
  -3   4   0  143.07    4.78 
  -3   4   0  153.69    4.96 
  -3   4   0  152.55    5.54 
   4  -4   0   29.29    1.88 
   4  -4   0   35.19    1.81 
  -4  -4   0   34.63    1.13 
  -4  -4   0   33.67    2.06 
   4  -4   0   33.40    1.73 
  -4  -4   0   36.43    1.86 
   4  -4   0   34.84    1.71 
   4  -4   0   36.14    2.08 
  -4  -4   0   33.90    1.34 
   4  -4   0   35.71    1.99 
  -4  -4   0   32.53    1.54 
  -4  -4   0   35.60    1.29 
  -4  -4   0   34.32    1.68 
   4  -4   0   35.10    1.73 
  -4   4   0   34.10    1.85 
   4   4   0   35.36    1.68 
  -4   4   0   31.56    1.78 
   4   4   0   32.73    1.75 
  -4   4   0   34.07    1.91 
  -4   4   0   34.19    2.29 
  -4   4   0   33.14    1.82 
   4   4   0   35.55    1.56 
  -4   4   0   34.87    2.18 
  -4   4   0   32.84    1.99 
  -4   4   0   33.87    1.80 
  -5  -4   0  148.64    5.59 
   5  -4   0  159.93    4.96 
  -5  -4   0  154.27    5.18 
   5  -4   0  153.28    5.61 
   5  -4   0  165.76    5.63 
   5  -4   0  159.29    4.92 
   5  -4   0  157.98    5.22 
   5  -4   0  159.66    5.25 
  -5  -4   0  156.42    4.22 
  -5  -4   0  158.26    4.83 
   5  -4   0  152.70    5.44 
  -5  -4   0  156.74    4.31 
  -5   4   0  156.66    5.32 
  -5   4   0  162.00    5.24 
  -5   4   0  164.21    5.34 
  -5   4   0  158.80    5.66 
  -5   4   0  163.18    6.16 
   5   4   0  153.73    4.82 
   5   4   0  158.04    5.06 
  -5   4   0  156.79    5.21 
  -5   4   0  160.92    5.78 
  -5   4   0  154.49    5.29 
   6  -4   0   89.09    3.89 
   6  -4   0   88.94    3.26 
  -6  -4   0   88.36    2.83 
  -6  -4   0   85.73    3.52 
  -6  -4   0   92.68    4.11 
  -6  -4   0   93.58    3.79 
  -6  -4   0   87.68    2.93 
   6  -4   0   89.91    3.70 
   6  -4   0   86.67    3.65 
  -6  -4   0   92.36    3.30 
   6  -4   0   93.54    4.00 
  -6   4   0   88.14    4.47 
   6   4   0   90.31    3.34 
  -6   4   0   86.58    3.54 
  -6   4   0   84.98    3.59 
  -6   4   0   90.33    3.63 
  -6   4   0   86.99    4.06 
  -6   4   0   91.02    3.78 
  -6   4   0   89.96    3.77 
  -6   4   0   84.75    4.07 
   6   4   0   93.38    3.57 
  -7  -4   0  101.22    4.30 
  -7  -4   0  102.96    4.64 
  -7  -4   0   97.52    3.68 
   7  -4   0   98.96    3.46 
   7  -4   0  103.86    4.25 
  -7  -4   0   97.24    3.91 
   7  -4   0   96.07    4.34 
   7  -4   0   95.88    4.13 
   7  -4   0   98.47    4.41 
  -7   4   0  100.86    4.66 
  -7   4   0  103.40    4.27 
  -7   4   0   95.52    3.98 
  -7   4   0   99.59    3.99 
   7   4   0  102.79    4.07 
  -7   4   0   99.26    4.02 
  -7   4   0   98.18    4.62 
  -7   4   0  102.11    5.12 
  -7   4   0   98.37    4.23 
  -8  -4   0   55.92    3.46 
  -8  -4   0   55.44    3.26 
   8  -4   0   55.05    3.26 
   8  -4   0   52.83    3.00 
  -8  -4   0   51.42    2.73 
  -8  -4   0   52.54    3.39 
   8  -4   0   48.29    3.10 
   8  -4   0   55.23    3.10 
  -8  -4   0   52.94    2.64 
   8   4   0   50.03    2.83 
  -8   4   0   48.91    2.72 
  -8   4   0   58.20    3.58 
  -8   4   0   56.83    3.13 
  -8   4   0   50.24    3.38 
  -8   4   0   62.47    3.06 
  -8   4   0   52.50    3.08 
  -8   4   0   52.95    3.76 
  -9  -4   0   25.88    3.62 
   9  -4   0   30.03    2.48 
  -9  -4   0   29.16    2.63 
  -9  -4   0   27.19    2.49 
   9  -4   0   23.09    2.23 
   9  -4   0   27.57    2.33 
   9  -4   0   28.79    2.31 
  -9   4   0   29.15    2.19 
  -9   4   0   28.27    2.67 
   9   4   0   26.00    2.12 
  -9   4   0   25.30    2.22 
  -9   4   0   29.81    2.77 
  -9   4   0   28.63    2.96 
  -9   4   0   25.38    2.22 
   0  -5   0    0.99    0.38 
   0  -5   0    0.79    0.37 
   0  -5   0    0.33    0.25 
   0  -5   0    0.05    0.28 
   0  -5   0    0.52    0.21 
   0  -5   0    0.19    0.26 
   0  -5   0   -0.06    0.26 
   0  -5   0    0.44    0.28 
   0  -5   0   -0.08    0.26 
   0   5   0   -0.02    0.28 
   0   5   0    0.71    0.21 
   0   5   0    0.10    0.22 
   0   5   0    0.45    0.22 
   0   5   0    0.30    0.25 
   0   5   0    0.36    0.24 
   0   5   0    0.71    0.51 
   0   5   0    0.78    0.50 
   0   5   0    0.29    0.28 
   1  -5   0   11.63    1.05 
  -1  -5   0   11.98    1.02 
   1  -5   0   14.18    1.15 
  -1  -5   0   16.43    1.18 
   1  -5   0   14.47    0.92 
  -1  -5   0   15.26    1.21 
  -1  -5   0   14.06    0.97 
   1  -5   0   14.07    0.88 
  -1  -5   0   14.20    1.29 
   1  -5   0   16.32    1.25 
   1  -5   0   13.90    1.12 
   1  -5   0   13.25    1.14 
   1  -5   0   13.97    1.04 
   1  -5   0   13.85    1.32 
   1   5   0   16.64    1.42 
   1   5   0   14.43    1.01 
  -1   5   0   14.20    0.95 
  -1   5   0   12.44    1.02 
  -1   5   0   15.93    1.41 
  -1   5   0   15.65    1.66 
   1   5   0   13.70    1.09 
   1   5   0   12.86    1.09 
   1   5   0   13.55    0.75 
   1   5   0   11.94    1.27 
   1   5   0   15.00    0.79 
  -1   5   0   12.26    1.00 
   1   5   0   16.09    1.20 
   1   5   0   14.19    0.61 
   1   5   0   14.27    0.95 
   2  -5   0    0.70    0.28 
   2  -5   0    1.46    0.39 
  -2  -5   0    3.31    0.65 
   2  -5   0    0.46    0.40 
  -2  -5   0    2.09    0.39 
   2  -5   0    0.70    0.34 
   2  -5   0    0.68    0.43 
   2  -5   0    1.59    0.50 
  -2  -5   0    0.67    0.39 
   2  -5   0    2.82    0.69 
   2  -5   0    1.19    0.57 
  -2  -5   0    0.85    0.29 
  -2  -5   0    1.93    0.61 
  -2  -5   0    1.12    0.38 
   2  -5   0    1.32    0.46 
   2   5   0    1.71    0.28 
  -2   5   0    2.28    0.75 
  -2   5   0    1.32    0.40 
   2   5   0    1.37    0.21 
   2   5   0    3.50    0.55 
  -2   5   0    0.92    0.57 
   2   5   0    0.54    0.39 
  -2   5   0    0.89    0.35 
  -2   5   0    0.88    0.38 
   2   5   0    1.11    0.33 
  -3  -5   0    1.43    0.53 
   3  -5   0   -0.03    0.33 
   3  -5   0    0.51    0.37 
   3  -5   0    0.27    0.31 
  -3  -5   0    0.73    0.35 
   3  -5   0    0.53    0.41 
  -3  -5   0    0.56    0.46 
   3  -5   0    0.17    0.36 
  -3  -5   0    0.54    0.26 
   3  -5   0    0.14    0.26 
   3  -5   0    2.44    0.71 
  -3   5   0    0.08    0.24 
   3   5   0    0.24    0.23 
  -3   5   0    0.72    0.40 
   3   5   0    0.87    0.43 
  -3   5   0    0.82    0.55 
  -3   5   0    1.29    0.66 
  -3   5   0   -0.08    0.26 
   3   5   0    0.92    0.33 
  -3   5   0    0.30    0.38 
   4  -5   0   30.66    2.00 
  -4  -5   0   34.17    2.17 
  -4  -5   0   28.79    1.54 
  -4  -5   0   31.93    1.88 
   4  -5   0   26.91    1.90 
   4  -5   0   33.22    2.12 
   4  -5   0   32.94    1.73 
  -4  -5   0   29.57    1.34 
  -4  -5   0   29.34    1.73 
   4  -5   0   29.26    1.72 
   4  -5   0   31.14    1.79 
   4  -5   0   32.63    1.79 
  -4   5   0   26.19    1.74 
  -4   5   0   31.70    1.87 
   4   5   0   29.45    1.59 
  -4   5   0   31.94    2.10 
  -4   5   0   29.01    1.89 
   4   5   0   32.37    1.51 
  -4   5   0   28.53    1.79 
  -4   5   0   32.85    2.27 
  -4   5   0   31.45    2.37 
  -5  -5   0    4.96    0.60 
   5  -5   0    3.81    0.82 
  -5  -5   0    4.47    0.88 
   5  -5   0    4.64    0.87 
  -5  -5   0    2.83    0.72 
  -5  -5   0    3.59    0.92 
   5  -5   0    3.48    0.91 
   5  -5   0    5.43    0.89 
   5  -5   0    2.99    0.85 
   5  -5   0    4.47    0.95 
   5  -5   0    3.27    0.69 
  -5   5   0    5.00    0.93 
  -5   5   0    3.77    0.91 
   5   5   0    3.57    0.68 
   5   5   0    3.55    0.62 
  -5   5   0    4.04    1.10 
  -5   5   0    5.24    0.94 
  -5   5   0    5.68    1.23 
  -5   5   0    3.07    0.74 
  -5   5   0    4.38    1.11 
  -6  -5   0  137.55    4.99 
  -6  -5   0  137.93    5.05 
  -6  -5   0  132.32    4.55 
   6  -5   0  141.35    5.03 
   6  -5   0  138.01    5.54 
   6  -5   0  137.01    5.45 
  -6  -5   0  127.54    5.42 
   6  -5   0  139.39    4.73 
   6  -5   0  133.87    5.05 
   6  -5   0  137.60    4.72 
   6  -5   0  138.38    5.40 
  -6  -5   0  137.78    4.50 
  -6   5   0  134.74    5.13 
  -6   5   0  137.23    5.08 
  -6   5   0  142.06    5.63 
  -6   5   0  129.52    5.09 
   6   5   0  141.50    4.84 
  -6   5   0  134.75    6.07 
   6   5   0  134.85    4.52 
  -6   5   0  142.63    5.07 
  -6   5   0  135.08    5.66 
  -7  -5   0    4.19    1.17 
  -7  -5   0    4.33    0.81 
   7  -5   0    4.78    1.01 
   7  -5   0    5.36    1.17 
   7  -5   0    4.88    0.86 
  -7  -5   0    3.85    0.99 
  -7  -5   0    5.98    1.08 
   7  -5   0    5.79    1.28 
   7  -5   0    2.20    0.76 
  -7   5   0    2.44    0.76 
  -7   5   0    5.40    1.29 
  -7   5   0    3.97    0.98 
  -7   5   0    5.10    1.28 
  -7   5   0    3.28    0.87 
  -7   5   0    4.34    1.36 
   7   5   0    6.24    1.08 
   8  -5   0   73.17    4.07 
  -8  -5   0   75.99    3.66 
   8  -5   0   76.85    4.13 
  -8  -5   0   79.82    4.03 
   8  -5   0   78.39    3.88 
  -8  -5   0   86.71    5.20 
   8  -5   0   79.27    3.94 
  -8   5   0   84.36    4.08 
  -8   5   0   75.52    4.78 
  -8   5   0   80.26    4.45 
   8   5   0   76.99    3.66 
  -8   5   0   75.38    4.37 
  -8   5   0   80.29    3.81 
  -8   5   0   76.15    3.91 
   9  -5   0    2.11    0.84 
   9  -5   0    3.73    1.18 
   9  -5   0    2.16    0.97 
  -9  -5   0    2.19    1.03 
   9  -5   0    2.23    0.97 
  -9   5   0    2.11    1.07 
  -9   5   0    3.37    1.04 
  -9   5   0    3.68    0.98 
   9   5   0    2.77    0.91 
  -9   5   0    0.87    0.87 
  -9   5   0    2.27    0.89 
   0  -6   0    1.14    0.51 
   0  -6   0    1.19    0.51 
   0  -6   0    2.44    0.61 
   0  -6   0    2.03    0.39 
   0  -6   0    1.36    0.59 
   0  -6   0    1.86    0.51 
   0  -6   0    1.49    0.42 
   0  -6   0    2.06    0.56 
   0  -6   0    2.82    0.73 
   0   6   0    1.38    0.38 
   0   6   0    1.71    0.52 
   0   6   0    1.48    0.47 
   0   6   0    1.61    0.72 
   0   6   0    2.75    0.62 
   0   6   0    2.54    0.84 
   0   6   0    2.64    0.64 
  -1  -6   0  291.46    8.98 
  -1  -6   0  289.79    8.15 
   1  -6   0  297.18    8.52 
   1  -6   0  289.54    7.82 
   1  -6   0  299.27    8.65 
   1  -6   0  280.32    9.06 
  -1  -6   0  290.27    8.35 
  -1  -6   0  289.61    8.59 
  -1  -6   0  283.00    8.28 
   1  -6   0  299.49    8.60 
   1  -6   0  287.20    7.81 
   1  -6   0  288.64    8.51 
   1  -6   0  298.09    8.35 
  -1  -6   0  292.18    8.31 
   1  -6   0  287.04    8.57 
   1   6   0  286.62    7.99 
  -1   6   0  281.28    8.00 
  -1   6   0  294.58    8.43 
  -1   6   0  295.12    9.12 
   1   6   0  283.93    7.59 
  -1   6   0  281.37    8.35 
   1   6   0  286.90    9.01 
  -1   6   0  288.15   10.05 
   1   6   0  279.56    8.40 
   1   6   0  295.69    8.34 
   1   6   0  290.96    8.26 
   1   6   0  285.92    8.55 
   1   6   0  288.95    7.26 
   1   6   0  285.43    9.17 
   1   6   0  290.17    7.87 
  -2  -6   0    5.20    0.86 
  -2  -6   0    7.90    1.19 
   2  -6   0    5.74    0.78 
   2  -6   0    6.87    0.79 
   2  -6   0    5.64    0.98 
   2  -6   0    9.04    1.35 
   2  -6   0    6.96    1.22 
  -2  -6   0    8.34    0.90 
   2  -6   0    6.85    0.94 
   2  -6   0    9.84    1.42 
  -2  -6   0    8.22    1.27 
   2  -6   0    6.11    1.00 
   2  -6   0    6.72    1.15 
  -2   6   0    6.08    0.92 
   2   6   0    8.10    1.13 
   2   6   0    7.01    0.54 
   2   6   0    7.28    0.82 
   2   6   0    7.35    0.49 
   2   6   0    6.62    0.84 
  -2   6   0    8.72    1.51 
  -2   6   0    8.29    1.60 
  -2   6   0    7.10    0.92 
  -2   6   0    6.61    1.00 
  -3  -6   0  109.55    3.84 
  -3  -6   0  109.64    4.57 
   3  -6   0  110.78    3.92 
   3  -6   0  113.55    4.13 
   3  -6   0  109.58    4.36 
   3  -6   0  112.54    4.26 
   3  -6   0  106.93    4.31 
   3  -6   0  112.96    3.79 
  -3  -6   0  115.19    3.72 
  -3  -6   0  105.64    4.14 
   3  -6   0  107.68    4.40 
  -3   6   0  110.37    4.05 
  -3   6   0  115.02    5.34 
  -3   6   0  113.43    4.78 
  -3   6   0  107.87    4.16 
   3   6   0  109.11    3.56 
   3   6   0  117.11    3.78 
  -3   6   0  116.83    4.25 
  -4  -6   0    3.52    0.72 
   4  -6   0    3.78    0.86 
   4  -6   0    4.61    0.83 
  -4  -6   0    3.74    0.62 
   4  -6   0    5.86    1.25 
  -4  -6   0    3.47    0.81 
   4  -6   0    4.44    0.99 
  -4  -6   0    4.52    0.98 
   4  -6   0    4.47    0.84 
   4  -6   0    3.99    0.92 
   4  -6   0    4.39    0.75 
  -4  -6   0    5.00    1.06 
  -4   6   0    3.72    0.80 
   4   6   0    3.64    0.65 
  -4   6   0    5.10    0.92 
  -4   6   0    4.46    1.22 
  -4   6   0    3.28    1.04 
  -4   6   0    4.03    0.84 
   4   6   0    4.84    0.68 
   5  -6   0  122.22    4.62 
   5  -6   0  127.23    4.75 
   5  -6   0  129.64    4.58 
   5  -6   0  126.71    5.20 
   5  -6   0  133.62    5.29 
  -5  -6   0  134.65    5.31 
  -5  -6   0  125.35    4.65 
   5  -6   0  127.57    4.72 
   5  -6   0  122.29    5.08 
  -5  -6   0  121.98    4.86 
  -5   6   0  128.61    4.91 
  -5   6   0  116.77    5.77 
  -5   6   0  126.12    4.92 
   5   6   0  131.23    4.16 
  -5   6   0  126.54    4.85 
   5   6   0  132.46    4.46 
  -5   6   0  127.52    5.47 
  -6  -6   0    5.81    1.14 
  -6  -6   0    5.32    1.08 
  -6  -6   0    4.31    1.12 
  -6  -6   0    3.09    0.86 
   6  -6   0    5.06    1.08 
   6  -6   0    7.40    1.37 
   6  -6   0    3.71    0.84 
   6  -6   0    3.89    0.94 
   6  -6   0    3.04    1.05 
   6  -6   0    3.57    1.02 
   6  -6   0    4.52    0.93 
  -6   6   0    4.20    1.28 
  -6   6   0    3.77    0.90 
   6   6   0    4.39    0.86 
  -6   6   0    4.16    0.98 
   6   6   0    3.94    0.73 
  -6   6   0    3.10    1.07 
  -6   6   0    2.73    1.11 
  -6   6   0    4.17    0.93 
   7  -6   0  109.04    5.14 
   7  -6   0  105.09    4.51 
  -7  -6   0  112.83    4.74 
  -7  -6   0  143.44    7.23 
   7  -6   0  107.01    4.26 
  -7  -6   0  111.42    7.33 
   7  -6   0  111.62    4.75 
   7  -6   0  100.57    4.93 
  -7   6   0  104.24    5.32 
   7   6   0  106.26    4.35 
  -7   6   0  105.66    5.81 
  -7   6   0  113.77    5.37 
  -7   6   0  120.08    4.85 
  -7   6   0  106.09    4.78 
  -7   6   0  116.09    4.90 
  -8  -6   0    0.44    0.54 
   8  -6   0   -0.06    0.44 
   8  -6   0    0.30    0.56 
   8  -6   0   -0.33    0.52 
   8  -6   0    0.28    0.53 
  -8   6   0   -0.05    0.48 
  -8   6   0    0.67    0.64 
   8   6   0    0.14    0.45 
  -8   6   0    0.31    0.74 
  -8   6   0    0.15    0.75 
  -8   6   0    0.55    0.92 
  -8   6   0    0.51    0.55 
   0  -7   0    0.12    0.35 
   0  -7   0    0.26    0.43 
   0  -7   0    0.36    0.41 
   0  -7   0    0.01    0.45 
   0  -7   0    0.45    0.31 
   0  -7   0    0.26    0.43 
   0  -7   0    0.14    0.30 
   0  -7   0   -0.31    0.19 
   0  -7   0   -0.12    0.34 
   0   7   0    0.67    0.43 
   0   7   0   -0.06    0.31 
   0   7   0    0.36    0.51 
   0   7   0   -0.07    0.47 
   0   7   0    0.07    0.24 
   0   7   0    0.65    0.38 
   0   7   0    0.08    0.31 
   1  -7   0   13.68    1.33 
   1  -7   0   11.82    1.33 
  -1  -7   0   14.38    1.76 
  -1  -7   0   13.06    1.37 
   1  -7   0   10.77    0.91 
   1  -7   0   12.83    1.48 
  -1  -7   0   11.32    1.32 
   1  -7   0   11.98    1.67 
  -1  -7   0   13.00    1.70 
   1  -7   0   13.99    0.99 
   1  -7   0   14.19    1.77 
  -1  -7   0    9.53    1.34 
   1  -7   0   13.67    1.72 
   1  -7   0   11.10    1.41 
  -1  -7   0   10.90    1.40 
  -1  -7   0   12.54    1.37 
  -1   7   0   12.36    1.07 
   1   7   0   11.80    1.44 
  -1   7   0   10.97    1.34 
  -1   7   0   15.18    2.10 
  -1   7   0   10.98    1.37 
  -1   7   0   17.06    2.44 
   1   7   0   10.54    1.26 
  -1   7   0   12.40    1.46 
   1   7   0   15.13    1.61 
  -1   7   0   13.88    1.50 
   1   7   0   12.75    0.91 
   1   7   0   12.24    1.00 
   1   7   0   14.19    1.27 
  -2  -7   0    1.38    0.58 
   2  -7   0    2.08    0.70 
   2  -7   0    0.85    0.58 
   2  -7   0    0.72    0.54 
   2  -7   0    0.52    0.46 
  -2  -7   0    0.70    0.55 
   2  -7   0    0.27    0.32 
   2  -7   0    1.17    0.40 
  -2  -7   0    1.89    0.68 
  -2  -7   0    1.51    0.52 
  -2  -7   0    1.27    0.68 
   2  -7   0    1.27    0.62 
   2  -7   0    1.02    0.61 
  -2  -7   0    0.21    0.36 
   2   7   0    0.95    0.39 
  -2   7   0    0.85    0.44 
  -2   7   0    1.84    0.85 
  -2   7   0    0.27    0.38 
  -2   7   0    1.32    0.50 
   2   7   0    1.12    0.43 
  -2   7   0    0.35    0.69 
  -3  -7   0    9.91    1.13 
  -3  -7   0    9.33    1.12 
  -3  -7   0   10.26    1.54 
   3  -7   0   10.14    1.45 
  -3  -7   0   13.09    1.73 
  -3  -7   0    8.86    1.22 
   3  -7   0   11.74    1.31 
   3  -7   0    9.26    1.27 
   3  -7   0   10.55    1.52 
   3  -7   0   10.14    1.58 
   3  -7   0   12.23    1.02 
   3  -7   0    9.11    1.46 
  -3   7   0    8.32    1.15 
  -3   7   0   10.11    1.38 
   3   7   0   10.39    0.87 
  -3   7   0    9.19    1.28 
  -3   7   0   10.17    1.98 
  -3   7   0   14.13    2.10 
   3   7   0    8.65    1.01 
   4  -7   0   32.76    2.20 
  -4  -7   0   30.32    2.31 
   4  -7   0   31.52    1.96 
  -4  -7   0   28.52    1.73 
   4  -7   0   30.53    2.24 
   4  -7   0   28.22    1.96 
  -4  -7   0   31.14    1.70 
  -4  -7   0   29.58    2.10 
   4  -7   0   28.77    2.22 
   4  -7   0   28.39    2.21 
   4  -7   0   31.32    1.78 
  -4  -7   0   31.11    2.15 
  -4   7   0   28.58    2.77 
  -4   7   0   30.00    2.11 
  -4   7   0   27.47    2.43 
  -4   7   0   27.46    2.01 
  -4   7   0   29.61    2.00 
   4   7   0   29.16    1.68 
   5  -7   0   14.10    1.64 
  -5  -7   0   15.96    1.93 
  -5  -7   0   14.39    1.90 
   5  -7   0   18.90    2.40 
   5  -7   0   17.16    2.04 
  -5  -7   0   14.95    1.83 
   5  -7   0   14.75    1.34 
   5  -7   0   15.19    2.01 
   5  -7   0   15.43    1.94 
   5  -7   0   14.47    1.65 
  -5   7   0   18.87    2.01 
  -5   7   0   14.48    1.70 
  -5   7   0   16.43    2.56 
  -5   7   0   15.85    1.83 
  -5   7   0   21.67    2.69 
   5   7   0   15.28    1.27 
   6  -7   0   99.18    4.00 
   6  -7   0   96.36    4.23 
   6  -7   0   86.55    4.50 
   6  -7   0   96.41    4.17 
   6  -7   0   90.08    4.00 
   6  -7   0   86.15    4.49 
  -6  -7   0   89.86    3.97 
  -6  -7   0   92.45    4.32 
   6  -7   0   89.15    4.48 
  -6   7   0   94.92    5.53 
  -6   7   0   98.83    5.06 
   6   7   0   95.13    3.79 
  -6   7   0   87.32    4.23 
  -6   7   0   87.45    4.15 
  -6   7   0   90.02    4.21 
  -7  -7   0   13.10    1.87 
   7  -7   0   17.74    2.32 
   7  -7   0   12.05    1.58 
   7  -7   0   13.39    1.74 
   7  -7   0   13.58    2.04 
   7  -7   0   11.73    1.66 
  -7   7   0   13.32    1.81 
  -7   7   0   14.97    1.98 
  -7   7   0   13.84    2.20 
  -7   7   0   12.01    1.75 
  -7   7   0   15.56    2.71 
   0  -8   0   93.10    4.01 
   0  -8   0   94.31    3.92 
   0  -8   0   95.71    4.09 
   0  -8   0   97.40    4.35 
   0  -8   0   97.83    4.14 
   0  -8   0   96.42    3.99 
   0  -8   0   96.99    4.58 
   0   8   0  100.95    4.85 
   0   8   0  104.58    5.01 
   0   8   0   94.81    3.99 
   0   8   0  100.16    3.70 
   0   8   0   95.13    4.08 
   0   8   0   95.14    4.04 
   0   8   0   97.59    3.51 
  -1  -8   0  141.44    5.14 
  -1  -8   0  144.50    5.13 
  -1  -8   0  143.74    5.56 
   1  -8   0  152.86    6.09 
   1  -8   0  141.54    5.25 
   1  -8   0  137.98    5.50 
   1  -8   0  141.08    5.39 
  -1  -8   0  138.12    5.01 
   1  -8   0  129.54    5.17 
  -1  -8   0  132.65    5.07 
   1  -8   0  138.77    5.41 
  -1  -8   0  138.96    5.15 
  -1  -8   0  144.52    5.76 
   1  -8   0  138.13    5.16 
   1  -8   0  141.51    4.52 
  -1   8   0  143.66    5.31 
  -1   8   0  145.84    5.07 
   1   8   0  139.80    4.62 
  -1   8   0  136.05    4.74 
   1   8   0  147.49    5.20 
  -1   8   0  134.51    6.33 
  -1   8   0  140.55    6.01 
  -1   8   0  145.71    5.27 
  -1   8   0  138.93    5.25 
   2  -8   0   33.44    2.26 
   2  -8   0   31.59    1.82 
   2  -8   0   34.99    2.34 
  -2  -8   0   31.93    2.42 
  -2  -8   0   33.63    2.09 
   2  -8   0   34.27    2.38 
  -2  -8   0   33.92    2.10 
   2  -8   0   29.18    2.29 
  -2  -8   0   33.19    2.00 
  -2  -8   0   32.85    2.04 
  -2  -8   0   32.53    2.07 
  -2  -8   0   31.30    2.33 
   2  -8   0   29.70    2.09 
   2  -8   0   29.31    2.21 
  -2   8   0   32.58    1.97 
  -2   8   0   37.65    2.87 
  -2   8   0   34.78    2.24 
  -2   8   0   32.25    2.20 
  -2   8   0   31.06    2.98 
   3  -8   0   83.93    4.12 
  -3  -8   0   89.63    4.09 
   3  -8   0   82.87    3.45 
  -3  -8   0   84.07    4.17 
  -3  -8   0   84.27    3.46 
   3  -8   0   87.01    4.05 
  -3  -8   0   84.84    3.46 
  -3  -8   0   87.52    3.56 
   3  -8   0   79.76    3.73 
   3  -8   0   88.12    4.07 
   3  -8   0   83.91    3.99 
  -3  -8   0   82.62    3.91 
  -3   8   0   77.42    3.77 
  -3   8   0   83.96    3.64 
  -3   8   0   81.00    3.82 
  -3   8   0   89.68    5.33 
  -3   8   0   83.26    4.53 
   4  -8   0   41.13    2.77 
  -4  -8   0   43.54    2.79 
  -4  -8   0   45.83    3.03 
   4  -8   0   46.00    2.95 
   4  -8   0   48.37    3.04 
   4  -8   0   50.59    2.83 
   4  -8   0   45.29    3.00 
   4  -8   0   45.91    2.56 
  -4  -8   0   47.08    2.92 
  -4   8   0   44.99    2.77 
  -4   8   0   50.59    4.03 
  -4   8   0   49.75    2.88 
  -4   8   0   44.61    3.32 
  -4   8   0   46.21    2.66 
   5  -8   0   62.23    3.44 
   5  -8   0   66.29    3.76 
   5  -8   0   60.85    3.26 
   5  -8   0   66.12    3.71 
  -5  -8   0   60.61    3.35 
   5  -8   0   63.16    3.25 
  -5  -8   0   57.42    3.40 
   5  -8   0   67.49    3.85 
  -5   8   0   59.38    4.55 
  -5   8   0   59.64    3.27 
  -5   8   0   65.40    3.53 
  -5   8   0   68.77    3.56 
  -5   8   0   64.00    4.16 
   6  -8   0   44.53    3.17 
   6  -8   0   43.32    3.14 
   6  -8   0   39.55    2.66 
  -6  -8   0   43.45    2.95 
   6  -8   0   46.14    2.81 
   6  -8   0   41.25    3.14 
   6  -8   0   43.95    2.86 
  -6  -8   0   42.36    2.98 
  -6   8   0   43.77    3.50 
  -6   8   0   42.44    2.84 
  -6   8   0   45.28    3.99 
  -6   8   0   45.86    2.99 
  -6   8   0   43.34    2.94 
   0  -9   0    0.04    0.47 
   0  -9   0    0.51    0.53 
   0  -9   0    0.44    0.62 
   0  -9   0    0.75    0.64 
   0  -9   0    0.33    0.57 
   0  -9   0    0.93    0.78 
   0  -9   0    0.23    0.50 
   0   9   0    2.51    0.96 
   0   9   0    0.87    0.58 
   0   9   0   -0.04    0.59 
   0   9   0    0.89    0.57 
   1  -9   0   -0.06    0.41 
   1  -9   0    0.41    0.52 
  -1  -9   0    0.78    0.77 
   1  -9   0   -0.32    0.45 
   1  -9   0    0.44    0.61 
  -1  -9   0    0.00    0.44 
   1  -9   0    0.24    0.49 
  -1  -9   0    0.06    0.42 
   1  -9   0   -0.37    0.48 
   1  -9   0    0.83    0.66 
  -1  -9   0    0.25    0.47 
  -1  -9   0    0.07    0.50 
  -1  -9   0    0.55    0.61 
  -1   9   0    0.20    0.58 
  -1   9   0    0.56    0.70 
  -1   9   0   -0.42    0.34 
  -1   9   0    0.47    0.48 
  -1   9   0   -0.08    0.38 
   2  -9   0    1.88    0.81 
  -2  -9   0    1.30    0.73 
  -2  -9   0    2.52    0.80 
   2  -9   0    0.28    0.52 
  -2  -9   0    1.24    0.69 
  -2  -9   0    1.64    0.63 
  -2  -9   0    0.93    0.61 
   2  -9   0    0.93    0.70 
  -2  -9   0    1.41    0.83 
   2  -9   0    1.74    0.82 
  -2  -9   0    0.85    0.72 
   2  -9   0    0.93    0.61 
  -2   9   0    1.30    0.61 
  -2   9   0    2.21    1.09 
  -2   9   0    1.37    0.73 
  -2   9   0    2.86    1.18 
  -2   9   0    1.49    0.75 
  -3  -9   0    5.23    1.33 
   3  -9   0    5.57    1.04 
   3  -9   0    4.94    1.14 
   3  -9   0    3.80    1.07 
  -3  -9   0    4.44    1.17 
  -3  -9   0    3.81    0.90 
   3  -9   0    4.24    1.12 
  -3  -9   0    5.33    1.08 
   3  -9   0    7.62    1.57 
   3  -9   0    4.50    1.28 
  -3  -9   0    4.41    1.08 
  -3   9   0    2.34    0.78 
  -3   9   0    3.16    1.29 
  -3   9   0    4.36    1.07 
  -3   9   0    5.29    1.18 
  -3   9   0    6.29    1.80 
  -4  -9   0    8.63    1.57 
  -4  -9   0    9.93    1.77 
   4  -9   0   11.12    1.82 
   4  -9   0    8.99    1.65 
   4  -9   0    8.09    1.65 
   4  -9   0   10.50    1.61 
   4  -9   0    9.35    1.79 
   4  -9   0    8.17    1.32 
  -4   9   0   10.29    2.41 
  -4   9   0    9.50    1.55 
  -4   9   0    8.97    1.53 
  -4   9   0    8.72    1.40 
  -4   9   0    9.65    2.02 
  -5  -9   0   32.79    2.63 
   5  -9   0   26.13    2.24 
  -5  -9   0   26.38    2.40 
   5  -9   0   31.17    2.58 
   5  -9   0   27.15    2.14 
   5  -9   0   30.83    2.74 
   5  -9   0   27.71    2.49 
   5  -9   0   32.73    2.72 
  -5   9   0   32.11    3.12 
  -5   9   0   32.83    4.23 
  -5   9   0   34.48    2.57 
  -5   9   0   27.74    2.35 
  -5   9   0   31.38    2.42 
   0 -10   0  157.84    6.18 
   0 -10   0  166.24    6.72 
   0 -10   0  161.83    6.30 
   0 -10   0  155.60    6.10 
   0 -10   0  165.45    6.29 
   0 -10   0  161.11    6.87 
   0 -10   0  163.60    6.33 
   1 -10   0   21.59    2.31 
   1 -10   0   26.46    3.11 
   1 -10   0   22.46    2.04 
  -1 -10   0   22.38    2.83 
  -1 -10   0   21.49    2.24 
  -1 -10   0   23.51    2.05 
  -1 -10   0   20.64    2.19 
  -1 -10   0   25.32    2.37 
   1 -10   0   22.88    1.99 
   1 -10   0   18.91    2.24 
  -1 -10   0   20.55    2.42 
  -1 -10   0   21.01    2.30 
  -1  10   0   20.32    2.87 
  -1  10   0   23.45    2.06 
   2 -10   0   84.84    4.45 
  -2 -10   0   83.85    4.24 
  -2 -10   0   88.95    4.07 
   2 -10   0   84.61    4.53 
   2 -10   0   83.82    4.28 
   2 -10   0   81.34    4.15 
  -2 -10   0   84.93    3.99 
   2 -10   0   87.59    4.04 
  -2 -10   0   85.35    4.52 
  -2  10   0   90.06    5.14 
  -2  10   0   87.58    4.30 
   3 -10   0    1.37    0.93 
  -3 -10   0    1.14    0.71 
   3 -10   0    2.22    1.06 
  -3 -10   0    1.99    1.10 
   3 -10   0    1.39    0.86 
  -3  10   0    2.05    0.99 
  -3  10   0    2.34    0.85 
  -3  10   0    0.91    0.68 
  -3  10   0    0.86    0.92 
 -10   0   1    0.25    0.57 
 -10   0   1   -0.35    0.62 
 -10   0   1    0.24    0.71 
  10   0  -1    0.11    0.50 
  10   0  -1   -0.09    0.44 
  10   0  -1   -0.01    0.43 
  -9   0   1   86.39    4.45 
   9   0  -1   84.86    3.74 
   9   0  -1   87.27    4.30 
   9   0  -1   85.21    4.15 
  -9   0   1   93.29    3.76 
  -9   0   1   75.88    4.53 
  -9   0   1   86.61    3.89 
   9   0  -1   81.64    3.89 
   8   0  -1   -0.16    0.36 
   8   0  -1   -0.17    0.33 
  -8   0   1   -0.18    0.42 
   8   0  -1   -0.11    0.30 
  -8   0   1   -0.07    0.29 
  -8   0   1    0.99    0.50 
  -8   0   1    0.51    0.65 
  -8   0   1    1.17    0.75 
  -8   0   1    0.09    0.38 
   8   0  -1    0.32    0.41 
  -7   0   1   70.07    3.05 
   7   0  -1   71.88    2.99 
  -7   0   1   75.50    3.57 
  -7   0   1   73.48    2.93 
   7   0  -1   72.76    3.26 
  -7   0   1   72.91    2.58 
  -7   0   1   71.60    3.33 
   7   0  -1   71.83    3.15 
  -7   0   1   69.86    2.63 
   7   0  -1   73.76    3.34 
   7   0  -1   72.13    2.98 
  -7   0   1   75.54    2.56 
  -7   0   1   74.13    3.77 
   6   0  -1    0.08    0.24 
  -6   0   1    0.17    0.29 
  -6   0   1    0.40    0.23 
   6   0  -1    0.27    0.32 
   6   0  -1    0.14    0.25 
  -6   0   1    0.14    0.22 
  -6   0   1    0.05    0.21 
  -6   0   1    0.07    0.32 
   6   0  -1    0.40    0.36 
   6   0  -1    0.07    0.25 
  -6   0   1    0.30    0.47 
  -6   0   1   -0.02    0.46 
  -6   0   1    0.03    0.19 
  -5   0   1   58.17    2.61 
   5   0  -1   57.12    2.41 
  -5   0   1   57.91    2.03 
   5   0  -1   59.37    2.27 
   5   0  -1   55.59    2.02 
  -5   0   1   62.17    2.04 
  -5   0   1   59.29    2.57 
  -5   0   1   58.39    2.22 
   5   0  -1   61.79    2.51 
  -5   0   1   62.03    2.36 
  -5   0   1   56.16    1.92 
   5   0  -1   59.10    2.39 
  -5   0   1   57.24    2.78 
   5   0  -1   57.45    2.26 
  -4   0   1   -0.09    0.30 
  -4   0   1    0.94    0.23 
   4   0  -1    0.29    0.21 
  -4   0   1    0.10    0.27 
   4   0  -1    0.14    0.14 
  -4   0   1    0.64    0.20 
   4   0  -1    0.31    0.22 
  -4   0   1    1.60    0.37 
   4   0  -1    0.50    0.18 
   4   0  -1   -0.27    0.17 
   4   0  -1    0.13    0.18 
   4   0  -1    0.25    0.24 
  -4   0   1    1.39    0.50 
   4   0  -1    0.74    0.28 
  -4   0   1    0.61    0.28 
  -4   0   1    0.13    0.13 
   3   0  -1   49.99    1.69 
   3   0  -1   49.31    1.72 
  -3   0   1   52.12    1.85 
   3   0  -1   50.69    1.57 
   3   0  -1   47.18    1.71 
  -3   0   1   49.39    1.67 
  -3   0   1   50.51    1.53 
  -3   0   1   51.19    1.71 
  -3   0   1   49.15    1.92 
   3   0  -1   48.73    1.56 
   3   0  -1   45.61    1.78 
  -3   0   1   51.74    1.91 
   3   0  -1   51.54    1.87 
  -3   0   1   50.70    1.78 
   3   0  -1   47.91    1.79 
  -3   0   1   50.87    1.60 
  -3   0   1   49.09    1.77 
   3   0  -1   55.27    1.74 
  -3   0   1   50.29    1.57 
  -3   0   1   51.91    1.76 
  -3   0   1   48.05    1.92 
   2   0  -1    0.77    0.17 
   2   0  -1    1.03    0.11 
   2   0  -1    1.10    0.12 
   2   0  -1    1.49    0.21 
   2   0  -1    1.90    0.21 
  -2   0   1    0.78    0.26 
   2   0  -1    1.18    0.24 
   2   0  -1    1.70    0.22 
   2   0  -1    1.01    0.25 
  -2   0   1    1.20    0.21 
  -2   0   1    1.48    0.22 
  -2   0   1    1.29    0.22 
  -2   0   1    1.51    0.26 
   2   0  -1    1.53    0.30 
  -2   0   1    1.11    0.27 
   2   0  -1    1.09    0.23 
   2   0  -1    0.80    0.16 
  -2   0   1    0.92    0.15 
   2   0  -1    0.63    0.17 
  -2   0   1    1.37    0.24 
  -2   0   1    0.93    0.18 
  -2   0   1    1.03    0.25 
  -2   0   1    1.40    0.19 
   2   0  -1    1.11    0.21 
  -2   0   1    2.68    0.33 
  -2   0   1    1.07    0.16 
  -1   0   1   36.49    0.97 
  -1   0   1   30.70    0.90 
  -1   0   1   30.85    0.93 
  -1   0   1   36.04    1.00 
  -1   0   1   29.49    1.01 
  -1   0   1   36.17    0.97 
  -1   0   1   32.84    0.94 
   0   0  -1   -0.02    0.02 
   0   0  -1   -0.01    0.01 
  -1   0  -1  162.28    3.79 
  -1   0  -1  163.64    3.90 
  -1   0  -1  159.53    3.99 
  -1   0  -1  150.19    3.93 
  -1   0  -1  158.04    4.00 
  -1   0  -1  172.50    4.13 
  -1   0  -1  165.59    3.80 
  -1   0  -1  139.12    3.91 
  -1   0  -1  136.83    3.92 
  -2   0  -1    0.96    0.20 
   2   0   1    0.45    0.17 
  -2   0  -1    0.77    0.19 
  -2   0  -1    1.09    0.12 
  -2   0  -1    0.44    0.17 
  -2   0  -1    1.08    0.24 
  -2   0  -1    0.63    0.17 
  -2   0  -1    0.70    0.19 
  -2   0  -1    0.65    0.24 
   2   0   1    0.46    0.17 
   2   0   1    0.47    0.17 
   2   0   1    0.22    0.13 
   2   0   1    0.87    0.18 
   2   0   1    0.37    0.15 
   2   0   1    0.52    0.17 
   2   0   1    0.41    0.14 
  -2   0  -1    0.35    0.12 
  -2   0  -1    0.41    0.15 
  -2   0  -1    0.67    0.10 
  -2   0  -1    0.96    0.19 
  -2   0  -1    0.56    0.11 
   3   0   1  185.27    4.99 
  -3   0  -1  182.03    4.97 
   3   0   1  176.41    5.00 
  -3   0  -1  179.55    4.54 
  -3   0  -1  177.16    5.16 
  -3   0  -1  189.92    4.75 
  -3   0  -1  181.70    4.51 
   3   0   1  186.31    4.91 
  -3   0  -1  177.00    5.31 
  -3   0  -1  179.41    4.93 
  -3   0  -1  185.29    4.87 
  -3   0  -1  182.62    4.50 
  -3   0  -1  174.60    4.96 
   3   0   1  176.48    4.75 
   3   0   1  184.34    5.02 
   3   0   1  180.42    5.05 
   3   0   1  174.81    4.79 
  -3   0  -1  181.62    5.06 
   3   0   1  172.73    4.95 
  -3   0  -1  179.56    4.85 
   3   0   1  176.92    4.87 
  -3   0  -1  169.01    4.75 
   4   0   1    0.57    0.28 
  -4   0  -1    0.21    0.13 
   4   0   1   -0.05    0.17 
  -4   0  -1    0.39    0.31 
  -4   0  -1    0.23    0.14 
  -4   0  -1    0.08    0.20 
   4   0   1    0.01    0.19 
  -4   0  -1    0.24    0.18 
  -4   0  -1    0.19    0.12 
   4   0   1   -0.04    0.12 
   4   0   1    0.30    0.25 
  -4   0  -1    0.19    0.32 
  -4   0  -1    1.38    0.33 
   4   0   1    0.21    0.19 
   5   0   1  116.00    3.82 
   5   0   1  118.39    3.79 
   5   0   1  120.26    4.01 
  -5   0  -1  119.41    4.44 
  -5   0  -1  118.41    3.26 
  -5   0  -1  116.05    3.60 
  -5   0  -1  115.33    3.28 
  -5   0  -1  112.99    4.20 
  -5   0  -1  121.60    3.31 
  -5   0  -1  120.45    3.74 
   5   0   1  116.56    4.03 
   5   0   1  114.34    3.87 
  -6   0  -1    0.20    0.18 
   6   0   1    0.03    0.26 
  -6   0  -1    0.08    0.35 
   6   0   1   -0.12    0.22 
  -6   0  -1    0.36    0.47 
  -6   0  -1    0.29    0.31 
  -6   0  -1    0.13    0.25 
  -6   0  -1    0.34    0.19 
  -6   0  -1    1.21    0.55 
  -6   0  -1    0.15    0.22 
   6   0   1    0.27    0.31 
   6   0   1    0.62    0.33 
  -7   0  -1  357.00    9.17 
  -7   0  -1  355.57   11.06 
   7   0   1  343.26   10.31 
   7   0   1  354.51   10.10 
  -7   0  -1  348.47   10.68 
  -7   0  -1  357.29    9.82 
   7   0   1  347.21   10.01 
  -7   0  -1  353.99   10.12 
  -7   0  -1  352.91    9.58 
   7   0   1  356.60    9.93 
  -7   0  -1  341.73    9.04 
  -8   0  -1    1.16    0.79 
  -8   0  -1    0.74    0.40 
  -8   0  -1    0.02    0.33 
  -8   0  -1    0.26    0.52 
   8   0   1    0.58    0.48 
   8   0   1    0.74    0.51 
   8   0   1    0.05    0.36 
  -8   0  -1    0.70    0.42 
   8   0   1    0.08    0.34 
   9   0   1  205.87    7.02 
  -9   0  -1  189.63    7.96 
  -9   0  -1  200.83    7.75 
  -9   0  -1  202.41    7.02 
   9   0   1  214.70    7.08 
   9   0   1  196.90    7.31 
  -9   0  -1  198.69    6.63 
   9   0   1  197.24    6.73 
 -10   0  -1    0.79    0.93 
  10   0   1    0.64    0.56 
  10   0   1    0.01    0.46 
 -10   0  -1    0.10    0.68 
 -10   0  -1    0.13    0.53 
  10   0   1    0.36    0.57 
  10  -1  -1   40.19    2.90 
 -10  -1   1   41.14    3.43 
 -10  -1   1   37.83    3.07 
 -10  -1   1   39.18    3.17 
 -10  -1   1   40.34    2.66 
  10  -1  -1   42.14    2.73 
  10  -1  -1   43.04    2.88 
  10   1  -1   38.95    2.45 
 -10   1   1   45.35    3.44 
 -10   1   1   44.55    3.37 
 -10   1   1   42.01    3.32 
  10   1  -1   42.10    2.78 
 -10   1   1   39.29    2.60 
 -10   1   1   38.48    3.35 
 -10   1   1   39.18    2.69 
  -9  -1   1    1.48    0.85 
  -9  -1   1    0.75    0.53 
   9  -1  -1    1.27    0.57 
   9  -1  -1    0.80    0.51 
   9  -1  -1    0.73    0.63 
  -9  -1   1    1.06    0.66 
  -9  -1   1    0.57    0.64 
   9  -1  -1    1.52    0.65 
  -9   1   1    1.31    0.66 
  -9   1   1    0.62    0.71 
   9   1  -1    1.02    0.52 
   9   1  -1    1.13    0.67 
   9   1  -1    1.07    0.55 
  -9   1   1   -0.37    0.81 
  -9   1   1    0.70    0.73 
  -9   1   1    0.81    0.57 
  -8  -1   1   75.43    3.36 
  -8  -1   1   75.25    4.13 
   8  -1  -1   78.13    3.45 
   8  -1  -1   78.13    3.48 
  -8  -1   1   81.29    4.00 
   8  -1  -1   74.42    3.53 
  -8  -1   1   78.00    3.11 
   8  -1  -1   73.83    3.62 
   8   1  -1   77.95    3.48 
   8   1  -1   80.52    3.72 
   8   1  -1   77.12    3.22 
   8   1  -1   75.22    3.22 
   8   1  -1   79.80    3.66 
  -8   1   1   76.89    3.08 
  -8   1   1   83.87    3.48 
  -8   1   1   76.67    3.98 
  -8   1   1   80.13    3.55 
  -8   1   1   80.79    4.33 
  -7  -1   1    7.35    0.75 
   7  -1  -1    7.28    1.09 
  -7  -1   1    8.66    0.87 
   7  -1  -1    6.25    0.97 
  -7  -1   1    5.76    1.17 
  -7  -1   1    7.48    1.01 
   7  -1  -1    7.51    1.06 
  -7  -1   1    6.56    0.82 
  -7  -1   1    7.89    1.40 
   7  -1  -1    4.59    0.91 
  -7  -1   1    8.12    0.95 
   7   1  -1    8.37    1.20 
  -7   1   1    5.78    0.94 
  -7   1   1    6.93    0.84 
   7   1  -1    6.29    0.87 
   7   1  -1    8.00    1.15 
  -7   1   1    7.81    1.43 
  -7   1   1    7.22    1.00 
  -7   1   1    7.26    0.89 
   7   1  -1    6.45    0.99 
   7   1  -1    6.76    0.91 
  -7   1   1    6.92    0.61 
  -7   1   1    7.92    1.32 
  -7   1   1    7.00    1.29 
  -6  -1   1  225.32    7.15 
  -6  -1   1  235.61    6.98 
   6  -1  -1  215.78    6.78 
   6  -1  -1  223.42    6.97 
  -6  -1   1  227.36    6.66 
  -6  -1   1  231.43    7.58 
   6  -1  -1  235.92    7.01 
  -6  -1   1  228.61    6.42 
  -6  -1   1  230.75    6.37 
  -6  -1   1  226.19    5.95 
   6  -1  -1  234.10    6.82 
  -6  -1   1  219.92    6.09 
   6   1  -1  236.74    7.00 
   6   1  -1  224.14    6.98 
  -6   1   1  231.85    6.87 
   6   1  -1  230.84    6.55 
  -6   1   1  220.41    6.43 
  -6   1   1  232.79    7.16 
  -6   1   1  227.93    7.32 
  -6   1   1  223.75    7.58 
  -6   1   1  225.90    6.72 
  -6   1   1  225.90    6.08 
  -6   1   1  221.36    6.34 
   6   1  -1  226.98    6.81 
   6   1  -1  233.74    6.56 
   5  -1  -1   48.32    1.49 
   5  -1  -1   47.11    2.20 
   5  -1  -1   58.96    2.28 
  -5  -1   1   52.03    1.93 
  -5  -1   1   49.68    1.71 
   5  -1  -1   50.92    2.15 
  -5  -1   1   47.98    2.32 
  -5  -1   1   49.51    1.60 
   5  -1  -1   51.07    2.25 
   5  -1  -1   49.50    1.45 
  -5  -1   1   52.67    2.29 
  -5  -1   1   49.68    2.03 
   5  -1  -1   49.87    2.22 
  -5  -1   1   49.72    1.88 
   5  -1  -1   49.66    1.63 
  -5   1   1   50.73    1.96 
   5   1  -1   50.11    1.96 
  -5   1   1   53.18    2.46 
   5   1  -1   51.72    2.24 
  -5   1   1   47.50    2.53 
  -5   1   1   50.28    2.17 
  -5   1   1   51.83    2.48 
   5   1  -1   50.35    2.13 
  -5   1   1   52.02    1.91 
  -5   1   1   51.02    1.76 
   5   1  -1   50.84    1.97 
  -5   1   1   53.11    2.15 
   5   1  -1   48.01    2.22 
  -4  -1   1  657.28   16.07 
   4  -1  -1  656.40   16.54 
  -4  -1   1  651.40   16.18 
  -4  -1   1  628.69   15.72 
   4  -1  -1  630.57   15.93 
   4  -1  -1  668.81   16.46 
  -4  -1   1  652.71   15.86 
  -4  -1   1  663.58   16.66 
   4  -1  -1  684.12   15.88 
   4  -1  -1  676.45   15.88 
   4  -1  -1  645.50   16.54 
   4  -1  -1  637.84   16.52 
   4  -1  -1  648.39   16.23 
   4  -1  -1  669.48   16.14 
  -4  -1   1  671.56   16.09 
  -4  -1   1  655.90   16.26 
   4  -1  -1  652.00   16.47 
  -4   1   1  659.95   16.47 
  -4   1   1  649.93   16.82 
  -4   1   1  686.24   16.84 
  -4   1   1  664.78   16.16 
  -4   1   1  663.70   16.44 
   4   1  -1  626.97   16.38 
   4   1  -1  640.49   16.50 
   4   1  -1  660.01   16.57 
  -4   1   1  675.60   16.24 
   4   1  -1  639.20   16.14 
   4   1  -1  658.73   16.17 
  -4   1   1  671.90   16.13 
  -4   1   1  628.00   16.99 
  -4   1   1  606.85   15.95 
   3  -1  -1   56.22    1.70 
   3  -1  -1   58.52    2.04 
   3  -1  -1   58.95    2.05 
  -3  -1   1   56.92    1.88 
   3  -1  -1   57.66    2.44 
  -3  -1   1   58.39    1.50 
   3  -1  -1   55.51    1.84 
  -3  -1   1   55.42    1.61 
  -3  -1   1   55.73    2.01 
  -3  -1   1   56.92    1.73 
   3  -1  -1   56.34    2.05 
   3  -1  -1   56.57    1.98 
  -3  -1   1   59.17    2.09 
   3  -1  -1   56.26    1.74 
  -3  -1   1   58.07    1.81 
  -3  -1   1   55.97    1.94 
  -3  -1   1   57.34    1.91 
   3  -1  -1   56.44    1.99 
  -3  -1   1   57.18    1.76 
   3  -1  -1   53.85    2.00 
   3  -1  -1   57.98    1.89 
   3  -1  -1   56.75    2.17 
   3  -1  -1   57.70    1.80 
  -3  -1   1   60.97    1.88 
  -3   1   1   55.01    2.28 
   3   1  -1   56.43    1.78 
  -3   1   1   57.00    2.01 
  -3   1   1   58.66    1.90 
   3   1  -1   58.10    2.06 
   3   1  -1   54.23    2.00 
  -3   1   1   56.41    2.01 
  -3   1   1   55.19    1.74 
   3   1  -1   57.03    1.73 
  -3   1   1   56.56    1.99 
  -3   1   1   55.91    2.19 
  -3   1   1   54.48    1.84 
  -3   1   1   57.81    2.22 
  -3   1   1   59.19    1.87 
   3   1  -1   57.03    1.99 
  -3   1   1   59.62    2.05 
   3   1  -1   56.63    1.81 
  -2  -1   1  316.97    7.59 
   2  -1  -1  292.41    7.70 
  -2  -1   1  316.19    7.89 
  -2  -1   1  313.13    7.90 
   2  -1  -1  311.00    8.11 
  -2  -1   1  311.09    7.61 
   2  -1  -1  312.81    7.83 
  -2  -1   1  317.15    7.47 
  -2  -1   1  307.39    7.49 
  -2  -1   1  318.63    7.92 
   2  -1  -1  307.13    7.79 
  -2  -1   1  303.29    7.81 
  -2  -1   1  318.75    7.68 
   2  -1  -1  310.77    7.81 
  -2  -1   1  295.87    7.85 
   2  -1  -1  321.13    7.93 
   2  -1  -1  310.19    8.07 
  -2  -1   1  305.20    8.11 
   2  -1  -1  321.03    7.97 
  -2  -1   1  303.03    7.74 
   2  -1  -1  317.75    7.91 
   2  -1  -1  313.97    7.88 
   2  -1  -1  313.81    7.90 
   2  -1  -1  308.79    7.96 
  -2  -1   1  307.84    7.69 
   2  -1  -1  311.30    7.75 
   2  -1  -1  307.09    7.88 
  -2   1   1  320.76    7.83 
   2   1  -1  294.87    7.61 
   2   1  -1  302.84    7.89 
  -2   1   1  310.76    7.87 
   2   1  -1  318.66    7.75 
   2   1  -1  303.17    7.90 
  -2   1   1  301.86    7.69 
  -2   1   1  315.07    7.92 
  -2   1   1  302.09    7.81 
  -2   1   1  317.75    7.93 
  -2   1   1  318.52    8.06 
  -2   1   1  314.05    7.86 
  -2   1   1  318.77    7.84 
  -2   1   1  323.07    7.90 
  -2   1   1  332.73    7.95 
   2   1  -1  309.02    7.60 
   2   1  -1  309.02    7.66 
  -2   1   1  301.88    7.68 
  -2   1   1  310.35    8.10 
  -2   1   1  327.65    7.96 
  -2   1   1  317.35    7.95 
  -2   1   1  307.29    8.16 
   1  -1  -1   33.37    1.17 
  -1  -1   1   38.43    0.95 
   1  -1  -1   34.80    1.25 
   1  -1  -1   37.94    1.15 
  -1  -1   1   37.70    1.05 
  -1  -1   1   37.67    1.23 
   1  -1  -1   34.43    1.30 
   1  -1  -1   38.14    1.22 
  -1  -1   1   37.91    1.04 
   1  -1  -1   41.02    1.31 
   1  -1  -1   39.41    1.25 
   1  -1  -1   36.87    1.21 
  -1  -1   1   37.60    1.20 
   1  -1  -1   37.80    1.20 
   1  -1  -1   38.40    1.14 
   1  -1  -1   35.91    1.22 
  -1  -1   1   38.84    1.19 
  -1  -1   1   37.91    1.39 
  -1  -1   1   36.89    1.05 
   1  -1  -1   40.42    1.35 
   1  -1  -1   36.94    1.23 
  -1  -1   1   37.23    0.98 
  -1   1   1   36.88    1.25 
  -1   1   1   37.64    1.20 
  -1   1   1   38.26    1.22 
  -1   1   1   37.97    1.19 
  -1   1   1   37.45    1.16 
   1   1  -1   35.98    1.21 
   1   1  -1   35.60    1.12 
   1   1  -1   36.53    1.36 
  -1   1   1   39.76    1.23 
  -1   1   1   37.52    1.22 
  -1   1   1   37.60    1.29 
  -1   1   1   41.83    1.29 
  -1   1   1   37.71    1.13 
  -1   1   1   36.68    1.20 
  -1   1   1   36.62    1.18 
   0  -1   1  719.04   16.69 
   0  -1  -1  692.93   16.67 
   0  -1   1  723.66   16.77 
   0  -1  -1  708.52   16.58 
   0  -1  -1  712.64   16.52 
   0  -1   1  706.75   16.52 
   0  -1   1  743.24   16.68 
   0  -1   1  743.10   16.61 
   0  -1  -1  577.46   16.52 
   0  -1  -1  657.99   16.65 
   0  -1  -1  617.62   16.43 
   0  -1  -1  665.84   16.65 
   0  -1  -1  691.36   16.55 
   0  -1   1  675.50   16.45 
   0  -1  -1  656.46   16.45 
   0   1   1  638.22   16.56 
  -1  -1  -1   60.49    1.62 
   1  -1   1   62.56    1.80 
  -1  -1  -1   62.58    1.84 
  -1  -1  -1   63.48    1.73 
  -1  -1  -1   62.34    1.72 
   1  -1   1   61.66    1.81 
   1  -1   1   62.29    1.87 
  -1  -1  -1   62.14    1.67 
   1  -1   1   63.85    2.07 
   1  -1   1   66.34    1.92 
  -1  -1  -1   61.62    1.76 
   1  -1   1   63.94    1.90 
  -1  -1  -1   64.05    1.63 
   1  -1   1   62.21    1.89 
   1  -1   1   60.95    1.83 
  -1  -1  -1   63.31    1.86 
   1  -1   1   61.51    1.77 
   1  -1   1   62.63    2.09 
   1  -1   1   62.71    1.96 
  -1  -1  -1   62.75    1.78 
   1  -1   1   59.15    1.80 
  -1  -1  -1   65.25    1.72 
  -1  -1  -1   61.03    1.79 
  -1  -1  -1   62.18    1.87 
   1  -1   1   61.51    1.85 
  -1   1  -1   55.42    1.82 
  -1   1  -1   64.80    1.82 
  -1   1  -1   61.08    1.88 
   1   1   1   61.49    1.71 
  -1   1  -1   64.08    1.87 
  -1   1  -1   63.03    1.88 
   1   1   1   54.43    1.80 
  -1   1  -1   64.94    1.84 
   1   1   1   61.12    1.80 
   1   1   1   61.78    1.75 
  -1   1  -1   63.71    1.82 
  -1   1  -1   65.32    1.79 
   1   1   1   62.66    1.76 
  -1   1  -1   70.14    1.86 
   1   1   1   57.96    1.90 
  -1   1  -1   60.93    2.08 
  -1   1  -1   63.65    1.89 
   1   1   1   57.09    1.77 
  -1   1  -1   63.21    1.97 
  -1   1  -1   66.73    1.91 
  -1   1  -1   65.42    2.07 
   2  -1   1  939.68   22.08 
  -2  -1  -1  937.95   22.03 
   2  -1   1  968.57   22.05 
   2  -1   1  907.00   22.16 
  -2  -1  -1  853.43   21.83 
  -2  -1  -1  904.27   21.82 
  -2  -1  -1  963.73   22.03 
   2  -1   1  911.71   21.91 
   2  -1   1  946.32   22.33 
   2  -1   1  935.88   22.19 
   2  -1   1  890.08   22.11 
   2  -1   1  946.86   22.08 
  -2  -1  -1  810.02   21.97 
  -2  -1  -1  834.08   21.99 
   2  -1   1  933.79   22.05 
   2  -1   1  875.18   22.42 
  -2   1  -1  852.68   22.16 
  -2   1  -1  930.00   22.10 
  -2   1  -1  945.84   22.24 
   2   1   1  898.23   21.99 
   2   1   1  915.13   22.08 
   2   1   1  902.94   22.04 
  -2   1  -1  979.51   22.07 
   2   1   1  909.30   21.93 
  -2   1  -1  993.36   21.94 
  -2   1  -1  874.07   21.93 
  -2   1  -1  878.28   22.12 
  -2   1  -1  953.05   22.26 
  -2   1  -1  867.14   22.10 
   2   1   1  893.70   22.03 
  -2   1  -1  958.08   22.08 
   2   1   1  849.68   21.85 
  -2   1  -1  901.92   22.50 
  -2   1  -1  960.47   22.11 
  -2   1  -1  939.42   22.17 
  -2   1  -1  874.12   22.07 
  -2   1  -1  956.30   22.09 
  -2   1  -1  977.36   22.08 
   2   1   1  783.95   22.00 
  -3  -1  -1    0.70    0.20 
   3  -1   1    1.62    0.36 
  -3  -1  -1    1.53    0.26 
   3  -1   1    0.70    0.24 
   3  -1   1    0.64    0.23 
  -3  -1  -1    1.13    0.28 
  -3  -1  -1    0.49    0.15 
  -3  -1  -1    0.61    0.21 
   3  -1   1    0.36    0.21 
   3  -1   1    0.94    0.19 
   3  -1   1    0.85    0.28 
   3  -1   1    0.57    0.16 
  -3  -1  -1    1.45    0.32 
  -3  -1  -1    0.49    0.19 
   3  -1   1    0.50    0.24 
   3   1   1    1.33    0.31 
  -3   1  -1    0.65    0.19 
  -3   1  -1    0.96    0.42 
   3   1   1    1.07    0.29 
  -3   1  -1    1.32    0.29 
   3   1   1    0.95    0.26 
  -3   1  -1    0.55    0.32 
  -3   1  -1    1.38    0.34 
  -3   1  -1    0.38    0.18 
   3   1   1    0.67    0.20 
  -3   1  -1    0.68    0.37 
  -3   1  -1    0.75    0.27 
   3   1   1    1.55    0.33 
  -3   1  -1    0.94    0.27 
  -3   1  -1    1.08    0.10 
  -3   1  -1    1.72    0.37 
   4  -1   1  340.50    8.80 
   4  -1   1  337.55    9.16 
   4  -1   1  340.84    8.31 
  -4  -1  -1  336.95    8.75 
   4  -1   1  327.56    8.34 
   4  -1   1  341.00    8.99 
   4  -1   1  345.05    9.15 
  -4  -1  -1  340.53    8.64 
   4  -1   1  331.07    9.01 
  -4  -1  -1  328.91    8.90 
  -4  -1  -1  330.18    9.40 
  -4  -1  -1  330.39    8.61 
  -4  -1  -1  348.58    8.65 
  -4   1  -1  336.28    8.19 
   4   1   1  336.81    8.98 
   4   1   1  341.77    9.09 
   4   1   1  337.90    8.73 
  -4   1  -1  341.97    8.65 
  -4   1  -1  348.58    8.88 
  -4   1  -1  344.18    9.22 
  -4   1  -1  334.26    8.96 
  -4   1  -1  344.30    9.05 
   4   1   1  345.31    9.03 
  -4   1  -1  325.94    9.57 
   4   1   1  335.99    8.93 
   4   1   1  339.97    8.83 
  -4   1  -1  339.72    9.36 
  -4   1  -1  340.69    8.79 
  -5  -1  -1    2.08    0.50 
   5  -1   1    1.89    0.51 
  -5  -1  -1    2.12    0.40 
   5  -1   1    2.20    0.51 
  -5  -1  -1    2.62    0.40 
  -5  -1  -1    3.09    0.72 
  -5  -1  -1    2.64    0.23 
   5  -1   1    2.50    0.57 
  -5  -1  -1    3.23    0.46 
  -5  -1  -1    2.27    0.21 
  -5  -1  -1    2.70    0.65 
   5  -1   1    3.87    0.67 
  -5   1  -1    1.91    0.37 
  -5   1  -1    2.44    0.25 
  -5   1  -1    1.93    0.57 
  -5   1  -1    2.29    0.48 
  -5   1  -1    2.67    0.53 
  -5   1  -1    2.12    0.67 
   5   1   1    1.49    0.37 
  -5   1  -1    2.05    0.50 
   5   1   1    1.75    0.49 
  -5   1  -1    2.65    0.50 
   5   1   1    2.69    0.56 
   5   1   1    2.26    0.49 
  -5   1  -1    1.90    0.59 
   5   1   1    2.34    0.48 
   6  -1   1   15.51    1.21 
  -6  -1  -1   16.63    1.51 
  -6  -1  -1   17.33    0.75 
  -6  -1  -1   17.57    1.56 
  -6  -1  -1   16.41    0.72 
   6  -1   1   17.79    1.32 
   6  -1   1   16.44    1.35 
  -6  -1  -1   16.11    1.22 
   6  -1   1   15.16    1.24 
  -6  -1  -1   16.86    0.98 
  -6  -1  -1   17.17    1.08 
  -6  -1  -1   16.80    1.02 
  -6   1  -1   16.89    1.61 
   6   1   1   18.30    1.35 
  -6   1  -1   17.26    1.54 
   6   1   1   18.30    1.24 
  -6   1  -1   16.39    1.24 
   6   1   1   18.83    1.19 
   6   1   1   17.36    1.35 
  -6   1  -1   16.39    1.49 
  -6   1  -1   17.45    1.16 
   6   1   1   17.55    1.24 
  -6   1  -1   16.55    1.01 
  -6   1  -1   16.62    0.65 
  -6   1  -1   15.89    1.25 
   7  -1   1    0.85    0.50 
  -7  -1  -1    0.72    0.60 
  -7  -1  -1    0.97    0.36 
  -7  -1  -1    1.28    0.52 
  -7  -1  -1    0.30    0.27 
   7  -1   1    1.05    0.50 
  -7  -1  -1    1.14    0.42 
   7  -1   1    0.59    0.46 
  -7  -1  -1    0.98    0.60 
   7  -1   1    0.39    0.37 
  -7   1  -1    1.62    0.56 
   7   1   1    0.44    0.38 
   7   1   1    1.04    0.44 
   7   1   1    0.69    0.38 
  -7   1  -1    1.08    0.42 
  -7   1  -1    1.52    0.76 
   7   1   1    0.98    0.45 
  -7   1  -1    0.49    0.32 
  -7   1  -1    1.07    0.67 
   7   1   1    0.56    0.43 
  -7   1  -1    1.49    0.67 
  -7   1  -1    1.01    0.47 
  -8  -1  -1    7.41    1.45 
   8  -1   1    7.67    1.22 
   8  -1   1    9.61    1.36 
  -8  -1  -1   10.47    1.17 
   8  -1   1    9.35    1.41 
  -8  -1  -1   10.82    1.10 
  -8  -1  -1    9.06    1.26 
   8  -1   1    7.16    1.17 
  -8  -1  -1    8.94    1.67 
   8   1   1    7.18    1.06 
   8   1   1    9.08    1.39 
  -8   1  -1    7.92    1.06 
  -8   1  -1    7.79    1.53 
   8   1   1    7.57    1.18 
  -8   1  -1   11.00    1.90 
  -8   1  -1    6.96    1.13 
  -8   1  -1    7.99    1.25 
   8   1   1    9.05    1.24 
   9  -1   1    0.22    0.47 
  -9  -1  -1    0.23    0.62 
   9  -1   1    0.22    0.36 
   9  -1   1    0.28    0.47 
  -9  -1  -1    0.19    0.37 
   9  -1   1   -0.27    0.35 
  -9  -1  -1    0.20    0.66 
  -9   1  -1    0.76    0.56 
  -9   1  -1    0.82    0.72 
   9   1   1   -0.05    0.40 
   9   1   1    0.12    0.44 
  -9   1  -1    0.23    0.46 
  -9   1  -1    0.53    0.70 
   9   1   1    0.32    0.45 
  -9   1  -1    0.75    0.45 
 -10  -1  -1   12.26    1.67 
 -10  -1  -1    8.26    1.81 
 -10  -1  -1    9.92    1.58 
  10  -1   1    9.12    1.54 
  10  -1   1   20.73    2.34 
 -10  -1  -1   10.38    2.07 
  10  -1   1   12.81    1.93 
 -10  -1  -1   10.37    1.87 
 -10   1  -1   10.67    1.67 
  10   1   1    9.83    1.46 
  10   1   1    8.78    1.62 
 -10   1  -1   10.87    1.66 
 -10   1  -1   12.37    2.31 
  10  -2  -1   27.48    2.44 
 -10  -2   1   31.54    2.28 
 -10  -2   1   31.31    3.00 
 -10  -2   1   27.49    2.65 
  10  -2  -1   29.13    2.46 
  10  -2  -1   29.90    2.37 
  10  -2  -1   30.50    2.59 
 -10   2   1   34.80    3.25 
 -10   2   1   27.50    2.29 
 -10   2   1   27.18    2.86 
 -10   2   1   34.44    2.54 
  -9  -2   1   45.32    3.33 
   9  -2  -1   41.88    2.62 
  -9  -2   1   47.10    3.15 
   9  -2  -1   44.23    2.82 
   9  -2  -1   43.13    2.83 
  -9  -2   1   39.25    2.96 
   9  -2  -1   44.86    2.75 
  -9  -2   1   39.82    2.42 
  -9   2   1   41.66    3.27 
   9   2  -1   39.97    2.66 
   9   2  -1   43.48    2.63 
  -9   2   1   42.23    2.69 
  -9   2   1   42.36    2.64 
  -9   2   1   44.26    2.39 
  -9   2   1   40.05    3.08 
   9   2  -1   40.72    2.25 
  -9   2   1   44.58    3.46 
  -8  -2   1    2.49    0.87 
  -8  -2   1    2.43    0.93 
   8  -2  -1    1.60    0.69 
   8  -2  -1    3.78    0.90 
  -8  -2   1    1.09    0.46 
  -8  -2   1    0.79    0.44 
   8  -2  -1    1.33    0.63 
   8  -2  -1    2.29    0.74 
  -8  -2   1    2.05    0.93 
  -8   2   1    5.46    1.42 
  -8   2   1    1.50    0.61 
   8   2  -1    1.68    0.53 
  -8   2   1    0.38    0.55 
  -8   2   1    1.33    0.62 
  -8   2   1    3.69    1.11 
  -8   2   1    1.61    0.56 
   8   2  -1    2.07    0.68 
  -8   2   1    1.80    0.57 
   8   2  -1    0.79    0.48 
   7  -2  -1    4.95    0.95 
  -7  -2   1    5.98    0.86 
  -7  -2   1    4.43    0.65 
  -7  -2   1    5.14    0.81 
  -7  -2   1    8.02    1.39 
  -7  -2   1    5.35    0.57 
  -7  -2   1    5.53    1.15 
  -7  -2   1    4.65    1.10 
   7  -2  -1    5.60    0.95 
   7  -2  -1    5.29    1.01 
   7  -2  -1    7.74    1.18 
  -7   2   1    5.15    0.83 
  -7   2   1    6.59    1.05 
   7   2  -1    4.82    0.72 
   7   2  -1    5.71    0.82 
  -7   2   1    6.16    1.33 
  -7   2   1    5.30    1.30 
  -7   2   1    6.13    0.99 
  -7   2   1    6.30    1.29 
  -7   2   1    5.85    0.84 
   7   2  -1    4.00    0.81 
   7   2  -1    4.02    0.84 
  -6  -2   1   12.17    0.98 
  -6  -2   1   12.91    1.31 
   6  -2  -1   14.15    1.18 
   6  -2  -1   12.89    0.80 
  -6  -2   1   13.02    0.72 
   6  -2  -1   12.32    1.36 
   6  -2  -1   13.51    0.69 
  -6  -2   1   14.80    1.05 
   6  -2  -1   13.27    0.74 
  -6  -2   1   12.83    0.67 
   6  -2  -1    9.88    1.20 
  -6  -2   1   11.86    1.49 
  -6  -2   1   13.46    0.86 
   6  -2  -1   14.14    1.22 
  -6   2   1   11.77    0.98 
  -6   2   1   14.80    1.45 
  -6   2   1   15.65    1.79 
  -6   2   1   11.52    1.25 
   6   2  -1   11.93    0.94 
  -6   2   1   13.75    1.48 
   6   2  -1   13.83    0.95 
   6   2  -1   11.73    1.24 
  -6   2   1   13.89    1.17 
  -6   2   1   12.25    1.02 
  -6   2   1   13.89    1.04 
   6   2  -1   15.28    1.24 
  -5  -2   1   49.77    2.32 
  -5  -2   1   53.22    2.07 
  -5  -2   1   49.98    2.51 
   5  -2  -1   49.73    2.24 
   5  -2  -1   51.74    2.33 
  -5  -2   1   50.52    1.74 
  -5  -2   1   48.92    1.98 
   5  -2  -1   47.52    2.43 
   5  -2  -1   48.46    2.20 
   5  -2  -1   49.36    1.59 
   5  -2  -1   48.64    1.78 
  -5  -2   1   48.24    1.44 
  -5  -2   1   47.78    1.58 
   5  -2  -1   49.26    2.29 
   5  -2  -1   49.87    1.87 
  -5  -2   1   51.50    1.94 
   5   2  -1   50.54    2.23 
  -5   2   1   50.34    2.27 
   5   2  -1   53.04    2.21 
   5   2  -1   49.19    1.84 
  -5   2   1   49.65    2.69 
  -5   2   1   46.30    2.47 
  -5   2   1   53.43    2.14 
  -5   2   1   48.36    2.02 
  -5   2   1   50.87    1.63 
  -5   2   1   47.48    2.18 
   5   2  -1   49.70    1.92 
  -5   2   1   47.52    2.46 
  -5   2   1   48.16    2.04 
  -4  -2   1   16.26    0.77 
  -4  -2   1   12.40    0.59 
  -4  -2   1   14.30    0.76 
   4  -2  -1   15.08    1.02 
   4  -2  -1   13.59    1.13 
  -4  -2   1   12.98    0.88 
  -4  -2   1   14.45    1.06 
   4  -2  -1   14.29    1.06 
  -4  -2   1   14.50    0.84 
  -4  -2   1   14.80    0.53 
   4  -2  -1   13.97    0.82 
   4  -2  -1   15.80    1.11 
  -4  -2   1   12.91    0.66 
   4  -2  -1   14.98    0.72 
  -4  -2   1   14.37    1.15 
   4  -2  -1   13.22    0.96 
   4  -2  -1   14.48    0.87 
  -4   2   1   14.87    0.97 
   4   2  -1   13.85    0.96 
  -4   2   1   14.45    0.96 
   4   2  -1   14.80    0.76 
  -4   2   1   15.56    1.06 
  -4   2   1   15.52    1.04 
  -4   2   1   14.36    1.26 
   4   2  -1   14.74    0.81 
  -4   2   1   15.08    1.20 
  -4   2   1   14.33    0.93 
  -4   2   1   14.40    1.23 
   4   2  -1   15.04    1.00 
  -3  -2   1   11.57    0.60 
   3  -2  -1   11.51    0.97 
  -3  -2   1   11.67    0.47 
   3  -2  -1   12.17    0.87 
   3  -2  -1   12.30    0.77 
  -3  -2   1   12.31    0.82 
   3  -2  -1   11.69    0.82 
   3  -2  -1   13.30    0.86 
   3  -2  -1   10.94    0.86 
   3  -2  -1   12.90    0.76 
  -3  -2   1   12.81    0.61 
  -3  -2   1   13.19    0.69 
   3  -2  -1   16.50    0.77 
   3  -2  -1   13.03    0.83 
  -3  -2   1   13.97    1.03 
  -3  -2   1   11.98    0.70 
   3  -2  -1   10.71    0.70 
  -3  -2   1   12.69    0.79 
  -3  -2   1   12.03    0.51 
   3   2  -1   10.92    0.78 
  -3   2   1   11.06    0.81 
  -3   2   1   11.55    0.79 
   3   2  -1   12.67    0.71 
  -3   2   1   12.70    1.01 
  -3   2   1   10.98    0.77 
  -3   2   1   14.91    0.94 
  -3   2   1   12.55    1.10 
   3   2  -1   11.77    0.57 
  -3   2   1   12.44    0.82 
  -3   2   1   12.11    1.01 
  -3   2   1   13.05    0.86 
   2  -2  -1    1.11    0.23 
  -2  -2   1    1.85    0.26 
  -2  -2   1    1.00    0.27 
   2  -2  -1    1.63    0.37 
   2  -2  -1    1.80    0.31 
   2  -2  -1    1.69    0.28 
  -2  -2   1    1.46    0.19 
   2  -2  -1    1.68    0.33 
   2  -2  -1    1.39    0.37 
  -2  -2   1    1.58    0.30 
   2  -2  -1    1.59    0.34 
  -2  -2   1    1.10    0.27 
   2  -2  -1    1.62    0.32 
  -2  -2   1    1.81    0.19 
  -2  -2   1    1.84    0.26 
   2  -2  -1    1.11    0.31 
   2  -2  -1    1.65    0.32 
  -2  -2   1    1.76    0.32 
   2  -2  -1    1.64    0.37 
   2  -2  -1    1.71    0.31 
  -2  -2   1    1.78    0.13 
  -2  -2   1    1.35    0.16 
   2  -2  -1    1.40    0.37 
  -2  -2   1    2.35    0.36 
   2  -2  -1    1.95    0.34 
   2  -2  -1    1.55    0.36 
  -2  -2   1    1.39    0.38 
   2   2  -1    1.59    0.16 
  -2   2   1    2.60    0.52 
  -2   2   1    1.77    0.30 
  -2   2   1    2.07    0.37 
  -2   2   1    2.17    0.32 
   2   2  -1    1.19    0.20 
   2   2  -1    1.36    0.35 
  -2   2   1    1.89    0.49 
   2   2  -1    1.43    0.29 
  -2   2   1    1.09    0.28 
   2   2  -1    1.38    0.17 
  -2   2   1    1.66    0.37 
  -2   2   1    2.47    0.39 
  -2   2   1    2.38    0.38 
  -2   2   1    1.86    0.33 
  -2   2   1    1.70    0.40 
   1  -2  -1    1.64    0.37 
  -1  -2   1    0.43    0.15 
   1  -2  -1    1.22    0.29 
   1  -2  -1    1.00    0.23 
  -1  -2   1    0.65    0.20 
   1  -2  -1    0.40    0.14 
  -1  -2   1    1.20    0.18 
   1  -2  -1    0.41    0.20 
   1  -2  -1    0.38    0.17 
   1  -2  -1    1.04    0.23 
   1  -2  -1    0.45    0.16 
   1  -2  -1    0.61    0.23 
  -1  -2   1    1.13    0.18 
   1  -2  -1    0.36    0.15 
   1  -2  -1    1.03    0.30 
  -1  -2   1    0.73    0.29 
  -1  -2   1    0.90    0.17 
   1  -2  -1    0.93    0.22 
  -1  -2   1    0.64    0.20 
   1  -2  -1    0.46    0.25 
   1  -2  -1    1.12    0.19 
  -1  -2   1    0.46    0.25 
   1  -2  -1    0.90    0.25 
  -1  -2   1    0.96    0.31 
  -1  -2   1    1.34    0.21 
  -1  -2   1    1.40    0.26 
   1  -2  -1    0.66    0.20 
   1   2  -1    1.19    0.25 
   1   2  -1    0.44    0.11 
  -1   2   1    0.92    0.19 
  -1   2   1    0.78    0.19 
   1   2  -1    1.49    0.28 
  -1   2   1    0.51    0.14 
  -1   2   1    0.42    0.26 
  -1   2   1    0.65    0.18 
   1   2  -1    0.42    0.24 
  -1   2   1    0.46    0.20 
  -1   2   1    0.48    0.20 
   1   2  -1    0.59    0.13 
  -1   2   1    0.99    0.25 
   1   2  -1    1.01    0.17 
  -1   2   1    0.36    0.19 
  -1   2   1    0.60    0.18 
  -1   2   1    0.77    0.21 
  -1   2   1    0.88    0.27 
   1   2  -1    1.05    0.24 
   1   2  -1    1.14    0.35 
  -1   2   1    0.47    0.18 
   0  -2  -1    1.47    0.24 
   0  -2   1    2.06    0.53 
   0  -2  -1    1.31    0.17 
   0  -2   1    1.38    0.24 
   0  -2   1    1.35    0.36 
   0  -2  -1    1.64    0.26 
   0  -2   1    1.56    0.24 
   0  -2   1    1.60    0.27 
   0  -2  -1    1.52    0.25 
   0  -2   1    1.91    0.32 
   0  -2  -1    1.76    0.23 
   0  -2  -1    1.30    0.26 
   0  -2   1    1.52    0.21 
   0  -2  -1    0.87    0.23 
   0  -2  -1    1.36    0.30 
   0  -2  -1    1.88    0.29 
   0  -2   1    2.17    0.23 
   0  -2  -1    1.56    0.31 
   0  -2   1    2.38    0.37 
   0  -2   1    0.86    0.29 
   0  -2  -1    2.81    0.42 
   0  -2  -1    1.30    0.31 
   0  -2   1    1.45    0.27 
   0  -2  -1    1.40    0.20 
   0  -2   1    1.24    0.22 
   0   2   1    0.92    0.26 
   0   2   1    1.36    0.25 
   0   2  -1    1.36    0.37 
   0   2   1    2.21    0.24 
   0   2   1    1.23    0.32 
   0   2   1    1.70    0.19 
   0   2  -1    1.45    0.22 
   0   2  -1    1.73    0.52 
   0   2  -1    1.87    0.34 
   0   2   1    1.37    0.24 
   0   2  -1    1.14    0.16 
   0   2   1    1.01    0.21 
   0   2  -1    1.66    0.28 
   0   2  -1    1.42    0.23 
   0   2   1    1.20    0.28 
   0   2   1    1.56    0.40 
   0   2  -1    1.67    0.25 
   0   2   1    1.70    0.22 
   0   2  -1    1.48    0.38 
   0   2   1    1.34    0.28 
   1  -2   1  152.21    3.96 
   1  -2   1  149.29    4.10 
   1  -2   1  138.66    4.23 
   1  -2   1  150.24    4.49 
   1  -2   1  146.18    4.09 
  -1  -2  -1  142.70    3.61 
  -1  -2  -1  149.30    4.02 
  -1  -2  -1  151.01    3.56 
  -1  -2  -1  148.98    3.93 
  -1  -2  -1  142.31    4.09 
   1  -2   1  142.33    3.95 
  -1  -2  -1  149.13    4.11 
  -1  -2  -1  142.31    4.03 
   1  -2   1  151.75    4.01 
   1  -2   1  147.21    4.06 
   1  -2   1  152.87    4.52 
   1  -2   1  148.99    4.10 
  -1  -2  -1  137.52    4.09 
   1  -2   1  147.19    4.12 
   1  -2   1  148.84    4.01 
   1  -2   1  150.99    4.18 
  -1  -2  -1  146.24    3.83 
  -1  -2  -1  150.20    4.04 
  -1  -2  -1  143.96    3.76 
   1  -2   1  149.12    4.08 
  -1  -2  -1  141.13    4.04 
  -1  -2  -1  145.61    3.76 
   1  -2   1  151.09    3.96 
   1   2   1  144.80    4.00 
   1   2   1  143.68    4.08 
   1   2   1  132.73    4.15 
  -1   2  -1  150.99    4.00 
  -1   2  -1  144.90    4.16 
   1   2   1  144.02    4.07 
  -1   2  -1  140.28    4.00 
  -1   2  -1  148.55    4.10 
  -1   2  -1  151.55    3.98 
  -1   2  -1  157.61    4.16 
   1   2   1  144.02    3.84 
  -1   2  -1  148.35    4.08 
  -1   2  -1  161.63    4.07 
  -1   2  -1  153.66    3.94 
  -1   2  -1  141.94    4.42 
  -1   2  -1  142.47    4.56 
   1   2   1  146.89    3.79 
  -1   2  -1  145.89    4.11 
   1   2   1  149.91    3.66 
   2  -2   1   31.76    1.32 
   2  -2   1   34.53    1.48 
   2  -2   1   37.75    1.39 
   2  -2   1   34.02    1.41 
  -2  -2  -1   33.04    1.32 
   2  -2   1   32.19    1.44 
  -2  -2  -1   33.74    1.37 
   2  -2   1   32.22    1.45 
  -2  -2  -1   35.24    1.35 
  -2  -2  -1   33.34    0.89 
  -2  -2  -1   33.50    1.28 
   2  -2   1   34.47    1.41 
  -2  -2  -1   32.03    1.19 
  -2  -2  -1   34.51    1.15 
  -2  -2  -1   32.57    1.22 
  -2  -2  -1   33.75    0.98 
  -2  -2  -1   33.30    1.24 
   2  -2   1   32.75    1.28 
  -2  -2  -1   33.41    0.88 
   2  -2   1   31.47    1.37 
   2  -2   1   32.71    1.34 
   2   2   1   33.10    1.32 
  -2   2  -1   35.22    1.67 
   2   2   1   32.83    1.33 
  -2   2  -1   32.68    1.41 
  -2   2  -1   33.16    1.37 
  -2   2  -1   33.60    1.69 
  -2   2  -1   35.82    1.40 
  -2   2  -1   32.92    1.40 
   2   2   1   33.74    1.39 
   2   2   1   33.96    1.24 
   2   2   1   34.46    1.27 
  -2   2  -1   34.87    1.43 
   2   2   1   34.92    1.32 
  -2   2  -1   32.78    1.35 
  -2   2  -1   33.91    1.37 
  -2   2  -1   34.98    1.47 
  -2   2  -1   36.71    1.48 
   3  -2   1   68.83    2.45 
   3  -2   1   67.76    2.50 
  -3  -2  -1   68.16    1.85 
   3  -2   1   68.52    2.50 
  -3  -2  -1   67.95    2.06 
  -3  -2  -1   67.46    2.46 
   3  -2   1   67.49    2.20 
  -3  -2  -1   68.17    2.14 
  -3  -2  -1   64.61    2.28 
   3  -2   1   74.16    2.59 
  -3  -2  -1   71.03    2.31 
   3  -2   1   69.56    2.15 
  -3  -2  -1   66.44    2.32 
  -3  -2  -1   67.62    2.28 
  -3  -2  -1   67.08    1.96 
   3  -2   1   63.93    1.86 
   3  -2   1   64.78    2.53 
   3  -2   1   69.87    2.40 
   3  -2   1   67.36    2.25 
   3   2   1   70.24    2.32 
  -3   2  -1   64.82    2.54 
  -3   2  -1   70.08    2.87 
  -3   2  -1   68.77    2.43 
  -3   2  -1   66.41    2.63 
  -3   2  -1   69.05    2.42 
  -3   2  -1   68.90    2.40 
  -3   2  -1   69.15    2.33 
   3   2   1   68.83    2.29 
   3   2   1   66.01    2.26 
   3   2   1   68.85    1.99 
   3   2   1   63.95    2.29 
  -3   2  -1   67.45    2.36 
  -4  -2  -1   97.91    3.42 
  -4  -2  -1   95.06    2.85 
  -4  -2  -1   94.18    2.66 
   4  -2   1   95.57    3.25 
  -4  -2  -1   97.87    2.84 
  -4  -2  -1   93.34    2.84 
   4  -2   1   96.06    3.34 
   4  -2   1   94.36    3.39 
  -4  -2  -1   91.53    3.14 
  -4  -2  -1   96.08    3.07 
  -4  -2  -1   96.92    2.96 
   4  -2   1   95.88    2.89 
   4  -2   1   94.18    2.94 
   4  -2   1   98.27    3.36 
  -4   2  -1   98.21    3.83 
  -4   2  -1   94.01    3.08 
  -4   2  -1   95.67    3.18 
  -4   2  -1   94.85    3.29 
   4   2   1   92.99    2.81 
  -4   2  -1   95.36    3.52 
   4   2   1   98.01    3.17 
   4   2   1   93.77    3.22 
  -4   2  -1   91.99    3.46 
  -4   2  -1   92.12    3.24 
   4   2   1   93.51    3.13 
  -4   2  -1   93.52    3.17 
   4   2   1   95.46    3.04 
   4   2   1   92.33    3.15 
  -5  -2  -1  100.61    3.34 
   5  -2   1  104.04    3.65 
   5  -2   1  101.76    3.11 
  -5  -2  -1  104.52    3.88 
   5  -2   1   96.39    3.66 
  -5  -2  -1  103.23    3.48 
  -5  -2  -1  101.23    3.02 
   5  -2   1  106.15    3.06 
   5  -2   1  102.05    3.74 
  -5  -2  -1  103.13    3.12 
  -5  -2  -1  105.63    3.23 
   5  -2   1  107.75    3.82 
  -5  -2  -1   99.00    3.52 
  -5   2  -1   98.72    3.82 
  -5   2  -1  105.12    4.00 
  -5   2  -1   97.86    3.35 
   5   2   1   99.91    3.51 
  -5   2  -1  104.66    3.49 
  -5   2  -1  103.95    3.69 
  -5   2  -1   98.44    3.61 
   5   2   1  105.83    3.69 
   5   2   1  103.55    3.60 
   5   2   1  101.53    3.50 
   5   2   1  104.31    3.43 
  -5   2  -1  106.57    3.55 
  -5   2  -1  102.83    4.26 
   5   2   1  103.20    3.20 
  -6  -2  -1   98.57    2.55 
  -6  -2  -1   98.09    3.58 
   6  -2   1   83.57    3.73 
   6  -2   1  101.77    3.78 
  -6  -2  -1  100.18    2.62 
  -6  -2  -1   99.60    4.06 
  -6  -2  -1   99.82    3.37 
  -6  -2  -1   98.02    4.01 
  -6  -2  -1   97.98    3.11 
   6  -2   1   99.95    3.07 
   6  -2   1  102.09    3.87 
  -6  -2  -1   98.41    3.65 
  -6  -2  -1  102.80    3.17 
  -6  -2  -1   99.08    3.31 
  -6  -2  -1  101.75    4.22 
   6  -2   1  101.01    3.91 
   6  -2   1   98.78    2.79 
   6   2   1  100.40    3.62 
  -6   2  -1  103.49    3.53 
  -6   2  -1   92.07    4.07 
   6   2   1   98.07    3.80 
   6   2   1   98.65    3.72 
   6   2   1   98.31    3.53 
  -6   2  -1  103.12    3.81 
  -6   2  -1   99.29    3.58 
   6   2   1  103.20    3.33 
  -6   2  -1   97.57    3.97 
  -6   2  -1  103.78    3.47 
  -6   2  -1  100.90    3.81 
  -6   2  -1  101.56    4.48 
  -7  -2  -1  138.56    5.72 
   7  -2   1  146.50    5.23 
  -7  -2  -1  145.70    4.46 
  -7  -2  -1  158.17    5.77 
  -7  -2  -1  151.32    4.54 
   7  -2   1  146.79    5.40 
   7  -2   1  156.98    5.45 
  -7  -2  -1  149.46    4.71 
  -7  -2  -1  151.02    5.70 
  -7  -2  -1  152.27    4.77 
   7  -2   1  149.90    5.48 
  -7  -2  -1  148.93    5.15 
  -7  -2  -1  147.53    5.06 
  -7   2  -1  153.71    5.64 
  -7   2  -1  153.47    5.28 
  -7   2  -1  144.31    5.27 
  -7   2  -1  146.79    4.79 
   7   2   1  148.58    5.36 
   7   2   1  153.54    5.04 
   7   2   1  153.63    4.79 
   7   2   1  146.80    5.05 
  -7   2  -1  149.57    4.87 
  -7   2  -1  143.81    6.07 
  -7   2  -1  155.68    5.86 
   7   2   1  140.97    5.19 
  -7   2  -1  154.20    5.05 
   8  -2   1   60.65    3.15 
  -8  -2  -1   56.08    3.29 
  -8  -2  -1   60.13    2.92 
  -8  -2  -1   56.58    3.45 
  -8  -2  -1   56.18    2.81 
   8  -2   1   52.20    2.86 
   8  -2   1   55.34    3.00 
   8  -2   1   61.54    3.24 
  -8  -2  -1   59.80    2.61 
  -8  -2  -1   57.15    3.35 
   8   2   1   59.14    2.84 
  -8   2  -1   56.68    2.56 
   8   2   1   54.49    2.53 
  -8   2  -1   52.31    3.56 
  -8   2  -1   53.93    2.67 
   8   2   1   54.73    2.74 
  -8   2  -1   59.22    3.05 
   8   2   1   54.98    2.96 
  -8   2  -1   57.60    3.42 
  -8   2  -1   56.93    2.94 
  -8   2  -1   58.71    3.33 
   8   2   1   53.29    2.99 
  -9  -2  -1  130.42    5.94 
  -9  -2  -1  120.26    4.86 
   9  -2   1  117.92    4.98 
  -9  -2  -1  111.51    5.42 
  -9  -2  -1  129.18    5.06 
   9  -2   1  117.11    5.08 
  -9  -2  -1  115.31    5.40 
   9  -2   1  123.42    5.32 
   9  -2   1  119.73    5.16 
   9   2   1  123.41    5.20 
  -9   2  -1  122.84    4.68 
  -9   2  -1  117.10    5.05 
  -9   2  -1  127.89    5.49 
   9   2   1  118.75    4.84 
   9   2   1  128.96    5.07 
  -9   2  -1  116.62    5.98 
  -9   2  -1  133.59    5.89 
  -9   2  -1  124.48    5.02 
  10  -2   1   27.25    2.44 
 -10  -2  -1   24.43    3.08 
 -10  -2  -1   29.71    2.26 
  10  -2   1   28.84    2.39 
  10  -2   1   28.48    2.28 
 -10  -2  -1   22.33    2.38 
  10  -2   1   29.37    2.43 
 -10   2  -1   27.16    3.42 
 -10   2  -1   28.59    2.29 
 -10   2  -1   28.49    2.38 
 -10   3   1   18.87    2.62 
   9  -3  -1   33.38    2.47 
   9  -3  -1   38.61    2.56 
  -9  -3   1   36.66    2.23 
  -9  -3   1   34.60    2.84 
   9  -3  -1   32.51    2.50 
  -9  -3   1   31.79    2.64 
  -9  -3   1   37.96    3.06 
   9  -3  -1   34.76    2.58 
  -9   3   1   32.23    2.83 
  -9   3   1   36.80    3.14 
   9   3  -1   33.74    2.42 
  -9   3   1   37.82    2.57 
  -9   3   1   32.59    2.19 
  -9   3   1   34.01    2.50 
  -9   3   1   37.81    3.00 
   8  -3  -1   42.29    2.65 
  -8  -3   1   40.49    2.20 
  -8  -3   1   39.58    2.19 
  -8  -3   1   40.57    2.88 
   8  -3  -1   37.18    2.43 
  -8  -3   1   40.65    2.94 
  -8  -3   1   38.27    2.64 
   8  -3  -1   42.49    2.66 
   8  -3  -1   40.28    2.54 
  -8   3   1   38.69    2.83 
  -8   3   1   40.34    2.89 
  -8   3   1   36.37    2.42 
  -8   3   1   42.94    2.34 
  -8   3   1   38.13    2.21 
   8   3  -1   41.52    2.48 
  -8   3   1   41.47    2.51 
  -8   3   1   36.29    2.94 
   7  -3  -1   66.01    3.32 
   7  -3  -1   68.73    3.24 
  -7  -3   1   72.30    2.57 
   7  -3  -1   68.61    2.42 
   7  -3  -1   65.63    3.14 
  -7  -3   1   73.19    3.00 
  -7  -3   1   70.93    3.66 
  -7  -3   1   72.09    2.89 
  -7  -3   1   66.47    3.33 
   7  -3  -1   67.10    3.31 
   7   3  -1   69.80    2.59 
  -7   3   1   66.29    2.94 
   7   3  -1   71.56    3.24 
  -7   3   1   71.90    3.94 
  -7   3   1   73.36    3.70 
  -7   3   1   74.80    3.10 
  -7   3   1   74.46    3.74 
  -7   3   1   65.76    3.19 
  -7   3   1   65.67    3.16 
   6  -3  -1  204.44    6.39 
   6  -3  -1  193.68    6.52 
   6  -3  -1  193.17    6.50 
  -6  -3   1  201.01    5.18 
   6  -3  -1  202.87    5.69 
  -6  -3   1  205.76    6.12 
  -6  -3   1  197.45    6.83 
  -6  -3   1  205.56    6.48 
  -6  -3   1  192.50    5.85 
  -6  -3   1  196.66    5.27 
  -6  -3   1  197.72    5.49 
  -6  -3   1  197.04    5.14 
   6  -3  -1  205.62    6.42 
   6   3  -1  203.29    5.56 
  -6   3   1  193.43    6.32 
  -6   3   1  198.53    6.41 
  -6   3   1  199.91    6.11 
  -6   3   1  200.11    7.18 
   6   3  -1  194.95    6.25 
  -6   3   1  199.96    6.11 
  -6   3   1  194.30    6.72 
  -6   3   1  197.06    6.83 
  -6   3   1  196.87    6.15 
  -5  -3   1  241.35    7.02 
   5  -3  -1  241.51    7.28 
   5  -3  -1  242.46    6.61 
  -5  -3   1  235.66    6.00 
  -5  -3   1  235.16    5.96 
   5  -3  -1  237.69    7.45 
   5  -3  -1  219.38    7.10 
   5  -3  -1  225.61    6.15 
  -5  -3   1  238.15    6.86 
   5  -3  -1  235.10    7.01 
  -5  -3   1  233.08    6.16 
  -5  -3   1  235.24    6.52 
  -5  -3   1  229.93    6.25 
  -5  -3   1  239.51    7.52 
   5  -3  -1  237.67    6.98 
  -5  -3   1  241.76    5.95 
  -5   3   1  229.15    7.71 
   5   3  -1  234.84    6.21 
  -5   3   1  241.74    6.91 
  -5   3   1  238.79    6.90 
  -5   3   1  239.87    7.09 
  -5   3   1  240.23    7.46 
  -5   3   1  237.48    6.90 
   5   3  -1  239.83    6.96 
  -5   3   1  222.41    7.37 
  -5   3   1  241.63    7.15 
  -4  -3   1  127.24    3.26 
   4  -3  -1  131.64    4.23 
   4  -3  -1  136.52    4.47 
   4  -3  -1  124.96    4.13 
  -4  -3   1  131.26    3.49 
  -4  -3   1  132.68    3.70 
  -4  -3   1  133.68    3.55 
   4  -3  -1  131.08    4.59 
  -4  -3   1  130.26    3.83 
   4  -3  -1  129.24    3.83 
  -4  -3   1  128.13    4.61 
   4  -3  -1  133.56    4.48 
   4  -3  -1  133.53    4.04 
   4  -3  -1  134.91    4.02 
  -4  -3   1  130.89    3.47 
  -4  -3   1  131.13    4.19 
  -4  -3   1  121.08    3.46 
   4   3  -1  135.16    3.90 
   4   3  -1  125.70    4.13 
  -4   3   1  131.72    4.21 
  -4   3   1  129.98    4.80 
  -4   3   1  129.79    4.58 
  -4   3   1  137.77    4.37 
   4   3  -1  132.03    3.51 
  -4   3   1  130.24    4.27 
  -4   3   1  140.36    4.70 
  -4   3   1  130.85    4.24 
  -4   3   1  131.00    4.20 
   3  -3  -1  304.04    8.10 
  -3  -3   1  300.09    7.60 
   3  -3  -1  300.08    8.16 
  -3  -3   1  289.96    8.69 
  -3  -3   1  291.90    7.83 
  -3  -3   1  290.03    7.37 
  -3  -3   1  305.88    8.21 
  -3  -3   1  306.86    8.53 
  -3  -3   1  294.38    7.86 
   3  -3  -1  311.36    8.52 
   3  -3  -1  304.94    8.07 
   3  -3  -1  314.99    8.43 
   3  -3  -1  299.42    8.40 
   3  -3  -1  310.01    8.60 
   3  -3  -1  309.90    7.96 
   3  -3  -1  309.24    8.12 
  -3  -3   1  307.80    7.58 
  -3   3   1  309.65    8.24 
  -3   3   1  304.18    8.30 
  -3   3   1  297.08    8.58 
   3   3  -1  306.29    8.14 
  -3   3   1  307.65    8.31 
  -3   3   1  307.38    8.26 
  -3   3   1  299.35    8.24 
   3   3  -1  308.58    7.38 
  -3   3   1  294.14    8.75 
   3   3  -1  318.15    7.81 
  -3   3   1  309.34    8.57 
   2  -3  -1   90.90    2.72 
   2  -3  -1   88.61    2.88 
  -2  -3   1   89.48    2.54 
   2  -3  -1   94.10    2.97 
   2  -3  -1   89.83    3.18 
  -2  -3   1   88.18    2.69 
   2  -3  -1   80.93    3.10 
   2  -3  -1   87.31    3.00 
   2  -3  -1   88.04    3.09 
  -2  -3   1   89.07    2.59 
   2  -3  -1   90.33    2.83 
  -2  -3   1   84.51    2.67 
   2  -3  -1   89.01    3.11 
  -2  -3   1   86.75    2.64 
  -2  -3   1   86.44    3.35 
  -2   3   1   89.87    3.31 
  -2   3   1   90.55    2.97 
  -2   3   1   89.77    2.97 
  -2   3   1   89.64    2.79 
   2   3  -1   91.31    2.87 
   2   3  -1   90.49    2.77 
   2   3  -1   90.00    2.54 
   2   3  -1   89.99    2.90 
  -2   3   1   92.32    3.21 
  -2   3   1   92.52    2.93 
  -2   3   1   88.94    3.02 
  -2   3   1   85.37    3.19 
  -2   3   1   88.33    2.97 
   2   3  -1   91.59    3.37 
   2   3  -1   92.71    2.20 
  -1  -3   1  335.73    8.35 
   1  -3  -1  335.72    8.95 
   1  -3  -1  329.39    8.52 
   1  -3  -1  320.70    8.74 
   1  -3  -1  344.48    8.67 
   1  -3  -1  329.89    8.54 
   1  -3  -1  326.13    8.20 
   1  -3  -1  337.79    8.43 
   1  -3  -1  355.00    8.80 
  -1  -3   1  321.44    9.04 
  -1  -3   1  295.46    9.31 
   1  -3  -1  326.18    8.35 
  -1  -3   1  340.57    8.29 
  -1  -3   1  299.94    8.69 
   1  -3  -1  326.54    8.66 
   1  -3  -1  329.22    8.81 
   1  -3  -1  329.62    8.54 
   1  -3  -1  335.85    8.82 
  -1  -3   1  320.37    8.21 
   1  -3  -1  340.15    8.33 
  -1  -3   1  309.79    9.04 
  -1  -3   1  322.27    8.37 
   1  -3  -1  335.70    8.62 
  -1  -3   1  327.85    8.45 
   1   3  -1  326.51    7.97 
  -1   3   1  316.41    8.96 
   1   3  -1  322.16    9.39 
  -1   3   1  340.29    8.59 
  -1   3   1  319.66    8.56 
   1   3  -1  315.60    8.27 
   1   3  -1  306.45    8.40 
  -1   3   1  340.15    8.37 
   1   3  -1  304.08    9.17 
  -1   3   1  338.15    8.65 
  -1   3   1  324.41    8.63 
   1   3  -1  342.62    8.35 
   1   3  -1  333.75    8.52 
   1   3  -1  340.17    8.07 
   1   3  -1  327.29    8.46 
  -1   3   1  336.72    8.60 
  -1   3   1  316.69    8.79 
   1   3  -1  337.99    7.92 
  -1   3   1  345.56    8.46 
  -1   3   1  318.24    9.04 
   1   3  -1  311.32    8.56 
  -1   3   1  341.47    8.33 
   0  -3  -1   74.99    2.51 
   0  -3  -1   76.80    2.70 
   0  -3  -1   75.99    2.18 
   0  -3   1   72.06    3.09 
   0  -3  -1   75.17    2.66 
   0  -3   1   76.73    2.14 
   0  -3  -1   70.31    2.46 
   0  -3   1   74.95    2.35 
   0  -3  -1   72.17    2.36 
   0  -3  -1   73.60    2.06 
   0  -3   1   75.69    2.37 
   0  -3   1   74.54    2.20 
   0  -3   1   71.81    2.38 
   0  -3   1   73.25    2.86 
   0  -3  -1   73.64    2.40 
   0  -3  -1   70.36    2.46 
   0  -3  -1   72.60    2.39 
   0  -3  -1   68.36    2.29 
   0  -3   1   72.19    2.44 
   0  -3   1   69.80    2.38 
   0   3  -1   72.36    2.34 
   0   3  -1   72.65    2.29 
   0   3  -1   72.22    2.19 
   0   3   1   74.25    2.20 
   0   3   1   75.17    2.85 
   0   3  -1   76.81    2.50 
   0   3   1   73.28    2.37 
   0   3   1   59.69    2.84 
   0   3   1   71.83    2.58 
   0   3   1   65.70    2.34 
   0   3   1   72.30    2.38 
   0   3  -1   66.53    3.28 
   0   3   1   75.75    2.20 
   0   3  -1   69.63    2.69 
   0   3   1   74.98    2.53 
   0   3  -1   70.29    2.94 
   0   3   1   73.59    2.56 
   0   3   1   76.94    2.09 
   0   3  -1   72.90    2.08 
   0   3  -1   73.88    2.30 
   1  -3   1  592.29   14.95 
   1  -3   1  614.79   14.54 
  -1  -3  -1  585.86   14.99 
   1  -3   1  617.05   14.90 
  -1  -3  -1  494.78   15.02 
   1  -3   1  610.46   14.71 
  -1  -3  -1  592.04   14.73 
  -1  -3  -1  535.52   14.53 
   1  -3   1  618.44   14.57 
   1  -3   1  616.14   14.80 
   1  -3   1  603.74   14.71 
  -1  -3  -1  565.20   14.73 
   1  -3   1  587.64   14.76 
   1  -3   1  615.32   14.60 
  -1  -3  -1  609.61   14.82 
  -1  -3  -1  603.00   14.04 
  -1  -3  -1  599.62   14.19 
   1  -3   1  600.93   14.60 
  -1  -3  -1  589.67   14.52 
   1  -3   1  612.77   15.50 
   1  -3   1  599.54   14.84 
  -1  -3  -1  594.55   14.76 
  -1  -3  -1  604.81   14.27 
  -1  -3  -1  609.82   14.59 
   1   3   1  582.53   14.97 
  -1   3  -1  585.92   15.14 
   1   3   1  578.46   14.71 
  -1   3  -1  563.36   15.69 
  -1   3  -1  560.46   14.78 
   1   3   1  566.15   14.38 
   1   3   1  601.75   14.23 
  -1   3  -1  610.92   14.75 
  -1   3  -1  620.20   14.77 
   1   3   1  517.24   14.84 
  -1   3  -1  624.85   14.52 
   1   3   1  527.90   15.20 
   1   3   1  575.96   14.38 
  -1   3  -1  575.22   15.41 
  -1   3  -1  591.86   14.64 
  -1   3  -1  621.22   14.66 
  -2  -3  -1  190.25    5.38 
   2  -3   1  193.55    5.40 
  -2  -3  -1  196.87    5.24 
   2  -3   1  196.54    5.39 
   2  -3   1  194.43    5.46 
  -2  -3  -1  202.40    5.45 
  -2  -3  -1  196.84    5.44 
  -2  -3  -1  195.57    5.49 
  -2  -3  -1  193.95    5.15 
   2  -3   1  184.51    5.43 
  -2  -3  -1  195.88    5.19 
  -2  -3  -1  192.86    4.93 
  -2  -3  -1  183.91    5.62 
   2  -3   1  195.46    5.61 
   2  -3   1  198.42    5.69 
   2  -3   1  186.26    5.61 
   2  -3   1  194.03    6.10 
  -2  -3  -1  191.90    5.63 
   2   3   1  200.84    5.63 
   2   3   1  196.73    5.69 
  -2   3  -1  192.78    5.56 
  -2   3  -1  200.48    5.48 
  -2   3  -1  189.52    5.55 
  -2   3  -1  195.26    5.49 
   2   3   1  190.37    5.16 
  -2   3  -1  191.87    5.56 
  -2   3  -1  199.60    5.46 
  -2   3  -1  193.34    6.17 
   2   3   1  191.32    5.42 
   2   3   1  190.46    5.32 
  -2   3  -1  195.63    5.87 
   2   3   1  193.24    4.94 
   3  -3   1  276.73    7.84 
  -3  -3  -1  276.85    7.86 
   3  -3   1  286.91    7.67 
   3  -3   1  282.43    7.11 
  -3  -3  -1  267.79    7.80 
  -3  -3  -1  281.26    6.77 
   3  -3   1  278.74    7.42 
   3  -3   1  275.93    7.57 
   3  -3   1  277.36    7.46 
  -3  -3  -1  277.01    7.45 
  -3  -3  -1  263.32    7.46 
   3  -3   1  270.09    7.79 
   3  -3   1  274.61    7.83 
  -3  -3  -1  269.74    7.05 
  -3  -3  -1  266.66    7.38 
  -3  -3  -1  276.42    7.31 
  -3   3  -1  288.45    7.64 
  -3   3  -1  283.49    7.71 
  -3   3  -1  285.48    7.66 
  -3   3  -1  293.23    7.70 
  -3   3  -1  273.34    8.35 
  -3   3  -1  288.84    7.86 
  -3   3  -1  275.99    8.01 
   3   3   1  269.52    7.48 
  -3   3  -1  277.48    7.64 
   3   3   1  273.76    7.40 
   3   3   1  275.01    7.35 
  -4  -3  -1   77.54    2.74 
  -4  -3  -1   78.72    2.60 
   4  -3   1   74.36    2.24 
  -4  -3  -1   77.25    3.05 
  -4  -3  -1   75.77    1.95 
   4  -3   1   77.64    2.68 
  -4  -3  -1   78.75    2.26 
   4  -3   1   79.25    3.12 
   4  -3   1   77.60    2.64 
   4  -3   1   76.54    2.90 
  -4  -3  -1   77.87    2.60 
  -4  -3  -1   78.61    2.42 
   4  -3   1   74.59    3.05 
   4  -3   1   80.56    3.19 
   4  -3   1   74.82    2.92 
  -4  -3  -1   72.88    1.96 
   4   3   1   81.36    2.79 
  -4   3  -1   71.33    3.41 
  -4   3  -1   79.52    2.97 
  -4   3  -1   79.54    2.97 
  -4   3  -1   73.76    2.87 
  -4   3  -1   83.30    3.32 
  -4   3  -1   79.78    3.18 
  -4   3  -1   76.21    2.84 
   4   3   1   79.39    2.75 
   4   3   1   78.99    2.79 
  -4   3  -1   76.12    2.86 
  -5  -3  -1   76.58    3.22 
   5  -3   1   74.87    2.65 
  -5  -3  -1   82.70    2.88 
  -5  -3  -1   75.14    2.83 
  -5  -3  -1   73.29    2.47 
  -5  -3  -1   76.76    2.89 
   5  -3   1   73.15    3.19 
  -5  -3  -1   75.04    2.13 
  -5  -3  -1   77.30    2.51 
   5  -3   1   72.95    3.05 
   5  -3   1   76.41    3.06 
   5  -3   1   78.75    3.22 
  -5   3  -1   78.22    3.40 
   5   3   1   75.34    2.41 
  -5   3  -1   75.83    3.33 
   5   3   1   74.32    2.89 
  -5   3  -1   76.89    2.98 
  -5   3  -1   73.17    3.05 
  -5   3  -1   76.17    3.08 
  -5   3  -1   73.79    3.65 
  -5   3  -1   77.07    2.92 
   5   3   1   70.34    2.80 
  -5   3  -1   72.56    2.94 
   6  -3   1   70.88    2.50 
  -6  -3  -1   73.65    3.36 
  -6  -3  -1   69.38    2.87 
  -6  -3  -1   72.11    2.87 
  -6  -3  -1   68.81    2.83 
   6  -3   1   71.52    3.26 
   6  -3   1   71.62    3.18 
   6  -3   1   69.82    3.09 
  -6  -3  -1   77.44    3.37 
  -6  -3  -1   71.45    2.20 
   6  -3   1   56.83    3.02 
  -6  -3  -1   72.66    2.43 
  -6  -3  -1   70.85    2.54 
   6   3   1   66.80    2.93 
   6   3   1   75.48    2.52 
  -6   3  -1   72.15    2.92 
  -6   3  -1   70.81    2.97 
  -6   3  -1   73.38    3.49 
  -6   3  -1   69.93    3.77 
  -6   3  -1   70.12    3.13 
  -6   3  -1   72.94    3.02 
  -6   3  -1   72.42    3.43 
   6   3   1   70.75    2.90 
  -6   3  -1   68.33    3.09 
  -7  -3  -1   13.53    1.19 
  -7  -3  -1   13.83    1.85 
   7  -3   1   11.38    1.53 
   7  -3   1   11.91    1.46 
   7  -3   1   12.15    1.53 
  -7  -3  -1   10.51    1.53 
  -7  -3  -1   10.17    1.19 
  -7  -3  -1   13.48    1.25 
   7  -3   1   11.39    1.29 
  -7  -3  -1   11.11    1.61 
  -7  -3  -1   11.36    1.11 
   7  -3   1   11.69    1.47 
  -7   3  -1   10.68    1.31 
  -7   3  -1   12.28    1.67 
  -7   3  -1    9.29    1.28 
  -7   3  -1   10.71    1.82 
  -7   3  -1   11.66    1.88 
  -7   3  -1   11.42    1.27 
  -7   3  -1   13.33    1.24 
   7   3   1   11.14    1.37 
   7   3   1   10.96    0.91 
  -7   3  -1   10.57    1.37 
   8  -3   1   16.33    1.83 
   8  -3   1   19.22    2.13 
   8  -3   1   19.82    2.17 
  -8  -3  -1   19.52    1.93 
  -8  -3  -1   18.92    1.95 
   8  -3   1   16.16    1.96 
  -8  -3  -1   19.74    1.55 
  -8  -3  -1   20.67    1.49 
  -8  -3  -1   15.58    2.08 
  -8   3  -1   20.44    1.62 
  -8   3  -1   18.32    1.98 
  -8   3  -1   20.64    1.56 
  -8   3  -1   24.22    2.92 
  -8   3  -1   20.87    1.66 
  -8   3  -1   16.82    2.41 
   8   3   1   17.44    1.88 
  -8   3  -1   18.25    2.00 
  -8   3  -1   18.83    2.18 
  -9  -3  -1    6.95    1.56 
  -9  -3  -1    4.60    1.00 
  -9  -3  -1    6.87    1.47 
   9  -3   1    7.07    1.39 
   9  -3   1    7.17    1.37 
  -9  -3  -1    8.81    1.72 
   9  -3   1    7.62    1.37 
   9  -3   1    6.56    1.34 
  -9   3  -1    7.70    1.38 
  -9   3  -1    5.04    1.51 
  -9   3  -1    8.56    1.63 
  -9   3  -1    7.75    1.26 
  -9   3  -1    7.26    1.35 
  -9   3  -1    5.95    1.46 
 -10   3  -1    8.77    1.87 
   9  -4  -1   12.71    1.92 
  -9  -4   1   12.57    2.12 
  -9  -4   1   13.17    2.18 
   9  -4  -1   13.03    1.95 
   9  -4  -1   12.93    1.84 
   9  -4  -1   12.76    1.83 
  -9  -4   1   10.88    1.91 
  -9   4   1   10.42    1.97 
  -9   4   1   11.74    2.21 
  -9   4   1   13.53    1.71 
  -9   4   1   12.54    2.15 
  -9   4   1   11.31    1.74 
  -9   4   1   10.72    1.48 
   9   4  -1    8.94    1.48 
  -9   4   1   10.25    1.63 
  -8  -4   1   34.97    2.49 
   8  -4  -1   33.99    2.35 
  -8  -4   1   43.17    3.04 
   8  -4  -1   35.77    2.42 
   8  -4  -1   30.93    2.41 
  -8  -4   1   35.92    2.05 
   8  -4  -1   32.83    2.48 
  -8  -4   1   41.48    2.35 
  -8   4   1   38.45    2.94 
  -8   4   1   32.72    2.35 
  -8   4   1   34.90    2.99 
   8   4  -1   34.58    2.32 
  -8   4   1   39.66    2.36 
  -8   4   1   42.33    3.02 
  -8   4   1   39.45    2.56 
  -8   4   1   35.58    2.27 
   7  -4  -1    7.62    1.30 
  -7  -4   1    7.74    1.38 
  -7  -4   1    5.25    0.83 
   7  -4  -1    7.09    1.28 
  -7  -4   1    5.99    1.00 
   7  -4  -1    6.59    0.87 
   7  -4  -1    6.95    1.18 
  -7  -4   1    5.99    1.26 
   7  -4  -1    6.51    1.12 
  -7   4   1    7.64    1.42 
  -7   4   1    7.18    1.12 
  -7   4   1    5.85    1.10 
  -7   4   1    4.19    0.94 
  -7   4   1    8.65    1.24 
  -7   4   1    9.30    1.77 
  -7   4   1    6.40    1.44 
   7   4  -1    7.21    1.15 
   6  -4  -1   32.89    2.17 
  -6  -4   1   34.09    1.98 
  -6  -4   1   33.00    2.35 
   6  -4  -1   32.27    2.18 
  -6  -4   1   35.13    2.08 
   6  -4  -1   31.18    1.95 
  -6  -4   1   34.44    1.70 
   6  -4  -1   34.94    2.08 
  -6  -4   1   35.84    1.73 
   6  -4  -1   32.53    1.75 
   6  -4  -1   35.32    2.39 
  -6   4   1   37.84    2.50 
   6   4  -1   34.72    2.01 
   6   4  -1   35.56    1.36 
  -6   4   1   34.59    2.59 
  -6   4   1   34.67    2.10 
  -6   4   1   31.75    2.40 
  -6   4   1   31.72    1.94 
  -6   4   1   34.48    2.01 
  -6   4   1   34.35    2.11 
   5  -4  -1   24.44    1.60 
  -5  -4   1   22.18    1.02 
  -5  -4   1   20.77    1.77 
   5  -4  -1   23.60    1.44 
   5  -4  -1   24.10    1.77 
  -5  -4   1   24.55    1.58 
   5  -4  -1   23.58    1.43 
   5  -4  -1   24.97    1.57 
  -5  -4   1   25.23    1.02 
  -5  -4   1   25.42    0.97 
  -5  -4   1   26.64    1.45 
   5  -4  -1   21.85    1.64 
  -5  -4   1   25.22    1.48 
   5  -4  -1   26.69    1.91 
  -5  -4   1   24.53    1.58 
  -5  -4   1   24.68    1.00 
  -5  -4   1   24.85    1.29 
  -5   4   1   22.06    1.57 
  -5   4   1   24.77    1.61 
  -5   4   1   25.96    1.92 
  -5   4   1   25.89    2.01 
   5   4  -1   24.89    1.32 
   5   4  -1   24.19    0.92 
  -5   4   1   24.44    1.65 
  -5   4   1   24.48    1.60 
  -5   4   1   24.38    2.04 
   5   4  -1   25.84    1.57 
  -4  -4   1   34.19    1.83 
   4  -4  -1   35.99    2.13 
   4  -4  -1   38.03    1.81 
   4  -4  -1   37.50    2.08 
   4  -4  -1   36.22    1.99 
  -4  -4   1   33.66    1.33 
   4  -4  -1   35.31    1.74 
   4  -4  -1   33.84    1.79 
  -4  -4   1   36.23    1.53 
   4  -4  -1   37.50    1.77 
  -4  -4   1   35.66    2.18 
  -4  -4   1   35.26    1.72 
  -4  -4   1   35.12    1.28 
  -4   4   1   33.31    1.87 
  -4   4   1   32.99    1.84 
   4   4  -1   36.13    1.51 
   4   4  -1   34.85    1.74 
  -4   4   1   37.42    2.15 
  -4   4   1   36.78    1.89 
  -4   4   1   34.66    2.17 
  -4   4   1   33.07    1.81 
  -4   4   1   33.44    1.83 
  -4   4   1   35.95    2.27 
  -3  -4   1    7.57    0.66 
  -3  -4   1    6.50    0.68 
   3  -4  -1    6.38    0.79 
  -3  -4   1    7.87    1.16 
  -3  -4   1    6.81    0.64 
  -3  -4   1    7.33    0.66 
   3  -4  -1    7.05    0.76 
   3  -4  -1    6.23    0.85 
   3  -4  -1    7.73    1.15 
   3  -4  -1    6.62    0.81 
   3  -4  -1    8.11    1.01 
   3  -4  -1    6.60    0.93 
  -3  -4   1    7.17    0.88 
  -3  -4   1    7.81    0.54 
   3  -4  -1    4.29    0.80 
  -3  -4   1    7.19    0.55 
  -3   4   1    9.03    1.28 
  -3   4   1    7.98    0.91 
  -3   4   1    8.56    1.23 
  -3   4   1    5.06    0.74 
   3   4  -1    7.51    0.56 
  -3   4   1    5.94    0.81 
  -3   4   1    8.21    0.95 
  -3   4   1    7.79    1.17 
   3   4  -1    5.96    0.74 
   2  -4  -1   10.74    1.01 
   2  -4  -1   12.94    1.01 
   2  -4  -1   11.61    0.89 
  -2  -4   1   12.13    0.74 
  -2  -4   1   12.32    1.18 
   2  -4  -1   11.57    1.06 
  -2  -4   1   10.97    0.73 
  -2  -4   1   12.54    0.77 
  -2  -4   1   10.69    0.67 
   2  -4  -1   10.96    1.00 
   2  -4  -1   11.84    0.97 
   2  -4  -1   11.28    0.74 
  -2  -4   1   11.97    0.82 
   2  -4  -1   11.29    0.80 
   2   4  -1   11.41    0.84 
  -2   4   1   11.83    0.94 
   2   4  -1   12.06    0.67 
  -2   4   1   13.13    0.96 
  -2   4   1   11.85    0.93 
  -2   4   1   11.47    1.15 
  -2   4   1   11.48    1.15 
  -2   4   1   12.03    0.88 
   2   4  -1   12.40    0.47 
  -2   4   1   11.64    0.88 
  -1  -4   1    1.70    0.39 
   1  -4  -1    2.24    0.54 
  -1  -4   1    3.38    0.56 
   1  -4  -1    2.80    0.56 
   1  -4  -1    2.11    0.60 
  -1  -4   1    1.73    0.35 
   1  -4  -1    2.22    0.55 
   1  -4  -1    2.57    0.37 
   1  -4  -1    2.12    0.55 
   1  -4  -1    2.61    0.59 
  -1  -4   1    3.00    0.46 
   1  -4  -1    2.52    0.40 
   1  -4  -1    1.97    0.46 
  -1  -4   1    2.44    0.68 
   1  -4  -1    2.24    0.48 
  -1  -4   1    2.79    0.39 
  -1   4   1    1.70    0.56 
   1   4  -1    2.87    0.47 
   1   4  -1    3.10    0.53 
   1   4  -1    2.05    0.28 
   1   4  -1    1.78    0.61 
  -1   4   1    2.70    0.49 
   1   4  -1    2.91    0.49 
  -1   4   1    2.98    0.54 
  -1   4   1    1.81    0.44 
   1   4  -1    2.00    0.22 
   1   4  -1    2.00    0.30 
  -1   4   1    2.35    0.43 
   1   4  -1    3.02    0.55 
  -1   4   1    2.57    0.73 
   0  -4  -1   30.57    1.55 
   0  -4   1   30.36    1.47 
   0  -4  -1   30.01    1.11 
   0  -4   1   27.60    1.40 
   0  -4   1   26.56    1.75 
   0  -4  -1   29.50    1.66 
   0  -4   1   28.23    1.23 
   0  -4  -1   29.85    1.39 
   0  -4   1   31.75    1.42 
   0  -4  -1   31.51    1.48 
   0  -4  -1   30.03    1.24 
   0  -4   1   29.00    1.44 
   0  -4  -1   29.91    1.39 
   0  -4  -1   29.91    1.61 
   0  -4   1   30.59    1.17 
   0   4   1   26.48    1.83 
   0   4   1   29.88    1.12 
   0   4   1   30.12    1.44 
   0   4  -1   26.23    2.11 
   0   4  -1   30.88    1.80 
   0   4  -1   29.83    1.53 
   0   4   1   31.45    1.25 
   0   4  -1   31.26    1.74 
   0   4   1   28.58    1.39 
   0   4  -1   29.33    1.11 
   0   4  -1   31.93    1.26 
   0   4   1   30.22    1.58 
   0   4   1   30.49    1.56 
   0   4  -1   31.19    1.42 
   0   4   1   29.05    1.41 
   0   4   1   29.67    1.23 
   0   4  -1   31.08    1.17 
   0   4  -1   30.53    1.39 
   0   4   1   31.00    1.71 
   0   4   1   26.54    1.89 
  -1  -4  -1   37.25    1.69 
  -1  -4  -1   36.31    1.87 
   1  -4   1   34.38    1.43 
   1  -4   1   36.84    2.10 
  -1  -4  -1   36.80    1.59 
   1  -4   1   38.79    1.73 
   1  -4   1   37.18    1.64 
   1  -4   1   35.17    1.61 
  -1  -4  -1   35.46    1.73 
   1  -4   1   36.09    1.52 
  -1  -4  -1   34.53    2.01 
   1  -4   1   35.37    1.72 
  -1  -4  -1   37.08    1.52 
   1  -4   1   37.44    1.71 
  -1  -4  -1   37.12    1.08 
   1  -4   1   35.74    1.79 
   1  -4   1   34.33    1.70 
   1   4   1   37.81    1.87 
  -1   4  -1   35.92    1.65 
   1   4   1   36.33    1.86 
  -1   4  -1   35.33    1.53 
   1   4   1   31.83    1.72 
   1   4   1   35.18    1.11 
   1   4   1   35.01    2.13 
  -1   4  -1   36.97    2.02 
  -1   4  -1   34.28    1.76 
  -1   4  -1   35.42    1.58 
   1   4   1   36.85    1.38 
   1   4   1   37.27    1.67 
   1   4   1   36.85    1.40 
   1   4   1   35.46    1.26 
   1   4   1   35.65    1.59 
  -1   4  -1   44.99    2.64 
   2  -4   1  147.09    4.57 
   2  -4   1  153.46    4.94 
  -2  -4  -1  150.08    4.57 
   2  -4   1  147.74    4.85 
   2  -4   1  154.36    4.54 
  -2  -4  -1  156.62    4.40 
   2  -4   1  149.46    5.37 
  -2  -4  -1  155.90    3.97 
   2  -4   1  149.98    4.80 
  -2  -4  -1  155.81    4.82 
  -2  -4  -1  154.97    4.66 
  -2  -4  -1  149.49    4.23 
  -2  -4  -1  149.99    4.60 
  -2  -4  -1  155.75    4.73 
   2  -4   1  150.74    4.64 
  -2  -4  -1  155.84    4.96 
   2  -4   1  150.64    4.72 
  -2  -4  -1  156.23    4.31 
  -2   4  -1  152.18    4.64 
  -2   4  -1  148.22    4.60 
  -2   4  -1  148.48    5.12 
  -2   4  -1  148.01    5.59 
   2   4   1  153.16    3.83 
  -2   4  -1  162.28    4.85 
   2   4   1  158.68    4.14 
   2   4   1  152.29    4.67 
  -2   4  -1  157.49    4.73 
  -2   4  -1  158.94    4.89 
   2   4   1  156.23    4.32 
   2   4   1  154.64    4.57 
   2   4   1  152.55    5.09 
   3  -4   1   12.85    1.12 
   3  -4   1   12.46    0.97 
   3  -4   1   14.34    1.19 
   3  -4   1   14.91    1.19 
  -3  -4  -1   13.86    0.62 
  -3  -4  -1   13.49    1.04 
   3  -4   1   12.11    0.96 
   3  -4   1   15.46    1.06 
  -3  -4  -1   12.87    1.03 
  -3  -4  -1   13.51    0.97 
  -3  -4  -1   13.05    0.81 
  -3  -4  -1   14.01    0.75 
   3  -4   1   14.60    1.06 
  -3  -4  -1   16.10    1.25 
  -3   4  -1   13.00    1.03 
   3   4   1   13.27    0.86 
   3   4   1   14.10    0.92 
  -3   4  -1   16.72    1.24 
  -3   4  -1   12.29    1.10 
  -3   4  -1   12.81    1.36 
  -3   4  -1   12.06    0.99 
  -3   4  -1   14.25    1.34 
   3   4   1   13.67    1.06 
  -3   4  -1   12.76    1.00 
  -4  -4  -1   39.07    1.56 
   4  -4   1   41.01    1.99 
  -4  -4  -1   40.26    1.40 
   4  -4   1   40.85    2.21 
   4  -4   1   41.14    2.21 
  -4  -4  -1   38.35    1.79 
   4  -4   1   37.83    1.83 
   4  -4   1   40.09    1.98 
  -4  -4  -1   38.44    1.36 
  -4  -4  -1   37.77    1.82 
   4  -4   1   44.84    2.28 
  -4  -4  -1   39.55    2.16 
   4  -4   1   38.34    1.57 
   4  -4   1   40.22    1.88 
  -4   4  -1   38.96    1.99 
   4   4   1   38.13    1.76 
   4   4   1   36.38    1.72 
  -4   4  -1   36.45    2.28 
  -4   4  -1   36.95    1.99 
  -4   4  -1   37.13    1.94 
  -4   4  -1   39.67    2.54 
  -4   4  -1   41.76    2.23 
  -4   4  -1   37.03    2.01 
   4   4   1   36.59    1.87 
  -5  -4  -1   29.30    1.75 
   5  -4   1   27.55    1.73 
  -5  -4  -1   26.37    1.53 
   5  -4   1   27.87    1.54 
   5  -4   1   29.48    1.78 
  -5  -4  -1   25.10    1.45 
  -5  -4  -1   28.44    1.92 
   5  -4   1   25.83    1.82 
   5  -4   1   27.89    1.91 
  -5  -4  -1   27.51    1.05 
   5  -4   1   30.14    2.02 
   5  -4   1   26.75    1.52 
  -5  -4  -1   27.51    1.24 
  -5   4  -1   27.59    1.76 
  -5   4  -1   30.49    2.03 
  -5   4  -1   30.59    1.80 
  -5   4  -1   29.54    2.14 
  -5   4  -1   32.27    2.39 
   5   4   1   30.46    1.73 
   5   4   1   31.57    1.66 
  -5   4  -1   29.22    1.75 
  -5   4  -1   29.48    1.82 
   5   4   1   28.35    1.56 
  -5   4  -1   27.75    1.77 
   6  -4   1  137.49    4.67 
  -6  -4  -1  154.25    5.16 
   6  -4   1  136.61    5.38 
  -6  -4  -1  150.10    4.87 
  -6  -4  -1  145.67    5.53 
  -6  -4  -1  148.99    4.88 
  -6  -4  -1  149.89    4.37 
   6  -4   1  143.72    5.26 
  -6  -4  -1  150.47    4.43 
   6  -4   1  147.58    5.28 
   6  -4   1  148.26    5.57 
  -6   4  -1  151.19    5.25 
  -6   4  -1  152.71    5.80 
   6   4   1  164.67    5.18 
  -6   4  -1  149.15    5.20 
   6   4   1  157.04    5.01 
  -6   4  -1  148.85    5.34 
  -6   4  -1  154.17    5.18 
  -6   4  -1  147.19    5.34 
  -6   4  -1  157.05    6.34 
  -6   4  -1  149.89    5.72 
   7  -4   1   29.78    2.08 
  -7  -4  -1   28.32    1.78 
   7  -4   1   29.14    2.17 
   7  -4   1   34.25    2.35 
  -7  -4  -1   29.73    2.24 
  -7  -4  -1   31.51    2.34 
  -7  -4  -1   26.86    1.82 
  -7  -4  -1   31.00    2.25 
   7  -4   1   27.21    1.52 
   7  -4   1   24.61    1.90 
   7   4   1   29.60    1.91 
  -7   4  -1   32.00    1.98 
  -7   4  -1   25.74    1.90 
  -7   4  -1   29.61    2.37 
  -7   4  -1   29.13    2.00 
  -7   4  -1   28.82    2.57 
  -7   4  -1   30.54    2.45 
  -7   4  -1   26.56    2.00 
  -7   4  -1   30.60    2.11 
  -8  -4  -1  182.81    6.84 
  -8  -4  -1  186.85    7.13 
   8  -4   1  176.39    6.51 
  -8  -4  -1  179.79    6.03 
   8  -4   1  175.79    6.77 
   8  -4   1  172.18    6.55 
  -8  -4  -1  173.61    6.87 
  -8  -4  -1  171.01    6.01 
   8  -4   1  171.28    6.76 
  -8   4  -1  176.76    7.00 
  -8   4  -1  182.82    6.61 
  -8   4  -1  180.64    7.73 
   8   4   1  176.10    6.28 
  -8   4  -1  177.39    6.55 
  -8   4  -1  193.42    7.33 
  -8   4  -1  179.24    6.30 
  -8   4  -1  175.97    6.19 
  -9  -4  -1   24.75    1.95 
   9  -4   1   24.21    2.73 
  -9  -4  -1   23.10    2.86 
   9  -4   1   23.76    2.19 
   9  -4   1   22.84    2.21 
   9  -4   1   26.94    2.24 
  -9  -4  -1   26.09    2.53 
  -9   4  -1   27.12    2.26 
   9   4   1   25.41    2.10 
  -9   4  -1   24.17    2.50 
  -9   4  -1   24.27    3.24 
  -9   4  -1   25.12    2.60 
  -9   4  -1   24.46    2.05 
  -9   4  -1   25.93    2.23 
   9  -5  -1   58.38    3.40 
   9  -5  -1   53.29    3.57 
  -9  -5   1   58.38    3.90 
   9  -5  -1   52.14    3.29 
   9  -5  -1   56.96    3.71 
  -9  -5   1   59.50    4.75 
  -9   5   1   53.40    3.84 
  -9   5   1   58.42    3.28 
  -9   5   1   54.21    3.39 
  -9   5   1   61.27    3.57 
   9   5  -1   57.42    3.28 
  -9   5   1   62.53    4.44 
   8  -5  -1    2.63    0.97 
  -8  -5   1    3.12    1.00 
  -8  -5   1    2.47    1.03 
   8  -5  -1    2.99    0.96 
   8  -5  -1    3.18    1.05 
   8  -5  -1    2.38    0.84 
  -8  -5   1    4.53    1.03 
  -8   5   1    3.84    1.24 
  -8   5   1    1.82    0.73 
   8   5  -1    2.49    0.77 
  -8   5   1    2.33    0.84 
  -8   5   1    2.96    0.87 
  -8   5   1    5.42    1.19 
  -8   5   1    2.75    1.19 
  -8   5   1    3.15    1.29 
  -7  -5   1   88.24    3.89 
   7  -5  -1   85.87    4.20 
   7  -5  -1   92.43    3.55 
   7  -5  -1   90.90    3.92 
  -7  -5   1   89.42    3.93 
   7  -5  -1   83.55    3.92 
   7  -5  -1   86.94    4.27 
  -7  -5   1   90.82    4.57 
  -7   5   1   92.79    4.11 
  -7   5   1   88.66    3.90 
  -7   5   1   91.61    4.12 
  -7   5   1   88.80    3.90 
  -7   5   1   90.68    4.60 
   7   5  -1   90.96    3.85 
  -7   5   1   85.06    4.79 
  -7   5   1   88.68    4.51 
   6  -5  -1   18.22    1.48 
   6  -5  -1   17.54    1.71 
   6  -5  -1   19.89    1.74 
  -6  -5   1   18.00    1.37 
  -6  -5   1   16.97    2.09 
   6  -5  -1   17.33    1.40 
  -6  -5   1   17.90    1.52 
  -6  -5   1   18.36    1.53 
  -6  -5   1   18.78    1.20 
   6  -5  -1   18.78    1.40 
   6  -5  -1   19.23    1.86 
   6  -5  -1   16.61    1.48 
  -6   5   1   17.21    1.49 
   6   5  -1   17.28    1.41 
  -6   5   1   16.52    2.16 
  -6   5   1   16.30    1.49 
  -6   5   1   19.68    1.58 
  -6   5   1   18.72    1.61 
  -6   5   1   17.86    2.10 
  -6   5   1   17.17    2.26 
   5  -5  -1  280.53    8.17 
   5  -5  -1  273.23    8.81 
   5  -5  -1  285.66    8.24 
   5  -5  -1  273.83    8.33 
  -5  -5   1  279.54    7.44 
  -5  -5   1  272.79    8.03 
   5  -5  -1  280.83    8.15 
   5  -5  -1  278.86    8.77 
  -5  -5   1  280.57    9.15 
   5  -5  -1  280.75    8.96 
  -5  -5   1  286.59    8.48 
  -5   5   1  271.86    8.49 
  -5   5   1  282.23    8.44 
  -5   5   1  276.10    9.05 
  -5   5   1  281.11    8.99 
  -5   5   1  290.34    8.49 
   5   5  -1  287.68    7.69 
  -5   5   1  268.17    8.39 
  -5   5   1  281.45    9.48 
   5   5  -1  279.08    8.15 
  -4  -5   1   36.25    1.93 
   4  -5  -1   37.99    2.19 
   4  -5  -1   35.04    1.90 
  -4  -5   1   37.65    1.58 
  -4  -5   1   36.14    2.05 
  -4  -5   1   40.35    2.47 
   4  -5  -1   41.74    2.37 
   4  -5  -1   35.50    1.80 
   4  -5  -1   37.36    1.97 
  -4  -5   1   35.25    1.54 
   4  -5  -1   38.17    2.03 
   4  -5  -1   38.82    2.35 
  -4   5   1   36.14    2.02 
  -4   5   1   35.73    2.06 
  -4   5   1   40.19    2.64 
  -4   5   1   37.37    2.03 
   4   5  -1   37.07    1.86 
   4   5  -1   38.77    1.59 
  -4   5   1   40.83    2.14 
  -4   5   1   35.87    2.39 
  -3  -5   1  207.40    5.82 
   3  -5  -1  207.71    6.71 
   3  -5  -1  207.59    6.64 
  -3  -5   1  213.50    5.93 
   3  -5  -1  209.31    6.17 
  -3  -5   1  210.17    6.99 
  -3  -5   1  204.32    6.32 
   3  -5  -1  218.36    6.78 
   3  -5  -1  205.30    6.27 
  -3  -5   1  209.00    6.43 
  -3  -5   1  210.77    5.87 
   3  -5  -1  204.43    6.50 
   3  -5  -1  210.39    5.95 
  -3  -5   1  203.30    5.80 
  -3  -5   1  196.85    5.87 
   3  -5  -1  208.54    6.40 
  -3   5   1  206.99    6.31 
   3   5  -1  215.12    6.13 
  -3   5   1  208.87    6.92 
  -3   5   1  214.88    6.50 
   3   5  -1  205.87    5.64 
  -3   5   1  213.73    7.31 
  -3   5   1  205.61    6.41 
  -3   5   1  206.07    6.41 
   2  -5  -1    3.02    0.47 
   2  -5  -1    3.44    0.71 
   2  -5  -1    2.96    0.51 
   2  -5  -1    3.63    0.64 
   2  -5  -1    3.63    0.78 
  -2  -5   1    3.91    0.86 
  -2  -5   1    4.30    0.53 
  -2  -5   1    3.83    0.63 
   2  -5  -1    3.62    0.78 
  -2  -5   1    3.72    0.57 
   2  -5  -1    3.42    0.77 
   2  -5  -1    2.22    0.59 
   2   5  -1    3.21    0.46 
  -2   5   1    4.31    0.74 
  -2   5   1    4.14    0.64 
  -2   5   1    4.36    0.98 
  -2   5   1    4.13    0.72 
  -2   5   1    3.14    0.82 
   2   5  -1    4.12    0.23 
   2   5  -1    4.97    0.69 
   2   5  -1    4.10    0.32 
  -1  -5   1  114.08    3.77 
  -1  -5   1  122.27    3.90 
   1  -5  -1  121.54    4.20 
  -1  -5   1  125.05    3.60 
   1  -5  -1  120.36    3.60 
   1  -5  -1  117.79    4.21 
  -1  -5   1  120.88    4.64 
   1  -5  -1  124.50    4.22 
  -1  -5   1  121.25    3.88 
   1  -5  -1  122.31    4.47 
  -1  -5   1  118.45    3.86 
   1  -5  -1  113.67    4.12 
   1  -5  -1  118.72    3.95 
   1  -5  -1  120.24    3.49 
   1  -5  -1  116.77    4.03 
   1   5  -1  120.46    3.18 
   1   5  -1  122.58    3.43 
   1   5  -1  119.22    4.01 
   1   5  -1  120.87    3.99 
  -1   5   1  120.67    3.77 
   1   5  -1  119.36    3.84 
  -1   5   1  124.36    5.11 
  -1   5   1  119.12    4.02 
   1   5  -1  121.74    3.35 
   1   5  -1   96.98    3.74 
   1   5  -1  116.16    4.83 
  -1   5   1  124.35    4.13 
  -1   5   1  120.20    4.43 
  -1   5   1  118.52    3.80 
   0  -5   1    1.16    0.45 
   0  -5   1    0.56    0.43 
   0  -5  -1    0.30    0.28 
   0  -5  -1    0.85    0.23 
   0  -5   1    0.86    0.35 
   0  -5  -1    0.76    0.39 
   0  -5  -1    0.63    0.38 
   0  -5   1    0.97    0.27 
   0  -5  -1    1.91    0.37 
   0  -5   1    0.84    0.32 
   0  -5  -1    4.23    0.71 
   0  -5   1    1.74    0.51 
   0  -5  -1    0.58    0.30 
   0  -5   1    0.97    0.40 
   0  -5  -1    0.74    0.41 
   0  -5  -1    0.46    0.36 
   0   5  -1    0.71    0.34 
   0   5   1    0.06    0.33 
   0   5  -1    0.63    0.49 
   0   5   1    0.72    0.39 
   0   5  -1    0.50    0.27 
   0   5  -1    0.53    0.27 
   0   5   1    0.58    0.24 
   0   5   1    0.64    0.29 
   0   5   1    1.31    0.57 
   0   5  -1    1.96    0.67 
   0   5  -1    1.85    0.55 
   0   5   1    0.33    0.28 
   0   5  -1    0.90    0.24 
   0   5   1    0.65    0.22 
   0   5   1    0.59    0.29 
   0   5   1    0.79    0.35 
   0   5  -1    1.35    0.32 
   1  -5   1  363.04   10.70 
   1  -5   1  368.52    9.80 
   1  -5   1  352.74    9.97 
  -1  -5  -1  374.92    9.89 
   1  -5   1  357.94    9.64 
  -1  -5  -1  369.88    9.62 
   1  -5   1  375.39    9.45 
  -1  -5  -1  363.37   10.23 
   1  -5   1  358.40    9.97 
  -1  -5  -1  367.46    8.86 
   1  -5   1  356.42    9.49 
   1  -5   1  370.79    9.88 
  -1  -5  -1  352.83    9.97 
   1  -5   1  358.30   10.04 
   1  -5   1  360.86    9.94 
  -1   5  -1  348.88   10.43 
   1   5   1  359.61   10.13 
  -1   5  -1  366.31    9.82 
   1   5   1  327.32   10.05 
   1   5   1  355.62    9.27 
  -1   5  -1  363.07    9.74 
   1   5   1  365.46    9.74 
  -1   5  -1  345.23   11.45 
   1   5   1  366.15   10.29 
   1   5   1  360.04    8.88 
   1   5   1  338.97   10.18 
   1   5   1  359.41    9.34 
   1   5   1  365.56    9.16 
   1   5   1  365.82    9.81 
  -1   5  -1  364.92   10.06 
  -1   5  -1  374.35    9.61 
   2  -5   1   13.87    1.15 
   2  -5   1   12.30    1.12 
   2  -5   1   13.74    1.01 
   2  -5   1   15.14    1.49 
  -2  -5  -1   12.34    1.12 
   2  -5   1   13.13    1.05 
  -2  -5  -1   12.86    1.19 
   2  -5   1   13.01    0.96 
   2  -5   1   14.12    1.21 
  -2  -5  -1   14.36    1.09 
  -2  -5  -1   12.91    0.79 
  -2  -5  -1   14.07    0.92 
   2  -5   1   11.48    1.09 
   2  -5   1   13.54    1.18 
   2   5   1   13.40    0.84 
  -2   5  -1   13.28    1.37 
   2   5   1   13.09    1.01 
   2   5   1   12.89    0.77 
   2   5   1   13.40    0.61 
  -2   5  -1   13.17    1.01 
  -2   5  -1   13.47    1.21 
  -2   5  -1   15.63    2.00 
  -2   5  -1   13.90    1.07 
   2   5   1   12.99    1.11 
  -2   5  -1   14.44    1.14 
   3  -5   1  351.19   10.34 
   3  -5   1  359.15   10.05 
  -3  -5  -1  379.68   10.45 
   3  -5   1  372.96   10.36 
  -3  -5  -1  362.58   10.05 
   3  -5   1  356.20    9.85 
  -3  -5  -1  355.93    9.80 
   3  -5   1  362.02   10.39 
  -3  -5  -1  364.96    8.83 
   3  -5   1  379.03   10.03 
  -3  -5  -1  369.22    9.44 
   3  -5   1  365.53    9.90 
  -3   5  -1  346.48   11.31 
   3   5   1  358.87    9.99 
  -3   5  -1  355.93   10.29 
   3   5   1  366.31    9.53 
  -3   5  -1  346.31   10.65 
  -3   5  -1  360.73   10.11 
  -3   5  -1  355.36    9.99 
  -3   5  -1  360.27   10.05 
  -3   5  -1  367.09   10.34 
   3   5   1  362.50    9.67 
   4  -5   1   17.67    1.33 
  -4  -5  -1   19.51    1.29 
   4  -5   1   20.16    1.60 
  -4  -5  -1   18.62    0.71 
  -4  -5  -1   19.86    1.03 
   4  -5   1   19.63    1.60 
  -4  -5  -1   19.04    1.40 
   4  -5   1   21.88    1.47 
  -4  -5  -1   19.57    1.59 
   4  -5   1   19.48    1.36 
   4  -5   1   18.98    1.38 
   4  -5   1   20.40    1.63 
  -4   5  -1   19.47    1.43 
   4   5   1   18.46    1.18 
  -4   5  -1   20.96    1.67 
   4   5   1   18.70    1.20 
  -4   5  -1   19.69    1.94 
   4   5   1   19.01    1.44 
  -4   5  -1   19.12    1.80 
  -4   5  -1   18.05    1.40 
  -4   5  -1   20.49    1.61 
  -4   5  -1   19.62    1.45 
   5  -5   1   86.44    3.65 
  -5  -5  -1   97.00    3.46 
   5  -5   1   93.88    3.79 
   5  -5   1   94.60    4.12 
   5  -5   1   96.45    3.63 
   5  -5   1   93.59    4.10 
  -5  -5  -1  104.06    4.22 
  -5  -5  -1   97.13    3.06 
  -5  -5  -1   94.98    3.55 
   5  -5   1   99.68    3.67 
   5  -5   1   96.98    4.14 
  -5  -5  -1   94.11    3.82 
  -5   5  -1  101.15    4.89 
  -5   5  -1   92.54    3.80 
  -5   5  -1   97.49    4.41 
  -5   5  -1   93.49    3.86 
   5   5   1   92.71    3.69 
  -5   5  -1   96.18    4.15 
  -5   5  -1   97.33    3.99 
   5   5   1   96.43    3.44 
  -5   5  -1   94.43    3.87 
   5   5   1   95.25    3.49 
   6  -5   1    0.99    0.47 
   6  -5   1    0.96    0.52 
  -6  -5  -1    0.66    0.48 
  -6  -5  -1    0.84    0.52 
  -6  -5  -1    2.74    0.87 
   6  -5   1    0.81    0.55 
  -6  -5  -1    1.40    0.48 
   6  -5   1    0.67    0.50 
   6  -5   1    1.00    0.50 
   6  -5   1    1.03    0.55 
   6   5   1    0.45    0.40 
  -6   5  -1    0.94    0.54 
  -6   5  -1    0.42    0.41 
  -6   5  -1    1.56    0.77 
   6   5   1    0.56    0.35 
  -6   5  -1    1.01    0.75 
  -6   5  -1    1.82    0.89 
  -6   5  -1    0.46    0.53 
  -6   5  -1    0.91    0.51 
  -7  -5  -1   12.62    1.37 
   7  -5   1   12.49    1.13 
   7  -5   1   10.81    1.63 
   7  -5   1   10.77    1.51 
   7  -5   1   14.17    1.90 
  -7  -5  -1   13.66    1.87 
  -7  -5  -1   12.50    1.56 
  -7  -5  -1   13.69    1.89 
   7  -5   1    9.54    1.42 
   7   5   1   12.02    1.46 
  -7   5  -1   10.59    1.51 
  -7   5  -1   14.23    1.73 
  -7   5  -1   11.65    1.84 
  -7   5  -1   13.23    2.22 
  -7   5  -1   19.50    2.60 
  -7   5  -1    7.84    1.38 
  -7   5  -1   14.49    1.80 
   8  -5   1    6.66    1.42 
   8  -5   1    7.02    1.32 
  -8  -5  -1    8.00    1.52 
  -8  -5  -1   10.46    1.82 
   8  -5   1    6.29    1.42 
   8  -5   1    5.53    1.17 
  -8  -5  -1    6.13    1.13 
  -8   5  -1    3.93    1.06 
   8   5   1    6.18    1.14 
  -8   5  -1    6.74    1.58 
  -8   5  -1    6.56    1.44 
  -8   5  -1    6.14    1.60 
  -8   5  -1    5.82    1.27 
  -8   5  -1    5.83    1.17 
  -9   5  -1   13.29    2.18 
  -8  -6   1   31.56    2.38 
   8  -6  -1   25.87    2.50 
   8  -6  -1   31.08    2.33 
   8  -6  -1   32.40    2.44 
   8  -6  -1   34.12    2.72 
  -8   6   1   29.25    2.41 
  -8   6   1   26.70    2.74 
  -8   6   1   32.43    2.98 
   8   6  -1   31.02    2.24 
  -8   6   1   28.99    2.40 
  -8   6   1   34.17    3.25 
  -8   6   1   31.32    2.33 
   7  -6  -1    0.45    0.54 
   7  -6  -1    0.42    0.64 
   7  -6  -1    0.02    0.52 
   7  -6  -1    0.23    0.42 
  -7  -6   1    0.09    0.63 
  -7  -6   1    0.53    0.52 
   7  -6  -1    0.02    0.48 
   7  -6  -1    0.32    0.49 
  -7   6   1    0.08    0.60 
  -7   6   1    0.86    0.90 
  -7   6   1   -0.09    0.47 
  -7   6   1    0.41    0.67 
  -7   6   1    0.43    0.52 
  -7   6   1   -0.04    0.50 
   7   6  -1    0.55    0.48 
   6  -6  -1   42.43    2.35 
  -6  -6   1   39.39    2.29 
   6  -6  -1   36.22    2.64 
   6  -6  -1   39.23    2.45 
  -6  -6   1   41.75    2.54 
  -6  -6   1   46.07    3.00 
   6  -6  -1   43.81    2.36 
  -6  -6   1   40.44    2.31 
   6  -6  -1   39.86    2.37 
   6  -6  -1   39.57    2.65 
   6  -6  -1   39.92    2.82 
  -6   6   1   43.65    3.09 
  -6   6   1   39.55    2.56 
  -6   6   1   42.20    3.23 
  -6   6   1   39.56    2.48 
   6   6  -1   42.70    2.32 
  -6   6   1   37.95    2.41 
   5  -6  -1   10.28    1.48 
  -5  -6   1   10.22    1.37 
  -5  -6   1   10.22    1.62 
   5  -6  -1   10.13    1.54 
   5  -6  -1    9.78    1.27 
   5  -6  -1    9.40    1.15 
   5  -6  -1   13.30    1.65 
  -5  -6   1   12.26    1.56 
   5  -6  -1   10.83    1.32 
   5  -6  -1    8.89    1.66 
  -5   6   1    9.80    1.34 
  -5   6   1    9.87    1.65 
  -5   6   1    9.42    1.30 
   5   6  -1   11.32    0.87 
  -5   6   1   10.39    1.83 
  -5   6   1   12.24    1.53 
   5   6  -1   10.27    1.20 
   4  -6  -1   29.75    1.97 
   4  -6  -1   30.56    2.10 
   4  -6  -1   34.66    2.29 
   4  -6  -1   29.47    1.87 
  -4  -6   1   30.78    2.28 
   4  -6  -1   29.53    1.65 
  -4  -6   1   32.78    1.61 
   4  -6  -1   31.99    2.24 
  -4  -6   1   34.94    2.10 
   4  -6  -1   29.98    1.82 
  -4  -6   1   27.54    1.87 
   4   6  -1   32.98    1.79 
  -4   6   1   31.55    2.02 
  -4   6   1   31.32    1.98 
  -4   6   1   30.34    1.91 
   4   6  -1   29.91    1.40 
  -4   6   1   36.29    2.76 
  -4   6   1   32.22    2.43 
  -3  -6   1    1.70    0.47 
   3  -6  -1    0.95    0.57 
   3  -6  -1    2.35    0.75 
   3  -6  -1    1.54    0.42 
  -3  -6   1    2.00    0.55 
  -3  -6   1    1.97    0.61 
  -3  -6   1    1.58    0.69 
   3  -6  -1    1.65    0.68 
   3  -6  -1    1.78    0.61 
  -3  -6   1    2.08    0.64 
   3  -6  -1    2.35    0.71 
  -3  -6   1    1.67    0.47 
   3  -6  -1    1.67    0.52 
   3  -6  -1    1.27    0.53 
  -3   6   1    0.83    0.47 
  -3   6   1    1.74    0.58 
   3   6  -1    3.10    0.62 
   3   6  -1    1.76    0.38 
  -3   6   1    1.95    0.59 
  -3   6   1    1.53    0.73 
  -3   6   1    1.17    0.66 
   2  -6  -1    2.79    0.74 
   2  -6  -1    3.05    0.83 
   2  -6  -1    2.37    0.45 
  -2  -6   1    2.52    0.56 
   2  -6  -1    1.99    0.48 
   2  -6  -1    2.30    0.58 
  -2  -6   1    2.03    0.69 
   2  -6  -1    1.88    0.62 
  -2  -6   1    2.62    0.63 
   2  -6  -1    0.97    0.46 
  -2  -6   1    2.53    0.55 
  -2  -6   1    3.77    0.97 
   2  -6  -1    2.34    0.73 
   2   6  -1    2.50    0.46 
   2   6  -1    1.93    0.48 
  -2   6   1    1.21    0.48 
  -2   6   1    2.11    0.53 
  -2   6   1    2.14    0.60 
   2   6  -1    2.23    0.32 
  -2   6   1    2.28    0.86 
   2   6  -1    2.56    0.30 
  -2   6   1    3.54    1.08 
   1  -6  -1   12.96    1.35 
   1  -6  -1   15.54    1.36 
   1  -6  -1   14.78    1.33 
   1  -6  -1   13.36    0.85 
  -1  -6   1   14.88    1.66 
   1  -6  -1   13.31    0.94 
   1  -6  -1   12.95    1.15 
   1  -6  -1   14.61    1.31 
  -1  -6   1   14.16    1.16 
  -1  -6   1   11.27    1.53 
   1  -6  -1   15.17    1.34 
  -1  -6   1   13.54    1.13 
  -1  -6   1   13.18    1.06 
  -1  -6   1   12.49    1.09 
   1  -6  -1   11.11    1.24 
   1   6  -1   19.09    1.28 
   1   6  -1   14.60    1.14 
   1   6  -1   14.94    0.87 
   1   6  -1   13.09    0.66 
  -1   6   1   17.45    1.86 
   1   6  -1   10.43    1.65 
   1   6  -1   13.39    0.80 
  -1   6   1   11.80    1.07 
  -1   6   1   15.65    1.54 
  -1   6   1   14.45    1.23 
  -1   6   1   14.64    1.06 
   1   6  -1   14.57    1.12 
  -1   6   1   13.01    1.16 
   1   6  -1   13.07    1.17 
   0  -6  -1   65.59    2.14 
   0  -6   1   57.85    2.73 
   0  -6   1   62.97    2.63 
   0  -6  -1   64.62    3.09 
   0  -6  -1   62.70    2.85 
   0  -6   1   63.24    2.74 
   0  -6   1   67.50    2.69 
   0  -6   1   65.15    2.61 
   0  -6   1   60.39    3.22 
   0  -6  -1   57.20    2.53 
   0  -6  -1   59.83    2.74 
   0  -6  -1   64.29    2.70 
   0  -6  -1   65.40    2.83 
   0  -6   1   61.33    2.71 
   0  -6   1   62.65    2.21 
   0  -6  -1   57.21    2.14 
   0  -6   1   60.45    2.83 
   0  -6  -1   57.79    2.82 
   0   6   1   63.17    2.87 
   0   6   1   63.99    2.86 
   0   6   1   61.91    2.46 
   0   6   1   57.09    2.61 
   0   6   1   61.50    3.13 
   0   6  -1   61.86    2.79 
   0   6  -1   67.21    3.80 
   0   6  -1   65.25    2.36 
   0   6   1   63.58    2.65 
   0   6  -1   62.41    2.64 
   0   6  -1   63.96    2.68 
   0   6  -1   61.93    3.20 
   0   6   1   63.93    3.37 
   0   6   1   61.81    2.31 
   0   6  -1   61.99    2.67 
   1  -6   1    3.64    0.78 
  -1  -6  -1    3.54    0.78 
  -1  -6  -1    4.92    0.94 
  -1  -6  -1    4.02    0.86 
   1  -6   1    3.26    0.89 
   1  -6   1    3.01    0.58 
  -1  -6  -1    2.96    0.60 
   1  -6   1    2.75    0.66 
   1  -6   1    4.17    0.82 
   1  -6   1    2.03    0.61 
   1  -6   1    4.04    0.63 
   1  -6   1    3.58    0.82 
  -1  -6  -1    2.38    0.72 
   1  -6   1    3.48    0.67 
  -1  -6  -1    2.46    0.59 
  -1   6  -1    3.35    0.97 
   1   6   1    3.46    0.67 
  -1   6  -1    3.51    0.64 
   1   6   1    3.81    0.86 
   1   6   1    3.89    0.52 
  -1   6  -1    2.81    0.64 
   1   6   1    3.89    0.76 
  -1   6  -1    3.88    0.71 
   1   6   1    3.28    0.76 
   1   6   1    3.28    0.93 
   1   6   1    3.70    0.80 
   1   6   1    3.15    0.52 
  -1   6  -1    1.80    0.84 
   1   6   1    3.30    0.39 
   2  -6   1   83.62    3.97 
   2  -6   1   79.88    2.94 
   2  -6   1   76.63    3.31 
  -2  -6  -1   80.47    3.14 
   2  -6   1   73.30    2.86 
   2  -6   1   77.47    3.36 
  -2  -6  -1   80.43    2.70 
   2  -6   1   78.03    3.28 
   2  -6   1   69.94    3.21 
  -2  -6  -1   74.88    2.86 
  -2  -6  -1   80.14    3.36 
   2  -6   1   79.17    3.18 
   2  -6   1   78.14    3.38 
  -2  -6  -1   78.97    3.47 
   2   6   1   77.76    3.06 
  -2   6  -1   73.65    3.14 
   2   6   1   76.67    2.67 
  -2   6  -1   73.98    3.12 
   2   6   1   75.07    2.65 
  -2   6  -1   76.30    3.01 
  -2   6  -1   82.38    4.51 
  -2   6  -1   82.93    3.85 
   2   6   1   78.67    2.32 
   2   6   1   77.92    3.19 
   3  -6   1    0.86    0.50 
   3  -6   1    2.29    0.71 
   3  -6   1    1.59    0.63 
   3  -6   1    1.84    0.65 
   3  -6   1    2.26    0.62 
  -3  -6  -1    1.75    0.57 
  -3  -6  -1    2.07    0.48 
   3  -6   1    2.59    0.57 
  -3  -6  -1    3.16    0.83 
   3  -6   1    2.20    0.57 
  -3  -6  -1    3.23    0.81 
  -3   6  -1    1.82    0.81 
   3   6   1    2.72    0.55 
  -3   6  -1    2.07    0.61 
  -3   6  -1    1.37    0.50 
  -3   6  -1    2.36    0.75 
   3   6   1    1.64    0.42 
  -3   6  -1    1.26    0.48 
   3   6   1    1.79    0.61 
  -3   6  -1    2.58    0.96 
  -4  -6  -1   42.31    2.53 
   4  -6   1   46.03    2.46 
   4  -6   1   49.61    2.74 
  -4  -6  -1   45.44    2.20 
   4  -6   1   48.97    2.73 
  -4  -6  -1   43.97    2.42 
  -4  -6  -1   48.84    1.99 
   4  -6   1   47.82    2.32 
   4  -6   1   43.32    2.61 
   4  -6   1   44.45    2.35 
   4  -6   1   46.41    2.35 
   4   6   1   46.08    2.08 
  -4   6  -1   45.07    2.94 
  -4   6  -1   44.00    2.57 
  -4   6  -1   47.21    3.37 
  -4   6  -1   47.95    2.48 
  -4   6  -1   47.42    2.52 
   4   6   1   46.48    2.06 
  -4   6  -1   43.05    2.41 
   4   6   1   48.37    2.51 
  -5  -6  -1   33.85    2.19 
  -5  -6  -1   36.21    1.91 
   5  -6   1   32.03    2.32 
  -5  -6  -1   32.04    2.23 
   5  -6   1   31.83    1.97 
   5  -6   1   36.35    2.15 
  -5  -6  -1   34.06    2.06 
   5  -6   1   29.82    2.03 
   5  -6   1   33.94    2.37 
   5  -6   1   32.70    2.01 
   5  -6   1   31.17    2.28 
  -5   6  -1   33.64    2.19 
   5   6   1   31.93    1.79 
  -5   6  -1   32.29    2.26 
   5   6   1   34.62    1.79 
  -5   6  -1   34.69    2.46 
  -5   6  -1   32.86    2.61 
  -5   6  -1   28.49    2.02 
  -5   6  -1   30.71    2.81 
  -5   6  -1   27.56    2.00 
   6  -6   1   98.29    4.54 
  -6  -6  -1  102.30    4.31 
  -6  -6  -1   97.91    3.83 
   6  -6   1   85.63    4.34 
   6  -6   1   91.12    3.97 
   6  -6   1   99.37    3.92 
   6  -6   1   95.80    3.91 
  -6  -6  -1  100.18    4.45 
   6  -6   1   91.69    4.08 
  -6   6  -1   98.98    4.28 
  -6   6  -1   96.64    4.61 
  -6   6  -1   88.15    4.09 
   6   6   1   95.93    3.63 
  -6   6  -1   94.91    5.25 
   6   6   1   98.94    3.78 
  -6   6  -1   95.58    4.19 
  -6   6  -1   92.21    4.69 
   7  -6   1    3.55    0.84 
   7  -6   1    4.38    1.14 
  -7  -6  -1    3.94    1.14 
   7  -6   1    4.40    1.01 
   7  -6   1    2.19    0.78 
   7  -6   1    5.56    1.27 
  -7  -6  -1    2.67    0.81 
  -7   6  -1    3.24    1.15 
  -7   6  -1    2.86    0.87 
  -7   6  -1    2.99    0.88 
  -7   6  -1    3.71    1.36 
  -7   6  -1    3.89    1.05 
  -7   6  -1    5.87    1.43 
   7   6   1    3.70    0.83 
  -8  -6  -1  104.32    4.80 
   8  -6   1  115.71    5.10 
   8  -6   1  115.84    5.51 
   8  -6   1  113.47    5.49 
   8  -6   1  113.33    5.00 
  -8  -6  -1  117.81    5.88 
  -8   6  -1  115.58    5.16 
   8   6   1  115.01    4.66 
  -8   6  -1  111.18    4.95 
  -8   6  -1  117.63    5.72 
  -8   6  -1  109.86    6.25 
  -8   6  -1  109.17    5.08 
  -8   6  -1  117.82    5.90 
  -8   7   1    6.74    1.63 
   7  -7  -1  103.50    4.71 
   7  -7  -1  109.83    4.50 
  -7  -7   1  112.02    4.95 
   7  -7  -1  106.83    4.48 
   7  -7  -1  113.00    5.29 
   7  -7  -1  104.97    5.24 
   7  -7  -1  102.56    5.26 
   7   7  -1  112.05    4.47 
  -7   7   1  103.95    6.01 
  -7   7   1  112.89    4.98 
  -7   7   1  108.68    4.99 
  -7   7   1  109.87    4.85 
  -7   7   1  100.25    5.59 
   6  -7  -1   20.46    1.61 
  -6  -7   1   20.03    2.20 
   6  -7  -1   15.31    1.84 
  -6  -7   1   20.00    1.78 
   6  -7  -1   19.69    2.32 
   6  -7  -1   16.22    2.29 
   6  -7  -1   18.38    2.34 
   6  -7  -1   19.70    1.69 
   6  -7  -1   20.33    1.84 
  -6  -7   1   20.19    2.09 
  -6   7   1   16.19    2.24 
  -6   7   1   18.31    2.84 
  -6   7   1   18.22    2.08 
  -6   7   1   19.55    2.12 
  -6   7   1   17.61    2.00 
   6   7  -1   20.89    1.63 
   5  -7  -1  215.19    7.89 
   5  -7  -1  225.13    7.47 
   5  -7  -1  222.37    6.89 
   5  -7  -1  213.63    7.25 
   5  -7  -1  216.34    7.74 
  -5  -7   1  222.04    8.05 
   5  -7  -1  222.55    7.99 
   5  -7  -1  224.81    7.31 
  -5  -7   1  223.41    7.63 
  -5  -7   1  228.40    7.41 
  -5   7   1  225.92    7.55 
  -5   7   1  221.36    7.61 
  -5   7   1  219.65    7.42 
  -5   7   1  245.66    9.30 
  -5   7   1  225.61    8.29 
   5   7  -1  219.33    6.93 
  -4  -7   1   48.04    2.67 
   4  -7  -1   47.46    2.81 
   4  -7  -1   44.70    2.63 
  -4  -7   1   45.34    2.65 
  -4  -7   1   43.82    2.12 
   4  -7  -1   40.23    2.70 
   4  -7  -1   41.92    2.75 
   4  -7  -1   44.32    2.12 
   4  -7  -1   39.34    2.38 
  -4  -7   1   44.41    2.13 
  -4  -7   1   44.65    2.95 
   4  -7  -1   49.67    2.48 
   4   7  -1   43.74    2.22 
  -4   7   1   44.25    2.59 
  -4   7   1   47.71    2.55 
  -4   7   1   47.32    3.14 
  -4   7   1   50.28    2.78 
  -4   7   1   46.81    3.51 
   3  -7  -1  159.42    5.99 
   3  -7  -1  158.28    5.26 
  -3  -7   1  158.30    5.72 
  -3  -7   1  159.34    5.16 
   3  -7  -1  158.99    5.77 
   3  -7  -1  167.84    6.05 
   3  -7  -1  161.11    4.92 
   3  -7  -1  165.23    5.99 
   3  -7  -1  161.20    5.79 
  -3  -7   1  162.51    5.20 
   3  -7  -1  153.74    5.54 
  -3  -7   1  161.79    5.13 
  -3  -7   1  164.65    6.31 
  -3  -7   1  151.42    5.62 
  -3   7   1  162.09    5.76 
  -3   7   1  156.59    5.44 
   3   7  -1  161.42    5.18 
  -3   7   1  165.85    6.41 
  -3   7   1  165.01    7.10 
  -3   7   1  159.66    5.70 
   2  -7  -1   25.63    1.92 
   2  -7  -1   23.49    1.87 
  -2  -7   1   24.94    2.09 
  -2  -7   1   21.06    1.77 
   2  -7  -1   23.23    1.26 
   2  -7  -1   24.56    1.92 
   2  -7  -1   21.67    1.63 
   2  -7  -1   22.98    1.43 
   2  -7  -1   26.37    1.94 
  -2  -7   1   26.56    1.67 
  -2  -7   1   24.12    1.59 
   2  -7  -1   23.56    1.76 
  -2  -7   1   23.50    1.53 
  -2  -7   1   23.45    1.54 
  -2   7   1   25.46    2.51 
  -2   7   1   25.22    1.60 
  -2   7   1   25.39    2.18 
  -2   7   1   25.11    1.80 
   2   7  -1   24.12    1.29 
  -2   7   1   25.98    1.79 
   2   7  -1   24.49    1.51 
   1  -7  -1  143.86    4.48 
   1  -7  -1  148.96    5.73 
  -1  -7   1  141.04    5.72 
   1  -7  -1  146.32    5.17 
   1  -7  -1  143.06    5.36 
  -1  -7   1  139.73    4.89 
   1  -7  -1  150.30    5.39 
   1  -7  -1  141.70    5.03 
  -1  -7   1  148.24    5.18 
   1  -7  -1  143.94    4.26 
   1  -7  -1  148.44    5.31 
  -1  -7   1  146.34    5.37 
  -1  -7   1  131.33    4.80 
   1  -7  -1  149.77    5.40 
  -1  -7   1  147.87    5.03 
  -1  -7   1  142.58    4.99 
  -1   7   1  149.20    5.27 
  -1   7   1  142.82    4.73 
   1   7  -1  145.96    4.86 
  -1   7   1  159.08    6.54 
   1   7  -1  147.81    6.07 
  -1   7   1  149.05    5.81 
  -1   7   1  143.82    5.15 
   1   7  -1  153.73    4.88 
   1   7  -1  151.32    5.03 
  -1   7   1  149.46    4.98 
  -1   7   1  148.04    5.30 
   1   7  -1  147.54    5.18 
   1   7  -1  146.82    4.35 
   0  -7  -1   23.05    1.85 
   0  -7  -1   21.68    1.73 
   0  -7   1   21.04    1.61 
   0  -7  -1   26.04    1.23 
   0  -7  -1   24.60    1.78 
   0  -7  -1   26.21    1.79 
   0  -7  -1   23.48    1.61 
   0  -7   1   23.46    1.69 
   0  -7   1   25.80    1.67 
   0  -7   1   23.53    2.04 
   0  -7   1   20.58    1.63 
   0  -7   1   22.82    1.59 
   0  -7   1   24.33    1.47 
   0  -7  -1   22.54    1.63 
   0  -7  -1   24.76    1.20 
   0   7  -1   21.78    1.61 
   0   7  -1   20.79    1.52 
   0   7   1   24.90    1.79 
   0   7   1   23.87    1.42 
   0   7   1   24.07    2.06 
   0   7  -1   22.67    1.33 
   0   7  -1   26.02    1.66 
   0   7   1   24.96    1.39 
   0   7   1   23.45    1.75 
   0   7  -1   25.76    2.21 
   0   7  -1   21.43    2.18 
   0   7   1   23.76    2.08 
   0   7   1   25.75    1.71 
   0   7   1   23.16    1.65 
   0   7  -1   23.92    1.66 
   1  -7   1  202.78    6.90 
   1  -7   1  211.41    6.65 
  -1  -7  -1  206.32    6.95 
  -1  -7  -1  210.01    7.14 
   1  -7   1  207.14    7.54 
   1  -7   1  208.00    6.09 
   1  -7   1  212.53    6.86 
   1  -7   1  216.54    6.22 
   1  -7   1  199.95    6.59 
  -1  -7  -1  221.37    6.64 
  -1  -7  -1  222.37    6.03 
  -1  -7  -1  200.21    6.68 
  -1  -7  -1  208.56    6.68 
   1  -7   1  209.19    6.87 
  -1  -7  -1  201.30    6.43 
   1  -7   1  207.68    6.88 
  -1  -7  -1  210.00    6.71 
   1   7   1  213.26    6.02 
   1   7   1  209.27    7.37 
  -1   7  -1  206.21    6.29 
  -1   7  -1  204.42    8.40 
  -1   7  -1  203.50    6.65 
  -1   7  -1  206.94    6.94 
   1   7   1  210.21    5.88 
  -1   7  -1  216.01    7.57 
   1   7   1  211.70    6.99 
  -1   7  -1  210.09    6.67 
   1   7   1  209.55    6.88 
   1   7   1  202.37    6.61 
  -1   7  -1  214.25    6.65 
   2  -7   1   39.54    2.82 
  -2  -7  -1   41.38    2.08 
   2  -7   1   38.15    1.92 
   2  -7   1   38.97    2.39 
  -2  -7  -1   41.00    2.45 
   2  -7   1   36.38    2.33 
   2  -7   1   39.60    2.43 
   2  -7   1   38.05    2.22 
  -2  -7  -1   40.79    2.14 
   2  -7   1   41.28    2.36 
  -2  -7  -1   40.84    2.49 
  -2  -7  -1   36.39    2.13 
   2  -7   1   38.77    1.97 
  -2   7  -1   38.72    2.07 
  -2   7  -1   39.41    2.24 
   2   7   1   41.00    1.78 
  -2   7  -1   39.57    2.79 
   2   7   1   43.75    2.16 
   2   7   1   38.76    2.28 
  -2   7  -1   38.69    2.25 
  -2   7  -1   41.05    3.35 
  -3  -7  -1  121.27    4.78 
  -3  -7  -1  119.51    4.36 
   3  -7   1  123.62    4.23 
   3  -7   1  117.88    4.54 
   3  -7   1  119.05    4.75 
   3  -7   1  117.62    4.84 
  -3  -7  -1  120.89    4.90 
  -3  -7  -1  129.58    4.23 
   3  -7   1  119.07    4.31 
   3  -7   1  123.11    4.80 
   3  -7   1  116.90    4.85 
  -3   7  -1  120.84    4.65 
   3   7   1  115.69    4.56 
  -3   7  -1  114.42    5.26 
  -3   7  -1  133.49    6.37 
  -3   7  -1  118.83    4.46 
  -3   7  -1  115.41    4.56 
   3   7   1  120.77    4.08 
   3   7   1  127.32    3.97 
  -4  -7  -1   31.15    2.13 
   4  -7   1   29.41    2.00 
   4  -7   1   27.70    1.90 
  -4  -7  -1   29.45    2.13 
  -4  -7  -1   29.38    1.65 
   4  -7   1   32.28    1.88 
  -4  -7  -1   30.68    2.22 
   4  -7   1   32.30    2.29 
  -4  -7  -1   28.33    1.82 
   4  -7   1   29.75    2.21 
   4  -7   1   29.83    2.27 
   4  -7   1   27.47    2.08 
   4   7   1   27.92    1.59 
  -4   7  -1   27.58    2.01 
  -4   7  -1   29.68    2.06 
  -4   7  -1   30.50    2.98 
  -4   7  -1   32.47    2.64 
  -4   7  -1   28.60    1.97 
   4   7   1   27.51    1.61 
   5  -7   1   59.66    3.08 
   5  -7   1   64.01    3.12 
   5  -7   1   63.36    3.22 
  -5  -7  -1   57.06    3.24 
  -5  -7  -1   57.18    3.18 
  -5  -7  -1   61.05    3.12 
   5  -7   1   64.24    2.98 
   5  -7   1   54.00    3.27 
   5  -7   1   64.19    3.53 
   5  -7   1   58.38    3.40 
  -5   7  -1   62.58    4.34 
  -5   7  -1   62.07    3.24 
  -5   7  -1   65.87    3.91 
  -5   7  -1   57.65    3.13 
  -5   7  -1   58.08    3.14 
   5   7   1   61.13    2.66 
   6  -7   1   16.59    2.18 
   6  -7   1   15.62    2.10 
   6  -7   1   18.50    1.65 
   6  -7   1   15.81    1.89 
   6  -7   1   18.37    1.92 
  -6  -7  -1   20.03    2.16 
   6  -7   1   18.29    1.74 
  -6  -7  -1   18.27    1.70 
  -6   7  -1   19.21    2.96 
  -6   7  -1   17.24    1.98 
  -6   7  -1   16.04    1.92 
  -6   7  -1   14.87    1.89 
  -6   7  -1   15.14    2.36 
   7  -7   1   22.83    2.69 
   7  -7   1   28.63    2.07 
   7  -7   1   23.02    1.98 
   7  -7   1   25.36    2.14 
   7  -7   1   24.41    2.83 
  -7  -7  -1   27.93    2.31 
  -7   7  -1   22.68    2.42 
  -7   7  -1   26.86    3.21 
  -7   7  -1   25.70    3.52 
  -7   7  -1   25.07    2.17 
  -7   7  -1   23.98    2.14 
  -6  -8   1   12.17    1.83 
   6  -8  -1    9.08    1.65 
  -6  -8   1    9.14    1.63 
   6  -8  -1    9.11    1.74 
   6  -8  -1    9.26    1.92 
   6  -8  -1   10.50    1.53 
   6  -8  -1   10.94    1.62 
   6  -8  -1    8.66    1.61 
  -6   8   1   12.34    2.53 
  -6   8   1   13.84    2.22 
  -6   8   1   11.51    1.78 
  -6   8   1    9.02    1.52 
  -6   8   1    9.59    1.62 
  -5  -8   1   11.80    1.71 
   5  -8  -1    9.90    1.67 
   5  -8  -1   10.74    1.84 
   5  -8  -1   10.52    1.47 
  -5  -8   1   11.59    1.92 
   5  -8  -1   11.44    1.61 
  -5  -8   1   12.59    1.95 
   5  -8  -1   10.68    1.82 
   5  -8  -1    9.46    1.80 
  -5   8   1   11.07    1.58 
  -5   8   1   11.17    1.72 
  -5   8   1    9.20    1.51 
  -5   8   1   13.87    2.57 
  -5   8   1   11.86    2.07 
   4  -8  -1   18.04    1.56 
   4  -8  -1   13.19    2.00 
  -4  -8   1   15.73    2.05 
  -4  -8   1   15.23    2.09 
   4  -8  -1   16.83    2.16 
   4  -8  -1   16.32    2.01 
   4  -8  -1   19.86    2.34 
  -4  -8   1   14.72    1.84 
  -4  -8   1   17.92    1.43 
   4  -8  -1   18.09    1.65 
  -4   8   1   15.13    1.85 
  -4   8   1   19.83    2.96 
  -4   8   1   16.97    1.93 
  -4   8   1   23.10    2.90 
  -4   8   1   17.79    1.62 
   3  -8  -1    4.38    1.12 
   3  -8  -1    3.43    1.04 
   3  -8  -1    4.49    0.88 
  -3  -8   1    3.24    0.94 
  -3  -8   1    4.19    0.85 
  -3  -8   1    5.31    1.29 
  -3  -8   1    6.41    1.16 
  -3  -8   1    5.32    0.96 
   3  -8  -1    4.13    1.02 
   3  -8  -1    5.05    1.21 
   3  -8  -1    2.80    0.83 
  -3  -8   1    5.21    0.92 
  -3   8   1    5.28    1.52 
  -3   8   1    3.81    0.98 
  -3   8   1    4.20    1.28 
  -3   8   1    3.57    0.86 
  -3   8   1    3.62    0.95 
   3   8  -1    3.49    0.73 
  -2  -8   1    1.67    0.67 
  -2  -8   1    1.16    0.62 
  -2  -8   1    0.92    0.63 
   2  -8  -1    1.01    0.68 
   2  -8  -1    1.72    0.75 
   2  -8  -1    1.28    0.67 
  -2  -8   1    1.52    0.61 
  -2  -8   1    2.09    0.69 
   2  -8  -1    2.50    0.92 
   2  -8  -1    1.13    0.50 
  -2  -8   1    1.50    0.61 
  -2  -8   1    1.59    0.65 
  -2  -8   1    0.65    0.61 
   2  -8  -1    1.31    0.69 
   2  -8  -1    1.63    0.69 
  -2   8   1    1.31    0.90 
  -2   8   1    0.82    0.54 
  -2   8   1    1.55    0.59 
  -2   8   1    2.95    0.86 
  -2   8   1    1.67    0.64 
  -2   8   1    1.98    0.92 
   2   8  -1    2.08    0.57 
   1  -8  -1    1.06    0.64 
   1  -8  -1    0.52    0.52 
   1  -8  -1    0.79    0.57 
  -1  -8   1    0.79    0.61 
  -1  -8   1    0.37    0.45 
  -1  -8   1    1.22    0.56 
  -1  -8   1    0.50    0.62 
  -1  -8   1    1.91    0.68 
  -1  -8   1    1.68    0.61 
   1  -8  -1    0.00    0.42 
   1  -8  -1    0.07    0.56 
   1  -8  -1   -0.16    0.32 
  -1  -8   1    0.78    0.50 
   1  -8  -1    0.57    0.51 
   1  -8  -1    1.14    0.63 
  -1   8   1    0.80    0.55 
   1   8  -1    0.69    0.44 
   1   8  -1    0.66    0.53 
   1   8  -1    1.00    0.67 
  -1   8   1    0.53    0.45 
  -1   8   1    0.12    0.37 
  -1   8   1    0.73    0.54 
  -1   8   1    1.14    0.71 
  -1   8   1    0.57    0.41 
  -1   8   1    0.58    0.71 
   0  -8  -1   31.96    2.20 
   0  -8   1   35.91    2.31 
   0  -8  -1   36.53    2.19 
   0  -8   1   33.20    2.21 
   0  -8   1   35.47    2.45 
   0  -8   1   36.38    2.21 
   0  -8  -1   33.78    2.46 
   0  -8  -1   35.14    2.32 
   0  -8  -1   33.01    2.23 
   0  -8  -1   38.51    2.27 
   0  -8   1   39.41    2.81 
   0  -8   1   35.43    2.27 
   0  -8   1   35.17    2.13 
   0  -8  -1   35.87    2.51 
   0   8  -1   37.44    2.26 
   0   8  -1   32.26    2.80 
   0   8   1   39.16    2.80 
   0   8   1   36.22    2.24 
   0   8  -1   38.12    1.87 
   0   8   1   35.25    1.85 
   0   8  -1   35.40    2.82 
   0   8   1   38.16    2.39 
   0   8  -1   36.56    2.22 
   0   8   1   38.34    2.70 
   0   8  -1   36.01    2.11 
   0   8   1   37.43    2.38 
  -1  -8  -1   25.88    2.12 
   1  -8   1   25.09    1.84 
   1  -8   1   26.49    2.01 
   1  -8   1   25.83    1.75 
  -1  -8  -1   28.34    1.99 
  -1  -8  -1   27.10    1.84 
  -1  -8  -1   27.80    1.98 
  -1  -8  -1   27.24    1.83 
   1  -8   1   19.89    1.90 
  -1  -8  -1   25.78    1.87 
   1  -8   1   24.43    2.22 
   1  -8   1   23.76    1.83 
   1  -8   1   23.31    1.90 
   1  -8   1   28.27    2.07 
  -1  -8  -1   23.69    2.05 
  -1   8  -1   25.19    1.61 
  -1   8  -1   27.29    1.91 
  -1   8  -1   24.51    2.35 
   1   8   1   24.10    1.80 
  -1   8  -1   23.13    1.74 
  -1   8  -1   30.45    2.04 
  -1   8  -1   20.56    1.73 
  -1   8  -1   29.71    2.77 
   2  -8   1   35.07    2.32 
  -2  -8  -1   42.29    2.28 
   2  -8   1   41.89    2.70 
  -2  -8  -1   39.53    2.42 
  -2  -8  -1   44.15    2.46 
  -2  -8  -1   36.72    2.57 
  -2  -8  -1   42.42    2.38 
   2  -8   1   38.44    2.56 
   2  -8   1   42.02    2.15 
  -2  -8  -1   45.65    2.79 
  -2  -8  -1   43.36    2.35 
   2  -8   1   41.60    2.07 
   2  -8   1   42.71    2.53 
   2  -8   1   37.90    2.52 
  -2   8  -1   44.35    3.15 
  -2   8  -1   37.87    2.36 
  -2   8  -1   41.16    2.25 
  -2   8  -1   43.76    2.54 
  -2   8  -1   47.79    3.80 
  -3  -8  -1   35.24    2.04 
  -3  -8  -1   32.72    2.35 
  -3  -8  -1   28.98    1.97 
   3  -8   1   33.33    2.33 
  -3  -8  -1   29.21    1.87 
   3  -8   1   34.68    2.44 
   3  -8   1   29.30    2.27 
   3  -8   1   31.03    2.17 
  -3  -8  -1   33.80    2.04 
  -3  -8  -1   33.77    2.38 
   3  -8   1   28.98    1.75 
   3  -8   1   30.58    1.91 
   3  -8   1   29.54    2.27 
  -3   8  -1   30.80    2.16 
  -3   8  -1   31.86    3.25 
  -3   8  -1   29.04    2.65 
  -3   8  -1   31.59    2.19 
  -3   8  -1   28.34    1.96 
   4  -8   1   15.91    1.38 
   4  -8   1   18.61    1.57 
  -4  -8  -1   18.96    2.29 
   4  -8   1   16.14    1.86 
   4  -8   1   15.38    2.01 
   4  -8   1   18.23    2.13 
   4  -8   1   16.77    2.08 
  -4  -8  -1   20.34    2.18 
   4  -8   1   20.87    1.95 
  -4   8  -1   22.69    3.28 
  -4   8  -1   18.16    1.98 
  -4   8  -1   20.84    2.75 
  -4   8  -1   17.69    1.61 
  -4   8  -1   18.84    2.02 
   5  -8   1   21.57    1.99 
   5  -8   1   18.41    1.97 
   5  -8   1   16.86    2.26 
   5  -8   1   17.99    2.22 
  -5  -8  -1   20.57    1.95 
   5  -8   1   21.87    1.89 
   5  -8   1   20.29    2.31 
   5  -8   1   24.23    2.21 
  -5  -8  -1   15.50    2.03 
  -5   8  -1   20.43    2.22 
  -5   8  -1   17.74    2.08 
  -5   8  -1   18.28    2.03 
  -5   8  -1   22.88    3.42 
  -5   8  -1   21.81    3.01 
  -6  -8  -1   36.97    2.74 
   6  -8   1   36.43    2.47 
   6  -8   1   35.35    2.84 
   6  -8   1   32.34    2.40 
   6  -8   1   35.34    2.89 
   6  -8   1   32.25    2.52 
  -6   8  -1   37.07    3.25 
  -6   8  -1   31.95    2.47 
  -6   8  -1   37.18    2.65 
  -6   8  -1   35.98    3.60 
  -6   8  -1   32.21    2.50 
  -5  -9   1   73.84    3.95 
   5  -9  -1   77.59    3.90 
   5  -9  -1   72.59    4.20 
   5  -9  -1   69.41    3.57 
   5  -9  -1   74.47    4.11 
   5  -9  -1   66.06    3.86 
  -5  -9   1   67.68    3.93 
   5  -9  -1   72.49    4.26 
  -5   9   1   69.94    4.57 
  -5   9   1   84.84    5.63 
  -5   9   1   74.43    4.02 
  -5   9   1   69.76    3.87 
  -5   9   1   67.03    3.68 
   4  -9  -1  114.02    5.16 
   4  -9  -1  110.74    5.10 
   4  -9  -1  113.15    5.34 
  -4  -9   1  109.11    5.05 
   4  -9  -1  117.94    4.60 
   4  -9  -1  109.13    4.84 
   4  -9  -1  112.24    5.24 
  -4  -9   1  106.10    5.05 
  -4   9   1  118.50    5.92 
  -4   9   1  116.77    5.07 
  -4   9   1  117.96    6.66 
  -4   9   1  114.11    5.07 
  -4   9   1  109.80    4.75 
   3  -9  -1   57.71    3.23 
  -3  -9   1   58.65    2.98 
   3  -9  -1   62.37    2.93 
   3  -9  -1   62.06    3.53 
  -3  -9   1   54.15    3.23 
  -3  -9   1   58.49    3.49 
  -3  -9   1   62.01    3.16 
  -3  -9   1   59.73    3.64 
   3  -9  -1   56.03    3.48 
   3  -9  -1   61.18    3.53 
   3  -9  -1   57.95    3.34 
  -3   9   1   57.55    3.91 
  -3   9   1   61.14    3.12 
  -3   9   1   56.32    3.29 
  -3   9   1   66.09    4.64 
  -3   9   1   54.72    3.23 
  -2  -9   1   59.29    3.49 
  -2  -9   1   62.80    3.10 
   2  -9  -1   63.11    3.53 
  -2  -9   1   59.71    3.69 
   2  -9  -1   61.58    3.53 
  -2  -9   1   63.67    3.21 
   2  -9  -1   63.35    3.37 
   2  -9  -1   58.04    3.35 
   2  -9  -1   55.45    3.41 
   2  -9  -1   54.75    3.14 
  -2  -9   1   59.13    3.03 
  -2  -9   1   66.56    3.13 
  -2  -9   1   61.21    3.29 
  -2   9   1   61.74    3.31 
  -2   9   1   56.87    3.82 
  -2   9   1   59.97    2.97 
  -2   9   1   62.59    3.37 
  -2   9   1   60.80    4.13 
  -2   9   1   62.34    3.39 
  -1  -9   1   25.87    2.03 
  -1  -9   1   24.17    1.97 
   1  -9  -1   23.67    2.19 
  -1  -9   1   28.02    2.36 
   1  -9  -1   27.84    2.20 
   1  -9  -1   27.10    2.06 
  -1  -9   1   25.50    1.95 
   1  -9  -1   21.73    2.06 
  -1  -9   1   25.72    2.39 
  -1  -9   1   26.67    1.98 
  -1  -9   1   29.03    2.10 
   1  -9  -1   29.82    2.15 
   1  -9  -1   24.78    2.11 
  -1   9   1   25.04    2.03 
  -1   9   1   30.65    2.23 
  -1   9   1   25.32    1.73 
  -1   9   1   20.27    2.65 
   1   9  -1   23.88    1.87 
   0  -9   1   84.80    3.89 
   0  -9   1   94.39    4.13 
   0  -9   1   85.30    3.92 
   0  -9  -1   86.51    3.92 
   0  -9  -1   88.03    4.12 
   0  -9   1   88.07    4.62 
   0  -9   1   90.27    4.38 
   0  -9  -1   86.97    4.42 
   0  -9  -1   87.23    4.31 
   0  -9  -1   92.88    4.21 
   0  -9   1   87.81    4.06 
   0  -9  -1   85.82    3.90 
   0  -9   1   86.18    4.00 
   0  -9  -1   84.33    3.97 
   0   9  -1   93.52    4.91 
   0   9   1   88.09    4.73 
   0   9   1   90.55    4.18 
   0   9   1   91.39    4.07 
   0   9  -1   82.55    3.88 
   1  -9   1   40.08    2.61 
  -1  -9  -1   36.15    2.31 
   1  -9   1   33.17    2.23 
  -1  -9  -1   37.84    2.68 
  -1  -9  -1   39.02    2.74 
  -1  -9  -1   35.67    2.40 
   1  -9   1   33.40    2.61 
  -1  -9  -1   33.05    2.32 
   1  -9   1   38.42    2.45 
  -1  -9  -1   40.05    2.41 
  -1  -9  -1   34.62    2.44 
   1  -9   1   39.39    2.61 
   1  -9   1   40.01    3.06 
   1  -9   1   37.20    2.40 
  -1   9  -1   32.01    2.00 
  -1   9  -1   38.13    3.09 
  -1   9  -1   39.02    2.50 
  -1   9  -1   35.68    3.09 
  -1   9  -1   38.20    2.44 
   2  -9   1   71.90    3.32 
  -2  -9  -1   70.33    3.78 
  -2  -9  -1   69.16    3.39 
  -2  -9  -1   65.87    3.21 
   2  -9   1   64.59    3.42 
  -2  -9  -1   66.06    3.67 
   2  -9   1   66.08    3.43 
   2  -9   1   71.46    3.72 
   2  -9   1   66.86    3.76 
  -2  -9  -1   70.92    3.32 
   2  -9   1   64.80    3.63 
  -2  -9  -1   69.33    3.41 
  -2   9  -1   71.59    4.77 
  -2   9  -1   68.74    3.20 
  -2   9  -1   66.17    3.44 
  -2   9  -1   69.98    4.30 
  -2   9  -1   66.94    3.51 
   3  -9   1   50.04    3.19 
  -3  -9  -1   51.93    3.24 
   3  -9   1   48.49    3.13 
  -3  -9  -1   50.52    3.12 
  -3  -9  -1   48.33    3.30 
   3  -9   1   51.20    2.66 
   3  -9   1   42.23    2.85 
  -3  -9  -1   47.82    2.63 
   3  -9   1   51.67    2.66 
   3  -9   1   41.57    2.91 
   3  -9   1   50.14    2.99 
  -3   9  -1   47.28    2.92 
  -3   9  -1   47.96    2.72 
  -3   9  -1   48.76    3.64 
  -3   9  -1   53.09    4.35 
  -3   9  -1   48.24    2.93 
   4  -9   1   36.60    2.83 
   4  -9   1   40.27    2.90 
  -4  -9  -1   38.61    2.82 
  -4  -9  -1   36.21    2.69 
   4  -9   1   40.07    2.68 
   4  -9   1   37.85    2.90 
   4  -9   1   39.13    2.80 
   4  -9   1   41.15    2.52 
  -4   9  -1   37.16    2.64 
  -4   9  -1   42.68    2.82 
  -4   9  -1   42.34    2.64 
  -4   9  -1   37.81    3.85 
  -4   9  -1   38.12    3.32 
  -5  -9  -1   10.06    1.90 
   5  -9   1    6.14    1.29 
   5  -9   1    8.34    1.66 
  -5  -9  -1    8.86    1.62 
   5  -9   1    7.93    1.36 
   5  -9   1    5.23    1.46 
   5  -9   1    6.10    1.50 
   5  -9   1    9.10    1.79 
  -5   9  -1    9.00    1.59 
  -5   9  -1    5.84    1.32 
  -5   9  -1    9.12    2.35 
  -5   9  -1    8.08    2.01 
  -5   9  -1    6.01    1.25 
   3 -10  -1    0.82    0.81 
  -3 -10   1    1.07    0.88 
   3 -10  -1    1.38    0.90 
   3 -10  -1    0.83    0.76 
   3 -10  -1    1.41    0.90 
   3 -10  -1    0.11    0.56 
  -3 -10   1    2.21    0.91 
  -3 -10   1    1.69    0.76 
  -3  10   1    0.21    0.55 
  -3  10   1    1.30    1.08 
  -3  10   1    0.53    0.67 
  -3  10   1    0.73    0.67 
   2 -10  -1    0.61    0.70 
   2 -10  -1    1.16    0.87 
  -2 -10   1    1.35    0.92 
   2 -10  -1    0.59    0.71 
  -2 -10   1    0.35    0.54 
  -2 -10   1    0.91    0.65 
   2 -10  -1    0.78    0.68 
   2 -10  -1    0.97    0.70 
  -2 -10   1    0.43    0.74 
  -2 -10   1    1.53    0.76 
  -2  10   1    0.57    0.63 
  -2  10   1    0.63    0.77 
  -2  10   1    0.82    0.66 
   1 -10  -1   10.42    1.77 
  -1 -10   1   10.68    1.74 
   1 -10  -1   11.44    1.71 
   1 -10  -1    9.81    1.60 
  -1 -10   1   10.80    1.59 
  -1 -10   1   11.72    1.65 
  -1 -10   1   10.81    1.63 
  -1 -10   1   14.16    2.37 
  -1 -10   1    9.86    1.57 
   1 -10  -1   14.22    2.20 
   1 -10  -1   15.57    2.43 
  -1 -10   1   12.02    1.98 
  -1  10   1   12.94    2.27 
  -1  10   1   12.05    1.76 
   0 -10  -1    3.93    1.14 
   0 -10  -1    4.47    1.10 
   0 -10  -1    5.93    1.43 
   0 -10  -1    4.14    1.04 
   0 -10   1    5.58    1.22 
   0 -10   1    5.72    1.26 
   0 -10   1    5.50    1.42 
   0 -10  -1    6.41    1.55 
   0 -10   1    4.30    1.28 
   0 -10   1    4.78    1.13 
   0 -10   1    6.92    1.33 
   0  10  -1    5.24    1.14 
   1 -10   1   25.63    2.47 
  -1 -10  -1   29.88    2.64 
   1 -10   1   29.72    2.41 
   1 -10   1   30.05    2.34 
  -1 -10  -1   27.45    2.30 
   1 -10   1   29.78    2.21 
   1 -10   1   25.74    2.23 
  -1 -10  -1   26.32    2.20 
  -1 -10  -1   27.64    2.19 
  -1 -10  -1   27.68    2.14 
  -1  10  -1   28.08    2.26 
  -1  10  -1   33.77    3.10 
   2 -10   1    2.85    1.08 
   2 -10   1    0.49    0.56 
  -2 -10  -1    1.36    0.77 
  -2 -10  -1    2.04    1.07 
  -2 -10  -1    0.54    0.81 
  -2 -10  -1    0.40    0.63 
   2 -10   1    1.38    0.76 
   2 -10   1    0.74    0.81 
   2 -10   1    1.53    0.84 
  -2  10  -1    0.27    0.58 
  -2  10  -1    0.65    0.91 
  -3  10  -1   18.86    2.84 
 -10   0   2   90.99    4.30 
 -10   0   2   89.39    4.96 
  10   0  -2   97.79    4.58 
 -10   0   2   97.13    5.44 
  10   0  -2  100.83    4.33 
  -9   0   2    0.01    0.38 
  -9   0   2    0.44    0.67 
   9   0  -2    0.45    0.45 
  -9   0   2    0.71    0.50 
  -9   0   2   -0.11    0.62 
  -9   0   2   -0.16    0.56 
   9   0  -2   -0.53    0.28 
   9   0  -2    0.16    0.47 
   8   0  -2  249.62    8.21 
  -8   0   2  238.43    8.34 
  -8   0   2  247.02    8.93 
   8   0  -2  253.97    7.76 
  -8   0   2  257.04    8.58 
  -8   0   2  265.10    7.73 
   8   0  -2  249.69    8.05 
   8   0  -2  253.96    7.68 
   8   0  -2  247.12    8.14 
  -8   0   2  257.73    7.15 
  -8   0   2  258.75    7.90 
  -7   0   2    0.02    0.51 
   7   0  -2    0.12    0.34 
   7   0  -2    0.35    0.40 
  -7   0   2    0.79    0.39 
  -7   0   2    0.65    0.29 
  -7   0   2    0.51    0.55 
  -7   0   2    0.53    0.31 
  -7   0   2    0.36    0.47 
   7   0  -2    0.43    0.35 
  -7   0   2   -0.18    0.22 
   7   0  -2    0.01    0.26 
  -7   0   2    0.16    0.25 
   7   0  -2    0.59    0.39 
  -6   0   2  251.07    7.59 
   6   0  -2  255.82    7.41 
   6   0  -2  242.00    7.39 
  -6   0   2  249.62    7.13 
  -6   0   2  252.48    6.65 
  -6   0   2  246.17    7.01 
  -6   0   2  246.30    6.74 
  -6   0   2  240.32    6.59 
   6   0  -2  236.31    6.92 
  -6   0   2  234.06    7.90 
  -6   0   2  241.79    7.62 
   6   0  -2  246.56    7.07 
   6   0  -2  240.34    7.26 
  -5   0   2    0.20    0.21 
  -5   0   2    0.01    0.16 
   5   0  -2    0.34    0.29 
  -5   0   2    0.14    0.24 
   5   0  -2    0.49    0.28 
   5   0  -2    0.58    0.21 
   5   0  -2    0.14    0.18 
  -5   0   2    0.25    0.19 
  -5   0   2    0.72    0.43 
   5   0  -2    0.97    0.37 
  -5   0   2    0.75    0.42 
  -5   0   2    0.39    0.19 
   5   0  -2    0.24    0.25 
  -5   0   2    0.21    0.35 
   4   0  -2  702.02   16.51 
   4   0  -2  656.42   16.80 
  -4   0   2  635.56   16.52 
  -4   0   2  657.93   16.96 
  -4   0   2  667.26   16.96 
   4   0  -2  661.04   16.32 
  -4   0   2  669.61   16.59 
  -4   0   2  642.85   16.38 
  -4   0   2  701.27   16.48 
   4   0  -2  641.11   16.23 
  -4   0   2  668.40   16.25 
  -4   0   2  685.85   16.57 
   4   0  -2  664.76   16.76 
   4   0  -2  678.02   16.56 
   4   0  -2  651.78   16.75 
  -4   0   2  660.11   16.29 
   4   0  -2  671.88   16.61 
   3   0  -2    0.71    0.16 
   3   0  -2    0.77    0.20 
   3   0  -2    0.93    0.27 
   3   0  -2    0.40    0.21 
   3   0  -2    0.56    0.20 
  -3   0   2    0.61    0.22 
  -3   0   2    1.53    0.41 
  -3   0   2    1.29    0.28 
  -3   0   2    1.79    0.28 
   3   0  -2    0.75    0.20 
  -3   0   2    0.91    0.24 
  -3   0   2    0.86    0.18 
  -3   0   2    0.71    0.20 
  -3   0   2    1.00    0.26 
   3   0  -2    1.14    0.15 
   3   0  -2    2.29    0.44 
  -3   0   2    1.42    0.41 
   3   0  -2    0.33    0.17 
  -3   0   2    0.61    0.17 
   3   0  -2    1.41    0.32 
  -3   0   2    1.88    0.35 
   3   0  -2    1.15    0.29 
   3   0  -2    0.98    0.15 
   3   0  -2    0.52    0.18 
  -2   0   2  648.43   15.07 
  -2   0   2  592.84   14.89 
  -2   0   2  626.10   15.13 
  -2   0   2  629.26   15.13 
  -2   0   2  654.05   15.08 
   2   0  -2  596.36   15.19 
   2   0  -2  619.73   15.14 
   2   0  -2  605.19   15.02 
  -2   0   2  602.80   15.00 
  -2   0   2  649.60   15.01 
  -2   0   2  597.84   15.20 
   2   0  -2  601.53   14.83 
  -2   0   2  622.63   14.92 
  -2   0   2  604.46   15.01 
  -2   0   2  625.89   15.13 
  -2   0   2  618.43   14.98 
  -2   0   2  588.05   14.95 
   2   0  -2  610.30   14.93 
   2   0  -2  625.24   15.01 
   2   0  -2  617.10   15.12 
   2   0  -2  629.53   15.01 
   2   0  -2  604.36   15.05 
   2   0  -2  641.80   15.18 
   2   0  -2  586.23   14.88 
  -2   0   2  657.03   15.15 
   2   0  -2  619.04   15.14 
  -1   0   2    0.56    0.15 
   1   0  -2    0.74    0.15 
   1   0  -2    0.47    0.13 
   1   0  -2    0.39    0.12 
  -1   0   2    0.31    0.10 
  -1   0   2    0.56    0.18 
   1   0  -2    0.63    0.16 
   1   0  -2    0.26    0.08 
  -1   0   2    0.43    0.13 
   1   0  -2    0.57    0.13 
   1   0  -2    0.93    0.16 
  -1   0   2    0.48    0.11 
  -1   0   2    0.76    0.16 
  -1   0   2    0.45    0.12 
  -1   0   2    0.47    0.12 
  -1   0   2    0.55    0.13 
   1   0  -2    0.17    0.08 
   1   0  -2    0.28    0.08 
   1   0  -2    0.57    0.14 
  -1   0  -2    0.13    0.12 
   1   0   2    0.39    0.13 
  -1   0  -2    0.35    0.10 
  -1   0  -2    0.35    0.13 
  -1   0  -2    0.54    0.16 
  -1   0  -2    0.21    0.11 
  -1   0  -2    0.18    0.11 
  -1   0  -2    0.05    0.09 
  -1   0  -2    0.37    0.14 
  -1   0  -2    0.94    0.21 
  -1   0  -2    0.29    0.09 
   1   0   2    0.18    0.10 
   1   0   2    0.53    0.16 
   1   0   2    0.19    0.13 
   1   0   2    0.29    0.12 
  -1   0  -2    0.99    0.14 
  -1   0  -2    0.33    0.12 
   1   0   2    0.22    0.07 
  -1   0  -2    1.21    0.20 
   2   0   2   87.12    2.62 
  -2   0  -2   88.58    2.45 
  -2   0  -2   89.61    2.30 
   2   0   2   82.14    2.63 
   2   0   2   87.80    2.80 
  -2   0  -2   86.95    2.29 
  -2   0  -2   87.98    2.54 
  -2   0  -2   92.12    2.64 
  -2   0  -2   91.29    2.57 
  -2   0  -2   87.42    2.54 
   2   0   2   86.17    2.45 
  -2   0  -2   86.91    2.80 
   2   0   2   84.30    2.54 
   2   0   2   85.30    2.55 
  -2   0  -2   91.68    2.66 
   2   0   2   87.03    2.65 
  -2   0  -2   90.22    2.66 
  -2   0  -2   86.84    2.61 
  -3   0  -2    0.20    0.23 
  -3   0  -2    0.10    0.16 
  -3   0  -2    0.06    0.17 
  -3   0  -2    0.09    0.14 
   3   0   2    0.08    0.14 
  -3   0  -2    0.06    0.08 
  -3   0  -2   -0.03    0.08 
   3   0   2    0.11    0.15 
  -3   0  -2    0.74    0.25 
   3   0   2    0.04    0.18 
   3   0   2    0.43    0.19 
   3   0   2    0.04    0.16 
   3   0   2    0.31    0.21 
   3   0   2   -0.01    0.16 
  -3   0  -2    0.17    0.10 
   4   0   2  296.62    8.26 
   4   0   2  310.88    8.26 
  -4   0  -2  302.01    8.47 
   4   0   2  297.64    7.91 
  -4   0  -2  308.14    8.24 
   4   0   2  308.33    8.22 
  -4   0  -2  303.89    8.00 
  -4   0  -2  289.51    7.90 
   4   0   2  305.90    8.01 
  -4   0  -2  296.61    8.15 
  -4   0  -2  298.32    7.49 
  -4   0  -2  305.21    7.53 
  -4   0  -2  305.64    8.66 
  -4   0  -2  303.37    7.86 
  -4   0  -2  298.99    7.53 
   4   0   2  304.98    8.06 
  -5   0  -2    0.31    0.17 
  -5   0  -2    0.11    0.14 
  -5   0  -2    0.18    0.33 
  -5   0  -2    0.16    0.14 
   5   0   2   -0.06    0.16 
  -5   0  -2    0.04    0.29 
  -5   0  -2   -0.05    0.19 
   5   0   2    0.61    0.35 
   5   0   2    0.07    0.20 
   5   0   2   -0.04    0.21 
  -5   0  -2    0.23    0.23 
   5   0   2    0.58    0.28 
  -5   0  -2    0.08    0.25 
  -6   0  -2  130.77    3.67 
  -6   0  -2  126.63    4.39 
  -6   0  -2  126.95    5.01 
  -6   0  -2  127.40    4.06 
   6   0   2  119.23    4.35 
   6   0   2  128.07    4.26 
  -6   0  -2  125.97    4.80 
  -6   0  -2  123.74    4.15 
   6   0   2  124.22    4.53 
  -6   0  -2  129.43    3.53 
   6   0   2  128.64    4.27 
   7   0   2    0.08    0.30 
  -7   0  -2    0.39    0.27 
  -7   0  -2    0.11    0.43 
  -7   0  -2    0.22    0.31 
  -7   0  -2    0.44    0.43 
  -7   0  -2    0.80    0.57 
   7   0   2    0.32    0.39 
   7   0   2    0.03    0.36 
  -7   0  -2    0.52    0.40 
  -7   0  -2    0.81    0.58 
   7   0   2    0.20    0.37 
  -8   0  -2    0.40    0.36 
  -8   0  -2    0.95    0.55 
   8   0   2    0.06    0.28 
  -8   0  -2    0.00    0.56 
  -8   0  -2    0.70    0.49 
   8   0   2    0.75    0.47 
   8   0   2    1.10    0.56 
  -8   0  -2    0.68    0.68 
   8   0   2    0.79    0.50 
  -9   0  -2    0.63    0.47 
   9   0   2    0.08    0.43 
  -9   0  -2    0.68    0.55 
   9   0   2    0.07    0.47 
  -9   0  -2    0.50    0.69 
  -9   0  -2    0.23    0.65 
   9   0   2    0.38    0.48 
   9   0   2    0.21    0.49 
 -10   0  -2    6.89    1.37 
  10   0   2    8.11    1.35 
 -10   0  -2    8.11    1.91 
  10   0   2    4.23    1.18 
 -10   0  -2    7.03    1.79 
  10  -1  -2   11.46    1.78 
 -10  -1   2   13.72    2.36 
  10  -1  -2   15.12    2.11 
 -10  -1   2   13.33    2.21 
  10  -1  -2   14.21    1.86 
 -10  -1   2   12.00    2.15 
 -10  -1   2   14.69    1.84 
  10   1  -2   13.74    1.67 
 -10   1   2   16.92    2.47 
 -10   1   2   12.54    1.71 
  10   1  -2   13.20    1.81 
 -10   1   2   13.17    1.82 
 -10   1   2   10.28    2.05 
 -10   1   2   13.69    2.47 
  -9  -1   2   73.88    4.00 
  -9  -1   2   73.73    4.36 
   9  -1  -2   66.69    3.39 
   9  -1  -2   74.65    3.78 
  -9  -1   2   71.30    3.37 
  -9  -1   2   69.14    4.05 
   9  -1  -2   71.04    3.64 
   9  -1  -2   73.14    3.45 
  -9   1   2   72.48    3.55 
   9   1  -2   70.76    3.67 
  -9   1   2   69.25    3.37 
   9   1  -2   70.50    3.24 
  -9   1   2   75.02    4.41 
   9   1  -2   76.32    3.64 
  -9   1   2   72.61    4.11 
  -8  -1   2    1.78    0.53 
   8  -1  -2    0.99    0.58 
  -8  -1   2    0.65    0.64 
   8  -1  -2    1.30    0.56 
  -8  -1   2    1.28    0.71 
   8  -1  -2    0.79    0.53 
  -8  -1   2    0.75    0.52 
  -8  -1   2    1.45    0.79 
  -8  -1   2    1.74    0.83 
   8  -1  -2    1.25    0.64 
  -8  -1   2    1.13    0.48 
  -8   1   2    1.40    0.77 
  -8   1   2    1.67    0.83 
   8   1  -2    0.84    0.56 
   8   1  -2    0.57    0.42 
   8   1  -2    0.11    0.37 
   8   1  -2    0.72    0.41 
  -8   1   2    0.99    0.44 
  -8   1   2    1.01    0.48 
  -8   1   2    1.59    0.82 
  -8   1   2    1.46    0.59 
  -8   1   2    1.23    0.60 
  -7  -1   2   28.20    2.06 
   7  -1  -2   27.30    1.84 
  -7  -1   2   27.24    2.19 
  -7  -1   2   27.51    1.29 
   7  -1  -2   28.11    1.89 
   7  -1  -2   27.05    1.74 
  -7  -1   2   27.09    1.53 
  -7  -1   2   28.73    1.54 
   7  -1  -2   29.08    1.77 
  -7  -1   2   29.26    1.29 
  -7  -1   2   26.41    1.65 
   7  -1  -2   29.10    1.93 
  -7   1   2   29.43    1.75 
  -7   1   2   27.91    2.13 
  -7   1   2   26.79    2.19 
  -7   1   2   27.45    2.10 
  -7   1   2   27.14    1.50 
   7   1  -2   31.86    1.71 
  -7   1   2   30.47    1.41 
  -7   1   2   28.43    1.80 
   7   1  -2   27.13    1.79 
   7   1  -2   28.18    1.87 
   7   1  -2   28.47    1.58 
  -7   1   2   29.30    1.54 
   7   1  -2   25.48    1.82 
   6  -1  -2   18.34    1.39 
  -6  -1   2   18.68    1.52 
  -6  -1   2   18.97    0.95 
   6  -1  -2   18.85    1.31 
   6  -1  -2   18.29    1.38 
  -6  -1   2   18.81    1.15 
  -6  -1   2   18.56    1.14 
  -6  -1   2   19.63    1.53 
  -6  -1   2   19.57    1.24 
   6  -1  -2   17.77    1.36 
   6  -1  -2   16.54    1.24 
  -6  -1   2   19.87    0.95 
  -6   1   2   19.73    1.08 
   6   1  -2   16.74    1.15 
  -6   1   2   19.09    1.34 
  -6   1   2   21.66    1.73 
  -6   1   2   19.87    1.17 
   6   1  -2   18.52    1.38 
  -6   1   2   16.77    1.26 
  -6   1   2   16.74    1.58 
   6   1  -2   17.77    1.30 
  -6   1   2   20.25    1.15 
   6   1  -2   16.70    1.34 
  -6   1   2   18.94    1.59 
   6   1  -2   20.07    1.18 
   5  -1  -2    5.08    0.37 
   5  -1  -2    5.44    0.80 
  -5  -1   2    5.43    0.42 
  -5  -1   2    4.82    0.84 
  -5  -1   2    4.22    0.58 
   5  -1  -2    7.26    0.46 
   5  -1  -2    5.38    0.47 
  -5  -1   2    5.15    0.65 
   5  -1  -2    4.68    0.73 
   5  -1  -2    6.35    0.81 
  -5  -1   2    4.72    0.60 
  -5  -1   2    6.51    1.00 
   5  -1  -2    4.63    0.73 
   5  -1  -2    4.91    0.69 
   5   1  -2    4.76    0.62 
  -5   1   2    5.89    0.91 
  -5   1   2    7.99    0.62 
  -5   1   2    5.10    0.70 
   5   1  -2    6.19    0.55 
  -5   1   2    5.03    0.60 
   5   1  -2    5.01    0.76 
  -5   1   2    7.71    1.18 
  -5   1   2    5.10    0.90 
   5   1  -2    5.46    0.74 
   5   1  -2    5.09    0.75 
  -5   1   2    4.27    0.66 
  -5   1   2    4.69    0.60 
   4  -1  -2   38.78    1.69 
   4  -1  -2   39.20    1.36 
   4  -1  -2   39.33    1.88 
  -4  -1   2   36.74    1.52 
   4  -1  -2   38.39    1.47 
  -4  -1   2   39.03    1.49 
  -4  -1   2   38.10    1.85 
   4  -1  -2   40.16    1.42 
  -4  -1   2   38.88    1.24 
   4  -1  -2   39.93    1.75 
  -4  -1   2   41.77    1.60 
   4  -1  -2   39.41    1.78 
   4  -1  -2   40.64    1.75 
  -4  -1   2   38.10    1.79 
   4  -1  -2   37.12    1.66 
  -4  -1   2   38.70    1.31 
   4  -1  -2   40.29    1.55 
   4  -1  -2   38.25    1.42 
  -4  -1   2   37.67    1.37 
  -4   1   2   38.78    2.02 
  -4   1   2   40.67    1.97 
   4   1  -2   38.23    1.41 
   4   1  -2   39.58    1.72 
   4   1  -2   41.61    1.80 
  -4   1   2   39.68    1.55 
  -4   1   2   39.77    1.98 
  -4   1   2   36.20    1.64 
   4   1  -2   38.88    1.54 
  -4   1   2   41.08    1.57 
  -4   1   2   39.55    1.51 
   4   1  -2   38.86    1.46 
   4   1  -2   40.66    1.78 
  -4   1   2   38.20    1.69 
   3  -1  -2   36.77    1.50 
  -3  -1   2   37.65    1.40 
  -3  -1   2   37.60    1.36 
  -3  -1   2   37.81    1.20 
   3  -1  -2   35.80    1.50 
  -3  -1   2   40.07    1.49 
  -3  -1   2   38.87    1.77 
   3  -1  -2   36.67    1.37 
  -3  -1   2   40.02    1.35 
   3  -1  -2   36.76    1.50 
  -3  -1   2   39.28    1.58 
   3  -1  -2   38.41    1.69 
   3  -1  -2   36.67    1.34 
   3  -1  -2   36.05    1.31 
  -3  -1   2   39.82    1.09 
  -3  -1   2   42.11    1.83 
   3  -1  -2   37.93    1.52 
  -3  -1   2   38.29    1.53 
   3  -1  -2   38.06    1.53 
   3  -1  -2   37.82    1.38 
  -3  -1   2   38.59    1.35 
   3  -1  -2   37.83    1.41 
   3  -1  -2   36.98    1.57 
  -3  -1   2   38.62    1.45 
   3  -1  -2   48.80    2.50 
   3  -1  -2   39.17    1.54 
  -3  -1   2   37.73    1.19 
  -3   1   2   39.35    1.75 
   3   1  -2   35.59    1.34 
  -3   1   2   38.86    1.75 
   3   1  -2   36.31    1.30 
  -3   1   2   38.77    1.77 
  -3   1   2   38.58    1.78 
   3   1  -2   42.75    1.62 
  -3   1   2   37.17    1.50 
   3   1  -2   37.92    1.43 
   3   1  -2   37.27    1.55 
  -3   1   2   40.72    1.44 
  -3   1   2   36.42    1.49 
  -3   1   2   36.14    1.55 
  -3   1   2   39.13    1.54 
  -3   1   2   36.19    1.51 
  -3   1   2   38.12    1.40 
   3   1  -2   37.40    1.22 
  -3   1   2   37.84    1.42 
  -2  -1   2    8.60    0.30 
  -2  -1   2    7.67    0.38 
   2  -1  -2    7.59    0.54 
   2  -1  -2    8.45    0.52 
   2  -1  -2    8.27    0.64 
  -2  -1   2    9.31    0.59 
   2  -1  -2    8.30    0.51 
   2  -1  -2    7.91    0.55 
   2  -1  -2    9.08    0.56 
  -2  -1   2    7.62    0.46 
   2  -1  -2    8.07    0.52 
  -2  -1   2    8.21    0.44 
  -2  -1   2    8.52    0.44 
   2  -1  -2    7.37    0.62 
   2  -1  -2    7.78    0.54 
   2  -1  -2    7.84    0.51 
  -2  -1   2    7.01    0.52 
   2  -1  -2    7.87    0.50 
   2  -1  -2    7.67    0.52 
   2  -1  -2    6.80    0.53 
  -2  -1   2    7.93    0.39 
  -2  -1   2    7.49    0.63 
  -2  -1   2    7.86    0.51 
   2  -1  -2    7.37    0.49 
  -2  -1   2    8.56    0.54 
  -2  -1   2    8.41    0.41 
  -2  -1   2    8.97    0.57 
  -2   1   2    8.92    0.57 
   2   1  -2    7.36    0.54 
  -2   1   2    7.69    0.53 
  -2   1   2    7.87    0.51 
  -2   1   2    8.24    0.50 
   2   1  -2    8.38    0.56 
  -2   1   2    7.75    0.50 
  -2   1   2    6.91    0.49 
   2   1  -2    8.16    0.43 
  -2   1   2    8.44    0.51 
   2   1  -2    8.00    0.40 
  -2   1   2    7.45    0.67 
  -2   1   2    7.74    0.48 
  -2   1   2    7.99    0.54 
  -2   1   2    8.85    0.55 
   2   1  -2    7.96    0.33 
  -2   1   2    8.41    0.55 
   2   1  -2    7.47    0.30 
  -2   1   2    9.55    0.54 
  -2   1   2    6.69    0.57 
  -2   1   2    8.41    0.63 
   2   1  -2    9.27    0.47 
   2   1  -2    8.11    0.51 
  -1  -1   2   12.56    0.58 
  -1  -1   2   10.83    0.37 
   1  -1  -2   11.66    0.57 
   1  -1  -2   10.62    0.59 
   1  -1  -2   13.22    0.50 
   1  -1  -2   11.98    0.66 
  -1  -1   2   11.25    0.35 
  -1  -1   2   12.48    0.35 
   1  -1  -2   10.84    0.47 
   1  -1  -2   11.46    0.59 
  -1  -1   2   12.97    0.78 
  -1  -1   2   11.34    0.50 
   1  -1  -2   12.05    0.58 
  -1  -1   2   11.74    0.43 
   1  -1  -2   12.36    0.59 
   1  -1  -2   11.58    0.56 
   1  -1  -2   12.25    0.61 
   1  -1  -2   11.24    0.56 
   1  -1  -2   15.83    0.79 
   1  -1  -2   11.52    0.57 
  -1  -1   2   11.72    0.53 
  -1  -1   2   12.39    0.65 
   1   1  -2   11.04    0.62 
  -1   1   2   11.23    0.47 
  -1   1   2   11.02    0.57 
   1   1  -2   11.79    0.57 
  -1   1   2   12.27    0.58 
  -1   1   2   10.99    0.57 
   1   1  -2   11.60    0.48 
   1   1  -2   12.56    0.54 
   1   1  -2   11.04    0.43 
  -1   1   2   11.47    0.56 
  -1   1   2   11.08    0.56 
  -1   1   2   10.99    0.47 
  -1   1   2   12.07    0.57 
  -1   1   2   11.89    0.62 
  -1   1   2   11.50    0.58 
  -1   1   2   12.03    0.58 
   1   1  -2   12.05    0.45 
   1   1  -2   12.06    0.75 
  -1   1   2   10.60    0.56 
   0  -1  -2    9.73    0.56 
   0  -1  -2   10.47    0.46 
   0  -1   2    8.00    0.63 
   0  -1   2    9.21    0.33 
   0  -1  -2   10.02    0.48 
   0  -1   2    9.33    0.45 
   0  -1  -2    9.68    0.44 
   0  -1   2    9.78    0.44 
   0  -1   2    9.97    0.45 
   0  -1  -2    8.72    0.57 
   0  -1   2    9.75    0.42 
   0  -1  -2   10.33    0.53 
   0  -1  -2    9.81    0.37 
   0  -1   2    8.34    0.58 
   0  -1   2    9.08    0.48 
   0  -1  -2    9.83    0.55 
   0  -1   2    8.06    0.80 
   0  -1  -2    9.93    0.44 
   0   1  -2    7.30    0.46 
   0   1   2    9.16    0.49 
   0   1   2    9.24    0.44 
   0   1  -2    8.62    0.43 
   0   1  -2    8.73    0.82 
   0   1   2    7.23    0.50 
   0   1   2    8.78    0.49 
   0   1   2    7.30    0.54 
   0   1  -2    9.45    0.40 
   0   1  -2   10.10    0.44 
   0   1   2    7.30    0.35 
   0   1   2    8.76    0.51 
  -1  -1  -2  166.56    4.16 
  -1  -1  -2  158.28    4.41 
   1  -1   2  156.15    4.64 
   1  -1   2  166.51    4.50 
  -1  -1  -2  166.83    4.08 
   1  -1   2  165.64    4.38 
  -1  -1  -2  164.59    4.29 
   1  -1   2  165.62    4.43 
  -1  -1  -2  165.00    4.32 
  -1  -1  -2  166.81    4.20 
  -1  -1  -2  164.37    4.47 
   1  -1   2  167.31    4.08 
  -1  -1  -2  162.19    3.99 
   1  -1   2  160.48    4.50 
   1  -1   2  170.40    4.77 
   1  -1   2  162.07    4.27 
   1  -1   2  167.48    4.36 
   1  -1   2  168.13    4.33 
  -1  -1  -2  159.16    4.30 
   1  -1   2  168.24    4.28 
  -1  -1  -2  154.53    4.20 
  -1  -1  -2  177.59    4.13 
   1  -1   2  167.67    4.28 
  -1  -1  -2  161.79    4.44 
  -1  -1  -2  161.93    4.22 
   1  -1   2  181.82    4.45 
  -1   1  -2  161.44    4.75 
  -1   1  -2  167.61    4.40 
   1   1   2  160.83    4.29 
  -1   1  -2  160.81    4.48 
  -1   1  -2  170.43    4.28 
  -1   1  -2  171.82    4.08 
   1   1   2  160.69    4.32 
   1   1   2  162.71    4.16 
  -1   1  -2  171.46    4.37 
  -1   1  -2  165.53    4.29 
   1   1   2  169.74    4.21 
   1   1   2  167.09    4.44 
  -1   1  -2  165.25    4.26 
   1   1   2  164.36    4.46 
  -1   1  -2  168.85    4.35 
  -1   1  -2  171.94    4.35 
  -1   1  -2  158.22    4.49 
   1   1   2  162.32    4.27 
  -1   1  -2  170.51    4.41 
  -1   1  -2  169.26    4.67 
   2  -1   2   18.80    0.97 
  -2  -1  -2   18.71    0.68 
  -2  -1  -2   19.13    0.94 
   2  -1   2   18.16    0.89 
   2  -1   2   18.60    0.79 
  -2  -1  -2   18.67    0.80 
  -2  -1  -2   18.86    0.86 
  -2  -1  -2   20.01    0.85 
   2  -1   2   19.05    0.77 
   2  -1   2   19.11    0.92 
  -2  -1  -2   19.89    0.92 
   2  -1   2   18.43    0.87 
   2  -1   2   18.90    0.88 
  -2  -1  -2   18.46    0.92 
   2  -1   2   19.72    0.90 
   2  -1   2   19.24    0.97 
  -2  -1  -2   17.68    0.86 
   2  -1   2   18.08    0.90 
  -2  -1  -2   20.06    0.79 
  -2   1  -2   20.53    0.99 
   2   1   2   18.49    0.70 
  -2   1  -2   18.84    0.89 
  -2   1  -2   19.38    0.80 
  -2   1  -2   20.32    1.17 
  -2   1  -2   19.27    0.90 
   2   1   2   20.75    0.89 
  -2   1  -2   19.38    0.90 
  -2   1  -2   19.47    0.92 
   2   1   2   18.81    0.83 
  -2   1  -2   20.03    0.90 
   2   1   2   19.59    0.85 
  -2   1  -2   18.83    1.00 
  -2   1  -2   20.41    0.92 
   2   1   2   19.81    0.98 
  -2   1  -2   18.32    1.04 
   2   1   2   20.07    0.93 
  -2   1  -2   18.30    0.93 
   3  -1   2  387.65    9.96 
   3  -1   2  388.97    9.94 
   3  -1   2  407.77   10.23 
  -3  -1  -2  384.24    9.82 
  -3  -1  -2  377.35    9.80 
  -3  -1  -2  393.14   10.03 
  -3  -1  -2  399.24   10.29 
  -3  -1  -2  388.04    9.68 
  -3  -1  -2  378.81    9.81 
   3  -1   2  377.22   10.00 
   3  -1   2  384.29    9.59 
   3  -1   2  390.76   10.18 
  -3  -1  -2  398.38    9.78 
   3  -1   2  401.86   10.05 
  -3  -1  -2  388.86   10.26 
   3  -1   2  381.10    9.62 
   3   1   2  392.52    9.79 
   3   1   2  403.16   10.08 
  -3   1  -2  392.85   10.05 
  -3   1  -2  390.31   10.26 
  -3   1  -2  405.50    9.99 
  -3   1  -2  397.01    9.96 
  -3   1  -2  386.44    9.97 
   3   1   2  388.31   10.09 
  -3   1  -2  384.98   10.55 
  -3   1  -2  392.59    9.72 
   3   1   2  389.30    9.73 
  -3   1  -2  387.65    9.77 
   3   1   2  389.40   10.03 
   3   1   2  375.87    9.94 
  -3   1  -2  377.06   10.10 
   4  -1   2    5.73    0.77 
   4  -1   2    5.90    0.36 
   4  -1   2    6.69    0.83 
  -4  -1  -2    6.58    0.53 
  -4  -1  -2    8.66    0.63 
  -4  -1  -2    4.87    0.63 
   4  -1   2    5.97    0.35 
  -4  -1  -2    6.79    0.90 
  -4  -1  -2    5.77    0.49 
  -4  -1  -2    7.06    0.56 
   4  -1   2    5.55    0.77 
   4  -1   2    5.25    0.68 
   4  -1   2    6.57    0.74 
   4   1   2    5.05    0.66 
   4   1   2    5.66    0.72 
  -4   1  -2    7.53    0.67 
  -4   1  -2    6.96    1.02 
  -4   1  -2    6.84    0.79 
   4   1   2    6.91    0.78 
   4   1   2    6.32    0.57 
  -4   1  -2    5.51    0.57 
  -4   1  -2    5.02    0.76 
  -4   1  -2    5.50    0.70 
  -4   1  -2    6.27    0.71 
   4   1   2    5.23    0.57 
   4   1   2    7.08    0.81 
  -4   1  -2    7.93    1.02 
  -5  -1  -2  207.79    5.21 
   5  -1   2  210.64    6.19 
  -5  -1  -2  209.73    5.68 
  -5  -1  -2  217.81    6.76 
  -5  -1  -2  215.81    6.19 
   5  -1   2  206.76    6.40 
  -5  -1  -2  205.71    5.82 
   5  -1   2  207.72    6.19 
  -5  -1  -2  213.18    5.22 
  -5  -1  -2  209.28    5.85 
  -5   1  -2  217.71    5.78 
   5   1   2  214.33    6.26 
   5   1   2  213.06    5.96 
  -5   1  -2  209.87    5.96 
  -5   1  -2  211.34    6.07 
  -5   1  -2  204.68    6.24 
   5   1   2  211.58    6.34 
   5   1   2  213.50    6.27 
  -5   1  -2  205.21    6.26 
   5   1   2  212.90    6.26 
   5   1   2  208.39    5.96 
  -5   1  -2  209.31    6.17 
  -5   1  -2  208.74    6.91 
  -5   1  -2  204.67    6.63 
  -6  -1  -2   16.28    0.72 
   6  -1   2   17.54    1.38 
  -6  -1  -2   16.06    1.05 
  -6  -1  -2   17.67    1.56 
  -6  -1  -2   15.74    1.22 
  -6  -1  -2   16.38    1.51 
  -6  -1  -2   17.62    0.73 
  -6  -1  -2   17.00    0.97 
   6  -1   2   17.41    1.29 
   6  -1   2   14.88    1.20 
   6  -1   2   18.75    1.45 
  -6  -1  -2   16.30    1.07 
  -6   1  -2   15.90    1.00 
  -6   1  -2   16.68    1.13 
  -6   1  -2   15.98    1.16 
  -6   1  -2   13.90    1.16 
   6   1   2   16.74    1.17 
   6   1   2   19.47    1.22 
   6   1   2   15.90    1.25 
   6   1   2   14.73    1.26 
  -6   1  -2   17.62    1.35 
  -6   1  -2   19.65    1.73 
  -6   1  -2   16.22    1.43 
  -6   1  -2   15.84    1.50 
  -7  -1  -2  206.72    5.95 
  -7  -1  -2  198.12    7.01 
   7  -1   2  192.01    6.41 
   7  -1   2  201.73    6.45 
  -7  -1  -2  196.06    6.00 
  -7  -1  -2  200.51    7.21 
  -7  -1  -2  202.00    6.45 
  -7  -1  -2  194.91    5.62 
   7  -1   2  194.52    6.59 
   7  -1   2  199.57    6.75 
   7   1   2  202.26    6.25 
  -7   1  -2  202.41    6.00 
   7   1   2  199.41    6.18 
  -7   1  -2  206.84    6.45 
   7   1   2  205.17    6.51 
  -7   1  -2  213.35    6.66 
  -7   1  -2  193.83    7.32 
   7   1   2  201.87    6.68 
  -7   1  -2  204.28    6.20 
  -7   1  -2  196.20    6.52 
  -7   1  -2  201.71    5.83 
  -7   1  -2  205.77    7.13 
  -8  -1  -2   31.95    2.14 
  -8  -1  -2   34.80    2.64 
  -8  -1  -2   39.44    2.00 
   8  -1   2   34.13    2.14 
   8  -1   2   33.24    2.16 
   8  -1   2   37.08    2.45 
   8  -1   2   34.50    2.29 
  -8  -1  -2   34.81    1.84 
  -8  -1  -2   35.89    2.71 
   8   1   2   35.09    2.03 
   8   1   2   34.51    2.21 
  -8   1  -2   36.03    2.67 
  -8   1  -2   39.14    2.39 
   8   1   2   35.72    2.10 
  -8   1  -2   34.43    2.16 
   8   1   2   39.03    2.46 
  -8   1  -2   31.67    2.65 
  -8   1  -2   37.27    2.06 
   9  -1   2  147.68    5.75 
  -9  -1  -2  160.48    5.88 
  -9  -1  -2  149.30    6.69 
  -9  -1  -2  157.38    5.48 
   9  -1   2  154.87    5.76 
   9  -1   2  147.15    6.07 
   9  -1   2  157.22    6.02 
  -9  -1  -2  151.53    6.49 
  -9   1  -2  142.31    6.72 
   9   1   2  155.97    5.49 
   9   1   2  158.78    6.17 
  -9   1  -2  154.59    5.69 
   9   1   2  161.38    5.70 
  -9   1  -2  152.87    5.36 
  -9   1  -2  155.41    6.61 
  -9   1  -2  143.25    5.77 
  10  -1   2    7.59    1.37 
 -10  -1  -2    6.97    1.25 
 -10  -1  -2    7.53    1.45 
 -10  -1  -2    6.79    1.53 
 -10  -1  -2    5.84    1.58 
  10  -1   2    6.32    1.43 
  10  -1   2    5.08    1.19 
  10  -1   2    7.37    1.49 
 -10   1  -2    7.53    1.44 
 -10   1  -2    6.03    1.64 
  10   1   2    9.09    1.67 
 -10   1  -2    4.57    1.08 
  10   1   2    7.38    1.34 
 -10  -2   2   86.37    4.96 
  10  -2  -2   78.73    4.12 
 -10  -2   2   85.38    3.98 
  10  -2  -2   83.13    4.41 
  10  -2  -2   89.24    4.52 
 -10  -2   2   93.98    5.29 
  10   2  -2   96.62    4.62 
 -10   2   2   94.19    5.42 
 -10   2   2  104.33    5.32 
 -10   2   2   90.59    4.39 
 -10   2   2   86.26    4.22 
  10   2  -2   91.92    4.38 
   9  -2  -2   39.47    2.52 
  -9  -2   2   37.44    2.95 
   9  -2  -2   35.67    2.57 
  -9  -2   2   38.97    2.31 
   9  -2  -2   36.02    2.55 
   9  -2  -2   32.01    2.31 
  -9  -2   2   39.50    3.11 
  -9   2   2   36.01    2.41 
   9   2  -2   34.04    2.45 
  -9   2   2   35.79    2.11 
  -9   2   2   48.09    3.50 
  -9   2   2   39.30    3.01 
  -9   2   2   34.47    2.41 
   9   2  -2   32.98    2.03 
  -9   2   2   42.25    3.25 
   9   2  -2   36.11    2.42 
  -8  -2   2   68.57    3.10 
   8  -2  -2   71.49    3.54 
  -8  -2   2   78.93    3.13 
   8  -2  -2   73.95    3.57 
  -8  -2   2   69.56    3.67 
  -8  -2   2   76.87    4.18 
   8  -2  -2   70.98    3.41 
   8  -2  -2   74.28    3.43 
  -8  -2   2   77.09    4.05 
  -8   2   2   74.71    3.48 
  -8   2   2   70.29    4.11 
  -8   2   2   67.94    4.03 
  -8   2   2   81.38    3.21 
  -8   2   2   76.94    3.12 
  -8   2   2   78.61    3.51 
   8   2  -2   72.28    3.49 
   8   2  -2   78.41    3.50 
  -8   2   2   72.19    3.92 
   8   2  -2   74.50    3.02 
   7  -2  -2   42.16    2.41 
  -7  -2   2   47.97    2.56 
   7  -2  -2   43.33    2.36 
  -7  -2   2   47.35    2.89 
  -7  -2   2   47.91    1.97 
  -7  -2   2   45.40    2.15 
   7  -2  -2   43.55    2.48 
  -7  -2   2   45.98    2.18 
  -7  -2   2   42.59    2.55 
   7  -2  -2   54.97    2.63 
   7   2  -2   41.46    2.33 
  -7   2   2   43.71    2.15 
   7   2  -2   45.55    2.01 
  -7   2   2   46.23    2.84 
   7   2  -2   46.41    2.49 
  -7   2   2   46.18    2.97 
   7   2  -2   43.83    2.03 
  -7   2   2   47.87    2.44 
  -7   2   2   44.65    2.42 
  -7   2   2   48.18    2.20 
  -7   2   2   45.82    2.82 
   6  -2  -2  136.77    3.83 
  -6  -2   2  137.11    4.05 
  -6  -2   2  129.70    5.12 
   6  -2  -2  132.03    4.67 
  -6  -2   2  134.83    4.36 
  -6  -2   2  138.03    4.83 
   6  -2  -2  137.84    4.74 
   6  -2  -2  138.67    3.88 
   6  -2  -2  137.51    4.66 
   6  -2  -2  129.98    4.75 
  -6  -2   2  136.52    3.82 
  -6  -2   2  137.47    4.32 
   6  -2  -2  129.66    3.97 
  -6  -2   2  134.53    3.63 
   6   2  -2  138.14    4.67 
  -6   2   2  134.25    4.37 
   6   2  -2  132.84    4.15 
  -6   2   2  135.16    5.11 
  -6   2   2  137.41    4.63 
   6   2  -2  137.16    4.12 
   6   2  -2  139.25    4.73 
  -6   2   2  131.31    4.64 
  -6   2   2  136.05    5.34 
  -6   2   2  133.87    4.36 
  -6   2   2  136.12    5.07 
  -6   2   2  134.41    3.86 
  -5  -2   2  150.06    4.24 
  -5  -2   2  152.05    4.03 
   5  -2  -2  150.68    4.97 
  -5  -2   2  156.34    4.66 
  -5  -2   2  151.43    3.89 
   5  -2  -2  153.76    4.86 
   5  -2  -2  146.65    5.14 
  -5  -2   2  155.00    4.98 
   5  -2  -2  151.40    4.93 
   5  -2  -2  151.85    4.44 
   5  -2  -2  152.05    4.32 
  -5  -2   2  154.75    4.16 
  -5  -2   2  148.86    5.28 
  -5  -2   2  155.17    4.48 
   5  -2  -2  149.21    4.18 
   5  -2  -2  153.33    4.84 
  -5  -2   2  153.76    4.93 
  -5   2   2  155.92    4.64 
   5   2  -2  151.27    4.83 
  -5   2   2  145.26    4.83 
   5   2  -2  146.56    4.34 
  -5   2   2  150.63    4.22 
  -5   2   2  152.08    4.63 
   5   2  -2  150.44    4.87 
  -5   2   2  149.94    5.23 
  -5   2   2  148.38    4.81 
   5   2  -2  148.48    4.28 
  -5   2   2  158.65    5.27 
  -5   2   2  146.42    5.37 
  -4  -2   2  422.15   10.85 
   4  -2  -2  409.68   10.63 
  -4  -2   2  415.06   10.26 
   4  -2  -2  399.24   10.96 
   4  -2  -2  398.58   11.18 
  -4  -2   2  399.62   11.31 
   4  -2  -2  406.71   10.98 
   4  -2  -2  429.41   10.86 
  -4  -2   2  421.00   10.44 
  -4  -2   2  393.77   10.12 
   4  -2  -2  403.45   10.40 
  -4  -2   2  409.45   10.10 
  -4  -2   2  412.55   10.40 
   4  -2  -2  427.90   10.54 
  -4  -2   2  410.34    9.93 
   4  -2  -2  409.76   10.86 
  -4  -2   2  404.53   10.70 
   4   2  -2  418.32   10.21 
  -4   2   2  415.39   10.88 
  -4   2   2  417.92   11.27 
   4   2  -2  426.45   10.38 
  -4   2   2  429.64   10.96 
  -4   2   2  402.72   11.38 
   4   2  -2  411.73   10.25 
  -4   2   2  412.65   10.73 
   4   2  -2  404.65   10.89 
  -4   2   2  413.91   10.37 
   4   2  -2  422.16   10.92 
  -4   2   2  413.93   10.72 
  -3  -2   2  366.40    8.62 
  -3  -2   2  353.91    9.01 
   3  -2  -2  351.72    8.99 
  -3  -2   2  363.51    8.73 
   3  -2  -2  359.17    9.53 
   3  -2  -2  341.69    9.30 
  -3  -2   2  361.95    8.56 
   3  -2  -2  336.61    8.95 
  -3  -2   2  341.54    8.36 
  -3  -2   2  340.61    9.57 
   3  -2  -2  337.46    9.24 
  -3  -2   2  339.67    8.36 
   3  -2  -2  346.53    8.96 
   3  -2  -2  347.35    9.15 
   3  -2  -2  350.93    9.06 
  -3  -2   2  349.62    8.72 
   3  -2  -2  363.89    9.07 
  -3  -2   2  346.78    9.08 
  -3  -2   2  349.00    9.16 
   3  -2  -2  359.20    9.12 
   3  -2  -2  342.00    9.23 
  -3  -2   2  350.31    8.81 
  -3  -2   2  337.29    8.61 
  -3   2   2  370.49    9.28 
  -3   2   2  341.35    9.48 
   3   2  -2  346.91    8.57 
   3   2  -2  353.75    9.20 
   3   2  -2  349.99    8.68 
  -3   2   2  355.57    9.11 
  -3   2   2  336.57    9.51 
  -3   2   2  329.84    9.06 
  -3   2   2  346.98    9.49 
  -3   2   2  340.89    8.89 
  -3   2   2  359.98    9.07 
  -3   2   2  358.51    9.25 
  -3   2   2  358.88    8.86 
   2  -2  -2  406.55   10.79 
  -2  -2   2  415.75   10.38 
  -2  -2   2  427.38   10.28 
   2  -2  -2  428.02   11.13 
   2  -2  -2  432.27   11.04 
  -2  -2   2  436.85   10.51 
   2  -2  -2  429.64   10.89 
  -2  -2   2  419.73   10.44 
   2  -2  -2  447.99   10.90 
  -2  -2   2  400.91   10.93 
   2  -2  -2  438.10   10.87 
   2  -2  -2  404.84   11.12 
   2  -2  -2  445.32   10.67 
   2  -2  -2  429.39   10.93 
  -2  -2   2  427.05   10.23 
   2  -2  -2  414.10   10.97 
   2  -2  -2  439.10   10.86 
   2  -2  -2  432.33   10.92 
   2  -2  -2  449.85   10.83 
   2  -2  -2  421.00   10.77 
  -2  -2   2  433.08   10.85 
   2  -2  -2  445.78   11.06 
  -2  -2   2  430.78   11.23 
  -2  -2   2  418.89   11.34 
   2  -2  -2  432.66   10.82 
  -2   2   2  440.71   10.68 
   2   2  -2  426.15   10.40 
  -2   2   2  435.11   10.68 
   2   2  -2  414.84   10.89 
  -2   2   2  438.26   10.87 
  -2   2   2  432.70   11.20 
  -2   2   2  448.89   10.99 
   2   2  -2  425.67   10.42 
   2   2  -2  402.85   11.23 
  -2   2   2  441.62   10.93 
  -2   2   2  434.12   10.79 
  -2   2   2  443.17   10.90 
   2   2  -2  425.27   10.35 
  -2   2   2  421.42   11.11 
  -2   2   2  419.59   11.08 
  -2   2   2  434.03   10.87 
   2   2  -2  436.81   10.43 
  -1  -2   2  101.01    2.85 
  -1  -2   2   94.04    2.60 
   1  -2  -2   94.74    2.81 
   1  -2  -2   95.35    3.11 
  -1  -2   2   95.51    2.58 
   1  -2  -2  100.61    2.83 
   1  -2  -2   98.48    2.56 
   1  -2  -2   99.06    2.89 
  -1  -2   2   99.84    3.37 
  -1  -2   2   94.59    3.38 
  -1  -2   2   95.43    2.45 
   1  -2  -2  103.68    2.95 
   1  -2  -2  101.75    2.88 
   1  -2  -2  102.12    2.86 
  -1  -2   2   83.02    2.68 
   1  -2  -2   96.13    2.94 
   1  -2  -2   96.21    2.99 
  -1  -2   2   93.26    2.43 
   1  -2  -2   97.02    2.77 
  -1  -2   2   94.52    2.71 
  -1  -2   2   99.20    3.06 
  -1  -2   2   97.97    2.86 
   1  -2  -2  101.53    2.86 
  -1   2   2   97.64    2.81 
   1   2  -2  100.99    2.69 
  -1   2   2   99.83    2.90 
  -1   2   2   96.97    2.58 
  -1   2   2   99.79    2.89 
   1   2  -2  100.95    2.62 
  -1   2   2  102.67    2.87 
   1   2  -2   97.37    2.44 
   1   2  -2   98.79    3.41 
   1   2  -2   98.42    2.39 
   1   2  -2   91.10    3.00 
  -1   2   2   93.98    2.97 
  -1   2   2   97.49    2.58 
   1   2  -2   95.58    3.41 
   1   2  -2  101.39    2.77 
  -1   2   2   90.41    2.87 
  -1   2   2   99.05    2.84 
  -1   2   2   98.94    3.03 
  -1   2   2   98.78    2.73 
   0  -2   2  108.17    2.95 
   0  -2   2  111.17    3.10 
   0  -2  -2   94.02    2.89 
   0  -2   2  106.85    3.33 
   0  -2   2  113.95    3.06 
   0  -2  -2  110.01    2.87 
   0  -2  -2  108.12    3.21 
   0  -2  -2  105.99    3.05 
   0  -2   2  105.33    3.95 
   0  -2   2  108.54    3.02 
   0  -2  -2  107.67    3.02 
   0  -2   2  107.71    2.81 
   0  -2  -2  116.12    3.19 
   0  -2  -2  107.31    2.97 
   0  -2   2  107.78    3.00 
   0  -2  -2  109.35    2.92 
   0  -2  -2  111.49    2.96 
   0  -2  -2  113.28    3.10 
   0  -2   2  108.51    3.63 
   0  -2  -2  106.09    3.19 
   0   2   2  105.07    2.80 
   0   2  -2  109.25    3.65 
   0   2   2  111.42    3.12 
   0   2   2  107.43    2.88 
   0   2  -2  111.25    3.02 
   0   2  -2  108.87    3.02 
   0   2  -2  107.46    3.03 
   0   2   2  110.30    3.03 
   0   2   2  112.46    3.22 
   0   2   2  106.02    3.13 
   0   2  -2  104.31    3.34 
   0   2   2  111.43    2.95 
   0   2   2  109.22    3.27 
   0   2  -2   88.91    3.86 
   0   2  -2  112.78    2.91 
   0   2   2  105.12    3.04 
   0   2  -2  108.81    3.10 
   0   2   2  112.13    3.02 
   0   2   2   91.26    3.13 
   0   2  -2  109.88    2.85 
   0   2   2  107.49    3.17 
   0   2  -2  114.83    3.00 
   0   2   2  102.20    3.31 
   1  -2   2   28.18    1.12 
   1  -2   2   28.88    1.20 
  -1  -2  -2   28.32    0.97 
   1  -2   2   26.72    1.28 
   1  -2   2   26.39    1.32 
   1  -2   2   27.09    0.96 
   1  -2   2   28.08    1.50 
   1  -2   2   29.84    1.60 
   1  -2   2   25.68    1.08 
  -1  -2  -2   28.00    0.89 
  -1  -2  -2   26.80    0.88 
  -1  -2  -2   28.58    1.06 
   1  -2   2   28.60    1.20 
  -1  -2  -2   28.00    0.90 
  -1  -2  -2   27.76    1.02 
  -1  -2  -2   27.02    1.21 
  -1  -2  -2   26.95    1.26 
   1  -2   2   26.91    1.09 
  -1  -2  -2   26.38    1.14 
   1  -2   2   25.65    1.23 
  -1  -2  -2   27.44    1.20 
  -1  -2  -2   28.43    1.08 
   1  -2   2   31.94    1.18 
   1   2   2   27.02    1.09 
  -1   2  -2   26.74    1.00 
  -1   2  -2   29.08    1.63 
  -1   2  -2   27.80    1.13 
   1   2   2   32.77    1.18 
  -1   2  -2   27.04    1.20 
   1   2   2   26.15    1.20 
  -1   2  -2   28.41    1.09 
  -1   2  -2   27.60    1.18 
  -1   2  -2   26.36    1.16 
   1   2   2   25.19    1.24 
  -1   2  -2   29.19    1.10 
   1   2   2   27.76    1.14 
  -1   2  -2   27.48    1.10 
  -1   2  -2   29.18    1.15 
   1   2   2   25.66    0.89 
   1   2   2   28.00    0.88 
  -1   2  -2   26.59    1.35 
  -1   2  -2   26.96    1.44 
   1   2   2   26.47    0.93 
   1   2   2   27.08    1.14 
  -2  -2  -2  156.46    4.21 
  -2  -2  -2  142.49    4.21 
  -2  -2  -2  149.22    4.11 
   2  -2   2  153.30    4.21 
  -2  -2  -2  154.59    4.10 
  -2  -2  -2  148.67    3.95 
   2  -2   2  150.83    3.84 
   2  -2   2  152.32    4.31 
   2  -2   2  149.34    4.46 
   2  -2   2  152.12    4.28 
  -2  -2  -2  152.17    4.35 
  -2  -2  -2  150.24    4.42 
   2  -2   2  155.33    4.86 
   2  -2   2  153.66    4.39 
   2  -2   2  156.67    4.47 
   2  -2   2  157.60    4.44 
  -2  -2  -2  157.35    4.12 
   2  -2   2  153.63    4.47 
   2  -2   2  154.13    4.26 
  -2  -2  -2  146.70    4.36 
  -2  -2  -2  146.02    3.86 
  -2  -2  -2  158.06    3.90 
   2  -2   2  147.86    4.28 
   2   2   2  150.72    4.07 
   2   2   2  151.97    4.12 
   2   2   2  151.62    4.33 
   2   2   2  152.03    4.28 
  -2   2  -2  153.49    4.33 
  -2   2  -2  149.92    4.41 
  -2   2  -2  159.01    4.86 
   2   2   2  151.37    4.43 
  -2   2  -2  156.30    4.41 
  -2   2  -2  160.67    4.32 
  -2   2  -2  157.37    4.50 
  -2   2  -2  152.96    4.22 
  -2   2  -2  144.21    4.56 
   2   2   2  146.13    4.03 
  -2   2  -2  157.63    4.41 
  -2   2  -2  151.32    4.91 
   3  -2   2    4.87    0.67 
  -3  -2  -2    4.88    0.40 
  -3  -2  -2    4.85    0.60 
   3  -2   2    4.96    0.68 
   3  -2   2    5.04    0.53 
  -3  -2  -2    5.23    0.40 
  -3  -2  -2    5.12    0.58 
   3  -2   2    5.11    0.58 
  -3  -2  -2    5.08    0.71 
   3  -2   2    4.79    0.68 
   3  -2   2    5.17    0.64 
  -3  -2  -2    4.40    0.47 
   3   2   2    4.58    0.56 
  -3   2  -2    5.06    0.84 
  -3   2  -2    6.24    0.72 
   3   2   2    4.74    0.54 
   3   2   2    5.69    0.65 
  -3   2  -2    4.97    0.74 
  -3   2  -2    6.14    0.93 
  -3   2  -2    5.61    0.66 
  -3   2  -2    4.24    0.55 
   3   2   2    4.48    0.57 
  -3   2  -2    5.24    0.64 
  -3   2  -2    6.07    0.77 
  -4  -2  -2  145.35    4.18 
  -4  -2  -2  143.30    4.51 
   4  -2   2  148.95    4.10 
  -4  -2  -2  144.40    4.56 
   4  -2   2  140.52    4.62 
  -4  -2  -2  141.18    4.06 
  -4  -2  -2  143.57    3.90 
  -4  -2  -2  144.51    4.13 
   4  -2   2  148.22    4.54 
   4  -2   2  150.13    4.18 
   4  -2   2  141.24    4.57 
   4   2   2  145.29    4.51 
  -4   2  -2  149.58    4.57 
  -4   2  -2  142.66    4.54 
  -4   2  -2  149.05    4.49 
   4   2   2  142.18    4.37 
   4   2   2  143.16    4.17 
  -4   2  -2  151.16    4.36 
   4   2   2  144.77    4.45 
  -4   2  -2  142.14    4.73 
   4   2   2  153.41    4.50 
  -4   2  -2  141.19    5.14 
  -4   2  -2  140.40    4.74 
  -4   2  -2  141.42    4.43 
   4   2   2  145.49    4.08 
  -5  -2  -2   31.98    1.91 
  -5  -2  -2   32.04    1.30 
  -5  -2  -2   29.32    1.69 
   5  -2   2   33.95    1.77 
  -5  -2  -2   34.11    1.50 
   5  -2   2   31.83    1.27 
   5  -2   2   33.45    1.85 
  -5  -2  -2   31.37    1.42 
   5  -2   2   31.41    1.84 
   5  -2   2   32.23    1.33 
   5  -2   2   30.74    1.73 
  -5  -2  -2   31.26    1.80 
  -5  -2  -2   33.50    1.54 
  -5  -2  -2   32.24    1.67 
  -5   2  -2   31.67    1.95 
   5   2   2   32.92    1.72 
  -5   2  -2   32.46    1.67 
   5   2   2   30.56    1.49 
  -5   2  -2   30.36    1.72 
  -5   2  -2   32.18    1.67 
  -5   2  -2   32.40    1.55 
   5   2   2   30.30    1.65 
  -5   2  -2   30.66    1.91 
   5   2   2   31.04    1.64 
  -5   2  -2   30.64    2.12 
   5   2   2   31.21    1.71 
   5   2   2   29.74    1.40 
  -5   2  -2   31.75    1.73 
  -6  -2  -2   40.94    1.66 
  -6  -2  -2   39.85    1.73 
  -6  -2  -2   38.63    2.24 
  -6  -2  -2   41.66    2.05 
  -6  -2  -2   35.63    2.30 
   6  -2   2   39.00    2.15 
   6  -2   2   40.26    1.30 
   6  -2   2   40.59    2.26 
  -6  -2  -2   40.94    2.39 
  -6  -2  -2   41.84    1.83 
   6  -2   2   38.75    2.09 
  -6  -2  -2   41.09    2.14 
   6  -2   2   37.38    2.21 
  -6  -2  -2   36.10    1.75 
  -6   2  -2   40.68    1.88 
  -6   2  -2   37.12    2.09 
  -6   2  -2   40.50    2.03 
   6   2   2   38.67    2.06 
   6   2   2   41.52    2.12 
   6   2   2   38.81    1.78 
  -6   2  -2   39.27    2.42 
  -6   2  -2   39.45    2.34 
  -6   2  -2   36.62    2.56 
   6   2   2   40.26    1.89 
   6   2   2   41.71    2.10 
  -6   2  -2   41.11    2.01 
  -6   2  -2   38.22    2.10 
   7  -2   2    0.18    0.35 
  -7  -2  -2    0.48    0.32 
  -7  -2  -2   -0.08    0.20 
  -7  -2  -2   -0.14    0.28 
  -7  -2  -2    0.67    0.52 
   7  -2   2   -0.04    0.34 
  -7  -2  -2    1.91    0.59 
  -7  -2  -2    0.49    0.44 
  -7  -2  -2    0.33    0.31 
  -7  -2  -2    0.26    0.44 
   7  -2   2    0.43    0.46 
   7  -2   2    0.49    0.41 
  -7  -2  -2    0.05    0.49 
  -7   2  -2    0.39    0.34 
   7   2   2    0.61    0.36 
  -7   2  -2    0.65    0.44 
  -7   2  -2    0.01    0.51 
   7   2   2    0.55    0.42 
   7   2   2    0.87    0.44 
  -7   2  -2    0.50    0.66 
   7   2   2    0.27    0.33 
   7   2   2    0.20    0.42 
  -7   2  -2    0.26    0.33 
  -7   2  -2    0.03    0.44 
  -7   2  -2    0.52    0.49 
  -7   2  -2    0.42    0.37 
   8  -2   2    3.94    1.00 
  -8  -2  -2    3.97    1.08 
   8  -2   2    6.24    1.21 
  -8  -2  -2    3.04    1.01 
  -8  -2  -2    2.85    0.80 
  -8  -2  -2    4.02    1.01 
  -8  -2  -2    5.34    1.19 
   8  -2   2    3.58    0.88 
  -8  -2  -2    4.06    0.81 
   8  -2   2    4.37    0.96 
  -8   2  -2    4.68    1.30 
  -8   2  -2    3.42    1.07 
  -8   2  -2    3.81    0.93 
  -8   2  -2    3.53    0.87 
  -8   2  -2    4.34    1.14 
   8   2   2    2.62    0.79 
   8   2   2    4.43    0.87 
   8   2   2    4.59    0.94 
   8   2   2    3.71    0.75 
  -8   2  -2    3.55    0.81 
  -8   2  -2    4.08    0.86 
  -8   2  -2    3.50    0.90 
  -9  -2  -2   -0.08    0.39 
  -9  -2  -2    0.82    0.52 
   9  -2   2    0.66    0.57 
  -9  -2  -2    0.08    0.49 
   9  -2   2    0.68    0.55 
  -9  -2  -2    0.16    0.48 
  -9  -2  -2    0.18    0.55 
   9  -2   2    0.27    0.49 
   9  -2   2    0.19    0.48 
  -9   2  -2    0.46    0.78 
  -9   2  -2    0.95    0.78 
  -9   2  -2    0.41    0.59 
   9   2   2    0.35    0.59 
  -9   2  -2   -0.14    0.45 
  -9   2  -2    0.28    0.80 
  -9   2  -2    0.61    0.50 
 -10   3   2   49.02    3.67 
  -9  -3   2   39.50    2.90 
   9  -3  -2   39.76    2.79 
  -9  -3   2   44.17    3.25 
  -9  -3   2   44.73    3.36 
  -9  -3   2   43.64    2.40 
   9  -3  -2   42.42    2.79 
   9  -3  -2   37.20    2.58 
   9  -3  -2   40.87    2.74 
  -9   3   2   51.48    3.47 
  -9   3   2   41.38    3.17 
   9   3  -2   40.88    2.73 
  -9   3   2   37.83    2.61 
  -9   3   2   42.92    3.40 
  -9   3   2   44.16    2.49 
  -9   3   2   40.85    2.72 
  -8  -3   2   33.01    1.90 
  -8  -3   2   33.92    2.62 
   8  -3  -2   34.10    2.28 
  -8  -3   2   32.31    1.95 
  -8  -3   2   27.77    2.23 
   8  -3  -2   28.69    2.07 
   8  -3  -2   25.51    2.12 
   8  -3  -2   29.85    2.20 
  -8   3   2   30.29    2.58 
  -8   3   2   28.79    2.11 
  -8   3   2   30.38    2.68 
  -8   3   2   35.40    2.08 
   8   3  -2   30.62    2.16 
  -8   3   2   29.66    1.91 
  -8   3   2   31.87    2.21 
  -8   3   2   31.49    2.55 
   7  -3  -2    5.49    0.98 
  -7  -3   2    3.10    0.72 
  -7  -3   2    4.90    1.11 
   7  -3  -2    3.51    0.81 
   7  -3  -2    4.12    0.91 
   7  -3  -2    4.21    0.96 
  -7  -3   2    4.41    0.74 
  -7  -3   2    5.26    1.21 
   7  -3  -2    4.37    0.61 
  -7   3   2    3.57    0.83 
   7   3  -2    3.97    0.87 
  -7   3   2    2.95    0.98 
  -7   3   2    3.10    0.72 
  -7   3   2    4.17    0.90 
  -7   3   2    4.02    0.82 
  -7   3   2    4.28    1.09 
   7   3  -2    4.08    0.65 
  -7   3   2    4.29    1.17 
  -6  -3   2    3.91    0.27 
   6  -3  -2    4.68    0.89 
   6  -3  -2    3.60    0.81 
  -6  -3   2    5.18    1.06 
  -6  -3   2    4.77    0.52 
   6  -3  -2    4.02    0.79 
   6  -3  -2    2.89    0.55 
   6  -3  -2    4.61    1.04 
  -6  -3   2    4.11    0.76 
  -6  -3   2    4.30    0.64 
   6  -3  -2    3.00    0.71 
  -6  -3   2    3.88    0.86 
  -6  -3   2    4.97    0.45 
  -6   3   2    2.91    0.66 
   6   3  -2    5.22    0.62 
  -6   3   2    4.04    0.72 
  -6   3   2    5.20    1.16 
   6   3  -2    5.12    0.88 
  -6   3   2    3.91    1.00 
  -6   3   2    5.76    1.24 
  -6   3   2    4.05    0.80 
  -5  -3   2    1.22    0.41 
  -5  -3   2    1.46    0.18 
  -5  -3   2    0.94    0.23 
  -5  -3   2    1.50    0.26 
   5  -3  -2    1.18    0.57 
  -5  -3   2    1.78    0.39 
   5  -3  -2    0.37    0.27 
   5  -3  -2    1.43    0.36 
  -5  -3   2    1.36    0.55 
  -5  -3   2    1.08    0.24 
   5  -3  -2    0.74    0.40 
   5  -3  -2    0.79    0.36 
  -5  -3   2    1.39    0.53 
   5  -3  -2    1.82    0.53 
   5  -3  -2    1.31    0.46 
  -5  -3   2    1.03    0.25 
  -5  -3   2    1.25    0.16 
   5   3  -2    0.78    0.26 
  -5   3   2    1.29    0.44 
  -5   3   2    1.64    0.71 
  -5   3   2    1.41    0.58 
   5   3  -2    1.27    0.46 
  -5   3   2    1.17    0.43 
  -5   3   2    1.24    0.46 
  -5   3   2    0.97    0.51 
  -5   3   2    1.56    0.49 
   4  -3  -2   12.58    0.98 
  -4  -3   2   11.60    0.48 
  -4  -3   2   10.88    0.58 
  -4  -3   2   13.00    0.65 
  -4  -3   2   13.08    0.55 
   4  -3  -2   12.49    0.98 
  -4  -3   2   13.43    0.56 
  -4  -3   2   12.57    0.95 
  -4  -3   2   12.98    0.98 
   4  -3  -2   11.66    0.86 
   4  -3  -2   11.87    0.90 
   4  -3  -2   13.47    0.93 
   4  -3  -2   10.97    0.99 
   4  -3  -2   14.43    1.15 
  -4  -3   2   12.68    0.55 
  -4  -3   2   13.17    1.22 
   4  -3  -2   15.49    1.29 
  -4  -3   2   12.58    0.49 
  -4  -3   2   12.01    0.65 
  -4  -3   2   13.45    0.75 
  -4  -3   2   12.41    0.80 
  -4   3   2   12.01    1.00 
  -4   3   2   11.84    0.94 
   4   3  -2   12.42    0.62 
  -4   3   2   12.11    0.99 
  -4   3   2   12.65    1.29 
  -4   3   2   12.44    0.98 
  -4   3   2   12.94    1.20 
  -4   3   2   12.07    1.19 
   4   3  -2   12.80    0.99 
  -3  -3   2    7.40    0.38 
  -3  -3   2    7.31    0.49 
   3  -3  -2    5.60    0.71 
   3  -3  -2    6.55    0.81 
  -3  -3   2    5.75    0.71 
   3  -3  -2    8.90    1.01 
   3  -3  -2    7.59    0.68 
  -3  -3   2    7.16    1.03 
   3  -3  -2    8.76    0.93 
   3  -3  -2    6.45    0.68 
  -3  -3   2    7.30    0.49 
   3  -3  -2    8.53    1.16 
   3  -3  -2    7.57    0.72 
  -3  -3   2    8.14    0.55 
  -3   3   2    8.18    1.11 
  -3   3   2    6.73    0.77 
  -3   3   2    7.50    1.10 
   3   3  -2    7.19    0.31 
   3   3  -2    7.21    0.38 
  -3   3   2    5.53    0.71 
  -3   3   2    7.78    0.86 
   3   3  -2    7.42    0.49 
  -3   3   2    7.88    0.90 
   3   3  -2    7.23    0.79 
  -3   3   2    7.04    0.94 
  -3   3   2    6.37    0.74 
  -2  -3   2    5.35    0.91 
   2  -3  -2    3.96    0.58 
   2  -3  -2    3.11    0.64 
   2  -3  -2    2.57    0.55 
  -2  -3   2    4.00    0.50 
   2  -3  -2    3.05    0.47 
  -2  -3   2    3.68    0.39 
   2  -3  -2    3.65    0.54 
   2  -3  -2    4.22    0.65 
   2  -3  -2    2.47    0.49 
  -2  -3   2    3.97    0.32 
   2  -3  -2    3.42    0.41 
  -2  -3   2    3.01    0.39 
  -2  -3   2    3.82    0.33 
  -2  -3   2    2.68    0.47 
   2   3  -2    4.26    0.30 
   2   3  -2    3.98    0.31 
  -2   3   2    3.42    0.56 
  -2   3   2    2.90    0.52 
  -2   3   2    3.93    0.54 
   2   3  -2    3.29    0.78 
  -2   3   2    3.29    0.59 
   2   3  -2    4.31    0.61 
  -2   3   2    2.66    0.63 
   2   3  -2    3.26    0.36 
  -2   3   2    4.04    0.45 
  -2   3   2    3.54    0.53 
  -2   3   2    3.72    0.46 
   2   3  -2    3.37    0.24 
   1  -3  -2   21.87    1.15 
   1  -3  -2   23.24    1.13 
  -1  -3   2   21.82    0.97 
   1  -3  -2   22.94    1.00 
  -1  -3   2   23.29    0.94 
  -1  -3   2   23.15    1.03 
   1  -3  -2   21.36    1.32 
   1  -3  -2   23.34    1.14 
  -1  -3   2   23.75    1.14 
   1  -3  -2   19.90    1.14 
   1  -3  -2   24.10    0.83 
  -1  -3   2   22.78    0.82 
   1  -3  -2   22.06    1.04 
   1  -3  -2   21.13    1.28 
  -1  -3   2   23.75    1.10 
  -1  -3   2   24.88    1.56 
  -1  -3   2   24.75    1.02 
  -1   3   2   24.81    1.26 
   1   3  -2   23.00    0.97 
  -1   3   2   22.73    1.29 
  -1   3   2   22.80    1.07 
  -1   3   2   22.87    1.00 
  -1   3   2   22.55    1.14 
   1   3  -2   20.15    1.21 
   1   3  -2   20.94    1.58 
   1   3  -2   22.64    0.97 
   1   3  -2   23.49    0.99 
   1   3  -2   22.90    1.60 
  -1   3   2   22.08    1.23 
   1   3  -2   24.82    0.80 
  -1   3   2   20.81    1.03 
  -1   3   2   21.84    1.28 
  -1   3   2   22.49    0.94 
  -1   3   2   22.07    1.14 
   1   3  -2   22.23    1.03 
  -1   3   2   22.78    1.15 
  -1   3   2   21.53    1.30 
   1   3  -2   22.66    0.80 
   1   3  -2   22.24    1.10 
   0  -3   2    0.81    0.24 
   0  -3  -2    1.07    0.36 
   0  -3  -2    0.54    0.28 
   0  -3   2    1.62    0.38 
   0  -3  -2    0.62    0.30 
   0  -3  -2    0.60    0.24 
   0  -3  -2    0.34    0.16 
   0  -3   2    0.97    0.25 
   0  -3   2    0.85    0.41 
   0  -3  -2    1.61    0.37 
   0  -3   2    0.79    0.24 
   0  -3  -2    0.81    0.18 
   0  -3  -2    0.83    0.27 
   0  -3  -2    1.04    0.23 
   0  -3   2    0.63    0.26 
   0  -3   2    0.49    0.21 
   0  -3  -2    1.05    0.16 
   0  -3  -2    1.07    0.27 
   0  -3   2    0.94    0.20 
   0   3   2    0.61    0.23 
   0   3   2    1.08    0.24 
   0   3  -2    0.89    0.52 
   0   3  -2    1.60    0.40 
   0   3  -2    0.68    0.36 
   0   3   2    1.43    0.23 
   0   3   2    0.65    0.21 
   0   3   2    0.56    0.19 
   0   3   2    0.76    0.35 
   0   3  -2    0.96    0.26 
   0   3  -2    1.25    0.47 
   0   3   2    0.63    0.34 
   0   3  -2    0.76    0.20 
   0   3  -2    1.59    0.25 
   0   3   2    0.68    0.28 
   0   3   2    0.29    0.20 
   0   3  -2    0.85    0.28 
   0   3  -2    0.23    0.18 
   0   3   2    0.90    0.34 
   0   3   2    1.88    0.42 
   0   3   2    0.76    0.36 
   1  -3   2  187.18    5.14 
   1  -3   2  189.99    5.94 
  -1  -3  -2  186.00    5.28 
   1  -3   2  175.11    4.92 
  -1  -3  -2  176.83    5.23 
  -1  -3  -2  185.69    4.86 
   1  -3   2  186.48    4.97 
   1  -3   2  187.69    5.03 
  -1  -3  -2  181.54    5.21 
   1  -3   2  188.16    5.34 
  -1  -3  -2  187.07    4.96 
   1  -3   2  184.05    5.42 
   1  -3   2  184.94    5.12 
  -1  -3  -2  187.50    4.67 
  -1  -3  -2  186.22    4.84 
  -1  -3  -2  184.42    5.26 
  -1  -3  -2  183.19    4.69 
   1  -3   2  188.67    5.41 
  -1  -3  -2  187.10    5.09 
   1  -3   2  186.54    5.26 
  -1  -3  -2  195.38    4.60 
  -1  -3  -2  179.17    5.36 
  -1  -3  -2  186.28    5.35 
  -1   3  -2  191.84    5.05 
  -1   3  -2  177.97    5.56 
   1   3   2  174.48    5.49 
   1   3   2  188.26    4.76 
   1   3   2  165.26    5.42 
  -1   3  -2  192.98    5.33 
  -1   3  -2  193.89    5.22 
   1   3   2  180.84    4.98 
  -1   3  -2  180.76    6.23 
   1   3   2  178.43    5.15 
  -1   3  -2  188.79    5.06 
  -1   3  -2  195.17    5.18 
   1   3   2  178.79    4.69 
   2  -3   2  125.12    3.94 
  -2  -3  -2  123.53    3.10 
  -2  -3  -2  128.59    3.12 
  -2  -3  -2  123.70    3.85 
   2  -3   2  126.70    3.92 
   2  -3   2  121.28    3.95 
  -2  -3  -2  120.97    3.43 
  -2  -3  -2  126.06    3.96 
  -2  -3  -2  124.51    3.46 
  -2  -3  -2  128.26    3.65 
  -2  -3  -2  122.40    3.84 
  -2  -3  -2  127.80    3.80 
  -2  -3  -2  123.21    3.51 
   2  -3   2  118.69    3.72 
  -2  -3  -2  121.62    3.83 
   2  -3   2  129.23    4.08 
  -2  -3  -2  124.95    3.88 
   2  -3   2  125.53    3.77 
   2  -3   2  122.23    4.46 
   2  -3   2  122.79    3.76 
  -2  -3  -2  125.86    3.41 
   2   3   2  122.95    3.79 
  -2   3  -2  126.53    3.84 
   2   3   2  129.42    3.79 
  -2   3  -2  125.79    3.85 
   2   3   2  125.01    3.46 
   2   3   2  127.24    3.49 
  -2   3  -2  120.08    3.93 
  -2   3  -2  120.79    4.19 
  -2   3  -2  125.02    3.83 
   2   3   2  127.05    3.87 
  -2   3  -2  127.13    4.64 
   3  -3   2  180.12    5.13 
  -3  -3  -2  179.26    4.51 
   3  -3   2  179.89    5.38 
  -3  -3  -2  164.50    5.26 
  -3  -3  -2  174.44    4.85 
   3  -3   2  174.64    5.46 
  -3  -3  -2  175.84    5.22 
  -3  -3  -2  177.77    5.08 
   3  -3   2  180.30    5.26 
  -3  -3  -2  172.43    4.82 
   3  -3   2  183.06    5.53 
  -3  -3  -2  179.83    5.00 
   3  -3   2  181.07    5.46 
  -3   3  -2  182.36    5.41 
  -3   3  -2  179.49    5.68 
  -3   3  -2  186.09    5.30 
  -3   3  -2  175.09    5.30 
  -3   3  -2  183.67    5.44 
  -3   3  -2  177.80    5.28 
   3   3   2  181.12    5.20 
   3   3   2  180.41    4.98 
   3   3   2  176.25    5.18 
  -3   3  -2  185.63    6.15 
  -4  -3  -2  152.88    4.02 
   4  -3   2  164.86    5.02 
   4  -3   2  162.07    3.92 
   4  -3   2  150.91    5.14 
  -4  -3  -2  156.71    4.87 
   4  -3   2  156.66    3.98 
  -4  -3  -2  160.74    4.22 
   4  -3   2  162.09    5.20 
  -4  -3  -2  152.91    3.97 
  -4  -3  -2  152.05    4.96 
   4  -3   2  156.80    5.06 
  -4  -3  -2  158.80    4.46 
   4  -3   2  156.70    4.60 
  -4  -3  -2  160.11    4.58 
   4  -3   2  161.58    4.70 
  -4  -3  -2  155.09    4.46 
   4   3   2  157.82    4.78 
   4   3   2  164.54    4.88 
  -4   3  -2  161.16    5.36 
  -4   3  -2  156.33    5.01 
  -4   3  -2  156.90    5.00 
  -4   3  -2  156.01    5.18 
   4   3   2  165.69    4.84 
   4   3   2  160.11    4.73 
  -4   3  -2  165.87    5.84 
  -4   3  -2  157.59    4.98 
  -4   3  -2  159.60    4.96 
   5  -3   2  125.65    4.50 
  -5  -3  -2  123.61    3.83 
  -5  -3  -2  125.03    4.20 
   5  -3   2  115.71    4.46 
  -5  -3  -2  119.37    4.36 
   5  -3   2  122.88    4.32 
   5  -3   2  125.98    3.86 
  -5  -3  -2  123.10    3.77 
  -5  -3  -2  130.37    4.18 
   5  -3   2  125.97    4.45 
  -5  -3  -2  129.27    3.36 
  -5   3  -2  120.45    4.13 
  -5   3  -2  124.77    4.38 
  -5   3  -2  126.71    4.69 
   5   3   2  126.24    4.15 
  -5   3  -2  122.24    4.26 
  -5   3  -2  123.26    5.12 
   5   3   2  122.98    4.18 
   5   3   2  124.70    4.23 
  -5   3  -2  126.79    4.38 
  -5   3  -2  129.82    4.31 
  -5   3  -2  124.45    4.64 
  -6  -3  -2  173.59    5.56 
  -6  -3  -2  183.98    6.15 
   6  -3   2  182.82    5.15 
   6  -3   2  174.88    6.06 
  -6  -3  -2  179.88    5.30 
   6  -3   2  173.57    5.89 
  -6  -3  -2  178.63    5.70 
  -6  -3  -2  176.14    6.23 
  -6  -3  -2  177.86    5.19 
  -6  -3  -2  176.09    5.72 
   6  -3   2  174.70    6.16 
  -6  -3  -2  180.98    4.84 
   6  -3   2  169.37    6.00 
  -6   3  -2  191.58    5.89 
  -6   3  -2  184.97    5.81 
  -6   3  -2  179.72    5.97 
  -6   3  -2  179.94    6.27 
  -6   3  -2  184.59    6.98 
   6   3   2  175.31    5.73 
   6   3   2  181.70    5.88 
  -6   3  -2  181.15    5.66 
  -6   3  -2  186.89    6.04 
  -6   3  -2  177.77    6.33 
   6   3   2  183.39    5.76 
  -7  -3  -2   71.54    3.07 
  -7  -3  -2   70.85    3.53 
  -7  -3  -2   66.43    3.02 
   7  -3   2   62.54    3.12 
   7  -3   2   64.04    3.26 
  -7  -3  -2   67.23    2.68 
  -7  -3  -2   66.87    2.82 
  -7  -3  -2   67.05    2.49 
   7  -3   2   70.63    3.39 
  -7  -3  -2   69.18    3.55 
  -7  -3  -2   67.75    3.40 
   7  -3   2   61.58    3.28 
  -7   3  -2   66.52    3.03 
  -7   3  -2   67.71    3.23 
  -7   3  -2   65.44    3.94 
   7   3   2   66.31    3.06 
   7   3   2   63.94    3.10 
  -7   3  -2   62.30    3.46 
  -7   3  -2   69.05    3.52 
  -7   3  -2   64.23    3.18 
  -7   3  -2   66.15    2.99 
  -8  -3  -2  109.82    4.85 
  -8  -3  -2  106.33    4.84 
   8  -3   2  111.58    4.63 
   8  -3   2  111.89    4.83 
  -8  -3  -2  114.55    5.15 
  -8  -3  -2  111.19    5.04 
   8  -3   2  101.29    4.62 
   8  -3   2  104.89    4.72 
  -8  -3  -2  114.08    4.54 
  -8  -3  -2  115.74    4.42 
  -8   3  -2  111.19    4.30 
  -8   3  -2  106.97    5.08 
  -8   3  -2  103.16    4.54 
  -8   3  -2  112.97    4.71 
  -8   3  -2  110.08    4.39 
  -8   3  -2  105.82    4.88 
  -8   3  -2  106.23    5.53 
  -9  -3  -2   59.55    3.15 
  -9  -3  -2   58.12    3.73 
   9  -3   2   55.54    3.21 
  -9  -3  -2   63.85    3.91 
   9  -3   2   61.80    3.60 
   9  -3   2   59.00    3.44 
   9  -3   2   44.20    3.16 
  -9   3  -2   56.91    3.74 
  -9   3  -2   57.31    4.12 
  -9   3  -2   61.04    3.15 
  -9   3  -2   63.30    3.42 
  -9   3  -2   61.73    3.44 
  -9   3  -2   60.96    3.70 
 -10   3  -2   49.22    4.29 
   9  -4  -2  113.14    5.15 
  -9  -4   2  109.31    5.58 
   9  -4  -2  100.66    4.72 
   9  -4  -2  102.31    5.00 
  -9  -4   2   97.68    4.81 
   9  -4  -2  100.85    4.74 
  -9  -4   2  107.81    5.56 
  -9   4   2  109.22    4.90 
  -9   4   2  108.16    4.91 
  -9   4   2  108.02    4.52 
  -9   4   2  105.44    5.36 
  -9   4   2  116.08    6.01 
   9   4  -2  111.19    4.82 
  -9   4   2  102.33    4.43 
  -9   4   2  113.47    5.57 
  -8  -4   2   16.73    2.30 
  -8  -4   2   13.82    1.64 
   8  -4  -2   14.13    1.75 
   8  -4  -2   13.25    1.72 
   8  -4  -2   16.79    2.09 
   8  -4  -2   15.21    1.96 
  -8  -4   2   17.24    1.77 
  -8   4   2   14.97    1.80 
  -8   4   2   13.78    1.74 
  -8   4   2   19.84    2.34 
  -8   4   2   17.21    1.81 
  -8   4   2   14.85    1.67 
  -8   4   2   12.77    2.12 
  -8   4   2   14.24    2.17 
   8   4  -2   14.92    1.79 
  -7  -4   2  121.05    5.38 
   7  -4  -2  122.60    5.03 
  -7  -4   2  120.50    4.07 
   7  -4  -2  121.77    4.98 
   7  -4  -2  117.54    4.62 
   7  -4  -2  128.63    4.14 
  -7  -4   2  124.28    4.72 
   7  -4  -2  109.36    4.63 
  -7  -4   2  118.51    4.54 
  -7   4   2  124.62    4.83 
  -7   4   2  125.24    4.88 
  -7   4   2  126.19    5.36 
  -7   4   2  123.58    5.62 
  -7   4   2  116.02    4.52 
  -7   4   2  119.51    4.53 
   7   4  -2  112.95    4.58 
  -7   4   2  122.57    5.30 
  -6  -4   2   22.49    1.28 
  -6  -4   2   23.28    2.00 
   6  -4  -2   22.87    1.47 
   6  -4  -2   22.36    1.57 
  -6  -4   2   22.86    1.65 
   6  -4  -2   22.76    1.42 
   6  -4  -2   22.64    1.81 
  -6  -4   2   24.30    1.63 
   6  -4  -2   24.82    2.01 
   6  -4  -2   24.74    1.83 
   6  -4  -2   27.78    1.80 
   6   4  -2   23.60    1.06 
  -6   4   2   21.89    1.67 
  -6   4   2   20.50    1.96 
   6   4  -2   20.66    1.56 
  -6   4   2   22.71    1.62 
  -6   4   2   23.64    1.64 
  -6   4   2   20.92    1.65 
  -6   4   2   23.77    2.05 
  -6   4   2   20.47    1.89 
   5  -4  -2  212.51    6.39 
  -5  -4   2  209.80    6.31 
  -5  -4   2  216.73    5.91 
   5  -4  -2  215.24    7.12 
   5  -4  -2  207.94    6.77 
  -5  -4   2  212.25    5.34 
  -5  -4   2  210.16    5.38 
   5  -4  -2  222.17    6.66 
  -5  -4   2  216.06    5.71 
  -5  -4   2  214.50    6.56 
  -5  -4   2  211.52    5.86 
   5  -4  -2  214.44    6.94 
   5  -4  -2  226.05    6.39 
  -5  -4   2  202.03    5.30 
  -5  -4   2  210.87    5.29 
  -5  -4   2  205.13    7.24 
   5  -4  -2  203.36    6.27 
  -5   4   2  214.94    7.15 
  -5   4   2  211.43    6.55 
  -5   4   2  215.88    6.73 
   5   4  -2  218.55    6.55 
   5   4  -2  215.68    5.46 
  -5   4   2  204.59    6.49 
  -5   4   2  206.42    6.61 
  -5   4   2  224.48    7.49 
  -5   4   2  204.51    7.06 
  -4  -4   2   80.64    2.61 
   4  -4  -2   81.99    2.97 
  -4  -4   2   84.31    3.21 
   4  -4  -2   85.75    3.37 
  -4  -4   2   78.77    3.66 
  -4  -4   2   83.76    2.35 
  -4  -4   2   79.47    2.77 
   4  -4  -2   80.79    3.13 
  -4  -4   2   85.13    2.58 
   4  -4  -2   85.81    3.14 
   4  -4  -2   80.17    3.04 
   4  -4  -2   83.18    3.45 
   4  -4  -2   89.65    3.66 
   4   4  -2   83.47    2.65 
  -4   4   2   88.83    3.33 
   4   4  -2   82.38    3.13 
  -4   4   2   81.42    3.56 
  -4   4   2   85.36    3.24 
  -4   4   2   90.59    3.71 
  -4   4   2   94.12    3.87 
  -4   4   2   80.14    3.16 
   4   4  -2   85.17    2.21 
  -4   4   2   85.31    3.32 
  -3  -4   2  316.23    9.30 
   3  -4  -2  299.53    8.26 
  -3  -4   2  284.87    7.87 
   3  -4  -2  295.13    8.66 
  -3  -4   2  312.70    7.63 
  -3  -4   2  303.84    8.43 
  -3  -4   2  296.67    7.79 
   3  -4  -2  290.17    8.72 
   3  -4  -2  309.40    8.88 
   3  -4  -2  292.68    8.50 
  -3  -4   2  305.53    7.86 
   3  -4  -2  305.07    8.02 
   3  -4  -2  301.10    8.38 
   3  -4  -2  299.13    8.31 
  -3   4   2  300.16    8.37 
  -3   4   2  297.08    8.95 
   3   4  -2  309.40    7.66 
  -3   4   2  302.27    8.87 
   3   4  -2  306.52    8.34 
  -3   4   2  313.77    8.49 
  -3   4   2  308.62    8.55 
  -3   4   2  291.75    8.41 
  -2  -4   2  187.30    5.22 
   2  -4  -2  189.78    5.62 
   2  -4  -2  193.19    5.83 
   2  -4  -2  189.93    5.94 
  -2  -4   2  184.11    5.55 
   2  -4  -2  189.50    5.08 
   2  -4  -2  189.67    5.35 
  -2  -4   2  178.04    6.17 
   2  -4  -2  187.65    5.63 
  -2  -4   2  193.08    5.18 
  -2  -4   2  197.73    5.17 
  -2  -4   2  188.31    5.43 
   2  -4  -2  188.27    5.54 
   2  -4  -2  183.27    5.79 
  -2  -4   2  191.17    4.99 
  -2  -4   2  192.85    5.05 
  -2   4   2  186.54    5.92 
   2   4  -2  197.67    5.21 
  -2   4   2  196.07    5.75 
  -2   4   2  189.48    6.05 
   2   4  -2  187.09    4.62 
  -2   4   2  186.50    5.28 
   2   4  -2  186.63    4.58 
  -2   4   2  194.38    5.52 
   2   4  -2  185.62    4.77 
  -2   4   2  189.78    5.62 
  -2   4   2  179.74    5.55 
   2   4  -2  181.92    5.53 
   2   4  -2  187.19    4.84 
   1  -4  -2  383.75   10.51 
   1  -4  -2  406.55   10.39 
  -1  -4   2  392.71    9.79 
  -1  -4   2  382.80   11.20 
  -1  -4   2  402.24   10.01 
   1  -4  -2  389.89   10.57 
   1  -4  -2  400.48    9.72 
  -1  -4   2  391.00   10.11 
   1  -4  -2  398.25   10.34 
   1  -4  -2  398.10   10.76 
   1  -4  -2  404.78   10.03 
  -1  -4   2  395.12   10.13 
   1  -4  -2  404.91   10.75 
   1  -4  -2  388.27   10.80 
  -1  -4   2  401.53   10.18 
  -1   4   2  402.18   10.57 
   1   4  -2  401.56   10.12 
  -1   4   2  400.16   10.19 
  -1   4   2  396.83   10.70 
   1   4  -2  398.77   10.37 
   1   4  -2  374.22   10.11 
   1   4  -2  387.67   10.62 
   1   4  -2  361.76   11.51 
   1   4  -2  411.37    9.83 
  -1   4   2  404.92   10.47 
  -1   4   2  388.89   10.16 
  -1   4   2  365.55   10.97 
   1   4  -2  395.10    9.62 
   1   4  -2  370.66    9.90 
   1   4  -2  394.85    9.62 
  -1   4   2  398.65   10.40 
   0  -4  -2   74.36    2.21 
   0  -4   2   69.62    3.20 
   0  -4  -2   72.60    2.10 
   0  -4  -2   70.17    2.76 
   0  -4  -2   74.82    2.70 
   0  -4   2   74.19    2.58 
   0  -4   2   74.33    2.48 
   0  -4   2   77.56    2.33 
   0  -4  -2   75.32    2.35 
   0  -4   2   74.76    2.62 
   0  -4   2   77.36    2.63 
   0  -4  -2   74.70    2.56 
   0  -4  -2   74.02    2.55 
   0  -4  -2   74.17    2.78 
   0  -4  -2   75.77    2.81 
   0   4   2   74.09    2.24 
   0   4  -2   75.34    2.24 
   0   4   2   67.97    3.04 
   0   4   2   70.14    3.06 
   0   4   2   72.51    2.34 
   0   4   2   73.88    2.85 
   0   4   2   75.31    2.85 
   0   4   2   69.18    2.87 
   0   4   2   72.00    2.64 
   0   4  -2   75.49    2.57 
   0   4  -2   74.27    2.39 
   0   4  -2   64.56    3.67 
   0   4  -2   76.72    3.11 
   0   4  -2   72.84    2.71 
   0   4  -2   73.92    2.46 
   0   4   2   76.13    2.40 
   0   4   2   74.80    2.60 
  -1  -4  -2  237.68    6.90 
   1  -4   2  241.80    6.50 
   1  -4   2  246.95    6.56 
  -1  -4  -2  251.45    6.01 
  -1  -4  -2  246.76    6.20 
   1  -4   2  248.41    7.10 
  -1  -4  -2  246.91    6.30 
   1  -4   2  237.61    6.86 
   1  -4   2  243.96    6.95 
   1  -4   2  249.12    6.47 
   1  -4   2  247.44    7.71 
   1  -4   2  246.38    6.76 
   1  -4   2  252.33    6.75 
  -1  -4  -2  245.39    7.15 
  -1  -4  -2  232.02    6.85 
  -1  -4  -2  243.86    6.12 
  -1  -4  -2  249.53    6.94 
   1   4   2  235.96    7.10 
   1   4   2  249.55    6.28 
  -1   4  -2  251.80    6.65 
  -1   4  -2  245.66    6.96 
   1   4   2  242.93    6.50 
  -1   4  -2  235.36    7.31 
   1   4   2  244.86    6.23 
   1   4   2  227.14    7.19 
  -1   4  -2  248.28    6.66 
   1   4   2  247.65    6.80 
  -1   4  -2  231.27    8.18 
   1   4   2  219.34    7.34 
  -1   4  -2  236.02    6.73 
  -2  -4  -2   50.03    2.15 
   2  -4   2   54.54    2.78 
   2  -4   2   51.48    2.11 
   2  -4   2   52.95    2.07 
  -2  -4  -2   49.65    2.19 
   2  -4   2   50.41    2.34 
   2  -4   2   53.49    2.22 
   2  -4   2   54.27    2.25 
  -2  -4  -2   50.88    2.21 
  -2  -4  -2   54.35    1.70 
  -2  -4  -2   51.00    2.30 
   2  -4   2   50.31    2.26 
  -2  -4  -2   53.98    1.93 
  -2  -4  -2   55.50    1.77 
  -2   4  -2   52.89    2.57 
  -2   4  -2   49.40    2.09 
   2   4   2   51.09    1.56 
  -2   4  -2   51.84    2.17 
   2   4   2   51.62    1.86 
  -2   4  -2   51.30    2.16 
   2   4   2   54.63    2.24 
  -2   4  -2   53.82    2.99 
   2   4   2   49.25    1.74 
   2   4   2   49.45    2.15 
  -2   4  -2   51.41    2.08 
   2   4   2   54.19    2.32 
   3  -4   2  171.05    5.71 
  -3  -4  -2  175.64    5.08 
   3  -4   2  177.49    5.63 
   3  -4   2  172.52    5.67 
   3  -4   2  180.89    5.38 
   3  -4   2  188.59    5.58 
   3  -4   2  181.59    5.42 
  -3  -4  -2  175.38    4.78 
  -3  -4  -2  187.63    5.62 
  -3  -4  -2  179.77    5.37 
  -3  -4  -2  179.71    5.39 
  -3   4  -2  177.56    5.43 
  -3   4  -2  176.48    5.48 
   3   4   2  188.44    5.07 
   3   4   2  173.38    5.31 
  -3   4  -2  180.28    5.62 
  -3   4  -2  185.93    6.56 
   3   4   2  175.00    5.40 
  -3   4  -2  187.29    5.67 
  -3   4  -2  182.71    5.53 
   3   4   2  175.27    5.36 
  -3   4  -2  183.33    6.02 
   4  -4   2   38.99    2.07 
   4  -4   2   43.61    1.42 
  -4  -4  -2   39.57    1.55 
  -4  -4  -2   47.27    2.00 
   4  -4   2   43.51    2.27 
  -4  -4  -2   43.07    1.22 
  -4  -4  -2   43.51    1.93 
  -4  -4  -2   43.66    2.20 
   4  -4   2   40.18    2.22 
   4  -4   2   43.72    1.96 
   4  -4   2   39.88    1.90 
   4  -4   2   40.31    2.03 
  -4  -4  -2   41.21    1.97 
   4  -4   2   47.72    2.38 
   4  -4   2   42.37    1.59 
  -4   4  -2   45.41    2.81 
  -4   4  -2   39.69    2.11 
   4   4   2   39.55    1.90 
  -4   4  -2   37.77    2.03 
  -4   4  -2   37.95    2.02 
  -4   4  -2   43.38    2.27 
  -4   4  -2   42.49    2.47 
   4   4   2   40.64    2.02 
   4   4   2   41.35    1.80 
  -4   4  -2   38.64    2.01 
   5  -4   2  156.08    4.94 
  -5  -4  -2  160.99    5.52 
  -5  -4  -2  159.49    4.65 
  -5  -4  -2  160.22    5.30 
   5  -4   2  166.46    5.74 
   5  -4   2  163.90    5.69 
  -5  -4  -2  158.39    5.13 
  -5  -4  -2  161.41    4.91 
   5  -4   2  160.09    5.37 
   5  -4   2  159.51    5.44 
   5  -4   2  163.67    5.03 
   5   4   2  160.22    5.12 
   5   4   2  156.24    5.02 
   5   4   2  164.52    5.22 
  -5   4  -2  159.96    5.41 
  -5   4  -2  159.95    5.86 
  -5   4  -2  162.77    5.38 
  -5   4  -2  160.67    5.40 
  -5   4  -2  160.96    6.39 
  -5   4  -2  161.85    5.47 
  -5   4  -2  161.76    5.72 
  -6  -4  -2   27.24    1.80 
  -6  -4  -2   30.57    1.78 
  -6  -4  -2   30.07    2.04 
   6  -4   2   25.89    1.87 
   6  -4   2   28.89    1.60 
  -6  -4  -2   30.06    1.49 
  -6  -4  -2   31.19    1.50 
  -6  -4  -2   33.66    1.89 
   6  -4   2   29.35    2.09 
   6  -4   2   28.63    1.93 
   6  -4   2   29.36    2.08 
  -6   4  -2   29.71    2.32 
  -6   4  -2   27.23    1.90 
  -6   4  -2   31.17    1.99 
  -6   4  -2   25.68    1.87 
  -6   4  -2   28.60    1.88 
   6   4   2   26.59    1.68 
   6   4   2   29.53    1.79 
  -6   4  -2   31.10    2.24 
  -6   4  -2   30.44    2.55 
  -7  -4  -2    9.85    1.41 
  -7  -4  -2    9.11    1.22 
   7  -4   2   11.27    0.94 
   7  -4   2    9.91    1.53 
   7  -4   2    9.74    1.45 
   7  -4   2   11.46    1.49 
  -7  -4  -2   10.32    1.62 
  -7  -4  -2   10.04    1.50 
  -7  -4  -2   10.05    1.50 
   7  -4   2   11.26    1.65 
  -7  -4  -2   10.63    1.30 
  -7   4  -2   10.09    1.37 
  -7   4  -2   14.06    2.15 
   7   4   2   11.72    1.38 
  -7   4  -2   10.82    1.96 
  -7   4  -2   11.52    1.57 
   7   4   2   11.20    1.39 
  -7   4  -2   11.92    1.70 
  -7   4  -2    9.73    1.44 
  -7   4  -2   10.48    1.46 
  -8  -4  -2    2.34    0.92 
  -8  -4  -2    1.40    0.57 
   8  -4   2    0.61    0.59 
   8  -4   2    1.70    0.68 
   8  -4   2    1.71    0.78 
  -8  -4  -2    1.72    0.66 
   8  -4   2    1.12    0.65 
  -8  -4  -2    1.14    0.75 
  -8   4  -2    1.54    0.91 
  -8   4  -2    1.81    0.75 
   8   4   2    0.08    0.44 
  -8   4  -2    1.99    1.00 
  -8   4  -2    1.69    0.92 
  -8   4  -2    1.39    0.72 
  -8   4  -2    1.14    0.63 
  -8   4  -2    1.43    0.67 
  -9  -4  -2   11.43    2.08 
   9  -4   2    9.08    1.63 
   9  -4   2   13.53    2.05 
  -9  -4  -2    8.75    1.69 
   9  -4   2   10.24    1.69 
   9  -4   2    6.57    1.44 
  -9  -4  -2    9.74    1.44 
  -9   4  -2   14.02    1.99 
  -9   4  -2   10.88    1.88 
  -9   4  -2   13.20    1.70 
  -9   4  -2    5.41    1.46 
  -9   4  -2   10.99    1.67 
  -9   4  -2   12.15    2.48 
   9  -5  -2    0.73    0.68 
  -9  -5   2    1.15    0.68 
  -9  -5   2    2.44    1.37 
   9  -5  -2    1.57    0.84 
   9  -5  -2    0.63    0.63 
   9  -5  -2    1.91    0.88 
  -9   5   2    1.15    0.92 
   9   5  -2    1.40    0.76 
  -9   5   2    0.66    0.73 
  -9   5   2    1.09    0.74 
  -9   5   2    3.43    1.16 
  -9   5   2    1.33    1.08 
  -9   5   2    1.58    0.76 
   8  -5  -2   40.20    2.68 
  -8  -5   2   35.00    2.43 
   8  -5  -2   40.07    2.87 
   8  -5  -2   45.15    3.05 
  -8  -5   2   45.69    2.78 
   8  -5  -2   41.87    2.62 
  -8  -5   2   44.55    3.33 
  -8   5   2   41.14    3.20 
  -8   5   2   41.85    2.78 
  -8   5   2   36.37    3.05 
  -8   5   2   44.66    3.45 
  -8   5   2   41.41    2.73 
  -8   5   2   38.55    2.48 
   8   5  -2   47.59    2.75 
  -8   5   2   40.12    2.59 
   7  -5  -2    5.87    1.21 
  -7  -5   2    6.17    1.42 
   7  -5  -2    4.61    1.13 
   7  -5  -2    4.99    0.99 
   7  -5  -2    5.56    0.93 
  -7  -5   2    6.90    1.19 
   7  -5  -2    4.19    1.21 
   7  -5  -2    5.86    1.11 
  -7  -5   2    5.28    1.08 
  -7   5   2    6.42    1.43 
  -7   5   2    6.51    1.45 
  -7   5   2    5.78    1.13 
  -7   5   2    8.01    1.59 
  -7   5   2    5.67    1.13 
  -7   5   2    7.14    1.28 
  -7   5   2    4.73    0.99 
   7   5  -2    4.81    1.00 
   6  -5  -2    9.32    1.45 
   6  -5  -2    8.53    1.13 
  -6  -5   2    9.76    1.62 
  -6  -5   2    7.05    0.81 
   6  -5  -2    8.43    1.12 
  -6  -5   2    8.41    1.22 
   6  -5  -2    9.04    1.28 
   6  -5  -2    9.53    1.30 
  -6  -5   2    7.13    1.12 
  -6  -5   2    7.81    1.10 
   6  -5  -2    9.64    1.42 
   6  -5  -2    6.88    1.38 
  -6   5   2    7.38    1.14 
  -6   5   2    9.02    1.68 
  -6   5   2    6.33    1.13 
   6   5  -2    8.24    1.16 
  -6   5   2    7.06    1.12 
  -6   5   2   11.03    1.40 
  -6   5   2    9.38    1.63 
  -6   5   2    8.24    1.50 
  -5  -5   2    0.35    0.48 
  -5  -5   2    0.47    0.42 
  -5  -5   2    0.76    0.43 
   5  -5  -2    0.53    0.47 
   5  -5  -2    0.63    0.49 
  -5  -5   2    1.16    0.49 
  -5  -5   2    0.72    0.31 
   5  -5  -2    0.76    0.37 
   5  -5  -2   -0.36    0.33 
   5  -5  -2    0.52    0.35 
   5  -5  -2    0.43    0.38 
  -5  -5   2    0.27    0.25 
   5  -5  -2    0.72    0.51 
  -5   5   2    0.39    0.42 
   5   5  -2    1.20    0.48 
  -5   5   2    0.73    0.51 
  -5   5   2    1.38    0.78 
  -5   5   2    1.15    0.57 
  -5   5   2    0.30    0.38 
  -5   5   2    1.46    0.70 
  -4  -5   2    2.13    0.75 
   4  -5  -2    3.39    0.92 
  -4  -5   2    1.57    0.43 
  -4  -5   2    0.53    0.37 
  -4  -5   2    0.78    0.41 
   4  -5  -2    1.01    0.48 
   4  -5  -2    0.66    0.51 
  -4  -5   2    0.67    0.33 
  -4  -5   2    0.45    0.47 
   4  -5  -2    0.35    0.32 
  -4  -5   2    0.69    0.30 
   4  -5  -2    0.79    0.48 
   4  -5  -2    1.29    0.40 
   4  -5  -2    0.79    0.39 
   4  -5  -2    0.61    0.40 
  -4   5   2    0.69    0.42 
  -4   5   2    0.61    0.39 
  -4   5   2    1.02    0.59 
  -4   5   2    1.57    0.79 
  -4   5   2    0.75    0.40 
   4   5  -2    0.27    0.32 
  -4   5   2    0.09    0.30 
   4   5  -2    1.10    0.29 
   3  -5  -2    0.17    0.35 
  -3  -5   2    0.79    0.28 
   3  -5  -2    1.36    0.54 
  -3  -5   2    0.66    0.53 
   3  -5  -2    1.05    0.42 
  -3  -5   2    0.88    0.27 
  -3  -5   2    1.08    0.29 
   3  -5  -2    0.37    0.42 
   3  -5  -2    0.41    0.37 
   3  -5  -2    1.11    0.55 
   3  -5  -2    1.12    0.33 
  -3  -5   2    1.16    0.35 
  -3  -5   2    0.53    0.36 
   3  -5  -2    0.36    0.32 
  -3  -5   2    1.32    0.35 
  -3   5   2    0.97    0.42 
  -3   5   2    0.89    0.56 
  -3   5   2    0.68    0.39 
   3   5  -2    1.03    0.25 
   3   5  -2    0.99    0.40 
  -3   5   2    1.17    0.56 
  -3   5   2    0.08    0.30 
  -3   5   2    0.98    0.45 
   2  -5  -2   12.00    1.50 
  -2  -5   2   12.93    0.86 
   2  -5  -2   11.02    0.71 
  -2  -5   2   10.07    0.81 
  -2  -5   2   11.35    0.68 
  -2  -5   2   11.72    1.53 
  -2  -5   2   11.59    0.86 
   2  -5  -2   11.67    1.33 
   2  -5  -2   10.49    0.82 
   2  -5  -2    8.63    1.03 
   2  -5  -2    9.74    1.06 
   2  -5  -2   11.24    1.06 
  -2  -5   2   10.36    1.11 
   2  -5  -2   13.18    1.53 
  -2   5   2   11.01    1.41 
  -2   5   2    9.88    1.10 
   2   5  -2   11.20    0.83 
  -2   5   2    9.22    1.36 
  -2   5   2   10.57    0.91 
   2   5  -2   10.61    0.60 
  -2   5   2    9.84    1.15 
   2   5  -2   10.28    0.55 
  -2   5   2   11.67    1.01 
   2   5  -2   10.13    0.91 
  -1  -5   2    6.69    1.13 
   1  -5  -2    6.63    0.83 
   1  -5  -2    8.00    1.14 
  -1  -5   2    6.07    0.82 
  -1  -5   2    6.65    0.79 
   1  -5  -2    5.86    0.45 
  -1  -5   2    7.06    0.55 
   1  -5  -2    6.43    0.67 
   1  -5  -2    6.02    0.97 
   1  -5  -2    9.29    1.24 
  -1  -5   2    5.93    0.72 
   1  -5  -2    5.96    1.04 
   1  -5  -2    6.71    0.86 
   1  -5  -2    5.86    0.90 
   1   5  -2    7.14    0.54 
   1   5  -2    4.55    1.07 
  -1   5   2    7.49    0.95 
  -1   5   2    8.41    1.36 
  -1   5   2    6.00    0.72 
  -1   5   2    7.27    0.97 
   1   5  -2    6.89    0.94 
   1   5  -2    6.92    0.83 
   1   5  -2    6.75    0.43 
  -1   5   2    7.46    0.88 
   1   5  -2    6.29    0.71 
  -1   5   2    9.21    1.30 
   1   5  -2    6.46    0.45 
   0  -5  -2   62.12    2.76 
   0  -5   2   60.80    2.31 
   0  -5   2   57.11    2.40 
   0  -5  -2   60.54    2.66 
   0  -5  -2   61.38    1.96 
   0  -5  -2   59.85    2.39 
   0  -5   2   59.40    3.04 
   0  -5  -2   59.07    2.58 
   0  -5   2   60.86    2.11 
   0  -5   2   63.52    2.44 
   0  -5  -2   55.53    2.32 
   0  -5   2   58.89    2.42 
   0  -5  -2   61.25    1.87 
   0   5  -2   59.64    2.29 
   0   5  -2   62.39    2.19 
   0   5  -2   64.61    2.65 
   0   5   2   56.94    2.10 
   0   5  -2   60.67    2.95 
   0   5   2   64.38    2.79 
   0   5   2   64.91    2.74 
   0   5   2   56.08    2.43 
   0   5   2   60.31    1.99 
   0   5   2   63.50    2.20 
   0   5  -2   61.19    2.33 
   0   5   2   60.06    2.75 
   0   5  -2   56.22    3.49 
   0   5   2   54.14    2.82 
   0   5  -2   58.48    2.78 
   0   5  -2   59.66    2.37 
   0   5   2   57.88    2.39 
  -1  -5  -2    4.02    0.61 
   1  -5   2    4.59    0.74 
  -1  -5  -2    3.42    0.58 
  -1  -5  -2    4.48    0.79 
   1  -5   2    6.03    0.69 
   1  -5   2    3.79    0.70 
   1  -5   2    5.72    1.06 
   1  -5   2    4.53    0.69 
  -1  -5  -2    4.10    0.84 
  -1  -5  -2    4.68    0.39 
  -1  -5  -2    3.68    0.73 
   1  -5   2    4.88    0.79 
  -1  -5  -2    4.49    0.33 
   1  -5   2    3.97    0.74 
   1  -5   2    4.60    0.84 
   1   5   2    3.80    0.82 
  -1   5  -2    4.05    1.10 
  -1   5  -2    4.59    0.65 
  -1   5  -2    4.61    0.72 
   1   5   2    4.16    0.50 
  -1   5  -2    3.45    0.57 
   1   5   2    4.07    0.69 
   1   5   2    4.20    0.48 
  -1   5  -2    4.85    0.89 
  -1   5  -2    5.41    1.07 
   1   5   2    4.47    0.84 
  -2  -5  -2  316.92    8.40 
  -2  -5  -2  309.99    8.97 
  -2  -5  -2  316.80    8.06 
  -2  -5  -2  314.79    8.96 
   2  -5   2  318.15    8.87 
   2  -5   2  314.63    9.87 
   2  -5   2  312.37    8.76 
  -2  -5  -2  323.03    7.97 
   2  -5   2  317.15    9.05 
   2  -5   2  315.68    8.78 
   2  -5   2  306.25    9.12 
   2  -5   2  319.41    8.59 
  -2  -5  -2  303.74    8.77 
   2   5   2  324.28    8.84 
  -2   5  -2  314.92    8.70 
  -2   5  -2  311.71    8.70 
   2   5   2  297.45    8.30 
   2   5   2  321.52    7.90 
   2   5   2  322.81    8.15 
  -2   5  -2  314.09    9.51 
  -2   5  -2  306.06    8.80 
   2   5   2  318.39    8.95 
  -2   5  -2  308.22   10.39 
  -2   5  -2  317.01    9.06 
   3  -5   2   30.18    1.85 
  -3  -5  -2   30.78    1.41 
  -3  -5  -2   31.30    1.78 
   3  -5   2   31.97    1.94 
   3  -5   2   32.06    1.72 
   3  -5   2   34.08    1.81 
   3  -5   2   30.46    1.77 
   3  -5   2   31.44    1.75 
  -3  -5  -2   32.08    1.74 
  -3  -5  -2   29.21    1.79 
   3  -5   2   32.76    2.01 
  -3  -5  -2   32.41    1.17 
   3   5   2   30.77    1.80 
   3   5   2   32.82    1.70 
   3   5   2   30.29    1.39 
  -3   5  -2   30.90    1.73 
  -3   5  -2   32.41    1.89 
  -3   5  -2   32.34    2.52 
  -3   5  -2   30.84    1.77 
  -3   5  -2   30.65    2.16 
  -3   5  -2   29.66    1.75 
  -3   5  -2   32.06    1.94 
  -4  -5  -2  186.85    4.90 
   4  -5   2  188.41    6.24 
  -4  -5  -2  182.04    5.13 
  -4  -5  -2  178.44    5.76 
  -4  -5  -2  178.20    6.02 
   4  -5   2  185.68    5.91 
   4  -5   2  196.37    5.88 
  -4  -5  -2  182.31    5.72 
   4  -5   2  187.02    6.30 
   4  -5   2  181.37    6.28 
   4  -5   2  185.43    5.84 
   4  -5   2  180.06    5.91 
   4   5   2  185.02    5.91 
  -4   5  -2  184.14    6.14 
  -4   5  -2  171.71    5.91 
   4   5   2  189.94    5.46 
  -4   5  -2  186.65    5.98 
  -4   5  -2  190.10    6.64 
  -4   5  -2  188.67    6.22 
  -4   5  -2  188.11    7.25 
  -4   5  -2  190.84    6.05 
   4   5   2  189.58    5.71 
   5  -5   2    3.23    0.88 
   5  -5   2    3.16    0.73 
   5  -5   2    2.87    0.63 
   5  -5   2    1.74    0.60 
  -5  -5  -2    1.75    0.64 
   5  -5   2    2.00    0.68 
  -5  -5  -2    3.65    0.78 
   5  -5   2    2.29    0.67 
  -5  -5  -2    3.91    0.87 
  -5  -5  -2    3.33    0.75 
   5   5   2    1.79    0.64 
  -5   5  -2    3.42    0.92 
  -5   5  -2    2.70    0.74 
   5   5   2    2.41    0.56 
  -5   5  -2    2.27    0.88 
  -5   5  -2    2.77    0.86 
   5   5   2    2.07    0.56 
  -5   5  -2    4.04    0.84 
  -5   5  -2    2.18    0.90 
  -5   5  -2    2.64    0.72 
  -6  -5  -2  131.94    5.14 
   6  -5   2  118.98    5.16 
   6  -5   2  120.79    4.85 
  -6  -5  -2  128.58    4.55 
   6  -5   2  136.38    4.57 
  -6  -5  -2  134.08    4.92 
   6  -5   2  129.56    4.52 
   6  -5   2  120.15    5.16 
   6  -5   2  142.25    5.10 
  -6   5  -2  131.91    5.53 
  -6   5  -2  135.52    6.21 
  -6   5  -2  134.07    4.99 
   6   5   2  130.47    4.60 
  -6   5  -2  128.22    5.31 
   6   5   2  131.64    4.76 
  -6   5  -2  128.43    5.01 
  -6   5  -2  128.15    5.01 
  -6   5  -2  123.91    4.92 
   6   5   2  131.12    4.56 
   7  -5   2    0.80    0.60 
   7  -5   2    0.61    0.59 
   7  -5   2    0.73    0.61 
  -7  -5  -2    0.13    0.57 
   7  -5   2    0.82    0.58 
  -7  -5  -2    0.73    0.49 
  -7  -5  -2    0.77    0.49 
  -7  -5  -2    0.89    0.62 
   7  -5   2    1.21    0.49 
  -7   5  -2    1.33    0.71 
   7   5   2    1.28    0.52 
   7   5   2    1.13    0.54 
  -7   5  -2    0.14    0.45 
  -7   5  -2    1.01    0.53 
  -7   5  -2   -0.17    0.68 
  -7   5  -2    1.92    0.87 
  -7   5  -2    4.50    1.40 
  -7   5  -2    1.43    0.64 
   8  -5   2   99.90    4.59 
  -8  -5  -2   85.71    3.88 
   8  -5   2   95.45    4.79 
   8  -5   2   93.94    4.41 
  -8  -5  -2   93.38    4.16 
   8  -5   2  101.48    4.91 
  -8  -5  -2   93.91    4.68 
  -8  -5  -2   96.22    4.65 
  -8   5  -2   95.45    5.64 
   8   5   2   94.86    4.12 
  -8   5  -2  103.18    4.47 
  -8   5  -2  105.81    4.69 
  -8   5  -2   98.76    4.39 
  -8   5  -2  104.83    5.13 
  -8   5  -2   98.08    4.59 
  -8   5  -2   91.57    4.86 
  -9   5  -2    2.31    1.08 
   8  -6  -2    1.16    0.87 
   8  -6  -2    0.40    0.54 
  -8  -6   2    2.30    0.86 
   8  -6  -2    5.04    1.24 
   8  -6  -2    1.43    0.78 
  -8  -6   2    2.22    1.18 
  -8   6   2    2.42    1.11 
  -8   6   2    0.82    0.68 
  -8   6   2    0.42    0.58 
   8   6  -2    0.89    0.56 
  -8   6   2    0.10    0.59 
  -8   6   2    0.04    0.53 
   7  -6  -2   79.15    3.59 
   7  -6  -2   81.26    3.53 
   7  -6  -2   80.81    4.27 
   7  -6  -2   82.92    4.43 
   7  -6  -2   83.61    3.92 
  -7  -6   2   84.55    3.92 
   7  -6  -2   79.61    4.12 
  -7  -6   2   73.07    4.33 
  -7   6   2   76.81    3.74 
  -7   6   2   80.35    3.86 
  -7   6   2   81.97    4.53 
  -7   6   2   78.01    3.89 
  -7   6   2   80.83    4.00 
  -7   6   2   73.99    4.62 
   7   6  -2   81.71    3.71 
   6  -6  -2    2.55    0.83 
   6  -6  -2    2.67    0.89 
  -6  -6   2    2.38    0.94 
   6  -6  -2    3.16    0.76 
  -6  -6   2    2.47    0.76 
   6  -6  -2    3.62    0.83 
   6  -6  -2    2.00    0.68 
  -6  -6   2    3.01    0.84 
   6  -6  -2    2.48    0.82 
   6  -6  -2    2.37    0.95 
   6   6  -2    1.47    0.57 
  -6   6   2    1.72    0.69 
  -6   6   2    2.13    0.76 
  -6   6   2    2.12    0.99 
  -6   6   2    1.86    0.70 
  -6   6   2    2.39    0.74 
  -6   6   2    2.20    0.95 
   5  -6  -2  161.59    5.64 
   5  -6  -2  151.32    6.13 
   5  -6  -2  163.90    6.18 
   5  -6  -2  160.91    5.59 
  -5  -6   2  162.00    5.78 
   5  -6  -2  161.06    5.23 
  -5  -6   2  167.74    5.01 
   5  -6  -2  170.44    6.03 
   5  -6  -2  155.34    5.50 
  -5  -6   2  160.88    6.44 
  -5  -6   2  165.15    5.56 
  -5   6   2  147.80    5.58 
  -5   6   2  164.56    5.87 
   5   6  -2  167.10    5.49 
  -5   6   2  158.51    5.70 
  -5   6   2  163.11    6.70 
  -5   6   2  163.36    5.79 
  -5   6   2  157.27    6.34 
  -4  -6   2    0.44    0.47 
   4  -6  -2    1.37    0.62 
  -4  -6   2    0.77    0.32 
   4  -6  -2    0.88    0.62 
   4  -6  -2    0.63    0.41 
  -4  -6   2    1.06    0.39 
  -4  -6   2    0.99    0.50 
   4  -6  -2    0.77    0.50 
   4  -6  -2    0.84    0.56 
   4  -6  -2    0.96    0.38 
  -4  -6   2    0.41    0.57 
   4  -6  -2    2.13    0.61 
  -4   6   2    1.01    0.72 
  -4   6   2    1.22    0.50 
  -4   6   2    4.90    0.92 
  -4   6   2    0.61    0.59 
   4   6  -2    0.57    0.40 
  -4   6   2    0.43    0.42 
  -4   6   2    0.18    0.37 
   4   6  -2    1.42    0.32 
   3  -6  -2  300.78    9.01 
  -3  -6   2  307.54    8.96 
   3  -6  -2  303.07    9.31 
   3  -6  -2  296.29    8.96 
  -3  -6   2  306.10    8.19 
   3  -6  -2  306.19    8.55 
   3  -6  -2  304.53    8.12 
  -3  -6   2  294.99    8.88 
  -3  -6   2  303.15    9.76 
  -3  -6   2  307.50    8.37 
   3  -6  -2  298.73    9.22 
   3  -6  -2  293.46    8.77 
   3  -6  -2  300.34    9.32 
  -3   6   2  306.61    9.56 
  -3   6   2  296.61    9.00 
  -3   6   2  310.06   10.08 
   3   6  -2  303.98    7.71 
  -3   6   2  294.21    8.70 
  -3   6   2  289.84    8.87 
   3   6  -2  300.94    8.61 
   2  -6  -2    5.76    1.10 
  -2  -6   2   10.61    1.18 
   2  -6  -2    4.60    0.83 
  -2  -6   2    8.18    0.97 
   2  -6  -2    5.54    0.98 
  -2  -6   2    6.96    0.99 
  -2  -6   2    7.55    0.62 
  -2  -6   2    7.74    1.33 
   2  -6  -2    9.33    1.46 
   2  -6  -2    6.74    0.83 
  -2  -6   2    7.30    0.88 
   2  -6  -2    6.14    1.04 
   2  -6  -2    8.22    0.64 
   2  -6  -2    7.20    1.02 
  -2   6   2    7.10    0.92 
  -2   6   2    8.36    1.52 
  -2   6   2    7.76    1.08 
  -2   6   2    8.87    1.51 
   2   6  -2    8.20    1.01 
  -2   6   2    6.98    0.94 
   2   6  -2    7.24    0.55 
  -2   6   2    6.23    1.02 
   2   6  -2    6.76    0.86 
  -1  -6   2  229.75    6.45 
  -1  -6   2  223.65    6.58 
   1  -6  -2  219.74    6.71 
   1  -6  -2  242.64    7.27 
   1  -6  -2  225.73    6.78 
   1  -6  -2  227.08    7.02 
  -1  -6   2  221.06    6.57 
   1  -6  -2  223.85    7.23 
   1  -6  -2  227.50    7.07 
   1  -6  -2  218.51    5.83 
  -1  -6   2  213.35    7.54 
   1  -6  -2  211.26    6.13 
   1  -6  -2  226.87    7.03 
  -1  -6   2  222.58    6.58 
  -1   6   2  222.32    6.44 
   1   6  -2  218.26    5.73 
   1   6  -2  224.53    6.56 
  -1   6   2  218.76    6.96 
   1   6  -2  223.29    6.05 
  -1   6   2  215.18    6.98 
   1   6  -2  218.33    6.64 
  -1   6   2  217.71    6.80 
   1   6  -2  218.92    5.86 
   1   6  -2  220.64    6.85 
   1   6  -2  207.06    7.93 
  -1   6   2  219.54    7.27 
   1   6  -2  240.79    6.42 
  -1   6   2  220.93    6.56 
  -1   6   2  218.52    7.90 
   0  -6   2    6.97    1.25 
   0  -6   2    5.54    0.93 
   0  -6  -2    6.00    1.07 
   0  -6  -2    5.69    0.84 
   0  -6   2    6.82    1.01 
   0  -6  -2    6.86    0.56 
   0  -6   2    6.19    0.89 
   0  -6  -2    6.12    0.48 
   0  -6  -2    4.37    0.73 
   0  -6   2    6.25    0.90 
   0  -6   2    9.25    1.12 
   0  -6   2    6.53    1.01 
   0  -6  -2    7.02    1.07 
   0  -6  -2    5.56    0.91 
   0  -6  -2    3.54    0.85 
   0  -6  -2    7.50    1.19 
   0   6  -2    6.28    1.04 
   0   6   2    7.53    1.13 
   0   6   2    7.12    1.21 
   0   6   2    5.07    1.04 
   0   6  -2    7.51    1.38 
   0   6  -2    6.12    0.87 
   0   6  -2    6.94    0.77 
   0   6  -2    5.83    0.83 
   0   6   2    7.85    1.01 
   0   6   2    6.50    0.91 
   0   6   2    7.86    0.68 
   0   6   2    6.34    0.74 
   0   6  -2    6.59    1.45 
   0   6   2    7.89    1.16 
   0   6  -2    6.08    0.86 
  -1  -6  -2  137.52    3.72 
   1  -6   2  138.15    4.71 
  -1  -6  -2  136.28    4.71 
   1  -6   2  141.96    4.80 
   1  -6   2  136.78    4.54 
   1  -6   2  138.21    4.62 
   1  -6   2  131.79    5.45 
   1  -6   2  138.31    4.55 
   1  -6   2  133.11    4.22 
  -1  -6  -2  137.29    4.45 
  -1  -6  -2  132.57    4.85 
  -1  -6  -2  140.50    4.91 
   1  -6   2  135.63    4.87 
  -1  -6  -2  135.01    4.43 
  -1  -6  -2  138.80    3.63 
   1  -6   2  124.63    4.72 
  -1   6  -2  135.14    4.49 
   1   6   2  125.51    4.93 
   1   6   2  135.42    4.63 
  -1   6  -2  129.62    4.79 
   1   6   2  144.00    5.15 
   1   6   2  140.63    5.04 
   1   6   2  132.94    3.98 
  -1   6  -2  131.41    4.57 
   1   6   2  131.56    3.91 
  -1   6  -2  136.34    4.37 
  -1   6  -2  136.74    6.32 
  -1   6  -2  141.20    5.38 
  -2  -6  -2   12.28    1.52 
  -2  -6  -2   13.39    1.02 
  -2  -6  -2   12.74    1.19 
   2  -6   2   14.25    1.24 
   2  -6   2   14.46    1.89 
   2  -6   2   14.29    1.29 
   2  -6   2   11.01    1.36 
   2  -6   2   12.53    1.53 
   2  -6   2   11.99    1.07 
   2  -6   2   12.30    1.01 
   2  -6   2   13.34    1.16 
  -2  -6  -2   14.12    1.29 
   2   6   2   12.52    0.71 
  -2   6  -2   11.41    2.00 
  -2   6  -2   13.85    1.12 
   2   6   2   10.23    1.25 
  -2   6  -2   13.34    1.18 
  -2   6  -2   11.73    1.05 
  -2   6  -2   16.48    2.05 
   2   6   2   13.38    1.44 
  -2   6  -2   12.17    1.58 
   2   6   2   12.13    0.80 
   3  -6   2  108.65    3.97 
  -3  -6  -2  113.75    4.29 
   3  -6   2  111.79    4.40 
   3  -6   2  104.46    4.14 
   3  -6   2  102.68    4.14 
  -3  -6  -2  118.08    4.26 
  -3  -6  -2  112.21    3.66 
   3  -6   2  111.91    4.51 
  -3  -6  -2  108.99    3.99 
   3  -6   2  104.95    4.04 
   3  -6   2  110.26    3.93 
  -3   6  -2  113.91    4.84 
  -3   6  -2  107.89    4.06 
   3   6   2  108.57    3.90 
  -3   6  -2  109.02    4.17 
   3   6   2  111.81    4.17 
  -3   6  -2  107.06    4.35 
   3   6   2  113.20    3.48 
  -3   6  -2  102.98    3.99 
  -3   6  -2  108.96    5.48 
  -4  -6  -2    2.03    0.62 
   4  -6   2    2.49    0.67 
   4  -6   2    0.91    0.53 
   4  -6   2    1.12    0.58 
   4  -6   2    1.92    0.72 
   4  -6   2    1.54    0.66 
  -4  -6  -2    1.29    0.59 
  -4  -6  -2    1.48    0.65 
   4  -6   2    1.43    0.57 
   4  -6   2    1.21    0.51 
  -4  -6  -2    1.45    0.41 
   4  -6   2    0.91    0.36 
  -4   6  -2    0.61    0.54 
  -4   6  -2    0.73    0.69 
  -4   6  -2    1.67    0.62 
  -4   6  -2    1.05    0.51 
   4   6   2    1.00    0.43 
  -4   6  -2    0.90    0.72 
   4   6   2    2.31    0.72 
   4   6   2    1.29    0.42 
  -4   6  -2    1.82    0.77 
  -4   6  -2    1.30    0.57 
  -5  -6  -2   92.78    3.75 
   5  -6   2   99.23    3.95 
   5  -6   2   99.69    3.96 
   5  -6   2   90.93    4.18 
  -5  -6  -2   91.04    3.60 
  -5  -6  -2   91.61    4.01 
   5  -6   2   90.65    4.26 
   5  -6   2   92.06    3.91 
  -5  -6  -2   98.86    4.11 
   5  -6   2   91.31    3.76 
   5  -6   2   93.91    4.34 
  -5   6  -2   98.91    5.28 
  -5   6  -2   87.47    4.49 
  -5   6  -2   92.92    3.99 
  -5   6  -2   92.51    4.15 
  -5   6  -2   93.69    4.00 
   5   6   2   95.71    3.60 
   5   6   2   88.08    3.84 
  -5   6  -2   92.47    4.25 
  -5   6  -2   96.20    4.00 
   5   6   2   94.29    3.43 
   6  -6   2    2.83    0.75 
   6  -6   2    2.00    0.83 
  -6  -6  -2    2.88    0.84 
   6  -6   2    3.83    0.91 
  -6  -6  -2    4.57    0.97 
   6  -6   2    3.28    0.97 
   6  -6   2    3.25    0.86 
   6  -6   2    5.39    1.09 
  -6   6  -2    2.59    1.14 
  -6   6  -2    4.78    1.31 
  -6   6  -2    2.78    0.82 
   6   6   2    2.47    0.65 
  -6   6  -2    2.00    0.75 
  -6   6  -2    2.28    0.78 
  -6   6  -2    2.70    1.02 
   6   6   2    2.33    0.64 
  -6   6  -2    2.27    0.86 
   7  -6   2    4.27    1.21 
   7  -6   2    3.41    0.94 
   7  -6   2    3.38    0.92 
   7  -6   2    4.65    0.92 
  -7  -6  -2    3.60    0.94 
   7  -6   2    2.79    0.95 
   7   6   2    3.10    0.78 
  -7   6  -2    3.58    1.11 
  -7   6  -2    3.44    1.26 
  -7   6  -2    3.63    1.15 
  -7   6  -2    2.64    1.31 
   7   6   2    3.34    0.86 
  -7   6  -2    3.91    0.99 
  -7   6  -2    2.37    0.85 
  -7   6  -2    2.35    0.80 
   8  -6   2    0.89    0.63 
  -8  -6  -2    0.82    0.60 
   8  -6   2   -0.08    0.51 
   8  -6   2    0.22    0.55 
   8  -6   2    0.95    0.72 
  -8  -6  -2    0.86    1.34 
  -8   6  -2    0.32    0.79 
  -8   6  -2    1.19    1.00 
   8   6   2    0.61    0.61 
  -8   6  -2    0.47    0.56 
  -8   6  -2    0.11    0.50 
  -8   6  -2    0.32    0.53 
  -8   7   2   33.32    3.23 
   7  -7  -2    1.80    0.72 
  -7  -7   2    4.84    1.21 
   7  -7  -2    2.21    0.90 
   7  -7  -2    2.97    1.06 
   7  -7  -2    1.94    0.99 
   7  -7  -2    3.97    1.19 
   7  -7  -2    1.83    0.71 
  -7   7   2    2.75    0.90 
  -7   7   2    2.71    0.89 
   7   7  -2    1.96    0.73 
  -7   7   2    2.79    1.23 
  -7   7   2    3.05    1.14 
  -7   7   2    2.16    0.87 
   6  -7  -2    7.42    1.42 
  -6  -7   2    4.28    1.07 
  -6  -7   2    6.04    1.32 
   6  -7  -2    4.57    1.33 
   6  -7  -2    4.12    1.13 
  -6  -7   2    3.00    1.07 
   6  -7  -2    4.42    0.97 
   6  -7  -2    4.30    0.88 
   6  -7  -2    6.13    1.15 
   6  -7  -2    3.64    1.14 
  -6   7   2    3.34    0.95 
  -6   7   2    5.25    1.13 
  -6   7   2    3.74    1.31 
   6   7  -2    4.59    0.96 
  -6   7   2    2.91    0.85 
  -6   7   2    3.57    1.31 
   5  -7  -2    4.48    1.07 
   5  -7  -2    2.38    0.84 
  -5  -7   2    4.36    1.07 
  -5  -7   2    3.62    0.98 
   5  -7  -2    3.38    0.94 
   5  -7  -2    3.57    0.92 
   5  -7  -2    4.62    0.95 
  -5  -7   2    3.75    1.10 
   5  -7  -2    3.02    0.68 
   5  -7  -2    3.31    1.07 
  -5   7   2    2.28    0.79 
   5   7  -2    3.51    0.83 
  -5   7   2    4.29    1.30 
  -5   7   2    3.95    0.94 
  -5   7   2    3.59    1.15 
  -5   7   2    4.63    1.03 
   4  -7  -2    4.93    1.11 
  -4  -7   2    3.87    0.92 
   4  -7  -2    6.29    1.18 
  -4  -7   2    5.43    1.14 
   4  -7  -2    6.25    0.83 
   4  -7  -2    5.53    0.95 
   4  -7  -2    3.91    0.86 
  -4  -7   2    4.93    1.23 
   4  -7  -2    5.43    1.29 
  -4  -7   2    8.30    1.06 
   4  -7  -2    7.08    1.30 
  -4   7   2    6.16    1.51 
  -4   7   2    4.27    0.88 
  -4   7   2    6.32    1.44 
  -4   7   2    4.90    1.00 
   4   7  -2    4.64    0.86 
  -4   7   2    5.89    1.11 
   3  -7  -2    0.37    0.50 
  -3  -7   2    0.39    0.41 
  -3  -7   2    0.77    0.62 
  -3  -7   2    0.82    0.42 
  -3  -7   2    1.85    0.72 
   3  -7  -2   -0.11    0.38 
   3  -7  -2    0.63    0.48 
   3  -7  -2    2.35    0.88 
   3  -7  -2    0.40    0.30 
   3  -7  -2    1.23    0.69 
  -3  -7   2    0.12    0.33 
   3  -7  -2    0.57    0.40 
   3  -7  -2    0.29    0.56 
  -3  -7   2    0.70    0.44 
  -3   7   2    0.07    0.37 
   3   7  -2    1.09    0.46 
  -3   7   2    0.36    0.63 
  -3   7   2    0.63    0.52 
  -3   7   2    0.22    0.62 
  -3   7   2    0.45    0.45 
   2  -7  -2    2.69    0.93 
   2  -7  -2    1.94    0.40 
  -2  -7   2    2.76    0.72 
  -2  -7   2    1.77    0.69 
  -2  -7   2    1.76    0.51 
  -2  -7   2    2.20    0.57 
   2  -7  -2    2.68    0.59 
  -2  -7   2    2.89    0.97 
   2  -7  -2    1.91    0.71 
   2  -7  -2    2.21    0.82 
   2  -7  -2    1.38    0.58 
  -2  -7   2    2.47    0.68 
   2  -7  -2    2.23    0.64 
   2  -7  -2    1.98    0.80 
  -2   7   2    2.01    0.94 
   2   7  -2    1.44    0.51 
  -2   7   2    1.93    0.87 
   2   7  -2    2.99    0.51 
  -2   7   2    2.72    0.64 
   2   7  -2    2.16    0.59 
  -2   7   2    2.82    0.76 
  -2   7   2    2.34    0.68 
   1  -7  -2    0.27    0.44 
  -1  -7   2    0.49    0.38 
  -1  -7   2    1.61    0.79 
  -1  -7   2    0.00    0.32 
   1  -7  -2    0.35    0.33 
  -1  -7   2    0.80    0.47 
   1  -7  -2    1.72    0.34 
  -1  -7   2    1.64    0.57 
   1  -7  -2    0.35    0.47 
   1  -7  -2    1.45    0.63 
  -1  -7   2    0.08    0.40 
   1  -7  -2    0.58    0.42 
   1  -7  -2    0.22    0.35 
   1  -7  -2    1.25    0.65 
  -1  -7   2    0.52    0.43 
   1   7  -2    0.31    0.38 
   1   7  -2    1.07    0.39 
  -1   7   2    1.42    0.45 
   1   7  -2    1.29    0.52 
  -1   7   2    0.92    0.50 
   1   7  -2    0.87    0.64 
  -1   7   2    0.60    0.47 
  -1   7   2    1.11    0.58 
  -1   7   2    1.03    0.68 
  -1   7   2    0.28    0.37 
   1   7  -2    1.09    0.52 
  -1   7   2    0.35    0.54 
  -1   7   2    0.06    0.37 
   1   7  -2    0.52    0.30 
   0  -7   2   40.84    2.24 
   0  -7  -2   37.53    2.26 
   0  -7  -2   41.40    2.17 
   0  -7   2   38.46    2.11 
   0  -7   2   40.53    2.77 
   0  -7  -2   39.44    1.60 
   0  -7  -2   39.33    2.40 
   0  -7   2   35.27    2.09 
   0  -7  -2   38.15    1.45 
   0  -7   2   38.33    2.02 
   0  -7  -2   36.76    2.07 
   0  -7  -2   36.02    2.32 
   0  -7   2   38.54    2.08 
   0  -7  -2   38.57    2.30 
   0  -7   2   39.05    2.31 
   0  -7  -2   37.90    2.34 
   0   7   2   39.70    2.37 
   0   7   2   38.58    1.71 
   0   7  -2   40.36    2.05 
   0   7   2   40.59    2.64 
   0   7   2   44.68    2.67 
   0   7  -2   39.94    2.78 
   0   7  -2   40.61    1.87 
   0   7   2   40.84    1.88 
   0   7   2   39.94    2.19 
   0   7  -2   37.80    3.00 
   0   7  -2   42.34    2.37 
   0   7   2   40.25    2.44 
   0   7  -2   38.83    2.11 
   0   7  -2   36.71    2.06 
   0   7   2   38.12    2.18 
  -1  -7  -2   17.52    1.52 
   1  -7   2   15.70    1.76 
  -1  -7  -2   15.55    1.26 
   1  -7   2   15.15    1.38 
   1  -7   2   16.18    2.04 
   1  -7   2   15.60    1.86 
  -1  -7  -2   16.34    1.55 
   1  -7   2   18.03    1.42 
  -1  -7  -2   16.07    1.55 
  -1  -7  -2   16.68    1.32 
  -1  -7  -2   18.69    1.60 
   1  -7   2   16.95    1.30 
   1  -7   2   17.40    1.48 
  -1   7  -2   18.67    2.36 
   1   7   2   16.24    0.97 
   1   7   2   17.47    1.08 
   1   7   2   17.47    1.49 
   1   7   2   19.47    1.66 
  -1   7  -2   19.29    1.43 
  -1   7  -2   12.98    2.29 
   1   7   2   19.49    1.86 
  -1   7  -2   14.99    1.20 
  -1   7  -2   17.27    1.42 
  -1   7  -2   18.29    1.96 
  -2  -7  -2  165.07    5.27 
   2  -7   2  160.87    5.79 
   2  -7   2  162.55    5.56 
  -2  -7  -2  161.14    5.74 
   2  -7   2  160.36    5.78 
   2  -7   2  151.11    5.77 
   2  -7   2  154.34    6.49 
   2  -7   2  157.17    5.23 
  -2  -7  -2  160.75    5.52 
  -2  -7  -2  167.09    5.28 
   2  -7   2  158.73    5.18 
  -2  -7  -2  163.51    5.79 
   2  -7   2  164.26    5.60 
  -2   7  -2  152.01    5.51 
   2   7   2  163.25    4.69 
  -2   7  -2  161.41    5.34 
  -2   7  -2  167.96    7.58 
   2   7   2  164.42    5.62 
  -2   7  -2  167.82    5.54 
  -2   7  -2  160.89    6.45 
   2   7   2  173.30    5.66 
  -3  -7  -2   21.66    1.65 
   3  -7   2   21.17    1.64 
   3  -7   2   19.32    1.34 
   3  -7   2   19.83    1.49 
   3  -7   2   18.46    1.68 
   3  -7   2   19.56    1.72 
   3  -7   2   21.81    1.74 
  -3  -7  -2   18.52    1.69 
  -3  -7  -2   20.45    1.72 
  -3  -7  -2   21.38    1.42 
   3  -7   2   25.35    1.96 
   3  -7   2   22.02    1.54 
  -3   7  -2   19.75    1.55 
   3   7   2   20.21    1.17 
  -3   7  -2   18.82    1.58 
  -3   7  -2   22.39    3.07 
   3   7   2   20.11    1.45 
  -3   7  -2   17.48    2.36 
   3   7   2   20.35    1.70 
  -3   7  -2   17.79    1.49 
   4  -7   2  137.84    5.14 
   4  -7   2  145.91    5.39 
  -4  -7  -2  138.02    4.58 
   4  -7   2  137.94    4.97 
   4  -7   2  143.21    4.51 
  -4  -7  -2  148.70    5.41 
   4  -7   2  134.73    5.02 
   4  -7   2  131.39    5.49 
  -4  -7  -2  141.08    4.98 
   4  -7   2  136.83    5.59 
  -4  -7  -2  142.16    5.29 
   4  -7   2  134.96    5.36 
   4   7   2  148.36    4.84 
  -4   7  -2  146.04    5.29 
  -4   7  -2  148.48    5.66 
   4   7   2  137.01    4.46 
   4   7   2  135.44    5.22 
  -4   7  -2  140.58    5.26 
  -4   7  -2  152.53    7.14 
  -4   7  -2  136.03    5.27 
  -4   7  -2  141.24    6.08 
  -5  -7  -2   30.22    2.13 
   5  -7   2   29.91    2.05 
   5  -7   2   31.16    2.36 
   5  -7   2   32.04    2.45 
   5  -7   2   31.77    2.47 
   5  -7   2   32.08    2.14 
  -5  -7  -2   31.08    2.17 
   5  -7   2   34.41    2.30 
   5  -7   2   31.81    2.08 
  -5  -7  -2   34.07    2.35 
  -5   7  -2   32.23    2.23 
  -5   7  -2   33.26    2.47 
  -5   7  -2   31.23    2.20 
  -5   7  -2   32.39    2.78 
  -5   7  -2   27.29    2.12 
  -5   7  -2   31.56    3.12 
   6  -7   2   61.56    3.70 
   6  -7   2   61.71    3.68 
  -6  -7  -2   58.43    3.37 
  -6  -7  -2   66.20    3.53 
   6  -7   2   61.59    3.29 
   6  -7   2   62.11    3.13 
   6  -7   2   58.94    3.17 
   6  -7   2   63.44    3.23 
  -6   7  -2   60.29    4.50 
  -6   7  -2   64.17    3.44 
  -6   7  -2   59.03    3.33 
  -6   7  -2   64.86    3.44 
  -6   7  -2   65.15    4.08 
   7  -7   2   40.41    2.45 
   7  -7   2   32.67    2.79 
  -7  -7  -2   37.66    2.70 
   7  -7   2   40.13    3.04 
   7  -7   2   39.55    2.61 
   7  -7   2   36.35    2.64 
  -7   7  -2   35.86    3.18 
  -7   7  -2   39.28    2.72 
  -7   7  -2   36.32    2.69 
  -7   7  -2   33.30    3.54 
  -7   7  -2   35.56    2.96 
  -7   7  -2   41.49    2.79 
  -6  -8   2   33.44    2.55 
   6  -8  -2   32.86    2.38 
   6  -8  -2   34.93    2.83 
   6  -8  -2   34.79    2.70 
   6  -8  -2   38.77    3.04 
  -6  -8   2   32.41    2.50 
   6  -8  -2   33.09    2.37 
   6  -8  -2   33.70    2.54 
  -6   8   2   35.66    3.11 
  -6   8   2   33.96    3.41 
  -6   8   2   38.39    2.66 
  -6   8   2   32.32    2.54 
  -6   8   2   37.32    2.62 
   5  -8  -2  112.72    5.29 
   5  -8  -2  112.90    5.06 
  -5  -8   2  113.22    5.48 
   5  -8  -2  113.38    4.77 
   5  -8  -2  112.63    4.93 
   5  -8  -2  110.32    5.28 
  -5  -8   2  115.49    4.90 
   5  -8  -2  111.37    4.59 
  -5  -8   2  107.57    4.89 
  -5   8   2  115.83    4.93 
  -5   8   2  116.51    6.26 
  -5   8   2  113.68    5.62 
   5   8  -2  114.48    4.70 
  -5   8   2  116.06    5.07 
  -5   8   2  104.86    4.68 
   4  -8  -2   68.57    3.17 
   4  -8  -2   61.08    3.42 
  -4  -8   2   63.58    2.96 
   4  -8  -2   69.24    3.42 
   4  -8  -2   73.44    3.68 
  -4  -8   2   71.71    4.07 
  -4  -8   2   60.69    3.38 
   4  -8  -2   66.77    3.76 
  -4  -8   2   65.49    3.49 
   4  -8  -2   67.53    3.78 
  -4   8   2   63.07    3.40 
  -4   8   2   64.56    3.99 
  -4   8   2   90.33    5.12 
  -4   8   2   70.86    3.64 
  -4   8   2   66.82    3.34 
   4   8  -2   63.11    2.98 
  -3  -8   2  234.17    7.87 
  -3  -8   2  226.16    7.71 
   3  -8  -2  242.69    7.89 
  -3  -8   2  237.60    7.37 
   3  -8  -2  232.45    7.15 
   3  -8  -2  225.41    8.01 
  -3  -8   2  238.08    7.28 
  -3  -8   2  235.07    8.54 
   3  -8  -2  220.31    7.56 
   3  -8  -2  233.24    8.10 
   3  -8  -2  232.71    8.17 
   3  -8  -2  234.97    7.93 
  -3   8   2  220.39    7.37 
  -3   8   2  249.36    9.53 
  -3   8   2  220.02    8.39 
   3   8  -2  227.15    7.12 
  -3   8   2  231.03    7.88 
  -3   8   2  219.21    7.65 
   2  -8  -2   58.00    2.55 
  -2  -8   2   59.08    2.82 
  -2  -8   2   61.01    2.80 
   2  -8  -2   61.00    3.31 
   2  -8  -2   54.74    2.93 
   2  -8  -2   58.71    3.27 
   2  -8  -2   57.39    3.00 
  -2  -8   2   56.51    3.00 
  -2  -8   2   60.81    3.27 
  -2  -8   2   56.84    2.71 
  -2  -8   2   63.98    3.68 
   2  -8  -2   57.32    3.24 
   2  -8  -2   51.02    3.08 
  -2   8   2   55.23    3.07 
  -2   8   2   59.56    3.19 
  -2   8   2   58.17    3.58 
   2   8  -2   63.67    2.81 
  -2   8   2   60.27    4.00 
  -2   8   2   59.16    2.79 
  -2   8   2   56.13    3.01 
  -1  -8   2  118.53    4.64 
   1  -8  -2  110.46    3.73 
  -1  -8   2  111.57    4.23 
   1  -8  -2  120.48    4.52 
  -1  -8   2  109.42    4.41 
  -1  -8   2  104.96    4.23 
   1  -8  -2  109.20    4.64 
  -1  -8   2  110.26    5.18 
  -1  -8   2  115.96    4.08 
  -1  -8   2  111.72    4.30 
   1  -8  -2  108.58    4.67 
  -1  -8   2  105.03    4.65 
   1  -8  -2  112.96    4.74 
   1  -8  -2  102.95    4.31 
  -1  -8   2  106.96    4.24 
   1  -8  -2  106.95    4.69 
  -1   8   2  108.18    4.62 
  -1   8   2  114.93    4.10 
   1   8  -2  110.68    5.41 
   1   8  -2  106.72    4.17 
  -1   8   2  114.24    4.67 
  -1   8   2  114.80    5.23 
   1   8  -2  120.80    4.93 
  -1   8   2  107.38    4.47 
  -1   8   2  108.13    5.09 
   1   8  -2  114.56    4.33 
   0  -8  -2   72.50    3.33 
   0  -8   2   70.73    3.34 
   0  -8   2   76.87    3.22 
   0  -8   2   71.88    3.65 
   0  -8  -2   73.08    3.56 
   0  -8   2   75.36    3.56 
   0  -8   2   73.34    3.41 
   0  -8   2   75.42    3.37 
   0  -8  -2   73.63    3.61 
   0  -8  -2   78.75    3.78 
   0  -8  -2   71.51    3.50 
   0  -8  -2   78.47    3.39 
   0  -8   2   77.54    4.20 
   0  -8   2   76.13    3.12 
   0  -8  -2   72.82    3.69 
   0  -8   2   73.52    3.35 
   0   8  -2   73.86    3.40 
   0   8   2   74.51    3.73 
   0   8  -2   72.05    4.42 
   0   8  -2   82.86    4.33 
   0   8  -2   74.41    2.93 
   0   8   2   77.82    3.70 
   0   8   2   78.29    3.71 
   0   8   2   75.82    3.39 
   0   8  -2   76.85    3.40 
   0   8  -2   78.30    3.39 
   0   8   2   75.36    2.96 
   0   8   2   72.69    3.45 
   0   8   2   77.52    4.06 
   1  -8   2   38.41    2.88 
  -1  -8  -2   37.41    2.13 
  -1  -8  -2   36.53    2.42 
   1  -8   2   35.92    2.13 
  -1  -8  -2   38.06    2.37 
   1  -8   2   35.99    2.17 
   1  -8   2   30.66    2.10 
   1  -8   2   39.07    2.54 
  -1  -8  -2   36.37    2.37 
  -1  -8  -2   32.91    2.22 
   1  -8   2   36.59    1.97 
   1  -8   2   35.25    2.36 
  -1  -8  -2   33.42    2.41 
  -1  -8  -2   32.66    2.05 
   1  -8   2   37.16    2.36 
  -1   8  -2   34.48    2.21 
  -1   8  -2   34.09    2.13 
  -1   8  -2   33.58    1.94 
   1   8   2   39.30    2.37 
  -1   8  -2   41.07    2.98 
  -1   8  -2   39.10    2.45 
  -1   8  -2   37.79    2.19 
   1   8   2   39.76    2.41 
  -1   8  -2   33.93    3.10 
   2  -8   2   25.38    2.04 
   2  -8   2   22.17    1.63 
  -2  -8  -2   22.42    1.98 
   2  -8   2   23.65    1.86 
   2  -8   2   24.20    2.04 
  -2  -8  -2   24.15    1.96 
   2  -8   2   21.68    1.56 
  -2  -8  -2   21.23    1.81 
  -2  -8  -2   26.35    1.72 
   2  -8   2   23.15    1.83 
  -2  -8  -2   23.16    1.67 
  -2  -8  -2   27.65    1.96 
  -2  -8  -2   23.51    1.80 
   2  -8   2   24.58    1.99 
   2  -8   2   23.17    1.56 
   2  -8   2   26.04    2.42 
  -2   8  -2   25.42    1.82 
   2   8   2   21.13    1.68 
  -2   8  -2   25.64    1.72 
  -2   8  -2   23.57    2.36 
  -2   8  -2   26.88    3.61 
   2   8   2   26.76    2.00 
  -2   8  -2   20.51    1.76 
   3  -8   2   33.75    2.47 
   3  -8   2   31.91    2.21 
  -3  -8  -2   37.36    2.28 
  -3  -8  -2   31.15    1.95 
   3  -8   2   35.82    2.50 
   3  -8   2   33.13    2.05 
   3  -8   2   32.06    2.40 
  -3  -8  -2   36.40    2.40 
  -3  -8  -2   36.22    2.04 
   3  -8   2   36.22    2.06 
   3  -8   2   32.10    2.28 
  -3  -8  -2   36.13    2.51 
   3  -8   2   35.45    2.00 
  -3   8  -2   41.24    3.68 
  -3   8  -2   36.11    2.22 
  -3   8  -2   34.33    2.24 
  -3   8  -2   34.50    2.92 
  -3   8  -2   41.95    2.52 
   3   8   2   33.56    2.33 
   4  -8   2   29.16    2.31 
   4  -8   2   23.67    1.72 
  -4  -8  -2   23.03    1.80 
   4  -8   2   21.40    1.97 
   4  -8   2   27.93    2.23 
  -4  -8  -2   21.80    2.00 
   4  -8   2   23.31    1.90 
   4  -8   2   20.79    1.73 
   4  -8   2   24.44    2.18 
  -4   8  -2   18.25    3.01 
  -4   8  -2   27.05    2.06 
  -4   8  -2   22.51    1.91 
  -4   8  -2   25.44    2.55 
  -4   8  -2   24.76    1.93 
   5  -8   2   30.94    2.58 
  -5  -8  -2   31.59    2.38 
   5  -8   2   30.33    2.22 
   5  -8   2   35.23    2.20 
  -5  -8  -2   28.49    2.33 
   5  -8   2   28.43    2.40 
   5  -8   2   29.12    2.48 
   5  -8   2   30.85    2.38 
   5  -8   2   27.95    2.14 
  -5   8  -2   34.08    3.06 
  -5   8  -2   35.46    3.53 
  -5   8  -2   35.50    2.47 
  -5   8  -2   31.18    2.29 
  -5   8  -2   33.89    2.40 
  -6  -8  -2   10.40    1.75 
   6  -8   2   11.28    1.63 
   6  -8   2    8.56    1.72 
   6  -8   2    9.10    1.51 
   6  -8   2    7.05    1.56 
   6  -8   2   10.26    1.55 
  -6   8  -2    9.62    1.66 
  -6   8  -2   11.58    2.62 
  -6   8  -2   10.38    1.65 
  -6   8  -2   12.01    2.24 
  -6   8  -2   11.91    1.78 
   5  -9  -2    2.70    1.13 
   5  -9  -2    0.33    0.66 
   5  -9  -2    1.83    0.98 
  -5  -9   2    1.54    0.82 
   5  -9  -2    2.11    0.96 
   5  -9  -2    1.30    0.79 
   5  -9  -2    3.19    0.97 
  -5  -9   2    0.47    0.75 
  -5   9   2    1.09    0.69 
  -5   9   2    2.10    1.17 
  -5   9   2    1.01    0.70 
  -5   9   2    2.78    1.40 
  -5   9   2    2.39    0.91 
   4  -9  -2    5.60    1.41 
   4  -9  -2    9.14    1.78 
  -4  -9   2    5.33    1.23 
  -4  -9   2    5.71    1.44 
   4  -9  -2    5.78    1.22 
   4  -9  -2    6.31    1.51 
   4  -9  -2    6.57    1.30 
   4  -9  -2    5.11    1.12 
  -4  -9   2    4.69    1.30 
  -4   9   2    4.90    1.67 
  -4   9   2    5.02    1.12 
  -4   9   2    5.53    1.22 
  -4   9   2    5.12    1.52 
  -4   9   2    6.63    1.39 
  -3  -9   2    5.50    1.39 
   3  -9  -2    5.33    1.25 
   3  -9  -2    5.36    1.23 
   3  -9  -2    5.30    1.42 
   3  -9  -2    4.02    1.23 
  -3  -9   2    6.61    1.16 
   3  -9  -2    3.51    0.85 
   3  -9  -2    4.38    1.21 
   3  -9  -2    4.41    1.06 
  -3  -9   2    4.68    1.29 
  -3  -9   2    5.77    1.22 
  -3   9   2    3.99    1.05 
  -3   9   2    5.49    1.25 
  -3   9   2    5.07    1.46 
  -3   9   2    5.18    1.09 
  -3   9   2    5.31    1.21 
  -2  -9   2    0.72    0.63 
   2  -9  -2    0.98    0.71 
   2  -9  -2    1.47    0.82 
  -2  -9   2    0.52    0.70 
  -2  -9   2    0.47    0.65 
  -2  -9   2    0.60    0.55 
   2  -9  -2    1.16    0.78 
   2  -9  -2    0.83    0.59 
  -2  -9   2    1.54    0.71 
   2  -9  -2    1.40    0.67 
  -2  -9   2    1.58    0.65 
   2  -9  -2    0.83    0.74 
  -2   9   2    1.78    0.84 
  -2   9   2    1.58    0.95 
  -2   9   2    2.35    0.74 
  -2   9   2    1.29    0.72 
  -2   9   2    1.40    0.66 
  -1  -9   2   22.54    1.84 
   1  -9  -2   23.38    2.11 
   1  -9  -2   18.84    2.19 
  -1  -9   2   21.50    1.77 
   1  -9  -2   21.56    2.00 
  -1  -9   2   22.18    2.12 
   1  -9  -2   18.87    1.72 
  -1  -9   2   20.87    1.79 
  -1  -9   2   21.74    2.25 
  -1  -9   2   19.28    2.09 
   1  -9  -2   16.48    1.88 
  -1  -9   2   21.25    1.84 
   1  -9  -2   22.32    2.11 
  -1   9   2   19.23    1.53 
  -1   9   2   23.09    2.38 
   1   9  -2   22.78    1.81 
  -1   9   2   22.19    1.96 
  -1   9   2   27.05    2.41 
  -1   9   2   26.25    2.04 
   0  -9  -2    2.54    0.99 
   0  -9   2    2.40    0.80 
   0  -9   2    1.93    0.91 
   0  -9  -2    2.95    1.03 
   0  -9  -2    2.23    0.97 
   0  -9  -2    3.54    0.91 
   0  -9   2    2.40    0.84 
   0  -9  -2    3.46    0.87 
   0  -9   2    2.43    0.88 
   0  -9  -2    2.87    0.91 
   0  -9   2    4.72    1.01 
   0  -9   2    2.84    1.01 
   0  -9  -2    2.09    0.86 
   0   9  -2    3.04    0.88 
   0   9  -2    3.52    1.13 
   0   9   2    2.45    1.07 
   0   9   2    1.86    0.80 
  -1  -9  -2   43.08    2.74 
   1  -9   2   44.26    2.73 
   1  -9   2   45.25    2.81 
  -1  -9  -2   47.66    3.08 
   1  -9   2   45.34    2.58 
   1  -9   2   41.22    3.19 
   1  -9   2   48.46    2.94 
  -1  -9  -2   45.20    2.90 
  -1  -9  -2   48.74    2.70 
   1  -9   2   47.09    3.06 
  -1  -9  -2   45.52    2.79 
  -1  -9  -2   47.60    2.60 
  -1  -9  -2   43.47    2.80 
  -1   9  -2   47.11    3.66 
  -1   9  -2   48.25    2.77 
  -1   9  -2   44.29    3.39 
  -1   9  -2   43.51    2.34 
  -2  -9  -2   25.85    1.94 
  -2  -9  -2   29.90    2.14 
   2  -9   2   30.25    2.45 
   2  -9   2   32.09    2.39 
  -2  -9  -2   29.17    2.61 
   2  -9   2   25.75    2.24 
   2  -9   2   25.70    1.87 
  -2  -9  -2   30.74    2.24 
   2  -9   2   29.66    2.17 
   2  -9   2   30.45    2.24 
  -2  -9  -2   26.88    1.87 
  -2  -9  -2   23.48    2.23 
  -2   9  -2   26.47    2.67 
  -2   9  -2   29.39    3.07 
  -2   9  -2   28.52    2.10 
  -2   9  -2   27.67    2.14 
  -2   9  -2   35.22    3.69 
  -2   9  -2   25.28    1.87 
   3  -9   2   85.56    3.57 
   3  -9   2   73.56    3.82 
  -3  -9  -2   78.42    4.11 
   3  -9   2   79.61    3.91 
   3  -9   2   75.08    4.07 
  -3  -9  -2   81.44    3.59 
   3  -9   2   82.90    4.24 
  -3  -9  -2   86.97    3.89 
   3  -9   2   83.17    4.23 
  -3   9  -2   79.24    3.69 
  -3   9  -2   75.61    3.90 
  -3   9  -2   80.88    3.90 
  -3   9  -2   80.97    4.78 
  -3   9  -2   85.06    5.69 
   4  -9   2   31.05    2.40 
   4  -9   2   29.62    2.50 
   4  -9   2   36.10    2.65 
   4  -9   2   38.08    2.43 
  -4  -9  -2   37.37    2.73 
  -4  -9  -2   38.62    2.79 
   4  -9   2   39.18    2.86 
   4  -9   2   35.00    2.75 
  -4   9  -2   40.87    4.04 
  -4   9  -2   38.47    3.39 
  -4   9  -2   36.19    2.57 
  -4   9  -2   34.53    2.53 
  -4   9  -2   34.59    2.43 
  -5  -9  -2   47.88    3.16 
   5  -9   2   45.13    3.11 
   5  -9   2   39.25    3.12 
   5  -9   2   41.31    3.02 
   5  -9   2   40.63    3.12 
   5  -9   2   42.42    2.84 
  -5  -9  -2   47.07    3.15 
   5  -9   2   47.92    2.88 
  -5   9  -2   49.63    3.11 
  -5   9  -2   49.66    4.58 
  -5   9  -2   49.61    3.86 
  -5   9  -2   43.18    2.85 
  -5   9  -2   42.06    2.99 
   3 -10  -2   22.55    2.91 
  -3 -10   2   18.25    2.60 
   3 -10  -2   14.56    2.25 
  -3  10   2   12.40    2.38 
  -3  10   2   15.17    1.83 
  -3  10   2   16.31    2.19 
   2 -10  -2  108.63    5.27 
   2 -10  -2  117.71    5.12 
   2 -10  -2  107.68    5.26 
   2 -10  -2  121.40    5.52 
  -2 -10   2  122.47    5.58 
  -2 -10   2  110.12    5.60 
  -2 -10   2  114.13    5.11 
  -2 -10   2  106.02    4.72 
   2 -10  -2  119.83    5.34 
  -2 -10   2  120.36    5.05 
   2 -10  -2  118.85    5.10 
  -2  10   2  111.72    5.17 
  -2  10   2  120.14    6.02 
  -2  10   2  114.35    5.14 
   1 -10  -2   10.51    1.65 
   1 -10  -2   10.85    1.76 
  -1 -10   2   13.60    2.31 
   1 -10  -2   16.51    1.98 
   1 -10  -2   17.80    2.48 
  -1 -10   2   13.24    1.82 
  -1 -10   2   16.91    1.99 
  -1 -10   2   13.11    2.11 
   1 -10  -2   13.11    2.08 
  -1 -10   2   14.65    1.94 
   1 -10  -2   19.04    2.58 
  -1  10   2    9.66    1.96 
   0 -10  -2   76.12    3.99 
   0 -10   2   74.08    3.88 
   0 -10  -2   73.68    3.76 
   0 -10   2   68.18    4.06 
   0 -10  -2   66.64    4.02 
   0 -10  -2   72.55    3.93 
   0 -10   2   72.66    3.76 
   0 -10   2   75.55    4.51 
   0 -10   2   78.65    3.83 
   0 -10  -2   69.34    3.57 
   0 -10   2   75.21    3.79 
   0  10  -2   76.29    3.81 
   0  10   2   83.33    4.72 
  -1 -10  -2    0.83    0.75 
   1 -10   2    1.83    0.96 
   1 -10   2    0.67    0.69 
  -1 -10  -2    0.14    0.54 
   1 -10   2    0.37    0.62 
   1 -10   2    1.92    0.79 
  -1 -10  -2    0.54    0.80 
  -1 -10  -2    0.75    0.74 
  -1 -10  -2    0.15    0.51 
   1 -10   2    0.77    0.72 
   1 -10   2    0.91    0.64 
  -1  10  -2    0.45    0.55 
   2 -10   2   30.14    2.72 
   2 -10   2   34.76    2.53 
   2 -10   2   32.48    2.60 
  -2 -10  -2   29.76    2.26 
  -2 -10  -2   31.22    2.71 
  -2 -10  -2   32.69    2.50 
   2 -10   2   30.97    2.22 
   2 -10   2   37.33    2.72 
  -2  10  -2   32.15    2.45 
  -2  10  -2   32.88    3.20 
  -2  10  -2   35.09    3.41 
  -3  10  -2    5.46    1.64 
 -10   0   3   -0.31    0.39 
  10   0  -3    0.05    0.50 
 -10   0   3   -0.16    0.85 
 -10   0   3   -0.01    0.60 
 -10   0   3    0.56    0.82 
  10   0  -3    0.18    0.45 
  -9   0   3    7.70    1.25 
   9   0  -3    8.54    1.29 
  -9   0   3   12.33    1.46 
   9   0  -3   10.41    1.54 
   9   0  -3   10.15    1.54 
  -9   0   3    6.06    1.48 
  -9   0   3   10.95    1.93 
  -9   0   3   12.34    2.07 
  -8   0   3    0.28    0.43 
   8   0  -3   -0.19    0.36 
   8   0  -3   -0.11    0.36 
  -8   0   3    1.11    0.79 
   8   0  -3    0.10    0.39 
  -8   0   3    0.99    0.68 
  -8   0   3    0.89    0.69 
   8   0  -3   -0.24    0.31 
  -8   0   3    0.59    0.64 
   8   0  -3    0.02    0.41 
  -8   0   3    0.42    0.42 
  -8   0   3    0.65    0.39 
   7   0  -3   18.00    1.51 
   7   0  -3   17.57    1.47 
  -7   0   3   18.00    1.08 
   7   0  -3   20.20    1.32 
  -7   0   3   19.40    1.80 
   7   0  -3   18.32    1.50 
  -7   0   3   19.51    1.16 
  -7   0   3   19.29    1.42 
  -7   0   3   20.95    1.40 
  -7   0   3   19.56    1.25 
   7   0  -3   17.94    1.36 
  -7   0   3   17.66    1.76 
  -7   0   3   19.68    1.75 
  -6   0   3    0.21    0.24 
   6   0  -3   -0.30    0.25 
   6   0  -3    0.34    0.31 
  -6   0   3    0.13    0.27 
  -6   0   3   -0.09    0.16 
  -6   0   3    0.34    0.39 
  -6   0   3   -0.11    0.27 
  -6   0   3    0.29    0.42 
   6   0  -3    0.57    0.31 
  -6   0   3    0.85    0.56 
   6   0  -3   -0.17    0.18 
  -6   0   3    0.23    0.24 
   6   0  -3    0.17    0.33 
  -5   0   3    1.88    0.57 
  -5   0   3    2.65    0.71 
   5   0  -3    3.22    0.62 
  -5   0   3    2.12    0.38 
   5   0  -3    2.43    0.51 
  -5   0   3    2.55    0.37 
   5   0  -3    1.97    0.45 
   5   0  -3    2.74    0.46 
  -5   0   3    2.62    0.51 
  -5   0   3    2.08    0.43 
   5   0  -3    2.79    0.40 
  -5   0   3    2.18    0.42 
   5   0  -3    2.70    0.56 
   4   0  -3    0.05    0.23 
  -4   0   3    0.42    0.23 
   4   0  -3    0.70    0.32 
   4   0  -3    0.55    0.28 
  -4   0   3    0.37    0.21 
   4   0  -3    0.48    0.13 
   4   0  -3    0.12    0.20 
  -4   0   3    1.08    0.46 
  -4   0   3    0.43    0.24 
   4   0  -3    0.42    0.22 
  -4   0   3    0.39    0.21 
  -4   0   3    0.43    0.17 
   4   0  -3    0.56    0.23 
   4   0  -3    0.60    0.14 
  -4   0   3    0.89    0.29 
   4   0  -3    0.14    0.13 
  -4   0   3    0.18    0.22 
  -4   0   3    0.34    0.37 
   3   0  -3  181.10    5.28 
  -3   0   3  188.54    5.51 
  -3   0   3  197.22    5.48 
   3   0  -3  193.42    5.04 
  -3   0   3  187.32    4.99 
   3   0  -3  185.66    4.92 
  -3   0   3  183.83    5.41 
   3   0  -3  191.84    5.18 
  -3   0   3  191.25    5.16 
   3   0  -3  189.33    4.90 
  -3   0   3  197.99    5.36 
   3   0  -3  193.33    5.13 
   3   0  -3  196.31    5.36 
  -3   0   3  197.60    5.21 
  -3   0   3  194.77    5.19 
   3   0  -3  186.49    5.41 
  -3   0   3  191.02    5.12 
   3   0  -3  192.85    5.14 
   3   0  -3  195.64    5.24 
  -3   0   3  194.62    4.91 
   3   0  -3  191.66    5.31 
   3   0  -3  193.18    5.32 
  -3   0   3  191.85    5.10 
  -3   0   3  188.66    5.30 
  -2   0   3    0.41    0.16 
  -2   0   3    0.11    0.13 
  -2   0   3    0.50    0.19 
  -2   0   3    0.47    0.18 
  -2   0   3    0.08    0.11 
  -2   0   3    0.21    0.10 
   2   0  -3    0.62    0.19 
   2   0  -3    0.11    0.07 
   2   0  -3    0.35    0.16 
  -2   0   3    0.15    0.11 
   2   0  -3    0.21    0.14 
  -2   0   3    0.58    0.18 
  -2   0   3    0.06    0.12 
  -2   0   3    0.21    0.12 
   2   0  -3    0.35    0.16 
  -2   0   3    0.22    0.12 
   2   0  -3    0.18    0.11 
   2   0  -3    0.68    0.21 
  -2   0   3    0.20    0.14 
  -2   0   3    0.53    0.26 
   2   0  -3    0.56    0.18 
   2   0  -3   -0.04    0.11 
   2   0  -3    0.36    0.14 
   2   0  -3    0.44    0.15 
   2   0  -3    0.41    0.21 
   2   0  -3    0.53    0.16 
  -1   0   3  234.32    6.10 
   1   0  -3  228.98    6.03 
   1   0  -3  234.92    5.95 
   1   0  -3  226.20    6.07 
  -1   0   3  252.93    6.11 
  -1   0   3  254.28    6.04 
  -1   0   3  242.95    6.07 
   1   0  -3  249.84    6.08 
   1   0  -3  239.59    6.05 
   1   0  -3  237.82    6.13 
  -1   0   3  250.51    6.09 
  -1   0   3  246.49    6.07 
  -1   0   3  238.17    6.02 
   1   0  -3  226.05    6.00 
  -1   0   3  242.86    5.93 
   1   0  -3  239.66    6.10 
  -1   0   3  247.46    6.22 
   1   0  -3  228.16    6.05 
   1   0  -3  207.77    6.03 
  -1   0   3  246.72    6.14 
   0   0   3    0.06    0.09 
   0   0  -3    0.60    0.16 
   0   0  -3    0.09    0.11 
   0   0  -3    0.74    0.18 
   0   0   3    0.11    0.11 
   0   0   3    0.19    0.12 
   0   0   3    0.16    0.14 
   0   0  -3    0.27    0.14 
   0   0   3    0.34    0.14 
   0   0  -3    0.46    0.25 
   0   0   3    0.15    0.12 
   0   0   3   -0.10    0.11 
   0   0   3    0.30    0.14 
   0   0  -3    1.45    0.24 
   0   0  -3    0.16    0.10 
   0   0  -3    0.06    0.10 
   0   0  -3    0.24    0.14 
   0   0  -3    0.21    0.15 
   1   0   3   89.01    2.67 
  -1   0  -3   93.25    2.47 
  -1   0  -3   94.46    2.69 
   1   0   3   88.99    2.56 
   1   0   3   96.67    2.63 
  -1   0  -3   86.61    2.57 
  -1   0  -3   88.58    2.54 
  -1   0  -3   93.15    2.47 
   1   0   3   88.51    2.45 
  -1   0  -3   88.30    2.59 
   1   0   3   87.07    2.63 
   1   0   3   92.16    2.44 
  -1   0  -3   93.44    2.67 
  -1   0  -3   87.47    2.55 
   1   0   3   89.06    2.54 
  -1   0  -3   84.75    2.73 
   1   0   3   85.94    2.56 
  -1   0  -3   86.90    2.55 
   1   0   3   91.20    2.43 
   1   0   3   92.59    2.58 
   1   0   3   95.86    2.69 
  -1   0  -3   91.96    2.67 
  -2   0  -3    0.41    0.17 
  -2   0  -3    0.11    0.14 
  -2   0  -3    0.34    0.17 
   2   0   3    0.28    0.19 
  -2   0  -3    0.06    0.14 
  -2   0  -3    0.23    0.17 
   2   0   3    0.19    0.16 
   2   0   3    0.11    0.06 
  -2   0  -3    0.14    0.18 
  -2   0  -3    0.17    0.11 
  -2   0  -3   -0.06    0.12 
   2   0   3    0.24    0.17 
   2   0   3    0.59    0.16 
   2   0   3    0.33    0.19 
   2   0   3    0.17    0.15 
  -3   0  -3  373.28    9.61 
  -3   0  -3  394.48    9.40 
   3   0   3  381.84    9.93 
  -3   0  -3  384.15   10.27 
   3   0   3  379.91    9.64 
  -3   0  -3  387.32    9.79 
   3   0   3  390.14   10.03 
   3   0   3  385.09    9.83 
   3   0   3  383.29   10.01 
   3   0   3  377.01    9.80 
  -3   0  -3  379.73    9.89 
  -3   0  -3  371.42    9.76 
  -4   0  -3    0.48    0.27 
  -4   0  -3    0.27    0.21 
   4   0   3    0.05    0.19 
   4   0   3    0.22    0.25 
  -4   0  -3    0.40    0.26 
   4   0   3    1.28    0.33 
  -4   0  -3    0.26    0.12 
  -4   0  -3    0.78    0.20 
   4   0   3    0.23    0.23 
  -4   0  -3    0.13    0.27 
  -4   0  -3    0.43    0.22 
  -4   0  -3    0.42    0.16 
   4   0   3    0.27    0.23 
   4   0   3    0.09    0.25 
  -5   0  -3  322.12    9.51 
  -5   0  -3  326.57    9.14 
  -5   0  -3  337.59    8.39 
  -5   0  -3  336.57    8.91 
  -5   0  -3  334.61    8.22 
  -5   0  -3  336.83    8.98 
   5   0   3  332.13    9.00 
   5   0   3  318.08    9.25 
   5   0   3  317.71    9.15 
   5   0   3  325.26    9.25 
  -5   0  -3  324.31    8.76 
   5   0   3  336.81    8.92 
  -5   0  -3  342.94    9.84 
   6   0   3    0.29    0.35 
  -6   0  -3    0.31    0.47 
  -6   0  -3    0.65    0.47 
   6   0   3    0.19    0.32 
  -6   0  -3    0.25    0.31 
  -6   0  -3    0.56    0.33 
  -6   0  -3    1.47    0.27 
   6   0   3    0.36    0.34 
   6   0   3    0.21    0.28 
  -6   0  -3    0.41    0.32 
  -6   0  -3    1.30    0.32 
  -6   0  -3    0.33    0.29 
   7   0   3  324.12    9.36 
   7   0   3  314.73    9.29 
  -7   0  -3  320.89    9.13 
  -7   0  -3  332.39   10.26 
  -7   0  -3  320.31    9.57 
  -7   0  -3  328.84    9.30 
   7   0   3  316.41    9.79 
   7   0   3  329.20    9.73 
  -7   0  -3  347.56   10.62 
  -8   0  -3    0.83    0.46 
  -8   0  -3   -0.04    0.51 
   8   0   3   -0.02    0.36 
   8   0   3    0.58    0.39 
   8   0   3    0.99    0.58 
  -8   0  -3    1.26    0.76 
  -8   0  -3   -0.33    0.28 
  -8   0  -3    0.08    0.28 
   8   0   3   -0.02    0.29 
  -9   0  -3  122.94    5.87 
   9   0   3  111.06    5.09 
   9   0   3  110.95    4.65 
  -9   0  -3  116.81    4.59 
   9   0   3  116.69    4.99 
   9   0   3  120.46    4.75 
  -9   0  -3  118.96    5.59 
  -9   0  -3  126.03    5.07 
 -10   0  -3   -0.49    0.41 
 -10   0  -3   -0.07    0.51 
  10   0   3    0.63    0.60 
 -10   0  -3   -0.71    0.52 
  10   0   3    0.89    0.63 
 -10  -1   3  111.66    4.63 
 -10  -1   3  102.69    5.26 
 -10  -1   3  100.91    5.43 
  10  -1  -3  103.78    4.65 
 -10  -1   3  113.46    5.89 
  10  -1  -3  101.51    4.85 
 -10   1   3  109.06    4.63 
 -10   1   3  108.70    5.83 
  10   1  -3  104.42    4.40 
  10   1  -3  105.70    4.96 
 -10   1   3  110.91    5.57 
  10   1  -3  107.42    4.88 
 -10   1   3   99.74    4.62 
  -9  -1   3   13.51    2.00 
   9  -1  -3    8.82    1.32 
  -9  -1   3    8.74    1.61 
  -9  -1   3   10.12    1.37 
   9  -1  -3   13.43    1.64 
   9  -1  -3   11.60    1.61 
  -9  -1   3   10.33    1.84 
  -9  -1   3   10.20    1.86 
   9  -1  -3   10.45    1.55 
   9   1  -3   12.63    1.48 
  -9   1   3   15.76    2.45 
  -9   1   3   12.23    2.03 
  -9   1   3    9.49    1.35 
  -9   1   3    8.62    1.70 
   9   1  -3    9.41    1.52 
  -9   1   3   10.84    1.50 
   9   1  -3   12.69    1.69 
  -8  -1   3  305.94    8.66 
  -8  -1   3  312.43    9.65 
  -8  -1   3  295.03   10.06 
  -8  -1   3  303.02   10.31 
  -8  -1   3  294.63    8.88 
  -8  -1   3  301.71    9.67 
  -8  -1   3  297.88    8.66 
   8  -1  -3  305.34    9.03 
   8  -1  -3  303.74    9.45 
   8  -1  -3  306.19    9.41 
   8  -1  -3  292.46    9.08 
   8  -1  -3  292.59    9.35 
  -8   1   3  300.29   10.29 
   8   1  -3  301.18    9.32 
   8   1  -3  301.47    8.84 
   8   1  -3  297.48    9.37 
  -8   1   3  309.48    9.10 
  -8   1   3  307.99    9.20 
  -8   1   3  308.82    9.84 
  -8   1   3  292.98    9.83 
  -8   1   3  310.27    8.63 
  -8   1   3  313.12    8.53 
  -7  -1   3   36.65    2.49 
  -7  -1   3   34.83    1.80 
   7  -1  -3   37.08    2.05 
   7  -1  -3   34.93    1.97 
  -7  -1   3   33.59    2.47 
  -7  -1   3   36.54    1.45 
   7  -1  -3   36.00    2.17 
  -7  -1   3   37.17    1.83 
   7  -1  -3   34.68    2.13 
  -7  -1   3   35.93    1.91 
  -7  -1   3   37.08    2.34 
   7  -1  -3   35.19    2.13 
  -7  -1   3   34.16    2.25 
  -7  -1   3   36.96    1.60 
   7   1  -3   37.12    1.91 
   7   1  -3   32.59    2.03 
  -7   1   3   35.25    1.77 
  -7   1   3   38.23    2.10 
  -7   1   3   36.58    2.44 
  -7   1   3   36.12    1.75 
  -7   1   3   36.23    2.02 
   7   1  -3   36.87    1.76 
  -7   1   3   36.31    2.55 
   7   1  -3   39.13    2.23 
  -7   1   3   36.57    2.43 
  -7   1   3   40.70    1.78 
   6  -1  -3  307.97    8.77 
  -6  -1   3  292.67    8.26 
   6  -1  -3  306.03    8.80 
   6  -1  -3  296.69    8.76 
   6  -1  -3  306.47    8.61 
  -6  -1   3  303.09    7.96 
   6  -1  -3  303.66    8.53 
   6  -1  -3  310.79    7.42 
  -6  -1   3  301.73    7.71 
  -6  -1   3  297.71    8.33 
  -6  -1   3  302.10    8.91 
  -6  -1   3  299.09    8.22 
  -6  -1   3  301.30    8.93 
  -6   1   3  298.52    8.16 
  -6   1   3  295.98    9.11 
  -6   1   3  296.19    8.15 
   6   1  -3  301.85    8.08 
  -6   1   3  302.12    8.23 
   6   1  -3  305.21    8.34 
   6   1  -3  307.86    8.80 
  -6   1   3  310.36    8.60 
   6   1  -3  295.71    8.69 
  -6   1   3  306.39    9.10 
  -6   1   3  300.63    9.43 
  -6   1   3  301.10    8.61 
  -5  -1   3   31.97    1.26 
  -5  -1   3   29.03    1.41 
   5  -1  -3   30.00    1.15 
   5  -1  -3   29.16    1.52 
  -5  -1   3   30.70    1.74 
  -5  -1   3   29.05    1.37 
  -5  -1   3   30.78    1.09 
   5  -1  -3   28.67    1.60 
   5  -1  -3   28.64    1.20 
   5  -1  -3   32.01    1.67 
  -5  -1   3   30.50    1.28 
  -5  -1   3   28.53    1.43 
   5  -1  -3   31.61    1.61 
   5  -1  -3   30.63    1.68 
  -5  -1   3   29.21    1.75 
   5  -1  -3   30.17    1.76 
   5   1  -3   26.59    1.58 
   5   1  -3   27.32    1.57 
  -5   1   3   30.53    1.58 
   5   1  -3   32.16    1.30 
  -5   1   3   29.50    1.83 
  -5   1   3   29.72    1.42 
  -5   1   3   33.29    1.47 
  -5   1   3   27.89    1.86 
  -5   1   3   31.31    1.60 
  -5   1   3   30.36    1.39 
  -5   1   3   29.90    1.88 
   5   1  -3   29.65    1.43 
   4  -1  -3  466.30   11.61 
  -4  -1   3  459.69   12.57 
   4  -1  -3  469.93   12.05 
   4  -1  -3  482.10   12.22 
  -4  -1   3  479.69   11.77 
   4  -1  -3  466.01   11.76 
   4  -1  -3  452.52   11.70 
  -4  -1   3  470.87   11.61 
  -4  -1   3  461.42   11.46 
   4  -1  -3  477.92   12.12 
   4  -1  -3  455.70   12.06 
  -4  -1   3  461.31   11.89 
   4  -1  -3  446.94   12.29 
   4  -1  -3  459.50   11.99 
  -4  -1   3  463.55   11.75 
  -4  -1   3  463.74   12.16 
  -4  -1   3  468.90   11.30 
   4  -1  -3  473.30   11.73 
   4   1  -3  474.05   12.18 
  -4   1   3  468.12   12.44 
  -4   1   3  472.18   12.06 
  -4   1   3  436.53   11.81 
   4   1  -3  470.59   12.16 
   4   1  -3  477.54   11.83 
  -4   1   3  470.20   11.84 
   4   1  -3  460.47   11.30 
   4   1  -3  465.42   11.73 
  -4   1   3  464.36   11.77 
  -4   1   3  478.04   12.50 
   4   1  -3  464.80   11.50 
  -4   1   3  470.47   12.62 
  -4   1   3  481.97   12.09 
   4   1  -3  470.11   11.72 
  -3  -1   3   43.42    1.58 
   3  -1  -3   42.37    1.54 
   3  -1  -3   39.09    1.62 
   3  -1  -3   44.54    1.76 
  -3  -1   3   41.56    1.53 
   3  -1  -3   43.13    1.57 
  -3  -1   3   42.53    1.95 
   3  -1  -3   44.55    1.67 
  -3  -1   3   42.79    1.52 
   3  -1  -3   42.02    1.68 
   3  -1  -3   43.25    1.52 
   3  -1  -3   44.15    1.68 
  -3  -1   3   41.62    1.44 
  -3  -1   3   40.85    1.50 
   3  -1  -3   42.26    1.68 
   3  -1  -3   41.90    1.55 
   3  -1  -3   48.40    1.74 
  -3  -1   3   43.08    1.15 
   3  -1  -3   43.01    1.84 
   3  -1  -3   44.20    1.69 
  -3  -1   3   45.75    1.73 
   3  -1  -3   44.44    1.53 
  -3  -1   3   43.61    1.43 
  -3  -1   3   42.69    1.62 
  -3  -1   3   43.14    1.43 
  -3  -1   3   43.95    1.52 
   3  -1  -3   42.67    1.57 
  -3   1   3   45.70    1.74 
  -3   1   3   42.25    1.69 
   3   1  -3   42.98    1.50 
  -3   1   3   42.02    1.53 
   3   1  -3   43.28    1.19 
  -3   1   3   42.54    1.60 
   3   1  -3   43.10    1.73 
   3   1  -3   42.68    1.73 
  -3   1   3   43.12    1.93 
  -3   1   3   43.44    1.64 
   3   1  -3   42.88    1.54 
   3   1  -3   40.44    1.64 
  -3   1   3   43.87    1.70 
   3   1  -3   41.07    1.43 
   3   1  -3   41.88    1.26 
  -3   1   3   40.98    1.62 
   3   1  -3   42.97    1.14 
  -3   1   3   44.04    1.51 
  -2  -1   3  242.36    6.75 
   2  -1  -3  235.62    6.38 
  -2  -1   3  244.35    6.45 
   2  -1  -3  258.16    6.38 
   2  -1  -3  249.85    6.31 
   2  -1  -3  233.45    6.62 
   2  -1  -3  244.60    6.39 
  -2  -1   3  233.24    6.04 
  -2  -1   3  247.80    6.18 
   2  -1  -3  253.23    6.44 
   2  -1  -3  239.15    6.59 
   2  -1  -3  236.24    6.39 
   2  -1  -3  244.33    6.40 
  -2  -1   3  248.01    6.25 
   2  -1  -3  244.28    6.42 
   2  -1  -3  253.04    6.44 
   2  -1  -3  231.30    6.56 
   2  -1  -3  250.48    6.31 
  -2  -1   3  241.65    6.36 
  -2  -1   3  238.43    6.28 
  -2  -1   3  244.35    6.23 
   2  -1  -3  245.94    6.29 
   2  -1  -3  252.63    6.36 
  -2  -1   3  243.99    6.10 
  -2  -1   3  250.09    6.48 
   2   1  -3  249.17    6.49 
  -2   1   3  249.72    6.29 
   2   1  -3  231.46    6.44 
  -2   1   3  244.75    6.56 
  -2   1   3  253.36    6.71 
   2   1  -3  242.65    6.28 
   2   1  -3  241.18    6.22 
  -2   1   3  250.00    6.30 
  -2   1   3  250.76    6.28 
  -2   1   3  247.84    6.40 
   2   1  -3  238.91    6.07 
   2   1  -3  243.18    6.72 
   2   1  -3  229.38    6.02 
  -2   1   3  249.20    6.36 
  -2   1   3  245.63    6.42 
   2   1  -3  239.49    6.09 
   2   1  -3  247.51    6.26 
  -2   1   3  232.63    6.33 
   2   1  -3  248.66    6.36 
  -2   1   3  238.08    6.39 
  -2   1   3  249.35    6.64 
  -2   1   3  253.65    6.41 
  -2   1   3  241.63    6.35 
  -2   1   3  244.17    6.43 
  -2   1   3  244.61    6.30 
  -1  -1   3    2.89    0.25 
  -1  -1   3    2.32    0.31 
   1  -1  -3    2.09    0.33 
   1  -1  -3    2.14    0.30 
   1  -1  -3    2.77    0.37 
   1  -1  -3    2.84    0.23 
   1  -1  -3    2.82    0.34 
   1  -1  -3    2.90    0.37 
   1  -1  -3    3.65    0.32 
   1  -1  -3    3.90    0.34 
  -1  -1   3    2.64    0.30 
   1  -1  -3    2.66    0.39 
  -1  -1   3    2.99    0.18 
   1  -1  -3    2.78    0.47 
  -1  -1   3    2.93    0.48 
  -1  -1   3    3.36    0.35 
  -1  -1   3    3.11    0.48 
   1  -1  -3    2.16    0.35 
  -1  -1   3    3.18    0.43 
   1  -1  -3    2.93    0.33 
  -1  -1   3    2.34    0.19 
  -1  -1   3    3.06    0.36 
   1   1  -3    2.53    0.30 
  -1   1   3    3.25    0.36 
   1   1  -3    2.63    0.33 
  -1   1   3    3.10    0.35 
  -1   1   3    3.10    0.35 
  -1   1   3    4.05    0.34 
  -1   1   3    2.96    0.24 
   1   1  -3    2.56    0.17 
   1   1  -3    2.35    0.30 
   1   1  -3    2.91    0.19 
  -1   1   3    2.83    0.38 
   1   1  -3    2.78    0.40 
  -1   1   3    2.71    0.36 
  -1   1   3    2.61    0.32 
  -1   1   3    2.92    0.35 
  -1   1   3    1.98    0.32 
  -1   1   3    2.63    0.22 
   1   1  -3    2.44    0.17 
  -1   1   3    3.12    0.42 
   1   1  -3    2.31    0.41 
   1   1  -3    2.47    0.28 
   1   1  -3    2.23    0.25 
  -1   1   3    2.86    0.31 
  -1   1   3    2.41    0.38 
   0  -1  -3  377.87    9.95 
   0  -1   3  396.42    9.56 
   0  -1  -3  398.73    9.38 
   0  -1  -3  377.73    9.67 
   0  -1   3  354.70   10.07 
   0  -1   3  386.83    9.40 
   0  -1   3  399.82    9.61 
   0  -1   3  397.34    9.52 
   0  -1  -3  376.66    9.39 
   0  -1  -3  405.36    9.71 
   0  -1  -3  390.99    9.61 
   0  -1  -3  386.53    9.76 
   0  -1  -3  372.87    9.81 
   0  -1   3  402.85    9.58 
   0  -1   3  383.91    9.62 
   0  -1   3  400.10    9.53 
   0  -1  -3  387.57    9.64 
   0  -1  -3  393.27    9.57 
   0   1   3  374.08    9.67 
   0   1  -3  395.95    9.54 
   0   1  -3  407.29    9.60 
   0   1   3  386.37    9.63 
   0   1   3  399.70    9.64 
   0   1   3  394.17    9.38 
   0   1   3  387.25    9.69 
   0   1  -3  409.81    9.54 
   0   1   3  394.18    9.56 
   0   1   3  370.96    9.94 
   0   1  -3  370.56    9.52 
   0   1  -3  360.41   10.01 
   0   1  -3  408.80    9.58 
   0   1   3  386.65    9.68 
   0   1  -3  374.73    9.43 
   0   1  -3  394.55    9.64 
   0   1   3  398.22    9.89 
   1  -1   3    2.24    0.29 
   1  -1   3    1.73    0.32 
  -1  -1  -3    1.89    0.30 
   1  -1   3    2.13    0.30 
  -1  -1  -3    1.98    0.25 
   1  -1   3    1.84    0.36 
   1  -1   3    2.60    0.22 
  -1  -1  -3    1.94    0.35 
   1  -1   3    2.59    0.43 
   1  -1   3    1.94    0.40 
  -1  -1  -3    2.45    0.29 
  -1  -1  -3    2.33    0.29 
  -1  -1  -3    2.16    0.39 
   1  -1   3    2.29    0.28 
   1  -1   3    1.90    0.45 
  -1  -1  -3    3.15    0.40 
  -1  -1  -3    3.36    0.44 
  -1  -1  -3    2.34    0.21 
  -1  -1  -3    2.43    0.25 
   1  -1   3    2.12    0.32 
   1   1   3    3.98    0.49 
   1   1   3    2.11    0.26 
  -1   1  -3    1.53    0.25 
  -1   1  -3    3.15    0.28 
  -1   1  -3    1.79    0.25 
  -1   1  -3    1.96    0.41 
   1   1   3    1.86    0.30 
  -1   1  -3    3.01    0.38 
  -1   1  -3    1.26    0.38 
  -1   1  -3    1.88    0.33 
  -1   1  -3    2.10    0.21 
  -1   1  -3    2.87    0.45 
   1   1   3    2.08    0.18 
  -1   1  -3    2.13    0.27 
   1   1   3    2.35    0.34 
  -1   1  -3    2.23    0.31 
   1   1   3    1.58    0.33 
   1   1   3    2.87    0.38 
  -1   1  -3    1.98    0.38 
   1   1   3    2.14    0.22 
  -2  -1  -3  115.42    3.39 
   2  -1   3  117.13    3.00 
  -2  -1  -3  118.31    3.53 
   2  -1   3  123.39    3.49 
   2  -1   3  118.96    3.59 
   2  -1   3  121.39    3.29 
  -2  -1  -3  117.64    3.60 
   2  -1   3  126.68    3.54 
   2  -1   3  122.88    3.34 
  -2  -1  -3  122.60    3.53 
  -2  -1  -3  116.64    3.40 
  -2  -1  -3  122.18    3.53 
   2  -1   3  123.66    3.65 
   2  -1   3  123.26    3.68 
  -2  -1  -3  114.07    3.33 
  -2  -1  -3  119.19    3.63 
  -2  -1  -3  115.90    3.33 
   2  -1   3  121.09    3.49 
  -2  -1  -3  122.65    3.07 
   2  -1   3  116.48    3.50 
  -2  -1  -3  127.95    3.33 
  -2  -1  -3  121.33    3.03 
   2  -1   3  121.94    3.52 
  -2   1  -3  121.02    3.75 
  -2   1  -3  116.68    3.94 
   2   1   3  116.26    3.39 
  -2   1  -3  122.94    3.53 
   2   1   3  125.41    3.68 
  -2   1  -3  113.21    3.55 
  -2   1  -3  123.62    3.49 
  -2   1  -3  123.50    3.50 
   2   1   3  118.90    3.41 
  -2   1  -3  122.70    2.96 
   2   1   3  118.17    3.08 
   2   1   3  124.76    3.61 
  -2   1  -3  119.34    3.46 
  -2   1  -3  115.24    3.62 
   2   1   3  120.93    3.29 
  -2   1  -3  126.41    3.35 
  -2   1  -3  120.09    3.46 
  -3  -1  -3   53.89    1.89 
   3  -1   3   53.76    2.16 
  -3  -1  -3   51.37    2.11 
   3  -1   3   55.80    2.02 
   3  -1   3   56.48    2.07 
   3  -1   3   54.10    1.71 
  -3  -1  -3   51.74    1.67 
   3  -1   3   54.91    2.03 
   3  -1   3   43.86    2.00 
  -3  -1  -3   57.44    1.96 
   3  -1   3   53.83    2.00 
   3  -1   3   54.02    1.69 
  -3  -1  -3   53.27    1.95 
  -3  -1  -3   55.51    1.41 
   3   1   3   54.51    2.07 
  -3   1  -3   54.33    2.02 
   3   1   3   52.26    2.11 
  -3   1  -3   52.19    1.95 
  -3   1  -3   55.96    2.01 
   3   1   3   53.35    1.71 
  -3   1  -3   54.04    2.11 
  -3   1  -3   55.45    1.81 
  -3   1  -3   57.45    2.10 
  -3   1  -3   55.96    2.45 
   3   1   3   53.47    2.01 
  -3   1  -3   58.62    2.32 
   4  -1   3   10.59    0.50 
  -4  -1  -3   10.51    0.40 
  -4  -1  -3    8.94    0.89 
   4  -1   3   10.54    0.83 
  -4  -1  -3   11.50    0.43 
  -4  -1  -3    9.15    0.63 
   4  -1   3   10.41    0.84 
  -4  -1  -3    9.22    0.73 
  -4  -1  -3   10.27    0.75 
   4  -1   3   10.73    0.50 
   4  -1   3   11.56    0.95 
   4  -1   3    9.08    0.85 
  -4  -1  -3   10.29    0.75 
   4   1   3    9.01    0.80 
  -4   1  -3    9.28    0.77 
  -4   1  -3   11.25    1.11 
  -4   1  -3   10.27    0.85 
   4   1   3   10.49    0.89 
  -4   1  -3   10.08    0.81 
  -4   1  -3   10.83    1.03 
   4   1   3    9.19    0.71 
   4   1   3    9.79    0.84 
  -4   1  -3    7.55    0.85 
   4   1   3   10.01    0.68 
  -4   1  -3   10.00    0.68 
  -5  -1  -3    0.40    0.37 
   5  -1   3    0.28    0.28 
   5  -1   3    0.02    0.23 
   5  -1   3    0.29    0.31 
  -5  -1  -3   -0.12    0.20 
  -5  -1  -3    0.52    0.27 
  -5  -1  -3    0.08    0.22 
  -5  -1  -3    0.29    0.12 
  -5  -1  -3    0.36    0.13 
   5  -1   3    0.43    0.33 
  -5  -1  -3    0.03    0.19 
  -5  -1  -3    0.42    0.23 
  -5   1  -3    0.14    0.19 
  -5   1  -3    0.34    0.30 
   5   1   3   -0.01    0.25 
   5   1   3    0.62    0.33 
  -5   1  -3    0.31    0.27 
   5   1   3    0.24    0.21 
  -5   1  -3    0.32    0.35 
  -5   1  -3   -0.04    0.23 
  -5   1  -3    0.47    0.45 
  -5   1  -3    0.26    0.28 
  -5   1  -3    0.44    0.42 
   5   1   3    0.67    0.33 
   5   1   3    0.14    0.19 
  -6  -1  -3   31.08    1.57 
  -6  -1  -3   29.80    1.77 
  -6  -1  -3   27.92    2.02 
   6  -1   3   29.26    1.73 
  -6  -1  -3   30.57    1.65 
   6  -1   3   30.40    1.93 
  -6  -1  -3   29.99    1.34 
  -6  -1  -3   30.59    1.12 
   6  -1   3   31.08    1.91 
  -6  -1  -3   32.99    1.32 
  -6  -1  -3   30.29    2.08 
  -6  -1  -3   31.04    1.57 
   6  -1   3   29.47    1.74 
  -6   1  -3   28.96    1.79 
  -6   1  -3   29.89    1.62 
  -6   1  -3   33.35    1.83 
  -6   1  -3   32.95    2.30 
   6   1   3   31.83    1.64 
  -6   1  -3   32.21    1.49 
  -6   1  -3   34.14    1.76 
   6   1   3   30.65    1.83 
  -6   1  -3   33.89    1.97 
   6   1   3   33.43    1.94 
  -6   1  -3   28.88    2.08 
   6   1   3   31.66    1.65 
   6   1   3   32.02    1.86 
  -7  -1  -3    0.31    0.31 
  -7  -1  -3    0.55    0.56 
  -7  -1  -3    0.16    0.23 
  -7  -1  -3    0.74    0.41 
  -7  -1  -3   -0.03    0.45 
  -7  -1  -3   -0.03    0.29 
   7  -1   3    0.58    0.35 
  -7  -1  -3    0.32    0.44 
   7  -1   3    0.24    0.40 
   7  -1   3    0.29    0.40 
   7  -1   3   -0.19    0.36 
  -7   1  -3    0.29    0.45 
   7   1   3   -0.20    0.24 
  -7   1  -3    0.86    0.42 
  -7   1  -3    0.71    0.53 
   7   1   3    0.40    0.39 
  -7   1  -3    0.25    0.35 
  -7   1  -3    0.09    0.39 
  -7   1  -3   -0.16    0.27 
  -7   1  -3    0.51    0.32 
   7   1   3    0.35    0.30 
   7   1   3    0.27    0.41 
   8  -1   3    1.81    0.66 
  -8  -1  -3    1.51    0.77 
  -8  -1  -3    3.01    0.69 
  -8  -1  -3    2.18    0.93 
   8  -1   3    2.23    0.79 
  -8  -1  -3    2.39    0.68 
  -8  -1  -3    2.20    0.68 
  -8  -1  -3    1.82    0.59 
   8  -1   3    2.12    0.75 
   8  -1   3    2.08    0.69 
   8   1   3    1.96    0.74 
  -8   1  -3    2.73    0.71 
   8   1   3    2.29    0.66 
  -8   1  -3    1.74    0.86 
  -8   1  -3    2.29    0.69 
  -8   1  -3    2.86    0.80 
   8   1   3    1.95    0.70 
  -8   1  -3    1.12    0.75 
   8   1   3    2.34    0.65 
   9  -1   3    0.27    0.51 
  -9  -1  -3    0.22    0.46 
  -9  -1  -3    0.54    0.50 
   9  -1   3    0.44    0.48 
  -9  -1  -3    0.34    0.63 
  -9  -1  -3    0.11    0.55 
   9  -1   3    0.43    0.52 
   9  -1   3    0.34    0.51 
   9   1   3    0.18    0.46 
  -9   1  -3    0.17    0.41 
  -9   1  -3    1.30    0.67 
   9   1   3   -0.11    0.45 
  -9   1  -3    0.86    0.74 
   9   1   3    0.38    0.46 
  -9   1  -3    0.41    0.48 
  -9   1  -3   -0.08    0.62 
  10  -2  -3    7.33    1.47 
 -10  -2   3   12.32    2.10 
  10  -2  -3    7.69    1.52 
  10  -2  -3    9.48    1.59 
 -10  -2   3    8.29    1.88 
 -10  -2   3   11.10    1.57 
 -10  -2   3    7.79    1.76 
 -10   2   3   11.04    1.71 
 -10   2   3    9.45    1.60 
 -10   2   3   10.36    2.11 
 -10   2   3    8.29    1.90 
  10   2  -3    8.67    1.60 
  10   2  -3    8.29    1.49 
 -10   2   3    9.87    1.97 
  -9  -2   3    4.02    1.23 
  -9  -2   3    5.17    1.40 
   9  -2  -3    6.15    1.17 
  -9  -2   3    4.77    1.29 
  -9  -2   3    5.04    1.00 
   9  -2  -3    3.16    0.93 
  -9  -2   3    3.54    1.18 
   9  -2  -3    6.07    1.14 
   9  -2  -3    4.53    1.10 
   9   2  -3    3.90    1.00 
  -9   2   3    4.47    1.28 
  -9   2   3    4.86    1.40 
   9   2  -3    3.05    0.88 
  -9   2   3    5.03    1.45 
  -9   2   3    3.99    1.04 
  -9   2   3    4.46    0.88 
   9   2  -3    4.56    0.91 
  -9   2   3    3.61    0.98 
   8  -2  -3   -0.25    0.33 
  -8  -2   3    0.06    0.52 
   8  -2  -3    0.53    0.45 
  -8  -2   3    0.37    0.37 
  -8  -2   3   -0.12    0.48 
   8  -2  -3    0.74    0.53 
  -8  -2   3   -0.12    0.49 
  -8  -2   3    0.43    0.40 
   8  -2  -3    0.27    0.48 
  -8   2   3   -0.07    0.40 
  -8   2   3    0.56    0.43 
  -8   2   3    0.19    0.33 
  -8   2   3    0.55    0.45 
   8   2  -3    0.96    0.56 
   8   2  -3    0.25    0.38 
   8   2  -3   -0.03    0.31 
  -8   2   3    0.16    0.51 
  -8   2   3    0.95    0.79 
  -8   2   3    0.04    0.66 
   7  -2  -3    1.62    0.58 
  -7  -2   3    1.32    0.65 
   7  -2  -3    1.76    0.60 
  -7  -2   3    0.94    0.37 
   7  -2  -3    1.37    0.57 
  -7  -2   3    1.72    0.72 
   7  -2  -3    2.07    0.65 
  -7  -2   3    1.82    0.51 
   7  -2  -3    0.78    0.25 
  -7  -2   3    3.38    0.96 
  -7  -2   3    1.30    0.48 
  -7   2   3    0.92    0.47 
   7   2  -3    1.81    0.47 
  -7   2   3    3.39    0.65 
  -7   2   3    1.24    0.69 
  -7   2   3    2.52    0.59 
   7   2  -3    1.83    0.59 
  -7   2   3    1.65    0.82 
  -7   2   3    0.65    0.32 
   7   2  -3    1.76    0.43 
  -7   2   3    1.14    0.51 
   7   2  -3    1.17    0.53 
  -7   2   3    2.01    0.90 
   6  -2  -3    0.53    0.27 
   6  -2  -3    0.31    0.23 
   6  -2  -3    0.61    0.40 
  -6  -2   3    0.75    0.59 
  -6  -2   3    0.32    0.22 
   6  -2  -3    0.22    0.30 
   6  -2  -3   -0.02    0.30 
  -6  -2   3    0.02    0.29 
  -6  -2   3    0.32    0.13 
  -6  -2   3    0.19    0.43 
  -6  -2   3    0.64    0.45 
   6  -2  -3    0.48    0.37 
   6  -2  -3    0.21    0.30 
  -6  -2   3   -0.15    0.23 
  -6  -2   3    0.44    0.23 
  -6  -2   3    0.10    0.22 
  -6   2   3    0.36    0.25 
  -6   2   3    0.55    0.36 
   6   2  -3    0.18    0.30 
   6   2  -3    0.72    0.30 
  -6   2   3    0.61    0.34 
   6   2  -3    0.53    0.24 
  -6   2   3    1.63    0.75 
  -6   2   3    0.32    0.46 
   6   2  -3   -0.05    0.26 
  -6   2   3    0.20    0.28 
  -6   2   3    0.65    0.51 
  -6   2   3   -0.17    0.24 
   5  -2  -3    0.11    0.23 
  -5  -2   3    0.34    0.22 
  -5  -2   3    0.38    0.19 
   5  -2  -3    0.34    0.31 
  -5  -2   3    0.21    0.07 
   5  -2  -3    0.38    0.30 
  -5  -2   3    1.03    0.25 
   5  -2  -3    0.12    0.31 
  -5  -2   3    0.79    0.41 
   5  -2  -3    0.31    0.28 
   5  -2  -3    0.48    0.32 
  -5  -2   3    1.96    0.60 
  -5  -2   3    0.17    0.26 
   5  -2  -3    0.41    0.23 
  -5  -2   3    0.69    0.20 
  -5   2   3    0.59    0.51 
  -5   2   3   -0.19    0.18 
  -5   2   3    0.16    0.19 
  -5   2   3    0.47    0.36 
   5   2  -3    0.52    0.20 
  -5   2   3    1.03    0.39 
  -5   2   3   -0.01    0.34 
  -5   2   3    0.62    0.33 
   5   2  -3    0.53    0.32 
   5   2  -3    0.47    0.31 
   5   2  -3    0.29    0.19 
   5   2  -3    0.28    0.20 
  -5   2   3    0.53    0.28 
  -4  -2   3   87.88    3.04 
  -4  -2   3   92.21    2.61 
   4  -2  -3   86.16    3.02 
  -4  -2   3   88.37    3.03 
  -4  -2   3   87.33    2.69 
  -4  -2   3   89.37    2.82 
   4  -2  -3   84.91    3.17 
  -4  -2   3   90.89    2.69 
   4  -2  -3   92.62    2.90 
   4  -2  -3   88.80    3.13 
  -4  -2   3   90.13    2.59 
   4  -2  -3   93.44    3.13 
  -4  -2   3   94.56    3.61 
   4  -2  -3   87.04    2.87 
  -4  -2   3   85.65    2.36 
   4  -2  -3   91.52    3.11 
   4  -2  -3   93.24    3.26 
   4   2  -3   87.97    3.16 
   4   2  -3   88.65    2.63 
   4   2  -3   91.33    2.75 
  -4   2   3   92.48    3.51 
  -4   2   3   93.52    3.05 
  -4   2   3   91.97    3.01 
  -4   2   3   88.97    2.84 
  -4   2   3   83.58    3.38 
   4   2  -3   94.99    3.25 
  -4   2   3   84.70    3.12 
  -4   2   3   89.70    2.80 
  -4   2   3   92.91    3.18 
  -3  -2   3  258.49    6.80 
  -3  -2   3  256.71    7.52 
   3  -2  -3  256.03    6.92 
  -3  -2   3  258.03    6.40 
  -3  -2   3  249.91    6.56 
   3  -2  -3  257.44    6.86 
   3  -2  -3  257.00    6.99 
  -3  -2   3  282.51    6.68 
   3  -2  -3  245.30    6.88 
   3  -2  -3  262.58    7.13 
  -3  -2   3  251.46    6.60 
  -3  -2   3  262.65    6.47 
   3  -2  -3  261.89    7.09 
  -3  -2   3  255.57    6.57 
   3  -2  -3  261.15    6.90 
  -3  -2   3  254.76    6.54 
   3  -2  -3  253.90    6.83 
  -3  -2   3  248.84    6.91 
   3  -2  -3  258.48    6.88 
   3  -2  -3  254.14    7.15 
   3   2  -3  250.44    6.57 
  -3   2   3  262.50    6.84 
  -3   2   3  259.94    7.08 
  -3   2   3  253.93    7.02 
  -3   2   3  258.65    6.83 
   3   2  -3  254.14    7.07 
   3   2  -3  254.68    6.52 
  -3   2   3  260.36    7.41 
  -3   2   3  261.64    6.96 
  -3   2   3  253.95    7.34 
  -3   2   3  257.35    6.91 
  -3   2   3  254.97    6.79 
   2  -2  -3  194.12    5.46 
  -2  -2   3  195.72    5.85 
   2  -2  -3  187.31    5.23 
  -2  -2   3  185.00    4.74 
   2  -2  -3  194.99    5.29 
  -2  -2   3  196.55    4.66 
   2  -2  -3  173.57    5.49 
   2  -2  -3  194.61    5.26 
  -2  -2   3  188.02    4.70 
   2  -2  -3  195.27    5.26 
   2  -2  -3  183.63    5.23 
   2  -2  -3  186.88    5.23 
   2  -2  -3  188.03    4.98 
   2  -2  -3  188.85    5.33 
  -2  -2   3  189.60    4.97 
   2  -2  -3  186.85    5.56 
   2  -2  -3  191.94    5.03 
  -2  -2   3  200.68    4.58 
   2  -2  -3  188.50    5.21 
  -2  -2   3  185.29    5.22 
  -2  -2   3  191.58    4.63 
  -2  -2   3  187.66    5.41 
   2  -2  -3  187.96    5.37 
   2   2  -3  185.60    5.72 
  -2   2   3  204.61    5.36 
  -2   2   3  189.65    5.23 
  -2   2   3  195.12    5.19 
  -2   2   3  193.73    5.20 
   2   2  -3  185.15    4.93 
  -2   2   3  195.15    5.26 
   2   2  -3  188.55    4.95 
  -2   2   3  189.44    4.98 
   2   2  -3  190.55    4.85 
   2   2  -3  183.69    5.34 
   2   2  -3  189.70    4.65 
  -2   2   3  195.14    5.37 
  -2   2   3  188.69    5.49 
  -2   2   3  196.80    5.00 
  -2   2   3  182.65    5.32 
  -2   2   3  191.94    5.23 
  -1  -2   3  191.37    5.82 
  -1  -2   3  187.99    4.83 
  -1  -2   3  198.05    4.86 
  -1  -2   3  190.29    5.05 
   1  -2  -3  191.82    5.16 
   1  -2  -3  184.00    5.53 
   1  -2  -3  193.48    5.33 
  -1  -2   3  189.15    5.49 
   1  -2  -3  192.94    5.23 
   1  -2  -3  194.90    5.27 
  -1  -2   3  186.12    5.93 
   1  -2  -3  198.09    5.19 
  -1  -2   3  200.19    5.19 
   1  -2  -3  190.83    5.20 
   1  -2  -3  183.40    5.25 
   1  -2  -3  195.67    5.10 
   1  -2  -3  194.72    5.14 
   1  -2  -3  196.41    5.36 
   1  -2  -3  193.67    4.78 
  -1  -2   3  189.59    5.02 
   1  -2  -3  195.99    5.10 
   1   2  -3  185.18    5.50 
  -1   2   3  196.07    4.78 
   1   2  -3  182.11    5.93 
   1   2  -3  196.12    5.01 
  -1   2   3  196.79    5.37 
   1   2  -3  192.73    5.87 
   1   2  -3  190.15    4.86 
   1   2  -3  186.08    4.84 
  -1   2   3  202.94    5.19 
  -1   2   3  191.24    5.06 
  -1   2   3  185.90    5.29 
  -1   2   3  198.24    4.80 
   1   2  -3  196.39    5.16 
  -1   2   3  192.66    5.10 
   1   2  -3  192.16    4.87 
  -1   2   3  195.23    5.22 
  -1   2   3  186.82    5.17 
  -1   2   3  184.73    5.05 
  -1   2   3  189.05    5.14 
  -1   2   3  194.85    5.09 
   1   2  -3  195.01    5.06 
  -1   2   3  194.05    5.24 
   0  -2   3    1.13    0.55 
   0  -2   3    0.90    0.26 
   0  -2   3    1.97    0.46 
   0  -2   3    1.66    0.27 
   0  -2  -3    0.77    0.18 
   0  -2  -3    1.30    0.28 
   0  -2   3    0.82    0.14 
   0  -2   3    0.93    0.21 
   0  -2   3    3.12    0.59 
   0  -2   3    0.97    0.21 
   0  -2  -3    0.81    0.16 
   0  -2  -3    1.08    0.13 
   0  -2  -3    1.13    0.25 
   0  -2  -3    0.71    0.19 
   0  -2   3    1.00    0.21 
   0  -2  -3    0.47    0.23 
   0  -2  -3    2.69    0.45 
   0  -2  -3    0.68    0.26 
   0   2   3    1.09    0.35 
   0   2  -3    0.69    0.20 
   0   2   3    0.93    0.25 
   0   2   3    1.08    0.20 
   0   2  -3    0.89    0.15 
   0   2   3    0.64    0.23 
   0   2   3    1.21    0.24 
   0   2  -3    0.51    0.28 
   0   2   3    1.20    0.22 
   0   2   3    1.74    0.37 
   0   2  -3    0.83    0.22 
   0   2  -3    0.53    0.29 
   0   2   3    1.20    0.23 
   0   2  -3    0.81    0.20 
   0   2   3    1.08    0.33 
   0   2  -3    0.84    0.20 
   0   2  -3    0.60    0.42 
   0   2   3    0.95    0.22 
   0   2  -3    1.18    0.14 
   0   2  -3    0.81    0.18 
   0   2  -3    0.94    0.25 
   0   2  -3    0.62    0.19 
   0   2   3    2.01    0.32 
  -1  -2  -3  136.59    3.51 
  -1  -2  -3  129.19    3.36 
  -1  -2  -3  122.93    3.84 
  -1  -2  -3  126.32    3.31 
  -1  -2  -3  130.31    3.46 
   1  -2   3  128.49    3.47 
   1  -2   3  135.49    4.39 
   1  -2   3  129.89    3.80 
   1  -2   3  132.53    3.80 
  -1  -2  -3  126.44    3.41 
  -1  -2  -3  125.06    3.31 
   1  -2   3  132.93    3.56 
  -1  -2  -3  131.35    3.66 
  -1  -2  -3  131.25    4.01 
   1  -2   3  129.88    4.12 
  -1  -2  -3  135.77    3.77 
   1  -2   3  134.49    3.70 
   1  -2   3  131.34    3.73 
  -1  -2  -3  128.92    3.91 
   1  -2   3  131.57    3.69 
   1   2   3  135.29    3.77 
   1   2   3  131.35    3.36 
   1   2   3  138.01    3.45 
  -1   2  -3  124.35    3.57 
   1   2   3  135.56    3.78 
  -1   2  -3  127.69    3.78 
   1   2   3  126.05    3.30 
  -1   2  -3  133.99    4.08 
  -1   2  -3  128.92    3.51 
  -1   2  -3  131.43    3.58 
  -1   2  -3  129.93    4.62 
   1   2   3  127.02    3.42 
  -1   2  -3  136.57    3.70 
   1   2   3  129.88    3.89 
  -1   2  -3  133.41    3.71 
  -1   2  -3  130.81    4.28 
  -1   2  -3  132.43    3.82 
  -1   2  -3  132.80    3.69 
   1   2   3  125.54    4.02 
  -1   2  -3  133.29    3.67 
   1   2   3  123.82    3.73 
   1   2   3  134.10    3.58 
  -2  -2  -3    5.97    0.41 
   2  -2   3    4.60    0.63 
  -2  -2  -3    5.01    0.30 
   2  -2   3    5.29    0.64 
   2  -2   3    5.24    0.55 
   2  -2   3    5.37    0.73 
  -2  -2  -3    5.13    0.63 
  -2  -2  -3    5.33    0.43 
  -2  -2  -3    5.14    0.71 
   2  -2   3    5.92    0.64 
  -2  -2  -3    6.32    0.42 
   2  -2   3    3.49    0.68 
  -2  -2  -3    6.05    0.34 
   2  -2   3    8.23    0.64 
  -2  -2  -3    4.53    0.52 
   2  -2   3    4.79    0.67 
  -2  -2  -3    6.09    0.55 
   2  -2   3    5.34    0.32 
  -2  -2  -3    5.24    0.44 
  -2  -2  -3    5.36    0.41 
   2  -2   3    6.50    0.53 
   2   2   3    5.35    0.54 
   2   2   3    4.40    0.57 
  -2   2  -3    6.96    0.58 
  -2   2  -3    7.66    0.67 
  -2   2  -3    5.64    0.70 
  -2   2  -3    6.15    0.53 
  -2   2  -3    5.40    0.49 
   2   2   3    5.19    0.44 
  -2   2  -3    5.74    0.90 
   2   2   3    5.75    0.67 
  -2   2  -3    8.65    1.02 
   2   2   3    6.23    0.43 
  -2   2  -3    5.19    0.77 
   2   2   3    5.72    0.51 
  -2   2  -3    5.05    0.69 
  -3  -2  -3  261.71    7.16 
   3  -2   3  271.85    7.25 
   3  -2   3  304.70    7.75 
  -3  -2  -3  265.82    7.53 
  -3  -2  -3  274.21    6.87 
  -3  -2  -3  271.50    7.24 
  -3  -2  -3  275.62    7.47 
  -3  -2  -3  281.82    7.31 
  -3  -2  -3  286.90    6.60 
   3  -2   3  276.79    7.67 
   3  -2   3  272.69    7.57 
   3  -2   3  276.02    7.47 
   3  -2   3  277.14    7.18 
  -3  -2  -3  276.54    7.01 
   3   2   3  279.08    7.32 
   3   2   3  268.83    7.47 
   3   2   3  276.62    7.30 
   3   2   3  277.19    7.60 
  -3   2  -3  241.99    8.03 
   3   2   3  279.10    7.22 
  -3   2  -3  270.37    7.70 
  -3   2  -3  286.30    7.66 
  -3   2  -3  250.11    7.41 
  -3   2  -3  267.92    7.41 
  -3   2  -3  273.38    7.44 
  -4  -2  -3  111.79    3.48 
   4  -2   3  110.58    3.40 
   4  -2   3  113.17    3.95 
  -4  -2  -3  110.24    3.82 
   4  -2   3  115.44    3.87 
   4  -2   3  116.28    3.37 
   4  -2   3  111.76    3.78 
  -4  -2  -3  115.81    3.73 
  -4  -2  -3  117.76    3.95 
  -4  -2  -3  111.99    3.57 
  -4  -2  -3  114.84    3.25 
   4  -2   3  112.63    3.97 
  -4   2  -3  111.58    3.72 
   4   2   3  111.24    3.33 
  -4   2  -3  116.21    3.77 
   4   2   3  116.66    3.72 
   4   2   3  112.42    3.77 
   4   2   3  114.47    3.87 
  -4   2  -3  108.20    3.94 
  -4   2  -3  115.94    3.82 
  -4   2  -3  116.94    4.05 
  -4   2  -3  106.33    4.36 
  -4   2  -3  112.83    3.82 
   4   2   3  114.56    3.63 
  -5  -2  -3  288.01    8.66 
   5  -2   3  298.54    8.42 
   5  -2   3  289.18    7.63 
  -5  -2  -3  308.96    8.19 
  -5  -2  -3  291.13    8.41 
   5  -2   3  256.90    8.45 
  -5  -2  -3  282.44    7.94 
   5  -2   3  294.29    7.59 
  -5  -2  -3  283.01    7.94 
  -5  -2  -3  295.04    7.97 
  -5  -2  -3  295.90    8.47 
  -5  -2  -3  300.72    7.71 
   5  -2   3  297.80    8.62 
   5  -2   3  290.26    8.43 
  -5   2  -3  319.78    9.48 
  -5   2  -3  294.63    8.58 
   5   2   3  282.82    8.31 
   5   2   3  294.32    8.46 
  -5   2  -3  296.84    8.44 
   5   2   3  292.40    8.34 
  -5   2  -3  305.59    8.83 
   5   2   3  302.98    8.28 
   5   2   3  293.05    7.88 
  -5   2  -3  303.59    8.32 
  -5   2  -3  294.79    8.27 
  -5   2  -3  298.13    8.44 
   6  -2   3   91.24    3.84 
   6  -2   3   88.07    2.50 
   6  -2   3   97.50    3.71 
   6  -2   3  106.91    4.00 
  -6  -2  -3   95.13    3.79 
  -6  -2  -3   93.91    3.72 
  -6  -2  -3   92.79    3.96 
  -6  -2  -3   92.79    3.20 
   6  -2   3   91.84    3.67 
  -6  -2  -3   93.54    3.05 
  -6  -2  -3   95.71    3.31 
  -6  -2  -3   94.47    3.23 
  -6  -2  -3   97.99    3.63 
   6   2   3   91.71    3.23 
   6   2   3   87.03    3.55 
  -6   2  -3   92.75    4.40 
  -6   2  -3   96.18    3.86 
  -6   2  -3   86.64    3.60 
  -6   2  -3   91.22    3.51 
  -6   2  -3   89.35    3.97 
  -6   2  -3   94.44    3.69 
   6   2   3   89.22    3.61 
  -6   2  -3   95.22    3.51 
   6   2   3   91.51    3.66 
  -7  -2  -3  184.93    6.20 
   7  -2   3  186.95    6.43 
   7  -2   3  175.14    6.09 
   7  -2   3  177.97    6.03 
   7  -2   3  176.57    6.31 
  -7  -2  -3  180.84    5.62 
  -7  -2  -3  178.66    5.37 
  -7  -2  -3  181.74    6.62 
  -7  -2  -3  182.96    5.48 
  -7  -2  -3  174.57    6.52 
  -7  -2  -3  180.77    5.33 
  -7  -2  -3  180.40    6.31 
  -7  -2  -3  180.03    6.00 
   7   2   3  176.31    5.58 
  -7   2  -3  172.10    5.72 
  -7   2  -3  181.69    6.15 
  -7   2  -3  188.66    6.32 
  -7   2  -3  165.04    6.93 
  -7   2  -3  179.65    5.87 
   7   2   3  181.46    6.18 
  -7   2  -3  180.72    6.10 
  -7   2  -3  171.15    6.53 
   7   2   3  176.86    6.06 
   8  -2   3   77.06    3.59 
   8  -2   3   72.18    3.71 
  -8  -2  -3   75.48    3.61 
   8  -2   3   76.24    3.63 
  -8  -2  -3   79.79    4.13 
  -8  -2  -3   74.03    4.04 
  -8  -2  -3   72.93    3.75 
  -8  -2  -3   78.67    3.23 
   8  -2   3   73.75    3.78 
  -8  -2  -3   75.56    3.49 
  -8   2  -3   83.34    4.23 
  -8   2  -3   79.08    3.68 
  -8   2  -3   72.81    3.33 
   8   2   3   73.22    3.62 
   8   2   3   71.69    3.50 
  -8   2  -3   79.04    3.86 
  -8   2  -3   79.19    3.28 
  -8   2  -3   75.07    4.40 
   8   2   3   74.08    3.23 
  -8   2  -3   74.85    3.56 
  -9  -2  -3   76.15    3.39 
  -9  -2  -3   72.41    4.30 
   9  -2   3   72.72    3.70 
   9  -2   3   75.86    4.07 
  -9  -2  -3   69.95    3.91 
   9  -2   3   73.14    3.78 
  -9  -2  -3   78.90    4.42 
   9  -2   3   75.04    3.95 
  -9  -2  -3   74.54    3.68 
   9   2   3   70.09    3.80 
  -9   2  -3   77.43    3.89 
  -9   2  -3   80.39    3.83 
  -9   2  -3   77.96    4.39 
  -9   2  -3   76.03    3.51 
  -9   2  -3   68.82    4.53 
 -10   3   3   55.04    3.98 
   9  -3  -3  108.37    4.78 
   9  -3  -3  103.80    4.83 
  -9  -3   3  117.63    5.70 
  -9  -3   3  105.53    5.56 
  -9  -3   3  112.37    5.05 
   9  -3  -3  117.57    4.99 
   9  -3  -3  106.71    4.96 
  -9   3   3  109.41    5.45 
  -9   3   3  110.10    4.85 
   9   3  -3  113.15    4.93 
  -9   3   3  111.19    5.74 
  -9   3   3  120.13    6.17 
  -9   3   3  116.62    6.03 
  -9   3   3  119.95    4.62 
  -9   3   3  106.59    4.77 
  -9   3   3  112.32    4.39 
  -8  -3   3   94.00    4.22 
   8  -3  -3   87.54    3.97 
  -8  -3   3   87.26    4.58 
  -8  -3   3   89.81    3.71 
   8  -3  -3   92.73    4.15 
   8  -3  -3   91.05    4.06 
   8  -3  -3   88.06    4.18 
  -8  -3   3   88.36    3.47 
   8   3  -3   85.63    4.00 
  -8   3   3   97.17    3.78 
  -8   3   3   88.19    4.53 
  -8   3   3   90.18    3.73 
  -8   3   3   86.99    3.96 
  -8   3   3   95.51    4.15 
  -8   3   3  103.43    5.07 
  -8   3   3   95.27    4.88 
   7  -3  -3  155.56    4.68 
  -7  -3   3  153.30    4.88 
   7  -3  -3  160.73    5.71 
  -7  -3   3  153.03    6.18 
  -7  -3   3  155.03    5.24 
   7  -3  -3  151.46    5.67 
   7  -3  -3  154.09    5.50 
   7  -3  -3  153.24    5.44 
  -7  -3   3  155.93    5.56 
  -7   3   3  162.39    6.23 
   7   3  -3  152.76    5.52 
   7   3  -3  158.25    4.74 
  -7   3   3  162.45    5.30 
  -7   3   3  155.06    6.31 
  -7   3   3  157.42    5.22 
  -7   3   3  153.01    5.54 
  -7   3   3  146.71    5.43 
  -7   3   3  150.35    6.02 
  -6  -3   3   82.74    2.91 
   6  -3  -3   81.83    3.79 
  -6  -3   3   84.49    3.97 
  -6  -3   3   88.22    3.33 
  -6  -3   3   84.84    2.67 
   6  -3  -3   83.82    3.35 
   6  -3  -3   80.70    3.39 
   6  -3  -3   85.67    2.98 
  -6  -3   3   90.73    3.48 
   6  -3  -3   77.68    3.50 
   6  -3  -3   80.33    3.52 
  -6  -3   3   80.77    2.63 
  -6   3   3   88.32    3.30 
  -6   3   3   87.96    3.98 
   6   3  -3   85.77    2.82 
  -6   3   3   83.70    3.87 
  -6   3   3   89.45    3.56 
  -6   3   3   83.41    3.27 
   6   3  -3   75.27    3.35 
  -6   3   3   81.23    3.42 
  -6   3   3   87.22    4.06 
   5  -3  -3  183.68    6.27 
  -5  -3   3  187.54    5.72 
  -5  -3   3  181.47    5.16 
  -5  -3   3  185.31    4.98 
  -5  -3   3  183.30    4.89 
   5  -3  -3  188.93    5.49 
  -5  -3   3  188.97    5.68 
  -5  -3   3  187.33    5.03 
   5  -3  -3  195.96    5.90 
   5  -3  -3  185.09    6.02 
  -5  -3   3  182.21    4.68 
   5  -3  -3  187.27    5.99 
  -5  -3   3  196.68    6.53 
   5  -3  -3  183.98    5.68 
   5  -3  -3  183.94    5.47 
   5   3  -3  190.71    5.10 
  -5   3   3  187.56    6.44 
  -5   3   3  186.07    5.71 
  -5   3   3  179.21    5.83 
  -5   3   3  180.42    5.64 
  -5   3   3  179.96    5.86 
   5   3  -3  191.78    5.90 
   5   3  -3  189.48    4.88 
  -5   3   3  191.21    6.36 
  -5   3   3  183.72    6.29 
  -4  -3   3   47.34    1.60 
   4  -3  -3   41.90    2.07 
   4  -3  -3   47.13    2.21 
   4  -3  -3   41.87    1.85 
   4  -3  -3   45.94    1.91 
   4  -3  -3   47.63    2.39 
   4  -3  -3   42.29    1.89 
  -4  -3   3   42.12    1.46 
   4  -3  -3   45.23    2.03 
  -4  -3   3   43.76    1.22 
  -4  -3   3   46.12    1.55 
  -4  -3   3   45.80    1.88 
  -4  -3   3   45.32    1.66 
  -4  -3   3   43.98    2.42 
  -4  -3   3   44.52    1.34 
  -4  -3   3   44.11    2.00 
   4  -3  -3   41.69    2.14 
  -4   3   3   46.05    2.11 
  -4   3   3   43.31    2.33 
   4   3  -3   45.00    1.39 
  -4   3   3   47.24    2.04 
  -4   3   3   41.10    2.25 
   4   3  -3   43.35    2.03 
  -4   3   3   44.56    1.97 
  -4   3   3   44.00    2.35 
   4   3  -3   43.04    1.50 
  -4   3   3   43.34    2.04 
   3  -3  -3  276.64    7.27 
  -3  -3   3  266.41    8.28 
  -3  -3   3  267.64    6.83 
  -3  -3   3  277.79    7.11 
  -3  -3   3  273.47    6.71 
  -3  -3   3  276.07    6.67 
   3  -3  -3  277.23    7.67 
   3  -3  -3  272.15    8.00 
  -3  -3   3  284.69    6.77 
   3  -3  -3  272.25    7.52 
   3  -3  -3  263.09    7.81 
  -3  -3   3  276.10    7.57 
   3  -3  -3  275.82    7.53 
   3  -3  -3  280.18    7.52 
  -3  -3   3  276.86    6.99 
   3  -3  -3  275.64    7.83 
  -3   3   3  276.76    7.30 
  -3   3   3  275.96    7.66 
  -3   3   3  275.25    7.71 
   3   3  -3  273.62    7.64 
  -3   3   3  268.79    7.96 
  -3   3   3  280.28    7.58 
  -3   3   3  280.60    7.60 
  -3   3   3  270.88    7.89 
   3   3  -3  276.35    6.85 
   3   3  -3  273.94    6.89 
  -2  -3   3  318.32    8.26 
  -2  -3   3  338.25    8.21 
   2  -3  -3  330.40    9.15 
  -2  -3   3  328.12    9.72 
   2  -3  -3  337.69    8.81 
  -2  -3   3  345.30    8.32 
  -2  -3   3  348.02    8.65 
   2  -3  -3  342.90    8.50 
   2  -3  -3  329.42    9.36 
   2  -3  -3  345.44    8.96 
  -2  -3   3  326.91    8.57 
  -2  -3   3  343.37    8.95 
   2  -3  -3  347.40    9.02 
  -2  -3   3  342.52    8.35 
   2   3  -3  325.68    8.39 
   2   3  -3  341.55    8.47 
   2   3  -3  323.07    9.05 
  -2   3   3  339.50    9.26 
  -2   3   3  336.21    8.96 
  -2   3   3  361.04    9.21 
  -2   3   3  344.78    8.94 
   2   3  -3  331.01    8.38 
  -2   3   3  338.19    9.12 
   2   3  -3  344.76    8.67 
  -2   3   3  337.06    8.96 
  -2   3   3  345.48    8.55 
   2   3  -3  319.41    8.52 
  -2   3   3  348.00    8.54 
  -1  -3   3  237.89    5.78 
   1  -3  -3  233.58    6.52 
   1  -3  -3  227.30    6.62 
  -1  -3   3  228.39    6.27 
  -1  -3   3  235.51    6.10 
  -1  -3   3  257.61    6.15 
  -1  -3   3  235.70    6.26 
   1  -3  -3  240.30    6.31 
   1  -3  -3  239.96    6.25 
   1  -3  -3  235.96    6.32 
   1  -3  -3  236.05    6.32 
  -1  -3   3  231.86    6.04 
  -1  -3   3  238.74    6.40 
  -1  -3   3  234.65    7.27 
   1  -3  -3  238.99    6.23 
   1  -3  -3  244.25    5.81 
   1  -3  -3  230.90    6.85 
   1   3  -3  234.05    6.16 
  -1   3   3  229.17    6.55 
   1   3  -3  229.21    5.95 
  -1   3   3  237.27    6.28 
  -1   3   3  239.59    6.35 
  -1   3   3  237.59    6.37 
   1   3  -3  247.50    6.21 
   1   3  -3  218.74    7.51 
  -1   3   3  244.70    6.68 
  -1   3   3  229.96    6.22 
   1   3  -3  222.52    6.80 
   1   3  -3  241.30    6.12 
   1   3  -3  226.50    5.83 
   1   3  -3  242.86    6.36 
  -1   3   3  245.88    6.50 
   1   3  -3  238.47    5.98 
  -1   3   3  239.65    5.88 
  -1   3   3  225.56    6.39 
  -1   3   3  227.20    5.90 
  -1   3   3  240.16    6.50 
  -1   3   3  229.67    6.61 
   0  -3  -3  400.05    9.97 
   0  -3  -3  396.95   10.48 
   0  -3   3  408.00   10.22 
   0  -3   3  422.65   10.23 
   0  -3   3  395.33   11.24 
   0  -3  -3  402.63   10.13 
   0  -3   3  411.28   10.26 
   0  -3  -3  399.45   10.04 
   0  -3  -3  396.80   10.52 
   0  -3  -3  399.54   10.44 
   0  -3   3  413.59    9.87 
   0  -3   3  409.37   10.34 
   0  -3   3  413.36   10.13 
   0  -3  -3  411.00   10.34 
   0  -3  -3  391.91   10.23 
   0  -3  -3  403.77   10.08 
   0  -3  -3  405.19    9.96 
   0   3   3  400.54   10.65 
   0   3  -3  408.26   10.16 
   0   3  -3  388.20   10.79 
   0   3  -3  410.88   10.03 
   0   3   3  393.21   10.27 
   0   3   3  407.80   10.23 
   0   3   3  394.60   10.00 
   0   3   3  400.55   10.19 
   0   3  -3  423.75   10.41 
   0   3   3  382.87   10.50 
   0   3   3  431.89   10.14 
   0   3  -3  402.96   10.23 
   0   3   3  344.12   10.31 
   0   3   3  394.35    9.64 
   0   3   3  394.52   10.78 
   0   3  -3  412.75   10.37 
   0   3  -3  406.90    9.94 
   0   3  -3  408.12    9.75 
   0   3  -3  352.34   11.81 
   1  -3   3  226.66    5.79 
   1  -3   3  222.78    5.79 
  -1  -3  -3  216.51    5.53 
  -1  -3  -3  217.27    5.67 
  -1  -3  -3  219.34    5.79 
  -1  -3  -3  215.13    6.18 
   1  -3   3  225.09    5.97 
   1  -3   3  220.10    6.47 
  -1  -3  -3  204.14    5.94 
  -1  -3  -3  213.63    5.85 
  -1  -3  -3  217.09    6.32 
  -1  -3  -3  221.06    5.44 
  -1  -3  -3  214.66    5.60 
   1  -3   3  213.15    6.85 
   1  -3   3  230.13    5.94 
  -1  -3  -3  221.14    6.24 
  -1  -3  -3  221.91    6.01 
  -1  -3  -3  222.65    6.13 
   1  -3   3  224.18    6.02 
  -1  -3  -3  225.35    5.82 
  -1  -3  -3  225.44    5.56 
   1  -3   3  221.56    6.11 
  -1   3  -3  219.63    5.69 
   1   3   3  219.22    5.43 
   1   3   3  220.94    5.98 
  -1   3  -3  214.52    6.51 
  -1   3  -3  227.89    5.84 
  -1   3  -3  221.77    5.97 
  -1   3  -3  216.31    7.32 
   1   3   3  191.68    6.07 
   1   3   3  224.89    6.08 
  -1   3  -3  224.75    6.01 
   1   3   3  218.78    5.70 
  -1   3  -3  227.46    6.20 
  -1   3  -3  221.55    5.84 
   1   3   3  214.58    6.55 
   2  -3   3   71.91    2.71 
  -2  -3  -3   74.75    2.69 
  -2  -3  -3   74.78    2.21 
  -2  -3  -3   73.93    2.21 
  -2  -3  -3   73.20    2.34 
   2  -3   3   74.29    2.61 
  -2  -3  -3   70.56    2.53 
   2  -3   3   71.46    2.77 
  -2  -3  -3   67.19    2.37 
  -2  -3  -3   72.39    2.02 
   2  -3   3   72.26    2.51 
   2  -3   3   74.45    2.57 
   2  -3   3   70.25    2.79 
   2  -3   3   71.06    3.19 
  -2  -3  -3   72.41    2.20 
   2  -3   3   71.99    2.17 
   2   3   3   72.43    2.59 
  -2   3  -3   73.63    2.58 
   2   3   3   75.78    2.41 
  -2   3  -3   74.64    2.97 
   2   3   3   75.12    2.19 
  -2   3  -3   73.56    2.50 
  -2   3  -3   71.68    2.55 
   2   3   3   74.04    2.23 
  -2   3  -3   74.84    2.42 
  -2   3  -3   75.37    3.43 
   2   3   3   72.14    2.32 
  -2   3  -3   70.90    2.68 
   2   3   3   73.77    2.73 
  -3  -3  -3    5.17    0.38 
  -3  -3  -3    6.44    0.36 
  -3  -3  -3    5.51    0.82 
  -3  -3  -3    5.75    0.44 
   3  -3   3    5.80    0.81 
  -3  -3  -3    5.93    0.39 
   3  -3   3    5.05    0.63 
   3  -3   3    6.04    0.86 
   3  -3   3    5.33    0.72 
  -3  -3  -3    5.89    0.62 
  -3  -3  -3    5.57    0.61 
  -3  -3  -3    6.72    0.65 
   3  -3   3    6.41    0.86 
   3  -3   3    6.50    0.39 
  -3  -3  -3    7.02    0.68 
   3   3   3    8.11    0.60 
   3   3   3    6.41    0.58 
  -3   3  -3    7.68    0.86 
  -3   3  -3    7.40    0.96 
   3   3   3    5.85    0.75 
   3   3   3    5.55    0.73 
  -3   3  -3    8.96    1.23 
  -3   3  -3    5.64    0.81 
  -3   3  -3    6.23    1.08 
  -3   3  -3    5.74    0.72 
  -3   3  -3    4.74    0.66 
  -4  -3  -3    0.74    0.28 
   4  -3   3    1.50    0.45 
  -4  -3  -3    1.36    0.42 
  -4  -3  -3    0.82    0.23 
   4  -3   3    0.86    0.39 
   4  -3   3    0.58    0.27 
  -4  -3  -3    0.88    0.33 
   4  -3   3    1.21    0.45 
  -4  -3  -3    0.60    0.36 
  -4  -3  -3    0.91    0.19 
  -4  -3  -3    0.56    0.21 
  -4  -3  -3    0.97    0.18 
   4  -3   3    0.27    0.31 
   4   3   3    1.05    0.37 
  -4   3  -3    1.09    0.51 
   4   3   3    0.86    0.39 
  -4   3  -3    1.48    0.46 
  -4   3  -3    1.14    0.39 
  -4   3  -3    1.44    0.62 
  -4   3  -3    0.76    0.53 
  -4   3  -3    0.82    0.40 
   4   3   3    0.73    0.29 
   4   3   3    1.38    0.39 
   5  -3   3   15.67    1.25 
   5  -3   3   11.22    1.35 
  -5  -3  -3   12.98    0.97 
  -5  -3  -3   14.81    0.88 
   5  -3   3   11.92    1.36 
   5  -3   3   10.82    1.30 
  -5  -3  -3   13.68    1.23 
  -5  -3  -3   12.91    1.11 
  -5  -3  -3   13.51    0.68 
  -5  -3  -3   13.81    1.17 
   5  -3   3   12.36    0.89 
  -5  -3  -3   13.44    0.93 
  -5   3  -3   10.65    1.55 
  -5   3  -3   13.62    1.19 
   5   3   3   15.75    1.15 
   5   3   3   13.92    1.11 
   5   3   3   13.53    1.11 
  -5   3  -3   13.50    1.61 
  -5   3  -3   12.86    1.16 
  -5   3  -3   13.37    1.33 
  -5   3  -3   14.45    1.20 
   5   3   3   13.64    1.04 
  -5   3  -3   12.85    1.12 
   6  -3   3   12.16    1.51 
   6  -3   3    9.95    0.77 
   6  -3   3    9.69    1.24 
  -6  -3  -3   11.42    1.19 
  -6  -3  -3   10.36    0.68 
  -6  -3  -3    9.70    1.17 
   6  -3   3    9.70    1.32 
  -6  -3  -3   11.23    0.92 
  -6  -3  -3   10.87    1.41 
  -6  -3  -3   10.77    1.40 
  -6  -3  -3    9.30    0.96 
  -6  -3  -3   11.34    1.38 
   6  -3   3    8.86    1.26 
   6   3   3    8.31    1.14 
  -6   3  -3    9.10    1.46 
  -6   3  -3   10.29    1.21 
  -6   3  -3   10.33    1.67 
   6   3   3   10.35    1.27 
   6   3   3   11.20    1.23 
  -6   3  -3    9.87    1.30 
  -6   3  -3   11.30    1.56 
  -6   3  -3   10.15    1.27 
  -6   3  -3    9.79    1.24 
  -7  -3  -3   15.74    1.54 
  -7  -3  -3   19.13    1.85 
   7  -3   3   14.71    1.79 
  -7  -3  -3   16.18    1.38 
  -7  -3  -3   15.47    1.25 
  -7  -3  -3   15.90    1.60 
  -7  -3  -3   16.86    1.17 
   7  -3   3   16.25    1.73 
  -7  -3  -3   18.25    1.28 
  -7  -3  -3   15.45    1.45 
   7  -3   3   14.21    1.71 
   7  -3   3   17.37    1.88 
  -7   3  -3   14.39    1.65 
  -7   3  -3   18.50    2.44 
  -7   3  -3   14.89    1.65 
  -7   3  -3   15.08    1.36 
   7   3   3   16.82    1.44 
  -7   3  -3   14.56    2.13 
   7   3   3   16.07    1.45 
  -7   3  -3   14.11    1.67 
  -7   3  -3   17.12    1.89 
  -8  -3  -3    2.06    0.78 
  -8  -3  -3    2.38    0.97 
   8  -3   3    1.98    0.77 
   8  -3   3    1.18    0.68 
   8  -3   3    0.53    0.51 
  -8  -3  -3    1.10    0.77 
  -8  -3  -3    1.77    0.69 
  -8  -3  -3    2.36    0.83 
  -8  -3  -3    1.35    0.75 
   8  -3   3    0.72    0.61 
  -8   3  -3    1.95    0.85 
  -8   3  -3    1.17    0.55 
  -8   3  -3    1.71    0.71 
  -8   3  -3    1.41    0.87 
   8   3   3    1.93    0.74 
  -8   3  -3    0.86    0.58 
  -8   3  -3    3.08    1.06 
  -8   3  -3    0.51    0.61 
   9  -3   3    3.66    1.11 
  -9  -3  -3    2.95    1.17 
   9  -3   3    2.04    0.85 
  -9  -3  -3    2.67    0.90 
   9  -3   3    2.19    0.88 
   9  -3   3    5.46    1.16 
  -9  -3  -3    3.28    1.16 
  -9   3  -3    3.34    1.00 
  -9   3  -3    1.60    1.01 
  -9   3  -3    2.53    1.15 
  -9   3  -3    3.44    1.25 
  -9   3  -3    1.85    0.75 
  -9   3  -3    1.59    0.80 
  -9  -4   3    2.99    1.09 
   9  -4  -3    1.99    0.84 
  -9  -4   3    2.91    0.89 
   9  -4  -3    2.95    1.00 
   9  -4  -3    3.79    1.11 
  -9  -4   3    2.37    1.10 
   9  -4  -3    1.69    0.76 
  -9   4   3    2.74    0.98 
  -9   4   3    3.48    0.96 
  -9   4   3    2.94    1.21 
  -9   4   3    2.36    0.75 
  -9   4   3    2.94    1.15 
   9   4  -3    4.10    1.10 
  -9   4   3    3.61    1.29 
  -9   4   3    3.47    1.08 
  -8  -4   3   11.86    2.05 
   8  -4  -3   10.39    1.49 
  -8  -4   3   10.81    1.45 
   8  -4  -3    9.48    1.57 
   8  -4  -3   10.54    1.63 
  -8  -4   3   15.78    2.11 
   8  -4  -3   13.11    1.67 
  -8   4   3   10.57    1.54 
  -8   4   3    9.72    1.79 
  -8   4   3   10.85    1.88 
  -8   4   3   10.54    1.54 
   8   4  -3    9.46    1.44 
  -8   4   3   12.00    1.50 
  -8   4   3   11.52    1.86 
  -8   4   3   10.45    1.43 
  -7  -4   3   10.86    1.51 
   7  -4  -3   12.66    1.67 
   7  -4  -3   11.61    1.50 
   7  -4  -3   11.10    1.38 
  -7  -4   3   11.58    1.88 
  -7  -4   3   11.79    1.41 
   7  -4  -3   17.32    2.39 
  -7  -4   3   11.98    0.99 
   7  -4  -3   10.59    1.14 
   7  -4  -3   12.20    1.67 
  -7   4   3    9.25    1.63 
  -7   4   3   10.45    1.35 
  -7   4   3   11.45    1.37 
  -7   4   3   15.71    2.24 
  -7   4   3   12.27    1.59 
   7   4  -3   15.11    1.70 
  -7   4   3   12.34    1.54 
  -7   4   3   12.87    1.83 
   6  -4  -3    5.30    0.81 
   6  -4  -3    5.00    1.02 
   6  -4  -3    6.07    1.27 
  -6  -4   3    8.77    1.19 
   6  -4  -3    6.96    0.98 
  -6  -4   3    6.90    0.84 
   6  -4  -3    5.41    0.95 
  -6  -4   3    8.38    1.23 
   6  -4  -3    6.07    0.97 
  -6  -4   3    6.17    0.73 
  -6  -4   3    6.33    1.28 
   6  -4  -3    8.44    1.27 
  -6   4   3    6.02    1.04 
   6   4  -3    6.65    0.55 
  -6   4   3    5.07    1.13 
  -6   4   3    5.44    1.22 
  -6   4   3    8.14    1.11 
  -6   4   3    7.25    1.09 
  -6   4   3    7.47    1.07 
  -6   4   3    6.63    1.45 
   6   4  -3    3.56    0.80 
  -5  -4   3    5.07    1.10 
   5  -4  -3    3.36    0.77 
  -5  -4   3    4.54    0.80 
   5  -4  -3    5.17    0.94 
   5  -4  -3    3.44    0.65 
  -5  -4   3    3.95    0.52 
  -5  -4   3    3.82    0.74 
   5  -4  -3    3.55    0.66 
   5  -4  -3    3.43    0.92 
   5  -4  -3    4.01    0.84 
   5  -4  -3    3.73    0.74 
  -5  -4   3    3.93    0.51 
  -5  -4   3    4.27    0.34 
  -5   4   3    3.85    0.99 
   5   4  -3    3.39    0.39 
   5   4  -3    2.81    0.67 
  -5   4   3    3.36    0.73 
  -5   4   3    3.45    0.91 
  -5   4   3    4.00    0.80 
  -5   4   3    3.74    0.99 
  -5   4   3    3.10    0.68 
  -5   4   3    3.49    0.76 
  -4  -4   3    6.06    0.46 
  -4  -4   3    7.23    0.60 
  -4  -4   3    6.61    0.42 
  -4  -4   3    6.88    0.40 
   4  -4  -3    6.35    1.14 
   4  -4  -3    7.18    0.80 
   4  -4  -3    4.96    0.82 
   4  -4  -3    5.97    0.82 
  -4  -4   3    6.34    0.58 
   4  -4  -3    5.51    0.81 
   4  -4  -3    5.72    0.96 
  -4  -4   3    6.06    0.32 
   4  -4  -3    5.98    0.91 
   4  -4  -3    5.10    0.96 
  -4  -4   3    7.30    0.96 
  -4  -4   3    5.00    1.06 
  -4   4   3    5.05    0.80 
  -4   4   3    6.63    0.96 
  -4   4   3    7.87    0.99 
   4   4  -3    6.49    0.38 
  -4   4   3    4.84    0.79 
   4   4  -3    6.91    0.93 
  -4   4   3    5.46    0.99 
  -4   4   3    5.61    1.09 
  -3  -4   3   34.80    2.24 
   3  -4  -3   37.64    2.12 
  -3  -4   3   34.59    1.18 
   3  -4  -3   35.28    1.68 
   3  -4  -3   34.75    1.79 
  -3  -4   3   33.13    1.21 
  -3  -4   3   35.52    1.44 
   3  -4  -3   32.16    1.41 
  -3  -4   3   32.99    1.31 
  -3  -4   3   36.56    1.79 
   3  -4  -3   33.21    1.94 
   3  -4  -3   33.08    1.91 
   3  -4  -3   32.56    1.74 
  -3  -4   3   34.45    1.45 
  -3  -4   3   33.73    1.22 
   3  -4  -3   31.87    1.66 
  -3   4   3   35.19    2.02 
  -3   4   3   34.31    1.74 
   3   4  -3   34.05    1.09 
  -3   4   3   29.90    1.88 
  -3   4   3   32.68    1.72 
  -3   4   3   35.28    1.76 
  -3   4   3   34.20    1.76 
   3   4  -3   35.01    1.77 
  -3   4   3   34.53    1.83 
   3   4  -3   33.76    1.04 
   2  -4  -3  135.92    3.73 
  -2  -4   3  135.79    4.03 
  -2  -4   3  139.92    3.76 
  -2  -4   3  135.85    4.31 
   2  -4  -3  137.05    4.11 
  -2  -4   3  142.34    3.84 
   2  -4  -3  134.92    4.27 
   2  -4  -3  127.94    4.33 
   2  -4  -3  136.43    4.32 
   2  -4  -3  128.66    4.66 
  -2  -4   3  132.90    3.53 
   2  -4  -3  126.62    4.51 
  -2  -4   3  138.33    5.09 
   2   4  -3  137.86    3.88 
   2   4  -3  134.35    3.40 
  -2   4   3  136.74    4.35 
  -2   4   3  140.87    4.27 
  -2   4   3  140.98    3.85 
   2   4  -3  139.53    3.87 
   2   4  -3  126.96    4.38 
   2   4  -3  137.07    3.51 
  -2   4   3  137.06    4.63 
  -2   4   3  127.88    4.28 
  -2   4   3  131.19    4.57 
  -2   4   3  138.27    3.91 
  -2   4   3  141.86    4.52 
   1  -4  -3   32.68    1.49 
   1  -4  -3   31.48    1.85 
  -1  -4   3   32.69    1.56 
  -1  -4   3   34.58    1.44 
  -1  -4   3   34.15    1.14 
   1  -4  -3   32.40    1.04 
   1  -4  -3   34.46    1.78 
  -1  -4   3   33.46    1.35 
  -1  -4   3   34.51    1.44 
   1  -4  -3   35.06    1.40 
  -1  -4   3   34.29    2.15 
  -1  -4   3   32.67    1.49 
   1  -4  -3   33.52    1.54 
  -1   4   3   32.36    1.73 
  -1   4   3   34.75    1.80 
   1   4  -3   33.99    1.89 
  -1   4   3   32.25    1.83 
   1   4  -3   32.66    1.40 
  -1   4   3   32.94    1.50 
  -1   4   3   30.48    1.47 
   1   4  -3   35.05    2.45 
   1   4  -3   33.74    1.17 
   1   4  -3   32.22    1.08 
  -1   4   3   31.10    1.55 
  -1   4   3   31.20    1.59 
   1   4  -3   33.64    1.60 
   1   4  -3   33.59    1.36 
   0  -4  -3   91.72    3.18 
   0  -4  -3   92.20    3.31 
   0  -4  -3   96.10    3.01 
   0  -4   3   95.42    2.74 
   0  -4   3   93.54    3.13 
   0  -4  -3  101.38    3.03 
   0  -4   3   93.16    3.95 
   0  -4  -3   93.58    2.92 
   0  -4  -3   97.11    3.39 
   0  -4  -3   95.18    2.75 
   0  -4  -3   94.56    2.87 
   0  -4   3   96.08    3.12 
   0  -4   3   94.61    3.07 
   0   4  -3   80.17    4.32 
   0   4  -3   91.82    3.03 
   0   4   3   92.92    3.56 
   0   4   3   94.18    3.15 
   0   4   3   91.30    3.20 
   0   4   3   91.86    2.79 
   0   4  -3  100.14    3.04 
   0   4   3   95.87    3.48 
   0   4  -3   95.05    3.70 
   0   4   3   94.28    3.31 
   0   4   3   87.70    3.34 
   0   4   3   93.17    2.59 
   0   4   3   98.33    2.95 
   0   4  -3   95.25    2.89 
   0   4   3   93.90    3.57 
   0   4  -3   95.00    3.26 
   1  -4   3   16.51    0.90 
   1  -4   3   18.18    1.33 
   1  -4   3   17.94    1.57 
   1  -4   3   17.40    0.97 
   1  -4   3   17.05    1.04 
  -1  -4  -3   16.49    1.10 
  -1  -4  -3   17.58    1.07 
  -1  -4  -3   17.82    0.65 
  -1  -4  -3   18.62    0.82 
  -1  -4  -3   17.42    0.89 
   1  -4   3   17.14    1.07 
   1  -4   3   15.81    1.22 
  -1  -4  -3   16.02    0.69 
  -1  -4  -3   19.35    1.24 
  -1  -4  -3   18.13    1.23 
   1  -4   3   18.19    1.16 
  -1  -4  -3   17.53    0.93 
   1  -4   3   16.42    0.99 
  -1   4  -3   17.82    0.99 
  -1   4  -3   17.76    1.08 
   1   4   3   16.37    0.67 
   1   4   3   17.63    1.33 
  -1   4  -3   17.54    1.86 
  -1   4  -3   16.42    1.42 
  -1   4  -3   16.66    1.18 
   1   4   3   15.72    1.33 
   1   4   3   17.10    1.14 
   1   4   3   19.20    0.89 
  -2  -4  -3  322.66    8.08 
  -2  -4  -3  306.12    8.59 
   2  -4   3  312.65    8.57 
  -2  -4  -3  320.27    8.11 
  -2  -4  -3  318.62    8.64 
  -2  -4  -3  316.63    7.93 
  -2  -4  -3  322.90    7.61 
  -2  -4  -3  312.23    8.66 
   2  -4   3  296.84    8.70 
  -2  -4  -3  313.93    8.47 
   2  -4   3  317.68    8.49 
   2  -4   3  311.17    9.63 
   2  -4   3  309.17    8.94 
  -2  -4  -3  311.39    7.71 
   2  -4   3  320.92    8.56 
   2  -4   3  320.10    8.84 
   2  -4   3  321.54    8.13 
   2   4   3  313.94    7.93 
  -2   4  -3  310.17    8.54 
   2   4   3  311.00    8.58 
   2   4   3  311.05    8.51 
  -2   4  -3  307.34    8.57 
  -2   4  -3  312.44    8.78 
   2   4   3  317.29    7.96 
  -2   4  -3  327.51    8.56 
  -2   4  -3  315.81   10.06 
   2   4   3  304.81    8.31 
  -2   4  -3  311.62    9.19 
   2   4   3  297.34    8.80 
  -2   4  -3  307.81    8.42 
   3  -4   3   60.08    1.96 
  -3  -4  -3   64.03    2.57 
  -3  -4  -3   62.97    2.35 
  -3  -4  -3   60.59    1.62 
  -3  -4  -3   59.55    2.06 
   3  -4   3   56.00    2.62 
   3  -4   3   62.77    2.43 
   3  -4   3   57.11    2.71 
   3  -4   3   59.41    2.57 
  -3  -4  -3   69.49    2.53 
  -3  -4  -3   59.80    2.42 
   3  -4   3   57.21    2.41 
   3  -4   3   63.22    2.66 
  -3  -4  -3   61.45    1.65 
  -3  -4  -3   59.79    2.07 
  -3   4  -3   60.20    2.45 
  -3   4  -3   60.86    2.52 
   3   4   3   56.35    2.04 
  -3   4  -3   60.74    3.34 
  -3   4  -3   58.97    2.89 
   3   4   3   59.99    2.50 
  -3   4  -3   60.35    2.57 
   3   4   3   55.80    2.43 
  -3   4  -3   61.37    2.54 
   3   4   3   59.54    2.05 
  -3   4  -3   58.02    2.60 
  -4  -4  -3  199.32    5.55 
   4  -4   3  198.88    6.49 
   4  -4   3  199.76    6.17 
  -4  -4  -3  195.66    6.08 
   4  -4   3  192.60    6.28 
  -4  -4  -3  197.20    5.45 
   4  -4   3  203.56    6.49 
  -4  -4  -3  206.64    5.92 
  -4  -4  -3  217.93    6.23 
   4  -4   3  196.11    5.91 
  -4  -4  -3  200.98    5.06 
   4  -4   3  199.65    5.30 
   4  -4   3  206.18    5.14 
  -4   4  -3  197.22    6.67 
  -4   4  -3  198.28    6.34 
  -4   4  -3  187.05    7.15 
  -4   4  -3  197.35    6.16 
   4   4   3  204.38    6.10 
   4   4   3  196.74    6.06 
  -4   4  -3  198.83    6.14 
  -4   4  -3  199.20    6.29 
   4   4   3  197.62    5.69 
  -4   4  -3  193.56    6.20 
  -5  -4  -3  113.18    4.13 
  -5  -4  -3  114.05    3.80 
  -5  -4  -3  119.78    4.28 
   5  -4   3  118.39    3.88 
  -5  -4  -3  113.99    3.66 
   5  -4   3  120.35    4.61 
   5  -4   3  117.66    4.42 
   5  -4   3  120.35    3.93 
   5  -4   3  109.43    4.45 
   5  -4   3  112.30    4.24 
  -5   4  -3  117.71    5.31 
  -5   4  -3  111.14    4.27 
   5   4   3  116.15    4.10 
   5   4   3  118.51    3.91 
  -5   4  -3  113.13    4.29 
  -5   4  -3  118.20    4.26 
   5   4   3  109.36    4.07 
  -5   4  -3  116.61    4.54 
  -5   4  -3  109.85    4.21 
  -5   4  -3  113.66    4.66 
  -6  -4  -3  235.47    6.77 
  -6  -4  -3  237.08    7.28 
   6  -4   3  221.42    7.66 
   6  -4   3  234.25    7.63 
  -6  -4  -3  234.09    6.71 
   6  -4   3  232.31    7.46 
  -6  -4  -3  240.14    7.51 
   6  -4   3  232.45    7.81 
  -6  -4  -3  221.35    7.50 
  -6  -4  -3  229.33    7.19 
   6  -4   3  231.64    6.78 
  -6   4  -3  242.31    7.48 
   6   4   3  244.97    7.32 
  -6   4  -3  230.61    7.54 
   6   4   3  233.23    7.06 
   6   4   3  242.46    7.15 
  -6   4  -3  229.91    7.46 
  -6   4  -3  242.72    8.00 
  -6   4  -3  239.54    8.78 
  -6   4  -3  233.95    7.38 
  -6   4  -3  231.89    7.85 
   7  -4   3   32.02    2.32 
  -7  -4  -3   32.59    2.05 
  -7  -4  -3   36.91    2.45 
   7  -4   3   31.22    2.14 
   7  -4   3   34.34    1.78 
   7  -4   3   35.91    2.40 
  -7  -4  -3   31.38    2.06 
   7  -4   3   29.48    2.27 
  -7  -4  -3   30.83    2.20 
  -7  -4  -3   29.97    1.94 
  -7   4  -3   34.56    2.19 
   7   4   3   31.61    2.05 
  -7   4  -3   33.03    2.25 
  -7   4  -3   29.55    2.74 
  -7   4  -3   34.12    2.51 
  -7   4  -3   32.86    2.56 
  -7   4  -3   31.24    2.13 
  -7   4  -3   30.81    2.16 
   7   4   3   31.69    2.00 
  -8  -4  -3  133.64    5.00 
  -8  -4  -3  127.01    5.52 
   8  -4   3  127.20    5.52 
   8  -4   3  123.72    5.19 
   8  -4   3  119.67    5.29 
   8  -4   3  125.44    5.46 
  -8  -4  -3  129.94    4.83 
  -8  -4  -3  132.26    5.66 
  -8   4  -3  128.92    5.05 
  -8   4  -3  129.90    5.32 
  -8   4  -3  123.05    5.57 
  -8   4  -3  126.62    5.74 
  -8   4  -3  123.15    6.32 
  -8   4  -3  119.20    4.96 
  -8   4  -3  128.61    5.32 
   9  -4   3   11.10    1.87 
  -9  -4  -3   11.20    1.61 
  -9  -4  -3    9.13    1.74 
   9  -4   3   11.87    1.88 
   9  -4   3    8.48    1.64 
   9  -4   3    9.47    1.60 
  -9  -4  -3    9.56    1.91 
  -9   4  -3    9.77    1.77 
  -9   4  -3   12.64    1.85 
  -9   4  -3   11.32    1.73 
  -9   4  -3   13.97    1.97 
  -9   4  -3   11.24    2.34 
   9  -5  -3  143.55    6.33 
  -9  -5   3  156.88    7.25 
   9  -5  -3  140.77    6.31 
   9  -5  -3  155.03    6.20 
   9  -5  -3  142.60    5.89 
  -9  -5   3  148.96    5.84 
  -9   5   3  142.47    6.10 
  -9   5   3  157.68    7.39 
  -9   5   3  150.12    6.24 
  -9   5   3  149.72    5.78 
   9   5  -3  149.54    6.03 
  -9   5   3  149.69    6.80 
  -9   5   3  145.44    5.84 
  -8  -5   3    3.47    1.24 
   8  -5  -3    3.67    1.05 
  -8  -5   3    5.63    1.14 
   8  -5  -3    4.83    1.10 
   8  -5  -3    6.04    1.34 
   8  -5  -3    3.43    0.93 
  -8   5   3    5.01    1.40 
  -8   5   3    4.47    1.39 
   8   5  -3    3.05    0.88 
  -8   5   3    4.33    1.09 
  -8   5   3    4.35    1.40 
  -8   5   3    5.03    1.13 
  -8   5   3    4.09    1.05 
  -8   5   3    3.57    0.92 
  -7  -5   3  171.42    7.05 
  -7  -5   3  171.72    6.08 
   7  -5  -3  159.03    6.63 
   7  -5  -3  173.60    5.64 
   7  -5  -3  167.26    5.83 
   7  -5  -3  178.88    6.61 
   7  -5  -3  179.02    6.50 
   7  -5  -3  162.54    6.05 
  -7  -5   3  164.49    5.73 
  -7   5   3  165.12    5.99 
  -7   5   3  165.80    6.83 
  -7   5   3  164.65    5.91 
  -7   5   3  164.20    6.14 
  -7   5   3  162.92    6.20 
  -7   5   3  168.36    6.82 
  -7   5   3  168.72    7.08 
   7   5  -3  161.65    5.97 
   6  -5  -3    1.32    0.50 
  -6  -5   3    2.13    0.66 
   6  -5  -3    0.95    0.64 
   6  -5  -3    1.21    0.60 
   6  -5  -3    0.76    0.47 
  -6  -5   3    1.33    0.53 
   6  -5  -3    0.97    0.53 
  -6  -5   3    1.53    0.79 
   6  -5  -3    1.61    0.55 
   6  -5  -3    2.60    1.02 
  -6  -5   3    1.74    0.59 
  -6   5   3    1.90    0.81 
  -6   5   3    4.43    1.18 
  -6   5   3    1.35    0.57 
   6   5  -3    1.26    0.57 
  -6   5   3    1.15    0.58 
  -6   5   3    1.04    0.57 
  -6   5   3    1.54    0.58 
  -5  -5   3  200.98    6.54 
   5  -5  -3  203.38    6.37 
   5  -5  -3  197.42    6.44 
   5  -5  -3  203.94    6.75 
   5  -5  -3  198.56    6.95 
  -5  -5   3  203.41    7.50 
   5  -5  -3  198.92    6.13 
   5  -5  -3  208.58    6.46 
  -5  -5   3  197.68    5.75 
   5  -5  -3  203.76    7.18 
  -5  -5   3  207.43    5.51 
  -5   5   3  206.62    7.35 
  -5   5   3  202.41    6.52 
   5   5  -3  204.38    6.49 
  -5   5   3  195.68    6.67 
  -5   5   3  208.01    6.64 
  -5   5   3  212.61    7.26 
  -5   5   3  192.78    6.51 
   4  -5  -3    2.65    0.68 
   4  -5  -3    2.46    0.59 
  -4  -5   3    3.68    0.44 
   4  -5  -3    3.09    0.65 
  -4  -5   3    4.68    0.65 
  -4  -5   3    3.29    0.72 
  -4  -5   3    3.67    0.42 
   4  -5  -3    2.33    0.67 
  -4  -5   3    2.40    0.80 
   4  -5  -3    2.87    0.72 
   4  -5  -3    3.89    0.61 
   4  -5  -3    2.08    0.77 
   4  -5  -3    5.65    1.14 
  -4   5   3    5.11    0.87 
  -4   5   3    4.84    1.15 
   4   5  -3    3.52    0.71 
  -4   5   3    6.41    0.97 
  -4   5   3    4.53    0.81 
  -4   5   3    4.00    0.80 
  -4   5   3    3.16    0.89 
  -3  -5   3  191.69    5.10 
   3  -5  -3  203.30    6.63 
   3  -5  -3  193.16    6.11 
   3  -5  -3  191.94    5.81 
   3  -5  -3  193.98    6.43 
  -3  -5   3  194.42    5.21 
  -3  -5   3  196.15    6.10 
   3  -5  -3  197.77    6.03 
   3  -5  -3  189.54    5.40 
   3  -5  -3  193.73    6.10 
  -3  -5   3  195.19    5.60 
  -3  -5   3  205.62    5.35 
  -3  -5   3  194.37    6.92 
   3  -5  -3  178.67    6.28 
  -3   5   3  193.43    6.09 
   3   5  -3  196.64    6.06 
  -3   5   3  199.18    6.14 
   3   5  -3  193.25    4.96 
  -3   5   3  194.18    5.99 
   3   5  -3  192.87    4.93 
   3   5  -3  196.98    4.83 
  -3   5   3  196.07    6.65 
  -3   5   3  192.17    6.51 
  -3   5   3  185.57    6.17 
  -2  -5   3   13.11    1.10 
  -2  -5   3   13.93    0.67 
   2  -5  -3   16.88    1.04 
   2  -5  -3   13.53    1.24 
  -2  -5   3   12.92    0.94 
  -2  -5   3   13.84    1.46 
   2  -5  -3   13.11    0.73 
   2  -5  -3   13.02    1.07 
   2  -5  -3   14.45    1.35 
   2  -5  -3   14.47    1.21 
   2  -5  -3   12.25    1.03 
   2  -5  -3   12.64    1.19 
  -2  -5   3   12.82    0.86 
  -2   5   3    9.78    1.12 
   2   5  -3   12.89    0.68 
   2   5  -3   12.92    1.12 
   2   5  -3   14.04    0.55 
   2   5  -3   11.72    0.85 
  -2   5   3   14.42    1.38 
  -2   5   3   13.22    1.10 
  -2   5   3   13.78    1.18 
  -2   5   3   12.47    1.00 
   2   5  -3   12.89    0.53 
  -2   5   3   12.26    1.28 
  -1  -5   3  223.33    6.36 
   1  -5  -3  221.87    6.73 
   1  -5  -3  218.95    6.06 
  -1  -5   3  223.60    6.27 
   1  -5  -3  226.21    6.83 
  -1  -5   3  221.14    6.48 
   1  -5  -3  216.39    5.56 
  -1  -5   3  224.02    5.78 
  -1  -5   3  219.98    7.50 
   1  -5  -3  219.08    6.42 
   1  -5  -3  220.64    6.48 
   1  -5  -3  216.30    6.97 
  -1  -5   3  219.64    6.24 
   1   5  -3  218.32    5.67 
   1   5  -3  217.44    8.06 
  -1   5   3  225.49    6.92 
   1   5  -3  223.95    6.25 
  -1   5   3  223.48    6.36 
  -1   5   3  210.09    6.53 
   1   5  -3  229.31    6.60 
   1   5  -3  229.11    6.25 
   1   5  -3  215.68    6.89 
   1   5  -3  214.85    5.81 
  -1   5   3  222.41    6.31 
   1   5  -3  226.64    5.96 
   1   5  -3  229.39    5.73 
  -1   5   3  217.06    6.85 
  -1   5   3  217.67    7.28 
  -1   5   3  221.22    6.80 
   0  -5   3   28.74    1.50 
   0  -5  -3   27.10    1.67 
   0  -5  -3   23.83    1.35 
   0  -5  -3   29.33    1.73 
   0  -5  -3   26.85    0.83 
   0  -5   3   28.19    1.36 
   0  -5  -3   28.64    1.84 
   0  -5  -3   27.07    1.46 
   0  -5  -3   26.81    1.14 
   0  -5  -3   23.99    1.51 
   0  -5   3   30.35    1.55 
   0  -5   3   28.14    2.08 
   0  -5  -3   27.06    1.40 
   0  -5   3   26.92    1.48 
   0  -5   3   26.84    1.18 
   0   5  -3   30.36    2.54 
   0   5   3   28.10    1.73 
   0   5  -3   26.46    1.31 
   0   5   3   26.90    1.31 
   0   5  -3   25.25    1.42 
   0   5   3   27.95    1.57 
   0   5   3   25.45    1.49 
   0   5  -3   26.51    1.60 
   0   5   3   27.36    1.09 
   0   5   3   26.82    1.68 
   0   5   3   28.97    1.84 
   0   5  -3   26.52    1.86 
   0   5  -3   28.56    1.38 
   0   5   3   26.31    1.33 
   0   5  -3   29.19    2.00 
   0   5   3   25.71    1.69 
   1  -5   3  264.61    7.71 
  -1  -5  -3  266.46    7.63 
   1  -5   3  257.02    7.50 
   1  -5   3  252.36    7.76 
  -1  -5  -3  255.73    7.09 
   1  -5   3  261.08    7.17 
   1  -5   3  265.17    7.21 
  -1  -5  -3  253.04    7.59 
  -1  -5  -3  256.43    6.51 
   1  -5   3  268.92    7.47 
  -1  -5  -3  255.83    6.42 
  -1  -5  -3  259.30    7.45 
  -1  -5  -3  266.32    6.89 
   1  -5   3  244.78    8.43 
  -1  -5  -3  265.98    6.76 
   1  -5   3  259.57    7.24 
  -1  -5  -3  271.62    7.46 
   1   5   3  242.14    8.01 
   1   5   3  265.00    6.89 
  -1   5  -3  260.23    7.66 
   1   5   3  258.57    6.57 
   1   5   3  263.05    7.46 
  -1   5  -3  253.45    7.17 
  -1   5  -3  256.58    7.37 
   1   5   3  249.37    7.89 
  -1   5  -3  257.53    9.40 
  -1   5  -3  260.43    8.16 
  -1   5  -3  262.36    7.24 
   2  -5   3   15.85    1.13 
  -2  -5  -3   14.62    1.13 
   2  -5   3   15.78    1.27 
   2  -5   3   14.04    1.15 
   2  -5   3   16.76    1.02 
   2  -5   3   13.81    1.48 
   2  -5   3   15.02    1.15 
  -2  -5  -3   15.94    1.27 
  -2  -5  -3   15.66    0.85 
   2  -5   3   15.81    1.26 
  -2  -5  -3   15.58    0.78 
  -2  -5  -3   16.66    1.27 
   2  -5   3   13.55    1.77 
   2   5   3   16.46    1.36 
  -2   5  -3   14.71    1.12 
   2   5   3   15.17    0.78 
  -2   5  -3   16.97    1.23 
   2   5   3   20.60    1.67 
   2   5   3   15.88    0.82 
  -2   5  -3   17.46    1.63 
   2   5   3   15.63    1.25 
  -2   5  -3   15.72    1.12 
  -2   5  -3   15.28    1.29 
  -2   5  -3   15.88    2.22 
  -2   5  -3   15.68    1.21 
  -3  -5  -3   60.90    2.67 
   3  -5   3   61.22    2.85 
  -3  -5  -3   60.69    2.66 
   3  -5   3   60.98    2.17 
   3  -5   3   65.56    3.08 
   3  -5   3   57.53    2.68 
  -3  -5  -3   63.62    2.66 
   3  -5   3   57.31    2.57 
  -3  -5  -3   62.14    2.05 
   3  -5   3   62.88    2.75 
   3  -5   3   61.42    2.60 
  -3   5  -3   60.08    2.68 
   3   5   3   60.31    2.25 
  -3   5  -3   61.98    2.71 
  -3   5  -3   66.31    3.84 
  -3   5  -3   62.34    2.73 
   3   5   3   59.31    2.65 
   3   5   3   67.21    2.77 
   3   5   3   58.27    2.12 
  -3   5  -3   64.09    2.64 
  -3   5  -3   57.09    3.10 
  -4  -5  -3    6.27    0.55 
   4  -5   3    6.00    1.07 
  -4  -5  -3    5.60    0.95 
   4  -5   3    6.58    1.02 
   4  -5   3    6.97    0.98 
  -4  -5  -3    7.85    1.06 
   4  -5   3    6.65    1.02 
   4  -5   3    5.85    0.90 
   4  -5   3    4.92    1.00 
   4  -5   3    4.72    0.55 
  -4  -5  -3    7.00    1.08 
  -4   5  -3    5.64    0.92 
  -4   5  -3    5.10    0.90 
   4   5   3    7.44    1.07 
  -4   5  -3    6.23    1.30 
  -4   5  -3    7.68    1.20 
  -4   5  -3    5.89    0.94 
   4   5   3    5.68    0.73 
  -4   5  -3    5.84    1.36 
   4   5   3    6.19    0.92 
  -4   5  -3    6.64    1.17 
  -5  -5  -3    7.50    1.16 
   5  -5   3    5.96    0.91 
  -5  -5  -3    5.37    0.94 
  -5  -5  -3    6.70    0.77 
   5  -5   3    6.42    1.06 
   5  -5   3    6.27    1.12 
   5  -5   3    6.98    1.07 
  -5  -5  -3    7.12    1.07 
   5  -5   3    5.67    1.13 
   5  -5   3    5.43    1.00 
   5   5   3    6.93    1.01 
  -5   5  -3    7.75    1.16 
  -5   5  -3    6.59    1.07 
  -5   5  -3    5.34    1.08 
  -5   5  -3    4.46    1.26 
  -5   5  -3    7.45    1.41 
  -5   5  -3    7.04    1.48 
  -5   5  -3    7.25    1.10 
   5   5   3    5.26    0.96 
   5   5   3    7.15    0.89 
  -6  -5  -3    0.29    0.44 
  -6  -5  -3    0.43    0.40 
   6  -5   3    0.22    0.35 
   6  -5   3    0.27    0.41 
  -6  -5  -3    0.55    0.52 
  -6  -5  -3    0.48    0.45 
   6  -5   3    0.78    0.54 
   6  -5   3   -0.12    0.35 
  -6  -5  -3    0.31    0.42 
   6  -5   3    0.24    0.51 
   6  -5   3    0.21    0.35 
  -6   5  -3   -0.13    0.30 
  -6   5  -3    0.42    0.47 
  -6   5  -3    0.78    0.48 
  -6   5  -3    0.84    0.52 
   6   5   3    0.48    0.43 
  -6   5  -3    0.91    0.69 
   6   5   3    0.53    0.47 
  -6   5  -3    0.70    0.59 
  -6   5  -3   -0.37    0.45 
   6   5   3    0.26    0.37 
  -7  -5  -3    2.98    0.84 
   7  -5   3    1.58    0.80 
  -7  -5  -3    2.57    0.82 
  -7  -5  -3    2.33    0.68 
   7  -5   3    4.14    0.77 
   7  -5   3    3.98    1.07 
   7  -5   3    1.83    0.68 
   7  -5   3    1.80    0.79 
  -7   5  -3    1.80    0.67 
   7   5   3    2.79    0.71 
   7   5   3    2.88    0.73 
  -7   5  -3    2.20    1.00 
  -7   5  -3    2.57    1.23 
  -7   5  -3    1.77    0.76 
  -7   5  -3    1.39    0.65 
  -7   5  -3    2.40    0.96 
  -7   5  -3    2.12    0.84 
  -8  -5  -3    2.21    0.93 
  -8  -5  -3    0.94    0.82 
   8  -5   3    1.95    0.79 
   8  -5   3    0.89    0.67 
   8  -5   3    0.94    0.68 
  -8  -5  -3    1.34    0.60 
   8  -5   3    0.44    0.59 
  -8  -5  -3    1.97    0.75 
  -8   5  -3    0.80    0.71 
  -8   5  -3    1.01    0.84 
  -8   5  -3    1.39    0.72 
  -8   5  -3    0.88    0.65 
  -8   5  -3    0.57    0.64 
  -8   5  -3    2.38    1.06 
  -8   5  -3    0.83    0.94 
   8  -6  -3    2.72    1.05 
   8  -6  -3    5.85    1.13 
   8  -6  -3    4.19    1.07 
  -8  -6   3    5.62    1.21 
  -8  -6   3    3.10    1.32 
   8  -6  -3    6.35    1.19 
   8  -6  -3    3.54    1.09 
  -8   6   3    2.66    1.17 
  -8   6   3    4.95    1.18 
   8   6  -3    3.79    1.00 
  -8   6   3    8.22    1.58 
  -8   6   3    3.06    0.89 
  -8   6   3    5.45    1.26 
  -8   6   3    3.11    1.24 
   7  -6  -3    0.17    0.49 
   7  -6  -3    0.49    0.60 
  -7  -6   3    0.12    0.43 
   7  -6  -3    0.99    0.55 
   7  -6  -3    1.26    0.81 
   7  -6  -3    0.63    0.46 
   7  -6  -3    1.61    0.88 
  -7  -6   3    0.29    0.61 
  -7   6   3    0.70    0.57 
  -7   6   3    0.85    0.87 
  -7   6   3   -0.06    0.53 
  -7   6   3    0.51    0.51 
  -7   6   3    0.80    0.60 
   7   6  -3    0.46    0.53 
  -7   6   3    0.96    0.62 
  -6  -6   3   15.84    1.77 
   6  -6  -3   15.56    1.87 
   6  -6  -3   13.03    1.75 
   6  -6  -3   13.21    1.52 
   6  -6  -3   11.48    1.49 
  -6  -6   3   11.55    1.92 
   6  -6  -3   11.61    1.33 
   6  -6  -3   11.58    1.74 
   6  -6  -3    9.19    1.72 
  -6  -6   3   10.36    1.46 
   6   6  -3   11.12    1.43 
  -6   6   3   12.98    1.91 
  -6   6   3   11.71    1.57 
  -6   6   3   14.11    1.68 
  -6   6   3   12.63    2.02 
  -6   6   3   10.79    1.48 
  -6   6   3   12.27    1.64 
   5  -6  -3    4.13    1.13 
   5  -6  -3    3.66    1.01 
  -5  -6   3    4.51    0.96 
  -5  -6   3    4.22    1.16 
   5  -6  -3    4.53    0.78 
  -5  -6   3    3.83    0.68 
   5  -6  -3    2.97    0.84 
  -5  -6   3    5.54    1.03 
   5  -6  -3    4.95    1.03 
   5  -6  -3    3.66    0.85 
   5  -6  -3    5.18    0.97 
   5   6  -3    4.53    0.89 
  -5   6   3    3.59    1.06 
  -5   6   3    5.16    1.02 
  -5   6   3    4.09    0.90 
  -5   6   3    3.51    0.85 
  -5   6   3    4.79    1.22 
  -5   6   3    4.29    0.96 
   4  -6  -3   18.52    2.19 
   4  -6  -3   18.96    1.59 
   4  -6  -3   17.13    1.14 
   4  -6  -3   17.87    1.67 
   4  -6  -3   20.46    1.54 
  -4  -6   3   16.71    1.17 
   4  -6  -3   15.88    1.34 
   4  -6  -3   19.01    1.82 
  -4  -6   3   17.81    1.84 
   4  -6  -3   17.54    1.53 
  -4  -6   3   17.42    1.48 
  -4  -6   3   18.39    0.99 
  -4   6   3   18.86    1.59 
  -4   6   3   17.32    1.82 
  -4   6   3   19.02    2.29 
  -4   6   3   17.23    1.49 
  -4   6   3   19.62    1.56 
   4   6  -3   17.82    1.42 
  -4   6   3   17.72    1.44 
   3  -6  -3   10.46    1.28 
  -3  -6   3   11.58    1.73 
   3  -6  -3    9.50    1.17 
   3  -6  -3   12.36    1.06 
   3  -6  -3   13.56    1.88 
   3  -6  -3   12.70    1.56 
  -3  -6   3   11.54    0.87 
  -3  -6   3   10.85    0.96 
   3  -6  -3   10.51    0.80 
   3  -6  -3   14.11    1.83 
   3  -6  -3    9.72    1.39 
  -3  -6   3    8.43    1.14 
  -3   6   3   11.59    1.69 
   3   6  -3   11.77    0.55 
  -3   6   3   13.27    1.49 
  -3   6   3    8.72    1.18 
  -3   6   3    9.94    1.18 
  -3   6   3   13.22    1.85 
  -3   6   3   11.23    1.32 
   3   6  -3   10.79    0.54 
   3   6  -3   10.22    1.20 
  -2  -6   3  166.12    5.55 
   2  -6  -3  166.81    5.72 
  -2  -6   3  169.81    4.97 
   2  -6  -3  167.09    4.62 
  -2  -6   3  168.49    5.28 
   2  -6  -3  168.24    5.90 
   2  -6  -3  168.42    5.54 
   2  -6  -3  164.12    5.49 
   2  -6  -3  168.10    5.99 
   2  -6  -3  162.04    5.10 
   2  -6  -3  173.30    5.91 
  -2  -6   3  170.66    5.12 
  -2  -6   3  171.65    6.54 
  -2  -6   3  166.85    5.10 
   2   6  -3  166.25    4.26 
   2   6  -3  173.51    5.19 
  -2   6   3  171.60    5.27 
   2   6  -3  170.99    4.63 
  -2   6   3  172.76    5.68 
   2   6  -3  167.85    5.59 
   2   6  -3  173.87    4.36 
  -2   6   3  171.10    5.40 
  -2   6   3  172.87    6.49 
  -2   6   3  175.78    6.11 
  -2   6   3  172.52    5.83 
  -1  -6   3    0.71    0.37 
  -1  -6   3    1.22    0.30 
   1  -6  -3    0.95    0.33 
   1  -6  -3    1.14    0.21 
   1  -6  -3    0.91    0.41 
   1  -6  -3    1.90    0.63 
   1  -6  -3    1.01    0.59 
  -1  -6   3    0.99    0.42 
  -1  -6   3    2.36    0.59 
   1  -6  -3    0.82    0.52 
  -1  -6   3    0.90    0.62 
  -1  -6   3    1.09    0.40 
   1  -6  -3    2.59    0.81 
   1  -6  -3    0.85    0.44 
  -1   6   3    0.86    0.59 
   1   6  -3    0.98    0.26 
  -1   6   3    0.71    0.44 
  -1   6   3    1.72    0.46 
   1   6  -3    0.97    0.26 
   1   6  -3    1.74    0.51 
   1   6  -3    1.01    0.64 
   1   6  -3    1.26    0.34 
   1   6  -3    1.21    0.43 
  -1   6   3    1.53    0.45 
   1   6  -3    1.36    0.51 
  -1   6   3    1.08    0.50 
  -1   6   3    1.04    0.44 
  -1   6   3    1.75    0.72 
  -1   6   3    1.08    0.45 
   1   6  -3    0.93    0.29 
   0  -6  -3  111.38    3.34 
   0  -6  -3  114.23    4.46 
   0  -6   3  110.63    4.89 
   0  -6  -3  113.36    3.87 
   0  -6   3  118.07    4.04 
   0  -6   3  107.40    3.89 
   0  -6  -3  115.24    4.28 
   0  -6  -3  113.14    4.29 
   0  -6   3  108.11    3.95 
   0  -6  -3  109.09    4.16 
   0  -6  -3  108.96    3.92 
   0  -6   3  106.08    3.66 
   0  -6   3  112.80    4.26 
   0  -6  -3  107.06    2.89 
   0   6   3  113.85    4.49 
   0   6  -3  111.78    3.65 
   0   6   3  113.56    4.32 
   0   6  -3  109.87    4.18 
   0   6  -3  114.15    3.72 
   0   6   3  118.63    4.45 
   0   6   3  112.11    3.64 
   0   6  -3  117.77    5.67 
   0   6   3  116.19    4.02 
   0   6  -3  108.73    3.88 
   0   6   3  112.91    4.11 
   0   6   3  117.50    3.32 
   0   6  -3  116.97    3.85 
   0   6  -3  112.37    4.49 
   0   6   3  115.43    4.45 
   0   6  -3  117.95    4.83 
  -1  -6  -3    0.54    0.47 
   1  -6   3    0.68    0.45 
  -1  -6  -3    0.23    0.18 
   1  -6   3    0.25    0.35 
  -1  -6  -3    0.40    0.17 
  -1  -6  -3    0.51    0.30 
  -1  -6  -3    0.05    0.26 
   1  -6   3    0.48    0.37 
  -1  -6  -3    0.48    0.43 
   1  -6   3    0.30    0.35 
   1  -6   3    0.18    0.28 
  -1  -6  -3    0.17    0.31 
  -1  -6  -3    0.42    0.15 
   1  -6   3    0.55    0.31 
   1  -6   3    0.53    0.52 
  -1   6  -3    0.75    0.39 
  -1   6  -3    0.57    0.34 
   1   6   3    0.56    0.26 
   1   6   3    0.31    0.43 
  -1   6  -3   -0.30    0.16 
   1   6   3    0.50    0.19 
  -1   6  -3    0.05    0.66 
  -1   6  -3    0.21    0.54 
   1   6   3    0.17    0.33 
  -1   6  -3    0.35    0.39 
  -2  -6  -3  192.83    5.08 
   2  -6   3  183.97    7.02 
   2  -6   3  187.06    5.95 
   2  -6   3  184.20    5.90 
  -2  -6  -3  178.32    5.52 
   2  -6   3  189.00    5.69 
  -2  -6  -3  173.73    5.82 
   2  -6   3  187.28    6.15 
   2  -6   3  186.15    5.53 
   2  -6   3  190.01    5.90 
   2  -6   3  179.90    6.28 
  -2  -6  -3  184.21    5.47 
  -2  -6  -3  182.54    5.97 
  -2  -6  -3  189.97    6.14 
   2   6   3  188.07    5.06 
  -2   6  -3  180.16    6.18 
  -2   6  -3  179.79    5.92 
  -2   6  -3  183.93    5.77 
  -2   6  -3  179.93    5.74 
  -2   6  -3  177.54    6.68 
   2   6   3  187.71    5.97 
   2   6   3  185.43    6.25 
  -2   6  -3  191.77    7.95 
   2   6   3  181.06    4.98 
   3  -6   3    7.32    1.00 
   3  -6   3    5.02    0.88 
  -3  -6  -3    4.86    0.97 
  -3  -6  -3    6.17    0.99 
  -3  -6  -3    5.75    0.50 
   3  -6   3    5.42    1.00 
  -3  -6  -3    7.26    1.16 
   3  -6   3    6.38    0.77 
   3  -6   3    4.93    0.97 
   3  -6   3    5.26    1.03 
   3  -6   3    4.03    0.95 
   3  -6   3    5.40    0.92 
  -3  -6  -3    6.62    0.83 
  -3   6  -3    4.69    0.88 
  -3   6  -3    5.84    0.93 
  -3   6  -3    6.85    1.44 
   3   6   3    5.87    1.02 
   3   6   3    5.16    0.62 
  -3   6  -3    5.31    1.14 
  -3   6  -3    6.42    0.94 
  -3   6  -3    6.30    1.53 
   3   6   3    7.43    1.07 
   4  -6   3  278.47    8.40 
   4  -6   3  284.07    7.47 
  -4  -6  -3  277.38    8.22 
   4  -6   3  276.83    8.57 
  -4  -6  -3  277.39    7.58 
   4  -6   3  260.28    8.67 
   4  -6   3  270.10    8.85 
  -4  -6  -3  276.14    8.30 
   4  -6   3  273.82    8.36 
   4  -6   3  269.14    8.26 
   4  -6   3  266.00    8.21 
  -4  -6  -3  269.80    8.27 
  -4   6  -3  268.85    8.30 
   4   6   3  278.28    8.19 
  -4   6  -3  285.44   10.38 
  -4   6  -3  282.61    8.65 
  -4   6  -3  275.48    8.69 
   4   6   3  284.27    7.58 
  -4   6  -3  272.14    9.22 
   4   6   3  290.93    8.49 
  -4   6  -3  261.93    8.37 
  -4   6  -3  264.35    8.36 
   5  -6   3    6.24    1.09 
   5  -6   3    8.51    1.18 
   5  -6   3    5.07    1.01 
   5  -6   3    5.41    1.24 
  -5  -6  -3    7.68    1.27 
  -5  -6  -3    6.56    1.29 
   5  -6   3    5.85    1.10 
  -5  -6  -3    8.18    1.29 
   5  -6   3    5.99    1.19 
  -5   6  -3    5.28    1.24 
  -5   6  -3    5.88    1.28 
  -5   6  -3    4.32    1.37 
  -5   6  -3    4.51    0.96 
  -5   6  -3    5.67    1.46 
   5   6   3    6.38    1.02 
   5   6   3    5.58    0.83 
  -5   6  -3    6.35    1.10 
   5   6   3    6.86    1.16 
  -5   6  -3    5.62    1.05 
  -6  -6  -3  180.41    6.40 
   6  -6   3  177.14    6.08 
  -6  -6  -3  185.15    6.55 
   6  -6   3  187.00    6.59 
   6  -6   3  172.73    6.93 
   6  -6   3  184.25    6.17 
   6  -6   3  176.59    6.47 
   6  -6   3  174.41    6.87 
  -6  -6  -3  195.80    6.50 
  -6   6  -3  182.77    6.56 
  -6   6  -3  173.39    7.14 
   6   6   3  183.23    5.86 
   6   6   3  183.82    6.15 
  -6   6  -3  184.93    6.65 
  -6   6  -3  186.26    6.79 
  -6   6  -3  191.73    6.65 
  -6   6  -3  193.67    8.34 
  -6   6  -3  198.29    7.07 
   6   6   3  191.02    6.52 
   7  -6   3    3.21    0.96 
  -7  -6  -3    3.75    0.95 
   7  -6   3    3.68    0.97 
   7  -6   3    2.26    0.92 
   7  -6   3    4.71    0.92 
  -7  -6  -3    3.14    0.81 
   7  -6   3    2.55    0.98 
  -7   6  -3    4.43    1.22 
  -7   6  -3    3.12    0.97 
  -7   6  -3    5.07    1.49 
  -7   6  -3    3.59    0.97 
   7   6   3    4.78    0.94 
  -7   6  -3    3.74    1.45 
  -7   6  -3    3.78    1.01 
   7   6   3    4.70    0.97 
  -7   6  -3    5.36    1.42 
   8  -6   3   66.90    4.19 
  -8  -6  -3   68.47    3.63 
   8  -6   3   73.48    3.95 
   8  -6   3   81.82    4.45 
   8  -6   3   74.09    3.94 
  -8   6  -3   67.48    3.74 
  -8   6  -3   72.38    3.99 
  -8   6  -3   65.35    4.88 
  -8   6  -3   70.44    4.48 
  -8   6  -3   74.52    3.94 
  -8   6  -3   69.48    3.85 
  -8   7   3    9.55    1.92 
   7  -7  -3  131.23    6.06 
   7  -7  -3  130.08    5.46 
  -7  -7   3  144.07    6.56 
   7  -7  -3  132.00    6.19 
   7  -7  -3  141.29    5.32 
   7  -7  -3  142.01    6.00 
  -7  -7   3  135.99    5.62 
  -7   7   3  132.34    5.51 
  -7   7   3  124.61    6.17 
  -7   7   3  137.53    5.84 
   7   7  -3  134.53    5.31 
  -7   7   3  123.99    5.47 
  -7   7   3  137.01    6.79 
   6  -7  -3   14.50    2.09 
   6  -7  -3   14.45    2.28 
  -6  -7   3   16.00    1.99 
   6  -7  -3   13.76    1.71 
   6  -7  -3   16.76    2.09 
  -6  -7   3   20.26    2.63 
   6  -7  -3   15.81    1.81 
   6  -7  -3   14.25    1.57 
  -6  -7   3   16.20    1.98 
   6  -7  -3   15.59    2.02 
  -6   7   3   14.80    1.92 
  -6   7   3   14.56    1.80 
  -6   7   3   14.15    2.13 
  -6   7   3   18.06    2.57 
  -6   7   3   15.68    1.90 
   6   7  -3   17.07    1.82 
  -5  -7   3   77.14    4.22 
   5  -7  -3   69.69    3.47 
  -5  -7   3   68.01    3.34 
  -5  -7   3   70.39    3.51 
   5  -7  -3   68.43    3.76 
   5  -7  -3   67.53    3.54 
   5  -7  -3   69.76    3.28 
   5  -7  -3   68.57    3.32 
   5  -7  -3   70.18    3.91 
   5  -7  -3   66.27    2.81 
  -5   7   3   64.56    3.47 
  -5   7   3   65.56    3.36 
   5   7  -3   71.97    3.26 
  -5   7   3   67.95    3.98 
  -5   7   3   71.14    4.30 
  -5   7   3   64.87    3.33 
   4  -7  -3   39.77    2.73 
   4  -7  -3   43.03    1.95 
  -4  -7   3   45.15    2.61 
   4  -7  -3   44.34    2.85 
  -4  -7   3   41.23    2.53 
   4  -7  -3   42.68    2.61 
   4  -7  -3   42.45    2.46 
   4  -7  -3   42.66    2.62 
  -4  -7   3   50.72    3.30 
  -4  -7   3   43.33    2.18 
   4  -7  -3   41.28    2.86 
   4  -7  -3   44.41    2.38 
  -4   7   3   44.20    3.05
[truncated: 1,196,586 more chars]
