# Supplementary material
Source: MDPI journal article supplement (https://www.mdpi.com/2073-4352/13/7/1043)
Supplement: s1 [file s1 › 9 Dy Ha2019_78_0m_a.cif]

 
data_Ha2019_78_0m_a 
  
_audit_creation_method            'SHELXL-2014/7' 
_shelx_SHELXL_version_number      '2014/7' 
_chemical_name_systematic         ? 
_chemical_name_common             ? 
_chemical_melting_point           ? 
_chemical_formula_moiety          ? 
_chemical_formula_sum 
 'C4 H12 Br Dy O7' 
_chemical_formula_weight          414.55 
  
loop_ 
 _atom_type_symbol 
 _atom_type_description 
 _atom_type_scat_dispersion_real 
 _atom_type_scat_dispersion_imag 
 _atom_type_scat_source 
 'C'  'C'   0.0033   0.0016 
 'International Tables Vol C Tables 4.2.6.8 and 6.1.1.4' 
 'H'  'H'   0.0000   0.0000 
 'International Tables Vol C Tables 4.2.6.8 and 6.1.1.4' 
 'O'  'O'   0.0106   0.0060 
 'International Tables Vol C Tables 4.2.6.8 and 6.1.1.4' 
 'Br'  'Br'  -0.2901   2.4595 
 'International Tables Vol C Tables 4.2.6.8 and 6.1.1.4' 
 'Dy'  'Dy'  -0.1892   4.4098 
 'International Tables Vol C Tables 4.2.6.8 and 6.1.1.4' 
  
_space_group_crystal_system       monoclinic 
_space_group_IT_number            14 
_space_group_name_H-M_alt         'P 21/n' 
_space_group_name_Hall            '-P 2yn' 
  
_shelx_space_group_comment 
; 
The symmetry employed for this shelxl refinement is uniquely defined 
by the following loop, which should always be used as a source of 
symmetry information in preference to the above space-group names. 
They are only intended as comments. 
; 
  
loop_ 
 _space_group_symop_operation_xyz 
 'x, y, z' 
 '-x+1/2, y+1/2, -z+1/2' 
 '-x, -y, -z' 
 'x-1/2, -y-1/2, z-1/2' 
  
_cell_length_a                    7.8038(3) 
_cell_length_b                    8.0288(3) 
_cell_length_c                    17.6550(7) 
_cell_angle_alpha                 90 
_cell_angle_beta                  96.034(2) 
_cell_angle_gamma                 90 
_cell_volume                      1100.05(7) 
_cell_formula_units_Z             4 
_cell_measurement_temperature     100(2) 
_cell_measurement_reflns_used     9634 
_cell_measurement_theta_min       2.32 
_cell_measurement_theta_max       28.25 
  
_exptl_crystal_description        prism 
_exptl_crystal_colour             colourless 
_exptl_crystal_density_meas       ? 
_exptl_crystal_density_method     ? 
_exptl_crystal_density_diffrn     2.503 
_exptl_crystal_F_000              772 
_exptl_transmission_factor_min    ? 
_exptl_transmission_factor_max    ? 
_exptl_crystal_size_max           0.484 
_exptl_crystal_size_mid           0.123 
_exptl_crystal_size_min           0.077 
_exptl_absorpt_coefficient_mu     10.429 
_shelx_estimated_absorpt_T_min    0.081 
_shelx_estimated_absorpt_T_max    0.501 
_exptl_absorpt_correction_type    multi-scan 
_exptl_absorpt_correction_T_min   0.267 
_exptl_absorpt_correction_T_max   0.734 
_exptl_absorpt_process_details    'Bruker SADABS'
_exptl_absorpt_special_details    ? 
_diffrn_ambient_temperature       100(2) 
_diffrn_radiation_wavelength      0.71073 
_diffrn_radiation_type            MoK\a 
_diffrn_source                    ? 
_diffrn_measurement_device_type   'Bruker APEX-II CCD' 
_diffrn_measurement_method        '\f and \w scans' 
_diffrn_detector_area_resol_mean  ? 
_diffrn_reflns_number             101683 
_diffrn_reflns_av_unetI/netI      0.0107 
_diffrn_reflns_av_R_equivalents   0.0444 
_diffrn_reflns_limit_h_min        -10 
_diffrn_reflns_limit_h_max        10 
_diffrn_reflns_limit_k_min        -10 
_diffrn_reflns_limit_k_max        10 
_diffrn_reflns_limit_l_min        -23 
_diffrn_reflns_limit_l_max        23 
_diffrn_reflns_theta_min          2.790 
_diffrn_reflns_theta_max          27.995 
_diffrn_reflns_theta_full         25.242 
_diffrn_measured_fraction_theta_max   0.999 
_diffrn_measured_fraction_theta_full  0.998 
_diffrn_reflns_Laue_measured_fraction_max    0.999 
_diffrn_reflns_Laue_measured_fraction_full   0.998 
_diffrn_reflns_point_group_measured_fraction_max   0.999 
_diffrn_reflns_point_group_measured_fraction_full  0.998 
_reflns_number_total              2666 
_reflns_number_gt                 2567 
_reflns_threshold_expression      'I > 2\s(I)' 
_reflns_Friedel_coverage          0.000 
_reflns_Friedel_fraction_max      . 
_reflns_Friedel_fraction_full     . 
  
_reflns_special_details 
; 
 Reflections were merged by SHELXL according to the crystal 
 class for the calculation of statistics and refinement. 
  
 _reflns_Friedel_fraction is defined as the number of unique 
 Friedel pairs measured divided by the number that would be 
 possible theoretically, ignoring centric projections and 
 systematic absences. 
; 
  
_computing_data_collection        'Bruker APEX2' 
_computing_cell_refinement        'Bruker SAINT' 
_computing_data_reduction         'Bruker SAINT' 
_computing_structure_solution     'SHELXS-97 (Sheldrick 2008)' 
_computing_structure_refinement 'SHELXL-2014/7 (Sheldrick, 2014)' 
_computing_molecular_graphics     'Bruker SHELXTL' 
_computing_publication_material   'Bruker SHELXTL' 
_refine_special_details           ? 
_refine_ls_structure_factor_coef  Fsqd 
_refine_ls_matrix_type            full 
_refine_ls_weighting_scheme       calc 
_refine_ls_weighting_details 
'w=1/[\s^2^(Fo^2^)+(0.0148P)^2^+1.1523P] where P=(Fo^2^+2Fc^2^)/3' 
_atom_sites_solution_primary      direct 
_atom_sites_solution_secondary    ? 
_atom_sites_solution_hydrogens    mixed 
_refine_ls_hydrogen_treatment     constr
_refine_ls_extinction_method      'SHELXL-2014/7 (Sheldrick 2014' 
_refine_ls_extinction_coef        0.00126(9) 
_refine_ls_extinction_expression 
 'Fc^*^=kFc[1+0.001xFc^2^\l^3^/sin(2\q)]^-1/4^' 
_refine_ls_number_reflns          2666 
_refine_ls_number_parameters      126 
_refine_ls_number_restraints      0 
_refine_ls_R_factor_all           0.0140 
_refine_ls_R_factor_gt            0.0129 
_refine_ls_wR_factor_ref          0.0325 
_refine_ls_wR_factor_gt           0.0321 
_refine_ls_goodness_of_fit_ref    1.118 
_refine_ls_restrained_S_all       1.118 
_refine_ls_shift/su_max           0.005 
_refine_ls_shift/su_mean          0.000 
  
loop_ 
 _atom_site_label 
 _atom_site_type_symbol 
 _atom_site_fract_x 
 _atom_site_fract_y 
 _atom_site_fract_z 
 _atom_site_U_iso_or_equiv 
 _atom_site_adp_type 
 _atom_site_occupancy 
 _atom_site_site_symmetry_order 
 _atom_site_calc_flag 
 _atom_site_refinement_flags_posn 
 _atom_site_refinement_flags_adp 
 _atom_site_refinement_flags_occupancy 
 _atom_site_disorder_assembly 
 _atom_site_disorder_group 
Dy1 Dy 0.26587(2) 0.45353(2) 0.53727(2) 0.01047(4) Uani 1 1 d . . . . . 
Br1 Br 0.38909(3) 0.95506(2) 0.68373(2) 0.01729(5) Uani 1 1 d . . . . . 
O11 O 0.00335(18) 0.3315(2) 0.53637(9) 0.0194(3) Uani 1 1 d . . . . . 
O12 O -0.27220(18) 0.27956(19) 0.52293(9) 0.0159(3) Uani 1 1 d . . . . . 
C11 C -0.1207(2) 0.2373(3) 0.54703(11) 0.0126(4) Uani 1 1 d . . . . . 
C12 C -0.0914(3) 0.0749(3) 0.58806(14) 0.0242(5) Uani 1 1 d . . . . . 
H12A H -0.1424 0.0795 0.6364 0.092(9) Uiso 1 1 calc R U . . . 
H12B H 0.0327 0.0541 0.5981 0.092(9) Uiso 1 1 calc R U . . . 
H12C H -0.1452 -0.0152 0.5565 0.092(9) Uiso 1 1 calc R U . . . 
O21 O 0.53883(18) 0.55478(17) 0.57344(8) 0.0130(3) Uani 1 1 d . . . . . 
O22 O 0.81039(17) 0.61938(19) 0.59451(8) 0.0152(3) Uani 1 1 d . . . . . 
C21 C 0.6709(3) 0.5861(2) 0.62076(12) 0.0130(4) Uani 1 1 d . . . . . 
C22 C 0.6598(3) 0.5792(3) 0.70444(12) 0.0205(5) Uani 1 1 d . . . . . 
H22A H 0.7762 0.5731 0.7312 0.094(10) Uiso 1 1 calc R U . . . 
H22B H 0.5941 0.4805 0.7166 0.094(10) Uiso 1 1 calc R U . . . 
H22C H 0.6019 0.6796 0.7205 0.094(10) Uiso 1 1 calc R U . . . 
O1W O 0.39778(18) 0.18595(18) 0.53178(8) 0.0153(3) Uani 1 1 d . . . . . 
H11W H 0.3911 0.1035 0.5707 0.045(6) Uiso 1 1 d R U . . . 
H12W H 0.5174 0.1900 0.5236 0.045(6) Uiso 1 1 d R U . . . 
O2W O 0.15572(17) 0.63967(18) 0.62400(8) 0.0151(3) Uani 1 1 d . . . . . 
H21W H 0.0351 0.6552 0.6283 0.046(7) Uiso 1 1 d R U . . . 
H22W H 0.2090 0.7424 0.6415 0.046(7) Uiso 1 1 d R U . . . 
O3W O 0.2968(2) 0.34299(19) 0.66342(9) 0.0195(3) Uani 1 1 d . . . . . 
H31W H 0.2459 0.3937 0.7049 0.054(7) Uiso 1 1 d R U . . . 
H32W H 0.3243 0.2315 0.6801 0.054(7) Uiso 1 1 d R U . . . 
  
loop_ 
 _atom_site_aniso_label 
 _atom_site_aniso_U_11 
 _atom_site_aniso_U_22 
 _atom_site_aniso_U_33 
 _atom_site_aniso_U_23 
 _atom_site_aniso_U_13 
 _atom_site_aniso_U_12 
Dy1 0.00754(5) 0.01295(6) 0.01108(6) -0.00046(3) 0.00168(3) -0.00226(3) 
Br1 0.02100(11) 0.01429(10) 0.01642(11) 0.00143(8) 0.00117(8) -0.00206(7) 
O11 0.0136(7) 0.0251(8) 0.0206(8) -0.0046(6) 0.0065(6) -0.0074(6) 
O12 0.0102(6) 0.0199(7) 0.0177(7) 0.0034(6) 0.0018(5) 0.0010(6) 
C11 0.0117(8) 0.0149(9) 0.0114(9) -0.0013(7) 0.0024(7) -0.0007(7) 
C12 0.0265(12) 0.0213(11) 0.0244(12) 0.0081(10) 0.0005(10) 0.0048(9) 
O21 0.0096(6) 0.0162(7) 0.0130(7) -0.0005(5) 0.0004(5) -0.0011(5) 
O22 0.0093(6) 0.0208(7) 0.0156(7) -0.0018(6) 0.0012(5) -0.0018(6) 
C21 0.0133(9) 0.0113(9) 0.0142(9) -0.0013(7) 0.0003(7) 0.0019(7) 
C22 0.0164(10) 0.0328(12) 0.0120(10) 0.0004(9) -0.0006(8) 0.0032(9) 
O1W 0.0132(7) 0.0163(7) 0.0172(7) 0.0019(6) 0.0049(5) -0.0001(5) 
O2W 0.0108(6) 0.0163(7) 0.0179(7) -0.0022(6) 0.0007(5) -0.0002(6) 
O3W 0.0273(8) 0.0171(7) 0.0152(7) 0.0020(6) 0.0077(6) 0.0042(6) 
  
_geom_special_details 
; 
 All esds (except the esd in the dihedral angle between two l.s. planes) 
 are estimated using the full covariance matrix.  The cell esds are taken 
 into account individually in the estimation of esds in distances, angles 
 and torsion angles; correlations between esds in cell parameters are only 
 used when they are defined by crystal symmetry.  An approximate (isotropic) 
 treatment of cell esds is used for estimating esds involving l.s. planes. 
; 
  
loop_ 
 _geom_bond_atom_site_label_1 
 _geom_bond_atom_site_label_2 
 _geom_bond_distance 
 _geom_bond_site_symmetry_2 
 _geom_bond_publ_flag 
Dy1 O11 2.2693(14) . ? 
Dy1 O21 2.3065(14) . ? 
Dy1 O2W 2.3651(14) . ? 
Dy1 O3W 2.3860(15) . ? 
Dy1 O1W 2.3886(14) . ? 
Dy1 O12 2.3949(15) 3_566 ? 
Dy1 O22 2.4123(15) 3_666 ? 
Dy1 O21 2.6027(14) 3_666 ? 
Dy1 O11 2.9168(16) 3_566 ? 
O11 C11 1.258(2) . ? 
O12 C11 1.260(2) . ? 
C11 C12 1.497(3) . ? 
C12 H12A 0.9800 . ? 
C12 H12B 0.9800 . ? 
C12 H12C 0.9800 . ? 
O21 C21 1.281(2) . ? 
O22 C21 1.256(2) . ? 
C21 C22 1.490(3) . ? 
C22 H22A 0.9800 . ? 
C22 H22B 0.9800 . ? 
C22 H22C 0.9800 . ? 
O1W H11W 0.9600 . ? 
O1W H12W 0.9600 . ? 
O2W H21W 0.9600 . ? 
O2W H22W 0.9600 . ? 
O3W H31W 0.9600 . ? 
O3W H32W 0.9600 . ? 
  
loop_ 
 _geom_angle_atom_site_label_1 
 _geom_angle_atom_site_label_2 
 _geom_angle_atom_site_label_3 
 _geom_angle 
 _geom_angle_site_symmetry_1 
 _geom_angle_site_symmetry_3 
 _geom_angle_publ_flag 
O11 Dy1 O21 163.91(5) . . ? 
O11 Dy1 O2W 83.57(5) . . ? 
O21 Dy1 O2W 89.20(5) . . ? 
O11 Dy1 O3W 81.29(6) . . ? 
O21 Dy1 O3W 82.70(5) . . ? 
O2W Dy1 O3W 68.82(5) . . ? 
O11 Dy1 O1W 90.24(5) . . ? 
O21 Dy1 O1W 86.49(5) . . ? 
O2W Dy1 O1W 141.45(5) . . ? 
O3W Dy1 O1W 72.64(5) . . ? 
O11 Dy1 O12 116.35(5) . 3_566 ? 
O21 Dy1 O12 75.28(5) . 3_566 ? 
O2W Dy1 O12 75.39(5) . 3_566 ? 
O3W Dy1 O12 137.93(5) . 3_566 ? 
O1W Dy1 O12 139.26(5) . 3_566 ? 
O11 Dy1 O22 75.97(5) . 3_666 ? 
O21 Dy1 O22 118.66(5) . 3_666 ? 
O2W Dy1 O22 135.09(5) . 3_666 ? 
O3W Dy1 O22 143.18(5) . 3_666 ? 
O1W Dy1 O22 78.83(5) . 3_666 ? 
O12 Dy1 O22 78.67(5) 3_566 3_666 ? 
O11 Dy1 O21 125.67(5) . 3_666 ? 
O21 Dy1 O21 67.68(6) . 3_666 ? 
O2W Dy1 O21 141.61(5) . 3_666 ? 
O3W Dy1 O21 132.98(5) . 3_666 ? 
O1W Dy1 O21 69.98(5) . 3_666 ? 
O12 Dy1 O21 69.43(5) 3_566 3_666 ? 
O22 Dy1 O21 51.24(4) 3_666 3_666 ? 
O11 Dy1 O11 69.20(6) . 3_566 ? 
O21 Dy1 O11 121.05(5) . 3_566 ? 
O2W Dy1 O11 67.73(5) . 3_566 ? 
O3W Dy1 O11 129.31(5) . 3_566 ? 
O1W Dy1 O11 143.84(5) . 3_566 ? 
O12 Dy1 O11 47.18(4) 3_566 3_566 ? 
O22 Dy1 O11 67.70(5) 3_666 3_566 ? 
O21 Dy1 O11 97.56(4) 3_666 3_566 ? 
Dy1 Dy1 Dy1 137.751(5) 3_666 3_566 ? 
C11 O11 Dy1 165.15(15) . . ? 
C11 O12 Dy1 109.16(12) . 3_566 ? 
O11 C11 O12 119.79(19) . . ? 
O11 C11 C12 121.01(19) . . ? 
O12 C11 C12 119.20(19) . . ? 
C11 C12 H12A 109.5 . . ? 
C11 C12 H12B 109.5 . . ? 
H12A C12 H12B 109.5 . . ? 
C11 C12 H12C 109.5 . . ? 
H12A C12 H12C 109.5 . . ? 
H12B C12 H12C 109.5 . . ? 
C21 O21 Dy1 154.91(14) . . ? 
C21 O21 Dy1 90.03(12) . 3_666 ? 
Dy1 O21 Dy1 112.32(6) . 3_666 ? 
C21 O22 Dy1 99.71(12) . 3_666 ? 
O22 C21 O21 118.03(19) . . ? 
O22 C21 C22 121.09(18) . . ? 
O21 C21 C22 120.86(19) . . ? 
C21 C22 H22A 109.5 . . ? 
C21 C22 H22B 109.5 . . ? 
H22A C22 H22B 109.5 . . ? 
C21 C22 H22C 109.5 . . ? 
H22A C22 H22C 109.5 . . ? 
H22B C22 H22C 109.5 . . ? 
Dy1 O1W H11W 122.4 . . ? 
Dy1 O1W H12W 113.9 . . ? 
H11W O1W H12W 105.0 . . ? 
Dy1 O2W H21W 124.0 . . ? 
Dy1 O2W H22W 125.2 . . ? 
H21W O2W H22W 105.0 . . ? 
Dy1 O3W H31W 123.1 . . ? 
Dy1 O3W H32W 129.1 . . ? 
H31W O3W H32W 105.0 . . ? 
  
loop_ 
 _geom_hbond_atom_site_label_D 
 _geom_hbond_atom_site_label_H 
 _geom_hbond_atom_site_label_A 
 _geom_hbond_distance_DH 
 _geom_hbond_distance_HA 
 _geom_hbond_distance_DA 
 _geom_hbond_angle_DHA 
 _geom_hbond_site_symmetry_A 
O1W H11W Br1  0.96 2.33 3.2674(15) 166.8 1_545 
O1W H12W O12  0.96 1.79 2.703(2) 156.9 1_655 
O2W H21W O22  0.96 1.81 2.6954(19) 151.0 1_455 
O2W H22W Br1  0.96 2.29 3.2306(14) 167.8 . 
O3W H31W Br1  0.96 2.38 3.3195(15) 166.9 2_546 
O3W H32W Br1  0.96 2.28 3.2085(15) 163.8 1_545 
  
_refine_diff_density_max    0.779 
_refine_diff_density_min   -0.601 
_refine_diff_density_rms    0.091 
  
_shelx_res_file 
; 
  
    Ha2019_78_0m_a.res created by SHELXL-2014/7 
  
  
TITL Ha2019_78_0m_a.res in P2(1)/n 
CELL  0.71073   7.8038   8.0288  17.6550   90.000   96.034   90.000 
ZERR    4.000   0.0003   0.0003   0.0007    0.000    0.002    0.000 
LATT 1 
SYMM 1/2-X, 1/2+Y, 1/2-Z 
SFAC C  H  O  Br Dy 
UNIT 16 48 28 4 4 
LIST 4 ! automatically inserted. Change 6 to 4 for CHECKCIF!! 
OMIT 0 0 2 
OMIT -1 0 1 
OMIT -1 0 5 
OMIT -3 56 
L.S. 10 
  
PLAN 6 
TEMP -173 
rem DFIX 0.96  0.0001 O1w H11w O1w H12w O2w H21w O2w H22w O3w H31w O3w H32w 
rem dfix 1.523  0.0001 H11w H12w H21w H22w H31w H32w 
FREE Dy1 C21_$6 
EQIV $6 1-x, 1-y, 1-z 
BIND Dy1 Dy1_$6 
BIND Dy1 Dy1_$7 
EQIV $7 -x,1-y,1-z 
BIND Dy1 O11_$7 
ACTA 
HTAB 
EQIV $1 -x+3/2, y-1/2, -z+3/2 
EQIV $2 x, y-1, z 
HTAB O1W Br1_$2 
EQIV $3 x+1, y, z 
HTAB O1W O12_$3 
EQIV $4 x-1, y, z 
HTAB O2W O22_$4 
HTAB O2W Br1 
EQIV $5 -x+1/2, y-1/2, -z+3/2 
HTAB O3W Br1_$5 
HTAB O3W Br1_$2 
SIZE 0.074  0.120  0.465 
BOND $H 
FMAP 2 
SIZE 0.077  0.123  0.484 
TEMP -173 
WGHT    0.014800    1.152300 
EXTI    0.001255 
FVAR       0.27955   0.09213   0.09449   0.04457   0.04573   0.05351 
DY1   5    0.265866    0.453532    0.537270    11.00000    0.00754    0.01295 = 
         0.01108   -0.00046    0.00168   -0.00226 
BR1   4    0.389094    0.955055    0.683727    11.00000    0.02100    0.01429 = 
         0.01642    0.00143    0.00117   -0.00206 
O11   3    0.003354    0.331533    0.536367    11.00000    0.01359    0.02506 = 
         0.02064   -0.00461    0.00652   -0.00741 
O12   3   -0.272203    0.279556    0.522935    11.00000    0.01017    0.01987 = 
         0.01771    0.00337    0.00176    0.00101 
C11   1   -0.120675    0.237294    0.547029    11.00000    0.01168    0.01486 = 
         0.01142   -0.00134    0.00243   -0.00070 
C12   1   -0.091372    0.074893    0.588057    11.00000    0.02647    0.02126 = 
         0.02437    0.00805    0.00054    0.00482 
AFIX 137 
H12A  2   -0.142392    0.079485    0.636420    11.00000   21.00000 
H12B  2    0.032686    0.054101    0.598073    11.00000   21.00000 
H12C  2   -0.145232   -0.015192    0.556531    11.00000   21.00000 
AFIX   0 
O21   3    0.538830    0.554778    0.573438    11.00000    0.00962    0.01622 = 
         0.01303   -0.00047    0.00039   -0.00109 
O22   3    0.810390    0.619382    0.594513    11.00000    0.00928    0.02079 = 
         0.01564   -0.00182    0.00121   -0.00178 
C21   1    0.670850    0.586134    0.620761    11.00000    0.01329    0.01129 = 
         0.01423   -0.00134    0.00027    0.00193 
C22   1    0.659804    0.579247    0.704436    11.00000    0.01636    0.03281 = 
         0.01202    0.00041   -0.00059    0.00324 
AFIX 137 
H22A  2    0.776157    0.573133    0.731235    11.00000   31.00000 
H22B  2    0.594093    0.480526    0.716593    11.00000   31.00000 
H22C  2    0.601896    0.679553    0.720520    11.00000   31.00000 
  
AFIX   0 
O1W   3    0.397785    0.185955    0.531780    11.00000    0.01317    0.01627 = 
         0.01720    0.00186    0.00488   -0.00012 
AFIX   3 
H11W  2    0.391063    0.103454    0.570718    11.00000   41.00000 
H12W  2    0.517388    0.189981    0.523579    11.00000   41.00000 
AFIX   0 
O2W   3    0.155725    0.639669    0.624000    11.00000    0.01084    0.01634 = 
         0.01787   -0.00224    0.00074   -0.00022 
AFIX   3 
H21W  2    0.035144    0.655167    0.628279    11.00000   51.00000 
H22W  2    0.209014    0.742416    0.641468    11.00000   51.00000 
AFIX   0 
O3W   3    0.296764    0.342989    0.663419    11.00000    0.02735    0.01710 = 
         0.01524    0.00204    0.00768    0.00419 
AFIX   3 
H31W  2    0.245882    0.393703    0.704923    11.00000   61.00000 
H32W  2    0.324345    0.231473    0.680122    11.00000   61.00000 
AFIX   0 
HKLF 4 
  
REM  Ha2019_78_0m_a.res in P2(1)/n 
REM R1 =  0.0129 for    2567 Fo > 4sig(Fo)  and  0.0140 for all    2666 data 
REM    126 parameters refined using      0 restraints 
  
END 
  
WGHT      0.0148      1.1523 
  
REM Instructions for potential hydrogen bonds 
HTAB C12 Br1_$2 
HTAB C22 Br1_$1 
HTAB C22 O3W 
HTAB C22 Br1 
HTAB O1W Br1_$2 
HTAB O1W O12_$3 
HTAB O2W O22_$4 
HTAB O2W Br1 
HTAB O3W Br1_$5 
HTAB O3W Br1_$2 
  
REM Highest difference peak  0.779,  deepest hole -0.601,  1-sigma level  0.091 
Q1    1   0.3780  0.4547  0.5390  11.00000  0.05    0.78 
Q2    1   0.1506  0.4524  0.5385  11.00000  0.05    0.74 
Q3    1   0.2864  0.9550  0.6842  11.00000  0.05    0.48 
Q4    1   0.6675  0.5867  0.6686  11.00000  0.05    0.39 
Q5    1   0.5230  0.9607  0.6854  11.00000  0.05    0.38 
Q6    1   0.2738  0.5497  0.5558  11.00000  0.05    0.37 
; 
_shelx_res_checksum   13826 
  
_shelx_hkl_file 
; 
   1   0   0    4.20    0.70 
   1   0   0    1.60    0.50 
   1   0   0    7.00    0.90 
   1   0   0    3.70    0.80 
   1   0   0    1.60    0.50 
   1   0   0    0.60    0.50 
   1   0   0    4.00    0.80 
   1   0   0    3.80    0.90 
   1   0   0    1.60    0.70 
   1   0   0    2.60    0.80 
  -1   0   0    4.00    0.60 
  -1   0   0    5.60    1.10 
  -1   0   0    2.70    0.80 
  -1   0   0    2.50    0.60 
  -1   0   0    1.30    0.40 
  -1   0   0    2.00    0.60 
  -1   0   0    2.00    0.80 
  -1   0   0    1.00    0.40 
  -1   0   0    1.30    0.50 
   1   0   0    4.10    0.60 
   1   0   0    4.60    1.00 
   1   0   0    1.90    0.80 
   1   0   0    4.70    0.90 
   1   0   0    3.40    0.80 
  -1   0   0    2.50    0.90 
  -1   0   0    7.20    1.30 
  -1   0   0    4.20    1.00 
   2   0   0 4223.48  184.18 
   2   0   0 4326.17  184.38 
   2   0   0 4185.98  185.38 
   2   0   0 4116.79  185.68 
  -2   0   0 4490.05  184.58 
  -2   0   0 4362.36  184.88 
  -2   0   0 4367.36  184.78 
  -2   0   0 4140.99  185.48 
   2   0   0 4065.99  185.48 
   2   0   0 4227.78  184.58 
   2   0   0 4091.39  185.18 
   2   0   0 4321.97  184.48 
   2   0   0 4326.87  185.48 
   2   0   0 4085.39  186.08 
   2   0   0 4707.13  186.48 
   2   0   0 4335.37  184.88 
   2   0   0 4352.26  184.88 
   2   0   0 4292.57  184.48 
  -2   0   0 4511.25  185.58 
  -2   0   0 4534.85  183.88 
  -2   0   0 4310.57  185.48 
  -2   0   0 4433.96  185.48 
  -2   0   0 4042.00  186.08 
  -2   0   0 4333.77  186.28 
  -2   0   0 4619.34  184.88 
  -2   0   0 4359.26  184.88 
  -2   0   0 4221.98  184.78 
  -2   0   0 4410.26  183.98 
  -2   0   0 4126.09  185.08 
  -2   0   0 4087.69  185.88 
  -2   0   0 4436.36  184.18 
  -2   0   0 4411.46  185.68 
  -2   0   0 4310.57  184.18 
   2   0   0 4199.68  183.98 
  -2   0   0 4267.97  184.48 
  -2   0   0 4395.46  184.88 
  -2   0   0 4293.57  185.28 
  -2   0   0 4316.67  184.48 
  -2   0   0 4452.45  183.58 
   2   0   0 4376.56  185.58 
   2   0   0 4445.66  183.78 
   2   0   0 4456.55  185.58 
   2   0   0 4068.89  184.58 
   2   0   0 4266.77  184.68 
   2   0   0 4447.65  184.08 
   2   0   0 4194.98  184.08 
   2   0   0 4310.97  184.68 
   3   0   0    0.00    1.70 
   3   0   0    0.30    2.00 
  -3   0   0    1.90    2.60 
  -3   0   0   -0.90    1.80 
  -3   0   0    6.10    2.20 
  -3   0   0    0.80    1.80 
  -3   0   0    0.30    1.20 
  -3   0   0    1.50    2.20 
  -3   0   0   -0.10    2.20 
  -3   0   0    0.30    1.40 
   3   0   0    2.10    2.20 
   3   0   0    1.20    1.10 
  -3   0   0    3.30    0.80 
   3   0   0    0.80    1.60 
  -3   0   0    2.40    1.70 
  -3   0   0    2.20    2.00 
  -3   0   0    2.80    1.60 
  -3   0   0    0.70    1.30 
   3   0   0    0.10    1.60 
   3   0   0    2.00    1.30 
   3   0   0   -3.30    1.30 
   3   0   0    6.50    2.10 
  -3   0   0    9.90    2.70 
  -3   0   0    2.90    1.30 
  -3   0   0    0.90    2.00 
  -3   0   0    3.70    2.10 
   3   0   0    2.90    2.10 
   3   0   0    2.40    1.30 
   3   0   0    6.70    2.10 
   3   0   0    2.20    2.40 
   3   0   0    2.00    1.70 
   3   0   0    7.90    2.70 
   3   0   0    0.00    1.20 
   3   0   0    5.70    2.20 
  -3   0   0    4.20    2.30 
   3   0   0    2.20    1.30 
   3   0   0    3.50    2.50 
   3   0   0    2.10    1.40 
   3   0   0    3.00    1.80 
  -3   0   0    1.30    1.80 
  -3   0   0    2.20    1.40 
  -3   0   0   -1.00    1.20 
   3   0   0    4.00    2.60 
   4   0   0  689.83   33.80 
   4   0   0  649.93   30.50 
  -4   0   0  670.63   29.60 
   4   0   0  710.03   32.00 
   4   0   0  670.73   32.50 
  -4   0   0  698.93   32.80 
  -4   0   0  648.04   31.90 
  -4   0   0  677.63   32.80 
   4   0   0  707.43   34.70 
   4   0   0  701.83   34.50 
   4   0   0  708.73   32.30 
   4   0   0  680.33   33.40 
  -4   0   0  632.74   35.00 
   4   0   0  633.14   32.50 
   4   0   0  693.83   31.20 
  -4   0   0  718.63   31.10 
  -4   0   0  671.23   33.40 
  -4   0   0  661.63   34.80 
  -4   0   0  672.73   31.30 
  -4   0   0  672.53   34.00 
  -4   0   0  671.33   31.40 
   4   0   0  682.33   33.80 
   4   0   0  656.93   33.80 
  -4   0   0  699.13   35.60 
  -4   0   0  664.63   35.20 
   4   0   0  704.83   32.50 
   4   0   0  674.43   31.10 
  -4   0   0  685.83   32.90 
   4   0   0  637.44   31.90 
   4   0   0  701.33   31.10 
  -4   0   0  662.93   30.70 
  -4   0   0  678.83   34.00 
   5   0   0    5.40    2.50 
   5   0   0    1.40    3.10 
  -5   0   0   -1.20    2.50 
   5   0   0    2.90    3.70 
  -5   0   0    1.00    0.90 
   5   0   0   -2.90    2.50 
   5   0   0   -0.40    1.50 
  -5   0   0    1.10    2.50 
  -5   0   0   -0.60    1.80 
  -5   0   0    3.30    3.40 
  -5   0   0    0.30    1.70 
  -5   0   0   -2.00    2.50 
   5   0   0    5.10    4.00 
   5   0   0   -0.20    2.30 
   5   0   0   -0.30    1.50 
   5   0   0    1.00    2.20 
   5   0   0   -0.30    1.80 
   5   0   0    2.30    2.80 
  -5   0   0    5.30    4.50 
  -5   0   0   -2.20    3.00 
  -5   0   0   -3.40    2.40 
  -5   0   0   -0.50    2.60 
  -5   0   0    0.40    1.60 
  -5   0   0    6.80    3.90 
  -5   0   0    3.20    3.50 
  -5   0   0   -0.60    1.90 
   5   0   0    0.80    2.80 
   5   0   0    2.00    3.20 
   5   0   0    0.20    2.90 
   6   0   0 1555.04   72.49 
   6   0   0 1540.95   71.69 
   6   0   0 1529.05   71.49 
  -6   0   0 1612.54   76.79 
  -6   0   0 1565.24   77.29 
  -6   0   0 1655.33   73.29 
  -6   0   0 1565.94   73.39 
  -6   0   0 1653.93   70.09 
  -6   0   0 1575.24   70.29 
  -6   0   0 1546.65   74.79 
   6   0   0 1554.54   74.49 
   6   0   0 1482.35   68.99 
   6   0   0 1563.34   74.89 
   6   0   0 1550.44   72.89 
   6   0   0 1562.24   71.19 
  -6   0   0 1627.24   74.29 
  -6   0   0 1549.84   69.79 
   6   0   0 1589.24   73.99 
  -6   0   0 1563.54   74.99 
  -6   0   0 1552.94   69.69 
  -6   0   0 1614.94   71.09 
  -6   0   0 1581.64   72.99 
  -6   0   0 1546.65   71.59 
  -6   0   0 1540.15   76.89 
   6   0   0 1538.25   75.09 
   6   0   0 1590.24   72.09 
   7   0   0    1.00    5.20 
  -7   0   0   -0.90    3.20 
   7   0   0   -3.30    2.60 
   7   0   0   -1.20    3.10 
  -7   0   0    2.90    4.30 
  -7   0   0    0.30    5.50 
   7   0   0    3.10    4.90 
   7   0   0    1.80    2.50 
   7   0   0   -1.30    4.40 
  -7   0   0    2.00    3.10 
  -7   0   0   -0.20    4.30 
  -7   0   0    0.70    3.10 
  -7   0   0    5.50    4.40 
  -7   0   0    0.30    3.90 
  -7   0   0   -3.40    3.40 
  -7   0   0   -0.50    2.30 
   7   0   0   -0.40    3.10 
   7   0   0    1.70    4.70 
   7   0   0   -0.60    3.70 
   7   0   0   -0.40    3.50 
  -7   0   0    1.30    4.90 
  -7   0   0    5.90    3.20 
  -7   0   0   -0.30    4.10 
  -7   0   0    1.60    4.90 
   7   0   0   13.70    5.70 
   8   0   0 1043.10   56.69 
  -8   0   0 1147.19   59.79 
  -8   0   0 1121.79   62.49 
  -8   0   0 1230.78   64.39 
   8   0   0 1099.39   58.09 
   8   0   0 1100.29   59.99 
   8   0   0 1185.78   56.19 
   8   0   0 1171.68   60.39 
  -8   0   0 1130.09   54.89 
   8   0   0 1177.68   54.99 
   8   0   0 1099.19   55.19 
   8   0   0 1220.48   83.99 
   8   0   0 1165.78   56.79 
  -8   0   0 1170.78   57.89 
  -8   0   0 1120.39   58.99 
  -8   0   0 1168.08   55.69 
   8   0   0 1027.50   58.19 
  -8   0   0 1128.49   53.39 
  -8   0   0 1151.38   57.49 
  -8   0   0 1077.19   57.89 
  -8   0   0 1127.49   52.79 
  -8   0   0 1180.68   58.79 
  -8   0   0 1100.09   61.89 
  -9   0   0    6.60    6.40 
  -9   0   0    0.60    6.50 
   9   0   0    5.20    6.40 
   9   0   0   -0.70   10.40 
   9   0   0    5.40    5.80 
   9   0   0   -0.60    4.90 
  -9   0   0   -3.50    4.80 
  -9   0   0   -7.00    5.40 
   9   0   0    5.70    6.30 
   9   0   0    6.70    6.40 
   9   0   0   -0.20    3.90 
   9   0   0    3.40    5.40 
  -9   0   0   -3.10    4.70 
  -9   0   0    3.20    4.20 
  -9   0   0    1.20    6.10 
  -9   0   0    3.50    5.80 
  -9   0   0    8.60    7.40 
  -9   0   0    3.70    6.20 
  10   0   0   35.90   11.70 
  10   0   0   52.89   10.00 
  10   0   0   39.50   10.50 
  10   0   0   40.20   23.20 
  10   0   0   52.09   12.10 
  10   0   0   26.10    8.90 
 -10   0   0   32.70    9.40 
  10   0   0   39.30   10.20 
 -10   0   0   32.70   11.50 
 -10   0   0   53.39   12.10 
 -10   0   0   23.80    9.80 
 -10   0   0   40.30   13.20 
 -10   0   0   45.20   11.90 
   0  -1   0    2.10    0.70 
   0   1   0    8.10    0.80 
   0   1   0    5.60    1.00 
   0   1   0    2.30    0.90 
   0   1   0   17.10    5.60 
   0   1   0    6.00    0.90 
   0   1   0    5.00    0.80 
   0   1   0    3.10    0.70 
   0   1   0   13.60    2.20 
   0   1   0   14.90    4.90 
   0   1   0    4.20    0.60 
   0   1   0    7.90    1.00 
   0   1   0    4.70    1.00 
   0   1   0   14.60    2.90 
   0   1   0    3.60    1.00 
   0   1   0    2.20    0.60 
   0   1   0    5.10    0.80 
   0   1   0    6.20    1.00 
  -1  -1   0  140.39    7.80 
  -1  -1   0  136.69    7.10 
   1  -1   0  124.89    8.50 
  -1  -1   0  134.89    6.90 
   1  -1   0  146.39    7.30 
   1  -1   0  140.29    7.20 
   1  -1   0  144.79    7.20 
   1  -1   0  141.29    7.10 
  -1  -1   0  125.19    7.30 
  -1  -1   0  144.59    7.50 
  -1  -1   0  116.99    6.90 
  -1  -1   0  108.79    7.00 
   1  -1   0  132.49    6.90 
  -1  -1   0  144.29    7.20 
  -1  -1   0  134.29    7.10 
   1  -1   0  135.49    7.20 
  -1  -1   0  130.09    6.80 
   1  -1   0  131.19    8.20 
   1  -1   0  134.79    7.30 
   1  -1   0  139.09    7.00 
   1  -1   0  141.69    7.20 
   1  -1   0  131.99    8.90 
   1  -1   0  147.09    7.70 
   1   1   0  146.19    6.90 
   1   1   0  141.19    7.40 
   1   1   0  138.09    6.40 
   1   1   0  138.19    6.70 
   1   1   0  149.09    7.90 
   1   1   0  155.48    7.70 
  -1   1   0  150.78    7.40 
  -1   1   0  141.09    7.10 
   1   1   0  140.39    7.30 
   1   1   0  138.29    7.10 
  -1   1   0  136.39    7.00 
  -1   1   0  139.79    7.50 
  -1   1   0  152.28    8.30 
   1   1   0  142.19    6.30 
   1   1   0  161.68    8.30 
   1   1   0  138.39    7.00 
  -1   1   0  153.08    7.90 
  -1   1   0  149.99    7.70 
   1   1   0  143.39    7.80 
   1   1   0  143.49    7.10 
  -1   1   0  138.79    7.30 
  -1   1   0  142.19    8.60 
   1   1   0  149.19    7.50 
   1   1   0  137.69    6.80 
  -1   1   0  120.19    7.00 
  -1   1   0  120.69    7.80 
   1   1   0  131.49    7.00 
   1   1   0  144.59    6.40 
  -1   1   0  136.99    7.70 
  -1   1   0  120.99    7.00 
  -1   1   0  141.29    7.00 
  -1   1   0  145.29    7.50 
  -1   1   0  143.09    6.30 
  -1   1   0  141.79   10.50 
   1   1   0  145.49    6.70 
   1   1   0  142.39    7.10 
   1   1   0  131.39    7.60 
   1   1   0  157.88    7.60 
   1   1   0  147.19    6.40 
   1   1   0  145.39    7.60 
   1   1   0  143.49    6.70 
  -1   1   0  131.09    7.10 
   1   1   0  143.29    6.80 
  -1   1   0  144.39    7.00 
  -1   1   0  132.69    6.80 
  -1   1   0  144.49    7.60 
  -1   1   0  143.79    6.30 
   1   1   0  141.99    7.20 
   2  -1   0  343.87   16.30 
  -2  -1   0  335.37   17.30 
  -2  -1   0  338.27   16.00 
   2  -1   0  336.47   22.50 
  -2  -1   0  326.07   15.00 
  -2  -1   0  340.17   16.00 
  -2  -1   0  318.27   16.60 
   2  -1   0  338.17   17.60 
  -2  -1   0  332.87   16.00 
   2  -1   0  336.27   16.00 
  -2  -1   0  344.37   17.20 
  -2  -1   0  338.57   16.60 
   2  -1   0  344.97   17.40 
   2  -1   0  322.67   15.90 
   2  -1   0  328.37   16.80 
   2  -1   0  305.37   16.60 
   2  -1   0  357.76   18.20 
  -2  -1   0  339.17   17.10 
  -2  -1   0  346.87   16.40 
  -2  -1   0  330.47   14.80 
   2  -1   0  334.07   15.40 
  -2  -1   0  365.66   16.70 
   2  -1   0  312.77   17.40 
   2  -1   0  331.97   16.90 
   2  -1   0  318.57   16.80 
  -2  -1   0  331.67   16.00 
  -2  -1   0  337.27   14.90 
  -2  -1   0  334.77   15.70 
  -2  -1   0  331.57   15.40 
   2  -1   0  318.27   16.10 
  -2  -1   0  341.37   15.30 
  -2  -1   0  352.46   17.20 
  -2  -1   0  334.17   16.80 
  -2  -1   0  345.27   16.00 
   2  -1   0  333.87   15.30 
   2  -1   0  354.86   15.30 
   2  -1   0  323.07   16.70 
   2  -1   0  348.07   16.10 
   2  -1   0  336.77   15.70 
   2  -1   0  323.37   16.20 
  -2  -1   0  359.26   16.70 
  -2  -1   0  342.17   16.60 
  -2  -1   0  343.87   16.00 
   2  -1   0  327.87   16.50 
   2  -1   0  333.77   16.20 
  -2   1   0  340.77   15.90 
  -2   1   0  320.27   15.30 
   2   1   0  332.47   16.10 
   2   1   0  361.76   17.20 
   2   1   0  327.67   16.20 
  -2   1   0  346.37   17.00 
   2   1   0  342.87   15.50 
   2   1   0  332.07   16.00 
  -2   1   0  319.97   16.80 
  -2   1   0  347.67   15.40 
   2   1   0  332.77   16.00 
   2   1   0  337.57   16.20 
   2   1   0  354.06   16.10 
   2   1   0  337.97   16.70 
  -2   1   0  346.17   17.70 
   2   1   0  340.67   15.70 
  -2   1   0  353.46   18.10 
  -2   1   0  336.27   17.60 
  -2   1   0  311.77   16.20 
  -2   1   0  312.27   16.50 
   2   1   0  328.97   16.20 
   2   1   0  322.37   16.50 
   2   1   0  360.46   17.90 
   2   1   0  323.37   17.20 
   2   1   0  334.47   14.70 
  -2   1   0  332.57   16.80 
  -2   1   0  334.17   16.60 
  -2   1   0  327.07   16.70 
  -2   1   0  334.17   16.20 
   2   1   0  338.27   16.70 
   2   1   0  330.67   17.20 
  -2   1   0  327.47   16.70 
  -2   1   0  347.07   16.40 
  -2   1   0  334.87   16.40 
  -2   1   0  326.27   17.20 
   2   1   0  344.17   15.90 
  -2   1   0  329.47   14.90 
  -2   1   0  335.87   16.10 
  -2   1   0  348.57   15.70 
   2   1   0  335.37   16.90 
  -2   1   0  345.47   16.20 
   2   1   0  333.97   15.30 
  -2   1   0  344.27   16.20 
   2   1   0  365.56   16.00 
  -3  -1   0   14.60    3.40 
  -3  -1   0    8.80    2.30 
  -3  -1   0    8.50    3.10 
  -3  -1   0   13.60    3.00 
   3  -1   0   20.10    2.20 
   3  -1   0   21.50    3.90 
   3  -1   0    9.90    2.10 
  -3  -1   0    7.70    3.30 
  -3  -1   0   14.80    3.00 
   3  -1   0    7.60    2.40 
   3  -1   0   11.70    2.90 
   3  -1   0    7.90    2.80 
  -3  -1   0    5.40    2.50 
  -3  -1   0   11.50    2.40 
  -3  -1   0   13.20    2.90 
  -3  -1   0   13.60    2.60 
   3  -1   0    8.80    3.00 
  -3  -1   0    9.60    1.70 
  -3  -1   0   10.00    3.10 
  -3  -1   0   28.10    3.00 
   3  -1   0   19.50    4.00 
  -3  -1   0   11.20    1.70 
   3  -1   0    6.80    2.40 
   3  -1   0    6.30    2.20 
   3  -1   0    7.30    2.80 
   3  -1   0    9.60    2.00 
   3  -1   0    9.40    2.50 
  -3  -1   0   13.70    2.20 
  -3  -1   0   16.40    3.20 
   3  -1   0   16.00    2.60 
  -3  -1   0   13.90    3.60 
   3  -1   0   12.50    2.50 
  -3  -1   0    8.40    2.20 
   3  -1   0   17.20    3.70 
   3  -1   0    5.90    2.90 
   3  -1   0   14.20    2.20 
   3  -1   0   15.90    3.40 
  -3  -1   0   12.20    3.40 
  -3  -1   0    9.90    2.90 
  -3  -1   0   10.60    2.20 
  -3  -1   0   11.30    3.00 
  -3   1   0   11.00    2.90 
   3   1   0   13.80    2.90 
  -3   1   0   11.70    2.00 
  -3   1   0   14.30    2.60 
  -3   1   0   13.40    2.70 
  -3   1   0   10.60    2.50 
  -3   1   0   12.20    3.80 
  -3   1   0   12.40    1.60 
  -3   1   0    7.90    3.20 
   3   1   0   10.20    3.30 
  -3   1   0   11.40    1.90 
   3   1   0   10.10    2.50 
   3   1   0   13.10    1.30 
   3   1   0   11.50    2.40 
   3   1   0   10.60    2.80 
   3   1   0    7.00    3.20 
   3   1   0   15.40    2.60 
   3   1   0   11.10    2.60 
  -3   1   0    8.30    2.70 
  -3   1   0   11.50    3.00 
   3   1   0   13.40    2.70 
   3   1   0    7.70    2.90 
  -3   1   0   12.80    2.80 
  -3   1   0   14.80    3.30 
  -3   1   0   11.40    4.10 
  -3   1   0   11.80    2.10 
  -3   1   0   16.10    3.40 
   3   1   0   15.70    2.80 
   3   1   0   12.60    1.70 
   3   1   0   10.80    2.10 
  -3   1   0    5.90    2.30 
   3   1   0   12.10    2.50 
   3   1   0   15.40    3.60 
   3   1   0   10.00    2.30 
   3   1   0   11.80    3.30 
  -3   1   0   16.10    2.60 
   3   1   0    9.80    3.10 
  -3   1   0   10.00    3.50 
   3   1   0   13.90    3.10 
   4  -1   0   61.69    4.90 
  -4  -1   0   42.00    7.10 
   4  -1   0   42.50    5.40 
   4  -1   0   56.19    5.20 
   4  -1   0   46.40    5.60 
  -4  -1   0   50.69    6.60 
  -4  -1   0   52.49    5.80 
  -4  -1   0   50.69    6.90 
  -4  -1   0   50.09    6.20 
   4  -1   0   50.59    6.70 
   4  -1   0   45.10    5.60 
  -4  -1   0   59.49    5.50 
  -4  -1   0   53.09    7.90 
   4  -1   0   49.20    6.40 
  -4  -1   0   49.30    5.80 
   4  -1   0   42.00    4.10 
   4  -1   0   42.00    6.40 
  -4  -1   0   52.79    6.30 
  -4  -1   0   45.80    4.80 
  -4  -1   0   54.09    3.90 
  -4  -1   0   51.89    4.10 
  -4  -1   0   45.50    5.80 
  -4  -1   0   31.10    5.50 
   4  -1   0   41.30    5.60 
  -4  -1   0   41.40    5.80 
   4  -1   0   55.69    5.20 
   4  -1   0   44.60    6.90 
  -4  -1   0   48.40    5.90 
  -4  -1   0   53.89    5.20 
   4  -1   0   59.19    4.90 
   4  -1   0   43.70    7.00 
   4  -1   0   47.20    4.80 
   4  -1   0   44.80    8.00 
  -4  -1   0   59.49    7.90 
   4   1   0   42.90    5.30 
   4   1   0   48.00    3.80 
  -4   1   0   47.10    4.40 
   4   1   0   37.50    5.20 
   4   1   0   43.60    4.60 
  -4   1   0   44.80    4.70 
   4   1   0   50.29    3.20 
   4   1   0   55.49    5.60 
   4   1   0   48.30    6.30 
   4   1   0   43.50    6.50 
  -4   1   0   54.69    6.60 
  -4   1   0   57.19    7.20 
  -4   1   0   40.20    7.00 
  -4   1   0   39.30    6.80 
  -4   1   0   38.90    5.30 
  -4   1   0   55.49    6.90 
   4   1   0   41.40    6.10 
   4   1   0   51.59    7.10 
  -4   1   0   57.49    7.20 
   4   1   0   37.90    5.30 
   4   1   0   46.40    6.30 
  -4   1   0   55.69    6.40 
   4   1   0   49.70    6.50 
  -4   1   0   38.90    6.20 
  -4   1   0   50.99    4.00 
  -4   1   0   41.00    7.00 
  -4   1   0   47.30    5.20 
  -4   1   0   50.69    3.80 
  -4   1   0   47.70    6.30 
  -4   1   0   49.20    5.00 
   5  -1   0 1703.93   79.59 
   5  -1   0 1656.83   76.79 
  -5  -1   0 1811.12   77.69 
   5  -1   0 1646.94   78.99 
  -5  -1   0 1745.73   77.39 
   5  -1   0 1701.73   78.59 
  -5  -1   0 1693.23   79.99 
   5  -1   0 1644.24   76.49 
   5  -1   0 1637.54   76.79 
   5  -1   0 1739.73   78.49 
  -5  -1   0 1698.33   74.19 
  -5  -1   0 1736.83   77.29 
  -5  -1   0 1685.23   77.99 
  -5  -1   0 1717.73   78.99 
   5  -1   0 1654.53   74.39 
  -5  -1   0 1761.12   75.59 
  -5  -1   0 1624.34   75.09 
  -5  -1   0 1644.24   78.19 
  -5  -1   0 1724.03   76.79 
  -5  -1   0 1648.04   80.09 
  -5  -1   0 1660.23   73.89 
  -5  -1   0 1639.14   77.59 
  -5  -1   0 1613.94   75.09 
   5  -1   0 1685.73   77.89 
   5  -1   0 1715.13   74.89 
   5  -1   0 1683.23   75.29 
   5  -1   0 1693.63   76.39 
  -5  -1   0 1708.63   76.59 
  -5  -1   0 1613.84   80.09 
   5   1   0 1785.02   78.19 
  -5   1   0 1623.84   80.39 
  -5   1   0 1777.42   78.59 
  -5   1   0 1581.74   73.69 
  -5   1   0 1644.14   78.59 
  -5   1   0 1735.53   75.79 
  -5   1   0 1719.73   77.09 
  -5   1   0 1768.42   77.89 
   5   1   0 1733.43   76.39 
   5   1   0 1717.23   74.39 
   5   1   0 1739.33   76.99 
   5   1   0 1675.73   78.89 
  -5   1   0 1668.33   77.09 
  -5   1   0 1590.24   80.19 
   5   1   0 1723.53   75.59 
  -5   1   0 1621.04   79.89 
   5   1   0 1761.72   73.99 
   5   1   0 1625.84   78.49 
   5   1   0 1694.13   72.89 
   5   1   0 1686.53   78.19 
  -5   1   0 1712.03   74.49 
  -5   1   0 1740.23   77.69 
  -5   1   0 1655.03   77.89 
   5   1   0 1722.83   78.59 
   5   1   0 1752.62   76.59 
  -5   1   0 1693.13   75.39 
  -5   1   0 1706.03   73.79 
   5   1   0 1614.14   75.59 
   6  -1   0   38.50   14.80 
   6  -1   0   38.60    6.60 
  -6  -1   0   31.90    6.70 
  -6  -1   0   44.20    7.60 
   6  -1   0   36.30    5.00 
   6  -1   0   35.10    6.90 
  -6  -1   0   29.10    7.40 
   6  -1   0   39.20    6.20 
   6  -1   0   35.60    5.30 
   6  -1   0   47.90    7.30 
  -6  -1   0   35.20    7.80 
  -6  -1   0   37.60    5.40 
  -6  -1   0   35.40    7.80 
  -6  -1   0   26.10    5.70 
  -6  -1   0   27.60    6.60 
  -6  -1   0   30.90    8.10 
   6  -1   0   42.20    8.30 
  -6  -1   0   39.90    6.90 
  -6  -1   0   37.20    7.10 
  -6  -1   0   31.90    3.70 
  -6  -1   0   38.00    4.70 
   6  -1   0   39.70    5.10 
   6  -1   0   35.00    7.30 
   6  -1   0   32.10    6.10 
  -6  -1   0   30.40    5.60 
  -6  -1   0   34.30    4.40 
  -6  -1   0   44.90    5.90 
  -6  -1   0   35.80    5.30 
  -6  -1   0   31.90    6.40 
   6  -1   0   41.20    7.70 
  -6   1   0   41.80    7.40 
   6   1   0   28.90    6.50 
  -6   1   0   42.10    4.10 
   6   1   0   37.60    3.40 
   6   1   0   31.30    6.00 
   6   1   0   35.10    7.20 
  -6   1   0   45.60    6.30 
  -6   1   0   42.60    6.80 
   6   1   0   32.00    5.70 
   6   1   0   41.10    7.80 
   6   1   0   37.80    6.00 
   6   1   0   35.40    6.00 
  -6   1   0   42.80    9.60 
   6   1   0   37.30    5.60 
  -6   1   0   39.60    7.90 
  -6   1   0   25.20    4.60 
   6   1   0   32.00    7.50 
  -6   1   0   39.70    8.40 
   6   1   0   37.70    4.30 
  -6   1   0   37.10    5.60 
   6   1   0   43.20    6.20 
  -6   1   0   31.70    7.20 
  -6   1   0   38.40    8.70 
  -6   1   0   40.20    5.00 
   6   1   0   36.10    7.30 
  -6   1   0   20.30    5.40 
  -6   1   0   42.10    7.20 
  -6   1   0   33.30    4.00 
  -6   1   0   43.80    4.30 
  -7  -1   0  758.12   42.50 
   7  -1   0  821.12   44.30 
   7  -1   0  822.32   37.30 
  -7  -1   0  797.12   39.20 
   7  -1   0  760.32   42.20 
  -7  -1   0  804.22   36.30 
   7  -1   0  755.22   39.00 
   7  -1   0  828.82   62.89 
  -7  -1   0  840.42   46.50 
  -7  -1   0  856.01   41.60 
  -7  -1   0  787.62   40.40 
   7  -1   0  810.62   40.50 
   7  -1   0  791.22   43.10 
   7  -1   0  844.12   38.00 
   7  -1   0  792.02   43.60 
   7  -1   0  771.92   41.10 
   7  -1   0  823.52   38.50 
   7  -1   0  805.52   40.60 
  -7  -1   0  828.02   36.90 
  -7  -1   0  801.82   38.50 
  -7  -1   0  789.52   41.70 
  -7  -1   0  784.62   42.40 
  -7  -1   0  789.62   42.00 
  -7  -1   0  785.32   43.80 
  -7  -1   0  853.21   46.70 
  -7  -1   0  782.42   41.60 
  -7  -1   0  805.72   37.80 
  -7  -1   0  792.02   38.80 
  -7  -1   0  757.12   44.80 
   7  -1   0  739.03   40.70 
   7   1   0  826.62   43.80 
  -7   1   0  811.82   43.40 
  -7   1   0  793.32   45.90 
   7   1   0  763.22   40.20 
   7   1   0  837.42   40.80 
  -7   1   0  729.83   41.50 
   7   1   0  754.32   42.70 
  -7   1   0  774.42   41.40 
  -7   1   0  770.32   43.50 
  -7   1   0  773.32   38.50 
  -7   1   0  796.62   39.30 
   7   1   0  754.42   40.90 
   7   1   0  747.83   43.10 
   7   1   0  841.92   40.30 
   7   1   0  787.72   42.20 
  -7   1   0  821.12   37.00 
   7   1   0  830.72   40.40 
  -7   1   0  789.92   39.40 
  -7   1   0  756.52   45.00 
  -7   1   0  790.92   37.60 
  -7   1   0  787.62   46.20 
  -7   1   0  795.92   41.40 
  -7   1   0  721.03   41.80 
   8  -1   0    8.20    5.60 
  -8  -1   0    3.20    5.20 
   8  -1   0   13.30    5.10 
  -8  -1   0   14.70    6.80 
  -8  -1   0   12.00    6.20 
  -8  -1   0    4.30    3.90 
  -8  -1   0   13.20    6.50 
  -8  -1   0   10.90    5.00 
  -8  -1   0    9.60    6.70 
   8  -1   0    7.00    5.00 
   8  -1   0    9.10    7.70 
   8  -1   0    4.90    5.80 
  -8  -1   0   17.00    4.70 
  -8  -1   0   -0.60    5.30 
   8  -1   0    5.10   10.70 
   8  -1   0    6.40    5.30 
  -8  -1   0    7.00    5.70 
   8  -1   0   10.70    6.10 
  -8  -1   0    6.30    7.50 
  -8  -1   0    7.40    6.50 
   8  -1   0   18.10    5.50 
   8   1   0   17.40    6.50 
   8   1   0   18.90    7.40 
  -8   1   0    9.10    5.60 
  -8   1   0    6.00    6.30 
  -8   1   0    8.30    7.00 
  -8   1   0   18.80    7.10 
   8   1   0   13.40    6.10 
   8   1   0   13.50    5.50 
   8   1   0   18.10    6.90 
  -8   1   0   16.10    6.40 
  -8   1   0   -0.60    5.90 
   8   1   0    9.20    5.60 
  -8   1   0   10.00    6.40 
  -8   1   0    7.60    4.30 
   8   1   0   12.70    5.10 
  -8   1   0    4.50    6.70 
  -8   1   0    6.00    6.50 
   8   1   0    8.80    5.30 
  -8   1   0   10.30    4.00 
   8   1   0   15.00    6.80 
  -9  -1   0  142.79   15.00 
   9  -1   0  122.39   30.80 
   9  -1   0  107.39   15.00 
  -9  -1   0  142.99   17.70 
  -9  -1   0  145.59   17.20 
  -9  -1   0  131.29   15.30 
   9  -1   0  121.19   13.90 
  -9  -1   0  113.29   15.90 
   9  -1   0  123.89   13.60 
   9  -1   0  144.59   15.80 
  -9  -1   0  144.69   14.40 
   9  -1   0  137.39   15.90 
  -9  -1   0  140.99   17.20 
  -9  -1   0  110.59   11.80 
   9  -1   0  117.59   16.30 
  -9  -1   0  119.19   15.70 
   9  -1   0   81.99   15.20 
  -9  -1   0  153.88   19.40 
  -9  -1   0  126.59   19.30 
   9   1   0  113.39   13.00 
   9   1   0  137.29   15.00 
  -9   1   0  134.29   16.80 
  -9   1   0  118.79   19.80 
  -9   1   0  119.39   16.40 
   9   1   0  114.79   16.40 
  -9   1   0  121.79   15.80 
  -9   1   0  106.69   17.90 
  -9   1   0  132.89   16.90 
   9   1   0  133.99   16.30 
   9   1   0  100.29   12.80 
   9   1   0  132.39   17.20 
  -9   1   0  130.49   17.80 
   9   1   0  121.99   31.10 
   9   1   0  124.09   17.10 
   9   1   0  119.19   15.10 
  -9   1   0   91.39   13.50 
  10  -1   0   29.50    8.50 
  10  -1   0   24.20   19.10 
  10  -1   0   17.00    7.30 
 -10  -1   0   24.90   11.90 
 -10  -1   0   10.80    7.80 
 -10  -1   0   14.70    9.40 
 -10  -1   0   26.90    9.70 
 -10  -1   0   23.40   10.10 
  10  -1   0   16.60    7.80 
  10  -1   0    7.20    8.50 
 -10  -1   0   32.90    9.80 
  10  -1   0   18.00    9.30 
 -10   1   0   31.50   10.70 
 -10   1   0   21.90    8.30 
  10   1   0   27.00    8.60 
 -10   1   0   11.60    7.90 
  10   1   0   33.20   10.30 
  10   1   0   32.20   19.80 
  10   1   0   20.10    8.10 
  10   1   0   31.00    9.50 
 -10   1   0   39.10   11.70 
  10   1   0   27.00   10.50 
 -10   1   0   24.40   12.10 
  10   1   0   33.10   10.80 
 -10   1   0   29.20   10.30 
 -10   1   0   25.30   11.50 
  10   1   0   25.00    7.10 
 -10   1   0   19.20    8.70 
   0  -2   0 5265.17  213.28 
   0  -2   0 5014.70  214.08 
   0  -2   0 5001.30  213.78 
   0  -2   0 4531.05  213.78 
   0  -2   0 5216.68  212.88 
   0  -2   0 4962.10  214.08 
   0  -2   0 5207.08  213.78 
   0  -2   0 5118.19  213.48 
   0  -2   0 5306.77  213.38 
   0  -2   0 4761.32  212.88 
   0  -2   0 5148.19  213.78 
   0  -2   0 5062.79  214.08 
   0  -2   0 4724.33  215.08 
   0  -2   0 5071.89  213.38 
   0  -2   0 4287.47  215.38 
   0  -2   0 4938.11  213.78 
   0  -2   0 5066.99  213.58 
   0   2   0 5187.48  212.88 
   0   2   0 5173.08  214.08 
   0   2   0 4495.05  214.58 
   0   2   0 4871.31  214.28 
   0   2   0 5132.09  213.68 
   0   2   0 4360.16  217.48 
   0   2   0 5442.06  213.58 
   0   2   0 5343.27  213.28 
   0   2   0 5153.18  213.08 
   0   2   0 4748.02  214.38 
   0   2   0 4711.83  213.78 
   0   2   0 5083.39  213.28 
   0   2   0 4668.23  215.38 
   0   2   0 5010.20  213.78 
   0   2   0 5287.47  213.58 
   0   2   0 5079.49  214.08 
   0   2   0 5076.59  212.78 
   0   2   0 5161.08  213.58 
   0   2   0 5116.49  213.28 
   0   2   0 5142.79  213.68 
   0   2   0 4778.62  213.18 
   0   2   0 5011.00  213.88 
   1  -2   0 3574.34  150.28 
   1  -2   0 3543.35  150.38 
  -1  -2   0 3573.44  150.38 
  -1  -2   0 3596.84  150.08 
  -1  -2   0 3258.57  151.88 
  -1  -2   0 3156.88  150.98 
  -1  -2   0 3428.46  150.68 
  -1  -2   0 3618.54  149.79 
  -1  -2   0 3450.15  150.38 
  -1  -2   0 3301.77  150.48 
   1  -2   0 3501.85  150.58 
  -1  -2   0 3428.16  151.18 
  -1  -2   0 3483.95  150.48 
  -1  -2   0 3529.15  149.19 
  -1  -2   0 3520.05  151.28 
  -1  -2   0 3642.84  151.18 
  -1  -2   0 3404.46  149.29 
  -1  -2   0 3650.33  150.48 
   1  -2   0 3499.45  150.58 
   1  -2   0 3570.94  150.08 
   1  -2   0 3591.94  150.88 
  -1  -2   0 3083.89  152.78 
   1  -2   0 3579.94  150.58 
   1  -2   0 3456.35  152.88 
   1  -2   0 3492.85  149.49 
   1  -2   0 3510.55  150.68 
  -1  -2   0 3504.25  151.68 
   1  -2   0 3308.17  158.48 
   1  -2   0 3158.38  150.98 
   1  -2   0 3638.24  150.28 
   1  -2   0 3440.56  151.18 
   1  -2   0 3457.85  149.29 
   1  -2   0 3563.04  150.58 
   1  -2   0 3450.55  150.08 
   1  -2   0 3513.75  152.28 
   1  -2   0 3569.34  150.98 
  -1  -2   0 3536.75  150.18 
   1  -2   0 3553.34  149.88 
  -1  -2   0 3622.44  149.88 
   1   2   0 3551.54  149.49 
  -1   2   0 3591.84  150.38 
  -1   2   0 3584.24  150.98 
   1   2   0 3502.45  149.59 
  -1   2   0 3618.64  150.48 
  -1   2   0 3061.89  155.08 
  -1   2   0 3549.84  152.58 
   1   2   0 3578.34  149.39 
   1   2   0 3488.45  151.28 
   1   2   0 3548.94  149.79 
  -1   2   0 3468.25  150.88 
   1   2   0 3621.84  149.88 
  -1   2   0 3505.35  150.08 
   1   2   0 3530.75  149.19 
  -1   2   0 3693.33  150.18 
  -1   2   0 3448.75  150.98 
  -1   2   0 3611.04  150.58 
  -1   2   0 3462.05  156.58 
  -1   2   0 3110.89  152.58 
  -1   2   0 3574.24  150.18 
  -1   2   0 3724.43  150.78 
   1   2   0 3639.34  150.28 
  -1   2   0 3568.64  149.79 
  -1   2   0 3560.44  151.08 
  -1   2   0 3563.24  149.39 
  -1   2   0 3580.84  149.69 
  -1   2   0 3661.23  150.78 
   1   2   0 3465.45  150.78 
   1   2   0 3531.45  156.98 
  -1   2   0 3434.96  149.79 
   1   2   0 3736.13  150.48 
   1   2   0 3643.14  150.28 
  -1   2   0 3505.85  150.58 
  -1   2   0 3569.74  149.59 
  -1   2   0 3631.74  150.28 
  -1   2   0 3572.24  150.68 
   1   2   0 2914.71  152.98 
   1   2   0 3574.14  150.38 
   1   2   0 3394.76  151.18 
   1   2   0 3748.22  149.88 
  -1   2   0 3595.84  150.88 
   1   2   0 3569.14  150.08 
   1   2   0 3357.06  152.18 
   1   2   0 3465.85  150.88 
   1   2   0 3438.36  150.28 
   1   2   0 3252.57  150.88 
   1   2   0 3508.65  150.98 
  -1   2   0 3670.43  150.08 
  -1   2   0 3542.15  150.48 
   1   2   0 3072.49  152.48 
  -1   2   0 3649.23  150.68 
   1   2   0 3450.15  150.88 
  -2  -2   0 1473.25   62.89 
  -2  -2   0 1440.26   63.69 
  -2  -2   0 1430.26   65.09 
   2  -2   0 1474.95   64.19 
   2  -2   0 1455.95   64.69 
  -2  -2   0 1463.65   65.99 
   2  -2   0 1471.15   64.79 
   2  -2   0 1417.76   64.89 
  -2  -2   0 1445.86   65.39 
   2  -2   0 1547.65   64.39 
  -2  -2   0 1501.85   64.69 
   2  -2   0 1444.06   73.69 
   2  -2   0 1403.86   66.29 
   2  -2   0 1479.85   64.79 
  -2  -2   0 1463.95   63.69 
  -2  -2   0 1506.75   63.79 
   2  -2   0 1470.95   65.69 
   2  -2   0 1514.65   64.99 
  -2  -2   0 1250.57   66.69 
   2  -2   0 1465.25   64.39 
   2  -2   0 1484.25   64.69 
   2  -2   0 1357.66   63.09 
   2  -2   0 1490.85   64.59 
  -2  -2   0 1396.96   66.69 
  -2  -2   0 1471.05   64.39 
   2  -2   0 1465.35   62.79 
   2  -2   0 1458.05   64.89 
   2  -2   0 1477.75   66.99 
  -2  -2   0 1417.46   64.59 
   2  -2   0 1445.96   68.49 
  -2  -2   0 1462.95   63.69 
   2  -2   0 1481.45   65.39 
  -2  -2   0 1366.26   64.89 
   2  -2   0 1325.37   66.59 
   2  -2   0 1503.75   62.89 
  -2  -2   0 1496.55   64.69 
  -2  -2   0 1493.25   66.39 
   2  -2   0 1408.06   65.69 
  -2  -2   0 1452.85   64.49 
  -2   2   0 1462.55   66.39 
   2   2   0 1431.96   63.09 
  -2   2   0 1474.75   64.89 
   2   2   0 1450.85   64.59 
  -2   2   0 1487.85   63.39 
   2   2   0 1511.05   65.39 
   2   2   0 1487.85   65.99 
   2   2   0 1484.25   65.19 
  -2   2   0 1493.35   64.69 
   2   2   0 1513.05   63.99 
  -2   2   0 1507.45   64.99 
  -2   2   0 1492.75   65.29 
  -2   2   0 1494.05   64.59 
   2   2   0 1427.46   65.39 
   2   2   0 1480.55   64.79 
   2   2   0 1525.05   63.89 
   2   2   0 1488.65   63.99 
  -2   2   0 1450.95   65.09 
   2   2   0 1410.46   65.69 
  -2   2   0 1491.65   65.79 
  -2   2   0 1526.05   64.89 
  -2   2   0 1508.05   65.69 
  -2   2   0 1501.25   64.19 
   2   2   0 1412.76   65.29 
   2   2   0 1341.77   65.59 
  -2   2   0 1470.95   67.79 
   2   2   0 1557.74   64.69 
   2   2   0 1509.25   63.99 
  -2   2   0 1485.05   64.69 
  -2   2   0 1522.95   64.39 
  -2   2   0 1552.44   65.89 
  -2   2   0 1404.96   62.69 
  -2   2   0 1479.15   64.89 
   2   2   0 1491.75   64.59 
  -2   2   0 1464.85   65.49 
   2   2   0 1496.65   66.79 
   2   2   0 1554.94   65.39 
  -2   2   0 1470.65   64.69 
   2   2   0 1422.66   64.49 
   2   2   0 1498.15   64.29 
  -2   2   0 1466.65   66.89 
   2   2   0 1392.26   66.39 
   2   2   0 1477.65   65.79 
   2   2   0 1500.75   63.09 
   2   2   0 1496.05   63.99 
  -2   2   0 1463.45   64.49 
   2   2   0 1454.85   63.19 
   2   2   0 1496.25   64.99 
   2   2   0 1458.55   63.89 
  -2   2   0 1433.46   65.89 
  -2   2   0 1519.55   65.09 
   3  -2   0  449.95   22.50 
   3  -2   0  429.86   23.60 
  -3  -2   0  408.06   22.50 
   3  -2   0  454.75   24.10 
   3  -2   0  436.86   22.00 
   3  -2   0  429.46   21.60 
   3  -2   0  449.06   21.90 
  -3  -2   0  426.06   23.00 
   3  -2   0  445.06   20.90 
   3  -2   0  437.36   22.60 
  -3  -2   0  419.06   19.60 
  -3  -2   0  474.75   20.20 
  -3  -2   0  441.16   22.50 
  -3  -2   0  471.75   23.30 
   3  -2   0  432.36   31.30 
  -3  -2   0  437.96   20.90 
  -3  -2   0  445.06   23.30 
  -3  -2   0  420.96   19.90 
  -3  -2   0  452.05   22.80 
  -3  -2   0  418.76   20.90 
  -3  -2   0  404.26   21.20 
  -3  -2   0  406.16   22.10 
   3  -2   0  423.56   19.90 
   3  -2   0  420.56   21.30 
  -3  -2   0  442.46   22.00 
   3  -2   0  421.36   23.00 
   3  -2   0  441.16   21.40 
   3  -2   0  417.06   20.10 
   3  -2   0  438.36   22.90 
  -3  -2   0  418.86   21.80 
   3  -2   0  438.66   19.90 
   3  -2   0  428.46   21.20 
   3  -2   0  410.76   21.30 
  -3  -2   0  427.76   21.20 
  -3  -2   0  425.56   21.30 
  -3  -2   0  418.76   21.10 
  -3   2   0  429.96   21.60 
  -3   2   0  434.16   22.20 
   3   2   0  439.86   21.30 
   3   2   0  418.46   21.90 
   3   2   0  472.35   23.30 
   3   2   0  438.26   20.80 
  -3   2   0  432.66   24.50 
  -3   2   0  408.16   23.40 
  -3   2   0  429.86   21.70 
  -3   2   0  454.85   22.50 
   3   2   0  426.96   20.10 
  -3   2   0  426.36   22.60 
  -3   2   0  430.46   21.60 
   3   2   0  426.16   21.90 
  -3   2   0  434.86   20.10 
  -3   2   0  444.46   22.40 
  -3   2   0  430.66   19.90 
   3   2   0  444.56   20.60 
  -3   2   0  442.86   21.90 
   3   2   0  432.96   22.10 
   3   2   0  462.45   20.10 
  -3   2   0  438.26   22.60 
   3   2   0  427.36   22.70 
   3   2   0  425.16   21.50 
  -3   2   0  423.86   22.10 
   3   2   0  425.76   21.60 
   3   2   0  472.15   20.90 
   3   2   0  418.96   20.80 
   3   2   0  447.66   23.10 
  -3   2   0  439.36   20.60 
   3   2   0  444.96   23.40 
   3   2   0  435.96   18.90 
  -3   2   0  441.66   19.20 
  -3   2   0  432.26   24.00 
  -4  -2   0  363.56   21.20 
  -4  -2   0  393.56   20.10 
  -4  -2   0  387.86   20.90 
  -4  -2   0  419.76   18.70 
  -4  -2   0  383.26   20.10 
   4  -2   0  363.96   22.50 
   4  -2   0  367.06   21.80 
   4  -2   0  409.26   19.30 
   4  -2   0  366.76   21.40 
   4  -2   0  379.46   20.40 
   4  -2   0  382.16   23.10 
  -4  -2   0  377.96   21.70 
   4  -2   0  421.36   21.00 
   4  -2   0  373.36   21.00 
   4  -2   0  397.16   19.40 
   4  -2   0  377.36   31.70 
   4  -2   0  362.06   20.40 
  -4  -2   0  381.06   21.90 
  -4  -2   0  391.36   19.00 
  -4  -2   0  359.46   21.30 
  -4  -2   0  390.66   17.40 
  -4  -2   0  393.86   18.40 
  -4  -2   0  412.16   21.80 
  -4  -2   0  407.86   22.80 
   4  -2   0  372.66   19.90 
   4  -2   0  397.16   18.90 
   4  -2   0  404.96   22.00 
   4  -2   0  407.16   18.90 
  -4  -2   0  401.96   19.90 
   4  -2   0  396.56   21.60 
   4  -2   0  407.76   22.20 
  -4  -2   0  374.16   22.50 
  -4  -2   0  389.66   20.10 
  -4  -2   0  420.36   20.40 
   4   2   0  383.66   22.50 
   4   2   0  382.16   22.40 
  -4   2   0  385.66   23.20 
  -4   2   0  381.36   23.20 
  -4   2   0  415.46   18.70 
   4   2   0  398.86   20.50 
  -4   2   0  365.06   20.70 
   4   2   0  366.96   21.50 
   4   2   0  365.76   21.20 
   4   2   0  382.76   21.30 
  -4   2   0  387.06   23.80 
   4   2   0  404.66   21.70 
   4   2   0  390.66   18.10 
   4   2   0  409.36   19.10 
   4   2   0  407.56   20.00 
  -4   2   0  406.86   21.60 
  -4   2   0  376.06   21.90 
  -4   2   0  410.16   20.60 
  -4   2   0  411.96   20.70 
   4   2   0  393.26   19.60 
   4   2   0  398.46   20.90 
   4   2   0  392.26   22.10 
  -4   2   0  396.26   21.70 
  -4   2   0  395.66   17.70 
  -4   2   0  388.16   21.00 
  -4   2   0  361.16   20.80 
  -4   2   0  389.76   21.80 
  -4   2   0  425.86   19.20 
  -4   2   0  383.76   18.90 
  -5  -2   0  392.56   23.20 
   5  -2   0  394.46   23.90 
  -5  -2   0  404.16   23.50 
   5  -2   0  397.76   23.60 
  -5  -2   0  426.96   20.10 
  -5  -2   0  390.66   22.20 
   5  -2   0  402.06   35.70 
  -5  -2   0  388.16   24.20 
  -5  -2   0  394.96   21.30 
  -5  -2   0  426.26   23.50 
   5  -2   0  400.06   22.60 
  -5  -2   0  410.36   25.10 
   5  -2   0  421.46   20.40 
   5  -2   0  425.66   22.30 
   5  -2   0  402.86   23.50 
   5  -2   0  366.36   20.10 
   5  -2   0  398.06   25.00 
   5  -2   0  421.66   20.80 
  -5  -2   0  399.56   21.80 
   5  -2   0  445.16   22.60 
   5  -2   0  405.06   21.30 
  -5  -2   0  413.76   23.90 
  -5  -2   0  409.76   23.30 
   5  -2   0  375.36   24.30 
  -5  -2   0  419.36   19.30 
  -5  -2   0  414.96   21.50 
  -5  -2   0  415.16   21.00 
   5  -2   0  421.96   22.40 
  -5   2   0  423.16   22.10 
   5   2   0  390.86   24.10 
  -5   2   0  409.16   18.70 
  -5   2   0  408.36   20.40 
  -5   2   0  395.96   22.60 
  -5   2   0  404.06   23.50 
   5   2   0  414.06   22.30 
  -5   2   0  408.66   23.20 
  -5   2   0  401.26   19.60 
   5   2   0  413.56   21.50 
  -5   2   0  396.86   25.60 
   5   2   0  407.66   22.40 
   5   2   0  395.06   18.90 
   5   2   0  431.46   23.60 
   5   2   0  442.16   24.50 
  -5   2   0  402.26   25.40 
   5   2   0  403.26   22.50 
  -5   2   0  412.26   22.90 
   5   2   0  394.76   23.30 
  -5   2   0  435.76   22.20 
   5   2   0  394.16   23.20 
  -5   2   0  393.56   23.30 
  -5   2   0  399.16   24.20 
  -5   2   0  407.26   22.50 
  -5   2   0  389.66   25.50 
   5   2   0  421.66   21.20 
  -6  -2   0 1151.58   57.09 
  -6  -2   0 1147.69   59.39 
  -6  -2   0 1143.59   57.59 
  -6  -2   0 1117.29   55.39 
   6  -2   0 1144.29   75.69 
   6  -2   0 1101.19   55.09 
   6  -2   0 1180.18   53.69 
   6  -2   0 1148.09   58.79 
  -6  -2   0 1188.28   56.99 
  -6  -2   0 1160.68   54.29 
   6  -2   0 1180.78   53.49 
   6  -2   0 1198.38   57.49 
   6  -2   0 1150.38   52.09 
  -6  -2   0 1211.58   54.49 
   6  -2   0 1247.08   54.19 
   6  -2   0 1128.69   52.59 
   6  -2   0 1192.68   56.49 
  -6  -2   0 1176.28   52.79 
  -6  -2   0 1259.17   51.49 
   6  -2   0 1140.09   55.29 
  -6  -2   0 1132.69   56.79 
   6  -2   0 1216.88   55.89 
  -6  -2   0 1094.19   56.29 
   6  -2   0 1142.59   57.69 
  -6  -2   0 1167.38   57.39 
  -6  -2   0 1159.48   58.39 
  -6  -2   0 1156.28   53.39 
   6  -2   0 1207.28   58.09 
  -6  -2   0 1142.19   55.19 
  -6   2   0 1152.48   60.19 
  -6   2   0 1158.78   52.29 
   6   2   0 1195.58   58.19 
  -6   2   0 1168.48   58.19 
  -6   2   0 1116.79   59.99 
  -6   2   0 1200.98   51.19 
  -6   2   0 1137.59   57.09 
   6   2   0 1209.68   52.89 
   6   2   0 1209.88   57.89 
   6   2   0 1166.18   56.89 
   6   2   0 1175.48   55.79 
   6   2   0 1161.48   55.49 
  -6   2   0 1126.89   60.19 
   6   2   0 1134.19   56.99 
  -6   2   0 1146.29   56.99 
  -6   2   0 1034.90   55.59 
  -6   2   0 1148.79   54.59 
   6   2   0 1158.38   54.59 
   6   2   0 1138.99   55.59 
  -6   2   0 1235.38   56.69 
  -6   2   0 1132.79   53.29 
  -6   2   0 1146.39   57.19 
  -6   2   0 1142.59   54.79 
  -6   2   0 1142.69   55.89 
   6   2   0 1137.69   54.09 
   6   2   0 1194.18   52.59 
  -7  -2   0  274.27   21.50 
   7  -2   0  277.77   20.90 
  -7  -2   0  268.07   18.70 
   7  -2   0  306.57   20.00 
   7  -2   0  292.47   35.30 
  -7  -2   0  272.77   22.70 
   7  -2   0  278.47   15.70 
  -7  -2   0  287.87   16.60 
   7  -2   0  341.17   22.30 
   7  -2   0  267.37   17.00 
   7  -2   0  266.67   20.20 
  -7  -2   0  307.37   20.80 
   7  -2   0  285.77   18.90 
  -7  -2   0  282.37   20.50 
  -7  -2   0  285.67   20.10 
  -7  -2   0  331.07   19.70 
   7  -2   0  296.87   16.20 
  -7  -2   0  281.27   17.70 
   7  -2   0  289.57   22.20 
  -7  -2   0  294.77   17.90 
   7  -2   0  279.47   19.00 
   7  -2   0  282.27   17.10 
   7  -2   0  290.37   19.00 
  -7  -2   0  284.77   20.60 
  -7  -2   0  271.07   20.90 
   7   2   0  315.57   22.00 
   7   2   0  290.97   19.40 
   7   2   0  274.17   19.10 
   7   2   0  279.07   19.00 
   7   2   0  300.57   20.50 
   7   2   0  259.27   20.40 
  -7   2   0  305.77   23.60 
  -7   2   0  298.27   15.90 
  -7   2   0  276.57   17.80 
  -7   2   0  324.47   24.70 
  -7   2   0  281.47   21.40 
  -7   2   0  317.17   20.30 
  -7   2   0  305.97   21.00 
   7   2   0  291.27   18.60 
  -7   2   0  282.07   18.40 
  -7   2   0  277.47   19.70 
  -7   2   0  285.07   23.50 
  -7   2   0  332.07   21.60 
  -7   2   0  268.67   20.10 
   7   2   0  324.87   18.30 
   8  -2   0  559.94   34.30 
  -8  -2   0  504.55   31.10 
  -8  -2   0  545.95   33.00 
  -8  -2   0  546.45   33.70 
   8  -2   0  573.94   29.10 
   8  -2   0  532.15   32.20 
   8  -2   0  528.25   34.10 
   8  -2   0  536.15   31.10 
   8  -2   0  540.35   31.90 
   8  -2   0  547.75   53.69 
  -8  -2   0  563.14   31.70 
  -8  -2   0  520.95   33.90 
   8  -2   0  568.84   35.70 
   8  -2   0  545.75   31.20 
  -8  -2   0  585.24   37.70 
  -8  -2   0  587.24   36.00 
  -8  -2   0  563.44   33.80 
  -8  -2   0  531.95   33.10 
  -8  -2   0  523.95   29.40 
   8  -2   0  609.44   29.90 
  -8  -2   0  518.75   29.20 
   8   2   0  533.95   29.90 
   8   2   0  532.25   31.10 
  -8   2   0  532.95   29.90 
  -8   2   0  530.25   37.40 
   8   2   0  552.54   31.40 
   8   2   0  538.15   34.50 
  -8   2   0  605.24   36.20 
  -8   2   0  554.54   37.60 
  -8   2   0  520.85   33.50 
  -8   2   0  560.74   30.70 
   8   2   0  576.64   32.30 
  -8   2   0  509.15   32.80 
  -8   2   0  511.95   33.00 
   8   2   0  603.54   35.10 
   8   2   0  533.25   33.50 
   8   2   0  585.74   31.10 
  -8   2   0  535.15   32.00 
   8   2   0  487.85   32.00 
  -8   2   0  521.35   32.20 
   9  -2   0   50.39    9.40 
   9  -2   0   45.20   11.40 
  -9  -2   0   56.49   13.20 
   9  -2   0   46.30    9.80 
  -9  -2   0   44.80    7.90 
  -9  -2   0   48.60   11.20 
  -9  -2   0   68.99    9.50 
  -9  -2   0   58.69   10.50 
  -9  -2   0   58.49   10.60 
  -9  -2   0   46.30   11.90 
  -9  -2   0   35.70   10.10 
   9  -2   0   42.60   20.40 
   9  -2   0   56.09   12.30 
   9  -2   0   68.39   13.40 
  -9  -2   0   51.09   11.10 
   9  -2   0   44.00    9.60 
   9   2   0   78.09   12.60 
   9   2   0   48.00   10.20 
  -9   2   0   62.49   11.90 
  -9   2   0   32.30    9.00 
  -9   2   0   44.30    9.00 
  -9   2   0   37.90    9.30 
   9   2   0   49.00   11.40 
  -9   2   0   44.80   10.60 
   9   2   0   57.29    9.20 
  -9   2   0   53.89   14.10 
   9   2   0   45.40    9.30 
   9   2   0   33.40    9.10 
   9   2   0   64.39   12.60 
   9   2   0   68.09   10.70 
  -9   2   0   74.79   12.90 
  -9   2   0   64.09   15.80 
   9   2   0   43.50   11.20 
  10  -2   0   68.99   27.20 
 -10  -2   0  129.29   19.10 
  10  -2   0  110.99   18.30 
 -10  -2   0  114.89   13.10 
  10  -2   0   93.49   16.30 
  10  -2   0   98.69   14.60 
 -10  -2   0   97.69   17.10 
  10  -2   0   75.89   13.40 
 -10  -2   0  109.89   16.90 
  10  -2   0  110.09   14.60 
 -10  -2   0   99.09   14.10 
 -10  -2   0   70.49   13.90 
  10   2   0  102.89   16.00 
  10   2   0   87.99   13.30 
 -10   2   0   79.59   13.90 
 -10   2   0   96.49   16.80 
 -10   2   0  111.79   19.90 
 -10   2   0  115.89   21.60 
  10   2   0   87.99   14.50 
  10   2   0  110.99   13.50 
 -10   2   0  161.28   19.00 
 -10   2   0   91.09   16.50 
  10   2   0  113.49   17.90 
  10   2   0  101.89   15.30 
  10   2   0  117.19   15.30 
 -10   2   0  140.79   18.60 
  10   2   0   72.69   27.50 
   0  -3   0    0.20    1.30 
   0  -3   0    1.60    5.00 
   0  -3   0    2.90    1.60 
   0  -3   0    3.70    2.40 
   0  -3   0    0.20    1.40 
   0  -3   0   12.20    2.00 
   0  -3   0    6.30    8.90 
   0  -3   0    3.00    1.10 
   0  -3   0    3.70    2.00 
   0  -3   0    0.40    0.90 
   0  -3   0   -0.10    1.50 
   0  -3   0    6.60    5.20 
   0  -3   0   -0.30    1.70 
   0  -3   0    1.40    3.40 
   0  -3   0   -0.30    1.60 
   0  -3   0    1.00    1.70 
   0  -3   0   -0.60    1.20 
   0  -3   0   -1.10    2.40 
   0  -3   0    0.10    1.50 
   0  -3   0    1.30    1.60 
   0   3   0   -0.60    1.50 
   0   3   0    3.00    1.70 
   0   3   0    0.40    0.90 
   0   3   0    0.80    1.80 
   0   3   0    0.00    1.90 
   0   3   0    2.50    3.40 
   0   3   0    7.30    1.90 
   0   3   0    1.20    0.90 
   0   3   0   -0.40    1.30 
   0   3   0   -1.20    1.20 
   0   3   0    3.30    8.70 
   0   3   0    1.70    1.60 
   0   3   0    1.80    1.00 
   0   3   0    0.60    1.40 
   0   3   0    1.20    1.60 
   0   3   0    0.40    1.50 
   0   3   0    0.00    3.70 
   0   3   0    1.60    1.20 
   0   3   0    2.50    1.50 
   0   3   0   -1.90    1.70 
   0   3   0   -1.70    3.90 
   0   3   0    3.10    2.10 
   0   3   0    0.80    1.30 
   0   3   0    0.60    1.10 
  -1  -3   0   41.20    4.40 
   1  -3   0   53.09    8.10 
   1  -3   0   42.80    4.80 
  -1  -3   0   37.30    4.90 
  -1  -3   0   44.40    2.80 
  -1  -3   0   38.40    6.00 
   1  -3   0   56.39   16.80 
  -1  -3   0   51.29    5.10 
  -1  -3   0   56.99    4.60 
   1  -3   0   36.70    3.80 
  -1  -3   0   31.10    3.70 
   1  -3   0   49.40    4.90 
   1  -3   0   45.20    4.60 
   1  -3   0   54.89    9.50 
   1  -3   0   50.79    4.10 
   1  -3   0   48.20    5.70 
   1  -3   0   45.30    5.10 
  -1  -3   0   38.50    4.10 
   1  -3   0   46.60    3.10 
   1  -3   0   49.80    5.20 
   1  -3   0   47.90    4.00 
  -1  -3   0   54.59    5.70 
  -1  -3   0   46.90    4.80 
   1  -3   0   39.70   11.40 
  -1  -3   0   46.00    3.10 
   1  -3   0   41.20    4.50 
   1  -3   0   47.90    5.00 
   1  -3   0   50.59    5.20 
   1  -3   0   53.19    6.20 
  -1  -3   0   49.99   14.00 
  -1  -3   0   45.00    5.10 
  -1  -3   0   47.70    4.10 
  -1  -3   0   46.40    4.90 
  -1  -3   0   50.49    6.00 
  -1  -3   0   51.59    4.80 
  -1   3   0   46.10    6.00 
  -1   3   0   47.00    4.80 
  -1   3   0   49.20    5.30 
   1   3   0   46.30    2.90 
   1   3   0   42.70    5.30 
  -1   3   0   43.90    3.00 
   1   3   0   46.10    6.10 
  -1   3   0   49.10    8.80 
  -1   3   0   29.10    6.80 
   1   3   0   47.20    4.80 
  -1   3   0   39.40   14.80 
   1   3   0   58.49    4.50 
  -1   3   0   46.70    3.80 
  -1   3   0   45.70    2.50 
   1   3   0   37.90    6.60 
   1   3   0   48.20    3.20 
   1   3   0   38.80    6.20 
  -1   3   0   41.80    4.70 
  -1   3   0   63.99    5.90 
   1   3   0   32.30    4.20 
   1   3   0   45.90    4.60 
   1   3   0   48.70    4.00 
  -1   3   0   47.00    7.20 
  -1   3   0   48.10    7.10 
  -1   3   0   46.00    3.90 
   1   3   0   40.90    4.10 
   1   3   0   41.60    5.10 
   1   3   0   39.60    3.20 
   1   3   0   38.20    6.70 
   1   3   0   53.99   11.50 
   1   3   0   36.30    3.90 
  -1   3   0   45.40    3.80 
  -1   3   0   40.60    3.90 
   1   3   0   41.10    2.40 
  -1   3   0   37.80    4.10 
  -1   3   0   38.30    4.20 
   1   3   0   43.60    3.00 
   1   3   0   43.40   13.20 
   1   3   0   43.90    6.90 
   1   3   0   41.20    4.10 
  -1   3   0   51.79    8.20 
   1   3   0   53.29    5.80 
  -1   3   0   45.30    3.70 
   1   3   0   53.29    5.40 
  -1   3   0   47.70    3.70 
  -1   3   0   59.09   12.50 
  -1   3   0   41.30    3.80 
  -1   3   0   43.00    5.10 
  -1   3   0   54.29    3.80 
  -1   3   0   41.40    4.60 
  -1   3   0   46.10    3.50 
  -1   3   0   58.19    5.10 
   1   3   0   55.59    7.30 
  -1   3   0   52.49    3.50 
  -1   3   0   46.60    7.10 
   2  -3   0   15.20    9.80 
  -2  -3   0   18.20    3.60 
   2  -3   0   18.30    3.50 
   2  -3   0   17.70    4.00 
  -2  -3   0   10.40    3.00 
  -2  -3   0   22.30    3.70 
  -2  -3   0    7.30    2.80 
   2  -3   0   15.70    2.80 
   2  -3   0   18.60    2.10 
  -2  -3   0   13.40    3.90 
   2  -3   0   17.40    4.70 
   2  -3   0   12.90    4.40 
  -2  -3   0   11.60    2.50 
   2  -3   0   12.60    3.10 
   2  -3   0   14.50    3.00 
  -2  -3   0   17.80    2.90 
  -2  -3   0   15.50    5.20 
   2  -3   0   15.10    6.90 
  -2  -3   0   13.30    4.60 
  -2  -3   0   14.70    2.60 
   2  -3   0   16.40    3.40 
  -2  -3   0   16.70    2.50 
  -2  -3   0    8.30    3.10 
   2  -3   0   17.10    3.30 
  -2  -3   0   14.70    4.00 
   2  -3   0   28.10    4.80 
  -2  -3   0   16.30    4.20 
   2  -3   0   15.90    2.30 
   2  -3   0   15.60    3.30 
   2  -3   0   12.10    3.30 
  -2  -3   0   15.70    3.30 
  -2   3   0   19.00    6.70 
   2   3   0   18.00    2.40 
   2   3   0   17.50    2.90 
   2   3   0   26.20    4.90 
  -2   3   0   14.40    2.50 
   2   3   0   13.90    4.30 
  -2   3   0   19.30    2.70 
  -2   3   0   15.80    3.00 
   2   3   0   12.00    2.10 
   2   3   0   20.70    5.10 
   2   3   0   14.20    2.30 
   2   3   0   12.80    2.30 
   2   3   0   19.70    4.10 
   2   3   0   16.90    2.70 
   2   3   0   25.70    7.70 
   2   3   0   15.60    2.80 
  -2   3   0   17.60    1.40 
  -2   3   0   20.40    2.60 
  -2   3   0   15.50    2.80 
  -2   3   0   16.30    3.90 
  -2   3   0   17.00    2.00 
  -2   3   0   16.90    4.50 
  -2   3   0   15.10    3.10 
   2   3   0   16.30    2.70 
   2   3   0   16.30    2.60 
   2   3   0   18.40    4.50 
  -2   3   0   17.40    3.30 
   2   3   0   19.30    2.40 
  -2   3   0   14.80    4.70 
  -2   3   0    8.60    5.20 
   2   3   0   20.90    5.80 
   2   3   0   20.50    3.20 
  -2   3   0   15.30    3.30 
  -2   3   0   15.80    3.40 
  -2   3   0   23.30    4.00 
  -2   3   0   13.50    3.40 
  -2   3   0   12.30    3.10 
   2   3   0   14.70    2.90 
  -2   3   0   15.90    3.20 
  -2   3   0   14.80    4.70 
  -2   3   0   17.20    3.50 
   2   3   0   19.40    4.00 
  -3  -3   0    2.10    2.70 
   3  -3   0    3.80    1.00 
  -3  -3   0    2.40    2.10 
  -3  -3   0    7.00    3.00 
   3  -3   0    4.00    2.80 
  -3  -3   0    2.30    2.40 
   3  -3   0    7.40    2.80 
  -3  -3   0   13.60    3.40 
   3  -3   0    4.20    5.70 
   3  -3   0    2.60    2.60 
   3  -3   0   -1.60    3.30 
  -3  -3   0    6.60    3.40 
   3  -3   0    2.60    2.10 
  -3  -3   0    1.20    3.20 
   3  -3   0    5.90    3.80 
   3  -3   0    0.20    2.90 
   3  -3   0    3.10    2.40 
   3  -3   0    5.50    1.00 
  -3  -3   0    4.80    1.80 
  -3  -3   0    6.40    2.90 
  -3  -3   0    3.90    2.70 
  -3  -3   0    6.10    3.20 
   3  -3   0    4.10    2.80 
  -3  -3   0    3.10    1.70 
  -3  -3   0    6.20    2.90 
   3  -3   0    5.20    2.70 
   3  -3   0    5.40    2.20 
   3  -3   0    6.90    3.20 
   3  -3   0    3.40    3.40 
  -3  -3   0    3.70    1.90 
  -3  -3   0    6.30    1.90 
  -3  -3   0    4.50    1.20 
  -3   3   0    5.80    4.20 
  -3   3   0    3.20    1.10 
  -3   3   0    4.40    3.90 
  -3   3   0    1.60    2.80 
  -3   3   0    2.80    2.20 
  -3   3   0    5.40    3.10 
   3   3   0    2.30    3.10 
   3   3   0    3.20    1.40 
   3   3   0   -0.20    1.70 
   3   3   0    4.80    1.80 
   3   3   0    4.00    2.50 
  -3   3   0    4.60    2.70 
   3   3   0    5.80    2.30 
   3   3   0    4.30    2.00 
   3   3   0    0.00    2.70 
  -3   3   0    2.40    2.70 
  -3   3   0    5.00    3.10 
  -3   3   0    7.10    3.30 
   3   3   0    4.40    1.70 
  -3   3   0    6.00    2.90 
  -3   3   0    4.90    1.80 
  -3   3   0    6.30    3.10 
   3   3   0    2.30    2.30 
   3   3   0    5.40    3.10 
   3   3   0    4.50    2.40 
   3   3   0    4.10    3.50 
  -3   3   0    2.70    3.00 
   3   3   0    4.80    2.00 
   3   3   0   16.10    4.50 
   3   3   0    6.20    3.40 
  -4  -3   0  471.05   26.20 
  -4  -3   0  418.16   23.50 
  -4  -3   0  438.06   23.00 
  -4  -3   0  442.26   24.00 
  -4  -3   0  482.15   21.20 
   4  -3   0  423.56   21.40 
   4  -3   0  440.96   24.10 
  -4  -3   0  471.35   22.60 
  -4  -3   0  427.86   24.60 
   4  -3   0  464.15   37.10 
   4  -3   0  443.56   26.70 
  -4  -3   0  477.25   22.50 
  -4  -3   0  437.96   23.20 
  -4  -3   0  466.15   25.40 
   4  -3   0  457.75   24.00 
   4  -3   0  477.05   23.30 
  -4  -3   0  451.75   23.50 
   4  -3   0  459.95   20.90 
   4  -3   0  437.36   25.20 
   4  -3   0  443.96   23.70 
   4  -3   0  475.95   27.20 
  -4  -3   0  417.86   23.60 
  -4  -3   0  475.05   21.20 
   4  -3   0  461.65   23.70 
  -4  -3   0  490.85   27.00 
   4  -3   0  442.26   25.50 
   4  -3   0  486.25   22.80 
  -4  -3   0  445.56   23.40 
  -4  -3   0  473.65   21.80 
  -4   3   0  451.55   27.50 
   4   3   0  449.06   22.40 
   4   3   0  465.45   25.90 
   4   3   0  443.66   24.00 
   4   3   0  463.35   22.20 
   4   3   0  435.36   25.00 
  -4   3   0  428.66   26.60 
  -4   3   0  483.05   25.30 
  -4   3   0  465.55   19.90 
   4   3   0  456.85   19.80 
  -4   3   0  466.35   21.40 
   4   3   0  470.65   24.30 
  -4   3   0  436.06   24.30 
   4   3   0  444.36   24.50 
  -4   3   0  444.66   24.90 
   4   3   0  444.86   25.40 
  -4   3   0  475.45   24.10 
  -4   3   0  472.25   24.80 
  -4   3   0  444.76   23.80 
  -4   3   0  446.36   26.30 
   4   3   0  468.05   24.40 
   4   3   0  435.96   25.00 
   4   3   0  475.95   21.50 
   4   3   0  446.26   23.00 
  -4   3   0  432.76   24.00 
  -4   3   0  431.36   24.00 
   4   3   0  454.75   22.40 
  -4   3   0  436.66   23.70 
   5  -3   0  610.24   31.00 
   5  -3   0  620.14   26.80 
   5  -3   0  602.24   28.60 
  -5  -3   0  530.15   32.20 
  -5  -3   0  621.64   31.70 
  -5  -3   0  603.94   33.80 
   5  -3   0  588.24   31.50 
  -5  -3   0  583.14   30.40 
   5  -3   0  587.34   33.10 
  -5  -3   0  621.54   34.10 
   5  -3   0  562.64   34.10 
  -5  -3   0  574.74   33.20 
  -5  -3   0  629.74   32.80 
   5  -3   0  595.14   29.30 
   5  -3   0  581.64   32.70 
   5  -3   0  625.34   33.30 
   5  -3   0  616.54   47.70 
  -5  -3   0  614.34   31.40 
   5  -3   0  602.74   31.20 
  -5  -3   0  631.94   30.10 
  -5  -3   0  579.94   31.40 
   5  -3   0  595.44   30.50 
   5  -3   0  606.14   27.20 
  -5  -3   0  594.04   29.90 
   5  -3   0  617.94   30.70 
  -5  -3   0  589.34   30.40 
  -5  -3   0  618.24   28.20 
  -5   3   0  599.74   31.20 
  -5   3   0  599.54   32.00 
   5   3   0  659.63   32.60 
  -5   3   0  654.23   36.20 
   5   3   0  595.24   31.80 
   5   3   0  563.54   31.40 
  -5   3   0  614.94   31.70 
   5   3   0  602.84   33.00 
   5   3   0  642.34   34.00 
   5   3   0  624.84   29.50 
  -5   3   0  657.23   33.10 
  -5   3   0  607.54   31.10 
   5   3   0  583.84   31.30 
  -5   3   0  615.14   31.50 
   5   3   0  611.54   27.20 
   5   3   0  552.64   32.00 
   5   3   0  597.54   29.70 
  -5   3   0  599.04   26.20 
  -5   3   0  578.74   32.70 
  -5   3   0  601.34   31.10 
  -5   3   0  553.74   34.20 
  -5   3   0  671.83   35.50 
   5   3   0  567.64   30.40 
  -5   3   0  616.64   31.50 
  -5   3   0  606.54   28.00 
  -5   3   0  616.14   32.50 
   6  -3   0 1061.19   50.49 
  -6  -3   0 1031.00   54.59 
  -6  -3   0 1087.29   53.89 
   6  -3   0 1048.90   48.60 
  -6  -3   0 1066.09   47.40 
  -6  -3   0 1037.10   50.49 
   6  -3   0 1030.20   51.19 
   6  -3   0 1077.89   53.39 
   6  -3   0 1085.09   54.09 
   6  -3   0 1008.90   71.79 
   6  -3   0 1073.09   55.79 
   6  -3   0 1080.69   51.79 
  -6  -3   0 1097.79   53.29 
   6  -3   0 1057.59   51.19 
   6  -3   0 1059.99   52.09 
  -6  -3   0 1146.49   55.39 
  -6  -3   0 1018.30   51.49 
  -6  -3   0 1041.30   51.69 
  -6  -3   0 1087.19   49.60 
  -6  -3   0 1034.70   50.29 
   6  -3   0 1070.19   53.69 
  -6  -3   0 1018.60   54.59 
   6  -3   0 1077.29   48.90 
  -6  -3   0 1066.29   50.59 
   6  -3   0 1053.79   47.40 
  -6  -3   0 1020.90   52.69 
   6  -3   0 1065.69   46.40 
  -6   3   0 1043.70   56.19 
  -6   3   0 1046.90   51.69 
  -6   3   0 1030.40   53.09 
   6   3   0 1075.29   49.99 
  -6   3   0 1007.70   56.09 
  -6   3   0 1036.00   55.99 
  -6   3   0 1065.29   51.29 
  -6   3   0 1058.99   47.50 
   6   3   0 1094.59   54.29 
   6   3   0 1085.59   53.19 
   6   3   0 1054.59   51.19 
  -6   3   0  995.20   51.09 
  -6   3   0  977.10   53.39 
   6   3   0 1037.20   52.79 
  -6   3   0 1072.19   51.19 
  -6   3   0 1074.39   52.89 
  -6   3   0 1101.09   45.60 
   6   3   0 1100.19   52.49 
   6   3   0 1069.99   49.50 
   6   3   0 1025.50   51.59 
  -6   3   0 1044.50   51.89 
  -6   3   0 1076.89   52.19 
   7  -3   0  145.69   11.70 
  -7  -3   0  132.29   14.90 
   7  -3   0  152.48   15.20 
   7  -3   0  141.89   13.80 
  -7  -3   0  145.99   10.60 
   7  -3   0  152.28   18.00 
  -7  -3   0  171.78   19.10 
   7  -3   0  153.78   13.00 
  -7  -3   0  133.29   11.90 
   7  -3   0  132.49    9.90 
  -7  -3   0  136.89   16.00 
   7  -3   0  136.39   15.60 
  -7  -3   0  134.19   15.00 
  -7  -3   0  118.29   14.20 
  -7  -3   0  117.39   11.90 
  -7  -3   0  128.69   12.60 
  -7  -3   0  141.59   17.10 
   7  -3   0  127.59   13.20 
   7  -3   0  120.69   27.20 
  -7  -3   0  101.19   12.20 
  -7  -3   0  140.19   14.10 
   7  -3   0  161.98   16.40 
   7   3   0  114.99   13.10 
   7   3   0  132.09   13.30 
  -7   3   0  119.69   16.90 
   7   3   0  126.19   14.30 
  -7   3   0  153.38   13.20 
  -7   3   0  138.39    8.90 
  -7   3   0  118.19   13.60 
  -7   3   0  167.68   17.10 
   7   3   0  111.99   11.50 
  -7   3   0  131.49   13.00 
  -7   3   0  154.18   14.90 
  -7   3   0  133.79   15.80 
  -7   3   0  144.29   15.90 
  -7   3   0  147.99   15.60 
  -7   3   0  135.29   13.30 
  -7   3   0  128.49   17.80 
   7   3   0  138.19   16.10 
   7   3   0  136.59   14.30 
   7   3   0  143.49   11.20 
  -7   3   0  135.09   17.90 
   7   3   0  131.19   14.90 
   8  -3   0   73.99   11.60 
   8  -3   0   75.99   10.60 
  -8  -3   0   83.99   13.50 
   8  -3   0   64.89   10.00 
  -8  -3   0   90.79   11.80 
  -8  -3   0   81.49   12.50 
  -8  -3   0  126.59   15.90 
   8  -3   0   58.09   10.10 
   8  -3   0   66.59   12.10 
  -8  -3   0   78.99   10.40 
   8  -3   0   69.69   13.60 
   8  -3   0   93.19   13.70 
   8  -3   0   80.39   10.10 
  -8  -3   0   82.89   10.80 
   8  -3   0   96.19   27.00 
  -8  -3   0   83.99   10.20 
  -8  -3   0   60.49   15.40 
  -8  -3   0  102.59   15.90 
  -8  -3   0   80.79   14.00 
  -8   3   0   91.49   13.50 
  -8   3   0   94.69   11.90 
   8   3   0   88.49   13.60 
   8   3   0   75.39    9.50 
  -8   3   0   80.69   15.50 
   8   3   0   59.49   10.10 
  -8   3   0   88.89   13.70 
   8   3   0   79.09   11.20 
  -8   3   0   97.89   11.30 
   8   3   0   84.49   10.30 
  -8   3   0   77.19   11.60 
  -8   3   0   78.79   14.60 
  -8   3   0   69.79   11.80 
   8   3   0   93.39   13.60 
  -8   3   0   95.69   12.60 
  -8   3   0   85.59   13.30 
   8   3   0   73.29   11.10 
   8   3   0   74.59   11.40 
  -9  -3   0   42.20    8.70 
  -9  -3   0   68.69   10.30 
   9  -3   0   45.00   12.40 
  -9  -3   0   45.60   12.30 
   9  -3   0   58.59   10.40 
  -9  -3   0   39.40   10.60 
  -9  -3   0   52.09   11.70 
   9  -3   0   47.20   10.30 
   9  -3   0   46.20   12.40 
  -9  -3   0   35.50    8.50 
  -9  -3   0   45.40    9.90 
  -9  -3   0   41.00   10.40 
   9  -3   0   40.00    9.20 
   9  -3   0   34.20   20.70 
   9   3   0   44.20   10.50 
   9   3   0   43.30    8.80 
   9   3   0   46.00    9.80 
  -9   3   0   41.40   10.50 
  -9   3   0   50.39   11.00 
  -9   3   0   59.49   12.70 
  -9   3   0   64.19   15.30 
   9   3   0   71.59    9.90 
   9   3   0   60.79   12.70 
  -9   3   0   50.79   14.10 
  -9   3   0   44.00   10.40 
   9   3   0   56.89   12.30 
   9   3   0   36.60    9.60 
  -9   3   0   50.19   11.10 
  -9   3   0   60.29   10.30 
   9   3   0   42.40   11.10 
   0  -4   0  427.46   27.40 
   0  -4   0  458.85   22.60 
   0  -4   0  428.46   21.10 
   0  -4   0  449.36   22.10 
   0  -4   0  444.76   22.40 
   0  -4   0  422.66   21.80 
   0  -4   0  423.06   22.90 
   0  -4   0  457.85   22.00 
   0  -4   0  417.46   34.00 
   0  -4   0  454.65   22.20 
   0  -4   0  453.35   24.70 
   0  -4   0  454.05   20.60 
   0  -4   0  415.06   43.90 
   0  -4   0  420.76   22.20 
   0  -4   0  430.96   20.30 
   0  -4   0  348.17   29.80 
   0  -4   0  427.36   22.90 
   0  -4   0  455.85   26.20 
   0  -4   0  439.36   21.50 
   0  -4   0  461.15   23.00 
   0   4   0  404.86   30.70 
   0   4   0  457.35   19.50 
   0   4   0  430.16   20.40 
   0   4   0  420.96   20.90 
   0   4   0  443.26   22.00 
   0   4   0  432.16   21.80 
   0   4   0  454.75   22.00 
   0   4   0  434.06   20.20 
   0   4   0  427.56   22.90 
   0   4   0  437.36   22.10 
   0   4   0  453.55   27.80 
   0   4   0  456.45   20.40 
   0   4   0  434.26   19.20 
   0   4   0  446.16   23.80 
   0   4   0  412.36   36.50 
   1  -4   0 5148.58  241.08 
   1  -4   0 5510.45  231.38 
   1  -4   0 5286.67  232.98 
  -1  -4   0 4739.83  240.08 
   1  -4   0 5258.07  231.38 
  -1  -4   0 5487.85  232.58 
  -1  -4   0 5463.25  232.68 
  -1  -4   0 5564.94  231.98 
  -1  -4   0 5504.45  233.78 
   1  -4   0 5419.16  232.78 
   1  -4   0 5297.77  232.68 
  -1  -4   0 4569.04  255.87 
   1  -4   0 5529.85  233.18 
  -1  -4   0 5067.19  235.08 
  -1  -4   0 5567.34  233.48 
   1  -4   0 5223.08  232.98 
  -1  -4   0 5423.26  232.38 
  -1  -4   0 5588.94  232.88 
  -1  -4   0 5536.15  231.68 
  -1  -4   0 5440.96  232.48 
  -1  -4   0 5229.98  237.78 
   1  -4   0 5428.46  233.68 
  -1  -4   0 5511.45  233.78 
   1  -4   0 5459.35  232.28 
  -1  -4   0 5551.44  232.28 
   1  -4   0 5393.26  232.58 
   1  -4   0 5490.85  233.38 
   1  -4   0 5338.17  231.48 
  -1  -4   0 5386.26  231.98 
   1  -4   0 5324.77  234.78 
  -1   4   0 4560.34  237.28 
  -1   4   0 5330.07  236.98 
  -1   4   0 5490.05  232.78 
   1   4   0 5569.04  232.98 
   1   4   0 5447.16  231.58 
   1   4   0 5405.36  231.88 
  -1   4   0 5537.25  231.38 
  -1   4   0 5407.26  232.98 
  -1   4   0 5560.84  231.28 
  -1   4   0 5504.95  231.78 
   1   4   0 5686.83  229.68 
  -1   4   0 5223.58  240.48 
   1   4   0 5444.25  229.68 
  -1   4   0 5649.43  230.58 
   1   4   0 5087.79  236.08 
  -1   4   0 5493.05  231.08 
  -1   4   0 5371.06  231.18 
   1   4   0 5118.89  237.48 
  -1   4   0 5534.25  243.88 
  -1   4   0 5633.34  231.38 
   1   4   0 5049.00  237.88 
  -1   4   0 5532.45  229.78 
   1   4   0 5357.26  233.48 
   1   4   0 5437.26  229.58 
  -1   4   0 5426.86  232.68 
  -1   4   0 5564.64  230.08 
  -1   4   0 5626.74  231.68 
  -1   4   0 5113.89  232.08 
  -1   4   0 5593.34  230.78 
  -1   4   0 5389.66  230.78 
   1   4   0 5525.25  231.58 
   1   4   0 5391.96  230.28 
  -1   4   0 5536.95  233.58 
   2  -4   0  209.68   12.30 
  -2  -4   0  214.98   11.50 
   2  -4   0  202.38   13.00 
   2  -4   0  196.68   14.10 
  -2  -4   0  228.98   13.00 
   2  -4   0  212.98   12.70 
   2  -4   0  170.88   30.30 
   2  -4   0  227.58   13.60 
   2  -4   0  225.08   12.40 
   2  -4   0  225.18   14.60 
   2  -4   0  219.78   11.50 
  -2  -4   0  213.28   12.70 
  -2  -4   0  222.18   12.70 
  -2  -4   0  231.18   12.60 
  -2  -4   0  201.38   11.70 
  -2  -4   0  232.28   12.50 
  -2  -4   0  218.48   13.50 
  -2  -4   0  196.48   14.00 
   2  -4   0  205.68   13.20 
   2  -4   0  222.88   13.50 
  -2  -4   0  203.98   13.20 
   2  -4   0  207.28   13.00 
   2  -4   0  261.97   27.10 
  -2  -4   0  218.08   12.90 
  -2  -4   0  228.88   15.50 
   2  -4   0  214.18   16.90 
   2   4   0  228.38   10.70 
  -2   4   0  200.98   13.30 
  -2   4   0  212.58   11.40 
  -2   4   0  229.28   12.40 
   2   4   0  222.48   11.60 
   2   4   0  200.18   11.20 
  -2   4   0  220.58   19.90 
  -2   4   0  215.08   13.30 
   2   4   0  218.78   12.20 
  -2   4   0  213.08   11.70 
   2   4   0  216.28   10.70 
  -2   4   0  220.08   11.30 
   2   4   0  208.08   11.50 
  -2   4   0  227.98   14.10 
  -2   4   0  223.28   10.90 
   2   4   0  194.48   13.20 
  -2   4   0  198.28   11.30 
  -2   4   0  193.38   12.70 
  -2   4   0  223.38   20.30 
  -2   4   0  182.48   17.60 
   2   4   0  185.58   16.40 
  -2   4   0  216.08   12.40 
  -2   4   0  214.98   12.80 
   2   4   0  200.68   13.60 
  -2   4   0  222.68   13.00 
   2   4   0  223.98   11.50 
  -2   4   0  186.98   12.80 
   2   4   0  209.18   15.00 
   2   4   0  212.08   11.60 
  -2   4   0  199.98   15.30 
   2   4   0  213.58   21.50 
   2   4   0  136.29   17.90 
   2   4   0  211.48   11.30 
   2   4   0  222.78   11.70 
  -3  -4   0  341.77   20.90 
  -3  -4   0  320.97   17.70 
  -3  -4   0  356.06   20.70 
   3  -4   0  306.47   18.30 
  -3  -4   0  315.07   19.30 
   3  -4   0  321.87   19.20 
   3  -4   0  330.27   18.00 
  -3  -4   0  329.57   18.10 
  -3  -4   0  339.77   18.50 
   3  -4   0  322.27   17.60 
   3  -4   0  341.27   35.90 
  -3  -4   0  331.47   19.30 
  -3  -4   0  304.87   17.90 
   3  -4   0  334.57   16.40 
  -3  -4   0  330.47   16.90 
   3  -4   0  332.67   22.20 
   3  -4   0  314.07   17.50 
   3  -4   0  334.67   31.40 
   3  -4   0  335.87   20.20 
   3  -4   0  320.27   17.50 
  -3  -4   0  338.87   17.00 
   3  -4   0  313.27   18.30 
  -3  -4   0  345.67   18.50 
   3  -4   0  348.37   18.80 
   3  -4   0  311.27   17.00 
  -3  -4   0  338.57   18.30 
   3  -4   0  329.37   18.60 
  -3   4   0  275.47   18.70 
  -3   4   0  314.87   16.80 
   3   4   0  329.97   17.40 
   3   4   0  335.17   17.40 
  -3   4   0  317.47   18.80 
  -3   4   0  295.97   20.70 
   3   4   0  317.47   17.90 
  -3   4   0  326.07   18.10 
   3   4   0  305.77   15.70 
  -3   4   0  342.07   16.10 
  -3   4   0  343.77   19.60 
  -3   4   0  306.47   15.00 
   3   4   0  350.06   18.70 
  -3   4   0  332.87   23.40 
   3   4   0  335.57   21.90 
   3   4   0  316.27   19.00 
   3   4   0  328.17   15.90 
   3   4   0  318.17   16.30 
  -3   4   0  327.97   18.50 
   3   4   0  306.27   16.80 
  -3   4   0  308.87   19.30 
   3   4   0  318.27   20.00 
   3   4   0  371.06   23.10 
   3   4   0  337.47   16.10 
   3   4   0  318.17   16.40 
  -3   4   0  309.47   18.80 
  -3   4   0  328.97   17.50 
  -3   4   0  324.47   18.50 
  -3   4   0  341.17   18.80 
  -3   4   0  315.47   18.20 
   4  -4   0   88.39    9.00 
   4  -4   0  101.19    7.60 
   4  -4   0   89.69    8.50 
  -4  -4   0   92.09    9.00 
   4  -4   0   96.09   11.00 
  -4  -4   0  105.09    8.20 
  -4  -4   0  107.89    8.80 
  -4  -4   0   77.59    8.60 
  -4  -4   0   96.99    9.40 
  -4  -4   0   96.79    7.10 
  -4  -4   0  101.69    8.60 
  -4  -4   0   96.09    6.50 
  -4  -4   0   92.89    6.70 
   4  -4   0   96.19    9.30 
  -4  -4   0  106.39   12.00 
  -4  -4   0  102.19    6.60 
  -4  -4   0   97.59    5.20 
   4  -4   0  105.69   20.40 
  -4  -4   0   76.99   11.10 
  -4  -4   0   95.29   10.00 
   4  -4   0   93.49   12.20 
   4  -4   0  100.99    9.30 
   4  -4   0   92.49    9.40 
   4  -4   0   99.19   10.90 
   4  -4   0  104.29    8.80 
  -4  -4   0   87.19    8.70 
   4  -4   0   86.89    9.40 
   4  -4   0   95.89    9.30 
  -4  -4   0  108.69   10.90 
   4   4   0   96.09    9.90 
  -4   4   0   94.69   10.70 
   4   4   0   81.19    6.00 
   4   4   0   93.59    6.70 
   4   4   0   86.89    9.50 
  -4   4   0   91.39    9.30 
  -4   4   0  110.49    9.40 
  -4   4   0   96.29   12.30 
  -4   4   0   95.59    4.70 
   4   4   0   87.59    7.40 
   4   4   0   86.39    8.50 
  -4   4   0   92.09    9.40 
  -4   4   0   79.99    9.20 
   4   4   0   95.09    8.60 
   4   4   0   93.29    9.00 
   4   4   0   86.59    5.40 
  -4   4   0  101.99   10.20 
  -4   4   0   93.09   10.20 
  -4   4   0   73.89    8.70 
  -4   4   0   87.69   12.90 
   4   4   0  127.99   13.00 
   4   4   0   97.59   11.60 
  -4   4   0   98.69    8.50 
   4   4   0   80.69    5.90 
  -4   4   0   98.19    8.90 
   4   4   0   95.89    8.40 
  -4   4   0   89.49    4.90 
   4   4   0   86.09   10.40 
   4   4   0  103.19    7.00 
  -5  -4   0  785.22   36.30 
  -5  -4   0  757.62   38.40 
   5  -4   0  803.12   35.50 
  -5  -4   0  776.12   43.70 
  -5  -4   0  803.62   41.10 
  -5  -4   0  776.92   38.80 
   5  -4   0  813.02   59.49 
   5  -4   0  807.62   41.80 
  -5  -4   0  793.82   39.60 
   5  -4   0  742.83   38.80 
  -5  -4   0  800.12   44.10 
   5  -4   0  772.62   41.60 
   5  -4   0  764.92   37.50 
  -5  -4   0  810.12   39.10 
   5  -4   0  758.42   37.90 
   5  -4   0  783.42   38.90 
  -5  -4   0  785.02   37.00 
  -5  -4   0  797.32   38.30 
   5  -4   0  778.42   39.80 
  -5  -4   0  786.92   36.90 
  -5  -4   0  788.32   40.80 
   5  -4   0  748.73   39.60 
  -5  -4   0  780.02   42.40 
   5  -4   0  753.82   39.00 
   5  -4   0  812.72   39.20 
   5   4   0  817.72   39.70 
  -5   4   0  724.23   42.80 
  -5   4   0  800.82   41.30 
   5   4   0  765.82   39.60 
  -5   4   0  789.22   39.80 
  -5   4   0  747.03   39.20 
   5   4   0  758.72   35.80 
  -5   4   0  745.73   42.20 
   5   4   0  774.52   36.60 
  -5   4   0  783.12   40.30 
  -5   4   0  769.72   35.40 
   5   4   0  802.92   39.80 
  -5   4   0  718.13   38.70 
  -5   4   0  777.22   39.60 
   5   4   0  803.32   37.20 
   5   4   0  727.23   40.40 
   5   4   0  785.02   40.40 
  -5   4   0  759.12   39.00 
  -5   4   0  744.43   39.10 
   5   4   0  797.02   41.30 
  -5   4   0  845.02   40.30 
   5   4   0  799.22   41.90 
   5   4   0  804.22   41.50 
  -5   4   0  778.92   44.20 
   5   4   0  794.92   36.90 
   5   4   0  779.02   38.20 
  -5   4   0  772.32   40.90 
   6  -4   0  516.15   26.30 
  -6  -4   0  480.05   29.70 
   6  -4   0  506.85   27.50 
   6  -4   0  515.55   28.20 
   6  -4   0  457.45   28.50 
  -6  -4   0  509.75   27.70 
  -6  -4   0  477.05   27.40 
  -6  -4   0  504.05   28.60 
   6  -4   0  492.95   28.30 
   6  -4   0  486.55   47.30 
  -6  -4   0  495.05   31.60 
   6  -4   0  504.15   28.00 
   6  -4   0  549.85   31.70 
  -6  -4   0  547.35   27.10 
  -6  -4   0  505.15   27.70 
  -6  -4   0  508.95   26.40 
   6  -4   0  474.85   27.80 
  -6  -4   0  521.45   31.10 
  -6  -4   0  497.45   24.50 
  -6  -4   0  504.45   32.70 
   6  -4   0  524.65   30.90 
  -6   4   0  499.95   32.40 
  -6   4   0  549.95   31.10 
  -6   4   0  516.95   33.90 
  -6   4   0  471.85   28.10 
  -6   4   0  525.05   30.90 
  -6   4   0  496.25   32.70 
  -6   4   0  517.25   28.70 
   6   4   0  498.85   29.40 
   6   4   0  494.95   27.60 
   6   4   0  496.55   30.40 
   6   4   0  449.16   28.20 
   6   4   0  532.85   25.90 
  -6   4   0  464.95   27.90 
   6   4   0  461.85   29.20 
  -6   4   0  502.95   28.80 
  -6   4   0  540.75   24.00 
  -6   4   0  533.45   28.50 
   6   4   0  500.65   26.20 
   6   4   0  489.15   29.10 
  -6   4   0  507.55   28.80 
  -6   4   0  503.15   29.10 
  -7  -4   0 1249.88   56.69 
  -7  -4   0 1137.89   60.79 
  -7  -4   0 1193.18   63.39 
  -7  -4   0 1156.88   63.99 
  -7  -4   0 1188.58   57.89 
   7  -4   0 1218.48   58.59 
   7  -4   0 1193.58   59.19 
   7  -4   0 1132.19   57.79 
   7  -4   0 1227.78   60.19 
   7  -4   0 1166.58   61.99 
  -7  -4   0 1209.98   56.99 
  -7  -4   0 1232.48   59.69 
   7  -4   0 1218.28   58.29 
   7  -4   0 1181.08   55.69 
   7  -4   0 1149.58   58.69 
   7  -4   0 1184.48   61.99 
  -7  -4   0 1154.08   57.79 
  -7  -4   0 1212.68   58.09 
   7  -4   0 1211.98   86.79 
  -7   4   0 1173.78   58.99 
  -7   4   0 1160.68   61.89 
   7   4   0 1169.58   58.39 
   7   4   0 1155.08   59.79 
   7   4   0 1186.98   61.99 
  -7   4   0 1206.68   58.59 
  -7   4   0 1197.68   58.89 
   7   4   0 1133.49   60.39 
  -7   4   0 1201.78   60.29 
  -7   4   0 1214.68   65.29 
  -7   4   0 1117.99   64.29 
  -7   4   0 1227.88   59.89 
  -7   4   0 1117.29   63.89 
  -7   4   0 1236.18   61.99 
   7   4   0 1238.78   56.79 
   7   4   0 1245.68   60.79 
  -7   4   0 1259.17   60.09 
   7   4   0 1224.88   59.69 
   7   4   0 1283.27   56.49 
   8  -4   0  274.47   19.60 
   8  -4   0  287.77   20.20 
   8  -4   0  264.57   20.30 
  -8  -4   0  277.47   24.20 
  -8  -4   0  329.97   23.60 
   8  -4   0  256.27   19.90 
   8  -4   0  270.67   21.30 
  -8  -4   0  264.27   27.20 
  -8  -4   0  283.47   19.60 
  -8  -4   0  294.27   19.40 
  -8  -4   0  338.97   20.50 
  -8  -4   0  265.87   20.60 
   8  -4   0  260.77   19.30 
   8  -4   0  271.77   23.50 
   8  -4   0  309.77   42.60 
  -8   4   0  294.57   26.50 
  -8   4   0  262.87   22.40 
  -8   4   0  267.57   20.60 
  -8   4   0  274.97   20.40 
   8   4   0  304.97   18.50 
  -8   4   0  223.48   20.00 
  -8   4   0  291.17   21.70 
  -8   4   0  312.77   26.90 
  -8   4   0  284.37   22.10 
   8   4   0  262.67   21.40 
   8   4   0  298.27   19.00 
   8   4   0  269.97   20.10 
  -8   4   0  311.07   23.70 
   8   4   0  242.98   21.70 
  -8   4   0  293.27   23.70 
   8   4   0  295.27   21.70 
   8   4   0  335.87   24.40 
  -9  -4   0  259.97   28.30 
   9  -4   0  261.57   23.30 
   9  -4   0  265.27   21.40 
  -9  -4   0  268.07   19.20 
   9  -4   0  213.48   43.90 
   9  -4   0  237.58   19.50 
  -9  -4   0  208.08   24.80 
   9  -4   0  253.47   19.80 
  -9  -4   0  227.38   18.60 
  -9  -4   0  230.08   19.60 
  -9  -4   0  234.18   24.20 
   9   4   0  261.07   26.40 
  -9   4   0  268.97   20.40 
   9   4   0  197.68   20.60 
   9   4   0  224.68   22.80 
  -9   4   0  265.67   27.10 
  -9   4   0  205.48   26.40 
   9   4   0  272.77   21.60 
  -9   4   0  263.67   21.10 
  -9   4   0  236.68   24.60 
  -9   4   0  240.68   24.40 
   9   4   0  234.88   22.20 
  -9   4   0  247.38   24.00 
   9   4   0  244.18   25.20 
  -9   4   0  227.38   20.70 
   0  -5   0   -0.10    2.50 
   0  -5   0    1.20    4.10 
   0  -5   0    5.90    2.90 
   0  -5   0    3.00    4.30 
   0  -5   0   13.00    7.20 
   0  -5   0   -2.10    1.90 
   0  -5   0    2.30    3.30 
   0  -5   0    2.30    2.00 
   0  -5   0   12.20    8.20 
   0  -5   0    0.10    2.10 
   0  -5   0    1.20    1.60 
   0  -5   0    2.80    9.50 
   0  -5   0    5.00    2.80 
   0  -5   0    3.40    3.10 
   0  -5   0    1.90    2.50 
   0  -5   0    4.00    2.80 
   0  -5   0    0.40    4.90 
   0  -5   0   -1.20    1.90 
   0  -5   0   -0.90    2.50 
   0   5   0    1.50    1.50 
   0   5   0    5.60    2.90 
   0   5   0    5.80    3.10 
   0   5   0    3.00    1.60 
   0   5   0    3.10    1.00 
   0   5   0   -2.60    4.70 
   0   5   0    3.90    1.10 
   0   5   0    2.00    2.30 
   0   5   0    0.60    2.40 
   0   5   0    1.80    2.70 
   0   5   0    1.40    1.60 
   0   5   0    5.30    2.90 
   0   5   0   -1.50    2.10 
   0   5   0   -0.10    3.70 
   0   5   0   -3.90    4.60 
   0   5   0    0.50    1.60 
   0   5   0    6.30    4.50 
   0   5   0    2.30    2.50 
  -1  -5   0   55.69   12.60 
   1  -5   0   57.89    7.30 
   1  -5   0   51.29    7.00 
   1  -5   0   69.99   14.50 
   1  -5   0   24.40   13.50 
   1  -5   0   53.99    5.40 
  -1  -5   0   67.69   10.30 
  -1  -5   0   58.29    7.00 
   1  -5   0   49.00   20.00 
  -1  -5   0   61.49    6.60 
   1  -5   0   72.19    6.50 
   1  -5   0   52.69    6.40 
  -1  -5   0   70.39    7.70 
   1  -5   0   60.89    7.10 
   1  -5   0   73.89    8.80 
   1  -5   0   51.59    6.90 
  -1  -5   0   57.69   11.70 
   1  -5   0   46.20    6.60 
  -1  -5   0   55.89    6.50 
  -1  -5   0   58.49    6.70 
  -1  -5   0   59.19    7.50 
   1  -5   0   63.09    7.40 
  -1  -5   0   53.59    5.70 
  -1  -5   0   54.09    6.70 
   1  -5   0   56.69    8.90 
  -1  -5   0   89.69   26.00 
  -1  -5   0   59.49    6.90 
  -1  -5   0   54.79    7.70 
  -1  -5   0   49.40    6.30 
  -1  -5   0   68.89    8.50 
  -1   5   0   68.59    7.80 
  -1   5   0   70.29   10.50 
   1   5   0   55.19    6.30 
   1   5   0   65.89    4.50 
  -1   5   0   44.00   14.70 
  -1   5   0   62.89    9.90 
   1   5   0   70.39    5.40 
  -1   5   0   71.79    5.60 
  -1   5   0   72.09    4.60 
  -1   5   0   68.99   13.40 
  -1   5   0   51.79    7.50 
  -1   5   0   57.89    6.90 
  -1   5   0   66.19    4.80 
   1   5   0   35.20   15.80 
  -1   5   0   62.19    4.10 
  -1   5   0   61.79    4.10 
   1   5   0   42.70   10.50 
   1   5   0   61.09    3.80 
   1   5   0   63.69    6.80 
   1   5   0   80.99   11.90 
  -1   5   0   55.79   12.50 
  -1   5   0   67.39    4.90 
  -1   5   0   61.59    4.90 
   1   5   0   62.49    7.30 
  -1   5   0   69.79    6.20 
   1   5   0   55.29   10.30 
  -1   5   0   64.39    7.40 
  -1   5   0   54.89    6.30 
  -1   5   0   66.39    4.90 
   1   5   0   50.79   10.20 
   1   5   0   62.09    3.60 
  -2  -5   0  117.59    9.00 
   2  -5   0   66.59   22.30 
   2  -5   0  107.99   24.30 
   2  -5   0  136.69    9.00 
  -2  -5   0  101.29   11.00 
  -2  -5   0  122.59    9.50 
  -2  -5   0  124.29   12.70 
   2  -5   0  123.19   16.70 
   2  -5   0  132.79    9.00 
  -2  -5   0  108.69    8.60 
   2  -5   0  121.09    9.90 
   2  -5   0  121.49   10.00 
   2  -5   0  126.29   13.00 
  -2  -5   0  132.89    8.90 
   2  -5   0  119.69    9.90 
  -2  -5   0  126.29    9.20 
  -2  -5   0  119.29    9.30 
  -2  -5   0  140.49   15.60 
   2  -5   0  113.69    9.30 
  -2  -5   0  111.89    9.90 
  -2  -5   0  112.49    9.20 
   2  -5   0  135.29   10.10 
   2  -5   0  116.49    9.70 
  -2  -5   0  118.99    9.20 
  -2   5   0   93.69   17.30 
   2   5   0  126.99    8.70 
  -2   5   0   99.09   10.70 
  -2   5   0  123.69    9.10 
   2   5   0  125.69    7.50 
  -2   5   0  129.99   10.30 
  -2   5   0  127.99   10.40 
  -2   5   0  122.29    8.40 
   2   5   0  125.59    9.80 
   2   5   0  125.49    8.90 
  -2   5   0  134.09    8.40 
  -2   5   0  110.59    8.40 
  -2   5   0  134.29   10.10 
   2   5   0  105.29   16.60 
  -2   5   0  127.59    9.20 
  -2   5   0  123.39    7.60 
   2   5   0  119.29    6.70 
   2   5   0  114.29    8.20 
  -2   5   0  109.09    7.80 
   2   5   0  128.49    6.80 
   2   5   0  125.59   13.70 
   2   5   0  126.19    9.50 
   2   5   0  128.79    7.10 
   2   5   0  120.49    7.40 
  -2   5   0   94.69   17.70 
  -2   5   0  137.49    9.70 
   2   5   0  116.69    7.30 
   2   5   0  119.39   10.00 
  -2   5   0  125.69    6.50 
  -2   5   0  143.39   15.30 
  -3  -5   0    1.00    3.00 
   3  -5   0    2.20    3.90 
   3  -5   0   -4.10    3.10 
   3  -5   0    7.00   11.10 
  -3  -5   0    2.50    2.60 
  -3  -5   0    2.50    3.40 
   3  -5   0   -1.90    2.80 
   3  -5   0    9.60    3.60 
  -3  -5   0    0.20    2.90 
  -3  -5   0    3.60    2.90 
  -3  -5   0    7.80    4.10 
   3  -5   0    1.60    3.50 
  -3  -5   0   -3.20    2.10 
  -3  -5   0    2.10    2.90 
  -3  -5   0    2.40    3.20 
   3  -5   0    4.90    3.30 
   3  -5   0    2.10    3.10 
   3  -5   0    5.90    5.10 
   3  -5   0    1.60    3.40 
  -3  -5   0   -0.20    2.20 
   3  -5   0    5.90    4.00 
   3  -5   0    3.80    1.40 
   3  -5   0    8.00    9.10 
  -3  -5   0    1.10    4.00 
  -3  -5   0    4.40    2.70 
  -3   5   0    1.90    3.50 
   3   5   0    3.20    2.10 
   3   5   0    8.60    2.70 
   3   5   0    5.80    2.70 
   3   5   0    2.10    2.00 
  -3   5   0    9.50    4.00 
   3   5   0    1.90    2.30 
  -3   5   0   -2.30    3.50 
  -3   5   0    5.90    2.90 
  -3   5   0    5.60    2.20 
   3   5   0    4.60    2.60 
   3   5   0    6.90    5.60 
   3   5   0    1.70    3.60 
   3   5   0    3.70    2.20 
   3   5   0    2.80    3.90 
  -3   5   0    4.00    1.70 
   3   5   0   -3.20    3.60 
  -3   5   0    5.50    3.80 
  -3   5   0    4.40    4.80 
  -3   5   0   -0.80    2.80 
  -3   5   0    3.10    3.40 
  -3   5   0    8.20    4.70 
  -3   5   0    1.10    2.80 
  -3   5   0    4.00    3.10 
  -3   5   0    4.10    4.00 
  -3   5   0    4.50    2.80 
   3   5   0    7.00    3.30 
   3   5   0    5.10    2.70 
  -4  -5   0  338.17   18.10 
  -4  -5   0  333.67   21.60 
  -4  -5   0  313.37   18.60 
  -4  -5   0  335.27   23.00 
   4  -5   0  347.17   19.30 
   4  -5   0  298.57   18.50 
   4  -5   0  335.97   20.10 
   4  -5   0  331.07   19.40 
   4  -5   0  315.77   20.00 
  -4  -5   0  351.16   21.90 
   4  -5   0  324.47   21.70 
   4  -5   0  341.37   20.40 
   4  -5   0  318.37   17.00 
   4  -5   0  345.77   19.50 
   4  -5   0  305.57   19.50 
  -4  -5   0  326.67   17.70 
   4  -5   0  352.96   37.40 
  -4  -5   0  346.27   19.90 
  -4  -5   0  319.77   19.30 
   4  -5   0  347.07   40.80 
  -4  -5   0  306.57   19.40 
  -4  -5   0  300.47   19.30 
  -4  -5   0  362.06   20.00 
   4  -5   0  328.37   20.30 
   4   5   0  311.07   21.30 
   4   5   0  340.57   17.10 
   4   5   0  328.47   19.70 
  -4   5   0  332.47   21.40 
  -4   5   0  297.57   19.40 
   4   5   0  336.67   17.20 
  -4   5   0  305.17   24.60 
  -4   5   0  334.17   20.40 
   4   5   0  338.27   23.30 
   4   5   0  331.17   19.00 
   4   5   0  333.07   16.30 
  -4   5   0  339.67   15.10 
  -4   5   0  330.27   21.00 
  -4   5   0  326.37   20.50 
  -4   5   0  329.37   19.80 
   4   5   0  318.37   18.70 
   4   5   0  332.47   16.90 
   4   5   0  294.37   17.40 
  -4   5   0  353.36   21.80 
  -4   5   0  332.27   19.00 
   4   5   0  317.57   20.50 
  -4   5   0  286.87   22.60 
  -4   5   0  333.97   16.70 
   4   5   0  346.47   16.60 
   4   5   0  333.07   20.10 
  -4   5   0  300.37   20.00 
   4   5   0  330.17   18.70 
  -4   5   0  299.37   19.60 
  -4   5   0  329.77   20.20 
  -5  -5   0   34.10    8.20 
  -5  -5   0   38.00    6.90 
   5  -5   0   44.10    7.70 
   5  -5   0   37.70    5.70 
  -5  -5   0   29.00    6.50 
  -5  -5   0   45.00    6.70 
   5  -5   0   29.90    6.90 
   5  -5   0   30.40    6.70 
   5  -5   0   29.90   16.50 
   5  -5   0   37.70    6.10 
   5  -5   0   49.70    7.60 
  -5  -5   0   38.90    8.10 
   5  -5   0   47.80   17.40 
  -5  -5   0   41.80    5.10 
   5  -5   0   29.20    7.80 
  -5  -5   0   39.40    9.70 
  -5  -5   0   46.50    9.70 
  -5  -5   0   40.50    7.10 
   5  -5   0   38.60    7.30 
   5  -5   0   38.10    6.90 
  -5  -5   0   28.30    5.00 
  -5  -5   0   35.30    6.80 
  -5   5   0   32.40    7.00 
   5   5   0   38.10    6.70 
  -5   5   0   32.10    8.60 
   5   5   0   49.60    5.30 
   5   5   0   38.40    6.90 
  -5   5   0   50.49   11.10 
   5   5   0   32.40    7.30 
  -5   5   0   46.90    8.10 
   5   5   0   42.80    8.50 
  -5   5   0   41.90    7.10 
  -5   5   0   46.90    8.70 
   5   5   0   35.30    6.10 
  -5   5   0   31.20    7.70 
   5   5   0   32.40    7.10 
  -5   5   0   46.60    4.90 
  -5   5   0   22.90    6.40 
  -5   5   0   49.99    7.80 
   5   5   0   45.50    8.60 
   5   5   0   47.70    5.70 
  -5   5   0   30.80    7.40 
  -5   5   0   42.40    7.30 
  -5   5   0   37.00    7.10 
   5   5   0   37.80    4.80 
   6  -5   0  997.20   49.80 
  -6  -5   0  938.71   48.90 
   6  -5   0 1028.60   51.59 
   6  -5   0 1085.89   78.29 
   6  -5   0  906.21   51.79 
   6  -5   0 1004.80   47.90 
  -6  -5   0 1005.30   45.90 
  -6  -5   0 1006.20   54.99 
  -6  -5   0  921.01   48.00 
  -6  -5   0  984.10   50.09 
   6  -5   0  899.51   49.20 
   6  -5   0 1031.20   49.70 
  -6  -5   0  961.00   53.99 
  -6  -5   0  991.30   48.00 
   6  -5   0 1115.19   82.99 
  -6  -5   0 1012.80   49.40 
   6  -5   0 1040.90   47.80 
   6  -5   0  978.10   49.40 
  -6  -5   0  895.21   51.09 
   6  -5   0 1015.20   50.89 
  -6   5   0  919.81   48.70 
  -6   5   0 1040.80   50.49 
   6   5   0 1002.10   48.40 
  -6   5   0  991.10   53.89 
   6   5   0 1048.90   51.59 
  -6   5   0 1020.80   50.59 
   6   5   0 1007.60   51.79 
   6   5   0  995.50   46.00 
   6   5   0  984.50   50.19 
   6   5   0  967.00   50.19 
   6   5   0  997.10   46.70 
  -6   5   0  941.11   51.29 
  -6   5   0  944.71   50.09 
  -6   5   0  935.61   54.69 
  -6   5   0  954.60   51.99 
   6   5   0 1012.10   52.39 
  -6   5   0 1019.10   49.99 
  -6   5   0  967.40   49.99 
  -6   5   0 1003.40   56.49 
  -6   5   0 1011.00   50.29 
   7  -5   0   22.60    5.80 
   7  -5   0   14.60    6.60 
   7  -5   0    6.10    4.70 
  -7  -5   0   10.00    5.70 
  -7  -5   0   14.80    6.90 
   7  -5   0   27.50   16.70 
  -7  -5   0   24.50    7.80 
   7  -5   0   22.30    7.20 
   7  -5   0   12.70    5.50 
  -7  -5   0   20.70    6.40 
  -7  -5   0   19.30    8.80 
   7  -5   0   18.00    8.20 
   7  -5   0   15.00    6.70 
  -7  -5   0   22.00    5.90 
   7  -5   0   21.70    6.60 
  -7  -5   0   16.90    8.10 
  -7   5   0   16.50    7.00 
  -7   5   0   21.50    9.40 
   7   5   0   14.30    7.00 
   7   5   0   18.40    6.90 
   7   5   0   21.70    5.50 
  -7   5   0   21.00    6.70 
  -7   5   0   14.80    6.80 
  -7   5   0   16.00    6.60 
  -7   5   0   12.40    7.80 
  -7   5   0   15.00    6.30 
   7   5   0   15.10    6.70 
   7   5   0   19.00    6.60 
  -7   5   0   19.80    6.60 
  -7   5   0   22.80    7.90 
  -7   5   0   24.70    7.00 
   7   5   0   18.40    6.00 
  -8  -5   0  187.38   20.30 
   8  -5   0  120.09   14.80 
  -8  -5   0  140.19   15.20 
  -8  -5   0  124.79   15.70 
  -8  -5   0  127.79   19.10 
   8  -5   0  158.88   37.80 
   8  -5   0  126.19   15.90 
  -8  -5   0  110.49   13.40 
   8  -5   0  165.38   14.10 
   8  -5   0  103.49   15.70 
   8  -5   0  160.98   16.10 
  -8   5   0  127.09   19.20 
  -8   5   0  136.39   16.40 
   8   5   0  160.88   17.50 
  -8   5   0  164.28   19.50 
   8   5   0  128.89   16.50 
  -8   5   0  126.19   15.60 
  -8   5   0  133.29   16.10 
   8   5   0  155.48   17.80 
  -8   5   0  150.98   17.50 
  -8   5   0   96.39   16.10 
  -8   5   0  150.28   21.20 
   8   5   0  126.19   17.30 
   8   5   0  149.59   15.50 
  -8   5   0  153.38   19.20 
  -9  -5   0    7.40    5.90 
   9  -5   0    6.20    7.00 
   9  -5   0    7.20    6.30 
   9  -5   0   -1.70    5.50 
   9  -5   0    1.20   14.80 
  -9  -5   0   -2.00    7.70 
   9  -5   0   -3.00    4.60 
  -9  -5   0   -4.00    6.10 
  -9  -5   0    0.60    7.00 
  -9  -5   0   11.30    6.30 
   9  -5   0   -2.70    6.70 
   9   5   0    0.10    6.10 
  -9   5   0    6.70    7.50 
  -9   5   0    5.20    8.10 
   9   5   0    0.00    6.90 
   9   5   0   -2.20    5.60 
  -9   5   0    4.40    7.90 
  -9   5   0   -1.80    6.40 
  -9   5   0   -2.30    5.70 
  -9   5   0    3.80    7.10 
  -9   5   0   -2.00    7.30 
   9   5   0    5.50    6.30 
   9   5   0    0.10    6.70 
  -9   5   0   -2.60    5.90 
   0  -6   0  134.29   11.40 
   0  -6   0  194.18   39.80 
   0  -6   0  159.88   18.20 
   0  -6   0  133.49   10.70 
   0  -6   0  165.28   12.50 
   0  -6   0  131.59   11.10 
   0  -6   0  128.09    8.50 
   0  -6   0  125.19   10.70 
   0  -6   0  137.79   10.20 
   0  -6   0  125.59   17.90 
   0  -6   0  130.79   17.40 
   0  -6   0  141.19   10.60 
   0  -6   0   99.49   10.10 
   0  -6   0  134.29   10.60 
   0  -6   0  132.79   10.80 
   0   6   0  149.59   10.60 
   0   6   0  129.19    6.60 
   0   6   0  108.49    9.90 
   0   6   0  127.99   10.10 
   0   6   0  171.68   37.00 
   0   6   0  126.89    7.10 
   0   6   0  142.99   10.40 
   0   6   0  136.89   23.70 
   0   6   0  120.39   10.60 
   0   6   0  132.39   14.30 
   0   6   0  122.49   16.90 
   0   6   0  126.69    9.10 
   0   6   0  124.69   16.50 
   0   6   0  132.39   10.90 
   1  -6   0 2401.76  110.09 
  -1  -6   0 2440.16  111.79 
   1  -6   0 2497.75  107.89 
   1  -6   0 2381.36  138.09 
  -1  -6   0 2465.85  109.99 
  -1  -6   0 2579.14  117.19 
  -1  -6   0 2479.35  109.39 
   1  -6   0 2202.98  146.09 
   1  -6   0 2387.56  111.09 
  -1  -6   0 2501.25  109.39 
  -1  -6   0 2613.94  111.89 
   1  -6   0 2507.15  108.49 
  -1  -6   0 2316.57  110.09 
  -1  -6   0 2581.44  109.79 
  -1  -6   0 2507.45  110.09 
   1  -6   0 2476.85  112.19 
   1  -6   0 2443.06  109.59 
  -1  -6   0 2513.45  108.39 
   1  -6   0 2381.36  110.89 
   1  -6   0 2431.26  110.19 
  -1  -6   0 2464.25  110.29 
  -1  -6   0 2172.08  121.29 
   1  -6   0 2557.74  115.49 
  -1  -6   0 2722.63  125.49 
   1  -6   0 2531.85  110.59 
  -1  -6   0 2405.86  109.29 
  -1  -6   0 2447.16  148.29 
   1  -6   0 2572.24  112.09 
  -1  -6   0 2597.34  111.69 
   1   6   0 2379.56  106.19 
  -1   6   0 2466.85  111.09 
  -1   6   0 2425.86  109.99 
  -1   6   0 2480.35  106.69 
  -1   6   0 2463.75  105.89 
  -1   6   0 2491.15  107.09 
  -1   6   0 2442.66  108.39 
  -1   6   0 2544.55  106.39 
   1   6   0 2513.45  110.39 
   1   6   0 2514.75  109.09 
  -1   6   0 2407.06  109.19 
   1   6   0 2053.39  115.99 
  -1   6   0 2436.86  106.09 
   1   6   0 2450.05  105.69 
   1   6   0 2386.46  117.69 
  -1   6   0 2509.45  106.79 
   1   6   0 2523.65  120.69 
  -1   6   0 2437.76  122.39 
  -1   6   0 2454.25  115.99 
  -1   6   0 2471.65  106.29 
   1   6   0 2423.76  109.59 
   1   6   0 2435.36  117.79 
   1   6   0 2427.36  109.29 
   1   6   0 2520.15  109.19 
   1   6   0 2460.15  108.89 
  -1   6   0 2493.75  108.99 
  -1   6   0 2325.27  109.99 
  -1   6   0 2438.56  110.49 
  -2  -6   0   57.29    8.40 
  -2  -6   0   66.69    7.60 
   2  -6   0   63.49    8.70 
  -2  -6   0   85.19   12.10 
  -2  -6   0   71.49    8.20 
  -2  -6   0   70.59    7.60 
   2  -6   0   32.10   16.60 
   2  -6   0   66.09    8.60 
  -2  -6   0   63.79    7.90 
  -2  -6   0   70.09    8.30 
  -2  -6   0   67.79    7.90 
   2  -6   0   59.79    7.10 
  -2  -6   0   75.19   14.10 
   2  -6   0   57.39    7.80 
   2  -6   0   70.29    9.10 
  -2  -6   0   85.79   10.70 
   2  -6   0   64.39   10.20 
   2  -6   0   76.79    7.80 
   2  -6   0   50.19    7.70 
   2  -6   0   72.79    9.00 
   2  -6   0   29.80   18.20 
  -2  -6   0   75.99    8.10 
  -2  -6   0   54.49    7.40 
  -2   6   0   75.59    6.10 
  -2   6   0   39.90   14.40 
  -2   6   0   75.39    9.10 
  -2   6   0   72.39    9.50 
  -2   6   0   65.99    5.70 
  -2   6   0   75.79    6.60 
  -2   6   0   72.39    6.80 
   2   6   0   75.89    7.80 
   2   6   0   71.69    4.90 
  -2   6   0   62.89    4.80 
  -2   6   0   88.89   10.10 
   2   6   0   72.59    5.20 
   2   6   0   73.49    9.10 
   2   6   0   78.19    5.20 
  -2   6   0   77.69   11.80 
   2   6   0   53.49   14.00 
   2   6   0   61.49   11.00 
   2   6   0   73.59    7.30 
  -2   6   0   81.59    7.00 
   2   6   0   76.19    4.80 
   2   6   0   72.09    7.40 
   2   6   0   98.09   10.00 
   2   6   0   71.29    4.60 
  -2   6   0   70.99    7.20 
  -2   6   0   74.99    7.00 
  -2   6   0   80.29    9.10 
   2   6   0   56.49   14.00 
   2   6   0   79.29    8.40 
  -2   6   0   73.59    8.30 
  -2   6   0   68.09   17.00 
  -3  -6   0  209.78   14.80 
   3  -6   0  251.27   15.40 
  -3  -6   0  248.88   15.80 
  -3  -6   0  240.38   18.60 
   3  -6   0  218.08   33.80 
   3  -6   0  257.17   16.20 
   3  -6   0  260.77   16.10 
  -3  -6   0  228.38   16.60 
   3  -6   0  252.77   46.80 
   3  -6   0  257.07   17.00 
  -3  -6   0  221.58   15.40 
  -3  -6   0  232.28   15.80 
   3  -6   0  257.67   17.30 
  -3  -6   0  239.18   20.90 
   3  -6   0  245.88   16.70 
  -3  -6   0  233.88   15.20 
  -3  -6   0  264.17   16.50 
   3  -6   0  249.68   16.70 
   3  -6   0  244.38   15.50 
  -3  -6   0  261.07   15.10 
   3  -6   0  232.98   18.60 
  -3   6   0  220.18   16.20 
   3   6   0  231.68   12.80 
  -3   6   0  232.88   14.30 
  -3   6   0  219.98   19.20 
   3   6   0  240.08   13.90 
  -3   6   0  254.07   15.00 
   3   6   0  182.58   24.10 
   3   6   0  268.97   13.80 
  -3   6   0  210.88   16.40 
   3   6   0  277.67   16.70 
   3   6   0  239.58   14.10 
  -3   6   0  233.98   20.60 
  -3   6   0  228.38   16.50 
   3   6   0  217.58   16.50 
   3   6   0  249.88   18.80 
   3   6   0  239.58   13.90 
   3   6   0  221.28   13.50 
  -3   6   0  238.38   15.10 
  -3   6   0  236.68   17.60 
  -3   6   0  261.37   25.20 
  -3   6   0  246.28   15.50 
   3   6   0  256.57   14.60 
   3   6   0  245.88   13.70 
  -3   6   0  233.78   16.00 
  -3   6   0  239.88   16.20 
  -4  -6   0   -0.60    3.50 
  -4  -6   0    4.10    4.80 
  -4  -6   0   -2.00    3.50 
   4  -6   0   -3.70    3.20 
   4  -6   0   -4.20    3.60 
  -4  -6   0    3.60    3.40 
   4  -6   0   -0.60    3.90 
  -4  -6   0    6.00    6.10 
   4  -6   0    2.70   10.40 
   4  -6   0    4.30    3.70 
  -4  -6   0    7.30    3.90 
   4  -6   0    1.40    3.90 
  -4  -6   0    1.40    3.70 
  -4  -6   0    2.10    3.50 
   4  -6   0   -3.50    3.80 
   4  -6   0    3.10    5.50 
  -4  -6   0    9.50    4.50 
  -4  -6   0    6.20    3.60 
   4  -6   0    2.30    3.70 
   4  -6   0   10.60   12.80 
   4  -6   0   -1.10    3.50 
   4   6   0    1.40    3.10 
  -4   6   0    0.40    4.10 
  -4   6   0    6.00    4.40 
   4   6   0    2.20    1.90 
   4   6   0   15.30    3.70 
   4   6   0   15.50    3.60 
   4   6   0    3.10    2.30 
  -4   6   0    3.90    4.80 
  -4   6   0   -1.70    4.90 
   4   6   0    0.90    2.60 
   4   6   0    1.50    5.20 
  -4   6   0    0.40    3.00 
   4   6   0   -4.80    3.50 
   4   6   0    1.80    4.00 
   4   6   0   30.00    7.60 
   4   6   0    2.90    2.90 
  -4   6   0    5.60    6.50 
  -4   6   0    2.70    6.00 
  -4   6   0    0.00    3.90 
   4   6   0    3.70    2.40 
  -4   6   0    3.50    4.50 
  -4   6   0   -0.50    3.70 
  -4   6   0   -1.10    4.20 
  -4   6   0   -1.70    3.30 
   5  -6   0  573.54   31.30 
  -5  -6   0  535.55   31.10 
   5  -6   0  524.85   57.69 
  -5  -6   0  598.34   36.80 
   5  -6   0  548.15   31.50 
  -5  -6   0  579.84   31.40 
   5  -6   0  539.25   33.90 
  -5  -6   0  571.74   31.00 
   5  -6   0  573.64   55.89 
   5  -6   0  570.54   30.90 
  -5  -6   0  545.65   32.30 
  -5  -6   0  581.44   29.60 
   5  -6   0  541.25   29.80 
   5  -6   0  604.44   31.40 
   5  -6   0  579.24   32.20 
  -5  -6   0  566.14   33.60 
   5  -6   0  537.55   30.30 
  -5  -6   0  556.84   28.40 
  -5  -6   0  515.45   30.50 
   5  -6   0  565.04   27.40 
  -5   6   0  547.65   30.80 
  -5   6   0  552.94   36.40 
   5   6   0  540.55   32.30 
   5   6   0  531.05   33.10 
  -5   6   0  474.55   30.80 
  -5   6   0  533.25   31.70 
   5   6   0  614.84   35.50 
  -5   6   0  525.65   30.00 
   5   6   0  548.85   30.10 
   5   6   0  545.85   28.70 
  -5   6   0  584.94   31.00 
   5   6   0  539.55   31.50 
  -5   6   0  671.83   40.40 
  -5   6   0  579.44   32.20 
  -5   6   0  563.24   31.40 
  -5   6   0  566.34   33.80 
  -5   6   0  495.35   32.70 
   5   6   0  548.85   27.30 
  -5   6   0  571.84   32.30 
   6  -6   0   49.20    8.60 
   6  -6   0   26.70    6.70 
   6  -6   0   21.40    6.00 
  -6  -6   0   24.60    7.00 
  -6  -6   0   23.90    8.20 
  -6  -6   0   30.60    5.70 
  -6  -6   0   35.10    7.70 
   6  -6   0   33.60    9.60 
  -6  -6   0   31.30    6.60 
  -6  -6   0   16.50    7.50 
  -6  -6   0   34.70   10.20 
   6  -6   0   20.70   19.60 
  -6  -6   0   35.40    7.60 
   6  -6   0   26.40    7.80 
   6  -6   0   26.30    7.50 
  -6  -6   0   33.60    7.70 
   6  -6   0   43.50   20.40 
   6  -6   0   19.10    6.70 
   6  -6   0   25.10    5.40 
   6   6   0   18.30    7.40 
  -6   6   0   21.50    8.00 
  -6   6   0   39.00    8.30 
  -6   6   0   35.40   10.70 
  -6   6   0   46.80    8.30 
   6   6   0   35.60    6.70 
  -6   6   0   33.80    8.30 
  -6   6   0   30.20    7.20 
   6   6   0   27.90    6.90 
  -6   6   0   37.80    8.10 
  -6   6   0   31.50    9.00 
  -6   6   0   32.10    7.90 
  -6   6   0   28.60    8.70 
   6   6   0   25.60    8.00 
   6   6   0   27.80    7.80 
   7  -6   0  877.81   82.29 
   7  -6   0  987.00   83.59 
   7  -6   0  981.20   54.79 
  -7  -6   0 1006.80   57.49 
  -7  -6   0  984.40   50.59 
   7  -6   0  987.20   48.00 
   7  -6   0  935.01   50.49 
  -7  -6   0  959.50   50.29 
   7  -6   0  988.30   52.19 
  -7  -6   0  893.61   52.89 
  -7  -6   0  975.50   51.29 
   7  -6   0 1018.50   50.89 
  -7  -6   0  988.20   49.30 
   7  -6   0  959.60   49.70 
   7   6   0  929.21   50.69 
  -7   6   0 1065.09   52.29 
  -7   6   0  927.31   52.89 
  -7   6   0  966.80   50.89 
   7   6   0  942.51   52.19 
   7   6   0  962.70   49.00 
  -7   6   0  945.71   51.19 
  -7   6   0  909.01   57.59 
  -7   6   0  939.21   53.79 
   7   6   0 1010.70   54.29 
  -7   6   0  984.30   51.99 
  -7   6   0 1028.60   51.19 
   7   6   0  914.41   51.09 
  -7   6   0  989.10   55.99 
  -8  -6   0    5.60    8.20 
  -8  -6   0    8.00    6.60 
  -8  -6   0   10.40    7.20 
   8  -6   0   -5.60    6.70 
  -8  -6   0    8.10    7.00 
   8  -6   0   -5.30   11.70 
  -8  -6   0   11.60    7.30 
   8  -6   0    4.30   13.70 
   8  -6   0   12.80    6.60 
   8  -6   0   -1.70    6.90 
   8  -6   0    5.60    5.80 
  -8   6   0   -1.70    5.60 
  -8   6   0    2.70    7.70 
   8   6   0    6.60    5.70 
   8   6   0   -1.30    6.90 
   8   6   0    0.80    6.20 
   8   6   0    3.10    6.80 
  -8   6   0    3.70    6.00 
  -8   6   0    2.30    7.60 
   8   6   0    4.10    6.30 
  -8   6   0    1.40    5.90 
  -8   6   0    0.60    5.70 
  -8   6   0    0.80    6.60 
   0  -7   0   -1.50    3.50 
   0  -7   0    0.40    3.80 
   0  -7   0    1.00    3.40 
   0  -7   0    1.70    3.70 
   0  -7   0   -0.80    5.40 
   0  -7   0   -3.10    3.00 
   0  -7   0   -2.60    3.10 
   0  -7   0   -2.90   11.50 
   0  -7   0    3.00    8.30 
   0  -7   0    1.00    3.60 
   0  -7   0   -1.80    3.90 
   0  -7   0   -4.00    3.40 
   0  -7   0    3.10    4.30 
   0  -7   0    7.20    6.80 
   0   7   0    2.60    3.30 
   0   7   0    1.10    4.30 
   0   7   0    3.60    4.10 
   0   7   0    0.90    3.30 
   0   7   0   -0.40    5.40 
   0   7   0   -2.40    3.10 
   0   7   0    0.70    3.30 
   0   7   0   -1.40    2.60 
   0   7   0    6.70    5.60 
   0   7   0   -8.90    7.80 
   0   7   0   -2.50    3.30 
  -1  -7   0   14.50    4.80 
  -1  -7   0   21.00    9.60 
  -1  -7   0    5.50    4.60 
   1  -7   0   10.90    5.50 
  -1  -7   0   12.60    4.00 
   1  -7   0    9.90    4.30 
   1  -7   0   10.00    5.00 
  -1  -7   0    6.40    4.50 
   1  -7   0    7.60    6.20 
  -1  -7   0   13.30    5.00 
   1  -7   0   16.90    6.30 
  -1  -7   0    5.40    4.20 
  -1  -7   0   11.60    9.40 
   1  -7   0   18.10    6.20 
  -1  -7   0   16.30    5.10 
  -1  -7   0    3.00   12.80 
   1  -7   0   22.00   17.70 
  -1  -7   0   10.80    6.10 
   1  -7   0    7.60    7.10 
   1  -7   0   17.30    5.60 
  -1  -7   0    8.50    4.20 
  -1  -7   0   12.50    5.50 
  -1  -7   0    7.10    3.90 
   1  -7   0   18.50   12.10 
   1  -7   0    8.50    3.80 
  -1   7   0   25.40    8.10 
   1   7   0   11.90    7.20 
  -1   7   0   15.10    5.40 
   1   7   0    5.70    8.40 
  -1   7   0   11.20    2.70 
   1   7   0   10.70    4.80 
   1   7   0    8.50    4.40 
   1   7   0   11.20    4.20 
  -1   7   0   -5.90    7.80 
   1   7   0    7.90    4.30 
   1   7   0   13.20    7.20 
  -1   7   0   12.30    5.30 
  -1   7   0    4.20    4.20 
   1   7   0    2.70    3.70 
  -1   7   0   11.00   10.10 
  -1   7   0   10.70    5.00 
  -1   7   0    8.70    3.10 
  -1   7   0   12.90    3.00 
   1   7   0    2.80    4.00 
   1   7   0   15.30    4.90 
   1   7   0   21.00    8.70 
  -1   7   0    7.00    4.20 
   1   7   0    9.20    4.40 
   1   7   0    5.60    6.20 
  -1   7   0   14.80    4.50 
   1   7   0   16.10    8.70 
   2  -7   0   50.99   21.00 
  -2  -7   0   58.49   15.40 
  -2  -7   0   62.49    8.80 
  -2  -7   0   71.09    8.80 
   2  -7   0   60.39    9.80 
   2  -7   0   41.40    8.20 
   2  -7   0   85.49   10.80 
  -2  -7   0   64.49    8.80 
   2  -7   0   59.69    7.70 
   2  -7   0   64.99    8.60 
  -2  -7   0   70.49    9.00 
  -2  -7   0   68.49    9.80 
   2  -7   0   20.00   20.10 
   2  -7   0   67.39   11.90 
   2  -7   0   53.69    9.20 
   2  -7   0   69.79    9.30 
  -2  -7   0   54.09   11.70 
  -2  -7   0   61.29    7.90 
  -2  -7   0   54.59    8.00 
  -2  -7   0   57.39    7.80 
   2   7   0   64.79    4.60 
  -2   7   0   58.49    6.60 
  -2   7   0   73.69    8.90 
  -2   7   0   66.59    6.10 
   2   7   0   58.29    9.20 
   2   7   0   53.89    7.50 
  -2   7   0   57.89    9.00 
  -2   7   0   64.29    6.30 
   2   7   0   75.29    9.00 
   2   7   0   59.49   15.90 
   2   7   0   66.19    8.10 
   2   7   0   71.29    9.40 
  -2   7   0   58.49    9.10 
  -2   7   0   58.39   11.80 
   2   7   0   62.09    4.80 
  -2   7   0   69.69    6.70 
  -2   7   0   81.89    8.40 
   2   7   0   80.49   16.70 
  -2   7   0   53.49    8.60 
   2   7   0   72.29   12.60 
   2   7   0   47.70    7.30 
  -2   7   0   51.49   17.60 
   2   7   0   61.89    7.50 
  -2   7   0   76.69   10.90 
  -2   7   0   63.59    6.50 
  -2   7   0   49.50   16.60 
  -3  -7   0   34.20   11.10 
  -3  -7   0   28.10    6.50 
   3  -7   0   36.60    6.20 
   3  -7   0   28.80    7.30 
   3  -7   0   30.00    7.10 
  -3  -7   0   37.90    6.60 
   3  -7   0   31.70    6.10 
  -3  -7   0   38.00    7.20 
  -3  -7   0   26.40    6.70 
   3  -7   0   21.00   20.30 
   3  -7   0   29.60    6.30 
   3  -7   0   24.90    6.80 
  -3  -7   0   51.09    7.70 
  -3  -7   0   24.50    5.60 
  -3  -7   0   35.10    7.60 
  -3  -7   0   38.50    9.70 
   3  -7   0   34.80    9.80 
   3  -7   0   18.30   15.20 
   3  -7   0   38.90    7.60 
  -3  -7   0   25.60    6.10 
   3  -7   0   29.30    7.20 
   3   7   0   37.40    8.80 
  -3   7   0   41.90    7.90 
  -3   7   0   36.70    8.30 
  -3   7   0   33.00    9.10 
  -3   7   0   27.60    5.00 
  -3   7   0   24.70    5.50 
   3   7   0   42.20    6.40 
  -3   7   0   30.50   11.00 
   3   7   0   41.70    7.90 
   3   7   0   29.80   11.90 
  -3   7   0   34.20    7.70 
  -3   7   0   30.30   12.10 
  -3   7   0   27.70    5.90 
   3   7   0   31.60    4.60 
  -3   7   0   30.70    5.70 
   3   7   0   37.20    5.80 
  -3   7   0   33.20    7.80 
  -3   7   0   29.20    6.60 
   3   7   0   33.10    4.60 
   3   7   0   34.90    5.80 
   3   7   0   43.00   13.40 
   3   7   0   31.00    7.70 
   4  -7   0  234.18   47.20 
  -4  -7   0  203.08   16.30 
   4  -7   0  222.28   16.60 
   4  -7   0  212.18   15.60 
  -4  -7   0  203.98   14.60 
   4  -7   0  211.38   46.90 
   4  -7   0  231.78   20.00 
  -4  -7   0  234.98   16.00 
  -4  -7   0  209.98   16.00 
  -4  -7   0  189.38   23.50 
  -4  -7   0  239.88   15.80 
   4  -7   0  227.58   16.10 
   4  -7   0  227.78   17.50 
  -4  -7   0  243.58   15.90 
   4  -7   0  213.28   17.60 
  -4  -7   0  209.98   16.40 
   4  -7   0  250.77   16.60 
  -4  -7   0  247.48   23.10 
  -4  -7   0  214.98   16.80 
   4  -7   0  213.28   15.70 
  -4   7   0  224.58   17.50 
  -4   7   0  241.78   18.20 
  -4   7   0  246.48   18.80 
  -4   7   0  230.88   17.80 
   4   7   0  200.88   16.90 
   4   7   0  245.78   18.90 
   4   7   0  240.98   17.60 
  -4   7   0  199.08   25.50 
   4   7   0  246.18   26.90 
  -4   7   0  229.78   16.40 
   4   7   0  201.28   18.30 
   4   7   0  201.28   14.00 
  -4   7   0  199.58   17.80 
  -4   7   0  228.38   15.10 
  -4   7   0  207.08   16.80 
   4   7   0  217.88   14.20 
  -4   7   0  191.38   22.00 
  -4   7   0  199.08   16.30 
  -5  -7   0  199.88   16.70 
  -5  -7   0  212.08   14.90 
  -5  -7   0  220.98   17.40 
  -5  -7   0  201.18   15.10 
   5  -7   0  200.08   16.10 
  -5  -7   0  229.88   17.30 
   5  -7   0  199.88   42.60 
  -5  -7   0  227.98   17.50 
  -5  -7   0  225.68   22.50 
   5  -7   0  210.78   17.90 
   5  -7   0  239.58   18.90 
  -5  -7   0  204.98   21.40 
   5  -7   0  213.88   16.00 
   5  -7   0  177.58   42.50 
  -5  -7   0  242.78   26.60 
   5  -7   0  210.58   21.70 
   5  -7   0  211.68   16.80 
   5  -7   0  254.57   17.00 
  -5   7   0  196.88   15.70 
  -5   7   0  202.58   21.10 
  -5   7   0  192.28   18.00 
   5   7   0  235.98   18.30 
  -5   7   0  213.58   26.20 
  -5   7   0  206.48   19.50 
  -5   7   0  200.28   15.90 
  -5   7   0  226.48   17.20 
  -5   7   0  221.58   17.40 
   5   7   0  224.58   23.70 
   5   7   0  198.28   15.10 
   5   7   0  220.18   19.00 
  -5   7   0  212.08   17.50 
  -6  -7   0  601.54   39.30 
   6  -7   0  580.74   68.49 
  -6  -7   0  629.24   34.70 
  -6  -7   0  685.73   43.90 
   6  -7   0  603.84   34.50 
   6  -7   0  612.04   36.70 
  -6  -7   0  654.63   36.90 
   6  -7   0  636.04   35.90 
  -6  -7   0  674.03   36.30 
   6  -7   0  641.34   67.99 
   6  -7   0  657.03   38.40 
  -6  -7   0  635.04   36.60 
  -6  -7   0  594.54   36.10 
   6  -7   0  670.23   41.30 
   6  -7   0  654.03   36.40 
   6   7   0  661.53   39.60 
   6   7   0  615.94   39.00 
  -6   7   0  678.33   45.00 
  -6   7   0  616.04   36.60 
  -6   7   0  665.13   37.70 
  -6   7   0  636.34   39.50 
  -6   7   0  679.73   40.30 
  -6   7   0  658.93   36.00 
   6   7   0  676.93   35.90 
  -6   7   0  652.53   37.80 
  -6   7   0  608.94   37.30 
   6   7   0  651.93   37.50 
   7  -7   0   55.79   10.60 
   7  -7   0   47.40   11.70 
  -7  -7   0   54.19   10.10 
  -7  -7   0   56.89   12.80 
   7  -7   0   44.20   26.60 
   7  -7   0   49.40    9.80 
  -7  -7   0   61.69   10.70 
  -7  -7   0   46.60    9.90 
  -7  -7   0   25.60    8.20 
   7  -7   0   49.30   10.00 
  -7  -7   0   64.79   15.50 
   7  -7   0   41.70   23.60 
   7  -7   0   67.99    9.60 
   7  -7   0   46.10   10.60 
  -7   7   0   66.99   12.50 
   7   7   0   53.39   10.30 
  -7   7   0   66.59   12.50 
  -7   7   0   37.60   12.70 
  -7   7   0   45.90   12.00 
  -7   7   0   52.29   11.90 
  -7   7   0   61.99   12.40 
   7   7   0   41.50   11.90 
  -7   7   0   54.69   10.90 
  -7   7   0   65.69   11.20 
   7   7   0   47.10   10.40 
   0  -8   0 1314.77   71.49 
   0  -8   0 1159.48   58.19 
   0  -8   0 1143.99   57.69 
   0  -8   0 1255.17   98.39 
   0  -8   0 1160.48   58.39 
   0  -8   0 1172.98   60.09 
   0  -8   0 1101.99   59.19 
   0  -8   0 1243.48   71.69 
   0  -8   0 1102.99   56.89 
   0  -8   0 1097.19   58.29 
   0   8   0 1126.29   57.19 
   0   8   0 1251.97   82.19 
   0   8   0 1192.28   57.39 
   0   8   0 1195.78   56.59 
   0   8   0 1123.99   64.29 
   0   8   0 1305.47   71.39 
   0   8   0 1168.48   58.49 
   0   8   0 1124.59   57.69 
   0   8   0 1255.07   55.49 
   0   8   0 1223.48   70.79 
   0   8   0 1161.48   57.49 
   0   8   0 1230.18   66.09 
   0   8   0 1172.58   57.89 
   0   8   0 1221.38   65.69 
   1  -8   0  892.11   46.70 
   1  -8   0  914.21   48.30 
   1  -8   0  915.11   47.10 
  -1  -8   0  882.11   47.20 
   1  -8   0  915.91   47.40 
   1  -8   0 1002.90   85.09 
  -1  -8   0  856.51   45.70 
  -1  -8   0 1035.30   87.89 
  -1  -8   0  895.91   46.40 
  -1  -8   0  876.61   46.70 
  -1  -8   0  896.51   48.80 
  -1  -8   0  935.61   46.40 
   1  -8   0  901.21   45.50 
  -1  -8   0 1052.89   58.89 
   1  -8   0 1054.99   54.69 
  -1  -8   0  955.20   49.30 
   1  -8   0  965.10   65.19 
   1  -8   0  913.11   54.59 
  -1  -8   0  908.61   47.30 
   1  -8   0  876.31   47.70 
   1   8   0  967.90   55.29 
  -1   8   0  933.41   47.70 
   1   8   0  886.21   46.10 
   1   8   0  962.00   56.69 
  -1   8   0  970.50   47.60 
   1   8   0  921.71   54.19 
   1   8   0  890.61   56.79 
  -1   8   0  943.91   69.39 
   1   8   0  909.51   46.90 
  -1   8   0  860.51   52.19 
  -1   8   0  881.11   45.50 
  -1   8   0  862.41   45.30 
   1   8   0  938.71   55.19 
  -1   8   0  917.21   42.30 
   1   8   0  895.41   44.90 
  -1   8   0  906.41   62.19 
   1   8   0  873.71   46.00 
  -1   8   0 1040.00   52.39 
   1   8   0  972.80   45.90 
  -1   8   0  832.82   46.10 
  -1   8   0  904.91   48.00 
   1   8   0  916.01   45.80 
   1   8   0  962.50   64.79 
   1   8   0  918.21   47.10 
   1   8   0  895.71   45.40 
   2  -8   0  238.68   50.19 
  -2  -8   0  218.48   15.10 
   2  -8   0  204.68   17.10 
  -2  -8   0  229.88   15.70 
  -2  -8   0  214.38   17.90 
   2  -8   0  216.38   18.00 
  -2  -8   0  232.98   17.10 
   2  -8   0  251.47   15.90 
  -2  -8   0  194.98   15.80 
   2  -8   0  210.98   16.20 
   2  -8   0  226.38   24.30 
  -2  -8   0  215.68   16.60 
   2  -8   0  211.88   17.00 
   2  -8   0  215.78   17.20 
   2  -8   0  235.48   35.90 
  -2  -8   0  226.38   16.40 
  -2  -8   0  255.77   33.80 
  -2  -8   0  195.88   24.40 
   2  -8   0  243.58   20.00 
  -2   8   0  214.38   16.20 
   2   8   0  228.58   17.00 
  -2   8   0  189.18   31.90 
  -2   8   0  166.78   17.30 
  -2   8   0  217.38   13.60 
   2   8   0  195.08   15.30 
   2   8   0  186.08   28.30 
   2   8   0  242.08   17.90 
  -2   8   0  224.58   13.90 
  -2   8   0  210.88   16.80 
   2   8   0  255.17   15.80 
  -2   8   0  198.68   31.60 
   2   8   0  206.18   15.40 
   2   8   0  219.98   16.10 
   2   8   0  254.67   28.80 
   2   8   0  262.97   16.90 
   2   8   0  242.58   21.70 
  -2   8   0  208.88   17.70 
  -2   8   0  226.58   20.90 
   2   8   0  241.78   16.40 
  -2   8   0  227.18   12.80 
  -2   8   0  238.38   17.90 
   3  -8   0  213.08   16.70 
   3  -8   0  250.07   18.90 
  -3  -8   0  233.28   17.50 
   3  -8   0  174.58   40.80 
  -3  -8   0  256.37   26.80 
   3  -8   0  239.68   19.80 
   3  -8   0  191.58   45.80 
  -3  -8   0  228.28   31.10 
  -3  -8   0  234.48   18.70 
  -3  -8   0  262.07   17.00 
  -3  -8   0  237.68   17.00 
   3  -8   0  263.27   23.50 
   3  -8   0  264.87   17.10 
  -3  -8   0  258.57   17.30 
   3  -8   0  241.18   18.60 
   3  -8   0  245.48   17.90 
   3  -8   0  253.07   19.10 
  -3  -8   0  228.28   17.70 
  -3  -8   0  262.67   17.50 
  -3  -8   0  241.08   17.00 
   3   8   0  216.88   18.10 
   3   8   0  231.08   15.90 
   3   8   0  220.78   17.50 
   3   8   0  249.88   13.30 
  -3   8   0  218.68   18.20 
  -3   8   0  202.18   30.80 
  -3   8   0  228.98   15.80 
   3   8   0  161.38   26.80 
   3   8   0  257.87   30.20 
   3   8   0  243.08   15.70 
  -3   8   0  226.78   17.90 
  -3   8   0  275.47   18.30 
  -3   8   0  239.88   16.00 
  -3   8   0  254.77   19.70 
   3   8   0  221.68   16.30 
  -3   8   0  233.78   21.70 
   3   8   0  255.07   21.20 
  -3   8   0  230.38   28.80 
   3   8   0  234.38   13.40 
   4  -8   0  118.99   17.70 
  -4  -8   0  129.59   15.00 
  -4  -8   0  132.19   22.20 
  -4  -8   0  133.19   14.90 
  -4  -8   0  139.49   14.50 
   4  -8   0  125.39   13.20 
   4  -8   0  101.29   34.20 
  -4  -8   0  129.99   12.70 
   4  -8   0  124.79   13.90 
  -4  -8   0  113.19   17.80 
   4  -8   0  101.99   13.60 
   4  -8   0  102.59   14.80 
  -4  -8   0  139.99   14.20 
   4  -8   0   86.09   32.60 
   4  -8   0  131.79   14.80 
  -4  -8   0  146.99   13.60 
  -4   8   0  123.49   16.10 
  -4   8   0  129.19   13.90 
  -4   8   0  135.89   23.40 
  -4   8   0  120.69   11.90 
  -4   8   0  118.99   14.30 
   4   8   0  145.79   14.90 
  -4   8   0  119.29   14.40 
   4   8   0  113.89   16.00 
   4   8   0   77.29   18.50 
   4   8   0  122.69   10.20 
  -4   8   0  156.68   14.00 
   4   8   0  129.39   10.40 
   4   8   0  141.29   12.80 
   4   8   0  150.68   23.20 
   5  -8   0  316.57   22.30 
   5  -8   0  352.66   27.90 
  -5  -8   0  373.36   24.70 
   5  -8   0  325.17   23.40 
   5  -8   0  352.16   24.60 
  -5  -8   0  368.86   32.60 
   5  -8   0  304.17   59.19 
  -5  -8   0  369.66   24.60 
  -5  -8   0  345.87   27.90 
  -5  -8   0  341.67   23.20 
  -5  -8   0  371.56   21.90 
   5  -8   0  322.77   63.19 
   5  -8   0  319.87   22.40 
   5  -8   0  374.16   26.10 
  -5  -8   0  328.47   23.30 
  -5   8   0  319.47   24.50 
  -5   8   0  332.97   24.10 
  -5   8   0  370.46   24.00 
   5   8   0  325.87   23.90 
   5   8   0  371.46   29.40 
   5   8   0  313.27   25.30 
  -5   8   0  366.66   26.90 
  -5   8   0  341.67   23.50 
   5   8   0  365.86   21.50 
  -5   8   0  332.97   31.50 
  -5   8   0  364.26   25.50 
   6  -8   0  363.26   59.59 
   6  -8   0  365.36   24.90 
  -6  -8   0  355.26   25.40 
  -6  -8   0  363.46   29.10 
  -6  -8   0  342.77   25.00 
   6  -8   0  324.77   26.30 
   6  -8   0  339.37   28.50 
  -6  -8   0  351.36   32.90 
   6  -8   0  360.36   26.30 
   6  -8   0  342.77   23.40 
   6  -8   0  269.77   58.69 
   6  -8   0  366.66   24.60 
  -6  -8   0  374.86   25.90 
  -6  -8   0  384.56   25.50 
  -6   8   0  398.56   33.60 
  -6   8   0  355.76   28.00 
  -6   8   0  335.47   25.00 
   6   8   0  411.86   26.90 
  -6   8   0  352.76   26.10 
  -6   8   0  382.66   28.10 
   6   8   0  382.26   28.50 
  -6   8   0  343.57   25.50 
   6   8   0  367.96   23.50 
  -6   8   0  324.27   25.10 
   0  -9   0    9.60   14.80 
   0  -9   0   -7.80    4.60 
   0  -9   0    5.40    5.80 
   0  -9   0   -1.50    5.10 
   0  -9   0    7.40    6.40 
   0  -9   0    2.40    5.40 
   0  -9   0   -1.20    9.10 
   0   9   0   -0.60    7.60 
   0   9   0   -2.50    4.20 
   0   9   0   -3.10    3.90 
   0   9   0    0.20    5.60 
   0   9   0   -5.70    3.90 
   0   9   0    3.60   10.10 
   0   9   0   -3.40   11.80 
   0   9   0   -3.10    4.30 
   0   9   0   -3.20    3.80 
   0   9   0   -4.30    6.50 
   0   9   0    3.10    5.40 
   0   9   0    4.50    5.80 
  -1  -9   0   36.70    8.70 
   1  -9   0   34.90    7.90 
   1  -9   0   27.60    8.60 
  -1  -9   0   27.20    8.30 
   1  -9   0   36.20    9.20 
   1  -9   0   44.70   13.80 
  -1  -9   0   37.00    8.60 
  -1  -9   0   49.90   28.00 
   1  -9   0   40.60    8.80 
  -1  -9   0   23.50    8.00 
   1  -9   0   23.00   17.80 
   1  -9   0   42.90    8.90 
   1   9   0   22.50   11.70 
  -1   9   0   30.50    3.40 
  -1   9   0   30.20    7.80 
   1   9   0   33.30    7.90 
  -1   9   0   28.40   15.90 
  -1   9   0   48.60   18.30 
  -1   9   0   32.50   10.10 
   1   9   0   32.20    7.40 
   1   9   0   32.40    8.00 
   1   9   0   17.40    6.70 
  -1   9   0   30.20    7.60 
   1   9   0   29.50    7.00 
  -1   9   0   20.10    7.50 
   1   9   0   47.30   12.90 
  -1   9   0   36.80   11.10 
  -1   9   0   33.20    9.30 
   1   9   0   29.50    7.40 
   1   9   0   35.60   17.90 
   1   9   0   31.60    6.80 
  -1   9   0   25.50    7.00 
   1   9   0   43.50   12.50 
   1   9   0   28.40   13.60 
  -1   9   0   41.60    6.20 
   1   9   0   22.90    7.00 
   2  -9   0   30.70    7.70 
   2  -9   0   35.80    9.10 
  -2  -9   0   24.00   12.00 
   2  -9   0   38.20    8.80 
   2  -9   0   33.80   12.60 
  -2  -9   0   36.00    9.30 
   2  -9   0   31.70    8.60 
  -2  -9   0   28.50    7.30 
   2  -9   0   20.70   19.90 
  -2  -9   0   42.80    8.10 
  -2  -9   0   27.80   15.30 
  -2  -9   0   37.60    8.80 
  -2  -9   0   30.10    8.00 
   2  -9   0   33.30    8.60 
  -2   9   0   36.10    9.40 
  -2   9   0   30.90    5.10 
   2   9   0   33.30    7.30 
  -2   9   0   20.90    8.40 
   2   9   0   24.60   11.90 
  -2   9   0   47.40    9.10 
   2   9   0   43.90   11.30 
   2   9   0   36.30   15.20 
   2   9   0   43.40    8.60 
   2   9   0   44.70    8.20 
  -2   9   0   26.30    7.70 
  -2   9   0   40.10    6.10 
   2   9   0   30.60    7.70 
  -2   9   0   30.20    8.40 
   2   9   0   49.20   13.20 
  -2   9   0   44.40    8.70 
   2   9   0   38.10    7.50 
  -2   9   0   55.39   18.90 
   2   9   0   25.50    7.40 
   2   9   0   49.60   16.90 
  -3  -9   0   16.80    8.10 
  -3  -9   0   13.20    7.20 
   3  -9   0   19.70    9.90 
  -3  -9   0    6.50    5.90 
  -3  -9   0    6.80    5.50 
  -3  -9   0   13.20    9.60 
   3  -9   0    7.30    6.50 
  -3  -9   0   14.00   13.20 
   3  -9   0   11.90    7.90 
   3  -9   0   12.00    8.90 
   3  -9   0   26.50   22.30 
   3  -9   0   13.60    7.40 
   3  -9   0    8.00    6.70 
  -3   9   0   11.60    7.40 
   3   9   0   22.40    6.60 
   3   9   0   12.20    2.90 
   3   9   0   21.60    8.70 
  -3   9   0   12.40    4.80 
   3   9   0   14.10    9.60 
  -3   9   0    9.00    5.50 
   3   9   0    7.50    6.10 
   3   9   0    6.00    5.40 
   3   9   0   -1.00    9.80 
   3   9   0   12.60    5.80 
  -3   9   0   11.00   11.80 
  -3   9   0   15.20    7.40 
  -3   9   0    1.80    6.20 
  -3   9   0   13.00    7.40 
   4  -9   0   19.60   21.60 
   4  -9   0   31.90    8.60 
  -4  -9   0   37.60    9.40 
   4  -9   0   33.80    8.00 
   4  -9   0   38.60   10.90 
  -4  -9   0   27.80    7.40 
   4  -9   0   31.00    9.00 
   4  -9   0   45.70   13.60 
   4  -9   0   29.60    7.90 
  -4  -9   0   53.29   14.20 
  -4  -9   0   23.20   13.30 
  -4  -9   0   42.60   10.30 
  -4   9   0   42.50   10.60 
   4   9   0   45.40   11.80 
  -4   9   0   35.10    9.80 
   4   9   0   40.90    9.90 
  -4   9   0   28.10   13.50 
  -4   9   0   31.40    8.40 
  -4   9   0   40.20   10.90 
   4   9   0   35.60    5.70 
  -4   9   0   37.20    9.40 
   5  -9   0  344.47   68.09 
  -5  -9   0  415.06   27.50 
  -5  -9   0  376.66   27.10 
  -5  -9   0  382.96   42.50 
   5  -9   0  411.36   26.00 
   5  -9   0  397.26   32.00 
   5  -9   0  358.56   28.60 
   5  -9   0  389.06   26.90 
  -5  -9   0  387.26   24.20 
   5  -9   0  391.76   25.60 
  -5  -9   0  401.06   33.00 
   5  -9   0  384.36   27.40 
  -5   9   0  346.47   25.00 
  -5   9   0  401.96   27.10 
   5   9   0  419.66   27.60 
  -5   9   0  390.76   26.10 
   5   9   0  381.96   29.20 
   5   9   0  370.46   22.60 
  -5   9   0  367.16   27.60 
  -5   9   0  387.06   27.60 
  -5   9   0  357.16   34.30 
  -5   9   0  328.47   27.90 
  -5   9   0  349.27   27.20 
   0 -10   0 1288.57   70.29 
   0 -10   0 1593.64   87.79 
   0 -10   0 1494.45  116.29 
   0 -10   0 1317.97   68.79 
   0  10   0 1258.87   68.29 
   0  10   0 1343.57   66.09 
   0  10   0 1340.27   79.99 
   0  10   0 1332.37   68.29 
   0  10   0 1475.25   88.19 
   0  10   0 1683.93  100.59 
   0  10   0 1337.47   78.89 
   0  10   0 1318.57   67.79 
   0  10   0 1322.07   67.39 
   1 -10   0   28.80    8.60 
   1 -10   0   32.70    9.40 
   1 -10   0   55.09   17.30 
  -1 -10   0   31.80   10.40 
   1 -10   0   27.20   21.20 
   1 -10   0   37.90   10.00 
  -1  10   0   38.50    9.50 
  -1  10   0   26.70    8.00 
   1  10   0   43.10   16.90 
   1  10   0   25.20    7.60 
   1  10   0   31.10    8.20 
   1  10   0   10.00    5.90 
  -1  10   0   38.40    9.60 
  -1  10   0   29.40    8.00 
  -1  10   0   64.99   16.30 
   1  10   0   43.20   15.40 
  -1  10   0   17.80    8.20 
  -1  10   0   46.80   19.70 
   1  10   0   33.90   18.40 
   1  10   0   54.19    9.90 
   1  10   0   34.50   12.30 
  -1  10   0   52.19   16.70 
   2 -10   0  368.76   27.20 
  -2 -10   0  428.56   28.40 
   2 -10   0  409.56   29.00 
  -2 -10   0  402.16   29.60 
   2 -10   0  373.86   26.80 
   2 -10   0  514.15   38.90 
   2 -10   0  413.96   67.69 
   2  10   0  495.15   40.70 
  -2  10   0  396.96   20.90 
   2  10   0  446.46   27.30 
   2  10   0  415.56   26.80 
   2  10   0  404.26   31.70 
  -2  10   0  399.06   28.00 
  -2  10   0  404.76   27.40 
   2  10   0  391.86   28.10 
  -2  10   0  359.86   27.10 
  -2  10   0  416.86   26.30 
  -2  10   0  455.35   30.00 
   2  10   0  298.37   43.70 
  -2  10   0  326.17   43.70 
   3 -10   0   12.40   19.60 
   3 -10   0   -2.30    5.80 
   3 -10   0   -5.70    8.90 
  -3 -10   0    2.70    7.50 
  -3 -10   0   -1.20    6.40 
   3 -10   0   10.90    7.70 
  -3 -10   0   12.90   10.60 
   3 -10   0    4.50    6.90 
  -3 -10   0   -6.20    7.80 
  -3  10   0    6.80   11.50 
   3  10   0    3.80    6.40 
   3  10   0    6.70    6.50 
  -3  10   0   -0.40    3.90 
  -3  10   0   -0.60    6.20 
  -3  10   0    1.50    6.30 
  -3  10   0   -3.80    6.40 
  -3  10   0   -0.90    5.90 
  -3  10   0   -2.20    5.60 
   3  10   0   -1.00    8.80 
   3  10   0    9.00    8.50 
  -3  10   0   -3.20    6.50 
   3  10   0    2.00   10.10 
  10   0  -1    1.40    6.30 
  10   0  -1   -2.50    6.60 
  10   0  -1    2.50    5.80 
  10   0  -1    3.60    5.60 
 -10   0   1   -3.50    5.90 
 -10   0   1    4.20    7.10 
 -10   0   1   -2.60    6.70 
  10   0  -1   -1.80   12.10 
 -10   0   1    0.20    6.10 
  10   0  -1   -1.30    6.00 
 -10   0   1   -8.90    5.90 
 -10   0   1   -3.10    5.90 
 -10   0   1   -7.50    7.00 
  10   0  -1   -1.40    6.30 
   9   0  -1  518.25   32.40 
  -9   0   1  570.64   39.70 
  -9   0   1  504.65   33.30 
   9   0  -1  541.25   34.80 
  -9   0   1  540.25   34.40 
   9   0  -1  543.25   35.90 
  -9   0   1  561.34   29.10 
   9   0  -1  519.55   33.20 
  -9   0   1  546.45   35.80 
  -9   0   1  530.25   32.90 
   9   0  -1  518.15   30.90 
  -9   0   1  495.95   30.30 
   9   0  -1  536.85   55.59 
   9   0  -1  562.24   32.70 
  -9   0   1  534.35   34.40 
  -9   0   1  543.45   34.70 
   9   0  -1  579.34   31.40 
  -9   0   1  512.55   33.00 
   8   0  -1    4.20    4.50 
   8   0  -1   -4.70    3.30 
  -8   0   1   -1.20    6.80 
   8   0  -1    0.80    5.20 
   8   0  -1   -1.70    3.30 
  -8   0   1   -3.90    4.50 
  -8   0   1   -0.80    4.40 
   8   0  -1    2.20    4.90 
  -8   0   1    0.40    5.70 
   8   0  -1    1.90    4.40 
   8   0  -1    0.70    5.60 
  -8   0   1    2.40    4.60 
  -8   0   1    2.80    5.50 
  -8   0   1   -6.00    3.60 
  -8   0   1    3.50    5.00 
   8   0  -1   -6.80    3.90 
   8   0  -1    2.10    5.80 
  -8   0   1   -1.60    4.30 
  -8   0   1   -1.90    3.00 
  -8   0   1   -1.60    5.10 
  -8   0   1    5.50    3.90 
   8   0  -1    6.80    4.50 
   7   0  -1   45.80    8.00 
  -7   0   1   44.60    8.90 
   7   0  -1   44.40    4.80 
   7   0  -1   45.20    6.90 
  -7   0   1   38.20    5.20 
  -7   0   1   49.50    5.70 
  -7   0   1   31.30    8.60 
  -7   0   1   45.80    9.30 
   7   0  -1   49.90    8.90 
  -7   0   1   36.30    9.10 
   7   0  -1   39.70    8.70 
  -7   0   1   35.50    7.60 
   7   0  -1   47.70    7.10 
  -7   0   1   53.19    8.90 
  -7   0   1   41.90    9.90 
  -7   0   1   36.20    5.90 
   7   0  -1   45.70    8.80 
   7   0  -1   33.20    7.10 
   7   0  -1   38.20    6.80 
   7   0  -1   45.80    6.60 
  -7   0   1   53.49    9.10 
  -7   0   1   51.89    7.10 
  -7   0   1   56.59    8.90 
   7   0  -1   49.20    7.70 
  -7   0   1   39.20    5.90 
  -6   0   1   -0.20    2.20 
  -6   0   1    1.30    4.10 
  -6   0   1    3.80    2.30 
  -6   0   1    0.90    2.00 
   6   0  -1    1.50    1.90 
   6   0  -1    0.00    3.10 
   6   0  -1    1.50    2.60 
  -6   0   1   -3.60    2.90 
  -6   0   1   -2.80    3.90 
  -6   0   1    2.70    1.40 
   6   0  -1   -2.80    2.80 
   6   0  -1   -1.60    2.20 
   6   0  -1   -2.40    2.80 
  -6   0   1   -0.40    3.40 
   6   0  -1   -2.80    2.80 
  -6   0   1    3.80    3.70 
  -6   0   1    2.10    2.70 
  -6   0   1   -1.60    2.20 
  -6   0   1    2.20    3.10 
   6   0  -1   -0.20    4.10 
  -6   0   1    0.00    1.10 
   6   0  -1   -1.20    3.50 
  -6   0   1   -1.70    3.50 
   6   0  -1    2.40    3.40 
  -6   0   1    2.60    4.30 
  -6   0   1    0.90    3.50 
  -6   0   1    0.30    2.50 
   6   0  -1    1.90    3.60 
   5   0  -1  108.29    8.20 
  -5   0   1   96.59    9.20 
   5   0  -1  100.89    6.80 
  -5   0   1  113.19   10.10 
   5   0  -1  111.89    8.90 
  -5   0   1  104.99    5.80 
   5   0  -1   91.99    8.00 
   5   0  -1   97.49    7.70 
   5   0  -1   98.69   10.10 
   5   0  -1  104.49   10.10 
  -5   0   1  102.99   11.10 
  -5   0   1  103.19    8.80 
   5   0  -1  114.89    8.60 
   5   0  -1   89.69    9.90 
   5   0  -1   91.59   10.30 
  -5   0   1  110.29    7.40 
   5   0  -1   86.59    9.00 
  -5   0   1  106.79    7.10 
  -5   0   1  112.59   12.40 
  -5   0   1  107.29   11.90 
  -5   0   1  109.19    7.80 
   5   0  -1  107.29    6.60 
  -5   0   1   94.49    9.80 
   5   0  -1  124.09   11.00 
  -5   0   1  115.19    6.90 
  -5   0   1  110.69    8.40 
   5   0  -1  125.99   10.90 
  -5   0   1  111.39    7.10 
  -5   0   1  118.79    9.70 
  -5   0   1   83.09    9.90 
   4   0  -1    3.50    3.10 
  -4   0   1   -1.20    2.30 
  -4   0   1    5.90    2.40 
  -4   0   1    3.50    2.30 
  -4   0   1    1.00    1.70 
   4   0  -1    5.50    2.50 
  -4   0   1    1.00    2.60 
  -4   0   1   -0.40    2.30 
   4   0  -1    2.00    2.80 
  -4   0   1   -0.10    2.80 
  -4   0   1    3.00    3.20 
   4   0  -1    1.40    1.40 
  -4   0   1    4.00    1.30 
   4   0  -1    2.70    2.50 
   4   0  -1    1.60    1.60 
   4   0  -1    0.40    2.90 
   4   0  -1    2.40    3.10 
  -4   0   1    4.90    1.70 
   4   0  -1    3.50    3.10 
   4   0  -1    4.30    2.70 
  -4   0   1    2.80    3.40 
   4   0  -1    0.00    2.30 
  -4   0   1    2.40    1.70 
  -4   0   1    1.40    2.60 
   4   0  -1   -0.90    2.00 
  -4   0   1    3.30    2.70 
   4   0  -1    0.70    3.00 
   4   0  -1    5.40    1.70 
  -4   0   1    4.80    3.00 
  -4   0   1   -0.10    3.00 
  -4   0   1    3.40    3.60 
  -4   0   1    3.10    1.70 
   4   0  -1   -0.10    1.90 
  -3   0   1  866.81   38.20 
   3   0  -1  891.11   40.20 
  -3   0   1  876.21   40.70 
  -3   0   1  847.72   39.80 
   3   0  -1  891.61   41.60 
   3   0  -1  878.71   38.10 
   3   0  -1  828.12   40.60 
  -3   0   1  865.21   40.60 
   3   0  -1  846.42   39.40 
   3   0  -1  859.31   40.40 
  -3   0   1  852.61   39.00 
   3   0  -1  866.61   40.50 
  -3   0   1  810.52   41.30 
   3   0  -1  811.22   39.30 
   3   0  -1  875.51   38.80 
   3   0  -1  878.11   40.70 
   3   0  -1  930.61   40.70 
   3   0  -1  824.82   39.70 
  -3   0   1  864.31   38.20 
  -3   0   1  859.11   38.70 
   3   0  -1  857.11   38.10 
  -3   0   1  888.61   40.00 
  -3   0   1  880.91   37.90 
   3   0  -1  851.51   37.80 
  -3   0   1  874.51   40.60 
  -3   0   1  908.21   40.50 
   3   0  -1  856.21   39.00 
   3   0  -1  848.02   41.00 
  -3   0   1  822.62   41.10 
   3   0  -1  869.51   39.10 
   3   0  -1  864.61   39.10 
  -3   0   1  877.71   38.20 
   3   0  -1  886.11   38.20 
  -3   0   1  860.61   39.00 
  -3   0   1  891.71   39.90 
  -3   0   1  867.01   41.30 
   3   0  -1  841.52   39.40 
   3   0  -1  833.42   38.80 
  -3   0   1  856.61   40.50 
  -3   0   1  883.11   39.40 
  -3   0   1  823.62   39.40 
   2   0  -1    7.50    2.00 
   2   0  -1    7.80    2.20 
  -2   0   1    5.50    1.40 
  -2   0   1    2.50    1.80 
   2   0  -1    6.30    2.00 
   2   0  -1    5.30    1.50 
  -2   0   1    6.50    1.40 
  -2   0   1    4.90    1.10 
   2   0  -1    7.30    1.20 
   2   0  -1    4.40    1.00 
   2   0  -1    6.90    1.70 
  -2   0   1    5.80    1.20 
   2   0  -1    3.20    1.20 
   2   0  -1    6.20    2.00 
  -2   0   1    5.40    2.10 
   2   0  -1    4.50    1.70 
   2   0  -1    6.20    1.90 
  -2   0   1    9.30    2.20 
  -2   0   1    3.80    2.00 
   2   0  -1    6.80    1.40 
  -2   0   1    3.40    1.50 
  -2   0   1    5.00    1.60 
   2   0  -1    5.00    1.70 
   2   0  -1    1.60    1.50 
  -2   0   1    4.60    1.40 
   2   0  -1    3.30    1.60 
  -2   0   1    4.60    1.10 
   2   0  -1    3.00    1.90 
   2   0  -1    3.60    1.50 
   2   0  -1   10.60    2.10 
   2   0  -1    6.00    1.40 
  -2   0   1    7.30    1.90 
   2   0  -1    3.60    1.00 
  -2   0   1    6.40    1.20 
  -2   0   1    7.10    1.60 
  -2   0   1    6.90    2.00 
  -2   0   1    4.10    1.50 
  -2   0   1    5.20    2.20 
  -2   0   1    7.10    2.10 
   2   0  -1    4.70    1.30 
  -2   0   1    5.20    1.70 
  -2   0   1    4.50    1.30 
  -2   0   1    7.10    1.10 
  -2   0   1    6.00    1.90 
   2   0  -1   11.20    2.00 
  -2   0   1    3.80    1.70 
   2   0  -1    6.80    1.50 
   2   0  -1    8.30    2.50 
   1   0  -1  297.27   13.20 
  -1   0   1  335.17   12.80 
  -1   0   1  247.08   12.80 
  -1   0   1  287.07   13.50 
  -1   0   1  310.17   13.70 
   1   0  -1  280.97   13.00 
   1   0  -1  299.77   13.00 
   1   0  -1  278.77   12.80 
   1   0  -1  307.47   13.30 
  -1   0   1  305.57   13.20 
  -1   0   1  234.18   13.10 
  -1   0   1  270.57   13.70 
   1   0   1 2009.40   86.29 
  -1   0  -1 2196.98   86.29 
   1   0   1 2242.38   86.79 
  -1   0  -1 1821.42   86.19 
   1   0   1 2151.88   85.89 
  -1   0  -1 1952.40   86.59 
   1   0   1 1667.73   86.39 
  -1   0  -1 2196.88   86.19 
   1   0   1 1687.73   86.79 
  -1   0  -1 1637.84   86.89 
   1   0   1 2133.39   86.09 
  -1   0  -1 2097.79   85.79 
   1   0   1 2170.78   86.09 
   1   0   1 2150.28   86.29 
   2   0   1    4.80    1.80 
   2   0   1    3.30    2.20 
   2   0   1    2.80    1.10 
   2   0   1    5.40    1.40 
  -2   0  -1    4.70    1.20 
   2   0   1    4.30    1.40 
   2   0   1    3.80    0.70 
  -2   0  -1    6.80    1.90 
  -2   0  -1    4.50    2.20 
  -2   0  -1    2.50    1.70 
  -2   0  -1    4.50    1.30 
   2   0   1    8.10    1.70 
   2   0   1    2.60    1.10 
  -2   0  -1    6.80    1.80 
   2   0   1    2.20    1.40 
  -2   0  -1    5.90    1.90 
   2   0   1    3.50    1.40 
   2   0   1    7.40    2.10 
   2   0   1    4.30    1.80 
  -2   0  -1    5.40    2.10 
   2   0   1    3.60    1.50 
   2   0   1    3.10    1.70 
  -2   0  -1    5.90    1.50 
   2   0   1    4.90    1.60 
   2   0   1    1.30    1.40 
  -2   0  -1   -0.10    1.60 
  -2   0  -1    2.80    1.20 
  -2   0  -1    2.90    1.40 
  -2   0  -1    4.90    1.40 
   2   0   1    4.00    1.30 
  -2   0  -1    6.70    2.00 
   2   0   1    4.10    1.20 
   2   0   1    4.10    1.70 
  -2   0  -1    4.90    1.20 
  -2   0  -1    3.20    1.90 
   2   0   1    1.70    1.10 
   2   0   1    3.20    1.90 
  -2   0  -1    5.50    1.30 
  -2   0  -1    2.40    1.10 
  -2   0  -1    7.40    1.60 
  -2   0  -1    6.60    1.70 
  -2   0  -1    2.30    1.50 
   2   0   1    4.50    1.60 
   2   0   1    7.60    2.10 
  -2   0  -1    6.20    1.90 
  -3   0  -1  323.87   15.90 
   3   0   1  334.07   17.80 
   3   0   1  338.77   16.60 
   3   0   1  332.17   16.10 
   3   0   1  323.17   16.00 
  -3   0  -1  320.17   17.60 
   3   0   1  344.47   16.60 
  -3   0  -1  335.07   17.90 
  -3   0  -1  326.17   16.80 
  -3   0  -1  358.46   16.20 
  -3   0  -1  328.97   18.40 
   3   0   1  329.17   15.70 
   3   0   1  339.47   16.40 
   3   0   1  321.57   18.00 
  -3   0  -1  315.27   17.80 
  -3   0  -1  320.97   15.80 
   3   0   1  344.87   19.00 
  -3   0  -1  327.57   18.90 
  -3   0  -1  316.47   17.50 
  -3   0  -1  325.17   14.70 
  -3   0  -1  320.27   19.00 
   3   0   1  328.47   17.80 
   3   0   1  322.27   16.70 
  -3   0  -1  336.07   15.90 
   3   0   1  344.27   17.20 
   3   0   1  338.17   15.90 
  -3   0  -1  323.77   17.90 
  -3   0  -1  331.27   16.60 
   3   0   1  331.37   17.90 
  -3   0  -1  327.47   16.80 
   3   0   1  340.37   16.70 
   3   0   1  347.77   18.20 
   3   0   1  331.37   16.90 
  -3   0  -1  346.27   16.50 
   3   0   1  317.87   17.70 
   3   0   1  339.97   16.50 
   3   0   1  318.57   16.70 
  -3   0  -1  354.36   17.30 
  -3   0  -1  335.77   16.50 
   3   0   1  312.27   17.70 
  -3   0  -1  337.87   17.10 
   4   0   1    4.30    3.20 
   4   0   1   -2.60    2.30 
   4   0   1   -0.40    2.50 
   4   0   1    0.90    1.90 
   4   0   1    2.10    2.90 
  -4   0  -1   -0.60    1.50 
  -4   0  -1   -1.00    2.70 
   4   0   1    1.30    1.50 
   4   0   1   -4.20    2.10 
  -4   0  -1    0.90    3.00 
   4   0   1    0.10    1.70 
   4   0   1    0.80    1.60 
  -4   0  -1    0.50    2.50 
  -4   0  -1   -0.10    2.10 
  -4   0  -1    1.30    1.70 
   4   0   1    1.80    1.80 
  -4   0  -1    7.10    4.10 
  -4   0  -1   -1.10    1.80 
  -4   0  -1   -0.20    2.20 
   4   0   1    0.70    2.70 
  -4   0  -1   -0.50    2.90 
   4   0   1    1.90    2.30 
  -4   0  -1    4.50    1.90 
  -4   0  -1    0.40    2.30 
  -4   0  -1   -0.30    1.50 
   4   0   1    0.30    2.20 
  -4   0  -1    1.20    2.90 
   4   0   1    0.80    3.00 
   4   0   1    1.20    2.00 
  -4   0  -1    4.80    3.50 
  -5   0  -1  306.37   17.30 
   5   0   1  275.97   18.10 
   5   0   1  329.57   19.40 
  -5   0  -1  299.17   18.10 
  -5   0  -1  261.17   16.00 
   5   0   1  281.77   16.20 
   5   0   1  285.37   16.20 
   5   0   1  260.77   16.10 
  -5   0  -1  306.37   15.30 
  -5   0  -1  279.67   19.90 
  -5   0  -1  276.77   19.30 
  -5   0  -1  278.07   18.10 
  -5   0  -1  290.37   20.10 
  -5   0  -1  285.17   16.00 
  -5   0  -1  274.17   16.90 
  -5   0  -1  272.57   18.30 
   5   0   1  288.27   18.40 
  -5   0  -1  295.67   15.10 
   5   0   1  277.37   14.50 
   5   0   1  316.77   19.00 
   5   0   1  291.77   18.50 
   5   0   1  281.17   17.90 
   5   0   1  289.97   17.30 
  -5   0  -1  291.47   17.00 
  -5   0  -1  265.27   14.90 
   5   0   1  280.17   16.60 
  -6   0  -1    4.80    5.10 
  -6   0  -1   -2.40    3.60 
  -6   0  -1    0.50    3.40 
   6   0   1    0.90    4.40 
  -6   0  -1    1.20    3.60 
   6   0   1   -0.40    3.10 
  -6   0  -1    0.60    3.90 
  -6   0  -1    3.30    2.70 
   6   0   1    9.40    3.90 
  -6   0  -1    5.20    4.20 
  -6   0  -1   -2.50    2.40 
   6   0   1    0.40    3.60 
   6   0   1   -0.30    2.60 
   6   0   1    3.20    4.20 
  -6   0  -1    4.70    3.70 
  -6   0  -1    0.40    4.10 
   6   0   1   -0.10    2.00 
  -6   0  -1   -2.80    2.70 
   6   0   1   -0.70    3.20 
   6   0   1    1.30    2.70 
   6   0   1    0.50    3.60 
  -6   0  -1    1.60    3.90 
  -6   0  -1    5.30    2.60 
  -7   0  -1 2776.52  120.69 
  -7   0  -1 2721.53  116.59 
   7   0   1 2624.44  118.79 
  -7   0  -1 2590.04  125.49 
  -7   0  -1 2579.04  124.49 
   7   0   1 2627.74  122.39 
   7   0   1 2683.03  115.59 
  -7   0  -1 2600.24  117.19 
  -7   0  -1 2730.93  118.59 
   7   0   1 2636.64  145.39 
   7   0   1 2703.13  121.99 
   7   0   1 2624.04  122.99 
   7   0   1 2626.44  122.79 
  -7   0  -1 2678.43  116.69 
  -7   0  -1 2594.24  121.99 
  -7   0  -1 2677.03  118.79 
  -7   0  -1 2585.64  122.79 
  -7   0  -1 2654.83  125.99 
  -7   0  -1 2556.14  121.99 
  -7   0  -1 2573.44  120.49 
   7   0   1 2613.74  120.29 
  -7   0  -1 2696.23  121.89 
   7   0   1 2711.53  119.69 
   7   0   1 2702.13  118.29 
  -7   0  -1 2658.53  116.69 
   7   0   1 2613.34  119.19 
  -7   0  -1 2612.04  120.49 
  -8   0  -1    1.00    4.70 
   8   0   1    4.30    4.90 
   8   0   1   -4.50    4.30 
  -8   0  -1    6.10    4.80 
   8   0   1    1.30    4.30 
   8   0   1    0.40    3.80 
  -8   0  -1    3.20    3.10 
   8   0   1   -1.90    5.00 
   8   0   1    1.90    3.60 
  -8   0  -1   -1.00    3.70 
   8   0   1    3.80    9.90 
   8   0   1    3.70    5.00 
   8   0   1    2.00    6.10 
   8   0   1    0.70    4.00 
  -8   0  -1   -4.20    4.70 
  -8   0  -1   -3.60    4.10 
  -8   0  -1    8.00    5.20 
  -8   0  -1    6.40    3.80 
  -8   0  -1    4.10    6.00 
  -8   0  -1   -2.20    4.70 
  -8   0  -1   -4.60    5.70 
  -8   0  -1   -0.40    5.30 
  -9   0  -1 1037.10   49.70 
   9   0   1 1055.69   81.69 
   9   0   1  994.80   51.69 
   9   0   1  972.80   51.19 
  -9   0  -1 1023.30   55.59 
  -9   0  -1  981.60   54.89 
  -9   0  -1  992.10   53.49 
  -9   0  -1  997.20   59.09 
  -9   0  -1 1011.60   52.99 
   9   0   1  971.30   52.59 
   9   0   1  940.91   53.49 
  -9   0  -1  938.61   53.59 
   9   0   1 1064.99   56.49 
  -9   0  -1  948.01   59.09 
  -9   0  -1  943.41   53.19 
   9   0   1 1008.50   55.49 
   9   0   1 1000.40   50.89 
  -9   0  -1  935.91   52.79 
 -10   0  -1    9.70    8.60 
  10   0   1   -5.90    4.40 
 -10   0  -1  -11.40    5.50 
  10   0   1   10.10    7.50 
 -10   0  -1   -6.70    5.80 
 -10   0  -1   -0.80    6.50 
  10   0   1   -6.80    6.20 
  10   0   1    7.20    6.80 
  10   0   1    2.60    6.80 
  10   0   1   -3.10    8.10 
  10   0   1   -8.50   10.60 
  10   0   1   -4.20    4.70 
 -10   0  -1   -5.20    5.90 
 -10   0  -1   -5.10    7.50 
 -10  -1   1  339.07   26.90 
 -10  -1   1  353.06   27.30 
  10  -1  -1  378.66   28.60 
 -10  -1   1  371.76   25.30 
  10  -1  -1  380.66   50.69 
 -10  -1   1  342.07   22.70 
  10  -1  -1  359.16   25.30 
 -10  -1   1  341.07   29.80 
 -10  -1   1  357.36   32.80 
  10  -1  -1  397.06   30.90 
 -10  -1   1  341.37   28.30 
  10  -1  -1  395.56   26.80 
 -10  -1   1  376.86   27.00 
  10  -1  -1  354.56   26.20 
  10   1  -1  384.66   28.30 
 -10   1   1  436.36   33.90 
 -10   1   1  358.86   29.50 
  10   1  -1  350.86   26.60 
 -10   1   1  318.77   32.10 
 -10   1   1  349.37   27.30 
 -10   1   1  362.36   27.30 
  10   1  -1  376.66   27.60 
  10   1  -1  363.66   25.40 
 -10   1   1  440.76   30.80 
  10   1  -1  354.16   25.30 
  10   1  -1  336.77   29.10 
 -10   1   1  394.66   29.70 
  10   1  -1  386.16   25.10 
 -10   1   1  362.56   28.10 
  10   1  -1  383.46   50.49 
  -9  -1   1   14.20    6.50 
  -9  -1   1   -0.90    4.50 
   9  -1  -1    6.80    6.90 
  -9  -1   1   -2.00    4.10 
   9  -1  -1    1.90    5.20 
  -9  -1   1    9.50    7.40 
   9  -1  -1    6.60   12.80 
  -9  -1   1   -4.50    4.90 
   9  -1  -1   -0.40    6.90 
  -9  -1   1    5.70    6.70 
  -9  -1   1   14.30    8.50 
   9  -1  -1    1.10    5.40 
   9  -1  -1   14.90    6.80 
  -9  -1   1   15.20    7.40 
   9  -1  -1   10.80    6.30 
   9  -1  -1   12.10    6.40 
  -9  -1   1    4.30    6.10 
  -9  -1   1   -4.00    5.30 
   9   1  -1    5.80    5.90 
  -9   1   1   14.10    6.40 
   9   1  -1   10.00    5.30 
   9   1  -1   -3.20    4.90 
  -9   1   1   -1.70    5.30 
   9   1  -1   10.20    7.60 
  -9   1   1   -6.60    5.90 
   9   1  -1    6.00    5.70 
  -9   1   1    5.50    5.70 
  -9   1   1    2.20    5.70 
   9   1  -1    2.50    4.90 
  -9   1   1   -5.60    5.70 
  -9   1   1   -4.80    5.40 
   9   1  -1    5.80    6.80 
  -9   1   1    7.80    4.60 
   9   1  -1    4.30    6.20 
  -8  -1   1  319.27   26.80 
  -8  -1   1  364.36   24.00 
  -8  -1   1  346.77   22.50 
   8  -1  -1  292.17   38.80 
  -8  -1   1  316.37   23.40 
   8  -1  -1  345.67   23.30 
  -8  -1   1  324.57   22.50 
   8  -1  -1  290.07   21.30 
   8  -1  -1  306.47   21.60 
  -8  -1   1  302.67   18.80 
   8  -1  -1  336.17   25.10 
   8  -1  -1  281.57   20.60 
  -8  -1   1  365.46   23.90 
   8  -1  -1  362.36   20.50 
   8  -1  -1  329.07   21.10 
   8  -1  -1  353.96   24.60 
  -8  -1   1  312.17   19.60 
  -8  -1   1  308.27   24.60 
  -8  -1   1  340.67   21.50 
  -8  -1   1  298.57   22.50 
  -8   1   1  328.77   20.00 
   8   1  -1  326.37   22.70 
   8   1  -1  362.56   21.00 
  -8   1   1  338.87   18.80 
  -8   1   1  288.47   25.20 
   8   1  -1  323.37   21.50 
  -8   1   1  330.27   23.70 
  -8   1   1  306.27   23.60 
   8   1  -1  346.07   22.70 
  -8   1   1  341.97   20.50 
   8   1  -1  341.97   20.90 
  -8   1   1  334.67   27.30 
  -8   1   1  313.57   22.70 
   8   1  -1  325.47   24.90 
  -8   1   1  332.07   19.00 
  -8   1   1  310.27   25.60 
  -8   1   1  335.97   22.40 
   8   1  -1  312.77   24.20 
  -8   1   1  313.87   22.20 
  -8   1   1  316.97   24.50 
   8   1  -1  333.07   21.10 
   8   1  -1  354.46   24.00 
   7  -1  -1   51.29    9.50 
   7  -1  -1   49.40    9.90 
   7  -1  -1   53.69    7.00 
   7  -1  -1   56.99    8.30 
  -7  -1   1   50.59    8.80 
  -7  -1   1   56.89    9.00 
  -7  -1   1   50.79    7.90 
  -7  -1   1   54.19    6.60 
   7  -1  -1   62.49    9.00 
  -7  -1   1   53.29    8.50 
  -7  -1   1   48.60   10.20 
   7  -1  -1   48.50    6.00 
  -7  -1   1   67.79   10.90 
  -7  -1   1   42.70    8.70 
   7  -1  -1   41.80    7.20 
  -7  -1   1   52.29    7.20 
  -7  -1   1   41.20    9.60 
  -7  -1   1   53.89    6.00 
  -7  -1   1   50.09    6.50 
   7  -1  -1   59.99    8.80 
  -7  -1   1   38.60    8.20 
   7  -1  -1   62.99    9.80 
  -7  -1   1   49.00    4.90 
   7  -1  -1   56.19    6.60 
  -7  -1   1   45.60    8.70 
  -7  -1   1   53.89   10.40 
   7  -1  -1   48.40    8.80 
   7   1  -1   49.00    7.70 
   7   1  -1   58.09    8.70 
   7   1  -1   70.79    9.00 
  -7   1   1   60.49    9.50 
  -7   1   1   58.19    5.50 
  -7   1   1   53.99   10.40 
   7   1  -1   62.49    8.10 
  -7   1   1   54.39   10.90 
   7   1  -1   61.09    9.20 
  -7   1   1   51.29    7.10 
  -7   1   1   55.99    6.60 
  -7   1   1   51.59    9.60 
  -7   1   1   50.89    7.10 
   7   1  -1   65.09    7.90 
  -7   1   1   66.79    9.10 
   7   1  -1   49.60    7.00 
  -7   1   1   46.10    9.30 
  -7   1   1   40.50    7.70 
   7   1  -1   71.19   10.90 
  -7   1   1   66.99   10.00 
   7   1  -1   46.10    8.90 
  -7   1   1   53.29    6.80 
   7   1  -1   49.20    9.70 
  -6  -1   1 1920.91   83.49 
  -6  -1   1 1864.01   85.39 
  -6  -1   1 1897.21   83.79 
  -6  -1   1 1902.81   87.29 
   6  -1  -1 1971.10   87.39 
  -6  -1   1 1944.51   86.09 
   6  -1  -1 1953.60   87.29 
  -6  -1   1 1948.01   89.09 
   6  -1  -1 1940.61   85.09 
   6  -1  -1 1884.91   85.69 
   6  -1  -1 1985.40   89.19 
  -6  -1   1 1891.81   83.29 
  -6  -1   1 1888.61   91.59 
   6  -1  -1 1835.42   89.49 
  -6  -1   1 1899.31   90.29 
   6  -1  -1 1838.12   87.69 
   6  -1  -1 1972.60   87.99 
  -6  -1   1 1895.91   83.99 
  -6  -1   1 2005.50   88.29 
   6  -1  -1 1953.30   90.89 
  -6  -1   1 1951.20   87.79 
   6  -1  -1 1882.21   89.29 
   6  -1  -1 1937.21   85.09 
  -6  -1   1 1855.61   88.59 
  -6  -1   1 1908.21   91.99 
  -6  -1   1 1879.31   88.89 
  -6  -1   1 1961.00   82.69 
  -6  -1   1 1871.31   89.49 
  -6  -1   1 1931.41   85.29 
  -6  -1   1 1991.90   89.19 
  -6   1   1 1854.51   91.59 
   6   1  -1 1908.71   89.79 
  -6   1   1 2052.19   93.09 
  -6   1   1 1828.92   91.39 
  -6   1   1 1930.51   85.19 
  -6   1   1 1905.91   83.79 
   6   1  -1 1944.81   87.89 
   6   1  -1 1899.41   87.19 
  -6   1   1 2108.09   89.99 
  -6   1   1 1909.71   85.79 
  -6   1   1 1903.31   89.69 
  -6   1   1 1922.11   83.49 
  -6   1   1 1834.82   88.69 
   6   1  -1 1835.92   89.99 
   6   1  -1 1965.50   88.69 
  -6   1   1 1933.41   87.99 
   6   1  -1 1957.70   83.99 
  -6   1   1 1878.41   83.89 
   6   1  -1 1980.20   86.69 
  -6   1   1 1831.52   88.49 
   6   1  -1 1911.31   86.99 
   6   1  -1 1949.10   87.19 
  -6   1   1 1907.41   86.09 
   6   1  -1 1841.62   88.79 
  -6   1   1 1921.91   88.09 
  -6   1   1 1990.30   86.29 
   6   1  -1 1959.50   86.29 
  -6   1   1 1998.70   90.49 
   6   1  -1 1946.01   89.69 
   5  -1  -1  506.85   27.10 
   5  -1  -1  516.55   28.30 
   5  -1  -1  488.75   28.20 
  -5  -1   1  520.75   30.00 
  -5  -1   1  551.04   28.20 
  -5  -1   1  519.75   23.70 
  -5  -1   1  515.35   27.80 
  -5  -1   1  512.25   23.90 
  -5  -1   1  525.15   26.70 
   5  -1  -1  505.65   24.40 
   5  -1  -1  531.55   28.10 
   5  -1  -1  529.25   26.60 
  -5  -1   1  540.35   25.00 
  -5  -1   1  554.74   28.00 
  -5  -1   1  520.75   23.20 
   5  -1  -1  538.05   25.20 
  -5  -1   1  531.05   23.80 
   5  -1  -1  513.35   27.00 
  -5  -1   1  539.45   27.30 
  -5  -1   1  503.25   29.70 
   5  -1  -1  492.75   28.90 
   5  -1  -1  550.04   30.00 
  -5  -1   1  528.55   25.90 
  -5  -1   1  530.25   28.50 
  -5  -1   1  475.15   28.40 
   5  -1  -1  525.45   24.90 
   5  -1  -1  529.75   25.50 
   5  -1  -1  486.55   26.40 
  -5  -1   1  508.05   25.30 
  -5  -1   1  503.45   26.80 
   5   1  -1  523.55   25.80 
  -5   1   1  540.15   28.80 
  -5   1   1  498.05   25.50 
  -5   1   1  516.85   24.30 
   5   1  -1  540.15   26.70 
  -5   1   1  509.85   28.10 
  -5   1   1  496.85   29.80 
  -5   1   1  519.25   27.70 
   5   1  -1  532.05   24.10 
  -5   1   1  540.55   25.80 
   5   1  -1  513.75   25.90 
  -5   1   1  481.35   29.40 
   5   1  -1  528.05   26.60 
  -5   1   1  530.25   30.50 
  -5   1   1  532.35   24.00 
  -5   1   1  523.45   27.30 
  -5   1   1  534.05   28.80 
  -5   1   1  531.25   23.90 
   5   1  -1  496.85   27.20 
   5   1  -1  531.45   26.70 
  -5   1   1  502.05   30.30 
  -5   1   1  555.24   26.00 
   5   1  -1  533.95   29.00 
  -5   1   1  525.35   27.90 
   5   1  -1  508.25   26.90 
  -5   1   1  491.05   26.80 
   5   1  -1  498.75   28.30 
  -5   1   1  517.25   25.10 
   5   1  -1  540.35   29.50 
  -4  -1   1 5553.44  246.88 
  -4  -1   1 5733.43  246.08 
  -4  -1   1 5364.36  244.88 
   4  -1  -1 5658.73  246.68 
   4  -1  -1 5785.52  242.98 
  -4  -1   1 5545.15  244.08 
  -4  -1   1 5727.83  241.18 
  -4  -1   1 5720.83  244.08 
  -4  -1   1 5758.12  247.08 
  -4  -1   1 5661.93  244.98 
  -4  -1   1 5663.03  244.08 
  -4  -1   1 5866.61  243.48 
   4  -1  -1 5531.15  244.98 
   4  -1  -1 5669.13  243.88 
   4  -1  -1 5595.94  241.88 
  -4  -1   1 5843.22  241.28 
   4  -1  -1 5917.51  244.28 
   4  -1  -1 5521.95  244.28 
  -4  -1   1 5419.46  246.78 
   4  -1  -1 5655.63  242.78 
  -4  -1   1 5753.42  243.08 
  -4  -1   1 5384.96  242.18 
  -4  -1   1 5709.23  244.28 
  -4  -1   1 5648.94  241.38 
   4  -1  -1 5361.96  244.08 
   4  -1  -1 5769.72  242.28 
   4  -1  -1 5948.80  242.88 
   4  -1  -1 5642.74  245.38 
   4  -1  -1 5569.34  245.58 
   4  -1  -1 5554.24  242.58 
  -4  -1   1 5670.63  244.98 
   4  -1  -1 5249.08  245.78 
  -4   1   1 5817.32  245.78 
  -4   1   1 5417.06  244.78 
   4   1  -1 5676.33  243.98 
   4   1  -1 5485.35  243.78 
  -4   1   1 5794.02  244.28 
   4   1  -1 5750.92  246.58 
  -4   1   1 5812.32  243.38 
   4   1  -1 5906.91  244.18 
  -4   1   1 5401.66  244.88 
  -4   1   1 5899.51  246.08 
  -4   1   1 5743.03  241.58 
   4   1  -1 5635.24  243.18 
   4   1  -1 5349.86  244.38 
   4   1  -1 5922.01  241.58 
  -4   1   1 5891.11  244.58 
  -4   1   1 5798.72  241.78 
  -4   1   1 5691.53  243.08 
  -4   1   1 5817.02  242.28 
  -4   1   1 5373.26  246.68 
  -4   1   1 5896.01  243.28 
  -4   1   1 5821.22  245.68 
  -4   1   1 5524.85  243.18 
  -4   1   1 4967.90  246.18 
   4   1  -1 5586.74  245.38 
   4   1  -1 5541.15  241.68 
  -4   1   1 5783.22  247.58 
   4   1  -1 5650.33  245.98 
   4   1  -1 5800.42  243.18 
   4   1  -1 5797.82  245.58 
   4   1  -1 5633.54  244.18 
  -4   1   1 5918.81  245.68 
  -4   1   1 5783.82  242.78 
  -4   1   1 5724.13  242.68 
   3  -1  -1  411.16   18.40 
  -3  -1   1  376.96   20.10 
  -3  -1   1  387.76   19.60 
   3  -1  -1  392.76   18.60 
  -3  -1   1  400.86   18.10 
  -3  -1   1  427.96   21.80 
  -3  -1   1  364.26   19.10 
  -3  -1   1  403.36   19.40 
  -3  -1   1  397.76   17.30 
   3  -1  -1  373.06   18.70 
   3  -1  -1  352.16   19.30 
   3  -1  -1  398.06   21.00 
   3  -1  -1  374.76   20.10 
   3  -1  -1  397.46   23.30 
  -3  -1   1  423.36   20.50 
  -3  -1   1  387.56   20.10 
  -3  -1   1  400.06   17.50 
  -3  -1   1  385.26   20.30 
  -3  -1   1  412.36   18.90 
   3  -1  -1  396.96   18.10 
   3  -1  -1  391.46   20.50 
   3  -1  -1  383.66   19.40 
   3  -1  -1  402.46   20.50 
  -3  -1   1  414.26   19.00 
   3  -1  -1  386.26   19.50 
   3  -1  -1  409.06   21.50 
   3  -1  -1  388.96   20.90 
  -3  -1   1  379.56   20.80 
  -3  -1   1  394.16   19.60 
  -3  -1   1  404.06   20.90 
   3  -1  -1  382.96   18.70 
  -3  -1   1  401.96   18.70 
  -3  -1   1  393.96   20.50 
  -3  -1   1  374.76   21.20 
  -3  -1   1  378.06   17.30 
  -3  -1   1  377.36   17.20 
   3  -1  -1  394.46   17.70 
   3  -1  -1  389.76   20.50 
  -3  -1   1  385.26   19.40 
   3  -1  -1  410.26   19.50 
  -3  -1   1  414.36   19.70 
   3   1  -1  400.46   21.20 
   3   1  -1  406.16   19.60 
   3   1  -1  409.16   21.40 
   3   1  -1  401.86   19.70 
   3   1  -1  395.06   19.90 
   3   1  -1  367.76   20.60 
  -3   1   1  390.06   18.70 
  -3   1   1  396.06   18.00 
  -3   1   1  398.16   19.70 
  -3   1   1  427.16   20.80 
  -3   1   1  405.56   18.70 
   3   1  -1  369.26   19.00 
  -3   1   1  389.76   20.20 
  -3   1   1  383.36   18.70 
   3   1  -1  373.86   20.60 
  -3   1   1  424.26   21.20 
   3   1  -1  392.46   18.80 
  -3   1   1  401.26   17.60 
  -3   1   1  395.26   18.50 
  -3   1   1  384.16   21.20 
  -3   1   1  386.06   19.50 
  -3   1   1  387.46   20.50 
   3   1  -1  394.36   18.70 
   3   1  -1  408.96   20.50 
   3   1  -1  383.66   19.60 
   3   1  -1  397.46   19.20 
   3   1  -1  396.66   19.50 
  -3   1   1  390.96   21.40 
  -3   1   1  397.36   21.80 
  -3   1   1  399.26   20.80 
  -3   1   1  383.96   20.60 
  -3   1   1  401.56   20.10 
  -3   1   1  398.06   19.10 
   3   1  -1  402.66   19.40 
   3   1  -1  374.86   19.40 
   3   1  -1  395.86   18.90 
  -3   1   1  399.06   20.60 
   3   1  -1  392.36   17.50 
   3   1  -1  384.36   20.30 
   3   1  -1  387.46   21.20 
  -3   1   1  392.46   19.00 
  -3   1   1  410.06   19.30 
  -2  -1   1  753.52   36.50 
  -2  -1   1  788.52   35.50 
   2  -1  -1  799.32   35.70 
   2  -1  -1  777.82   37.10 
   2  -1  -1  813.82   35.90 
   2  -1  -1  812.12   34.20 
  -2  -1   1  775.52   34.90 
  -2  -1   1  801.42   35.80 
  -2  -1   1  801.62   35.90 
  -2  -1   1  762.42   34.30 
   2  -1  -1  832.02   36.50 
   2  -1  -1  797.02   34.40 
  -2  -1   1  787.92   35.50 
   2  -1  -1  806.52   36.20 
  -2  -1   1  805.62   36.20 
   2  -1  -1  795.62   35.80 
  -2  -1   1  795.52   36.10 
  -2  -1   1  767.82   35.60 
   2  -1  -1  800.32   34.90 
   2  -1  -1  849.81   37.50 
  -2  -1   1  773.72   36.70 
   2  -1  -1  809.62   36.00 
   2  -1  -1  735.03   36.30 
  -2  -1   1  810.92   35.70 
   2  -1  -1  790.72   37.00 
   2  -1  -1  764.22   37.10 
   2  -1  -1  774.42   36.40 
   2  -1  -1  804.32   35.50 
  -2  -1   1  789.32   34.40 
  -2  -1   1  840.82   35.80 
  -2  -1   1  820.12   35.10 
  -2  -1   1  723.83   36.70 
   2  -1  -1  804.22   36.80 
  -2  -1   1  779.12   36.20 
   2  -1  -1  793.02   35.70 
  -2  -1   1  802.92   35.90 
  -2   1   1  776.82   34.10 
   2   1  -1  794.62   35.00 
  -2   1   1  806.32   35.50 
  -2   1   1  834.22   35.90 
   2   1  -1  764.22   36.50 
  -2   1   1  816.02   36.80 
  -2   1   1  791.32   34.90 
   2   1  -1  843.72   37.10 
   2   1  -1  801.92   35.00 
  -2   1   1  801.52   35.60 
   2   1  -1  801.22   35.70 
  -2   1   1  804.72   36.60 
  -2   1   1  759.62   37.00 
  -2   1   1  825.42   35.80 
   2   1  -1  780.12   35.60 
  -2   1   1  834.82   37.00 
  -2   1   1  818.42   35.90 
  -2   1   1  785.52   35.70 
   2   1  -1  789.92   36.20 
   2   1  -1  789.52   36.00 
  -2   1   1  764.72   35.80 
   2   1  -1  832.82   36.30 
  -2   1   1  811.42   36.50 
   2   1  -1  785.62   35.40 
   2   1  -1  842.12   37.50 
   2   1  -1  813.92   36.30 
  -2   1   1  791.02   36.20 
   2   1  -1  711.23   36.60 
   2   1  -1  815.02   36.40 
   2   1  -1  779.02   34.10 
   2   1  -1  840.32   36.00 
   2   1  -1  778.52   35.30 
   2   1  -1  822.22   35.80 
  -2   1   1  792.12   36.30 
   2   1  -1  803.72   36.90 
  -2   1   1  798.12   35.70 
  -2   1   1  817.52   37.20 
  -2   1   1  813.62   35.50 
   2   1  -1  788.02   37.20 
  -2   1   1  803.02   35.40 
  -2   1   1  792.72   36.40 
  -2   1   1  836.32   36.40 
   2   1  -1  774.42   35.80 
  -2   1   1  769.12   34.80 
  -1  -1   1   67.29    4.20 
  -1  -1   1   82.19    6.70 
  -1  -1   1   87.29    5.00 
   1  -1  -1   66.69    4.90 
   1  -1  -1   66.79    4.70 
  -1  -1   1   74.79    4.90 
   1  -1  -1   75.79    4.20 
  -1  -1   1   77.39    5.40 
   1  -1  -1   77.19    4.40 
   1  -1  -1   88.59    4.80 
  -1  -1   1   69.29    5.30 
  -1  -1   1   74.29    4.40 
  -1  -1   1   72.69    4.60 
  -1  -1   1   60.09    4.30 
  -1  -1   1   73.99    4.50 
  -1  -1   1   76.89    4.30 
   1  -1  -1   61.09    5.20 
  -1  -1   1   75.89    4.40 
   1  -1  -1   86.29    6.40 
   1  -1  -1   76.09    4.60 
   1  -1  -1   73.99    4.70 
   1  -1  -1   78.79    5.90 
   1  -1  -1   55.79    4.20 
   1  -1  -1   77.79    4.60 
  -1  -1   1   75.19    4.80 
  -1  -1   1   89.29    5.00 
   1  -1  -1   78.69    4.50 
  -1   1   1   76.79    4.60 
   1   1  -1   76.69    3.70 
  -1   1   1   80.69    4.50 
   1   1  -1   74.79    4.10 
  -1   1   1   73.69    4.30 
  -1   1   1   73.79    4.70 
   1   1  -1   74.49    4.10 
  -1   1   1   77.29    5.10 
  -1   1   1   85.39    5.20 
   1   1  -1   81.59    4.30 
   1   1  -1   77.99    3.60 
   1   1  -1   72.59    4.70 
  -1   1   1   71.39    4.10 
   1   1  -1   75.79    4.50 
   1   1  -1   77.99    3.90 
  -1   1   1   70.69    4.70 
  -1   1   1   79.49    4.50 
   1   1  -1   80.09    3.70 
   1   1  -1   77.79    4.50 
   1   1  -1   81.59    4.80 
  -1   1   1   76.89    4.30 
   1   1  -1   73.29    3.70 
   1   1  -1   75.29    5.50 
   1   1  -1   81.49    4.50 
  -1   1   1   80.39    5.10 
  -1   1   1   76.79    4.70 
  -1   1   1   77.59    5.20 
   1   1  -1   77.99    4.90 
  -1   1   1   77.99    4.60 
  -1   1   1   76.59    4.40 
   1   1  -1   81.19    5.50 
   1   1  -1   79.49    4.90 
   1   1  -1   78.19    4.80 
  -1   1   1   82.79    5.80 
   1   1  -1   78.69    3.80 
   1   1  -1   78.69    4.50 
   1   1  -1   76.69    5.70 
   1   1  -1   83.79    4.70 
  -1   1   1   72.89    3.80 
  -1   1   1   71.49    5.80 
  -1   1   1   74.39    4.40 
   1   1  -1   78.99    4.60 
   0  -1   1 3545.25  183.08 
   0  -1   1 3621.74  182.88 
   0  -1   1 4477.05  183.18 
   0   1  -1 4511.65  183.68 
   0   1  -1 4500.75  183.28 
   0   1  -1 4769.22  182.88 
   0   1   1 4477.15  183.98 
   0   1   1 4496.65  183.58 
   0   1  -1 4693.73  184.98 
   0   1   1 4274.87  183.78 
   0   1   1 4462.35  182.88 
   0   1  -1 3940.51  186.08 
   0   1  -1 4121.19  183.58 
   0   1  -1 3530.75  184.58 
   0   1   1 4032.10  183.48 
   0   1   1 4346.37  184.68 
   0   1  -1 4455.45  182.78 
   0   1   1 4481.25  182.88 
   0   1   1 3793.62  183.38 
   0   1   1 4563.24  183.68 
   0   1   1 4182.28  182.58 
   0   1   1 4578.74  183.48 
   0   1  -1 4075.59  183.78 
   0   1   1 4479.95  183.18 
   0   1   1 4514.05  184.18 
   0   1  -1 4242.08  183.38 
   0   1   1 4341.17  183.68 
   0   1  -1 4414.66  184.48 
   0   1   1 4248.27  182.98 
   0   1  -1 4438.16  182.88 
   0   1   1 4400.76  183.18 
   0   1   1 4218.38  182.98 
   0   1  -1 3901.21  182.68 
   0   1  -1 4369.36  182.58 
   0   1  -1 4543.85  183.68 
   0   1  -1 4739.73  183.58 
   0   1  -1 4109.59  183.08 
   0   1   1 4139.59  182.98 
   1  -1   1  521.05   22.50 
  -1  -1  -1  436.96   23.20 
   1  -1   1  552.04   23.50 
  -1  -1  -1  513.95   23.00 
   1  -1   1  501.95   23.00 
   1  -1   1  527.55   23.10 
  -1  -1  -1  513.55   23.10 
  -1  -1  -1  435.26   24.50 
   1  -1   1  521.45   23.00 
   1  -1   1  528.75   25.60 
  -1  -1  -1  521.15   23.60 
  -1  -1  -1  452.15   23.00 
  -1  -1  -1  473.75   22.40 
   1  -1   1  463.75   23.50 
   1  -1   1  496.85   24.20 
  -1  -1  -1  519.95   24.00 
  -1  -1  -1  450.35   23.30 
   1  -1   1  465.95   28.30 
   1  -1   1  495.25   23.20 
   1  -1   1  475.25   22.90 
  -1  -1  -1  534.05   22.90 
  -1  -1  -1  510.85   23.00 
   1  -1   1  506.85   22.90 
  -1  -1  -1  539.15   23.10 
   1  -1   1  508.95   23.20 
   1  -1   1  519.45   23.30 
   1  -1   1  505.75   22.90 
  -1  -1  -1  493.25   22.70 
   1  -1   1  545.15   23.20 
   1  -1   1  459.75   23.60 
  -1  -1  -1  503.95   23.20 
   1  -1   1  514.15   22.80 
  -1  -1  -1  510.35   22.70 
  -1  -1  -1  547.25   23.10 
   1   1   1  489.35   24.70 
  -1   1  -1  487.25   22.90 
   1   1   1  514.35   22.90 
   1   1   1  531.65   22.60 
  -1   1  -1  533.75   23.30 
   1   1   1  534.15   23.00 
   1   1   1  533.55   23.20 
   1   1   1  507.45   23.00 
  -1   1  -1  511.85   23.10 
   1   1   1  503.85   23.80 
  -1   1  -1  541.95   23.30 
   1   1   1  520.25   22.90 
  -1   1  -1  513.65   22.50 
  -1   1  -1  503.85   23.60 
  -1   1  -1  537.75   23.30 
  -1   1  -1  497.15   23.60 
   1   1   1  490.85   22.70 
   1   1   1  525.05   23.10 
  -1   1  -1  457.95   23.10 
  -1   1  -1  506.15   23.30 
  -1   1  -1  499.25   23.80 
   1   1   1  513.85   22.40 
  -1   1  -1  526.55   24.40 
  -1   1  -1  525.85   23.10 
  -1   1  -1  517.65   22.80 
   1   1   1  536.95   23.70 
   1   1   1  494.65   23.30 
  -1   1  -1  516.65   23.00 
   1   1   1  483.85   23.90 
   1   1   1  504.35   22.20 
   1   1   1  523.95   23.10 
   1   1   1  523.45   22.50 
   1   1   1  519.15   23.10 
   1   1   1  490.55   22.70 
  -1   1  -1  499.75   22.90 
  -1   1  -1  519.25   22.90 
   1   1   1  481.75   22.60 
  -1   1  -1  530.15   22.80 
   1   1   1  526.15   23.40 
   1   1   1  514.25   24.50 
  -1   1  -1  516.65   22.60 
  -1   1  -1  539.85   25.60 
  -1   1  -1  519.55   22.70 
  -1   1  -1  528.95   23.10 
  -1   1  -1  520.35   28.60 
   1   1   1  527.15   23.50 
  -1   1  -1  525.25   24.30 
  -1   1  -1  520.15   23.00 
   1   1   1  494.35   22.70 
   1   1   1  504.55   23.00 
  -1   1  -1  520.25   23.40 
   1   1   1  516.25   22.80 
   1   1   1  518.15   22.80 
  -2  -1  -1 8781.92  388.66 
  -2  -1  -1 8991.10  390.36 
  -2  -1  -1 9046.59  388.26 
   2  -1   1 9626.94  387.66 
   2  -1   1 9310.27  387.86 
  -2  -1  -1 9015.90  389.16 
  -2  -1  -1 9009.00  387.16 
   2  -1   1 8705.83  388.96 
  -2  -1  -1 8027.90  388.66 
  -2  -1  -1 9687.83  388.06 
   2  -1   1 9015.00  388.16 
  -2  -1  -1 9212.18  387.36 
  -2  -1  -1 8442.56  387.16 
   2  -1   1 9059.19  388.06 
  -2  -1  -1 9580.14  387.76 
   2  -1   1 9479.65  387.76 
  -2  -1  -1 8063.79  387.06 
   2  -1   1 9740.23  387.76 
  -2  -1  -1 7952.00  387.46 
  -2  -1  -1 8145.19  388.06 
   2  -1   1 9017.50  388.76 
  -2  -1  -1 8828.12  387.96 
   2  -1   1 9911.01  389.46 
  -2  -1  -1 8040.90  386.96 
  -2  -1  -1 9209.48  389.06 
   2  -1   1 8738.83  386.96 
   2  -1   1 8028.30  387.26 
   2  -1   1 9320.37  387.66 
  -2  -1  -1 9675.23  388.76 
  -2  -1  -1 9137.09  388.26 
   2  -1   1 9141.38  388.26 
   2  -1   1 9155.88  387.56 
  -2  -1  -1 8049.69  388.36 
   2  -1   1 9530.95  388.46 
  -2  -1  -1 8117.19  386.86 
   2  -1   1 9013.00  388.26 
  -2  -1  -1 9134.09  387.36 
  -2  -1  -1 9059.99  387.56 
  -2  -1  -1 9685.03  387.46 
   2  -1   1 9461.85  388.36 
   2  -1   1 8336.07  388.66 
   2  -1   1 9446.25  387.56 
   2  -1   1 9305.47  387.66 
   2  -1   1 9346.07  387.36 
  -2  -1  -1 8811.82  388.46 
   2  -1   1 9028.40  387.66 
   2  -1   1 8933.11  396.46 
   2  -1   1 9320.77  387.56 
   2   1   1 8820.32  388.06 
  -2   1  -1 9288.37  387.56 
  -2   1  -1 9033.60  390.16 
   2   1   1 8646.94  388.16 
   2   1   1 9288.97  386.76 
   2   1   1 9406.56  387.76 
   2   1   1 9568.64  387.46 
  -2   1  -1 9481.55  387.66 
   2   1   1 7630.64  387.06 
  -2   1  -1 9518.95  388.96 
  -2   1  -1 9455.55  388.36 
   2   1   1 8956.90  387.26 
  -2   1  -1 9528.35  388.56 
  -2   1  -1 9601.44  388.36 
   2   1   1 8680.63  387.16 
   2   1   1 9053.29  387.26 
  -2   1  -1 9780.02  387.66 
   2   1   1 8159.38  387.86 
   2   1   1 9349.37  388.26 
   2   1   1 8612.64  388.56 
  -2   1  -1 9349.26  387.96 
   2   1   1 9841.21  389.06 
  -2   1  -1 8586.04  388.76 
  -2   1  -1 9210.28  387.66 
   2   1   1 8613.04  388.46 
  -2   1  -1 9637.34  387.56 
   2   1   1 9305.97  387.36 
  -2   1  -1 8996.90  389.26 
  -2   1  -1 9685.63  389.06 
  -2   1  -1 9294.47  387.86 
  -2   1  -1 9050.89  389.66 
   2   1   1 9199.98  388.56 
   2   1   1 8237.28  388.16 
  -2   1  -1 9642.14  388.16 
  -2   1  -1 9468.35  387.76 
   2   1   1 9333.77  388.06 
   2   1   1 8288.47  387.46 
   2   1   1 8918.71  387.86 
   2   1   1 8925.11  388.96 
  -2   1  -1 9837.52  387.96 
  -2   1  -1 9323.07  387.66 
  -2   1  -1 9999.00  389.36 
  -2   1  -1 9165.78  389.36 
  -2   1  -1 9762.12  387.46 
  -2   1  -1 9307.07  388.96 
   2   1   1 9323.67  387.66 
  -2   1  -1 9648.63  387.96 
   2   1   1 8915.31  389.26 
   2   1   1 9279.37  388.16 
  -3  -1  -1   71.59    6.00 
   3  -1   1   87.49    5.90 
   3  -1   1   74.69    5.00 
   3  -1   1   75.19    5.20 
   3  -1   1   76.89    6.00 
   3  -1   1   83.09    4.90 
   3  -1   1   77.79    6.90 
  -3  -1  -1   81.59    5.70 
  -3  -1  -1   71.99    5.50 
  -3  -1  -1   57.59    7.50 
  -3  -1  -1   78.99    6.10 
   3  -1   1   79.79    5.00 
   3  -1   1   93.49    6.90 
  -3  -1  -1   87.29    5.80 
   3  -1   1   78.29    8.00 
  -3  -1  -1   85.49    5.50 
   3  -1   1   69.99    6.80 
   3  -1   1   73.79    6.50 
  -3  -1  -1   83.29    7.60 
   3  -1   1   87.89    6.50 
  -3  -1  -1   93.29    7.10 
   3  -1   1   84.29    5.60 
  -3  -1  -1   76.49    6.00 
  -3  -1  -1   69.69    5.90 
  -3  -1  -1  108.89    7.50 
  -3  -1  -1   79.79    6.00 
  -3  -1  -1   70.79    7.30 
  -3  -1  -1   94.69    7.60 
   3  -1   1   72.89    6.00 
  -3  -1  -1   77.99    6.80 
  -3  -1  -1   79.79    5.10 
  -3  -1  -1   84.29    6.80 
   3  -1   1   79.59    5.70 
   3  -1   1   91.29    7.80 
   3  -1   1   73.59    6.70 
   3  -1   1   77.09    6.10 
  -3  -1  -1   81.89    5.50 
  -3  -1  -1   82.19    7.40 
   3  -1   1   80.09    5.90 
  -3  -1  -1   88.39    7.00 
  -3  -1  -1   80.09    5.30 
  -3  -1  -1   83.59    6.20 
   3  -1   1   80.89    5.40 
   3  -1   1   63.99    7.00 
   3  -1   1   77.89   11.70 
   3   1   1   81.19    4.70 
  -3   1  -1   79.59    6.30 
   3   1   1   82.89    5.30 
  -3   1  -1   77.39    4.90 
   3   1   1   63.59    7.10 
   3   1   1   83.19    5.50 
   3   1   1   78.09    7.00 
   3   1   1   76.29    7.10 
  -3   1  -1   78.49    7.60 
  -3   1  -1   73.29    6.60 
  -3   1  -1   75.39    6.20 
   3   1   1   71.99    6.50 
   3   1   1   69.79    5.80 
  -3   1  -1   74.39    6.00 
   3   1   1   79.39    7.40 
  -3   1  -1   74.69    5.30 
  -3   1  -1   79.79    5.20 
   3   1   1   64.89    5.90 
   3   1   1   60.69    6.70 
   3   1   1   81.29    5.80 
  -3   1  -1   84.79    5.00 
  -3   1  -1   81.79    5.70 
   3   1   1   77.39    5.70 
  -3   1  -1   78.79    4.70 
  -3   1  -1   74.39    8.80 
  -3   1  -1   84.89    7.70 
  -3   1  -1   83.19    6.00 
  -3   1  -1   80.49    7.20 
   3   1   1   84.39    5.90 
   3   1   1   79.39    6.30 
   3   1   1   79.19    6.20 
  -3   1  -1   87.89    6.50 
   3   1   1   80.09    6.70 
   3   1   1   80.59    5.80 
  -3   1  -1   75.19    6.60 
  -3   1  -1   69.99    7.70 
   4  -1   1 2254.27   99.09 
  -4  -1  -1 2269.07   99.49 
   4  -1   1 2217.78   97.89 
  -4  -1  -1 2320.17  101.99 
   4  -1   1 2270.47  101.59 
   4  -1   1 2227.88   99.89 
   4  -1   1 2306.37   98.39 
  -4  -1  -1 2277.27  100.39 
   4  -1   1 2302.27  101.49 
  -4  -1  -1 2206.28  101.19 
   4  -1   1 2278.67  102.49 
  -4  -1  -1 2144.59  100.89 
   4  -1   1 2260.17  101.59 
  -4  -1  -1 2265.77   99.99 
  -4  -1  -1 2231.18   98.59 
  -4  -1  -1 2171.88  101.29 
   4  -1   1 2168.68  100.99 
  -4  -1  -1 2295.97  100.79 
   4  -1   1 2305.47   98.69 
   4  -1   1 2235.78  100.19 
  -4  -1  -1 2316.17   99.29 
  -4  -1  -1 2293.17  103.29 
  -4  -1  -1 2146.39  102.59 
   4  -1   1 2251.27   99.99 
   4  -1   1 2173.88  100.09 
  -4  -1  -1 2264.37  102.39 
  -4  -1  -1 2222.68   99.99 
  -4  -1  -1 2233.98   99.89 
   4  -1   1 2292.77   98.99 
   4  -1   1 2174.88  114.39 
  -4  -1  -1 2233.68   98.29 
  -4  -1  -1 2253.37   98.99 
   4  -1   1 2264.37   98.89 
  -4  -1  -1 2261.67   98.19 
   4   1   1 2323.67   98.39 
  -4   1  -1 2229.58  102.79 
  -4   1  -1 2329.37   97.89 
  -4   1  -1 2286.77  100.49 
  -4   1  -1 2282.67   98.09 
  -4   1  -1 2194.18  103.19 
  -4   1  -1 2390.06   99.79 
  -4   1  -1 2241.48  100.39 
   4   1   1 2300.67  100.09 
   4   1   1 2275.87  101.49 
   4   1   1 2291.27   99.59 
  -4   1  -1 2354.46  102.09 
  -4   1  -1 2268.77   98.99 
   4   1   1 2282.57   97.49 
  -4   1  -1 2277.17  100.39 
   4   1   1 2260.17  101.29 
  -4   1  -1 2296.37  103.79 
   4   1   1 2138.39  101.19 
  -4   1  -1 2224.18  100.99 
  -4   1  -1 2393.96  101.69 
   4   1   1 2301.77   99.59 
   4   1   1 2254.57   98.99 
   4   1   1 2198.98  101.29 
   4   1   1 2333.77  101.89 
  -4   1  -1 2279.47   97.89 
   4   1   1 2339.17  100.29 
  -4   1  -1 2344.87  100.59 
   5  -1   1    2.80    2.10 
  -5  -1  -1    6.60    2.90 
  -5  -1  -1   11.50    5.00 
   5  -1   1    6.00    3.20 
   5  -1   1    6.20    3.00 
   5  -1   1    6.20    2.10 
  -5  -1  -1   10.10    4.00 
   5  -1   1    6.90    4.10 
  -5  -1  -1    9.80    4.20 
  -5  -1  -1    4.20    2.50 
  -5  -1  -1   10.60    3.30 
  -5  -1  -1    6.20    4.20 
   5  -1   1    6.20    2.50 
  -5  -1  -1    2.70    3.00 
   5  -1   1    7.90    2.90 
  -5  -1  -1    1.40    3.30 
  -5  -1  -1    6.60    2.40 
  -5  -1  -1   10.90    4.10 
  -5  -1  -1    3.30    2.90 
   5  -1   1    4.00    3.20 
   5  -1   1    7.20    3.90 
   5  -1   1    8.40    3.60 
  -5  -1  -1    7.30    2.30 
  -5  -1  -1    0.50    2.80 
   5  -1   1   10.10    8.50 
  -5  -1  -1    6.10    2.30 
  -5  -1  -1    7.20    3.60 
   5  -1   1    8.20    3.40 
   5  -1   1    6.70    4.00 
  -5  -1  -1   13.20    5.70 
   5  -1   1    8.80    4.20 
  -5   1  -1   10.60    3.10 
   5   1   1    5.80    3.60 
  -5   1  -1    2.80    3.40 
   5   1   1    5.80    3.50 
  -5   1  -1    3.20    4.10 
  -5   1  -1    7.10    2.00 
  -5   1  -1    2.40    3.40 
  -5   1  -1   -0.20    2.40 
   5   1   1    3.90    3.00 
  -5   1  -1    3.00    3.40 
   5   1   1   10.70    3.30 
   5   1   1   11.30    4.60 
  -5   1  -1    7.10    4.30 
   5   1   1    4.30    3.20 
  -5   1  -1   11.00    4.10 
  -5   1  -1    5.60    4.70 
   5   1   1    8.40    3.30 
   5   1   1    6.30    2.20 
  -5   1  -1    5.70    2.20 
  -5   1  -1    3.90    3.10 
  -5   1  -1    8.00    3.80 
   5   1   1    5.50    3.90 
   5   1   1    9.70    2.80 
   5   1   1    1.60    3.30 
   5   1   1    4.90    1.60 
  -5   1  -1    8.30    2.00 
  -6  -1  -1    3.50    3.10 
   6  -1   1    9.60    2.50 
   6  -1   1    4.40    4.20 
  -6  -1  -1    5.00    3.90 
  -6  -1  -1    6.40    2.80 
   6  -1   1    7.10    8.90 
  -6  -1  -1   -0.90    3.20 
   6  -1   1    1.30    4.20 
   6  -1   1   -0.30    3.00 
  -6  -1  -1   11.80    5.60 
  -6  -1  -1    5.50    4.90 
  -6  -1  -1    0.60    3.60 
  -6  -1  -1    3.00    3.90 
   6  -1   1    0.50    2.90 
  -6  -1  -1    2.20    3.10 
   6  -1   1    1.80    4.40 
  -6  -1  -1    2.50    4.00 
  -6  -1  -1    1.60    3.30 
  -6  -1  -1    4.00    2.30 
   6  -1   1   -0.70    3.30 
   6  -1   1    4.60    2.80 
   6  -1   1    0.80    2.90 
  -6  -1  -1    5.20    3.00 
  -6  -1  -1    4.00    3.70 
   6  -1   1   -5.80    3.80 
   6  -1   1    1.90    3.70 
  -6  -1  -1    2.50    2.50 
  -6  -1  -1   -0.10    4.50 
  -6  -1  -1    5.00    3.10 
  -6  -1  -1    6.10    5.10 
   6   1   1   -1.70    3.50 
   6   1   1    6.20    4.70 
  -6   1  -1    0.70    4.20 
  -6   1  -1    9.50    4.80 
   6   1   1    4.50    3.80 
  -6   1  -1    5.30    4.20 
  -6   1  -1   -1.80    1.80 
  -6   1  -1    7.30    4.30 
  -6   1  -1    4.70    4.30 
   6   1   1   -1.50    3.50 
   6   1   1   11.40    4.50 
  -6   1  -1    7.40    2.70 
  -6   1  -1   -1.70    3.60 
  -6   1  -1    2.90    3.00 
  -6   1  -1    3.80    1.70 
   6   1   1    1.80    3.40 
   6   1   1    1.50    3.50 
  -6   1  -1    4.80    5.30 
  -6   1  -1    0.80    3.60 
  -6   1  -1    3.60    3.20 
   6   1   1    9.60    2.10 
  -6   1  -1    6.30    5.30 
   6   1   1    5.90    3.20 
  -7  -1  -1    4.80    4.60 
  -7  -1  -1    2.60    2.40 
   7  -1   1    1.50    3.00 
  -7  -1  -1   -0.60    3.80 
  -7  -1  -1    4.40    4.50 
   7  -1   1    4.20    3.70 
  -7  -1  -1    5.40    5.70 
   7  -1   1    3.50    4.90 
   7  -1   1    2.10    3.80 
  -7  -1  -1    3.10    4.40 
  -7  -1  -1   -0.60    4.30 
  -7  -1  -1    3.60    4.30 
   7  -1   1    1.70    4.50 
   7  -1   1    7.10    2.60 
   7  -1   1   -1.10    3.20 
  -7  -1  -1    3.70    3.80 
   7  -1   1    5.60    4.50 
  -7  -1  -1    1.40    5.20 
  -7  -1  -1    3.20    5.00 
  -7  -1  -1    4.40    2.80 
  -7  -1  -1   -2.10    4.80 
  -7  -1  -1    2.70    3.60 
  -7  -1  -1   -1.20    4.40 
   7  -1   1    3.40    5.00 
  -7  -1  -1    5.70    3.80 
   7  -1   1   -1.00    9.10 
   7  -1   1    1.30    5.00 
  -7   1  -1   13.60    5.70 
  -7   1  -1    6.80    3.90 
  -7   1  -1    1.80    3.20 
   7   1   1    0.60    5.20 
   7   1   1    2.00    4.30 
  -7   1  -1    0.80    2.70 
  -7   1  -1    6.20    6.40 
  -7   1  -1    6.40    4.90 
   7   1   1    5.20    4.90 
   7   1   1   -2.20    3.80 
  -7   1  -1    3.90    4.70 
  -7   1  -1   -1.00    4.20 
  -7   1  -1    3.30    2.60 
  -7   1  -1    9.60    6.00 
   7   1   1    2.40    4.70 
   7   1   1    3.30    3.20 
  -7   1  -1    9.10    5.30 
   7   1   1    7.20    4.20 
   7   1   1   -2.50    3.50 
  -7   1  -1    6.00    5.40 
  -7   1  -1    6.10    6.30 
   7   1   1   -0.10    4.10 
   8  -1   1  218.68   17.90 
   8  -1   1  228.88   20.30 
  -8  -1  -1  224.38   21.10 
  -8  -1  -1  206.88   17.10 
  -8  -1  -1  262.97   19.30 
  -8  -1  -1  238.88   15.40 
  -8  -1  -1  250.07   19.90 
   8  -1   1  233.78   19.30 
   8  -1   1  214.88   19.90 
  -8  -1  -1  244.58   18.70 
   8  -1   1  263.77   36.20 
  -8  -1  -1  253.37   19.10 
  -8  -1  -1  230.68   16.80 
   8  -1   1  232.88   18.20 
   8  -1   1  241.78   16.60 
  -8  -1  -1  227.48   22.40 
  -8  -1  -1  224.58   20.30 
   8  -1   1  250.07   17.60 
  -8  -1  -1  209.88   18.80 
  -8  -1  -1  229.88   21.90 
  -8  -1  -1  241.78   15.50 
  -8   1  -1  213.78   18.80 
   8   1   1  219.68   22.20 
  -8   1  -1  228.08   19.10 
  -8   1  -1  231.18   16.60 
   8   1   1  218.88   19.70 
   8   1   1  228.38   16.80 
  -8   1  -1  203.28   18.10 
   8   1   1  222.08   17.20 
   8   1   1  240.38   18.20 
  -8   1  -1  230.18   14.10 
   8   1   1  229.88   18.90 
  -8   1  -1  212.18   21.50 
  -8   1  -1  239.58   23.00 
  -8   1  -1  236.58   22.10 
  -8   1  -1  220.58   17.90 
   8   1   1  246.68   33.90 
   8   1   1  226.78   16.50 
  -8   1  -1  205.28   18.20 
   8   1   1  230.38   17.30 
  -8   1  -1  272.87   25.00 
   8   1   1  239.38   20.00 
   9  -1   1    3.30   11.90 
  -9  -1  -1   21.60    6.00 
  -9  -1  -1   12.50    7.60 
   9  -1   1   14.20    6.40 
  -9  -1  -1   18.40   10.10 
   9  -1   1   10.60    6.20 
  -9  -1  -1    4.70    5.70 
   9  -1   1    5.80    7.80 
  -9  -1  -1   15.70    5.10 
   9  -1   1   11.90    7.10 
  -9  -1  -1   25.50    8.30 
  -9  -1  -1   15.40    7.60 
   9  -1   1    8.20    5.40 
   9  -1   1   16.50    6.20 
  -9  -1  -1   11.50    7.40 
   9  -1   1   10.80    7.60 
   9   1   1   12.00    8.20 
   9   1   1   14.00    6.10 
   9   1   1    6.40    6.70 
   9   1   1   14.80    7.00 
  -9   1  -1   20.30    9.80 
   9   1   1   21.30    8.70 
   9   1   1   14.90    6.20 
  -9   1  -1   18.10   10.20 
  -9   1  -1    5.00    6.70 
   9   1   1   14.80    6.90 
  -9   1  -1   13.00    7.70 
  -9   1  -1   12.00    7.20 
  -9   1  -1   12.70    6.50 
  -9   1  -1   13.50    6.80 
   9   1   1   11.10   13.90 
  -9   1  -1    8.00    6.90 
   9   1   1    7.60    6.30 
 -10  -1  -1  273.57   28.00 
  10  -1   1  319.77   26.70 
 -10  -1  -1  267.47   22.00 
  10  -1   1  291.27   21.70 
  10  -1   1  235.18   47.40 
 -10  -1  -1  320.07   25.10 
  10  -1   1  250.67   22.30 
 -10  -1  -1  294.07   27.90 
 -10  -1  -1  282.87   29.70 
  10  -1   1  255.87   26.00 
 -10  -1  -1  284.67   29.30 
  10  -1   1  283.17   25.10 
  10  -1   1  264.17   21.80 
  10   1   1  266.87   23.60 
 -10   1  -1  239.08   30.90 
  10   1   1  280.07   20.80 
 -10   1  -1  275.97   23.20 
  10   1   1  240.28   26.30 
  10   1   1  260.87   21.30 
 -10   1  -1  293.47   30.00 
  10   1   1  264.47   22.80 
 -10   1  -1  273.27   25.70 
 -10   1  -1  274.87   25.00 
 -10   1  -1  269.17   26.60 
  10   1   1  302.57   22.30 
  10   1   1  278.67   25.30 
  10   1   1  284.37   43.20 
 -10   1  -1  267.47   24.20 
 -10  -2   1  250.67   21.30 
 -10  -2   1  309.77   27.80 
  10  -2  -1  268.97   22.20 
  10  -2  -1  276.17   24.90 
  10  -2  -1  251.17   21.00 
 -10  -2   1  264.17   29.00 
 -10  -2   1  307.77   29.70 
  10  -2  -1  232.88   45.90 
 -10  -2   1  276.67   19.50 
 -10  -2   1  280.87   27.20 
  10  -2  -1  250.47   21.70 
  10  -2  -1  267.87   28.50 
 -10  -2   1  261.17   20.70 
 -10   2   1  231.38   23.80 
 -10   2   1  285.57   28.30 
 -10   2   1  281.47   31.30 
  10   2  -1  253.27   22.10 
  10   2  -1  260.77   19.70 
  10   2  -1  264.07   22.50 
  10   2  -1  245.78   26.60 
  10   2  -1  261.27   23.50 
 -10   2   1  264.47   24.60 
 -10   2   1  243.78   29.70 
  10   2  -1  269.37   21.20 
  10   2  -1  254.17   20.80 
 -10   2   1  252.07   22.20 
 -10   2   1  255.57   25.40 
  -9  -2   1  288.57   18.30 
   9  -2  -1  259.37   20.60 
   9  -2  -1  227.18   23.80 
  -9  -2   1  281.47   22.00 
   9  -2  -1  233.08   19.00 
   9  -2  -1  252.27   20.40 
  -9  -2   1  283.67   18.60 
   9  -2  -1  284.27   23.70 
  -9  -2   1  239.28   25.00 
  -9  -2   1  254.77   23.80 
   9  -2  -1  274.47   24.10 
   9  -2  -1  238.28   37.60 
  -9  -2   1  270.97   30.40 
  -9  -2   1  301.97   24.60 
  -9  -2   1  247.98   20.00 
  -9  -2   1  233.18   24.10 
  -9  -2   1  254.27   19.90 
   9  -2  -1  259.87   19.40 
  -9   2   1  258.47   21.80 
  -9   2   1  260.07   21.00 
   9   2  -1  301.37   19.20 
  -9   2   1  226.88   20.20 
   9   2  -1  292.57   23.40 
   9   2  -1  255.37   22.80 
   9   2  -1  246.88   18.90 
   9   2  -1  270.17   19.80 
   9   2  -1  237.18   21.50 
   9   2  -1  234.48   20.10 
  -9   2   1  312.17   26.20 
  -9   2   1  229.68   22.10 
  -9   2   1  280.97   22.90 
  -9   2   1  271.67   23.10 
   9   2  -1  225.08   20.10 
   9   2  -1  262.37   20.10 
  -9   2   1  266.17   26.70 
  -8  -2   1   -0.60    4.80 
  -8  -2   1    8.80    6.40 
  -8  -2   1    1.50    5.60 
   8  -2  -1   -3.30    3.90 
  -8  -2   1    6.10    5.80 
  -8  -2   1   -2.80    5.20 
   8  -2  -1   -3.40    4.10 
  -8  -2   1   -1.10    4.40 
   8  -2  -1   13.00    7.00 
   8  -2  -1   -2.10    4.40 
  -8  -2   1    8.10    6.00 
   8  -2  -1   -3.50    3.40 
   8  -2  -1   -1.00    3.30 
   8  -2  -1   -1.40    5.80 
  -8  -2   1    0.80    4.20 
   8  -2  -1    9.80    4.80 
   8  -2  -1    2.80    9.60 
  -8  -2   1   -0.90    4.80 
  -8  -2   1   -0.60    3.80 
   8  -2  -1   -6.70    4.30 
  -8  -2   1   -3.80    6.10 
   8   2  -1    7.60    5.30 
  -8   2   1    7.00    6.10 
   8   2  -1    4.80    5.80 
  -8   2   1    1.20    3.90 
   8   2  -1   -0.10    3.30 
  -8   2   1    6.50    6.20 
   8   2  -1   -0.20    5.20 
  -8   2   1    4.60    6.20 
   8   2  -1    4.10    5.10 
  -8   2   1   -3.20    3.40 
   8   2  -1   -1.60    3.80 
  -8   2   1    4.80    5.60 
  -8   2   1    4.30    6.80 
  -8   2   1   -0.30    3.10 
   8   2  -1    3.80    4.60 
  -8   2   1    0.60    4.30 
  -8   2   1    5.30    5.70 
   8   2  -1    3.10    4.80 
   8   2  -1    0.20    5.80 
   7  -2  -1   18.70    4.60 
   7  -2  -1   37.30    5.50 
  -7  -2   1   23.10    6.90 
  -7  -2   1   39.90    7.30 
  -7  -2   1   40.00    6.30 
   7  -2  -1   30.40    6.60 
  -7  -2   1   33.30    8.10 
   7  -2  -1   38.60    6.80 
  -7  -2   1   22.20    7.50 
  -7  -2   1   22.40    7.60 
   7  -2  -1   28.20    5.40 
  -7  -2   1   26.70    7.20 
   7  -2  -1   23.40    7.90 
  -7  -2   1   33.60    7.90 
   7  -2  -1   27.20    7.30 
  -7  -2   1   35.90    5.80 
   7  -2  -1   31.30    6.60 
  -7  -2   1   29.40    6.20 
   7  -2  -1   38.70    4.80 
   7  -2  -1   30.30    8.00 
   7  -2  -1   33.40    8.60 
  -7  -2   1   31.30    7.70 
  -7  -2   1   28.70    6.80 
   7  -2  -1   31.90   14.40 
   7  -2  -1   39.40    7.60 
  -7   2   1   38.10    6.00 
  -7   2   1   21.60    7.30 
   7   2  -1   28.40    7.90 
   7   2  -1   29.80    5.90 
   7   2  -1   40.30    7.30 
  -7   2   1   39.20    6.60 
   7   2  -1   38.60    7.10 
  -7   2   1   39.00    8.60 
  -7   2   1   37.20    9.20 
  -7   2   1   36.70    8.00 
  -7   2   1   25.70    8.30 
  -7   2   1   31.60    8.00 
   7   2  -1   38.00    7.20 
  -7   2   1   35.70    7.30 
   7   2  -1   28.60    7.70 
  -7   2   1   37.50    7.40 
  -7   2   1   41.10    6.80 
   7   2  -1   21.80    6.00 
  -7   2   1   44.90    8.40 
  -7   2   1   33.80    5.00 
   7   2  -1   30.30    6.60 
  -7   2   1   35.60    9.60 
   7   2  -1   33.70    8.10 
   6  -2  -1   -1.70    3.70 
  -6  -2   1    3.90    3.70 
  -6  -2   1    1.10    1.40 
   6  -2  -1   -5.30    2.80 
   6  -2  -1    3.80    7.70 
   6  -2  -1    3.40    4.30 
  -6  -2   1    4.10    3.50 
   6  -2  -1    5.60    2.80 
   6  -2  -1    6.70    4.80 
  -6  -2   1   -0.50    3.80 
  -6  -2   1    3.40    1.90 
  -6  -2   1    4.30    3.90 
   6  -2  -1    2.00    1.80 
   6  -2  -1    2.60    3.30 
  -6  -2   1    1.20    4.90 
  -6  -2   1    5.10    4.20 
  -6  -2   1    2.30    4.30 
  -6  -2   1    6.30    4.00 
  -6  -2   1    4.40    3.20 
   6  -2  -1    2.90    3.10 
   6  -2  -1   -0.80    4.10 
   6  -2  -1    4.00    3.80 
   6  -2  -1    1.60    2.50 
  -6  -2   1    3.10    4.20 
  -6  -2   1    6.60    3.20 
   6  -2  -1   -3.60    3.00 
  -6  -2   1   -1.60    3.80 
   6  -2  -1    3.20    2.80 
  -6  -2   1    4.50    4.60 
  -6   2   1   11.70    4.50 
   6   2  -1    3.10    4.10 
  -6   2   1    1.30    3.60 
   6   2  -1   -0.70    3.20 
  -6   2   1    2.00    2.50 
   6   2  -1    2.30    2.30 
   6   2  -1   -2.20    3.30 
   6   2  -1   -3.40    3.40 
  -6   2   1   10.60    5.20 
   6   2  -1    4.40    3.30 
  -6   2   1    5.40    4.20 
  -6   2   1   -4.80    4.20 
  -6   2   1    2.80    1.50 
  -6   2   1    3.80    3.40 
   6   2  -1    1.90    3.40 
   6   2  -1    2.40    2.70 
   6   2  -1    0.00    2.70 
  -6   2   1   -1.70    3.40 
  -6   2   1   -0.90    2.80 
  -6   2   1    2.50    3.60 
  -6   2   1    4.00    2.70 
  -6   2   1    6.80    4.50 
   6   2  -1   -2.10    3.80 
  -6   2   1   10.70    5.80 
  -6   2   1   -2.20    3.20 
   6   2  -1   12.10    4.50 
  -5  -2   1   91.09   10.40 
   5  -2  -1  104.69    8.80 
  -5  -2   1  101.29   10.90 
  -5  -2   1   87.29    9.30 
  -5  -2   1  101.89   10.70 
  -5  -2   1   88.79    7.60 
   5  -2  -1  116.79   12.80 
   5  -2  -1   84.99    9.30 
   5  -2  -1  103.49    6.90 
   5  -2  -1   98.39    6.80 
   5  -2  -1  113.49   21.10 
  -5  -2   1   83.89    9.60 
   5  -2  -1   97.09    6.00 
  -5  -2   1   80.89    8.50 
   5  -2  -1   98.49    9.30 
  -5  -2   1  110.79    9.50 
  -5  -2   1  101.49    4.80 
   5  -2  -1   84.79    9.00 
   5  -2  -1   91.09    7.30 
  -5  -2   1  105.59    8.10 
   5  -2  -1   92.79   10.30 
   5  -2  -1  101.29   11.60 
  -5  -2   1   89.59    9.30 
  -5  -2   1  100.89    5.80 
  -5  -2   1  109.19   12.00 
  -5  -2   1  102.69    8.50 
  -5  -2   1   92.49    5.60 
   5  -2  -1   97.39    7.80 
   5  -2  -1  104.19   10.80 
   5  -2  -1   86.79   10.10 
  -5   2   1   73.29   10.40 
  -5   2   1   88.69    9.40 
  -5   2   1   97.69    5.20 
  -5   2   1   91.29   10.20 
   5   2  -1   89.19    7.00 
  -5   2   1  103.69   10.50 
  -5   2   1  100.29    8.10 
   5   2  -1  105.39    8.80 
  -5   2   1   95.29   11.60 
  -5   2   1   94.79   10.30 
   5   2  -1  102.89    8.70 
  -5   2   1  102.39    9.50 
  -5   2   1   87.49   10.20 
   5   2  -1  105.89   11.60 
   5   2  -1   68.19    8.30 
   5   2  -1   96.89    6.10 
   5   2  -1   93.09    7.90 
   5   2  -1  101.49    9.60 
   5   2  -1   93.79    5.20 
  -5   2   1   94.39    6.40 
   5   2  -1   95.89    9.20 
   5   2  -1   87.79    9.60 
  -5   2   1  100.59    6.90 
  -5   2   1  103.19   12.60 
  -5   2   1  104.39    8.30 
  -5   2   1   93.79   10.40 
   5   2  -1  102.79    7.60 
  -5   2   1   94.19    9.60 
  -5   2   1  100.29    8.10 
  -5   2   1   98.59    7.00 
   5   2  -1  112.29   12.10 
  -4  -2   1   94.09    7.80 
  -4  -2   1   97.79    8.40 
   4  -2  -1   99.29   15.00 
   4  -2  -1  101.19    6.30 
   4  -2  -1  102.59    9.10 
  -4  -2   1  102.39    9.30 
   4  -2  -1   99.99    6.00 
   4  -2  -1  100.39    7.50 
   4  -2  -1   92.99   10.10 
   4  -2  -1   89.09    8.60 
  -4  -2   1   92.69    5.30 
  -4  -2   1  107.39    8.80 
  -4  -2   1  100.19    7.40 
  -4  -2   1   97.49    5.60 
  -4  -2   1   91.29    9.30 
   4  -2  -1   93.99    7.00 
  -4  -2   1  105.69   10.20 
  -4  -2   1   99.99    7.60 
  -4  -2   1   83.29    9.40 
  -4  -2   1  108.79    7.80 
  -4  -2   1  110.69    8.00 
   4  -2  -1   82.19    9.00 
   4  -2  -1   99.09    7.90 
   4  -2  -1   94.29    8.40 
   4  -2  -1  100.09    5.30 
   4  -2  -1  101.49   11.00 
  -4  -2   1   90.69    6.20 
   4  -2  -1   99.19    6.00 
   4  -2  -1   89.09    7.60 
   4  -2  -1  120.59    8.20 
   4   2  -1   93.69    7.30 
   4   2  -1   91.19    7.90 
  -4   2   1  105.59    8.80 
   4   2  -1   97.29    8.60 
  -4   2   1   89.39    6.30 
   4   2  -1   88.49    4.80 
  -4   2   1  104.59   10.20 
   4   2  -1   94.69    7.40 
  -4   2   1  100.29    7.70 
  -4   2   1   92.89    8.50 
  -4   2   1   82.79   10.30 
  -4   2   1   89.99    7.40 
   4   2  -1   83.69    9.50 
  -4   2   1   95.69    4.70 
   4   2  -1   99.39    7.80 
  -4   2   1   99.89    6.40 
  -4   2   1   96.79    7.50 
   4   2  -1   86.19    8.00 
  -4   2   1   89.29    7.80 
  -4   2   1   88.99    8.40 
  -4   2   1   93.79    9.50 
  -4   2   1   87.49    8.50 
   4   2  -1   96.09    8.00 
  -4   2   1   83.49    6.00 
  -4   2   1   93.09   10.70 
   4   2  -1   85.99    9.90 
   4   2  -1   68.49    8.70 
  -4   2   1  107.59    8.90 
   4   2  -1   94.89    6.30 
   4   2  -1   84.39    8.20 
   4   2  -1   94.09    6.60 
   3  -2  -1  309.77   18.70 
  -3  -2   1  346.27   17.80 
   3  -2  -1  325.57   17.90 
   3  -2  -1  303.87   16.10 
   3  -2  -1  323.77   18.50 
  -3  -2   1  305.47   16.80 
   3  -2  -1  325.37   16.60 
   3  -2  -1  302.57   16.30 
  -3  -2   1  326.47   15.00 
  -3  -2   1  323.77   16.20 
   3  -2  -1  342.57   17.20 
   3  -2  -1  318.47   18.50 
  -3  -2   1  324.57   16.60 
   3  -2  -1  335.97   25.80 
  -3  -2   1  327.57   16.60 
   3  -2  -1  299.27   16.70 
  -3  -2   1  314.47   17.00 
   3  -2  -1  328.77   18.90 
  -3  -2   1  341.47   18.40 
  -3  -2   1  307.37   15.00 
  -3  -2   1  327.07   18.20 
   3  -2  -1  297.07   16.40 
  -3  -2   1  310.67   17.40 
  -3  -2   1  339.87   16.90 
  -3  -2   1  325.17   16.00 
  -3  -2   1  311.67   15.10 
  -3  -2   1  310.67   17.20 
  -3  -2   1  312.07   16.80 
   3  -2  -1  312.87   14.70 
  -3  -2   1  260.97   17.80 
  -3  -2   1  338.57   18.20 
  -3  -2   1  316.47   18.20 
   3  -2  -1  321.07   15.00 
   3  -2  -1  309.17   16.60 
  -3   2   1  323.77   18.80 
  -3   2   1  327.87   17.70 
  -3   2   1  325.17   17.70 
   3   2  -1  303.67   17.10 
  -3   2   1  330.37   19.00 
   3   2  -1  336.37   17.40 
  -3   2   1  321.37   17.60 
   3   2  -1  312.57   16.90 
  -3   2   1  329.87   17.10 
   3   2  -1  329.47   17.30 
   3   2  -1  317.87   16.40 
   3   2  -1  329.77   16.40 
   3   2  -1  317.27   15.50 
  -3   2   1  315.47   16.90 
   3   2  -1  329.27   19.00 
   3   2  -1  310.67   16.30 
  -3   2   1  319.47   15.00 
   3   2  -1  314.57   14.20 
  -3   2   1  321.07   16.60 
   3   2  -1  320.27   18.30 
   3   2  -1  311.47   17.90 
  -3   2   1  311.47   16.70 
  -3   2   1  344.77   19.30 
  -3   2   1  337.57   18.10 
  -3   2   1  341.67   16.90 
   3   2  -1  314.97   17.40 
   3   2  -1  333.37   15.20 
   3   2  -1  318.47   17.20 
   3   2  -1  304.17   17.20 
  -3   2   1  310.87   15.50 
   2  -2  -1   47.70    5.80 
   2  -2  -1   57.99    8.50 
   2  -2  -1   49.10    6.20 
   2  -2  -1   52.49    4.50 
  -2  -2   1   45.00    5.00 
   2  -2  -1   47.20    5.90 
  -2  -2   1   51.69    4.30 
  -2  -2   1   44.90    4.60 
   2  -2  -1   54.39    4.30 
   2  -2  -1   46.90    4.50 
  -2  -2   1   50.19    3.50 
   2  -2  -1   45.70    4.50 
   2  -2  -1   53.59    4.00 
  -2  -2   1   48.50    3.00 
   2  -2  -1   40.70    4.40 
   2  -2  -1   54.29    5.10 
  -2  -2   1   58.39    4.60 
   2  -2  -1   51.39    4.80 
   2  -2  -1   37.60    5.90 
  -2  -2   1   55.99    5.20 
  -2  -2   1   64.19    3.80 
  -2  -2   1   56.29    4.90 
   2  -2  -1   50.79    3.00 
   2  -2  -1   53.89    4.50 
   2  -2  -1   59.39    6.10 
  -2  -2   1   47.70    5.30 
  -2  -2   1   49.40    3.00 
  -2  -2   1   45.30    3.90 
  -2  -2   1   46.80    4.80 
  -2  -2   1   43.00    5.10 
   2  -2  -1   46.20    3.80 
   2  -2  -1   57.49    7.40 
  -2  -2   1   54.39    6.20 
  -2  -2   1   49.70    3.70 
   2  -2  -1   48.80    5.10 
  -2  -2   1   42.90    3.70 
   2  -2  -1   36.10    4.60 
   2  -2  -1   50.29    4.50 
  -2  -2   1   52.29    6.20 
  -2  -2   1   48.30    5.00 
  -2   2   1   49.60    4.70 
  -2   2   1   44.70    5.30 
  -2   2   1   49.99    5.00 
   2   2  -1   52.49    4.70 
   2   2  -1   59.69    5.00 
   2   2  -1   50.49    2.90 
   2   2  -1   54.99    4.90 
   2   2  -1   52.69    4.10 
  -2   2   1   49.00    4.80 
   2   2  -1   90.99    8.20 
   2   2  -1   41.70    5.80 
   2   2  -1   54.19    4.50 
   2   2  -1   57.59    4.40 
   2   2  -1   53.99    3.00 
   2   2  -1   66.19    4.60 
  -2   2   1   52.19    4.90 
  -2   2   1   50.99    4.20 
  -2   2   1   41.40    4.40 
  -2   2   1   58.29    4.50 
  -2   2   1   46.30    6.10 
   2   2  -1   54.59    3.00 
   2   2  -1   49.99    5.80 
  -2   2   1   42.10    4.30 
   2   2  -1   59.89    3.70 
   2   2  -1   54.59    4.40 
  -2   2   1   53.59    4.70 
  -2   2   1   52.09    5.30 
  -2   2   1   57.49    4.40 
   2   2  -1   50.89    3.80 
  -2   2   1   46.00    4.00 
  -2   2   1   67.49    7.20 
  -2   2   1   52.59    4.50 
  -2   2   1   58.39    6.20 
  -2   2   1   51.29    2.50 
   2   2  -1   53.39    2.80 
   2   2  -1   56.29    4.50 
  -2   2   1   57.19    6.50 
   2   2  -1   43.40    4.20 
  -2   2   1   45.40    4.10 
  -2   2   1   47.60    5.10 
   2   2  -1   52.09    4.80 
   2   2  -1   50.39    3.30 
   2   2  -1   55.49    4.30 
   2   2  -1   53.89    4.00 
   2   2  -1   50.89    5.20 
  -2   2   1   45.90    5.70 
  -2   2   1   51.89    2.90 
   2   2  -1   58.19    5.60 
   1  -2  -1    6.70    1.90 
   1  -2  -1   10.00    2.10 
  -1  -2   1    4.30    1.30 
   1  -2  -1   10.40    1.20 
  -1  -2   1    9.80    1.90 
  -1  -2   1    8.00    1.70 
   1  -2  -1    8.00    1.40 
   1  -2  -1    9.30    2.70 
   1  -2  -1    5.60    1.60 
   1  -2  -1    3.90    2.00 
   1  -2  -1    5.20    1.70 
  -1  -2   1    7.40    2.00 
   1  -2  -1   48.10   11.50 
  -1  -2   1    4.90    1.80 
   1  -2  -1    5.60    1.00 
  -1  -2   1    3.80    1.30 
  -1  -2   1    6.10    1.00 
   1  -2  -1    5.30    1.60 
   1  -2  -1    8.30    1.90 
   1  -2  -1    5.00    1.30 
   1  -2  -1    6.50    2.40 
  -1  -2   1    4.20    1.70 
  -1  -2   1    7.20    1.40 
  -1  -2   1    6.00    1.70 
  -1  -2   1    5.90    1.50 
  -1  -2   1    3.20    1.90 
   1  -2  -1    5.70    1.10 
   1  -2  -1    3.60    2.70 
  -1  -2   1    3.50    1.60 
   1  -2  -1    7.90    3.40 
  -1  -2   1    3.90    1.60 
  -1  -2   1    3.20    1.40 
   1  -2  -1    4.50    2.70 
  -1  -2   1   12.60    3.00 
   1  -2  -1    7.20    1.60 
   1   2  -1    5.10    1.50 
   1   2  -1   14.70    5.30 
  -1   2   1    9.70    3.10 
   1   2  -1    6.70    2.00 
   1   2  -1   19.80    3.40 
   1   2  -1    8.60    2.30 
  -1   2   1   11.30    2.30 
   1   2  -1    7.30    2.90 
   1   2  -1    6.90    1.50 
  -1   2   1    6.90    3.20 
  -1   2   1    7.70    2.00 
  -1   2   1    6.60    1.60 
   1   2  -1    6.40    1.50 
  -1   2   1    7.20    0.90 
  -1   2   1   13.10    1.90 
  -1   2   1   16.70    2.60 
   1   2  -1   10.20    2.20 
   1   2  -1    3.50    1.60 
  -1   2   1    7.80    1.60 
   1   2  -1   10.70    1.50 
   1   2  -1    7.40    1.80 
  -1   2   1    5.10    2.10 
  -1   2   1    7.70    1.70 
   1   2  -1    2.90    4.40 
   1   2  -1    6.70    0.80 
  -1   2   1    7.00    1.80 
  -1   2   1   10.20    3.50 
   1   2  -1    6.40    1.70 
  -1   2   1    2.30    1.40 
   1   2  -1    5.50    2.60 
   1   2  -1   12.70    1.90 
  -1   2   1    5.90    1.40 
   1   2  -1    7.20    1.30 
   1   2  -1    7.50    1.40 
   1   2  -1    8.10    1.80 
  -1   2   1    5.10    1.70 
  -1   2   1    6.60    1.10 
  -1   2   1    9.60    2.00 
  -1   2   1    5.60    1.70 
   1   2  -1    4.70    1.60 
  -1   2   1    7.20    1.10 
   1   2  -1   10.90    1.20 
   1   2  -1    3.70    2.60 
  -1   2   1   10.00    2.10 
   1   2  -1    7.10    2.50 
   1   2  -1    6.20    2.20 
   1   2  -1    8.80    1.70 
   1   2  -1    5.00    1.30 
   1   2  -1    4.80    0.90 
  -1   2   1    5.60    4.00 
  -1   2   1    5.40    1.10 
  -1   2   1    4.30    1.10 
   1   2  -1    5.20    1.30 
  -1   2   1    2.90    1.80 
  -1   2   1   10.40    1.80 
  -1   2   1    8.70    2.00 
   0  -2  -1   84.39    5.20 
   0  -2   1   74.89    5.70 
   0  -2   1   64.09    7.60 
   0  -2   1   70.49    4.90 
   0  -2  -1   82.59    5.40 
   0  -2  -1   75.49    4.90 
   0  -2  -1   75.29    5.00 
   0  -2  -1   73.29    4.80 
   0  -2   1   71.99    5.10 
   0  -2   1   53.09   14.40 
   0  -2  -1   84.39    6.50 
   0  -2  -1   64.89    9.60 
   0  -2   1   73.79    4.90 
   0  -2  -1   67.49    4.70 
   0  -2  -1   74.69    5.80 
   0  -2  -1   68.29   15.30 
   0  -2  -1   73.39    8.10 
   0  -2   1   77.79    4.50 
   0  -2   1   70.69    4.70 
   0  -2  -1   66.29   10.30 
   0  -2   1   70.89    5.30 
   0  -2  -1   75.29    4.80 
   0  -2  -1   73.59    4.10 
   0  -2   1   74.39    4.20 
   0  -2  -1   76.09    5.00 
   0  -2   1   70.59    6.20 
   0  -2   1   51.19   14.80 
   0  -2   1   73.29    4.90 
   0  -2  -1   73.09    4.30 
   0  -2   1   63.59    7.70 
   0  -2   1   78.89    5.40 
   0  -2   1   73.59    3.90 
   0  -2  -1   62.39    4.70 
   0  -2  -1   86.59    5.70 
   0  -2  -1   72.39    4.50 
   0  -2   1   79.69    4.90 
   0  -2   1   76.99    4.90 
   0  -2  -1   71.59    6.50 
   0   2  -1   63.69    6.30 
   0   2   1   82.39    6.20 
   0   2  -1   69.39    4.10 
   0   2  -1   75.09    5.00 
   0   2   1   78.09    4.50 
   0   2  -1   74.39    4.90 
   0   2  -1   81.09    3.90 
   0   2  -1   47.90   14.30 
   0   2  -1   67.59    4.80 
   0   2  -1   78.79    4.60 
   0   2  -1   72.19    4.20 
   0   2  -1   69.59    5.00 
   0   2   1   76.39    5.30 
   0   2   1   74.49    4.90 
   0   2   1   67.99    4.70 
   0   2  -1   79.59    5.30 
   0   2  -1   99.69   11.10 
   0   2  -1   70.29    4.10 
   0   2  -1   73.79    4.60 
   0   2   1   65.59    4.30 
   0   2   1   71.39    4.40 
   0   2  -1   59.39    5.80 
   0   2   1   73.19    8.80 
   0   2   1   56.09    8.60 
   0   2  -1   78.49    4.60 
   0   2  -1   82.39    5.50 
   0   2  -1   86.99    6.80 
   0   2  -1   80.49    4.80 
   0   2   1   83.79    5.00 
   0   2  -1   82.19    4.80 
   0   2   1   76.69    4.90 
   0   2   1   75.69    4.60 
   0   2  -1   86.09    5.00 
   0   2   1   73.19    3.50 
   0   2   1   76.69    4.80 
   0   2  -1   81.69    5.30 
   0   2  -1   80.09    5.20 
   0   2  -1   85.59    4.50 
   0   2  -1   79.49    4.80 
   0   2  -1   50.39   14.90 
   0   2   1   71.99    6.50 
   0   2  -1   77.79    5.30 
   0   2   1   82.59    6.00 
   0   2   1   76.49    4.40 
   0   2  -1   88.89   11.20 
   0   2   1   75.39    4.90 
   0   2   1   47.20   13.90 
   0   2   1   75.49    4.20 
   0   2   1   79.59    4.10 
   0   2   1   77.89    4.70 
   0   2   1   69.99    5.30 
   0   2   1   79.29    4.30 
   0   2   1   74.59    6.60 
   0   2   1   77.49    5.20 
   0   2   1   72.09    4.80 
   0   2  -1   77.09    5.00 
   1  -2   1 1416.56   64.69 
   1  -2   1 1531.05   64.29 
  -1  -2  -1 1552.14   64.69 
  -1  -2  -1 1643.84   64.59 
   1  -2   1 1456.95   63.99 
   1  -2   1 1617.54   64.89 
   1  -2   1 1515.65   65.09 
   1  -2   1 1507.65   65.19 
  -1  -2  -1 1565.64   64.29 
   1  -2   1 1211.78   69.49 
   1  -2   1 1452.25   64.19 
  -1  -2  -1 1448.16   64.39 
  -1  -2  -1 1509.85   63.99 
   1  -2   1 1499.65   64.69 
  -1  -2  -1 1451.25   64.59 
  -1  -2  -1 1481.05   64.09 
  -1  -2  -1 1421.16   64.19 
  -1  -2  -1 1480.15   63.59 
   1  -2   1 1455.95   64.89 
   1  -2   1 1462.35   64.69 
  -1  -2  -1 1540.05   66.69 
   1  -2   1 1504.65   64.89 
  -1  -2  -1 1499.65   64.39 
  -1  -2  -1 1420.36   64.09 
   1  -2   1 1494.35   64.69 
   1  -2   1 1420.96   63.89 
  -1  -2  -1 1503.85   63.29 
  -1  -2  -1 1452.05   66.59 
  -1  -2  -1 1460.15   65.49 
   1  -2   1 1249.28   76.09 
  -1  -2  -1 1453.75   66.99 
  -1  -2  -1 1451.45   63.09 
   1  -2   1 1538.85   65.19 
   1  -2   1 1458.35   64.79 
   1  -2   1 1485.95   64.59 
  -1  -2  -1 1431.96   64.79 
   1  -2   1 1501.65   62.99 
   1  -2   1 1541.05   64.39 
   1  -2   1 1414.06   64.19 
   1  -2   1 1456.15   63.39 
   1  -2   1 1486.65   64.99 
   1  -2   1 1441.36   67.49 
   1  -2   1 1483.95   63.89 
  -1  -2  -1 1423.66   63.99 
   1  -2   1 1431.16   75.79 
  -1   2  -1 1512.45   64.89 
  -1   2  -1 1472.65   63.29 
  -1   2  -1 1565.24   64.39 
  -1   2  -1 1405.46   64.09 
   1   2   1 1483.05   64.19 
   1   2   1 1434.76   63.49 
  -1   2  -1 1487.85   64.39 
   1   2   1 1483.65   63.79 
   1   2   1 1245.08   72.39 
  -1   2  -1 1467.35   63.89 
  -1   2  -1 1454.85   64.49 
   1   2   1 1476.95   63.59 
   1   2   1 1426.76   64.59 
   1   2   1 1400.56   67.59 
   1   2   1 1536.05   64.49 
   1   2   1 1514.05   65.19 
   1   2   1 1476.95   64.49 
  -1   2  -1 1501.55   64.89 
   1   2   1 1487.55   63.89 
   1   2   1 1418.76   64.09 
  -1   2  -1 1474.75   73.39 
   1   2   1 1477.45   63.89 
  -1   2  -1 1445.46   63.99 
  -1   2  -1 1534.45   67.59 
  -1   2  -1 1507.35   64.29 
   1   2   1 1465.75   64.59 
  -1   2  -1 1529.65   64.69 
  -1   2  -1 1515.25   64.69 
   1   2   1 1295.37   67.59 
   1   2   1 1384.96   68.19 
  -1   2  -1 1516.75   64.69 
  -1   2  -1 1539.45   64.69 
  -1   2  -1 1514.05   64.79 
   1   2   1 1483.25   64.29 
  -1   2  -1 1473.55   64.29 
  -1   2  -1 1518.25   65.29 
   1   2   1 1493.65   64.69 
   1   2   1 1465.55   64.49 
   1   2   1 1486.55   65.59 
  -1   2  -1 1474.25   64.19 
  -1   2  -1 1515.05   64.69 
  -1   2  -1 1515.85   63.69 
  -1   2  -1 1340.27   70.69 
  -1   2  -1 1411.06   65.79 
   1   2   1 1325.67   65.59 
   1   2   1 1412.26   65.29 
   1   2   1 1521.35   63.99 
   1   2   1 1549.64   64.09 
  -1   2  -1 1495.45   64.89 
  -1   2  -1 1435.46   64.89 
  -1   2  -1 1513.15   64.19 
   1   2   1 1494.25   64.09 
   1   2   1 1533.95   63.19 
   1   2   1 1457.85   64.19 
  -2  -2  -1  259.17   13.40 
   2  -2   1  262.07   12.80 
  -2  -2  -1  260.47   12.40 
  -2  -2  -1  255.37   12.70 
  -2  -2  -1  248.08   12.90 
   2  -2   1  238.68   16.90 
   2  -2   1  256.57   13.50 
   2  -2   1  239.18   12.80 
  -2  -2  -1  261.37   15.00 
   2  -2   1  248.08   15.40 
  -2  -2  -1  259.57   12.10 
   2  -2   1  239.18   13.20 
   2  -2   1  269.47   13.50 
   2  -2   1  271.17   14.00 
   2  -2   1  239.78   13.90 
   2  -2   1  255.47   14.20 
   2  -2   1  237.98   14.30 
  -2  -2  -1  241.08   13.80 
  -2  -2  -1  256.37   12.80 
  -2  -2  -1  253.77   11.80 
  -2  -2  -1  259.47   13.10 
  -2  -2  -1  264.07   13.60 
   2  -2   1  259.37   13.60 
   2  -2   1  268.47   13.90 
   2  -2   1  261.47   12.60 
  -2  -2  -1  238.78   15.70 
  -2  -2  -1  221.28   13.10 
  -2  -2  -1  268.37   14.60 
  -2  -2  -1  275.77   14.10 
   2  -2   1  261.17   13.60 
  -2  -2  -1  260.77   12.40 
   2  -2   1  259.97   14.00 
   2  -2   1  260.77   14.60 
  -2  -2  -1  235.28   16.00 
  -2  -2  -1  272.57   13.90 
  -2  -2  -1  248.38   13.00 
  -2  -2  -1  254.47   12.50 
   2  -2   1  256.07   14.70 
   2  -2   1  272.77   13.50 
   2  -2   1  256.27   11.70 
  -2  -2  -1  266.67   12.20 
   2  -2   1  264.97   13.00 
   2   2   1  247.98   13.30 
   2   2   1  251.57   12.50 
  -2   2  -1  258.47   13.00 
   2   2   1  264.47   13.60 
  -2   2  -1  264.77   13.50 
   2   2   1  267.67   12.70 
  -2   2  -1  261.87   14.20 
  -2   2  -1  250.87   13.60 
   2   2   1  239.38   13.60 
   2   2   1  275.17   12.80 
   2   2   1  254.47   13.90 
   2   2   1  275.67   15.00 
   2   2   1  232.08   12.10 
  -2   2  -1  275.97   17.20 
   2   2   1  253.17   13.40 
  -2   2  -1  248.58   13.10 
  -2   2  -1  263.47   13.80 
  -2   2  -1  300.97   13.80 
   2   2   1  269.67   13.50 
   2   2   1  257.97   14.90 
  -2   2  -1  253.87   20.50 
   2   2   1  247.48   12.30 
   2   2   1  275.67   13.50 
   2   2   1  230.68   13.40 
  -2   2  -1  245.58   13.30 
  -2   2  -1  247.48   13.60 
  -2   2  -1  288.87   14.50 
  -2   2  -1  254.67   14.40 
   2   2   1  269.77   12.30 
  -2   2  -1  267.27   13.10 
  -2   2  -1  253.27   13.40 
  -2   2  -1  275.57   13.80 
   2   2   1  265.47   12.90 
  -2   2  -1  250.37   12.10 
  -2   2  -1  253.37   14.60 
  -2   2  -1  232.18   13.80 
   2   2   1  259.77   12.70 
   2   2   1  270.37   12.40 
   2   2   1  254.77   13.30 
   2   2   1  253.37   14.70 
  -2   2  -1  259.67   15.50 
  -2   2  -1  248.98   13.20 
  -2   2  -1  268.67   15.40 
   2   2   1  266.67   15.90 
  -2   2  -1  285.67   13.90 
  -2   2  -1  262.67   13.50 
   2   2   1  254.67   13.80 
   2   2   1  255.37   13.40 
   2   2   1  284.67   14.50 
   2   2   1  250.67   14.00 
   2   2   1  268.07   14.70 
  -2   2  -1  259.47   14.40 
  -2   2  -1  252.97   13.00 
  -2   2  -1  265.57   13.10 
   3  -2   1   40.00    6.20 
  -3  -2  -1   36.30    4.10 
   3  -2   1   32.60    5.90 
  -3  -2  -1   33.70    4.00 
  -3  -2  -1   40.50    4.20 
   3  -2   1   38.20    5.00 
  -3  -2  -1   40.60    3.50 
   3  -2   1   38.80    4.30 
  -3  -2  -1   27.90    4.90 
  -3  -2  -1   45.90    6.90 
  -3  -2  -1   38.10    5.20 
   3  -2   1   32.70    4.40 
  -3  -2  -1   28.80    4.40 
  -3  -2  -1   38.60    3.90 
   3  -2   1   39.30    5.40 
   3  -2   1   38.30    5.20 
   3  -2   1   41.60    5.00 
  -3  -2  -1   39.20    3.00 
   3  -2   1   42.00    5.00 
  -3  -2  -1   32.80    5.50 
   3  -2   1   64.79    4.50 
  -3  -2  -1   49.10    4.60 
  -3  -2  -1   42.70    5.50 
  -3  -2  -1   39.50    5.00 
  -3  -2  -1   37.80    2.90 
  -3  -2  -1   45.10    5.10 
   3  -2   1   41.70    4.80 
  -3  -2  -1   37.70    5.80 
  -3  -2  -1   42.20    4.70 
  -3  -2  -1   46.20    4.20 
   3  -2   1   38.80    4.00 
   3  -2   1   45.60    5.80 
   3  -2   1   32.90    4.20 
   3  -2   1   38.50    3.20 
  -3  -2  -1   42.00    4.70 
   3  -2   1   34.50    9.70 
   3  -2   1   50.59    5.60 
  -3   2  -1   40.90    5.20 
   3   2   1   35.20    4.70 
  -3   2  -1   34.50    4.60 
   3   2   1   35.60    5.10 
   3   2   1   45.30    5.90 
  -3   2  -1   42.40    4.70 
   3   2   1   32.70    5.20 
  -3   2  -1   40.20    3.20 
   3   2   1   33.30    5.20 
   3   2   1   32.20    4.80 
  -3   2  -1   32.20    5.00 
  -3   2  -1   54.89    4.50 
  -3   2  -1   40.40    4.40 
   3   2   1   44.10    6.60 
   3   2   1   42.20    4.60 
   3   2   1   33.00    4.90 
  -3   2  -1   32.20    5.80 
  -3   2  -1   34.30    6.70 
  -3   2  -1   44.90    5.20 
  -3   2  -1   37.90    6.40 
  -3   2  -1   45.00    3.40 
  -3   2  -1   34.50    3.00 
   3   2   1   36.90    4.50 
   3   2   1   35.20    3.90 
  -3   2  -1   43.40    5.20 
  -3   2  -1   39.20    5.00 
  -3   2  -1   47.10    6.50 
   3   2   1   48.90    3.50 
   3   2   1   49.60    4.70 
  -3   2  -1   48.30    6.00 
   3   2   1   46.00    3.60 
   3   2   1   42.30    5.90 
   3   2   1   41.60    3.10 
  -3   2  -1   37.10    5.10 
   3   2   1   48.80    4.20 
   4  -2   1  206.78   14.70 
   4  -2   1  185.38   21.60 
  -4  -2  -1  199.48   11.20 
  -4  -2  -1  185.58   12.70 
  -4  -2  -1  224.88   13.00 
   4  -2   1  212.98   13.00 
   4  -2   1  208.78   13.50 
  -4  -2  -1  194.18   12.50 
   4  -2   1  190.78   11.10 
  -4  -2  -1  193.98    9.70 
  -4  -2  -1  196.68    9.80 
  -4  -2  -1  192.28   11.10 
   4  -2   1  200.88   12.50 
   4  -2   1  205.88   10.80 
   4  -2   1  181.08   11.60 
  -4  -2  -1  191.08   11.20 
  -4  -2  -1  192.98   10.70 
  -4  -2  -1  218.88   14.80 
  -4  -2  -1  211.38   12.30 
   4  -2   1  189.98   13.40 
  -4  -2  -1  189.18   11.80 
  -4  -2  -1  207.28   14.30 
  -4  -2  -1  204.78   14.50 
  -4  -2  -1  204.88   11.70 
  -4  -2  -1  200.48   13.30 
   4  -2   1  213.38   13.60 
  -4  -2  -1  220.48   13.90 
   4  -2   1  204.28   12.50 
   4  -2   1  203.28   10.90 
  -4  -2  -1  196.58   11.80 
   4  -2   1  191.58   12.20 
   4  -2   1  193.08   12.00 
   4  -2   1  213.38   14.00 
   4  -2   1  189.98   14.20 
   4  -2   1  199.68   11.40 
   4  -2   1  200.68   12.90 
   4   2   1  217.18   11.60 
   4   2   1  189.08   14.10 
  -4   2  -1  194.98   11.80 
  -4   2  -1  185.08   14.70 
   4   2   1  201.98   10.70 
   4   2   1  207.08    9.60 
   4   2   1  204.68   14.10 
   4   2   1  190.88   13.70 
   4   2   1  197.98   13.20 
  -4   2  -1  195.78   10.00 
  -4   2  -1  232.08   16.40 
   4   2   1  192.38   11.60 
  -4   2  -1  208.58   13.10 
  -4   2  -1  193.58   12.40 
  -4   2  -1  208.68   13.50 
  -4   2  -1  177.88   12.10 
  -4   2  -1  190.58   14.70 
   4   2   1  198.78   11.50 
   4   2   1  183.98   12.90 
   4   2   1  198.38   10.70 
  -4   2  -1  210.78   13.10 
  -4   2  -1  197.08   13.80 
  -4   2  -1  201.48   12.70 
   4   2   1  201.08   12.40 
   4   2   1  172.78   12.30 
  -4   2  -1  184.78   13.10 
  -4   2  -1  197.28   12.60 
   4   2   1  218.18   14.20 
  -4   2  -1  206.38   10.10 
  -5  -2  -1  248.88   18.30 
   5  -2   1  264.57   15.80 
  -5  -2  -1  256.57   17.60 
   5  -2   1  276.37   16.50 
  -5  -2  -1  282.37   16.20 
  -5  -2  -1  259.67   14.50 
   5  -2   1  270.27   16.00 
   5  -2   1  247.98   13.40 
  -5  -2  -1  254.87   13.90 
   5  -2   1  266.37   15.00 
   5  -2   1  260.47   17.40 
  -5  -2  -1  255.07   12.60 
  -5  -2  -1  270.37   15.10 
  -5  -2  -1  251.57   12.40 
   5  -2   1  220.98   17.30 
  -5  -2  -1  254.67   13.20 
  -5  -2  -1  233.88   16.40 
  -5  -2  -1  266.47   15.50 
   5  -2   1  247.58   14.80 
   5  -2   1  254.77   17.00 
   5  -2   1  276.67   19.00 
  -5  -2  -1  254.37   14.80 
  -5  -2  -1  241.48   17.50 
   5  -2   1  258.97   15.90 
   5  -2   1  258.37   14.40 
  -5  -2  -1  222.18   16.60 
  -5  -2  -1  251.97   16.30 
  -5  -2  -1  248.98   16.10 
   5  -2   1  245.68   27.60 
   5  -2   1  244.98   16.90 
   5   2   1  243.68   16.80 
   5   2   1  256.57   14.90 
  -5   2  -1  259.77   12.80 
  -5   2  -1  233.98   15.90 
  -5   2  -1  248.78   16.40 
  -5   2  -1  240.18   12.80 
   5   2   1  254.87   15.80 
   5   2   1  264.27   13.30 
  -5   2  -1  252.27   17.50 
  -5   2  -1  227.78   18.70 
   5   2   1  253.67   17.10 
   5   2   1  252.47   14.80 
   5   2   1  273.57   13.50 
  -5   2  -1  232.08   16.60 
  -5   2  -1  269.57   16.80 
  -5   2  -1  243.18   15.50 
   5   2   1  285.57   11.80 
   5   2   1  284.57   17.90 
   5   2   1  251.37   17.10 
  -5   2  -1  247.98   15.90 
   5   2   1  244.48   16.70 
  -5   2  -1  252.97   15.50 
  -5   2  -1  245.68   18.60 
  -5   2  -1  244.58   18.90 
   5   2   1  245.68   15.80 
  -6  -2  -1  575.44   32.30 
   6  -2   1  555.14   27.30 
  -6  -2  -1  611.44   34.00 
   6  -2   1  588.34   48.80 
  -6  -2  -1  553.34   34.10 
  -6  -2  -1  576.74   30.30 
  -6  -2  -1  553.74   29.00 
  -6  -2  -1  552.74   31.80 
   6  -2   1  551.04   32.10 
   6  -2   1  545.75   30.80 
  -6  -2  -1  579.74   25.70 
   6  -2   1  544.75   33.20 
  -6  -2  -1  573.04   32.90 
   6  -2   1  589.54   30.80 
  -6  -2  -1  560.74   26.10 
  -6  -2  -1  534.15   31.90 
  -6  -2  -1  554.44   30.80 
   6  -2   1  558.24   28.80 
  -6  -2  -1  578.34   27.00 
  -6  -2  -1  599.64   26.40 
   6  -2   1  588.54   32.90 
   6  -2   1  538.45   30.10 
  -6  -2  -1  593.64   27.90 
   6  -2   1  574.94   29.40 
  -6  -2  -1  579.84   28.80 
   6  -2   1  540.65   32.40 
  -6  -2  -1  610.34   31.80 
   6  -2   1  561.14   30.50 
   6  -2   1  589.84   29.30 
  -6  -2  -1  576.64   29.40 
  -6  -2  -1  563.54   30.70 
   6   2   1  572.14   32.60 
  -6   2  -1  622.74   36.00 
   6   2   1  575.04   32.80 
  -6   2  -1  560.64   26.60 
  -6   2  -1  628.14   33.80 
   6   2   1  612.24   32.80 
  -6   2  -1  594.64   33.00 
  -6   2  -1  581.94   35.50 
  -6   2  -1  566.04   30.20 
  -6   2  -1  568.44   34.70 
   6   2   1  700.83   30.90 
   6   2   1  595.24   29.80 
   6   2   1  576.84   30.90 
   6   2   1  554.44   32.20 
  -6   2  -1  562.04   27.00 
   6   2   1  564.64   30.60 
  -6   2  -1  553.54   31.10 
   6   2   1  556.54   29.40 
  -6   2  -1  560.54   30.90 
  -6   2  -1  610.14   32.30 
  -6   2  -1  594.74   32.20 
  -7  -2  -1 1014.40   54.09 
   7  -2   1 1057.39   48.20 
  -7  -2  -1 1098.39   55.89 
  -7  -2  -1 1076.99   50.89 
  -7  -2  -1 1085.89   50.79 
  -7  -2  -1 1051.79   53.59 
   7  -2   1 1033.70   51.99 
   7  -2   1 1057.19   50.49 
   7  -2   1 1110.49   56.59 
   7  -2   1 1099.09   54.99 
   7  -2   1 1043.00   52.79 
   7  -2   1 1001.10   54.79 
   7  -2   1 1042.50   52.59 
   7  -2   1 1003.30   51.99 
   7  -2   1 1071.19   55.79 
  -7  -2  -1 1104.79   52.49 
  -7  -2  -1 1122.19   56.49 
  -7  -2  -1 1089.79   53.19 
   7  -2   1 1099.89   49.10 
  -7  -2  -1 1085.39   47.90 
  -7  -2  -1 1052.39   54.09 
  -7  -2  -1 1112.89   57.99 
  -7  -2  -1 1099.09   48.70 
  -7  -2  -1 1125.59   50.59 
   7  -2   1 1069.79   50.39 
   7  -2   1 1018.90   75.59 
  -7  -2  -1 1079.49   52.69 
   7   2   1 1075.39   55.19 
  -7   2  -1 1006.80   57.99 
  -7   2  -1 1024.40   54.49 
   7   2   1 1087.09   53.09 
  -7   2  -1  996.90   53.79 
   7   2   1 1075.59   51.39 
  -7   2  -1 1033.20   55.69 
  -7   2  -1 1044.10   51.69 
   7   2   1 1114.99   54.89 
   7   2   1 1067.59   55.09 
  -7   2  -1 1122.99   54.49 
   7   2   1 1028.30   52.29 
  -7   2  -1 1030.00   53.19 
  -7   2  -1 1035.70   48.10 
   7   2   1 1096.09   51.49 
  -7   2  -1  999.10   52.59 
  -7   2  -1 1021.60   57.49 
   7   2   1  997.00   52.19 
  -7   2  -1 1029.50   48.10 
  -7   2  -1 1067.29   51.19 
  -7   2  -1  992.10   57.89 
  -8  -2  -1  351.46   21.00 
  -8  -2  -1  295.27   23.00 
  -8  -2  -1  314.77   24.60 
  -8  -2  -1  366.46   22.90 
   8  -2   1  333.07   22.90 
   8  -2   1  370.06   21.20 
  -8  -2  -1  328.27   22.00 
   8  -2   1  345.57   25.20 
  -8  -2  -1  351.06   24.80 
   8  -2   1  344.67   26.00 
  -8  -2  -1  316.07   23.60 
   8  -2   1  322.27   24.40 
  -8  -2  -1  359.36   23.70 
  -8  -2  -1  367.96   28.40 
  -8  -2  -1  318.07   20.30 
   8  -2   1  325.57   22.90 
   8  -2   1  374.76   43.40 
  -8  -2  -1  320.37   25.20 
   8  -2   1  326.87   22.30 
   8  -2   1  322.57   19.80 
  -8   2  -1  334.17   23.50 
   8   2   1  343.27   22.40 
   8   2   1  367.66   26.10 
  -8   2  -1  368.56   25.10 
   8   2   1  328.17   21.10 
  -8   2  -1  344.47   23.20 
   8   2   1  316.97   22.80 
   8   2   1  327.27   22.20 
   8   2   1  340.07   25.00 
  -8   2  -1  337.37   26.10 
  -8   2  -1  348.67   21.20 
   8   2   1  357.86   25.50 
  -8   2  -1  352.86   24.70 
  -8   2  -1  317.37   27.60 
  -8   2  -1  312.57   27.20 
  -8   2  -1  324.37   24.00 
   8   2   1  326.27   21.50 
  -8   2  -1  361.96   22.10 
   8   2   1  286.07   23.20 
  -9  -2  -1  550.04   37.00 
  -9  -2  -1  534.85   30.30 
  -9  -2  -1  482.25   34.00 
  -9  -2  -1  584.64   40.40 
   9  -2   1  564.74   36.80 
   9  -2   1  493.35   32.60 
  -9  -2  -1  528.65   36.40 
  -9  -2  -1  546.95   35.70 
  -9  -2  -1  605.24   33.80 
  -9  -2  -1  509.85   30.20 
   9  -2   1  557.14   34.00 
   9  -2   1  594.94   33.40 
   9  -2   1  547.45   58.69 
   9  -2   1  537.05   37.00 
  -9   2  -1  563.64   34.20 
   9   2   1  557.44   36.70 
  -9   2  -1  581.34   36.10 
  -9   2  -1  558.14   34.40 
  -9   2  -1  546.85   40.60 
   9   2   1  579.84   32.10 
   9   2   1  587.94   33.70 
   9   2   1  585.64   33.30 
   9   2   1  554.84   36.10 
  -9   2  -1  505.55   31.70 
   9   2   1  526.55   34.90 
  -9   2  -1  523.85   35.50 
  -9   2  -1  606.34   41.20 
   9   2   1  500.35   35.50 
   9   2   1  556.84   34.10 
  -9   2  -1  587.84   35.90 
   9   2   1  571.14   56.89 
   9   2   1  528.75   31.70 
  10  -2   1   80.99   13.70 
 -10  -2  -1   87.69   15.40 
 -10  -2  -1  106.19   12.60 
 -10  -2  -1   81.69   15.00 
 -10  -2  -1  102.79   14.80 
  10  -2   1  113.79   34.90 
 -10  -2  -1   86.09   16.50 
  10  -2   1  113.19   15.00 
  10  -2   1   75.59   14.80 
  10  -2   1   96.29   14.40 
  10  -2   1  110.59   19.40 
 -10  -2  -1  116.69   18.20 
  10   2   1   90.99   13.80 
 -10   2  -1  112.49   17.80 
 -10   2  -1   83.29   14.50 
  10   2   1   68.09   15.40 
 -10   2  -1   93.59   14.70 
 -10   2  -1   89.09   18.60 
 -10   2  -1   70.09   14.70 
  10   2   1   86.49   14.40 
 -10   2  -1   71.59   17.70 
  10   2   1   83.59   12.50 
  10   2   1  102.79   31.50 
  10   2   1   85.29   15.00 
 -10   2  -1   68.59   14.60 
 -10   2  -1  106.79   16.70 
  10   2   1   91.79   13.30 
  10   2   1  111.89   17.80 
 -10   3   1  145.29   23.10 
  -9  -3   1  169.18   21.90 
   9  -3  -1  185.18   19.20 
  -9  -3   1  173.88   18.30 
  -9  -3   1  164.28   19.60 
   9  -3  -1  171.78   22.70 
  -9  -3   1  185.98   20.60 
   9  -3  -1  166.38   17.20 
   9  -3  -1  183.98   18.40 
  -9  -3   1  219.38   23.40 
  -9  -3   1  208.48   17.90 
   9  -3  -1  176.78   20.30 
  -9  -3   1  161.88   15.40 
  -9  -3   1  192.48   18.40 
   9  -3  -1  177.48   17.60 
   9  -3  -1  183.98   39.60 
  -9   3   1  175.08   15.20 
   9   3  -1  171.68   20.20 
  -9   3   1  180.98   17.60 
  -9   3   1  175.18   19.70 
   9   3  -1  175.68   21.10 
  -9   3   1  191.48   21.20 
  -9   3   1  144.39   21.10 
   9   3  -1  179.28   14.60 
   9   3  -1  190.78   21.20 
   9   3  -1  202.28   17.70 
  -9   3   1  200.88   20.00 
   9   3  -1  198.88   19.40 
  -9   3   1  205.18   19.20 
   9   3  -1  199.58   17.80 
  -9   3   1  158.78   18.50 
  -9   3   1  185.08   24.20 
   9   3  -1  188.98   16.10 
  -8  -3   1  132.49   14.90 
   8  -3  -1  107.89   13.50 
   8  -3  -1   99.19   12.20 
   8  -3  -1  102.79   14.40 
   8  -3  -1   93.09   14.40 
   8  -3  -1   83.79   24.60 
  -8  -3   1  115.49   15.20 
  -8  -3   1  124.79   15.30 
   8  -3  -1   93.19   15.20 
  -8  -3   1  106.49   15.40 
   8  -3  -1   90.39   11.60 
  -8  -3   1  113.99   12.60 
   8  -3  -1  105.09   11.20 
   8  -3  -1  111.89   13.10 
  -8  -3   1   96.69   14.40 
  -8  -3   1  113.89   15.10 
  -8  -3   1   96.09   12.20 
  -8  -3   1   81.29   10.50 
  -8  -3   1   88.59   14.80 
  -8  -3   1   87.89   10.70 
   8   3  -1   87.49   11.00 
   8   3  -1   81.49   12.70 
  -8   3   1  118.49   14.40 
  -8   3   1   92.09   11.60 
   8   3  -1  100.09   14.50 
   8   3  -1  100.49   12.80 
   8   3  -1  106.19   13.30 
  -8   3   1   83.19   15.70 
  -8   3   1  100.99   13.60 
   8   3  -1   94.89   12.30 
  -8   3   1   96.39   13.00 
  -8   3   1  143.59   15.50 
  -8   3   1  118.59   12.60 
  -8   3   1   99.19   14.40 
  -8   3   1   97.29   14.70 
   8   3  -1  112.69   14.80 
   8   3  -1  103.39   10.80 
   8   3  -1  100.89   12.40 
  -8   3   1  110.39   16.70 
   7  -3  -1  318.27   24.00 
  -7  -3   1  358.26   24.00 
   7  -3  -1  343.97   19.80 
  -7  -3   1  368.36   21.90 
   7  -3  -1  363.96   26.20 
  -7  -3   1  380.06   25.00 
   7  -3  -1  358.16   21.20 
  -7  -3   1  333.37   24.40 
  -7  -3   1  380.86   20.90 
   7  -3  -1  339.17   39.90 
  -7  -3   1  346.17   26.10 
  -7  -3   1  360.36   23.70 
   7  -3  -1  341.57   22.20 
   7  -3  -1  352.86   22.20 
  -7  -3   1  398.86   22.20 
   7  -3  -1  384.36   25.70 
  -7  -3   1  355.56   25.80 
   7  -3  -1  382.56   22.80 
  -7  -3   1  357.26   22.60 
  -7  -3   1  358.66   24.10 
   7  -3  -1  349.47   23.00 
  -7  -3   1  371.36   21.60 
  -7   3   1  409.66   28.00 
  -7   3   1  384.26   24.80 
  -7   3   1  355.16   23.30 
   7   3  -1  347.57   24.20 
   7   3  -1  370.26   20.60 
   7   3  -1  349.27   23.00 
   7   3  -1  391.36   21.80 
  -7   3   1  321.97   22.60 
   7   3  -1  349.07   22.10 
   7   3  -1  342.37   22.50 
  -7   3   1  365.56   24.90 
  -7   3   1  338.77   23.50 
  -7   3   1  323.67   26.50 
  -7   3   1  385.26   25.50 
  -7   3   1  378.26   27.70 
  -7   3   1  358.26   21.90 
   7   3  -1  360.86   23.00 
  -7   3   1  335.17   21.80 
  -7   3   1  387.76   23.50 
  -7   3   1  362.86   18.90 
   7   3  -1  380.66   25.50 
   6  -3  -1 1063.09   56.39 
   6  -3  -1 1086.79   54.89 
   6  -3  -1 1086.79   52.69 
  -6  -3   1 1137.19   56.19 
  -6  -3   1 1107.09   55.29 
  -6  -3   1 1089.79   48.10 
   6  -3  -1 1099.59   54.39 
  -6  -3   1 1024.90   51.49 
  -6  -3   1 1121.29   51.79 
  -6  -3   1 1080.99   51.59 
   6  -3  -1 1100.39   73.79 
   6  -3  -1 1140.09   50.79 
  -6  -3   1 1024.10   53.49 
   6  -3  -1 1085.99   52.39 
   6  -3  -1 1090.09   55.49 
  -6  -3   1 1106.19   53.09 
  -6  -3   1 1139.89   56.49 
  -6  -3   1 1068.39   51.19 
  -6  -3   1 1114.09   54.59 
   6  -3  -1 1007.40   51.19 
  -6  -3   1 1045.00   53.79 
   6  -3  -1 1077.19   53.19 
   6  -3  -1 1076.09   52.39 
   6  -3  -1 1088.29   49.20 
  -6  -3   1 1044.00   54.59 
   6   3  -1 1031.70   50.19 
   6   3  -1 1113.99   52.39 
  -6   3   1 1109.19   57.19 
  -6   3   1 1079.69   52.19 
   6   3  -1 1084.79   53.39 
  -6   3   1 1084.79   52.39 
  -6   3   1 1053.09   52.89 
  -6   3   1 1143.19   54.69 
  -6   3   1 1119.49   54.89 
  -6   3   1 1128.39   53.39 
   6   3  -1 1095.49   54.19 
   6   3  -1 1056.99   55.19 
  -6   3   1 1125.29   57.69 
   6   3  -1  997.80   52.39 
  -6   3   1 1082.29   49.20 
  -6   3   1 1155.88   54.09 
   6   3  -1 1082.09   51.39 
  -6   3   1 1060.59   54.99 
  -6   3   1 1088.99   52.29 
  -6   3   1 1097.69   57.29 
   6   3  -1 1029.50   52.89 
   5  -3  -1 2210.78  108.69 
  -5  -3   1 2316.27  108.99 
   5  -3  -1 2361.76  114.39 
  -5  -3   1 2342.87  108.59 
   5  -3  -1 2284.77  109.79 
   5  -3  -1 2477.65  106.09 
  -5  -3   1 2353.06  107.89 
  -5  -3   1 2342.27  106.79 
  -5  -3   1 2385.96  106.69 
  -5  -3   1 2390.56  107.79 
   5  -3  -1 2394.76  106.19 
  -5  -3   1 2469.35  105.89 
   5  -3  -1 2380.36  106.99 
   5  -3  -1 2358.06  108.39 
   5  -3  -1 2311.07  102.99 
  -5  -3   1 2410.86  102.89 
  -5  -3   1 2246.18  106.99 
  -5  -3   1 2347.77  105.19 
   5  -3  -1 2394.66  105.79 
  -5  -3   1 2352.36  105.59 
  -5  -3   1 2315.37  105.69 
  -5  -3   1 2486.35  109.49 
   5  -3  -1 2389.56  126.39 
   5  -3  -1 2344.77  104.79 
   5  -3  -1 2392.86  106.69 
  -5  -3   1 2367.56  102.29 
   5   3  -1 2340.87  106.99 
   5   3  -1 2323.87  104.09 
  -5   3   1 2537.85  108.29 
   5   3  -1 2360.16  107.19 
  -5   3   1 2409.56  106.49 
  -5   3   1 2500.75  107.59 
  -5   3   1 2386.96  103.59 
   5   3  -1 2332.17  106.59 
  -5   3   1 2378.76  108.29 
   5   3  -1 2422.36  107.59 
  -5   3   1 2374.46  103.29 
  -5   3   1 2357.76  110.19 
  -5   3   1 2363.16  107.79 
  -5   3   1 2420.76  106.69 
   5   3  -1 2343.27  105.09 
  -5   3   1 2391.66  106.79 
   5   3  -1 2460.15  109.69 
  -5   3   1 2463.35  110.89 
   5   3  -1 2373.16  105.09 
  -5   3   1 2368.06  110.39 
   5   3  -1 2267.37  105.59 
   5   3  -1 2321.37  108.69 
  -5   3   1 2351.16  106.09 
  -5   3   1 2411.36  108.19 
  -5   3   1 2475.15  106.39 
   5   3  -1 2308.97  106.99 
  -4  -3   1 1027.20   47.20 
   4  -3  -1 1063.19   49.40 
  -4  -3   1 1009.90   44.90 
  -4  -3   1 1001.90   46.10 
   4  -3  -1  998.50   61.79 
  -4  -3   1  992.80   49.00 
   4  -3  -1  978.80   47.00 
  -4  -3   1 1075.69   49.00 
   4  -3  -1 1026.10   47.90 
  -4  -3   1 1039.80   45.80 
  -4  -3   1  953.10   47.40 
  -4  -3   1 1018.40   44.60 
  -4  -3   1  970.60   47.30 
   4  -3  -1 1026.70   47.30 
   4  -3  -1 1016.70   47.50 
   4  -3  -1 1024.60   44.50 
   4  -3  -1 1058.49   47.10 
  -4  -3   1 1032.10   47.10 
   4  -3  -1 1037.50   51.09 
   4  -3  -1  961.20   50.19 
  -4  -3   1  952.80   48.10 
   4  -3  -1 1086.19   47.00 
   4  -3  -1 1020.60   46.60 
  -4  -3   1 1002.90   49.50 
  -4  -3   1 1043.20   47.20 
  -4  -3   1 1028.00   44.80 
   4  -3  -1  974.60   44.10 
  -4  -3   1  958.90   49.30 
   4  -3  -1  934.41   49.80 
   4   3  -1 1005.50   48.90 
  -4   3   1 1023.30   47.40 
   4   3  -1 1004.20   43.60 
  -4   3   1  972.10   48.10 
  -4   3   1 1068.19   50.49 
  -4   3   1  983.50   48.60 
   4   3  -1 1003.80   46.60 
  -4   3   1 1000.50   47.60 
   4   3  -1 1004.90   47.90 
  -4   3   1 1032.20   48.90 
   4   3  -1  995.20   48.10 
   4   3  -1 1034.50   46.50 
  -4   3   1  993.50   48.60 
   4   3  -1  958.90   47.70 
  -4   3   1 1059.39   51.09 
   4   3  -1  986.70   48.10 
  -4   3   1 1010.70   47.70 
  -4   3   1  947.91   50.09 
   4   3  -1  969.30   47.60 
   4   3  -1 1014.80   45.30 
   4   3  -1 1013.20   50.09 
  -4   3   1  994.50   44.40 
   4   3  -1 1008.10   49.50 
  -4   3   1 1022.00   47.50 
  -4   3   1  991.10   47.30 
  -3  -3   1 1945.81   88.19 
   3  -3  -1 1893.71   90.49 
   3  -3  -1 2027.20   87.79 
   3  -3  -1 2029.90   87.69 
   3  -3  -1 1818.12   88.59 
  -3  -3   1 2004.00   87.39 
  -3  -3   1 1999.40   87.79 
   3  -3  -1 2010.10   90.79 
   3  -3  -1 1975.30   87.19 
  -3  -3   1 2069.39   85.89 
  -3  -3   1 2056.39   89.59 
  -3  -3   1 1979.40   87.69 
   3  -3  -1 1940.31   84.49 
  -3  -3   1 1978.00   86.99 
   3  -3  -1 2093.19  101.39 
   3  -3  -1 1833.62   91.89 
  -3  -3   1 1896.91   88.09 
  -3  -3   1 1944.71   85.99 
  -3  -3   1 1943.61   88.49 
   3  -3  -1 2052.39   87.39 
  -3  -3   1 1949.80   88.59 
  -3  -3   1 1904.71   84.69 
   3  -3  -1 2013.70   86.59 
   3  -3  -1 1985.80   86.69 
   3  -3  -1 1983.80   87.09 
   3  -3  -1 1806.72   87.19 
  -3  -3   1 2012.40   87.49 
   3  -3  -1 1986.50   87.59 
  -3  -3   1 1926.01   85.99 
  -3  -3   1 1765.02   89.39 
  -3  -3   1 1994.70   85.59 
  -3   3   1 1974.10   87.99 
   3   3  -1 1821.62   85.59 
  -3   3   1 2008.70   87.09 
   3   3  -1 1911.71   88.59 
  -3   3   1 2142.89   87.99 
   3   3  -1 1958.40   89.69 
  -3   3   1 1942.91   90.29 
  -3   3   1 1877.71   88.49 
  -3   3   1 1953.50   87.69 
   3   3  -1 2044.00   85.39 
   3   3  -1 1979.00   88.29 
   3   3  -1 2005.70   87.19 
   3   3  -1 1944.91   84.59 
  -3   3   1 1986.00   87.79 
  -3   3   1 1926.91   89.19 
   3   3  -1 2027.50   87.49 
  -3   3   1 2033.30   88.09 
   3   3  -1 2067.69   87.49 
  -3   3   1 1923.71   90.79 
   3   3  -1 1972.20   84.69 
   3   3  -1 2014.40   86.79 
  -3   3   1 2023.20   88.29 
   3   3  -1 2009.60   86.39 
   3   3  -1 1918.01   87.29 
   3   3  -1 2056.19   86.09 
  -3   3   1 2012.00   89.59 
   3   3  -1 1986.90   84.59 
   3   3  -1 1953.40   88.39 
   2  -3  -1  206.68   18.60 
  -2  -3   1  183.98   11.60 
  -2  -3   1  180.28   11.70 
  -2  -3   1  201.08   12.60 
  -2  -3   1  194.48   11.80 
  -2  -3   1  190.88   10.40 
   2  -3  -1  187.68   10.80 
  -2  -3   1  181.08   12.20 
   2  -3  -1  191.98   23.70 
   2  -3  -1  187.78   10.80 
   2  -3  -1  172.78   11.20 
   2  -3  -1  199.38   11.30 
  -2  -3   1  197.68    9.80 
   2  -3  -1  191.88   11.30 
   2  -3  -1  179.48   16.10 
   2  -3  -1  185.68   11.00 
  -2  -3   1  195.38   10.40 
   2  -3  -1  197.38   10.10 
  -2  -3   1  193.08   12.60 
   2  -3  -1  176.88    9.80 
  -2  -3   1  202.28   11.30 
   2  -3  -1  194.58   10.70 
   2  -3  -1  233.38   14.40 
   2  -3  -1  173.48   11.40 
  -2  -3   1  197.38   10.70 
  -2  -3   1  191.48   11.20 
  -2  -3   1  187.98   11.90 
   2  -3  -1  196.88   13.30 
   2  -3  -1  196.98   14.70 
  -2  -3   1  187.98   11.10 
   2  -3  -1  186.28   12.30 
  -2  -3   1  184.88   13.00 
   2  -3  -1  206.48   11.30 
  -2   3   1  178.18   15.00 
   2   3  -1  137.69   12.30 
  -2   3   1  191.28   11.40 
   2   3  -1  188.08    9.70 
  -2   3   1  189.28   11.20 
  -2   3   1  190.78   10.40 
   2   3  -1  191.78   14.00 
  -2   3   1  180.48   14.20 
   2   3  -1  201.98   19.30 
   2   3  -1  208.58   11.30 
  -2   3   1  196.08   12.00 
  -2   3   1  179.28   11.60 
   2   3  -1  194.58   11.80 
  -2   3   1  210.68   11.30 
   2   3  -1  164.58   11.90 
  -2   3   1  198.38    9.30 
  -2   3   1  193.78   11.10 
   2   3  -1  193.68   11.90 
  -2   3   1  187.28   14.10 
  -2   3   1  192.48   10.80 
   2   3  -1  184.48   10.90 
  -2   3   1  187.38   13.80 
   2   3  -1  176.18   10.10 
  -2   3   1  189.48   11.40 
   2   3  -1  181.38   10.40 
  -2   3   1  185.48   11.90 
  -2   3   1  217.28   11.70 
   2   3  -1  179.28    9.60 
  -2   3   1  188.08    9.10 
   2   3  -1  185.88   10.70 
   2   3  -1  200.38   13.50 
   2   3  -1  180.78   11.80 
   2   3  -1  154.38   12.60 
  -2   3   1  196.08   11.70 
   2   3  -1  200.98   10.00 
  -2   3   1  196.98   10.20 
  -2   3   1  188.28   12.90 
   2   3  -1  191.28    9.70 
   1  -3  -1  949.31   41.80 
  -1  -3   1  912.31   41.90 
  -1  -3   1  932.01   41.90 
  -1  -3   1  937.11   44.10 
  -1  -3   1  934.81   41.70 
   1  -3  -1  931.51   53.69 
   1  -3  -1  925.81   41.50 
   1  -3  -1  911.41   41.80 
   1  -3  -1  951.00   42.50 
  -1  -3   1  949.21   43.70 
   1  -3  -1  951.60   41.40 
  -1  -3   1  905.81   42.60 
   1  -3  -1  959.80   42.40 
   1  -3  -1  768.92   58.89 
  -1  -3   1  984.30   42.50 
   1  -3  -1  928.21   42.30 
  -1  -3   1  944.01   41.70 
  -1  -3   1  960.70   41.70 
   1  -3  -1  899.51   40.80 
   1  -3  -1  933.21   46.20 
   1  -3  -1  902.51   43.70 
  -1  -3   1  849.52   42.20 
  -1  -3   1  925.61   43.00 
  -1  -3   1  839.92   58.49 
  -1  -3   1  821.22   46.70 
   1  -3  -1  929.31   41.70 
   1  -3  -1  930.01   43.60 
   1  -3  -1  961.80   40.80 
  -1  -3   1  936.01   42.80 
  -1  -3   1  904.61   42.10 
  -1  -3   1  918.21   51.09 
   1  -3  -1  894.71   42.40 
   1  -3  -1  936.21   47.20 
   1  -3  -1  969.00   45.00 
  -1  -3   1  892.61   41.40 
  -1   3   1  902.11   41.30 
  -1   3   1  946.31   43.10 
   1   3  -1  890.51   40.00 
  -1   3   1  909.01   46.10 
   1   3  -1  912.21   56.29 
  -1   3   1  969.60   41.50 
  -1   3   1  946.41   44.40 
  -1   3   1  890.21   41.00 
   1   3  -1  945.51   43.60 
   1   3  -1  917.11   43.60 
   1   3  -1  998.50   41.50 
  -1   3   1  950.30   41.60 
   1   3  -1  921.11   42.70 
  -1   3   1  959.80   41.10 
  -1   3   1  961.30   40.50 
   1   3  -1  984.60   43.30 
  -1   3   1  944.61   40.00 
  -1   3   1  928.51   47.20 
   1   3  -1  911.51   40.50 
  -1   3   1  964.20   40.60 
   1   3  -1  945.61   41.60 
  -1   3   1  775.22   49.20 
  -1   3   1  942.81   41.80 
  -1   3   1  916.11   40.30 
   1   3  -1  912.81   44.30 
   1   3  -1  906.21   45.40 
   1   3  -1  923.71   40.80 
   1   3  -1  914.31   42.30 
  -1   3   1  933.11   41.50 
  -1   3   1  922.91   41.40 
  -1   3   1  824.52   61.39 
  -1   3   1  912.11   42.20 
   1   3  -1  933.41   42.60 
   1   3  -1  937.11   41.70 
   1   3  -1  943.61   39.90 
  -1   3   1  953.30   42.60 
  -1   3   1  891.61   48.70 
   1   3  -1  772.62   55.89 
   1   3  -1  918.21   40.80 
  -1   3   1  974.30   42.80 
   1   3  -1  969.50   41.30 
  -1   3   1  907.01   41.00 
  -1   3   1  911.41   44.70 
   1   3  -1  915.21   44.30 
   1   3  -1  948.31   41.50 
   1   3  -1  955.50   39.80 
  -1   3   1  933.61   42.30 
   1   3  -1  961.80   47.50 
   1   3  -1  952.60   42.20 
  -1   3   1  955.90   40.90 
   1   3  -1  929.01   41.60 
  -1   3   1  933.71   42.60 
   0  -3  -1  300.27   16.40 
   0  -3  -1  332.27   16.00 
   0  -3  -1  340.57   19.20 
   0  -3   1  334.47   16.20 
   0  -3  -1  258.57   30.00 
   0  -3   1  328.57   18.50 
   0  -3   1  324.67   35.00 
   0  -3  -1  329.57   16.20 
   0  -3   1  329.67   16.80 
   0  -3   1  330.97   15.60 
   0  -3   1  300.47   31.20 
   0  -3   1  335.07   15.90 
   0  -3   1  330.77   14.70 
   0  -3  -1  312.87   15.80 
   0  -3  -1  304.17   16.90 
   0  -3  -1  324.97   16.60 
   0  -3  -1  333.07   16.30 
   0  -3  -1  315.07   14.70 
   0  -3   1  236.58   19.80 
   0  -3  -1  324.07   19.10 
   0  -3  -1  319.67   15.40 
   0  -3   1  319.97   15.90 
   0  -3  -1  313.37   15.90 
   0  -3   1  350.36   20.40 
   0  -3   1  306.87   16.60 
   0  -3  -1  271.17   23.60 
   0  -3  -1  317.87   16.00 
   0  -3  -1  326.07   15.00 
   0  -3   1  331.47   16.00 
   0  -3   1  278.57   16.10 
   0  -3   1  313.47   16.10 
   0  -3   1  333.77   18.20 
   0  -3   1  302.17   16.10 
   0  -3   1  315.47   14.80 
   0  -3  -1  324.27   22.50 
   0  -3  -1  307.77   16.60 
   0  -3  -1  312.37   15.90 
   0  -3  -1  295.57   15.60 
   0   3   1  310.47   16.00 
   0   3   1  323.27   15.10 
   0   3   1  312.27   16.00 
   0   3   1  333.37   14.80 
   0   3  -1  232.88   30.10 
   0   3  -1  278.27   21.50 
   0   3   1  315.67   16.00 
   0   3   1  330.27   17.70 
   0   3   1  323.47   15.20 
   0   3   1  318.67   19.50 
   0   3   1  284.17   14.60 
   0   3  -1  300.87   15.80 
   0   3   1  316.27   13.80 
   0   3  -1  331.67   14.50 
   0   3   1  317.37   17.70 
   0   3  -1  297.47   15.70 
   0   3  -1  319.77   15.50 
   0   3  -1  329.67   14.90 
   0   3   1  304.57   16.60 
   0   3   1  326.67   15.70 
   0   3  -1  293.67   16.20 
   0   3  -1  327.07   16.10 
   0   3  -1  311.67   14.80 
   0   3   1  332.07   15.50 
   0   3  -1  319.77   16.70 
   0   3  -1  340.97   16.40 
   0   3  -1  307.77   15.90 
   0   3  -1  309.57   15.20 
   0   3  -1  309.97   17.40 
   0   3   1  301.27   23.80 
   0   3   1  318.57   15.90 
   0   3  -1  319.47   14.70 
   0   3  -1  307.87   18.00 
   0   3  -1  325.87   15.80 
   0   3  -1  303.57   16.50 
   0   3   1  306.77   15.70 
   0   3  -1  319.87   14.40 
   0   3  -1  311.77   15.40 
   0   3   1  315.87   19.00 
   0   3  -1  299.37   22.80 
   0   3   1  299.67   14.80 
   0   3   1  326.37   17.10 
   0   3  -1  310.67   16.00 
   0   3   1  267.77   38.90 
   0   3   1  319.67   16.50 
   0   3   1  316.57   14.70 
   0   3   1  302.07   18.90 
   0   3   1  329.67   15.80 
   0   3   1  331.77   16.30 
   0   3  -1  249.08   31.50 
   1  -3   1 4499.95  195.98 
   1  -3   1 4544.35  194.78 
   1  -3   1 4573.14  196.48 
   1  -3   1 4424.76  196.18 
  -1  -3  -1 4596.84  195.18 
  -1  -3  -1 4682.23  195.78 
  -1  -3  -1 4606.64  195.78 
   1  -3   1 4548.04  194.98 
   1  -3   1 4349.96  201.38 
  -1  -3  -1 4748.23  193.38 
  -1  -3  -1 4568.24  195.18 
  -1  -3  -1 4552.94  193.68 
   1  -3   1 4552.24  195.48 
   1  -3   1 4687.43  195.88 
  -1  -3  -1 4767.02  196.18 
  -1  -3  -1 4496.75  196.88 
  -1  -3  -1 4676.93  195.38 
   1  -3   1 4530.65  196.18 
  -1  -3  -1 4557.44  195.48 
   1  -3   1 4646.24  193.48 
  -1  -3  -1 4635.34  196.98 
  -1  -3  -1 4573.34  195.08 
   1  -3   1 4598.74  195.88 
   1  -3   1 4569.64  194.88 
   1  -3   1 4615.14  195.58 
  -1  -3  -1 4524.15  195.38 
  -1  -3  -1 4191.18  211.48 
   1  -3   1 4495.85  196.68 
  -1  -3  -1 4487.65  196.48 
   1  -3   1 4707.73  194.18 
  -1  -3  -1 3986.10  194.58 
  -1  -3  -1 4513.15  199.58 
   1  -3   1 4539.95  195.48 
  -1  -3  -1 4344.67  196.68 
   1  -3   1 4522.45  196.28 
   1  -3   1 4432.96  194.68 
   1  -3   1 4011.50  204.98 
  -1  -3  -1 4603.24  195.08 
   1   3   1 4518.65  193.98 
  -1   3  -1 4578.24  195.08 
  -1   3  -1 4724.93  195.68 
   1   3   1 4721.93  195.48 
   1   3   1 4423.46  195.38 
  -1   3  -1 4533.15  195.38 
   1   3   1 4283.77  194.38 
   1   3   1 4462.85  195.88 
  -1   3  -1 4756.72  196.18 
  -1   3  -1 4609.54  194.58 
   1   3   1 4572.24  195.08 
   1   3   1 4543.35  204.58 
   1   3   1 4602.44  194.98 
  -1   3  -1 4592.84  195.38 
  -1   3  -1 4507.65  195.58 
  -1   3  -1 4778.32  195.18 
  -1   3  -1 4648.83  195.08 
  -1   3  -1 4626.84  194.58 
  -1   3  -1 4588.84  200.28 
   1   3   1 4728.73  195.08 
   1   3   1 4365.56  200.48 
  -1   3  -1 4629.64  208.88 
  -1   3  -1 4694.03  194.08 
   1   3   1 4676.83  194.38 
   1   3   1 4382.76  197.28 
  -1   3  -1 4609.14  194.98 
   1   3   1 4581.24  195.18 
  -1   3  -1 4293.37  200.28 
  -1   3  -1 4722.43  195.88 
  -1   3  -1 4780.62  195.38 
  -1   3  -1 4475.15  195.78 
   1   3   1 4604.94  198.18 
  -1   3  -1 4244.48  197.78 
   1   3   1 4550.94  199.28 
   1   3   1 4564.14  195.38 
   1   3   1 4580.14  195.08 
   1   3   1 4288.97  195.98 
   1   3   1 4509.25  196.38 
  -1   3  -1 4633.94  196.68 
  -1   3  -1 4512.95  196.48 
  -1   3  -1 4643.54  194.78 
  -1   3  -1 4355.76  195.98 
  -1   3  -1 4576.84  195.68 
  -1   3  -1 4354.16  193.78 
   1   3   1 4420.06  199.88 
  -1   3  -1 4549.65  194.28 
   1   3   1 4649.13  193.78 
   1   3   1 4571.04  195.18 
   1   3   1 4662.43  195.78 
  -2  -3  -1 1847.32   85.49 
   2  -3   1 1838.52   82.79 
  -2  -3  -1 1898.61   81.39 
  -2  -3  -1 1950.50   85.09 
  -2  -3  -1 1855.21   81.99 
  -2  -3  -1 1850.51   80.69 
  -2  -3  -1 1877.61   82.09 
   2  -3   1 1840.72   82.29 
  -2  -3  -1 1833.82   81.59 
   2  -3   1 1977.10   81.99 
   2  -3   1 1871.71   80.59 
   2  -3   1 1890.21  102.39 
  -2  -3  -1 1845.52   80.79 
  -2  -3  -1 1822.72   82.19 
   2  -3   1 1877.01   82.59 
  -2  -3  -1 1807.52   84.99 
   2  -3   1 1883.31   98.09 
  -2  -3  -1 1870.01   82.19 
   2  -3   1 1933.21   82.89 
   2  -3   1 1891.71   80.79 
  -2  -3  -1 1751.62   81.99 
   2  -3   1 1814.92   82.49 
  -2  -3  -1 1878.51   83.19 
   2  -3   1 1858.11   83.59 
  -2  -3  -1 1942.41   81.59 
   2  -3   1 1887.91   81.89 
   2  -3   1 1820.82   82.99 
  -2  -3  -1 1823.52   82.29 
   2  -3   1 1855.01   86.19 
   2  -3   1 1837.72   81.69 
   2  -3   1 1884.31   81.99 
  -2  -3  -1 1901.01   82.29 
  -2  -3  -1 1774.32   79.49 
  -2  -3  -1 1810.52   79.49 
   2  -3   1 1835.22   83.29 
   2   3   1 1875.91   80.89 
  -2   3  -1 1856.21   82.49 
  -2   3  -1 1926.71   81.89 
   2   3   1 1903.71   80.59 
  -2   3  -1 1844.62   81.89 
  -2   3  -1 1826.72   83.49 
  -2   3  -1 1872.51   82.19 
   2   3   1 2183.18   81.19 
   2   3   1 1680.73   83.39 
   2   3   1 1893.31   81.19 
  -2   3  -1 1881.61   80.29 
   2   3   1 1873.01   81.59 
  -2   3  -1 1933.01   81.59 
   2   3   1 1789.92   81.29 
  -2   3  -1 1879.41   82.09 
  -2   3  -1 1817.72   83.09 
  -2   3  -1 1917.01   82.19 
   2   3   1 1846.52   81.39 
  -2   3  -1 1855.91   83.39 
  -2   3  -1 1757.82   83.09 
  -2   3  -1 1932.61   82.79 
   2   3   1 1748.82   85.99 
  -2   3  -1 1898.01   82.49 
   2   3   1 1906.61   83.59 
  -2   3  -1 1910.01   83.09 
   2   3   1 1877.81   81.69 
   2   3   1 1885.31   81.39 
  -2   3  -1 1864.21   85.79 
   2   3   1 1564.44   86.59 
   2   3   1 1849.42   82.39 
  -2   3  -1 1849.42   93.49 
   2   3   1 1899.11   82.09 
  -2   3  -1 1829.92   89.59 
   2   3   1 1864.61   80.99 
   2   3   1 1882.11   80.39 
  -2   3  -1 1809.12   81.09 
  -3  -3  -1 2805.22  120.79 
  -3  -3  -1 2797.02  124.59 
  -3  -3  -1 2797.12  122.09 
  -3  -3  -1 2917.41  121.09 
   3  -3   1 2627.34  124.29 
   3  -3   1 2813.02  121.19 
  -3  -3  -1 2958.60  122.39 
   3  -3   1 2894.41  124.29 
  -3  -3  -1 2848.01  121.79 
   3  -3   1 2689.93  123.49 
   3  -3   1 2840.82  122.59 
  -3  -3  -1 2861.51  122.89 
   3  -3   1 2919.51  123.69 
   3  -3   1 2857.61  122.59 
  -3  -3  -1 2751.72  122.99 
  -3  -3  -1 2538.55  127.39 
   3  -3   1 2867.81  123.89 
   3  -3   1 2911.11  123.39 
   3  -3   1 2875.51  125.19 
  -3  -3  -1 2772.22  124.19 
  -3  -3  -1 2665.33  122.59 
  -3  -3  -1 2859.71  126.29 
  -3  -3  -1 2813.12  123.39 
   3  -3   1 2852.71  127.49 
   3  -3   1 2881.11  120.59 
   3  -3   1 2632.64  125.79 
  -3  -3  -1 2679.93  123.59 
   3  -3   1 2951.30  141.39 
   3  -3   1 2878.21  123.59 
  -3  -3  -1 2888.71  123.59 
   3  -3   1 2837.12  121.19 
  -3  -3  -1 2860.91  122.89 
   3  -3   1 2739.03  123.19 
  -3  -3  -1 2740.23  121.59 
  -3   3  -1 2815.62  124.49 
  -3   3  -1 2754.42  123.79 
  -3   3  -1 2774.42  123.49 
   3   3   1 2781.52  122.49 
  -3   3  -1 2859.41  120.69 
  -3   3  -1 2923.71  127.69 
   3   3   1 2882.51  121.59 
   3   3   1 2812.72  123.29 
   3   3   1 2761.42  125.39 
   3   3   1 2749.32  121.99 
   3   3   1 2729.93  126.99 
   3   3   1 3070.49  124.39 
   3   3   1 2628.34  123.19 
   3   3   1 2705.23  123.39 
  -3   3  -1 2847.11  123.49 
  -3   3  -1 2848.22  129.39 
  -3   3  -1 2832.22  121.89 
   3   3   1 2791.22  125.09 
   3   3   1 2965.10  121.99 
  -3   3  -1 2802.42  123.79 
  -3   3  -1 2782.22  125.59 
   3   3   1 2791.42  121.19 
   3   3   1 2918.61  121.79 
  -3   3  -1 2849.91  124.89 
   3   3   1 2866.41  124.89 
  -3   3  -1 2939.01  125.39 
   3   3   1 2807.32  124.39 
   3   3   1 2849.61  123.49 
  -3   3  -1 2835.62  123.29 
   3   3   1 2882.01  122.39 
  -3   3  -1 2936.71  123.59 
   3   3   1 2717.13  123.79 
   3   3   1 2748.12  122.19 
  -3   3  -1 2853.31  124.09 
  -4  -3  -1  474.85   23.90 
   4  -3   1  502.35   24.30 
   4  -3   1  464.75   24.40 
  -4  -3  -1  512.85   24.70 
  -4  -3  -1  456.35   26.70 
  -4  -3  -1  484.75   28.20 
  -4  -3  -1  460.05   22.50 
   4  -3   1  450.55   23.70 
  -4  -3  -1  484.05   26.10 
  -4  -3  -1  451.95   21.70 
  -4  -3  -1  471.95   23.40 
   4  -3   1  430.16   24.00 
   4  -3   1  473.25   23.00 
   4  -3   1  436.36   28.20 
  -4  -3  -1  431.76   24.30 
  -4  -3  -1  484.35   23.10 
   4  -3   1  475.75   39.00 
   4  -3   1  454.65   24.90 
   4  -3   1  435.26   24.30 
  -4  -3  -1  447.56   23.90 
   4  -3   1  464.05   21.60 
   4  -3   1  473.85   26.10 
  -4  -3  -1  480.95   25.60 
  -4  -3  -1  470.75   23.40 
   4  -3   1  458.35   27.50 
   4  -3   1  471.55   25.60 
   4  -3   1  480.95   21.90 
  -4  -3  -1  460.35   23.10 
  -4  -3  -1  465.75   20.70 
   4  -3   1  442.66   22.80 
  -4  -3  -1  457.45   24.10 
  -4   3  -1  469.75   24.80 
   4   3   1  472.15   26.90 
   4   3   1  466.95   23.40 
  -4   3  -1  482.85   24.70 
   4   3   1  465.75   23.00 
  -4   3  -1  471.95   25.30 
   4   3   1  469.95   21.00 
  -4   3  -1  463.45   25.60 
  -4   3  -1  446.36   24.40 
  -4   3  -1  464.35   24.80 
   4   3   1  469.65   23.80 
  -4   3  -1  447.16   23.70 
   4   3   1  491.85   25.20 
   4   3   1  474.65   22.80 
   4   3   1  464.75   21.00 
   4   3   1  469.95   25.90 
  -4   3  -1  479.05   24.70 
   4   3   1  473.75   26.10 
   4   3   1  478.35   23.30 
  -4   3  -1  473.35   21.40 
  -4   3  -1  474.15   28.10 
  -4   3  -1  481.95   27.40 
  -4   3  -1  438.26   25.60 
  -4   3  -1  454.15   28.90 
   4   3   1  468.45   24.90 
   4   3   1  506.05   25.10 
  -4   3  -1  460.95   21.30 
   4   3   1  474.45   26.00 
   5  -3   1  241.58   13.40 
   5  -3   1  238.18   16.20 
  -5  -3  -1  233.08   17.30 
   5  -3   1  227.78   18.10 
  -5  -3  -1  227.28   13.60 
  -5  -3  -1  236.88   17.70 
   5  -3   1  231.28   16.10 
  -5  -3  -1  239.38   12.90 
  -5  -3  -1  222.18   14.00 
   5  -3   1  233.38   14.90 
   5  -3   1  256.67   13.90 
   5  -3   1  241.98   15.50 
   5  -3   1  270.17   17.70 
  -5  -3  -1  232.58   14.80 
   5  -3   1  229.38   27.80 
  -5  -3  -1  244.48   15.00 
   5  -3   1  242.78   15.00 
  -5  -3  -1  231.48   15.70 
   5  -3   1  241.58   15.90 
  -5  -3  -1  230.18   15.60 
   5  -3   1  232.98   12.80 
  -5  -3  -1  253.67   18.30 
  -5  -3  -1  231.58   16.30 
  -5  -3  -1  205.98   14.30 
   5  -3   1  224.48   15.10 
  -5   3  -1  236.38   11.80 
   5   3   1  233.78   15.00 
  -5   3  -1  207.68   14.80 
   5   3   1  217.68   12.30 
   5   3   1  247.58   15.80 
   5   3   1  233.98   15.80 
  -5   3  -1  225.18   15.60 
   5   3   1  238.78   14.00 
  -5   3  -1  262.67   15.30 
   5   3   1  249.38   14.00 
  -5   3  -1  240.48   19.50 
  -5   3  -1  254.37   18.90 
  -5   3  -1  256.47   16.10 
  -5   3  -1  219.98   16.10 
   5   3   1  236.28   16.70 
  -5   3  -1  226.18   18.20 
   5   3   1  248.88   17.30 
  -5   3  -1  225.08   11.40 
  -5   3  -1  209.98   16.40 
  -5   3  -1  250.37   16.80 
  -5   3  -1  240.38   15.60 
   5   3   1  245.88   16.20 
   5   3   1  213.68   15.60 
  -5   3  -1  226.38   15.40 
   5   3   1  235.58   17.00 
   6  -3   1  234.68   18.10 
  -6  -3  -1  255.87   15.90 
  -6  -3  -1  229.28   16.90 
   6  -3   1  255.77   14.90 
  -6  -3  -1  230.18   15.80 
   6  -3   1  268.77   18.20 
  -6  -3  -1  270.17   19.90 
  -6  -3  -1  241.58   17.20 
  -6  -3  -1  257.37   20.00 
  -6  -3  -1  260.37   16.50 
  -6  -3  -1  241.08   13.40 
   6  -3   1  228.68   30.40 
   6  -3   1  237.58   16.70 
   6  -3   1  254.47   16.70 
   6  -3   1  240.88   18.90 
   6  -3   1  258.77   16.80 
   6  -3   1  254.87   17.40 
  -6  -3  -1  227.18   15.70 
  -6  -3  -1  236.58   18.50 
   6  -3   1  237.88   14.00 
   6  -3   1  254.77   14.30 
   6  -3   1  247.18   20.00 
   6  -3   1  221.28   15.70 
  -6  -3  -1  239.48   17.80 
  -6  -3  -1  277.67   20.20 
  -6  -3  -1  263.77   14.70 
  -6   3  -1  241.88   17.50 
   6   3   1  219.08   14.90 
  -6   3  -1  258.77   12.80 
   6   3   1  227.98   16.80 
  -6   3  -1  245.58   18.30 
  -6   3  -1  260.57   17.00 
  -6   3  -1  258.47   12.10 
   6   3   1  240.38   16.60 
   6   3   1  238.18   18.20 
  -6   3  -1  262.37   21.10 
  -6   3  -1  274.37   19.90 
  -6   3  -1  220.98   19.60 
   6   3   1  257.27   18.40 
  -6   3  -1  233.48   16.90 
   6   3   1  259.57   18.60 
  -6   3  -1  220.48   15.90 
   6   3   1  229.48   16.70 
   6   3   1  281.07   15.80 
  -6   3  -1  224.58   20.50 
  -6   3  -1  273.37   17.80 
   7  -3   1   50.79    7.90 
   7  -3   1   53.09    9.30 
   7  -3   1   40.30   17.80 
  -7  -3  -1   47.40   10.70 
  -7  -3  -1   54.69    8.20 
   7  -3   1   47.50    8.10 
  -7  -3  -1   54.09    7.80 
  -7  -3  -1   62.49    9.10 
  -7  -3  -1   59.99    6.80 
   7  -3   1   33.40    7.30 
  -7  -3  -1   56.99    8.40 
  -7  -3  -1   44.30    9.80 
  -7  -3  -1   76.59   12.10 
   7  -3   1   45.20    9.40 
   7  -3   1   49.90    8.40 
   7  -3   1   52.09    9.20 
   7  -3   1   48.40   10.80 
   7  -3   1   47.10    8.60 
  -7  -3  -1   60.79    9.50 
  -7  -3  -1   72.49   12.00 
   7  -3   1   45.40    5.90 
  -7  -3  -1   56.09    8.20 
  -7  -3  -1   50.89    9.70 
  -7   3  -1   48.40   11.40 
  -7   3  -1   49.70    8.30 
   7   3   1   57.19   10.00 
   7   3   1   58.69    9.30 
   7   3   1   46.70    8.10 
  -7   3  -1   57.99   10.50 
  -7   3  -1   21.70    7.40 
  -7   3  -1   42.80    8.50 
   7   3   1   53.49   10.00 
  -7   3  -1   45.90    8.50 
  -7   3  -1   63.69   10.50 
   7   3   1   41.50    6.80 
  -7   3  -1   74.99   13.40 
  -7   3  -1   45.40    8.40 
   7   3   1   42.30    9.10 
  -7   3  -1   51.99   11.50 
   7   3   1   45.50    8.20 
   7   3   1   43.30    7.10 
  -7   3  -1   43.90    9.30 
   8  -3   1  230.98   23.70 
   8  -3   1  209.08   15.60 
  -8  -3  -1  168.78   17.50 
   8  -3   1  224.28   35.70 
  -8  -3  -1  220.28   21.80 
  -8  -3  -1  229.38   22.10 
  -8  -3  -1  229.48   20.50 
   8  -3   1  209.18   17.70 
  -8  -3  -1  203.48   22.50 
  -8  -3  -1  225.88   16.70 
   8  -3   1  206.68   18.60 
  -8  -3  -1  231.18   16.20 
   8  -3   1  185.58   16.70 
  -8  -3  -1  240.48   19.30 
  -8  -3  -1  195.58   15.70 
   8  -3   1  197.88   21.50 
   8  -3   1  206.68   16.70 
  -8   3  -1  214.08   18.60 
  -8   3  -1  241.98   21.40 
  -8   3  -1  156.88   21.10 
  -8   3  -1  184.98   19.00 
  -8   3  -1  221.88   17.70 
   8   3   1  232.18   18.10 
   8   3   1  209.48   19.10 
   8   3   1  224.58   16.30 
  -8   3  -1  212.58   24.40 
   8   3   1  228.58   15.90 
  -8   3  -1  197.58   20.90 
   8   3   1  191.18   16.90 
   8   3   1  208.78   17.60 
  -8   3  -1  234.88   17.40 
   8   3   1  214.78   18.50 
   8   3   1  213.78   19.60 
  -8   3  -1  185.68   15.80 
  -8   3  -1  190.88   20.70 
  -9  -3  -1  262.67   23.80 
   9  -3   1  196.38   23.90 
   9  -3   1  234.38   19.50 
  -9  -3  -1  253.27   24.90 
  -9  -3  -1  227.58   25.60 
   9  -3   1  226.38   19.20 
  -9  -3  -1  241.88   19.00 
  -9  -3  -1  247.18   24.60 
  -9  -3  -1  221.38   17.20 
   9  -3   1  224.58   21.90 
   9  -3   1  275.27   23.20 
  -9  -3  -1  230.88   17.50 
   9  -3   1  239.38   39.00 
  -9   3  -1  241.78   24.40 
  -9   3  -1  197.08   22.40 
   9   3   1  210.78   19.20 
   9   3   1  233.18   21.60 
  -9   3  -1  208.68   18.20 
   9   3   1  266.47   18.10 
  -9   3  -1  267.07   30.30 
  -9   3  -1  222.78   19.80 
   9   3   1  254.77   18.20 
   9   3   1  206.48   23.60 
  -9   3  -1  221.98   20.70 
   9   3   1  239.58   20.50 
  -9   3  -1  251.17   29.20 
  -9   3  -1  201.58   20.70 
   9   3   1  235.48   24.20 
   9   3   1  186.28   19.80 
  -9  -4   1   71.69   13.30 
   9  -4  -1   64.99   10.80 
  -9  -4   1   66.39   11.00 
  -9  -4   1   75.09   15.30 
   9  -4  -1   84.89   13.90 
  -9  -4   1  101.49   14.20 
   9  -4  -1   50.69   22.80 
  -9  -4   1   79.89   11.00 
   9  -4  -1   49.10   10.00 
   9  -4  -1   69.49   11.30 
   9  -4  -1   79.29   14.40 
  -9   4   1   59.89   12.20 
   9   4  -1   50.69   10.80 
  -9   4   1   45.60   11.20 
  -9   4   1   55.19   10.60 
   9   4  -1   53.39   11.10 
   9   4  -1   75.69   13.60 
  -9   4   1   60.19   14.80 
   9   4  -1   74.09   14.10 
  -9   4   1   83.29   16.50 
   9   4  -1   52.29   11.20 
   9   4  -1   90.69   14.90 
  -9   4   1   63.49   12.10 
  -9   4   1   82.69   15.30 
   9   4  -1   79.09   11.20 
  -9   4   1   87.69   14.50 
  -9   4   1   71.79   13.80 
  -9   4   1   74.19   11.20 
   8  -4  -1   67.69   11.40 
   8  -4  -1   76.69   11.50 
  -8  -4   1   87.29   12.40 
   8  -4  -1   73.79   24.00 
  -8  -4   1   81.69   11.10 
  -8  -4   1   81.79   14.30 
   8  -4  -1   79.79   11.00 
  -8  -4   1  106.09   11.80 
  -8  -4   1   90.89   15.30 
  -8  -4   1   94.19   11.40 
   8  -4  -1   83.49   11.00 
   8  -4  -1   84.69   11.70 
   8  -4  -1  116.59   17.20 
   8  -4  -1   74.79   12.80 
  -8  -4   1   99.19   14.20 
  -8   4   1  164.08   18.20 
   8   4  -1   88.89   12.30 
  -8   4   1  102.39   17.30 
  -8   4   1   88.49   15.40 
   8   4  -1   85.59   12.20 
   8   4  -1   71.79   12.50 
  -8   4   1   88.09   13.00 
  -8   4   1  100.09   12.70 
  -8   4   1  106.49   13.60 
   8   4  -1  100.19   10.20 
   8   4  -1   98.89   11.40 
  -8   4   1  100.09   13.40 
   8   4  -1   77.99   13.30 
   8   4  -1   81.09   11.60 
  -8   4   1   78.99   11.00 
  -8   4   1   97.59   13.60 
  -8   4   1  106.69   15.40 
  -7  -4   1    1.40    6.20 
  -7  -4   1    3.70    4.30 
   7  -4  -1   10.00    5.40 
   7  -4  -1    3.10    3.80 
   7  -4  -1    6.80    5.80 
   7  -4  -1   -0.80    9.70 
   7  -4  -1   -1.60    3.60 
   7  -4  -1   10.60    5.50 
  -7  -4   1   -2.40    4.00 
  -7  -4   1    3.50    5.50 
   7  -4  -1   -3.20    3.90 
  -7  -4   1    4.30    4.30 
   7  -4  -1    1.80    6.50 
  -7  -4   1    3.90    8.90 
  -7  -4   1    4.50    5.00 
   7  -4  -1    0.90    3.20 
  -7  -4   1   -3.60    4.40 
   7  -4  -1    1.30    6.20 
  -7  -4   1   -0.60    3.70 
  -7  -4   1    1.10    5.20 
   7  -4  -1   -2.80    5.20 
  -7   4   1   -1.20    5.30 
   7   4  -1    4.80    4.30 
  -7   4   1    0.60    5.20 
  -7   4   1    3.10    6.00 
  -7   4   1    6.00    5.30 
  -7   4   1   -2.20    3.80 
   7   4  -1   -1.00    4.10 
  -7   4   1    6.60    6.50 
  -7   4   1    5.10    4.80 
  -7   4   1    6.10    5.30 
  -7   4   1    5.90    4.40 
  -7   4   1   -4.10    4.20 
  -7   4   1   10.40    6.40 
   7   4  -1    3.90    3.20 
   7   4  -1    2.70    4.30 
   7   4  -1    7.50    4.90 
  -7   4   1    2.20    4.30 
   7   4  -1    2.80    4.40 
   7   4  -1    0.60    4.70 
  -7   4   1    3.90    4.80 
   7   4  -1   -3.60    5.40 
  -6  -4   1    0.80    4.20 
   6  -4  -1    3.90    3.50 
  -6  -4   1   11.20    4.90 
  -6  -4   1    2.50    3.70 
  -6  -4   1    0.40    4.30 
  -6  -4   1   -2.40    3.40 
   6  -4  -1    0.60    3.70 
   6  -4  -1    6.10    6.00 
  -6  -4   1    6.70    6.00 
   6  -4  -1    1.90    8.00 
   6  -4  -1    0.10    3.90 
  -6  -4   1   -0.30    2.80 
  -6  -4   1    1.30    2.40 
   6  -4  -1    6.10    3.40 
   6  -4  -1   -0.40    3.10 
   6  -4  -1    0.60    3.40 
   6  -4  -1   -1.30    3.30 
  -6  -4   1   -1.20    4.00 
   6  -4  -1   17.90    6.80 
  -6  -4   1    0.90    4.10 
  -6  -4   1    7.50    4.10 
   6   4  -1   -0.60    4.00 
  -6   4   1    1.60    4.40 
  -6   4   1    4.00    4.50 
   6   4  -1    0.60    4.70 
  -6   4   1   -0.50    3.50 
  -6   4   1   -4.00    4.20 
   6   4  -1    2.70    3.70 
  -6   4   1    3.30    5.00 
  -6   4   1   -1.50    3.80 
  -6   4   1    1.30    4.10 
   6   4  -1   -1.30    2.30 
   6   4  -1    2.30    4.20 
   6   4  -1    5.70    4.00 
  -6   4   1   -2.50    3.20 
   6   4  -1    3.10    3.40 
   6   4  -1    0.90    3.90 
  -6   4   1   -2.10    3.00 
  -6   4   1   -0.20    5.10 
  -6   4   1    2.20    4.00 
  -6   4   1   -0.30    4.10 
  -6   4   1    2.30    2.30 
   5  -4  -1   65.69    7.20 
  -5  -4   1   59.19    7.70 
  -5  -4   1   61.29    6.30 
  -5  -4   1   49.60    7.70 
   5  -4  -1   62.79    4.80 
   5  -4  -1   54.59    8.00 
   5  -4  -1   60.39    7.40 
  -5  -4   1   54.09    8.70 
  -5  -4   1   65.49    6.40 
   5  -4  -1   66.29   18.40 
  -5  -4   1   51.59    9.50 
   5  -4  -1   58.59    9.50 
   5  -4  -1   70.89    8.10 
  -5  -4   1   60.49    8.10 
   5  -4  -1   54.79    7.50 
  -5  -4   1   72.39    9.90 
   5  -4  -1   54.29    7.40 
  -5  -4   1   58.39    7.80 
  -5  -4   1   59.99   10.00 
  -5  -4   1   64.69    6.70 
  -5  -4   1   76.49    8.80 
  -5  -4   1   68.69   10.00 
  -5  -4   1   58.99    5.20 
   5  -4  -1   71.19    9.00 
  -5  -4   1   74.29    6.30 
   5  -4  -1   49.80    7.60 
   5  -4  -1   60.49   10.20 
  -5   4   1   53.89    7.90 
  -5   4   1   63.49    9.40 
   5   4  -1   62.29    8.80 
  -5   4   1   60.19   10.30 
  -5   4   1   69.99    9.70 
   5   4  -1   57.19    8.70 
  -5   4   1   52.49    7.50 
  -5   4   1   50.49    9.00 
  -5   4   1   70.39    6.40 
   5   4  -1   69.09    8.90 
  -5   4   1   63.79    8.60 
   5   4  -1   54.89    7.90 
   5   4  -1   72.89   10.40 
   5   4  -1   70.89    7.20 
   5   4  -1   56.69    6.80 
   5   4  -1   61.69    8.40 
  -5   4   1   67.69    8.90 
   5   4  -1   57.39    7.00 
   5   4  -1   67.69    8.50 
  -5   4   1   73.19    9.40 
  -5   4   1   67.59    8.70 
  -5   4   1   64.89    9.00 
  -5   4   1   75.79   11.70 
   5   4  -1   60.19    5.90 
  -5   4   1   52.59    8.00 
  -4  -4   1  367.16   21.00 
   4  -4  -1  363.06   20.40 
  -4  -4   1  380.46   18.80 
  -4  -4   1  350.76   21.40 
   4  -4  -1  389.36   21.30 
   4  -4  -1  381.46   20.60 
  -4  -4   1  380.66   21.00 
  -4  -4   1  366.66   20.00 
  -4  -4   1  407.16   23.80 
  -4  -4   1  352.06   18.70 
  -4  -4   1  360.36   18.60 
  -4  -4   1  365.56   20.60 
  -4  -4   1  364.66   21.10 
   4  -4  -1  389.16   19.70 
   4  -4  -1  378.06   21.20 
   4  -4  -1  383.36   21.00 
  -4  -4   1  381.56   18.20 
   4  -4  -1  353.36   23.20 
   4  -4  -1  370.86   20.20 
   4  -4  -1  353.56   20.70 
  -4  -4   1  400.96   22.70 
   4  -4  -1  347.07   24.20 
  -4  -4   1  359.36   17.00 
  -4  -4   1  353.56   23.10 
   4  -4  -1  398.56   35.00 
  -4  -4   1  368.86   20.80 
   4  -4  -1  380.96   22.90 
   4   4  -1  407.16   23.60 
  -4   4   1  361.06   21.30 
  -4   4   1  397.86   26.20 
  -4   4   1  377.56   21.20 
   4   4  -1  379.66   17.20 
   4   4  -1  352.66   20.60 
  -4   4   1  370.66   20.40 
   4   4  -1  394.86   21.90 
  -4   4   1  353.56   22.70 
  -4   4   1  382.96   24.80 
   4   4  -1  387.76   19.50 
  -4   4   1  394.66   21.60 
  -4   4   1  375.56   22.20 
  -4   4   1  359.56   21.10 
   4   4  -1  380.96   21.90 
  -4   4   1  355.86   21.00 
   4   4  -1  374.16   22.30 
   4   4  -1  371.66   19.60 
  -4   4   1  436.16   23.10 
   4   4  -1  354.36   18.10 
   4   4  -1  360.36   18.90 
  -4   4   1  369.26   21.70 
   4   4  -1  371.16   21.40 
  -4   4   1  376.46   24.10 
   4   4  -1  377.76   20.70 
  -3  -4   1   99.19   11.10 
   3  -4  -1   97.69    6.90 
   3  -4  -1  102.49    7.30 
   3  -4  -1   88.59   11.40 
   3  -4  -1   99.59   10.40 
  -3  -4   1   98.49    7.40 
   3  -4  -1  109.99    8.10 
   3  -4  -1   97.69   22.70 
  -3  -4   1  105.89   10.80 
   3  -4  -1  102.69   16.20 
   3  -4  -1   98.39    8.00 
  -3  -4   1   98.39    7.10 
   3  -4  -1  101.99    8.30 
   3  -4  -1  104.49   11.00 
  -3  -4   1  107.89    8.50 
  -3  -4   1  112.39    8.60 
  -3  -4   1  103.29   10.90 
   3  -4  -1  101.29    8.30 
  -3  -4   1  104.89    8.50 
  -3  -4   1  102.19    8.60 
   3  -4  -1  118.09    8.70 
  -3  -4   1   97.39    8.30 
  -3  -4   1   99.59    8.80 
  -3  -4   1  101.29    9.20 
   3  -4  -1  122.19    9.10 
   3  -4  -1  121.39    8.90 
   3  -4  -1  110.39    8.90 
  -3   4   1   86.69    9.00 
   3   4  -1   99.89   11.20 
  -3   4   1  122.29    9.90 
   3   4  -1  115.19    7.70 
  -3   4   1  106.79   13.00 
   3   4  -1  107.99    8.40 
  -3   4   1  116.49    9.00 
   3   4  -1  105.39    6.40 
   3   4  -1   93.99    7.70 
  -3   4   1  129.59   11.60 
   3   4  -1  100.89    7.00 
  -3   4   1   93.79    8.80 
  -3   4   1  104.59    8.70 
   3   4  -1  109.49    6.50 
  -3   4   1   98.79    6.90 
   3   4  -1  104.59   10.20 
   3   4  -1  113.59    7.90 
  -3   4   1   85.19    9.00 
  -3   4   1  105.09    9.60 
  -3   4   1  112.69    8.90 
   3   4  -1  109.19    8.50 
   3   4  -1  105.79    6.50 
  -3   4   1   96.29    7.60 
  -3   4   1  102.89   11.50 
  -3   4   1   99.69    5.40 
   3   4  -1  111.19    6.10 
   3   4  -1   95.09   11.10 
  -3   4   1   86.99    8.00 
   2  -4  -1  367.06   30.70 
  -2  -4   1  345.77   17.80 
   2  -4  -1  351.36   21.10 
  -2  -4   1  329.87   17.90 
  -2  -4   1  344.77   17.30 
  -2  -4   1  305.27   18.00 
   2  -4  -1  324.27   17.40 
   2  -4  -1  326.47   18.30 
   2  -4  -1  352.36   18.10 
  -2  -4   1  349.17   19.30 
   2  -4  -1  336.47   16.60 
   2  -4  -1  333.37   18.50 
   2  -4  -1  335.27   22.40 
  -2  -4   1  371.96   19.20 
   2  -4  -1  369.36   18.00 
   2  -4  -1  336.37   18.10 
   2  -4  -1  355.56   20.30 
  -2  -4   1  329.27   17.20 
  -2  -4   1  331.07   17.90 
  -2  -4   1  320.37   16.60 
  -2  -4   1  344.67   18.90 
  -2  -4   1  321.47   17.60 
   2  -4  -1  346.77   18.30 
   2  -4  -1  300.87   34.90 
   2  -4  -1  320.17   17.40 
  -2  -4   1  326.17   19.80 
  -2  -4   1  340.57   17.60 
   2  -4  -1  348.17   19.60 
  -2  -4   1  356.66   20.40 
  -2   4   1  316.97   17.30 
  -2   4   1  334.87   23.90 
   2   4  -1  326.07   16.80 
   2   4  -1  300.27   20.80 
  -2   4   1  324.37   18.60 
   2   4  -1  327.27   16.60 
  -2   4   1  341.47   16.20 
   2   4  -1  328.87   16.40 
   2   4  -1  347.57   18.80 
  -2   4   1  314.47   18.10 
   2   4  -1  335.37   16.60 
   2   4  -1  337.37   16.50 
   2   4  -1  346.57   16.10 
  -2   4   1  336.47   24.60 
  -2   4   1  239.78   23.40 
  -2   4   1  319.47   18.20 
   2   4  -1  264.17   22.10 
  -2   4   1  339.37   20.60 
   2   4  -1  288.77   19.60 
  -2   4   1  325.57   18.90 
   2   4  -1  357.76   31.00 
  -2   4   1  326.87   15.70 
   2   4  -1  349.96   15.50 
  -2   4   1  338.27   16.60 
   2   4  -1  325.27   21.20 
  -2   4   1  332.17   18.10 
  -2   4   1  346.27   18.30 
   2   4  -1  332.47   18.80 
  -2   4   1  325.27   15.20 
  -2   4   1  333.67   16.80 
  -2   4   1  336.77   14.70 
  -2   4   1  344.37   17.40 
   2   4  -1  320.07   15.70 
   1  -4  -1   -1.90    2.30 
  -1  -4   1    2.10    2.40 
  -1  -4   1    3.10    2.90 
  -1  -4   1    4.20    2.10 
   1  -4  -1    1.90    1.80 
  -1  -4   1    4.30    2.50 
  -1  -4   1    2.20    2.50 
   1  -4  -1    2.80    2.90 
   1  -4  -1    1.60    2.10 
  -1  -4   1    1.00    2.30 
  -1  -4   1    6.20    3.10 
   1  -4  -1    3.20    2.30 
  -1  -4   1    3.00    5.90 
  -1  -4   1    8.60    5.60 
  -1  -4   1   -0.20    2.00 
  -1  -4   1    6.40    4.30 
   1  -4  -1   -0.50    6.30 
   1  -4  -1    1.30    1.50 
   1  -4  -1    6.00    3.60 
   1  -4  -1    4.10   10.90 
  -1  -4   1    9.60   10.50 
   1  -4  -1   -2.00    2.20 
   1  -4  -1    7.50    5.10 
  -1  -4   1    2.90    3.50 
  -1  -4   1    3.90    2.40 
   1  -4  -1    2.90    2.60 
  -1  -4   1    4.30    3.00 
   1  -4  -1    0.50    3.10 
   1  -4  -1    3.80    2.20 
  -1  -4   1    1.20    2.20 
   1  -4  -1   -1.20    2.10 
   1  -4  -1    5.20    2.80 
   1   4  -1    1.10    1.20 
   1   4  -1    1.80    0.60 
   1   4  -1    2.40    3.70 
   1   4  -1   22.00    7.30 
  -1   4   1    0.60    1.40 
  -1   4   1    2.70    1.70 
  -1   4   1   -2.10    1.50 
  -1   4   1    4.40    5.00 
   1   4  -1    1.80    0.90 
   1   4  -1    2.60    1.10 
  -1   4   1    6.40    3.60 
   1   4  -1    1.50    0.90 
   1   4  -1    1.00    1.20 
  -1   4   1    0.70    1.60 
   1   4  -1    2.60    2.70 
   1   4  -1   15.80    4.80 
   1   4  -1    0.80    1.80 
  -1   4   1    1.90    2.60 
   1   4  -1    0.60    4.80 
  -1   4   1   -0.30    7.10 
   1   4  -1    0.80    2.20 
  -1   4   1   -0.10    1.50 
   1   4  -1   -0.20    1.00 
   1   4  -1    2.00    6.40 
   1   4  -1    2.90    2.50 
  -1   4   1    1.10    1.10 
  -1   4   1    6.80    5.80 
  -1   4   1    1.90    1.90 
  -1   4   1    2.10    1.00 
  -1   4   1   -3.50    2.40 
  -1   4   1    3.30    3.70 
  -1   4   1   -1.90    1.70 
  -1   4   1    1.20    1.70 
  -1   4   1   -1.50    1.70 
   1   4  -1    0.50    6.80 
  -1   4   1   -0.20    1.10 
  -1   4   1    0.00    1.60 
   1   4  -1    4.40    2.40 
   1   4  -1    3.30    2.00 
  -1   4   1    1.70    2.50 
   0  -4  -1  512.75   25.90 
   0  -4  -1  417.06   35.50 
   0  -4  -1  510.65   24.90 
   0  -4  -1  541.15   30.50 
   0  -4   1  540.45   25.60 
   0  -4  -1  498.25   25.60 
   0  -4  -1  544.95   34.00 
   0  -4   1  548.45   29.50 
   0  -4   1  506.95   26.60 
   0  -4  -1  519.75   24.00 
   0  -4  -1  520.95   25.70 
   0  -4   1  467.15   48.00 
   0  -4  -1  521.25   26.50 
   0  -4  -1  532.85   25.90 
   0  -4  -1  563.74   26.60 
   0  -4   1  518.15   25.20 
   0  -4  -1  553.74   31.40 
   0  -4  -1  491.05   25.90 
   0  -4   1  506.85   24.10 
   0  -4   1  513.85   43.20 
   0  -4  -1  520.65   26.90 
   0  -4  -1  519.45   25.50 
   0  -4   1  528.15   26.80 
   0  -4   1  535.95   26.40 
   0  -4  -1  483.75   25.20 
   0  -4  -1  502.35   26.50 
   0  -4   1  563.24   30.00 
   0  -4   1  529.75   24.20 
   0  -4   1  528.05   26.00 
   0  -4   1  510.25   26.10 
   0  -4  -1  514.25   26.70 
   0  -4   1  439.56   32.20 
   0  -4  -1  542.35   48.70 
   0  -4   1  508.25   25.60 
   0  -4   1  556.44   26.20 
   0  -4   1  562.14   32.10 
   0   4  -1  517.65   25.80 
   0   4   1  568.14   24.30 
   0   4  -1  530.85   23.50 
   0   4  -1  466.35   44.80 
   0   4  -1  542.15   24.00 
   0   4   1  551.04   26.10 
   0   4  -1  521.85   24.70 
   0   4  -1  512.35   25.20 
   0   4  -1  528.55   26.00 
   0   4  -1  507.45   25.10 
   0   4   1  522.75   34.60 
   0   4   1  523.75   22.80 
   0   4  -1  527.95   28.00 
   0   4   1  533.55   22.90 
   0   4  -1  533.65   25.70 
   0   4  -1  464.15   35.00 
   0   4   1  486.35   24.50 
   0   4   1  477.55   29.40 
   0   4   1  531.65   25.50 
   0   4  -1  523.85   25.30 
   0   4  -1  539.15   26.20 
   0   4  -1  541.65   24.20 
   0   4   1  532.45   24.10 
   0   4   1  540.35   24.40 
   0   4   1  529.35   25.90 
   0   4  -1  525.65   23.70 
   0   4  -1  517.55   23.60 
   0   4  -1  539.75   25.50 
   0   4  -1  536.55   25.70 
   0   4   1  540.45   36.20 
   0   4   1  564.74   29.60 
   0   4   1  534.75   30.10 
   0   4  -1  498.05   32.70 
   0   4   1  534.05   27.40 
   0   4   1  531.15   24.00 
   1  -4   1  349.57   18.60 
  -1  -4  -1  337.67   17.50 
  -1  -4  -1  317.77   17.70 
   1  -4   1  321.67   18.70 
   1  -4   1  318.37   16.60 
   1  -4   1  349.37   17.80 
   1  -4   1  266.87   40.90 
  -1  -4  -1  351.46   17.60 
   1  -4   1  337.57   18.70 
  -1  -4  -1  333.87   15.00 
   1  -4   1  331.47   16.90 
  -1  -4  -1  305.97   24.70 
  -1  -4  -1  340.77   18.50 
   1  -4   1  326.07   17.20 
   1  -4   1  316.57   24.90 
   1  -4   1  335.47   17.00 
  -1  -4  -1  340.77   34.70 
  -1  -4  -1  340.37   18.00 
  -1  -4  -1  353.46   24.10 
  -1  -4  -1  323.77   17.30 
  -1  -4  -1  354.96   19.30 
  -1  -4  -1  346.87   19.00 
  -1  -4  -1  339.77   17.20 
  -1  -4  -1  350.06   18.20 
   1  -4   1  338.37   18.40 
  -1  -4  -1  319.17   19.70 
  -1  -4  -1  325.17   17.40 
  -1  -4  -1  331.27   18.40 
   1  -4   1  344.37   15.30 
   1  -4   1  332.97   18.00 
   1  -4   1  318.47   18.40 
   1  -4   1  352.06   19.60 
   1  -4   1  345.17   17.90 
  -1   4  -1  340.97   17.70 
  -1   4  -1  355.56   18.30 
   1   4   1  343.77   15.10 
  -1   4  -1  334.67   16.80 
   1   4   1  337.27   15.60 
   1   4   1  320.57   16.80 
  -1   4  -1  363.66   17.70 
  -1   4  -1  327.87   16.70 
  -1   4  -1  332.27   20.70 
  -1   4  -1  319.27   23.20 
  -1   4  -1  331.27   15.50 
   1   4   1  329.47   17.40 
   1   4   1  364.06   17.70 
  -1   4  -1  322.57   28.30 
   1   4   1  340.17   21.20 
  -1   4  -1  326.17   15.60 
  -1   4  -1  186.68   29.00 
   1   4   1  325.07   24.80 
   1   4   1  340.47   15.20 
  -1   4  -1  335.67   17.90 
   1   4   1  352.26   22.90 
   1   4   1  344.07   16.40 
  -1   4  -1  343.37   17.40 
   1   4   1  247.18   19.70 
  -1   4  -1  356.96   19.00 
   1   4   1  312.87   18.00 
   1   4   1  332.47   15.90 
  -1   4  -1  336.87   16.90 
  -1   4  -1  301.67   20.50 
   1   4   1  368.36   22.30 
  -1   4  -1  371.36   23.20 
  -1   4  -1  342.17   16.30 
   1   4   1  324.17   17.10 
  -1   4  -1  338.87   16.70 
  -1   4  -1  338.47   16.70 
  -1   4  -1  357.66   17.60 
  -1   4  -1  341.37   17.50 
   1   4   1  309.87   30.10 
  -1   4  -1  335.17   16.40 
   2  -4   1  846.22   41.30 
   2  -4   1  821.92   39.30 
  -2  -4  -1  865.61   39.10 
   2  -4   1  840.62   39.10 
  -2  -4  -1  839.22   40.00 
   2  -4   1  842.02   38.80 
   2  -4   1  888.41   40.50 
   2  -4   1  865.21   59.99 
  -2  -4  -1  830.52   39.60 
  -2  -4  -1  857.91   39.80 
   2  -4   1  868.21   38.00 
   2  -4   1  848.72   40.10 
  -2  -4  -1  845.22   38.00 
  -2  -4  -1  834.72   39.70 
  -2  -4  -1  860.91   39.50 
   2  -4   1  810.92   40.50 
  -2  -4  -1  848.92   43.50 
   2  -4   1  877.91   40.70 
   2  -4   1  856.61   45.70 
  -2  -4  -1  838.12   38.90 
  -2  -4  -1  843.62   38.90 
  -2  -4  -1  865.31   41.60 
  -2  -4  -1  859.71   41.20 
   2  -4   1  861.51   38.30 
   2  -4   1  868.91   39.50 
   2  -4   1  837.52   40.20 
   2  -4   1  843.12   36.60 
   2  -4   1  727.93   59.99 
  -2   4  -1  845.32   40.10 
   2   4   1  843.02   41.60 
   2   4   1  833.32   39.20 
  -2   4  -1  849.61   40.10 
   2   4   1  885.51   38.00 
   2   4   1  831.92   37.90 
  -2   4  -1  790.32   49.90 
   2   4   1  880.61   38.70 
  -2   4  -1  859.81   39.40 
   2   4   1  724.83   45.80 
   2   4   1  892.91   39.90 
   2   4   1  683.33   45.70 
   2   4   1  790.22   38.80 
   2   4   1  853.61   40.60 
  -2   4  -1  731.93   38.90 
   2   4   1  847.02   37.20 
  -2   4  -1  845.02   39.10 
  -2   4  -1  875.81   40.20 
   2   4   1  884.31   38.60 
  -2   4  -1  848.42   39.50 
   2   4   1  888.11   38.70 
  -2   4  -1  862.21   37.70 
  -2   4  -1  861.91   40.30 
   2   4   1  824.92   37.60 
  -2   4  -1  850.91   38.80 
  -2   4  -1  834.82   40.90 
  -2   4  -1  835.92   38.60 
  -2   4  -1  792.92   44.00 
   2   4   1  785.62   39.30 
  -2   4  -1  852.91   44.20 
  -2   4  -1  846.42   37.50 
  -2   4  -1  662.33   43.00 
   2   4   1  829.12   37.40 
   2   4   1  875.61   50.19 
  -3  -4  -1   18.90    4.20 
  -3  -4  -1   16.90    5.60 
   3  -4   1   11.50    3.80 
  -3  -4  -1   20.30    3.70 
   3  -4   1   10.40    3.20 
   3  -4   1   14.30    3.70 
   3  -4   1   16.80    3.70 
  -3  -4  -1   13.30    3.40 
  -3  -4  -1   13.90    3.10 
   3  -4   1   13.40    3.70 
   3  -4   1   21.20    6.10 
   3  -4   1   13.50    3.60 
   3  -4   1   18.70    4.70 
   3  -4   1   12.20   10.80 
   3  -4   1   11.10    2.60 
   3  -4   1   13.30    2.20 
  -3  -4  -1    9.40    3.50 
  -3  -4  -1   25.00    4.30 
   3  -4   1   12.50    3.80 
   3  -4   1   17.90    5.00 
  -3  -4  -1   14.30    3.80 
   3  -4   1   19.70    3.90 
   3  -4   1   19.20    4.10 
  -3  -4  -1   15.40    3.10 
  -3  -4  -1   14.80    5.10 
   3  -4   1   14.70    4.10 
   3  -4   1   19.50   10.10 
  -3  -4  -1   16.40    4.00 
  -3  -4  -1   17.50    4.60 
   3   4   1   16.70    3.10 
   3   4   1   20.20    3.70 
   3   4   1   25.00    4.90 
  -3   4  -1   18.40    2.50 
  -3   4  -1   13.70    4.10 
   3   4   1   18.70    3.60 
  -3   4  -1   13.30    3.80 
  -3   4  -1   19.70    5.70 
   3   4   1   18.90    6.50 
  -3   4  -1   18.40    2.40 
   3   4   1   25.50    5.50 
   3   4   1   18.10    3.50 
   3   4   1   15.40    5.90 
  -3   4  -1   17.50    4.20 
   3   4   1   11.40    2.20 
   3   4   1   20.90    3.30 
  -3   4  -1   12.80    4.20 
  -3   4  -1   17.80    4.30 
   3   4   1   16.60    4.40 
  -3   4  -1   17.90    4.30 
  -3   4  -1   16.10    3.90 
  -3   4  -1   20.60    4.40 
   3   4   1   15.20    3.00 
  -3   4  -1   18.30    1.60 
   3   4   1   14.90    2.80 
  -3   4  -1   11.40    4.00 
  -3   4  -1   18.50    7.20 
   3   4   1   17.80    3.90 
  -3   4  -1    9.60    3.20 
  -3   4  -1   12.90    3.90 
  -3   4  -1   20.70    5.00 
  -4  -4  -1    0.10    2.90 
  -4  -4  -1   17.10    4.10 
   4  -4   1   13.00    3.90 
  -4  -4  -1    7.00    4.50 
  -4  -4  -1    3.00    2.40 
   4  -4   1    5.40    3.40 
   4  -4   1    7.60    3.60 
  -4  -4  -1    2.10    3.50 
   4  -4   1    7.20   10.10 
  -4  -4  -1    2.20    3.00 
  -4  -4  -1   -0.20    3.80 
  -4  -4  -1    1.50    2.80 
  -4  -4  -1    4.80    1.30 
   4  -4   1    6.10    3.00 
   4  -4   1    7.10    3.90 
   4  -4   1    4.30    3.70 
   4  -4   1    5.40    3.50 
   4  -4   1    2.30    6.60 
  -4  -4  -1    6.70    3.70 
  -4  -4  -1    2.70    1.80 
   4  -4   1    3.40    3.10 
   4  -4   1   12.10    4.20 
  -4  -4  -1    7.00    2.70 
  -4  -4  -1   18.20    4.50 
  -4  -4  -1    2.40    2.90 
   4  -4   1    7.10    1.50 
  -4  -4  -1    5.40    2.20 
   4  -4   1    5.80    4.10 
   4  -4   1   14.80    5.80 
   4  -4   1    6.40    2.80 
   4   4   1    2.50    1.60 
   4   4   1    1.60    3.30 
   4   4   1    4.00    2.30 
  -4   4  -1    3.30    3.10 
   4   4   1   -0.20    2.80 
  -4   4  -1    0.10    4.10 
  -4   4  -1    4.70    3.20 
  -4   4  -1    1.90    3.40 
  -4   4  -1    7.00    3.20 
  -4   4  -1   14.00    4.10 
   4   4   1    7.00    3.70 
  -4   4  -1    8.00    3.80 
  -4   4  -1    3.80    3.30 
  -4   4  -1    6.00    3.70 
   4   4   1    0.50    3.10 
  -4   4  -1    3.80    1.50 
  -4   4  -1    2.50    3.40 
  -4   4  -1    3.50    4.70 
   4   4   1    2.40    2.30 
   4   4   1    6.60    3.90 
   4   4   1    2.40    3.10 
   4   4   1    2.30    1.80 
   4   4   1    5.80    2.50 
   4   4   1    2.30    2.60 
  -4   4  -1    4.30    3.00 
   4   4   1    2.10    2.40 
   4   4   1    5.90    3.20 
   4   4   1    2.60    3.00 
  -4   4  -1    5.20    1.70 
  -4   4  -1    5.10    2.00 
  -5  -4  -1   92.09   11.00 
  -5  -4  -1   87.99   10.10 
   5  -4   1   89.99   10.10 
   5  -4   1   88.89    8.20 
  -5  -4  -1   89.29    8.90 
   5  -4   1   81.09   10.60 
   5  -4   1   86.89   20.90 
   5  -4   1   64.09    9.00 
   5  -4   1   74.99    8.10 
   5  -4   1   71.09    8.50 
  -5  -4  -1   99.99   11.60 
   5  -4   1   83.59    5.30 
   5  -4   1   70.99    9.60 
  -5  -4  -1   96.79   12.40 
   5  -4   1   87.29   10.20 
   5  -4   1   92.99   10.10 
  -5  -4  -1   89.29    8.70 
  -5  -4  -1   92.29    9.30 
  -5  -4  -1   77.79    9.00 
  -5  -4  -1   72.69   12.00 
  -5  -4  -1   81.09    7.30 
  -5  -4  -1   82.89    6.90 
  -5  -4  -1   72.19    8.60 
   5  -4   1   73.89    9.10 
   5   4   1   76.69    4.50 
  -5   4  -1   86.19    9.80 
  -5   4  -1   83.49    9.10 
  -5   4  -1   77.99    4.60 
   5   4   1   88.59    8.00 
  -5   4  -1   73.79    9.60 
   5   4   1   86.19    8.80 
   5   4   1   87.39   11.20 
  -5   4  -1   66.89   11.70 
   5   4   1   72.99   10.60 
  -5   4  -1   79.39    9.60 
  -5   4  -1   69.19    9.50 
   5   4   1   73.39    4.90 
   5   4   1   77.59    9.30 
  -5   4  -1   84.19    4.60 
  -5   4  -1   99.59    5.50 
  -5   4  -1   76.29    9.20 
   5   4   1   78.99   11.40 
   5   4   1   82.99   10.50 
  -5   4  -1   68.19   10.00 
   5   4   1   75.79    9.50 
   5   4   1   83.29    9.70 
  -5   4  -1   83.49    9.80 
  -5   4  -1   84.29   12.10 
  -5   4  -1   84.89   11.00 
   5   4   1   84.59    7.70 
  -5   4  -1   92.79   13.70 
   5   4   1   53.89    8.40 
   6  -4   1  880.91   47.80 
   6  -4   1  957.80   44.60 
  -6  -4  -1  934.21   44.90 
  -6  -4  -1  934.81   47.70 
   6  -4   1  933.81   47.10 
  -6  -4  -1  958.50   45.30 
   6  -4   1  858.41   49.30 
  -6  -4  -1  995.00   47.10 
   6  -4   1  977.20   47.20 
  -6  -4  -1  948.71   46.60 
  -6  -4  -1  897.51   52.59 
   6  -4   1  966.70   49.40 
   6  -4   1  915.51   46.20 
   6  -4   1  917.71   47.30 
  -6  -4  -1  928.21   51.19 
  -6  -4  -1 1022.70   44.00 
  -6  -4  -1  981.60   49.50 
  -6  -4  -1 1006.30   45.90 
   6  -4   1  889.21   70.09 
  -6  -4  -1  949.11   50.09 
  -6   4  -1  960.10   48.00 
  -6   4  -1  946.11   47.90 
   6   4   1  932.91   49.70 
  -6   4  -1  984.80   48.10 
  -6   4  -1  951.40   47.80 
   6   4   1  972.60   48.70 
   6   4   1  922.11   46.60 
  -6   4  -1  946.01   46.30 
  -6   4  -1  991.40   48.00 
  -6   4  -1  919.41   52.49 
   6   4   1  872.91   47.60 
   6   4   1  913.81   44.80 
  -6   4  -1 1005.90   50.49 
  -6   4  -1  955.40   52.19 
  -6   4  -1  936.01   49.40 
  -6   4  -1  903.11   53.39 
   6   4   1  975.20   48.80 
  -6   4  -1  904.71   47.30 
   6   4   1  962.10   49.60 
   6   4   1  976.40   45.00 
  -7  -4  -1  198.78   13.90 
  -7  -4  -1  195.38   16.20 
   7  -4   1  197.28   15.70 
  -7  -4  -1  203.28   16.80 
   7  -4   1  238.48   35.40 
   7  -4   1  201.08   16.90 
   7  -4   1  217.18   18.80 
  -7  -4  -1  192.48   14.40 
   7  -4   1  193.78   13.10 
   7  -4   1  170.98   19.00 
  -7  -4  -1  203.98   19.30 
  -7  -4  -1  177.08   18.70 
  -7  -4  -1  202.38   15.50 
  -7  -4  -1  202.18   22.20 
   7  -4   1  214.38   15.90 
  -7  -4  -1  239.68   16.50 
   7  -4   1  191.58   15.70 
  -7   4  -1  199.38   20.70 
   7   4   1  233.68   17.80 
   7   4   1  223.78   14.50 
  -7   4  -1  202.38   16.80 
  -7   4  -1  199.68   15.30 
   7   4   1  242.68   17.50 
   7   4   1  203.98   16.10 
   7   4   1  191.48   17.50 
  -7   4  -1  198.38   15.90 
   7   4   1  186.88   13.90 
  -7   4  -1  225.88   17.10 
   7   4   1  220.18   18.40 
  -7   4  -1  197.98   18.60 
  -7   4  -1  219.58   24.80 
  -7   4  -1  218.48   18.70 
  -7   4  -1  195.48   16.90 
   7   4   1  188.48   17.00 
  -7   4  -1  220.88   16.50 
  -7   4  -1  222.28   21.00 
   8  -4   1 1146.69   62.59 
  -8  -4  -1 1183.68   59.49 
   8  -4   1 1214.58   59.29 
  -8  -4  -1 1188.88   58.09 
   8  -4   1 1217.28   92.19 
  -8  -4  -1 1156.38   64.19 
   8  -4   1 1131.79   58.39 
  -8  -4  -1 1232.58   66.79 
  -8  -4  -1 1144.59   61.49 
  -8  -4  -1 1201.58   57.99 
  -8  -4  -1 1193.48   57.19 
   8  -4   1 1125.59   57.69 
   8  -4   1 1180.98   60.39 
  -8   4  -1 1195.48   59.59 
   8   4   1 1095.99   59.29 
  -8   4  -1 1078.39   65.89 
  -8   4  -1 1084.39   61.59 
   8   4   1 1156.88   56.29 
   8   4   1 1159.48   61.29 
  -8   4  -1 1157.08   58.89 
  -8   4  -1 1136.89   65.89 
   8   4   1 1168.58   56.39 
  -8   4  -1 1130.19   60.19 
  -8   4  -1 1184.38   60.49 
   8   4   1 1194.18   62.09 
   8   4   1 1174.68   62.09 
  -8   4  -1 1226.78   60.39 
   8   4   1 1214.78   59.49 
  -8   4  -1 1121.19   61.89 
  -8   4  -1 1233.58   64.09 
  -9  -4  -1   97.49   17.80 
   9  -4   1   80.19   14.80 
   9  -4   1   80.29   12.40 
  -9  -4  -1   88.19   14.80 
  -9  -4  -1   73.79   11.30 
   9  -4   1   93.99   13.10 
  -9  -4  -1   84.99   17.40 
  -9  -4  -1   90.19   12.20 
   9  -4   1   98.69   31.00 
   9  -4   1  101.19   15.00 
   9  -4   1  113.39   18.60 
  -9   4  -1  117.79   17.10 
   9   4   1   77.59   14.80 
  -9   4  -1   89.59   13.10 
  -9   4  -1  115.39   16.00 
  -9   4  -1  114.79   18.20 
   9   4   1   91.39   15.00 
  -9   4  -1   92.99   14.50 
   9   4   1   92.69   14.90 
   9   4   1   65.59   12.30 
  -9   4  -1  109.09   19.90 
  -9   4  -1   73.09   12.60 
  -9   4  -1   67.69   13.70 
  -9   4  -1   73.79   16.20 
   9   4   1   93.39   14.00 
   9  -5  -1  307.07   47.40 
   9  -5  -1  254.47   22.30 
  -9  -5   1  296.27   21.50 
  -9  -5   1  285.27   24.20 
   9  -5  -1  299.17   21.80 
  -9  -5   1  289.97   27.40 
   9  -5  -1  266.47   20.80 
   9  -5  -1  253.27   26.80 
   9  -5  -1  287.47   22.30 
  -9  -5   1  269.47   20.70 
  -9  -5   1  273.57   22.70 
   9   5  -1  253.57   21.30 
  -9   5   1  276.87   30.50 
  -9   5   1  279.87   27.00 
  -9   5   1  262.97   27.00 
   9   5  -1  255.97   22.00 
   9   5  -1  248.38   23.30 
  -9   5   1  239.88   21.40 
  -9   5   1  272.37   25.10 
  -9   5   1  271.77   23.30 
  -9   5   1  277.87   23.20 
   9   5  -1  286.07   25.10 
  -9   5   1  284.07   25.80 
  -9   5   1  298.47   21.60 
  -9   5   1  266.27   28.30 
   8  -5  -1   -2.20    4.90 
   8  -5  -1   10.20    7.30 
  -8  -5   1   10.80    5.70 
  -8  -5   1    7.60    7.40 
  -8  -5   1    2.60    6.30 
   8  -5  -1   10.40    7.30 
   8  -5  -1    4.10   12.90 
   8  -5  -1    2.40    4.60 
   8  -5  -1    3.10    5.00 
   8  -5  -1    3.40    5.20 
  -8  -5   1    3.30    6.50 
  -8  -5   1    2.60    5.90 
   8   5  -1   13.20    6.70 
  -8   5   1    9.40    8.50 
  -8   5   1   12.80    6.20 
  -8   5   1    2.40    5.80 
   8   5  -1   -2.30    4.40 
   8   5  -1   -2.50    5.20 
  -8   5   1    9.70    6.70 
   8   5  -1   14.20    7.70 
  -8   5   1   -6.50    6.70 
  -8   5   1    8.20    6.90 
  -8   5   1    5.70    7.10 
   8   5  -1   -1.90    4.90 
  -8   5   1    2.60    5.80 
   7  -5  -1  437.56   27.60 
   7  -5  -1  414.26   24.20 
   7  -5  -1  416.96   48.20 
   7  -5  -1  464.85   25.90 
   7  -5  -1  421.66   25.10 
  -7  -5   1  428.06   26.90 
   7  -5  -1  386.86   28.60 
  -7  -5   1  397.46   25.20 
  -7  -5   1  467.75   26.80 
   7  -5  -1  439.66   30.10 
  -7  -5   1  424.66   28.60 
  -7  -5   1  489.15   32.20 
  -7  -5   1  424.86   26.00 
   7  -5  -1  450.65   27.00 
   7  -5  -1  397.56   25.90 
   7  -5  -1  450.85   26.70 
  -7  -5   1  392.56   29.90 
  -7  -5   1  454.25   25.50 
  -7   5   1  407.76   26.90 
  -7   5   1  373.26   28.10 
  -7   5   1  416.66   26.50 
  -7   5   1  477.05   28.50 
  -7   5   1  420.46   31.10 
  -7   5   1  437.76   27.20 
   7   5  -1  427.26   27.10 
  -7   5   1  431.96   27.10 
   7   5  -1  458.65   27.90 
  -7   5   1  464.25   28.10 
   7   5  -1  427.46   25.60 
  -7   5   1  391.56   28.10 
   7   5  -1  420.46   29.20 
  -7   5   1  411.86   26.90 
   7   5  -1  422.86   27.10 
  -7   5   1  441.26   31.70 
   7   5  -1  447.86   24.20 
  -6  -5   1   71.79   11.20 
   6  -5  -1   47.90    8.30 
   6  -5  -1   59.49   11.00 
   6  -5  -1   59.29   22.80 
   6  -5  -1   69.29   11.30 
  -6  -5   1   60.89    8.70 
  -6  -5   1   56.69    6.50 
  -6  -5   1   43.00   10.10 
   6  -5  -1   50.99    7.80 
  -6  -5   1   61.29    9.30 
   6  -5  -1   80.99   23.40 
   6  -5  -1   66.79    9.40 
  -6  -5   1   58.19    8.60 
   6  -5  -1   67.39    9.00 
   6  -5  -1   57.49    7.80 
  -6  -5   1   61.69   11.30 
   6  -5  -1   63.49   10.30 
   6  -5  -1   62.99    9.30 
  -6  -5   1   45.00    8.10 
  -6  -5   1   41.80    7.90 
  -6   5   1   64.29   10.60 
   6   5  -1   57.89    6.30 
  -6   5   1   58.79   10.20 
   6   5  -1   59.49    9.10 
  -6   5   1   65.09   12.00 
   6   5  -1   58.79   10.70 
  -6   5   1   57.19    9.20 
   6   5  -1   61.09    7.50 
  -6   5   1   60.39    9.70 
  -6   5   1   51.69   10.10 
   6   5  -1   83.99   11.10 
  -6   5   1   69.39    9.80 
  -6   5   1   63.59    9.10 
  -6   5   1   58.89   11.40 
   6   5  -1   69.29   10.20 
   6   5  -1   64.99    9.80 
   6   5  -1   61.79    8.30 
  -6   5   1   66.99   10.30 
  -6   5   1   57.29    9.50 
  -6   5   1   59.59   12.40 
  -5  -5   1 2534.85  112.39 
  -5  -5   1 2495.85  114.29 
  -5  -5   1 2528.65  112.69 
  -5  -5   1 2487.05  109.69 
  -5  -5   1 2518.45  117.09 
   5  -5  -1 2517.45  115.49 
  -5  -5   1 2537.45  113.39 
   5  -5  -1 2504.55  112.69 
   5  -5  -1 2463.75  138.59 
  -5  -5   1 2434.56  115.49 
  -5  -5   1 2598.34  109.79 
   5  -5  -1 2436.46  145.09 
   5  -5  -1 2498.95  111.69 
  -5  -5   1 2532.05  115.49 
   5  -5  -1 2499.95  115.79 
   5  -5  -1 2495.15  113.09 
  -5  -5   1 2600.04  113.09 
   5  -5  -1 2582.14  110.79 
   5  -5  -1 2444.46  113.49 
   5  -5  -1 2459.75  112.79 
   5  -5  -1 2522.25  112.29 
  -5  -5   1 2415.66  112.49 
  -5   5   1 2454.35  117.69 
  -5   5   1 2562.94  116.39 
  -5   5   1 2511.65  114.29 
   5   5  -1 2422.36  114.09 
  -5   5   1 2428.36  113.19 
  -5   5   1 2533.25  113.89 
   5   5  -1 2500.15  110.29 
  -5   5   1 2504.35  113.39 
   5   5  -1 2465.65  112.49 
   5   5  -1 2411.36  114.09 
   5   5  -1 2505.05  112.69 
   5   5  -1 2514.25  116.19 
   5   5  -1 2438.36  113.19 
  -5   5   1 2468.35  115.29 
  -5   5   1 2485.65  114.09 
   5   5  -1 2485.65  110.29 
  -5   5   1 2539.55  112.49 
  -5   5   1 2554.94  113.89 
   5   5  -1 2456.75  110.99 
   5   5  -1 2469.45  108.69 
  -5   5   1 2491.85  113.49 
  -5   5   1 2528.45  118.69 
   4  -5  -1  206.48   15.50 
  -4  -5   1  173.88   11.50 
  -4  -5   1  171.08   13.30 
   4  -5  -1  180.18   13.80 
  -4  -5   1  198.58   15.20 
   4  -5  -1  199.38   13.30 
   4  -5  -1  181.78   11.00 
  -4  -5   1  186.78   16.10 
  -4  -5   1  184.78   13.40 
   4  -5  -1  168.88   11.50 
   4  -5  -1  183.28   36.20 
  -4  -5   1  190.28   11.60 
   4  -5  -1  182.78   13.30 
   4  -5  -1  182.58   12.70 
   4  -5  -1  209.18   27.40 
   4  -5  -1  185.58   12.80 
  -4  -5   1  199.38   14.00 
  -4  -5   1  179.28   13.90 
  -4  -5   1  180.98   12.90 
   4  -5  -1  190.98   13.70 
   4  -5  -1  191.48   13.00 
  -4  -5   1  158.18   12.70 
   4  -5  -1  200.68   15.70 
  -4  -5   1  166.68   12.90 
   4   5  -1  182.18   14.40 
   4   5  -1  161.58   11.90 
   4   5  -1  194.08   10.00 
   4   5  -1  165.18   12.80 
  -4   5   1  184.88   12.60 
   4   5  -1  175.28   12.30 
  -4   5   1  192.48   13.80 
   4   5  -1  178.28   13.90 
   4   5  -1  163.68    9.70 
   4   5  -1  184.48   10.10 
   4   5  -1  194.18   12.70 
   4   5  -1  197.08   11.60 
   4   5  -1  172.68   10.20 
   4   5  -1  192.48   11.70 
   4   5  -1  195.68   10.20 
  -4   5   1  177.98   16.00 
   4   5  -1  187.38   15.20 
  -4   5   1  201.88   14.80 
  -4   5   1  169.58   13.50 
  -4   5   1  174.58   13.10 
   4   5  -1  198.48   15.90 
  -4   5   1  198.08   15.30 
  -4   5   1  170.98   13.40 
  -4   5   1  210.78   18.00 
  -4   5   1  204.98   15.20 
  -4   5   1  186.38   13.60 
  -4   5   1  192.98   14.90 
  -4   5   1  164.48   13.40 
  -3  -5   1 1063.29   51.59 
   3  -5  -1 1022.70   50.69 
  -3  -5   1 1128.19   55.49 
   3  -5  -1 1156.48   72.89 
  -3  -5   1 1116.59   51.19 
  -3  -5   1 1079.89   49.40 
   3  -5  -1 1056.79   50.19 
   3  -5  -1 1131.69   51.39 
   3  -5  -1 1001.00   77.39 
   3  -5  -1 1121.89   52.59 
   3  -5  -1 1088.09   51.69 
  -3  -5   1 1010.00   50.59 
  -3  -5   1 1036.10   54.49 
  -3  -5   1 1059.19   53.39 
   3  -5  -1 1072.19   51.49 
  -3  -5   1 1105.19   50.79 
   3  -5  -1 1063.99   50.39 
   3  -5  -1 1023.00   50.39 
   3  -5  -1 1065.99   53.49 
  -3  -5   1 1100.89   50.99 
  -3  -5   1 1076.29   50.59 
  -3  -5   1 1121.59   54.69 
   3  -5  -1 1124.89   57.79 
  -3  -5   1 1081.89   49.90 
  -3   5   1 1053.79   51.49 
  -3   5   1 1062.89   47.20 
  -3   5   1 1055.99   51.09 
   3   5  -1 1049.99   49.10 
  -3   5   1 1151.98   57.49 
  -3   5   1 1070.99   50.29 
  -3   5   1 1054.89   57.39 
  -3   5   1 1047.90   51.69 
  -3   5   1 1039.40   50.39 
   3   5  -1 1101.89   48.50 
  -3   5   1 1072.29   51.09 
   3   5  -1 1068.39   48.30 
   3   5  -1 1070.29   46.90 
  -3   5   1 1044.60   51.19 
   3   5  -1 1079.99   56.29 
  -3   5   1 1054.19   54.59 
   3   5  -1 1084.19   49.50 
  -3   5   1 1062.49   51.39 
   3   5  -1 1075.49   48.20 
  -3   5   1 1083.69   49.30 
   3   5  -1 1058.49   54.59 
   3   5  -1 1077.49   52.09 
  -3   5   1 1054.49   48.60 
   3   5  -1 1077.19   49.20 
   3   5  -1 1045.80   47.40 
   3   5  -1 1056.09   48.10 
   3   5  -1 1091.29   49.80 
  -3   5   1 1085.89   52.59 
  -2  -5   1    7.20    4.50 
   2  -5  -1   13.30    3.80 
   2  -5  -1   11.30    9.40 
  -2  -5   1   10.40    3.60 
  -2  -5   1   13.50    3.90 
  -2  -5   1   11.20    3.20 
   2  -5  -1   11.30    3.50 
   2  -5  -1    8.00    3.60 
  -2  -5   1    8.00    3.10 
   2  -5  -1   10.70    3.00 
  -2  -5   1   12.10    3.20 
  -2  -5   1   17.00    4.70 
  -2  -5   1    8.80    3.30 
   2  -5  -1   -2.30    7.90 
   2  -5  -1    5.70    3.40 
   2  -5  -1   10.70    3.50 
   2  -5  -1   18.90    7.30 
  -2  -5   1   11.20    3.20 
   2  -5  -1   15.80    5.40 
   2  -5  -1   19.90    3.90 
  -2  -5   1    7.10    3.50 
  -2  -5   1    5.20    2.50 
  -2  -5   1   17.30    6.00 
  -2  -5   1    6.70    3.20 
   2  -5  -1    8.10    4.00 
   2  -5  -1   15.00    4.70 
  -2   5   1   13.30    4.00 
  -2   5   1   12.50    8.80 
   2   5  -1    7.20    2.10 
  -2   5   1   10.00    4.00 
   2   5  -1    8.50    3.50 
   2   5  -1    9.80    5.20 
   2   5  -1    9.50    1.50 
  -2   5   1   10.00    3.90 
  -2   5   1   13.80    7.60 
   2   5  -1    9.90    2.30 
  -2   5   1   17.30    2.70 
  -2   5   1   12.50    4.80 
   2   5  -1   15.40    4.80 
  -2   5   1   14.60    4.10 
   2   5  -1   10.70    2.90 
  -2   5   1    8.90    2.50 
   2   5  -1   11.10    1.90 
   2   5  -1    8.80    2.10 
  -2   5   1   16.50    3.40 
  -2   5   1   10.10    2.50 
   2   5  -1   11.30    7.20 
  -2   5   1    8.20    2.60 
  -2   5   1   11.50    2.00 
  -2   5   1    9.60    1.60 
   2   5  -1   14.50    3.10 
   2   5  -1    9.80    6.10 
   2   5  -1    8.70    2.80 
   2   5  -1   13.30    2.20 
  -2   5   1   10.20    3.00 
   2   5  -1   16.70    4.50 
  -2   5   1    8.50    7.00 
  -2   5   1    6.90    3.60 
  -2   5   1   16.70    3.50 
  -1  -5   1  212.48   24.40 
   1  -5  -1  185.28   12.10 
   1  -5  -1  195.28   12.90 
   1  -5  -1  178.28   12.30 
  -1  -5   1  197.28   11.90 
  -1  -5   1  168.68   12.00 
  -1  -5   1  185.48   11.80 
   1  -5  -1  222.48   13.70 
   1  -5  -1  202.28   13.10 
   1  -5  -1  155.48   24.90 
  -1  -5   1  186.28   20.20 
  -1  -5   1  188.68   12.10 
   1  -5  -1  184.78   11.00 
   1  -5  -1  157.68   33.60 
  -1  -5   1  205.08   12.10 
  -1  -5   1  204.08   38.30 
  -1  -5   1  165.28   13.10 
  -1  -5   1  187.28   12.60 
  -1  -5   1  160.38   10.90 
   1  -5  -1  174.58   14.80 
  -1  -5   1  185.68   12.60 
   1  -5  -1  186.88   12.40 
  -1  -5   1  186.98   13.20 
   1  -5  -1  194.08   12.40 
   1  -5  -1  201.68   11.10 
   1  -5  -1  155.58   21.50 
  -1  -5   1  198.38   17.80 
  -1  -5   1  191.08   16.00 
   1  -5  -1  195.38   11.60 
  -1  -5   1  192.88   11.60 
   1  -5  -1  212.88   14.10 
  -1   5   1  187.98   10.20 
   1   5  -1  181.98   11.70 
  -1   5   1  192.28   10.30 
   1   5  -1  164.48   19.40 
  -1   5   1  171.28   12.10 
  -1   5   1  183.78   11.30 
  -1   5   1  187.38    9.40 
   1   5  -1  152.88   12.00 
   1   5  -1  188.28    9.50 
  -1   5   1  174.38   14.60 
   1   5  -1  175.78   11.20 
  -1   5   1  197.68   12.80 
   1   5  -1  180.08   16.10 
   1   5  -1  166.78   11.40 
   1   5  -1  194.18    9.30 
  -1   5   1  212.88   12.10 
  -1   5   1  195.48   12.30 
  -1   5   1  192.88    9.50 
   1   5  -1  197.88   11.70 
  -1   5   1  133.29   24.40 
  -1   5   1  186.18   10.00 
  -1   5   1  204.58   18.10 
   1   5  -1  179.08   14.80 
   1   5  -1  223.68   22.80 
  -1   5   1  185.78   10.10 
  -1   5   1  187.28   12.80 
   1   5  -1  207.58   24.60 
  -1   5   1  185.48   22.70 
  -1   5   1  195.38    9.40 
   1   5  -1  197.78    9.70 
  -1   5   1  199.98   13.00 
  -1   5   1  200.48   10.30 
   1   5  -1  104.99   33.10 
   1   5  -1  188.38    9.10 
   0  -5   1   -3.20    2.40 
   0  -5   1   -1.20    2.50 
   0  -5  -1    3.30    2.70 
   0  -5   1   -0.10    1.50 
   0  -5  -1    3.80    2.60 
   0  -5   1    4.00    3.50 
   0  -5  -1   -1.00    2.50 
   0  -5  -1    2.20    2.60 
   0  -5   1   -0.80    9.70 
   0  -5   1   -0.50    1.90 
   0  -5  -1   -1.00    2.20 
   0  -5  -1   -0.90    2.50 
   0  -5  -1   -1.20    2.60 
   0  -5   1    3.20    1.90 
   0  -5   1    3.60    4.70 
   0  -5   1    6.90    5.20 
   0  -5   1    1.30    2.60 
   0  -5   1    3.30    2.80 
   0  -5  -1   -5.60    6.10 
   0  -5   1  -11.30    4.10 
   0  -5   1    4.50    3.10 
   0  -5  -1    1.50    2.80 
   0  -5  -1    1.40    2.80 
   0  -5   1   -1.10    5.50 
   0  -5  -1   -2.10    9.50 
   0  -5  -1   -0.50    3.60 
   0  -5  -1    3.00    5.60 
   0  -5  -1   -1.50    1.20 
   0  -5  -1   -1.20    2.40 
   0  -5  -1    1.20    2.30 
   0  -5  -1   -1.10    3.40 
   0  -5  -1    5.70    5.60 
   0  -5  -1   -2.60    2.10 
   0  -5   1    1.60    2.30 
   0  -5   1    0.80    3.00 
   0   5  -1    8.10    4.00 
   0   5   1    1.30    2.20 
   0   5   1    1.10    1.50 
   0   5  -1    0.50    2.30 
   0   5   1    5.70    7.00 
   0   5  -1    2.10    7.20 
   0   5  -1    1.70    2.10 
   0   5  -1    0.90    1.50 
   0   5  -1    0.60    2.00 
   0   5  -1    2.30    1.60 
   0   5   1    1.60    2.30 
   0   5   1    0.60    2.50 
   0   5   1    4.30    5.10 
   0   5  -1    2.90    2.60 
   0   5  -1    0.10    1.40 
   0   5   1    1.40    3.90 
   0   5  -1    0.20    2.10 
   0   5   1   -2.40    2.40 
   0   5  -1   -0.30    2.00 
   0   5  -1   -4.90    4.00 
   0   5   1    0.20    1.50 
   0   5   1    5.70    2.20 
   0   5   1   -0.10    0.70 
   0   5  -1   -0.30    1.30 
   0   5   1    4.70    1.70 
   0   5  -1    4.50    1.70 
   0   5  -1    0.10    2.20 
   0   5  -1    1.30    0.70 
   0   5  -1    9.40    7.10 
   0   5   1    1.00    3.10 
   0   5  -1    0.20    0.60 
  -1  -5  -1 2991.00  131.69 
  -1  -5  -1 3050.39  133.29 
   1  -5   1 3123.39  135.59 
  -1  -5  -1 3114.79  131.09 
  -1  -5  -1 2812.62  133.29 
  -1  -5  -1 2970.10  131.69 
   1  -5   1 3060.69  130.59 
   1  -5   1 2908.61  132.79 
   1  -5   1 2982.20  132.99 
  -1  -5  -1 2736.23  142.09 
  -1  -5  -1 3076.79  132.39 
  -1  -5  -1 3040.60  133.99 
   1  -5   1 2965.10  132.39 
   1  -5   1 3057.49  133.79 
   1  -5   1 3054.19  132.19 
  -1  -5  -1 2985.10  131.69 
  -1  -5  -1 2884.81  132.39 
  -1  -5  -1 2876.21  161.68 
  -1  -5  -1 3039.80  136.69 
   1  -5   1 3063.19  128.99 
  -1  -5  -1 3074.09  144.09 
   1  -5   1 2896.71  132.09 
   1  -5   1 2889.11  145.99 
  -1  -5  -1 3148.39  132.09 
  -1  -5  -1 3088.09  132.89 
   1  -5   1 3145.79  131.89 
   1  -5   1 2931.81  133.89 
  -1  -5  -1 2986.10  132.29 
   1  -5   1 2959.10  133.39 
   1   5   1 2999.70  128.29 
   1   5   1 2925.81  129.79 
  -1   5  -1 2911.41  132.59 
  -1   5  -1 3064.39  130.09 
   1   5   1 3040.80  128.29 
  -1   5  -1 3161.18  134.79 
   1   5   1 3068.49  129.59 
  -1   5  -1 3133.19  131.99 
  -1   5  -1 2684.43  140.09 
  -1   5  -1 3020.40  130.29 
  -1   5  -1 3005.80  131.49 
  -1   5  -1 3132.89  133.79 
   1   5   1 2904.71  140.39 
  -1   5  -1 3023.00  132.49 
   1   5   1 3109.19  129.19 
  -1   5  -1 2979.50  132.19 
  -1   5  -1 2941.81  138.79 
  -1   5  -1 3051.89  129.19 
  -1   5  -1 3135.19  130.29 
   1   5   1 2887.71  131.29 
   1   5   1 2914.71  137.29 
  -1   5  -1 3017.80  129.19 
   1   5   1 3038.30  131.79 
   1   5   1 2957.80  138.99 
   1   5   1 2998.90  131.39 
   1   5   1 2997.00  132.49 
  -1   5  -1 2993.80  131.49 
  -1   5  -1 3092.39  130.29 
   2  -5   1   23.40    4.00 
   2  -5   1   27.70    8.20 
   2  -5   1   22.10    4.40 
  -2  -5  -1   19.70    4.50 
  -2  -5  -1   22.10    4.40 
  -2  -5  -1   24.00    4.30 
  -2  -5  -1   34.30    5.90 
  -2  -5  -1   29.60    8.20 
   2  -5   1   25.30   15.90 
  -2  -5  -1   27.90    5.00 
   2  -5   1   20.40   13.10 
  -2  -5  -1   16.40    4.00 
   2  -5   1   36.00    7.00 
   2  -5   1   18.50    4.60 
  -2  -5  -1   24.20    5.90 
   2  -5   1   23.00    5.40 
   2  -5   1   47.70    6.90 
   2  -5   1   22.00    4.20 
  -2  -5  -1   26.50    5.20 
  -2  -5  -1   31.50    5.60 
   2  -5   1   24.50    5.50 
   2  -5   1   29.40    5.40 
  -2  -5  -1   27.70    4.70 
   2  -5   1   24.80    4.70 
  -2   5  -1   22.00    3.70 
  -2   5  -1   18.10    8.80 
   2   5   1   24.40    3.20 
  -2   5  -1   22.80    4.40 
  -2   5  -1   22.70   10.90 
  -2   5  -1   26.50    4.70 
  -2   5  -1   30.20    7.90 
   2   5   1   28.10    3.90 
  -2   5  -1   25.90    3.40 
   2   5   1   34.90    4.00 
  -2   5  -1   22.60    6.80 
  -2   5  -1   30.40    4.50 
   2   5   1   20.30    4.60 
   2   5   1   29.90    2.90 
   2   5   1   26.20   10.00 
   2   5   1   19.10    9.50 
   2   5   1   23.90    5.20 
   2   5   1   35.80    4.70 
  -2   5  -1   26.50    4.20 
   2   5   1   34.90    4.70 
  -2   5  -1   32.50    4.60 
   2   5   1   30.80    3.40 
   2   5   1   29.00    3.70 
  -2   5  -1   30.10    5.90 
  -2   5  -1   23.70    4.50 
   2   5   1   26.30    2.90 
  -2   5  -1   19.70    5.10 
   2   5   1   43.40    4.40 
  -2   5  -1   32.80    5.80 
  -2   5  -1   29.90    4.40 
   2   5   1   29.90    6.30 
   3  -5   1 3150.28  140.19 
   3  -5   1 3215.38  169.98 
   3  -5   1 3079.39  147.49 
  -3  -5  -1 3222.68  141.69 
  -3  -5  -1 3306.47  145.19 
   3  -5   1 3196.98  140.39 
   3  -5   1 2675.23  136.99 
  -3  -5  -1 3173.38  139.79 
  -3  -5  -1 3250.07  138.39 
   3  -5   1 3085.19  141.79 
  -3  -5  -1 3195.18  141.69 
   3  -5   1 3222.08  139.09 
  -3  -5  -1 3261.47  138.29 
  -3  -5  -1 3232.78  139.69 
  -3  -5  -1 3264.07  139.69 
   3  -5   1 2846.72  170.18 
   3  -5   1 3148.39  138.79 
   3  -5   1 3154.38  140.39 
  -3  -5  -1 3244.98  137.99 
   3  -5   1 3183.28  135.59 
  -3  -5  -1 3084.89  139.19 
   3  -5   1 3263.07  140.29 
  -3  -5  -1 3161.18  138.19 
   3  -5   1 3163.98  138.89 
   3  -5   1 3207.38  138.59 
   3   5   1 2873.61  147.89 
  -3   5  -1 3117.09  140.39 
  -3   5  -1 3292.17  139.59 
  -3   5  -1 3119.99  139.59 
   3   5   1 3108.79  137.59 
   3   5   1 3228.68  136.19 
   3   5   1 3176.38  137.59 
   3   5   1 3124.99  140.69 
   3   5   1 3103.59  141.49 
  -3   5  -1 3178.98  136.09 
  -3   5  -1 3200.08  138.39 
  -3   5  -1 3311.77  139.29 
  -3   5  -1 3227.78  140.59 
   3   5   1 3119.59  137.59 
  -3   5  -1 3166.78  141.39 
   3   5   1 3221.48  139.89 
   3   5   1 3248.07  138.59 
  -3   5  -1 3180.68  151.88 
  -3   5  -1 3335.37  139.69 
  -3   5  -1 3172.18  140.09 
  -3   5  -1 3135.59  145.09 
  -3   5  -1 2981.70  139.89 
  -3   5  -1 3082.19  140.89 
   3   5   1 2744.73  138.29 
  -3   5  -1 3225.28  136.19 
   3   5   1 3278.57  136.89 
   3   5   1 3177.08  137.39 
   4  -5   1  109.59   14.30 
   4  -5   1   92.69   10.40 
   4  -5   1  103.99    9.10 
  -4  -5  -1  103.09   10.90 
  -4  -5  -1   89.79    8.60 
  -4  -5  -1  135.09   12.60 
   4  -5   1  104.39    9.60 
  -4  -5  -1   86.29   12.10 
   4  -5   1   98.39   10.40 
   4  -5   1   82.09    9.40 
   4  -5   1  101.89   11.00 
  -4  -5  -1  119.09   10.00 
  -4  -5  -1   92.19    9.90 
   4  -5   1   86.89   10.20 
   4  -5   1  104.89   24.40 
   4  -5   1   80.49   23.20 
  -4  -5  -1   97.29    9.10 
   4  -5   1  107.29   10.10 
  -4  -5  -1  124.29   15.20 
   4  -5   1  111.09    9.50 
   4  -5   1  100.19    7.40 
  -4  -5  -1  121.79    8.70 
  -4  -5  -1  100.69   10.20 
   4  -5   1   97.79   12.20 
  -4  -5  -1  104.09   11.80 
   4   5   1  100.49   14.50 
   4   5   1   85.69   10.30 
  -4   5  -1   99.99   10.80 
   4   5   1   92.99    8.60 
   4   5   1  104.89   11.60 
   4   5   1   93.49    6.80 
  -4   5  -1   83.59   10.10 
  -4   5  -1  114.29   10.60 
  -4   5  -1   90.69    9.80 
   4   5   1  103.39    8.10 
   4   5   1   92.09    8.70 
  -4   5  -1  100.09    6.00 
   4   5   1   84.39   10.00 
  -4   5  -1   79.49    9.80 
   4   5   1  106.99    9.80 
   4   5   1  104.69    8.30 
  -4   5  -1   97.39    9.80 
   4   5   1   94.19    6.90 
   4   5   1   97.29   11.50 
  -4   5  -1  101.39    9.20 
  -4   5  -1  108.89   10.00 
   4   5   1   95.39    6.50 
  -4   5  -1  100.99    9.20 
  -4   5  -1  100.59   14.40 
  -4   5  -1   81.99   14.70 
  -4   5  -1  111.19   11.50 
  -4   5  -1  105.19   11.00 
   4   5   1   97.69    7.90 
  -4   5  -1  100.59   11.80 
  -5  -5  -1  347.17   17.60 
  -5  -5  -1  297.07   21.00 
  -5  -5  -1  313.17   17.60 
   5  -5   1  296.87   18.80 
  -5  -5  -1  288.87   19.10 
  -5  -5  -1  258.77   19.20 
  -5  -5  -1  319.97   23.70 
   5  -5   1  280.57   19.80 
  -5  -5  -1  321.57   23.70 
   5  -5   1  300.37   19.40 
  -5  -5  -1  319.17   19.70 
   5  -5   1  302.97   17.90 
   5  -5   1  284.17   19.10 
   5  -5   1  320.27   38.00 
   5  -5   1  291.77   19.60 
   5  -5   1  330.27   17.70 
   5  -5   1  283.67   43.80 
   5  -5   1  307.97   19.40 
   5  -5   1  314.27   22.00 
   5  -5   1  301.47   19.80 
  -5  -5  -1  296.67   18.40 
  -5   5  -1  305.47   25.70 
   5   5   1  310.87   20.00 
  -5   5  -1  313.57   19.50 
  -5   5  -1  336.07   19.60 
   5   5   1  304.47   18.00 
  -5   5  -1  304.47   20.00 
   5   5   1  304.27   16.70 
  -5   5  -1  288.97   19.40 
  -5   5  -1  300.17   19.70 
  -5   5  -1  292.07   16.70 
  -5   5  -1  261.37   22.80 
   5   5   1  312.67   16.40 
   5   5   1  280.57   19.00 
   5   5   1  299.77   20.90 
   5   5   1  317.37   21.10 
   5   5   1  303.57   22.80 
  -5   5  -1  289.57   18.00 
  -5   5  -1  310.27   22.40 
   5   5   1  278.17   18.90 
  -5   5  -1  314.47   20.70 
  -5   5  -1  312.87   20.30 
  -5   5  -1  305.57   21.30 
   6  -5   1   17.50    5.00 
  -6  -5  -1   14.00    4.60 
  -6  -5  -1   15.70    6.10 
   6  -5   1   11.50    5.30 
   6  -5   1   38.20    9.50 
  -6  -5  -1   13.90    7.70 
  -6  -5  -1   24.80    7.60 
  -6  -5  -1   15.10    5.10 
   6  -5   1   19.50    6.20 
   6  -5   1    4.70    5.20 
   6  -5   1   11.30    5.60 
  -6  -5  -1   24.50    6.30 
   6  -5   1   20.50   17.00 
   6  -5   1   25.50    7.10 
  -6  -5  -1   12.50    5.50 
   6  -5   1   15.80    4.70 
  -6  -5  -1   15.30    8.30 
   6  -5   1   13.40    5.40 
   6  -5   1   12.00   12.20 
   6   5   1    4.10    5.30 
  -6   5  -1   26.90    6.10 
  -6   5  -1   11.90    5.50 
  -6   5  -1   11.80    5.40 
   6   5   1   18.70    6.20 
  -6   5  -1   17.50    7.70 
   6   5   1   23.20    7.50 
  -6   5  -1   14.80    6.60 
  -6   5  -1   14.00    8.40 
   6   5   1   14.10    5.20 
  -6   5  -1   13.40    7.20 
   6   5   1   12.40    3.70 
  -6   5  -1   22.90    6.40 
  -6   5  -1   18.20    6.10 
   6   5   1    7.00    5.40 
   6   5   1   19.30    6.90 
   6   5   1   17.50    4.40 
  -6   5  -1   13.30    5.60 
  -6   5  -1   14.50    5.60 
  -6   5  -1   20.40    7.30 
   7  -5   1   45.80    9.70 
  -7  -5  -1   51.39   10.70 
   7  -5   1   87.29   14.00 
   7  -5   1   63.59    9.90 
  -7  -5  -1   54.79    9.30 
  -7  -5  -1   58.99   12.50 
   7  -5   1   73.39   25.10 
   7  -5   1   58.59   10.00 
  -7  -5  -1   60.09   13.30 
   7  -5   1   59.29    9.80 
  -7  -5  -1   37.40    8.00 
   7  -5   1   62.99    8.90 
  -7  -5  -1   55.89    8.30 
   7  -5   1   60.39    7.90 
  -7  -5  -1   53.89   10.20 
  -7   5  -1   77.19   11.40 
  -7   5  -1   85.29   13.10 
   7   5   1   68.59    8.10 
  -7   5  -1   56.69    9.80 
  -7   5  -1   45.70    8.90 
   7   5   1   52.39    8.90 
  -7   5  -1   38.80   10.70 
   7   5   1   48.10    9.60 
  -7   5  -1   44.40    9.10 
  -7   5  -1   37.40    8.80 
   7   5   1   68.39   11.60 
  -7   5  -1   62.09   14.20 
  -7   5  -1   56.89   11.10 
   7   5   1   53.49   10.00 
   7   5   1   83.29   13.30 
   8  -5   1   31.30    8.90 
   8  -5   1   37.70    8.00 
  -8  -5  -1   36.50   11.60 
   8  -5   1   35.90    8.90 
   8  -5   1   42.00    8.60 
  -8  -5  -1   33.50    9.70 
   8  -5   1   39.50   10.40 
   8  -5   1   38.80   21.80 
  -8  -5  -1   47.90   13.90 
   8  -5   1   36.10    9.20 
  -8  -5  -1   33.30    8.80 
  -8  -5  -1   32.80    8.50 
  -8  -5  -1   41.00    9.00 
  -8   5  -1   40.50    9.90 
  -8   5  -1   55.69   14.00 
   8   5   1   24.90    7.70 
  -8   5  -1   59.69   11.10 
   8   5   1   44.20   10.80 
  -8   5  -1   46.50   10.10 
  -8   5  -1   43.70   11.10 
   8   5   1   40.70    9.70 
  -8   5  -1   26.40    9.20 
  -8   5  -1   24.50   10.20 
   8   5   1   46.50   10.60 
  -8   5  -1   48.80    9.90 
   8   5   1   36.20    9.60 
   9  -5   1  369.16   25.30 
   9  -5   1  366.86   27.60 
   9  -5   1  362.56   26.40 
  -9  -5  -1  363.56   25.50 
  -9  -5  -1  383.26   29.10 
  -9  -5  -1  394.46   26.10 
  -9  -5  -1  409.76   33.20 
   9  -5   1  367.06   52.49 
   9  -5   1  421.76   26.80 
   9  -5   1  360.86   30.30 
  -9   5  -1  393.36   30.80 
  -9   5  -1  366.86   26.80 
   9   5   1  375.46   27.90 
  -9   5  -1  351.36   28.90 
  -9   5  -1  376.86   30.50 
   9   5   1  366.96   28.30 
  -9   5  -1  356.56   33.60 
  -9   5  -1  346.77   27.00 
   9   5   1  416.46   29.20 
   9   5   1  373.96   26.50 
  -9   5  -1  366.06   28.10 
   9   5   1  389.46   30.00 
  -9   5  -1  386.96   27.60 
  -9   5  -1  350.76   32.90 
   8  -6  -1   78.29   29.60 
   8  -6  -1   51.59   23.60 
  -8  -6   1   57.79   11.30 
   8  -6  -1   80.19   11.90 
   8  -6  -1   89.19   12.90 
  -8  -6   1   86.29   13.10 
   8  -6  -1   64.69   12.10 
  -8  -6   1   78.29   11.50 
  -8  -6   1   76.89   14.30 
   8  -6  -1   69.79   14.00 
  -8  -6   1   55.69   14.10 
   8  -6  -1   65.79   11.20 
   8   6  -1   45.50   12.00 
   8   6  -1   56.09   11.50 
  -8   6   1   73.99   12.80 
  -8   6   1   61.89   11.90 
   8   6  -1   68.19   10.70 
  -8   6   1   58.49   13.90 
  -8   6   1   49.40   11.70 
  -8   6   1   56.89   14.20 
  -8   6   1   59.19   11.60 
  -8   6   1  103.79   17.00 
  -8   6   1   55.09   11.10 
   8   6  -1   43.30   10.50 
  -8   6   1   53.59   10.60 
  -8   6   1   45.50   10.80 
  -7  -6   1    1.00    5.70 
   7  -6  -1    5.40   12.90 
   7  -6  -1    2.50    5.50 
  -7  -6   1    4.70    5.10 
  -7  -6   1    5.60    7.50 
   7  -6  -1    7.90    6.90 
   7  -6  -1    9.40    5.20 
   7  -6  -1    5.90    6.40 
   7  -6  -1    9.50   15.00 
   7  -6  -1   -4.50    5.10 
  -7  -6   1    4.30    5.50 
   7  -6  -1    5.60    5.00 
  -7  -6   1    4.10    6.10 
  -7  -6   1   -1.40    5.20 
   7  -6  -1    7.20    5.70 
  -7   6   1    2.00    5.30 
  -7   6   1    1.90    5.80 
   7   6  -1    5.90    6.20 
  -7   6   1    1.30    5.60 
   7   6  -1    9.50    6.10 
  -7   6   1    6.40    6.00 
  -7   6   1    2.00    6.50 
   7   6  -1    2.20    4.40 
   7   6  -1    1.60    5.00 
  -7   6   1    0.10    4.80 
  -7   6   1    0.50    6.50 
  -7   6   1   -1.50    4.70 
  -7   6   1    7.40    6.50 
   7   6  -1    9.20    7.00 
  -6  -6   1   20.10    7.70 
  -6  -6   1   29.50    7.30 
   6  -6  -1   29.10   16.30 
   6  -6  -1   21.20    5.10 
  -6  -6   1   22.20    6.90 
  -6  -6   1   22.30    4.90 
   6  -6  -1   20.50    6.50 
   6  -6  -1    4.10   13.70 
  -6  -6   1   21.40    6.20 
   6  -6  -1   27.10    8.80 
  -6  -6   1   22.20    6.50 
   6  -6  -1   17.30    5.20 
   6  -6  -1   26.00    8.40 
   6  -6  -1   25.20    6.30 
   6  -6  -1   14.90    6.60 
  -6  -6   1   14.40    7.80 
  -6  -6   1   29.90    7.50 
  -6  -6   1   17.60    7.60 
   6  -6  -1   14.10    6.50 
   6  -6  -1   16.40    6.20 
  -6   6   1   24.70    7.50 
  -6   6   1   17.30    6.60 
   6   6  -1   10.40    6.20 
  -6   6   1   30.00    7.40 
  -6   6   1   11.90    6.90 
   6   6  -1   26.20    8.30 
  -6   6   1   21.40    7.00 
  -6   6   1   14.60    6.00 
   6   6  -1   22.80    7.10 
  -6   6   1   17.10    7.10 
   6   6  -1   17.20    5.10 
  -6   6   1   18.00    6.70 
  -6   6   1   21.90    9.10 
  -6   6   1   25.90    7.10 
   6   6  -1   14.60    5.70 
  -6   6   1   35.30    8.30 
   5  -6  -1   52.89    8.80 
   5  -6  -1   23.20   16.90 
  -5  -6   1   30.20    6.70 
  -5  -6   1   38.00    5.90 
  -5  -6   1   32.50    6.40 
  -5  -6   1   31.90    5.70 
  -5  -6   1   29.50    7.90 
   5  -6  -1   34.50    7.80 
   5  -6  -1   37.40    7.50 
   5  -6  -1   38.10    5.10 
  -5  -6   1   24.30    6.40 
   5  -6  -1   32.70    6.60 
  -5  -6   1   36.80    7.50 
  -5  -6   1   43.20   10.60 
   5  -6  -1   29.10    9.00 
  -5  -6   1   32.70    7.30 
   5  -6  -1   31.60   15.40 
   5  -6  -1   31.10    6.80 
  -5  -6   1   44.00    7.80 
   5  -6  -1   52.59    8.20 
   5  -6  -1   23.30    6.90 
  -5   6   1   35.40    7.60 
  -5   6   1   30.70    7.30 
  -5   6   1   42.10    7.10 
   5   6  -1   35.00    5.80 
  -5   6   1   35.20    9.30 
  -5   6   1   40.30    8.50 
  -5   6   1   40.70    8.90 
   5   6  -1   25.30    7.30 
   5   6  -1   36.30    5.50 
  -5   6   1   38.80    8.20 
  -5   6   1   26.50    7.10 
  -5   6   1   30.60    7.80 
  -5   6   1   41.30    8.10 
   5   6  -1   35.30    8.70 
  -5   6   1   41.00   10.10 
   5   6  -1   22.90    6.70 
   5   6  -1   26.60    7.30 
   5   6  -1   28.70    5.20 
   5   6  -1   29.20    6.30 
   4  -6  -1  279.47   18.30 
   4  -6  -1  279.07   36.40 
   4  -6  -1  288.67   19.50 
   4  -6  -1  277.37   19.60 
  -4  -6   1  324.77   19.80 
  -4  -6   1  266.07   18.70 
  -4  -6   1  305.77   17.70 
  -4  -6   1  293.87   19.00 
   4  -6  -1  272.57   46.70 
  -4  -6   1  306.17   18.60 
  -4  -6   1  297.67   23.00 
   4  -6  -1  331.07   20.50 
  -4  -6   1  295.77   18.50 
  -4  -6   1  285.27   21.50 
  -4  -6   1  299.97   19.80 
  -4  -6   1  301.17   17.30 
   4  -6  -1  262.17   21.30 
   4  -6  -1  303.87   18.60 
   4  -6  -1  275.97   18.20 
   4  -6  -1  305.97   19.10 
   4   6  -1  305.47   17.70 
  -4   6   1  313.97   20.60 
  -4   6   1  313.17   17.90 
   4   6  -1  302.97   17.50 
   4   6  -1  302.67   22.80 
  -4   6   1  277.37   20.60 
   4   6  -1  298.17   15.60 
  -4   6   1  312.17   25.10 
   4   6  -1  297.87   16.50 
   4   6  -1  272.97   15.70 
  -4   6   1  306.87   19.30 
  -4   6   1  312.37   21.00 
  -4   6   1  295.27   20.10 
  -4   6   1  296.17   19.80 
   4   6  -1  322.77   20.90 
  -4   6   1  343.97   20.30 
   4   6  -1  272.97   21.80 
  -4   6   1  266.47   21.10 
   4   6  -1  302.47   15.80 
   4   6  -1  298.17   19.40 
   4   6  -1  309.77   16.70 
  -4   6   1  285.37   22.50 
  -4   6   1  298.77   19.60 
  -3  -6   1    3.70    3.20 
   3  -6  -1   -1.20    3.20 
   3  -6  -1    0.10    3.50 
  -3  -6   1    1.50    4.30 
   3  -6  -1    1.40    3.60 
   3  -6  -1   -0.70    3.50 
   3  -6  -1    0.90    3.30 
   3  -6  -1   -1.40    2.80 
  -3  -6   1    3.80    5.60 
  -3  -6   1    2.10    3.60 
  -3  -6   1   -3.40    3.20 
  -3  -6   1    2.20    2.70 
  -3  -6   1   -0.50    3.20 
   3  -6  -1   -1.80    8.10 
  -3  -6   1   -0.10    3.70 
   3  -6  -1    2.00   11.70 
  -3  -6   1    0.40    4.90 
   3  -6  -1    6.30    3.70 
   3  -6  -1   -2.80    4.30 
   3  -6  -1    2.60    5.40 
  -3  -6   1    1.10    3.40 
   3   6  -1   -1.40    2.70 
  -3   6   1    0.90    3.30 
   3   6  -1   -2.50    2.20 
   3   6  -1    4.70    5.70 
   3   6  -1    0.70    1.10 
   3   6  -1   -1.80    2.30 
  -3   6   1   -4.60    2.60 
   3   6  -1    3.60    3.90 
  -3   6   1    1.20    7.00 
  -3   6   1    0.30    3.70 
   3   6  -1   -0.90    4.20 
  -3   6   1   -0.50    2.70 
  -3   6   1   -1.90    3.60 
  -3   6   1   -0.10    2.40 
  -3   6   1   -2.00    3.80 
   3   6  -1    3.10    2.70 
   3   6  -1   -0.30    2.10 
  -3   6   1    5.30    6.20 
  -3   6   1    1.50    4.20 
   3   6  -1    0.50    2.80 
   3   6  -1   -2.20    1.80 
  -3   6   1    1.10    3.30 
  -3   6   1   -4.00    2.80 
   3   6  -1    7.00    3.00 
   3   6  -1    0.00    5.30 
  -3   6   1    0.50    3.60 
   2  -6  -1   19.70    5.40 
   2  -6  -1   18.90    9.80 
  -2  -6   1   10.40    6.60 
   2  -6  -1   23.60    4.70 
  -2  -6   1   23.80    5.70 
   2  -6  -1   17.00    4.80 
  -2  -6   1   18.90    7.40 
   2  -6  -1   25.70    6.10 
   2  -6  -1    9.60    4.50 
  -2  -6   1   24.30    6.10 
  -2  -6   1   18.10    4.50 
   2  -6  -1   16.90    4.80 
  -2  -6   1   25.00    4.90 
   2  -6  -1   10.90    3.70 
  -2  -6   1   19.30    5.10 
   2  -6  -1   23.80   15.90 
  -2  -6   1   17.40    4.10 
  -2  -6   1   12.90    4.30 
   2  -6  -1   19.60    5.80 
  -2  -6   1   18.90    4.40 
  -2  -6   1    8.40    4.10 
   2  -6  -1   24.70    7.10 
   2  -6  -1    8.20   10.00 
   2  -6  -1   17.30    4.90 
  -2  -6   1   13.80    4.00 
   2   6  -1   20.40    2.90 
   2   6  -1   16.20    4.00 
  -2   6   1   17.80    3.90 
  -2   6   1   14.10    5.10 
  -2   6   1   15.60    4.80 
  -2   6   1   14.00    2.50 
  -2   6   1   13.30   10.80 
   2   6  -1   13.20    3.60 
  -2   6   1   15.80    3.70 
   2   6  -1   38.00    7.70 
   2   6  -1   17.30    2.00 
   2   6  -1   17.80    5.20 
  -2   6   1   18.50    2.90 
  -2   6   1   23.80   10.40 
  -2   6   1   18.70    5.30 
   2   6  -1    5.00    8.20 
  -2   6   1   13.80    5.80 
   2   6  -1   16.30    2.80 
   2   6  -1   15.90    2.50 
  -2   6   1    7.20    4.50 
  -2   6   1   14.20    4.40 
  -2   6   1   15.50    3.20 
   2   6  -1   18.60    9.60 
  -2   6   1   16.30    3.70 
  -2   6   1   14.40    3.30 
   2   6  -1   20.70    7.80 
   2   6  -1   17.60    2.40 
  -2   6   1   18.00    3.90 
   2   6  -1   25.30    4.80 
   2   6  -1   22.90    4.30 
   1  -6  -1   50.09    6.40 
  -1  -6   1   40.40    9.70 
   1  -6  -1   55.19    7.90 
  -1  -6   1   55.29    8.40 
   1  -6  -1   43.70    6.90 
  -1  -6   1   35.40    6.40 
   1  -6  -1   44.40    7.20 
   1  -6  -1   49.60    7.70 
   1  -6  -1   37.40    6.40 
   1  -6  -1   50.29    7.60 
  -1  -6   1   34.80    5.20 
   1  -6  -1   39.90    8.90 
  -1  -6   1   41.70    5.90 
  -1  -6   1   43.70    6.70 
  -1  -6   1   44.20   12.40 
  -1  -6   1   46.50    7.10 
   1  -6  -1   47.20    5.40 
   1  -6  -1   61.89   17.60 
   1  -6  -1   54.59   22.10 
  -1  -6   1   71.39   16.40 
   1  -6  -1   44.00    7.30 
  -1  -6   1   53.79   23.30 
  -1  -6   1   41.30    7.00 
  -1  -6   1   46.50    6.40 
  -1  -6   1   55.59    8.70 
  -1  -6   1   55.49    7.00 
   1  -6  -1   56.89    8.60 
  -1   6   1   80.69   20.40 
   1   6  -1   50.89    3.60 
  -1   6   1   46.80    4.40 
  -1   6   1   45.20    6.90 
  -1   6   1   39.60    6.70 
  -1   6   1   51.39    4.00 
  -1   6   1   45.60    4.60 
  -1   6   1   51.19    7.00 
  -1   6   1   56.49   11.40 
   1   6  -1   34.50   10.30 
   1   6  -1   44.70    6.20 
   1   6  -1   53.99   11.30 
   1   6  -1   40.80   11.00 
  -1   6   1   50.99    4.30 
  -1   6   1   46.30    4.90 
   1   6  -1   48.80    2.80 
   1   6  -1   55.09   12.90 
   1   6  -1   47.90    6.40 
   1   6  -1   45.60    6.50 
   1   6  -1   52.69    3.90 
   1   6  -1   45.30    3.60 
   1   6  -1   51.59    6.70 
  -1   6   1   52.69   14.20 
  -1   6   1   58.49   10.20 
  -1   6   1   43.80    6.00 
   1   6  -1   42.30    5.40 
  -1   6   1   48.40    7.40 
   1   6  -1   53.19    7.20 
  -1   6   1   54.29    4.10 
  -1   6   1   42.90    7.00 
  -1   6   1   40.40    3.70 
   1   6  -1   50.19    3.60 
  -1   6   1   51.59    5.10 
   0  -6  -1  833.82   40.60 
   0  -6   1  958.00   49.30 
   0  -6   1  812.12   39.80 
   0  -6   1  778.42   39.70 
   0  -6   1  852.21   47.60 
   0  -6  -1  815.42   40.70 
   0  -6  -1  881.01   40.90 
   0  -6  -1  871.91   40.40 
   0  -6   1  818.02   40.70 
   0  -6  -1  807.02   37.20 
   0  -6  -1  806.42   39.10 
   0  -6  -1  802.52   41.40 
   0  -6  -1  802.92   48.90 
   0  -6   1  878.81   73.79 
   0  -6   1  832.72   38.90 
   0  -6  -1  810.62   40.10 
   0  -6  -1  816.82   41.60 
   0  -6   1  770.22   41.40 
   0  -6  -1  858.81   48.20 
   0  -6   1  851.51   40.30 
   0  -6   1  833.22   41.80 
   0  -6   1  810.82   37.60 
   0  -6  -1  904.61   46.40 
   0  -6   1  800.52   57.29 
   0  -6   1  854.41   41.00 
   0  -6   1  844.42   40.80 
   0  -6  -1  892.11   71.19 
   0  -6  -1  784.92   40.00 
   0  -6  -1  787.02   40.60 
   0  -6   1  824.62   40.60 
   0  -6  -1  790.82   40.30 
   0   6  -1  790.72   39.00 
   0   6   1  827.72   50.99 
   0   6  -1  827.62   40.10 
   0   6   1  846.42   48.20 
   0   6  -1  805.32   38.10 
   0   6  -1  811.92   44.50 
   0   6  -1  815.62   46.20 
   0   6  -1  844.22   40.30 
   0   6  -1  860.21   57.19 
   0   6   1  794.62   39.90 
   0   6   1  786.32   39.70 
   0   6  -1  769.22   39.50 
   0   6   1  799.32   40.10 
   0   6   1  819.52   45.40 
   0   6   1  773.12   40.20 
   0   6   1  768.22   54.09 
   0   6   1  807.92   39.80 
   0   6  -1  866.01   37.80 
   0   6   1  846.32   38.50 
   0   6  -1  770.02   39.90 
   0   6   1  772.82   39.70 
   0   6  -1  805.42   35.50 
   0   6   1  833.92   42.80 
   0   6  -1  806.22   36.40 
   0   6  -1  814.32   48.40 
   1  -6   1    2.00    8.90 
  -1  -6  -1    9.20    8.10 
  -1  -6  -1    1.70   10.40 
   1  -6   1   -0.10    3.60 
   1  -6   1    2.40    3.70 
  -1  -6  -1    1.60    3.00 
  -1  -6  -1    1.70    3.40 
  -1  -6  -1    2.20    3.60 
  -1  -6  -1    0.40    3.00 
  -1  -6  -1    1.30    3.70 
  -1  -6  -1   -0.20    2.70 
  -1  -6  -1    1.60    3.00 
  -1  -6  -1   -1.30    3.40 
  -1  -6  -1    0.90    3.20 
   1  -6   1   -2.10    3.40 
   1  -6   1    3.10   11.10 
   1  -6   1    4.90    3.70 
  -1  -6  -1    9.70    4.40 
   1  -6   1    5.00    4.40 
  -1  -6  -1   -0.50    3.00 
   1  -6   1    5.60    3.40 
  -1  -6  -1    3.00    7.50 
  -1  -6  -1   13.00    4.50 
   1  -6   1    0.40    3.20 
   1  -6   1    5.60    3.00 
   1  -6   1    0.20    4.80 
  -1  -6  -1    7.70    5.50 
   1  -6   1    2.20    3.70 
   1   6   1   -1.00    1.60 
   1   6   1    9.70    5.70 
  -1   6  -1    7.30    3.40 
   1   6   1    1.80    1.60 
   1   6   1    1.90    3.20 
   1   6   1    6.70    9.10 
  -1   6  -1    6.00    5.00 
   1   6   1   -0.20    4.60 
   1   6   1    3.70    3.00 
   1   6   1   -4.60    2.40 
   1   6   1   -2.50    4.10 
  -1   6  -1    3.30    2.00 
  -1   6  -1    0.50    2.60 
  -1   6  -1    1.10    2.10 
  -1   6  -1   -1.10    3.00 
  -1   6  -1    1.00    3.70 
  -1   6  -1   -0.50    3.10 
   1   6   1   -1.60    3.00 
  -1   6  -1    2.20    1.80 
  -1   6  -1    1.10    3.20 
  -1   6  -1    1.70    2.10 
  -1   6  -1    4.30    3.70 
  -1   6  -1    1.10    1.60 
  -1   6  -1    4.70    9.30 
   1   6   1    4.80    2.90 
  -1   6  -1    2.70    6.20 
  -1   6  -1    1.80    1.90 
   1   6   1    2.80    4.70 
  -2  -6  -1  439.06   23.10 
  -2  -6  -1  416.26   22.60 
   2  -6   1  408.26   23.90 
  -2  -6  -1  396.86   23.10 
  -2  -6  -1  412.26   30.90 
   2  -6   1  324.27   53.09 
  -2  -6  -1  430.06   22.60 
   2  -6   1  393.06   23.80 
   2  -6   1  420.06   24.80 
  -2  -6  -1  399.16   23.20 
   2  -6   1  409.66   23.50 
   2  -6   1  397.26   22.80 
   2  -6   1  449.26   26.60 
  -2  -6  -1  401.96   22.10 
   2  -6   1  443.26   25.00 
  -2  -6  -1  416.46   23.50 
  -2  -6  -1  375.36   23.50 
   2  -6   1  426.16   22.60 
  -2  -6  -1  424.36   26.80 
   2  -6   1  427.56   21.80 
  -2  -6  -1  427.16   22.90 
  -2   6  -1  464.95   29.30 
  -2   6  -1  415.16   22.00 
  -2   6  -1  406.66   20.80 
  -2   6  -1  378.96   23.30 
   2   6   1  400.16   22.60 
   2   6   1  423.36   18.90 
   2   6   1  409.26   19.50 
   2   6   1  396.26   31.80 
   2   6   1  404.76   21.40 
  -2   6  -1  417.26   23.50 
   2   6   1  423.86   24.00 
  -2   6  -1  411.26   21.40 
   2   6   1  412.86   19.70 
  -2   6  -1  413.56   22.90 
   2   6   1  417.76   19.50 
   2   6   1  439.96   22.40 
  -2   6  -1  394.86   19.40 
   2   6   1  399.36   19.00 
   2   6   1  415.76   21.90 
   2   6   1  418.16   33.20 
   2   6   1  399.76   25.80 
  -2   6  -1  420.16   24.70 
  -2   6  -1  267.47   33.90 
  -2   6  -1  398.56   21.80 
  -2   6  -1  381.96   22.30 
  -2   6  -1  408.16   21.50 
  -2   6  -1  422.56   21.40 
  -2   6  -1  314.47   39.60 
  -2   6  -1  394.76   23.70 
  -3  -6  -1   -0.60    3.40 
   3  -6   1   12.70   11.60 
   3  -6   1   -1.00    3.60 
  -3  -6  -1    3.00    4.30 
  -3  -6  -1   -5.20    4.00 
   3  -6   1   -1.00    4.70 
   3  -6   1    4.40    3.80 
  -3  -6  -1   -3.00    2.60 
   3  -6   1   -2.20    4.20 
   3  -6   1    3.90    3.00 
   3  -6   1   -0.40    3.20 
  -3  -6  -1   -0.50    4.10 
   3  -6   1    4.10   13.80 
  -3  -6  -1   -1.90    2.70 
  -3  -6  -1   -0.50    2.90 
  -3  -6  -1   -0.20    3.90 
  -3  -6  -1    0.70    3.20 
   3  -6   1    0.40    3.70 
   3  -6   1   -3.10    2.80 
  -3  -6  -1    6.00    3.90 
  -3   6  -1   -1.40    3.00 
   3   6   1    4.20    6.30 
   3   6   1    2.10    2.40 
   3   6   1   -1.40    2.20 
  -3   6  -1    0.60    4.50 
  -3   6  -1   -0.30    4.30 
  -3   6  -1   -2.00    3.30 
   3   6   1    1.10    2.30 
  -3   6  -1   -2.80    4.00 
  -3   6  -1    4.50    3.90 
  -3   6  -1   -0.10    3.60 
   3   6   1    4.10    4.70 
   3   6   1    0.40    1.60 
   3   6   1    2.70    3.00 
  -3   6  -1    0.10    7.10 
   3   6   1    2.00    3.70 
  -3   6  -1   -0.90    3.00 
   3   6   1    2.70    2.80 
  -3   6  -1   -1.90    2.40 
   3   6   1   -0.90    1.80 
  -3   6  -1    1.60    3.00 
  -3   6  -1   -0.50    2.50 
  -3   6  -1    3.40    5.00 
   3   6   1    6.80    4.90 
   4  -6   1    4.10    3.50 
  -4  -6  -1   10.10    4.30 
   4  -6   1    8.30    4.70 
  -4  -6  -1    7.10    4.50 
   4  -6   1   13.30    4.40 
   4  -6   1    7.40    5.70 
   4  -6   1   13.50   12.80 
  -4  -6  -1    8.70    4.90 
   4  -6   1   13.80    4.90 
   4  -6   1    9.90   14.60 
  -4  -6  -1   13.80    4.90 
   4  -6   1    3.70    4.90 
  -4  -6  -1   15.70    5.30 
  -4  -6  -1   13.10    5.20 
  -4  -6  -1   14.80    6.00 
   4  -6   1    9.50    5.10 
   4  -6   1   13.60    4.20 
  -4  -6  -1    6.50    3.60 
   4  -6   1   14.70    6.00 
  -4  -6  -1    3.90    6.10 
   4   6   1    9.90    3.90 
   4   6   1    9.50    2.60 
  -4   6  -1   11.50    4.40 
   4   6   1    8.10    4.90 
  -4   6  -1   15.60    6.00 
   4   6   1    9.00    3.60 
  -4   6  -1   15.40    5.50 
   4   6   1    7.80    3.60 
  -4   6  -1   14.50    6.90 
   4   6   1    8.30    5.00 
  -4   6  -1   19.20    5.90 
   4   6   1   10.80    7.20 
  -4   6  -1    6.80    4.30 
  -4   6  -1   11.80    4.60 
   4   6   1   18.50    5.90 
  -4   6  -1   13.00    5.70 
   4   6   1    9.90    3.40 
  -4   6  -1    7.80    8.00 
  -4   6  -1   16.80    5.40 
  -4   6  -1    7.90    4.80 
   4   6   1    9.90    3.40 
   5  -6   1  151.68   13.30 
  -5  -6  -1  158.48   16.90 
  -5  -6  -1  146.99   11.20 
  -5  -6  -1  156.08   13.30 
   5  -6   1  127.49   30.60 
   5  -6   1  133.59   11.50 
  -5  -6  -1  123.89   13.10 
  -5  -6  -1  155.08   16.80 
  -5  -6  -1  123.19   12.90 
   5  -6   1  126.19    9.60 
  -5  -6  -1  159.58   11.50 
   5  -6   1  138.19   14.70 
   5  -6   1  140.59   35.20 
  -5  -6  -1  142.29   14.00 
   5  -6   1  172.08   17.90 
   5  -6   1  150.78   12.50 
  -5  -6  -1  132.79   18.00 
   5  -6   1  144.69   15.60 
   5  -6   1  146.49   11.70 
  -5   6  -1  140.29   15.00 
   5   6   1  156.08   16.30 
  -5   6  -1  120.79   13.70 
  -5   6  -1  124.49   13.90 
  -5   6  -1  146.59   15.10 
  -5   6  -1  154.68   14.90 
   5   6   1  143.59   11.20 
   5   6   1  158.98   11.00 
  -5   6  -1  141.49   13.20 
  -5   6  -1  130.49   15.90 
  -5   6  -1  158.78   12.50 
   5   6   1  135.59   14.00 
  -5   6  -1  133.19   14.10 
  -5   6  -1  178.28   23.10 
   5   6   1  124.49   11.90 
  -5   6  -1  171.68   13.20 
  -5   6  -1  149.88   19.40 
   5   6   1  140.59   15.30 
   5   6   1  130.29   17.70 
  -6  -6  -1  621.74   37.90 
   6  -6   1  554.44   32.20 
  -6  -6  -1  630.34   35.40 
   6  -6   1  644.24   35.30 
  -6  -6  -1  621.94   40.50 
   6  -6   1  635.74   34.70 
   6  -6   1  647.34   32.00 
  -6  -6  -1  622.94   31.60 
  -6  -6  -1  599.14   34.60 
   6  -6   1  694.43   65.59 
  -6  -6  -1  626.04   33.80 
   6  -6   1  639.04   64.39 
  -6  -6  -1  596.54   34.40 
  -6  -6  -1  629.24   38.90 
   6  -6   1  627.34   36.20 
   6  -6   1  586.44   38.00 
   6  -6   1  642.94   35.50 
   6   6   1  628.84   34.90 
  -6   6  -1  663.43   35.30 
   6   6   1  640.14   33.30 
   6   6   1  560.94   37.60 
  -6   6  -1  612.14   35.50 
  -6   6  -1  602.54   34.90 
  -6   6  -1  669.33   34.60 
  -6   6  -1  571.74   37.00 
   6   6   1  657.53   37.70 
   6   6   1  632.04   36.10 
  -6   6  -1  642.44   38.90 
  -6   6  -1  596.64   36.40 
  -6   6  -1  606.64   35.90 
  -6   6  -1  660.93   43.70 
  -7  -6  -1   51.79   13.60 
   7  -6   1   41.40   20.50 
  -7  -6  -1   40.10    9.00 
   7  -6   1   44.40   11.90 
   7  -6   1   42.10    7.10 
  -7  -6  -1   40.40    8.40 
  -7  -6  -1   44.50   10.60 
   7  -6   1   30.30    8.90 
   7  -6   1   40.10    8.60 
   7  -6   1   46.60   23.70 
   7  -6   1   38.00    9.10 
  -7  -6  -1   45.00   14.20 
  -7  -6  -1   22.00    7.60 
   7  -6   1   49.80    9.50 
  -7  -6  -1   38.20    9.70 
  -7   6  -1   26.60    8.40 
  -7   6  -1   38.60    9.70 
  -7   6  -1   46.30   11.80 
  -7   6  -1   25.70    9.40 
   7   6   1   35.80    9.80 
  -7   6  -1   32.30    8.70 
   7   6   1   28.70    9.50 
   7   6   1   26.40    7.90 
   7   6   1   32.40    7.50 
  -7   6  -1   59.09   14.50 
  -7   6  -1   23.10    7.50 
  -7   6  -1   40.70    9.10 
   7   6   1   35.90    9.30 
  -7   6  -1   39.90    9.60 
   8  -6   1  749.53   77.39 
   8  -6   1  815.32   80.19 
  -8  -6  -1  784.42   43.90 
  -8  -6  -1  781.32   44.20 
   8  -6   1  802.42   48.80 
   8  -6   1  786.72   44.40 
   8  -6   1  808.02   44.40 
   8  -6   1  720.93   45.20 
  -8  -6  -1  869.41   52.79 
  -8  -6  -1  799.32   47.60 
   8   6   1  842.22   44.30 
   8   6   1  726.23   46.10 
  -8   6  -1  800.32   45.40 
  -8   6  -1  810.52   51.09 
  -8   6  -1  734.53   51.99 
  -8   6  -1  760.92   45.10 
  -8   6  -1  799.82   48.20 
  -8   6  -1  804.92   48.30 
   8   6   1  896.31   48.70 
   8   6   1  857.51   46.10 
   8   6   1  743.93   45.20 
  -8   6  -1  842.52   45.70 
  -7  -7   1  472.55   29.10 
  -7  -7   1  504.85   30.40 
   7  -7  -1  477.55   29.90 
   7  -7  -1  484.75   28.10 
   7  -7  -1  467.95   72.09 
  -7  -7   1  435.06   35.50 
   7  -7  -1  434.26   29.90 
  -7  -7   1  469.55   33.20 
   7  -7  -1  493.55   30.10 
  -7  -7   1  429.26   29.00 
   7  -7  -1  511.65   32.20 
   7  -7  -1  460.45   58.09 
   7  -7  -1  495.85   34.30 
  -7  -7   1  479.25   30.40 
  -7   7   1  509.15   37.00 
  -7   7   1  462.35   34.00 
  -7   7   1  440.46   29.20 
   7   7  -1  512.95   31.50 
  -7   7   1  492.65   30.80 
   7   7  -1  464.65   29.70 
  -7   7   1  429.26   31.10 
   7   7  -1  502.55   33.40 
  -7   7   1  441.56   32.50 
  -7   7   1  491.15   31.50 
  -7   7   1  420.06   29.80 
  -6  -7   1  153.08   16.20 
   6  -7  -1  154.68   40.30 
   6  -7  -1  171.18   20.10 
  -6  -7   1  169.68   16.90 
   6  -7  -1  166.78   39.50 
   6  -7  -1  158.58   15.00 
   6  -7  -1  166.08   14.70 
   6  -7  -1  136.19   14.70 
  -6  -7   1  145.39   21.10 
  -6  -7   1  156.28   16.20 
   6  -7  -1  164.38   16.60 
  -6  -7   1  150.58   19.00 
   6  -7  -1  143.19   16.10 
  -6  -7   1  149.88   15.80 
   6  -7  -1  165.98   17.50 
   6   7  -1  140.39   16.20 
  -6   7   1  160.48   21.20 
  -6   7   1  180.28   18.00 
  -6   7   1  145.09   16.30 
  -6   7   1  163.98   17.20 
  -6   7   1  150.88   14.70 
   6   7  -1  150.58   17.20 
   6   7  -1  137.49   18.20 
   6   7  -1  163.08   14.40 
  -6   7   1  146.89   16.30 
  -6   7   1  192.68   18.50 
  -6   7   1  156.48   15.20 
  -6   7   1  171.88   19.40 
  -5  -7   1 1420.36   73.49 
  -5  -7   1 1540.75   81.09 
   5  -7  -1 1524.55  109.99 
   5  -7  -1 1449.76   74.59 
  -5  -7   1 1398.16   77.59 
  -5  -7   1 1584.24   74.99 
  -5  -7   1 1582.94   71.79 
  -5  -7   1 1525.65   74.09 
  -5  -7   1 1546.65   74.39 
  -5  -7   1 1530.95   71.19 
   5  -7  -1 1634.54   73.59 
   5  -7  -1 1555.94   77.19 
   5  -7  -1 1621.14   74.19 
  -5  -7   1 1557.64   72.69 
   5  -7  -1 1384.36  112.09 
   5  -7  -1 1538.75   73.59 
   5  -7  -1 1552.44   73.89 
   5  -7  -1 1613.94   75.79 
   5  -7  -1 1584.84   78.79 
  -5   7   1 1597.64   74.89 
  -5   7   1 1462.05   74.09 
  -5   7   1 1519.15   72.49 
  -5   7   1 1586.34   82.49 
  -5   7   1 1502.35   76.89 
   5   7  -1 1513.05   72.29 
  -5   7   1 1627.74   87.19 
   5   7  -1 1637.44   75.39 
  -5   7   1 1556.04   75.49 
  -5   7   1 1519.45   76.09 
  -5   7   1 1569.34   75.19 
   5   7  -1 1630.54   78.79 
   5   7  -1 1535.65   77.49 
   4  -7  -1  448.06   27.10 
  -4  -7   1  475.45   24.70 
  -4  -7   1  428.76   24.40 
  -4  -7   1  391.16   25.30 
   4  -7  -1  423.06   51.49 
   4  -7  -1  434.46   29.80 
  -4  -7   1  427.66   23.80 
   4  -7  -1  426.56   25.90 
  -4  -7   1  458.55   25.20 
  -4  -7   1  453.85   27.10 
   4  -7  -1  346.67   59.89 
   4  -7  -1  463.95   25.60 
   4  -7  -1  443.26   26.90 
   4  -7  -1  415.86   24.90 
  -4  -7   1  408.96   25.50 
  -4  -7   1  464.75   26.00 
   4  -7  -1  431.66   25.40 
  -4  -7   1  474.05   32.70 
  -4  -7   1  382.76   28.80 
   4  -7  -1  451.05   26.10 
  -4   7   1  433.06   26.30 
  -4   7   1  375.46   26.00 
  -4   7   1  429.66   29.50 
   4   7  -1  414.16   26.10 
  -4   7   1  453.15   33.40 
  -4   7   1  447.16   27.30 
  -4   7   1  434.36   26.00 
  -4   7   1  436.96   25.40 
  -4   7   1  404.36   27.40 
  -4   7   1  468.25   27.00 
   4   7  -1  412.06   29.10 
  -4   7   1  427.46   23.90 
   4   7  -1  442.66   23.30 
   4   7  -1  452.95   31.50 
   4   7  -1  414.76   23.30 
  -4   7   1  395.86   29.50 
   4   7  -1  429.56   23.40 
   4   7  -1  400.16   26.80 
   3  -7  -1  716.83   38.30 
   3  -7  -1  738.03   38.00 
   3  -7  -1  717.13   36.20 
  -3  -7   1  691.83   36.40 
  -3  -7   1  774.02   46.10 
   3  -7  -1  651.93   36.80 
  -3  -7   1  677.03   36.70 
   3  -7  -1  699.43   41.50 
  -3  -7   1  680.73   36.90 
  -3  -7   1  690.63   37.20 
   3  -7  -1  650.33   69.39 
  -3  -7   1  712.63   38.60 
   3  -7  -1  750.62   38.30 
  -3  -7   1  670.03   41.70 
  -3  -7   1  703.23   36.80 
   3  -7  -1  759.52   36.80 
  -3  -7   1  711.13   35.70 
  -3  -7   1  723.93   36.10 
   3  -7  -1  733.03   38.30 
  -3   7   1  692.03   38.00 
  -3   7   1  692.93   41.50 
   3   7  -1  707.13   33.70 
   3   7  -1  712.33   34.00 
   3   7  -1  742.63   37.70 
  -3   7   1  716.93   48.60 
  -3   7   1  681.63   35.60 
   3   7  -1  737.33   35.40 
   3   7  -1  705.53   35.20 
   3   7  -1  580.94   45.20 
   3   7  -1  671.73   49.50 
   3   7  -1  708.13   38.70 
   3   7  -1  760.22   35.20 
  -3   7   1  737.43   37.60 
  -3   7   1  742.43   39.70 
  -3   7   1  725.33   35.60 
  -3   7   1  728.43   36.50 
   3   7  -1  716.93   35.80 
  -3   7   1  729.53   38.20 
  -3   7   1  694.23   38.50 
  -3   7   1  779.12   48.70 
  -3   7   1  702.43   34.50 
   3   7  -1  699.53   34.60 
   3   7  -1  734.33   42.40 
  -2  -7   1   71.49    8.50 
   2  -7  -1   55.79    8.80 
   2  -7  -1   69.69    7.90 
   2  -7  -1   82.69   10.50 
   2  -7  -1   73.59   12.60 
   2  -7  -1   44.40   23.10 
  -2  -7   1   85.19   10.00 
   2  -7  -1   74.29    9.80 
  -2  -7   1   89.19   17.20 
   2  -7  -1   71.99    8.50 
  -2  -7   1   82.09   11.30 
   2  -7  -1   92.59   11.60 
   2  -7  -1   46.80   19.10 
   2  -7  -1   57.39    9.00 
  -2  -7   1   90.89    8.90 
  -2  -7   1   60.59    8.50 
  -2  -7   1   85.19   11.20 
  -2  -7   1   70.69    8.30 
  -2  -7   1   80.69   13.90 
  -2  -7   1   77.69    9.70 
   2  -7  -1   67.49    9.80 
  -2  -7   1   84.69    9.20 
  -2   7   1   79.29   12.30 
   2   7  -1   46.10   14.70 
  -2   7   1   86.59   19.10 
   2   7  -1   96.79   10.20 
   2   7  -1   78.29    8.70 
   2   7  -1   68.99   13.00 
   2   7  -1   98.79   18.10 
  -2   7   1   39.20   15.50 
   2   7  -1   88.89    6.40 
  -2   7   1   95.29    8.90 
  -2   7   1   83.99   10.60 
   2   7  -1   80.39    5.50 
   2   7  -1   81.69    8.60 
  -2   7   1   63.69    9.10 
  -2   7   1   79.99    7.10 
  -2   7   1   81.09    7.20 
   2   7  -1   77.59    8.50 
   2   7  -1   56.29    8.70 
   2   7  -1   79.69   11.50 
  -2   7   1   78.09    7.20 
  -2   7   1   81.49    9.90 
  -2   7   1   81.09   10.50 
  -2   7   1   93.99    6.70 
   2   7  -1   63.99    8.20 
  -2   7   1   82.89   11.40 
   1  -7  -1  357.06   27.10 
   1  -7  -1  321.97   21.20 
  -1  -7   1  334.67   21.20 
  -1  -7   1  374.16   32.30 
  -1  -7   1  356.86   20.70 
   1  -7  -1  395.26   34.90 
  -1  -7   1  326.77   21.30 
   1  -7  -1  323.17   20.50 
  -1  -7   1  363.06   21.60 
  -1  -7   1  332.37   19.00 
   1  -7  -1  324.07   21.50 
   1  -7  -1  342.27   21.80 
   1  -7  -1  325.77   21.60 
  -1  -7   1  442.26   66.99 
   1  -7  -1  312.57   22.90 
  -1  -7   1  352.36   20.50 
   1  -7  -1  395.96   58.09 
   1  -7  -1  325.17   18.50 
   1  -7  -1  347.57   20.30 
  -1  -7   1  362.16   23.10 
  -1  -7   1  413.66   34.90 
  -1  -7   1  347.17   28.50 
   1  -7  -1  311.27   20.90 
  -1  -7   1  347.27   20.90 
  -1  -7   1  366.56   22.90 
   1   7  -1  357.66   29.90 
  -1   7   1  371.26   20.80 
   1   7  -1  381.76   29.80 
  -1   7   1  346.57   21.50 
   1   7  -1  354.36   33.70 
   1   7  -1  332.77   20.40 
   1   7  -1  351.46   20.00 
  -1   7   1  348.67   42.70 
  -1   7   1  334.67   18.10 
   1   7  -1  340.07   20.00 
  -1   7   1  366.96   22.00 
   1   7  -1  362.26   20.90 
  -1   7   1  343.67   24.80 
   1   7  -1  377.26   30.10 
   1   7  -1  344.37   21.30 
  -1   7   1  342.67   32.30 
   1   7  -1  344.87   28.10 
  -1   7   1  346.27   21.30 
   1   7  -1  373.46   20.20 
  -1   7   1  330.07   20.80 
  -1   7   1  329.67   17.00 
  -1   7   1  340.87   19.90 
  -1   7   1  328.57   17.00 
  -1   7   1  351.66   21.30 
   0  -7   1  113.69   11.90 
   0  -7   1  174.08   40.50 
   0  -7  -1  136.69   33.60 
   0  -7   1  116.99   13.40 
   0  -7   1  135.49   19.70 
   0  -7  -1  109.49   12.40 
   0  -7   1  121.69   13.60 
   0  -7  -1  129.59   13.30 
   0  -7  -1  112.49   11.70 
   0  -7  -1  102.69   12.40 
   0  -7   1  128.49   12.40 
   0  -7  -1  119.59   12.40 
   0  -7   1  140.89   13.20 
   0  -7   1  134.59   13.20 
   0  -7  -1   98.39   10.80 
   0  -7   1  164.88   22.00 
   0  -7  -1  107.19   11.90 
   0  -7  -1  140.29   21.00 
   0  -7   1  130.99   11.80 
   0  -7   1  130.79    8.80 
   0  -7   1  133.59   13.10 
   0  -7  -1   97.69   11.60 
   0  -7   1  133.99   11.40 
   0  -7   1  134.19   20.90 
   0  -7  -1  125.19   16.40 
   0  -7  -1  159.48   19.20 
   0   7  -1  123.29   13.10 
   0   7   1  118.29   14.80 
   0   7  -1  140.29   12.90 
   0   7   1  111.59   11.90 
   0   7   1  127.79   12.40 
   0   7  -1  148.79   19.90 
   0   7  -1  112.19   10.10 
   0   7   1  138.79   11.20 
   0   7   1  121.09   12.00 
   0   7  -1  118.69   10.80 
   0   7  -1  132.69   11.20 
   0   7  -1  128.29   10.70 
   0   7   1  118.29   10.80 
   0   7  -1  153.68   20.80 
   0   7   1  124.09   11.80 
   0   7  -1  132.39   26.30 
   0   7   1  154.78   27.60 
   0   7  -1  122.49    6.80 
   0   7   1  147.69   20.90 
   0   7   1  122.59    9.60 
   0   7  -1  129.79    9.60 
   0   7  -1  150.58   17.90 
   0   7   1  111.29   11.70 
   0   7  -1  129.09   11.00 
   0   7   1  127.59   16.30 
   1  -7   1 1615.54   79.49 
  -1  -7  -1 1502.25   73.09 
  -1  -7  -1 1591.04   74.59 
   1  -7   1 1621.14   75.29 
   1  -7   1 1600.64   73.69 
  -1  -7  -1 1649.54   74.59 
  -1  -7  -1 1590.04   74.29 
   1  -7   1 1582.64   71.89 
  -1  -7  -1 1454.85   89.39 
  -1  -7  -1 1700.53   83.59 
  -1  -7  -1 1589.74   75.99 
  -1  -7  -1 1528.85   73.19 
   1  -7   1 1614.64   76.29 
   1  -7   1 1580.94   74.39 
   1  -7   1 1658.43  104.09 
   1  -7   1 1546.85   75.49 
   1  -7   1 1591.14   80.39 
  -1  -7  -1 1581.74   75.69 
  -1  -7  -1 1555.34   73.69 
  -1  -7  -1 1527.95   72.89 
  -1  -7  -1 1597.24   75.79 
  -1  -7  -1 1709.93  113.79 
   1  -7   1 1658.63   74.59 
   1  -7   1 1600.04  113.79 
  -1  -7  -1 1602.04   73.39 
  -1   7  -1 1548.65   69.99 
  -1   7  -1 1494.15   70.59 
  -1   7  -1 1488.55   70.49 
  -1   7  -1 1492.15   86.59 
  -1   7  -1 1596.54   72.79 
   1   7   1 1694.63   83.39 
   1   7   1 1549.54   72.39 
  -1   7  -1 1539.65   72.99 
   1   7   1 1566.74   72.99 
  -1   7  -1 1616.04   70.79 
   1   7   1 1557.94   73.79 
   1   7   1 1656.43   84.19 
   1   7   1 1450.55   79.39 
   1   7   1 1684.13   73.39 
   1   7   1 1703.93   82.29 
   1   7   1 1528.85   73.29 
  -1   7  -1 1587.74   75.49 
   1   7   1 1626.54   80.69 
   1   7   1 1570.14   74.09 
  -1   7  -1 1705.93   78.79 
  -1   7  -1 1652.23   82.39 
  -1   7  -1 1396.16   96.19 
  -1   7  -1 1616.64   74.09 
   1   7   1 1556.64   73.49 
  -1   7  -1 1528.25   73.99 
  -1   7  -1 1553.04   74.49 
   1   7   1 1670.63   90.29 
  -2  -7  -1  598.24   33.20 
  -2  -7  -1  582.54   31.70 
  -2  -7  -1  590.44   44.00 
   2  -7   1  603.44   65.29 
   2  -7   1  608.44   33.50 
  -2  -7  -1  572.74   37.60 
   2  -7   1  645.14   34.40 
   2  -7   1  590.24   32.40 
  -2  -7  -1  627.04   33.20 
  -2  -7  -1  656.93   32.90 
   2  -7   1  631.54   35.50 
  -2  -7  -1  608.24   31.60 
   2  -7   1  657.03   32.20 
   2  -7   1  637.84   34.00 
   2  -7   1  485.35   57.79 
  -2  -7  -1  630.54   32.50 
   2  -7   1  614.84   37.10 
  -2  -7  -1  635.04   34.30 
  -2  -7  -1  622.14   32.70 
   2  -7   1  624.54   31.00 
   2   7   1  622.14   27.80 
  -2   7  -1  629.54   33.50 
   2   7   1  632.04   41.70 
  -2   7  -1  601.64   28.40 
   2   7   1  636.94   31.50 
  -2   7  -1  610.94   38.80 
  -2   7  -1  618.54   30.40 
  -2   7  -1  536.95   49.70 
   2   7   1  519.45   42.50 
  -2   7  -1  607.14   31.40 
  -2   7  -1  570.74   32.50 
   2   7   1  647.74   32.00 
  -2   7  -1  635.34   30.40 
  -2   7  -1  584.64   30.10 
  -2   7  -1  440.26   42.40 
  -2   7  -1  620.84   33.80 
   2   7   1  628.04   30.90 
  -2   7  -1  575.64   34.00 
  -2   7  -1  638.24   29.70 
  -2   7  -1  624.74   32.00 
   2   7   1  607.74   32.10 
   2   7   1  595.44   36.00 
   2   7   1  596.04   33.40 
   2   7   1  580.44   31.00 
   2   7   1  593.94   27.60 
   3  -7   1 1071.09   51.69 
  -3  -7  -1 1026.00   51.99 
   3  -7   1 1054.09   54.39 
  -3  -7  -1 1102.79   58.19 
  -3  -7  -1 1060.99   52.19 
   3  -7   1 1040.20   54.69 
   3  -7   1 1038.30   53.89 
   3  -7   1 1079.09   54.29 
  -3  -7  -1 1123.59   63.99 
  -3  -7  -1 1114.49   53.19 
  -3  -7  -1 1124.49   53.39 
  -3  -7  -1 1097.29   53.69 
  -3  -7  -1 1075.39   51.69 
  -3  -7  -1 1115.39   52.09 
   3  -7   1 1095.69   51.79 
   3  -7   1 1128.79   57.79 
  -3  -7  -1 1096.89   53.99 
   3  -7   1 1082.79   52.69 
   3  -7   1 1053.69   91.89 
   3   7   1 1115.29   53.29 
   3   7   1 1050.39   54.29 
  -3   7  -1 1023.60   69.19 
  -3   7  -1 1054.09   53.59 
  -3   7  -1 1086.39   51.59 
   3   7   1  984.90   63.09 
  -3   7  -1 1080.59   59.69 
  -3   7  -1 1141.59   54.89 
   3   7   1 1087.09   50.69 
   3   7   1 1058.19   55.89 
   3   7   1 1142.29   51.19 
   3   7   1 1058.39   51.19 
   3   7   1 1049.49   49.10 
  -3   7  -1 1042.60   55.09 
  -3   7  -1 1063.09   50.59 
  -3   7  -1 1111.29   52.59 
  -3   7  -1 1105.79   58.49 
   3   7   1 1107.89   49.30 
  -3   7  -1 1030.30   52.29 
  -3   7  -1 1096.99   54.09 
  -3   7  -1 1026.30   51.49 
   4  -7   1  230.18   20.30 
   4  -7   1  223.58   18.00 
  -4  -7  -1  233.28   17.40 
  -4  -7  -1  244.18   17.80 
   4  -7   1  248.88   16.90 
  -4  -7  -1  242.08   17.80 
   4  -7   1  232.18   18.20 
   4  -7   1  264.87   17.30 
   4  -7   1  265.57   19.90 
   4  -7   1  262.87   51.69 
  -4  -7  -1  281.37   25.80 
  -4  -7  -1  248.48   16.40 
  -4  -7  -1  259.77   21.10 
  -4  -7  -1  237.58   17.40 
  -4  -7  -1  235.78   18.20 
   4  -7   1  224.58   45.50 
   4  -7   1  226.58   18.00 
  -4  -7  -1  249.48   16.20 
   4  -7   1  264.97   19.80 
   4   7   1  231.48   15.20 
  -4   7  -1  245.48   17.70 
   4   7   1  252.27   14.90 
   4   7   1  262.97   18.30 
  -4   7  -1  225.68   17.10 
  -4   7  -1  247.88   18.50 
  -4   7  -1  220.48   19.00 
   4   7   1  272.97   20.10 
  -4   7  -1  286.87   33.80 
  -4   7  -1  262.87   23.60 
  -4   7  -1  235.68   18.60 
   4   7   1  251.97   19.60 
  -4   7  -1  245.68   18.50 
   4   7   1  186.18   25.70 
  -4   7  -1  259.67   19.30 
  -4   7  -1  239.08   16.30 
   4   7   1  260.77   15.50 
   5  -7   1  196.08   15.90 
  -5  -7  -1  210.58   16.60 
  -5  -7  -1  217.78   14.90 
   5  -7   1  193.68   42.10 
  -5  -7  -1  213.18   21.00 
  -5  -7  -1  168.98   19.90 
   5  -7   1  240.48   20.60 
  -5  -7  -1  237.48   26.70 
   5  -7   1  201.28   45.20 
  -5  -7  -1  196.68   16.30 
  -5  -7  -1  173.98   17.20 
  -5  -7  -1  233.88   17.30 
   5  -7   1  214.08   17.30 
   5  -7   1  184.68   18.90 
   5  -7   1  220.98   16.10 
   5  -7   1  199.78   17.10 
  -5  -7  -1  188.88   16.60 
  -5   7  -1  224.08   16.30 
  -5   7  -1  204.18   18.30 
  -5   7  -1  212.08   21.50 
  -5   7  -1  226.78   17.90 
   5   7   1  222.08   17.60 
   5   7   1  254.37   19.80 
   5   7   1  218.08   15.40 
  -5   7  -1  212.78   27.50 
  -5   7  -1  191.28   16.80 
   5   7   1  212.38   24.80 
  -5   7  -1  213.08   17.60 
  -5   7  -1  202.88   18.30 
   6  -7   1   33.40    8.20 
  -6  -7  -1   42.70   10.90 
   6  -7   1   23.80    7.90 
   6  -7   1   43.50    9.90 
   6  -7   1   24.60    6.90 
   6  -7   1   47.00   24.90 
   6  -7   1   40.10    8.00 
  -6  -7  -1   29.10    7.80 
  -6  -7  -1   35.60    6.80 
   6  -7   1   34.10   10.90 
  -6  -7  -1   25.00    7.90 
  -6  -7  -1   26.20    7.90 
   6  -7   1   20.60   18.20 
  -6  -7  -1   32.80    8.30 
  -6  -7  -1   33.40   12.00 
  -6   7  -1   30.20    8.30 
  -6   7  -1   30.00    9.70 
  -6   7  -1   29.60    8.40 
  -6   7  -1   28.50   11.90 
  -6   7  -1   37.40    8.30 
  -6   7  -1   33.50    8.60 
   6   7   1   24.20    8.30 
   6   7   1   29.70    8.90 
  -6   7  -1   23.70    8.40 
   6   7   1   35.10   10.30 
   6   7   1   30.10    7.40 
  -6   7  -1   18.70    6.90 
  -7  -7  -1  150.78   16.60 
   7  -7   1  124.19   13.50 
   7  -7   1  119.39   17.90 
   7  -7   1  138.99   17.50 
   7  -7   1  128.19   15.30 
   7  -7   1   98.59   13.40 
   7  -7   1  141.29   39.90 
  -7  -7  -1  139.49   22.50 
  -7  -7  -1  157.68   16.40 
  -7  -7  -1  161.08   19.60 
   7  -7   1  156.78   17.40 
   7  -7   1  100.29   34.10 
   7   7   1  102.39   14.00 
  -7   7  -1  133.99   19.40 
  -7   7  -1  148.39   17.60 
  -7   7  -1  144.39   17.90 
  -7   7  -1  125.09   18.30 
   7   7   1  125.89   16.70 
  -7   7  -1  124.19   22.10 
   7   7   1  141.49   18.80 
  -7   7  -1  107.49   15.80 
  -7   7  -1  140.39   16.70 
   7   7   1  128.09   17.50 
  -7   7  -1  172.08   17.50 
   6  -8  -1    4.30    5.00 
   6  -8  -1    9.20    7.30 
  -6  -8   1    2.00    6.50 
   6  -8  -1    3.70    5.50 
   6  -8  -1   10.80    6.20 
   6  -8  -1    2.00    8.10 
  -6  -8   1    5.00    6.30 
  -6  -8   1   -5.20    5.10 
  -6  -8   1    9.20    9.60 
   6  -8  -1   -4.80   13.70 
   6  -8  -1    2.20    6.60 
  -6  -8   1    1.90    5.90 
  -6  -8   1    1.90    6.40 
  -6   8   1   -1.60    5.30 
  -6   8   1   11.10    6.60 
  -6   8   1   -7.40    4.40 
  -6   8   1   12.10    9.10 
   6   8  -1    1.50    4.70 
  -6   8   1   -4.60    5.60 
  -6   8   1    0.80    6.70 
   6   8  -1   -1.90    6.40 
  -6   8   1   -0.90    6.00 
   6   8  -1    1.20    6.30 
  -6   8   1   -6.40    4.70 
   5  -8  -1   10.00    6.20 
  -5  -8   1    9.70    6.40 
   5  -8  -1   22.10    9.60 
   5  -8  -1   25.50    7.10 
   5  -8  -1   13.40   17.60 
   5  -8  -1   31.90    8.80 
  -5  -8   1   10.40    8.20 
   5  -8  -1   14.40    7.80 
  -5  -8   1   14.30    6.50 
  -5  -8   1   19.70    6.20 
   5  -8  -1   16.60    6.60 
  -5  -8   1   18.50    5.70 
  -5  -8   1   22.90   10.80 
  -5  -8   1   14.70    6.80 
  -5  -8   1   19.60    6.80 
  -5   8   1    5.80    6.10 
   5   8  -1   12.80    5.00 
   5   8  -1   17.70    8.60 
  -5   8   1    4.80    7.20 
  -5   8   1   19.90    8.30 
  -5   8   1   14.50    6.40 
  -5   8   1   13.50    6.90 
   5   8  -1   11.50    6.90 
  -5   8   1    8.10    6.20 
  -4  -8   1   73.79   11.10 
   4  -8  -1   91.09   12.90 
  -4  -8   1  114.09   14.60 
   4  -8  -1   97.89   35.60 
  -4  -8   1   97.19   10.90 
  -4  -8   1  128.09   17.80 
   4  -8  -1  122.39   18.10 
   4  -8  -1  121.79   12.70 
   4  -8  -1   87.79   11.30 
   4  -8  -1  127.09   14.00 
   4  -8  -1  103.99   12.70 
  -4  -8   1  104.19   12.00 
   4  -8  -1  128.39   15.40 
  -4  -8   1  102.99   19.30 
  -4  -8   1  114.49   13.20 
  -4  -8   1   93.29   11.30 
   4   8  -1  103.39   12.60 
  -4   8   1   82.49   12.60 
  -4   8   1  125.49   13.70 
  -4   8   1  118.29   15.30 
  -4   8   1   99.59   12.50 
   4   8  -1  108.99   10.60 
   4   8  -1  108.59   16.10 
   4   8  -1   82.69   18.60 
   4   8  -1  118.19   11.40 
  -4   8   1   97.79   13.40 
   4   8  -1  101.19    9.40 
  -4   8   1  120.89   20.00 
   4   8  -1   96.09   17.00 
   3  -8  -1  156.68   17.40 
  -3  -8   1  180.98   22.40 
  -3  -8   1  161.58   24.90 
  -3  -8   1  175.28   14.10 
  -3  -8   1  180.38   16.60 
  -3  -8   1  187.78   14.80 
  -3  -8   1  164.18   14.30 
   3  -8  -1  154.98   15.50 
  -3  -8   1  161.28   17.60 
   3  -8  -1  168.08   13.70 
   3  -8  -1  167.38   14.30 
  -3  -8   1  175.78   15.10 
   3  -8  -1  196.38   22.40 
   3  -8  -1  153.68   16.60 
   3  -8  -1  140.69   39.70 
   3  -8  -1  167.08   16.60 
  -3   8   1  177.68   14.50 
   3   8  -1  134.19   22.90 
  -3   8   1  159.88   16.60 
   3   8  -1  178.28   25.50 
  -3   8   1  173.58   25.40 
   3   8  -1  154.88   14.90 
   3   8  -1  165.58   10.30 
  -3   8   1  142.19   15.50 
  -3   8   1  205.88   16.90 
   3   8  -1  145.79   15.80 
  -3   8   1  180.08   28.10 
   3   8  -1  147.49   19.20 
  -3   8   1  169.08   20.00 
   3   8  -1  163.18   12.30 
   3   8  -1  161.88   13.40 
   3   8  -1  172.58   11.00 
  -3   8   1  169.28   17.00 
   3   8  -1  167.18   14.40 
  -3   8   1  158.08   12.80 
  -2  -8   1   40.70   11.60 
   2  -8  -1   32.70    8.00 
   2  -8  -1   56.19   12.70 
  -2  -8   1   51.69   15.30 
  -2  -8   1   40.80    8.20 
   2  -8  -1   38.90   22.60 
  -2  -8   1   23.50    6.30 
   2  -8  -1   31.90    7.50 
   2  -8  -1   43.60    9.60 
   2  -8  -1   46.70    7.60 
  -2  -8   1   51.79    8.10 
  -2  -8   1   24.00    7.80 
  -2  -8   1   37.10    8.00 
  -2  -8   1   54.69    8.50 
  -2  -8   1   27.40    8.70 
  -2  -8   1   28.90    6.40 
   2  -8  -1   39.20    8.60 
   2  -8  -1   32.40    7.30 
   2   8  -1   48.20   13.60 
   2   8  -1   33.00   10.40 
  -2   8   1   41.30    8.50 
  -2   8   1   32.10    7.60 
   2   8  -1   32.60    7.50 
  -2   8   1   39.20    5.60 
  -2   8   1   34.40    7.90 
  -2   8   1   46.30   15.30 
  -2   8   1   24.50    6.40 
  -2   8   1   36.00    8.00 
  -2   8   1   20.20    7.80 
  -2   8   1   38.30    8.50 
   2   8  -1   36.00    6.80 
   2   8  -1   36.00   14.20 
  -2   8   1   39.60    5.10 
   2   8  -1   31.50    6.50 
   2   8  -1   50.69   16.00 
   2   8  -1   39.80    6.90 
  -2   8   1   31.20    5.10 
  -2   8   1   19.80   14.00 
   2   8  -1   28.20    4.70 
   2   8  -1   32.30    6.90 
   2   8  -1   31.80    6.90 
   2   8  -1   31.70    6.60 
  -1  -8   1   12.00    5.40 
  -1  -8   1   16.70    5.50 
  -1  -8   1    1.80    5.10 
   1  -8  -1   -2.80   11.50 
   1  -8  -1    7.30    4.60 
   1  -8  -1    8.50    4.80 
   1  -8  -1   -2.90    5.80 
   1  -8  -1   10.00    6.10 
   1  -8  -1    7.20    5.30 
   1  -8  -1    1.00    7.90 
  -1  -8   1    2.70   14.80 
  -1  -8   1   -1.10    4.60 
  -1  -8   1    6.90    8.40 
   1  -8  -1   -0.20    4.60 
  -1  -8   1    1.60    3.40 
   1  -8  -1   -2.90    4.20 
  -1  -8   1    9.10    5.80 
  -1  -8   1    5.90    4.60 
   1  -8  -1    4.30    4.80 
  -1   8   1    5.50    5.80 
   1   8  -1    1.90    4.10 
  -1   8   1    1.60    4.60 
  -1   8   1    4.70    2.20 
   1   8  -1    0.40    4.40 
   1   8  -1   -1.60    4.30 
  -1   8   1    3.00    5.40 
   1   8  -1   13.70    9.20 
  -1   8   1   -8.50    8.20 
   1   8  -1   10.70    8.40 
   1   8  -1    6.70    4.70 
  -1   8   1   -1.90    4.30 
   1   8  -1    0.10    7.30 
  -1   8   1    6.90    4.80 
   1   8  -1   -8.10    5.30 
   1   8  -1    5.20    4.30 
   1   8  -1    7.40    4.70 
  -1   8   1   -5.70    4.60 
  -1   8   1    5.80    9.70 
  -1   8   1   -4.60    3.80 
   1   8  -1   13.70    9.10 
   1   8  -1    8.70    4.80 
  -1   8   1   -0.50    4.70 
   1   8  -1    4.10    8.10 
  -1   8   1    1.70    2.30 
   1   8  -1    6.20    4.80 
  -1   8   1    3.30    3.90 
   0  -8  -1  391.96   24.50 
   0  -8   1  336.37   22.60 
   0  -8   1  339.77   24.50 
   0  -8  -1  379.16   24.10 
   0  -8   1  345.27   24.10 
   0  -8  -1  362.56   22.80 
   0  -8  -1  328.07   24.20 
   0  -8  -1  435.76   34.80 
   0  -8   1  410.76   63.39 
   0  -8  -1  457.05   65.29 
   0  -8  -1  339.07   23.80 
   0  -8   1  369.76   23.50 
   0  -8  -1  384.36   23.90 
   0  -8   1  380.76   23.10 
   0  -8   1  371.36   23.50 
   0  -8   1  361.96   23.60 
   0  -8   1  368.36   35.30 
   0  -8  -1  325.27   22.00 
   0  -8   1  398.86   33.30 
   0   8  -1  348.97   22.50 
   0   8   1  362.26   22.60 
   0   8  -1  351.86   22.90 
   0   8   1  378.46   22.70 
   0   8   1  413.96   29.10 
   0   8  -1  428.06   50.69 
   0   8  -1  367.06   23.10 
   0   8   1  326.97   22.00 
   0   8  -1  328.57   22.20 
   0   8   1  375.56   31.10 
   0   8   1  349.57   20.60 
   0   8  -1  397.46   29.70 
   0   8   1  355.66   23.10 
   0   8   1  352.46   29.00 
   0   8  -1  398.76   33.20 
   0   8   1  389.16   23.70 
   0   8  -1  367.76   33.20 
   0   8   1  365.36   23.00 
   0   8  -1  390.66   30.10 
   0   8  -1  361.36   29.40 
   0   8   1  368.06   46.10 
   0   8  -1  377.86   20.90 
   0   8  -1  360.96   24.10 
   0   8   1  382.66   34.10 
   0   8   1  345.77   26.80 
   0   8   1  401.06   22.80 
   0   8  -1  346.07   21.10 
  -1  -8  -1  347.57   34.60 
  -1  -8  -1  407.56   62.29 
   1  -8   1  349.87   20.40 
  -1  -8  -1  379.06   24.30 
  -1  -8  -1  355.36   23.00 
  -1  -8  -1  342.97   22.60 
  -1  -8  -1  344.17   21.50 
  -1  -8  -1  315.17   21.90 
   1  -8   1  347.97   23.50 
   1  -8   1  369.76   24.70 
   1  -8   1  375.76   29.00 
   1  -8   1  394.26   29.00 
   1  -8   1  380.06   40.30 
   1  -8   1  360.16   23.20 
   1  -8   1  296.07   20.70 
   1  -8   1  313.67   21.60 
   1  -8   1  340.57   22.10 
  -1  -8  -1  310.87   22.90 
  -1  -8  -1  297.87   21.10 
   1  -8   1  379.66   61.89 
  -1  -8  -1  357.36   21.20 
  -1   8  -1  330.77   17.30 
   1   8   1  337.57   27.40 
   1   8   1  333.57   30.40 
  -1   8  -1  371.36   35.50 
   1   8   1  335.17   21.30 
   1   8   1  331.37   27.10 
   1   8   1  340.67   20.60 
   1   8   1  383.26   36.80 
   1   8   1  352.56   21.40 
  -1   8  -1  324.97   21.90 
  -1   8  -1  365.16   23.10 
  -1   8  -1  367.56   19.40 
  -1   8  -1  330.17   22.30 
   1   8   1  333.17   30.10 
  -1   8  -1  334.77   46.40 
  -1   8  -1  298.67   20.60 
   1   8   1  322.17   21.40 
  -1   8  -1  305.47   20.20 
  -1   8  -1  356.76   23.30 
  -1   8  -1  361.26   28.20 
  -1   8  -1  310.37   25.20 
  -1   8  -1  349.87   22.10 
   1   8   1  349.17   21.50 
   1   8   1  345.97   22.20 
   1   8   1  293.47   20.20 
   1   8   1  341.17   21.60 
   2  -8   1  240.28   16.10 
  -2  -8  -1  234.68   16.80 
  -2  -8  -1  233.88   33.20 
   2  -8   1  253.07   18.20 
   2  -8   1  246.78   39.00 
   2  -8   1  249.97   19.60 
  -2  -8  -1  229.38   18.80 
  -2  -8  -1  229.08   17.80 
   2  -8   1  274.17   54.89 
   2  -8   1  225.68   23.50 
  -2  -8  -1  258.07   17.40 
   2  -8   1  233.08   16.60 
  -2  -8  -1  243.78   17.70 
  -2  -8  -1  230.58   17.60 
   2  -8   1  234.18   18.20 
   2  -8   1  244.28   25.80 
   2  -8   1  230.78   18.90 
  -2  -8  -1  321.77   30.50 
  -2  -8  -1  245.98   17.20 
  -2   8  -1  276.37   19.40 
   2   8   1  242.38   17.40 
  -2   8  -1  231.18   14.80 
   2   8   1  240.68   21.10 
   2   8   1  264.27   19.10 
  -2   8  -1  280.57   36.70 
  -2   8  -1  251.57   14.10 
  -2   8  -1  185.38   33.00 
   2   8   1  242.38   17.20 
   2   8   1  221.28   16.00 
  -2   8  -1  244.48   23.30 
   2   8   1  257.47   24.30 
  -2   8  -1  238.18   16.70 
  -2   8  -1  247.08   18.10 
   2   8   1  245.58   16.70 
   2   8   1  247.18   17.10 
  -2   8  -1  282.97   19.30 
   2   8   1  252.77   33.60 
  -2   8  -1  241.28   19.20 
   2   8   1  279.57   17.90 
  -2   8  -1  262.97   15.70 
   3  -8   1   91.59   31.40 
   3  -8   1  105.49   13.50 
   3  -8   1  115.29   15.40 
   3  -8   1   97.69   12.90 
   3  -8   1  113.89   17.00 
   3  -8   1   86.09   12.00 
  -3  -8  -1  105.69   21.40 
  -3  -8  -1   92.69   10.60 
   3  -8   1   89.59   11.30 
   3  -8   1  113.79   16.30 
  -3  -8  -1   99.59   11.30 
  -3  -8  -1  100.29   13.20 
  -3  -8  -1   85.09   11.60 
  -3  -8  -1  122.49   18.10 
  -3  -8  -1   99.99   11.90 
   3  -8   1   68.29   29.50 
  -3  -8  -1  105.09   11.70 
   3  -8   1   97.09   10.80 
  -3   8  -1  100.99   10.10 
   3   8   1  106.29   10.80 
  -3   8  -1   86.49   13.60 
  -3   8  -1   72.69   10.20 
   3   8   1  107.49    7.50 
   3   8   1  105.89   11.50 
  -3   8  -1   81.69   11.60 
  -3   8  -1  107.29   23.80 
   3   8   1  119.49   13.00 
   3   8   1  110.99   15.10 
   3   8   1  105.49   23.10 
   3   8   1   89.79   12.30 
  -3   8  -1  132.09   18.80 
   3   8   1   90.59    7.40 
  -3   8  -1   82.09   11.90 
  -3   8  -1   93.39   10.00 
   3   8   1   89.09   17.70 
   3   8   1   97.99   10.10 
   4  -8   1    0.10    4.90 
  -4  -8  -1   -1.20    5.30 
   4  -8   1    0.10    6.30 
  -4  -8  -1    5.10    7.30 
   4  -8   1   10.90    5.50 
  -4  -8  -1   -1.00    5.10 
  -4  -8  -1    4.60    4.50 
   4  -8   1    1.00    4.20 
   4  -8   1    5.60    7.20 
   4  -8   1   11.20   15.80 
   4  -8   1    5.90    6.20 
  -4  -8  -1    7.90    6.30 
   4  -8   1    1.20   13.50 
   4  -8   1   12.20    6.10 
  -4  -8  -1    2.60    4.30 
  -4  -8  -1   10.70    9.50 
  -4   8  -1   -2.00    4.90 
   4   8   1   35.60   12.20 
  -4   8  -1    6.30    5.10 
  -4   8  -1    4.40    9.60 
   4   8   1    4.30    8.90 
   4   8   1    1.40    3.40 
  -4   8  -1    3.50    5.60 
   4   8   1    7.40    6.00 
   4   8   1   -1.10    5.40 
  -4   8  -1   13.70    6.80 
  -4   8  -1    3.70    4.50 
   4   8   1    7.80    4.20 
  -4   8  -1   14.50    6.70 
   5  -8   1   76.99   10.70 
  -5  -8  -1   77.29   10.20 
  -5  -8  -1   73.29   11.70 
   5  -8   1   75.79   30.60 
  -5  -8  -1   86.99   15.50 
   5  -8   1   94.99   11.50 
   5  -8   1   71.09   12.70 
   5  -8   1   91.29   13.30 
  -5  -8  -1   60.59   10.70 
  -5  -8  -1   57.79   11.10 
   5  -8   1   83.39   14.60 
   5  -8   1   44.50   26.90 
   5  -8   1   87.29   12.50 
  -5  -8  -1   86.09   18.90 
  -5   8  -1   53.79   11.90 
   5   8   1   75.29   12.60 
  -5   8  -1   81.89   18.90 
   5   8   1   89.19   10.00 
  -5   8  -1   77.39   12.20 
  -5   8  -1   69.49   11.00 
  -5   8  -1   71.59   12.50 
  -5   8  -1   78.99   11.30 
   5   8   1   77.49   11.90 
   5   8   1   86.59   17.40 
  -5   8  -1   74.29   12.20 
   6  -8   1  185.18   20.90 
  -6  -8  -1  199.28   28.00 
   6  -8   1  160.08   17.50 
  -6  -8  -1  207.88   19.50 
   6  -8   1  178.68   17.90 
  -6  -8  -1  172.78   18.10 
   6  -8   1  154.28   46.10 
  -6  -8  -1  144.69   16.90 
  -6  -8  -1  198.98   23.30 
   6  -8   1  139.99   15.20 
   6  -8   1  178.68   46.10 
   6  -8   1  208.78   23.70 
   6  -8   1  179.88   19.30 
   6   8   1  139.89   17.90 
   6   8   1  175.98   20.00 
  -6   8  -1  196.98   18.30 
  -6   8  -1  209.58   29.50 
  -6   8  -1  166.38   20.90 
  -6   8  -1  191.68   18.90 
  -6   8  -1  168.18   19.10 
  -6   8  -1  194.18   19.70 
   6   8   1  174.18   15.50 
  -6   8  -1  176.58   19.00 
  -5  -9   1  474.75   30.50 
   5  -9  -1  477.45   31.20 
  -5  -9   1  430.06   35.60 
  -5  -9   1  425.76   28.70 
   5  -9  -1  444.86   31.70 
   5  -9  -1  460.25   29.40 
  -5  -9   1  443.26   30.50 
  -5  -9   1  493.15   41.70 
   5  -9  -1  394.56   34.30 
   5  -9  -1  428.36   28.50 
   5  -9  -1  452.05   29.50 
   5  -9  -1  414.66   75.09 
   5   9  -1  480.75   26.40 
  -5   9   1  498.25   32.00 
  -5   9   1  429.96   30.60 
  -5   9   1  507.75   33.60 
  -5   9   1  477.05   31.70 
  -5   9   1  461.95   29.90 
  -5   9   1  453.55   37.20 
  -5   9   1  484.05   30.70 
   5   9  -1  445.46   32.80 
   5   9  -1  482.05   31.10 
  -5   9   1  413.86   28.10 
  -4  -9   1  951.00   62.79 
  -4  -9   1  990.60   57.69 
  -4  -9   1  849.81   47.90 
   4  -9  -1  873.51   54.29 
  -4  -9   1  922.71   46.90 
   4  -9  -1  844.12   47.70 
  -4  -9   1  898.41   46.40 
   4  -9  -1  925.51   50.89 
  -4  -9   1  906.71   46.80 
   4  -9  -1  884.91   91.99 
   4  -9  -1  862.41   49.00 
   4  -9  -1  897.41   47.50 
   4  -9  -1  857.71   46.60 
  -4  -9   1  934.91   49.60 
  -4   9   1  918.71   49.10 
  -4   9   1  807.42   48.40 
  -4   9   1  952.70   49.80 
  -4   9   1  822.82   46.90 
   4   9  -1  869.31   42.70 
  -4   9   1  899.81   57.69 
   4   9  -1  927.21   48.40 
  -4   9   1  890.01   50.59 
   4   9  -1  921.61   52.89 
  -4   9   1  824.82   45.10 
  -3  -9   1  306.77   20.10 
   3  -9  -1  325.87   22.50 
  -3  -9   1  341.47   34.00 
   3  -9  -1  291.87   21.10 
  -3  -9   1  272.57   19.90 
   3  -9  -1  309.77   20.60 
   3  -9  -1  273.47   21.50 
  -3  -9   1  262.17   20.30 
  -3  -9   1  280.17   20.80 
  -3  -9   1  268.37   22.60 
  -3  -9   1  263.77   39.40 
   3  -9  -1  273.87   29.80 
   3  -9  -1  265.67   55.19 
   3  -9  -1  296.77   24.30 
  -3   9   1  288.07   21.90 
  -3   9   1  317.67   21.50 
  -3   9   1  275.67   21.10 
   3   9  -1  254.97   15.90 
   3   9  -1  298.17   25.70 
   3   9  -1  261.37   19.10 
  -3   9   1  256.97   21.90 
  -3   9   1  294.27   22.50 
   3   9  -1  254.47   20.30 
  -3   9   1  280.57   17.90 
   3   9  -1  291.47   14.20 
  -3   9   1  264.87   33.50 
   2  -9  -1  159.08   14.10 
   2  -9  -1  109.69   19.40 
  -2  -9   1  121.59   14.20 
  -2  -9   1  117.79   14.50 
   2  -9  -1  134.79   15.10 
   2  -9  -1  123.19   15.00 
   2  -9  -1  115.29   14.50 
  -2  -9   1  145.49   22.20 
  -2  -9   1  107.79   15.00 
   2  -9  -1  120.29   36.30 
  -2  -9   1  127.39   14.50 
   2   9  -1   78.49   17.50 
   2   9  -1  154.68   15.70 
  -2   9   1  123.99   15.20 
  -2   9   1  125.59    9.40 
   2   9  -1  144.09   27.70 
  -2   9   1  139.19   10.00 
  -2   9   1  120.19   14.70 
   2   9  -1  131.59   13.00 
  -2   9   1  152.48   26.80 
  -2   9   1  125.39   13.80 
   2   9  -1  128.69   13.40 
   2   9  -1  137.19   13.10 
  -2   9   1  107.49   13.80 
   2   9  -1  130.49   21.80 
  -2   9   1   96.79   15.90 
   2   9  -1  135.99   20.20 
  -2   9   1  160.58   31.40 
   2   9  -1  148.59   14.40 
   2   9  -1  145.69   25.70 
  -2   9   1  160.08   16.60 
   1  -9  -1   45.80    9.20 
   1  -9  -1   56.29   25.70 
  -1  -9   1   31.50    8.80 
  -1  -9   1   80.09   32.90 
   1  -9  -1   40.60    9.70 
   1  -9  -1   44.90    9.30 
  -1  -9   1   37.30    8.20 
  -1  -9   1   53.59    9.50 
   1  -9  -1   55.09   15.20 
  -1  -9   1   48.00   10.60 
   1  -9  -1   42.40    8.90 
  -1  -9   1   64.49   10.20 
  -1  -9   1   36.10    9.10 
  -1   9   1   48.20   19.10 
  -1   9   1   40.10    8.80 
   1   9  -1   30.90    6.90 
   1   9  -1   61.39   14.50 
  -1   9   1   34.20   11.60 
   1   9  -1   42.80    7.80 
   1   9  -1   29.30    7.70 
  -1   9   1   27.00    8.30 
   1   9  -1   40.60    8.30 
  -1   9   1   64.39   10.20 
   1   9  -1   54.89   15.50 
   1   9  -1   51.19    9.50 
  -1   9   1   29.90    7.50 
  -1   9   1   41.10   10.80 
   1   9  -1   84.69   18.90 
  -1   9   1   36.70    9.10 
   1   9  -1   51.59   13.90 
   1   9  -1   31.80    7.80 
   1   9  -1   16.70   14.10 
  -1   9   1   46.70   18.80 
   1   9  -1   45.90    8.00 
   1   9  -1   49.20    9.70 
   0  -9   1  339.57   25.50 
   0  -9  -1  403.26   26.40 
   0  -9   1  457.45   38.20 
   0  -9  -1  360.36   25.10 
   0  -9  -1  371.06   24.30 
   0  -9   1  359.56   26.70 
   0  -9   1  355.16   24.90 
   0  -9   1  372.66   26.60 
   0  -9   1  392.86   25.80 
   0  -9   1  472.55   71.69 
   0  -9  -1  424.16   37.00 
   0  -9  -1  404.86   26.90 
   0  -9  -1  528.75   59.79 
   0   9  -1  446.76   26.30 
   0   9  -1  496.75   64.19 
   0   9  -1  359.56   30.70 
   0   9  -1  365.86   22.90 
   0   9   1  419.76   25.90 
   0   9   1  363.56   25.10 
   0   9   1  445.66   39.60 
   0   9  -1  381.06   25.90 
   0   9   1  409.56   33.70 
   0   9  -1  345.57   24.60 
   0   9   1  393.56   29.90 
   0   9   1  447.96   34.70 
   0   9   1  360.16   24.60 
   0   9  -1  348.87   31.60 
   0   9  -1  392.36   25.20 
   0   9  -1  394.66   24.40 
   0   9   1  399.06   24.80 
   0   9  -1  396.86   24.80 
   0   9  -1  417.36   54.69 
   0   9   1  419.16   52.19 
   0   9   1  385.66   24.80 
   0   9   1  417.06   26.00 
   0   9  -1  424.36   43.10 
   0   9  -1  468.55   39.70 
   0   9   1  353.16   23.60 
   1  -9   1  151.88   16.00 
   1  -9   1  158.08   17.80 
  -1  -9  -1  174.48   17.80 
   1  -9   1  191.68   45.90 
  -1  -9  -1  157.28   17.60 
  -1  -9  -1  158.48   15.40 
   1  -9   1  172.08   24.20 
   1  -9   1  155.18   16.70 
   1  -9   1  130.29   15.20 
   1   9   1  169.38   21.30 
   1   9   1  133.59   23.70 
  -1   9  -1  151.08   17.40 
  -1   9  -1  172.28   16.60 
  -1   9  -1  179.18   36.40 
   1   9   1  180.88   26.90 
   1   9   1  144.29   12.90 
  -1   9  -1  146.09   20.30 
  -1   9  -1  154.28   23.70 
  -1   9  -1  208.78   32.60 
  -1   9  -1  158.88   13.10 
   1   9   1  185.88   15.50 
  -1   9  -1  140.49   14.10 
  -1   9  -1  151.88   16.20 
   1   9   1  146.29   14.90 
   1   9   1  170.38   15.10 
   1   9   1  160.78   16.00 
   1   9   1  183.58   15.30 
  -1   9  -1  152.38   16.10 
   1   9   1  129.09   14.50 
   1   9   1  140.09   14.30 
   1   9   1  133.39   27.30 
   1   9   1  182.48   22.40 
   2  -9   1  780.82   43.70 
   2  -9   1  867.81   52.19 
   2  -9   1  869.61   83.49 
  -2  -9  -1  786.52   52.99 
   2  -9   1  929.31   51.99 
  -2  -9  -1  801.82   42.50 
  -2  -9  -1  796.42   42.60 
   2  -9   1  789.32   44.70 
   2  -9   1  861.01   44.20 
   2  -9   1  779.12   44.80 
  -2  -9  -1  824.82   44.30 
  -2  -9  -1  813.02   45.20 
  -2  -9  -1  858.91   61.89 
   2   9   1  834.22   42.60 
  -2   9  -1  800.42   43.50 
   2   9   1  707.53   41.90 
   2   9   1  882.91   55.39 
   2   9   1  775.32   41.80 
   2   9   1  827.52   42.40 
  -2   9  -1  769.82   62.59 
  -2   9  -1  809.52   42.10 
   2   9   1  787.52   41.40 
  -2   9  -1  727.83   43.30 
   2   9   1  829.72   47.80 
  -2   9  -1  802.22   40.90 
  -2   9  -1  835.42   45.70 
   2   9   1  818.02   50.79 
  -2   9  -1  779.32   38.60 
   2   9   1  792.32   58.69 
   2   9   1  816.82   58.59 
  -2   9  -1  836.72   48.80 
   2   9   1  772.52   42.00 
  -3  -9  -1  297.87   31.80 
   3  -9   1  244.98   20.60 
  -3  -9  -1  259.77   21.50 
   3  -9   1  280.47   19.90 
   3  -9   1  290.97   28.10 
  -3  -9  -1  237.88   18.80 
  -3  -9  -1  240.28   18.60 
  -3  -9  -1  252.27   19.80 
   3  -9   1  247.18   55.39 
   3  -9   1  225.18   20.10 
  -3  -9  -1  231.08   17.70 
   3  -9   1  225.98   20.10 
  -3  -9  -1  208.28   33.70 
   3  -9   1  237.58   27.00 
   3   9   1  240.78   24.50 
   3   9   1  257.17   19.60 
   3   9   1  261.07   19.00 
  -3   9  -1  274.67   17.30 
  -3   9  -1  251.77   18.90 
   3   9   1  193.18   30.90 
  -3   9  -1  271.67   21.90 
  -3   9  -1  243.38   20.00 
  -3   9  -1  209.68   33.80 
  -3   9  -1  256.27   20.10 
   4  -9   1  293.27   20.70 
  -4  -9  -1  336.67   33.20 
   4  -9   1  338.87   26.40 
  -4  -9  -1  297.67   21.80 
   4  -9   1  236.28   54.89 
   4  -9   1  278.97   21.90 
  -4  -9  -1  283.67   20.20 
   4  -9   1  294.97   23.10 
   4  -9   1  306.27   23.30 
  -4  -9  -1  314.57   23.80 
  -4  -9  -1  320.67   23.00 
   4  -9   1  300.97   30.40 
  -4  -9  -1  321.67   40.70 
  -4   9  -1  306.47   20.80 
  -4   9  -1  309.27   39.00 
   4   9   1  293.77   36.00 
   4   9   1  293.77   22.60 
  -4   9  -1  279.07   20.90 
  -4   9  -1  305.57   23.30 
  -4   9  -1  274.17   23.80 
  -4   9  -1  256.87   21.90 
   4   9   1  304.17   17.30 
   4   9   1  331.87   25.40 
  -4   9  -1  336.17   21.70 
  -5  -9  -1   41.80    8.60 
   5  -9   1   36.80    9.90 
   5  -9   1   58.59   10.50 
   5  -9   1   34.50   10.90 
   5  -9   1   49.40   10.40 
   5  -9   1   61.99   14.80 
  -5  -9  -1   25.60   14.40 
   5  -9   1   37.30   28.80 
  -5  -9  -1   57.19   11.50 
  -5  -9  -1   42.30   12.30 
  -5  -9  -1   41.10    9.80 
   5  -9   1   39.80   10.40 
  -5  -9  -1   20.40    7.30 
  -5   9  -1   43.70   10.70 
  -5   9  -1   45.50   10.90 
   5   9   1   38.90    7.30 
   5   9   1   39.80   10.00 
  -5   9  -1   35.80    8.80 
   5   9   1   41.50   10.50 
  -5   9  -1   65.99   13.90 
  -5   9  -1   38.50    9.30 
  -5   9  -1   64.69   18.40 
  -5   9  -1   45.70   10.40 
  -3 -10   1   46.40   10.90 
   3 -10  -1   60.39   12.10 
  -3 -10   1   91.79   15.20 
  -3 -10   1   63.69   10.90 
  -3 -10   1  108.19   19.90 
   3 -10  -1   59.99   29.50 
   3 -10  -1   46.50   10.70 
   3 -10  -1   71.99   12.60 
   3 -10  -1   47.00   14.20 
   3  10  -1   71.49   15.00 
   3  10  -1   79.09   19.20 
  -3  10   1   69.59   12.60 
  -3  10   1   72.99   12.00 
  -3  10   1   60.29   12.40 
  -3  10   1   78.79   13.00 
   3  10  -1   47.50   18.40 
  -3  10   1   60.09   11.90 
   3  10  -1   64.09   11.60 
  -3  10   1   82.39    9.10 
  -2 -10   1    6.80    6.60 
  -2 -10   1    7.20    7.80 
   2 -10  -1   10.00    7.70 
  -2 -10   1   11.40    6.50 
  -2 -10   1    0.40    5.60 
   2 -10  -1   15.90    7.70 
   2 -10  -1   -1.80   13.80 
   2 -10  -1   -5.80    5.40 
   2 -10  -1   20.90   11.70 
  -2  10   1    1.30   10.30 
   2  10  -1   10.70    7.20 
  -2  10   1    3.00    6.40 
  -2  10   1    0.90    5.70 
   2  10  -1   22.80   14.40 
   2  10  -1    9.40    6.80 
  -2  10   1   -0.60    2.90 
  -2  10   1    2.60    6.50 
  -2  10   1   -2.30    6.50 
  -2  10   1   -1.10    6.30 
  -2  10   1    4.90    6.90 
   2  10  -1    7.50    9.50 
   2  10  -1    7.40    9.60 
   2  10  -1    0.70    6.00 
  -1 -10   1   80.59   13.90 
  -1 -10   1  110.89   15.90 
   1 -10  -1  124.09   16.00 
   1 -10  -1  139.99   23.70 
  -1 -10   1   79.99   12.80 
   1 -10  -1   88.49   12.90 
   1 -10  -1   92.09   33.40 
   1 -10  -1   59.49   11.50 
   1  10  -1  101.69   13.20 
  -1  10   1   50.29   10.40 
   1  10  -1   87.79   18.20 
  -1  10   1   75.89   12.80 
   1  10  -1   64.99   11.80 
   1  10  -1   56.59   10.70 
   1  10  -1   83.59   25.60 
  -1  10   1   81.39   18.90 
  -1  10   1   92.69   19.50 
   1  10  -1   77.89   11.50 
  -1  10   1   90.99   13.50 
  -1  10   1   64.19   10.90 
  -1  10   1   78.69   22.40 
   1  10  -1   89.49   21.70 
  -1  10   1   97.29   13.80 
   0 -10   1    5.10   11.40 
   0 -10  -1   28.00    8.50 
   0 -10   1   21.30    8.30 
   0 -10  -1   36.50    9.80 
   0 -10   1   22.90   22.20 
   0 -10   1   26.50    8.70 
   0 -10   1   26.00    8.70 
   0 -10  -1    2.10   16.10 
   0  10   1   14.10    7.40 
   0  10   1   32.00   12.50 
   0  10   1   19.80   15.70 
   0  10  -1   20.20    7.30 
   0  10   1   44.80   19.50 
   0  10   1    8.30    7.50 
   0  10  -1   19.70   12.00 
   0  10   1   37.20    9.30 
   0  10  -1   16.70    6.50 
   0  10   1   13.40    6.90 
   0  10  -1   25.20    8.10 
   0  10  -1   12.90   10.50 
   0  10   1   27.00    7.80 
   0  10  -1   26.90   18.30 
   0  10  -1   41.80   10.40 
   0  10  -1   16.10    7.10 
   0  10   1   38.70   13.80 
   1 -10   1  380.36   67.09 
   1 -10   1  273.87   23.40 
   1 -10   1  335.87   24.10 
   1 -10   1  405.06   42.60 
   1 -10   1  348.77   26.20 
   1 -10   1  309.57   23.50 
  -1  10  -1  284.67   45.10 
   1  10   1  359.56   43.20 
   1  10   1  308.57   22.60 
  -1  10  -1  312.97   23.00 
  -1  10  -1  336.17   35.30 
  -1  10  -1  308.87   38.50 
  -1  10  -1  327.97   25.20 
  -1  10  -1  350.36   22.20 
   1  10   1  318.47   23.00 
   1  10   1  385.66   30.30 
   1  10   1  381.56   42.60 
  -1  10  -1  306.57   24.00 
   1  10   1  306.27   23.10 
   1  10   1  312.37   21.90 
   1  10   1  326.97   22.80 
   1  10   1  391.96   50.19 
  -1  10  -1  329.57   24.40 
  -2 -10  -1  -10.00    5.00 
   2 -10   1   10.80   11.10 
   2 -10   1    1.20   15.90 
   2 -10   1    3.50    6.30 
   2 -10   1    6.70    7.10 
  -2 -10  -1   10.10    8.50 
   2 -10   1    6.30    6.80 
   2  10   1   11.90   13.10 
   2  10   1   10.40    9.60 
   2  10   1   -3.50    5.90 
   2  10   1    2.40    9.60 
   2  10   1   -1.90    6.00 
  -2  10  -1   -4.70    5.80 
  -2  10  -1    7.00    6.50 
  -2  10  -1   12.20    7.10 
  -2  10  -1    3.50    3.00 
   2  10   1   23.40   14.00 
  -2  10  -1    0.00    5.20 
  -2  10  -1    5.80   12.30 
  -2  10  -1    1.40    6.40 
   3 -10   1   34.50    9.80 
  -3 -10  -1   55.89   15.50 
  -3 -10  -1   35.80   10.50 
  -3 -10  -1   21.20    8.70 
   3 -10   1   30.50   13.00 
   3 -10   1   31.50    9.40 
   3 -10   1   25.90   22.90 
  -3 -10  -1   26.30    7.50 
   3 -10   1   20.70    8.80 
  -3  10  -1   30.70   15.90 
  -3  10  -1   42.90   11.10 
  -3  10  -1   21.50    6.00 
   3  10   1   24.90    8.40 
   3  10   1   36.20   10.60 
  -3  10  -1   30.50    8.20 
  -3  10  -1   37.30   11.70 
  -3  10  -1   38.30   11.10 
   3  10   1   17.00   13.00 
  -3  10  -1   11.90    7.80 
   3  10   1   22.70   13.00 
   3  10   1   28.10    9.10 
  -3  10  -1   29.10    9.70 
 -10   0   2  846.22   56.69 
  10   0  -2  900.81   53.89 
 -10   0   2  939.11   51.49 
 -10   0   2  948.91   52.79 
  10   0  -2  883.31   79.19 
 -10   0   2  970.80   50.99 
  10   0  -2  905.21   50.29 
 -10   0   2  835.72   51.69 
  10   0  -2  934.91   48.10 
 -10   0   2  948.51   51.39 
  10   0  -2  872.51   51.29 
 -10   0   2  903.71   47.70 
  10   0  -2  813.22   48.70 
 -10   0   2  870.51   53.29 
 -10   0   2  922.61   53.09 
  -9   0   2   -0.70    5.60 
   9   0  -2    5.00    6.80 
   9   0  -2   -0.30    4.70 
  -9   0   2   -0.30    4.10 
  -9   0   2    4.40    6.00 
  -9   0   2    2.80    6.80 
  -9   0   2    0.80    7.20 
  -9   0   2    0.00    5.50 
  -9   0   2   -1.40    4.60 
   9   0  -2    3.90    5.20 
   9   0  -2   -2.30    3.90 
   9   0  -2   -1.90    3.70 
   9   0  -2    0.50    5.10 
   9   0  -2   -2.20    4.00 
  -9   0   2   -2.00    4.50 
  -9   0   2    4.20    4.20 
   9   0  -2    8.80    5.50 
  -9   0   2   -2.10    6.30 
  -8   0   2 2027.40   94.09 
   8   0  -2 2000.50   92.59 
   8   0  -2 1937.51   92.69 
  -8   0   2 1983.70   98.29 
   8   0  -2 1961.60   91.19 
   8   0  -2 2006.70   90.09 
  -8   0   2 1893.41   95.39 
   8   0  -2 1990.30   96.59 
  -8   0   2 1920.51   92.79 
  -8   0   2 1987.40   92.99 
  -8   0   2 1922.51   94.39 
   8   0  -2 1929.51   94.09 
  -8   0   2 2000.30   89.59 
   8   0  -2 2002.30   95.59 
   8   0  -2 1930.51   93.19 
  -8   0   2 2049.09   88.19 
  -8   0   2 1848.62   98.19 
  -8   0   2 2060.09   91.39 
   8   0  -2 1998.90   90.89 
  -8   0   2 2062.69   98.39 
   8   0  -2 1949.51   91.09 
   7   0  -2    2.20    4.80 
  -7   0   2    2.50    4.20 
  -7   0   2   -4.70    3.80 
  -7   0   2    4.10    3.40 
  -7   0   2    0.80    2.70 
  -7   0   2   -3.10    2.10 
   7   0  -2    0.00    3.60 
  -7   0   2   -1.80    2.00 
   7   0  -2    0.00    3.90 
  -7   0   2    2.40    3.30 
  -7   0   2    3.50    4.20 
   7   0  -2    0.30    3.70 
   7   0  -2   -0.70    2.70 
  -7   0   2    0.20    5.30 
  -7   0   2    3.70    5.00 
  -7   0   2    2.00    4.10 
  -7   0   2   -7.00    3.80 
  -7   0   2    0.20    2.40 
   7   0  -2    1.50    3.40 
   7   0  -2    6.40    4.80 
   7   0  -2   -1.50    3.10 
   7   0  -2    4.60    4.20 
  -7   0   2    0.30    4.90 
   7   0  -2    4.50    3.50 
  -7   0   2   -4.50    3.00 
  -6   0   2  815.32   36.70 
  -6   0   2  766.42   38.60 
   6   0  -2  801.02   38.80 
   6   0  -2  779.32   42.10 
  -6   0   2  819.62   41.30 
  -6   0   2  793.52   36.20 
   6   0  -2  810.82   40.20 
   6   0  -2  781.32   40.60 
   6   0  -2  780.02   41.40 
  -6   0   2  798.72   39.90 
  -6   0   2  775.22   36.80 
  -6   0   2  782.22   39.60 
  -6   0   2  828.02   43.60 
  -6   0   2  775.62   41.60 
  -6   0   2  799.72   36.90 
   6   0  -2  813.82   38.80 
   6   0  -2  813.32   38.10 
   6   0  -2  786.02   39.80 
  -6   0   2  780.12   34.30 
  -6   0   2  805.02   42.10 
  -6   0   2  839.42   43.70 
   6   0  -2  756.42   39.40 
  -6   0   2  780.52   43.70 
  -6   0   2  780.52   38.00 
  -6   0   2  758.12   41.70 
  -6   0   2  812.22   40.50 
   6   0  -2  784.82   38.40 
  -6   0   2  816.42   35.40 
  -6   0   2  785.72   37.20 
  -5   0   2    4.30    3.50 
  -5   0   2    3.00    3.80 
   5   0  -2   -0.60    2.90 
  -5   0   2    1.30    1.80 
  -5   0   2    1.60    2.50 
  -5   0   2    1.90    1.40 
   5   0  -2    8.50    4.80 
   5   0  -2    2.70    2.20 
  -5   0   2    1.40    1.80 
  -5   0   2    2.20    1.80 
  -5   0   2    1.80    3.40 
  -5   0   2    1.70    3.10 
   5   0  -2    0.20    3.00 
  -5   0   2   -1.10    2.20 
  -5   0   2    3.70    2.90 
   5   0  -2   -2.90    1.70 
   5   0  -2   -2.10    1.90 
   5   0  -2    5.40    1.80 
  -5   0   2   -0.50    1.40 
   5   0  -2    0.20    1.50 
  -5   0   2   -0.10    3.20 
  -5   0   2    3.60    3.40 
  -5   0   2   -0.80    2.40 
   5   0  -2   -2.00    3.00 
  -5   0   2   -2.20    2.40 
  -5   0   2   -0.30    0.70 
   5   0  -2    0.50    2.90 
   5   0  -2    2.10    2.10 
   5   0  -2    3.00    3.50 
   5   0  -2   -1.00    2.20 
  -5   0   2    3.50    1.90 
   5   0  -2    2.20    2.70 
  -5   0   2    4.00    3.80 
  -4   0   2 4597.14  199.38 
  -4   0   2 4460.75  201.78 
  -4   0   2 4737.73  201.88 
   4   0  -2 4649.04  202.48 
  -4   0   2 4640.34  202.98 
  -4   0   2 4583.14  199.78 
   4   0  -2 4507.55  199.18 
  -4   0   2 4658.73  200.78 
  -4   0   2 4662.63  198.48 
   4   0  -2 4490.05  200.78 
  -4   0   2 5083.69  202.88 
  -4   0   2 4585.34  203.38 
  -4   0   2 4571.34  200.48 
  -4   0   2 4458.35  201.08 
  -4   0   2 4740.43  198.58 
  -4   0   2 4666.03  198.38 
  -4   0   2 4659.03  196.88 
  -4   0   2 4852.81  198.58 
   4   0  -2 4751.92  198.08 
  -4   0   2 4707.83  198.08 
   4   0  -2 4636.44  200.48 
  -4   0   2 4323.87  202.28 
   4   0  -2 4644.04  201.78 
  -4   0   2 4733.53  202.08 
  -4   0   2 4524.45  199.98 
   4   0  -2 4643.24  198.48 
   4   0  -2 4697.53  198.08 
   4   0  -2 4636.54  199.68 
   4   0  -2 4501.55  199.68 
   4   0  -2 4550.24  202.68 
   4   0  -2 4453.05  200.48 
   4   0  -2 4639.64  200.48 
   4   0  -2 4745.43  201.88 
  -3   0   2    4.70    2.20 
   3   0  -2    0.70    1.90 
  -3   0   2    5.80    2.40 
   3   0  -2    6.20    3.50 
  -3   0   2    5.90    2.60 
   3   0  -2    2.30    1.90 
   3   0  -2    2.60    2.40 
  -3   0   2    5.60    1.40 
  -3   0   2    3.00    1.60 
  -3   0   2    2.20    1.30 
   3   0  -2    2.00    1.40 
   3   0  -2    3.20    1.90 
  -3   0   2    4.30    1.40 
  -3   0   2    5.90    2.80 
   3   0  -2    3.20    1.60 
   3   0  -2    3.10    1.60 
   3   0  -2    3.80    1.60 
  -3   0   2    6.50    2.50 
   3   0  -2    3.00    1.80 
  -3   0   2    2.90    1.80 
   3   0  -2    2.20    2.00 
   3   0  -2    6.90    1.50 
   3   0  -2    0.80    1.80 
   3   0  -2    6.90    2.70 
  -3   0   2    5.60    1.80 
  -3   0   2    4.10    0.60 
  -3   0   2    4.10    2.00 
  -3   0   2    3.40    1.70 
  -3   0   2    4.30    2.60 
   3   0  -2    2.50    1.90 
  -3   0   2    5.00    1.50 
  -3   0   2   -0.20    2.40 
   3   0  -2    1.20    1.90 
  -3   0   2    5.90    1.60 
   3   0  -2    6.60    1.50 
   3   0  -2    3.50    1.90 
   3   0  -2    0.70    2.10 
   3   0  -2    5.40    2.90 
  -3   0   2    3.80    2.60 
  -3   0   2    4.40    1.30 
  -3   0   2    4.00    1.60 
   3   0  -2   10.20    3.20 
  -3   0   2    6.20    2.90 
  -3   0   2    0.30    2.00 
  -3   0   2    5.20    2.20 
   3   0  -2    3.60    2.10 
  -2   0   2 5798.02  248.98 
  -2   0   2 5787.52  249.48 
   2   0  -2 5737.73  248.28 
  -2   0   2 5787.92  248.08 
  -2   0   2 5866.61  249.97 
  -2   0   2 5987.70  248.28 
  -2   0   2 5749.52  248.28 
  -2   0   2 5817.62  248.18 
   2   0  -2 5955.10  250.17 
   2   0  -2 5899.41  249.48 
   2   0  -2 5578.44  248.38 
  -2   0   2 5788.32  247.78 
   2   0  -2 6129.69  249.28 
  -2   0   2 5732.63  249.48 
   2   0  -2 5999.80  248.68 
   2   0  -2 5595.74  248.28 
   2   0  -2 5983.70  250.07 
  -2   0   2 5553.44  247.58 
   2   0  -2 5639.64  248.38 
  -2   0   2 5941.21  249.38 
   2   0  -2 5773.32  247.68 
   2   0  -2 5738.63  249.38 
   2   0  -2 5740.73  249.28 
   2   0  -2 6170.78  249.88 
  -2   0   2 6247.18  250.07 
  -2   0   2 5816.52  248.38 
  -2   0   2 6064.89  249.48 
  -2   0   2 5702.53  249.38 
  -2   0   2 5796.72  249.28 
  -2   0   2 5744.43  247.88 
  -2   0   2 5711.53  248.58 
  -2   0   2 5797.82  248.68 
  -2   0   2 5737.03  250.17 
  -2   0   2 6003.10  248.88 
   2   0  -2 5765.42  248.68 
   2   0  -2 5724.53  248.08 
   2   0  -2 5511.55  248.58 
   2   0  -2 5750.23  248.98 
  -2   0   2 5974.40  248.68 
  -2   0   2 5734.73  248.58 
   2   0  -2 5801.02  248.08 
   2   0  -2 5845.92  248.38 
   2   0  -2 5448.75  249.78 
   2   0  -2 5794.32  248.68 
  -2   0   2 5871.41  247.58 
  -2   0   2 5899.61  248.48 
   1   0  -2    5.50    1.70 
   1   0  -2    0.40    0.80 
   1   0  -2    2.20    1.10 
  -1   0   2    3.30    1.20 
  -1   0   2    2.50    1.10 
  -1   0   2   -0.40    0.40 
   1   0  -2    5.40    1.10 
  -1   0   2    1.70    0.90 
  -1   0   2    1.90    1.30 
  -1   0   2    1.10    0.90 
  -1   0   2    4.30    1.10 
  -1   0   2    1.00    0.40 
  -1   0   2    0.00    0.80 
  -1   0   2    1.80    0.80 
  -1   0   2    8.00    1.50 
   1   0  -2    0.80    0.80 
   1   0  -2    1.80    1.00 
   1   0  -2    0.60    0.80 
   1   0  -2    1.80    1.20 
  -1   0   2    3.00    1.40 
  -1   0   2   -0.70    1.10 
   1   0  -2   -1.30    0.80 
   1   0  -2    1.60    0.90 
   1   0  -2    5.20    0.90 
  -1   0   2    1.30    1.20 
   1   0  -2    1.60    0.80 
  -1   0   2    1.10    0.90 
   1   0  -2    0.20    1.00 
   1   0  -2    2.30    0.80 
   1   0  -2    0.30    0.70 
  -1   0   2   -0.10    0.90 
   0   0   2 1696.23   74.49 
  -1   0  -2    1.90    1.50 
  -1   0  -2    0.50    1.30 
   1   0   2    3.40    1.40 
  -1   0  -2    3.90    1.20 
   1   0   2    3.60    1.20 
   1   0   2    2.00    1.40 
   1   0   2    1.20    1.30 
  -1   0  -2    2.40    1.40 
  -1   0  -2    1.20    1.10 
  -1   0  -2    1.00    1.20 
   1   0   2    2.40    1.20 
   1   0   2    2.80    1.30 
  -1   0  -2    0.40    0.70 
  -1   0  -2    3.40    1.30 
   1   0   2    3.60    1.70 
   1   0   2    4.10    1.30 
   1   0   2    2.30    1.30 
   1   0   2    4.00    1.50 
  -1   0  -2    4.90    1.60 
  -1   0  -2    3.00    1.30 
   1   0   2    2.00    1.40 
  -1   0  -2    3.30    1.00 
  -1   0  -2    2.00    1.30 
  -1   0  -2    3.90    1.30 
   1   0   2    2.20    0.70 
   1   0   2    2.10    1.20 
   1   0   2    1.20    1.20 
   1   0   2    4.60    1.50 
   1   0   2    3.60    1.70 
   1   0   2    2.50    2.40 
  -1   0  -2    0.40    1.40 
  -1   0  -2    3.50    1.20 
  -1   0  -2    4.00    1.50 
  -1   0  -2    0.40    1.10 
  -1   0  -2    2.00    0.80 
   1   0   2    0.80    0.80 
   1   0   2    2.30    1.10 
   1   0   2    1.40    1.10 
  -1   0  -2    0.60    1.30 
   1   0   2    0.60    1.00 
  -1   0  -2    2.50    0.90 
  -1   0  -2    4.00    2.50 
  -2   0  -2  355.66   17.60 
   2   0   2  341.07   16.40 
   2   0   2  338.27   15.90 
  -2   0  -2  353.86   17.50 
   2   0   2  335.07   16.80 
  -2   0  -2  350.06   18.10 
   2   0   2  341.07   15.70 
  -2   0  -2  329.07   16.30 
  -2   0  -2  332.47   16.50 
   2   0   2  347.67   17.60 
  -2   0  -2  337.37   17.30 
   2   0   2  317.47   18.00 
  -2   0  -2  373.26   17.00 
  -2   0  -2  350.36   17.40 
  -2   0  -2  346.47   16.60 
  -2   0  -2  345.47   17.20 
   2   0   2  346.67   16.30 
  -2   0  -2  352.96   17.00 
  -2   0  -2  325.07   17.40 
   2   0   2  340.77   17.40 
  -2   0  -2  344.37   16.50 
   2   0   2  334.07   16.40 
  -2   0  -2  345.07   16.10 
   2   0   2  336.97   16.40 
  -2   0  -2  342.27   16.70 
  -2   0  -2  342.67   16.90 
  -2   0  -2  328.77   16.40 
  -2   0  -2  352.16   18.50 
   2   0   2  352.96   15.40 
   2   0   2  334.47   17.40 
  -2   0  -2  311.07   18.10 
   2   0   2  338.07   16.80 
   2   0   2  348.57   23.20 
   2   0   2  355.26   16.70 
  -2   0  -2  347.17   15.70 
   2   0   2  358.56   16.90 
  -2   0  -2  344.37   16.50 
   2   0   2  357.36   17.30 
  -2   0  -2  330.17   16.30 
   2   0   2  344.37   18.20 
   2   0   2  329.37   17.20 
   2   0   2  341.57   16.60 
   2   0   2  343.97   17.30 
  -2   0  -2  336.17   17.40 
  -3   0  -2    4.10    1.70 
   3   0   2   -0.40    1.90 
   3   0   2    2.50    1.80 
   3   0   2    1.70    0.80 
  -3   0  -2    7.30    2.30 
   3   0   2   -0.10    1.80 
  -3   0  -2    0.10    1.70 
  -3   0  -2    3.80    2.40 
   3   0   2    1.50    1.80 
  -3   0  -2   -0.70    1.90 
   3   0   2    0.30    1.60 
   3   0   2    3.20    2.60 
   3   0   2    0.90    1.50 
  -3   0  -2    5.70    2.30 
   3   0   2    1.30    1.90 
  -3   0  -2    1.00    2.00 
   3   0   2   -0.20    3.50 
   3   0   2    1.00    1.80 
   3   0   2    0.20    2.60 
  -3   0  -2    6.60    3.40 
   3   0   2   -1.30    1.20 
   3   0   2    5.30    2.90 
  -3   0  -2    1.70    1.60 
   3   0   2    1.30    1.60 
   3   0   2    0.40    1.90 
  -3   0  -2    0.50    2.30 
   3   0   2   -1.00    2.10 
  -3   0  -2   -0.20    2.10 
   3   0   2    0.40    1.30 
  -3   0  -2    4.20    1.70 
  -3   0  -2   -0.70    2.50 
  -3   0  -2    0.90    1.40 
  -3   0  -2    3.10    2.60 
  -3   0  -2    7.80    2.30 
  -3   0  -2    1.80    1.40 
   3   0   2    2.80    2.10 
   3   0   2    1.70    2.50 
  -3   0  -2    0.50    1.70 
  -3   0  -2   -1.60    1.30 
  -3   0  -2    2.00    2.10 
   3   0   2    3.30    2.50 
   4   0   2 3343.47  149.99 
  -4   0  -2 3409.26  146.59 
  -4   0  -2 3485.25  152.28 
   4   0   2 3445.16  149.88 
   4   0   2 3295.37  149.69 
   4   0   2 3393.86  147.79 
  -4   0  -2 3510.45  150.98 
   4   0   2 3306.57  149.88 
   4   0   2 3608.54  148.89 
  -4   0  -2 3385.96  151.88 
  -4   0  -2 3354.56  148.79 
  -4   0  -2 3477.05  147.29 
  -4   0  -2 3370.86  147.19 
  -4   0  -2 3382.96  147.89 
   4   0   2 3358.46  163.18 
   4   0   2 3472.45  148.29 
  -4   0  -2 3475.75  148.09 
  -4   0  -2 3354.96  148.69 
  -4   0  -2 3402.36  147.19 
   4   0   2 3375.16  147.39 
   4   0   2 3493.75  146.89 
   4   0   2 3414.96  148.29 
   4   0   2 3390.16  150.08 
  -4   0  -2 3402.06  148.09 
  -4   0  -2 3213.88  149.39 
   4   0   2 3450.15  146.79 
  -4   0  -2 3264.17  149.99 
   4   0   2 3473.15  148.79 
  -4   0  -2 3362.36  149.69 
   4   0   2 3380.46  148.09 
  -5   0  -2   -2.10    2.60 
   5   0   2    0.20    3.30 
   5   0   2    3.60    2.80 
  -5   0  -2    0.90    1.80 
  -5   0  -2    2.20    3.30 
   5   0   2   -4.20    3.10 
  -5   0  -2    0.10    1.90 
  -5   0  -2    3.90    3.50 
   5   0   2   -2.20    2.60 
   5   0   2    0.40    2.20 
   5   0   2   -1.50    3.30 
  -5   0  -2    0.50    2.10 
  -5   0  -2   -0.30    2.50 
   5   0   2   -0.30    5.40 
  -5   0  -2   -3.60    2.90 
   5   0   2    0.40    1.90 
   5   0   2    5.10    3.30 
   5   0   2   -0.20    3.60 
   5   0   2    0.50    3.40 
   5   0   2    1.30    2.90 
  -5   0  -2    0.80    3.80 
  -5   0  -2    0.90    2.40 
  -5   0  -2    0.10    3.60 
  -5   0  -2    1.30    2.90 
  -5   0  -2   -1.10    2.40 
  -5   0  -2   -2.00    2.60 
  -5   0  -2    2.50    3.10 
   6   0   2  892.21   42.40 
  -6   0  -2  838.02   41.80 
   6   0   2  864.71   42.30 
  -6   0  -2  861.11   41.00 
  -6   0  -2  899.91   42.70 
  -6   0  -2  819.82   39.80 
  -6   0  -2  852.31   47.30 
  -6   0  -2  866.51   45.10 
   6   0   2  807.52   41.60 
  -6   0  -2  889.71   47.70 
  -6   0  -2  882.51   44.70 
  -6   0  -2  872.41   40.40 
   6   0   2  822.62   44.60 
   6   0   2  883.81   44.60 
   6   0   2  871.31   45.10 
   6   0   2  810.82   42.80 
  -6   0  -2  930.71   44.90 
   6   0   2  834.92   39.60 
  -6   0  -2  822.62   45.80 
   6   0   2  864.91   45.00 
  -6   0  -2  839.52   43.20 
  -6   0  -2  897.11   44.70 
   6   0   2  822.92   60.09 
  -6   0  -2  839.12   42.90 
  -7   0  -2    4.10    3.10 
   7   0   2    5.00    5.40 
  -7   0  -2   -1.70    3.70 
  -7   0  -2   -1.20    2.80 
  -7   0  -2    2.00    3.10 
  -7   0  -2    1.30    4.20 
   7   0   2   -2.40    3.80 
   7   0   2    3.20    9.10 
   7   0   2    0.00    3.60 
   7   0   2   -1.10    4.20 
   7   0   2   -0.40    2.40 
  -7   0  -2   -1.40    4.50 
  -7   0  -2    1.70    4.70 
  -7   0  -2   -1.20    4.30 
  -7   0  -2   -1.60    3.70 
   7   0   2    8.40    5.60 
   7   0   2    4.50    4.20 
  -7   0  -2    0.90    5.60 
  -7   0  -2   -1.50    5.10 
  -7   0  -2    3.10    4.40 
  -7   0  -2   -4.80    3.60 
  -7   0  -2   -1.00    4.80 
   7   0   2    0.30    4.70 
   7   0   2   -7.30    3.60 
  -8   0  -2   41.20    9.40 
  -8   0  -2   58.49   13.30 
  -8   0  -2   41.50    9.80 
   8   0   2   33.40   17.50 
   8   0   2   23.70    9.00 
   8   0   2   32.50    6.60 
  -8   0  -2   39.10    9.10 
  -8   0  -2   41.30    8.90 
   8   0   2   51.69   10.50 
  -8   0  -2   13.70    8.40 
  -8   0  -2   29.90    7.10 
   8   0   2   37.80    7.60 
  -8   0  -2   56.09    7.10 
   8   0   2   41.00    9.30 
  -8   0  -2   45.70    9.00 
  -8   0  -2   37.70    6.20 
   8   0   2   56.09   10.80 
  -8   0  -2   47.90    9.30 
   8   0   2   42.40    8.00 
   8   0   2   60.19   10.10 
  -8   0  -2   52.59   11.90 
   8   0   2   30.20    7.10 
   9   0   2    2.60    5.90 
  -9   0  -2    2.80    5.80 
  -9   0  -2   -4.40    5.00 
  -9   0  -2   -5.10    5.80 
  -9   0  -2    3.10    6.60 
   9   0   2   -0.60   10.00 
  -9   0  -2   -2.30    5.90 
  -9   0  -2   -3.00    5.20 
   9   0   2   -0.10    4.90 
   9   0   2   -6.40    4.50 
   9   0   2    0.00    4.80 
  -9   0  -2   -1.10    6.70 
  -9   0  -2    0.20    6.30 
   9   0   2    3.10    6.70 
   9   0   2   -1.10    4.60 
   9   0   2    5.90    7.70 
 -10   0  -2   -3.20    5.60 
  10   0   2    2.00    8.10 
  10   0   2   -0.20    7.10 
  10   0   2    8.90    7.50 
 -10   0  -2   -1.60    7.20 
  10   0   2    5.90    5.20 
  10   0   2    7.70    6.60 
  10   0   2    4.90    6.90 
 -10   0  -2   -2.90    8.00 
 -10   0  -2   -0.40    8.40 
  10   0   2   12.90    8.40 
 -10   0  -2   13.40    7.70 
  10   0   2    5.40   13.80 
 -10   0  -2    5.80    7.30 
 -10   0  -2   -0.50    7.30 
 -10  -1   2   59.09   12.60 
 -10  -1   2   64.49   12.50 
  10  -1  -2   44.20   11.00 
  10  -1  -2   50.39   11.00 
 -10  -1   2   30.70   13.00 
  10  -1  -2   54.49   10.10 
 -10  -1   2   56.69   13.10 
 -10  -1   2   45.30    9.10 
 -10  -1   2   50.19    9.80 
  10  -1  -2   45.60   22.80 
  10  -1  -2   49.80   13.30 
 -10  -1   2   47.90   13.10 
  10  -1  -2   45.40   10.10 
 -10  -1   2   41.30    9.90 
 -10   1   2   59.39   12.20 
 -10   1   2   49.40   11.20 
  10   1  -2   41.60    8.70 
  10   1  -2   50.79   11.70 
  10   1  -2   36.20    9.40 
 -10   1   2   36.50   11.70 
  10   1  -2   43.50   12.30 
 -10   1   2   40.10   12.20 
 -10   1   2   31.80   10.40 
 -10   1   2   68.29   17.10 
 -10   1   2   38.30   10.50 
  10   1  -2   40.10   10.50 
  10   1  -2   61.39   11.90 
  10   1  -2   46.10   10.80 
  -9  -1   2  342.37   25.40 
   9  -1  -2  329.67   22.60 
  -9  -1   2  365.66   21.80 
   9  -1  -2  354.46   24.60 
   9  -1  -2  291.17   25.90 
  -9  -1   2  333.87   25.70 
   9  -1  -2  363.76   26.30 
  -9  -1   2  348.67   29.60 
  -9  -1   2  330.57   22.60 
   9  -1  -2  371.76   23.20 
   9  -1  -2  322.47   28.60 
   9  -1  -2  365.26   45.80 
  -9  -1   2  355.96   25.50 
  -9  -1   2  362.86   25.20 
  -9  -1   2  373.56   24.40 
  -9  -1   2  321.47   26.30 
  -9  -1   2  338.47   26.30 
   9  -1  -2  365.86   24.70 
  -9   1   2  394.06   25.70 
   9   1  -2  347.87   26.90 
  -9   1   2  299.97   28.70 
  -9   1   2  321.97   21.50 
   9   1  -2  326.57   22.00 
   9   1  -2  319.17   22.10 
  -9   1   2  369.66   20.80 
   9   1  -2  327.67   24.90 
  -9   1   2  328.37   25.70 
   9   1  -2  346.97   24.50 
  -9   1   2  346.57   24.70 
  -9   1   2  385.46   29.70 
  -9   1   2  319.37   24.20 
   9   1  -2  324.77   26.50 
   9   1  -2  278.67   23.10 
   9   1  -2  390.66   24.50 
  -9   1   2  360.76   27.00 
  -8  -1   2   16.60    8.00 
   8  -1  -2    5.60    4.50 
  -8  -1   2   12.20    5.50 
  -8  -1   2   15.60    6.30 
  -8  -1   2   16.70    5.30 
   8  -1  -2   21.30    6.00 
  -8  -1   2   16.00    7.30 
  -8  -1   2    6.10    5.70 
  -8  -1   2   16.80    6.20 
  -8  -1   2   21.70    8.20 
   8  -1  -2   13.00    6.20 
   8  -1  -2   16.60    5.30 
  -8  -1   2   22.20    7.90 
   8  -1  -2   13.80    7.20 
  -8  -1   2   13.20    4.60 
   8  -1  -2   17.00    6.20 
   8  -1  -2   14.70    6.20 
  -8  -1   2   13.80    6.30 
   8   1  -2   14.00    5.40 
  -8   1   2   18.20    6.50 
  -8   1   2   20.20    4.90 
  -8   1   2    6.60    6.70 
  -8   1   2    9.60    4.60 
  -8   1   2   18.10    7.80 
  -8   1   2   21.70    6.70 
   8   1  -2   25.20    6.60 
   8   1  -2   20.40    6.60 
  -8   1   2   16.50    4.90 
  -8   1   2   10.70    7.00 
  -8   1   2   27.70    7.60 
   8   1  -2   23.10    7.70 
   8   1  -2   16.00    5.30 
  -8   1   2   13.30    6.90 
  -8   1   2   19.70    5.30 
   8   1  -2   24.40    5.90 
  -8   1   2   20.80    8.30 
   8   1  -2   28.60    7.10 
   8   1  -2   22.70    6.60 
   8   1  -2   17.70    7.90 
  -8   1   2   10.90    7.50 
   8   1  -2    8.30    5.10 
   7  -1  -2  188.38   18.00 
   7  -1  -2  215.88   13.70 
  -7  -1   2  236.68   18.20 
  -7  -1   2  231.98   17.10 
   7  -1  -2  242.98   16.30 
   7  -1  -2  251.27   18.60 
   7  -1  -2  221.68   17.00 
   7  -1  -2  225.18   16.40 
   7  -1  -2  229.58   17.70 
  -7  -1   2  246.78   14.00 
   7  -1  -2  225.38   16.60 
  -7  -1   2  248.18   15.20 
   7  -1  -2  221.78   14.50 
  -7  -1   2  234.48   16.80 
   7  -1  -2  207.98   13.40 
  -7  -1   2  237.28   20.60 
  -7  -1   2  231.08   18.10 
  -7  -1   2  195.58   16.50 
  -7  -1   2  221.28   16.00 
  -7  -1   2  228.48   14.10 
   7  -1  -2  231.78   16.00 
  -7  -1   2  257.17   17.80
[truncated: 2,852,508 more chars]
