# Supplementary material
Source: MDPI journal article supplement (https://www.mdpi.com/2073-4352/13/7/1043)
Supplement: s1 [file s1 › 10 Ho Ha2019_84_0m_a.cif]

 
data_Ha2019_84_0m_a 
  
_audit_creation_method            'SHELXL-2014/7' 
_shelx_SHELXL_version_number      '2014/7' 
_chemical_name_systematic         ? 
_chemical_name_common             ? 
_chemical_melting_point           ? 
_chemical_formula_moiety          ? 
_chemical_formula_sum 
 'C4 H12 Br Ho O7' 
_chemical_formula_weight          416.98 
  
loop_ 
 _atom_type_symbol 
 _atom_type_description 
 _atom_type_scat_dispersion_real 
 _atom_type_scat_dispersion_imag 
 _atom_type_scat_source 
 'C'  'C'   0.0033   0.0016 
 'International Tables Vol C Tables 4.2.6.8 and 6.1.1.4' 
 'H'  'H'   0.0000   0.0000 
 'International Tables Vol C Tables 4.2.6.8 and 6.1.1.4' 
 'O'  'O'   0.0106   0.0060 
 'International Tables Vol C Tables 4.2.6.8 and 6.1.1.4' 
 'Br'  'Br'  -0.2901   2.4595 
 'International Tables Vol C Tables 4.2.6.8 and 6.1.1.4' 
 'Ho'  'Ho'  -0.2175   4.6783 
 'International Tables Vol C Tables 4.2.6.8 and 6.1.1.4' 
  
_space_group_crystal_system       monoclinic 
_space_group_IT_number            14 
_space_group_name_H-M_alt         'P 21/n' 
_space_group_name_Hall            '-P 2yn' 
  
_shelx_space_group_comment 
; 
The symmetry employed for this shelxl refinement is uniquely defined 
by the following loop, which should always be used as a source of 
symmetry information in preference to the above space-group names. 
They are only intended as comments. 
; 
  
loop_ 
 _space_group_symop_operation_xyz 
 'x, y, z' 
 '-x+1/2, y+1/2, -z+1/2' 
 '-x, -y, -z' 
 'x-1/2, -y-1/2, z-1/2' 
  
_cell_length_a                    7.8117(3) 
_cell_length_b                    8.0361(4) 
_cell_length_c                    17.5440(9) 
_cell_angle_alpha                 90 
_cell_angle_beta                  96.096(3) 
_cell_angle_gamma                 90 
_cell_volume                      1095.11(9) 
_cell_formula_units_Z             4 
_cell_measurement_temperature     100(2) 
_cell_measurement_reflns_used     9946 
_cell_measurement_theta_min       2.34 
_cell_measurement_theta_max       27.17 
  
_exptl_crystal_description        prism 
_exptl_crystal_colour             pink 
_exptl_crystal_density_meas       ? 
_exptl_crystal_density_method     ? 
_exptl_crystal_density_diffrn     2.529 
_exptl_crystal_F_000              776 
_exptl_transmission_factor_min    ? 
_exptl_transmission_factor_max    ? 
_exptl_crystal_size_max           0.487 
_exptl_crystal_size_mid           0.172 
_exptl_crystal_size_min           0.070 
_exptl_absorpt_coefficient_mu     10.878 
_shelx_estimated_absorpt_T_min    0.076 
_shelx_estimated_absorpt_T_max    0.516 
_exptl_absorpt_correction_type    multi-scan 
_exptl_absorpt_correction_T_min   0.365 
_exptl_absorpt_correction_T_max   0.754 
_exptl_absorpt_process_details    'Bruker SADABS' 
_exptl_absorpt_special_details    ? 
_diffrn_ambient_temperature       100(2) 
_diffrn_radiation_wavelength      0.71073 
_diffrn_radiation_type            MoK\a 
_diffrn_source                    ? 
_diffrn_measurement_device_type   'Bruker APEX-II CCD' 
_diffrn_measurement_method        '\f and \w scans' 
_diffrn_detector_area_resol_mean  ? 
_diffrn_reflns_number             102663 
_diffrn_reflns_av_unetI/netI      0.0187 
_diffrn_reflns_av_R_equivalents   0.0734 
_diffrn_reflns_limit_h_min        -10 
_diffrn_reflns_limit_h_max        10 
_diffrn_reflns_limit_k_min        -10 
_diffrn_reflns_limit_k_max        10 
_diffrn_reflns_limit_l_min        -23 
_diffrn_reflns_limit_l_max        23 
_diffrn_reflns_theta_min          2.755 
_diffrn_reflns_theta_max          28.000 
_diffrn_reflns_theta_full         25.242 
_diffrn_measured_fraction_theta_max   1.000 
_diffrn_measured_fraction_theta_full  0.999 
_diffrn_reflns_Laue_measured_fraction_max    1.000 
_diffrn_reflns_Laue_measured_fraction_full   0.999 
_diffrn_reflns_point_group_measured_fraction_max   1.000 
_diffrn_reflns_point_group_measured_fraction_full  0.999 
_reflns_number_total              2655 
_reflns_number_gt                 2353 
_reflns_threshold_expression      'I > 2\s(I)' 
_reflns_Friedel_coverage          0.000 
_reflns_Friedel_fraction_max      . 
_reflns_Friedel_fraction_full     . 
  
_reflns_special_details 
; 
 Reflections were merged by SHELXL according to the crystal 
 class for the calculation of statistics and refinement. 
  
 _reflns_Friedel_fraction is defined as the number of unique 
 Friedel pairs measured divided by the number that would be 
 possible theoretically, ignoring centric projections and 
 systematic absences. 
; 
  
_computing_data_collection        'Bruker APEX2' 
_computing_cell_refinement        'Bruker SAINT' 
_computing_data_reduction         'Bruker SAINT' 
_computing_structure_solution     'SHELXS-97 (Sheldrick 2008)' 
_computing_structure_refinement 'SHELXL-2014/7 (Sheldrick, 2014)' 
_computing_molecular_graphics     'Bruker SHELXTL' 
_computing_publication_material   'Bruker SHELXTL' 
_refine_special_details           ? 
_refine_ls_structure_factor_coef  Fsqd 
_refine_ls_matrix_type            full 
_refine_ls_weighting_scheme       calc 
_refine_ls_weighting_details 
'w=1/[\s^2^(Fo^2^)+(0.0135P)^2^+1.1800P] where P=(Fo^2^+2Fc^2^)/3' 
_atom_sites_solution_primary      direct 
_atom_sites_solution_secondary    ? 
_atom_sites_solution_hydrogens    mixed 
_refine_ls_hydrogen_treatment     constr
_refine_ls_extinction_method      none 
_refine_ls_extinction_coef        . 
_refine_ls_number_reflns          2655 
_refine_ls_number_parameters      125 
_refine_ls_number_restraints      0 
_refine_ls_R_factor_all           0.0196 
_refine_ls_R_factor_gt            0.0148 
_refine_ls_wR_factor_ref          0.0354 
_refine_ls_wR_factor_gt           0.0337 
_refine_ls_goodness_of_fit_ref    1.051 
_refine_ls_restrained_S_all       1.051 
_refine_ls_shift/su_max           0.003 
_refine_ls_shift/su_mean          0.000 
  
loop_ 
 _atom_site_label 
 _atom_site_type_symbol 
 _atom_site_fract_x 
 _atom_site_fract_y 
 _atom_site_fract_z 
 _atom_site_U_iso_or_equiv 
 _atom_site_adp_type 
 _atom_site_occupancy 
 _atom_site_site_symmetry_order 
 _atom_site_calc_flag 
 _atom_site_refinement_flags_posn 
 _atom_site_refinement_flags_adp 
 _atom_site_refinement_flags_occupancy 
 _atom_site_disorder_assembly 
 _atom_site_disorder_group 
Ho1 Ho 0.26937(2) 0.45005(2) 0.53831(2) 0.01059(4) Uani 1 1 d . . . . . 
Br1 Br 0.38681(3) 0.95165(3) 0.68230(2) 0.01732(6) Uani 1 1 d . . . . . 
O11 O 0.0106(2) 0.3278(2) 0.53848(12) 0.0212(4) Uani 1 1 d . . . . . 
O12 O -0.2677(2) 0.2860(2) 0.52275(11) 0.0155(4) Uani 1 1 d . . . . . 
C11 C -0.1183(3) 0.2384(3) 0.54723(15) 0.0127(5) Uani 1 1 d . . . . . 
C12 C -0.0959(4) 0.0739(4) 0.58749(18) 0.0246(6) Uani 1 1 d . . . . . 
H12A H 0.0256 0.0580 0.6063 0.086(10) Uiso 1 1 calc R U . . . 
H12B H -0.1334 -0.0157 0.5516 0.086(10) Uiso 1 1 calc R U . . . 
H12C H -0.1655 0.0719 0.6308 0.086(10) Uiso 1 1 calc R U . . . 
O21 O 0.5392(2) 0.5551(2) 0.57355(10) 0.0126(4) Uani 1 1 d . . . . . 
O22 O 0.8104(2) 0.6221(2) 0.59311(11) 0.0150(4) Uani 1 1 d . . . . . 
C21 C 0.6718(3) 0.5872(3) 0.62026(15) 0.0128(5) Uani 1 1 d . . . . . 
C22 C 0.6636(3) 0.5812(4) 0.70464(16) 0.0192(6) Uani 1 1 d . . . . . 
H22A H 0.7806 0.5751 0.7310 0.024(8) Uiso 0.67(3) 1 d R U P . . 
H22B H 0.5983 0.4829 0.7175 0.024(8) Uiso 0.67(3) 1 d R U P . . 
H22C H 0.6066 0.6817 0.7210 0.024(8) Uiso 0.67(3) 1 d R U P . . 
H22D H 0.5411 0.5872 0.7119 0.024(8) Uiso 0.33(3) 1 d R U P . . 
H22E H 0.7227 0.6804 0.7267 0.024(8) Uiso 0.33(3) 1 d R U P . . 
H22F H 0.7143 0.4815 0.7301 0.024(8) Uiso 0.33(3) 1 d R U P . . 
O1W O 0.4039(2) 0.1873(2) 0.53206(11) 0.0150(4) Uani 1 1 d . . . . . 
H11W H 0.4051 0.1048 0.5717 0.063(9) Uiso 1 1 d R U . . . 
H12W H 0.5217 0.1969 0.5216 0.063(9) Uiso 1 1 d R U . . . 
O2W O 0.1557(2) 0.6333(2) 0.62407(10) 0.0144(4) Uani 1 1 d . . . . . 
H21W H 0.0351 0.6473 0.6284 0.047(8) Uiso 1 1 d R U . . . 
H22W H 0.2078 0.7362 0.6421 0.047(8) Uiso 1 1 d R U . . . 
O3W O 0.3039(2) 0.3418(2) 0.66489(11) 0.0190(4) Uani 1 1 d . . . . . 
H31W H 0.2494 0.3909 0.7060 0.050(8) Uiso 1 1 d R U . . . 
H32W H 0.3320 0.2305 0.6816 0.050(8) Uiso 1 1 d R U . . . 
  
loop_ 
 _atom_site_aniso_label 
 _atom_site_aniso_U_11 
 _atom_site_aniso_U_22 
 _atom_site_aniso_U_33 
 _atom_site_aniso_U_23 
 _atom_site_aniso_U_13 
 _atom_site_aniso_U_12 
Ho1 0.00693(6) 0.01255(6) 0.01243(6) -0.00037(5) 0.00165(4) -0.00215(4) 
Br1 0.02051(13) 0.01375(13) 0.01764(13) 0.00133(10) 0.00169(10) -0.00224(10) 
O11 0.0143(9) 0.0259(11) 0.0244(11) -0.0054(9) 0.0072(8) -0.0109(8) 
O12 0.0097(8) 0.0187(10) 0.0181(10) 0.0025(8) 0.0015(7) 0.0015(7) 
C11 0.0127(11) 0.0129(12) 0.0134(12) -0.0019(10) 0.0047(9) 0.0009(9) 
C12 0.0262(15) 0.0221(15) 0.0251(16) 0.0089(13) 0.0013(12) 0.0036(12) 
O21 0.0098(8) 0.0139(9) 0.0142(9) -0.0011(7) 0.0012(7) -0.0016(7) 
O22 0.0078(8) 0.0191(10) 0.0178(10) -0.0028(8) 0.0004(7) -0.0026(7) 
C21 0.0122(11) 0.0117(12) 0.0143(13) -0.0022(10) 0.0009(10) 0.0014(9) 
C22 0.0154(12) 0.0285(15) 0.0133(13) 0.0007(11) 0.0000(10) 0.0027(11) 
O1W 0.0132(8) 0.0161(9) 0.0166(10) 0.0013(7) 0.0052(7) 0.0000(7) 
O2W 0.0097(8) 0.0165(9) 0.0170(9) -0.0038(8) 0.0018(7) -0.0003(7) 
O3W 0.0257(10) 0.0156(9) 0.0168(10) 0.0022(8) 0.0071(8) 0.0044(8) 
  
_geom_special_details 
; 
 All esds (except the esd in the dihedral angle between two l.s. planes) 
 are estimated using the full covariance matrix.  The cell esds are taken 
 into account individually in the estimation of esds in distances, angles 
 and torsion angles; correlations between esds in cell parameters are only 
 used when they are defined by crystal symmetry.  An approximate (isotropic) 
 treatment of cell esds is used for estimating esds involving l.s. planes. 
; 
  
loop_ 
 _geom_bond_atom_site_label_1 
 _geom_bond_atom_site_label_2 
 _geom_bond_distance 
 _geom_bond_site_symmetry_2 
 _geom_bond_publ_flag 
Ho1 O11 2.2475(17) . ? 
Ho1 O21 2.2937(17) . ? 
Ho1 O2W 2.3461(17) . ? 
Ho1 O1W 2.3662(17) . ? 
Ho1 O3W 2.3734(19) . ? 
Ho1 O12 2.3758(18) 3_566 ? 
Ho1 O22 2.3950(18) 3_666 ? 
Ho1 O21 2.5908(18) 3_666 ? 
Ho1 O11 3.026(2) 3_566 ? 
O11 C11 1.260(3) . ? 
O12 C11 1.260(3) . ? 
C11 C12 1.500(4) . ? 
C12 H12A 0.9800 . ? 
C12 H12B 0.9800 . ? 
C12 H12C 0.9800 . ? 
O21 C21 1.277(3) . ? 
O22 C21 1.260(3) . ? 
C21 C22 1.489(4) . ? 
C22 H22A 0.9800 . ? 
C22 H22B 0.9800 . ? 
C22 H22C 0.9800 . ? 
C22 H22D 0.9800 . ? 
C22 H22E 0.9800 . ? 
C22 H22F 0.9800 . ? 
O1W H11W 0.9600 . ? 
O1W H12W 0.9600 . ? 
O2W H21W 0.9600 . ? 
O2W H22W 0.9600 . ? 
O3W H31W 0.9600 . ? 
O3W H32W 0.9600 . ? 
  
loop_ 
 _geom_angle_atom_site_label_1 
 _geom_angle_atom_site_label_2 
 _geom_angle_atom_site_label_3 
 _geom_angle 
 _geom_angle_site_symmetry_1 
 _geom_angle_site_symmetry_3 
 _geom_angle_publ_flag 
O11 Ho1 O21 164.01(7) . . ? 
O11 Ho1 O2W 82.64(6) . . ? 
O21 Ho1 O2W 89.75(6) . . ? 
O11 Ho1 O1W 90.81(7) . . ? 
O21 Ho1 O1W 86.61(6) . . ? 
O2W Ho1 O1W 142.19(6) . . ? 
O11 Ho1 O3W 81.47(7) . . ? 
O21 Ho1 O3W 82.69(6) . . ? 
O2W Ho1 O3W 69.09(6) . . ? 
O1W Ho1 O3W 73.11(6) . . ? 
O11 Ho1 O12 115.40(7) . 3_566 ? 
O21 Ho1 O12 75.75(6) . 3_566 ? 
O2W Ho1 O12 75.19(6) . 3_566 ? 
O1W Ho1 O12 139.19(6) . 3_566 ? 
O3W Ho1 O12 138.05(7) . 3_566 ? 
O11 Ho1 O22 75.72(6) . 3_666 ? 
O21 Ho1 O22 119.09(6) . 3_666 ? 
O2W Ho1 O22 133.78(6) . 3_666 ? 
O1W Ho1 O22 79.09(6) . 3_666 ? 
O3W Ho1 O22 143.53(7) . 3_666 ? 
O12 Ho1 O22 78.09(6) 3_566 3_666 ? 
O11 Ho1 O21 125.84(6) . 3_666 ? 
O21 Ho1 O21 67.80(7) . 3_666 ? 
O2W Ho1 O21 141.62(6) . 3_666 ? 
O1W Ho1 O21 69.86(6) . 3_666 ? 
O3W Ho1 O21 133.27(6) . 3_666 ? 
O12 Ho1 O21 69.42(6) 3_566 3_666 ? 
O22 Ho1 O21 51.61(5) 3_666 3_666 ? 
O11 Ho1 O11 69.56(7) . 3_566 ? 
O21 Ho1 O11 120.20(6) . 3_566 ? 
O2W Ho1 O11 67.08(6) . 3_566 ? 
O1W Ho1 O11 144.02(6) . 3_566 ? 
O3W Ho1 O11 129.61(6) . 3_566 ? 
O12 Ho1 O11 45.86(5) 3_566 3_566 ? 
O22 Ho1 O11 67.19(6) 3_666 3_566 ? 
O21 Ho1 O11 96.90(5) 3_666 3_566 ? 
Ho1 Ho1 Ho1 136.417(6) 3_666 3_566 ? 
C11 O11 Ho1 168.54(19) . . ? 
C11 O12 Ho1 112.66(15) . 3_566 ? 
O11 C11 O12 120.6(2) . . ? 
O11 C11 C12 120.4(2) . . ? 
O12 C11 C12 119.0(2) . . ? 
C11 C12 H12A 109.5 . . ? 
C11 C12 H12B 109.5 . . ? 
H12A C12 H12B 109.5 . . ? 
C11 C12 H12C 109.5 . . ? 
H12A C12 H12C 109.5 . . ? 
H12B C12 H12C 109.5 . . ? 
C21 O21 Ho1 155.08(17) . . ? 
C21 O21 Ho1 89.72(15) . 3_666 ? 
Ho1 O21 Ho1 112.20(7) . 3_666 ? 
C21 O22 Ho1 99.43(15) . 3_666 ? 
O22 C21 O21 118.3(2) . . ? 
O22 C21 C22 120.8(2) . . ? 
O21 C21 C22 120.9(2) . . ? 
C21 C22 H22A 109.5 . . ? 
C21 C22 H22B 109.5 . . ? 
H22A C22 H22B 109.5 . . ? 
C21 C22 H22C 109.5 . . ? 
H22A C22 H22C 109.5 . . ? 
H22B C22 H22C 109.5 . . ? 
C21 C22 H22D 105.8 . . ? 
C21 C22 H22E 107.4 . . ? 
H22D C22 H22E 109.5 . . ? 
C21 C22 H22F 114.9 . . ? 
H22D C22 H22F 109.5 . . ? 
H22E C22 H22F 109.5 . . ? 
Ho1 O1W H11W 123.5 . . ? 
Ho1 O1W H12W 112.1 . . ? 
H11W O1W H12W 105.0 . . ? 
Ho1 O2W H21W 124.5 . . ? 
Ho1 O2W H22W 125.1 . . ? 
H21W O2W H22W 105.0 . . ? 
Ho1 O3W H31W 122.5 . . ? 
Ho1 O3W H32W 128.8 . . ? 
H31W O3W H32W 105.0 . . ? 
  
loop_ 
 _geom_hbond_atom_site_label_D 
 _geom_hbond_atom_site_label_H 
 _geom_hbond_atom_site_label_A 
 _geom_hbond_distance_DH 
 _geom_hbond_distance_HA 
 _geom_hbond_distance_DA 
 _geom_hbond_angle_DHA 
 _geom_hbond_site_symmetry_A 
O1W H11W Br1  0.96 2.32 3.2598(18) 167.8 1_545 
O1W H12W O12  0.96 1.79 2.706(2) 158.0 1_655 
O2W H21W O22  0.96 1.81 2.696(2) 152.2 1_455 
O2W H22W Br1  0.96 2.29 3.2334(18) 167.5 . 
O3W H31W Br1  0.96 2.38 3.3218(19) 167.5 2_546 
O3W H32W Br1  0.96 2.28 3.2097(19) 162.6 1_545 
  
_refine_diff_density_max    0.508 
_refine_diff_density_min   -0.579 
_refine_diff_density_rms    0.107 
  
_shelx_res_file 
; 
  
    Ha2019_84_0m_a.res created by SHELXL-2014/7 
  
  
TITL Ha2019_84_0m_a.res in P2(1)/n 
CELL  0.71073   7.8117   8.0361  17.5440   90.000   96.096   90.000 
ZERR    4.000   0.0003   0.0004   0.0009    0.000    0.003    0.000 
LATT 1 
SYMM 1/2-X, 1/2+Y, 1/2-Z 
SFAC C  H  O  Br Ho 
UNIT 16 48 28 4 4 
LIST 4 ! automatically inserted. Change 6 to 4 for CHECKCIF!! 
OMIT -3 56 
L.S. 10 
BOND $H 
ACTA 
FMAP 2 
TEMP -173 
rem DFIX 0.96  0.0001 O1w H11w O1w H12w O2w H21w O2w H22w O3w H31w O3w H32w 
rem dfix 1.523  0.0001 H11w H12w H21w H22w H31w H32w 
FREE Ho1 C21_$6 
EQIV $6 1-x, 1-y, 1-z 
BIND Ho1 O11_$7 
EQIV $7 -x, 1-y, 1-z 
BIND Ho1 Ho1_$6 
BIND Ho1 Ho1_$8 
EQIV $8 -x, 1-y, 1-z 
ACTA 
HTAB 
EQIV $1 -x+3/2, y-1/2, -z+3/2 
EQIV $2 x, y-1, z 
HTAB O1W Br1_$2 
EQIV $3 x+1, y, z 
HTAB O1W O12_$3 
EQIV $4 x-1, y, z 
HTAB O2W O22_$4 
HTAB O2W Br1 
EQIV $5 -x+1/2, y-1/2, -z+3/2 
HTAB O3W Br1_$5 
HTAB O3W Br1_$2 
SIZE 0.074  0.120  0.465 
BOND $H 
rem DFIX 0.98  0.0001 C22 H22d C22 H22e C22 H22f 
rem fix 1.601 0.0001 H22d H22e H22d H22f H22e H22f 
SIZE 0.070  0.172  0.487 
PLAN 20 
TEMP -173 
WGHT    0.013500    1.180000 
FVAR       0.27357   0.08555   0.02393   0.06341   0.04691   0.05029   0.67294 
HO1   5    0.269367    0.450048    0.538314    11.00000    0.00693    0.01255 = 
         0.01243   -0.00037    0.00165   -0.00215 
BR1   4    0.386805    0.951654    0.682297    11.00000    0.02051    0.01375 = 
         0.01764    0.00133    0.00169   -0.00224 
O11   3    0.010621    0.327848    0.538481    11.00000    0.01429    0.02593 = 
         0.02443   -0.00542    0.00723   -0.01090 
O12   3   -0.267719    0.285998    0.522754    11.00000    0.00968    0.01872 = 
         0.01814    0.00245    0.00146    0.00149 
C11   1   -0.118264    0.238407    0.547231    11.00000    0.01266    0.01289 = 
         0.01338   -0.00187    0.00473    0.00088 
C12   1   -0.095944    0.073885    0.587495    11.00000    0.02623    0.02214 = 
         0.02514    0.00887    0.00126    0.00364 
AFIX 137 
H12A  2    0.025607    0.058029    0.606333    11.00000   21.00000 
H12B  2   -0.133379   -0.015704    0.551643    11.00000   21.00000 
H12C  2   -0.165480    0.071870    0.630807    11.00000   21.00000 
AFIX   0 
O21   3    0.539215    0.555077    0.573547    11.00000    0.00977    0.01391 = 
         0.01418   -0.00114    0.00120   -0.00161 
O22   3    0.810393    0.622123    0.593115    11.00000    0.00780    0.01910 = 
         0.01777   -0.00279    0.00045   -0.00264 
C21   1    0.671833    0.587167    0.620260    11.00000    0.01219    0.01166 = 
         0.01430   -0.00217    0.00087    0.00138 
C22   1    0.663620    0.581195    0.704645    11.00000    0.01536    0.02853 = 
         0.01330    0.00070   -0.00003    0.00270 
AFIX   3 
H22A  2    0.780555    0.575105    0.730962    71.00000   31.00000 
H22B  2    0.598294    0.482851    0.717511    71.00000   31.00000 
H22C  2    0.606585    0.681719    0.720986    71.00000   31.00000 
  
H22D  2    0.541081    0.587225    0.711858   -71.00000   31.00000 
H22E  2    0.722736    0.680351    0.726738   -71.00000   31.00000 
H22F  2    0.714279    0.481459    0.730066   -71.00000   31.00000 
AFIX   0 
O1W   3    0.403918    0.187314    0.532061    11.00000    0.01320    0.01609 = 
         0.01659    0.00126    0.00523   -0.00001 
AFIX   3 
H11W  2    0.405059    0.104828    0.571693    11.00000   41.00000 
H12W  2    0.521683    0.196946    0.521625    11.00000   41.00000 
AFIX   0 
O2W   3    0.155730    0.633311    0.624070    11.00000    0.00972    0.01647 = 
         0.01698   -0.00377    0.00177   -0.00027 
AFIX   3 
H21W  2    0.035110    0.647280    0.628430    11.00000   51.00000 
H22W  2    0.207828    0.736179    0.642090    11.00000   51.00000 
AFIX   0 
O3W   3    0.303914    0.341835    0.664891    11.00000    0.02565    0.01564 = 
         0.01683    0.00220    0.00711    0.00444 
AFIX   3 
H31W  2    0.249426    0.390858    0.705992    11.00000   61.00000 
H32W  2    0.332028    0.230461    0.681605    11.00000   61.00000 
AFIX   0 
HKLF 4 
  
REM  Ha2019_84_0m_a.res in P2(1)/n 
REM R1 =  0.0148 for    2353 Fo > 4sig(Fo)  and  0.0196 for all    2655 data 
REM    125 parameters refined using      0 restraints 
  
END 
  
WGHT      0.0135      1.1800 
  
REM Instructions for potential hydrogen bonds 
HTAB C12 Br1_$2 
HTAB C22 Br1_$1 
HTAB C22 O3W 
HTAB C22 Br1 
HTAB O1W Br1_$2 
HTAB O1W O12_$3 
HTAB O2W O22_$4 
HTAB O2W Br1 
HTAB O3W Br1_$5 
HTAB O3W Br1_$2 
  
REM Highest difference peak  0.508,  deepest hole -0.579,  1-sigma level  0.107 
Q1    1   0.1750  0.4641  0.5889  11.00000  0.05    0.51 
Q2    1   0.3659  0.4285  0.4862  11.00000  0.05    0.49 
Q3    1   0.5603  0.5222  0.5311  11.00000  0.05    0.48 
Q4    1   0.4547  0.4588  0.5377  11.00000  0.05    0.48 
Q5    1  -0.0258  0.3872  0.5304  11.00000  0.05    0.42 
Q6    1   0.1012  0.3935  0.6046  11.00000  0.05    0.42 
Q7    1  -0.2234  0.0415  0.6006  11.00000  0.05    0.42 
Q8    1   0.1978  0.6873  0.6308  11.00000  0.05    0.39 
Q9    1   0.9046  0.5233  0.5253  11.00000  0.05    0.37 
Q10   1  -0.0918  0.1574  0.5709  11.00000  0.05    0.35 
Q11   1   0.3300  0.4571  0.5926  11.00000  0.05    0.35 
Q12   1   0.1040  0.4109  0.5357  11.00000  0.05    0.35 
Q13   1   0.0813  0.6239  0.6010  11.00000  0.05    0.34 
Q14   1   0.2897  0.9734  0.6745  11.00000  0.05    0.34 
Q15   1   0.5173  0.9857  0.6838  11.00000  0.05    0.33 
Q16   1  -0.0224  0.2604  0.5356  11.00000  0.05    0.33 
Q17   1   0.0651  0.5117  0.6032  11.00000  0.05    0.33 
Q18   1   0.6555  0.6394  0.6531  11.00000  0.05    0.33 
Q19   1   0.4019  0.1215  0.5504  11.00000  0.05    0.33 
Q20   1   0.0059 -0.0080  0.5423  11.00000  0.05    0.33 
; 
_shelx_res_checksum   85691 
  
_shelx_hkl_file 
; 
  -1   0   0    4.50    2.00 
  -1   0   0   10.20    2.00 
  -1   0   0    7.60    2.40 
  -1   0   0    4.40    1.90 
  -1   0   0    7.20    1.60 
  -1   0   0    3.50    2.30 
  -1   0   0    7.60    1.30 
   1   0   0   -0.30    1.00 
   1   0   0    0.90    1.00 
   1   0   0    1.70    1.30 
   1   0   0    2.10    1.30 
  -1   0   0   10.40    2.50 
  -1   0   0    6.10    1.80 
  -1   0   0    5.80    2.30 
  -1   0   0   -1.40    1.30 
  -1   0   0    7.70    2.50 
  -1   0   0    4.90    2.80 
  -1   0   0    1.20    1.70 
  -1   0   0    2.30    1.90 
  -1   0   0    5.10    1.80 
  -1   0   0    5.10    2.40 
  -1   0   0    2.90    1.80 
  -1   0   0   12.90    2.90 
  -1   0   0    6.10    1.80 
  -1   0   0    0.60    1.30 
  -1   0   0    1.60    1.90 
  -1   0   0    2.70    1.70 
  -1   0   0    7.00    2.10 
  -2   0   0 4407.56  294.37 
  -2   0   0 4472.45  294.37 
  -2   0   0 4412.46  294.57 
  -2   0   0 4317.07  291.87 
  -2   0   0 4445.86  296.17 
   2   0   0 4623.54  294.67 
   2   0   0 4570.94  295.17 
   2   0   0 4525.65  294.67 
   2   0   0 4488.25  294.67 
   2   0   0 4462.25  296.07 
   2   0   0 4478.55  291.17 
  -2   0   0 4378.06  294.27 
  -2   0   0 4364.26  293.07 
  -2   0   0 4380.56  292.27 
  -2   0   0 4446.26  293.97 
  -2   0   0 4375.96  293.97 
  -2   0   0 4518.35  297.17 
  -2   0   0 4692.13  295.07 
  -2   0   0 4389.46  291.67 
   2   0   0 4455.35  291.87 
   2   0   0 4536.25  294.97 
   2   0   0 4698.73  294.47 
   2   0   0 4443.96  294.47 
   2   0   0 4396.96  294.67 
   2   0   0 4467.95  295.47 
   2   0   0 4438.16  294.07 
   2   0   0 4484.65  294.37 
   2   0   0 4510.95  292.77 
   2   0   0 4481.65  292.57 
   2   0   0 4608.14  294.17 
   2   0   0 4459.65  294.17 
   2   0   0 4467.05  296.47 
   2   0   0 4347.37  291.57 
  -2   0   0 4362.16  294.27 
  -2   0   0 4421.56  292.57 
  -2   0   0 4607.34  294.77 
  -2   0   0 4434.16  295.57 
  -2   0   0 4484.45  293.97 
   2   0   0 4475.75  294.57 
   2   0   0 4511.85  292.37 
  -2   0   0 4330.67  294.47 
  -2   0   0 4570.14  291.07 
   2   0   0 4452.95  291.27 
  -2   0   0 4389.06  294.27 
  -2   0   0 4492.25  294.57 
  -2   0   0 4567.54  295.47 
  -2   0   0 4415.46  292.67 
  -3   0   0   -1.60    3.30 
   3   0   0    3.30    5.20 
   3   0   0    4.30    2.50 
   3   0   0   -2.00    3.30 
   3   0   0    6.40    5.80 
   3   0   0   -4.70    4.20 
  -3   0   0   -0.70    2.60 
   3   0   0   -3.40    4.10 
   3   0   0    8.70    5.40 
   3   0   0   -1.40    3.40 
   3   0   0    1.10    3.40 
   3   0   0   -2.20    4.30 
   3   0   0    0.10    4.60 
   3   0   0   10.50    6.60 
   3   0   0    3.30    3.10 
   3   0   0    4.80    5.60 
   3   0   0    5.00    5.90 
   3   0   0    1.80    4.30 
   3   0   0    2.10    2.60 
  -3   0   0   -4.00    3.40 
  -3   0   0    0.50    4.70 
  -3   0   0    4.90    3.50 
  -3   0   0    5.90    5.70 
  -3   0   0    3.80    4.20 
  -3   0   0   -1.10    4.50 
  -3   0   0    1.70    4.30 
  -3   0   0   -0.40    3.60 
  -3   0   0    2.40    4.60 
  -3   0   0    8.80    4.80 
   3   0   0    7.40    6.10 
  -3   0   0    5.00    5.30 
  -3   0   0   -1.70    3.40 
  -3   0   0   -1.50    4.20 
  -3   0   0    2.60    2.20 
  -3   0   0    2.70    4.70 
  -3   0   0    1.80    4.40 
  -3   0   0    2.10    3.10 
  -3   0   0   -3.70    5.20 
  -3   0   0   -0.60    4.70 
   4   0   0  559.94   37.80 
  -4   0   0  574.34   41.00 
  -4   0   0  569.34   44.50 
  -4   0   0  627.84   46.80 
  -4   0   0  556.94   42.70 
  -4   0   0  564.54   47.80 
  -4   0   0  543.85   40.40 
   4   0   0  585.64   46.80 
   4   0   0  579.34   46.10 
   4   0   0  540.85   45.20 
   4   0   0  536.15   38.60 
   4   0   0  571.54   45.50 
   4   0   0  533.15   40.90 
   4   0   0  608.14   42.20 
   4   0   0  559.34   46.10 
  -4   0   0  582.94   48.30 
  -4   0   0  525.95   44.90 
  -4   0   0  483.15   41.60 
  -4   0   0  494.45   37.30 
  -4   0   0  512.75   44.30 
   4   0   0  560.14   40.10 
  -4   0   0  542.95   38.60 
  -4   0   0  536.45   41.70 
  -4   0   0  563.84   49.10 
   4   0   0  573.24   45.70 
   4   0   0  507.55   45.40 
  -4   0   0  529.95   47.50 
   4   0   0  523.55   44.20 
   4   0   0  592.44   45.70 
   4   0   0  559.24   40.00 
  -5   0   0   -0.20    7.10 
  -5   0   0    6.80    5.40 
   5   0   0   -9.60    5.90 
  -5   0   0   -1.30    5.00 
   5   0   0    0.90    7.40 
  -5   0   0   -4.70    6.90 
  -5   0   0    2.70    5.80 
  -5   0   0   -2.40    7.30 
  -5   0   0    2.90    7.00 
   5   0   0   -4.20    6.90 
   5   0   0   -5.50    6.10 
  -5   0   0    8.70    5.90 
   5   0   0   11.90    7.90 
   5   0   0    1.80    4.80 
   5   0   0    5.30    7.20 
   5   0   0    4.50    4.30 
   5   0   0   -1.50    6.50 
   5   0   0   -1.60    6.10 
   5   0   0    5.10    6.60 
  -5   0   0    2.30    6.90 
  -5   0   0   -9.40    5.90 
  -5   0   0   -0.10    2.80 
  -5   0   0   -6.20    5.90 
   5   0   0    2.40    2.00 
   5   0   0   -2.60    3.60 
  -5   0   0    3.80    2.10 
  -5   0   0   -3.60    5.10 
  -5   0   0    5.50    8.70 
  -6   0   0 1146.89   98.59 
  -6   0   0 1084.09   93.59 
   6   0   0 1279.57   97.29 
   6   0   0 1286.37   97.29 
  -6   0   0 1168.78   90.99 
   6   0   0 1246.38   95.29 
   6   0   0 1237.18   87.99 
   6   0   0 1258.47   97.79 
   6   0   0 1196.28   96.09 
  -6   0   0 1224.78   88.19 
  -6   0   0 1140.19   98.89 
  -6   0   0 1206.98   87.59 
   6   0   0 1268.77   85.49 
   6   0   0 1331.67   98.79 
  -6   0   0 1295.37   94.59 
  -6   0   0 1235.98   96.09 
  -6   0   0 1251.37   83.59 
   6   0   0 1264.37   95.89 
   6   0   0 1353.26   97.59 
  -6   0   0 1240.08   99.29 
  -6   0   0 1313.27   89.69 
   6   0   0 1353.56   98.29 
  -6   0   0 1283.97   96.59 
   6   0   0 1291.67   85.09 
  -6   0   0 1247.08  101.79 
   7   0   0   14.20   12.00 
  -7   0   0  -13.90    7.10 
   7   0   0   -7.50    8.30 
  -7   0   0    3.90   11.50 
  -7   0   0   -6.00    7.20 
   7   0   0    1.20   11.20 
   7   0   0   -5.70    9.60 
  -7   0   0    9.00   13.30 
  -7   0   0    3.00    7.80 
   7   0   0   -3.60   10.60 
  -7   0   0    7.80   10.80 
   7   0   0   -1.20   10.40 
  -7   0   0   -1.50   11.30 
  -7   0   0    7.30   13.40 
   7   0   0   -3.30   10.30 
  -7   0   0   12.20   12.50 
  -7   0   0   -7.10    8.60 
  -7   0   0   -2.50    9.90 
   7   0   0    4.10   10.40 
   8   0   0  856.01   77.39 
   8   0   0  763.02   71.59 
   8   0   0  928.01   75.59 
   8   0   0  800.22   75.79 
  -8   0   0  939.11   81.09 
  -8   0   0  761.52   72.79 
  -8   0   0  868.31   80.49 
  -8   0   0  652.43   82.89 
   8   0   0  847.52   75.89 
  -8   0   0  757.72   76.59 
  -8   0   0  870.81   79.69 
  -8   0   0  809.92   72.49 
   8   0   0  817.22   73.99 
  -8   0   0  839.22   68.39 
  -8   0   0  817.72   70.69 
  -8   0   0  864.21   75.19 
   8   0   0  718.83   72.49 
   8   0   0  822.12   74.89 
  -9   0   0   18.40   14.20 
  -9   0   0   13.20   18.90 
  -9   0   0    3.60   15.10 
   9   0   0    6.90   15.40 
   9   0   0    8.20   17.20 
   9   0   0   28.10   18.90 
  -9   0   0    1.50   15.70 
  -9   0   0   -8.60   11.90 
  -9   0   0    0.60   12.40 
   9   0   0    6.20   15.20 
  -9   0   0  -14.20   12.10 
  -9   0   0   10.80   17.20 
   9   0   0   14.40   14.20 
   9   0   0  -12.90    9.50 
  -9   0   0   11.80   18.20 
   9   0   0    4.00   14.40 
   9   0   0  -12.10    9.90 
 -10   0   0   10.60   19.60 
  10   0   0   -3.00   16.40 
 -10   0   0   -2.20   17.00 
 -10   0   0    3.20   23.50 
 -10   0   0    2.40   18.10 
 -10   0   0   25.10   20.80 
 -10   0   0    5.30   22.00 
  10   0   0    0.80   15.10 
  10   0   0   19.90   19.10 
  10   0   0    1.70   17.30 
  10   0   0   -2.50   15.00 
  10   0   0   -8.60   11.30 
  10   0   0   14.70   17.10 
 -10   0   0   -7.10   15.70 
 -10   0   0   -4.40   15.30 
 -10   0   0   -0.90   17.60 
   0  -1   0    1.70    1.60 
   0  -1   0    2.90    1.60 
   0  -1   0    5.30    1.80 
   0  -1   0   10.20    2.60 
   0  -1   0    7.30    2.00 
   0  -1   0    5.50    2.00 
   0  -1   0    5.10    1.60 
   0  -1   0    5.70    2.20 
   0  -1   0    8.80    2.30 
   0  -1   0   -0.50    1.00 
   0  -1   0    2.50    1.70 
   0  -1   0   11.30    2.90 
   0  -1   0    6.20    2.00 
   0  -1   0    6.90    2.20 
   0  -1   0    8.80    1.90 
   0  -1   0    7.40    2.00 
   0  -1   0    3.60    1.60 
   0  -1   0    0.80    1.50 
   0   1   0   -0.10    1.00 
   0   1   0    6.20    1.90 
   0   1   0    1.20    1.30 
   0   1   0    1.10    1.40 
   0   1   0    0.00    0.90 
   0   1   0    0.10    0.80 
  -1  -1   0  108.59    9.20 
  -1  -1   0   93.59    9.30 
  -1  -1   0   94.29    8.80 
  -1  -1   0   84.69    7.30 
   1  -1   0  106.89    8.70 
   1  -1   0   88.09    8.80 
   1  -1   0   88.49    9.70 
   1  -1   0  109.09    8.80 
  -1  -1   0   92.29   10.30 
   1  -1   0   85.09    9.90 
  -1  -1   0  106.09   10.80 
  -1  -1   0   92.09    8.60 
  -1  -1   0  102.19    8.80 
  -1  -1   0  109.59    7.90 
  -1  -1   0   95.89    8.70 
  -1  -1   0   90.39    8.60 
   1  -1   0   96.49   10.90 
  -1  -1   0  100.49    8.00 
   1  -1   0   86.19   10.00 
   1  -1   0  109.29   10.70 
   1  -1   0   94.29    8.90 
   1  -1   0  100.29   10.40 
   1  -1   0   88.99   11.30 
  -1  -1   0  108.69    9.20 
  -1  -1   0  113.49    9.20 
  -1  -1   0   98.49    8.30 
   1  -1   0   91.79   10.10 
   1  -1   0   93.39    8.70 
   1  -1   0  100.09    9.50 
  -1  -1   0   74.69    9.40 
  -1  -1   0  110.49    9.40 
  -1  -1   0  101.09    8.40 
  -1  -1   0   87.99    9.60 
  -1  -1   0   90.09    7.80 
  -1  -1   0   80.29    9.60 
   1  -1   0  112.39   10.80 
   1  -1   0   89.09   10.00 
   1  -1   0   93.39    8.60 
   1  -1   0   87.99   10.40 
  -1  -1   0  108.59    8.50 
   1  -1   0   85.39   10.30 
  -1  -1   0   92.59    9.00 
   1  -1   0   94.19   10.40 
  -1  -1   0   98.49    9.40 
  -1  -1   0   88.09    8.80 
   1  -1   0  114.79    9.80 
  -1   1   0  119.09    9.60 
  -1   1   0   97.99   10.70 
  -1   1   0  100.29    8.80 
  -1   1   0   86.09   10.20 
  -1   1   0   86.49   10.00 
  -1   1   0  112.69   11.60 
  -1   1   0   84.89   10.00 
  -1   1   0  100.09   11.20 
  -1   1   0  102.09   10.10 
  -1   1   0   91.59   10.10 
  -1   1   0  111.49   12.30 
  -1   1   0   82.69   10.50 
  -1   1   0   99.99    8.70 
  -1   1   0   91.39   10.10 
   1   1   0   81.09    9.40 
  -1   1   0  104.79   11.10 
   1   1   0   54.29    8.50 
  -1   1   0   96.29    9.40 
  -1   1   0   87.19    8.40 
  -1   1   0   91.39   10.70 
  -1   1   0   99.69    8.50 
   1   1   0   66.79    8.70 
   1   1   0   73.99    8.70 
  -1   1   0   91.19    9.70 
  -1   1   0   91.59   10.10 
  -1   1   0   94.19    8.60 
  -2  -1   0  343.47   27.70 
  -2  -1   0  360.16   25.10 
  -2  -1   0  341.57   26.90 
   2  -1   0  360.56   29.20 
   2  -1   0  322.77   26.60 
   2  -1   0  344.87   25.10 
   2  -1   0  311.47   27.40 
   2  -1   0  344.17   24.80 
  -2  -1   0  323.97   26.30 
  -2  -1   0  341.17   26.70 
  -2  -1   0  350.66   27.20 
  -2  -1   0  351.96   24.80 
   2  -1   0  331.07   28.00 
   2  -1   0  358.86   29.00 
  -2  -1   0  322.57   24.60 
   2  -1   0  330.47   26.90 
   2  -1   0  317.17   24.80 
   2  -1   0  333.47   27.00 
   2  -1   0  336.27   27.80 
  -2  -1   0  344.97   26.30 
  -2  -1   0  354.36   27.50 
  -2  -1   0  338.77   28.60 
  -2  -1   0  364.56   24.70 
   2  -1   0  320.17   27.60 
   2  -1   0  329.17   27.20 
   2  -1   0  337.97   27.40 
   2  -1   0  346.77   27.60 
   2  -1   0  332.77   25.70 
  -2  -1   0  362.46   25.70 
   2  -1   0  350.96   24.80 
  -2  -1   0  348.37   26.30 
  -2  -1   0  342.77   25.30 
  -2  -1   0  355.86   30.10 
  -2  -1   0  336.77   27.80 
  -2  -1   0  334.67   26.10 
  -2  -1   0  339.97   26.60 
  -2  -1   0  358.26   27.50 
  -2  -1   0  380.06   26.70 
   2  -1   0  356.06   27.50 
   2  -1   0  320.77   27.50 
  -2  -1   0  329.37   24.80 
  -2  -1   0  319.17   26.50 
  -2  -1   0  349.57   24.70 
  -2  -1   0  338.77   25.00 
   2  -1   0  330.37   26.70 
   2  -1   0  344.97   27.80 
   2  -1   0  351.96   26.90 
   2  -1   0  342.27   25.60 
  -2   1   0  339.57   27.30 
  -2   1   0  367.46   28.90 
   2   1   0  363.76   27.60 
  -2   1   0  308.27   27.60 
  -2   1   0  359.86   27.40 
  -2   1   0  338.37   25.00 
   2   1   0  321.77   24.20 
  -2   1   0  329.07   26.60 
  -2   1   0  323.77   28.20 
   2   1   0  290.27   26.60 
  -2   1   0  351.26   27.40 
  -2   1   0  355.36   25.50 
   2   1   0  366.36   26.60 
   2   1   0  312.77   26.20 
   2   1   0  354.66   26.00 
   2   1   0  353.36   27.10 
   2   1   0  345.57   24.60 
   2   1   0  357.36   25.70 
  -2   1   0  309.47   26.80 
   2   1   0  355.56   27.00 
  -2   1   0  330.57   24.60 
  -2   1   0  331.37   26.80 
  -2   1   0  342.17   26.20 
  -2   1   0  338.47   28.00 
  -2   1   0  355.76   26.80 
  -2   1   0  373.06   25.30 
  -2   1   0  318.37   26.30 
  -2   1   0  298.67   27.40 
   2   1   0  344.47   27.60 
   2   1   0  378.26   27.00 
  -2   1   0  334.37   27.80 
  -2   1   0  328.97   24.60 
   2   1   0  332.27   26.20 
  -2   1   0  387.26   28.00 
   2   1   0  336.67   25.40 
  -2   1   0  350.86   27.60 
   2   1   0  351.56   24.30 
   2   1   0  351.86   24.90 
  -2   1   0  308.67   27.00 
  -2   1   0  360.86   29.20 
   2   1   0  395.06   26.30 
  -3  -1   0   34.60    8.50 
   3  -1   0   56.19    9.40 
  -3  -1   0   53.49   11.70 
   3  -1   0   47.50   11.40 
  -3  -1   0   30.10    8.00 
   3  -1   0   57.39    6.60 
   3  -1   0   31.40    9.10 
   3  -1   0   35.50    7.40 
   3  -1   0   49.90   10.00 
  -3  -1   0   27.60    8.90 
  -3  -1   0   40.70    8.80 
  -3  -1   0   66.09   10.30 
  -3  -1   0   40.60    7.40 
   3  -1   0   32.40    9.30 
   3  -1   0   45.10    6.50 
   3  -1   0   46.80   11.20 
  -3  -1   0   25.70   11.40 
   3  -1   0   48.10   10.70 
  -3  -1   0   52.89   10.10 
   3  -1   0   43.90    6.10 
   3  -1   0   46.10    9.40 
  -3  -1   0   33.50    8.50 
  -3  -1   0   30.30    8.50 
  -3  -1   0   35.90    7.90 
  -3  -1   0   52.89    7.40 
   3  -1   0   43.60   10.10 
   3  -1   0   58.09   10.30 
   3  -1   0   36.30    9.70 
   3  -1   0   39.00    9.50 
  -3  -1   0   53.09    9.00 
  -3  -1   0   50.49    6.80 
  -3  -1   0   33.10    9.10 
  -3  -1   0   27.20    7.80 
  -3  -1   0   63.39   10.20 
  -3  -1   0   53.49    7.30 
   3  -1   0   51.59    8.50 
  -3  -1   0   39.60    5.90 
  -3  -1   0   49.80    5.80 
   3  -1   0   34.90    9.00 
   3  -1   0   26.60    8.00 
  -3  -1   0   43.60    5.80 
  -3  -1   0   37.30    6.00 
  -3  -1   0   52.19    5.40 
   3  -1   0   52.69    6.90 
   3  -1   0   29.70    7.10 
   3   1   0   26.10    7.80 
  -3   1   0   51.49    7.50 
   3   1   0   27.60    8.80 
   3   1   0   43.10    8.50 
  -3   1   0   44.40   10.50 
   3   1   0   41.00    5.30 
   3   1   0   40.80    7.90 
  -3   1   0   49.20    9.90 
   3   1   0   46.10    8.10 
  -3   1   0   33.30   10.10 
  -3   1   0   39.10    9.10 
  -3   1   0   37.00    8.50 
  -3   1   0   44.10   10.90 
   3   1   0   30.60    8.80 
  -3   1   0   58.79   11.40 
  -3   1   0   48.00   10.20 
  -3   1   0   39.80    9.80 
   3   1   0   27.80    9.10 
   3   1   0   57.09   11.00 
  -3   1   0   46.70   11.20 
   3   1   0   36.30    8.50 
  -3   1   0   45.50    6.30 
  -3   1   0   29.60    9.90 
  -3   1   0   41.70    6.40 
  -3   1   0   42.60   10.30 
  -3   1   0   40.10    7.20 
  -3   1   0   39.50    8.40 
  -3   1   0   28.30    8.90 
  -3   1   0   37.40    6.00 
   3   1   0   47.70    5.80 
   3   1   0   33.60    8.50 
   3   1   0   54.89   11.20 
   3   1   0   36.00    5.80 
  -3   1   0   43.00   10.80 
   3   1   0   48.70   10.00 
  -3   1   0   55.49   11.40 
   3   1   0   53.79    9.20 
  -3   1   0   41.90    8.80 
   3   1   0   43.50    5.70 
  -3   1   0   39.80    9.20 
   4  -1   0  134.39   18.20 
   4  -1   0   89.89   12.50 
  -4  -1   0   76.89   16.80 
  -4  -1   0  100.79   18.20 
   4  -1   0   90.29   16.20 
   4  -1   0  104.99   18.70 
   4  -1   0  101.09   17.00 
   4  -1   0   94.29    9.70 
   4  -1   0   75.79   13.00 
  -4  -1   0   81.49   12.50 
  -4  -1   0   78.69   14.80 
  -4  -1   0   53.69   17.00 
  -4  -1   0   97.99   12.20 
   4  -1   0   58.79   13.20 
  -4  -1   0   86.59    9.60 
  -4  -1   0   97.59   10.40 
   4  -1   0  105.69   17.60 
   4  -1   0   88.79    9.60 
  -4  -1   0  116.39   16.00 
  -4  -1   0   94.29   15.50 
  -4  -1   0   91.79   14.00 
  -4  -1   0   82.29   14.60 
  -4  -1   0   81.39   14.50 
  -4  -1   0   72.89   10.60 
   4  -1   0  102.79   12.20 
   4  -1   0   99.39   17.20 
  -4  -1   0   74.39   13.80 
  -4  -1   0   99.59   15.20 
   4  -1   0   96.89   17.10 
  -4  -1   0   74.69   13.20 
  -4  -1   0   75.79   16.20 
   4  -1   0   93.49   14.10 
   4  -1   0   85.99   14.00 
   4  -1   0   82.59   17.10 
   4  -1   0   92.79   13.30 
   4   1   0   83.09   14.10 
  -4   1   0   73.99   16.30 
  -4   1   0   82.49   16.10 
  -4   1   0   51.19   12.10 
   4   1   0   95.89   15.70 
  -4   1   0   94.39   11.20 
  -4   1   0   70.39   16.40 
  -4   1   0   99.39   18.50 
   4   1   0   84.79   12.60 
   4   1   0   72.49   13.50 
  -4   1   0   77.19   16.60 
  -4   1   0   93.59    9.40 
  -4   1   0   72.49   15.90 
   4   1   0   69.19   14.40 
   4   1   0   88.19   15.00 
   4   1   0   99.19   16.50 
   4   1   0   87.49   15.50 
   4   1   0   94.79   14.40 
   4   1   0   88.59   16.80 
  -4   1   0   77.19   16.20 
  -4   1   0   76.49   10.00 
   4   1   0   75.79    9.20 
   4   1   0   91.89    9.10 
   4   1   0   48.20   13.10 
  -4   1   0  106.69   12.50 
  -4   1   0   75.19    9.10 
  -4   1   0   88.69   15.60 
  -4   1   0   78.39   13.40 
   4   1   0   94.69    8.20 
  -4   1   0  100.69   14.40 
  -5  -1   0 1933.11  137.89 
  -5  -1   0 2069.69  144.99 
   5  -1   0 2101.39  142.79 
   5  -1   0 2046.90  136.09 
  -5  -1   0 2043.00  140.29 
  -5  -1   0 2041.90  140.79 
  -5  -1   0 2002.80  137.89 
  -5  -1   0 2036.10  135.59 
  -5  -1   0 1953.20  133.19 
  -5  -1   0 1847.42  140.49 
  -5  -1   0 1966.40  149.09 
   5  -1   0 2062.39  138.59 
   5  -1   0 2106.19  141.99 
   5  -1   0 1957.80  142.79 
   5  -1   0 1946.61  135.59 
   5  -1   0 2084.19  143.09 
   5  -1   0 2137.59  145.59 
   5  -1   0 1902.61  134.59 
  -5  -1   0 2072.89  136.79 
   5  -1   0 2031.30  136.59 
  -5  -1   0 2020.80  146.79 
   5  -1   0 2049.49  131.59 
   5  -1   0 2008.40  140.79 
  -5  -1   0 2096.79  131.69 
   5  -1   0 1791.52  140.39 
  -5  -1   0 1956.60  133.29 
  -5  -1   0 1935.31  143.59 
  -5  -1   0 2122.99  139.49 
  -5  -1   0 1958.20  144.09 
   5  -1   0 1994.60  142.19 
   5  -1   0 2159.98  144.89 
   5   1   0 1971.40  131.59 
   5   1   0 2005.00  135.69 
  -5   1   0 1846.82  138.59 
  -5   1   0 1940.31  144.59 
  -5   1   0 1923.51  131.39 
  -5   1   0 1729.93  140.59 
  -5   1   0 1962.70  133.19 
  -5   1   0 1919.01  132.79 
  -5   1   0 2015.80  137.59 
   5   1   0 1931.11  140.09 
  -5   1   0 2066.39  134.99 
  -5   1   0 1877.21  140.79 
   5   1   0 2009.10  130.99 
  -5   1   0 1835.32  141.59 
  -5   1   0 2043.10  141.69 
   5   1   0 1966.70  141.59 
  -5   1   0 2050.69  146.49 
   5   1   0 1963.90  142.19 
   5   1   0 2117.39  142.19 
   5   1   0 1959.80  139.79 
   5   1   0 2068.89  143.69 
  -5   1   0 2054.99  147.19 
  -5   1   0 1790.22  143.09 
   5   1   0 1988.50  141.29 
   5   1   0 1921.41  139.49 
   5   1   0 1971.10  142.49 
  -6  -1   0  119.69   17.40 
   6  -1   0   47.60   15.20 
  -6  -1   0   73.79   19.50 
  -6  -1   0   79.39   11.20 
  -6  -1   0   75.29   18.20 
  -6  -1   0   76.79    8.70 
   6  -1   0   80.19   12.40 
   6  -1   0   95.79    8.60 
   6  -1   0   52.69   12.00 
  -6  -1   0   63.79    8.00 
   6  -1   0   80.09   20.90 
   6  -1   0   67.09   13.00 
  -6  -1   0   58.59   15.80 
  -6  -1   0   60.19   12.80 
   6  -1   0   48.30   16.90 
   6  -1   0   92.29   20.40 
   6  -1   0   98.29   21.80 
   6  -1   0   75.09   18.90 
  -6  -1   0   76.49   19.50 
  -6  -1   0   82.79   19.80 
  -6  -1   0   54.19   15.40 
   6  -1   0   78.59   18.90 
  -6  -1   0   98.29   21.70 
   6  -1   0   76.49    7.50 
   6  -1   0   61.99   12.50 
  -6  -1   0   79.69    7.80 
  -6  -1   0   48.70   14.90 
  -6  -1   0   80.39    7.40 
   6  -1   0   86.49   19.10 
   6  -1   0   86.39   16.20 
  -6  -1   0   42.00   13.20 
  -6  -1   0   67.09   19.10 
   6  -1   0   50.69   16.60 
  -6   1   0   48.20   17.00 
   6   1   0   81.79   18.50 
  -6   1   0   78.89   20.10 
  -6   1   0   75.09   20.70 
  -6   1   0   49.70   17.70 
   6   1   0   44.50   14.30 
  -6   1   0   84.09   16.10 
   6   1   0   68.29    7.20 
  -6   1   0   69.69    7.20 
  -6   1   0   73.39   12.70 
  -6   1   0   54.89   15.60 
  -6   1   0   55.99   18.80 
  -6   1   0   61.49    9.70 
   6   1   0   83.19   20.10 
   6   1   0   71.79   17.40 
  -6   1   0   57.69   17.60 
   6   1   0   64.79   16.40 
   6   1   0   99.19   21.10 
  -6   1   0   78.99   10.50 
   6   1   0   84.89   20.60 
   6   1   0   54.59   17.20 
  -6   1   0  110.59   21.80 
   6   1   0   57.59   15.00 
  -6   1   0   81.89   16.90 
   7  -1   0  898.21   86.59 
  -7  -1   0 1019.40   90.59 
   7  -1   0 1038.00   86.29 
   7  -1   0 1040.70   88.09 
  -7  -1   0 1114.09   88.09 
  -7  -1   0 1188.58   81.49 
  -7  -1   0 1099.69   80.39 
  -7  -1   0 1126.99   82.99 
   7  -1   0 1055.69   88.49 
  -7  -1   0 1129.29   91.89 
   7  -1   0 1052.49   87.19 
  -7  -1   0 1023.70   90.99 
   7  -1   0 1064.39   88.49 
   7  -1   0 1069.59   78.09 
   7  -1   0 1099.99   78.79 
   7  -1   0  954.20   87.89 
  -7  -1   0 1156.18   93.59 
   7  -1   0 1153.18   92.39 
  -7  -1   0  885.01   90.49 
  -7  -1   0 1083.99   86.49 
  -7  -1   0 1153.88   84.19 
   7  -1   0 1065.99   90.19 
  -7  -1   0 1184.18   87.49 
  -7   1   0  996.90   90.29 
  -7   1   0 1055.59   92.99 
   7   1   0  975.10   88.29 
   7   1   0 1136.09   89.39 
  -7   1   0  996.00   90.89 
  -7   1   0 1219.58   82.69 
  -7   1   0 1011.00   86.69 
  -7   1   0 1154.18   90.09 
   7   1   0 1185.38   87.89 
   7   1   0 1063.69   86.29 
   7   1   0 1005.10   86.49 
  -7   1   0 1113.29   77.09 
  -7   1   0 1168.58   87.59 
  -7   1   0 1114.19   89.19 
   7   1   0 1120.29   86.89 
  -7   1   0  875.31   90.29 
   7   1   0 1011.30   86.59 
   7   1   0  973.60   88.29 
  -7   1   0 1112.19   84.89 
  -8  -1   0   44.40   20.60 
   8  -1   0   31.20   19.90 
   8  -1   0   28.20   17.20 
  -8  -1   0   49.60   18.40 
  -8  -1   0    2.50   12.50 
   8  -1   0   15.20   17.20 
  -8  -1   0   52.79   20.80 
   8  -1   0   25.10   15.50 
   8  -1   0   14.60   14.90 
  -8  -1   0   37.40   19.30 
   8  -1   0   11.50   14.00 
  -8  -1   0   28.60   14.00 
  -8  -1   0   31.90   15.10 
  -8  -1   0   11.10   15.40 
   8  -1   0   40.30   19.90 
  -8  -1   0   28.60   19.10 
  -8  -1   0   32.30   14.70 
   8  -1   0   27.30   15.80 
  -8   1   0   24.80   17.20 
   8   1   0   68.89   20.30 
   8   1   0   35.00   16.40 
   8   1   0   33.90   17.30 
   8   1   0   17.70   13.10 
  -8   1   0   27.40   16.50 
  -8   1   0   22.00   16.60 
   8   1   0   14.10   14.90 
   8   1   0    3.30   11.90 
  -8   1   0   25.20   16.00 
  -8   1   0   84.39   26.40 
   8   1   0    3.60   11.60 
  -8   1   0   37.30   16.10 
  -8   1   0   14.10   11.60 
  -8   1   0    0.30   14.40 
   8   1   0   57.29   21.30 
  -8   1   0   55.29   18.30 
  -8   1   0   30.90   18.20 
  -8   1   0   41.00   19.00 
  -9  -1   0  226.08   35.70 
  -9  -1   0  268.17   41.70 
  -9  -1   0  189.98   40.80 
  -9  -1   0  199.38   40.50 
   9  -1   0  245.08   44.80 
   9  -1   0  223.18   38.70 
  -9  -1   0  272.87   45.20 
   9  -1   0  250.37   42.20 
  -9  -1   0  148.19   38.20 
   9  -1   0  130.99   32.70 
  -9  -1   0  238.68   46.10 
  -9  -1   0  171.08   35.20 
   9  -1   0  235.08   40.90 
   9  -1   0  203.48   39.00 
   9  -1   0  179.08   37.90 
   9  -1   0  221.18   41.80 
  -9  -1   0  230.78   34.20 
   9   1   0  185.38   37.80 
  -9   1   0  200.28   42.10 
  -9   1   0  167.58   35.50 
   9   1   0  134.59   32.50 
  -9   1   0  195.28   38.00 
  -9   1   0  209.88   43.20 
  -9   1   0  191.58   34.60 
   9   1   0  316.27   46.40 
  -9   1   0  203.78   43.40 
  -9   1   0  216.38   42.90 
   9   1   0  151.68   33.90 
  -9   1   0  244.78   43.50 
   9   1   0  182.78   34.90 
   9   1   0  237.28   39.80 
  -9   1   0  175.78   33.30 
   9   1   0  310.57   47.20 
  -9   1   0  258.57   46.10 
  10  -1   0   32.70   22.00 
 -10  -1   0    3.60   17.90 
  10  -1   0   -8.20   13.80 
  10  -1   0  -13.00   18.80 
  10  -1   0   51.89   25.30 
 -10  -1   0   60.69   25.70 
  10  -1   0   44.70   24.00 
 -10  -1   0   35.10   21.60 
 -10  -1   0   31.90   23.60 
 -10  -1   0   43.70   22.80 
 -10  -1   0    4.70   22.70 
 -10  -1   0   12.10   19.40 
  10  -1   0   -0.10   19.10 
 -10  -1   0   56.49   25.10 
  10  -1   0   17.40   20.80 
  10   1   0   25.30   22.50 
  10   1   0   22.80   17.40 
 -10   1   0   44.10   23.70 
 -10   1   0    1.00   15.90 
 -10   1   0   46.50   23.80 
  10   1   0   38.00   25.50 
  10   1   0   -6.40   18.00 
  10   1   0   10.50   17.40 
 -10   1   0   25.60   18.80 
 -10   1   0   69.09   28.50 
 -10   1   0   23.90   20.40 
  10   1   0   26.90   21.50 
  10   1   0   26.10   20.70 
 -10   1   0   49.99   25.60 
 -10   1   0   -8.00   20.60 
 -10   1   0   44.90   23.70 
   0  -2   0 4877.81  328.77 
   0  -2   0 5144.39  328.27 
   0  -2   0 4765.02  329.17 
   0  -2   0 4927.91  329.87 
   0  -2   0 5181.08  328.77 
   0  -2   0 5149.69  331.17 
   0  -2   0 5229.38  330.27 
   0  -2   0 4943.41  329.87 
   0  -2   0 5069.79  329.67 
   0  -2   0 5058.39  329.17 
   0  -2   0 5003.20  326.67 
   0  -2   0 5027.50  329.37 
   0  -2   0 4880.21  328.27 
   0  -2   0 5083.19  330.67 
   0  -2   0 5006.00  328.07 
   0  -2   0 5007.20  329.37 
   0  -2   0 4993.00  329.37 
   0  -2   0 5123.79  326.57 
   0  -2   0 5100.39  330.17 
   0  -2   0 5210.68  330.27 
   0  -2   0 5075.89  329.37 
   0  -2   0 5159.48  329.27 
   0   2   0 5126.59  330.47 
   0   2   0 4909.31  331.17 
   0   2   0 4908.61  329.67 
   0   2   0 4897.51  327.47 
   0   2   0 5117.19  330.27 
   0   2   0 5011.50  329.67 
   0   2   0 4840.42  329.87 
   0   2   0 4986.60  329.17 
   0   2   0 4960.80  330.37 
   0   2   0 4615.14  328.87 
   0   2   0 5117.49  329.77 
   0   2   0 4931.71  329.17 
   0   2   0 5013.50  329.47 
   0   2   0 4808.32  330.07 
   0   2   0 5002.50  329.97 
   0   2   0 5659.43  331.07 
   0   2   0 5177.68  331.27 
   0   2   0 4911.91  330.07 
  -1  -2   0 3814.12  257.87 
  -1  -2   0 3772.32  259.67 
   1  -2   0 3963.80  260.57 
  -1  -2   0 4097.09  259.57 
   1  -2   0 4073.89  260.37 
   1  -2   0 3955.70  260.57 
   1  -2   0 3969.70  259.67 
   1  -2   0 4020.50  260.87 
  -1  -2   0 3867.31  258.07 
  -1  -2   0 3854.11  257.77 
   1  -2   0 3984.50  260.77 
   1  -2   0 3918.91  259.77 
  -1  -2   0 3899.01  262.17 
   1  -2   0 4036.40  260.37 
  -1  -2   0 3868.41  257.97 
   1  -2   0 3959.10  260.07 
   1  -2   0 3948.20  259.77 
  -1  -2   0 3954.80  258.77 
  -1  -2   0 4031.00  260.27 
   1  -2   0 3992.30  257.87 
   1  -2   0 4062.19  260.77 
   1  -2   0 3951.10  260.27 
  -1  -2   0 3963.60  259.97 
  -1  -2   0 3895.91  258.07 
  -1  -2   0 3964.90  259.57 
   1  -2   0 3845.82  259.47 
  -1  -2   0 4072.49  260.17 
   1  -2   0 4078.79  260.37 
  -1  -2   0 4037.10  259.07 
  -1  -2   0 3911.01  260.77 
  -1  -2   0 4025.30  258.87 
  -1  -2   0 3850.11  258.17 
  -1  -2   0 3777.02  257.27 
  -1  -2   0 4001.10  260.57 
   1  -2   0 4054.09  260.77 
   1  -2   0 3915.41  259.77 
  -1  -2   0 3413.56  261.47 
  -1  -2   0 3883.51  259.97 
   1  -2   0 3913.41  259.67 
  -1  -2   0 3882.61  257.97 
   1  -2   0 4042.80  259.77 
   1  -2   0 3934.61  258.07 
  -1  -2   0 3957.30  257.67 
  -1  -2   0 3814.52  257.27 
   1  -2   0 4040.30  258.77 
  -1  -2   0 4075.69  260.07 
   1  -2   0 3875.01  258.67 
  -1   2   0 3922.51  259.97 
  -1   2   0 3947.90  260.17 
   1   2   0 3971.00  260.17 
   1   2   0 3615.34  262.07 
  -1   2   0 3904.41  257.87 
  -1   2   0 3873.11  260.67 
  -1   2   0 3951.90  260.17 
  -1   2   0 3939.01  260.47 
  -1   2   0 3936.51  260.27 
  -1   2   0 3951.70  259.77 
   1   2   0 3882.41  259.97 
  -1   2   0 3959.90  260.27 
   1   2   0 3844.42  257.87 
  -1   2   0 4051.89  260.47 
   1   2   0 4025.00  257.87 
   1   2   0 4107.69  260.67 
  -1   2   0 3991.00  259.97 
   1   2   0 3894.11  258.37 
  -1   2   0 3867.31  260.07 
  -1   2   0 4074.09  260.47 
  -1   2   0 3983.00  257.97 
   1   2   0 3993.70  260.37 
  -1   2   0 3931.71  260.57 
  -1   2   0 3973.50  261.77 
   1   2   0 3997.80  257.47 
   1   2   0 3815.12  259.87 
  -1   2   0 3833.42  258.07 
   1   2   0 4012.20  258.07 
  -1   2   0 3826.32  259.47 
  -1   2   0 4022.90  260.07 
  -1   2   0 3954.60  260.47 
   1   2   0 3717.33  262.07 
   1   2   0 3958.60  259.17 
  -1   2   0 4093.79  259.07 
  -1   2   0 4002.40  260.87 
  -1   2   0 3884.21  260.37 
  -1   2   0 3945.81  258.87 
   1   2   0 3953.50  259.07 
   2  -2   0 1508.35  102.19 
   2  -2   0 1498.75  102.39 
  -2  -2   0 1530.55  102.19 
   2  -2   0 1508.55  103.99 
   2  -2   0 1528.85  103.09 
   2  -2   0 1539.75  106.89 
  -2  -2   0 1484.75   99.09 
   2  -2   0 1458.95  101.89 
  -2  -2   0 1520.05  102.39 
   2  -2   0 1569.44  102.09 
  -2  -2   0 1504.45  100.19 
   2  -2   0 1538.05  103.39 
  -2  -2   0 1470.35  101.89 
  -2  -2   0 1456.25   99.49 
   2  -2   0 1531.15  103.59 
  -2  -2   0 1487.95  102.79 
  -2  -2   0 1397.56  103.99 
   2  -2   0 1520.55  103.79 
  -2  -2   0 1484.25  102.79 
  -2  -2   0 1518.55  102.19 
  -2  -2   0 1547.95  102.49 
  -2  -2   0 1519.05  102.39 
   2  -2   0 1578.64  104.29 
   2  -2   0 1489.55  106.49 
  -2  -2   0 1576.64  101.59 
  -2  -2   0 1506.85  102.69 
  -2  -2   0 1478.95  101.19 
  -2  -2   0 1519.05  101.39 
  -2  -2   0 1458.35  101.79 
   2  -2   0 1610.84  104.29 
   2  -2   0 1522.05  102.89 
   2  -2   0 1600.04  105.09 
  -2  -2   0 1496.35  100.19 
   2  -2   0 1551.14  103.29 
  -2  -2   0 1429.36  103.89 
  -2  -2   0 1479.95  100.99 
  -2  -2   0 1560.04  104.19 
  -2  -2   0 1479.95  102.79 
   2  -2   0 1531.15  103.19 
  -2  -2   0 1491.95  101.19 
   2  -2   0 1473.85  101.89 
   2  -2   0 1664.93  104.59 
   2  -2   0 1475.95  104.29 
   2  -2   0 1593.34  103.59 
   2  -2   0 1532.45  101.99 
  -2  -2   0 1551.44  103.99 
  -2  -2   0 1382.16   99.19 
  -2  -2   0 1517.15  103.19 
  -2  -2   0 1526.75  101.89 
  -2  -2   0 1498.95  102.59 
   2  -2   0 1649.04  105.99 
   2  -2   0 1460.65  101.69 
  -2  -2   0 1619.24  103.69 
   2   2   0 1458.25  102.29 
  -2   2   0 1428.86  103.59 
   2   2   0 1444.06  103.09 
  -2   2   0 1509.15  101.99 
  -2   2   0 1422.86  103.79 
  -2   2   0 1528.15  102.99 
  -2   2   0 1527.65  104.29 
   2   2   0 1480.55  102.89 
   2   2   0 1451.95  101.89 
   2   2   0 1447.36  102.09 
   2   2   0 1564.54  102.49 
  -2   2   0 1420.76  101.79 
  -2   2   0 1485.15  103.39 
   2   2   0 1508.55  101.39 
  -2   2   0 1496.35  104.49 
  -2   2   0 1577.34  104.49 
   2   2   0 1465.05  101.69 
   2   2   0 1569.34  103.89 
  -2   2   0 1422.96  103.39 
   2   2   0 1492.45  101.39 
  -2   2   0 1497.25  103.69 
   2   2   0 1548.35  102.39 
  -2   2   0 1447.26  104.49 
  -2   2   0 1519.05  103.09 
  -2   2   0 1502.35  101.89 
  -2   2   0 1529.95  105.29 
   2   2   0 1374.76  102.19 
   2   2   0 1545.75  104.69 
  -2   2   0 1348.47  102.19 
  -2   2   0 1453.05  103.39 
  -2   2   0 1460.25  104.29 
  -2   2   0 1413.76  103.99 
  -2   2   0 1530.85  101.69 
  -2   2   0 1540.35  102.39 
  -2   2   0 1516.75  103.19 
  -2   2   0 1495.55  103.79 
  -2   2   0 1443.56  101.89 
   2   2   0 1484.65   99.09 
   2   2   0 1568.14  102.59 
  -3  -2   0  445.86   32.70 
  -3  -2   0  440.56   33.50 
  -3  -2   0  401.36   39.80 
   3  -2   0  437.86   34.60 
   3  -2   0  427.76   33.00 
  -3  -2   0  375.76   36.50 
  -3  -2   0  447.66   35.50 
   3  -2   0  420.16   38.30 
  -3  -2   0  410.16   34.60 
   3  -2   0  421.96   34.90 
   3  -2   0  416.86   37.40 
   3  -2   0  464.65   36.40 
  -3  -2   0  454.45   32.40 
  -3  -2   0  421.96   34.50 
  -3  -2   0  424.86   31.70 
  -3  -2   0  457.65   33.60 
  -3  -2   0  464.05   33.20 
   3  -2   0  420.76   32.30 
   3  -2   0  373.06   36.00 
  -3  -2   0  488.85   35.70 
  -3  -2   0  459.05   32.00 
   3  -2   0  448.46   36.90 
  -3  -2   0  420.56   33.70 
  -3  -2   0  408.96   35.70 
  -3  -2   0  445.26   32.20 
   3  -2   0  408.66   33.10 
   3  -2   0  398.36   35.60 
  -3  -2   0  404.76   36.30 
  -3  -2   0  402.46   31.30 
  -3  -2   0  359.76   33.60 
  -3  -2   0  435.46   35.80 
   3  -2   0  428.96   32.20 
  -3  -2   0  415.56   32.40 
   3  -2   0  412.96   32.60 
   3  -2   0  445.06   34.30 
  -3  -2   0  414.86   33.50 
  -3  -2   0  416.16   30.40 
   3  -2   0  471.05   36.30 
  -3  -2   0  418.76   32.30 
   3  -2   0  430.36   34.50 
  -3  -2   0  406.76   29.00 
  -3   2   0  425.06   36.20 
  -3   2   0  416.56   32.20 
   3   2   0  407.86   34.90 
  -3   2   0  374.76   37.00 
  -3   2   0  401.56   34.40 
   3   2   0  410.36   35.50 
   3   2   0  432.66   34.00 
  -3   2   0  429.06   37.10 
  -3   2   0  416.26   33.00 
  -3   2   0  385.86   33.70 
  -3   2   0  411.86   37.30 
   3   2   0  432.16   34.30 
  -3   2   0  378.36   36.10 
   3   2   0  431.56   32.60 
  -3   2   0  377.66   36.10 
   3   2   0  402.76   32.10 
  -3   2   0  417.96   33.00 
   3   2   0  421.16   35.10 
   3   2   0  398.76   32.70 
   3   2   0  410.86   35.20 
   3   2   0  422.66   34.20 
  -3   2   0  425.76   36.80 
  -3   2   0  423.46   36.10 
  -3   2   0  449.56   36.60 
  -3   2   0  463.15   32.20 
   3   2   0  394.76   35.80 
   3   2   0  406.96   32.20 
   4  -2   0  295.37   35.70 
   4  -2   0  292.47   26.00 
   4  -2   0  237.88   28.30 
  -4  -2   0  324.97   36.00 
   4  -2   0  347.87   30.80 
   4  -2   0  311.37   34.40 
  -4  -2   0  277.97   25.40 
   4  -2   0  334.07   27.70 
  -4  -2   0  272.27   24.70 
  -4  -2   0  323.57   27.80 
   4  -2   0  275.27   24.90 
  -4  -2   0  306.57   21.50 
  -4  -2   0  292.17   21.70 
   4  -2   0  297.47   31.60 
   4  -2   0  299.87   31.30 
  -4  -2   0  247.88   32.80 
  -4  -2   0  307.77   24.50 
   4  -2   0  302.77   34.70 
  -4  -2   0  340.57   25.00 
  -4  -2   0  294.47   25.70 
  -4  -2   0  301.17   33.30 
   4  -2   0  307.27   33.60 
   4  -2   0  285.77   32.10 
  -4  -2   0  308.07   22.40 
   4  -2   0  299.37   24.20 
  -4  -2   0  246.98   23.60 
  -4  -2   0  360.66   26.20 
  -4  -2   0  304.27   25.60 
   4  -2   0  283.97   24.70 
  -4  -2   0  325.07   30.90 
  -4  -2   0  301.07   27.30 
   4  -2   0  292.87   26.60 
  -4  -2   0  327.57   28.50 
   4  -2   0  307.37   33.30 
   4  -2   0  329.57   24.60 
  -4  -2   0  316.77   26.10 
  -4  -2   0  466.65   47.90 
   4  -2   0  268.47   30.40 
  -4  -2   0  305.87   25.30 
  -4  -2   0  292.17   31.60 
  -4  -2   0  306.57   24.50 
  -4   2   0  260.07   33.60 
  -4   2   0  276.97   23.80 
  -4   2   0  307.97   27.80 
   4   2   0  337.57   30.50 
  -4   2   0  347.97   36.70 
  -4   2   0  279.37   35.20 
  -4   2   0  255.47   32.60 
  -4   2   0  332.07   26.00 
  -4   2   0  332.27   35.10 
  -4   2   0  302.27   33.70 
   4   2   0  282.47   26.70 
   4   2   0  306.87   32.60 
  -4   2   0  278.27   33.60 
  -4   2   0  222.58   29.40 
   4   2   0  263.47   30.00 
   4   2   0  317.57   24.90 
   4   2   0  272.67   29.80 
  -4   2   0  262.17   31.80 
   4   2   0  269.97   32.00 
   4   2   0  239.58   29.50 
   4   2   0  340.47   34.90 
  -4   2   0  314.17   24.50 
   4   2   0  304.97   24.20 
   4   2   0  313.67   26.50 
  -4   2   0  323.07   25.40 
   4   2   0  322.87   28.20 
   5  -2   0  342.37   38.10 
  -5  -2   0  343.17   26.50 
   5  -2   0  328.27   30.20 
  -5  -2   0  305.97   31.40 
  -5  -2   0  357.96   29.20 
   5  -2   0  340.27   41.50 
  -5  -2   0  344.17   29.50 
  -5  -2   0  229.98   36.00 
   5  -2   0  305.87   27.00 
   5  -2   0  302.87   36.20 
   5  -2   0  293.47   26.00 
  -5  -2   0  381.26   38.00 
  -5  -2   0  263.37   37.00 
   5  -2   0  314.47   40.60 
  -5  -2   0  346.47   29.80 
  -5  -2   0  343.27   24.80 
  -5  -2   0  359.56   24.00 
  -5  -2   0  304.67   35.00 
   5  -2   0  353.26   36.50 
   5  -2   0  430.36   43.00 
  -5  -2   0  351.56   32.00 
   5  -2   0  316.87   24.10 
  -5  -2   0  283.67   36.50 
  -5  -2   0  352.76   26.60 
  -5  -2   0  348.87   46.20 
   5  -2   0  323.87   33.60 
  -5  -2   0  368.96   38.60 
   5  -2   0  339.47   27.50 
   5  -2   0  322.37   36.80 
   5  -2   0  333.57   28.60 
   5  -2   0  353.66   38.40 
  -5  -2   0  344.07   39.50 
   5  -2   0  313.97   33.50 
   5  -2   0  281.37   36.70 
  -5  -2   0  308.67   26.10 
  -5  -2   0  336.17   25.70 
  -5  -2   0  387.46   32.40 
  -5  -2   0  312.77   25.70 
   5  -2   0  408.16   34.30 
   5   2   0  290.67   35.80 
   5   2   0  270.57   33.70 
   5   2   0  390.26   35.50 
  -5   2   0  349.47   39.00 
   5   2   0  367.36   31.30 
  -5   2   0  285.47   36.40 
  -5   2   0  346.57   28.20 
  -5   2   0  339.17   36.60 
  -5   2   0  324.57   26.10 
   5   2   0  317.47   37.40 
  -5   2   0  379.66   41.20 
   5   2   0  314.87   33.70 
   5   2   0  321.07   37.60 
  -5   2   0  297.97   26.00 
  -5   2   0  262.67   37.30 
  -5   2   0  353.16   41.00 
   5   2   0  296.17   33.90 
   5   2   0  386.16   33.40 
   5   2   0  301.77   26.20 
  -5   2   0  366.16   27.20 
  -5   2   0  299.67   36.60 
  -5   2   0  334.07   42.00 
  -5   2   0  293.97   39.20 
   5   2   0  330.37   37.50 
  -5   2   0  364.96   31.30 
   6  -2   0  784.92   70.29 
   6  -2   0  869.21   62.89 
  -6  -2   0  729.33   68.39 
  -6  -2   0  835.22   62.59 
   6  -2   0  814.32   58.19 
  -6  -2   0  650.33   69.29 
   6  -2   0  823.02   67.09 
   6  -2   0  849.12   73.59 
   6  -2   0  764.42   61.39 
   6  -2   0  822.32   70.09 
  -6  -2   0  789.12   69.39 
  -6  -2   0  788.62   64.99 
  -6  -2   0  759.72   55.69 
  -6  -2   0  791.62   65.89 
  -6  -2   0  857.41   67.59 
  -6  -2   0  797.12   56.79 
   6  -2   0  841.22   62.99 
   6  -2   0  757.12   64.99 
   6  -2   0  837.82   68.39 
  -6  -2   0  777.12   59.09 
  -6  -2   0  793.42   63.39 
   6  -2   0  778.52   68.49 
   6  -2   0  790.72   67.89 
   6  -2   0  880.51   68.09 
   6  -2   0  773.32   57.19 
  -6  -2   0  783.32   70.39 
  -6  -2   0  760.12   64.89 
  -6  -2   0  879.01   59.59 
  -6  -2   0  810.02   70.39 
   6  -2   0  805.82   69.09 
   6  -2   0  831.62   63.09 
  -6  -2   0  796.92   62.99 
   6   2   0  788.12   56.79 
  -6   2   0  838.52   68.79 
   6   2   0  878.51   65.09 
  -6   2   0  796.92   62.29 
  -6   2   0  749.23   71.39 
   6   2   0  967.80   70.59 
  -6   2   0  842.92   58.39 
  -6   2   0  854.11   63.69 
   6   2   0  908.01   66.09 
  -6   2   0  871.21   69.79 
  -6   2   0  826.82   71.69 
   6   2   0  734.13   67.99 
   6   2   0  697.53   67.19 
  -6   2   0  781.22   56.69 
  -6   2   0  875.91   70.69 
  -6   2   0  709.93   65.29 
   6   2   0  865.71   68.59 
  -6   2   0  855.91   69.39 
   6   2   0  726.23   64.79 
   6   2   0  837.42   67.79 
  -6   2   0  856.81   72.19 
  -6   2   0  852.41   73.69 
   7  -2   0  255.87   37.50 
  -7  -2   0  261.47   35.00 
   7  -2   0  175.78   32.50 
  -7  -2   0  216.18   32.80 
   7  -2   0  184.48   27.20 
   7  -2   0  248.18   37.90 
   7  -2   0  250.87   28.10 
  -7  -2   0  172.68   32.80 
  -7  -2   0  268.27   41.70 
   7  -2   0  182.28   34.70 
   7  -2   0  212.68   26.80 
  -7  -2   0  261.57   37.20 
  -7  -2   0  226.68   43.20 
   7  -2   0  215.98   37.50 
  -7  -2   0  289.57   40.30 
   7  -2   0  248.08   40.20 
   7  -2   0  207.68   33.00 
  -7  -2   0  274.27   36.10 
  -7  -2   0  256.97   27.50 
   7  -2   0  235.38   32.50 
   7  -2   0  136.09   30.00 
  -7  -2   0  268.07   31.60 
  -7  -2   0  273.77   41.10 
  -7  -2   0  252.77   40.40 
   7  -2   0  216.98   33.30 
  -7  -2   0  245.08   29.10 
  -7   2   0  327.17   45.10 
  -7   2   0  218.48   29.50 
   7   2   0  163.08   31.40 
  -7   2   0  203.08   32.10 
   7   2   0  309.47   35.40 
   7   2   0  230.78   33.00 
   7   2   0  186.58   33.00 
  -7   2   0  258.27   36.90 
   7   2   0  234.48   32.60 
  -7   2   0  229.68   37.80 
  -7   2   0  195.38   34.50 
  -7   2   0  244.38   40.70 
   7   2   0  264.07   36.00 
   7   2   0  265.07   38.80 
   7   2   0  217.68   35.80 
  -7   2   0  205.78   33.90 
  -7   2   0  232.78   38.10 
  -7   2   0  263.67   40.60 
   8  -2   0  472.65   53.39 
  -8  -2   0  421.26   50.19 
  -8  -2   0  545.45   57.79 
  -8  -2   0  389.36   54.09 
  -8  -2   0  224.48   40.80 
   8  -2   0  478.55   61.59 
   8  -2   0  408.26   54.19 
  -8  -2   0  472.05   59.89 
   8  -2   0  428.66   57.69 
  -8  -2   0  400.46   56.19 
  -8  -2   0  333.27   54.39 
   8  -2   0  476.05   54.09 
  -8  -2   0  353.06   51.49 
   8  -2   0  448.86   55.29 
   8  -2   0  322.87   48.70 
  -8  -2   0  421.26   44.50 
   8  -2   0  437.56   57.69 
  -8   2   0  368.96   51.69 
   8   2   0  370.46   47.30 
  -8   2   0  370.66   56.39 
  -8   2   0  444.96   56.89 
  -8   2   0  439.26   54.29 
   8   2   0  491.95   57.89 
  -8   2   0  513.15   54.29 
   8   2   0  566.34   62.99 
  -8   2   0  328.47   51.59 
  -8   2   0  415.06   44.80 
  -8   2   0  408.96   57.49 
  -8   2   0  408.26   55.69 
   8   2   0  479.35   56.89 
   8   2   0  390.66   51.29 
   8   2   0  368.66   49.30 
  -8   2   0  413.56   53.09 
   8   2   0  399.06   49.80 
  -9  -2   0   10.60   17.50 
   9  -2   0   14.60   19.30 
  -9  -2   0   58.19   25.70 
  -9  -2   0   12.30   13.70 
   9  -2   0   19.00   17.50 
   9  -2   0   31.40   23.10 
  -9  -2   0    1.00   16.20 
  -9  -2   0   48.70   23.90 
   9  -2   0   56.59   21.80 
  -9  -2   0   16.60   14.80 
   9  -2   0   49.80   24.70 
  -9  -2   0   49.70   19.60 
  -9  -2   0   19.00   17.70 
   9  -2   0   59.89   23.10 
   9  -2   0   61.19   22.80 
   9  -2   0   84.29   27.10 
  -9   2   0   39.20   20.70 
  -9   2   0   46.30   23.90 
   9   2   0   21.00   20.30 
   9   2   0   32.70   18.70 
  -9   2   0   21.40   18.00 
  -9   2   0   48.30   22.30 
   9   2   0   49.20   21.30 
   9   2   0   67.59   21.80 
   9   2   0   29.50   19.70 
  -9   2   0    3.90   15.60 
  -9   2   0   22.20   18.10 
  -9   2   0   45.60   24.10 
   9   2   0   37.40   20.30 
   9   2   0   65.89   21.50 
  -9   2   0   56.79   21.90 
  -9   2   0   14.50   17.30 
  -9   2   0   19.80   15.30 
  10  -2   0   43.40   24.00 
  10  -2   0   67.59   29.70 
 -10  -2   0   10.00   18.30 
 -10  -2   0   10.40   20.50 
  10  -2   0   16.20   18.30 
 -10  -2   0   71.89   27.70 
 -10  -2   0   36.60   22.00 
 -10  -2   0   17.50   23.90 
  10  -2   0   54.69   26.10 
  10  -2   0   23.10   20.80 
  10  -2   0   24.10   18.60 
  10  -2   0    7.00   20.90 
 -10  -2   0    3.30   20.80 
 -10  -2   0    8.50   19.60 
 -10  -2   0   37.60   23.40 
 -10  -2   0   27.50   18.40 
  10  -2   0   39.60   20.60 
 -10   2   0  101.39   28.60 
  10   2   0   61.39   25.60 
 -10   2   0    6.10   18.30 
 -10   2   0   10.00   16.50 
 -10   2   0   59.09   25.20 
  10   2   0   20.10   17.90 
 -10   2   0   20.40   21.00 
  10   2   0   14.60   17.10 
 -10   2   0   22.20   19.90 
  10   2   0   31.10   24.40 
 -10   2   0   11.00   21.10 
 -10   2   0   13.50   17.80 
 -10   2   0   19.80   20.80 
 -10   2   0   36.60   22.00 
  10   2   0   45.00   25.30 
   0  -3   0    0.10    3.00 
   0  -3   0    0.60    2.90 
   0  -3   0   -1.40    3.60 
   0  -3   0    1.40    5.00 
   0  -3   0    4.80    4.70 
   0  -3   0   13.20    5.40 
   0  -3   0   -2.80    3.20 
   0  -3   0   -0.60    3.90 
   0  -3   0    2.10    2.60 
   0  -3   0    4.20    3.60 
   0  -3   0    1.90    4.20 
   0  -3   0    1.90    4.40 
   0  -3   0    4.90    4.20 
   0  -3   0    1.40    1.60 
   0  -3   0    0.70    4.40 
   0  -3   0    5.70    3.90 
   0  -3   0   -4.80    2.70 
   0  -3   0    2.90    3.80 
   0  -3   0    1.60    3.20 
   0  -3   0    8.30    4.90 
   0  -3   0   -1.50    3.60 
   0   3   0   -2.90    3.70 
   0   3   0   -3.80    5.60 
   0   3   0   -0.80    4.40 
   0   3   0   -4.60    3.10 
   0   3   0   -2.60    4.40 
   0   3   0   -5.10    3.80 
   0   3   0   -0.60    3.80 
   0   3   0   -3.20    4.80 
   0   3   0   10.90    7.80 
   0   3   0   -0.70    3.90 
   0   3   0   -5.70    3.60 
   0   3   0    8.10    6.30 
   0   3   0    0.50    3.60 
   0   3   0   -2.40    3.50 
   0   3   0    5.10    8.20 
   0   3   0    2.00    3.50 
   0   3   0    1.70    3.80 
   0   3   0   -0.10    5.30 
   0   3   0   -4.10    3.90 
   0   3   0    5.90    2.00 
  -1  -3   0   69.69   13.70 
  -1  -3   0   62.09   10.80 
  -1  -3   0   44.30    9.70 
  -1  -3   0   64.09    7.20 
   1  -3   0   57.79   10.60 
   1  -3   0   68.99    7.40 
   1  -3   0   56.79   10.40 
  -1  -3   0   42.20   10.50 
  -1  -3   0   74.49    9.70 
  -1  -3   0   55.09    7.10 
   1  -3   0   61.79    8.20 
   1  -3   0   61.89    7.40 
  -1  -3   0   57.19    8.60 
   1  -3   0   57.69    9.70 
  -1  -3   0   50.69    8.80 
  -1  -3   0   54.29    7.80 
  -1  -3   0   47.50    8.20 
  -1  -3   0   60.59   11.10 
  -1  -3   0   80.79   12.20 
  -1  -3   0   75.59   11.90 
   1  -3   0   56.69   10.20 
  -1  -3   0   61.99    6.50 
   1  -3   0   65.69   11.40 
   1  -3   0   59.69   10.70 
   1  -3   0   64.09   10.10 
   1  -3   0   50.99    7.90 
   1  -3   0   50.49    9.50 
   1  -3   0   60.79    9.50 
  -1  -3   0   64.99    8.50 
   1  -3   0   68.99   11.30 
  -1  -3   0   62.29    8.30 
  -1  -3   0   34.00   10.30 
  -1  -3   0   48.40   10.10 
   1  -3   0   47.10    8.80 
   1  -3   0   81.69   12.70 
   1  -3   0   79.19   11.80 
   1  -3   0   70.29   10.90 
   1  -3   0   63.59   10.20 
   1  -3   0   41.10   10.70 
  -1  -3   0   49.99   13.00 
  -1  -3   0   70.09   11.00 
  -1  -3   0   50.59   10.60 
  -1  -3   0   38.60    9.20 
  -1  -3   0   62.49   10.80 
  -1  -3   0   57.49    8.10 
  -1  -3   0   60.39    8.00 
   1  -3   0   53.99   11.40 
   1   3   0   58.39    7.60 
  -1   3   0   69.39    7.50 
  -1   3   0   68.79    7.80 
  -1   3   0   69.89   11.20 
   1   3   0   70.99   10.50 
  -1   3   0   59.09   10.80 
   1   3   0   96.69   16.60 
  -1   3   0   70.79   11.50 
  -1   3   0   69.89   11.70 
   1   3   0   63.89    8.60 
  -1   3   0   52.89   10.60 
  -1   3   0   49.70    9.40 
  -1   3   0   84.59   13.40 
   1   3   0   53.19    9.40 
  -1   3   0   55.29    9.00 
   1   3   0   54.59    6.90 
   1   3   0   69.19   12.30 
  -1   3   0   52.49   10.50 
  -1   3   0   69.79   13.10 
  -1   3   0   70.59   11.50 
  -1   3   0   69.09   11.60 
   1   3   0   63.89    7.40 
   1   3   0   54.49    8.90 
  -1   3   0   67.89   10.30 
   1   3   0   47.20   10.20 
   1   3   0   59.09   14.30 
   1   3   0   68.49   11.80 
  -1   3   0   66.89    8.90 
   1   3   0   49.30   10.30 
  -1   3   0   59.59   10.60 
  -1   3   0   56.69   10.60 
  -1   3   0   64.39   12.00 
  -1   3   0   58.19   11.80 
  -1   3   0   59.09   11.30 
  -1   3   0   54.99   10.50 
  -1   3   0   65.59   10.90 
   1   3   0   65.69    9.20 
   1   3   0   53.79   10.60 
  -1   3   0   47.90    9.40 
  -1   3   0   65.49    8.20 
   1   3   0   65.29    9.60 
   2  -3   0    9.80    5.10 
  -2  -3   0   14.40    5.00 
  -2  -3   0   -0.30    7.70 
   2  -3   0    4.70    5.60 
   2  -3   0   13.00    8.10 
  -2  -3   0    8.40    4.00 
   2  -3   0   10.20    5.30 
   2  -3   0    7.20    5.90 
  -2  -3   0    4.70    5.00 
  -2  -3   0    4.90    5.00 
   2  -3   0   10.60    8.30 
  -2  -3   0    6.00    5.00 
   2  -3   0    7.30    5.50 
  -2  -3   0    5.70    4.00 
  -2  -3   0   -1.20    5.00 
  -2  -3   0    1.30    3.20 
  -2  -3   0  -10.10    4.10 
   2  -3   0   -0.90    6.90 
  -2  -3   0    6.10    5.50 
   2  -3   0    6.90    7.70 
  -2  -3   0    6.50    4.50 
   2  -3   0    4.60    5.30 
  -2  -3   0    3.10    5.60 
  -2  -3   0   -0.30    4.50 
   2  -3   0   11.30    6.50 
   2  -3   0    1.70    4.50 
  -2  -3   0   -0.90    5.30 
  -2  -3   0    3.70    4.70 
   2  -3   0    8.20    7.00 
  -2  -3   0    5.10    4.70 
  -2  -3   0    8.00    3.80 
  -2  -3   0    9.60    3.30 
  -2  -3   0   11.20    5.60 
  -2  -3   0    6.70    5.10 
  -2  -3   0   -1.30    5.10 
  -2  -3   0   12.60    4.80 
   2  -3   0   11.00    9.00 
  -2  -3   0   10.20    6.40 
  -2  -3   0   -1.60    7.80 
  -2  -3   0    5.20    3.70 
  -2  -3   0    0.40    5.70 
   2  -3   0    8.00    7.10 
   2  -3   0    5.20    5.70 
   2   3   0    1.60    6.10 
  -2   3   0    4.60    4.90 
   2   3   0   11.30    6.60 
   2   3   0   -1.70    5.70 
  -2   3   0   22.10    8.90 
  -2   3   0   22.90    8.40 
  -2   3   0    6.30    4.80 
   2   3   0    3.40    6.10 
  -2   3   0    7.80    4.80 
  -2   3   0    6.90    6.70 
   2   3   0   15.10    5.50 
  -2   3   0    6.00    7.10 
  -2   3   0    7.10    7.30 
  -2   3   0   25.50    8.70 
   2   3   0    4.80    4.30 
   2   3   0    4.80    6.10 
   2   3   0    4.60    4.40 
  -2   3   0   14.10    6.30 
  -2   3   0   12.40    7.20 
  -2   3   0    2.30    5.80 
  -2   3   0   -0.40    5.80 
  -2   3   0   -0.10    5.10 
   2   3   0   11.40    4.90 
  -2   3   0    8.50    4.50 
  -2   3   0    1.00    6.00 
  -2   3   0   11.00    6.40 
   2   3   0   10.40    7.00 
  -2   3   0    5.40    5.30 
   2   3   0    1.30    5.00 
  -2   3   0    9.70    7.20 
   3  -3   0   -0.30    6.10 
   3  -3   0    8.30    7.90 
  -3  -3   0    5.80    5.50 
  -3  -3   0   10.20    8.20 
   3  -3   0   -1.30    5.10 
   3  -3   0   -0.70    4.70 
   3  -3   0    7.70    7.70 
  -3  -3   0   -0.50    3.00 
   3  -3   0   13.50    6.40 
  -3  -3   0    0.30    4.90 
   3  -3   0  -10.50    5.80 
  -3  -3   0    3.80    4.30 
  -3  -3   0    5.20    9.40 
  -3  -3   0    8.80    5.90 
  -3  -3   0    3.10    6.70 
  -3  -3   0   -1.90    3.10 
  -3  -3   0    6.30    4.80 
  -3  -3   0    5.70    2.00 
  -3  -3   0   -2.80    5.50 
  -3  -3   0    5.20    2.20 
  -3  -3   0   -0.40    5.70 
  -3  -3   0    5.60    5.80 
   3  -3   0   -3.10    5.00 
  -3  -3   0    1.80    3.90 
  -3  -3   0   -1.00    1.90 
   3  -3   0    6.60    8.00 
   3  -3   0   -6.30    7.30 
  -3  -3   0    0.40    3.90 
  -3  -3   0    6.20    2.50 
   3  -3   0   -5.10    6.50 
   3  -3   0    2.80    6.00 
  -3  -3   0   -7.90    4.80 
  -3  -3   0    5.20    5.30 
   3  -3   0   -5.20    6.00 
  -3  -3   0   -1.00    3.30 
   3  -3   0    4.20    5.30 
  -3  -3   0   -5.70    4.50 
   3  -3   0    8.00    6.30 
  -3   3   0    7.00    5.40 
  -3   3   0   -7.60    5.20 
   3   3   0   11.50    5.70 
  -3   3   0   -4.40    5.00 
  -3   3   0    3.20    6.60 
   3   3   0   -9.70    6.50 
  -3   3   0    7.50    6.00 
  -3   3   0   -2.70    5.10 
   3   3   0   -6.00    4.40 
  -3   3   0    8.70    7.30 
   3   3   0   -0.10    5.90 
  -3   3   0    6.90    7.80 
  -3   3   0    6.80    7.20 
   3   3   0    2.30    5.00 
   3   3   0    7.70    5.30 
   3   3   0    3.60    5.00 
  -3   3   0    9.00    5.80 
  -3   3   0    8.40    7.10 
  -3   3   0    3.20    6.00 
  -3   3   0   -0.50    7.10 
   3   3   0    7.80    5.40 
   3   3   0    2.60    4.80 
   4  -3   0  630.84   54.09 
   4  -3   0  592.44   52.29 
   4  -3   0  590.04   50.49 
   4  -3   0  560.14   48.70 
   4  -3   0  644.14   47.60 
   4  -3   0  598.44   55.59 
  -4  -3   0  601.64   50.09 
  -4  -3   0  616.04   50.99 
  -4  -3   0  620.04   47.10 
   4  -3   0  586.84   49.10 
  -4  -3   0  598.04   47.20 
   4  -3   0  711.23   52.59 
  -4  -3   0  579.34   50.99 
  -4  -3   0  600.64   41.10 
   4  -3   0  659.73   51.69 
  -4  -3   0  654.03   43.00 
  -4  -3   0  635.94   47.20 
  -4  -3   0  586.44   47.70 
  -4  -3   0  603.74   52.89 
  -4  -3   0  598.74   58.49 
   4  -3   0  680.63   53.59 
   4  -3   0  577.24   48.80 
  -4  -3   0  621.24   41.50 
   4  -3   0  520.65   48.60 
  -4  -3   0  642.24   44.50 
  -4  -3   0  669.13   46.80 
  -4  -3   0  572.14   46.30 
  -4  -3   0  577.24   51.49 
  -4  -3   0  697.03   51.69 
  -4  -3   0  622.54   45.50 
   4  -3   0  623.04   50.99 
  -4   3   0  602.44   51.89 
  -4   3   0  643.54   54.59 
   4   3   0  609.44   50.39 
  -4   3   0  580.14   46.50 
  -4   3   0  632.74   52.49 
   4   3   0  562.74   46.90 
   4   3   0  670.03   53.39 
   4   3   0  573.64   48.40 
  -4   3   0  621.24   48.40 
  -4   3   0  618.84   49.80 
  -4   3   0  614.74   53.19 
  -4   3   0  601.14   52.59 
  -4   3   0  641.04   53.49 
  -4   3   0  557.44   51.99 
   4   3   0  615.64   46.90 
  -4   3   0  568.14   51.29 
   4   3   0  617.64   48.90 
   4   3   0  636.04   50.09 
   4   3   0  559.84   46.80 
   4   3   0  636.64   48.80 
  -4   3   0  626.84   51.99 
   5  -3   0  597.44   59.29 
   5  -3   0  670.23   51.49 
   5  -3   0  627.14   53.89 
  -5  -3   0  525.95   47.90 
  -5  -3   0  631.64   70.39 
  -5  -3   0  649.83   51.59 
  -5  -3   0  508.85   43.60 
   5  -3   0  637.34   52.59 
   5  -3   0  537.25   48.90 
   5  -3   0  633.44   51.89 
  -5  -3   0  519.45   50.39 
   5  -3   0  624.64   53.89 
  -5  -3   0  606.94   44.60 
   5  -3   0  596.84   49.00 
  -5  -3   0  628.04   48.20 
   5  -3   0  658.23   52.19 
  -5  -3   0  525.45   52.19 
   5  -3   0  593.34   49.99 
  -5  -3   0  553.84   44.30 
  -5  -3   0  593.34   45.10 
   5  -3   0  432.06   54.79 
   5  -3   0  578.04   51.39 
  -5  -3   0  530.95   44.80 
  -5  -3   0  591.24   46.30 
  -5  -3   0  598.74   42.70 
  -5  -3   0  582.14   41.50 
  -5  -3   0  545.85   53.39 
   5  -3   0  598.64   44.90 
  -5  -3   0  599.34   47.00 
   5  -3   0  657.03   47.90 
  -5  -3   0  649.34   52.69 
  -5  -3   0  596.14   45.20 
  -5  -3   0  656.73   53.49 
  -5  -3   0  520.25   45.80 
   5  -3   0  520.75   60.39 
  -5   3   0  685.93   55.59 
   5   3   0  541.75   51.19 
   5   3   0  494.45   48.00 
   5   3   0  582.54   45.30 
   5   3   0  555.74   48.80 
  -5   3   0  630.14   53.09 
   5   3   0  541.15   48.40 
  -5   3   0  528.15   52.69 
  -5   3   0  632.24   45.40 
  -5   3   0  624.44   54.19 
  -5   3   0  520.15   51.99 
   5   3   0  594.84   52.59 
  -5   3   0  499.25   50.89 
   5   3   0  585.24   50.89 
   5   3   0  631.84   48.20 
   5   3   0  557.94   44.20 
  -5   3   0  544.75   51.49 
  -5   3   0  620.74   49.50 
   5   3   0  652.03   51.49 
  -5   3   0  638.24   55.59 
  -5   3   0  644.94   46.90 
  -5   3   0  521.55   53.49 
   5   3   0  608.34   45.20 
   6  -3   0 1337.77  103.89 
  -6  -3   0 1337.37  106.69 
   6  -3   0 1359.86  106.59 
   6  -3   0 1365.96  102.19 
  -6  -3   0 1480.35  107.99 
  -6  -3   0 1266.77  103.09 
  -6  -3   0 1357.46   93.49 
  -6  -3   0 1626.74  107.99 
  -6  -3   0 1389.16  104.99 
  -6  -3   0 1289.57  100.89 
   6  -3   0 1502.75  103.19 
   6  -3   0 1318.47   98.89 
  -6  -3   0 1380.46  110.59 
   6  -3   0 1373.36  106.09 
  -6  -3   0 1352.76  117.29 
   6  -3   0 1386.36  108.09 
  -6  -3   0 1361.46  102.79 
   6  -3   0 1326.37  111.69 
  -6  -3   0 1417.76   96.19 
   6  -3   0 1290.77  104.19 
  -6  -3   0 1362.56   97.49 
   6  -3   0 1316.77  108.99 
   6  -3   0 1394.26  104.39 
  -6  -3   0 1352.36  108.49 
  -6  -3   0 1407.46  103.99 
   6  -3   0 1448.16  108.99 
   6  -3   0 1350.06  105.19 
  -6  -3   0 1475.35   95.09 
  -6   3   0 1383.16   97.39 
   6   3   0 1359.46   96.39 
  -6   3   0 1341.77  108.39 
  -6   3   0 1284.77  106.19 
  -6   3   0 1388.86  108.69 
   6   3   0 1311.97   98.39 
  -6   3   0 1435.76  108.19 
  -6   3   0 1454.95  102.99 
  -6   3   0 1393.56  110.89 
  -6   3   0 1348.97  106.99 
   6   3   0 1270.47  104.49 
   6   3   0 1269.77  102.39 
   6   3   0 1388.26  103.19 
   6   3   0 1445.86  104.39 
  -6   3   0 1371.86  111.09 
  -6   3   0 1419.86   96.59 
   6   3   0 1383.06  107.69 
   6   3   0 1372.06  101.49 
  -6   3   0 1353.56  105.69 
   6   3   0 1389.76  105.29 
  -6   3   0 1380.76  110.09 
   6   3   0 1469.45  108.19 
   7  -3   0  223.78   33.20 
   7  -3   0  259.67   39.40 
   7  -3   0  219.28   35.50 
   7  -3   0  230.08   33.80 
  -7  -3   0  278.67   38.20 
   7  -3   0  216.98   30.30 
   7  -3   0  196.68   29.70 
  -7  -3   0  232.28   36.40 
  -7  -3   0  237.58   49.10 
  -7  -3   0  246.78   36.20 
   7  -3   0  193.38   35.50 
  -7  -3   0  207.58   31.60 
  -7  -3   0  234.68   38.10 
  -7  -3   0  201.28   34.80 
  -7  -3   0  161.18   34.00 
  -7  -3   0  270.87   42.30 
  -7  -3   0  185.88   25.20 
  -7  -3   0  196.28   31.80 
   7  -3   0  124.59   32.10 
   7  -3   0  155.38   31.70 
  -7  -3   0  254.67   32.30 
  -7  -3   0  240.88   33.70 
   7  -3   0  270.37   32.00 
   7  -3   0  221.38   38.80 
   7  -3   0  243.38   31.70 
   7  -3   0  265.07   36.60 
  -7   3   0  155.88   33.70 
   7   3   0  207.38   31.80 
  -7   3   0  226.78   39.20 
  -7   3   0  214.78   37.80 
  -7   3   0  305.87   41.40 
  -7   3   0  205.08   36.00 
   7   3   0  269.57   35.90 
   7   3   0  232.28   32.00 
  -7   3   0  276.57   34.10 
   7   3   0  221.18   35.30 
   7   3   0  226.98   35.60 
  -7   3   0  172.48   33.00 
   7   3   0  262.67   40.50 
  -7   3   0  229.78   37.00 
  -7   3   0  284.57   43.00 
  -7   3   0  185.88   35.80 
  -8  -3   0  127.99   33.20 
   8  -3   0  153.38   33.70 
  -8  -3   0  149.29   35.70 
   8  -3   0  176.48   35.60 
   8  -3   0   88.89   28.70 
   8  -3   0  119.89   34.20 
   8  -3   0  209.88   36.40 
  -8  -3   0  163.18   33.00 
   8  -3   0  130.49   30.20 
  -8  -3   0  142.69   31.90 
  -8  -3   0  153.98   28.00 
  -8  -3   0  196.68   37.40 
  -8  -3   0  187.08   29.90 
  -8  -3   0  209.28   36.20 
  -8  -3   0  195.08   33.70 
   8  -3   0  139.19   29.90 
   8  -3   0  136.59   29.00 
  -8  -3   0  195.48   45.10 
   8  -3   0  150.18   29.90 
  -8   3   0  210.18   36.80 
  -8   3   0  214.68   36.80 
  -8   3   0  180.48   28.80 
   8   3   0  112.49   27.60 
  -8   3   0  170.58   36.30 
   8   3   0  161.28   29.50 
  -8   3   0  178.08   34.90 
  -8   3   0  185.88   37.50 
  -8   3   0  174.88   36.50 
   8   3   0  210.18   37.70 
   8   3   0  161.88   31.70 
  -8   3   0  216.48   39.60 
   8   3   0  153.28   32.20 
   8   3   0  194.58   36.40 
  -8   3   0  205.78   40.40 
  -8   3   0  147.49   30.40 
   9  -3   0   92.69   29.50 
  -9  -3   0   62.59   23.20 
  -9  -3   0   91.19   28.50 
   9  -3   0   65.09   24.50 
  -9  -3   0   50.99   25.20 
  -9  -3   0   98.19   26.60 
   9  -3   0   44.70   25.20 
  -9  -3   0   38.70   21.80 
  -9  -3   0   35.10   18.10 
   9  -3   0   75.69   23.50 
  -9  -3   0   30.40   21.50 
   9  -3   0   79.69   30.30 
  -9  -3   0  109.29   29.60 
   9  -3   0   76.19   27.70 
   9  -3   0   63.69   23.80 
   9  -3   0   81.39   26.90 
  -9  -3   0   58.99   20.00 
   9   3   0   72.79   25.00 
  -9   3   0   36.40   21.70 
  -9   3   0   92.79   28.50 
   9   3   0   78.69   24.60 
  -9   3   0   93.09   28.00 
   9   3   0   58.69   27.00 
   9   3   0   55.19   21.20 
  -9   3   0   50.79   24.50 
  -9   3   0  107.09   31.20 
  -9   3   0  148.59   32.80 
   9   3   0   94.39   28.10 
  -9   3   0   94.79   27.60 
  -9   3   0   53.79   23.80 
  -9   3   0  122.59   31.40 
  -9   3   0   26.10   20.90 
   0  -4   0  218.88   17.90 
   0  -4   0  212.58   22.80 
   0  -4   0  224.78   21.50 
   0  -4   0  198.48   17.50 
   0  -4   0  214.68   18.30 
   0  -4   0  159.18   19.00 
   0  -4   0  214.58   19.70 
   0  -4   0  173.68   23.80 
   0  -4   0  235.38   20.60 
   0  -4   0  184.38   21.00 
   0  -4   0  238.78   23.20 
   0  -4   0  199.58   17.60 
   0  -4   0  179.68   22.00 
   0  -4   0  199.28   14.20 
   0  -4   0  207.28   19.40 
   0  -4   0  195.08   24.60 
   0  -4   0  202.18   23.60 
   0  -4   0  189.38   17.90 
   0   4   0  169.88   23.50 
   0   4   0  154.38   22.90 
   0   4   0  220.68   22.90 
   0   4   0  190.98   21.10 
   0   4   0  177.98   23.00 
   0   4   0  197.78   14.20 
   0   4   0  201.78   28.20 
   0   4   0  193.78   29.20 
   0   4   0  220.98   24.60 
   0   4   0  197.48   27.30 
   0   4   0  232.78   24.30 
   0   4   0  121.49   23.80 
   0   4   0  214.98   26.30 
   0   4   0  219.78   22.70 
   0   4   0  221.08   25.70 
   0   4   0  170.58   21.80 
   0   4   0  163.58   21.80 
   0   4   0  167.98   27.30 
  -1  -4   0 5715.63  382.06 
   1  -4   0 5923.81  380.26 
  -1  -4   0 5583.24  382.96 
   1  -4   0 6053.69  386.46 
  -1  -4   0 5891.51  380.66 
   1  -4   0 6136.09  384.96 
   1  -4   0 5660.33  387.36 
  -1  -4   0 5939.01  385.66 
   1  -4   0 5833.42  384.46 
  -1  -4   0 6083.59  382.76 
  -1  -4   0 5628.44  380.66 
  -1  -4   0 6034.80  380.76 
  -1  -4   0 5877.11  384.56 
   1  -4   0 6145.79  385.46 
   1  -4   0 5778.92  381.16 
   1  -4   0 5635.14  389.76 
  -1  -4   0 5737.43  387.66 
  -1  -4   0 6027.50  383.46 
   1  -4   0 5797.62  387.46 
   1  -4   0 5985.10  384.86 
  -1  -4   0 5931.71  379.96 
  -1  -4   0 5807.42  379.66 
  -1  -4   0 5728.13  385.06 
  -1  -4   0 5407.96  382.66 
  -1  -4   0 5671.93  387.66 
   1  -4   0 5763.72  384.96 
  -1  -4   0 6112.79  382.76 
   1  -4   0 5583.74  386.66 
  -1  -4   0 5811.22  384.36 
   1  -4   0 5712.33  388.36 
  -1  -4   0 4907.71  390.16 
   1  -4   0 5923.51  385.86 
  -1  -4   0 5783.42  384.96 
  -1  -4   0 5817.32  388.06 
   1  -4   0 5961.60  389.36 
  -1  -4   0 5574.34  382.36 
  -1  -4   0 6085.69  382.66 
   1  -4   0 5840.22  382.86 
  -1   4   0 5829.92  389.26 
   1   4   0 5957.50  387.86 
  -1   4   0 5902.71  386.56 
  -1   4   0 5905.51  386.26 
  -1   4   0 5742.13  380.66 
  -1   4   0 5834.82  389.06 
  -1   4   0 6020.10  381.66 
   1   4   0 5403.66  393.66 
   1   4   0 5836.72  381.46 
   1   4   0 5935.91  387.66 
  -1   4   0 5671.03  380.66 
   1   4   0 5759.82  390.56 
   1   4   0 5732.33  385.56 
  -1   4   0 5795.12  380.56 
   1   4   0 6030.10  383.36 
   1   4   0 5584.54  384.96 
  -1   4   0 5720.93  386.56 
  -1   4   0 5831.52  380.86 
  -1   4   0 5895.21  387.96 
   1   4   0 6070.19  389.36 
  -1   4   0 5629.64  386.16 
  -1   4   0 5974.30  387.66 
  -1   4   0 5886.51  387.16 
  -1   4   0 6059.59  381.96 
   1   4   0 6388.36  383.66 
   1   4   0 5716.73  380.96 
  -1   4   0 5804.52  387.66 
  -1   4   0 5764.72  386.86 
  -1   4   0 5964.50  387.66 
  -1   4   0 5652.03  382.86 
  -1   4   0 5531.65  381.96 
   1   4   0 5851.91  388.06 
   1   4   0 5729.43  384.56 
  -1   4   0 6067.39  388.16 
  -1   4   0 6007.30  387.76 
   1   4   0 5891.41  382.06 
   1   4   0 5887.71  384.36 
  -2  -4   0  109.99   13.00 
   2  -4   0   89.19   18.40 
  -2  -4   0  126.39   17.20 
  -2  -4   0  101.79   13.50 
  -2  -4   0  108.99   12.60 
  -2  -4   0  112.99   17.00 
  -2  -4   0  119.29   12.40 
   2  -4   0   92.89   19.00 
  -2  -4   0  103.09   18.60 
  -2  -4   0  102.19   11.30 
  -2  -4   0  102.69   14.10 
   2  -4   0  103.29   15.40 
  -2  -4   0  130.29   19.70 
  -2  -4   0   75.79   12.20 
  -2  -4   0   95.29   16.10 
  -2  -4   0  104.59   13.30 
   2  -4   0  116.59   16.30 
  -2  -4   0  106.99   12.10 
  -2  -4   0  109.19   13.30 
   2  -4   0   85.39   11.80 
  -2  -4   0   83.79   16.80 
  -2  -4   0  106.99   12.80 
  -2  -4   0   95.09   17.40 
  -2  -4   0  114.09   17.20 
  -2  -4   0  129.59   19.40 
  -2  -4   0  106.89   12.60 
   2  -4   0   87.69   15.80 
   2  -4   0   79.69   16.30 
   2  -4   0   88.09   12.30 
  -2  -4   0  122.79   23.90 
  -2  -4   0   79.99   15.00 
  -2  -4   0  113.49   14.60 
   2  -4   0  104.09   17.50 
   2  -4   0   81.19   15.40 
  -2  -4   0  139.19   14.50 
   2  -4   0   98.49   13.60 
  -2  -4   0  125.99   18.60 
   2  -4   0  127.09   17.40 
   2  -4   0  123.79   19.80 
   2   4   0  129.19   15.50 
   2   4   0  106.59   18.20 
   2   4   0   95.79   19.60 
  -2   4   0   97.59   16.80 
  -2   4   0  122.79   18.90 
   2   4   0   85.29   15.10 
  -2   4   0   88.59   16.40 
  -2   4   0   85.69   16.10 
   2   4   0  103.49   12.40 
  -2   4   0  105.29   14.90 
  -2   4   0  115.69   18.90 
  -2   4   0  122.09   17.20 
  -2   4   0   82.89   15.60 
   2   4   0  107.19   13.30 
  -2   4   0  121.29   13.10 
   2   4   0   96.79   16.10 
  -2   4   0   69.69   14.70 
   2   4   0  106.29   14.80 
  -2   4   0  117.79   19.30 
  -2   4   0  118.79   13.70 
   2   4   0   94.69   17.80 
   2   4   0  106.29   18.30 
  -2   4   0   84.29   12.80 
  -2   4   0  102.29   14.90 
  -2   4   0  108.49   14.10 
   2   4   0  103.29   18.10 
  -2   4   0   83.79   16.40 
  -2   4   0  116.49   17.50 
  -2   4   0   90.79   15.90 
  -3  -4   0  396.16   44.90 
   3  -4   0  393.06   35.00 
  -3  -4   0  428.96   33.90 
  -3  -4   0  367.06   40.80 
   3  -4   0  450.25   37.90 
  -3  -4   0  392.76   31.30 
  -3  -4   0  400.96   29.40 
  -3  -4   0  420.36   36.10 
  -3  -4   0  409.36   29.20 
  -3  -4   0  397.96   31.20 
   3  -4   0  429.06   36.50 
  -3  -4   0  405.86   29.40 
   3  -4   0  394.56   34.80 
  -3  -4   0  425.56   29.70 
  -3  -4   0  378.66   35.20 
  -3  -4   0  423.56   30.30 
  -3  -4   0  368.16   31.30 
  -3  -4   0  375.66   34.80 
  -3  -4   0  408.66   34.10 
   3  -4   0  397.66   41.00 
   3  -4   0  392.56   33.30 
  -3  -4   0  432.36   30.80 
   3  -4   0  375.96   41.40 
   3  -4   0  358.06   32.80 
   3  -4   0  297.67   41.50 
  -3  -4   0  417.26   29.70 
  -3  -4   0  408.06   32.00 
  -3  -4   0  415.96   34.90 
  -3  -4   0  443.16   37.70 
  -3  -4   0  406.36   35.70 
   3  -4   0  324.07   38.30 
   3  -4   0  388.76   46.00 
  -3  -4   0  380.86   35.40 
  -3  -4   0  405.46   36.40 
   3  -4   0  355.26   40.30 
   3   4   0  420.16   35.90 
  -3   4   0  403.06   42.00 
  -3   4   0  412.16   38.40 
  -3   4   0  392.76   35.40 
  -3   4   0  364.56   39.20 
  -3   4   0  389.86   35.30 
  -3   4   0  313.37   39.60 
   3   4   0  404.76   41.20 
  -3   4   0  376.26   36.60 
  -3   4   0  383.16   35.10 
  -3   4   0  345.77   39.60 
  -3   4   0  462.15   39.70 
   3   4   0  394.06   28.60 
   3   4   0  390.46   33.40 
   3   4   0  372.66   31.90 
  -3   4   0  355.36   34.30 
  -3   4   0  433.96   37.40 
   3   4   0  452.55   36.20 
   3   4   0  354.56   35.30 
   3   4   0  452.15   35.40 
  -3   4   0  390.86   37.30 
  -3   4   0  384.06   32.60 
  -4  -4   0   59.69    8.20 
   4  -4   0   46.50   13.00 
  -4  -4   0   67.19   10.30 
  -4  -4   0   55.99   12.90 
  -4  -4   0   58.39   14.40 
   4  -4   0   77.29   14.90 
   4  -4   0   36.80   11.40 
   4  -4   0   53.19   15.00 
  -4  -4   0   48.70   12.30 
   4  -4   0   73.69   16.20 
  -4  -4   0   51.99   16.60 
   4  -4   0   68.79   15.00 
  -4  -4   0   73.09   11.80 
   4  -4   0   75.89   18.00 
   4  -4   0   70.39   19.30 
   4  -4   0   27.40   14.30 
   4  -4   0   61.89   13.00 
  -4  -4   0   45.60    8.40 
  -4  -4   0   48.80   12.60 
  -4  -4   0   75.79   17.00 
  -4  -4   0   41.70   13.30 
  -4  -4   0   65.59    7.80 
   4  -4   0   43.20   13.70 
   4  -4   0   39.70   13.00 
  -4  -4   0   62.69    7.90 
  -4  -4   0   39.00   12.80 
  -4  -4   0   63.19   14.40 
  -4   4   0   76.29   16.70 
   4   4   0   70.39   14.40 
   4   4   0   64.09   13.20 
  -4   4   0   54.39   16.20 
  -4   4   0   52.59   14.00 
  -4   4   0   15.20   11.40 
  -4   4   0   56.09   14.10 
   4   4   0   60.39   17.80 
   4   4   0   72.39   13.90 
   4   4   0   26.40   12.70 
  -4   4   0   83.39   17.40 
  -4   4   0   44.60   14.20 
   4   4   0   81.69   14.90 
  -4   4   0   72.69   16.10 
   4   4   0   60.29   12.70 
   4   4   0   50.79   12.30 
  -4   4   0   75.19   16.40 
  -4   4   0   69.69   13.80 
  -4   4   0   53.89   15.50 
  -4   4   0   49.70   14.80 
   5  -4   0  714.63   62.39 
   5  -4   0  682.53   63.89 
  -5  -4   0  808.12   64.79 
   5  -4   0  737.33   57.49 
  -5  -4   0  668.03   51.49 
  -5  -4   0  734.63   80.99 
  -5  -4   0  665.43   57.69 
   5  -4   0  710.93   62.99 
  -5  -4   0  737.43   51.69 
   5  -4   0  779.12   69.79 
  -5  -4   0  699.23   56.89 
  -5  -4   0  783.82   62.69 
  -5  -4   0  673.33   51.29 
   5  -4   0  682.33   60.99 
  -5  -4   0  750.02   63.89 
   5  -4   0  682.03   59.69 
  -5  -4   0  717.93   56.49 
  -5  -4   0  725.63   60.29 
  -5  -4   0  769.72   56.19 
  -5  -4   0  716.03   57.79 
  -5  -4   0  737.23   50.79 
  -5  -4   0  684.73   63.99 
  -5  -4   0  758.82   55.49 
   5  -4   0  682.73   59.49 
   5  -4   0  650.53   63.79 
   5  -4   0  775.42   59.89 
   5  -4   0  722.03   61.29 
   5  -4   0  729.63   61.99 
   5  -4   0  681.53   58.69 
  -5  -4   0  715.73   60.99 
   5   4   0  720.43   63.89 
  -5   4   0  692.13   56.29 
   5   4   0  694.53   57.79 
  -5   4   0  729.73   64.09 
  -5   4   0  727.63   63.09 
  -5   4   0  707.53   63.89 
   5   4   0  717.73   58.69 
  -5   4   0  818.42   61.19 
   5   4   0  735.03   57.59 
  -5   4   0  647.44   61.29 
   5   4   0  795.92   58.39 
   5   4   0  775.02   57.29 
  -5   4   0  720.23   58.19 
  -5   4   0  666.23   62.99 
  -5   4   0  766.12   65.49 
   5   4   0  703.43   59.69 
  -5   4   0  737.33   63.29 
  -5   4   0  761.42   66.39 
  -5   4   0  814.72   64.89 
   5   4   0  762.02   58.79 
  -6  -4   0  347.27   40.80 
   6  -4   0  311.67   42.50 
   6  -4   0  295.77   39.00 
  -6  -4   0  478.65   36.40 
   6  -4   0  354.76   38.20 
  -6  -4   0  348.97   52.29 
  -6  -4   0  341.37   42.40 
  -6  -4   0  341.47   54.99 
  -6  -4   0  332.07   34.70 
   6  -4   0  326.37   40.30 
   6  -4   0  339.97   44.80 
   6  -4   0  323.17   39.30 
  -6  -4   0  330.37   38.90 
   6  -4   0  358.86   43.50 
  -6  -4   0  391.76   34.30 
   6  -4   0  313.37   48.10 
  -6  -4   0  339.97   45.90 
  -6  -4   0  375.26   47.10 
  -6  -4   0  328.97   41.40 
   6  -4   0  329.57   39.40 
  -6  -4   0  277.47   40.20 
   6  -4   0  276.07   41.40 
   6  -4   0  313.27   41.70 
   6  -4   0  328.57   46.50 
   6  -4   0  349.57   42.70 
  -6  -4   0  365.06   46.50 
   6   4   0  309.97   44.40 
  -6   4   0  386.06   36.80 
   6   4   0  361.06   40.00 
   6   4   0  326.77   40.90 
  -6   4   0  373.46   47.10 
  -6   4   0  346.77   44.50 
  -6   4   0  402.66   50.39 
  -6   4   0  319.07   46.60 
   6   4   0  345.37   32.90 
  -6   4   0  364.06   46.50 
  -6   4   0  331.67   44.70 
  -6   4   0  359.86   45.20 
   6   4   0  308.97   37.00 
  -6   4   0  379.16   42.30 
  -6   4   0  382.86   38.60 
  -6   4   0  264.67   41.10 
  -6   4   0  349.96   46.10 
   6   4   0  365.16   32.90 
   6   4   0  297.97   37.70 
   6   4   0  391.86   41.30 
   7  -4   0 1044.20   95.29 
  -7  -4   0 1132.69   93.69 
   7  -4   0 1158.58  102.19 
  -7  -4   0  913.61  111.79 
   7  -4   0 1038.50   92.19 
   7  -4   0 1270.47   91.89 
  -7  -4   0 1165.88   97.59 
  -7  -4   0 1171.48   91.19 
  -7  -4   0 1144.79   86.19 
  -7  -4   0 1119.69   94.79 
  -7  -4   0 1035.00   91.09 
  -7  -4   0 1179.28   88.79 
  -7  -4   0 1052.69   93.89 
   7  -4   0 1083.29   89.99 
   7  -4   0 1083.39   90.29 
   7  -4   0 1231.08   94.59 
   7  -4   0 1093.79   87.69 
   7  -4   0 1204.08   96.29 
   7  -4   0 1218.48  100.09 
   7  -4   0 1088.79   88.89 
   7  -4   0 1091.99   92.19 
  -7  -4   0 1041.10   89.39 
  -7  -4   0 1160.48   96.59 
  -7  -4   0 1118.39   93.49 
  -7   4   0 1110.99   93.79 
  -7   4   0 1092.99   95.79 
  -7   4   0 1179.68   98.69 
   7   4   0 1112.09   95.09 
   7   4   0 1087.89   89.59 
  -7   4   0 1091.39   94.39 
  -7   4   0 1151.98   88.79 
  -7   4   0 1125.09   97.99 
  -7   4   0 1063.39   95.29 
   7   4   0 1123.29   91.49 
   7   4   0 1188.38   90.29 
  -7   4   0 1147.89   99.49 
  -7   4   0 1019.50   93.49 
  -7   4   0 1049.79   93.39 
  -8  -4   0  164.78   36.70 
   8  -4   0  194.58   35.80 
   8  -4   0  192.68   37.00 
  -8  -4   0  181.48   47.70 
  -8  -4   0  145.49   35.40 
   8  -4   0  245.98   46.90 
  -8  -4   0  264.97   38.20 
   8  -4   0  200.28   39.30 
  -8  -4   0  145.59   28.70 
  -8  -4   0  224.48   37.50 
   8  -4   0  230.68   44.40 
  -8  -4   0  183.68   35.60 
   8  -4   0  155.48   32.40 
  -8  -4   0  151.28   34.20 
  -8  -4   0  176.78   37.50 
   8  -4   0  203.28   37.30 
   8  -4   0  212.38   39.30 
  -8   4   0  148.39   35.40 
   8   4   0  217.78   35.70 
   8   4   0  183.18   31.80 
  -8   4   0  221.98   38.50 
  -8   4   0  186.58   38.30 
   8   4   0  185.68   37.90 
  -8   4   0  210.38   41.10 
  -8   4   0  240.38   39.90 
  -8   4   0  205.78   37.20 
  -8   4   0  169.08   37.70 
   8   4   0  200.28   34.70 
  -8   4   0  219.58   32.90 
  -8   4   0  213.78   42.00 
  -8   4   0  168.38   36.60 
  -9  -4   0  181.58   53.09 
   9  -4   0  202.48   39.50 
   9  -4   0  168.18   40.60 
  -9  -4   0  164.08   41.40 
  -9  -4   0  131.89   29.50 
   9  -4   0  123.89   35.30 
  -9  -4   0  216.88   43.80 
   9  -4   0  256.27   46.20 
   9  -4   0  223.38   49.99 
   9  -4   0  144.09   36.20 
   9  -4   0  190.18   36.00 
  -9  -4   0  130.09   34.80 
   9  -4   0  153.78   32.80 
  -9  -4   0  142.69   33.40 
  -9  -4   0  177.88   39.90 
  -9  -4   0  134.29   31.90 
  -9   4   0  158.18   36.30 
  -9   4   0  187.38   40.30 
  -9   4   0  187.38   37.20 
   9   4   0  111.59   28.80 
   9   4   0  138.39   35.50 
  -9   4   0  178.28   41.70 
  -9   4   0  130.09   35.20 
   9   4   0  113.19   29.70 
  -9   4   0  154.08   35.00 
   9   4   0  114.59   29.00 
  -9   4   0  136.89   36.30 
  -9   4   0  144.69   37.00 
  -9   4   0  175.48   41.70 
  -9   4   0  107.39   31.20 
   0  -5   0    6.90    5.80 
   0  -5   0    2.70    5.10 
   0  -5   0   14.70    5.70 
   0  -5   0   -0.30    4.60 
   0  -5   0   -2.40    3.50 
   0  -5   0    1.20    6.80 
   0  -5   0   -1.40    5.70 
   0  -5   0  -12.90    5.10 
   0  -5   0   -7.90    5.70 
   0  -5   0   -0.70    4.00 
   0  -5   0   -3.10    4.00 
   0  -5   0    6.00    7.70 
   0  -5   0   -2.80    5.40 
   0  -5   0    1.80    7.20 
   0  -5   0    0.00    5.60 
   0  -5   0   -3.60    8.30 
   0   5   0   -3.30    5.20 
   0   5   0   -5.80    5.30 
   0   5   0   11.00   12.10 
   0   5   0   -2.50    8.00 
   0   5   0    2.50    6.80 
   0   5   0   -1.30    8.30 
   0   5   0   -2.50    5.80 
   0   5   0   -4.20    9.00 
   0   5   0    0.30    6.80 
   0   5   0   -7.80    7.30 
   0   5   0   25.80   11.30 
   0   5   0    4.80    4.70 
   0   5   0    1.50    7.30 
   0   5   0   -3.50    4.80 
   0   5   0   17.00   10.00 
   0   5   0   -4.10    9.20 
  -1  -5   0   46.70    5.40 
   1  -5   0   36.70   11.50 
   1  -5   0   57.19   11.60 
   1  -5   0   55.69   10.40 
   1  -5   0   44.20    8.10 
  -1  -5   0   35.20   10.10 
   1  -5   0   43.00    6.60 
   1  -5   0   53.89   11.50 
  -1  -5   0   43.90   10.70 
  -1  -5   0   40.90    7.60 
   1  -5   0   44.90   12.80 
  -1  -5   0   51.19   11.30 
  -1  -5   0   34.70    8.60 
  -1  -5   0   45.60    7.40 
   1  -5   0   23.50   10.50 
   1  -5   0   41.80   13.60 
  -1  -5   0   50.79   11.40 
   1  -5   0   58.09   13.40 
   1  -5   0   37.40    9.70 
  -1  -5   0   51.19   14.10 
  -1  -5   0   40.00   10.60 
  -1  -5   0   33.80   10.50 
  -1  -5   0   41.50   13.60 
   1  -5   0   49.70   10.20 
   1  -5   0   39.40   11.90 
   1  -5   0   32.80   13.30 
  -1  -5   0   58.29   14.90 
  -1  -5   0   48.30    8.60 
  -1  -5   0   56.69    9.30 
  -1  -5   0   48.70    7.50 
  -1  -5   0   38.00    7.50 
  -1  -5   0   54.99   14.20 
   1   5   0   37.70    8.00 
  -1   5   0   43.40   15.90 
   1   5   0   30.40    5.50 
   1   5   0   50.99   13.40 
   1   5   0   43.20   12.90 
  -1   5   0   40.50   10.80 
   1   5   0   47.00   17.80 
  -1   5   0   39.10   12.60 
   1   5   0   43.70    6.90 
   1   5   0   33.20   11.20 
  -1   5   0   36.50   11.90 
  -1   5   0   40.90   11.70 
  -1   5   0   47.90    5.70 
  -1   5   0   38.10   12.80 
  -1   5   0   23.90   11.30 
  -1   5   0   66.19   14.10 
   1   5   0   49.50    9.10 
  -1   5   0   28.10   11.60 
  -1   5   0   44.40   14.00 
   1   5   0   35.10   10.00 
   1   5   0   56.69    9.80 
  -1   5   0   35.70   11.30 
  -1   5   0   40.90   11.70 
  -1   5   0   51.39   13.80 
  -1   5   0   52.59    9.60 
  -1   5   0   50.79   12.90 
  -1   5   0   27.30   12.80 
   1   5   0   34.10   12.30 
   1   5   0   65.79   13.40 
   1   5   0   31.40   10.00 
  -2  -5   0   89.29   10.50 
  -2  -5   0   74.79   12.00 
   2  -5   0   77.29   15.90 
  -2  -5   0   79.99   10.80 
   2  -5   0   81.69   11.40 
  -2  -5   0  106.09   14.20 
  -2  -5   0   80.19   11.10 
  -2  -5   0   67.59    9.60 
   2  -5   0   44.10   15.10 
  -2  -5   0   97.19   13.20 
   2  -5   0   82.99   14.70 
   2  -5   0   37.50   13.30 
   2  -5   0   60.79   15.40 
  -2  -5   0   79.69   14.60 
  -2  -5   0   64.09   12.10 
  -2  -5   0   69.29   14.40 
  -2  -5   0   53.79   10.40 
   2  -5   0   55.29   12.10 
  -2  -5   0   90.79   12.10 
   2  -5   0   72.99   14.30 
  -2  -5   0   56.79   11.00 
   2  -5   0   46.50   12.80 
  -2  -5   0   72.19   11.30 
  -2  -5   0   58.09   15.10 
  -2  -5   0   77.49   16.80 
  -2  -5   0   78.99   19.20 
  -2  -5   0   91.09   14.50 
  -2  -5   0   57.09   13.70 
  -2  -5   0   66.49   17.10 
  -2  -5   0   92.59   13.80 
   2  -5   0   48.30   14.10 
  -2  -5   0   91.29    9.30 
  -2  -5   0   80.99    9.60 
   2  -5   0   67.89   17.30 
   2  -5   0   81.79   12.30 
  -2  -5   0   69.29   10.70 
  -2  -5   0   68.39   12.80 
  -2  -5   0   66.29   10.90 
  -2  -5   0   54.99   17.70 
  -2   5   0   68.29   15.90 
   2   5   0   63.29   10.20 
  -2   5   0   70.09   10.90 
   2   5   0   50.79   14.00 
   2   5   0   67.29   15.10 
   2   5   0  100.49   19.30 
  -2   5   0   76.19   10.30 
   2   5   0   78.39   18.90 
  -2   5   0   69.79   15.40 
  -2   5   0   91.39   17.70 
  -2   5   0   83.89   11.60 
  -2   5   0   87.09   17.50 
  -2   5   0   63.89   14.20 
   2   5   0   68.59   16.70 
   2   5   0   92.29   18.20 
  -2   5   0   69.29   16.70 
  -2   5   0   71.29   15.40 
  -2   5   0   86.59   12.10 
  -2   5   0   48.80   13.60 
  -2   5   0   73.29   15.70 
   2   5   0   52.89   11.90 
   2   5   0   76.59   10.10 
  -2   5   0   40.50   14.20 
  -2   5   0   56.99   14.20 
  -2   5   0   72.99   12.60 
  -2   5   0   73.79   11.00 
   3  -5   0   16.40   10.50 
   3  -5   0   -6.10    9.70 
  -3  -5   0   -0.70    4.80 
   3  -5   0   10.50    7.00 
  -3  -5   0    5.80    4.30 
   3  -5   0    5.00    7.60 
  -3  -5   0    1.00    3.50 
  -3  -5   0   -5.50    9.50 
  -3  -5   0    5.10    9.50 
   3  -5   0    8.50    6.90 
  -3  -5   0   14.30    6.40 
  -3  -5   0    6.00    7.40 
  -3  -5   0    5.00    6.30 
  -3  -5   0    7.70    8.70 
   3  -5   0   11.50   11.50 
  -3  -5   0    6.10    5.90 
  -3  -5   0   11.00    9.80 
   3  -5   0   17.10   10.00 
   3  -5   0    0.70    8.70 
  -3  -5   0   10.00   10.10 
  -3  -5   0    5.80    5.60 
  -3  -5   0    5.60    5.10 
  -3  -5   0    7.20    6.00 
  -3  -5   0    3.60    5.30 
  -3  -5   0    9.70   10.10 
  -3  -5   0    9.20    9.10 
   3  -5   0    3.20    5.70 
  -3  -5   0    5.50    4.60 
  -3  -5   0    0.10    4.40 
   3  -5   0   12.90   10.60 
   3  -5   0    3.70    8.00 
  -3  -5   0   10.70    4.30 
   3   5   0    6.80    6.80 
   3   5   0   11.30    9.40 
  -3   5   0    1.10    7.60 
   3   5   0   11.80    8.10 
  -3   5   0    1.00    8.00 
   3   5   0    3.60    5.40 
  -3   5   0   -3.70    7.60 
   3   5   0    3.50    5.50 
  -3   5   0   10.90   10.30 
  -3   5   0    5.60    8.50 
  -3   5   0   -9.20    6.20 
  -3   5   0    2.40    5.20 
  -3   5   0   -1.70    5.30 
   3   5   0    6.80    8.60 
  -3   5   0    3.70    9.80 
  -3   5   0    4.30    7.00 
   3   5   0   21.60   10.90 
  -3   5   0    0.40    8.90 
   3   5   0    6.30    8.90 
  -3   5   0    6.50    7.20 
  -3   5   0    8.80    9.70 
  -3   5   0    4.20    8.80 
  -4  -5   0  521.75   50.49 
  -4  -5   0  433.36   37.50 
   4  -5   0  436.96   46.60 
   4  -5   0  477.95   38.80 
   4  -5   0  450.55   48.40 
  -4  -5   0  435.46   34.30 
  -4  -5   0  415.36   38.20 
   4  -5   0  425.66   37.70 
  -4  -5   0  425.16   30.60 
   4  -5   0  435.46   50.09 
  -4  -5   0  427.56   31.50 
   4  -5   0  479.65   40.60 
  -4  -5   0  395.46   34.30 
  -4  -5   0  400.86   34.40 
  -4  -5   0  393.36   46.00 
  -4  -5   0  421.16   41.90 
   4  -5   0  446.16   48.10 
  -4  -5   0  428.26   32.50 
   4  -5   0  425.06   47.80 
  -4  -5   0  471.15   41.50 
   4  -5   0  387.16   47.10 
   4  -5   0  437.56   45.60 
  -4  -5   0  433.16   44.10 
  -4  -5   0  381.36   39.50 
   4  -5   0  362.66   37.90 
   4  -5   0  391.76   52.49 
  -4  -5   0  436.36   30.40 
  -4  -5   0  469.15   42.90 
   4   5   0  456.45   36.60 
   4   5   0  511.35   41.40 
  -4   5   0  464.15   41.40 
  -4   5   0  413.36   48.30 
  -4   5   0  403.96   47.00 
  -4   5   0  457.45   49.40 
  -4   5   0  386.96   44.20 
   4   5   0  389.16   37.60 
  -4   5   0  358.66   46.50 
  -4   5   0  450.25   40.00 
  -4   5   0  429.26   40.90 
  -4   5   0  313.67   42.50 
  -4   5   0  378.96   44.30 
   4   5   0  443.56   41.60 
   4   5   0  416.36   37.60 
   4   5   0  396.46   46.30 
  -4   5   0  372.36   45.80 
  -4   5   0  431.26   48.80 
  -5  -5   0   18.20    8.40 
  -5  -5   0    3.00    8.60 
   5  -5   0   21.20   12.80 
  -5  -5   0   13.00   11.90 
  -5  -5   0   36.10   17.90 
  -5  -5   0   11.80   10.10 
   5  -5   0    2.90    9.30 
   5  -5   0   -7.30    8.00 
   5  -5   0   20.90   14.30 
   5  -5   0   -7.60   10.60 
   5  -5   0   -6.90    9.60 
   5  -5   0   16.90   11.90 
  -5  -5   0    1.90    9.70 
  -5  -5   0   18.10   20.30 
   5  -5   0   20.90   13.60 
  -5  -5   0   -3.00    9.70 
   5  -5   0   22.90   14.60 
  -5  -5   0  -14.30    8.30 
  -5  -5   0   10.30    9.30 
  -5  -5   0   13.90   10.50 
   5  -5   0  -11.40    9.70 
  -5  -5   0    9.70   10.90 
   5  -5   0    6.50    9.50 
   5   5   0   15.10    9.80 
  -5   5   0   15.70   13.30 
  -5   5   0    4.30   11.70 
  -5   5   0    0.50    9.50 
   5   5   0   10.10   11.50 
  -5   5   0    2.80    9.10 
  -5   5   0   13.50   11.70 
  -5   5   0   13.70    9.80 
  -5   5   0    3.10   11.70 
   5   5   0   14.40   10.20 
  -5   5   0   -2.50    9.00 
  -5   5   0    0.30   10.50 
   5   5   0   -7.30    7.10 
   5   5   0   -6.00    6.80 
   5   5   0   17.00   10.50 
  -5   5   0   17.90   13.40 
  -5   5   0    5.20    9.20 
  -5   5   0    5.00   11.80 
  -6  -5   0 1442.96  105.49 
  -6  -5   0 1265.57  107.29 
  -6  -5   0 1469.95  104.39 
   6  -5   0 1345.87  107.49 
   6  -5   0 1273.87  110.29 
   6  -5   0 1418.66  116.89 
   6  -5   0 1465.75  110.69 
   6  -5   0 1423.26  105.69 
  -6  -5   0 1355.86  100.69 
  -6  -5   0 1349.07  106.59 
  -6  -5   0 1387.16  103.39 
  -6  -5   0 1255.47   98.19 
   6  -5   0 1430.16  109.29 
   6  -5   0 1294.37  104.79 
   6  -5   0 1411.06  107.19 
  -6  -5   0 1191.98  107.99 
   6  -5   0 1206.38  103.29 
   6  -5   0 1360.96  102.99 
   6  -5   0 1356.06  100.89 
  -6  -5   0 1308.37   96.99 
  -6  -5   0 1409.56  107.79 
   6  -5   0 1330.67  106.19 
  -6  -5   0 1259.07  107.09 
  -6  -5   0 1051.19  115.59 
   6   5   0 1412.36  103.09 
   6   5   0 1502.85  111.89 
  -6   5   0 1429.66  108.49 
  -6   5   0 1240.58  106.79 
  -6   5   0 1371.76  111.69 
  -6   5   0 1275.87  106.99 
   6   5   0 1359.56  103.19 
  -6   5   0 1387.96  101.69 
  -6   5   0 1385.06  110.99 
  -6   5   0 1420.66  108.49 
   6   5   0 1350.06  101.29 
  -6   5   0 1380.96  110.49 
  -6   5   0 1319.87   98.99 
  -6   5   0 1338.07  108.89 
   6   5   0 1384.56  101.09 
   6   5   0 1353.86  100.49 
  -6   5   0 1269.37  102.89 
  -6   5   0 1134.29  105.29 
   6   5   0 1275.47   99.19 
   7  -5   0  -13.40   13.20 
   7  -5   0   23.00   17.60 
   7  -5   0   -0.80   14.80 
  -7  -5   0   -7.80   10.80 
   7  -5   0   -4.80   10.20 
  -7  -5   0    6.70   18.50 
   7  -5   0  -21.50   11.30 
   7  -5   0   11.50   16.30 
   7  -5   0    1.40   13.70 
  -7  -5   0   19.50   13.30 
  -7  -5   0   -0.60   11.70 
  -7  -5   0    4.30   12.70 
  -7  -5   0   -0.40   14.40 
   7  -5   0   -9.00   11.00 
  -7  -5   0  -15.70   11.60 
  -7  -5   0   15.10   15.40 
  -7  -5   0  -12.30   13.20 
  -7  -5   0   17.30   22.70 
   7  -5   0   23.40   14.40 
   7  -5   0   -8.30   11.80 
  -7  -5   0   15.50   15.20 
  -7  -5   0    2.60   10.60 
   7  -5   0    4.70   12.20 
  -7   5   0   20.00   15.10 
   7   5   0   -1.20    9.60 
   7   5   0  -19.10   12.60 
  -7   5   0    4.00   12.80 
  -7   5   0   -1.50   13.40 
  -7   5   0    7.30   12.00 
  -7   5   0    6.30   14.30 
   7   5   0    1.20   12.50 
   7   5   0   23.10   14.10 
  -7   5   0  -12.20   12.70 
  -7   5   0    8.40   14.80 
  -7   5   0    3.70   13.50 
  -7   5   0   -8.80   11.20 
  -7   5   0   11.90   13.20 
   7   5   0    5.10   10.20 
  -8  -5   0  367.56   48.70 
   8  -5   0  358.26   45.20 
  -8  -5   0  274.87   47.60 
  -8  -5   0  259.77   41.50 
  -8  -5   0  230.48   38.80 
   8  -5   0  376.46   58.99 
  -8  -5   0  277.17   48.60 
   8  -5   0  266.67   44.00 
  -8  -5   0  300.47   48.60 
   8  -5   0  183.18   40.20 
   8  -5   0  341.37   54.89 
   8  -5   0  390.36   57.09 
  -8  -5   0  276.87   41.70 
   8  -5   0  258.47   42.70 
  -8  -5   0  306.97   62.19 
   8  -5   0  258.87   42.90 
  -8   5   0  288.77   47.60 
  -8   5   0  280.37   50.19 
  -8   5   0  260.37   44.50 
   8   5   0  311.57   43.80 
  -8   5   0  384.36   57.79 
  -8   5   0  330.87   49.99 
  -8   5   0  230.88   44.00 
  -8   5   0  203.28   42.20 
   8   5   0  283.07   40.40 
  -8   5   0  272.77   40.60 
  -8   5   0  211.58   42.70 
  -8   5   0  233.38   45.00 
  -9  -5   0    9.60   19.70 
  -9  -5   0  -15.80   17.40 
   9  -5   0   -4.30   18.60 
   9  -5   0    9.00   18.10 
  -9  -5   0   26.60   18.10 
   9  -5   0    3.80   14.50 
  -9  -5   0    2.50   17.00 
   9  -5   0    7.50   22.80 
   9  -5   0   27.20   23.10 
   9  -5   0   14.70   21.00 
   9  -5   0   -9.50   14.40 
  -9  -5   0  -10.00   16.30 
  -9  -5   0   -4.10   16.10 
  -9  -5   0    7.70   25.80 
   9  -5   0   -5.10   17.30 
   9   5   0   -2.50   14.60 
  -9   5   0   -1.20   17.80 
  -9   5   0    3.50   16.20 
  -9   5   0   25.40   19.80 
  -9   5   0  -25.90   14.90 
  -9   5   0   -5.80   15.70 
  -9   5   0    9.60   17.20 
  -9   5   0  -20.40   13.00 
  -9   5   0    6.40   19.40 
  -9   5   0   -4.20   14.30 
  -9   5   0   16.60   17.90 
  -9   5   0   -3.70   14.80 
   9   5   0   21.70   16.20 
   0  -6   0  388.26   32.10 
   0  -6   0  348.07   39.90 
   0  -6   0  365.36   30.40 
   0  -6   0  399.76   29.40 
   0  -6   0  361.26   40.30 
   0  -6   0  320.07   40.30 
   0  -6   0  385.36   30.30 
   0  -6   0  352.06   32.80 
   0  -6   0  375.06   32.60 
   0  -6   0  417.76   45.10 
   0  -6   0  332.87   36.30 
   0  -6   0  375.86   40.70 
   0  -6   0  389.56   44.30 
   0   6   0  407.86   47.40 
   0   6   0  365.26   41.60 
   0   6   0  400.06   44.40 
   0   6   0  374.26   45.40 
   0   6   0  392.96   34.30 
   0   6   0  337.47   39.10 
   0   6   0  347.57   29.30 
   0   6   0  251.37   41.10 
   0   6   0  410.96   44.60 
   0   6   0  366.06   54.29 
   0   6   0  427.06   38.50 
   0   6   0  321.17   41.90 
   0   6   0  339.27   40.70 
   0   6   0  386.56   39.80 
   0   6   0  386.66   33.40 
  -1  -6   0 2419.06  161.58 
  -1  -6   0 2224.58  163.78 
  -1  -6   0 2337.37  157.38 
   1  -6   0 2369.06  170.68 
  -1  -6   0 2381.16  169.38 
   1  -6   0 2287.07  169.58 
  -1  -6   0 2261.17  157.98 
  -1  -6   0 2351.26  158.28 
   1  -6   0 2265.17  166.98 
   1  -6   0 2340.97  163.08 
  -1  -6   0 2292.47  159.78 
  -1  -6   0 2458.15  165.18 
   1  -6   0 2415.06  164.48 
   1  -6   0 2413.66  156.28 
   1  -6   0 2546.55  170.78 
  -1  -6   0 2334.07  165.08 
  -1  -6   0 2330.17  169.48 
  -1  -6   0 2603.94  162.88 
   1  -6   0 2410.86  162.18 
   1  -6   0 2444.86  169.08 
  -1  -6   0 2327.17  161.98 
  -1  -6   0 2424.66  164.78 
  -1  -6   0 2600.04  159.98 
  -1  -6   0 2441.26  164.68 
  -1  -6   0 2308.87  163.28 
  -1  -6   0 2351.66  168.68 
  -1  -6   0 2432.76  163.58 
   1  -6   0 2469.65  162.28 
   1  -6   0 2383.26  159.28 
   1  -6   0 2274.47  169.28 
  -1   6   0 2090.89  166.08 
   1   6   0 2324.67  156.38 
  -1   6   0 2445.16  169.28 
  -1   6   0 2475.95  171.08 
  -1   6   0 2315.47  168.38 
  -1   6   0 2459.65  166.38 
   1   6   0 2307.07  159.18 
  -1   6   0 2310.67  167.58 
   1   6   0 2267.37  167.68 
  -1   6   0 2465.35  167.48 
   1   6   0 2083.89  176.08 
   1   6   0 2116.69  167.68 
  -1   6   0 2586.44  174.48 
   1   6   0 2353.16  159.78 
   1   6   0 2429.26  164.18 
  -1   6   0 2246.08  167.78 
  -1   6   0 2363.36  168.68 
   1   6   0 2441.76  171.08 
   1   6   0 2348.27  168.28 
  -1   6   0 2422.46  170.88 
  -1   6   0 2215.28  169.88 
   1   6   0 2403.46  164.28 
   1   6   0 2368.86  160.18 
  -1   6   0 2520.65  169.28 
  -2  -6   0  171.38   14.80 
  -2  -6   0  112.29   25.00 
   2  -6   0  162.88   19.00 
  -2  -6   0  151.78   15.90 
  -2  -6   0  169.88   15.80 
  -2  -6   0  114.49   23.40 
   2  -6   0  141.39   27.10 
   2  -6   0  142.69   25.50 
   2  -6   0  198.08   29.30 
  -2  -6   0  150.08   20.20 
  -2  -6   0  168.88   15.50 
   2  -6   0  102.09   24.10 
   2  -6   0  151.18   24.50 
   2  -6   0  119.59   23.50 
  -2  -6   0  122.79   16.70 
   2  -6   0  146.29   23.20 
  -2  -6   0  171.38   15.50 
  -2  -6   0  156.58   13.10 
  -2  -6   0  158.88   26.30 
  -2  -6   0  149.49   14.70 
  -2  -6   0  154.68   21.50 
   2  -6   0  113.49   24.80 
  -2  -6   0  167.68   16.20 
  -2  -6   0  206.38   22.30 
   2  -6   0  141.09   21.70 
   2  -6   0  171.88   17.50 
   2  -6   0  158.08   22.30 
  -2  -6   0  169.08   20.80 
  -2  -6   0  180.78   15.30 
  -2  -6   0  165.28   22.50 
  -2  -6   0  155.68   21.30 
  -2  -6   0  125.19   24.90 
  -2  -6   0  165.18   30.80 
  -2  -6   0  150.98   12.10 
  -2  -6   0  169.98   17.80 
  -2  -6   0  144.19   18.40 
  -2  -6   0  162.68   21.40 
   2   6   0  195.28   28.50 
  -2   6   0  152.98   15.50 
  -2   6   0  195.88   28.20 
  -2   6   0  134.49   24.10 
  -2   6   0  174.08   28.40 
   2   6   0  143.89   26.30 
  -2   6   0  175.28   25.90 
  -2   6   0  127.19   23.00 
  -2   6   0  157.08   14.60 
  -2   6   0  144.19   20.70 
  -2   6   0  157.88   14.90 
   2   6   0  165.08   23.20 
  -2   6   0  152.08   26.00 
   2   6   0  122.79   22.70 
   2   6   0  158.08   16.70 
   2   6   0  162.08   26.60 
   2   6   0  191.38   29.90 
   2   6   0  114.19   26.50 
  -2   6   0  189.68   27.50 
  -2   6   0  172.78   19.40 
  -2   6   0  156.98   19.00 
  -2   6   0  130.89   25.30 
  -2   6   0  226.98   32.50 
  -2   6   0  176.68   16.00 
  -2   6   0  140.99   25.60 
  -2   6   0  234.48   31.80 
   3  -6   0  165.58   31.00 
   3  -6   0  238.78   30.40 
   3  -6   0  224.38   28.10 
   3  -6   0  187.48   29.00 
  -3  -6   0  172.58   29.80 
   3  -6   0  215.88   23.60 
   3  -6   0  217.88   35.60 
  -3  -6   0  207.48   19.70 
  -3  -6   0  205.88   19.70 
   3  -6   0  283.17   36.10 
  -3  -6   0  220.18   26.00 
   3  -6   0  225.68   32.20 
   3  -6   0  252.97   34.30 
  -3  -6   0  191.58   23.40 
  -3  -6   0  280.47   34.10 
   3  -6   0  222.18   25.60 
  -3  -6   0  225.68   25.10 
  -3  -6   0  213.38   30.90 
   3  -6   0  216.88   31.20 
  -3  -6   0  205.78   19.70 
  -3  -6   0  161.78   24.90 
  -3  -6   0  217.28   33.30 
  -3  -6   0  220.88   16.60 
  -3  -6   0  220.18   21.10 
  -3  -6   0  207.88   24.80 
  -3  -6   0  186.88   24.30 
  -3   6   0  223.38   27.50 
   3   6   0  214.28   29.00 
  -3   6   0  182.68   30.00 
   3   6   0  188.58   28.90 
   3   6   0  250.77   24.90 
  -3   6   0  170.78   29.50 
   3   6   0  213.88   28.60 
  -3   6   0  197.18   28.70 
  -3   6   0  209.08   24.40 
  -3   6   0  225.38   33.20 
  -3   6   0  209.78   30.90 
  -3   6   0  221.78   32.20 
  -3   6   0  203.38   24.70 
  -3   6   0  176.38   29.20 
   3   6   0  214.88   30.60 
   3   6   0  273.77   35.60 
   3   6   0  209.98   31.90 
  -3   6   0  239.68   33.80 
  -3   6   0  200.18   31.70 
  -3   6   0  188.78   29.00 
  -3   6   0  235.28   32.60 
   4  -6   0    9.50   10.40 
   4  -6   0   -2.10   10.30 
  -4  -6   0   19.60   12.90 
  -4  -6   0    0.10   11.10 
  -4  -6   0    8.70   12.00 
   4  -6   0    8.50   11.70 
  -4  -6   0   -0.60    7.90 
   4  -6   0   -3.00   11.90 
  -4  -6   0    6.00    6.10 
  -4  -6   0   17.20   12.60 
   4  -6   0  -14.30    8.80 
  -4  -6   0    7.50    9.80 
  -4  -6   0   -0.40    6.80 
   4  -6   0   -9.00   10.40 
   4  -6   0   22.90   10.30 
   4  -6   0   21.90   14.40 
  -4  -6   0    0.00    6.80 
  -4  -6   0   -0.70    6.00 
   4  -6   0    6.90    7.90 
   4  -6   0   10.20   10.80 
  -4  -6   0    9.90    9.30 
   4  -6   0    2.30   11.30 
  -4  -6   0    5.70   11.20 
  -4  -6   0    7.90    6.70 
   4  -6   0    4.50   11.20 
  -4   6   0   23.60   10.70 
   4   6   0    4.30    7.20 
   4   6   0   17.10    8.80 
  -4   6   0   13.30   11.20 
  -4   6   0   16.50   11.80 
   4   6   0    0.70    9.00 
  -4   6   0    7.10   10.70 
  -4   6   0    2.70    8.10 
  -4   6   0    5.00   11.50 
  -4   6   0    2.20   10.00 
  -4   6   0    4.90   13.60 
   4   6   0   11.10   10.90 
  -4   6   0   13.90    9.30 
  -4   6   0    3.10    9.60 
   4   6   0    0.30   10.30 
  -4   6   0    6.70   11.20 
  -4   6   0    9.70   13.50 
  -4   6   0   15.70   13.50 
  -5  -6   0  427.66   48.50 
   5  -6   0  334.77   47.20 
   5  -6   0  424.06   46.00 
   5  -6   0  394.36   52.19 
   5  -6   0  465.15   53.39 
  -5  -6   0  399.76   43.40 
  -5  -6   0  462.15   52.19 
   5  -6   0  447.06   47.10 
  -5  -6   0  398.36   38.30 
   5  -6   0  331.67   40.40 
  -5  -6   0  375.46   44.10 
   5  -6   0  375.16   48.00 
   5  -6   0  446.76   52.99 
   5  -6   0  411.06   50.89 
  -5  -6   0  405.46   46.10 
   5  -6   0  367.46   54.79 
   5  -6   0  437.66   54.19 
  -5  -6   0  500.35   49.60 
  -5  -6   0  498.75   45.60 
  -5  -6   0  408.46   47.20 
   5  -6   0  390.16   46.70 
  -5  -6   0  467.95   65.09 
  -5  -6   0  422.66   51.69 
  -5   6   0  386.86   51.99 
  -5   6   0  383.06   46.90 
  -5   6   0  414.76   52.69 
  -5   6   0  337.57   48.30 
   5   6   0  436.36   39.70 
  -5   6   0  509.75   52.19 
  -5   6   0  389.66   51.49 
   5   6   0  381.46   45.30 
  -5   6   0  432.26   45.60 
  -5   6   0  399.66   51.39 
   5   6   0  467.75   40.80 
   5   6   0  385.56   40.80 
  -5   6   0  440.36   53.09 
   5   6   0  357.26   49.70 
  -5   6   0  402.86   47.10 
   5   6   0  420.76   49.60 
  -5   6   0  336.87   44.20 
  -5   6   0  411.36   51.79 
  -5   6   0  433.86   49.60 
   6  -6   0   81.79   19.30 
   6  -6   0   80.49   22.80 
   6  -6   0   55.49   23.80 
   6  -6   0   49.90   27.20 
  -6  -6   0   56.79   20.00 
  -6  -6   0   34.80   28.80 
   6  -6   0   46.40   19.40 
   6  -6   0   67.09   23.90 
  -6  -6   0   64.89   18.60 
   6  -6   0   83.39   24.20 
   6  -6   0   83.79   24.30 
  -6  -6   0   75.39   17.80 
   6  -6   0   34.70   18.30 
  -6  -6   0   64.59   22.40 
  -6  -6   0   66.79   18.40 
   6  -6   0   59.39   18.00 
   6  -6   0  101.19   25.20 
   6  -6   0   52.69   19.30 
  -6  -6   0   86.99   24.90 
  -6  -6   0   59.29   20.10 
  -6   6   0   35.50   18.50 
  -6   6   0   39.30   17.20 
  -6   6   0   56.29   20.40 
  -6   6   0   75.29   18.70 
  -6   6   0   62.19   24.20 
   6   6   0   94.19   20.50 
  -6   6   0   65.89   17.70 
   6   6   0   62.69   18.00 
  -6   6   0   66.19   23.70 
   6   6   0   91.19   19.10 
   6   6   0   54.79   16.30 
  -6   6   0   66.19   23.20 
  -6   6   0   49.70   19.30 
  -6   6   0   56.89   22.20 
   6   6   0   75.39   19.90 
  -6   6   0   79.09   23.80 
  -6   6   0   53.49   19.40 
  -6   6   0   70.99   23.60 
   7  -6   0  716.13   89.29 
  -7  -6   0  671.83   95.89 
  -7  -6   0  715.33   72.19 
   7  -6   0  718.83   77.69 
  -7  -6   0  827.52   83.59 
  -7  -6   0  776.32   69.59 
   7  -6   0  721.73   66.29 
  -7  -6   0  709.43   66.29 
  -7  -6   0  711.63   80.49 
   7  -6   0  675.13   77.69 
   7  -6   0  769.92   69.99 
  -7  -6   0  750.62   68.69 
   7  -6   0  725.63   81.79 
   7  -6   0  681.03   78.39 
   7  -6   0  786.52   87.49 
  -7  -6   0  832.52   74.49 
   7  -6   0  779.12   81.09 
   7  -6   0  822.42   81.49 
   7  -6   0  782.02   70.59 
  -7  -6   0  752.42   71.79 
  -7   6   0  677.33   78.09 
  -7   6   0  769.12   85.99 
  -7   6   0  561.94   74.99 
  -7   6   0  714.43   83.59 
  -7   6   0  782.92   86.49 
  -7   6   0  766.52   72.89 
   7   6   0  675.23   65.49 
   7   6   0  698.63   64.19 
  -7   6   0  774.52   76.99 
  -7   6   0  717.73   81.89 
  -7   6   0  747.83   83.29 
  -7   6   0  728.63   71.39 
  -7   6   0  753.62   83.79 
  -8  -6   0   41.40   25.30 
   8  -6   0   19.80   21.90 
  -8  -6   0    8.30   19.80 
  -8  -6   0   36.80   22.30 
  -8  -6   0   27.80   21.20 
   8  -6   0   45.30   24.30 
  -8  -6   0   -2.50   26.20 
   8  -6   0   46.10   21.00 
   8  -6   0  -13.40   16.10 
   8  -6   0   26.50   20.10 
   8  -6   0  -16.30   14.80 
   8  -6   0   25.70   19.70 
  -8  -6   0   23.80   19.60 
   8  -6   0   17.60   18.70 
  -8   6   0   -1.10   18.20 
  -8   6   0   56.09   25.80 
  -8   6   0   29.90   21.00 
  -8   6   0   44.30   22.20 
  -8   6   0   30.80   19.90 
  -8   6   0    4.10   18.90 
  -8   6   0   54.39   17.40 
  -8   6   0   41.40   19.50 
  -8   6   0   18.40   19.00 
   8   6   0   16.90   15.30 
  -8   6   0   38.80   21.40 
  -8   6   0    5.90   18.20 
   0  -7   0   -9.30    7.10 
   0  -7   0    2.70    7.70 
   0  -7   0   -3.80    9.60 
   0  -7   0   -0.90    8.60 
   0  -7   0   14.00   11.90 
   0  -7   0    3.60    6.00 
   0  -7   0  -18.60    7.30 
   0  -7   0   -0.70    3.80 
   0  -7   0   13.40    9.90 
   0  -7   0  -13.90    7.80 
   0  -7   0   -4.60   11.80 
   0  -7   0   -6.50   11.20 
   0   7   0    6.20    8.30 
   0   7   0   18.80   12.00 
   0   7   0   -7.90    8.00 
   0   7   0  -11.70   10.90 
   0   7   0  -12.20   13.00 
   0   7   0   -2.90   10.30 
   0   7   0    1.70    4.90 
   0   7   0    1.00    9.40 
   0   7   0   12.70   12.90 
   0   7   0  -10.40    9.40 
   0   7   0   -3.10    9.00 
   0   7   0  -18.00   13.30 
   1  -7   0    0.80    9.30 
   1  -7   0   12.20    6.10 
  -1  -7   0    7.00    5.30 
   1  -7   0   -3.30    9.70 
   1  -7   0    7.40   11.60 
   1  -7   0   12.20   12.30 
   1  -7   0   -5.60    9.50 
  -1  -7   0    4.20    9.80 
   1  -7   0   -4.00    8.20 
  -1  -7   0    4.30    8.90 
  -1  -7   0   -1.10    5.30 
   1  -7   0    6.10   13.10 
  -1  -7   0  -12.10    8.90 
  -1  -7   0  -16.80    8.70 
  -1  -7   0   21.40   13.60 
  -1  -7   0    4.60    8.50 
  -1  -7   0    7.10    6.50 
   1  -7   0    7.10   12.80 
  -1  -7   0    2.80    9.30 
  -1  -7   0    8.40    9.90 
  -1  -7   0   -6.50    6.90 
   1  -7   0   -1.10    7.20 
  -1  -7   0    1.20    4.90 
   1  -7   0   -1.80    9.70 
  -1   7   0   14.10   13.80 
   1   7   0   14.20   12.50 
  -1   7   0   22.30   13.30 
  -1   7   0    6.90    9.40 
   1   7   0    3.90   12.00 
   1   7   0  -11.30    7.80 
  -1   7   0   -1.70   12.80 
  -1   7   0    5.70   10.60 
  -1   7   0    3.30    9.00 
  -1   7   0   22.70   16.20 
  -1   7   0    4.30   10.90 
   1   7   0   21.60   10.50 
  -1   7   0    0.40   12.10 
   1   7   0    1.10    6.20 
  -1   7   0   -2.90   10.70 
  -1   7   0  -12.40    7.50 
   1   7   0   21.00   13.00 
  -1   7   0   -0.60   10.60 
  -1   7   0    4.60   10.60 
  -1   7   0  -23.60   13.10 
   1   7   0    1.40   14.30 
  -2  -7   0   45.60   12.50 
   2  -7   0   21.30   15.20 
  -2  -7   0   37.10   14.20 
  -2  -7   0   66.79   13.20 
   2  -7   0   50.19   17.50 
  -2  -7   0   60.49   17.60 
  -2  -7   0   28.40   11.40 
   2  -7   0   51.99   14.50 
   2  -7   0   44.60    8.50 
  -2  -7   0   71.89   20.50 
  -2  -7   0   44.80   13.90 
   2  -7   0   54.49   19.00 
  -2  -7   0   57.89   19.20 
   2  -7   0   39.40   16.10 
   2  -7   0   29.40   16.10 
  -2  -7   0   40.70   17.90 
  -2  -7   0   41.80   14.20 
   2  -7   0   50.99   14.10 
  -2  -7   0   60.79   14.30 
   2  -7   0   15.40   11.50 
   2  -7   0   36.20   16.30 
   2  -7   0   38.10   10.00 
  -2   7   0   50.19   18.50 
   2   7   0   19.40   13.50 
  -2   7   0   57.69   23.30 
  -2   7   0   27.20   16.10 
   2   7   0   57.69   20.00 
  -2   7   0   28.70   17.40 
   2   7   0   70.09   18.90 
   2   7   0   46.80   17.00 
  -2   7   0   45.60   17.20 
  -2   7   0   21.00   14.50 
  -2   7   0   66.59   18.70 
  -2   7   0   50.59   19.10 
   2   7   0   52.49   20.70 
  -2   7   0   51.29   17.00 
  -2   7   0   55.69   18.50 
   2   7   0   55.29   14.40 
  -2   7   0   67.39   21.10 
  -2   7   0   36.60   16.30 
   3  -7   0   43.60   17.90 
  -3  -7   0   42.60   18.50 
   3  -7   0   50.99   18.60 
   3  -7   0   27.30   17.50 
   3  -7   0   49.80   15.30 
  -3  -7   0   63.89   21.60 
   3  -7   0   66.19   13.70 
  -3  -7   0   30.70   11.80 
   3  -7   0   48.90   18.90 
   3  -7   0   30.00   17.10 
  -3  -7   0   44.50   12.60 
  -3  -7   0   -2.60   15.00 
   3  -7   0   54.29   15.30 
   3  -7   0   40.20   18.00 
   3  -7   0   80.59   20.00 
  -3  -7   0   77.39   21.60 
  -3  -7   0   61.29   20.30 
   3  -7   0   34.60   15.40 
   3  -7   0   66.89   12.30 
  -3  -7   0   67.09   15.30 
  -3   7   0   49.90   17.90 
  -3   7   0   59.29   19.30 
   3   7   0   39.90   15.60 
  -3   7   0   65.09   18.70 
   3   7   0   67.09   22.30 
  -3   7   0   19.00   15.30 
  -3   7   0   38.30   17.10 
  -3   7   0   58.29   20.10 
  -3   7   0   49.99   16.90 
   3   7   0    5.10   12.90 
  -3   7   0   58.59   20.20 
  -3   7   0   22.80   14.50 
  -3   7   0   40.80   15.40 
   3   7   0   58.69   18.10 
  -3   7   0   31.50   15.20 
   3   7   0   53.79   17.10 
   4  -7   0  240.18   36.60 
   4  -7   0  217.98   39.20 
   4  -7   0  208.28   32.70 
  -4  -7   0  233.18   36.50 
   4  -7   0  213.38   30.70 
  -4  -7   0  240.18   39.30 
   4  -7   0  247.68   27.10 
   4  -7   0  178.78   34.60 
  -4  -7   0  293.27   32.60 
   4  -7   0  227.68   37.70 
   4  -7   0  254.17   42.40 
  -4  -7   0  196.18   34.10 
  -4  -7   0  244.58   33.90 
   4  -7   0  162.58   29.50 
  -4  -7   0  231.28   35.70 
   4  -7   0  179.38   34.50 
   4  -7   0  158.88   25.60 
   4  -7   0  173.18   32.10 
  -4   7   0  236.78   36.90 
  -4   7   0  186.58   32.50 
   4   7   0  214.68   34.90 
  -4   7   0  229.88   37.30 
  -4   7   0  205.98   36.50 
  -4   7   0  199.28   35.30 
   4   7   0  257.57   30.00 
  -4   7   0  296.47   41.00 
   4   7   0  178.28   32.70 
   4   7   0  197.48   27.80 
   4   7   0  181.58   30.80 
  -4   7   0  225.18   37.00 
  -4   7   0  244.68   37.60 
  -4   7   0  186.68   32.50 
  -4   7   0  117.79   28.80 
  -4   7   0  183.58   28.80 
   5  -7   0  376.96   48.50 
  -5  -7   0  399.56   49.10 
  -5  -7   0  364.46   50.69 
   5  -7   0  436.16   53.99 
  -5  -7   0  458.55   49.80 
   5  -7   0  401.16   53.09 
  -5  -7   0  449.06   54.69 
   5  -7   0  334.17   49.10 
   5  -7   0  428.56   42.70 
   5  -7   0  351.76   46.70 
   5  -7   0  380.36   53.79 
   5  -7   0  405.96   58.69 
  -5  -7   0  334.77   47.60 
   5  -7   0  383.66   44.40 
  -5  -7   0  348.17   46.70 
   5  -7   0  458.75   55.09 
   5  -7   0  360.66   50.59 
   5  -7   0  420.06   48.80 
  -5   7   0  312.47   48.50 
  -5   7   0  320.87   48.10 
  -5   7   0  398.06   55.19 
   5   7   0  469.55   50.39 
   5   7   0  389.56   50.29 
  -5   7   0  275.47   46.30 
  -5   7   0  384.96   52.79 
   5   7   0  360.36   44.30 
  -5   7   0  353.66   48.40 
  -5   7   0  398.26   53.79 
  -5   7   0  455.95   49.30 
  -5   7   0  343.17   45.40 
   5   7   0  348.77   50.59 
  -5   7   0  478.45   57.99 
  -5   7   0  465.65   53.39 
  -6  -7   0  724.23   63.49 
   6  -7   0  671.03   75.49 
   6  -7   0  653.03   72.09 
  -6  -7   0  644.64   90.69 
  -6  -7   0  820.72   70.79 
   6  -7   0  705.73   63.79 
   6  -7   0  696.13   77.39 
   6  -7   0  730.03   77.69 
   6  -7   0  861.01   85.49 
   6  -7   0  588.14   70.29 
   6  -7   0  884.91   88.99 
   6  -7   0  696.13   76.59 
  -6  -7   0  722.43   78.59 
   6  -7   0  604.54   82.49 
   6  -7   0  721.43   61.49 
  -6   7   0  611.94   71.49 
   6   7   0  722.93   65.39 
  -6   7   0  731.93   66.59 
  -6   7   0  690.53   63.79 
  -6   7   0  574.44   75.89 
  -6   7   0  615.94   74.49 
  -6   7   0  792.62   73.99 
  -6   7   0  663.43   66.39 
  -6   7   0  724.13   79.79 
   6   7   0  643.94   67.79 
  -6   7   0  821.32   84.39 
  -6   7   0  649.74   76.99 
  -6   7   0  562.94   74.39 
  -7  -7   0  158.38   45.20 
   7  -7   0  196.38   38.50 
   7  -7   0  212.88   40.10 
  -7  -7   0  159.78   36.40 
   7  -7   0  233.08   49.00 
   7  -7   0   89.69   28.20 
   7  -7   0  138.59   30.90 
   7  -7   0  167.78   36.70 
   7  -7   0  126.19   32.60 
   7  -7   0  170.08   36.80 
   7  -7   0  215.98   39.10 
   7  -7   0  154.28   39.70 
  -7  -7   0  119.89   31.30 
   7  -7   0  153.58   27.90 
  -7   7   0   95.99   28.80 
  -7   7   0  149.88   35.60 
  -7   7   0  119.69   34.20 
  -7   7   0  147.09   36.40 
  -7   7   0  141.29   33.90 
  -7   7   0  125.29   32.80 
  -7   7   0  170.98   32.60 
  -7   7   0  125.49   36.30 
  -7   7   0  126.49   35.40 
   0  -8   0 1594.94  126.29 
   0  -8   0 1818.32  120.29 
   0  -8   0 1618.94  121.49 
   0  -8   0 1635.84  115.29 
   0  -8   0 1522.25  113.99 
   0  -8   0 1590.44  126.49 
   0  -8   0 1515.25  122.69 
   0  -8   0 1558.44  124.99 
   0   8   0 1635.84  116.49 
   0   8   0 1639.64  125.09 
   0   8   0 1685.93  134.19 
   0   8   0 1676.23  125.79 
   0   8   0 1717.83  125.99 
   0   8   0 1331.47  118.19 
   0   8   0 1502.25  127.09 
   1  -8   0  613.84   69.99 
   1  -8   0  706.33   62.59 
  -1  -8   0  630.44   68.89 
   1  -8   0  526.15   67.49 
  -1  -8   0  720.33   59.99 
  -1  -8   0  572.34   66.89 
   1  -8   0  685.73   60.09 
  -1  -8   0  449.95   62.99 
   1  -8   0  756.02   55.99 
   1  -8   0  667.33   70.69 
  -1  -8   0  609.44   55.19 
  -1  -8   0  622.24   58.59 
   1  -8   0  687.33   55.49 
   1  -8   0  589.84   67.19 
   1  -8   0  713.43   57.39 
  -1   8   0  665.53   70.49 
  -1   8   0  666.33   70.19 
  -1   8   0  615.74   67.99 
  -1   8   0  654.73   73.69 
  -1   8   0  639.94   66.89 
  -1   8   0  603.04   81.89 
  -1   8   0  742.93   64.59 
   1   8   0  605.14   80.09 
  -1   8   0  685.53   75.19 
  -1   8   0  690.23   75.49 
  -1   8   0  632.04   57.69 
   1   8   0  690.73   70.19 
   1   8   0  651.23   69.29 
   1   8   0  683.83   58.39 
   1   8   0  639.74   74.19 
   1   8   0  722.03   63.49 
  -1   8   0  703.93   64.59 
  -2  -8   0  348.37   47.50 
   2  -8   0  368.26   49.99 
   2  -8   0  364.96   53.29 
   2  -8   0  295.87   38.60 
   2  -8   0  303.67   43.60 
   2  -8   0  321.17   44.40 
  -2  -8   0  375.46   47.90 
  -2  -8   0  414.56   51.79 
  -2  -8   0  367.26   38.20 
  -2  -8   0  373.16   40.50 
   2  -8   0  347.67   45.20 
   2  -8   0  365.26   48.50 
   2  -8   0  306.47   35.90 
  -2  -8   0  337.67   39.60 
   2  -8   0  395.96   50.69 
   2   8   0  298.67   48.40 
  -2   8   0  354.76   50.39 
   2   8   0  292.97   43.30 
  -2   8   0  316.97   45.10 
   2   8   0  268.37   42.80 
  -2   8   0  384.36   48.70 
   2   8   0  297.87   46.10 
  -2   8   0  358.36   46.00 
  -2   8   0  262.07   47.70 
  -2   8   0  489.25   52.79 
  -2   8   0  305.87   46.40 
  -2   8   0  354.76   47.10 
  -2   8   0  303.67   42.40 
  -2   8   0  305.97   44.80 
   2   8   0  347.77   46.10 
   3  -8   0  169.08   31.30 
   3  -8   0  141.29   31.00 
   3  -8   0  135.39   32.60 
  -3  -8   0  193.08   35.20 
   3  -8   0  125.69   28.30 
   3  -8   0  167.58   29.40 
  -3  -8   0  156.78   32.80 
   3  -8   0  132.99   32.60 
   3  -8   0  129.99   32.50 
  -3  -8   0  167.78   25.10 
  -3  -8   0  144.39   31.50 
   3  -8   0  170.58   27.20 
  -3  -8   0  182.28   31.60 
   3  -8   0  157.88   25.90 
   3  -8   0  200.58   33.20 
  -3   8   0  159.68   34.00 
   3   8   0  214.78   36.60 
  -3   8   0  172.28   33.20 
   3   8   0  126.39   27.70 
  -3   8   0  143.09   29.70 
  -3   8   0  199.68   34.00 
  -3   8   0  211.08   35.40 
  -3   8   0  105.59   28.50 
  -3   8   0  204.28   37.10 
  -3   8   0  166.98   34.50 
  -3   8   0  179.88   32.40 
  -3   8   0  101.69   26.70 
   3   8   0  119.59   28.80 
  -4  -8   0  128.49   31.80 
   4  -8   0  187.88   41.60 
   4  -8   0  201.58   36.60 
   4  -8   0  198.08   40.30 
   4  -8   0  146.29   28.00 
  -4  -8   0  224.18   40.50 
   4  -8   0  181.48   33.90 
   4  -8   0  189.28   36.90 
  -4  -8   0  163.08   34.00 
   4  -8   0  171.38   33.00 
  -4  -8   0  167.48   34.90 
   4  -8   0  153.08   29.50 
   4  -8   0  161.18   30.90 
   4  -8   0  176.48   37.40 
  -4  -8   0  119.89   29.20 
   4   8   0  201.38   38.20 
  -4   8   0  194.58   35.40 
  -4   8   0  171.58   33.30 
  -4   8   0  139.89   32.90 
  -4   8   0  209.28   37.10 
   4   8   0  198.98   36.40 
  -4   8   0  188.28   34.60 
   4   8   0  212.28   35.20 
  -4   8   0  190.48   35.70 
  -4   8   0  185.08   34.70 
  -4   8   0  120.99   29.60 
  -4   8   0  170.88   31.90 
   5  -8   0  177.98   33.00 
   5  -8   0  157.98   32.80 
   5  -8   0  255.67   41.10 
   5  -8   0  110.59   29.30 
   5  -8   0  250.57   48.00 
   5  -8   0  231.78   38.30 
   5  -8   0  195.28   38.20 
   5  -8   0  213.08   39.10 
   5  -8   0  186.78   41.00 
  -5  -8   0  178.18   37.00 
  -5  -8   0  259.97   42.50 
   5  -8   0  143.19   32.90 
  -5  -8   0  186.48   36.80 
  -5  -8   0  229.38   38.00 
  -5   8   0  150.58   35.40 
  -5   8   0  188.48   35.60 
  -5   8   0  244.68   41.60 
  -5   8   0  162.48   35.30 
  -5   8   0  179.78   36.20 
  -5   8   0  237.98   41.10 
  -5   8   0  197.18   39.00 
  -5   8   0  236.58   39.50 
   5   8   0  249.08   42.60 
  -5   8   0  215.08   40.20 
   5   8   0  224.88   36.90 
   5   8   0  258.77   41.60 
  -6  -8   0  339.57   64.79 
   6  -8   0  416.76   55.19 
   6  -8   0  382.36   57.19 
  -6  -8   0  476.75   62.99 
   6  -8   0  368.36   56.39 
  -6  -8   0  580.74   66.99 
   6  -8   0  338.07   53.09 
   6  -8   0  386.86   57.59 
   6  -8   0  482.65   63.69 
   6  -8   0  494.65   72.29 
   6  -8   0  388.16   52.59 
   6  -8   0  334.47   54.49 
   6   8   0  395.76   52.49 
  -6   8   0  499.45   63.99 
  -6   8   0  362.96   56.59 
  -6   8   0  477.35   55.19 
  -6   8   0  342.67   55.99 
  -6   8   0  337.17   54.09 
  -6   8   0  519.65   60.09 
  -6   8   0  473.55   66.09 
  -6   8   0  476.95   59.69 
  -6   8   0  378.66   57.69 
   0  -9   0    3.10   13.00 
   0  -9   0    8.10   15.00 
   0  -9   0  -13.90   11.90 
   0  -9   0    3.40   14.50 
   0  -9   0   -8.00   15.50 
   0  -9   0   -9.00   11.00 
   0  -9   0   -0.90   16.10 
   0   9   0   -8.10   13.80 
   0   9   0   18.90   16.30 
   0   9   0  -10.40   18.60 
   0   9   0  -16.10   10.80 
   0   9   0   11.60   13.40 
   0   9   0  -15.10   12.40 
   1  -9   0   11.70   15.80 
   1  -9   0  -12.60   12.80 
  -1  -9   0   23.70   16.30 
  -1  -9   0  -11.20   12.30 
   1  -9   0   29.50   18.80 
   1  -9   0   20.60   14.70 
   1  -9   0    5.10   17.00 
   1  -9   0   13.90   17.00 
  -1  -9   0   11.60   15.50 
  -1  -9   0   38.90   21.80 
  -1  -9   0   37.10   20.90 
   1  -9   0   29.90   19.70 
  -1   9   0   17.90   22.70 
  -1   9   0   34.00   19.10 
  -1   9   0   39.30   20.90 
  -1   9   0   33.40   20.00 
  -1   9   0    9.90   13.70 
   1   9   0   17.50   15.90 
  -1   9   0   15.30   15.00 
  -1   9   0   16.20   15.40 
  -1   9   0   29.90   19.90 
   1   9   0   24.40   14.50 
   1   9   0  -11.40   13.70 
  -1   9   0   41.50   16.80 
   1   9   0   25.70   17.10 
   2  -9   0   33.40   19.00 
   2  -9   0   31.60   21.00 
   2  -9   0   38.70   20.20 
  -2  -9   0   14.30   17.00 
  -2  -9   0    5.40   15.60 
  -2  -9   0   10.10   15.50 
  -2  -9   0   31.90   20.70 
   2  -9   0   28.20   21.00 
  -2  -9   0   13.30   13.40 
   2  -9   0   34.30   17.60 
   2  -9   0   65.19   21.90 
   2  -9   0   -7.90   13.00 
   2  -9   0   12.90   18.90 
  -2   9   0   21.50   15.40 
  -2   9   0   10.70   14.60 
   2   9   0   10.40   16.20 
   2   9   0   19.60   19.30 
   2   9   0   45.70   19.80 
  -2   9   0   43.90   19.80 
  -2   9   0   22.00   17.10 
  -2   9   0   12.60   20.50 
   2   9   0   32.80   17.80 
  -2   9   0    3.00   16.40 
  -2   9   0   35.20   18.00 
  -2   9   0   23.10   17.20 
  -2   9   0   44.70   19.30 
  -2   9   0   33.10   19.30 
   3  -9   0   66.99   25.00 
   3  -9   0   11.60   15.70 
   3  -9   0   27.80   20.80 
  -3  -9   0   12.70   19.50 
  -3  -9   0   40.30   20.00 
   3  -9   0    5.70   19.40 
  -3  -9   0   13.90   19.80 
   3  -9   0   63.59   21.00 
   3  -9   0   23.00   18.50 
  -3  -9   0   37.20   21.70 
   3  -9   0   34.10   19.20 
   3  -9   0   22.10   21.80 
  -3  -9   0   42.40   21.80 
   3   9   0    3.70   16.90 
   3   9   0   42.10   21.00 
  -3   9   0    5.70   17.30 
  -3   9   0   41.00   20.70 
  -3   9   0   29.20   19.40 
  -3   9   0   30.40   19.90 
  -3   9   0   14.70   17.00 
  -3   9   0   37.70   26.00 
  -3   9   0   28.70   17.30 
  -3   9   0   32.30   19.10 
  -3   9   0   70.99   24.30 
   3   9   0    4.30   15.70 
  -4  -9   0   15.50   20.40 
   4  -9   0   -4.80   16.30 
   4  -9   0   15.60   17.50 
   4  -9   0    0.20   19.30 
  -4  -9   0   -0.60   16.40 
  -4  -9   0   -8.10   14.00 
   4  -9   0   12.20   17.90 
  -4  -9   0   14.30   20.60 
  -4  -9   0    3.70   17.30 
   4  -9   0    5.40   17.20 
   4  -9   0   17.30   18.80 
   4  -9   0   31.80   20.90 
   4  -9   0    6.50   19.20 
  -4   9   0   11.70   18.20 
   4   9   0   -2.50   13.20 
   4   9   0   23.50   15.80 
  -4   9   0  -15.70   17.00 
  -4   9   0   25.30   19.70 
  -4   9   0    8.50   15.70 
  -4   9   0    8.40   15.80 
   4   9   0   -3.10   16.10 
  -4   9   0   19.90   18.90 
  -4   9   0    8.40   19.80 
  -4   9   0   23.00   19.30 
  -4   9   0    9.30   15.60 
   5  -9   0  566.24   75.79 
   5  -9   0  685.43   80.39 
   5  -9   0  543.05   71.39 
   5  -9   0  583.64   72.69 
   5  -9   0  450.15   67.19 
   5  -9   0  572.34   77.09 
   5  -9   0  560.94   69.29 
  -5  -9   0  573.34   71.09 
   5  -9   0  629.54   70.99 
   5  -9   0  478.75   73.49 
  -5  -9   0  525.85   65.39 
  -5  -9   0  556.74   70.69 
   5   9   0  526.55   64.79 
  -5   9   0  485.85   67.19 
   5   9   0  564.94   71.09 
  -5   9   0  528.05   69.19 
  -5   9   0  578.24   71.99 
   5   9   0  706.23   80.09 
  -5   9   0  518.25   66.99 
  -5   9   0  551.64   66.29 
  -5   9   0  651.03   76.89 
  -5   9   0  563.44   71.89 
  -5   9   0  447.76   67.69 
  -5   9   0  501.95   68.29 
   0 -10   0 1285.47  107.99 
   0 -10   0 1232.38  111.59 
   0 -10   0 1295.67  115.19 
   0 -10   0 1278.47  113.79 
   0 -10   0 1167.88  116.79 
   0  10   0 1417.46  114.89 
   0  10   0 1290.07  116.39 
   0  10   0 1386.76  113.19 
   0  10   0 1356.56  113.09 
   1 -10   0   10.10   21.00 
   1 -10   0   11.10   16.30 
  -1 -10   0  -29.30   15.80 
  -1 -10   0   22.60   23.30 
   1 -10   0    0.70   16.70 
  -1 -10   0   -4.40   14.30 
   1 -10   0  -12.70   16.10 
   1 -10   0   17.50   17.70 
  -1 -10   0  -21.20   13.70 
  -1 -10   0    1.80   17.20 
   1 -10   0   19.00   19.50 
  -1  10   0   -4.20   14.50 
  -1  10   0    8.30   13.90 
   1  10   0  -17.90   11.20 
   1  10   0   -0.40   14.50 
  -1  10   0   -0.40   15.20 
  -1  10   0  -12.70   13.90 
  -1  10   0    8.50   15.40 
   1  10   0  -16.20   14.90 
   1  10   0   15.20   15.10 
  -2 -10   0  329.47   55.19 
  -2 -10   0  347.87   56.39 
   2 -10   0  434.16   58.89 
   2 -10   0  423.66   54.59 
   2 -10   0  402.96   59.69 
  -2 -10   0  431.16   59.39 
  -2 -10   0  481.15   69.29 
   2 -10   0  449.26   68.49 
   2 -10   0  398.76   59.29 
   2 -10   0  394.46   61.59 
  -2 -10   0  391.66   56.19 
   2 -10   0  403.06   59.99 
   2  10   0  466.35   62.39 
  -2  10   0  385.06   61.79 
  -2  10   0  444.76   55.49 
  -2  10   0  458.85   61.09 
  -2  10   0  358.06   80.49 
  -2  10   0  373.36   57.49 
  -2  10   0  414.86   57.69 
  -2  10   0  518.05   65.29 
   2  10   0  400.76   58.49 
   2  10   0  604.34   74.39 
   3 -10   0  -17.50   20.30 
   3 -10   0   20.80   20.60 
   3 -10   0   25.00   20.00 
  -3 -10   0  -11.70   13.50 
  -3 -10   0   -1.10   17.40 
  -3 -10   0   11.30   23.60 
  -3 -10   0  -14.90   13.40 
   3 -10   0   16.10   20.10 
   3 -10   0    6.00   18.50 
  -3 -10   0   -2.60   18.70 
   3 -10   0    2.30   18.10 
   3 -10   0    1.80   18.30 
  -3  10   0   34.90   23.30 
  -3  10   0  -15.50   15.70 
  -3  10   0   -9.90   13.80 
  -3  10   0   -0.50   15.70 
  -3  10   0   -3.80   16.00 
  -3  10   0   -3.40   17.20 
   3  10   0  -27.50   12.80 
  -3  10   0   20.20   17.90 
   3  10   0   -6.40   16.50 
   3  10   0    1.60   18.40 
  -3  10   0   -8.20   15.90 
 -10   0   1   -9.60   14.70 
 -10   0   1   -5.50   14.10 
 -10   0   1   20.90   22.40 
  10   0  -1    6.30   17.60 
 -10   0   1   -5.00   13.80 
  10   0  -1   -5.10   15.00 
 -10   0   1  -36.50   12.10 
  10   0  -1    2.40   16.70 
  10   0  -1    6.00   15.40 
 -10   0   1   12.10   16.50 
 -10   0   1   -6.40   15.80 
  10   0  -1   27.50   21.50 
 -10   0   1   -1.20   17.50 
  10   0  -1   12.10   17.80 
 -10   0   1   -7.90   14.30 
  10   0  -1   18.90   16.70 
   9   0  -1  672.13   72.59 
   9   0  -1  755.42   80.19 
  -9   0   1  636.24   82.89 
  -9   0   1  716.53   65.09 
   9   0  -1  643.24   75.89 
  -9   0   1  491.45   73.09 
  -9   0   1  667.73   80.79 
  -9   0   1  673.43   75.89 
  -9   0   1  736.33   75.79 
   9   0  -1  533.95   70.09 
  -9   0   1  664.63   74.99 
   9   0  -1  749.13   79.89 
   9   0  -1  698.73   80.19 
   9   0  -1  798.82   79.69 
   9   0  -1  637.24   77.19 
  -9   0   1  775.82   85.29 
  -9   0   1  691.73   82.49 
   8   0  -1  -12.30    9.50 
   8   0  -1   -2.60   11.50 
   8   0  -1  -16.20   11.20 
  -8   0   1    1.00   11.20 
  -8   0   1   -3.50   11.20 
  -8   0   1    3.80    8.80 
  -8   0   1    1.80   13.30 
   8   0  -1   -4.70    9.60 
   8   0  -1   -4.90   10.10 
  -8   0   1    6.80   13.00 
  -8   0   1    3.20    9.40 
   8   0  -1   11.40   12.60 
  -8   0   1    3.00   14.50 
  -8   0   1   -7.20   11.00 
   8   0  -1    1.60   12.60 
  -8   0   1   -1.10   11.90 
   8   0  -1   -8.70   11.10 
  -8   0   1   -7.90   11.30 
   8   0  -1  -16.50    9.60 
  -8   0   1  -17.40   10.00 
   7   0  -1  150.08   27.80 
  -7   0   1  161.38   26.60 
  -7   0   1  117.59   27.30 
  -7   0   1  115.99   27.60 
  -7   0   1  116.09   21.80 
  -7   0   1  170.18   32.40 
  -7   0   1  180.68   28.60 
   7   0  -1  130.99   26.20 
  -7   0   1  126.39   28.60 
   7   0  -1  116.59   26.10 
   7   0  -1  118.39   25.80 
   7   0  -1  162.68   27.90 
   7   0  -1  165.18   28.30 
  -7   0   1  210.78   31.90 
  -7   0   1  142.89   27.30 
   7   0  -1  162.08   28.40 
   7   0  -1  164.78   17.20 
   7   0  -1  157.78   29.30 
  -7   0   1  162.88   18.20 
   7   0  -1   86.59   22.90 
   6   0  -1   -0.80    7.90 
   6   0  -1   -3.70    8.60 
  -6   0   1   -0.50    4.40 
   6   0  -1    3.60    9.30 
  -6   0   1    4.00    9.30 
   6   0  -1   -3.30    9.20 
  -6   0   1    5.20    5.30 
   6   0  -1    6.50    8.90 
  -6   0   1    2.30    9.50 
  -6   0   1    9.40   10.30 
  -6   0   1    3.00    9.70 
  -6   0   1    3.90    9.00 
   6   0  -1   -6.60    7.10 
   6   0  -1   -7.00    7.10 
   6   0  -1   -4.70    4.90 
  -6   0   1    3.10    8.50 
  -6   0   1  -11.40    6.40 
   6   0  -1   -3.30    8.90 
  -6   0   1    0.90    9.90 
  -6   0   1    0.90    6.80 
  -6   0   1   -2.60    8.40 
   6   0  -1    0.20    9.00 
   6   0  -1   -1.40    4.80 
  -6   0   1   -3.40    5.20 
   5   0  -1  320.97   33.50 
   5   0  -1  294.27   33.00 
   5   0  -1  235.08   31.30 
   5   0  -1  267.37   22.00 
   5   0  -1  298.47   34.10 
  -5   0   1  246.08   34.60 
   5   0  -1  260.07   31.70 
  -5   0   1  278.97   24.30 
   5   0  -1  189.78   28.10 
  -5   0   1  273.37   22.20 
   5   0  -1  238.78   30.40 
   5   0  -1  273.97   19.20 
  -5   0   1  282.27   22.50 
  -5   0   1  259.67   30.40 
  -5   0   1  266.17   35.10 
  -5   0   1  290.47   23.50 
   5   0  -1  236.98   32.70 
  -5   0   1  243.98   26.90 
  -5   0   1  336.57   33.80 
  -5   0   1  267.17   34.20 
  -5   0   1  257.47   31.90 
  -5   0   1  265.47   25.10 
   5   0  -1  245.48   19.90 
   5   0  -1  264.57   23.80 
  -5   0   1  225.88   31.80 
   5   0  -1  277.67   33.00 
  -5   0   1  222.48   29.40 
  -4   0   1    9.30    8.00 
  -4   0   1   -2.30    4.80 
  -4   0   1    6.00    7.40 
  -4   0   1    2.40    4.60 
  -4   0   1    9.70    6.00 
   4   0  -1   -0.80    6.90 
  -4   0   1   -4.50    4.80 
   4   0  -1    4.40    6.60 
  -4   0   1    7.50    6.20 
  -4   0   1    0.80    4.90 
  -4   0   1    4.80    7.70 
  -4   0   1    5.20    7.50 
   4   0  -1    8.60    7.60 
  -4   0   1    2.20    5.90 
   4   0  -1    9.30    7.10 
   4   0  -1   -0.40    3.10 
   4   0  -1   -1.70    6.00 
   4   0  -1    5.80    4.00 
   4   0  -1    4.50    7.30 
   4   0  -1    4.10    6.90 
  -4   0   1    1.90    7.00 
   4   0  -1    2.50    6.10 
   4   0  -1    4.70    6.70 
  -4   0   1    9.40    5.30 
  -4   0   1   -5.20    6.30 
   4   0  -1   17.30    7.00 
  -3   0   1 1058.59   77.79 
   3   0  -1 1032.70   75.49 
  -3   0   1 1055.19   75.39 
   3   0  -1 1048.20   74.39 
  -3   0   1 1080.69   75.79 
  -3   0   1 1051.59   76.89 
   3   0  -1 1072.89   70.69 
  -3   0   1 1028.80   72.39 
   3   0  -1 1076.29   75.39 
   3   0  -1 1010.70   72.59 
  -3   0   1 1031.00   72.29 
   3   0  -1 1050.19   75.49 
  -3   0   1 1070.69   74.59 
   3   0  -1 1099.49   75.39 
   3   0  -1 1106.09   76.39 
  -3   0   1  995.40   71.39 
   3   0  -1 1025.60   74.59 
   3   0  -1 1084.29   75.09 
   3   0  -1 1042.10   69.29 
  -3   0   1  994.50   74.39 
  -3   0   1 1072.89   72.59 
  -3   0   1 1059.59   76.99 
   3   0  -1 1069.79   76.89 
  -3   0   1 1076.39   75.49 
  -3   0   1 1055.19   75.49 
  -3   0   1 1034.70   74.69 
   3   0  -1  909.91   74.29 
  -3   0   1 1026.80   74.29 
   3   0  -1 1109.79   75.19 
  -3   0   1 1007.50   70.69 
  -3   0   1 1010.80   74.49 
  -3   0   1 1058.09   74.59 
  -3   0   1 1084.79   72.89 
   3   0  -1  994.00   75.59 
  -3   0   1 1087.89   75.19 
   3   0  -1 1104.29   76.19 
   2   0  -1   -3.60    2.50 
   2   0  -1    7.20    4.60 
  -2   0   1   -3.80    2.50 
   2   0  -1    0.10    3.50 
  -2   0   1   -0.10    1.90 
   2   0  -1   12.10    4.60 
   2   0  -1   23.80    6.70 
   2   0  -1    1.60    1.40 
  -2   0   1    6.70    6.10 
  -2   0   1    1.10    3.20 
   2   0  -1    1.20    3.70 
  -2   0   1    6.40    4.60 
  -2   0   1    1.60    4.20 
   2   0  -1    8.00    3.20 
  -2   0   1    5.90    4.40 
  -2   0   1    1.20    2.80 
  -2   0   1    3.60    3.20 
   2   0  -1    8.10    4.10 
   2   0  -1   -0.40    2.90 
  -2   0   1   12.30    4.80 
  -2   0   1    5.50    4.30 
  -2   0   1    6.40    2.60 
  -2   0   1   11.00    4.60 
  -2   0   1    3.80    3.20 
   2   0  -1   -2.10    3.10 
  -2   0   1    0.00    2.10 
   2   0  -1    5.60    4.30 
  -2   0   1    7.60    3.50 
   2   0  -1    5.90    3.30 
  -2   0   1   -1.10    3.50 
   2   0  -1   -4.20    2.30 
  -2   0   1    5.20    4.20 
  -2   0   1    6.20    4.00 
   2   0  -1    7.00    4.00 
  -2   0   1    1.90    3.40 
  -2   0   1    8.00    4.00 
   2   0  -1   -0.70    3.50 
  -2   0   1    7.30    3.80 
   2   0  -1   -0.20    3.80 
  -2   0   1    6.70    4.10 
  -2   0   1   12.00    5.10 
  -2   0   1   -4.10    2.80 
   2   0  -1    5.40    2.10 
   2   0  -1   14.00    5.70 
  -1   0   1  286.97   21.60 
  -1   0   1  339.67   21.60 
  -1   0   1  311.47   22.00 
  -1   0   1  298.07   21.90 
  -1   0   1  320.17   21.80 
  -1   0   1  291.57   21.50 
  -1   0   1  307.97   22.60 
  -1   0   1  290.57   22.20 
  -1   0   1  289.67   21.70 
  -1   0   1  308.77   22.30 
  -1   0   1  284.37   21.90 
  -1   0   1  294.77   21.50 
  -1   0   1  309.77   22.30 
  -1   0   1  245.18   21.20 
  -1   0   1  296.87   20.10 
  -1   0   1  300.97   21.70 
  -1   0   1  286.47   21.90 
  -1   0  -1 2403.66  159.28 
  -1   0  -1 2457.35  158.58 
  -1   0  -1 2402.16  158.48 
  -1   0  -1 2530.15  158.38 
  -1   0  -1 2322.07  159.08 
  -1   0  -1 2577.54  158.88 
  -1   0  -1 2350.46  158.48 
  -1   0  -1 2437.66  159.58 
  -1   0  -1 2443.36  156.78 
  -1   0  -1 2345.27  159.38 
  -1   0  -1 2533.45  158.38 
  -1   0  -1 2427.66  159.18 
  -1   0  -1 2401.86  159.58 
  -1   0  -1 2397.36  157.48 
   1   0   1 2007.90  158.68 
  -1   0  -1 2297.87  159.08 
  -1   0  -1 2495.45  160.08 
  -1   0  -1 2461.55  158.68 
  -1   0  -1 2425.56  158.38 
  -1   0  -1 2382.86  158.58 
  -1   0  -1 2462.65  158.38 
  -2   0  -1    4.00    4.70 
   2   0   1    5.60    3.80 
   2   0   1    2.60    3.90 
  -2   0  -1    6.50    3.80 
   2   0   1    3.30    2.70 
  -2   0  -1    9.50    5.20 
   2   0   1    4.10    3.80 
   2   0   1    5.20    3.80 
  -2   0  -1    2.30    3.80 
  -2   0  -1    5.20    2.60 
   2   0   1    2.20    4.20 
   2   0   1    5.90    4.30 
  -2   0  -1   -2.60    2.90 
   2   0   1    2.00    2.50 
   2   0   1    4.30    4.10 
  -2   0  -1    2.10    3.50 
   2   0   1    4.00    4.10 
  -2   0  -1    5.30    3.60 
   2   0   1    5.50    3.70 
  -2   0  -1    2.30    3.90 
   2   0   1    6.00    3.80 
  -2   0  -1    0.50    3.00 
  -2   0  -1    4.20    3.10 
  -2   0  -1    3.10    3.50 
  -2   0  -1    2.60    3.90 
  -2   0  -1    7.60    4.20 
  -2   0  -1   14.00    4.70 
  -2   0  -1   -0.60    2.90 
   2   0   1    3.90    3.70 
   2   0   1    4.30    3.70 
   2   0   1    4.20    3.60 
   2   0   1    4.80    3.10 
  -2   0  -1    7.50    4.80 
   2   0   1   23.20    7.50 
  -2   0  -1    2.00    2.70 
   2   0   1    2.60    3.90 
   2   0   1   -0.90    3.50 
   2   0   1    2.80    3.50 
  -2   0  -1    3.10    3.00 
  -2   0  -1    6.60    4.50 
  -2   0  -1    4.00    3.50 
   2   0   1    4.20    3.10 
  -2   0  -1   -0.50    2.80 
   2   0   1   10.60    3.80 
   2   0   1   -1.70    3.00 
   3   0   1  462.45   32.60 
   3   0   1  415.56   34.80 
   3   0   1  432.16   34.60 
   3   0   1  465.75   33.30 
  -3   0  -1  505.85   32.40 
  -3   0  -1  446.56   31.50 
   3   0   1  467.65   39.70 
   3   0   1  446.26   36.60 
  -3   0  -1  464.75   35.70 
  -3   0  -1  454.35   36.00 
  -3   0  -1  424.56   29.30 
  -3   0  -1  440.66   37.20 
   3   0   1  426.96   36.20 
   3   0   1  444.16   34.40 
   3   0   1  452.95   36.20 
   3   0   1  452.35   32.50 
  -3   0  -1  420.36   30.90 
  -3   0  -1  460.15   34.90 
  -3   0  -1  414.66   33.40 
  -3   0  -1  378.46   37.10 
   3   0   1  428.76   35.30 
   3   0   1  415.06   35.90 
  -3   0  -1  395.96   34.80 
  -3   0  -1  465.25   35.00 
  -3   0  -1  451.05   36.10 
  -3   0  -1  484.35   35.90 
  -3   0  -1  417.76   35.20 
   3   0   1  459.15   36.00 
   3   0   1  421.56   32.40 
  -3   0  -1  443.46   34.80 
  -3   0  -1  413.86   35.30 
  -3   0  -1  433.06   32.00 
  -3   0  -1  413.56   34.80 
   3   0   1  492.55   36.80 
   3   0   1  422.06   30.40 
  -3   0  -1  369.26   33.80 
   3   0   1  461.25   35.50 
   3   0   1  423.66   32.50 
   4   0   1   -4.30    6.10 
   4   0   1   -1.50    5.40 
  -4   0  -1    6.70    7.70 
  -4   0  -1   -1.90    3.30 
  -4   0  -1    2.40    6.80 
  -4   0  -1    5.40    6.60 
   4   0   1   -1.50    6.10 
   4   0   1    2.30    4.20 
  -4   0  -1    5.20    6.60 
  -4   0  -1   -0.30    7.40 
   4   0   1   -8.60    5.00 
  -4   0  -1    2.50    3.80 
  -4   0  -1    4.30    8.00 
   4   0   1    5.20    3.90 
  -4   0  -1  -11.80    3.70 
  -4   0  -1   -2.30    3.90 
   4   0   1   -5.70    6.30 
   4   0   1   -0.90    6.30 
   4   0   1    4.10    4.90 
   4   0   1   -0.60    5.40 
   4   0   1    4.00    5.00 
  -4   0  -1    7.90    6.10 
   4   0   1  -11.10    5.40 
  -4   0  -1    1.90    6.70 
   4   0   1    3.00    5.00 
  -4   0  -1   -1.70    4.90 
   4   0   1   -3.40    5.10 
   4   0   1    9.00    7.10 
  -4   0  -1    2.80    7.10 
   4   0   1    0.80    3.30 
   5   0   1  287.47   36.90 
  -5   0  -1  404.56   33.30 
   5   0   1  380.16   40.20 
  -5   0  -1  344.07   28.60 
  -5   0  -1  394.86   44.30 
   5   0   1  363.06   30.60 
   5   0   1  333.17   39.60 
   5   0   1  361.06   28.40 
  -5   0  -1  346.17   42.70 
  -5   0  -1  380.26   34.60 
   5   0   1  299.77   36.40 
  -5   0  -1  368.16   42.60 
   5   0   1  300.77   37.10 
   5   0   1  383.96   31.90 
  -5   0  -1  393.26   41.40 
   5   0   1  384.36   31.30 
  -5   0  -1  392.56   35.90 
  -5   0  -1  351.66   33.10 
   5   0   1  384.96   28.00 
  -5   0  -1  345.67   27.30 
   5   0   1  327.07   36.80 
  -5   0  -1  403.66   33.20 
  -5   0  -1  390.96   30.30 
   5   0   1  377.76   40.70 
   5   0   1  347.77   38.50 
   5   0   1  391.46   26.70 
  -5   0  -1  382.86   40.70 
  -5   0  -1  419.76   39.50 
   6   0   1   -0.90    9.90 
  -6   0  -1    3.50    8.70 
   6   0   1   -1.40    3.10 
  -6   0  -1    2.70    9.10 
  -6   0  -1    5.50   10.20 
  -6   0  -1   12.00   11.00 
  -6   0  -1   -9.70    5.60 
   6   0   1   -5.30    7.40 
  -6   0  -1   -5.90    5.00 
   6   0   1   -7.20    7.60 
  -6   0  -1   -8.10    6.30 
   6   0   1  -10.10    7.00 
   6   0   1   -3.90    6.90 
  -6   0  -1    2.00    7.60 
   6   0   1    1.60    5.60 
  -6   0  -1   -3.50    9.00 
  -6   0  -1   -1.40    9.00 
  -6   0  -1    2.70    9.30 
   6   0   1    2.80    7.70 
  -6   0  -1   -3.10    9.30 
   6   0   1  -12.70    7.20 
   6   0   1    1.80    9.40 
  -6   0  -1    0.00    3.00 
  -6   0  -1   -9.70    6.70 
   7   0   1 2771.32  199.38 
   7   0   1 2841.12  198.78 
  -7   0  -1 2797.22  193.48 
  -7   0  -1 2864.61  198.68 
  -7   0  -1 2682.23  202.18 
   7   0   1 2788.22  197.98 
   7   0   1 2806.22  201.58 
  -7   0  -1 2980.60  196.38 
   7   0   1 2672.13  198.48 
  -7   0  -1 2535.75  202.28 
  -7   0  -1 2693.03  203.08 
  -7   0  -1 2847.02  206.78 
  -7   0  -1 2809.02  203.78 
   7   0   1 2712.53  200.28 
  -7   0  -1 2866.01  191.18 
   7   0   1 2736.53  199.08 
  -7   0  -1 2749.02  198.28 
  -7   0  -1 2762.62  198.98 
   7   0   1 2781.22  200.08 
  -8   0  -1   -0.60   10.90 
   8   0   1  -19.80    8.50 
   8   0   1    9.00   13.50 
   8   0   1   -2.20   11.40 
  -8   0  -1    1.00   14.30 
  -8   0  -1   -6.20   11.00 
  -8   0  -1   -5.00   11.80 
  -8   0  -1   -2.40    8.50 
   8   0   1   -0.90   11.60 
   8   0   1    8.70   14.60 
   8   0   1   -3.70    9.10 
  -8   0  -1   -5.50    8.40 
  -8   0  -1    1.90   11.30 
  -8   0  -1   11.80   15.90 
  -8   0  -1    4.30   13.00 
   8   0   1  -12.90    8.50 
  -8   0  -1   -2.60   11.40 
   8   0   1   -8.10   11.10 
  -9   0  -1 1055.89   95.99 
  -9   0  -1 1161.28   99.19 
   9   0   1 1219.18  107.79 
  -9   0  -1 1269.37  106.99 
   9   0   1 1063.49   99.39 
  -9   0  -1 1094.19  102.59 
  -9   0  -1 1225.88  105.59 
   9   0   1 1118.79   98.69 
  -9   0  -1 1103.69   96.99 
  -9   0  -1 1145.69  103.29 
  -9   0  -1 1024.60   92.19 
   9   0   1 1191.58   97.79 
   9   0   1 1167.28   99.19 
   9   0   1 1071.59   97.29 
   9   0   1 1080.99  100.09 
   9   0   1 1111.39   96.69 
  -9   0  -1 1184.88  107.29 
  10   0   1  -30.20   16.20 
 -10   0  -1   -5.00   18.00 
 -10   0  -1   -2.20   15.60 
 -10   0  -1  -13.50   18.10 
  10   0   1   -8.70   16.30 
 -10   0  -1  -12.50   16.80 
 -10   0  -1  -11.70   12.50 
  10   0   1  -24.30   14.30 
 -10   0  -1  -14.10   17.40 
  10   0   1   -4.00   18.80 
 -10   0  -1  -17.40   14.20 
 -10   0  -1   16.70   19.70 
  10   0   1   12.70   19.50 
  10   0   1   -2.40   14.00 
  10   0   1    7.30   17.40 
  10  -1  -1  260.47   42.80 
 -10  -1   1  164.38   36.20 
 -10  -1   1  174.38   40.30 
 -10  -1   1  275.17   49.70 
 -10  -1   1  263.97   44.60 
 -10  -1   1  161.58   37.90 
  10  -1  -1  238.28   43.40 
 -10  -1   1  167.88   41.60 
  10  -1  -1  147.49   39.50 
  10  -1  -1  231.68   44.80 
  10  -1  -1  233.38   41.70 
  10  -1  -1  186.08   41.20 
 -10  -1   1  172.48   42.30 
 -10  -1   1  144.19   36.20 
  10  -1  -1  226.08   51.39 
  10  -1  -1   65.69   29.30 
 -10   1   1  206.48   44.20 
  10   1  -1  175.38   37.00 
  10   1  -1  215.48   40.70 
 -10   1   1  142.49   39.40 
  10   1  -1  277.47   46.70 
 -10   1   1  163.58   41.00 
 -10   1   1  244.38   47.70 
  10   1  -1  132.89   33.70 
 -10   1   1  222.98   40.10 
 -10   1   1  240.48   44.00 
 -10   1   1  172.98   42.70 
 -10   1   1  232.68   41.40 
  10   1  -1  205.28   45.10 
  10   1  -1  115.49   33.30 
  10   1  -1  108.79   32.70 
 -10   1   1  195.08   39.70 
  -9  -1   1    5.20   14.60 
  -9  -1   1   -7.70   11.10 
  -9  -1   1   -8.60   15.20 
   9  -1  -1   -5.50   14.00 
   9  -1  -1   11.30   15.60 
   9  -1  -1   31.60   19.60 
  -9  -1   1  -12.50   12.70 
  -9  -1   1   -7.20   13.10 
   9  -1  -1   -5.90   11.20 
  -9  -1   1    3.30   14.20 
  -9  -1   1    2.10   16.00 
   9  -1  -1   -8.70   11.80 
   9  -1  -1   16.20   17.40 
   9  -1  -1   12.70   18.80 
   9  -1  -1   10.00   14.60 
  -9  -1   1  -15.10   12.00 
  -9  -1   1   16.00   17.00 
   9   1  -1   -5.50   13.20 
  -9   1   1   -7.80   14.50 
  -9   1   1    6.90   14.00 
   9   1  -1  -15.90    9.70 
  -9   1   1   16.60   16.30 
  -9   1   1    9.50   15.00 
   9   1  -1   11.80   16.60 
  -9   1   1    6.00   13.80 
   9   1  -1   29.00   18.10 
  -9   1   1   -2.40   13.80 
  -9   1   1    6.30   14.50 
  -9   1   1  -22.10   11.20 
   9   1  -1   19.60   15.40 
   9   1  -1   -4.70   11.70 
   9   1  -1    0.60   14.20 
  -9   1   1   -2.40   11.70 
  -9   1   1   11.30   15.60 
  -8  -1   1  217.68   41.50 
   8  -1  -1  250.57   40.70 
  -8  -1   1  256.87   38.30 
   8  -1  -1  206.38   37.10 
  -8  -1   1  231.98   35.00 
   8  -1  -1  226.98   38.20 
   8  -1  -1  237.28   39.90 
   8  -1  -1  189.88   37.20 
  -8  -1   1  212.28   41.90 
  -8  -1   1  221.78   33.50 
  -8  -1   1  191.48   37.50 
   8  -1  -1  208.28   37.00 
   8  -1  -1  254.47   38.90 
   8  -1  -1  266.27   39.20 
  -8  -1   1  301.97   45.40 
  -8  -1   1  302.97   44.50 
   8  -1  -1  172.28   34.30 
  -8  -1   1  234.58   37.10 
  -8   1   1  244.18   37.40 
   8   1  -1  217.88   37.00 
   8   1  -1  165.58   34.50 
   8   1  -1  261.77   38.60 
  -8   1   1  264.57   40.00 
  -8   1   1  232.68   34.10 
   8   1  -1  287.17   39.40 
   8   1  -1  223.78   37.80 
  -8   1   1  243.48   29.30 
   8   1  -1  196.58   34.60 
  -8   1   1  267.07   40.10 
   8   1  -1  190.58   35.50 
   8   1  -1  194.58   34.20 
  -8   1   1  227.28   40.90 
  -8   1   1  184.98   37.20 
  -8   1   1  284.37   45.10 
  -8   1   1  235.58   37.40 
  -8   1   1  177.58   38.00 
   7  -1  -1   13.20   12.20 
   7  -1  -1    7.90   12.10 
  -7  -1   1   68.69   18.30 
   7  -1  -1   24.40   14.60 
   7  -1  -1   54.39   17.80 
  -7  -1   1   34.40   15.00 
  -7  -1   1   21.20    9.80 
  -7  -1   1   21.50   13.00 
   7  -1  -1    1.40   12.70 
  -7  -1   1   48.00   15.90 
  -7  -1   1   57.49   19.70 
   7  -1  -1   39.40   12.50 
   7  -1  -1   24.60   15.40 
  -7  -1   1   55.39   13.90 
  -7  -1   1   22.90   15.70 
  -7  -1   1   25.30   16.50 
   7  -1  -1   43.10   18.50 
  -7  -1   1   11.70   14.60 
   7  -1  -1   54.89   18.90 
   7  -1  -1   24.00   14.60 
  -7  -1   1   26.80   16.20 
  -7  -1   1   38.70   13.00 
   7   1  -1   30.50   13.50 
   7   1  -1   17.00   11.20 
   7   1  -1   20.50   13.10 
  -7   1   1   32.90   17.30 
  -7   1   1   46.20   14.40 
   7   1  -1   20.20   12.20 
  -7   1   1   31.30   15.50 
   7   1  -1   33.10   15.60 
  -7   1   1   44.00   18.60 
  -7   1   1   78.69   20.50 
  -7   1   1    9.80   11.80 
  -7   1   1   35.00   16.30 
   7   1  -1   40.40   15.80 
   7   1  -1   49.80   18.20 
  -7   1   1   46.50   18.70 
   7   1  -1   61.19   19.50 
   7   1  -1    6.80   12.80 
  -7   1   1   30.50   11.30 
  -7   1   1   12.00   13.00 
  -6  -1   1 1719.63  128.19 
   6  -1  -1 1768.22  120.49 
  -6  -1   1 1716.63  128.29 
   6  -1  -1 1832.72  130.09 
   6  -1  -1 1848.42  131.99 
  -6  -1   1 1816.52  124.69 
  -6  -1   1 1769.02  133.49 
   6  -1  -1 1819.52  129.69 
   6  -1  -1 1669.73  123.09 
  -6  -1   1 1797.22  122.49 
   6  -1  -1 1838.12  119.49 
  -6  -1   1 1759.22  120.29 
  -6  -1   1 1771.02  126.39 
   6  -1  -1 1822.32  131.09 
  -6  -1   1 1677.33  132.19 
  -6  -1   1 1775.82  120.19 
  -6  -1   1 1728.63  124.09 
  -6  -1   1 1891.71  133.69 
  -6  -1   1 1746.93  123.19 
   6  -1  -1 1755.72  132.79 
   6  -1  -1 1818.02  120.19 
   6  -1  -1 1756.62  132.09 
   6  -1  -1 1747.03  119.49 
   6  -1  -1 1632.74  129.59 
  -6  -1   1 1684.63  134.59 
   6  -1  -1 1602.44  127.29 
   6  -1  -1 1940.01  132.99 
  -6  -1   1 1718.43  127.29 
   6   1  -1 1667.53  129.89 
   6   1  -1 1674.93  128.69 
  -6   1   1 1876.31  130.59 
  -6   1   1 1758.92  120.19 
  -6   1   1 1601.44  127.89 
  -6   1   1 1714.13  129.79 
   6   1  -1 1784.92  128.19 
   6   1  -1 1686.73  129.09 
  -6   1   1 1806.02  133.49 
  -6   1   1 1864.61  131.69 
  -6   1   1 1780.62  135.89 
   6   1  -1 1700.83  130.69 
  -6   1   1 1727.63  133.09 
  -6   1   1 1829.22  126.89 
   6   1  -1 1739.73  128.19 
   6   1  -1 1817.72  129.29 
   6   1  -1 1673.03  130.69 
   6   1  -1 1742.53  129.39 
  -6   1   1 1758.92  123.29 
   6   1  -1 1778.42  117.99 
  -5  -1   1  644.14   46.50 
   5  -1  -1  624.34   51.29 
   5  -1  -1  552.84   39.00 
  -5  -1   1  552.34   48.20 
  -5  -1   1  513.45   38.30 
   5  -1  -1  617.34   47.60 
  -5  -1   1  568.14   55.79 
   5  -1  -1  612.04   45.60 
   5  -1  -1  546.55   48.40 
  -5  -1   1  595.64   42.60 
  -5  -1   1  534.35   42.90 
   5  -1  -1  569.44   50.29 
  -5  -1   1  523.05   48.00 
   5  -1  -1  537.95   48.90 
   5  -1  -1  517.85   49.80 
   5  -1  -1  574.24   42.80 
   5  -1  -1  565.04   48.70 
  -5  -1   1  572.24   43.70 
   5  -1  -1  565.84   51.49 
  -5  -1   1  582.54   45.00 
   5  -1  -1  547.85   49.70 
   5  -1  -1  616.24   50.39 
   5  -1  -1  587.24   45.60 
  -5  -1   1  574.74   45.60 
   5  -1  -1  542.95   42.30 
  -5  -1   1  520.95   52.39 
  -5  -1   1  590.54   51.49 
  -5  -1   1  580.14   46.30 
  -5  -1   1  578.24   47.60 
  -5  -1   1  583.14   52.19 
  -5  -1   1  703.43   48.70 
  -5   1   1  620.34   50.49 
   5   1  -1  565.94   38.40 
   5   1  -1  608.44   48.80 
  -5   1   1  588.34   47.40 
   5   1  -1  569.84   41.20 
  -5   1   1  510.25   50.59 
   5   1  -1  560.94   49.99 
   5   1  -1  538.45   48.30 
  -5   1   1  542.85   42.60 
  -5   1   1  599.04   50.79 
   5   1  -1  534.55   49.99 
   5   1  -1  570.64   48.50 
  -5   1   1  600.44   49.80 
   5   1  -1  569.34   49.00 
  -5   1   1  495.55   51.59 
  -5   1   1  586.74   39.20 
   5   1  -1  623.54   50.59 
  -5   1   1  553.74   52.59 
  -5   1   1  601.34   45.00 
   5   1  -1  588.44   48.60 
  -5   1   1  543.55   51.49 
   5   1  -1  587.74   49.10 
  -5   1   1  582.14   49.20 
  -5   1   1  662.53   42.10 
   4  -1  -1 5446.15  362.06 
  -4  -1   1 5586.44  358.36 
   4  -1  -1 5429.16  362.86 
   4  -1  -1 5539.15  361.96 
   4  -1  -1 5338.27  360.06 
  -4  -1   1 5286.57  358.96 
   4  -1  -1 5468.75  358.16 
  -4  -1   1 5465.85  366.16 
  -4  -1   1 5369.36  352.76 
   4  -1  -1 5312.27  355.76 
  -4  -1   1 5456.25  355.66 
  -4  -1   1 5296.37  353.96 
  -4  -1   1 5552.84  352.56 
  -4  -1   1 5211.68  358.16 
  -4  -1   1 5492.25  358.86 
  -4  -1   1 5430.46  363.96 
  -4  -1   1 5443.46  355.16 
   4  -1  -1 5430.96  352.96 
   4  -1  -1 5399.76  353.56 
  -4  -1   1 5301.37  355.16 
   4  -1  -1 5483.05  361.96 
  -4  -1   1 5183.38  362.36 
  -4  -1   1 5414.56  360.16 
   4  -1  -1 5439.06  360.66 
   4  -1  -1 5190.48  355.76 
   4  -1  -1 5636.44  359.56 
  -4  -1   1 5686.93  357.96 
   4  -1  -1 5454.05  363.86 
  -4  -1   1 5454.25  360.46 
   4  -1  -1 5324.57  361.06 
  -4  -1   1 4974.30  357.06 
  -4  -1   1 5399.96  358.66 
   4  -1  -1 5768.92  358.16 
  -4  -1   1 5285.87  362.66 
   4  -1  -1 5297.17  355.06 
  -4  -1   1 5307.97  364.86 
   4  -1  -1 5679.23  361.96 
  -4  -1   1 5595.24  358.26 
   4   1  -1 5405.46  359.86 
  -4   1   1 5378.96  353.56 
  -4   1   1 5040.00  364.06 
   4   1  -1 5444.56  360.56 
  -4   1   1 5183.88  358.06 
   4   1  -1 5333.77  360.16 
  -4   1   1 5288.97  361.16 
   4   1  -1 5262.97  361.66 
  -4   1   1 5577.34  359.56 
  -4   1   1 5339.37  352.86 
   4   1  -1 5358.36  354.76 
   4   1  -1 5570.94  361.66 
  -4   1   1 5332.17  352.76 
  -4   1   1 5631.54  361.26 
   4   1  -1 5684.13  361.26 
   4   1  -1 5491.15  362.46 
   4   1  -1 5483.15  359.96 
  -4   1   1 5222.98  362.96 
  -4   1   1 5311.97  354.36 
  -4   1   1 5650.33  357.26 
   4   1  -1 5364.36  360.66 
  -4   1   1 5438.46  362.26 
   4   1  -1 5396.36  352.96 
  -4   1   1 5664.73  364.76 
  -4   1   1 5494.45  356.26 
  -4   1   1 5380.46  361.56 
   3  -1  -1  375.76   33.10 
   3  -1  -1  391.16   28.40 
   3  -1  -1  377.26   28.80 
  -3  -1   1  351.96   31.70 
  -3  -1   1  316.97   28.80 
   3  -1  -1  381.06   32.00 
  -3  -1   1  379.36   29.80 
   3  -1  -1  399.36   27.00 
   3  -1  -1  462.85   32.40 
   3  -1  -1  360.56   32.30 
  -3  -1   1  355.06   32.90 
   3  -1  -1  411.76   32.50 
  -3  -1   1  376.16   26.70 
   3  -1  -1  345.87   31.90 
  -3  -1   1  349.07   30.20 
   3  -1  -1  371.56   33.70 
  -3  -1   1  397.56   29.70 
   3  -1  -1  362.76   27.10 
  -3  -1   1  389.66   30.50 
  -3  -1   1  371.86   30.30 
  -3  -1   1  379.26   30.20 
   3  -1  -1  386.06   28.50 
   3  -1  -1  361.46   31.70 
  -3  -1   1  378.76   35.10 
  -3  -1   1  386.56   31.40 
  -3  -1   1  374.66   30.40 
  -3  -1   1  353.66   30.90 
   3  -1  -1  405.86   31.90 
   3  -1  -1  387.96   26.80 
  -3  -1   1  375.06   27.20 
  -3  -1   1  397.16   30.80 
   3  -1  -1  362.86   30.90 
   3  -1  -1  380.26   32.50 
  -3  -1   1  413.86   30.90 
  -3  -1   1  358.86   29.20 
  -3  -1   1  394.96   33.60 
  -3  -1   1  349.37   30.80 
  -3  -1   1  371.76   31.10 
   3  -1  -1  361.26   30.30 
  -3  -1   1  408.36   28.30 
  -3  -1   1  384.76   27.00 
   3  -1  -1  353.26   31.40 
   3   1  -1  394.26   32.90 
  -3   1   1  416.56   34.10 
   3   1  -1  396.76   30.50 
   3   1  -1  359.06   32.00 
   3   1  -1  378.06   31.20 
  -3   1   1  344.57   34.00 
   3   1  -1  354.16   30.40 
  -3   1   1  379.36   26.70 
  -3   1   1  381.76   30.60 
  -3   1   1  396.06   32.40 
   3   1  -1  410.56   31.40 
   3   1  -1  335.47   31.80 
  -3   1   1  339.17   33.10 
  -3   1   1  378.26   31.20 
  -3   1   1  330.97   30.20 
  -3   1   1  381.36   29.30 
  -3   1   1  393.26   29.50 
  -3   1   1  384.06   26.20 
  -3   1   1  372.16   34.10 
  -3   1   1  385.16   31.20 
   3   1  -1  344.27   30.70 
   3   1  -1  404.66   32.60 
   3   1  -1  405.76   31.50 
  -3   1   1  386.56   27.80 
   3   1  -1  382.66   28.20 
  -3   1   1  385.66   33.70 
  -3   1   1  358.36   32.50 
  -3   1   1  358.16   32.30 
  -3   1   1  358.86   31.70 
   3   1  -1  379.66   31.60 
  -3   1   1  354.96   33.00 
   3   1  -1  352.76   26.60 
   3   1  -1  373.66   31.50 
  -3   1   1  387.26   33.60 
  -2  -1   1  827.52   56.89 
   2  -1  -1  831.62   55.49 
   2  -1  -1  875.51   58.79 
  -2  -1   1  803.22   56.29 
   2  -1  -1  833.12   59.59 
   2  -1  -1  770.42   58.49 
  -2  -1   1  818.52   57.39 
  -2  -1   1  839.12   57.49 
   2  -1  -1  794.42   54.99 
   2  -1  -1  856.01   58.19 
  -2  -1   1  851.71   54.99 
  -2  -1   1  807.02   54.79 
   2  -1  -1  761.72   55.49 
  -2  -1   1  803.12   55.89 
   2  -1  -1  876.81   59.69 
  -2  -1   1  848.32   58.29 
  -2  -1   1  841.62   57.49 
  -2  -1   1  924.81   57.89 
   2  -1  -1  793.02   58.89 
  -2  -1   1  813.82   56.69 
  -2  -1   1  777.92   58.69 
  -2  -1   1  846.32   57.19 
  -2  -1   1  811.72   57.39 
   2  -1  -1  812.12   58.29 
   2  -1  -1  873.71   60.69 
   2  -1  -1  802.62   58.09 
   2  -1  -1  827.22   59.19 
   2  -1  -1  867.51   59.29 
   2  -1  -1  838.12   56.69 
   2  -1  -1  863.11   59.09 
  -2  -1   1  902.21   61.19 
  -2  -1   1  809.72   56.99 
   2  -1  -1  811.32   57.69 
   2  -1  -1  819.42   60.59 
  -2  -1   1  861.11   59.19 
   2  -1  -1  849.41   55.59 
  -2  -1   1  800.22   57.69 
  -2  -1   1  803.52   57.39 
  -2  -1   1  915.01   58.69 
   2  -1  -1  837.72   58.59 
   2  -1  -1  822.02   56.79 
   2  -1  -1  818.42   57.79 
   2  -1  -1  847.22   58.99 
  -2  -1   1  830.82   56.89 
  -2  -1   1  787.22   59.29 
  -2  -1   1  787.62   55.29 
  -2  -1   1  824.82   57.99 
  -2  -1   1  841.82   55.59 
  -2  -1   1  815.12   57.99 
  -2   1   1  868.21   58.89 
  -2   1   1  786.02   56.59 
   2   1  -1  835.32   58.49 
   2   1  -1  841.82   59.59 
  -2   1   1  835.32   55.59 
   2   1  -1  809.32   57.59 
  -2   1   1  823.32   59.49 
  -2   1   1  779.72   57.19 
  -2   1   1  789.62   58.09 
  -2   1   1  836.02   60.09 
  -2   1   1  811.72   58.59 
  -2   1   1  825.42   57.99 
  -2   1   1  859.51   58.79 
  -2   1   1  806.42   56.49 
   2   1  -1  828.32   58.19 
  -2   1   1  805.32   59.19 
   2   1  -1  825.42   57.99 
  -2   1   1  833.22   60.29 
  -2   1   1  873.01   58.59 
  -2   1   1  872.51   60.09 
  -2   1   1  815.82   59.19 
  -2   1   1  806.92   58.79 
   2   1  -1  835.02   57.69 
  -2   1   1  820.42   55.49 
   2   1  -1  815.32   56.89 
   2   1  -1  814.82   56.29 
  -2   1   1  772.02   58.89 
  -2   1   1  787.12   58.59 
   2   1  -1  813.42   55.49 
   2   1  -1  812.22   58.19 
   2   1  -1  834.52   58.39 
  -2   1   1  840.22   58.89 
   2   1  -1  804.32   57.69 
  -2   1   1  823.32   57.69 
   2   1  -1  781.82   58.69 
  -2   1   1  762.62   59.89 
   2   1  -1  793.02   55.49 
  -2   1   1  784.72   57.89 
  -2   1   1  822.72   59.19 
   2   1  -1  732.83   55.79 
   1  -1  -1   79.69    9.40 
  -1  -1   1  121.19    8.40 
  -1  -1   1   96.19   11.20 
   1  -1  -1  119.59   11.60 
  -1  -1   1  104.79    8.70 
  -1  -1   1  106.59    8.90 
   1  -1  -1  103.39   10.90 
  -1  -1   1   79.99    7.80 
  -1  -1   1  100.49    8.80 
   1  -1  -1   91.29   11.40 
   1  -1  -1   86.39   10.20 
  -1  -1   1   94.89    8.80 
  -1  -1   1   88.39    8.30 
  -1  -1   1   86.69   11.70 
   1  -1  -1  102.89   11.00 
   1  -1  -1  102.29   11.90 
  -1  -1   1   83.19   11.30 
   1  -1  -1   96.59   10.70 
   1  -1  -1   95.39   10.70 
   1  -1  -1  113.49   11.80 
  -1  -1   1  104.09    9.00 
   1  -1  -1   81.19   10.20 
   1  -1  -1   95.99   10.80 
  -1  -1   1  118.49   11.50 
   1  -1  -1   96.39   10.80 
  -1  -1   1  111.29    9.30 
   1  -1  -1  103.99   10.70 
   1  -1  -1  109.89   11.10 
  -1  -1   1   91.59    9.90 
   1  -1  -1  110.39    9.30 
   1  -1  -1   76.19   10.40 
  -1  -1   1   93.09   10.60 
  -1  -1   1  109.39    9.50 
   1  -1  -1  127.09   11.90 
   1  -1  -1   92.39    9.40 
  -1  -1   1   98.79    9.00 
  -1  -1   1  117.59    9.10 
  -1  -1   1  114.49   13.30 
   1  -1  -1   95.69   10.40 
   1  -1  -1   94.89    8.60 
  -1  -1   1   99.19    8.40 
  -1  -1   1   84.49   10.40 
  -1  -1   1  102.89   10.20 
   1  -1  -1   98.09   11.40 
  -1   1   1  103.19    8.90 
  -1   1   1  107.89    8.90 
  -1   1   1   78.79   10.80 
   1   1  -1  103.29   11.00 
   1   1  -1   76.29    9.00 
  -1   1   1  108.99   10.00 
  -1   1   1   87.59   10.20 
  -1   1   1   87.89   10.40 
  -1   1   1   84.69   10.60 
  -1   1   1   88.49   10.10 
  -1   1   1  116.99   11.50 
  -1   1   1  127.19   12.10 
  -1   1   1   93.79   10.80 
  -1   1   1  100.59   11.00 
  -1   1   1  100.39   11.00 
  -1   1   1  102.29   11.20 
   1   1  -1   90.19    9.70 
  -1   1   1   82.79   10.10 
  -1   1   1   98.89   10.90 
  -1   1   1   81.79   10.00 
  -1   1   1   82.39    9.20 
  -1   1   1   95.59   10.50 
  -1   1   1  111.99   11.20 
  -1   1   1  108.99    9.30 
   1   1  -1   76.29    8.70 
  -1   1   1   82.89   11.20 
   1   1  -1   78.29    9.30 
  -1   1   1  102.69    8.90 
   0  -1   1 4552.44  309.17 
   0  -1   1 5368.56  313.27 
   0  -1   1 4768.82  309.27 
   0  -1  -1 4777.82  310.67 
   0  -1  -1 4025.50  313.77 
   0  -1   1 4706.53  310.67 
   0  -1  -1 4504.55  310.57 
   0  -1  -1 4765.22  310.17 
   0  -1   1 5122.79  308.77 
   0  -1  -1 5043.20  309.17 
   0  -1   1 4839.82  310.37 
   0  -1   1 4144.59  310.47 
   0  -1   1 5078.39  312.27 
   0  -1  -1 4871.81  309.27 
   0  -1  -1 4854.71  309.37 
   0  -1   1 4913.61  311.37 
   0  -1  -1 4756.32  308.77 
   0  -1   1 4209.98  310.27 
   0  -1  -1 4566.84  311.47 
   0  -1   1 4553.44  312.47 
   0  -1   1 4565.34  310.87 
   0  -1   1 4952.40  308.87 
   0  -1   1 4832.72  310.47 
   0  -1  -1 4706.33  310.47 
   0  -1   1 5227.08  312.87 
   0  -1  -1 5421.26  310.37 
   0  -1  -1 5016.70  310.77 
   0  -1   1 4855.11  310.17 
   0  -1   1 4845.42  310.47 
   0  -1   1 4743.23  310.57 
   0  -1   1 4920.91  311.17 
   0  -1  -1 4697.53  311.27 
   0  -1  -1 4801.22  309.77 
   0  -1  -1 4619.44  312.57 
   0  -1  -1 3979.30  310.27 
   0  -1  -1 4812.12  311.87 
   0  -1   1 4760.42  310.77 
   0   1   1 4504.15  310.47 
   0   1  -1 4564.54  310.87 
   1  -1   1  551.44   40.10 
  -1  -1  -1  590.74   41.10 
  -1  -1  -1  589.54   40.70 
   1  -1   1  604.64   40.50 
  -1  -1  -1  607.04   39.30 
   1  -1   1  536.55   40.00 
  -1  -1  -1  564.94   40.30 
  -1  -1  -1  564.64   38.20 
   1  -1   1  542.55   40.90 
   1  -1   1  590.34   42.10 
   1  -1   1  599.54   41.10 
   1  -1   1  559.44   40.30 
   1  -1   1  553.04   39.80 
   1  -1   1  612.64   42.00 
  -1  -1  -1  583.94   40.50 
   1  -1   1  590.74   41.50 
   1  -1   1  596.44   40.70 
   1  -1   1  566.04   41.30 
   1  -1   1  576.84   41.00 
   1  -1   1  604.24   40.90 
  -1  -1  -1  613.64   41.20 
   1  -1   1  616.44   42.10 
  -1  -1  -1  590.54   40.40 
   1  -1   1  567.14   40.30 
   1  -1   1  542.35   41.20 
   1  -1   1  578.24   40.40 
  -1  -1  -1  554.24   39.50 
  -1  -1  -1  569.24   39.00 
  -1  -1  -1  575.04   38.70 
  -1  -1  -1  595.84   41.70 
  -1  -1  -1  576.54   39.80 
  -1  -1  -1  574.74   41.40 
  -1  -1  -1  553.74   40.30 
  -1  -1  -1  574.74   39.40 
   1  -1   1  529.45   40.20 
  -1  -1  -1  550.64   38.10 
  -1  -1  -1  555.64   42.00 
   1  -1   1  592.64   41.10 
  -1  -1  -1  618.24   42.80 
   1  -1   1  577.14   41.30 
   1  -1   1  629.24   41.40 
  -1  -1  -1  531.35   40.90 
  -1  -1  -1  601.64   39.30 
  -1   1  -1  546.85   40.90 
  -1   1  -1  586.44   39.90 
  -1   1  -1  534.55   40.50 
  -1   1  -1  592.04   41.50 
  -1   1  -1  620.94   41.50 
  -1   1  -1  564.64   41.30 
  -1   1  -1  631.24   42.30 
  -1   1  -1  575.84   40.80 
  -1   1  -1  541.05   40.30 
  -1   1  -1  594.54   41.60 
   1   1   1  569.54   40.20 
  -1   1  -1  571.14   40.30 
   1   1   1  592.44   40.50 
   1   1   1  547.95   39.50 
  -1   1  -1  578.74   40.30 
   1   1   1  585.14   40.50 
  -1   1  -1  579.04   40.90 
  -1   1  -1  576.34   41.00 
   1   1   1  579.14   40.90 
  -1   1  -1  548.65   41.10 
  -1   1  -1  560.44   40.60 
  -1   1  -1  551.14   39.80 
  -1   1  -1  580.84   40.20 
  -1   1  -1  579.54   40.40 
  -1   1  -1  580.64   40.80 
  -1   1  -1  544.15   41.60 
  -1   1  -1  600.54   40.50 
  -2  -1  -1 9653.93  611.34 
  -2  -1  -1 9273.17  613.84 
   2  -1   1 9580.04  611.44 
   2  -1   1 9703.63  610.44 
  -2  -1  -1 9294.87  606.64 
  -2  -1  -1 9579.04  610.64 
   2  -1   1 9198.48  609.74 
  -2  -1  -1 9392.06  612.04 
   2  -1   1 9385.06  611.54 
   2  -1   1 9484.55  610.34 
  -2  -1  -1 9008.20  610.64 
   2  -1   1 9469.25  611.74 
  -2  -1  -1 9561.84  610.74 
   2  -1   1 9491.45  611.24 
  -2  -1  -1 9712.63  609.04 
   2  -1   1 9020.10  610.74 
   2  -1   1 9459.85  611.34 
   2  -1   1 9364.16  608.34 
  -2  -1  -1 9286.17  609.14 
  -2  -1  -1 9999.00  608.34 
  -2  -1  -1 9201.98  607.24 
   2  -1   1 8927.21  609.34 
  -2  -1  -1 9314.47  609.34 
   2  -1   1 9537.55  608.34 
  -2  -1  -1 9054.19  612.34 
  -2  -1  -1 9189.68  611.04 
  -2  -1  -1 9270.47  609.34 
   2  -1   1 9560.04  612.94 
  -2  -1  -1 9419.26  610.64 
   2  -1   1 9622.74  610.84 
  -2  -1  -1 9274.07  611.14 
  -2  -1  -1 9346.96  610.64 
  -2  -1  -1 9204.18  609.04 
   2  -1   1 9121.49  609.84 
   2  -1   1 9646.13  612.54 
  -2  -1  -1 8996.00  608.14 
   2  -1   1 9393.46  610.54 
  -2  -1  -1 9076.49  610.14 
   2  -1   1 9473.05  609.94 
  -2  -1  -1 9315.57  607.74 
  -2  -1  -1 9133.59  609.14 
   2  -1   1 9259.57  610.54 
  -2  -1  -1 9065.39  610.74 
  -2  -1  -1 9094.69  607.84 
   2  -1   1 9287.17  608.64 
  -2  -1  -1 9128.99  607.34 
   2  -1   1 9475.95  611.24 
  -2  -1  -1 9255.77  609.74 
   2  -1   1 9581.14  610.24 
  -2   1  -1 9193.38  608.24 
  -2   1  -1 9379.96  610.84 
   2   1   1 9389.16  608.04 
  -2   1  -1 9234.98  609.94 
  -2   1  -1 8919.11  608.64 
  -2   1  -1 9503.35  611.04 
  -2   1  -1 9149.08  607.94 
   2   1   1 9458.65  609.94 
  -2   1  -1 9397.96  610.84 
   2   1   1 9540.75  608.04 
  -2   1  -1 9248.47  612.54 
  -2   1  -1 9534.35  608.64 
   2   1   1 9354.96  610.64 
   2   1   1 9674.43  609.64 
   2   1   1 9344.07  609.84 
   2   1   1 9311.57  608.54 
  -2   1  -1 9243.77  610.84 
  -2   1  -1 9459.85  610.74 
  -2   1  -1 9447.85  611.84 
   2   1   1 9413.46  609.64 
  -2   1  -1 9291.97  610.64 
   2   1   1 8823.52  610.44 
  -2   1  -1 9587.44  610.54 
   2   1   1 9396.26  611.14 
  -2   1  -1 9434.36  611.94 
   2   1   1 9139.69  607.74 
  -2   1  -1 9016.40  609.24 
  -2   1  -1 9173.38  609.94 
   2   1   1 8695.73  610.94 
   2   1   1 9719.93  613.04 
  -2   1  -1 9215.08  611.04 
   2   1   1 9267.87  608.64 
  -2   1  -1 9435.76  610.54 
   2   1   1 9380.26  611.14 
   2   1   1 9449.65  609.14 
  -2   1  -1 9277.77  612.34 
  -2   1  -1 9089.59  611.64 
  -2   1  -1 9360.56  610.54 
  -2   1  -1 9353.06  609.64 
   2   1   1 9414.56  610.94 
  -2   1  -1 9160.58  611.24 
  -2   1  -1 9379.66  611.54 
   2   1   1 9539.75  608.84 
  -3  -1  -1   80.89   10.40 
   3  -1   1   86.49   13.80 
  -3  -1  -1   75.79   10.50 
  -3  -1  -1   86.39   12.70 
  -3  -1  -1   75.39   11.50 
   3  -1   1   69.29   12.60 
   3  -1   1   96.19   15.00 
  -3  -1  -1   77.69   13.40 
   3  -1   1   74.39    9.60 
   3  -1   1   75.99   11.90 
   3  -1   1   58.49   12.90 
  -3  -1  -1   94.09   11.90 
  -3  -1  -1   74.39   11.60 
   3  -1   1   63.29   10.80 
  -3  -1  -1   57.09   11.10 
  -3  -1  -1   68.99   13.10 
   3  -1   1   95.99   15.50 
   3  -1   1   68.59   11.80 
   3  -1   1   79.09   12.60 
  -3  -1  -1   78.79    6.90 
  -3  -1  -1   56.29   12.60 
   3  -1   1   74.99   12.70 
  -3  -1  -1   84.49   17.40 
   3  -1   1   76.19   13.50 
   3  -1   1   78.09   13.20 
   3  -1   1   82.99    9.00 
   3  -1   1   77.69   11.50 
   3  -1   1   77.49   14.00 
   3  -1   1   85.59   13.80 
  -3  -1  -1   84.19    9.60 
  -3  -1  -1   94.59    9.70 
  -3  -1  -1   95.69   15.10 
  -3  -1  -1   61.69   10.70 
  -3  -1  -1   87.29   12.80 
  -3  -1  -1   75.79   10.70 
  -3  -1  -1   78.99   11.20 
  -3  -1  -1   79.39    7.80 
  -3  -1  -1   72.49   13.60 
  -3  -1  -1   77.59   10.70 
  -3  -1  -1   74.29   14.40 
  -3  -1  -1   85.49   13.50 
   3  -1   1   70.09   12.20 
   3  -1   1   86.69   10.90 
   3   1   1   76.59   12.20 
   3   1   1   59.49   12.10 
  -3   1  -1   68.69   10.00 
   3   1   1   72.59   12.50 
  -3   1  -1   76.69   11.30 
   3   1   1   83.49   10.50 
  -3   1  -1   92.59   16.00 
  -3   1  -1   82.49   13.20 
   3   1   1   61.09   10.80 
  -3   1  -1   74.09   14.40 
  -3   1  -1   72.69    8.80 
  -3   1  -1   83.99   13.10 
  -3   1  -1   87.29   15.50 
   3   1   1   92.09   12.30 
   3   1   1   77.09   13.40 
  -3   1  -1   68.59   12.60 
  -3   1  -1   83.09   14.50 
  -3   1  -1   71.29    9.20 
   3   1   1   71.79   10.60 
  -3   1  -1   98.59   15.00 
   3   1   1   68.19   12.00 
  -3   1  -1   69.59    9.00 
  -3   1  -1   75.09   11.60 
   3   1   1   52.79    8.90 
  -3   1  -1   68.99   12.30 
   3   1   1   85.49   16.00 
   3   1   1   57.09   10.30 
   3   1   1   90.89   10.40 
   3   1   1   50.59   11.50 
   3   1   1   51.19   10.30 
  -3   1  -1   86.19   14.90 
   3   1   1   90.09    8.60 
  -3   1  -1   76.39   13.40 
  -3   1  -1   79.19   12.60 
  -3   1  -1   71.69   13.30 
  -4  -1  -1 1968.50  143.19 
  -4  -1  -1 2032.70  142.09 
  -4  -1  -1 2050.49  143.39 
  -4  -1  -1 2053.39  147.99 
   4  -1   1 2027.40  145.19 
  -4  -1  -1 2064.39  137.29 
  -4  -1  -1 2069.89  147.19 
  -4  -1  -1 2049.20  144.29 
  -4  -1  -1 2117.69  147.49 
   4  -1   1 2116.79  137.89 
  -4  -1  -1 2056.29  151.58 
  -4  -1  -1 2079.69  140.29 
   4  -1   1 2114.49  139.79 
   4  -1   1 2128.99  143.39 
  -4  -1  -1 2159.08  142.19 
   4  -1   1 2028.90  147.39 
   4  -1   1 2116.79  142.89 
  -4  -1  -1 2099.89  149.39 
   4  -1   1 2023.90  141.69 
  -4  -1  -1 2073.59  136.89 
   4  -1   1 2016.50  145.99 
   4  -1   1 2036.50  144.49 
   4  -1   1 2020.90  141.09 
   4  -1   1 2010.00  144.69 
  -4  -1  -1 2148.49  144.99 
  -4  -1  -1 2049.49  137.79 
   4  -1   1 2154.98  145.99 
  -4  -1  -1 2078.29  137.89 
   4  -1   1 1920.71  146.09 
   4  -1   1 2209.08  146.39 
   4  -1   1 2189.18  146.79 
   4  -1   1 2014.40  142.49 
  -4  -1  -1 2115.89  142.49 
   4   1   1 2166.18  143.59 
  -4   1  -1 2029.40  138.89 
  -4   1  -1 2117.39  141.49 
   4   1   1 2158.28  142.69 
   4   1   1 2117.99  144.29 
  -4   1  -1 2023.50  148.89 
  -4   1  -1 2059.79  141.89 
   4   1   1 2100.19  145.09 
   4   1   1 2208.38  145.99 
  -4   1  -1 2054.79  147.39 
   4   1   1 1941.11  144.49 
   4   1   1 2049.20  141.89 
  -4   1  -1 2052.49  147.79 
   4   1   1 2097.79  139.19 
   4   1   1 1960.20  145.99 
  -4   1  -1 2219.48  144.39 
   4   1   1 2118.39  144.79 
  -4   1  -1 2157.88  146.29 
  -4   1  -1 2043.00  140.29 
   4   1   1 2138.19  142.99 
  -4   1  -1 2167.78  145.99 
  -4   1  -1 2111.79  149.39 
  -4   1  -1 2121.49  138.49 
  -4   1  -1 2090.09  145.09 
  -4   1  -1 2120.99  146.09 
   4   1   1 2057.49  139.29 
   4   1   1 2138.59  145.39 
   5  -1   1    5.00    8.30 
  -5  -1  -1    1.40    5.40 
   5  -1   1   -5.60    8.10 
   5  -1   1    0.70    4.60 
  -5  -1  -1    3.20    5.40 
   5  -1   1    1.90    3.60 
   5  -1   1   15.20    6.70 
   5  -1   1    3.10    5.00 
  -5  -1  -1   12.60   10.10 
   5  -1   1    6.30    7.00 
   5  -1   1    8.10    8.30 
   5  -1   1   -5.00    6.80 
  -5  -1  -1   14.40    9.50 
  -5  -1  -1   12.10    9.20 
  -5  -1  -1    4.10    9.60 
   5  -1   1    6.40    7.60 
   5  -1   1    7.00    8.90 
   5  -1   1   13.30    6.20 
   5  -1   1    5.90    8.40 
  -5  -1  -1   -4.00    9.90 
  -5  -1  -1   14.60    8.40 
   5  -1   1   18.80    8.50 
   5  -1   1   14.70    6.40 
  -5  -1  -1   19.90    9.80 
   5  -1   1   19.20   11.10 
  -5  -1  -1   23.10    9.60 
   5  -1   1   15.80    9.30 
  -5  -1  -1   -6.10    6.70 
  -5  -1  -1    6.40    6.70 
  -5  -1  -1   15.40    4.70 
  -5  -1  -1   12.00    4.90 
  -5   1  -1    2.30    7.80 
  -5   1  -1    3.10    6.80 
   5   1   1    8.90    8.00 
  -5   1  -1   12.10    6.90 
   5   1   1    4.20    3.80 
   5   1   1   14.00    9.60 
   5   1   1    4.70    7.80 
   5   1   1    3.20    8.10 
  -5   1  -1   15.50   10.90 
   5   1   1    2.60    7.30 
  -5   1  -1    2.40    3.80 
   5   1   1  -10.70    5.00 
  -5   1  -1   11.10    4.10 
   5   1   1   -3.80    5.40 
   5   1   1   11.80    8.50 
  -5   1  -1    1.40    7.40 
   5   1   1    0.90    6.20 
  -5   1  -1   15.30   10.20 
   5   1   1   10.20    4.80 
  -5   1  -1    2.00    8.90 
  -5   1  -1   10.50    9.40 
  -5   1  -1    6.50    9.20 
  -5   1  -1   -2.90    7.20 
   6  -1   1   11.00   10.70 
   6  -1   1   -9.10    8.70 
   6  -1   1    8.70    4.60 
   6  -1   1   29.90   13.20 
  -6  -1  -1    4.30    7.60 
  -6  -1  -1    9.50    9.90 
  -6  -1  -1   11.00    5.30 
   6  -1   1    8.20    6.70 
  -6  -1  -1    5.80   11.20 
  -6  -1  -1    8.90    6.90 
   6  -1   1   12.20    6.80 
   6  -1   1    1.30    5.20 
  -6  -1  -1   16.80    5.50 
  -6  -1  -1    8.00   10.90 
  -6  -1  -1   22.00   13.60 
  -6  -1  -1    4.40    4.50 
  -6  -1  -1   14.70   12.30 
   6  -1   1   18.30   11.60 
  -6  -1  -1    5.40    9.20 
   6  -1   1   16.00   11.10 
  -6  -1  -1    8.40    7.10 
   6  -1   1    4.30    9.70 
   6  -1   1    3.00    7.20 
  -6  -1  -1    7.80   10.40 
   6  -1   1   10.60   10.50 
   6  -1   1   26.00   11.80 
  -6  -1  -1   23.10   11.70 
   6  -1   1   -2.80    7.00 
  -6  -1  -1   -5.40    9.30 
  -6   1  -1   -8.20    8.30 
   6   1   1   -0.30    3.70 
   6   1   1    2.00    3.80 
  -6   1  -1   -0.60    5.20 
  -6   1  -1   15.20   10.10 
  -6   1  -1    8.90    9.30 
   6   1   1    9.70   10.20 
  -6   1  -1   10.30    3.90 
  -6   1  -1   -2.40    6.10 
  -6   1  -1    4.70    3.40 
   6   1   1    8.80   10.30 
   6   1   1   -4.00    7.90 
  -6   1  -1   -3.10    8.90 
   6   1   1   -1.30    8.40 
  -6   1  -1    6.90    9.10 
   6   1   1   -5.00    7.40 
  -6   1  -1   28.30   14.40 
  -6   1  -1    3.40    9.70 
   6   1   1   11.90   10.60 
   6   1   1   11.70    8.10 
   6   1   1    5.00   10.00 
  -6   1  -1   -2.70    9.60 
  -6   1  -1    5.10    9.20 
  -7  -1  -1   15.10   16.00 
  -7  -1  -1    0.10   11.90 
  -7  -1  -1    8.30   11.00 
  -7  -1  -1   23.80   16.00 
   7  -1   1   54.29   18.90 
   7  -1   1    8.20   12.00 
   7  -1   1    4.60   12.50 
   7  -1   1   -5.10    9.30 
   7  -1   1   23.60   11.00 
  -7  -1  -1   29.00   11.00 
   7  -1   1   18.00   14.50 
  -7  -1  -1   20.50   14.40 
  -7  -1  -1   16.80   11.10 
  -7  -1  -1   17.00   14.60 
   7  -1   1   19.80   13.80 
   7  -1   1   11.70   12.70 
  -7  -1  -1   14.80    9.60 
  -7  -1  -1   34.70   15.70 
   7  -1   1   25.80   14.70 
  -7  -1  -1   29.70   13.70 
  -7  -1  -1   10.60   14.20 
  -7   1  -1   15.50   11.70 
   7   1   1    1.40   11.30 
   7   1   1   12.00   11.20 
   7   1   1   37.50   15.10 
   7   1   1   -7.90    9.60 
   7   1   1   11.80   11.00 
   7   1   1   12.80   11.70 
  -7   1  -1   24.20   15.60 
  -7   1  -1   26.40   13.90 
  -7   1  -1   19.90    9.50 
  -7   1  -1   24.40   15.80 
  -7   1  -1   22.30   13.00 
  -7   1  -1    4.40   11.10 
  -7   1  -1    5.90   13.10 
  -7   1  -1   11.60   13.60 
   7   1   1    9.90   12.90 
  -7   1  -1   18.50   13.60 
   7   1   1   21.50   14.00 
  -7   1  -1   25.10   16.20 
  -7   1  -1   29.70   12.20 
  -8  -1  -1   86.59   19.90 
  -8  -1  -1   56.19   16.60 
  -8  -1  -1   41.30   22.80 
   8  -1   1   73.69   23.20 
   8  -1   1   58.49   20.80 
   8  -1   1   65.19   21.90 
   8  -1   1   38.60   20.50 
  -8  -1  -1   80.39   26.90 
   8  -1   1   94.79   23.90 
   8  -1   1   83.39   24.80 
  -8  -1  -1   74.59   25.10 
  -8  -1  -1   70.99   21.40 
  -8  -1  -1  120.69   30.00 
   8  -1   1  106.39   25.00 
  -8  -1  -1   68.09   23.70 
  -8  -1  -1   91.89   23.00 
  -8  -1  -1   89.69   22.20 
   8  -1   1   72.19   23.20 
  -8   1  -1   65.29   23.30 
  -8   1  -1  105.59   29.30 
  -8   1  -1   67.39   23.50 
   8   1   1   77.99   21.30 
   8   1   1   63.99   20.40 
  -8   1  -1   54.99   17.30 
  -8   1  -1   76.79   26.20 
   8   1   1   82.89   23.80 
  -8   1  -1  107.19   28.20 
  -8   1  -1   80.29   22.20 
  -8   1  -1   89.59   21.40 
   8   1   1   71.09   22.90 
   8   1   1   56.59   19.50 
  -8   1  -1   79.89   25.70 
   8   1   1   51.19   21.30 
   8   1   1   74.29   22.70 
  -8   1  -1  160.08   30.70 
   8   1   1   76.99   20.70 
  -8   1  -1   73.99   23.80 
  -9  -1  -1   12.70   23.50 
  -9  -1  -1    9.30   15.10 
   9  -1   1   19.20   16.30 
   9  -1   1   -9.50   14.50 
  -9  -1  -1    0.30   16.90 
   9  -1   1  -14.50   13.00 
   9  -1   1   21.60   18.60 
   9  -1   1   -6.30   14.80 
  -9  -1  -1   19.00   15.90 
   9  -1   1   23.90   18.40 
  -9  -1  -1    7.50   14.10 
   9  -1   1   -1.10   12.50 
  -9  -1  -1   -3.80   18.80 
  -9  -1  -1  -19.60   12.30 
   9  -1   1   -6.30   12.80 
  -9  -1  -1    3.20   14.90 
  -9  -1  -1   -0.90   12.40 
  -9   1  -1   -3.90   12.80 
   9   1   1   19.30   17.60 
   9   1   1    2.00   16.90 
  -9   1  -1   22.40   18.50 
  -9   1  -1    5.30   14.60 
   9   1   1   23.40   17.50 
   9   1   1    5.30   14.90 
  -9   1  -1    2.80   12.20 
   9   1   1   12.90   15.20 
  -9   1  -1    7.70   15.30 
   9   1   1   -0.90   13.00 
  -9   1  -1   10.50   15.80 
  -9   1  -1  -10.40   12.00 
  -9   1  -1   10.90   14.70 
   9   1   1  -17.30   11.70 
  -9   1  -1   17.00   18.60 
  -9   1  -1  -16.90   12.50 
 -10  -1  -1  199.58   44.10 
  10  -1   1   66.59   27.50 
 -10  -1  -1   80.19   30.50 
  10  -1   1  179.78   39.50 
 -10  -1  -1  179.68   41.20 
 -10  -1  -1   88.09   31.10 
 -10  -1  -1  108.49   33.70 
  10  -1   1  111.39   30.10 
 -10  -1  -1  117.49   32.10 
 -10  -1  -1  126.29   39.00 
  10  -1   1  109.49   32.50 
  10  -1   1   91.99   28.60 
  10  -1   1  107.19   33.50 
 -10  -1  -1  122.19   29.00 
  10  -1   1  172.68   41.70 
 -10   1  -1  177.78   41.20 
 -10   1  -1  108.59   30.20 
  10   1   1  178.98   39.20 
  10   1   1  202.98   43.00 
  10   1   1  135.09   33.00 
  10   1   1  103.99   29.60 
 -10   1  -1  191.08   37.10 
 -10   1  -1  111.59   31.10 
 -10   1  -1  199.68   45.20 
 -10   1  -1  167.68   39.80 
  10   1   1  142.49   33.40 
 -10   1  -1  134.49   37.40 
 -10   1  -1  148.39   38.20 
 -10   1  -1   94.39   35.00 
  10   1   1  114.49   32.70 
 -10  -2   1  325.77   53.69 
 -10  -2   1  284.37   49.60 
 -10  -2   1  404.66   63.89 
 -10  -2   1  353.36   49.30 
 -10  -2   1  388.96   59.69 
  10  -2  -1  331.07   53.99 
 -10  -2   1  312.27   58.09 
  10  -2  -1  433.86   61.89 
 -10  -2   1  363.76   51.79 
 -10  -2   1  309.27   54.89 
  10  -2  -1  386.46   58.49 
  10  -2  -1  308.97   49.50 
  10  -2  -1  373.86   60.19 
  10  -2  -1  339.87   58.79 
  10  -2  -1  245.88   49.40 
 -10  -2   1  396.56   61.79 
 -10   2   1  236.68   47.00 
  10   2  -1  305.47   52.99 
 -10   2   1  277.17   53.49 
  10   2  -1  373.66   55.69 
  10   2  -1  322.77   53.99 
 -10   2   1  394.26   55.39 
  10   2  -1  407.76   55.59 
 -10   2   1  268.77   56.99 
 -10   2   1  292.97   52.19 
  10   2  -1  392.96   61.09 
 -10   2   1  376.96   59.79 
 -10   2   1  398.56   54.99 
 -10   2   1  249.68   53.29 
 -10   2   1  476.75   58.69 
 -10   2   1  370.96   60.59 
 -10   2   1  329.67   59.09 
  10   2  -1  402.36   58.69 
   9  -2  -1  301.77   49.60 
   9  -2  -1  331.27   55.49 
   9  -2  -1  298.97   50.69 
  -9  -2   1  399.56   60.29 
   9  -2  -1  333.67   52.39 
   9  -2  -1  418.06   53.59 
   9  -2  -1  314.07   53.89 
  -9  -2   1  382.16   49.70 
  -9  -2   1  289.47   50.19 
  -9  -2   1  349.07   51.29 
  -9  -2   1  458.85   53.39 
   9  -2  -1  450.35   58.59 
  -9  -2   1  425.86   61.49 
  -9  -2   1  347.47   54.39 
  -9  -2   1  327.27   52.89 
   9  -2  -1  414.16   52.89 
   9   2  -1  306.47   49.60 
   9   2  -1  290.87   46.20 
  -9   2   1  439.26   56.69 
  -9   2   1  322.07   51.19 
  -9   2   1  287.47   51.29 
  -9   2   1  341.47   55.39 
  -9   2   1  315.47   56.09 
  -9   2   1  324.77   49.99 
  -9   2   1  440.46   56.09 
   9   2  -1  365.26   54.99 
   9   2  -1  423.86   53.29 
   9   2  -1  317.47   47.30 
   9   2  -1  316.87   49.10 
  -9   2   1  440.76   52.69 
  -9   2   1  300.37   50.89 
   9   2  -1  364.46   49.30 
   8  -2  -1    9.00   13.70 
  -8  -2   1   24.80   12.30 
  -8  -2   1   31.60   19.00 
   8  -2  -1   -6.60   10.40 
   8  -2  -1   15.40   15.40 
   8  -2  -1    8.60   11.90 
  -8  -2   1   -6.90   14.90 
   8  -2  -1    1.80   10.60 
  -8  -2   1    3.80   14.00 
   8  -2  -1   43.60   19.00 
  -8  -2   1    3.40   15.00 
  -8  -2   1   24.80   16.00 
  -8  -2   1   -6.80    9.80 
   8  -2  -1    0.50   13.30 
   8  -2  -1   10.70   16.70 
  -8  -2   1   24.00   14.90 
   8  -2  -1  -15.30   10.50 
  -8  -2   1   24.50   15.60 
  -8   2   1    8.30   13.70 
  -8   2   1   20.70   13.30 
   8   2  -1   32.10   17.30 
  -8   2   1   14.20   14.70 
   8   2  -1   56.79   20.30 
  -8   2   1   26.30   16.10 
   8   2  -1   28.20   14.90 
  -8   2   1   -1.40   12.90 
  -8   2   1    8.20   13.50 
   8   2  -1   24.90   16.60 
   8   2  -1   26.90   16.80 
  -8   2   1    4.40   13.10 
   8   2  -1    9.20   14.10 
  -8   2   1    4.60   14.50 
  -8   2   1   23.70   12.10 
   8   2  -1   10.80   12.20 
  -8   2   1   14.20   15.60 
  -7  -2   1   -2.00    9.90 
   7  -2  -1    8.10   12.70 
  -7  -2   1   -7.10    8.20 
  -7  -2   1    7.10   13.50 
   7  -2  -1   -3.30    9.30 
  -7  -2   1  -17.80    6.20 
   7  -2  -1   -2.40   12.30 
   7  -2  -1   -3.50    7.20 
  -7  -2   1   18.10   13.50 
   7  -2  -1   -0.40   12.60 
  -7  -2   1   16.70   12.00 
   7  -2  -1   -1.70    9.40 
   7  -2  -1    3.60   13.00 
  -7  -2   1    3.60   12.80 
  -7  -2   1   -3.70    7.80 
   7  -2  -1   -2.80    9.70 
   7  -2  -1   10.10   10.40 
  -7  -2   1    8.10   12.30 
   7  -2  -1   -7.50    8.50 
  -7  -2   1   -3.70    6.00 
  -7  -2   1   -0.40    9.90 
  -7  -2   1  -18.30   14.00 
   7  -2  -1    0.90   11.10 
   7  -2  -1   12.70    8.30 
  -7  -2   1    8.70   12.30 
   7  -2  -1   24.70   11.60 
   7   2  -1    0.60   10.20 
  -7   2   1    9.60    9.00 
  -7   2   1   -6.60    9.10 
   7   2  -1    2.40    9.60 
  -7   2   1    3.70   11.60 
  -7   2   1    7.40   12.10 
   7   2  -1  -16.00    8.90 
  -7   2   1   -4.80   11.70 
  -7   2   1   24.40   14.70 
  -7   2   1   16.30   13.10 
   7   2  -1   -3.30    8.80 
   7   2  -1    5.50   11.00 
  -7   2   1   -6.70    8.00 
   7   2  -1   -0.10    9.90 
  -7   2   1    7.30   12.40 
   7   2  -1   -8.00    7.90 
   7   2  -1   18.80   12.10 
  -7   2   1    3.00   11.90 
   6  -2  -1    8.80   10.00 
  -6  -2   1    8.10    5.50 
   6  -2  -1   24.80   13.00 
   6  -2  -1    6.10   10.20 
   6  -2  -1   17.10   10.00 
  -6  -2   1   15.60   12.30 
  -6  -2   1    7.50    8.60 
   6  -2  -1    0.90   11.10 
  -6  -2   1   -2.50    8.40 
   6  -2  -1   -5.10   10.00 
   6  -2  -1    5.90    7.20 
   6  -2  -1    0.00    7.70 
   6  -2  -1    2.80    9.60 
  -6  -2   1    5.50    4.20 
   6  -2  -1    8.60    7.70 
  -6  -2   1    5.20    5.30 
   6  -2  -1   10.00    9.40 
   6  -2  -1    5.60    9.10 
   6  -2  -1   -1.70    8.00 
  -6  -2   1    4.60   11.50 
  -6  -2   1   -5.70    4.20 
  -6  -2   1    2.10    7.70 
  -6  -2   1    1.70    7.10 
   6  -2  -1   -2.00   10.20 
   6  -2  -1    7.60    4.60 
  -6  -2   1   10.50   10.50 
  -6  -2   1    2.30    8.70 
  -6  -2   1    5.60    9.60 
  -6  -2   1    4.70   12.80 
  -6  -2   1    8.10    9.70 
  -6  -2   1   -0.50    8.80 
  -6  -2   1   10.10    9.60 
   6  -2  -1   -1.30    6.50 
  -6   2   1   -0.50    9.10 
   6   2  -1    6.50    9.40 
  -6   2   1   -4.90    9.40 
  -6   2   1   14.80    8.20 
  -6   2   1   -4.00    9.20 
   6   2  -1    1.40    8.80 
   6   2  -1   -1.60    8.80 
   6   2  -1    9.40    8.70 
  -6   2   1   -3.80    9.20 
   6   2  -1   -6.50    3.10 
  -6   2   1    2.90   10.10 
  -6   2   1   -6.50    6.70 
  -6   2   1    7.90   11.10 
   6   2  -1    4.20   11.20 
  -6   2   1   -2.90    8.00 
   6   2  -1   21.80   11.10 
  -6   2   1   -0.80    8.20 
   6   2  -1    2.50    4.10 
  -6   2   1    0.00    3.70 
   6   2  -1    4.20    7.70 
   6   2  -1   19.00   10.30 
  -6   2   1   -0.70    4.00 
   6   2  -1  -11.20    7.70 
  -5  -2   1  266.57   32.60 
  -5  -2   1  228.58   18.70 
  -5  -2   1  259.27   28.70 
   5  -2  -1  203.18   25.90 
   5  -2  -1  194.88   27.60 
  -5  -2   1  199.58   26.90 
   5  -2  -1  229.18   28.70 
   5  -2  -1  238.58   32.60 
  -5  -2   1  216.38   18.20 
  -5  -2   1  202.98   24.20 
   5  -2  -1  200.38   24.20 
  -5  -2   1  236.88   28.00 
  -5  -2   1  230.88   27.10 
  -5  -2   1  218.18   20.20 
  -5  -2   1  208.08   31.00 
   5  -2  -1  209.78   20.10 
   5  -2  -1  209.18   29.00 
  -5  -2   1  237.78   24.70 
   5  -2  -1  277.57   33.60 
   5  -2  -1  236.18   19.50 
  -5  -2   1  201.08   29.00 
  -5  -2   1  221.88   27.40 
  -5  -2   1  269.57   28.60 
   5  -2  -1  288.07   36.20 
   5  -2  -1  203.38   19.10 
  -5  -2   1  210.88   21.80 
   5  -2  -1  243.18   29.10 
  -5  -2   1  232.58   23.40 
  -5  -2   1  260.67   34.30 
  -5  -2   1  211.78   30.60 
   5  -2  -1  217.58   28.10 
   5  -2  -1  231.58   30.50 
   5  -2  -1  237.28   19.50 
  -5  -2   1  161.58   32.20 
  -5  -2   1  255.97   32.60 
   5  -2  -1  219.18   30.00 
  -5  -2   1  217.28   18.50 
   5  -2  -1  222.68   24.90 
  -5  -2   1  221.38   18.40 
   5  -2  -1  231.88   18.90 
  -5   2   1  183.48   29.90 
   5   2  -1  212.08   18.60 
   5   2  -1  226.68   30.70 
   5   2  -1  186.08   25.30 
   5   2  -1  205.98   28.20 
   5   2  -1  234.68   27.50 
   5   2  -1  218.48   26.60 
  -5   2   1  207.98   31.80 
  -5   2   1  200.18   18.30 
   5   2  -1  250.97   30.50 
  -5   2   1  249.88   29.70 
  -5   2   1  259.87   32.30 
  -5   2   1  282.47   33.20 
  -5   2   1  181.08   29.00 
  -5   2   1  245.78   25.70 
  -5   2   1  212.28   28.50 
   5   2  -1  204.28   27.40 
   5   2  -1  196.88   18.40 
  -5   2   1  199.88   19.30 
  -5   2   1  240.08   24.70 
  -5   2   1  156.88   28.40 
   5   2  -1  191.18   27.00 
  -5   2   1  224.28   30.20 
   5   2  -1  152.48   25.60 
  -4  -2   1  245.38   26.00 
   4  -2  -1  212.28   20.50 
  -4  -2   1  245.38   25.20 
  -4  -2   1  219.58   20.40 
  -4  -2   1  208.08   18.60 
  -4  -2   1  268.07   35.60 
   4  -2  -1  200.78   24.20 
  -4  -2   1  221.28   19.30 
  -4  -2   1  241.68   18.50 
  -4  -2   1  256.37   22.40 
   4  -2  -1  241.58   23.60 
  -4  -2   1  250.97   24.40 
   4  -2  -1  227.68   28.20 
  -4  -2   1  236.68   30.10 
   4  -2  -1  207.68   26.60 
  -4  -2   1  207.08   22.70 
  -4  -2   1  212.58   27.20 
   4  -2  -1  281.07   28.10 
  -4  -2   1  227.38   16.60 
   4  -2  -1  213.68   30.00 
   4  -2  -1  242.08   23.80 
   4  -2  -1  242.78   28.20 
   4  -2  -1  248.08   30.40 
   4  -2  -1  189.18   25.60 
  -4  -2   1  234.78   25.60 
   4  -2  -1  203.18   18.70 
   4  -2  -1  256.47   27.20 
   4  -2  -1  239.58   20.10 
   4  -2  -1  250.97   29.10 
   4  -2  -1  221.58   19.00 
  -4  -2   1  245.78   25.50 
  -4  -2   1  203.78   16.90 
  -4  -2   1  216.08   19.80 
  -4  -2   1  206.58   22.30 
   4  -2  -1  208.08   26.20 
  -4  -2   1  283.67   22.50 
  -4  -2   1  234.88   19.00 
  -4  -2   1  204.18   27.00 
  -4   2   1  183.08   27.00 
   4   2  -1  210.98   19.40 
  -4   2   1  215.78   23.50 
  -4   2   1  196.98   27.10 
  -4   2   1  239.48   27.60 
   4   2  -1  212.18   25.20 
   4   2  -1  203.48   23.50 
   4   2  -1  198.28   24.10 
  -4   2   1  240.68   29.20 
   4   2  -1  224.18   26.40 
  -4   2   1  187.58   19.60 
  -4   2   1  241.98   19.30 
  -4   2   1  197.48   27.00 
   4   2  -1  198.58   25.70 
  -4   2   1  205.68   27.50 
  -4   2   1  229.88   24.10 
   4   2  -1  264.07   31.00 
   4   2  -1  172.58   23.00 
   4   2  -1  228.28   19.10 
  -4   2   1  223.68   28.00 
   4   2  -1  255.67   27.50 
   4   2  -1  222.88   19.10 
  -4   2   1  200.38   28.70 
   4   2  -1  212.88   26.80 
   4   2  -1  192.98   24.40 
   3  -2  -1  291.07   33.90 
   3  -2  -1  384.66   30.60 
   3  -2  -1  400.86   33.30 
   3  -2  -1  403.66   32.30 
   3  -2  -1  354.96   31.70 
  -3  -2   1  358.26   30.90 
  -3  -2   1  377.56   32.70 
  -3  -2   1  380.86   28.00 
  -3  -2   1  370.16   31.30 
  -3  -2   1  359.36   29.70 
  -3  -2   1  382.56   37.30 
  -3  -2   1  389.46   31.40 
  -3  -2   1  379.36   28.50 
   3  -2  -1  400.26   33.20 
   3  -2  -1  399.96   33.60 
  -3  -2   1  376.96   30.50 
   3  -2  -1  339.87   33.60 
  -3  -2   1  393.16   31.10 
   3  -2  -1  391.96   29.10 
   3  -2  -1  377.76   31.60 
  -3  -2   1  384.86   29.70 
  -3  -2   1  367.26   30.60 
   3  -2  -1  400.56   31.70 
   3  -2  -1  353.26   29.10 
  -3  -2   1  392.16   30.90 
  -3  -2   1  407.96   29.60 
  -3  -2   1  410.86   30.20 
  -3  -2   1  348.87   32.30 
   3  -2  -1  377.96   29.00 
  -3  -2   1  366.76   28.70 
  -3  -2   1  372.36   29.10 
   3  -2  -1  350.76   28.50 
  -3  -2   1  375.36   29.80 
   3  -2  -1  368.26   35.50 
  -3  -2   1  385.66   30.40 
   3  -2  -1  346.97   32.10 
  -3  -2   1  391.46   28.40 
  -3  -2   1  365.46   30.80 
  -3  -2   1  385.86   34.30 
  -3  -2   1  362.66   29.80 
  -3  -2   1  350.56   32.70 
  -3   2   1  364.56   31.10 
   3   2  -1  372.96   31.50 
   3   2  -1  371.06   31.60 
  -3   2   1  413.06   34.30 
   3   2  -1  431.16   30.90 
  -3   2   1  372.76   29.20 
   3   2  -1  331.17   31.20 
  -3   2   1  400.26   35.60 
   3   2  -1  370.06   29.00 
  -3   2   1  444.56   34.50 
  -3   2   1  388.76   30.90 
   3   2  -1  390.86   29.80 
   3   2  -1  389.36   31.40 
   3   2  -1  375.46   29.50 
   3   2  -1  373.06   34.20 
   3   2  -1  355.86   32.10 
  -3   2   1  360.96   32.60 
  -3   2   1  394.56   34.60 
  -3   2   1  335.67   28.60 
   3   2  -1  414.56   32.40 
   3   2  -1  368.46   29.10 
  -3   2   1  349.07   32.70 
  -3   2   1  362.96   33.00 
  -3   2   1  386.16   34.50 
  -3   2   1  377.66   34.60 
   3   2  -1  437.26   32.00 
   3   2  -1  353.06   30.50 
   3   2  -1  382.46   32.70 
  -3   2   1  363.26   30.80 
  -3   2   1  369.06   30.40 
   3   2  -1  292.27   30.80 
   2  -2  -1   81.69   12.50 
  -2  -2   1  112.49   11.90 
  -2  -2   1   81.09   10.80 
   2  -2  -1   93.59   13.40 
  -2  -2   1  102.99   11.90 
  -2  -2   1  103.19   12.20 
   2  -2  -1   77.59   10.10 
  -2  -2   1   97.39   10.90 
  -2  -2   1   97.69   10.60 
  -2  -2   1   77.09   10.00 
   2  -2  -1  101.89   11.30 
   2  -2  -1   78.69   10.20 
   2  -2  -1   83.99   11.40 
  -2  -2   1   92.69   11.80 
  -2  -2   1   78.29   11.10 
   2  -2  -1   78.39   12.50 
   2  -2  -1   80.69   11.70 
  -2  -2   1   85.79   10.90 
   2  -2  -1   80.49   12.20 
  -2  -2   1   67.19    9.80 
  -2  -2   1  105.49   12.80 
  -2  -2   1   82.29   12.30 
  -2  -2   1   76.19   10.10 
  -2  -2   1   90.99   10.70 
  -2  -2   1   88.69   11.60 
   2  -2  -1   76.49   11.60 
   2  -2  -1   65.79   10.70 
   2  -2  -1   91.29   11.40 
  -2  -2   1   88.69   11.50 
   2  -2  -1   97.19   13.80 
   2  -2  -1  102.69   13.70 
   2  -2  -1   91.39   13.40 
  -2  -2   1  106.79   14.90 
   2  -2  -1   73.49   12.50 
   2  -2  -1   78.99   13.80 
   2  -2  -1   61.49   11.50 
   2  -2  -1   92.59   14.30 
  -2  -2   1   88.69   10.90 
  -2  -2   1   88.89   13.00 
  -2  -2   1   69.19   10.90 
  -2  -2   1  106.39   12.10 
  -2  -2   1   92.39    9.80 
   2  -2  -1  102.69   13.60 
   2  -2  -1   80.19   12.60 
  -2   2   1   93.39   13.10 
  -2   2   1   86.79   12.20 
  -2   2   1   68.69   11.20 
   2   2  -1   83.29    9.90 
  -2   2   1   81.09   13.00 
   2   2  -1   94.69   11.10 
  -2   2   1   94.09   13.00 
  -2   2   1   59.99   11.60 
  -2   2   1   69.99   10.70 
   2   2  -1   91.19   11.70 
  -2   2   1   91.39   13.60 
  -2   2   1   91.19   12.80 
  -2   2   1   59.39   12.00 
   2   2  -1   89.09   11.00 
  -2   2   1   88.29   11.60 
  -2   2   1   75.99   11.90 
   2   2  -1   68.29   10.40 
   2   2  -1   95.59   12.50 
   2   2  -1   97.99   10.80 
  -2   2   1   75.09   10.50 
   2   2  -1   88.09   11.20 
  -2   2   1   87.39   11.90 
  -2   2   1  102.89   13.50 
  -2   2   1   57.09    9.50 
   2   2  -1   75.59   10.40 
   2   2  -1   78.49   10.60 
  -2   2   1  112.49   14.50 
  -2   2   1   57.59   11.80 
   2   2  -1   83.79   11.60 
   2   2  -1   80.59   11.70 
  -2   2   1   89.39   14.60 
   2   2  -1   87.99   11.70 
  -2   2   1   88.99   11.60 
   2   2  -1   76.19   11.10 
   2   2  -1   75.99   11.20 
  -2   2   1   55.59    9.40 
  -2   2   1   77.79   12.60 
  -2   2   1   86.09   12.20 
   2   2  -1   86.99   15.10 
  -2   2   1   81.59   13.10 
  -2   2   1   70.89   12.20 
  -1  -2   1    3.80    2.30 
  -1  -2   1    3.70    3.80 
  -1  -2   1    5.40    3.50 
   1  -2  -1    0.70    3.80 
  -1  -2   1    3.60    5.50 
  -1  -2   1    2.90    3.10 
   1  -2  -1    3.50    3.70 
  -1  -2   1    9.70    3.90 
  -1  -2   1    2.00    2.70 
   1  -2  -1    2.60    3.40 
  -1  -2   1   -0.20    3.90 
  -1  -2   1    1.20    2.00 
  -1  -2   1    2.10    3.60 
   1  -2  -1    2.20    3.50 
  -1  -2   1    7.80    6.00 
  -1  -2   1    5.40    2.80 
   1  -2  -1    3.60    4.80 
   1  -2  -1    1.60    3.90 
  -1  -2   1    8.20    3.30 
   1  -2  -1    0.10    2.80 
  -1  -2   1    4.10    2.50 
  -1  -2   1    3.90    3.40 
   1  -2  -1   -0.90    3.70 
  -1  -2   1   -1.80    1.70 
  -1  -2   1    3.40    4.00 
   1  -2  -1   15.20    5.50 
   1  -2  -1    3.10    2.60 
  -1  -2   1    5.30    2.70 
  -1  -2   1   11.30    4.50 
   1  -2  -1    3.70    3.90 
   1  -2  -1    1.30    2.80 
  -1  -2   1    2.40    2.20 
   1  -2  -1   -0.80    2.70 
   1  -2  -1   -0.80    3.00 
   1  -2  -1    9.20    4.30 
  -1  -2   1    6.30    3.10 
   1  -2  -1    3.70    4.30 
  -1  -2   1    0.20    3.30 
   1  -2  -1    1.40    4.00 
   1  -2  -1    5.70    4.40 
   1  -2  -1    4.70    4.20 
  -1  -2   1    4.10    2.70 
   1  -2  -1    4.40    2.60 
   1  -2  -1    1.50    4.40 
  -1  -2   1   10.40    3.90 
   1  -2  -1    0.90    3.30 
   1  -2  -1   -0.60    3.20 
  -1  -2   1    3.90    3.60 
   1  -2  -1    1.00    2.90 
  -1   2   1    2.20    3.80 
  -1   2   1    4.20    3.90 
   1   2  -1   -0.40    3.30 
  -1   2   1    5.20    3.90 
  -1   2   1    3.90    4.40 
  -1   2   1    9.10    3.90 
  -1   2   1    8.20    3.30 
   1   2  -1    9.60    4.90 
   1   2  -1    2.60    3.30 
  -1   2   1    0.50    3.40 
  -1   2   1    6.00    4.40 
  -1   2   1    2.90    2.80 
   1   2  -1    3.40    3.80 
   1   2  -1   12.50    5.50 
  -1   2   1    3.60    4.40 
  -1   2   1    2.10    3.80 
  -1   2   1    3.20    3.40 
  -1   2   1    0.00    3.20 
   1   2  -1    2.70    2.40 
  -1   2   1   -1.10    3.60 
   1   2  -1   -5.90    2.60 
  -1   2   1    0.00    3.20 
  -1   2   1    1.00    2.20 
  -1   2   1    0.20    2.90 
   1   2  -1    0.90    2.80 
   1   2  -1    5.30    4.60 
  -1   2   1    2.70    3.70 
  -1   2   1    3.60    3.70 
  -1   2   1    3.10    3.90 
  -1   2   1    8.80    4.10 
   1   2  -1    2.70    2.50 
   1   2  -1    7.70    3.80 
   1   2  -1    1.40    3.40 
   1   2  -1   10.10    4.50 
  -1   2   1    6.40    2.90 
  -1   2   1    3.10    2.90 
  -1   2   1   -5.80    2.70 
  -1   2   1    2.30    3.70 
   1   2  -1    5.00    3.30 
  -1   2   1    3.40    3.30 
  -1   2   1    6.60    3.50 
   0  -2  -1  114.79   12.40 
   0  -2  -1  120.39   13.10 
   0  -2   1   89.69   12.30 
   0  -2   1  102.39    9.10 
   0  -2   1  102.59   12.10 
   0  -2  -1  118.29    8.60 
   0  -2  -1  101.69    8.70 
   0  -2  -1   93.49   12.80 
   0  -2   1  110.89    7.90 
   0  -2  -1  113.49   13.40 
   0  -2  -1  106.89    9.90 
   0  -2   1  131.39   13.50 
   0  -2  -1  118.59   13.40 
   0  -2   1  109.69   13.30 
   0  -2   1  123.99   11.50 
   0  -2  -1  133.69   13.60 
   0  -2  -1  124.69   16.70 
   0  -2  -1  100.99   11.70 
   0  -2  -1  112.59    9.50 
   0  -2  -1  107.09    9.70 
   0  -2   1  133.09   13.40 
   0  -2   1  102.19   11.60 
   0  -2  -1  115.79   12.30 
   0  -2   1   94.79   10.30 
   0  -2   1  115.69    8.90 
   0  -2   1  102.29   12.90 
   0  -2  -1  127.89   14.20 
   0  -2   1  110.29    9.50 
   0  -2  -1   93.19   12.00 
   0  -2   1  107.19   12.70 
   0  -2  -1  118.29   13.70 
   0  -2   1   94.89   12.00 
   0  -2  -1  122.89   14.70 
   0  -2   1  118.39   12.70 
   0  -2   1   93.09   12.80 
   0  -2  -1  137.09   13.70 
   0  -2   1  118.39   12.70 
   0  -2  -1  109.79   12.20 
   0  -2  -1   98.59   15.20 
   0  -2  -1  116.99   14.20 
   0  -2   1  105.09    9.90 
   0  -2   1  112.59    9.40 
   0  -2  -1  109.19   13.20 
   0  -2   1  124.29   13.50 
   0  -2   1  115.19   12.40 
   0  -2  -1  119.29   10.60 
   0   2  -1  128.49   10.70 
   0   2   1   96.99   12.40 
   0   2   1  110.19   14.10 
   0   2   1  111.59    9.10 
   0   2  -1   97.99   11.00 
   0   2   1  106.89   11.50 
   0   2   1  114.59   12.80 
   0   2  -1  115.59   15.90 
   0   2   1   77.09   16.30 
   0   2   1  106.69   11.70 
   0   2  -1   86.39   11.80 
   0   2  -1   91.79   12.10 
   0   2   1  110.79   13.20 
   0   2  -1  106.79   12.50 
   0   2  -1  101.89   12.40 
   0   2   1  108.19    9.80 
   0   2  -1   87.49   12.10 
   0   2   1  100.49   11.80 
   0   2  -1   97.49   16.50 
   0   2  -1   87.79   12.60 
   0   2  -1   74.39   13.70 
   0   2   1   93.09   12.70 
   0   2   1  122.09   12.60 
   0   2  -1  121.09    9.90 
   0   2   1   94.49   15.40 
   0   2  -1  129.79   11.30 
   0   2  -1   93.79   12.10 
   0   2   1   95.99    9.40 
   0   2   1   95.39    8.60 
   0   2   1  105.79   13.90 
   0   2  -1  102.49   12.60 
   0   2  -1  117.69   16.50 
   0   2   1   92.89   12.10 
   0   2   1  122.29   14.40 
   0   2  -1   89.49   10.60 
   0   2   1   71.69   15.50 
   0   2   1  101.49   11.70 
   0   2   1  114.39    9.80 
   0   2   1  110.89   13.80 
   0   2  -1  112.19   12.20 
   0   2  -1  113.49   13.20 
   0   2  -1  116.19   10.40 
   0   2  -1  111.89   12.30 
   0   2   1  105.59   12.90 
   1  -2   1 1507.05  105.09 
  -1  -2  -1 1554.94  105.29 
  -1  -2  -1 1548.05  104.69 
  -1  -2  -1 1540.85  104.19 
   1  -2   1 1566.94  105.09 
  -1  -2  -1 1547.65  101.09 
  -1  -2  -1 1461.25  104.39 
   1  -2   1 1520.15  105.89 
  -1  -2  -1 1534.45  101.29 
  -1  -2  -1 1535.05  101.99 
  -1  -2  -1 1590.54  104.79 
  -1  -2  -1 1561.04  101.89 
  -1  -2  -1 1660.23  108.09 
  -1  -2  -1 1534.25  101.69 
   1  -2   1 1552.84  104.49 
   1  -2   1 1513.95  105.09 
   1  -2   1 1483.35  104.59 
  -1  -2  -1 1593.84  105.89 
  -1  -2  -1 1509.25  103.29 
   1  -2   1 1532.65  102.79 
   1  -2   1 1536.65  105.09 
  -1  -2  -1 1477.75  101.49 
  -1  -2  -1 1551.54  102.49 
  -1  -2  -1 1555.14  101.09 
  -1  -2  -1 1542.55  101.59 
   1  -2   1 1490.05  106.49 
  -1  -2  -1 1472.95  107.39 
   1  -2   1 1586.74  105.69 
   1  -2   1 1499.75  103.49 
   1  -2   1 1514.25  102.19 
  -1  -2  -1 1509.05  104.39 
   1  -2   1 1616.64  104.99 
   1  -2   1 1548.65  103.49 
  -1  -2  -1 1536.85  102.59 
  -1  -2  -1 1567.64  105.19 
   1  -2   1 1605.54  104.09 
  -1  -2  -1 1544.85  102.59 
  -1  -2  -1 1602.64  101.99 
   1  -2   1 1597.34  104.69 
  -1  -2  -1 1441.06  108.49 
   1  -2   1 1523.95  104.59 
   1  -2   1 1552.34  105.09 
   1  -2   1 1535.85  103.19 
  -1  -2  -1 1476.45  104.29 
   1  -2   1 1495.55  104.09 
   1  -2   1 1515.45  105.29 
  -1  -2  -1 1497.15  104.99 
   1  -2   1 1600.24  105.69 
   1  -2   1 1533.35  105.19 
  -1   2  -1 1393.56  102.99 
   1   2   1 1570.84  103.19 
  -1   2  -1 1515.45  105.69 
  -1   2  -1 1538.55  103.39 
  -1   2  -1 1538.65  102.79 
   1   2   1 1570.54  105.59 
   1   2   1 1547.15  102.49 
  -1   2  -1 1541.05  102.39 
  -1   2  -1 1515.15  104.49 
   1   2   1 1534.75  104.49 
  -1   2  -1 1572.74  104.79 
  -1   2  -1 1562.94  104.99 
  -1   2  -1 1565.84  105.49 
  -1   2  -1 1528.25  104.19 
   1   2   1 1588.64  104.99 
   1   2   1 1559.74  101.69 
   1   2   1 1617.14  105.09 
  -1   2  -1 1490.15  102.09 
  -1   2  -1 1595.04  105.59 
  -1   2  -1 1580.74  103.89 
  -1   2  -1 1478.95  104.39 
  -1   2  -1 1536.25  105.19 
   1   2   1 1595.94  104.39 
   1   2   1 1474.65  105.09 
   1   2   1 1498.25  103.19 
   1   2   1 1507.85  104.79 
   1   2   1 1535.85  104.79 
   1   2   1 1452.55  108.39 
  -1   2  -1 1538.15  104.69 
   1   2   1 1590.24  102.59 
   1   2   1 1413.06  108.39 
  -1   2  -1 1504.15  105.39 
  -1   2  -1 1620.24  104.79 
  -1   2  -1 1570.54  103.69 
  -1   2  -1 1642.84  104.09 
   1   2   1 1518.55  101.49 
  -1   2  -1 1526.55  106.39 
   1   2   1 1554.94  101.69 
  -1   2  -1 1577.34  104.49 
  -1   2  -1 1529.95  104.29 
  -1   2  -1 1517.55  105.69 
  -1   2  -1 1543.65  105.09 
   2  -2   1  331.57   30.00 
  -2  -2  -1  345.97   26.50 
   2  -2   1  361.56   28.50 
  -2  -2  -1  363.96   28.80 
  -2  -2  -1  340.57   24.50 
   2  -2   1  386.56   29.10 
   2  -2   1  354.96   28.10 
  -2  -2  -1  318.47   30.30 
   2  -2   1  345.67   29.70 
  -2  -2  -1  390.36   29.70 
   2  -2   1  379.46   29.60 
   2  -2   1  320.07   31.30 
   2  -2   1  363.86   29.90 
  -2  -2  -1  400.26   29.20 
  -2  -2  -1  351.36   26.90 
  -2  -2  -1  376.36   28.20 
   2  -2   1  368.36   28.10 
   2  -2   1  354.36   30.80 
   2  -2   1  384.56   30.40 
  -2  -2  -1  358.06   28.70 
   2  -2   1  373.06   28.50 
   2  -2   1  379.86   29.40 
  -2  -2  -1  337.47   27.40 
  -2  -2  -1  395.76   32.70 
  -2  -2  -1  379.26   29.00 
  -2  -2  -1  384.36   30.50 
   2  -2   1  396.16   28.60 
  -2  -2  -1  332.87   26.80 
   2  -2   1  363.06   30.40 
  -2  -2  -1  367.76   30.50 
  -2  -2  -1  368.06   25.20 
  -2  -2  -1  369.86   27.80 
   2  -2   1  374.06   30.20 
  -2  -2  -1  382.86   25.70 
  -2  -2  -1  360.16   29.10 
  -2  -2  -1  325.07   28.90 
  -2  -2  -1  372.36   28.40 
  -2  -2  -1  360.76   28.20 
   2  -2   1  353.86   28.80 
   2  -2   1  360.26   28.70 
  -2  -2  -1  314.57   25.80 
   2  -2   1  362.66   31.30 
   2  -2   1  293.67   27.80 
  -2  -2  -1  350.76   28.60 
  -2  -2  -1  327.87   28.00 
  -2  -2  -1  354.16   24.40 
   2  -2   1  368.66   28.70 
  -2  -2  -1  347.17   29.40 
   2  -2   1  371.06   28.90 
   2   2   1  314.27   29.50 
  -2   2  -1  366.36   29.60 
  -2   2  -1  388.36   30.40 
  -2   2  -1  371.16   28.00 
  -2   2  -1  336.07   30.40 
   2   2   1  331.97   27.70 
   2   2   1  376.16   30.40 
  -2   2  -1  373.66   29.20 
  -2   2  -1  383.16   30.50 
  -2   2  -1  353.06   28.50 
  -2   2  -1  369.66   29.70 
  -2   2  -1  368.06   28.30 
  -2   2  -1  375.26   30.00 
   2   2   1  334.77   28.80 
  -2   2  -1  325.37   30.70 
   2   2   1  380.86   28.80 
  -2   2  -1  333.27   27.90 
   2   2   1  317.27   29.00 
  -2   2  -1  383.26   29.50 
   2   2   1  361.46   25.80 
   2   2   1  354.76   27.10 
  -2   2  -1  321.77   28.80 
  -2   2  -1  348.37   29.80 
   2   2   1  341.57   28.30 
  -2   2  -1  371.46   30.70 
   2   2   1  360.86   24.80 
   2   2   1  383.46   29.00 
  -2   2  -1  409.26   30.60 
  -2   2  -1  358.86   28.30 
   2   2   1  344.07   27.50 
   2   2   1  363.76   27.40 
   2   2   1  411.96   31.40 
  -2   2  -1  330.67   30.00 
  -2   2  -1  313.47   29.80 
  -2   2  -1  349.67   29.40 
  -2   2  -1  352.76   29.80 
  -2   2  -1  364.96   28.10 
  -2   2  -1  337.37   27.90 
  -3  -2  -1  108.59   17.60 
  -3  -2  -1  104.19   14.10 
  -3  -2  -1   84.09    9.70 
   3  -2   1   97.39   12.70 
   3  -2   1  101.29   16.70 
   3  -2   1   95.59   14.70 
  -3  -2  -1   94.59   15.10 
  -3  -2  -1   89.69   16.40 
  -3  -2  -1  133.39   18.40 
   3  -2   1  103.29   19.70 
   3  -2   1   91.89   15.30 
  -3  -2  -1   98.79   15.10 
   3  -2   1  116.89   14.00 
   3  -2   1  100.89   13.50 
  -3  -2  -1   98.09   14.00 
  -3  -2  -1  106.59   14.40 
   3  -2   1   91.19   13.40 
  -3  -2  -1  139.19   14.60 
  -3  -2  -1  113.89   12.00 
  -3  -2  -1  119.39   12.10 
  -3  -2  -1  108.39   10.40 
   3  -2   1  126.69   17.00 
  -3  -2  -1  108.09   13.40 
  -3  -2  -1  106.99   16.40 
   3  -2   1  113.09   17.10 
   3  -2   1  141.39   19.80 
  -3  -2  -1  112.29   10.10 
   3  -2   1  120.69   16.60 
  -3  -2  -1   83.39   13.30 
   3  -2   1   96.99   17.60 
   3  -2   1   92.29   13.80 
  -3  -2  -1   94.99   14.80 
   3  -2   1   90.69   15.70 
   3  -2   1  111.19   14.90 
   3  -2   1  100.59   14.50 
   3  -2   1  104.29   16.00 
  -3  -2  -1  101.99   12.30 
  -3  -2  -1  100.89   13.70 
  -3  -2  -1  107.99   13.10 
  -3  -2  -1   92.79   15.30 
  -3  -2  -1  122.59   10.70 
  -3  -2  -1   89.49   19.80 
  -3   2  -1  138.09   16.50 
   3   2   1   93.29   13.00 
  -3   2  -1  111.79   17.20 
   3   2   1  109.39   15.00 
  -3   2  -1  102.59   16.80 
  -3   2  -1   96.69   13.00 
   3   2   1   91.69   12.10 
  -3   2  -1   72.49   14.70 
  -3   2  -1  120.49   14.00 
  -3   2  -1   90.09   15.50 
   3   2   1   92.19   11.80 
  -3   2  -1   83.39   14.90 
  -3   2  -1   96.89   15.00 
  -3   2  -1   99.39   16.90 
   3   2   1  113.89   13.30 
   3   2   1   82.69   14.10 
  -3   2  -1   84.49   15.70 
   3   2   1  105.49   14.20 
   3   2   1  103.49   14.40 
  -3   2  -1   89.59   12.50 
   3   2   1   81.29   13.80 
  -3   2  -1  115.89   18.60 
  -3   2  -1   76.09   15.80 
  -3   2  -1  103.59   13.30 
   3   2   1  113.09   10.10 
   3   2   1   98.79   15.70 
   4  -2   1  265.57   28.30 
  -4  -2  -1  311.77   33.80 
  -4  -2  -1  310.77   26.10 
   4  -2   1  307.87   21.00 
  -4  -2  -1  268.57   22.30 
   4  -2   1  274.27   34.10 
   4  -2   1  266.87   32.50 
   4  -2   1  261.97   30.10 
   4  -2   1  319.07   27.90 
  -4  -2  -1  279.17   24.50 
   4  -2   1  260.17   32.10 
   4  -2   1  321.17   25.30 
  -4  -2  -1  274.07   22.70 
  -4  -2  -1  324.07   40.80 
  -4  -2  -1  285.97   31.50 
   4  -2   1  371.06   37.70 
  -4  -2  -1  333.67   24.70 
   4  -2   1  296.37   24.20 
  -4  -2  -1  298.07   26.50 
   4  -2   1  294.47   25.50 
  -4  -2  -1  330.07   25.00 
   4  -2   1  303.87   32.70 
  -4  -2  -1  284.97   25.00 
  -4  -2  -1  305.77   24.20 
  -4  -2  -1  274.87   23.80 
   4  -2   1  277.17   24.20 
  -4  -2  -1  259.87   25.80 
  -4  -2  -1  291.77   22.90 
   4  -2   1  266.17   31.00 
  -4  -2  -1  325.27   33.60 
   4  -2   1  324.67   32.10 
  -4  -2  -1  264.77   30.80 
  -4  -2  -1  191.18   28.10 
   4  -2   1  270.67   30.20 
   4  -2   1  261.57   30.90 
  -4  -2  -1  286.87   33.90 
  -4  -2  -1  254.47   33.30 
  -4  -2  -1  298.87   23.50 
   4  -2   1  308.27   27.80 
   4   2   1  316.17   32.50 
   4   2   1  251.17   28.70 
   4   2   1  274.57   23.10 
  -4   2  -1  252.37   31.40 
  -4   2  -1  289.77   24.30 
  -4   2  -1  233.88   32.20 
  -4   2  -1  307.17   24.40 
  -4   2  -1  250.87   31.40 
   4   2   1  251.37   28.40 
   4   2   1  291.27   32.40 
  -4   2  -1  275.67   32.70 
   4   2   1  291.07   23.30 
  -4   2  -1  325.97   34.00 
  -4   2  -1  289.47   24.50 
  -4   2  -1  284.87   30.90 
  -4   2  -1  288.17   24.30 
   4   2   1  248.88   29.80 
   4   2   1  270.77   24.30 
   4   2   1  281.97   24.70 
  -4   2  -1  270.87   32.20 
   4   2   1  296.67   24.00 
   4   2   1  288.77   25.60 
  -4   2  -1  268.57   31.30 
   4   2   1  248.68   30.50 
  -4   2  -1  231.68   31.70 
   4   2   1  270.17   30.20 
  -4   2  -1  285.97   34.50 
  -5  -2  -1  193.88   38.50 
   5  -2   1  276.77   35.10 
  -5  -2  -1  359.56   39.90 
  -5  -2  -1  376.66   32.30 
  -5  -2  -1  304.97   28.40 
  -5  -2  -1  303.27   27.10 
   5  -2   1  323.37   39.20 
   5  -2   1  365.86   42.90 
   5  -2   1  341.17   29.60 
   5  -2   1  290.77   35.60 
   5  -2   1  355.66   38.50 
   5  -2   1  295.67   34.40 
   5  -2   1  365.16   39.20 
  -5  -2  -1  346.67   36.90 
  -5  -2  -1  367.56   30.80 
   5  -2   1  354.46   31.20 
  -5  -2  -1  381.46   42.40 
  -5  -2  -1  317.77   28.70 
  -5  -2  -1  400.36   37.00 
  -5  -2  -1  317.17   27.00 
   5  -2   1  378.16   29.30 
   5  -2   1  269.87   35.10 
   5  -2   1  355.06   31.20 
  -5  -2  -1  349.47   25.70 
  -5  -2  -1  358.16   38.30 
   5  -2   1  340.17   27.30 
   5  -2   1  345.17   39.60 
  -5  -2  -1  313.97   28.10 
  -5  -2  -1  293.27   39.50 
  -5  -2  -1  274.87   35.40 
   5  -2   1  309.57   35.80 
  -5  -2  -1  394.76   28.50 
   5  -2   1  325.47   27.10 
   5  -2   1  271.17   38.20 
  -5  -2  -1  327.27   24.40 
   5   2   1  272.77   35.20 
   5   2   1  349.37   29.70 
  -5   2  -1  347.17   35.50 
  -5   2  -1  325.77   37.00 
   5   2   1  316.87   37.60 
  -5   2  -1  303.67   36.80 
  -5   2  -1  312.57   27.10 
   5   2   1  333.47   37.90 
  -5   2  -1  326.17   40.80 
  -5   2  -1  242.38   34.60 
   5   2   1  321.47   35.70 
   5   2   1  331.77   37.80 
   5   2   1  375.96   28.10 
   5   2   1  368.56   25.60 
  -5   2  -1  332.37   27.60 
   5   2   1  349.27   26.00 
  -5   2  -1  320.27   39.80 
  -5   2  -1  354.96   42.00 
  -5   2  -1  298.37   36.60 
  -5   2  -1  298.97   39.70 
   5   2   1  332.37   36.20 
   5   2   1  305.77   35.50 
  -5   2  -1  339.47   39.20 
  -5   2  -1  311.87   26.80 
   5   2   1  347.17   31.30 
  -6  -2  -1  630.74   48.30 
  -6  -2  -1  710.13   50.89 
  -6  -2  -1  735.63   56.19 
  -6  -2  -1  594.34   54.89 
  -6  -2  -1  644.74   55.99 
   6  -2   1  627.34   50.99 
   6  -2   1  614.14   46.70 
   6  -2   1  644.64   56.59 
  -6  -2  -1  590.24   50.59 
   6  -2   1  546.35   60.49 
   6  -2   1  587.94   48.90 
   6  -2   1  664.63   56.29 
  -6  -2  -1  601.84   53.09 
   6  -2   1  650.03   49.20 
   6  -2   1  625.84   49.50 
   6  -2   1  647.94   61.19 
  -6  -2  -1  742.73   79.49 
  -6  -2  -1  602.04   59.79 
  -6  -2  -1  592.44   57.09 
  -6  -2  -1  629.44   43.50 
   6  -2   1  642.34   57.39 
   6  -2   1  727.43   55.59 
   6  -2   1  655.33   66.79 
  -6  -2  -1  617.84   57.59 
  -6  -2  -1  578.24   58.09 
   6  -2   1  713.43   60.09 
   6  -2   1  526.05   53.59 
   6   2   1  641.34   51.29 
   6   2   1  573.84   53.39 
  -6   2  -1  568.14   52.19 
  -6   2  -1  732.03   58.69 
  -6   2  -1  605.24   45.90 
   6   2   1  666.13   57.69 
  -6   2  -1  567.64   53.99 
  -6   2  -1  595.44   58.29 
  -6   2  -1  632.14   56.99 
   6   2   1  678.63   58.89 
   6   2   1  627.34   54.69 
  -6   2  -1  557.24   57.69 
  -6   2  -1  482.25   60.89 
   6   2   1  682.83   55.49 
  -6   2  -1  578.34   59.39 
   6   2   1  659.23   56.69 
   6   2   1  626.94   46.50 
  -6   2  -1  709.53   59.19 
  -6   2  -1  639.34   57.89 
   6   2   1  647.34   56.89 
   6   2   1  581.44   52.19 
   7  -2   1 1037.00   94.49 
  -7  -2  -1 1229.08   95.29 
  -7  -2  -1 1194.18   88.89 
   7  -2   1 1238.98   92.69 
  -7  -2  -1 1214.78   96.09 
   7  -2   1 1023.00   96.59 
  -7  -2  -1 1108.99   92.99 
   7  -2   1 1254.87  101.49 
  -7  -2  -1 1275.27   99.69 
  -7  -2  -1 1118.29   98.89 
  -7  -2  -1 1175.28   86.69 
   7  -2   1 1088.49   93.79 
  -7  -2  -1 1041.50  105.69 
  -7  -2  -1 1219.48   88.59 
  -7  -2  -1 1220.08  100.59 
   7  -2   1 1238.58   88.19 
   7  -2   1 1248.78   98.89 
   7  -2   1 1267.67   98.49 
  -7  -2  -1 1049.79   99.29 
   7  -2   1 1244.68   95.99 
   7  -2   1 1199.78   97.79 
  -7  -2  -1 1235.58   98.99 
  -7  -2  -1 1163.98   91.89 
   7  -2   1 1266.67   88.29 
  -7   2  -1 1057.19   95.89 
   7   2   1 1209.18   95.39 
  -7   2  -1 1181.18   90.69 
  -7   2  -1 1163.48   96.59 
   7   2   1 1242.88   97.79 
  -7   2  -1 1173.48  101.69 
  -7   2  -1 1133.59  100.49 
   7   2   1 1172.08   96.19 
  -7   2  -1 1179.68   96.79 
   7   2   1 1221.08   96.89 
  -7   2  -1 1203.88   99.59 
   7   2   1 1149.69   93.69 
   7   2   1 1230.08   90.99 
   7   2   1 1354.16  100.59 
   7   2   1 1191.08   92.29 
  -7   2  -1 1206.68   94.39 
  -7   2  -1 1171.98   95.69 
  -7   2  -1 1114.49   98.89 
   8  -2   1  606.94   69.79 
   8  -2   1  540.65   59.49 
   8  -2   1  426.16   51.49 
  -8  -2  -1  551.94   63.19 
  -8  -2  -1  476.45   62.89 
   8  -2   1  474.45   59.79 
  -8  -2  -1  486.05   60.29 
   8  -2   1  468.65   57.09 
   8  -2   1  511.45   61.59 
  -8  -2  -1  463.25   63.19 
   8  -2   1  499.25   63.39 
  -8  -2  -1  463.45   55.19 
  -8  -2  -1  506.05   63.59 
  -8  -2  -1  470.85   59.89 
  -8  -2  -1  477.25   53.79 
   8  -2   1  443.86   57.59 
   8  -2   1  492.25   59.59 
  -8  -2  -1  598.64   61.99 
   8   2   1  454.95   59.19 
   8   2   1  500.45   60.49 
  -8   2  -1  459.55   61.09 
  -8   2  -1  487.25   56.89 
  -8   2  -1  498.75   60.39 
  -8   2  -1  456.45   62.99 
  -8   2  -1  539.45   67.39 
  -8   2  -1  411.76   58.79 
  -8   2  -1  481.95   57.39 
   8   2   1  536.65   57.09 
  -8   2  -1  472.45   57.79 
  -8   2  -1  469.45   50.19 
   8   2   1  441.96   56.49 
   8   2   1  427.66   57.99 
   8   2   1  421.26   52.09 
  -8   2  -1  479.35   64.49 
  -8   2  -1  505.95   60.29 
   9  -2   1  675.83   79.49 
  -9  -2  -1  774.42   77.69 
  -9  -2  -1  790.02   83.99 
   9  -2   1  511.95   74.89 
   9  -2   1  551.44   75.69 
  -9  -2  -1  756.52   86.99 
   9  -2   1  623.64   80.19 
   9  -2   1  745.13   83.49 
  -9  -2  -1  728.03   87.39 
   9  -2   1  706.53   77.49 
  -9  -2  -1  690.93   81.19 
   9  -2   1  694.03   79.69 
  -9  -2  -1  682.53   85.39 
  -9  -2  -1  791.42   68.69 
   9  -2   1  667.43   75.19 
  -9  -2  -1  811.92   72.69 
  -9  -2  -1  707.63   81.39 
   9   2   1  734.33   77.49 
  -9   2  -1  806.82   90.69 
  -9   2  -1  625.14   80.99 
   9   2   1  677.33   77.59 
  -9   2  -1  657.73   79.39 
  -9   2  -1  849.81   93.09 
  -9   2  -1  745.33   68.99 
   9   2   1  871.61   87.29 
  -9   2  -1  658.83   82.59 
  -9   2  -1  774.82   82.69 
  -9   2  -1  751.42   81.29 
  -9   2  -1  703.33   77.99 
   9   2   1  639.94   76.29 
   9   2   1  647.54   71.89 
   9   2   1  809.82   85.69 
  -9   2  -1  709.73   85.89 
 -10  -2  -1  195.18   36.20 
  10  -2   1   76.99   30.10 
  10  -2   1  118.89   31.00 
 -10  -2  -1  132.69   32.50 
 -10  -2  -1  148.29   40.30 
 -10  -2  -1  169.68   39.90 
 -10  -2  -1  154.58   36.20 
 -10  -2  -1  100.49   32.90 
  10  -2   1   97.09   31.40 
  10  -2   1  141.59   34.90 
  10  -2   1  143.19   35.00 
 -10  -2  -1   64.29   31.00 
 -10  -2  -1  217.38   44.90 
  10  -2   1  154.58   35.90 
  10  -2   1  140.09   35.80 
  10  -2   1  206.18   45.30 
 -10  -2  -1   81.09   29.90 
 -10   2  -1  179.68   39.50 
 -10   2  -1  120.49   35.60 
 -10   2  -1  118.39   36.30 
  10   2   1  229.68   45.60 
  10   2   1  182.58   41.90 
  10   2   1  150.58   35.00 
 -10   2  -1   94.09   33.20 
  10   2   1  131.89   31.80 
 -10   2  -1  182.48   39.40 
 -10   2  -1  140.59   37.20 
 -10   2  -1  120.49   30.70 
 -10   2  -1  156.98   39.50 
 -10   2  -1  142.69   38.10 
 -10   2  -1  202.58   39.00 
  10   2   1  131.79   33.30 
 -10  -3   1   88.49   36.60 
 -10   3   1   59.69   27.30 
  -9  -3   1  109.19   30.90 
   9  -3  -1  137.79   31.50 
  -9  -3   1   51.59   20.50 
  -9  -3   1  127.09   34.00 
   9  -3  -1  164.18   38.60 
  -9  -3   1  129.19   32.20 
  -9  -3   1  157.48   33.90 
  -9  -3   1  122.19   34.20 
  -9  -3   1  129.19   30.40 
   9  -3  -1  144.49   34.80 
   9  -3  -1  122.99   31.30 
  -9  -3   1  171.38   31.00 
   9  -3  -1  117.99   30.30 
  -9  -3   1  150.88   33.00 
   9  -3  -1  101.09   30.70 
   9  -3  -1  131.69   32.90 
  -9   3   1   85.69   27.20 
   9   3  -1  146.69   35.20 
   9   3  -1  103.59   27.50 
  -9   3   1  128.39   36.60 
   9   3  -1  107.89   27.60 
  -9   3   1  149.19   36.90 
  -9   3   1  153.88   33.20 
   9   3  -1   80.09   26.60 
  -9   3   1  102.99   35.00 
  -9   3   1  137.69   34.70 
  -9   3   1   82.89   28.50 
   9   3  -1  122.19   29.00 
  -9   3   1   68.79   26.10 
  -9   3   1  163.68   33.30 
  -8  -3   1   64.79   22.10 
   8  -3  -1   53.49   22.10 
   8  -3  -1   32.60   19.10 
  -8  -3   1   80.09   20.00 
   8  -3  -1   89.69   27.30 
   8  -3  -1   53.19   19.30 
  -8  -3   1   74.69   20.90 
   8  -3  -1   85.49   26.10 
  -8  -3   1   54.59   22.40 
   8  -3  -1   73.69   21.20 
  -8  -3   1   48.40   27.60 
  -8  -3   1   24.60   18.40 
   8  -3  -1   47.30   24.40 
   8  -3  -1   41.60   19.00 
  -8  -3   1   76.09   24.00 
  -8  -3   1   37.60   17.40 
  -8  -3   1   44.70   20.80 
  -8   3   1   76.19   23.30 
  -8   3   1   84.59   19.00 
  -8   3   1   59.39   23.70 
   8   3  -1  116.59   25.60 
  -8   3   1   72.79   25.30 
   8   3  -1   44.70   19.90 
   8   3  -1   70.09   22.20 
  -8   3   1   67.99   21.20 
  -8   3   1   93.09   27.50 
  -8   3   1   67.19   23.70 
   8   3  -1   23.70   18.30 
  -8   3   1   45.10   21.70 
   8   3  -1   73.29   22.10 
  -8   3   1   33.10   19.00 
   8   3  -1   65.19   19.90 
  -8   3   1   54.49   22.80 
   8   3  -1   67.09   20.90 
   7  -3  -1  352.76   44.00 
  -7  -3   1  380.46   49.80 
   7  -3  -1  291.47   45.80 
   7  -3  -1  408.86   41.50 
  -7  -3   1  316.07   56.39 
   7  -3  -1  354.06   40.00 
  -7  -3   1  406.56   36.00 
  -7  -3   1  310.57   39.80 
  -7  -3   1  403.06   47.10 
  -7  -3   1  307.07   40.80 
   7  -3  -1  299.57   45.90 
  -7  -3   1  343.77   49.50 
   7  -3  -1  370.06   47.30 
  -7  -3   1  419.06   46.40 
   7  -3  -1  429.46   49.10 
  -7  -3   1  333.47   46.50 
  -7  -3   1  391.96   44.70 
   7  -3  -1  376.16   53.49 
  -7  -3   1  311.27   44.70 
  -7  -3   1  460.15   48.80 
   7  -3  -1  410.86   44.60 
   7  -3  -1  340.37   45.30 
   7  -3  -1  433.26   48.90 
  -7  -3   1  323.67   45.60 
   7  -3  -1  354.16   42.40 
   7  -3  -1  368.56   48.70 
   7  -3  -1  350.56   43.60 
   7   3  -1  334.07   45.10 
   7   3  -1  403.16   49.00 
  -7   3   1  439.46   54.89 
   7   3  -1  369.36   46.40 
  -7   3   1  389.26   52.19 
  -7   3   1  373.36   50.09 
  -7   3   1  386.16   47.90 
  -7   3   1  371.26   48.10 
   7   3  -1  355.76   43.50 
  -7   3   1  418.46   53.99 
  -7   3   1  326.87   39.70 
  -7   3   1  358.16   49.00 
  -7   3   1  395.66   49.99 
  -7   3   1  372.26   49.70 
   7   3  -1  345.57   42.10 
   7   3  -1  387.96   46.30 
   7   3  -1  323.37   46.80 
  -6  -3   1  972.30   73.99 
   6  -3  -1  957.20   78.19 
  -6  -3   1  953.40   74.99 
   6  -3  -1 1034.40   73.49 
   6  -3  -1  895.21   77.19 
   6  -3  -1  935.81   76.99 
  -6  -3   1  916.91   79.79 
   6  -3  -1  942.41   75.09 
  -6  -3   1  929.01   78.59 
  -6  -3   1  983.00   81.99 
   6  -3  -1  935.01   80.99 
  -6  -3   1  984.40   75.69 
   6  -3  -1 1088.89   81.79 
  -6  -3   1  974.30   64.39 
  -6  -3   1  927.41   68.49 
   6  -3  -1  876.11   67.99 
  -6  -3   1  924.21   78.19 
   6  -3  -1  963.10   77.19 
  -6  -3   1  980.60   73.59 
   6  -3  -1  997.90   73.89 
  -6  -3   1 1057.99   66.19 
   6  -3  -1  883.91   74.69 
  -6  -3   1  977.50   79.09 
  -6  -3   1  881.51   69.69 
  -6  -3   1  998.70   76.49 
  -6  -3   1 1013.80   76.39 
   6  -3  -1  940.81   78.99 
  -6  -3   1 1022.00   89.69 
   6  -3  -1  888.51   82.59 
   6  -3  -1  843.92   74.29 
  -6   3   1  824.52   75.69 
   6   3  -1  883.61   74.09 
  -6   3   1  890.71   81.29 
   6   3  -1  920.91   79.19 
  -6   3   1  970.90   78.49 
   6   3  -1  886.41   73.19 
   6   3  -1  938.81   75.99 
  -6   3   1  842.52   79.79 
  -6   3   1  976.70   69.19 
   6   3  -1  900.71   75.99 
  -6   3   1  921.91   78.59 
  -6   3   1  994.70   80.99 
   6   3  -1  956.00   67.69 
   6   3  -1  959.80   78.49 
  -6   3   1  920.41   81.49 
  -6   3   1  934.81   79.79 
   6   3  -1  990.50   76.89 
   6   3  -1  731.33   70.49 
  -6   3   1  912.01   78.69 
  -6   3   1  925.81   72.69 
  -6   3   1  944.21   67.59 
   5  -3  -1 2648.94  173.48 
   5  -3  -1 2410.86  174.18 
   5  -3  -1 2678.33  175.28 
   5  -3  -1 2399.76  178.98 
   5  -3  -1 2423.86  178.38 
  -5  -3   1 2512.55  172.88 
  -5  -3   1 2638.64  175.38 
   5  -3  -1 2463.35  179.78 
  -5  -3   1 2677.23  169.98 
  -5  -3   1 2281.97  186.98 
   5  -3  -1 2528.85  181.58 
   5  -3  -1 2674.93  178.48 
  -5  -3   1 2447.16  180.28 
   5  -3  -1 2617.74  177.98 
  -5  -3   1 2544.55  181.98 
  -5  -3   1 2631.44  176.38 
  -5  -3   1 2423.86  172.28 
  -5  -3   1 2521.45  174.18 
  -5  -3   1 2427.96  182.58 
  -5  -3   1 2393.46  171.78 
  -5  -3   1 2499.95  167.98 
  -5  -3   1 2524.15  180.38 
   5  -3  -1 2731.83  178.38 
  -5  -3   1 2639.94  177.98 
  -5  -3   1 2427.66  168.38 
   5  -3  -1 2608.14  178.18 
   5  -3  -1 2445.46  182.38 
  -5  -3   1 2610.74  177.48 
   5  -3  -1 2640.84  173.08 
  -5  -3   1 2858.11  176.88 
  -5  -3   1 2650.53  182.28 
  -5  -3   1 2509.35  171.08 
   5  -3  -1 2558.84  181.08 
   5  -3  -1 2842.82  188.28 
  -5  -3   1 2567.34  173.48 
  -5  -3   1 2546.35  168.38 
  -5  -3   1 2564.34  178.08 
  -5  -3   1 2606.64  171.38 
   5  -3  -1 2620.64  180.48 
  -5   3   1 2530.85  172.38 
  -5   3   1 2586.94  182.28 
   5   3  -1 2476.15  177.88 
   5   3  -1 2579.14  172.58 
  -5   3   1 2739.13  181.28 
  -5   3   1 2787.02  177.38 
  -5   3   1 2459.35  181.38 
   5   3  -1 2430.16  177.78 
   5   3  -1 2220.28  177.68 
   5   3  -1 2486.25  174.98 
  -5   3   1 2487.85  180.28 
   5   3  -1 2554.94  173.28 
  -5   3   1 2537.45  174.18 
  -5   3   1 2442.26  183.08 
  -5   3   1 2764.12  181.98 
  -5   3   1 2656.03  185.38 
   5   3  -1 2489.75  179.68 
   5   3  -1 2689.63  176.58 
   5   3  -1 2693.93  177.38 
   5   3  -1 2567.14  177.18 
   5   3  -1 2502.65  178.48 
   5   3  -1 2574.14  182.28 
  -5   3   1 2411.06  182.58 
  -5   3   1 2786.62  183.38 
   4  -3  -1  708.33   58.89 
   4  -3  -1  797.32   61.29 
  -4  -3   1  789.92   55.69 
  -4  -3   1  755.82   55.39 
  -4  -3   1  742.33   60.29 
  -4  -3   1  749.33   56.79 
   4  -3  -1  712.83   59.69 
   4  -3  -1  760.42   60.69 
  -4  -3   1  757.62   54.59 
   4  -3  -1  761.42   58.69 
   4  -3  -1  699.93   57.99 
  -4  -3   1  753.02   55.49 
  -4  -3   1  763.32   60.49 
  -4  -3   1  704.93   56.19 
  -4  -3   1  735.33   54.69 
  -4  -3   1  778.12   55.29 
  -4  -3   1  752.82   59.19 
   4  -3  -1  714.93   60.79 
  -4  -3   1  732.83   61.89 
  -4  -3   1  783.22   57.59 
  -4  -3   1  792.22   61.69 
   4  -3  -1  805.62   55.99 
   4  -3  -1  769.92   62.09 
   4  -3  -1  736.03   58.99 
  -4  -3   1  763.72   58.99 
  -4  -3   1  698.33   58.99 
  -4  -3   1  791.32   53.79 
  -4  -3   1  721.93   56.49 
  -4  -3   1  775.72   67.69 
  -4  -3   1  807.02   52.49 
   4  -3  -1  760.52   56.39 
   4  -3  -1  727.03   62.79 
   4  -3  -1  844.62   66.99 
   4   3  -1  787.62   59.09 
  -4   3   1  755.82   61.29 
  -4   3   1  710.23   57.09 
   4   3  -1  730.33   55.69 
  -4   3   1  774.42   61.59 
   4   3  -1  776.22   59.39 
  -4   3   1  757.52   61.19 
  -4   3   1  697.73   60.69 
   4   3  -1  775.72   58.49 
  -4   3   1  813.82   63.59 
  -4   3   1  732.03   57.99 
  -4   3   1  724.63   55.69 
  -4   3   1  719.93   62.89 
   4   3  -1  784.82   55.49 
   4   3  -1  826.32   58.69 
   4   3  -1  798.32   57.49 
   4   3  -1  740.23   59.39 
   4   3  -1  753.12   56.69 
   4   3  -1  844.82   64.09 
   4   3  -1  719.23   58.49 
  -4   3   1  736.03   61.69 
  -4   3   1  648.14   61.09 
   4   3  -1  771.52   60.09 
  -3  -3   1 2262.27  144.29 
  -3  -3   1 2139.99  138.69 
  -3  -3   1 2174.58  140.69 
   3  -3  -1 2080.99  144.39 
  -3  -3   1 2104.29  143.69 
  -3  -3   1 2078.69  138.39 
   3  -3  -1 2102.09  142.09 
  -3  -3   1 2021.50  141.39 
   3  -3  -1 2055.29  149.19 
  -3  -3   1 1964.40  140.99 
   3  -3  -1 2035.80  142.49 
  -3  -3   1 2140.39  144.39 
   3  -3  -1 1986.80  145.79 
  -3  -3   1 1934.11  144.29 
  -3  -3   1 2070.89  141.19 
  -3  -3   1 2058.89  144.09 
  -3  -3   1 2011.40  140.79 
   3  -3  -1 1966.70  143.29 
  -3  -3   1 2109.49  141.79 
  -3  -3   1 2142.19  141.59 
   3  -3  -1 2091.69  141.39 
   3  -3  -1 2146.49  145.59 
  -3  -3   1 2097.29  140.09 
  -3  -3   1 2071.19  142.39 
   3  -3  -1 2160.68  144.79 
  -3  -3   1 2030.20  141.69 
   3  -3  -1 2060.59  141.19 
  -3  -3   1 2148.19  144.99 
  -3  -3   1 2111.79  145.29 
  -3  -3   1 2050.69  144.79 
   3  -3  -1 2121.49  145.29 
   3  -3  -1 2055.39  144.49 
  -3  -3   1 2046.70  143.29 
  -3  -3   1 2156.68  144.09 
  -3  -3   1 2049.20  141.49 
  -3  -3   1 2074.59  139.89 
   3   3  -1 2101.09  143.79 
   3   3  -1 2112.69  142.99 
  -3   3   1 2088.29  141.99 
   3   3  -1 1874.61  140.49 
   3   3  -1 2104.69  142.39 
  -3   3   1 1997.50  145.19 
  -3   3   1 2233.88  142.19 
   3   3  -1 2029.20  141.79 
  -3   3   1 2133.09  143.89 
   3   3  -1 2039.40  143.09 
  -3   3   1 2066.99  144.39 
  -3   3   1 2165.08  147.09 
   3   3  -1 2079.39  147.79 
  -3   3   1 2156.18  143.49 
   3   3  -1 2082.49  143.29 
  -3   3   1 2093.99  145.29 
   3   3  -1 2237.98  143.29 
   3   3  -1 2085.39  141.69 
   3   3  -1 2028.80  141.39 
   3   3  -1 2116.89  142.89 
  -3   3   1 2056.39  146.29 
   3   3  -1 2110.59  138.79 
  -3   3   1 2025.70  145.09 
  -3   3   1 1943.51  142.79 
  -3   3   1 2066.79  145.59 
   3   3  -1 2066.39  142.79 
  -3   3   1 2020.10  146.39 
   2  -3  -1   98.69   18.10 
   2  -3  -1  112.79   17.20 
   2  -3  -1  142.69   18.50 
  -2  -3   1  120.89   15.60 
   2  -3  -1   89.99   14.60 
  -2  -3   1   92.49   15.20 
  -2  -3   1  133.59   18.30 
  -2  -3   1  144.59   12.10 
  -2  -3   1  139.49   14.90 
  -2  -3   1   98.69   13.10 
  -2  -3   1  103.69   14.40 
   2  -3  -1  109.09   15.00 
  -2  -3   1  118.29   18.40 
  -2  -3   1  113.79   14.40 
   2  -3  -1  126.69   17.10 
  -2  -3   1  141.59   17.40 
   2  -3  -1  100.49   14.30 
  -2  -3   1  130.69   19.60 
   2  -3  -1  136.99   18.70 
  -2  -3   1   94.79   13.30 
  -2  -3   1  134.49   16.40 
   2  -3  -1  118.39   17.00 
   2  -3  -1  141.79   16.70 
  -2  -3   1  134.59   18.10 
  -2  -3   1  118.69   11.60 
   2  -3  -1  104.89   16.80 
   2  -3  -1  113.49   13.50 
  -2  -3   1  111.49   13.50 
  -2  -3   1  124.79   17.00 
  -2  -3   1  146.79   15.00 
  -2  -3   1  178.38   18.10 
  -2  -3   1  138.19   14.10 
  -2  -3   1  101.89   13.10 
  -2  -3   1  111.89   14.70 
  -2  -3   1  106.29    9.80 
  -2  -3   1  134.09   13.60 
   2  -3  -1   95.29   13.30 
   2  -3  -1  134.19   18.10 
   2  -3  -1  110.59   17.10 
  -2  -3   1  127.19   16.30 
  -2   3   1  132.49   18.80 
  -2   3   1  127.89   17.30 
  -2   3   1  120.59   15.20 
  -2   3   1  108.39   15.60 
  -2   3   1  105.29   16.10 
   2   3  -1  117.09   14.40 
  -2   3   1  144.79   18.40 
  -2   3   1  122.09   13.60 
   2   3  -1  129.29   19.80 
   2   3  -1   81.39   14.60 
  -2   3   1  109.69   15.40 
   2   3  -1  128.79   14.90 
  -2   3   1   98.29   14.80 
  -2   3   1  144.59   18.30 
   2   3  -1  129.89   15.30 
   2   3  -1  116.69   13.60 
   2   3  -1  101.09   13.10 
   2   3  -1  107.59   15.50 
   2   3  -1  121.29   16.10 
  -2   3   1   93.19   17.10 
   2   3  -1  125.59   16.00 
  -2   3   1  109.99   17.50 
  -2   3   1  142.49   18.80 
  -2   3   1  123.39   14.60 
  -2   3   1  103.69   16.80 
   2   3  -1  116.09   14.30 
  -2   3   1  118.39   14.20 
  -2   3   1  117.89   18.20 
   2   3  -1  135.39   14.60 
  -2   3   1  117.69   15.60 
   2   3  -1  143.69   18.00 
  -2   3   1  128.19   17.90 
  -1  -3   1 1034.30   68.69 
  -1  -3   1 1014.80   69.19 
   1  -3  -1 1038.70   71.89 
  -1  -3   1  799.52   73.49 
  -1  -3   1 1032.00   70.49 
   1  -3  -1  990.00   71.39 
   1  -3  -1 1023.80   73.79 
  -1  -3   1  983.70   69.29 
   1  -3  -1 1001.90   71.89 
   1  -3  -1  991.60   69.99 
  -1  -3   1 1016.40   70.19 
   1  -3  -1 1046.80   71.79 
  -1  -3   1  990.50   71.39 
  -1  -3   1 1037.00   72.19 
  -1  -3   1  949.51   71.59 
   1  -3  -1 1017.10   71.19 
   1  -3  -1 1083.19   71.89 
  -1  -3   1  977.00   67.09 
   1  -3  -1 1049.30   73.59 
  -1  -3   1  989.50   70.79 
  -1  -3   1 1065.89   68.79 
   1  -3  -1 1045.00   73.29 
   1  -3  -1 1027.60   71.69 
  -1  -3   1  970.40   66.99 
   1  -3  -1  917.31   70.79 
  -1  -3   1  984.00   68.19 
   1  -3  -1 1054.99   70.99 
   1  -3  -1 1099.59   73.79 
  -1  -3   1  984.00   69.49 
  -1  -3   1  853.71   72.69 
   1  -3  -1  940.51   67.59 
  -1  -3   1  747.93   72.69 
   1  -3  -1  979.20   69.39 
   1  -3  -1 1088.49   72.59 
  -1  -3   1 1031.20   67.59 
   1  -3  -1  948.41   70.19 
   1  -3  -1 1035.80   71.39 
   1  -3  -1  926.21   69.59 
   1  -3  -1 1049.40   73.99 
   1  -3  -1  984.60   67.29 
  -1  -3   1  989.30   72.49 
  -1  -3   1 1025.00   68.99 
  -1  -3   1 1061.99   68.09 
  -1  -3   1 1055.59   71.49 
  -1  -3   1 1010.70   71.99 
  -1  -3   1  943.01   69.89 
  -1  -3   1  979.40   67.39 
   1   3  -1 1040.10   72.99 
  -1   3   1  995.80   72.49 
  -1   3   1  962.40   67.29 
   1   3  -1 1030.50   71.79 
  -1   3   1  956.50   67.89 
   1   3  -1  840.22   73.49 
  -1   3   1 1006.00   70.09 
  -1   3   1  980.70   71.49 
   1   3  -1 1029.70   70.09 
  -1   3   1 1020.70   71.59 
  -1   3   1 1021.50   68.79 
  -1   3   1 1104.39   69.89 
  -1   3   1  967.10   70.59 
  -1   3   1  997.90   71.59 
  -1   3   1 1005.90   72.89 
  -1   3   1 1069.79   72.19 
  -1   3   1 1074.09   68.69 
  -1   3   1  957.20   67.79 
  -1   3   1  937.01   71.59 
  -1   3   1  956.10   72.09 
  -1   3   1 1028.50   73.39 
  -1   3   1 1018.80   70.59 
   1   3  -1  968.60   71.19 
  -1   3   1  986.50   72.29 
   1   3  -1 1033.90   67.99 
   1   3  -1 1059.79   72.09 
   1   3  -1  986.70   67.09 
   1   3  -1 1002.50   69.89 
   1   3  -1 1015.70   70.39 
  -1   3   1  974.60   69.49 
  -1   3   1 1016.10   73.69 
  -1   3   1  971.70   71.39 
   1   3  -1  966.40   66.99 
  -1   3   1  994.90   70.19 
   1   3  -1 1009.60   71.69 
  -1   3   1  987.20   72.29 
  -1   3   1  971.40   71.59 
   1   3  -1  981.70   71.49 
   1   3  -1 1078.09   73.09 
  -1   3   1 1027.70   72.09 
   0  -3  -1  201.48   17.60 
   0  -3   1  201.48   19.60 
   0  -3  -1  210.38   22.40 
   0  -3   1  258.17   18.00 
   0  -3  -1  215.68   20.10 
   0  -3   1  163.58   20.20 
   0  -3   1  181.58   22.10 
   0  -3  -1  214.28   14.90 
   0  -3  -1  216.28   23.50 
   0  -3   1  208.28   18.10 
   0  -3  -1  215.88   17.20 
   0  -3   1  207.68   18.30 
   0  -3  -1  170.58   21.00 
   0  -3   1  208.08   19.10 
   0  -3   1  216.28   23.10 
   0  -3   1  229.68   22.90 
   0  -3   1  193.38   15.40 
   0  -3  -1  227.88   20.30 
   0  -3  -1  221.58   16.20 
   0  -3   1  245.68   17.20 
   0  -3   1  191.68   18.70 
   0  -3   1  205.38   16.40 
   0  -3  -1  225.28   18.80 
   0  -3   1  201.08   17.40 
   0  -3  -1  217.28   17.20 
   0  -3  -1  202.18   22.30 
   0  -3  -1  216.58   21.70 
   0  -3  -1  231.18   20.20 
   0  -3   1  211.28   19.40 
   0  -3  -1  223.88   20.40 
   0  -3  -1  225.38   24.90 
   0  -3  -1  188.08   21.40 
   0  -3   1  187.48   21.20 
   0  -3  -1  195.08   16.30 
   0  -3  -1  215.18   19.70 
   0  -3  -1  210.48   19.80 
   0  -3  -1  246.58   24.70 
   0  -3   1  222.18   23.50 
   0  -3  -1  205.98   17.40 
   0  -3   1  197.08   22.20 
   0  -3  -1  227.28   20.00 
   0  -3   1  206.38   18.90 
   0  -3   1  214.38   16.80 
   0   3   1  218.48   18.30 
   0   3   1  211.98   17.90 
   0   3   1  221.28   22.90 
   0   3   1  226.88   19.90 
   0   3  -1  205.98   19.00 
   0   3  -1  216.68   22.70 
   0   3   1  166.28   22.60 
   0   3   1  221.48   16.90 
   0   3   1  175.68   21.20 
   0   3   1  202.48   27.70 
   0   3   1  170.68   28.50 
   0   3  -1  202.78   21.70 
   0   3   1  220.18   23.00 
   0   3  -1  235.98   19.90 
   0   3  -1  204.98   23.10 
   0   3  -1  228.08   28.00 
   0   3  -1  208.38   22.10 
   0   3  -1  220.18   16.50 
   0   3   1  233.38   18.80 
   0   3   1  252.37   20.40 
   0   3  -1  213.98   23.20 
   0   3  -1  191.78   21.60 
   0   3  -1  169.58   19.90 
   0   3   1  190.68   22.50 
   0   3   1  207.28   19.40 
   0   3   1  241.98   24.40 
   0   3   1  267.07   26.80 
   0   3   1  221.78   28.10 
   0   3  -1  221.48   23.90 
   0   3   1  209.68   19.00 
   0   3  -1  152.78   25.90 
   0   3  -1  228.78   18.90 
   0   3  -1  258.57   24.80 
   0   3  -1  209.58   19.00 
   0   3   1  214.68   23.50 
   0   3   1  204.98   18.90 
   0   3  -1  225.48   20.30 
   0   3   1  238.88   19.40 
   0   3  -1  202.38   27.70 
   0   3   1  226.48   18.50 
   0   3  -1  225.08   20.20 
   0   3  -1  154.28   21.80 
   0   3  -1  195.48   22.20 
  -1  -3  -1 4694.93  306.57 
   1  -3   1 4699.43  307.87 
  -1  -3  -1 4699.73  302.67 
  -1  -3  -1 4646.14  304.47 
  -1  -3  -1 4673.53  305.47 
  -1  -3  -1 4498.85  304.87 
  -1  -3  -1 4605.44  308.87 
  -1  -3  -1 4658.83  311.17 
   1  -3   1 4742.23  309.07 
   1  -3   1 4829.52  304.87 
   1  -3   1 4801.72  306.97 
  -1  -3  -1 4202.78  313.67 
   1  -3   1 4726.83  304.47 
  -1  -3  -1 4616.44  309.97 
   1  -3   1 4752.02  308.17 
  -1  -3  -1 4667.23  302.47 
   1  -3   1 4748.02  308.67 
  -1  -3  -1 4670.03  303.37 
  -1  -3  -1 4343.87  303.27 
   1  -3   1 4829.42  308.17 
  -1  -3  -1 4665.13  308.27 
  -1  -3  -1 4512.95  305.77 
  -1  -3  -1 4614.24  302.67 
   1  -3   1 4725.13  308.27 
  -1  -3  -1 4682.93  308.87 
   1  -3   1 4538.65  308.97 
   1  -3   1 4590.44  307.67 
  -1  -3  -1 4706.83  305.77 
   1  -3   1 4861.51  307.27 
   1  -3   1 4703.53  305.87 
  -1  -3  -1 4667.23  308.37 
   1  -3   1 4853.11  308.17 
   1  -3   1 4600.94  305.97 
  -1  -3  -1 4898.91  311.17 
  -1  -3  -1 4673.73  304.07 
  -1  -3  -1 4663.03  302.87 
   1  -3   1 4685.63  305.57 
  -1  -3  -1 4905.71  303.27 
   1  -3   1 4785.92  310.57 
  -1  -3  -1 4599.74  307.87 
  -1  -3  -1 4620.34  304.87 
  -1  -3  -1 4775.52  305.67 
  -1  -3  -1 4027.00  312.77 
   1  -3   1 4687.93  308.27 
  -1  -3  -1 4669.63  306.27 
   1  -3   1 4665.03  305.47 
  -1   3  -1 4678.23  304.37 
  -1   3  -1 4658.33  307.27 
  -1   3  -1 4658.73  306.47 
   1   3   1 4579.04  304.77 
  -1   3  -1 4798.82  303.47 
  -1   3  -1 4536.45  308.27 
   1   3   1 4404.96  314.97 
   1   3   1 4665.53  308.97 
  -1   3  -1 4456.25  308.97 
   1   3   1 4299.57  304.77 
   1   3   1 4653.43  313.17 
  -1   3  -1 4610.44  303.27 
  -1   3  -1 4665.03  306.47 
  -1   3  -1 4482.55  307.97 
   1   3   1 4617.14  308.17 
  -1   3  -1 4648.44  308.07 
   1   3   1 4697.53  308.37 
   1   3   1 4607.04  304.87 
  -1   3  -1 4522.45  308.27 
   1   3   1 4631.94  302.77 
  -1   3  -1 4606.74  308.27 
  -1   3  -1 4597.54  308.97 
   1   3   1 4591.74  308.27 
  -1   3  -1 4582.94  307.57 
  -1   3  -1 4453.85  308.57 
   1   3   1 4809.42  307.37 
  -1   3  -1 4613.14  308.17 
  -1   3  -1 4606.54  304.87 
   1   3   1 4656.53  305.87 
   1   3   1 4947.71  309.77 
  -1   3  -1 4662.23  306.87 
  -1   3  -1 4738.83  308.67 
   1   3   1 4377.76  307.77 
  -1   3  -1 4691.93  308.67 
  -1   3  -1 4681.43  304.87 
  -1   3  -1 4349.67  304.97 
   1   3   1 4731.93  305.77 
   1   3   1 4751.52  304.17 
  -1   3  -1 4557.84  309.77 
  -1   3  -1 4670.23  306.47 
  -1   3  -1 4786.32  307.77 
  -2  -3  -1 1410.06  101.99 
  -2  -3  -1 1416.76  101.69 
   2  -3   1 1454.75  100.09 
  -2  -3  -1 1437.36   99.89 
  -2  -3  -1 1397.56   99.89 
  -2  -3  -1 1412.76  101.59 
  -2  -3  -1 1484.35  100.79 
   2  -3   1 1462.75  100.09 
   2  -3   1 1443.66   99.69 
  -2  -3  -1 1391.06   96.29 
   2  -3   1 1325.77  101.19 
   2  -3   1 1516.75  101.69 
   2  -3   1 1509.85  100.09 
  -2  -3  -1 1455.25  105.29 
  -2  -3  -1 1458.65   99.29 
   2  -3   1 1460.15   97.79 
   2  -3   1 1365.16  102.79 
  -2  -3  -1 1367.96   96.39 
  -2  -3  -1 1363.56   94.19 
  -2  -3  -1 1424.06   94.39 
  -2  -3  -1 1399.06   98.59 
   2  -3   1 1554.84  101.89 
  -2  -3  -1 1492.75   98.59 
  -2  -3  -1 1584.24  100.79 
  -2  -3  -1 1485.85  101.19 
  -2  -3  -1 1434.26   95.59 
  -2  -3  -1 1445.16  100.19 
  -2  -3  -1 1489.05   99.39 
  -2  -3  -1 1267.77   96.09 
  -2  -3  -1 1483.55   97.69 
  -2  -3  -1 1520.45   96.79 
  -2  -3  -1 1405.06  106.49 
  -2  -3  -1 1466.25   97.99 
  -2  -3  -1 1569.74   99.29 
   2  -3   1 1532.45  102.39 
   2  -3   1 1407.56  104.29 
   2  -3   1 1474.85   98.99 
  -2  -3  -1 1411.16   94.69 
   2  -3   1 1344.57  100.09 
  -2  -3  -1 1393.56   94.49 
  -2  -3  -1 1403.26   95.99 
   2  -3   1 1426.66   98.99 
  -2  -3  -1 1416.06  102.79 
  -2  -3  -1 1430.66   98.19 
  -2   3  -1 1509.85   98.29 
  -2   3  -1 1496.25  101.79 
  -2   3  -1 1372.26  102.39 
   2   3   1 1461.45  101.19 
  -2   3  -1 1450.65   98.79 
  -2   3  -1 1463.55  101.69 
   2   3   1 1382.76   99.99 
  -2   3  -1 1484.95   99.29 
   2   3   1 1421.16   97.29 
  -2   3  -1 1366.76   97.49 
   2   3   1 1491.75  103.39 
   2   3   1 1456.65  100.99 
   2   3   1 1450.95   98.99 
  -2   3  -1 1486.45  100.49 
   2   3   1 1407.16   96.59 
   2   3   1 1431.56  102.19 
  -2   3  -1 1382.66  101.79 
  -2   3  -1 1381.26   99.69 
   2   3   1 1465.45  103.59 
  -2   3  -1 1461.85  100.69 
  -2   3  -1 1326.77   99.99 
  -2   3  -1 1384.96  100.49 
  -2   3  -1 1348.17  101.79 
  -2   3  -1 1464.25  102.99 
  -2   3  -1 1267.97  100.09 
   2   3   1 1494.75   97.09 
  -2   3  -1 1500.45  100.89 
   2   3   1 1472.75   95.79 
  -2   3  -1 1386.26  100.89 
   2   3   1 1449.76  100.69 
  -2   3  -1 1468.65  102.09 
  -3  -3  -1 2937.91  195.28 
  -3  -3  -1 2871.61  201.78 
  -3  -3  -1 3029.80  200.68 
  -3  -3  -1 3013.60  204.58 
  -3  -3  -1 2989.60  204.48 
  -3  -3  -1 2955.70  199.28 
   3  -3   1 3022.30  204.08 
  -3  -3  -1 3361.66  206.48 
  -3  -3  -1 2754.42  205.48 
   3  -3   1 2905.01  201.18 
   3  -3   1 3069.99  204.48 
  -3  -3  -1 2929.41  196.48 
   3  -3   1 2862.51  202.18 
   3  -3   1 3170.88  201.18 
   3  -3   1 3227.08  202.98 
  -3  -3  -1 3011.90  201.88 
  -3  -3  -1 2980.80  201.38 
  -3  -3  -1 3000.00  198.78 
  -3  -3  -1 3013.60  200.58 
  -3  -3  -1 3017.40  198.08 
   3  -3   1 3379.86  210.68 
   3  -3   1 2849.11  201.08 
   3  -3   1 3020.40  201.48 
   3  -3   1 2992.50  204.78 
  -3  -3  -1 2805.22  206.68 
   3  -3   1 2872.91  205.08 
  -3  -3  -1 3024.80  203.68 
  -3  -3  -1 2923.31  197.38 
   3  -3   1 2998.80  204.68 
  -3  -3  -1 3141.59  199.58 
  -3  -3  -1 2893.31  195.28 
  -3  -3  -1 2993.10  201.28 
   3  -3   1 3030.10  202.38 
   3  -3   1 2799.22  207.38 
   3  -3   1 2949.10  208.18 
   3   3   1 3107.29  200.08 
   3   3   1 2836.12  200.98 
   3   3   1 2983.60  204.78 
   3   3   1 3102.89  202.18 
  -3   3  -1 2981.00  200.98 
  -3   3  -1 2983.90  204.38 
  -3   3  -1 2930.81  200.58 
  -3   3  -1 2821.52  203.48 
  -3   3  -1 2905.91  203.78 
  -3   3  -1 3101.99  206.78 
   3   3   1 3119.29  199.98 
   3   3   1 2913.31  201.38 
  -3   3  -1 3081.29  203.38 
  -3   3  -1 3174.08  206.78 
  -3   3  -1 2986.10  203.58 
   3   3   1 2857.51  202.28 
  -3   3  -1 3034.00  205.48 
  -3   3  -1 3003.50  204.88 
   3   3   1 3018.00  203.78 
  -3   3  -1 2959.00  203.78 
  -3   3  -1 2895.61  201.88 
   3   3   1 2913.41  198.28 
  -3   3  -1 2987.00  204.28 
   4  -3   1  396.56   46.50 
   4  -3   1  399.46   34.80 
   4  -3   1  426.06   36.10 
  -4  -3  -1  366.96   28.70 
  -4  -3  -1  449.06   32.70 
  -4  -3  -1  359.06   33.80 
   4  -3   1  430.86   37.60 
   4  -3   1  352.46   33.30 
   4  -3   1  385.36   34.50 
   4  -3   1  355.46   39.10 
  -4  -3  -1  418.76   37.50 
   4  -3   1  424.36   46.30 
  -4  -3  -1  487.65   52.69 
   4  -3   1  355.66   39.80 
   4  -3   1  369.66   35.50 
  -4  -3  -1  436.36   31.70 
  -4  -3  -1  391.56   30.20 
  -4  -3  -1  376.06   31.70 
   4  -3   1  343.77   40.20 
  -4  -3  -1  407.36   34.50 
  -4  -3  -1  377.86   28.10 
  -4  -3  -1  416.26   36.80 
  -4  -3  -1  389.36   30.60 
  -4  -3  -1  399.46   29.00 
   4  -3   1  350.76   41.00 
  -4  -3  -1  399.26   35.50 
  -4  -3  -1  410.86   38.80 
  -4  -3  -1  408.56   43.90 
  -4  -3  -1  387.66   38.00 
   4  -3   1  469.35   39.80 
   4  -3   1  367.66   35.20 
   4   3   1  350.56   32.50 
  -4   3  -1  394.26   33.80 
  -4   3  -1  316.87   38.20 
  -4   3  -1  396.86   42.10 
   4   3   1  408.76   33.80 
   4   3   1  390.56   32.90 
  -4   3  -1  436.46   38.30 
   4   3   1  348.27   38.50 
  -4   3  -1  347.87   32.30 
   4   3   1  353.76   32.90 
  -4   3  -1  350.16   42.40 
  -4   3  -1  322.87   40.00 
  -4   3  -1  420.46   36.40 
  -4   3  -1  393.06   37.70 
  -4   3  -1  402.96   38.30 
  -4   3  -1  377.66   40.80 
  -4   3  -1  393.26   38.00 
   4   3   1  425.86   36.00 
   4   3   1  407.26   31.90 
   4   3   1  355.46   34.90 
   5  -3   1  224.08   34.10 
   5  -3   1  221.28   18.80 
  -5  -3  -1  199.38   26.20 
  -5  -3  -1  264.77   27.10 
  -5  -3  -1  204.38   19.10 
   5  -3   1  213.68   29.50 
  -5  -3  -1  213.48   19.10 
  -5  -3  -1  192.88   30.90 
  -5  -3  -1  249.78   32.40 
   5  -3   1  225.88   30.10 
  -5  -3  -1  235.18   20.10 
   5  -3   1  265.57   28.40 
  -5  -3  -1  216.58   22.90 
   5  -3   1  196.38   28.90 
   5  -3   1  251.17   33.80 
   5  -3   1  193.98   27.70 
  -5  -3  -1  221.18   31.90 
  -5  -3  -1  241.88   19.00 
  -5  -3  -1  305.87   32.30 
  -5  -3  -1  160.08   26.50 
  -5  -3  -1  232.78   26.30 
   5  -3   1  201.28   32.30 
   5  -3   1  212.08   26.60 
  -5  -3  -1  205.08   28.80 
   5  -3   1  227.38   28.60 
   5  -3   1  176.28   25.70 
  -5  -3  -1  242.28   24.20 
  -5  -3  -1  209.88   30.30 
  -5  -3  -1  238.38   40.70 
  -5  -3  -1  264.87   27.50 
   5  -3   1  240.98   32.60 
  -5   3  -1  221.08   30.50 
  -5   3  -1  179.58   28.50 
  -5   3  -1  214.08   31.70 
   5   3   1  194.28   17.10 
   5   3   1  257.37   31.90 
  -5   3  -1  176.08   22.50 
   5   3   1  218.18   29.80 
  -5   3  -1  218.28   31.70 
  -5   3  -1  241.28   25.60 
   5   3   1  195.08   24.20 
   5   3   1  224.38   31.00 
  -5   3  -1  208.48   30.50 
   5   3   1  221.78   26.60 
   5   3   1  236.28   21.50 
   5   3   1  158.68   25.20 
  -5   3  -1  204.88   30.80 
   5   3   1  220.48   27.60 
  -5   3  -1  182.58   29.40 
  -5   3  -1  225.68   31.30 
   5   3   1  223.98   24.30 
  -5   3  -1  163.78   29.60 
  -5   3  -1  206.08   27.20 
  -6  -3  -1  141.19   18.00 
  -6  -3  -1  196.78   20.90 
  -6  -3  -1  171.58   20.40 
   6  -3   1  148.79   26.20 
   6  -3   1  176.78   27.40 
   6  -3   1  139.69   28.20 
  -6  -3  -1  181.08   27.80 
  -6  -3  -1  151.68   28.80 
   6  -3   1  125.89   23.20 
  -6  -3  -1  186.38   19.10 
   6  -3   1  181.58   28.20 
  -6  -3  -1  142.89   27.70 
   6  -3   1  117.99   22.30 
  -6  -3  -1  130.79   26.10 
  -6  -3  -1  117.99   23.90 
   6  -3   1  183.28   32.40 
   6  -3   1  165.98   24.70 
   6  -3   1  195.08   34.00 
  -6  -3  -1  134.49   22.10 
   6  -3   1  142.19   25.30 
   6  -3   1  139.39   27.30 
  -6  -3  -1  165.68   25.90 
   6  -3   1  168.88   28.50 
  -6  -3  -1   94.79   23.90 
  -6  -3  -1  143.39   28.20 
  -6  -3  -1  150.68   36.00 
   6   3   1  140.99   19.10 
  -6   3  -1  184.68   30.20 
   6   3   1  154.68   24.20 
  -6   3  -1  148.09   28.20 
   6   3   1  151.78   24.10 
  -6   3  -1  203.98   26.80 
   6   3   1  155.98   23.40 
   6   3   1  196.38   30.10 
   6   3   1  171.68   18.70 
   6   3   1  209.78   29.70 
  -6   3  -1  165.98   31.40 
  -6   3  -1  166.18   30.20 
  -6   3  -1  166.68   27.90 
  -6   3  -1  188.68   31.10 
   6   3   1  175.68   26.60 
  -6   3  -1  169.68   29.60 
  -6   3  -1  157.68   28.80 
  -6   3  -1  162.98   20.20 
   6   3   1  156.38   28.00 
  -6   3  -1  100.89   24.70 
   6   3   1  184.68   19.90 
  -7  -3  -1   10.10   12.90 
  -7  -3  -1   13.00   14.20 
   7  -3   1   22.20   13.60 
  -7  -3  -1   19.30   14.70 
  -7  -3  -1   27.30   15.70 
  -7  -3  -1   25.90   21.50 
  -7  -3  -1   10.80   11.30 
  -7  -3  -1   12.80   13.60 
  -7  -3  -1    9.20   11.70 
   7  -3   1   17.70   16.20 
  -7  -3  -1   13.70   13.20 
   7  -3   1   15.80   12.10 
   7  -3   1   36.90   15.80 
   7  -3   1    7.20   12.90 
  -7  -3  -1    3.10    9.30 
   7  -3   1   14.30   14.90 
   7  -3   1    6.20   14.10 
  -7  -3  -1    7.30   13.30 
   7  -3   1   18.90   14.70 
   7  -3   1    3.30   11.30 
   7  -3   1    7.20   13.60 
   7   3   1   15.70   10.50 
  -7   3  -1   10.10   13.60 
  -7   3  -1   30.90   17.00 
  -7   3  -1    7.10   12.40 
  -7   3  -1    5.30   12.50 
  -7   3  -1   27.60   13.30 
   7   3   1   10.50   10.90 
   7   3   1   21.80   16.50 
   7   3   1   15.30   15.50 
   7   3   1    1.50    9.80 
  -7   3  -1   22.30   14.50 
  -7   3  -1   12.20   12.80 
  -7   3  -1   24.70   15.90 
   7   3   1   18.60   13.60 
  -7   3  -1   -9.10   12.20 
   7   3   1   16.10   11.10 
  -7   3  -1   20.60   15.90 
  -8  -3  -1  121.19   26.30 
   8  -3   1   87.89   28.40 
  -8  -3  -1   72.99   32.50 
   8  -3   1   49.10   19.10 
  -8  -3  -1   80.19   25.30 
  -8  -3  -1   61.19   23.50 
   8  -3   1   27.90   17.20 
   8  -3   1   47.40   18.80 
   8  -3   1  107.39   26.00 
  -8  -3  -1   70.09   25.50 
   8  -3   1   52.59   22.60 
  -8  -3  -1   82.59   24.70 
   8  -3   1   76.49   24.30 
  -8  -3  -1   80.69   23.60 
  -8  -3  -1   65.99   24.00 
  -8  -3  -1   97.09   29.00 
   8  -3   1   96.29   27.30 
  -8  -3  -1   90.99   21.10 
   8  -3   1   68.19   21.30 
   8   3   1   72.09   20.90 
  -8   3  -1   61.69   23.40 
  -8   3  -1   89.69   27.90 
   8   3   1  148.39   30.70 
   8   3   1   80.99   23.10 
   8   3   1  120.99   27.80 
  -8   3  -1   79.99   25.60 
  -8   3  -1   79.39   26.80 
  -8   3  -1   73.89   23.10 
   8   3   1  105.09   24.20 
   8   3   1   62.29   23.10 
  -8   3  -1   83.39   20.70 
  -8   3  -1   89.99   26.10 
  -8   3  -1  125.59   28.60 
  -8   3  -1  102.99   28.10 
  -8   3  -1   94.39   26.60 
  -8   3  -1   88.09   26.90 
   9  -3   1  127.09   31.70 
  -9  -3  -1  108.49   30.70 
   9  -3   1  102.39   27.90 
  -9  -3  -1  192.48   40.20 
   9  -3   1   93.09   31.00 
   9  -3   1  173.08   34.60 
   9  -3   1  138.49   35.90 
   9  -3   1  139.49   36.90 
  -9  -3  -1  138.59   35.40 
  -9  -3  -1  123.49   30.40 
  -9  -3  -1  126.99   29.70 
   9  -3   1  132.39   36.40 
  -9  -3  -1  184.18   38.10 
  -9  -3  -1  146.19   37.00 
   9  -3   1  172.98   36.70 
  -9  -3  -1   76.09   29.20 
  -9   3  -1  115.79   33.80 
  -9   3  -1   86.29   29.50 
  -9   3  -1   77.69   27.30 
  -9   3  -1  154.98   35.30 
   9   3   1  159.58   34.30 
  -9   3  -1  117.79   27.00 
   9   3   1  140.09   33.40 
  -9   3  -1  142.69   35.30 
  -9   3  -1  166.38   39.10 
  -9   3  -1   80.29   25.10 
  -9   3  -1  154.38   40.00 
  -9   3  -1  171.68   37.70 
   9   3   1  129.69   34.10 
  -9   3  -1  141.89   31.30 
   9   3   1  167.78   32.80 
   9   3   1  163.58   32.50 
   9  -4  -1   16.80   21.10 
   9  -4  -1   49.30   22.40 
   9  -4  -1   33.30   24.90 
   9  -4  -1   54.29   22.70 
  -9  -4   1   53.19   26.10 
   9  -4  -1   37.40   21.60 
   9  -4  -1   83.99   32.10 
  -9  -4   1   46.30   25.90 
  -9  -4   1   40.40   21.00 
  -9  -4   1   47.20   26.10 
  -9  -4   1   33.70   22.30 
  -9  -4   1    9.60   19.50 
  -9  -4   1   38.00   20.20 
   9  -4  -1   42.50   20.40 
  -9  -4   1   81.19   43.00 
  -9   4   1   48.40   25.20 
  -9   4   1   61.19   25.40 
  -9   4   1   93.39   28.30 
  -9   4   1   60.39   26.60 
  -9   4   1   79.39   30.30 
   9   4  -1   66.79   26.90 
   9   4  -1   70.59   26.10 
  -9   4   1   16.60   18.00 
   9   4  -1   67.89   22.90 
  -9   4   1   37.70   21.10 
   9   4  -1   13.20   15.10 
  -9   4   1   57.89   26.80 
  -9   4   1   47.40   25.90 
  -9   4   1   61.09   29.00 
  -8  -4   1  119.79   27.90 
  -8  -4   1  155.68   32.50 
  -8  -4   1  167.98   45.20 
  -8  -4   1  157.48   36.10 
   8  -4  -1  183.78   35.30 
   8  -4  -1  110.09   32.90 
  -8  -4   1  178.28   34.00 
  -8  -4   1  191.18   29.50 
   8  -4  -1  146.79   32.00 
   8  -4  -1   89.89   29.10 
  -8  -4   1  130.29   24.80 
  -8  -4   1  194.88   38.30 
  -8  -4   1  141.79   32.00 
   8  -4  -1  136.09   30.20 
   8  -4  -1  143.29   33.50 
  -8  -4   1  169.48   36.30 
  -8  -4   1  119.59   28.70 
   8  -4  -1  126.09   28.60 
   8  -4  -1  156.28   35.90 
  -8   4   1  159.58   34.60 
  -8   4   1  115.99   30.90 
  -8   4   1  160.08   33.90 
  -8   4   1   91.69   30.70 
   8   4  -1  117.69   30.50 
   8   4  -1  130.29   30.20 
   8   4  -1   76.19   22.70 
  -8   4   1  163.68   34.40 
  -8   4   1  214.08   41.50 
  -8   4   1  153.48   27.30 
   8   4  -1  195.28   38.10 
   8   4  -1  192.88   33.20 
  -8   4   1  186.48   37.20 
  -8   4   1  136.99   34.20 
  -8   4   1  177.28   39.10 
   7  -4  -1   10.90   14.40 
   7  -4  -1   -0.60   11.50 
   7  -4  -1   10.50   14.30 
  -7  -4   1   14.10   14.20 
   7  -4  -1   18.70   15.50 
   7  -4  -1    5.40   15.40 
  -7  -4   1    8.90   13.30 
  -7  -4   1    2.70   11.30 
  -7  -4   1   -0.80   10.60 
   7  -4  -1   16.60   16.30 
   7  -4  -1   18.20   11.50 
  -7  -4   1    1.10   10.20 
  -7  -4   1   -4.50   17.90 
   7  -4  -1    8.60   13.10 
   7  -4  -1  -25.80    9.30 
  -7  -4   1   -6.10   10.70 
  -7  -4   1   -1.50   12.80 
   7  -4  -1   19.90   14.10 
   7  -4  -1   -2.30    9.30 
  -7  -4   1   -1.80   10.10 
  -7  -4   1   10.90    9.50 
   7  -4  -1    7.10   13.80 
  -7  -4   1   -6.00    9.50 
  -7  -4   1    9.50   13.20 
  -7   4   1   10.60   13.60 
  -7   4   1   26.50   14.90 
   7   4  -1   -3.70   12.80 
  -7   4   1   17.00   14.90 
   7   4  -1   -1.90   11.00 
  -7   4   1   -1.10   13.70 
  -7   4   1   13.50   15.20 
  -7   4   1  -16.00   10.20 
  -7   4   1    8.80   10.80 
  -7   4   1   20.30   14.80 
  -7   4   1   11.20   14.60 
   7   4  -1  -12.60    9.50 
  -7   4   1    0.30   11.70 
   7   4  -1  -16.40   10.20 
   7   4  -1    3.10   10.50 
   7   4  -1   -0.60    9.80 
   6  -4  -1   44.70   16.90 
   6  -4  -1   35.40   12.90 
   6  -4  -1   26.60   17.00 
   6  -4  -1   28.70   14.80 
  -6  -4   1   37.20   22.10 
  -6  -4   1   38.10   11.80 
  -6  -4   1   34.50   16.80 
   6  -4  -1   38.90   18.30 
   6  -4  -1   38.20   15.50 
  -6  -4   1   38.40   14.50 
  -6  -4   1   37.70   10.20 
   6  -4  -1   33.50   17.40 
   6  -4  -1   44.20   15.40 
  -6  -4   1   25.00   15.30 
   6  -4  -1   32.80   14.60 
   6  -4  -1   28.60   13.50 
  -6  -4   1   50.79   17.30 
  -6  -4   1   41.10   14.80 
  -6  -4   1   49.70   17.00 
  -6  -4   1   24.40   12.80 
   6  -4  -1   17.70   15.20 
  -6  -4   1   32.20   15.50 
  -6  -4   1   44.10   16.10 
  -6  -4   1   42.80   17.00 
   6  -4  -1   34.50   14.20 
  -6  -4   1   21.80   11.10 
  -6  -4   1   53.79   14.60 
   6  -4  -1   34.90   13.60 
  -6   4   1   35.00   15.50 
  -6   4   1   26.80   14.40 
  -6   4   1   48.90   11.50 
   6   4  -1   28.70   10.00 
   6   4  -1   10.40   10.50 
   6   4  -1   76.49   21.80 
  -6   4   1   36.90   16.10 
   6   4  -1   30.00   13.90 
   6   4  -1   43.50   14.60 
  -6   4   1   25.20   14.90 
   6   4  -1   11.80    9.30 
   6   4  -1   23.00   10.30 
  -6   4   1   27.20   14.50 
  -6   4   1   46.70   17.50 
   6   4  -1   35.70   13.90 
  -6   4   1   29.60   15.80 
  -6   4   1   25.10   16.90 
  -6   4   1   32.50   13.60 
  -6   4   1   46.60   17.90 
  -6   4   1   52.29   13.70 
  -5  -4   1   67.79   13.60 
   5  -4  -1   31.70   15.70 
  -5  -4   1   76.19    8.00 
  -5  -4   1   46.60   14.60 
   5  -4  -1   52.29   15.70 
  -5  -4   1   63.89   18.10 
   5  -4  -1   81.99   18.40 
   5  -4  -1   34.10   16.50 
   5  -4  -1   31.10   15.10 
   5  -4  -1   79.99   18.20 
   5  -4  -1   65.69   18.80 
  -5  -4   1   87.89   19.80 
  -5  -4   1   68.59   23.70 
  -5  -4   1   79.09    9.10 
   5  -4  -1   59.09   16.00 
  -5  -4   1   67.39   16.40 
  -5  -4   1   50.69   14.80 
   5  -4  -1   44.30   16.00 
  -5  -4   1  104.39   21.30 
   5  -4  -1   81.19   14.40 
  -5  -4   1   56.09   12.70 
  -5  -4   1   59.79   12.50 
  -5  -4   1   40.00   13.70 
  -5  -4   1  117.49   18.20 
  -5  -4   1   70.59   17.80 
   5  -4  -1   52.09   14.60 
  -5  -4   1   57.39   13.60 
   5  -4  -1   55.29   16.60 
  -5  -4   1   73.99   11.50 
  -5  -4   1   69.39   12.90 
   5  -4  -1   70.99   16.30 
   5   4  -1   54.39   12.90 
  -5   4   1   58.49   14.40 
  -5   4   1   28.50   14.70 
  -5   4   1   56.09   17.70 
   5   4  -1   83.09   17.40 
   5   4  -1   77.89   16.20 
  -5   4   1   64.99   18.40 
  -5   4   1   57.89   17.20 
   5   4  -1   79.89   17.00 
   5   4  -1   58.99   15.10 
  -5   4   1   59.69   13.10 
   5   4  -1   54.19   13.20 
  -5   4   1   34.70   15.50 
   5   4  -1   52.29   17.70 
  -5   4   1   72.39   19.00 
  -5   4   1   49.70   16.60 
   5   4  -1   91.19   15.90 
  -5   4   1   56.89   15.60 
  -5   4   1   54.49   18.40 
  -5   4   1   75.89   19.20 
  -4  -4   1  534.85   41.20 
   4  -4  -1  505.75   45.10 
  -4  -4   1  500.85   41.90 
  -4  -4   1  539.05   42.50 
   4  -4  -1  444.36   53.49 
   4  -4  -1  537.75   48.20 
   4  -4  -1  533.15   46.30 
  -4  -4   1  510.95   46.10 
  -4  -4   1  473.05   50.49 
  -4  -4   1  483.55   38.60 
  -4  -4   1  509.65   42.90 
  -4  -4   1  455.95   36.90 
  -4  -4   1  511.85   38.90 
   4  -4  -1  522.25   44.80 
   4  -4  -1  499.15   52.09 
  -4  -4   1  449.36   44.30 
  -4  -4   1  508.85   36.00 
  -4  -4   1  550.04   44.70 
   4  -4  -1  580.84   43.00 
  -4  -4   1  479.85   38.70 
  -4  -4   1  517.95   36.60 
  -4  -4   1  458.05   44.20 
  -4  -4   1  527.05   46.20 
  -4  -4   1  546.25   44.50 
   4  -4  -1  534.35   46.30 
   4  -4  -1  469.05   42.60 
   4  -4  -1  447.26   49.30 
   4  -4  -1  524.65   42.70 
   4   4  -1  540.15   42.70 
   4   4  -1  533.55   42.70 
  -4   4   1  532.45   42.80 
  -4   4   1  516.75   48.00 
  -4   4   1  589.44   49.40 
  -4   4   1  486.75   46.60 
  -4   4   1  505.45   44.20 
  -4   4   1  440.66   46.40 
  -4   4   1  516.05   45.70 
  -4   4   1  497.45   46.20 
   4   4  -1  516.85   41.50 
   4   4  -1  551.34   44.20 
   4   4  -1  428.16   52.19 
   4   4  -1  505.75   43.60 
   4   4  -1  533.15   43.00 
   4   4  -1  465.25   44.70 
  -4   4   1  517.55   46.80 
  -4   4   1  521.85   44.40 
  -4   4   1  509.65   47.40 
  -4   4   1  494.35   45.70 
  -3  -4   1   84.49    9.90 
  -3  -4   1   67.49   13.50 
  -3  -4   1   84.79   13.70 
   3  -4  -1   78.99   15.30 
   3  -4  -1  106.39   21.30 
  -3  -4   1   63.19   10.40 
   3  -4  -1   62.59   11.80 
  -3  -4   1   73.99   13.20 
   3  -4  -1   61.59   12.90 
   3  -4  -1   63.89   15.30 
  -3  -4   1   47.40   14.10 
  -3  -4   1   65.59   10.80 
  -3  -4   1   83.99   17.10 
   3  -4  -1   87.09   16.60 
  -3  -4   1   80.09   14.60 
  -3  -4   1   69.19   11.20 
   3  -4  -1   79.79   14.00 
  -3  -4   1   98.09   14.80 
  -3  -4   1  111.49   17.30 
  -3  -4   1   90.69   11.30 
  -3  -4   1   54.99    7.80 
  -3  -4   1   71.99   10.80 
   3  -4  -1   73.99   12.70 
  -3  -4   1   88.39   14.80 
   3  -4  -1   77.59   16.60 
   3  -4  -1   77.29   16.10 
  -3  -4   1   69.29   11.90 
   3  -4  -1   38.10   11.80 
  -3  -4   1   74.09   15.00 
   3   4  -1  111.59   16.30 
   3   4  -1   72.59   11.20 
  -3   4   1   61.69   15.10 
  -3   4   1   58.89   12.70 
  -3   4   1   94.19   17.00 
   3   4  -1   56.39   13.20 
  -3   4   1   60.09   12.70 
   3   4  -1   88.29   13.50 
  -3   4   1   55.39   14.20 
  -3   4   1   70.89   14.00 
   3   4  -1   73.29   12.40 
   3   4  -1   91.09   16.60 
  -3   4   1   61.79   14.90 
   3   4  -1   65.69   11.50 
  -3   4   1   58.49   14.10 
  -3   4   1   32.80   11.80 
   3   4  -1   82.89   15.70 
  -3   4   1   45.50   13.10 
  -3   4   1   73.49   14.30 
   3   4  -1   72.79   12.00 
  -3   4   1   67.39   16.10 
  -2  -4   1  452.15   33.00 
  -2  -4   1  431.36   33.40 
  -2  -4   1  359.36   42.30 
  -2  -4   1  412.86   32.80 
  -2  -4   1  413.06   36.10 
   2  -4  -1  423.66   37.60 
   2  -4  -1  447.26   32.60 
  -2  -4   1  461.95   35.10 
  -2  -4   1  468.25   35.40 
   2  -4  -1  402.56   36.00 
   2  -4  -1  377.66   35.30 
  -2  -4   1  407.76   34.60 
  -2  -4   1  419.76   32.40 
  -2  -4   1  510.75   38.50 
  -2  -4   1  383.36   44.00 
  -2  -4   1  417.36   31.10 
  -2  -4   1  346.57   33.40 
   2  -4  -1  412.86   35.80 
   2  -4  -1  369.86   34.40 
  -2  -4   1  344.67   37.20 
   2  -4  -1  365.56   42.20 
   2  -4  -1  423.36   38.20 
  -2  -4   1  394.66   33.10 
   2  -4  -1  360.86   39.30 
  -2  -4   1  400.16   32.10 
  -2  -4   1  457.45   31.70 
  -2  -4   1  366.86   35.70 
  -2  -4   1  435.96   31.90 
  -2  -4   1  435.06   32.10 
  -2  -4   1  353.66   42.00 
  -2  -4   1  426.66   31.80 
  -2  -4   1  394.96   33.00 
  -2  -4   1  420.46   32.60 
  -2  -4   1  412.26   33.60 
   2  -4  -1  418.96   34.10 
   2  -4  -1  446.56   38.20 
   2  -4  -1  405.46   36.10 
   2  -4  -1  426.86   32.10 
  -2  -4   1  395.26   34.90 
  -2  -4   1  445.86   32.90 
  -2   4   1  421.16   32.20 
  -2   4   1  497.35   39.60 
  -2   4   1  405.36   35.90 
  -2   4   1  426.96   33.50 
  -2   4   1  417.06   33.40 
  -2   4   1  443.86   38.30 
   2   4  -1  466.25   36.20 
  -2   4   1  421.36   37.80 
  -2   4   1  370.66   36.60 
  -2   4   1  388.46   31.90 
   2   4  -1  389.06   35.00 
   2   4  -1  407.76   35.80 
   2   4  -1  383.76   32.50 
  -2   4   1  406.66   32.70 
  -2   4   1  365.66   35.00 
   2   4  -1  380.96   33.30 
   2   4  -1  439.86   36.90 
  -2   4   1  448.86   38.10 
   2   4  -1  410.06   44.60 
   2   4  -1  418.56   31.80 
  -2   4   1  382.86   35.50 
   2   4  -1  414.56   36.20 
   2   4  -1  470.55   38.30 
   2   4  -1  408.76   37.40 
  -2   4   1  365.96   35.60 
  -2   4   1  447.66   36.60 
  -2   4   1  393.86   35.90 
  -2   4   1  457.75   38.20 
  -1  -4   1   -1.70    4.40 
  -1  -4   1    7.20    5.30 
  -1  -4   1   -3.50    4.70 
  -1  -4   1    3.30    6.00 
  -1  -4   1   -3.70    5.60 
  -1  -4   1   -1.00    2.60 
   1  -4  -1   -8.00    6.60 
   1  -4  -1    2.70    7.10 
   1  -4  -1    3.30    5.70 
  -1  -4   1   -3.30    4.50 
  -1  -4   1    2.20    3.10 
  -1  -4   1   11.30    7.30 
  -1  -4   1   -0.50    7.60 
   1  -4  -1   -1.00    4.80 
  -1  -4   1    8.80    8.40 
  -1  -4   1    6.20    5.50 
   1  -4  -1   -3.50    6.40 
  -1  -4   1   -1.90    5.80 
   1  -4  -1   -6.90    6.50 
  -1  -4   1   -3.40    3.30 
  -1  -4   1  -10.30    5.50 
   1  -4  -1   -6.50    5.20 
  -1  -4   1    6.90    3.80 
  -1  -4   1    5.90    3.20 
   1  -4  -1    1.00    4.40 
  -1  -4   1    4.10    8.30 
   1  -4  -1    2.30    5.00 
   1  -4  -1    1.90    7.40 
   1  -4  -1    3.00    3.00 
   1  -4  -1   -3.30    6.50 
  -1  -4   1   -6.10    4.80 
   1  -4  -1   -1.80    4.20 
   1  -4  -1   13.40    8.10 
  -1  -4   1    6.20    7.60 
   1  -4  -1    7.20    6.90 
   1  -4  -1   -7.10    4.20 
   1  -4  -1   14.70    8.30 
   1  -4  -1    3.20    3.30 
  -1  -4   1   -9.60    7.90 
  -1  -4   1    1.50    2.80 
  -1   4   1  -10.00    5.80 
  -1   4   1    6.00    3.60 
  -1   4   1    4.70    7.50 
  -1   4   1   -5.00    4.00 
   1   4  -1    7.00    5.20 
  -1   4   1    6.30    9.10 
  -1   4   1   12.70    9.60 
   1   4  -1    1.40    6.20 
  -1   4   1  -15.80    4.50 
  -1   4   1    0.40    7.80 
  -1   4   1   -0.70    4.80 
  -1   4   1    5.10    6.50 
   1   4  -1   -2.50    5.10 
  -1   4   1   -1.90    5.70 
  -1   4   1   -0.70    6.50 
  -1   4   1   14.40    8.30 
   1   4  -1  -10.40    7.20 
  -1   4   1   -0.40    5.20 
   1   4  -1   -2.50    5.20 
  -1   4   1   -1.30    4.80 
  -1   4   1    1.80    3.30 
   1   4  -1   -2.20    3.30 
   1   4  -1    1.60    2.40 
   1   4  -1    2.60    7.50 
  -1   4   1    1.30    7.60 
  -1   4   1    0.20    4.00 
  -1   4   1   -4.70    5.70 
   1   4  -1    3.20    4.90 
   1   4  -1   -8.70    5.70 
   1   4  -1   -5.70    6.20 
   1   4  -1   -1.20    6.20 
   1   4  -1    8.40    8.10 
  -1   4   1    4.30    3.80 
  -1   4   1    8.00    6.40 
   1   4  -1    5.50    6.80 
   0  -4   1  570.14   44.60 
   0  -4  -1  554.54   41.20 
   0  -4   1  546.55   41.10 
   0  -4  -1  583.24   44.40 
   0  -4   1  610.54   43.50 
   0  -4   1  596.64   40.80 
   0  -4  -1  551.64   44.30 
   0  -4   1  554.64   38.90 
   0  -4  -1  617.54   46.20 
   0  -4  -1  537.05   39.80 
   0  -4  -1  547.55   44.70 
   0  -4   1  604.34   42.80 
   0  -4   1  583.14   42.60 
   0  -4  -1  496.45   43.90 
   0  -4   1  622.54   46.00 
   0  -4  -1  551.74   42.80 
   0  -4  -1  576.54   44.80 
   0  -4   1  578.94   41.60 
   0  -4   1  569.44   46.30 
   0  -4   1  567.44   38.90 
   0  -4  -1  596.64   44.80 
   0  -4   1  556.44   42.00 
   0  -4   1  542.75   38.60 
   0  -4  -1  549.54   44.90 
   0  -4  -1  601.34   39.70 
   0  -4  -1  557.94   46.80 
   0  -4   1  523.75   42.40 
   0  -4  -1  583.54   44.40 
   0  -4  -1  578.34   38.70 
   0  -4  -1  554.14   41.40 
   0  -4   1  534.15   42.30 
   0  -4   1  533.25   45.90 
   0  -4  -1  566.34   46.80 
   0  -4   1  550.54   42.50 
   0  -4  -1  573.54   43.50 
   0  -4  -1  614.54   45.30 
   0   4   1  510.85   44.00 
   0   4  -1  365.16   51.49 
   0   4  -1  576.04   46.00 
   0   4   1  546.25   44.20 
   0   4   1  428.26   42.60 
   0   4   1  567.24   38.50 
   0   4   1  499.55   47.40 
   0   4   1  527.85   43.80 
   0   4   1  576.94   46.00 
   0   4  -1  460.25   54.99 
   0   4  -1  565.14   46.30 
   0   4  -1  527.95   42.70 
   0   4   1  577.74   43.80 
   0   4   1  583.14   39.80 
   0   4  -1  606.44   44.90 
   0   4   1  425.36   55.19 
   0   4  -1  553.74   45.10 
   0   4   1  528.55   46.80 
   0   4   1  732.73   57.39 
   0   4  -1  572.84   39.10 
   0   4  -1  600.54   45.10 
   0   4   1  486.55   44.70 
   0   4  -1  585.24   46.40 
   0   4  -1  522.45   44.90 
   0   4   1  520.25   45.20 
   0   4   1  562.44   43.40 
   0   4  -1  639.54   44.00 
   0   4  -1  508.55   50.09 
   0   4   1  581.14   46.30 
   0   4   1  542.15   42.50 
   0   4  -1  566.54   45.80 
   0   4  -1  577.24   48.50 
   0   4   1  527.15   47.50 
   0   4  -1  558.94   45.00 
   0   4  -1  546.95   47.10 
   0   4  -1  530.35   45.20 
   0   4   1  570.14   47.90 
  -1  -4  -1  184.48   32.70 
   1  -4   1  241.38   24.70 
  -1  -4  -1  222.38   19.90 
  -1  -4  -1  247.38   18.80 
  -1  -4  -1  226.88   18.00 
  -1  -4  -1  221.18   20.10 
  -1  -4  -1  218.58   20.90 
  -1  -4  -1  241.18   24.60 
   1  -4   1  303.17   29.90 
   1  -4   1  282.57   22.30 
  -1  -4  -1  246.58   17.60 
  -1  -4  -1  218.28   18.40 
  -1  -4  -1  231.08   26.50 
  -1  -4  -1  240.68   16.80 
  -1  -4  -1  225.98   25.90 
   1  -4   1  241.38   19.20 
   1  -4   1  246.18   29.40 
  -1  -4  -1  259.57   19.40 
   1  -4   1  236.18   19.40 
   1  -4   1  249.48   27.30 
   1  -4   1  265.37   26.50 
  -1  -4  -1  242.98   25.90 
  -1  -4  -1  272.87   32.80 
   1  -4   1  192.88   23.70 
  -1  -4  -1  228.98   27.40 
  -1  -4  -1  211.28   26.50 
   1  -4   1  233.88   23.10 
  -1  -4  -1  231.98   17.50 
   1  -4   1  228.38   21.40 
   1  -4   1  242.08   22.60 
  -1  -4  -1  155.58   28.40 
   1  -4   1  247.88   20.70 
  -1  -4  -1  241.28   23.40 
  -1  -4  -1  216.98   23.30 
   1  -4   1  237.98   20.00 
  -1  -4  -1  222.98   21.50 
   1  -4   1  232.68   28.30 
   1  -4   1  183.98   24.60 
  -1   4  -1  262.27   28.70 
   1   4   1  238.18   22.20 
   1   4   1  261.97   21.90 
  -1   4  -1  249.28   23.90 
  -1   4  -1  234.08   17.30 
  -1   4  -1  257.77   29.60 
   1   4   1  217.58   23.10 
  -1   4  -1  224.58   26.30 
  -1   4  -1  223.88   21.80 
  -1   4  -1  251.37   28.40 
   1   4   1  227.58   26.20 
  -1   4  -1  270.97   26.60 
  -1   4  -1  206.08   19.50 
  -1   4  -1  283.97   27.60 
  -1   4  -1  250.77   27.90 
   1   4   1  229.48   28.20 
   1   4   1  260.07   28.60 
   1   4   1  228.98   26.80 
   1   4   1  240.38   24.60 
  -1   4  -1  285.87   29.40 
  -1   4  -1  243.18   25.70 
  -1   4  -1  227.98   17.50 
   1   4   1  222.58   19.80 
   1   4   1  212.78   20.40 
  -1   4  -1  236.98   27.70 
  -1   4  -1  211.38   26.30 
  -1   4  -1  222.08   21.30 
   1   4   1  236.08   26.70 
   1   4   1  245.18   19.80 
   1   4   1  232.58   19.40 
  -1   4  -1  257.27   23.90 
  -1   4  -1  242.98   28.10 
   1   4   1  234.28   34.70 
  -1   4  -1  225.88   17.80 
  -2  -4  -1 1068.29   81.59 
   2  -4   1 1077.59   76.99 
  -2  -4  -1 1048.90   73.99 
  -2  -4  -1 1163.88   85.09 
   2  -4   1 1096.99   82.09 
  -2  -4  -1 1110.89   77.09 
  -2  -4  -1 1090.99   77.99 
  -2  -4  -1 1077.59   73.89 
  -2  -4  -1 1165.68   86.39 
  -2  -4  -1 1080.29   80.59 
  -2  -4  -1 1075.99   77.49 
  -2  -4  -1 1152.58   74.69 
  -2  -4  -1 1115.19   77.99 
  -2  -4  -1 1102.69   74.79 
  -2  -4  -1 1118.19   76.69 
  -2  -4  -1 1085.19   72.79 
   2  -4   1  991.40   81.09 
  -2  -4  -1 1061.69   82.09 
  -2  -4  -1 1118.39   79.09 
   2  -4   1 1027.20   82.19 
   2  -4   1 1188.08   78.79 
  -2  -4  -1 1041.10   72.49 
  -2  -4  -1 1064.19   75.99 
  -2  -4  -1 1170.18   83.09 
  -2  -4  -1  947.31   77.89 
   2  -4   1 1207.78   79.49 
  -2  -4  -1 1075.19   75.19 
  -2  -4  -1 1114.19   73.99 
   2  -4   1 1203.38   81.29 
   2  -4   1 1071.79   80.69 
   2  -4   1 1109.99   77.49 
   2  -4   1 1104.69   78.79 
  -2  -4  -1 1010.70   88.49 
  -2  -4  -1  985.60   83.59 
  -2  -4  -1 1126.29   75.09 
   2  -4   1 1099.39   81.39 
  -2  -4  -1 1153.88   81.99 
  -2  -4  -1 1006.60   79.19 
   2  -4   1 1014.70   83.79 
  -2  -4  -1 1119.49   76.69 
  -2  -4  -1 1071.29   77.39 
   2   4   1 1127.79   82.39 
   2   4   1 1123.69   77.39 
  -2   4  -1 1082.99   75.69 
  -2   4  -1 1182.88   80.99 
  -2   4  -1 1020.10   81.19 
   2   4   1 1128.69   82.19 
  -2   4  -1 1139.19   82.79 
  -2   4  -1 1018.60   81.69 
  -2   4  -1 1017.10   81.69 
  -2   4  -1 1095.29   75.99 
   2   4   1 1183.18   77.39 
  -2   4  -1 1163.78   81.69 
   2   4   1 1261.07   87.59 
  -2   4  -1 1034.00   81.49 
   2   4   1 1070.29   78.39 
  -2   4  -1 1091.69   80.69 
  -2   4  -1 1106.29   77.59 
  -2   4  -1 1187.98   78.19 
  -2   4  -1 1009.60   81.99 
  -2   4  -1 1106.59   80.39 
   2   4   1 1164.58   76.19 
   2   4   1 1116.89   81.29 
  -2   4  -1 1152.68   78.19 
   2   4   1 1109.89   81.29 
  -2   4  -1 1031.40   78.79 
  -2   4  -1 1182.18   81.39 
   2   4   1 1094.39   74.89 
  -3  -4  -1   26.40    9.90 
  -3  -4  -1   18.10    9.80 
  -3  -4  -1   33.20    7.10 
  -3  -4  -1   33.10    6.90 
   3  -4   1   23.30    7.60 
   3  -4   1   29.20   13.20 
   3  -4   1   11.30   10.50 
   3  -4   1   16.00    7.20 
  -3  -4  -1   24.40    8.00 
  -3  -4  -1   15.80    8.00 
   3  -4   1   23.50   10.30 
   3  -4   1   47.50   13.00 
  -3  -4  -1   26.40    5.90 
   3  -4   1   11.60    9.80 
  -3  -4  -1   13.40   11.90 
   3  -4   1   30.20    9.40 
  -3  -4  -1   27.50    3.90 
   3  -4   1   22.50    9.60 
   3  -4   1   61.19   17.70 
  -3  -4  -1   27.40    9.30 
  -3  -4  -1   16.80    7.60 
  -3  -4  -1   24.80    8.60 
   3  -4   1   32.90   11.50 
  -3  -4  -1   33.40    6.40 
   3  -4   1   21.20    8.70 
  -3  -4  -1   29.60   11.90 
   3  -4   1   18.30   10.70 
  -3  -4  -1    9.70    7.90 
  -3  -4  -1   15.20    7.00 
  -3  -4  -1   23.90    7.50 
   3   4   1   18.70    8.20 
   3   4   1   26.50    8.70 
   3   4   1   42.70   12.00 
  -3   4  -1   27.00   11.10 
  -3   4  -1    9.30    8.10 
   3   4   1   31.60    7.10 
  -3   4  -1   35.80   11.90 
  -3   4  -1    8.40    7.80 
  -3   4  -1   38.90   10.10 
   3   4   1   27.60    9.60 
  -3   4  -1   37.40   11.90 
  -3   4  -1   19.60    9.40 
   3   4   1   16.20    6.70 
  -3   4  -1   28.30   10.50 
  -3   4  -1   12.00    9.70 
  -3   4  -1   30.40    7.90 
  -3   4  -1    8.20    7.60 
  -3   4  -1   14.80    8.50 
   3   4   1   44.40   12.50 
  -3   4  -1   17.30    9.50 
  -4  -4  -1   38.00   12.50 
  -4  -4  -1   17.20    6.80 
   4  -4   1   36.40   12.90 
   4  -4   1   14.20   10.90 
   4  -4   1   27.90   12.20 
   4  -4   1   11.90    7.80 
   4  -4   1   18.80    9.00 
  -4  -4  -1   36.90   10.60 
  -4  -4  -1   26.30   10.00 
   4  -4   1   19.10    9.20 
  -4  -4  -1   16.80   10.30 
   4  -4   1    8.70    9.70 
  -4  -4  -1   21.30    8.90 
  -4  -4  -1   18.10   11.00 
   4  -4   1   19.10   11.20 
  -4  -4  -1   19.90   14.70 
  -4  -4  -1   18.50    8.30 
   4  -4   1   30.60   14.80 
   4  -4   1   38.10   11.40 
  -4  -4  -1   29.40    5.70 
  -4  -4  -1   60.89   20.60 
  -4  -4  -1   16.10    9.40 
   4  -4   1   21.10   12.90 
   4  -4   1   29.60   12.90 
   4  -4   1   36.30   11.70 
  -4  -4  -1   39.90   10.00 
  -4  -4  -1   36.80    8.70 
  -4   4  -1   17.30    9.90 
   4   4   1   35.90   13.50 
   4   4   1   20.50    9.30 
  -4   4  -1   11.60   10.40 
  -4   4  -1   28.10    9.80 
   4   4   1   22.90    9.30 
  -4   4  -1   43.10   14.10 
  -4   4  -1   36.50   13.10 
   4   4   1   13.60    8.40 
   4   4   1   27.00   10.20 
   4   4   1   19.30    8.30 
  -4   4  -1   27.90   12.20 
  -4   4  -1   23.50   12.00 
  -4   4  -1    6.70    7.30 
  -4   4  -1    9.10   10.00 
  -4   4  -1   12.40    9.70 
   4   4   1   33.10    9.30 
  -4   4  -1   24.50   10.70 
  -4   4  -1   53.09   15.90 
   4   4   1   25.80   13.00 
   5  -4   1   85.19   17.40 
   5  -4   1   84.39   18.90 
  -5  -4  -1   81.19   12.00 
  -5  -4  -1   73.49    8.50 
   5  -4   1   96.09   21.40 
   5  -4   1   83.49   17.70 
   5  -4   1   63.59   19.20 
   5  -4   1   60.89   20.10 
   5  -4   1   88.19   17.00 
  -5  -4  -1   50.09   16.30 
   5  -4   1   67.89   17.90 
  -5  -4  -1   78.89   14.00 
   5  -4   1   91.49   18.90 
  -5  -4  -1   72.19   13.50 
  -5  -4  -1   85.09   25.90 
  -5  -4  -1   46.50   14.50 
   5  -4   1   72.39   19.30 
  -5  -4  -1   92.79   19.70 
  -5  -4  -1   45.60   14.70 
  -5  -4  -1   63.19   19.80 
   5  -4   1   71.29   20.20 
  -5  -4  -1   68.29   19.10 
  -5  -4  -1   77.99   17.50 
   5  -4   1   47.60   13.70 
  -5   4  -1   42.30   14.90 
  -5   4  -1   91.99   21.80 
  -5   4  -1   65.19   16.10 
   5   4   1   65.69   15.70 
  -5   4  -1   83.79   21.00 
   5   4   1   41.90   15.90 
  -5   4  -1   52.29   14.10 
   5   4   1   57.99   14.30 
   5   4   1   92.89   16.20 
  -5   4  -1   68.89   20.60 
   5   4   1   77.49   14.90 
   5   4   1   65.79   16.40 
   5   4   1   74.99   15.70 
  -5   4  -1   78.29   15.90 
  -5   4  -1   78.59   18.60 
  -5   4  -1   65.09   18.70 
   5   4   1   70.79   14.50 
  -5   4  -1   80.39   19.20 
  -5   4  -1   58.09   17.70 
  -5   4  -1   84.39   20.30 
  -6  -4  -1 1100.69   98.79 
  -6  -4  -1 1219.28   95.19 
   6  -4   1 1342.37   98.69 
  -6  -4  -1 1300.27   97.69 
  -6  -4  -1 1361.46  102.49 
   6  -4   1 1162.58   98.89 
   6  -4   1 1191.38   93.99 
   6  -4   1 1192.08  100.69 
  -6  -4  -1 1184.68   89.19 
  -6  -4  -1 1122.09   92.49 
  -6  -4  -1 1156.68   87.29 
  -6  -4  -1 1105.09   95.99 
   6  -4   1 1304.47  100.69 
  -6  -4  -1 1112.59  108.09 
  -6  -4  -1 1131.49   92.09 
   6  -4   1 1285.67  105.59 
   6  -4   1 1177.88   96.09 
   6  -4   1 1221.78   95.19 
   6  -4   1 1296.37   92.99 
   6  -4   1 1227.38   93.49 
   6  -4   1 1256.87   95.29 
  -6  -4  -1 1163.78   99.09 
   6  -4   1 1205.18   96.09 
  -6   4  -1 1178.18   99.49 
   6   4   1 1177.08   93.39 
  -6   4  -1 1310.67  100.79 
  -6   4  -1 1262.77  103.09 
  -6   4  -1 1179.98   88.69 
   6   4   1 1275.17   93.79 
   6   4   1 1220.48   97.69 
  -6   4  -1 1223.08   90.69 
   6   4   1 1250.07   88.89 
   6   4   1 1217.28   95.69 
  -6   4  -1 1233.48   98.29 
   6   4   1 1290.97   89.89 
   6   4   1 1225.88   92.69 
  -6   4  -1 1122.29   96.89 
   6   4   1 1162.88   89.69 
  -6   4  -1 1234.18   94.49 
  -6   4  -1 1231.48   98.19 
  -6   4  -1 1303.07  100.39 
  -6   4  -1 1259.77  100.59 
  -6   4  -1 1184.38   99.99 
   7  -4   1   81.69   22.30 
  -7  -4  -1  180.68   29.80 
   7  -4   1  120.99   24.80 
  -7  -4  -1   93.09   26.00 
   7  -4   1  178.88   31.90 
  -7  -4  -1  131.19   38.00 
   7  -4   1  207.38   45.70 
  -7  -4  -1  194.38   34.40 
   7  -4   1  136.99   26.50 
  -7  -4  -1  138.79   30.20 
   7  -4   1  142.19   33.50 
  -7  -4  -1  146.39   33.10 
   7  -4   1  199.88   33.50 
   7  -4   1  147.49   30.60 
  -7  -4  -1  177.58   28.20 
  -7  -4  -1  137.29   22.80 
   7  -4   1  165.38   32.80 
   7  -4   1  183.68   34.50 
  -7  -4  -1  140.79   27.30 
  -7  -4  -1  101.59   25.50 
  -7  -4  -1  143.79   27.50 
   7  -4   1  133.19   28.90 
  -7   4  -1  121.19   28.00 
   7   4   1  148.59   26.70 
  -7   4  -1  123.59   24.80 
  -7   4  -1  127.49   28.40 
   7   4   1  146.69   28.70 
   7   4   1   96.99   22.60 
  -7   4  -1   85.49   26.50 
   7   4   1  127.69   25.20 
  -7   4  -1   93.59   24.70 
  -7   4  -1  150.08   31.60 
  -7   4  -1  115.39   29.80 
  -7   4  -1  198.48   34.50 
   7   4   1  129.59   28.90 
  -7   4  -1  132.99   31.50 
  -7   4  -1  128.89   29.10 
   8  -4   1 1619.34  116.49 
  -8  -4  -1 1283.37  131.09 
   8  -4   1 1467.45  126.59 
  -8  -4  -1 1376.86  119.59 
  -8  -4  -1 1581.44  117.69 
  -8  -4  -1 1451.35  114.79 
   8  -4   1 1311.67  117.69 
   8  -4   1 1575.94  118.79 
  -8  -4  -1 1569.04  122.69 
   8  -4   1 1350.06  121.49 
  -8  -4  -1 1597.74  113.39 
   8  -4   1 1445.76  120.59 
   8  -4   1 1549.45  118.29 
   8  -4   1 1499.15  115.79 
  -8  -4  -1 1366.66  119.59 
  -8  -4  -1 1517.15  126.49 
  -8  -4  -1 1326.67  120.59 
   8  -4   1 1458.85  114.09 
  -8  -4  -1 1368.66  116.59 
   8   4   1 1213.58  112.19 
  -8   4  -1 1573.64  124.49 
  -8   4  -1 1202.48  114.29 
  -8   4  -1 1440.46  118.39 
  -8   4  -1 1428.66  117.79 
   8   4   1 1473.25  112.69 
  -8   4  -1 1315.87  119.99 
  -8   4  -1 1479.85  124.19 
  -8   4  -1 1377.66  119.39 
  -8   4  -1 1303.77  118.29 
  -8   4  -1 1306.57  109.59 
   8   4   1 1351.76  116.79 
  -8   4  -1 1498.25  116.99 
  -8   4  -1 1275.27  118.19 
   8   4   1 1414.46  112.89 
   9  -4   1   45.50   25.40 
  -9  -4  -1   39.00   21.80 
  -9  -4  -1   87.49   23.50 
  -9  -4  -1   94.79   27.60 
   9  -4   1   79.49   30.70 
  -9  -4  -1  120.79   32.50 
   9  -4   1   74.59   25.80 
   9  -4   1   74.19   27.70 
   9  -4   1   44.40   23.90 
   9  -4   1   67.39   29.00 
  -9  -4  -1   48.20   24.70 
   9  -4   1   54.29   24.40 
   9  -4   1   83.79   30.70 
  -9  -4  -1   93.49   32.20 
  -9  -4  -1    5.90   27.60 
  -9  -4  -1   59.39   25.50 
  -9   4  -1   18.40   18.80 
  -9   4  -1   59.09   25.20 
  -9   4  -1   41.90   21.20 
   9   4   1   54.59   23.90 
  -9   4  -1   73.09   28.00 
  -9   4  -1   66.99   27.30 
  -9   4  -1  114.39   30.00 
  -9   4  -1   84.89   29.70 
  -9   4  -1   79.19   29.30 
  -9   4  -1   70.59   24.80 
  -9   4  -1   55.29   24.30 
   9   4   1   83.99   24.70 
  -9   4  -1   57.29   27.50 
   9  -5  -1  192.78   39.30 
   9  -5  -1  139.79   36.70 
   9  -5  -1  119.89   34.80 
  -9  -5   1  182.68   40.60 
   9  -5  -1  129.59   30.90 
   9  -5  -1  167.68   37.60 
  -9  -5   1  115.99   38.40 
   9  -5  -1  197.78   38.00 
  -9  -5   1  199.88   38.70 
  -9  -5   1  168.68   55.99 
   9  -5  -1  178.88   41.70 
  -9  -5   1  177.48   40.60 
  -9  -5   1  152.68   33.80 
  -9  -5   1  202.08   43.60 
   9  -5  -1  161.18   43.60 
  -9   5   1  175.48   39.70 
  -9   5   1  168.68   39.70 
  -9   5   1  134.39   37.10 
  -9   5   1  151.98   40.30 
   9   5  -1  148.09   33.10 
  -9   5   1  213.48   44.00 
  -9   5   1  176.58   42.30 
  -9   5   1  192.48   39.90 
  -9   5   1   91.39   31.10 
  -9   5   1  179.08   42.20 
  -9   5   1  173.38   40.00 
   9   5  -1  203.38   34.80 
   8  -5  -1    7.90   18.80 
  -8  -5   1    9.40   16.30 
  -8  -5   1    9.80   17.90 
  -8  -5   1   10.10   21.10 
  -8  -5   1   10.50   16.30 
   8  -5  -1  -11.50   10.80 
   8  -5  -1   -8.70   17.40 
   8  -5  -1   -8.20   13.00 
  -8  -5   1   -4.00   15.70 
  -8  -5   1    3.50   17.30 
  -8  -5   1    3.70   23.60 
  -8  -5   1   11.60   16.10 
   8  -5  -1   12.60   17.00 
   8  -5  -1   -4.60   13.60 
  -8  -5   1   -7.00   13.50 
   8  -5  -1    0.40   16.80 
   8  -5  -1   12.20   17.10 
  -8  -5   1   -1.50   11.40 
  -8   5   1   -3.90   15.10 
  -8   5   1    5.30   16.50 
  -8   5   1   -0.30   12.90 
  -8   5   1   -1.50   13.00 
  -8   5   1    8.10   14.80 
  -8   5   1   -3.10   15.00 
   8   5  -1  -20.80   14.50 
  -8   5   1  -13.30   12.00 
   8   5  -1    7.60   13.10 
  -8   5   1  -15.60   10.60 
  -8   5   1  -11.00   11.40 
  -8   5   1    5.90   13.80 
   8   5  -1   -3.50   13.00 
  -8   5   1   29.80   19.30 
   7  -5  -1  458.95   57.69 
   7  -5  -1  380.06   49.20 
  -7  -5   1  487.15   57.99 
   7  -5  -1  421.56   59.79 
  -7  -5   1  398.76   53.49 
   7  -5  -1  469.75   57.29 
  -7  -5   1  611.14   53.59 
   7  -5  -1  461.45   56.29 
  -7  -5   1  422.06   58.09 
  -7  -5   1  412.06   51.19 
   7  -5  -1  452.25   52.09 
  -7  -5   1  581.94   63.99 
   7  -5  -1  454.15   55.99 
  -7  -5   1  459.15   57.99 
  -7  -5   1  412.86   69.39 
  -7  -5   1  436.46   50.59 
   7  -5  -1  439.06   54.09 
  -7  -5   1  462.15   57.09 
  -7  -5   1  496.55   44.80 
   7  -5  -1  395.76   55.89 
  -7  -5   1  469.35   51.69 
   7  -5  -1  498.25   59.69 
   7  -5  -1  450.05   65.29 
  -7   5   1  453.65   59.59 
  -7   5   1  440.06   58.39 
  -7   5   1  453.45   56.99 
  -7   5   1  512.15   61.69 
  -7   5   1  418.76   55.69 
   7   5  -1  527.65   55.19 
   7   5  -1  524.55   63.79 
  -7   5   1  401.66   55.59 
  -7   5   1  377.66   56.19 
   7   5  -1  330.87   47.40 
  -7   5   1  432.36   58.59 
  -7   5   1  447.56   60.09 
  -7   5   1  442.06   50.59 
   7   5  -1  389.66   48.40 
  -7   5   1  399.76   55.19 
  -6  -5   1   23.10   15.90 
  -6  -5   1   16.90   12.70 
  -6  -5   1   21.40   10.90 
   6  -5  -1   -3.70   14.00 
   6  -5  -1    1.70   12.70 
   6  -5  -1   19.00   14.00 
  -6  -5   1   12.50   10.30 
  -6  -5   1    3.10    8.80 
  -6  -5   1  -18.50    9.70 
   6  -5  -1   16.50   11.70 
   6  -5  -1   14.50   16.50 
  -6  -5   1   17.50   15.90 
   6  -5  -1    8.70   13.00 
  -6  -5   1    6.30   12.70 
   6  -5  -1   17.10   11.00 
   6  -5  -1   20.40   12.80 
   6  -5  -1   18.10   13.80 
   6  -5  -1   -1.50   10.80 
   6  -5  -1   12.60   12.80 
  -6  -5   1   26.10   15.50 
   6  -5  -1   38.30   17.20 
  -6  -5   1   17.20   12.50 
  -6  -5   1   19.00   22.40 
  -6  -5   1   14.00   13.80 
  -6  -5   1   17.60   12.20 
  -6  -5   1   13.80   10.50 
   6  -5  -1   13.30   14.50 
   6   5  -1    1.40   14.10 
  -6   5   1    9.70   12.40 
  -6   5   1  -13.30   11.00 
   6   5  -1   21.40   11.70 
  -6   5   1   -0.90   13.00 
  -6   5   1   19.80   15.20 
  -6   5   1    4.40   13.60 
  -6   5   1   -5.40    8.20 
   6   5  -1    9.00    9.80 
  -6   5   1   10.00   10.00 
  -6   5   1    1.20   10.60 
   6   5  -1   10.40    9.60 
   6   5  -1   17.80   10.20 
   6   5  -1    6.80    9.00 
  -6   5   1   -8.40    9.30 
  -6   5   1   22.70   13.40 
  -6   5   1   10.60   14.50 
   6   5  -1   18.90   11.50 
  -6   5   1    5.50   12.70 
  -6   5   1   10.40   13.10 
  -5  -5   1 2467.85  190.38 
  -5  -5   1 2413.36  177.58 
  -5  -5   1 2343.17  176.78 
  -5  -5   1 2449.05  176.88 
  -5  -5   1 2420.76  165.38 
   5  -5  -1 2591.74  181.78 
   5  -5  -1 2304.17  176.48 
   5  -5  -1 2478.85  176.08 
  -5  -5   1 2509.25  169.68 
  -5  -5   1 2558.64  175.18 
  -5  -5   1 2610.44  174.98 
  -5  -5   1 2488.05  173.18 
   5  -5  -1 2319.37  171.38 
   5  -5  -1 2219.68  177.58 
   5  -5  -1 2550.24  180.08 
  -5  -5   1 2536.15  171.98 
  -5  -5   1 2502.75  170.98 
   5  -5  -1 2301.97  175.68 
   5  -5  -1 2489.15  179.08 
  -5  -5   1 2353.96  171.98 
  -5  -5   1 2489.65  177.48 
   5  -5  -1 2420.86  177.38 
   5  -5  -1 2426.66  177.08 
  -5  -5   1 2486.65  178.78 
   5  -5  -1 2379.16  173.48 
   5  -5  -1 2516.05  173.18 
   5  -5  -1 2577.54  187.48 
   5   5  -1 2598.34  171.68 
  -5   5   1 2701.53  183.18 
   5   5  -1 2617.14  173.58 
  -5   5   1 2385.86  175.08 
  -5   5   1 2425.76  172.08 
  -5   5   1 2280.17  179.68 
  -5   5   1 2523.95  177.58 
  -5   5   1 2537.15  181.38 
  -5   5   1 2406.76  179.28 
   5   5  -1 2645.84  174.08 
  -5   5   1 2361.56  178.48 
  -5   5   1 2467.85  177.28 
  -5   5   1 2382.16  174.88 
   5   5  -1 2589.54  179.28 
  -5   5   1 2568.24  179.18 
  -5   5   1 2500.65  180.18 
   5   5  -1 2534.05  172.28 
   5   5  -1 2572.04  174.78 
  -5   5   1 2487.85  179.88 
  -4  -5   1   80.89   10.80 
   4  -5  -1   59.39   19.10 
  -4  -5   1   72.29   16.40 
  -4  -5   1   98.39   22.30 
  -4  -5   1   71.89   16.20 
   4  -5  -1   94.19   18.40 
  -4  -5   1   72.09    9.00 
  -4  -5   1   71.59   11.50 
  -4  -5   1   87.29   12.70 
  -4  -5   1   79.59   10.40 
   4  -5  -1   82.69   20.00 
  -4  -5   1   99.29   18.80 
   4  -5  -1  110.69   21.50 
   4  -5  -1   60.39   16.60 
  -4  -5   1   73.89   14.90 
  -4  -5   1   86.99   12.30 
   4  -5  -1  100.59   18.00 
  -4  -5   1   65.59   10.50 
   4  -5  -1   75.69   15.70 
   4  -5  -1   88.29   20.90 
   4  -5  -1   95.49   17.70 
  -4  -5   1   67.19   16.50 
  -4  -5   1   76.29   15.80 
   4  -5  -1   85.59   15.50 
  -4  -5   1   67.19   12.70 
  -4  -5   1   91.19   11.90 
  -4  -5   1   58.29   15.60 
   4  -5  -1  106.39   22.20 
   4  -5  -1   59.39   17.10 
  -4  -5   1   66.79   15.70 
  -4  -5   1   63.29   15.90 
  -4  -5   1   72.09   18.10 
  -4   5   1   85.69   18.00 
  -4   5   1   59.19   15.60 
   4   5  -1   44.00   15.10 
   4   5  -1   59.09   13.90 
  -4   5   1   71.59   18.80 
  -4   5   1  103.49   19.20 
  -4   5   1  100.19   20.20 
   4   5  -1   82.19   16.20 
  -4   5   1  103.59   17.90 
   4   5  -1   68.19   13.40 
  -4   5   1   91.99   21.00 
  -4   5   1  104.69   21.90 
  -4   5   1   65.69   17.00 
  -4   5   1   85.29   20.40 
   4   5  -1   84.59   18.20 
  -4   5   1   60.29   15.90 
  -4   5   1   89.49   20.60 
   4   5  -1   67.59   14.10 
  -4   5   1   50.79   16.80 
  -4   5   1  100.89   22.30 
  -3  -5   1 1114.99   84.19 
   3  -5  -1 1097.79   86.49 
  -3  -5   1 1053.49   96.49 
  -3  -5   1 1117.99   82.19 
  -3  -5   1 1094.89   77.89 
  -3  -5   1  988.70   82.29 
  -3  -5   1 1175.38   79.59 
  -3  -5   1 1156.88   83.89 
  -3  -5   1 1099.29   78.69 
   3  -5  -1 1132.89   84.19 
  -3  -5   1 1019.70   80.09 
  -3  -5   1 1086.29   77.79 
  -3  -5   1 1129.79   78.29 
   3  -5  -1 1038.40   90.09 
  -3  -5   1 1147.49   79.79 
   3  -5  -1  971.80   85.59 
   3  -5  -1 1110.19   82.19 
  -3  -5   1  963.10   86.39 
  -3  -5   1 1139.19   77.89 
  -3  -5   1 1116.69   81.39 
   3  -5  -1 1155.68   80.19 
  -3  -5   1 1118.99   84.99 
  -3  -5   1  850.81   81.69 
  -3  -5   1 1187.68   80.79 
  -3  -5   1 1213.78   82.59 
  -3  -5   1 1287.77  104.39 
  -3  -5   1 1050.29   83.99 
  -3  -5   1 1145.19   78.19 
   3  -5  -1 1148.29   80.09 
   3  -5  -1 1130.19   85.69 
   3  -5  -1 1178.78   87.49 
   3  -5  -1 1172.08   84.39 
  -3  -5   1 1153.18   81.59 
   3  -5  -1 1040.90   86.39 
  -3   5   1 1058.39   85.79 
   3   5  -1 1232.18   87.19 
  -3   5   1 1144.99   84.49 
   3   5  -1 1162.08   84.89 
   3   5  -1 1187.68   85.09 
   3   5  -1 1147.49   80.09 
  -3   5   1 1118.09   82.59 
   3   5  -1 1252.77   83.99 
  -3   5   1 1103.79   86.29 
  -3   5   1 1244.48   87.89 
  -3   5   1 1101.69   87.09 
   3   5  -1 1194.68   81.59 
  -3   5   1 1130.19   85.29 
  -3   5   1 1141.29   82.39 
  -3   5   1 1080.59   87.09 
   3   5  -1 1097.99   81.89 
  -3   5   1 1129.19   87.29 
  -3   5   1 1103.09   85.79 
   3   5  -1 1081.09   79.39 
   3   5  -1 1159.88   86.09 
  -3   5   1 1087.39   84.09 
  -3   5   1  968.70   85.29 
  -3   5   1 1064.09   81.49 
  -2  -5   1    2.90    4.40 
  -2  -5   1    1.10    4.90 
   2  -5  -1   -3.50    6.80 
  -2  -5   1   -1.40    5.80 
  -2  -5   1    1.40    4.30 
  -2  -5   1   -2.00    5.30 
   2  -5  -1   -2.70    7.00 
   2  -5  -1   -6.40    8.30 
  -2  -5   1    2.90    5.30 
  -2  -5   1    6.40    5.10 
   2  -5  -1   -1.20    4.10 
  -2  -5   1   -2.40    4.30 
  -2  -5   1   10.50    8.50 
   2  -5  -1    8.90    8.60 
  -2  -5   1    6.30    5.20 
  -2  -5   1   -3.00    3.10 
  -2  -5   1    8.10   10.20 
  -2  -5   1   -0.60    5.70 
  -2  -5   1   18.30   11.10 
  -2  -5   1   -1.30    4.10 
  -2  -5   1    3.20    4.10 
  -2  -5   1   -7.40    6.20 
  -2  -5   1    5.20    5.10 
  -2  -5   1   15.80    9.70 
   2  -5  -1   -0.30    5.60 
  -2  -5   1    1.80    8.20 
   2  -5  -1    5.00    8.00 
  -2  -5   1   -4.50    6.80 
   2  -5  -1    6.70    4.60 
  -2  -5   1   -4.80    5.30 
   2  -5  -1    2.20    7.70 
   2  -5  -1    4.40    7.50 
  -2  -5   1    9.50    6.50 
  -2  -5   1    5.80    6.00 
   2  -5  -1    0.80    7.10 
  -2  -5   1   11.30    6.10 
   2  -5  -1   15.50    6.90 
  -2  -5   1   15.50   11.10 
   2   5  -1    2.60    7.50 
  -2   5   1    2.20    3.60 
   2   5  -1   -6.00    5.80 
  -2   5   1    3.10    8.00 
  -2   5   1   -3.50    6.60 
  -2   5   1   -6.70    3.50 
  -2   5   1    3.50    8.10 
  -2   5   1    5.80    9.20 
  -2   5   1    0.30    5.60 
  -2   5   1   -0.90    4.70 
  -2   5   1    8.20    8.80 
   2   5  -1    3.60    3.90 
  -2   5   1    8.70    8.10 
   2   5  -1   17.10   11.10 
  -2   5   1    4.40    4.90 
  -2   5   1    0.50    7.80 
   2   5  -1    4.40    8.30 
  -2   5   1    5.50    4.60 
   2   5  -1    3.10    4.70 
  -2   5   1    1.00    4.10 
  -2   5   1    7.20    5.10 
  -2   5   1   -1.30    6.70 
  -2   5   1   -7.90    4.70 
   2   5  -1  -10.30    5.10 
  -2   5   1    4.70    8.20 
   2   5  -1   -1.00    6.40 
   2   5  -1   -2.00    5.90 
   1  -5  -1  170.68   25.60 
  -1  -5   1  217.78   17.20 
  -1  -5   1  219.38   21.00 
  -1  -5   1  219.28   23.90 
   1  -5  -1  225.88   29.10 
   1  -5  -1  261.87   24.30 
   1  -5  -1  237.58   17.40 
  -1  -5   1  245.38   23.30 
  -1  -5   1  234.18   21.90 
   1  -5  -1  230.18   24.10 
   1  -5  -1  204.78   28.40 
  -1  -5   1  231.88   21.40 
  -1  -5   1  217.58   25.00 
   1  -5  -1  207.18   22.50 
  -1  -5   1  205.78   18.30 
  -1  -5   1  247.38   17.30 
  -1  -5   1  245.48   22.20 
   1  -5  -1  206.78   27.20 
   1  -5  -1  191.58   26.80 
   1  -5  -1  229.38   17.40 
  -1  -5   1  227.28   30.80 
   1  -5  -1  235.58   25.50 
   1  -5  -1  185.58   28.10 
  -1  -5   1  247.58   27.10 
  -1  -5   1  239.28   18.60 
   1  -5  -1  238.28   27.60 
  -1  -5   1  229.18   24.60 
  -1  -5   1  196.78   22.70 
   1  -5  -1  270.07   31.70 
  -1  -5   1  222.28   25.70 
  -1  -5   1  236.28   29.70 
  -1  -5   1  202.88   28.40 
  -1  -5   1  238.28   25.40 
  -1  -5   1  219.28   23.60 
   1  -5  -1  209.78   25.20 
   1  -5  -1  226.38   21.30 
   1   5  -1  260.87   28.60 
  -1   5   1  195.58   31.40 
  -1   5   1  212.28   27.60 
  -1   5   1  225.08   25.80 
  -1   5   1  275.57   28.30 
  -1   5   1  210.68   26.10 
   1   5  -1  236.48   26.30 
   1   5  -1  261.97   31.70 
  -1   5   1  209.78   31.30 
  -1   5   1  203.68   28.50 
   1   5  -1  208.98   20.60 
   1   5  -1  189.28   27.20 
  -1   5   1  253.87   30.60 
  -1   5   1  223.48   28.40 
   1   5  -1  237.08   24.40 
   1   5  -1  249.68   29.70 
  -1   5   1  226.78   34.50 
  -1   5   1  242.78   29.00 
   1   5  -1  197.98   27.80 
  -1   5   1  210.58   18.00 
   1   5  -1  252.77   20.60 
   1   5  -1  232.48   30.70 
   1   5  -1  247.58   34.90 
  -1   5   1  224.28   30.30 
  -1   5   1  246.88   20.20 
  -1   5   1  204.48   26.60 
  -1   5   1  245.08   21.30 
   0  -5   1   18.30    4.00 
   0  -5   1   29.00    8.00 
   0  -5  -1   19.90    9.30 
   0  -5   1   13.30    5.30 
   0  -5  -1   22.30    6.90 
   0  -5  -1    6.10    6.70 
   0  -5   1   24.40    7.40 
   0  -5  -1   12.40    7.90 
   0  -5   1   11.30    8.20 
   0  -5  -1    5.30    8.30 
   0  -5   1   17.70    7.10 
   0  -5   1    3.20    7.70 
   0  -5  -1    7.10    7.10 
   0  -5   1   30.80    8.60 
   0  -5   1   27.40    7.70 
   0  -5   1   15.40    6.40 
   0  -5  -1   20.20    5.60 
   0  -5   1   12.60    3.10 
   0  -5   1   15.20   10.00 
   0  -5  -1   36.20    8.20 
   0  -5  -1   16.20    9.70 
   0  -5  -1   12.70    7.30 
   0  -5   1   24.00    7.90 
   0  -5   1   19.40    4.10 
   0  -5  -1    8.20    8.20 
   0  -5  -1   22.80   10.80 
   0  -5  -1   20.70    8.30 
   0  -5  -1   10.10    6.40 
   0  -5   1    2.20    4.90 
   0  -5   1    0.70    6.30 
   0  -5  -1   15.10    4.60 
   0  -5  -1   15.80    6.30 
   0   5  -1    6.80    7.80 
   0   5  -1   31.20   11.80 
   0   5   1   13.30    7.90 
   0   5  -1    7.80   10.90 
   0   5  -1   12.60    9.60 
   0   5   1    2.30   10.40 
   0   5   1    9.70    9.30 
   0   5   1   19.40    4.40 
   0   5  -1   12.50   12.50 
   0   5  -1   20.40   10.60 
   0   5   1    6.30    5.90 
   0   5  -1   23.60    9.50 
   0   5  -1   24.30    9.20 
   0   5   1   26.60   10.50 
   0   5   1    9.10    9.20 
   0   5   1   28.10   12.30 
   0   5   1   14.30    7.70 
   0   5   1   12.00    8.60 
   0   5  -1   17.40    9.30 
   0   5  -1   15.40    8.80 
   0   5   1   10.00   10.10 
   0   5  -1   16.40    4.10 
   0   5  -1   18.20    7.90 
   0   5  -1    2.10    7.90 
   0   5   1   28.80   10.90 
   0   5   1   18.40    7.80 
   0   5  -1    8.40   13.00 
   0   5   1    9.10    9.90 
   0   5   1   12.90    8.50 
   0   5  -1   31.30   10.80 
   0   5  -1   33.20    9.90 
   0   5  -1    4.50   12.20 
   0   5   1   13.70   14.20 
   1  -5   1 3228.38  207.58 
  -1  -5  -1 3110.09  204.08 
   1  -5   1 3045.70  201.98 
   1  -5   1 3077.79  199.08 
   1  -5   1 3023.40  202.28 
  -1  -5  -1 2938.21  197.78 
   1  -5   1 3077.09  198.88 
   1  -5   1 2990.70  204.48 
   1  -5   1 3170.78  208.58 
  -1  -5  -1 3055.29  203.78 
  -1  -5  -1 2901.91  198.08 
   1  -5   1 3118.49  201.18 
  -1  -5  -1 3153.18  212.68 
  -1  -5  -1 3105.59  208.28 
   1  -5   1 3062.19  203.28 
  -1  -5  -1 3019.50  197.48 
  -1  -5  -1 2982.10  200.98 
   1  -5   1 3086.69  206.98 
  -1  -5  -1 2817.22  196.98 
  -1  -5  -1 2917.31  198.98 
  -1  -5  -1 2708.43  208.88 
  -1  -5  -1 3146.49  204.48 
  -1  -5  -1 2972.10  198.98 
   1  -5   1 2987.70  203.98 
  -1  -5  -1 3204.78  210.58 
   1  -5   1 2987.60  207.28 
  -1  -5  -1 2612.24  203.18 
  -1  -5  -1 3049.40  207.38 
   1  -5   1 2849.51  207.88 
  -1  -5  -1 3033.10  204.78 
  -1  -5  -1 2980.50  202.88 
   1  -5   1 3054.59  198.98 
   1   5   1 3048.29  207.08 
   1   5   1 3011.00  207.08 
  -1   5  -1 3278.27  210.78 
   1   5   1 2980.20  208.88 
  -1   5  -1 2880.31  208.58 
   1   5   1 3085.19  198.88 
  -1   5  -1 3070.09  207.38 
  -1   5  -1 3047.09  206.68 
   1   5   1 2984.70  205.08 
  -1   5  -1 3010.70  205.48 
  -1   5  -1 3092.19  209.38 
   1   5   1 2952.30  202.18 
  -1   5  -1 2946.41  206.08 
  -1   5  -1 3040.20  208.78 
  -1   5  -1 3019.90  206.78 
   1   5   1 3041.30  207.78 
   1   5   1 3037.30  202.48 
  -1   5  -1 3077.39  209.38 
  -1   5  -1 2973.10  207.08 
   1   5   1 2950.20  203.58 
   1   5   1 3031.70  217.58 
  -1   5  -1 2414.56  204.58 
  -1   5  -1 3184.88  206.68 
  -1   5  -1 2986.50  206.98 
   1   5   1 2959.80  200.38 
   1   5   1 3106.49  203.48 
   2  -5   1   11.20    9.60 
   2  -5   1   19.20   10.50 
  -2  -5  -1    0.30    4.80 
  -2  -5  -1    3.10   11.80 
  -2  -5  -1   10.40    3.50 
  -2  -5  -1    6.20    3.90 
  -2  -5  -1    3.30    2.80 
  -2  -5  -1    3.60    2.90 
  -2  -5  -1    5.50    4.00 
   2  -5   1    9.30    8.10 
  -2  -5  -1    1.90    4.40 
   2  -5   1    7.30    5.60 
  -2  -5  -1    4.40    4.50 
   2  -5   1   -7.80    7.50 
  -2  -5  -1    8.00    5.30 
  -2  -5  -1    8.60    3.50 
  -2  -5  -1    4.40    7.50 
   2  -5   1   -1.60    5.50 
   2  -5   1    4.30    5.80 
  -2  -5  -1    1.50    6.20 
   2  -5   1   -0.20    6.80 
  -2  -5  -1   11.20    6.60 
  -2  -5  -1   10.40   11.70 
  -2  -5  -1    4.70    4.40 
  -2  -5  -1    8.00    5.20 
   2  -5   1    2.00    6.50 
   2  -5   1    8.70    5.70 
   2  -5   1   -0.10    7.10 
  -2  -5  -1    5.70    6.00 
   2  -5   1    3.30    5.40 
  -2  -5  -1   13.00    6.20 
  -2  -5  -1   -2.80    8.00 
   2  -5   1    8.30    8.90 
  -2  -5  -1    8.30    3.60 
  -2  -5  -1    7.60    7.60 
  -2  -5  -1    1.00    3.70 
  -2  -5  -1   -7.80    5.80 
  -2  -5  -1    2.20    5.40 
   2   5   1    8.10    6.00 
   2   5   1   -0.20    6.80 
   2   5   1    6.00   10.70 
  -2   5  -1    8.40    4.60 
  -2   5  -1   -0.20    7.30 
  -2   5  -1    4.00    7.30 
  -2   5  -1   -0.10    5.80 
  -2   5  -1    3.00    8.50 
  -2   5  -1    7.70    4.10 
  -2   5  -1    9.30    9.20 
  -2   5  -1    7.00    4.70 
  -2   5  -1   13.50    7.30 
  -2   5  -1    0.40    6.20 
  -2   5  -1    6.20    6.70 
   2   5   1    9.40    9.00 
   2   5   1   -1.30    8.50 
  -2   5  -1   11.10    8.60 
   2   5   1    1.70    7.00 
  -2   5  -1   14.20    9.00 
  -2   5  -1    0.40    4.20 
  -2   5  -1   11.00    9.20 
  -2   5  -1    1.50    7.80 
  -2   5  -1   -8.80    5.80 
  -2   5  -1    8.80    8.50 
   2   5   1    3.70    4.50 
   2   5   1    0.60    7.50 
   2   5   1   -2.20    5.50 
  -3  -5  -1 3183.88  221.38 
  -3  -5  -1 3203.98  215.48 
   3  -5   1 3277.77  219.98 
   3  -5   1 3173.58  230.68 
  -3  -5  -1 3689.13  228.48 
   3  -5   1 3270.67  226.08 
   3  -5   1 3159.48  223.78 
  -3  -5  -1 3203.98  215.08 
  -3  -5  -1 3358.16  221.58 
   3  -5   1 3070.49  225.68 
  -3  -5  -1 3232.88  214.68 
  -3  -5  -1 3238.18  223.38 
  -3  -5  -1 3260.27  217.58 
  -3  -5  -1 3331.67  222.98 
   3  -5   1 3341.47  227.78 
   3  -5   1 3197.38  222.28 
  -3  -5  -1 3132.89  220.98 
  -3  -5  -1 2992.80  224.68 
  -3  -5  -1 3328.77  219.18 
  -3  -5  -1 3153.48  225.78 
   3  -5   1 3354.26  221.08 
  -3  -5  -1 3222.18  217.28 
  -3  -5  -1 3576.64  216.98 
  -3  -5  -1 3337.67  225.18 
   3  -5   1 3480.85  225.28 
   3  -5   1 3075.69  230.18 
   3  -5   1 3215.68  228.98 
   3  -5   1 3262.87  226.08 
  -3  -5  -1 3160.58  219.28 
  -3   5  -1 3209.88  223.68 
   3   5   1 3244.78  218.98 
   3   5   1 3476.75  224.98 
  -3   5  -1 3294.17  227.88 
   3   5   1 3225.28  225.48 
  -3   5  -1 3256.17  221.58 
  -3   5  -1 3259.87  225.88 
  -3   5  -1 3143.29  224.28 
  -3   5  -1 3257.77  225.48 
  -3   5  -1 3328.87  225.28 
   3   5   1 3130.99  219.68 
  -3   5  -1 3327.27  227.28 
  -3   5  -1 3254.97  218.48 
   3   5   1 3072.49  225.88 
  -3   5  -1 3216.08  222.98 
  -3   5  -1 3435.96  221.98 
  -3   5  -1 3057.29  225.48 
  -3   5  -1 3106.79  225.88 
   3   5   1 3260.37  217.58 
   3   5   1 3602.34  227.28 
  -3   5  -1 3481.85  228.28 
   4  -5   1   35.10   12.40 
   4  -5   1   31.40   14.30 
   4  -5   1   31.10   13.00 
   4  -5   1   25.30   10.70 
  -4  -5  -1   41.70   11.00 
  -4  -5  -1   37.40   12.90 
  -4  -5  -1   47.70   14.40 
  -4  -5  -1   27.00   16.80 
  -4  -5  -1   22.90   11.10 
   4  -5   1   13.70   14.20 
  -4  -5  -1   52.09   16.10 
  -4  -5  -1   52.49   12.30 
   4  -5   1   28.00   12.60 
   4  -5   1   14.40   14.10 
   4  -5   1   38.70   16.00 
   4  -5   1   34.60   14.00 
   4  -5   1   21.90   13.60 
  -4  -5  -1   25.50    6.90 
  -4  -5  -1   29.20    6.50 
  -4  -5  -1   44.20   14.60 
  -4  -5  -1   42.30   16.20 
  -4  -5  -1   58.59   13.00 
   4  -5   1   36.40   11.90 
   4  -5   1   49.99   16.50 
  -4   5  -1   56.19   17.20 
   4   5   1   26.10   10.90 
  -4   5  -1   39.90   15.10 
  -4   5  -1    7.30   10.70 
  -4   5  -1   19.90   12.70 
  -4   5  -1   37.10   15.10 
   4   5   1   51.49   11.20 
  -4   5  -1   36.40   13.70 
  -4   5  -1   44.10   13.20 
   4   5   1   15.50    9.30 
   4   5   1   11.50   12.70 
  -4   5  -1   33.30   12.70 
   4   5   1   27.70   12.50 
   4   5   1   37.80   12.30 
  -4   5  -1   36.00   14.60 
  -4   5  -1   49.10   15.00 
  -4   5  -1   36.40   13.80 
  -4   5  -1   34.50   12.20 
   5  -5   1  304.57   38.20 
  -5  -5  -1  269.17   36.40 
  -5  -5  -1  293.17   48.90 
  -5  -5  -1  201.98   31.50 
  -5  -5  -1  271.77   32.10 
   5  -5   1  286.57   40.80 
   5  -5   1  284.17   33.90 
   5  -5   1  170.78   33.00 
   5  -5   1  213.08   31.70 
  -5  -5  -1  316.27   37.20 
   5  -5   1  289.67   36.50 
  -5  -5  -1  305.57   40.20 
   5  -5   1  285.27   38.30 
  -5  -5  -1  260.47   41.70 
   5  -5   1  282.37   45.00 
   5  -5   1  261.87   37.90 
  -5  -5  -1  248.98   23.90 
   5  -5   1  239.08   31.20 
  -5  -5  -1  308.17   40.20 
  -5  -5  -1  290.37   32.70 
  -5  -5  -1  363.06   37.80 
   5  -5   1  287.57   39.30 
  -5   5  -1  261.87   38.00 
  -5   5  -1  240.78   36.70 
   5   5   1  378.06   38.00 
  -5   5  -1  273.57   35.50 
   5   5   1  245.58   32.60 
  -5   5  -1  294.27   38.90 
  -5   5  -1  256.97   36.80 
   5   5   1  209.38   29.70 
  -5   5  -1  256.17   32.10 
  -5   5  -1  281.37   37.20 
   5   5   1  243.78   30.80 
  -5   5  -1  262.77   38.90 
   5   5   1  319.97   35.70 
  -5   5  -1  211.18   34.90 
  -5   5  -1  261.67   39.30 
  -5   5  -1  270.67   34.40 
  -5   5  -1  292.67   41.20 
   5   5   1  258.57   31.20 
  -6  -5  -1   -7.20    7.90 
   6  -5   1   34.30   14.30 
   6  -5   1   12.30   15.00 
   6  -5   1    6.00   14.20 
  -6  -5  -1   25.20   16.20 
  -6  -5  -1   -6.50   16.50 
   6  -5   1    1.40    9.90 
   6  -5   1   13.60   12.60 
  -6  -5  -1    9.90   12.00 
   6  -5   1   10.20   13.80 
   6  -5   1   33.90   14.90 
  -6  -5  -1    1.70    8.90 
  -6  -5  -1    5.80   10.00 
  -6  -5  -1   14.10   15.50 
   6  -5   1   10.30   12.60 
   6  -5   1   20.70   13.80 
   6  -5   1    8.30   14.30 
  -6  -5  -1   10.70   12.50 
  -6  -5  -1   17.40   19.00 
  -6  -5  -1   13.30   15.40 
   6  -5   1  -16.80   14.50 
  -6   5  -1   -2.00   12.70 
   6   5   1   16.50   10.30 
   6   5   1    6.40    9.40 
  -6   5  -1   17.90   12.90 
  -6   5  -1    9.70   13.10 
  -6   5  -1   15.60   15.40 
   6   5   1   22.90   11.30 
   6   5   1   23.20   16.10 
  -6   5  -1   18.50   14.80 
  -6   5  -1   19.60   14.90 
   6   5   1    2.60    9.90 
  -6   5  -1   19.30   13.70 
  -6   5  -1   11.10   11.80 
  -6   5  -1   22.30   14.50 
   6   5   1    3.50   10.90 
   6   5   1   17.80   12.00 
  -6   5  -1   17.20   11.50 
  -6   5  -1   15.60   14.20 
  -6   5  -1   35.20   13.20 
   7  -5   1    4.90   14.60 
   7  -5   1   13.10   13.40 
   7  -5   1   14.90   17.80 
   7  -5   1   31.90   16.90 
   7  -5   1   -3.30   13.00 
   7  -5   1   10.40   12.90 
   7  -5   1   22.60   20.40 
   7  -5   1   -3.20   15.10 
   7  -5   1   15.00   15.80 
  -7  -5  -1  -12.70   13.00 
  -7  -5  -1   -5.90   10.00 
  -7  -5  -1   29.50   14.20 
  -7  -5  -1    3.90   13.50 
  -7  -5  -1   29.80   15.10 
   7  -5   1   30.60   17.00 
   7  -5   1  -25.30   11.10 
  -7  -5  -1   24.70   18.90 
  -7  -5  -1   26.00   17.60 
  -7  -5  -1    1.40   23.30 
   7   5   1    9.00   11.50 
  -7   5  -1    1.70   14.70 
  -7   5  -1    7.50   14.50 
  -7   5  -1   32.70   18.00 
  -7   5  -1   36.40   19.00 
   7   5   1    6.80   15.90 
  -7   5  -1   -1.60   14.50 
  -7   5  -1   -1.50   13.90 
  -7   5  -1   11.40   13.40 
  -7   5  -1    1.40   12.80 
  -7   5  -1  -11.80    8.30 
   7   5   1   24.10   13.00 
  -7   5  -1   19.90   14.50 
   7   5   1   26.40   15.20 
  -8  -5  -1   25.60   17.10 
  -8  -5  -1   58.39   31.80 
   8  -5   1   34.60   21.20 
   8  -5   1   81.59   29.10 
   8  -5   1   51.99   28.50 
  -8  -5  -1   16.00   17.10 
   8  -5   1    8.40   16.20 
  -8  -5  -1   13.50   15.80 
   8  -5   1   26.30   17.80 
  -8  -5  -1   33.60   23.20 
  -8  -5  -1   18.40   17.90 
   8  -5   1   49.70   22.60 
   8  -5   1   29.60   20.70 
  -8  -5  -1   29.40   22.20 
   8  -5   1   41.90   19.60 
  -8  -5  -1   52.69   20.50 
  -8   5  -1  -21.30   13.60 
  -8   5  -1   19.00   16.40 
  -8   5  -1   13.40   16.20 
  -8   5  -1   27.80   17.50 
  -8   5  -1   41.00   20.10 
  -8   5  -1   27.60   20.90 
  -8   5  -1   32.40   23.30 
  -8   5  -1   36.70   20.70 
   8   5   1   18.50   15.90 
  -8   5  -1   26.50   20.20 
  -8   5  -1   60.69   24.00 
   8   5   1   44.80   19.50 
  -8   5  -1    4.10   16.20 
   9  -5   1  171.98   35.60 
   9  -5   1  149.29   36.00 
   9  -5   1  155.78   41.40 
   9  -5   1  207.38   47.80 
  -9  -5  -1  185.48   39.40 
  -9  -5  -1  195.48   43.90 
   9  -5   1  212.08   47.50 
   9  -5   1  191.18   38.40 
  -9  -5  -1  160.38   40.80 
   9  -5   1  176.48   42.40 
  -9  -5  -1  193.38   54.89 
  -9  -5  -1  251.07   49.10 
  -9  -5  -1  223.58   40.50 
   9  -5   1  239.48   40.00 
  -9   5  -1  144.59   36.60 
  -9   5  -1  171.78   43.40 
  -9   5  -1  262.67   48.90 
   9   5   1  173.98   34.30 
  -9   5  -1  164.08   42.20 
   9   5   1  152.08   35.90 
  -9   5  -1  204.88   44.90 
  -9   5  -1  215.78   45.40 
  -9   5  -1  152.18   37.00 
  -9   5  -1  211.48   44.20 
  -9   5  -1  192.98   40.40 
  -9   5  -1  258.47   39.90 
  -9   5  -1  263.47   49.10 
  -8  -6   1  148.19   34.90 
  -8  -6   1  105.39   41.10 
  -8  -6   1   78.79   26.70 
   8  -6  -1  128.29   31.00 
  -8  -6   1   67.39   27.10 
   8  -6  -1  110.29   35.30 
  -8  -6   1  101.89   31.80 
   8  -6  -1   95.49   31.30 
   8  -6  -1  102.19   31.30 
   8  -6  -1  145.39   38.40 
   8  -6  -1  112.19   27.40 
  -8  -6   1  101.99   29.70 
   8  -6  -1  155.08   37.70 
   8  -6  -1  191.58   37.40 
  -8  -6   1   90.89   27.90 
  -8   6   1   70.49   25.20 
  -8   6   1  164.98   35.90 
  -8   6   1  110.09   32.00 
  -8   6   1  137.49   34.00 
  -8   6   1  129.09   34.70 
  -8   6   1   78.59   27.80 
   8   6  -1   63.29   21.80 
  -8   6   1   99.39   25.90 
  -8   6   1   68.19   26.10 
  -8   6   1  105.39   30.90 
  -8   6   1  138.19   35.20 
  -8   6   1   86.49   30.70 
   7  -6  -1   25.70   18.30 
   7  -6  -1   20.50   13.50 
   7  -6  -1    3.50   17.90 
  -7  -6   1   -1.60   14.10 
  -7  -6   1   24.20   16.00 
  -7  -6   1  -14.10   11.30 
  -7  -6   1    3.60   13.10 
   7  -6  -1    0.00   12.70 
   7  -6  -1   -1.20   15.00 
   7  -6  -1   -2.70   12.40 
  -7  -6   1   12.30   15.00 
   7  -6  -1   -7.10   13.20 
  -7  -6   1    9.80   15.80 
  -7  -6   1    8.40   23.10 
  -7  -6   1   15.00   18.30 
   7  -6  -1   -0.70   16.00 
   7  -6  -1   14.00   15.10 
   7  -6  -1   -4.80   13.40 
  -7  -6   1   18.70   18.20 
   7  -6  -1   28.20   18.90 
  -7  -6   1  -10.40   13.60 
  -7   6   1   -0.10   16.60 
  -7   6   1   -4.60   12.50 
   7   6  -1   -8.90   10.40 
  -7   6   1  -19.00   11.40 
  -7   6   1   -4.40   14.00 
  -7   6   1   36.20   17.00 
  -7   6   1   10.80   13.60 
  -7   6   1   -7.60   11.10 
  -7   6   1   -3.70   12.40 
  -7   6   1   -3.20   13.60 
  -7   6   1   -5.90   14.60 
  -7   6   1   15.80   16.10 
   7   6  -1    2.60   11.10 
   6  -6  -1   65.49   24.00 
   6  -6  -1   23.00   16.60 
  -6  -6   1   95.69   24.50 
  -6  -6   1   51.39   15.80 
  -6  -6   1   62.79   17.70 
   6  -6  -1   82.99   29.00 
   6  -6  -1   38.20   17.90 
   6  -6  -1   30.90   17.10 
  -6  -6   1   63.89   19.40 
   6  -6  -1   91.49   25.40 
  -6  -6   1   98.59   35.70 
   6  -6  -1   45.20   22.50 
  -6  -6   1   47.60   19.70 
   6  -6  -1  113.49   21.80 
   6  -6  -1  139.59   29.80 
  -6  -6   1   92.99   22.70 
   6  -6  -1   46.10   18.70 
  -6  -6   1  139.49   27.00 
  -6  -6   1   62.29   19.80 
  -6  -6   1   74.39   21.60 
   6  -6  -1   73.49   20.50 
   6   6  -1  105.89   21.20 
  -6   6   1   82.79   24.70 
   6   6  -1   65.49   20.20 
  -6   6   1   91.99   25.60 
   6   6  -1   20.60   13.80 
  -6   6   1   60.19   20.90 
  -6   6   1   56.89   18.70 
   6   6  -1   78.39   18.30 
  -6   6   1  107.39   24.80 
  -6   6   1   92.69   25.70 
  -6   6   1   98.39   28.00 
  -6   6   1   94.69   24.50 
  -6   6   1   97.09   26.30 
  -6   6   1  103.79   21.00 
  -6   6   1   95.49   21.10 
  -6   6   1  129.29   31.40 
  -6   6   1   58.49   23.10 
  -5  -6   1   51.79   16.30 
  -5  -6   1   39.00   16.50 
  -5  -6   1   65.89   18.30 
  -5  -6   1   73.49   18.40 
   5  -6  -1   84.49   23.90 
   5  -6  -1   61.69   20.40 
  -5  -6   1   44.30   19.90 
   5  -6  -1  135.89   25.80 
   5  -6  -1   60.99   24.10 
  -5  -6   1   49.10   19.20 
   5  -6  -1   67.59   17.90 
   5  -6  -1   74.29   20.40 
   5  -6  -1   69.89   21.30 
  -5  -6   1   61.09   17.90 
  -5  -6   1   46.30   18.00 
  -5  -6   1   31.00   14.90 
   5  -6  -1  102.59   18.70 
   5  -6  -1   62.09   16.90 
  -5  -6   1   71.79   18.50 
  -5  -6   1   42.20   14.00 
   5  -6  -1   65.89   20.60 
   5  -6  -1   41.70   18.70 
  -5  -6   1   49.60   14.70 
   5  -6  -1   42.90   18.50 
  -5   6   1   35.90   18.20 
  -5   6   1   67.09   18.40 
  -5   6   1  123.49   26.90 
  -5   6   1   88.19   21.50 
  -5   6   1   70.69   18.80 
  -5   6   1   58.89   18.10 
   5   6  -1   50.99   14.60 
  -5   6   1   64.79   20.40 
   5   6  -1   56.79   20.20 
  -5   6   1   28.90   18.00 
  -5   6   1   48.90   18.30 
   5   6  -1   54.39   13.60 
   5   6  -1   90.99   20.70 
   5   6  -1   99.89   20.40 
  -5   6   1   61.39   20.70 
  -5   6   1   81.09   18.80 
  -5   6   1   70.89   20.70 
  -5   6   1   64.29   18.10 
  -4  -6   1  398.86   39.30 
  -4  -6   1  341.07   43.50 
  -4  -6   1  401.36   45.30 
  -4  -6   1  442.66   50.09 
   4  -6  -1  408.56   49.30 
   4  -6  -1  383.36   46.70 
  -4  -6   1  443.36   35.00 
   4  -6  -1  406.16   49.10 
  -4  -6   1  363.86   48.80 
  -4  -6   1  462.55   38.30 
  -4  -6   1  423.56   38.00 
   4  -6  -1  429.36   40.20 
  -4  -6   1  434.06   40.20 
  -4  -6   1  436.66   49.40 
  -4  -6   1  407.96   47.20 
  -4  -6   1  448.36   35.00 
  -4  -6   1  396.46   36.70 
   4  -6  -1  422.36   44.80 
   4  -6  -1  379.06   44.00 
   4  -6  -1  464.45   38.20 
   4  -6  -1  375.86   52.69 
  -4  -6   1  418.36   46.60 
   4  -6  -1  460.65   38.00 
   4  -6  -1  487.25   48.10 
   4  -6  -1  389.46   48.70 
   4  -6  -1  419.66   50.29 
  -4   6   1  449.26   47.10 
  -4   6   1  405.96   49.60 
  -4   6   1  419.56   49.10 
  -4   6   1  395.56   48.60 
  -4   6   1  507.25   41.60 
  -4   6   1  384.26   49.50 
   4   6  -1  386.26   36.10 
  -4   6   1  394.56   39.70 
  -4   6   1  408.46   48.80 
   4   6  -1  442.86   49.70 
  -4   6   1  369.46   45.80 
  -4   6   1  380.46   44.00 
  -4   6   1  386.16   39.00 
  -4   6   1  391.96   48.40 
  -4   6   1  395.66   49.90 
   4   6  -1  437.06   49.10 
   4   6  -1  374.16   36.10 
  -4   6   1  331.17   46.30 
   4   6  -1  411.16   45.60 
  -3  -6   1    8.10    7.80 
   3  -6  -1   14.20   11.50 
  -3  -6   1    3.50    5.90 
   3  -6  -1   14.40   12.60 
  -3  -6   1    6.60   10.50 
   3  -6  -1    7.90   12.20 
  -3  -6   1    4.70   10.50 
   3  -6  -1    7.20   10.30 
  -3  -6   1    6.90    7.10 
  -3  -6   1    9.00    6.90 
   3  -6  -1    6.70   12.00 
  -3  -6   1    3.50   10.90 
  -3  -6   1   10.50   10.70 
   3  -6  -1   25.80    9.70 
   3  -6  -1    7.20   11.90 
   3  -6  -1   15.00   10.30 
  -3  -6   1   20.70   13.30 
  -3  -6   1    4.40    6.10 
  -3  -6   1    8.10    7.70 
   3  -6  -1    0.70    6.50 
  -3  -6   1   14.80    8.70 
  -3  -6   1    1.70    6.50 
   3  -6  -1   -4.40   10.50 
   3  -6  -1    8.40    9.50 
   3  -6  -1    9.10    7.60 
   3   6  -1   13.90    6.80 
  -3   6   1   10.10   11.60 
   3   6  -1   15.70   11.30 
  -3   6   1   16.20   12.30 
  -3   6   1   11.40    8.30 
  -3   6   1    6.30   10.60 
  -3   6   1    8.70   12.00 
   3   6  -1    8.80   10.40 
  -3   6   1   16.70   12.30 
  -3   6   1   10.30   11.50 
   3   6  -1   15.20    7.00 
  -3   6   1    1.00   10.10 
   3   6  -1   16.80   10.60 
  -3   6   1   11.30    7.00 
   3   6  -1   11.10   10.60 
  -3   6   1   24.00   12.60 
   3   6  -1    3.00    6.80 
  -3   6   1    4.30    9.50 
   3   6  -1   26.00   14.30 
  -3   6   1   15.90    8.70 
  -3   6   1    0.70    8.60 
  -3   6   1   11.40   10.90 
   2  -6  -1   17.20    9.80 
   2  -6  -1   26.30    9.00 
  -2  -6   1   28.00   13.10 
  -2  -6   1   16.00    8.10 
  -2  -6   1   21.80    8.80 
   2  -6  -1    9.90   10.60 
  -2  -6   1   19.50    5.70 
   2  -6  -1   39.30   16.10 
  -2  -6   1   10.90    7.50 
  -2  -6   1   19.00    6.80 
  -2  -6   1   21.80    8.20 
   2  -6  -1   17.60    9.10 
  -2  -6   1   24.60   13.50 
   2  -6  -1    1.20   10.20 
  -2  -6   1   10.90   10.10 
  -2  -6   1   19.20    8.30 
  -2  -6   1   39.10    8.70 
   2  -6  -1    4.00    9.80 
   2  -6  -1   15.10    5.60 
   2  -6  -1   25.50   11.60 
  -2  -6   1   45.20   14.80 
  -2  -6   1    3.90    7.10 
  -2  -6   1   10.40    6.40 
  -2  -6   1   19.40    9.30 
  -2  -6   1   27.60    5.30 
  -2  -6   1   28.80    7.40 
  -2  -6   1   26.90   12.90 
  -2  -6   1   44.80   15.00 
   2  -6  -1    4.90   10.30 
  -2  -6   1   12.40    6.50 
  -2  -6   1   15.60    9.40 
  -2  -6   1   13.40    9.60 
   2  -6  -1   22.00   11.90 
  -2  -6   1   19.80    5.80 
  -2  -6   1   20.90    5.50 
   2   6  -1   29.20   14.40 
  -2   6   1   17.10   10.90 
  -2   6   1   25.60    6.00 
  -2   6   1   16.00   11.10 
  -2   6   1    2.50   11.60 
  -2   6   1   20.80    7.90 
  -2   6   1   14.60   11.40 
  -2   6   1   14.80   12.30 
  -2   6   1   -0.60   10.60 
  -2   6   1   15.70    9.60 
  -2   6   1   15.80    8.80 
   2   6  -1    5.20    9.40 
   2   6  -1    6.90    9.90 
  -2   6   1   25.80    8.00 
   2   6  -1   22.40   14.10 
  -2   6   1    6.30    9.50 
  -2   6   1   21.90   11.90 
   2   6  -1   12.60   10.40 
  -2   6   1   -0.40    8.10 
   2   6  -1    6.00    9.00 
   2   6  -1   34.30   12.10 
  -2   6   1   30.20   11.00 
  -2   6   1   17.00    6.00 
  -2   6   1   19.30    7.50 
   2   6  -1   17.60    6.10 
  -2   6   1    3.70    9.20 
  -2   6   1   23.80    6.30 
  -1  -6   1   29.70   11.40 
  -1  -6   1    5.60    9.80 
  -1  -6   1   36.80   14.30 
   1  -6  -1   14.60    7.40 
  -1  -6   1   23.40   10.70 
   1  -6  -1   34.10   10.50 
  -1  -6   1   29.90    6.00 
   1  -6  -1   34.80    9.40 
   1  -6  -1   16.70   11.10 
  -1  -6   1   25.40    6.40 
  -1  -6   1   22.30    8.40 
  -1  -6   1   31.60    7.90 
   1  -6  -1   19.10   13.60 
  -1  -6   1   24.80    8.70 
  -1  -6   1   27.80    6.30 
  -1  -6   1   38.80   15.30 
   1  -6  -1   31.30   13.80 
   1  -6  -1    4.00   10.20 
   1  -6  -1   15.60    7.10 
  -1  -6   1   21.50    7.70 
   1  -6  -1   28.40   12.10 
  -1  -6   1   31.50    8.20 
   1  -6  -1    3.40    9.20 
  -1  -6   1   31.20    9.40 
   1  -6  -1   36.80   10.60 
  -1  -6   1   20.80    7.10 
  -1  -6   1   16.00    7.10 
   1  -6  -1   21.90    9.30 
   1   6  -1   19.00   10.90 
   1   6  -1   21.50   15.90 
  -1   6   1   28.80   13.60 
   1   6  -1   26.00    7.40 
   1   6  -1   30.80   14.50 
  -1   6   1   28.80   12.70 
  -1   6   1   30.40   13.80 
  -1   6   1    5.50   11.10 
  -1   6   1   23.30   12.10 
  -1   6   1    1.50   13.50 
  -1   6   1    9.50   13.40 
   1   6  -1   26.90   12.90 
  -1   6   1   14.80    5.50 
  -1   6   1   50.59   14.20 
   1   6  -1   19.00   10.60 
  -1   6   1   14.10   11.30 
  -1   6   1    9.50   12.30 
   1   6  -1   29.30   10.30 
   1   6  -1   26.10    9.50 
  -1   6   1   21.30   11.90 
  -1   6   1   17.20    4.20 
   1   6  -1   12.00    6.50 
  -1   6   1   44.70   12.20 
  -1   6   1   28.00   10.90 
  -1   6   1   25.60   15.90 
   1   6  -1   18.10    9.90 
  -1   6   1   18.10    7.20 
   0  -6   1  727.03   63.29 
   0  -6  -1  791.52   56.99 
   0  -6  -1  757.92   61.69 
   0  -6  -1  825.42   64.59 
   0  -6  -1  824.52   66.09 
   0  -6  -1  768.62   66.89 
   0  -6   1  772.22   53.49 
   0  -6  -1  729.53   61.89 
   0  -6   1  823.52   61.29 
   0  -6   1  825.82   59.59 
   0  -6  -1  815.32   56.09 
   0  -6   1  844.72   59.29 
   0  -6   1  783.32   64.99 
   0  -6   1  834.02   54.59 
   0  -6   1  816.32   53.69 
   0  -6   1  753.62   59.19 
   0  -6   1  828.32   57.69 
   0  -6   1  789.42   59.09 
   0  -6   1  848.72   68.29 
   0  -6  -1  715.33   62.19 
   0  -6  -1  833.32   68.19 
   0  -6  -1  763.72   58.79 
   0  -6   1  876.91   68.29 
   0  -6  -1  742.53   66.49 
   0  -6  -1  778.02   63.79 
   0  -6  -1  807.42   59.79 
   0  -6   1  808.52   59.89 
   0  -6   1  750.42   60.99 
   0  -6   1  879.01   68.19 
   0  -6  -1  806.62   62.09 
   0   6   1  764.72   66.19 
   0   6   1  848.72   72.39 
   0   6   1  683.73   85.19 
   0   6   1  915.01   68.09 
   0   6  -1  747.33   65.39 
   0   6  -1  726.03   64.99 
   0   6  -1  517.35   73.29 
   0   6  -1  771.52   61.39 
   0   6   1  778.92   66.29 
   0   6  -1  775.72   84.69 
   0   6   1  736.53   61.19 
   0   6   1  778.82   63.19 
   0   6   1  837.92   68.99 
   0   6   1  814.12   60.99 
   0   6  -1  853.61   54.09 
   0   6  -1  794.72   66.19 
   0   6   1 1013.90   74.99 
   0   6  -1  856.21   69.79 
   0   6   1  805.72   55.59 
   0   6  -1  803.82   67.79 
   0   6   1  801.42   54.39 
   0   6   1  874.11   70.99 
   0   6   1  820.82   53.59 
   0   6  -1  809.22   68.99 
   0   6  -1  786.02   65.09 
   0   6  -1  601.84   63.09 
   0   6   1  822.42   65.29 
   0   6   1  795.82   53.49 
   0   6  -1  813.02   64.59 
   0   6  -1  965.90   70.69 
   1  -6   1   17.20    8.10 
  -1  -6  -1   15.60   10.00 
   1  -6   1    2.00    9.20 
   1  -6   1   10.10    7.60 
   1  -6   1   11.30   11.00 
  -1  -6  -1   19.30   12.30 
   1  -6   1    8.20    4.50 
  -1  -6  -1   14.10    9.50 
   1  -6   1    9.00    7.90 
  -1  -6  -1   14.60    3.40 
   1  -6   1    7.60   11.70 
   1  -6   1    7.90   10.70 
  -1  -6  -1   -5.60    8.00 
  -1  -6  -1    9.10    6.10 
   1  -6   1   19.90    5.50 
   1  -6   1   12.90    6.10 
  -1  -6  -1   13.20    9.60 
  -1  -6  -1   14.60    8.30 
  -1  -6  -1    5.00   11.00 
  -1  -6  -1   10.60    4.00 
  -1  -6  -1   13.10    6.30 
  -1  -6  -1    9.50   10.00 
   1  -6   1   11.70   10.30 
  -1  -6  -1    9.00    4.40 
   1  -6   1   26.50   13.20 
  -1  -6  -1    2.30    7.30 
  -1   6  -1    0.90   10.90 
   1   6   1   15.30    4.50 
   1   6   1    8.00    9.40 
  -1   6  -1   14.60   11.00 
  -1   6  -1   23.70    9.40 
  -1   6  -1   18.90   11.60 
   1   6   1   22.90   11.40 
  -1   6  -1   12.70   12.50 
   1   6   1    0.20    8.70 
   1   6   1    7.40    5.90 
  -1   6  -1    8.50   10.40 
  -1   6  -1   12.10   10.40 
  -1   6  -1   18.30   14.60 
  -1   6  -1   15.80    9.40 
  -1   6  -1    2.20    9.00 
  -1   6  -1   13.50   10.00 
  -1   6  -1    9.40    9.70 
  -1   6  -1   25.70   13.60 
  -1   6  -1    9.00    8.40 
  -1   6  -1   11.70    9.80 
   1   6   1   16.10   10.40 
   1   6   1   12.80    8.40 
   1   6   1   11.60    6.60 
   1   6   1   -3.20   12.20 
   1   6   1   15.00   12.30 
  -2  -6  -1  476.25   51.39 
   2  -6   1  504.85   55.79 
   2  -6   1  481.15   45.20 
   2  -6   1  483.85   42.60 
  -2  -6  -1  491.65   40.80 
   2  -6   1  494.55   51.89 
   2  -6   1  483.25   38.90 
  -2  -6  -1  484.85   35.20 
   2  -6   1  498.85   57.29 
  -2  -6  -1  543.95   38.80 
  -2  -6  -1  523.95   36.00 
  -2  -6  -1  288.47   49.99 
   2  -6   1  600.34   59.39 
  -2  -6  -1  572.24   45.40 
  -2  -6  -1  507.95   44.10 
  -2  -6  -1  517.65   54.19 
   2  -6   1  507.75   43.80 
  -2  -6  -1  431.46   43.30 
  -2  -6  -1  532.95   43.00 
   2  -6   1  417.96   49.90 
  -2  -6  -1  460.55   41.40 
   2  -6   1  501.05   53.39 
  -2  -6  -1  407.36   35.80 
   2  -6   1  496.75   51.89 
  -2  -6  -1  566.64   37.80 
   2  -6   1  535.95   42.60 
  -2  -6  -1  502.25   39.80 
  -2  -6  -1  507.45   37.90 
   2  -6   1  525.95   38.80 
  -2   6  -1  651.83   52.99 
  -2   6  -1  516.05   48.10 
  -2   6  -1  480.85   51.99 
   2   6   1  500.15   54.49 
  -2   6  -1  474.15   36.50 
  -2   6  -1  525.85   46.90 
  -2   6  -1  480.55   51.79 
  -2   6  -1  493.65   37.10 
   2   6   1  330.27   52.89 
  -2   6  -1  489.55   35.70 
  -2   6  -1  487.05   37.00 
  -2   6  -1  516.35   45.40 
  -2   6  -1  493.35   53.59 
  -2   6  -1  564.04   49.30 
  -2   6  -1  509.05   46.60 
  -2   6  -1  545.75   37.70 
   2   6   1  525.35   41.70 
  -2   6  -1  516.35   44.60 
   2   6   1  504.15   51.69 
   2   6   1  427.36   48.90 
  -2   6  -1  454.75   49.90 
  -2   6  -1  505.35   44.70 
  -2   6  -1  489.25   39.30 
  -2   6  -1  449.66   49.50 
   2   6   1  487.95   52.99 
   2   6   1  523.45   46.30 
   2   6   1  481.15   38.00 
  -2   6  -1  509.55   46.70 
   3  -6   1    7.10    7.20 
  -3  -6  -1    2.30   13.30 
  -3  -6  -1   -2.20    5.00 
  -3  -6  -1    2.80    7.50 
   3  -6   1   -2.40   11.90 
  -3  -6  -1    4.90   11.40 
   3  -6   1   -0.80   11.00 
  -3  -6  -1   26.30   11.70 
   3  -6   1   11.50   12.10 
   3  -6   1    4.40   12.10 
  -3  -6  -1    8.90    8.70 
   3  -6   1  -16.20    8.50 
   3  -6   1    4.80   10.30 
  -3  -6  -1    8.30    3.70 
   3  -6   1   -3.00    9.00 
  -3  -6  -1    3.20   11.50 
  -3  -6  -1    6.90    7.40 
   3  -6   1    4.60    6.90 
   3  -6   1   11.10   11.90 
  -3  -6  -1    4.80    4.20 
   3  -6   1   -6.20   10.00 
  -3  -6  -1    4.70    5.60 
  -3  -6  -1   -3.30   10.20 
  -3  -6  -1    7.90    4.40 
   3  -6   1   -4.20    7.40 
  -3   6  -1    5.00    6.60 
  -3   6  -1    7.20   10.50 
   3   6   1   13.50   11.10 
   3   6   1  -16.00    6.80 
  -3   6  -1   -2.00    7.80 
   3   6   1   18.50    7.70 
  -3   6  -1   12.20   10.90 
  -3   6  -1   15.40    7.30 
   3   6   1   13.00    8.30 
   3   6   1    9.90   10.60 
  -3   6  -1   10.80   10.30 
  -3   6  -1   19.10   12.20 
   3   6   1    8.30    9.80 
  -3   6  -1    6.10    9.80 
  -3   6  -1    3.90    9.80 
  -3   6  -1   15.80   10.70 
  -3   6  -1   -1.50    8.30 
  -3   6  -1   19.20   12.30 
  -3   6  -1    1.00    8.90 
   4  -6   1   25.70   16.40 
   4  -6   1   34.20   11.90 
   4  -6   1   26.70   14.50 
  -4  -6  -1   40.00   17.00 
   4  -6   1   39.00   17.60 
  -4  -6  -1   52.69   16.30 
  -4  -6  -1   59.79   16.30 
   4  -6   1   53.89   15.70 
  -4  -6  -1   28.00   10.40 
  -4  -6  -1   50.99   10.60 
  -4  -6  -1   30.00   15.60 
  -4  -6  -1   23.60   15.00 
  -4  -6  -1   42.60   12.00 
   4  -6   1   35.40   17.80 
  -4  -6  -1   37.00    8.80 
  -4  -6  -1   26.10   16.60 
   4  -6   1   47.80   15.80 
   4  -6   1   24.60   13.70 
   4  -6   1   37.60   12.50 
  -4  -6  -1   28.50   16.40 
   4  -6   1   64.49   18.60 
   4  -6   1   28.10   15.70 
  -4   6  -1   46.40   17.90 
  -4   6  -1   29.50   14.80 
  -4   6  -1   42.30   16.20 
  -4   6  -1   28.60   11.80 
  -4   6  -1   51.09   15.50 
  -4   6  -1   46.00   16.60 
  -4   6  -1   36.70   16.50 
   4   6   1   31.10   14.50 
   4   6   1   29.80   14.60 
   4   6   1   35.50   11.80 
  -4   6  -1   74.69   18.00 
  -4   6  -1   56.09   18.20 
   4   6   1   50.99   15.60 
  -4   6  -1   20.80   14.60 
  -4   6  -1   24.20   14.40 
   4   6   1   31.50   12.00 
  -4   6  -1   26.60   14.90 
   5  -6   1  204.58   35.60 
  -5  -6  -1  209.98   34.80 
   5  -6   1  154.88   31.00 
   5  -6   1  189.28   29.70 
  -5  -6  -1  181.38   27.80 
   5  -6   1  174.68   30.50 
   5  -6   1  179.68   33.50 
   5  -6   1  164.48   26.10 
  -5  -6  -1  127.09   35.60 
   5  -6   1  251.07   38.70 
   5  -6   1  151.98   30.30 
   5  -6   1  202.88   39.50 
  -5  -6  -1  191.98   27.00 
  -5  -6  -1  141.69   27.50 
  -5  -6  -1  179.48   30.30 
  -5  -6  -1  207.88   34.40 
   5  -6   1  193.48   29.30 
  -5  -6  -1  183.38   32.90 
   5  -6   1  249.28   35.10 
  -5   6  -1  156.98   31.80 
  -5   6  -1  162.88   29.50 
   5   6   1  189.88   25.30 
  -5   6  -1  209.38   30.80 
  -5   6  -1  233.28   32.10 
  -5   6  -1  237.78   37.70 
   5   6   1  181.38   29.30 
  -5   6  -1  191.68   35.70 
   5   6   1  211.78   29.10 
  -5   6  -1  217.68   36.30 
  -5   6  -1  194.78   34.30 
  -5   6  -1  175.68   30.20 
  -5   6  -1  152.48   28.60 
   5   6   1  171.18   27.50 
  -5   6  -1  247.58   36.70 
  -5   6  -1  197.78   33.10 
   5   6   1  196.08   35.80 
   5   6   1  178.88   28.30 
   6  -6   1  733.83   75.29 
   6  -6   1  749.13   74.19 
   6  -6   1  639.24   61.19 
   6  -6   1  714.03   71.09 
  -6  -6  -1  671.23   58.29 
   6  -6   1  744.33   76.09 
   6  -6   1  614.74   69.89 
   6  -6   1  688.23   59.89 
  -6  -6  -1  661.03   72.79 
   6  -6   1  643.74   59.39 
  -6  -6  -1  614.74   84.89 
   6  -6   1  637.94   68.49 
  -6  -6  -1  627.14   72.69 
   6  -6   1  757.92   79.99 
   6  -6   1  662.23   72.79 
   6  -6   1  585.74   77.29 
  -6  -6  -1  736.93   60.79 
  -6  -6  -1  671.33   64.09 
  -6  -6  -1  650.03   57.79 
  -6  -6  -1  634.44   72.59 
   6   6   1  679.93   59.99 
   6   6   1  628.54   58.29 
  -6   6  -1  630.24   71.89 
   6   6   1  626.34   59.59 
  -6   6  -1  747.83   68.39 
  -6   6  -1  649.74   60.39 
  -6   6  -1  540.25   60.79 
  -6   6  -1  651.83   75.89 
   6   6   1  701.03   59.39 
  -6   6  -1  618.54   63.09 
  -6   6  -1  722.13   64.59 
  -6   6  -1  726.93   63.49 
  -6   6  -1  537.25   68.59 
  -6   6  -1  666.33   76.29 
  -6   6  -1  529.65   69.69 
   6   6   1  727.53   57.49 
  -6   6  -1  729.43   66.29 
   7  -6   1  107.09   28.00 
   7  -6   1  139.49   32.20 
   7  -6   1  160.58   38.20 
   7  -6   1  133.79   28.70 
   7  -6   1  134.69   30.70 
   7  -6   1  116.19   29.00 
  -7  -6  -1  107.99   27.90 
  -7  -6  -1  118.59   32.20 
  -7  -6  -1  121.29   39.90 
  -7  -6  -1  110.29   25.00 
  -7  -6  -1  119.39   27.40 
   7  -6   1  120.59   27.10 
   7  -6   1  173.28   36.30 
   7  -6   1  161.08   32.00 
  -7  -6  -1  168.58   35.50 
   7  -6   1  110.89   36.10 
  -7   6  -1  160.58   30.70 
   7   6   1  147.19   29.50 
  -7   6  -1  104.99   30.70 
  -7   6  -1   71.39   26.10 
  -7   6  -1  165.08   36.30 
  -7   6  -1   92.99   29.80 
   7   6   1  138.19   29.10 
  -7   6  -1  109.09   30.30 
  -7   6  -1  109.49   28.50 
  -7   6  -1  151.98   33.60 
  -7   6  -1  115.89   30.10 
  -7   6  -1  109.19   29.30 
   8  -6   1  939.71   85.69 
  -8  -6  -1 1127.59  143.79 
  -8  -6  -1  839.32  118.19 
   8  -6   1 1058.19   90.99 
   8  -6   1  974.30  101.09 
  -8  -6  -1  878.91   87.29 
  -8  -6  -1  982.50   84.19 
   8  -6   1 1203.78  114.79 
   8  -6   1  987.00  111.39 
  -8  -6  -1  930.41   90.39 
   8  -6   1  941.91   83.09 
  -8  -6  -1  922.61   89.99 
   8  -6   1  898.91   84.69 
   8  -6   1  924.31  100.19 
  -8  -6  -1  991.20  100.69 
  -8   6  -1  741.13   94.59 
  -8   6  -1  893.61  102.99 
  -8   6  -1 1039.00   91.79 
  -8   6  -1  956.30   83.19 
  -8   6  -1  920.01   88.19 
  -8   6  -1  929.01   87.99 
  -8   6  -1  949.80   92.49 
  -8   6  -1  997.60  103.89 
  -8   6  -1  852.01   86.99 
   8   6   1  782.92   87.79 
  -8   6  -1  979.30   89.49 
  -8   6  -1  737.53   92.19 
  -8   6  -1  813.92   95.29 
   7  -7  -1  331.67   50.19 
  -7  -7   1  283.27   49.50 
   7  -7  -1  304.27   50.89 
   7  -7  -1  315.77   42.30 
   7  -7  -1  356.06   48.10 
  -7  -7   1  336.47   66.59 
   7  -7  -1  369.96   52.79 
   7  -7  -1  366.46   62.69 
   7  -7  -1  440.96   59.09 
   7  -7  -1  266.47   48.10 
   7  -7  -1  419.66   60.29 
   7  -7  -1  409.26   57.39 
   7  -7  -1  301.27   49.80 
  -7  -7   1  331.87   53.99 
  -7  -7   1  364.86   50.29 
  -7   7   1  300.17   49.60 
  -7   7   1  282.17   46.30 
  -7   7   1  375.26   56.59 
  -7   7   1  441.86   60.49 
  -7   7   1  392.06   57.79 
  -7   7   1  409.26   57.19 
  -7   7   1  429.36   60.69 
  -7   7   1  414.76   60.19 
   6  -7  -1  256.97   45.20 
   6  -7  -1  293.07   43.00 
   6  -7  -1  234.28   41.30 
   6  -7  -1  326.87   38.80 
   6  -7  -1  293.27   46.60 
   6  -7  -1  210.88   39.70 
   6  -7  -1  348.57   56.29 
   6  -7  -1  261.67   43.40 
   6  -7  -1  250.57   38.60 
  -6  -7   1  264.37   54.79 
   6  -7  -1  271.97   43.70 
  -6  -7   1  277.67   44.60 
  -6  -7   1  253.37   42.90 
  -6  -7   1  326.97   42.40 
   6  -7  -1  341.87   48.60 
  -6   7   1  315.17   49.00 
  -6   7   1  243.28   44.70 
   6   7  -1  310.67   40.50 
  -6   7   1  324.77   42.10 
  -6   7   1  338.77   45.20 
  -6   7   1  300.47   44.00 
   6   7  -1  315.57   44.10 
  -6   7   1  326.17   49.50 
  -6   7   1  214.68   39.40 
  -6   7   1  275.97   46.30 
  -6   7   1  302.77   47.30 
  -6   7   1  332.67   51.39 
  -6   7   1  273.27   47.20 
   5  -7  -1 1318.57  108.19 
   5  -7  -1  995.70  104.19 
   5  -7  -1 1338.77  103.59 
   5  -7  -1 1318.67  107.29 
   5  -7  -1 1293.57  105.79 
   5  -7  -1 1254.07  105.79 
  -5  -7   1 1391.56  107.29 
   5  -7  -1 1225.38  113.19 
   5  -7  -1 1315.37  100.39 
  -5  -7   1 1242.18  104.69 
  -5  -7   1 1233.38  101.59 
   5  -7  -1 1275.37  105.59 
  -5  -7   1 1300.67  101.89 
   5  -7  -1 1269.87   96.29 
  -5  -7   1 1360.56  102.99 
   5  -7  -1 1268.17  102.19 
   5  -7  -1 1462.95  103.59 
   5   7  -1 1190.18  104.99 
  -5   7   1 1357.86  102.19 
  -5   7   1 1398.46  106.49 
  -5   7   1 1378.86  108.19 
  -5   7   1 1228.38  100.29 
  -5   7   1 1210.68  106.19 
  -5   7   1 1238.78  107.59 
  -5   7   1 1201.48  105.59 
  -5   7   1 1350.76  110.29 
   5   7  -1 1263.27  103.59 
  -5   7   1 1275.37  107.09 
  -5   7   1 1262.57  103.79 
  -5   7   1 1338.07  108.19 
   5   7  -1 1332.37  102.29 
   4  -7  -1  628.64   76.69 
   4  -7  -1  676.93   60.99 
   4  -7  -1  753.72   67.39 
  -4  -7   1  799.82   66.19 
  -4  -7   1  655.63   62.99 
  -4  -7   1  673.83   72.79 
   4  -7  -1  760.32   66.79 
   4  -7  -1  751.62   65.19 
   4  -7  -1  643.64   71.19 
   4  -7  -1  701.83   55.49 
  -4  -7   1  697.73   63.49 
   4  -7  -1  641.84   60.29 
   4  -7  -1  707.13   59.09 
  -4  -7   1  746.13   67.59 
   4  -7  -1  648.94   61.79 
   4  -7  -1  655.53   71.19 
  -4   7   1  732.13   67.59 
  -4   7   1  600.54   57.69 
  -4   7   1  696.73   72.49 
  -4   7   1  689.43   66.09 
   4   7  -1  725.93   63.49 
  -4   7   1  717.83   63.19 
  -4   7   1  666.33   63.99 
  -4   7   1  794.22   70.29 
  -4   7   1  677.53   73.49 
   4   7  -1  725.33   66.19 
   4   7  -1  757.62   74.49 
  -4   7   1  658.63   71.49 
  -4   7   1  639.44   68.99 
  -4   7   1  709.73   66.39 
  -3  -7   1  626.84   54.59 
   3  -7  -1  510.45   59.69 
   3  -7  -1  527.25   41.50 
  -3  -7   1  481.65   55.29 
  -3  -7   1  597.24   46.50 
  -3  -7   1  520.75   58.59 
  -3  -7   1  483.55   57.39 
   3  -7  -1  620.94   53.29 
   3  -7  -1  545.85   48.70 
   3  -7  -1  448.36   59.59 
   3  -7  -1  544.15   57.49 
  -3  -7   1  522.25   44.90 
   3  -7  -1  499.85   44.80 
  -3  -7   1  535.55   44.20 
   3  -7  -1  488.05   53.69 
   3  -7  -1  574.74   60.49 
   3  -7  -1  517.25   59.49 
  -3   7   1  514.45   58.29 
   3   7  -1  478.45   54.99 
  -3   7   1  550.44   60.89 
  -3   7   1  461.35   58.29 
   3   7  -1  538.65   46.90 
  -3   7   1  540.15   64.49 
   3   7  -1  599.94   61.69 
  -3   7   1  470.15   54.19 
  -3   7   1  487.95   55.29 
  -3   7   1  636.94   54.49 
  -3   7   1  411.16   52.09 
  -3   7   1  528.85   58.49 
   3   7  -1  514.55   59.09 
   3   7  -1  578.14   58.19 
  -3   7   1  598.94   64.09 
  -2  -7   1  131.19   20.80 
   2  -7  -1  138.19   23.10 
  -2  -7   1  114.49   25.50 
   2  -7  -1  138.39   27.30 
   2  -7  -1  104.69   23.70 
   2  -7  -1  118.49   24.30 
  -2  -7   1  148.39   16.80 
  -2  -7   1  150.38   16.30 
   2  -7  -1  118.79   17.70 
   2  -7  -1  137.39   21.00 
  -2  -7   1  124.29   20.30 
   2  -7  -1  111.39   27.40 
  -2  -7   1  119.29   24.70 
  -2  -7   1  128.49   20.70 
   2  -7  -1  121.19   25.90 
   2  -7  -1  129.59   21.90 
  -2  -7   1   94.49   19.30 
   2  -7  -1  135.49   24.90 
  -2  -7   1  123.69   19.10 
  -2  -7   1  127.59   25.00 
  -2  -7   1  117.09   18.80 
  -2   7   1  105.09   23.70 
  -2   7   1  137.59   27.50 
  -2   7   1  104.59   23.10 
   2   7  -1  117.99   25.60 
   2   7  -1  114.99   26.40 
  -2   7   1  140.39   25.60 
  -2   7   1  119.09   27.40 
   2   7  -1   88.79   23.20 
   2   7  -1  105.79   23.40 
  -2   7   1  119.09   24.40 
  -2   7   1  151.88   25.10 
  -2   7   1  109.19   28.00 
   2   7  -1  100.29   21.50 
  -2   7   1   93.79   21.60 
  -2   7   1   74.09   27.10 
   2   7  -1  142.59   26.20 
  -2   7   1  153.28   27.80 
  -2   7   1  137.89   25.30 
   1  -7  -1  286.87   40.80 
   1  -7  -1  298.57   29.50 
   1  -7  -1  284.27   25.80 
  -1  -7   1  293.37   35.20 
   1  -7  -1  280.67   38.30 
  -1  -7   1  304.17   31.90 
   1  -7  -1  351.76   40.20 
  -1  -7   1  311.17   27.30 
  -1  -7   1  253.47   38.00 
  -1  -7   1  290.17   25.30 
  -1  -7   1  259.67   28.50 
   1  -7  -1  333.57   34.60 
   1  -7  -1  330.87   34.70 
   1  -7  -1  339.07   42.10 
   1  -7  -1  253.87   36.80 
  -1  -7   1  239.78   36.50 
  -1  -7   1  319.47   36.00 
  -1  -7   1  296.57   35.40 
   1  -7  -1  260.87   34.00 
  -1  -7   1  259.37   24.90 
   1  -7  -1  317.17   36.60 
  -1  -7   1  235.48   35.80 
  -1   7   1  275.07   45.60 
   1   7  -1  345.07   37.80 
  -1   7   1  180.28   33.50 
  -1   7   1  285.97   38.60 
  -1   7   1  352.46   43.40 
   1   7  -1  277.37   37.90 
  -1   7   1  309.97   39.10 
   1   7  -1  293.27   39.40 
  -1   7   1  380.96   40.20 
  -1   7   1  335.27   44.50 
   1   7  -1  276.57   25.80 
  -1   7   1  264.17   46.70 
  -1   7   1  254.47   35.00 
   1   7  -1  222.78   23.60 
  -1   7   1  309.77   43.70 
   1   7  -1  308.37   43.30 
  -1   7   1  387.66   44.10 
  -1   7   1  240.38   38.40 
   1   7  -1  250.17   37.60 
  -1   7   1  268.97   36.20 
   1   7  -1  238.68   43.70 
   0  -7   1  191.98   33.00 
   0  -7   1  312.57   35.80 
   0  -7   1  271.07   29.30 
   0  -7   1  246.68   25.70 
   0  -7  -1  238.58   21.40 
   0  -7  -1  173.68   30.90 
   0  -7  -1  307.87   32.40 
   0  -7   1  248.08   33.60 
   0  -7  -1  240.98   27.00 
   0  -7  -1  207.58   30.10 
   0  -7  -1  206.78   28.30 
   0  -7  -1  253.97   32.40 
   0  -7   1  229.48   33.40 
   0  -7  -1  137.09   29.60 
   0  -7   1  162.88   30.70 
   0  -7   1  226.58   25.70 
   0  -7   1  184.78   32.50 
   0  -7  -1  225.08   23.70 
   0  -7   1  222.98   26.00 
   0  -7  -1  282.27   35.50 
   0  -7  -1  215.28   34.50 
   0   7   1  230.48   30.60 
   0   7   1  273.57   39.90 
   0   7  -1  236.78   34.90 
   0   7   1  228.18   34.80 
   0   7  -1  199.08   35.60 
   0   7   1  279.47   34.70 
   0   7   1  249.78   29.60 
   0   7   1  274.77   36.80 
   0   7  -1  257.67   30.30 
   0   7  -1  251.47   30.10 
   0   7  -1  198.08   32.30 
   0   7   1  193.58   38.00 
   0   7   1  282.47   37.90 
   0   7   1  301.07   38.60 
   0   7  -1  232.18   32.80 
   0   7  -1  155.78   37.80 
   0   7  -1  249.08   38.50 
   0   7   1  188.18   44.40 
   0   7  -1  227.88   33.80 
   0   7  -1  308.67   42.30 
   0   7   1  215.28   38.40 
  -1  -7  -1 1237.48  101.59 
   1  -7   1 1124.89   98.79 
   1  -7   1 1234.08  101.29 
   1  -7   1 1348.17  103.69 
   1  -7   1 1257.17   92.99 
  -1  -7  -1 1362.86   92.59 
  -1  -7  -1 1339.57   96.99 
  -1  -7  -1 1249.77   89.29 
   1  -7   1 1441.56   96.99 
  -1  -7  -1 1362.06   93.49 
  -1  -7  -1 1221.88  101.19 
  -1  -7  -1 1224.18   95.09 
  -1  -7  -1 1352.16   95.79 
   1  -7   1 1322.07  100.19 
   1  -7   1 1378.86  103.19 
  -1  -7  -1 1179.18   95.49 
   1  -7   1 1354.16   92.89 
   1  -7   1 1308.37  102.09 
  -1  -7  -1 1233.38   96.49 
  -1  -7  -1 1315.87  101.79 
   1  -7   1 1188.98   97.19 
   1   7   1 1447.26  103.29 
  -1   7  -1 1191.58   98.49 
  -1   7  -1 1049.30  105.39 
  -1   7  -1 1395.66   97.99 
  -1   7  -1 1163.68   99.09 
  -1   7  -1 1261.17  100.29 
   1   7   1 1301.77   90.49 
  -1   7  -1 1150.28  105.09 
  -1   7  -1 1288.47  101.09 
   1   7   1 1377.66  101.69 
   1   7   1 1137.09   98.69 
  -1   7  -1 1234.48  102.99 
   1   7   1 1290.47  103.09 
   1   7   1 1319.27   95.19 
  -1   7  -1 1230.98   99.69 
  -1   7  -1 1238.48   99.99 
   1   7   1 1418.16  115.49 
  -1   7  -1 1411.16  102.29 
  -1   7  -1 1398.66  102.19 
  -1   7  -1  924.31  101.59 
   2  -7   1 1041.60   80.79 
   2  -7   1  992.70   84.19 
  -2  -7  -1  902.41   73.69 
  -2  -7  -1  992.20   80.29 
   2  -7   1  916.31   83.89 
   2  -7   1  981.20   77.59 
  -2  -7  -1  965.80   73.89 
   2  -7   1  901.01   73.79 
   2  -7   1  961.80   67.69 
  -2  -7  -1  980.00   74.89 
   2  -7   1  979.60   83.19 
  -2  -7  -1  920.11   80.39 
   2  -7   1 1045.30   83.59 
  -2  -7  -1 1010.00   82.29 
   2  -7   1  998.00   82.09 
   2  -7   1  809.62   76.89 
   2  -7   1 1099.99   81.79 
  -2  -7  -1  894.51   79.59 
   2  -7   1 1019.50   68.69 
  -2  -7  -1  902.11   72.09 
   2   7   1  942.81   71.49 
  -2   7  -1  823.82   82.19 
   2   7   1 1036.50   81.09 
   2   7   1  913.01   80.29 
  -2   7  -1  977.10   83.49 
  -2   7  -1  994.40   83.09 
   2   7   1 1082.69   75.19 
  -2   7  -1  851.91   78.19 
  -2   7  -1  933.11   77.89 
   2   7   1  989.30   82.59 
   2   7   1 1049.49   80.89 
  -2   7  -1  864.31   79.29 
  -2   7  -1  936.51   80.39 
  -2   7  -1  947.31   79.49 
  -2   7  -1  961.70   82.39 
  -2   7  -1  898.91   80.19 
  -2   7  -1  936.41   79.49 
  -2   7  -1  952.40   79.69 
   2   7   1  818.22   92.99 
  -2   7  -1  842.02   77.29 
   3  -7   1  871.81   62.29 
  -3  -7  -1  692.73   69.49 
   3  -7   1  860.81   73.29 
   3  -7   1  819.32   60.89 
  -3  -7  -1  833.52   72.29 
   3  -7   1  922.51   78.49 
   3  -7   1  716.23   70.99 
  -3  -7  -1  863.41   64.49 
   3  -7   1  775.12   65.19 
  -3  -7  -1  787.52   69.69 
   3  -7   1  777.72   83.59 
   3  -7   1  794.52   71.59 
  -3  -7  -1  759.22   62.09 
   3  -7   1  968.50   72.19 
   3  -7   1  802.52   67.19 
   3  -7   1  736.43   68.79 
  -3  -7  -1  831.82   65.99 
  -3  -7  -1  517.95   74.69 
   3  -7   1  830.42   72.59 
  -3   7  -1  854.31   71.19 
  -3   7  -1  948.31   71.89 
  -3   7  -1  836.42   72.89 
  -3   7  -1  703.23   69.89 
   3   7   1  864.81   72.99 
  -3   7  -1  765.52   71.29 
   3   7   1  784.52   60.09 
   3   7   1  816.72   72.59 
  -3   7  -1  819.22   72.99 
  -3   7  -1  781.42   70.59 
  -3   7  -1  757.82   70.99 
  -3   7  -1  793.92   71.29 
   3   7   1  752.42   69.59 
   3   7   1  834.42   72.59 
  -3   7  -1  839.42   67.69 
  -3   7  -1  823.92   70.69 
  -4  -7  -1  339.27   47.90 
   4  -7   1  408.36   39.80 
   4  -7   1  374.76   46.50 
   4  -7   1  324.27   47.30 
   4  -7   1  413.36   52.99 
   4  -7   1  259.37   44.10 
  -4  -7  -1  420.76   45.10 
  -4  -7  -1  397.96   49.40 
   4  -7   1  387.96   55.79 
   4  -7   1  422.96   38.30 
   4  -7   1  416.06   52.39 
   4  -7   1  424.36   49.90 
   4  -7   1  473.95   50.49 
  -4  -7  -1  368.56   45.60 
  -4  -7  -1  433.36   56.59 
   4  -7   1  460.35   46.60 
   4  -7   1  320.37   50.19 
  -4   7  -1  464.95   51.89 
  -4   7  -1  433.36   51.79 
   4   7   1  385.76   46.60 
  -4   7  -1  368.96   49.00 
  -4   7  -1  467.25   52.69 
   4   7   1  405.46   36.30 
  -4   7  -1  358.26   48.50 
  -4   7  -1  392.46   45.60 
   4   7   1  419.56   53.19 
   4   7   1  362.36   44.10 
  -4   7  -1  431.86   52.09 
  -4   7  -1  326.37   48.60 
  -4   7  -1  377.06   49.99 
   4   7   1  364.36   49.70 
  -4   7  -1  272.17   44.90 
  -4   7  -1  375.86   51.29 
  -5  -7  -1  171.78   29.20 
  -5  -7  -1  160.28   31.90 
   5  -7   1  180.18   32.60 
   5  -7   1  148.09   31.80 
   5  -7   1  120.39   26.10 
  -5  -7  -1  134.69   32.80 
   5  -7   1  217.18   38.80 
   5  -7   1  126.19   29.80 
  -5  -7  -1  120.89   36.30 
   5  -7   1   92.59   21.50 
   5  -7   1   95.19   25.20 
   5  -7   1  113.79   30.10 
  -5  -7  -1  178.18   31.90 
   5  -7   1  191.38   26.80 
   5  -7   1  100.09   32.10 
   5  -7   1  132.59   27.80 
   5  -7   1  134.09   30.50 
   5   7   1  127.39   31.80 
   5   7   1  110.89   26.00 
  -5   7  -1  179.18   33.90 
   5   7   1  113.09   25.10 
   5   7   1  130.39   23.40 
  -5   7  -1  145.59   29.60 
   5   7   1  126.79   24.60 
  -5   7  -1  179.68   33.50 
  -5   7  -1  167.58   29.60 
  -5   7  -1  114.89   28.80 
  -5   7  -1  139.99   30.60 
  -5   7  -1  138.69   27.60 
  -5   7  -1  136.29   29.90 
  -5   7  -1  188.68   36.40 
  -5   7  -1  131.39   29.30 
  -5   7  -1  135.89   30.30 
   6  -7   1   46.30   19.00 
   6  -7   1   28.00   17.90 
  -6  -7  -1   33.60   19.80 
   6  -7   1   45.30   20.70 
  -6  -7  -1   13.10   15.30 
   6  -7   1   29.10   15.80 
   6  -7   1   32.90   14.90 
   6  -7   1   11.50   15.40 
   6  -7   1   32.90   19.00 
   6  -7   1   67.29   24.60 
  -6  -7  -1   20.00   27.50 
   6  -7   1   14.50   17.80 
   6  -7   1   38.70   23.60 
   6  -7   1    5.80   14.00 
  -6  -7  -1   23.70   19.60 
   6   7   1   27.40   16.20 
   6   7   1   27.60   16.60 
  -6   7  -1   33.70   18.80 
  -6   7  -1   22.00   19.70 
  -6   7  -1   68.79   21.00 
  -6   7  -1   21.30   20.30 
  -6   7  -1    8.40   15.10 
  -6   7  -1   10.30   14.50 
  -6   7  -1    8.20   13.60 
  -6   7  -1   36.20   18.20 
  -6   7  -1   43.50   21.90 
  -6   7  -1   12.20   16.20 
  -6   7  -1   20.80   18.20 
   6   7   1   14.90   13.20 
   7  -7   1   50.29   24.80 
   7  -7   1    7.70   17.50 
   7  -7   1   13.10   19.40 
   7  -7   1   20.20   19.10 
  -7  -7  -1   21.20   20.30 
  -7  -7  -1   46.60   32.00 
   7  -7   1   13.50   21.70 
   7  -7   1   49.40   23.30 
   7  -7   1   12.90   14.50 
  -7  -7  -1   45.50   23.10 
   7  -7   1   42.60   24.10 
   7  -7   1   63.29   22.50 
  -7   7  -1   19.10   18.50 
  -7   7  -1   54.19   20.70 
  -7   7  -1   39.00   22.40 
  -7   7  -1   59.89   25.80 
  -7   7  -1    5.00   15.10 
  -7   7  -1   53.49   23.50 
  -7   7  -1    5.60   15.60 
  -7   7  -1   38.60   21.60 
  -7   7  -1   76.69   27.70 
  -6  -8   1   17.80   19.40 
  -6  -8   1   30.90   22.40 
   6  -8  -1   10.30   19.70 
   6  -8  -1   38.40   21.70 
   6  -8  -1   28.20   21.60 
   6  -8  -1   -9.90   18.20 
  -6  -8   1   -1.90   15.00 
  -6  -8   1    1.10   20.80 
   6  -8  -1   70.19   23.40 
   6  -8  -1   29.80   21.00 
   6  -8  -1   30.00   19.20 
   6  -8  -1   43.10   21.30 
   6  -8  -1   12.10   17.10 
   6   8  -1   -0.70   13.50 
  -6   8   1    8.80   16.40 
  -6   8   1   26.20   18.50 
  -6   8   1   18.70   21.10 
  -6   8   1   34.00   22.30 
  -6   8   1   13.60   18.40 
  -6   8   1   13.20   17.70 
   6   8  -1    9.80   21.00 
  -6   8   1   15.60   17.50 
  -6   8   1   11.60   18.90 
  -6   8   1   16.40   17.50 
   6   8  -1  -15.20   15.20 
   5  -8  -1   26.60   18.20 
   5  -8  -1   57.29   21.70 
   5  -8  -1   60.59   20.40 
   5  -8  -1   76.59   25.40 
   5  -8  -1   60.69   24.50 
   5  -8  -1   78.09   22.50 
   5  -8  -1   65.69   28.20 
  -5  -8   1   66.79   22.50 
   5  -8  -1   37.10   19.60 
  -5  -8   1   12.90   21.30 
   5  -8  -1   22.60   22.00 
  -5  -8   1   65.89   22.50 
   5  -8  -1   70.99   23.30 
  -5   8   1   39.10   21.70 
  -5   8   1   55.69   34.80 
  -5   8   1   84.69   23.00 
  -5   8   1   47.80   21.50 
  -5   8   1   71.99   24.80 
   5   8  -1   52.79   23.10 
  -5   8   1   63.79   23.70 
  -5   8   1   55.09   23.50 
   5   8  -1   44.90   20.80 
  -5   8   1   68.89   24.30 
  -5   8   1   50.59   21.00 
   5   8  -1  100.49   24.60 
  -5   8   1   38.30   22.00 
  -4  -8   1  178.78   34.10 
   4  -8  -1   75.89   20.60 
   4  -8  -1   86.69   22.10 
  -4  -8   1  139.99   31.20 
   4  -8  -1  124.29   27.40 
   4  -8  -1  118.49   27.50 
  -4  -8   1  124.49   29.50 
  -4  -8   1  141.19   28.50 
  -4  -8   1  133.79   29.60 
   4  -8  -1   74.79   27.10 
   4  -8  -1   99.29   30.00 
   4  -8  -1   99.39   29.80 
   4  -8  -1  134.69   31.70 
   4  -8  -1  158.18   33.30 
   4  -8  -1   69.09   24.00 
   4   8  -1  144.99   29.30 
  -4   8   1   56.49   21.10 
  -4   8   1  170.18   36.20 
   4   8  -1   50.19   19.40 
  -4   8   1  130.29   27.40 
  -4   8   1  136.69   29.20 
  -4   8   1  120.79   27.70 
  -4   8   1   90.19   26.90 
  -4   8   1   96.09   33.10 
   4   8  -1   34.50   21.20 
  -4   8   1   92.79   27.00 
  -4   8   1   77.09   25.30 
  -4   8   1  134.29   28.50 
   3  -8  -1  287.37   37.20 
   3  -8  -1  313.17   42.70 
   3  -8  -1  255.37   43.00 
  -3  -8   1  197.08   39.10 
   3  -8  -1  278.37   45.90 
  -3  -8   1  249.78   32.50 
   3  -8  -1  246.48   33.70 
   3  -8  -1  280.57   34.30 
  -3  -8   1  328.37   44.10 
  -3  -8   1  328.57   45.70 
  -3  -8   1  344.97   45.60 
   3  -8  -1  255.47   38.90 
   3  -8  -1  345.27   44.00 
   3  -8  -1  276.67   43.20 
  -3   8   1  286.97   41.30 
  -3   8   1  301.47   48.30 
   3   8  -1  238.58   42.40 
  -3   8   1  190.98   35.70 
   3   8  -1  300.27   42.80 
  -3   8   1  193.08   37.50 
  -3   8   1  238.48   39.00 
  -3   8   1  276.27   44.60 
   3   8  -1  224.68   37.20 
  -3   8   1  233.48   39.60 
  -3   8   1  251.27   38.50 
  -3   8   1  311.27   69.99 
   3   8  -1  211.38   37.40 
  -3   8   1  318.77   44.70 
  -2  -8   1   19.10   16.90 
  -2  -8   1   18.70   16.30 
   2  -8  -1   44.90   17.40 
  -2  -8   1    9.70   12.70 
   2  -8  -1   36.50   12.80 
   2  -8  -1   45.30   19.90 
  -2  -8   1   44.60   21.20 
   2  -8  -1   12.20   17.20 
  -2  -8   1   47.20   18.90 
  -2  -8   1   33.70   17.60 
   2  -8  -1   24.60   16.20 
   2  -8  -1   46.80   15.40 
   2  -8  -1   60.89   20.60 
   2  -8  -1   40.80   20.90 
   2  -8  -1   24.70   13.60 
   2   8  -1    4.40   13.60 
  -2   8   1   13.80   17.90 
  -2   8   1   35.10   17.50 
  -2   8   1   22.00   15.00 
  -2   8   1   12.70   15.10 
   2   8  -1   14.20   15.80 
   2   8  -1   50.09   21.80 
  -2   8   1    9.60   15.40 
   2   8  -1   24.70   16.20 
   2   8  -1    8.00   14.30 
  -2   8   1   31.60   18.20 
  -2   8   1   27.30   14.40 
  -2   8   1   19.20   15.20 
  -2   8   1   14.10   13.20 
  -2   8   1   39.10   19.60 
   1  -8  -1   31.30   16.90 
  -1  -8   1   -0.60   12.20 
   1  -8  -1   -4.50    8.70 
  -1  -8   1    8.30   16.30 
   1  -8  -1   -0.60   11.70 
  -1  -8   1   -8.60   13.70 
  -1  -8   1    2.10   12.00 
   1  -8  -1  -13.20    9.30 
  -1  -8   1   -2.20   11.50 
   1  -8  -1    3.90   12.20 
   1  -8  -1    1.60    9.60 
  -1  -8   1   13.50   11.20 
  -1  -8   1   18.80   12.30 
   1  -8  -1   28.00   16.10 
   1  -8  -1   -5.80   11.80 
  -1   8   1  -10.50    9.30 
   1   8  -1   16.00   13.90 
  -1   8   1    1.00   10.90 
  -1   8   1   11.00   12.50 
   1   8  -1    1.30   12.00 
  -1   8   1    4.70   14.70 
  -1   8   1  -10.10   11.20 
   1   8  -1   -2.10   10.00 
  -1   8   1  -15.90   10.90 
  -1   8   1   17.30   14.60 
  -1   8   1   15.60   13.80 
   1   8  -1   -2.60   11.30 
  -1   8   1   -1.90   17.10 
  -1   8   1  -14.60    9.00 
  -1   8   1    8.70   11.40 
   1   8  -1   15.80   18.20 
   1   8  -1    1.10   10.60 
   0  -8  -1  317.37   37.90 
   0  -8   1  319.47   44.90 
   0  -8  -1  289.67   30.70 
   0  -8   1  277.57   37.80 
   0  -8   1  317.17   41.20 
   0  -8   1  261.67   43.30 
   0  -8  -1  291.27   37.10 
   0  -8  -1  289.97   42.60 
   0  -8   1  298.97   39.60 
   0  -8   1  288.87   32.70 
   0  -8  -1  281.67   34.70 
   0  -8   1  287.77   42.40 
   0  -8  -1  216.48   37.60 
   0  -8  -1  279.47   32.60 
   0  -8   1  328.47   43.70 
   0  -8  -1  212.28   38.60 
   0  -8  -1  177.18   33.50 
   0  -8   1  201.58   32.70 
   0   8   1  247.78   47.00 
   0   8  -1  328.47   35.30 
   0   8  -1  183.58   33.90 
   0   8   1  272.67   33.20 
   0   8   1  254.37   38.60 
   0   8  -1  373.16   42.50 
   0   8   1  284.57   38.10 
   0   8   1  247.58   39.20 
   0   8   1  192.88   33.00 
   0   8  -1  250.27   40.90 
   0   8  -1  271.87   45.80 
   0   8  -1  241.08   37.80 
   0   8  -1  209.18   36.40 
   0   8   1  271.57   42.70 
   0   8   1  283.57   42.10 
  -1  -8  -1  644.24   49.99 
  -1  -8  -1  443.16   43.30 
   1  -8   1  521.95   64.49 
   1  -8   1  363.06   51.99 
   1  -8   1  480.55   49.40 
   1  -8   1  496.35   42.30 
  -1  -8  -1  415.36   48.90 
  -1  -8  -1  392.66   53.69 
   1  -8   1  497.75   53.79 
  -1  -8  -1  422.86   47.30 
  -1  -8  -1  494.05   44.70 
  -1  -8  -1  543.05   59.59 
   1  -8   1  492.75   57.69 
   1  -8   1  466.65   56.69 
  -1  -8  -1  441.96   57.19 
   1  -8   1  472.45   59.09 
   1  -8   1  436.46   52.49 
   1  -8   1  517.65   61.39 
  -1  -8  -1  521.65   47.60 
   1   8   1  391.76   54.49 
  -1   8  -1  425.86   55.99 
  -1   8  -1  519.25   47.20 
   1   8   1  464.15   68.09 
  -1   8  -1  432.56   56.59 
   1   8   1  546.95   60.09 
   1   8   1  561.34   47.20 
  -1   8  -1  490.85   61.69 
  -1   8  -1  440.36   55.39 
  -1   8  -1  392.56   62.99 
  -1   8  -1  550.94   58.39 
  -1   8  -1  443.86   54.89 
  -1   8  -1  413.16   54.09 
  -1   8  -1  511.85   56.89 
   1   8   1  612.44   63.49 
  -1   8  -1  415.16   56.49 
   1   8   1  474.95   56.09 
  -2  -8  -1  284.67   34.20 
   2  -8   1  217.98   31.90 
  -2  -8  -1  240.08   37.80 
   2  -8   1  260.57   40.50 
  -2  -8  -1  201.58   30.20 
   2  -8   1  196.58   35.70 
  -2  -8  -1  229.68   37.10 
  -2  -8  -1  205.08   37.00 
  -2  -8  -1  203.88   29.90 
   2  -8   1  230.78   30.00 
   2  -8   1  282.07   39.60 
   2  -8   1  131.79   30.80 
  -2  -8  -1  278.77   41.80 
   2  -8   1  205.38   27.10 
  -2  -8  -1  206.18   29.00 
   2  -8   1  234.58   37.30 
   2  -8   1  207.28   38.30 
  -2   8  -1  167.88   32.60 
   2   8   1  168.08   32.40 
  -2   8  -1  152.28   36.30 
  -2   8  -1  142.29   31.00 
  -2   8  -1  276.67   41.70 
  -2   8  -1  199.78   35.40 
  -2   8  -1  204.48   35.60 
   2   8   1  190.78   37.60 
   2   8   1  321.67   49.60 
  -2   8  -1  189.58   40.00 
  -2   8  -1  193.68   38.20 
   2   8   1  181.28   33.90 
  -2   8  -1  204.88   33.30 
  -2   8  -1  214.28   35.60 
   3  -8   1  209.28   35.70 
   3  -8   1  163.58   31.40 
   3  -8   1  234.88   31.60 
   3  -8   1  207.68   39.10 
  -3  -8  -1  121.09   28.90 
   3  -8   1  180.58   30.50 
   3  -8   1  209.38   28.10 
   3  -8   1  124.99   30.10 
  -3  -8  -1  142.09   31.60 
  -3  -8  -1  173.18   33.30 
   3  -8   1  198.68   39.50 
   3  -8   1  221.18   35.40 
   3  -8   1  163.78   33.10 
  -3  -8  -1  119.29   29.90 
  -3   8  -1  166.78   32.40 
  -3   8  -1  180.78   33.70 
  -3   8  -1  155.78   33.50 
  -3   8  -1  165.08   33.90 
  -3   8  -1  166.38   31.70 
   3   8   1  188.78   35.30 
   3   8   1  152.58   33.90 
  -3   8  -1  167.48   32.90 
  -3   8  -1  143.49   32.40 
  -3   8  -1  156.38   30.60 
  -3   8  -1  148.59   33.90 
  -3   8  -1  126.99   30.10 
   3   8   1  202.28   35.20 
   3   8   1  182.88   33.80 
  -3   8  -1  160.88   33.60 
  -4  -8  -1   20.80   15.30 
   4  -8   1  -23.60   13.40 
   4  -8   1   -4.70   14.00 
  -4  -8  -1   19.80   18.00 
   4  -8   1   -0.50   15.00 
  -4  -8  -1   -4.60   13.60 
   4  -8   1    6.00   14.00 
   4  -8   1    0.30   13.70 
   4  -8   1    2.00   10.70 
   4  -8   1    0.70   16.70 
   4  -8   1  -21.30   10.00 
   4  -8   1   -3.80   13.70 
  -4  -8  -1   -9.20   14.60 
   4  -8   1    3.40   14.80 
  -4   8  -1    9.40   16.20 
   4   8   1   -7.40   11.60 
   4   8   1   10.00   14.80 
   4   8   1   -2.70    9.30 
  -4   8  -1   -7.90   13.10 
  -4   8  -1   -7.00   11.90 
  -4   8  -1   -1.00   13.40 
  -4   8  -1    3.40   13.40 
  -4   8  -1   -1.40   14.60 
  -4   8  -1   18.60   14.80 
  -4   8  -1   -9.70   10.70 
  -4   8  -1  -17.40   11.50 
  -4   8  -1   -3.30   12.70 
  -5  -8  -1  166.38   32.90 
   5  -8   1  138.09   28.50 
   5  -8   1  207.08   38.80 
   5  -8   1  171.78   35.10 
   5  -8   1  173.78   37.40 
  -5  -8  -1  133.69   32.10 
   5  -8   1   83.39   27.60 
   5  -8   1   70.29   26.40 
  -5  -8  -1  185.48   54.29 
   5  -8   1  118.59   35.10 
   5  -8   1  108.79   34.70 
  -5  -8  -1  211.58   39.40 
   5  -8   1  112.99   28.80 
  -5  -8  -1  158.48   31.70 
   5  -8   1   88.79   27.70 
  -5   8  -1  163.58   36.20 
  -5   8  -1  134.49   33.40 
  -5   8  -1  152.68   36.10 
  -5   8  -1  132.79   30.60 
  -5   8  -1  170.88   34.50 
   5   8   1  116.19   28.10 
  -5   8  -1  177.48   36.60 
  -5   8  -1  118.59   27.90 
   5   8   1  166.68   35.00 
   5   8   1  134.19   31.10 
  -5   8  -1   87.89   28.90 
  -5   8  -1  135.29   32.00 
  -5   8  -1  152.58   31.10 
   6  -8   1  125.09   33.00 
   6  -8   1  110.09   26.60 
   6  -8   1   76.29   29.30 
   6  -8   1  134.69   33.60 
  -6  -8  -1  116.09   39.10 
  -6  -8  -1  138.79   32.00 
  -6  -8  -1  182.18   40.00 
   6  -8   1  128.89   33.60 
   6  -8   1   55.79   24.00 
   6  -8   1   82.69   28.00 
   6  -8   1   33.90   23.90 
   6  -8   1  115.79   35.00 
  -6   8  -1  121.89   32.40 
  -6   8  -1   88.69   31.70 
  -6   8  -1   71.59   26.60 
  -6   8  -1  139.59   35.20 
  -6   8  -1  120.69   30.20 
  -6   8  -1  142.09   36.80 
  -6   8  -1  107.49   31.00 
  -6   8  -1  130.69   33.30 
  -6   8  -1  105.79   27.90 
   6   8   1   92.19   26.00 
  -6   8  -1  126.09   28.40 
   5  -9  -1  252.47   45.00 
   5  -9  -1  278.17   44.70 
   5  -9  -1  164.28   42.20 
   5  -9  -1  216.68   36.80 
  -5  -9   1  264.77   45.00 
  -5  -9   1  262.47   45.70 
   5  -9  -1  243.58   45.00 
   5  -9  -1  245.58   49.00 
   5  -9  -1  179.48   39.60 
   5  -9  -1  162.78   37.20 
  -5  -9   1  156.18   35.80 
  -5   9   1  176.78   36.20 
  -5   9   1  210.08   41.50 
  -5   9   1  224.48   42.20 
  -5   9   1  238.78   43.20 
  -5   9   1  191.98   45.30 
  -5   9   1  119.99   32.60 
  -5   9   1  240.08   47.70 
   5   9  -1  241.88   43.00 
   5   9  -1  338.87   51.09 
   5   9  -1  120.69   30.20 
  -5   9   1  150.48   38.40 
  -4  -9   1 1123.69   97.89 
  -4  -9   1 1209.68   99.09 
   4  -9  -1 1101.39   96.79 
  -4  -9   1 1074.19   94.59 
  -4  -9   1 1241.68  100.69 
   4  -9  -1  948.41  108.49 
   4  -9  -1 1148.59   98.29 
   4  -9  -1 1056.79   92.09 
   4  -9  -1 1053.59   96.89 
   4  -9  -1 1070.59   94.09 
   4  -9  -1 1053.49  112.59 
  -4  -9   1  948.11   91.79 
   4  -9  -1 1072.89   92.79 
   4  -9  -1 1157.78   93.99 
  -4   9   1 1086.49   94.89 
  -4   9   1 1006.90   94.09 
  -4   9   1 1042.20   95.49 
  -4   9   1  873.11  101.79 
   4   9  -1  964.50  103.69 
  -4   9   1  955.30  108.79 
  -4   9   1 1029.20   96.39 
  -4   9   1  957.00   92.39 
  -4   9   1 1031.90   92.69 
   4   9  -1 1039.00   95.29 
  -4   9   1 1116.29   94.59 
   4   9  -1 1015.60   92.19 
  -3  -9   1  118.09   32.60 
   3  -9  -1  165.58   33.70 
  -3  -9   1  157.98   33.60 
  -3  -9   1  184.08   37.80 
   3  -9  -1  221.78   37.60 
   3  -9  -1  205.58   43.50 
   3  -9  -1  152.58   34.50 
   3  -9  -1  143.39   32.80 
  -3  -9   1  201.68   38.30 
  -3  -9   1  178.18   36.10 
   3  -9  -1  192.88   37.40 
   3  -9  -1  109.69   27.00 
   3  -9  -1  186.58   42.10 
   3   9  -1  169.18   33.80 
  -3   9   1  190.38   36.80 
  -3   9   1  147.29   40.10 
  -3   9   1  147.69   36.60 
   3   9  -1  133.29   31.40 
  -3   9   1  162.08   35.40 
  -3   9   1  212.08   37.20 
   3   9  -1  114.09   32.40 
   3   9  -1  185.08   39.80 
  -3   9   1  173.18   34.80 
  -3   9   1  146.29   34.20 
  -3   9   1  173.58   34.40 
  -3   9   1  123.49   31.90 
  -3   9   1  179.48   34.20 
  -2  -9   1  141.19   32.60 
   2  -9  -1  141.49   28.80 
   2  -9  -1  210.08   39.50 
  -2  -9   1  188.88   30.30 
   2  -9  -1  199.38   37.70 
  -2  -9   1  203.88   37.70 
  -2  -9   1  229.08   41.30 
   2  -9  -1  151.78   35.30 
   2  -9  -1  227.38   32.90 
   2  -9  -1  146.79   32.20 
   2  -9  -1  182.18   35.40 
  -2  -9   1  162.98   34.20 
  -2   9   1  149.09   32.20 
   2   9  -1  178.58   37.00 
  -2   9   1  167.48   34.60 
   2   9  -1  125.89   31.90 
  -2   9   1  180.98   34.20 
  -2   9   1  178.38   35.10 
  -2   9   1  182.88   37.80 
  -2   9   1  204.48   35.00 
   2   9  -1  220.58   38.30 
  -2   9   1  246.98   53.29 
   2   9  -1  191.98   36.40 
  -2   9   1  226.08   43.20 
  -2   9   1  137.59   30.00 
  -2   9   1  128.49   34.60 
  -1  -9   1   48.60   20.30 
  -1  -9   1   15.40   18.90 
   1  -9  -1   21.60   17.90 
  -1  -9   1   21.20   14.80 
  -1  -9   1   60.99   20.80 
   1  -9  -1   20.20   21.10 
   1  -9  -1   16.70   15.50 
   1  -9  -1   -7.70   12.90 
   1  -9  -1    0.90   11.90 
  -1  -9   1   20.90   17.40 
  -1  -9   1   25.30   18.40 
   1  -9  -1   36.80   19.90 
  -1   9   1  -17.90   13.70 
   1   9  -1   32.70   18.60 
  -1   9   1   26.50   19.10 
  -1   9   1   -1.80   13.10 
  -1   9   1    2.60   13.00 
  -1   9   1    4.20   11.10 
  -1   9   1   30.90   22.80 
   1   9  -1   10.10   16.30 
   1   9  -1    4.00   13.70 
   1   9  -1   12.70   17.40 
   1   9  -1    0.50   11.20 
  -1   9   1   48.20   19.80 
  -1   9   1   16.80   12.30 
  -1   9   1   12.20   14.70 
   0  -9  -1  404.16   47.70 
   0  -9   1  455.65   53.59 
   0  -9   1  380.56   54.29 
   0  -9  -1  458.55   59.19 
   0  -9   1  358.76   48.40 
   0  -9   1  494.95   61.09 
   0  -9  -1  576.34   66.69 
   0  -9  -1  496.55   55.19 
   0  -9   1  404.86   57.49 
   0  -9   1  443.36   63.59 
   0  -9  -1  394.66   52.59 
   0  -9   1  386.86   52.49 
   0  -9  -1  532.15   62.29 
   0   9  -1  462.65   59.39 
   0   9   1  456.65   57.69 
   0   9   1  461.85   52.79 
   0   9  -1  515.95   59.79 
   0   9   1  385.16   54.59 
   0   9  -1  536.55   58.59 
   0   9   1  523.95   73.99 
   0   9   1  467.95   61.89 
   0   9  -1  418.66   58.39 
   0   9  -1  493.75   59.59 
  -1  -9  -1   31.90   18.60 
  -1  -9  -1   62.99   26.30 
   1  -9   1   50.59   23.50 
   1  -9   1   47.80   21.80 
   1  -9   1   54.99   20.00 
  -1  -9  -1   37.90   20.60 
   1  -9   1  119.39   27.20 
  -1  -9  -1   79.09   25.30 
   1  -9   1   34.40   21.40 
  -1  -9  -1   71.99   17.70 
   1  -9   1   42.10   21.20 
   1  -9   1   53.89   23.30 
   1  -9   1   59.49   18.30 
  -1   9  -1   71.79   28.20 
   1   9   1   94.19   41.00 
  -1   9  -1   58.79   21.70 
   1   9   1   15.50   16.10 
  -1   9  -1   64.79   27.20 
  -1   9  -1    9.00   17.30 
  -1   9  -1   63.69   23.20 
   1   9   1   46.50   21.50 
  -1   9  -1   66.79   21.80 
   1   9   1   66.09   22.10 
  -1   9  -1   47.80   17.50 
   1   9   1   67.39   22.70 
  -1   9  -1   81.39   25.60 
   2  -9   1 1076.79   88.99 
   2  -9   1 1077.09   82.29 
  -2  -9  -1  809.62   77.19 
  -2  -9  -1  927.11   86.99 
  -2  -9  -1  940.81   85.99 
   2  -9   1  924.11   85.29 
   2  -9   1 1003.80   89.09 
   2  -9   1  928.31   89.69 
   2  -9   1  925.81   83.39 
  -2  -9  -1  886.81   85.59 
  -2  -9  -1  820.22   90.89 
   2  -9   1  851.41   99.99 
   2  -9   1 1066.99   90.79 
   2   9   1  983.80   87.09 
  -2   9  -1  915.51   84.69 
   2   9   1  945.11   89.49 
  -2   9  -1 1170.18   94.19 
  -2   9  -1  909.21   87.29 
  -2   9  -1  882.31   80.89 
  -2   9  -1 1023.10   87.39 
  -2   9  -1  825.52   91.19 
  -2   9  -1 1019.40   90.09 
   2   9   1  939.81   86.19 
  -2   9  -1 1109.49   87.89 
   3  -9   1  129.39   31.90 
   3  -9   1  156.18   35.40 
  -3  -9  -1  122.49   30.50 
   3  -9   1  129.09   28.60 
   3  -9   1  156.08   37.20 
   3  -9   1  107.39   31.60 
  -3  -9  -1   98.59   29.50 
   3  -9   1  126.09   31.00 
   3  -9   1  140.29   30.70 
  -3  -9  -1  134.39   33.10 
  -3  -9  -1  157.68   33.30 
   3  -9   1  101.79   28.10 
  -3   9  -1  102.49   29.30 
   3   9   1   94.89   29.50 
  -3   9  -1   63.59   23.60 
   3   9   1  142.49   32.60 
  -3   9  -1   86.59   25.70 
  -3   9  -1  193.28   36.50 
  -3   9  -1   79.79   25.60 
  -3   9  -1  117.89   31.80 
  -3   9  -1   82.99   27.50 
   3   9   1  143.79   32.80 
  -3   9  -1  105.49   29.40 
  -4  -9  -1  245.18   45.00 
  -4  -9  -1  247.68   47.40 
   4  -9   1  426.76   63.69 
  -4  -9  -1  380.76   55.19 
   4  -9   1  299.07   49.40 
   4  -9   1  315.07   47.20 
   4  -9   1  323.07   52.29 
  -4  -9  -1  308.47   50.59 
   4  -9   1  417.36   54.99 
   4  -9   1  403.26   61.49 
   4  -9   1  305.87   53.99 
   4  -9   1  314.57   50.19 
  -4  -9  -1  325.67   53.39 
   4  -9   1  364.56   51.89 
  -4   9  -1  276.07   49.20 
  -4   9  -1  409.86   54.99 
  -4   9  -1  442.16   56.39 
   4   9   1  427.76   55.19 
  -4   9  -1  315.87   51.49 
  -4   9  -1  328.27   52.99 
  -4   9  -1  360.46   53.39 
   4   9   1  444.16   59.29 
   4   9   1  255.37   48.90 
  -4   9  -1  356.26   54.29 
  -4   9  -1  337.57   48.80 
   5  -9   1   13.60   21.50 
   5  -9   1   16.40   18.00 
   5  -9   1    8.70   19.90 
   5  -9   1    8.10   19.90 
   5  -9   1    7.90   16.50 
  -5  -9  -1   29.30   23.90 
  -5  -9  -1   14.80   20.80 
   5  -9   1   27.60   21.70 
   5  -9   1   24.30   22.40 
  -5  -9  -1   43.90   21.80 
   5  -9   1   23.00   18.90 
   5  -9   1   29.70   19.20 
  -5   9  -1   17.30   19.80 
  -5   9  -1   35.40   21.80 
   5   9   1   10.10   19.50 
   5   9   1    6.60   15.80 
   5   9   1   -2.40   18.30 
  -5   9  -1   -7.30   15.60 
  -5   9  -1   -1.30   17.10 
  -5   9  -1   18.10   19.70 
  -5   9  -1   28.20   30.40 
  -5   9  -1   50.29   26.40 
  -5   9  -1   16.30   19.40 
  -5   9  -1   13.00   18.50 
  -3 -10   1   87.99   30.50 
   3 -10  -1   81.29   29.10 
  -3 -10   1   79.09   30.80 
   3 -10  -1  137.19   35.20 
  -3 -10   1   49.40   26.30 
   3 -10  -1   93.39   28.20 
  -3 -10   1   90.69   30.00 
   3 -10  -1   92.69   33.60 
   3 -10  -1   69.69   29.50 
  -3 -10   1  116.59   35.80 
   3 -10  -1   72.49   28.40 
   3 -10  -1   91.89   29.70 
  -3  10   1   99.79   34.00 
   3  10  -1  128.99   32.00 
  -3  10   1   57.29   27.40 
  -3  10   1   50.19   22.10 
  -3  10   1   97.59   31.80 
   3  10  -1  109.99   32.70 
  -3  10   1   56.59   25.40 
  -3  10   1  151.88   36.00 
  -3  10   1   57.49   24.70 
   3  10  -1  110.09   31.50 
  -3  10   1  115.09   30.70 
  -2 -10   1  -12.00   18.30 
   2 -10  -1   -7.40   16.00 
  -2 -10   1    9.60   17.00 
  -2 -10   1   19.30   21.90 
   2 -10  -1   -9.90   19.70 
  -2 -10   1    2.60   17.60 
   2 -10  -1   -2.20   16.30 
   2 -10  -1   26.40   25.70 
   2 -10  -1  -18.30   18.50 
   2 -10  -1   -9.30   16.20 
  -2  10   1   14.90   18.30 
  -2  10   1  -11.40   13.80 
   2  10  -1   13.70   15.80 
  -2  10   1    7.70   17.80 
  -2  10   1   18.00   19.30 
  -2  10   1   38.90   25.40 
  -2  10   1    4.10   21.50 
  -2  10   1    3.70   17.30 
  -2  10   1   25.90   19.30 
   2  10  -1   13.90   21.50 
   2  10  -1  -28.10   10.20 
   2  10  -1   10.20   18.40 
  -2  10   1    6.60   16.00 
  -1 -10   1   63.39   27.60 
   1 -10  -1   57.59   25.40 
   1 -10  -1   24.80   20.90 
   1 -10  -1   50.39   25.00 
  -1 -10   1   63.19   24.70 
  -1 -10   1   59.49   22.00 
  -1 -10   1   94.09   28.90 
   1 -10  -1   43.90   22.80 
   1 -10  -1   58.99   23.40 
   1 -10  -1   51.49   24.30 
  -1 -10   1   90.59   31.30 
  -1  10   1   63.89   23.40 
   1  10  -1   98.49   28.80 
  -1  10   1   33.10   20.00 
  -1  10   1   93.29   30.20 
  -1  10   1  110.59   32.00 
   1  10  -1   46.90   22.80 
  -1  10   1   65.49   24.40 
   1  10  -1   52.49   21.90 
   1  10  -1   96.19   29.70 
   0 -10   1    9.80   20.60 
   0 -10   1   -2.30   14.40 
   0 -10  -1  -18.20   18.40 
   0 -10   1   22.10   16.90 
   0 -10  -1   20.50   18.30 
   0 -10  -1    6.30   20.40 
   0 -10   1   41.40   24.10 
   0 -10   1   26.50   19.80 
   0 -10  -1   -6.20   17.00 
   0 -10  -1   13.70   20.60 
   0  10   1   -0.60   13.90 
   0  10  -1   -4.70   13.60 
   0  10   1   -1.90   15.60 
   0  10  -1    8.50   18.60 
   0  10  -1    3.70   15.40 
   0  10   1  -23.40   11.50 
  -1 -10  -1  399.96   61.89 
  -1 -10  -1  308.77   45.70 
   1 -10   1  378.06   61.29 
   1 -10   1  440.36   52.29 
   1 -10   1  326.87   52.39 
   1 -10   1  418.06   59.39 
   1 -10   1  338.27   48.70 
  -1 -10  -1  310.47   49.99 
   1 -10   1  353.86   56.39 
  -1 -10  -1  378.56   55.79 
  -1 -10  -1  283.37   51.39 
   1 -10   1  344.57   52.99 
  -1 -10  -1  406.96   57.09 
  -1  10  -1  401.76   52.59 
  -1  10  -1  382.36   58.89 
  -1  10  -1  332.77   52.89 
   1  10   1  362.86   54.89 
   1  10   1  323.57   53.69 
   1  10   1  438.76   61.19 
  -1  10  -1  347.27   52.19 
   2 -10   1   15.10   22.40 
  -2 -10  -1   -3.60   19.40 
   2 -10   1  -11.50   15.30 
   2 -10   1  -10.70   16.60 
   2 -10   1   27.00   20.40 
  -2 -10  -1    6.30   20.80 
  -2 -10  -1    0.20   18.90 
  -2 -10  -1    8.10   19.40 
   2 -10   1  -25.10   17.60 
  -2 -10  -1   15.50   19.30 
   2 -10   1  -17.40   14.90 
   2 -10   1   -4.10   19.40 
  -2  10  -1  -16.70   14.80 
   2  10   1   -2.00   15.20 
  -2  10  -1   -2.90   17.30 
   2  10   1   -7.90   16.40 
  -2  10  -1   22.70   16.40 
  -2  10  -1   -4.60   16.50 
   2  10   1   -9.70   16.20 
  -2  10  -1   31.10   19.80 
  -2  10  -1   -0.90   14.70 
   3 -10   1   17.40   24.60 
  -3 -10  -1   54.09   25.10 
   3 -10   1   63.79   26.70 
  -3 -10  -1   18.00   18.00 
   3 -10   1   15.70   21.70 
  -3 -10  -1   57.59   28.30 
   3 -10   1   83.79   27.80 
  -3 -10  -1   95.29   31.90 
   3 -10   1   43.40   25.30 
  -3 -10  -1   59.59   28.50 
   3 -10   1   40.30   23.80 
   3 -10   1   18.20   31.50 
   3 -10   1   52.19   25.30 
  -3  10  -1   28.80   26.10 
  -3  10  -1   42.20   23.50 
   3  10   1   40.80   22.70 
  -3  10  -1   47.20   24.80 
  -3  10  -1   50.89   24.80 
  -3  10  -1   52.49   25.00 
  -3  10  -1   84.09   28.10 
  -3  10  -1  103.79   31.00 
   3  10   1   42.70   24.60 
   3  10   1   58.39   24.30 
 -10   0   2  921.31  102.29 
 -10   0   2  817.12   94.79 
 -10   0   2  714.53   83.89 
 -10   0   2  613.14   75.79 
 -10   0   2  677.13   88.29 
  10   0  -2  733.13   89.99 
 -10   0   2  727.33   84.29 
  10   0  -2  751.72   88.29 
  10   0  -2  755.42   87.79 
 -10   0   2  706.13   89.79 
 -10   0   2  754.32   95.19 
  10   0  -2  678.63   82.09 
 -10   0   2  739.83   82.89 
  10   0  -2  943.71   94.19 
 -10   0   2  841.12   94.79 
  10   0  -2  728.33   81.69 
   9   0  -2   -3.60   10.70 
  -9   0   2   10.80   15.20 
  -9   0   2   28.80   16.50 
   9   0  -2    0.60   13.40 
   9   0  -2    6.20   16.20 
  -9   0   2   10.70   14.50 
  -9   0   2    7.60   15.60 
   9   0  -2    1.50   12.40 
  -9   0   2    8.50   13.70 
   9   0  -2    7.90   14.00 
   9   0  -2    4.50   13.70 
  -9   0   2   -1.50   11.00 
   9   0  -2  -24.70   11.40 
  -9   0   2   -4.50   14.60 
  -9   0   2    7.90   13.60 
  -9   0   2   -3.90   14.30 
   9   0  -2   -9.60   12.10 
   8   0  -2 1815.12  133.49 
   8   0  -2 1750.52  130.19 
   8   0  -2 1731.23  129.69 
   8   0  -2 1785.62  134.39 
   8   0  -2 1814.22  129.69 
   8   0  -2 1553.64  129.19 
  -8   0   2 1344.47  126.49 
  -8   0   2 1792.22  139.19 
  -8   0   2 1617.34  133.19 
  -8   0   2 1738.23  129.69 
   8   0  -2 1772.02  133.09 
   8   0  -2 1765.32  132.29 
  -8   0   2 1547.65  125.59 
   8   0  -2 1567.84  128.29 
  -8   0   2 1791.72  127.99 
  -8   0   2 1640.74  133.49 
  -8   0   2 1588.24  122.19 
  -8   0   2 1474.75  133.19 
   7   0  -2  -10.80    8.80 
   7   0  -2   -5.70   11.00 
   7   0  -2   -0.90   10.30 
  -7   0   2    6.20    7.80 
  -7   0   2   -3.80    9.40 
   7   0  -2    0.20    9.70 
   7   0  -2   -4.00   11.00 
   7   0  -2    2.30   10.40 
   7   0  -2   -5.80    8.60 
   7   0  -2   -3.70   10.30 
  -7   0   2    0.10   10.50 
  -7   0   2   -5.10   11.40 
   7   0  -2    4.90    7.10 
  -7   0   2    6.80   12.40 
  -7   0   2    2.50    6.60 
  -7   0   2  -11.70    7.70 
  -7   0   2   -4.90    9.30 
  -7   0   2  -13.90    7.60 
  -7   0   2    8.30   11.80 
  -7   0   2    5.60   10.90 
   7   0  -2    5.30   10.80 
  -6   0   2  859.51   66.99 
   6   0  -2  802.42   67.39 
  -6   0   2  805.32   67.89 
   6   0  -2  770.32   68.09 
   6   0  -2  751.82   60.09 
  -6   0   2  810.62   62.29 
   6   0  -2  834.12   69.79 
  -6   0   2  809.82   56.19 
  -6   0   2  768.02   70.59 
  -6   0   2  736.03   58.49 
   6   0  -2  802.72   67.69 
  -6   0   2  771.52   72.09 
  -6   0   2  760.82   62.89 
  -6   0   2  903.01   72.49 
   6   0  -2  768.32   65.39 
  -6   0   2  920.11   72.39 
   6   0  -2  839.82   68.39 
  -6   0   2  833.52   65.79 
   6   0  -2  800.32   68.49 
  -6   0   2  878.31   67.79 
   6   0  -2  815.22   66.79 
   6   0  -2  754.72   65.89 
  -5   0   2   -1.40    7.60 
   5   0  -2   -4.60    6.50 
  -5   0   2    6.00    6.40 
  -5   0   2    0.20    6.80 
   5   0  -2   -7.60    7.10 
  -5   0   2   11.00    8.50 
  -5   0   2    4.80    7.50 
  -5   0   2    3.20    2.30 
   5   0  -2   -3.60    5.70 
   5   0  -2    4.80    8.00 
  -5   0   2    5.30    8.00 
  -5   0   2    7.90    6.10 
   5   0  -2  -10.50    5.50 
  -5   0   2    1.70    3.70 
   5   0  -2   -3.70    5.80 
  -5   0   2   -0.10    6.90 
   5   0  -2  -11.40    5.10 
  -5   0   2    0.30    2.90 
   5   0  -2    7.80    8.60 
  -5   0   2   -6.90    6.60 
  -5   0   2   -8.50    6.90 
   5   0  -2    3.90    7.30 
   5   0  -2    3.00    7.00 
  -4   0   2 4810.22  331.17 
  -4   0   2 4972.80  325.37 
   4   0  -2 5055.59  332.77 
   4   0  -2 5275.67  335.37 
  -4   0   2 5129.79  330.37 
  -4   0   2 4921.41  325.97 
  -4   0   2 4904.51  333.17 
   4   0  -2 5016.60  333.47 
  -4   0   2 5033.50  326.67 
   4   0  -2 4884.41  335.17 
   4   0  -2 5060.79  331.37 
  -4   0   2 5001.10  325.17 
   4   0  -2 4799.92  333.77 
   4   0  -2 5112.89  333.67 
  -4   0   2 5136.59  336.47 
   4   0  -2 4929.91  324.97 
  -4   0   2 4968.50  333.27 
  -4   0   2 5185.48  338.17 
  -4   0   2 4804.22  334.07 
  -4   0   2 4663.03  335.27 
   4   0  -2 4948.50  334.07 
  -4   0   2 4926.31  334.27 
   4   0  -2 5192.48  334.27 
  -4   0   2 5165.68  330.37 
   4   0  -2 4989.00  335.47 
  -4   0   2 5195.48  332.77 
   4   0  -2 4806.42  334.37 
  -4   0   2 4944.51  330.47 
  -3   0   2   -0.50    3.60 
   3   0  -2   -0.30    5.50 
  -3   0   2    2.20    4.10 
  -3   0   2    3.80    1.60 
  -3   0   2   12.40    7.00 
   3   0  -2    1.80    5.00 
   3   0  -2   -3.90    4.10 
  -3   0   2   -0.20    5.90 
   3   0  -2   17.10    6.90 
  -3   0   2    1.80    3.10 
   3   0  -2    7.90    4.20 
  -3   0   2    5.60    5.00 
   3   0  -2    7.10    5.40 
   3   0  -2    8.30    7.10 
   3   0  -2    0.90    4.40 
   3   0  -2    1.00    4.90 
  -3   0   2    4.00    5.00 
  -3   0   2    5.20    2.50 
  -3   0   2    9.20    6.50 
   3   0  -2    3.70    2.10 
   3   0  -2   -3.60    3.80 
  -3   0   2   -7.30    4.10 
  -3   0   2    4.20    4.90 
  -3   0   2    5.60    4.70 
   3   0  -2    3.50    2.90 
  -3   0   2    3.90    4.90 
  -3   0   2    2.40    2.50 
  -3   0   2    9.80    5.20 
   3   0  -2    0.90    5.10 
   3   0  -2   -2.90    4.00 
  -3   0   2   -3.00    4.00 
   3   0  -2   -5.50    3.70 
   3   0  -2    3.70    5.40 
  -3   0   2    2.90    4.10 
   3   0  -2   10.00    6.30 
  -3   0   2    8.10    5.50 
   2   0  -2 6478.95  420.86 
  -2   0   2 6205.38  420.66 
  -2   0   2 6519.95  417.06 
  -2   0   2 6383.56  422.36 
   2   0  -2 6661.63  421.06 
  -2   0   2 6256.97  422.46 
   2   0  -2 6322.97  421.26 
   2   0  -2 6632.54  421.86 
  -2   0   2 6971.00  420.56 
  -2   0   2 6458.75  421.56 
   2   0  -2 6614.84  422.06 
  -2   0   2 6614.24  421.66 
   2   0  -2 6296.97  421.76 
   2   0  -2 6334.27  422.36 
   2   0  -2 6374.76  420.96 
  -2   0   2 6417.26  420.76 
   2   0  -2 6418.36  421.76 
   2   0  -2 6325.77  417.96 
  -2   0   2 6322.17  422.26 
   2   0  -2 6374.06  420.66 
   2   0  -2 6353.96  422.96 
  -2   0   2 6112.19  420.86 
  -2   0   2 6513.05  421.26 
  -2   0   2 6379.76  417.66 
  -2   0   2 6271.57  422.06 
  -2   0   2 6511.15  421.46 
  -2   0   2 6516.45  421.26 
   2   0  -2 6301.37  419.16 
  -2   0   2 6459.55  420.86 
  -2   0   2 6723.03  421.86 
  -2   0   2 6593.34  417.56 
  -2   0   2 6266.77  420.66 
   2   0  -2 6759.82  422.66 
   2   0  -2 6379.66  420.56 
  -2   0   2 6358.46  421.96 
   2   0  -2 6085.99  422.16 
  -2   0   2 6209.38  421.26 
  -2   0   2 6325.87  417.06 
  -2   0   2 6352.36  421.76 
  -2   0   2 6708.53  422.06 
   2   0  -2 6359.66  420.26 
   2   0  -2 6036.90  417.16 
   2   0  -2 6636.64  421.86 
   2   0  -2 6275.47  420.66 
   1   0  -2    0.60    2.80 
   1   0  -2    2.50    2.20 
  -1   0   2    2.00    1.80 
  -1   0   2    7.90    4.00 
   1   0  -2   -0.20    1.50 
   1   0  -2    4.60    3.40 
   1   0  -2    1.90    2.30 
   1   0  -2    4.00    3.40 
   1   0  -2    0.20    2.20 
  -1   0   2    6.20    4.30 
  -1   0   2    0.80    2.70 
  -1   0   2    0.20    3.00 
   1   0  -2    2.10    1.60 
  -1   0   2   -0.50    2.00 
   1   0  -2    2.40    2.20 
  -1   0   2   -2.40    3.30 
  -1   0   2    1.00    3.00 
   1   0  -2   -1.30    2.90 
  -1   0   2   -3.30    3.00 
  -1   0   2   -0.70    2.70 
  -1   0   2    1.40    2.30 
   1   0  -2    5.30    3.00 
  -1   0   2    4.90    2.50 
   1   0  -2    2.10    1.80 
  -1   0   2    4.30    2.50 
  -1   0   2    2.00    2.60 
  -1   0   2    0.40    2.60 
  -1   0   2   -0.70    3.50 
  -1   0   2   -2.80    2.80 
  -1   0   2    4.50    2.50 
   1   0  -2   -0.30    2.30 
  -1   0   2   -2.00    2.40 
  -1   0   2    0.70    2.70 
   1   0  -2    0.50    2.00 
  -1   0   2    1.10    2.90 
  -1   0   2   -1.50    2.70 
   1   0  -2   -0.40    1.70 
   1   0  -2   -2.30    1.00 
  -1   0   2   -2.70    1.90 
  -1   0   2    1.60    2.50 
  -1   0   2   -0.50    2.00 
   1   0   2    0.20    4.10 
   1   0   2   -3.70    3.60 
  -1   0  -2    1.90    2.80 
  -1   0  -2    1.20    3.10 
  -1   0  -2   -1.90    2.30 
  -1   0  -2    4.20    3.90 
   1   0   2    2.80    3.00 
  -1   0  -2    6.50    3.20 
   1   0   2   -0.60    3.00 
  -1   0  -2    1.30    2.60 
  -1   0  -2    3.20    3.30 
   1   0   2    1.60    3.60 
   1   0   2   -0.10    3.00 
   1   0   2   -0.30    2.50 
   1   0   2   11.20    4.70 
   1   0   2    4.30    3.50 
  -1   0  -2   -3.50    2.20 
  -1   0  -2   -3.30    2.40 
  -1   0  -2    1.90    2.60 
   1   0   2   -2.90    2.20 
  -1   0  -2   10.20    4.40 
  -1   0  -2    4.00    3.40 
  -1   0  -2    4.40    4.00 
  -1   0  -2    0.10    3.10 
  -1   0  -2   -4.80    3.90 
   1   0   2   17.00    6.20 
  -1   0  -2    4.40    4.60 
  -1   0  -2   -0.10    3.90 
  -1   0  -2    5.40    2.60 
  -1   0  -2   -2.60    2.60 
  -1   0  -2    3.40    2.00 
  -1   0  -2    2.90    3.30 
  -1   0  -2    3.20    2.90 
   1   0   2   -3.10    2.70 
   2   0   2  224.28   19.10 
   2   0   2  222.98   15.30 
   2   0   2  212.98   19.20 
  -2   0  -2  218.68   20.60 
   2   0   2  248.38   26.20 
  -2   0  -2  181.78   16.40 
   2   0   2  256.97   20.60 
  -2   0  -2  208.08   18.80 
   2   0   2  200.88   19.60 
   2   0   2  207.98   19.40 
   2   0   2  225.88   18.10 
   2   0   2  217.58   20.60 
  -2   0  -2  212.48   19.60 
  -2   0  -2  178.38   18.80 
   2   0   2  223.78   19.80 
  -2   0  -2  221.08   18.40 
   2   0   2  195.28   18.10 
  -2   0  -2  208.08   22.10 
   2   0   2  217.78   19.10 
   2   0   2  232.98   19.90 
   2   0   2  256.67   19.90 
  -2   0  -2  192.18   19.00 
  -2   0  -2  224.48   18.50 
  -2   0  -2  211.38   19.30 
  -2   0  -2  218.08   19.70 
  -2   0  -2  207.78   18.70 
   2   0   2  209.28   20.90 
  -2   0  -2  231.68   18.90 
   2   0   2  232.88   19.40 
   2   0   2  230.78   19.70 
  -2   0  -2  186.08   20.80 
  -2   0  -2  209.38   20.80 
  -2   0  -2  175.18   20.80 
  -2   0  -2  242.58   20.90 
  -2   0  -2  285.97   22.10 
  -2   0  -2  203.48   18.10 
  -2   0  -2  221.08   18.70 
  -2   0  -2  246.88   19.20 
   2   0   2  223.08   19.00 
   2   0   2  226.88   17.00 
   2   0   2  173.68   17.90 
   2   0   2  228.38   19.40 
  -2   0  -2  205.18   18.90 
  -2   0  -2  188.98   18.20 
  -3   0  -2    8.30    5.70 
   3   0   2    6.10    5.40 
  -3   0  -2   -5.50    5.80 
   3   0   2    3.90    3.70 
  -3   0  -2   -2.10    5.40 
   3   0   2    2.00    5.80 
  -3   0  -2   -2.50    4.50 
   3   0   2    3.90    4.90 
   3   0   2   -3.90    4.30 
  -3   0  -2   -1.50    3.80 
  -3   0  -2    8.60    5.80 
   3   0   2   -3.00    4.60 
   3   0   2   -2.10    4.80 
   3   0   2    5.30    5.60 
  -3   0  -2    9.40    6.90 
   3   0   2   -4.90    4.50 
  -3   0  -2   -0.90    7.20 
   3   0   2   -3.50    4.50 
  -3   0  -2   11.20    5.20 
  -3   0  -2   -1.70    4.40 
   3   0   2    0.20    4.80 
   3   0   2   -0.60    4.80 
  -3   0  -2    0.50    4.60 
   3   0   2   -2.50    3.40 
  -3   0  -2   -2.00    5.80 
   3   0   2   -1.10    5.10 
  -3   0  -2   -3.60    4.20 
  -3   0  -2    4.40    5.70 
  -3   0  -2   -0.40    4.90 
   3   0   2   -6.10    5.60 
   3   0   2    4.10    1.80 
   3   0   2   -1.60    5.30 
   3   0   2    1.60    5.70 
  -3   0  -2   -1.60    3.70 
  -3   0  -2   -1.20    5.20 
   3   0   2   -6.30    5.90 
  -3   0  -2   -1.70    5.40 
  -3   0  -2   -1.30    3.10 
   4   0   2 2803.32  194.38 
  -4   0  -2 2897.51  193.68 
  -4   0  -2 2717.43  192.68 
   4   0   2 2804.62  189.68 
  -4   0  -2 2909.31  188.68 
   4   0   2 2816.02  194.48 
   4   0   2 2846.32  190.68 
   4   0   2 2836.62  194.38 
  -4   0  -2 3000.40  192.58 
   4   0   2 2934.31  194.08 
   4   0   2 2863.01  194.68 
   4   0   2 2862.51  189.58 
  -4   0  -2 2737.43  186.28 
   4   0   2 2789.62  189.08 
  -4   0  -2 2921.01  193.48 
   4   0   2 2790.42  191.28 
  -4   0  -2 2920.61  188.68 
  -4   0  -2 2754.32  196.48 
   4   0   2 2998.60  195.08 
  -4   0  -2 2690.13  195.78 
  -4   0  -2 2852.61  191.48 
  -4   0  -2 2638.94  188.78 
  -4   0  -2 2697.33  193.48 
  -4   0  -2 2974.60  195.28 
   4   0   2 2855.71  193.48 
   4   0   2 2847.71  193.68 
   4   0   2 2823.72  195.78 
  -4   0  -2 2865.61  198.58 
   4   0   2 2894.31  192.88 
  -4   0  -2 2681.83  196.28 
  -4   0  -2 2941.21  194.88 
   5   0   2    3.10    4.40 
   5   0   2   -4.00    5.70 
   5   0   2   -1.20    7.30 
  -5   0  -2    2.60    6.30 
   5   0   2    4.50    5.30 
  -5   0  -2    0.80    7.30 
   5   0   2   -6.10    5.40 
  -5   0  -2    3.00    8.30 
   5   0   2   -0.50    6.70 
   5   0   2   -4.10    4.80 
  -5   0  -2    2.10    7.80 
  -5   0  -2   -1.80    3.20 
   5   0   2    4.40    8.10 
  -5   0  -2    4.20    6.30 
  -5   0  -2    3.20    4.30 
  -5   0  -2    4.30    7.90 
  -5   0  -2   -4.50    6.80 
   5   0   2  -11.10    5.60 
   5   0   2    6.10    7.60 
   5   0   2   -4.10    7.20 
  -5   0  -2    0.30    4.10 
  -5   0  -2    6.10    8.50 
  -5   0  -2    3.30    8.40 
  -5   0  -2   11.70    8.50 
   5   0   2    1.30    4.90 
  -6   0  -2  723.13   61.39 
   6   0   2  716.33   52.79 
   6   0   2  809.32   64.69 
  -6   0  -2  758.52   68.19 
  -6   0  -2  681.93   64.99 
  -6   0  -2  729.13   62.19 
  -6   0  -2  734.23   58.39 
   6   0   2  698.13   52.29 
   6   0   2  755.92   62.79 
   6   0   2  704.33   62.39 
   6   0   2  722.23   55.49 
   6   0   2  679.93   60.59 
  -6   0  -2  635.44   63.89 
  -6   0  -2  770.92   66.69 
   6   0   2  776.52   63.49 
  -6   0  -2  727.23   65.29 
  -6   0  -2  707.23   63.29 
  -6   0  -2  787.52   60.29 
   6   0   2  657.73   55.39 
  -6   0  -2  752.32   54.19 
   6   0   2  731.73   61.39 
   6   0   2  746.83   63.29 
   6   0   2  673.23   62.69 
  -6   0  -2  819.12   60.69 
  -6   0  -2  704.43   51.69 
  -7   0  -2    8.20   13.60 
   7   0   2   -2.40   11.40 
   7   0   2   -2.60    9.30 
  -7   0  -2   -0.20    8.40 
   7   0   2   -1.60    8.60 
  -7   0  -2    0.00   10.00 
  -7   0  -2   10.90   12.80 
   7   0   2   -3.50   11.80 
   7   0   2   -0.20   10.60 
   7   0   2    1.40   10.50 
  -7   0  -2   21.70   14.50 
  -7   0  -2   11.40   12.20 
   7   0   2   -2.80   10.90 
   7   0   2  -12.40    9.30 
  -7   0  -2   16.10   12.40 
  -7   0  -2   -0.40   11.70 
  -7   0  -2   15.50   12.20 
  -7   0  -2   12.80   12.80 
  -7   0  -2    1.00    9.10 
  -8   0  -2  141.09   32.20 
  -8   0  -2  158.78   28.00 
   8   0   2  109.49   27.30 
   8   0   2  140.39   30.60 
  -8   0  -2  136.29   32.50 
   8   0   2   93.89   25.50 
   8   0   2  127.89   29.10 
   8   0   2  196.98   32.70 
  -8   0  -2  159.78   34.60 
   8   0   2  157.78   31.90 
  -8   0  -2  151.48   29.70 
  -8   0  -2  130.69   30.30 
  -8   0  -2  169.78   32.10 
   8   0   2  180.38   34.40 
   8   0   2  124.59   28.70 
  -8   0  -2  111.39   24.30 
  -8   0  -2  193.18   33.30 
  -8   0  -2  194.88   36.00 
  -9   0  -2  -10.80   12.80 
  -9   0  -2   -6.50   13.50 
  -9   0  -2   -2.40   14.10 
   9   0   2   -2.90   11.60 
  -9   0  -2   -4.30   16.40 
   9   0   2   -1.90   15.90 
   9   0   2   -8.80   12.10 
  -9   0  -2   -8.20   10.50 
   9   0   2   -0.20   14.50 
  -9   0  -2   -7.50   12.30 
   9   0   2   -7.90   11.20 
  -9   0  -2   23.90   17.60 
   9   0   2   -4.10   12.30 
  -9   0  -2   11.10   17.90 
  -9   0  -2    6.20   16.20 
   9   0   2    5.30   16.40 
 -10   0  -2   43.90   25.70 
 -10   0  -2   21.50   21.80 
  10   0   2   32.30   21.00 
 -10   0  -2   62.29   24.00 
  10   0   2   79.19   29.40 
  10   0   2   15.40   21.00 
  10   0   2   40.30   22.90 
 -10   0  -2    8.40   19.80 
 -10   0  -2   43.10   24.30 
  10   0   2   79.49   27.30 
 -10   0  -2    4.40   20.20 
 -10   0  -2   59.49   31.30 
  10   0   2   28.80   21.50 
 -10   0  -2   33.30   26.00 
  10  -1  -2   78.49   29.70 
 -10  -1   2  103.29   30.60 
 -10  -1   2   69.09   30.80 
 -10  -1   2   43.30   24.70 
  10  -1  -2   33.30   22.10 
 -10  -1   2    7.80   20.20 
 -10  -1   2   18.30   22.80 
  10  -1  -2   73.89   28.80 
 -10  -1   2   44.00   23.30 
 -10  -1   2  111.39   34.60 
  10  -1  -2  104.19   32.20 
 -10  -1   2   23.00   19.60 
  10  -1  -2   52.19   26.20 
 -10  -1   2   83.99   26.00 
  10  -1  -2   45.60   21.40 
  10  -1  -2   70.79   26.10 
  10   1  -2  107.49   33.80 
 -10   1   2   45.60   22.80 
 -10   1   2   59.69   27.40 
  10   1  -2   39.70   22.50 
 -10   1   2   69.29   29.30 
  10   1  -2   18.80   20.40 
  10   1  -2   99.19   27.50 
 -10   1   2   38.60   21.50 
 -10   1   2   29.00   23.00 
  10   1  -2   75.79   24.80 
  10   1  -2   57.39   26.80 
 -10   1   2   48.20   25.60 
 -10   1   2   64.59   23.50 
 -10   1   2   46.20   27.00 
  10   1  -2   90.49   29.50 
 -10   1   2   99.49   31.20 
 -10   1   2   92.59   31.50 
   9  -1  -2  682.63   78.09 
  -9  -1   2  534.35   63.79 
   9  -1  -2  605.34   72.09 
   9  -1  -2  623.44   67.99 
   9  -1  -2  487.15   66.29 
   9  -1  -2  602.84   72.49 
  -9  -1   2  573.44   66.99 
  -9  -1   2  448.66   69.79 
  -9  -1   2  583.94   73.29 
  -9  -1   2  631.54   74.79 
  -9  -1   2  570.44   62.99 
   9  -1  -2  563.34   66.89 
   9  -1  -2  643.64   72.39 
  -9  -1   2  689.23   78.79 
   9  -1  -2  585.54   74.09 
  -9  -1   2  661.73   71.49 
  -9  -1   2  551.64   73.59 
   9  -1  -2  559.94   68.19 
  -9   1   2  699.63   82.89 
  -9   1   2  633.34   67.79 
   9   1  -2  551.04   65.99 
   9   1  -2  464.55   63.19 
   9   1  -2  621.14   67.49 
  -9   1   2  616.04   71.99 
   9   1  -2  667.03   72.59 
  -9   1   2  590.34   69.19 
  -9   1   2  539.65   60.99 
   9   1  -2  490.45   67.59 
  -9   1   2  515.75   70.79 
   9   1  -2  667.23   73.69 
  -9   1   2  500.15   63.59 
  -9   1   2  626.94   77.79 
  -9   1   2  580.34   76.19 
   9   1  -2  643.54   72.29 
   8  -1  -2   14.20   15.50 
   8  -1  -2   51.39   21.20 
   8  -1  -2   70.29   21.40 
   8  -1  -2   68.59   22.60 
  -8  -1   2   47.50   17.00 
  -8  -1   2   51.19   21.10 
  -8  -1   2   24.30   20.10 
   8  -1  -2   60.09   20.50 
   8  -1  -2   49.80   21.10 
   8  -1  -2   37.50   18.20 
   8  -1  -2   51.49   21.40 
  -8  -1   2   46.80   17.40 
  -8  -1   2   62.59   23.60 
  -8  -1   2   71.09   20.90 
  -8  -1   2   45.10   18.00 
   8  -1  -2   87.49   24.70 
  -8  -1   2   65.69   24.40 
   8   1  -2   71.49   22.10 
   8   1  -2   30.50   15.80 
  -8   1   2   48.70   16.70 
   8   1  -2   24.70   16.20 
  -8   1   2   57.99   21.60 
   8   1  -2   80.29   24.10 
  -8   1   2   66.89   20.60 
   8   1  -2   55.89   19.90 
  -8   1   2   80.59   25.80 
   8   1  -2   80.09   24.00 
  -8   1   2   79.09   23.90 
  -8   1   2   57.49   21.90 
   8   1  -2   60.39   20.30 
  -8   1   2   54.59   18.40 
   8   1  -2   92.39   22.80 
   8   1  -2   65.99   22.60 
  -8   1   2   72.79   14.30 
  -8   1   2   96.09   26.60 
  -8   1   2   45.00   20.60 
  -7  -1   2  404.56   34.00 
   7  -1  -2  331.57   45.20 
  -7  -1   2  326.17   41.60 
   7  -1  -2  302.47   42.60 
   7  -1  -2  367.26   45.00 
  -7  -1   2  296.87   46.50 
  -7  -1   2  327.87   30.50 
  -7  -1   2  273.37   37.80 
  -7  -1   2  419.26   46.00 
   7  -1  -2  347.97   44.40 
   7  -1  -2  338.67   46.80 
   7  -1  -2  324.67   44.20 
   7  -1  -2  291.77   39.70 
  -7  -1   2  315.47   44.60 
   7  -1  -2  327.77   46.80 
  -7  -1   2  281.37   38.10 
   7  -1  -2  366.86   38.90 
   7  -1  -2  366.66   43.40 
  -7  -1   2  316.47   45.40 
  -7  -1   2  389.76   40.70 
  -7  -1   2  342.37   46.00 
   7   1  -2  366.66   28.10 
  -7   1   2  348.37   45.40 
   7   1  -2  317.17   42.40 
  -7   1   2  430.26   43.30 
  -7   1   2  283.67   46.10 
   7   1  -2  362.06   42.40 
   7   1  -2  286.57   42.70 
  -7   1   2  368.36   43.30 
  -7   1   2  328.37   48.30 
   7   1  -2  343.77   45.20 
  -7   1   2  349.27   34.90 
   7   1  -2  312.77   42.20 
  -7   1   2  368.36   48.10 
  -7   1   2  360.16   44.80 
   7   1  -2  343.67   43.70 
   7   1  -2  331.07   42.90 
   7   1  -2  383.36   45.00 
   7   1  -2  354.36   45.80 
  -7   1   2  367.86   48.50 
  -7   1   2  383.06   47.00 
   6  -1  -2  108.69   11.40 
  -6  -1   2  115.09   16.00 
  -6  -1   2   86.99   14.80 
  -6  -1   2   82.89   14.40 
   6  -1  -2   71.29   11.40 
  -6  -1   2  110.39   22.90 
  -6  -1   2   90.69   15.60 
  -6  -1   2  106.99   12.50 
   6  -1  -2   85.29   22.60 
   6  -1  -2   73.29   18.10 
  -6  -1   2  111.39   20.70 
   6  -1  -2   72.89   19.20 
  -6  -1   2   81.39   16.70 
  -6  -1   2   97.39   14.30 
  -6  -1   2  104.59   19.80 
  -6  -1   2   91.49   15.40 
   6  -1  -2   90.89   11.80 
   6  -1  -2  100.89   18.30 
   6  -1  -2   93.69   20.30 
  -6  -1   2   86.59   19.60 
   6  -1  -2   70.89   18.00 
  -6  -1   2   59.79   18.80 
   6  -1  -2   76.39   18.80 
   6  -1  -2   99.39   22.60 
   6  -1  -2   89.69   18.80 
  -6  -1   2   79.49   21.10 
  -6  -1   2   77.09   17.90 
  -6  -1   2   89.19   21.40 
   6  -1  -2  106.29   22.00 
   6   1  -2   75.19   19.70 
   6   1  -2  114.49   20.60 
  -6   1   2  110.69   15.50 
   6   1  -2  128.49   15.00 
  -6   1   2   70.49   20.20 
  -6   1   2  102.09   14.80 
  -6   1   2   82.39   17.60 
  -6   1   2   78.59   21.00 
   6   1  -2  107.19   23.40 
   6   1  -2   73.39   18.30 
   6   1  -2   93.59   20.40 
   6   1  -2  131.09   23.10 
  -6   1   2   94.89   22.40 
   6   1  -2   90.99   20.30 
  -6   1   2  131.59   23.00 
   6   1  -2   92.39   19.90 
  -6   1   2   75.89   18.80 
  -6   1   2   91.39   18.80 
  -6   1   2   82.09   20.50 
   6   1  -2   99.39   20.00 
  -6   1   2   81.09   19.80 
   5  -1  -2  177.88   15.80 
  -5  -1   2  187.98   23.10 
   5  -1  -2  177.68   25.90 
   5  -1  -2  149.49   13.60 
  -5  -1   2  126.29   23.00 
  -5  -1   2  160.58   22.80 
   5  -1  -2  184.58   27.10 
   5  -1  -2  154.98   26.00 
  -5  -1   2  150.08   18.70 
   5  -1  -2  124.69   21.90 
   5  -1  -2  195.48   25.20 
   5  -1  -2  178.48   25.20 
  -5  -1   2  164.48   26.10 
   5  -1  -2  150.18   17.40 
   5  -1  -2  166.78   22.00 
  -5  -1   2  138.89   27.00 
  -5  -1   2  122.69   19.50 
  -5  -1   2  144.69   17.60 
  -5  -1   2  161.68   18.40 
  -5  -1   2  179.78   21.30 
  -5  -1   2  149.79   24.90 
   5  -1  -2  194.68   25.80 
  -5  -1   2  134.99   21.40 
  -5  -1   2  143.39   17.50 
   5  -1  -2  151.68   16.80 
   5  -1  -2  153.88   23.30 
  -5  -1   2  194.38   20.30 
   5  -1  -2  127.19   19.60 
  -5  -1   2  128.99   19.70 
   5  -1  -2  141.39   23.40 
  -5   1   2  130.39   24.70 
   5   1  -2  151.08   22.80 
  -5   1   2  129.29   20.10 
  -5   1   2  166.28   25.80 
  -5   1   2  161.18   18.30 
  -5   1   2  169.68   13.10 
   5   1  -2  150.18   23.80 
  -5   1   2  148.39   23.60 
   5   1  -2  138.49   23.10 
   5   1  -2  150.18   24.90 
  -5   1   2  148.89   24.00 
   5   1  -2  161.08   23.40 
  -5   1   2  125.49   22.40 
   5   1  -2  154.88   23.20 
   5   1  -2  135.79   22.60 
   5   1  -2  180.48   24.80 
  -5   1   2  175.78   24.00 
  -5   1   2  174.58   19.80 
  -5   1   2  112.59   22.50 
   5   1  -2  170.18   17.90 
   5   1  -2  165.38   23.70 
   4  -1  -2  303.07   32.90 
  -4  -1   2  343.47   24.30 
   4  -1  -2  389.86   38.60 
  -4  -1   2  384.76   29.50 
   4  -1  -2  326.07   27.80 
   4  -1  -2  378.16   37.50 
   4  -1  -2  330.67   31.40 
  -4  -1   2  337.17   29.80 
   4  -1  -2  309.17   34.30 
  -4  -1   2  349.47   38.20 
  -4  -1   2  305.77   34.00 
  -4  -1   2  301.47   27.00 
   4  -1  -2  330.47   30.70 
  -4  -1   2  357.26   30.80 
   4  -1  -2  333.47   30.70 
   4  -1  -2  317.97   23.70 
  -4  -1   2  328.07   33.10 
   4  -1  -2  346.37   32.30 
  -4  -1   2  342.77   24.90 
  -4  -1   2  353.56   30.90 
   4  -1  -2  322.97   37.50 
  -4  -1   2  262.97   31.10 
   4  -1  -2  361.86   27.10 
   4  -1  -2  336.57   35.90 
  -4  -1   2  380.36   27.80 
  -4  -1   2  370.66   23.80 
   4  -1  -2  343.17   32.40 
  -4  -1   2  358.26   34.30 
   4  -1  -2  345.77   37.50 
   4  -1  -2  369.56   25.70 
   4  -1  -2  336.47   23.80 
   4  -1  -2  374.76   30.60 
  -4  -1   2  351.26   39.50 
  -4  -1   2  319.57   29.90 
  -4  -1   2  316.07   27.60 
   4   1  -2  342.37   31.00 
   4   1  -2  359.96   31.40 
  -4   1   2  297.67   34.60 
   4   1  -2  269.87   34.20 
   4   1  -2  329.47   34.60 
  -4   1   2  343.87   31.70 
  -4   1   2  310.27   35.60 
   4   1  -2  355.76   32.30 
   4   1  -2  336.47   30.70 
  -4   1   2  391.16   31.60 
   4   1  -2  288.87   33.50 
  -4   1   2  335.07   27.40 
  -4   1   2  313.37   36.50 
   4   1  -2  323.07   27.70 
   4   1  -2  348.17   37.90 
   4   1  -2  310.97   31.40 
  -4   1   2  390.66   33.50 
   4   1  -2  355.56   31.70 
  -4   1   2  350.86   26.00 
  -4   1   2  332.37   28.40 
  -4   1   2  340.47   39.10 
  -4   1   2  294.87   35.30 
   3  -1  -2  346.77   24.80 
  -3  -1   2  326.67   29.10 
  -3  -1   2  343.57   29.50 
  -3  -1   2  338.17   29.00 
   3  -1  -2  367.66   31.20 
   3  -1  -2  376.86   25.30 
   3  -1  -2  331.97   29.90 
   3  -1  -2  352.86   24.50 
   3  -1  -2  265.17   32.80 
  -3  -1   2  380.26   33.50 
   3  -1  -2  333.27   30.90 
  -3  -1   2  296.67   25.40 
  -3  -1   2  329.37   28.70 
  -3  -1   2  347.27   26.40 
   3  -1  -2  355.56   28.70 
  -3  -1   2  368.16   31.00 
  -3  -1   2  330.67   24.50 
   3  -1  -2  325.07   29.20 
   3  -1  -2  356.66   30.30 
  -3  -1   2  348.57   29.30 
  -3  -1   2  304.97   29.70 
   3  -1  -2  320.67   28.80 
  -3  -1   2  331.67   25.80 
   3  -1  -2  344.07   26.70 
  -3  -1   2  355.56   29.00 
   3  -1  -2  333.07   30.50 
   3  -1  -2  371.46   30.10 
   3  -1  -2  316.27   30.70 
   3  -1  -2  343.57   29.10 
  -3  -1   2  345.37   29.40 
   3  -1  -2  351.66   30.50 
   3  -1  -2  327.17   29.50 
   3  -1  -2  370.26   30.00 
  -3  -1   2  358.46   24.70 
  -3  -1   2  336.17   31.60 
  -3  -1   2  348.67   29.20 
  -3  -1   2  318.17   27.60 
  -3  -1   2  346.97   30.90 
  -3  -1   2  325.57   24.20 
  -3  -1   2  371.06   28.30 
   3  -1  -2  371.26   30.20 
  -3  -1   2  367.76   29.00 
  -3  -1   2  317.07   29.10 
  -3   1   2  357.76   28.90 
   3   1  -2  354.36   27.80 
   3   1  -2  378.96   30.10 
   3   1  -2  343.87   29.10 
   3   1  -2  337.07   29.40 
   3   1  -2  343.27   28.80 
  -3   1   2  338.97   28.10 
   3   1  -2  378.36   31.20 
  -3   1   2  356.56   29.60 
   3   1  -2  380.46   32.40 
   3   1  -2  363.16   30.20 
   3   1  -2  356.06   30.10 
   3   1  -2  395.96   31.90 
  -3   1   2  372.46   26.90 
  -3   1   2  300.57   32.90 
  -3   1   2  376.16   31.20 
  -3   1   2  319.37   29.50 
  -3   1   2  334.77   31.00 
  -3   1   2  350.96   31.10 
   3   1  -2  327.37   29.60 
   3   1  -2  343.87   24.70 
  -3   1   2  346.97   32.50 
  -3   1   2  350.66   26.60 
  -3   1   2  346.77   24.60 
   3   1  -2  349.47   28.10 
  -3   1   2  301.07   30.90 
  -3   1   2  367.06   32.30 
  -3   1   2  355.26   29.60 
  -3   1   2  387.56   29.50 
  -3   1   2  404.66   33.60 
  -2  -1   2   90.39   11.20 
  -2  -1   2   82.69   10.60 
   2  -1  -2   56.89    9.80 
  -2  -1   2   66.99   11.00 
   2  -1  -2   71.39   12.00 
   2  -1  -2   77.09   11.40 
   2  -1  -2   56.29   10.30 
   2  -1  -2   81.39   11.70 
   2  -1  -2   69.89   10.00 
  -2  -1   2   67.09   11.30 
  -2  -1   2   74.79   12.10 
  -2  -1   2   76.79   10.20 
   2  -1  -2  103.19   13.40 
   2  -1  -2   76.89   11.50 
   2  -1  -2   59.59    8.90 
   2  -1  -2   87.79   12.00 
   2  -1  -2   74.29   10.80 
  -2  -1   2   72.09   10.00 
  -2  -1   2   64.49   10.30 
  -2  -1   2   67.19    8.50 
   2  -1  -2   89.89   12.00 
   2  -1  -2   89.79   11.60 
  -2  -1   2   68.89    7.30 
  -2  -1   2   95.19   12.20 
  -2  -1   2   66.89    8.10 
   2  -1  -2   72.49    7.90 
  -2  -1   2   56.89    9.90 
  -2  -1   2   85.09   11.00 
  -2  -1   2   60.29    9.90 
  -2  -1   2   67.29    8.40 
  -2  -1   2   66.09    8.80 
   2  -1  -2   74.79   10.60 
   2  -1  -2   78.79   11.20 
   2  -1  -2   55.39   10.00 
  -2  -1   2   65.19    7.40 
  -2  -1   2   68.69   10.50 
  -2  -1   2   73.49    8.90 
   2  -1  -2   70.09   10.20 
   2  -1  -2   72.29    9.60 
  -2  -1   2   70.69    7.80 
  -2  -1   2   76.09   10.80 
   2  -1  -2   66.49    7.70 
  -2  -1   2   81.49    8.70 
   2  -1  -2   62.89    8.10 
   2  -1  -2   69.09   11.60 
  -2  -1   2   61.69   11.30 
  -2  -1   2   73.99    9.40 
   2   1  -2   70.39   10.10 
   2   1  -2   61.49    7.90 
  -2   1   2   70.29   10.00 
   2   1  -2   82.79    8.30 
  -2   1   2   50.99    9.00 
   2   1  -2   68.19   10.40 
   2   1  -2   65.59    9.30 
  -2   1   2   70.09   11.00 
  -2   1   2   70.79   10.40 
  -2   1   2   93.89   12.30 
  -2   1   2   76.89    9.70 
  -2   1   2   67.69   11.10 
  -2   1   2   90.39   12.10 
  -2   1   2   65.89   10.50 
  -2   1   2   66.69   10.20 
  -2   1   2   64.79   11.10 
   2   1  -2   77.59    8.20
[truncated: 2,893,038 more chars]
