# Supplementary material
Source: MDPI journal article supplement (https://www.mdpi.com/2073-4352/13/7/1043)
Supplement: s1 [file s1 › 10 Ho Ha2019_86_0m_a.cif]

 
data_Ha2019_86_0m_a 
  
_audit_creation_method            'SHELXL-2014/7' 
_shelx_SHELXL_version_number      '2014/7' 
_chemical_name_systematic         ? 
_chemical_name_common             ? 
_chemical_melting_point           ? 
_chemical_formula_moiety          ? 
_chemical_formula_sum 
 'C4 H12 Cl Ho O7' 
_chemical_formula_weight          372.52 
  
loop_ 
 _atom_type_symbol 
 _atom_type_description 
 _atom_type_scat_dispersion_real 
 _atom_type_scat_dispersion_imag 
 _atom_type_scat_source 
 'C'  'C'   0.0033   0.0016 
 'International Tables Vol C Tables 4.2.6.8 and 6.1.1.4' 
 'H'  'H'   0.0000   0.0000 
 'International Tables Vol C Tables 4.2.6.8 and 6.1.1.4' 
 'O'  'O'   0.0106   0.0060 
 'International Tables Vol C Tables 4.2.6.8 and 6.1.1.4' 
 'Cl'  'Cl'   0.1484   0.1585 
 'International Tables Vol C Tables 4.2.6.8 and 6.1.1.4' 
 'Ho'  'Ho'  -0.2175   4.6783 
 'International Tables Vol C Tables 4.2.6.8 and 6.1.1.4' 
  
_space_group_crystal_system       monoclinic 
_space_group_IT_number            14 
_space_group_name_H-M_alt         'P 21/n' 
_space_group_name_Hall            '-P 2yn' 
  
_shelx_space_group_comment 
; 
The symmetry employed for this shelxl refinement is uniquely defined 
by the following loop, which should always be used as a source of 
symmetry information in preference to the above space-group names. 
They are only intended as comments. 
; 
  
loop_ 
 _space_group_symop_operation_xyz 
 'x, y, z' 
 '-x+1/2, y+1/2, -z+1/2' 
 '-x, -y, -z' 
 'x-1/2, -y-1/2, z-1/2' 
  
_cell_length_a                    7.7993(3) 
_cell_length_b                    7.8345(3) 
_cell_length_c                    17.2564(7) 
_cell_angle_alpha                 90 
_cell_angle_beta                  97.881(2) 
_cell_angle_gamma                 90 
_cell_volume                      1044.47(7) 
_cell_formula_units_Z             4 
_cell_measurement_temperature     100(2) 
_cell_measurement_reflns_used     9036 
_cell_measurement_theta_min       2.38 
_cell_measurement_theta_max       28.30 
  
_exptl_crystal_description        prism 
_exptl_crystal_colour             pink 
_exptl_crystal_density_meas       ? 
_exptl_crystal_density_method     ? 
_exptl_crystal_density_diffrn     2.369 
_exptl_crystal_F_000              704 
_exptl_transmission_factor_min    ? 
_exptl_transmission_factor_max    ? 
_exptl_crystal_size_max           0.381 
_exptl_crystal_size_mid           0.090 
_exptl_crystal_size_min           0.078 
_exptl_absorpt_coefficient_mu     7.835 
_shelx_estimated_absorpt_T_min    0.154 
_shelx_estimated_absorpt_T_max    0.580 
_exptl_absorpt_correction_type    multi-scan 
_exptl_absorpt_correction_T_min   0.398 
_exptl_absorpt_correction_T_max   0.746 
_exptl_absorpt_process_details    'Bruker SADABS'
_exptl_absorpt_special_details    ? 
_diffrn_ambient_temperature       100(2) 
_diffrn_radiation_wavelength      0.71073 
_diffrn_radiation_type            MoK\a 
_diffrn_source                    ? 
_diffrn_measurement_device_type   'Bruker APEX-II CCD' 
_diffrn_measurement_method        '\f and \w scans' 
_diffrn_detector_area_resol_mean  ? 
_diffrn_reflns_number             133421 
_diffrn_reflns_av_unetI/netI      0.0071 
_diffrn_reflns_av_R_equivalents   0.0358 
_diffrn_reflns_limit_h_min        -10 
_diffrn_reflns_limit_h_max        10 
_diffrn_reflns_limit_k_min        -10 
_diffrn_reflns_limit_k_max        10 
_diffrn_reflns_limit_l_min        -22 
_diffrn_reflns_limit_l_max        22 
_diffrn_reflns_theta_min          2.740 
_diffrn_reflns_theta_max          27.997 
_diffrn_reflns_theta_full         25.242 
_diffrn_measured_fraction_theta_max   0.999 
_diffrn_measured_fraction_theta_full  0.999 
_diffrn_reflns_Laue_measured_fraction_max    0.999 
_diffrn_reflns_Laue_measured_fraction_full   0.999 
_diffrn_reflns_point_group_measured_fraction_max   0.999 
_diffrn_reflns_point_group_measured_fraction_full  0.999 
_reflns_number_total              2528 
_reflns_number_gt                 2500 
_reflns_threshold_expression      'I > 2\s(I)' 
_reflns_Friedel_coverage          0.000 
_reflns_Friedel_fraction_max      . 
_reflns_Friedel_fraction_full     . 
  
_reflns_special_details 
; 
 Reflections were merged by SHELXL according to the crystal 
 class for the calculation of statistics and refinement. 
  
 _reflns_Friedel_fraction is defined as the number of unique 
 Friedel pairs measured divided by the number that would be 
 possible theoretically, ignoring centric projections and 
 systematic absences. 
; 
  
_computing_data_collection        'Bruker APEX2' 
_computing_cell_refinement        'Bruker SAINT' 
_computing_data_reduction         'Bruker SAINT' 
_computing_structure_solution     'SHELXS-97 (Sheldrick 2008)' 
_computing_structure_refinement 'SHELXL-2014/7 (Sheldrick, 2014)' 
_computing_molecular_graphics     'Bruker SHELXTL' 
_computing_publication_material   'Bruker SHELXTL' 
_refine_special_details           ? 
_refine_ls_structure_factor_coef  Fsqd 
_refine_ls_matrix_type            full 
_refine_ls_weighting_scheme       calc 
_refine_ls_weighting_details 
'w=1/[\s^2^(Fo^2^)+(0.0066P)^2^+1.2034P] where P=(Fo^2^+2Fc^2^)/3' 
_atom_sites_solution_primary      direct 
_atom_sites_solution_secondary    ? 
_atom_sites_solution_hydrogens    mixed 
_refine_ls_hydrogen_treatment     constr 
_refine_ls_extinction_method      'SHELXL-2014/7 (Sheldrick 2014' 
_refine_ls_extinction_coef        0.00185(8) 
_refine_ls_extinction_expression 
 'Fc^*^=kFc[1+0.001xFc^2^\l^3^/sin(2\q)]^-1/4^' 
_refine_ls_number_reflns          2528 
_refine_ls_number_parameters      126 
_refine_ls_number_restraints      0 
_refine_ls_R_factor_all           0.0106 
_refine_ls_R_factor_gt            0.0103 
_refine_ls_wR_factor_ref          0.0235 
_refine_ls_wR_factor_gt           0.0234 
_refine_ls_goodness_of_fit_ref    1.176 
_refine_ls_restrained_S_all       1.176 
_refine_ls_shift/su_max           0.006 
_refine_ls_shift/su_mean          0.000 
  
loop_ 
 _atom_site_label 
 _atom_site_type_symbol 
 _atom_site_fract_x 
 _atom_site_fract_y 
 _atom_site_fract_z 
 _atom_site_U_iso_or_equiv 
 _atom_site_adp_type 
 _atom_site_occupancy 
 _atom_site_site_symmetry_order 
 _atom_site_calc_flag 
 _atom_site_refinement_flags_posn 
 _atom_site_refinement_flags_adp 
 _atom_site_refinement_flags_occupancy 
 _atom_site_disorder_assembly 
 _atom_site_disorder_group 
Ho1 Ho 0.27152(2) 0.45208(2) 0.53996(2) 0.00926(3) Uani 1 1 d . . . . . 
Cl1 Cl 0.37869(5) 0.96112(5) 0.68609(2) 0.01562(8) Uani 1 1 d . . . . . 
O11 O 0.01154(16) 0.32755(18) 0.54057(8) 0.0192(3) Uani 1 1 d . . . . . 
O12 O -0.26735(15) 0.28104(16) 0.52597(7) 0.0143(2) Uani 1 1 d . . . . . 
C11 C -0.1149(2) 0.2340(2) 0.55063(10) 0.0112(3) Uani 1 1 d . . . . . 
C12 C -0.0874(3) 0.0658(3) 0.59107(12) 0.0222(4) Uani 1 1 d . . . . . 
H12A H -0.1098 -0.0264 0.5526 0.069(6) Uiso 1 1 calc R U . . . 
H12B H -0.1666 0.0551 0.6302 0.069(6) Uiso 1 1 calc R U . . . 
H12C H 0.0324 0.0581 0.6169 0.069(6) Uiso 1 1 calc R U . . . 
O21 O 0.54398(15) 0.56239(15) 0.57414(7) 0.0119(2) Uani 1 1 d . . . . . 
O22 O 0.81705(15) 0.62987(16) 0.59354(7) 0.0135(2) Uani 1 1 d . . . . . 
C21 C 0.6791(2) 0.5992(2) 0.62145(10) 0.0109(3) Uani 1 1 d . . . . . 
C22 C 0.6740(2) 0.6046(3) 0.70731(10) 0.0180(4) Uani 1 1 d . . . . . 
H22A H 0.7913 0.5901 0.7351 0.050(5) Uiso 1 1 calc R U . . . 
H22B H 0.5998 0.5125 0.7220 0.050(5) Uiso 1 1 calc R U . . . 
H22C H 0.6275 0.7149 0.7214 0.050(5) Uiso 1 1 calc R U . . . 
O1W O 0.40510(15) 0.18116(16) 0.53755(7) 0.0136(2) Uani 1 1 d . . . . . 
H11W H 0.3999 0.0939 0.5762 0.043(6) Uiso 1 1 d R U . . . 
H12W H 0.5257 0.1910 0.5323 0.043(6) Uiso 1 1 d R U . . . 
O2W O 0.16557(15) 0.64674(16) 0.62508(7) 0.0138(2) Uani 1 1 d . . . . . 
H21W H 0.0436 0.6638 0.6247 0.048(6) Uiso 1 1 d R U . . . 
H22W H 0.2176 0.7541 0.6415 0.048(6) Uiso 1 1 d R U . . . 
O3W O 0.31317(17) 0.34721(17) 0.67068(7) 0.0173(3) Uani 1 1 d . . . . . 
H31W H 0.2534 0.3979 0.7100 0.044(6) Uiso 1 1 d R U . . . 
H32W H 0.3278 0.2295 0.6857 0.044(6) Uiso 1 1 d R U . . . 
  
loop_ 
 _atom_site_aniso_label 
 _atom_site_aniso_U_11 
 _atom_site_aniso_U_22 
 _atom_site_aniso_U_33 
 _atom_site_aniso_U_23 
 _atom_site_aniso_U_13 
 _atom_site_aniso_U_12 
Ho1 0.00704(4) 0.00984(4) 0.01114(4) -0.00040(3) 0.00212(3) -0.00193(3) 
Cl1 0.01809(19) 0.01214(19) 0.01657(19) 0.00104(15) 0.00218(15) -0.00141(15) 
O11 0.0143(6) 0.0228(7) 0.0221(7) -0.0066(6) 0.0081(5) -0.0086(5) 
O12 0.0093(5) 0.0158(6) 0.0180(6) 0.0034(5) 0.0025(4) 0.0009(5) 
C11 0.0107(7) 0.0117(8) 0.0116(7) -0.0022(6) 0.0030(6) -0.0009(6) 
C12 0.0258(10) 0.0179(9) 0.0225(9) 0.0057(8) 0.0019(8) 0.0060(8) 
O21 0.0087(5) 0.0132(6) 0.0135(6) -0.0002(5) 0.0005(4) -0.0012(4) 
O22 0.0089(5) 0.0163(6) 0.0153(6) -0.0017(5) 0.0017(4) -0.0016(5) 
C21 0.0107(7) 0.0082(7) 0.0136(8) 0.0000(6) 0.0008(6) 0.0011(6) 
C22 0.0151(8) 0.0260(10) 0.0124(8) -0.0010(7) 0.0005(6) 0.0021(7) 
O1W 0.0119(5) 0.0136(6) 0.0162(6) 0.0021(5) 0.0047(5) 0.0007(5) 
O2W 0.0104(5) 0.0134(6) 0.0173(6) -0.0027(5) 0.0012(4) 0.0000(5) 
O3W 0.0239(6) 0.0136(6) 0.0160(6) 0.0017(5) 0.0077(5) 0.0042(5) 
  
_geom_special_details 
; 
 All esds (except the esd in the dihedral angle between two l.s. planes) 
 are estimated using the full covariance matrix.  The cell esds are taken 
 into account individually in the estimation of esds in distances, angles 
 and torsion angles; correlations between esds in cell parameters are only 
 used when they are defined by crystal symmetry.  An approximate (isotropic) 
 treatment of cell esds is used for estimating esds involving l.s. planes. 
; 
  
loop_ 
 _geom_bond_atom_site_label_1 
 _geom_bond_atom_site_label_2 
 _geom_bond_distance 
 _geom_bond_site_symmetry_2 
 _geom_bond_publ_flag 
Ho1 O11 2.2515(12) . ? 
Ho1 O21 2.2949(12) . ? 
Ho1 O2W 2.3449(12) . ? 
Ho1 O1W 2.3674(12) . ? 
Ho1 O12 2.3784(13) 3_566 ? 
Ho1 O3W 2.3808(13) . ? 
Ho1 O22 2.4001(12) 3_666 ? 
Ho1 O21 2.5957(12) 3_666 ? 
Ho1 O11 2.9907(14) 3_566 ? 
O11 C11 1.259(2) . ? 
O12 C11 1.262(2) . ? 
C11 C12 1.493(2) . ? 
C12 H12A 0.9800 . ? 
C12 H12B 0.9800 . ? 
C12 H12C 0.9800 . ? 
O21 C21 1.274(2) . ? 
O22 C21 1.261(2) . ? 
C21 C22 1.488(2) . ? 
C22 H22A 0.9800 . ? 
C22 H22B 0.9800 . ? 
C22 H22C 0.9800 . ? 
O1W H11W 0.9600 . ? 
O1W H12W 0.9600 . ? 
O2W H21W 0.9600 . ? 
O2W H22W 0.9600 . ? 
O3W H31W 0.9600 . ? 
O3W H32W 0.9600 . ? 
  
loop_ 
 _geom_angle_atom_site_label_1 
 _geom_angle_atom_site_label_2 
 _geom_angle_atom_site_label_3 
 _geom_angle 
 _geom_angle_site_symmetry_1 
 _geom_angle_site_symmetry_3 
 _geom_angle_publ_flag 
O11 Ho1 O21 164.74(5) . . ? 
O11 Ho1 O2W 83.34(4) . . ? 
O21 Ho1 O2W 89.29(4) . . ? 
O11 Ho1 O1W 90.59(5) . . ? 
O21 Ho1 O1W 87.01(4) . . ? 
O2W Ho1 O1W 141.98(4) . . ? 
O11 Ho1 O12 115.46(5) . 3_566 ? 
O21 Ho1 O12 75.13(4) . 3_566 ? 
O2W Ho1 O12 75.23(4) . 3_566 ? 
O1W Ho1 O12 139.20(4) . 3_566 ? 
O11 Ho1 O3W 81.49(5) . . ? 
O21 Ho1 O3W 83.41(4) . . ? 
O2W Ho1 O3W 69.20(4) . . ? 
O1W Ho1 O3W 72.78(4) . . ? 
O12 Ho1 O3W 138.40(4) 3_566 . ? 
O11 Ho1 O22 75.38(4) . 3_666 ? 
O21 Ho1 O22 118.81(4) . 3_666 ? 
O2W Ho1 O22 134.06(4) . 3_666 ? 
O1W Ho1 O22 79.21(4) . 3_666 ? 
O12 Ho1 O22 78.04(4) 3_566 3_666 ? 
O3W Ho1 O22 143.23(5) . 3_666 ? 
O11 Ho1 O21 125.30(4) . 3_666 ? 
O21 Ho1 O21 67.75(5) . 3_666 ? 
O2W Ho1 O21 141.55(4) . 3_666 ? 
O1W Ho1 O21 69.91(4) . 3_666 ? 
O12 Ho1 O21 69.40(4) 3_566 3_666 ? 
O3W Ho1 O21 133.30(4) . 3_666 ? 
O22 Ho1 O21 51.44(4) 3_666 3_666 ? 
O11 Ho1 O11 69.17(5) . 3_566 ? 
O21 Ho1 O11 120.04(4) . 3_566 ? 
O2W Ho1 O11 67.33(4) . 3_566 ? 
O1W Ho1 O11 143.90(4) . 3_566 ? 
O12 Ho1 O11 46.33(4) 3_566 3_566 ? 
O3W Ho1 O11 129.46(4) . 3_566 ? 
O22 Ho1 O11 67.14(4) 3_666 3_566 ? 
O21 Ho1 O11 97.09(4) 3_666 3_566 ? 
Ho1 Ho1 Ho1 136.374(4) 3_666 3_566 ? 
C11 O11 Ho1 167.25(13) . . ? 
C11 O12 Ho1 111.62(11) . 3_566 ? 
O11 C11 O12 120.21(16) . . ? 
O11 C11 C12 120.87(16) . . ? 
O12 C11 C12 118.93(16) . . ? 
C11 C12 H12A 109.5 . . ? 
C11 C12 H12B 109.5 . . ? 
H12A C12 H12B 109.5 . . ? 
C11 C12 H12C 109.5 . . ? 
H12A C12 H12C 109.5 . . ? 
H12B C12 H12C 109.5 . . ? 
C21 O21 Ho1 154.82(11) . . ? 
C21 O21 Ho1 90.01(10) . 3_666 ? 
Ho1 O21 Ho1 112.25(5) . 3_666 ? 
C21 O22 Ho1 99.62(10) . 3_666 ? 
O22 C21 O21 118.20(15) . . ? 
O22 C21 C22 121.03(15) . . ? 
O21 C21 C22 120.77(15) . . ? 
O22 C21 Ho1 54.92(8) . 3_666 ? 
O21 C21 Ho1 63.85(9) . 3_666 ? 
C22 C21 Ho1 171.20(12) . 3_666 ? 
C21 C22 H22A 109.5 . . ? 
C21 C22 H22B 109.5 . . ? 
H22A C22 H22B 109.5 . . ? 
C21 C22 H22C 109.5 . . ? 
H22A C22 H22C 109.5 . . ? 
H22B C22 H22C 109.5 . . ? 
Ho1 O1W H11W 124.4 . . ? 
Ho1 O1W H12W 111.6 . . ? 
H11W O1W H12W 105.0 . . ? 
Ho1 O2W H21W 121.4 . . ? 
Ho1 O2W H22W 125.8 . . ? 
H21W O2W H22W 105.0 . . ? 
Ho1 O3W H31W 120.7 . . ? 
Ho1 O3W H32W 125.6 . . ? 
H31W O3W H32W 105.0 . . ? 
  
loop_ 
 _geom_hbond_atom_site_label_D 
 _geom_hbond_atom_site_label_H 
 _geom_hbond_atom_site_label_A 
 _geom_hbond_distance_DH 
 _geom_hbond_distance_HA 
 _geom_hbond_distance_DA 
 _geom_hbond_angle_DHA 
 _geom_hbond_site_symmetry_A 
O1W H11W Cl1  0.96 2.19 3.1192(13) 162.9 1_545 
O1W H12W O12  0.96 1.78 2.7053(17) 161.2 1_655 
O2W H21W O22  0.96 1.79 2.7012(16) 156.3 1_455 
O2W H22W Cl1  0.96 2.13 3.0754(13) 168.2 . 
O3W H31W Cl1  0.96 2.24 3.1872(13) 167.7 2_546 
O3W H32W Cl1  0.96 2.14 3.0731(14) 163.7 1_545 
  
_refine_diff_density_max    0.364 
_refine_diff_density_min   -0.436 
_refine_diff_density_rms    0.065 
  
_shelx_res_file 
; 
  
    Ha2019_86_0m_a.res created by SHELXL-2014/7 
  
  
TITL Ha2019_86_0m_a.res in P2(1)/n 
CELL  0.71073   7.7993   7.8345  17.2564   90.000   97.881   90.000 
ZERR    4.000   0.0003   0.0003   0.0007    0.000    0.002    0.000 
LATT 1 
SYMM 1/2-X, 1/2+Y, 1/2-Z 
SFAC C  H  O  Cl Ho 
UNIT 16 48 28 4 4 
LIST 4 ! automatically inserted. Change 6 to 4 for CHECKCIF!! 
OMIT 0 1 1 
OMIT -3 56 
L.S. 10 
ACTA 
rem DFIX 0.96  0.0001 O1w H11w O1w H12w O2w H21w O2w H22w O3w H31w O3w H32w 
rem dfix 1.523  0.0001 H11w H12w H21w H22w H31w H32w 
ACTA 
FREE Ho1 C21_$6 
EQIV $6 1-x, 1-y, 1-z 
BIND Ho1 O11_$7 
EQIV $7 -x, 1-y, 1-z 
BIND Ho1 Ho1_$6 
BIND Ho1 Ho1_$8 
EQIV $8 -x, 1-y, 1-z 
HTAB 
EQIV $1 -x+3/2, y-1/2, -z+3/2 
EQIV $2 x, y-1, z 
HTAB O1W Cl1_$2 
EQIV $3 x+1, y, z 
HTAB O1W O12_$3 
EQIV $4 x-1, y, z 
HTAB O2W O22_$4 
HTAB O2W Cl1 
EQIV $5 -x+1/2, y-1/2, -z+3/2 
HTAB O3W Cl1_$5 
HTAB O3W Cl1_$2 
SIZE 0.078  0.09  0.381 
BOND $H 
FMAP 2 
PLAN 15 
TEMP -173 
WGHT    0.006600    1.203400 
EXTI    0.001852 
FVAR       0.34725   0.06900   0.05046   0.04334   0.04797   0.04434 
HO1   5    0.271518    0.452085    0.539962    11.00000    0.00704    0.00984 = 
         0.01114   -0.00040    0.00212   -0.00193 
CL1   4    0.378690    0.961121    0.686092    11.00000    0.01809    0.01214 = 
         0.01657    0.00104    0.00218   -0.00141 
O11   3    0.011542    0.327549    0.540567    11.00000    0.01433    0.02281 = 
         0.02213   -0.00660    0.00811   -0.00858 
O12   3   -0.267348    0.281044    0.525972    11.00000    0.00928    0.01579 = 
         0.01803    0.00344    0.00249    0.00089 
C11   1   -0.114882    0.234031    0.550634    11.00000    0.01074    0.01174 = 
         0.01163   -0.00216    0.00299   -0.00091 
C12   1   -0.087379    0.065756    0.591067    11.00000    0.02576    0.01789 = 
         0.02254    0.00572    0.00192    0.00598 
AFIX 137 
H12A  2   -0.109816   -0.026415    0.552620    11.00000   21.00000 
H12B  2   -0.166650    0.055141    0.630228    11.00000   21.00000 
H12C  2    0.032378    0.058105    0.616889    11.00000   21.00000 
AFIX   0 
O21   3    0.543977    0.562385    0.574140    11.00000    0.00866    0.01316 = 
         0.01351   -0.00017    0.00052   -0.00119 
O22   3    0.817054    0.629871    0.593542    11.00000    0.00887    0.01628 = 
         0.01533   -0.00167    0.00175   -0.00160 
C21   1    0.679088    0.599162    0.621449    11.00000    0.01066    0.00817 = 
         0.01360   -0.00003    0.00082    0.00112 
C22   1    0.673975    0.604633    0.707310    11.00000    0.01513    0.02598 = 
         0.01241   -0.00100    0.00048    0.00206 
AFIX 137 
H22A  2    0.791331    0.590146    0.735113    11.00000   31.00000 
H22B  2    0.599757    0.512495    0.721979    11.00000   31.00000 
H22C  2    0.627471    0.714861    0.721378    11.00000   31.00000 
AFIX   0 
O1W   3    0.405099    0.181156    0.537554    11.00000    0.01187    0.01364 = 
         0.01620    0.00208    0.00468    0.00068 
AFIX   3 
H11W  2    0.399855    0.093897    0.576215    11.00000   41.00000 
H12W  2    0.525660    0.191039    0.532320    11.00000   41.00000 
AFIX   0 
O2W   3    0.165570    0.646737    0.625080    11.00000    0.01039    0.01337 = 
         0.01734   -0.00268    0.00116   -0.00002 
AFIX   3 
H21W  2    0.043572    0.663762    0.624729    11.00000   51.00000 
H22W  2    0.217593    0.754131    0.641537    11.00000   51.00000 
AFIX   0 
O3W   3    0.313167    0.347208    0.670685    11.00000    0.02385    0.01358 = 
         0.01601    0.00168    0.00773    0.00419 
AFIX   3 
H31W  2    0.253415    0.397949    0.709977    11.00000   61.00000 
H32W  2    0.327773    0.229546    0.685678    11.00000   61.00000 
AFIX   0 
HKLF 4 
  
REM  Ha2019_86_0m_a.res in P2(1)/n 
REM R1 =  0.0103 for    2500 Fo > 4sig(Fo)  and  0.0106 for all    2528 data 
REM    126 parameters refined using      0 restraints 
  
END 
  
WGHT      0.0066      1.2034 
  
REM Instructions for potential hydrogen bonds 
HTAB C12 Cl1_$2 
HTAB C22 Cl1_$1 
HTAB C22 O3W 
HTAB C22 Cl1 
HTAB O1W Cl1_$2 
HTAB O1W O12_$3 
HTAB O2W O22_$4 
HTAB O2W Cl1 
HTAB O3W Cl1_$5 
HTAB O3W Cl1_$2 
  
REM Highest difference peak  0.364,  deepest hole -0.436,  1-sigma level  0.065 
Q1    1   0.1567  0.4543  0.5396  11.00000  0.05    0.36 
Q2    1   0.6808  0.6081  0.6688  11.00000  0.05    0.36 
Q3    1   0.2762  0.5010  0.5813  11.00000  0.05    0.36 
Q4    1   0.3877  0.4457  0.5410  11.00000  0.05    0.34 
Q5    1   0.2664  0.3832  0.5791  11.00000  0.05    0.32 
Q6    1   0.7864  0.6276  0.5524  11.00000  0.05    0.32 
Q7    1   0.2405  0.3924  0.4973  11.00000  0.05    0.31 
Q8    1  -0.1091  0.1394  0.5688  11.00000  0.05    0.30 
Q9    1   0.2161  0.7134  0.6328  11.00000  0.05    0.30 
Q10   1   0.7498  0.6449  0.7280  11.00000  0.05    0.30 
Q11   1   0.4820  0.1892  0.5343  11.00000  0.05    0.27 
Q12   1   0.0839  0.6499  0.6162  11.00000  0.05    0.26 
Q13   1   0.2537  0.3732  0.6900  11.00000  0.05    0.26 
Q14   1   0.4000  0.1367  0.5677  11.00000  0.05    0.26 
Q15   1   0.2764  0.5084  0.4953  11.00000  0.05    0.25 
; 
_shelx_res_checksum   39995 
  
_shelx_hkl_file 
; 
   1   0   0    6.10    1.20 
   1   0   0   11.40    1.70 
   1   0   0    9.00    1.60 
   1   0   0    7.60    1.20 
   1   0   0    0.30    0.50 
   1   0   0    4.80    0.90 
   1   0   0    5.00    1.10 
   1   0   0    2.10    0.80 
   1   0   0    6.60    1.30 
   1   0   0   13.50    1.80 
   1   0   0    6.80    1.10 
   1   0   0    3.20    0.80 
   1   0   0    9.10    1.50 
   1   0   0    3.70    0.90 
   1   0   0    6.80    1.30 
   1   0   0    7.50    1.40 
   1   0   0    7.10    1.40 
   1   0   0    8.60    1.20 
  -1   0   0    3.40    1.00 
  -1   0   0   10.50    1.60 
  -1   0   0    0.90    0.60 
  -1   0   0    2.10    0.70 
  -1   0   0    0.60    0.60 
  -1   0   0    3.70    0.90 
  -1   0   0    0.60    0.50 
  -1   0   0    0.10    0.60 
  -1   0   0    0.40    0.50 
  -1   0   0    1.10    0.50 
  -1   0   0    0.60    0.60 
  -1   0   0    5.60    1.20 
  -1   0   0    3.20    1.00 
   1   0   0    0.00    0.40 
  -1   0   0    1.40    0.60 
   1   0   0    5.90    1.00 
   1   0   0    0.10    0.40 
   1   0   0    7.60    1.00 
   1   0   0    2.20    0.70 
   2   0   0 7390.76  208.98 
   2   0   0 7209.98  207.48 
   2   0   0 6912.31  208.28 
   2   0   0 7162.48  209.08 
   2   0   0 7368.26  206.98 
   2   0   0 7376.56  207.28 
   2   0   0 7050.39  208.38 
   2   0   0 7192.78  206.48 
   2   0   0 7282.67  208.38 
   2   0   0 7405.56  207.88 
   2   0   0 7265.97  208.48 
  -2   0   0 6911.11  207.98 
  -2   0   0 7043.70  206.68 
  -2   0   0 6815.02  207.38 
  -2   0   0 7164.78  208.48 
  -2   0   0 7030.20  208.08 
  -2   0   0 6441.86  207.58 
  -2   0   0 7251.37  208.28 
  -2   0   0 7076.89  207.08 
  -2   0   0 7272.67  208.68 
  -2   0   0 7346.17  208.38 
  -2   0   0 7159.78  207.38 
  -2   0   0 6943.71  207.38 
  -2   0   0 7077.79  206.98 
  -2   0   0 6905.01  208.48 
  -2   0   0 7313.17  208.38 
  -2   0   0 7138.59  206.98 
  -2   0   0 6964.10  208.28 
  -2   0   0 7106.29  208.38 
  -2   0   0 7154.58  207.88 
  -2   0   0 6758.02  208.28 
  -2   0   0 7198.28  208.88 
  -2   0   0 7146.08  208.38 
  -2   0   0 7283.17  208.58 
  -2   0   0 6698.83  207.48 
   2   0   0 7296.67  206.48 
   2   0   0 7285.67  208.88 
   2   0   0 7640.14  207.48 
   2   0   0 7229.68  208.08 
   2   0   0 7392.46  206.78 
   2   0   0 7066.99  207.58 
   2   0   0 7361.66  207.08 
   2   0   0 7031.30  208.38 
   2   0   0 7112.19  208.18 
   2   0   0 6954.20  207.88 
   2   0   0 7124.79  208.38 
   2   0   0 7187.78  208.98 
   2   0   0 7180.08  208.48 
   2   0   0 6892.61  207.98 
   2   0   0 7054.19  206.48 
   2   0   0 7316.57  207.58 
  -2   0   0 7101.89  208.38 
  -2   0   0 6713.53  206.98 
  -2   0   0 7070.89  207.08 
   2   0   0 7088.09  208.28 
   2   0   0 7621.94  208.98 
  -2   0   0 7231.98  206.68 
  -3   0   0    3.40    1.20 
  -3   0   0   -0.40    1.50 
  -3   0   0   11.10    3.00 
  -3   0   0    2.10    1.50 
  -3   0   0    1.70    1.90 
   3   0   0    2.70    2.50 
   3   0   0    3.20    2.20 
   3   0   0    5.90    2.20 
   3   0   0    0.10    1.20 
   3   0   0    3.10    2.00 
   3   0   0   -0.10    1.40 
   3   0   0    3.50    2.20 
   3   0   0    1.40    2.20 
   3   0   0    0.50    1.40 
   3   0   0    1.80    1.70 
   3   0   0    3.50    2.30 
   3   0   0    5.00    1.80 
   3   0   0    3.00    1.90 
   3   0   0    3.40    2.40 
   3   0   0    4.00    2.20 
  -3   0   0    3.00    1.60 
  -3   0   0    2.40    1.90 
  -3   0   0    5.80    2.50 
  -3   0   0    1.70    1.90 
  -3   0   0    1.00    1.50 
  -3   0   0   12.70    3.50 
  -3   0   0    2.00    2.00 
  -3   0   0    1.70    1.80 
  -3   0   0    6.70    2.30 
   3   0   0    2.70    1.40 
   3   0   0    2.10    1.20 
   3   0   0    5.70    2.00 
   3   0   0    3.90    1.90 
  -3   0   0    2.20    2.10 
   3   0   0    0.00    1.70 
   3   0   0    3.60    2.10 
   3   0   0   -0.80    1.80 
   3   0   0    1.20    1.80 
  -3   0   0    2.00    1.60 
  -3   0   0    3.40    1.50 
  -3   0   0    0.50    1.50 
  -3   0   0    3.20    1.70 
  -3   0   0    4.70    2.20 
  -3   0   0    0.40    1.30 
  -3   0   0   10.70    2.70 
  -3   0   0   13.60    3.50 
  -3   0   0    1.70    2.00 
  -3   0   0    0.10    1.30 
  -3   0   0    4.20    2.20 
   3   0   0    1.50    1.60 
  -3   0   0    4.00    2.00 
  -3   0   0    0.80    1.50 
  -3   0   0    1.80    1.80 
  -3   0   0    2.40    1.40 
   4   0   0 1864.01   65.49 
  -4   0   0 2014.60   63.09 
   4   0   0 2034.30   64.09 
   4   0   0 1892.81   66.09 
  -4   0   0 2002.20   65.59 
  -4   0   0 2027.90   66.89 
  -4   0   0 2034.10   66.59 
  -4   0   0 2021.90   66.69 
  -4   0   0 1959.60   61.19 
  -4   0   0 2002.70   63.99 
   4   0   0 1974.20   67.49 
   4   0   0 2033.70   64.39 
   4   0   0 2002.80   66.69 
  -4   0   0 1924.41   66.59 
   4   0   0 1912.71   66.09 
  -4   0   0 1989.10   65.09 
  -4   0   0 1925.01   65.49 
   4   0   0 1989.10   60.79 
   4   0   0 2007.30   63.19 
  -4   0   0 1954.50   66.09 
  -4   0   0 2030.70   63.39 
  -4   0   0 1983.90   63.69 
  -4   0   0 2038.40   66.99 
  -4   0   0 1960.10   66.49 
  -4   0   0 1966.80   63.79 
   4   0   0 1923.51   62.59 
   4   0   0 1922.51   64.49 
   4   0   0 1963.40   64.39 
   4   0   0 2011.30   66.59 
  -4   0   0 1925.11   62.89 
  -4   0   0 1943.41   66.39 
  -4   0   0 2035.50   62.29 
  -4   0   0 1996.10   60.29 
  -4   0   0 2005.60   63.59 
  -4   0   0 2052.19   66.89 
  -4   0   0 1922.91   62.69 
  -4   0   0 1996.60   59.49 
  -5   0   0   -1.00    1.20 
  -5   0   0    2.90    2.70 
  -5   0   0    4.70    3.40 
  -5   0   0    0.10    1.10 
  -5   0   0    4.40    3.20 
  -5   0   0    0.40    2.30 
   5   0   0    4.10    2.40 
   5   0   0    2.20    2.40 
   5   0   0    2.80    2.60 
   5   0   0   -0.80    2.60 
  -5   0   0    1.60    2.10 
  -5   0   0   -0.40    1.90 
  -5   0   0    1.30    2.50 
  -5   0   0   -1.90    1.90 
  -5   0   0    9.20    4.30 
  -5   0   0    1.40    2.10 
  -5   0   0    0.00    2.40 
  -5   0   0    0.30    1.90 
   5   0   0    1.60    3.20 
   5   0   0    1.20    3.10 
   5   0   0    2.80    3.00 
   5   0   0    0.20    2.00 
   5   0   0    2.80    2.90 
   5   0   0    5.30    3.50 
  -5   0   0    1.40    2.80 
  -5   0   0    0.50    1.70 
  -5   0   0    3.90    3.20 
  -5   0   0   -1.60    1.90 
  -5   0   0    2.50    2.80 
   5   0   0    2.10    2.10 
  -5   0   0    0.80    2.50 
   5   0   0    0.80    1.80 
  -5   0   0   -1.10    2.20 
  -5   0   0   -0.10    1.90 
  -5   0   0    3.30    2.60 
   5   0   0    2.60    2.90 
  -6   0   0 1047.90   44.20 
   6   0   0 1056.69   40.90 
   6   0   0 1118.59   45.70 
   6   0   0 1050.69   43.70 
   6   0   0 1077.59   41.60 
  -6   0   0 1016.40   39.70 
  -6   0   0 1058.59   39.70 
  -6   0   0 1049.00   44.40 
  -6   0   0 1042.90   36.60 
  -6   0   0 1072.49   40.20 
  -6   0   0 1089.19   45.50 
  -6   0   0 1066.89   44.90 
  -6   0   0 1056.69   35.40 
  -6   0   0 1077.39   41.10 
  -6   0   0  984.30   42.40 
  -6   0   0 1082.39   33.10 
  -6   0   0 1048.20   33.30 
  -6   0   0 1013.30   43.90 
  -6   0   0 1038.90   43.00 
  -6   0   0 1068.59   45.20 
  -6   0   0 1038.90   42.20 
  -6   0   0  949.11   43.50 
   6   0   0 1059.99   39.80 
  -6   0   0 1047.70   40.90 
   6   0   0 1014.20   43.90 
  -6   0   0 1039.80   42.50 
  -6   0   0 1114.39   43.90 
   6   0   0 1027.60   44.00 
  -6   0   0 1028.50   44.70 
  -6   0   0 1056.59   38.40 
   6   0   0 1133.09   45.00 
   6   0   0 1137.89   46.70 
   6   0   0 1111.19   41.60 
   6   0   0 1080.79   42.80 
   6   0   0 1048.90   42.10 
   7   0   0    4.30    4.90 
  -7   0   0   -1.70    3.70 
  -7   0   0   -5.00    2.50 
   7   0   0    2.30    4.30 
  -7   0   0   -2.60    2.30 
  -7   0   0    2.10    2.60 
   7   0   0   -2.20    3.50 
   7   0   0    6.90    4.60 
   7   0   0    5.10    5.00 
   7   0   0    5.70    4.60 
   7   0   0    7.50    4.80 
   7   0   0    1.70    3.60 
  -7   0   0   -1.20    3.20 
  -7   0   0    3.20    4.20 
  -7   0   0    2.90    2.50 
  -7   0   0    2.60    3.10 
  -7   0   0    4.30    3.50 
  -7   0   0   -3.50    2.80 
  -7   0   0   -2.20    3.10 
  -7   0   0    2.70    3.90 
  -7   0   0    3.30    4.30 
  -7   0   0   -4.50    2.80 
   7   0   0   -1.80    2.50 
   7   0   0    7.00    4.40 
   7   0   0    1.60    3.20 
   7   0   0   -2.70    3.60 
  -7   0   0    0.00    3.00 
   7   0   0    2.00    3.70 
  -7   0   0   -2.70    2.50 
  -7   0   0    1.20    3.00 
  -7   0   0    2.70    4.20 
  -7   0   0   -2.30    3.30 
  -7   0   0    0.40    4.10 
  -8   0   0  477.75   30.30 
  -8   0   0  512.35   26.50 
   8   0   0  500.05   32.30 
  -8   0   0  485.85   25.80 
  -8   0   0  476.05   31.00 
  -8   0   0  502.95   29.80 
  -8   0   0  529.15   24.80 
  -8   0   0  512.45   27.00 
  -8   0   0  480.05   26.90 
  -8   0   0  514.95   29.40 
  -8   0   0  513.85   28.90 
  -8   0   0  492.55   31.10 
   8   0   0  510.85   26.10 
   8   0   0  454.65   26.60 
   8   0   0  489.15   30.70 
   8   0   0  479.25   29.60 
   8   0   0  548.85   29.30 
   8   0   0  531.35   28.40 
  -8   0   0  505.75   31.10 
  -8   0   0  489.35   30.90 
  -8   0   0  501.15   31.60 
   8   0   0  488.65   30.00 
  -8   0   0  528.05   30.30 
  -8   0   0  475.25   30.40 
   8   0   0  559.34   32.10 
  -8   0   0  483.15   31.30 
   8   0   0  585.74   29.20 
   8   0   0  517.75   29.20 
   8   0   0  532.35   32.00 
  -8   0   0  475.75   25.40 
   8   0   0  544.35   31.90 
  -9   0   0    3.00    6.00 
   9   0   0   -5.20    4.10 
   9   0   0   -1.00    4.20 
   9   0   0    5.70    5.70 
  -9   0   0    4.80    6.40 
   9   0   0    2.60    5.70 
  -9   0   0   -2.20    3.80 
  -9   0   0    6.00    6.80 
   9   0   0    6.10    5.00 
   9   0   0    4.00    5.00 
   9   0   0   10.60    6.50 
   9   0   0    1.20    6.00 
  -9   0   0    8.50    6.70 
   9   0   0   -1.20    5.00 
   9   0   0    3.40    7.00 
  -9   0   0   -2.00    4.10 
  -9   0   0    0.60    4.80 
  -9   0   0   -1.70    5.20 
  -9   0   0    8.10    5.70 
  -9   0   0   -0.30    3.90 
  -9   0   0    9.80    6.60 
   9   0   0   -0.90    3.90 
   9   0   0    4.70    5.40 
   9   0   0    2.10    5.90 
  -9   0   0    5.20    5.50 
  -9   0   0    2.90    5.70 
  -9   0   0   -2.90    4.10 
 -10   0   0   19.00    9.80 
 -10   0   0   20.70    8.30 
 -10   0   0   11.60    5.80 
  10   0   0   21.50   10.40 
  10   0   0   16.20    8.00 
  10   0   0   23.50    9.60 
 -10   0   0   13.60    9.10 
 -10   0   0   22.40   10.90 
  10   0   0    5.30    6.90 
  10   0   0   23.70    9.90 
 -10   0   0    9.50    8.00 
  10   0   0   13.40    8.10 
  10   0   0    5.60    7.40 
  10   0   0   19.10   10.20 
  10   0   0    8.20    6.90 
  10   0   0   15.50    7.80 
 -10   0   0   13.70    8.00 
 -10   0   0    4.50    6.90 
  10   0   0   12.60    8.50 
  10   0   0   15.80    7.50 
 -10   0   0   17.90    7.80 
 -10   0   0   23.40   10.30 
 -10   0   0   19.20   10.00 
  10   0   0    5.60    7.10 
 -10   0   0   10.70    8.60 
  10   0   0    8.30    7.60 
   0  -1   0    4.60    1.50 
   0  -1   0    5.00    0.70 
   0  -1   0    4.50    1.10 
   0  -1   0    2.70    1.20 
   0  -1   0    1.70    0.80 
   0  -1   0    7.50    1.30 
   0  -1   0   12.70    2.20 
   0  -1   0    6.10    0.80 
   0  -1   0    3.10    1.00 
   0  -1   0    5.30    1.40 
   0  -1   0    8.70    2.10 
   0  -1   0    5.00    1.30 
   0  -1   0    9.80    2.00 
   0  -1   0    7.80    0.60 
   0  -1   0    7.20    1.10 
   0  -1   0    6.60    1.10 
   0  -1   0    5.30    1.60 
   0  -1   0    4.50    0.50 
   0  -1   0    3.50    1.10 
   0  -1   0    1.00    0.70 
   0   1   0    2.10    0.80 
  -1  -1   0   46.60    3.40 
  -1  -1   0   36.10    3.70 
  -1  -1   0   52.89    3.50 
   1  -1   0   48.70    3.90 
  -1  -1   0   44.10    3.60 
   1  -1   0   49.70    3.20 
  -1  -1   0   47.20    3.50 
  -1  -1   0   43.30    2.90 
  -1  -1   0   42.40    2.40 
  -1  -1   0   40.90    3.10 
  -1  -1   0   49.99    3.80 
   1  -1   0   46.70    2.80 
   1  -1   0   41.20    2.80 
  -1  -1   0   47.60    3.00 
  -1  -1   0   39.40    3.20 
   1  -1   0   42.90    3.20 
  -1  -1   0   34.10    3.40 
   1  -1   0   45.90    3.60 
   1  -1   0   47.80    3.30 
  -1  -1   0   41.50    3.00 
  -1  -1   0   45.30    2.90 
   1  -1   0   42.50    3.00 
   1  -1   0   40.70    4.00 
   1  -1   0   44.10    2.90 
   1  -1   0   44.70    3.40 
   1  -1   0   40.00    2.50 
   1  -1   0   41.30    4.10 
  -1  -1   0   45.30    3.10 
  -1  -1   0   33.00    3.40 
  -1  -1   0   38.20    3.20 
  -1  -1   0   42.40    3.30 
  -1  -1   0   44.10    3.20 
  -1  -1   0   37.40    3.90 
   1  -1   0   50.79    3.40 
   1  -1   0   47.00    3.00 
   1  -1   0   39.20    2.70 
   1  -1   0   47.40    2.40 
   1  -1   0   42.60    3.60 
   1  -1   0   40.70    3.40 
   1  -1   0   40.50    1.90 
   1  -1   0   45.60    3.70 
   1  -1   0   40.20    2.90 
  -1  -1   0   37.30    3.00 
   1  -1   0   43.40    3.10 
   1  -1   0   42.90    3.40 
   1  -1   0   42.90    4.40 
   1  -1   0   38.40    3.20 
  -1  -1   0   43.80    4.30 
  -1  -1   0   43.60    3.50 
   1  -1   0   42.20    2.40 
  -1  -1   0   37.80    3.10 
  -1  -1   0   42.90    3.50 
   1  -1   0   44.40    2.60 
   1  -1   0   47.50    3.50 
  -1  -1   0   46.60    3.00 
  -1  -1   0   45.40    3.30 
  -1  -1   0   39.10    2.70 
  -1  -1   0   42.70    2.70 
  -1  -1   0   35.50    3.70 
   1   1   0   42.00    3.20 
   1   1   0   34.90    3.00 
  -1   1   0   34.10    3.90 
  -1   1   0   46.20    3.30 
   1   1   0   25.30    3.50 
  -1   1   0   35.80    2.90 
  -1   1   0   42.00    3.30 
  -1   1   0   35.00    3.60 
   1   1   0   35.60    2.60 
  -1   1   0   48.30    3.80 
  -1   1   0   38.70    2.60 
  -1   1   0   43.70    3.40 
  -1   1   0   48.70    3.30 
   1   1   0   34.70    3.80 
   1   1   0   34.60    2.70 
   1   1   0   45.40    3.60 
   1   1   0   41.20    2.90 
  -1   1   0   31.00    3.60 
  -1   1   0   38.00    3.00 
   1   1   0   42.00    3.20 
   1   1   0   48.00    3.70 
   1   1   0   45.20    3.30 
   1   1   0   31.00    3.60 
   1   1   0   46.90    3.50 
   1   1   0   39.80    3.30 
   1   1   0   35.60    2.90 
   1   1   0   44.40    3.40 
   1   1   0   34.60    3.50 
   1   1   0   53.19    3.70 
   1   1   0   43.80    2.90 
   1   1   0   41.60    3.50 
   1   1   0   44.70    3.60 
   1   1   0   35.80    3.50 
   1   1   0   32.70    2.20 
   1   1   0   41.50    3.40 
   2  -1   0  983.60   31.60 
   2  -1   0  973.50   31.40 
  -2  -1   0  927.01   33.50 
   2  -1   0 1022.30   33.90 
   2  -1   0  967.60   30.10 
  -2  -1   0  998.40   32.50 
   2  -1   0  978.20   32.20 
  -2  -1   0  971.20   33.30 
  -2  -1   0  970.70   32.50 
  -2  -1   0  955.90   33.20 
   2  -1   0  960.70   33.10 
  -2  -1   0  980.50   32.60 
   2  -1   0  934.81   31.30 
   2  -1   0  967.00   29.30 
   2  -1   0  981.60   32.50 
   2  -1   0  987.90   32.90 
   2  -1   0  999.70   31.00 
   2  -1   0  943.21   33.40 
   2  -1   0  997.30   31.70 
   2  -1   0  982.00   33.10 
  -2  -1   0  980.90   31.50 
  -2  -1   0  978.10   33.00 
   2  -1   0 1005.80   33.70 
   2  -1   0 1010.90   32.80 
  -2  -1   0  958.70   32.80 
  -2  -1   0 1003.90   32.50 
  -2  -1   0 1009.80   33.30 
   2  -1   0  988.90   32.00 
   2  -1   0  982.30   32.70 
  -2  -1   0  985.70   32.80 
  -2  -1   0  977.40   32.00 
  -2  -1   0  979.60   32.50 
   2  -1   0  969.30   33.30 
  -2  -1   0  975.70   33.10 
  -2  -1   0  974.30   32.30 
  -2  -1   0  993.20   32.60 
  -2  -1   0  927.01   33.00 
  -2  -1   0 1009.40   32.80 
  -2  -1   0  972.00   32.10 
   2  -1   0  968.20   31.60 
   2  -1   0  992.30   32.90 
   2  -1   0  979.90   32.40 
   2  -1   0  943.51   32.70 
  -2  -1   0  971.20   33.10 
  -2  -1   0 1057.09   33.80 
  -2  -1   0  969.80   31.50 
  -2  -1   0  941.51   32.40 
  -2  -1   0  977.80   32.30 
   2  -1   0 1005.30   32.50 
   2  -1   0  967.90   31.20 
  -2  -1   0  958.60   31.00 
   2  -1   0  992.70   32.70 
   2  -1   0  966.30   31.80 
   2  -1   0 1002.30   32.40 
   2  -1   0  970.00   32.50 
   2  -1   0  990.70   33.30 
  -2  -1   0  953.70   32.00 
  -2  -1   0  925.01   32.50 
   2  -1   0  934.21   31.80 
   2  -1   0 1039.40   33.40 
   2  -1   0  967.90   32.40 
   2  -1   0  978.70   31.00 
  -2   1   0 1013.80   33.70 
  -2   1   0  999.00   33.70 
  -2   1   0  990.10   31.70 
  -2   1   0  958.40   32.50 
   2   1   0  949.21   33.30 
  -2   1   0  963.50   31.30 
  -2   1   0  941.21   32.80 
   2   1   0  992.50   32.70 
  -2   1   0  975.40   33.50 
   2   1   0  999.60   32.00 
  -2   1   0 1015.50   32.70 
   2   1   0  987.30   33.40 
   2   1   0  996.50   32.30 
  -2   1   0  944.01   32.40 
  -2   1   0  991.90   33.50 
   2   1   0 1004.00   32.20 
   2   1   0  968.60   32.60 
  -2   1   0  965.20   31.00 
   2   1   0  953.00   31.50 
   2   1   0 1009.50   31.30 
   2   1   0 1036.40   33.60 
   2   1   0  982.00   33.50 
  -2   1   0  974.00   30.10 
   2   1   0  995.00   32.70 
   2   1   0  982.60   33.40 
  -2   1   0  972.60   31.70 
  -2   1   0  987.50   32.70 
  -2   1   0  963.90   31.50 
   2   1   0  953.10   32.90 
   2   1   0  950.90   33.40 
   2   1   0 1001.10   33.50 
   2   1   0  993.20   33.30 
   2   1   0  971.90   32.50 
  -2   1   0  976.80   29.40 
  -2   1   0  964.10   31.80 
  -2   1   0  976.10   33.00 
   2   1   0 1001.80   32.10 
   2   1   0 1012.40   33.20 
   2   1   0  941.61   32.30 
   2   1   0  988.30   32.20 
   2   1   0  991.10   32.70 
  -2   1   0  974.90   32.50 
  -2   1   0  951.20   32.00 
   2   1   0  983.50   32.50 
   2   1   0  962.30   32.50 
  -2   1   0  954.50   30.90 
  -2   1   0  936.21   31.90 
  -2   1   0  956.30   33.30 
   2   1   0  993.10   32.60 
  -2   1   0  990.30   33.30 
  -2   1   0  952.60   32.70 
  -2   1   0  972.90   32.50 
  -2   1   0  943.01   29.90 
   2   1   0  972.30   32.10 
  -2   1   0  993.00   32.20 
   3  -1   0  360.26   14.00 
  -3  -1   0  375.16   17.40 
  -3  -1   0  362.46   16.20 
  -3  -1   0  360.06   15.60 
   3  -1   0  373.16   15.30 
   3  -1   0  366.96   14.40 
  -3  -1   0  370.46   15.80 
  -3  -1   0  354.66   16.20 
   3  -1   0  358.96   13.30 
   3  -1   0  392.86   16.50 
   3  -1   0  347.37   14.90 
  -3  -1   0  382.46   19.40 
   3  -1   0  358.26   17.00 
  -3  -1   0  358.96   16.00 
   3  -1   0  376.76   14.80 
  -3  -1   0  369.46   17.20 
  -3  -1   0  365.66   17.10 
  -3  -1   0  367.96   15.30 
  -3  -1   0  381.66   16.80 
  -3  -1   0  359.66   16.10 
  -3  -1   0  331.77   16.60 
  -3  -1   0  377.66   16.80 
   3  -1   0  397.56   18.60 
   3  -1   0  334.97   15.40 
   3  -1   0  374.06   15.20 
   3  -1   0  369.36   17.70 
   3  -1   0  346.37   16.70 
   3  -1   0  389.36   16.80 
   3  -1   0  370.66   15.60 
  -3  -1   0  370.16   16.00 
  -3  -1   0  352.96   15.40 
  -3  -1   0  346.87   14.50 
  -3  -1   0  337.97   15.70 
  -3  -1   0  411.86   17.20 
   3  -1   0  390.06   16.50 
   3  -1   0  372.96   16.40 
   3  -1   0  378.26   13.00 
   3  -1   0  351.46   16.40 
   3  -1   0  360.86   16.70 
   3  -1   0  353.66   17.20 
   3  -1   0  374.86   17.50 
  -3  -1   0  361.76   16.70 
  -3  -1   0  351.06   14.50 
  -3  -1   0  330.87   15.80 
   3  -1   0  363.16   17.20 
  -3  -1   0  362.06   15.80 
  -3  -1   0  385.36   15.80 
   3  -1   0  342.97   16.40 
  -3  -1   0  355.36   16.60 
  -3  -1   0  363.86   17.50 
   3  -1   0  367.96   17.30 
   3  -1   0  383.66   15.30 
  -3  -1   0  378.86   17.70 
  -3   1   0  375.06   15.60 
   3   1   0  380.66   16.70 
  -3   1   0  379.96   13.10 
   3   1   0  375.06   16.10 
  -3   1   0  386.36   15.30 
   3   1   0  382.96   17.50 
   3   1   0  402.26   17.80 
   3   1   0  392.36   16.60 
  -3   1   0  380.26   16.50 
   3   1   0  372.96   17.30 
  -3   1   0  360.96   14.90 
   3   1   0  390.46   17.10 
   3   1   0  373.66   17.10 
   3   1   0  348.07   16.90 
  -3   1   0  372.66   17.40 
  -3   1   0  373.36   16.70 
   3   1   0  365.26   17.60 
   3   1   0  358.96   17.10 
   3   1   0  392.76   15.20 
   3   1   0  348.77   16.90 
   3   1   0  338.07   16.30 
   3   1   0  361.36   15.80 
   3   1   0  365.96   16.90 
   3   1   0  355.46   15.90 
  -3   1   0  377.56   16.00 
  -3   1   0  363.16   15.50 
  -3   1   0  374.16   16.50 
  -3   1   0  362.96   17.30 
  -3   1   0  358.36   15.70 
  -3   1   0  386.96   15.50 
  -3   1   0  364.56   16.80 
  -3   1   0  385.36   17.10 
  -3   1   0  345.47   13.40 
  -3   1   0  414.86   16.70 
  -3   1   0  367.46   14.10 
  -3   1   0  355.36   17.00 
   3   1   0  390.36   17.50 
  -3   1   0  374.16   17.20 
  -3   1   0  393.26   16.50 
   3   1   0  360.46   17.30 
   3   1   0  373.06   15.70 
  -3   1   0  355.36   16.00 
  -3   1   0  358.26   16.90 
   3   1   0  357.06   17.20 
  -3   1   0  366.26   16.50 
  -3   1   0  371.16   14.20 
  -3   1   0  367.26   14.90 
  -3   1   0  368.36   17.50 
  -4  -1   0  124.59   10.20 
   4  -1   0  119.29    9.70 
  -4  -1   0  136.49   10.70 
  -4  -1   0  117.39    8.90 
  -4  -1   0  113.69   10.00 
   4  -1   0  125.59    9.20 
  -4  -1   0  104.49   10.10 
   4  -1   0  126.19    6.90 
   4  -1   0  133.79    8.80 
   4  -1   0  124.79    9.00 
  -4  -1   0  112.59    8.20 
   4  -1   0  117.29    9.00 
   4  -1   0  113.39    9.30 
  -4  -1   0  120.69    9.20 
  -4  -1   0  129.79    9.80 
  -4  -1   0  107.69   10.70 
   4  -1   0  117.29    6.90 
  -4  -1   0  134.69   10.40 
  -4  -1   0  110.09    7.40 
   4  -1   0  124.39   10.10 
   4  -1   0  128.09    8.10 
   4  -1   0  131.99    9.90 
  -4  -1   0  134.99    9.30 
  -4  -1   0  117.29    8.10 
   4  -1   0  114.89    9.00 
   4  -1   0  102.69   10.70 
   4  -1   0  107.39   11.50 
   4  -1   0  113.09    8.10 
  -4  -1   0  120.49    8.80 
  -4  -1   0  120.49   11.90 
  -4  -1   0  136.69    9.10 
  -4  -1   0  119.39    9.50 
  -4  -1   0  119.19    9.80 
   4  -1   0  124.79    7.70 
  -4  -1   0   97.79   10.80 
  -4  -1   0  129.59    7.80 
  -4  -1   0  121.29    9.80 
   4  -1   0  136.19    9.50 
   4   1   0  116.49    8.80 
  -4   1   0  123.49    8.20 
   4   1   0  125.79    8.40 
  -4   1   0  117.69   10.10 
  -4   1   0  115.89    7.50 
  -4   1   0  109.89    9.70 
  -4   1   0   96.99   10.30 
  -4   1   0  120.69    7.20 
   4   1   0  130.99   10.10 
  -4   1   0  119.49    9.80 
  -4   1   0  127.29    6.70 
  -4   1   0  131.09   10.00 
  -4   1   0  142.99    9.30 
  -4   1   0  120.69    8.50 
  -4   1   0  125.09    9.90 
  -4   1   0  135.69    9.50 
  -4   1   0  108.59   10.70 
   4   1   0  122.09    8.90 
   4   1   0  136.49    9.50 
  -4   1   0  118.09    8.00 
  -4   1   0  103.69   10.70 
  -4   1   0  118.99    7.10 
  -4   1   0   90.89    9.60 
  -4   1   0  107.69    8.80 
  -4   1   0  106.99    8.90 
   4   1   0   93.49   10.20 
   4   1   0  105.39   11.00 
   4   1   0  111.39   11.20 
  -4   1   0  121.99    9.50 
  -4   1   0  120.89    8.40 
   4   1   0  138.49   10.60 
  -4   1   0  123.59    8.60 
   4   1   0  119.29    9.70 
   4   1   0  114.99   10.00 
   4   1   0  114.49    8.90 
  -4   1   0  111.29    7.80 
  -4   1   0  108.39    5.90 
   5  -1   0 1844.62   67.39 
   5  -1   0 1950.60   67.39 
   5  -1   0 2022.50   63.39 
   5  -1   0 2033.00   67.09 
  -5  -1   0 2024.80   67.29 
  -5  -1   0 2105.09   68.09 
  -5  -1   0 2045.90   70.99 
  -5  -1   0 2012.20   66.49 
   5  -1   0 2067.69   69.49 
  -5  -1   0 2007.40   71.19 
   5  -1   0 2017.20   66.49 
  -5  -1   0 2125.59   65.49 
  -5  -1   0 2039.90   69.89 
  -5  -1   0 1963.90   68.39 
  -5  -1   0 2081.49   70.79 
  -5  -1   0 1995.60   69.79 
  -5  -1   0 2077.39   71.09 
   5  -1   0 2047.60   67.99 
   5  -1   0 1912.51   69.79 
   5  -1   0 1972.70   64.59 
  -5  -1   0 1999.40   70.99 
  -5  -1   0 2043.10   70.29 
   5  -1   0 1996.40   65.09 
  -5  -1   0 1956.00   65.99 
  -5  -1   0 1976.50   63.99 
  -5  -1   0 1963.50   70.79 
  -5  -1   0 2066.39   67.99 
   5  -1   0 2028.50   62.69 
  -5  -1   0 2060.59   69.39 
  -5  -1   0 2102.99   67.99 
   5  -1   0 1961.70   71.49 
   5  -1   0 2004.80   70.59 
   5  -1   0 1926.21   67.89 
   5  -1   0 1997.30   69.79 
  -5   1   0 2032.50   69.29 
   5   1   0 2029.10   70.49 
   5   1   0 2079.19   71.09 
  -5   1   0 1911.51   69.69 
   5   1   0 2051.79   67.19 
  -5   1   0 1973.60   68.19 
   5   1   0 2003.10   69.89 
  -5   1   0 2061.79   69.69 
  -5   1   0 1936.81   66.49 
   5   1   0 2084.69   70.79 
  -5   1   0 2010.90   64.79 
  -5   1   0 1933.01   70.19 
  -5   1   0 2085.59   69.69 
  -5   1   0 2001.40   61.09 
   5   1   0 2007.00   67.89 
   5   1   0 2000.20   70.39 
   5   1   0 2032.90   69.99 
  -5   1   0 2025.80   71.29 
  -5   1   0 1960.20   69.89 
  -5   1   0 1994.90   67.99 
   5   1   0 2108.69   71.79 
  -5   1   0 2059.49   66.59 
  -5   1   0 1983.40   68.69 
  -5   1   0 1919.61   65.19 
  -5   1   0 1981.30   69.99 
  -5   1   0 2040.10   62.59 
  -5   1   0 2027.60   67.69 
  -5   1   0 1992.00   65.29 
  -5   1   0 1979.20   62.99 
  -5   1   0 2050.69   65.99 
   5   1   0 1994.60   67.59 
   5   1   0 1954.30   65.89 
  -5   1   0 1962.40   63.79 
  -5   1   0 2003.10   69.59 
   5   1   0 2016.30   68.49 
  -5   1   0 1967.00   70.09 
  -6  -1   0   80.09   11.60 
  -6  -1   0  119.49   14.20 
  -6  -1   0   75.59   11.70 
   6  -1   0   96.49   11.30 
   6  -1   0   88.79   12.30 
   6  -1   0   85.79    9.20 
  -6  -1   0  105.99   11.20 
   6  -1   0   88.89   12.50 
  -6  -1   0   80.99   11.60 
  -6  -1   0   79.99   11.90 
   6  -1   0   83.29   12.70 
   6  -1   0  109.79   11.70 
   6  -1   0   90.29    6.70 
   6  -1   0  101.99    8.50 
  -6  -1   0  101.09   11.40 
  -6  -1   0   99.09    7.80 
  -6  -1   0   86.79   12.30 
   6  -1   0   90.29   11.50 
  -6  -1   0   94.09   11.10 
   6  -1   0   96.89   11.70 
   6  -1   0   82.79   11.70 
  -6  -1   0   80.49   10.40 
  -6  -1   0   86.89   12.40 
  -6  -1   0   79.59    9.60 
   6  -1   0   85.39   10.50 
   6  -1   0  114.29   13.30 
  -6  -1   0   83.59   11.60 
  -6  -1   0   90.49   11.00 
  -6  -1   0   88.29   11.30 
  -6  -1   0  100.59   13.70 
   6  -1   0   85.59   10.60 
  -6  -1   0   93.59   11.90 
  -6  -1   0   84.59   12.30 
  -6   1   0  117.89   13.40 
  -6   1   0   95.69    7.20 
  -6   1   0   93.59    9.10 
   6   1   0   85.79   11.00 
   6   1   0  104.49   10.90 
   6   1   0   78.79   11.60 
  -6   1   0   90.49    9.80 
  -6   1   0   90.49   12.10 
  -6   1   0   99.19   12.90 
   6   1   0   84.49   12.10 
   6   1   0   91.69   11.20 
   6   1   0   94.89   12.80 
   6   1   0   87.49   12.50 
   6   1   0   96.29   12.30 
   6   1   0   82.99   12.20 
  -6   1   0  105.49   13.50 
  -6   1   0   73.29   11.40 
   6   1   0   86.69   11.40 
  -6   1   0   68.09    9.80 
  -6   1   0   97.99   12.40 
  -6   1   0   97.09    7.10 
   6   1   0   75.69   11.20 
   6   1   0  110.99   12.60 
  -6   1   0   89.09   11.90 
  -6   1   0   96.59    5.80 
  -6   1   0   74.59   11.60 
  -6   1   0  107.39   11.90 
  -6   1   0  106.49   10.80 
   6   1   0   99.49   11.30 
  -6   1   0   87.89   11.60 
  -6   1   0  119.09    9.50 
  -6   1   0   90.19   12.50 
   6   1   0   77.69   11.50 
  -6   1   0  107.39   11.40 
  -7  -1   0 2140.99   80.39 
   7  -1   0 2156.18   71.39 
  -7  -1   0 2048.70   79.29 
  -7  -1   0 2102.29   78.59 
  -7  -1   0 2103.89   69.19 
  -7  -1   0 2174.68   75.29 
   7  -1   0 2152.08   76.79 
  -7  -1   0 2027.50   76.29 
   7  -1   0 1986.00   75.29 
   7  -1   0 2076.89   77.49 
   7  -1   0 2171.38   81.39 
  -7  -1   0 2093.59   77.39 
   7  -1   0 2009.70   74.49 
   7  -1   0 2148.09   74.09 
   7  -1   0 2205.98   75.49 
  -7  -1   0 2312.57   76.89 
  -7  -1   0 2129.19   73.59 
  -7  -1   0 2143.09   80.09 
  -7  -1   0 2088.79   79.79 
  -7  -1   0 2127.59   73.29 
   7  -1   0 2169.48   75.39 
  -7  -1   0 2094.79   67.99 
  -7  -1   0 2161.38   74.99 
  -7  -1   0 2255.67   79.49 
  -7  -1   0 2087.49   78.49 
   7  -1   0 2048.50   78.89 
  -7  -1   0 2110.89   78.59 
  -7  -1   0 2135.09   80.09 
  -7  -1   0 2184.78   75.29 
  -7  -1   0 2102.29   79.29 
   7  -1   0 2111.89   78.59 
   7  -1   0 2043.20   78.79 
  -7  -1   0 2061.19   72.49 
  -7   1   0 2105.49   72.89 
  -7   1   0 2136.29   72.09 
  -7   1   0 2080.79   75.49 
  -7   1   0 2062.29   78.69 
   7   1   0 2135.69   79.09 
   7   1   0 2183.98   79.29 
  -7   1   0 2087.99   79.49 
   7   1   0 2135.69   80.49 
  -7   1   0 1965.90   73.19 
  -7   1   0 2079.89   78.29 
  -7   1   0 2174.48   77.69 
  -7   1   0 2060.39   75.79 
   7   1   0 2203.78   76.19 
   7   1   0 2176.38   79.49 
   7   1   0 2128.89   77.99 
  -7   1   0 2130.19   79.69 
  -7   1   0 2120.19   68.29 
   7   1   0 2196.88   74.39 
   7   1   0 2088.89   73.09 
  -7   1   0 2134.79   79.29 
   7   1   0 2146.19   76.79 
  -7   1   0 2164.08   70.79 
  -7   1   0 2089.79   76.89 
   7   1   0 2080.29   77.49 
  -7   1   0 2140.69   72.79 
  -7   1   0 2051.49   78.09 
   7   1   0 2067.39   78.69 
   7   1   0 2167.48   75.69 
  -7   1   0 2103.19   67.59 
   7   1   0 1992.10   78.29 
  -7   1   0 2198.58   79.69 
   7   1   0 2184.68   78.99 
   8  -1   0  126.99   16.10 
   8  -1   0  110.49   16.60 
  -8  -1   0  139.99   15.50 
  -8  -1   0  141.39   15.10 
   8  -1   0  124.59   13.00 
  -8  -1   0  105.49   14.10 
   8  -1   0  120.49   14.80 
  -8  -1   0  132.79   14.40 
  -8  -1   0   94.49   16.10 
   8  -1   0  118.29   16.70 
  -8  -1   0  141.49   18.30 
  -8  -1   0  117.89   14.50 
   8  -1   0  122.19   18.20 
  -8  -1   0  121.29   17.70 
   8  -1   0  121.59   16.00 
   8  -1   0  140.79   15.70 
  -8  -1   0  139.29   16.70 
  -8  -1   0  100.59   15.00 
  -8  -1   0  137.89   17.70 
   8  -1   0  105.09   14.40 
  -8  -1   0  143.59   17.90 
   8  -1   0  139.99   15.60 
  -8  -1   0  122.09   15.00 
   8  -1   0  101.09   15.80 
   8  -1   0  119.69   16.40 
  -8  -1   0  104.89   17.40 
  -8  -1   0  145.19   19.90 
  -8  -1   0   95.69   15.80 
  -8  -1   0  117.09   16.90 
  -8  -1   0  112.29   16.40 
  -8  -1   0  113.49   17.00 
   8   1   0  134.39   15.90 
  -8   1   0  145.89   18.80 
   8   1   0  152.28   18.90 
   8   1   0  106.79   14.50 
  -8   1   0  147.79   15.10 
   8   1   0  159.78   19.50 
   8   1   0  134.59   15.30 
  -8   1   0  121.49   17.10 
   8   1   0  131.69   14.80 
  -8   1   0  117.99   17.30 
   8   1   0  117.29   15.70 
   8   1   0  105.89   16.10 
  -8   1   0  176.68   19.40 
   8   1   0  126.29   17.30 
  -8   1   0  134.19   14.20 
  -8   1   0   90.29   15.00 
   8   1   0  133.39   19.50 
   8   1   0  122.79   17.30 
   8   1   0  112.69   17.30 
  -8   1   0  130.69   18.10 
  -8   1   0  136.49   13.50 
  -8   1   0   98.89   16.20 
   8   1   0  128.69   16.90 
   8   1   0  133.29   17.70 
   8   1   0  134.49   17.10 
  -8   1   0  108.39   13.30 
  -8   1   0  133.89   18.00 
  -8   1   0  105.49   13.90 
  -8   1   0  128.59   15.90 
  -8   1   0  129.69   16.30 
  -9  -1   0  876.41   46.30 
   9  -1   0  828.42   39.80 
  -9  -1   0  762.72   43.80 
  -9  -1   0  739.33   43.70 
  -9  -1   0  814.72   43.70 
   9  -1   0  830.42   40.20 
  -9  -1   0  806.22   39.00 
  -9  -1   0  845.82   41.60 
   9  -1   0  758.02   44.80 
  -9  -1   0  790.72   43.10 
  -9  -1   0  808.72   37.60 
   9  -1   0  765.52   41.90 
   9  -1   0  770.62   40.40 
   9  -1   0  818.22   38.90 
   9  -1   0  776.42   39.60 
   9  -1   0  834.32   44.70 
   9  -1   0  776.32   43.70 
  -9  -1   0  863.11   44.50 
   9  -1   0  779.22   42.80 
  -9  -1   0  839.32   40.00 
  -9  -1   0  795.42   39.20 
  -9  -1   0  745.93   42.60 
  -9  -1   0  760.32   41.60 
   9  -1   0  763.32   42.70 
  -9  -1   0  838.52   45.50 
  -9  -1   0  790.62   40.80 
  -9  -1   0  721.83   43.20 
   9  -1   0  813.92   41.80 
  -9   1   0  792.22   42.00 
   9   1   0  825.22   44.30 
  -9   1   0  857.01   44.80 
   9   1   0  775.62   44.80 
  -9   1   0  808.02   43.90 
   9   1   0  807.82   43.20 
   9   1   0  877.51   42.80 
   9   1   0  771.12   42.80 
   9   1   0  773.92   38.40 
   9   1   0  797.22   38.10 
   9   1   0  791.42   41.80 
  -9   1   0  806.52   44.60 
  -9   1   0  836.12   41.60 
  -9   1   0  774.82   43.50 
   9   1   0  802.52   44.10 
   9   1   0  751.42   42.70 
  -9   1   0  724.93   37.60 
  -9   1   0  807.92   43.60 
   9   1   0  780.72   43.30 
  -9   1   0  768.22   40.40 
   9   1   0  767.22   41.90 
   9   1   0  763.72   45.90 
   9   1   0  708.43   39.00 
  -9   1   0  817.02   44.90 
  -9   1   0  776.22   36.30 
  -9   1   0  787.32   43.60 
   9   1   0  799.82   39.80 
 -10  -1   0   11.20    7.60 
  10  -1   0   31.70   12.60 
  10  -1   0   21.80    9.70 
  10  -1   0   27.00    9.40 
 -10  -1   0   20.00    8.00 
  10  -1   0   36.00   10.30 
 -10  -1   0   24.30    9.10 
  10  -1   0   36.80   11.00 
 -10  -1   0   20.10    9.70 
  10  -1   0   34.50   12.30 
 -10  -1   0   30.70   10.10 
  10  -1   0   38.30   12.30 
 -10  -1   0   30.60   11.60 
 -10  -1   0   24.20    9.90 
 -10  -1   0   26.40   10.50 
 -10  -1   0   39.40   12.80 
  10  -1   0   17.10    9.40 
  10  -1   0   26.60    9.60 
 -10  -1   0   24.50   10.40 
  10  -1   0   29.10   10.60 
 -10  -1   0   29.40   11.50 
 -10  -1   0   35.40    9.80 
  10  -1   0   30.20   10.00 
 -10  -1   0   30.10   11.60 
  10  -1   0   16.10    8.80 
 -10  -1   0   28.90   10.40 
  10  -1   0   17.20   10.20 
  10   1   0   45.70   12.00 
  10   1   0   24.00    9.80 
 -10   1   0   43.30   11.40 
  10   1   0   59.59   13.90 
 -10   1   0   12.70    8.40 
 -10   1   0   14.20    8.40 
 -10   1   0   13.50    8.80 
 -10   1   0   39.00   12.40 
  10   1   0   22.30    8.90 
  10   1   0   26.50    9.60 
  10   1   0   34.40   12.50 
 -10   1   0   17.20    9.30 
 -10   1   0   26.00   11.30 
  10   1   0   14.20    8.70 
 -10   1   0   17.50    9.00 
 -10   1   0   34.30   10.80 
  10   1   0   37.00   12.00 
  10   1   0   16.30    8.80 
  10   1   0   25.30    9.50 
  10   1   0   26.00   10.70 
  10   1   0   22.70   10.00 
  10   1   0   36.50   11.80 
 -10   1   0   23.80    9.60 
   0  -2   0 4299.37  133.09 
   0  -2   0 4575.14  130.99 
   0  -2   0 4572.44  133.19 
   0  -2   0 4635.04  134.19 
   0  -2   0 4745.33  133.79 
   0  -2   0 4669.73  131.49 
   0  -2   0 4452.15  130.69 
   0  -2   0 4601.34  133.69 
   0  -2   0 4459.15  137.09 
   0  -2   0 4583.44  133.79 
   0  -2   0 4564.14  135.69 
   0  -2   0 4486.45  135.29 
   0  -2   0 4633.74  130.29 
   0  -2   0 4254.57  134.99 
   0  -2   0 4605.74  134.19 
   0  -2   0 4514.65  133.59 
   0  -2   0 4380.26  136.09 
   0  -2   0 4259.47  134.99 
   0  -2   0 4510.65  132.09 
   0  -2   0 4202.08  133.29 
   0  -2   0 4598.74  130.79 
   0  -2   0 4696.33  130.79 
   0  -2   0 4437.36  134.29 
   0  -2   0 4580.54  132.39 
   0   2   0 4541.65  133.49 
   0   2   0 4465.05  131.79 
   0   2   0 4601.54  133.09 
   0   2   0 4526.05  134.09 
   0   2   0 4634.34  134.39 
   0   2   0 4629.84  136.29 
   0   2   0 4506.55  134.39 
   0   2   0 4320.57  137.79 
   0   2   0 4594.54  132.29 
   0   2   0 4631.94  134.19 
   0   2   0 4522.55  135.69 
   0   2   0 4563.74  130.99 
   0   2   0 4587.14  130.89 
   0   2   0 4470.15  132.49 
   0   2   0 4526.55  132.99 
   0   2   0 4242.48  133.49 
   0   2   0 4754.22  130.99 
   0   2   0 4708.13  134.09 
   0   2   0 4309.27  137.19 
  -1  -2   0 4679.83  141.99 
   1  -2   0 4358.36  143.09 
   1  -2   0 4751.82  142.49 
   1  -2   0 4739.53  137.29 
  -1  -2   0 4820.02  139.89 
  -1  -2   0 4542.05  141.59 
   1  -2   0 4785.32  137.79 
  -1  -2   0 4866.31  140.79 
   1  -2   0 4584.44  142.59 
  -1  -2   0 4896.91  139.59 
   1  -2   0 4344.37  137.29 
  -1  -2   0 4794.42  137.19 
   1  -2   0 4735.43  139.79 
  -1  -2   0 5055.19  140.69 
  -1  -2   0 4822.62  137.89 
  -1  -2   0 4560.64  137.69 
  -1  -2   0 4902.01  138.49 
  -1  -2   0 4945.31  140.59 
  -1  -2   0 4992.10  140.99 
   1  -2   0 4673.43  141.89 
   1  -2   0 4862.01  139.79 
   1  -2   0 4699.83  140.69 
   1  -2   0 4621.44  139.69 
   1  -2   0 4656.33  140.49 
   1  -2   0 4680.33  136.89 
  -1  -2   0 4794.92  141.59 
  -1  -2   0 4544.45  139.49 
   1  -2   0 4360.36  140.89 
   1  -2   0 4730.93  138.39 
   1  -2   0 4027.80  141.29 
   1  -2   0 4775.92  141.29 
  -1  -2   0 4722.83  140.89 
  -1  -2   0 4865.41  137.49 
  -1  -2   0 4758.62  140.99 
   1  -2   0 4795.62  137.79 
   1  -2   0 4863.81  136.99 
   1  -2   0 4626.44  140.69 
  -1  -2   0 4962.30  139.99 
  -1  -2   0 4767.72  137.59 
  -1  -2   0 4782.92  140.59 
   1  -2   0 4659.73  141.69 
   1  -2   0 4843.42  137.19 
  -1  -2   0 4811.42  138.79 
  -1  -2   0 4755.42  138.69 
  -1  -2   0 4877.01  141.39 
  -1  -2   0 4463.25  141.29 
  -1  -2   0 4594.04  140.29 
   1  -2   0 4803.32  141.29 
   1  -2   0 4695.93  137.69 
  -1  -2   0 4563.64  141.79 
   1  -2   0 4880.61  137.49 
   1  -2   0 4719.73  137.09 
   1  -2   0 4982.40  136.69 
   1  -2   0 4848.21  143.39 
  -1  -2   0 4789.92  138.79 
  -1  -2   0 4719.53  140.59 
  -1  -2   0 4627.44  141.39 
  -1  -2   0 5038.20  137.59 
   1  -2   0 4380.66  139.09 
  -1  -2   0 4936.31  140.99 
  -1  -2   0 4752.82  139.09 
   1  -2   0 4785.12  138.69 
   1   2   0 4764.42  138.89 
  -1   2   0 4758.12  140.29 
  -1   2   0 4477.35  141.39 
  -1   2   0 4814.62  137.29 
  -1   2   0 4779.82  138.29 
  -1   2   0 4777.82  136.89 
   1   2   0 5001.20  141.09 
   1   2   0 4772.92  138.29 
   1   2   0 4680.63  140.69 
   1   2   0 4812.12  140.29 
   1   2   0 4710.33  136.89 
   1   2   0 4798.92  137.59 
   1   2   0 4837.82  140.69 
  -1   2   0 4671.93  143.49 
   1   2   0 4788.12  137.59 
   1   2   0 4719.63  142.19 
   1   2   0 4886.71  141.29 
  -1   2   0 4718.33  140.29 
   1   2   0 4781.12  138.79 
  -1   2   0 4844.92  136.59 
   1   2   0 4652.83  141.29 
   1   2   0 4721.83  139.59 
   1   2   0 4852.51  140.49 
   1   2   0 4724.33  138.49 
   1   2   0 4595.14  142.09 
  -1   2   0 4847.21  137.79 
   1   2   0 4849.41  139.69 
   1   2   0 4797.72  141.29 
  -1   2   0 4751.52  139.49 
  -1   2   0 4936.61  139.59 
  -1   2   0 4603.74  140.89 
   1   2   0 4805.92  140.79 
  -1   2   0 4578.04  143.09 
  -1   2   0 4643.04  140.69 
   1   2   0 4709.13  140.39 
  -1   2   0 4668.53  139.09 
  -1   2   0 4709.03  140.99 
  -1   2   0 4941.51  138.59 
   1   2   0 4484.75  138.49 
   1   2   0 4866.01  137.69 
  -1   2   0 4929.81  136.79 
   1   2   0 4888.81  138.09 
  -1   2   0 4896.71  137.89 
   1   2   0 4830.12  141.99 
  -1   2   0 4640.74  141.29 
  -1   2   0 4693.33  142.89 
   1   2   0 4767.12  141.79 
  -1   2   0 4738.23  140.79 
   1   2   0 4889.21  139.19 
   1   2   0 4516.55  136.89 
   1   2   0 4860.81  139.29 
  -2  -2   0 2701.13   78.59 
   2  -2   0 2532.95   79.19 
  -2  -2   0 2465.35   79.39 
  -2  -2   0 2587.34   82.69 
   2  -2   0 2679.03   78.49 
   2  -2   0 2670.93   80.39 
   2  -2   0 2664.63   79.89 
   2  -2   0 2627.44   82.09 
   2  -2   0 2596.34   77.29 
   2  -2   0 2676.33   80.69 
   2  -2   0 2651.83   81.99 
  -2  -2   0 2616.34   81.69 
   2  -2   0 2602.94   81.79 
   2  -2   0 2664.73   82.49 
   2  -2   0 2584.14   83.09 
   2  -2   0 2652.83   83.69 
   2  -2   0 2556.74   79.59 
   2  -2   0 2758.92   78.29 
  -2  -2   0 2688.43   82.49 
   2  -2   0 2520.95   83.29 
  -2  -2   0 2539.95   81.49 
  -2  -2   0 2611.64   83.09 
  -2  -2   0 2620.64   80.79 
   2  -2   0 2703.93   80.49 
  -2  -2   0 2779.52   81.39 
  -2  -2   0 2649.03   80.59 
  -2  -2   0 2730.23   83.39 
  -2  -2   0 2668.33   82.19 
  -2  -2   0 2655.93   82.89 
  -2  -2   0 2707.13   80.69 
   2  -2   0 2724.33   80.99 
   2  -2   0 2602.54   78.89 
  -2  -2   0 2680.43   82.39 
   2  -2   0 2694.03   81.29 
   2  -2   0 2490.35   82.69 
   2  -2   0 2514.55   80.89 
   2  -2   0 2638.24   80.19 
  -2  -2   0 2763.22   81.89 
  -2  -2   0 2684.13   80.29 
  -2  -2   0 2696.63   79.99 
   2  -2   0 2648.44   80.89 
   2  -2   0 2631.24   81.99 
  -2  -2   0 2762.02   81.39 
  -2  -2   0 2628.54   82.69 
   2  -2   0 2653.73   80.59 
   2  -2   0 2634.34   82.69 
   2  -2   0 2547.95   83.79 
   2  -2   0 2620.04   80.79 
  -2  -2   0 2714.73   81.69 
  -2  -2   0 2557.14   82.39 
  -2  -2   0 2751.62   82.49 
  -2  -2   0 2642.34   79.79 
  -2  -2   0 2714.33   82.49 
  -2  -2   0 2735.73   80.19 
  -2  -2   0 2615.14   82.49 
   2  -2   0 2630.94   79.29 
   2  -2   0 2669.33   78.39 
   2  -2   0 2574.44   78.09 
   2  -2   0 2477.95   82.59 
   2  -2   0 2595.94   82.39 
   2  -2   0 2578.94   81.19 
   2  -2   0 2618.34   76.49 
  -2  -2   0 2713.93   81.59 
  -2  -2   0 2639.84   84.49 
  -2   2   0 2728.93   78.49 
   2   2   0 2638.64   81.49 
  -2   2   0 2634.74   81.99 
  -2   2   0 2641.24   82.99 
   2   2   0 2705.13   79.89 
   2   2   0 2713.23   80.39 
  -2   2   0 2614.84   81.89 
  -2   2   0 2760.42   82.69 
  -2   2   0 2602.94   79.39 
   2   2   0 2671.73   80.99 
   2   2   0 2685.13   80.89 
  -2   2   0 2582.54   81.89 
  -2   2   0 2650.53   77.49 
   2   2   0 2721.53   82.09 
   2   2   0 2670.83   82.19 
  -2   2   0 2682.33   80.89 
   2   2   0 2677.63   82.59 
  -2   2   0 2556.74   80.69 
   2   2   0 2701.13   81.79 
   2   2   0 2678.73   81.19 
   2   2   0 2607.14   81.79 
   2   2   0 2573.14   82.69 
   2   2   0 2643.84   79.89 
   2   2   0 2734.03   79.59 
   2   2   0 2672.43   79.79 
  -2   2   0 2731.23   79.49 
   2   2   0 2674.53   81.29 
   2   2   0 2605.04   81.39 
   2   2   0 2636.54   82.99 
  -2   2   0 2614.34   82.29 
  -2   2   0 2662.93   77.79 
  -2   2   0 2736.83   80.49 
  -2   2   0 2689.83   80.89 
  -2   2   0 2747.93   80.19 
   2   2   0 2623.74   82.99 
  -2   2   0 2688.13   80.59 
  -2   2   0 2622.84   76.99 
  -2   2   0 2629.54   81.49 
  -2   2   0 2549.84   81.19 
  -2   2   0 2615.84   82.29 
  -2   2   0 2528.75   83.39 
   2   2   0 2563.64   81.99 
  -2   2   0 2612.84   78.39 
   2   2   0 2611.44   78.59 
   2   2   0 2690.53   83.19 
   2   2   0 2585.34   82.99 
  -2   2   0 2604.64   79.09 
   2   2   0 2626.44   80.29 
   2   2   0 2651.33   80.39 
   2   2   0 2628.64   82.49 
  -3  -2   0 1129.79   39.40 
   3  -2   0 1109.99   36.80 
  -3  -2   0 1108.89   39.50 
   3  -2   0 1104.89   36.30 
  -3  -2   0 1142.79   38.50 
  -3  -2   0 1140.79   38.70 
  -3  -2   0 1127.59   40.10 
  -3  -2   0 1160.78   37.40 
  -3  -2   0 1117.49   39.50 
  -3  -2   0 1173.78   39.50 
   3  -2   0 1146.69   41.60 
   3  -2   0 1157.38   39.20 
  -3  -2   0 1142.29   39.80 
   3  -2   0 1130.89   37.20 
   3  -2   0 1093.69   41.50 
  -3  -2   0 1132.69   37.00 
   3  -2   0 1159.18   34.00 
  -3  -2   0 1088.39   38.30 
   3  -2   0 1146.99   40.20 
  -3  -2   0 1134.39   41.60 
  -3  -2   0 1173.98   40.60 
  -3  -2   0 1144.99   41.20 
   3  -2   0 1115.19   40.80 
  -3  -2   0 1141.39   39.20 
  -3  -2   0 1068.09   40.10 
   3  -2   0 1149.48   38.30 
   3  -2   0 1073.59   38.90 
  -3  -2   0 1141.99   40.60 
  -3  -2   0 1081.69   40.80 
   3  -2   0 1117.29   39.50 
   3  -2   0 1108.29   36.20 
   3  -2   0 1127.29   37.30 
   3  -2   0 1071.89   39.00 
  -3  -2   0 1080.29   39.60 
   3  -2   0 1105.49   43.40 
   3  -2   0 1150.88   38.20 
   3  -2   0 1105.49   38.10 
   3  -2   0 1119.99   37.80 
   3  -2   0 1123.89   38.70 
   3  -2   0 1126.79   39.20 
   3  -2   0 1116.89   40.80 
  -3   2   0 1138.39   37.40 
  -3   2   0 1157.58   40.00 
  -3   2   0 1126.69   40.60 
  -3   2   0 1121.19   34.40 
  -3   2   0 1132.09   40.10 
  -3   2   0 1128.09   38.50 
  -3   2   0 1077.69   34.90 
  -3   2   0 1109.69   39.90 
   3   2   0 1132.69   41.10 
   3   2   0 1146.39   39.20 
   3   2   0 1107.69   40.30 
  -3   2   0 1137.59   38.40 
   3   2   0 1150.48   40.80 
   3   2   0 1139.89   39.00 
  -3   2   0 1097.49   35.70 
  -3   2   0 1151.18   37.70 
   3   2   0 1115.69   41.10 
  -3   2   0 1124.49   38.20 
  -3   2   0 1162.78   41.60 
   3   2   0 1123.89   38.00 
  -3   2   0 1055.99   39.20 
  -3   2   0 1100.99   34.50 
   3   2   0 1129.39   41.10 
  -3   2   0 1138.49   39.40 
   3   2   0 1147.09   41.10 
  -3   2   0 1149.48   39.60 
  -3   2   0 1136.69   36.10 
  -3   2   0 1119.69   38.20 
  -3   2   0 1096.29   38.50 
   3   2   0 1147.49   37.40 
   3   2   0 1091.79   39.80 
   3   2   0 1121.99   39.30 
   3   2   0 1119.99   40.20 
   3   2   0 1084.99   40.00 
   3   2   0 1123.19   39.20 
  -3   2   0 1115.09   39.40 
   3   2   0 1181.78   39.40 
  -3   2   0 1150.78   36.40 
  -3   2   0 1128.89   40.90 
  -3   2   0 1137.09   39.20 
  -4  -2   0 1163.78   43.30 
   4  -2   0 1200.98   45.30 
  -4  -2   0 1221.18   43.60 
  -4  -2   0 1138.19   45.20 
   4  -2   0 1181.58   45.30 
   4  -2   0 1209.08   40.90 
   4  -2   0 1211.68   40.40 
  -4  -2   0 1159.78   44.80 
  -4  -2   0 1229.48   46.00 
  -4  -2   0 1198.38   41.20 
   4  -2   0 1213.58   40.00 
  -4  -2   0 1215.88   44.00 
  -4  -2   0 1157.38   41.10 
   4  -2   0 1200.08   41.40 
   4  -2   0 1244.48   43.90 
   4  -2   0 1161.58   43.30 
  -4  -2   0 1156.78   42.40 
   4  -2   0 1209.58   41.30 
  -4  -2   0 1189.78   43.40 
  -4  -2   0 1250.37   44.70 
  -4  -2   0 1190.28   43.10 
  -4  -2   0 1135.19   42.40 
  -4  -2   0 1267.47   45.00 
   4  -2   0 1207.78   42.10 
   4  -2   0 1177.88   38.20 
   4  -2   0 1221.88   42.70 
  -4  -2   0 1202.88   42.70 
   4  -2   0 1199.08   44.80 
   4  -2   0 1176.78   40.00 
   4  -2   0 1182.18   45.50 
  -4  -2   0 1137.69   42.70 
  -4  -2   0 1228.98   40.30 
  -4  -2   0 1242.28   45.40 
   4  -2   0 1204.18   43.40 
  -4  -2   0 1186.08   43.70 
   4   2   0 1181.38   40.70 
   4   2   0 1160.28   44.80 
  -4   2   0 1236.58   41.90 
  -4   2   0 1191.68   39.00 
  -4   2   0 1185.58   44.20 
  -4   2   0 1177.28   45.00 
   4   2   0 1148.59   43.30 
   4   2   0 1166.08   43.50 
  -4   2   0 1201.28   42.70 
  -4   2   0 1178.48   45.00 
   4   2   0 1190.68   45.30 
   4   2   0 1148.39   44.80 
   4   2   0 1176.48   42.50 
  -4   2   0 1210.98   38.90 
  -4   2   0 1208.98   36.90 
  -4   2   0 1223.68   44.60 
  -4   2   0 1197.58   36.70 
  -4   2   0 1140.59   39.30 
  -4   2   0 1145.09   42.20 
  -4   2   0 1154.38   43.20 
  -4   2   0 1145.79   44.30 
  -4   2   0 1189.78   41.70 
  -4   2   0 1189.98   43.60 
   4   2   0 1179.48   44.90 
  -4   2   0 1215.08   43.20 
  -4   2   0 1164.68   37.80 
   4   2   0 1155.38   44.80 
  -4   2   0 1237.18   42.30 
  -4   2   0 1191.98   38.10 
  -4   2   0 1189.08   40.40 
   4   2   0 1239.08   44.80 
   4   2   0 1162.78   44.00 
   4   2   0 1170.08   41.90 
   4   2   0 1227.38   44.90 
   4   2   0 1259.57   44.00 
  -4   2   0 1252.67   44.30 
  -5  -2   0  507.45   25.90 
  -5  -2   0  542.45   24.30 
  -5  -2   0  519.85   21.80 
  -5  -2   0  464.05   25.60 
  -5  -2   0  514.15   25.00 
   5  -2   0  500.75   20.70 
   5  -2   0  484.05   25.70 
  -5  -2   0  519.25   24.90 
   5  -2   0  511.45   21.90 
  -5  -2   0  476.45   23.40 
   5  -2   0  489.65   25.70 
  -5  -2   0  496.95   22.60 
   5  -2   0  521.55   22.50 
   5  -2   0  496.35   25.20 
  -5  -2   0  496.95   23.70 
  -5  -2   0  467.45   22.70 
  -5  -2   0  491.35   24.50 
   5  -2   0  535.65   23.70 
  -5  -2   0  550.54   26.60 
   5  -2   0  524.55   25.20 
   5  -2   0  476.45   21.70 
   5  -2   0  512.65   23.90 
   5  -2   0  522.15   26.70 
  -5  -2   0  506.25   25.00 
   5  -2   0  480.05   23.80 
   5  -2   0  501.95   23.90 
  -5  -2   0  450.05   24.70 
   5  -2   0  504.05   22.90 
  -5  -2   0  507.25   24.60 
  -5  -2   0  437.36   25.30 
  -5  -2   0  484.25   23.80 
  -5   2   0  484.65   22.80 
   5   2   0  481.25   25.30 
   5   2   0  505.45   23.60 
   5   2   0  469.95   24.40 
  -5   2   0  502.85   24.00 
  -5   2   0  496.85   24.40 
   5   2   0  513.45   26.10 
  -5   2   0  500.35   20.50 
  -5   2   0  474.75   19.10 
  -5   2   0  481.45   25.00 
  -5   2   0  472.45   24.70 
   5   2   0  520.55   23.50 
  -5   2   0  477.15   18.10 
  -5   2   0  515.85   25.10 
  -5   2   0  507.05   17.80 
  -5   2   0  485.35   17.40 
  -5   2   0  503.55   22.10 
  -5   2   0  475.95   25.50 
  -5   2   0  494.85   18.10 
  -5   2   0  473.15   21.40 
   5   2   0  541.65   22.30 
   5   2   0  498.85   25.70 
   5   2   0  518.35   25.90 
   5   2   0  466.35   23.60 
   5   2   0  554.24   26.60 
  -5   2   0  502.05   20.40 
   5   2   0  504.15   24.30 
   5   2   0  521.55   26.00 
  -5   2   0  503.95   26.00 
  -5   2   0  523.85   25.40 
  -5   2   0  480.15   20.60 
  -5   2   0  480.65   23.70 
  -5   2   0  498.75   23.50 
   5   2   0  501.25   24.80 
   5   2   0  521.35   26.70 
   6  -2   0  949.21   39.20 
  -6  -2   0 1024.20   39.30 
  -6  -2   0  836.82   39.60 
  -6  -2   0  961.10   39.10 
  -6  -2   0  916.51   34.50 
  -6  -2   0  872.61   40.70 
   6  -2   0  933.11   41.20 
   6  -2   0  903.31   39.60 
  -6  -2   0  916.31   41.00 
  -6  -2   0  898.41   37.10 
  -6  -2   0  915.71   39.80 
   6  -2   0  920.11   36.40 
  -6  -2   0  927.31   40.00 
  -6  -2   0  906.71   40.90 
  -6  -2   0  909.31   39.50 
  -6  -2   0  925.71   39.00 
  -6  -2   0  886.01   37.40 
   6  -2   0  892.81   35.90 
   6  -2   0  916.41   33.90 
   6  -2   0  913.11   35.50 
   6  -2   0  876.81   40.70 
  -6  -2   0  857.31   41.10 
  -6  -2   0  870.01   39.60 
   6  -2   0  946.21   37.80 
  -6  -2   0  901.21   37.00 
   6  -2   0  886.91   37.80 
   6  -2   0  895.71   38.30 
  -6  -2   0  946.11   42.10 
   6  -2   0  906.81   39.70 
  -6  -2   0  820.42   40.70 
  -6  -2   0  927.61   34.90 
  -6  -2   0  904.91   38.30 
   6  -2   0  925.61   39.20 
   6  -2   0  940.91   42.30 
   6   2   0  897.31   37.60 
  -6   2   0  879.71   36.50 
  -6   2   0  922.71   39.60 
  -6   2   0  885.61   36.10 
   6   2   0  869.91   41.40 
  -6   2   0  824.22   40.30 
  -6   2   0  920.31   40.50 
   6   2   0  917.51   38.80 
  -6   2   0  908.61   31.60 
  -6   2   0  936.61   39.30 
   6   2   0  918.91   41.00 
  -6   2   0  893.11   31.10 
   6   2   0  887.01   40.70 
   6   2   0  873.81   40.20 
  -6   2   0  846.12   39.70 
   6   2   0  904.21   35.60 
  -6   2   0  946.51   40.80 
  -6   2   0  933.61   33.30 
  -6   2   0  962.50   41.80 
   6   2   0  901.11   41.00 
  -6   2   0  791.42   38.50 
   6   2   0  915.41   38.20 
   6   2   0  910.61   40.90 
   6   2   0  881.91   37.70 
   6   2   0  915.51   41.00 
   6   2   0  922.31   40.00 
   6   2   0  947.31   40.90 
   6   2   0  942.41   40.10 
  -6   2   0  975.90   35.90 
  -6   2   0  914.81   34.40 
  -6   2   0  861.41   38.00 
  -6   2   0  951.00   32.30 
  -6   2   0  893.11   38.30 
  -6   2   0  895.81   30.00 
  -7  -2   0   67.59   12.40 
   7  -2   0   36.80    8.00 
  -7  -2   0   69.39   10.40 
  -7  -2   0   81.89   13.10 
   7  -2   0   72.49   10.30 
  -7  -2   0   61.69   12.20 
  -7  -2   0   78.69   11.20 
  -7  -2   0   68.49   11.70 
   7  -2   0   81.79   12.00 
  -7  -2   0   57.39   10.80 
   7  -2   0   71.09   12.50 
  -7  -2   0   73.99   10.90 
  -7  -2   0   59.59   11.90 
   7  -2   0   60.29   10.50 
  -7  -2   0   78.89   11.20 
   7  -2   0   67.99   11.60 
  -7  -2   0   56.29   10.30 
   7  -2   0   61.99   10.90 
   7  -2   0   68.69   12.50 
  -7  -2   0   70.29    8.50 
  -7  -2   0   40.60    9.80 
  -7  -2   0   42.30   10.30 
   7  -2   0   73.49   11.70 
  -7  -2   0   52.39    9.90 
   7  -2   0   71.89   10.20 
  -7  -2   0   54.79   10.40 
  -7  -2   0   75.29    9.40 
  -7  -2   0   39.90    9.50 
   7  -2   0   63.29    8.30 
  -7  -2   0   53.39   10.00 
   7  -2   0   66.69    9.00 
   7  -2   0   59.69   12.20 
   7   2   0   61.49    9.30 
  -7   2   0   69.99   10.10 
  -7   2   0   69.89   11.50 
   7   2   0   49.10   10.50 
  -7   2   0   51.59    7.60 
  -7   2   0   79.79   13.80 
   7   2   0   63.29   12.00 
   7   2   0   75.39   12.70 
  -7   2   0   71.29   12.30 
   7   2   0   68.79   10.80 
   7   2   0   56.89   11.00 
   7   2   0   52.79   10.80 
   7   2   0   55.79   11.10 
  -7   2   0   60.39   11.30 
  -7   2   0   73.59    9.50 
   7   2   0   71.99   13.10 
  -7   2   0   72.79   12.50 
   7   2   0   75.49   12.00 
  -7   2   0   83.09   12.40 
  -7   2   0   50.99   10.30 
   7   2   0   65.79   10.70 
   7   2   0   71.89   12.50 
  -7   2   0   56.69   11.20 
  -7   2   0   59.79    9.30 
   7   2   0   81.09   11.60 
  -7   2   0   61.19    7.10 
   7   2   0   96.19   12.50 
   7   2   0   72.89   12.30 
  -7   2   0   59.89   12.10 
  -7   2   0   78.39   12.30 
  -8  -2   0  270.77   22.30 
  -8  -2   0  330.17   25.00 
   8  -2   0  374.66   21.90 
   8  -2   0  315.27   22.90 
  -8  -2   0  324.57   22.00 
  -8  -2   0  311.37   25.20 
   8  -2   0  344.77   21.50 
   8  -2   0  267.97   22.20 
  -8  -2   0  285.57   21.80 
  -8  -2   0  329.27   24.20 
  -8  -2   0  351.36   24.60 
   8  -2   0  307.37   24.40 
  -8  -2   0  347.77   22.40 
  -8  -2   0  287.97   21.90 
  -8  -2   0  314.07   23.80 
  -8  -2   0  332.17   21.50 
  -8  -2   0  322.37   24.50 
   8  -2   0  333.97   22.80 
   8  -2   0  304.17   22.20 
  -8  -2   0  280.07   23.20 
   8  -2   0  337.47   25.20 
  -8  -2   0  374.16   26.50 
   8  -2   0  313.57   25.20 
   8  -2   0  351.56   22.80 
   8  -2   0  351.76   22.50 
  -8  -2   0  298.07   24.80 
  -8  -2   0  347.77   21.60 
  -8  -2   0  340.67   22.70 
  -8  -2   0  362.26   26.40 
  -8   2   0  288.47   22.90 
   8   2   0  295.27   23.20 
  -8   2   0  378.36   26.00 
  -8   2   0  293.77   18.70 
   8   2   0  298.87   24.30 
  -8   2   0  317.87   21.20 
   8   2   0  253.77   20.30 
   8   2   0  326.57   24.60 
  -8   2   0  351.16   21.30 
   8   2   0  337.67   25.00 
   8   2   0  326.47   20.20 
  -8   2   0  348.27   25.30 
  -8   2   0  314.77   23.10 
   8   2   0  364.66   24.80 
   8   2   0  332.97   22.40 
  -8   2   0  313.37   22.40 
   8   2   0  299.37   24.10 
  -8   2   0  317.67   24.30 
   8   2   0  307.37   24.50 
  -8   2   0  341.57   25.90 
   8   2   0  319.27   24.00 
   8   2   0  372.36   27.40 
   8   2   0  353.16   25.10 
  -8   2   0  347.97   19.40 
  -8   2   0  321.47   23.40 
   8   2   0  361.66   23.70 
  -8   2   0  317.97   24.30 
   8   2   0  317.87   21.90 
   9  -2   0   50.59   11.50 
  -9  -2   0   47.50   11.10 
  -9  -2   0   38.80   11.10 
   9  -2   0   31.50   10.50 
  -9  -2   0   33.20    8.70 
  -9  -2   0   28.10    9.70 
   9  -2   0   25.10    9.90 
  -9  -2   0   40.00   12.30 
   9  -2   0   29.70   10.30 
  -9  -2   0   46.80   12.50 
   9  -2   0   43.40    9.60 
   9  -2   0   38.30   10.50 
  -9  -2   0   54.09   12.50 
  -9  -2   0   28.60   10.40 
   9  -2   0   38.00   10.50 
  -9  -2   0   45.10   10.40 
  -9  -2   0   47.40   12.50 
  -9  -2   0   40.30   10.10 
   9  -2   0   36.50   11.00 
   9  -2   0   37.20   10.00 
   9  -2   0   46.60   10.00 
  -9  -2   0   40.10   10.80 
   9  -2   0   36.40    9.70 
  -9  -2   0   19.10    8.90 
  -9  -2   0   25.00    9.20 
  -9  -2   0   36.20    9.50 
  -9  -2   0   25.20   10.40 
  -9  -2   0   41.20   12.40 
   9  -2   0   37.50   10.50 
   9   2   0   28.30    8.10 
   9   2   0   50.39   12.20 
   9   2   0   28.70    9.60 
  -9   2   0   37.20   11.00 
   9   2   0   28.80   10.60 
   9   2   0   32.20   10.40 
   9   2   0   29.50   10.10 
  -9   2   0   41.70   11.70 
  -9   2   0   42.10   10.50 
   9   2   0   34.90   10.70 
   9   2   0   37.00   11.90 
   9   2   0   39.40    9.90 
   9   2   0   20.10    8.30 
   9   2   0   38.90   11.20 
   9   2   0   19.90    9.50 
  -9   2   0   24.30    8.90 
   9   2   0   24.10   10.10 
  -9   2   0   19.80    8.50 
  -9   2   0   37.50    9.90 
  -9   2   0   47.20   13.00 
   9   2   0   58.29   12.20 
  -9   2   0   24.30    9.50 
  -9   2   0   24.90    9.20 
   9   2   0   28.60    8.90 
 -10  -2   0   43.60   14.00 
  10  -2   0   56.29   14.50 
 -10  -2   0   66.19   16.70 
  10  -2   0   77.39   16.50 
 -10  -2   0   64.29   14.60 
  10  -2   0   61.39   13.10 
 -10  -2   0   80.89   17.70 
 -10  -2   0   90.39   18.00 
 -10  -2   0   60.69   14.50 
  10  -2   0   71.49   16.30 
  10  -2   0   90.59   18.80 
 -10  -2   0   75.69   16.00 
 -10  -2   0   71.69   14.50 
  10  -2   0   72.69   14.80 
 -10  -2   0   80.39   16.90 
 -10  -2   0   84.89   15.00 
  10  -2   0   65.19   14.70 
 -10  -2   0   94.89   16.70 
 -10  -2   0   46.60   13.60 
  10  -2   0   56.69   13.30 
 -10  -2   0   37.70   11.90 
 -10  -2   0   79.29   16.20 
  10  -2   0   72.59   16.30 
 -10  -2   0   88.59   15.60 
 -10   2   0   37.60   12.20 
  10   2   0   50.19   12.90 
 -10   2   0   81.79   17.00 
  10   2   0   85.09   18.00 
 -10   2   0   47.00   13.20 
 -10   2   0   49.00   12.80 
  10   2   0   73.79   16.10 
 -10   2   0   43.60   12.70 
 -10   2   0   69.29   15.20 
  10   2   0   59.99   15.90 
  10   2   0   61.39   13.60 
  10   2   0   71.89   14.30 
 -10   2   0   55.39   14.50 
  10   2   0   69.89   15.40 
  10   2   0   55.59   15.10 
  10   2   0   41.90   13.80 
  10   2   0   94.29   17.50 
 -10   2   0   92.99   18.60 
  10   2   0   54.59   13.20 
  10   2   0   55.09   14.80 
  10   2   0   52.69   14.30 
   0  -3   0   -0.50    1.80 
   0  -3   0    3.00    1.80 
   0  -3   0    2.10    0.70 
   0  -3   0    1.10    1.50 
   0  -3   0    4.30    2.20 
   0  -3   0    7.40    3.30 
   0  -3   0    0.40    1.90 
   0  -3   0    1.80    1.00 
   0  -3   0    1.50    0.90 
   0  -3   0    8.10    2.10 
   0  -3   0    0.30    0.60 
   0  -3   0    4.20    2.40 
   0  -3   0    2.70    1.70 
   0  -3   0    6.30    2.40 
   0  -3   0    9.90    3.20 
   0  -3   0    5.60    2.30 
   0  -3   0    3.00    3.20 
   0  -3   0    0.60    0.60 
   0  -3   0    5.00    2.70 
   0  -3   0    3.50    1.00 
   0  -3   0    1.20    1.70 
   0  -3   0    2.70    1.50 
   0  -3   0    3.00    2.00 
   0  -3   0    3.70    2.60 
   0  -3   0   -1.60    1.40 
   0  -3   0    3.40    2.10 
   0  -3   0    1.30    1.90 
   0  -3   0    1.30    1.80 
   0  -3   0   -1.80    2.10 
   0  -3   0   -0.10    2.60 
   0  -3   0    2.00    1.10 
   0   3   0    0.60    1.30 
   0   3   0   -0.20    1.00 
   0   3   0    5.10    2.30 
   0   3   0    2.90    0.80 
   0   3   0    2.10    1.10 
   0   3   0    1.10    2.10 
   0   3   0    6.50    1.60 
   0   3   0    3.00    1.80 
   0   3   0    5.40    2.20 
   0   3   0    8.70    4.30 
   0   3   0   -0.70    1.60 
   0   3   0    0.10    1.60 
   0   3   0    2.20    2.50 
   0   3   0    2.90    3.70 
   0   3   0    0.70    1.70 
   0   3   0    7.50    3.00 
   0   3   0    4.30    2.40 
   0   3   0    1.70    1.50 
   1  -3   0  371.16   17.60 
   1  -3   0  325.57   12.50 
   1  -3   0  327.27   14.70 
   1  -3   0  340.37   12.40 
  -1  -3   0  329.17   14.00 
   1  -3   0  331.17   13.00 
   1  -3   0  322.77   12.10 
   1  -3   0  341.17   18.30 
   1  -3   0  317.37   14.20 
   1  -3   0  337.87   11.70 
   1  -3   0  316.77   10.60 
  -1  -3   0  311.37   15.10 
  -1  -3   0  322.77   11.40 
  -1  -3   0  333.87   13.80 
  -1  -3   0  297.07   14.40 
  -1  -3   0  332.67   13.00 
  -1  -3   0  314.47   12.10 
  -1  -3   0  306.27   16.80 
   1  -3   0  282.37   20.30 
  -1  -3   0  319.37   13.10 
   1  -3   0  323.17   15.70 
  -1  -3   0  311.47   16.30 
   1  -3   0  319.17   11.50 
  -1  -3   0  291.77   14.80 
  -1  -3   0  325.87   14.00 
  -1  -3   0  301.07   15.00 
  -1  -3   0  333.77   13.10 
   1  -3   0  310.47   14.90 
   1  -3   0  325.67   15.20 
  -1  -3   0  309.97   15.50 
  -1  -3   0  310.07   16.90 
   1  -3   0  334.57   17.70 
  -1  -3   0  311.47   13.10 
   1  -3   0  321.17   10.60 
   1  -3   0  325.67   12.00 
  -1  -3   0  288.27   14.60 
  -1  -3   0  335.47   12.70 
   1  -3   0  314.67   12.20 
   1  -3   0  303.47   10.90 
   1  -3   0  323.17   10.20 
   1  -3   0  327.77   16.10 
  -1  -3   0  343.57   16.60 
  -1  -3   0  300.37   14.10 
   1  -3   0  315.57   15.70 
   1  -3   0  307.77   14.50 
  -1  -3   0  291.47   16.10 
  -1  -3   0  325.37   12.30 
  -1  -3   0  317.77   15.40 
   1  -3   0  305.77   13.70 
  -1  -3   0  330.37   15.00 
  -1  -3   0  325.17   11.20 
   1   3   0  324.77   16.90 
   1   3   0  323.07   11.70 
  -1   3   0  318.67   11.50 
   1   3   0  347.37   16.50 
  -1   3   0  329.97   18.10 
   1   3   0  320.67   11.40 
  -1   3   0  331.07   17.80 
   1   3   0  320.57   14.20 
   1   3   0  326.17   15.90 
  -1   3   0  306.07   15.70 
   1   3   0  302.77   14.50 
   1   3   0  330.27   11.40 
  -1   3   0  314.57   12.20 
  -1   3   0  338.37   15.40 
  -1   3   0  333.67   16.40 
   1   3   0  325.87   14.30 
  -1   3   0  322.97   16.00 
   1   3   0  323.37   14.00 
  -1   3   0  308.57   14.30 
   1   3   0  312.57   14.90 
   1   3   0  329.47   14.50 
   1   3   0  317.17   16.60 
   1   3   0  309.77   15.00 
  -1   3   0  310.57   13.40 
   1   3   0  345.97   16.50 
  -1   3   0  324.17   11.50 
  -1   3   0  338.97   13.80 
  -1   3   0  314.67   10.80 
   1   3   0  325.27   12.30 
   1   3   0  310.17   12.70 
   1   3   0  338.47   15.90 
   1   3   0  322.37   11.70 
  -1   3   0  312.87   15.90 
   1   3   0  314.57   13.80 
   1   3   0  319.97   13.90 
  -1   3   0  321.97   12.60 
   1   3   0  334.97   13.10 
   1   3   0  330.07   16.80 
  -1   3   0  329.17   13.70 
   1   3   0  315.77   12.90 
  -1   3   0  353.36   19.10 
   1   3   0  328.17   16.00 
  -1   3   0  320.77   17.90 
   2  -3   0  179.18   10.60 
   2  -3   0  199.08   13.10 
   2  -3   0  208.38    9.30 
  -2  -3   0  212.68    8.20 
   2  -3   0  209.68    7.40 
   2  -3   0  212.98    8.80 
   2  -3   0  191.88    9.80 
  -2  -3   0  206.68   10.70 
   2  -3   0  222.78   13.70 
   2  -3   0  182.18   13.10 
   2  -3   0  212.18   10.60 
  -2  -3   0  223.78   12.90 
   2  -3   0  210.38   10.10 
  -2  -3   0  222.28   11.40 
  -2  -3   0  220.88   12.50 
   2  -3   0  210.98   10.10 
  -2  -3   0  209.18   12.20 
  -2  -3   0  203.88    9.50 
  -2  -3   0  189.48   12.90 
  -2  -3   0  219.98   10.00 
  -2  -3   0  245.18   13.00 
  -2  -3   0  227.78   11.10 
   2  -3   0  217.88   11.30 
   2  -3   0  187.88   11.70 
  -2  -3   0  217.08   12.60 
  -2  -3   0  206.88   11.30 
   2  -3   0  230.48   13.20 
   2  -3   0  206.88    7.40 
  -2  -3   0  206.18   11.70 
   2  -3   0  221.58   11.00 
  -2  -3   0  201.48    9.70 
   2  -3   0  195.28   11.00 
   2  -3   0  204.88   13.60 
   2  -3   0  202.68    9.50 
   2  -3   0  187.48    9.10 
   2  -3   0  205.38   14.80 
   2  -3   0  221.28   10.10 
   2  -3   0  222.48   12.20 
   2  -3   0  215.28   12.90 
   2  -3   0  201.68    8.50 
   2  -3   0  224.38   12.00 
  -2  -3   0  200.48    9.70 
  -2  -3   0  192.98    9.20 
  -2  -3   0  207.68   13.00 
   2  -3   0  218.18   10.80 
  -2  -3   0  212.78   12.00 
   2  -3   0  205.98   10.30 
   2  -3   0  194.38   12.10 
  -2  -3   0  209.58   12.30 
   2   3   0  202.28   11.10 
   2   3   0  229.78   11.30 
   2   3   0  213.98   11.30 
   2   3   0  234.38   12.30 
  -2   3   0  211.88    7.70 
   2   3   0  214.38   13.60 
  -2   3   0  210.68   11.20 
   2   3   0  189.68   12.00 
  -2   3   0  192.98   10.40 
   2   3   0  204.08   13.00 
  -2   3   0  193.88   13.50 
   2   3   0  203.88    9.90 
  -2   3   0  212.08   11.70 
  -2   3   0  216.48    9.10 
  -2   3   0  220.28    9.70 
  -2   3   0  234.18   11.20 
  -2   3   0  225.18   12.70 
   2   3   0  212.98    8.50 
   2   3   0  202.98   10.20 
   2   3   0  212.78   10.10 
   2   3   0  218.18   10.10 
  -2   3   0  239.88   13.40 
   2   3   0  210.18    9.50 
   2   3   0  195.98   12.40 
   2   3   0  221.98   13.30 
  -2   3   0  211.68    8.80 
  -2   3   0  193.48   11.30 
   2   3   0  223.88    9.90 
  -2   3   0  205.68   12.00 
   2   3   0  217.58   13.30 
   2   3   0  202.28   10.70 
   2   3   0  227.48   13.70 
  -2   3   0  211.78   11.70 
  -2   3   0  209.38    7.50 
  -2   3   0  205.88   10.20 
  -2   3   0  199.48   12.50 
   2   3   0  226.28   12.20 
   2   3   0  221.98   10.80 
   2   3   0  213.28   11.20 
  -2   3   0  220.38   12.90 
   2   3   0  216.88   10.20 
  -2   3   0  188.48    9.80 
  -2   3   0  184.78   13.60 
  -2   3   0  211.78    9.50 
  -2   3   0  214.58   12.50 
  -3  -3   0   25.90    4.30 
  -3  -3   0   29.20    5.60 
   3  -3   0   19.40    5.20 
   3  -3   0   14.50    4.10 
   3  -3   0   21.00    4.10 
   3  -3   0   18.00    2.40 
   3  -3   0   29.40    5.90 
   3  -3   0   23.60    4.20 
   3  -3   0   26.50    4.10 
  -3  -3   0   25.50    5.70 
  -3  -3   0   24.00    5.10 
  -3  -3   0   20.00    3.30 
   3  -3   0   26.00    6.20 
  -3  -3   0   28.80    5.40 
   3  -3   0   23.50    5.20 
  -3  -3   0   19.50    4.20 
  -3  -3   0   24.30    4.50 
  -3  -3   0   20.80    4.40 
  -3  -3   0   24.30    5.10 
  -3  -3   0   24.60    4.10 
   3  -3   0   17.00    3.60 
   3  -3   0   19.40    3.00 
   3  -3   0   25.20    4.90 
  -3  -3   0   18.30    4.00 
  -3  -3   0   15.80    4.80 
  -3  -3   0   15.60    4.60 
  -3  -3   0   30.00    5.90 
  -3  -3   0   16.50    4.20 
   3  -3   0   22.00    3.90 
   3  -3   0   27.60    3.40 
   3  -3   0   21.70    3.10 
   3  -3   0   17.40    3.90 
   3  -3   0   14.20    4.80 
  -3  -3   0   19.00    4.50 
  -3  -3   0   14.40    3.40 
   3  -3   0   21.70    5.00 
  -3  -3   0   19.10    5.10 
   3  -3   0   18.40    3.10 
  -3  -3   0   20.10    5.00 
  -3   3   0   24.70    3.40 
  -3   3   0   21.50    3.90 
   3   3   0   13.00    4.50 
  -3   3   0   29.60    4.30 
   3   3   0   22.60    4.30 
   3   3   0   20.50    4.20 
  -3   3   0   23.30    4.60 
   3   3   0   22.30    5.20 
  -3   3   0   20.00    4.20 
  -3   3   0   17.20    4.20 
  -3   3   0   17.00    4.70 
  -3   3   0   19.70    4.20 
   3   3   0   26.70    4.90 
  -3   3   0   20.70    2.60 
   3   3   0   14.20    3.20 
  -3   3   0   25.20    2.90 
   3   3   0   24.20    4.90 
  -3   3   0   21.20    3.20 
   3   3   0   15.60    4.70 
   3   3   0   25.60    3.80 
   3   3   0   26.00    4.70 
  -3   3   0   17.40    4.50 
  -3   3   0   20.10    4.90 
  -3   3   0   17.90    5.20 
  -3   3   0   27.90    4.50 
   3   3   0   30.40    6.20 
  -3   3   0   29.20    5.20 
   3   3   0   21.20    5.00 
  -3   3   0   18.70    4.80 
  -3   3   0   31.10    5.90 
   3   3   0   27.80    5.70 
   3   3   0   16.60    4.60 
  -3   3   0   28.20    4.10 
   3   3   0   22.00    5.40 
   3   3   0   15.20    4.10 
   3   3   0   15.80    4.60 
   4  -3   0  774.52   32.30 
  -4  -3   0  748.83   31.90 
  -4  -3   0  765.52   29.70 
   4  -3   0  702.93   33.30 
  -4  -3   0  720.53   31.60 
  -4  -3   0  720.73   31.00 
  -4  -3   0  732.53   30.00 
   4  -3   0  761.92   32.60 
   4  -3   0  745.33   28.80 
   4  -3   0  752.02   31.00 
  -4  -3   0  786.22   30.20 
   4  -3   0  741.63   25.90 
   4  -3   0  726.33   32.70 
   4  -3   0  752.72   33.50 
   4  -3   0  736.73   30.70 
   4  -3   0  745.13   30.30 
  -4  -3   0  720.63   27.50 
  -4  -3   0  728.33   32.20 
  -4  -3   0  739.93   31.30 
   4  -3   0  751.92   27.20 
  -4  -3   0  724.53   30.90 
  -4  -3   0  779.12   30.80 
   4  -3   0  749.13   26.80 
   4  -3   0  729.13   27.20 
  -4  -3   0  729.63   33.20 
   4  -3   0  740.23   24.10 
  -4  -3   0  755.72   30.30 
  -4  -3   0  726.93   30.70 
  -4  -3   0  740.23   32.80 
  -4  -3   0  780.72   32.00 
  -4  -3   0  760.82   33.10 
  -4  -3   0  746.63   29.40 
  -4  -3   0  760.02   27.70 
   4  -3   0  734.03   29.20 
  -4  -3   0  735.73   30.70 
  -4   3   0  747.83   33.50 
  -4   3   0  753.22   23.70 
  -4   3   0  695.33   30.10 
  -4   3   0  715.83   31.10 
   4   3   0  692.93   31.60 
   4   3   0  689.03   31.10 
  -4   3   0  769.82   30.90 
   4   3   0  735.43   32.40 
  -4   3   0  726.23   32.20 
  -4   3   0  740.43   26.50 
   4   3   0  733.63   31.50 
   4   3   0  728.13   31.90 
   4   3   0  784.02   30.70 
  -4   3   0  756.62   28.90 
   4   3   0  781.12   31.50 
   4   3   0  716.53   32.60 
   4   3   0  745.63   28.70 
  -4   3   0  710.43   30.80 
  -4   3   0  749.92   26.20 
  -4   3   0  713.93   23.40 
  -4   3   0  740.43   24.00 
  -4   3   0  792.82   30.50 
   4   3   0  772.12   30.60 
  -4   3   0  756.12   32.20 
  -4   3   0  761.32   28.00 
  -4   3   0  733.63   29.30 
  -4   3   0  758.82   31.00 
   4   3   0  709.33   32.50 
   4   3   0  721.13   32.80 
   4   3   0  708.23   31.50 
   5  -3   0  697.13   31.40 
  -5  -3   0  704.93   32.30 
   5  -3   0  693.23   27.60 
   5  -3   0  700.03   25.30 
  -5  -3   0  648.14   30.50 
  -5  -3   0  633.04   32.80 
  -5  -3   0  703.23   31.10 
  -5  -3   0  660.73   31.30 
  -5  -3   0  720.93   29.40 
   5  -3   0  686.63   30.70 
  -5  -3   0  748.83   31.50 
   5  -3   0  720.83   28.50 
   5  -3   0  662.73   32.60 
  -5  -3   0  667.93   27.40 
  -5  -3   0  727.03   30.90 
   5  -3   0  679.33   28.80 
   5  -3   0  624.54   32.50 
  -5  -3   0  661.73   32.70 
  -5  -3   0  641.34   28.20 
  -5  -3   0  663.33   30.60 
  -5  -3   0  641.84   32.20 
  -5  -3   0  694.43   31.80 
  -5  -3   0  696.83   29.50 
   5  -3   0  716.53   33.30 
  -5  -3   0  701.43   30.60 
  -5  -3   0  681.63   32.10 
   5  -3   0  679.53   29.60 
   5  -3   0  663.73   32.30 
  -5  -3   0  681.33   30.60 
   5  -3   0  668.83   30.30 
   5  -3   0  648.74   26.20 
   5  -3   0  656.53   25.90 
   5   3   0  695.73   30.10 
  -5   3   0  661.93   32.70 
  -5   3   0  707.73   28.60 
   5   3   0  703.43   33.40 
  -5   3   0  658.53   29.70 
   5   3   0  685.63   31.90 
  -5   3   0  654.83   30.10 
   5   3   0  707.63   31.80 
  -5   3   0  664.93   26.20 
   5   3   0  657.43   31.90 
  -5   3   0  676.63   22.30 
   5   3   0  687.23   33.20 
   5   3   0  696.33   31.50 
   5   3   0  630.84   31.00 
  -5   3   0  692.03   30.90 
   5   3   0  679.73   32.70 
  -5   3   0  683.63   23.80 
   5   3   0  646.14   31.60 
  -5   3   0  669.03   28.40 
  -5   3   0  680.73   30.90 
  -5   3   0  683.13   30.60 
  -5   3   0  671.03   24.40 
   5   3   0  640.04   30.90 
   5   3   0  682.63   28.60 
  -5   3   0  706.43   23.60 
  -5   3   0  628.04   31.70 
   5   3   0  714.43   33.10 
   5   3   0  689.83   30.80 
  -5   3   0  692.63   32.10 
  -5   3   0  680.23   29.20 
  -5   3   0  618.94   30.60 
  -5   3   0  672.63   24.00 
   6  -3   0 1746.43   66.29 
  -6  -3   0 1872.11   69.99 
   6  -3   0 1842.52   60.79 
   6  -3   0 1875.21   68.29 
  -6  -3   0 1862.01   68.89 
   6  -3   0 1804.92   70.29 
  -6  -3   0 1875.21   63.79 
  -6  -3   0 1905.61   67.79 
   6  -3   0 1848.32   70.69 
  -6  -3   0 1836.62   68.09 
  -6  -3   0 1736.73   69.89 
  -6  -3   0 1861.91   63.59 
   6  -3   0 1738.23   63.19 
   6  -3   0 1828.92   65.49 
  -6  -3   0 1933.11   64.19 
   6  -3   0 1841.82   61.69 
  -6  -3   0 1783.52   66.59 
  -6  -3   0 1797.22   70.99 
  -6  -3   0 1651.93   64.79 
  -6  -3   0 1883.51   68.39 
  -6  -3   0 1865.61   67.79 
  -6  -3   0 1883.71   66.19 
  -6  -3   0 1797.82   66.89 
   6  -3   0 1818.42   70.39 
   6  -3   0 1807.52   63.09 
   6  -3   0 1780.42   68.89 
  -6  -3   0 1826.72   68.89 
  -6  -3   0 1886.91   67.29 
   6  -3   0 1874.91   67.49 
   6  -3   0 1791.82   63.89 
   6  -3   0 1792.32   67.19 
  -6  -3   0 1894.31   70.69 
  -6  -3   0 1707.23   68.49 
   6   3   0 1854.11   70.39 
  -6   3   0 1783.42   67.69 
  -6   3   0 1794.02   66.59 
  -6   3   0 1838.12   68.89 
   6   3   0 1894.51   65.29 
  -6   3   0 1819.62   67.39 
  -6   3   0 1875.51   64.09 
  -6   3   0 1921.31   71.29 
  -6   3   0 1799.02   65.79 
  -6   3   0 1841.62   58.59 
   6   3   0 1895.81   68.29 
   6   3   0 1827.72   69.19 
   6   3   0 1880.51   68.19 
   6   3   0 1715.93   69.39 
   6   3   0 1903.61   69.59 
   6   3   0 1915.11   70.89 
  -6   3   0 1863.91   62.39 
   6   3   0 1833.62   69.39 
  -6   3   0 1869.91   70.39 
   6   3   0 1791.52   65.89 
  -6   3   0 1788.52   67.29 
  -6   3   0 1828.12   65.39 
   6   3   0 1826.12   68.59 
   6   3   0 1754.82   67.19 
   6   3   0 1837.12   70.09 
  -6   3   0 1903.61   65.29 
   6   3   0 1842.72   70.29 
  -7  -3   0  532.15   29.40 
   7  -3   0  535.05   29.90 
  -7  -3   0  567.34   33.40 
  -7  -3   0  541.75   26.00 
   7  -3   0  555.34   29.20 
   7  -3   0  546.85   32.10 
  -7  -3   0  549.45   31.40 
   7  -3   0  554.94   32.30 
  -7  -3   0  538.45   32.80 
   7  -3   0  483.65   28.90 
   7  -3   0  548.05   26.20 
   7  -3   0  542.95   31.30 
  -7  -3   0  593.24   30.30 
   7  -3   0  543.25   32.40 
  -7  -3   0  547.25   30.30 
  -7  -3   0  543.55   32.30 
  -7  -3   0  510.35   26.80 
   7  -3   0  544.05   29.60 
   7  -3   0  532.25   28.70 
  -7  -3   0  565.74   32.20 
   7  -3   0  573.04   27.20 
   7  -3   0  554.54   25.90 
  -7  -3   0  535.85   29.90 
  -7  -3   0  560.54   31.30 
  -7  -3   0  561.34   29.20 
  -7  -3   0  507.75   29.70 
  -7  -3   0  519.95   25.70 
  -7  -3   0  523.15   31.30 
  -7  -3   0  476.25   27.90 
  -7  -3   0  555.64   30.40 
   7  -3   0  540.95   25.60 
  -7  -3   0  527.35   28.00 
  -7  -3   0  538.15   32.80 
   7  -3   0  517.65   26.70 
   7   3   0  482.65   28.60 
  -7   3   0  562.54   32.80 
   7   3   0  564.74   32.00 
  -7   3   0  529.35   28.10 
  -7   3   0  546.05   30.90 
   7   3   0  580.84   29.50 
   7   3   0  546.15   32.00 
  -7   3   0  521.45   30.90 
   7   3   0  602.64   31.60 
  -7   3   0  534.25   25.90 
   7   3   0  577.64   32.50 
   7   3   0  549.54   32.40 
   7   3   0  513.35   27.50 
   7   3   0  512.95   30.80 
  -7   3   0  575.04   27.30 
  -7   3   0  524.05   29.00 
  -7   3   0  574.64   28.30 
   7   3   0  580.24   31.40 
  -7   3   0  508.65   29.70 
  -7   3   0  543.45   29.10 
  -7   3   0  536.55   30.00 
   7   3   0  525.65   31.10 
   7   3   0  477.05   30.70 
  -7   3   0  532.55   31.90 
  -7   3   0  555.24   22.40 
   7   3   0  540.25   29.80 
   7   3   0  619.14   33.60 
   8  -3   0  640.94   35.70 
  -8  -3   0  638.64   35.80 
   8  -3   0  699.23   38.80 
   8  -3   0  669.23   38.10 
  -8  -3   0  632.44   32.90 
  -8  -3   0  628.44   35.10 
  -8  -3   0  653.43   34.10 
   8  -3   0  648.64   30.60 
  -8  -3   0  627.34   38.10 
  -8  -3   0  636.14   38.40 
  -8  -3   0  606.24   36.80 
   8  -3   0  660.73   34.30 
  -8  -3   0  654.83   34.90 
   8  -3   0  615.84   33.20 
  -8  -3   0  613.84   35.80 
  -8  -3   0  626.54   35.00 
  -8  -3   0  664.63   36.00 
   8  -3   0  682.03   39.20 
  -8  -3   0  626.54   38.60 
   8  -3   0  634.04   34.80 
   8  -3   0  586.84   30.40 
   8  -3   0  666.33   32.90 
  -8  -3   0  641.84   37.70 
  -8  -3   0  622.14   31.90 
  -8  -3   0  605.74   33.40 
  -8  -3   0  618.94   36.60 
  -8  -3   0  659.03   34.30 
  -8  -3   0  722.23   39.00 
   8  -3   0  581.34   33.60 
   8   3   0  617.14   37.60 
  -8   3   0  636.24   31.60 
  -8   3   0  588.84   34.60 
   8   3   0  607.44   36.10 
   8   3   0  614.84   35.30 
  -8   3   0  656.43   32.40 
  -8   3   0  626.54   33.60 
  -8   3   0  650.63   34.80 
   8   3   0  700.33   38.40 
   8   3   0  674.13   38.10 
  -8   3   0  641.64   36.40 
   8   3   0  621.04   33.60 
   8   3   0  609.64   34.20 
   8   3   0  647.24   36.10 
  -8   3   0  688.43   39.00 
   8   3   0  590.94   36.60 
   8   3   0  646.34   33.20 
   8   3   0  712.63   39.20 
  -8   3   0  632.14   36.20 
  -8   3   0  635.24   34.30 
  -8   3   0  584.24   35.50 
   8   3   0  665.13   35.20 
   8   3   0  582.34   36.00 
   8   3   0  593.14   36.00 
   9  -3   0  328.17   29.70 
   9  -3   0  318.27   24.10 
   9  -3   0  297.27   23.80 
  -9  -3   0  305.97   24.30 
  -9  -3   0  279.67   23.00 
  -9  -3   0  290.77   23.00 
  -9  -3   0  281.47   28.20 
   9  -3   0  268.27   21.80 
  -9  -3   0  285.27   31.80 
  -9  -3   0  306.67   31.40 
  -9  -3   0  266.67   28.10 
  -9  -3   0  297.47   23.10 
   9  -3   0  330.87   28.10 
  -9  -3   0  311.77   25.30 
  -9  -3   0  304.67   31.70 
   9  -3   0  261.17   27.50 
  -9  -3   0  313.37   25.60 
  -9  -3   0  306.47   27.00 
  -9  -3   0  283.77   21.60 
  -9  -3   0  317.87   26.80 
  -9  -3   0  304.07   30.90 
   9  -3   0  296.77   30.90 
  -9  -3   0  317.17   22.90 
   9  -3   0  302.97   22.30 
  -9  -3   0  285.07   30.70 
   9  -3   0  328.77   27.50 
   9   3   0  307.87   23.40 
   9   3   0  367.96   28.10 
   9   3   0  300.57   25.90 
   9   3   0  302.37   24.20 
   9   3   0  333.77   26.50 
  -9   3   0  291.87   29.60 
  -9   3   0  290.57   27.60 
   9   3   0  286.57   30.20 
   9   3   0  271.27   29.40 
   9   3   0  320.27   31.10 
  -9   3   0  282.37   28.10 
  -9   3   0  260.37   26.50 
  -9   3   0  309.97   24.10 
   9   3   0  282.57   24.30 
  -9   3   0  335.67   28.00 
   9   3   0  313.77   31.30 
   9   3   0  258.07   22.20 
   9   3   0  306.97   27.50 
   9   3   0  288.17   30.50 
  -9   3   0  295.67   25.00 
  -9   3   0  307.37   25.90 
   9   3   0  296.77   22.60 
   0  -4   0  227.58   16.40 
   0  -4   0  216.48   13.70 
   0  -4   0  236.48   13.60 
   0  -4   0  219.28   12.70 
   0  -4   0  237.78    7.90 
   0  -4   0  217.68    7.80 
   0  -4   0  200.28   15.80 
   0  -4   0  227.88   14.10 
   0  -4   0  243.98   12.70 
   0  -4   0  195.78   11.80 
   0  -4   0  220.08   12.00 
   0  -4   0  222.18    9.80 
   0  -4   0  239.68   14.70 
   0  -4   0  221.08    8.10 
   0  -4   0  212.88   13.90 
   0  -4   0  218.48    8.40 
   0  -4   0  234.68   11.90 
   0  -4   0  239.98   15.60 
   0  -4   0  230.48    9.90 
   0  -4   0  221.48   13.20 
   0  -4   0  233.08   11.90 
   0  -4   0  209.98   10.70 
   0  -4   0  231.48    9.50 
   0  -4   0  232.68    8.70 
   0  -4   0  221.18   11.20 
   0  -4   0  214.58    8.00 
   0   4   0  207.28   13.60 
   0   4   0  245.68   16.00 
   0   4   0  224.78   10.80 
   0   4   0  194.98   15.10 
   0   4   0  224.18    7.40 
   0   4   0  236.18   11.60 
   0   4   0  219.58    8.00 
   0   4   0  206.68   10.10 
   0   4   0  213.68   13.50 
   0   4   0  199.48   13.30 
   0   4   0  235.48   14.10 
   0   4   0  238.28   18.10 
   0   4   0  213.88   11.50 
   0   4   0  249.68   18.20 
   0   4   0  220.88   13.70 
   0   4   0  237.38   12.50 
   0   4   0  223.28   11.60 
   1  -4   0 5937.91  194.68 
   1  -4   0 6457.35  188.38 
   1  -4   0 6168.18  192.58 
  -1  -4   0 6447.85  185.78 
  -1  -4   0 6480.35  194.48 
  -1  -4   0 6607.54  190.08 
  -1  -4   0 6614.74  186.78 
  -1  -4   0 6700.73  187.88 
   1  -4   0 6490.75  197.48 
  -1  -4   0 6503.65  190.68 
   1  -4   0 6340.87  201.08 
   1  -4   0 5733.43  199.68 
   1  -4   0 6581.84  189.48 
   1  -4   0 6718.93  196.38 
   1  -4   0 6638.74  186.98 
   1  -4   0 6632.74  186.28 
  -1  -4   0 6743.23  194.68 
   1  -4   0 6081.09  193.98 
   1  -4   0 6049.79  198.88 
  -1  -4   0 6347.67  194.18 
   1  -4   0 6340.47  189.48 
   1  -4   0 6350.56  188.58 
   1  -4   0 6415.86  193.48 
   1  -4   0 6557.84  186.68 
   1  -4   0 6562.64  189.48 
  -1  -4   0 6702.33  191.18 
  -1  -4   0 6628.84  192.98 
   1  -4   0 6446.46  195.28 
   1  -4   0 5842.62  186.88 
   1  -4   0 6543.15  189.18 
  -1  -4   0 6626.94  190.48 
  -1  -4   0 6659.63  188.28 
  -1  -4   0 6442.16  189.28 
  -1  -4   0 6264.97  196.88 
  -1  -4   0 6453.35  192.38 
   1  -4   0 6412.46  191.98 
  -1  -4   0 6722.53  188.68 
  -1  -4   0 6577.74  193.08 
  -1  -4   0 6689.13  189.68 
  -1  -4   0 6331.17  198.48 
   1   4   0 6318.27  190.08 
  -1   4   0 6096.19  200.68 
  -1   4   0 6384.16  198.58 
   1   4   0 6477.55  197.68 
   1   4   0 6179.48  192.18 
   1   4   0 6554.64  195.68 
   1   4   0 6569.04  195.38 
  -1   4   0 6594.04  188.58 
   1   4   0 6067.19  186.98 
  -1   4   0 6627.34  190.48 
  -1   4   0 6585.94  191.58 
  -1   4   0 6419.66  186.08 
  -1   4   0 6511.65  195.78 
  -1   4   0 6685.53  189.68 
  -1   4   0 6514.85  201.78 
   1   4   0 6404.26  188.88 
  -1   4   0 6460.35  196.68 
  -1   4   0 6605.34  186.48 
   1   4   0 6513.45  197.38 
   1   4   0 6437.96  189.38 
  -1   4   0 6739.03  190.48 
  -1   4   0 6555.84  194.38 
   1   4   0 6410.76  186.08 
   1   4   0 6315.07  193.28 
   1   4   0 6763.52  198.48 
   1   4   0 6542.15  186.28 
   1   4   0 6565.74  196.18 
   1   4   0 6459.55  195.58 
   1   4   0 6535.95  191.08 
  -1   4   0 6658.23  195.78 
  -1   4   0 6520.35  195.58 
  -1   4   0 6413.06  199.18 
   2  -4   0  268.47   10.70 
   2  -4   0  278.27   12.10 
   2  -4   0  271.87   11.00 
  -2  -4   0  259.07   13.50 
  -2  -4   0  283.97   15.10 
   2  -4   0  306.77   15.10 
  -2  -4   0  251.77   15.40 
  -2  -4   0  280.07   15.60 
  -2  -4   0  278.17   11.50 
   2  -4   0  270.07   12.60 
  -2  -4   0  261.37   12.70 
   2  -4   0  288.27   20.90 
   2  -4   0  289.87   12.20 
   2  -4   0  259.57   11.70 
   2  -4   0  252.77   13.10 
   2  -4   0  266.47   10.70 
   2  -4   0  268.47   15.60 
   2  -4   0  262.07   16.10 
  -2  -4   0  265.87    8.70 
   2  -4   0  275.27   15.20 
   2  -4   0  291.77   16.30 
  -2  -4   0  259.37   15.70 
   2  -4   0  279.07   17.80 
  -2  -4   0  273.17   13.40 
   2  -4   0  272.47    9.80 
  -2  -4   0  277.97   15.70 
  -2  -4   0  252.57   11.80 
  -2  -4   0  270.07   17.20 
  -2  -4   0  275.07   15.60 
  -2  -4   0  251.07   16.40 
   2  -4   0  277.77   12.80 
   2  -4   0  278.27   14.90 
  -2  -4   0  266.47   11.50 
  -2  -4   0  283.37   11.90 
   2  -4   0  256.37   13.70 
  -2  -4   0  263.27   15.50 
   2  -4   0  255.87   17.10 
   2  -4   0  281.27   13.70 
   2  -4   0  287.27   16.80 
  -2  -4   0  266.57   11.60 
  -2  -4   0  291.57   15.00 
   2  -4   0  272.87   10.70 
   2  -4   0  264.07   12.80 
  -2   4   0  263.37   15.90 
  -2   4   0  267.67   19.00 
   2   4   0  274.07   12.40 
  -2   4   0  271.27   15.00 
   2   4   0  233.78   16.00 
  -2   4   0  269.57   11.20 
  -2   4   0  252.57   10.50 
   2   4   0  262.07   17.00 
  -2   4   0  279.07    9.50 
  -2   4   0  295.57   13.00 
   2   4   0  272.57   12.60 
  -2   4   0  261.27   12.90 
   2   4   0  272.37   10.80 
   2   4   0  228.28   15.90 
   2   4   0  257.97   14.00 
   2   4   0  245.58   15.90 
   2   4   0  277.97   12.70 
   2   4   0  256.17   11.70 
   2   4   0  258.77   14.40 
   2   4   0  279.77   13.80 
  -2   4   0  264.67   18.20 
  -2   4   0  285.27   12.10 
  -2   4   0  276.77   15.90 
   2   4   0  274.17   11.90 
  -2   4   0  287.77   14.00 
   2   4   0  276.77   14.00 
   2   4   0  266.57   16.10 
  -2   4   0  245.88   17.60 
   2   4   0  264.77   16.00 
   2   4   0  271.47   11.80 
   2   4   0  277.37   16.10 
   2   4   0  293.97   12.20 
   2   4   0  287.77   13.80 
  -2   4   0  286.47   17.10 
  -2   4   0  269.17   12.10 
  -2   4   0  273.47   16.30 
  -3  -4   0 1523.75   55.19 
  -3  -4   0 1565.64   50.89 
  -3  -4   0 1514.35   55.89 
   3  -4   0 1544.95   55.19 
  -3  -4   0 1516.35   55.39 
   3  -4   0 1519.65   57.59 
  -3  -4   0 1553.94   57.09 
  -3  -4   0 1478.65   52.29 
   3  -4   0 1540.05   56.29 
  -3  -4   0 1496.75   54.39 
   3  -4   0 1598.24   49.10 
  -3  -4   0 1504.15   57.69 
   3  -4   0 1436.96   60.19 
   3  -4   0 1590.64   48.40 
  -3  -4   0 1619.74   53.09 
   3  -4   0 1555.84   47.60 
  -3  -4   0 1569.94   50.59 
  -3  -4   0 1568.84   47.80 
  -3  -4   0 1558.64   52.19 
  -3  -4   0 1618.44   54.39 
  -3  -4   0 1638.94   55.39 
   3  -4   0 1543.85   52.59 
   3  -4   0 1592.54   53.29 
   3  -4   0 1602.14   50.29 
  -3  -4   0 1497.95   55.09 
   3  -4   0 1597.14   60.19 
   3  -4   0 1531.55   50.49 
  -3  -4   0 1502.05   50.79 
  -3  -4   0 1553.04   55.29 
   3  -4   0 1514.05   58.39 
  -3  -4   0 1539.15   56.49 
   3  -4   0 1528.25   55.59 
   3  -4   0 1510.55   51.39 
  -3  -4   0 1616.74   56.09 
   3  -4   0 1518.95   50.09 
   3  -4   0 1565.54   51.59 
   3   4   0 1582.94   51.29 
   3   4   0 1495.25   57.39 
  -3   4   0 1495.65   46.40 
  -3   4   0 1575.04   53.89 
   3   4   0 1571.24   57.19 
  -3   4   0 1560.24   56.29 
   3   4   0 1497.65   51.19 
   3   4   0 1486.65   50.09 
  -3   4   0 1467.65   58.29 
  -3   4   0 1510.55   50.49 
  -3   4   0 1584.94   47.10 
   3   4   0 1468.15   54.69 
   3   4   0 1544.05   53.79 
   3   4   0 1601.54   57.79 
  -3   4   0 1575.24   55.89 
   3   4   0 1555.34   51.29 
   3   4   0 1542.65   58.29 
  -3   4   0 1543.65   49.40 
   3   4   0 1578.74   57.09 
  -3   4   0 1554.44   49.00 
  -3   4   0 1509.75   55.49 
   3   4   0 1463.65   55.49 
   3   4   0 1559.34   53.79 
  -3   4   0 1529.35   52.69 
  -3   4   0 1566.04   51.79 
   3   4   0 1530.15   48.30 
  -3   4   0 1507.95   53.39 
  -3   4   0 1554.04   48.80 
  -3   4   0 1541.65   56.09 
   3   4   0 1597.34   54.99 
   4  -4   0  228.18    9.10 
  -4  -4   0  257.17   17.90 
   4  -4   0  239.88   14.90 
  -4  -4   0  286.17   17.90 
   4  -4   0  202.88   15.80 
   4  -4   0  203.58   16.60 
   4  -4   0  235.88   10.70 
   4  -4   0  233.18   13.50 
  -4  -4   0  253.37   17.50 
  -4  -4   0  202.28   14.60 
  -4  -4   0  223.98   13.60 
  -4  -4   0  221.28   15.30 
  -4  -4   0  198.58   15.10 
   4  -4   0  260.17   14.60 
   4  -4   0  234.58   16.10 
  -4  -4   0  228.18   15.40 
   4  -4   0  214.58   14.80 
   4  -4   0  211.18   12.00 
  -4  -4   0  205.98   14.60 
   4  -4   0  217.28   17.80 
   4  -4   0  232.08   11.30 
   4  -4   0  222.78   10.50 
  -4  -4   0  252.47   13.80 
  -4  -4   0  211.08   14.30 
   4  -4   0  197.68   16.40 
  -4  -4   0  221.68   14.70 
  -4  -4   0  225.58   15.60 
  -4  -4   0  234.58   16.50 
  -4  -4   0  241.58   14.60 
  -4  -4   0  237.38   13.40 
  -4  -4   0  228.08   11.40 
   4  -4   0  220.58   15.60 
  -4  -4   0  245.18   16.40 
   4   4   0  230.38   17.00 
   4   4   0  215.18   15.60 
   4   4   0  221.28   15.80 
  -4   4   0  227.08    9.00 
   4   4   0  220.18   15.10 
  -4   4   0  227.08   12.30 
   4   4   0  207.38   15.60 
  -4   4   0  210.08   15.50 
  -4   4   0  257.07   16.10 
   4   4   0  241.48   13.60 
   4   4   0  243.98   15.20 
  -4   4   0  218.08   11.00 
  -4   4   0  217.08   15.70 
   4   4   0  227.78   16.30 
   4   4   0  211.48   11.50 
  -4   4   0  216.08   10.90 
  -4   4   0  202.38   14.00 
   4   4   0  242.58   13.10 
   4   4   0  255.17   15.10 
  -4   4   0  204.58   13.60 
   4   4   0  243.98   15.60 
  -4   4   0  226.38   13.40 
   4   4   0  175.58   15.20 
  -4   4   0  214.68    9.30 
  -4   4   0  236.08   15.20 
  -4   4   0  236.08   17.80 
  -4   4   0  232.18   14.10 
  -4   4   0  216.88   15.50 
   4   4   0  244.58   14.30 
   4   4   0  230.58   16.10 
  -5  -4   0 1354.66   54.49 
   5  -4   0 1377.46   49.30 
   5  -4   0 1379.86   53.09 
  -5  -4   0 1388.96   51.69 
  -5  -4   0 1454.75   55.89 
   5  -4   0 1373.46   47.80 
  -5  -4   0 1318.57   50.79 
   5  -4   0 1399.26   46.90 
   5  -4   0 1296.17   54.29 
  -5  -4   0 1358.96   55.89 
   5  -4   0 1397.96   50.49 
   5  -4   0 1310.27   56.79 
  -5  -4   0 1409.86   47.70 
  -5  -4   0 1298.77   52.69 
   5  -4   0 1284.27   55.59 
  -5  -4   0 1413.06   52.59 
  -5  -4   0 1377.46   51.69 
  -5  -4   0 1389.06   55.59 
   5  -4   0 1443.16   53.39 
  -5  -4   0 1388.36   50.49 
  -5  -4   0 1453.85   53.79 
   5  -4   0 1386.26   56.29 
   5  -4   0 1408.06   51.89 
   5  -4   0 1354.96   44.60 
  -5  -4   0 1368.16   53.09 
  -5  -4   0 1363.56   56.29 
   5  -4   0 1381.46   48.80 
  -5  -4   0 1364.16   54.09 
  -5  -4   0 1423.96   53.99 
   5  -4   0 1361.96   44.70 
  -5  -4   0 1383.06   54.19 
   5  -4   0 1424.56   55.19 
   5  -4   0 1356.66   42.30 
   5   4   0 1386.26   49.40 
  -5   4   0 1373.86   56.69 
   5   4   0 1454.25   54.79 
   5   4   0 1353.96   52.59 
   5   4   0 1369.56   56.19 
  -5   4   0 1337.07   54.09 
  -5   4   0 1407.26   49.50 
   5   4   0 1369.46   56.29 
  -5   4   0 1447.66   52.69 
  -5   4   0 1411.36   53.09 
   5   4   0 1309.77   51.29 
  -5   4   0 1453.65   54.19 
  -5   4   0 1330.57   53.19 
  -5   4   0 1415.86   52.89 
   5   4   0 1414.86   55.19 
   5   4   0 1397.36   55.39 
   5   4   0 1425.26   54.59 
   5   4   0 1412.16   54.69 
  -5   4   0 1399.36   51.39 
  -5   4   0 1417.56   45.00 
  -5   4   0 1346.27   54.69 
   5   4   0 1371.96   54.59 
   5   4   0 1308.87   55.49 
  -5   4   0 1449.46   50.99 
   5   4   0 1392.36   54.89 
  -5   4   0 1371.26   47.60 
   5   4   0 1330.67   51.69 
   6  -4   0  625.74   26.10 
   6  -4   0  637.14   24.90 
   6  -4   0  589.24   29.80 
  -6  -4   0  666.93   33.70 
  -6  -4   0  589.44   30.70 
   6  -4   0  593.84   33.70 
   6  -4   0  647.94   29.20 
  -6  -4   0  530.25   32.40 
  -6  -4   0  605.44   31.20 
  -6  -4   0  640.24   33.80 
   6  -4   0  646.54   35.40 
  -6  -4   0  609.84   33.00 
  -6  -4   0  593.94   31.60 
  -6  -4   0  606.94   31.80 
  -6  -4   0  664.73   27.70 
   6  -4   0  646.14   31.30 
  -6  -4   0  614.74   34.70 
  -6  -4   0  621.14   31.20 
  -6  -4   0  657.93   30.10 
  -6  -4   0  622.24   34.20 
  -6  -4   0  617.04   31.80 
  -6  -4   0  590.94   31.90 
   6  -4   0  616.44   32.00 
  -6  -4   0  556.64   29.40 
  -6  -4   0  640.44   31.50 
   6  -4   0  580.74   24.40 
  -6  -4   0  603.44   29.20 
   6  -4   0  605.64   33.40 
   6  -4   0  589.74   33.40 
   6  -4   0  665.33   27.20 
  -6  -4   0  586.14   29.10 
   6  -4   0  628.44   28.30 
   6  -4   0  613.54   31.40 
  -6   4   0  580.04   31.60 
   6   4   0  632.04   34.00 
   6   4   0  605.54   33.90 
   6   4   0  580.04   33.30 
  -6   4   0  631.34   25.10 
   6   4   0  663.13   33.50 
   6   4   0  685.23   33.50 
  -6   4   0  638.04   31.60 
  -6   4   0  656.43   29.10 
  -6   4   0  665.43   29.60 
  -6   4   0  671.33   32.30 
   6   4   0  585.44   32.40 
  -6   4   0  642.84   35.10 
  -6   4   0  580.24   30.60 
  -6   4   0  645.44   28.00 
   6   4   0  604.64   31.60 
   6   4   0  567.34   33.10 
   6   4   0  580.34   30.00 
  -6   4   0  673.53   31.50 
   6   4   0  571.34   31.50 
   6   4   0  634.54   33.80 
   6   4   0  625.44   28.70 
   6   4   0  687.83   34.00 
  -6   4   0  599.64   30.20 
  -6   4   0  618.04   33.30 
   6   4   0  583.54   30.30 
  -7  -4   0  829.92   39.80 
   7  -4   0  748.33   36.20 
  -7  -4   0  831.92   40.30 
  -7  -4   0  800.32   41.20 
   7  -4   0  827.82   43.30 
  -7  -4   0  807.42   42.00 
  -7  -4   0  866.41   37.50 
   7  -4   0  766.72   39.80 
   7  -4   0  889.11   43.40 
  -7  -4   0  796.92   40.60 
   7  -4   0  824.32   35.50 
  -7  -4   0  818.92   43.20 
   7  -4   0  844.12   35.10 
   7  -4   0  768.62   36.60 
  -7  -4   0  874.21   36.10 
  -7  -4   0  797.22   38.70 
  -7  -4   0  829.32   39.30 
   7  -4   0  786.82   42.70 
   7  -4   0  863.41   40.30 
  -7  -4   0  831.42   40.20 
  -7  -4   0  797.72   39.50 
   7  -4   0  810.72   42.80 
  -7  -4   0  850.51   36.90 
  -7  -4   0  775.62   37.30 
  -7  -4   0  831.12   40.40 
  -7  -4   0  862.81   44.70 
  -7  -4   0  885.71   42.20 
  -7  -4   0  870.71   44.20 
   7  -4   0  792.12   39.30 
  -7  -4   0  811.12   41.70 
   7  -4   0  824.12   39.70 
  -7   4   0  778.02   40.70 
  -7   4   0  857.21   38.10 
   7   4   0  773.72   41.40 
   7   4   0  789.22   42.20 
   7   4   0  759.42   41.70 
   7   4   0  843.62   43.00 
   7   4   0  832.62   38.90 
   7   4   0  888.41   37.80 
  -7   4   0  829.42   39.60 
  -7   4   0  782.62   35.80 
  -7   4   0  819.02   39.40 
   7   4   0  817.12   40.00 
   7   4   0  866.71   41.40 
  -7   4   0  747.13   41.00 
  -7   4   0  826.42   43.40 
   7   4   0  896.21   41.60 
   7   4   0  812.62   41.90 
   7   4   0  838.32   43.30 
   7   4   0  869.81   42.70 
   7   4   0  810.42   40.60 
  -7   4   0  851.51   40.60 
  -7   4   0  841.02   38.50 
   7   4   0  926.51   42.60 
  -7   4   0  815.22   40.10 
  -8  -4   0  333.77   27.50 
  -8  -4   0  393.86   23.00 
   8  -4   0  387.06   26.30 
  -8  -4   0  382.06   26.90 
  -8  -4   0  342.97   28.00 
  -8  -4   0  391.46   26.40 
  -8  -4   0  372.86   27.70 
  -8  -4   0  372.06   28.00 
  -8  -4   0  341.87   28.40 
  -8  -4   0  340.37   24.00 
  -8  -4   0  360.56   22.30 
  -8  -4   0  359.06   24.50 
  -8  -4   0  318.07   24.50 
  -8  -4   0  356.56   25.40 
  -8  -4   0  406.26   26.80 
   8  -4   0  343.17   24.30 
   8  -4   0  314.07   26.50 
   8  -4   0  337.27   25.50 
  -8  -4   0  357.96   27.50 
   8  -4   0  381.96   25.00 
  -8  -4   0  376.26   25.90 
  -8  -4   0  347.07   26.40 
   8  -4   0  359.76   23.70 
  -8  -4   0  374.26   26.20 
  -8  -4   0  341.47   26.60 
   8  -4   0  327.47   27.20 
   8  -4   0  360.96   27.50 
   8  -4   0  317.17   27.20 
   8  -4   0  349.07   25.10 
   8   4   0  365.56   26.40 
   8   4   0  338.27   25.20 
  -8   4   0  380.06   28.30 
   8   4   0  372.16   26.00 
  -8   4   0  408.36   26.30 
   8   4   0  365.76   27.70 
   8   4   0  374.06   27.40 
  -8   4   0  349.07   26.40 
   8   4   0  365.86   26.80 
  -8   4   0  344.67   25.10 
   8   4   0  319.07   22.40 
   8   4   0  354.06   27.60 
  -8   4   0  354.96   28.20 
   8   4   0  366.96   26.00 
   8   4   0  331.67   23.70 
  -8   4   0  326.47   24.90 
  -8   4   0  377.76   26.60 
   8   4   0  323.37   26.30 
  -8   4   0  298.87   22.10 
   8   4   0  338.17   27.00 
   8   4   0  303.27   30.10 
  -8   4   0  343.07   23.80 
   8   4   0  388.66   28.70 
  -9  -4   0  144.09   19.70 
  -9  -4   0  142.09   21.80 
   9  -4   0  156.38   23.10 
   9  -4   0  144.69   21.10 
   9  -4   0  137.29   19.80 
  -9  -4   0  174.78   22.00 
  -9  -4   0  121.79   21.20 
   9  -4   0  143.29   19.00 
  -9  -4   0  164.68   21.20 
  -9  -4   0  150.28   19.50 
  -9  -4   0  232.78   29.10 
  -9  -4   0  167.98   24.80 
  -9  -4   0  151.88   22.50 
  -9  -4   0  155.88   22.40 
   9  -4   0  166.68   23.70 
  -9  -4   0  108.39   15.20 
  -9  -4   0  135.09   20.60 
  -9  -4   0  128.49   20.20 
  -9  -4   0  132.89   20.30 
   9  -4   0  151.58   22.60 
  -9  -4   0  160.98   21.00 
  -9  -4   0  147.09   20.80 
   9  -4   0  160.18   21.80 
   9   4   0  174.78   23.20 
  -9   4   0  118.19   18.50 
   9   4   0  170.58   21.70 
   9   4   0  184.88   24.50 
   9   4   0  133.09   21.20 
  -9   4   0  142.09   20.10 
  -9   4   0  109.99   17.40 
   9   4   0  155.88   20.80 
   9   4   0  150.48   21.80 
  -9   4   0  135.39   19.00 
   9   4   0  151.38   19.80 
   9   4   0  138.59   22.30 
   9   4   0  160.78   22.70 
   9   4   0  140.89   21.10 
   9   4   0  154.38   22.70 
   9   4   0  160.88   23.40 
  -9   4   0  141.69   23.10 
  -9   4   0  132.99   20.60 
   9   4   0  141.79   20.40 
   9   4   0  153.48   22.60 
  -9   4   0  139.09   20.70 
   0  -5   0    1.60    1.90 
   0  -5   0   18.20    4.40 
   0  -5   0    3.90    1.10 
   0  -5   0   -4.10    2.50 
   0  -5   0    1.10    2.50 
   0  -5   0   12.40    3.30 
   0  -5   0    1.60    1.50 
   0  -5   0    2.60    1.40 
   0  -5   0    1.70    1.40 
   0  -5   0    6.30    2.70 
   0  -5   0    0.10    1.70 
   0  -5   0    4.00    3.10 
   0  -5   0    6.60    2.20 
   0  -5   0    3.30    1.90 
   0  -5   0    0.00    3.20 
   0  -5   0    0.50    2.50 
   0  -5   0   -1.20    2.70 
   0  -5   0   -0.50    2.60 
   0  -5   0   14.30    5.00 
   0   5   0    1.20    2.80 
   0   5   0    3.80    4.20 
   0   5   0    0.00    1.30 
   0   5   0   -0.40    2.30 
   0   5   0    0.60    2.70 
   0   5   0   10.50    5.60 
   0   5   0    1.70    2.70 
   0   5   0    1.30    1.60 
   0   5   0    1.20    1.80 
   0   5   0    4.10    3.80 
   0   5   0   -0.80    1.70 
   0   5   0    4.70    3.90 
   0   5   0    0.70    2.30 
   1  -5   0  114.99    5.80 
  -1  -5   0  111.09    7.20 
  -1  -5   0  140.49    9.30 
  -1  -5   0  126.79   12.60 
   1  -5   0  123.99   13.80 
   1  -5   0  106.49   12.80 
  -1  -5   0  115.89   14.70 
  -1  -5   0  117.89    7.50 
  -1  -5   0  114.49    8.40 
   1  -5   0  140.39   10.80 
  -1  -5   0  126.29    6.80 
   1  -5   0  131.59    8.40 
  -1  -5   0  120.89    6.10 
  -1  -5   0  110.39   12.50 
   1  -5   0  124.99    7.60 
   1  -5   0  108.89    6.40 
  -1  -5   0  126.09   14.60 
   1  -5   0  122.09    7.50 
   1  -5   0  103.99   10.50 
  -1  -5   0  131.39    9.80 
   1  -5   0  109.69   13.70 
  -1  -5   0  112.19    5.30 
   1  -5   0  115.29   12.60 
   1  -5   0  116.79    6.90 
  -1  -5   0  123.39    9.80 
  -1  -5   0   97.29   10.40 
   1  -5   0  136.49   17.00 
   1  -5   0  116.49    8.40 
  -1  -5   0  118.19   12.20 
  -1  -5   0  120.99   12.50 
  -1  -5   0  117.49    6.80 
   1  -5   0  130.09   12.70 
  -1  -5   0  110.09    7.80 
   1  -5   0  120.99   14.40 
  -1   5   0  121.59   16.20 
   1   5   0  104.09   12.10 
  -1   5   0  122.99    7.10 
   1   5   0  116.59   14.60 
   1   5   0  122.19    8.70 
  -1   5   0   95.79   11.80 
  -1   5   0  110.39   11.70 
   1   5   0  139.49   16.80 
  -1   5   0  127.29    8.40 
  -1   5   0  130.79   14.60 
  -1   5   0  150.18   16.80 
   1   5   0  102.59   12.40 
   1   5   0  117.19    9.80 
  -1   5   0  109.59   12.90 
  -1   5   0  137.89   14.20 
   1   5   0  129.79    7.50 
   1   5   0   99.19   13.10 
   1   5   0  126.69    9.30 
   1   5   0  133.19   13.00 
   1   5   0  109.69    7.40 
   1   5   0  108.89   12.80 
  -1   5   0  118.99    5.90 
   1   5   0  119.19   14.60 
  -1   5   0  111.49   13.80 
  -1   5   0  125.29    8.10 
  -1   5   0  119.69    8.00 
   1   5   0  106.99   12.60 
   1   5   0  119.99    8.90 
  -1   5   0  115.89   15.90 
   1   5   0  121.19    7.70 
   2  -5   0   27.30    3.40 
  -2  -5   0   33.70    3.80 
   2  -5   0   29.50    5.50 
   2  -5   0   22.60    3.60 
  -2  -5   0   18.50    5.10 
   2  -5   0   22.90    6.10 
  -2  -5   0   28.20    5.40 
   2  -5   0   30.40    2.50 
  -2  -5   0   21.30    4.40 
   2  -5   0   28.50    5.20 
   2  -5   0   29.40    7.60 
  -2  -5   0   19.90    5.20 
   2  -5   0   27.80    5.20 
  -2  -5   0   24.10    6.00 
   2  -5   0   28.70    7.60 
  -2  -5   0   22.30    5.80 
   2  -5   0   30.50    8.90 
  -2  -5   0   27.30    6.10 
   2  -5   0   24.80    6.00 
  -2  -5   0   27.40    4.30 
   2  -5   0   29.20    5.10 
   2  -5   0   28.00    3.30 
   2  -5   0   35.10    6.60 
  -2  -5   0   29.40    6.50 
  -2  -5   0   26.30    3.80 
   2  -5   0   26.90    3.80 
  -2  -5   0   23.20    6.60 
  -2  -5   0   34.30    3.80 
  -2  -5   0   21.40    5.10 
   2  -5   0   30.40    4.50 
   2  -5   0   39.30    7.80 
   2  -5   0   28.10    2.70 
   2  -5   0   28.60    3.20 
  -2  -5   0   21.30    3.60 
   2  -5   0   31.70    7.50 
  -2  -5   0   25.60    4.60 
  -2  -5   0   25.10    6.80 
   2   5   0   15.80    5.80 
  -2   5   0   28.90    6.50 
   2   5   0   25.50    5.40 
   2   5   0   20.30    4.30 
  -2   5   0   36.90    4.50 
   2   5   0   29.80    7.50 
   2   5   0   32.50    3.90 
  -2   5   0   26.30    8.40 
   2   5   0   23.20    5.50 
   2   5   0   33.30    4.60 
   2   5   0   23.80    4.80 
  -2   5   0   22.60    7.30 
   2   5   0   31.60    7.20 
   2   5   0   24.80    6.70 
  -2   5   0   31.90    5.20 
   2   5   0   26.50    5.40 
  -2   5   0   28.00    7.20 
   2   5   0   29.10    4.00 
  -2   5   0   48.00    5.70 
   2   5   0   27.90    6.60 
   2   5   0   24.10    4.50 
  -2   5   0   23.90    6.10 
  -2   5   0   26.50    7.40 
   2   5   0   30.20    6.80 
  -2   5   0   27.10    5.90 
   2   5   0   26.10    6.40 
  -2   5   0   27.80    3.70 
  -2   5   0   38.90    3.00 
   2   5   0   34.10    5.70 
   2   5   0   42.90    8.70 
   2   5   0   24.90    3.80 
  -2   5   0   23.80    5.90 
   2   5   0   36.20    6.20 
   2   5   0   26.30    4.30 
   3  -5   0    3.80    1.90 
  -3  -5   0    2.50    2.00 
  -3  -5   0    1.50    1.10 
   3  -5   0   -0.20    5.50 
   3  -5   0    1.30    2.50 
  -3  -5   0    0.00    1.80 
   3  -5   0    7.10    4.90 
  -3  -5   0    3.90    3.60 
  -3  -5   0   -2.90    2.60 
  -3  -5   0    2.30    2.30 
  -3  -5   0    0.10    3.10 
  -3  -5   0   -1.40    2.50 
   3  -5   0   -1.00    2.60 
   3  -5   0    3.20    1.40 
   3  -5   0    2.60    3.20 
   3  -5   0    1.00    2.90 
  -3  -5   0    4.50    3.80 
   3  -5   0    1.50    1.70 
   3  -5   0   -0.20    1.70 
   3  -5   0    0.80    2.60 
   3  -5   0   -3.20    2.60 
  -3  -5   0    2.80    3.50 
   3  -5   0    3.10    2.10 
  -3  -5   0    4.90    4.10 
  -3  -5   0    3.40    2.70 
  -3  -5   0    0.90    2.60 
  -3  -5   0    5.30    4.50 
   3  -5   0    0.10    2.50 
  -3  -5   0    3.80    2.90 
  -3  -5   0    2.10    3.50 
   3  -5   0    4.80    1.50 
  -3  -5   0   -1.10    2.90 
   3  -5   0    1.80    1.20 
   3  -5   0   -1.60    2.90 
  -3   5   0    4.70    3.20 
   3   5   0    3.30    2.80 
   3   5   0    9.50    4.80 
   3   5   0    0.20    2.60 
   3   5   0    0.80    3.80 
   3   5   0    1.80    2.00 
  -3   5   0    4.70    2.50 
   3   5   0    8.30    3.80 
  -3   5   0   -0.20    1.80 
   3   5   0   -1.10    2.00 
  -3   5   0   -0.70    2.80 
  -3   5   0    4.00    1.50 
   3   5   0    2.60    2.00 
   3   5   0    2.00    3.80 
   3   5   0    6.80    4.40 
   3   5   0    3.40    2.60 
  -3   5   0    2.30    4.40 
  -3   5   0    1.50    2.30 
  -3   5   0    4.80    3.20 
   3   5   0    3.90    4.30 
   3   5   0    4.10    3.50 
   3   5   0    6.30    4.10 
  -3   5   0   -3.60    2.30 
  -3   5   0    2.80    3.40 
  -3   5   0    2.10    3.50 
  -3   5   0   -4.10    2.20 
   3   5   0    1.20    3.70 
  -4  -5   0  367.36   24.00 
  -4  -5   0  409.36   16.20 
   4  -5   0  462.95   27.10 
  -4  -5   0  387.76   23.30 
  -4  -5   0  422.66   22.60 
   4  -5   0  387.36   27.90 
   4  -5   0  421.56   23.80 
  -4  -5   0  423.46   19.90 
  -4  -5   0  389.16   22.50 
   4  -5   0  397.76   24.10 
  -4  -5   0  417.46   24.70 
   4  -5   0  408.66   15.40 
   4  -5   0  441.56   20.70 
  -4  -5   0  421.46   21.50 
  -4  -5   0  428.06   21.50 
  -4  -5   0  409.76   23.40 
  -4  -5   0  424.06   24.00 
   4  -5   0  418.66   17.70 
  -4  -5   0  426.26   23.40 
  -4  -5   0  445.96   24.90 
   4  -5   0  411.66   26.20 
   4  -5   0  434.16   18.40 
  -4  -5   0  382.26   19.10 
   4  -5   0  411.86   21.10 
  -4  -5   0  386.66   25.10 
   4  -5   0  407.36   23.70 
  -4  -5   0  454.65   24.20 
  -4  -5   0  382.76   23.30 
   4  -5   0  378.86   26.00 
  -4   5   0  431.06   19.60 
   4   5   0  381.66   24.90 
   4   5   0  448.76   23.00 
   4   5   0  389.96   24.40 
  -4   5   0  442.06   22.00 
   4   5   0  389.56   19.40 
   4   5   0  431.26   20.20 
  -4   5   0  436.06   17.70 
  -4   5   0  421.56   23.90 
  -4   5   0  442.46   20.80 
  -4   5   0  472.05   25.10 
   4   5   0  374.76   24.00 
  -4   5   0  423.26   14.30 
  -4   5   0  383.76   23.40 
   4   5   0  405.36   25.90 
   4   5   0  384.06   19.80 
   4   5   0  411.06   20.90 
  -4   5   0  416.16   22.20 
   4   5   0  403.26   22.80 
  -4   5   0  402.46   21.20 
  -4   5   0  414.16   26.90 
   4   5   0  410.76   23.50 
   4   5   0  420.56   23.90 
   4   5   0  343.37   20.90 
   4   5   0  449.26   23.10 
   4   5   0  392.66   23.90 
   4   5   0  385.96   24.70 
  -4   5   0  400.56   23.70 
  -5  -5   0    9.00    3.40 
   5  -5   0    8.90    4.60 
  -5  -5   0   12.60    5.50 
  -5  -5   0   11.90    5.40 
   5  -5   0    6.70    6.10 
  -5  -5   0    4.90    3.90 
  -5  -5   0   17.50    6.80 
  -5  -5   0   13.70    5.80 
   5  -5   0   10.50    6.10 
   5  -5   0   11.40    5.80 
  -5  -5   0   10.50    5.90 
  -5  -5   0   10.90    5.60 
   5  -5   0   14.70    6.00 
   5  -5   0   14.00    5.00 
  -5  -5   0    8.10    4.10 
  -5  -5   0   15.70    5.90 
  -5  -5   0   12.20    6.00 
  -5  -5   0   11.60    5.90 
  -5  -5   0   26.20    8.20 
  -5  -5   0    6.90    5.20 
   5  -5   0   15.20    6.70 
  -5  -5   0    6.70    4.60 
   5  -5   0   16.90    6.10 
   5  -5   0    9.90    5.40 
   5  -5   0   10.00    4.00 
  -5  -5   0    8.50    5.40 
   5  -5   0   19.10    7.50 
  -5  -5   0   17.60    6.90 
  -5  -5   0    7.30    4.50 
  -5   5   0   13.80    4.40 
  -5   5   0   12.80    5.80 
   5   5   0    8.40    4.40 
   5   5   0    3.10    4.40 
  -5   5   0   10.40    5.50 
  -5   5   0   10.90    5.30 
   5   5   0   16.80    6.30 
   5   5   0    9.10    5.20 
   5   5   0    9.90    5.30 
   5   5   0   14.00    5.70 
  -5   5   0   10.40    5.10 
   5   5   0   12.60    5.90 
  -5   5   0    6.80    3.80 
  -5   5   0    8.40    5.20 
  -5   5   0   24.20    8.20 
   5   5   0   14.30    6.50 
   5   5   0   18.00    5.00 
   5   5   0    9.00    5.70 
  -5   5   0    7.70    3.50 
   5   5   0    4.20    4.90 
   5   5   0   16.00    5.70 
  -5   5   0   12.20    5.20 
  -5   5   0   13.70    5.00 
   5   5   0    6.80    4.60 
  -5   5   0   14.90    5.70 
  -6  -5   0 1608.64   64.89 
  -6  -5   0 1594.84   65.49 
  -6  -5   0 1506.35   62.69 
  -6  -5   0 1612.64   63.59 
  -6  -5   0 1600.74   59.99 
  -6  -5   0 1520.15   64.79 
   6  -5   0 1492.55   61.79 
   6  -5   0 1630.14   65.69 
   6  -5   0 1557.44   60.19 
   6  -5   0 1585.74   67.19 
  -6  -5   0 1554.74   63.89 
   6  -5   0 1626.84   65.49 
  -6  -5   0 1490.15   61.29 
  -6  -5   0 1509.55   65.89 
   6  -5   0 1649.33   63.19 
  -6  -5   0 1531.75   60.49 
  -6  -5   0 1578.14   63.89 
  -6  -5   0 1643.94   61.59 
   6  -5   0 1502.45   67.89 
  -6  -5   0 1598.54   54.89 
   6  -5   0 1635.44   58.79 
  -6  -5   0 1516.65   65.89 
  -6  -5   0 1567.84   62.79 
  -6  -5   0 1536.75   60.89 
   6  -5   0 1641.34   57.19 
  -6  -5   0 1531.55   62.59 
  -6  -5   0 1660.83   59.39 
   6  -5   0 1649.73   68.19 
   6   5   0 1502.95   63.89 
  -6   5   0 1661.23   62.19 
   6   5   0 1740.13   66.29 
   6   5   0 1568.64   60.49 
  -6   5   0 1579.24   64.09 
  -6   5   0 1501.95   66.49 
  -6   5   0 1620.94   58.29 
   6   5   0 1576.44   57.59 
  -6   5   0 1564.74   62.69 
  -6   5   0 1574.74   62.79 
   6   5   0 1594.74   66.89 
   6   5   0 1563.04   64.79 
   6   5   0 1604.44   63.69 
   6   5   0 1541.05   64.79 
  -6   5   0 1543.55   61.29 
   6   5   0 1587.74   61.79 
  -6   5   0 1600.54   60.89 
  -6   5   0 1669.83   60.09 
  -6   5   0 1598.34   57.09 
  -6   5   0 1603.74   65.09 
   6   5   0 1535.55   64.39 
   6   5   0 1525.25   60.99 
   6   5   0 1585.04   63.59 
   6   5   0 1677.13   67.69 
   7  -5   0   11.90    7.00 
  -7  -5   0   13.20    6.20 
   7  -5   0   17.50    8.30 
  -7  -5   0   11.20    6.70 
  -7  -5   0   22.90    7.70 
  -7  -5   0   12.40    6.60 
  -7  -5   0    8.10    7.10 
   7  -5   0   19.00    8.70 
  -7  -5   0    8.80    6.20 
  -7  -5   0   15.70    6.40 
  -7  -5   0   19.60    8.90 
   7  -5   0   23.40    8.70 
   7  -5   0   21.10    6.50 
  -7  -5   0   14.50    7.10 
   7  -5   0    8.90    6.00 
   7  -5   0   21.80    8.50 
  -7  -5   0    2.20    4.70 
  -7  -5   0    8.60    5.70 
   7  -5   0   10.50    7.20 
  -7  -5   0   17.70    8.20 
  -7  -5   0   10.40    6.10 
  -7  -5   0   18.80    6.80 
   7  -5   0   14.30    6.60 
  -7  -5   0    7.50    6.30 
  -7  -5   0   16.80    7.40 
  -7  -5   0   18.30    8.10 
   7   5   0   13.40    8.60 
   7   5   0   10.50    5.40 
  -7   5   0    3.50    6.30 
   7   5   0    9.20    6.60 
   7   5   0   19.40    7.30 
  -7   5   0    3.60    5.20 
  -7   5   0    9.00    7.00 
  -7   5   0    8.40    5.20 
   7   5   0   15.60    7.90 
   7   5   0   21.40    9.20 
   7   5   0   26.60    8.60 
   7   5   0    6.20    5.40 
   7   5   0    9.30    6.00 
   7   5   0   13.60    6.80 
  -7   5   0    8.50    6.10 
   7   5   0    8.90    6.00 
   7   5   0   34.40    9.60 
   7   5   0   13.20    7.10 
  -7   5   0   12.70    6.70 
  -7   5   0    0.60    5.00 
  -7   5   0   16.80    6.30 
  -8  -5   0 1021.30   45.60 
  -8  -5   0  951.60   47.90 
  -8  -5   0  982.90   48.90 
  -8  -5   0  974.10   46.70 
  -8  -5   0  959.80   50.19 
  -8  -5   0  957.90   51.29 
  -8  -5   0 1000.90   51.09 
   8  -5   0  928.91   50.49 
   8  -5   0  889.81   49.70 
  -8  -5   0  896.81   46.20 
  -8  -5   0  978.10   44.00 
  -8  -5   0 1021.70   50.49 
   8  -5   0  955.00   52.09 
   8  -5   0  916.51   46.50 
   8  -5   0  875.91   46.40 
  -8  -5   0  980.80   52.59 
  -8  -5   0  929.71   48.50 
  -8  -5   0 1053.29   53.99 
  -8  -5   0  998.60   48.10 
   8  -5   0  899.61   47.60 
  -8  -5   0  868.11   49.80 
   8  -5   0  991.30   47.20 
  -8  -5   0  984.10   48.20 
   8  -5   0  973.60   51.99 
  -8  -5   0  928.21   45.40 
  -8   5   0  890.11   46.20 
  -8   5   0  856.31   48.40 
   8   5   0  853.51   49.10 
   8   5   0 1003.70   49.20 
   8   5   0  940.21   49.40 
   8   5   0  922.91   49.40 
  -8   5   0  965.80   48.80 
   8   5   0 1028.80   52.89 
   8   5   0  913.51   48.10 
  -8   5   0  962.30   47.60 
  -8   5   0  934.81   46.60 
   8   5   0  934.31   46.00 
   8   5   0  964.80   49.50 
   8   5   0  968.90   51.59 
   8   5   0 1008.70   49.80 
  -8   5   0  914.81   51.09 
   8   5   0  975.00   48.20 
   8   5   0  954.70   50.29 
   8   5   0 1022.20   47.90 
  -8   5   0 1001.40   46.70 
   9  -5   0    2.60    6.20 
  -9  -5   0   17.70    9.10 
  -9  -5   0   18.50    8.80 
  -9  -5   0    8.00    7.50 
  -9  -5   0   19.70    8.70 
  -9  -5   0    7.10    8.60 
  -9  -5   0    7.60    7.90 
   9  -5   0   11.60    8.70 
   9  -5   0    9.80    7.50 
  -9  -5   0   -3.10    4.70 
  -9  -5   0    9.60    8.60 
  -9  -5   0    0.30    4.80 
  -9  -5   0    9.00    8.20 
   9  -5   0    8.30    7.70 
   9  -5   0    5.80    7.20 
  -9  -5   0    1.00    6.80 
  -9  -5   0    9.90    7.50 
  -9  -5   0    6.30    7.40 
  -9  -5   0   12.80    8.90 
   9  -5   0    6.50    7.50 
   9  -5   0   23.50   10.30 
  -9  -5   0    9.80    7.20 
   9   5   0   13.20    7.40 
   9   5   0    1.80    7.30 
  -9   5   0    7.90    7.40 
   9   5   0    2.90    7.00 
  -9   5   0    7.70    7.30 
   9   5   0    2.30    7.10 
   9   5   0    2.40    6.50 
  -9   5   0    0.50    6.40 
   9   5   0    3.60    7.10 
  -9   5   0   -2.20    7.00 
   9   5   0   13.00    8.70 
   9   5   0    0.40    6.10 
  -9   5   0    6.10    7.40 
   9   5   0    7.20    7.50 
   9   5   0   12.30    7.40 
   9   5   0   -3.80    4.70 
   9   5   0    1.70    6.30 
   9   5   0    6.30    7.40 
   0  -6   0  111.99    5.20 
   0  -6   0  102.19    6.60 
   0  -6   0  112.29    8.80 
   0  -6   0  102.79   12.10 
   0  -6   0  115.89   13.80 
   0  -6   0  101.89    7.90 
   0  -6   0   95.49   11.60 
   0  -6   0   90.29    6.70 
   0  -6   0  113.19   15.70 
   0  -6   0  109.49    7.20 
   0  -6   0  117.69   14.30 
   0  -6   0  109.49    5.00 
   0  -6   0   99.49   15.50 
   0  -6   0  118.99   12.10 
   0  -6   0  117.69   14.70 
   0  -6   0  115.99   11.20 
   0  -6   0  124.99   15.10 
   0  -6   0   98.89    7.50 
   0  -6   0  104.69    8.30 
   0   6   0  115.89   16.80 
   0   6   0   82.39   13.40 
   0   6   0  106.59   13.30 
   0   6   0  106.89   15.30 
   0   6   0   98.09   13.20 
   0   6   0  106.09   16.60 
   0   6   0  112.49    7.90 
   0   6   0  118.79    8.10 
   0   6   0  115.19    7.40 
   0   6   0  124.69   13.90 
   0   6   0  125.49   14.80 
  -1  -6   0 2631.94   89.79 
  -1  -6   0 2627.24   83.79 
   1  -6   0 2531.05   86.59 
   1  -6   0 2564.84   89.09 
   1  -6   0 2620.54   83.79 
  -1  -6   0 2643.34   80.89 
  -1  -6   0 2685.73   79.59 
   1  -6   0 2737.03   98.69 
   1  -6   0 2616.04   80.79 
  -1  -6   0 2508.75   89.79 
  -1  -6   0 2607.84   84.29 
   1  -6   0 2679.73   82.89 
   1  -6   0 2523.95   92.99 
   1  -6   0 2642.14   81.39 
   1  -6   0 2604.74   91.29 
   1  -6   0 2627.94   80.09 
  -1  -6   0 2656.63   86.49 
  -1  -6   0 2635.24   81.19 
   1  -6   0 2579.44   92.09 
  -1  -6   0 2696.93   82.89 
   1  -6   0 2769.82   85.09 
  -1  -6   0 2669.73   77.29 
   1  -6   0 2593.24   87.49 
  -1  -6   0 2667.73   91.79 
  -1  -6   0 2617.24   79.59 
  -1  -6   0 2719.23   87.19 
   1  -6   0 2629.94   78.79 
   1  -6   0 2699.13   89.29 
  -1  -6   0 2744.93   87.89 
   1  -6   0 2762.22   90.19 
   1  -6   0 2600.94   94.69 
  -1  -6   0 2705.23   97.19 
   1  -6   0 2686.13   85.99 
   1  -6   0 2626.64   81.89 
  -1  -6   0 2672.43   84.19 
  -1  -6   0 2714.93   92.99 
  -1  -6   0 2623.84   90.49 
   1  -6   0 2700.63   88.69 
   1  -6   0 2699.53   79.79 
   1  -6   0 2193.78   79.39 
  -1  -6   0 2599.34   89.59 
  -1  -6   0 2581.14   94.09 
   1   6   0 2547.25   79.59 
   1   6   0 2669.63   81.19 
  -1   6   0 2655.23   91.89 
  -1   6   0 2585.04   95.39 
  -1   6   0 2761.92   99.89 
   1   6   0 2572.14   94.49 
   1   6   0 2663.03   96.09 
   1   6   0 2684.43   91.99 
  -1   6   0 2579.64   78.19 
   1   6   0 2593.84   83.99 
   1   6   0 2528.05   84.29 
   1   6   0 2769.22   84.29 
  -1   6   0 2643.54   97.89 
  -1   6   0 2755.42   92.29 
   1   6   0 2604.04   79.19 
  -1   6   0 2582.04   89.69 
  -1   6   0 2592.74   91.59 
  -1   6   0 2640.84   82.59 
   1   6   0 2648.64   98.29 
   1   6   0 2684.63   84.19 
   1   6   0 2691.63   81.79 
   1   6   0 2606.54   82.09 
   1   6   0 2660.73   91.99 
   1   6   0 2627.14   98.19 
  -1   6   0 2618.84   80.09 
  -1   6   0 2635.54   91.19 
   1   6   0 2657.53   91.89 
  -1   6   0 2651.73   78.79 
   1   6   0 2567.54   91.29 
  -1   6   0 2710.33   82.69 
  -2  -6   0  171.28   16.40 
  -2  -6   0  138.79   14.90 
  -2  -6   0  152.58   10.40 
   2  -6   0  166.08    9.70 
   2  -6   0  148.59    7.60 
  -2  -6   0  172.88    9.30 
  -2  -6   0  163.38    9.30 
  -2  -6   0  144.69   11.60 
   2  -6   0  134.09   17.70 
  -2  -6   0  191.18   14.30 
   2  -6   0  155.78    8.10 
  -2  -6   0  147.19   10.40 
  -2  -6   0  180.68   19.60 
   2  -6   0  128.59   14.30 
   2  -6   0  145.19   19.30 
   2  -6   0  184.28   20.40 
   2  -6   0  169.78   12.50 
   2  -6   0  170.28   16.90 
  -2  -6   0  178.18   12.60 
   2  -6   0  163.48    9.20 
   2  -6   0  167.08   17.50 
   2  -6   0  166.28    8.40 
  -2  -6   0  179.18   13.70 
   2  -6   0  153.38   11.40 
  -2  -6   0  131.59   14.90 
   2  -6   0  173.18   10.20 
   2  -6   0  143.09   16.70 
   2  -6   0  167.98    8.50 
   2  -6   0  165.28   17.80 
  -2  -6   0  146.89   18.60 
   2  -6   0  159.38    8.50 
  -2  -6   0  144.39   15.40 
  -2  -6   0  176.28    9.10 
  -2  -6   0  151.58   12.60 
   2   6   0  167.08   11.20 
  -2   6   0  166.88   14.00 
  -2   6   0  199.78   20.70 
   2   6   0  175.28   10.90 
   2   6   0  140.79   17.30 
   2   6   0  147.49   10.70 
   2   6   0  143.69   16.00 
   2   6   0  160.78    7.30 
   2   6   0  183.18    8.10 
   2   6   0  172.08   19.20 
  -2   6   0  144.09   10.40 
  -2   6   0  150.18   16.30 
   2   6   0  166.48   19.00 
  -2   6   0  179.38   22.50 
   2   6   0  139.99   15.50 
   2   6   0  136.59   12.80 
   2   6   0  136.69   18.00 
   2   6   0  162.58   12.50 
  -2   6   0  126.69   17.60 
   2   6   0  138.59   16.10 
  -2   6   0  179.18    8.10 
  -2   6   0  143.99   18.20 
   2   6   0  155.38    9.60 
   2   6   0  142.19   12.40 
  -2   6   0  139.09   15.70 
   2   6   0  137.79   16.00 
   2   6   0  172.18   12.60 
  -2   6   0  164.18    9.80 
   2   6   0  160.28    7.10 
  -2   6   0  147.39    9.80 
  -2   6   0  176.08   13.90 
  -3  -6   0  900.11   38.70 
  -3  -6   0  917.11   40.70 
  -3  -6   0  936.01   35.70 
  -3  -6   0  884.61   40.10 
  -3  -6   0  894.71   40.10 
   3  -6   0  924.21   36.10 
   3  -6   0  911.71   33.30 
   3  -6   0  857.51   32.20 
  -3  -6   0  934.91   39.10 
  -3  -6   0  948.01   35.10 
  -3  -6   0  880.11   39.80 
  -3  -6   0  897.11   41.30 
   3  -6   0  857.21   42.00 
  -3  -6   0  908.31   39.10 
   3  -6   0  888.61   28.90 
   3  -6   0  968.10   45.50 
  -3  -6   0  923.01   41.50 
  -3  -6   0  875.11   31.90 
  -3  -6   0  992.50   37.40 
   3  -6   0  894.11   49.99 
   3  -6   0  877.01   38.50 
  -3  -6   0  947.21   45.00 
  -3  -6   0  938.61   43.90 
   3  -6   0  955.10   40.90 
  -3  -6   0  906.11   32.90 
   3  -6   0  946.61   45.30 
   3  -6   0 1030.30   44.00 
  -3   6   0  888.81   40.10 
   3   6   0  875.91   42.40 
  -3   6   0  947.41   30.90 
   3   6   0  974.00   45.40 
   3   6   0  870.61   38.30 
   3   6   0  920.11   32.90 
   3   6   0  959.80   39.30 
   3   6   0  947.41   33.00 
  -3   6   0  883.11   41.80 
   3   6   0  918.31   43.40 
  -3   6   0  924.01   35.80 
  -3   6   0  912.01   41.40 
   3   6   0  972.40   37.40 
  -3   6   0  944.71   36.70 
  -3   6   0  906.91   40.90 
   3   6   0  838.72   41.40 
   3   6   0 1009.00   44.10 
   3   6   0  913.01   43.30 
  -3   6   0  969.50   45.70 
   3   6   0  916.91   34.40 
  -3   6   0  908.31   33.10 
  -3   6   0  981.10   39.30 
   3   6   0  945.71   39.70 
   3   6   0  876.21   41.20 
  -3   6   0  929.81   49.10 
  -4  -6   0   73.29   12.10 
  -4  -6   0   73.09   13.20 
  -4  -6   0   59.79   10.40 
   4  -6   0   90.79    9.90 
   4  -6   0   69.99    9.00 
  -4  -6   0   90.69   14.90 
   4  -6   0   70.39   15.10 
  -4  -6   0   78.19   10.00 
  -4  -6   0   71.99   12.00 
  -4  -6   0   86.39   11.50 
  -4  -6   0   60.79   11.40 
   4  -6   0   80.89   12.30 
   4  -6   0   76.39   14.10 
  -4  -6   0   86.89   12.60 
  -4  -6   0   64.19    9.20 
  -4  -6   0   71.79   11.40 
   4  -6   0   85.49   13.90 
   4  -6   0   96.39   12.20 
  -4  -6   0   92.09    9.30 
  -4  -6   0   67.49   11.60 
   4  -6   0   64.39   11.90 
  -4  -6   0   87.59   12.80 
  -4  -6   0   67.49    8.10 
  -4  -6   0   76.99   12.10 
  -4  -6   0   67.49   11.00 
   4  -6   0   98.59   15.90 
   4  -6   0   69.49   14.20 
   4   6   0   82.89   11.60 
  -4   6   0   67.29   10.10 
  -4   6   0   62.59    9.10 
   4   6   0   82.19   12.00 
   4   6   0   73.69    9.40 
   4   6   0   66.89   12.40 
   4   6   0   78.89   12.90 
  -4   6   0   84.09    9.50 
   4   6   0   58.39   11.00 
   4   6   0   83.49   13.00 
  -4   6   0   87.39   11.20 
  -4   6   0   73.59   11.80 
  -4   6   0   70.49   11.60 
   4   6   0   73.49   13.50 
  -4   6   0   83.69   12.40 
   4   6   0   87.19   13.80 
   4   6   0   74.29   10.60 
  -4   6   0   74.09   12.40 
   4   6   0   86.59    9.00 
   4   6   0   86.39    9.50 
   4   6   0   84.69   10.30 
  -4   6   0   52.49   12.20 
   4   6   0   65.09   11.00 
  -4   6   0   69.49    7.80 
   5  -6   0  961.50   52.19 
  -5  -6   0  900.61   42.60 
   5  -6   0  972.40   40.00 
   5  -6   0  896.41   43.20 
  -5  -6   0  947.51   47.20 
  -5  -6   0  987.40   43.10 
   5  -6   0  940.11   44.90 
   5  -6   0  970.90   43.10 
  -5  -6   0  979.40   44.70 
   5  -6   0  935.31   48.60 
  -5  -6   0  945.41   46.50 
   5  -6   0  927.51   42.90 
   5  -6   0  855.81   46.10 
  -5  -6   0  940.71   40.30 
  -5  -6   0  948.41   37.50 
  -5  -6   0  952.80   43.10 
  -5  -6   0  896.61   43.90 
  -5  -6   0  898.11   43.00 
  -5  -6   0  913.11   43.50 
   5  -6   0  927.61   47.80 
  -5  -6   0  969.90   44.00 
  -5  -6   0  947.61   37.90 
  -5  -6   0  921.71   39.80 
  -5  -6   0  947.01   45.60 
  -5  -6   0  910.41   41.60 
   5  -6   0  953.60   38.80 
  -5  -6   0  874.81   43.10 
   5   6   0  957.50   43.40 
   5   6   0  949.80   45.60 
   5   6   0  873.01   37.80 
   5   6   0  924.41   43.90 
  -5   6   0  959.00   39.50 
   5   6   0  918.41   43.40 
  -5   6   0  935.01   43.40 
   5   6   0  992.10   46.30 
   5   6   0  944.01   42.20 
   5   6   0  904.01   44.40 
  -5   6   0  938.91   41.20 
   5   6   0  944.21   41.80 
   5   6   0  936.21   37.60 
  -5   6   0  856.81   42.60 
  -5   6   0  904.91   42.70 
  -5   6   0  946.91   48.60 
  -5   6   0  965.10   40.60 
  -5   6   0  932.31   37.00 
   5   6   0  982.90   48.50 
   5   6   0  923.61   39.50 
   5   6   0  908.81   46.40 
  -5   6   0  915.21   43.50 
  -5   6   0  922.91   38.60 
  -6  -6   0   80.09   13.30 
  -6  -6   0   42.60   11.60 
   6  -6   0   87.19   18.20 
  -6  -6   0   65.99   12.10 
   6  -6   0   70.59   13.50 
   6  -6   0   82.49   17.10 
  -6  -6   0   87.49   15.30 
  -6  -6   0   81.09   11.10 
  -6  -6   0   65.39   13.20 
  -6  -6   0   83.19   13.00 
  -6  -6   0   75.59   12.60 
  -6  -6   0   71.29   13.30 
   6  -6   0   78.49   15.80 
  -6  -6   0   66.69   13.60 
  -6  -6   0   68.79   12.90 
  -6  -6   0   69.79   10.80 
  -6  -6   0   90.39   13.30 
   6  -6   0   63.39   13.90 
  -6  -6   0   81.19   14.10 
   6  -6   0   85.79   16.10 
   6  -6   0   81.19   14.50 
  -6  -6   0   71.99   13.00 
   6  -6   0   74.49   12.80 
  -6  -6   0   57.39   12.10 
   6  -6   0   68.99   11.10 
  -6  -6   0   64.79   12.50 
   6   6   0   76.19   14.40 
   6   6   0   53.59   11.90 
   6   6   0   61.39   12.80 
   6   6   0   83.09   12.30 
   6   6   0   65.29   11.50 
   6   6   0   71.79   10.90 
   6   6   0   45.10   11.40 
  -6   6   0   94.59   14.30 
   6   6   0   66.29   14.00 
  -6   6   0   62.59   10.80 
  -6   6   0   94.09   14.10 
  -6   6   0   77.59   13.80 
   6   6   0   68.99   13.10 
   6   6   0   68.69   12.40 
  -6   6   0   59.59   11.60 
   6   6   0   62.89   13.80 
  -6   6   0   73.29   14.80 
  -6   6   0   65.79   12.70 
   6   6   0   73.79   12.70 
   6   6   0   58.39   11.90 
  -6   6   0   80.09   12.30 
  -7  -6   0  785.62   40.20 
  -7  -6   0  763.82   37.20 
  -7  -6   0  779.62   42.20 
  -7  -6   0  805.62   43.90 
  -7  -6   0  790.42   36.70 
  -7  -6   0  794.32   41.70 
   7  -6   0  771.72   43.00 
  -7  -6   0  794.42   41.30 
  -7  -6   0  735.33   38.40 
  -7  -6   0  737.43   41.30 
   7  -6   0  735.83   39.70 
   7  -6   0  811.42   44.70 
   7  -6   0  710.83   43.90 
  -7  -6   0  715.93   40.30 
   7  -6   0  686.53   43.80 
  -7  -6   0  834.42   40.20 
   7  -6   0  771.92   38.20 
  -7  -6   0  790.82   41.50 
  -7  -6   0  738.43   43.80 
  -7  -6   0  776.62   42.70 
  -7  -6   0  762.92   38.90 
  -7  -6   0  775.52   44.30 
  -7  -6   0  670.53   41.70 
   7  -6   0  702.43   46.30 
   7   6   0  836.22   44.00 
   7   6   0  742.33   44.50 
   7   6   0  709.63   38.10 
   7   6   0  703.73   40.20 
   7   6   0  853.31   44.40 
  -7   6   0  734.13   38.80 
  -7   6   0  719.73   40.00 
  -7   6   0  793.82   41.00 
   7   6   0  762.22   39.90 
  -7   6   0  800.72   46.00 
   7   6   0  701.93   37.20 
   7   6   0  766.42   42.20 
   7   6   0  728.13   41.90 
   7   6   0  813.92   41.90 
  -7   6   0  711.43   38.70 
  -7   6   0  800.72   42.80 
  -7   6   0  783.42   38.90 
   7   6   0  772.32   42.60 
   7   6   0  779.22   44.90 
  -8  -6   0    1.10    6.70 
  -8  -6   0   11.10    7.80 
  -8  -6   0    7.90    7.50 
   8  -6   0    3.20    7.50 
  -8  -6   0    1.00    5.30 
  -8  -6   0   -1.40    5.00 
   8  -6   0    6.00    8.10 
   8  -6   0    1.70    6.00 
  -8  -6   0    3.10    6.60 
   8  -6   0    7.40    6.50 
  -8  -6   0    1.20    4.90 
  -8  -6   0   -1.60    5.40 
   8  -6   0    2.10    5.50 
  -8  -6   0    5.70    7.20 
   8  -6   0    4.80    7.50 
   8  -6   0    1.30    6.70 
  -8  -6   0    0.80    6.30 
  -8  -6   0    0.80    5.30 
  -8  -6   0   -3.10    5.80 
   8  -6   0    4.70    7.40 
  -8  -6   0   -4.90    5.10 
  -8  -6   0    4.90    6.90 
  -8  -6   0    1.50    6.00 
  -8   6   0   -6.10    4.90 
   8   6   0    7.70    7.90 
  -8   6   0    0.90    7.40 
   8   6   0    4.70    7.40 
   8   6   0   -2.50    5.80 
  -8   6   0   -0.40    5.10 
   8   6   0    9.90    6.80 
   8   6   0   -3.30    5.20 
   8   6   0   -1.10    5.50 
   8   6   0   12.80    8.20 
  -8   6   0   -5.60    4.90 
   8   6   0   -2.90    6.30 
  -8   6   0    4.50    6.70 
   8   6   0    6.60    6.60 
   8   6   0    7.90    6.60 
   8   6   0   -0.10    6.70 
   0  -7   0    1.80    2.60 
   0  -7   0   -1.80    2.90 
   0  -7   0   -2.50    3.00 
   0  -7   0   -3.70    3.10 
   0  -7   0   -0.60    3.20 
   0  -7   0    0.20    2.50 
   0  -7   0    1.40    1.80 
   0  -7   0    1.60    5.20 
   0  -7   0    0.60    2.20 
   0  -7   0    2.60    3.90 
   0  -7   0   -2.00    3.40 
   0  -7   0    0.10    3.50 
   0  -7   0    4.50    4.90 
   0  -7   0    4.50    2.70 
   0   7   0    2.10    4.80 
   0   7   0   -1.20    3.50 
   0   7   0    1.10    2.00 
   0   7   0    1.20    4.70 
   0   7   0   -1.50    4.40 
   0   7   0    6.30    5.10 
   0   7   0    2.20    3.90 
   0   7   0   -0.50    3.40 
   0   7   0    1.50    2.50 
   1  -7   0  115.39   11.40 
   1  -7   0   93.99   13.20 
   1  -7   0   79.29   13.50 
  -1  -7   0   92.59   12.90 
   1  -7   0  119.29   13.00 
   1  -7   0   98.09   14.40 
  -1  -7   0  115.19   15.40 
  -1  -7   0   94.89   13.30 
   1  -7   0   80.59    8.40 
  -1  -7   0   86.89   12.80 
  -1  -7   0   97.99   10.70 
  -1  -7   0  145.49   18.50 
   1  -7   0   75.59   14.20 
  -1  -7   0  119.29    8.70 
  -1  -7   0  122.59   13.60 
  -1  -7   0  107.29    7.10 
   1  -7   0   95.29   12.70 
   1  -7   0   87.89   14.60 
   1  -7   0  103.89   10.50 
  -1  -7   0  101.89   12.40 
   1  -7   0  115.09   11.60 
  -1  -7   0  106.89   10.80 
  -1  -7   0  109.99   12.00 
   1  -7   0  105.89   10.10 
   1  -7   0  105.89   17.20 
  -1  -7   0   93.19   13.40 
   1  -7   0   95.89   13.20 
  -1  -7   0   93.49   15.90 
  -1  -7   0  111.19   15.80 
  -1   7   0  102.29   16.90 
  -1   7   0  111.69   14.40 
   1   7   0   92.19   15.30 
  -1   7   0  110.69    8.30 
  -1   7   0   71.19   14.90 
   1   7   0  110.89   11.40 
  -1   7   0   91.59   14.30 
   1   7   0   83.89   13.40 
   1   7   0  114.19    8.40 
  -1   7   0  117.59   15.20 
   1   7   0  104.09   16.70 
   1   7   0  136.59   16.90 
  -1   7   0   92.89   14.30 
   1   7   0   95.49   14.20 
  -1   7   0  107.89   14.80 
   1   7   0  104.89   17.30 
   1   7   0  104.29   17.70 
  -1   7   0   98.49   16.60 
  -2  -7   0    6.00    5.20 
   2  -7   0   -1.00    4.40 
  -2  -7   0   16.00    4.30 
   2  -7   0    4.10    3.90 
  -2  -7   0    9.00    6.30 
  -2  -7   0    2.90    4.60 
   2  -7   0   23.90    8.50 
  -2  -7   0   10.10    6.20 
  -2  -7   0    1.30    4.30 
  -2  -7   0    6.30    4.40 
   2  -7   0   11.40    6.60 
   2  -7   0    3.50    6.30 
   2  -7   0    5.40    5.70 
  -2  -7   0    3.50    3.80 
  -2  -7   0    1.90    3.80 
  -2  -7   0   17.30    6.60 
  -2  -7   0    4.20    3.70 
   2  -7   0    0.10    4.10 
   2  -7   0   17.20    4.50 
   2  -7   0   13.60    6.70 
   2  -7   0    4.50    5.50 
  -2  -7   0    4.50    4.30 
  -2  -7   0    5.20    4.90 
  -2  -7   0   12.20    6.10 
   2  -7   0   12.40    5.10 
  -2  -7   0    8.30    3.20 
   2  -7   0   12.60    5.20 
   2   7   0    3.20    4.50 
   2   7   0    3.80    4.70 
   2   7   0   13.30    6.90 
  -2   7   0   16.40    6.10 
  -2   7   0   17.40    9.90 
   2   7   0    9.30    4.60 
   2   7   0    5.80    5.80 
  -2   7   0   -0.40    4.80 
  -2   7   0    9.50    3.50 
  -2   7   0   33.50   10.10 
   2   7   0    8.50    4.10 
   2   7   0   12.80    4.50 
   2   7   0   11.30    6.00 
  -2   7   0    7.40    5.20 
  -2   7   0   11.30    3.90 
   2   7   0    8.50    6.80 
  -2   7   0    9.10    5.40 
  -2   7   0   15.70    6.20 
   2   7   0   15.90    4.60 
   2   7   0    7.20    5.70 
   2   7   0    4.80    6.20 
   3  -7   0  144.29   14.60 
  -3  -7   0  135.39   16.90 
  -3  -7   0  145.29   16.70 
  -3  -7   0  116.29   14.10 
  -3  -7   0  124.79    9.80 
  -3  -7   0  105.39   14.30 
   3  -7   0  149.59   21.80 
  -3  -7   0  169.28   18.40 
   3  -7   0  136.29   23.20 
  -3  -7   0  128.19   14.30 
  -3  -7   0  166.28   21.60 
   3  -7   0  146.59   18.40 
   3  -7   0  143.09   19.80 
   3  -7   0  149.69   18.40 
  -3  -7   0  136.59   16.50 
  -3  -7   0  134.69   17.20 
  -3  -7   0  153.78   16.90 
  -3  -7   0  113.49   17.10 
  -3  -7   0  157.08   12.40 
   3  -7   0  121.09   18.30 
  -3  -7   0  117.39   16.40 
   3  -7   0  136.09   16.10 
   3  -7   0  163.08   20.80 
  -3  -7   0  146.29   11.20 
  -3   7   0  129.39   16.00 
   3   7   0  138.89   19.60 
   3   7   0  123.79   14.40 
  -3   7   0  135.99   16.80 
  -3   7   0  187.68   26.30 
   3   7   0  165.88   20.20 
   3   7   0  138.79   19.00 
   3   7   0  147.69   15.80 
  -3   7   0  122.49   12.40 
   3   7   0  115.09   15.70 
  -3   7   0  148.89   18.60 
  -3   7   0  110.69   15.90 
  -3   7   0  127.59   14.90 
   3   7   0  155.78   14.60 
   3   7   0  126.39   18.60 
  -3   7   0  111.39   17.40 
   3   7   0  148.69   12.30 
  -3   7   0  133.49   12.60 
   3   7   0  128.09   17.10 
  -4  -7   0  270.87   22.00 
   4  -7   0  279.97   34.40 
  -4  -7   0  299.77   25.00 
   4  -7   0  230.98   26.30 
   4  -7   0  320.07   24.00 
   4  -7   0  336.97   23.40 
  -4  -7   0  283.07   21.50 
  -4  -7   0  267.17   21.60 
  -4  -7   0  264.77   19.90 
  -4  -7   0  285.47   20.90 
  -4  -7   0  284.37   20.40 
  -4  -7   0  304.17   17.80 
   4  -7   0  261.77   30.00 
   4  -7   0  280.97   19.90 
  -4  -7   0  297.17   21.90 
  -4  -7   0  292.37   22.60 
  -4  -7   0  334.27   23.00 
  -4  -7   0  281.17   17.50 
   4  -7   0  306.67   30.80 
  -4  -7   0  296.97   29.70 
  -4  -7   0  269.17   21.10 
   4  -7   0  258.77   27.30 
  -4  -7   0  301.37   19.30 
  -4   7   0  321.07   22.60 
  -4   7   0  259.97   27.70 
   4   7   0  255.47   22.20 
   4   7   0  295.57   28.50 
  -4   7   0  301.17   18.40 
  -4   7   0  258.47   17.90 
  -4   7   0  292.07   19.70 
   4   7   0  267.77   21.80 
   4   7   0  276.67   23.30 
   4   7   0  274.77   18.90 
  -4   7   0  267.27   21.40 
   4   7   0  274.07   22.80 
  -4   7   0  264.07   20.50 
   4   7   0  303.27   21.20 
  -4   7   0  279.27   22.00 
   4   7   0  286.67   20.80 
   4   7   0  268.97   27.90 
   4   7   0  291.57   19.20 
   4   7   0  271.87   22.90 
   5  -7   0  255.07   21.80 
  -5  -7   0  278.37   21.90 
   5  -7   0  278.07   31.00 
  -5  -7   0  284.87   23.10 
   5  -7   0  280.67   20.20 
  -5  -7   0  254.67   24.70 
   5  -7   0  309.27   24.20 
  -5  -7   0  311.67   23.40 
  -5  -7   0  237.78   19.40 
   5  -7   0  272.87   24.90 
  -5  -7   0  286.67   23.40 
  -5  -7   0  265.47   18.20 
   5  -7   0  240.08   25.80 
   5  -7   0  282.27   31.00 
  -5  -7   0  303.67   23.40 
  -5  -7   0  289.17   22.40 
   5  -7   0  284.87   29.90 
  -5  -7   0  230.28   23.40 
  -5  -7   0  248.48   20.80 
  -5  -7   0  275.07   29.50 
  -5  -7   0  333.77   32.30 
   5  -7   0  211.78   30.60 
  -5  -7   0  281.87   18.80 
  -5  -7   0  282.67   21.70 
   5   7   0  275.17   26.70 
   5   7   0  207.98   24.70 
  -5   7   0  293.67   30.90 
   5   7   0  309.87   23.90 
  -5   7   0  232.98   20.40 
  -5   7   0  308.57   23.10 
   5   7   0  293.07   22.10 
  -5   7   0  269.77   21.60 
  -5   7   0  266.57   21.20 
   5   7   0  245.78   27.10 
   5   7   0  302.07   24.60 
  -5   7   0  266.37   19.40 
   5   7   0  224.18   23.10 
   5   7   0  257.57   20.00 
  -5   7   0  244.18   18.40 
   5   7   0  262.97   27.70 
  -6  -7   0  843.32   44.70 
   6  -7   0  861.21   49.70 
   6  -7   0  905.51   50.29 
   6  -7   0  907.61   55.19 
  -6  -7   0  830.62   44.00 
  -6  -7   0  859.31   48.20 
  -6  -7   0  843.82   40.00 
  -6  -7   0  773.82   42.50 
  -6  -7   0  777.12   41.80 
   6  -7   0  896.21   50.79 
  -6  -7   0  844.12   43.90 
  -6  -7   0  867.21   43.70 
  -6  -7   0  807.82   41.50 
  -6  -7   0  888.11   45.40 
  -6  -7   0  827.92   45.80 
  -6  -7   0  785.82   44.20 
   6  -7   0  834.12   45.70 
  -6  -7   0  764.02   46.00 
   6  -7   0  794.32   41.90 
  -6  -7   0  833.02   44.10 
  -6  -7   0  821.92   39.50 
   6  -7   0  869.81   45.20 
  -6   7   0  886.11   41.20 
  -6   7   0  931.81   42.80 
  -6   7   0  871.91   43.10 
   6   7   0  877.61   46.80 
  -6   7   0  875.71   44.60 
  -6   7   0  884.71   43.80 
   6   7   0  887.71   48.80 
   6   7   0  892.21   46.30 
   6   7   0  816.62   45.40 
   6   7   0  902.61   45.50 
  -6   7   0  964.80   51.59 
   6   7   0  792.32   41.60 
   6   7   0  799.62   43.60 
  -6   7   0  833.62   43.90 
   6   7   0  920.91   45.30 
  -7  -7   0  249.08   24.90 
  -7  -7   0  217.88   26.60 
  -7  -7   0  295.17   24.00 
  -7  -7   0  268.47   28.10 
   7  -7   0  258.57   31.70 
   7  -7   0  269.07   35.10 
  -7  -7   0  263.07   26.90 
  -7  -7   0  250.47   28.30 
  -7  -7   0  276.17   26.70 
  -7  -7   0  245.08   27.10 
  -7  -7   0  256.37   28.00 
  -7  -7   0  276.27   31.50 
   7  -7   0  277.97   33.30 
  -7  -7   0  265.67   30.80 
  -7  -7   0  281.07   30.00 
  -7  -7   0  247.78   27.00 
   7  -7   0  317.97   26.80 
   7  -7   0  267.57   26.70 
  -7  -7   0  273.17   30.70 
   7  -7   0  247.68   31.00 
   7   7   0  295.27   32.80 
   7   7   0  215.38   25.80 
   7   7   0  208.28   24.70 
  -7   7   0  258.57   26.20 
  -7   7   0  207.78   27.60 
  -7   7   0  287.47   29.70 
   7   7   0  232.88   26.40 
  -7   7   0  333.27   35.60 
  -7   7   0  186.48   21.70 
   7   7   0  274.97   29.50 
   7   7   0  251.47   27.90 
   7   7   0  269.77   27.20 
  -7   7   0  302.57   23.80 
   7   7   0  253.17   28.60 
   0  -8   0 1251.87   53.19 
   0  -8   0 1275.57   56.39 
   0  -8   0 1225.28   53.99 
   0  -8   0 1172.08   57.99 
   0  -8   0 1196.98   47.70 
   0  -8   0 1257.77   58.19 
   0  -8   0 1331.47   54.99 
   0  -8   0 1212.98   48.70 
   0  -8   0 1143.89   59.09 
   0  -8   0 1365.86   54.19 
   0  -8   0 1214.98   56.19 
   0  -8   0 1263.27   46.70 
   0  -8   0 1252.97   49.70 
   0   8   0 1253.57   54.49 
   0   8   0 1238.98   56.19 
   0   8   0 1399.46   61.79 
   0   8   0 1275.97   55.49 
   0   8   0 1210.08   59.19 
   0   8   0 1323.57   62.39 
   0   8   0 1177.88   55.19 
  -1  -8   0 1083.99   49.90 
  -1  -8   0  989.10   49.00 
   1  -8   0  991.70   45.30 
   1  -8   0 1033.20   40.20 
  -1  -8   0  979.50   45.70 
   1  -8   0 1042.70   51.19 
  -1  -8   0 1034.30   47.30 
  -1  -8   0  884.21   50.19 
   1  -8   0  984.40   46.30 
  -1  -8   0 1065.79   44.30 
  -1  -8   0 1054.29   42.10 
  -1  -8   0  992.30   51.09 
  -1  -8   0  996.90   43.10 
   1  -8   0 1029.50   48.40 
  -1  -8   0 1011.00   39.50 
  -1  -8   0  986.10   45.80 
   1  -8   0  969.70   52.49 
   1  -8   0  979.40   46.10 
   1  -8   0 1006.30   51.59 
   1  -8   0 1075.29   50.29 
   1  -8   0  971.00   49.80 
   1  -8   0 1067.49   45.40 
  -1  -8   0  886.01   45.40 
  -1   8   0 1093.69   49.00 
   1   8   0 1099.79   50.29 
  -1   8   0  957.80   45.10 
  -1   8   0 1050.39   52.89 
   1   8   0  979.50   48.30 
  -1   8   0  911.51   45.50 
   1   8   0 1091.49   52.19 
   1   8   0 1007.30   53.39 
   1   8   0 1039.20   53.79 
  -1   8   0 1102.59   52.19 
  -1   8   0 1068.69   54.99 
  -1   8   0  986.70   48.10 
   1   8   0 1021.70   48.70 
   1   8   0  972.40   50.79 
  -1   8   0 1073.99   49.60 
   1   8   0 1017.10   49.10 
   2  -8   0  482.15   32.20 
   2  -8   0  479.65   27.70 
  -2  -8   0  454.15   26.50 
   2  -8   0  408.96   32.50 
  -2  -8   0  443.76   29.60 
  -2  -8   0  470.95   26.30 
  -2  -8   0  409.46   25.80 
  -2  -8   0  426.66   31.80 
  -2  -8   0  451.85   28.90 
  -2  -8   0  505.45   33.40 
   2  -8   0  496.55   28.80 
   2  -8   0  485.55   26.40 
  -2  -8   0  454.65   30.10 
   2  -8   0  405.46   28.80 
   2  -8   0  459.45   31.50 
  -2  -8   0  400.96   27.40 
   2  -8   0  454.55   29.70 
  -2  -8   0  430.26   27.60 
   2  -8   0  428.56   31.10 
  -2  -8   0  431.16   23.70 
  -2  -8   0  471.15   29.50 
   2   8   0  495.25   32.90 
  -2   8   0  468.95   35.50 
   2   8   0  457.65   34.50 
  -2   8   0  432.76   29.00 
  -2   8   0  477.75   29.60 
  -2   8   0  456.95   27.10 
   2   8   0  400.26   28.50 
   2   8   0  420.26   32.20 
  -2   8   0  464.65   30.80 
  -2   8   0  456.55   33.20 
   2   8   0  445.06   29.70 
   2   8   0  402.36   29.00 
  -2   8   0  499.75   28.60 
   2   8   0  512.55   25.70 
   2   8   0  450.75   33.00 
  -3  -8   0  529.85   34.00 
  -3  -8   0  600.74   32.30 
  -3  -8   0  580.64   32.40 
   3  -8   0  519.95   31.10 
  -3  -8   0  574.84   34.20 
  -3  -8   0  519.15   33.10 
   3  -8   0  587.74   39.20 
  -3  -8   0  607.04   38.70 
   3  -8   0  553.54   30.90 
   3  -8   0  594.04   37.80 
  -3  -8   0  580.14   33.50 
  -3  -8   0  576.84   30.00 
  -3  -8   0  564.24   30.00 
   3  -8   0  588.94   43.60 
  -3  -8   0  566.54   34.80 
  -3  -8   0  530.65   33.10 
  -3  -8   0  574.14   37.20 
   3  -8   0  583.94   37.00 
  -3  -8   0  563.74   31.40 
   3  -8   0  551.94   34.60 
   3  -8   0  590.64   35.70 
  -3  -8   0  590.74   33.70 
   3  -8   0  538.65   36.00 
   3   8   0  560.14   34.80 
  -3   8   0  611.84   32.70 
   3   8   0  533.35   34.70 
   3   8   0  598.34   37.10 
  -3   8   0  566.74   34.40 
   3   8   0  585.04   38.80 
  -3   8   0  669.83   32.90 
   3   8   0  569.54   35.10 
   3   8   0  530.35   36.80 
   3   8   0  540.05   30.10 
  -3   8   0  560.44   34.00 
  -3   8   0  673.13   44.90 
  -3   8   0  604.84   34.10 
   3   8   0  607.54   39.80 
  -4  -8   0  528.05   32.40 
  -4  -8   0  586.54   34.50 
   4  -8   0  535.25   36.40 
   4  -8   0  577.24   31.60 
   4  -8   0  503.95   38.40 
  -4  -8   0  532.15   34.00 
  -4  -8   0  514.35   31.20 
  -4  -8   0  543.25   32.70 
  -4  -8   0  527.55   33.50 
  -4  -8   0  541.75   33.90 
  -4  -8   0  514.85   36.20 
  -4  -8   0  542.15   32.20 
   4  -8   0  504.55   36.20 
  -4  -8   0  538.95   30.80 
   4  -8   0  493.55   37.40 
   4  -8   0  540.55   34.50 
   4  -8   0  485.55   34.50 
  -4  -8   0  534.75   30.70 
  -4  -8   0  470.05   35.20 
  -4  -8   0  560.14   33.00 
   4  -8   0  548.45   43.40 
  -4   8   0  583.54   33.20 
  -4   8   0  542.55   31.70 
   4   8   0  529.95   34.20 
  -4   8   0  548.15   35.90 
   4   8   0  510.05   30.70 
  -4   8   0  564.84   33.60 
   4   8   0  575.44   37.60 
   4   8   0  535.85   35.00 
   4   8   0  553.54   35.70 
   4   8   0  582.74   36.80 
  -4   8   0  492.15   32.60 
   4   8   0  495.65   34.80 
  -4   8   0  505.85   32.30 
   4   8   0  488.75   29.60 
   5  -8   0  398.56   30.20 
  -5  -8   0  364.06   31.10 
  -5  -8   0  385.86   28.50 
  -5  -8   0  386.56   28.70 
  -5  -8   0  396.96   32.00 
  -5  -8   0  364.26   26.90 
  -5  -8   0  444.66   30.10 
   5  -8   0  447.06   35.80 
   5  -8   0  457.95   35.60 
   5  -8   0  418.16   27.40 
   5  -8   0  404.76   40.20 
  -5  -8   0  430.66   26.40 
  -5  -8   0  397.26   28.80 
  -5  -8   0  332.97   25.70 
   5  -8   0  312.17   40.50 
  -5  -8   0  400.36   28.10 
   5  -8   0  446.16   34.10 
  -5  -8   0  409.46   30.60 
  -5  -8   0  435.66   28.40 
  -5  -8   0  358.66   28.20 
  -5  -8   0  439.96   30.30 
   5   8   0  439.06   31.00 
  -5   8   0  434.06   29.30 
  -5   8   0  360.06   26.80 
  -5   8   0  456.25   33.40 
   5   8   0  372.76   29.80 
   5   8   0  343.87   30.00 
   5   8   0  442.46   31.40 
   5   8   0  365.66   27.30 
   5   8   0  428.96   32.20 
   5   8   0  425.46   39.00 
  -5   8   0  406.26   28.70 
   5   8   0  373.56   27.10 
  -5   8   0  432.86   28.60 
   6  -8   0  481.15   38.30 
  -6  -8   0  456.35   32.10 
   6  -8   0  436.66   48.10 
  -6  -8   0  491.75   36.60 
  -6  -8   0  374.26   28.90 
   6  -8   0  400.76   40.30 
  -6  -8   0  484.15   29.80 
  -6  -8   0  462.75   35.90 
  -6  -8   0  482.25   33.10 
   6  -8   0  454.95   33.60 
  -6  -8   0  491.15   32.10 
   6  -8   0  432.26   43.90 
  -6  -8   0  430.36   30.60 
  -6  -8   0  443.06   30.40 
   6  -8   0  412.16   29.20 
  -6  -8   0  439.66   31.20 
  -6  -8   0  476.85   32.90 
  -6  -8   0  437.26   32.30 
  -6  -8   0  432.76   31.40 
  -6  -8   0  443.06   32.60 
   6   8   0  454.35   31.80 
   6   8   0  430.06   34.30 
   6   8   0  470.05   33.20 
  -6   8   0  426.56   44.20 
   6   8   0  392.86   32.00 
  -6   8   0  459.85   31.00 
  -6   8   0  423.16   34.20 
  -6   8   0  455.25   30.70 
   6   8   0  423.06   33.00 
   6   8   0  442.16   32.80 
   6   8   0  421.16   30.30 
   6   8   0  444.86   33.50 
   0  -9   0   -2.30    4.50 
   0  -9   0    2.60    5.30 
   0  -9   0   -5.00    4.30 
   0  -9   0    0.70    6.10 
   0  -9   0    3.70    5.80 
   0  -9   0    7.10    5.50 
   0  -9   0    1.90    4.40 
   0  -9   0   -1.70    4.60 
   0  -9   0    7.30    8.30 
   0  -9   0    0.50    4.90 
   0   9   0   -4.50    5.30 
   0   9   0    2.30    5.20 
   0   9   0   -1.30    5.20 
   0   9   0   -5.80    3.70 
   0   9   0   -2.70    4.90 
   0   9   0    5.30    5.60 
  -1  -9   0    3.50    5.50 
   1  -9   0    2.80    5.10 
  -1  -9   0    3.70    5.90 
  -1  -9   0    0.30    4.90 
   1  -9   0    1.10    4.90 
  -1  -9   0    4.40    5.20 
  -1  -9   0    7.10    6.90 
  -1  -9   0    5.70    6.10 
   1  -9   0    1.30    5.70 
  -1  -9   0   -5.20    5.20 
  -1  -9   0   -3.70    4.40 
  -1  -9   0    0.70    4.90 
   1  -9   0    4.50    7.00 
   1  -9   0    1.90    4.40 
  -1  -9   0   -4.60    3.80 
   1  -9   0    2.80    5.70 
   1  -9   0    0.50    5.10 
   1  -9   0    0.30    6.00 
   1  -9   0   -4.40    4.00 
  -1  -9   0    3.30    4.90 
   1  -9   0   -1.10    5.80 
  -1   9   0   -3.00    5.80 
   1   9   0    7.90    7.00 
   1   9   0   -3.60    4.90 
  -1   9   0   -6.20    4.90 
   1   9   0    3.70    5.70 
   1   9   0    5.90    7.00 
   1   9   0   -0.90    5.80 
   1   9   0   -4.10    4.40 
  -1   9   0   -3.20    3.40 
  -1   9   0    3.10    7.60 
  -1   9   0   -2.10    4.80 
  -1   9   0   -0.20    5.70 
   2  -9   0   13.00    8.50 
  -2  -9   0    9.10    6.40 
   2  -9   0   18.20    7.80 
   2  -9   0    2.50    5.20 
  -2  -9   0   -1.40    4.20 
  -2  -9   0   15.00    8.70 
  -2  -9   0    7.00    7.10 
   2  -9   0    6.10    7.20 
  -2  -9   0   11.20    7.40 
   2  -9   0   22.10    9.20 
   2  -9   0    2.10    6.60 
   2  -9   0    1.70    6.00 
  -2  -9   0    3.30    6.00 
  -2  -9   0    2.70    5.50 
  -2  -9   0   18.70    9.60 
  -2  -9   0   31.50    9.10 
  -2  -9   0    4.40    6.40 
   2  -9   0   25.60   10.40 
  -2  -9   0   26.20   10.90 
   2  -9   0   -3.40    4.80 
  -2   9   0    5.10    7.00 
  -2   9   0   17.50    9.80 
   2   9   0    4.70    6.50 
   2   9   0    5.70    6.90 
  -2   9   0    5.30    5.90 
  -2   9   0    8.50    7.90 
   2   9   0   14.90    7.70 
   2   9   0   20.00   10.60 
   2   9   0   12.80    8.80 
  -2   9   0    8.80    7.10 
  -3  -9   0   96.29   18.50 
   3  -9   0   79.99   16.20 
  -3  -9   0   75.49   13.70 
   3  -9   0   77.39   16.80 
   3  -9   0   74.29   16.80 
  -3  -9   0   57.99   13.30 
   3  -9   0   50.39   11.90 
  -3  -9   0   79.49   13.70 
  -3  -9   0   45.00   12.60 
  -3  -9   0   94.19   14.60 
  -3  -9   0   62.29   13.80 
   3  -9   0   60.89   12.10 
  -3  -9   0   61.99   14.00 
   3  -9   0   76.89   16.00 
   3  -9   0  128.59   22.40 
  -3  -9   0   91.79   17.10 
   3  -9   0   54.09   14.30 
  -3  -9   0   81.79   16.00 
  -3  -9   0   68.59   16.10 
  -3  -9   0   51.49   13.20 
   3  -9   0   72.69   19.00 
  -3   9   0   63.39   14.00 
   3   9   0   92.19   17.30 
   3   9   0   64.59   17.20 
   3   9   0   80.99   16.30 
  -3   9   0   72.19   13.50 
  -3   9   0   77.39   14.30 
   3   9   0   70.29   16.20 
   3   9   0   74.99   17.30 
  -3   9   0   82.89   20.30 
  -4  -9   0   68.79   15.20 
  -4  -9   0   83.89   15.50 
  -4  -9   0  102.59   21.20 
   4  -9   0   60.69   16.40 
  -4  -9   0   77.19   15.10 
   4  -9   0   63.59   17.50 
   4  -9   0   70.59   13.80 
  -4  -9   0   65.79   14.50 
  -4  -9   0   34.50   11.30 
   4  -9   0   60.19   16.30 
  -4  -9   0   40.60   10.90 
   4  -9   0   52.99   14.00 
  -4  -9   0   81.59   16.10 
   4  -9   0   48.10   14.90 
   4  -9   0   72.39   16.40 
  -4  -9   0   80.99   13.70 
   4  -9   0  107.89   24.40 
  -4  -9   0   76.29   17.90 
   4  -9   0   76.39   13.40 
  -4  -9   0   60.29   14.60 
  -4  -9   0   56.79   12.70 
  -4  -9   0   62.69   14.30 
   4   9   0   83.09   15.00 
   4   9   0   71.09   16.40 
   4   9   0   71.59   17.30 
   4   9   0   54.89   13.90 
  -4   9   0   86.79   16.80 
   4   9   0   66.89   17.10 
   4   9   0   61.49   14.60 
   4   9   0   57.39   14.70 
  -4   9   0   56.89   13.60 
   5  -9   0  425.66   29.30 
   5  -9   0  409.56   41.00 
  -5  -9   0  400.86   30.60 
  -5  -9   0  400.66   31.70 
   5  -9   0  434.46   44.30 
   5  -9   0  419.86   33.50 
  -5  -9   0  460.95   32.00 
  -5  -9   0  382.96   30.50 
   5  -9   0  386.96   48.10 
  -5  -9   0  423.06   35.40 
   5  -9   0  435.76   44.80 
  -5  -9   0  441.56   36.10 
  -5  -9   0  423.06   30.40 
  -5  -9   0  445.96   31.80 
   5  -9   0  457.65   38.30 
  -5  -9   0  383.66   28.30 
  -5  -9   0  443.56   31.90 
  -5  -9   0  443.86   33.00 
  -5  -9   0  472.85   33.10 
   5   9   0  404.26   32.80 
   5   9   0  382.66   39.90 
  -5   9   0  452.85   31.90 
   5   9   0  434.66   34.60 
   5   9   0  457.35   30.80 
  -5   9   0  475.65   31.60 
   5   9   0  387.66   31.40 
   5   9   0  397.96   34.60 
  -5   9   0  444.76   34.20 
   0 -10   0 1610.84   75.89 
   0 -10   0 1560.94   69.79 
   0 -10   0 1652.73   68.79 
   0 -10   0 1574.04   76.79 
   0 -10   0 1800.82   75.29 
   0 -10   0 1539.05   69.09 
   0 -10   0 1480.45   66.79 
   0 -10   0 1532.25   72.59 
   0 -10   0 1727.73   77.29 
   0  10   0 1557.64   71.89 
   0  10   0 1627.74   78.79 
   0  10   0 1587.94   76.49 
   0  10   0 1482.25   69.09 
   0  10   0 1608.04   72.29 
   1 -10   0   56.49   12.70 
  -1 -10   0   60.49   16.20 
  -1 -10   0   81.59   16.00 
   1 -10   0   45.50   11.70 
  -1 -10   0   44.10   14.60 
   1 -10   0   61.99   16.90 
  -1 -10   0   62.09   15.60 
   1 -10   0   56.89   12.90 
  -1 -10   0   45.10   13.20 
  -1 -10   0   72.79   16.90 
   1 -10   0   63.39   14.60 
  -1 -10   0   44.80   10.70 
   1 -10   0   70.29   16.40 
   1 -10   0   62.29   16.80 
   1 -10   0   80.69   17.60 
  -1 -10   0   56.29   12.90 
  -1 -10   0   36.80   11.20 
   1 -10   0   50.19   12.10 
  -1 -10   0   34.10   11.30 
  -1  10   0   52.19   15.10 
  -1  10   0   22.10    9.70 
   1  10   0   46.00   12.70 
   1  10   0   64.69   15.60 
   1  10   0   47.50   14.20 
   1  10   0   52.19   15.20 
   1  10   0   34.90   11.50 
  -1  10   0   51.79   16.30 
  -1  10   0   50.19   13.10 
  -2 -10   0  795.32   48.10 
   2 -10   0  887.71   50.39 
   2 -10   0  880.31   56.69 
   2 -10   0  837.52   50.49 
  -2 -10   0  789.22   47.20 
   2 -10   0  993.00   53.89 
  -2 -10   0  872.41   47.40 
  -2 -10   0  871.51   52.39 
  -2 -10   0  803.62   51.39 
   2 -10   0  868.91   52.79 
   2 -10   0  807.62   45.20 
  -2 -10   0  861.11   43.90 
   2 -10   0  866.31   48.40 
   2 -10   0  866.01   44.10 
  -2 -10   0  831.62   45.40 
  -2 -10   0  913.41   48.50 
   2 -10   0  874.81   51.09 
  -2 -10   0  900.61   50.09 
  -2 -10   0  854.51   47.50 
   2 -10   0  810.22   44.80 
   2  10   0  784.62   47.90 
  -2  10   0  923.51   56.49 
   2  10   0  887.01   54.99 
   2  10   0  869.71   52.19 
   2  10   0  825.12   48.80 
  -2  10   0  892.91   46.20 
  -2  10   0  806.62   47.50 
  -3 -10   0    8.70    7.80 
  10   0  -1   -4.00    5.40 
 -10   0   1    6.60    7.40 
  10   0  -1   -0.10    5.70 
 -10   0   1    9.80    7.10 
 -10   0   1    5.00    6.90 
 -10   0   1   -5.60    5.00 
 -10   0   1    1.70    6.40 
  10   0  -1    6.30    6.50 
  10   0  -1    2.70    6.90 
  10   0  -1   -0.20    6.00 
  10   0  -1    3.50    6.90 
 -10   0   1   -2.10    5.20 
  10   0  -1    3.10    6.30 
  10   0  -1   -1.40    5.50 
  10   0  -1   -2.20    5.40 
 -10   0   1    3.30    6.60 
  10   0  -1   -8.20    4.60 
 -10   0   1   -2.90    5.80 
 -10   0   1    8.10    7.50 
  10   0  -1    4.80    6.80 
  10   0  -1    7.50    6.10 
 -10   0   1    1.00    5.90 
 -10   0   1    3.00    5.40 
  10   0  -1    3.40    7.00 
  10   0  -1   -2.40    5.60 
 -10   0   1    4.00    6.10 
  -9   0   1  880.31   46.90 
  -9   0   1  889.21   41.00 
   9   0  -1  962.10   45.50 
  -9   0   1  902.51   48.20 
   9   0  -1  897.21   42.80 
  -9   0   1  905.41   47.50 
   9   0  -1  910.51   49.30 
   9   0  -1  927.91   46.50 
  -9   0   1  947.71   49.20 
  -9   0   1  952.50   46.20 
  -9   0   1  892.41   47.20 
   9   0  -1  877.21   46.40 
   9   0  -1  948.41   42.80 
   9   0  -1  909.91   46.40 
  -9   0   1  959.60   45.70 
   9   0  -1  974.10   45.40 
  -9   0   1  853.91   47.00 
   9   0  -1  917.51   47.80 
  -9   0   1  973.40   46.90 
   9   0  -1  979.70   52.59 
  -9   0   1  901.81   48.00 
  -9   0   1  958.90   43.00 
   9   0  -1  934.91   46.90 
  -9   0   1  957.70   44.90 
   9   0  -1  971.50   48.10 
   9   0  -1  862.61   46.50 
  -8   0   1   -2.00    4.60 
  -8   0   1    3.60    4.10 
   8   0  -1   -3.20    3.80 
  -8   0   1    0.10    5.10 
  -8   0   1    0.30    4.50 
  -8   0   1    3.10    5.20 
  -8   0   1    2.80    3.60 
  -8   0   1    2.30    4.90 
  -8   0   1    0.60    4.40 
  -8   0   1   -5.50    3.20 
   8   0  -1    0.10    4.50 
   8   0  -1    4.70    4.60 
  -8   0   1    0.60    4.10 
  -8   0   1   -0.60    4.30 
   8   0  -1   -2.80    3.70 
   8   0  -1    7.80    4.80 
   8   0  -1    1.70    3.20 
  -8   0   1    0.00    3.70 
   8   0  -1    2.10    5.30 
  -8   0   1   -0.80    3.90 
   8   0  -1    0.30    4.20 
   8   0  -1    1.20    4.30 
  -8   0   1    3.20    4.00 
  -8   0   1    5.10    6.00 
   8   0  -1   -5.10    3.60 
   8   0  -1    0.70    4.60 
  -8   0   1    2.30    3.80 
  -8   0   1    0.90    3.50 
   8   0  -1    4.90    5.30 
  -8   0   1   -2.30    3.80 
   8   0  -1    1.30    4.60 
   8   0  -1   -3.50    4.40 
  -8   0   1   -2.40    4.70 
  -7   0   1 1030.80   37.80 
  -7   0   1 1006.70   41.00 
   7   0  -1  941.41   37.10 
  -7   0   1  931.11   32.40 
   7   0  -1  978.10   43.30 
  -7   0   1  959.20   36.10 
   7   0  -1  845.82   39.40 
   7   0  -1  928.61   42.60 
  -7   0   1  913.91   42.80 
   7   0  -1  912.11   38.70 
   7   0  -1  879.11   38.40 
   7   0  -1  903.41   41.70 
  -7   0   1  940.81   38.20 
   7   0  -1  985.70   45.50 
   7   0  -1  937.21   43.20 
  -7   0   1  911.21   43.10 
  -7   0   1  949.80   43.50 
   7   0  -1  991.40   42.90 
  -7   0   1  893.91   42.40 
   7   0  -1  880.91   40.10 
  -7   0   1  968.60   37.30 
  -7   0   1  899.21   42.90 
   7   0  -1  888.31   38.90 
  -7   0   1  963.90   41.40 
  -7   0   1  875.81   42.80 
  -7   0   1  916.71   41.40 
  -7   0   1  958.50   43.20 
  -7   0   1  940.61   41.30 
  -7   0   1 1073.29   45.10 
  -7   0   1  918.71   41.50 
   7   0  -1  901.31   42.30 
  -7   0   1  955.20   39.00 
  -7   0   1  943.21   38.60 
   6   0  -1   -0.60    2.40 
  -6   0   1   -3.00    2.60 
   6   0  -1    1.30    3.50 
  -6   0   1    2.60    3.40 
  -6   0   1   -1.90    3.00 
  -6   0   1    7.10    4.40 
   6   0  -1    2.00    2.70 
  -6   0   1    2.30    3.40 
  -6   0   1    0.30    2.30 
   6   0  -1    3.70    3.70 
   6   0  -1   -1.80    2.80 
   6   0  -1   -2.40    2.10 
   6   0  -1   -1.60    2.10 
  -6   0   1   -0.20    2.20 
  -6   0   1   -1.70    2.00 
  -6   0   1    2.70    3.60 
   6   0  -1   -1.60    2.80 
   6   0  -1   -1.30    3.00 
  -6   0   1   -0.50    1.60 
  -6   0   1    5.10    3.80 
  -6   0   1    0.20    2.60 
  -6   0   1    7.80    4.40 
  -6   0   1    3.80    3.50 
  -6   0   1   -2.00    2.80 
  -6   0   1   -1.40    1.30 
   6   0  -1    0.30    2.60 
  -6   0   1    0.70    3.30 
  -6   0   1    1.20    1.50 
   6   0  -1   -1.20    2.50 
  -6   0   1   -3.10    2.60 
  -6   0   1   -2.30    2.40 
   6   0  -1    1.10    3.40 
  -6   0   1   -3.40    2.00 
  -6   0   1    0.90    1.40 
  -6   0   1    1.50    2.50 
  -5   0   1  826.62   34.30 
  -5   0   1  790.02   32.50 
  -5   0   1  786.72   29.10 
  -5   0   1  773.92   33.70 
  -5   0   1  794.02   29.20 
  -5   0   1  744.13   33.90 
   5   0  -1  826.22   32.00 
   5   0  -1  770.42   30.90 
  -5   0   1  795.92   29.80 
   5   0  -1  811.12   26.80 
  -5   0   1  793.62   30.70 
  -5   0   1  791.82   27.10 
   5   0  -1  808.12   31.20 
  -5   0   1  797.22   34.00 
  -5   0   1  892.31   37.50 
  -5   0   1  782.42   26.30 
  -5   0   1  849.91   34.80 
  -5   0   1  790.32   32.80 
   5   0  -1  792.42   32.20 
  -5   0   1  801.82   33.10 
  -5   0   1  807.32   33.20 
  -5   0   1  759.12   29.60 
   5   0  -1  827.52   34.10 
  -5   0   1  793.92   34.00 
  -5   0   1  787.92   26.10 
  -5   0   1  788.42   33.90 
   5   0  -1  746.03   33.30 
   5   0  -1  876.91   36.20 
  -5   0   1  826.32   31.10 
   5   0  -1  777.12   33.70 
   5   0  -1  824.02   30.00 
  -5   0   1  775.52   30.80 
  -5   0   1  719.33   33.30 
   5   0  -1  844.52   34.60 
   5   0  -1  760.42   33.10 
  -5   0   1  821.62   34.30 
   4   0  -1    1.70    2.10 
   4   0  -1    2.90    1.80 
  -4   0   1    1.40    1.70 
   4   0  -1    3.00    2.70 
  -4   0   1    1.40    2.40 
  -4   0   1    3.00    1.90 
  -4   0   1    1.40    1.90 
   4   0  -1    5.00    3.40 
   4   0  -1    3.50    2.20 
  -4   0   1    0.70    1.90 
   4   0  -1    2.10    2.70 
   4   0  -1    1.20    2.40 
  -4   0   1    0.70    1.20 
  -4   0   1    0.90    1.60 
  -4   0   1    0.20    2.20 
  -4   0   1    2.30    1.80 
  -4   0   1    1.20    1.90 
  -4   0   1    2.90    2.10 
  -4   0   1    2.90    2.50 
  -4   0   1   -1.20    2.10 
   4   0  -1    2.40    1.90 
   4   0  -1    1.30    2.00 
   4   0  -1    2.20    1.90 
  -4   0   1    1.20    2.40 
  -4   0   1   -0.20    2.30 
   4   0  -1    0.00    2.00 
  -4   0   1    0.30    2.10 
  -4   0   1    1.60    1.10 
  -4   0   1    0.60    2.00 
  -4   0   1    4.20    3.00 
   4   0  -1    1.80    2.40 
  -4   0   1    2.60    2.60 
  -4   0   1    1.50    1.40 
  -4   0   1    1.40    2.70 
   4   0  -1    1.60    2.50 
  -4   0   1    4.50    3.00 
   4   0  -1    0.80    1.30 
  -4   0   1    1.30    2.30 
  -4   0   1    0.40    1.50 
  -4   0   1    1.60    1.70 
  -4   0   1   -2.30    1.80 
  -4   0   1    0.70    2.00 
   3   0  -1  549.54   22.80 
  -3   0   1  548.05   22.90 
  -3   0   1  546.35   18.70 
  -3   0   1  600.64   23.20 
   3   0  -1  564.24   23.60 
   3   0  -1  597.34   20.90 
   3   0  -1  571.24   20.80 
   3   0  -1  571.94   21.20 
  -3   0   1  579.14   23.10 
   3   0  -1  547.75   20.30 
  -3   0   1  533.35   21.00 
   3   0  -1  583.24   23.40 
  -3   0   1  584.64   23.40 
  -3   0   1  568.74   20.30 
  -3   0   1  624.14   23.00 
  -3   0   1  568.14   22.60 
  -3   0   1  564.44   21.10 
  -3   0   1  536.55   20.70 
  -3   0   1  551.24   22.60 
  -3   0   1  572.94   21.10 
   3   0  -1  572.24   22.00 
   3   0  -1  595.44   23.50 
   3   0  -1  583.54   22.90 
   3   0  -1  581.94   21.90 
   3   0  -1  596.54   18.70 
   3   0  -1  598.24   23.10 
   3   0  -1  578.34   22.90 
  -3   0   1  538.75   21.90 
   3   0  -1  571.94   22.80 
  -3   0   1  576.14   20.00 
   3   0  -1  565.84   22.80 
   3   0  -1  558.64   22.90 
   3   0  -1  544.65   21.50 
  -3   0   1  589.24   20.40 
  -3   0   1  610.04   22.00 
  -3   0   1  595.64   22.10 
   3   0  -1  552.74   21.80 
  -3   0   1  597.64   23.00 
  -3   0   1  571.94   22.50 
  -3   0   1  555.04   22.90 
  -3   0   1  561.14   21.00 
   3   0  -1  591.54   21.30 
   3   0  -1  597.24   23.20 
  -3   0   1  583.94   21.40 
  -3   0   1  565.74   23.20 
   3   0  -1  599.94   23.30 
  -3   0   1  568.24   23.00 
  -3   0   1  569.74   19.00 
  -3   0   1  574.24   20.10 
   3   0  -1  582.14   20.10 
  -3   0   1  607.04   23.30 
  -3   0   1  585.04   22.30 
   3   0  -1  593.94   23.00 
  -3   0   1  579.44   21.50 
  -3   0   1  592.44   23.30 
   2   0  -1    8.50    1.40 
  -2   0   1    9.10    2.30 
  -2   0   1    7.60    2.20 
  -2   0   1    1.90    1.00 
   2   0  -1    3.80    1.80 
  -2   0   1   10.90    2.40 
   2   0  -1    5.20    1.90 
   2   0  -1    9.90    2.40 
  -2   0   1   10.70    2.60 
   2   0  -1    7.60    2.30 
   2   0  -1    6.80    2.10 
  -2   0   1   10.70    2.30 
   2   0  -1    5.80    2.10 
  -2   0   1    5.70    1.20 
  -2   0   1    4.30    1.90 
   2   0  -1    6.00    1.60 
   2   0  -1    8.60    2.00 
  -2   0   1    4.60    1.90 
  -2   0   1    6.20    1.80 
  -2   0   1    7.70    2.20 
   2   0  -1    4.60    1.50 
   2   0  -1    9.50    1.60 
   2   0  -1    5.20    1.70 
   2   0  -1    8.10    2.10 
  -2   0   1    8.40    1.90 
  -2   0   1    6.10    1.40 
   2   0  -1    7.10    2.00 
  -2   0   1    3.90    1.60 
  -2   0   1    6.00    1.00 
  -2   0   1    7.20    2.20 
  -2   0   1    9.90    1.60 
   2   0  -1    3.80    1.80 
  -2   0   1    8.40    2.20 
   2   0  -1    7.90    2.10 
  -2   0   1    9.90    2.00 
  -2   0   1    8.80    1.80 
   2   0  -1    9.80    2.30 
  -2   0   1    7.30    1.70 
  -2   0   1    9.60    1.80 
  -2   0   1    1.50    1.50 
   2   0  -1    5.50    1.90 
  -2   0   1    6.70    1.80 
   2   0  -1    6.70    1.40 
   2   0  -1    5.30    1.40 
   2   0  -1    7.40    1.10 
  -2   0   1    4.90    1.60 
  -2   0   1    5.50    1.40 
   2   0  -1    7.40    2.20 
  -2   0   1   10.20    2.20 
  -2   0   1   14.50    2.80 
   2   0  -1    7.30    1.80 
   2   0  -1    4.60    1.80 
   2   0  -1   10.50    2.50 
  -2   0   1    6.90    2.10 
  -2   0   1    9.60    2.40 
  -2   0   1    7.30    1.70 
   2   0  -1    8.10    2.40 
   2   0  -1    6.50    2.10 
  -2   0   1   13.70    2.60 
  -2   0   1    3.20    1.60 
   2   0  -1    8.50    1.80 
   2   0  -1    6.80    1.90 
  -2   0   1   10.90    2.50 
   1   0  -1  291.57    9.20 
   1   0  -1  253.37   10.00 
   1   0  -1  282.77    9.60 
   1   0  -1  245.58    9.20 
   1   0  -1  263.47    8.90 
   1   0  -1  296.07    8.70 
   1   0  -1  281.17    9.20 
   1   0  -1  251.17   10.00 
   1   0  -1  266.57   10.10 
   1   0  -1  290.17    9.70 
   1   0  -1  242.88    9.80 
   1   0  -1  262.27    8.90 
   1   0  -1  219.18    9.70 
   1   0  -1  260.67   10.10 
   1   0  -1  287.57    9.10 
   1   0  -1  274.77    8.90 
   1   0  -1  269.57    9.90 
   1   0  -1  270.67   10.20 
   1   0  -1  284.77    8.30 
   1   0  -1  276.87    9.10 
   0   0  -1   -0.10    0.20 
   0   0  -1    0.00    0.20 
   0   0  -1   -0.10    0.10 
  -1   0  -1 1455.65   48.60 
   1   0   1 1745.93   49.30 
   1   0   1 1653.83   48.80 
  -1   0  -1 1644.94   48.60 
   1   0   1 1507.05   48.60 
   1   0   1 1692.33   49.30 
   1   0   1 1809.92   49.80 
   1   0   1 1695.43   49.10 
   1   0   1 1707.83   48.20 
   1   0   1 1449.55   49.10 
  -1   0  -1 1744.23   49.30 
   1   0   1 1644.54   49.70 
  -1   0  -1 1551.34   48.80 
   1   0   1 1349.96   48.20 
  -1   0  -1 1732.13   49.10 
   1   0   1 1497.85   48.50 
  -1   0  -1 1711.63   49.50 
   1   0   1 1670.33   48.40 
  -1   0  -1 1334.57   48.20 
  -1   0  -1 1734.33   49.20 
  -1   0  -1 1745.53   49.20 
   1   0   1 1468.35   48.90 
  -1   0  -1 1716.13   49.20 
   1   0   1 1730.63   49.00 
   1   0   1 1426.16   48.70 
  -1   0  -1 1745.03   48.50 
   1   0   1 1411.66   48.90 
   1   0   1 1527.55   48.70 
   1   0   1 1705.73   48.90 
   1   0   1 1666.63   49.20 
  -1   0  -1 1683.63   48.70 
  -1   0  -1 1663.03   48.90 
   2   0   1    2.30    1.40 
   2   0   1    0.50    1.20 
   2   0   1   -0.60    1.30 
  -2   0  -1    0.90    1.10 
   2   0   1    1.40    1.40 
   2   0   1    2.50    1.50 
  -2   0  -1    1.80    1.10 
   2   0   1    2.70    1.70 
   2   0   1    1.80    1.60 
  -2   0  -1    3.40    1.50 
   2   0   1    7.30    1.80 
  -2   0  -1    1.60    1.50 
   2   0   1    6.50    2.20 
   2   0   1   -0.80    1.40 
  -2   0  -1    7.30    2.30 
   2   0   1    5.00    2.00 
  -2   0  -1    2.70    1.70 
  -2   0  -1    2.30    1.60 
  -2   0  -1    3.50    1.40 
  -2   0  -1    4.50    1.70 
  -2   0  -1    2.00    1.70 
  -2   0  -1    4.60    2.00 
  -2   0  -1    2.60    1.40 
  -2   0  -1    1.30    1.50 
  -2   0  -1    3.40    1.70 
  -2   0  -1    3.10    1.50 
  -2   0  -1    6.80    2.20 
  -2   0  -1    1.30    1.50 
   2   0   1    4.10    1.80 
   2   0   1    1.60    1.60 
   2   0   1    5.50    2.10 
   2   0   1    2.90    1.50 
  -2   0  -1    3.30    1.60 
   2   0   1    5.10    1.90 
   2   0   1    1.00    1.40 
   2   0   1    3.00    1.80 
   2   0   1    5.50    1.80 
  -2   0  -1    2.20    1.70 
  -2   0  -1    3.20    1.60 
  -2   0  -1    6.00    2.20 
   2   0   1    5.40    2.00 
   2   0   1    3.10    1.50 
  -2   0  -1    4.00    2.00 
   2   0   1   -0.30    1.20 
   2   0   1    6.10    1.80 
   2   0   1    5.30    1.80 
  -2   0  -1    2.30    1.50 
   2   0   1    4.60    1.70 
  -2   0  -1    1.80    1.40 
   2   0   1    9.40    2.20 
   2   0   1    2.70    1.60 
   2   0   1    5.30    2.10 
  -2   0  -1    3.00    1.40 
   2   0   1    5.50    1.60 
  -2   0  -1    3.30    1.60 
   2   0   1    5.20    1.90 
   2   0   1    5.40    2.10 
  -2   0  -1    2.20    1.70 
  -2   0  -1    1.60    1.50 
  -2   0  -1    5.90    2.00 
  -2   0  -1    2.80    2.00 
  -2   0  -1    1.30    1.60 
  -2   0  -1    2.80    1.40 
   2   0   1   10.00    2.40 
   2   0   1    1.30    1.40 
   3   0   1 1757.12   55.69 
  -3   0  -1 1769.92   56.89 
  -3   0  -1 1681.83   57.99 
  -3   0  -1 1715.73   55.99 
  -3   0  -1 1767.62   57.69 
  -3   0  -1 1700.03   57.29 
  -3   0  -1 1776.62   53.99 
  -3   0  -1 1731.23   56.09 
   3   0   1 1680.73   57.29 
   3   0   1 1714.03   57.39 
  -3   0  -1 1737.43   56.89 
  -3   0  -1 1811.22   56.19 
   3   0   1 1767.42   56.29 
   3   0   1 1691.63   57.49 
  -3   0  -1 1735.63   56.89 
  -3   0  -1 1788.82   57.99 
   3   0   1 1767.22   55.79 
   3   0   1 1772.92   58.09 
   3   0   1 1788.62   54.99 
   3   0   1 1738.63   57.69 
  -3   0  -1 1709.73   57.59 
   3   0   1 1749.03   57.39 
  -3   0  -1 1760.32   56.39 
  -3   0  -1 1789.72   58.39 
  -3   0  -1 1768.02   55.19 
   3   0   1 1755.42   58.49 
   3   0   1 1693.33   56.69 
   3   0   1 1716.13   58.39 
  -3   0  -1 1768.72   57.89 
   3   0   1 1837.92   57.19 
  -3   0  -1 1737.13   54.69 
   3   0   1 1757.02   58.69 
   3   0   1 1733.93   56.59 
  -3   0  -1 1804.32   57.99 
   3   0   1 1836.32   55.49 
  -3   0  -1 1736.73   58.19 
   3   0   1 1759.02   56.39 
  -3   0  -1 1686.23   55.99 
  -3   0  -1 1731.33   57.09 
  -3   0  -1 1813.02   55.99 
  -3   0  -1 1769.92   57.79 
  -3   0  -1 1830.42   55.99 
  -3   0  -1 1746.33   57.99 
   3   0   1 1689.73   57.89 
   3   0   1 1864.01   58.09 
   3   0   1 1755.92   58.19 
  -3   0  -1 1777.22   57.39 
   3   0   1 1750.92   57.69 
   3   0   1 1804.02   54.59 
  -3   0  -1 1784.92   55.89 
   3   0   1 1712.03   56.69 
   4   0   1    2.00    1.70 
   4   0   1    1.90    2.50 
  -4   0  -1    3.20    2.50 
  -4   0  -1   -1.30    1.80 
   4   0   1    2.30    2.20 
  -4   0  -1   -0.30    1.60 
  -4   0  -1    2.60    2.70 
   4   0   1    5.40    3.20 
  -4   0  -1    2.40    2.40 
  -4   0  -1    1.60    2.30 
  -4   0  -1   -1.30    1.10 
  -4   0  -1    3.10    2.10 
  -4   0  -1    1.90    1.90 
   4   0   1    1.60    1.70 
  -4   0  -1   -1.00    1.80 
  -4   0  -1    1.80    2.30 
  -4   0  -1    3.30    2.70 
   4   0   1    4.80    3.10 
   4   0   1   -1.50    1.50 
   4   0   1    0.90    2.20 
   4   0   1    4.00    2.80 
  -4   0  -1    1.20    2.20 
   4   0   1   -0.80    1.80 
   4   0   1    5.30    3.40 
  -4   0  -1    0.70    1.90 
  -4   0  -1    3.00    1.30 
  -4   0  -1    0.70    1.80 
  -4   0  -1    0.60    2.50 
  -4   0  -1    2.30    2.20 
  -4   0  -1    1.60    2.40 
  -4   0  -1    5.40    3.40 
   4   0   1    1.10    1.90 
   4   0   1    1.70    2.30 
  -4   0  -1    1.00    2.20 
   4   0   1   -1.50    1.80 
  -4   0  -1    3.00    2.10 
   4   0   1    2.20    1.80 
  -4   0  -1    2.70    2.70 
  -5   0  -1 1314.27   48.70 
  -5   0  -1 1280.77   48.90 
   5   0   1 1254.77   46.50 
  -5   0  -1 1297.47   46.40 
  -5   0  -1 1320.37   46.50 
  -5   0  -1 1245.08   49.10 
  -5   0  -1 1305.37   40.20 
   5   0   1 1292.97   45.40 
  -5   0  -1 1305.57   49.99 
  -5   0  -1 1316.27   45.70 
  -5   0  -1 1315.47   48.50 
  -5   0  -1 1248.18   48.80 
   5   0   1 1275.67   49.90 
  -5   0  -1 1249.88   43.20 
   5   0   1 1306.67   45.60 
  -5   0  -1 1317.47   49.20 
  -5   0  -1 1299.17   44.10 
  -5   0  -1 1274.37   44.90 
  -5   0  -1 1304.17   49.40 
   5   0   1 1300.97   48.80 
  -5   0  -1 1306.67   39.90 
   5   0   1 1264.57   46.90 
  -5   0  -1 1311.87   49.50 
   5   0   1 1318.07   49.10 
   5   0   1 1239.68   48.80 
  -5   0  -1 1155.98   48.70 
   5   0   1 1316.47   47.70 
   5   0   1 1272.67   46.40 
   5   0   1 1267.97   48.20 
  -5   0  -1 1253.57   48.70 
  -5   0  -1 1281.57   47.50 
   5   0   1 1186.78   48.10 
  -5   0  -1 1240.18   47.50 
  -5   0  -1 1294.57   46.00 
  -5   0  -1 1244.78   42.00 
  -5   0  -1 1242.08   47.00 
  -6   0  -1    0.70    2.60 
   6   0   1    1.90    2.80 
  -6   0  -1    2.60    3.50 
  -6   0  -1    1.80    2.00 
  -6   0  -1    3.80    3.30 
   6   0   1    3.80    3.60 
  -6   0  -1    0.90    1.20 
   6   0   1   -1.60    2.30 
  -6   0  -1   10.30    5.20 
   6   0   1   -1.50    2.80 
  -6   0  -1    2.00    2.80 
   6   0   1    5.40    3.60 
   6   0   1    1.40    3.60 
  -6   0  -1   -0.40    2.60 
  -6   0  -1    2.90    3.40 
  -6   0  -1   -1.70    2.80 
   6   0   1    4.20    3.80 
   6   0   1    0.10    2.40 
  -6   0  -1    1.90    1.60 
  -6   0  -1    3.00    3.00 
  -6   0  -1    3.90    2.80 
  -6   0  -1    2.40    3.20 
   6   0   1    7.10    4.00 
   6   0   1   -0.40    2.30 
  -6   0  -1   -2.30    2.30 
   6   0   1    1.80    3.40 
  -6   0  -1    0.90    3.00 
   6   0   1   -2.10    2.50 
  -6   0  -1    1.80    2.30 
  -6   0  -1   -2.20    2.20 
  -6   0  -1    0.10    3.10 
  -6   0  -1   -1.90    2.60 
  -6   0  -1    3.00    3.70 
   7   0   1 3385.86  108.29 
  -7   0  -1 3302.47  114.59 
  -7   0  -1 3294.67  114.69 
   7   0   1 3152.88  109.99 
  -7   0  -1 3324.57  113.69 
  -7   0  -1 3358.16  112.49 
  -7   0  -1 3282.07  113.89 
   7   0   1 3365.86  109.99 
   7   0   1 3359.06  108.79 
   7   0   1 3313.97  113.89 
  -7   0  -1 3300.47  107.59 
  -7   0  -1 3553.44  106.49 
  -7   0  -1 3291.07  115.19 
  -7   0  -1 3238.48  112.49 
   7   0   1 3321.67  114.39 
   7   0   1 3262.07  110.09 
  -7   0  -1 3425.46  114.79 
   7   0   1 3236.58  113.29 
  -7   0  -1 3379.96  109.79 
   7   0   1 3321.07  116.09 
  -7   0  -1 3244.38  108.29 
  -7   0  -1 3381.16  111.89 
   7   0   1 3272.47  114.09 
   7   0   1 3286.47  111.19 
  -7   0  -1 3271.47  107.99 
  -7   0  -1 3323.77  103.79 
  -7   0  -1 3252.77  113.99 
  -7   0  -1 3309.97  108.89 
  -7   0  -1 3334.37  115.19 
   7   0   1 3409.56  113.59 
  -7   0  -1 3303.17  111.39 
  -8   0  -1   -2.50    4.10 
  -8   0  -1    1.60    4.20 
  -8   0  -1   -0.10    4.00 
  -8   0  -1    0.00    4.00 
  -8   0  -1    1.40    4.40 
  -8   0  -1    0.80    3.90 
  -8   0  -1    2.80    4.20 
  -8   0  -1   -5.10    3.40 
   8   0   1    3.30    4.60 
  -8   0  -1   -0.10    4.20 
   8   0   1   -1.80    4.70 
   8   0   1   -1.00    3.30 
   8   0   1   -0.10    4.20 
  -8   0  -1    1.80    4.20 
   8   0   1   -1.00    4.00 
  -8   0  -1   -0.80    4.00 
  -8   0  -1   -6.20    3.40 
   8   0   1    1.30    3.70 
   8   0   1    3.30    4.30 
  -8   0  -1   -3.20    3.50 
  -8   0  -1    5.60    5.10 
   8   0   1   -4.00    3.40 
  -8   0  -1    3.70    5.30 
   8   0   1    2.50    4.80 
   8   0   1    1.20    3.60 
   8   0   1    4.00    5.00 
  -8   0  -1    1.90    3.80 
   8   0   1   -1.60    3.20 
  -8   0  -1   -6.60    3.70 
   8   0   1    0.50    3.90 
  -8   0  -1   -3.00    3.00 
  -9   0  -1 1946.61   73.49 
   9   0   1 1878.01   77.99 
  -9   0  -1 1922.61   77.49 
  -9   0  -1 1923.51   79.79 
   9   0   1 1903.51   75.59 
   9   0   1 1989.80   73.09 
  -9   0  -1 2056.99   81.79 
  -9   0  -1 1953.50   79.99 
   9   0   1 1858.51   78.89 
   9   0   1 1929.71   78.39 
   9   0   1 1814.82   76.59 
   9   0   1 1925.11   74.89 
   9   0   1 1887.41   73.69 
  -9   0  -1 1853.51   71.69 
  -9   0  -1 1808.32   77.99 
   9   0   1 1784.62   79.79 
  -9   0  -1 1958.00   77.39 
   9   0   1 1851.31   76.59 
  -9   0  -1 1926.91   78.39 
  -9   0  -1 1987.70   76.89 
  -9   0  -1 1953.20   79.59 
   9   0   1 1862.21   78.29 
  -9   0  -1 1858.11   79.79 
  -9   0  -1 1759.92   78.49 
  -9   0  -1 1905.31   71.59 
  -9   0  -1 1853.11   75.19 
   9   0   1 1947.21   79.79 
 -10   0  -1    0.70    5.60 
 -10   0  -1    6.40    6.60 
 -10   0  -1    6.90    7.10 
 -10   0  -1   -1.50    6.10 
  10   0   1    1.70    5.00 
 -10   0  -1   -2.70    6.30 
  10   0   1    8.20    7.50 
  10   0   1    3.40    6.50 
 -10   0  -1    1.70    5.70 
  10   0   1   -4.20    5.50 
 -10   0  -1   -3.50    4.90 
  10   0   1   -0.30    6.60 
  10   0   1    4.30    7.60 
 -10   0  -1    2.40    4.70 
  10   0   1   -1.90    5.50 
  10   0   1    8.60    7.50 
  10   0   1    3.10    7.10 
  10   0   1    3.30    6.00 
  10   0   1   -5.40    5.50 
  10   0   1    1.00    6.50 
 -10   0  -1    4.80    7.10 
  10   0   1   -1.10    5.70 
 -10   0  -1   -6.30    6.00 
 -10   0  -1   -2.60    6.00 
  10   0   1    1.80    6.00 
 -10   0  -1    3.20    5.60 
 -10   0  -1   -1.30    5.70 
 -10  -1   1  215.68   25.70 
 -10  -1   1  241.38   23.70 
 -10  -1   1  250.47   29.70 
  10  -1  -1  228.48   25.00 
 -10  -1   1  202.48   25.80 
 -10  -1   1  280.87   30.40 
  10  -1  -1  204.88   26.00 
 -10  -1   1  223.48   23.70 
 -10  -1   1  238.28   25.40 
 -10  -1   1  234.68   28.10 
 -10  -1   1  245.58   30.10 
  10  -1  -1  223.88   24.30 
  10  -1  -1  234.48   27.10 
  10  -1  -1  245.98   28.40 
 -10  -1   1  288.27   28.40 
  10  -1  -1  226.68   30.70 
  10  -1  -1  240.18   26.90 
 -10  -1   1  178.68   24.00 
 -10  -1   1  195.68   25.80 
  10  -1  -1  228.38   25.00 
  10  -1  -1  245.78   29.50 
  10  -1  -1  213.98   25.70 
 -10  -1   1  233.98   28.20 
 -10  -1   1  203.28   27.30 
  10  -1  -1  201.68   25.60 
  10  -1  -1  188.78   24.90 
  10   1  -1  219.08   25.50 
  10   1  -1  209.38   26.10 
 -10   1   1  224.68   28.10 
  10   1  -1  237.48   29.30 
  10   1  -1  218.48   27.10 
  10   1  -1  227.78   23.60 
 -10   1   1  197.88   24.40 
 -10   1   1  219.58   25.50 
  10   1  -1  231.78   24.30 
  10   1  -1  225.58   25.80 
  10   1  -1  217.98   24.20 
  10   1  -1  198.58   26.00 
 -10   1   1  165.08   24.00 
 -10   1   1  249.58   29.30 
 -10   1   1  214.58   26.90 
  10   1  -1  219.58   27.70 
  10   1  -1  228.18   27.60 
  10   1  -1  245.08   27.60 
 -10   1   1  218.38   24.60 
 -10   1   1  224.48   27.50 
  10   1  -1  180.08   26.70 
  10   1  -1  233.28   26.20 
 -10   1   1  209.58   26.60 
 -10   1   1  222.88   27.30 
  -9  -1   1    2.70    5.30 
   9  -1  -1    2.00    4.90 
   9  -1  -1    7.20    5.50 
  -9  -1   1   16.50    7.70 
   9  -1  -1    3.10    6.40 
  -9  -1   1    7.20    5.10 
   9  -1  -1    7.40    6.30 
  -9  -1   1    4.80    5.80 
   9  -1  -1   -0.50    5.20 
  -9  -1   1    6.80    6.40 
  -9  -1   1    2.00    5.20 
  -9  -1   1   -0.90    5.00 
   9  -1  -1    0.90    5.00 
   9  -1  -1   -0.10    4.50 
   9  -1  -1    3.50    5.90 
  -9  -1   1   -2.30    4.90 
  -9  -1   1    8.90    6.70 
  -9  -1   1    5.50    5.60 
   9  -1  -1   -2.20    3.40 
  -9  -1   1   16.60    8.10 
   9  -1  -1    5.50    5.20 
   9  -1  -1    1.60    5.90 
  -9  -1   1    2.40    5.20 
  -9  -1   1    3.30    5.40 
  -9  -1   1   10.20    5.10 
  -9  -1   1    3.90    5.70 
   9  -1  -1    5.50    5.90 
   9  -1  -1    4.10    5.20 
  -9   1   1    2.40    5.10 
   9   1  -1   -0.60    4.00 
   9   1  -1    4.70    5.80 
   9   1  -1   -8.20    4.50 
  -9   1   1    2.60    5.00 
   9   1  -1   -2.80    4.80 
   9   1  -1    1.10    5.20 
  -9   1   1    3.40    5.70 
   9   1  -1   -2.70    4.30 
  -9   1   1    5.20    5.00 
  -9   1   1    0.00    3.60 
   9   1  -1    6.90    6.50 
  -9   1   1   -2.20    4.30 
  -9   1   1    4.60    5.90 
   9   1  -1    0.00    5.20 
  -9   1   1    0.20    4.50 
  -9   1   1    2.10    3.80 
   9   1  -1    1.50    4.60 
  -9   1   1    0.70    5.40 
   9   1  -1   13.90    7.60 
   9   1  -1    1.10    5.40 
   9   1  -1    0.60    5.50 
   9   1  -1    2.50    4.50 
  -9   1   1    2.70    5.80 
  -9   1   1    8.90    6.50 
   8  -1  -1  523.35   31.60 
   8  -1  -1  565.14   31.90 
  -8  -1   1  510.05   32.30 
  -8  -1   1  511.35   30.10 
  -8  -1   1  542.75   27.10 
   8  -1  -1  539.25   30.00 
  -8  -1   1  518.05   28.10 
  -8  -1   1  562.14   33.60 
  -8  -1   1  576.14   33.50 
  -8  -1   1  570.44   30.20 
  -8  -1   1  596.84   29.70 
   8  -1  -1  549.74   29.70 
  -8  -1   1  557.04   32.70 
  -8  -1   1  556.64   31.00 
  -8  -1   1  505.95   31.20 
   8  -1  -1  512.85   31.70 
  -8  -1   1  496.95   32.00 
  -8  -1   1  557.94   32.20 
   8  -1  -1  548.15   28.10 
   8  -1  -1  515.85   31.70 
  -8  -1   1  503.85   31.00 
  -8  -1   1  543.95   32.10 
  -8  -1   1  563.04   27.40 
  -8  -1   1  548.95   29.10 
   8  -1  -1  564.34   28.20 
   8  -1  -1  480.65   32.20 
   8  -1  -1  491.85   31.20 
   8  -1  -1  571.44   31.10 
  -8  -1   1  525.25   32.70 
   8  -1  -1  491.95   28.40 
  -8  -1   1  547.65   26.80 
   8   1  -1  505.65   27.50 
   8   1  -1  567.04   32.80 
  -8   1   1  515.75   31.50 
   8   1  -1  557.94   28.10 
  -8   1   1  550.24   26.50 
   8   1  -1  509.65   31.40 
   8   1  -1  616.04   30.50 
   8   1  -1  513.65   31.60 
  -8   1   1  524.55   31.80 
   8   1  -1  474.65   33.00 
  -8   1   1  537.05   32.60 
  -8   1   1  545.25   32.50 
  -8   1   1  552.74   25.80 
  -8   1   1  535.25   30.00 
  -8   1   1  529.25   27.70 
  -8   1   1  537.35   31.20 
   8   1  -1  543.75   32.50 
   8   1  -1  510.75   31.00 
  -8   1   1  489.75   31.50 
   8   1  -1  547.85   30.90 
   8   1  -1  566.74   31.00 
   8   1  -1  565.04   31.60 
  -8   1   1  545.65   26.00 
  -8   1   1  544.65   32.20 
   8   1  -1  523.25   29.40 
  -8   1   1  491.75   28.50 
  -8   1   1  546.95   26.50 
   8   1  -1  576.94   32.90 
  -8   1   1  508.15   31.70 
   8   1  -1  470.05   31.60 
   7  -1  -1   50.19   10.30 
  -7  -1   1   32.80    7.80 
   7  -1  -1   41.70    6.60 
   7  -1  -1   33.80    7.40 
   7  -1  -1   42.10   10.00 
  -7  -1   1   31.20    7.10 
  -7  -1   1   44.70    8.80 
  -7  -1   1   59.09   11.00 
  -7  -1   1   35.60    8.90 
  -7  -1   1   46.60    7.80 
  -7  -1   1   30.60    8.60 
  -7  -1   1   47.10    8.70 
   7  -1  -1   42.20    8.50 
  -7  -1   1   31.80    8.30 
   7  -1  -1   38.70    8.70 
  -7  -1   1   39.60    7.40 
  -7  -1   1   42.90    5.80 
  -7  -1   1   47.60   10.50 
   7  -1  -1   23.70    6.80 
   7  -1  -1   45.10    9.00 
  -7  -1   1   47.10    8.70 
  -7  -1   1   37.70    5.80 
   7  -1  -1   28.80    7.90 
   7  -1  -1   31.70    6.70 
  -7  -1   1   45.90    9.30 
  -7  -1   1   44.80    7.90 
   7  -1  -1   39.10    9.10 
  -7  -1   1   38.00    9.50 
  -7  -1   1   47.60   10.20 
  -7  -1   1   45.30   10.20 
  -7  -1   1   29.90    7.80 
  -7  -1   1   36.90    8.60 
   7  -1  -1   41.80    9.00 
   7   1  -1   32.70    8.40 
   7   1  -1   51.69    9.50 
   7   1  -1   44.60   10.10 
  -7   1   1   41.50    9.30 
   7   1  -1   43.20    9.50 
   7   1  -1   30.80    8.60 
  -7   1   1   46.30    6.20 
  -7   1   1   37.50    9.00 
  -7   1   1   40.90    7.90 
  -7   1   1   33.90    6.80 
   7   1  -1   43.40    8.00 
  -7   1   1   36.70    8.40 
   7   1  -1   34.30    9.50 
  -7   1   1   24.00    7.00 
  -7   1   1   40.50    6.80 
  -7   1   1   30.70    8.00 
  -7   1   1   34.50    8.50 
  -7   1   1   26.80    5.70 
   7   1  -1   36.10    9.20 
   7   1  -1   29.50    6.90 
   7   1  -1   35.40    9.40 
  -7   1   1   44.00    8.50 
  -7   1   1   25.00    7.10 
   7   1  -1   36.70    7.60 
  -7   1   1   34.70    6.80 
   7   1  -1   47.20    9.20 
  -7   1   1   28.80    8.20 
   7   1  -1   53.89   10.10 
  -7   1   1   54.19   10.90 
  -7   1   1   44.50    9.90 
   7   1  -1   38.40    8.30 
   7   1  -1   41.40    9.10 
  -6  -1   1 1757.82   67.39 
  -6  -1   1 1801.52   68.09 
   6  -1  -1 1822.12   68.19 
  -6  -1   1 1862.51   65.29 
   6  -1  -1 1894.71   63.79 
  -6  -1   1 1919.41   60.19 
   6  -1  -1 1925.81   70.89 
   6  -1  -1 1878.81   66.79 
   6  -1  -1 1898.31   61.29 
   6  -1  -1 1894.51   57.59 
   6  -1  -1 1890.01   67.79 
  -6  -1   1 1802.72   66.49 
  -6  -1   1 1928.61   65.79 
  -6  -1   1 1752.82   68.39 
  -6  -1   1 1830.92   64.49 
  -6  -1   1 1943.81   59.69 
  -6  -1   1 1882.51   65.69 
  -6  -1   1 1851.21   63.29 
   6  -1  -1 1817.02   68.59 
  -6  -1   1 1892.11   69.59 
  -6  -1   1 1889.91   68.39 
  -6  -1   1 1882.41   67.19 
  -6  -1   1 1914.51   63.89 
  -6  -1   1 1803.72   69.39 
  -6  -1   1 1885.61   68.59 
  -6  -1   1 1791.82   68.69 
  -6  -1   1 1719.93   68.39 
   6  -1  -1 1822.22   65.79 
   6  -1  -1 1903.11   66.09 
   6  -1  -1 1913.21   65.29 
   6  -1  -1 1839.72   64.19 
  -6  -1   1 1796.22   67.69 
   6  -1  -1 1856.11   68.09 
   6   1  -1 1915.11   64.39 
  -6   1   1 1824.52   68.19 
  -6   1   1 1734.73   67.49 
   6   1  -1 1900.01   68.09 
  -6   1   1 1901.01   61.79 
  -6   1   1 1852.61   67.89 
  -6   1   1 1930.01   61.89 
   6   1  -1 1803.12   70.69 
  -6   1   1 1897.91   68.89 
   6   1  -1 1922.91   69.09 
   6   1  -1 1925.51   68.59 
   6   1  -1 1796.62   65.49 
   6   1  -1 1842.62   64.19 
   6   1  -1 1854.51   66.89 
  -6   1   1 1936.31   69.09 
  -6   1   1 1853.11   62.79 
   6   1  -1 1832.92   68.59 
  -6   1   1 1829.12   54.99 
  -6   1   1 1882.21   67.29 
  -6   1   1 1878.71   59.19 
  -6   1   1 2013.20   66.29 
  -6   1   1 1891.31   65.89 
  -6   1   1 1814.22   68.79 
  -6   1   1 1844.12   67.79 
   6   1  -1 1834.12   68.09 
   6   1  -1 1850.21   68.69 
  -6   1   1 1880.51   63.99 
  -6   1   1 1825.32   61.89 
  -6   1   1 1952.30   67.99 
   6   1  -1 1859.31   66.79 
   6   1  -1 1862.71   69.89 
  -6   1   1 1897.51   58.29 
  -6   1   1 1840.32   67.19 
  -6   1   1 1885.51   62.89 
   6   1  -1 1892.01   65.59 
   5  -1  -1  492.95   25.70 
  -5  -1   1  541.95   22.60 
  -5  -1   1  528.05   24.20 
  -5  -1   1  485.25   24.50 
  -5  -1   1  505.55   23.10 
   5  -1  -1  523.45   25.10 
   5  -1  -1  494.95   24.20 
   5  -1  -1  514.55   23.50 
   5  -1  -1  508.75   19.90 
  -5  -1   1  522.05   25.90 
   5  -1  -1  491.55   22.30 
   5  -1  -1  507.55   20.10 
  -5  -1   1  500.05   25.30 
  -5  -1   1  474.85   20.80 
  -5  -1   1  497.85   19.40 
  -5  -1   1  511.25   24.90 
   5  -1  -1  532.75   22.00 
  -5  -1   1  499.85   20.70 
  -5  -1   1  457.15   23.90 
  -5  -1   1  506.05   21.80 
  -5  -1   1  499.85   19.70 
  -5  -1   1  499.75   24.80 
   5  -1  -1  524.05   23.70 
  -5  -1   1  491.35   25.20 
  -5  -1   1  497.85   23.00 
  -5  -1   1  492.55   23.00 
  -5  -1   1  506.65   23.90 
   5  -1  -1  512.05   24.80 
  -5  -1   1  512.05   22.80 
   5  -1  -1  482.85   24.70 
  -5  -1   1  498.35   25.30 
   5  -1  -1  516.65   20.40 
  -5  -1   1  484.85   25.30 
   5  -1  -1  516.25   23.80 
   5  -1  -1  526.85   18.20 
  -5  -1   1  511.15   24.40 
  -5  -1   1  518.05   25.10 
  -5   1   1  487.85   23.80 
  -5   1   1  454.05   24.00 
  -5   1   1  488.95   24.20 
  -5   1   1  479.15   23.70 
  -5   1   1  532.65   25.50 
  -5   1   1  572.04   25.80 
  -5   1   1  486.65   20.50 
  -5   1   1  496.65   23.00 
   5   1  -1  515.75   24.90 
   5   1  -1  528.85   25.80 
   5   1  -1  515.45   22.50 
   5   1  -1  514.55   22.60 
  -5   1   1  486.05   20.30 
   5   1  -1  462.05   23.40 
  -5   1   1  516.35   18.60 
   5   1  -1  521.05   25.40 
  -5   1   1  498.85   18.60 
   5   1  -1  515.75   25.40 
  -5   1   1  491.15   21.90 
   5   1  -1  502.45   23.80 
  -5   1   1  490.75   24.80 
  -5   1   1  486.15   23.80 
  -5   1   1  496.45   16.40 
  -5   1   1  522.75   24.40 
  -5   1   1  489.85   20.70 
  -5   1   1  477.85   24.10 
   5   1  -1  522.05   25.10 
  -5   1   1  489.85   24.70 
   5   1  -1  495.55   24.60 
   5   1  -1  559.94   23.90 
  -5   1   1  509.65   20.60 
  -5   1   1  493.85   21.20 
   5   1  -1  471.15   25.20 
  -5   1   1  517.35   23.10 
   5   1  -1  536.65   23.80 
  -5   1   1  489.95   21.30 
  -4  -1   1 6004.10  182.98 
  -4  -1   1 6008.70  180.78 
  -4  -1   1 6176.48  179.08 
   4  -1  -1 5929.21  176.48 
  -4  -1   1 6107.79  177.48 
   4  -1  -1 5968.30  176.08 
   4  -1  -1 5929.51  180.78 
   4  -1  -1 5993.40  175.88 
  -4  -1   1 6106.29  179.88 
   4  -1  -1 6002.10  177.68 
  -4  -1   1 6050.99  179.38 
  -4  -1   1 6226.68  182.08 
  -4  -1   1 5948.60  179.08 
   4  -1  -1 6045.10  180.28 
  -4  -1   1 6019.60  178.08 
   4  -1  -1 5802.82  179.68 
   4  -1  -1 5774.52  179.98 
   4  -1  -1 5996.70  175.68 
  -4  -1   1 5986.60  181.88 
  -4  -1   1 6065.39  182.48 
   4  -1  -1 5698.03  182.38 
  -4  -1   1 6112.39  176.18 
  -4  -1   1 5731.13  180.18 
  -4  -1   1 5928.11  179.88 
   4  -1  -1 6154.78  174.58 
  -4  -1   1 6017.20  177.18 
  -4  -1   1 6001.10  178.78 
   4  -1  -1 5998.30  180.08 
  -4  -1   1 6002.70  182.88 
  -4  -1   1 5928.61  181.48 
   4  -1  -1 5922.51  181.38 
   4  -1  -1 5946.51  181.68 
  -4  -1   1 5893.51  181.98 
   4  -1  -1 5936.01  181.28 
  -4  -1   1 6044.40  181.48 
  -4  -1   1 6010.40  181.48 
  -4  -1   1 6136.09  180.68 
   4  -1  -1 5907.91  178.68 
  -4   1   1 5985.30  177.28 
  -4   1   1 5908.01  181.38 
   4   1  -1 5809.62  181.78 
  -4   1   1 6212.98  180.88 
  -4   1   1 5923.71  179.08 
   4   1  -1 5945.21  179.78 
  -4   1   1 6212.98  180.98 
   4   1  -1 6096.39  179.78 
  -4   1   1 5802.42  176.28 
  -4   1   1 6071.19  172.88 
   4   1  -1 6196.48  180.68 
  -4   1   1 5937.81  177.58 
  -4   1   1 5990.60  181.78 
  -4   1   1 6061.89  181.18 
  -4   1   1 6158.78  179.48 
   4   1  -1 6049.99  181.58 
   4   1  -1 6149.58  182.38 
   4   1  -1 5975.50  182.18 
  -4   1   1 5833.72  180.38 
   4   1  -1 6180.08  183.18 
  -4   1   1 6026.80  174.38 
   4   1  -1 6252.97  181.88 
  -4   1   1 5866.41  182.08 
  -4   1   1 5956.40  174.78 
  -4   1   1 5916.51  177.68 
   4   1  -1 6186.08  180.88 
  -4   1   1 5822.62  180.48 
  -4   1   1 5894.91  179.08 
  -4   1   1 6016.40  181.58 
  -4   1   1 6152.48  176.98 
  -4   1   1 6007.00  181.78 
  -4   1   1 6168.38  177.48 
   4   1  -1 6113.09  179.08 
  -4   1   1 5964.80  181.68 
  -4   1   1 6129.49  176.38 
  -4   1   1 5915.31  177.98 
   4   1  -1 6100.89  178.88 
  -4   1   1 5914.81  176.78 
   4   1  -1 5883.71  181.48 
   3  -1  -1  517.55   21.70 
  -3  -1   1  513.45   21.60 
   3  -1  -1  482.65   20.10 
  -3  -1   1  536.15   20.50 
  -3  -1   1  529.95   21.50 
  -3  -1   1  503.25   21.40 
  -3  -1   1  570.04   23.00 
  -3  -1   1  526.15   21.70 
  -3  -1   1  531.95   22.90 
   3  -1  -1  505.55   17.80 
  -3  -1   1  495.65   20.30 
  -3  -1   1  503.55   20.70 
  -3  -1   1  519.95   20.10 
   3  -1  -1  510.25   18.30 
   3  -1  -1  514.65   20.70 
  -3  -1   1  517.15   20.30 
  -3  -1   1  503.15   21.70 
   3  -1  -1  529.05   21.00 
   3  -1  -1  541.35   19.10 
   3  -1  -1  510.35   21.30 
  -3  -1   1  507.95   21.40 
   3  -1  -1  525.65   21.20 
  -3  -1   1  524.15   19.50 
  -3  -1   1  523.05   22.40 
   3  -1  -1  488.45   21.90 
  -3  -1   1  503.15   19.60 
   3  -1  -1  522.75   19.30 
   3  -1  -1  528.85   20.90 
   3  -1  -1  526.35   19.00 
   3  -1  -1  496.65   19.10 
   3  -1  -1  529.55   20.60 
   3  -1  -1  509.45   22.90 
  -3  -1   1  526.25   20.50 
   3  -1  -1  532.15   18.80 
   3  -1  -1  520.05   17.60 
  -3  -1   1  486.45   19.90 
   3  -1  -1  500.35   21.10 
  -3  -1   1  513.65   21.70 
  -3  -1   1  529.25   22.10 
   3  -1  -1  514.95   17.80 
   3  -1  -1  539.45   21.80 
   3  -1  -1  489.05   21.10 
   3  -1  -1  524.45   21.30 
   3  -1  -1  556.74   22.20 
  -3  -1   1  516.15   20.70 
  -3  -1   1  557.24   21.20 
  -3  -1   1  528.45   21.60 
   3  -1  -1  498.15   20.70 
  -3  -1   1  510.25   19.70 
  -3  -1   1  538.25   20.40 
   3  -1  -1  544.45   21.10 
   3  -1  -1  513.15   19.90 
  -3  -1   1  526.45   20.80 
   3  -1  -1  534.15   21.20 
  -3  -1   1  500.75   20.80 
  -3  -1   1  510.95   18.50 
  -3   1   1  532.35   21.60 
  -3   1   1  515.85   18.10 
   3   1  -1  531.65   22.80 
   3   1  -1  556.84   20.40 
  -3   1   1  512.25   21.00 
   3   1  -1  521.05   21.90 
   3   1  -1  507.85   20.30 
  -3   1   1  525.55   16.70 
  -3   1   1  509.55   20.40 
  -3   1   1  543.05   21.40 
  -3   1   1  532.05   20.70 
  -3   1   1  512.55   16.20 
  -3   1   1  510.15   21.50 
  -3   1   1  513.65   20.00 
  -3   1   1  509.95   21.50 
  -3   1   1  504.65   18.70 
  -3   1   1  510.15   21.30 
  -3   1   1  539.65   20.90 
  -3   1   1  509.85   18.10 
  -3   1   1  502.55   19.20 
   3   1  -1  473.05   21.60 
   3   1  -1  549.45   20.30 
   3   1  -1  502.35   21.00 
   3   1  -1  540.95   22.40 
  -3   1   1  556.24   20.30 
  -3   1   1  501.85   21.20 
   3   1  -1  541.85   21.20 
  -3   1   1  485.65   20.60 
  -3   1   1  538.55   18.70 
   3   1  -1  513.55   21.30 
   3   1  -1  494.85   19.90 
  -3   1   1  531.35   20.10 
  -3   1   1  519.95   21.60 
  -3   1   1  508.45   18.70 
  -3   1   1  521.75   19.40 
   3   1  -1  546.35   21.10 
  -3   1   1  518.55   19.10 
  -3   1   1  547.85   21.60 
  -3   1   1  521.05   21.50 
   3   1  -1  556.84   21.00 
   3   1  -1  503.25   21.80 
  -3   1   1  511.95   21.70 
   3   1  -1  509.85   19.60 
   3   1  -1  551.14   22.50 
  -3   1   1  536.45   18.90 
   3   1  -1  559.14   21.00 
   3   1  -1  492.35   20.40 
   3   1  -1  504.75   21.50 
   3   1  -1  527.15   21.70 
   3   1  -1  526.05   21.60 
   3   1  -1  511.45   22.00 
   3   1  -1  546.15   21.60 
  -2  -1   1 2997.80   91.19 
  -2  -1   1 3085.59   92.19 
  -2  -1   1 2935.21   90.49 
   2  -1  -1 2930.81   88.39 
   2  -1  -1 3064.59   91.09 
  -2  -1   1 3027.00   91.39 
   2  -1  -1 2892.71   88.69 
   2  -1  -1 3008.80   90.39 
   2  -1  -1 2988.00   88.29 
  -2  -1   1 3118.09   91.09 
   2  -1  -1 2959.70   89.99 
   2  -1  -1 2976.10   88.69 
   2  -1  -1 2953.20   87.49 
  -2  -1   1 2991.90   90.29 
  -2  -1   1 2957.70   91.29 
   2  -1  -1 3015.40   90.49 
  -2  -1   1 3126.49   91.39 
  -2  -1   1 3074.39   92.09 
   2  -1  -1 2981.80   90.59 
  -2  -1   1 3132.99   90.79 
  -2  -1   1 3033.80   90.19 
  -2  -1   1 2905.71   90.19 
  -2  -1   1 2954.20   90.99 
  -2  -1   1 3093.29   90.99 
  -2  -1   1 3003.90   91.39 
  -2  -1   1 2831.12   90.19 
  -2  -1   1 2997.40   90.19 
   2  -1  -1 2965.40   89.19 
   2  -1  -1 2923.71   91.09 
  -2  -1   1 3090.19   90.09 
   2  -1  -1 2980.20   88.09 
   2  -1  -1 2923.71   90.49 
   2  -1  -1 3062.49   91.29 
  -2  -1   1 3076.39   90.99 
   2  -1  -1 2929.51   90.39 
  -2  -1   1 3079.99   90.69 
  -2  -1   1 3057.09   89.49 
   2  -1  -1 2911.71   91.29 
   2  -1  -1 3090.39   90.29 
  -2  -1   1 3012.70   90.39 
   2  -1  -1 2997.80   90.09 
   2  -1  -1 2921.11   90.59 
   2  -1  -1 2972.60   89.69 
   2  -1  -1 2968.70   90.59 
   2  -1  -1 3056.29   89.79 
   2  -1  -1 2949.30   89.99 
   2  -1  -1 3064.49   91.89 
   2  -1  -1 2972.60   86.89 
  -2  -1   1 3056.29   91.09 
   2  -1  -1 2960.90   90.59 
   2  -1  -1 2915.91   89.19 
  -2  -1   1 2957.70   91.29 
  -2  -1   1 3007.00   89.19 
   2  -1  -1 2929.31   90.09 
  -2  -1   1 3087.79   90.59 
   2  -1  -1 2946.91   87.09 
  -2  -1   1 2944.31   89.69 
  -2  -1   1 2994.90   91.19 
   2  -1  -1 3016.50   90.79 
   2  -1  -1 2889.71   87.49 
  -2  -1   1 3123.49   91.69 
   2  -1  -1 2974.00   90.29 
   2  -1  -1 3120.29   90.79 
  -2  -1   1 2983.00   90.19 
  -2  -1   1 3017.70   90.49 
  -2  -1   1 3073.19   90.49 
   2  -1  -1 2936.41   88.39 
   2   1  -1 2978.60   90.59 
  -2   1   1 2870.21   90.49 
   2   1  -1 3102.29   89.99 
   2   1  -1 3079.19   90.39 
  -2   1   1 3123.29   90.49 
  -2   1   1 2875.41   88.69 
   2   1  -1 3108.59   90.49 
   2   1  -1 3102.39   90.69 
  -2   1   1 3068.09   87.99 
   2   1  -1 3050.09   91.29 
  -2   1   1 3038.50   90.89 
   2   1  -1 3095.39   91.49 
   2   1  -1 3110.69   91.39 
   2   1  -1 3029.60   90.59 
   2   1  -1 3057.29   90.59 
   2   1  -1 3030.40   90.79 
  -2   1   1 2999.70   89.69 
   2   1  -1 3027.50   90.39 
   2   1  -1 3152.58   91.99 
  -2   1   1 2941.21   90.59 
   2   1  -1 3057.49   91.39 
   2   1  -1 2994.80   90.19 
  -2   1   1 2882.11   90.09 
   2   1  -1 3024.80   91.19 
   2   1  -1 2991.40   89.39 
  -2   1   1 3036.60   90.39 
  -2   1   1 2932.91   90.99 
  -2   1   1 3036.20   89.89 
  -2   1   1 2938.71   89.29 
   2   1  -1 2901.41   91.29 
   2   1  -1 3101.69   91.09 
  -2   1   1 3027.90   87.69 
   2   1  -1 3049.50   90.49 
   2   1  -1 3000.20   90.19 
   2   1  -1 3145.29   90.39 
   2   1  -1 2914.51   90.49 
   2   1  -1 3121.39   91.89 
  -2   1   1 3003.40   90.99 
  -2   1   1 3073.59   89.39 
  -2   1   1 2877.31   90.49 
  -2   1   1 2958.00   90.69 
  -2   1   1 2823.02   88.49 
  -2   1   1 2941.21   90.59 
  -2   1   1 3179.28   90.99 
  -2   1   1 3147.59   90.79 
  -2   1   1 2822.52   87.89 
  -2   1   1 3129.49   90.79 
  -2   1   1 2966.60   91.19 
   2   1  -1 3045.70   91.19 
  -2   1   1 2882.31   88.29 
  -2   1   1 3050.79   89.99 
  -2   1   1 3018.30   87.39 
   2   1  -1 3097.89   90.49 
  -2   1   1 2904.81   89.89 
   2   1  -1 3075.79   92.09 
   2   1  -1 3130.09   90.29 
   2   1  -1 3069.79   89.79 
   2   1  -1 2917.41   90.89 
  -2   1   1 2946.31   89.59 
   2   1  -1 2976.60   91.69 
  -2   1   1 3058.89   86.99 
  -1  -1   1  402.66   14.70 
  -1  -1   1  412.66   14.70 
   1  -1  -1  403.96   13.90 
   1  -1  -1  390.46   13.90 
   1  -1  -1  412.86   14.60 
  -1  -1   1  415.26   14.60 
  -1  -1   1  420.86   14.90 
  -1  -1   1  402.96   15.10 
   1  -1  -1  423.36   14.20 
  -1  -1   1  369.96   14.50 
   1  -1  -1  406.96   13.80 
  -1  -1   1  448.06   14.60 
  -1  -1   1  408.76   14.10 
   1  -1  -1  395.96   13.40 
   1  -1  -1  404.86   13.20 
  -1  -1   1  395.36   14.60 
  -1  -1   1  388.76   14.60 
  -1  -1   1  405.26   14.80 
  -1  -1   1  394.86   15.10 
   1  -1  -1  410.06   13.90 
  -1  -1   1  430.76   14.50 
   1  -1  -1  394.36   14.00 
  -1  -1   1  409.66   14.80 
   1  -1  -1  421.46   14.40 
  -1  -1   1  400.36   14.50 
   1  -1  -1  411.86   13.30 
  -1  -1   1  417.36   14.70 
  -1  -1   1  442.46   14.80 
  -1  -1   1  427.96   15.10 
   1  -1  -1  423.16   14.80 
  -1  -1   1  416.26   14.90 
   1  -1  -1  386.46   15.20 
   1  -1  -1  417.66   14.00 
  -1  -1   1  413.16   15.40 
   1  -1  -1  400.66   14.00 
   1  -1  -1  404.16   14.20 
  -1  -1   1  415.06   15.10 
   1  -1  -1  394.06   13.90 
   1  -1  -1  394.66   14.40 
  -1  -1   1  407.16   13.30 
   1  -1  -1  410.46   14.00 
   1  -1  -1  388.96   12.80 
   1  -1  -1  425.26   15.20 
   1  -1  -1  409.86   13.80 
  -1  -1   1  447.86   15.00 
   1  -1  -1  403.76   14.10 
  -1  -1   1  406.46   14.50 
   1  -1  -1  401.56   13.20 
   1  -1  -1  411.16   14.00 
  -1  -1   1  412.96   14.30 
   1  -1  -1  401.76   12.30 
  -1  -1   1  404.96   14.30 
   1  -1  -1  390.66   14.20 
  -1  -1   1  397.16   15.00 
   1  -1  -1  411.26   12.70 
   1  -1  -1  374.86   14.80 
  -1  -1   1  394.76   15.10 
   1  -1  -1  432.66   13.70 
  -1  -1   1  409.86   14.20 
   1  -1  -1  411.86   13.30 
   1  -1  -1  406.36   14.00 
   1  -1  -1  425.06   13.80 
  -1  -1   1  386.86   14.50 
   1   1  -1  396.36   13.30 
   1   1  -1  391.96   14.30 
   1   1  -1  400.96   14.90 
   1   1  -1  341.07   14.30 
   1   1  -1  394.06   14.00 
   1   1  -1  401.66   14.50 
  -1   1   1  392.86   13.80 
   1   1  -1  405.66   14.30 
  -1   1   1  388.26   14.30 
   1   1  -1  400.56   14.30 
  -1   1   1  395.46   13.70 
   1   1  -1  412.26   14.00 
   1   1  -1  414.56   15.00 
  -1   1   1  373.16   13.80 
   1   1  -1  424.26   15.20 
   1   1  -1  418.26   14.70 
   1   1  -1  401.86   14.60 
  -1   1   1  408.06   15.10 
   1   1  -1  415.26   15.30 
  -1   1   1  413.96   14.60 
   1   1  -1  408.66   14.80 
   1   1  -1  414.66   15.20 
   1   1  -1  429.16   14.90 
  -1   1   1  394.96   14.20 
   1   1  -1  417.26   14.60 
   1   1  -1  381.16   14.50 
  -1   1   1  347.37   13.30 
   1   1  -1  409.56   14.50 
   1   1  -1  415.66   15.30 
   1   1  -1  398.56   14.50 
   1   1  -1  408.36   14.30 
  -1   1   1  413.36   13.90 
   1   1  -1  414.46   15.50 
   1   1  -1  419.06   14.90 
  -1   1   1  408.06   14.10 
   1   1  -1  438.46   15.10 
   1   1  -1  419.46   14.60 
   0  -1  -1 7483.85  216.08 
   0  -1  -1 7787.42  217.68 
   0  -1  -1 7602.74  217.08 
   0  -1   1 6623.14  215.98 
   0  -1  -1 7183.28  214.58 
   0  -1  -1 7247.17  214.28 
   0  -1  -1 7758.62  216.38 
   0  -1   1 7182.58  216.58 
   0  -1   1 7211.08  212.88 
   0  -1  -1 7661.03  215.88 
   0  -1   1 7413.76  215.38 
   0  -1  -1 6851.81  213.18 
   0  -1  -1 7781.72  211.88 
   0  -1  -1 6522.95  213.78 
   0  -1   1 7767.02  213.18 
   0  -1  -1 7670.23  214.28 
   0  -1  -1 7701.13  213.18 
   0  -1  -1 7404.56  212.88 
   0  -1   1 8056.99  217.58 
   0  -1   1 6764.42  214.68 
   0  -1   1 6848.01  215.18 
   0  -1   1 7840.62  215.98 
   0  -1   1 7707.33  211.98 
   0  -1  -1 7104.29  216.88 
   0  -1  -1 7907.51  215.98 
   0  -1   1 7271.97  213.78 
   0  -1   1 6806.52  213.78 
   0  -1  -1 7870.41  212.98 
   0  -1   1 7897.21  213.68 
   0  -1  -1 7679.13  212.78 
   0  -1  -1 7162.38  212.68 
   0  -1   1 7342.07  215.68 
   0  -1  -1 7780.12  216.28 
   0  -1  -1 6992.10  217.68 
   0   1  -1 7625.24  217.28 
   0   1  -1 6899.81  214.48 
   0   1  -1 5997.20  214.88 
   0   1  -1 6476.85  212.58 
   0   1  -1 7846.61  212.98 
   0   1  -1 7223.68  213.18 
   0   1  -1 7630.64  217.28 
   1  -1   1  664.03   22.80 
  -1  -1  -1  690.93   22.50 
  -1  -1  -1  639.14   21.60 
   1  -1   1  648.14   20.20 
  -1  -1  -1  640.04   21.20 
   1  -1   1  637.14   22.00 
  -1  -1  -1  646.34   21.40 
   1  -1   1  606.04   21.00 
   1  -1   1  649.64   20.20 
  -1  -1  -1  657.03   21.10 
   1  -1   1  631.94   22.00 
   1  -1   1  637.74   20.60 
  -1  -1  -1  645.74   22.40 
   1  -1   1  645.24   20.30 
   1  -1   1  650.33   20.60 
  -1  -1  -1  651.23   21.90 
   1  -1   1  610.74   21.10 
   1  -1   1  660.53   21.40 
   1  -1   1  624.94   21.90 
  -1  -1  -1  665.73   21.80 
  -1  -1  -1  650.53   20.70 
  -1  -1  -1  660.63   22.20 
   1  -1   1  668.03   23.00 
  -1  -1  -1  662.63   21.20 
   1  -1   1  631.24   21.10 
   1  -1   1  640.84   20.70 
   1  -1   1  658.13   21.20 
  -1  -1  -1  661.13   20.90 
  -1  -1  -1  673.43   22.00 
  -1  -1  -1  625.84   21.40 
  -1  -1  -1  627.84   21.50 
   1  -1   1  633.14   22.90 
   1  -1   1  623.94   21.90 
  -1  -1  -1  624.74   19.40 
   1  -1   1  689.13   22.60 
  -1  -1  -1  669.23   22.00 
  -1  -1  -1  624.64   20.40 
   1  -1   1  666.93   22.60 
  -1  -1  -1  678.53   22.10 
  -1  -1  -1  633.64   21.90 
  -1  -1  -1  657.03   21.70 
   1  -1   1  641.04   21.60 
   1  -1   1  628.94   21.90 
  -1  -1  -1  618.04   21.80 
   1  -1   1  658.83   22.20 
  -1  -1  -1  656.43   21.40 
   1  -1   1  626.94   22.60 
   1  -1   1  626.04   22.70 
   1  -1   1  670.33   22.50 
   1  -1   1  645.94   19.30 
   1  -1   1  659.83   22.30 
  -1  -1  -1  613.74   21.80 
  -1  -1  -1  657.63   20.50 
  -1  -1  -1  614.14   21.50 
   1  -1   1  607.24   21.10 
  -1  -1  -1  642.24   21.50 
  -1  -1  -1  655.03   21.90 
   1  -1   1  661.83   21.70 
  -1  -1  -1  652.83   20.40 
   1   1   1  639.24   20.60 
   1   1   1  652.63   21.40 
   1   1   1  582.74   20.90 
   1   1   1  672.13   21.90 
  -1   1  -1  633.94   21.00 
  -1   1  -1  654.33   21.40 
   1   1   1  628.34   21.10 
  -1   1  -1  628.84   21.50 
   1   1   1  662.83   22.10 
   1   1   1  636.74   20.60 
  -1   1  -1  628.94   20.80 
   1   1   1  669.43   22.00 
  -1   1  -1  656.03   22.10 
  -1   1  -1  623.14   20.60 
  -1   1  -1  641.14   22.30 
   1   1   1  665.93   22.00 
  -1   1  -1  646.04   20.30 
   1   1   1  629.04   21.10 
  -1   1  -1  625.64   21.90 
  -1   1  -1  598.34   21.10 
   1   1   1  643.04   22.00 
  -1   1  -1  660.03   22.30 
   1   1   1  657.73   22.10 
   1   1   1  649.04   22.30 
   1   1   1  526.05   20.10 
   1   1   1  638.14   21.90 
  -1   1  -1  604.74   21.10 
  -1   1  -1  630.24   22.00 
   1   1   1  653.43   20.90 
   1   1   1  635.74   21.90 
  -1   1  -1  665.03   23.00 
   1   1   1  649.04   21.70 
   1   1   1  657.03   21.60 
  -1   1  -1  655.73   20.50 
  -1   1  -1  628.24   21.90 
   1   1   1  623.34   21.80 
  -1   1  -1  662.03   22.40 
  -1   1  -1  642.44   20.30 
   1   1   1  582.04   20.70 
  -1   1  -1  658.83   22.10 
  -1   1  -1  629.64   21.80 
  -1   1  -1  623.14   22.10 
   1   1   1  661.03   21.50 
   1   1   1  585.74   20.30 
   1   1   1  613.24   22.20 
   1   1   1  645.54   22.00 
  -1   1  -1  649.83   22.70 
  -1   1  -1  639.04   23.00 
   1   1   1  628.04   21.60 
  -1   1  -1  578.64   20.80 
   1   1   1  615.94   21.00 
   1   1   1  654.03   22.00 
   1   1   1  739.33   21.90 
  -1   1  -1  685.33   23.00 
   1   1   1  635.04   21.60 
  -2  -1  -1 9255.27  262.77 
  -2  -1  -1 9142.08  264.57 
   2  -1   1 9128.29  262.57 
   2  -1   1 8764.12  262.97 
  -2  -1  -1 9227.78  262.57 
  -2  -1  -1 9575.54  263.87 
   2  -1   1 9036.70  263.07 
  -2  -1  -1 8766.82  263.97 
  -2  -1  -1 9263.27  263.67 
   2  -1   1 8870.71  263.37 
   2  -1   1 8937.91  263.47 
   2  -1   1 8569.34  264.77 
  -2  -1  -1 9188.98  263.47 
  -2  -1  -1 9611.64  262.67 
  -2  -1  -1 9736.83  264.77 
  -2  -1  -1 9323.07  263.47 
  -2  -1  -1 9270.17  264.27 
   2  -1   1 8680.23  261.87 
  -2  -1  -1 9008.90  263.87 
   2  -1   1 9116.69  263.57 
   2  -1   1 8794.72  261.47 
  -2  -1  -1 9531.15  263.97 
  -2  -1  -1 8617.74  264.67 
   2  -1   1 9042.29  264.47 
   2  -1   1 8526.85  262.87 
   2  -1   1 8689.63  261.57 
   2  -1   1 9077.09  263.77 
  -2  -1  -1 9515.35  264.07 
   2  -1   1 8991.00  263.67 
   2  -1   1 8926.41  264.97 
   2  -1   1 9136.39  264.37 
   2  -1   1 9148.18  264.47 
   2  -1   1 8474.35  263.57 
   2  -1   1 8926.31  262.47 
   2  -1   1 8742.93  263.47 
  -2  -1  -1 9895.51  265.07 
   2  -1   1 9118.99  263.47 
  -2  -1  -1 9337.17  263.77 
  -2  -1  -1 9259.47  264.27 
   2  -1   1 8506.25  264.67 
   2  -1   1 8544.45  264.47 
   2  -1   1 8765.42  264.07 
  -2  -1  -1 8991.20  264.27 
  -2  -1  -1 9655.63  263.17 
   2  -1   1 8927.81  263.87 
   2  -1   1 8872.31  262.97 
   2  -1   1 8774.02  263.67 
  -2  -1  -1 9209.28  264.57 
  -2  -1  -1 9325.77  265.07 
  -2  -1  -1 8972.00  265.77 
  -2  -1  -1 8895.51  264.27 
   2  -1   1 8465.05  262.37 
  -2  -1  -1 9251.88  263.57 
   2  -1   1 8699.93  262.77 
   2  -1   1 8741.53  263.27 
  -2  -1  -1 9171.88  263.97 
   2  -1   1 8822.42  264.27 
   2  -1   1 8695.23  264.97 
   2  -1   1 8497.45  264.47 
   2  -1   1 8657.73  264.67 
  -2  -1  -1 9614.64  263.57 
   2   1   1 9172.48  264.07 
  -2   1  -1 9322.67  266.07 
  -2   1  -1 8925.51  262.87 
   2   1   1 9284.67  263.87 
   2   1   1 9519.15  264.67 
   2   1   1 9394.06  264.37 
   2   1   1 9232.68  264.47 
   2   1   1 9515.15  264.27 
  -2   1  -1 9171.78  263.47 
  -2   1  -1 9273.17  264.27 
  -2   1  -1 8866.01  264.37 
   2   1   1 9452.15  263.97 
  -2   1  -1 9262.77  263.97 
   2   1   1 9755.02  264.37 
   2   1   1 9065.09  264.37 
  -2   1  -1 8599.94  264.57 
   2   1   1 9229.18  263.57 
  -2   1  -1 9245.58  263.87 
  -2   1  -1 9275.57  264.47 
   2   1   1 9564.44  263.57 
  -2   1  -1 9063.09  263.67 
   2   1   1 9201.68  261.07 
   2   1   1 8999.30  264.47 
   2   1   1 8789.22  264.57 
   2   1   1 9598.34  263.17 
  -2   1  -1 8371.86  264.47 
  -2   1  -1 9151.68  264.17 
  -2   1  -1 8456.55  262.27 
  -2   1  -1 8499.25  261.47 
   2   1   1 9514.85  263.47 
   2   1   1 8952.90  262.57 
  -2   1  -1 8937.71  264.97 
   2   1   1 8920.91  264.47 
   2   1   1 8908.11  264.07 
   2   1   1 9115.59  263.87 
   2   1   1 8804.82  264.07 
  -2   1  -1 9342.87  261.87 
   2   1   1 9156.38  264.67 
  -2   1  -1 8408.06  264.07 
  -2   1  -1 9231.88  263.27 
   2   1   1 9648.83  263.57 
  -2   1  -1 8556.24  264.77 
   2   1   1 9469.85  263.47 
  -2   1  -1 8899.31  264.97 
  -2   1  -1 8452.65  264.77 
  -2   1  -1 9036.80  261.67 
  -2   1  -1 8893.71  262.97 
  -2   1  -1 9161.68  262.57 
  -2   1  -1 9004.70  263.87 
   2   1   1 9672.33  262.97 
   2   1   1 9588.24  263.67 
  -2   1  -1 9404.16  263.27 
   2   1   1 9553.24  264.17 
   2   1   1 9175.28  264.07 
  -2   1  -1 9101.39  263.67 
  -2   1  -1 9151.28  265.37 
   2   1   1 9433.46  262.77 
  -2   1  -1 8108.39  262.77 
  -2   1  -1 8524.85  263.77 
   2   1   1 9598.64  262.87 
   3  -1   1    5.80    2.10 
   3  -1   1    3.70    2.30 
   3  -1   1    8.70    2.40 
  -3  -1  -1    6.30    2.70 
   3  -1   1    6.10    1.80 
  -3  -1  -1    7.00    2.30 
   3  -1   1    3.10    3.00 
  -3  -1  -1    7.20    2.90 
  -3  -1  -1    2.90    2.30 
   3  -1   1    7.70    1.70 
  -3  -1  -1    8.80    2.80 
   3  -1   1   18.90    4.30 
   3  -1   1   15.70    3.70 
  -3  -1  -1    5.60    2.30 
  -3  -1  -1    4.00    2.10 
  -3  -1  -1    3.60    2.40 
  -3  -1  -1    6.50    2.40 
  -3  -1  -1    6.60    2.70 
  -3  -1  -1    7.80    3.30 
   3  -1   1    1.20    2.30 
   3  -1   1    9.00    3.20 
  -3  -1  -1    4.50    2.40 
   3  -1   1    6.20    2.20 
   3  -1   1    6.80    2.70 
  -3  -1  -1    3.30    2.20 
   3  -1   1    6.00    2.20 
  -3  -1  -1    1.20    2.00 
  -3  -1  -1    7.90    2.60 
   3  -1   1    1.80    1.90 
  -3  -1  -1   18.20    4.20 
  -3  -1  -1   10.30    2.90 
  -3  -1  -1    7.10    3.20 
  -3  -1  -1    8.20    3.30 
   3  -1   1    5.40    1.90 
   3  -1   1    6.90    2.80 
  -3  -1  -1    3.70    2.20 
  -3  -1  -1    5.00    2.50 
  -3  -1  -1   13.90    3.20 
   3  -1   1    7.10    2.60 
   3  -1   1   10.10    3.30 
   3  -1   1    4.50    2.30 
   3  -1   1    3.30    1.90 
   3  -1   1   16.30    3.80 
   3  -1   1    8.70    2.60 
  -3  -1  -1    8.60    2.90 
  -3  -1  -1    4.50    2.20 
  -3   1  -1   11.50    3.00 
  -3   1  -1   10.50    3.10 
   3   1   1    7.60    2.40 
   3   1   1    9.10    3.00 
  -3   1  -1    7.50    3.20 
  -3   1  -1    9.00    2.70 
  -3   1  -1    7.10    2.90 
  -3   1  -1    9.20    1.90 
  -3   1  -1    5.50    2.50 
  -3   1  -1    5.20    2.20 
  -3   1  -1    4.70    2.60 
   3   1   1    3.10    1.80 
  -3   1  -1    7.00    2.40 
  -3   1  -1    6.50    2.90 
   3   1   1    2.20    1.60 
  -3   1  -1    4.90    2.30 
  -3   1  -1    5.00    1.70 
   3   1   1    6.60    2.40 
  -3   1  -1   10.50    3.20 
   3   1   1    4.50    2.40 
   3   1   1    0.90    2.10 
  -3   1  -1    6.80    2.50 
   3   1   1    9.50    2.70 
  -3   1  -1   10.80    3.00 
  -3   1  -1    4.20    2.50 
   3   1   1    2.80    2.20 
  -3   1  -1   10.10    2.70 
   3   1   1    3.80    2.20 
  -3   1  -1    3.90    1.90 
   3   1   1    6.50    2.80 
   3   1   1    9.30    2.60 
   3   1   1    0.80    2.10 
  -3   1  -1    3.40    2.40 
  -3   1  -1    3.10    1.90 
  -3   1  -1    6.70    3.00 
   3   1   1    3.20    2.40 
   3   1   1    4.50    2.40 
   3   1   1    8.00    2.90 
  -3   1  -1    3.30    2.30 
  -3   1  -1    6.90    2.90 
  -3   1  -1    6.40    2.10 
   3   1   1    9.10    3.20 
   3   1   1    5.30    2.60 
   3   1   1    2.90    2.20 
  -3   1  -1    5.20    1.90 
   3   1   1    4.30    2.50 
   4  -1   1 2689.23   90.59 
  -4  -1  -1 2838.32   92.09 
   4  -1   1 2808.82   90.39 
   4  -1   1 2824.52   88.59 
  -4  -1  -1 2812.42   92.09 
   4  -1   1 2896.71   89.09 
   4  -1   1 2820.32   91.29 
  -4  -1  -1 2916.11   91.59 
  -4  -1  -1 2806.22   89.19 
  -4  -1  -1 2793.52   88.89 
  -4  -1  -1 2762.12   89.59 
  -4  -1  -1 2911.91   92.69 
   4  -1   1 2854.61   92.29 
   4  -1   1 2746.13   92.59 
  -4  -1  -1 2851.11   92.59 
   4  -1   1 2856.61   89.89 
  -4  -1  -1 2874.41   91.99 
  -4  -1  -1 2896.61   89.19 
  -4  -1  -1 2884.41   89.79 
   4  -1   1 2821.22   90.29 
   4  -1   1 2868.21   88.09 
  -4  -1  -1 2778.22   89.39 
   4  -1   1 2814.32   86.79 
   4  -1   1 2794.62   88.79 
  -4  -1  -1 2786.22   88.79 
  -4  -1  -1 2740.53   90.79 
   4  -1   1 2846.52   89.19 
   4  -1   1 2929.91   90.39 
  -4  -1  -1 2892.71   91.29 
  -4  -1  -1 2905.61   91.59 
  -4  -1  -1 2750.92   89.79 
   4  -1   1 2872.61   92.39 
  -4  -1  -1 2799.22   87.39 
   4  -1   1 2789.22   85.59 
  -4   1  -1 2822.82   89.29 
  -4   1  -1 2764.42   91.19 
  -4   1  -1 2843.92   91.49 
   4   1   1 2746.13   90.09 
  -4   1  -1 2747.53   90.19 
  -4   1  -1 2918.41   85.59 
   4   1   1 2818.72   92.09 
  -4   1  -1 2766.52   89.09 
  -4   1  -1 2810.12   91.49 
   4   1   1 2859.41   92.09 
  -4   1  -1 2923.81   92.49 
   4   1   1 2765.82   91.69 
  -4   1  -1 2840.22   87.09 
  -4   1  -1 2908.31   86.29 
   4   1   1 2898.71   89.89 
   4   1   1 2963.20   87.59 
  -4   1  -1 2814.72   87.09 
  -4   1  -1 2887.81   89.49 
  -4   1  -1 2795.22   92.29 
   4   1   1 2813.02   91.79 
  -4   1  -1 2929.31   91.19 
  -4   1  -1 2874.61   88.69 
   4   1   1 2879.51   91.49 
   4   1   1 2890.31   91.99 
  -4   1  -1 2813.92   92.69 
  -4   1  -1 2804.32   91.69 
  -4   1  -1 2811.82   88.39 
  -4   1  -1 2970.40   88.99 
   4   1   1 2861.81   91.29 
  -4   1  -1 2792.52   90.39 
  -4   1  -1 2853.41   87.99 
   4   1   1 2871.81   89.39 
   4   1   1 2798.02   89.99 
   5  -1   1   26.10    5.20 
  -5  -1  -1   27.00    6.00 
  -5  -1  -1   28.60    6.60 
  -5  -1  -1   16.30    5.30 
  -5  -1  -1   21.40    4.90 
   5  -1   1   27.80    4.40 
   5  -1   1   26.10    4.90 
   5  -1   1   33.30    7.30 
   5  -1   1   24.20    5.80 
   5  -1   1   29.70    6.30 
  -5  -1  -1   26.20    5.50 
   5  -1   1   22.80    6.00 
  -5  -1  -1   23.50    6.00 
   5  -1   1   25.50    5.50 
   5  -1   1   37.50    6.40 
   5  -1   1   22.00    5.30 
  -5  -1  -1   27.20    6.10 
  -5  -1  -1   26.90    6.10 
  -5  -1  -1   28.00    6.30 
  -5  -1  -1   18.90    4.90 
  -5  -1  -1   21.80    6.30 
  -5  -1  -1   43.30    8.30 
  -5  -1  -1   28.10    6.00 
  -5  -1  -1   33.50    7.30 
  -5  -1  -1   21.80    5.30 
  -5  -1  -1   30.20    5.80 
   5  -1   1   23.40    5.20 
   5  -1   1   31.20    7.10 
  -5  -1  -1   22.00    5.90 
   5  -1   1   23.40    5.40 
  -5  -1  -1   30.60    5.10 
   5  -1   1   24.80    6.10 
  -5   1  -1   16.80    5.00 
  -5   1  -1   28.90    5.80 
  -5   1  -1   30.50    5.70 
   5   1   1   21.60    5.10 
  -5   1  -1   17.30    5.30 
  -5   1  -1   32.70    6.90 
   5   1   1   14.50    4.40 
  -5   1  -1   35.70    7.70 
   5   1   1   17.60    5.30 
  -5   1  -1   19.00    5.40 
   5   1   1   18.50    5.50 
   5   1   1   25.30    6.10 
  -5   1  -1   31.40    6.50 
  -5   1  -1   31.50    4.80 
   5   1   1   21.90    5.20 
  -5   1  -1   27.80    4.00 
  -5   1  -1   28.00    5.90 
  -5   1  -1   38.40    7.20 
  -5   1  -1   22.20    4.00 
   5   1   1   38.30    7.40 
  -5   1  -1   43.30    6.80 
   5   1   1   24.60    6.10 
   5   1   1   28.80    6.50 
  -5   1  -1   22.60    5.40 
  -5   1  -1   23.10    4.70 
   5   1   1   21.50    4.90 
  -5   1  -1   21.40    5.90 
   5   1   1   22.20    4.50 
   5   1   1   29.20    6.50 
  -5   1  -1   19.50    5.50 
  -5   1  -1   19.00    5.80 
  -6  -1  -1   52.29    9.50 
   6  -1   1   67.39    9.80 
   6  -1   1   66.19    9.80 
  -6  -1  -1   93.99   12.40 
   6  -1   1   75.39    9.00 
  -6  -1  -1   73.99    8.40 
  -6  -1  -1   71.09   10.80 
  -6  -1  -1   67.79    9.70 
   6  -1   1   73.99   11.80 
   6  -1   1   62.79   10.10 
  -6  -1  -1   47.50    9.50 
   6  -1   1   66.79   10.00 
   6  -1   1   61.29    9.10 
  -6  -1  -1   78.99   11.90 
   6  -1   1   61.49   11.00 
  -6  -1  -1   73.69   10.00 
   6  -1   1  105.59   13.10 
  -6  -1  -1   59.39   10.70 
   6  -1   1   65.19    9.40 
  -6  -1  -1   57.09   10.20 
  -6  -1  -1   63.69    8.60 
   6  -1   1   69.19    9.70 
  -6  -1  -1   72.79   10.00 
   6  -1   1   73.69   11.40 
  -6  -1  -1   78.59   11.60 
  -6  -1  -1   72.19   11.40 
  -6  -1  -1   65.19   10.00 
  -6  -1  -1   51.89    8.00 
  -6  -1  -1   68.19   10.80 
   6  -1   1   71.59    8.80 
  -6  -1  -1   79.29   10.30 
  -6   1  -1   83.39   11.80 
  -6   1  -1   80.49   11.40 
  -6   1  -1   62.89   10.70 
  -6   1  -1   69.49   10.90 
  -6   1  -1   57.79    9.20 
  -6   1  -1   62.79    9.40 
   6   1   1   71.09   11.20 
   6   1   1   74.09   10.80 
   6   1   1   78.79   11.50 
  -6   1  -1   47.50    8.50 
   6   1   1   48.80    8.40 
   6   1   1   78.19   10.60 
   6   1   1   69.89   10.80 
  -6   1  -1   61.69   10.00 
  -6   1  -1   72.39   11.60 
   6   1   1   63.39    9.10 
  -6   1  -1   71.29    9.70 
  -6   1  -1   80.19   11.40 
  -6   1  -1   72.39    9.10 
  -6   1  -1   86.29   10.10 
  -6   1  -1   73.09    8.10 
  -6   1  -1   70.99    7.50 
  -6   1  -1   67.59    9.20 
  -6   1  -1   80.09    5.90 
  -6   1  -1   78.59   11.90 
   6   1   1   74.19    9.00 
   6   1   1   76.19   11.40 
  -6   1  -1   58.29   10.90 
  -6   1  -1   73.69    8.00 
   6   1   1   73.49   11.10 
  -6   1  -1   61.59   10.20 
   6   1   1   71.99   11.20 
   6   1   1   65.09    9.70 
   6   1   1   57.09   10.00 
   7  -1   1   22.10    6.60 
  -7  -1  -1   23.10    6.60 
  -7  -1  -1   18.80    6.00 
  -7  -1  -1   29.70    8.10 
  -7  -1  -1   20.30    4.20 
   7  -1   1   31.30    7.70 
  -7  -1  -1   31.50    6.10 
  -7  -1  -1   24.30    7.70 
   7  -1   1   21.80    7.20 
  -7  -1  -1   20.50    7.50 
   7  -1   1   23.30    6.90 
  -7  -1  -1   23.10    6.60 
   7  -1   1   16.90    6.50 
  -7  -1  -1   19.40    6.10 
  -7  -1  -1   32.20    7.00 
  -7  -1  -1   20.40    6.80 
  -7  -1  -1   32.10    9.10 
   7  -1   1   19.20    5.40 
   7  -1   1   16.20    6.70 
  -7  -1  -1   21.40    7.80 
   7  -1   1   31.00    7.60 
   7  -1   1   24.90    7.70 
  -7  -1  -1   39.30    8.00 
  -7  -1  -1   13.10    5.40 
  -7  -1  -1   24.60    7.80 
   7  -1   1   17.50    6.30 
   7  -1   1   14.60    6.80 
   7  -1   1   24.10    6.80 
  -7  -1  -1   27.90    8.10 
  -7  -1  -1   20.40    7.30 
  -7  -1  -1   22.60    7.50 
  -7  -1  -1   19.20    6.60 
  -7   1  -1   26.80    8.00 
   7   1   1   23.70    7.80 
  -7   1  -1   21.90    7.40 
  -7   1  -1   20.50    6.90 
  -7   1  -1   23.20    5.20 
  -7   1  -1   17.90    5.50 
   7   1   1   29.70    7.80 
  -7   1  -1   19.60    4.60 
  -7   1  -1    6.20    4.10 
   7   1   1   25.90    6.50 
  -7   1  -1   11.30    5.80 
   7   1   1   13.40    6.10 
   7   1   1   15.60    5.80 
  -7   1  -1   17.90    6.70 
  -7   1  -1   18.10    4.40 
  -7   1  -1   26.30    7.40 
   7   1   1   29.60    8.30 
   7   1   1   18.00    6.80 
  -7   1  -1   21.60    6.10 
   7   1   1   32.00    9.10 
  -7   1  -1   16.10    6.90 
  -7   1  -1   23.70    7.80 
   7   1   1   23.40    7.20 
  -7   1  -1   23.90    7.50 
  -7   1  -1   21.00    7.50 
   7   1   1   19.10    7.00 
  -7   1  -1   29.00    8.20 
   7   1   1   24.40    7.50 
   7   1   1   15.10    6.60 
   7   1   1   24.90    6.00 
  -7   1  -1   25.30    6.80 
   7   1   1   23.10    7.50 
  -8  -1  -1   14.80    7.60 
  -8  -1  -1   10.80    5.70 
   8  -1   1   15.00    5.90 
   8  -1   1    8.40    5.50 
   8  -1   1   26.00    8.80 
   8  -1   1   11.50    6.00 
  -8  -1  -1   21.60    7.80 
  -8  -1  -1   21.10    7.80 
  -8  -1  -1   13.20    5.90 
   8  -1   1   14.40    7.10 
  -8  -1  -1   14.00    5.90 
  -8  -1  -1   10.30    6.50 
  -8  -1  -1   16.60    7.50 
  -8  -1  -1   34.80    9.40 
   8  -1   1   11.30    6.00 
  -8  -1  -1   13.30    6.30 
  -8  -1  -1   14.00    5.60 
  -8  -1  -1   18.00    7.60 
   8  -1   1    5.10    5.80 
   8  -1   1    5.30    5.30 
   8  -1   1   12.80    5.80 
   8  -1   1   10.60    4.70 
   8  -1   1    9.00    5.50 
  -8  -1  -1   16.40    6.10 
  -8  -1  -1   15.90    7.50 
  -8  -1  -1   19.30    7.00 
   8  -1   1    9.90    6.20 
  -8  -1  -1   22.40    8.30 
  -8  -1  -1    9.60    5.90 
  -8  -1  -1   30.50    7.60 
   8   1   1   26.80    7.50 
  -8   1  -1   16.70    6.80 
  -8   1  -1   13.80    7.30 
   8   1   1   25.40    7.40 
   8   1   1   39.30   10.10 
   8   1   1   12.20    6.50 
   8   1   1   20.20    6.20 
  -8   1  -1    5.40    4.40 
   8   1   1   10.60    6.50 
   8   1   1    8.40    5.90 
  -8   1  -1   12.40    6.30 
  -8   1  -1   18.20    7.50 
   8   1   1   14.70    7.20 
   8   1   1   14.10    6.50 
  -8   1  -1   11.80    5.20 
   8   1   1   11.50    6.00 
  -8   1  -1   10.40    5.30 
  -8   1  -1    5.50    5.80 
  -8   1  -1   13.90    6.90 
  -8   1  -1    1.50    4.70 
   8   1   1   21.10    6.90 
  -8   1  -1   13.50    6.00 
  -8   1  -1    4.90    5.30 
   8   1   1   20.30    7.90 
  -8   1  -1    6.90    5.40 
  -8   1  -1    7.40    4.90 
  -8   1  -1   11.30    6.30 
  -8   1  -1   11.80    6.80 
   8   1   1   18.90    7.40 
   8   1   1   25.70    8.90 
  -9  -1  -1   -0.40    4.70 
  -9  -1  -1    2.50    5.50 
  -9  -1  -1    9.20    6.70 
   9  -1   1    7.90    5.90 
   9  -1   1    7.20    6.00 
   9  -1   1    4.90    5.90 
  -9  -1  -1   -1.00    4.20 
  -9  -1  -1    2.10    4.80 
   9  -1   1    6.80    6.10 
   9  -1   1    0.50    5.00 
  -9  -1  -1    2.20    6.00 
   9  -1   1   -1.10    5.00 
  -9  -1  -1   -1.20    5.10 
  -9  -1  -1   11.60    7.30 
  -9  -1  -1    4.00    5.00 
   9  -1   1   -0.60    5.00 
  -9  -1  -1    2.10    5.90 
  -9  -1  -1    3.40    5.20 
  -9  -1  -1   -4.10    4.50 
  -9  -1  -1   -1.90    4.20 
   9  -1   1   -2.20    4.70 
  -9  -1  -1   -4.30    3.60 
   9  -1   1    7.30    6.90 
   9  -1   1    1.20    5.70 
  -9  -1  -1    0.30    5.00 
  -9  -1  -1   -2.10    5.00 
  -9  -1  -1    6.30    5.80 
   9  -1   1    2.20    6.50 
   9  -1   1    4.10    5.30 
   9   1   1   -4.90    4.30 
   9   1   1    1.70    5.10 
  -9   1  -1    1.40    5.20 
   9   1   1    0.00    4.20 
   9   1   1    0.20    4.50 
   9   1   1    2.20    5.30 
  -9   1  -1   -2.00    4.70 
  -9   1  -1    7.70    6.30 
   9   1   1    2.10    5.40 
   9   1   1    6.90    5.50 
   9   1   1    6.90    5.40 
   9   1   1    0.30    4.80 
   9   1   1   -3.90    4.10 
   9   1   1   13.70    7.10 
  -9   1  -1    0.40    5.10 
  -9   1  -1    0.10    5.00 
  -9   1  -1   -4.10    3.90 
  -9   1  -1   -0.60    5.10 
   9   1   1    0.90    4.60 
   9   1   1   -4.70    4.10 
   9   1   1    8.60    6.10 
  -9   1  -1    6.60    7.00 
  -9   1  -1    4.00    5.50 
  -9   1  -1    0.20    4.20 
   9   1   1    4.10    7.10 
  -9   1  -1   -2.40    4.40 
  10  -1   1   42.10   13.00 
 -10  -1  -1   27.90    9.50 
 -10  -1  -1   26.30    9.90 
 -10  -1  -1   29.80   12.50 
  10  -1   1   35.50   10.70 
 -10  -1  -1   18.50    8.10 
 -10  -1  -1   29.10   11.20 
  10  -1   1    7.10    6.40 
  10  -1   1   21.60    9.50 
 -10  -1  -1   15.40    8.30 
 -10  -1  -1   28.30   10.70 
  10  -1   1   46.60   11.90 
  10  -1   1   13.10    9.20 
  10  -1   1   15.60    7.80 
 -10  -1  -1   22.00   10.60 
 -10  -1  -1   31.70   10.60 
 -10  -1  -1   16.80    8.60 
  10  -1   1   25.80    9.60 
  10  -1   1   13.50    8.60 
  10  -1   1    8.10    7.40 
 -10  -1  -1   17.10    8.80 
  10  -1   1    4.50    6.90 
  10  -1   1   32.10   10.30 
 -10  -1  -1   30.30   11.20 
 -10  -1  -1    4.80    7.00 
 -10  -1  -1   15.90    9.60 
  10   1   1   23.30    9.40 
  10   1   1   38.70   13.50 
 -10   1  -1   33.90   11.10 
 -10   1  -1   16.70    9.40 
  10   1   1   14.40    8.40 
  10   1   1   16.30    8.60 
 -10   1  -1   19.90   10.10 
 -10   1  -1   10.30    7.90 
 -10   1  -1   19.20    8.10 
  10   1   1   16.20    7.90 
  10   1   1    8.80    6.50 
  10   1   1   29.90   11.60 
  10   1   1   11.30    8.40 
 -10   1  -1   14.60    8.60 
 -10   1  -1   35.20   12.50 
  10   1   1   24.20    9.50 
  10   1   1   25.50   11.20 
  10   1   1   12.70    8.10 
 -10   1  -1   17.60    8.70 
  10   1   1    9.50    7.20 
  10   1   1   32.40   10.80 
  10  -2  -1  312.37   25.70 
  10  -2  -1  298.47   29.70 
 -10  -2   1  314.77   24.80 
 -10  -2   1  342.27   25.50 
  10  -2  -1  297.77   32.10 
 -10  -2   1  302.97   31.50 
  10  -2  -1  375.06   33.20 
 -10  -2   1  344.87   28.70 
  10  -2  -1  367.26   28.50 
  10  -2  -1  354.26   29.10 
 -10  -2   1  302.97   31.70 
 -10  -2   1  317.27   24.90 
 -10  -2   1  320.87   33.60 
  10  -2  -1  340.87   26.30 
 -10  -2   1  334.97   33.10 
 -10  -2   1  324.87   35.00 
  10  -2  -1  370.86   29.40 
 -10  -2   1  339.37   35.30 
  10  -2  -1  342.67   30.40 
 -10  -2   1  348.87   36.40 
  10  -2  -1  370.06   29.50 
 -10  -2   1  344.47   27.30 
 -10  -2   1  359.76   27.20 
 -10  -2   1  362.56   29.60 
 -10  -2   1  356.86   30.60 
  10   2  -1  347.87   35.10 
 -10   2   1  347.57   34.70 
  10   2  -1  355.06   26.90 
  10   2  -1  327.87   32.80 
  10   2  -1  363.56   29.90 
 -10   2   1  333.77   33.70 
  10   2  -1  351.46   31.20 
  10   2  -1  339.87   27.60 
  10   2  -1  306.07   33.20 
  10   2  -1  294.77   31.50 
 -10   2   1  364.76   29.10 
 -10   2   1  364.76   30.30 
  10   2  -1  284.07   28.90 
  10   2  -1  322.47   26.10 
  10   2  -1  348.67   35.10 
 -10   2   1  272.17   31.20 
  10   2  -1  334.77   33.80 
 -10   2   1  364.96   33.20 
  10   2  -1  344.07   28.70 
 -10   2   1  301.37   31.80 
   9  -2  -1  527.55   33.80 
   9  -2  -1  494.55   30.10 
   9  -2  -1  471.85   33.90 
  -9  -2   1  508.95   34.90 
  -9  -2   1  486.45   29.40 
  -9  -2   1  449.66   31.40 
  -9  -2   1  541.45   34.80 
  -9  -2   1  518.25   35.10 
   9  -2  -1  505.15   31.00 
  -9  -2   1  436.86   31.30 
  -9  -2   1  480.65   30.30 
  -9  -2   1  519.05   31.70 
   9  -2  -1  488.65   28.00 
   9  -2  -1  492.15   28.40 
   9  -2  -1  518.95   32.20 
  -9  -2   1  478.15   32.70 
  -9  -2   1  466.05   31.20 
   9  -2  -1  444.66   30.90 
   9  -2  -1  462.15   27.70 
  -9  -2   1  548.75   29.70 
  -9  -2   1  533.05   34.90 
  -9  -2   1  469.15   29.00 
   9  -2  -1  440.46   29.10 
  -9  -2   1  487.55   28.00 
  -9  -2   1  443.66   32.00 
  -9  -2   1  500.15   29.80 
   9  -2  -1  527.35   34.10 
  -9  -2   1  514.95   34.50 
  -9  -2   1  518.65   33.20 
   9  -2  -1  517.15   34.00 
   9   2  -1  453.05   27.90 
   9   2  -1  521.85   34.40 
  -9   2   1  510.15   33.60 
  -9   2   1  495.95   31.70 
  -9   2   1  481.55   31.80 
  -9   2   1  474.55   32.50 
  -9   2   1  482.25   33.00 
   9   2  -1  522.95   34.40 
  -9   2   1  456.45   32.10 
   9   2  -1  511.35   30.60 
   9   2  -1  523.15   33.30 
  -9   2   1  494.05   29.90 
   9   2  -1  446.96   29.40 
   9   2  -1  471.55   32.70 
   9   2  -1  501.45   31.50 
   9   2  -1  442.86   31.50 
   9   2  -1  544.05   31.00 
   9   2  -1  528.05   34.70 
   9   2  -1  428.56   30.70 
   9   2  -1  494.25   28.10 
  -9   2   1  490.75   31.80 
  -9   2   1  486.15   29.30 
   9   2  -1  495.75   35.20 
  -9   2   1  489.75   32.80 
   9   2  -1  442.46   31.40 
   8  -2  -1   46.60   11.30 
  -8  -2   1   46.00   10.70 
   8  -2  -1   53.89   10.90 
   8  -2  -1   36.20   10.50 
   8  -2  -1   45.00    9.30 
   8  -2  -1   49.50    9.20 
   8  -2  -1   39.60   10.20 
   8  -2  -1   58.09   11.40 
  -8  -2   1   38.00   10.80 
  -8  -2   1   58.79   12.10 
  -8  -2   1   39.30   10.60 
   8  -2  -1   32.30    9.00 
   8  -2  -1   47.60   11.70 
   8  -2  -1   31.70    8.00 
  -8  -2   1   46.20   10.80 
  -8  -2   1   46.60    9.60 
  -8  -2   1   35.90    9.90 
   8  -2  -1   52.49   10.90 
  -8  -2   1   37.40    9.70 
  -8  -2   1   73.49   11.80 
  -8  -2   1   43.40   11.20 
  -8  -2   1   58.99   13.20 
  -8  -2   1   45.50   10.00 
  -8  -2   1   41.60    9.00 
  -8  -2   1   44.20    9.90 
  -8  -2   1   47.20    9.40 
  -8  -2   1   35.40    9.90 
  -8  -2   1   46.60   10.00 
  -8  -2   1   56.39   11.90 
  -8   2   1   30.90    9.10 
   8   2  -1   57.79   12.50 
  -8   2   1   32.10    7.90 
  -8   2   1   52.79    8.30 
  -8   2   1   40.40    9.90 
   8   2  -1   33.70    9.60 
  -8   2   1   41.70   10.70 
  -8   2   1   37.20    9.80 
   8   2  -1   33.50    9.40 
  -8   2   1   45.70   11.00 
   8   2  -1   44.00   10.80 
  -8   2   1   52.39   11.40 
  -8   2   1   38.60    9.30 
  -8   2   1   51.09   10.10 
   8   2  -1   60.49   12.10 
   8   2  -1   45.00   10.70 
   8   2  -1   43.60   11.50 
   8   2  -1   36.90   10.20 
   8   2  -1   33.30    8.60 
   8   2  -1   67.99   11.50 
   8   2  -1   44.40    9.00 
   8   2  -1   44.80   10.30 
  -8   2   1   40.90   10.10 
   8   2  -1   33.60    9.70 
   8   2  -1   49.99    9.80 
   8   2  -1   56.39   11.20 
  -8   2   1   55.59   11.30 
   7  -2  -1  118.89   13.80 
  -7  -2   1  106.29   15.70 
   7  -2  -1  119.59   15.80 
  -7  -2   1   98.49   12.70 
   7  -2  -1  120.69   15.50 
  -7  -2   1  111.09   15.90 
  -7  -2   1  108.29   14.00 
  -7  -2   1  112.09   15.00 
  -7  -2   1  114.59   16.10 
  -7  -2   1  134.69   14.40 
  -7  -2   1   95.39   14.80 
   7  -2  -1  111.39   12.10 
   7  -2  -1  120.29   13.10 
  -7  -2   1  128.09   14.20 
  -7  -2   1  118.79   13.00 
   7  -2  -1   97.39   13.10 
  -7  -2   1  126.19   14.70 
   7  -2  -1  129.99   17.00 
   7  -2  -1  103.79   13.80 
  -7  -2   1  109.89   10.90 
   7  -2  -1  125.49   13.90 
  -7  -2   1  107.49   15.20 
  -7  -2   1   85.99   13.00 
   7  -2  -1  115.49    8.90 
  -7  -2   1  110.89   14.60 
  -7  -2   1  143.99   16.30 
   7  -2  -1  108.69   13.90 
  -7  -2   1   84.39   14.20 
  -7  -2   1  136.79   15.70 
   7  -2  -1  111.79   11.00 
   7  -2  -1  119.99   15.60 
  -7  -2   1  110.29   10.60 
  -7  -2   1  117.49   15.50 
  -7   2   1   88.69   12.90 
   7   2  -1   98.19   14.80 
  -7   2   1  119.89    9.80 
  -7   2   1  161.98   17.40 
  -7   2   1  105.39   14.80 
  -7   2   1  109.19   15.00 
   7   2  -1  118.69   13.00 
   7   2  -1  104.09   14.40 
  -7   2   1  133.09    9.00 
  -7   2   1  113.09   15.40 
   7   2  -1  124.89   14.60 
   7   2  -1  121.09   15.90 
  -7   2   1  101.79   12.00 
   7   2  -1  106.39   13.50 
   7   2  -1  118.69   14.00 
  -7   2   1  128.79   14.50 
   7   2  -1  122.69   15.80 
  -7   2   1  104.19   14.50 
   7   2  -1  114.99   14.00 
   7   2  -1  120.39   16.00 
  -7   2   1  130.69   13.90 
   7   2  -1   92.79   13.70 
   7   2  -1  106.49   15.00 
  -7   2   1  128.19   12.10 
  -7   2   1  148.79   17.70 
   7   2  -1  120.69   15.80 
  -7   2   1   99.99   13.90 
   7   2  -1  104.49   14.00 
  -6  -2   1  204.58   16.30 
   6  -2  -1  169.38   16.00 
  -6  -2   1  175.48   13.70 
   6  -2  -1  204.18   11.20 
   6  -2  -1  199.08   14.70 
  -6  -2   1  206.78   14.30 
  -6  -2   1  178.98   15.70 
  -6  -2   1  176.78   12.80 
  -6  -2   1  189.48   15.60 
  -6  -2   1  173.48   11.30 
   6  -2  -1  164.38   12.20 
   6  -2  -1  168.48   13.00 
   6  -2  -1  178.18   17.40 
  -6  -2   1  183.38   17.50 
  -6  -2   1  161.58   17.80 
  -6  -2   1  164.08   17.70 
   6  -2  -1  193.88   10.80 
  -6  -2   1  172.08   13.40 
   6  -2  -1  203.78   12.90 
  -6  -2   1  180.28   14.30 
  -6  -2   1  207.78   12.10 
  -6  -2   1  158.48   16.00 
  -6  -2   1  178.28   14.90 
  -6  -2   1  145.09   14.80 
   6  -2  -1  186.28    9.90 
   6  -2  -1  204.78   16.20 
   6  -2  -1  184.38   18.20 
  -6  -2   1  209.78   14.20 
   6  -2  -1  190.48   16.30 
   6  -2  -1  189.18   11.80 
   6  -2  -1  174.28   13.40 
  -6  -2   1  199.08   19.60 
   6  -2  -1  162.78   16.40 
  -6  -2   1  166.68   17.20 
   6  -2  -1  179.58   14.20 
  -6  -2   1  181.68   14.80 
   6   2  -1  179.38   15.40 
  -6   2   1  168.78   10.90 
  -6   2   1  183.88   15.60 
  -6   2   1  186.38   10.40 
   6   2  -1  155.68   13.30 
   6   2  -1  197.78   13.30 
   6   2  -1  182.78   14.20 
  -6   2   1  181.98   12.70 
  -6   2   1  179.98   14.20 
   6   2  -1  183.58   15.50 
   6   2  -1  147.69   16.40 
  -6   2   1  171.68   13.40 
  -6   2   1  174.38   11.10 
   6   2  -1  177.98   14.40 
  -6   2   1  177.78   14.90 
   6   2  -1  187.78   14.10 
  -6   2   1  185.08   11.70 
  -6   2   1  212.88   16.30 
  -6   2   1  145.49   17.00 
  -6   2   1  174.18    7.60 
   6   2  -1  180.98   15.60 
   6   2  -1  188.78   16.60 
   6   2  -1  214.48   16.40 
  -6   2   1  186.68   14.90 
  -6   2   1  174.48    7.70 
   6   2  -1  190.38   14.20 
  -6   2   1  173.68    9.80 
   6   2  -1  210.18   15.70 
  -6   2   1  180.28   14.90 
   6   2  -1  139.49   16.00 
  -6   2   1  139.39   15.70 
  -6   2   1  177.88   12.90 
  -6   2   1  181.68   17.20 
  -5  -2   1  627.14   26.20 
   5  -2  -1  615.94   21.30 
   5  -2  -1  600.94   27.30 
  -5  -2   1  588.74   27.80 
  -5  -2   1  613.54   30.30 
  -5  -2   1  700.33   30.60 
   5  -2  -1  631.84   29.60 
  -5  -2   1  640.84   29.60 
   5  -2  -1  609.14   29.20 
   5  -2  -1  581.54   27.00 
  -5  -2   1  624.34   28.40 
  -5  -2   1  617.34   26.50 
  -5  -2   1  666.03   27.70 
   5  -2  -1  616.44   26.70 
   5  -2  -1  591.14   27.60 
   5  -2  -1  652.73   25.50 
   5  -2  -1  612.04   28.20 
  -5  -2   1  557.04   28.40 
  -5  -2   1  586.94   28.00 
   5  -2  -1  623.14   23.00 
  -5  -2   1  630.34   30.30 
   5  -2  -1  598.34   28.30 
  -5  -2   1  589.64   27.50 
   5  -2  -1  591.44   29.50 
   5  -2  -1  639.84   25.00 
   5  -2  -1  615.34   26.40 
  -5  -2   1  616.54   27.20 
  -5  -2   1  612.74   24.70 
   5  -2  -1  620.84   22.80 
  -5  -2   1  609.84   27.40 
  -5  -2   1  627.54   27.90 
  -5  -2   1  605.34   28.50 
  -5  -2   1  559.74   28.60 
  -5  -2   1  578.64   24.20 
  -5  -2   1  595.64   27.70 
  -5   2   1  631.64   28.00 
   5   2  -1  621.64   27.80 
   5   2  -1  641.74   27.70 
  -5   2   1  619.94   23.50 
   5   2  -1  643.54   29.70 
  -5   2   1  589.94   22.10 
  -5   2   1  600.94   28.30 
  -5   2   1  616.34   19.40 
  -5   2   1  609.64   28.40 
  -5   2   1  607.44   24.80 
  -5   2   1  623.14   29.00 
   5   2  -1  607.04   29.40 
   5   2  -1  623.44   28.20 
   5   2  -1  646.04   27.60 
  -5   2   1  624.64   28.20 
  -5   2   1  666.43   29.80 
  -5   2   1  616.44   23.20 
  -5   2   1  568.44   28.00 
   5   2  -1  652.33   28.80 
  -5   2   1  644.74   27.60 
  -5   2   1  669.23   26.60 
  -5   2   1  619.14   27.90 
   5   2  -1  631.94   29.50 
  -5   2   1  617.04   19.90 
  -5   2   1  613.84   27.00 
   5   2  -1  596.94   25.80 
   5   2  -1  611.54   30.20 
  -5   2   1  626.54   19.50 
  -5   2   1  618.84   21.80 
   5   2  -1  564.24   28.60 
   5   2  -1  625.94   29.70 
   5   2  -1  618.74   27.50 
   5   2  -1  600.14   29.30 
  -5   2   1  609.74   29.30 
  -5   2   1  634.84   25.90 
   4  -2  -1  266.67   15.70 
  -4  -2   1  262.27   12.80 
  -4  -2   1  256.67   15.40 
   4  -2  -1  247.28   12.20 
  -4  -2   1  254.37   14.80 
  -4  -2   1  277.37   16.70 
  -4  -2   1  226.28   13.80 
   4  -2  -1  246.18   11.50 
  -4  -2   1  246.28   13.50 
   4  -2  -1  233.28    9.80 
  -4  -2   1  241.78   15.80 
   4  -2  -1  222.68   14.00 
  -4  -2   1  246.48   14.50 
   4  -2  -1  262.67   12.20 
   4  -2  -1  251.97   15.10 
   4  -2  -1  232.18   15.10 
   4  -2  -1  248.78   14.10 
  -4  -2   1  243.08   12.90 
  -4  -2   1  249.58   15.10 
  -4  -2   1  246.98   15.30 
   4  -2  -1  270.57   13.20 
   4  -2  -1  258.67   11.20 
  -4  -2   1  274.77   15.30 
   4  -2  -1  251.27   13.10 
   4  -2  -1  237.88   12.90 
  -4  -2   1  243.58   13.90 
  -4  -2   1  262.57   13.00 
  -4  -2   1  238.98   14.20 
  -4  -2   1  221.28   14.70 
   4  -2  -1  246.98    9.40 
  -4  -2   1  257.87   14.90 
  -4  -2   1  247.08   14.70 
   4  -2  -1  224.08   13.50 
   4  -2  -1  258.37   15.70 
  -4  -2   1  255.27   14.30 
   4  -2  -1  251.17   14.00 
  -4  -2   1  254.07   14.10 
   4   2  -1  242.28   14.40 
  -4   2   1  248.18   10.70 
   4   2  -1  236.08   15.40 
  -4   2   1  275.57   13.80 
  -4   2   1  252.97    9.80 
  -4   2   1  233.58   14.30 
  -4   2   1  267.37   14.90 
  -4   2   1  256.57   12.80 
  -4   2   1  254.27   12.70 
  -4   2   1  235.58   14.80 
  -4   2   1  238.18   14.40 
   4   2  -1  259.87   15.70 
  -4   2   1  251.57   11.00 
  -4   2   1  267.07   15.50 
  -4   2   1  268.87   14.40 
   4   2  -1  266.97   15.80 
  -4   2   1  234.88   12.30 
  -4   2   1  236.68   12.40 
  -4   2   1  251.07    9.80 
   4   2  -1  252.97   14.20 
   4   2  -1  247.48   15.20 
   4   2  -1  270.87   15.00 
   4   2  -1  262.17   14.90 
   4   2  -1  231.28   15.20 
  -4   2   1  239.28    9.90 
  -4   2   1  257.67   13.90 
   4   2  -1  243.98   13.10 
  -4   2   1  252.37   15.40 
  -4   2   1  249.97   14.90 
  -4   2   1  254.87   13.70 
   4   2  -1  232.18   15.10 
  -4   2   1  247.98   14.70 
  -4   2   1  234.98   14.00 
   4   2  -1  254.07   13.90 
   4   2  -1  228.18   14.10 
   3  -2  -1  155.58   10.00 
   3  -2  -1  147.59   10.20 
   3  -2  -1  149.49    9.00 
   3  -2  -1  150.28    5.30 
  -3  -2   1  165.98   11.30 
   3  -2  -1  145.59    9.30 
   3  -2  -1  146.19    9.00 
  -3  -2   1  133.49    9.70 
   3  -2  -1  166.78   11.10 
   3  -2  -1  144.49    7.70 
  -3  -2   1  144.49    9.40 
   3  -2  -1  140.29    9.90 
  -3  -2   1  135.69    9.00 
  -3  -2   1  148.79    9.90 
  -3  -2   1  154.08    9.30 
   3  -2  -1  163.08    8.70 
   3  -2  -1  160.98   10.60 
  -3  -2   1  146.99    9.80 
   3  -2  -1  143.79    8.90 
   3  -2  -1  151.78    8.30 
  -3  -2   1  151.08   10.10 
   3  -2  -1  152.98    8.40 
   3  -2  -1  142.79    9.10 
   3  -2  -1  151.38    6.20 
   3  -2  -1  148.09    8.30 
   3  -2  -1  149.39    8.70 
  -3  -2   1  157.78    9.10 
   3  -2  -1  141.59    8.00 
   3  -2  -1  151.28    8.60 
   3  -2  -1  145.99    9.70 
  -3  -2   1  146.49    9.50 
  -3  -2   1  139.29   10.00 
   3  -2  -1  149.19    9.50 
  -3  -2   1  151.68    8.90 
  -3  -2   1  145.69    8.60 
   3  -2  -1  153.48    7.40 
  -3  -2   1  140.39    8.20 
  -3  -2   1  154.28    9.80 
  -3  -2   1  159.88   10.30 
  -3  -2   1  158.88   10.30 
   3  -2  -1  153.38   10.50 
  -3  -2   1  151.38   10.70 
  -3  -2   1  150.98   10.70 
   3  -2  -1  150.88    9.50 
   3  -2  -1  140.19    9.30 
  -3  -2   1  146.19    9.60 
   3  -2  -1  157.58    9.30 
  -3   2   1  161.98    8.40 
  -3   2   1  159.08    9.70 
  -3   2   1  143.09    9.50 
  -3   2   1  157.18    8.10 
  -3   2   1  152.88    9.50 
   3   2  -1  142.39   10.00 
  -3   2   1  142.09    9.70 
  -3   2   1  153.28   10.20 
   3   2  -1  140.39   10.40 
  -3   2   1  150.08    9.00 
  -3   2   1  156.28    9.50 
  -3   2   1  149.69    6.00 
   3   2  -1  141.99    9.40 
  -3   2   1  150.98    5.50 
  -3   2   1  143.49    8.70 
  -3   2   1  160.98   10.00 
  -3   2   1  171.78   10.90 
  -3   2   1  161.48   10.00 
   3   2  -1  148.69   10.60 
  -3   2   1  150.28    9.20 
  -3   2   1  146.99    9.40 
   3   2  -1  133.69    9.10 
   3   2  -1  132.59   10.10 
  -3   2   1  148.69    8.30 
  -3   2   1  163.78    9.50 
   3   2  -1  157.38   10.70 
  -3   2   1  148.99    8.50 
   3   2  -1  145.49    9.80 
  -3   2   1  151.68    8.50 
   3   2  -1  160.28    9.80 
  -3   2   1  154.98    9.80 
   3   2  -1  146.09   10.40 
   3   2  -1  158.68   10.80 
   3   2  -1  144.49    9.70 
   3   2  -1  141.09    9.90 
  -3   2   1  153.18    6.20 
   3   2  -1  149.59    8.30 
   3   2  -1  147.69    9.10 
  -3   2   1  146.39    6.90 
   3   2  -1  151.08    9.50 
   2  -2  -1   26.00    3.50 
  -2  -2   1   31.20    4.60 
  -2  -2   1   26.20    4.00 
  -2  -2   1   36.10    3.40 
  -2  -2   1   27.80    3.80 
  -2  -2   1   33.70    5.00 
  -2  -2   1   29.80    5.10 
  -2  -2   1   36.30    5.00 
   2  -2  -1   29.20    3.50 
   2  -2  -1   25.80    3.90 
   2  -2  -1   27.20    3.70 
   2  -2  -1   29.80    4.30 
   2  -2  -1   28.40    4.30 
   2  -2  -1   24.60    4.50 
   2  -2  -1   26.40    3.90 
   2  -2  -1   32.30    3.90 
   2  -2  -1   29.70    1.40 
   2  -2  -1   34.90    4.70 
   2  -2  -1   35.60    2.60 
   2  -2  -1   23.10    3.30 
  -2  -2   1   27.70    4.50 
  -2  -2   1   34.50    5.00 
  -2  -2   1   30.70    4.60 
   2  -2  -1   26.50    3.70 
   2  -2  -1   29.40    4.90 
   2  -2  -1   25.50    3.20 
  -2  -2   1   22.00    4.10 
   2  -2  -1   30.60    3.10 
   2  -2  -1   22.10    3.80 
   2  -2  -1   27.30    1.40 
  -2  -2   1   34.00    4.40 
   2  -2  -1   24.60    3.60 
  -2  -2   1   25.30    4.70 
   2  -2  -1   28.90    4.40 
   2  -2  -1   26.10    4.00 
   2  -2  -1   25.20    4.40 
  -2  -2   1   26.60    4.40 
  -2  -2   1   26.80    4.10 
   2  -2  -1   22.40    3.80 
  -2  -2   1   27.30    3.70 
  -2  -2   1   39.90    5.10 
  -2  -2   1   25.60    4.20 
   2  -2  -1   30.40    4.40 
  -2  -2   1   38.40    5.70 
  -2  -2   1   27.40    4.10 
  -2  -2   1   39.10    5.20 
  -2  -2   1   30.80    3.90 
  -2  -2   1   24.80    3.50 
   2  -2  -1   25.20    4.00 
  -2  -2   1   29.80    4.90 
  -2  -2   1   26.90    3.60 
   2  -2  -1   26.70    4.40 
  -2  -2   1   34.00    4.50 
   2  -2  -1   30.30    4.00 
  -2  -2   1   27.80    4.10 
   2  -2  -1   33.60    3.70 
  -2  -2   1   27.00    4.00 
  -2  -2   1   27.40    4.10 
   2  -2  -1   28.50    3.00 
   2  -2  -1   27.50    3.70 
   2  -2  -1   25.40    2.10 
   2  -2  -1   19.60    4.20 
   2  -2  -1   29.70    3.80 
  -2  -2   1   33.00    5.10 
  -2  -2   1   24.90    4.30 
  -2  -2   1   25.80    4.30 
   2   2  -1   26.80    4.40 
  -2   2   1   32.60    4.20 
   2   2  -1   36.90    3.40 
   2   2  -1   26.10    3.60 
   2   2  -1   26.10    4.30 
   2   2  -1   22.60    4.10 
  -2   2   1   19.80    3.10 
   2   2  -1   23.60    3.90 
   2   2  -1   25.40    4.10 
   2   2  -1   26.30    4.10 
  -2   2   1   27.40    3.20 
  -2   2   1   31.90    4.50 
   2   2  -1   33.00    4.70 
   2   2  -1   29.10    4.50 
  -2   2   1   24.70    3.80 
   2   2  -1   28.10    4.90 
  -2   2   1   25.40    3.70 
   2   2  -1   22.00    3.70 
   2   2  -1   29.50    4.40 
   2   2  -1   22.70    3.40 
  -2   2   1   24.80    3.30 
   2   2  -1   31.80    4.50 
  -2   2   1   26.20    4.10 
   2   2  -1   30.70    4.60 
  -2   2   1   23.70    3.40 
   2   2  -1   22.10    3.30 
  -2   2   1   29.90    3.00 
   2   2  -1   31.40    4.50 
  -2   2   1   29.40    3.80 
  -2   2   1   31.40    4.10 
  -2   2   1   31.10    4.50 
  -2   2   1   21.80    3.50 
  -2   2   1   42.80    5.70 
  -2   2   1   39.60    3.00 
   2   2  -1   32.80    5.10 
   2   2  -1   23.40    3.70 
   2   2  -1   27.00    4.50 
   2   2  -1   27.40    4.40 
  -2   2   1   29.10    1.90 
  -2   2   1   23.20    3.50 
   2   2  -1   23.80    4.60 
   2   2  -1   31.80    4.50 
  -2   2   1   21.90    2.80 
   2   2  -1   30.40    3.80 
  -2   2   1   32.20    4.30 
  -2   2   1   25.00    4.20 
   2   2  -1   26.90    4.70 
  -2   2   1   29.10    3.60 
   2   2  -1   35.70    5.00 
   2   2  -1   33.70    3.90 
  -2   2   1   33.60    4.20 
  -2   2   1   24.90    4.20 
  -1  -2   1    2.90    1.30 
  -1  -2   1    8.50    2.40 
   1  -2  -1    2.80    1.10 
   1  -2  -1    6.10    2.00 
   1  -2  -1    4.70    2.20 
   1  -2  -1    7.20    1.70 
   1  -2  -1    8.90    2.10 
  -1  -2   1    4.90    2.00 
  -1  -2   1    7.50    2.40 
  -1  -2   1    1.80    1.60 
  -1  -2   1    3.10    2.00 
  -1  -2   1    8.50    2.90 
   1  -2  -1    3.70    1.00 
   1  -2  -1    5.00    1.50 
  -1  -2   1    5.40    1.90 
   1  -2  -1    3.10    1.30 
   1  -2  -1    3.90    1.10 
  -1  -2   1    0.50    1.10 
   1  -2  -1    2.40    1.10 
   1  -2  -1    2.20    1.10 
  -1  -2   1    3.10    1.80 
   1  -2  -1    2.30    1.70 
   1  -2  -1    6.10    1.90 
  -1  -2   1    3.70    2.00 
   1  -2  -1    3.30    1.30 
  -1  -2   1    1.80    1.30 
  -1  -2   1    4.00    1.60 
   1  -2  -1    4.40    2.20 
  -1  -2   1    0.10    1.80 
   1  -2  -1   12.20    1.90 
   1  -2  -1    2.20    1.60 
   1  -2  -1    5.50    1.90 
   1  -2  -1    4.00    1.00 
  -1  -2   1    2.80    2.00 
   1  -2  -1    2.20    0.60 
  -1  -2   1    3.30    1.40 
   1  -2  -1    2.00    0.90 
  -1  -2   1    8.00    2.10 
  -1  -2   1    0.50    1.40 
   1  -2  -1    1.90    1.40 
   1  -2  -1    5.60    1.60 
   1  -2  -1    2.60    1.10 
   1  -2  -1    6.90    2.80 
   1  -2  -1    5.00    0.60 
  -1  -2   1    2.60    1.70 
  -1  -2   1    6.40    2.00 
  -1  -2   1    3.60    1.70 
  -1  -2   1    4.70    1.80 
   1  -2  -1    6.20    2.20 
   1  -2  -1    1.80    1.50 
   1  -2  -1    4.50    1.20 
  -1  -2   1    3.20    1.90 
   1  -2  -1    2.20    1.90 
  -1  -2   1    1.90    1.80 
   1  -2  -1    1.10    1.10 
  -1  -2   1    3.70    1.30 
   1  -2  -1    4.30    1.40 
  -1  -2   1    7.20    2.00 
   1  -2  -1    3.20    1.00 
  -1  -2   1    2.90    1.10 
   1  -2  -1    4.20    1.90 
  -1  -2   1    1.10    1.40 
  -1  -2   1    4.30    2.00 
   1  -2  -1    2.20    1.00 
   1  -2  -1    7.80    1.10 
   1   2  -1    4.50    1.60 
   1   2  -1    1.70    1.40 
   1   2  -1    3.30    1.30 
   1   2  -1    2.90    1.60 
   1   2  -1    4.40    1.80 
   1   2  -1    4.10    2.00 
   1   2  -1   17.70    3.20 
  -1   2   1    1.10    0.90 
   1   2  -1    2.90    1.80 
  -1   2   1   26.50    4.70 
   1   2  -1    5.90    2.00 
  -1   2   1    3.20    1.70 
   1   2  -1    2.50    1.20 
   1   2  -1    1.70    1.60 
  -1   2   1    2.30    1.30 
  -1   2   1    3.70    1.30 
  -1   2   1    9.60    2.90 
   1   2  -1    2.90    1.20 
   1   2  -1    3.40    1.10 
   1   2  -1    3.00    2.00 
   1   2  -1    1.60    1.50 
   1   2  -1    2.80    1.30 
   1   2  -1    7.20    2.10 
   1   2  -1    0.60    1.70 
   1   2  -1    9.20    2.10 
   1   2  -1    0.40    1.60 
  -1   2   1    2.50    1.40 
  -1   2   1    3.90    2.10 
   1   2  -1    6.90    2.10 
  -1   2   1    4.10    1.70 
  -1   2   1    1.30    1.50 
  -1   2   1    3.80    1.30 
   1   2  -1    5.00    0.90 
   1   2  -1    5.00    1.40 
  -1   2   1    5.10    1.70 
   1   2  -1    8.90    2.80 
   1   2  -1    2.50    1.90 
   1   2  -1    2.80    1.40 
  -1   2   1    0.90    1.50 
  -1   2   1    6.00    1.50 
   1   2  -1    2.90    1.40 
   1   2  -1    0.70    1.70 
  -1   2   1    0.50    1.00 
   1   2  -1    5.10    2.10 
   0  -2   1    3.30    1.90 
   0  -2  -1    3.10    1.20 
   0  -2  -1    5.10    1.20 
   0  -2  -1    5.30    1.10 
   0  -2   1    6.30    2.50 
   0  -2  -1    9.50    2.50 
   0  -2   1    5.20    2.30 
   0  -2   1    5.60    1.30 
   0  -2   1    2.60    2.10 
   0  -2   1    7.40    2.20 
   0  -2   1    4.00    2.80 
   0  -2   1    9.10    3.30 
   0  -2   1    4.50    1.60 
   0  -2  -1    8.70    2.30 
   0  -2   1    6.10    1.40 
   0  -2  -1    5.30    1.30 
   0  -2  -1    7.50    1.80 
   0  -2   1    2.50    1.20 
   0  -2  -1    6.10    2.30 
   0  -2  -1    5.10    2.00 
   0  -2  -1    6.40    1.60 
   0  -2   1   12.70    4.20 
   0  -2   1    2.40    1.60 
   0  -2  -1    6.90    2.10 
   0  -2  -1    7.20    1.30 
   0  -2  -1    3.70    0.80 
   0  -2   1    0.60    2.70 
   0  -2   1    4.00    2.00 
   0  -2  -1    2.10    1.30 
   0  -2  -1    5.90    2.60 
   0  -2   1    7.60    2.10 
   0  -2  -1    3.40    2.00 
   0  -2  -1    5.00    1.40 
   0  -2   1    5.30    2.70 
   0  -2  -1    4.90    1.80 
   0  -2  -1    5.50    1.00 
   0  -2   1    3.60    1.40 
   0  -2   1    7.10    3.00 
   0  -2  -1    2.70    1.40 
   0  -2  -1   10.00    1.70 
   0  -2   1    5.40    2.00 
   0  -2   1    3.90    2.30 
   0  -2   1   14.40    3.40 
   0  -2   1    2.90    3.00 
   0  -2  -1    4.80    1.60 
   0  -2  -1    6.80    2.20 
   0  -2   1    5.60    2.50 
   0  -2  -1    3.90    2.70 
   0  -2  -1    6.00    1.30 
   0  -2   1    5.20    1.00 
   0  -2  -1    4.00    1.60 
   0  -2   1    5.00    2.00 
   0  -2   1    6.10    2.60 
   0  -2  -1    4.90    0.90 
   0  -2  -1    6.70    1.90 
   0  -2   1   10.10    1.50 
   0  -2   1    3.50    2.10 
   0  -2   1    3.30    1.30 
   0  -2  -1    3.60    1.10 
   0  -2   1    5.30    1.30 
   0  -2  -1    7.70    1.50 
   0  -2  -1    5.10    1.10 
   0   2  -1    5.80    1.80 
   0   2   1    4.90    1.90 
   0   2  -1    3.10    2.10 
   0   2  -1    6.20    1.20 
   0   2   1    6.00    1.50 
   0   2  -1    4.40    2.50 
   0   2   1    4.90    1.90 
   0   2  -1    4.60    1.30 
   0   2   1    4.50    2.20 
   0   2   1    2.80    1.40 
   0   2  -1    4.40    2.70 
   0   2   1    6.20    2.50 
   0   2  -1    5.20    2.20 
   0   2  -1    3.30    1.60 
   0   2  -1    7.40    2.50 
   0   2  -1   26.50    3.90 
   0   2  -1    6.70    1.50 
   0   2   1    3.10    2.20 
   0   2  -1    5.20    1.00 
   0   2  -1    4.10    1.10 
   0   2   1    1.70    1.60 
   0   2  -1    1.30    2.70 
   0   2  -1    4.30    0.90 
   0   2  -1    1.90    3.50 
   0   2   1    4.20    1.50 
   0   2   1    3.30    0.80 
   0   2  -1    3.80    2.10 
   0   2  -1    5.70    1.00 
   0   2   1    6.40    2.30 
   0   2   1    3.60    2.30 
   0   2  -1    6.70    1.10 
   0   2   1    4.10    1.00 
   0   2  -1    4.60    1.80 
   0   2  -1    5.50    1.10 
   0   2  -1    8.30    1.70 
   0   2  -1   17.60    4.10 
   0   2   1    4.60    1.60 
   0   2   1    1.20    1.50 
   0   2  -1    4.80    1.50 
   0   2   1    3.60    0.90 
   0   2  -1    6.80    3.20 
   0   2  -1    6.60    1.70 
   0   2   1   10.40    2.50 
   0   2   1    4.50    1.90 
   0   2  -1    4.40    2.00 
   0   2   1    2.50    1.50 
   1  -2   1 1431.96   43.00 
   1  -2   1 1391.96   44.30 
  -1  -2  -1 1498.05   43.60 
   1  -2   1 1448.96   49.90 
   1  -2   1 1435.46   44.10 
  -1  -2  -1 1460.25   46.20 
   1  -2   1 1378.56   43.30 
  -1  -2  -1 1436.66   45.80 
  -1  -2  -1 1423.56   42.90 
  -1  -2  -1 1371.06   45.70 
  -1  -2  -1 1422.26   46.40 
  -1  -2  -1 1414.16   43.50 
   1  -2   1 1382.36   48.80 
   1  -2   1 1409.56   45.30 
  -1  -2  -1 1509.85   47.00 
   1  -2   1 1539.55   49.00 
   1  -2   1 1402.96   45.00 
   1  -2   1 1417.66   43.60 
   1  -2   1 1444.06   47.10 
  -1  -2  -1 1445.06   46.20 
  -1  -2  -1 1382.66   42.50 
  -1  -2  -1 1413.36   44.30 
  -1  -2  -1 1442.26   46.30 
  -1  -2  -1 1401.36   46.10 
  -1  -2  -1 1383.56   45.70 
   1  -2   1 1410.56   47.10 
  -1  -2  -1 1440.16   47.00 
   1  -2   1 1441.06   47.10 
   1  -2   1 1426.96   46.80 
  -1  -2  -1 1397.26   46.90 
  -1  -2  -1 1384.06   42.10 
  -1  -2  -1 1446.76   46.70 
   1  -2   1 1411.86   46.70 
   1  -2   1 1486.75   47.40 
  -1  -2  -1 1406.76   44.80 
   1  -2   1 1442.86   47.90 
  -1  -2  -1 1427.46   47.10 
  -1  -2  -1 1431.06   47.00 
   1  -2   1 1324.97   47.20 
   1  -2   1 1387.96   45.00 
   1  -2   1 1453.55   47.50 
  -1  -2  -1 1496.45   46.90 
   1  -2   1 1409.16   46.10 
   1  -2   1 1457.85   45.00 
   1  -2   1 1462.45   49.00 
  -1  -2  -1 1429.36   46.40 
  -1  -2  -1 1442.76   45.40 
   1  -2   1 1426.56   44.60 
  -1  -2  -1 1440.26   43.70 
   1  -2   1 1402.76   47.60 
  -1  -2  -1 1473.65   44.80 
   1  -2   1 1436.76   44.40 
   1  -2   1 1385.46   43.00 
  -1  -2  -1 1400.96   43.50 
   1  -2   1 1458.25   42.70 
  -1  -2  -1 1422.36   44.40 
  -1  -2  -1 1417.56   44.90 
  -1  -2  -1 1443.66   43.40 
   1  -2   1 1471.35   45.90 
   1  -2   1 1446.56   42.20 
  -1   2  -1 1430.86   45.90 
  -1   2  -1 1445.16   46.70 
   1   2   1 1421.06   47.00 
  -1   2  -1 1479.35   46.40 
  -1   2  -1 1424.56   43.00 
   1   2   1 1375.06   43.70 
   1   2   1 1466.45   47.00 
  -1   2  -1 1407.86   42.20 
   1   2   1 1393.56   46.60 
   1   2   1 1445.86   43.80 
   1   2   1 1394.56   45.50 
  -1   2  -1 1488.95   49.60 
  -1   2  -1 1433.76   48.20 
  -1   2  -1 1503.55   44.00 
  -1   2  -1 1446.56   41.70 
  -1   2  -1 1472.35   49.40 
   1   2   1 1447.66   46.80 
   1   2   1 1462.65   43.80 
   1   2   1 1433.86   45.00 
   1   2   1 1430.86   45.70 
   1   2   1 1362.26   44.50 
   1   2   1 1431.66   42.70 
  -1   2  -1 1444.26   43.30 
  -1   2  -1 1472.55   47.60 
   1   2   1 1363.26   46.80 
   1   2   1 1440.26   42.70 
   1   2   1 1527.45   46.40 
  -1   2  -1 1430.76   44.40 
   1   2   1 1429.06   45.10 
   1   2   1 1485.75   43.00 
  -1   2  -1 1460.05   49.10 
   1   2   1 1463.85   43.30 
   1   2   1 1467.35   47.50 
   1   2   1 1443.76   46.80 
  -1   2  -1 1470.05   42.50 
  -1   2  -1 1424.86   43.40 
  -1   2  -1 1431.66   42.30 
  -1   2  -1 1397.96   42.70 
   1   2   1 1459.95   44.70 
  -1   2  -1 1488.25   48.70 
   1   2   1 1384.86   46.50 
   1   2   1 1431.66   45.60 
  -1   2  -1 1385.76   46.90 
  -1   2  -1 1416.56   44.60 
  -1   2  -1 1439.16   43.90 
   1   2   1 1436.16   45.90 
   1   2   1 1422.36   45.20 
  -1   2  -1 1413.76   47.40 
  -1   2  -1 1409.46   46.80 
  -1   2  -1 1423.86   45.50 
  -1   2  -1 1419.26   46.80 
  -1   2  -1 1391.36   43.50 
  -2  -2  -1  416.96   17.10 
  -2  -2  -1  410.16   17.40 
  -2  -2  -1  418.36   18.50 
   2  -2   1  381.96   17.10 
   2  -2   1  396.06   16.00 
   2  -2   1  409.16   15.40 
   2  -2   1  405.86   16.20 
   2  -2   1  404.76   19.10 
   2  -2   1  384.86   15.00 
  -2  -2  -1  400.46   17.20 
   2  -2   1  414.36   18.30 
   2  -2   1  442.36   18.30 
   2  -2   1  371.46   18.60 
   2  -2   1  410.46   16.40 
  -2  -2  -1  403.06   16.00 
   2  -2   1  409.16   17.60 
   2  -2   1  407.56   17.40 
  -2  -2  -1  404.96   16.90 
  -2  -2  -1  413.46   16.20 
  -2  -2  -1  424.06   18.20 
  -2  -2  -1  386.66   14.40 
  -2  -2  -1  437.86   18.30 
   2  -2   1  405.96   17.80 
   2  -2   1  397.26   18.40 
  -2  -2  -1  398.06   17.40 
  -2  -2  -1  432.26   17.90 
   2  -2   1  434.26   17.30 
   2  -2   1  394.56   16.20 
   2  -2   1  393.16   17.80 
  -2  -2  -1  423.46   18.30 
  -2  -2  -1  404.86   18.00 
   2  -2   1  400.36   14.70 
  -2  -2  -1  407.46   17.30 
  -2  -2  -1  431.06   18.40 
   2  -2   1  391.56   14.20 
   2  -2   1  400.46   17.00 
   2  -2   1  404.96   17.40 
  -2  -2  -1  407.16   14.90 
  -2  -2  -1  408.06   16.90 
  -2  -2  -1  410.06   17.30 
   2  -2   1  383.16   15.90 
   2  -2   1  444.36   19.00 
  -2  -2  -1  400.36   16.00 
  -2  -2  -1  410.16   17.50 
   2  -2   1  411.76   18.20 
  -2  -2  -1  415.16   17.10 
   2  -2   1  405.36   13.60 
   2  -2   1  404.96   17.40 
  -2  -2  -1  399.86   17.10 
   2  -2   1  402.56   18.80 
   2  -2   1  399.26   18.20 
  -2  -2  -1  398.06   17.50 
  -2  -2  -1  400.46   15.50 
  -2  -2  -1  413.56   16.30 
  -2  -2  -1  407.16   15.80 
   2  -2   1  389.76   16.30 
   2  -2   1  410.56   14.20 
   2  -2   1  416.36   14.60 
  -2  -2  -1  398.56   18.00 
   2   2   1  436.46   18.60 
  -2   2  -1  401.56   17.70 
  -2   2  -1  405.56   15.90 
  -2   2  -1  425.26   12.50 
  -2   2  -1  397.96   18.80 
  -2   2  -1  419.06   15.20 
   2   2   1  394.86   16.30 
   2   2   1  404.66   16.00 
   2   2   1  362.16   17.50 
   2   2   1  402.76   16.60 
   2   2   1  407.16   17.90 
  -2   2  -1  396.86   17.20 
   2   2   1  416.76   16.20 
  -2   2  -1  397.06   14.40 
   2   2   1  387.96   17.30 
   2   2   1  380.06   16.00 
   2   2   1  396.06   14.80 
   2   2   1  403.86   18.00 
   2   2   1  416.76   18.00 
  -2   2  -1  406.46   16.30 
  -2   2  -1  409.26   17.40 
   2   2   1  402.76   18.20 
  -2   2  -1  387.66   18.00 
   2   2   1  418.86   15.40 
  -2   2  -1  414.66   16.70 
  -2   2  -1  433.26   17.80 
  -2   2  -1  390.06   16.90 
   2   2   1  427.16   15.60 
  -2   2  -1  385.16   18.30 
   2   2   1  410.16   17.40 
  -2   2  -1  412.76   18.10 
   2   2   1  401.66   17.60 
   2   2   1  416.06   17.40 
  -2   2  -1  393.76   14.80 
  -2   2  -1  401.76   14.90 
   2   2   1  407.26   17.60 
   2   2   1  403.26   15.90 
  -2   2  -1  414.06   14.30 
  -2   2  -1  399.76   17.80 
   2   2   1  398.16   15.10 
   2   2   1  382.36   16.10 
  -2   2  -1  396.26   19.10 
  -2   2  -1  403.26   15.90 
   2   2   1  407.36   17.50 
  -2   2  -1  426.76   18.10 
  -2   2  -1  413.16   14.10 
  -2   2  -1  411.96   16.50 
  -2   2  -1  415.76   15.40 
  -2   2  -1  426.26   18.70 
   2   2   1  425.46   16.40 
   3  -2   1  737.53   29.00 
   3  -2   1  749.13   27.90 
  -3  -2  -1  757.02   29.20 
  -3  -2  -1  766.22   30.30 
  -3  -2  -1  736.93   29.00 
  -3  -2  -1  757.02   29.60 
  -3  -2  -1  759.62   29.80 
  -3  -2  -1  773.02   28.10 
   3  -2   1  768.22   30.40 
  -3  -2  -1  760.72   29.50 
   3  -2   1  786.62   31.60 
   3  -2   1  812.42   29.30 
   3  -2   1  779.02   28.50 
   3  -2   1  773.42   29.70 
  -3  -2  -1  795.02   29.10 
   3  -2   1  743.03   26.90 
  -3  -2  -1  747.23   28.90 
  -3  -2  -1  767.52   30.00 
   3  -2   1  780.32   31.70 
   3  -2   1  764.72   31.20 
  -3  -2  -1  771.52   31.30 
   3  -2   1  758.22   30.80 
  -3  -2  -1  758.32   30.50 
   3  -2   1  772.32   30.80 
   3  -2   1  758.32   29.30 
   3  -2   1  779.02   24.20 
   3  -2   1  794.62   25.40 
  -3  -2  -1  817.52   27.50 
  -3  -2  -1  767.72   29.20 
   3  -2   1  787.32   27.10 
  -3  -2  -1  749.73   30.10 
   3  -2   1  755.92   28.90 
   3  -2   1  817.72   28.30 
   3  -2   1  738.43   25.90 
  -3  -2  -1  769.92   28.80 
  -3  -2  -1  785.82   28.60 
   3  -2   1  762.92   26.30 
  -3  -2  -1  749.42   25.80 
  -3   2  -1  736.73   30.60 
  -3   2  -1  692.33   28.90 
   3   2   1  759.52   30.40 
   3   2   1  747.33   29.60 
   3   2   1  740.83   30.20 
  -3   2  -1  795.72   31.40 
  -3   2  -1  784.42   29.20 
  -3   2  -1  808.72   27.00 
  -3   2  -1  780.22   27.20 
  -3   2  -1  753.22   29.10 
  -3   2  -1  743.13   25.50 
   3   2   1  762.92   27.40 
  -3   2  -1  777.72   29.20 
  -3   2  -1  770.42   25.50 
   3   2   1  781.92   28.70 
  -3   2  -1  790.72   25.70 
  -3   2  -1  757.12   28.70 
  -3   2  -1  734.53   31.20 
  -3   2  -1  766.32   30.10 
  -3   2  -1  770.02   26.70 
   3   2   1  773.92   29.20 
   3   2   1  764.92   30.10 
  -3   2  -1  742.73   29.60 
  -3   2  -1  814.32   28.30 
  -3   2  -1  808.42   30.40 
   3   2   1  746.23   29.10 
   3   2   1  781.72   26.60 
   3   2   1  821.12   27.60 
   3   2   1  772.12   30.80 
  -3   2  -1  797.32   29.00 
  -3   2  -1  755.12   23.30 
   3   2   1  758.32   28.10 
   3   2   1  753.72   30.60 
   3   2   1  749.42   28.90 
   3   2   1  771.72   29.40 
   3   2   1  742.93   30.40 
   3   2   1  777.52   30.30 
  -3   2  -1  784.72   29.50 
  -3   2  -1  779.02   32.10 
   3   2   1  749.13   30.00 
  -4  -2  -1 1050.99   39.80 
  -4  -2  -1 1108.19   41.80 
   4  -2   1 1029.30   39.40 
  -4  -2  -1 1110.59   40.30 
   4  -2   1 1080.29   38.70 
   4  -2   1 1065.69   42.20 
   4  -2   1 1078.69   37.40 
  -4  -2  -1 1077.19   40.90 
  -4  -2  -1 1066.29   41.80 
   4  -2   1 1053.39   36.60 
  -4  -2  -1 1031.10   37.40 
  -4  -2  -1  995.80   39.10 
  -4  -2  -1 1027.10   38.40 
   4  -2   1 1047.80   38.80 
   4  -2   1 1061.49   35.50 
   4  -2   1 1060.79   36.50 
  -4  -2  -1 1023.80   38.80 
   4  -2   1 1058.69   37.70 
  -4  -2  -1 1041.00   37.80 
   4  -2   1 1053.59   38.70 
  -4  -2  -1 1021.60   39.40 
  -4  -2  -1 1043.70   41.90 
  -4  -2  -1 1046.10   41.10 
  -4  -2  -1 1018.80   39.00 
  -4  -2  -1 1064.49   35.70 
   4  -2   1 1053.69   41.10 
   4  -2   1 1013.30   41.50 
  -4  -2  -1 1060.99   39.50 
  -4  -2  -1 1069.49   40.80 
   4  -2   1 1016.70   41.40 
  -4  -2  -1 1055.09   39.40 
   4  -2   1  978.20   39.30 
   4  -2   1 1107.79   40.80 
   4   2   1 1125.79   40.60 
   4   2   1 1019.30   38.20 
  -4   2  -1 1039.90   40.10 
   4   2   1 1055.89   36.20 
  -4   2  -1 1036.60   35.50 
  -4   2  -1 1053.39   36.50 
  -4   2  -1 1060.79   33.10 
   4   2   1 1118.19   41.60 
  -4   2  -1 1031.50   41.20 
   4   2   1 1092.19   41.30 
   4   2   1 1056.99   41.20 
   4   2   1 1060.19   40.00 
   4   2   1 1092.09   41.20 
  -4   2  -1 1069.19   39.90 
  -4   2  -1 1068.69   35.10 
  -4   2  -1 1012.10   39.40 
   4   2   1 1107.29   41.80 
  -4   2  -1 1051.59   39.20 
   4   2   1 1002.60   40.80 
   4   2   1 1088.99   38.00 
  -4   2  -1 1089.09   35.50 
   4   2   1 1078.99   40.60 
  -4   2  -1 1026.90   36.90 
  -4   2  -1 1045.80   34.30 
  -4   2  -1 1077.29   42.00 
  -4   2  -1 1123.29   41.40 
   4   2   1 1086.39   40.20 
  -4   2  -1 1076.09   38.80 
  -4   2  -1 1049.20   38.00 
  -4   2  -1 1020.60   39.60 
   4   2   1 1044.10   40.80 
  -4   2  -1 1091.89   42.10 
  -4   2  -1 1047.40   36.60 
  -5  -2  -1 1180.68   44.70 
  -5  -2  -1 1100.79   45.40 
  -5  -2  -1 1135.79   43.30 
   5  -2   1 1111.09   43.20 
   5  -2   1 1049.79   40.80 
  -5  -2  -1 1088.99   41.70 
   5  -2   1 1077.99   45.00 
   5  -2   1 1072.39   44.00 
  -5  -2  -1 1095.99   42.00 
   5  -2   1 1100.19   45.60 
   5  -2   1 1117.59   43.70 
  -5  -2  -1 1034.70   43.90 
  -5  -2  -1 1105.39   40.90 
  -5  -2  -1 1078.89   45.10 
  -5  -2  -1 1175.58   46.30 
  -5  -2  -1 1163.58   44.00 
  -5  -2  -1 1086.59   40.00 
  -5  -2  -1 1096.09   44.80 
  -5  -2  -1 1056.39   42.90 
  -5  -2  -1 1067.09   41.80 
  -5  -2  -1 1082.19   42.90 
  -5  -2  -1 1125.29   45.10 
   5  -2   1 1018.50   44.40 
   5  -2   1 1116.39   40.10 
   5  -2   1 1057.39   41.90 
   5  -2   1 1058.79   39.20 
   5  -2   1 1057.99   42.40 
  -5  -2  -1 1168.68   43.10 
   5  -2   1 1117.89   41.40 
  -5  -2  -1 1079.09   42.10 
   5  -2   1 1112.79   41.10 
   5   2   1 1088.09   41.60 
  -5   2  -1 1127.29   45.80 
  -5   2  -1 1129.89   42.30 
  -5   2  -1 1123.39   45.60 
  -5   2  -1 1098.39   43.80 
   5   2   1 1066.29   42.70 
   5   2   1 1130.79   44.60 
   5   2   1 1160.48   45.30 
  -5   2  -1 1096.49   37.60 
  -5   2  -1 1096.49   44.40 
  -5   2  -1 1079.09   42.30 
  -5   2  -1 1138.19   38.80 
   5   2   1 1060.59   43.70 
   5   2   1 1101.89   44.30 
   5   2   1 1007.90   43.90 
  -5   2  -1 1128.09   36.50 
  -5   2  -1 1078.39   42.90 
  -5   2  -1 1085.19   39.10 
  -5   2  -1 1120.09   39.60 
  -5   2  -1 1121.49   44.60 
  -5   2  -1 1147.59   37.00 
  -5   2  -1 1107.59   40.10 
   5   2   1 1044.40   44.20 
  -5   2  -1 1088.89   40.60 
  -5   2  -1 1107.39   43.70 
   5   2   1 1128.99   41.40 
   5   2   1 1156.58   39.40 
   5   2   1 1101.09   43.60 
  -5   2  -1 1041.30   42.70 
   5   2   1 1099.69   44.60 
  -5   2  -1 1096.59   40.60 
   5   2   1 1072.29   44.50 
   5   2   1 1110.29   43.00 
  -5   2  -1 1088.39   35.80 
  -5   2  -1 1130.39   42.20 
  -6  -2  -1  995.00   42.30 
  -6  -2  -1 1073.09   40.50 
   6  -2   1  997.50   44.30 
  -6  -2  -1  987.70   44.10 
   6  -2   1 1050.09   45.60 
  -6  -2  -1 1012.20   45.00 
   6  -2   1 1020.20   40.40 
   6  -2   1  989.10   41.40 
  -6  -2  -1  976.80   41.00 
   6  -2   1  958.80   37.20 
   6  -2   1 1006.40   39.20 
   6  -2   1  984.90   42.50 
  -6  -2  -1  986.00   40.30 
  -6  -2  -1  922.01   40.00 
  -6  -2  -1  980.10   42.50 
   6  -2   1 1007.40   41.60 
   6  -2   1 1001.20   42.70 
   6  -2   1  955.30   41.10 
  -6  -2  -1  971.70   42.50 
   6  -2   1  951.60   43.60 
  -6  -2  -1  946.81   44.00 
   6  -2   1  989.70   41.10 
  -6  -2  -1 1019.50   41.70 
  -6  -2  -1 1004.00   38.20 
  -6  -2  -1  951.90   43.40 
  -6  -2  -1 1032.20   43.00 
  -6  -2  -1  997.50   44.80 
   6  -2   1 1011.60   39.00 
  -6  -2  -1  994.00   41.20 
  -6  -2  -1 1071.09   44.70 
   6  -2   1  968.40   39.40 
  -6  -2  -1  979.50   39.80 
  -6   2  -1  950.50   42.50 
  -6   2  -1  955.70   43.10 
  -6   2  -1 1037.10   40.70 
  -6   2  -1 1056.69   39.30 
   6   2   1  994.90   37.70 
  -6   2  -1  949.71   42.40 
  -6   2  -1  980.00   43.40 
  -6   2  -1 1028.60   42.30 
   6   2   1  969.70   42.40 
  -6   2  -1 1032.10   40.30 
  -6   2  -1 1018.70   38.00 
   6   2   1  941.71   40.70 
  -6   2  -1 1038.90   45.10 
   6   2   1 1014.30   43.90 
  -6   2  -1  885.11   40.90 
   6   2   1 1063.19   44.10 
  -6   2  -1 1038.20   39.50 
   6   2   1  956.90   39.80 
  -6   2  -1  943.11   41.20 
  -6   2  -1 1073.79   34.10 
   6   2   1  941.61   43.00 
  -6   2  -1  937.31   43.80 
  -6   2  -1  980.80   41.30 
  -6   2  -1 1007.40   34.20 
   6   2   1  953.10   41.10 
   6   2   1  943.41   39.90 
   6   2   1  996.90   44.20 
   6   2   1  924.91   42.20 
   6   2   1 1010.20   44.10 
   6   2   1  969.80   43.40 
   6   2   1 1023.70   44.30 
  -7  -2  -1 1427.06   57.19 
   7  -2   1 1391.56   56.39 
  -7  -2  -1 1439.16   61.69 
   7  -2   1 1394.26   56.99 
   7  -2   1 1436.66   59.09 
  -7  -2  -1 1442.66   61.39 
  -7  -2  -1 1494.25   61.09 
  -7  -2  -1 1499.45   59.89 
  -7  -2  -1 1504.65   61.49 
  -7  -2  -1 1386.26   58.69 
   7  -2   1 1464.55   61.09 
   7  -2   1 1474.35   57.49 
  -7  -2  -1 1389.06   56.99 
  -7  -2  -1 1548.35   56.79 
   7  -2   1 1511.95   55.79 
  -7  -2  -1 1483.95   57.19 
  -7  -2  -1 1429.06   58.69 
   7  -2   1 1480.25   54.29 
   7  -2   1 1584.14   63.49 
   7  -2   1 1386.06   57.29 
  -7  -2  -1 1472.55   56.19 
  -7  -2  -1 1371.86   60.09 
   7  -2   1 1474.55   56.59 
  -7  -2  -1 1421.26   56.89 
  -7  -2  -1 1440.76   59.89 
  -7  -2  -1 1405.16   52.49 
   7  -2   1 1406.56   54.29 
  -7  -2  -1 1488.35   56.49 
   7  -2   1 1446.56   52.39 
   7  -2   1 1430.06   60.69 
  -7  -2  -1 1448.16   59.39 
  -7  -2  -1 1391.66   61.09 
   7   2   1 1469.25   56.69 
  -7   2  -1 1456.35   55.59 
   7   2   1 1482.75   59.69 
   7   2   1 1408.76   59.99 
  -7   2  -1 1550.04   62.79 
   7   2   1 1487.25   60.99 
   7   2   1 1507.55   61.39 
  -7   2  -1 1451.45   52.99 
   7   2   1 1552.44   61.69 
  -7   2  -1 1498.75   55.49 
  -7   2  -1 1511.15   59.69 
   7   2   1 1475.25   57.09 
  -7   2  -1 1411.66   60.09 
   7   2   1 1577.64   57.59 
   7   2   1 1371.36   59.29 
  -7   2  -1 1491.45   58.49 
  -7   2  -1 1488.65   60.49 
   7   2   1 1501.85   60.09 
   7   2   1 1445.26   57.49 
  -7   2  -1 1499.75   50.69 
  -7   2  -1 1482.05   54.19 
  -7   2  -1 1466.45   58.69 
   7   2   1 1398.66   52.79 
  -7   2  -1 1508.85   60.49 
  -7   2  -1 1467.15   61.59 
   7   2   1 1438.66   61.89 
  -7   2  -1 1454.15   57.99 
   7   2   1 1363.66   59.59 
   7   2   1 1539.15   60.29 
  -8  -2  -1  595.24   35.70 
   8  -2   1  676.73   35.30 
  -8  -2  -1  610.34   37.00 
  -8  -2  -1  687.33   33.20 
  -8  -2  -1  644.14   37.20 
  -8  -2  -1  658.73   36.10 
  -8  -2  -1  667.33   36.20 
  -8  -2  -1  641.14   32.90 
   8  -2   1  627.94   33.30 
   8  -2   1  630.64   34.20 
  -8  -2  -1  662.43   34.40 
  -8  -2  -1  580.24   35.70 
   8  -2   1  649.64   31.90 
   8  -2   1  646.24   32.00 
  -8  -2  -1  589.84   34.20 
   8  -2   1  647.84   30.30 
  -8  -2  -1  603.94   36.60 
   8  -2   1  633.34   33.40 
   8  -2   1  620.54   33.10 
  -8  -2  -1  634.94   37.90 
  -8  -2  -1  612.44   33.00 
   8  -2   1  580.24   34.50 
   8  -2   1  592.24   36.30 
  -8  -2  -1  700.53   34.40 
  -8  -2  -1  583.24   35.20 
  -8  -2  -1  651.23   35.90 
   8  -2   1  657.33   37.30 
  -8  -2  -1  632.74   32.20 
   8  -2   1  638.24   37.90 
  -8   2  -1  608.74   29.20 
  -8   2  -1  645.94   35.40 
  -8   2  -1  684.63   31.30 
   8   2   1  575.24   35.10 
   8   2   1  721.63   37.10 
   8   2   1  613.94   32.80 
  -8   2  -1  606.74   34.50 
   8   2   1  632.94   35.50 
  -8   2  -1  606.14   36.60 
  -8   2  -1  612.84   33.70 
   8   2   1  605.04   35.40 
   8   2   1  645.64   33.30 
   8   2   1  593.64   35.50 
  -8   2  -1  648.84   36.70 
  -8   2  -1  650.23   32.00 
   8   2   1  662.83   33.70 
   8   2   1  613.84   33.40 
   8   2   1  588.34   35.20 
   8   2   1  599.94   37.40 
   8   2   1  606.84   36.20 
  -8   2  -1  573.44   34.80 
   8   2   1  576.54   35.00 
   8   2   1  643.94   30.20 
  -8   2  -1  614.14   35.90 
   8   2   1  653.03   37.20 
  -8   2  -1  661.63   35.60 
  -8   2  -1  649.34   32.50 
  -9  -2  -1 1169.28   55.79 
  -9  -2  -1 1124.19   56.39 
   9  -2   1 1158.68   53.99 
  -9  -2  -1 1136.09   57.59 
   9  -2   1 1071.79   52.09 
  -9  -2  -1 1095.19   57.29 
  -9  -2  -1 1216.58   51.09 
  -9  -2  -1 1072.79   51.09 
   9  -2   1 1140.79   49.80 
   9  -2   1 1134.79   51.69 
  -9  -2  -1 1137.69   54.89 
  -9  -2  -1 1138.49   52.19 
  -9  -2  -1 1258.47   59.99 
   9  -2   1 1213.58   52.49 
  -9  -2  -1 1193.08   52.29 
  -9  -2  -1 1186.78   50.89 
  -9  -2  -1 1059.99   53.79 
   9  -2   1 1089.09   57.29 
   9  -2   1 1130.19   54.99 
   9  -2   1 1174.08   57.39 
   9  -2   1 1178.68   52.59 
  -9  -2  -1 1144.69   50.49 
  -9  -2  -1 1066.59   55.89 
  -9  -2  -1 1142.49   52.59 
   9  -2   1 1159.58   57.49 
  -9  -2  -1 1199.48   56.99 
   9  -2   1 1137.19   50.09 
  -9  -2  -1 1109.39   54.79 
  -9  -2  -1 1235.48   58.49 
  -9   2  -1 1120.99   52.59 
  -9   2  -1 1119.09   54.19 
   9   2   1 1128.49   54.79 
   9   2   1 1153.38   56.49 
  -9   2  -1 1218.18   55.49 
   9   2   1 1184.38   55.39 
  -9   2  -1 1154.08   56.69 
   9   2   1 1105.49   56.39 
   9   2   1 1186.28   56.79 
  -9   2  -1 1088.79   54.29 
   9   2   1 1180.88   56.29 
  -9   2  -1 1113.19   50.29 
   9   2   1 1136.09   56.19 
  -9   2  -1 1174.58   56.89 
   9   2   1 1181.48   52.09 
   9   2   1 1126.29   56.19 
  -9   2  -1 1138.19   57.29 
   9   2   1 1183.08   53.09 
   9   2   1 1161.98   58.89 
   9   2   1 1152.28   52.29 
   9   2   1 1188.08   56.59 
  -9   2  -1 1200.18   57.19 
   9   2   1 1191.08   52.59 
 -10  -2  -1  319.77   34.90 
  10  -2   1  263.97   30.20 
  10  -2   1  291.37   24.70 
 -10  -2  -1  299.87   29.10 
 -10  -2  -1  334.67   33.90 
 -10  -2  -1  304.07   33.70 
 -10  -2  -1  330.97   35.50 
 -10  -2  -1  293.47   28.20 
  10  -2   1  288.17   29.10 
 -10  -2  -1  317.27   32.40 
 -10  -2  -1  325.17   25.40 
  10  -2   1  302.57   29.40 
 -10  -2  -1  313.57   33.40 
 -10  -2  -1  271.47   31.50 
 -10  -2  -1  309.47   32.60 
  10  -2   1  305.67   33.00 
  10  -2   1  278.67   32.70 
 -10  -2  -1  348.77   36.80 
  10  -2   1  294.57   30.20 
 -10  -2  -1  322.47   26.50 
  10  -2   1  326.37   34.30 
 -10  -2  -1  349.47   28.40 
  10  -2   1  327.47   34.10 
  10   2   1  303.47   32.90 
  10   2   1  346.87   34.70 
 -10   2  -1  312.77   30.50 
  10   2   1  296.37   29.20 
  10   2   1  309.67   30.40 
  10   2   1  314.07   33.20 
 -10   2  -1  319.77   33.40 
 -10   2  -1  241.08   30.30 
 -10   2  -1  380.76   37.30 
 -10   2  -1  281.77   30.40 
 -10   2  -1  330.77   34.50 
 -10   2  -1  328.77   27.70 
  10   2   1  306.57   31.20 
  10   2   1  318.37   33.70 
  10   2   1  308.27   33.20 
  10   2   1  339.67   34.30 
 -10   2  -1  309.27   32.00 
  10   2   1  359.46   36.30 
  10   2   1  280.87   30.10 
  10   2   1  334.77   30.30 
  10   2   1  345.27   26.60 
  -9  -3   1  260.57   28.70 
   9  -3  -1  193.08   25.40 
  -9  -3   1  231.68   26.00 
  -9  -3   1  174.48   24.80 
   9  -3  -1  244.58   27.50 
  -9  -3   1  252.67   20.20 
  -9  -3   1  242.48   28.80 
  -9  -3   1  201.78   25.20 
   9  -3  -1  285.97   22.40 
  -9  -3   1  233.58   25.60 
  -9  -3   1  212.68   24.20 
  -9  -3   1  227.48   23.40 
   9  -3  -1  232.68   24.50 
   9  -3  -1  251.37   25.60 
  -9  -3   1  214.48   23.90 
  -9  -3   1  199.48   22.80 
   9  -3  -1  280.67   28.10 
   9  -3  -1  202.48   24.70 
  -9  -3   1  225.18   27.20 
   9  -3  -1  230.28   26.50 
  -9  -3   1  229.98   23.60 
  -9  -3   1  232.18   26.60 
  -9  -3   1  249.18   23.30 
  -9  -3   1  196.68   22.90 
  -9  -3   1  239.48   27.60 
  -9  -3   1  223.98   25.80 
   9  -3  -1  236.08   19.60 
  -9   3   1  187.68   22.50 
   9   3  -1  243.18   26.40 
   9   3  -1  209.88   24.00 
   9   3  -1  204.38   26.10 
   9   3  -1  237.68   26.80 
  -9   3   1  251.47   27.60 
   9   3  -1  232.88   26.00 
   9   3  -1  216.98   23.00 
  -9   3   1  247.18   24.90 
   9   3  -1  236.88   27.90 
  -9   3   1  265.97   26.80 
   9   3  -1  230.48   26.90 
   9   3  -1  195.58   24.70 
  -9   3   1  204.58   24.20 
  -9   3   1  227.58   27.20 
  -9   3   1  196.78   23.90 
   9   3  -1  270.17   28.90 
   9   3  -1  267.97   25.80 
   9   3  -1  212.28   25.60 
  -9   3   1  270.47   21.40 
   9   3  -1  187.98   21.70 
   9   3  -1  260.37   25.20 
  -8  -3   1  247.98   19.50 
  -8  -3   1  235.28   26.30 
   8  -3  -1  283.77   27.80 
  -8  -3   1  234.88   26.20 
   8  -3  -1  261.97   17.60 
   8  -3  -1  234.88   19.50 
  -8  -3   1  195.88   20.90 
  -8  -3   1  274.77   21.70 
  -8  -3   1  259.77   19.10 
  -8  -3   1  262.67   27.80 
   8  -3  -1  215.28   22.90 
  -8  -3   1  233.58   24.80 
  -8  -3   1  265.57   20.10 
  -8  -3   1  226.88   22.90 
  -8  -3   1  270.77   19.10 
   8  -3  -1  263.77   23.10 
   8  -3  -1  233.78   22.80 
   8  -3  -1  246.58   17.20 
  -8  -3   1  214.38   24.50 
  -8  -3   1  248.28   24.80 
  -8  -3   1  288.27   23.10 
  -8  -3   1  279.17   21.80 
  -8  -3   1  259.37   20.20 
   8  -3  -1  240.68   24.30 
  -8  -3   1  234.08   24.30 
   8  -3  -1  281.67   19.80 
  -8  -3   1  274.77   23.00 
   8  -3  -1  246.68   18.70 
   8  -3  -1  242.58   25.10 
  -8   3   1  254.97   19.90 
  -8   3   1  286.37   22.20 
  -8   3   1  276.87   21.10 
   8   3  -1  273.57   21.70 
  -8   3   1  261.37   18.70 
   8   3  -1  265.97   27.40 
   8   3  -1  268.67   27.20 
   8   3  -1  252.57   19.80 
   8   3  -1  256.57   25.50 
  -8   3   1  230.48   24.90 
  -8   3   1  225.38   23.60 
   8   3  -1  273.87   26.80 
  -8   3   1  224.18   23.80 
   8   3  -1  295.67   21.60 
   8   3  -1  253.47   25.80 
   8   3  -1  265.47   27.10 
   8   3  -1  246.88   19.10 
  -8   3   1  249.97   26.20 
   8   3  -1  241.48   25.80 
   8   3  -1  264.67   20.40 
   8   3  -1  245.78   26.00 
  -8   3   1  226.28   18.80 
  -8   3   1  251.97   18.20 
   8   3  -1  223.98   25.70 
   7  -3  -1  649.04   27.80 
  -7  -3   1  623.34   34.20 
  -7  -3   1  634.84   35.50 
  -7  -3   1  560.54   30.20 
   7  -3  -1  577.64   31.00 
   7  -3  -1  590.74   32.50 
  -7  -3   1  631.84   32.50 
   7  -3  -1  580.24   28.80 
  -7  -3   1  546.35   33.90 
  -7  -3   1  647.24   34.00 
  -7  -3   1  579.04   31.80 
   7  -3  -1  611.84   34.90 
   7  -3  -1  631.14   27.80 
   7  -3  -1  567.24   31.50 
   7  -3  -1  574.24   31.40 
  -7  -3   1  609.44   32.80 
  -7  -3   1  601.34   27.50 
   7  -3  -1  641.64   28.40 
  -7  -3   1  578.64   33.60 
  -7  -3   1  606.54   32.50 
  -7  -3   1  569.54   33.40 
  -7  -3   1  592.54   29.90 
  -7  -3   1  647.64   31.70 
   7  -3  -1  602.84   33.70 
  -7  -3   1  530.35   30.30 
  -7  -3   1  546.75   33.40 
   7  -3  -1  638.74   30.70 
   7  -3  -1  580.74   30.20 
   7  -3  -1  650.43   34.80 
  -7  -3   1  646.04   28.10 
  -7  -3   1  629.84   33.30 
  -7  -3   1  555.24   28.30 
  -7  -3   1  637.24   31.60 
   7   3  -1  588.24   34.30 
   7   3  -1  625.14   32.90 
  -7   3   1  685.53   34.00 
   7   3  -1  547.95   31.40 
   7   3  -1  597.74   30.20 
   7   3  -1  644.44   32.60 
  -7   3   1  643.34   31.40 
  -7   3   1  597.24   32.00 
  -7   3   1  588.84   32.60 
   7   3  -1  597.24   31.20 
  -7   3   1  611.34   27.70 
  -7   3   1  605.14   28.30 
   7   3  -1  617.04   34.10 
  -7   3   1  673.13   32.40 
   7   3  -1  620.74   31.30 
   7   3  -1  630.74   34.30 
  -7   3   1  650.03   29.60 
  -7   3   1  618.34   33.50 
  -7   3   1  536.25   32.70 
   7   3  -1  638.94   34.70 
   7   3  -1  611.94   33.60 
   7   3  -1  535.85   32.80 
  -7   3   1  611.84   30.50 
  -7   3   1  643.34   33.30 
   7   3  -1  555.04   32.30 
  -7   3   1  594.04   33.70 
   7   3  -1  565.84   33.40 
  -6  -3   1 1621.04   61.69 
   6  -3  -1 1592.94   51.89 
   6  -3  -1 1645.74   56.09 
  -6  -3   1 1612.64   62.19 
   6  -3  -1 1571.64   62.19 
  -6  -3   1 1622.74   60.19 
  -6  -3   1 1608.24   63.89 
   6  -3  -1 1573.24   62.59 
   6  -3  -1 1635.34   54.49 
  -6  -3   1 1554.64   62.29 
   6  -3  -1 1628.14   55.09 
  -6  -3   1 1482.95   61.19 
   6  -3  -1 1606.44   58.69 
  -6  -3   1 1651.33   64.09 
  -6  -3   1 1585.64   60.39 
  -6  -3   1 1564.04   58.49 
  -6  -3   1 1508.65   55.49 
  -6  -3   1 1507.45   58.99 
  -6  -3   1 1532.75   60.19 
   6  -3  -1 1600.84   61.49 
  -6  -3   1 1535.25   60.19 
  -6  -3   1 1586.84   59.19 
   6  -3  -1 1508.25   59.79 
  -6  -3   1 1552.74   55.49 
  -6  -3   1 1573.94   55.99 
   6  -3  -1 1504.05   57.49 
  -6  -3   1 1665.33   58.89 
  -6  -3   1 1569.14   60.89 
   6  -3  -1 1543.25   58.99 
  -6  -3   1 1656.23   60.09 
   6  -3  -1 1593.84   59.89 
   6  -3  -1 1590.04   62.39 
   6  -3  -1 1536.75   55.99 
   6   3  -1 1577.54   62.99 
  -6   3   1 1649.44   55.69 
  -6   3   1 1626.24   57.69 
  -6   3   1 1644.94   58.99 
   6   3  -1 1571.24   57.89 
  -6   3   1 1542.85   60.59 
  -6   3   1 1599.34   60.29 
  -6   3   1 1619.44   57.49 
  -6   3   1 1657.33   61.19 
   6   3  -1 1535.55   61.99 
   6   3  -1 1483.75   61.79 
   6   3  -1 1612.44   60.79 
  -6   3   1 1578.34   55.19 
   6   3  -1 1549.24   61.29 
   6   3  -1 1591.04   60.29 
  -6   3   1 1546.95   59.79 
  -6   3   1 1556.14   58.49 
  -6   3   1 1530.95   61.59 
   6   3  -1 1609.94   61.99 
   6   3  -1 1545.15   59.99 
  -6   3   1 1573.04   62.19 
   6   3  -1 1535.25   58.69 
   6   3  -1 1654.43   62.99 
  -6   3   1 1579.24   49.20 
   6   3  -1 1699.23   61.09 
  -6   3   1 1549.14   60.99 
   6   3  -1 1501.95   61.69 
   5  -3  -1 2179.28   80.39 
  -5  -3   1 2309.07   78.19 
   5  -3  -1 2279.97   76.19 
   5  -3  -1 2331.87   72.99 
  -5  -3   1 2325.97   79.19 
  -5  -3   1 2283.87   80.69 
  -5  -3   1 2252.27   79.39 
   5  -3  -1 2299.47   74.79 
  -5  -3   1 2328.37   77.99 
   5  -3  -1 2277.37   81.59 
  -5  -3   1 2238.78   78.59 
  -5  -3   1 2338.67   80.09 
  -5  -3   1 2422.86   82.19 
  -5  -3   1 2237.78   81.59 
   5  -3  -1 2293.77   74.19 
  -5  -3   1 2312.17   79.79 
   5  -3  -1 2357.56   76.89 
  -5  -3   1 2335.67   79.29 
  -5  -3   1 2373.26   76.29 
  -5  -3   1 2365.16   77.89 
   5  -3  -1 2259.87   78.19 
   5  -3  -1 2293.07   78.29 
  -5  -3   1 2263.37   81.99 
  -5  -3   1 2356.26   75.99 
   5  -3  -1 2295.37   78.29 
  -5  -3   1 2333.47   77.59 
   5  -3  -1 2274.67   80.89 
   5  -3  -1 2280.57   70.69 
   5  -3  -1 2282.07   80.49 
  -5  -3   1 2417.26   79.09 
  -5  -3   1 2333.47   74.89 
   5  -3  -1 2354.56   72.19 
  -5  -3   1 2291.87   79.29 
  -5  -3   1 2239.68   80.19 
  -5   3   1 2270.87   78.79 
  -5   3   1 2257.77   77.49 
   5   3  -1 2237.58   79.19 
   5   3  -1 2391.26   78.89 
   5   3  -1 2291.77   78.09 
   5   3  -1 2375.56   79.79 
  -5   3   1 2332.37   78.69 
  -5   3   1 2310.17   70.69 
  -5   3   1 2212.48   80.39 
  -5   3   1 2361.96   78.99 
  -5   3   1 2294.47   70.19 
   5   3  -1 2338.27   80.19 
   5   3  -1 2374.36   76.99 
  -5   3   1 2294.67   74.59 
  -5   3   1 2205.98   78.89 
   5   3  -1 2277.87   81.89 
   5   3  -1 2412.76   81.89 
   5   3  -1 2445.16   80.19 
   5   3  -1 2374.96   81.79 
  -5   3   1 2302.37   76.99 
   5   3  -1 2293.97   81.29 
   5   3  -1 2317.17   80.29 
  -5   3   1 2251.57   69.99 
  -5   3   1 2304.17   79.39 
   5   3  -1 2258.87   81.19 
  -5   3   1 2336.87   75.79 
  -5   3   1 2272.27   76.89 
  -5   3   1 2316.57   80.49 
  -5   3   1 2287.77   73.69 
  -4  -3   1 1008.40   37.10 
  -4  -3   1 1031.00   39.70 
  -4  -3   1  965.30   39.30 
  -4  -3   1 1012.10   37.30 
   4  -3  -1 1004.90   38.90 
  -4  -3   1 1001.30   38.70 
   4  -3  -1  985.40   33.20 
  -4  -3   1 1029.80   37.90 
   4  -3  -1  971.30   40.20 
   4  -3  -1  988.20   34.90 
  -4  -3   1 1019.60   35.10 
  -4  -3   1  965.50   38.10 
  -4  -3   1  943.31   38.40 
   4  -3  -1  987.80   33.90 
  -4  -3   1 1045.80   38.80 
   4  -3  -1 1000.40   31.50 
   4  -3  -1 1032.50   34.90 
  -4  -3   1  965.30   39.20 
  -4  -3   1  986.00   40.70 
   4  -3  -1  960.60   40.80 
   4  -3  -1  980.90   37.40 
  -4  -3   1 1044.70   40.10 
  -4  -3   1  945.61   40.50 
   4  -3  -1  978.80   39.60 
   4  -3  -1  986.50   35.50 
   4  -3  -1  945.81   39.90 
   4  -3  -1  976.30   37.60 
  -4  -3   1  994.10   37.30 
  -4  -3   1  979.50   38.90 
   4  -3  -1 1005.90   31.60 
  -4  -3   1  958.80   38.40 
  -4  -3   1  972.60   40.90 
   4  -3  -1  997.40   38.20 
   4  -3  -1 1030.80   36.50 
  -4  -3   1  988.40   37.10 
   4  -3  -1 1094.79   39.20 
  -4  -3   1  989.30   39.80 
  -4   3   1 1005.70   38.70 
   4   3  -1 1021.90   39.90 
  -4   3   1 1019.30   38.20 
  -4   3   1 1035.00   39.30 
  -4   3   1  973.50   37.50 
   4   3  -1  989.20   39.20 
  -4   3   1  979.70   38.00 
  -4   3   1  973.40   40.20 
   4   3  -1 1021.00   40.30 
   4   3  -1  989.90   37.70 
  -4   3   1 1054.49   38.40 
  -4   3   1 1024.10   36.70 
  -4   3   1 1039.60   39.90 
   4   3  -1 1024.60   37.00 
  -4   3   1  975.10   30.70 
   4   3  -1 1016.10   40.90 
   4   3  -1  983.50   40.60 
   4   3  -1 1002.60   40.50 
   4   3  -1  972.30   39.90 
  -4   3   1  996.60   34.00 
  -4   3   1  998.20   35.70 
   4   3  -1  997.70   39.30 
  -4   3   1  961.80   38.40 
   4   3  -1  935.01   38.90 
  -4   3   1 1019.60   36.10 
  -4   3   1 1013.00   30.60 
   4   3  -1 1015.20   41.10 
   4   3  -1 1002.70   38.20 
  -4   3   1 1002.10   35.30 
  -4   3   1 1003.70   33.20 
  -4   3   1 1011.70   38.30 
   3  -3  -1 2983.80   98.69 
   3  -3  -1 3094.19   92.49 
   3  -3  -1 2959.20   95.39 
  -3  -3   1 3043.40   95.59 
   3  -3  -1 2933.61   99.49 
   3  -3  -1 2999.40   94.29 
   3  -3  -1 3064.79   89.59 
   3  -3  -1 3153.98   91.29 
   3  -3  -1 2900.21   91.79 
  -3  -3   1 3076.59   95.99 
  -3  -3   1 3059.29   96.69 
   3  -3  -1 2990.70   97.19 
   3  -3  -1 3103.49   94.59 
   3  -3  -1 2962.30   96.09 
   3  -3  -1 3144.39   97.29 
  -3  -3   1 3080.69   93.59 
   3  -3  -1 2947.01   94.09 
  -3  -3   1 3015.20   97.29 
  -3  -3   1 2933.81   96.49 
   3  -3  -1 2937.01   96.19 
   3  -3  -1 2907.21   89.39 
  -3  -3   1 3061.89   96.49 
  -3  -3   1 2984.80   97.99 
   3  -3  -1 2990.00   92.29 
  -3  -3   1 3036.80   93.99 
   3  -3  -1 3001.20   93.79 
   3  -3  -1 3021.10   98.39 
   3  -3  -1 3136.09   93.09 
  -3  -3   1 2923.21   98.49 
  -3  -3   1 3160.48   94.39 
  -3  -3   1 3094.59   98.09 
   3  -3  -1 3054.49   94.09 
  -3  -3   1 3021.50   97.49 
  -3  -3   1 3032.70   97.29 
   3  -3  -1 3090.69   93.69 
  -3  -3   1 3044.10   94.19 
   3  -3  -1 3157.38   93.49 
  -3  -3   1 3036.60   94.09 
  -3  -3   1 3234.78   97.29 
  -3  -3   1 3057.19   91.59 
  -3  -3   1 3043.70   95.69 
   3   3  -1 3122.99   99.39 
   3   3  -1 3178.08   97.89 
   3   3  -1 3054.69   97.39 
   3   3  -1 3120.59   91.79 
   3   3  -1 2996.60   98.69 
  -3   3   1 3024.40   95.39 
   3   3  -1 3110.59   97.29 
  -3   3   1 2967.90   90.49 
   3   3  -1 3077.79   94.19 
  -3   3   1 3068.59   95.09 
  -3   3   1 3102.99   95.39 
   3   3  -1 3075.29   97.39 
   3   3  -1 3065.89   96.29 
  -3   3   1 3126.09   96.59 
  -3   3   1 3128.99   96.19 
  -3   3   1 3141.59   91.99 
  -3   3   1 3088.29   91.49 
  -3   3   1 3036.10   94.79 
  -3   3   1 3092.09   94.29 
  -3   3   1 3062.79   96.59 
  -3   3   1 3134.19   93.39 
  -3   3   1 3104.19   92.39 
   3   3  -1 2975.90   93.29 
   3   3  -1 3113.39   99.09 
   3   3  -1 3112.89   94.59 
  -3   3   1 3039.00   88.89 
  -3   3   1 2961.90   98.39 
  -3   3   1 3062.89   96.39 
  -3   3   1 3048.99   93.99 
   3   3  -1 3015.60   97.79 
  -3   3   1 3026.00   93.79 
   3   3  -1 2997.80   94.09 
   3   3  -1 3061.69   96.09 
  -3   3   1 3057.29   93.19 
   3   3  -1 2993.90   98.89 
   2  -3  -1  628.24   27.60 
   2  -3  -1  590.04   23.40 
  -2  -3   1  621.24   26.00 
   2  -3  -1  641.44   23.20 
   2  -3  -1  642.54   26.20 
   2  -3  -1  634.14   20.10 
   2  -3  -1  642.94   25.20 
   2  -3  -1  607.04   26.80 
  -2  -3   1  665.83   26.10 
   2  -3  -1  633.84   22.40 
  -2  -3   1  636.74   25.50 
   2  -3  -1  640.14   23.00 
  -2  -3   1  634.94   25.70 
  -2  -3   1  676.23   25.00 
  -2  -3   1  595.44   22.50 
  -2  -3   1  673.83   26.30 
   2  -3  -1  650.03   25.50 
   2  -3  -1  595.34   28.60 
  -2  -3   1  620.44   20.50 
  -2  -3   1  640.14   24.50 
  -2  -3   1  643.54   26.70 
  -2  -3   1  670.13   23.20 
   2  -3  -1  632.04   21.10 
  -2  -3   1  633.84   24.40 
   2  -3  -1  659.83   24.00 
   2  -3  -1  644.64   22.70 
   2  -3  -1  635.34   22.10 
  -2  -3   1  632.14   24.00 
   2  -3  -1  648.94   24.50 
   2  -3  -1  622.44   19.80 
   2  -3  -1  598.84   23.10 
   2  -3  -1  661.73   24.60 
   2  -3  -1  628.54   19.90 
   2  -3  -1  630.54   21.50 
  -2  -3   1  625.34   26.10 
   2  -3  -1  667.83   24.10 
  -2  -3   1  636.24   27.50 
  -2  -3   1  636.24   23.60 
   2  -3  -1  645.74   26.00 
   2  -3  -1  657.03   27.10 
   2  -3  -1  613.24   24.60 
   2  -3  -1  653.33   21.20 
  -2  -3   1  586.54   25.30 
   2  -3  -1  636.04   23.40 
  -2  -3   1  637.14   22.60 
   2  -3  -1  632.94   19.50 
  -2  -3   1  646.24   23.20 
   2  -3  -1  640.24   22.80 
   2  -3  -1  656.53   23.60 
  -2  -3   1  602.14   25.10 
   2  -3  -1  621.94   22.00 
   2  -3  -1  624.84   19.50 
  -2  -3   1  612.94   25.20 
  -2   3   1  581.24   25.20 
   2   3  -1  627.84   20.50 
  -2   3   1  619.34   24.00 
   2   3  -1  666.63   26.90 
   2   3  -1  646.14   23.70 
  -2   3   1  624.14   22.90 
  -2   3   1  639.54   22.60 
  -2   3   1  658.53   23.00 
   2   3  -1  653.83   24.30 
   2   3  -1  645.84   24.20 
  -2   3   1  658.43   22.10 
  -2   3   1  668.83   25.80 
   2   3  -1  666.33   25.70 
   2   3  -1  644.14   27.20 
  -2   3   1  633.14   21.50 
  -2   3   1  625.04   23.90 
   2   3  -1  623.24   23.50 
   2   3  -1  693.13   27.30 
  -2   3   1  604.24   19.70 
  -2   3   1  625.24   23.60 
  -2   3   1  645.64   27.60 
   2   3  -1  636.04   22.70 
   2   3  -1  663.33   24.30 
  -2   3   1  640.84   25.10 
  -2   3   1  673.93   29.20 
   2   3  -1  602.94   26.20 
   2   3  -1  652.63   23.30 
   2   3  -1  633.44   25.60 
   2   3  -1  631.54   26.20 
   2   3  -1  634.04   23.80 
   2   3  -1  637.64   23.50 
  -2   3   1  642.24   27.90 
   2   3  -1  627.04   21.50 
  -2   3   1  587.34   23.50 
   2   3  -1  614.74   24.90 
  -2   3   1  680.63   25.20 
   2   3  -1  649.34   27.50 
   2   3  -1  653.43   26.00 
   2   3  -1  643.94   23.10 
  -2   3   1  635.64   23.70 
   2   3  -1  571.54   27.10 
  -2   3   1  654.83   19.80 
   2   3  -1  640.84   22.60 
  -1  -3   1 3307.27   99.39 
   1  -3  -1 3016.40  103.29 
  -1  -3   1 3144.79  102.79 
   1  -3  -1 3365.36   98.69 
  -1  -3   1 3267.57  101.39 
   1  -3  -1 3274.87   99.69 
  -1  -3   1 3211.68  102.99 
   1  -3  -1 3368.26   97.19 
   1  -3  -1 3399.26  100.09 
   1  -3  -1 3214.58  100.39 
  -1  -3   1 3199.88  102.29 
  -1  -3   1 3214.78  101.89 
   1  -3  -1 3206.08   97.49 
   1  -3  -1 3200.18   96.19 
   1  -3  -1 3289.97  102.59 
  -1  -3   1 3264.47   97.29 
   1  -3  -1 3383.76   95.49 
  -1  -3   1 3507.95  102.19 
   1  -3  -1 3219.08   99.49 
   1  -3  -1 2928.31  102.09 
   1  -3  -1 3288.97  103.09 
   1  -3  -1 3354.56   98.39 
   1  -3  -1 3249.07   96.89 
   1  -3  -1 3214.38   96.99 
   1  -3  -1 3407.66  100.89 
   1  -3  -1 3382.36   96.59 
   1  -3  -1 3298.67   98.29 
   1  -3  -1 3161.18   97.89 
   1  -3  -1 3318.57   94.79 
  -1  -3   1 3338.57  100.49 
  -1  -3   1 3334.87  104.99 
  -1  -3   1 3399.36   99.39 
   1  -3  -1 3317.27   96.69 
  -1  -3   1 3181.78   99.99 
   1  -3  -1 3262.37  104.19 
   1  -3  -1 3379.16   95.49 
   1  -3  -1 3119.69  105.29 
  -1  -3   1 3440.26  101.59 
   1  -3  -1 3430.36   97.39 
   1  -3  -1 3254.37   95.19 
   1  -3  -1 3340.67   95.99 
  -1  -3   1 3346.37  101.59 
   1  -3  -1 2948.10   97.09 
  -1  -3   1 3290.67   99.59 
   1  -3  -1 3306.17  101.59 
   1  -3  -1 2960.60   96.99 
  -1  -3   1 3387.66  100.09 
  -1  -3   1 3422.36   98.19 
   1  -3  -1 3059.49  105.49 
  -1  -3   1 3272.57   96.79 
  -1  -3   1 3235.98  100.59 
  -1  -3   1 3383.26   97.99 
   1  -3  -1 3303.87   95.89 
   1  -3  -1 3272.97   97.09 
  -1  -3   1 3361.76   99.69 
  -1  -3   1 3314.17  105.39 
   1  -3  -1 3196.08  102.09 
  -1  -3   1 3397.06   98.79 
  -1  -3   1 3215.48  101.39 
   1  -3  -1 3319.97   95.19 
  -1  -3   1 3279.67   96.19 
  -1  -3   1 3319.47   97.19 
   1  -3  -1 3327.97   98.99 
   1   3  -1 3404.56  103.99 
   1   3  -1 3153.58   98.49 
   1   3  -1 3297.07  102.19 
   1   3  -1 3108.19   99.19 
   1   3  -1 3304.37  102.69 
   1   3  -1 3332.77   98.89 
   1   3  -1 3218.28  100.89 
  -1   3   1 3258.37   97.09 
  -1   3   1 3198.58  101.99 
   1   3  -1 3346.47   97.19 
  -1   3   1 3392.46  101.29 
  -1   3   1 3126.49   95.89 
   1   3  -1 3368.76  104.09 
  -1   3   1 3224.08  105.29 
   1   3  -1 3305.17   97.49 
  -1   3   1 3332.37   97.49 
  -1   3   1 3352.66   98.49 
  -1   3   1 3354.26   97.19 
   1   3  -1 3172.88  100.39 
   1   3  -1 3405.56   96.99 
   1   3  -1 3227.78  100.99 
  -1   3   1 3138.79   99.59 
   1   3  -1 3311.97  102.49 
   1   3  -1 3384.56   95.89 
   1   3  -1 3255.57  102.09 
  -1   3   1 3297.77   97.39 
  -1   3   1 3270.27   97.19 
   1   3  -1 3268.17   95.79 
   1   3  -1 3352.86   96.89 
   1   3  -1 3371.86  100.29 
   1   3  -1 3173.08  104.09 
   1   3  -1 3374.96   98.29 
  -1   3   1 3207.38  103.39 
  -1   3   1 3277.67  104.79 
  -1   3   1 3305.67   96.29 
  -1   3   1 3374.36  101.59 
   1   3  -1 3129.09  101.29 
  -1   3   1 3323.77  100.09 
   1   3  -1 3387.06  102.29 
   1   3  -1 3215.78  100.09 
  -1   3   1 3217.48  100.89 
   1   3  -1 3376.16  101.99 
   1   3  -1 3259.67  102.79 
   0  -3   1  508.75   23.80 
   0  -3   1  490.45   23.90 
   0  -3   1  500.35   21.60 
   0  -3  -1  505.45   22.50 
   0  -3   1  472.25   22.80 
   0  -3  -1  526.05   23.10 
   0  -3   1  529.15   16.60 
   0  -3  -1  521.15   16.70 
   0  -3   1  529.05   17.20 
   0  -3   1  453.75   25.50 
   0  -3   1  517.85   19.50 
   0  -3  -1  513.25   18.90 
   0  -3   1  579.44   24.20 
   0  -3  -1  515.55   17.00 
   0  -3  -1  483.45   17.50 
   0  -3  -1  525.25   19.60 
   0  -3  -1  525.65   20.90 
   0  -3  -1  536.65   17.90 
   0  -3  -1  508.15   20.20 
   0  -3   1  520.75   21.70 
   0  -3   1  518.85   23.80 
   0  -3   1  522.25   19.20 
   0  -3  -1  500.35   23.50 
   0  -3   1  508.45   17.40 
   0  -3   1  540.05   22.30 
   0  -3  -1  501.95   15.60 
   0  -3  -1  484.85   20.10 
   0  -3   1  515.65   18.00 
   0  -3  -1  528.45   19.70 
   0  -3  -1  496.95   20.20 
   0  -3   1  517.65   18.30 
   0  -3  -1  530.75   17.80 
   0  -3   1  496.55   21.30 
   0  -3  -1  527.55   23.00 
   0  -3   1  525.85   20.90 
   0  -3   1  473.65   20.10 
   0  -3   1  482.25   24.60 
   0  -3   1  552.14   21.50 
   0  -3   1  520.25   15.90 
   0  -3  -1  518.95   19.50 
   0  -3  -1  514.25   17.00 
   0  -3   1  519.75   23.60 
   0  -3  -1  494.85   20.50 
   0  -3  -1  512.05   21.00 
   0  -3  -1  462.45   22.80 
   0  -3   1  543.35   22.40 
   0  -3  -1  524.35   21.90 
   0  -3  -1  535.05   20.00 
   0  -3  -1  500.95   17.70 
   0  -3   1  488.85   21.20 
   0  -3  -1  551.84   18.30 
   0  -3   1  512.55   22.10 
   0  -3  -1  520.05   15.30 
   0  -3   1  500.45   18.40 
   0  -3  -1  526.35   16.30 
   0   3  -1  477.45   27.30 
   0   3  -1  512.05   21.90 
   0   3  -1  519.65   15.60 
   0   3   1  508.35   17.20 
   0   3   1  529.35   21.60 
   0   3   1  536.05   24.80 
   0   3  -1  502.45   18.80 
   0   3  -1  525.65   16.10 
   0   3  -1  507.45   16.40 
   0   3   1  520.65   16.70 
   0   3   1  532.35   23.10 
   0   3  -1  508.15   22.10 
   0   3   1  520.95   19.50 
   0   3  -1  535.55   17.40 
   0   3  -1  506.25   19.30 
   0   3  -1  520.25   22.20 
   0   3  -1  547.25   27.80 
   0   3  -1  525.45   15.60 
   0   3   1  510.45   23.20 
   0   3   1  543.25   21.10 
   0   3  -1  489.55   22.80 
   0   3   1  490.15   19.90 
   0   3  -1  516.45   20.60 
   0   3   1  507.35   20.90 
   0   3  -1  528.25   23.20 
   0   3  -1  475.85   21.50 
   0   3   1  521.15   21.20 
   0   3   1  520.35   19.60 
   0   3   1  507.55   19.90 
   0   3  -1  507.95   18.10 
   0   3  -1  535.35   20.70 
   0   3  -1  511.55   21.90 
   0   3   1  526.95   18.50 
   0   3   1  474.25   20.70 
   0   3   1  498.45   24.40 
   0   3   1  542.55   21.10 
   0   3  -1  499.65   24.20 
   0   3  -1  525.75   17.90 
   0   3  -1  517.05   16.00 
   0   3  -1  519.55   21.00 
   0   3  -1  505.85   23.70 
  -1  -3  -1 5636.54  175.98 
  -1  -3  -1 5630.04  176.38 
   1  -3   1 6067.49  171.98 
   1  -3   1 5827.12  175.38 
  -1  -3  -1 5911.51  170.48 
   1  -3   1 5633.54  174.48 
  -1  -3  -1 6020.00  168.58 
  -1  -3  -1 5638.64  176.28 
  -1  -3  -1 5860.71  168.28 
  -1  -3  -1 5794.82  172.68 
  -1  -3  -1 5891.71  174.58 
  -1  -3  -1 5991.60  171.48 
  -1  -3  -1 5913.31  173.98 
   1  -3   1 5796.82  174.48 
   1  -3   1 5895.01  173.28 
  -1  -3  -1 5898.31  168.88 
   1  -3   1 5892.91  178.98 
   1  -3   1 5932.11  170.68 
  -1  -3  -1 5952.30  174.38 
   1  -3   1 5836.92  177.38 
   1  -3   1 5692.63  168.98 
   1  -3   1 5931.71  171.18 
  -1  -3  -1 5832.92  169.08 
   1  -3   1 5715.53  175.68 
   1  -3   1 6016.50  173.58 
  -1  -3  -1 5815.62  174.18 
  -1  -3  -1 6005.10  169.38 
   1  -3   1 5145.58  179.28 
   1  -3   1 5861.71  176.28 
  -1  -3  -1 5816.02  178.98 
  -1  -3  -1 6078.49  172.68 
  -1  -3  -1 5952.10  170.88 
   1  -3   1 6127.89  174.58 
   1  -3   1 5643.44  178.68 
   1  -3   1 5836.22  168.78 
   1  -3   1 5954.40  167.68 
  -1  -3  -1 5763.02  169.18 
  -1  -3  -1 5929.71  174.68 
   1  -3   1 5741.13  170.68 
  -1  -3  -1 5780.42  175.88 
   1  -3   1 5568.54  176.28 
   1  -3   1 5809.92  172.58 
  -1  -3  -1 6229.38  175.08 
  -1  -3  -1 5970.80  174.28 
  -1  -3  -1 5944.01  169.18 
  -1  -3  -1 5858.01  175.08 
  -1  -3  -1 6139.59  172.98 
   1  -3   1 5696.53  168.38 
   1  -3   1 5241.28  179.58 
   1  -3   1 5716.53  170.28 
  -1  -3  -1 5805.42  175.38 
  -1  -3  -1 5806.02  171.18 
   1  -3   1 5725.63  176.18 
   1  -3   1 5982.90  177.68 
   1  -3   1 5950.90  172.08 
  -1  -3  -1 6118.49  174.88 
   1   3   1 5978.80  175.38 
   1   3   1 5866.31  174.98 
  -1   3  -1 6096.29  169.98 
   1   3   1 5548.74  170.08 
   1   3   1 5875.81  172.48 
  -1   3  -1 5992.40  172.78 
  -1   3  -1 5705.63  173.48 
  -1   3  -1 5619.84  180.78 
  -1   3  -1 5768.92  169.28 
   1   3   1 5751.82  170.08 
  -1   3  -1 5961.60  175.88 
   1   3   1 5804.22  173.08 
   1   3   1 5801.22  168.78 
   1   3   1 5895.11  169.88 
  -1   3  -1 5861.81  175.58 
  -1   3  -1 6080.19  178.58 
  -1   3  -1 5810.22  180.08 
  -1   3  -1 6004.00  169.88 
   1   3   1 5848.71  172.18 
  -1   3  -1 5809.12  173.78 
   1   3   1 5981.50  173.98 
  -1   3  -1 5644.23  179.78 
   1   3   1 5956.90  175.78 
   1   3   1 5907.21  171.18 
  -1   3  -1 5934.51  168.38 
   1   3   1 6009.60  176.58 
  -1   3  -1 5485.85  169.18 
   1   3   1 5908.91  174.48 
   1   3   1 5983.70  169.78 
   1   3   1 5913.41  173.08 
  -1   3  -1 5987.10  170.98 
   1   3   1 5877.31  172.28 
   1   3   1 5789.42  175.08 
  -1   3  -1 6085.89  175.38 
  -1   3  -1 5887.31  178.88 
   1   3   1 5556.84  169.58 
  -1   3  -1 5635.64  176.18 
  -1   3  -1 5933.31  173.88 
  -1   3  -1 6046.19  176.28 
  -1   3  -1 5856.61  170.38 
  -1   3  -1 5960.20  176.88 
   1   3   1 5882.31  168.68 
  -1   3  -1 5821.82  168.38 
   1   3   1 5665.13  175.18 
   1   3   1 5878.41  172.18 
   1   3   1 6057.19  177.28 
   1   3   1 5993.90  171.08 
   1   3   1 6049.79  174.98 
   2  -3   1 1420.56   48.80 
   2  -3   1 1419.06   42.60 
  -2  -3  -1 1464.65   48.30 
   2  -3   1 1444.76   43.30 
   2  -3   1 1482.95   50.99 
  -2  -3  -1 1427.56   49.60 
  -2  -3  -1 1453.05   47.50 
  -2  -3  -1 1476.95   45.90 
   2  -3   1 1386.26   53.79 
  -2  -3  -1 1427.66   44.30 
   2  -3   1 1416.16   51.79 
  -2  -3  -1 1491.95   50.09 
   2  -3   1 1456.75   50.39 
   2  -3   1 1419.16   51.99 
  -2  -3  -1 1480.45   51.49 
   2  -3   1 1461.25   45.00 
  -2  -3  -1 1429.06   48.60 
   2  -3   1 1429.56   42.70 
   2  -3   1 1464.75   43.00 
   2  -3   1 1453.85   48.70 
  -2  -3  -1 1458.25   48.80 
   2  -3   1 1414.16   46.10 
  -2  -3  -1 1475.45   45.70 
  -2  -3  -1 1419.46   49.80 
   2  -3   1 1444.46   45.90 
   2  -3   1 1440.96   47.00 
  -2  -3  -1 1498.55   46.40 
  -2  -3  -1 1449.85   46.40 
   2  -3   1 1359.36   51.99 
   2  -3   1 1475.65   47.30 
   2  -3   1 1441.76   49.40 
  -2  -3  -1 1407.06   49.99 
  -2  -3  -1 1486.35   47.20 
  -2  -3  -1 1467.15   50.79 
   2  -3   1 1511.85   49.10 
   2  -3   1 1390.56   47.30 
   2  -3   1 1454.15   51.09 
  -2  -3  -1 1449.46   47.80 
  -2  -3  -1 1487.45   51.09 
   2  -3   1 1470.75   47.00 
  -2  -3  -1 1466.85   49.70 
   2  -3   1 1430.46   51.79 
   2  -3   1 1384.96   49.70 
   2  -3   1 1448.76   47.50 
   2  -3   1 1453.05   47.10 
  -2   3  -1 1446.76   43.70 
  -2   3  -1 1440.36   49.99 
  -2   3  -1 1489.25   46.00 
   2   3   1 1482.65   48.20 
   2   3   1 1524.85   49.80 
  -2   3  -1 1473.55   45.00 
   2   3   1 1534.25   51.69 
   2   3   1 1477.85   45.60 
  -2   3  -1 1409.66   46.80 
   2   3   1 1479.85   50.99 
   2   3   1 1514.15   51.59 
   2   3   1 1484.55   48.90 
  -2   3  -1 1522.75   52.99 
   2   3   1 1439.56   48.60 
   2   3   1 1499.75   46.90 
  -2   3  -1 1490.55   51.39 
  -2   3  -1 1459.75   53.69 
  -2   3  -1 1482.85   46.50 
  -2   3  -1 1429.06   48.10 
  -2   3  -1 1436.16   44.50 
  -2   3  -1 1544.25   49.60 
   2   3   1 1452.45   46.90 
  -2   3  -1 1436.26   53.59 
   2   3   1 1470.55   46.50 
  -2   3  -1 1541.65   51.79 
   2   3   1 1389.96   50.99 
  -2   3  -1 1439.36   46.70 
   2   3   1 1536.05   48.70 
   2   3   1 1398.56   51.09 
  -2   3  -1 1458.65   47.60 
  -2   3  -1 1448.56   43.20 
   2   3   1 1498.15   47.30 
  -2   3  -1 1444.36   50.79 
  -2   3  -1 1453.05   45.10 
   2   3   1 1448.66   45.80 
  -2   3  -1 1456.05   49.80 
  -2   3  -1 1420.16   43.10 
   2   3   1 1479.35   47.60 
   2   3   1 1477.45   45.40 
  -2   3  -1 1521.75   52.49 
   2   3   1 1464.15   49.70 
   2   3   1 1453.95   50.09 
   2   3   1 1435.76   46.90 
   3  -3   1 2761.12   90.69 
   3  -3   1 2752.82   82.39 
  -3  -3  -1 2682.53   88.19 
  -3  -3  -1 2683.73   86.79 
  -3  -3  -1 2646.64   88.19 
  -3  -3  -1 2636.84   86.49 
   3  -3   1 2697.53   81.09 
  -3  -3  -1 2685.83   85.69 
   3  -3   1 2674.73   88.59 
   3  -3   1 2644.94   83.79 
   3  -3   1 2615.04   78.99 
   3  -3   1 2662.53   80.59 
   3  -3   1 2584.94   85.89 
  -3  -3  -1 2709.43   83.99 
  -3  -3  -1 2707.53   87.29 
   3  -3   1 2683.13   83.69 
   3  -3   1 2644.14   89.49 
  -3  -3  -1 2647.73   87.49 
  -3  -3  -1 2576.24   85.09 
  -3  -3  -1 2679.43   86.09 
   3  -3   1 2674.93   86.99 
  -3  -3  -1 2682.13   85.59 
  -3  -3  -1 2701.33   81.29 
  -3  -3  -1 2716.73   81.49 
   3  -3   1 2631.14   87.29 
   3  -3   1 2729.33   88.29 
  -3  -3  -1 2683.33   86.19 
   3  -3   1 2767.72   79.79 
  -3  -3  -1 2776.32   83.19 
  -3  -3  -1 2693.93   84.39 
   3  -3   1 2679.93   84.29 
  -3  -3  -1 2639.64   86.19 
  -3  -3  -1 2632.84   83.59 
   3  -3   1 2611.74   81.39 
   3  -3   1 2645.34   79.39 
   3   3   1 2750.42   86.99 
  -3   3  -1 2692.13   85.59 
  -3   3  -1 2543.85   87.59 
  -3   3  -1 2774.32   86.99 
   3   3   1 2624.34   83.99 
   3   3   1 2662.73   81.89 
  -3   3  -1 2722.93   80.69 
   3   3   1 2633.74   87.79 
  -3   3  -1 2658.33   87.19 
  -3   3  -1 2747.82   82.09 
   3   3   1 2543.05   87.29 
  -3   3  -1 2713.33   78.49 
   3   3   1 2619.64   87.59 
   3   3   1 2738.23   86.39 
   3   3   1 2708.93   81.89 
  -3   3  -1 2639.84   82.89 
   3   3   1 2687.43   85.29 
   3   3   1 2762.72   87.49 
   3   3   1 2646.64   87.29 
  -3   3  -1 2684.03   89.89 
   3   3   1 2615.64   86.79 
   3   3   1 2677.93   84.49 
  -3   3  -1 2730.23   80.89 
  -3   3  -1 2562.34   79.59 
  -3   3  -1 2728.33   78.99 
   3   3   1 2696.03   84.29 
  -3   3  -1 2729.43   84.69 
  -3   3  -1 2698.03   83.49 
  -3   3  -1 2732.33   82.49 
   3   3   1 2626.14   83.89 
   3   3   1 2681.53   84.39 
  -3   3  -1 2714.73   86.99 
  -3   3  -1 2700.33   84.89 
  -3   3  -1 2605.04   87.79 
  -3   3  -1 2664.13   86.19 
   3   3   1 2600.04   87.99 
   3   3   1 2688.93   83.69 
   4  -3   1  584.84   25.80 
   4  -3   1  576.14   26.40 
   4  -3   1  555.44   27.70 
  -4  -3  -1  584.14   27.80 
  -4  -3  -1  588.24   27.10 
   4  -3   1  597.94   20.00 
   4  -3   1  609.14   27.00 
  -4  -3  -1  621.14   25.10 
   4  -3   1  609.34   26.00 
   4  -3   1  569.94   27.60 
   4  -3   1  590.74   24.40 
  -4  -3  -1  598.14   25.70 
  -4  -3  -1  592.54   26.50 
  -4  -3  -1  623.14   27.90 
   4  -3   1  570.24   23.40 
  -4  -3  -1  596.44   25.80 
   4  -3   1  622.84   23.30 
  -4  -3  -1  593.54   29.00 
   4  -3   1  599.54   21.90 
  -4  -3  -1  593.54   25.60 
   4  -3   1  569.74   28.70 
  -4  -3  -1  591.44   23.30 
  -4  -3  -1  583.54   27.20 
  -4  -3  -1  600.24   26.70 
  -4  -3  -1  597.94   22.40 
  -4  -3  -1  622.54   27.00 
  -4  -3  -1  553.54   27.50 
   4  -3   1  635.34   30.20 
   4  -3   1  563.64   28.00 
  -4  -3  -1  572.04   26.60 
  -4  -3  -1  606.24   26.20 
  -4  -3  -1  588.04   28.20 
   4  -3   1  568.84   21.80 
   4   3   1  585.74   26.90 
   4   3   1  571.14   27.80 
   4   3   1  605.14   28.70 
  -4   3  -1  592.34   20.80 
  -4   3  -1  592.14   20.80 
  -4   3  -1  572.94   27.90 
  -4   3  -1  595.04   25.70 
   4   3   1  614.34   26.20 
  -4   3  -1  588.14   23.60 
  -4   3  -1  597.24   25.80 
   4   3   1  587.64   27.90 
  -4   3  -1  569.24   21.30 
  -4   3  -1  541.35   26.70 
   4   3   1  624.44   28.20 
   4   3   1  572.34   28.20 
  -4   3  -1  638.94   26.70 
   4   3   1  574.44   27.70 
  -4   3  -1  606.84   21.80 
  -4   3  -1  578.64   26.10 
   4   3   1  618.94   24.00 
  -4   3  -1  600.34   26.90 
  -4   3  -1  632.14   29.90 
  -4   3  -1  561.54   22.70 
   4   3   1  561.54   27.20 
   4   3   1  586.04   27.30 
   4   3   1  581.44   26.20 
   4   3   1  565.74   25.10 
  -4   3  -1  600.44   28.60 
   4   3   1  566.94   26.90 
  -4   3  -1  602.94   24.40 
  -4   3  -1  597.44   20.30 
  -4   3  -1  607.94   27.40 
   5  -3   1  642.14   32.00 
  -5  -3  -1  674.13   28.40 
  -5  -3  -1  649.04   29.60 
   5  -3   1  633.24   24.70 
  -5  -3  -1  656.23   29.50 
  -5  -3  -1  615.14   30.60 
  -5  -3  -1  588.14   29.50 
  -5  -3  -1  625.84   29.40 
  -5  -3  -1  708.83   32.70 
  -5  -3  -1  622.24   27.60 
   5  -3   1  640.34   30.50 
  -5  -3  -1  645.44   29.40 
  -5  -3  -1  583.44   28.20 
  -5  -3  -1  637.74   32.50 
   5  -3   1  599.44   30.90 
   5  -3   1  624.34   32.40 
   5  -3   1  622.54   26.20 
  -5  -3  -1  616.74   31.40 
   5  -3   1  623.74   24.90 
   5  -3   1  664.23   29.20 
   5  -3   1  605.34   24.60 
  -5  -3  -1  619.74   26.20 
  -5  -3  -1  648.04   30.30 
   5  -3   1  637.04   26.30 
   5  -3   1  622.84   27.60 
   5  -3   1  636.44   27.90 
   5  -3   1  632.84   29.20 
   5  -3   1  661.83   32.10 
  -5  -3  -1  636.24   29.10 
  -5  -3  -1  623.04   30.60 
   5  -3   1  615.54   29.20 
  -5  -3  -1  626.94   29.50 
  -5   3  -1  614.94   28.80 
  -5   3  -1  669.63   30.10 
  -5   3  -1  639.04   27.90 
   5   3   1  643.84   30.90 
   5   3   1  603.14   30.80 
   5   3   1  612.54   30.40 
   5   3   1  641.34   31.40 
  -5   3  -1  625.34   27.90 
   5   3   1  635.04   30.30 
  -5   3  -1  615.54   29.20 
  -5   3  -1  616.24   24.00 
  -5   3  -1  621.64   23.40 
   5   3   1  632.74   28.10 
  -5   3  -1  644.44   29.10 
   5   3   1  639.44   29.90 
  -5   3  -1  634.94   24.10 
  -5   3  -1  622.14   30.90 
   5   3   1  650.73   29.60 
  -5   3  -1  651.63   27.30 
   5   3   1  588.34   30.80 
  -5   3  -1  622.74   22.40 
   5   3   1  592.44   30.10 
  -5   3  -1  649.43   31.80 
   5   3   1  628.44   31.80 
  -5   3  -1  629.94   21.90 
  -5   3  -1  641.34   29.80 
   5   3   1  644.84   27.00 
  -5   3  -1  698.53   33.20 
   5   3   1  599.24   29.50 
   5   3   1  656.53   31.30 
  -5   3  -1  613.94   24.70 
  -5   3  -1  580.14   29.90 
  -5   3  -1  625.84   23.30 
   6  -3   1  455.85   24.10 
  -6  -3  -1  410.56   24.50 
  -6  -3  -1  466.15   26.70 
  -6  -3  -1  453.35   25.10 
   6  -3   1  430.26   26.90 
  -6  -3  -1  489.15   25.50 
   6  -3   1  460.55   23.20 
  -6  -3  -1  477.55   25.70 
  -6  -3  -1  430.96   24.60 
   6  -3   1  443.76   21.30 
  -6  -3  -1  440.66   22.30 
   6  -3   1  475.95   25.80 
  -6  -3  -1  429.46   24.80 
   6  -3   1  490.65   28.50 
  -6  -3  -1  479.35   26.70 
   6  -3   1  447.96   26.70 
  -6  -3  -1  440.66   24.20 
   6  -3   1  428.76   25.00 
   6  -3   1  467.35   23.90 
   6  -3   1  428.26   20.90 
  -6  -3  -1  425.26   22.50 
  -6  -3  -1  445.16   27.90 
   6  -3   1  421.46   22.10 
   6  -3   1  480.95   28.10 
  -6  -3  -1  425.76   23.40 
  -6  -3  -1  451.15   27.20 
  -6  -3  -1  417.26   26.70 
   6  -3   1  467.55   25.80 
  -6  -3  -1  455.95   26.70 
  -6  -3  -1  459.15   25.90 
   6   3   1  437.76   25.20 
  -6   3  -1  429.46   21.00 
  -6   3  -1  412.86   25.00 
   6   3   1  474.05   27.60 
   6   3   1  464.95   26.80 
   6   3   1  446.16   27.00 
  -6   3  -1  455.55   25.40 
   6   3   1  477.75   27.10 
  -6   3  -1  488.95   24.70 
   6   3   1  450.95   23.00 
   6   3   1  444.16   24.10 
   6   3   1  432.46   26.80 
   6   3   1  464.55   27.10 
  -6   3  -1  491.15   24.20 
  -6   3  -1  452.95   27.60 
  -6   3  -1  459.05   16.30 
  -6   3  -1  451.15   23.50 
   6   3   1  428.06   25.30 
   6   3   1  471.35   27.20 
   6   3   1  477.55   27.50 
  -6   3  -1  442.26   19.60 
  -6   3  -1  415.06   24.50 
  -6   3  -1  433.86   26.90 
  -6   3  -1  445.56   25.30 
  -6   3  -1  405.16   23.40 
  -6   3  -1  416.26   25.60 
   6   3   1  477.25   26.60 
   6   3   1  439.16   25.30 
   7  -3   1   41.30    9.00 
  -7  -3  -1   40.70    9.60 
  -7  -3  -1   48.20    8.90 
   7  -3   1   42.10   10.50 
  -7  -3  -1   52.29   10.50 
   7  -3   1   52.49   10.60 
  -7  -3  -1   38.70    7.50 
  -7  -3  -1   61.19   12.00 
  -7  -3  -1   38.60    9.10 
   7  -3   1   57.29    9.60 
  -7  -3  -1   42.60   10.10 
   7  -3   1   44.50    8.50 
   7  -3   1   57.79   10.70 
  -7  -3  -1   48.40   11.20 
   7  -3   1   59.19    9.00 
  -7  -3  -1   45.60    9.90 
  -7  -3  -1   44.20   11.30 
  -7  -3  -1   53.39    9.10 
   7  -3   1   43.00    7.20 
   7  -3   1   43.50    9.50 
  -7  -3  -1   55.69   10.40 
   7  -3   1   35.70   10.10 
  -7  -3  -1   44.50   10.70 
  -7  -3  -1   44.90    9.90 
  -7  -3  -1   42.80    9.10 
  -7  -3  -1   45.90    9.60 
  -7  -3  -1   39.10   10.50 
   7  -3   1   34.90    9.40 
  -7  -3  -1   61.19   10.90 
   7  -3   1   58.19   12.50 
  -7  -3  -1   37.90    9.90 
   7  -3   1   49.20    8.90 
  -7  -3  -1   32.40    8.10 
   7  -3   1   32.50    8.70 
  -7   3  -1   45.10    9.80 
  -7   3  -1   43.20    7.90 
  -7   3  -1   42.90    9.90 
   7   3   1   49.00   10.30 
  -7   3  -1   52.19   10.30 
   7   3   1   41.70    8.90 
  -7   3  -1   60.09    7.80 
   7   3   1   49.20    9.80 
   7   3   1   66.79   12.50 
   7   3   1   55.19    9.50 
  -7   3  -1   53.49   11.80 
  -7   3  -1   47.10    9.80 
   7   3   1   49.00   10.90 
   7   3   1   55.09   11.50 
  -7   3  -1   37.20   10.20 
   7   3   1   56.49   11.70 
  -7   3  -1   54.19   11.00 
   7   3   1   49.40   11.20 
   7   3   1   39.00    9.40 
  -7   3  -1   51.09   10.10 
   7   3   1   64.99   12.30 
  -7   3  -1   50.29    9.10 
   7   3   1   50.39   11.00 
   7   3   1   63.79   12.00 
  -7   3  -1   36.20    9.40 
   7   3   1   59.99   11.40 
  -7   3  -1   36.60    8.70 
  -8  -3  -1   60.19   13.80 
   8  -3   1   69.49   10.80 
  -8  -3  -1   69.79   12.60 
  -8  -3  -1   65.69   11.40 
   8  -3   1   54.69   13.00 
  -8  -3  -1   57.79   11.20 
  -8  -3  -1   56.59   11.50 
   8  -3   1   47.40   10.80 
  -8  -3  -1   52.39   10.90 
  -8  -3  -1   66.99   13.80 
  -8  -3  -1   60.19   11.00 
  -8  -3  -1   45.60   11.70 
  -8  -3  -1   61.39   12.50 
   8  -3   1   55.19   10.40 
   8  -3   1   68.79   13.00 
   8  -3   1   61.99   11.80 
  -8  -3  -1   74.79   15.20 
   8  -3   1   74.69   15.30 
  -8  -3  -1   54.69   11.70 
  -8  -3  -1   55.29   13.10 
   8  -3   1   66.69   11.40 
  -8  -3  -1   50.49   11.90 
   8  -3   1   60.09   11.70 
  -8  -3  -1   72.59   12.50 
   8  -3   1   56.39   12.90 
  -8  -3  -1   49.80   11.60 
  -8  -3  -1   53.39   12.70 
   8  -3   1   56.59   12.20 
  -8  -3  -1   51.49   12.30 
   8   3   1   63.69   13.00 
  -8   3  -1   90.19   13.30 
   8   3   1   71.79   13.30 
   8   3   1   41.90   10.50 
   8   3   1   55.99   12.50 
   8   3   1   64.19   13.20 
  -8   3  -1   66.59   14.40 
  -8   3  -1   85.79   15.80 
  -8   3  -1   72.09   12.90 
   8   3   1   52.79   12.30 
  -8   3  -1   70.49   13.20 
   8   3   1   58.79   11.80 
  -8   3  -1   63.89   13.00 
   8   3   1   69.89   12.00 
  -8   3  -1   61.29   11.50 
   8   3   1   67.39   13.10 
  -8   3  -1   65.49   12.60 
   8   3   1   62.49   13.60 
  -8   3  -1   50.89   10.80 
  -8   3  -1   75.89   14.20 
   8   3   1   58.89   13.10 
   8   3   1   49.00   12.00 
   8   3   1   57.69   10.90 
   8   3   1   60.39   13.20 
   9  -3   1   20.20    7.90 
  -9  -3  -1   18.70    9.10 
   9  -3   1   11.00    7.20 
  -9  -3  -1   17.40    8.70 
  -9  -3  -1    7.50    6.70 
  -9  -3  -1   24.70    8.30 
  -9  -3  -1   20.60    7.70 
   9  -3   1   11.00    7.90 
   9  -3   1   16.20    9.00 
  -9  -3  -1   28.20    9.30 
   9  -3   1   36.60   10.60 
  -9  -3  -1   10.90    7.20 
  -9  -3  -1   25.10    9.80 
  -9  -3  -1   22.20   11.20 
  -9  -3  -1   20.80    8.90 
  -9  -3  -1   37.20   10.50 
   9  -3   1   23.20    9.30 
  -9  -3  -1   21.40   10.00 
   9  -3   1   17.60    7.30 
  -9  -3  -1   21.20    8.70 
   9  -3   1   24.30    9.20 
  -9  -3  -1   12.40    7.00 
   9  -3   1   15.20    8.00 
   9  -3   1    2.90    7.30 
  -9  -3  -1   13.20    8.20 
  -9  -3  -1   18.00    9.00 
  -9  -3  -1   23.80    9.80 
   9   3   1   19.90    9.20 
   9   3   1   10.60    7.70 
   9   3   1   27.10   10.90 
   9   3   1   38.90   10.80 
  -9   3  -1   12.60    7.50 
   9   3   1   32.00   11.30 
   9   3   1   20.50    9.40 
   9   3   1   26.30   10.70 
   9   3   1   16.70    7.80 
  -9   3  -1   25.40   10.00 
  -9   3  -1   11.30    7.50 
  -9   3  -1   22.30    9.20 
   9   3   1   14.40    8.20 
   9   3   1   23.20    8.60 
  -9   3  -1   11.20    7.80 
  -9   3  -1    7.20    6.50 
   9   3   1   18.30    7.90 
  -9   3  -1   17.70    8.10 
   9   3   1   11.00    8.10 
   9   3   1   36.70   11.30 
   9   3   1   14.40    8.30 
  -9   3  -1   19.70    9.00 
  -9  -4   1   79.29   16.90 
   9  -4  -1   82.99   17.10 
  -9  -4   1   95.89   16.80 
  -9  -4   1   81.59   16.40 
   9  -4  -1  104.09   17.40 
  -9  -4   1  100.39   15.50 
  -9  -4   1   73.69   14.50 
  -9  -4   1   85.49   16.30 
   9  -4  -1  112.29   17.10 
  -9  -4   1   87.49   16.80 
   9  -4  -1   86.39   17.20 
  -9  -4   1   69.39   14.50 
   9  -4  -1   91.49   15.50 
  -9  -4   1  116.09   19.60 
  -9  -4   1  124.59   19.80 
  -9  -4   1   76.19   15.40 
   9  -4  -1   96.69   17.10 
  -9  -4   1   99.19   14.20 
  -9  -4   1  101.89   16.70 
   9  -4  -1   79.39   16.40 
  -9  -4   1   91.69   17.50 
  -9  -4   1   82.29   17.60 
  -9  -4   1   81.39   14.90 
  -9  -4   1   82.99   17.80 
   9   4  -1   83.79   16.80 
  -9   4   1   89.39   16.80 
   9   4  -1   74.59   15.70 
   9   4  -1  108.29   17.80 
   9   4  -1  102.99   18.10 
   9   4  -1   84.19   16.40 
   9   4  -1   72.59   13.50 
  -9   4   1   86.29   15.40 
   9   4  -1   88.49   15.20 
  -9   4   1  108.09   17.60 
   9   4  -1  140.79   19.80 
   9   4  -1   88.09   14.80 
   9   4  -1  122.09   19.40 
  -9   4   1   88.59   16.80 
   9   4  -1   73.09   16.40 
   9   4  -1  106.29   19.10 
  -9   4   1   93.99   18.20 
   9   4  -1  111.49   18.20 
   9   4  -1  114.69   19.60 
  -9   4   1   59.69   13.60 
   8  -4  -1  456.85   31.80 
  -8  -4   1  527.85   30.60 
  -8  -4   1  514.75   30.30 
  -8  -4   1  469.65   32.50 
   8  -4  -1  453.05   30.80 
   8  -4  -1  505.65   30.40 
  -8  -4   1  436.86   27.50 
   8  -4  -1  470.35   29.90 
  -8  -4   1  510.85   34.00 
   8  -4  -1  460.15   31.50 
  -8  -4   1  468.45   29.60 
   8  -4  -1  486.05   28.50 
  -8  -4   1  482.15   29.90 
  -8  -4   1  462.75   30.00 
  -8  -4   1  448.76   30.50 
  -8  -4   1  455.95   31.30 
  -8  -4   1  464.55   30.60 
  -8  -4   1  494.55   26.50 
  -8  -4   1  508.85   34.00 
  -8  -4   1  468.15   30.90 
   8  -4  -1  427.96   30.80 
  -8  -4   1  476.45   28.70 
   8  -4  -1  486.55   29.60 
  -8  -4   1  433.96   30.70 
  -8  -4   1  477.65   29.80 
   8  -4  -1  502.05   28.50 
  -8  -4   1  478.95   33.60 
  -8   4   1  461.35   30.80 
   8   4  -1  440.36   30.70 
   8   4  -1  451.75   31.60 
   8   4  -1  426.46   30.60 
  -8   4   1  474.95   30.00 
   8   4  -1  447.06   27.20 
   8   4  -1  514.65   33.40 
   8   4  -1  512.95   31.10 
   8   4  -1  476.75   30.20 
  -8   4   1  452.85   31.60 
   8   4  -1  532.95   34.00 
  -8   4   1  470.55   30.70 
   8   4  -1  442.26   28.70 
   8   4  -1  507.55   32.00 
  -8   4   1  458.75   29.60 
   8   4  -1  466.45   29.70 
  -8   4   1  466.75   28.60 
   8   4  -1  472.65   32.30 
   8   4  -1  479.45   30.10 
   8   4  -1  443.76   31.40 
  -8   4   1  447.26   28.00 
   7  -4  -1   72.99   11.20 
   7  -4  -1   53.19   11.70 
  -7  -4   1   58.69   12.70 
  -7  -4   1   73.89   13.50 
  -7  -4   1   63.99   10.10 
  -7  -4   1   49.30   10.20 
   7  -4  -1   60.09   12.40 
   7  -4  -1   47.40   10.60 
   7  -4  -1   44.50   10.40 
  -7  -4   1   53.99   10.80 
   7  -4  -1   59.69   10.80 
   7  -4  -1   64.89    9.50 
   7  -4  -1   57.39   11.10 
  -7  -4   1   71.99   12.70 
   7  -4  -1   71.19   10.70 
  -7  -4   1   33.70   10.30 
  -7  -4   1   51.19    9.40 
  -7  -4   1   66.79   12.80 
  -7  -4   1   66.89   11.80 
  -7  -4   1   61.19   12.00 
   7  -4  -1   47.20   11.20 
  -7  -4   1   75.29   12.10 
   7  -4  -1   46.20    9.80 
  -7  -4   1   65.99   12.20 
  -7  -4   1   70.19    9.90 
  -7  -4   1   54.29   11.40 
  -7  -4   1   56.99   11.30 
  -7  -4   1   36.10    8.40 
  -7  -4   1   52.29   12.00 
  -7   4   1   62.09   12.00 
  -7   4   1   63.39   10.20 
   7   4  -1   58.49   11.40 
   7   4  -1   48.30   11.20 
  -7   4   1   65.09   11.00 
   7   4  -1   61.69   12.10 
   7   4  -1   52.59   10.90 
  -7   4   1   57.09   10.70 
  -7   4   1   64.69   12.30 
  -7   4   1   52.49   10.60 
   7   4  -1   54.29   11.20 
   7   4  -1   54.99   10.00 
   7   4  -1   34.90    9.90 
  -7   4   1   44.20    9.20 
   7   4  -1   54.49   10.60 
  -7   4   1   30.70    8.50 
   7   4  -1   37.90   10.20 
   7   4  -1   60.39   11.40 
   7   4  -1   47.10   11.10 
  -7   4   1   50.99   10.40 
   7   4  -1   44.10   10.50 
   7   4  -1   55.69   11.70 
  -7   4   1   60.99   12.90 
   7   4  -1   62.59   12.90 
   6  -4  -1  519.15   27.90 
  -6  -4   1  496.85   28.00 
   6  -4  -1  515.65   23.80 
  -6  -4   1  526.65   26.10 
   6  -4  -1  521.85   21.60 
  -6  -4   1  530.35   26.10 
   6  -4  -1  513.25   26.20 
   6  -4  -1  539.45   30.50 
  -6  -4   1  478.15   27.80 
  -6  -4   1  542.65   26.80 
  -6  -4   1  524.65   24.00 
  -6  -4   1  527.45   29.20 
   6  -4  -1  501.95   23.40 
   6  -4  -1  524.85   27.40 
   6  -4  -1  511.95   25.20 
  -6  -4   1  485.45   28.60 
  -6  -4   1  492.75   28.00 
  -6  -4   1  529.75   28.40 
   6  -4  -1  534.35   30.40 
  -6  -4   1  477.15   28.90 
   6  -4  -1  536.35   21.60 
  -6  -4   1  479.45   30.10 
  -6  -4   1  528.95   27.40 
   6  -4  -1  488.95   29.00 
  -6  -4   1  559.14   31.30 
  -6  -4   1  475.05   28.60 
  -6  -4   1  517.95   28.10 
  -6  -4   1  501.05   29.90 
  -6  -4   1  525.25   27.90 
   6  -4  -1  504.85   27.60 
   6  -4  -1  531.15   31.10 
  -6   4   1  522.95   27.30 
  -6   4   1  534.75   24.40 
  -6   4   1  568.94   28.70 
   6   4  -1  579.04   28.60 
  -6   4   1  528.85   22.40 
   6   4  -1  526.35   30.10 
   6   4  -1  525.35   29.00 
   6   4  -1  480.05   29.60 
  -6   4   1  518.85   26.50 
   6   4  -1  561.74   29.70 
   6   4  -1  531.15   30.10 
   6   4  -1  559.94   31.50 
  -6   4   1  555.24   24.90 
  -6   4   1  471.75   27.80 
   6   4  -1  538.35   29.30 
  -6   4   1  527.25   30.70 
   6   4  -1  487.05   26.90 
  -6   4   1  505.45   27.10 
  -6   4   1  510.25   29.10 
   6   4  -1  527.65   30.60 
   6   4  -1  486.05   28.30 
  -6   4   1  536.65   26.20 
   6   4  -1  538.35   29.50 
  -6   4   1  475.95   27.20 
   6   4  -1  477.25   28.70 
   6   4  -1  541.15   26.20 
   5  -4  -1  214.88   13.40 
  -5  -4   1  216.88   14.20 
   5  -4  -1  190.38   14.60 
  -5  -4   1  201.58   13.90 
   5  -4  -1  188.28    9.80 
   5  -4  -1  201.28   11.80 
  -5  -4   1  174.18   14.90 
   5  -4  -1  204.28   16.80 
   5  -4  -1  197.98   10.30 
  -5  -4   1  203.18   15.30 
  -5  -4   1  215.98   14.60 
  -5  -4   1  199.48   14.40 
   5  -4  -1  194.48   15.80 
  -5  -4   1  220.18   16.40 
  -5  -4   1  221.78   14.70 
   5  -4  -1  207.08   14.90 
  -5  -4   1  212.68   17.00 
  -5  -4   1  203.88   12.10 
   5  -4  -1  207.48   15.80 
  -5  -4   1  243.88   17.40 
   5  -4  -1  191.58   11.50 
   5  -4  -1  223.48   17.50 
   5  -4  -1  259.47   19.20 
   5  -4  -1  214.08   14.80 
   5  -4  -1  208.18   13.20 
  -5  -4   1  179.28   18.80 
   5  -4  -1  196.88   11.50 
  -5  -4   1  199.88   16.30 
   5  -4  -1  191.88    8.70 
  -5  -4   1  213.98   16.60 
  -5  -4   1  198.78   15.70 
  -5  -4   1  168.48   14.10 
  -5  -4   1  194.38   14.70 
   5  -4  -1  198.28   12.70 
  -5  -4   1  211.28   17.10 
  -5  -4   1  205.48   15.40 
  -5   4   1  197.68   14.50 
  -5   4   1  221.78   16.10 
   5   4  -1  163.98   13.50 
   5   4  -1  218.78   16.70 
  -5   4   1  199.08   13.30 
   5   4  -1  182.88   16.70 
   5   4  -1  199.98   16.80 
  -5   4   1  172.48   13.40 
  -5   4   1  200.58   12.90 
   5   4  -1  207.88   17.20 
   5   4  -1  204.28   13.60 
  -5   4   1  207.88   10.80 
  -5   4   1  203.18   14.60 
   5   4  -1  192.18   15.80 
  -5   4   1  196.08   15.60 
  -5   4   1  165.08   14.20 
  -5   4   1  209.88   12.30 
   5   4  -1  214.78   16.70 
  -5   4   1  189.98   15.00 
   5   4  -1  192.58   15.50 
   5   4  -1  229.28   17.90 
   5   4  -1  190.38   15.20 
  -5   4   1  204.88   16.90 
   5   4  -1  199.78   15.10 
   5   4  -1  204.18   16.00 
  -5   4   1  223.48   15.60 
   4  -4  -1  415.16   18.60 
  -4  -4   1  427.16   22.80 
  -4  -4   1  464.05   24.50 
  -4  -4   1  415.46   19.80 
   4  -4  -1  451.85   23.00 
  -4  -4   1  435.86   24.20 
  -4  -4   1  432.76   22.70 
  -4  -4   1  437.16   17.70 
   4  -4  -1  417.76   17.50 
  -4  -4   1  453.55   23.60 
  -4  -4   1  453.25   23.40 
   4  -4  -1  444.16   25.80 
  -4  -4   1  422.56   21.80 
  -4  -4   1  430.36   22.00 
  -4  -4   1  399.36   22.90 
   4  -4  -1  413.76   20.30 
   4  -4  -1  420.06   17.30 
   4  -4  -1  419.06   16.70 
  -4  -4   1  434.56   20.20 
  -4  -4   1  441.06   20.60 
   4  -4  -1  422.06   24.20 
  -4  -4   1  440.86   24.80 
   4  -4  -1  422.56   14.70 
   4  -4  -1  430.46   18.80 
   4  -4  -1  418.36   24.70 
   4  -4  -1  445.26   19.60 
   4  -4  -1  444.26   22.10 
   4  -4  -1  440.46   15.30 
   4  -4  -1  445.36   20.80 
  -4  -4   1  397.26   21.20 
   4  -4  -1  470.25   24.40 
  -4  -4   1  448.96   22.70 
  -4  -4   1  410.26   22.80 
  -4  -4   1  404.06   21.10 
  -4  -4   1  393.76   22.00 
   4  -4  -1  408.56   22.20 
   4   4  -1  426.76   19.60 
  -4   4   1  437.16   17.70 
   4   4  -1  399.36   24.00 
   4   4  -1  424.76   22.60 
   4   4  -1  417.46   19.90 
   4   4  -1  431.66   20.60 
   4   4  -1  462.25   25.10 
   4   4  -1  424.16   24.10 
  -4   4   1  419.46   24.30 
   4   4  -1  417.56   23.10 
  -4   4   1  438.76   19.30 
  -4   4   1  430.16   22.10 
  -4   4   1  395.96   21.70 
  -4   4   1  461.35   21.30 
   4   4  -1  445.56   23.50 
   4   4  -1  420.66   17.80 
   4   4  -1  440.66   24.10 
  -4   4   1  431.76   22.40 
  -4   4   1  421.86   22.40 
  -4   4   1  438.66   21.70 
  -4   4   1  444.96   20.00 
   4   4  -1  439.76   23.50 
  -4   4   1  445.46   17.30 
   4   4  -1  370.96   21.10 
  -4   4   1  440.76   15.80 
  -4   4   1  397.26   20.90 
  -4   4   1  411.86   20.00 
   4   4  -1  470.55   22.90 
   3  -4  -1   62.29    8.10 
   3  -4  -1   62.49    6.30 
  -3  -4   1   58.49    6.60 
  -3  -4   1   70.99    9.20 
   3  -4  -1   59.39    9.90 
   3  -4  -1   65.69    5.40 
  -3  -4   1   51.89    7.90 
  -3  -4   1   38.60    6.50 
  -3  -4   1   56.99    8.30 
   3  -4  -1   61.19    9.80 
  -3  -4   1   51.89    7.60 
   3  -4  -1   51.99    5.40 
   3  -4  -1   53.89    7.00 
   3  -4  -1   32.80    8.40 
  -3  -4   1   59.59    6.80 
   3  -4  -1   66.49    6.90 
   3  -4  -1   61.49    3.70 
  -3  -4   1   59.89    7.50 
   3  -4  -1   53.19    8.30 
   3  -4  -1   56.49    6.30 
   3  -4  -1   57.79    6.60 
   3  -4  -1   44.00    7.40 
   3  -4  -1   51.79    6.50 
  -3  -4   1   60.09    4.40 
   3  -4  -1   74.29    7.30 
  -3  -4   1   45.50    6.50 
  -3  -4   1   78.59   11.00 
  -3  -4   1   58.99    8.30 
  -3  -4   1   57.79    8.40 
  -3  -4   1   62.79    6.70 
  -3  -4   1   53.19    8.70 
   3  -4  -1   50.59    9.00 
  -3  -4   1   48.80    7.90 
   3  -4  -1   64.39    7.00 
  -3  -4   1   42.60    5.60 
  -3  -4   1   57.99    8.70 
  -3  -4   1   47.50    8.10 
  -3   4   1   56.39    6.70 
  -3   4   1   53.99    5.80 
  -3   4   1   55.79    7.90 
  -3   4   1   52.49    9.20 
  -3   4   1   65.29    6.90 
   3   4  -1   56.29    6.60 
  -3   4   1   56.79    7.20 
   3   4  -1   56.69    6.50 
   3   4  -1   46.20    7.50 
   3   4  -1   66.99    9.70 
  -3   4   1   56.69    8.20 
  -3   4   1   54.69    8.10 
  -3   4   1   63.49    4.50 
   3   4  -1   69.59   10.60 
   3   4  -1   55.19    7.60 
   3   4  -1   68.39   10.60 
   3   4  -1   53.09    6.60 
  -3   4   1   54.39    3.30 
  -3   4   1   63.19    7.70 
   3   4  -1   50.59    6.80 
   3   4  -1   61.29    9.10 
   3   4  -1   52.69    8.60 
   3   4  -1   57.29    4.50 
   3   4  -1   50.69    7.80 
  -3   4   1   66.99    7.90 
   3   4  -1   60.99    8.50 
  -3   4   1   60.49    7.50 
   3   4  -1   52.49    5.70 
  -3   4   1   50.39    8.00 
   3   4  -1   48.80    8.60 
  -2  -4   1  162.88    8.30 
  -2  -4   1  146.49    8.80 
   2  -4  -1  153.88    9.10 
   2  -4  -1  169.38    8.40 
   2  -4  -1  168.98   10.70 
   2  -4  -1  163.58    9.00 
  -2  -4   1  165.18   10.80 
  -2  -4   1  152.08   11.10 
   2  -4  -1  152.88    6.30 
   2  -4  -1  182.18   13.40 
   2  -4  -1  174.58    9.50 
   2  -4  -1  146.49    8.10 
   2  -4  -1  121.19   13.80 
   2  -4  -1  162.08    7.80 
   2  -4  -1  148.59   11.60 
   2  -4  -1  159.38    7.30 
   2  -4  -1  157.98    6.90 
   2  -4  -1  161.48    9.30 
  -2  -4   1  148.79    9.80 
  -2  -4   1  151.08   11.40 
  -2  -4   1  164.58    9.20 
   2  -4  -1  151.38    9.80 
   2  -4  -1  160.88    9.90 
   2  -4  -1  160.58    9.10 
  -2  -4   1  152.98    9.60 
   2  -4  -1  183.78    9.80 
  -2  -4   1  134.79   10.70 
   2  -4  -1  168.48   10.50 
   2  -4  -1  160.48   11.70 
   2  -4  -1  154.98    7.40 
  -2  -4   1  175.58   12.10 
  -2  -4   1  148.99    8.70 
   2  -4  -1  168.58    7.30 
  -2  -4   1  179.48   11.80 
   2  -4  -1  193.78   14.00 
   2  -4  -1  174.48   12.60 
   2  -4  -1  164.48    8.00 
  -2  -4   1  161.28   11.20 
  -2  -4   1  158.58   10.00 
   2  -4  -1  158.98    8.90 
  -2  -4   1  125.99   13.60 
   2  -4  -1  163.28    8.40 
  -2  -4   1  152.88    8.30 
  -2  -4   1  140.69   11.30 
   2  -4  -1  158.38   10.50 
  -2  -4   1  137.89   10.20 
  -2  -4   1  169.68   13.50 
   2  -4  -1  151.48    8.50 
   2   4  -1  157.68   11.80 
   2   4  -1  160.88    9.70 
  -2   4   1  146.19    9.00 
  -2   4   1  197.08   12.50 
   2   4  -1  158.98   11.20 
  -2   4   1  165.28   10.60 
   2   4  -1  169.78    9.10 
   2   4  -1  139.89    9.20 
   2   4  -1  141.59    8.50 
   2   4  -1  155.48   12.70 
   2   4  -1  140.89   11.40 
  -2   4   1  147.49   11.00 
   2   4  -1  151.88   12.40 
  -2   4   1  153.88   13.10 
  -2   4   1  146.69   16.20 
  -2   4   1  155.28    8.50 
   2   4  -1  140.39    7.90 
   2   4  -1  164.88    6.30 
   2   4  -1  151.08   12.00 
   2   4  -1  154.08   12.40 
  -2   4   1  150.48   15.90 
  -2   4   1  160.28    7.70 
  -2   4   1  171.28    9.00 
   2   4  -1  159.28    9.10 
  -2   4   1  153.58   11.40 
   2   4  -1  138.59    7.90 
   2   4  -1  135.39   13.50 
   2   4  -1  151.68   12.20 
   2   4  -1  154.18   10.40 
   2   4  -1  160.88    6.50 
  -2   4   1  148.89    9.50 
   2   4  -1  155.48    9.40 
  -2   4   1  156.28    8.10 
  -2   4   1  157.38   10.70 
  -2   4   1  157.08    9.40 
   2   4  -1  148.69    9.20 
   2   4  -1  183.58   11.70 
   2   4  -1  149.49    9.00 
  -1  -4   1   21.30    4.10 
   1  -4  -1   26.10    3.20 
   1  -4  -1   20.80    3.30 
   1  -4  -1    8.30    4.50 
   1  -4  -1   17.40    1.60 
   1  -4  -1   15.30    1.50 
   1  -4  -1   18.00    3.40 
   1  -4  -1   22.10    5.20 
   1  -4  -1   12.10    2.90 
  -1  -4   1   16.70    4.40 
   1  -4  -1   12.90    3.60 
   1  -4  -1   17.80    2.80 
   1  -4  -1   12.10    3.80 
   1  -4  -1   13.80    1.90 
   1  -4  -1   25.50    5.80 
  -1  -4   1   10.50    3.00 
  -1  -4   1   17.50    2.80 
  -1  -4   1   18.00    5.50 
   1  -4  -1   17.60    5.50 
  -1  -4   1    7.00    3.40 
  -1  -4   1   15.90    4.40 
  -1  -4   1   13.60    3.30 
  -1  -4   1   13.40    2.80 
  -1  -4   1    9.40    3.30 
  -1  -4   1   13.30    3.80 
  -1  -4   1   11.10    4.20 
   1  -4  -1   18.50    1.90 
  -1  -4   1   11.50    3.70 
   1  -4  -1   14.10    1.30 
   1  -4  -1   17.50    3.30 
  -1  -4   1   22.00    6.40 
   1  -4  -1   23.00    4.80 
   1  -4  -1   17.70    2.60 
  -1  -4   1   16.10    2.90 
   1  -4  -1   12.30    2.50 
   1  -4  -1   10.80    3.70 
   1  -4  -1   13.90    2.30 
   1  -4  -1   17.40    4.50 
   1  -4  -1   12.10    1.80 
  -1  -4   1   12.90    2.30 
   1  -4  -1   13.50    3.90 
   1  -4  -1   12.90    3.50 
  -1  -4   1   16.00    4.40 
  -1  -4   1   14.60    3.00 
   1  -4  -1   13.60    2.50 
  -1  -4   1   13.90    3.50 
  -1  -4   1   13.80    3.30 
   1  -4  -1   10.80    5.20 
  -1   4   1   13.30    5.50 
   1   4  -1   14.10    3.30 
  -1   4   1    7.50    1.70 
   1   4  -1   13.70    2.30 
   1   4  -1   26.20    5.90 
   1   4  -1   14.20    4.60 
  -1   4   1   10.30    2.50 
   1   4  -1   12.90    4.60 
   1   4  -1   15.30    1.90 
   1   4  -1   23.90    4.20 
   1   4  -1   15.80    5.60 
  -1   4   1   14.50    4.60 
   1   4  -1   19.20    4.30 
   1   4  -1   13.50    1.70 
   1   4  -1   19.70    5.10 
  -1   4   1   13.30    4.10 
   1   4  -1    8.60    4.20 
   1   4  -1   14.60    4.30 
  -1   4   1   16.10    2.90 
  -1   4   1   17.70    4.30 
   1   4  -1    8.50    3.70 
  -1   4   1   14.30    2.50 
   1   4  -1   13.30    4.50 
   1   4  -1   12.50    2.50 
   1   4  -1   11.30    4.40 
  -1   4   1    9.80    3.40 
   1   4  -1   15.60    5.60 
  -1   4   1   10.20    4.60 
   1   4  -1   13.00    2.80 
  -1   4   1   10.40    4.70 
  -1   4   1   15.50    2.90 
  -1   4   1    7.70    3.50 
  -1   4   1   16.50    3.40 
   1   4  -1   15.00    4.00 
   1   4  -1   18.80    5.30 
  -1   4   1   31.20    6.30 
  -1   4   1   16.70    3.80 
   0  -4   1  277.47   16.60 
   0  -4  -1  296.47   12.00 
   0  -4   1  305.07   11.30 
   0  -4   1  296.77   12.70 
   0  -4   1  298.57   15.50 
   0  -4  -1  310.37   17.90 
   0  -4  -1  288.27   15.10 
   0  -4  -1  293.87   14.20 
   0  -4  -1  301.87   14.20 
   0  -4   1  338.97   17.50 
   0  -4   1  296.27   10.40 
   0  -4  -1  277.37   11.10 
   0  -4   1  315.17   16.40 
   0  -4   1  354.66   19.40 
   0  -4  -1  268.27   17.80 
   0  -4  -1  311.47   15.40 
   0  -4   1  267.07   17.40 
   0  -4  -1  298.17   13.80 
   0  -4  -1  301.07   11.20 
   0  -4   1  277.57   14.00 
   0  -4  -1  317.47   16.00 
   0  -4   1  299.77   16.20 
   0  -4   1  280.17   14.90 
   0  -4  -1  289.47   12.60 
   0  -4  -1  302.07   12.00 
   0  -4   1  291.67   11.60 
   0  -4   1  283.57   19.40 
   0  -4   1  294.57   12.40 
   0  -4  -1  288.17   10.70 
   0  -4  -1  310.47   12.50 
   0  -4   1  305.57   13.00 
   0  -4   1  286.17   16.90 
   0  -4  -1  293.07    9.90 
   0  -4   1  267.07   19.20 
   0  -4   1  304.27   17.00 
   0  -4  -1  301.47   10.20 
   0  -4  -1  327.27   15.80 
   0  -4   1  264.77   15.40 
   0  -4  -1  290.47   17.90 
   0  -4   1  299.57   16.20 
   0  -4  -1  316.37   12.80 
   0  -4   1  298.07   14.20 
   0  -4  -1  301.57   12.00 
   0  -4  -1  284.27   10.60 
   0  -4   1  286.97   13.00 
   0   4   1  300.37   16.10 
   0   4   1  282.97   15.80 
   0   4  -1  302.27   21.60 
   0   4   1  298.07   13.60 
   0   4  -1  299.17   10.30 
   0   4  -1  286.27   16.90 
   0   4  -1  327.37   22.50 
   0   4   1  280.07   15.20 
   0   4   1  303.87   20.00 
   0   4  -1  326.67   17.60 
   0   4  -1  286.07   15.00 
   0   4   1  307.57   11.10 
   0   4  -1  304.27   11.60 
   0   4  -1  295.17   13.90 
   0   4  -1  314.17   17.30 
   0   4   1  283.97   15.80 
   0   4   1  289.77   12.70 
   0   4  -1  255.47   15.90 
   0   4   1  278.77   11.50 
   0   4   1  296.57   18.10 
   0   4  -1  301.27   15.60 
   0   4  -1  337.87   20.30 
   0   4  -1  286.27   13.70 
   0   4   1  314.57   16.30 
   0   4  -1  294.17   11.70 
   0   4   1  280.87   18.50 
   0   4  -1  295.17   16.10 
   0   4   1  293.37   16.40 
   0   4   1  274.77   17.70 
   0   4   1  297.37   14.20 
  -1  -4  -1  233.58   12.30 
  -1  -4  -1  244.48   10.80 
   1  -4   1  247.98   10.70 
   1  -4   1  257.57   16.40 
  -1  -4  -1  223.88   13.80 
   1  -4   1  262.17   11.30 
   1  -4   1  276.47   17.00 
   1  -4   1  255.37   11.50 
   1  -4   1  263.17   14.60 
  -1  -4  -1  255.87   12.50 
  -1  -4  -1  235.48   10.50 
   1  -4   1  253.67    9.00 
   1  -4   1  230.88   11.20 
   1  -4   1  274.77   16.40 
   1  -4   1  232.58   18.20 
  -1  -4  -1  255.37   11.30 
   1  -4   1  254.77   11.80 
   1  -4   1  286.17   16.30 
  -1  -4  -1  262.57    8.90 
  -1  -4  -1  250.77   11.70 
  -1  -4  -1  231.18   14.20 
   1  -4   1  260.57   13.10 
   1  -4   1  261.57   14.80 
   1  -4   1  270.17   13.90 
   1  -4   1  233.18   15.80 
  -1  -4  -1  229.78   15.30 
   1  -4   1  246.98   13.30 
  -1  -4  -1  261.37   13.70 
  -1  -4  -1  252.77   14.60 
  -1  -4  -1  254.67   14.20 
  -1  -4  -1  251.97    9.50 
   1  -4   1  240.78    9.90 
  -1  -4  -1  233.38    8.70 
  -1  -4  -1  242.58   16.00 
   1  -4   1  256.47   11.60 
  -1  -4  -1  245.68   13.90 
  -1  -4  -1  244.08   10.20 
  -1  -4  -1  259.67   13.00 
   1  -4   1  231.88   16.30 
   1  -4   1  240.68   18.90 
  -1  -4  -1  267.07   14.00 
  -1   4  -1  232.28   10.80 
   1   4   1  229.28   12.00 
  -1   4  -1  252.87   13.10 
   1   4   1  218.38   11.90 
  -1   4  -1  237.68   11.30 
   1   4   1  261.87   12.20 
   1   4   1  243.68   12.60 
   1   4   1  248.18   16.20 
  -1   4  -1  260.07   19.90 
   1   4   1  247.48   15.10 
   1   4   1  240.28   12.70 
  -1   4  -1  260.07    9.80 
  -1   4  -1  266.27   15.90 
   1   4   1  236.88   12.70 
   1   4   1  252.97   15.20 
  -1   4  -1  255.47   17.20 
   1   4   1  248.18   10.00 
   1   4   1  239.38   14.80 
   1   4   1  247.48   14.60 
   1   4   1  243.28   15.70 
   1   4   1  264.27   11.20 
  -1   4  -1  266.17   15.20 
  -1   4  -1  250.77   17.40 
  -1   4  -1  269.57   16.10 
   1   4   1  251.47   12.20 
  -1   4  -1  216.48   17.20 
   1   4   1  228.98   12.70 
  -1   4  -1  239.98    9.40 
   1   4   1  221.48   14.40 
  -1   4  -1  255.27   17.70 
  -1   4  -1  257.67   13.30 
  -1   4  -1  253.67   13.30 
  -1   4  -1  243.78    9.50 
  -1   4  -1  250.67    8.90 
   1   4   1  244.58   10.40 
  -1   4  -1  292.17   16.50 
   1   4   1  242.68    9.20 
   2  -4   1 1658.83   59.09 
  -2  -4  -1 1685.13   60.09 
  -2  -4  -1 1686.93   58.19 
   2  -4   1 1649.44   64.99 
   2  -4   1 1680.73   55.19 
   2  -4   1 1637.34   55.29 
   2  -4   1 1603.74   48.40 
   2  -4   1 1657.63   53.89 
   2  -4   1 1684.13   56.89 
   2  -4   1 1669.63   50.19 
   2  -4   1 1748.23   60.39 
  -2  -4  -1 1651.63   57.29 
   2  -4   1 1675.73   52.99 
  -2  -4  -1 1648.44   51.69 
  -2  -4  -1 1662.53   49.00 
   2  -4   1 1795.32   61.89 
  -2  -4  -1 1677.93   58.09 
  -2  -4  -1 1698.33   56.49 
  -2  -4  -1 1658.13   51.89 
  -2  -4  -1 1587.84   50.39 
  -2  -4  -1 1639.04   53.69 
   2  -4   1 1681.63   60.99 
  -2  -4  -1 1642.84   57.39 
  -2  -4  -1 1651.13   53.29 
   2  -4   1 1634.74   57.99 
   2  -4   1 1664.13   55.39 
   2  -4   1 1611.24   53.19 
  -2  -4  -1 1655.13   57.19 
   2  -4   1 1586.74   59.19 
  -2  -4  -1 1654.93   54.99 
   2  -4   1 1666.13   50.49 
  -2  -4  -1 1629.74   57.89 
  -2  -4  -1 1721.83   56.29 
   2  -4   1 1697.83   50.99 
  -2  -4  -1 1650.33   59.59 
   2  -4   1 1600.74   59.09 
  -2  -4  -1 1608.34   51.49 
   2  -4   1 1582.44   50.59 
   2  -4   1 1604.24   51.29 
  -2   4  -1 1661.63   58.79 
  -2   4  -1 1588.04   58.99 
   2   4   1 1671.33   53.99 
   2   4   1 1693.83   60.19 
   2   4   1 1649.63   59.09 
  -2   4  -1 1714.33   64.49 
   2   4   1 1607.84   53.89 
  -2   4  -1 1615.64   62.79 
  -2   4  -1 1681.03   53.89 
   2   4   1 1597.04   52.79 
   2   4   1 1664.03   58.99 
   2   4   1 1650.53   52.69 
   2   4   1 1676.13   52.49 
  -2   4  -1 1701.13   52.79 
   2   4   1 1626.04   55.09 
  -2   4  -1 1626.24   50.39 
   2   4   1 1624.84   51.19 
  -2   4  -1 1724.03   60.19 
  -2   4  -1 1674.03   52.49 
   2   4   1 1694.93   60.29 
  -2   4  -1 1646.64   61.49 
   2   4   1 1611.14   52.49 
   2   4   1 1739.43   56.89 
  -2   4  -1 1637.74   53.89 
   2   4   1 1657.83   58.09 
  -2   4  -1 1704.93   51.09 
   2   4   1 1753.52   57.09 
  -2   4  -1 1719.83   49.70 
  -2   4  -1 1681.03   56.19 
   2   4   1 1616.24   57.19 
   2   4   1 1709.03   52.39 
   2   4   1 1664.23   55.39 
  -2   4  -1 1601.34   57.49 
   3  -4   1  131.99    6.60 
   3  -4   1  122.39   14.20 
  -3  -4  -1  121.99    6.80 
   3  -4   1  129.29   13.50 
  -3  -4  -1  128.09   10.20 
  -3  -4  -1  105.39   12.30 
  -3  -4  -1  130.29    8.70 
   3  -4   1  151.58   17.30 
  -3  -4  -1  145.99   14.80 
   3  -4   1  191.78   15.70 
   3  -4   1  144.09    7.90 
   3  -4   1  127.89    8.60 
   3  -4   1  138.79    9.50 
   3  -4   1  132.09    5.20 
   3  -4   1  137.39    5.50 
   3  -4   1  123.79   11.00 
  -3  -4  -1  126.89   12.20 
  -3  -4  -1  116.19   11.70 
  -3  -4  -1  127.59   12.90 
  -3  -4  -1  159.08   12.10 
   3  -4   1  122.69   13.40 
  -3  -4  -1  116.79   11.80 
  -3  -4  -1  151.18   12.20 
  -3  -4  -1  145.89   12.30 
  -3  -4  -1  145.49    9.70 
   3  -4   1  121.89    9.90 
  -3  -4  -1  127.89    9.70 
  -3  -4  -1  131.99    8.50 
   3  -4   1  106.19   13.20 
  -3  -4  -1  132.29   13.20 
  -3  -4  -1  140.19   11.10 
  -3  -4  -1  126.29    8.40 
   3  -4   1  131.19    8.90 
   3   4   1  130.89    9.20 
   3   4   1  145.59   10.10 
  -3   4  -1  143.69    7.50 
   3   4   1  114.19   12.80 
  -3   4  -1  150.38   12.60 
  -3   4  -1  122.79    6.30 
  -3   4  -1  128.19    7.70 
  -3   4  -1  136.99    8.60 
  -3   4  -1  131.89   10.70 
   3   4   1  110.09   12.10 
   3   4   1  129.69   13.70 
   3   4   1  140.49    9.40 
   3   4   1  132.49   13.80 
   3   4   1  139.39    9.30 
   3   4   1  138.19    9.20 
   3   4   1  105.59   12.50 
  -3   4  -1  108.09    8.50 
  -3   4  -1  121.49   13.20 
  -3   4  -1  144.49   14.30 
  -3   4  -1  131.09    7.20 
   3   4   1  130.29   12.80 
   3   4   1  165.48   11.50 
  -3   4  -1  136.79    6.00 
   3   4   1  129.99    8.20 
  -3   4  -1  136.59    8.10 
   3   4   1  141.09   10.60 
   3   4   1  124.69   12.70 
  -3   4  -1  146.39   11.00 
   3   4   1  112.09   12.90 
  -3   4  -1   98.99   13.50 
  -3   4  -1  105.09   12.10 
  -3   4  -1  131.39    9.80 
   4  -4   1  502.35   28.10 
  -4  -4  -1  525.25   25.40 
  -4  -4  -1  478.45   25.90 
  -4  -4  -1  496.85   27.00 
  -4  -4  -1  496.95   23.30 
  -4  -4  -1  513.05   24.90 
  -4  -4  -1  469.95   25.00 
   4  -4   1  481.75   20.80 
   4  -4   1  506.65   26.90 
   4  -4   1  488.15   17.50 
   4  -4   1  481.45   22.90 
  -4  -4  -1  487.95   24.50 
   4  -4   1  497.35   19.70 
   4  -4   1  503.15   28.90 
  -4  -4  -1  529.55   27.40 
  -4  -4  -1  452.25   25.10 
   4  -4   1  458.65   25.30 
  -4  -4  -1  472.45   22.30 
  -4  -4  -1  471.35   24.50 
   4  -4   1  487.95   22.40 
   4  -4   1  467.05   24.30 
  -4  -4  -1  497.55   20.30 
  -4  -4  -1  483.85   21.70 
  -4  -4  -1  497.85   19.80 
   4  -4   1  514.15   26.00 
  -4  -4  -1  569.64   25.20 
   4  -4   1  483.65   27.00 
  -4  -4  -1  505.45   25.00 
   4  -4   1  490.25   17.50 
  -4  -4  -1  515.15   24.30 
  -4  -4  -1  488.65   25.50 
   4   4   1  512.45   27.30 
   4   4   1  504.75   23.60 
  -4   4  -1  510.45   19.20 
   4   4   1  509.75   26.10 
  -4   4  -1  485.75   26.20 
  -4   4  -1  505.55   28.30 
  -4   4  -1  503.85   18.70 
  -4   4  -1  507.95   22.40 
   4   4   1  530.25   23.60 
   4   4   1  506.25   25.90 
  -4   4  -1  513.95   25.70 
   4   4   1  484.35   24.70 
   4   4   1  497.65   20.60 
   4   4   1  462.95   25.60 
   4   4   1  502.15   25.20 
   4   4   1  488.55   26.40 
   4   4   1  449.46   26.20 
  -4   4  -1  470.05   20.40 
   4   4   1  485.65   20.70 
  -4   4  -1  480.25   16.40 
   4   4   1  513.55   23.60 
   4   4   1  520.95   26.70 
   4   4   1  519.65   26.40 
  -4   4  -1  527.05   24.40 
  -4   4  -1  514.55   26.60 
  -4   4  -1  469.75   25.20 
  -4   4  -1  485.95   24.60 
  -4   4  -1  484.05   16.40 
  -4   4  -1  483.45   23.10 
  -4   4  -1  492.45   23.70 
   4   4   1  492.35   24.10 
  -4   4  -1  504.65   19.60 
  -5  -4  -1  214.98   14.40 
   5  -4   1  237.38   14.00 
   5  -4   1  253.97   16.20 
   5  -4   1  231.38   17.70 
  -5  -4  -1  215.28   12.80 
  -5  -4  -1  226.68   16.50 
   5  -4   1  207.18   16.00 
  -5  -4  -1  192.28   16.60 
   5  -4   1  230.68   18.90 
   5  -4   1  199.38   21.30 
  -5  -4  -1  216.38   16.30 
   5  -4   1  215.98   11.20 
   5  -4   1  235.68   15.80 
  -5  -4  -1  224.18   16.40 
  -5  -4  -1  218.78   16.90 
   5  -4   1  233.98   18.00 
  -5  -4  -1  217.88   15.40 
  -5  -4  -1  242.28   17.40 
   5  -4   1  234.78   18.50 
  -5  -4  -1  241.08   17.30 
   5  -4   1  237.88   15.00 
  -5  -4  -1  210.48   15.10 
  -5  -4  -1  230.58   15.90 
  -5  -4  -1  244.58   18.00 
   5  -4   1  199.78   13.60 
  -5  -4  -1  227.08   16.60 
   5  -4   1  225.48   16.70 
  -5  -4  -1  214.78   17.60 
  -5  -4  -1  221.08   15.20 
  -5  -4  -1  217.08   18.00 
  -5  -4  -1  191.58   14.50 
   5   4   1  220.58   15.30 
   5   4   1  219.58   17.40 
   5   4   1  219.88   15.70 
  -5   4  -1  241.18   16.20 
  -5   4  -1  222.68   13.10 
   5   4   1  221.58   17.40 
  -5   4  -1  216.48   18.40 
   5   4   1  233.88   16.90 
  -5   4  -1  258.17   18.80 
   5   4   1  227.48   16.10 
  -5   4  -1  226.28   16.70 
   5   4   1  225.18   13.60 
   5   4   1  213.98   17.10 
   5   4   1  218.88   17.70 
   5   4   1  233.28   17.90 
  -5   4  -1  218.08   17.40 
  -5   4  -1  214.78   14.80 
  -5   4  -1  232.58   17.20 
   5   4   1  233.18   17.10 
   5   4   1  229.38   17.90 
  -5   4  -1  231.18   14.10 
   5   4   1  232.18   18.30 
  -5   4  -1  240.28   11.10 
  -5   4  -1  239.08   17.40 
  -5   4  -1  219.18   15.90 
  -5   4  -1  256.17   16.10 
   5   4   1  213.18   16.70 
  -6  -4  -1 1759.72   65.19 
  -6  -4  -1 1761.92   63.69 
  -6  -4  -1 1796.72   66.39 
   6  -4   1 1713.43   65.19 
   6  -4   1 1730.53   66.29 
   6  -4   1 1761.22   67.89 
   6  -4   1 1791.02   69.99 
  -6  -4  -1 1759.92   66.79 
  -6  -4  -1 1696.23   60.29 
   6  -4   1 1693.03   62.19 
   6  -4   1 1727.53   60.59 
  -6  -4  -1 1710.43   67.19 
   6  -4   1 1745.53   57.89 
  -6  -4  -1 1744.13   63.19 
  -6  -4  -1 1734.53   66.19 
  -6  -4  -1 1671.83   67.39 
   6  -4   1 1817.32   59.09 
   6  -4   1 1675.23   69.69 
  -6  -4  -1 1771.02   64.89 
  -6  -4  -1 1737.23   67.09 
  -6  -4  -1 1807.82   69.19 
  -6  -4  -1 1869.31   64.79 
  -6  -4  -1 1828.12   66.59 
  -6  -4  -1 1653.33   68.69 
  -6  -4  -1 1677.73   69.89 
   6  -4   1 1682.23   68.99 
   6  -4   1 1715.23   62.89 
   6  -4   1 1681.23   70.39 
  -6  -4  -1 1823.52   70.19 
   6  -4   1 1774.32   60.09 
   6  -4   1 1732.33   65.19 
  -6  -4  -1 1807.62   66.19 
  -6   4  -1 1664.13   64.19 
   6   4   1 1764.62   68.79 
   6   4   1 1749.12   67.39 
   6   4   1 1827.92   68.79 
  -6   4  -1 1696.93   67.29 
  -6   4  -1 1760.02   71.09 
  -6   4  -1 1681.33   65.59 
  -6   4  -1 1748.13   69.39 
  -6   4  -1 1734.53   65.99 
   6   4   1 1722.63   69.19 
  -6   4  -1 1700.33   57.39 
  -6   4  -1 1585.64   64.39 
   6   4   1 1722.43   67.69 
  -6   4  -1 1779.22   62.69 
  -6   4  -1 1822.42   63.79 
   6   4   1 1790.92   65.99 
  -6   4  -1 1719.63   68.39 
   6   4   1 1783.72   69.49 
   6   4   1 1709.63   64.19 
   6   4   1 1741.43   67.49 
   6   4   1 1727.63   67.59 
   6   4   1 1744.33   69.59 
  -6   4  -1 1833.92   67.39 
   6   4   1 1785.52   69.89 
   6   4   1 1796.52   66.69 
  -6   4  -1 1770.12   61.39 
   6   4   1 1736.13   61.69 
   7  -4   1  185.08   21.80 
   7  -4   1  191.98   15.20 
   7  -4   1  197.18   20.60 
  -7  -4  -1  184.98   20.10 
  -7  -4  -1  190.48   17.90 
  -7  -4  -1  211.48   22.60 
  -7  -4  -1  148.69   19.30 
  -7  -4  -1  218.08   21.40 
  -7  -4  -1  190.68   20.40 
  -7  -4  -1  204.38   23.10 
  -7  -4  -1  198.08   20.00 
   7  -4   1  135.59   15.60 
  -7  -4  -1  220.58   16.90 
  -7  -4  -1  200.48   22.50 
  -7  -4  -1  196.58   23.20 
  -7  -4  -1  220.38   21.10 
   7  -4   1  216.18   15.20 
  -7  -4  -1  247.58   19.00 
   7  -4   1  238.38   23.40 
  -7  -4  -1  195.98   22.70 
  -7  -4  -1  183.78   22.60 
  -7  -4  -1  188.38   14.70 
   7  -4   1  209.98   23.70 
  -7  -4  -1  204.78   21.70 
   7  -4   1  188.88   22.60 
   7  -4   1  208.88   16.80 
  -7  -4  -1  187.48   20.60 
   7  -4   1  172.68   21.80 
   7  -4   1  194.38   20.50 
  -7  -4  -1  183.78   19.70 
  -7  -4  -1  210.88   16.20 
  -7   4  -1  184.78   19.90 
   7   4   1  212.38   22.60 
   7   4   1  192.68   15.20 
   7   4   1  172.78   19.60 
   7   4   1  164.78   20.00 
  -7   4  -1  208.28   20.40 
   7   4   1  204.48   18.90 
  -7   4  -1  197.58   15.90 
  -7   4  -1  203.28   16.10 
   7   4   1  187.08   21.60 
  -7   4  -1  205.38   21.90 
   7   4   1  174.38   21.30 
  -7   4  -1  149.19   18.20 
   7   4   1  182.38   20.10 
  -7   4  -1  206.18   23.70 
  -7   4  -1  186.38   23.40 
   7   4   1  178.18   20.70 
   7   4   1  183.78   18.70 
   7   4   1  221.48   23.60 
   7   4   1  209.88   21.80 
   7   4   1  182.48   20.80 
  -7   4  -1  201.28   20.80 
   7   4   1  216.48   23.70 
  -7   4  -1  197.28   15.50 
  -7   4  -1  182.78   19.30 
  -8  -4  -1 1741.53   71.69 
  -8  -4  -1 1861.21   77.09 
  -8  -4  -1 1733.93   74.39 
  -8  -4  -1 1655.53   70.39 
  -8  -4  -1 1937.11   73.09 
  -8  -4  -1 1905.21   67.89 
   8  -4   1 1789.12   67.89 
  -8  -4  -1 1758.42   77.49 
  -8  -4  -1 1734.03   72.39 
   8  -4   1 1776.32   76.59 
  -8  -4  -1 1833.82   75.89 
   8  -4   1 1762.32   71.99 
  -8  -4  -1 1802.22   74.79 
   8  -4   1 1770.22   76.99 
  -8  -4  -1 1770.72   71.89 
  -8  -4  -1 1754.62   75.39 
   8  -4   1 1775.42   72.99 
   8  -4   1 1737.13   71.99 
   8  -4   1 1779.32   74.89 
  -8  -4  -1 1856.51   71.29 
  -8  -4  -1 1717.93   72.69 
   8  -4   1 1787.42   71.89 
   8  -4   1 1776.02   76.89 
  -8  -4  -1 1786.12   77.59 
   8  -4   1 1842.02   69.99 
  -8  -4  -1 1870.21   78.79 
  -8  -4  -1 1782.92   66.69 
  -8  -4  -1 1837.72   72.19 
  -8   4  -1 1766.82   77.19 
   8   4   1 1795.72   75.49 
   8   4   1 1674.33   71.59 
  -8   4  -1 1869.61   72.89 
  -8   4  -1 1703.43   75.59 
   8   4   1 1850.61   73.49 
   8   4   1 1779.72   67.89 
  -8   4  -1 1775.92   75.09 
  -8   4  -1 1833.62   72.89 
  -8   4  -1 1889.51   70.69 
   8   4   1 1762.92   73.59 
   8   4   1 1803.52   75.29 
   8   4   1 1780.82   76.39 
   8   4   1 1813.22   73.09 
   8   4   1 1845.12   75.09 
  -8   4  -1 1733.03   72.89 
   8   4   1 1872.31   77.39 
   8   4   1 1794.52   70.59 
   8   4   1 1773.32   75.69 
   8   4   1 1737.73   74.69 
  -8   4  -1 1828.62   69.99 
   8   4   1 1735.83   75.39 
  -8   4  -1 1707.93   72.09 
   9  -4   1  158.18   23.60 
  -9  -4  -1  145.79   24.50 
  -9  -4  -1  153.58   20.10 
   9  -4   1  168.38   24.20 
  -9  -4  -1  176.38   23.70 
  -9  -4  -1  196.28   25.00 
  -9  -4  -1  147.69   20.30 
  -9  -4  -1  157.38   23.60 
   9  -4   1  187.58   26.00 
  -9  -4  -1  156.18   21.50 
   9  -4   1  150.58   21.50 
  -9  -4  -1  152.38   22.40 
  -9  -4  -1  187.38   23.40 
   9  -4   1  170.18   22.20 
  -9  -4  -1  165.68   18.70 
  -9  -4  -1  156.38   22.10 
  -9  -4  -1  142.79   21.90 
  -9  -4  -1  170.68   23.10 
  -9  -4  -1  136.39   22.60 
   9  -4   1  163.28   21.20 
  -9  -4  -1  174.08   21.30 
   9  -4   1  160.38   21.30 
   9  -4   1  150.68   19.60 
  -9  -4  -1  170.28   21.30 
  -9  -4  -1  169.78   21.90 
  -9   4  -1  179.78   23.50 
  -9   4  -1  143.89   28.30 
   9   4   1  181.18   21.70 
  -9   4  -1  169.18   21.80 
   9   4   1  156.58   23.80 
  -9   4  -1  181.28   25.70 
   9   4   1  137.49   21.80 
   9   4   1  143.29   21.80 
   9   4   1  182.68   24.60 
   9   4   1  183.68   24.50 
   9   4   1  180.08   24.90 
  -9   4  -1  176.78   22.60 
   9   4   1  189.88   23.10 
  -9   4  -1  165.48   23.10 
   9   4   1  147.39   21.60 
   9   4   1  173.68   22.50 
   9   4   1  162.18   22.10 
  -9   4  -1  162.38   22.30 
   9   4   1  136.59   21.00 
   9   4   1  150.78   22.60 
  -9  -5   1  360.76   31.10 
  -9  -5   1  355.06   28.00 
   9  -5  -1  376.16   29.30 
   9  -5  -1  381.76   36.70 
  -9  -5   1  343.17   28.60 
  -9  -5   1  377.26   27.80 
  -9  -5   1  404.06   32.20 
   9  -5  -1  399.46   31.70 
   9  -5  -1  336.97   27.50 
   9  -5  -1  315.17   30.30 
  -9  -5   1  412.36   29.40 
  -9  -5   1  345.97   33.20 
  -9  -5   1  354.76   37.00 
  -9  -5   1  448.16   34.30 
  -9  -5   1  366.46   29.60 
  -9  -5   1  379.16   27.10 
   9  -5  -1  403.66   32.10 
  -9  -5   1  381.56   30.60 
  -9  -5   1  347.87   27.30 
  -9  -5   1  341.07   27.00 
  -9  -5   1  364.36   28.40 
  -9  -5   1  402.36   31.50 
   9   5  -1  422.26   33.00 
  -9   5   1  340.07   28.40 
   9   5  -1  401.16   30.40 
  -9   5   1  325.27   27.10 
  -9   5   1  361.76   30.90 
  -9   5   1  388.96   29.10 
   9   5  -1  365.26   30.30 
   9   5  -1  365.36   30.80 
   9   5  -1  414.06   28.90 
   9   5  -1  373.06   30.70 
   9   5  -1  375.26   30.60 
  -9   5   1  365.06   28.00 
   9   5  -1  403.36   29.80 
   9   5  -1  370.56   31.40 
   9   5  -1  402.86   30.20 
   9   5  -1  347.67   33.20 
   9   5  -1  410.96   30.90 
   9   5  -1  334.87   29.40 
  -8  -5   1   17.20    7.30 
  -8  -5   1   19.30    8.60 
   8  -5  -1   11.60    8.60 
  -8  -5   1   10.70    6.90 
  -8  -5   1   21.70    8.70 
  -8  -5   1   37.50   10.60 
  -8  -5   1   17.40    8.00 
  -8  -5   1    6.00    6.30 
  -8  -5   1   22.20    8.10 
  -8  -5   1   12.10    6.50 
  -8  -5   1   20.50    9.60 
   8  -5  -1   16.70    7.90 
  -8  -5   1   17.00    7.70 
   8  -5  -1   21.00    9.60 
   8  -5  -1   13.50    6.80 
  -8  -5   1   16.30    6.50 
  -8  -5   1    7.00    7.00 
  -8  -5   1    3.10    5.80 
  -8  -5   1   34.00   11.70 
   8  -5  -1   13.60    7.50 
  -8  -5   1   24.80    9.20 
   8  -5  -1   23.70    9.40 
   8  -5  -1    7.20    7.40 
   8  -5  -1    5.80    6.70 
   8   5  -1   11.70    6.90 
  -8   5   1   24.90    8.10 
   8   5  -1   13.00    8.50 
   8   5  -1   19.60    8.40 
  -8   5   1    8.10    6.60 
   8   5  -1   18.50    7.90 
  -8   5   1   15.80    8.80 
   8   5  -1   23.70   10.10 
   8   5  -1   19.20    8.80 
  -8   5   1    6.50    6.00 
   8   5  -1   20.40    8.00 
   8   5  -1   20.40    8.40 
   8   5  -1   29.20   10.40 
  -8   5   1   13.50    7.50 
  -8   5   1    7.20    6.10 
   8   5  -1   27.90   11.10 
   8   5  -1   20.60    9.40 
   8   5  -1   13.50    8.40 
   7  -5  -1  737.33   34.40 
  -7  -5   1  701.33   35.50 
   7  -5  -1  803.52   39.30 
   7  -5  -1  768.42   43.10 
  -7  -5   1  730.43   39.80 
   7  -5  -1  786.72   42.40 
  -7  -5   1  792.72   39.20 
  -7  -5   1  734.83   40.10 
  -7  -5   1  748.53   37.00 
  -7  -5   1  740.63   40.70 
   7  -5  -1  781.52   38.00 
  -7  -5   1  754.92   39.70 
  -7  -5   1  717.63   40.60 
  -7  -5   1  807.22   43.40 
  -7  -5   1  778.72   39.00 
  -7  -5   1  791.72   42.60 
  -7  -5   1  788.92   40.20 
   7  -5  -1  784.62   41.60 
  -7  -5   1  724.73   38.40 
   7  -5  -1  735.33   41.80 
  -7  -5   1  770.72   42.60 
   7  -5  -1  743.53   39.80 
  -7  -5   1  810.72   37.20 
   7  -5  -1  747.83   39.00 
  -7  -5   1  801.02   39.90 
  -7  -5   1  732.93   36.20 
   7   5  -1  763.72   41.60 
   7   5  -1  803.32   39.00 
  -7   5   1  786.32   38.60 
  -7   5   1  752.62   39.20 
  -7   5   1  766.82   38.80 
   7   5  -1  682.83   41.00 
  -7   5   1  839.02   38.40 
  -7   5   1  791.12   37.30 
  -7   5   1  842.42   42.00 
   7   5  -1  739.53   39.80 
   7   5  -1  749.13   35.50 
  -7   5   1  715.13   41.10 
   7   5  -1  723.93   38.50 
   7   5  -1  778.22   40.70 
   7   5  -1  807.42   41.30 
  -7   5   1  779.62   38.50 
   7   5  -1  760.22   37.90 
   7   5  -1  800.42   43.10 
   7   5  -1  738.03   39.90 
   7   5  -1  681.93   39.60 
   7   5  -1  776.52   41.10 
   6  -5  -1   75.29   11.90 
   6  -5  -1  100.29   13.30 
  -6  -5   1   77.59    9.10 
  -6  -5   1   75.09   11.80 
  -6  -5   1   84.59   13.00 
   6  -5  -1   80.99   10.10 
   6  -5  -1   83.19   15.30 
  -6  -5   1  104.59   13.20 
   6  -5  -1   89.79   13.60 
  -6  -5   1   82.29   12.70 
  -6  -5   1   79.79   14.30 
  -6  -5   1   92.19   11.70 
  -6  -5   1   69.09   12.60 
  -6  -5   1   79.79   13.30 
   6  -5  -1   86.89   14.80 
  -6  -5   1   49.80   10.80 
  -6  -5   1   82.89   12.10 
   6  -5  -1   82.79   10.50 
   6  -5  -1   70.19   12.60 
  -6  -5   1   74.89   11.50 
  -6  -5   1   67.29   10.50 
   6  -5  -1   60.79   13.00 
  -6  -5   1   67.79   13.20 
  -6  -5   1   74.89   13.30 
  -6  -5   1  107.19   14.80 
  -6  -5   1   85.29   13.60 
   6  -5  -1   97.59   14.90 
  -6  -5   1   85.09   14.30 
  -6   5   1   70.69   11.70 
  -6   5   1   73.29   11.40 
  -6   5   1   91.19   12.60 
  -6   5   1   92.19   12.90 
  -6   5   1   99.19   15.90 
   6   5  -1   70.59   12.70 
   6   5  -1   89.19   14.50 
  -6   5   1   64.69    9.50 
   6   5  -1   91.49   11.40 
   6   5  -1   78.89   13.20 
   6   5  -1   76.59   12.50 
   6   5  -1   80.19   12.60 
   6   5  -1   90.39   12.60 
  -6   5   1   88.89   11.70 
   6   5  -1   76.69   14.00 
  -6   5   1   84.89   13.10 
   6   5  -1   84.29   13.60 
   6   5  -1   65.09   12.30 
   6   5  -1   64.49   13.30 
  -6   5   1   65.09   11.60 
   6   5  -1   57.69   11.60 
   6   5  -1   65.59   11.30 
   5  -5  -1 2559.74   84.79 
   5  -5  -1 2502.25   87.49 
  -5  -5   1 2502.55   83.59 
  -5  -5   1 2411.66   89.39 
   5  -5  -1 2552.24   95.59 
  -5  -5   1 2475.35   92.59 
  -5  -5   1 2522.05   87.39 
  -5  -5   1 2397.56   88.29 
  -5  -5   1 2459.25   86.79 
   5  -5  -1 2540.85   93.29 
  -5  -5   1 2620.54   91.89 
   5  -5  -1 2504.65   84.69 
   5  -5  -1 2511.15   92.59 
  -5  -5   1 2564.64   84.49 
  -5  -5   1 2469.25   88.49 
   5  -5  -1 2547.34   78.69 
   5  -5  -1 2496.55   91.09 
  -5  -5   1 2477.95   86.39 
  -5  -5   1 2460.75   88.69 
  -5  -5   1 2643.94   90.49 
  -5  -5   1 2544.55   86.89 
   5  -5  -1 2509.45   88.99 
   5  -5  -1 2385.06   87.99 
  -5  -5   1 2447.46   91.09 
  -5  -5   1 2509.15   90.49 
  -5  -5   1 2610.24   79.59 
   5  -5  -1 2555.04   77.79 
   5  -5  -1 2458.45   82.49 
  -5  -5   1 2606.64   84.39 
   5  -5  -1 2592.24   81.59 
  -5  -5   1 2483.35   89.59 
  -5  -5   1 2522.05   88.29 
  -5   5   1 2495.55   86.29 
  -5   5   1 2625.64   84.69 
  -5   5   1 2470.05   88.49 
   5   5  -1 2537.35   88.19 
  -5   5   1 2522.15   88.19 
  -5   5   1 2490.85   85.39 
   5   5  -1 2567.54   90.39 
   5   5  -1 2616.24   84.49 
   5   5  -1 2514.65   90.29 
  -5   5   1 2516.05   88.29 
  -5   5   1 2525.45   82.89 
  -5   5   1 2465.65   92.59 
  -5   5   1 2442.96   87.19 
   5   5  -1 2592.74   87.09 
   5   5  -1 2489.15   92.49 
   5   5  -1 2532.45   84.89 
  -5   5   1 2440.56   85.29 
  -5   5   1 2487.55   86.79 
   5   5  -1 2544.55   88.39 
   5   5  -1 2592.14   91.29 
   5   5  -1 2523.45   89.79 
  -5   5   1 2637.34   82.29 
   5   5  -1 2476.05   92.89 
   5   5  -1 2600.14   85.19 
   5   5  -1 2657.13   89.69 
   5   5  -1 2513.65   90.29 
  -4  -5   1  203.78   12.60 
  -4  -5   1  191.88   15.50 
  -4  -5   1  199.98   15.40 
   4  -5  -1  222.48   14.30 
  -4  -5   1  191.98   14.00 
   4  -5  -1  216.08   18.20 
  -4  -5   1  207.38   14.80 
  -4  -5   1  215.58   17.20 
  -4  -5   1  194.48   15.50 
   4  -5  -1  197.38   22.90 
   4  -5  -1  214.98   15.60 
  -4  -5   1  185.98   15.00 
  -4  -5   1  202.98   16.10 
  -4  -5   1  208.38   12.90 
   4  -5  -1  209.78   13.20 
   4  -5  -1  210.58   15.30 
   4  -5  -1  194.78   20.30 
   4  -5  -1  225.98   11.00 
  -4  -5   1  218.38   16.90 
  -4  -5   1  223.08   14.50 
   4  -5  -1  194.08   16.00 
  -4  -5   1  223.88   16.50 
   4  -5  -1  215.88   11.00 
  -4  -5   1  180.38   19.60 
  -4  -5   1  185.68   15.30 
  -4  -5   1  230.18   10.30 
  -4  -5   1  212.88   16.60 
   4  -5  -1  214.18   22.20 
   4  -5  -1  209.88   11.20 
  -4  -5   1  234.58   16.20 
  -4  -5   1  199.08   12.70 
   4   5  -1  213.08   15.00 
   4   5  -1  185.78   15.90 
   4   5  -1  239.48   18.80 
   4   5  -1  226.38   16.40 
  -4   5   1  177.38   14.50 
  -4   5   1  240.38   14.20 
  -4   5   1  219.88   14.50 
   4   5  -1  208.38   13.20 
  -4   5   1  207.08   11.50 
   4   5  -1  202.48   16.70 
   4   5  -1  212.58   15.50 
   4   5  -1  186.08   12.70 
  -4   5   1  213.28   15.70 
  -4   5   1  165.18   12.90 
  -4   5   1  204.98   12.70 
   4   5  -1  216.68   18.20 
   4   5  -1  195.68   13.40 
  -4   5   1  202.38   13.30 
   4   5  -1  207.88   13.20 
  -4   5   1  213.18   15.70 
   4   5  -1  195.28   15.50 
   4   5  -1  213.48   12.60 
  -4   5   1  179.78   15.00 
   4   5  -1  191.68   18.90 
   4   5  -1  251.37   18.70 
  -4   5   1  214.68   18.40 
  -3  -5   1 1989.70   69.39 
  -3  -5   1 1998.10   69.99 
   3  -5  -1 1970.20   62.39 
  -3  -5   1 2005.30   70.29 
   3  -5  -1 1873.31   78.09 
  -3  -5   1 1964.80   66.99 
   3  -5  -1 2015.60   71.79 
  -3  -5   1 2050.09   65.79 
  -3  -5   1 1968.60   64.29 
  -3  -5   1 1889.71   70.69 
   3  -5  -1 1993.30   67.59 
   3  -5  -1 2005.90   68.49 
  -3  -5   1 1899.71   72.29 
   3  -5  -1 2026.80   58.29 
   3  -5  -1 2039.70   71.39 
  -3  -5   1 1990.60   63.59 
  -3  -5   1 1903.61   73.79 
   3  -5  -1 1987.90   62.79 
   3  -5  -1 1995.10   74.59 
  -3  -5   1 2024.30   63.79 
  -3  -5   1 1998.30   69.09 
   3  -5  -1 1969.60   61.89 
  -3  -5   1 2065.19   71.09 
  -3  -5   1 1902.81   69.89 
   3  -5  -1 1946.51   75.09 
   3  -5  -1 1998.20   60.59 
   3  -5  -1 1941.11   63.59 
  -3  -5   1 2013.00   70.99 
  -3  -5   1 1989.90   63.39 
   3  -5  -1 1972.60   61.99 
   3  -5  -1 1972.30   73.89 
  -3  -5   1 1932.81   69.19 
   3  -5  -1 2048.79   63.99 
  -3  -5   1 1965.00   66.69 
   3  -5  -1 2025.00   64.39 
  -3   5   1 2063.49   63.49 
  -3   5   1 1952.70   69.49 
  -3   5   1 2010.50   68.99 
   3   5  -1 2035.80   72.19 
  -3   5   1 2069.79   74.99 
   3   5  -1 2006.60   72.39 
  -3   5   1 1936.01   61.09 
  -3   5   1 2003.40   66.19 
  -3   5   1 2042.20   66.19 
   3   5  -1 1939.01   63.29 
  -3   5   1 1959.30   64.19 
   3   5  -1 2029.00   72.79 
   3   5  -1 1957.90   60.69 
   3   5  -1 1978.20   63.59 
   3   5  -1 1901.41   67.49 
   3   5  -1 1957.80   59.89 
   3   5  -1 2009.50   69.49 
   3   5  -1 2018.10   67.09 
   3   5  -1 1940.11   73.59 
   3   5  -1 1970.60   68.79 
  -3   5   1 2017.90   70.39 
   3   5  -1 1987.50   71.49 
   3   5  -1 1994.80   64.39 
   3   5  -1 2034.60   73.39 
  -3   5   1 1894.61   69.49 
  -3   5   1 1961.50   66.79 
  -2  -5   1    5.10    3.80 
  -2  -5   1    9.50    4.20 
   2  -5  -1    8.40    2.70 
   2  -5  -1    7.50    3.10 
  -2  -5   1    7.00    2.20 
  -2  -5   1    7.30    2.90 
  -2  -5   1    9.30    5.00 
   2  -5  -1    7.20    2.50 
  -2  -5   1   20.50    4.80 
   2  -5  -1    7.50    1.60 
  -2  -5   1   10.10    3.20 
   2  -5  -1    7.10    2.10 
  -2  -5   1    6.20    1.90 
   2  -5  -1    7.90    4.30 
  -2  -5   1    6.80    3.40 
  -2  -5   1   10.50    3.00 
  -2  -5   1    9.50    3.70 
   2  -5  -1    8.50    3.10 
   2  -5  -1   14.50    3.20 
   2  -5  -1    4.20    3.10 
   2  -5  -1    9.00    1.80 
  -2  -5   1    9.50    2.90 
  -2  -5   1    3.20    3.20 
  -2  -5   1    2.10    3.10 
   2  -5  -1    6.40    3.30 
   2  -5  -1    5.60    4.80 
  -2  -5   1    8.60    4.40 
   2  -5  -1   10.90    2.40 
   2  -5  -1    6.20    2.30 
   2  -5  -1   14.70    4.60 
   2  -5  -1    9.70    3.20 
   2  -5  -1   18.30    6.20 
   2  -5  -1    8.30    4.50 
   2  -5  -1    8.60    2.30 
  -2  -5   1    7.00    3.00 
   2  -5  -1    7.90    3.60 
   2  -5  -1   10.20    3.00 
   2  -5  -1    6.70    2.20 
   2  -5  -1    9.90    1.50 
   2  -5  -1   10.30    4.90 
  -2  -5   1    6.90    3.60 
  -2  -5   1   14.40    5.20 
  -2  -5   1    9.80    2.70 
  -2   5   1    4.40    4.20 
  -2   5   1    9.50    3.00 
  -2   5   1    8.10    3.90 
   2   5  -1    9.00    3.00 
   2   5  -1   11.30    3.80 
   2   5  -1    6.80    4.30 
   2   5  -1    4.50    3.90 
  -2   5   1    8.30    3.90 
   2   5  -1   12.00    4.50 
   2   5  -1    6.60    4.00 
  -2   5   1    3.30    2.70 
   2   5  -1   15.70    5.30 
  -2   5   1    7.20    3.70 
   2   5  -1    8.70    2.10 
   2   5  -1    4.40    2.40 
  -2   5   1    6.70    3.80 
  -2   5   1    9.20    4.60 
   2   5  -1   10.50    2.90 
  -2   5   1    9.70    2.40 
   2   5  -1   14.50    6.40 
   2   5  -1   14.00    5.40 
  -2   5   1    2.80    2.80 
   2   5  -1    2.90    3.10 
  -2   5   1    6.50    5.00 
   2   5  -1   12.10    5.80 
   2   5  -1    6.70    2.60 
   2   5  -1   16.10    4.40 
   2   5  -1   10.50    3.40 
   2   5  -1    9.10    2.20 
   2   5  -1    5.20    2.20 
  -2   5   1    6.80    2.70 
  -1  -5   1 1182.98   36.70 
  -1  -5   1 1211.08   41.40 
   1  -5  -1 1080.59   43.30 
   1  -5  -1 1086.09   38.60 
   1  -5  -1 1213.38   47.80 
   1  -5  -1 1153.18   41.70 
  -1  -5   1 1212.28   42.50 
   1  -5  -1 1228.18   39.30 
  -1  -5   1 1069.09   40.60 
   1  -5  -1 1165.08   37.80 
   1  -5  -1 1217.78   45.60 
   1  -5  -1 1203.18   50.59 
  -1  -5   1 1201.48   41.70 
  -1  -5   1 1206.78   43.60 
  -1  -5   1 1224.08   45.80 
   1  -5  -1 1149.29   40.00 
   1  -5  -1 1215.28   49.00 
  -1  -5   1 1126.99   44.70 
  -1  -5   1 1192.68   45.60 
   1  -5  -1 1174.58   42.60 
  -1  -5   1 1105.09   47.80 
   1  -5  -1 1010.50   43.40 
   1  -5  -1 1156.28   43.50 
  -1  -5   1 1236.88   39.70 
  -1  -5   1 1190.78   50.69 
   1  -5  -1 1211.38   38.50 
  -1  -5   1 1150.68   46.30 
   1  -5  -1 1139.29   42.50 
  -1  -5   1 1181.18   41.20 
   1  -5  -1 1166.48   44.10 
  -1  -5   1 1169.78   38.60 
  -1  -5   1 1133.99   43.60 
   1  -5  -1 1168.28   46.40 
  -1  -5   1 1173.28   37.60 
   1  -5  -1 1165.08   40.20 
   1  -5  -1 1206.58   40.60 
   1  -5  -1 1178.18   37.60 
  -1  -5   1 1213.88   37.90 
  -1  -5   1 1188.78   44.00 
   1  -5  -1 1175.38   37.00 
  -1  -5   1 1168.18   46.50 
   1   5  -1 1202.68   36.60 
  -1   5   1 1192.18   44.30 
   1   5  -1 1147.49   49.20 
  -1   5   1 1184.18   40.40 
  -1   5   1 1193.18   37.70 
   1   5  -1 1256.87   45.40 
   1   5  -1 1104.49   51.49 
   1   5  -1 1151.18   41.50 
   1   5  -1 1151.58   46.40 
   1   5  -1 1191.48   46.60 
   1   5  -1 1198.98   38.50 
   1   5  -1 1070.39   45.30 
  -1   5   1 1173.98   38.50 
  -1   5   1 1159.98   45.70 
   1   5  -1 1183.98   48.20 
  -1   5   1 1217.58   44.90 
  -1   5   1 1203.78   38.60 
  -1   5   1 1200.68   45.80 
  -1   5   1 1206.78   45.50 
   1   5  -1 1130.29   46.40 
  -1   5   1 1193.48   38.50 
   1   5  -1 1189.58   46.20 
  -1   5   1 1163.98   49.60 
  -1   5   1 1143.89   49.00 
   1   5  -1 1153.88   46.10 
   1   5  -1 1185.88   37.50 
   1   5  -1 1223.18   37.80 
   1   5  -1 1161.78   40.50 
  -1   5   1 1285.17   52.39 
   1   5  -1 1260.57   52.09 
   0  -5   1    6.30    2.50 
   0  -5   1    8.90    2.60 
   0  -5   1    0.60    2.80 
   0  -5  -1   11.40    1.80 
   0  -5   1    9.80    4.30 
   0  -5  -1   18.20    1.90 
   0  -5  -1   14.10    4.80 
   0  -5  -1    4.20    3.40 
   0  -5   1    9.40    3.90 
   0  -5   1    5.80    2.60 
   0  -5   1    3.10    2.30 
   0  -5  -1   10.20    3.60 
   0  -5   1    6.60    3.50 
   0  -5  -1    9.20    1.80 
   0  -5  -1    5.80    1.90 
   0  -5   1    7.60    1.90 
   0  -5  -1   11.40    2.10 
   0  -5  -1   16.90    5.90 
   0  -5   1    9.50    4.10 
   0  -5   1    4.20    3.10 
   0  -5  -1   12.80    2.60 
   0  -5  -1    2.60    3.50 
   0  -5  -1    4.80    3.00 
   0  -5   1    2.10    3.50 
   0  -5  -1    7.30    3.60 
   0  -5   1    9.30    2.30 
   0  -5  -1   14.40    3.70 
   0  -5   1    1.00    3.90 
   0  -5   1    3.00    1.90 
   0  -5  -1   15.00    4.80 
   0  -5  -1    7.70    2.30 
   0  -5  -1   11.00    2.60 
   0  -5   1    8.00    3.30 
   0  -5  -1    3.70    3.60 
   0  -5   1   13.40    5.30 
   0  -5  -1   13.80    3.90 
   0  -5  -1    6.90    2.40 
   0  -5   1   12.20    3.60 
   0  -5  -1   10.70    1.50 
   0  -5   1    7.30    1.40 
   0  -5   1   -1.10    3.00 
   0   5   1    8.60    3.90 
   0   5  -1    6.70    1.30 
   0   5   1    9.90    2.20 
   0   5   1    6.20    2.30 
   0   5  -1    7.40    2.20 
   0   5  -1    8.20    2.40 
   0   5   1    9.00    1.80 
   0   5  -1    5.60    4.20 
   0   5   1    0.00    2.40 
   0   5  -1   11.60    4.70 
   0   5   1    4.80    3.30 
   0   5  -1    8.70    4.20 
   0   5   1    5.20    3.90 
   0   5  -1    9.70    3.30 
   0   5  -1    8.90    5.30 
   0   5   1   12.40    5.40 
   0   5  -1    9.60    3.50 
   0   5  -1    3.80    5.10 
   0   5  -1    1.20    2.10 
   0   5  -1    8.90    4.50 
   0   5   1    5.30    3.90 
   0   5   1    6.80    1.70 
   0   5  -1   18.90    7.50 
   0   5   1   16.30    6.50 
   0   5  -1    5.60    2.90 
   0   5  -1    5.20    3.80 
   0   5   1    3.70    3.30 
   0   5   1    7.40    3.70 
   1  -5   1 3539.55  104.89 
   1  -5   1 3539.35  106.79 
   1  -5   1 3427.86  102.79 
   1  -5   1 3533.35  104.19 
   1  -5   1 3042.60  114.29 
   1  -5   1 3527.85  105.69 
   1  -5   1 3521.55  114.29 
  -1  -5  -1 3514.85  104.69 
   1  -5   1 3610.94  101.39 
  -1  -5  -1 3385.86  115.99 
  -1  -5  -1 3521.05  105.59 
   1  -5   1 3514.45  102.29 
  -1  -5  -1 3479.25  115.19 
   1  -5   1 3511.45  106.29 
  -1  -5  -1 3474.95  111.19 
  -1  -5  -1 3461.95  107.29 
  -1  -5  -1 3561.04  112.49 
  -1  -5  -1 3520.65  111.79 
  -1  -5  -1 3476.55  108.69 
   1  -5   1 3408.96  119.89 
   1  -5   1 3451.75  115.89 
  -1  -5  -1 3421.86  109.99 
  -1  -5  -1 3495.55  103.49 
  -1  -5  -1 3534.25  112.19 
   1  -5   1 3359.66  112.19 
   1  -5   1 3508.05  114.69 
   1  -5   1 3500.05  111.89 
  -1  -5  -1 3514.25  110.29 
   1  -5   1 2932.31  114.69 
  -1  -5  -1 3497.15  102.29 
  -1  -5  -1 3471.45  104.69 
   1  -5   1 3631.34  110.79 
   1  -5   1 3201.78  108.69 
  -1  -5  -1 3539.65  104.59 
  -1   5  -1 3493.15  104.39 
   1   5   1 3431.76  109.59 
   1   5   1 3456.35  113.19 
  -1   5  -1 3506.75  108.29 
  -1   5  -1 3486.25  117.69 
  -1   5  -1 3543.15  114.09 
  -1   5  -1 3627.34  115.09 
  -1   5  -1 3495.35  106.49 
   1   5   1 3568.64  108.49 
   1   5   1 3568.64  104.89 
  -1   5  -1 3548.64  117.99 
   1   5   1 3484.35  115.99 
   1   5   1 3445.26  106.79 
  -1   5  -1 3398.46  122.49 
  -1   5  -1 3676.53  113.49 
  -1   5  -1 3577.44  120.89 
   1   5   1 3492.65  113.29 
   1   5   1 3596.24  117.49 
  -1   5  -1 3643.84  117.89 
   1   5   1 3530.35  113.39 
  -1   5  -1 3538.55  114.29 
   1   5   1 3464.15  112.69 
   1   5   1 3550.94  103.49 
   1   5   1 3656.13  116.39 
   1   5   1 3490.75  106.39 
   1   5   1 3488.85  107.19 
  -1   5  -1 3585.34  103.19 
   1   5   1 3413.56  115.99 
  -1   5  -1 3512.05  101.09 
  -1   5  -1 3580.34  102.19 
   2  -5   1   38.30    4.90 
   2  -5   1   32.70    5.80 
   2  -5   1   30.90    4.30 
  -2  -5  -1   29.00    3.60 
  -2  -5  -1   25.60    6.30 
   2  -5   1   30.60    4.50 
  -2  -5  -1   35.50    6.10 
   2  -5   1   30.50    4.20 
  -2  -5  -1   27.40    6.20 
   2  -5   1   25.00    4.90 
  -2  -5  -1   21.00    6.10 
  -2  -5  -1   23.30    4.70 
  -2  -5  -1   23.50    6.20 
  -2  -5  -1   30.90    4.70 
   2  -5   1   31.70    8.20 
   2  -5   1   27.90    5.70 
  -2  -5  -1   32.80    4.00 
   2  -5   1   32.30    7.50 
   2  -5   1   33.70    8.20 
   2  -5   1   27.80    6.00 
   2  -5   1   29.50    5.80 
  -2  -5  -1   41.40    8.50 
  -2  -5  -1   32.00    6.10 
   2  -5   1   30.20    2.30 
   2  -5   1   33.70    7.40 
   2  -5   1   35.60    3.40 
  -2  -5  -1   24.60    5.90 
  -2  -5  -1   22.20    3.90 
  -2  -5  -1   39.80    7.40 
  -2  -5  -1   36.00    7.30 
   2  -5   1   26.80    7.00 
  -2  -5  -1   33.40    3.60 
  -2   5  -1   39.10   10.10 
   2   5   1   30.00    6.80 
  -2   5  -1   27.90    7.90 
   2   5   1   28.50    3.10 
   2   5   1   21.10    6.00 
  -2   5  -1   36.10    4.30 
  -2   5  -1   32.20    8.10 
   2   5   1   39.10    6.30 
  -2   5  -1   20.70    5.50 
  -2   5  -1   38.30    4.50 
  -2   5  -1   20.60    4.20 
   2   5   1   26.60    6.50 
  -2   5  -1   36.30    6.00 
  -2   5  -1   28.10    6.90 
   2   5   1   23.80    6.70 
   2   5   1   23.90    4.80 
  -2   5  -1   36.20    4.30 
  -2   5  -1   18.90    6.10 
   2   5   1   29.10    4.50 
   2   5   1   25.20    5.00 
   2   5   1   43.50    8.10 
   2   5   1   29.90    7.50 
   2   5   1   27.70    5.80 
   2   5   1   26.50    5.60 
   2   5   1   31.60    5.70 
   2   5   1   30.00    3.40 
   2   5   1   31.10    5.60 
  -2   5  -1   34.30    8.10 
   2   5   1   30.70    4.30 
   2   5   1   28.10    3.90 
  -2   5  -1   31.20    2.40 
   2   5   1   30.70    4.00 
  -2   5  -1   31.10    8.40 
   2   5   1   37.30    4.70 
   2   5   1   36.50    8.10 
   2   5   1   36.00    4.40 
  -3  -5  -1 3228.68  110.49 
   3  -5   1 3316.77  114.79 
   3  -5   1 3279.07  112.49 
  -3  -5  -1 3331.97  110.19 
   3  -5   1 3405.36  111.59 
  -3  -5  -1 3392.66  114.09 
  -3  -5  -1 3428.76  111.19 
   3  -5   1 3465.25  113.79 
  -3  -5  -1 3459.75  109.89 
   3  -5   1 3200.78  102.19 
   3  -5   1 3425.06  101.39 
  -3  -5  -1 3182.28  109.99 
   3  -5   1 3370.16  102.69 
   3  -5   1 3449.35  100.39 
  -3  -5  -1 3659.93  114.69 
   3  -5   1 3314.87  108.49 
   3  -5   1 3416.56  104.89 
  -3  -5  -1 3390.76  102.99 
  -3  -5  -1 3325.07  105.09 
   3  -5   1 3350.76  105.89 
  -3  -5  -1 3459.65  103.39 
  -3  -5  -1 3436.76  106.09 
  -3  -5  -1 3533.25  109.49 
   3  -5   1 3416.86  101.29 
   3  -5   1 3385.16  115.29 
  -3  -5  -1 3328.07  107.59 
   3  -5   1 3365.16  120.99 
  -3  -5  -1 3387.76   98.79 
  -3  -5  -1 3315.87  110.09 
  -3  -5  -1 3417.76  111.79 
  -3  -5  -1 3393.06  111.79 
   3   5   1 3454.05  104.69 
   3   5   1 3393.26  108.09 
   3   5   1 3442.06  109.99 
   3   5   1 3304.87  113.29 
  -3   5  -1 3335.17  102.19 
   3   5   1 3241.58  113.29 
   3   5   1 3372.96  102.59 
   3   5   1 3396.36  104.49 
  -3   5  -1 3366.66   98.59 
  -3   5  -1 3356.66  114.19 
  -3   5  -1 3449.55  117.99 
   3   5   1 3366.06  106.59 
   3   5   1 3449.55  110.49 
  -3   5  -1 3500.45  112.49 
  -3   5  -1 3452.55  106.49 
   3   5   1 3289.97  111.19 
  -3   5  -1 3319.87  103.79 
   3   5   1 3172.48  103.79 
   3   5   1 3425.26  102.89 
  -3   5  -1 3404.76  108.29 
  -3   5  -1 3409.76  104.49 
  -3   5  -1 3355.16  112.39 
   3   5   1 3246.58  103.29 
   3   5   1 3429.16  104.39 
   3   5   1 3294.27  112.19 
  -3   5  -1 3404.36  109.69 
   3   5   1 3469.45  110.29 
  -3   5  -1 3415.36  112.49 
   3   5   1 3438.96  113.69 
  -4  -5  -1   93.99    9.40 
  -4  -5  -1   89.99   13.00 
  -4  -5  -1   79.09   11.90 
   4  -5   1   69.69   14.10 
  -4  -5  -1  107.39   13.00 
  -4  -5  -1   79.99   11.70 
  -4  -5  -1   79.89   11.00 
  -4  -5  -1   86.69   13.00 
   4  -5   1   80.29   12.20 
   4  -5   1  107.29   14.40 
  -4  -5  -1   87.19    6.20 
   4  -5   1   98.09    9.70 
  -4  -5  -1   92.69   12.10 
   4  -5   1   90.99   12.50 
   4  -5   1  102.09   14.90 
  -4  -5  -1   76.19   11.30 
   4  -5   1   80.99   10.50 
  -4  -5  -1   86.09   10.40 
   4  -5   1   81.99    7.90 
   4  -5   1   77.59   13.30 
  -4  -5  -1  112.09   14.30 
  -4  -5  -1   89.59   10.40 
   4  -5   1   94.79   10.70 
   4  -5   1   86.49   14.60 
  -4  -5  -1   90.89   11.70 
  -4  -5  -1   72.89    8.60 
  -4  -5  -1   96.39   11.80 
  -4  -5  -1   72.79   11.30 
   4   5   1  111.29   14.80 
  -4   5  -1  102.69   13.50 
  -4   5  -1  107.99    8.60 
  -4   5  -1   74.59   12.10 
   4   5   1   87.49   13.10 
   4   5   1   71.59   11.90 
  -4   5  -1   95.79   13.40 
  -4   5  -1   78.79   10.70 
  -4   5  -1   86.69    6.70 
   4   5   1   96.39    7.90 
   4   5   1   71.09   10.60 
   4   5   1   97.39   13.20 
   4   5   1   73.49   10.80 
  -4   5  -1   73.99    9.70 
   4   5   1   67.29   11.20 
  -4   5  -1   80.39    9.70 
  -4   5  -1   74.59   13.30 
  -4   5  -1   89.59   11.40 
   4   5   1   92.29   12.30 
  -4   5  -1   89.89   12.50 
  -4   5  -1   86.39    5.10 
   4   5   1   99.59   11.10 
   4   5   1  106.39   13.10 
   4   5   1   76.29    9.30 
   4   5   1   75.19    9.50 
  -5  -5  -1  759.22   34.80 
   5  -5   1  792.82   39.70 
   5  -5   1  690.93   40.30 
  -5  -5  -1  741.63   31.20 
   5  -5   1  715.93   34.70 
   5  -5   1  731.93   39.50 
  -5  -5  -1  788.72   36.20 
  -5  -5  -1  752.02   33.30 
   5  -5   1  729.63   35.40 
  -5  -5  -1  735.53   35.70 
   5  -5   1  663.03   35.80 
  -5  -5  -1  672.23   34.40 
   5  -5   1  720.93   31.80 
   5  -5   1  726.43   29.60 
   5  -5   1  763.12   38.90 
   5  -5   1  730.13   36.30 
  -5  -5  -1  726.03   36.20 
  -5  -5  -1  802.62   39.40 
  -5  -5  -1  737.73   35.30 
  -5  -5  -1  755.62   36.90 
   5  -5   1  718.53   32.60 
  -5  -5  -1  749.73   34.30 
  -5  -5  -1  798.42   38.60 
  -5  -5  -1  699.33   37.20 
  -5  -5  -1  773.92   35.30 
  -5  -5  -1  726.03   28.00 
  -5  -5  -1  779.22   32.50 
  -5  -5  -1  731.13   36.30 
  -5   5  -1  701.93   36.50 
   5   5   1  727.73   29.90 
   5   5   1  707.53   37.60 
  -5   5  -1  710.23   34.90 
  -5   5  -1  752.72   35.70 
   5   5   1  718.63   33.00 
   5   5   1  676.03   35.50 
  -5   5  -1  782.42   37.00 
  -5   5  -1  738.43   33.00 
   5   5   1  709.83   33.60 
  -5   5  -1  768.02   27.70 
  -5   5  -1  711.93   36.60 
   5   5   1  709.43   36.20 
   5   5   1  726.53   36.90 
  -5   5  -1  780.02   40.60 
  -5   5  -1  741.53   29.40 
   5   5   1  769.92   34.80 
   5   5   1  728.93   38.10 
  -5   5  -1  755.52   33.60 
   5   5   1  756.22   36.80 
   5   5   1  728.73   37.20 
  -5   5  -1  793.62   32.20 
  -5   5  -1  703.53   33.50 
   5   5   1  723.33   32.70 
   5   5   1  728.43   35.40 
  -6  -5  -1    0.90    3.30 
  -6  -5  -1    2.70    4.30 
  -6  -5  -1    9.90    6.30 
  -6  -5  -1   -4.50    3.70 
   6  -5   1   -0.80    4.30 
   6  -5   1   11.90    7.50 
  -6  -5  -1    3.80    4.80 
  -6  -5  -1   -3.10    2.80 
   6  -5   1    1.10    4.20 
   6  -5   1    0.70    3.60 
  -6  -5  -1    2.70    4.90 
  -6  -5  -1    2.20    3.50 
  -6  -5  -1    2.00    4.40 
   6  -5   1    0.10    3.50 
   6  -5   1    6.20    5.30 
  -6  -5  -1    4.70    5.40 
   6  -5   1   12.00    6.40 
  -6  -5  -1    0.80    4.90 
  -6  -5  -1    0.60    4.80 
  -6  -5  -1   -1.60    3.90 
   6  -5   1    9.70    6.90 
  -6  -5  -1    3.10    4.10 
  -6  -5  -1    0.60    3.90 
   6  -5   1   -3.00    4.70 
  -6  -5  -1    3.80    4.60 
   6  -5   1    7.00    4.70 
   6  -5   1    1.10    7.30 
  -6  -5  -1    2.30    4.80 
   6  -5   1    7.10    5.20 
   6   5   1   -5.00    4.00 
   6   5   1    1.90    3.40 
   6   5   1    1.30    4.20 
  -6   5  -1   -2.60    4.20 
  -6   5  -1    6.60    5.50 
  -6   5  -1   -2.10    3.00 
   6   5   1    6.80    5.30 
  -6   5  -1    8.10    4.70 
  -6   5  -1    3.90    4.70 
   6   5   1    7.50    5.60 
   6   5   1    5.70    5.40 
  -6   5  -1    4.00    4.40 
   6   5   1   -2.10    3.20 
  -6   5  -1    8.20    4.60 
   6   5   1   -2.60    3.70 
   6   5   1    1.80    4.90 
   6   5   1    1.40    4.60 
  -6   5  -1    2.50    4.40 
  -6   5  -1   -3.10    3.30 
   6   5   1    2.20    4.00 
  -6   5  -1    5.40    4.80 
  -6   5  -1   -0.10    3.80 
   6   5   1   -1.40    3.80 
   6   5   1    9.70    5.80 
  -7  -5  -1   48.70   11.80 
  -7  -5  -1   28.30    8.30 
   7  -5   1   40.00   10.80 
  -7  -5  -1   22.90    7.40 
  -7  -5  -1   37.80    8.90 
  -7  -5  -1   54.39   12.10 
  -7  -5  -1   44.60   11.10 
  -7  -5  -1   56.69   12.60 
   7  -5   1   31.50   10.30 
  -7  -5  -1   44.10   10.80 
  -7  -5  -1   33.70   10.70 
  -7  -5  -1   57.49   13.30 
   7  -5   1   39.40   10.80 
  -7  -5  -1   46.20   10.20 
   7  -5   1   41.40    9.00 
  -7  -5  -1   41.30   10.10 
   7  -5   1   60.49   12.10 
  -7  -5  -1   39.30   10.20 
   7  -5   1   57.19   11.70 
  -7  -5  -1   36.00   10.30 
   7  -5   1   47.90   12.50 
   7  -5   1   77.09   15.60 
   7  -5   1   22.60    8.30 
  -7  -5  -1   34.50   10.30 
   7  -5   1   39.20    8.50 
  -7  -5  -1   31.40    9.30 
  -7  -5  -1   43.90    9.40 
   7   5   1   48.30   11.80 
  -7   5  -1   36.70   10.10 
   7   5   1   43.50   10.10 
   7   5   1   48.40   11.00 
  -7   5  -1   24.50    8.20 
   7   5   1   52.39   12.90 
  -7   5  -1   46.70   10.30 
   7   5   1   44.90   10.90 
  -7   5  -1   30.70   11.10 
   7   5   1   34.50    9.80 
   7   5   1   32.40    9.70 
   7   5   1   40.30   10.50 
  -7   5  -1   35.70    9.00 
   7   5   1   35.40   10.00 
   7   5   1   28.50    8.70 
  -7   5  -1   38.10   10.10 
   7   5   1   49.50   13.00 
  -7   5  -1   34.20   10.80 
  -7   5  -1   36.10    9.80 
   7   5   1   35.10   10.00 
   7   5   1   41.60   11.70 
  -8  -5  -1   42.80   12.80 
  -8  -5  -1   38.40   10.40 
  -8  -5  -1   31.00   11.50 
   8  -5   1   46.60   11.30 
  -8  -5  -1   41.20   12.50 
  -8  -5  -1   42.10   11.30 
  -8  -5  -1   49.30   11.80 
   8  -5   1   43.10   11.20 
  -8  -5  -1   48.50   12.10 
  -8  -5  -1   62.99   14.20 
   8  -5   1   33.70   11.10 
  -8  -5  -1   64.09   13.60 
  -8  -5  -1   47.10   10.60 
  -8  -5  -1   50.19   11.20 
   8  -5   1   53.49   13.90 
   8  -5   1   33.20   10.20 
  -8  -5  -1   71.19   14.80 
  -8  -5  -1   55.89   14.20 
  -8  -5  -1   48.20   13.30 
   8  -5   1   34.00   11.60 
   8  -5   1   97.49   19.00 
  -8  -5  -1   34.20   11.10 
  -8  -5  -1   28.80    9.90 
   8  -5   1   61.09   15.60 
  -8  -5  -1   56.09   13.10 
  -8   5  -1   46.50   11.20 
   8   5   1   20.80    8.70 
  -8   5  -1   56.89   14.50 
  -8   5  -1   36.50   12.10 
  -8   5  -1   55.59   13.50 
   8   5   1   44.80   12.50 
   8   5   1   40.60   11.40 
   8   5   1   36.50   11.10 
   8   5   1   39.40   11.90 
   8   5   1   60.19   15.00 
   8   5   1   45.60   12.70 
  -8   5  -1   30.80   10.50 
   8   5   1   36.40   12.00 
   8   5   1   48.70   12.40 
  -8   5  -1   53.69   11.90 
   8   5   1   36.90   10.70 
   8   5   1   39.80   10.80 
  -8   5  -1   43.50   10.80 
   8   5   1   45.50   12.00 
   8   5   1   48.40   12.90 
  -8   5  -1   57.79   12.50 
  -8  -6   1  364.96   30.60 
  -8  -6   1  351.26   27.20 
  -8  -6   1  359.06   25.50 
  -8  -6   1  406.36   29.50 
  -8  -6   1  358.36   25.50 
  -8  -6   1  347.97   24.80 
   8  -6  -1  399.66   28.10 
  -8  -6   1  338.27   26.90 
  -8  -6   1  386.66   29.90 
   8  -6  -1  444.56   35.10 
  -8  -6   1  367.56   28.70 
   8  -6  -1  416.76   30.10 
  -8  -6   1  344.97   28.20 
  -8  -6   1  351.86   29.90 
  -8  -6   1  384.66   30.60 
   8  -6  -1  390.06   31.30 
   8  -6  -1  376.56   37.20 
   8  -6  -1  360.86   26.10 
   8  -6  -1  382.36   30.20 
  -8  -6   1  432.46   30.70 
  -8  -6   1  360.16   26.60 
  -8  -6   1  367.26   27.40 
  -8  -6   1  415.96   31.60 
  -8   6   1  379.56   28.40 
   8   6  -1  388.96   30.00 
   8   6  -1  321.97   31.20 
   8   6  -1  394.96   30.70 
   8   6  -1  406.16   32.50 
  -8   6   1  356.96   26.80 
   8   6  -1  343.27   27.70 
   8   6  -1  398.86   28.30 
  -8   6   1  347.57   36.30 
   8   6  -1  374.06   29.70 
  -8   6   1  401.56   27.80 
   8   6  -1  342.77   28.40 
   8   6  -1  355.26   26.10 
   8   6  -1  306.57   31.40 
  -8   6   1  340.37   28.20 
   8   6  -1  379.36   29.20 
   8   6  -1  381.56   31.10 
   7  -6  -1    9.90    6.60 
  -7  -6   1    0.40    5.50 
   7  -6  -1    6.40    6.80 
  -7  -6   1    0.30    4.50 
  -7  -6   1   12.70    7.00 
   7  -6  -1   12.90    8.00 
  -7  -6   1    7.70    7.00 
  -7  -6   1    3.80    5.30 
  -7  -6   1   11.90    5.80 
  -7  -6   1    9.90    7.00 
  -7  -6   1   -1.00    4.90 
   7  -6  -1   -0.50    6.10 
  -7  -6   1   15.30    6.70 
  -7  -6   1    7.50    7.60 
  -7  -6   1   12.80    6.90 
   7  -6  -1   10.10    6.70 
  -7  -6   1    3.00    6.10 
  -7  -6   1    2.30    4.60 
  -7  -6   1    5.80    7.10 
   7  -6  -1   17.30    8.50 
  -7  -6   1    3.00    5.70 
   7  -6  -1    9.10    7.00 
  -7  -6   1   -0.90    4.40 
   7  -6  -1   10.60    6.50 
  -7  -6   1   12.20    8.10 
  -7   6   1    7.90    5.60 
   7   6  -1    1.90    4.70 
   7   6  -1   19.20    8.70 
   7   6  -1   -1.00    4.80 
  -7   6   1    4.20    5.40 
  -7   6   1    7.00    6.70 
  -7   6   1    8.20    6.20 
  -7   6   1    2.20    5.50 
   7   6  -1   -2.60    4.40 
   7   6  -1    6.70    5.70 
   7   6  -1    8.30    6.10 
  -7   6   1    1.30    5.00 
   7   6  -1    0.00    5.30 
   7   6  -1    0.40    5.40 
   7   6  -1    7.90    6.20 
   7   6  -1    5.40    5.90 
   7   6  -1   14.40    8.10 
  -7   6   1    7.60    7.80 
   7   6  -1   11.10    6.30 
   6  -6  -1  511.85   31.00 
  -6  -6   1  513.15   26.30 
  -6  -6   1  513.65   29.40 
  -6  -6   1  454.95   31.80 
   6  -6  -1  519.85   33.60 
  -6  -6   1  489.35   30.00 
  -6  -6   1  558.74   30.80 
  -6  -6   1  563.44   32.60 
  -6  -6   1  500.25   28.50 
  -6  -6   1  543.95   33.60 
  -6  -6   1  478.25   28.60 
   6  -6  -1  476.45   26.50 
   6  -6  -1  468.25   34.60 
  -6  -6   1  487.55   31.10 
   6  -6  -1  468.15   29.90 
  -6  -6   1  525.95   31.00 
  -6  -6   1  549.85   29.30 
   6  -6  -1  510.05   29.30 
   6  -6  -1  533.25   35.00 
   6  -6  -1  544.65   34.10 
  -6  -6   1  450.05   29.00 
  -6  -6   1  510.35   31.30 
  -6  -6   1  483.75   30.60 
  -6  -6   1  488.55   32.00 
  -6  -6   1  499.15   26.40 
  -6   6   1  498.05   29.80 
   6   6  -1  473.95   30.60 
   6   6  -1  550.44   33.00 
  -6   6   1  493.35   29.40 
  -6   6   1  549.95   34.90 
   6   6  -1  559.04   31.30 
   6   6  -1  433.66   27.90 
  -6   6   1  513.05   29.10 
  -6   6   1  447.76   26.50 
   6   6  -1  516.25   31.70 
   6   6  -1  479.45   32.70 
   6   6  -1  502.25   30.20 
   6   6  -1  497.85   28.20 
  -6   6   1  501.15   28.20 
   6   6  -1  542.05   32.30 
   6   6  -1  482.75   26.60 
   6   6  -1  489.15   33.60 
  -6   6   1  491.95   28.80 
  -6   6   1  479.35   29.70 
   6   6  -1  486.35   26.50 
   6   6  -1  495.05   31.00 
  -5  -6   1  140.39   17.60 
   5  -6  -1  137.09   14.50 
   5  -6  -1  141.19   19.70 
   5  -6  -1  136.89   13.80 
   5  -6  -1  140.59   19.60 
  -5  -6   1  105.29   16.10 
  -5  -6   1  158.18   19.70 
  -5  -6   1  139.19   16.20 
  -5  -6   1  133.89   17.00 
  -5  -6   1  137.09   19.40 
  -5  -6   1  130.29   16.50 
   5  -6  -1  136.99   15.80 
  -5  -6   1  115.59   15.50 
  -5  -6   1  120.59   16.20 
  -5  -6   1  149.79   17.80 
  -5  -6   1  135.59   13.00 
  -5  -6   1  126.49   15.90 
   5  -6  -1  152.58   22.50 
   5  -6  -1  151.38   20.40 
  -5  -6   1  171.58   14.20 
   5  -6  -1  109.49   15.80 
  -5  -6   1  130.19   14.30 
   5  -6  -1  151.08   16.90 
  -5  -6   1  121.19   15.10 
  -5  -6   1  127.79   13.20 
  -5  -6   1  109.89   16.10 
   5  -6  -1  131.49   16.20 
  -5   6   1  140.29   16.70 
   5   6  -1  144.99   16.30 
  -5   6   1  124.19   14.40 
   5   6  -1  129.29   13.30 
  -5   6   1  149.79   17.10 
  -5   6   1  117.69   12.10 
   5   6  -1  144.59   19.30 
   5   6  -1  131.49   17.60 
   5   6  -1  130.49   15.90 
   5   6  -1  147.29   18.30 
   5   6  -1  137.59   17.30 
  -5   6   1  130.59   16.10 
   5   6  -1  106.39   16.00 
   5   6  -1  156.58   14.70 
   5   6  -1  124.89   16.30 
  -5   6   1  154.68   12.40 
  -5   6   1  130.99   13.80 
   5   6  -1  172.48   13.80 
   5   6  -1  130.69   15.80 
  -5   6   1  137.59   15.20 
   5   6  -1  126.49   13.90 
  -5   6   1  111.79   14.70 
  -5   6   1  128.49   19.00 
  -4  -6   1  366.26   18.30 
  -4  -6   1  380.46   20.20 
  -4  -6   1  428.06   25.10 
  -4  -6   1  415.66   18.70 
  -4  -6   1  355.46   18.40 
  -4  -6   1  372.46   23.20 
  -4  -6   1  353.46   20.50 
  -4  -6   1  345.37   22.70 
  -4  -6   1  401.26   25.00 
  -4  -6   1  385.56   24.00 
   4  -6  -1  373.96   26.50 
  -4  -6   1  344.27   21.00 
   4  -6  -1  402.76   21.90 
  -4  -6   1  382.56   24.20 
   4  -6  -1  354.66   26.20 
  -4  -6   1  383.86   26.80 
  -4  -6   1  360.76   25.50 
   4  -6  -1  361.86   24.20 
  -4  -6   1  404.66   24.80 
  -4  -6   1  373.46   23.80 
   4  -6  -1  349.17   34.60 
   4  -6  -1  387.66   24.90 
   4  -6  -1  356.76   26.30 
  -4  -6   1  333.67   22.30 
   4  -6  -1  397.06   19.60 
   4  -6  -1  397.46   23.20 
  -4  -6   1  367.06   22.90 
   4  -6  -1  372.16   18.70 
  -4   6   1  380.16   20.50 
  -4   6   1  375.66   23.00 
   4   6  -1  361.96   25.60 
   4   6  -1  373.06   26.00 
   4   6  -1  363.36   20.80 
   4   6  -1  344.97   23.70 
  -4   6   1  390.26   20.80 
  -4   6   1  396.16   18.20 
   4   6  -1  345.87   20.70 
  -4   6   1  393.36   19.40 
   4   6  -1  348.37   24.80 
   4   6  -1  344.27   22.40 
  -4   6   1  347.57   25.70 
   4   6  -1  388.16   25.40 
   4   6  -1  396.06   23.30 
  -4   6   1  374.76   23.50 
   4   6  -1  350.16   24.50 
  -4   6   1  357.76   22.70 
  -4   6   1  402.06   23.30 
   4   6  -1  334.27   22.20 
  -4   6   1  376.96   20.60 
   4   6  -1  383.16   19.00 
   4   6  -1  423.06   25.90 
   4   6  -1  390.56   18.80 
   3  -6  -1    4.40    2.00 
   3  -6  -1    8.80    6.00 
   3  -6  -1    7.20    2.10 
  -3  -6   1    3.50    4.10 
   3  -6  -1    8.10    4.40 
  -3  -6   1    0.30    3.20 
   3  -6  -1    2.40    2.70 
   3  -6  -1    1.20    5.00 
   3  -6  -1    3.30    4.10 
  -3  -6   1    3.50    2.50 
  -3  -6   1    5.50    3.70 
  -3  -6   1   -0.70    2.80 
   3  -6  -1    6.10    3.40 
  -3  -6   1    7.50    4.20 
   3  -6  -1    2.50    4.60 
   3  -6  -1    7.50    3.00 
   3  -6  -1    7.20    5.60 
  -3  -6   1    9.30    5.70 
  -3  -6   1    2.10    2.80 
  -3  -6   1    5.80    4.40 
   3  -6  -1    7.70    2.60 
  -3  -6   1    4.40    4.20 
  -3  -6   1    3.10    2.70 
   3  -6  -1    6.00    4.40 
  -3  -6   1    6.30    4.40 
  -3  -6   1    4.90    4.60 
  -3  -6   1    1.90    4.00 
  -3  -6   1    0.70    2.40 
  -3  -6   1    0.70    4.40 
   3  -6  -1    3.20    5.50 
  -3  -6   1    4.30    4.10 
   3   6  -1    0.60    4.40 
   3   6  -1    9.00    5.50 
   3   6  -1   -0.20    3.10 
  -3   6   1   14.50    5.90 
   3   6  -1    1.60    4.00 
  -3   6   1    2.10    4.50 
  -3   6   1    4.20    4.70 
  -3   6   1    2.60    3.10 
   3   6  -1    5.70    3.90 
   3   6  -1    1.30    3.20 
   3   6  -1    3.20    4.80 
   3   6  -1    5.00    4.70 
  -3   6   1    7.00    3.60 
   3   6  -1    8.50    5.60 
   3   6  -1    5.50    4.50 
  -3   6   1    5.80    4.30 
   3   6  -1    5.20    3.00 
  -3   6   1    8.00    2.90 
   3   6  -1    3.90    2.70 
   3   6  -1   12.20    5.40 
   3   6  -1    0.50    3.70 
  -3   6   1    1.60    3.20 
  -3   6   1    5.20    4.60 
  -3   6   1    3.70    3.00 
  -3   6   1    2.50    3.30 
   2  -6  -1   11.50    2.50 
  -2  -6   1   10.80    5.40 
  -2  -6   1   15.40    5.10 
   2  -6  -1   17.10    6.80 
   2  -6  -1   10.10    3.20 
  -2  -6   1   15.70    5.40 
  -2  -6   1   12.90    2.70 
  -2  -6   1   10.70    4.30 
  -2  -6   1    7.60    3.30 
   2  -6  -1   17.40    5.40 
  -2  -6   1   18.60    4.40 
   2  -6  -1   12.60    5.30 
  -2  -6   1   13.70    3.50 
   2  -6  -1   14.90    3.50 
   2  -6  -1    7.60    4.60 
  -2  -6   1   12.00    4.80 
  -2  -6   1    6.00    4.30 
  -2  -6   1   13.50    6.50 
   2  -6  -1   17.50    3.50 
  -2  -6   1   10.90    4.30 
   2  -6  -1   17.10    6.40 
   2  -6  -1   17.50    2.90 
   2  -6  -1   15.40    3.00 
   2  -6  -1   13.60    4.70 
  -2  -6   1   16.00    4.20 
   2  -6  -1   14.90    4.50 
   2  -6  -1    6.60    4.70 
   2  -6  -1   19.80    6.90 
   2  -6  -1   17.70    4.10 
   2  -6  -1   12.60    2.60 
  -2  -6   1    7.50    4.40 
  -2  -6   1   14.30    3.30 
  -2  -6   1   18.10    6.40 
   2  -6  -1   17.70    5.90 
  -2  -6   1   16.70    7.00 
  -2  -6   1   17.70    4.50 
  -2  -6   1    8.80    4.40 
   2  -6  -1   14.70    6.90 
  -2   6   1   15.50    7.30 
   2   6  -1    5.90    4.70 
   2   6  -1   17.50    4.80 
   2   6  -1   15.50    2.80 
  -2   6   1   12.20    3.50 
   2   6  -1   12.20    3.60 
   2   6  -1   12.30    4.00 
  -2   6   1   10.90    5.20 
   2   6  -1   13.20    3.90 
   2   6  -1   18.80    5.10 
   2   6  -1   16.00    6.60 
   2   6  -1   19.90    7.70 
  -2   6   1   16.30    2.80 
   2   6  -1   15.30    6.30 
   2   6  -1   15.40    2.20 
   2   6  -1   11.30    5.60 
  -2   6   1    6.70    4.10 
  -2   6   1   14.20    3.70 
  -2   6   1    9.40    6.00 
  -2   6   1   17.20    5.30 
  -2   6   1   13.70    5.60 
   2   6  -1    0.20    3.40 
   2   6  -1   17.80    3.20 
  -2   6   1    0.90    3.50 
   2   6  -1   19.20    7.30 
  -2   6   1   10.70    4.80 
   2   6  -1   11.20    6.70 
   2   6  -1   17.10    6.30 
   1  -6  -1   89.59    5.80 
   1  -6  -1   74.09    7.90 
  -1  -6   1   78.39    8.60 
   1  -6  -1   75.59    8.20 
  -1  -6   1   72.09   10.10 
  -1  -6   1   97.59    9.80 
  -1  -6   1   79.49   11.30 
   1  -6  -1   89.49    9.30 
  -1  -6   1   74.89    8.50
[truncated: 3,886,818 more chars]
