# Supplementary material
Source: MDPI journal article supplement (https://www.mdpi.com/2073-4352/13/7/1043)
Supplement: s1 [file s1 › 10 Ho(OAc)2Br x 3H2O_Tabellen.pdf]

Table S1. Crystal data and structure refinement for  $\text{Ho}(\text{OAc})_2\text{Br}\cdot x\text{H}_2\text{O}$ .

|                                      |                                                                                       |
|--------------------------------------|---------------------------------------------------------------------------------------|
| Identification code                  | Ha2019_84_0m_a                                                                        |
| Empirical formula                    | $\text{C}_4\text{H}_{12}\text{BrHoO}_7$                                               |
| Formula weight                       | 416.98                                                                                |
| Temperature                          | 100(2) K                                                                              |
| Wavelength                           | 0.71073 Å                                                                             |
| Crystal system, space group          | Monoclinic, $P2(1)/n$                                                                 |
| Unit cell dimensions                 | $a = 7.8117(3)$ Å<br>$b = 8.0361(4)$ Å $\beta = 96.096(3)$ deg.<br>$c = 17.5440(9)$ Å |
| Volume                               | $1095.11(9)$ Å <sup>3</sup>                                                           |
| Z, Calculated density                | 4, 2.529 Mg/m <sup>3</sup>                                                            |
| Absorption coefficient               | $10.878\text{ mm}^{-1}$                                                               |
| F(000)                               | 776                                                                                   |
| Crystal size                         | 0.487 x 0.172 x 0.070 mm                                                              |
| Theta range for data collection      | 2.755 to 28.000 deg.                                                                  |
| Limiting indices                     | $-10 \leq h \leq 10$ , $-10 \leq k \leq 10$ , $-23 \leq l \leq 23$                    |
| Reflections collected / unique       | 102663 / 2655 [ $R(\text{int}) = 0.0734$ ]                                            |
| Completeness to theta = 25.242       | 99.9 %                                                                                |
| Absorption correction                | Semi-empirical from equivalents                                                       |
| Max. and min. transmission           | 0.754 and 0.365                                                                       |
| Refinement method                    | Full-matrix least-squares on $F^2$                                                    |
| Data / restraints / parameters       | 2655 / 0 / 125                                                                        |
| Goodness-of-fit on $F^2$             | 1.051                                                                                 |
| Final R indices [ $I > 2\sigma(I)$ ] | $R_1 = 0.0148$ , $wR_2 = 0.0337$                                                      |
| R indices (all data)                 | $R_1 = 0.0196$ , $wR_2 = 0.0354$                                                      |
| Extinction coefficient               | n/a                                                                                   |
| Largest diff. peak and hole          | 0.508 and $-0.579\text{ e.Å}^{-3}$                                                    |

Table S2. Atomic coordinates ( $\times 10^4$ ) and equivalent isotropic displacement parameters ( $\text{\AA}^2 \times 10^3$ ) for  $\text{Ho}(\text{OAc})_2\text{Br} \cdot 3\text{H}_2\text{O}$ .  $U(\text{eq})$  is defined as one third of the trace of the orthogonalized  $U_{ij}$  tensor.

|        | x         | y        | z        | U (eq) |
|--------|-----------|----------|----------|--------|
| Ho (1) | 2694 (1)  | 4500 (1) | 5383 (1) | 11 (1) |
| Br (1) | 3868 (1)  | 9517 (1) | 6823 (1) | 17 (1) |
| O (11) | 106 (2)   | 3278 (2) | 5385 (1) | 21 (1) |
| O (12) | -2677 (2) | 2860 (2) | 5228 (1) | 16 (1) |
| C (11) | -1183 (3) | 2384 (3) | 5472 (2) | 13 (1) |
| C (12) | -959 (4)  | 739 (4)  | 5875 (2) | 25 (1) |
| O (21) | 5392 (2)  | 5551 (2) | 5736 (1) | 13 (1) |
| O (22) | 8104 (2)  | 6221 (2) | 5931 (1) | 15 (1) |
| C (21) | 6718 (3)  | 5872 (3) | 6203 (2) | 13 (1) |
| C (22) | 6636 (3)  | 5812 (4) | 7046 (2) | 19 (1) |
| O (1W) | 4039 (2)  | 1873 (2) | 5321 (1) | 15 (1) |
| O (2W) | 1557 (2)  | 6333 (2) | 6241 (1) | 14 (1) |
| O (3W) | 3039 (2)  | 3418 (2) | 6649 (1) | 19 (1) |

Table S3. Bond lengths [Å] and angles [deg] for Ho(OAc)<sub>2</sub>Br·x·3H<sub>2</sub>O.

---

|                       |            |
|-----------------------|------------|
| Ho(1)-O(11)           | 2.248(2)   |
| Ho(1)-O(21)           | 2.294(2)   |
| Ho(1)-O(2W)           | 2.346(2)   |
| Ho(1)-O(1W)           | 2.366(2)   |
| Ho(1)-O(3W)           | 2.373(2)   |
| Ho(1)-O(12)#1         | 2.376(2)   |
| Ho(1)-O(22)#2         | 2.395(2)   |
| Ho(1)-O(21)#2         | 2.591(2)   |
| Ho(1)-O(11)#1         | 3.026(2)   |
|                       |            |
| Ho(1)-Ho(1)#2         | 4.0576(3)  |
| Ho(1)-Ho(1)#1         | 4.3544(3)  |
|                       |            |
| O(11)-C(11)           | 1.260(3)   |
| O(12)-C(11)           | 1.260(3)   |
| C(11)-C(12)           | 1.500(4)   |
|                       |            |
| O(21)-C(21)           | 1.277(3)   |
| O(22)-C(21)           | 1.260(3)   |
| C(21)-C(22)           | 1.489(4)   |
|                       |            |
| O(11)-Ho(1)-O(21)     | 164.01(7)  |
| O(11)-Ho(1)-O(2W)     | 82.64(6)   |
| O(21)-Ho(1)-O(2W)     | 89.75(6)   |
| O(11)-Ho(1)-O(1W)     | 90.81(7)   |
| O(21)-Ho(1)-O(1W)     | 86.61(6)   |
| O(2W)-Ho(1)-O(1W)     | 142.19(6)  |
| O(11)-Ho(1)-O(3W)     | 81.47(7)   |
| O(21)-Ho(1)-O(3W)     | 82.69(6)   |
| O(2W)-Ho(1)-O(3W)     | 69.09(6)   |
| O(1W)-Ho(1)-O(3W)     | 73.11(6)   |
| O(11)-Ho(1)-O(12)#1   | 115.40(7)  |
| O(21)-Ho(1)-O(12)#1   | 75.75(6)   |
| O(2W)-Ho(1)-O(12)#1   | 75.19(6)   |
| O(1W)-Ho(1)-O(12)#1   | 139.19(6)  |
| O(3W)-Ho(1)-O(12)#1   | 138.05(7)  |
| O(11)-Ho(1)-O(22)#2   | 75.72(6)   |
| O(21)-Ho(1)-O(22)#2   | 119.09(6)  |
| O(2W)-Ho(1)-O(22)#2   | 133.78(6)  |
| O(1W)-Ho(1)-O(22)#2   | 79.09(6)   |
| O(3W)-Ho(1)-O(22)#2   | 143.53(7)  |
| O(12)#1-Ho(1)-O(22)#2 | 78.09(6)   |
| O(11)-Ho(1)-O(21)#2   | 125.84(6)  |
| O(21)-Ho(1)-O(21)#2   | 67.80(7)   |
| O(2W)-Ho(1)-O(21)#2   | 141.62(6)  |
| O(1W)-Ho(1)-O(21)#2   | 69.86(6)   |
| O(3W)-Ho(1)-O(21)#2   | 133.27(6)  |
| O(12)#1-Ho(1)-O(21)#2 | 69.42(6)   |
| O(22)#2-Ho(1)-O(21)#2 | 51.61(5)   |
| O(11)-Ho(1)-O(11)#1   | 69.56(7)   |
| O(21)-Ho(1)-O(11)#1   | 120.20(6)  |
| O(2W)-Ho(1)-O(11)#1   | 67.08(6)   |
| O(1W)-Ho(1)-O(11)#1   | 144.02(6)  |
| O(3W)-Ho(1)-O(11)#1   | 129.61(6)  |
| O(12)#1-Ho(1)-O(11)#1 | 45.86(5)   |
| O(22)#2-Ho(1)-O(11)#1 | 67.19(6)   |
| O(21)#2-Ho(1)-O(11)#1 | 96.90(5)   |
|                       |            |
| Ho(1)#2-Ho(1)-Ho(1)#1 | 136.417(6) |

|                         |           |
|-------------------------|-----------|
| C (11)-O (11)-Ho (1)    | 168.5 (2) |
| C (11)-O (12)-Ho (1) #1 | 112.7 (2) |
| O (11)-C (11)-O (12)    | 120.6 (2) |
| O (11)-C (11)-C (12)    | 120.4 (2) |
| O (12)-C (11)-C (12)    | 119.0 (2) |
| C (21)-O (21)-Ho (1)    | 155.1 (2) |
| C (21)-O (21)-Ho (1) #2 | 89.7 (2)  |
| Ho (1)-O (21)-Ho (1) #2 | 112.2 (1) |
| C (21)-O (22)-Ho (1) #2 | 99.4 (2)  |
| O (22)-C (21)-O (21)    | 118.3 (2) |
| O (22)-C (21)-C (22)    | 120.8 (2) |
| O (21)-C (21)-C (22)    | 120.9 (2) |

---

Symmetry transformations used to generate equivalent atoms:  
 #1 -x,-y+1,-z+1      #2 -x+1,-y+1,-z+1

Table S4. Anisotropic displacement parameters ( $\text{\AA}^2 \times 10^3$ ) for  
 $\text{Ho}(\text{OAc})_2\text{Br} \cdot 3\text{H}_2\text{O}$ .

The anisotropic displacement factor exponent takes the form:  
 $-2 \pi^2 [ h^2 a^{*2} U_{11} + \dots + 2 h k a^* b^* U_{12} ]$

|        | U <sub>11</sub> | U <sub>22</sub> | U <sub>33</sub> | U <sub>23</sub> | U <sub>13</sub> | U <sub>12</sub> |
|--------|-----------------|-----------------|-----------------|-----------------|-----------------|-----------------|
| Ho (1) | 7 (1)           | 13 (1)          | 12 (1)          | 0 (1)           | 2 (1)           | -2 (1)          |
| Br (1) | 21 (1)          | 14 (1)          | 18 (1)          | 1 (1)           | 2 (1)           | -2 (1)          |
| O (11) | 14 (1)          | 26 (1)          | 24 (1)          | -5 (1)          | 7 (1)           | -11 (1)         |
| O (12) | 10 (1)          | 19 (1)          | 18 (1)          | 2 (1)           | 2 (1)           | 2 (1)           |
| C (11) | 13 (1)          | 13 (1)          | 13 (1)          | -2 (1)          | 5 (1)           | 1 (1)           |
| C (12) | 26 (2)          | 22 (2)          | 25 (2)          | 9 (1)           | 1 (1)           | 4 (1)           |
| O (21) | 10 (1)          | 14 (1)          | 14 (1)          | -1 (1)          | 1 (1)           | -2 (1)          |
| O (22) | 8 (1)           | 19 (1)          | 18 (1)          | -3 (1)          | 0 (1)           | -3 (1)          |
| C (21) | 12 (1)          | 12 (1)          | 14 (1)          | -2 (1)          | 1 (1)           | 1 (1)           |
| C (22) | 15 (1)          | 28 (2)          | 13 (1)          | 1 (1)           | 0 (1)           | 3 (1)           |
| O (1W) | 13 (1)          | 16 (1)          | 17 (1)          | 1 (1)           | 5 (1)           | 0 (1)           |
| O (2W) | 10 (1)          | 16 (1)          | 17 (1)          | -4 (1)          | 2 (1)           | 0 (1)           |
| O (3W) | 26 (1)          | 16 (1)          | 17 (1)          | 2 (1)           | 7 (1)           | 4 (1)           |

Table S5. Hydrogen coordinates ( $\times 10^4$ ) and isotropic displacement parameters ( $\text{\AA}^2 \times 10^3$ ) for  $\text{Ho}(\text{OAc})_2\text{Br}\cdot 3\text{H}_2\text{O}$ .

|        | x     | y    | z    | U (eq)  |
|--------|-------|------|------|---------|
| H(12A) | 256   | 580  | 6063 | 86 (10) |
| H(12B) | -1334 | -157 | 5516 | 86 (10) |
| H(12C) | -1655 | 719  | 6308 | 86 (10) |
| H(22A) | 7806  | 5751 | 7310 | 24 (8)  |
| H(22B) | 5983  | 4829 | 7175 | 24 (8)  |
| H(22C) | 6066  | 6817 | 7210 | 24 (8)  |
| H(22D) | 5411  | 5872 | 7119 | 24 (8)  |
| H(22E) | 7227  | 6804 | 7267 | 24 (8)  |
| H(22F) | 7143  | 4815 | 7301 | 24 (8)  |
| H(11W) | 4051  | 1048 | 5717 | 63 (9)  |
| H(12W) | 5217  | 1969 | 5216 | 63 (9)  |
| H(21W) | 351   | 6473 | 6284 | 47 (8)  |
| H(22W) | 2078  | 7362 | 6421 | 47 (8)  |
| H(31W) | 2494  | 3909 | 7060 | 50 (8)  |
| H(32W) | 3320  | 2305 | 6816 | 50 (8)  |

Table S6. Hydrogen bonds for Ho(OAc)<sub>2</sub>Br·x<sub>3</sub>H<sub>2</sub>O [Å and deg.].

| D-H...A                | d(D-H) | d(H...A) | d(D...A) | <(DHA) |
|------------------------|--------|----------|----------|--------|
| O(1W)-H(11W)...Br(1)#3 | 0.96   | 2.32     | 3.260(2) | 167.8  |
| O(1W)-H(12W)...O(12)#4 | 0.96   | 1.79     | 2.706(2) | 158.0  |
| O(2W)-H(21W)...O(22)#5 | 0.96   | 1.81     | 2.696(2) | 152.2  |
| O(2W)-H(22W)...Br(1)   | 0.96   | 2.29     | 3.233(2) | 167.5  |
| O(3W)-H(31W)...Br(1)#6 | 0.96   | 2.38     | 3.322(2) | 167.5  |
| O(3W)-H(32W)...Br(1)#3 | 0.96   | 2.28     | 3.210(2) | 162.6  |

Symmetry transformations used to generate equivalent atoms:

#1 -x,-y+1,-z+1      #2 -x+1,-y+1,-z+1      #3 x,y-1,z  
#4 x+1,y,z      #5 x-1,y,z      #6 -x+1/2,y-1/2,-z+3/2
