# Supplementary material
Source: MDPI journal article supplement (https://www.mdpi.com/2073-4352/13/7/1043)
Supplement: s1 [file s1 › 10 Ho(OAc)2Cl x 3H2O_Tabellen.pdf]

Table S1. Crystal data and structure refinement for  $\text{Ho}(\text{OAc})_2\text{Cl}\cdot 3\text{H}_2\text{O}$ .

|                                      |                                                                                       |
|--------------------------------------|---------------------------------------------------------------------------------------|
| Identification code                  | Ha2019_86_0m_a                                                                        |
| Empirical formula                    | $\text{C}_4\text{H}_{12}\text{ClHoO}_7$                                               |
| Formula weight                       | 372.52                                                                                |
| Temperature                          | 100(2) K                                                                              |
| Wavelength                           | 0.71073 Å                                                                             |
| Crystal system, space group          | Monoclinic, $P2(1)/n$                                                                 |
| Unit cell dimensions                 | $a = 7.7993(3)$ Å<br>$b = 7.8345(3)$ Å $\beta = 97.881(2)$ deg.<br>$c = 17.2564(7)$ Å |
| Volume                               | $1044.47(7)$ Å <sup>3</sup>                                                           |
| Z, Calculated density                | 4, 2.369 Mg/m <sup>3</sup>                                                            |
| Absorption coefficient               | $7.835\text{ mm}^{-1}$                                                                |
| F(000)                               | 704                                                                                   |
| Crystal size                         | 0.381 x 0.090 x 0.078 mm                                                              |
| Theta range for data collection      | 2.740 to 27.997 deg.                                                                  |
| Limiting indices                     | $-10 \leq h \leq 10$ , $-10 \leq k \leq 10$ , $-22 \leq l \leq 22$                    |
| Reflections collected / unique       | 133421 / 2528 [ $R(\text{int}) = 0.0358$ ]                                            |
| Completeness to theta = 25.242       | 99.9 %                                                                                |
| Absorption correction                | Semi-empirical from equivalents                                                       |
| Max. and min. transmission           | 0.746 and 0.398                                                                       |
| Refinement method                    | Full-matrix least-squares on $F^2$                                                    |
| Data / restraints / parameters       | 2528 / 0 / 126                                                                        |
| Goodness-of-fit on $F^2$             | 1.176                                                                                 |
| Final R indices [ $I > 2\sigma(I)$ ] | $R_1 = 0.0103$ , $wR_2 = 0.0234$                                                      |
| R indices (all data)                 | $R_1 = 0.0106$ , $wR_2 = 0.0235$                                                      |
| Extinction coefficient               | $0.00185(8)$                                                                          |
| Largest diff. peak and hole          | 0.364 and $-0.436\text{ e.Å}^{-3}$                                                    |

Table S2. Atomic coordinates ( $\times 10^4$ ) and equivalent isotropic displacement parameters ( $\text{\AA}^2 \times 10^3$ ) for  $\text{Ho}(\text{OAc})_2\text{Cl} \cdot 3\text{H}_2\text{O}$ .  $U(\text{eq})$  is defined as one third of the trace of the orthogonalized  $U_{ij}$  tensor.

|        | x         | y        | z        | U (eq) |
|--------|-----------|----------|----------|--------|
| Ho (1) | 2715 (1)  | 4521 (1) | 5400 (1) | 9 (1)  |
| Cl (1) | 3787 (1)  | 9611 (1) | 6861 (1) | 16 (1) |
| O (11) | 115 (2)   | 3276 (2) | 5406 (1) | 19 (1) |
| O (12) | -2673 (2) | 2810 (2) | 5260 (1) | 14 (1) |
| C (11) | -1149 (2) | 2340 (2) | 5506 (1) | 11 (1) |
| C (12) | -874 (3)  | 658 (3)  | 5911 (1) | 22 (1) |
| O (21) | 5440 (2)  | 5624 (2) | 5741 (1) | 12 (1) |
| O (22) | 8171 (2)  | 6299 (2) | 5935 (1) | 14 (1) |
| C (21) | 6791 (2)  | 5992 (2) | 6214 (1) | 11 (1) |
| C (22) | 6740 (2)  | 6046 (3) | 7073 (1) | 18 (1) |
| O (1W) | 4051 (2)  | 1812 (2) | 5376 (1) | 14 (1) |
| O (2W) | 1656 (2)  | 6467 (2) | 6251 (1) | 14 (1) |
| O (3W) | 3132 (2)  | 3472 (2) | 6707 (1) | 17 (1) |

Table S3. Bond lengths [Å] and angles [deg] for Ho(OAc<sub>2</sub>)Cl\_x\_3H<sub>2</sub>O.

---

|                       |            |
|-----------------------|------------|
| Ho(1)-O(11)           | 2.252(1)   |
| Ho(1)-O(21)           | 2.295(1)   |
| Ho(1)-O(2W)           | 2.345(1)   |
| Ho(1)-O(1W)           | 2.367(1)   |
| Ho(1)-O(12)#1         | 2.378(1)   |
| Ho(1)-O(3W)           | 2.381(1)   |
| Ho(1)-O(22)#2         | 2.400(1)   |
| Ho(1)-O(21)#2         | 2.596(1)   |
| Ho(1)-O(11)#1         | 2.991(1)   |
|                       |            |
| Ho(1)-Ho(1)#2         | 4.0640(2)  |
| Ho(1)-Ho(1)#1         | 4.3361(2)  |
|                       |            |
| O(11)-C(11)           | 1.259(2)   |
| O(12)-C(11)           | 1.262(2)   |
| C(11)-C(12)           | 1.493(2)   |
|                       |            |
| O(21)-C(21)           | 1.274(2)   |
| O(22)-C(21)           | 1.261(2)   |
| C(21)-C(22)           | 1.488(2)   |
|                       |            |
| O(11)-Ho(1)-O(21)     | 164.74(5)  |
| O(11)-Ho(1)-O(2W)     | 83.34(4)   |
| O(21)-Ho(1)-O(2W)     | 89.29(4)   |
| O(11)-Ho(1)-O(1W)     | 90.59(5)   |
| O(21)-Ho(1)-O(1W)     | 87.01(4)   |
| O(2W)-Ho(1)-O(1W)     | 141.98(4)  |
| O(11)-Ho(1)-O(12)#1   | 115.46(5)  |
| O(21)-Ho(1)-O(12)#1   | 75.13(4)   |
| O(2W)-Ho(1)-O(12)#1   | 75.23(4)   |
| O(1W)-Ho(1)-O(12)#1   | 139.20(4)  |
| O(11)-Ho(1)-O(3W)     | 81.49(5)   |
| O(21)-Ho(1)-O(3W)     | 83.41(4)   |
| O(2W)-Ho(1)-O(3W)     | 69.20(4)   |
| O(1W)-Ho(1)-O(3W)     | 72.78(4)   |
| O(12)#1-Ho(1)-O(3W)   | 138.40(4)  |
| O(11)-Ho(1)-O(22)#2   | 75.38(4)   |
| O(21)-Ho(1)-O(22)#2   | 118.81(4)  |
| O(2W)-Ho(1)-O(22)#2   | 134.06(4)  |
| O(1W)-Ho(1)-O(22)#2   | 79.21(4)   |
| O(12)#1-Ho(1)-O(22)#2 | 78.04(4)   |
| O(3W)-Ho(1)-O(22)#2   | 143.23(5)  |
| O(11)-Ho(1)-O(21)#2   | 125.30(4)  |
| O(21)-Ho(1)-O(21)#2   | 67.75(5)   |
| O(2W)-Ho(1)-O(21)#2   | 141.55(4)  |
| O(1W)-Ho(1)-O(21)#2   | 69.91(4)   |
| O(12)#1-Ho(1)-O(21)#2 | 69.40(4)   |
| O(3W)-Ho(1)-O(21)#2   | 133.30(4)  |
| O(22)#2-Ho(1)-O(21)#2 | 51.44(4)   |
| O(11)-Ho(1)-O(11)#1   | 69.17(5)   |
| O(21)-Ho(1)-O(11)#1   | 120.04(4)  |
| O(2W)-Ho(1)-O(11)#1   | 67.33(4)   |
| O(1W)-Ho(1)-O(11)#1   | 143.90(4)  |
| O(12)#1-Ho(1)-O(11)#1 | 46.33(4)   |
| O(3W)-Ho(1)-O(11)#1   | 129.46(4)  |
| O(22)#2-Ho(1)-O(11)#1 | 67.14(4)   |
| O(21)#2-Ho(1)-O(11)#1 | 97.09(4)   |
|                       |            |
| Ho(1)#2-Ho(1)-Ho(1)#1 | 136.374(4) |

|                         |           |
|-------------------------|-----------|
| C (11)-O (11)-Ho (1)    | 167.3 (1) |
| C (11)-O (12)-Ho (1) #1 | 111.6 (1) |
| O (11)-C (11)-O (12)    | 120.2 (2) |
| O (11)-C (11)-C (12)    | 120.9 (2) |
| O (12)-C (11)-C (12)    | 118.9 (2) |
| C (21)-O (21)-Ho (1)    | 154.8 (1) |
| C (21)-O (21)-Ho (1) #2 | 90.0 (1)  |
| Ho (1)-O (21)-Ho (1) #2 | 112.3 (1) |
| C (21)-O (22)-Ho (1) #2 | 99.6 (1)  |
| O (22)-C (21)-O (21)    | 118.2 (2) |
| O (22)-C (21)-C (22)    | 121.0 (2) |
| O (21)-C (21)-C (22)    | 120.8 (2) |

---

Symmetry transformations used to generate equivalent atoms:  
 #1 -x,-y+1,-z+1      #2 -x+1,-y+1,-z+1

Table S4. Anisotropic displacement parameters ( $\text{\AA}^2 \times 10^3$ ) for  
 $\text{Ho}(\text{OAc})_2\text{Cl} \cdot 3\text{H}_2\text{O}$ .

The anisotropic displacement factor exponent takes the form:  
 $-2 \pi^2 [ h^2 a^{*2} U_{11} + \dots + 2 h k a^* b^* U_{12} ]$

|        | U <sub>11</sub> | U <sub>22</sub> | U <sub>33</sub> | U <sub>23</sub> | U <sub>13</sub> | U <sub>12</sub> |
|--------|-----------------|-----------------|-----------------|-----------------|-----------------|-----------------|
| Ho (1) | 7 (1)           | 10 (1)          | 11 (1)          | 0 (1)           | 2 (1)           | -2 (1)          |
| Cl (1) | 18 (1)          | 12 (1)          | 17 (1)          | 1 (1)           | 2 (1)           | -1 (1)          |
| O (11) | 14 (1)          | 23 (1)          | 22 (1)          | -7 (1)          | 8 (1)           | -9 (1)          |
| O (12) | 9 (1)           | 16 (1)          | 18 (1)          | 3 (1)           | 2 (1)           | 1 (1)           |
| C (11) | 11 (1)          | 12 (1)          | 12 (1)          | -2 (1)          | 3 (1)           | -1 (1)          |
| C (12) | 26 (1)          | 18 (1)          | 22 (1)          | 6 (1)           | 2 (1)           | 6 (1)           |
| O (21) | 9 (1)           | 13 (1)          | 14 (1)          | 0 (1)           | 1 (1)           | -1 (1)          |
| O (22) | 9 (1)           | 16 (1)          | 15 (1)          | -2 (1)          | 2 (1)           | -2 (1)          |
| C (21) | 11 (1)          | 8 (1)           | 14 (1)          | 0 (1)           | 1 (1)           | 1 (1)           |
| C (22) | 15 (1)          | 26 (1)          | 12 (1)          | -1 (1)          | 1 (1)           | 2 (1)           |
| O (1W) | 12 (1)          | 14 (1)          | 16 (1)          | 2 (1)           | 5 (1)           | 1 (1)           |
| O (2W) | 10 (1)          | 13 (1)          | 17 (1)          | -3 (1)          | 1 (1)           | 0 (1)           |
| O (3W) | 24 (1)          | 14 (1)          | 16 (1)          | 2 (1)           | 8 (1)           | 4 (1)           |

Table S5. Hydrogen coordinates ( $\times 10^4$ ) and isotropic displacement parameters ( $\text{\AA}^2 \times 10^3$ ) for  $\text{Ho}(\text{OAc})_2\text{Cl} \cdot 3\text{H}_2\text{O}$ .

|        | x     | y    | z    | U (eq) |
|--------|-------|------|------|--------|
| H(12A) | -1098 | -264 | 5526 | 69 (6) |
| H(12B) | -1666 | 551  | 6302 | 69 (6) |
| H(12C) | 324   | 581  | 6169 | 69 (6) |
| H(22A) | 7913  | 5901 | 7351 | 50 (5) |
| H(22B) | 5998  | 5125 | 7220 | 50 (5) |
| H(22C) | 6275  | 7149 | 7214 | 50 (5) |
| H(11W) | 3999  | 939  | 5762 | 43 (6) |
| H(12W) | 5257  | 1910 | 5323 | 43 (6) |
| H(21W) | 436   | 6638 | 6247 | 48 (6) |
| H(22W) | 2176  | 7541 | 6415 | 48 (6) |
| H(31W) | 2534  | 3979 | 7100 | 44 (6) |
| H(32W) | 3278  | 2295 | 6857 | 44 (6) |

Table S6. Hydrogen bonds for Ho(OAc<sub>2</sub>)Cl\_x\_3H<sub>2</sub>O [Å and deg.].

| D-H...A                | d(D-H) | d(H...A) | d(D...A) | <(DHA) |
|------------------------|--------|----------|----------|--------|
| O(1W)-H(11W)...Cl(1)#3 | 0.96   | 2.19     | 3.119(1) | 162.9  |
| O(1W)-H(12W)...O(12)#4 | 0.96   | 1.78     | 2.705(2) | 161.2  |
| O(2W)-H(21W)...O(22)#5 | 0.96   | 1.79     | 2.701(2) | 156.3  |
| O(2W)-H(22W)...Cl(1)   | 0.96   | 2.13     | 3.075(1) | 168.2  |
| O(3W)-H(31W)...Cl(1)#6 | 0.96   | 2.24     | 3.187(1) | 167.7  |
| O(3W)-H(32W)...Cl(1)#3 | 0.96   | 2.14     | 3.073(1) | 163.7  |

Symmetry transformations used to generate equivalent atoms:

#1 -x,-y+1,-z+1      #2 -x+1,-y+1,-z+1      #3 x,y-1,z  
#4 x+1,y,z      #5 x-1,y,z      #6 -x+1/2,y-1/2,-z+3/2
