# Supplementary material
Source: MDPI journal article supplement (https://www.mdpi.com/2073-4352/13/7/1043)
Supplement: s1 [file s1 › 11 Er Ha2019_54_0m_a.cif]

 
data_Ha2019_54_0m_a 
  
_audit_creation_method            'SHELXL-2014/7' 
_shelx_SHELXL_version_number      '2014/7' 
_chemical_name_systematic         ? 
_chemical_name_common             ? 
_chemical_melting_point           ? 
_chemical_formula_moiety          ? 
_chemical_formula_sum 
 'C4 H12 Cl Er O7' 
_chemical_formula_weight          374.85 
  
loop_ 
 _atom_type_symbol 
 _atom_type_description 
 _atom_type_scat_dispersion_real 
 _atom_type_scat_dispersion_imag 
 _atom_type_scat_source 
 'C'  'C'   0.0033   0.0016 
 'International Tables Vol C Tables 4.2.6.8 and 6.1.1.4' 
 'H'  'H'   0.0000   0.0000 
 'International Tables Vol C Tables 4.2.6.8 and 6.1.1.4' 
 'O'  'O'   0.0106   0.0060 
 'International Tables Vol C Tables 4.2.6.8 and 6.1.1.4' 
 'Cl'  'Cl'   0.1484   0.1585 
 'International Tables Vol C Tables 4.2.6.8 and 6.1.1.4' 
 'Er'  'Er'  -0.2586   4.9576 
 'International Tables Vol C Tables 4.2.6.8 and 6.1.1.4' 
  
_space_group_crystal_system       monoclinic 
_space_group_IT_number            14 
_space_group_name_H-M_alt         'P 21/n' 
_space_group_name_Hall            '-P 2yn' 
  
_shelx_space_group_comment 
; 
The symmetry employed for this shelxl refinement is uniquely defined 
by the following loop, which should always be used as a source of 
symmetry information in preference to the above space-group names. 
They are only intended as comments. 
; 
  
loop_ 
 _space_group_symop_operation_xyz 
 'x, y, z' 
 '-x+1/2, y+1/2, -z+1/2' 
 '-x, -y, -z' 
 'x-1/2, -y-1/2, z-1/2' 
  
_cell_length_a                    7.7927(3) 
_cell_length_b                    7.8301(3) 
_cell_length_c                    17.1904(7) 
_cell_angle_alpha                 90 
_cell_angle_beta                  97.695(2) 
_cell_angle_gamma                 90 
_cell_volume                      1039.47(7) 
_cell_formula_units_Z             4 
_cell_measurement_temperature     100(2) 
_cell_measurement_reflns_used     9613 
_cell_measurement_theta_min       2.86 
_cell_measurement_theta_max       28.26 
  
_exptl_crystal_description        prism 
_exptl_crystal_colour             pink 
_exptl_crystal_density_meas       ? 
_exptl_crystal_density_method     ? 
_exptl_crystal_density_diffrn     2.395 
_exptl_crystal_F_000              708 
_exptl_transmission_factor_min    ? 
_exptl_transmission_factor_max    ? 
_exptl_crystal_size_max           0.486 
_exptl_crystal_size_mid           0.220 
_exptl_crystal_size_min           0.162 
_exptl_absorpt_coefficient_mu     8.335 
_shelx_estimated_absorpt_T_min    0.107 
_shelx_estimated_absorpt_T_max    0.345 
_exptl_absorpt_correction_type    multi-scan 
_exptl_absorpt_correction_T_min   0.256 
_exptl_absorpt_correction_T_max   0.738 
_exptl_absorpt_process_details    'Bruker SADABS' 
_exptl_absorpt_special_details    ? 
_diffrn_ambient_temperature       100(2) 
_diffrn_radiation_wavelength      0.71073 
_diffrn_radiation_type            MoK\a 
_diffrn_source                    ? 
_diffrn_measurement_device_type   'Bruker APEX-II CCD' 
_diffrn_measurement_method        '\f and \w scans' 
_diffrn_detector_area_resol_mean  ? 
_diffrn_reflns_number             93617 
_diffrn_reflns_av_unetI/netI      0.0069 
_diffrn_reflns_av_R_equivalents   0.0305 
_diffrn_reflns_limit_h_min        -10 
_diffrn_reflns_limit_h_max        10 
_diffrn_reflns_limit_k_min        -10 
_diffrn_reflns_limit_k_max        10 
_diffrn_reflns_limit_l_min        -22 
_diffrn_reflns_limit_l_max        22 
_diffrn_reflns_theta_min          2.746 
_diffrn_reflns_theta_max          27.996 
_diffrn_reflns_theta_full         25.242 
_diffrn_measured_fraction_theta_max   0.999 
_diffrn_measured_fraction_theta_full  0.999 
_diffrn_reflns_Laue_measured_fraction_max    0.999 
_diffrn_reflns_Laue_measured_fraction_full   0.999 
_diffrn_reflns_point_group_measured_fraction_max   0.999 
_diffrn_reflns_point_group_measured_fraction_full  0.999 
_reflns_number_total              2514 
_reflns_number_gt                 2511 
_reflns_threshold_expression      'I > 2\s(I)' 
_reflns_Friedel_coverage          0.000 
_reflns_Friedel_fraction_max      . 
_reflns_Friedel_fraction_full     . 
  
_reflns_special_details 
; 
 Reflections were merged by SHELXL according to the crystal 
 class for the calculation of statistics and refinement. 
  
 _reflns_Friedel_fraction is defined as the number of unique 
 Friedel pairs measured divided by the number that would be 
 possible theoretically, ignoring centric projections and 
 systematic absences. 
; 
  
_computing_data_collection        'Bruker APEX2' 
_computing_cell_refinement        'Bruker SAINT' 
_computing_data_reduction         'Bruker SAINT' 
_computing_structure_solution     'SHELXS-97 (Sheldrick 2008)' 
_computing_structure_refinement 'SHELXL-2014/7 (Sheldrick, 2014)' 
_computing_molecular_graphics     'Bruker SHELXTL' 
_computing_publication_material   'Bruker SHELXTL' 
_refine_special_details           ? 
_refine_ls_structure_factor_coef  Fsqd 
_refine_ls_matrix_type            full 
_refine_ls_weighting_scheme       calc 
_refine_ls_weighting_details 
'w=1/[\s^2^(Fo^2^)+(0.0015P)^2^+2.0171P] where P=(Fo^2^+2Fc^2^)/3' 
_atom_sites_solution_primary      direct
_atom_sites_solution_secondary    ? 
_atom_sites_solution_hydrogens    mixed 
_refine_ls_hydrogen_treatment     constr
_refine_ls_extinction_method      'SHELXL-2014/7 (Sheldrick 2014' 
_refine_ls_extinction_coef        0.00115(9) 
_refine_ls_extinction_expression 
 'Fc^*^=kFc[1+0.001xFc^2^\l^3^/sin(2\q)]^-1/4^' 
_refine_ls_number_reflns          2514 
_refine_ls_number_parameters      126 
_refine_ls_number_restraints      0 
_refine_ls_R_factor_all           0.0135 
_refine_ls_R_factor_gt            0.0135 
_refine_ls_wR_factor_ref          0.0292 
_refine_ls_wR_factor_gt           0.0292 
_refine_ls_goodness_of_fit_ref    1.415 
_refine_ls_restrained_S_all       1.415 
_refine_ls_shift/su_max           0.002 
_refine_ls_shift/su_mean          0.000 
  
loop_ 
 _atom_site_label 
 _atom_site_type_symbol 
 _atom_site_fract_x 
 _atom_site_fract_y 
 _atom_site_fract_z 
 _atom_site_U_iso_or_equiv 
 _atom_site_adp_type 
 _atom_site_occupancy 
 _atom_site_site_symmetry_order 
 _atom_site_calc_flag 
 _atom_site_refinement_flags_posn 
 _atom_site_refinement_flags_adp 
 _atom_site_refinement_flags_occupancy 
 _atom_site_disorder_assembly 
 _atom_site_disorder_group 
Er1 Er 0.27424(2) 0.44925(2) 0.54089(2) 0.00797(4) Uani 1 1 d . . . . . 
Cl1 Cl 0.37710(7) 0.95830(7) 0.68467(3) 0.01464(11) Uani 1 1 d . . . . . 
O11 O 0.0175(2) 0.3237(2) 0.54236(11) 0.0175(4) Uani 1 1 d . . . . . 
O12 O -0.2635(2) 0.2865(2) 0.52568(10) 0.0124(3) Uani 1 1 d . . . . . 
C11 C -0.1129(3) 0.2347(3) 0.55091(13) 0.0101(4) Uani 1 1 d . . . . . 
C12 C -0.0925(3) 0.0644(3) 0.59046(16) 0.0198(5) Uani 1 1 d . . . . . 
H12A H -0.1746 0.0550 0.6287 0.060(8) Uiso 1 1 calc R U . . . 
H12B H 0.0260 0.0530 0.6175 0.060(8) Uiso 1 1 calc R U . . . 
H12C H -0.1154 -0.0262 0.5511 0.060(8) Uiso 1 1 calc R U . . . 
O21 O 0.5435(2) 0.5627(2) 0.57425(9) 0.0104(3) Uani 1 1 d . . . . . 
O22 O 0.8164(2) 0.6312(2) 0.59216(10) 0.0120(3) Uani 1 1 d . . . . . 
C21 C 0.6795(3) 0.6002(3) 0.62123(13) 0.0097(4) Uani 1 1 d . . . . . 
C22 C 0.6760(3) 0.6053(4) 0.70749(14) 0.0165(5) Uani 1 1 d . . . . . 
H22A H 0.7942 0.5939 0.7348 0.045(6) Uiso 1 1 calc R U . . . 
H22B H 0.6047 0.5111 0.7228 0.045(6) Uiso 1 1 calc R U . . . 
H22C H 0.6268 0.7143 0.7218 0.045(6) Uiso 1 1 calc R U . . . 
O1W O 0.4100(2) 0.1823(2) 0.53777(10) 0.0124(3) Uani 1 1 d . . . . . 
H11W H 0.4066 0.0930 0.5758 0.047(8) Uiso 1 1 d R U . . . 
H12W H 0.5302 0.1940 0.5318 0.047(8) Uiso 1 1 d R U . . . 
O2W O 0.1648(2) 0.6420(2) 0.62511(10) 0.0126(3) Uani 1 1 d . . . . . 
H21W H 0.0427 0.6589 0.6249 0.044(8) Uiso 1 1 d R U . . . 
H22W H 0.2166 0.7500 0.6408 0.044(8) Uiso 1 1 d R U . . . 
O3W O 0.3179(2) 0.3459(2) 0.67167(10) 0.0157(3) Uani 1 1 d . . . . . 
H31W H 0.2678 0.4003 0.7133 0.049(8) Uiso 1 1 d R U . . . 
H32W H 0.3310 0.2282 0.6871 0.049(8) Uiso 1 1 d R U . . . 
  
loop_ 
 _atom_site_aniso_label 
 _atom_site_aniso_U_11 
 _atom_site_aniso_U_22 
 _atom_site_aniso_U_33 
 _atom_site_aniso_U_23 
 _atom_site_aniso_U_13 
 _atom_site_aniso_U_12 
Er1 0.00622(5) 0.00815(6) 0.00972(6) -0.00014(4) 0.00173(3) -0.00158(4) 
Cl1 0.0181(3) 0.0106(2) 0.0152(3) 0.0011(2) 0.0022(2) -0.0018(2) 
O11 0.0131(8) 0.0197(9) 0.0209(9) -0.0056(7) 0.0069(7) -0.0077(7) 
O12 0.0074(7) 0.0128(8) 0.0171(8) 0.0033(7) 0.0020(6) 0.0014(6) 
C11 0.0103(10) 0.0105(10) 0.0100(10) -0.0021(8) 0.0026(8) -0.0011(8) 
C12 0.0226(12) 0.0151(12) 0.0213(12) 0.0060(10) 0.0014(10) 0.0034(10) 
O21 0.0071(7) 0.0115(8) 0.0124(7) -0.0003(6) 0.0004(6) -0.0017(6) 
O22 0.0074(7) 0.0139(8) 0.0147(8) -0.0007(7) 0.0015(6) -0.0015(6) 
C21 0.0102(10) 0.0071(10) 0.0117(10) 0.0001(8) 0.0010(8) 0.0010(8) 
C22 0.0138(11) 0.0258(13) 0.0095(10) -0.0012(9) 0.0007(8) 0.0010(10) 
O1W 0.0119(8) 0.0113(8) 0.0149(8) 0.0018(6) 0.0051(6) 0.0009(6) 
O2W 0.0096(7) 0.0115(8) 0.0165(8) -0.0028(7) 0.0015(6) -0.0005(6) 
O3W 0.0226(9) 0.0123(8) 0.0134(8) 0.0019(7) 0.0065(7) 0.0044(7) 
  
_geom_special_details 
; 
 All esds (except the esd in the dihedral angle between two l.s. planes) 
 are estimated using the full covariance matrix.  The cell esds are taken 
 into account individually in the estimation of esds in distances, angles 
 and torsion angles; correlations between esds in cell parameters are only 
 used when they are defined by crystal symmetry.  An approximate (isotropic) 
 treatment of cell esds is used for estimating esds involving l.s. planes. 
; 
  
loop_ 
 _geom_bond_atom_site_label_1 
 _geom_bond_atom_site_label_2 
 _geom_bond_distance 
 _geom_bond_site_symmetry_2 
 _geom_bond_publ_flag 
Er1 O11 2.2322(17) . ? 
Er1 O21 2.2803(15) . ? 
Er1 O2W 2.3307(16) . ? 
Er1 O1W 2.3464(16) . ? 
Er1 O12 2.3607(17) 3_566 ? 
Er1 O3W 2.3708(17) . ? 
Er1 O22 2.3861(16) 3_666 ? 
Er1 O21 2.5876(16) 3_666 ? 
Er1 O11 3.0833(19) 3_566 ? 
O11 C11 1.257(3) . ? 
O12 C11 1.262(3) . ? 
C11 C12 1.495(3) . ? 
C12 H12A 0.9800 . ? 
C12 H12B 0.9800 . ? 
C12 H12C 0.9800 . ? 
O21 C21 1.278(3) . ? 
O22 C21 1.260(3) . ? 
C21 C22 1.487(3) . ? 
C22 H22A 0.9800 . ? 
C22 H22B 0.9800 . ? 
C22 H22C 0.9800 . ? 
O1W H11W 0.9600 . ? 
O1W H12W 0.9600 . ? 
O2W H21W 0.9600 . ? 
O2W H22W 0.9600 . ? 
O3W H31W 0.9600 . ? 
O3W H32W 0.9600 . ? 
  
loop_ 
 _geom_angle_atom_site_label_1 
 _geom_angle_atom_site_label_2 
 _geom_angle_atom_site_label_3 
 _geom_angle 
 _geom_angle_site_symmetry_1 
 _geom_angle_site_symmetry_3 
 _geom_angle_publ_flag 
O11 Er1 O21 164.74(6) . . ? 
O11 Er1 O2W 82.83(6) . . ? 
O21 Er1 O2W 89.57(6) . . ? 
O11 Er1 O1W 90.89(6) . . ? 
O21 Er1 O1W 87.15(6) . . ? 
O2W Er1 O1W 142.62(6) . . ? 
O11 Er1 O12 114.71(6) . 3_566 ? 
O21 Er1 O12 75.64(6) . 3_566 ? 
O2W Er1 O12 75.01(6) . 3_566 ? 
O1W Er1 O12 139.16(6) . 3_566 ? 
O11 Er1 O3W 81.61(6) . . ? 
O21 Er1 O3W 83.35(6) . . ? 
O2W Er1 O3W 69.52(6) . . ? 
O1W Er1 O3W 73.12(6) . . ? 
O12 Er1 O3W 138.61(6) 3_566 . ? 
O11 Er1 O22 75.17(6) . 3_666 ? 
O21 Er1 O22 119.22(6) . 3_666 ? 
O2W Er1 O22 132.87(6) . 3_666 ? 
O1W Er1 O22 79.60(6) . 3_666 ? 
O12 Er1 O22 77.29(6) 3_566 3_666 ? 
O3W Er1 O22 143.64(6) . 3_666 ? 
O11 Er1 O21 125.25(6) . 3_666 ? 
O21 Er1 O21 68.02(6) . 3_666 ? 
O2W Er1 O21 141.50(6) . 3_666 ? 
O1W Er1 O21 69.81(5) . 3_666 ? 
O12 Er1 O21 69.42(5) 3_566 3_666 ? 
O3W Er1 O21 133.56(5) . 3_666 ? 
O22 Er1 O21 51.65(5) 3_666 3_666 ? 
O11 Er1 O11 69.69(7) . 3_566 ? 
O21 Er1 O11 119.25(5) . 3_566 ? 
O2W Er1 O11 66.82(5) . 3_566 ? 
O1W Er1 O11 144.07(5) . 3_566 ? 
O12 Er1 O11 45.05(5) 3_566 3_566 ? 
O3W Er1 O11 129.82(5) . 3_566 ? 
O22 Er1 O11 66.56(5) 3_666 3_566 ? 
O21 Er1 O11 96.43(5) 3_666 3_566 ? 
Er1 Er1 Er1 135.170(5) 3_666 3_566 ? 
C11 O11 Er1 170.17(17) . . ? 
C11 O12 Er1 114.78(14) . 3_566 ? 
O11 C11 O12 120.7(2) . . ? 
O11 C11 C12 120.6(2) . . ? 
O12 C11 C12 118.7(2) . . ? 
C11 C12 H12A 109.5 . . ? 
C11 C12 H12B 109.5 . . ? 
H12A C12 H12B 109.5 . . ? 
C11 C12 H12C 109.5 . . ? 
H12A C12 H12C 109.5 . . ? 
H12B C12 H12C 109.5 . . ? 
C21 O21 Er1 154.96(15) . . ? 
C21 O21 Er1 89.89(13) . 3_666 ? 
Er1 O21 Er1 111.98(6) . 3_666 ? 
C21 O22 Er1 99.89(14) . 3_666 ? 
O22 C21 O21 117.9(2) . . ? 
O22 C21 C22 121.3(2) . . ? 
O21 C21 C22 120.8(2) . . ? 
C21 C22 H22A 109.5 . . ? 
C21 C22 H22B 109.5 . . ? 
H22A C22 H22B 109.5 . . ? 
C21 C22 H22C 109.5 . . ? 
H22A C22 H22C 109.5 . . ? 
H22B C22 H22C 109.5 . . ? 
Er1 O1W H11W 125.4 . . ? 
Er1 O1W H12W 111.5 . . ? 
H11W O1W H12W 105.0 . . ? 
Er1 O2W H21W 122.2 . . ? 
Er1 O2W H22W 124.8 . . ? 
H21W O2W H22W 105.0 . . ? 
Er1 O3W H31W 122.3 . . ? 
Er1 O3W H32W 125.9 . . ? 
H31W O3W H32W 105.0 . . ? 
  
loop_ 
 _geom_hbond_atom_site_label_D 
 _geom_hbond_atom_site_label_H 
 _geom_hbond_atom_site_label_A 
 _geom_hbond_distance_DH 
 _geom_hbond_distance_HA 
 _geom_hbond_distance_DA 
 _geom_hbond_angle_DHA 
 _geom_hbond_site_symmetry_A 
O1W H11W Cl1  0.96 2.19 3.1134(17) 161.7 1_545 
O1W H12W O12  0.96 1.78 2.706(2) 161.3 1_655 
O2W H21W O22  0.96 1.79 2.700(2) 156.6 1_455 
O2W H22W Cl1  0.96 2.13 3.0767(17) 168.1 . 
O3W H31W Cl1  0.96 2.26 3.1921(17) 164.9 2_546 
O3W H32W Cl1  0.96 2.15 3.0731(19) 162.1 1_545 
  
_refine_diff_density_max    0.524 
_refine_diff_density_min   -0.603 
_refine_diff_density_rms    0.083 
  
_shelx_res_file 
; 
  
    Ha2019_54_0m_a.res created by SHELXL-2014/7 
  
  
TITL Ha2019_54_0m_a.res in P2(1)/n 
CELL  0.71073   7.7927   7.8301  17.1904   90.000   97.695   90.000 
ZERR    4.000   0.0003   0.0003   0.0007    0.000    0.002    0.000 
LATT 1 
SYMM 1/2-X, 1/2+Y, 1/2-Z 
SFAC C  H  O  Cl Er 
UNIT 16 48 28 4 4 
LIST 4 ! automatically inserted. Change 6 to 4 for CHECKCIF!! 
OMIT 0 0 2 
OMIT 0 1 1 
OMIT -3 56 
L.S. 10 
ACTA 
rem DFIX 0.96  0.0001 O1w H11w O1w H12w O2w H21w O2w H22w O3w H31w O3w H32w 
rem dfix 1.523  0.0001 H11w H12w H21w H22w H31w H32w 
FREe Er1 C21_$6 
EQIV $6 1-x, 1-y,1-z 
BIND Er1 Er1_$6 
BIND Er1 Er1_$7 
EQIV $7 -x,1-y, 1-z 
BIND Er1 O11_$7 
HTAB 
EQIV $1 -x+3/2, y-1/2, -z+3/2 
EQIV $2 x, y-1, z 
HTAB O1W Cl1_$2 
EQIV $3 x+1, y, z 
HTAB O1W O12_$3 
EQIV $4 x-1, y, z 
HTAB O2W O22_$4 
HTAB O2W Cl1 
EQIV $5 -x+1/2, y-1/2, -z+3/2 
HTAB O3W Cl1_$5 
HTAB O3W Cl1_$2 
SIZE 0.162  0.220  0.486 
BOND $H 
FMAP 2 
PLAN 5 
TEMP -173 
WGHT    0.001500    2.017100 
EXTI    0.001148 
FVAR       0.33320   0.06022   0.04460   0.04694   0.04365   0.04864 
ER1   5    0.274237    0.449254    0.540891    11.00000    0.00622    0.00815 = 
         0.00972   -0.00014    0.00173   -0.00158 
CL1   4    0.377099    0.958301    0.684666    11.00000    0.01808    0.01064 = 
         0.01518    0.00109    0.00218   -0.00177 
O11   3    0.017527    0.323682    0.542356    11.00000    0.01310    0.01973 = 
         0.02094   -0.00560    0.00691   -0.00771 
O12   3   -0.263510    0.286463    0.525676    11.00000    0.00745    0.01284 = 
         0.01715    0.00331    0.00201    0.00140 
C11   1   -0.112903    0.234666    0.550913    11.00000    0.01027    0.01052 = 
         0.00996   -0.00213    0.00261   -0.00108 
C12   1   -0.092468    0.064445    0.590456    11.00000    0.02260    0.01507 = 
         0.02127    0.00602    0.00140    0.00341 
AFIX 137 
H12A  2   -0.174596    0.054962    0.628716    11.00000   21.00000 
H12B  2    0.025952    0.052968    0.617457    11.00000   21.00000 
H12C  2   -0.115365   -0.026181    0.551116    11.00000   21.00000 
AFIX   0 
O21   3    0.543530    0.562739    0.574248    11.00000    0.00711    0.01150 = 
         0.01244   -0.00031    0.00038   -0.00167 
O22   3    0.816363    0.631179    0.592158    11.00000    0.00736    0.01388 = 
         0.01467   -0.00069    0.00153   -0.00152 
C21   1    0.679534    0.600211    0.621227    11.00000    0.01024    0.00712 = 
         0.01173    0.00008    0.00096    0.00095 
C22   1    0.676033    0.605319    0.707493    11.00000    0.01383    0.02575 = 
         0.00954   -0.00115    0.00070    0.00096 
AFIX 137 
H22A  2    0.794206    0.593924    0.734784    11.00000   31.00000 
H22B  2    0.604749    0.511122    0.722751    11.00000   31.00000 
H22C  2    0.626836    0.714277    0.721782    11.00000   31.00000 
AFIX   0 
O1W   3    0.410012    0.182344    0.537770    11.00000    0.01194    0.01134 = 
         0.01494    0.00184    0.00506    0.00091 
AFIX   3 
H11W  2    0.406573    0.093011    0.575778    11.00000   41.00000 
H12W  2    0.530192    0.193996    0.531809    11.00000   41.00000 
AFIX   0 
O2W   3    0.164770    0.642006    0.625111    11.00000    0.00964    0.01154 = 
         0.01651   -0.00280    0.00146   -0.00048 
AFIX   3 
H21W  2    0.042710    0.658943    0.624943    11.00000   51.00000 
H22W  2    0.216590    0.749968    0.640846    11.00000   51.00000 
AFIX   0 
O3W   3    0.317934    0.345859    0.671671    11.00000    0.02255    0.01230 = 
         0.01340    0.00187    0.00652    0.00444 
AFIX   3 
H31W  2    0.267781    0.400264    0.713314    11.00000   61.00000 
H32W  2    0.330982    0.228239    0.687093    11.00000   61.00000 
AFIX   0 
HKLF 4 
  
REM  Ha2019_54_0m_a.res in P2(1)/n 
REM R1 =  0.0135 for    2511 Fo > 4sig(Fo)  and  0.0135 for all    2514 data 
REM    126 parameters refined using      0 restraints 
  
END 
  
WGHT      0.0015      2.0171 
  
REM Instructions for potential hydrogen bonds 
HTAB C12 Cl1_$2 
HTAB C22 Cl1_$1 
HTAB C22 O3W 
HTAB C22 Cl1 
HTAB O1W Cl1_$2 
HTAB O1W O12_$3 
HTAB O2W O22_$4 
HTAB O2W Cl1 
HTAB O3W Cl1_$5 
HTAB O3W Cl1_$2 
  
REM Highest difference peak  0.524,  deepest hole -0.603,  1-sigma level  0.083 
Q1    1   0.2817  0.2401  0.5388  11.00000  0.05    0.52 
Q2    1   0.3766  0.4388  0.7042  11.00000  0.05    0.49 
Q3    1   0.2696  0.5649  0.5520  11.00000  0.05    0.47 
Q4    1  -0.1797  0.3463  0.6224  11.00000  0.05    0.44 
Q5    1   0.2816  0.5603  0.5295  11.00000  0.05    0.44 
; 
_shelx_res_checksum   33102 
  
_shelx_hkl_file 
; 
  -1   0   0   11.80    0.80 
  -1   0   0   11.40    0.50 
  -1   0   0    8.00    0.70 
  -1   0   0   13.30    1.00 
   1   0   0    7.80    1.00 
  -1   0   0   11.20    1.10 
  -1   0   0   11.40    0.90 
  -1   0   0    9.30    0.80 
  -1   0   0    9.30    1.20 
   2   0   0 7063.99  216.78 
   2   0   0 7445.06  218.58 
   2   0   0 7306.57  218.18 
   2   0   0 7097.89  216.28 
  -2   0   0 7478.85  216.58 
   2   0   0 7220.88  216.78 
   2   0   0 6986.70  218.88 
   2   0   0 7264.17  221.68 
   2   0   0 6686.43  216.08 
   2   0   0 6696.23  218.08 
   2   0   0 7295.57  221.78 
   2   0   0 7203.98  218.58 
   2   0   0 6622.64  217.08 
   2   0   0 6394.96  216.68 
   2   0   0 6678.73  219.08 
   2   0   0 7087.79  219.98 
  -2   0   0 7222.38  222.08 
  -2   0   0 7664.23  219.48 
  -2   0   0 7786.12  220.88 
  -2   0   0 6669.73  218.78 
  -2   0   0 6823.42  219.38 
  -2   0   0 7426.46  219.28 
  -2   0   0 7485.05  222.38 
  -2   0   0 7199.48  215.98 
  -2   0   0 7389.96  218.48 
  -2   0   0 6552.34  217.68 
  -2   0   0 7389.66  224.18 
  -2   0   0 7641.44  222.78 
  -2   0   0 7776.72  218.88 
  -2   0   0 7577.24  218.48 
  -2   0   0 7032.10  218.08 
  -2   0   0 7666.63  220.38 
  -2   0   0 7799.42  221.18 
   2   0   0 6860.31  216.58 
   2   0   0 7309.77  215.48 
   2   0   0 7383.76  218.18 
   2   0   0 7325.67  219.28 
   2   0   0 7382.66  222.68 
   2   0   0 7195.58  218.38 
  -2   0   0 7402.06  222.08 
  -2   0   0 7150.78  219.38 
   3   0   0    3.00    1.00 
  -3   0   0    1.10    1.00 
   3   0   0    4.10    0.80 
   3   0   0   11.60    1.70 
  -3   0   0    4.90    1.80 
  -3   0   0    3.10    1.10 
  -3   0   0    2.90    1.50 
  -3   0   0    4.50    1.50 
  -3   0   0    2.80    1.20 
  -3   0   0    1.50    0.90 
  -3   0   0    4.20    1.90 
  -3   0   0    3.30    1.40 
  -3   0   0    4.80    1.10 
  -3   0   0    3.70    1.20 
  -3   0   0    1.90    1.10 
  -3   0   0    5.30    1.30 
  -3   0   0    3.40    1.70 
  -3   0   0    2.60    1.30 
  -3   0   0    3.00    1.50 
  -3   0   0    4.50    1.40 
  -3   0   0    2.40    0.90 
   3   0   0    1.70    1.10 
   3   0   0    4.70    1.80 
   3   0   0    2.40    1.50 
   3   0   0    1.60    1.40 
   3   0   0    1.70    1.40 
   3   0   0    7.20    1.50 
   3   0   0    2.70    1.30 
   3   0   0    2.50    1.70 
   3   0   0    7.90    1.90 
   3   0   0    3.20    1.10 
   3   0   0    4.10    1.10 
   3   0   0    3.60    1.00 
   3   0   0    2.50    1.50 
   3   0   0    4.10    1.40 
   3   0   0    5.60    1.40 
   3   0   0    5.60    1.50 
  -3   0   0    2.70    1.20 
   3   0   0    7.60    1.60 
   3   0   0    7.30    1.60 
  -3   0   0    1.60    0.90 
   3   0   0    4.40    0.70 
   4   0   0 1764.22   55.49 
   4   0   0 1713.73   54.79 
   4   0   0 1784.02   56.49 
   4   0   0 1735.93   56.49 
   4   0   0 1765.22   55.09 
   4   0   0 1723.93   56.09 
   4   0   0 1729.53   52.89 
  -4   0   0 1734.73   56.19 
  -4   0   0 1696.23   54.49 
  -4   0   0 1781.02   54.39 
  -4   0   0 1765.02   54.69 
   4   0   0 1721.73   56.09 
   4   0   0 1789.32   56.59 
   4   0   0 1737.73   54.79 
  -4   0   0 1795.22   55.09 
  -4   0   0 1802.22   55.79 
  -4   0   0 1780.62   54.59 
  -4   0   0 1706.33   57.19 
  -4   0   0 1736.73   56.69 
  -4   0   0 1809.52   53.89 
  -4   0   0 1742.33   54.09 
   4   0   0 1807.12   55.29 
   4   0   0 1700.73   54.49 
   4   0   0 1749.82   53.89 
   4   0   0 1743.83   54.49 
   4   0   0 1775.32   55.89 
  -4   0   0 1736.53   54.49 
  -4   0   0 1741.93   54.39 
  -4   0   0 1777.72   55.49 
  -4   0   0 1741.63   56.89 
  -5   0   0    2.10    1.50 
  -5   0   0    1.20    1.60 
  -5   0   0    0.50    1.50 
  -5   0   0    2.70    1.60 
  -5   0   0    1.60    1.20 
  -5   0   0    0.30    2.10 
   5   0   0    4.30    1.80 
  -5   0   0    0.80    2.00 
  -5   0   0    2.70    1.50 
  -5   0   0    2.50    2.00 
  -5   0   0    3.00    2.10 
  -5   0   0    2.20    1.60 
   5   0   0    1.80    1.90 
  -5   0   0    2.80    1.80 
   5   0   0    4.70    2.50 
   5   0   0   11.20    2.50 
  -5   0   0    2.50    2.40 
  -5   0   0    1.90    1.40 
  -5   0   0    1.80    1.20 
  -5   0   0    5.50    2.90 
   5   0   0   10.00    2.70 
   5   0   0   14.20    3.40 
   5   0   0    2.90    2.40 
   5   0   0    0.40    1.40 
   5   0   0    3.50    0.80 
   5   0   0    4.80    1.80 
   5   0   0    1.60    1.60 
   5   0   0    1.50    1.90 
   5   0   0    3.40    2.50 
  -6   0   0  820.32   31.70 
  -6   0   0  809.52   27.80 
  -6   0   0  808.22   27.70 
   6   0   0  829.72   27.70 
  -6   0   0  822.62   29.40 
  -6   0   0  818.02   31.40 
  -6   0   0  805.82   26.60 
   6   0   0  820.92   30.10 
   6   0   0  794.42   30.00 
   6   0   0  813.02   28.70 
  -6   0   0  792.12   28.90 
   6   0   0  801.82   30.70 
  -6   0   0  851.81   30.10 
  -6   0   0  791.32   27.30 
  -6   0   0  805.82   31.00 
  -6   0   0  791.12   30.10 
   6   0   0  812.12   28.10 
   6   0   0  768.02   30.30 
  -6   0   0  823.02   28.60 
   6   0   0  796.72   28.80 
  -6   0   0  821.32   28.00 
  -6   0   0  797.22   26.70 
   6   0   0  825.32   30.70 
  -6   0   0  789.52   27.70 
  -6   0   0  833.02   28.10 
   6   0   0  756.02   29.40 
   6   0   0  824.52   29.40 
  -6   0   0  798.72   27.80 
   6   0   0  807.32   27.70 
   7   0   0    2.60    3.10 
  -7   0   0    4.40    2.60 
   7   0   0    9.10    3.90 
   7   0   0   -0.10    2.70 
  -7   0   0   -1.80    2.30 
  -7   0   0    3.80    2.60 
   7   0   0    1.90    2.30 
  -7   0   0    0.40    1.50 
   7   0   0    4.70    2.70 
  -7   0   0    0.80    1.80 
  -7   0   0    0.80    3.30 
  -7   0   0    0.50    2.40 
  -7   0   0   -1.50    2.40 
  -7   0   0   -0.30    2.40 
  -7   0   0    0.20    1.50 
  -7   0   0    5.60    2.50 
   7   0   0    1.10    3.10 
  -7   0   0    3.00    2.00 
  -7   0   0    4.50    3.10 
  -7   0   0    2.40    2.10 
  -7   0   0    0.80    2.20 
   7   0   0    6.50    3.20 
   8   0   0  285.07   13.20 
  -8   0   0  288.67   13.30 
  -8   0   0  281.97   13.70 
  -8   0   0  281.47   11.60 
  -8   0   0  271.67   14.50 
   8   0   0  272.77   14.50 
   8   0   0  283.27   16.50 
   8   0   0  252.57   15.20 
  -8   0   0  288.47   14.30 
   8   0   0  282.07   13.60 
  -8   0   0  277.97   15.70 
  -8   0   0  281.57   13.50 
  -8   0   0  265.67   12.30 
  -8   0   0  289.87   13.10 
  -8   0   0  288.47   13.10 
  -8   0   0  285.47   14.70 
   8   0   0  274.67   15.00 
  -8   0   0  267.67   17.00 
  -8   0   0  268.57   15.00 
   8   0   0  258.17   15.20 
  -8   0   0  276.77   13.30 
   9   0   0    2.90    4.30 
  -9   0   0   -0.10    2.60 
  -9   0   0    7.30    3.80 
  -9   0   0    1.70    3.30 
  -9   0   0   -0.50    3.30 
   9   0   0    0.00    3.40 
  -9   0   0    2.30    2.70 
   9   0   0    7.20    4.30 
  -9   0   0    0.80    3.10 
  -9   0   0    5.10    4.30 
  -9   0   0    2.70    3.50 
   9   0   0   -0.30    3.40 
   9   0   0    1.40    3.00 
   9   0   0    1.40    2.80 
  -9   0   0    0.90    2.20 
  -9   0   0    1.30    2.70 
   9   0   0    3.60    4.50 
  -9   0   0    3.00    3.70 
 -10   0   0   -1.20    3.20 
 -10   0   0    4.10    3.10 
 -10   0   0    0.20    3.10 
  10   0   0    5.20    4.80 
  10   0   0    2.80    3.80 
 -10   0   0    2.90    3.70 
  10   0   0    4.30    4.80 
  10   0   0    2.30    3.30 
  10   0   0   -0.70    2.90 
 -10   0   0    9.60    5.10 
 -10   0   0   -3.00    3.00 
 -10   0   0    3.70    4.20 
 -10   0   0    6.40    4.20 
 -10   0   0    2.00    2.90 
 -10   0   0    4.50    3.70 
   0  -1   0    6.40    1.30 
   0  -1   0    8.80    1.70 
   0  -1   0    4.10    1.00 
   0  -1   0    4.80    1.00 
   0  -1   0    8.00    0.90 
   0  -1   0    8.00    0.90 
   0  -1   0    7.50    1.00 
   0  -1   0    7.50    1.10 
   0  -1   0    6.30    0.90 
   0   1   0    7.40    1.00 
   0   1   0    8.00    0.70 
   0   1   0    8.80    1.60 
   0   1   0   15.50    2.20 
   0   1   0   11.20    1.30 
   0   1   0   12.20    1.80 
   0   1   0    9.10    0.90 
   0   1   0   11.60    1.40 
   1  -1   0   63.39    3.20 
  -1  -1   0   53.89    2.40 
  -1  -1   0   59.49    2.80 
   1  -1   0   63.29    3.60 
  -1  -1   0   63.59    3.00 
  -1  -1   0   67.79    3.30 
  -1  -1   0   51.49    2.40 
  -1  -1   0   63.59    2.40 
  -1  -1   0   61.89    3.20 
  -1  -1   0   59.49    2.90 
   1  -1   0   63.89    3.70 
   1  -1   0   58.49    3.50 
   1  -1   0   63.99    3.00 
  -1  -1   0   63.99    2.80 
   1  -1   0   61.29    3.30 
   1  -1   0   64.59    3.40 
  -1  -1   0   68.79    3.20 
  -1  -1   0   61.49    3.30 
   1  -1   0   64.49    3.60 
  -1  -1   0   59.99    3.40 
   1  -1   0   66.49    3.00 
   1  -1   0   62.99    3.50 
  -1  -1   0   59.29    2.70 
  -1   1   0   60.19    2.90 
   1   1   0   64.39    2.80 
   1   1   0   64.09    3.00 
  -1   1   0   63.29    4.20 
  -1   1   0   60.99    3.70 
   1   1   0   62.49    3.50 
  -1   1   0   73.09    3.70 
  -1   1   0   66.49    3.70 
   1   1   0   64.19    2.40 
  -1   1   0   60.79    3.40 
   1   1   0   65.49    3.00 
  -1   1   0   61.59    2.80 
  -1   1   0   62.79    3.80 
  -1   1   0   68.09    2.90 
  -1   1   0   60.69    3.10 
   1   1   0   56.19    2.80 
   1   1   0   61.19    3.20 
   1   1   0   64.49    3.40 
   1   1   0   61.09    3.00 
   1   1   0   62.09    2.50 
  -1   1   0   65.69    2.10 
   1   1   0   57.49    2.60 
  -1   1   0   61.39    2.20 
  -1   1   0   63.99    3.50 
  -1   1   0   62.09    2.90 
   1   1   0   60.89    2.60 
  -1   1   0   74.99    3.00 
  -1   1   0   66.79    3.60 
  -1   1   0   58.99    3.60 
  -1   1   0   50.49    4.00 
  -1   1   0   59.59    2.60 
   1   1   0   54.09    2.50 
  -2  -1   0 1020.50   31.00 
   2  -1   0  946.31   31.30 
  -2  -1   0  948.71   29.80 
   2  -1   0  939.81   28.90 
  -2  -1   0  997.20   29.40 
   2  -1   0  925.71   30.40 
   2  -1   0  964.20   29.00 
   2  -1   0  974.80   29.30 
   2  -1   0  968.50   29.60 
  -2  -1   0  932.51   30.80 
   2  -1   0  967.90   29.20 
   2  -1   0  925.61   30.40 
   2  -1   0  982.40   29.60 
   2  -1   0  934.01   30.70 
   2  -1   0  968.30   30.70 
   2  -1   0  935.71   30.00 
   2  -1   0  970.80   29.60 
   2  -1   0  929.51   30.10 
  -2  -1   0  955.20   29.60 
   2  -1   0  940.71   30.20 
  -2  -1   0 1021.50   30.40 
  -2  -1   0  978.20   29.30 
   2  -1   0  960.50   30.40 
   2  -1   0  947.31   30.60 
   2  -1   0  944.61   30.70 
  -2  -1   0  947.81   29.80 
  -2  -1   0  928.91   30.60 
  -2  -1   0  921.51   29.70 
   2  -1   0  925.11   31.00 
   2  -1   0  956.10   29.40 
   2  -1   0  968.10   31.00 
  -2  -1   0  982.50   29.80 
  -2  -1   0  929.61   31.10 
  -2  -1   0  953.60   29.30 
  -2  -1   0  950.80   29.20 
  -2  -1   0  953.40   30.10 
  -2  -1   0  937.71   29.40 
   2  -1   0  930.11   30.90 
  -2  -1   0  958.40   29.80 
   2  -1   0  972.50   30.90 
  -2  -1   0  960.30   31.00 
  -2  -1   0  925.81   29.40 
  -2  -1   0  961.20   29.40 
   2  -1   0  934.21   29.80 
  -2  -1   0  965.10   30.20 
  -2  -1   0  940.11   29.90 
  -2  -1   0  996.00   30.70 
   2   1   0  951.80   29.50 
   2   1   0  967.80   30.20 
  -2   1   0  952.10   29.90 
  -2   1   0  955.20   30.50 
  -2   1   0  970.20   30.70 
   2   1   0  946.11   29.30 
  -2   1   0  925.31   28.80 
  -2   1   0  951.80   29.50 
  -2   1   0  933.31   30.20 
  -2   1   0  926.51   29.80 
   2   1   0  940.11   29.70 
  -2   1   0  953.10   29.20 
  -2   1   0  929.91   29.60 
   2   1   0  979.80   29.90 
   2   1   0  951.90   29.80 
   2   1   0  977.50   29.70 
   2   1   0  922.21   30.80 
   2   1   0  969.90   29.00 
   2   1   0  984.60   29.50 
  -2   1   0  923.81   31.10 
  -2   1   0  910.01   30.00 
   2   1   0  956.80   30.50 
   2   1   0  945.81   29.50 
   2   1   0  943.91   30.80 
  -2   1   0  968.10   30.80 
  -2   1   0  949.90   30.60 
   2   1   0  937.81   29.40 
  -2   1   0  933.01   31.10 
  -2   1   0  940.61   31.30 
   2   1   0  923.31   29.70 
   2   1   0  940.71   29.30 
   2   1   0  935.71   29.40 
   2   1   0  962.30   29.60 
  -2   1   0  899.21   31.10 
  -2   1   0  925.71   29.60 
  -2   1   0  979.70   31.30 
  -2   1   0  923.41   31.10 
   2   1   0  985.10   30.60 
  -2   1   0  988.90   30.40 
   2   1   0  964.10   30.70 
  -2   1   0  957.90   30.00 
  -2   1   0  972.10   31.40 
  -2   1   0  966.80   29.00 
  -2   1   0  968.70   29.10 
  -2   1   0  957.50   28.90 
   2   1   0  935.21   30.40 
  -2   1   0  856.51   31.10 
   2   1   0  938.41   31.00 
  -2   1   0  936.01   30.60 
  -2   1   0  968.20   30.70 
  -2   1   0  931.21   29.60 
   3  -1   0  494.75   17.90 
  -3  -1   0  501.05   16.80 
  -3  -1   0  507.35   16.10 
  -3  -1   0  495.65   17.40 
   3  -1   0  494.45   17.90 
   3  -1   0  508.15   17.30 
   3  -1   0  511.35   16.70 
  -3  -1   0  510.75   16.80 
  -3  -1   0  507.35   17.00 
   3  -1   0  523.25   17.90 
  -3  -1   0  500.55   17.00 
  -3  -1   0  506.25   16.30 
   3  -1   0  495.95   15.80 
  -3  -1   0  528.45   18.50 
  -3  -1   0  484.45   18.00 
   3  -1   0  487.45   16.60 
   3  -1   0  523.55   16.80 
  -3  -1   0  487.15   18.90 
   3  -1   0  496.75   18.30 
  -3  -1   0  486.95   17.00 
  -3  -1   0  500.15   15.70 
  -3  -1   0  492.05   16.50 
  -3  -1   0  509.75   16.70 
   3  -1   0  542.05   20.50 
   3  -1   0  504.95   17.30 
  -3  -1   0  504.75   15.80 
  -3  -1   0  502.65   17.20 
   3  -1   0  504.85   16.30 
   3  -1   0  506.35   17.50 
   3  -1   0  504.95   17.20 
   3  -1   0  489.45   16.80 
   3  -1   0  495.95   18.50 
   3  -1   0  500.95   16.50 
  -3  -1   0  495.05   16.90 
   3  -1   0  495.75   18.10 
   3  -1   0  492.75   17.70 
   3  -1   0  507.55   18.40 
   3   1   0  480.85   17.00 
   3   1   0  508.55   16.00 
  -3   1   0  513.65   16.30 
   3   1   0  487.55   18.00 
  -3   1   0  470.95   17.90 
   3   1   0  500.55   16.50 
  -3   1   0  491.85   16.80 
   3   1   0  495.85   17.60 
  -3   1   0  490.85   18.70 
  -3   1   0  494.05   17.20 
  -3   1   0  508.05   17.70 
  -3   1   0  511.25   16.70 
  -3   1   0  509.55   16.30 
  -3   1   0  494.45   16.10 
   3   1   0  495.95   16.30 
   3   1   0  498.75   16.00 
   3   1   0  498.05   17.10 
   3   1   0  508.65   16.30 
  -3   1   0  491.55   16.80 
   3   1   0  496.85   16.60 
  -3   1   0  489.35   18.70 
  -3   1   0  499.75   18.30 
  -3   1   0  499.45   16.50 
  -3   1   0  495.75   16.80 
  -3   1   0  480.15   18.40 
   3   1   0  496.55   18.10 
   3   1   0  505.15   17.10 
   3   1   0  500.05   16.70 
   3   1   0  493.45   16.60 
   3   1   0  509.25   17.50 
  -3   1   0  492.65   17.20 
  -3   1   0  513.45   16.70 
  -3   1   0  498.45   18.80 
   3   1   0  512.05   18.50 
   3   1   0  480.35   17.80 
  -3   1   0  507.25   16.50 
   3   1   0  517.15   18.00 
  -3   1   0  505.95   18.30 
  -3   1   0  497.05   16.70 
   3   1   0  513.25   18.00 
   3   1   0  494.95   17.10 
  -3   1   0  491.45   18.00 
   4  -1   0  163.78    9.10 
   4  -1   0  172.28    6.00 
  -4  -1   0  174.48    8.00 
   4  -1   0  177.58    7.50 
  -4  -1   0  173.38    8.20 
  -4  -1   0  190.18    6.50 
  -4  -1   0  171.88    6.00 
  -4  -1   0  188.58    9.90 
  -4  -1   0  169.88    7.80 
  -4  -1   0  179.28    7.90 
   4  -1   0  172.68    6.80 
   4  -1   0  182.58    9.10 
  -4  -1   0  182.48    7.00 
   4  -1   0  177.38    7.30 
   4  -1   0  176.78    7.60 
  -4  -1   0  174.28    6.50 
   4  -1   0  171.78    8.50 
  -4  -1   0  187.48    8.10 
  -4  -1   0  182.88    9.10 
  -4  -1   0  176.98    9.20 
   4  -1   0  174.08    8.60 
   4  -1   0  184.08    7.90 
  -4  -1   0  168.88    9.90 
  -4  -1   0  175.68    7.70 
   4  -1   0  167.38    9.10 
   4  -1   0  177.78    8.70 
   4  -1   0  171.38    7.60 
   4  -1   0  178.08    8.10 
  -4  -1   0  185.88    8.00 
  -4  -1   0  192.38    7.80 
   4   1   0  172.68    8.40 
   4   1   0  176.68    7.90 
  -4   1   0  176.18    7.60 
  -4   1   0  180.58    7.80 
   4   1   0  174.78    8.20 
  -4   1   0  182.98    9.10 
   4   1   0  181.88    7.10 
   4   1   0  181.18    9.30 
  -4   1   0  179.08    9.50 
  -4   1   0  180.98    9.50 
  -4   1   0  168.78    7.30 
   4   1   0  177.78    8.50 
   4   1   0  187.98    8.40 
   4   1   0  164.88    8.90 
   4   1   0  178.48    8.40 
   4   1   0  181.48    7.10 
  -4   1   0  181.38    8.60 
  -4   1   0  174.78    7.00 
  -4   1   0  166.38    7.10 
  -4   1   0  161.88    9.60 
  -4   1   0  174.48    8.10 
  -4   1   0  156.78    9.40 
   4   1   0  171.18    7.40 
   4   1   0  180.98    7.10 
   4   1   0  168.18    8.90 
  -4   1   0  170.58    7.20 
  -4   1   0  179.88    8.80 
  -4   1   0  180.48    9.00 
  -4   1   0  184.78    7.50 
   4   1   0  193.28    8.20 
   4   1   0  177.38    7.00 
  -4   1   0  179.18    7.70 
   4   1   0  178.78    9.00 
  -5  -1   0 2272.67   68.09 
  -5  -1   0 2231.38   69.89 
  -5  -1   0 2275.17   68.99 
  -5  -1   0 2280.67   70.19 
  -5  -1   0 2263.77   72.79 
  -5  -1   0 2239.58   72.29 
  -5  -1   0 2289.67   70.09 
   5  -1   0 2211.18   70.49 
  -5  -1   0 2212.38   70.39 
  -5  -1   0 2147.19   70.59 
  -5  -1   0 2214.28   70.19 
   5  -1   0 2169.18   69.89 
  -5  -1   0 2282.27   68.29 
   5  -1   0 2317.97   71.99 
  -5  -1   0 2156.08   70.19 
   5  -1   0 2256.87   70.39 
   5  -1   0 2279.87   70.19 
   5  -1   0 2254.07   70.99 
  -5  -1   0 2185.78   73.69 
  -5  -1   0 2258.77   73.59 
   5  -1   0 2216.58   71.49 
   5  -1   0 2257.07   72.29 
  -5  -1   0 2303.37   70.29 
   5  -1   0 2225.58   71.89 
   5  -1   0 2227.98   72.59 
  -5  -1   0 2273.17   70.89 
  -5   1   0 2145.79   73.39 
  -5   1   0 2271.67   72.29 
   5   1   0 2192.38   72.09 
   5   1   0 2293.67   70.39 
  -5   1   0 2265.87   72.79 
   5   1   0 2270.47   71.19 
   5   1   0 2260.87   70.69 
  -5   1   0 2277.07   73.09 
  -5   1   0 2239.98   69.99 
   5   1   0 2205.98   68.59 
   5   1   0 2255.87   69.29 
  -5   1   0 2311.47   70.19 
  -5   1   0 2191.78   70.69 
  -5   1   0 2272.17   69.99 
   5   1   0 2239.38   72.69 
   5   1   0 2276.07   72.29 
  -5   1   0 2297.47   69.49 
  -5   1   0 2298.97   69.09 
   5   1   0 2178.88   71.29 
  -5   1   0 2255.17   70.99 
   5   1   0 2245.18   68.79 
   5   1   0 2249.57   71.19 
   5   1   0 2240.98   69.69 
  -5   1   0 2296.37   69.49 
  -5   1   0 2209.68   69.29 
  -5   1   0 2238.48   71.39 
  -5   1   0 2273.17   73.19 
   5   1   0 2257.67   72.89 
  -5   1   0 2224.38   72.09 
   5   1   0 2244.78   71.09 
  -5   1   0 2264.47   69.99 
   6  -1   0  132.79    9.30 
  -6  -1   0  122.89    7.50 
  -6  -1   0  138.39    7.90 
   6  -1   0  134.49    7.60 
  -6  -1   0  127.29    7.20 
  -6  -1   0  139.39    9.50 
  -6  -1   0  134.49   10.20 
   6  -1   0  147.99    9.30 
   6  -1   0  139.79    7.90 
   6  -1   0  137.99    9.10 
   6  -1   0  125.89    7.70 
  -6  -1   0  141.09    8.10 
  -6  -1   0  137.39    5.70 
   6  -1   0  147.09    8.00 
  -6  -1   0  127.79    7.30 
  -6  -1   0  138.99    7.80 
  -6  -1   0  143.89    8.10 
  -6  -1   0  130.79    9.00 
   6  -1   0  142.39    9.20 
  -6  -1   0  147.89    7.60 
  -6  -1   0  140.09    6.40 
  -6  -1   0  136.69    7.40 
   6  -1   0  137.69    7.60 
  -6   1   0  131.49    8.80 
   6   1   0  127.69    7.60 
   6   1   0  141.09    8.50 
   6   1   0  136.09    5.90 
  -6   1   0  132.59    7.50 
  -6   1   0  140.29    9.60 
   6   1   0  114.69    8.10 
   6   1   0  142.29    8.40 
  -6   1   0  145.79    8.30 
  -6   1   0  134.49    7.60 
  -6   1   0  129.59    8.30 
  -6   1   0  134.29    6.80 
   6   1   0  138.49    9.20 
  -6   1   0  129.99    7.50 
  -6   1   0  135.89    9.60 
   6   1   0  136.09    7.90 
   6   1   0  134.79    9.20 
   6   1   0  124.89    9.10 
  -6   1   0  122.59    7.30 
  -6   1   0  116.49    9.90 
  -6   1   0  124.29    6.70 
   6   1   0  131.19    9.40 
   6   1   0  141.09    8.50 
  -6   1   0  144.19    9.20 
  -6   1   0  126.39    6.60 
   6   1   0  136.79    7.20 
  -6   1   0  145.79    6.70 
  -6   1   0  137.79    7.40 
   6   1   0  130.39    6.10 
   6   1   0  141.59    6.70 
  -6   1   0  143.49    9.80 
  -7  -1   0 2344.37   73.69 
   7  -1   0 2327.07   76.59 
  -7  -1   0 2307.67   77.09 
  -7  -1   0 2383.46   73.99 
  -7  -1   0 2327.97   79.39 
   7  -1   0 2293.57   76.59 
   7  -1   0 2271.87   73.79 
  -7  -1   0 2252.67   74.29 
   7  -1   0 2348.86   74.79 
   7  -1   0 2373.36   74.49 
  -7  -1   0 2318.77   73.89 
   7  -1   0 2367.76   77.09 
  -7  -1   0 2291.97   75.09 
  -7  -1   0 2347.77   74.29 
  -7  -1   0 2315.67   74.29 
  -7  -1   0 2370.16   72.09 
   7  -1   0 2338.07   74.29 
  -7  -1   0 2266.97   74.49 
  -7  -1   0 2288.87   73.69 
   7  -1   0 2343.27   77.09 
  -7  -1   0 2348.36   74.39 
  -7   1   0 2375.76   77.19 
  -7   1   0 2294.57   78.29 
  -7   1   0 2360.86   74.09 
  -7   1   0 2280.57   79.19 
  -7   1   0 2369.16   73.89 
   7   1   0 2333.47   72.59 
   7   1   0 2278.67   75.49 
  -7   1   0 2373.86   72.49 
  -7   1   0 2269.97   73.69 
   7   1   0 2309.57   74.09 
   7   1   0 2249.87   76.59 
  -7   1   0 2299.17   72.29 
   7   1   0 2269.97   75.89 
  -7   1   0 2258.17   76.49 
   7   1   0 2344.67   75.69 
   7   1   0 2347.67   77.99 
   7   1   0 2370.16   77.39 
  -7   1   0 2397.86   72.99 
  -7   1   0 2250.87   73.49 
   7   1   0 2375.16   73.59 
  -7   1   0 2333.07   75.79 
  -7   1   0 2322.07   75.09 
  -7   1   0 2277.97   73.99 
  -7   1   0 2297.87   77.09 
  -8  -1   0  169.58    9.90 
  -8  -1   0  166.28   13.10 
  -8  -1   0  174.68   10.00 
  -8  -1   0  167.38    9.90 
   8  -1   0  163.58   11.60 
  -8  -1   0  176.58   10.20 
   8  -1   0  164.48    9.90 
  -8  -1   0  175.68   10.50 
   8  -1   0  170.18   10.80 
  -8  -1   0  176.98   10.90 
   8  -1   0  181.78   12.30 
  -8  -1   0  181.28   10.20 
  -8  -1   0  178.78   11.60 
   8  -1   0  180.38   10.50 
  -8  -1   0  175.38    9.70 
   8  -1   0  166.48   11.90 
   8  -1   0  177.28   12.40 
  -8  -1   0  180.18   10.80 
  -8  -1   0  165.48   11.90 
  -8  -1   0  176.98   10.40 
  -8  -1   0  192.28    8.60 
  -8   1   0  183.88   10.30 
  -8   1   0  174.88    9.80 
   8   1   0  161.78   10.00 
  -8   1   0  175.98   13.00 
  -8   1   0  163.38   11.80 
  -8   1   0  182.88    9.20 
  -8   1   0  174.88   11.90 
  -8   1   0  177.88    8.70 
  -8   1   0  178.08   10.30 
   8   1   0  183.18   13.30 
  -8   1   0  171.98    9.90 
  -8   1   0  167.58   10.80 
   8   1   0  186.28   11.60 
   8   1   0  166.08   11.50 
   8   1   0  179.88   12.70 
   8   1   0  179.98    9.80 
  -8   1   0  161.88   12.00 
   8   1   0  178.38   11.50 
  -8   1   0  173.68   13.80 
  -8   1   0  186.58    8.80 
   8   1   0  182.48   12.50 
  -8   1   0  175.38   11.20 
  -9  -1   0 1022.80   42.00 
  -9  -1   0  962.10   37.70 
  -9  -1   0  967.40   35.00 
   9  -1   0  950.50   36.00 
  -9  -1   0  947.71   35.20 
   9  -1   0  953.20   34.80 
  -9  -1   0  962.20   34.90 
  -9  -1   0 1002.40   37.90 
   9  -1   0  917.51   37.50 
   9  -1   0  980.50   39.10 
   9  -1   0  965.50   37.70 
   9  -1   0  990.10   35.60 
  -9  -1   0  963.50   38.70 
  -9  -1   0  955.20   35.00 
  -9  -1   0  950.10   34.10 
  -9  -1   0  951.60   34.80 
  -9  -1   0  938.01   35.40 
   9  -1   0  920.01   37.70 
  -9  -1   0  947.11   35.80 
   9   1   0  913.31   36.80 
   9   1   0  915.31   37.90 
  -9   1   0  965.00   38.20 
  -9   1   0  945.91   40.10 
   9   1   0  939.41   34.90 
  -9   1   0  947.71   32.90 
  -9   1   0  926.21   37.70 
  -9   1   0  943.21   34.70 
  -9   1   0  983.70   38.90 
  -9   1   0  935.61   34.90 
   9   1   0  910.91   36.70 
   9   1   0  935.31   39.80 
   9   1   0  921.51   36.60 
   9   1   0  963.70   34.50 
  -9   1   0  947.61   36.40 
  -9   1   0  958.80   35.50 
  -9   1   0  971.10   35.00 
  -9   1   0  942.41   33.30 
 -10  -1   0   34.50    6.00 
 -10  -1   0   19.20    5.40 
  10  -1   0   30.70    7.70 
  10  -1   0   35.80    6.10 
 -10  -1   0   39.10    9.00 
 -10  -1   0   28.90    6.10 
 -10  -1   0   33.50    5.90 
  10  -1   0   36.10    7.50 
  10  -1   0   25.10    6.40 
 -10  -1   0   30.80    6.80 
 -10  -1   0   25.20    6.20 
 -10  -1   0   34.50    6.00 
 -10  -1   0   28.00    6.80 
  10  -1   0   30.30    6.00 
 -10  -1   0   33.40    5.20 
 -10   1   0   34.60    6.20 
  10   1   0   31.90    7.80 
  10   1   0   34.00    5.80 
 -10   1   0   31.30    7.10 
  10   1   0   35.00    7.10 
 -10   1   0   32.50    5.80 
  10   1   0   33.00    5.80 
 -10   1   0   29.40    6.60 
 -10   1   0   37.20    6.00 
 -10   1   0   35.30    7.60 
 -10   1   0   44.50    9.20 
 -10   1   0   23.20    6.00 
  10   1   0   44.80    8.40 
 -10   1   0   47.70    8.10 
   0  -2   0 4195.08  122.39 
   0  -2   0 4035.90  121.09 
   0  -2   0 4203.68  121.79 
   0  -2   0 4247.48  120.49 
   0  -2   0 4091.09  122.79 
   0  -2   0 4187.78  121.99 
   0  -2   0 4105.69  121.09 
   0  -2   0 4233.18  122.09 
   0  -2   0 3909.71  122.69 
   0  -2   0 3516.65  123.89 
   0  -2   0 4241.28  121.59 
   0  -2   0 4027.00  121.49 
   0  -2   0 3787.72  122.79 
   0  -2   0 3983.50  121.99 
   0  -2   0 3814.12  123.49 
   0  -2   0 4317.67  120.49 
   0  -2   0 4116.29  121.99 
   0  -2   0 4093.09  120.69 
   0  -2   0 4003.50  121.29 
   0  -2   0 4121.99  121.49 
   0  -2   0 4193.38  120.99 
   0  -2   0 4018.30  120.79 
   0  -2   0 4281.57  120.99 
   0  -2   0 3765.42  122.69 
   0  -2   0 3672.33  124.59 
   0   2   0 3814.42  121.79 
   0   2   0 4126.19  123.89 
   0   2   0 4361.76  121.59 
   0   2   0 3940.21  121.59 
   0   2   0 3961.60  122.49 
   0   2   0 4146.89  122.79 
   0   2   0 4104.59  120.69 
   0   2   0 3567.34  122.89 
   0   2   0 3980.70  120.99 
   0   2   0 4036.40  122.59 
   0   2   0 4161.38  124.09 
   0   2   0 3514.85  124.39 
   0   2   0 3899.01  124.09 
   0   2   0 3808.12  121.89 
   0   2   0 3952.20  121.09 
   0   2   0 3834.42  122.79 
   0   2   0 3999.20  122.39 
   0   2   0 3823.52  121.69 
   0   2   0 4093.69  120.99 
   0   2   0 4147.19  122.59 
   0   2   0 4047.09  122.29 
  -1  -2   0 4780.22  147.19 
   1  -2   0 4902.51  141.29 
  -1  -2   0 4538.75  142.09 
   1  -2   0 4508.05  142.89 
  -1  -2   0 4658.53  141.99 
   1  -2   0 4872.71  142.09 
  -1  -2   0 4608.94  141.59 
   1  -2   0 4564.54  148.69 
  -1  -2   0 4734.13  142.99 
   1  -2   0 4503.75  140.69 
  -1  -2   0 4922.51  141.69 
   1  -2   0 4498.75  142.49 
  -1  -2   0 4665.43  141.49 
   1  -2   0 4314.27  146.39 
  -1  -2   0 4621.14  143.29 
  -1  -2   0 4738.23  141.79 
   1  -2   0 4772.82  143.19 
   1  -2   0 4482.05  142.59 
   1  -2   0 4667.93  142.09 
  -1  -2   0 4991.10  142.59 
  -1  -2   0 5225.58  143.29 
   1  -2   0 4742.83  143.59 
   1  -2   0 4969.40  142.19 
   1  -2   0 4031.60  146.39 
   1  -2   0 4895.31  142.59 
   1  -2   0 4576.44  141.59 
   1  -2   0 4675.13  143.79 
   1  -2   0 4730.63  142.39 
  -1  -2   0 4818.22  141.99 
  -1  -2   0 4770.52  143.89 
   1  -2   0 4202.58  144.19 
  -1  -2   0 4515.75  142.69 
  -1  -2   0 4835.12  141.89 
   1  -2   0 4734.13  142.99 
  -1  -2   0 4939.41  141.89 
  -1  -2   0 5081.09  141.79 
  -1  -2   0 4677.33  142.89 
  -1  -2   0 4710.03  142.39 
  -1  -2   0 4513.75  142.19 
  -1  -2   0 4999.80  142.19 
   1  -2   0 4525.15  143.29 
   1  -2   0 4857.21  141.49 
   1  -2   0 4721.23  141.79 
  -1  -2   0 4894.11  143.09 
   1  -2   0 4918.11  141.09 
   1   2   0 4843.62  143.29 
   1   2   0 4722.03  142.99 
  -1   2   0 4054.59  145.69 
   1   2   0 4609.64  144.39 
  -1   2   0 4641.94  143.99 
   1   2   0 5093.09  141.99 
   1   2   0 4654.63  144.19 
   1   2   0 4964.00  149.19 
   1   2   0 4930.91  145.19 
   1   2   0 4776.52  141.39 
   1   2   0 5297.87  143.39 
   1   2   0 4908.51  142.29 
  -1   2   0 4424.56  143.89 
  -1   2   0 4389.16  144.59 
  -1   2   0 4877.01  142.89 
  -1   2   0 4771.22  142.09 
  -1   2   0 3984.80  146.39 
   1   2   0 4659.63  143.79 
   1   2   0 4753.92  141.89 
   1   2   0 4666.83  142.49 
   1   2   0 4836.82  145.29 
  -1   2   0 4756.22  143.29 
   1   2   0 4985.20  143.39 
  -1   2   0 3983.50  141.39 
  -1   2   0 4694.33  142.89 
  -1   2   0 4821.82  144.39 
  -1   2   0 4732.53  143.09 
  -1   2   0 4269.27  143.49 
  -1   2   0 4842.52  142.69 
  -1   2   0 4029.20  141.69 
   1   2   0 5065.59  143.19 
   1   2   0 4876.01  142.89 
   1   2   0 4942.61  141.89 
   1   2   0 4884.71  141.99 
   1   2   0 4894.11  142.89 
  -1   2   0 4743.23  142.09 
  -1   2   0 4532.95  144.09 
   1   2   0 4780.72  142.19 
  -1   2   0 4828.32  141.89 
  -1   2   0 4769.32  143.89 
  -1   2   0 4654.73  142.59 
  -1   2   0 4701.63  141.69 
   2  -2   0 2303.37   77.79 
  -2  -2   0 2479.85   76.39 
   2  -2   0 2453.85   77.79 
   2  -2   0 2505.95   76.49 
   2  -2   0 2465.25   76.19 
   2  -2   0 2477.35   76.19 
  -2  -2   0 2544.55   77.59 
   2  -2   0 2469.15   74.59 
   2  -2   0 2521.15   76.69 
   2  -2   0 2596.94   78.29 
   2  -2   0 2473.95   75.59 
   2  -2   0 2449.35   77.49 
  -2  -2   0 2457.95   75.49 
  -2  -2   0 2573.84   77.39 
  -2  -2   0 2484.05   76.89 
   2  -2   0 2379.26   77.59 
   2  -2   0 2580.64   76.79 
   2  -2   0 2564.04   75.89 
   2  -2   0 2497.45   78.19 
   2  -2   0 2461.25   77.19 
  -2  -2   0 2416.66   75.99 
  -2  -2   0 2464.95   76.19 
  -2  -2   0 2533.25   75.29 
  -2  -2   0 2435.46   77.39 
  -2  -2   0 2527.65   76.69 
  -2  -2   0 2419.96   77.59 
  -2  -2   0 2477.45   76.49 
   2  -2   0 2517.65   78.19 
  -2  -2   0 2487.75   76.19 
   2  -2   0 2511.65   75.79 
  -2  -2   0 2455.55   75.99 
   2  -2   0 2520.55   78.29 
  -2  -2   0 2546.65   76.19 
   2  -2   0 2522.95   77.49 
  -2  -2   0 2533.15   77.59 
  -2  -2   0 2597.34   77.89 
  -2  -2   0 2441.16   75.39 
   2  -2   0 2544.55   74.79 
  -2  -2   0 2667.43   75.59 
  -2  -2   0 2553.74   75.89 
  -2  -2   0 2545.85   77.79 
   2  -2   0 2527.65   74.49 
  -2  -2   0 2544.75   76.79 
   2  -2   0 2587.24   77.89 
  -2   2   0 2508.35   75.79 
  -2   2   0 2445.16   78.69 
   2   2   0 2584.54   78.09 
  -2   2   0 2424.96   79.49 
   2   2   0 2571.14   75.79 
  -2   2   0 2411.36   77.89 
   2   2   0 2457.85   76.29 
  -2   2   0 2399.96   78.09 
   2   2   0 2522.75   75.49 
   2   2   0 2490.55   76.69 
  -2   2   0 2452.85   76.09 
   2   2   0 2519.85   77.09 
   2   2   0 2595.74   76.49 
   2   2   0 2494.15   76.19 
  -2   2   0 2512.95   78.79 
  -2   2   0 2611.44   78.39 
  -2   2   0 2560.84   76.49 
   2   2   0 2391.66   75.99 
  -2   2   0 2503.95   76.49 
   2   2   0 2450.75   77.09 
  -2   2   0 2466.45   77.89 
   2   2   0 2414.96   75.39 
  -2   2   0 2435.96   78.29 
   2   2   0 2521.25   77.39 
  -2   2   0 2504.65   77.09 
  -2   2   0 2454.95   74.79 
  -2   2   0 2504.25   76.49 
   2   2   0 2602.84   76.29 
  -2   2   0 2490.95   76.29 
   2   2   0 2505.85   75.49 
   2   2   0 2591.24   77.29 
   2   2   0 2507.95   77.79 
  -2   2   0 2331.37   79.09 
  -2   2   0 2420.26   78.29 
  -2   2   0 2446.56   78.29 
  -2   2   0 2426.36   80.19 
  -2   2   0 2433.56   78.39 
   2   2   0 2551.64   77.49 
   2   2   0 2500.15   76.99 
   2   2   0 2600.94   75.19 
   2   2   0 2553.64   76.09 
   2   2   0 2424.16   76.19 
   2   2   0 2537.25   77.49 
  -2   2   0 2338.67   78.39 
   3  -2   0 1067.39   36.60 
   3  -2   0 1085.69   33.40 
  -3  -2   0 1092.09   34.00 
  -3  -2   0 1130.49   34.00 
  -3  -2   0 1074.69   35.40 
   3  -2   0 1068.89   36.10 
   3  -2   0 1059.59   34.10 
  -3  -2   0 1066.09   34.50 
   3  -2   0 1096.19   36.50 
  -3  -2   0 1095.49   34.20 
  -3  -2   0 1074.39   34.50 
  -3  -2   0 1072.99   34.30 
  -3  -2   0 1106.99   36.70 
   3  -2   0 1076.59   37.60 
   3  -2   0 1053.29   35.30 
  -3  -2   0 1084.69   36.20 
  -3  -2   0 1093.39   34.10 
  -3  -2   0 1060.39   34.90 
   3  -2   0 1103.89   33.30 
   3  -2   0 1101.49   37.40 
   3  -2   0 1119.49   36.30 
   3  -2   0 1064.79   35.80 
  -3  -2   0 1118.99   35.00 
  -3  -2   0 1083.79   36.90 
  -3  -2   0 1090.39   34.70 
  -3  -2   0 1097.79   36.40 
  -3  -2   0 1118.39   33.70 
   3  -2   0 1078.49   37.10 
   3  -2   0 1120.49   33.60 
   3  -2   0 1073.49   35.60 
   3  -2   0 1112.69   34.40 
   3  -2   0 1080.59   34.80 
   3  -2   0 1100.79   33.10 
   3  -2   0 1102.99   35.20 
  -3   2   0 1053.59   37.40 
  -3   2   0 1061.59   34.00 
  -3   2   0 1077.49   33.30 
  -3   2   0 1055.19   35.40 
   3   2   0 1110.69   34.50 
  -3   2   0 1085.19   33.00 
  -3   2   0 1080.39   34.60 
   3   2   0 1094.89   35.70 
  -3   2   0 1079.09   37.50 
   3   2   0 1100.99   34.20 
  -3   2   0 1072.99   36.40 
  -3   2   0 1011.40   37.40 
   3   2   0 1057.39   34.80 
   3   2   0 1030.30   36.30 
   3   2   0 1104.59   34.10 
  -3   2   0 1088.39   36.20 
  -3   2   0 1074.99   34.30 
  -3   2   0 1137.69   36.70 
   3   2   0 1095.59   35.20 
  -3   2   0 1071.39   34.40 
  -3   2   0 1055.39   35.40 
  -3   2   0 1093.99   35.60 
   3   2   0 1081.29   33.90 
  -3   2   0 1059.79   36.50 
  -3   2   0 1038.60   33.60 
   3   2   0 1097.09   35.40 
   3   2   0 1068.99   33.40 
   3   2   0 1074.19   36.20 
   3   2   0 1072.99   36.30 
   3   2   0 1107.99   35.30 
  -3   2   0 1083.29   35.70 
   3   2   0 1109.59   36.00 
  -3   2   0 1026.00   37.20 
  -3   2   0 1012.20   36.50 
   3   2   0 1080.39   33.90 
   3   2   0 1052.49   36.10 
  -4  -2   0  993.50   32.30 
  -4  -2   0  984.90   34.20 
   4  -2   0  976.30   32.40 
  -4  -2   0 1018.50   34.80 
   4  -2   0  987.40   35.40 
   4  -2   0  977.30   32.70 
  -4  -2   0  958.90   32.40 
  -4  -2   0  959.60   32.20 
  -4  -2   0 1012.10   31.30 
   4  -2   0  988.00   29.90 
  -4  -2   0  995.60   32.30 
  -4  -2   0  971.20   31.10 
   4  -2   0  972.20   30.70 
   4  -2   0 1017.50   33.10 
   4  -2   0  961.70   33.60 
  -4  -2   0  968.90   31.90 
   4  -2   0  939.31   31.80 
   4  -2   0 1007.20   32.10 
   4  -2   0  989.80   31.00 
   4  -2   0 1019.20   31.40 
   4  -2   0  983.10   33.50 
  -4  -2   0  953.10   33.90 
  -4  -2   0  988.20   31.60 
   4  -2   0  970.30   30.90 
   4  -2   0  931.41   34.20 
  -4  -2   0  981.80   30.80 
  -4  -2   0 1019.30   31.30 
   4  -2   0  988.10   34.20 
  -4  -2   0  965.30   32.90 
   4  -2   0  943.91   33.40 
  -4  -2   0  986.80   35.20 
  -4  -2   0 1013.60   32.20 
   4   2   0  962.20   31.70 
  -4   2   0  970.40   30.80 
   4   2   0  966.30   31.40 
   4   2   0  970.60   33.50 
  -4   2   0  981.90   33.40 
   4   2   0 1003.70   34.50 
  -4   2   0  979.20   34.20 
  -4   2   0  966.10   35.50 
   4   2   0  977.30   34.40 
  -4   2   0 1023.50   33.80 
  -4   2   0  957.90   32.00 
  -4   2   0  909.01   35.20 
   4   2   0  994.10   31.90 
   4   2   0  999.80   33.10 
  -4   2   0  923.01   34.80 
  -4   2   0  974.10   34.00 
   4   2   0  989.00   32.00 
  -4   2   0 1018.10   34.60 
  -4   2   0  937.81   35.00 
  -4   2   0  954.90   31.80 
  -4   2   0  970.70   33.10 
  -4   2   0  948.01   32.90 
  -4   2   0  994.60   30.50 
   4   2   0  994.40   32.40 
  -4   2   0  938.21   32.20 
  -4   2   0  983.40   32.90 
   4   2   0  986.20   32.30 
  -4   2   0  989.80   30.30 
   4   2   0  969.90   30.50 
   5  -2   0  403.86   16.60 
   5  -2   0  420.96   15.60 
   5  -2   0  439.86   17.00 
  -5  -2   0  411.86   16.20 
  -5  -2   0  420.06   16.90 
   5  -2   0  423.96   13.40 
  -5  -2   0  420.56   14.10 
  -5  -2   0  419.56   15.70 
  -5  -2   0  425.36   13.60 
  -5  -2   0  432.66   16.50 
  -5  -2   0  436.56   15.10 
   5  -2   0  424.46   14.10 
  -5  -2   0  432.56   18.20 
   5  -2   0  437.86   17.40 
  -5  -2   0  434.06   18.40 
   5  -2   0  424.46   16.80 
  -5  -2   0  440.26   16.50 
  -5  -2   0  425.86   16.00 
  -5  -2   0  435.36   19.00 
  -5  -2   0  413.16   19.30 
   5  -2   0  433.66   15.40 
   5  -2   0  432.96   18.20 
  -5  -2   0  432.36   15.50 
  -5  -2   0  438.76   16.30 
   5  -2   0  420.66   16.00 
  -5  -2   0  423.96   16.40 
   5  -2   0  430.06   17.90 
   5  -2   0  407.66   15.00 
   5  -2   0  408.36   17.40 
   5  -2   0  421.16   18.30 
   5   2   0  450.15   18.50 
  -5   2   0  403.26   18.50 
  -5   2   0  415.96   19.60 
   5   2   0  427.26   17.10 
  -5   2   0  430.26   18.10 
   5   2   0  425.66   16.00 
  -5   2   0  437.06   14.40 
  -5   2   0  418.96   16.00 
  -5   2   0  419.26   19.60 
  -5   2   0  406.56   16.80 
  -5   2   0  441.56   16.10 
   5   2   0  443.76   16.50 
   5   2   0  434.36   15.60 
  -5   2   0  418.26   14.50 
   5   2   0  430.76   15.50 
  -5   2   0  404.16   16.80 
  -5   2   0  388.86   18.60 
   5   2   0  413.56   18.30 
   5   2   0  438.76   18.20 
  -5   2   0  442.96   18.30 
   5   2   0  415.06   16.30 
  -5   2   0  420.66   15.90 
  -5   2   0  409.46   15.80 
   5   2   0  422.36   17.10 
   5   2   0  424.06   14.50 
   5   2   0  422.06   17.70 
   5   2   0  420.56   18.50 
  -5   2   0  430.56   18.10 
  -5   2   0  414.16   15.40 
  -5   2   0  412.56   17.30 
   6  -2   0  626.94   24.90 
   6  -2   0  646.24   23.70 
  -6  -2   0  612.14   26.90 
   6  -2   0  641.64   22.60 
  -6  -2   0  636.84   22.90 
  -6  -2   0  579.64   23.40 
   6  -2   0  591.64   22.50 
  -6  -2   0  628.94   23.20 
   6  -2   0  622.94   24.10 
   6  -2   0  640.74   22.20 
  -6  -2   0  623.24   22.20 
  -6  -2   0  632.54   25.40 
  -6  -2   0  638.94   23.10 
  -6  -2   0  631.84   19.80 
  -6  -2   0  600.64   29.40 
  -6  -2   0  650.33   21.50 
  -6  -2   0  578.54   22.80 
  -6  -2   0  628.14   22.50 
  -6  -2   0  613.34   23.20 
   6  -2   0  632.34   25.50 
  -6  -2   0  618.14   22.70 
   6  -2   0  633.74   25.20 
  -6   2   0  634.84   21.10 
  -6   2   0  626.04   25.50 
   6   2   0  624.44   22.00 
   6   2   0  634.04   25.40 
   6   2   0  602.84   23.90 
  -6   2   0  618.14   27.30 
  -6   2   0  607.94   26.70 
  -6   2   0  616.14   22.70 
  -6   2   0  615.94   22.20 
   6   2   0  633.84   23.40 
  -6   2   0  606.14   24.20 
   6   2   0  616.04   23.60 
  -6   2   0  630.24   25.10 
   6   2   0  614.74   24.90 
  -6   2   0  623.84   26.50 
   6   2   0  635.64   22.10 
   6   2   0  633.24   20.90 
  -6   2   0  643.14   25.40 
  -6   2   0  663.23   22.90 
  -6   2   0  622.64   20.80 
   6   2   0  689.93   24.50 
  -6   2   0  606.14   25.00 
   6   2   0  619.14   25.90 
   6   2   0  603.44   25.50 
  -6   2   0  630.54   23.90 
   6   2   0  615.44   23.00 
  -6   2   0  644.04   22.80 
   6   2   0  623.14   22.10 
   6   2   0  607.74   25.00 
   7  -2   0   31.80    4.60 
  -7  -2   0   41.50    5.50 
  -7  -2   0   44.00    7.70 
   7  -2   0   37.90    4.90 
   7  -2   0   39.50    5.40 
  -7  -2   0   35.50    6.00 
  -7  -2   0   38.10    4.70 
  -7  -2   0   32.20    5.00 
  -7  -2   0   36.20    5.20 
  -7  -2   0   32.30    4.90 
   7  -2   0   46.60    6.80 
  -7  -2   0   35.90    4.90 
   7  -2   0   39.00    5.90 
  -7  -2   0   41.60    4.00 
  -7  -2   0   28.40    4.50 
  -7  -2   0   31.70    4.60 
  -7  -2   0   32.50    4.30 
   7  -2   0   33.80    5.70 
  -7  -2   0   31.20    4.60 
   7  -2   0   36.70    4.50 
   7  -2   0   38.50    6.20 
  -7   2   0   26.40    4.10 
  -7   2   0   33.20    3.30 
   7   2   0   41.20    4.70 
  -7   2   0   33.90    6.20 
  -7   2   0   35.50    4.90 
   7   2   0   32.20    5.70 
  -7   2   0   34.10    7.20 
  -7   2   0   43.20    6.50 
   7   2   0   28.20    3.60 
  -7   2   0   34.90    4.60 
   7   2   0   42.40    6.70 
   7   2   0   29.60    5.00 
   7   2   0   37.60    5.40 
  -7   2   0   36.60    5.60 
  -7   2   0   24.40    6.30 
  -7   2   0   45.70    6.20 
  -7   2   0   41.30    4.50 
   7   2   0   31.30    4.50 
   7   2   0   38.20    5.30 
  -7   2   0   32.00    5.70 
   7   2   0   35.60    6.30 
  -7   2   0   40.10    5.00 
  -7   2   0   26.70    5.10 
  -7   2   0   31.60    3.60 
   8  -2   0  183.38   12.40 
  -8  -2   0  235.58    9.80 
  -8  -2   0  191.78   10.80 
  -8  -2   0  208.58   11.80 
  -8  -2   0  186.58   10.20 
  -8  -2   0  206.98   11.10 
   8  -2   0  195.88   13.10 
  -8  -2   0  195.28   11.30 
  -8  -2   0  182.68   10.50 
  -8  -2   0  167.08   12.60 
  -8  -2   0  196.68   11.50 
   8  -2   0  201.38   11.70 
   8  -2   0  207.28   11.30 
  -8  -2   0  182.08   14.50 
   8  -2   0  175.18   10.60 
   8  -2   0  187.78   13.00 
  -8  -2   0  187.88   11.20 
  -8  -2   0  199.08   11.10 
  -8   2   0  196.28   11.20 
  -8   2   0  187.28   13.30 
  -8   2   0  192.48    9.20 
  -8   2   0  197.88   10.80 
   8   2   0  196.58   14.10 
  -8   2   0  197.08   12.60 
  -8   2   0  205.38   11.10 
  -8   2   0  190.78    8.90 
   8   2   0  192.48   11.80 
  -8   2   0  196.28   13.20 
  -8   2   0  193.88   13.20 
   8   2   0  192.88   11.80 
  -8   2   0  181.98   11.80 
   8   2   0  184.68   12.70 
  -8   2   0  212.38   16.10 
   8   2   0  183.58   10.80 
   8   2   0  189.38   12.30 
   8   2   0  197.28   13.40 
  -8   2   0  187.78   10.70 
  -8   2   0  187.98   14.40 
  -8   2   0  198.88    9.80 
   8   2   0  222.28   10.80 
  -9  -2   0   11.80    3.80 
   9  -2   0   17.80    4.80 
   9  -2   0    9.90    4.90 
   9  -2   0   22.00    6.20 
  -9  -2   0   14.30    5.20 
  -9  -2   0   12.00    5.90 
  -9  -2   0   14.50    6.80 
  -9  -2   0   15.30    4.50 
  -9  -2   0   12.50    4.40 
  -9  -2   0    7.50    3.40 
  -9  -2   0    7.60    3.70 
   9  -2   0   16.60    6.50 
   9  -2   0   21.50    4.80 
   9  -2   0   12.90    5.50 
  -9  -2   0    9.90    3.60 
  -9   2   0   15.10    5.90 
  -9   2   0   12.40    4.60 
  -9   2   0    7.90    4.00 
  -9   2   0   14.00    5.40 
   9   2   0   17.60    4.50 
   9   2   0   16.10    5.00 
   9   2   0   10.80    4.70 
  -9   2   0   11.80    5.00 
   9   2   0   15.70    5.90 
   9   2   0   14.90    5.30 
  -9   2   0   14.00    4.40 
  -9   2   0   10.40    6.80 
   9   2   0   18.50    4.10 
  -9   2   0   18.90    4.40 
  -9   2   0    7.60    4.20 
  -9   2   0    9.90    3.40 
 -10  -2   0   17.80    5.70 
 -10  -2   0    8.70    3.70 
  10  -2   0   12.80    5.30 
 -10  -2   0    9.90    4.40 
  10  -2   0   11.40    5.10 
  10  -2   0   13.80    6.10 
 -10  -2   0    8.30    4.10 
  10  -2   0   17.00    5.00 
 -10  -2   0   13.50    4.40 
 -10  -2   0   12.20    6.00 
 -10  -2   0   13.40    5.60 
 -10  -2   0    8.80    3.80 
 -10  -2   0   11.40    4.80 
  10   2   0    8.90    5.90 
  10   2   0   15.40    4.70 
  10   2   0   12.00    5.20 
 -10   2   0    7.90    3.70 
 -10   2   0   10.10    4.50 
 -10   2   0   10.40    3.90 
 -10   2   0   10.00    5.60 
  10   2   0   18.90    6.10 
 -10   2   0   16.60    6.70 
 -10   2   0   21.00    5.40 
 -10   2   0   10.70    5.30 
  10   2   0    8.60    3.90 
 -10   2   0   16.60    5.50 
 -10   2   0   10.00    5.10 
   0  -3   0    3.10    2.70 
   0  -3   0    7.10    1.60 
   0  -3   0    1.00    0.80 
   0  -3   0    8.00    2.00 
   0  -3   0    1.10    1.40 
   0  -3   0    3.80    1.40 
   0  -3   0    2.20    1.10 
   0  -3   0    3.00    2.30 
   0  -3   0    0.50    1.00 
   0  -3   0   13.20    2.60 
   0  -3   0    1.40    1.60 
   0  -3   0    0.20    1.60 
   0  -3   0    7.50    1.30 
   0  -3   0    2.20    1.50 
   0  -3   0    1.20    1.60 
   0  -3   0   10.10    2.40 
   0  -3   0    3.10    1.90 
   0  -3   0    3.20    1.70 
   0  -3   0    1.30    1.00 
   0  -3   0    1.70    1.50 
   0  -3   0    1.40    0.90 
   0  -3   0    1.90    2.00 
   0  -3   0    3.30    2.20 
   0  -3   0    2.30    2.80 
   0   3   0    1.30    1.80 
   0   3   0    2.00    1.90 
   0   3   0    1.00    2.60 
   0   3   0    4.70    1.40 
   0   3   0    0.30    2.20 
   0   3   0    0.70    1.70 
   0   3   0    0.90    1.40 
   0   3   0   -0.60    1.50 
   0   3   0    7.20    3.50 
   0   3   0    0.40    1.20 
   0   3   0    2.40    3.00 
   0   3   0    1.00    2.50 
   0   3   0    2.90    1.30 
   0   3   0    3.50    2.60 
   0   3   0    8.60    2.80 
   0   3   0    3.30    1.40 
   0   3   0    2.40    1.20 
   0   3   0    1.80    1.80 
   0   3   0    5.00    1.10 
  -1  -3   0  327.67   12.80 
   1  -3   0  313.27   17.80 
   1  -3   0  300.37   14.50 
   1  -3   0  336.47   10.80 
   1  -3   0  331.67   13.90 
  -1  -3   0  328.67   11.90 
  -1  -3   0  323.97   12.10 
   1  -3   0  347.57   13.40 
   1  -3   0  322.57   10.40 
  -1  -3   0  335.97   12.60 
   1  -3   0  341.07   19.00 
  -1  -3   0  301.67   14.30 
   1  -3   0  337.37   14.10 
   1  -3   0  308.57   13.10 
  -1  -3   0  310.67   12.00 
  -1  -3   0  328.77   12.20 
   1  -3   0  321.07   12.80 
   1  -3   0  327.77   13.10 
   1  -3   0  342.27   11.30 
   1  -3   0  326.07   10.60 
  -1  -3   0  335.57   12.80 
   1  -3   0  307.87   16.00 
  -1  -3   0  323.57   12.40 
  -1  -3   0  338.17   14.20 
  -1  -3   0  329.77   13.10 
  -1  -3   0  330.07   12.40 
  -1  -3   0  347.57   14.50 
   1  -3   0  324.17   13.00 
  -1  -3   0  313.57   11.20 
   1  -3   0  313.07   11.60 
  -1  -3   0  312.37   11.30 
  -1  -3   0  309.67   13.40 
  -1  -3   0  324.97   13.90 
  -1  -3   0  342.47   11.90 
  -1  -3   0  310.67   11.20 
   1  -3   0  332.17   13.30 
   1  -3   0  329.27   12.80 
   1  -3   0  328.57   11.50 
  -1  -3   0  337.47   12.80 
  -1   3   0  297.57   15.10 
   1   3   0  318.77   14.20 
   1   3   0  331.07   11.60 
  -1   3   0  335.27   11.90 
   1   3   0  338.87   11.80 
  -1   3   0  296.17   12.70 
  -1   3   0  283.37   17.00 
  -1   3   0  342.67   13.80 
  -1   3   0  332.37   13.40 
  -1   3   0  298.77   12.50 
   1   3   0  336.37   11.30 
  -1   3   0  262.87   16.50 
   1   3   0  322.87   14.30 
   1   3   0  333.47   13.80 
  -1   3   0  340.07   14.40 
  -1   3   0  275.97   16.00 
   1   3   0  327.67   10.90 
   1   3   0  309.47   12.00 
   1   3   0  319.57   11.90 
  -1   3   0  330.87   11.70 
   1   3   0  325.07   12.60 
   1   3   0  341.07   13.50 
  -1   3   0  317.47   11.90 
  -1   3   0  341.37   13.10 
  -1   3   0  301.87   12.60 
  -1   3   0  306.67   17.60 
   1   3   0  317.67   13.20 
   1   3   0  313.87   12.90 
  -1   3   0  359.76   12.50 
   1   3   0  320.77   12.40 
   1   3   0  341.77   12.70 
   1   3   0  322.37   11.10 
   1   3   0  307.67   15.10 
   1   3   0  341.57   12.40 
  -1   3   0  273.17   16.30 
   1   3   0  309.67   12.90 
  -1   3   0  325.97   11.30 
   2  -3   0  255.07   10.90 
   2  -3   0  281.27   13.00 
   2  -3   0  280.67   10.40 
  -2  -3   0  284.87   11.30 
   2  -3   0  252.97   11.90 
  -2  -3   0  275.07   12.20 
  -2  -3   0  265.97    9.70 
   2  -3   0  246.88   13.70 
  -2  -3   0  277.57   11.30 
  -2  -3   0  267.27   11.10 
   2  -3   0  273.47   11.90 
  -2  -3   0  288.07   11.10 
   2  -3   0  282.37   10.30 
  -2  -3   0  269.77    9.60 
  -2  -3   0  258.77   10.70 
   2  -3   0  296.17   12.50 
   2  -3   0  281.07   12.50 
  -2  -3   0  275.27   12.20 
   2  -3   0  278.67   11.20 
   2  -3   0  286.27   10.50 
   2  -3   0  272.77   11.40 
  -2  -3   0  274.97   10.70 
   2  -3   0  266.37   11.80 
   2  -3   0  264.57   16.50 
   2  -3   0  283.07   11.00 
  -2  -3   0  268.87   12.10 
  -2  -3   0  279.27   10.80 
  -2  -3   0  278.97   12.00 
   2   3   0  268.07   12.80 
   2   3   0  289.17   11.90 
  -2   3   0  268.27   13.20 
  -2   3   0  268.47   12.60 
  -2   3   0  280.17   10.90 
   2   3   0  283.77    9.90 
  -2   3   0  246.58   12.80 
   2   3   0  285.37   10.00 
   2   3   0  277.27   12.60 
  -2   3   0  251.37   14.10 
   2   3   0  291.17   11.90 
   2   3   0  267.47    9.40 
   2   3   0  267.67   10.90 
  -2   3   0  261.97   10.90 
  -2   3   0  261.77   15.80 
  -2   3   0  274.97   12.60 
   2   3   0  292.57   11.20 
  -2   3   0  226.88   17.00 
   2   3   0  257.27   10.30 
   2   3   0  269.67   11.20 
  -2   3   0  292.87   13.00 
   2   3   0  285.57   11.90 
   2   3   0  276.17   10.40 
  -2   3   0  265.87   14.20 
  -2   3   0  236.38   15.80 
   2   3   0  274.97   12.30 
   2   3   0  253.37   12.70 
  -2   3   0  281.47   12.00 
  -2   3   0  277.47   11.00 
  -2   3   0  270.27   10.20 
  -3  -3   0   27.60    3.10 
  -3  -3   0   26.90    4.00 
   3  -3   0   41.90    2.90 
  -3  -3   0   32.40    3.20 
  -3  -3   0   26.60    2.60 
  -3  -3   0   28.60    4.40 
  -3  -3   0   25.00    3.30 
  -3  -3   0   35.10    3.50 
  -3  -3   0   26.90    3.40 
  -3  -3   0   30.30    4.40 
  -3  -3   0   28.50    3.30 
   3  -3   0   36.00    3.50 
   3  -3   0   33.80    4.60 
  -3  -3   0   19.40    3.20 
  -3  -3   0   28.20    3.80 
   3  -3   0   42.70    4.80 
   3  -3   0   48.00    4.60 
   3   3   0   25.50    3.90 
  -3   3   0   55.79    6.10 
   3   3   0   22.50    3.80 
  -3   3   0   44.40    7.00 
   3   3   0   40.50    4.70 
  -3   3   0   37.80    2.10 
  -3   3   0   54.99    6.90 
  -3   3   0   32.20    5.20 
   3   3   0   29.90    2.80 
  -3   3   0   42.30    5.80 
   3   3   0   28.40    3.50 
   3   3   0   28.70    3.90 
  -3   3   0   40.00    3.90 
   3   3   0   31.50    2.70 
  -3   3   0   43.80    4.10 
   3   3   0   24.20    3.10 
   3   3   0   26.80    4.00 
   3   3   0   30.00    3.70 
  -3   3   0   40.50    5.40 
   3   3   0   20.20    3.90 
   4  -3   0  971.70   33.40 
  -4  -3   0  950.60   31.60 
   4  -3   0  933.91   31.10 
  -4  -3   0  909.31   30.90 
   4  -3   0  946.81   30.90 
   4  -3   0  960.50   33.90 
   4  -3   0  953.80   33.00 
   4  -3   0  939.61   32.70 
  -4  -3   0  965.70   32.00 
  -4  -3   0  934.51   31.40 
  -4  -3   0  956.80   31.40 
  -4  -3   0  964.40   30.00 
  -4  -3   0  943.41   33.70 
   4  -3   0  932.71   32.30 
   4  -3   0  947.11   29.70 
   4  -3   0  946.31   34.00 
  -4  -3   0  960.80   34.70 
   4  -3   0  939.41   35.00 
  -4  -3   0  984.40   34.30 
   4  -3   0  939.61   29.10 
  -4  -3   0  946.71   31.50 
  -4  -3   0  944.61   30.50 
   4  -3   0  945.11   29.60 
  -4  -3   0  899.21   32.40 
  -4  -3   0  942.41   30.60 
  -4  -3   0  951.20   33.80 
   4  -3   0  930.61   28.90 
   4  -3   0  955.60   30.80 
  -4   3   0  861.41   35.10 
  -4   3   0  908.21   29.20 
  -4   3   0  952.30   34.20 
   4   3   0  972.70   32.00 
  -4   3   0  891.01   33.00 
  -4   3   0  950.50   31.80 
  -4   3   0  940.61   31.00 
  -4   3   0  889.41   36.00 
  -4   3   0  923.91   34.20 
   4   3   0  936.21   33.80 
   4   3   0  923.71   29.80 
  -4   3   0  931.81   32.30 
   4   3   0  954.10   33.90 
   4   3   0  976.20   31.60 
   4   3   0  967.90   33.90 
   4   3   0  936.51   34.60 
  -4   3   0  938.11   35.80 
  -4   3   0  948.71   28.70 
  -4   3   0  919.51   32.80 
  -4   3   0  926.81   35.40 
   4   3   0  922.31   30.30 
   4   3   0  931.61   30.80 
   4   3   0  961.90   32.40 
  -4   3   0  938.41   33.20 
   4   3   0  942.81   34.20 
  -4   3   0  933.71   34.60 
   4   3   0  932.41   32.20 
  -4   3   0  926.81   34.50 
  -4   3   0  878.41   30.30 
   4   3   0  968.20   33.00 
   4   3   0  925.41   30.60 
  -5  -3   0  710.93   27.00 
   5  -3   0  683.83   22.20 
   5  -3   0  682.23   24.30 
  -5  -3   0  711.33   28.40 
   5  -3   0  666.23   25.50 
  -5  -3   0  660.73   23.70 
  -5  -3   0  693.53   22.80 
   5  -3   0  665.03   28.20 
   5  -3   0  687.73   25.60 
  -5  -3   0  652.83   25.30 
   5  -3   0  690.23   22.90 
   5  -3   0  693.03   24.20 
  -5  -3   0  696.23   26.90 
   5  -3   0  698.83   21.40 
   5  -3   0  680.63   22.80 
  -5  -3   0  664.03   24.20 
  -5  -3   0  679.43   24.80 
   5  -3   0  688.93   26.80 
  -5  -3   0  668.83   24.20 
  -5  -3   0  715.53   24.60 
  -5  -3   0  696.73   23.50 
   5  -3   0  683.43   21.80 
  -5  -3   0  657.53   24.20 
   5  -3   0  686.63   26.80 
   5  -3   0  669.63   24.00 
  -5  -3   0  674.43   22.00 
  -5   3   0  639.14   28.60 
  -5   3   0  682.63   21.50 
  -5   3   0  675.53   25.70 
  -5   3   0  648.64   28.30 
   5   3   0  676.03   24.10 
  -5   3   0  636.94   28.20 
  -5   3   0  685.33   27.30 
   5   3   0  670.63   22.00 
  -5   3   0  639.04   28.60 
  -5   3   0  699.63   24.50 
  -5   3   0  672.23   25.80 
   5   3   0  690.43   25.40 
  -5   3   0  644.34   26.20 
   5   3   0  656.53   24.50 
   5   3   0  676.93   27.10 
  -5   3   0  669.23   22.10 
   5   3   0  726.73   27.20 
   5   3   0  664.53   23.10 
  -5   3   0  724.93   27.40 
  -5   3   0  685.23   25.90 
  -5   3   0  679.63   23.90 
   5   3   0  672.73   25.90 
  -5   3   0  709.93   28.00 
   5   3   0  669.33   26.90 
   5   3   0  666.73   23.70 
  -5   3   0  693.83   25.30 
  -6  -3   0 2056.79   66.29 
  -6  -3   0 2014.10   68.19 
  -6  -3   0 2068.89   67.49 
  -6  -3   0 2049.70   71.89 
   6  -3   0 2136.79   69.99 
  -6  -3   0 2085.49   67.09 
   6  -3   0 2080.79   66.69 
   6  -3   0 2102.49   64.29 
  -6  -3   0 2082.69   70.19 
  -6  -3   0 2045.70   66.99 
   6  -3   0 2046.10   67.29 
   6  -3   0 2089.39   69.89 
   6  -3   0 2129.49   65.69 
   6  -3   0 2136.59   64.89 
  -6  -3   0 2134.59   66.29 
  -6  -3   0 2101.89   66.79 
  -6  -3   0 2120.09   67.09 
   6  -3   0 2068.59   68.49 
   6  -3   0 2162.68   68.49 
   6  -3   0 2184.18   65.69 
  -6  -3   0 2106.19   64.39 
   6   3   0 2089.09   66.99 
  -6   3   0 1958.30   71.39 
  -6   3   0 2118.69   69.09 
  -6   3   0 2056.59   69.09 
  -6   3   0 2100.49   67.19 
  -6   3   0 1958.60   72.69 
   6   3   0 2097.19   66.89 
   6   3   0 2112.79   70.19 
  -6   3   0 2048.00   66.49 
  -6   3   0 2125.29   70.49 
  -6   3   0 2068.69   68.69 
  -6   3   0 1936.61   72.39 
   6   3   0 2125.09   63.99 
   6   3   0 2075.19   66.59 
  -6   3   0 2089.39   67.29 
   6   3   0 2095.59   69.39 
  -6   3   0 2115.89   63.89 
   6   3   0 2135.19   65.89 
  -6   3   0 2112.19   66.99 
  -6   3   0 2147.19   70.79 
   6   3   0 2061.89   70.59 
   6   3   0 2036.00   68.19 
   6   3   0 2063.19   70.59 
  -6   3   0 2060.19   68.89 
   6   3   0 2146.19   67.39 
   6   3   0 2042.00   69.99 
   7  -3   0  595.34   26.10 
  -7  -3   0  618.04   23.90 
  -7  -3   0  632.14   24.20 
   7  -3   0  617.24   24.90 
   7  -3   0  627.04   24.70 
  -7  -3   0  626.34   24.20 
  -7  -3   0  605.64   23.50 
  -7  -3   0  622.34   23.80 
   7  -3   0  661.53   22.80 
  -7  -3   0  614.44   23.20 
  -7  -3   0  596.04   24.70 
  -7  -3   0  613.04   23.10 
   7  -3   0  638.04   23.80 
   7  -3   0  602.24   26.30 
  -7  -3   0  618.54   24.90 
  -7  -3   0  628.74   27.00 
  -7  -3   0  579.94   28.10 
   7   3   0  627.84   25.40 
   7   3   0  617.84   27.50 
   7   3   0  592.84   26.60 
  -7   3   0  585.54   23.80 
  -7   3   0  633.54   23.60 
  -7   3   0  616.74   30.10 
   7   3   0  625.14   26.30 
   7   3   0  606.24   23.20 
  -7   3   0  620.84   23.80 
  -7   3   0  605.64   26.70 
  -7   3   0  614.34   25.60 
  -7   3   0  619.54   23.50 
   7   3   0  594.64   25.50 
   7   3   0  598.04   23.80 
   7   3   0  596.24   22.60 
   7   3   0  608.54   23.90 
  -7   3   0  657.23   27.50 
  -7   3   0  599.94   29.20 
   7   3   0  576.14   26.20 
   7   3   0  627.14   23.30 
  -7   3   0  633.74   26.30 
  -7   3   0  628.34   25.60 
   8  -3   0  797.42   31.10 
  -8  -3   0  752.12   30.60 
  -8  -3   0  780.92   29.50 
  -8  -3   0  768.72   29.80 
  -8  -3   0  813.42   33.70 
   8  -3   0  822.92   29.80 
  -8  -3   0  770.92   29.10 
  -8  -3   0  750.72   29.90 
  -8  -3   0  781.52   30.00 
  -8  -3   0  796.12   29.80 
   8  -3   0  770.92   32.30 
   8  -3   0  796.92   33.10 
  -8  -3   0  749.13   35.20 
   8  -3   0  807.22   30.90 
  -8  -3   0  746.23   28.80 
  -8   3   0  797.32   28.80 
   8   3   0  778.72   32.70 
  -8   3   0  803.92   36.40 
  -8   3   0  818.92   33.10 
  -8   3   0  755.42   30.10 
   8   3   0  739.23   32.70 
   8   3   0  794.42   34.20 
   8   3   0  807.72   29.90 
  -8   3   0  797.52   29.90 
  -8   3   0  789.82   33.60 
   8   3   0  813.52   28.70 
  -8   3   0  785.92   29.70 
  -8   3   0  773.82   33.00 
  -8   3   0  776.02   37.10 
  -8   3   0  778.32   29.20 
   8   3   0  811.22   31.70 
  -8   3   0  789.62   31.80 
  -9  -3   0  296.57   14.80 
  -9  -3   0  234.38   18.80 
  -9  -3   0  309.97   15.50 
  -9  -3   0  278.57   15.80 
   9  -3   0  295.17   17.70 
  -9  -3   0  293.27   15.30 
  -9  -3   0  288.77   18.10 
   9  -3   0  299.17   16.10 
  -9  -3   0  313.67   15.90 
   9  -3   0  296.27   15.30 
  -9  -3   0  285.97   15.10 
  -9  -3   0  287.97   14.70 
   9  -3   0  307.27   18.50 
   9   3   0  292.87   14.10 
  -9   3   0  288.37   14.80 
  -9   3   0  286.67   15.40 
   9   3   0  313.97   15.50 
  -9   3   0  267.77   17.30 
   9   3   0  299.67   18.10 
  -9   3   0  288.47   21.70 
   9   3   0  285.07   16.90 
  -9   3   0  269.77   14.90 
  -9   3   0  340.97   21.90 
   9   3   0  271.37   18.70 
   9   3   0  288.37   18.00 
  -9   3   0  302.77   18.80 
  -9   3   0  302.97   17.50 
  -9   3   0  269.57   17.40 
  -9   3   0  338.07   17.00 
   0  -4   0   87.39    6.10 
   0  -4   0   96.69    6.90 
   0  -4   0   90.59    6.50 
   0  -4   0   84.69    8.40 
   0  -4   0   97.99    4.70 
   0  -4   0   94.49    5.60 
   0  -4   0   88.39    6.30 
   0  -4   0  103.69    9.00 
   0  -4   0   95.99    5.20 
   0  -4   0   93.59    4.80 
   0  -4   0   85.99    6.10 
   0  -4   0   87.39    7.60 
   0  -4   0   91.59    5.90 
   0  -4   0   95.79    4.70 
   0  -4   0   85.99    6.50 
   0  -4   0  121.19    7.10 
   0  -4   0   90.79    5.00 
   0  -4   0   80.49    7.70 
   0  -4   0   91.29    6.30 
   0   4   0   91.89    6.20 
   0   4   0   88.49    8.30 
   0   4   0   95.79    5.00 
   0   4   0  100.99    5.70 
   0   4   0   92.09    6.40 
   0   4   0   86.19    7.60 
   0   4   0   91.49    8.10 
   0   4   0  100.29    9.50 
   0   4   0   88.49    4.60 
   0   4   0   88.49   10.30 
   0   4   0   95.89    6.30 
   0   4   0   96.59    8.30 
   0   4   0   96.19    9.90 
   0   4   0   95.49    6.00 
   0   4   0   87.79   10.20 
   0   4   0  101.69    6.20 
   0   4   0   99.09    9.40 
   1  -4   0 6565.14  195.08 
   1  -4   0 6625.04  199.88 
   1  -4   0 6631.54  197.68 
  -1  -4   0 6370.06  196.88 
   1  -4   0 6524.45  195.28 
  -1  -4   0 6777.62  197.68 
  -1  -4   0 6943.21  198.38 
  -1  -4   0 6644.44  200.08 
   1  -4   0 6905.91  206.38 
   1  -4   0 6658.83  195.58 
   1  -4   0 6762.22  195.58 
   1  -4   0 6366.26  197.58 
   1  -4   0 6306.87  195.68 
  -1  -4   0 6653.73  197.58 
   1  -4   0 6637.24  195.28 
  -1  -4   0 6739.43  196.18 
   1  -4   0 6540.95  197.68 
  -1  -4   0 6773.52  197.68 
  -1  -4   0 6778.52  196.78 
   1  -4   0 6633.84  198.28 
  -1  -4   0 6347.06  195.98 
   1  -4   0 6530.25  198.28 
  -1  -4   0 6351.56  196.78 
  -1  -4   0 6596.64  197.58 
  -1  -4   0 6129.39  200.98 
   1  -4   0 6673.13  201.18 
  -1  -4   0 6479.55  199.68 
   1  -4   0 6285.97  197.68 
  -1  -4   0 6472.95  199.68 
   1  -4   0 6374.76  197.78 
  -1  -4   0 6710.83  195.98 
  -1  -4   0 6505.45  197.58 
   1  -4   0 6658.13  202.78 
  -1  -4   0 6187.28  197.38 
   1   4   0 6472.05  196.98 
  -1   4   0 6307.97  202.28 
   1   4   0 6618.34  201.58 
  -1   4   0 6486.05  199.58 
  -1   4   0 6441.26  196.78 
   1   4   0 6487.95  199.58 
  -1   4   0 6003.00  204.08 
  -1   4   0 6643.64  197.68 
  -1   4   0 6632.04  202.98 
  -1   4   0 6507.55  196.98 
   1   4   0 6315.37  196.18 
   1   4   0 6420.76  197.28 
   1   4   0 6391.56  199.58 
   1   4   0 6674.23  197.48 
   1   4   0 6595.84  196.98 
  -1   4   0 6576.74  196.88 
  -1   4   0 6668.43  195.88 
  -1   4   0 6563.24  199.58 
  -1   4   0 6614.54  204.68 
  -1   4   0 6603.44  195.38 
   1   4   0 6596.04  195.48 
  -1   4   0 6267.67  204.58 
  -1   4   0 5733.63  210.48 
  -1   4   0 6129.59  199.68 
   1   4   0 6386.56  198.88 
   1   4   0 6555.04  200.78 
  -1   4   0 6561.24  202.78 
   1   4   0 6764.82  195.78 
   1   4   0 6617.04  198.88 
  -1   4   0 6377.86  198.28 
   1   4   0 6386.66  202.88 
   1   4   0 6677.93  195.08 
  -1   4   0 5705.73  207.38 
   1   4   0 6245.78  198.68 
  -2  -4   0  129.19    7.50 
  -2  -4   0  125.19    8.30 
  -2  -4   0  132.19    5.50 
   2  -4   0  123.89    7.80 
   2  -4   0  129.89    4.70 
   2  -4   0  128.89    8.00 
  -2  -4   0  143.79    7.20 
   2  -4   0  127.89    4.50 
   2  -4   0  125.89    8.10 
  -2  -4   0  121.49    7.20 
  -2  -4   0  132.49    6.90 
   2  -4   0  137.39    9.30 
  -2  -4   0  123.29    7.60 
   2  -4   0  123.69    5.80 
   2  -4   0  122.29    6.00 
   2  -4   0  135.89    8.90 
  -2  -4   0  127.59    7.20 
  -2  -4   0  128.29    7.30 
   2  -4   0  120.79   10.20 
   2  -4   0  123.29    7.40 
  -2  -4   0  123.99    8.50 
  -2  -4   0  127.59    7.50 
   2  -4   0  117.59    7.40 
  -2  -4   0  125.09    8.50 
  -2  -4   0  123.19    7.10 
   2  -4   0  137.79    8.10 
  -2   4   0  127.59   11.40 
   2   4   0  137.59    7.10 
   2   4   0  122.89    7.80 
   2   4   0  134.49    9.20 
   2   4   0  125.49    9.60 
  -2   4   0  128.29   13.70 
  -2   4   0  135.49    7.30 
   2   4   0  133.09    9.00 
  -2   4   0  132.99    6.80 
  -2   4   0  124.89    8.50 
  -2   4   0  143.59   10.20 
  -2   4   0  119.39   11.60 
   2   4   0  124.39    6.60 
  -2   4   0  120.79   10.50 
  -2   4   0  123.29    8.10 
  -2   4   0   92.49   14.10 
   2   4   0  118.39    8.40 
  -2   4   0  132.99    9.90 
  -2   4   0  133.99    8.30 
  -2   4   0  124.09    6.40 
   2   4   0  143.29    8.40 
   2   4   0  121.99    7.40 
   2   4   0  130.59    6.20 
   2   4   0  128.39    7.10 
   2   4   0  125.69    7.50 
  -2   4   0  126.49   10.00 
   2   4   0  138.79    6.20 
   2   4   0  122.69    5.40 
   2   4   0  128.89    6.70 
  -3  -4   0 1663.93   52.39 
   3  -4   0 1607.04   58.49 
   3  -4   0 1714.23   51.19 
  -3  -4   0 1601.84   51.79 
   3  -4   0 1585.14   53.19 
  -3  -4   0 1619.24   54.09 
   3  -4   0 1540.85   53.49 
  -3  -4   0 1583.64   51.39 
  -3  -4   0 1653.33   52.19 
  -3  -4   0 1605.54   52.79 
   3  -4   0 1608.44   52.89 
   3  -4   0 1677.63   54.29 
  -3  -4   0 1604.64   51.89 
   3  -4   0 1481.25   55.79 
   3  -4   0 1669.73   52.29 
   3  -4   0 1646.54   53.89 
  -3  -4   0 1629.34   50.09 
  -3  -4   0 1600.84   53.79 
  -3  -4   0 1616.54   54.39 
   3  -4   0 1627.14   51.49 
   3  -4   0 1689.63   55.69 
  -3  -4   0 1622.24   51.99 
  -3  -4   0 1594.14   52.39 
   3  -4   0 1633.94   51.19 
   3  -4   0 1671.73   53.99 
  -3  -4   0 1656.63   54.59 
  -3   4   0 1636.34   55.79 
  -3   4   0 1641.04   55.09 
  -3   4   0 1611.24   52.19 
   3   4   0 1629.04   49.60 
   3   4   0 1656.83   53.69 
   3   4   0 1619.84   50.49 
   3   4   0 1644.94   50.39 
  -3   4   0 1493.25   59.89 
  -3   4   0 1628.24   54.39 
  -3   4   0 1585.94   59.19 
   3   4   0 1606.04   51.19 
  -3   4   0 1476.65   56.69 
  -3   4   0 1545.35   56.09 
   3   4   0 1611.14   55.09 
  -3   4   0 1624.04   50.99 
  -3   4   0 1371.86   61.49 
   3   4   0 1604.74   51.89 
   3   4   0 1621.94   54.39 
   3   4   0 1594.44   52.49 
   3   4   0 1572.64   55.19 
  -3   4   0 1574.24   53.49 
   3   4   0 1676.63   52.39 
   3   4   0 1583.04   52.09 
   3   4   0 1694.23   53.79 
   4  -4   0  139.29   10.40 
  -4  -4   0  155.48   10.00 
  -4  -4   0  147.89    9.80 
   4  -4   0  134.79    9.20 
  -4  -4   0  141.29    7.60 
  -4  -4   0  141.69    8.60 
  -4  -4   0  149.29    7.70 
  -4  -4   0  135.99    8.60 
   4  -4   0  128.19   10.50 
   4  -4   0  140.89    7.80 
  -4  -4   0  139.89    6.80 
   4  -4   0  142.49    9.30 
   4  -4   0  132.69    8.90 
   4  -4   0  155.68    9.10 
   4  -4   0  138.69    7.40 
  -4  -4   0  147.59    8.00 
  -4  -4   0  140.39    7.50 
   4  -4   0  131.39    7.30 
  -4  -4   0  145.09    8.40 
  -4  -4   0  144.39    8.00 
   4  -4   0  136.59    6.60 
  -4  -4   0  143.69    8.20 
  -4  -4   0  145.69   10.10 
  -4   4   0  162.68   10.70 
   4   4   0  157.98    8.40 
  -4   4   0  137.39   10.40 
  -4   4   0  152.58    7.60 
  -4   4   0  153.18   11.90 
  -4   4   0  142.49   11.10 
   4   4   0  153.28    8.40 
  -4   4   0  128.69   10.60 
  -4   4   0  150.08    8.90 
   4   4   0  134.49    6.50 
   4   4   0  133.89    9.20 
   4   4   0  145.19    7.20 
  -4   4   0  138.29    8.20 
   4   4   0  147.69    6.80 
   4   4   0  149.69    7.00 
  -4   4   0  158.58   11.10 
   4   4   0  153.08    9.80 
  -4   4   0  128.09   13.00 
   4   4   0  141.59    9.60 
  -4   4   0  135.39    8.80 
  -4   4   0  130.39   11.10 
   4   4   0  146.79    8.30 
  -4   4   0  127.09    7.80 
  -4   4   0  136.89   11.50 
   4   4   0  142.29    5.90 
   4   4   0  153.18   10.20 
   4   4   0  145.69    9.00 
  -4   4   0  120.29   10.40 
  -4   4   0  136.89    7.30 
   4   4   0  149.49    9.90 
  -4   4   0  147.29   10.60 
  -5  -4   0 1287.47   41.40 
   5  -4   0 1248.28   44.70 
   5  -4   0 1264.67   43.30 
  -5  -4   0 1265.97   44.30 
   5  -4   0 1300.37   45.10 
  -5  -4   0 1224.78   43.80 
  -5  -4   0 1332.07   45.90 
  -5  -4   0 1258.37   42.10 
   5  -4   0 1230.88   46.10 
  -5  -4   0 1253.57   42.50 
   5  -4   0 1274.77   47.30 
   5  -4   0 1273.07   41.90 
  -5  -4   0 1293.97   41.20 
   5  -4   0 1277.17   41.00 
  -5  -4   0 1314.27   47.10 
  -5  -4   0 1339.07   42.90 
   5  -4   0 1280.67   41.50 
  -5  -4   0 1259.47   42.30 
   5  -4   0 1278.67   39.40 
  -5  -4   0 1286.27   41.90 
  -5  -4   0 1285.07   43.20 
   5  -4   0 1280.77   43.80 
  -5   4   0 1293.37   43.30 
   5   4   0 1263.57   41.30 
   5   4   0 1240.88   40.00 
   5   4   0 1183.38   46.30 
   5   4   0 1290.97   45.60 
  -5   4   0 1257.77   47.60 
  -5   4   0 1234.38   44.30 
  -5   4   0 1254.47   47.20 
  -5   4   0 1279.57   41.70 
   5   4   0 1273.37   45.60 
  -5   4   0 1285.47   46.30 
   5   4   0 1260.57   42.60 
   5   4   0 1248.08   46.10 
  -5   4   0 1242.98   43.20 
  -5   4   0 1234.88   45.50 
  -5   4   0 1287.87   48.70 
  -5   4   0 1197.68   40.80 
   5   4   0 1249.57   43.20 
   5   4   0 1236.88   41.20 
   5   4   0 1294.17   44.60 
  -5   4   0 1262.07   47.70 
  -5   4   0 1241.08   45.40 
   5   4   0 1229.68   45.40 
  -5   4   0 1274.47   54.59 
   5   4   0 1247.58   40.80 
  -5   4   0 1205.18   47.80 
  -5   4   0 1226.48   47.10 
  -6  -4   0  453.65   21.40 
  -6  -4   0  433.46   17.20 
   6  -4   0  439.66   21.50 
  -6  -4   0  424.46   19.60 
   6  -4   0  445.86   17.60 
   6  -4   0  449.46   20.60 
   6  -4   0  442.06   18.10 
  -6  -4   0  434.96   18.30 
  -6  -4   0  443.16   22.60 
   6  -4   0  472.95   16.90 
   6  -4   0  439.26   18.30 
  -6  -4   0  451.15   18.20 
  -6  -4   0  453.45   18.60 
  -6  -4   0  441.46   19.10 
  -6  -4   0  451.35   17.90 
  -6  -4   0  449.95   18.60 
   6  -4   0  447.36   19.50 
  -6  -4   0  425.86   16.50 
   6  -4   0  461.65   21.00 
  -6   4   0  460.95   24.10 
  -6   4   0  445.16   23.00 
   6   4   0  435.06   17.60 
   6   4   0  441.76   18.70 
  -6   4   0  450.95   17.80 
   6   4   0  449.06   21.50 
   6   4   0  435.36   17.10 
   6   4   0  424.46   20.90 
  -6   4   0  466.65   22.20 
   6   4   0  439.96   18.40 
   6   4   0  426.56   19.30 
  -6   4   0  428.46   20.80 
  -6   4   0  441.96   18.80 
   6   4   0  442.36   20.40 
  -6   4   0  437.56   20.20 
   6   4   0  429.66   21.10 
  -6   4   0  451.15   22.60 
  -6   4   0  457.75   20.40 
   6   4   0  448.86   17.00 
  -6   4   0  459.85   24.10 
   6   4   0  472.15   29.30 
  -6   4   0  455.95   21.80 
  -6   4   0  420.06   19.40 
  -7  -4   0  708.13   26.80 
   7  -4   0  673.43   29.10 
  -7  -4   0  705.83   30.50 
   7  -4   0  705.03   29.40 
  -7  -4   0  663.63   27.30 
  -7  -4   0  694.73   26.90 
  -7  -4   0  681.23   32.10 
  -7  -4   0  700.93   28.50 
  -7  -4   0  691.33   26.90 
  -7  -4   0  712.33   26.40 
   7  -4   0  733.33   31.00 
  -7  -4   0  701.13   27.00 
   7  -4   0  703.73   28.00 
  -7  -4   0  714.13   28.70 
  -7  -4   0  738.63   26.10 
   7  -4   0  705.83   26.60 
  -7   4   0  684.53   26.20 
  -7   4   0  707.83   27.80 
  -7   4   0  722.53   30.50 
   7   4   0  693.13   25.30 
  -7   4   0  750.52   29.90 
  -7   4   0  740.23   27.60 
   7   4   0  720.23   31.00 
   7   4   0  716.33   27.20 
   7   4   0  665.43   29.90 
   7   4   0  712.63   29.70 
  -7   4   0  702.13   28.10 
   7   4   0  703.43   27.30 
   7   4   0  691.93   30.40 
  -7   4   0  693.03   31.40 
   7   4   0  650.53   26.60 
  -7   4   0  665.43   29.40 
  -7   4   0  725.23   34.30 
  -7   4   0  657.73   32.90 
  -7   4   0  697.43   30.60 
  -7   4   0  727.53   29.00 
   7   4   0  708.03   28.40 
   7   4   0  706.73   25.40 
   8  -4   0  256.87   17.00 
  -8  -4   0  245.58   13.90 
   8  -4   0  279.27   14.80 
   8  -4   0  245.08   15.80 
  -8  -4   0  244.88   15.10 
  -8  -4   0  249.88   13.70 
  -8  -4   0  277.27   16.70 
  -8  -4   0  222.98   17.60 
  -8  -4   0  251.57   13.70 
  -8  -4   0  255.77   16.60 
  -8  -4   0  256.27   13.00 
  -8  -4   0  252.77   13.90 
   8  -4   0  260.67   13.80 
  -8  -4   0  251.27   13.10 
  -8   4   0  250.87   17.50 
  -8   4   0  258.67   13.30 
  -8   4   0  253.37   16.30 
  -8   4   0  254.87   13.80 
   8   4   0  259.67   12.20 
   8   4   0  252.87   13.80 
  -8   4   0  260.17   20.10 
   8   4   0  245.88   16.10 
   8   4   0  268.57   12.60 
   8   4   0  253.87   16.70 
  -8   4   0  267.57   14.90 
  -8   4   0  263.47   14.10 
   8   4   0  228.38   16.40 
   8   4   0  229.78   15.50 
  -8   4   0  270.37   17.10 
  -8   4   0  256.07   19.70 
  -8   4   0  228.28   15.00 
   8   4   0  247.88   15.00 
  -9  -4   0   65.69    7.50 
  -9  -4   0   65.49    8.10 
   9  -4   0   77.09    9.90 
  -9  -4   0   64.79    8.70 
  -9  -4   0   65.69    8.20 
  -9  -4   0   59.69    7.80 
   9  -4   0   59.29    7.70 
  -9  -4   0   72.49   12.10 
   9  -4   0   66.29    8.30 
  -9  -4   0   59.79    7.40 
   9  -4   0   63.69   10.30 
  -9  -4   0   70.69    8.50 
   9   4   0   83.79   10.40 
  -9   4   0   73.19    8.20 
   9   4   0   51.99    9.60 
  -9   4   0   55.29    9.20 
  -9   4   0   63.59    8.20 
  -9   4   0   74.79    9.00 
  -9   4   0   60.69   12.40 
   9   4   0   57.39    7.60 
  -9   4   0   66.79   10.60 
   9   4   0   59.09    9.80 
   9   4   0   72.29   10.20 
  -9   4   0   82.49   10.00 
   9   4   0   64.89    7.10 
  -9   4   0   73.79   11.50 
  -9   4   0   58.69    9.30 
  -9   4   0   79.39   14.50 
   0  -5   0    5.50    2.70 
   0  -5   0   11.20    3.80 
   0  -5   0    7.10    3.90 
   0  -5   0    6.20    3.50 
   0  -5   0    4.70    2.40 
   0  -5   0   13.00    2.40 
   0  -5   0    3.50    1.40 
   0  -5   0    2.10    2.00 
   0  -5   0    3.60    2.30 
   0  -5   0    4.30    1.90 
   0  -5   0    1.70    2.30 
   0  -5   0    6.20    2.50 
   0  -5   0    4.40    1.80 
   0  -5   0    2.30    1.60 
   0  -5   0    4.10    3.20 
   0  -5   0    3.70    1.40 
   0   5   0    3.90    2.40 
   0   5   0    8.80    3.60 
   0   5   0    8.30    4.30 
   0   5   0    1.80    1.90 
   0   5   0    2.50    2.10 
   0   5   0   12.20    4.50 
   0   5   0   -0.80    3.40 
   0   5   0   10.40    3.00 
   0   5   0   41.40    8.00 
   0   5   0    0.60    3.00 
   0   5   0    1.00    3.60 
   0   5   0    5.10    3.90 
   0   5   0    5.00    2.10 
   0   5   0    4.40    1.60 
   0   5   0    2.30    1.80 
  -1  -5   0  120.49    8.10 
   1  -5   0  106.39    7.50 
  -1  -5   0   98.49    8.90 
   1  -5   0  108.89    5.80 
  -1  -5   0  115.89    6.90 
   1  -5   0  120.59    8.00 
   1  -5   0  125.69    6.30 
  -1  -5   0  125.59    7.80 
  -1  -5   0  129.99    7.70 
   1  -5   0  121.99   10.60 
   1  -5   0  114.89    7.90 
  -1  -5   0  120.89    7.00 
  -1  -5   0  104.19   10.00 
   1  -5   0  126.59    8.40 
   1  -5   0  134.09   12.30 
   1  -5   0  117.99    9.50 
  -1  -5   0  118.69    8.10 
   1  -5   0  107.79    7.80 
   1  -5   0  116.19    5.70 
  -1  -5   0  116.79    7.80 
  -1  -5   0  108.79    9.00 
  -1  -5   0  126.89    6.80 
   1  -5   0  115.69    5.60 
  -1  -5   0  130.49    9.70 
   1  -5   0  110.09    7.50 
  -1  -5   0  115.09    6.90 
   1  -5   0  118.79    5.40 
   1  -5   0  105.39    7.60 
   1  -5   0  114.09    5.10 
  -1  -5   0  117.19    7.60 
  -1  -5   0  129.39    6.00 
  -1  -5   0  124.79    7.90 
  -1   5   0  118.89    8.10 
   1   5   0  105.29    9.50 
  -1   5   0  112.39    9.00 
   1   5   0  119.29   10.70 
   1   5   0  103.29    7.00 
   1   5   0  118.69    7.50 
  -1   5   0  113.69   11.10 
  -1   5   0  119.19    6.00 
   1   5   0  117.19    8.80 
  -1   5   0  120.49    6.40 
  -1   5   0  132.59   11.90 
   1   5   0  106.69    7.20 
  -1   5   0  110.99   10.40 
   1   5   0  113.89    9.20 
   1   5   0  115.19    6.30 
  -1   5   0  118.19    7.80 
   1   5   0  110.69    6.40 
  -1   5   0  107.09   16.50 
   1   5   0  107.99    9.00 
  -1   5   0  116.09    7.30 
   1   5   0  113.89    5.50 
  -1   5   0  114.09   13.20 
   1   5   0  108.19    8.50 
  -1   5   0  122.09    7.60 
  -1   5   0  115.79    8.80 
   1   5   0  112.99    7.20 
   1   5   0  115.09    9.60 
  -1   5   0  112.19    9.30 
  -1   5   0  111.99   12.50 
   1   5   0  127.09   13.50 
  -2  -5   0   56.49    7.10 
   2  -5   0   60.29    3.90 
   2  -5   0   57.29    8.20 
   2  -5   0   58.49    5.70 
  -2  -5   0   58.59    5.50 
  -2  -5   0   58.09    6.10 
  -2  -5   0   56.99    5.30 
  -2  -5   0   53.89    5.20 
  -2  -5   0   60.29    5.80 
  -2  -5   0   62.79    6.80 
   2  -5   0   56.39    3.60 
  -2  -5   0   50.19    5.80 
   2  -5   0   52.99    5.50 
  -2  -5   0   55.19    7.00 
   2  -5   0   62.59    3.10 
  -2  -5   0   67.69    5.30 
  -2  -5   0   65.29    5.70 
   2  -5   0   78.99    8.30 
  -2  -5   0   62.59    6.70 
  -2  -5   0   58.39    3.60 
  -2  -5   0   59.19    5.90 
   2  -5   0   62.09    6.30 
   2  -5   0   57.99    2.90 
   2  -5   0   61.99    6.10 
  -2  -5   0   60.49    5.20 
   2  -5   0   56.69    6.80 
   2  -5   0   63.49    6.00 
   2  -5   0   48.70    6.10 
   2   5   0   56.99    7.90 
   2   5   0   57.09    4.90 
  -2   5   0   63.19    6.60 
  -2   5   0   65.69    8.40 
  -2   5   0   53.99    9.20 
   2   5   0   57.09    6.30 
   2   5   0   57.29    4.70 
  -2   5   0   57.89    8.70 
  -2   5   0   57.79    5.20 
   2   5   0   43.20    6.70 
   2   5   0   57.69    4.00 
  -2   5   0   46.60   10.10 
  -2   5   0   75.69    5.50 
  -2   5   0   42.50    5.50 
  -2   5   0   57.69    7.70 
   2   5   0   66.29    5.10 
   2   5   0   61.89    6.20 
  -2   5   0   65.39   13.20 
  -2   5   0   56.59    8.20 
   2   5   0   68.89    5.70 
  -2   5   0   59.69    9.70 
  -2   5   0   46.10    6.10 
   2   5   0   56.39    4.40 
   2   5   0   57.19    5.40 
   2   5   0   45.10    7.60 
   2   5   0   69.19    8.10 
  -2   5   0   61.59    5.00 
  -3  -5   0    2.80    2.10 
   3  -5   0    3.60    3.10 
  -3  -5   0    5.60    2.70 
  -3  -5   0    4.40    2.40 
   3  -5   0   17.20    4.10 
  -3  -5   0    5.40    2.90 
  -3  -5   0    1.80    3.40 
   3  -5   0   17.50    4.30 
   3  -5   0   20.20    4.50 
   3  -5   0    3.40    1.90 
   3  -5   0    7.10    3.60 
   3  -5   0    2.00    2.60 
  -3  -5   0    1.20    2.50 
   3  -5   0   19.00    4.00 
  -3  -5   0   -1.60    2.00 
  -3  -5   0    5.00    3.10 
  -3  -5   0   -1.80    2.20 
  -3  -5   0    6.00    1.70 
  -3  -5   0    2.20    2.40 
  -3  -5   0    0.20    2.30 
  -3  -5   0    7.30    3.30 
  -3   5   0    2.90    2.30 
   3   5   0    2.90    2.50 
   3   5   0    5.30    2.70 
  -3   5   0    6.00    4.70 
   3   5   0    4.90    1.80 
  -3   5   0   20.20    6.00 
   3   5   0    5.00    3.30 
  -3   5   0    2.30    2.40 
  -3   5   0   14.40    7.40 
  -3   5   0    7.00    6.20 
   3   5   0    5.70    3.30 
  -3   5   0    1.80    3.30 
   3   5   0    3.40    2.50 
   3   5   0    4.00    2.90 
  -3   5   0    2.60    2.00 
   3   5   0    5.00    2.50 
   3   5   0    6.30    2.50 
  -3   5   0    9.80    4.50 
   3   5   0    5.00    2.10 
  -3   5   0    5.40    4.60 
  -3   5   0    5.20    2.30 
  -3   5   0    6.60    3.50 
  -3   5   0   10.50    4.60 
   3   5   0   -1.30    1.80 
   3   5   0    6.20    2.00 
  -4  -5   0  521.35   21.20 
   4  -5   0  579.34   23.40 
   4  -5   0  531.05   22.60 
  -4  -5   0  521.35   21.90 
   4  -5   0  539.85   21.00 
   4  -5   0  545.15   21.80 
  -4  -5   0  566.84   24.20 
  -4  -5   0  538.85   23.80 
   4  -5   0  511.35   23.30 
  -4  -5   0  540.15   19.00 
   4  -5   0  529.75   24.60 
  -4  -5   0  542.35   21.10 
   4  -5   0  581.04   26.00 
  -4  -5   0  523.25   20.90 
   4  -5   0  545.95   20.00 
   4  -5   0  548.15   17.70 
  -4  -5   0  526.85   20.50 
  -4  -5   0  541.55   21.30 
  -4  -5   0  545.25   21.60 
  -4  -5   0  525.05   20.90 
  -4   5   0  498.65   24.60 
   4   5   0  540.85   22.90 
   4   5   0  578.64   22.00 
  -4   5   0  545.85   26.60 
   4   5   0  538.65   21.10 
  -4   5   0  549.54   20.40 
  -4   5   0  579.44   25.50 
   4   5   0  537.95   19.40 
  -4   5   0  526.35   24.30 
   4   5   0  520.15   24.80 
   4   5   0  567.34   21.60 
  -4   5   0  525.25   22.80 
  -4   5   0  547.25   28.50 
  -4   5   0  547.25   21.50 
  -4   5   0  539.55   19.90 
  -4   5   0  509.65   29.50 
   4   5   0  488.65   23.90 
  -4   5   0  511.65   26.30 
  -4   5   0  558.74   25.50 
   4   5   0  533.75   22.90 
  -4   5   0  425.66   30.40 
  -4   5   0  558.24   24.00 
   4   5   0  544.05   23.80 
   4   5   0  531.25   20.00 
   4   5   0  537.75   23.90 
   4   5   0  537.85   19.10 
  -5  -5   0   -0.10    2.10 
   5  -5   0    3.10    3.90 
  -5  -5   0    5.10    2.40 
   5  -5   0   11.30    5.00 
   5  -5   0   -0.10    3.90 
  -5  -5   0    8.40    3.30 
  -5  -5   0   14.30    3.90 
   5  -5   0   -3.20    3.20 
   5  -5   0   -1.80    3.00 
   5  -5   0    2.40    2.30 
  -5  -5   0    1.30    1.90 
  -5  -5   0    1.70    2.60 
  -5  -5   0    3.60    3.10 
  -5  -5   0    2.60    3.90 
   5  -5   0    6.90    2.80 
  -5  -5   0    2.80    3.00 
  -5  -5   0    7.90    3.00 
   5  -5   0    5.70    2.90 
  -5  -5   0   20.70    4.20 
  -5  -5   0    9.30    3.90 
   5   5   0    0.30    1.50 
  -5   5   0    3.60    4.50 
   5   5   0    2.30    2.60 
   5   5   0   -1.30    2.70 
   5   5   0    5.90    3.00 
  -5   5   0    2.10    3.40 
   5   5   0   -0.20    2.70 
  -5   5   0    3.00    2.50 
  -5   5   0   11.90    5.40 
  -5   5   0    0.30    3.80 
  -5   5   0    0.60    3.80 
  -5   5   0    2.50    5.00 
  -5   5   0    7.50    5.20 
   5   5   0    7.20    2.50 
   5   5   0   -0.60    2.80 
   5   5   0    1.30    3.20 
  -5   5   0    1.00    2.30 
   5   5   0    1.80    3.10 
  -5   5   0    3.40    4.60 
  -5   5   0    3.60    2.30 
   5   5   0    1.80    3.30 
  -5   5   0    2.60    2.70 
   5   5   0    2.60    2.20 
  -5   5   0    4.60    5.10 
   5   5   0    3.90    1.90 
  -5   5   0    6.40    3.50 
   5   5   0   -0.80    3.10 
   6  -5   0 1957.00   63.19 
  -6  -5   0 1840.22   63.19 
  -6  -5   0 1858.01   61.49 
  -6  -5   0 1955.10   62.69 
  -6  -5   0 1847.22   60.49 
   6  -5   0 1801.32   65.69 
  -6  -5   0 1841.02   61.29 
  -6  -5   0 1864.21   61.99 
   6  -5   0 1850.11   64.59 
  -6  -5   0 1808.22   63.49 
  -6  -5   0 1854.21   67.89 
  -6  -5   0 1904.91   60.49 
   6  -5   0 1967.70   63.29 
  -6  -5   0 1879.31   66.39 
   6  -5   0 1794.32   67.59 
  -6  -5   0 1854.91   64.29 
   6  -5   0 1917.91   61.59 
   6  -5   0 1906.11   60.79 
  -6  -5   0 1818.42   62.19 
   6  -5   0 1877.71   68.49 
   6   5   0 1927.41   62.89 
  -6   5   0 1864.41   67.09 
   6   5   0 1892.21   62.99 
   6   5   0 1818.52   66.19 
   6   5   0 1889.51   65.99 
   6   5   0 1867.91   63.19 
  -6   5   0 1871.91   69.29 
   6   5   0 1859.51   66.29 
   6   5   0 1763.62   67.39 
  -6   5   0 1876.01   61.09 
  -6   5   0 1873.31   70.59 
   6   5   0 1892.61   64.99 
  -6   5   0 1821.82   66.99 
  -6   5   0 1893.81   68.59 
  -6   5   0 1823.92   67.09 
   6   5   0 1949.70   60.19 
  -6   5   0 1923.61   64.99 
   6   5   0 1920.51   60.79 
  -6   5   0 1930.61   70.79 
  -6   5   0 1956.30   63.49 
  -6   5   0 1920.01   68.99 
  -6   5   0 1820.62   69.29 
  -6   5   0 1934.81   63.99 
   7  -5   0    2.60    4.10 
  -7  -5   0    2.30    3.20 
  -7  -5   0   -0.50    2.70 
   7  -5   0    1.50    2.80 
  -7  -5   0   -1.30    3.90 
  -7  -5   0    3.40    3.70 
  -7  -5   0    1.80    2.70 
  -7  -5   0   10.00    3.80 
   7  -5   0    3.90    4.60 
  -7  -5   0    2.40    3.60 
   7  -5   0   -0.10    3.40 
   7  -5   0    1.10    2.80 
  -7  -5   0    0.90    2.30 
  -7  -5   0   -0.40    3.00 
  -7  -5   0    3.80    3.40 
  -7  -5   0    1.70    3.50 
  -7   5   0    3.70    4.90 
  -7   5   0   -1.00    5.10 
  -7   5   0    3.20    2.60 
  -7   5   0   -0.40    4.30 
  -7   5   0    1.30    4.40 
   7   5   0    3.40    2.50 
   7   5   0    1.60    2.80 
  -7   5   0    5.50    5.70 
  -7   5   0   12.10    4.90 
  -7   5   0   -2.40    3.20 
   7   5   0    4.40    3.30 
  -7   5   0    1.30    3.00 
   7   5   0   12.50    4.70 
   7   5   0    4.50    4.10 
   7   5   0   -0.20    2.80 
  -7   5   0    0.10    4.10 
   7   5   0    4.90    4.30 
   7   5   0    3.50    2.50 
  -7   5   0   -1.70    3.60 
   7   5   0    4.50    3.70 
   7   5   0    2.70    3.00 
  -7   5   0    4.80    3.30 
  -8  -5   0 1115.99   43.20 
  -8  -5   0 1175.68   45.00 
  -8  -5   0 1111.29   49.60 
  -8  -5   0 1159.18   41.20 
   8  -5   0 1165.18   42.10 
   8  -5   0 1156.58   44.90 
  -8  -5   0 1111.19   42.40 
   8  -5   0 1188.88   42.80 
  -8  -5   0 1185.48   42.60 
  -8  -5   0 1171.88   41.60 
   8  -5   0 1214.48   48.90 
  -8  -5   0 1200.18   42.90 
  -8   5   0 1185.18   45.10 
   8   5   0 1153.88   47.10 
   8   5   0 1154.48   45.90 
   8   5   0 1159.08   47.30 
  -8   5   0 1178.08   43.80 
  -8   5   0 1157.28   47.60 
   8   5   0 1153.88   47.30 
  -8   5   0 1189.68   48.10 
  -8   5   0 1166.38   51.29 
  -8   5   0 1191.18   50.99 
  -8   5   0 1217.88   45.40 
   8   5   0 1193.18   40.50 
   8   5   0 1208.18   44.60 
  -8   5   0 1175.78   50.49 
   8   5   0 1163.18   43.00 
   8   5   0 1220.28   40.50 
  -8   5   0 1114.19   41.40 
  -9  -5   0    2.40    3.10 
  -9  -5   0    6.00    4.50 
   9  -5   0   27.00    7.70 
  -9  -5   0    3.80    3.90 
  -9  -5   0    4.90    3.60 
  -9  -5   0    2.40    4.00 
  -9  -5   0    6.30    5.70 
  -9  -5   0    5.20    4.50 
   9  -5   0    1.10    4.50 
   9  -5   0    8.80    4.20 
  -9  -5   0   -1.40    3.50 
   9   5   0    3.00    3.10 
  -9   5   0   -2.20    6.40 
   9   5   0    4.10    4.40 
  -9   5   0    5.50    3.30 
  -9   5   0    1.70    3.70 
  -9   5   0   -0.80    4.20 
  -9   5   0    0.30    5.40 
   9   5   0    8.20    5.00 
  -9   5   0   -0.20    4.80 
   9   5   0    0.90    4.60 
  -9   5   0    8.90    7.00 
  -9   5   0    5.40    5.40 
   9   5   0    4.50    3.90 
   0  -6   0  289.87   14.00 
   0  -6   0  268.37   16.50 
   0  -6   0  286.47   11.90 
   0  -6   0  292.77   16.50 
   0  -6   0  281.37   13.50 
   0  -6   0  305.77   18.40 
   0  -6   0  289.07   14.20 
   0  -6   0  297.67   14.10 
   0  -6   0  294.77   11.50 
   0  -6   0  273.47   11.30 
   0  -6   0  269.67   14.00 
   0  -6   0  255.57   13.60 
   0  -6   0  290.47   17.60 
   0  -6   0  259.47   13.30 
   0   6   0  271.17   17.10 
   0   6   0  273.67   14.00 
   0   6   0  274.07   18.40 
   0   6   0  282.57   12.10 
   0   6   0  271.37   14.20 
   0   6   0  247.78   13.00 
   0   6   0  277.77   13.40 
   0   6   0  242.68   17.00 
   0   6   0  290.07   19.10 
   0   6   0  289.17   20.30 
   0   6   0  270.17   16.40 
   0   6   0  294.97   15.70 
   0   6   0  290.97   21.70 
   0   6   0  261.27   12.60 
   1  -6   0 2447.96   77.09 
   1  -6   0 2622.34   87.19 
  -1  -6   0 2365.76   80.29 
  -1  -6   0 2503.35   79.49 
   1  -6   0 2517.55   80.89 
   1  -6   0 2531.75   77.09 
  -1  -6   0 2589.54   81.49 
   1  -6   0 2497.15   77.59 
   1  -6   0 2549.65   81.09 
   1  -6   0 2541.75   81.69 
   1  -6   0 2470.55   81.59 
  -1  -6   0 2434.16   85.09 
  -1  -6   0 2568.74   77.39 
  -1  -6   0 2511.15   81.19 
  -1  -6   0 2551.34   81.89 
  -1  -6   0 2690.73   80.99 
   1  -6   0 2570.14   81.89 
   1  -6   0 2818.22   90.19 
  -1  -6   0 2458.05   81.39 
  -1  -6   0 2565.44   81.19 
  -1  -6   0 2513.45   80.59 
   1  -6   0 2494.35   81.19 
  -1  -6   0 2553.84   85.19 
   1  -6   0 2520.85   77.19 
   1  -6   0 2572.14   84.89 
  -1  -6   0 2498.15   80.79 
   1  -6   0 2571.24   81.69 
   1  -6   0 2449.16   84.49 
  -1  -6   0 2583.74   79.59 
   1  -6   0 2452.55   78.29 
  -1  -6   0 2531.55   85.89 
  -1  -6   0 2332.37   86.19 
  -1  -6   0 2566.34   78.89 
   1   6   0 2469.05   86.89 
  -1   6   0 2401.96   80.49 
   1   6   0 2547.15   81.39 
   1   6   0 2562.24   78.99 
  -1   6   0 2370.26   82.89 
  -1   6   0 2632.24   97.79 
   1   6   0 2520.15   81.19 
   1   6   0 2504.35   79.29 
   1   6   0 2462.65   85.29 
   1   6   0 2545.75   80.99 
  -1   6   0 2483.85   87.79 
   1   6   0 2465.85   85.99 
   1   6   0 2511.15   84.69 
  -1   6   0 2408.86   84.79 
  -1   6   0 2461.65   88.99 
  -1   6   0 2636.94   81.79 
  -1   6   0 2502.95   85.79 
   1   6   0 2468.05   89.99 
  -1   6   0 2670.13   90.49 
  -1   6   0 2595.74   79.09 
   1   6   0 2421.16   77.39 
  -1   6   0 2593.64   80.99 
  -1   6   0 2580.24   89.99 
   1   6   0 2323.87   80.39 
  -1   6   0 2471.55   83.09 
   1   6   0 2405.86   89.19 
   2  -6   0  300.77   10.10 
  -2  -6   0  309.97   15.10 
   2  -6   0  297.77   14.70 
   2  -6   0  307.77   11.60 
  -2  -6   0  305.77   14.10 
   2  -6   0  316.87   15.40 
  -2  -6   0  284.07   13.30 
  -2  -6   0  291.67   14.80 
  -2  -6   0  299.47   14.30 
  -2  -6   0  311.87   17.50 
  -2  -6   0  327.07   14.80 
   2  -6   0  323.97   17.20 
   2  -6   0  310.57   18.30 
  -2  -6   0  323.67   13.70 
   2  -6   0  287.67   10.90 
   2  -6   0  308.17   10.40 
   2  -6   0  295.17   16.70 
  -2  -6   0  297.87   17.00 
  -2  -6   0  301.97   14.20 
   2  -6   0  289.27   14.90 
   2  -6   0  300.77   14.70 
  -2  -6   0  274.77   17.90 
  -2  -6   0  306.87   11.40 
  -2  -6   0  295.27   14.10 
  -2  -6   0  291.87   14.30 
  -2  -6   0  304.17   14.40 
   2  -6   0  312.57   10.70 
   2  -6   0  287.77   11.20 
   2  -6   0  298.47   14.40 
   2   6   0  287.97   17.40 
  -2   6   0  298.37   14.90 
   2   6   0  307.97   20.00 
   2   6   0  275.47   15.80 
   2   6   0  304.87   18.80 
  -2   6   0  297.57   19.30 
  -2   6   0  279.77   16.20 
   2   6   0  295.07   17.20 
   2   6   0  306.77   12.30 
  -2   6   0  321.57   25.90 
  -2   6   0  295.07   20.20 
  -2   6   0  295.97   13.80 
  -2   6   0  299.57   18.20 
  -2   6   0  278.47   13.80 
  -2   6   0  289.47   14.00 
   2   6   0  288.67   14.60 
  -2   6   0  289.97   19.20 
  -2   6   0  271.57   16.20 
   2   6   0  310.27   17.20 
  -2   6   0  300.47   16.80 
   2   6   0  280.97   14.10 
   2   6   0  291.97   13.80 
  -2   6   0  303.17   22.10 
   2   6   0  292.67   13.90 
   2   6   0  297.57   13.30 
   3  -6   0  815.32   31.90 
  -3  -6   0  791.82   33.50 
  -3  -6   0  804.82   34.30 
  -3  -6   0  812.62   31.60 
  -3  -6   0  868.61   30.80 
   3  -6   0  799.82   31.00 
  -3  -6   0  809.22   26.70 
   3  -6   0  837.62   35.30 
   3  -6   0  790.32   30.70 
  -3  -6   0  825.62   29.70 
   3  -6   0  817.12   33.00 
   3  -6   0  798.82   33.40 
  -3  -6   0  805.72   30.40 
  -3  -6   0  777.72   30.80 
   3  -6   0  851.81   28.20 
  -3  -6   0  790.42   30.50 
   3  -6   0  836.72   30.50 
  -3  -6   0  800.92   29.50 
  -3  -6   0  802.12   30.20 
  -3  -6   0  804.52   30.10 
  -3  -6   0  787.22   29.80 
   3  -6   0  818.72   30.10 
   3   6   0  801.22   33.20 
  -3   6   0  789.22   28.70 
   3   6   0  836.42   27.20 
   3   6   0  785.82   29.00 
   3   6   0  822.92   29.40 
   3   6   0  843.92   31.50 
   3   6   0  777.52   28.30 
  -3   6   0  859.11   37.10 
   3   6   0  814.42   35.10 
   3   6   0  774.72   31.20 
  -3   6   0  791.82   31.80 
  -3   6   0  777.02   32.30 
   3   6   0  772.62   34.00 
  -3   6   0  813.32   33.20 
   3   6   0  776.42   35.60 
  -3   6   0  790.32   37.00 
  -3   6   0  789.12   29.30 
   3   6   0  794.42   29.00 
   3   6   0  821.92   30.40 
  -3   6   0  766.12   42.80 
  -3   6   0  823.82   30.20 
  -3   6   0  769.62   35.10 
  -3   6   0  849.32   35.00 
  -3   6   0  861.81   36.30 
   3   6   0  745.73   32.30 
  -4  -6   0  135.69    9.90 
  -4  -6   0  143.99    9.30 
  -4  -6   0  124.59   10.80 
  -4  -6   0  124.19    8.70 
  -4  -6   0  124.99    9.10 
   4  -6   0  138.69    8.10 
   4  -6   0  145.29    9.50 
  -4  -6   0  148.19   11.20 
  -4  -6   0  120.49    8.90 
   4  -6   0  128.89    8.90 
   4  -6   0  137.89   10.80 
   4  -6   0  124.69   10.70 
  -4  -6   0  136.79    9.60 
   4  -6   0  121.99   11.50 
  -4  -6   0  146.09    9.60 
  -4  -6   0  138.69    7.00 
  -4  -6   0  112.29    8.80 
   4  -6   0  129.09    9.70 
  -4   6   0  118.79   10.10 
   4   6   0  138.79    8.10 
  -4   6   0  118.49   13.70 
   4   6   0  127.19   10.30 
   4   6   0  128.29    7.50 
  -4   6   0  124.89   10.90 
  -4   6   0  100.39   16.30 
  -4   6   0  136.09   12.40 
   4   6   0  122.29    7.20 
  -4   6   0  131.99    8.40 
  -4   6   0  133.89    9.30 
   4   6   0  127.79    8.10 
   4   6   0  129.09    9.30 
   4   6   0  128.59   11.80 
   4   6   0  127.49   10.10 
  -4   6   0  123.99   11.70 
   4   6   0  119.49   10.80 
  -4   6   0  155.88   12.20 
   4   6   0  116.79   11.40 
  -4   6   0  127.39   12.70 
  -4   6   0  114.09    8.20 
   4   6   0  143.29    9.90 
   4   6   0  127.59    8.60 
  -4   6   0  122.09    7.90 
  -4   6   0  110.79   13.80 
   4   6   0  137.89    6.60 
  -4   6   0  118.79   12.20 
  -4   6   0  153.48   14.20 
   5  -6   0  707.13   27.40 
   5  -6   0  697.23   31.10 
   5  -6   0  728.83   26.40 
   5  -6   0  759.82   33.00 
   5  -6   0  688.03   28.90 
  -5  -6   0  742.13   28.30 
  -5  -6   0  693.43   27.10 
  -5  -6   0  756.92   28.60 
  -5  -6   0  722.93   29.30 
   5  -6   0  739.53   29.90 
  -5  -6   0  712.23   27.70 
  -5  -6   0  683.13   31.00 
  -5  -6   0  680.63   26.80 
   5  -6   0  717.43   32.40 
   5  -6   0  725.23   27.30 
  -5  -6   0  651.03   27.20 
  -5  -6   0  691.93   24.90 
  -5  -6   0  688.93   31.40 
  -5  -6   0  684.23   26.50 
  -5  -6   0  685.93   27.40 
   5   6   0  683.93   26.10 
   5   6   0  702.93   28.40 
  -5   6   0  741.33   32.00 
  -5   6   0  666.03   32.20 
  -5   6   0  725.53   26.40 
   5   6   0  717.53   25.20 
   5   6   0  746.03   31.50 
  -5   6   0  720.63   31.70 
   5   6   0  721.03   27.80 
  -5   6   0  742.63   33.50 
  -5   6   0  652.73   38.00 
   5   6   0  699.03   28.00 
  -5   6   0  695.53   35.60 
  -5   6   0  745.33   26.70 
  -5   6   0  684.23   29.80 
  -5   6   0  689.13   34.30 
   5   6   0  738.53   31.80 
   5   6   0  660.33   32.00 
   5   6   0  676.53   29.80 
  -5   6   0  732.33   35.00 
  -5   6   0  610.94   32.80 
  -5   6   0  748.73   28.30 
  -5   6   0  724.43   32.20 
   5   6   0  717.83   30.20 
  -5   6   0  743.23   33.10 
  -5   6   0  695.93   27.10 
  -6  -6   0  109.09    9.50 
  -6  -6   0  110.49    9.60 
   6  -6   0  117.59   12.50 
   6  -6   0  127.09    9.10 
   6  -6   0  105.69   10.00 
   6  -6   0  111.99    9.80 
  -6  -6   0  112.69   13.40 
  -6  -6   0  107.09    8.10 
   6  -6   0  114.49    8.50 
  -6  -6   0  106.09    7.20 
  -6  -6   0  103.69    8.70 
  -6  -6   0   94.49   10.60 
   6  -6   0  106.79    8.20 
  -6  -6   0  101.39    8.60 
   6  -6   0  111.89   13.40 
  -6  -6   0  112.99    8.60 
   6  -6   0  110.99   12.40 
   6   6   0   98.59   10.20 
  -6   6   0  115.69   13.90 
  -6   6   0  103.49    8.50 
  -6   6   0  119.39   11.20 
  -6   6   0  101.29    7.80 
  -6   6   0  100.09   15.80 
  -6   6   0  133.99   15.10 
   6   6   0  105.59    7.60 
   6   6   0  108.09    9.10 
  -6   6   0  124.39   14.20 
   6   6   0   99.29    6.90 
  -6   6   0  101.89   13.50 
  -6   6   0   90.19   13.60 
  -6   6   0  117.69   16.10 
   6   6   0   97.59   10.30 
   6   6   0  107.99   10.20 
   6   6   0   85.09    8.60 
   6   6   0  117.09    9.40 
  -6   6   0   99.29   12.60 
  -6   6   0  107.19   15.50 
   6   6   0  105.29   11.20 
  -7  -6   0  481.75   24.30 
  -7  -6   0  510.95   28.40 
   7  -6   0  534.25   22.10 
   7  -6   0  517.85   22.20 
   7  -6   0  518.05   28.40 
  -7  -6   0  513.55   21.90 
  -7  -6   0  507.15   23.70 
  -7  -6   0  529.15   22.80 
   7  -6   0  452.95   26.20 
  -7  -6   0  521.95   23.40 
  -7  -6   0  492.05   22.60 
  -7  -6   0  499.25   20.70 
   7  -6   0  510.35   24.50 
  -7   6   0  572.54   33.40 
   7   6   0  516.35   23.30 
  -7   6   0  523.25   21.60 
  -7   6   0  509.45   28.30 
   7   6   0  506.65   26.60 
   7   6   0  522.45   25.70 
  -7   6   0  530.05   27.90 
  -7   6   0  530.45   30.60 
   7   6   0  510.35   26.20 
   7   6   0  514.55   27.10 
   7   6   0  501.05   23.50 
   7   6   0  535.75   21.20 
  -7   6   0  532.05   25.30 
   7   6   0  532.55   20.50 
  -7   6   0  518.95   28.00 
  -7   6   0  499.85   28.70 
   7   6   0  537.15   23.80 
   7   6   0  535.15   23.70 
  -7   6   0  482.25   27.60 
   8  -6   0   10.90    4.10 
  -8  -6   0   15.10    5.10 
   8  -6   0   11.40    6.30 
  -8  -6   0   11.30    6.60 
  -8  -6   0    9.90    5.10 
  -8  -6   0    4.60    3.60 
  -8  -6   0    7.20    4.30 
  -8  -6   0    8.80    5.60 
   8  -6   0    7.80    9.00 
   8  -6   0    8.80    4.50 
   8  -6   0   16.60    6.40 
  -8  -6   0   11.90    5.40 
   8   6   0   12.60    3.70 
   8   6   0   14.10    5.80 
   8   6   0    9.80    4.40 
  -8   6   0    9.30    6.10 
  -8   6   0   11.40    6.90 
  -8   6   0   26.80    7.70 
  -8   6   0   13.40    4.00 
  -8   6   0    8.70    7.00 
  -8   6   0    4.40    6.30 
  -8   6   0   10.90    7.60 
   8   6   0   12.50    5.80 
   8   6   0    7.70    5.60 
   8   6   0    8.40    3.50 
  -8   6   0   12.70    7.30 
   8   6   0    7.40    5.00 
  -8   6   0   13.80    5.50 
  -8   6   0    5.60    6.70 
   0  -7   0    4.30    4.80 
   0  -7   0   19.30    4.80 
   0  -7   0    2.70    2.10 
   0  -7   0    1.70    3.50 
   0  -7   0    1.30    3.40 
   0  -7   0   -1.70    2.90 
   0  -7   0    0.30    2.10 
   0  -7   0    0.20    2.80 
   0  -7   0    2.60    2.10 
   0  -7   0    5.90    3.10 
   0  -7   0    4.90    3.10 
   0  -7   0    0.00    3.90 
   0   7   0    4.60    5.60 
   0   7   0    0.50    4.10 
   0   7   0   -1.90    5.20 
   0   7   0    0.60    2.80 
   0   7   0    1.70    5.40 
   0   7   0    2.90    2.70 
   0   7   0    6.00    2.60 
   0   7   0   11.90    4.10 
   0   7   0    0.90    2.60 
   0   7   0    2.50    4.40 
   0   7   0    5.20    5.90 
   0   7   0    6.80    3.00 
  -1  -7   0  105.09    8.80 
  -1  -7   0   93.39    8.00 
  -1  -7   0   99.59    7.90 
  -1  -7   0  101.19    8.20 
   1  -7   0   95.59    8.20 
  -1  -7   0   85.89    8.80 
   1  -7   0   95.29    9.80 
  -1  -7   0   88.89    7.10 
  -1  -7   0   93.29    7.00 
   1  -7   0  103.69    8.80 
   1  -7   0   91.69    8.40 
   1  -7   0   99.29    5.90 
  -1  -7   0   97.89    6.90 
   1  -7   0   92.19    5.60 
   1  -7   0  116.19    5.90 
  -1  -7   0   91.49    8.40 
  -1  -7   0  106.69   11.70 
   1  -7   0   74.59    9.90 
   1  -7   0  103.69    8.70 
   1  -7   0   91.29    8.60 
  -1  -7   0  105.99   12.60 
  -1  -7   0   84.49    8.40 
  -1  -7   0  101.89   11.40 
   1  -7   0   95.09    8.10 
  -1   7   0   98.29    8.00 
  -1   7   0  107.99    8.20 
  -1   7   0   96.79    6.90 
   1   7   0  101.49    5.60 
   1   7   0   96.39   13.80 
  -1   7   0   98.19    9.50 
   1   7   0  109.99   16.10 
   1   7   0   82.29   11.40 
  -1   7   0  107.69   18.40 
  -1   7   0  108.09    9.30 
   1   7   0   94.99    8.50 
  -1   7   0  108.29   12.20 
  -1   7   0  103.19   14.60 
  -1   7   0  105.49   11.20 
   1   7   0   85.99    8.20 
   1   7   0   99.39   15.10 
  -1   7   0  104.39   11.30 
   1   7   0   92.19    6.90 
  -1   7   0  105.49   15.10 
  -1   7   0   89.29    9.20 
   1   7   0  102.09    7.00 
   1   7   0   90.79   11.20 
   1   7   0  109.39   14.00 
   1   7   0  100.39    8.40 
  -1   7   0  103.19   14.80 
  -2  -7   0    6.50    3.40 
  -2  -7   0   14.20    4.00 
   2  -7   0   15.60    5.10 
  -2  -7   0    7.10    3.40 
  -2  -7   0   12.50    3.90 
   2  -7   0    8.70    3.80 
  -2  -7   0    9.70    3.40 
  -2  -7   0   10.60    5.00 
   2  -7   0   23.80    6.30 
  -2  -7   0   10.90    3.80 
  -2  -7   0   11.90    3.90 
  -2  -7   0   11.20    3.60 
   2  -7   0   14.80    4.10 
  -2  -7   0    8.60    3.90 
   2  -7   0   12.30    4.50 
  -2  -7   0   12.50    6.10 
   2  -7   0   19.80    4.90 
   2  -7   0   15.30    4.20 
  -2  -7   0   13.70    2.50 
  -2  -7   0    9.70    5.30 
  -2  -7   0    4.50    3.60 
  -2  -7   0   17.60    4.40 
  -2   7   0   17.10    5.10 
  -2   7   0    6.30    3.20 
   2   7   0   11.50    5.70 
  -2   7   0    9.50    6.60 
  -2   7   0   15.30    8.80 
  -2   7   0    9.50    3.80 
   2   7   0    8.60    3.60 
   2   7   0   12.10    3.00 
  -2   7   0   10.30    5.00 
  -2   7   0    8.70    5.40 
   2   7   0   19.10    7.40 
  -2   7   0   11.30    4.70 
   2   7   0   12.60    4.00 
   2   7   0    6.90    3.50 
   2   7   0    6.70    4.60 
  -2   7   0   17.70    6.70 
  -2   7   0    8.80    6.10 
   2   7   0   12.30    6.10 
   2   7   0    6.30    4.70 
  -2   7   0   11.80    4.10 
   2   7   0    6.60    4.50 
  -3  -7   0  218.48   12.30 
  -3  -7   0  212.48   13.10 
   3  -7   0  215.28   13.10 
  -3  -7   0  209.68    9.20 
   3  -7   0  220.58   13.00 
   3  -7   0  225.28   10.70 
  -3  -7   0  194.58   11.70 
   3  -7   0  221.08   15.10 
  -3  -7   0  216.98   16.90 
  -3  -7   0  210.88   12.50 
   3  -7   0  211.78   12.90 
  -3  -7   0  200.78   12.50 
  -3  -7   0  203.68   12.40 
  -3  -7   0  195.08   12.80 
  -3  -7   0  203.38   15.60 
  -3  -7   0  230.18   12.60 
  -3  -7   0  226.68   13.50 
   3  -7   0  208.48   13.50 
   3  -7   0  221.58   15.10 
   3  -7   0  213.68   12.10 
  -3  -7   0  209.88   11.80 
  -3   7   0  209.58   15.70 
   3   7   0  185.38   13.70 
  -3   7   0  232.18   17.70 
   3   7   0  185.98   11.40 
  -3   7   0  202.58   17.00 
   3   7   0  196.08   16.50 
   3   7   0  222.48   10.10 
   3   7   0  211.28   12.70 
   3   7   0  203.18   11.50 
  -3   7   0  221.28   12.50 
   3   7   0  197.08   14.90 
   3   7   0  184.08   16.80 
   3   7   0  209.68   15.20 
  -3   7   0  204.28   17.30 
   3   7   0  226.98   13.50 
  -3   7   0  204.98   14.60 
  -3   7   0  209.08   11.80 
   3   7   0  195.28   15.60 
  -3   7   0  267.67   24.50 
  -3   7   0  228.08   14.00 
  -3   7   0  238.78   16.10 
  -3   7   0  215.08   12.20 
  -3   7   0  217.58   14.20 
  -4  -7   0  264.97   15.20 
   4  -7   0  260.87   15.20 
   4  -7   0  287.47   17.30 
  -4  -7   0  284.37   13.60 
   4  -7   0  269.97   15.00 
   4  -7   0  282.97   14.20 
  -4  -7   0  263.27   14.50 
  -4  -7   0  259.57   14.80 
   4  -7   0  282.77   18.10 
   4  -7   0  286.07   13.10 
  -4  -7   0  287.17   20.90 
  -4  -7   0  261.77   16.50 
  -4  -7   0  257.47   14.30 
  -4  -7   0  286.77   19.10 
   4  -7   0  298.37   17.10 
  -4  -7   0  271.17   15.00 
  -4  -7   0  274.57   15.90 
  -4  -7   0  267.07   15.30 
  -4   7   0  259.27   16.50 
  -4   7   0  266.07   19.50 
  -4   7   0  313.07   19.60 
   4   7   0  285.47   15.20 
   4   7   0  263.57   16.10 
  -4   7   0  312.57   26.70 
  -4   7   0  299.37   19.60 
  -4   7   0  280.17   14.00 
  -4   7   0  253.67   19.60 
   4   7   0  281.17   14.00 
  -4   7   0  267.37   19.10 
   4   7   0  301.87   22.20 
  -4   7   0  288.87   15.10 
  -4   7   0  280.17   13.70 
  -4   7   0  267.87   17.00 
  -4   7   0  287.67   17.20 
   4   7   0  293.77   17.80 
  -4   7   0  301.07   21.20 
   4   7   0  268.77   17.80 
   4   7   0  289.87   16.40 
   4   7   0  268.47   18.60 
  -4   7   0  255.47   13.90 
  -5  -7   0  429.26   20.40 
   5  -7   0  425.46   19.20 
   5  -7   0  423.86   19.70 
   5  -7   0  444.26   24.50 
  -5  -7   0  458.45   23.80 
   5  -7   0  449.95   22.80 
   5  -7   0  447.46   23.60 
  -5  -7   0  422.06   20.10 
  -5  -7   0  440.46   20.20 
  -5  -7   0  444.46   20.70 
   5  -7   0  435.16   18.40 
  -5  -7   0  426.36   20.40 
   5  -7   0  404.86   20.70 
  -5  -7   0  461.15   25.40 
   5   7   0  446.46   22.50 
  -5   7   0  454.05   26.10 
  -5   7   0  450.75   23.60 
  -5   7   0  474.15   20.80 
   5   7   0  415.96   20.40 
   5   7   0  450.75   18.00 
  -5   7   0  411.76   25.90 
  -5   7   0  391.86   25.20 
  -5   7   0  441.26   27.50 
  -5   7   0  480.25   24.80 
  -5   7   0  400.26   31.10 
   5   7   0  394.96   22.90 
  -5   7   0  479.25   24.00 
  -5   7   0  420.26   25.50 
  -5   7   0  439.26   18.90 
  -5   7   0  449.06   19.90 
  -5   7   0  479.05   26.60 
  -5   7   0  489.15   25.50 
   5   7   0  397.16   22.40 
   5   7   0  410.46   18.90 
   5   7   0  419.76   23.80 
   5   7   0  425.16   21.40 
  -6  -7   0  828.12   33.10 
   6  -7   0  838.32   38.80 
  -6  -7   0  814.92   34.70 
  -6  -7   0  804.62   33.20 
   6  -7   0  864.11   31.60 
   6  -7   0  892.41   32.70 
  -6  -7   0  876.91   33.90 
   6  -7   0  841.32   31.80 
   6  -7   0  872.81   34.80 
   6  -7   0  887.61   38.30 
  -6  -7   0  772.12   37.30 
  -6  -7   0  818.92   33.80 
  -6  -7   0  847.32   32.60 
  -6  -7   0  815.72   32.60 
   6  -7   0  873.91   35.40 
   6   7   0  776.32   37.40 
   6   7   0  799.12   37.20 
  -6   7   0  856.91   37.70 
   6   7   0  844.02   30.40 
  -6   7   0  961.90   40.50 
  -6   7   0  860.61   38.90 
  -6   7   0  859.81   37.80 
  -6   7   0  914.91   42.20 
  -6   7   0  846.22   31.70 
   6   7   0  800.62   34.10 
   6   7   0  820.92   31.40 
   6   7   0  847.62   36.50 
  -6   7   0  878.11   41.60 
  -6   7   0  692.63   44.00 
  -6   7   0  868.31   41.00 
   6   7   0  811.42   36.20 
   6   7   0  858.41   34.20 
  -6   7   0  833.92   32.70 
  -6   7   0  907.51   38.70 
  -6   7   0  817.92   39.40 
  -7  -7   0  450.25   21.30 
   7  -7   0  473.25   20.30 
  -7  -7   0  436.26   26.60 
   7  -7   0  431.06   25.60 
  -7  -7   0  456.45   22.60 
  -7  -7   0  458.75   23.60 
   7  -7   0  411.06   22.10 
  -7  -7   0  419.76   21.40 
   7  -7   0  407.36   25.40 
   7  -7   0  439.66   19.60 
  -7  -7   0  418.66   21.10 
  -7   7   0  454.85   29.80 
   7   7   0  419.26   23.90 
   7   7   0  448.06   22.10 
  -7   7   0  515.05   28.60 
   7   7   0  428.06   22.00 
   7   7   0  445.56   24.60 
   7   7   0  404.46   25.00 
   7   7   0  419.96   21.90 
  -7   7   0  473.05   20.30 
  -7   7   0  399.36   24.60 
  -7   7   0  401.66   31.70 
   7   7   0  408.96   24.70 
  -7   7   0  488.75   26.40 
  -7   7   0  418.26   25.10 
   7   7   0  415.86   19.20 
  -7   7   0  427.06   26.50 
  -7   7   0  421.26   20.70 
  -7   7   0  452.15   28.20 
   7   7   0  450.65   18.70 
  -7   7   0  415.06   28.00 
   0  -8   0 1719.03   54.89 
   0  -8   0 1730.23   58.49 
   0  -8   0 1647.74   54.89 
   0  -8   0 1678.23   59.19 
   0  -8   0 1667.43   59.89 
   0  -8   0 1709.83   59.19 
   0  -8   0 1694.43   55.49 
   0  -8   0 1617.74   63.69 
   0  -8   0 1760.42   62.79 
   0  -8   0 1665.33   57.89 
   0  -8   0 1782.62   60.39 
   0   8   0 1719.83   65.49 
   0   8   0 1750.02   61.09 
   0   8   0 1715.03   57.69 
   0   8   0 1750.32   70.79 
   0   8   0 1787.42   63.89 
   0   8   0 1735.43   75.19 
   0   8   0 1724.43   61.19 
   0   8   0 1597.94   69.29 
   0   8   0 1559.24   66.49 
   0   8   0 1728.73   59.19 
  -1  -8   0  787.82   31.70 
   1  -8   0  738.53   31.80 
  -1  -8   0  759.82   32.30 
  -1  -8   0  788.92   31.90 
  -1  -8   0  769.32   30.80 
   1  -8   0  784.32   30.80 
  -1  -8   0  778.22   29.20 
   1  -8   0  759.52   35.40 
   1  -8   0  809.22   34.10 
   1  -8   0  828.22   32.40 
   1  -8   0  785.22   31.30 
  -1  -8   0  780.02   30.20 
  -1  -8   0  769.52   28.60 
  -1  -8   0  736.73   32.10 
   1  -8   0  768.02   31.60 
  -1  -8   0  800.62   36.60 
  -1  -8   0  798.32   28.60 
  -1  -8   0  796.62   35.90 
  -1   8   0  769.02   40.80 
   1   8   0  770.92   32.20 
  -1   8   0  804.42   33.90 
   1   8   0  781.02   35.50 
  -1   8   0  853.81   39.80 
  -1   8   0  894.41   46.80 
  -1   8   0  789.12   30.80 
   1   8   0  806.22   29.50 
  -1   8   0  783.52   31.40 
   1   8   0  734.63   36.20 
   1   8   0  729.83   37.50 
   1   8   0  753.22   39.90 
   1   8   0  809.22   32.90 
   1   8   0  784.22   31.60 
   1   8   0  764.42   42.90 
  -1   8   0  829.72   41.20 
  -1   8   0  858.51   37.70 
   1   8   0  769.52   41.20 
  -1   8   0  871.91   36.20 
  -2  -8   0  637.34   26.50 
  -2  -8   0  656.03   25.20 
  -2  -8   0  624.34   25.70 
   2  -8   0  662.23   26.90 
   2  -8   0  636.54   27.60 
   2  -8   0  654.23   31.10 
  -2  -8   0  648.54   28.60 
  -2  -8   0  576.24   26.40 
  -2  -8   0  617.64   32.30 
   2  -8   0  675.93   29.90 
  -2  -8   0  657.83   26.20 
  -2  -8   0  652.33   25.40 
  -2  -8   0  665.03   27.70 
   2  -8   0  674.73   27.20 
   2  -8   0  669.53   27.50 
   2  -8   0  608.44   27.10 
  -2  -8   0  635.54   27.70 
   2   8   0  645.24   24.40 
   2   8   0  582.84   31.40 
  -2   8   0  676.63   27.50 
  -2   8   0  703.53   33.60 
   2   8   0  682.43   27.70 
   2   8   0  714.23   29.10 
  -2   8   0  654.33   30.10 
  -2   8   0  675.43   31.40 
   2   8   0  625.84   27.20 
   2   8   0  664.23   34.70 
   2   8   0  596.54   35.90 
  -2   8   0  645.84   28.40 
  -2   8   0  745.13   35.20 
  -2   8   0  664.73   27.60 
  -2   8   0  593.34   34.70 
  -2   8   0  649.34   31.30 
   2   8   0  586.84   31.40 
   2   8   0  601.54   30.50 
   2   8   0  597.84   35.90 
  -2   8   0  741.23   41.70 
   2   8   0  594.44   26.70 
   3  -8   0  406.96   19.90 
   3  -8   0  397.36   19.90 
  -3  -8   0  350.16   24.20 
  -3  -8   0  400.46   18.40 
  -3  -8   0  383.56   19.00 
  -3  -8   0  398.16   19.20 
   3  -8   0  366.36   22.20 
   3  -8   0  413.46   16.70 
  -3  -8   0  388.46   20.00 
  -3  -8   0  378.56   18.60 
  -3  -8   0  403.46   20.30 
   3  -8   0  388.36   18.60 
   3  -8   0  425.36   20.80 
  -3  -8   0  384.56   20.60 
   3  -8   0  426.26   22.60 
  -3  -8   0  397.96   18.70 
   3  -8   0  418.96   20.30 
  -3   8   0  401.46   19.50 
  -3   8   0  375.26   20.40 
  -3   8   0  429.26   19.20 
   3   8   0  405.76   24.50 
  -3   8   0  420.56   23.00 
   3   8   0  396.26   19.30 
  -3   8   0  435.16   20.00 
  -3   8   0  447.66   25.50 
  -3   8   0  477.45   32.70 
   3   8   0  369.96   23.90 
   3   8   0  374.46   22.60 
   3   8   0  403.16   27.50 
   3   8   0  403.96   20.90 
  -3   8   0  430.96   23.50 
  -3   8   0  412.76   23.00 
   3   8   0  387.06   19.80 
  -3   8   0  387.66   26.10 
  -3   8   0  424.66   21.00 
   3   8   0  340.27   21.90 
  -3   8   0  480.85   27.00 
  -4  -8   0  615.54   33.70 
  -4  -8   0  668.73   27.10 
  -4  -8   0  728.23   29.40 
   4  -8   0  599.84   27.30 
   4  -8   0  656.13   29.60 
   4  -8   0  656.53   31.00 
   4  -8   0  670.63   28.40 
  -4  -8   0  637.94   27.60 
  -4  -8   0  634.04   27.00 
   4  -8   0  665.03   24.90 
   4  -8   0  673.63   26.60 
  -4  -8   0  660.43   28.60 
   4  -8   0  697.23   31.80 
  -4  -8   0  630.74   27.40 
  -4  -8   0  671.63   29.70 
  -4  -8   0  634.84   28.80 
  -4   8   0  683.63   26.90 
   4   8   0  645.94   32.40 
  -4   8   0  636.04   27.20 
  -4   8   0  618.44   31.40 
  -4   8   0  673.03   35.60 
   4   8   0  662.93   32.20 
  -4   8   0  725.03   32.90 
  -4   8   0  655.83   27.70 
  -4   8   0  662.53   29.60 
  -4   8   0  636.54   29.50 
   4   8   0  634.54   28.30 
  -4   8   0  690.53   27.00 
   4   8   0  569.74   29.70 
  -4   8   0  693.13   34.60 
   4   8   0  650.63   29.60 
   4   8   0  632.34   26.90 
  -4   8   0  711.83   35.00 
  -4   8   0  742.13   42.80 
  -5  -8   0  233.38   17.20 
   5  -8   0  258.17   13.00 
   5  -8   0  250.47   18.30 
  -5  -8   0  253.27   15.60 
  -5  -8   0  251.47   14.70 
  -5  -8   0  237.38   15.70 
  -5  -8   0  245.88   15.40 
   5  -8   0  248.58   13.50 
   5  -8   0  234.78   17.20 
  -5  -8   0  229.58   14.70 
  -5  -8   0  257.17   20.20 
   5  -8   0  231.28   14.90 
  -5  -8   0  238.58   15.40 
   5  -8   0  234.78   14.80 
  -5  -8   0  253.97   15.30 
   5  -8   0  260.67   17.30 
   5   8   0  198.98   15.60 
  -5   8   0  241.38   18.80 
  -5   8   0  215.58   19.40 
  -5   8   0  257.87   14.10 
  -5   8   0  256.57   17.80 
   5   8   0  238.18   13.80 
  -5   8   0  260.67   17.20 
   5   8   0  237.48   18.20 
   5   8   0  250.57   18.10 
  -5   8   0  290.77   18.70 
   5   8   0  222.98   16.20 
  -5   8   0  266.27   17.40 
  -5   8   0  259.67   20.90 
   5   8   0  243.18   15.40 
  -5   8   0  264.17   19.30 
  -5   8   0  224.78   14.20 
   5   8   0  257.17   18.20 
  -5   8   0  269.17   25.50 
  -6  -8   0  512.35   24.00 
  -6  -8   0  500.05   25.10 
  -6  -8   0  520.95   24.30 
   6  -8   0  582.14   28.70 
  -6  -8   0  498.75   28.10 
  -6  -8   0  519.45   30.20 
  -6  -8   0  479.25   24.10 
   6  -8   0  548.85   22.10 
  -6  -8   0  458.85   23.80 
   6  -8   0  527.95   28.90 
   6  -8   0  501.45   21.60 
   6  -8   0  506.65   24.60 
  -6  -8   0  505.15   25.40 
   6   8   0  424.26   24.50 
  -6   8   0  561.34   38.40 
  -6   8   0  462.85   29.50 
  -6   8   0  528.15   27.50 
  -6   8   0  523.35   30.30 
  -6   8   0  508.55   23.50 
  -6   8   0  527.35   26.90 
  -6   8   0  541.75   30.70 
   6   8   0  535.85   22.80 
   6   8   0  495.45   24.50 
   6   8   0  464.35   27.30 
   6   8   0  492.45   24.50 
   6   8   0  495.25   27.30 
  -6   8   0  513.85   22.60 
  -6   8   0  582.44   29.30 
   6   8   0  479.85   28.10 
   6   8   0  486.55   26.40 
  -6   8   0  465.55   28.70 
  -6   8   0  524.65   31.40 
   0  -9   0    4.30    3.80 
   0  -9   0    1.60    4.50 
   0  -9   0    4.70    3.70 
   0  -9   0   -3.20    4.30 
   0  -9   0    3.30    4.20 
   0  -9   0    3.10    5.80 
   0  -9   0    2.40    3.70 
   0  -9   0    3.30    3.70 
   0   9   0    2.80    3.00 
   0   9   0    1.30    6.60 
   0   9   0    2.90    5.50 
   0   9   0   -1.60    5.20 
   0   9   0    8.00    4.50 
   0   9   0   10.00    8.40 
   0   9   0    0.10    4.90 
   0   9   0    4.50    3.80 
   0   9   0    0.30    4.60 
   1  -9   0    2.60    4.00 
  -1  -9   0    6.40    4.90 
   1  -9   0    7.40    4.60 
   1  -9   0   -6.30    4.10 
   1  -9   0    2.20    3.80 
  -1  -9   0    6.00    4.10 
  -1  -9   0    1.80    2.70 
  -1  -9   0    7.30    4.70 
   1  -9   0    1.30    4.20 
  -1  -9   0    3.00    7.40 
  -1  -9   0    4.20    4.10 
  -1  -9   0   -1.10    3.70 
   1  -9   0   -1.00    3.20 
  -1  -9   0    3.60    3.70 
   1   9   0   -1.00    2.50 
  -1   9   0   16.80    5.70 
  -1   9   0    8.90    8.40 
  -1   9   0   30.90    9.90 
   1   9   0   -0.30    5.60 
   1   9   0    4.10    3.90 
  -1   9   0   -2.20    5.70 
  -1   9   0   -1.30    5.60 
  -1   9   0    8.40    4.20 
   1   9   0    3.20    5.20 
   1   9   0    0.90    7.10 
   1   9   0    7.10    4.50 
   1   9   0    8.30    8.00 
  -1   9   0    8.00    5.50 
  -1   9   0    3.50    3.30 
   1   9   0    1.40    6.30 
   1   9   0    3.70    6.30 
  -1   9   0    5.70    5.40 
  -1   9   0    1.90    3.80 
   2  -9   0   12.70    4.80 
  -2  -9   0   13.30    4.80 
   2  -9   0   11.30    5.00 
  -2  -9   0   10.70    4.20 
   2  -9   0    6.60    4.50 
  -2  -9   0    3.20    3.60 
  -2  -9   0    4.30    4.30 
   2  -9   0   13.50    4.90 
  -2  -9   0    7.20    5.30 
  -2  -9   0   11.30    4.30 
  -2  -9   0    3.60    3.90 
   2  -9   0    7.00    5.90 
  -2  -9   0    6.80    4.70 
   2  -9   0   14.30    4.50 
  -2  -9   0    8.10    6.30 
  -2   9   0   16.90    8.60 
   2   9   0    7.00    4.60 
   2   9   0    6.30    5.60 
  -2   9   0    8.90    5.60 
   2   9   0   -1.00    4.80 
   2   9   0    4.50    4.10 
  -2   9   0   16.30    8.70 
   2   9   0    6.10    4.00 
  -2   9   0   15.40    5.20 
   2   9   0   11.40    8.20 
  -2   9   0   15.70    6.00 
   2   9   0    5.10    7.10 
  -2   9   0   22.70    8.70 
  -2   9   0   12.20    4.70 
  -2   9   0   17.90    7.30 
  -2   9   0   10.40    4.40 
  -2   9   0    9.40    6.30 
   3  -9   0  136.89   10.50 
  -3  -9   0  112.79    9.50 
   3  -9   0  117.89   13.90 
  -3  -9   0  119.09    9.80 
  -3  -9   0  151.38   10.60 
  -3  -9   0  128.79   12.60 
   3  -9   0  115.39   10.70 
   3  -9   0  149.69   11.90 
  -3  -9   0  123.79   11.70 
   3  -9   0  123.59   11.50 
  -3  -9   0  137.49   11.70 
   3  -9   0  122.99   10.90 
  -3  -9   0  123.09   15.90 
  -3  -9   0  135.49   10.90 
   3   9   0  131.49   14.00 
  -3   9   0  128.79   13.40 
  -3   9   0  121.99   11.30 
   3   9   0  126.09   12.00 
   3   9   0  128.09   11.00 
  -3   9   0  142.69   13.50 
  -3   9   0  123.49   11.30 
  -3   9   0  137.19   17.40 
  -3   9   0  136.49   10.60 
  -3   9   0  141.89   19.80 
   3   9   0  161.08   20.10 
  -3   9   0  141.39   11.20 
   3   9   0  133.89   17.10 
  -3   9   0  180.28   20.70 
   3   9   0  127.29   19.30 
   3   9   0  154.08   11.70 
   4  -9   0   39.60    6.40 
  -4  -9   0   38.60    7.70 
  -4  -9   0   35.90   15.10 
  -4  -9   0   42.10    7.60 
   4  -9   0   41.50    7.70 
  -4  -9   0   38.20    8.10 
  -4  -9   0   24.30    5.90 
   4  -9   0   42.50    7.80 
   4  -9   0   31.00    7.00 
  -4  -9   0   25.20    6.30 
   4  -9   0   43.70    9.30 
  -4  -9   0   39.60    6.80 
   4   9   0   22.70    6.20 
   4   9   0   31.90    6.30 
  -4   9   0   47.40    9.50 
   4   9   0   39.70    9.40 
  -4   9   0   31.20    6.60 
  -4   9   0   45.10    8.60 
  -4   9   0   26.70    6.00 
  -4   9   0   44.00    8.20 
  -4   9   0   36.40    8.70 
  -4   9   0   44.70   10.50 
   4   9   0   34.90    7.70 
   4   9   0   33.60    9.60 
  -4   9   0   34.50    7.80 
  -4   9   0   40.70   11.10 
   4   9   0   34.60    8.50 
  -4   9   0   47.00   13.30 
  -5  -9   0  572.74   28.70 
   5  -9   0  596.14   27.70 
  -5  -9   0  611.04   29.70 
   5  -9   0  651.13   28.10 
  -5  -9   0  590.84   27.80 
   5  -9   0  619.44   25.60 
  -5  -9   0  672.53   28.20 
  -5  -9   0  649.14   29.40 
  -5  -9   0  577.44   27.30 
   5  -9   0  710.73   30.90 
   5   9   0  593.04   30.30 
   5   9   0  580.04   32.30 
   5   9   0  589.94   31.40 
  -5   9   0  631.44   36.50 
  -5   9   0  649.43   32.50 
   5   9   0  627.84   27.40 
   5   9   0  574.64   32.60 
  -5   9   0  693.63   42.40 
  -5   9   0  621.14   34.10 
  -5   9   0  603.14   29.10 
  -5   9   0  643.54   32.40 
  -5   9   0  639.34   30.80 
   5   9   0  638.84   29.20 
  -5   9   0  640.14   30.50 
   5   9   0  550.14   30.90 
   0 -10   0 1739.13   62.09 
   0 -10   0 1731.63   63.89 
   0 -10   0 1725.53   61.89 
   0 -10   0 1733.63   60.39 
   0  10   0 1738.33   64.99 
   0  10   0 1651.13   74.79 
   0  10   0 1711.43   60.49 
   0  10   0 1702.53   62.79 
   0  10   0 1849.11   67.29 
   0  10   0 1745.33   75.39 
   0  10   0 1766.32   72.59 
  -1 -10   0    2.40    3.80 
  -1 -10   0    0.30    4.90 
   1 -10   0    1.10    3.70 
   1 -10   0    2.10    5.30 
   1 -10   0    3.80    3.90 
   1 -10   0   -3.70    4.30 
  -1 -10   0    0.70    3.90 
   1 -10   0    5.00    4.10 
  -1 -10   0    2.60    4.00 
  -1 -10   0    2.40    4.30 
  -1  10   0    1.90    7.00 
   1  10   0    2.40    5.70 
   1  10   0   -7.10    5.60 
   1  10   0    6.30    7.30 
   1  10   0    1.80    4.20 
  -1  10   0   -0.90    6.70 
  -1  10   0   14.00    7.40 
   1  10   0    1.90    4.40 
  -1  10   0    9.00    4.60 
  -1  10   0   -2.00    3.30 
  -1  10   0    5.30    4.30 
  -1  10   0    4.90    4.70 
  -1  10   0   -4.70    4.40 
   1  10   0    6.50    6.40 
   2 -10   0  862.61   37.90 
  -2 -10   0  877.01   39.30 
   2 -10   0  905.91   36.10 
  -2 -10   0  900.21   35.70 
   2 -10   0  934.51   37.00 
  -2 -10   0  877.71   38.30 
   2 -10   0  946.11   37.70 
  -2 -10   0  910.51   36.30 
  -2 -10   0  885.01   37.40 
   2 -10   0  912.51   37.20 
   2  10   0  872.31   49.90 
  -2  10   0 1132.99   68.69 
   2  10   0  949.90   39.20 
  -2  10   0  938.71   49.00 
   2  10   0  855.91   45.70 
  -2  10   0  880.91   40.20 
   2  10   0  935.71   38.70 
  -2  10   0  955.40   37.40 
  -2  10   0  927.11   37.70 
   2  10   0  897.61   41.90 
  -2  10   0 1034.80   48.30 
  -2  10   0 1031.20   45.30 
  -2  10   0  881.01   37.60 
   2  10   0  851.61   48.20 
  -2  10   0  936.81   41.00 
  -3 -10   0   21.10    8.10 
   3 -10   0   11.30    5.30 
  -3  10   0   18.10    5.70 
  -3  10   0   24.00    6.20 
   3  10   0    8.10    4.70 
   3  10   0   11.50    5.30 
  -3  10   0   15.30    7.70 
  -3  10   0   15.50    8.80 
  10   0  -1    2.50    3.50 
 -10   0   1   -0.50    4.40 
 -10   0   1    6.80    3.40 
  10   0  -1    2.30    4.60 
 -10   0   1    1.50    2.70 
 -10   0   1    4.60    3.90 
 -10   0   1    5.40    3.90 
 -10   0   1    1.70    3.20 
 -10   0   1    2.70    3.70 
  10   0  -1   -1.30    3.50 
  10   0  -1   -1.60    3.50 
 -10   0   1    3.90    3.90 
 -10   0   1    1.90    3.60 
  10   0  -1   -1.50    4.50 
 -10   0   1    0.20    2.20 
  10   0  -1    0.80    3.80 
 -10   0   1   -2.10    2.20 
  10   0  -1    1.80    3.30 
  -9   0   1 1008.70   36.30 
   9   0  -1 1019.30   39.70 
  -9   0   1 1019.90   35.20 
   9   0  -1 1002.20   36.20 
  -9   0   1 1008.30   36.60 
  -9   0   1  990.70   38.00 
  -9   0   1 1027.10   40.30 
  -9   0   1 1021.40   39.00 
   9   0  -1  931.31   38.80 
  -9   0   1  927.51   41.70 
   9   0  -1 1017.00   41.10 
   9   0  -1 1015.00   38.30 
   9   0  -1 1015.30   39.20 
  -9   0   1 1039.20   37.00 
  -9   0   1 1030.10   37.80 
  -9   0   1 1025.30   35.80 
   9   0  -1 1017.80   36.90 
  -9   0   1  998.20   36.10 
  -8   0   1    3.60    2.80 
  -8   0   1    2.70    2.00 
   8   0  -1    0.00    2.60 
   8   0  -1    3.40    3.30 
  -8   0   1    0.10    2.30 
   8   0  -1    0.40    2.80 
  -8   0   1    5.00    2.30 
  -8   0   1    9.10    3.60 
  -8   0   1    9.40    3.80 
  -8   0   1    3.90    2.50 
   8   0  -1    1.00    2.30 
  -8   0   1    2.90    3.50 
  -8   0   1    5.30    3.50 
  -8   0   1   -0.10    2.20 
   8   0  -1   -0.60    3.20 
  -8   0   1    1.60    2.70 
  -8   0   1    1.00    2.70 
  -8   0   1    0.70    2.20 
   8   0  -1    9.00    3.90 
   8   0  -1   -3.00    3.20 
   7   0  -1 1165.18   43.60 
  -7   0   1 1254.27   40.00 
  -7   0   1 1215.28   43.10 
   7   0  -1 1257.37   42.50 
   7   0  -1 1226.28   44.70 
   7   0  -1 1212.28   41.10 
  -7   0   1 1218.48   40.90 
   7   0  -1 1260.17   41.80 
  -7   0   1 1248.98   42.70 
  -7   0   1 1245.08   41.00 
  -7   0   1 1222.18   44.10 
  -7   0   1 1200.58   41.00 
  -7   0   1 1270.57   40.50 
   7   0  -1 1209.28   43.40 
  -7   0   1 1248.48   41.40 
  -7   0   1 1215.38   41.20 
  -7   0   1 1192.28   41.10 
   7   0  -1 1217.58   44.60 
  -7   0   1 1264.57   40.00 
   7   0  -1 1208.88   41.00 
  -7   0   1 1215.68   42.80 
  -7   0   1 1244.68   42.20 
  -7   0   1 1233.48   46.00 
   7   0  -1 1203.88   43.50 
  -6   0   1    3.10    1.80 
   6   0  -1    0.20    1.80 
   6   0  -1    3.40    2.60 
  -6   0   1    3.50    1.70 
   6   0  -1    5.50    2.30 
  -6   0   1   -0.10    1.60 
  -6   0   1    2.60    1.90 
  -6   0   1    1.10    1.80 
  -6   0   1   -1.20    1.90 
  -6   0   1    2.30    2.50 
   6   0  -1    0.50    1.80 
   6   0  -1    4.90    2.30 
  -6   0   1    3.00    2.00 
   6   0  -1    1.60    1.80 
   6   0  -1    0.90    2.30 
   6   0  -1    3.20    2.50 
   6   0  -1    0.30    2.70 
   6   0  -1    4.50    2.60 
   6   0  -1    0.30    2.60 
  -6   0   1    1.10    1.60 
  -6   0   1    2.50    2.70 
  -6   0   1   -0.70    1.30 
   6   0  -1    2.10    0.90 
  -6   0   1    2.40    2.20 
  -6   0   1    1.10    2.00 
  -6   0   1   -0.60    2.10 
  -6   0   1    1.10    2.00 
  -6   0   1    0.20    1.40 
   6   0  -1    3.80    2.60 
  -5   0   1 1107.29   37.50 
  -5   0   1 1073.29   36.10 
   5   0  -1 1099.99   34.10 
   5   0  -1 1084.59   37.80 
  -5   0   1 1115.49   36.30 
  -5   0   1 1112.49   36.20 
  -5   0   1 1109.19   36.00 
   5   0  -1 1154.18   37.10 
   5   0  -1 1079.49   36.00 
   5   0  -1 1115.39   37.10 
  -5   0   1 1121.69   37.20 
   5   0  -1 1092.59   38.50 
  -5   0   1 1103.59   38.20 
   5   0  -1 1119.69   38.50 
   5   0  -1 1148.19   38.30 
   5   0  -1 1106.59   34.70 
  -5   0   1 1128.79   35.50 
  -5   0   1 1078.09   36.00 
   5   0  -1 1102.09   36.70 
  -5   0   1 1113.69   39.00 
  -5   0   1 1130.39   37.60 
   5   0  -1 1105.89   37.80 
  -5   0   1 1103.09   39.40 
  -5   0   1 1119.59   35.90 
   5   0  -1 1131.59   38.80 
   5   0  -1 1190.68   36.80 
  -5   0   1 1085.69   36.60 
  -5   0   1 1090.19   35.70 
  -5   0   1 1121.39   35.90 
  -5   0   1 1102.19   39.40 
   5   0  -1 1092.59   36.70 
  -5   0   1 1110.39   39.00 
  -4   0   1    3.60    2.20 
   4   0  -1    3.90    2.30 
   4   0  -1    4.50    1.80 
   4   0  -1    1.20    1.70 
   4   0  -1    1.40    2.00 
  -4   0   1    5.60    2.20 
   4   0  -1    4.00    1.00 
   4   0  -1    7.20    1.40 
   4   0  -1    3.80    0.70 
  -4   0   1    6.10    1.70 
   4   0  -1    2.40    1.40 
   4   0  -1    3.70    2.10 
  -4   0   1    0.30    1.40 
  -4   0   1    3.30    1.50 
  -4   0   1    6.30    1.90 
   4   0  -1    2.90    1.70 
   4   0  -1    2.90    1.50 
   3   0  -1  671.63   23.40 
  -3   0   1  666.83   22.20 
  -3   0   1  662.13   21.80 
  -3   0   1  678.53   22.10 
  -3   0   1  670.73   22.10 
  -3   0   1  673.23   22.10 
   3   0  -1  684.43   22.40 
   3   0  -1  674.93   23.50 
   3   0  -1  682.93   21.00 
   3   0  -1  690.73   22.60 
   3   0  -1  699.23   22.10 
  -3   0   1  682.83   23.80 
   3   0  -1  686.83   21.90 
   3   0  -1  683.83   22.50 
   3   0  -1  674.43   23.00 
   3   0  -1  671.73   23.30 
  -3   0   1  680.43   22.80 
  -3   0   1  690.73   22.30 
   3   0  -1  676.63   21.60 
   3   0  -1  675.43   21.70 
  -3   0   1  681.13   23.90 
  -3   0   1  674.93   24.10 
  -3   0   1  678.13   24.00 
  -3   0   1  717.83   24.80 
   3   0  -1  674.93   23.10 
  -3   0   1  692.33   22.00 
  -3   0   1  663.23   22.10 
  -3   0   1  699.93   21.90 
   3   0  -1  675.73   23.30 
   3   0  -1  691.43   20.80 
  -3   0   1  653.23   21.90 
  -3   0   1  680.83   22.60 
   3   0  -1  698.43   22.50 
  -3   0   1  717.73   21.90 
   3   0  -1  696.53   23.70 
   3   0  -1  698.03   22.10 
  -3   0   1  715.43   23.10 
   3   0  -1  674.53   22.00 
   3   0  -1  696.23   20.90 
  -3   0   1  670.03   23.30 
   3   0  -1  681.73   23.00 
   3   0  -1  662.33   22.30 
   2   0  -1    9.80    1.60 
  -2   0   1   11.30    1.40 
   2   0  -1   15.30    1.80 
  -2   0   1   19.10    2.20 
  -2   0   1   10.10    1.20 
   2   0  -1   10.50    1.70 
  -2   0   1   17.00    1.70 
   2   0  -1   11.60    1.40 
   2   0  -1   12.00    0.90 
  -2   0   1   10.90    2.00 
  -2   0   1   13.90    2.10 
   2   0  -1   13.00    1.00 
  -2   0   1   11.00    1.40 
  -2   0   1   16.50    1.90 
  -2   0   1   11.10    1.40 
   2   0  -1   17.80    1.80 
   2   0  -1    7.10    1.10 
   2   0  -1   11.80    1.40 
  -2   0   1   11.60    1.60 
  -2   0   1   10.00    1.20 
   2   0  -1    7.70    1.50 
  -2   0   1   12.20    1.80 
  -2   0   1   16.50    1.60 
   2   0  -1   10.10    1.20 
  -2   0   1    9.10    1.60 
   2   0  -1   16.80    2.00 
  -2   0   1    9.30    1.30 
  -2   0   1    8.00    1.50 
  -2   0   1   15.60    1.90 
   2   0  -1   12.00    1.50 
   2   0  -1   20.10    1.90 
   2   0  -1   12.80    1.40 
   2   0  -1    7.00    1.10 
   2   0  -1   14.20    1.50 
  -2   0   1    8.90    1.20 
  -2   0   1   21.60    2.30 
   2   0  -1   10.70    1.10 
   2   0  -1    9.80    1.70 
   2   0  -1   15.80    2.20 
   2   0  -1    5.90    1.10 
  -2   0   1   12.00    1.90 
   2   0  -1   11.40    1.30 
  -2   0   1   11.90    1.20 
  -2   0   1   13.10    1.30 
   2   0  -1   15.10    1.80 
   2   0  -1   10.60    0.80 
  -2   0   1    9.40    1.30 
   2   0  -1   15.40    1.60 
   1   0  -1  207.68    6.60 
  -1   0   1  175.48    6.80 
   1   0  -1  214.68    6.10 
   1   0  -1  195.78    6.80 
   1   0  -1  210.08    6.80 
   1   0  -1  216.48    6.70 
   1   0  -1  191.98    6.30 
  -1   0   1  183.78    6.00 
  -1   0   1  180.68    6.30 
  -1   0   1  168.28    6.30 
   1   0  -1  159.38    6.30 
  -1   0  -1 1457.15   51.49 
  -1   0  -1 1793.32   51.49 
  -1   0  -1 1722.13   51.59 
  -1   0  -1 1806.82   51.59 
  -1   0  -1 1813.52   51.69 
   1   0   1 1434.96   51.59 
  -1   0  -1 1745.93   51.19 
   1   0   1 1504.25   51.59 
  -1   0  -1 1581.34   51.59 
  -1   0  -1 1857.01   51.19 
  -1   0  -1 1787.92   51.49 
  -1   0  -1 1878.01   52.99 
   1   0   1 1716.93   51.29 
  -1   0  -1 1582.84   51.49 
  -1   0  -1 1776.02   51.39 
  -1   0  -1 1597.54   51.39 
  -1   0  -1 1875.91   51.19 
  -1   0  -1 1565.74   51.49 
  -1   0  -1 1522.75   51.69 
  -1   0  -1 1764.92   51.69 
  -1   0  -1 1860.81   51.19 
  -1   0  -1 1703.73   51.99 
  -1   0  -1 1776.12   51.69 
  -2   0  -1    4.90    1.20 
   2   0   1    5.90    0.70 
   2   0   1    4.60    0.90 
   2   0   1    6.40    1.40 
  -2   0  -1    2.90    0.60 
  -2   0  -1    6.20    1.10 
  -2   0  -1    5.70    1.40 
   2   0   1    5.20    1.10 
   2   0   1    2.80    0.80 
  -2   0  -1    4.90    0.50 
   2   0   1   10.30    1.70 
  -2   0  -1    5.60    1.20 
  -2   0  -1    3.80    1.30 
   2   0   1    4.20    0.90 
  -2   0  -1    4.40    1.40 
   2   0   1    7.00    1.60 
  -2   0  -1    5.30    1.10 
   2   0   1    5.40    1.20 
   2   0   1    3.30    0.90 
   2   0   1    3.60    0.60 
  -2   0  -1    3.40    0.90 
   2   0   1    4.30    0.90 
   2   0   1    3.60    1.20 
   2   0   1    5.40    1.30 
   2   0   1    4.60    0.90 
   2   0   1    4.80    1.10 
  -2   0  -1    2.80    0.80 
  -2   0  -1    3.90    1.30 
   2   0   1    5.00    0.70 
   2   0   1    4.60    1.30 
  -2   0  -1    4.40    1.50 
   2   0   1    3.10    1.30 
  -2   0  -1    5.10    1.00 
   2   0   1    3.50    1.00 
  -2   0  -1    2.90    0.90 
  -2   0  -1    7.00    1.30 
  -2   0  -1    4.30    1.00 
   2   0   1    5.50    1.40 
  -2   0  -1    6.20    1.60 
   2   0   1    5.30    0.90 
  -2   0  -1    5.10    1.40 
  -2   0  -1    3.80    1.20 
  -2   0  -1    3.90    1.00 
   2   0   1    4.60    1.00 
  -2   0  -1    2.80    0.80 
  -2   0  -1    3.00    1.40 
   2   0   1    3.00    0.70 
  -2   0  -1    1.90    0.90 
   2   0   1    8.00    1.60 
  -2   0  -1    3.80    0.80 
   3   0   1 1805.72   55.89 
   3   0   1 1812.02   54.89 
  -3   0  -1 1808.42   57.19 
  -3   0  -1 1977.90   56.69 
  -3   0  -1 1914.31   57.69 
  -3   0  -1 1796.82   56.39 
   3   0   1 1824.72   56.39 
   3   0   1 1820.42   56.89 
  -3   0  -1 1812.82   55.99 
  -3   0  -1 1852.31   57.99 
  -3   0  -1 1858.21   57.19 
   3   0   1 1776.62   57.39 
  -3   0  -1 1866.01   56.19 
   3   0   1 1851.31   55.89 
   3   0   1 1807.12   56.19 
   3   0   1 1821.42   54.89 
   3   0   1 1855.11   56.69 
  -3   0  -1 1882.51   56.39 
   3   0   1 1836.92   56.59 
   3   0   1 1796.82   55.39 
   3   0   1 1789.82   57.09 
  -3   0  -1 1874.61   56.29 
   3   0   1 1791.22   57.39 
  -3   0  -1 1894.71   56.49 
  -3   0  -1 1819.52   58.29 
  -3   0  -1 1779.12   55.99 
  -3   0  -1 1876.91   56.99 
   3   0   1 1789.12   55.99 
   3   0   1 1718.03   57.19 
   3   0   1 1834.42   57.49 
   3   0   1 1810.02   56.19 
  -3   0  -1 1857.51   56.89 
   3   0   1 1826.02   57.69 
  -3   0  -1 1817.92   55.79 
  -3   0  -1 1780.52   56.19 
   3   0   1 1815.42   57.19 
  -3   0  -1 1788.82   56.09 
   3   0   1 1782.92   55.89 
   3   0   1 1805.22   56.09 
  -3   0  -1 1859.51   55.39 
  -3   0  -1 1815.72   54.59 
   3   0   1 1842.42   57.59 
   4   0   1    2.30    2.00 
  -4   0  -1    2.20    1.80 
   4   0   1    3.10    2.00 
  -4   0  -1    3.50    1.90 
  -4   0  -1   -1.10    2.00 
   4   0   1    2.30    1.40 
  -4   0  -1    2.90    1.40 
  -4   0  -1    2.40    1.40 
  -4   0  -1   11.80    2.00 
  -4   0  -1    2.10    1.00 
  -4   0  -1    0.30    1.30 
  -4   0  -1    3.30    1.50 
  -4   0  -1    0.40    1.80 
  -4   0  -1    2.20    1.80 
   4   0   1    1.80    1.50 
  -4   0  -1    2.90    1.60 
  -4   0  -1   -0.50    1.00 
  -4   0  -1    2.40    2.10 
   4   0   1    2.50    1.70 
  -4   0  -1    2.60    1.70 
   4   0   1    1.50    1.90 
   4   0   1    2.40    1.30 
   4   0   1    8.90    2.60 
   4   0   1    1.40    1.60 
   4   0   1   -0.10    1.80 
   4   0   1    1.80    1.60 
   5   0   1 1526.35   48.90 
  -5   0  -1 1531.45   49.30 
   5   0   1 1507.45   48.00 
   5   0   1 1480.65   47.70 
  -5   0  -1 1475.55   47.90 
  -5   0  -1 1462.75   50.69 
  -5   0  -1 1555.44   50.59 
  -5   0  -1 1457.35   47.90 
  -5   0  -1 1494.35   48.40 
  -5   0  -1 1492.45   46.80 
   5   0   1 1476.65   49.00 
   5   0   1 1544.45   50.39 
  -5   0  -1 1489.15   49.00 
  -5   0  -1 1512.45   47.50 
   5   0   1 1451.45   49.30 
  -5   0  -1 1498.95   48.10 
  -5   0  -1 1480.65   47.90 
  -5   0  -1 1517.35   49.90 
   5   0   1 1489.05   49.70 
   5   0   1 1494.75   48.60 
   5   0   1 1537.85   50.49 
  -5   0  -1 1543.05   46.60 
   5   0   1 1523.55   50.09 
  -5   0  -1 1508.15   51.29 
  -5   0  -1 1510.25   47.70 
  -6   0  -1    2.50    2.40 
  -6   0  -1    1.60    1.90 
  -6   0  -1   -0.20    2.30 
   6   0   1    6.60    2.90 
   6   0   1    4.00    2.60 
  -6   0  -1    1.70    1.60 
  -6   0  -1   12.40    2.60 
  -6   0  -1    2.60    2.30 
  -6   0  -1    6.10    3.60 
  -6   0  -1    0.80    1.30 
  -6   0  -1    9.30    2.50 
  -6   0  -1    3.10    1.40 
  -6   0  -1    4.30    2.20 
   6   0   1   13.20    3.50 
  -6   0  -1    2.30    2.10 
  -6   0  -1    4.10    2.70 
   6   0   1    6.50    2.30 
   6   0   1    3.00    2.30 
   6   0   1    4.00    3.00 
  -6   0  -1    0.70    2.10 
   6   0   1    1.10    2.50 
   6   0   1    3.80    2.50 
   6   0   1    1.30    1.80 
  -6   0  -1    7.40    2.90 
  -6   0  -1    1.80    1.60 
   7   0   1 3311.87  104.39 
   7   0   1 3360.06  106.89 
   7   0   1 3304.37  108.29 
  -7   0  -1 3414.86  107.69 
  -7   0  -1 3422.66  105.29 
  -7   0  -1 3354.76  104.59 
  -7   0  -1 3388.16  106.39 
  -7   0  -1 3339.17  104.49 
  -7   0  -1 3337.37  104.59 
  -7   0  -1 3288.97  105.59 
  -7   0  -1 3332.27  109.39 
  -7   0  -1 3481.65  107.99 
  -7   0  -1 3371.06  109.89 
   7   0   1 3309.97  106.99 
  -7   0  -1 3374.76  104.89 
  -7   0  -1 3349.76  103.89 
   7   0   1 3368.96  104.79 
   7   0   1 3308.37  107.59 
  -7   0  -1 3320.17  106.39 
  -7   0  -1 3461.45  102.69 
  -7   0  -1 3356.86  104.79 
   7   0   1 3353.56  106.19 
   8   0   1    2.20    3.50 
  -8   0  -1   -0.30    2.70 
  -8   0  -1    2.40    3.30 
  -8   0  -1    2.60    2.30 
   8   0   1    1.70    2.60 
   8   0   1    2.80    3.00 
  -8   0  -1    2.60    2.60 
  -8   0  -1    5.90    3.40 
  -8   0  -1    0.90    2.80 
  -8   0  -1    4.70    3.10 
  -8   0  -1    3.20    3.00 
  -8   0  -1    4.90    2.20 
  -8   0  -1    2.10    2.20 
   8   0   1    3.10    3.20 
  -8   0  -1    1.50    2.20 
  -8   0  -1    5.00    2.30 
   8   0   1    3.20    2.60 
   8   0   1    8.00    3.70 
   8   0   1    9.60    4.20 
  -8   0  -1    6.20    3.00 
  -9   0  -1 1934.21   65.59 
  -9   0  -1 1833.72   66.89 
   9   0   1 1923.01   65.99 
   9   0   1 1890.01   65.99 
  -9   0  -1 1902.51   62.39 
  -9   0  -1 1930.31   64.09 
  -9   0  -1 1903.31   70.39 
   9   0   1 1937.41   69.09 
   9   0   1 1895.51   63.79 
  -9   0  -1 1893.61   63.99 
   9   0   1 1982.60   63.79 
  -9   0  -1 1953.60   63.39 
  -9   0  -1 1988.70   64.69 
   9   0   1 1943.21   67.79 
  -9   0  -1 1969.40   68.09 
  -9   0  -1 1892.51   63.59 
  -9   0  -1 1918.21   64.69 
  -9   0  -1 1912.01   65.19 
 -10   0  -1    3.00    4.20 
 -10   0  -1    9.60    4.20 
 -10   0  -1    2.40    3.70 
  10   0   1   -1.20    2.90 
  10   0   1   -1.00    4.00 
 -10   0  -1    4.60    4.80 
 -10   0  -1    5.10    4.20 
 -10   0  -1    2.50    2.80 
 -10   0  -1    7.80    3.90 
 -10   0  -1    1.00    3.60 
  10   0   1    1.50    3.10 
 -10   0  -1    5.70    4.00 
  10   0   1   11.40    5.60 
 -10  -1   1   89.49    8.30 
 -10  -1   1  110.29    9.90 
 -10  -1   1   95.29    8.30 
  10  -1  -1   84.89   10.50 
 -10  -1   1   96.29    9.00 
  10  -1  -1   94.89    9.50 
  10  -1  -1   89.29   11.10 
  10  -1  -1  106.19   11.70 
 -10  -1   1   82.09   10.20 
 -10  -1   1   93.29   13.10 
 -10  -1   1   95.99    8.80 
  10  -1  -1  105.49   10.90 
 -10  -1   1   98.79    7.80 
  10  -1  -1   89.19    9.00 
 -10  -1   1  104.29    8.80 
  10  -1  -1   99.19    8.80 
 -10  -1   1   91.09   10.60 
 -10   1   1   92.39   10.80 
 -10   1   1   85.39    8.10 
  10   1  -1   86.19    8.70 
  10   1  -1   92.59   11.50 
 -10   1   1   90.19    8.50 
 -10   1   1   92.59   11.20 
 -10   1   1   84.69   10.60 
  10   1  -1   80.99    8.50 
 -10   1   1   91.79   10.60 
  10   1  -1   73.39   11.10 
  10   1  -1   98.29   11.00 
 -10   1   1   97.29    8.50 
 -10   1   1  106.29   10.70 
 -10   1   1   94.89   12.90 
  -9  -1   1    6.40    3.10 
   9  -1  -1    6.00    3.40 
   9  -1  -1    2.40    4.20 
  -9  -1   1    6.70    3.50 
  -9  -1   1   -0.50    2.20 
  -9  -1   1   -3.00    3.30 
   9  -1  -1    2.90    3.90 
  -9  -1   1    4.60    3.00 
  -9  -1   1    1.70    2.90 
   9  -1  -1    3.10    3.20 
  -9  -1   1    4.80    3.90 
   9  -1  -1   -2.80    3.10 
  -9  -1   1    3.80    3.70 
   9  -1  -1    3.40    3.80 
  -9  -1   1    3.90    3.40 
  -9  -1   1    3.50    3.20 
  -9  -1   1    0.10    2.70 
  -9  -1   1    1.20    3.60 
   9  -1  -1    3.00    3.90 
   9   1  -1    3.00    4.40 
  -9   1   1    1.60    2.70 
  -9   1   1    1.00    3.40 
  -9   1   1    6.50    3.10 
  -9   1   1    9.10    4.20 
  -9   1   1    2.00    4.00 
  -9   1   1    5.30    3.20 
  -9   1   1   -1.50    3.40 
   9   1  -1    6.60    4.70 
   9   1  -1    7.10    3.20 
  -9   1   1    1.00    2.10 
   9   1  -1    4.60    4.10 
  -9   1   1    3.30    2.50 
  -9   1   1    8.10    4.00 
   9   1  -1    7.10    3.60 
   9   1  -1   -0.20    3.40 
   9   1  -1    3.10    3.40 
  -9   1   1    7.00    4.10 
   9   1  -1   -0.90    4.00 
  -8  -1   1  373.06   16.50 
  -8  -1   1  384.06   14.70 
  -8  -1   1  371.76   16.80 
  -8  -1   1  366.26   17.80 
  -8  -1   1  348.07   20.40 
  -8  -1   1  369.46   19.00 
  -8  -1   1  366.66   16.50 
  -8  -1   1  377.86   16.30 
  -8  -1   1  365.66   16.40 
   8  -1  -1  378.96   16.30 
   8  -1  -1  379.36   17.20 
  -8  -1   1  360.06   16.00 
  -8  -1   1  342.27   15.90 
   8  -1  -1  361.96   18.30 
  -8  -1   1  351.56   15.60 
   8  -1  -1  364.06   19.00 
  -8  -1   1  430.56   17.60 
   8  -1  -1  387.26   19.20 
   8  -1  -1  362.56   18.50 
   8  -1  -1  357.26   16.70 
  -8  -1   1  373.06   17.20 
   8   1  -1  370.46   19.20 
   8   1  -1  363.06   15.80 
  -8   1   1  340.47   19.50 
  -8   1   1  374.86   14.80 
  -8   1   1  381.66   19.20 
   8   1  -1  342.77   18.30 
  -8   1   1  353.06   18.00 
   8   1  -1  375.36   19.80 
  -8   1   1  370.66   16.30 
  -8   1   1  365.36   17.20 
  -8   1   1  358.86   18.70 
   8   1  -1  367.56   17.80 
   8   1  -1  363.06   18.20 
  -8   1   1  385.06   17.90 
  -8   1   1  383.96   16.50 
  -8   1   1  378.36   16.30 
   8   1  -1  382.36   16.80 
   8   1  -1  369.46   18.00 
  -8   1   1  377.86   15.00 
  -8   1   1  367.76   15.10 
  -8   1   1  372.56   16.00 
  -7  -1   1   22.70    3.80 
  -7  -1   1   20.70    3.00 
  -7  -1   1   20.00    3.20 
  -7  -1   1   23.50    3.90 
  -7  -1   1   13.10    3.40 
  -7  -1   1   15.20    3.30 
   7  -1  -1   22.30    3.80 
  -7  -1   1   23.70    5.70 
  -7  -1   1   18.10    4.00 
   7  -1  -1   15.10    4.10 
   7  -1  -1   19.70    3.80 
   7  -1  -1   18.70    4.80 
   7  -1  -1   22.20    4.10 
   7  -1  -1   17.40    4.50 
  -7  -1   1   17.70    3.70 
  -7  -1   1   20.90    3.70 
  -7  -1   1   24.50    4.30 
   7  -1  -1   15.50    3.50 
   7  -1  -1   20.50    4.60 
  -7  -1   1   23.80    4.10 
  -7  -1   1   20.10    4.50 
  -7  -1   1   18.60    3.60 
   7  -1  -1   21.90    3.80 
   7   1  -1   17.90    3.60 
  -7   1   1   15.20    4.00 
   7   1  -1   15.90    4.80 
  -7   1   1   19.20    3.30 
   7   1  -1   19.20    5.00 
  -7   1   1   16.40    4.70 
   7   1  -1   17.10    4.20 
  -7   1   1   23.40    4.90 
  -7   1   1   25.40    3.90 
  -7   1   1   15.10    2.70 
  -7   1   1   20.70    3.90 
  -7   1   1   20.80    3.20 
  -7   1   1   25.10    4.00 
  -7   1   1   17.20    3.70 
   7   1  -1   15.90    4.10 
   7   1  -1   24.30    3.80 
   7   1  -1   20.70    3.70 
  -7   1   1   21.30    5.30 
  -7   1   1   16.30    3.50 
  -7   1   1   15.00    3.80 
   7   1  -1   16.80    4.30 
  -7   1   1   24.70    6.30 
  -7   1   1   21.30    3.70 
   7   1  -1   18.60    3.20 
   7   1  -1   21.50    4.70 
  -6  -1   1 1667.03   51.99 
  -6  -1   1 1579.64   52.39 
   6  -1  -1 1655.33   54.99 
   6  -1  -1 1601.54   51.89 
  -6  -1   1 1629.24   50.09 
  -6  -1   1 1610.54   51.79 
   6  -1  -1 1604.84   52.09 
  -6  -1   1 1629.64   51.59 
  -6  -1   1 1541.75   52.19 
   6  -1  -1 1578.94   54.29 
  -6  -1   1 1662.23   52.09 
  -6  -1   1 1610.94   52.39 
   6  -1  -1 1621.94   54.29 
   6  -1  -1 1587.14   52.99 
  -6  -1   1 1594.94   52.39 
  -6  -1   1 1570.34   51.89 
   6  -1  -1 1606.34   52.49 
  -6  -1   1 1631.74   55.39 
  -6  -1   1 1612.34   50.79 
   6  -1  -1 1609.14   52.39 
  -6  -1   1 1619.44   54.59 
  -6  -1   1 1624.24   56.39 
  -6  -1   1 1583.54   52.59 
   6  -1  -1 1608.34   53.79 
   6  -1  -1 1631.84   55.29 
  -6   1   1 1596.14   53.39 
  -6   1   1 1634.44   51.29 
  -6   1   1 1655.73   52.19 
   6   1  -1 1615.04   55.19 
  -6   1   1 1552.14   55.79 
  -6   1   1 1649.23   51.19 
   6   1  -1 1619.14   53.89 
   6   1  -1 1590.54   49.99 
   6   1  -1 1606.74   53.09 
  -6   1   1 1591.54   55.39 
   6   1  -1 1585.74   51.49 
  -6   1   1 1620.74   53.99 
   6   1  -1 1681.93   54.59 
   6   1  -1 1577.14   53.09 
  -6   1   1 1602.64   51.59 
   6   1  -1 1606.74   55.09 
  -6   1   1 1620.24   50.69 
   6   1  -1 1580.34   49.20 
   6   1  -1 1614.84   49.80 
   6   1  -1 1618.34   50.19 
  -6   1   1 1634.94   54.69 
  -6   1   1 1590.94   55.69 
  -6   1   1 1644.94   51.99 
   6   1  -1 1606.34   53.39 
  -6   1   1 1591.54   51.69 
  -6   1   1 1581.64   52.69 
   6   1  -1 1629.74   54.69 
   6   1  -1 1639.14   52.39 
   6   1  -1 1625.84   52.59 
   6   1  -1 1597.64   51.59 
  -6   1   1 1605.94   52.39 
  -6   1   1 1617.74   54.79 
  -5  -1   1  545.15   19.10 
   5  -1  -1  527.45   16.80 
  -5  -1   1  536.25   17.90 
   5  -1  -1  546.85   19.20 
  -5  -1   1  551.34   19.30 
  -5  -1   1  544.25   19.60 
  -5  -1   1  551.64   19.30 
  -5  -1   1  528.85   18.90 
  -5  -1   1  513.05   21.00 
  -5  -1   1  523.05   18.30 
   5  -1  -1  545.05   19.50 
  -5  -1   1  544.85   21.70 
   5  -1  -1  562.54   19.30 
   5  -1  -1  556.34   20.60 
   5  -1  -1  535.75   18.30 
   5  -1  -1  529.25   20.80 
   5  -1  -1  509.75   20.90 
   5  -1  -1  525.85   20.50 
   5  -1  -1  540.65   21.40 
  -5  -1   1  532.55   19.50 
  -5  -1   1  526.75   19.60 
  -5  -1   1  543.55   19.70 
  -5  -1   1  530.55   17.40 
  -5  -1   1  546.85   19.70 
  -5  -1   1  543.95   22.50 
   5  -1  -1  533.95   19.70 
  -5  -1   1  540.55   19.30 
   5  -1  -1  523.15   16.90 
   5  -1  -1  542.75   20.50 
   5  -1  -1  547.35   21.80 
  -5  -1   1  560.64   17.10 
  -5   1   1  532.75   18.90 
  -5   1   1  530.25   18.90 
  -5   1   1  524.55   20.30 
  -5   1   1  547.25   18.60 
  -5   1   1  526.75   19.20 
  -5   1   1  539.85   19.80 
   5   1  -1  543.45   19.60 
  -5   1   1  543.95   20.80 
  -5   1   1  548.25   21.20 
  -5   1   1  549.05   19.30 
   5   1  -1  529.25   21.10 
   5   1  -1  553.64   19.70 
   5   1  -1  535.85   17.90 
   5   1  -1  550.94   20.20 
  -5   1   1  529.15   21.80 
   5   1  -1  553.14   21.10 
   5   1  -1  562.84   20.30 
   5   1  -1  558.64   19.00 
  -5   1   1  535.25   19.90 
  -5   1   1  543.05   22.10 
  -5   1   1  560.24   19.00 
  -5   1   1  537.05   18.30 
   5   1  -1  545.65   18.20 
   5   1  -1  534.05   21.60 
  -5   1   1  510.95   21.30 
   5   1  -1  522.95   20.10 
   5   1  -1  564.34   21.30 
   5   1  -1  528.65   18.80 
   5   1  -1  525.65   21.50 
  -4  -1   1 5817.02  172.18 
   4  -1  -1 5595.14  170.28 
  -4  -1   1 5541.25  172.38 
  -4  -1   1 5931.01  171.28 
  -4  -1   1 5563.64  171.88 
  -4  -1   1 5677.73  170.98 
   4  -1  -1 5709.63  170.28 
   4  -1  -1 5867.41  173.18 
  -4  -1   1 5869.01  171.28 
   4  -1  -1 5444.85  171.68 
  -4  -1   1 5953.50  174.38 
  -4  -1   1 5430.06  174.68 
  -4  -1   1 5689.93  172.08 
   4  -1  -1 5560.44  172.28 
   4  -1  -1 5774.52  170.18 
  -4  -1   1 5646.23  171.68 
  -4  -1   1 5756.92  171.88 
   4  -1  -1 5548.94  173.18 
  -4  -1   1 5789.82  170.88 
   4  -1  -1 5810.72  174.38 
  -4  -1   1 5743.52  171.98 
   4  -1  -1 5601.04  171.78 
   4  -1  -1 5532.15  173.28 
   4  -1  -1 5418.76  171.48 
   4  -1  -1 5614.84  173.68 
  -4  -1   1 5800.62  173.88 
   4  -1  -1 5494.65  173.88 
  -4  -1   1 5814.52  172.28 
  -4  -1   1 5842.32  174.78 
   4  -1  -1 5681.23  171.88 
   4  -1  -1 5574.74  171.68 
   4  -1  -1 5781.02  173.18 
  -4  -1   1 5698.63  171.48 
  -4   1   1 5966.60  172.68 
   4   1  -1 5715.73  174.08 
   4   1  -1 5613.64  172.58 
  -4   1   1 5795.72  173.08 
   4   1  -1 5609.14  173.58 
   4   1  -1 5650.03  173.68 
   4   1  -1 5713.73  173.58 
   4   1  -1 5613.44  170.88 
   4   1  -1 5491.45  170.98 
  -4   1   1 5711.23  171.48 
  -4   1   1 5800.52  174.38 
  -4   1   1 5779.52  171.88 
   4   1  -1 5564.44  173.98 
  -4   1   1 5726.33  171.98 
  -4   1   1 5648.63  171.88 
   4   1  -1 5699.13  172.18 
  -4   1   1 5863.31  171.48 
   4   1  -1 5462.05  172.58 
  -4   1   1 6012.20  171.88 
   4   1  -1 5725.63  172.08 
  -4   1   1 5815.82  174.68 
   4   1  -1 5413.46  172.38 
  -4   1   1 5712.03  173.78 
   4   1  -1 5663.33  171.38 
  -4   1   1 5842.22  172.48 
  -4   1   1 5882.11  174.78 
   4   1  -1 5715.73  171.48 
  -4   1   1 5634.24  173.28 
  -4   1   1 5767.32  174.18 
  -4   1   1 5733.53  171.28 
   4   1  -1 5685.63  171.18 
  -4   1   1 5731.23  173.08 
   4   1  -1 5638.04  174.18 
   3  -1  -1  508.05   16.90 
   3  -1  -1  470.35   16.70 
  -3  -1   1  483.25   16.30 
   3  -1  -1  491.95   17.20 
  -3  -1   1  499.65   15.80 
   3  -1  -1  478.35   18.20 
  -3  -1   1  511.15   16.90 
   3  -1  -1  500.45   16.80 
  -3  -1   1  488.35   15.30 
  -3  -1   1  503.05   16.80 
   3  -1  -1  486.55   16.70 
   3  -1  -1  486.85   16.40 
  -3  -1   1  501.55   16.50 
  -3  -1   1  550.04   19.10 
   3  -1  -1  509.15   18.00 
  -3  -1   1  495.85   17.10 
  -3  -1   1  492.05   16.80 
  -3  -1   1  507.65   16.00 
  -3  -1   1  516.75   17.30 
   3  -1  -1  503.75   18.10 
  -3  -1   1  490.25   18.00 
   3  -1  -1  494.75   16.20 
   3  -1  -1  501.25   18.00 
  -3  -1   1  501.45   18.60 
   3  -1  -1  495.85   16.90 
   3  -1  -1  504.85   18.20 
  -3  -1   1  492.45   16.50 
  -3  -1   1  499.05   16.10 
   3  -1  -1  479.95   17.10 
   3  -1  -1  505.95   16.70 
   3  -1  -1  477.55   18.40 
   3  -1  -1  491.95   17.60 
   3  -1  -1  472.15   18.00 
  -3  -1   1  504.75   16.30 
  -3  -1   1  530.75   16.90 
  -3  -1   1  513.55   16.80 
  -3  -1   1  497.15   16.80 
   3  -1  -1  492.75   17.30 
   3  -1  -1  496.75   19.10 
   3  -1  -1  498.05   15.80 
   3  -1  -1  481.45   17.10 
   3  -1  -1  489.35   17.50 
  -3  -1   1  488.85   18.20 
  -3  -1   1  494.15   16.90 
  -3   1   1  511.95   18.00 
  -3   1   1  504.35   16.80 
  -3   1   1  477.55   18.80 
  -3   1   1  490.15   17.20 
   3   1  -1  490.65   16.20 
  -3   1   1  487.75   18.40 
   3   1  -1  494.45   17.00 
  -3   1   1  493.95   17.80 
  -3   1   1  493.45   17.60 
  -3   1   1  483.95   18.40 
   3   1  -1  497.55   17.10 
  -3   1   1  495.65   18.10 
   3   1  -1  491.05   16.50 
   3   1  -1  515.05   18.30 
  -3   1   1  488.35   16.40 
  -3   1   1  492.65   18.60 
   3   1  -1  504.35   17.00 
  -3   1   1  499.35   16.00 
  -3   1   1  494.65   16.10 
   3   1  -1  469.55   18.30 
  -3   1   1  503.45   16.40 
   3   1  -1  505.65   17.40 
  -3   1   1  482.65   16.60 
  -3   1   1  500.15   16.80 
   3   1  -1  509.55   15.90 
  -3   1   1  496.55   17.10 
   3   1  -1  536.05   16.30 
  -3   1   1  516.55   18.40 
   3   1  -1  511.45   18.30 
   3   1  -1  503.65   16.80 
   3   1  -1  510.35   18.00 
  -3   1   1  496.85   18.00 
   3   1  -1  500.25   18.00 
  -3   1   1  483.25   16.70 
  -3   1   1  473.75   16.70 
   3   1  -1  494.65   17.10 
   3   1  -1  510.75   16.40 
   3   1  -1  489.45   16.40 
  -3   1   1  488.35   16.90 
   3   1  -1  486.35   18.30 
   3   1  -1  484.55   17.30 
   3   1  -1  504.55   16.40 
  -3   1   1  488.85   16.40 
  -2  -1   1 3059.59   89.29 
  -2  -1   1 2977.30   88.89 
   2  -1  -1 3040.10   88.29 
  -2  -1   1 2974.90   88.69 
  -2  -1   1 2919.51   88.59 
  -2  -1   1 3091.39   88.59 
   2  -1  -1 2751.12   88.89 
  -2  -1   1 2867.11   90.09 
  -2  -1   1 2864.11   88.39 
   2  -1  -1 2995.60   90.49 
   2  -1  -1 2924.21   90.09 
  -2  -1   1 2908.11   88.79 
  -2  -1   1 2954.60   88.39 
  -2  -1   1 2888.11   88.59 
   2  -1  -1 2915.91   89.09 
   2  -1  -1 2992.00   88.69 
   2  -1  -1 2965.30   89.99 
  -2  -1   1 2944.41   89.19 
   2  -1  -1 2728.23   89.79 
   2  -1  -1 2862.71   89.99 
   2  -1  -1 2918.31   89.79 
  -2  -1   1 2906.01   88.39 
   2  -1  -1 2926.51   89.29 
  -2  -1   1 2942.61   89.79 
   2  -1  -1 3052.69   90.89 
   2  -1  -1 2872.91   89.99 
   2  -1  -1 2948.41   89.69 
   2  -1  -1 2884.21   88.89 
   2  -1  -1 2976.50   88.99 
  -2  -1   1 2996.80   88.99 
   2  -1  -1 2934.61   88.89 
   2  -1  -1 2795.32   89.99 
  -2  -1   1 3102.79   90.19 
  -2  -1   1 2777.62   89.69 
  -2  -1   1 3054.59   88.69 
   2  -1  -1 3059.29   88.89 
   2  -1  -1 3015.90   88.39 
   2  -1  -1 2892.11   89.29 
   2  -1  -1 2974.60   89.69 
   2  -1  -1 2852.11   89.69 
   2  -1  -1 2955.40   88.29 
   2  -1  -1 2930.11   89.29 
   2  -1  -1 2922.31   88.49 
   2  -1  -1 3039.40   88.89 
  -2  -1   1 2939.71   88.39 
  -2  -1   1 2935.41   89.09 
  -2  -1   1 2917.71   88.89 
   2   1  -1 2937.41   89.19 
   2   1  -1 3053.39   88.59 
  -2   1   1 3002.80   89.59 
  -2   1   1 2962.30   88.99 
  -2   1   1 2842.42   88.79 
  -2   1   1 2904.31   88.89 
   2   1  -1 2876.61   88.49 
   2   1  -1 2974.30   88.89 
   2   1  -1 2990.40   88.79 
  -2   1   1 2940.81   90.49 
   2   1  -1 2945.31   89.79 
   2   1  -1 2948.70   88.39 
   2   1  -1 2761.02   88.79 
  -2   1   1 2924.51   89.79 
  -2   1   1 2895.31   88.79 
   2   1  -1 2893.41   88.79 
  -2   1   1 2896.51   90.49 
   2   1  -1 2958.70   88.59 
   2   1  -1 2959.30   90.09 
   2   1  -1 2981.30   89.89 
   2   1  -1 2954.60   89.99 
  -2   1   1 2831.52   87.99 
  -2   1   1 2928.21   89.99 
   2   1  -1 2845.12   88.69 
  -2   1   1 2988.40   90.29 
  -2   1   1 2937.21   89.29 
  -2   1   1 2978.20   89.39 
   2   1  -1 3040.30   88.49 
   2   1  -1 2863.11   88.39 
   2   1  -1 2858.21   89.09 
   2   1  -1 2877.71   89.99 
  -2   1   1 2914.61   88.99 
   2   1  -1 2903.01   89.19 
  -2   1   1 2898.31   90.19 
   2   1  -1 2895.21   89.69 
  -2   1   1 3048.60   89.39 
  -2   1   1 2931.01   88.89 
  -2   1   1 3024.60   90.19 
   2   1  -1 2969.50   90.29 
  -2   1   1 3060.59   88.59 
  -2   1   1 3126.89   90.19 
  -2   1   1 3029.50   89.69 
  -2   1   1 2968.20   89.09 
   2   1  -1 2992.80   88.39 
  -2   1   1 2993.70   89.49 
  -2   1   1 2964.50   89.89 
   2   1  -1 2817.72   88.79 
  -2   1   1 2940.61   90.29 
   2   1  -1 2926.81   89.69 
   1  -1  -1  465.35   17.20 
  -1  -1   1  475.95   14.70 
   1  -1  -1  465.95   15.30 
   1  -1  -1  450.85   14.50 
  -1  -1   1  482.75   15.30 
  -1  -1   1  446.66   15.40 
  -1  -1   1  462.25   14.40 
  -1  -1   1  444.16   14.40 
  -1  -1   1  417.86   14.90 
  -1  -1   1  459.65   14.60 
   1  -1  -1  456.85   15.20 
   1  -1  -1  439.26   14.80 
   1  -1  -1  449.36   15.20 
  -1  -1   1  477.75   14.40 
  -1  -1   1  464.25   14.40 
   1  -1  -1  439.56   14.80 
   1  -1  -1  443.76   15.10 
  -1  -1   1  471.25   14.50 
  -1  -1   1  462.95   14.10 
   1  -1  -1  438.06   15.50 
  -1  -1   1  400.46   14.00 
   1  -1  -1  457.55   15.70 
   1  -1  -1  459.35   16.20 
   1  -1  -1  464.85   15.60 
   1  -1  -1  469.25   14.70 
   1  -1  -1  457.05   15.30 
  -1  -1   1  467.15   15.70 
   1   1  -1  473.45   15.00 
   1   1  -1  464.75   15.10 
   1   1  -1  468.65   14.70 
   1   1  -1  467.95   14.00 
  -1   1   1  474.55   14.60 
  -1   1   1  431.86   14.40 
  -1   1   1  438.46   14.40 
  -1   1   1  437.06   16.00 
  -1   1   1  461.45   15.30 
   1   1  -1  402.66   14.70 
   1   1  -1  449.16   14.40 
  -1   1   1  445.76   15.80 
   1   1  -1  449.06   14.50 
  -1   1   1  439.56   14.90 
  -1   1   1  453.95   15.00 
  -1   1   1  461.25   14.80 
  -1   1   1  462.95   16.30 
   1   1  -1  470.25   15.00 
   1   1  -1  440.96   14.30 
  -1   1   1  421.76   15.80 
  -1   1   1  463.95   15.30 
  -1   1   1  441.96   15.40 
  -1   1   1  465.35   14.20 
   1   1  -1  458.65   14.50 
   1   1  -1  475.25   14.60 
   1   1  -1  459.35   15.60 
  -1   1   1  455.55   15.10 
  -1   1   1  444.26   14.20 
   1   1  -1  473.65   15.10 
   1   1  -1  468.45   14.40 
  -1   1   1  459.85   15.30 
   1   1  -1  431.66   15.10 
  -1   1   1  459.85   15.20 
  -1   1   1  425.06   15.20 
   1   1  -1  463.55   14.00 
  -1   1   1  465.85   15.60 
  -1   1   1  446.56   16.60 
   0  -1  -1 6636.14  209.78 
   0  -1   1 6716.83  208.08 
   0  -1  -1 6436.76  210.18 
   0  -1  -1 5978.80  207.08 
   0  -1  -1 5957.90  206.78 
   0  -1  -1 6170.08  205.48 
   0  -1  -1 7170.98  209.38 
   0  -1  -1 6459.25  210.38 
   0  -1  -1 6830.02  207.78 
   0  -1  -1 6772.62  209.68 
   0   1   1 7114.49  209.68 
   0   1  -1 7038.50  206.18 
   0   1  -1 7104.29  208.58 
   0   1   1 6915.51  208.78 
   0   1  -1 7063.09  208.28 
   0   1  -1 6191.58  208.08 
   0   1   1 7375.96  216.08 
   0   1   1 6903.31  211.28 
   0   1   1 7222.88  213.68 
   0   1  -1 6050.90  209.28 
   0   1  -1 7666.83  207.88 
   0   1  -1 7156.78  210.18 
   0   1  -1 7289.07  206.88 
   0   1  -1 7322.77  206.18 
   0   1  -1 7258.27  206.48 
   0   1  -1 6343.97  208.68 
   0   1  -1 6510.65  206.78 
   0   1   1 7057.69  209.68 
   0   1  -1 7412.66  208.68 
   0   1  -1 7286.77  204.48 
  -1  -1  -1  700.63   20.20 
  -1  -1  -1  659.63   20.70 
  -1  -1  -1  652.63   21.90 
  -1  -1  -1  686.73   21.30 
  -1  -1  -1  672.13   21.50 
  -1  -1  -1  665.93   21.20 
   1  -1   1  670.93   21.70 
  -1  -1  -1  668.43   21.20 
   1  -1   1  669.33   21.20 
   1  -1   1  682.33   21.80 
   1  -1   1  639.64   21.70 
  -1  -1  -1  718.23   21.00 
   1  -1   1  684.03   20.70 
   1  -1   1  658.83   22.90 
   1  -1   1  668.03   21.60 
   1  -1   1  626.94   21.80 
  -1  -1  -1  677.13   21.80 
  -1  -1  -1  657.63   20.90 
  -1  -1  -1  664.73   21.80 
   1  -1   1  692.63   20.40 
  -1  -1  -1  719.13   21.70 
  -1  -1  -1  663.63   20.90 
  -1  -1  -1  644.64   21.30 
  -1  -1  -1  681.73   20.80 
   1  -1   1  674.23   20.40 
   1  -1   1  690.73   21.10 
  -1  -1  -1  676.33   21.30 
   1  -1   1  608.04   21.30 
   1  -1   1  607.94   22.20 
  -1  -1  -1  699.43   21.50 
   1  -1   1  686.43   21.40 
  -1  -1  -1  668.83   20.90 
  -1   1  -1  687.03   20.10 
  -1   1  -1  695.53   21.30 
   1   1   1  675.53   21.00 
  -1   1  -1  693.73   20.50 
  -1   1  -1  663.93   20.70 
   1   1   1  672.83   20.80 
  -1   1  -1  707.53   21.80 
   1   1   1  642.34   20.90 
  -1   1  -1  676.33   20.90 
  -1   1  -1  604.44   20.50 
  -1   1  -1  683.93   20.10 
  -1   1  -1  635.24   22.80 
   1   1   1  660.73   21.50 
   1   1   1  651.03   21.00 
   1   1   1  675.83   21.40 
  -1   1  -1  677.33   20.60 
  -1   1  -1  625.64   23.10 
  -1   1  -1  673.93   21.10 
  -1   1  -1  675.93   20.80 
   1   1   1  670.83   20.90 
   1   1   1  714.63   20.90 
  -1   1  -1  689.53   21.20 
   1   1   1  681.03   21.30 
  -1   1  -1  671.13   22.60 
  -1   1  -1  671.33   21.60 
   1   1   1  689.93   20.70 
  -1   1  -1  652.63   21.70 
  -1   1  -1  609.24   22.10 
  -1   1  -1  644.74   20.90 
   1   1   1  666.83   21.60 
   1   1   1  677.03   21.40 
  -1   1  -1  677.83   20.50 
   1   1   1  685.63   21.20 
  -1   1  -1  582.94   21.70 
   1   1   1  671.33   21.80 
   1   1   1  637.54   21.00 
   1   1   1  663.73   21.70 
   1   1   1  689.33   21.50 
  -1   1  -1  661.73   21.90 
  -1   1  -1  669.13   20.20 
  -1   1  -1  661.73   21.40 
  -2  -1  -1 8158.98  255.27 
  -2  -1  -1 8059.09  256.87 
   2  -1   1 8619.04  257.77 
   2  -1   1 8441.26  254.17 
  -2  -1  -1 8065.09  254.47 
   2  -1   1 8718.63  256.87 
   2  -1   1 8730.83  256.67 
   2  -1   1 8514.35  253.97 
  -2  -1  -1 8527.55  258.87 
  -2  -1  -1 8507.65  255.77 
   2  -1   1 8980.10  260.27 
  -2  -1  -1 8489.05  257.47 
   2  -1   1 9162.18  261.27 
  -2  -1  -1 8153.28  258.57 
   2  -1   1 8590.64  253.87 
   2  -1   1 8686.93  262.47 
  -2  -1  -1 8636.04  255.47 
  -2  -1  -1 8574.64  255.97 
  -2  -1  -1 7997.80  261.07 
  -2  -1  -1 8673.03  255.37 
  -2  -1  -1 8513.55  257.17 
  -2  -1  -1 8287.27  259.07 
   2  -1   1 8409.06  255.67 
  -2  -1  -1 8359.26  257.77 
   2  -1   1 8689.93  259.97 
   2  -1   1 8289.07  254.97 
   2  -1   1 8768.72  259.07 
   2  -1   1 9177.58  260.87 
  -2  -1  -1 8589.14  257.57 
  -2  -1  -1 8759.32  259.77 
   2  -1   1 8672.43  253.27 
   2  -1   1 7758.52  258.17 
  -2  -1  -1 8540.45  263.17 
   2  -1   1 8347.46  256.17 
   2  -1   1 8893.71  259.17 
  -2  -1  -1 8295.67  256.47 
  -2  -1  -1 8313.07  256.47 
   2  -1   1 8210.18  257.17 
  -2  -1  -1 7961.90  256.57 
  -2  -1  -1 8080.09  255.97 
   2  -1   1 7839.32  259.57 
   2  -1   1 7747.72  255.37 
   2  -1   1 8007.10  254.47 
  -2  -1  -1 8468.25  257.57 
   2  -1   1 8797.62  257.37 
  -2  -1  -1 8651.73  256.47 
  -2  -1  -1 7963.90  256.87 
  -2   1  -1 8780.12  256.67 
  -2   1  -1 8146.69  255.97 
   2   1   1 8226.58  256.97 
   2   1   1 8290.27  260.67 
   2   1   1 8324.47  256.87 
   2   1   1 8003.20  256.77 
   2   1   1 7722.13  254.37 
   2   1   1 8296.67  256.57 
  -2   1  -1 8132.59  256.47 
  -2   1  -1 8770.02  259.17 
  -2   1  -1 9093.09  260.97 
   2   1   1 8458.65  254.47 
  -2   1  -1 8808.82  259.17 
  -2   1  -1 8725.83  257.07 
   2   1   1 8380.76  257.57 
  -2   1  -1 9118.49  259.27 
  -2   1  -1 9038.50  258.27 
  -2   1  -1 8097.39  254.27 
  -2   1  -1 8225.38  254.97 
  -2   1  -1 9077.89  257.47 
   2   1   1 8419.36  255.97 
  -2   1  -1 8170.58  255.27 
  -2   1  -1 8625.04  255.87 
  -2   1  -1 8983.00  263.47 
   2   1   1 8160.18  259.17 
  -2   1  -1 8166.68  256.17 
  -2   1  -1 8915.41  257.37 
  -2   1  -1 9165.68  258.17 
  -2   1  -1 9016.90  264.47 
  -2   1  -1 8276.47  256.07 
  -2   1  -1 9314.67  253.67 
  -2   1  -1 8759.72  261.17 
  -2   1  -1 8234.38  257.37 
   2   1   1 8461.25  257.17 
   2   1   1 8382.16  255.97 
  -2   1  -1 8897.91  257.17 
   2   1   1 8098.19  255.77 
   2   1   1 8210.68  259.77 
  -2   1  -1 8950.10  256.67 
   2   1   1 8309.67  257.87 
   2   1   1 8346.46  257.87 
   2   1   1 8584.54  260.47 
   2   1   1 8390.06  262.07 
   2   1   1 8049.89  254.97 
   2   1   1 8278.97  254.37 
  -2   1  -1 7856.31  258.37 
  -2   1  -1 8196.48  254.77 
  -3  -1  -1    5.60    1.10 
   3  -1   1    8.80    0.90 
  -3  -1  -1    5.80    0.90 
   3  -1   1    5.60    2.30 
  -3  -1  -1   17.40    2.90 
  -3  -1  -1    9.00    2.00 
  -3  -1  -1    5.20    1.40 
  -3  -1  -1    7.90    2.20 
   3  -1   1    8.90    2.80 
  -3  -1  -1    6.80    1.50 
  -3  -1  -1    7.70    1.80 
   3  -1   1    6.30    2.10 
  -3  -1  -1    5.90    1.80 
  -3  -1  -1    7.50    1.70 
  -3  -1  -1   14.40    2.70 
   3  -1   1    5.30    1.40 
   3  -1   1    3.60    1.40 
  -3  -1  -1    3.00    1.60 
   3  -1   1    9.20    1.20 
   3  -1   1    7.20    2.30 
  -3  -1  -1    7.00    1.50 
  -3  -1  -1    7.80    1.50 
  -3  -1  -1    6.30    2.30 
   3  -1   1    7.70    0.70 
   3  -1   1   12.20    2.10 
  -3  -1  -1    4.00    1.70 
   3  -1   1    6.80    1.80 
   3  -1   1   10.30    1.90 
   3  -1   1    8.60    1.40 
  -3  -1  -1    8.60    1.20 
  -3  -1  -1    5.70    2.20 
  -3  -1  -1    5.10    1.60 
  -3  -1  -1    9.90    2.00 
   3  -1   1    7.30    2.00 
   3  -1   1    8.80    1.90 
  -3  -1  -1    6.40    1.70 
   3  -1   1   12.80    2.00 
   3   1   1    7.20    1.50 
  -3   1  -1    7.40    1.40 
   3   1   1    6.80    1.80 
   3   1   1    6.30    1.60 
   3   1   1    7.00    1.10 
   3   1   1    8.50    1.50 
   3   1   1    6.30    1.90 
  -3   1  -1    7.70    1.90 
   3   1   1   14.50    2.00 
   3   1   1    6.00    1.60 
  -3   1  -1    4.80    2.20 
  -3   1  -1    7.30    1.60 
   3   1   1    6.80    1.60 
   3   1   1    8.10    2.20 
  -3   1  -1   13.20    1.70 
   3   1   1    5.80    1.60 
  -3   1  -1    6.40    1.80 
  -3   1  -1    4.90    1.50 
  -3   1  -1    3.80    1.10 
  -3   1  -1    6.60    1.80 
  -3   1  -1    8.20    1.20 
   3   1   1    8.30    1.80 
   3   1   1    4.20    2.00 
   3   1   1    4.30    1.80 
  -3   1  -1    5.80    2.00 
   3   1   1    6.60    1.70 
  -3   1  -1    5.70    1.90 
  -3   1  -1    4.90    1.60 
  -3   1  -1    9.80    1.50 
  -3   1  -1    7.60    2.00 
  -3   1  -1    9.50    1.50 
  -3   1  -1   24.70    4.00 
  -3   1  -1    5.60    1.60 
  -3   1  -1    7.20    1.60 
   3   1   1    9.60    1.60 
  -3   1  -1    6.80    2.20 
  -3   1  -1   13.60    3.00 
   3   1   1    4.60    2.00 
   3   1   1    4.80    1.60 
   4  -1   1 2458.75   76.19 
   4  -1   1 2467.35   76.89 
  -4  -1  -1 2558.24   76.39 
  -4  -1  -1 2465.85   75.19 
  -4  -1  -1 2510.95   75.49 
  -4  -1  -1 2504.55   74.49 
  -4  -1  -1 2459.95   77.29 
  -4  -1  -1 2443.66   79.79 
   4  -1   1 2513.75   78.39 
  -4  -1  -1 2568.44   79.49 
   4  -1   1 2549.74   77.89 
  -4  -1  -1 2583.74   76.89 
  -4  -1  -1 2422.16   77.29 
   4  -1   1 2407.86   77.39 
   4  -1   1 2425.06   78.39 
  -4  -1  -1 2480.75   78.29 
  -4  -1  -1 2385.16   76.69 
   4  -1   1 2470.95   77.79 
   4  -1   1 2450.35   76.39 
   4  -1   1 2546.85   76.79 
  -4  -1  -1 2607.54   76.69 
  -4  -1  -1 2442.96   76.79 
   4  -1   1 2446.06   75.99 
  -4  -1  -1 2535.55   74.69 
  -4  -1  -1 2502.65   76.59 
   4  -1   1 2484.35   76.49 
  -4  -1  -1 2491.15   76.59 
  -4  -1  -1 2498.25   76.59 
  -4  -1  -1 2433.66   78.49 
   4  -1   1 2395.26   78.59 
  -4   1  -1 2527.25   78.69 
  -4   1  -1 2487.35   78.89 
   4   1   1 2480.75   78.09 
   4   1   1 2478.45   77.59 
   4   1   1 2569.34   75.59 
   4   1   1 2494.15   77.59 
   4   1   1 2480.05   76.69 
   4   1   1 2617.34   82.29 
  -4   1  -1 2469.55   76.39 
  -4   1  -1 2534.15   75.89 
  -4   1  -1 2509.95   78.09 
  -4   1  -1 2579.04   76.69 
   4   1   1 2428.96   77.09 
  -4   1  -1 2451.75   76.09 
   4   1   1 2487.65   76.29 
  -4   1  -1 2469.85   79.29 
   4   1   1 2453.45   78.89 
  -4   1  -1 2485.95   77.79 
  -4   1  -1 2542.85   79.89 
  -4   1  -1 2511.55   78.09 
  -4   1  -1 2493.45   76.59 
  -4   1  -1 2493.25   78.79 
   4   1   1 2502.45   75.99 
   4   1   1 2428.76   75.79 
   4   1   1 2464.65   78.39 
  -4   1  -1 2516.75   75.99 
   4   1   1 2509.65   77.29 
   4   1   1 2485.85   75.29 
  -4   1  -1 2514.75   77.19 
   4   1   1 2413.26   75.89 
   4   1   1 2379.46   77.19 
   4   1   1 2462.55   77.19 
  -4   1  -1 2495.35   75.69 
   5  -1   1   23.20    4.00 
  -5  -1  -1   31.10    5.10 
  -5  -1  -1   27.60    3.50 
   5  -1   1   31.90    4.60 
   5  -1   1   46.10    4.10 
  -5  -1  -1   38.80    5.20 
   5  -1   1   29.70    3.40 
  -5  -1  -1   50.69    6.50 
  -5  -1  -1   36.40    3.80 
  -5  -1  -1   31.80    3.60 
   5  -1   1   30.80    4.30 
  -5  -1  -1   26.10    3.50 
  -5  -1  -1   36.40    3.90 
  -5  -1  -1   35.80    2.10 
  -5  -1  -1   28.70    3.40 
  -5  -1  -1   38.70    4.50 
   5  -1   1   37.50    3.80 
  -5  -1  -1   33.70    4.10 
  -5  -1  -1   39.40    2.80 
   5  -1   1   30.30    4.20 
  -5  -1  -1   32.00    2.10 
   5  -1   1   31.70    4.50 
  -5  -1  -1   32.60    3.90 
  -5  -1  -1   38.50    3.60 
   5  -1   1   37.70    4.00 
   5   1   1   49.99    4.80 
   5   1   1   33.50    4.50 
   5   1   1   29.30    3.30 
  -5   1  -1   23.80    4.30 
   5   1   1   31.20    2.80 
   5   1   1   31.30    4.70 
  -5   1  -1   31.40    3.00 
   5   1   1   36.30    4.40 
   5   1   1   28.00    3.40 
   5   1   1   32.00    4.20 
  -5   1  -1   33.40    5.00 
   5   1   1   32.50    4.10 
  -5   1  -1   41.70    3.50 
  -5   1  -1   34.70    4.10 
   5   1   1   36.60    3.00 
  -5   1  -1   26.30    4.20 
  -5   1  -1   25.50    4.80 
  -5   1  -1   34.80    2.90 
  -5   1  -1   32.80    3.70 
  -5   1  -1   35.90    4.50 
  -5   1  -1   31.70    2.90 
  -5   1  -1   30.90    3.50 
  -5   1  -1   46.70    3.80 
   5   1   1   32.60    3.90 
   5   1   1   34.70    4.90 
  -5   1  -1   31.20    4.20 
  -5   1  -1   30.10    4.00 
  -5   1  -1   33.80    4.50 
   5   1   1   30.00    4.60 
   5   1   1   35.10    2.50 
   6  -1   1   24.60    4.00 
   6  -1   1   28.30    4.70 
  -6  -1  -1   20.40    3.30 
   6  -1   1   28.70    3.90 
   6  -1   1   21.00    3.30 
  -6  -1  -1   22.80    1.70 
  -6  -1  -1   18.80    3.40 
  -6  -1  -1   24.70    4.50 
  -6  -1  -1   30.50    5.60 
  -6  -1  -1   21.20    4.20 
  -6  -1  -1   45.90    4.80 
  -6  -1  -1   24.70    3.60 
  -6  -1  -1   15.70    3.00 
  -6  -1  -1   27.40    4.20 
   6  -1   1   25.70    4.80 
  -6  -1  -1   18.80    3.50 
   6  -1   1   25.70    4.50 
  -6  -1  -1   25.00    2.60 
   6  -1   1   20.50    4.30 
  -6  -1  -1   20.70    1.80 
  -6  -1  -1   21.40    3.70 
  -6  -1  -1   23.80    3.70 
   6  -1   1   20.70    3.50 
  -6   1  -1   36.70    4.90 
  -6   1  -1   21.90    5.10 
   6   1   1   21.40    3.90 
   6   1   1   29.80    3.80 
   6   1   1   17.70    4.00 
  -6   1  -1   23.00    4.80 
  -6   1  -1   19.10    4.30 
   6   1   1   20.40    3.80 
   6   1   1   20.30    4.40 
  -6   1  -1   33.80    4.00 
   6   1   1   14.40    3.60 
   6   1   1   23.50    2.30 
  -6   1  -1   26.90    3.00 
   6   1   1   23.20    4.20 
   6   1   1   19.20    3.10 
  -6   1  -1   19.90    3.40 
   6   1   1   23.10    2.50 
  -6   1  -1   26.90    4.70 
  -6   1  -1   32.30    4.00 
  -6   1  -1   31.70    3.60 
  -6   1  -1   17.50    3.60 
  -6   1  -1   22.60    3.00 
  -6   1  -1   32.30    5.40 
  -6   1  -1   27.50    3.00 
  -6   1  -1   24.80    3.90 
  -6   1  -1   20.60    3.30 
  -6   1  -1   24.70    4.50 
   6   1   1   25.00    4.30 
   7  -1   1   52.49    6.90 
  -7  -1  -1   56.89    5.30 
   7  -1   1   48.80    6.50 
  -7  -1  -1   47.50    5.30 
  -7  -1  -1   42.80    5.30 
  -7  -1  -1   57.49    5.30 
   7  -1   1   55.69    5.60 
  -7  -1  -1   55.19    4.00 
   7  -1   1   48.40    5.80 
   7  -1   1   49.30    5.30 
  -7  -1  -1   54.69    5.50 
   7  -1   1   45.80    5.40 
   7  -1   1   48.20    6.80 
  -7  -1  -1   48.70    6.70 
  -7  -1  -1   48.30    5.50 
  -7  -1  -1   57.99    8.60 
  -7  -1  -1   55.09    5.60 
  -7  -1  -1   41.10    5.50 
   7  -1   1   45.80    6.70 
  -7  -1  -1   48.80    5.60 
   7   1   1   33.00    5.40 
  -7   1  -1   47.90    8.20 
  -7   1  -1   48.60    4.90 
  -7   1  -1   49.10    6.10 
  -7   1  -1   49.40    4.00 
   7   1   1   52.09    5.40 
  -7   1  -1   49.40    5.40 
   7   1   1   49.70    6.70 
  -7   1  -1   48.00    6.90 
   7   1   1   65.39    8.40 
  -7   1  -1   50.09    6.20 
   7   1   1   56.99    6.80 
  -7   1  -1   56.89    5.10 
  -7   1  -1   47.00    4.90 
  -7   1  -1   53.29    6.50 
   7   1   1   63.49    5.30 
   7   1   1   43.80    6.80 
   7   1   1   61.89    6.80 
  -7   1  -1   52.39    5.70 
  -7   1  -1   46.40    5.70 
  -7   1  -1   42.40    6.90 
  -7   1  -1   50.39    4.30 
  -7   1  -1   49.99    6.90 
  -7   1  -1   54.19    4.60 
  -8  -1  -1   12.20    3.50 
  -8  -1  -1    9.30    3.10 
  -8  -1  -1   18.20    3.90 
  -8  -1  -1    4.80    3.50 
  -8  -1  -1   15.20    3.90 
   8  -1   1   13.00    3.60 
  -8  -1  -1    9.90    3.00 
   8  -1   1    8.90    3.20 
  -8  -1  -1   13.60    3.50 
  -8  -1  -1   13.20    3.50 
  -8  -1  -1   11.90    3.70 
  -8  -1  -1   10.10    3.70 
  -8  -1  -1   20.60    5.00 
   8  -1   1   11.30    4.10 
  -8  -1  -1   17.20    5.50 
   8  -1   1   27.50    5.20 
   8  -1   1   12.40    4.40 
  -8  -1  -1   12.60    4.30 
   8  -1   1   13.00    4.60 
  -8   1  -1    6.20    4.80 
  -8   1  -1   17.80    4.90 
   8   1   1   26.70    5.10 
  -8   1  -1   17.60    4.30 
  -8   1  -1   14.70    5.00 
   8   1   1   14.10    3.50 
  -8   1  -1    9.20    2.70 
  -8   1  -1   10.30    3.30 
  -8   1  -1   11.30    2.60 
   8   1   1   16.10    4.50 
  -8   1  -1    8.90    3.90 
   8   1   1   14.50    4.00 
  -8   1  -1   11.40    3.20 
  -8   1  -1   12.60    3.70 
  -8   1  -1   13.20    4.80 
  -8   1  -1   11.20    3.80 
   8   1   1   12.50    3.60 
  -8   1  -1   10.40    3.50 
   8   1   1   26.90    6.00 
   8   1   1   22.80    5.60 
   8   1   1   38.60    7.10 
   9  -1   1    6.80    3.50 
  -9  -1  -1    9.60    4.20 
   9  -1   1    5.60    3.40 
  -9  -1  -1    6.70    3.60 
  -9  -1  -1    7.20    3.80 
  -9  -1  -1    6.80    4.20 
   9  -1   1    3.50    3.90 
  -9  -1  -1    5.10    3.30 
   9  -1   1    9.20    5.20 
   9  -1   1    1.70    4.00 
  -9  -1  -1    6.60    3.20 
  -9  -1  -1    8.20    3.90 
  -9  -1  -1   11.40    4.20 
  -9  -1  -1    5.40    3.00 
  -9  -1  -1    9.80    3.40 
  -9  -1  -1    3.90    3.80 
  -9  -1  -1    5.40    4.30 
  -9   1  -1    3.20    3.40 
  -9   1  -1    8.20    3.20 
  -9   1  -1    2.90    3.80 
   9   1   1    5.50    3.90 
   9   1   1   10.80    4.40 
  -9   1  -1    2.70    2.70 
   9   1   1    6.40    4.50 
   9   1   1    4.60    3.90 
  -9   1  -1    2.90    3.40 
  -9   1  -1    3.50    3.60 
   9   1   1    2.30    3.80 
  -9   1  -1   12.00    5.30 
  -9   1  -1    6.90    4.30 
  -9   1  -1    7.40    3.80 
   9   1   1    6.10    3.40 
  -9   1  -1    8.10    3.90 
   9   1   1    4.50    3.00 
 -10  -1  -1    5.30    4.10 
  10  -1   1   20.80    6.60 
  10  -1   1    4.70    4.90 
 -10  -1  -1   10.60    5.20 
 -10  -1  -1    8.30    3.60 
 -10  -1  -1    3.60    2.90 
 -10  -1  -1   14.20    5.40 
 -10  -1  -1    1.00    3.90 
 -10  -1  -1    2.90    5.20 
  10  -1   1    1.20    3.30 
 -10  -1  -1    3.50    3.30 
  10  -1   1    4.90    4.40 
 -10  -1  -1    3.70    3.40 
 -10  -1  -1    3.30    3.70 
  10   1   1   -2.20    4.00 
 -10   1  -1    1.80    3.00 
 -10   1  -1    7.70    3.60 
  10   1   1    7.20    4.60 
 -10   1  -1   11.30    4.60 
  10   1   1    3.80    3.40 
  10   1   1    0.20    3.20 
 -10   1  -1    1.70    3.90 
 -10   1  -1    6.10    4.80 
 -10   1  -1    8.30    4.90 
 -10   1  -1   13.00    5.20 
 -10   1  -1    7.80    4.60 
 -10   1  -1   10.80    4.50 
  10  -2  -1  398.96   19.10 
 -10  -2   1  392.46   18.30 
 -10  -2   1  388.26   25.30 
 -10  -2   1  389.36   19.00 
  10  -2  -1  418.06   22.20 
 -10  -2   1  395.36   18.80 
 -10  -2   1  393.66   24.80 
  10  -2  -1  368.96   21.50 
 -10  -2   1  385.66   18.50 
 -10  -2   1  414.16   19.20 
 -10  -2   1  382.06   19.50 
  10  -2  -1  406.86   19.90 
  10   2  -1  401.06   21.20 
  10   2  -1  400.06   22.90 
 -10   2   1  377.66   18.60 
  10   2  -1  377.86   17.90 
  10   2  -1  412.06   19.40 
 -10   2   1  377.56   22.70 
 -10   2   1  368.66   18.80 
 -10   2   1  385.76   20.80 
  10   2  -1  366.16   21.50 
 -10   2   1  391.46   18.80 
 -10   2   1  402.86   19.70 
 -10   2   1  423.46   22.20 
 -10   2   1  387.86   23.20 
 -10   2   1  399.86   22.90 
  10   2  -1  410.96   24.00 
   9  -2  -1  596.64   26.90 
   9  -2  -1  584.54   26.70 
  -9  -2   1  589.94   27.60 
  -9  -2   1  571.44   25.50 
  -9  -2   1  565.04   23.30 
   9  -2  -1  585.74   24.70 
   9  -2  -1  573.94   26.60 
  -9  -2   1  546.65   24.20 
  -9  -2   1  596.84   23.70 
   9  -2  -1  574.64   24.00 
  -9  -2   1  552.94   24.00 
  -9  -2   1  561.94   23.70 
   9  -2  -1  603.94   24.20 
   9  -2  -1  611.84   27.20 
  -9  -2   1  573.54   24.50 
  -9  -2   1  593.94   23.70 
  -9  -2   1  545.75   29.10 
   9   2  -1  544.25   33.00 
  -9   2   1  552.94   27.50 
   9   2  -1  580.44   27.00 
  -9   2   1  585.34   26.70 
  -9   2   1  617.94   28.90 
   9   2  -1  585.44   27.50 
  -9   2   1  565.94   23.60 
  -9   2   1  609.44   25.80 
  -9   2   1  591.74   27.70 
   9   2  -1  591.24   28.70 
   9   2  -1  589.14   26.00 
  -9   2   1  590.04   24.20 
   9   2  -1  553.94   22.80 
   9   2  -1  588.14   29.40 
  -9   2   1  577.44   23.70 
  -9   2   1  565.64   23.60 
   9   2  -1  558.44   23.80 
   8  -2  -1   87.79    9.60 
   8  -2  -1  114.39   10.20 
  -8  -2   1   82.69    7.60 
  -8  -2   1  109.99    7.90 
   8  -2  -1  109.79    8.50 
   8  -2  -1   89.79    8.90 
   8  -2  -1   92.89    7.70 
  -8  -2   1   85.79   11.00 
  -8  -2   1   95.99    9.20 
  -8  -2   1   89.49    7.00 
   8  -2  -1   92.69    7.60 
  -8  -2   1  100.49    7.50 
   8  -2  -1   82.69    8.40 
  -8  -2   1  101.09    6.30 
  -8  -2   1   97.49    8.00 
  -8  -2   1  101.29    7.50 
  -8  -2   1   84.19    7.40 
  -8  -2   1   86.69    7.40 
  -8  -2   1  101.69    7.40 
  -8   2   1  115.49    8.00 
  -8   2   1   91.89   11.80 
   8   2  -1  103.29    8.70 
   8   2  -1   94.59    9.90 
  -8   2   1   92.59   10.00 
  -8   2   1  109.59    9.70 
  -8   2   1  100.89    8.60 
  -8   2   1   88.19    5.90 
   8   2  -1   95.69    9.00 
  -8   2   1   98.29    7.50 
  -8   2   1   99.29   10.90 
   8   2  -1   99.49    9.50 
   8   2  -1   85.09    8.00 
  -8   2   1   90.99    7.30 
   8   2  -1  109.79    7.20 
  -8   2   1   88.39    8.30 
   8   2  -1   90.19    7.70 
  -8   2   1   85.19   10.40 
  -8   2   1   98.99    7.80 
   8   2  -1  103.69    9.00 
  -8   2   1   92.69    6.70 
  -7  -2   1  226.28   11.40 
  -7  -2   1  236.08   14.70 
   7  -2  -1  216.58   10.90 
  -7  -2   1  197.68   11.20 
  -7  -2   1  213.98   13.10 
   7  -2  -1  212.58   10.80 
  -7  -2   1  209.98   11.10 
  -7  -2   1  211.28   10.70 
   7  -2  -1  208.08   11.50 
   7  -2  -1  203.88   13.00 
  -7  -2   1  215.98    9.60 
   7  -2  -1  227.98   10.60 
  -7  -2   1  220.98   10.60 
   7  -2  -1  212.48   12.40 
   7  -2  -1  194.68   12.20 
  -7  -2   1  217.68   10.90 
   7  -2  -1  204.58   12.80 
  -7  -2   1  206.68   11.20 
  -7  -2   1  208.78   10.50 
  -7  -2   1  209.48   10.80 
  -7   2   1  232.38    9.50 
  -7   2   1  204.58   10.60 
  -7   2   1  187.78   14.40 
  -7   2   1  222.28   10.40 
   7   2  -1  213.78    9.70 
   7   2  -1  223.58   10.40 
  -7   2   1  200.68   10.50 
  -7   2   1  184.68   13.50 
   7   2  -1  216.18   13.70 
  -7   2   1  200.98   11.80 
   7   2  -1  199.48   11.50 
   7   2  -1  216.28   13.00 
  -7   2   1  224.48   12.30 
  -7   2   1  204.98   12.60 
   7   2  -1  190.78   11.60 
  -7   2   1  243.88   11.30 
  -7   2   1  216.08   13.30 
   7   2  -1  191.58   12.40 
   7   2  -1  227.18   11.30 
   7   2  -1  215.48   12.10 
  -7   2   1  190.68   11.40 
  -7   2   1  211.58   10.70 
  -7   2   1  209.38   13.00 
   6  -2  -1  251.97    9.00 
  -6  -2   1  257.87   11.30 
   6  -2  -1  265.07   11.10 
  -6  -2   1  254.67   11.20 
  -6  -2   1  240.58   14.60 
   6  -2  -1  248.88   10.30 
   6  -2  -1  239.98    9.10 
   6  -2  -1  251.57   11.30 
   6  -2  -1  254.77   12.30 
  -6  -2   1  242.68   12.00 
   6  -2  -1  261.17   12.90 
  -6  -2   1  266.17   11.90 
  -6  -2   1  260.97   11.80 
   6  -2  -1  253.17   13.90 
  -6  -2   1  260.67   13.70 
   6  -2  -1  249.18   13.50 
   6  -2  -1  254.37   13.10 
   6  -2  -1  243.28   11.40 
  -6  -2   1  262.17    9.10 
  -6  -2   1  273.77   11.80 
  -6  -2   1  262.47   11.90 
  -6  -2   1  272.17   12.50 
   6  -2  -1  265.77   12.90 
  -6  -2   1  252.57   11.20 
  -6  -2   1  258.27   10.50 
  -6  -2   1  269.07   16.50 
   6  -2  -1  246.28   14.20 
   6   2  -1  258.27   13.50 
  -6   2   1  247.48   12.80 
  -6   2   1  261.17   13.70 
   6   2  -1  257.47   12.50 
   6   2  -1  236.68   10.90 
  -6   2   1  262.27   13.50 
   6   2  -1  260.37   12.30 
   6   2  -1  263.07   10.70 
  -6   2   1  232.58   12.10 
   6   2  -1  263.17   14.10 
  -6   2   1  258.17   11.60 
  -6   2   1  271.37   11.60 
  -6   2   1  255.47   10.10 
  -6   2   1  240.78   13.50 
  -6   2   1  250.17   13.30 
  -6   2   1  245.08   11.30 
   6   2  -1  250.07   14.00 
   6   2  -1  259.47   11.00 
   6   2  -1  258.67   10.50 
   6   2  -1  252.97   13.40 
  -6   2   1  244.38   14.30 
  -6   2   1  258.47   11.40 
  -6   2   1  274.57   15.50 
   6   2  -1  249.88   12.60 
   6   2  -1  259.17   11.90 
  -6   2   1  274.87   15.10 
   6   2  -1  255.77   13.70 
  -5  -2   1  791.92   27.50 
  -5  -2   1  794.42   24.70 
   5  -2  -1  834.02   27.20 
   5  -2  -1  794.12   25.70 
   5  -2  -1  815.72   29.10 
   5  -2  -1  816.32   30.00 
   5  -2  -1  795.22   27.20 
  -5  -2   1  804.92   30.90 
   5  -2  -1  780.82   29.40 
  -5  -2   1  786.62   26.80 
   5  -2  -1  810.22   28.30 
  -5  -2   1  771.82   28.00 
  -5  -2   1  796.52   26.80 
  -5  -2   1  778.12   29.40 
  -5  -2   1  775.32   26.90 
   5  -2  -1  783.32   28.70 
   5  -2  -1  812.52   26.90 
  -5  -2   1  814.12   26.40 
  -5  -2   1  824.92   30.50 
  -5  -2   1  816.62   27.40 
   5  -2  -1  808.12   26.50 
  -5  -2   1  781.82   27.40 
   5  -2  -1  812.52   30.60 
  -5  -2   1  810.92   25.40 
  -5  -2   1  789.12   27.30 
   5  -2  -1  804.12   28.40 
  -5  -2   1  798.92   29.80 
   5  -2  -1  789.32   28.90 
   5  -2  -1  789.92   24.60 
  -5   2   1  816.32   25.70 
   5   2  -1  787.82   26.00 
  -5   2   1  819.62   29.50 
  -5   2   1  803.02   27.30 
  -5   2   1  781.02   27.30 
   5   2  -1  810.92   26.60 
   5   2  -1  815.92   28.40 
  -5   2   1  791.42   28.10 
   5   2  -1  795.92   27.70 
  -5   2   1  769.62   30.70 
   5   2  -1  799.92   28.30 
   5   2  -1  834.42   29.50 
  -5   2   1  796.52   29.60 
  -5   2   1  773.22   29.40 
   5   2  -1  785.42   27.00 
  -5   2   1  781.02   30.80 
  -5   2   1  787.52   29.80 
   5   2  -1  834.02   29.70 
  -5   2   1  808.82   27.00 
   5   2  -1  805.22   30.00 
  -5   2   1  762.52   27.00 
   5   2  -1  776.62   29.70 
  -5   2   1  784.42   28.70 
   5   2  -1  750.52   29.20 
   5   2  -1  809.62   27.70 
   5   2  -1  798.62   26.50 
  -5   2   1  805.12   26.90 
  -5   2   1  755.52   30.50 
   4  -2  -1  412.76   17.80 
  -4  -2   1  417.36   16.80 
   4  -2  -1  394.76   18.00 
  -4  -2   1  431.86   15.20 
  -4  -2   1  412.36   15.20 
  -4  -2   1  414.46   15.80 
   4  -2  -1  415.76   14.40 
  -4  -2   1  427.46   15.00 
   4  -2  -1  413.26   16.30 
  -4  -2   1  428.06   17.60 
  -4  -2   1  434.76   14.50 
  -4  -2   1  404.76   15.30 
   4  -2  -1  408.26   16.40 
   4  -2  -1  402.76   15.30 
   4  -2  -1  395.66   14.90 
   4  -2  -1  381.56   16.70 
   4  -2  -1  403.46   15.70 
  -4  -2   1  428.76   14.00 
   4  -2  -1  404.36   16.70 
  -4  -2   1  425.36   14.90 
   4  -2  -1  414.06   14.10 
   4  -2  -1  407.26   17.20 
  -4  -2   1  435.36   17.20 
  -4  -2   1  407.56   13.20 
   4  -2  -1  392.46   13.50 
  -4  -2   1  428.36   14.60 
   4  -2  -1  415.36   16.00 
  -4  -2   1  402.96   17.50 
  -4  -2   1  415.46   14.20 
   4  -2  -1  399.96   14.40 
   4  -2  -1  406.06   13.80 
   4   2  -1  412.16   14.00 
  -4   2   1  400.16   16.90 
   4   2  -1  402.46   15.00 
   4   2  -1  406.46   14.20 
  -4   2   1  407.16   15.10 
   4   2  -1  408.96   17.00 
  -4   2   1  414.26   17.70 
   4   2  -1  416.86   15.80 
  -4   2   1  358.26   17.30 
   4   2  -1  422.66   14.40 
   4   2  -1  421.16   15.90 
  -4   2   1  404.26   15.40 
  -4   2   1  372.26   16.30 
   4   2  -1  406.16   16.20 
  -4   2   1  405.26   13.60 
  -4   2   1  379.96   15.90 
   4   2  -1  406.06   14.60 
  -4   2   1  380.66   14.80 
  -4   2   1  404.46   16.20 
  -4   2   1  394.86   17.70 
  -4   2   1  401.06   17.60 
   4   2  -1  417.06   15.40 
  -4   2   1  397.66   15.60 
   4   2  -1  421.36   16.90 
  -4   2   1  412.06   16.80 
  -4   2   1  385.86   15.70 
  -4   2   1  406.86   14.00 
   4   2  -1  409.66   16.50 
   4   2  -1  399.26   17.00 
   4   2  -1  413.16   15.20 
  -3  -2   1  208.88    8.50 
   3  -2  -1  212.78    7.50 
  -3  -2   1  205.38    7.30 
  -3  -2   1  196.98   10.10 
  -3  -2   1  205.58    7.80 
  -3  -2   1  204.58   10.20 
   3  -2  -1  219.48    9.50 
  -3  -2   1  200.58    8.00 
  -3  -2   1  196.88    8.10 
   3  -2  -1  206.18   10.10 
   3  -2  -1  217.48   11.00 
  -3  -2   1  197.58    9.60 
  -3  -2   1  204.28    9.50 
   3  -2  -1  209.08    9.70 
   3  -2  -1  207.58    7.80 
   3  -2  -1  215.58    8.80 
  -3  -2   1  197.68    9.00 
   3  -2  -1  199.38   10.70 
  -3  -2   1  198.28    8.50 
   3  -2  -1  215.38    9.60 
  -3  -2   1  205.48    9.80 
  -3  -2   1  201.98    7.80 
  -3  -2   1  195.88    7.90 
  -3  -2   1  215.88    8.00 
  -3  -2   1  206.68    8.40 
   3  -2  -1  203.68   10.00 
  -3  -2   1  197.68    8.60 
   3  -2  -1  211.48    7.20 
  -3  -2   1  192.38    7.70 
   3  -2  -1  222.38    7.80 
  -3  -2   1  204.88    7.90 
   3  -2  -1  201.28   10.20 
  -3   2   1  217.98   10.10 
  -3   2   1  224.08   10.50 
   3   2  -1  191.98    7.80 
  -3   2   1  214.48    9.50 
  -3   2   1  179.48    9.40 
  -3   2   1  208.98    8.70 
   3   2  -1  200.58    8.20 
   3   2  -1  201.88    8.00 
  -3   2   1  212.98    9.20 
  -3   2   1  178.18   10.30 
   3   2  -1  195.98    9.90 
   3   2  -1  205.78    9.90 
  -3   2   1  204.08    9.10 
  -3   2   1  200.68   10.20 
  -3   2   1  215.78    8.20 
   3   2  -1  204.08    8.20 
   3   2  -1  200.28    8.10 
  -3   2   1  192.38    9.40 
  -3   2   1  204.08   10.80 
   3   2  -1  199.18    7.60 
   3   2  -1  208.38    9.90 
   3   2  -1  198.48    9.40 
  -3   2   1  244.38    8.60 
  -3   2   1  214.48    7.40 
  -3   2   1  207.78    7.10 
   3   2  -1  205.98    7.70 
  -3   2   1  193.08    7.60 
   3   2  -1  192.48    8.80 
   3   2  -1  206.98    8.20 
   3   2  -1  188.58    8.70 
  -3   2   1  182.48    9.90 
   3   2  -1  213.78   10.50 
  -3   2   1  216.38    9.60 
   3   2  -1  191.78    9.60 
   3   2  -1  196.58    7.70 
  -3   2   1  208.48   10.90 
   3   2  -1  193.98    9.30 
  -2  -2   1   50.39    3.90 
   2  -2  -1   45.20    4.80 
  -2  -2   1   48.90    3.80 
  -2  -2   1   48.60    3.50 
   2  -2  -1   46.10    3.90 
  -2  -2   1   52.39    4.30 
  -2  -2   1   52.39    3.00 
  -2  -2   1   52.29    4.00 
   2  -2  -1   49.99    2.20 
  -2  -2   1   59.49    3.40 
  -2  -2   1   48.50    2.80 
   2  -2  -1   50.09    4.00 
   2  -2  -1   45.40    3.00 
  -2  -2   1   60.59    3.50 
   2  -2  -1   55.49    3.60 
  -2  -2   1   48.30    2.50 
  -2  -2   1   53.89    3.10 
  -2  -2   1   48.90    2.50 
   2  -2  -1   42.50    3.90 
   2  -2  -1   50.69    4.30 
   2  -2  -1   50.09    4.20 
   2  -2  -1   51.89    4.30 
   2  -2  -1   50.09    3.70 
  -2  -2   1   51.49    4.00 
  -2  -2   1   54.69    2.80 
  -2  -2   1   50.79    3.90 
  -2  -2   1   52.59    4.30 
   2  -2  -1   47.40    3.10 
   2  -2  -1   48.60    2.50 
   2  -2  -1   50.99    3.20 
   2  -2  -1   55.19    3.60 
  -2  -2   1   52.39    3.30 
  -2  -2   1   47.10    2.90 
  -2  -2   1   51.69    3.20 
  -2  -2   1   52.59    4.10 
   2  -2  -1   44.70    4.00 
   2  -2  -1   44.50    4.20 
  -2  -2   1   47.80    3.20 
   2  -2  -1   53.69    4.80 
  -2  -2   1   48.50    3.30 
   2   2  -1   53.69    3.50 
  -2   2   1   46.10    5.10 
   2   2  -1   67.39    4.80 
  -2   2   1   63.09    5.10 
   2   2  -1   50.39    3.10 
  -2   2   1   49.60    4.30 
  -2   2   1   50.59    3.60 
  -2   2   1   51.19    3.10 
   2   2  -1   53.09    2.80 
   2   2  -1   52.09    3.70 
   2   2  -1   45.60    3.90 
  -2   2   1   51.19    4.30 
  -2   2   1   57.59    3.60 
  -2   2   1   44.80    4.20 
  -2   2   1   49.10    3.30 
  -2   2   1   48.00    4.00 
  -2   2   1   55.49    4.60 
  -2   2   1   47.10    3.90 
  -2   2   1   48.40    4.60 
   2   2  -1   48.00    2.90 
   2   2  -1   52.69    3.40 
  -2   2   1   51.39    3.70 
   2   2  -1   53.09    3.00 
  -2   2   1   51.59    5.30 
  -2   2   1   48.50    2.40 
  -2   2   1   48.50    4.30 
   2   2  -1   49.70    2.40 
   2   2  -1   57.99    3.80 
  -2   2   1   46.20    2.50 
   2   2  -1   46.10    3.70 
   2   2  -1   51.19    3.10 
   2   2  -1   48.40    2.50 
  -2   2   1   57.29    3.80 
   2   2  -1   51.49    3.20 
  -2   2   1   46.00    3.10 
  -2   2   1   45.80    3.80 
   2   2  -1   66.99    4.10 
  -2   2   1   53.19    4.80 
  -2   2   1   51.99    5.00 
   2   2  -1   51.29    3.50 
  -2   2   1   50.29    4.70 
   2   2  -1   71.49    4.60 
   2   2  -1   48.50    3.30 
  -1  -2   1    6.10    1.20 
  -1  -2   1    4.40    1.20 
  -1  -2   1    4.00    1.10 
  -1  -2   1    4.80    1.30 
  -1  -2   1   10.20    1.50 
  -1  -2   1    4.80    1.20 
   1  -2  -1   10.20    2.50 
   1  -2  -1    7.50    2.50 
   1  -2  -1    6.50    1.60 
   1  -2  -1    9.60    3.20 
  -1  -2   1    9.60    1.40 
  -1  -2   1   12.90    1.90 
  -1  -2   1    3.70    1.30 
  -1  -2   1    6.10    0.70 
  -1  -2   1    3.00    0.60 
  -1  -2   1    3.30    1.20 
   1  -2  -1    6.10    2.80 
   1  -2  -1    5.80    1.40 
   1  -2  -1    6.70    1.20 
  -1  -2   1    6.90    1.80 
   1  -2  -1    6.30    1.30 
   1  -2  -1    5.20    2.10 
   1  -2  -1    4.60    2.60 
  -1  -2   1    7.60    1.70 
   1  -2  -1    9.40    1.90 
   1  -2  -1    7.50    1.60 
  -1  -2   1    3.80    1.00 
  -1  -2   1    4.50    0.70 
  -1  -2   1    9.30    1.80 
   1  -2  -1    6.00    1.60 
   1  -2  -1    7.80    2.10 
   1  -2  -1    3.50    1.60 
  -1  -2   1    5.00    1.20 
   1  -2  -1    5.70    1.60 
   1  -2  -1    4.60    1.80 
   1  -2  -1    7.00    2.00 
   1  -2  -1    6.30    1.10 
  -1  -2   1    2.50    1.20 
  -1  -2   1    6.00    1.20 
   1  -2  -1    7.90    1.50 
  -1  -2   1    5.80    1.60 
  -1  -2   1    8.10    2.10 
   1  -2  -1   11.40    2.00 
  -1  -2   1    4.50    1.50 
   1  -2  -1    8.10    2.10 
   1  -2  -1   11.20    2.30 
  -1   2   1    9.80    1.70 
   1   2  -1    4.80    1.10 
  -1   2   1    3.10    2.30 
   1   2  -1    4.80    1.30 
   1   2  -1    1.80    1.10 
  -1   2   1   13.30    3.00 
   1   2  -1    5.10    1.40 
   1   2  -1    4.40    1.10 
   1   2  -1    5.30    1.80 
  -1   2   1    4.00    2.00 
   1   2  -1    4.10    1.40 
  -1   2   1    7.60    2.00 
   1   2  -1    3.00    1.00 
   1   2  -1    6.80    0.90 
  -1   2   1    4.30    1.80 
  -1   2   1   10.70    2.00 
   1   2  -1    2.40    1.00 
  -1   2   1    7.60    1.60 
  -1   2   1   11.90    1.80 
  -1   2   1    8.50    2.40 
   1   2  -1    8.20    1.30 
   1   2  -1    4.50    1.00 
  -1   2   1    9.80    2.50 
   1   2  -1   14.50    2.60 
   1   2  -1    4.30    1.40 
   1   2  -1    9.80    1.40 
   1   2  -1    2.90    1.10 
  -1   2   1    5.80    1.40 
   1   2  -1    5.60    1.00 
   1   2  -1    6.20    1.20 
   1   2  -1    2.70    0.80 
  -1   2   1   10.40    2.60 
  -1   2   1    9.20    2.60 
   1   2  -1    4.10    1.30 
  -1   2   1    5.80    1.90 
  -1   2   1   11.00    2.40 
  -1   2   1    4.60    2.70 
  -1   2   1   10.40    3.10 
   1   2  -1    4.10    1.50 
  -1   2   1   12.60    2.00 
  -1   2   1    7.90    3.20 
  -1   2   1   15.60    2.30 
   1   2  -1    5.40    1.10 
  -1   2   1    5.70    3.60 
  -1   2   1    6.10    3.10 
  -1   2   1    7.90    2.20 
   1   2  -1    4.50    1.20 
   1   2  -1    9.50    1.80 
  -1   2   1    7.00    1.80 
   0  -2   1    3.20    1.10 
   0  -2   1    6.40    1.40 
   0  -2   1    5.00    1.50 
   0  -2  -1    3.90    1.40 
   0  -2  -1    3.10    1.40 
   0  -2  -1    3.60    1.70 
   0  -2   1    2.70    0.70 
   0  -2   1    2.10    0.80 
   0  -2   1    4.80    2.40 
   0  -2   1    3.10    1.40 
   0  -2  -1    3.20    1.50 
   0  -2   1    3.40    1.20 
   0  -2  -1    3.00    1.40 
   0  -2  -1    3.60    1.20 
   0  -2   1    4.30    0.80 
   0  -2  -1    2.70    1.10 
   0  -2   1    4.70    1.70 
   0  -2  -1    4.40    1.90 
   0  -2  -1    6.70    2.10 
   0  -2  -1    0.90    1.20 
   0  -2   1    2.10    1.30 
   0  -2   1    2.40    0.90 
   0  -2  -1    3.50    1.10 
   0  -2  -1    4.40    2.00 
   0  -2   1    5.10    0.70 
   0  -2  -1    4.60    1.10 
   0  -2   1    2.60    1.10 
   0  -2   1    1.80    1.70 
   0  -2   1    4.00    2.20 
   0  -2   1    3.20    0.80 
   0  -2  -1    3.90    1.20 
   0  -2  -1    3.70    1.90 
   0  -2   1    5.80    1.90 
   0  -2   1    5.60    0.70 
   0  -2  -1    6.50    1.70 
   0  -2   1    3.60    1.00 
   0  -2  -1    4.80    1.20 
   0  -2  -1    7.60    2.80 
   0  -2   1    3.00    1.70 
   0  -2  -1    4.00    1.60 
   0  -2   1    4.10    1.30 
   0  -2  -1    3.00    1.30 
   0  -2  -1    2.20    2.20 
   0  -2   1    1.20    1.70 
   0   2   1    4.80    1.80 
   0   2   1    1.60    1.50 
   0   2   1    6.00    2.20 
   0   2  -1    5.10    1.20 
   0   2  -1    4.30    0.80 
   0   2   1    5.10    2.20 
   0   2   1    6.40    1.70 
   0   2  -1    2.40    2.30 
   0   2   1    9.60    1.50 
   0   2  -1    5.20    2.30 
   0   2   1    1.10    2.40 
   0   2  -1    2.40    1.20 
   0   2   1    4.30    1.40 
   0   2   1    7.70    1.70 
   0   2   1    3.30    1.50 
   0   2  -1    2.90    1.50 
   0   2   1   11.70    1.90 
   0   2   1    5.20    1.90 
   0   2  -1    7.00    2.40 
   0   2   1    3.60    1.10 
   0   2  -1    4.30    1.10 
   0   2  -1    4.50    2.20 
   0   2   1    3.10    1.40 
   0   2  -1    2.10    1.60 
   0   2  -1    6.00    2.30 
   0   2  -1    5.40    0.90 
   0   2  -1    3.10    1.50 
   0   2   1    3.10    1.40 
   0   2  -1    4.30    0.70 
   0   2   1    3.10    1.10 
   0   2   1    6.30    1.20 
   0   2  -1    2.30    1.40 
   0   2  -1    6.90    1.20 
   0   2   1   10.30    3.30 
   0   2   1    1.60    1.30 
   0   2  -1    2.60    1.10 
   0   2  -1    2.90    1.30 
   0   2  -1    4.60    2.60 
   0   2   1    2.00    2.10 
   0   2   1    2.80    1.40 
   0   2  -1    4.00    1.40 
   0   2  -1    2.80    1.10 
   0   2  -1    5.00    1.00 
  -1  -2  -1 1474.25   43.90 
  -1  -2  -1 1419.26   44.20 
   1  -2   1 1401.06   44.50 
  -1  -2  -1 1391.66   43.80 
  -1  -2  -1 1394.46   42.60 
  -1  -2  -1 1406.76   44.80 
  -1  -2  -1 1452.35   45.70 
   1  -2   1 1447.56   44.10 
  -1  -2  -1 1378.96   43.10 
   1  -2   1 1414.56   42.80 
   1  -2   1 1474.95   45.50 
   1  -2   1 1299.87   47.10 
   1  -2   1 1465.85   42.70 
  -1  -2  -1 1367.86   43.20 
  -1  -2  -1 1452.85   43.70 
  -1  -2  -1 1432.46   45.10 
   1  -2   1 1412.46   43.20 
  -1  -2  -1 1456.15   44.60 
  -1  -2  -1 1312.87   43.30 
  -1  -2  -1 1387.76   44.20 
  -1  -2  -1 1411.76   45.30 
  -1  -2  -1 1407.76   44.70 
   1  -2   1 1312.47   44.00 
  -1  -2  -1 1383.16   43.80 
   1  -2   1 1457.95   42.90 
   1  -2   1 1405.16   44.00 
  -1  -2  -1 1405.16   44.90 
   1  -2   1 1412.96   43.70 
  -1  -2  -1 1419.76   44.10 
  -1  -2  -1 1469.65   44.20 
   1  -2   1 1419.46   45.10 
  -1  -2  -1 1462.45   43.80 
   1  -2   1 1346.17   44.30 
   1  -2   1 1460.25   44.50 
  -1  -2  -1 1427.76   43.20 
   1  -2   1 1211.98   46.80 
  -1  -2  -1 1417.26   43.90 
   1  -2   1 1437.46   44.60 
  -1  -2  -1 1372.16   43.70 
   1   2   1 1418.06   43.60 
  -1   2  -1 1345.67   45.10 
   1   2   1 1388.66   44.00 
  -1   2  -1 1442.26   42.80 
  -1   2  -1 1401.86   43.70 
   1   2   1 1417.46   44.40 
  -1   2  -1 1192.58   48.30 
   1   2   1 1414.36   44.00 
   1   2   1 1319.87   43.70 
  -1   2  -1 1433.96   45.70 
   1   2   1 1505.35   44.30 
   1   2   1 1467.05   43.20 
  -1   2  -1 1371.16   45.00 
  -1   2  -1 1399.56   44.60 
   1   2   1 1427.06   44.70 
   1   2   1 1442.76   44.70 
  -1   2  -1 1385.76   44.50 
  -1   2  -1 1470.65   43.40 
   1   2   1 1379.96   42.50 
  -1   2  -1 1333.47   44.70 
  -1   2  -1 1413.36   44.30 
   1   2   1 1420.66   43.60 
  -1   2  -1 1418.16   42.90 
  -1   2  -1 1423.56   44.10 
  -1   2  -1 1437.36   43.80 
   1   2   1 1418.06   43.60 
  -1   2  -1 1359.76   44.00 
   1   2   1 1419.26   43.90 
   1   2   1 1434.56   44.00 
   1   2   1 1469.15   43.30 
   1   2   1 1429.06   43.50 
   1   2   1 1473.35   44.90 
   1   2   1 1405.96   45.30 
  -1   2  -1 1347.67   47.10 
   1   2   1 1451.35   44.40 
   1   2   1 1372.46   43.60 
  -1   2  -1 1432.46   42.20 
   1   2   1 1442.76   45.90 
  -1   2  -1 1392.56   43.70 
   1   2   1 1421.96   43.80 
  -2  -2  -1  515.85   17.70 
  -2  -2  -1  517.95   18.50 
   2  -2   1  508.45   17.00 
  -2  -2  -1  491.15   16.30 
  -2  -2  -1  515.75   16.80 
   2  -2   1  499.15   16.40 
   2  -2   1  473.85   18.90 
   2  -2   1  501.15   16.60 
  -2  -2  -1  512.75   17.70 
   2  -2   1  510.25   16.50 
  -2  -2  -1  486.85   17.20 
  -2  -2  -1  493.85   17.00 
  -2  -2  -1  498.55   18.30 
  -2  -2  -1  508.45   17.00 
   2  -2   1  501.75   19.50 
  -2  -2  -1  518.75   18.20 
  -2  -2  -1  511.35   17.00 
  -2  -2  -1  486.55   18.40 
  -2  -2  -1  505.05   16.90 
   2  -2   1  505.85   17.50 
  -2  -2  -1  478.15   16.30 
  -2  -2  -1  510.25   16.40 
   2  -2   1  492.65   18.10 
   2  -2   1  502.45   15.80 
   2  -2   1  477.15   17.80 
   2  -2   1  476.65   18.10 
   2  -2   1  474.15   18.10 
   2  -2   1  499.95   18.40 
  -2  -2  -1  508.65   17.80 
  -2  -2  -1  526.65   18.20 
  -2  -2  -1  497.05   16.70 
   2  -2   1  506.85   16.30 
   2  -2   1  492.25   16.00 
   2  -2   1  502.15   17.50 
   2  -2   1  497.95   18.10 
  -2  -2  -1  510.15   18.20 
  -2   2  -1  506.95   18.00 
   2   2   1  512.55   15.60 
   2   2   1  506.15   16.30 
  -2   2  -1  500.65   18.90 
  -2   2  -1  495.25   18.00 
   2   2   1  480.95   15.80 
  -2   2  -1  490.25   16.30 
   2   2   1  507.35   16.30 
  -2   2  -1  449.26   19.80 
  -2   2  -1  483.45   19.40 
  -2   2  -1  474.05   20.30 
   2   2   1  496.95   16.70 
   2   2   1  485.95   16.80 
   2   2   1  496.85   17.30 
  -2   2  -1  492.95   16.30 
   2   2   1  489.15   16.90 
  -2   2  -1  496.55   16.80 
  -2   2  -1  465.05   19.20 
   2   2   1  513.55   17.90 
   2   2   1  510.45   18.20 
  -2   2  -1  499.55   16.90 
  -2   2  -1  506.35   18.30 
  -2   2  -1  500.65   17.00 
   2   2   1  477.25   17.70 
   2   2   1  521.55   18.30 
  -2   2  -1  500.45   17.50 
   2   2   1  510.95   18.00 
  -2   2  -1  457.45   18.60 
  -2   2  -1  491.95   16.90 
   2   2   1  510.25   17.20 
   2   2   1  511.95   16.80 
   2   2   1  516.25   16.40 
  -2   2  -1  492.95   15.30 
  -2   2  -1  507.95   18.80 
   2   2   1  517.75   18.50 
   2   2   1  491.95   15.80 
   3  -2   1  919.71   29.50 
   3  -2   1  915.71   28.10 
   3  -2   1  878.71   30.20 
   3  -2   1  922.31   30.20 
  -3  -2  -1  950.90   31.40 
   3  -2   1  871.41   31.20 
   3  -2   1  916.31   31.60 
  -3  -2  -1  875.91   30.90 
  -3  -2  -1  900.01   29.60 
   3  -2   1  933.21   30.50 
   3  -2   1  912.81   28.00 
   3  -2   1  883.01   28.80 
  -3  -2  -1  887.21   28.90 
  -3  -2  -1  906.31   29.60 
  -3  -2  -1  940.81   31.10 
   3  -2   1  890.41   30.70 
   3  -2   1  897.31   31.30 
  -3  -2  -1  906.11   29.30 
  -3  -2  -1  907.81   29.40 
   3  -2   1  907.21   29.00 
  -3  -2  -1  913.41   29.50 
   3  -2   1  896.41   28.60 
   3  -2   1  985.30   39.30 
  -3  -2  -1  919.91   28.20 
  -3  -2  -1  933.41   29.90 
  -3  -2  -1  897.91   28.80 
  -3  -2  -1  909.31   29.70 
  -3  -2  -1  873.81   28.90 
  -3  -2  -1  938.61   30.50 
  -3  -2  -1  916.51   32.00 
   3  -2   1  951.10   29.00 
   3  -2   1  911.71   27.80 
   3  -2   1  874.71   27.80 
   3  -2   1  918.71   30.80 
   3  -2   1  925.01   28.40 
   3   2   1  923.71   30.40 
   3   2   1  913.21   30.30 
  -3   2  -1  914.21   28.00 
   3   2   1  885.51   28.80 
  -3   2  -1  916.01   29.00 
   3   2   1  906.11   27.80 
   3   2   1  878.21   28.60 
  -3   2  -1  832.52   28.60 
  -3   2  -1  926.41   27.60 
   3   2   1  893.21   30.10 
   3   2   1  893.71   28.70 
   3   2   1  895.71   28.50 
   3   2   1  885.71   30.80 
  -3   2  -1  910.71   30.10 
  -3   2  -1  905.01   30.30 
   3   2   1  903.51   29.50 
  -3   2  -1  882.31   31.90 
  -3   2  -1  888.11   31.30 
   3   2   1  856.31   30.70 
  -3   2  -1  879.61   29.10 
  -3   2  -1  848.72   32.30 
   3   2   1  937.61   31.70 
  -3   2  -1  901.51   30.40 
  -3   2  -1  908.11   31.00 
  -3   2  -1  895.21   31.90 
   3   2   1  911.01   31.30 
  -3   2  -1  914.91   27.70 
   3   2   1  938.91   29.60 
  -3   2  -1  875.11   30.10 
  -3   2  -1  936.71   32.00 
  -3   2  -1  897.31   31.00 
  -3   2  -1  871.01   32.70 
   3   2   1  902.71   31.20 
   3   2   1  897.11   30.10 
  -3   2  -1  895.11   31.00 
   4  -2   1 1223.78   40.50 
  -4  -2  -1 1250.07   38.80 
  -4  -2  -1 1239.48   40.00 
   4  -2   1 1246.18   40.60 
   4  -2   1 1221.78   41.00 
  -4  -2  -1 1242.58   38.60 
  -4  -2  -1 1221.88   43.00 
  -4  -2  -1 1227.68   39.70 
  -4  -2  -1 1283.27   42.40 
  -4  -2  -1 1220.58   39.70 
  -4  -2  -1 1273.37   38.40 
  -4  -2  -1 1251.67   41.70 
  -4  -2  -1 1264.27   39.40 
   4  -2   1 1233.98   37.60 
   4  -2   1 1218.28   39.30 
  -4  -2  -1 1246.78   40.10 
  -4  -2  -1 1277.57   39.90 
  -4  -2  -1 1244.48   41.80 
   4  -2   1 1207.68   38.20 
   4  -2   1 1236.18   38.60 
   4  -2   1 1217.58   41.90 
   4  -2   1 1277.57   40.00 
  -4  -2  -1 1245.78   38.50 
   4  -2   1 1221.18   38.20 
   4  -2   1 1144.99   41.30 
   4  -2   1 1277.47   39.00 
   4  -2   1 1273.07   39.00 
  -4  -2  -1 1248.98   40.20 
  -4  -2  -1 1260.97   40.90 
  -4   2  -1 1242.58   39.40 
  -4   2  -1 1158.08   42.60 
  -4   2  -1 1225.38   40.90 
  -4   2  -1 1148.29   42.10 
   4   2   1 1208.08   40.80 
   4   2   1 1227.28   39.60 
   4   2   1 1253.07   39.50 
  -4   2  -1 1245.68   41.90 
  -4   2  -1 1260.67   38.40 
  -4   2  -1 1211.88   42.50 
  -4   2  -1 1221.08   38.00 
  -4   2  -1 1284.77   41.30 
  -4   2  -1 1215.88   40.70 
  -4   2  -1 1206.38   39.30 
  -4   2  -1 1178.88   39.60 
   4   2   1 1258.67   42.00 
  -4   2  -1 1197.38   40.60 
   4   2   1 1238.08   39.80 
   4   2   1 1194.98   39.00 
  -4   2  -1 1182.38   43.40 
   4   2   1 1255.87   41.70 
   4   2   1 1245.18   40.40 
   4   2   1 1217.08   41.50 
  -4   2  -1 1233.68   41.50 
  -4   2  -1 1240.68   37.80 
  -4   2  -1 1123.59   43.20 
  -4   2  -1 1218.48   40.50 
   4   2   1 1222.78   38.60 
   4   2   1 1225.48   40.70 
   4   2   1 1242.58   39.30 
   4   2   1 1292.07   41.00 
   4   2   1 1249.47   42.20 
  -5  -2  -1 1196.38   40.40 
  -5  -2  -1 1202.68   40.10 
   5  -2   1 1179.48   42.10 
   5  -2   1 1226.38   40.60 
   5  -2   1 1251.07   42.30 
   5  -2   1 1309.97   44.80 
  -5  -2  -1 1263.97   38.50 
  -5  -2  -1 1201.78   43.80 
  -5  -2  -1 1239.58   37.60 
  -5  -2  -1 1227.78   40.30 
   5  -2   1 1225.38   37.30 
  -5  -2  -1 1211.28   40.00 
  -5  -2  -1 1193.18   37.10 
   5  -2   1 1247.68   39.10 
   5  -2   1 1261.07   42.40 
   5  -2   1 1244.08   40.70 
  -5  -2  -1 1162.38   40.70 
   5  -2   1 1205.48   40.90 
  -5  -2  -1 1221.78   39.90 
  -5  -2  -1 1228.48   42.40 
   5  -2   1 1266.37   39.40 
  -5  -2  -1 1236.98   39.80 
  -5  -2  -1 1201.58   42.10 
  -5  -2  -1 1253.57   39.60 
  -5  -2  -1 1222.48   38.90 
  -5  -2  -1 1232.08   43.10 
   5  -2   1 1172.08   39.40 
   5  -2   1 1187.98   41.40 
  -5  -2  -1 1209.98   38.30 
  -5   2  -1 1176.28   40.60 
  -5   2  -1 1185.58   39.80 
  -5   2  -1 1281.17   38.20 
  -5   2  -1 1238.18   37.80 
   5   2   1 1197.48   41.40 
  -5   2  -1 1170.48   42.70 
   5   2   1 1175.88   39.90 
   5   2   1 1238.68   39.50 
  -5   2  -1 1180.18   38.50 
  -5   2  -1 1168.88   42.80 
   5   2   1 1222.78   42.40 
  -5   2  -1 1174.48   44.10 
  -5   2  -1 1235.18   42.00 
  -5   2  -1 1183.78   41.20 
   5   2   1 1199.88   41.00 
  -5   2  -1 1194.78   40.40 
   5   2   1 1229.78   42.30 
  -5   2  -1 1214.58   44.20 
  -5   2  -1 1254.37   39.70 
   5   2   1 1251.57   41.30 
   5   2   1 1169.48   39.70 
  -5   2  -1 1178.48   39.20 
   5   2   1 1176.78   39.10 
   5   2   1 1207.68   42.00 
   5   2   1 1213.08   39.90 
   5   2   1 1183.58   42.60 
  -5   2  -1 1231.08   42.00 
   5   2   1 1193.38   39.90 
  -5   2  -1 1235.48   42.40 
  -5   2  -1 1215.58   39.50 
   5   2   1 1221.08   39.60 
   6  -2   1 1089.49   39.50 
   6  -2   1 1054.79   35.60 
   6  -2   1 1074.39   36.60 
  -6  -2  -1 1023.20   36.00 
   6  -2   1 1071.89   38.50 
  -6  -2  -1 1065.29   35.90 
  -6  -2  -1 1141.99   43.90 
   6  -2   1 1042.90   35.50 
  -6  -2  -1 1067.39   32.40 
  -6  -2  -1 1105.19   38.80 
  -6  -2  -1 1051.19   40.60 
  -6  -2  -1 1116.69   34.30 
  -6  -2  -1 1006.60   36.70 
  -6  -2  -1 1055.69   35.60 
  -6  -2  -1 1075.79   35.90 
  -6  -2  -1 1072.99   35.00 
  -6  -2  -1 1072.29   36.30 
  -6  -2  -1 1072.09   36.30 
   6  -2   1 1046.80   35.10 
   6  -2   1 1028.70   38.20 
   6  -2   1 1067.29   37.20 
  -6  -2  -1 1053.19   36.50 
  -6   2  -1 1034.80   38.20 
  -6   2  -1 1070.39   34.90 
  -6   2  -1 1032.70   38.40 
   6   2   1 1030.60   36.00 
  -6   2  -1 1051.09   39.70 
  -6   2  -1 1068.89   34.00 
  -6   2  -1 1086.09   38.40 
  -6   2  -1 1053.09   35.90 
  -6   2  -1 1053.19   37.50 
   6   2   1 1042.00   38.70 
  -6   2  -1 1024.20   40.30 
   6   2   1 1037.00   35.00 
   6   2   1 1078.09   35.00 
   6   2   1 1051.19   35.10 
  -6   2  -1 1069.39   35.70 
  -6   2  -1 1051.29   33.60 
   6   2   1 1049.40   38.40 
  -6   2  -1 1018.40   40.80 
   6   2   1 1082.39   39.50 
  -6   2  -1 1066.19   35.60 
  -6   2  -1 1043.80   38.50 
   6   2   1 1049.59   37.30 
  -6   2  -1 1042.50   36.90 
   6   2   1 1009.00   36.10 
   6   2   1 1058.29   38.00 
   6   2   1 1027.30   35.80 
  -7  -2  -1 1496.95   50.59 
  -7  -2  -1 1643.64   48.40 
   7  -2   1 1521.25   49.90 
  -7  -2  -1 1511.75   50.29 
  -7  -2  -1 1528.25   50.09 
   7  -2   1 1500.25   53.29 
  -7  -2  -1 1451.15   50.29 
   7  -2   1 1545.65   51.09 
  -7  -2  -1 1528.85   49.40 
  -7  -2  -1 1481.95   50.19 
   7  -2   1 1522.85   52.29 
   7  -2   1 1527.15   53.19 
  -7  -2  -1 1491.85   51.19 
  -7  -2  -1 1483.65   53.39 
   7  -2   1 1545.35   50.29 
  -7  -2  -1 1529.85   51.39 
  -7  -2  -1 1497.15   50.69 
   7  -2   1 1535.35   50.09 
  -7  -2  -1 1495.65   55.89 
  -7   2  -1 1548.74   52.39 
  -7   2  -1 1543.75   52.29 
   7   2   1 1451.25   53.09 
  -7   2  -1 1554.24   50.09 
  -7   2  -1 1507.15   47.70 
   7   2   1 1494.35   50.89 
  -7   2  -1 1513.45   50.29 
  -7   2  -1 1555.44   50.29 
  -7   2  -1 1520.75   50.69 
  -7   2  -1 1545.55   53.89 
  -7   2  -1 1562.84   53.49 
  -7   2  -1 1560.04   48.30 
   7   2   1 1545.05   54.69 
  -7   2  -1 1451.75   54.99 
   7   2   1 1485.65   51.99 
   7   2   1 1516.55   48.30 
  -7   2  -1 1483.45   48.70 
   7   2   1 1470.45   50.69 
   7   2   1 1532.35   50.29 
  -7   2  -1 1555.24   53.69 
  -7   2  -1 1493.95   56.59 
   7   2   1 1435.46   52.79 
  -7   2  -1 1448.56   51.39 
   7   2   1 1516.65   49.50 
  -8  -2  -1  719.83   28.30 
  -8  -2  -1  741.13   27.60 
   8  -2   1  740.63   30.00 
   8  -2   1  769.62   28.50 
   8  -2   1  766.32   27.70 
  -8  -2  -1  719.23   27.50 
  -8  -2  -1  742.03   27.60 
   8  -2   1  733.13   27.60 
  -8  -2  -1  742.93   28.10 
  -8  -2  -1  656.73   32.40 
  -8  -2  -1  719.83   26.50 
   8  -2   1  736.73   30.20 
   8  -2   1  725.03   30.70 
  -8  -2  -1  698.43   27.20 
  -8  -2  -1  734.73   28.70 
  -8  -2  -1  744.93   31.00 
  -8  -2  -1  698.23   28.10 
  -8  -2  -1  715.53   28.00 
  -8   2  -1  731.63   27.30 
   8   2   1  753.82   26.90 
  -8   2  -1  725.33   30.60 
  -8   2  -1  742.13   29.40 
  -8   2  -1  691.33   28.80 
   8   2   1  715.63   27.30 
  -8   2  -1  723.83   32.40 
   8   2   1  742.83   32.10 
  -8   2  -1  691.03   27.40 
  -8   2  -1  700.13   30.40 
   8   2   1  712.63   30.60 
   8   2   1  742.73   28.80 
  -8   2  -1  742.43   31.50 
  -8   2  -1  703.53   27.90 
   8   2   1  749.73   28.30 
  -8   2  -1  724.63   27.30 
  -8   2  -1  711.53   34.10 
   8   2   1  720.73   30.60 
   8   2   1  752.92   29.80 
  -9  -2  -1 1154.88   45.50 
  -9  -2  -1 1153.48   41.30 
  -9  -2  -1 1125.99   41.90 
  -9  -2  -1 1099.99   47.80 
  -9  -2  -1 1141.49   41.20 
  -9  -2  -1 1134.89   41.10 
  -9  -2  -1 1188.78   41.60 
   9  -2   1 1207.58   42.30 
   9  -2   1 1141.69   41.20 
   9  -2   1 1101.29   44.80 
  -9  -2  -1 1171.68   42.10 
   9  -2   1 1160.58   44.50 
   9  -2   1 1100.89   43.80 
  -9   2  -1 1147.99   46.80 
  -9   2  -1 1165.88   41.20 
   9   2   1 1125.69   45.00 
  -9   2  -1 1201.78   46.40 
  -9   2  -1 1185.58   41.30 
  -9   2  -1 1122.19   44.90 
  -9   2  -1 1169.08   41.70 
   9   2   1 1208.78   40.80 
  -9   2  -1 1174.68   45.50 
  -9   2  -1 1200.88   43.50 
   9   2   1 1160.18   41.10 
  -9   2  -1 1087.39   49.20 
  -9   2  -1 1151.68   42.30 
   9   2   1 1149.48   43.80 
   9   2   1 1154.58   45.40 
   9   2   1 1186.98   47.10 
 -10  -2  -1  350.86   20.00 
 -10  -2  -1  342.97   17.30 
 -10  -2  -1  332.97   17.40 
 -10  -2  -1  333.17   22.90 
 -10  -2  -1  352.96   17.00 
  10  -2   1  330.67   19.40 
  10  -2   1  340.17   17.50 
 -10  -2  -1  356.56   21.00 
 -10  -2  -1  342.67   17.80 
 -10  -2  -1  331.47   17.10 
 -10  -2  -1  335.87   17.60 
 -10  -2  -1  356.06   18.60 
  10  -2   1  350.56   20.60 
  10   2   1  352.16   17.40 
 -10   2  -1  352.46   17.30 
 -10   2  -1  345.77   20.90 
  10   2   1  365.16   17.10 
 -10   2  -1  348.07   18.90 
 -10   2  -1  338.37   17.80 
  10   2   1  375.76   21.30 
 -10   2  -1  328.87   17.00 
  10   2   1  357.46   22.40 
 -10   2  -1  334.97   20.20 
 -10   2  -1  341.47   21.80 
 -10   2  -1  352.66   19.90 
 -10   2  -1  334.27   20.90 
  -9  -3   1  154.18   14.40 
  -9  -3   1  144.69   10.20 
  -9  -3   1  134.59   12.10 
   9  -3  -1  136.29   12.10 
  -9  -3   1  135.19    9.90 
   9  -3  -1  144.89   10.40 
   9  -3  -1  129.59   10.60 
  -9  -3   1  133.49   10.20 
  -9  -3   1  128.19   10.40 
  -9  -3   1  134.69    9.50 
  -9  -3   1  135.39    9.50 
   9  -3  -1  129.09   11.50 
  -9  -3   1  150.58   10.20 
  -9   3   1  145.29   10.50 
  -9   3   1  147.29   10.40 
  -9   3   1  129.89   11.80 
  -9   3   1  139.99   17.30 
   9   3  -1  162.58   12.90 
  -9   3   1  128.79    9.60 
  -9   3   1  126.79    9.80 
  -9   3   1  148.09   12.90 
   9   3  -1  149.09   12.90 
   9   3  -1  128.59   10.00 
   9   3  -1  137.89    9.20 
  -9   3   1  144.29   16.40 
   9   3  -1  141.69   13.20 
  -9   3   1  140.99   11.70 
   9   3  -1  155.68   11.90 
  -9   3   1  135.29   11.90 
  -8  -3   1  170.88   10.50 
   8  -3  -1  147.79   10.60 
   8  -3  -1  152.78   11.00 
   8  -3  -1  141.99   11.50 
  -8  -3   1  148.09    9.70 
  -8  -3   1  163.98   10.70 
  -8  -3   1  148.39    9.70 
  -8  -3   1  136.99   12.90 
   8  -3  -1  136.09   11.50 
  -8  -3   1  151.98    9.30 
  -8  -3   1  151.68    9.90 
   8  -3  -1  162.18   10.30 
  -8  -3   1  146.99    9.20 
  -8  -3   1  142.59    9.60 
  -8  -3   1  153.08   12.00 
  -8   3   1  152.08   14.00 
   8   3  -1  141.79   11.60 
   8   3  -1  163.78    9.10 
  -8   3   1  159.08   11.40 
   8   3  -1  146.99   11.90 
   8   3  -1  147.39   11.10 
  -8   3   1  139.69    9.60 
  -8   3   1  149.99   11.70 
  -8   3   1  149.49    9.50 
  -8   3   1  144.49   14.60 
  -8   3   1  166.98   10.10 
  -8   3   1  147.59    9.80 
   8   3  -1  156.28   12.80 
  -8   3   1  142.09   11.60 
   8   3  -1  145.39    9.80 
  -8   3   1  156.68   12.50 
   8   3  -1  142.09   10.90 
  -8   3   1  145.09    9.30 
  -7  -3   1  523.65   22.40 
   7  -3  -1  568.24   24.40 
  -7  -3   1  515.95   22.40 
   7  -3  -1  557.74   20.60 
  -7  -3   1  556.64   21.70 
  -7  -3   1  526.05   21.20 
   7  -3  -1  521.65   21.40 
   7  -3  -1  561.54   24.50 
  -7  -3   1  532.15   21.80 
  -7  -3   1  550.94   21.70 
  -7  -3   1  547.85   20.90 
  -7  -3   1  550.24   24.60 
   7  -3  -1  579.54   23.00 
  -7  -3   1  556.34   20.90 
  -7  -3   1  548.95   26.40 
   7  -3  -1  548.05   22.90 
  -7  -3   1  535.05   21.70 
   7  -3  -1  560.44   24.10 
  -7   3   1  564.84   23.50 
  -7   3   1  532.65   21.50 
   7   3  -1  579.74   22.60 
   7   3  -1  516.65   21.80 
   7   3  -1  549.45   22.00 
   7   3  -1  560.94   20.50 
   7   3  -1  538.25   25.00 
  -7   3   1  550.84   27.10 
  -7   3   1  536.55   21.30 
   7   3  -1  560.84   21.00 
  -7   3   1  546.75   21.60 
  -7   3   1  514.75   26.40 
  -7   3   1  557.74   21.80 
   7   3  -1  561.54   24.30 
  -7   3   1  543.65   19.10 
   7   3  -1  532.85   24.20 
  -7   3   1  546.85   24.20 
   7   3  -1  535.65   22.90 
   7   3  -1  559.74   24.80 
  -7   3   1  535.85   24.30 
  -7   3   1  523.25   23.30 
  -7   3   1  547.65   25.00 
  -6  -3   1 1221.88   44.00 
   6  -3  -1 1292.37   41.00 
  -6  -3   1 1311.57   40.80 
   6  -3  -1 1316.17   41.30 
   6  -3  -1 1309.17   43.10 
  -6  -3   1 1272.47   42.80 
   6  -3  -1 1243.78   45.20 
   6  -3  -1 1309.47   41.80 
  -6  -3   1 1268.97   42.30 
  -6  -3   1 1331.67   41.90 
  -6  -3   1 1298.57   44.30 
  -6  -3   1 1279.27   43.20 
  -6  -3   1 1257.67   42.80 
   6  -3  -1 1325.57   46.30 
   6  -3  -1 1291.97   42.70 
   6  -3  -1 1279.77   45.70 
  -6  -3   1 1291.77   46.20 
   6  -3  -1 1350.36   44.00 
  -6  -3   1 1253.17   42.10 
  -6  -3   1 1293.27   47.90 
   6  -3  -1 1278.77   51.49 
   6  -3  -1 1274.57   44.20 
  -6  -3   1 1289.07   43.60 
  -6  -3   1 1264.67   43.10 
   6  -3  -1 1308.77   44.70 
   6   3  -1 1283.97   41.80 
   6   3  -1 1268.47   44.30 
  -6   3   1 1258.37   42.80 
  -6   3   1 1265.67   44.70 
   6   3  -1 1264.57   46.10 
  -6   3   1 1287.07   46.20 
  -6   3   1 1316.97   45.30 
  -6   3   1 1267.57   46.60 
   6   3  -1 1356.46   43.50 
   6   3  -1 1263.27   46.00 
  -6   3   1 1284.77   40.30 
  -6   3   1 1305.57   45.40 
  -6   3   1 1261.07   47.40 
   6   3  -1 1314.17   45.80 
  -6   3   1 1294.37   43.00 
  -6   3   1 1285.47   45.50 
  -6   3   1 1247.38   48.30 
   6   3  -1 1310.37   46.90 
  -6   3   1 1349.16   43.50 
   6   3  -1 1261.57   40.80 
   6   3  -1 1279.27   46.50 
   6   3  -1 1278.27   42.50 
  -6   3   1 1300.17   43.80 
  -6   3   1 1275.57   48.50 
   6   3  -1 1240.28   43.40 
   5  -3  -1 2325.37   73.99 
  -5  -3   1 2233.38   73.99 
   5  -3  -1 2418.86   78.49 
   5  -3  -1 2271.17   72.79 
  -5  -3   1 2306.57   72.69 
  -5  -3   1 2401.66   73.19 
  -5  -3   1 2317.57   72.79 
  -5  -3   1 2277.07   72.99 
   5  -3  -1 2339.17   73.69 
   5  -3  -1 2339.67   75.19 
   5  -3  -1 2336.47   78.29 
  -5  -3   1 2418.36   70.99 
  -5  -3   1 2334.67   73.49 
   5  -3  -1 2303.07   75.09 
   5  -3  -1 2371.46   75.89 
   5  -3  -1 2297.47   74.49 
  -5  -3   1 2365.56   71.49 
   5  -3  -1 2270.27   71.39 
   5  -3  -1 2337.37   71.89 
   5  -3  -1 2369.76   73.29 
  -5  -3   1 2271.87   76.89 
   5  -3  -1 2341.37   70.99 
   5  -3  -1 2331.87   70.49 
  -5  -3   1 2335.87   75.89 
   5  -3  -1 2306.37   75.49 
  -5  -3   1 2285.07   72.19 
  -5  -3   1 2330.77   71.99 
   5   3  -1 2247.58   73.79 
   5   3  -1 2344.07   75.99 
  -5   3   1 2310.77   72.69 
  -5   3   1 2211.58   77.39 
  -5   3   1 2332.67   76.09 
   5   3  -1 2346.57   75.89 
   5   3  -1 2408.56   73.59 
  -5   3   1 2375.26   76.79 
  -5   3   1 2211.48   69.89 
  -5   3   1 2168.88   77.49 
  -5   3   1 2176.28   77.29 
  -5   3   1 2265.27   74.09 
   5   3  -1 2312.87   71.19 
  -5   3   1 2322.97   74.69 
  -5   3   1 2335.17   74.89 
   5   3  -1 2231.28   76.69 
  -5   3   1 2313.27   78.39 
   5   3  -1 2319.77   71.69 
  -5   3   1 2312.87   70.89 
  -5   3   1 2281.37   75.39 
   5   3  -1 2317.77   75.19 
   5   3  -1 2316.57   76.39 
   5   3  -1 2364.16   72.69 
   5   3  -1 2329.17   75.99 
  -5   3   1 2353.66   70.29 
  -5   3   1 2263.77   74.79 
  -5   3   1 2370.96   73.39 
   5   3  -1 2261.37   72.69 
  -4  -3   1  794.72   29.10 
  -4  -3   1  793.82   26.10 
   4  -3  -1  795.52   24.90 
  -4  -3   1  777.72   25.80 
  -4  -3   1  792.52   26.80 
  -4  -3   1  752.82   27.60 
   4  -3  -1  786.22   24.60 
   4  -3  -1  774.62   28.70 
   4  -3  -1  802.32   25.30 
  -4  -3   1  790.82   27.20 
  -4  -3   1  804.22   27.00 
   4  -3  -1  782.72   26.60 
  -4  -3   1  790.12   29.00 
   4  -3  -1  778.82   26.70 
   4  -3  -1  798.92   27.90 
  -4  -3   1  799.62   29.90 
   4  -3  -1  782.42   28.30 
  -4  -3   1  794.52   26.20 
   4  -3  -1  842.92   29.50 
   4  -3  -1  746.73   28.60 
   4  -3  -1  786.92   25.50 
  -4  -3   1  784.52   26.40 
   4  -3  -1  821.72   28.50 
   4  -3  -1  765.62   30.60 
   4  -3  -1  829.12   29.20 
   4  -3  -1  777.82   31.30 
   4  -3  -1  785.52   28.80 
  -4  -3   1  799.92   25.60 
  -4   3   1  743.03   25.70 
   4   3  -1  767.02   25.50 
  -4   3   1  770.12   28.40 
   4   3  -1  797.82   26.40 
  -4   3   1  767.72   29.50 
  -4   3   1  813.82   29.70 
  -4   3   1  796.82   30.40 
   4   3  -1  788.22   27.30 
  -4   3   1  769.12   31.70 
  -4   3   1  779.82   30.80 
  -4   3   1  770.72   24.90 
   4   3  -1  817.72   26.80 
  -4   3   1  778.32   24.50 
   4   3  -1  789.82   29.00 
   4   3  -1  762.82   29.40 
  -4   3   1  757.12   27.20 
  -4   3   1  786.82   26.60 
  -4   3   1  777.42   30.40 
  -4   3   1  779.42   29.20 
  -4   3   1  707.23   30.30 
   4   3  -1  771.02   29.90 
  -4   3   1  786.52   28.10 
   4   3  -1  823.62   27.80 
   4   3  -1  809.32   29.30 
   4   3  -1  794.22   28.60 
  -4   3   1  763.82   28.50 
   4   3  -1  784.02   25.60 
   4   3  -1  780.72   27.40 
  -4   3   1  809.32   28.60 
   3  -3  -1 3146.69   96.29 
   3  -3  -1 3099.49   93.19 
   3  -3  -1 3091.59   92.99 
   3  -3  -1 3049.20   97.19 
   3  -3  -1 3152.28   99.09 
  -3  -3   1 3314.47   97.49 
  -3  -3   1 3126.29   95.29 
  -3  -3   1 3096.09   94.79 
  -3  -3   1 3104.39   95.39 
   3  -3  -1 3156.68   97.19 
  -3  -3   1 3119.59   95.19 
  -3  -3   1 3086.29   96.69 
   3  -3  -1 3116.69   94.89 
  -3  -3   1 3138.79   97.39 
   3  -3  -1 2980.20   96.69 
   3  -3  -1 3156.28   92.89 
  -3  -3   1 3177.88   94.49 
   3  -3  -1 3095.99   93.69 
  -3  -3   1 3115.49   95.19 
   3  -3  -1 2921.51   97.09 
   3  -3  -1 3052.69   97.59 
  -3  -3   1 3138.89   93.79 
   3  -3  -1 3184.18   94.49 
   3  -3  -1 3123.49   95.49 
  -3  -3   1 3139.39   95.99 
   3  -3  -1 2943.71   99.99 
  -3  -3   1 3229.48   97.89 
   3  -3  -1 3055.69   97.19 
  -3  -3   1 3080.89   97.19 
   3  -3  -1 3209.58   95.59 
   3  -3  -1 3013.40   96.99 
  -3   3   1 2964.00   95.69 
  -3   3   1 2851.41   97.39 
  -3   3   1 3107.29   94.79 
   3   3  -1 3153.78   95.69 
   3   3  -1 3052.59   94.39 
  -3   3   1 3176.38  102.29 
   3   3  -1 3154.58   95.09 
  -3   3   1 2881.61   93.29 
  -3   3   1 2997.20   98.29 
  -3   3   1 3233.28   99.79 
   3   3  -1 3135.59   96.89 
   3   3  -1 3174.48   97.59 
   3   3  -1 3147.89   93.79 
   3   3  -1 3033.80   97.59 
  -3   3   1 3143.69   97.59 
   3   3  -1 3204.68   93.79 
   3   3  -1 3096.59   98.19 
   3   3  -1 3132.59   96.79 
  -3   3   1 2870.11   98.19 
  -3   3   1 3049.59   96.79 
   3   3  -1 3053.69   95.49 
  -3   3   1 2978.40   92.99 
  -3   3   1 3127.79   98.19 
  -3   3   1 3139.39   96.09 
  -3   3   1 3083.79   98.99 
   3   3  -1 3158.08   96.69 
  -3   3   1 2987.30   98.19 
   3   3  -1 3071.29   95.39 
  -3   3   1 3099.69   95.09 
  -3   3   1 3115.39   96.19 
   3   3  -1 3095.89   94.49 
  -3   3   1 3144.29   99.99 
   3   3  -1 3111.59   94.59 
   2  -3  -1  452.05   14.30 
  -2  -3   1  467.45   17.80 
   2  -3  -1  441.36   17.80 
  -2  -3   1  464.65   16.60 
   2  -3  -1  451.15   17.20 
   2  -3  -1  416.86   18.80 
  -2  -3   1  470.05   16.20 
  -2  -3   1  436.26   16.30 
   2  -3  -1  461.85   14.80 
   2  -3  -1  472.75   19.60 
   2  -3  -1  475.15   14.60 
   2  -3  -1  448.26   17.30 
   2  -3  -1  461.45   17.00 
   2  -3  -1  456.95   18.50 
   2  -3  -1  447.46   17.60 
  -2  -3   1  467.25   17.30 
   2  -3  -1  461.35   16.60 
  -2  -3   1  458.05   16.10 
  -2  -3   1  457.55   14.70 
  -2  -3   1  452.85   16.70 
   2  -3  -1  464.45   15.10 
   2  -3  -1  403.46   17.20 
   2  -3  -1  457.55   17.90 
  -2  -3   1  474.85   17.90 
   2  -3  -1  420.76   20.40 
  -2  -3   1  459.75   14.70 
  -2  -3   1  476.05   18.40 
  -2  -3   1  446.26   15.90 
  -2  -3   1  462.65   17.30 
   2  -3  -1  467.35   18.10 
  -2  -3   1  453.65   14.90 
   2  -3  -1  451.05   16.10 
   2   3  -1  474.35   16.80 
  -2   3   1  477.65   16.50 
  -2   3   1  418.06   19.40 
  -2   3   1  424.16   19.60 
  -2   3   1  443.06   19.10 
   2   3  -1  436.26   18.30 
   2   3  -1  470.65   18.90 
   2   3  -1  491.35   16.50 
   2   3  -1  448.96   15.60 
  -2   3   1  437.86   17.00 
  -2   3   1  450.45   18.30 
   2   3  -1  466.85   17.20 
  -2   3   1  457.25   17.90 
  -2   3   1  398.76   22.10 
   2   3  -1  451.35   15.90 
  -2   3   1  423.36   20.90 
  -2   3   1  474.55   18.80 
  -2   3   1  452.35   18.80 
   2   3  -1  466.45   15.00 
   2   3  -1  476.65   15.60 
   2   3  -1  454.55   15.10 
   2   3  -1  446.76   18.10 
   2   3  -1  474.55   17.70 
  -2   3   1  390.56   22.90 
   2   3  -1  466.85   17.40 
   2   3  -1  462.45   18.20 
  -2   3   1  458.65   16.00 
  -2   3   1  435.46   16.30 
  -2   3   1  490.25   19.10 
   2   3  -1  460.25   16.30 
   1  -3  -1 3115.69   97.99 
  -1  -3   1 3298.17   99.49 
  -1  -3   1 3358.96   98.99 
   1  -3  -1 3399.46   98.79 
  -1  -3   1 3302.57   98.99 
   1  -3  -1 3332.07   99.99 
  -1  -3   1 3191.08   97.69 
   1  -3  -1 3232.28  100.09 
  -1  -3   1 3411.26   99.69 
   1  -3  -1 3244.18  104.09 
  -1  -3   1 3255.27  100.39 
  -1  -3   1 3259.27  100.89 
   1  -3  -1 3272.37  100.19 
  -1  -3   1 3133.69   97.69 
   1  -3  -1 3343.17  103.19 
   1  -3  -1 3309.17  100.39 
  -1  -3   1 3358.96   98.69 
  -1  -3   1 3330.17   98.69 
  -1  -3   1 3372.26  101.69 
   1  -3  -1 3278.17   99.49 
   1  -3  -1 3179.48  100.89 
  -1  -3   1 3516.85  101.39 
   1  -3  -1 3233.08  101.89 
  -1  -3   1 3262.97   99.29 
  -1  -3   1 3307.27   99.89 
   1  -3  -1 3129.29   98.69 
   1  -3  -1 3275.07  100.99 
  -1  -3   1 3159.38   99.09 
   1  -3  -1 3142.09  105.09 
  -1  -3   1 3425.96   99.09 
  -1  -3   1 3123.69  101.79 
  -1  -3   1 3301.77  102.69 
   1  -3  -1 3311.37  100.29 
  -1  -3   1 3263.27   98.69 
  -1  -3   1 3348.76   99.59 
   1  -3  -1 3329.17  106.09 
   1  -3  -1 3268.27   98.39 
   1  -3  -1 3328.67  109.09 
  -1  -3   1 3297.47  100.69 
   1  -3  -1 3194.38  100.19 
   1  -3  -1 3340.07  100.39 
  -1  -3   1 3355.86   99.99 
  -1  -3   1 3451.05  100.59 
   1   3  -1 3212.08  101.19 
   1   3  -1 3208.88  100.29 
  -1   3   1 3286.87  101.29 
   1   3  -1 3356.26   98.59 
   1   3  -1 3286.77  101.79 
  -1   3   1 3330.17   99.99 
  -1   3   1 2974.20  102.99 
   1   3  -1 3317.37   98.39 
  -1   3   1 3240.68  102.19 
  -1   3   1 3125.79   99.79 
   1   3  -1 3003.90   99.99 
   1   3  -1 3279.27   98.69 
  -1   3   1 3245.78  101.79 
  -1   3   1 3192.48   99.49 
   1   3  -1 3407.86  102.89 
  -1   3   1 3162.48   99.49 
   1   3  -1 3378.66  101.89 
   1   3  -1 3273.87  100.19 
  -1   3   1 3107.69  104.49 
   1   3  -1 3253.17  100.89 
  -1   3   1 3127.49   99.79 
   1   3  -1 3234.08   99.39 
   1   3  -1 3623.54   97.39 
   1   3  -1 3370.06   98.89 
   1   3  -1 3309.37   99.19 
   1   3  -1 3238.48  103.59 
  -1   3   1 3259.47  103.79 
  -1   3   1 3136.89   99.99 
  -1   3   1 3202.28  100.09 
   1   3  -1 3114.19  101.19 
  -1   3   1 3257.07   99.79 
   1   3  -1 3374.26   99.19 
   1   3  -1 3254.77   99.49 
  -1   3   1 2953.00  100.39 
  -1   3   1 2871.41  104.49 
  -1   3   1 2725.23  106.29 
  -1   3   1 3304.37  101.19 
   1   3  -1 3278.97   98.29 
  -1   3   1 3264.07  100.29 
  -1   3   1 3079.89  102.49 
  -1   3   1 2932.51  106.69 
   0  -3  -1  347.27   14.00 
   0  -3  -1  362.76   13.40 
   0  -3  -1  354.16   13.90 
   0  -3   1  371.46   11.80 
   0  -3  -1  339.17   17.40 
   0  -3  -1  358.66   12.60 
   0  -3   1  338.17   17.50 
   0  -3   1  384.36   15.20 
   0  -3  -1  358.66   14.90 
   0  -3   1  373.36   12.40 
   0  -3   1  350.46   17.10 
   0  -3   1  372.76   11.80 
   0  -3  -1  367.06   12.90 
   0  -3   1  363.46   13.80 
   0  -3  -1  360.86   12.60 
   0  -3   1  370.26   14.30 
   0  -3  -1  367.66   15.60 
   0  -3   1  380.46   18.00 
   0  -3   1  369.86   14.70 
   0  -3   1  383.96   15.90 
   0  -3   1  349.27   13.00 
   0  -3  -1  363.86   15.80 
   0  -3  -1  340.77   13.70 
   0  -3   1  355.06   13.60 
   0  -3   1  367.26   13.40 
   0  -3  -1  326.87   13.80 
   0  -3  -1  364.26   13.90 
   0  -3   1  355.26   12.00 
   0  -3   1  364.46   13.30 
   0  -3  -1  378.16   13.10 
   0  -3  -1  358.56   13.20 
   0  -3   1  335.07   14.50 
   0  -3  -1  365.26   14.50 
   0  -3   1  369.26   12.60 
   0  -3   1  377.36   12.10 
   0  -3   1  368.66   13.00 
   0  -3  -1  344.37   17.90 
   0  -3  -1  357.26   13.50 
   0  -3   1  337.87   15.80 
   0  -3  -1  362.16   14.70 
   0  -3  -1  365.16   14.10 
   0  -3  -1  364.16   13.00 
   0  -3   1  355.46   13.60 
   0  -3  -1  328.17   16.10 
   0   3   1  384.46   13.80 
   0   3  -1  360.56   12.80 
   0   3   1  374.86   13.00 
   0   3  -1  310.97   14.00 
   0   3  -1  363.76   12.00 
   0   3   1  349.17   14.30 
   0   3   1  375.96   12.70 
   0   3   1  374.16   15.00 
   0   3  -1  347.77   17.50 
   0   3  -1  338.87   12.90 
   0   3   1  365.56   14.00 
   0   3  -1  344.97   14.00 
   0   3   1  367.26   13.10 
   0   3  -1  372.86   13.10 
   0   3  -1  330.17   14.20 
   0   3  -1  338.37   16.40 
   0   3  -1  355.86   16.40 
   0   3  -1  359.96   12.60 
   0   3  -1  375.46   13.10 
   0   3   1  327.87   16.00 
   0   3   1  362.76   15.00 
   0   3   1  360.06   14.10 
   0   3  -1  336.87   16.70 
   0   3  -1  336.77   14.60 
   0   3   1  339.57   15.90 
   0   3  -1  363.86   11.90 
   0   3   1  386.26   15.90 
   0   3  -1  309.57   15.70 
   0   3   1  347.47   19.00 
   0   3  -1  372.56   12.30 
   0   3  -1  367.26   17.70 
   0   3   1  344.17   14.90 
   0   3   1  369.46   13.10 
   0   3   1  380.96   14.30 
   0   3  -1  347.57   15.90 
   0   3  -1  344.47   14.70 
   0   3   1  440.96   20.10 
  -1  -3  -1 5434.66  168.28 
   1  -3   1 5762.72  168.68 
  -1  -3  -1 5457.25  167.68 
   1  -3   1 5683.03  167.78 
   1  -3   1 5673.43  170.18 
   1  -3   1 5403.26  166.98 
  -1  -3  -1 5678.43  170.08 
  -1  -3  -1 5531.75  170.88 
  -1  -3  -1 5558.34  168.08 
  -1  -3  -1 5487.85  168.28 
   1  -3   1 5580.34  169.08 
   1  -3   1 5931.21  168.08 
  -1  -3  -1 5830.52  169.08 
  -1  -3  -1 5618.34  170.78 
  -1  -3  -1 5471.55  169.18 
  -1  -3  -1 5536.15  168.68 
   1  -3   1 5733.53  168.78 
   1  -3   1 5595.64  166.48 
  -1  -3  -1 5593.04  169.28 
   1  -3   1 5672.13  170.18 
  -1  -3  -1 5542.25  168.68 
  -1  -3  -1 5748.52  171.28 
  -1  -3  -1 5559.34  168.98 
  -1  -3  -1 5473.75  169.58 
   1  -3   1 5741.93  170.28 
  -1  -3  -1 5512.45  167.28 
   1  -3   1 5661.03  177.58 
   1  -3   1 5449.75  169.98 
   1  -3   1 5538.35  167.58 
   1  -3   1 5417.46  168.68 
  -1  -3  -1 5604.34  167.78 
   1  -3   1 5488.15  168.68 
   1  -3   1 5535.85  169.28 
  -1  -3  -1 6007.40  172.38 
  -1  -3  -1 5503.85  169.38 
   1  -3   1 5487.55  169.58 
  -1  -3  -1 5453.65  169.08 
   1  -3   1 5371.36  166.88 
   1  -3   1 5561.84  169.48 
  -1  -3  -1 5480.95  168.48 
   1  -3   1 5385.86  167.48 
  -1   3  -1 5694.93  168.18 
   1   3   1 5645.64  168.98 
   1   3   1 5623.04  172.38 
   1   3   1 5675.93  169.28 
  -1   3  -1 5765.12  169.58 
   1   3   1 5526.95  169.38 
   1   3   1 5644.33  169.78 
  -1   3  -1 5480.25  168.78 
  -1   3  -1 4705.23  172.38 
   1   3   1 5381.46  169.98 
  -1   3  -1 5840.92  169.38 
   1   3   1 5808.72  170.58 
   1   3   1 5380.26  168.28 
   1   3   1 5806.42  171.58 
   1   3   1 5430.66  168.48 
  -1   3  -1 5622.24  167.88 
   1   3   1 5558.04  168.98 
  -1   3  -1 5794.52  169.98 
   1   3   1 5685.43  168.58 
  -1   3  -1 5047.19  174.58 
   1   3   1 5650.23  168.98 
  -1   3  -1 5469.75  169.18 
  -1   3  -1 5873.51  170.78 
   1   3   1 5636.74  169.58 
   1   3   1 5748.62  167.98 
  -1   3  -1 5064.19  173.48 
  -1   3  -1 5876.41  169.58 
   1   3   1 5572.34  168.08 
   1   3   1 5693.53  168.78 
  -1   3  -1 5590.64  168.88 
  -1   3  -1 5650.43  173.58 
  -1   3  -1 5550.24  171.78 
   1   3   1 5667.43  168.48 
  -1   3  -1 5336.67  174.68 
   1   3   1 5657.23  169.08 
   1   3   1 5867.91  169.68 
  -1   3  -1 5268.47  176.58 
   2  -3   1 1108.29   34.40 
   2  -3   1 1084.09   35.60 
   2  -3   1 1106.39   36.90 
  -2  -3  -1 1078.59   35.00 
  -2  -3  -1 1121.89   37.20 
  -2  -3  -1 1047.10   37.00 
   2  -3   1 1104.19   34.30 
  -2  -3  -1 1043.30   34.20 
  -2  -3  -1 1080.59   35.30 
  -2  -3  -1 1122.39   36.10 
   2  -3   1 1075.89   36.60 
   2  -3   1 1058.99   36.10 
   2  -3   1 1058.49   35.20 
  -2  -3  -1 1131.89   36.90 
  -2  -3  -1 1118.99   35.60 
  -2  -3  -1 1083.39   34.10 
   2  -3   1 1092.89   34.40 
   2  -3   1 1081.89   34.20 
  -2  -3  -1 1141.89   37.20 
  -2  -3  -1 1093.89   35.70 
   2  -3   1 1098.39   35.30 
  -2  -3  -1 1096.19   35.50 
  -2  -3  -1 1094.19   35.10 
   2  -3   1  998.80   39.20 
  -2  -3  -1 1113.89   37.10 
   2  -3   1 1098.19   36.40 
   2  -3   1 1062.19   36.60 
  -2  -3  -1 1103.49   35.30 
   2   3   1 1099.29   36.70 
  -2   3  -1 1023.00   39.10 
  -2   3  -1 1081.99   34.20 
  -2   3  -1 1054.29   36.80 
   2   3   1 1136.09   35.80 
   2   3   1 1129.59   33.90 
  -2   3  -1 1108.09   36.20 
  -2   3  -1 1082.79   36.70 
   2   3   1 1097.29   35.70 
  -2   3  -1 1076.29   37.80 
  -2   3  -1 1095.09   37.30 
   2   3   1 1082.29   35.90 
   2   3   1 1067.99   36.40 
   2   3   1 1048.50   33.30 
   2   3   1 1111.19   37.30 
   2   3   1 1099.59   35.40 
  -2   3  -1 1024.00   41.80 
  -2   3  -1 1048.60   37.10 
  -2   3  -1 1094.39   34.50 
   2   3   1 1110.79   36.70 
  -2   3  -1 1042.00   40.00 
  -2   3  -1 1110.09   34.90 
   2   3   1 1119.79   35.80 
   2   3   1 1099.09   37.50 
  -2   3  -1 1009.80   41.40 
   2   3   1 1150.78   34.50 
   2   3   1 1120.29   34.40 
   2   3   1 1046.70   35.00 
   2   3   1 1145.89   38.30 
   2   3   1 1106.19   34.80 
   3  -3   1 2541.05   84.59 
  -3  -3  -1 2611.34   80.79 
   3  -3   1 2617.34   80.19 
   3  -3   1 2696.23   80.69 
   3  -3   1 2634.54   81.99 
   3  -3   1 2628.34   81.19 
  -3  -3  -1 2560.14   83.59 
  -3  -3  -1 2623.64   79.99 
  -3  -3  -1 2627.74   81.49 
  -3  -3  -1 2646.34   80.89 
  -3  -3  -1 2662.73   82.99 
  -3  -3  -1 2703.03   83.19 
  -3  -3  -1 2624.74   82.29 
  -3  -3  -1 2665.83   81.09 
   3  -3   1 2688.43   82.39 
  -3  -3  -1 2599.04   83.09 
   3  -3   1 2612.24   82.29 
   3  -3   1 2591.84   82.99 
   3  -3   1 2668.53   79.29 
  -3  -3  -1 2688.23   81.09 
  -3  -3  -1 2652.33   82.19 
   3  -3   1 2679.33   79.59 
   3  -3   1 2678.03   83.59 
   3  -3   1 2596.14   82.19 
  -3  -3  -1 2558.44   80.69 
  -3   3  -1 2707.93   86.99 
   3   3   1 2608.14   79.49 
   3   3   1 2585.84   81.39 
   3   3   1 2601.14   80.09 
  -3   3  -1 2533.35   87.19 
  -3   3  -1 2637.14   80.69 
   3   3   1 2638.04   81.59 
  -3   3  -1 2478.05   78.29 
   3   3   1 2684.43   83.19 
  -3   3  -1 2648.54   84.99 
   3   3   1 2594.74   79.59 
   3   3   1 2520.25   82.59 
   3   3   1 2462.35   81.09 
   3   3   1 2649.73   79.99 
  -3   3  -1 2599.04   83.69 
   3   3   1 2637.04   83.69 
   3   3   1 2639.04   81.89 
   3   3   1 2653.63   82.89 
  -3   3  -1 2628.34   82.19 
   3   3   1 2555.74   83.39 
  -3   3  -1 2671.73   84.59 
  -3   3  -1 2639.44   80.99 
  -3   3  -1 2373.56   84.59 
  -3   3  -1 2633.74   83.89 
   3   3   1 2687.13   81.89 
  -3   3  -1 2579.04   85.49 
  -3   3  -1 2423.36   85.59 
  -3   3  -1 2685.93   81.39 
  -3   3  -1 2613.14   80.19 
   3   3   1 2688.03   78.89 
  -4  -3  -1  476.95   17.50 
  -4  -3  -1  480.85   18.10 
  -4  -3  -1  471.45   17.30 
   4  -3   1  468.25   18.70 
  -4  -3  -1  453.85   18.50 
   4  -3   1  460.45   15.60 
  -4  -3  -1  448.46   20.20 
  -4  -3  -1  460.65   16.60 
   4  -3   1  471.35   16.50 
  -4  -3  -1  466.75   16.60 
   4  -3   1  469.85   20.10 
   4  -3   1  460.95   14.80 
   4  -3   1  455.75   16.40 
   4  -3   1  483.85   19.60 
   4  -3   1  462.85   16.80 
  -4  -3  -1  464.55   17.50 
   4  -3   1  428.36   21.30 
  -4  -3  -1  477.35   19.40 
  -4  -3  -1  470.45   17.40 
   4  -3   1  472.05   18.40 
   4  -3   1  469.35   17.70 
   4  -3   1  448.26   15.50 
   4  -3   1  470.55   18.80 
   4  -3   1  468.65   20.10 
   4  -3   1  480.85   15.00 
  -4  -3  -1  464.45   15.50 
   4  -3   1  459.65   15.30 
  -4  -3  -1  478.85   19.50 
  -4  -3  -1  460.45   17.10 
  -4  -3  -1  485.15   19.80 
  -4   3  -1  437.66   16.70 
   4   3   1  456.45   18.10 
   4   3   1  486.55   17.70 
   4   3   1  493.35   19.60 
  -4   3  -1  462.95   17.30 
  -4   3  -1  460.95   16.70 
   4   3   1  464.25   15.30 
  -4   3  -1  434.66   21.40 
  -4   3  -1  488.55   21.10 
  -4   3  -1  466.15   20.70 
  -4   3  -1  447.16   21.00 
   4   3   1  479.25   16.40 
   4   3   1  466.85   18.40 
   4   3   1  472.35   20.20 
   4   3   1  460.15   16.40 
  -4   3  -1  489.65   20.20 
  -4   3  -1  480.45   20.00 
  -4   3  -1  468.95   20.10 
  -4   3  -1  448.36   18.90 
   4   3   1  471.85   19.30 
   4   3   1  469.85   17.70 
   4   3   1  458.35   16.30 
  -4   3  -1  477.35   18.00 
   4   3   1  459.35   16.40 
  -4   3  -1  453.55   18.90 
  -4   3  -1  450.65   21.10 
   4   3   1  463.05   19.50 
  -4   3  -1  481.55   18.70 
  -4   3  -1  450.05   15.00 
   4   3   1  453.95   19.60 
  -4   3  -1  463.85   14.50 
   5  -3   1  590.64   23.00 
   5  -3   1  550.94   24.30 
  -5  -3  -1  538.05   24.00 
  -5  -3  -1  571.74   22.80 
  -5  -3  -1  535.05   19.90 
   5  -3   1  555.24   18.20 
   5  -3   1  560.44   20.00 
   5  -3   1  544.05   18.80 
   5  -3   1  530.35   19.70 
   5  -3   1  541.45   19.60 
  -5  -3  -1  551.24   20.30 
  -5  -3  -1  555.44   18.70 
   5  -3   1  557.24   21.40 
  -5  -3  -1  558.44   20.60 
  -5  -3  -1  570.54   19.70 
   5  -3   1  547.95   21.70 
  -5  -3  -1  528.25   20.10 
   5  -3   1  538.55   22.90 
   5  -3   1  554.84   17.00 
   5  -3   1  554.14   18.60 
  -5  -3  -1  511.95   21.20 
  -5  -3  -1  535.95   20.80 
  -5  -3  -1  539.95   22.60 
  -5  -3  -1  529.55   20.30 
   5  -3   1  545.95   17.90 
  -5   3  -1  552.84   17.50 
  -5   3  -1  521.65   22.10 
  -5   3  -1  542.25   21.50 
   5   3   1  536.95   19.30 
  -5   3  -1  526.05   21.60 
  -5   3  -1  539.25   18.00 
   5   3   1  538.45   21.70 
  -5   3  -1  530.75   25.30 
  -5   3  -1  538.15   22.90 
  -5   3  -1  564.94   22.00 
  -5   3  -1  553.54   23.00 
   5   3   1  546.75   23.10 
   5   3   1  548.35   20.50 
  -5   3  -1  565.64   19.90 
   5   3   1  534.15   22.40 
   5   3   1  556.44   20.50 
  -5   3  -1  520.55   24.80 
  -5   3  -1  558.74   24.40 
   5   3   1  539.15   21.30 
  -5   3  -1  533.65   20.90 
  -5   3  -1  517.35   23.70 
   5   3   1  548.05   19.60 
  -5   3  -1  538.65   20.10 
   5   3   1  540.25   22.60 
  -5   3  -1  499.25   23.90 
   5   3   1  538.15   22.90 
   6  -3   1  313.57   15.80 
  -6  -3  -1  286.27   13.40 
  -6  -3  -1  295.97   13.10 
   6  -3   1  275.57   11.80 
   6  -3   1  291.77   14.50 
   6  -3   1  291.17   13.20 
  -6  -3  -1  283.37   13.20 
  -6  -3  -1  273.87   13.90 
  -6  -3  -1  262.77   16.20 
  -6  -3  -1  290.97   13.10 
  -6  -3  -1  292.77   15.40 
  -6  -3  -1  276.87   12.50 
   6  -3   1  258.57   14.50 
   6  -3   1  279.37   10.40 
   6  -3   1  284.37   12.70 
  -6  -3  -1  299.47   12.60 
   6  -3   1  258.17   11.00 
  -6  -3  -1  296.77   13.20 
   6  -3   1  288.17   13.80 
  -6  -3  -1  277.57   10.60 
  -6   3  -1  280.87   13.20 
   6   3   1  277.77   12.80 
   6   3   1  295.77   13.10 
   6   3   1  292.27   15.40 
  -6   3  -1  311.17   15.80 
  -6   3  -1  283.27   12.90 
   6   3   1  291.27   12.60 
  -6   3  -1  298.37   12.90 
  -6   3  -1  286.07   14.30 
  -6   3  -1  270.37   14.10 
   6   3   1  263.77   12.80 
  -6   3  -1  251.07   16.10 
   6   3   1  278.87   12.00 
  -6   3  -1  264.37   14.00 
   6   3   1  277.37   14.30 
   6   3   1  269.47   15.20 
  -6   3  -1  275.47   12.40 
   6   3   1  279.67   15.00 
  -6   3  -1  275.37   10.20 
  -6   3  -1  292.17   15.50 
   6   3   1  300.47   12.70 
   6   3   1  275.87   15.40 
  -6   3  -1  271.17   17.20 
   6   3   1  285.57   14.10 
  -6   3  -1  304.47   18.60 
  -6   3  -1  265.37   14.20 
  -7  -3  -1   12.10    4.70 
  -7  -3  -1   10.50    3.50 
  -7  -3  -1   11.10    3.10 
  -7  -3  -1   16.30    3.70 
  -7  -3  -1   16.90    4.00 
   7  -3   1   43.90    6.90 
  -7  -3  -1   15.60    4.50 
   7  -3   1   13.60    3.90 
   7  -3   1   13.40    5.00 
   7  -3   1   15.40    3.90 
  -7  -3  -1   11.70    3.30 
  -7  -3  -1   17.80    4.00 
  -7  -3  -1   15.70    3.80 
   7  -3   1   11.20    3.40 
  -7  -3  -1   12.20    3.40 
  -7   3  -1   13.30    4.20 
   7   3   1    5.90    3.70 
   7   3   1   17.20    3.70 
  -7   3  -1   32.30    4.70 
  -7   3  -1   13.90    6.10 
  -7   3  -1   13.40    4.20 
   7   3   1   16.40    4.70 
  -7   3  -1   15.40    3.40 
   7   3   1   15.40    3.30 
   7   3   1   17.60    5.40 
  -7   3  -1   19.20    4.90 
  -7   3  -1   15.30    6.60 
  -7   3  -1   15.00    3.60 
   7   3   1   13.40    4.70 
   7   3   1   15.40    3.70 
  -7   3  -1   12.20    3.70 
  -7   3  -1   13.80    3.90 
  -7   3  -1    8.20    4.00 
   7   3   1   12.30    3.40 
  -8  -3  -1    9.70    4.60 
   8  -3   1   12.80    4.10 
   8  -3   1   10.60    4.90 
   8  -3   1   17.60    5.50 
  -8  -3  -1   11.30    5.20 
  -8  -3  -1   11.30    4.20 
  -8  -3  -1   11.10    3.40 
  -8  -3  -1   12.50    4.00 
  -8  -3  -1    9.70    3.70 
  -8  -3  -1   16.40    4.40 
  -8  -3  -1   16.20    4.20 
   8  -3   1   10.20    3.90 
  -8  -3  -1   19.10    4.80 
  -8  -3  -1   10.80    3.70 
   8   3   1   13.10    5.40 
   8   3   1   10.30    3.50 
   8   3   1    9.20    4.30 
  -8   3  -1   11.70    4.70 
   8   3   1   15.30    3.60 
  -8   3  -1    9.10    4.30 
  -8   3  -1   12.10    4.30 
   8   3   1   13.50    5.10 
  -8   3  -1   12.50    4.60 
  -8   3  -1   13.90    6.80 
  -8   3  -1   12.80    3.80 
  -8   3  -1   12.10    3.70 
  -8   3  -1    4.80    2.90 
  -8   3  -1   14.00    4.60 
  -8   3  -1   16.50    6.40 
   8   3   1   19.30    5.30 
   9  -3   1    4.50    3.70 
   9  -3   1   -2.90    3.60 
  -9  -3  -1   -0.10    3.00 
   9  -3   1    1.60    4.40 
  -9  -3  -1    3.10    3.30 
  -9  -3  -1    2.00    3.00 
  -9  -3  -1    5.50    3.00 
  -9  -3  -1    0.70    3.10 
  -9  -3  -1   -1.20    3.00 
   9  -3   1   -0.10    3.10 
  -9  -3  -1    8.00    4.20 
  -9  -3  -1    1.30    4.00 
  -9  -3  -1    2.10    2.80 
  -9   3  -1    0.10    5.30 
  -9   3  -1   10.00    7.60 
  -9   3  -1    1.30    2.80 
   9   3   1   -0.70    3.70 
   9   3   1    3.20    3.80 
   9   3   1    0.40    2.60 
  -9   3  -1   -1.80    3.20 
   9   3   1    7.50    3.70 
  -9   3  -1    7.50    4.50 
  -9   3  -1    4.70    4.00 
  -9   3  -1    2.50    3.90 
  -9   3  -1    6.30    4.30 
   9   3   1    4.00    4.20 
   9   3   1    5.30    4.20 
  -9   3  -1    0.00    2.30 
  -9   3  -1    1.50    3.20 
  -9  -4   1   84.09    9.20 
  -9  -4   1   80.09    8.00 
   9  -4  -1   76.69    8.60 
  -9  -4   1   77.49    8.30 
   9  -4  -1   86.29    9.80 
  -9  -4   1   92.69    8.00 
   9  -4  -1   95.29   11.30 
  -9  -4   1   90.09    9.30 
  -9  -4   1   71.99   12.40 
   9  -4  -1   93.99   11.90 
  -9  -4   1   99.49   10.00 
  -9  -4   1   87.79   10.20 
  -9   4   1   82.79    7.70 
   9   4  -1   86.39   11.50 
  -9   4   1   86.59   11.60 
   9   4  -1   77.39    7.00 
   9   4  -1   66.49    8.90 
  -9   4   1   96.79   10.60 
   9   4  -1   75.09    8.60 
  -9   4   1   88.09   12.70 
  -9   4   1   72.29   10.10 
  -9   4   1   90.59   11.90 
  -9   4   1   64.09   12.60 
   9   4  -1   78.39   11.50 
  -9   4   1   88.49    8.70 
   9   4  -1   79.79   10.70 
  -9   4   1   79.29    9.30 
  -9   4   1   85.39   14.10 
  -8  -4   1  629.64   24.30 
  -8  -4   1  648.84   25.30 
  -8  -4   1  646.64   25.50 
   8  -4  -1  599.14   27.40 
   8  -4  -1  616.84   25.20 
   8  -4  -1  627.54   28.70 
  -8  -4   1  611.84   31.00 
  -8  -4   1  618.94   25.20 
  -8  -4   1  620.74   29.00 
  -8  -4   1  585.44   26.20 
  -8  -4   1  629.94   24.30 
  -8  -4   1  604.64   25.60 
   8  -4  -1  616.94   26.40 
  -8   4   1  611.14   25.80 
  -8   4   1  654.73   29.30 
   8   4  -1  605.04   28.70 
  -8   4   1  656.33   26.30 
  -8   4   1  619.44   25.60 
   8   4  -1  587.94   28.00 
  -8   4   1  595.84   31.60 
   8   4  -1  620.04   29.30 
  -8   4   1  589.04   31.80 
   8   4  -1  625.24   28.80 
   8   4  -1  601.54   25.40 
  -8   4   1  629.44   28.30 
   8   4  -1  633.24   26.90 
  -8   4   1  626.34   30.30 
   8   4  -1  635.34   23.50 
  -8   4   1  637.14   24.90 
  -8   4   1  611.54   27.50 
  -7  -4   1   50.49    5.60 
   7  -4  -1   47.30    7.70 
  -7  -4   1   60.69    6.70 
  -7  -4   1   57.49    8.50 
  -7  -4   1   46.20    6.10 
  -7  -4   1   43.20    6.30 
   7  -4  -1   60.39    7.00 
  -7  -4   1   54.79    5.90 
  -7  -4   1   60.69    6.90 
  -7  -4   1   66.69    7.90 
   7  -4  -1   64.49    8.30 
  -7  -4   1   49.00    8.50 
   7  -4  -1   57.79    6.60 
   7  -4  -1   43.10    7.10 
  -7  -4   1   49.70    6.00 
  -7  -4   1   51.19    5.40 
   7  -4  -1   48.30    6.80 
  -7   4   1   53.39    6.50 
  -7   4   1   49.80    5.90 
  -7   4   1   49.00    9.30 
   7   4  -1   56.29    5.50 
   7   4  -1   49.10    7.50 
  -7   4   1   56.09    7.00 
   7   4  -1   59.29    8.50 
  -7   4   1   43.50    6.90 
  -7   4   1   57.39    8.80 
   7   4  -1   46.40    7.80 
   7   4  -1   52.89    7.00 
  -7   4   1   43.10    9.00 
  -7   4   1   51.49    7.30 
   7   4  -1   51.29    6.60 
  -7   4   1   60.09    9.20 
   7   4  -1   50.09    7.90 
  -7   4   1   53.19    7.40 
  -7   4   1   61.39    8.90 
   7   4  -1   47.30    5.90 
  -7   4   1   44.10    7.20 
  -6  -4   1  782.52   28.70 
   6  -4  -1  818.02   29.30 
  -6  -4   1  801.22   26.90 
   6  -4  -1  792.82   31.40 
  -6  -4   1  768.72   29.90 
  -6  -4   1  765.02   33.00 
  -6  -4   1  771.32   29.20 
   6  -4  -1  814.22   28.30 
  -6  -4   1  786.52   28.10 
   6  -4  -1  737.93   30.30 
  -6  -4   1  762.62   28.50 
  -6  -4   1  783.32   30.10 
   6  -4  -1  788.62   34.50 
   6  -4  -1  848.22   30.70 
  -6  -4   1  810.02   27.50 
  -6  -4   1  800.32   32.10 
  -6  -4   1  797.82   27.90 
   6  -4  -1  819.32   28.40 
   6  -4  -1  775.72   28.50 
   6  -4  -1  821.82   32.20 
  -6  -4   1  771.92   31.60 
  -6  -4   1  761.62   28.60 
   6  -4  -1  779.22   27.20 
  -6   4   1  786.62   30.90 
  -6   4   1  686.03   33.10 
  -6   4   1  788.52   30.40 
  -6   4   1  793.72   28.30 
   6   4  -1  787.32   31.20 
   6   4  -1  796.72   28.60 
   6   4  -1  728.43   31.40 
  -6   4   1  843.82   32.00 
   6   4  -1  790.42   28.20 
   6   4  -1  824.02   29.50 
  -6   4   1  766.32   29.20 
  -6   4   1  788.72   33.60 
   6   4  -1  770.32   26.20 
   6   4  -1  790.72   27.00 
  -6   4   1  739.93   33.70 
  -6   4   1  805.72   32.60 
   6   4  -1  735.73   31.60 
   6   4  -1  772.42   29.60 
   6   4  -1  766.12   32.40 
  -6   4   1  799.32   32.80 
   6   4  -1  775.82   31.80 
  -6   4   1  807.92   31.00 
   5  -4  -1  160.88    8.90 
   5  -4  -1  163.68    8.70 
  -5  -4   1  165.28    9.20 
   5  -4  -1  174.98   10.40 
   5  -4  -1  148.29    9.60 
  -5  -4   1  168.38    8.50 
   5  -4  -1  165.78   10.30 
   5  -4  -1  170.38   10.80 
   5  -4  -1  169.58   12.80 
  -5  -4   1  170.98    8.60 
   5  -4  -1  183.18   10.50 
  -5  -4   1  171.98    9.30 
  -5  -4   1  167.68    8.00 
  -5  -4   1  164.48   10.80 
   5  -4  -1  167.38    6.80 
   5  -4  -1  161.18   11.50 
  -5  -4   1  166.18    9.60 
  -5  -4   1  164.78    8.30 
  -5  -4   1  163.38   10.90 
   5  -4  -1  158.08   10.40 
  -5  -4   1  160.38    9.10 
  -5  -4   1  169.68   10.10 
   5  -4  -1  163.98    6.20 
   5  -4  -1  164.88    6.90 
  -5  -4   1  163.08   11.60 
   5   4  -1  164.38   10.90 
  -5   4   1  157.88    8.10 
  -5   4   1  160.68    9.60 
  -5   4   1  157.68   11.30 
   5   4  -1  187.48   12.00 
  -5   4   1  153.68   12.00 
  -5   4   1  174.48   10.20 
   5   4  -1  157.78   11.20 
   5   4  -1  162.08    8.30 
   5   4  -1  177.78    7.90 
  -5   4   1  165.48   12.80 
   5   4  -1  169.28   11.40 
  -5   4   1  171.38   12.70 
   5   4  -1  168.98    9.10 
  -5   4   1  141.89   12.00 
   5   4  -1  170.48   10.70 
  -5   4   1  151.68   11.10 
   5   4  -1  172.88    9.80 
  -5   4   1  170.48   10.60 
   5   4  -1  161.38    7.60 
  -5   4   1  180.28   13.00 
  -5   4   1  168.38   14.40 
   5   4  -1  172.18    8.60 
  -5   4   1  171.28   11.40 
   5   4  -1  167.38   12.00 
  -5   4   1  153.98    8.50 
   5   4  -1  182.58    9.80 
  -5   4   1  173.98   11.90 
  -4  -4   1  556.24   20.30 
  -4  -4   1  529.05   18.50 
  -4  -4   1  529.95   21.10 
   4  -4  -1  553.34   20.30 
   4  -4  -1  555.94   22.30 
   4  -4  -1  539.85   24.40 
   4  -4  -1  568.94   22.40 
  -4  -4   1  524.75   20.10 
  -4  -4   1  546.35   19.50 
   4  -4  -1  550.14   22.10 
   4  -4  -1  537.95   17.30 
   4  -4  -1  518.85   21.40 
   4  -4  -1  565.64   24.60 
  -4  -4   1  566.64   22.80 
   4  -4  -1  490.25   20.10 
   4  -4  -1  511.55   19.70 
  -4  -4   1  551.44   19.40 
  -4  -4   1  559.14   20.60 
  -4  -4   1  535.05   21.50 
  -4  -4   1  566.54   23.10 
  -4  -4   1  566.14   23.20 
  -4  -4   1  534.65   20.40 
  -4  -4   1  545.35   19.70 
   4  -4  -1  528.15   23.30 
   4  -4  -1  515.95   25.00 
   4   4  -1  553.14   21.40 
  -4   4   1  519.05   20.70 
  -4   4   1  532.65   23.40 
  -4   4   1  553.94   25.90 
  -4   4   1  518.55   23.70 
   4   4  -1  523.65   19.20 
  -4   4   1  541.75   21.10 
  -4   4   1  507.35   21.60 
   4   4  -1  555.74   23.30 
  -4   4   1  534.75   19.60 
  -4   4   1  507.25   27.50 
   4   4  -1  538.95   20.70 
  -4   4   1  542.25   21.50 
   4   4  -1  550.24   22.90 
  -4   4   1  481.55   23.90 
   4   4  -1  516.65   23.50 
  -4   4   1  549.15   24.40 
   4   4  -1  552.44   22.10 
   4   4  -1  552.94   18.60 
  -4   4   1  532.85   24.90 
  -4   4   1  560.54   23.70 
   4   4  -1  513.55   18.70 
   4   4  -1  540.75   20.50 
  -4   4   1  524.15   23.80 
   4   4  -1  533.65   20.20 
  -4   4   1  557.74   20.00 
   4   4  -1  561.24   22.30 
  -4   4   1  501.65   23.00 
  -4   4   1  528.35   23.20 
   4   4  -1  553.84   22.90 
   4   4  -1  547.65   19.40 
  -3  -4   1   53.79    4.40 
   3  -4  -1   52.59    5.10 
  -3  -4   1   37.10    4.30 
  -3  -4   1   53.19    5.10 
   3  -4  -1   59.09    2.50 
  -3  -4   1   54.89    5.20 
  -3  -4   1   57.39    5.20 
   3  -4  -1   62.29    5.80 
   3  -4  -1   62.89    2.50 
  -3  -4   1   48.00    4.50 
  -3  -4   1   50.79    5.50 
  -3  -4   1   56.09    3.40 
   3  -4  -1   60.29    5.80 
  -3  -4   1   55.09    4.50 
  -3  -4   1   41.00    5.50 
   3  -4  -1   46.70    5.50 
   3  -4  -1   52.89    2.40 
  -3  -4   1   51.69    4.70 
  -3  -4   1   46.20    5.60 
   3  -4  -1   54.69    6.60 
  -3   4   1   51.89    5.60 
   3   4  -1   47.20    4.50 
   3   4  -1   54.49    5.00 
  -3   4   1   41.80    8.40 
   3   4  -1   48.20    5.40 
   3   4  -1   50.59    3.50 
  -3   4   1   57.59    4.50 
   3   4  -1   43.90    6.30 
   3   4  -1   49.60    3.50 
  -3   4   1   46.90    7.80 
   3   4  -1   44.10    5.90 
   3   4  -1   53.99    5.30 
  -3   4   1   73.79    7.40 
   3   4  -1   41.90    4.30 
  -3   4   1   52.79    7.10 
   3   4  -1   51.39    5.90 
  -3   4   1   65.29    6.80 
   3   4  -1   61.09    4.20 
   3   4  -1   52.39    4.20 
  -3   4   1   68.19    5.70 
  -3   4   1   73.89    5.30 
  -3   4   1   44.00    5.90 
  -3   4   1   67.29    7.70 
   3   4  -1   53.49    4.70 
  -3   4   1   67.99    5.00 
  -3   4   1   69.99    8.70 
   2  -4  -1  214.68   11.10 
  -2  -4   1  208.18   10.30 
   2  -4  -1  209.58    9.70 
   2  -4  -1  218.68    7.60 
   2  -4  -1  200.68   10.60 
   2  -4  -1  211.38    7.60 
   2  -4  -1  220.78   12.90 
  -2  -4   1  204.68    9.70 
  -2  -4   1  218.48    9.90 
  -2  -4   1  238.18   10.40 
  -2  -4   1  202.28    9.40 
  -2  -4   1  209.48    7.70 
   2  -4  -1  213.48   10.80 
  -2  -4   1  222.88   11.30 
   2  -4  -1  215.38    9.40 
  -2  -4   1  218.28   10.30 
   2  -4  -1  224.48    7.90 
   2  -4  -1  218.28   10.70 
   2  -4  -1  218.28    8.20 
  -2  -4   1  222.28    9.50 
  -2  -4   1  209.68    9.80 
  -2  -4   1  210.98   11.70 
  -2  -4   1  209.98   10.10 
   2  -4  -1  202.88   13.70 
   2  -4  -1  221.48   10.50 
  -2  -4   1  205.48   10.10 
   2  -4  -1  209.88   11.90 
  -2  -4   1  208.28   11.20 
   2   4  -1  198.48    8.10 
  -2   4   1  207.38   12.10 
   2   4  -1  199.58    8.90 
  -2   4   1  219.28   10.40 
   2   4  -1  225.68   12.00 
   2   4  -1  218.38    9.20 
   2   4  -1  230.08    8.50 
  -2   4   1  204.78   13.90 
   2   4  -1  214.58   11.10 
   2   4  -1  216.88   12.40 
   2   4  -1  209.68    9.30 
   2   4  -1  207.78   10.20 
  -2   4   1  223.68   13.20 
  -2   4   1  202.58   13.00 
  -2   4   1  223.38   10.00 
  -2   4   1  209.68   14.50 
  -2   4   1  201.78   13.60 
  -2   4   1  209.98   11.10 
   2   4  -1  236.48   10.00 
  -2   4   1  192.38   17.10 
   2   4  -1  215.58   11.90 
   2   4  -1  217.48   12.80 
   2   4  -1  199.18   10.50 
  -2   4   1  211.78    9.50 
   2   4  -1  184.38    8.90 
   2   4  -1  223.98    9.60 
  -2   4   1  180.38   17.30 
   2   4  -1  224.18   10.30 
  -2   4   1  196.68   11.30 
  -1  -4   1    7.50    2.50 
   1  -4  -1   12.90    1.80 
  -1  -4   1   23.40    3.70 
   1  -4  -1   15.60    5.30 
   1  -4  -1   18.50    3.60 
   1  -4  -1   17.30    4.90 
  -1  -4   1   12.40    2.60 
   1  -4  -1   10.70    3.00 
   1  -4  -1   14.60    3.20 
  -1  -4   1   11.00    2.30 
  -1  -4   1   14.30    2.30 
   1  -4  -1   10.60    1.80 
  -1  -4   1   19.90    3.30 
   1  -4  -1   15.20    2.20 
   1  -4  -1   12.40    3.10 
   1  -4  -1   21.90    3.80 
  -1  -4   1   12.80    3.70 
  -1  -4   1   16.10    2.00 
  -1  -4   1   13.80    2.50 
  -1  -4   1   16.10    3.90 
   1  -4  -1   36.20    6.50 
   1  -4  -1   13.40    3.30 
   1  -4  -1   10.90    3.10 
  -1  -4   1    8.30    2.20 
  -1  -4   1   12.30    3.10 
   1  -4  -1   14.30    4.10 
  -1  -4   1   18.40    3.70 
  -1  -4   1   12.90    3.10 
   1  -4  -1   15.40    2.70 
  -1  -4   1    9.90    2.40 
  -1  -4   1   15.10    2.70 
   1  -4  -1   14.70    2.70 
  -1  -4   1   12.00    3.20 
  -1  -4   1   16.30    4.20 
  -1   4   1   17.40    3.00 
   1   4  -1   14.20    4.90 
   1   4  -1   25.00    4.60 
   1   4  -1   12.00    2.20 
   1   4  -1    9.60    3.00 
  -1   4   1   16.60    4.00 
  -1   4   1   22.90    3.10 
  -1   4   1   17.50    3.60 
   1   4  -1    9.80    2.00 
   1   4  -1   10.60    2.30 
   1   4  -1   29.70    4.20 
  -1   4   1   11.90    3.00 
  -1   4   1   10.90    4.30 
  -1   4   1   10.90    3.70 
   1   4  -1   16.10    1.60 
  -1   4   1   13.80    3.40 
   1   4  -1   18.10    2.60 
   1   4  -1   13.40    3.70 
  -1   4   1   10.00    4.30 
   1   4  -1   13.20    2.20 
   1   4  -1    8.20    3.60 
  -1   4   1   12.50    2.90 
   1   4  -1   11.50    2.70 
   1   4  -1   18.80    4.50 
   1   4  -1   16.60    3.50 
   1   4  -1   13.10    3.80 
  -1   4   1   20.40    5.80 
  -1   4   1   20.60    8.90 
  -1   4   1   45.80    8.10 
  -1   4   1   11.00    4.20 
  -1   4   1   10.00    4.70 
  -1   4   1   17.40    5.30 
   1   4  -1   11.60    2.50 
   0  -4   1  314.17   13.60 
   0  -4   1  294.77   14.20 
   0  -4   1  304.37   11.70 
   0  -4   1  312.37   12.70 
   0  -4   1  308.37   12.40 
   0  -4  -1  312.87   14.00 
   0  -4  -1  328.57   12.10 
   0  -4  -1  308.07   13.40 
   0  -4   1  313.07   12.80 
   0  -4   1  297.77   15.30 
   0  -4  -1  291.07   16.00 
   0  -4  -1  292.97   12.40 
   0  -4  -1  280.87   12.60 
   0  -4   1  307.77   13.10 
   0  -4   1  312.47   11.10 
   0  -4  -1  321.97   11.60 
   0  -4   1  324.77   14.50 
   0  -4  -1  322.97   11.50 
   0  -4   1  320.37   11.40 
   0  -4  -1  270.77   20.00 
   0  -4   1  306.07   14.70 
   0  -4   1  310.67   17.10 
   0  -4  -1  309.17   13.10 
   0  -4   1  304.47   10.90 
   0  -4  -1  317.57   15.90 
   0  -4  -1  300.57   13.20 
   0  -4   1  307.87   10.70 
   0  -4  -1  295.67   13.30 
   0  -4  -1  276.27   13.00 
   0  -4  -1  295.27   16.90 
   0  -4   1  319.07   13.10 
   0  -4  -1  297.77   12.60 
   0  -4   1  298.87   12.60 
   0  -4  -1  311.97   12.90 
   0  -4  -1  313.97   11.60 
   0  -4  -1  291.27   13.10 
   0  -4   1  324.97   10.60 
   0   4   1  324.27   16.10 
   0   4  -1  293.07   16.00 
   0   4  -1  266.27   15.80 
   0   4  -1  308.97   17.80 
   0   4  -1  278.57   14.60 
   0   4  -1  279.97   17.60 
   0   4   1  321.37   11.70 
   0   4  -1  298.37   10.80 
   0   4   1  311.37   15.40 
   0   4  -1  266.17   15.10 
   0   4   1  293.87   13.60 
   0   4  -1  310.07   12.50 
   0   4  -1  310.27   12.20 
   0   4   1  311.87   18.10 
   0   4   1  308.87   14.80 
   0   4  -1  311.17   12.00 
   0   4   1  309.97   13.30 
   0   4   1  308.17   12.90 
   0   4   1  294.67   13.30 
   0   4  -1  295.67   16.30 
   0   4  -1  296.97   13.00 
   0   4   1  283.97   13.40 
   0   4   1  312.17   12.70 
   0   4   1  308.27   19.30 
   0   4   1  325.37   12.20 
   0   4  -1  299.87   10.80 
   0   4   1  330.57   12.30 
   0   4  -1  296.07   16.00 
   0   4  -1  317.47   12.40 
   0   4  -1  289.37   14.60 
   0   4   1  307.97   15.60 
   0   4  -1  314.47   11.30 
   0   4  -1  297.47   16.30 
  -1  -4  -1  166.48    8.80 
   1  -4   1  166.88    6.70 
  -1  -4  -1  160.48   10.50 
  -1  -4  -1  174.78    8.50 
  -1  -4  -1  172.78   10.70 
   1  -4   1  174.58    6.30 
  -1  -4  -1  178.58    8.90 
   1  -4   1  172.58    8.90 
   1  -4   1  161.08    8.50 
  -1  -4  -1  168.88    9.00 
  -1  -4  -1  168.08    8.10 
   1  -4   1  166.38    6.70 
   1  -4   1  167.68   10.10 
  -1  -4  -1  164.88   11.10 
   1  -4   1  175.38    8.70 
   1  -4   1  165.28    6.40 
   1  -4   1  165.78    6.00 
   1  -4   1  176.08   14.20 
  -1  -4  -1  151.28   11.30 
  -1  -4  -1  158.88    9.10 
  -1  -4  -1  178.38    9.60 
   1  -4   1  171.38    8.70 
   1  -4   1  166.58   13.10 
  -1  -4  -1  171.78    7.60 
   1  -4   1  174.28    9.50 
   1  -4   1  173.38   10.20 
   1  -4   1  174.58    9.30 
  -1  -4  -1  172.38    9.20 
   1  -4   1  174.18    6.60 
  -1  -4  -1  173.98    8.90 
  -1  -4  -1  176.58   10.10 
  -1  -4  -1  176.98    8.40 
  -1   4  -1  177.68    7.80 
  -1   4  -1  173.38    6.90 
  -1   4  -1  172.68    8.20 
  -1   4  -1  175.18   10.00 
   1   4   1  166.18   11.30 
   1   4   1  167.58    8.60 
  -1   4  -1  170.88    9.30 
  -1   4  -1  195.98   13.30 
  -1   4  -1  172.98    9.10 
  -1   4  -1  179.38   14.40 
   1   4   1  174.38    7.10 
  -1   4  -1  156.38   14.50 
  -1   4  -1  173.68    6.60 
   1   4   1  159.08    9.50 
  -1   4  -1  162.88   12.90 
   1   4   1  160.08    9.70 
  -1   4  -1  172.28    9.70 
   1   4   1  175.98   12.20 
   1   4   1  161.18    9.70 
  -1   4  -1  161.28   16.60 
  -1   4  -1  170.58   13.70 
   1   4   1  173.98    8.50 
  -1   4  -1  172.18    7.80 
  -1   4  -1  183.28    9.00 
   1   4   1  173.18    8.60 
   1   4   1  173.78    8.10 
  -1   4  -1  157.08   11.40 
   1   4   1  175.48   10.40 
   1   4   1  174.08    9.10 
   1   4   1  175.48    7.30 
   1   4   1  156.28    7.30 
   1   4   1  164.08    9.70 
   2  -4   1 1909.11   57.69 
  -2  -4  -1 1817.22   61.59 
  -2  -4  -1 1860.61   59.59 
  -2  -4  -1 1896.61   60.79 
   2  -4   1 1912.11   57.09 
  -2  -4  -1 1876.51   59.19 
   2  -4   1 1867.21   60.69 
   2  -4   1 1788.32   60.49 
  -2  -4  -1 1999.80   63.39 
  -2  -4  -1 1880.31   59.89 
  -2  -4  -1 1865.01   59.39 
  -2  -4  -1 1905.21   61.89 
   2  -4   1 1868.51   59.69 
   2  -4   1 1828.52   59.49 
  -2  -4  -1 1864.41   59.79 
   2  -4   1 1847.62   60.09 
   2  -4   1 1921.31   61.39 
  -2  -4  -1 1870.21   61.89 
  -2  -4  -1 1849.52   59.29 
  -2  -4  -1 1866.31   59.09 
  -2  -4  -1 1844.82   58.49 
   2  -4   1 1954.60   59.49 
   2  -4   1 1955.70   61.49 
  -2  -4  -1 1884.01   61.09 
   2   4   1 1888.81   58.69 
  -2   4  -1 1810.02   58.59 
  -2   4  -1 1884.81   57.69 
  -2   4  -1 1746.13   67.49 
   2   4   1 1846.32   58.59 
  -2   4  -1 1772.62   65.89 
  -2   4  -1 1816.92   64.39 
   2   4   1 1971.60   57.69 
  -2   4  -1 1698.13   65.79 
   2   4   1 1862.11   63.39 
   2   4   1 1837.82   60.29 
   2   4   1 1908.61   60.59 
   2   4   1 1927.11   62.09 
   2   4   1 1937.11   61.29 
   2   4   1 1897.31   58.09 
  -2   4  -1 1519.95   68.99 
   2   4   1 1855.01   56.79 
   2   4   1 1894.41   58.89 
   2   4   1 1840.32   57.09 
  -2   4  -1 1722.73   63.39 
   2   4   1 1849.21   59.79 
  -2   4  -1 1833.02   60.39 
   2   4   1 1846.52   59.59 
  -2   4  -1 1872.11   60.89 
   2   4   1 1900.61   59.29 
  -2   4  -1 1849.11   63.19 
  -2   4  -1 1923.91   61.09 
   2   4   1 1813.62   57.49 
  -2   4  -1 1818.42   62.79 
   2   4   1 1883.71   62.49 
  -2   4  -1 1775.22   70.29 
  -3  -4  -1  138.89    7.40 
  -3  -4  -1  129.29    8.60 
  -3  -4  -1  133.99    7.40 
   3  -4   1  131.79    8.50 
   3  -4   1  137.69    8.30 
  -3  -4  -1  130.49    8.70 
   3  -4   1  145.29    8.20 
  -3  -4  -1  132.29    8.90 
   3  -4   1  132.99    8.60 
   3  -4   1  136.29    7.50 
  -3  -4  -1  117.49    7.00 
  -3  -4  -1  124.89    7.10 
   3  -4   1  146.19    6.90 
  -3  -4  -1  143.39    8.00 
  -3  -4  -1  121.49    8.00 
  -3  -4  -1  130.99    7.50 
   3  -4   1  154.98    6.80 
   3  -4   1  156.28    9.60 
  -3  -4  -1  126.39    7.60 
  -3  -4  -1  129.39    6.20 
  -3  -4  -1  116.79    8.60 
   3  -4   1  139.29   10.60 
  -3  -4  -1  133.09    8.90 
   3  -4   1  133.89    8.60 
   3   4   1  125.39    7.90 
  -3   4  -1  126.89    6.80 
  -3   4  -1  100.59   12.50 
  -3   4  -1  136.69    6.50 
  -3   4  -1  139.29    7.30 
  -3   4  -1  137.49   11.00 
   3   4   1  117.29    8.90 
   3   4   1  131.59    7.70 
  -3   4  -1  133.29    8.70 
   3   4   1  139.39    7.90 
   3   4   1  126.29    6.50 
   3   4   1  125.99    5.80 
  -3   4  -1  129.09    9.10 
  -3   4  -1  119.99   12.00 
  -3   4  -1  123.99   11.90 
   3   4   1  136.79    8.90 
   3   4   1  129.19    7.60 
  -3   4  -1  120.79   10.60 
   3   4   1  122.59    5.10 
   3   4   1  132.09    5.90 
   3   4   1  131.99    8.60 
   3   4   1  133.89    6.70 
   3   4   1  130.49    7.50 
   3   4   1  131.79    6.30 
  -3   4  -1  123.39    8.00 
  -3   4  -1  127.79    9.40 
   3   4   1  128.39    9.10 
  -3   4  -1  128.19    9.20 
   4  -4   1  590.94   21.90 
   4  -4   1  638.94   24.60 
  -4  -4  -1  619.54   23.00 
  -4  -4  -1  645.94   25.00 
   4  -4   1  680.23   23.20 
  -4  -4  -1  663.73   26.00 
  -4  -4  -1  649.74   23.70 
  -4  -4  -1  653.53   22.30 
   4  -4   1  654.43   21.70 
   4  -4   1  698.73   26.00 
   4  -4   1  636.94   27.80 
   4  -4   1  643.04   26.50 
  -4  -4  -1  664.03   26.30 
  -4  -4  -1  691.13   26.10 
   4  -4   1  637.74   32.60 
   4  -4   1  639.24   25.50 
   4  -4   1  634.24   24.30 
  -4  -4  -1  652.83   23.50 
  -4  -4  -1  681.03   23.90 
   4  -4   1  670.43   32.00 
  -4  -4  -1  678.33   24.40 
  -4  -4  -1  644.94   23.30 
  -4  -4  -1  652.73   23.20 
   4  -4   1  670.13   22.70 
   4  -4   1  656.63   21.20 
  -4  -4  -1  654.83   26.90 
  -4  -4  -1  640.94   24.00 
  -4   4  -1  639.64   28.90 
   4   4   1  667.63   26.10 
  -4   4  -1  618.64   24.80 
   4   4   1  627.84   21.40 
   4   4   1  653.13   26.90 
   4   4   1  643.84   26.50 
   4   4   1  649.83   22.20 
  -4   4  -1  594.74   26.30 
   4   4   1  653.43   24.90 
  -4   4  -1  665.63   27.70 
  -4   4  -1  615.44   26.50 
  -4   4  -1  680.23   23.60 
   4   4   1  655.43   24.20 
  -4   4  -1  622.54   28.50 
  -4   4  -1  659.63   28.90 
   4   4   1  644.14   22.50 
  -4   4  -1  643.94   24.30 
   4   4   1  624.54   20.60 
   4   4   1  650.03   21.90 
   4   4   1  673.43   24.00 
  -4   4  -1  635.64   29.40 
  -4   4  -1  609.94   28.20 
  -4   4  -1  663.23   22.60 
  -4   4  -1  609.84   26.80 
   4   4   1  644.44   24.00 
   4   4   1  638.84   21.80 
   4   4   1  644.14   25.80 
  -4   4  -1  629.84   31.00 
  -4   4  -1  659.23   27.10 
  -4   4  -1  636.54   23.40 
   5  -4   1  182.28   10.30 
  -5  -4  -1  186.18    9.70 
   5  -4   1  181.98    8.30 
  -5  -4  -1  177.48    8.70 
   5  -4   1  174.98   11.10 
  -5  -4  -1  182.38   10.40 
  -5  -4  -1  170.48   12.40 
  -5  -4  -1  176.68    9.50 
   5  -4   1  186.18   10.10 
  -5  -4  -1  184.68    8.80 
  -5  -4  -1  176.58    9.80 
   5  -4   1  191.28    9.00 
  -5  -4  -1  178.08    9.40 
  -5  -4  -1  184.28    9.90 
   5  -4   1  195.98   13.30 
   5  -4   1  194.08   11.80 
   5  -4   1  169.58   13.20 
  -5  -4  -1  172.38   10.70 
   5  -4   1  194.88    9.30 
   5  -4   1  171.78   12.20 
  -5  -4  -1  182.08   11.70 
   5   4   1  189.98   10.20 
   5   4   1  183.28   12.40 
   5   4   1  183.28   11.80 
  -5   4  -1  181.88   12.00 
  -5   4  -1  180.08   14.00 
  -5   4  -1  174.58   11.70 
  -5   4  -1  192.98   10.10 
   5   4   1  168.38   11.70 
   5   4   1  175.98    7.60 
  -5   4  -1  183.68    9.00 
  -5   4  -1  176.08   14.30 
  -5   4  -1  178.08    8.40 
   5   4   1  184.28    8.70 
  -5   4  -1  175.08   12.90 
  -5   4  -1  187.58   16.20 
  -5   4  -1  182.98   14.00 
  -5   4  -1  192.58   10.20 
  -5   4  -1  194.68   13.10 
  -5   4  -1  209.68   14.40 
   5   4   1  180.98    8.60 
  -5   4  -1  208.38   12.70 
   5   4   1  173.98   10.70 
   5   4   1  175.48    8.40 
  -5   4  -1  187.88   11.00 
   5   4   1  181.88   11.80 
   5   4   1  177.08   10.30 
   5   4   1  174.68    7.30 
   5   4   1  168.68   11.30 
  -6  -4  -1 2116.99   65.89 
  -6  -4  -1 1984.60   71.29 
   6  -4   1 2092.99   68.79 
  -6  -4  -1 2103.09   73.99 
   6  -4   1 2128.79   67.29 
  -6  -4  -1 2078.19   67.99 
   6  -4   1 2172.88   73.09 
   6  -4   1 2089.59   70.69 
   6  -4   1 2035.00   70.69 
  -6  -4  -1 2132.09   67.89 
  -6  -4  -1 2094.19   67.49 
  -6  -4  -1 2045.40   66.79 
   6  -4   1 2203.08   66.89 
  -6  -4  -1 2099.29   70.09 
   6  -4   1 2126.29   65.69 
  -6  -4  -1 2086.59   68.99 
  -6  -4  -1 2080.89   68.09 
  -6  -4  -1 2091.89   68.09 
  -6   4  -1 2123.99   69.99 
   6   4   1 2123.29   69.49 
  -6   4  -1 2170.68   69.39 
  -6   4  -1 2175.38   72.49 
  -6   4  -1 2199.28   68.49 
   6   4   1 2149.58   66.49 
  -6   4  -1 2011.60   74.29 
   6   4   1 2064.49   71.49 
   6   4   1 2114.69   68.69 
  -6   4  -1 2082.89   67.09 
   6   4   1 2122.09   72.09 
   6   4   1 2030.80   71.29 
   6   4   1 2061.89   70.09 
  -6   4  -1 2100.99   70.09 
   6   4   1 2079.79   68.19 
  -6   4  -1 2140.99   73.19 
  -6   4  -1 2077.39   74.89 
   6   4   1 2048.00   66.49 
  -6   4  -1 2034.10   70.89 
   6   4   1 2131.89   68.49 
   6   4   1 2033.20   66.19 
  -6   4  -1 2112.59   72.39 
  -6   4  -1 1967.00   75.39 
   6   4   1 2116.79   66.29 
   7  -4   1  142.99    9.10 
   7  -4   1  137.59   11.00 
  -7  -4  -1  123.99    8.20 
   7  -4   1  130.99    9.40 
  -7  -4  -1  140.09    9.90 
  -7  -4  -1  124.09    9.00 
   7  -4   1  117.69   11.60 
  -7  -4  -1  132.29   11.10 
  -7  -4  -1  116.89    8.60 
  -7  -4  -1  126.09    8.80 
  -7  -4  -1  106.09   12.60 
  -7  -4  -1  138.29   10.40 
  -7  -4  -1  124.59    8.70 
  -7  -4  -1  129.59    9.00 
   7  -4   1  147.09   11.50 
   7   4   1  133.19    9.20 
  -7   4  -1  138.89   10.10 
   7   4   1  141.89   10.70 
   7   4   1  135.49   11.40 
   7   4   1  132.69    9.20 
  -7   4  -1  123.69   10.90 
   7   4   1  139.49    8.10 
  -7   4  -1  138.99    9.20 
  -7   4  -1  126.29   11.60 
  -7   4  -1  146.49   11.90 
   7   4   1  135.39    7.70 
   7   4   1  133.89    9.20 
   7   4   1  134.69   10.20 
  -7   4  -1  139.29   16.80 
  -7   4  -1  148.29   11.30 
  -7   4  -1  146.49   16.00 
   7   4   1  151.68   12.00 
  -7   4  -1  144.69    8.70 
  -7   4  -1  143.79    9.90 
   7   4   1  132.99   11.20 
  -7   4  -1  127.29    9.70 
  -7   4  -1  137.49   13.40 
   8  -4   1 1831.42   65.59 
   8  -4   1 1973.20   63.59 
   8  -4   1 1903.01   62.59 
  -8  -4  -1 1832.12   63.79 
  -8  -4  -1 1941.51   63.19 
  -8  -4  -1 1905.01   63.19 
  -8  -4  -1 1850.61   67.59 
  -8  -4  -1 1883.11   62.09 
  -8  -4  -1 1923.31   63.09 
  -8  -4  -1 1862.61   63.39 
  -8  -4  -1 1847.22   62.29 
   8  -4   1 1819.92   67.89 
  -8  -4  -1 1809.12   70.39 
  -8  -4  -1 1842.12   64.99 
  -8   4  -1 1821.42   66.19 
   8   4   1 1871.81   65.09 
   8   4   1 1922.11   68.69 
   8   4   1 1782.32   66.89 
  -8   4  -1 1948.11   69.19 
  -8   4  -1 1904.21   64.69 
   8   4   1 1862.81   62.89 
  -8   4  -1 1771.72   72.39 
   8   4   1 1898.91   60.59 
   8   4   1 1823.62   66.09 
  -8   4  -1 1855.61   71.79 
   8   4   1 1886.91   61.19 
  -8   4  -1 1886.01   63.19 
  -8   4  -1 1846.82   67.59 
  -8   4  -1 1944.61   65.79 
  -8   4  -1 1884.91   62.19 
  -9  -4  -1  110.59    9.60 
  -9  -4  -1   97.79    8.30 
  -9  -4  -1   98.59   11.00 
  -9  -4  -1   99.79    8.80 
   9  -4   1  108.19   13.70 
  -9  -4  -1   98.89   10.10 
   9  -4   1  120.49   12.90 
  -9  -4  -1   99.59    9.00 
   9  -4   1   86.79    9.10 
  -9  -4  -1   83.89    9.10 
  -9  -4  -1   87.09   13.00 
  -9  -4  -1  103.79    9.70 
  -9   4  -1   91.29    8.30 
   9   4   1   95.09    8.80 
   9   4   1   99.09   10.80 
  -9   4  -1   92.19   11.00 
  -9   4  -1   99.39    9.00 
  -9   4  -1   86.09   11.70 
  -9   4  -1  112.29   13.00 
  -9   4  -1   99.99   16.00 
   9   4   1  101.09   12.00 
  -9   4  -1   96.49   10.10 
  -9   4  -1   85.09   12.40 
   9   4   1  103.69    8.20 
  -9   4  -1  104.19   15.70 
   9   4   1   96.79   12.00 
  -9   4  -1  133.79   11.30 
  -9  -5   1  232.38   15.80 
   9  -5  -1  224.48   15.70 
   9  -5  -1  239.98   14.60 
   9  -5  -1  255.47   18.70 
  -9  -5   1  228.48   14.70 
  -9  -5   1  225.08   14.30 
   9  -5  -1  240.68   14.70 
  -9  -5   1  222.68   14.20 
  -9  -5   1  207.88   18.80 
  -9  -5   1  230.38   14.10 
  -9  -5   1  225.68   13.20 
  -9   5   1  255.87   20.70 
   9   5  -1  240.98   12.70 
   9   5  -1  253.97   17.60 
  -9   5   1  247.08   18.00 
   9   5  -1  237.98   18.00 
  -9   5   1  245.98   18.80 
   9   5  -1  255.87   16.50 
   9   5  -1  226.68   14.60 
  -9   5   1  272.37   20.90 
  -9   5   1  252.27   21.30 
   9   5  -1  237.68   17.80 
   9   5  -1  230.58   17.50 
  -9   5   1  247.48   15.50 
  -9   5   1  261.77   14.30 
   8  -5  -1   16.10    6.50 
  -8  -5   1   19.70    5.20 
  -8  -5   1   10.80    3.80 
  -8  -5   1    8.90    3.90 
  -8  -5   1   12.00    4.60 
  -8  -5   1   20.70    7.10 
   8  -5  -1    8.60    4.80 
  -8  -5   1    6.60    3.80 
  -8  -5   1    4.90    4.90 
  -8  -5   1    9.70    4.00 
   8  -5  -1   15.00    4.70 
  -8  -5   1    9.90    3.60 
   8  -5  -1    8.00    4.00 
  -8   5   1   22.90    7.20 
   8   5  -1   10.30    5.40 
   8   5  -1   14.50    4.90 
  -8   5   1   15.10    5.20 
   8   5  -1   10.40    5.30 
  -8   5   1   12.00    6.20 
   8   5  -1    8.10    3.30 
  -8   5   1    6.70    3.40 
  -8   5   1   15.40    5.80 
   8   5  -1   11.90    3.30 
  -8   5   1   17.30    5.60 
   8   5  -1    8.30    5.20 
  -8   5   1    3.50    5.80 
   8   5  -1   10.80    4.10 
   8   5  -1   14.90    5.80 
  -8   5   1   13.30    5.10 
  -8   5   1   23.70    8.30 
  -8   5   1    9.30    4.30 
  -7  -5   1  660.93   25.10 
  -7  -5   1  653.73   26.60 
  -7  -5   1  690.83   25.90 
  -7  -5   1  665.13   28.50 
  -7  -5   1  686.43   30.80 
  -7  -5   1  673.63   29.40 
  -7  -5   1  683.33   27.70 
   7  -5  -1  673.53   26.60 
   7  -5  -1  661.63   29.60 
   7  -5  -1  660.33   31.20 
   7  -5  -1  663.73   28.90 
  -7  -5   1  692.93   32.60 
  -7  -5   1  665.23   27.00 
  -7  -5   1  654.33   26.70 
   7  -5  -1  681.43   27.80 
   7   5  -1  656.43   30.50 
  -7   5   1  722.03   34.10 
  -7   5   1  672.33   28.10 
  -7   5   1  667.73   31.20 
   7   5  -1  646.64   30.60 
  -7   5   1  714.63   29.00 
  -7   5   1  705.93   34.30 
   7   5  -1  688.33   28.00 
  -7   5   1  719.73   33.80 
  -7   5   1  715.03   31.80 
   7   5  -1  690.03   30.60 
  -7   5   1  653.23   32.60 
   7   5  -1  686.73   24.80 
   7   5  -1  698.43   27.20 
  -7   5   1  659.93   26.00 
  -7   5   1  676.43   32.80 
   7   5  -1  704.33   25.50 
   7   5  -1  692.33   27.60 
   7   5  -1  650.53   29.60 
  -7   5   1  687.53   30.70 
  -7   5   1  655.13   28.10 
  -6  -5   1   30.90    5.40 
  -6  -5   1   31.70    7.10 
  -6  -5   1   28.90    5.80 
   6  -5  -1   51.49    7.00 
   6  -5  -1   26.80    5.30 
  -6  -5   1   29.40    4.60 
   6  -5  -1   34.50    6.80 
   6  -5  -1   29.70    4.90 
  -6  -5   1   38.60    5.50 
  -6  -5   1   30.00    5.90 
  -6  -5   1   30.70    6.50 
   6  -5  -1   45.60    6.80 
  -6  -5   1   23.50    4.90 
  -6  -5   1   47.10    5.50 
   6  -5  -1   25.80    4.20 
   6  -5  -1   27.90    7.50 
  -6  -5   1   27.60    5.50 
  -6  -5   1   23.50    4.00 
  -6  -5   1   35.30    4.30 
  -6  -5   1   33.80    5.40 
  -6   5   1   28.10    6.80 
  -6   5   1   38.90    8.80 
  -6   5   1   37.60    7.90 
   6   5  -1   27.10    4.90 
   6   5  -1   31.20    6.40 
   6   5  -1   36.80    5.80 
   6   5  -1   40.10    7.60 
   6   5  -1   25.90    6.10 
  -6   5   1   37.60    8.30 
   6   5  -1   30.90    5.10 
  -6   5   1   40.10    8.00 
   6   5  -1   44.10    8.40 
  -6   5   1   24.10    5.10 
  -6   5   1   36.60    6.30 
  -6   5   1   37.70    7.30 
   6   5  -1   28.00    5.90 
   6   5  -1   21.60    3.90 
  -6   5   1   35.80    6.30 
  -6   5   1   49.99    5.70 
   6   5  -1   31.80    3.90 
  -6   5   1   42.80    8.90 
  -6   5   1   34.20    7.80 
  -6   5   1   35.80    8.10 
  -5  -5   1 2363.86   79.59 
   5  -5  -1 2321.27   79.19 
  -5  -5   1 2323.47   74.49 
   5  -5  -1 2341.87   81.99 
   5  -5  -1 2377.56   77.09 
  -5  -5   1 2334.17   74.89 
  -5  -5   1 2357.96   77.39 
   5  -5  -1 2493.85   78.39 
  -5  -5   1 2327.97   77.29 
   5  -5  -1 2418.26   75.59 
  -5  -5   1 2314.87   76.29 
  -5  -5   1 2402.66   75.99 
  -5  -5   1 2327.67   79.99 
   5  -5  -1 2439.86   78.29 
  -5  -5   1 2399.56   76.29 
  -5  -5   1 2361.76   74.79 
   5  -5  -1 2429.06   75.29 
  -5  -5   1 2369.26   75.79 
  -5  -5   1 2382.16   73.49 
   5  -5  -1 2348.27   80.99 
  -5   5   1 2218.28   80.49 
   5   5  -1 2298.17   73.59 
  -5   5   1 2398.26   75.19 
   5   5  -1 2365.26   75.99 
   5   5  -1 2302.67   74.29 
   5   5  -1 2241.58   80.89 
   5   5  -1 2385.76   73.39 
   5   5  -1 2403.66   80.79 
  -5   5   1 2312.17   82.79 
   5   5  -1 2398.96   74.69 
  -5   5   1 2313.57   83.39 
  -5   5   1 2343.97   78.59 
   5   5  -1 2362.06   79.79 
  -5   5   1 2390.56   74.99 
   5   5  -1 2406.86   78.79 
   5   5  -1 2210.18   79.39 
  -5   5   1 2411.56   80.69 
  -5   5   1 2376.46   78.39 
  -5   5   1 2286.27   80.69 
  -5   5   1 2435.86   81.29 
  -5   5   1 2449.25   81.39 
   5   5  -1 2306.67   76.49 
   5   5  -1 2369.16   76.29 
  -5   5   1 2162.78   80.69 
  -5   5   1 2371.66   85.79 
   5   5  -1 2348.36   78.59 
  -4  -5   1   96.09    7.60 
   4  -5  -1  106.99    8.90 
  -4  -5   1  101.59    7.80 
   4  -5  -1  106.09    8.60 
  -4  -5   1  100.99    7.40 
  -4  -5   1  106.09    5.60 
   4  -5  -1  117.79   10.60 
   4  -5  -1   98.79    7.80 
  -4  -5   1  108.79    7.30 
   4  -5  -1  101.79   10.00 
   4  -5  -1  118.79    7.90 
  -4  -5   1  103.59    9.00 
   4  -5  -1  110.89    9.30 
   4  -5  -1  113.39   10.70 
  -4  -5   1  113.99    8.10 
  -4  -5   1  107.89    7.60 
  -4  -5   1  101.29    8.90 
  -4  -5   1  104.69    7.20 
   4  -5  -1  116.59    7.20 
  -4  -5   1  104.59    7.10 
   4   5  -1   93.99    6.40 
  -4   5   1  110.99   10.20 
   4   5  -1   97.79    8.10 
  -4   5   1  107.29    9.60 
   4   5  -1  101.69    7.70 
   4   5  -1  137.79    9.50 
   4   5  -1   97.99    5.70 
   4   5  -1   97.59    9.20 
  -4   5   1  123.99   11.00 
   4   5  -1  113.39    7.50 
   4   5  -1  106.69   10.00 
   4   5  -1  110.09    7.20 
  -4   5   1   91.09   10.90 
  -4   5   1  116.69    7.60 
  -4   5   1  101.09    6.80 
   4   5  -1  101.89    6.40 
  -4   5   1  110.29   17.30 
  -4   5   1  114.59    9.80 
  -4   5   1  103.09   10.20 
  -4   5   1  113.49    7.40 
  -4   5   1  115.59   10.10 
  -4   5   1   92.09   14.00 
  -4   5   1   98.99    8.50 
  -4   5   1  103.69    8.00 
   4   5  -1  101.49    9.40 
  -4   5   1   98.09   12.00 
  -3  -5   1 2067.19   64.99 
  -3  -5   1 2038.40   65.99 
   3  -5  -1 2125.19   66.19 
  -3  -5   1 2101.09   64.29 
   3  -5  -1 2074.69   65.69 
   3  -5  -1 1708.53   69.99 
   3  -5  -1 1922.01   65.49 
  -3  -5   1 2042.50   64.29 
  -3  -5   1 2025.20   64.59 
   3  -5  -1 2000.30   63.29 
   3  -5  -1 2033.80   62.79 
  -3  -5   1 1932.81   68.19 
   3  -5  -1 2029.90   66.59 
   3  -5  -1 2018.40   69.19 
  -3  -5   1 1906.01   64.39 
  -3  -5   1 2050.89   64.99 
  -3  -5   1 1927.81   66.99 
   3  -5  -1 2053.89   70.89 
  -3  -5   1 1991.90   61.39 
   3  -5  -1 2035.30   67.69 
  -3  -5   1 2040.60   64.19 
   3  -5  -1 2039.60   64.99 
  -3  -5   1 1944.11   64.89 
  -3   5   1 1994.10   64.29 
  -3   5   1 1986.80   79.09 
  -3   5   1 2063.69   70.39 
   3   5  -1 1994.10   63.69 
  -3   5   1 2036.70   64.19 
   3   5  -1 1846.62   68.39 
  -3   5   1 2000.80   69.99 
  -3   5   1 1686.13   75.69 
   3   5  -1 2038.40   68.59 
  -3   5   1 2082.89   65.39 
   3   5  -1 1973.00   69.09 
   3   5  -1 1967.20   63.09 
  -3   5   1 1987.10   63.59 
   3   5  -1 2010.10   65.59 
  -3   5   1 1979.30   66.99 
  -3   5   1 2084.79   70.39 
  -3   5   1 1865.41   71.29 
  -3   5   1 1953.10   70.39 
   3   5  -1 2061.99   68.19 
   3   5  -1 2039.60   62.19 
   3   5  -1 2008.60   65.29 
   3   5  -1 1924.21   63.39 
  -3   5   1 2060.69   67.89 
   3   5  -1 2059.79   64.49 
   3   5  -1 1931.11   66.49 
  -3   5   1 1923.91   66.89 
   3   5  -1 2020.20   64.09 
   2  -5  -1    5.00    3.40 
  -2  -5   1    7.30    2.30 
  -2  -5   1    5.10    1.30 
  -2  -5   1    3.40    2.40 
  -2  -5   1    4.00    2.50 
  -2  -5   1    3.30    2.10 
   2  -5  -1    8.30    3.00 
   2  -5  -1    5.30    1.10 
   2  -5  -1   13.50    1.80 
   2  -5  -1    5.40    2.80 
  -2  -5   1    4.10    2.00 
   2  -5  -1    5.00    2.80 
   2  -5  -1   12.40    2.40 
   2  -5  -1    3.90    1.80 
  -2  -5   1    4.60    2.30 
   2  -5  -1    8.60    3.10 
  -2  -5   1    6.70    3.50 
   2  -5  -1    5.30    1.30 
  -2  -5   1    7.80    2.60 
   2  -5  -1    3.80    1.20 
  -2  -5   1    3.50    2.90 
   2  -5  -1    9.20    2.10 
  -2  -5   1    5.60    2.50 
   2  -5  -1    1.30    2.90 
  -2  -5   1    8.40    2.70 
  -2  -5   1   12.00    3.90 
   2  -5  -1    3.10    2.70 
   2  -5  -1    5.50    3.60 
  -2  -5   1    6.40    2.30 
  -2  -5   1    5.00    2.40 
  -2  -5   1    2.70    2.10 
   2  -5  -1    3.40    2.70 
   2   5  -1    8.70    3.60 
  -2   5   1    2.60    2.70 
  -2   5   1    3.00    2.70 
   2   5  -1    3.50    2.20 
   2   5  -1    4.40    1.90 
   2   5  -1    6.70    3.80 
  -2   5   1    5.30    6.60 
   2   5  -1    3.00    3.10 
   2   5  -1    5.10    2.30 
   2   5  -1    4.80    2.30 
  -2   5   1    2.30    2.70 
  -2   5   1    5.30    2.50 
  -2   5   1    3.10    3.60 
   2   5  -1    0.50    2.10 
  -2   5   1    3.90    3.20 
   2   5  -1    3.40    2.00 
  -2   5   1   10.60    5.60 
   2   5  -1    2.00    1.60 
  -2   5   1    6.70    2.70 
   2   5  -1    3.60    2.60 
  -2   5   1   15.80    4.90 
   2   5  -1    1.60    3.30 
  -2   5   1    4.80    4.00 
  -2   5   1    5.20    2.50 
  -2   5   1    1.30    3.90 
  -2   5   1    5.70    5.50 
   2   5  -1    4.00    1.70 
   2   5  -1    3.80    1.80 
  -1  -5   1 1171.18   40.60 
  -1  -5   1 1286.07   39.90 
   1  -5  -1 1241.18   46.20 
  -1  -5   1 1218.68   44.00 
   1  -5  -1 1216.38   42.20 
   1  -5  -1 1273.97   47.50 
   1  -5  -1 1223.88   42.10 
   1  -5  -1 1261.17   42.90 
  -1  -5   1 1233.88   41.50 
  -1  -5   1 1263.37   44.20 
  -1  -5   1 1242.48   40.30 
  -1  -5   1 1094.39   44.70 
  -1  -5   1 1203.38   41.00 
   1  -5  -1 1176.58   41.90 
   1  -5  -1 1214.08   41.60 
   1  -5  -1 1178.78   44.40 
  -1  -5   1 1244.98   42.60 
  -1  -5   1 1190.98   45.10 
  -1  -5   1 1208.58   41.50 
   1  -5  -1 1190.98   40.40 
   1  -5  -1 1229.48   42.00 
  -1  -5   1 1167.88   42.00 
  -1  -5   1 1242.08   38.40 
   1  -5  -1 1246.78   38.80 
   1  -5  -1 1394.06   49.30 
  -1  -5   1 1279.87   40.10 
   1  -5  -1 1254.47   39.20 
  -1  -5   1 1214.18   41.70 
  -1  -5   1 1220.08   38.10 
   1  -5  -1 1246.78   41.90 
  -1  -5   1 1243.68   40.90 
  -1   5   1 1228.28   41.50 
  -1   5   1 1248.68   46.80 
  -1   5   1 1281.57   49.40 
   1   5  -1 1224.58   46.60 
  -1   5   1 1210.98   43.70 
  -1   5   1 1227.58   40.00 
   1   5  -1 1220.38   37.90 
   1   5  -1 1249.97   41.00 
   1   5  -1 1173.38   48.20 
   1   5  -1 1237.48   41.00 
  -1   5   1 1204.98   45.20 
   1   5  -1 1152.68   43.60 
   1   5  -1 1194.88   39.30 
  -1   5   1 1248.48   42.50 
   1   5  -1 1208.28   45.10 
  -1   5   1 1168.48   44.80 
  -1   5   1 1184.28   48.70 
   1   5  -1 1271.37   45.40 
   1   5  -1 1169.18   43.20 
  -1   5   1 1231.88   45.20 
   1   5  -1 1256.27   39.90 
   1   5  -1 1250.57   41.30 
  -1   5   1 1273.67   43.10 
  -1   5   1 1233.98   41.60 
   1   5  -1 1233.98   39.90 
   1   5  -1 1231.78   46.60 
  -1   5   1 1257.27   40.90 
   0  -5   1   51.99    5.60 
   0  -5   1   31.00    4.40 
   0  -5  -1   49.60    4.20 
   0  -5  -1   49.80    7.00 
   0  -5  -1   45.30    5.50 
   0  -5  -1   46.90    7.20 
   0  -5   1   47.30    3.80 
   0  -5   1   50.79    3.30 
   0  -5   1   47.30    6.50 
   0  -5  -1   49.99    5.90 
   0  -5  -1   41.20    5.30 
   0  -5   1   42.20    5.80 
   0  -5   1   52.29    4.90 
   0  -5  -1   44.80    5.10 
   0  -5   1   50.49    3.10 
   0  -5   1   52.69    6.70 
   0  -5  -1   70.29    8.40 
   0  -5  -1   50.99    4.70 
   0  -5  -1   46.20    5.30 
   0  -5   1   49.20    4.20 
   0  -5   1   45.00    5.50 
   0  -5  -1   53.59    4.10 
   0  -5   1   53.49    4.90 
   0  -5   1   60.79    5.40 
   0  -5   1   45.10    4.70 
   0  -5   1   50.49    5.30 
   0  -5   1   52.19    6.50 
   0  -5  -1   51.79    5.20 
   0  -5  -1   50.99    5.90 
   0  -5  -1   58.19    5.70 
   0  -5  -1   46.50    7.80 
   0  -5   1   52.79    8.30 
   0  -5   1   51.09    3.70 
   0   5  -1   49.00    3.60 
   0   5  -1   51.09    7.40 
   0   5  -1   57.59    4.90 
   0   5  -1   49.70    7.80 
   0   5   1   53.09    4.40 
   0   5  -1   49.20    5.20 
   0   5   1   49.30    7.30 
   0   5  -1   40.50    7.10 
   0   5   1   51.59    7.80 
   0   5  -1   39.90    8.00 
   0   5   1   45.80    8.70 
   0   5   1   62.29    9.50 
   0   5  -1   41.20    7.80 
   0   5  -1   49.80    4.40 
   0   5   1   47.10    5.40 
   0   5  -1   50.59    5.90 
   0   5   1   42.20    4.30 
   0   5   1   52.89   10.40 
   0   5   1   51.89    6.10 
   0   5   1   41.30    6.40 
   0   5   1   52.69    8.70 
   0   5   1   50.19    4.90 
   0   5  -1   34.80    7.70 
   0   5  -1   49.00    4.50 
   0   5   1   56.99    8.10 
   0   5  -1   48.40    6.10 
   0   5   1   48.30    6.10 
   0   5  -1   45.70    4.80 
   0   5  -1   42.40    7.50 
   0   5   1   52.39    5.30 
  -1  -5  -1 3534.15  108.69 
   1  -5   1 3427.26  112.59 
  -1  -5  -1 3516.35  108.79 
  -1  -5  -1 3508.05  107.69 
  -1  -5  -1 3568.04  111.39 
  -1  -5  -1 3520.35  112.09 
   1  -5   1 3536.55  110.99 
   1  -5   1 3563.94  108.29 
   1  -5   1 3400.66  108.09 
   1  -5   1 3486.15  109.39 
   1  -5   1 3408.76  108.89 
   1  -5   1 3450.95  105.19 
  -1  -5  -1 3539.55  108.59 
  -1  -5  -1 3420.96  109.09 
   1  -5   1 3488.45  108.79 
   1  -5   1 3518.05  104.99 
  -1  -5  -1 3488.05  108.39 
  -1  -5  -1 3664.43  109.69 
   1  -5   1 3404.66  105.09 
  -1  -5  -1 3473.85  108.89 
  -1  -5  -1 3491.45  112.89 
   1  -5   1 3764.12  118.49 
  -1  -5  -1 3234.28  106.89 
   1  -5   1 3524.95  105.59 
  -1  -5  -1 3069.89  113.39 
   1  -5   1 3516.85  108.59 
   1  -5   1 3577.14  111.29 
  -1  -5  -1 3516.05  106.99 
  -1  -5  -1 3491.45  107.89 
   1  -5   1 3430.76  104.89 
   1  -5   1 3422.76  104.49 
  -1   5  -1 3321.57  116.29 
   1   5   1 3401.36  111.99 
  -1   5  -1 3367.56  115.19 
  -1   5  -1 3456.65  108.29 
   1   5   1 3527.95  107.49 
  -1   5  -1 3541.75  105.89 
  -1   5  -1 3505.15  107.49 
  -1   5  -1 3385.56  109.09 
  -1   5  -1 3458.85  123.09 
   1   5   1 3310.67  114.69 
   1   5   1 3527.85  115.79 
   1   5   1 3492.45  109.39 
  -1   5  -1 3598.94  117.29 
   1   5   1 3534.25  108.49 
   1   5   1 3413.66  108.29 
   1   5   1 3513.45  109.39 
  -1   5  -1 3528.45  105.39 
  -1   5  -1 3428.06  110.09 
  -1   5  -1 3408.36  107.59 
   1   5   1 3496.05  110.79 
   1   5   1 3449.85  108.49 
  -1   5  -1 3591.74  115.29 
   1   5   1 3491.85  111.39 
   1   5   1 3477.25  111.89 
  -1   5  -1 3403.96  110.69 
  -1   5  -1 3468.25  114.69 
   1   5   1 3343.27  106.29 
   1   5   1 3530.05  106.49 
  -2  -5  -1    1.80    2.50 
   2  -5   1   16.80    3.40 
  -2  -5  -1    5.30    2.80 
   2  -5   1    2.80    2.50 
   2  -5   1   -1.10    1.00 
   2  -5   1    8.30    3.40 
  -2  -5  -1   -0.70    2.50 
  -2  -5  -1   -0.20    2.40 
  -2  -5  -1    0.90    3.00 
   2  -5   1    2.10    0.70 
  -2  -5  -1    2.60    2.50 
   2  -5   1    4.40    2.70 
  -2  -5  -1    2.50    1.90 
   2  -5   1    4.20    2.60 
   2  -5   1    0.70    1.60 
   2  -5   1    4.50    3.40 
  -2  -5  -1    1.90    2.40 
  -2  -5  -1    0.20    2.50 
  -2  -5  -1    2.20    2.30 
  -2  -5  -1   -0.90    2.00 
  -2  -5  -1    6.30    2.00 
  -2  -5  -1    5.20    3.50 
   2  -5   1    5.40    2.60 
  -2  -5  -1    0.20    1.90 
   2  -5   1    6.30    3.10 
  -2   5  -1    1.60    1.80 
  -2   5  -1   12.00    3.70 
   2   5   1    8.90    4.10 
  -2   5  -1    8.80    5.60 
   2   5   1    8.20    2.90 
   2   5   1    0.40    1.80 
   2   5   1    0.50    1.20 
  -2   5  -1    8.50    3.20 
   2   5   1    0.10    2.00 
   2   5   1    4.40    2.70 
  -2   5  -1    4.00    2.10 
   2   5   1    1.70    1.30 
  -2   5  -1   10.70    5.30 
  -2   5  -1    3.60    3.30 
   2   5   1    2.10    2.70 
  -2   5  -1    4.20    3.50 
  -2   5  -1    8.00    6.30 
  -2   5  -1    8.90    5.10 
   2   5   1    3.90    2.10 
  -2   5  -1   21.20    4.30 
  -2   5  -1    0.40    4.20 
   2   5   1    1.40    2.70 
  -2   5  -1    8.30    4.10 
   2   5   1    2.50    1.30 
   2   5   1    2.80    2.70 
  -2   5  -1    1.50    1.80 
   2   5   1    2.30    2.00 
   2   5   1    0.60    2.00 
   3  -5   1 3422.86  102.09 
   3  -5   1 3343.17  103.59 
  -3  -5  -1 3381.16  102.09 
  -3  -5  -1 3287.27  101.79 
  -3  -5  -1 3228.48  101.39 
   3  -5   1 3254.37  104.59 
  -3  -5  -1 3208.38  105.09 
  -3  -5  -1 3171.48  101.89 
  -3  -5  -1 3245.28  102.29 
   3  -5   1 3350.86  104.29 
   3  -5   1 3226.58  106.79 
   3  -5   1 3151.18  103.69 
  -3  -5  -1 3322.77   99.39 
  -3  -5  -1 3222.38  102.59 
  -3  -5  -1 3261.17  104.99 
   3  -5   1 3246.18  103.29 
  -3  -5  -1 3240.58  101.59 
  -3  -5  -1 3260.67  104.09 
   3  -5   1 3403.46  101.89 
   3  -5   1 3285.57   99.29 
  -3  -5  -1 3357.96  104.69 
   3  -5   1 3180.18  102.19 
   3  -5   1 3334.07   99.79 
  -3  -5  -1 3265.97  100.89 
  -3   5  -1 3286.07  107.79 
   3   5   1 3245.48  103.59 
  -3   5  -1 3256.57  117.49 
   3   5   1 3114.79  102.29 
   3   5   1 3176.58  104.19 
  -3   5  -1 3284.17   99.89 
   3   5   1 3267.37  100.79 
  -3   5  -1 3208.08  109.69 
   3   5   1 3104.79  105.19 
   3   5   1 3288.17  104.39 
  -3   5  -1 3197.18  103.29 
   3   5   1 3315.67   99.99 
   3   5   1 3214.18   99.29 
  -3   5  -1 3300.27  104.39 
  -3   5  -1 2981.80  110.29 
  -3   5  -1 3324.37  106.89 
   3   5   1 3197.08   98.19 
   3   5   1 3234.68  100.69 
   3   5   1 3391.46   98.79 
  -3   5  -1 3149.49  106.49 
   3   5   1 3183.78  101.19 
   3   5   1 3177.58  103.19 
   3   5   1 3206.48  105.99 
  -3   5  -1 3289.27  107.29 
  -3   5  -1 2768.82  113.09 
   3   5   1 3286.47  102.29 
  -3   5  -1 3296.17  101.39 
  -4  -5  -1   37.80    5.30 
   4  -5   1   23.50    5.00 
   4  -5   1   23.10    3.60 
   4  -5   1   23.60    5.50 
  -4  -5  -1   29.20    4.30 
   4  -5   1   33.70    6.20 
   4  -5   1   27.60    6.80 
   4  -5   1   34.50    4.90 
  -4  -5  -1   34.00    3.80 
  -4  -5  -1   32.20    5.00 
  -4  -5  -1   24.90    4.40 
  -4  -5  -1   28.10    5.60 
  -4  -5  -1   30.80    4.60 
   4  -5   1   20.60    4.80 
  -4  -5  -1   27.00    4.20 
  -4  -5  -1   31.40    5.90 
   4  -5   1   33.80    4.60 
  -4  -5  -1   28.10    5.00 
  -4  -5  -1   34.80    4.80 
   4   5   1   34.30    3.60 
   4   5   1   25.70    3.40 
  -4   5  -1   41.60    7.40 
  -4   5  -1   22.70    7.60 
   4   5   1   32.00    5.10 
   4   5   1   33.10    3.90 
   4   5   1   32.50    6.20 
  -4   5  -1   31.20    4.60 
  -4   5  -1   44.80    7.60 
   4   5   1   35.10    5.00 
   4   5   1   26.80    3.50 
  -4   5  -1   69.89   13.90 
   4   5   1   30.60    5.50 
  -4   5  -1   34.30    6.00 
   4   5   1   33.80    4.10 
  -4   5  -1   36.10    7.30 
   4   5   1   31.70    5.20 
   4   5   1   30.90    4.90 
  -4   5  -1   47.50    9.10 
  -4   5  -1   39.30    8.60 
  -4   5  -1   25.30    5.90 
   4   5   1   23.80    5.10 
  -4   5  -1   34.10    8.40 
   4   5   1   38.20    6.00 
  -4   5  -1   33.50    5.40 
   4   5   1   24.10    5.30 
  -4   5  -1   29.90    3.90 
  -5  -5  -1  579.54   22.90 
   5  -5   1  569.84   24.50 
  -5  -5  -1  615.74   27.50 
  -5  -5  -1  574.84   25.90 
   5  -5   1  573.24   22.80 
  -5  -5  -1  595.64   24.60 
  -5  -5  -1  580.24   22.40 
  -5  -5  -1  564.94   22.80 
  -5  -5  -1  552.44   22.70 
   5  -5   1  589.74   23.80 
  -5  -5  -1  533.05   22.00 
   5  -5   1  574.24   28.00 
  -5  -5  -1  570.54   22.00 
  -5  -5  -1  548.65   22.00 
   5  -5   1  597.74   22.00 
   5  -5   1  572.94   26.40 
  -5  -5  -1  578.04   23.60 
   5  -5   1  603.44   21.80 
  -5  -5  -1  558.54   20.90 
   5  -5   1  599.14   26.10 
  -5   5  -1  568.84   24.30 
   5   5   1  577.54   20.90 
   5   5   1  569.24   20.40 
   5   5   1  604.74   25.70 
  -5   5  -1  578.44   27.20 
  -5   5  -1  599.74   22.70 
  -5   5  -1  574.74   26.50 
  -5   5  -1  567.24   21.30 
   5   5   1  566.44   21.30 
  -5   5  -1  584.74   30.00 
  -5   5  -1  561.74   22.50 
  -5   5  -1  552.94   28.00 
   5   5   1  595.64   23.50 
   5   5   1  567.74   26.40 
   5   5   1  549.54   26.40 
  -5   5  -1  476.05   25.70 
   5   5   1  584.24   23.20 
   5   5   1  530.85   25.20 
   5   5   1  586.94   25.70 
   5   5   1  547.95   19.80 
  -5   5  -1  540.55   28.60 
   5   5   1  585.04   24.50 
  -5   5  -1  563.54   29.80 
  -5   5  -1  594.54   24.30 
  -5   5  -1  610.04   21.50 
  -5   5  -1  622.24   27.70 
  -5   5  -1  621.84   29.50 
   5   5   1  584.24   23.40 
  -6  -5  -1    5.10    3.60 
   6  -5   1    2.90    3.00 
  -6  -5  -1    5.00    4.50 
  -6  -5  -1    5.90    3.00 
   6  -5   1    6.80    5.30 
  -6  -5  -1    4.60    2.90 
  -6  -5  -1    4.30    2.60 
   6  -5   1    6.20    3.00 
   6  -5   1    1.30    3.90 
  -6  -5  -1    5.90    3.70 
  -6  -5  -1    5.40    3.20 
  -6  -5  -1    4.70    2.60 
   6  -5   1    2.20    2.50 
  -6  -5  -1    8.20    3.50 
  -6  -5  -1    1.30    2.30 
  -6  -5  -1    6.30    3.80 
  -6  -5  -1    1.20    3.40 
   6  -5   1    4.20    4.00 
   6   5   1    1.60    2.60 
  -6   5  -1    3.20    4.50 
  -6   5  -1    1.20    4.20 
   6   5   1    0.60    3.00 
  -6   5  -1    2.20    4.50 
  -6   5  -1    9.90    3.90 
   6   5   1    5.30    4.00 
  -6   5  -1    5.30    4.90 
  -6   5  -1    2.80    5.20 
   6   5   1    5.20    3.30 
  -6   5  -1    0.50    2.60 
   6   5   1   -0.30    2.80 
  -6   5  -1   11.40    5.40 
  -6   5  -1    0.70    2.70 
   6   5   1    5.10    2.40 
  -6   5  -1    5.60    2.70 
   6   5   1    3.90    3.40 
  -6   5  -1    8.30    5.50 
  -6   5  -1    7.90    4.10 
   6   5   1    3.90    2.40 
   6   5   1    2.90    3.90 
   6   5   1    0.50    3.40 
  -6   5  -1    2.30    5.00 
  -7  -5  -1    8.10    3.60 
  -7  -5  -1    8.90    4.00 
   7  -5   1    2.90    2.90 
  -7  -5  -1    3.90    2.90 
  -7  -5  -1    7.00    2.90 
   7  -5   1   11.00    4.60 
  -7  -5  -1    9.30    4.50 
  -7  -5  -1   21.20    6.90 
   7  -5   1    7.10    5.80 
   7  -5   1    8.50    4.90 
   7  -5   1    3.30    3.20 
  -7  -5  -1   10.60    4.40 
  -7  -5  -1    3.70    3.30 
  -7  -5  -1   17.50    4.20 
  -7  -5  -1    1.90    3.30 
  -7   5  -1    6.60    2.90 
   7   5   1   12.70    5.10 
   7   5   1    3.80    3.00 
   7   5   1    6.70    2.80 
  -7   5  -1    8.70    5.70 
   7   5   1    6.30    2.90 
  -7   5  -1    8.00    5.60 
   7   5   1    2.40    2.90 
  -7   5  -1    5.10    3.20 
   7   5   1    3.50    3.90 
  -7   5  -1   12.80    5.00 
   7   5   1    5.90    3.40 
  -7   5  -1   15.70    5.80 
   7   5   1   13.70    5.40 
   7   5   1    7.00    4.10 
  -7   5  -1   10.60    4.50 
  -7   5  -1   16.10    6.60 
  -7   5  -1    4.80    5.90 
  -7   5  -1   13.40    4.40 
  -7   5  -1   -0.70    4.00 
   7   5   1   17.80    4.50 
  -8  -5  -1   42.70    9.70 
  -8  -5  -1   42.30    5.90 
   8  -5   1   57.09    8.90 
   8  -5   1   57.29    7.10 
  -8  -5  -1   43.40    8.50 
  -8  -5  -1   47.90    6.90 
  -8  -5  -1   34.00    6.10 
  -8  -5  -1   46.20    6.60 
  -8  -5  -1   43.30    7.90 
   8  -5   1   48.70    6.80 
  -8  -5  -1   57.29    7.40 
   8  -5   1   51.59   10.20 
  -8  -5  -1   34.50    6.60 
   8   5   1   51.69    9.40 
  -8   5  -1   52.89   11.50 
   8   5   1   42.00    6.70 
   8   5   1   53.89    9.00 
   8   5   1   49.10    9.10 
  -8   5  -1   56.99    8.00 
  -8   5  -1   35.30    8.10 
  -8   5  -1   48.00    9.40 
  -8   5  -1   50.89    8.40 
   8   5   1   47.50    6.00 
  -8   5  -1   52.59   10.50 
  -8   5  -1   43.70    6.40 
   8   5   1   47.10    7.00 
  -8   5  -1   48.40   11.10 
   8   5   1   47.10    9.20 
   8  -6  -1  506.05   22.10 
   8  -6  -1  506.45   28.10 
  -8  -6   1  500.45   24.60 
  -8  -6   1  477.55   22.20 
  -8  -6   1  459.55   21.90 
  -8  -6   1  483.75   22.80 
   8  -6  -1  482.55   22.00 
  -8  -6   1  487.75   28.70 
  -8  -6   1  477.95   23.20 
   8  -6  -1  458.95   23.50 
  -8   6   1  447.16   27.60 
   8   6  -1  481.95   22.90 
   8   6  -1  500.85   20.60 
   8   6  -1  461.95   26.10 
   8   6  -1  460.05   26.50 
  -8   6   1  468.25   25.20 
   8   6  -1  479.05   25.50 
  -8   6   1  482.35   22.80 
  -8   6   1  451.65   26.60 
   8   6  -1  474.85   25.90 
  -8   6   1  523.15   25.20 
   8   6  -1  450.65   19.40 
   8   6  -1  462.05   23.00 
  -8   6   1  487.35   28.70 
  -8   6   1  476.15   26.90 
  -8   6   1  473.25   27.90 
  -8   6   1  484.35   30.10 
  -8   6   1  484.75   21.50 
  -8   6   1  488.85   31.70 
  -7  -6   1   33.50    5.80 
   7  -6  -1   23.70    5.00 
  -7  -6   1   22.30    5.60 
   7  -6  -1   24.50    7.50 
  -7  -6   1   23.00    6.30 
  -7  -6   1   30.10    7.80 
   7  -6  -1   35.00    8.40 
  -7  -6   1   25.60    5.30 
   7  -6  -1   24.30    7.80 
   7  -6  -1   31.50    5.70 
   7  -6  -1   33.00    7.10 
  -7  -6   1   28.50    5.90 
  -7  -6   1   30.20    6.20 
  -7  -6   1   23.00    5.20 
   7   6  -1   31.00    5.10 
  -7   6   1   19.60    7.20 
   7   6  -1   25.10    7.20 
  -7   6   1   27.60    5.20 
   7   6  -1   30.80    4.50 
   7   6  -1   30.30    5.80 
  -7   6   1   32.50    5.80 
  -7   6   1   25.00    8.00 
   7   6  -1   16.60    6.30 
  -7   6   1   22.80    8.60 
  -7   6   1   41.90    8.00 
  -7   6   1   25.50    7.90 
   7   6  -1   27.90    7.00 
   7   6  -1   31.20    6.20 
  -7   6   1   24.10    7.20 
   7   6  -1   29.00    7.00 
   7   6  -1   35.90    6.30 
  -7   6   1   28.60    8.00 
  -7   6   1   44.80   11.20 
  -6  -6   1  653.73   27.30 
  -6  -6   1  640.44   39.60 
   6  -6  -1  657.73   25.50 
  -6  -6   1  635.24   26.10 
   6  -6  -1  674.63   31.60 
  -6  -6   1  660.53   23.80 
   6  -6  -1  665.73   25.50 
  -6  -6   1  624.14   27.50 
   6  -6  -1  693.53   26.90 
   6  -6  -1  600.24   29.70 
  -6  -6   1  633.74   30.60 
   6  -6  -1  640.04   27.80 
  -6  -6   1  647.74   25.30 
  -6  -6   1  660.63   26.30 
   6  -6  -1  648.44   27.80 
  -6  -6   1  630.44   26.50 
  -6  -6   1  643.54   26.90 
   6  -6  -1  655.63   32.40 
  -6  -6   1  630.34   25.00 
   6   6  -1  658.23   26.70 
   6   6  -1  672.63   23.70 
   6   6  -1  627.04   28.90 
   6   6  -1  605.74   29.90 
  -6   6   1  581.74   31.50 
  -6   6   1  699.43   34.60 
  -6   6   1  657.23   30.50 
  -6   6   1  642.04   26.20 
  -6   6   1  642.54   31.80 
  -6   6   1  668.23   25.40 
  -6   6   1  624.74   33.80 
  -6   6   1  712.73   31.80 
  -6   6   1  647.74   31.50 
  -6   6   1  681.43   31.40 
   6   6  -1  663.43   29.20 
   6   6  -1  616.44   26.80 
   6   6  -1  657.53   26.70 
  -6   6   1  603.84   36.00 
   6   6  -1  601.74   29.60 
   6   6  -1  675.33   25.10 
  -6   6   1  657.63   29.60 
   5  -6  -1  202.28   11.00 
   5  -6  -1  207.48   15.70 
   5  -6  -1  199.38   14.80 
  -5  -6   1  199.78    9.30 
  -5  -6   1  207.98   11.60 
  -5  -6   1  198.68   12.00 
  -5  -6   1  186.78   12.40 
   5  -6  -1  211.18   13.70 
  -5  -6   1  198.48   11.20 
  -5  -6   1  200.88   12.60 
  -5  -6   1  185.08   11.20 
  -5  -6   1  215.28   11.30 
   5  -6  -1  198.08   14.30 
  -5  -6   1  186.28   10.20 
   5  -6  -1  191.88   12.70 
  -5  -6   1  190.58   11.90 
  -5  -6   1  190.28   12.20 
  -5  -6   1  210.08   14.40 
   5  -6  -1  205.78   11.70 
   5  -6  -1  212.78   12.00 
  -5  -6   1  203.28   14.30 
  -5   6   1  186.28   16.30 
   5   6  -1  195.98   14.30 
  -5   6   1  190.18   17.00 
   5   6  -1  193.18   14.40 
   5   6  -1  195.18   14.70 
  -5   6   1  200.08   14.90 
   5   6  -1  197.88   13.50 
  -5   6   1  145.99   17.60 
   5   6  -1  206.88   13.30 
  -5   6   1  193.28   14.10 
  -5   6   1  206.08   11.80 
  -5   6   1  192.38   16.60 
   5   6  -1  212.08   10.80 
  -5   6   1  205.68   16.90 
   5   6  -1  175.08   11.70 
   5   6  -1  192.88    9.80 
  -5   6   1  198.88   13.50 
   5   6  -1  200.88   11.40 
   5   6  -1  199.08    9.50 
   5   6  -1  200.78   11.80 
  -5   6   1  199.48   14.60 
   5   6  -1  198.78   15.40 
  -5   6   1  213.68   11.10 
  -5   6   1  211.98   11.30 
  -5   6   1  225.78   15.60 
  -5   6   1  202.48   15.50 
  -5   6   1  174.98   14.70 
   4  -6  -1  495.55   22.90 
   4  -6  -1  494.65   21.60 
   4  -6  -1  471.85   19.00 
  -4  -6   1  481.05   20.20 
   4  -6  -1  512.15   21.90 
  -4  -6   1  491.65   20.70 
  -4  -6   1  477.95   20.90 
  -4  -6   1  466.45   20.50 
   4  -6  -1  472.55   24.40 
  -4  -6   1  471.55   20.00 
  -4  -6   1  472.15   23.10 
   4  -6  -1  483.25   20.40 
  -4  -6   1  479.95   20.20 
   4  -6  -1  490.45   22.80 
   4  -6  -1  496.15   20.60 
  -4  -6   1  505.35   20.50 
  -4  -6   1  436.86   19.90 
  -4  -6   1  491.25   20.10 
  -4  -6   1  476.85   22.20 
  -4  -6   1  498.05   17.20 
   4   6  -1  446.76   19.40 
  -4   6   1  454.85   26.30 
   4   6  -1  481.85   18.80 
   4   6  -1  467.25   19.10 
  -4   6   1  480.95   19.40 
  -4   6   1  452.65   24.90 
  -4   6   1  470.45   22.60 
   4   6  -1  473.55   21.50 
  -4   6   1  494.55   23.20 
   4   6  -1  478.25   23.70 
   4   6  -1  477.25   24.40 
  -4   6   1  449.46   31.00 
   4   6  -1  465.25   20.20 
  -4   6   1  470.75   20.00 
  -4   6   1  508.35   26.00 
  -4   6   1  477.85   25.60 
  -4   6   1  466.25   22.70 
   4   6  -1  461.85   21.00 
  -4   6   1  564.34   25.80 
  -4   6   1  475.45   24.00 
  -4   6   1  504.05   20.00 
  -4   6   1  509.95   21.10 
  -4   6   1  451.55   25.00 
   4   6  -1  453.25   22.50 
   4   6  -1  500.65   18.00 
   4   6  -1  443.96   24.10 
   3  -6  -1    1.50    2.70 
  -3  -6   1    5.30    3.10 
  -3  -6   1    0.70    2.60 
  -3  -6   1    0.30    2.20 
   3  -6  -1    5.90    3.90 
   3  -6  -1   15.00    4.20 
  -3  -6   1    4.70    4.10 
   3  -6  -1    8.90    3.70 
  -3  -6   1    0.50    2.70 
  -3  -6   1    4.20    3.00 
  -3  -6   1    3.70    2.70 
   3  -6  -1    4.50    3.70 
  -3  -6   1    3.90    1.50 
  -3  -6   1    7.10    3.70 
  -3  -6   1    9.20    3.40 
   3  -6  -1    6.60    3.10 
  -3  -6   1    1.40    3.00 
  -3  -6   1    3.90    3.30 
   3  -6  -1    5.40    3.30 
  -3  -6   1   -0.30    2.40 
   3  -6  -1    2.70    3.70 
   3   6  -1    2.50    2.70 
   3   6  -1    4.40    2.00 
  -3   6   1   -0.60    4.00 
  -3   6   1    3.90    4.40 
   3   6  -1    8.70    4.70 
  -3   6   1   16.10    4.10 
  -3   6   1    3.80    3.60 
  -3   6   1   11.40    3.40 
  -3   6   1    1.00    2.40 
  -3   6   1    6.90    5.50 
  -3   6   1   13.40    5.20 
  -3   6   1    3.50    6.50 
   3   6  -1    0.70    2.10 
   3   6  -1    0.80    2.20 
  -3   6   1    2.50    3.20 
   3   6  -1   19.00    4.70 
  -3   6   1   19.40    5.20 
   3   6  -1    5.10    4.00 
   3   6  -1    0.30    2.50 
   3   6  -1    2.50    2.30 
   3   6  -1    1.50    3.00 
   3   6  -1    6.60    4.70 
   3   6  -1    4.30    3.60 
  -3   6   1    1.20    2.50 
  -3   6   1    3.90    4.10 
  -2  -6   1   12.50    3.40 
  -2  -6   1    9.40    3.50 
   2  -6  -1    9.90    3.40 
   2  -6  -1   11.80    3.80 
  -2  -6   1   11.60    3.40 
  -2  -6   1    8.20    2.90 
  -2  -6   1   10.50    3.30 
  -2  -6   1   10.90    1.80 
   2  -6  -1    3.30    3.70 
   2  -6  -1   12.10    3.80 
  -2  -6   1    9.60    3.00 
  -2  -6   1    6.70    3.20 
   2  -6  -1   12.10    1.80 
   2  -6  -1   14.80    2.00 
  -2  -6   1   15.00    4.00 
   2  -6  -1   14.10    4.80 
   2  -6  -1   18.40    4.40 
  -2  -6   1    8.70    4.00 
  -2  -6   1   18.40    5.50 
   2  -6  -1   16.80    5.50 
  -2  -6   1   24.40    4.40 
   2  -6  -1   11.80    2.00 
  -2  -6   1   12.50    3.40 
  -2  -6   1   10.50    3.20 
   2  -6  -1    8.80    2.30 
   2  -6  -1   14.00    4.20 
  -2   6   1    9.60    3.60 
   2   6  -1    7.70    2.20 
  -2   6   1    9.60    5.70 
   2   6  -1    7.20    4.30 
   2   6  -1   16.20    5.00 
   2   6  -1    8.10    3.00 
  -2   6   1   15.40    8.20 
   2   6  -1   17.30    4.80 
   2   6  -1   12.00    2.80 
  -2   6   1   10.80    5.40 
  -2   6   1   11.90    6.30 
   2   6  -1    5.60    2.60 
  -2   6   1   32.10    8.40 
  -2   6   1   10.80    3.50 
  -2   6   1   14.60    5.10 
  -2   6   1    4.60    4.00 
   2   6  -1    8.80    4.30 
   2   6  -1    8.00    5.30 
  -2   6   1   28.40    5.30 
   2   6  -1    6.70    2.70 
  -2   6   1    6.80    4.50 
  -2   6   1   14.00    4.30 
   2   6  -1   13.60    3.10 
   2   6  -1   10.50    4.70 
  -1  -6   1   54.79    6.60 
  -1  -6   1   59.09    8.80 
  -1  -6   1   52.09    5.90 
  -1  -6   1   60.79    5.00 
  -1  -6   1   60.69    6.00 
  -1  -6   1   58.09    5.80 
   1  -6  -1   54.69    4.90 
   1  -6  -1   51.79    4.30 
   1  -6  -1   45.00    6.10 
  -1  -6   1   48.60    5.10 
   1  -6  -1   58.19    4.80 
  -1  -6   1   59.89    5.10 
  -1  -6   1   50.49    6.20 
   1  -6  -1   62.19    4.30 
   1  -6  -1   55.49    6.50 
   1  -6  -1   61.59    7.00 
  -1  -6   1   63.99    6.50 
   1  -6  -1   57.39    7.90 
   1  -6  -1   61.39    8.60 
   1  -6  -1   61.39    9.70 
   1  -6  -1   63.99    6.80 
   1  -6  -1   52.99    6.30 
   1  -6  -1   56.99    6.50 
  -1  -6   1   48.80    8.20 
   1  -6  -1   51.99    8.80 
  -1  -6   1   54.49    6.80 
   1  -6  -1   51.79    6.50 
   1  -6  -1   58.69    5.10 
  -1  -6   1   54.59    7.90 
  -1  -6   1   53.89    6.20 
  -1  -6   1   65.09    7.70 
  -1   6   1   61.19    9.40 
  -1   6   1   51.99    8.50 
  -1   6   1   59.29    6.60 
   1   6  -1   48.00    8.50 
   1   6  -1   78.19   11.20 
  -1   6   1   54.09   10.30 
  -1   6   1   57.79    7.60 
  -1   6   1   54.89   10.00 
  -1   6   1   57.29    7.30 
   1   6  -1   57.19    7.20 
   1   6  -1   52.99    4.80 
  -1   6   1   64.09    6.10 
  -1   6   1   65.69    9.00 
   1   6  -1   62.99    5.90 
   1   6  -1   61.49    9.20 
   1   6  -1   51.69   10.20 
   1   6  -1   59.99    3.40 
  -1   6   1   58.09   10.60 
   1   6  -1   54.89    4.80 
   1   6  -1   52.89    8.20 
  -1   6   1   55.99    5.30 
   1   6  -1   56.49    5.80 
   1   6  -1   58.99    9.60 
   1   6  -1   45.50    5.70 
   1   6  -1   49.20    5.90 
  -1   6   1   58.39    8.40 
  -1   6   1   71.99   14.90 
   0  -6   1  607.04   21.30 
   0  -6   1  625.64   24.50 
   0  -6   1  617.14   21.60 
   0  -6  -1  599.04   24.60 
   0  -6  -1  596.24   23.90 
   0  -6   1  579.64   23.40 
   0  -6   1  588.44   23.70 
   0  -6  -1  634.24   24.50 
   0  -6  -1  608.24   28.60 
   0  -6   1  590.84   20.10 
   0  -6  -1  589.84   21.40 
   0  -6  -1  579.64   23.60 
   0  -6   1  608.84   26.70 
   0  -6  -1  602.04   24.50 
   0  -6  -1  586.24   23.80 
   0  -6   1  606.14   24.50 
   0  -6  -1  626.54   22.70 
   0  -6  -1  624.34   24.80 
   0  -6   1  620.64   27.70 
   0  -6  -1  605.14   22.10 
   0  -6   1  619.34   21.20 
   0  -6   1  629.14   23.60 
   0  -6  -1  708.43   29.80 
   0  -6  -1  631.94   29.50 
   0  -6   1  631.14   20.30 
   0  -6   1  650.03   27.30 
   0  -6  -1  627.84   27.70 
   0  -6   1  704.83   31.10 
   0  -6   1  620.34   24.40 
   0  -6   1  610.54   23.90 
   0   6   1  639.64   30.80 
   0   6  -1  621.34   28.50 
   0   6   1  602.44   24.80 
   0   6   1  606.44   31.50 
   0   6   1  627.04   22.90 
   0   6  -1  623.84   31.80 
   0   6  -1  622.04   21.80 
   0   6  -1  615.44   23.40 
   0   6  -1  616.94   30.20 
   0   6  -1  594.64   23.50 
   0   6  -1  533.15   28.50 
   0   6  -1  604.34   29.80 
   0   6  -1  602.94   22.80 
   0   6  -1  608.84   32.70 
   0   6   1  627.84   34.60 
   0   6   1  597.74   25.40 
   0   6   1  572.24   27.20 
   0   6   1  599.74   24.80 
   0   6   1  577.84   26.20 
   0   6  -1  584.24   27.60 
   0   6   1  622.84   22.80 
   0   6  -1  564.44   22.30 
   0   6  -1  593.94   24.50 
   0   6   1  602.54   24.00 
   0   6   1  608.04   29.70 
   0   6   1  552.64   24.10 
   1  -6   1    3.10    1.70 
   1  -6   1   11.90    5.20 
   1  -6   1    7.00    2.00 
   1  -6   1    4.90    1.80 
   1  -6   1   10.80    3.90 
  -1  -6  -1    4.20    2.40 
   1  -6   1    6.50    3.00 
  -1  -6  -1    7.60    3.40 
  -1  -6  -1    4.90    3.20 
   1  -6   1    4.40    2.90 
  -1  -6  -1    9.60    5.20 
  -1  -6  -1    5.40    2.80 
   1  -6   1    5.50    2.00 
   1  -6   1    7.20    3.60 
  -1  -6  -1    7.80    3.80 
   1  -6   1    0.00    2.80 
   1  -6   1   10.10    4.50 
  -1  -6  -1   12.30    3.50 
  -1  -6  -1    4.90    2.80 
  -1  -6  -1    5.10    3.50 
  -1  -6  -1    5.00    2.60 
  -1  -6  -1    5.00    3.00 
  -1  -6  -1    2.50    3.90 
  -1  -6  -1    8.80    4.80 
  -1  -6  -1   12.90    3.50 
   1  -6   1    0.70    2.30 
   1  -6   1    4.00    3.80 
   1  -6   1    6.50    3.20 
  -1   6  -1    6.40    3.00 
   1   6   1    5.80    2.40 
   1   6   1    6.70    4.20 
  -1   6  -1    4.10    1.80 
   1   6   1    3.80    2.00 
   1   6   1    1.80    4.50 
   1   6   1   10.30    3.50 
   1   6   1    6.60    3.80 
   1   6   1    4.60    2.70 
  -1   6  -1    2.90    3.50 
  -1   6  -1    8.60    3.00 
  -1   6  -1    4.70    3.80 
   1   6   1    7.50    3.10 
  -1   6  -1    7.50    3.30 
  -1   6  -1    9.80    3.60 
   1   6   1    4.70    2.00 
   1   6   1    5.10    3.00 
  -1   6  -1   13.30    5.80 
   1   6   1    5.50    3.80 
  -1   6  -1    7.70    5.40 
  -1   6  -1    3.80    5.00 
   1   6   1    0.60    3.80 
  -1   6  -1    8.90    6.60 
  -1   6  -1   10.10    6.10 
  -1   6  -1    6.50    1.90 
   1   6   1    2.10    4.10 
  -1   6  -1    4.00    3.10 
   1   6   1    4.70    2.70 
   2  -6   1  825.42   31.00 
  -2  -6  -1  863.01   35.70 
  -2  -6  -1  852.11   31.20 
   2  -6   1  826.62   33.80 
   2  -6   1  859.31   41.10 
   2  -6   1  882.71   32.30 
  -2  -6  -1  799.12   36.70 
  -2  -6  -1  880.21   32.20 
   2  -6   1  876.51   33.50 
  -2  -6  -1  838.82   30.10 
  -2  -6  -1  863.91   31.90 
  -2  -6  -1  845.72   31.00 
   2  -6   1  860.51   30.90 
   2  -6   1  869.21   28.50 
  -2  -6  -1  852.71   31.20 
   2  -6   1  893.71   32.70 
   2  -6   1  859.01   26.30 
  -2  -6  -1  752.02   29.00 
  -2  -6  -1  836.72   30.10 
  -2  -6  -1  807.32   31.30 
  -2  -6  -1  884.21   32.10 
  -2  -6  -1  844.02   32.10 
   2  -6   1  875.81   31.60 
  -2  -6  -1  784.42   36.30 
  -2  -6  -1  846.72   35.10 
  -2   6  -1  838.22   38.60 
  -2   6  -1  972.90   46.80 
  -2   6  -1  783.82   33.00 
   2   6   1  834.42   31.50 
  -2   6  -1  881.31   32.20 
  -2   6  -1  898.01   28.90 
   2   6   1  833.42   37.00 
   2   6   1  834.52   33.70 
  -2   6  -1  865.61   38.50 
   2   6   1  819.92   28.00 
  -2   6  -1  802.02   34.00 
   2   6   1  866.81   32.50 
   2   6   1  793.62   34.40 
   2   6   1  809.92   34.20 
   2   6   1  830.22   30.80 
  -2   6  -1  803.32   36.40 
  -2   6  -1  836.92   40.80 
   2   6   1  839.22   33.50 
   2   6   1  843.32   30.80 
  -2   6  -1  896.41   31.00 
   2   6   1  868.31   28.60 
  -2   6  -1  869.01   37.50 
  -2   6  -1  904.61   35.20 
  -2   6  -1  836.62   30.00 
  -2   6  -1  833.12   29.80 
   2   6   1  775.62   37.20 
   2   6   1  829.82   30.30 
  -3  -6  -1  107.99    7.40 
  -3  -6  -1  114.89    8.70 
  -3  -6  -1  129.99   11.30 
  -3  -6  -1  112.39   11.30 
  -3  -6  -1  130.29   10.00 
   3  -6   1  124.29    8.30 
  -3  -6  -1  115.89    6.40 
  -3  -6  -1  112.39    8.70 
   3  -6   1  115.19   10.30 
  -3  -6  -1  122.39    9.10 
   3  -6   1  113.49    9.00 
   3  -6   1  123.49   10.20 
  -3  -6  -1  112.09    8.80 
  -3  -6  -1  119.29    8.50 
  -3  -6  -1  112.29   11.80 
  -3  -6  -1  120.19    8.70 
  -3  -6  -1  107.19    8.30 
   3  -6   1  130.49   10.10 
   3  -6   1  117.89    6.90 
   3  -6   1  107.89    8.50 
   3  -6   1  134.59    9.20 
   3   6   1  110.99    6.80 
   3   6   1  113.59   10.00 
  -3   6  -1  126.09   13.80 
   3   6   1  104.49    8.80 
  -3   6  -1  102.29    7.00 
  -3   6  -1  129.99   11.30 
   3   6   1  112.89    9.10 
  -3   6  -1  120.39    7.60 
   3   6   1  115.19    6.00 
   3   6   1  102.89    8.50 
  -3   6  -1  119.19   13.80 
  -3   6  -1  130.19   11.80 
   3   6   1  115.19    7.70 
  -3   6  -1  111.89    9.50 
   3   6   1  112.99    9.40 
  -3   6  -1  117.09    8.00 
  -3   6  -1  105.69   16.50 
   3   6   1  109.79   10.90 
  -3   6  -1  108.89   13.60 
  -3   6  -1   98.29   12.80 
  -3   6  -1  105.89    9.30 
   3   6   1  119.09   10.70 
   3   6   1  114.19    7.70 
  -4  -6  -1  640.04   25.50 
   4  -6   1  612.24   26.20 
   4  -6   1  659.73   27.50 
  -4  -6  -1  647.74   25.70 
   4  -6   1  620.34   27.60 
  -4  -6  -1  614.04   25.20 
  -4  -6  -1  646.34   28.40 
  -4  -6  -1  596.54   25.10 
   4  -6   1  651.13   24.60 
  -4  -6  -1  625.64   25.00 
  -4  -6  -1  654.83   30.10 
   4  -6   1  625.94   28.10 
   4  -6   1  620.74   23.00 
  -4  -6  -1  617.34   23.90 
  -4  -6  -1  621.04   24.90 
  -4  -6  -1  635.64   22.50 
  -4  -6  -1  601.04   26.00 
   4  -6   1  630.34   24.70 
  -4  -6  -1  593.04   28.30 
   4   6   1  610.74   29.10 
   4   6   1  627.54   27.00 
  -4   6  -1  570.44   32.10 
   4   6   1  613.14   25.80 
   4   6   1  640.34   23.10 
  -4   6  -1  632.04   29.10 
  -4   6  -1  629.44   28.00 
  -4   6  -1  648.14   32.10 
  -4   6  -1  658.03   23.50 
  -4   6  -1  699.53   25.30 
   4   6   1  631.94   23.80 
   4   6   1  657.03   27.40 
  -4   6  -1  631.54   26.90 
   4   6   1  649.54   28.00 
  -4   6  -1  612.94   29.70 
   4   6   1  628.54   22.40 
  -4   6  -1  661.93   31.10 
   4   6   1  636.04   25.80 
   4   6   1  648.74   21.50 
  -4   6  -1  644.24   24.10 
   4   6   1  645.04   24.10 
  -4   6  -1  586.24   35.70 
   4   6   1  695.63   30.40 
  -4   6  -1  622.74   29.80 
  -4   6  -1  657.43   32.40 
   4   6   1  606.44   27.80 
  -5  -6  -1  500.55   21.50 
   5  -6   1  517.95   23.20 
   5  -6   1  520.75   21.10 
   5  -6   1  520.65   26.70 
  -5  -6  -1  519.55   22.30 
  -5  -6  -1  528.55   22.20 
  -5  -6  -1  493.35   21.20 
   5  -6   1  535.85   21.10 
  -5  -6  -1  502.95   25.20 
  -5  -6  -1  527.55   26.00 
  -5  -6  -1  504.45   21.20 
  -5  -6  -1  473.05   21.40 
  -5  -6  -1  530.15   21.40 
  -5  -6  -1  510.35   23.20 
   5  -6   1  501.45   24.90 
  -5  -6  -1  512.45   21.40 
  -5  -6  -1  503.05   19.30 
   5  -6   1  527.05   23.30 
   5  -6   1  506.75   19.90 
   5  -6   1  503.55   25.10 
  -5   6  -1  513.65   26.20 
   5   6   1  503.95   22.20 
  -5   6  -1  514.25   25.30 
  -5   6  -1  521.95   20.00 
  -5   6  -1  487.85   24.70 
  -5   6  -1  497.05   23.30 
  -5   6  -1  528.15   21.70 
   5   6   1  486.65   23.20 
   5   6   1  522.75   24.30 
  -5   6  -1  521.95   28.10 
   5   6   1  502.65   19.40 
  -5   6  -1  402.76   29.50 
  -5   6  -1  531.95   26.90 
  -5   6  -1  484.35   28.10 
  -5   6  -1  463.75   28.90 
   5   6   1  484.85   24.40 
   5   6   1  523.75   26.30 
  -5   6  -1  491.15   25.80 
  -5   6  -1  528.35   28.50 
   5   6   1  465.65   23.80 
   5   6   1  523.85   22.50 
  -5   6  -1  432.96   26.20 
  -5   6  -1  522.05   20.30 
   5   6   1  517.75   20.30 
  -6  -6  -1  979.80   36.30 
  -6  -6  -1  948.01   41.60 
   6  -6   1  936.01   40.30 
   6  -6   1  995.60   34.50 
   6  -6   1  944.11   37.50 
   6  -6   1  964.60   34.20 
  -6  -6  -1  973.50   37.10 
  -6  -6  -1  973.70   35.30 
  -6  -6  -1  965.50   35.20 
   6  -6   1  910.11   41.50 
  -6  -6  -1  914.41   39.80 
   6  -6   1  969.60   34.80 
  -6  -6  -1  890.71   35.60 
  -6  -6  -1  943.71   34.60 
  -6  -6  -1  949.51   35.30 
  -6  -6  -1  960.10   33.70 
   6   6   1  969.50   34.00 
   6   6   1  963.00   40.00 
   6   6   1  921.31   39.30 
  -6   6  -1  985.80   38.90 
   6   6   1  943.21   38.10 
  -6   6  -1  943.71   41.50 
  -6   6  -1  821.82   40.60 
   6   6   1  949.31   36.50 
   6   6   1  968.40   39.50 
   6   6   1  971.10   33.40 
  -6   6  -1  990.50   34.20 
   6   6   1  946.51   36.70 
  -6   6  -1  852.91   39.90 
  -6   6  -1  988.10   47.50 
  -6   6  -1 1059.99   47.10 
  -6   6  -1 1034.40   42.90 
  -6   6  -1 1033.30   43.70 
  -6   6  -1  944.11   40.80 
  -6   6  -1  939.91   44.00 
  -7  -6  -1  186.88   12.00 
   7  -6   1  197.48   13.90 
  -7  -6  -1  208.08   17.30 
   7  -6   1  160.48   16.10 
  -7  -6  -1  175.98   12.70 
   7  -6   1  205.78   11.80 
  -7  -6  -1  212.58   12.90 
  -7  -6  -1  202.28   13.10 
   7  -6   1  179.18   15.80 
  -7  -6  -1  186.98   21.80 
  -7  -6  -1  201.58   11.20 
  -7  -6  -1  208.38   12.50 
   7  -6   1  202.58   11.60 
   7   6   1  196.98   15.20 
  -7   6  -1  199.28   19.50 
   7   6   1  200.18   10.60 
  -7   6  -1  196.38   14.10 
   7   6   1  192.18   14.90 
   7   6   1  192.18   13.10 
   7   6   1  198.58   10.90 
  -7   6  -1  181.38   16.10 
  -7   6  -1  190.48   17.00 
  -7   6  -1  181.08   17.10 
  -7   6  -1  203.88   11.40 
  -7   6  -1  185.38   15.50 
  -7   6  -1  208.18   16.70 
   7   6   1  203.88   15.70 
   7   6   1  180.98   12.40 
  -7   6  -1  189.38   17.10 
  -7   6  -1  190.58   18.10 
   7   6   1  197.38   13.30 
   7   6   1  187.48   14.20 
  -8  -6  -1 1138.49   50.49 
   8  -6   1 1135.29   43.90 
   8  -6   1 1136.39   40.60 
   8  -6   1 1059.09   48.60 
  -8  -6  -1 1062.69   41.00 
  -8  -6  -1 1124.09   43.40 
  -8  -6  -1 1100.29   42.00 
  -8  -6  -1 1098.29   41.80 
   8  -6   1  982.80   46.30 
  -8  -6  -1 1148.49   45.10 
  -8  -6  -1 1070.89   40.50 
  -8  -6  -1 1133.29   41.20 
   8   6   1 1065.59   46.00 
  -8   6  -1 1159.68   53.49 
  -8   6  -1 1131.69   50.29 
   8   6   1 1085.39   44.80 
  -8   6  -1 1129.49   47.80 
   8   6   1 1053.49   46.20 
  -8   6  -1 1052.99   48.20 
   8   6   1 1046.80   46.10 
  -8   6  -1 1196.18   50.29 
  -8   6  -1 1158.18   44.20 
   8   6   1 1072.09   41.70 
  -8   6  -1 1067.29   44.90 
  -8   6  -1 1169.18   40.40 
   8   6   1 1124.19   39.10 
  -8   6  -1 1088.89   49.90 
   7  -7  -1  609.64   32.30 
   7  -7  -1  583.34   24.20 
  -7  -7   1  561.94   26.90 
   7  -7  -1  565.64   29.70 
  -7  -7   1  531.25   24.80 
   7  -7  -1  574.84   24.10 
   7  -7  -1  522.15   25.70 
  -7  -7   1  550.04   25.00 
  -7  -7   1  584.04   25.90 
   7  -7  -1  512.15   28.60 
  -7  -7   1  528.35   25.60 
  -7  -7   1  548.45   30.20 
   7   7  -1  607.14   26.30 
  -7   7   1  588.24   29.60 
   7   7  -1  577.14   28.60 
   7   7  -1  521.65   25.70 
  -7   7   1  590.74   24.30 
   7   7  -1  560.34   23.40 
   7   7  -1  550.84   28.30 
  -7   7   1  581.84   31.70 
  -7   7   1  542.95   32.20 
  -7   7   1  491.75   36.00 
  -7   7   1  573.64   32.10 
   7   7  -1  536.05   29.60 
   7   7  -1  562.74   22.10 
  -7   7   1  614.04   30.60 
  -7   7   1  569.94   31.30 
   7   7  -1  546.25   25.10 
   7   7  -1  523.35   29.20 
  -7   7   1  600.94   34.70 
  -7   7   1  545.25   25.10 
  -7   7   1  566.24   29.80 
   6  -7  -1  413.16   23.60 
  -6  -7   1  396.76   23.50 
   6  -7  -1  423.96   25.40 
   6  -7  -1  431.96   21.30 
   6  -7  -1  430.06   19.30 
  -6  -7   1  430.46   20.60 
   6  -7  -1  395.96   18.90 
  -6  -7   1  414.56   19.40 
   6  -7  -1  408.06   18.60 
  -6  -7   1  399.86   19.00 
   6  -7  -1  420.06   21.90 
  -6  -7   1  376.86   19.30 
  -6  -7   1  400.76   21.00 
  -6  -7   1  414.06   20.20 
  -6  -7   1  440.96   20.40 
  -6   7   1  402.16   18.70 
   6   7  -1  371.66   22.80 
  -6   7   1  394.86   25.00 
  -6   7   1  382.56   30.60 
  -6   7   1  464.55   25.70 
  -6   7   1  453.35   23.70 
  -6   7   1  407.06   23.50 
  -6   7   1  428.66   23.30 
  -6   7   1  414.26   19.80 
  -6   7   1  407.26   25.40 
  -6   7   1  456.95   27.60 
  -6   7   1  443.46   25.40 
   6   7  -1  420.06   19.80 
   6   7  -1  399.56   17.00 
   6   7  -1  423.96   22.50 
   6   7  -1  413.86   18.50 
   6   7  -1  408.16   20.30 
   6   7  -1  363.46   23.40 
  -6   7   1  438.56   31.00 
   6   7  -1  416.96   21.00 
  -6   7   1  399.56   26.40 
   6   7  -1  402.06   22.80 
  -5  -7   1 1478.35   52.29 
   5  -7  -1 1472.45   51.39 
  -5  -7   1 1509.95   52.49 
   5  -7  -1 1465.75   50.29 
  -5  -7   1 1496.15   53.89 
   5  -7  -1 1539.65   56.29 
  -5  -7   1 1449.26   52.19 
   5  -7  -1 1509.85   52.09 
  -5  -7   1 1455.35   52.99 
  -5  -7   1 1481.05   55.79 
  -5  -7   1 1567.14   58.39 
   5  -7  -1 1557.94   58.79 
   5  -7  -1 1430.16   52.89 
  -5  -7   1 1391.16   51.89 
   5  -7  -1 1464.55   55.09 
  -5  -7   1 1449.15   51.49 
  -5   7   1 1363.16   66.59 
  -5   7   1 1507.35   58.89 
  -5   7   1 1501.15   59.39 
   5   7  -1 1331.97   53.09 
  -5   7   1 1561.04   60.19 
  -5   7   1 1569.34   52.99 
   5   7  -1 1420.96   56.59 
  -5   7   1 1636.84   56.99 
   5   7  -1 1480.35   54.69 
  -5   7   1 1498.15   55.89 
   5   7  -1 1476.65   50.89 
  -5   7   1 1435.86   51.89 
  -5   7   1 1470.35   60.49 
  -5   7   1 1515.35   51.19 
   5   7  -1 1514.55   51.79 
  -5   7   1 1616.04   61.29 
   5   7  -1 1458.75   52.49 
   5   7  -1 1441.96   49.00 
   5   7  -1 1451.75   56.09 
  -5   7   1 1641.04   60.59 
  -5   7   1 1599.94   57.99 
  -5   7   1 1581.54   56.09 
   5   7  -1 1418.96   56.99 
  -4  -7   1  945.61   36.40 
   4  -7  -1  978.30   34.10 
  -4  -7   1  917.51   36.20 
  -4  -7   1  941.81   35.90 
   4  -7  -1  981.50   35.60 
  -4  -7   1  964.40   41.00 
  -4  -7   1  989.30   37.40 
   4  -7  -1 1087.49   39.40 
  -4  -7   1  945.71   36.10 
  -4  -7   1  960.10   35.50 
   4  -7  -1  946.21   39.10 
   4  -7  -1 1017.40   37.70 
  -4  -7   1  942.71   35.70 
  -4  -7   1  949.21   35.20 
   4  -7  -1  991.60   41.20 
  -4  -7   1  954.80   37.90 
  -4  -7   1  950.80   35.90 
   4  -7  -1  965.40   36.90 
   4  -7  -1  926.81   36.00 
  -4   7   1  994.50   38.80 
  -4   7   1 1115.19   41.60 
   4   7  -1  965.80   32.50 
  -4   7   1  943.21   42.50 
  -4   7   1  954.40   35.10 
   4   7  -1  904.71   41.50 
  -4   7   1  940.11   40.80 
  -4   7   1  977.40   36.60 
   4   7  -1  915.31   41.60 
  -4   7   1 1020.40   40.20 
   4   7  -1  956.50   36.20 
  -4   7   1  921.51   39.10 
  -4   7   1 1012.50   41.80 
  -4   7   1  974.40   50.79 
  -4   7   1  981.00   38.30 
   4   7  -1  898.11   39.60 
  -4   7   1 1002.90   35.50 
   4   7  -1  867.11   39.60 
   4   7  -1  854.01   37.10 
  -4   7   1  930.81   42.80 
   4   7  -1  939.31   34.90 
  -4   7   1 1012.00   43.30 
   4   7  -1  980.50   35.00 
  -4   7   1  966.50   36.00 
   4   7  -1  984.20   37.70 
   3  -7  -1 1034.30   37.10 
  -3  -7   1  938.31   41.30 
  -3  -7   1  966.80   36.60 
  -3  -7   1  948.31   35.90 
  -3  -7   1  960.40   36.90 
  -3  -7   1  968.00   36.10 
  -3  -7   1  951.90   36.00 
  -3  -7   1  937.51   36.00 
   3  -7  -1  959.80   36.60 
  -3  -7   1  968.90   35.60 
  -3  -7   1  988.20   48.40 
   3  -7  -1  984.90   40.60 
  -3  -7   1  979.80   35.20 
   3  -7  -1  998.40   40.00 
   3  -7  -1  993.00   34.00 
   3  -7  -1 1004.30   37.80 
  -3  -7   1  994.10   37.40 
  -3  -7   1  981.80   35.40 
  -3  -7   1  995.80   35.80 
   3  -7  -1 1033.20   36.30 
   3  -7  -1  982.80   37.10 
   3   7  -1  927.91   36.00 
   3   7  -1  908.51   40.50 
  -3   7   1  979.90   35.70 
  -3   7   1 1079.29   44.40 
  -3   7   1 1015.50   36.60 
  -3   7   1  973.50   37.80 
  -3   7   1 1011.10   38.10 
   3   7  -1  924.01   38.50 
   3   7  -1  972.70   44.20 
  -3   7   1 1008.70   42.50 
  -3   7   1  994.50   44.10 
   3   7  -1  995.10   33.30 
   3   7  -1  896.21   35.00 
   3   7  -1  997.90   37.30 
  -3   7   1  999.60   36.80 
  -3   7   1  993.40   35.70 
   3   7  -1  904.91   42.10 
   3   7  -1  942.11   41.90 
  -3   7   1 1087.29   52.79 
  -3   7   1 1075.19   41.40 
  -3   7   1  976.40   40.40 
  -3   7   1  938.81   39.70 
   3   7  -1  961.80   35.60 
   3   7  -1  984.10   41.00 
  -2  -7   1  527.45   23.00 
  -2  -7   1  491.65   22.30 
  -2  -7   1  525.45   22.20 
   2  -7  -1  542.45   26.00 
   2  -7  -1  543.05   17.90 
  -2  -7   1  488.85   21.80 
  -2  -7   1  530.65   17.80 
  -2  -7   1  471.55   26.20 
  -2  -7   1  522.65   21.10 
  -2  -7   1  531.35   21.30 
  -2  -7   1  533.55   22.40 
  -2  -7   1  495.15   25.70 
   2  -7  -1  538.45   23.10 
   2  -7  -1  575.14   23.10 
   2  -7  -1  529.75   22.60 
   2  -7  -1  535.45   23.10 
  -2  -7   1  546.05   21.90 
  -2  -7   1  511.85   22.90 
   2  -7  -1  539.55   22.60 
  -2  -7   1  519.35   20.70 
   2  -7  -1  554.34   26.10 
  -2  -7   1  534.85   21.50 
   2  -7  -1  526.65   18.40 
  -2  -7   1  519.05   21.40 
  -2   7   1  527.25   22.90 
  -2   7   1  607.04   37.10 
  -2   7   1  552.64   23.20 
  -2   7   1  543.15   25.60 
   2   7  -1  454.45   24.70 
   2   7  -1  534.95   22.60 
  -2   7   1  547.65   30.00 
   2   7  -1  467.45   26.60 
  -2   7   1  585.94   28.10 
  -2   7   1  561.74   22.90 
  -2   7   1  499.65   25.80 
   2   7  -1  509.55   27.50 
   2   7  -1  482.95   28.10 
  -2   7   1  577.54   29.80 
   2   7  -1  552.44   30.80 
   2   7  -1  527.55   20.10 
  -2   7   1  551.04   26.00 
   2   7  -1  506.35   22.00 
  -2   7   1  520.25   23.50 
   2   7  -1  486.65   21.60 
   2   7  -1  536.65   22.30 
   2   7  -1  508.45   26.10 
  -1  -7   1  961.70   39.90 
   1  -7  -1  962.80   39.90 
  -1  -7   1  981.80   32.80 
   1  -7  -1  983.80   31.90 
  -1  -7   1  944.11   36.40 
  -1  -7   1  965.80   35.60 
   1  -7  -1  924.31   35.30 
  -1  -7   1  975.70   33.20 
  -1  -7   1  924.71   36.10 
  -1  -7   1  948.31   39.80 
   1  -7  -1  962.10   36.20 
  -1  -7   1  979.40   35.70 
  -1  -7   1  951.90   33.40 
  -1  -7   1  973.70   33.90 
   1  -7  -1 1009.10   36.30 
  -1  -7   1  982.20   36.80 
  -1  -7   1  929.01   34.60 
  -1  -7   1  912.51   36.10 
   1  -7  -1 1003.20   42.10 
   1  -7  -1  957.70   36.60 
  -1  -7   1  965.20   40.40 
   1  -7  -1  932.91   35.50 
  -1  -7   1  943.11   35.10 
   1  -7  -1  994.40   39.90 
   1  -7  -1  964.80   32.40 
   1  -7  -1  968.50   36.10 
  -1   7   1  908.91   37.60 
   1   7  -1  959.50   36.10 
  -1   7   1 1016.40   39.60 
  -1   7   1  940.41   38.60 
  -1   7   1  974.70   35.40 
  -1   7   1 1029.20   44.10 
  -1   7   1  983.20   45.10 
   1   7  -1  888.31   40.60 
   1   7  -1  927.71   44.60 
  -1   7   1 1052.59   51.89 
  -1   7   1 1017.90   34.90 
   1   7  -1  879.61   40.90 
   1   7  -1  886.61   44.30 
   1   7  -1  943.61   33.60 
  -1   7   1  966.40   36.00 
   1   7  -1 1026.40   36.10 
   1   7  -1  972.40   35.50 
  -1   7   1 1037.90   37.30 
   1   7  -1  999.80   34.10 
   1   7  -1  971.50   40.50 
  -1   7   1 1060.09   41.70 
   1   7  -1  964.90   43.20 
   0  -7  -1  607.64   25.90 
   0  -7  -1  624.74   29.40 
   0  -7   1  595.34   28.40 
   0  -7   1  623.94   21.70 
   0  -7   1  625.34   25.60 
   0  -7  -1  635.24   22.20 
   0  -7   1  647.84   25.10 
   0  -7   1  615.84   24.30 
   0  -7   1  641.84   25.00 
   0  -7  -1  613.14   22.80 
   0  -7  -1  619.74   25.30 
   0  -7  -1  661.33   31.80 
   0  -7   1  595.14   22.10 
   0  -7   1  586.04   25.50 
   0  -7   1  593.74   34.60 
   0  -7  -1  608.64   25.40 
   0  -7  -1  583.54   24.40 
   0  -7   1  582.84   27.10 
   0  -7   1  608.04   21.90 
   0  -7  -1  635.54   22.90 
   0  -7  -1  619.84   24.70 
   0  -7   1  586.34   25.30 
   0  -7   1  607.84   24.70 
   0  -7  -1  644.54   29.60 
   0  -7  -1  567.24   25.30 
   0   7   1  611.74   36.70 
   0   7   1  628.84   25.30 
   0   7  -1  611.44   25.20 
   0   7  -1  592.64   22.20 
   0   7   1  629.74   23.70 
   0   7  -1  635.54   24.10 
   0   7   1  640.34   23.90 
   0   7   1  618.34   28.00 
   0   7   1  616.04   27.10 
   0   7   1  579.34   28.90 
   0   7   1  626.64   33.80 
   0   7  -1  598.84   24.50 
   0   7  -1  618.24   22.70 
   0   7  -1  581.74   29.20 
   0   7   1  626.54   26.50 
   0   7  -1  621.04   32.80 
   0   7   1  613.14   32.70 
   0   7   1  576.54   24.60 
   0   7   1  613.14   31.80 
   0   7  -1  610.04   26.00 
   0   7  -1  641.34   35.90 
   0   7  -1  686.43   35.00 
   0   7  -1  564.44   30.20 
   0   7  -1  516.65   30.10 
   1  -7   1 1437.26   51.79 
  -1  -7  -1 1462.15   49.40 
  -1  -7  -1 1472.35   48.50 
  -1  -7  -1 1460.45   54.89 
   1  -7   1 1411.86   50.09 
  -1  -7  -1 1383.36   55.59 
  -1  -7  -1 1427.66   56.59 
  -1  -7  -1 1373.06   49.40 
   1  -7   1 1432.06   50.39 
  -1  -7  -1 1413.26   50.79 
  -1  -7  -1 1421.46   49.10 
   1  -7   1 1434.16   49.00 
  -1  -7  -1 1422.56   47.20 
   1  -7   1 1428.56   53.59 
  -1  -7  -1 1411.46   50.39 
   1  -7   1 1433.56   45.00 
  -1  -7  -1 1446.06   49.90 
  -1  -7  -1 1396.46   47.90 
   1  -7   1 1485.15   50.59 
   1  -7   1 1424.76   45.00 
   1  -7   1 1386.06   45.30 
   1  -7   1 1368.96   48.90 
   1   7   1 1364.76   49.60 
  -1   7  -1 1528.65   49.60 
  -1   7  -1 1382.06   51.49 
  -1   7  -1 1451.55   49.20 
   1   7   1 1410.96   55.59 
   1   7   1 1311.67   58.39 
  -1   7  -1 1531.85   58.19 
   1   7   1 1439.56   47.40 
  -1   7  -1 1423.46   63.79 
  -1   7  -1 1450.25   54.09 
  -1   7  -1 1374.66   58.59 
   1   7   1 1394.66   50.09 
  -1   7  -1 1410.06   49.20 
   1   7   1 1446.36   51.49 
  -1   7  -1 1527.55   56.09 
  -1   7  -1 1363.66   50.09 
  -1   7  -1 1444.76   58.09 
   1   7   1 1400.56   52.79 
   1   7   1 1344.67   56.39 
   1   7   1 1538.55   62.59 
   1   7   1 1363.06   53.79 
   1   7   1 1490.05   48.60 
  -1   7  -1 1355.36   58.09 
   1   7   1 1366.56   46.30 
  -1   7  -1 1458.15   46.80 
  -2  -7  -1  721.03   36.80 
  -2  -7  -1  826.12   37.30 
  -2  -7  -1  832.62   30.30 
  -2  -7  -1  761.52   30.00 
   2  -7   1  830.42   32.50 
  -2  -7  -1  818.42   31.80 
  -2  -7  -1  805.02   31.10 
   2  -7   1  808.02   31.70 
   2  -7   1  846.32   28.30 
  -2  -7  -1  821.92   32.70 
   2  -7   1  859.61   33.90 
   2  -7   1  825.32   31.40 
  -2  -7  -1  842.32   32.20 
  -2  -7  -1  818.02   31.30 
  -2  -7  -1  824.72   28.20 
   2  -7   1  811.32   30.90 
  -2  -7  -1  813.22   30.90 
   2  -7   1  813.62   34.90 
  -2  -7  -1  805.92   32.30 
  -2  -7  -1  820.12   36.30 
  -2  -7  -1  835.42   30.20 
   2  -7   1  824.02   32.40 
   2   7   1  760.12   39.20 
  -2   7  -1  799.42   30.90 
   2   7   1  789.52   35.50 
   2   7   1  770.02   34.80 
   2   7   1  838.32   33.20 
  -2   7  -1  873.81   39.20 
  -2   7  -1  842.52   30.90 
  -2   7  -1  853.41   34.60 
   2   7   1  789.02   27.70 
   2   7   1  831.22   34.70 
  -2   7  -1  854.31   39.30 
  -2   7  -1  831.12   32.20 
  -2   7  -1  779.12   34.30 
   2   7   1  825.12   32.10 
   2   7   1  823.92   31.50 
  -2   7  -1  953.40   47.10 
   2   7   1  807.62   36.50 
   2   7   1  849.91   40.30 
  -2   7  -1  898.01   35.30 
   2   7   1  856.11   28.80 
  -2   7  -1  877.11   37.40 
  -2   7  -1  776.92   38.30 
  -3  -7  -1  587.44   31.60 
   3  -7   1  688.13   28.40 
  -3  -7  -1  643.24   25.70 
  -3  -7  -1  637.94   26.20 
  -3  -7  -1  654.43   31.00 
   3  -7   1  649.34   25.60 
   3  -7   1  644.44   26.40 
  -3  -7  -1  623.74   26.40 
  -3  -7  -1  654.93   26.30 
  -3  -7  -1  652.43   27.20 
   3  -7   1  698.23   30.00 
  -3  -7  -1  616.84   26.90 
  -3  -7  -1  637.64   27.90 
   3  -7   1  646.04   27.20 
   3  -7   1  640.34   28.70 
  -3  -7  -1  647.44   23.10 
   3  -7   1  638.54   26.60 
  -3  -7  -1  653.73   27.70 
  -3  -7  -1  654.03   31.60 
   3  -7   1  666.03   23.60 
   3   7   1  646.04   27.10 
   3   7   1  678.63   23.20 
  -3   7  -1  662.73   25.40 
  -3   7  -1  716.73   34.50 
  -3   7  -1  656.33   29.40 
   3   7   1  620.44   30.40 
   3   7   1  622.64   32.60 
   3   7   1  620.84   33.40 
  -3   7  -1  633.84   32.60 
   3   7   1  649.04   29.90 
  -3   7  -1  671.83   28.10 
   3   7   1  613.54   28.50 
   3   7   1  666.53   29.90 
   3   7   1  652.13   28.20 
  -3   7  -1  698.43   26.50 
  -3   7  -1  639.04   31.30 
  -3   7  -1  688.13   30.90 
   3   7   1  665.83   26.10 
  -3   7  -1  698.33   33.80 
  -3   7  -1  693.83   25.20 
  -3   7  -1  616.74   28.60 
  -3   7  -1  748.23   41.40 
   3   7   1  619.84   24.50 
   4  -7   1  557.84   25.50 
  -4  -7  -1  529.15   25.50 
   4  -7   1  520.15   25.40 
  -4  -7  -1  507.95   22.50 
  -4  -7  -1  522.15   23.60 
  -4  -7  -1  505.05   22.60 
   4  -7   1  528.85   25.20 
   4  -7   1  532.45   22.80 
  -4  -7  -1  531.35   23.70 
   4  -7   1  533.85   23.60 
  -4  -7  -1  517.45   27.10 
   4  -7   1  523.75   20.10 
   4  -7   1  549.25   21.70 
  -4  -7  -1  502.85   22.50 
  -4  -7  -1  505.85   23.00 
  -4  -7  -1  509.95   19.40 
  -4  -7  -1  521.55   23.50 
  -4  -7  -1  516.35   27.80 
   4   7   1  503.55   21.50 
  -4   7  -1  526.95   25.00 
   4   7   1  485.95   26.50 
   4   7   1  522.75   25.40 
  -4   7  -1  576.54   28.20 
   4   7   1  472.15   24.60 
   4   7   1  488.05   25.40 
  -4   7  -1  480.75   33.70 
   4   7   1  519.65   24.60 
  -4   7  -1  511.85   28.10 
  -4   7  -1  557.44   29.10 
  -4   7  -1  542.45   26.00 
   4   7   1  525.15   23.30 
  -4   7  -1  518.45   29.80 
  -4   7  -1  528.85   20.90 
   4   7   1  503.25   24.00 
  -4   7  -1  508.75   21.40 
  -4   7  -1  545.55   22.50 
  -4   7  -1  482.75   24.40 
  -4   7  -1  512.45   28.00 
  -5  -7  -1  275.37   15.40 
  -5  -7  -1  277.57   15.60 
   5  -7   1  293.87   15.30 
   5  -7   1  301.77   18.50 
  -5  -7  -1  278.27   18.70 
  -5  -7  -1  294.17   15.30 
  -5  -7  -1  275.57   15.60 
   5  -7   1  289.57   16.20 
  -5  -7  -1  298.47   20.20 
  -5  -7  -1  279.67   15.70 
  -5  -7  -1  255.07   15.40 
   5  -7   1  269.97   13.30 
   5  -7   1  272.97   18.20 
   5  -7   1  257.37   13.60 
  -5   7  -1  285.07   16.00 
  -5   7  -1  290.77   14.60 
  -5   7  -1  321.37   21.30 
  -5   7  -1  262.87   21.60 
  -5   7  -1  285.67   13.80 
   5   7   1  261.77   16.00 
  -5   7  -1  320.77   21.10 
  -5   7  -1  277.67   25.70 
   5   7   1  281.07   13.30 
   5   7   1  276.57   17.80 
  -5   7  -1  297.17   20.30 
  -5   7  -1  294.17   19.10 
   5   7   1  268.77   15.50 
  -5   7  -1  291.27   18.50 
  -5   7  -1  294.77   20.90 
   5   7   1  245.08   17.40 
  -5   7  -1  281.97   17.70 
   5   7   1  280.17   17.40 
  -5   7  -1  249.97   20.30 
   5   7   1  279.67   17.30 
   5   7   1  275.97   14.10 
  -5   7  -1  274.77   19.90 
  -6  -7  -1  146.59   16.00 
   6  -7   1  139.39    9.30 
   6  -7   1  136.29   13.60 
  -6  -7  -1  134.19   10.30 
  -6  -7  -1  131.99   10.50 
  -6  -7  -1  129.39   11.40 
   6  -7   1  142.49   13.80 
  -6  -7  -1  144.79   10.70 
   6  -7   1  118.39   10.10 
   6  -7   1  139.19    9.60 
   6  -7   1  129.39   11.10 
  -6  -7  -1  135.89   10.80 
  -6  -7  -1  132.09   11.00 
   6   7   1  126.09   12.90 
   6   7   1  118.09   12.00 
  -6   7  -1  171.58   20.00 
   6   7   1  131.59    9.30 
  -6   7  -1  154.88   14.90 
  -6   7  -1  137.69   15.90 
  -6   7  -1  128.69   20.50 
  -6   7  -1  134.99   17.10 
   6   7   1  118.59   11.80 
  -6   7  -1  128.49    9.20 
   6   7   1  121.09   12.00 
  -6   7  -1  143.99   13.80 
   6   7   1  131.09    8.70 
   6   7   1  119.99   10.70 
  -6   7  -1  126.19   16.00 
  -6   7  -1  112.09   15.90 
   6   7   1  138.89   11.50 
   6   7   1  114.79   10.60 
  -6   7  -1  121.49    9.60 
  -6   7  -1  131.29   16.00 
  -6   7  -1  146.69   13.50 
  -7  -7  -1   21.50    5.60 
   7  -7   1   22.10    8.10 
   7  -7   1   27.00    8.60 
   7  -7   1   23.20    5.00 
  -7  -7  -1   27.20    6.40 
  -7  -7  -1   19.50    6.10 
  -7  -7  -1   25.70    6.30 
  -7  -7  -1   17.00    5.40 
  -7  -7  -1   19.60    7.70 
  -7  -7  -1   14.20    6.00 
   7   7   1   18.70    7.10 
   7   7   1   24.70    7.10 
  -7   7  -1   20.30    7.50 
  -7   7  -1   36.90    9.30 
   7   7   1   32.90    6.80 
   7   7   1   18.90    6.30 
   7   7   1   21.70    6.00 
  -7   7  -1   30.30    9.70 
   7   7   1   22.00    4.80 
  -7   7  -1   25.90    7.70 
   7   7   1   33.90    5.20 
  -7   7  -1   21.10    8.00 
  -7   7  -1   15.30    8.30 
  -7   7  -1   26.20   10.10 
  -7   7  -1   24.80    5.10 
  -7   7  -1   18.10    8.10 
  -7   7  -1   14.50    9.10 
   7   7   1   18.40    6.70 
   7   7   1   21.00    6.00 
  -7   7  -1   35.20    9.60 
  -7   7  -1   22.70    5.50 
  -6  -8   1   99.09   10.00 
  -6  -8   1   87.79   10.40 
   6  -8  -1  101.39    8.80 
  -6  -8   1   85.49   12.50 
  -6  -8   1  117.59   13.00 
   6  -8  -1  108.49   13.90 
   6  -8  -1  102.49   10.20 
  -6  -8   1   91.59   13.10 
   6  -8  -1   99.89    8.70 
   6  -8  -1   93.29   11.20 
  -6  -8   1   89.09   10.60 
   6  -8  -1  105.69   13.50 
   6  -8  -1   92.09   13.30 
  -6  -8   1   88.09   10.40 
  -6  -8   1   94.79   10.30 
   6   8  -1   87.49   11.00 
  -6   8   1  136.99   17.50 
   6   8  -1  109.89    9.30 
   6   8  -1   93.39   14.10 
   6   8  -1   92.89   10.80 
  -6   8   1  106.29   10.80 
   6   8  -1   85.99   12.70 
  -6   8   1  115.39   11.70 
  -6   8   1   94.19   13.30 
  -6   8   1   89.49   15.10 
  -6   8   1  113.99   14.10 
   6   8  -1   80.69   10.80 
  -6   8   1  137.89   18.00 
  -6   8   1   87.89   10.20 
  -6   8   1   92.49   14.40 
  -6   8   1  102.09   14.30 
   6   8  -1  111.19   14.40 
  -6   8   1   80.39   17.40 
   5  -8  -1  282.97   15.90 
   5  -8  -1  311.77   18.50 
  -5  -8   1  263.07   15.70 
  -5  -8   1  290.97   17.20 
  -5  -8   1  256.57   19.90 
   5  -8  -1  278.87   19.70 
  -5  -8   1  258.87   15.40 
  -5  -8   1  295.07   19.10 
  -5  -8   1  258.37   16.00 
   5  -8  -1  279.77   14.70 
   5  -8  -1  252.77   17.90 
  -5  -8   1  263.57   15.90 
  -5  -8   1  256.87   16.00 
   5  -8  -1  285.17   14.10 
   5  -8  -1  257.17   15.90 
  -5   8   1  263.37   18.90 
  -5   8   1  300.27   27.60 
   5   8  -1  256.17   17.40 
   5   8  -1  254.87   15.80 
  -5   8   1  279.67   15.20 
   5   8  -1  262.67   19.60 
  -5   8   1  287.27   20.20 
   5   8  -1  275.97   14.90 
  -5   8   1  258.77   17.50 
  -5   8   1  258.37   16.80 
  -5   8   1  263.57   21.00 
   5   8  -1  250.77   18.40 
   5   8  -1  269.67   17.20 
  -5   8   1  289.27   18.90 
  -5   8   1  269.37   20.60 
  -5   8   1  254.27   15.40 
  -5   8   1  306.97   22.20 
   5   8  -1  249.58   18.80 
   4  -8  -1  198.78   13.70 
  -4  -8   1  180.08   12.20 
  -4  -8   1  165.88   12.10 
   4  -8  -1  179.68   10.40 
   4  -8  -1  151.48   11.90 
   4  -8  -1  187.78   12.80 
   4  -8  -1  182.98   15.40 
  -4  -8   1  157.88   11.30 
  -4  -8   1  153.38   15.70 
   4  -8  -1  169.48   12.80 
  -4  -8   1  162.68   11.10 
  -4  -8   1  158.78   12.00 
   4  -8  -1  155.78   13.90 
  -4  -8   1  171.78   12.80 
   4  -8  -1  186.18   11.40 
  -4  -8   1  179.78   13.20 
   4   8  -1  155.18   14.70 
  -4   8   1  148.59   14.10 
  -4   8   1  217.18   18.30 
   4   8  -1  162.28   12.50 
  -4   8   1  165.08   12.10 
  -4   8   1  169.98   13.30 
   4   8  -1  144.79   13.40 
  -4   8   1  170.28   14.00 
  -4   8   1  170.28   11.50 
   4   8  -1  153.88   10.90 
  -4   8   1  149.59   11.50 
  -4   8   1  183.38   13.00 
   4   8  -1  173.98   15.90 
  -4   8   1  190.08   16.50 
  -4   8   1  213.78   16.20 
  -4   8   1  185.48   14.40 
  -4   8   1  137.59   17.80 
  -4   8   1  206.28   22.40 
   4   8  -1  168.98   12.20 
  -3  -8   1  140.89   10.80 
  -3  -8   1  184.78   10.90 
   3  -8  -1  168.08    9.50 
   3  -8  -1  153.88   13.90 
  -3  -8   1  132.79   14.50 
  -3  -8   1  201.58   12.10 
   3  -8  -1  160.38   11.60 
   3  -8  -1  157.98   11.70 
   3  -8  -1  155.18   13.80 
  -3  -8   1  160.88   11.60 
   3  -8  -1  169.08   12.10 
  -3  -8   1  139.89   10.30 
   3  -8  -1  143.89   11.50 
  -3  -8   1  143.99   10.60 
  -3  -8   1  171.18   12.60 
  -3  -8   1  170.48   12.40 
   3  -8  -1  162.38   10.90 
   3   8  -1  141.19   15.00 
  -3   8   1  166.68   19.70 
  -3   8   1  156.38   11.40 
  -3   8   1  148.19   13.70 
  -3   8   1  168.98   13.70 
   3   8  -1  148.69    8.80 
  -3   8   1  158.58   14.80 
  -3   8   1  154.78   11.90 
   3   8  -1  125.39   12.90 
   3   8  -1  160.68   11.30 
   3   8  -1  162.08   11.90 
   3   8  -1  145.19   10.80 
   3   8  -1  118.59   17.60 
  -3   8   1  154.08   11.60 
   3   8  -1  121.39   13.50 
  -3   8   1  139.49   13.60 
  -3   8   1  184.68   12.50 
  -3   8   1  158.38   11.00 
  -3   8   1  182.98   16.80 
  -3   8   1  202.48   22.20 
   3   8  -1  157.68   16.50 
   3   8  -1  149.09   15.10 
   2  -8  -1   12.30    5.20 
   2  -8  -1   10.00    4.80 
   2  -8  -1   29.10    7.70 
  -2  -8   1    4.40    3.40 
  -2  -8   1   11.40    4.50 
  -2  -8   1   13.60    3.90 
   2  -8  -1   12.40    4.30 
   2  -8  -1   10.10    4.00 
  -2  -8   1   20.80    5.60 
  -2  -8   1   11.70    5.00 
  -2  -8   1   16.00    4.60 
  -2  -8   1   10.00    4.00 
   2  -8  -1   14.10    4.70 
  -2  -8   1    9.90    3.90 
   2  -8  -1    8.90    4.50 
  -2  -8   1    9.80    4.40 
  -2  -8   1   15.10    6.50 
   2   8  -1    7.80    4.00 
  -2   8   1   17.50    5.10 
  -2   8   1   24.30    8.40 
  -2   8   1   15.40    4.90 
   2   8  -1   12.90    4.40 
   2   8  -1    8.50    6.20 
  -2   8   1   23.80    6.50 
   2   8  -1   10.00    4.10 
   2   8  -1   21.60    9.10 
  -2   8   1   16.70    7.70 
  -2   8   1   11.10    4.30 
   2   8  -1    8.20    5.70 
   2   8  -1   20.60    4.10 
  -2   8   1   24.60    7.10 
   2   8  -1   14.10    7.70 
  -2   8   1   28.20    7.80 
   2   8  -1   10.00    5.90 
   2   8  -1    6.30    3.50 
  -2   8   1   20.50    5.30 
  -2   8   1   22.10    7.30 
   2   8  -1   14.00    6.00 
  -2   8   1   23.00    9.40 
  -2   8   1   11.20    4.00 
  -1  -8   1    2.70    2.80 
   1  -8  -1   16.40    5.70 
   1  -8  -1    9.10    4.10 
  -1  -8   1    8.30    4.00 
   1  -8  -1   23.00    7.30 
   1  -8  -1    5.80    4.10 
  -1  -8   1    1.90    4.30 
  -1  -8   1    5.60    3.00 
  -1  -8   1   14.00    5.70 
   1  -8  -1    7.00    4.30 
  -1  -8   1    6.40    4.10 
  -1  -8   1    7.80    4.10 
  -1  -8   1    6.00    3.70 
   1  -8  -1    5.80    3.90 
   1  -8  -1    0.80    3.60 
  -1  -8   1    2.10    2.60 
   1  -8  -1    6.30    4.50 
  -1  -8   1    5.70    3.70 
   1   8  -1    5.10    5.20 
  -1   8   1    9.20    3.70 
   1   8  -1    6.40    6.10 
   1   8  -1    0.10    6.40 
   1   8  -1   12.80    4.40 
  -1   8   1    4.00    6.80 
   1   8  -1   11.80    4.30 
   1   8  -1   11.80    6.20 
  -1   8   1    9.80    4.20 
   1   8  -1    7.50    5.50 
   1   8  -1   12.40    4.80 
  -1   8   1    6.00    4.60 
  -1   8   1    9.00    5.30 
   1   8  -1    4.90    6.70 
  -1   8   1   25.20    8.60 
  -1   8   1    6.90    5.90 
  -1   8   1    8.10    4.30 
  -1   8   1   14.80    5.60 
   1   8  -1   10.80    3.50 
  -1   8   1   16.90    7.80 
   0  -8  -1  230.88   11.70 
   0  -8   1  225.88   14.00 
   0  -8   1  256.67   13.40 
   0  -8   1  216.18   13.30 
   0  -8  -1  224.38   11.10 
   0  -8  -1  252.97   15.10 
   0  -8   1  229.98   12.40 
   0  -8  -1  215.28   17.10 
   0  -8   1  247.58   15.50 
   0  -8   1  241.18   13.90 
   0  -8  -1  234.78   14.00 
   0  -8   1  238.68   10.90 
   0  -8  -1  221.68   14.60 
   0  -8  -1  248.38   14.70 
   0  -8   1  213.78   10.80 
   0  -8  -1  238.78   16.90 
   0  -8  -1  216.88   13.20 
   0  -8  -1  222.98   13.20 
   0  -8   1  260.27   15.40 
   0  -8   1  223.18   14.80 
   0  -8   1  220.88   17.10 
   0   8  -1  255.37   22.10 
   0   8  -1  247.68   17.70 
   0   8   1  234.98   12.80 
   0   8   1  247.48   15.40 
   0   8   1  219.98   17.00 
   0   8   1  221.38   19.30 
   0   8   1  250.67   16.50 
   0   8  -1  240.88   18.70 
   0   8  -1  225.48   20.60 
   0   8  -1  242.68   13.00 
   0   8  -1  255.87   20.30 
   0   8   1  234.78   15.90 
   0   8  -1  229.78   14.60 
   0   8   1  182.18   21.50 
   0   8   1  247.58   24.30 
   0   8  -1  245.78   14.00 
   0   8   1  239.88   14.10 
   0   8  -1  240.38   22.90 
   0   8   1  213.78   20.30 
   1  -8   1  464.15   20.60 
   1  -8   1  447.06   21.50 
  -1  -8  -1  418.56   21.70 
  -1  -8  -1  488.05   26.50 
   1  -8   1  469.95   22.20 
  -1  -8  -1  439.16   22.20 
  -1  -8  -1  439.56   18.60 
  -1  -8  -1  453.65   20.50 
  -1  -8  -1  476.65   22.20 
   1  -8   1  467.15   22.30 
   1  -8   1  483.15   22.90 
  -1  -8  -1  457.65   19.50 
  -1  -8  -1  452.35   20.70 
   1  -8   1  446.66   20.70 
  -1  -8  -1  457.75   21.50 
   1  -8   1  419.76   24.40 
  -1  -8  -1  435.76   25.40 
  -1   8  -1  452.45   22.90 
   1   8   1  444.16   28.50 
   1   8   1  463.75   25.30 
   1   8   1  456.75   21.50 
  -1   8  -1  470.85   28.10 
  -1   8  -1  439.26   20.70 
   1   8   1  462.65   22.00 
  -1   8  -1  462.95   20.90 
  -1   8  -1  509.05   27.90 
   1   8   1  458.75   19.30 
   1   8   1  490.25   28.00 
  -1   8  -1  468.25   25.50 
   1   8   1  467.55   32.50 
  -1   8  -1  494.35   33.10 
  -1   8  -1  459.55   29.20 
   1   8   1  503.35   23.80 
   1   8   1  431.66   23.80 
   1   8   1  437.36   29.70 
  -1   8  -1  448.06   29.50 
   2  -8   1  303.47   15.70 
   2  -8   1  315.37   17.60 
  -2  -8  -1  278.47   14.70 
  -2  -8  -1  259.87   13.80 
   2  -8   1  257.77   18.20 
   2  -8   1  285.87   16.30 
  -2  -8  -1  281.97   16.60 
  -2  -8  -1  294.97   16.20 
  -2  -8  -1  282.77   20.80 
   2  -8   1  277.97   16.10 
   2  -8   1  288.27   12.40 
  -2  -8  -1  296.77   15.50 
  -2  -8  -1  251.47   19.10 
  -2  -8  -1  287.57   15.10 
   2  -8   1  306.67   16.60 
   2  -8   1  288.37   15.00 
  -2  -8  -1  282.97   16.90 
  -2   8  -1  276.97   19.20 
  -2   8  -1  244.48   21.30 
   2   8   1  266.47   23.20 
  -2   8  -1  290.57   17.30 
  -2   8  -1  328.37   26.80 
   2   8   1  258.37   15.60 
   2   8   1  254.47   19.20 
  -2   8  -1  289.87   18.00 
   2   8   1  286.87   21.10 
  -2   8  -1  334.57   22.10 
  -2   8  -1  339.37   22.30 
  -2   8  -1  303.77   15.70 
   2   8   1  280.97   23.10 
   2   8   1  270.47   18.90 
   2   8   1  259.97   17.80 
   2   8   1  261.37   15.60 
  -2   8  -1  279.97   15.80 
   2   8   1  298.27   17.40 
   2   8   1  299.87   15.90 
   2   8   1  284.97   13.20 
  -2   8  -1  288.77   18.80 
  -3  -8  -1  575.94   24.30 
  -3  -8  -1  642.34   25.80 
  -3  -8  -1  574.24   26.50 
   3  -8   1  589.24   25.90 
   3  -8   1  655.53   27.40 
   3  -8   1  632.04   28.20 
  -3  -8  -1  512.15   31.00 
   3  -8   1  636.14   24.80 
   3  -8   1  583.14   26.10 
  -3  -8  -1  575.14   27.00 
  -3  -8  -1  573.04   24.80 
  -3  -8  -1  584.54   25.40 
   3  -8   1  570.24   25.40 
  -3  -8  -1  605.64   26.70 
   3  -8   1  588.44   22.00 
  -3  -8  -1  601.24   26.20 
   3  -8   1  593.34   29.00 
   3   8   1  566.24   30.10 
   3   8   1  517.25   28.40 
   3   8   1  598.94   27.60 
   3   8   1  577.54   26.10 
  -3   8  -1  622.64   30.60 
   3   8   1  544.65   28.40 
  -3   8  -1  547.05   32.10 
   3   8   1  560.14   33.90 
   3   8   1  559.84   29.80 
  -3   8  -1  572.14   28.60 
  -3   8  -1  582.14   26.60 
  -3   8  -1  562.44   27.10 
  -3   8  -1  604.94   25.40 
  -3   8  -1  632.14   32.50 
  -3   8  -1  601.04   29.30 
  -3   8  -1  642.54   32.80 
  -3   8  -1  711.63   40.20 
   3   8   1  589.04   25.30 
  -4  -8  -1   99.79   10.50 
  -4  -8  -1  102.29    9.70 
   4  -8   1  124.39   10.80 
  -4  -8  -1  122.29   11.70 
   4  -8   1  120.59   11.40 
  -4  -8  -1  115.09    9.80 
   4  -8   1  116.59   11.60 
  -4  -8  -1  114.99   10.70 
  -4  -8  -1  119.19   10.10 
   4  -8   1  117.89    8.90 
  -4  -8  -1  102.29   10.30 
  -4  -8  -1   98.49   15.00 
   4  -8   1  111.99   10.20 
   4  -8   1  117.69    7.90 
  -4   8  -1  104.99   14.80 
   4   8   1   87.79   12.10 
  -4   8  -1  120.89   16.90 
  -4   8  -1  120.69   19.90 
   4   8   1  103.29   11.90 
   4   8   1   98.99   10.00 
  -4   8  -1  106.29   15.40 
   4   8   1  106.29    9.30 
   4   8   1  114.99   11.30 
  -4   8  -1  115.69   14.60 
  -4   8  -1  107.19    9.50 
   4   8   1   94.59   12.00 
  -4   8  -1  108.29    8.70 
  -4   8  -1  118.69   10.90 
  -4   8  -1  113.19   11.20 
   4   8   1  110.19   11.60 
  -4   8  -1  139.69   13.50 
  -5  -8  -1  476.05   23.60 
  -5  -8  -1  466.35   25.70 
   5  -8   1  485.65   23.40 
   5  -8   1  477.65   20.60 
   5  -8   1  490.55   20.00 
  -5  -8  -1  487.45   23.80 
   5  -8   1  488.35   22.40 
  -5  -8  -1  499.25   23.00 
  -5  -8  -1  460.25   28.60 
  -5  -8  -1  441.96   21.90 
  -5  -8  -1  482.95   23.90 
   5  -8   1  457.25   25.60 
   5  -8   1  529.65   26.20 
  -5  -8  -1  460.25   22.90 
  -5   8  -1  535.55   27.70 
  -5   8  -1  500.55   25.60 
  -5   8  -1  429.76   27.60 
   5   8   1  484.25   23.70 
  -5   8  -1  462.25   27.70 
  -5   8  -1  493.75   25.70 
   5   8   1  491.55   23.60 
  -5   8  -1  481.05   29.10 
  -5   8  -1  477.25   27.00 
   5   8   1  489.05   25.60 
  -5   8  -1  514.55   35.60 
   5   8   1  468.85   24.70 
   5   8   1  439.96   25.20 
   5   8   1  473.15   25.80 
  -5   8  -1  468.65   22.00 
  -5   8  -1  542.65   26.80 
   5   8   1  501.85   22.00 
   5   8   1  462.25   26.30 
  -5   8  -1  528.35   28.30 
  -6  -8  -1  151.78   12.80 
   6  -8   1  166.58   10.70 
  -6  -8  -1  161.78   13.70 
  -6  -8  -1  147.59   16.60 
  -6  -8  -1  170.48   17.60 
  -6  -8  -1  188.88   15.00 
  -6  -8  -1  167.98   12.90 
   6  -8   1  182.08   15.90 
   6  -8   1  153.28   12.50 
  -6  -8  -1  169.98   13.10 
   6  -8   1  132.99   16.20 
  -6  -8  -1  165.28   13.20 
  -6  -8  -1  163.88   13.60 
  -6   8  -1  176.18   15.20 
  -6   8  -1  158.38   16.50 
   6   8   1  156.38   13.50 
   6   8   1  154.78   11.20 
   6   8   1  159.18   14.50 
  -6   8  -1  173.08   12.40 
   6   8   1  163.68   15.60 
  -6   8  -1  205.48   18.50 
   6   8   1  177.88   15.20 
   6   8   1  160.38   13.10 
  -6   8  -1  224.48   16.40 
   6   8   1  188.68   13.80 
   6   8   1  171.88   15.40 
  -6   8  -1  197.88   16.60 
  -6   8  -1  159.58   23.90 
  -6   8  -1  147.79   18.40 
  -6   8  -1  169.48   20.20 
  -6   8  -1  182.68   20.70 
  -5  -9   1  209.48   15.40 
   5  -9  -1  221.68   17.70 
  -5  -9   1  263.87   15.80 
  -5  -9   1  241.28   16.20 
  -5  -9   1  248.48   16.50 
   5  -9  -1  242.48   15.60 
  -5  -9   1  229.28   15.00 
  -5  -9   1  239.28   16.90 
   5  -9  -1  269.97   17.40 
   5  -9  -1  227.88   13.60 
   5  -9  -1  270.47   16.40 
  -5   9   1  300.97   27.70 
  -5   9   1  256.77   22.20 
  -5   9   1  243.98   18.80 
   5   9  -1  251.37   16.30 
   5   9  -1  196.38   17.40 
   5   9  -1  230.28   17.00 
  -5   9   1  274.97   18.00 
   5   9  -1  258.87   15.30 
   5   9  -1  237.48   19.80 
  -5   9   1  282.77   18.60 
  -5   9   1  246.68   20.70 
  -5   9   1  229.98   18.00 
   5   9  -1  196.78   18.80 
  -5   9   1  247.48   18.50 
   5   9  -1  224.78   18.60 
  -4  -9   1 1373.56   52.89 
  -4  -9   1 1486.95   51.99 
  -4  -9   1 1354.16   51.09 
   4  -9  -1 1515.55   53.79 
  -4  -9   1 1398.76   50.79 
   4  -9  -1 1458.15   56.89 
  -4  -9   1 1384.36   53.79 
   4  -9  -1 1404.96   51.79 
   4  -9  -1 1403.56   52.19 
  -4  -9   1 1413.66   52.89 
   4  -9  -1 1346.97   49.99 
  -4   9   1 1442.06   54.29 
   4   9  -1 1345.97   60.19 
  -4   9   1 1418.66   62.79 
  -4   9   1 1472.95   55.19 
  -4   9   1 1466.05   52.59 
   4   9  -1 1403.26   51.89 
  -4   9   1 1469.05   51.39 
  -4   9   1 1478.75   56.89 
   4   9  -1 1464.65   53.49 
  -4   9   1 1445.16   55.89 
  -4   9   1 1726.93   71.39 
   4   9  -1 1436.06   54.59 
   4   9  -1 1290.17   56.69 
  -4   9   1 1480.05   59.49 
  -4   9   1 1457.95   52.99 
   4   9  -1 1264.27   56.99 
  -3  -9   1  215.08   12.90 
   3  -9  -1  249.18   15.20 
  -3  -9   1  224.38   16.10 
   3  -9  -1  203.78   17.40 
  -3  -9   1  226.28   14.10 
  -3  -9   1  209.38   14.80 
   3  -9  -1  228.28   15.20 
   3  -9  -1  222.08   13.70 
  -3  -9   1  226.78   15.10 
   3  -9  -1  240.78   17.30 
  -3  -9   1  223.78   13.50 
   3  -9  -1  223.78   14.40 
  -3  -9   1  216.48   13.10 
   3  -9  -1  232.28   14.90 
  -3   9   1  221.58   14.50 
  -3   9   1  299.07   23.50 
  -3   9   1  230.68   14.50 
  -3   9   1  284.07   25.70 
   3   9  -1  218.98   20.50 
  -3   9   1  239.28   15.50 
  -3   9   1  221.88   14.10 
   3   9  -1  211.28   18.30 
   3   9  -1  216.98   18.20 
   3   9  -1  278.87   29.40 
   3   9  -1  221.88   15.30 
  -3   9   1  279.27   18.20 
   3   9  -1  254.47   15.60 
   3   9  -1  224.88   14.50 
  -3   9   1  261.47   17.80 
  -3   9   1  264.57   20.20 
  -3   9   1  246.28   21.90 
  -2  -9   1  842.72   32.00 
   2  -9  -1  878.11   34.10 
   2  -9  -1  807.62   36.40 
   2  -9  -1  838.52   33.20 
  -2  -9   1  848.82   34.40 
  -2  -9   1  830.72   34.30 
  -2  -9   1  801.42   35.00 
   2  -9  -1  848.62   33.70 
  -2  -9   1  805.02   32.80 
  -2  -9   1  825.12   30.90 
  -2  -9   1  799.92   31.10 
   2  -9  -1  868.21   33.70 
   2  -9  -1  736.03   33.70 
   2  -9  -1  826.92   38.40 
   2   9  -1  792.32   38.70 
  -2   9   1  802.52   43.30 
  -2   9   1  939.61   49.20 
   2   9  -1  760.32   43.00 
  -2   9   1  861.01   38.60 
   2   9  -1  860.11   40.90 
  -2   9   1  931.51   41.50 
   2   9  -1  879.71   66.29 
  -2   9   1  839.02   37.00 
   2   9  -1  808.12   34.00 
  -2   9   1  812.72   33.90 
   2   9  -1  753.62   39.90 
   2   9  -1  796.12   45.60 
   2   9  -1  868.91   32.90 
  -2   9   1  844.42   34.00 
  -2   9   1  842.12   36.80 
  -2   9   1  829.22   33.30 
   2   9  -1  812.42   34.30 
  -2   9   1  925.41   43.80 
  -2   9   1  803.62   33.50 
  -1  -9   1   53.59    7.00 
   1  -9  -1   56.69    9.50 
   1  -9  -1   65.19    8.40 
   1  -9  -1   56.19    8.60 
  -1  -9   1   50.49    8.70 
  -1  -9   1   43.90    6.70 
  -1  -9   1   54.59    9.60 
  -1  -9   1   60.39    8.00 
   1  -9  -1   57.79    8.00 
   1  -9  -1   89.79    9.70 
   1  -9  -1   39.30    7.40 
  -1  -9   1   37.70    7.10 
  -1  -9   1   64.69    9.00 
   1  -9  -1   52.99   10.10 
   1   9  -1   48.10    8.00 
  -1   9   1   56.79    8.10 
  -1   9   1   53.49   13.50 
  -1   9   1   62.69   14.00 
   1   9  -1   58.89    7.90 
   1   9  -1   53.49   10.20 
  -1   9   1   59.99    9.90 
  -1   9   1   56.59   12.80 
  -1   9   1   70.79   12.60 
  -1   9   1   57.89    8.00 
   1   9  -1   64.39   15.30 
  -1   9   1   61.49   10.90 
   1   9  -1   36.30   11.90 
  -1   9   1   59.59    8.30 
  -1   9   1   64.79    8.70 
   1   9  -1   55.19   12.50 
   1   9  -1   52.69    6.90 
   1   9  -1   43.60   12.40 
  -1   9   1   55.69    9.40 
   0  -9  -1 1111.59   40.40 
   0  -9   1 1044.30   40.00 
   0  -9  -1 1122.69   42.30 
   0  -9  -1 1094.69   41.10 
   0  -9   1 1059.09   40.80 
   0  -9   1 1052.79   42.60 
   0  -9   1 1028.00   39.30 
   0  -9   1 1119.69   42.80 
   0  -9   1 1063.39   41.20 
   0  -9  -1 1090.69   40.20 
   0  -9  -1 1103.89   44.80 
   0  -9  -1 1045.00   41.40 
   0  -9  -1 1062.19   42.30 
   0  -9  -1 1027.60   46.30 
   0   9   1 1071.29   41.70 
   0   9   1 1031.20   39.20 
   0   9  -1 1119.99   41.50 
   0   9   1 1106.19   44.50 
   0   9   1 1022.40   51.39 
   0   9  -1 1150.48   46.70 
   0   9   1 1022.90   51.69 
   0   9   1 1056.59   57.19 
   0   9  -1 1050.59   49.60 
   0   9   1 1062.79   45.80 
   0   9  -1 1109.69   56.49 
   0   9  -1 1053.49   42.90 
   0   9  -1 1056.49   39.70 
   0   9   1 1064.29   49.60 
   0   9  -1 1076.49   53.09 
   0   9  -1 1071.99   52.49 
   0   9   1 1085.29   43.40 
  -1  -9  -1   68.09   10.10 
   1  -9   1   71.09    8.70 
   1  -9   1   68.89    8.50 
  -1  -9  -1   69.99   12.30 
  -1  -9  -1   80.09   11.30 
  -1  -9  -1   88.89   10.80 
  -1  -9  -1   75.69    7.30 
  -1  -9  -1   75.59    9.60 
   1  -9   1   61.49    9.30 
  -1  -9  -1   74.09    6.90 
  -1  -9  -1   60.09    8.00 
   1  -9   1   77.49   10.10 
  -1  -9  -1   68.39    8.30 
   1  -9   1   71.69    9.10 
   1   9   1   92.79   12.50 
  -1   9  -1   82.49   15.20 
   1   9   1   79.89   12.30 
  -1   9  -1   77.69   16.10 
   1   9   1   71.69   13.20 
  -1   9  -1   79.59   10.50 
  -1   9  -1   74.79   10.80 
   1   9   1   63.69    8.70 
  -1   9  -1   69.39   13.10 
   1   9   1   89.09   11.00 
   1   9   1   63.49   14.20 
  -1   9  -1   65.59   14.10 
   1   9   1   86.49    7.60 
   1   9   1   52.39   13.30 
  -1   9  -1   81.39   12.30 
  -1   9  -1   64.19    8.50 
  -1   9  -1   75.59    9.00 
  -2  -9  -1  896.71   33.50 
  -2  -9  -1  874.61   37.20 
  -2  -9  -1  923.21   34.70 
  -2  -9  -1  956.60   36.50 
  -2  -9  -1  837.92   41.30 
   2  -9   1  909.81   35.40 
  -2  -9  -1  863.21   37.40 
   2  -9   1  865.71   36.00 
   2  -9   1  878.01   35.90 
  -2  -9  -1  887.81   34.90 
  -2  -9  -1  868.91   33.10 
   2  -9   1  864.51   36.10 
  -2  -9  -1  871.91   34.00 
   2  -9   1  903.81   34.60 
  -2   9  -1  899.81   36.10 
  -2   9  -1  930.41   37.70 
   2   9   1  924.31   39.00 
  -2   9  -1  921.41   45.20 
   2   9   1  870.11   47.20 
  -2   9  -1  890.11   39.00 
  -2   9  -1  958.00   40.90 
   2   9   1  883.51   36.50 
   2   9   1  835.62   42.20 
  -2   9  -1  848.22   45.00 
  -2   9  -1  973.60   50.19 
   2   9   1  891.81   36.70 
  -2   9  -1  977.20   43.50 
  -2   9  -1  933.41   36.00 
   2   9   1  842.22   38.80 
   2   9   1  850.21   44.20 
   3  -9   1  170.98   11.30 
  -3  -9  -1  153.58   11.70 
  -3  -9  -1  151.78   13.20 
  -3  -9  -1  172.68   11.70 
   3  -9   1  157.28   12.80 
   3  -9   1  145.89   12.40 
  -3  -9  -1  168.08   12.90 
   3  -9   1  157.68   12.00 
  -3  -9  -1  137.59   13.20 
   3  -9   1  164.38   12.70 
  -3  -9  -1  153.88   11.30 
  -3  -9  -1  173.78   11.80 
  -3  -9  -1  127.09   16.20 
  -3   9  -1  178.68   13.70 
  -3   9  -1  163.88   12.20 
  -3   9  -1  133.09   18.70 
  -3   9  -1  199.18   21.40 
   3   9   1  148.29   14.70 
   3   9   1  154.58   12.70 
  -3   9  -1  178.18   17.00 
   3   9   1  162.78   12.50 
   3   9   1  163.98   16.30 
   3   9   1  142.69   21.20 
  -3   9  -1  164.58   14.50 
   3   9   1  146.79   16.70 
  -3   9  -1  172.98   15.20 
  -3   9  -1  163.48   13.00 
   3   9   1  153.58   13.70 
  -4  -9  -1  393.16   20.20 
   4  -9   1  407.06   20.90 
  -4  -9  -1  381.46   22.00 
  -4  -9  -1  357.36   26.60 
   4  -9   1  399.86   21.00 
  -4  -9  -1  366.46   19.40 
   4  -9   1  386.46   18.60 
  -4  -9  -1  409.76   19.90 
  -4  -9  -1  406.56   21.40 
  -4  -9  -1  376.46   20.00 
  -4  -9  -1  389.36   22.20 
   4  -9   1  433.76   22.30 
   4   9   1  404.56   21.40 
  -4   9  -1  402.56   21.90 
  -4   9  -1  407.56   23.90 
  -4   9  -1  413.26   28.20 
   4   9   1  420.26   23.60 
  -4   9  -1  499.35   33.80 
   4   9   1  409.66   24.50 
   4   9   1  400.16   20.40 
   4   9   1  381.96   23.10 
   4   9   1  399.76   21.50 
  -4   9  -1  395.26   19.40 
  -4   9  -1  431.26   22.70 
  -4   9  -1  412.26   26.10 
  -4   9  -1  416.66   24.60 
   4   9   1  371.86   24.20 
   4   9   1  330.27   23.70 
  -4   9  -1  387.36   20.10 
   5  -9   1    8.90    5.20 
   5  -9   1    8.90    5.50 
  -5  -9  -1    2.90    5.00 
   5  -9   1   10.50    5.00 
  -5  -9  -1   10.80    5.40 
  -5  -9  -1    9.50    5.20 
  -5  -9  -1    4.60    6.70 
   5  -9   1    7.30    5.00 
  -5  -9  -1   13.60    5.80 
  -5  -9  -1    5.80    4.50 
  -5   9  -1   12.50    6.10 
  -5   9  -1    0.90    6.00 
   5   9   1    4.20    4.30 
   5   9   1    1.50    5.00 
  -5   9  -1    8.40    5.50 
   5   9   1    8.80    5.80 
   5   9   1    8.90    6.10 
   5   9   1    2.30    5.10 
   5   9   1   16.90    7.20 
  -5   9  -1    4.80    4.90 
  -5   9  -1   10.50    5.30 
  -5   9  -1    7.30    5.90 
   5   9   1   10.00    4.30 
  -5   9  -1   10.00    6.90 
  -5   9  -1    3.00    7.20 
   5   9   1    3.80    4.10 
   3 -10  -1   46.70    7.30 
   3 -10  -1   36.40    9.70 
  -3 -10   1   35.70    8.40 
   3 -10  -1   27.90    6.90 
   3 -10  -1   28.50    7.00 
  -3 -10   1   32.30    6.10 
   3 -10  -1   45.00    8.00 
   3 -10  -1   39.80    7.30 
  -3 -10   1   20.20    6.80 
  -3  10   1   30.40    7.10 
  -3  10   1   47.40   11.90 
   3  10  -1   30.10   11.80 
  -3  10   1   45.70    9.40 
   3  10  -1   34.90   11.00 
  -3  10   1   37.00    7.50 
   3  10  -1   31.10    7.40 
  -3  10   1   42.00    7.60 
   3  10  -1   36.80    7.70 
   3  10  -1   52.29   11.70 
  -3  10   1   41.30   10.00 
  -3  10   1   52.99   11.20 
  -2 -10   1    6.50    6.10 
   2 -10  -1    2.20    5.20 
  -2 -10   1    7.30    5.00 
  -2 -10   1    4.00    4.40 
   2 -10  -1   13.60    5.50 
   2 -10  -1    9.00    6.90 
   2 -10  -1   14.80    5.40 
  -2 -10   1   11.40    5.10 
   2 -10  -1    9.00    4.50 
   2 -10  -1   11.80    4.80 
  -2  10   1   22.50    8.10 
   2  10  -1    6.00    5.90 
   2  10  -1   -7.20    6.70 
   2  10  -1   -3.80    7.10 
   2  10  -1    3.80    6.40 
  -2  10   1   11.70    5.70 
  -2  10   1    9.40    4.90 
   2  10  -1   10.90    4.80 
  -2  10   1    6.10    4.40 
  -2  10   1    3.70    4.10 
  -2  10   1   12.00    5.80 
  -2  10   1   17.70    8.60 
   2  10  -1   11.40    5.00 
  -2  10   1    2.80    7.00 
  -1 -10   1  107.39   10.90 
   1 -10  -1  130.49   11.30 
  -1 -10   1  112.99   11.90 
   1 -10  -1   90.59   10.70 
   1 -10  -1   97.79    9.60 
  -1 -10   1   81.59   10.40 
  -1 -10   1   93.79   12.30 
   1 -10  -1  107.49   15.00 
   1 -10  -1  117.39   13.10 
  -1 -10   1   88.59    8.90 
   1 -10  -1  104.99   13.20 
  -1  10   1   99.79   11.30 
   1  10  -1  115.69   11.20 
   1  10  -1  119.29   20.70 
  -1  10   1  117.09   11.10 
  -1  10   1   97.59   12.60 
  -1  10   1   96.79   16.20 
  -1  10   1  121.09   12.70 
  -1  10   1  110.89   16.80 
   1  10  -1  102.19   12.60 
   1  10  -1   86.79   18.40 
  -1  10   1  114.89   18.30 
   1  10  -1  109.09   14.90 
   1  10  -1   87.69   15.60 
  -1  10   1   99.99    9.80 
   0 -10  -1    6.90    4.50 
   0 -10  -1    9.90    4.70 
   0 -10   1    9.90    4.60 
   0 -10   1    4.30    5.70 
   0 -10  -1   13.00    5.00 
   0 -10  -1    8.90    5.80 
   0 -10  -1    4.60    4.20 
   0 -10   1   11.20    4.90 
   0 -10  -1    8.40    6.60 
   0 -10   1    6.20    4.80 
   0  10  -1    5.00    8.00 
   0  10   1    3.80    4.10 
   0  10   1   12.50    6.60 
   0  10  -1    8.60    8.20 
   0  10  -1   10.30    6.20 
   0  10   1    8.60    8.00 
   0  10  -1    8.30    4.10 
   0  10   1    6.10    5.10 
   0  10   1   27.70    9.50 
   0  10  -1    6.10    5.10 
   0  10   1    1.70    4.10 
   0  10  -1    6.80    6.90 
   0  10  -1   -0.40    3.60 
   0  10   1    8.20    8.30 
  -1 -10  -1  368.16   21.10 
  -1 -10  -1  359.46   21.70 
   1 -10   1  440.56   22.40 
  -1 -10  -1  364.46   19.00 
  -1 -10  -1  372.56   19.70 
   1 -10   1  400.86   20.80 
   1 -10   1  394.46   19.60 
   1 -10   1  389.06   21.80 
  -1 -10  -1  366.16   20.20 
   1 -10   1  373.56   19.60 
  -1  10  -1  386.96   22.90 
   1  10   1  385.66   20.80 
  -1  10  -1  374.26   31.20 
   1  10   1  393.76   23.90 
  -1  10  -1  379.06   28.80 
  -1  10  -1  422.66   27.50 
   1  10   1  379.16   21.90 
   1  10   1  348.27   28.80 
   1  10   1  375.06   27.50 
   1  10   1  385.06   21.30 
  -1  10  -1  386.16   20.80 
  -1  10  -1  385.26   23.80 
  -1  10  -1  393.96   20.20 
   1  10   1  341.67   29.20 
  -1  10  -1  384.46   29.60 
   2 -10   1   13.90    5.40 
  -2 -10  -1   17.70    6.70 
   2 -10   1    9.70    5.40 
   2 -10   1    3.40    5.20 
  -2 -10  -1    7.00    5.90 
  -2 -10  -1    7.20    4.50 
  -2 -10  -1    3.70    4.20 
   2 -10   1   12.40    5.30 
  -2 -10  -1    5.30    4.80 
   2 -10   1   11.10    4.50 
   2  10   1    6.20    5.50 
  -2  10  -1   -1.20    3.30 
  -2  10  -1   13.10    7.00 
   2  10   1    3.30    4.30 
  -2  10  -1   -1.00    3.40 
  -2  10  -1   14.90    8.60 
   2  10   1   -0.60    6.90 
  -2  10  -1   12.20    5.80 
   2  10   1    1.40    4.30 
   2  10   1    7.30    8.30 
  -2  10  -1   12.50    7.70 
  -2  10  -1    0.30    6.40 
   2  10   1    0.70    4.00 
   2  10   1   12.10    7.70 
  -2  10  -1   13.90    5.10 
  -2  10  -1    0.60    5.00 
  10   0  -2  415.56   21.60 
  10   0  -2  455.25   25.10 
  10   0  -2  458.55   21.10 
 -10   0   2  461.55   20.60 
 -10   0   2  442.96   21.80 
 -10   0   2  424.06   25.10 
  10   0  -2  437.86   20.00 
 -10   0   2  443.96   21.50 
  10   0  -2  470.15   23.60 
 -10   0   2  438.46   18.70 
 -10   0   2  445.66   20.00 
  10   0  -2  463.65   23.20 
 -10   0   2  441.16   20.20 
 -10   0   2  420.76   20.40 
  10   0  -2  462.05   23.30 
 -10   0   2  467.85   19.70 
 -10   0   2  460.25   24.10 
 -10   0   2  463.75   22.50 
  -9   0   2    0.90    3.10 
  -9   0   2    4.40    2.60 
   9   0  -2    2.90    3.50 
  -9   0   2    2.80    2.50 
  -9   0   2   -1.70    3.40 
   9   0  -2   -2.30    3.20 
  -9   0   2   -0.80    2.90 
  -9   0   2   10.60    4.20 
  -9   0   2   -1.40    2.20 
   9   0  -2   -2.70    3.00 
   9   0  -2   -0.90    2.80 
  -9   0   2    0.20    2.50 
  -9   0   2   -3.10    2.80 
   9   0  -2    4.60    3.30 
  -9   0   2    0.00    3.40 
  -9   0   2    0.60    2.40 
  -9   0   2    6.60    4.10 
  -9   0   2    0.60    3.00 
   9   0  -2    2.30    3.90 
   9   0  -2    0.30    4.00 
  -8   0   2 1793.82   57.89 
  -8   0   2 1784.72   58.49 
   8   0  -2 1788.22   61.09 
   8   0  -2 1835.42   62.99 
  -8   0   2 1730.33   63.79 
   8   0  -2 1710.63   62.29 
  -8   0   2 1695.23   59.99 
  -8   0   2 1815.62   56.99 
   8   0  -2 1792.92   61.79 
  -8   0   2 1730.63   58.29 
   8   0  -2 1775.32   58.09 
  -8   0   2 1811.42   59.49 
  -8   0   2 1752.52   61.89 
  -8   0   2 1724.03   60.09 
  -8   0   2 1727.13   57.19 
  -8   0   2 1796.32   58.39 
  -8   0   2 1781.42   59.89 
   8   0  -2 1800.22   61.29 
   8   0  -2 1794.72   59.89 
   8   0  -2 1814.62   59.09 
  -8   0   2 1752.22   57.69 
   7   0  -2    1.30    3.10 
  -7   0   2   10.20    4.20 
  -7   0   2    4.00    2.50 
  -7   0   2    5.20    2.30 
   7   0  -2   -2.10    3.00 
   7   0  -2    3.50    2.50 
  -7   0   2    4.20    2.50 
   7   0  -2    5.90    3.20 
  -7   0   2    5.90    3.20 
   7   0  -2    3.00    2.30 
   7   0  -2    0.10    2.90 
  -7   0   2    2.00    1.90 
   7   0  -2    7.70    3.30 
   7   0  -2    1.60    3.20 
  -7   0   2    2.50    2.70 
   7   0  -2    3.00    3.10 
  -7   0   2   -0.10    2.00 
   7   0  -2    9.60    3.00 
  -7   0   2   -2.70    2.30 
  -7   0   2    2.50    2.10 
  -7   0   2    0.20    2.50 
  -7   0   2    1.80    1.90 
  -7   0   2    3.10    2.00 
  -7   0   2    0.60    2.40 
   6   0  -2 2222.68   69.99 
  -6   0   2 2233.78   68.29 
   6   0  -2 2118.59   71.79 
  -6   0   2 2136.09   69.49 
   6   0  -2 2236.78   71.69 
  -6   0   2 2183.48   68.99 
  -6   0   2 2179.28   68.39 
   6   0  -2 2210.68   71.99 
   6   0  -2 2159.68   69.49 
  -6   0   2 2284.87   69.19 
   6   0  -2 2163.88   66.49 
  -6   0   2 2142.59   71.49 
  -6   0   2 2233.18   68.89 
   6   0  -2 2193.78   67.49 
  -6   0   2 2178.08   68.59 
   6   0  -2 2221.48   69.79 
  -6   0   2 2167.38   70.39 
  -6   0   2 2186.28   69.99 
   6   0  -2 2146.39   69.89 
  -6   0   2 2156.68   70.49 
  -6   0   2 2254.37   68.59 
   6   0  -2 2110.99   68.69 
   6   0  -2 2244.88   70.99 
   6   0  -2 2171.88   72.29 
   6   0  -2 2146.49   69.79 
  -6   0   2 2223.88   68.49 
   6   0  -2 2092.69   70.79 
  -6   0   2 2197.88   73.19 
  -6   0   2 2222.68   72.89 
   5   0  -2    4.30    0.90 
  -5   0   2    1.50    1.40 
   5   0  -2    2.40    1.80 
   5   0  -2    4.10    1.10 
  -5   0   2    4.50    2.30 
  -5   0   2    0.60    1.60 
  -5   0   2    1.50    1.50 
  -5   0   2    2.70    2.50 
   5   0  -2    1.00    1.90 
   5   0  -2    4.50    2.10 
  -5   0   2    3.60    2.20 
  -5   0   2    3.10    1.50 
   5   0  -2    2.30    2.40 
  -5   0   2    1.30    1.50 
   5   0  -2    3.70    1.50 
   5   0  -2    3.80    1.80 
  -5   0   2    0.10    1.40 
  -5   0   2    5.20    1.60 
  -5   0   2    2.60    1.50 
   5   0  -2    1.70    1.50 
  -5   0   2    3.30    2.20 
  -5   0   2    2.70    1.50 
   5   0  -2    2.80    1.80 
  -5   0   2   10.20    2.20 
   5   0  -2    4.50    2.30 
   5   0  -2    2.20    2.00 
   5   0  -2    6.40    2.10 
   5   0  -2    2.00    2.20 
   5   0  -2    0.50    1.80 
  -5   0   2    4.00    2.60 
   5   0  -2    3.10    0.70 
  -5   0   2    2.70    1.70 
  -5   0   2    7.80    2.20 
  -4   0   2 7011.90  207.28 
   4   0  -2 6824.02  206.58 
   4   0  -2 6791.52  206.78 
   4   0  -2 6377.76  207.78 
   4   0  -2 6713.83  207.18 
  -4   0   2 6807.72  208.98 
  -4   0   2 6735.83  208.58 
  -4   0   2 7110.29  205.68 
  -4   0   2 6892.31  208.68 
   4   0  -2 6997.90  204.78 
   4   0  -2 6920.91  206.68 
   4   0  -2 6790.52  205.28 
   4   0  -2 6714.13  206.58 
   4   0  -2 6525.35  207.18 
   4   0  -2 6622.74  206.38 
   4   0  -2 6598.04  206.48 
  -4   0   2 6829.22  207.18 
  -4   0   2 7161.08  208.38 
   4   0  -2 6816.22  205.58 
  -4   0   2 6801.32  206.08 
  -4   0   2 7474.65  205.98 
  -4   0   2 6836.12  207.98 
   4   0  -2 6824.62  205.68 
   4   0  -2 6419.66  208.08 
  -4   0   2 6859.51  206.18 
  -4   0   2 7115.49  206.48 
  -4   0   2 6843.72  206.88 
  -4   0   2 6703.93  206.08 
  -4   0   2 6924.81  206.18 
  -4   0   2 7298.07  207.28 
  -4   0   2 7055.99  206.18 
  -4   0   2 6844.22  206.98 
   4   0  -2 6821.02  205.88 
  -3   0   2   11.70    2.30 
   3   0  -2    7.00    1.00 
  -3   0   2    8.60    1.60 
   3   0  -2   10.20    2.10 
  -3   0   2    9.90    1.90 
  -3   0   2   11.20    1.50 
  -3   0   2    9.50    1.60 
  -3   0   2   11.60    1.70 
  -3   0   2   12.30    2.20 
   3   0  -2    8.60    1.70 
   3   0  -2    7.60    1.50 
   3   0  -2    5.50    0.80 
  -3   0   2    4.50    1.70 
   3   0  -2   16.60    2.50 
   3   0  -2    7.30    1.50 
  -3   0   2    8.60    1.60 
   3   0  -2   11.30    1.60 
   3   0  -2    6.60    1.80 
   3   0  -2   10.50    1.80 
   3   0  -2    5.50    1.30 
  -3   0   2   17.40    2.40 
   3   0  -2    9.80    2.00 
  -3   0   2   12.40    2.20 
   3   0  -2   10.90    1.70 
  -3   0   2    8.30    2.20 
   3   0  -2   11.00    1.90 
   3   0  -2    4.80    1.80 
   3   0  -2    7.90    2.10 
  -3   0   2    8.80    1.40 
   3   0  -2    6.60    1.90 
   3   0  -2   10.60    1.20 
  -3   0   2    9.30    1.40 
   3   0  -2    3.20    1.10 
  -3   0   2   11.30    1.70 
   3   0  -2    5.30    1.10 
   2   0  -2 6616.74  198.48 
  -2   0   2 6557.04  198.78 
   2   0  -2 6640.04  199.58 
   2   0  -2 6652.53  200.48 
  -2   0   2 6774.62  201.08 
   2   0  -2 6545.15  198.78 
   2   0  -2 6884.61  199.38 
   2   0  -2 6433.16  200.88 
  -2   0   2 6830.62  203.18 
   2   0  -2 6164.18  199.58 
   2   0  -2 6586.94  202.38 
   2   0  -2 6278.67  200.08 
   2   0  -2 6790.62  199.88 
   2   0  -2 6388.86  202.08 
   2   0  -2 6571.44  199.68 
  -2   0   2 6436.16  204.88 
   2   0  -2 6423.56  202.18 
  -2   0   2 6777.82  203.28 
  -2   0   2 6614.14  205.98 
  -2   0   2 6736.53  197.88 
  -2   0   2 6720.23  202.28 
  -2   0   2 6535.15  201.98 
  -2   0   2 6546.15  200.58 
   2   0  -2 6518.75  198.78 
  -2   0   2 6789.32  199.28 
  -2   0   2 6497.95  199.88 
   2   0  -2 6630.14  203.78 
  -2   0   2 6597.54  201.48 
   2   0  -2 6638.94  201.38 
  -2   0   2 6665.83  198.98 
  -2   0   2 6936.11  200.38 
  -2   0   2 6808.52  201.58 
  -2   0   2 6636.64  200.78 
   2   0  -2 6522.15  199.88 
   2   0  -2 6416.86  199.58 
  -2   0   2 6730.93  201.08 
  -2   0   2 6602.44  198.78 
   2   0  -2 6407.36  202.38 
   2   0  -2 6255.77  199.68 
   2   0  -2 6416.86  203.98 
   2   0  -2 6343.07  198.58 
  -2   0   2 6765.02  201.38 
   2   0  -2 6607.14  199.78 
  -2   0   2 6821.12  203.68 
   2   0  -2 6750.82  199.98 
   2   0  -2 6553.24  200.28 
   2   0  -2 6548.54  207.58 
  -1   0   2    6.20    1.10 
   1   0  -2    6.10    0.90 
  -1   0   2    5.10    0.80 
  -1   0   2    4.40    0.90 
   1   0  -2    7.80    1.00 
   1   0  -2    6.90    0.80 
  -1   0   2    6.90    0.80 
  -1   0   2    4.10    0.80 
   1   0  -2    8.70    1.40 
   1   0  -2    5.00    0.50 
   1   0  -2    4.20    0.70 
  -1   0   2    7.00    1.00 
   1   0  -2    5.00    1.00 
   1   0  -2    5.60    1.00 
  -1   0   2    3.70    0.80 
  -1   0   2    8.80    0.90 
  -1   0   2    6.20    1.00 
  -1   0   2    3.40    1.00 
   1   0  -2    8.90    1.10 
  -1   0   2   10.90    1.50 
   1   0  -2    5.00    1.20 
  -1   0   2    5.60    1.10 
  -1   0   2    3.50    1.20 
   1   0  -2    3.70    0.90 
   1   0  -2    3.40    0.70 
   1   0  -2    4.80    0.90 
   1   0  -2    3.70    0.60 
  -1   0   2    7.90    1.40 
  -1   0   2    9.90    1.20 
   0   0  -2 4491.95  129.99 
   0   0  -2 4123.19  129.99 
  -1   0  -2    2.70    1.20 
  -1   0  -2    2.30    0.70 
   1   0   2    2.00    0.60 
   1   0   2    2.50    0.60 
  -1   0  -2    2.20    0.70 
  -1   0  -2    1.20    0.80 
  -1   0  -2    2.00    0.30 
  -1   0  -2    1.70    0.70 
  -1   0  -2    0.30    0.50 
   1   0   2    3.60    1.10 
  -1   0  -2    2.00    1.00 
  -1   0  -2    2.30    1.10 
   1   0   2    1.60    0.60 
  -1   0  -2    1.10    0.70 
   1   0   2    1.10    0.60 
  -1   0  -2    2.20    0.50 
  -1   0  -2    1.40    1.00 
   1   0   2    4.20    0.90 
  -1   0  -2    1.30    0.40 
  -1   0  -2    1.40    0.60 
  -1   0  -2    2.10    0.90 
   1   0   2    2.60    0.90 
  -1   0  -2    2.30    0.70 
  -1   0  -2    1.30    0.90 
  -1   0  -2    1.80    0.50 
  -1   0  -2    1.00    0.70 
  -1   0  -2    1.30    0.40 
   1   0   2    1.90    0.60 
  -1   0  -2    2.40    0.70 
   1   0   2    1.00    0.50 
   1   0   2    4.30    1.00 
  -1   0  -2    2.30    1.00 
  -1   0  -2    3.30    0.70 
  -1   0  -2    1.20    0.60 
  -1   0  -2    3.10    0.80 
  -2   0  -2  527.75   16.50 
   2   0   2  532.55   17.20 
  -2   0  -2  533.65   16.20 
   2   0   2  509.45   17.70 
  -2   0  -2  522.15   17.30 
  -2   0  -2  540.55   16.20 
  -2   0  -2  523.55   16.90 
  -2   0  -2  532.55   18.00 
   2   0   2  518.15   18.30 
  -2   0  -2  527.35   18.00 
  -2   0  -2  529.55   17.60 
   2   0   2  533.95   18.20 
  -2   0  -2  510.25   16.70 
  -2   0  -2  526.15   18.10 
  -2   0  -2  517.25   17.50 
  -2   0  -2  516.95   16.80 
   2   0   2  519.65   16.90 
  -2   0  -2  558.34   17.60 
  -2   0  -2  538.35   18.40 
  -2   0  -2  520.65   18.10 
  -2   0  -2  524.35   17.50 
   2   0   2  556.94   18.30 
  -2   0  -2  547.85   17.90 
   2   0   2  514.95   16.30 
   2   0   2  519.55   17.60 
   2   0   2  530.15   17.20 
  -2   0  -2  539.75   17.00 
   2   0   2  513.15   16.60 
  -2   0  -2  541.55   17.80 
  -2   0  -2  527.05   17.30 
   2   0   2  532.15   18.20 
   2   0   2  526.25   16.50 
   2   0   2  526.95   17.60 
  -2   0  -2  519.45   17.80 
   2   0   2  543.15   18.60 
   2   0   2  539.05   16.70 
   2   0   2  556.24   17.50 
   2   0   2  534.75   17.10 
  -2   0  -2  531.95   16.80 
   2   0   2  541.55   17.10 
  -2   0  -2  562.34   17.30 
  -2   0  -2  549.45   17.80 
  -2   0  -2  539.15   17.00 
   2   0   2  532.65   17.90 
   2   0   2  519.05   17.50 
  -3   0  -2   -0.30    1.00 
   3   0   2    1.70    1.40 
  -3   0  -2    1.10    1.20 
  -3   0  -2    1.40    1.30 
   3   0   2    0.40    1.40 
  -3   0  -2    1.50    1.20 
   3   0   2    1.80    1.40 
  -3   0  -2    2.20    1.80 
  -3   0  -2    1.30    1.80 
   3   0   2    1.10    0.70 
   3   0   2    2.50    1.10 
  -3   0  -2    2.50    1.40 
  -3   0  -2    1.30    0.60 
  -3   0  -2    1.20    0.90 
   3   0   2    5.90    1.90 
  -3   0  -2    7.80    1.80 
  -3   0  -2    1.50    1.10 
  -3   0  -2    1.10    1.20 
   3   0   2    2.50    1.80 
  -3   0  -2    0.00    1.00 
   3   0   2    7.40    1.30 
   3   0   2    7.50    2.30 
  -3   0  -2   14.40    3.00 
   3   0   2    2.40    1.60 
  -3   0  -2    2.20    1.40 
  -3   0  -2    3.10    1.70 
  -3   0  -2    0.80    1.10 
   3   0   2    3.20    1.30 
   3   0   2    2.50    1.30 
   3   0   2    2.90    1.20 
  -3   0  -2    3.50    0.60 
  -3   0  -2    0.50    1.00 
  -3   0  -2    1.70    1.70 
   3   0   2    7.40    3.00 
  -3   0  -2    0.80    1.30 
  -3   0  -2    1.10    1.50 
   3   0   2    2.10    1.50 
   3   0   2    0.70    0.70 
   3   0   2    3.10    1.60 
   4   0   2 1899.81   60.19 
  -4   0  -2 1816.72   57.09 
   4   0   2 1809.82   56.09 
   4   0   2 1845.62   56.89 
   4   0   2 1852.31   55.39 
  -4   0  -2 1823.82   56.99 
  -4   0  -2 1865.01   59.09 
  -4   0  -2 1818.72   57.69 
   4   0   2 1805.72   59.09 
   4   0   2 1880.61   57.19 
  -4   0  -2 1873.41   58.59 
   4   0   2 1801.12   58.49 
  -4   0  -2 1824.62   59.69 
   4   0   2 1869.81   58.19 
  -4   0  -2 1855.31   57.39 
   4   0   2 1847.92   58.79 
   4   0   2 1831.32   58.29 
  -4   0  -2 1834.12   56.49 
  -4   0  -2 1871.01   58.39 
  -4   0  -2 1849.91   57.59 
   4   0   2 1820.32   59.19 
  -4   0  -2 1863.81   60.29 
  -4   0  -2 1816.52   58.59 
   4   0   2 1839.32   58.19 
  -4   0  -2 1794.02   57.29 
  -4   0  -2 1859.21   57.49 
   4   0   2 1811.32   57.09 
   4   0   2 1832.82   56.79 
  -4   0  -2 1859.01   55.89 
   4   0   2 1789.82   58.39 
   4   0   2 1880.21   59.29 
  -5   0  -2    0.60    1.40 
  -5   0  -2    1.00    1.70 
  -5   0  -2    6.30    2.40 
   5   0   2    3.50    2.00 
  -5   0  -2    0.50    2.20 
   5   0   2    3.40    2.20 
  -5   0  -2    5.40    1.70 
  -5   0  -2    2.40    2.60 
   5   0   2    2.80    1.60 
   5   0   2    0.60    2.30 
   5   0   2    1.80    2.20 
   5   0   2    3.50    2.00 
  -5   0  -2    3.30    1.90 
  -5   0  -2    2.60    1.20 
  -5   0  -2    0.30    1.80 
  -5   0  -2    3.70    2.10 
  -5   0  -2    0.40    1.30 
   5   0   2    2.20    2.10 
   5   0   2   10.00    2.30 
  -5   0  -2    0.10    1.70 
  -5   0  -2    2.10    1.00 
  -5   0  -2    4.30    2.30 
   5   0   2    2.00    1.80 
   5   0   2   -0.40    1.90 
  -5   0  -2    2.50    1.70 
  -6   0  -2  676.43   25.30 
  -6   0  -2  697.03   24.20 
   6   0   2  687.93   26.80 
  -6   0  -2  657.83   25.20 
   6   0   2  676.23   23.80 
   6   0   2  677.13   26.30 
  -6   0  -2  690.43   24.70 
  -6   0  -2  687.13   24.40 
   6   0   2  667.43   25.30 
  -6   0  -2  678.63   23.70 
  -6   0  -2  685.63   22.10 
  -6   0  -2  650.23   25.80 
   6   0   2  656.83   25.00 
  -6   0  -2  652.33   24.00 
   6   0   2  633.24   25.80 
  -6   0  -2  679.53   27.70 
  -6   0  -2  680.23   26.60 
  -6   0  -2  667.73   21.90 
  -6   0  -2  665.03   23.90 
  -6   0  -2  688.93   27.60 
  -6   0  -2  669.53   23.40 
   6   0   2  686.03   23.80 
   6   0   2  647.44   25.30 
   6   0   2  675.23   25.00 
  -7   0  -2    2.40    2.10 
   7   0   2    5.10    3.30 
  -7   0  -2    3.70    4.20 
   7   0   2    8.60    4.10 
  -7   0  -2   -0.10    1.90 
  -7   0  -2    0.20    2.80 
   7   0   2    3.10    2.30 
  -7   0  -2    1.30    1.50 
  -7   0  -2    2.60    2.00 
   7   0   2    6.30    2.60 
  -7   0  -2    5.70    3.30 
   7   0   2    1.80    3.10 
  -7   0  -2    4.10    2.80 
  -7   0  -2    2.90    2.70 
   7   0   2    1.20    2.90 
   7   0   2    1.90    3.10 
  -7   0  -2   -0.20    2.70 
  -7   0  -2    2.00    3.30 
  -7   0  -2    0.50    2.00 
  -7   0  -2    6.80    3.40 
  -7   0  -2    0.20    2.70 
  -8   0  -2  220.18   11.50 
   8   0   2  232.98   11.90 
   8   0   2  237.88   13.30 
   8   0   2  232.08   14.30 
  -8   0  -2  214.18   10.80 
  -8   0  -2  231.48   12.50 
  -8   0  -2  221.48   13.90 
   8   0   2  234.28   15.00 
  -8   0  -2  243.58   11.80 
   8   0   2  232.78   11.80 
  -8   0  -2  235.58   12.30 
  -8   0  -2  235.68   14.10 
  -8   0  -2  240.28   13.40 
  -8   0  -2  209.68   15.00 
  -8   0  -2  224.68   11.80 
  -8   0  -2  254.57   11.90 
  -8   0  -2  241.08   13.20 
  -8   0  -2  224.68   12.60 
  -9   0  -2    4.40    3.80 
  -9   0  -2    3.60    3.40 
  -9   0  -2    1.90    2.50 
   9   0   2    5.60    4.80 
  -9   0  -2   -1.50    3.30 
   9   0   2    1.00    3.50 
  -9   0  -2    3.30    2.80 
   9   0   2    1.80    3.00 
   9   0   2   -1.10    2.60 
  -9   0  -2    0.20    3.40 
  -9   0  -2    1.50    2.60 
  -9   0  -2    6.20    4.20 
   9   0   2    4.70    3.90 
  -9   0  -2    4.50    3.90 
  -9   0  -2    3.40    3.70 
  -9   0  -2    1.60    2.70 
 -10   0  -2  320.27   17.20 
  10   0   2  362.06   22.00 
 -10   0  -2  352.26   16.90 
 -10   0  -2  346.37   17.30 
 -10   0  -2  342.97   22.20 
 -10   0  -2  349.77   20.30 
  10   0   2  322.07   20.10 
 -10   0  -2  356.66   20.30 
  10   0   2  344.97   17.00 
 -10   0  -2  345.27   18.20 
 -10   0  -2  350.06   18.30 
 -10  -1   2  179.08   25.10 
 -10  -1   2  146.59   11.40 
  10  -1  -2  131.99   12.30 
  10  -1  -2  150.48   13.10 
  10  -1  -2  149.88   11.60 
  10  -1  -2  150.88   13.60 
 -10  -1   2  144.39   16.10 
 -10  -1   2  141.29   10.00 
 -10  -1   2  138.79   10.00 
  10  -1  -2  134.89   11.80 
 -10  -1   2  143.09   10.20 
 -10  -1   2  144.29   10.90 
 -10  -1   2  141.79   10.20 
 -10  -1   2  152.78    9.60 
  10  -1  -2  126.39   10.60 
  10  -1  -2  140.89   10.40 
  10   1  -2  158.28   12.40 
  10   1  -2  137.69   10.00 
 -10   1   2  167.58   12.40 
 -10   1   2  131.99   12.40 
 -10   1   2  147.69   12.00 
 -10   1   2  136.39   10.10 
  10   1  -2  144.49   10.90 
 -10   1   2  139.79   15.60 
 -10   1   2  134.09   11.40 
  10   1  -2  143.69   12.50 
 -10   1   2  134.99   12.40 
 -10   1   2  130.89   10.20 
  10   1  -2  167.58   14.50 
  10   1  -2  148.39   12.30 
 -10   1   2  153.18   10.50 
  -9  -1   2 1179.08   42.80 
   9  -1  -2 1152.48   43.50 
  -9  -1   2 1163.48   41.50 
  -9  -1   2 1127.99   40.70 
   9  -1  -2 1198.18   45.40 
  -9  -1   2 1191.68   42.00 
  -9  -1   2 1167.38   40.30 
  -9  -1   2 1130.69   39.90 
   9  -1  -2 1181.88   41.00 
  -9  -1   2 1191.38   42.60 
  -9  -1   2 1126.49   40.70 
  -9  -1   2 1138.59   44.60 
  -9  -1   2 1146.29   47.30 
   9  -1  -2 1113.09   41.40 
  -9  -1   2 1155.28   40.70 
  -9  -1   2 1142.79   42.00 
  -9  -1   2 1127.59   41.00 
   9  -1  -2 1166.38   44.50 
   9  -1  -2 1199.08   42.30 
   9  -1  -2 1135.79   43.80 
  -9   1   2 1168.08   43.50 
  -9   1   2 1111.69   44.50 
  -9   1   2 1125.59   42.10 
   9   1  -2 1151.98   43.00 
  -9   1   2 1149.08   46.40 
   9   1  -2 1147.09   40.20 
   9   1  -2 1136.99   43.70 
  -9   1   2 1155.88   39.40 
  -9   1   2 1175.38   41.10 
   9   1  -2 1122.49   45.80 
   9   1  -2 1133.39   41.10 
   9   1  -2 1112.89   43.60 
  -9   1   2 1187.38   41.00 
  -9   1   2 1177.68   40.50 
   9   1  -2 1153.48   43.40 
  -9   1   2 1102.89   43.70 
  -9   1   2 1106.59   40.70 
   9   1  -2 1100.49   44.80 
  -9   1   2 1146.39   39.20 
   8  -1  -2   88.69    7.10 
  -8  -1   2   86.19    5.90 
   8  -1  -2   86.19    7.60 
  -8  -1   2   95.09   11.80 
  -8  -1   2   81.99    6.70 
   8  -1  -2   88.69    9.00 
  -8  -1   2   87.79    6.90 
  -8  -1   2   86.29    7.10 
  -8  -1   2   73.79    6.90 
  -8  -1   2   88.39    9.00 
  -8  -1   2   74.29    7.10 
   8  -1  -2   84.19    8.50 
  -8  -1   2   95.19    7.90 
  -8  -1   2   81.99    7.60 
  -8  -1   2   72.59    7.20 
   8  -1  -2   83.39    9.80 
  -8  -1   2   90.29    7.40 
   8  -1  -2   86.19    9.60 
  -8  -1   2   84.19    6.50 
   8  -1  -2   88.49    7.50 
   8   1  -2   80.39    8.20 
  -8   1   2   91.29    6.40 
   8   1  -2   83.19    8.30 
  -8   1   2   75.99    6.60 
  -8   1   2   83.49    9.10 
   8   1  -2   85.09    8.40 
  -8   1   2   77.79    7.60 
   8   1  -2   87.29    8.60 
   8   1  -2   87.49    9.50 
  -8   1   2   77.09    8.10 
  -8   1   2   89.59    6.30 
  -8   1   2   84.99    6.80 
   8   1  -2   83.89    8.80 
  -8   1   2   80.89    6.90 
   8   1  -2   80.49    6.50 
   8   1  -2   86.89    7.50 
  -8   1   2   80.29    5.70 
  -8   1   2   73.19    8.30 
  -8   1   2   72.99    9.60 
  -8   1   2   81.99    9.40 
  -8   1   2   74.89    6.70 
   7  -1  -2  559.84   21.40 
  -7  -1   2  548.15   19.50 
  -7  -1   2  502.65   20.40 
   7  -1  -2  554.74   22.60 
  -7  -1   2  547.65   20.70 
  -7  -1   2  512.55   24.50 
   7  -1  -2  531.35   21.20 
   7  -1  -2  547.45   23.40 
  -7  -1   2  505.75   21.50 
  -7  -1   2  518.65   20.80 
  -7  -1   2  532.15   20.50 
   7  -1  -2  538.55   21.80 
   7  -1  -2  554.04   21.00 
  -7  -1   2  549.25   18.80 
  -7  -1   2  538.65   21.30 
   7  -1  -2  555.54   20.80 
  -7  -1   2  557.64   20.30 
  -7  -1   2  526.55   20.20 
   7  -1  -2  557.74   23.70 
  -7  -1   2  543.85   23.30 
  -7  -1   2  527.35   21.10 
  -7  -1   2  523.45   20.70 
   7  -1  -2  547.45   23.10 
  -7  -1   2  531.55   21.20 
  -7   1   2  538.75   23.20 
  -7   1   2  560.34   21.60 
   7   1  -2  519.55   23.70 
  -7   1   2  523.95   19.20 
   7   1  -2  535.65   21.00 
   7   1  -2  511.05   22.50 
  -7   1   2  550.34   22.20 
   7   1  -2  545.25   20.60 
   7   1  -2  508.45   22.10 
  -7   1   2  566.04   20.90 
  -7   1   2  523.35   20.70 
   7   1  -2  526.15   23.40 
  -7   1   2  530.55   20.30 
   7   1  -2  533.05   21.90 
   7   1  -2  539.25   22.70 
   7   1  -2  544.55   20.20 
  -7   1   2  534.75   20.60 
  -7   1   2  536.35   19.90 
  -7   1   2  528.75   20.10 
  -7   1   2  527.45   23.30 
  -7   1   2  538.15   19.70 
   7   1  -2  576.64   25.20 
  -7   1   2  545.85   22.40 
  -7   1   2  481.05   23.60 
  -6  -1   2   77.69    6.00 
   6  -1  -2   69.09    6.20 
   6  -1  -2   84.59    6.80 
   6  -1  -2   80.79    3.30 
   6  -1  -2   80.49    5.80 
  -6  -1   2   88.09    5.80 
  -6  -1   2   63.89    7.90 
   6  -1  -2   86.29    5.20 
  -6  -1   2   78.39    5.50 
  -6  -1   2   75.29    4.60 
  -6  -1   2   73.99    5.40 
  -6  -1   2   77.89    6.90 
   6  -1  -2   80.49    5.80 
   6  -1  -2   84.99    3.50 
   6  -1  -2   81.89    7.50 
   6  -1  -2   78.19    6.10 
   6  -1  -2   81.69    6.20 
  -6  -1   2   79.29    5.80 
  -6  -1   2   82.89    5.00 
  -6  -1   2   80.19    8.30 
   6  -1  -2   85.79    7.30 
  -6  -1   2   77.59    5.80 
   6  -1  -2   77.39    3.30 
  -6  -1   2   83.89    5.80 
  -6  -1   2   75.39    5.90 
  -6  -1   2   79.89    6.10 
   6  -1  -2   81.59    7.40 
   6  -1  -2   86.69    7.30 
  -6  -1   2   83.59    5.40 
   6  -1  -2   81.79    7.50 
  -6   1   2   75.49    5.40 
   6   1  -2   71.99    7.30 
   6   1  -2   71.69    5.20 
   6   1  -2   70.99    6.80 
   6   1  -2   76.79    6.20 
  -6   1   2   77.19    7.20 
  -6   1   2   76.69    5.30 
   6   1  -2   79.99    6.00 
   6   1  -2   73.09    4.60 
   6   1  -2   70.59    5.50 
   6   1  -2   80.19    3.80 
   6   1  -2   80.19    7.40 
  -6   1   2   79.39    7.00 
  -6   1   2   89.19    7.80 
  -6   1   2   75.19    4.80 
  -6   1   2   84.79    7.90 
   6   1  -2   76.99    5.60 
   6   1  -2   72.09    6.30 
   6   1  -2   79.09    3.70 
   6   1  -2   83.29    6.70 
  -6   1   2   79.79    6.30 
  -6   1   2   83.49    7.70 
  -6   1   2   81.89    5.50 
   6   1  -2   76.49    4.40 
   6   1  -2   89.29    7.30 
  -6   1   2   70.69    6.00 
  -6   1   2   94.89    5.90 
  -6   1   2   87.89    6.70 
  -6   1   2   81.89    5.80 
   6   1  -2   71.79    4.60 
   6   1  -2   73.19    6.70 
  -6   1   2   74.39    5.90 
  -6   1   2   81.29    5.10 
  -5  -1   2   18.80    3.10 
   5  -1  -2   15.20    3.40 
   5  -1  -2   16.60    2.60 
  -5  -1   2   25.60    2.00 
  -5  -1   2   24.90    2.50 
  -5  -1   2   23.10    4.30 
   5  -1  -2   20.50    1.80 
  -5  -1   2   14.90    3.70 
   5  -1  -2   20.30    3.10 
  -5  -1   2   16.90    2.70 
  -5  -1   2   16.40    2.80 
   5  -1  -2   23.70    4.40 
   5  -1  -2   21.40    3.00 
  -5  -1   2   15.00    2.70 
  -5  -1   2   22.90    3.00 
  -5  -1   2   18.50    2.80 
   5  -1  -2   17.80    1.50 
  -5  -1   2   24.70    3.30 
   5  -1  -2   28.20    4.00 
   5  -1  -2   19.70    3.30 
  -5  -1   2   18.10    2.40 
   5  -1  -2   18.00    3.30 
   5  -1  -2   27.80    4.20 
  -5  -1   2   16.10    3.30 
   5  -1  -2   21.10    3.10 
   5  -1  -2   16.60    2.80 
  -5  -1   2   16.30    4.00 
  -5  -1   2   18.90    3.00 
   5  -1  -2   21.10    4.10 
  -5  -1   2   17.50    2.80 
  -5   1   2   18.30    4.10 
  -5   1   2   13.80    3.00 
  -5   1   2   17.10    3.60 
   5   1  -2   15.60    3.40 
   5   1  -2   17.60    3.00 
  -5   1   2   19.90    2.60 
  -5   1   2   20.20    4.00 
  -5   1   2   13.70    2.10 
   5   1  -2   20.20    2.70 
   5   1  -2   19.10    3.40 
   5   1  -2   17.60    3.60 
  -5   1   2   18.90    2.50 
   5   1  -2   19.10    1.80 
  -5   1   2   21.00    2.80 
   5   1  -2   16.40    2.60 
   5   1  -2   20.70    4.00 
  -5   1   2   21.50    3.10 
   5   1  -2   18.20    3.90 
   5   1  -2   17.60    2.80 
   5   1  -2   23.80    3.60 
  -5   1   2   14.70    2.80 
  -5   1   2   21.00    2.90 
  -5   1   2   20.50    2.70 
  -5   1   2   22.30    3.30 
  -5   1   2   20.10    3.40 
   5   1  -2   27.20    4.50 
   5   1  -2   17.10    2.10 
   5   1  -2   19.00    3.10 
   5   1  -2   18.40    1.80 
  -5   1   2   21.80    4.40 
  -5   1   2   15.60    3.30 
  -4  -1   2  225.88    9.30 
  -4  -1   2  228.28    9.00 
  -4  -1   2  228.38   10.50 
  -4  -1   2  214.68    7.70 
  -4  -1   2  224.28    8.50 
  -4  -1   2  214.48    7.60 
   4  -1  -2  203.88    7.70 
   4  -1  -2  200.88    8.70 
  -4  -1   2  219.68    8.70 
   4  -1  -2  220.48   10.90 
  -4  -1   2  222.58    8.50 
  -4  -1   2  216.78    8.30 
   4  -1  -2  203.68    9.60 
  -4  -1   2  232.88   11.10 
   4  -1  -2  205.88   10.20 
   4  -1  -2  208.28   10.10 
   4  -1  -2  203.48    7.00 
  -4  -1   2  216.98    9.10 
  -4  -1   2  209.68   11.10 
   4  -1  -2  207.28    8.80 
   4  -1  -2  218.08    9.80 
  -4  -1   2  210.48    8.90 
  -4  -1   2  229.68    9.00 
   4  -1  -2  208.48    9.00 
  -4  -1   2  205.68    9.10 
   4  -1  -2  209.28   10.50 
  -4  -1   2  224.68   10.70 
   4  -1  -2  196.08   10.20 
  -4  -1   2  205.78    8.70 
   4  -1  -2  208.08    9.20 
  -4  -1   2  216.88    9.30 
  -4   1   2  219.08   10.90 
  -4   1   2  223.28    9.50 
  -4   1   2  219.08    9.00 
  -4   1   2  216.18   10.90 
   4   1  -2  218.98    8.70 
   4   1  -2  203.88   10.00 
   4   1  -2  204.38    9.40 
   4   1  -2  216.08   10.10 
  -4   1   2  211.48    8.90 
  -4   1   2  216.18    9.20 
  -4   1   2  212.08    9.70 
  -4   1   2  207.18   10.40 
   4   1  -2  213.98    8.50 
  -4   1   2  197.78    8.20 
  -4   1   2  225.68    8.30 
   4   1  -2  204.58    9.50 
   4   1  -2  208.28    7.70 
  -4   1   2  205.58    9.70 
   4   1  -2  205.68   10.50 
  -4   1   2  200.28    9.60 
  -4   1   2  207.08   10.20 
   4   1  -2  205.78   10.50 
   4   1  -2  213.88    8.80 
   4   1  -2  204.08    8.00 
  -4   1   2  202.18   10.60 
   4   1  -2  191.58    9.30 
   4   1  -2  201.08    9.10 
   4   1  -2  202.28   10.10 
  -4   1   2  214.98    8.20 
  -4   1   2  214.68    8.30 
   4   1  -2  199.88    8.00 
  -3  -1   2  121.19    5.60 
  -3  -1   2  118.39    5.00 
  -3  -1   2  109.29    6.80 
   3  -1  -2  120.19    6.80 
  -3  -1   2  119.99    5.80 
  -3  -1   2  115.59    5.20 
   3  -1  -2  126.99    5.80 
  -3  -1   2  117.49    5.50 
   3  -1  -2  122.49    7.40 
   3  -1  -2  137.19    6.40 
   3  -1  -2  131.49    7.70 
   3  -1  -2  109.69    5.40 
  -3  -1   2  112.09    4.70 
  -3  -1   2  108.89    6.50 
   3  -1  -2  118.89    6.60 
   3  -1  -2  111.19    6.00 
  -3  -1   2  120.99    5.50 
  -3  -1   2  122.09    5.10 
   3  -1  -2  113.99    4.40 
   3  -1  -2  111.49    6.30 
  -3  -1   2  115.89    4.80 
   3  -1  -2  126.19    6.60 
   3  -1  -2  110.69    5.70 
  -3  -1   2  108.79    5.10 
   3  -1  -2  115.99    5.90 
   3  -1  -2  121.89    7.00
[truncated: 2,600,148 more chars]
