# Supplementary material
Source: MDPI journal article supplement (https://www.mdpi.com/2073-4352/13/7/1043)
Supplement: s1 [file s1 › 11 Er Ha2019_79_0m_a.cif]

 
data_Ha2019_79_0m_a 
  
_audit_creation_method            'SHELXL-2014/7' 
_shelx_SHELXL_version_number      '2014/7' 
_chemical_name_systematic         ? 
_chemical_name_common             ? 
_chemical_melting_point           ? 
_chemical_formula_moiety          ? 
_chemical_formula_sum 
 'C4 H12 Br Er O7' 
_chemical_formula_weight          419.31 
  
loop_ 
 _atom_type_symbol 
 _atom_type_description 
 _atom_type_scat_dispersion_real 
 _atom_type_scat_dispersion_imag 
 _atom_type_scat_source 
 'C'  'C'   0.0033   0.0016 
 'International Tables Vol C Tables 4.2.6.8 and 6.1.1.4' 
 'H'  'H'   0.0000   0.0000 
 'International Tables Vol C Tables 4.2.6.8 and 6.1.1.4' 
 'O'  'O'   0.0106   0.0060 
 'International Tables Vol C Tables 4.2.6.8 and 6.1.1.4' 
 'Br'  'Br'  -0.2901   2.4595 
 'International Tables Vol C Tables 4.2.6.8 and 6.1.1.4' 
 'Er'  'Er'  -0.2586   4.9576 
 'International Tables Vol C Tables 4.2.6.8 and 6.1.1.4' 
  
_space_group_crystal_system       monoclinic 
_space_group_IT_number            14 
_space_group_name_H-M_alt         'P 21/n' 
_space_group_name_Hall            '-P 2yn' 
  
_shelx_space_group_comment 
; 
The symmetry employed for this shelxl refinement is uniquely defined 
by the following loop, which should always be used as a source of 
symmetry information in preference to the above space-group names. 
They are only intended as comments. 
; 
  
loop_ 
 _space_group_symop_operation_xyz 
 'x, y, z' 
 '-x+1/2, y+1/2, -z+1/2' 
 '-x, -y, -z' 
 'x-1/2, -y-1/2, z-1/2' 
  
_cell_length_a                    7.8069(3) 
_cell_length_b                    8.0529(3) 
_cell_length_c                    17.4494(7) 
_cell_angle_alpha                 90 
_cell_angle_beta                  96.154(2) 
_cell_angle_gamma                 90 
_cell_volume                      1090.69(7) 
_cell_formula_units_Z             4 
_cell_measurement_temperature     100(2) 
_cell_measurement_reflns_used     9454 
_cell_measurement_theta_min       2.35 
_cell_measurement_theta_max       28.18 
  
_exptl_crystal_description        prism 
_exptl_crystal_colour             pink 
_exptl_crystal_density_meas       ? 
_exptl_crystal_density_method     ? 
_exptl_crystal_density_diffrn     2.554 
_exptl_crystal_F_000              780 
_exptl_transmission_factor_min    ? 
_exptl_transmission_factor_max    ? 
_exptl_crystal_size_max           0.362 
_exptl_crystal_size_mid           0.162 
_exptl_crystal_size_min           0.144 
_exptl_absorpt_coefficient_mu     11.362 
_shelx_estimated_absorpt_T_min    0.105 
_shelx_estimated_absorpt_T_max    0.291 
_exptl_absorpt_correction_type    multi-scan 
_exptl_absorpt_correction_T_min   0.267 
_exptl_absorpt_correction_T_max   0.683 
_exptl_absorpt_process_details    'Bruker SADABS' 
_exptl_absorpt_special_details    ? 
_diffrn_ambient_temperature       100(2) 
_diffrn_radiation_wavelength      0.71073 
_diffrn_radiation_type            MoK\a 
_diffrn_source                    ? 
_diffrn_measurement_device_type   'Bruker APEX-II CCD' 
_diffrn_measurement_method        '\f and \w scans' 
_diffrn_detector_area_resol_mean  ? 
_diffrn_reflns_number             121468 
_diffrn_reflns_av_unetI/netI      0.0087 
_diffrn_reflns_av_R_equivalents   0.0413 
_diffrn_reflns_limit_h_min        -10 
_diffrn_reflns_limit_h_max        10 
_diffrn_reflns_limit_k_min        -10 
_diffrn_reflns_limit_k_max        10 
_diffrn_reflns_limit_l_min        -23 
_diffrn_reflns_limit_l_max        23 
_diffrn_reflns_theta_min          2.758 
_diffrn_reflns_theta_max          27.998 
_diffrn_reflns_theta_full         25.242 
_diffrn_measured_fraction_theta_max   0.999 
_diffrn_measured_fraction_theta_full  0.998 
_diffrn_reflns_Laue_measured_fraction_max    0.999 
_diffrn_reflns_Laue_measured_fraction_full   0.998 
_diffrn_reflns_point_group_measured_fraction_max   0.999 
_diffrn_reflns_point_group_measured_fraction_full  0.998 
_reflns_number_total              2636 
_reflns_number_gt                 2538 
_reflns_threshold_expression      'I > 2\s(I)' 
_reflns_Friedel_coverage          0.000 
_reflns_Friedel_fraction_max      . 
_reflns_Friedel_fraction_full     . 
  
_reflns_special_details 
; 
 Reflections were merged by SHELXL according to the crystal 
 class for the calculation of statistics and refinement. 
  
 _reflns_Friedel_fraction is defined as the number of unique 
 Friedel pairs measured divided by the number that would be 
 possible theoretically, ignoring centric projections and 
 systematic absences. 
; 
  
_computing_data_collection        'Bruker APEX2' 
_computing_cell_refinement        'Bruker SAINT' 
_computing_data_reduction         'Bruker SAINT' 
_computing_structure_solution     'SHELXS-97 (Sheldrick 2008)' 
_computing_structure_refinement 'SHELXL-2014/7 (Sheldrick, 2014)' 
_computing_molecular_graphics     'Bruker SHELXTL' 
_computing_publication_material   'Bruker SHELXTL' 
_refine_special_details           ? 
_refine_ls_structure_factor_coef  Fsqd 
_refine_ls_matrix_type            full 
_refine_ls_weighting_scheme       calc 
_refine_ls_weighting_details 
'w=1/[\s^2^(Fo^2^)+(0.0064P)^2^+1.5223P] where P=(Fo^2^+2Fc^2^)/3' 
_atom_sites_solution_primary      direct 
_atom_sites_solution_secondary    ? 
_atom_sites_solution_hydrogens    mixed 
_refine_ls_hydrogen_treatment     constr 
_refine_ls_extinction_method      'SHELXL-2014/7 (Sheldrick 2014' 
_refine_ls_extinction_coef        0.00082(5) 
_refine_ls_extinction_expression 
 'Fc^*^=kFc[1+0.001xFc^2^\l^3^/sin(2\q)]^-1/4^' 
_refine_ls_number_reflns          2636 
_refine_ls_number_parameters      126 
_refine_ls_number_restraints      0 
_refine_ls_R_factor_all           0.0123 
_refine_ls_R_factor_gt            0.0114 
_refine_ls_wR_factor_ref          0.0255 
_refine_ls_wR_factor_gt           0.0253 
_refine_ls_goodness_of_fit_ref    1.181 
_refine_ls_restrained_S_all       1.181 
_refine_ls_shift/su_max           0.003 
_refine_ls_shift/su_mean          0.000 
  
loop_ 
 _atom_site_label 
 _atom_site_type_symbol 
 _atom_site_fract_x 
 _atom_site_fract_y 
 _atom_site_fract_z 
 _atom_site_U_iso_or_equiv 
 _atom_site_adp_type 
 _atom_site_occupancy 
 _atom_site_site_symmetry_order 
 _atom_site_calc_flag 
 _atom_site_refinement_flags_posn 
 _atom_site_refinement_flags_adp 
 _atom_site_refinement_flags_occupancy 
 _atom_site_disorder_assembly 
 _atom_site_disorder_group 
Er1 Er 0.27275(2) 0.44685(2) 0.53933(2) 0.00954(3) Uani 1 1 d . . . . . 
Br1 Br 0.38418(3) 0.94881(3) 0.68074(2) 0.01631(5) Uani 1 1 d . . . . . 
O11 O 0.01720(18) 0.3238(2) 0.54034(9) 0.0189(3) Uani 1 1 d . . . . . 
O12 O -0.26317(17) 0.29231(18) 0.52266(8) 0.0141(3) Uani 1 1 d . . . . . 
C11 C -0.1153(2) 0.2395(3) 0.54790(11) 0.0115(4) Uani 1 1 d . . . . . 
C12 C -0.1012(3) 0.0735(3) 0.58667(14) 0.0216(5) Uani 1 1 d . . . . . 
H12A H -0.1808 0.0687 0.6264 0.071(7) Uiso 1 1 calc R U . . . 
H12B H 0.0170 0.0570 0.6105 0.071(7) Uiso 1 1 calc R U . . . 
H12C H -0.1307 -0.0139 0.5484 0.071(7) Uiso 1 1 calc R U . . . 
O21 O 0.53956(17) 0.55547(18) 0.57385(8) 0.0116(3) Uani 1 1 d . . . . . 
O22 O 0.81057(17) 0.62363(19) 0.59194(8) 0.0143(3) Uani 1 1 d . . . . . 
C21 C 0.6731(2) 0.5890(2) 0.62021(12) 0.0120(4) Uani 1 1 d . . . . . 
C22 C 0.6677(3) 0.5837(3) 0.70542(12) 0.0192(5) Uani 1 1 d . . . . . 
H22A H 0.7847 0.5688 0.7310 0.073(7) Uiso 1 1 calc R U . . . 
H22B H 0.5952 0.4908 0.7185 0.073(7) Uiso 1 1 calc R U . . . 
H22C H 0.6198 0.6880 0.7227 0.073(7) Uiso 1 1 calc R U . . . 
O1W O 0.41028(18) 0.18886(18) 0.53260(8) 0.0145(3) Uani 1 1 d . . . . . 
H11W H 0.4085 0.1049 0.5716 0.050(7) Uiso 1 1 d R U . . . 
H12W H 0.5295 0.2005 0.5247 0.050(7) Uiso 1 1 d R U . . . 
O2W O 0.15594(18) 0.62838(18) 0.62445(8) 0.0140(3) Uani 1 1 d . . . . . 
H21W H 0.0343 0.6441 0.6253 0.058(8) Uiso 1 1 d R U . . . 
H22W H 0.2060 0.7352 0.6368 0.058(8) Uiso 1 1 d R U . . . 
O3W O 0.31120(19) 0.34069(19) 0.66640(8) 0.0176(3) Uani 1 1 d . . . . . 
H31W H 0.2514 0.3860 0.7069 0.048(7) Uiso 1 1 d R U . . . 
H32W H 0.3316 0.2265 0.6803 0.048(7) Uiso 1 1 d R U . . . 
  
loop_ 
 _atom_site_aniso_label 
 _atom_site_aniso_U_11 
 _atom_site_aniso_U_22 
 _atom_site_aniso_U_33 
 _atom_site_aniso_U_23 
 _atom_site_aniso_U_13 
 _atom_site_aniso_U_12 
Er1 0.00664(5) 0.01117(5) 0.01096(5) -0.00002(3) 0.00164(3) -0.00161(3) 
Br1 0.02045(10) 0.01243(10) 0.01609(10) 0.00124(8) 0.00214(8) -0.00232(8) 
O11 0.0133(7) 0.0229(8) 0.0218(8) -0.0057(7) 0.0071(6) -0.0078(6) 
O12 0.0092(6) 0.0165(7) 0.0166(7) 0.0025(6) 0.0014(5) 0.0011(5) 
C11 0.0111(9) 0.0129(9) 0.0108(9) -0.0019(7) 0.0028(7) -0.0004(7) 
C12 0.0211(11) 0.0189(11) 0.0245(11) 0.0067(9) 0.0011(9) 0.0030(9) 
O21 0.0083(6) 0.0148(7) 0.0116(6) -0.0001(6) 0.0006(5) -0.0003(5) 
O22 0.0091(6) 0.0182(7) 0.0155(7) -0.0014(6) 0.0011(5) -0.0023(6) 
C21 0.0110(9) 0.0104(9) 0.0147(9) -0.0007(7) 0.0013(7) 0.0012(7) 
C22 0.0171(10) 0.0294(13) 0.0106(9) 0.0001(9) 0.0000(8) 0.0021(9) 
O1W 0.0125(7) 0.0151(7) 0.0164(7) 0.0019(6) 0.0047(5) 0.0002(6) 
O2W 0.0108(6) 0.0137(7) 0.0175(7) -0.0022(6) 0.0013(5) -0.0002(6) 
O3W 0.0242(8) 0.0146(7) 0.0151(7) 0.0016(6) 0.0073(6) 0.0039(6) 
  
_geom_special_details 
; 
 All esds (except the esd in the dihedral angle between two l.s. planes) 
 are estimated using the full covariance matrix.  The cell esds are taken 
 into account individually in the estimation of esds in distances, angles 
 and torsion angles; correlations between esds in cell parameters are only 
 used when they are defined by crystal symmetry.  An approximate (isotropic) 
 treatment of cell esds is used for estimating esds involving l.s. planes. 
; 
  
loop_ 
 _geom_bond_atom_site_label_1 
 _geom_bond_atom_site_label_2 
 _geom_bond_distance 
 _geom_bond_site_symmetry_2 
 _geom_bond_publ_flag 
Er1 O11 2.2293(14) . ? 
Er1 O21 2.2799(13) . ? 
Er1 O2W 2.3378(14) . ? 
Er1 O1W 2.3473(15) . ? 
Er1 O12 2.3601(15) 3_566 ? 
Er1 O3W 2.3653(15) . ? 
Er1 O22 2.3817(14) 3_666 ? 
Er1 O21 2.5823(14) 3_666 ? 
Er1 O11 3.1292(16) 3_566 ? 
O11 C11 1.256(2) . ? 
O12 C11 1.264(2) . ? 
C11 C12 1.497(3) . ? 
C12 H12A 0.9800 . ? 
C12 H12B 0.9800 . ? 
C12 H12C 0.9800 . ? 
O21 C21 1.278(2) . ? 
O22 C21 1.259(2) . ? 
C21 C22 1.493(3) . ? 
C22 H22A 0.9800 . ? 
C22 H22B 0.9800 . ? 
C22 H22C 0.9800 . ? 
O1W H11W 0.9600 . ? 
O1W H12W 0.9600 . ? 
O2W H21W 0.9600 . ? 
O2W H22W 0.9600 . ? 
O3W H31W 0.9600 . ? 
O3W H32W 0.9600 . ? 
  
loop_ 
 _geom_angle_atom_site_label_1 
 _geom_angle_atom_site_label_2 
 _geom_angle_atom_site_label_3 
 _geom_angle 
 _geom_angle_site_symmetry_1 
 _geom_angle_site_symmetry_3 
 _geom_angle_publ_flag 
O11 Er1 O21 164.05(5) . . ? 
O11 Er1 O2W 82.09(5) . . ? 
O21 Er1 O2W 89.99(5) . . ? 
O11 Er1 O1W 91.24(6) . . ? 
O21 Er1 O1W 86.73(5) . . ? 
O2W Er1 O1W 142.83(5) . . ? 
O11 Er1 O12 114.50(5) . 3_566 ? 
O21 Er1 O12 76.28(5) . 3_566 ? 
O2W Er1 O12 74.89(5) . 3_566 ? 
O1W Er1 O12 139.20(5) . 3_566 ? 
O11 Er1 O3W 81.70(6) . . ? 
O21 Er1 O3W 82.55(5) . . ? 
O2W Er1 O3W 69.47(5) . . ? 
O1W Er1 O3W 73.40(5) . . ? 
O12 Er1 O3W 138.23(5) 3_566 . ? 
O11 Er1 O22 75.49(5) . 3_666 ? 
O21 Er1 O22 119.55(5) . 3_666 ? 
O2W Er1 O22 132.47(5) . 3_666 ? 
O1W Er1 O22 79.64(5) . 3_666 ? 
O12 Er1 O22 77.25(5) 3_566 3_666 ? 
O3W Er1 O22 144.05(5) . 3_666 ? 
O11 Er1 O21 125.77(5) . 3_666 ? 
O21 Er1 O21 68.14(5) . 3_666 ? 
O2W Er1 O21 141.48(5) . 3_666 ? 
O1W Er1 O21 69.83(5) . 3_666 ? 
O12 Er1 O21 69.43(5) 3_566 3_666 ? 
O3W Er1 O21 133.55(5) . 3_666 ? 
O22 Er1 O21 51.80(4) 3_666 3_666 ? 
O11 Er1 O11 70.15(6) . 3_566 ? 
O21 Er1 O11 119.20(5) . 3_566 ? 
O2W Er1 O11 66.44(5) . 3_566 ? 
O1W Er1 O11 144.40(5) . 3_566 ? 
O12 Er1 O11 44.38(4) 3_566 3_566 ? 
O3W Er1 O11 130.00(5) . 3_566 ? 
O22 Er1 O11 66.64(4) 3_666 3_566 ? 
O21 Er1 O11 96.16(4) 3_666 3_566 ? 
Er1 Er1 Er1 135.053(5) 3_666 3_566 ? 
C11 O11 Er1 171.45(15) . . ? 
C11 O12 Er1 116.21(12) . 3_566 ? 
O11 C11 O12 120.89(19) . . ? 
O11 C11 C12 120.59(19) . . ? 
O12 C11 C12 118.52(18) . . ? 
C11 C12 H12A 109.5 . . ? 
C11 C12 H12B 109.5 . . ? 
H12A C12 H12B 109.5 . . ? 
C11 C12 H12C 109.5 . . ? 
H12A C12 H12C 109.5 . . ? 
H12B C12 H12C 109.5 . . ? 
C21 O21 Er1 155.31(13) . . ? 
C21 O21 Er1 89.67(11) . 3_666 ? 
Er1 O21 Er1 111.86(5) . 3_666 ? 
C21 O22 Er1 99.65(12) . 3_666 ? 
O22 C21 O21 118.06(18) . . ? 
O22 C21 C22 120.84(18) . . ? 
O21 C21 C22 121.08(18) . . ?  
C21 C22 H22A 109.5 . . ? 
C21 C22 H22B 109.5 . . ? 
H22A C22 H22B 109.5 . . ? 
C21 C22 H22C 109.5 . . ? 
H22A C22 H22C 109.5 . . ? 
H22B C22 H22C 109.5 . . ? 
Er1 O1W H11W 123.1 . . ? 
Er1 O1W H12W 112.1 . . ? 
H11W O1W H12W 105.0 . . ? 
Er1 O2W H21W 123.1 . . ? 
Er1 O2W H22W 121.7 . . ? 
H21W O2W H22W 105.0 . . ? 
Er1 O3W H31W 122.0 . . ? 
Er1 O3W H32W 125.8 . . ? 
H31W O3W H32W 105.0 . . ? 
  
loop_ 
 _geom_hbond_atom_site_label_D 
 _geom_hbond_atom_site_label_H 
 _geom_hbond_atom_site_label_A 
 _geom_hbond_distance_DH 
 _geom_hbond_distance_HA 
 _geom_hbond_distance_DA 
 _geom_hbond_angle_DHA 
 _geom_hbond_site_symmetry_A 
O1W H11W Br1  0.96 2.31 3.2517(15) 167.8 1_545 
O1W H12W O12  0.96 1.78 2.705(2) 160.0 1_655 
O2W H21W O22  0.96 1.79 2.695(2) 156.4 1_455 
O2W H22W Br1  0.96 2.29 3.2285(15) 165.0 . 
O3W H31W Br1  0.96 2.38 3.3274(14) 169.0 2_546 
O3W H32W Br1  0.96 2.27 3.2118(16) 165.4 1_545 
  
_refine_diff_density_max    0.364 
_refine_diff_density_min   -0.467 
_refine_diff_density_rms    0.076 
  
_shelx_res_file 
; 
  
    Ha2019_79_0m_a.res created by SHELXL-2014/7 
  
  
TITL Ha2019_79_0m_a.res in P2(1)/n 
CELL  0.71073   7.8069   8.0529  17.4494   90.000   96.154   90.000 
ZERR    4.000   0.0003   0.0003   0.0007    0.000    0.002    0.000 
LATT 1 
SYMM 1/2-X, 1/2+Y, 1/2-Z 
SFAC C  H  O  Br Er 
UNIT 16 48 28 4 4 
LIST 4 ! automatically inserted. Change 6 to 4 for CHECKCIF!! 
OMIT 0 1 1 
OMIT -1 0 5 
OMIT -3 56 
L.S. 10 
rem DFIX 0.96  0.0001 O1w H11w O1w H12w O2w H21w O2w H22w O3w H31w O3w H32w 
rem dfix 1.523  0.0001 H11w H12w H21w H22w H31w H32w 
FREe Er1 C21_$6 
EQIV $6 1-x, 1-y,1-z 
BIND Er1 Er1_$6 
BIND Er1 Er1_$7 
EQIV $7 -x,1-y, 1-z 
BIND Er1 O11_$7 
ACTA 
HTAB 
EQIV $1 -x+3/2, y-1/2, -z+3/2 
EQIV $2 x, y-1, z 
HTAB O1W Br1_$2 
EQIV $3 x+1, y, z 
HTAB O1W O12_$3 
EQIV $4 x-1, y, z 
HTAB O2W O22_$4 
HTAB O2W Br1 
EQIV $5 -x+1/2, y-1/2, -z+3/2 
HTAB O3W Br1_$5 
HTAB O3W Br1_$2 
SIZE 0.144  0.162  0.362 
BOND $H 
FMAP 2 
PLAN 5 
TEMP -173 
WGHT    0.006400    1.522300 
EXTI    0.000822 
FVAR       0.28176   0.07058   0.07339   0.04968   0.05760   0.04841 
ER1   5    0.272751    0.446847    0.539326    11.00000    0.00664    0.01117 = 
         0.01096   -0.00002    0.00164   -0.00161 
BR1   4    0.384176    0.948812    0.680740    11.00000    0.02045    0.01243 = 
         0.01609    0.00124    0.00214   -0.00232 
O11   3    0.017198    0.323827    0.540340    11.00000    0.01327    0.02285 = 
         0.02182   -0.00573    0.00712   -0.00784 
O12   3   -0.263168    0.292309    0.522662    11.00000    0.00924    0.01651 = 
         0.01657    0.00249    0.00142    0.00113 
C11   1   -0.115284    0.239547    0.547895    11.00000    0.01111    0.01293 = 
         0.01077   -0.00190    0.00275   -0.00044 
C12   1   -0.101241    0.073492    0.586668    11.00000    0.02111    0.01888 = 
         0.02447    0.00671    0.00110    0.00295 
AFIX 137 
H12A  2   -0.180779    0.068749    0.626416    11.00000   21.00000 
H12B  2    0.016973    0.056952    0.610527    11.00000   21.00000 
H12C  2   -0.130726   -0.013906    0.548439    11.00000   21.00000 
AFIX   0 
O21   3    0.539561    0.555475    0.573854    11.00000    0.00834    0.01479 = 
         0.01160   -0.00015    0.00064   -0.00028 
O22   3    0.810566    0.623625    0.591942    11.00000    0.00906    0.01823 = 
         0.01549   -0.00141    0.00113   -0.00235 
C21   1    0.673107    0.589050    0.620210    11.00000    0.01101    0.01040 = 
         0.01467   -0.00074    0.00131    0.00124 
C22   1    0.667740    0.583705    0.705423    11.00000    0.01711    0.02943 = 
         0.01065    0.00006   -0.00004    0.00212 
AFIX 137 
H22A  2    0.784708    0.568776    0.731023    11.00000   31.00000 
H22B  2    0.595213    0.490809    0.718542    11.00000   31.00000 
H22C  2    0.619774    0.688020    0.722652    11.00000   31.00000 
AFIX   0 
O1W   3    0.410278    0.188856    0.532597    11.00000    0.01253    0.01513 = 
         0.01644    0.00193    0.00465    0.00022 
AFIX   3 
H11W  2    0.408535    0.104910    0.571568    11.00000   41.00000 
H12W  2    0.529491    0.200549    0.524692    11.00000   41.00000 
AFIX   0 
O2W   3    0.155937    0.628376    0.624453    11.00000    0.01082    0.01368 = 
         0.01749   -0.00219    0.00127   -0.00021 
AFIX   3 
H21W  2    0.034252    0.644113    0.625264    11.00000   51.00000 
H22W  2    0.206036    0.735225    0.636782    11.00000   51.00000 
AFIX   0 
O3W   3    0.311204    0.340693    0.666397    11.00000    0.02418    0.01463 = 
         0.01509    0.00162    0.00732    0.00387 
AFIX   3 
H31W  2    0.251362    0.386036    0.706889    11.00000   61.00000 
H32W  2    0.331596    0.226515    0.680334    11.00000   61.00000 
AFIX   0 
HKLF 4 
  
REM  Ha2019_79_0m_a.res in P2(1)/n 
REM R1 =  0.0114 for    2538 Fo > 4sig(Fo)  and  0.0123 for all    2636 data 
REM    126 parameters refined using      0 restraints 
  
END 
  
WGHT      0.0064      1.5223 
  
REM Instructions for potential hydrogen bonds 
HTAB C12 Br1_$2 
HTAB C22 Br1_$1 
HTAB C22 O3W 
HTAB C22 Br1 
HTAB O1W Br1_$2 
HTAB O1W O12_$3 
HTAB O2W O22_$4 
HTAB O2W Br1 
HTAB O3W Br1_$5 
HTAB O3W Br1_$2 
  
REM Highest difference peak  0.364,  deepest hole -0.467,  1-sigma level  0.076 
Q1    1   0.6687  0.5592  0.6619  11.00000  0.05    0.36 
Q2    1   0.2911  0.5164  0.5787  11.00000  0.05    0.33 
Q3    1   0.2826  0.9463  0.6664  11.00000  0.05    0.33 
Q4    1   0.2474  0.5423  0.5137  11.00000  0.05    0.32 
Q5    1   0.4095  0.8926  0.7204  11.00000  0.05    0.31 
; 
_shelx_res_checksum   69055 
  
_shelx_hkl_file 
; 
   1   0   0    7.80    1.20 
   1   0   0    4.60    1.00 
   1   0   0    2.30    1.10 
   1   0   0    2.40    1.00 
   1   0   0    8.30    1.10 
   1   0   0    7.40    1.00 
   1   0   0    8.50    0.90 
   1   0   0    3.80    1.10 
   1   0   0   10.10    1.30 
   1   0   0    5.50    1.30 
   1   0   0    4.10    1.10 
   1   0   0    6.30    0.90 
   1   0   0    7.30    1.10 
   1   0   0    8.70    1.70 
   1   0   0    6.80    1.20 
   1   0   0    8.60    1.20 
   1   0   0    9.40    1.10 
   1   0   0    7.60    1.20 
   1   0   0    9.50    1.50 
   1   0   0    7.20    1.50 
   1   0   0    1.20    0.80 
   1   0   0    7.40    1.30 
   1   0   0    3.80    1.00 
   1   0   0   11.30    1.60 
   1   0   0    4.80    1.10 
   1   0   0    3.70    1.10 
   1   0   0    3.80    1.30 
   1   0   0    3.30    1.10 
   1   0   0    6.60    1.20 
  -1   0   0    3.40    1.00 
  -1   0   0    2.20    0.80 
  -1   0   0    4.10    1.10 
  -1   0   0    0.40    0.60 
  -1   0   0    1.50    0.80 
   1   0   0    9.00    1.10 
   1   0   0    3.70    1.10 
   1   0   0   10.50    1.20 
  -2   0   0 4651.13  143.99 
  -2   0   0 4429.46  144.09 
  -2   0   0 4445.86  142.89 
  -2   0   0 4743.33  143.29 
  -2   0   0 4881.21  142.49 
   2   0   0 4573.04  142.79 
   2   0   0 4594.84  140.99 
   2   0   0 4715.43  141.49 
   2   0   0 4896.61  144.59 
   2   0   0 4731.63  142.69 
   2   0   0 4752.62  143.39 
   2   0   0 4848.51  141.59 
   2   0   0 4764.32  140.79 
   2   0   0 4734.03  142.29 
   2   0   0 4589.04  142.99 
   2   0   0 4721.83  142.89 
   2   0   0 4727.63  143.99 
   2   0   0 4826.02  144.49 
   2   0   0 4724.33  142.19 
   2   0   0 4812.12  143.19 
   2   0   0 4766.42  142.99 
   2   0   0 4583.94  143.99 
   2   0   0 4874.21  142.69 
   2   0   0 4705.53  143.59 
  -2   0   0 4664.33  144.09 
  -2   0   0 4557.94  141.89 
  -2   0   0 4655.03  143.79 
  -2   0   0 4674.33  141.19 
  -2   0   0 4734.63  141.59 
  -2   0   0 4709.23  144.49 
  -2   0   0 4600.74  142.69 
  -2   0   0 4783.12  143.59 
  -2   0   0 4554.74  140.79 
   2   0   0 4436.66  143.79 
   2   0   0 4792.42  142.69 
   2   0   0 4452.85  141.19 
   2   0   0 4751.52  144.09 
   2   0   0 4656.03  141.79 
   2   0   0 4819.72  142.29 
   2   0   0 4523.15  146.19 
   2   0   0 4761.32  143.59 
   2   0   0 4533.55  141.39 
   2   0   0 4734.33  140.89 
   2   0   0 4821.02  140.59 
   2   0   0 4738.63  144.09 
   2   0   0 4611.54  141.79 
   2   0   0 4653.43  143.49 
  -2   0   0 4774.42  143.09 
  -2   0   0 4551.14  144.19 
  -2   0   0 4638.84  143.69 
   2   0   0 4718.23  141.29 
   2   0   0 4749.02  146.59 
   2   0   0 4876.01  144.29 
   2   0   0 4903.71  144.69 
   2   0   0 4412.56  143.19 
  -2   0   0 4540.05  144.09 
  -2   0   0 4612.04  143.49 
  -2   0   0 4553.04  142.49 
  -2   0   0 4769.12  141.49 
  -2   0   0 4742.13  144.29 
  -2   0   0 4757.52  141.79 
  -2   0   0 4565.14  142.19 
  -2   0   0 4799.42  143.69 
  -2   0   0 4926.91  141.69 
  -2   0   0 4667.23  140.79 
  -2   0   0 4776.92  140.49 
   3   0   0    1.20    2.10 
   3   0   0    0.70    1.60 
   3   0   0    3.90    2.00 
   3   0   0    3.50    2.30 
  -3   0   0    1.70    2.40 
  -3   0   0    1.60    2.30 
  -3   0   0    1.30    2.50 
  -3   0   0    4.40    2.60 
   3   0   0    2.80    2.30 
   3   0   0   11.80    3.00 
   3   0   0    1.10    1.50 
   3   0   0    1.70    2.20 
   3   0   0    2.40    1.70 
   3   0   0    0.10    1.20 
   3   0   0    1.60    1.20 
   3   0   0    1.80    1.60 
   3   0   0    4.10    2.20 
   3   0   0    5.20    1.70 
   3   0   0    6.40    2.20 
   3   0   0    2.80    2.80 
   3   0   0    1.10    2.10 
   3   0   0    2.10    1.20 
   3   0   0   -0.10    1.00 
   3   0   0    6.70    2.70 
   3   0   0    5.70    2.00 
   3   0   0    4.80    1.60 
   3   0   0    3.10    2.40 
  -3   0   0    0.20    2.00 
  -3   0   0   -0.40    1.00 
  -3   0   0    0.90    2.20 
  -3   0   0    3.70    2.30 
  -3   0   0    2.30    1.90 
  -3   0   0    3.90    1.70 
  -3   0   0    5.00    2.90 
  -3   0   0    5.10    1.80 
  -3   0   0    6.70    2.20 
  -3   0   0   12.00    3.30 
  -3   0   0    1.30    1.50 
  -3   0   0    1.30    1.20 
  -3   0   0    3.30    1.30 
  -3   0   0    8.60    3.00 
  -3   0   0   -1.30    1.20 
  -3   0   0    0.70    2.00 
  -3   0   0    2.00    1.40 
  -3   0   0   -0.30    1.40 
  -3   0   0   -0.20    1.90 
  -3   0   0    0.40    1.60 
   3   0   0    2.50    2.50 
   3   0   0    2.20    2.40 
  -3   0   0    1.30    1.80 
  -3   0   0   -1.20    1.70 
  -3   0   0    6.00    2.60 
   3   0   0    0.60    1.80 
   3   0   0    0.80    1.70 
   3   0   0    1.30    2.10 
   3   0   0   14.60    4.50 
   3   0   0    0.40    1.20 
  -4   0   0  453.25   23.50 
   4   0   0  502.35   21.00 
   4   0   0  509.75   22.40 
  -4   0   0  521.05   24.60 
   4   0   0  500.45   21.30 
   4   0   0  490.05   21.90 
   4   0   0  507.15   20.10 
   4   0   0  506.25   18.70 
   4   0   0  512.85   18.30 
   4   0   0  489.95   21.40 
   4   0   0  489.05   23.00 
   4   0   0  496.95   20.20 
   4   0   0  516.85   22.40 
   4   0   0  491.55   19.10 
  -4   0   0  474.85   22.90 
  -4   0   0  471.75   21.50 
  -4   0   0  518.05   20.00 
   4   0   0  511.85   20.50 
   4   0   0  501.35   26.80 
   4   0   0  511.75   21.80 
  -4   0   0  479.75   23.90 
  -4   0   0  460.95   21.00 
  -4   0   0  492.35   20.10 
  -4   0   0  550.04   24.40 
  -4   0   0  539.25   25.10 
  -4   0   0  521.95   21.40 
  -4   0   0  522.35   23.20 
  -4   0   0  504.35   23.90 
  -4   0   0  445.36   23.70 
   4   0   0  465.55   19.20 
   4   0   0  505.45   27.40 
   4   0   0  502.25   21.60 
   4   0   0  497.45   23.70 
   4   0   0  525.05   19.80 
  -4   0   0  527.05   22.50 
  -4   0   0  484.15   23.00 
   4   0   0  487.65   19.60 
   4   0   0  473.35   19.80 
   4   0   0  487.45   24.20 
  -4   0   0  486.95   20.70 
  -4   0   0  468.35   23.00 
   4   0   0  484.65   18.40 
  -4   0   0  501.05   18.40 
  -4   0   0  491.05   17.90 
  -4   0   0  545.95   24.80 
   5   0   0    0.70    2.80 
   5   0   0    0.10    1.70 
   5   0   0   -2.00    2.20 
   5   0   0   -3.40    2.30 
   5   0   0    2.40    2.20 
   5   0   0   -0.90    2.70 
  -5   0   0    3.80    4.00 
   5   0   0   -0.50    3.30 
  -5   0   0   -0.40    2.90 
   5   0   0   -0.40    1.30 
   5   0   0    0.50    1.80 
   5   0   0   -0.10    1.90 
   5   0   0    1.90    2.30 
   5   0   0    2.80    2.40 
   5   0   0    4.30    3.30 
   5   0   0    0.80    2.00 
   5   0   0    0.00    1.60 
   5   0   0    0.20    2.50 
   5   0   0    1.10    2.50 
   5   0   0   -0.70    1.90 
   5   0   0   -3.00    1.90 
  -5   0   0    0.00    2.20 
  -5   0   0    3.10    3.70 
  -5   0   0    0.10    3.10 
  -5   0   0   -1.80    2.60 
  -5   0   0   -1.00    3.20 
  -5   0   0    0.10    3.10 
  -5   0   0    0.40    2.10 
   5   0   0    2.60    3.90 
  -5   0   0    4.40    3.30 
  -5   0   0    0.20    2.20 
  -5   0   0    0.10    1.40 
  -5   0   0   -1.80    1.20 
  -5   0   0    3.30    3.20 
  -5   0   0    0.50    2.90 
  -5   0   0    1.50    3.40 
  -5   0   0    2.90    3.70 
  -5   0   0   19.30    5.80 
   5   0   0    1.50    2.00 
  -5   0   0    4.80    3.90 
   5   0   0   -0.40    2.90 
  -5   0   0    0.40    2.60 
  -6   0   0 1068.39   43.90 
   6   0   0  953.90   34.20 
   6   0   0  951.50   35.60 
  -6   0   0 1026.50   45.90 
   6   0   0  940.01   36.70 
   6   0   0 1113.09   44.50 
  -6   0   0  978.50   45.00 
  -6   0   0  980.20   43.20 
  -6   0   0  891.51   43.70 
  -6   0   0 1011.80   40.40 
  -6   0   0 1084.99   38.60 
  -6   0   0  979.80   34.30 
   6   0   0 1022.00   39.70 
   6   0   0  994.50   40.40 
  -6   0   0  974.90   43.70 
  -6   0   0 1002.60   44.20 
  -6   0   0  953.80   44.80 
   6   0   0  977.40   40.90 
  -6   0   0 1003.90   43.50 
  -6   0   0  970.60   39.50 
  -6   0   0  904.21   44.50 
   6   0   0  986.80   34.30 
   6   0   0 1059.69   37.10 
   6   0   0  947.91   49.20 
   6   0   0 1041.40   46.00 
   6   0   0 1119.49   40.60 
  -6   0   0  965.40   41.10 
   6   0   0 1027.40   50.29 
   6   0   0 1017.50   41.00 
  -6   0   0  941.61   44.50 
   6   0   0  974.30   34.10 
   6   0   0 1028.20   41.00 
  -6   0   0  946.21   38.90 
   6   0   0  985.40   41.10 
   6   0   0 1063.99   39.90 
   6   0   0 1041.20   44.90 
  -7   0   0   -0.70    5.10 
   7   0   0   -0.50    3.60 
  -7   0   0   -3.50    2.60 
  -7   0   0   10.30    5.20 
   7   0   0   -0.40    3.60 
   7   0   0   -4.40    4.80 
   7   0   0    1.30    2.30 
  -7   0   0    1.70    3.40 
  -7   0   0    1.50    5.00 
   7   0   0   -2.00    3.10 
   7   0   0    7.20    5.10 
   7   0   0   -1.60    3.40 
   7   0   0    7.80    4.70 
  -7   0   0    1.60    3.90 
   7   0   0    1.50    5.30 
  -7   0   0   -2.40    4.30 
   7   0   0    3.90    5.30 
  -7   0   0   -3.20    3.30 
  -7   0   0    3.60    5.50 
   7   0   0    7.80    7.00 
  -7   0   0    3.00    5.40 
  -7   0   0    9.50    6.20 
   7   0   0    8.50    5.80 
   7   0   0    2.00    4.30 
   7   0   0    6.80    3.20 
   7   0   0    0.40    3.00 
   7   0   0    2.10    4.20 
  -7   0   0    4.20    2.70 
  -7   0   0   -5.30    3.30 
  -7   0   0    3.80    5.90 
   8   0   0  593.24   31.30 
   8   0   0  659.03   33.20 
  -8   0   0  570.04   35.20 
   8   0   0  611.64   31.10 
   8   0   0  685.73   38.60 
   8   0   0  667.83   31.50 
  -8   0   0  599.64   36.40 
   8   0   0  707.83   32.50 
   8   0   0  694.13   34.20 
  -8   0   0  617.84   31.20 
  -8   0   0  571.54   34.70 
  -8   0   0  603.14   38.00 
  -8   0   0  559.74   36.90 
  -8   0   0  591.14   36.40 
   8   0   0  617.84   43.00 
   8   0   0  716.13   39.60 
  -8   0   0  632.84   38.30 
  -8   0   0  630.64   32.20 
   8   0   0  614.94   42.50 
  -8   0   0  651.33   39.40 
  -8   0   0  591.44   32.90 
   8   0   0  628.24   33.10 
   8   0   0  603.34   32.70 
   8   0   0  684.23   37.10 
  -8   0   0  631.74   36.30 
   9   0   0   -0.40    8.90 
   9   0   0    3.60    7.30 
   9   0   0    9.40    9.50 
   9   0   0    1.50    5.40 
   9   0   0    8.70    8.00 
   9   0   0    8.90    6.60 
  -9   0   0   -1.80    7.20 
  -9   0   0   -7.60    6.10 
  -9   0   0    1.70    6.80 
   9   0   0    4.10    6.70 
  -9   0   0   -8.80    4.90 
  -9   0   0    1.10    7.30 
   9   0   0   -3.00    5.20 
  -9   0   0   10.30    8.20 
   9   0   0   -2.10    5.40 
  -9   0   0    7.20    6.20 
  -9   0   0    7.30    7.60 
  -9   0   0    1.50    6.10 
  -9   0   0   -4.50    6.50 
 -10   0   0    1.30    7.60 
 -10   0   0    2.10    7.50 
 -10   0   0    9.90    9.30 
  10   0   0   -2.20    6.10 
  10   0   0    8.10    9.10 
  10   0   0    6.10    8.50 
 -10   0   0    0.90    6.70 
  10   0   0    7.20   10.20 
  10   0   0   19.00   12.60 
 -10   0   0    2.90    7.80 
 -10   0   0    6.50    8.50 
  10   0   0    1.50    7.70 
 -10   0   0   -0.50    8.90 
  10   0   0   -4.00    8.10 
 -10   0   0   -7.30    7.40 
   0  -1   0    4.10    1.10 
   0  -1   0    9.30    1.90 
   0  -1   0   10.40    2.30 
   0  -1   0    4.50    1.20 
   0  -1   0    4.10    1.00 
   0  -1   0    5.90    1.20 
   0  -1   0    4.90    1.40 
   0  -1   0   11.30    1.80 
   0  -1   0    0.00    0.70 
   0  -1   0    8.90    1.30 
   0  -1   0   12.90    2.00 
   0  -1   0    6.00    1.20 
   0  -1   0    5.20    1.30 
   0  -1   0    2.90    0.80 
   0  -1   0    7.80    1.50 
   0   1   0    3.30    0.90 
   0   1   0   -0.30    0.70 
   0   1   0    1.30    0.70 
   0   1   0    1.10    0.70 
   0   1   0    0.90    0.70 
   0   1   0    1.60    0.90 
   1  -1   0   74.59    5.00 
   1  -1   0   75.89    5.60 
   1  -1   0   65.09    3.90 
   1  -1   0   66.79    4.90 
   1  -1   0   70.99    5.10 
  -1  -1   0   69.29    4.60 
   1  -1   0   69.09    4.10 
   1  -1   0   70.59    4.00 
   1  -1   0   70.69    4.70 
  -1  -1   0   67.69    4.60 
   1  -1   0   80.39    4.70 
   1  -1   0   70.29    4.20 
   1  -1   0   83.29    4.90 
   1  -1   0   71.09    3.50 
   1  -1   0   71.59    3.60 
   1  -1   0   74.89    4.30 
   1  -1   0   78.79    3.90 
   1  -1   0   74.39    4.50 
  -1  -1   0   47.40    4.10 
  -1  -1   0   67.89    4.10 
  -1  -1   0   63.39    4.50 
  -1  -1   0   77.39    5.90 
  -1  -1   0   72.89    4.50 
  -1  -1   0   81.99    5.00 
  -1  -1   0   60.99    4.50 
   1  -1   0   64.89    4.50 
  -1  -1   0   82.99    4.70 
   1  -1   0   66.19    4.30 
   1  -1   0   74.09    4.00 
   1  -1   0   80.79    5.30 
  -1  -1   0   72.49    5.90 
  -1  -1   0   76.59    4.90 
  -1  -1   0   66.99    4.60 
   1  -1   0   64.39    4.20 
  -1  -1   0   65.59    4.90 
  -1  -1   0   71.19    4.70 
  -1  -1   0   82.89    4.60 
  -1  -1   0   70.99    5.00 
  -1  -1   0   62.69    4.40 
  -1  -1   0   67.79    5.00 
   1  -1   0   73.99    5.20 
  -1  -1   0   63.09    4.80 
   1  -1   0   76.19    4.40 
   1  -1   0   71.59    4.50 
  -1  -1   0   75.79    4.10 
   1  -1   0   70.29    4.40 
  -1  -1   0   65.99    4.50 
  -1  -1   0   64.79    4.10 
  -1  -1   0   65.39    4.60 
   1  -1   0   65.99    4.80 
   1  -1   0   63.39    3.70 
   1  -1   0   79.59    4.40 
   1  -1   0   71.09    3.80 
  -1  -1   0   82.19    5.20 
   1  -1   0   75.59    4.50 
  -1  -1   0   65.79    4.20 
   1   1   0   81.99    4.90 
  -1   1   0   75.79    5.10 
  -1   1   0   78.29    5.00 
   1   1   0   67.19    3.30 
   1   1   0   70.79    4.30 
   1   1   0   68.39    4.20 
   1   1   0   67.59    4.20 
   1   1   0   59.39    5.40 
  -1   1   0   74.39    4.60 
   1   1   0   79.89    5.30 
   1   1   0   66.29    2.80 
   1   1   0   70.19    4.60 
   1   1   0   69.29    4.70 
   1   1   0   57.69    4.10 
   1   1   0   66.69    4.90 
   1   1   0   77.19    4.70 
  -1   1   0   58.19    4.70 
   1   1   0   75.19    5.00 
   1   1   0   58.79    4.40 
   1   1   0   65.69    4.20 
   1   1   0   77.39    4.80 
   1   1   0   67.09    4.60 
  -1   1   0   66.69    4.40 
  -1   1   0   61.99    3.90 
   1   1   0   75.39    5.30 
   1   1   0   68.49    4.60 
  -1   1   0   71.09    4.50 
  -1   1   0   73.99    5.30 
  -1   1   0   68.29    3.90 
   1   1   0   74.09    5.10 
  -1   1   0   62.29    4.20 
  -1   1   0   71.59    4.20 
   1   1   0   78.09    4.70 
   1   1   0   68.59    4.70 
   1   1   0   68.89    4.10 
   1   1   0   64.29    5.70 
   1   1   0   68.79    4.70 
   1   1   0   91.59    5.00 
   1   1   0   73.39    5.00 
   1   1   0   62.99    4.60 
   1   1   0   65.49    2.90 
   2  -1   0  386.36   15.80 
   2  -1   0  382.46   13.70 
  -2  -1   0  387.16   16.10 
   2  -1   0  360.76   14.70 
  -2  -1   0  384.06   17.00 
  -2  -1   0  379.46   15.70 
  -2  -1   0  405.06   16.40 
  -2  -1   0  382.76   16.20 
   2  -1   0  381.06   15.50 
  -2  -1   0  359.16   14.40 
  -2  -1   0  381.96   16.80 
   2  -1   0  389.86   16.70 
   2  -1   0  386.66   13.20 
  -2  -1   0  367.06   15.50 
  -2  -1   0  382.66   18.80 
  -2  -1   0  359.76   15.60 
   2  -1   0  397.26   15.60 
   2  -1   0  401.56   15.20 
   2  -1   0  402.56   16.40 
   2  -1   0  375.06   16.20 
   2  -1   0  391.36   16.70 
   2  -1   0  374.16   14.80 
   2  -1   0  374.96   15.60 
   2  -1   0  407.06   14.80 
  -2  -1   0  403.16   16.50 
   2  -1   0  389.26   16.30 
   2  -1   0  384.26   16.30 
   2  -1   0  382.26   16.90 
   2  -1   0  380.06   14.40 
   2  -1   0  406.76   14.30 
   2  -1   0  387.06   15.90 
   2  -1   0  382.06   15.90 
   2  -1   0  359.86   16.20 
   2  -1   0  373.06   16.60 
  -2  -1   0  366.36   15.60 
  -2  -1   0  378.46   16.80 
   2  -1   0  410.86   16.30 
   2  -1   0  399.06   16.40 
   2  -1   0  371.36   15.00 
   2  -1   0  406.96   15.80 
  -2  -1   0  391.86   15.20 
  -2  -1   0  390.66   16.40 
  -2  -1   0  388.16   16.10 
  -2  -1   0  374.96   16.90 
  -2  -1   0  390.06   15.60 
   2  -1   0  377.36   15.40 
  -2  -1   0  401.26   16.60 
  -2  -1   0  391.06   15.10 
  -2  -1   0  388.16   15.40 
   2  -1   0  381.16   17.40 
  -2  -1   0  381.56   15.90 
   2  -1   0  377.86   15.50 
  -2  -1   0  357.96   16.70 
  -2  -1   0  371.56   15.90 
   2  -1   0  368.66   12.30 
   2  -1   0  358.96   15.80 
   2  -1   0  374.16   13.30 
   2  -1   0  401.46   13.00 
   2  -1   0  384.36   16.30 
   2  -1   0  380.76   13.50 
  -2  -1   0  355.46   18.00 
  -2  -1   0  387.66   13.60 
  -2   1   0  395.86   14.20 
   2   1   0  382.36   16.00 
   2   1   0  384.56   15.90 
  -2   1   0  398.66   16.30 
   2   1   0  373.76   12.10 
  -2   1   0  366.76   16.20 
  -2   1   0  378.56   14.80 
  -2   1   0  390.76   15.10 
   2   1   0  375.56   15.70 
   2   1   0  397.26   16.60 
   2   1   0  366.76   16.60 
  -2   1   0  378.56   15.60 
  -2   1   0  350.26   16.40 
  -2   1   0  382.66   15.90 
  -2   1   0  377.76   13.20 
   2   1   0  405.76   15.80 
  -2   1   0  386.16   16.30 
  -2   1   0  375.76   16.40 
  -2   1   0  375.76   16.90 
   2   1   0  371.46   16.90 
   2   1   0  382.66   15.40 
   2   1   0  395.06   14.60 
   2   1   0  385.26   15.00 
  -2   1   0  386.16   14.50 
  -2   1   0  381.06   16.20 
  -2   1   0  382.96   15.00 
  -2   1   0  396.96   15.80 
  -2   1   0  383.36   16.20 
  -2   1   0  375.86   13.00 
   2   1   0  403.66   19.20 
   2   1   0  397.26   15.90 
   2   1   0  384.16   16.10 
   2   1   0  369.36   18.50 
   2   1   0  365.06   15.30 
   2   1   0  372.36   16.10 
   2   1   0  375.56   13.70 
   2   1   0  385.66   16.70 
   2   1   0  370.96   15.40 
  -2   1   0  354.76   15.70 
   2   1   0  371.36   15.80 
  -2   1   0  369.26   15.70 
   2   1   0  388.76   13.00 
  -2   1   0  359.56   15.80 
   2   1   0  397.26   16.40 
   2   1   0  394.86   16.50 
   2   1   0  377.66   14.90 
   2   1   0  384.96   15.40 
   2   1   0  388.76   15.80 
   2   1   0  386.46   16.70 
  -2   1   0  389.86   15.50 
  -2   1   0  408.26   16.60 
   2   1   0  392.86   17.10 
   2   1   0  373.96   16.10 
   2   1   0  403.66   16.20 
  -2   1   0  350.66   17.20 
   2   1   0  404.76   16.20 
  -2   1   0  379.76   15.70 
  -2   1   0  364.76   14.50 
  -2   1   0  395.66   14.60 
   2   1   0  379.86   16.10 
   2   1   0  396.16   14.70 
  -3  -1   0   94.99    6.50 
  -3  -1   0  110.29    7.50 
   3  -1   0  100.79    7.80 
  -3  -1   0   89.89    8.90 
   3  -1   0  116.59    7.50 
   3  -1   0   66.29    7.90 
  -3  -1   0   92.29    9.60 
  -3  -1   0   93.59    6.70 
   3  -1   0   86.09    5.30 
  -3  -1   0   93.89    5.50 
  -3  -1   0  105.99    4.50 
   3  -1   0   94.69    5.60 
   3  -1   0  108.49    6.90 
  -3  -1   0   84.99    9.40 
   3  -1   0  106.79    6.30 
   3  -1   0   91.69    4.80 
   3  -1   0   82.29    6.00 
   3  -1   0   92.49    7.60 
  -3  -1   0   86.89    9.60 
  -3  -1   0   98.09    7.80 
   3  -1   0   98.19    6.40 
   3  -1   0   93.69    7.10 
   3  -1   0   86.79    7.30 
  -3  -1   0  100.39    7.90 
  -3  -1   0  102.59    9.80 
   3  -1   0   97.39    8.00 
  -3  -1   0  103.89    7.80 
  -3  -1   0   79.69    8.10 
   3  -1   0   95.19    7.50 
   3  -1   0  103.19    7.30 
  -3  -1   0   95.69    8.10 
  -3  -1   0   93.09    7.30 
   3  -1   0   93.69    5.40 
   3  -1   0   91.29    5.30 
   3  -1   0   97.59   10.00 
  -3  -1   0  108.09    7.60 
  -3  -1   0   97.69    9.70 
  -3  -1   0   95.49    6.10 
   3  -1   0  100.99    6.50 
  -3  -1   0   93.99    8.10 
   3  -1   0   95.99    6.00 
  -3  -1   0  101.79    8.00 
   3  -1   0  103.09    6.60 
   3  -1   0  105.29    5.70 
   3  -1   0   99.69    8.20 
  -3  -1   0   93.99    6.90 
  -3  -1   0  105.89    8.60 
   3  -1   0   96.89    6.10 
   3  -1   0   99.39    7.30 
   3  -1   0   97.29    7.30 
  -3  -1   0  100.19    7.90 
  -3  -1   0   87.39    7.00 
  -3   1   0  111.69    8.40 
   3   1   0  103.59    6.70 
   3   1   0   99.19    7.80 
  -3   1   0  101.29    6.70 
  -3   1   0   84.99    6.70 
  -3   1   0  103.39    6.20 
   3   1   0   97.79    8.10 
  -3   1   0   71.49    7.40 
   3   1   0  120.39   10.90 
  -3   1   0   90.29    6.20 
  -3   1   0   95.49    5.70 
  -3   1   0   98.49    7.80 
  -3   1   0  102.09    7.30 
   3   1   0   96.09    7.80 
   3   1   0   90.39    7.30 
   3   1   0  102.09   11.00 
   3   1   0  104.59    7.50 
  -3   1   0  107.29    8.40 
   3   1   0   92.29    8.10 
   3   1   0  109.19    7.40 
   3   1   0  108.49   11.20 
  -3   1   0   91.49    5.10 
  -3   1   0  102.99    6.70 
   3   1   0  110.19    6.30 
   3   1   0   96.99    8.50 
   3   1   0   90.59    6.00 
  -3   1   0   95.29    8.00 
   3   1   0  100.59    7.00 
   3   1   0   99.39    8.00 
  -3   1   0  106.39    8.10 
   3   1   0   95.09   11.70 
   3   1   0   98.29    8.60 
  -3   1   0  109.69    8.00 
   3   1   0  100.79    8.40 
  -3   1   0   92.69    5.60 
  -3   1   0   95.39    8.10 
   3   1   0  105.09    7.50 
  -3   1   0   95.79    7.30 
  -3   1   0  103.29    7.90 
   3   1   0   89.79    5.90 
   3   1   0   84.09    7.40 
   3   1   0   90.29    7.50 
   3   1   0  105.89    7.90 
  -3   1   0   97.69    8.20 
  -3   1   0  109.29    8.40 
  -3   1   0   80.69    8.70 
  -3   1   0  100.89    8.60 
   3   1   0   98.19    7.00 
  -3   1   0   97.19    6.50 
  -3   1   0  107.89    9.00 
  -3   1   0   95.49    4.90 
   3   1   0   92.49    6.60 
   3   1   0   95.19    4.60 
  -3   1   0   81.49    9.60 
   3   1   0  106.99    7.20 
   4  -1   0  146.79    8.00 
   4  -1   0  148.29    8.90 
  -4  -1   0  169.88   12.80 
  -4  -1   0  169.78   12.10 
   4  -1   0  148.09    8.40 
   4  -1   0  163.68    8.60 
   4  -1   0  155.08    8.80 
   4  -1   0  152.88   10.40 
  -4  -1   0  158.58   10.50 
  -4  -1   0  144.99   10.20 
   4  -1   0  156.98   10.50 
   4  -1   0  150.28    9.20 
  -4  -1   0  158.48   11.70 
   4  -1   0  160.68   10.70 
  -4  -1   0  142.59    9.70 
   4  -1   0  147.39    9.10 
  -4  -1   0  152.78   11.00 
  -4  -1   0  159.18    9.40 
   4  -1   0  135.99    8.40 
   4  -1   0  134.99    8.00 
  -4  -1   0  193.18   13.20 
  -4  -1   0  169.18   13.00 
   4  -1   0  154.88   10.00 
  -4  -1   0  147.99    7.70 
   4  -1   0  146.79    9.50 
  -4  -1   0  135.49   10.40 
  -4  -1   0  130.09   10.70 
  -4  -1   0  144.69    8.40 
   4  -1   0  153.68   10.10 
   4  -1   0  154.68    9.40 
   4  -1   0  147.79    8.80 
  -4  -1   0  144.69   11.40 
   4  -1   0  152.78    8.60 
  -4  -1   0  123.39   11.90 
  -4  -1   0  133.49   13.60 
   4  -1   0  156.68    7.80 
  -4  -1   0  181.88   11.90 
  -4  -1   0  143.39    5.90 
  -4  -1   0  133.19   11.30 
   4  -1   0  151.48    7.90 
   4  -1   0  141.59    7.70 
   4  -1   0  161.08   10.70 
   4  -1   0  139.29    8.80 
  -4   1   0  157.28    7.90 
  -4   1   0  152.48    7.80 
  -4   1   0  138.49   11.60 
   4   1   0  168.08   12.90 
  -4   1   0  157.98    9.80 
  -4   1   0  139.49    7.80 
   4   1   0  164.08    9.60 
   4   1   0  135.29    9.90 
  -4   1   0  151.18   10.50 
  -4   1   0  151.68   12.20 
  -4   1   0  142.79   11.10 
  -4   1   0  143.79    9.30 
  -4   1   0  148.39    8.50 
  -4   1   0  143.29   10.00 
   4   1   0  141.39    9.50 
   4   1   0  150.98    8.40 
  -4   1   0  155.88   11.60 
   4   1   0  152.48    9.30 
   4   1   0  142.89   13.80 
   4   1   0  138.79    7.10 
  -4   1   0  153.98    8.90 
  -4   1   0  152.48   11.90 
   4   1   0  173.08   11.00 
   4   1   0  156.28    9.30 
   4   1   0  133.59   11.30 
   4   1   0  151.18    8.40 
  -4   1   0  153.28   12.60 
  -4   1   0  174.68   10.80 
  -4   1   0  139.59    8.60 
  -4   1   0  131.39    9.80 
  -4   1   0  159.98   11.50 
  -4   1   0  138.09   11.70 
  -4   1   0  135.89   13.70 
  -4   1   0  139.09   10.50 
   4   1   0  139.89    9.60 
   4   1   0  171.78   15.10 
  -4   1   0  147.69    8.70 
  -4   1   0  140.89   11.30 
   4   1   0  161.78   12.40 
   4   1   0  161.28   10.90 
  -4   1   0  146.39   11.30 
   4   1   0  150.28    9.70 
   4   1   0  138.39   10.60 
  -4   1   0  142.09   11.60 
  -4   1   0  152.48   11.50 
   4   1   0  149.39   11.20 
   5  -1   0 2513.05   82.69 
   5  -1   0 2511.75   80.59 
   5  -1   0 2531.55   78.79 
   5  -1   0 2353.76   81.19 
  -5  -1   0 2426.56   86.09 
   5  -1   0 2496.75   83.99 
  -5  -1   0 2624.74   85.59 
  -5  -1   0 2553.64   83.29 
   5  -1   0 2542.75   80.69 
   5  -1   0 2521.35   87.29 
   5  -1   0 2538.25   81.59 
  -5  -1   0 2485.35   86.29 
  -5  -1   0 2378.16   87.39 
  -5  -1   0 2399.36   86.59 
  -5  -1   0 2588.04   89.29 
   5  -1   0 2449.16   79.59 
   5  -1   0 2436.56   82.89 
   5  -1   0 2541.55   85.09 
  -5  -1   0 2550.14   83.69 
  -5  -1   0 2497.15   88.69 
  -5  -1   0 2484.85   86.79 
   5  -1   0 2414.36   79.49 
  -5  -1   0 2452.05   79.69 
   5  -1   0 2484.55   80.49 
   5  -1   0 2535.65   79.09 
   5  -1   0 2538.15   93.59 
   5  -1   0 2520.45   80.29 
   5  -1   0 2603.04   89.39 
   5  -1   0 2489.15   80.59 
   5  -1   0 2457.55   83.89 
  -5  -1   0 2454.95   88.59 
   5  -1   0 2426.16   78.39 
  -5  -1   0 2494.65   82.79 
  -5  -1   0 2412.26   86.09 
  -5  -1   0 2472.75   77.89 
   5  -1   0 2426.96   80.19 
  -5  -1   0 2524.95   81.69 
   5  -1   0 2694.53   94.09 
   5  -1   0 2568.54   82.09 
  -5  -1   0 2452.75   84.79 
   5  -1   0 2467.45   85.29 
   5  -1   0 2503.45   78.99 
   5   1   0 2646.14   81.79 
  -5   1   0 2406.86   80.79 
  -5   1   0 2351.06   85.59 
  -5   1   0 2588.34   79.99 
   5   1   0 2484.95   88.19 
  -5   1   0 2558.44   83.99 
   5   1   0 2548.25   87.59 
   5   1   0 2520.15   85.89 
   5   1   0 2464.55   80.89 
   5   1   0 2503.95   79.39 
  -5   1   0 2501.15   82.99 
  -5   1   0 2532.75   87.99 
   5   1   0 2388.86   77.89 
  -5   1   0 2493.95   86.89 
  -5   1   0 2352.36   86.69 
  -5   1   0 2469.15   88.29 
  -5   1   0 2509.55   84.99 
   5   1   0 2479.75   81.79 
  -5   1   0 2522.45   86.29 
   5   1   0 2437.36   79.09 
   5   1   0 2415.06   79.59 
   5   1   0 2350.46   92.49 
  -5   1   0 2511.35   86.59 
  -5   1   0 2556.54   84.09 
   5   1   0 2470.65   81.59 
   5   1   0 2601.84   94.89 
   5   1   0 2503.45   85.29 
  -5   1   0 2659.03   84.89 
  -5   1   0 2496.25   86.79 
  -5   1   0 2458.35   87.39 
  -5   1   0 2513.65   81.89 
  -5   1   0 2407.06   79.89 
  -5   1   0 2402.46   85.99 
   5   1   0 2434.36   81.79 
   5   1   0 2529.15   85.19 
  -5   1   0 2497.35   88.49 
  -5   1   0 2350.76   88.49 
  -5   1   0 2667.13   83.29 
  -5   1   0 2437.26   87.49 
   5   1   0 2526.85   84.59 
   5   1   0 2521.35   88.19 
   5   1   0 2342.17   83.19 
  -6  -1   0  139.59   14.70 
   6  -1   0  150.38   11.00 
  -6  -1   0  129.79   16.20 
  -6  -1   0  146.09   11.60 
  -6  -1   0  139.29   16.60 
   6  -1   0  167.28   18.90 
  -6  -1   0  143.19   13.60 
  -6  -1   0  119.29   14.90 
  -6  -1   0  146.79   15.70 
   6  -1   0  140.39    8.30 
  -6  -1   0  136.19   15.80 
  -6  -1   0  137.29    9.20 
   6  -1   0  137.19   14.80 
   6  -1   0  113.49   17.70 
  -6  -1   0  110.29   15.20 
   6  -1   0  121.49    9.90 
   6  -1   0  129.99    9.20 
   6  -1   0  140.79    8.50 
   6  -1   0  120.69   18.00 
   6  -1   0  125.39   14.30 
   6  -1   0  149.59   11.90 
   6  -1   0  153.58    8.70 
   6  -1   0  140.29    9.30 
   6  -1   0  155.98   10.10 
  -6  -1   0  142.59    7.80 
  -6  -1   0  162.68   12.40 
   6  -1   0  148.29   15.70 
  -6  -1   0  114.49   14.50 
  -6  -1   0  128.79   14.20 
  -6  -1   0  125.39   15.50 
   6  -1   0  124.59   13.20 
   6  -1   0  155.68   11.90 
   6  -1   0  130.99   13.70 
   6  -1   0  122.09   15.20 
   6  -1   0  133.29    9.00 
   6  -1   0  131.49   10.30 
  -6  -1   0  128.49   16.10 
   6  -1   0  145.69   11.30 
  -6   1   0  142.19   10.70 
  -6   1   0  147.49   17.40 
   6   1   0  118.69   13.30 
  -6   1   0  133.59   15.10 
   6   1   0  139.29   16.10 
  -6   1   0  112.89   13.00 
  -6   1   0  153.68   12.10 
   6   1   0  132.99   13.70 
   6   1   0  138.19    8.80 
  -6   1   0  151.18   17.10 
   6   1   0  153.68   17.30 
  -6   1   0  147.79   16.70 
   6   1   0  134.89   13.70 
  -6   1   0  154.98   16.40 
  -6   1   0  145.39    9.30 
  -6   1   0  112.59   13.70 
  -6   1   0  146.19   14.10 
  -6   1   0  100.79   14.10 
  -6   1   0  126.19   10.40 
  -6   1   0  125.09   14.60 
   6   1   0  131.69   16.00 
   6   1   0  119.89   18.50 
   6   1   0  116.59   13.30 
   6   1   0  118.69   18.40 
   6   1   0  158.08   16.00 
   6   1   0  143.49    9.90 
   6   1   0  123.39    8.90 
  -6   1   0  106.09   14.90 
  -6   1   0  130.99   12.80 
   6   1   0  150.38    8.60 
   6   1   0  146.39   11.30 
  -6   1   0  114.39   14.90 
   6   1   0  123.09   14.30 
   6   1   0  144.39   10.20 
  -6   1   0  137.59   16.40 
   6   1   0  151.18   11.10 
  -6   1   0  133.19   15.20 
  -6   1   0  163.88   19.10 
   7  -1   0 1557.44   58.39 
   7  -1   0 1520.75   51.39 
   7  -1   0 1554.24   59.69 
   7  -1   0 1526.25   55.99 
   7  -1   0 1361.96   68.19 
   7  -1   0 1516.55   58.29 
   7  -1   0 1556.24   53.99 
   7  -1   0 1498.55   59.39 
  -7  -1   0 1647.44   61.79 
  -7  -1   0 1495.95   57.69 
  -7  -1   0 1475.35   65.39 
   7  -1   0 1519.65   61.39 
   7  -1   0 1603.64   55.89 
  -7  -1   0 1658.33   64.19 
  -7  -1   0 1471.95   63.39 
  -7  -1   0 1504.85   63.29 
  -7  -1   0 1520.05   65.19 
   7  -1   0 1615.44   72.59 
  -7  -1   0 1591.34   59.19 
  -7  -1   0 1536.95   63.09 
   7  -1   0 1436.26   55.69 
  -7  -1   0 1485.55   65.59 
  -7  -1   0 1360.66   59.69 
   7  -1   0 1550.54   64.39 
   7  -1   0 1558.44   61.39 
   7  -1   0 1611.04   66.39 
   7  -1   0 1505.85   53.19 
  -7  -1   0 1486.35   63.69 
  -7  -1   0 1454.55   64.99 
   7  -1   0 1484.25   60.19 
  -7  -1   0 1537.05   58.19 
   7  -1   0 1592.14   58.29 
   7   1   0 1547.95   56.19 
  -7   1   0 1389.46   63.39 
  -7   1   0 1633.44   59.29 
   7   1   0 1568.14   60.19 
   7   1   0 1675.03   74.49 
   7   1   0 1510.75   57.49 
  -7   1   0 1596.84   64.29 
  -7   1   0 1593.94   57.09 
  -7   1   0 1569.44   63.39 
  -7   1   0 1584.64   66.19 
   7   1   0 1530.85   53.69 
   7   1   0 1504.95   54.69 
   7   1   0 1530.15   65.09 
  -7   1   0 1510.55   63.09 
   7   1   0 1521.75   60.79 
  -7   1   0 1533.75   65.39 
   7   1   0 1640.84   62.69 
   7   1   0 1592.24   54.89 
   7   1   0 1598.84   64.79 
  -7   1   0 1576.24   67.29 
  -7   1   0 1659.23   64.49 
  -7   1   0 1614.74   60.99 
  -7   1   0 1589.24   56.39 
   7   1   0 1512.05   58.89 
   7   1   0 1574.74   52.09 
   7   1   0 1495.95   71.29 
  -7   1   0 1567.74   65.89 
   7   1   0 1575.44   61.49 
  -7   1   0 1589.64   66.59 
   7   1   0 1602.94   60.19 
  -7   1   0 1511.45   63.69 
   7   1   0 1692.53   66.79 
   8  -1   0   77.89   15.70 
   8  -1   0   96.89   11.90 
   8  -1   0   80.39   12.10 
   8  -1   0   74.69   10.60 
  -8  -1   0   74.49   13.70 
  -8  -1   0   80.89   14.50 
   8  -1   0  108.89   17.40 
   8  -1   0   85.89   14.80 
  -8  -1   0   77.09   14.90 
  -8  -1   0   89.49   16.50 
   8  -1   0   79.09   12.60 
   8  -1   0   59.29   15.70 
  -8  -1   0   70.99   11.30 
  -8  -1   0   87.59   12.70 
   8  -1   0   93.79   19.40 
   8  -1   0   85.19   12.70 
  -8  -1   0   93.99   17.60 
  -8  -1   0   70.99   13.80 
  -8  -1   0   86.69   12.30 
   8  -1   0   82.89   13.70 
  -8  -1   0   83.19   15.80 
  -8  -1   0   68.49   14.00 
  -8  -1   0   81.59   15.40 
   8  -1   0   87.09   13.20 
   8  -1   0   52.39   12.70 
   8  -1   0  102.19   14.40 
   8  -1   0   80.59   13.60 
  -8  -1   0   83.99   13.80 
   8  -1   0   89.29   12.80 
   8  -1   0   98.49   16.30 
  -8  -1   0   70.49   14.10 
   8  -1   0   91.29   15.90 
  -8   1   0   65.29   10.80 
   8   1   0   92.29   13.40 
   8   1   0   77.19   11.90 
   8   1   0   72.09   11.60 
  -8   1   0   65.29   14.90 
  -8   1   0   90.19   15.90 
   8   1   0   74.69   14.90 
  -8   1   0   89.79   16.10 
  -8   1   0   84.79   15.40 
   8   1   0   71.59   13.20 
  -8   1   0   69.59   14.10 
  -8   1   0   90.19   16.30 
   8   1   0   68.59   17.60 
   8   1   0   72.79   13.00 
   8   1   0   86.99   16.40 
   8   1   0   88.19   13.60 
   8   1   0   76.69   13.30 
  -8   1   0   85.89   13.30 
   8   1   0   91.09   16.10 
   8   1   0   87.99   20.10 
  -8   1   0   59.59   13.70 
  -8   1   0   82.89   14.70 
  -8   1   0   82.79   15.70 
  -8   1   0   96.39   18.10 
  -9  -1   0  355.66   28.50 
   9  -1   0  365.46   28.90 
  -9  -1   0  326.07   31.80 
   9  -1   0  347.97   29.80 
   9  -1   0  321.87   28.40 
  -9  -1   0  352.56   30.00 
   9  -1   0  389.16   29.90 
   9  -1   0  352.06   29.10 
  -9  -1   0  375.16   30.80 
  -9  -1   0  352.06   28.90 
  -9  -1   0  256.57   30.80 
   9  -1   0  360.76   27.20 
   9  -1   0  330.67   33.50 
   9  -1   0  382.66   26.80 
  -9  -1   0  401.36   27.20 
   9  -1   0  384.26   30.40 
  -9  -1   0  354.26   28.20 
  -9  -1   0  295.37   32.20 
  -9  -1   0  330.57   32.90 
   9  -1   0  343.37   24.50 
   9  -1   0  334.97   33.20 
  -9  -1   0  337.57   26.00 
  -9   1   0  387.46   26.60 
  -9   1   0  358.96   30.40 
  -9   1   0  381.96   31.50 
   9   1   0  376.06   26.10 
  -9   1   0  303.07   33.20 
  -9   1   0  370.06   29.70 
   9   1   0  382.36   25.00 
   9   1   0  386.16   26.70 
  -9   1   0  268.77   29.40 
  -9   1   0  313.47   32.90 
   9   1   0  362.96   29.20 
  -9   1   0  348.77   28.00 
   9   1   0  399.46   26.40 
   9   1   0  379.46   27.10 
  -9   1   0  386.66   29.20 
   9   1   0  362.76   35.60 
   9   1   0  443.76   32.90 
   9   1   0  376.16   30.00 
   9   1   0  381.76   35.80 
   9   1   0  356.56   26.10 
  -9   1   0  332.17   28.00 
 -10  -1   0    9.20   10.00 
  10  -1   0   40.90   17.60 
  10  -1   0   10.20    9.90 
  10  -1   0   22.40   12.00 
 -10  -1   0   33.90   12.80 
  10  -1   0   12.40   10.20 
  10  -1   0   14.70    9.40 
 -10  -1   0   11.70   11.30 
 -10  -1   0   34.00   13.60 
 -10  -1   0   31.70   12.00 
 -10  -1   0   22.40    9.70 
 -10  -1   0   21.00   10.90 
 -10  -1   0    7.10    9.30 
  10  -1   0   12.00   10.30 
  10  -1   0   23.00   12.40 
  10  -1   0   14.60   10.60 
  10  -1   0   21.30   14.20 
 -10  -1   0   15.50   10.50 
 -10   1   0   37.60   13.30 
 -10   1   0   14.70    8.80 
  10   1   0   19.60   10.40 
  10   1   0   21.10   10.80 
  10   1   0   16.50   14.00 
  10   1   0   50.99   18.50 
 -10   1   0   16.60   10.50 
 -10   1   0   22.30   11.20 
 -10   1   0   16.90   10.90 
  10   1   0   31.00   13.70 
  10   1   0    4.60    7.80 
  10   1   0   21.60   12.40 
 -10   1   0   30.80   12.60 
 -10   1   0   23.10   10.20 
 -10   1   0   28.20   14.00 
   0  -2   0 4944.91  148.99 
   0  -2   0 4738.73  149.19 
   0  -2   0 4906.41  149.79 
   0  -2   0 4905.81  149.09 
   0  -2   0 5031.30  148.09 
   0  -2   0 5108.09  150.58 
   0  -2   0 4909.01  149.09 
   0  -2   0 4851.71  150.98 
   0  -2   0 4936.41  148.99 
   0  -2   0 4849.71  148.09 
   0  -2   0 4683.83  153.18 
   0  -2   0 4705.13  151.48 
   0  -2   0 4848.11  151.68 
   0  -2   0 5060.89  148.29 
   0  -2   0 4848.21  150.58 
   0  -2   0 4879.11  147.69 
   0  -2   0 4758.32  152.28 
   0  -2   0 4773.12  149.19 
   0  -2   0 4971.50  150.08 
   0  -2   0 4985.10  149.39 
   0  -2   0 4799.62  148.59 
   0  -2   0 4879.81  148.69 
   0  -2   0 5020.20  147.89 
   0  -2   0 5053.59  149.29 
   0   2   0 4648.04  154.18 
   0   2   0 4801.52  150.68 
   0   2   0 4728.63  148.29 
   0   2   0 4850.41  149.59 
   0   2   0 5016.80  149.39 
   0   2   0 4732.83  150.38 
   0   2   0 4979.70  147.69 
   0   2   0 4817.42  149.59 
   0   2   0 5044.30  149.09 
   0   2   0 4756.82  149.88 
   0   2   0 4876.71  149.19 
   0   2   0 4906.61  152.38 
   0   2   0 4928.91  148.29 
   0   2   0 5030.40  148.99 
   0   2   0 4507.05  151.78 
   0   2   0 4782.62  150.68 
   0   2   0 4917.21  149.88 
   0   2   0 4976.50  148.09 
   0   2   0 4970.80  148.79 
   0   2   0 4994.90  148.29 
   0   2   0 4590.24  153.28 
  -1  -2   0 4497.15  139.79 
  -1  -2   0 4346.06  137.09 
  -1  -2   0 4580.04  139.59 
   1  -2   0 4616.84  136.19 
   1  -2   0 4323.37  140.79 
  -1  -2   0 4638.44  139.29 
  -1  -2   0 4588.94  136.39 
  -1  -2   0 4637.14  141.39 
  -1  -2   0 4624.54  140.09 
   1  -2   0 4705.43  140.89 
   1  -2   0 4517.75  138.19 
  -1  -2   0 4580.04  141.99 
  -1  -2   0 4566.74  140.89 
  -1  -2   0 4672.53  137.49 
  -1  -2   0 4533.15  140.49 
  -1  -2   0 4495.85  139.79 
   1  -2   0 4468.95  142.99 
  -1  -2   0 4648.83  139.49 
   1  -2   0 4355.36  139.29 
  -1  -2   0 4509.75  140.49 
   1  -2   0 4589.74  141.39 
   1  -2   0 4170.18  140.59 
   1  -2   0 4740.23  139.09 
  -1  -2   0 4622.54  140.69 
   1  -2   0 4519.35  137.99 
  -1  -2   0 4635.34  141.39 
   1  -2   0 4696.83  139.39 
   1  -2   0 4283.67  136.49 
  -1  -2   0 4354.46  139.29 
   1  -2   0 4454.35  136.69 
   1  -2   0 4503.25  137.89 
   1  -2   0 4682.73  138.19 
   1  -2   0 4687.23  138.39 
  -1  -2   0 4551.24  139.69 
   1  -2   0 4501.45  139.39 
   1  -2   0 4725.93  139.79 
  -1  -2   0 4626.54  140.49 
  -1  -2   0 4609.14  140.09 
  -1  -2   0 4525.45  137.79 
   1  -2   0 4622.74  142.59 
   1  -2   0 4379.16  143.19 
  -1  -2   0 4382.36  139.29 
  -1  -2   0 4679.03  139.29 
  -1  -2   0 4556.64  140.69 
  -1  -2   0 4479.95  143.89 
  -1  -2   0 4458.15  141.29 
  -1  -2   0 4707.73  139.79 
   1  -2   0 4454.35  143.79 
   1  -2   0 4411.76  139.29 
  -1  -2   0 4491.75  143.29 
  -1  -2   0 4584.54  139.09 
  -1  -2   0 4603.34  138.19 
   1  -2   0 4474.75  135.99 
  -1  -2   0 4648.63  136.79 
   1  -2   0 4375.56  138.99 
   1  -2   0 4289.37  145.29 
   1  -2   0 4617.84  138.79 
   1  -2   0 4738.33  136.29 
  -1  -2   0 4514.15  136.69 
  -1   2   0 4684.93  136.59 
  -1   2   0 4266.87  143.89 
   1   2   0 4567.84  139.19 
   1   2   0 4692.23  140.99 
   1   2   0 4703.13  144.99 
  -1   2   0 4369.06  139.09 
  -1   2   0 3909.31  144.09 
  -1   2   0 4505.05  138.39 
  -1   2   0 4570.24  138.99 
  -1   2   0 4269.07  142.09 
  -1   2   0 4604.24  137.89 
  -1   2   0 4615.64  139.59 
   1   2   0 4663.33  140.59 
   1   2   0 4411.96  140.49 
   1   2   0 4640.04  139.79 
   1   2   0 4713.23  140.59 
   1   2   0 4671.83  144.29 
   1   2   0 4507.05  138.89 
   1   2   0 4594.54  139.69 
   1   2   0 4610.74  141.39 
   1   2   0 4510.15  141.89 
   1   2   0 4586.54  140.09 
  -1   2   0 4424.26  139.89 
  -1   2   0 4458.15  139.89 
  -1   2   0 5158.88  137.09 
  -1   2   0 4357.46  137.69 
  -1   2   0 4703.03  138.69 
  -1   2   0 4441.26  139.79 
  -1   2   0 4537.85  136.09 
  -1   2   0 4137.79  142.19 
   1   2   0 4667.33  136.49 
  -1   2   0 4553.94  139.59 
   1   2   0 4594.44  136.69 
   1   2   0 4573.04  136.79 
   1   2   0 4596.64  139.69 
  -1   2   0 4661.73  138.79 
  -1   2   0 4414.76  139.29 
  -1   2   0 4578.04  134.99 
   1   2   0 4543.55  141.99 
   1   2   0 4579.74  139.49 
  -1   2   0 4557.34  138.39 
  -1   2   0 3990.70  138.29 
   1   2   0 4761.22  140.19 
   1   2   0 4630.94  139.39 
  -1   2   0 4275.37  147.29 
   1   2   0 4616.94  140.19 
  -1   2   0 4324.77  142.09 
  -1   2   0 4356.26  142.09 
   1   2   0 4575.94  139.69 
  -1   2   0 4512.65  139.99 
   1   2   0 4549.94  141.09 
  -1   2   0 4711.13  139.09 
  -1   2   0 4370.56  139.79 
   1   2   0 4742.43  139.89 
  -1   2   0 4554.54  136.39 
  -1   2   0 4012.90  142.99 
  -1   2   0 4270.37  141.39 
  -2  -2   0 1660.23   60.39 
  -2  -2   0 1657.93   56.39 
  -2  -2   0 1716.43   54.29 
  -2  -2   0 1616.94   51.49 
  -2  -2   0 1626.14   56.59 
   2  -2   0 1684.23   55.99 
   2  -2   0 1689.73   53.39 
   2  -2   0 1712.53   55.69 
   2  -2   0 1773.92   58.19 
   2  -2   0 1655.83   58.19 
  -2  -2   0 1646.44   52.09 
   2  -2   0 1728.03   55.39 
   2  -2   0 1717.23   54.49 
   2  -2   0 1689.73   54.79 
   2  -2   0 1693.13   57.89 
  -2  -2   0 1722.83   56.79 
  -2  -2   0 1732.03   55.39 
  -2  -2   0 1721.73   56.19 
  -2  -2   0 1682.43   55.39 
   2  -2   0 1647.14   54.19 
   2  -2   0 1637.74   55.49 
  -2  -2   0 1715.83   57.89 
   2  -2   0 1629.54   53.39 
   2  -2   0 1769.12   56.69 
   2  -2   0 1684.43   55.09 
   2  -2   0 1632.04   57.19 
   2  -2   0 1662.73   53.19 
   2  -2   0 1685.13   54.89 
   2  -2   0 1697.73   55.19 
   2  -2   0 1703.23   55.89 
   2  -2   0 1692.73   54.19 
  -2  -2   0 1726.03   55.79 
   2  -2   0 1644.44   58.19 
   2  -2   0 1676.83   57.59 
   2  -2   0 1663.63   55.49 
   2  -2   0 1649.13   53.99 
  -2  -2   0 1760.52   56.49 
   2  -2   0 1647.84   53.89 
  -2  -2   0 1657.63   57.29 
   2  -2   0 1582.44   59.69 
  -2  -2   0 1637.64   50.89 
   2  -2   0 1680.53   53.19 
   2  -2   0 1597.84   57.19 
  -2  -2   0 1688.53   58.29 
   2  -2   0 1645.44   57.29 
  -2  -2   0 1641.64   54.79 
  -2  -2   0 1646.14   54.99 
   2  -2   0 1621.34   56.49 
  -2  -2   0 1773.52   57.49 
   2  -2   0 1716.33   56.09 
   2  -2   0 1598.14   54.99 
   2  -2   0 1629.14   58.69 
   2  -2   0 1690.13   52.79 
   2  -2   0 1724.73   54.59 
  -2  -2   0 1693.93   56.69 
  -2  -2   0 1690.63   55.59 
  -2  -2   0 1681.13   55.09 
  -2  -2   0 1774.62   57.29 
  -2  -2   0 1739.83   56.49 
  -2  -2   0 1674.13   56.69 
   2  -2   0 1731.93   54.79 
  -2  -2   0 1624.94   60.79 
   2   2   0 1640.14   55.39 
  -2   2   0 1697.93   55.89 
  -2   2   0 1582.44   57.79 
   2   2   0 1660.73   56.19 
  -2   2   0 1761.62   55.69 
  -2   2   0 1718.63   54.39 
   2   2   0 1662.03   56.99 
  -2   2   0 1669.43   56.29 
  -2   2   0 1552.74   57.79 
   2   2   0 1627.44   54.79 
   2   2   0 1644.74   57.29 
   2   2   0 1714.93   55.69 
  -2   2   0 1705.13   56.49 
  -2   2   0 1659.93   54.19 
   2   2   0 1659.13   52.09 
  -2   2   0 1665.53   57.29 
  -2   2   0 1636.64   50.69 
  -2   2   0 1657.23   52.59 
   2   2   0 1659.13   56.99 
   2   2   0 1674.93   56.39 
   2   2   0 1611.24   50.69 
   2   2   0 1671.23   56.59 
   2   2   0 1749.03   54.49 
   2   2   0 1641.04   60.69 
   2   2   0 1645.74   55.59 
   2   2   0 1729.73   57.09 
  -2   2   0 1651.53   55.79 
   2   2   0 1707.63   50.99 
   2   2   0 1664.73   56.09 
   2   2   0 1646.64   54.89 
  -2   2   0 1631.44   54.19 
  -2   2   0 1516.45   57.59 
   2   2   0 1723.43   61.69 
  -2   2   0 1646.34   58.39 
   2   2   0 1727.23   55.59 
  -2   2   0 1639.04   54.59 
  -2   2   0 1705.13   57.09 
  -2   2   0 1550.94   54.89 
  -2   2   0 1779.12   55.19 
   2   2   0 1625.54   57.99 
   2   2   0 1727.73   55.59 
   2   2   0 1620.94   57.79 
  -2   2   0 1642.24   55.69 
  -2   2   0 1732.43   56.29 
   2   2   0 1587.54   56.39 
  -2   2   0 1584.54   56.59 
   2   2   0 1629.14   55.99 
   3  -2   0  434.96   19.50 
   3  -2   0  448.66   20.80 
   3  -2   0  476.15   18.00 
   3  -2   0  455.15   21.50 
   3  -2   0  460.85   18.90 
   3  -2   0  446.46   20.40 
   3  -2   0  441.66   21.80 
   3  -2   0  447.46   21.30 
   3  -2   0  419.96   16.90 
   3  -2   0  424.66   21.40 
   3  -2   0  464.25   14.20 
   3  -2   0  454.65   21.50 
   3  -2   0  443.36   19.30 
   3  -2   0  430.76   22.00 
  -3  -2   0  443.76   21.80 
   3  -2   0  471.45   18.30 
   3  -2   0  429.06   20.60 
  -3  -2   0  446.46   16.20 
   3  -2   0  443.76   18.70 
   3  -2   0  411.96   20.90 
   3  -2   0  433.46   15.40 
   3  -2   0  448.36   20.80 
   3  -2   0  452.15   20.20 
  -3  -2   0  459.85   20.80 
  -3  -2   0  428.26   19.50 
  -3  -2   0  461.85   18.90 
   3  -2   0  457.85   15.70 
  -3  -2   0  430.86   20.80 
  -3  -2   0  454.85   22.30 
   3  -2   0  439.46   19.70 
  -3  -2   0  430.96   20.40 
  -3  -2   0  439.06   19.60 
  -3  -2   0  411.66   20.80 
   3  -2   0  437.06   20.00 
   3  -2   0  419.36   15.40 
  -3  -2   0  431.76   20.10 
   3  -2   0  451.15   15.90 
  -3  -2   0  435.16   20.20 
   3  -2   0  432.86   19.40 
  -3  -2   0  426.36   20.00 
  -3  -2   0  443.46   19.50 
  -3  -2   0  431.86   20.30 
  -3  -2   0  447.56   21.30 
  -3  -2   0  482.15   24.70 
   3  -2   0  441.36   19.30 
  -3   2   0  464.05   20.60 
  -3   2   0  434.06   17.90 
  -3   2   0  464.15   19.40 
   3   2   0  435.06   19.20 
  -3   2   0  475.95   19.90 
   3   2   0  443.06   20.20 
   3   2   0  429.46   22.10 
   3   2   0  427.56   19.10 
   3   2   0  443.46   20.40 
   3   2   0  459.75   25.10 
  -3   2   0  484.15   20.80 
  -3   2   0  448.66   20.40 
   3   2   0  439.96   18.70 
  -3   2   0  435.06   17.90 
  -3   2   0  458.95   19.80 
   3   2   0  463.85   21.50 
  -3   2   0  469.75   21.70 
  -3   2   0  427.36   15.40 
  -3   2   0  446.56   21.20 
   3   2   0  429.76   20.00 
   3   2   0  427.86   18.90 
   3   2   0  461.55   16.80 
   3   2   0  429.16   21.40 
  -3   2   0  449.66   19.90 
  -3   2   0  463.25   20.80 
   3   2   0  443.86   22.20 
  -3   2   0  429.16   19.50 
  -3   2   0  472.45   21.00 
   3   2   0  474.45   25.90 
  -3   2   0  482.95   20.70 
   3   2   0  444.86   20.70 
  -3   2   0  479.85   21.60 
   3   2   0  435.16   21.10 
   3   2   0  425.46   20.10 
  -3   2   0  436.96   18.90 
   3   2   0  451.65   20.40 
  -3   2   0  446.76   18.60 
  -4  -2   0  212.98   15.10 
   4  -2   0  256.67   13.10 
   4  -2   0  287.87   17.00 
   4  -2   0  270.67   17.10 
   4  -2   0  237.08   11.10 
  -4  -2   0  225.28   15.10 
   4  -2   0  244.28   13.90 
   4  -2   0  242.58   12.40 
   4  -2   0  247.98   12.00 
   4  -2   0  229.08   13.40 
  -4  -2   0  250.87   14.20 
  -4  -2   0  240.48   14.90 
  -4  -2   0  248.08   15.30 
   4  -2   0  267.97   13.80 
  -4  -2   0  217.48   14.50 
  -4  -2   0  276.37   12.30 
  -4  -2   0  237.48    9.90 
   4  -2   0  235.88   13.90 
  -4  -2   0  247.18   16.00 
  -4  -2   0  200.48   15.60 
  -4  -2   0  237.58   15.60 
  -4  -2   0  241.08   16.70 
  -4  -2   0  251.57   16.70 
  -4  -2   0  229.58   14.80 
  -4  -2   0  249.88   15.00 
   4  -2   0  309.27   11.90 
  -4  -2   0  237.58   12.70 
   4  -2   0  264.17   16.60 
   4  -2   0  252.47   10.60 
   4  -2   0  264.07    9.90 
   4  -2   0  261.77   16.30 
   4  -2   0  250.17   13.40 
  -4  -2   0  253.77   14.80 
  -4   2   0  269.37   16.20 
  -4   2   0  244.08   13.30 
  -4   2   0  253.87   15.30 
   4   2   0  262.57   17.40 
  -4   2   0  231.68    9.40 
   4   2   0  266.37   15.70 
   4   2   0  236.28   13.20 
   4   2   0  233.68   14.60 
   4   2   0  235.38    9.00 
   4   2   0  284.27   20.80 
  -4   2   0  247.98   15.30 
   4   2   0  222.08   14.90 
  -4   2   0  229.58   14.50 
   4   2   0  251.67   13.70 
  -4   2   0  256.77   13.80 
  -4   2   0  264.07   16.30 
   4   2   0  237.08    8.80 
  -4   2   0  276.47   16.80 
  -4   2   0  244.68   16.80 
   4   2   0  226.08   13.90 
   4   2   0  248.28   19.30 
  -4   2   0  282.67   18.70 
  -4   2   0  243.08   16.80 
   4   2   0  224.28   16.30 
   4   2   0  235.18   16.10 
  -4   2   0  248.58   15.70 
  -4   2   0  274.37   13.20 
   4   2   0  252.77   12.90 
   4   2   0  259.57   13.90 
   4   2   0  227.58   11.40 
  -4   2   0  240.68   12.60 
  -4   2   0  228.68   14.50 
  -4   2   0  260.17   15.90 
  -4   2   0  252.97   12.30 
  -4   2   0  234.48   15.40 
  -4   2   0  239.98   15.00 
  -4   2   0  235.18   13.80 
   4   2   0  252.47   15.90 
   5  -2   0  285.77   18.60 
   5  -2   0  288.07   14.50 
   5  -2   0  289.97   19.00 
   5  -2   0  268.07   14.40 
   5  -2   0  269.07   12.60 
   5  -2   0  281.47   13.60 
   5  -2   0  257.67   10.30 
  -5  -2   0  271.87   19.50 
  -5  -2   0  253.87   16.50 
  -5  -2   0  283.97   18.20 
  -5  -2   0  272.67   16.50 
  -5  -2   0  269.97   12.90 
   5  -2   0  265.87   12.80 
   5  -2   0  279.27   11.80 
   5  -2   0  287.17   18.30 
   5  -2   0  270.97   16.80 
   5  -2   0  297.57   14.60 
  -5  -2   0  232.18   18.20 
   5  -2   0  254.67   11.10 
  -5  -2   0  279.97   19.30 
  -5  -2   0  260.57   17.20 
   5  -2   0  271.17   14.10 
  -5  -2   0  256.47   17.30 
  -5  -2   0  251.97   17.90 
  -5  -2   0  281.47   16.20 
  -5  -2   0  267.17   18.00 
   5  -2   0  276.77   13.70 
   5  -2   0  260.27   12.10 
  -5  -2   0  291.07   17.90 
   5  -2   0  302.87   14.90 
   5  -2   0  287.97   16.20 
  -5  -2   0  284.37   18.10 
   5  -2   0  281.77   18.80 
  -5  -2   0  232.28   17.30 
   5  -2   0  267.27   18.60 
   5  -2   0  305.37   14.20 
   5  -2   0  283.87   13.40 
  -5   2   0  275.57   13.70 
  -5   2   0  285.27   20.80 
  -5   2   0  269.07   17.30 
   5   2   0  253.67   21.90 
  -5   2   0  256.87   19.10 
  -5   2   0  308.57   20.30 
  -5   2   0  268.27   16.70 
   5   2   0  255.67   16.90 
   5   2   0  297.07   19.50 
  -5   2   0  226.18   17.10 
   5   2   0  243.98   16.40 
  -5   2   0  288.47   16.10 
  -5   2   0  307.47   18.70 
  -5   2   0  313.47   15.40 
   5   2   0  279.57   15.40 
   5   2   0  263.17   21.90 
  -5   2   0  255.47   16.40 
  -5   2   0  247.68   16.50 
   5   2   0  295.27   19.00 
   5   2   0  276.67   13.80 
  -5   2   0  278.77   18.60 
   5   2   0  263.77   17.50 
  -5   2   0  265.67   17.60 
   5   2   0  272.87   10.80 
  -5   2   0  274.17   18.40 
   5   2   0  281.17   19.30 
   5   2   0  266.97   14.80 
   5   2   0  257.07   11.00 
   5   2   0  264.07   15.90 
  -5   2   0  242.68   17.40 
  -5   2   0  289.97   18.40 
   5   2   0  283.37   19.50 
  -5   2   0  272.17   12.90 
  -5   2   0  254.87   17.90 
   5   2   0  249.28   17.40 
   5   2   0  280.27   14.30 
  -6  -2   0  563.74   29.90 
   6  -2   0  523.75   34.80 
  -6  -2   0  604.94   30.10 
   6  -2   0  585.94   25.70 
   6  -2   0  649.34   32.70 
   6  -2   0  549.15   24.60 
  -6  -2   0  573.44   30.80 
  -6  -2   0  556.44   30.50 
   6  -2   0  619.54   23.80 
  -6  -2   0  601.04   33.40 
   6  -2   0  621.84   31.80 
  -6  -2   0  576.14   28.40 
  -6  -2   0  594.44   22.30 
  -6  -2   0  620.24   29.20 
  -6  -2   0  496.25   29.70 
  -6  -2   0  583.14   27.30 
   6  -2   0  567.24   28.00 
   6  -2   0  568.94   27.40 
   6  -2   0  572.54   21.00 
   6  -2   0  565.04   31.40 
  -6  -2   0  550.84   32.30 
  -6  -2   0  526.15   30.50 
   6  -2   0  595.84   24.10 
   6  -2   0  584.24   23.60 
   6  -2   0  623.84   22.60 
  -6  -2   0  562.64   32.10 
  -6  -2   0  557.34   30.10 
   6  -2   0  569.24   22.50 
  -6  -2   0  635.14   31.50 
   6  -2   0  571.24   23.40 
   6  -2   0  554.64   26.90 
   6  -2   0  566.34   27.80 
   6  -2   0  611.04   25.00 
   6  -2   0  637.74   25.90 
   6  -2   0  618.74   31.00 
   6  -2   0  565.54   23.60 
   6  -2   0  572.94   30.40 
   6  -2   0  585.24   21.60 
   6  -2   0  611.64   32.30 
  -6   2   0  546.65   32.20 
   6   2   0  585.54   21.10 
  -6   2   0  597.84   30.80 
   6   2   0  603.84   29.70 
  -6   2   0  590.94   27.60 
   6   2   0  601.44   32.30 
   6   2   0  566.44   30.40 
  -6   2   0  548.45   28.10 
  -6   2   0  592.94   31.80 
  -6   2   0  572.94   30.10 
  -6   2   0  545.65   30.70 
  -6   2   0  665.43   27.30 
   6   2   0  563.44   37.00 
   6   2   0  574.84   32.30 
   6   2   0  624.94   26.40 
   6   2   0  589.84   22.00 
  -6   2   0  562.74   31.20 
  -6   2   0  546.95   32.00 
   6   2   0  579.74   24.50 
   6   2   0  593.24   37.30 
   6   2   0  597.04   30.70 
  -6   2   0  570.04   31.10 
   6   2   0  620.44   26.80 
  -6   2   0  626.94   31.90 
  -6   2   0  606.84   34.40 
  -6   2   0  570.74   30.10 
  -6   2   0  589.04   24.00 
   6   2   0  581.64   28.70 
  -6   2   0  611.84   31.40 
   6   2   0  569.14   27.20 
   6   2   0  570.54   29.70 
  -6   2   0  585.04   29.20 
  -6   2   0  574.24   28.40 
   6   2   0  631.94   33.50 
   6   2   0  537.95   24.50 
  -7  -2   0  197.38   21.40 
  -7  -2   0  194.18   15.90 
   7  -2   0  218.58   24.40 
  -7  -2   0  215.18   19.70 
   7  -2   0  172.58   20.10 
   7  -2   0  161.98   19.80 
   7  -2   0  165.88   16.40 
  -7  -2   0  177.08   14.40 
  -7  -2   0  183.78   20.10 
   7  -2   0  197.68   15.90 
   7  -2   0  182.58   24.70 
   7  -2   0  177.98   13.30 
   7  -2   0  161.58   19.80 
  -7  -2   0  211.48   21.40 
   7  -2   0  178.48   14.20 
   7  -2   0  143.49   21.70 
   7  -2   0  185.98   13.20 
   7  -2   0  174.98   13.30 
   7  -2   0  161.78   11.40 
  -7  -2   0  182.38   19.50 
   7  -2   0  157.08   19.40 
   7  -2   0  209.68   22.40 
  -7  -2   0  162.58   18.90 
  -7  -2   0  183.28   20.90 
  -7  -2   0  157.98   18.40 
  -7  -2   0  183.48   20.20 
   7  -2   0  163.88   16.70 
  -7  -2   0  175.58   21.30 
  -7  -2   0  140.19   19.40 
   7  -2   0  184.18   19.80 
  -7  -2   0  172.38   21.10 
   7  -2   0  166.68   12.50 
   7  -2   0  171.18   19.30 
   7   2   0  182.18   12.90 
   7   2   0  155.98   20.20 
   7   2   0  177.08   13.10 
  -7   2   0  180.18   18.90 
  -7   2   0  186.58   20.70 
  -7   2   0  169.88   19.60 
   7   2   0  183.08   25.30 
   7   2   0  154.08   17.30 
  -7   2   0  201.18   23.30 
   7   2   0  133.29   18.70 
  -7   2   0  166.58   19.10 
   7   2   0  154.08   15.60 
   7   2   0  175.68   25.70 
  -7   2   0  171.18   19.00 
   7   2   0  168.68   17.60 
  -7   2   0  185.18   20.70 
  -7   2   0  183.38   23.10 
  -7   2   0  178.28   20.80 
  -7   2   0  195.88   14.10 
  -7   2   0  198.28   15.70 
   7   2   0  174.48   19.20 
   7   2   0  188.78   19.40 
  -7   2   0  170.98   20.30 
   7   2   0  173.48   13.20 
  -7   2   0  204.58   23.40 
   7   2   0  172.08   18.60 
   7   2   0  145.99   19.20 
  -7   2   0  178.18   20.30 
   7   2   0  169.18   19.40 
  -7   2   0  175.98   19.50 
   7   2   0  170.88   11.40 
  -8  -2   0  312.67   24.90 
   8  -2   0  332.67   22.10 
   8  -2   0  316.97   24.30 
  -8  -2   0  304.07   21.70 
   8  -2   0  308.07   22.30 
  -8  -2   0  262.27   29.30 
  -8  -2   0  329.47   26.30 
   8  -2   0  352.16   26.10 
  -8  -2   0  287.57   28.70 
   8  -2   0  324.07   23.80 
  -8  -2   0  312.87   26.50 
  -8  -2   0  286.47   23.20 
   8  -2   0  365.26   24.30 
   8  -2   0  310.87   29.80 
   8  -2   0  299.97   25.10 
   8  -2   0  353.46   20.70 
  -8  -2   0  334.67   21.00 
   8  -2   0  333.37   26.00 
   8  -2   0  328.97   26.20 
   8  -2   0  380.36   31.60 
   8  -2   0  341.57   27.90 
   8  -2   0  335.17   26.50 
  -8  -2   0  313.37   31.90 
  -8  -2   0  273.17   22.60 
  -8  -2   0  292.37   24.10 
  -8  -2   0  335.07   27.10 
  -8  -2   0  362.76   26.80 
  -8  -2   0  311.77   22.00 
   8   2   0  279.07   19.50 
   8   2   0  295.27   22.40 
   8   2   0  326.27   23.90 
  -8   2   0  278.97   24.80 
  -8   2   0  286.57   28.10 
   8   2   0  328.67   23.10 
   8   2   0  345.27   23.00 
  -8   2   0  305.87   25.10 
  -8   2   0  354.56   29.40 
  -8   2   0  319.57   25.90 
   8   2   0  283.37   25.00 
  -8   2   0  306.37   26.40 
  -8   2   0  296.37   30.60 
   8   2   0  311.57   24.50 
  -8   2   0  329.97   25.00 
  -8   2   0  284.27   29.10 
   8   2   0  279.97   34.80 
   8   2   0  313.07   21.40 
   8   2   0  326.87   32.10 
   8   2   0  350.26   27.70 
  -8   2   0  314.97   25.20 
  -8   2   0  277.57   24.60 
   8   2   0  328.57   24.60 
   8   2   0  332.07   27.30 
  -9  -2   0    6.80    7.30 
  -9  -2   0   17.30    9.30 
   9  -2   0   14.00    7.70 
  -9  -2   0   25.50   10.80 
  -9  -2   0   23.20   10.20 
  -9  -2   0   26.60   10.00 
   9  -2   0   24.20   10.20 
   9  -2   0   12.10    9.40 
   9  -2   0   23.00   10.40 
   9  -2   0   24.20    9.80 
   9  -2   0   27.80   12.90 
  -9  -2   0    8.30    8.70 
   9  -2   0   16.40    9.40 
   9  -2   0   29.30   10.40 
   9  -2   0   23.80   10.80 
  -9  -2   0   28.70   10.10 
  -9  -2   0   29.00    9.70 
  -9  -2   0    6.00    7.70 
  -9  -2   0   19.80    9.90 
   9  -2   0   29.10   14.00 
  -9  -2   0   18.10    9.80 
   9  -2   0   16.00   10.00 
  -9   2   0   29.20   12.70 
  -9   2   0   32.90   11.30 
   9   2   0   24.20   11.70 
   9   2   0   16.20   11.60 
   9   2   0   24.10   10.70 
   9   2   0   37.40   11.20 
   9   2   0   18.30   11.70 
   9   2   0    6.30    7.60 
  -9   2   0   22.00   10.90 
  -9   2   0   16.30   10.20 
   9   2   0   16.00    8.50 
   9   2   0   13.60    8.40 
   9   2   0   19.80   10.50 
  -9   2   0   33.40   11.90 
   9   2   0   23.40    9.40 
   9   2   0   34.60   11.50 
  10  -2   0   -1.10    6.80 
  10  -2   0   13.40    9.20 
 -10  -2   0   11.50    8.50 
 -10  -2   0   14.00    9.70 
  10  -2   0    2.70   10.60 
  10  -2   0   11.90    9.70 
  10  -2   0    6.20   10.10 
 -10  -2   0    6.50    8.50 
  10  -2   0    8.20    9.30 
 -10  -2   0    1.50    8.40 
 -10  -2   0   -0.40    8.00 
  10  -2   0   12.10   11.10 
 -10  -2   0   16.50   10.70 
 -10  -2   0   12.80    9.90 
 -10  -2   0    5.10    8.10 
  10  -2   0   -3.40    7.40 
 -10  -2   0   10.50   11.40 
  10   2   0    4.60    8.20 
  10   2   0   14.60   12.10 
  10   2   0    1.40    7.40 
  10   2   0    4.30    8.10 
  10   2   0    0.10    8.60 
  10   2   0    6.30   13.20 
  10   2   0    4.80    9.80 
  10   2   0   -5.10    7.40 
  10   2   0    4.20    7.80 
   0  -3   0    1.60    2.00 
   0  -3   0    1.60    1.80 
   0  -3   0    5.20    3.30 
   0  -3   0    4.90    2.50 
   0  -3   0   -0.70    1.50 
   0  -3   0    6.40    3.50 
   0  -3   0   -0.10    1.50 
   0  -3   0    1.10    2.00 
   0  -3   0    0.80    2.00 
   0  -3   0    4.80    2.40 
   0  -3   0    1.60    2.40 
   0  -3   0    0.40    2.20 
   0  -3   0   19.10    5.50 
   0  -3   0    1.30    1.80 
   0  -3   0    2.50    1.70 
   0  -3   0   11.40    4.00 
   0  -3   0    1.20    2.10 
   0  -3   0    1.50    2.90 
   0  -3   0    4.30    2.60 
   0  -3   0    1.70    1.90 
   0   3   0    4.90    2.50 
   0   3   0    0.40    2.80 
   0   3   0    3.20    3.20 
   0   3   0    2.70    2.20 
   0   3   0   -0.60    2.60 
   0   3   0    2.80    2.30 
   0   3   0   -0.80    1.90 
   0   3   0    2.70    2.10 
   0   3   0    1.00    1.80 
   0   3   0    6.20    3.20 
   0   3   0    4.60    3.90 
   0   3   0    3.50    2.90 
   0   3   0    0.90    2.00 
   0   3   0    0.50    1.70 
   0   3   0    2.00    2.70 
   0   3   0    1.40    2.40 
   0   3   0    6.90    2.60 
   0   3   0    0.00    1.60 
   0   3   0    5.40    2.10 
  -1  -3   0   76.99    8.10 
   1  -3   0   93.49    4.90 
   1  -3   0  107.19    7.60 
   1  -3   0   84.19    8.50 
   1  -3   0   99.79    8.10 
  -1  -3   0  112.69   10.50 
  -1  -3   0   86.29    8.40 
   1  -3   0   92.89    7.40 
  -1  -3   0   82.79    8.40 
  -1  -3   0   91.89    9.60 
   1  -3   0   80.59   10.40 
   1  -3   0  101.89    4.70 
   1  -3   0   91.39    9.10 
  -1  -3   0   92.59   11.80 
  -1  -3   0   78.79   10.10 
   1  -3   0   72.79   10.90 
   1  -3   0   80.29   10.20 
  -1  -3   0   80.89    6.70 
  -1  -3   0   83.69    6.30 
   1  -3   0  108.79   11.90 
  -1  -3   0   99.29    9.90 
  -1  -3   0   82.49    9.80 
  -1  -3   0   91.39    9.40 
  -1  -3   0   91.39    4.70 
   1  -3   0   90.49    5.90 
   1  -3   0   90.59   12.40 
  -1  -3   0   91.69    9.90 
  -1  -3   0   76.09    9.10 
  -1  -3   0   92.69    9.00 
   1  -3   0   96.69    6.00 
   1  -3   0   88.59    6.00 
   1  -3   0  103.89    7.60 
   1  -3   0   94.39    8.50 
  -1  -3   0   65.39    7.60 
  -1  -3   0   80.89    6.50 
  -1  -3   0   78.59    8.00 
   1  -3   0   88.49    9.80 
  -1  -3   0   91.99    9.80 
  -1  -3   0   81.69    7.10 
   1  -3   0   89.29    6.70 
   1  -3   0   93.29    9.90 
   1  -3   0   91.29   11.20 
  -1  -3   0   72.19    9.00 
  -1  -3   0   71.99    8.40 
   1  -3   0   99.99   10.10 
   1  -3   0   91.49    5.70 
   1  -3   0  102.39    7.90 
  -1  -3   0   83.39    8.10 
  -1  -3   0   92.49    9.80 
  -1  -3   0   88.19    6.20 
  -1  -3   0   89.99    4.90 
   1  -3   0  105.49    7.30 
   1  -3   0  107.39    7.90 
  -1   3   0   71.49    7.50 
  -1   3   0   85.49   10.50 
  -1   3   0   95.19    9.80 
   1   3   0   95.69   10.70 
  -1   3   0   78.69    9.90 
   1   3   0   93.99   11.10 
  -1   3   0   86.09    7.10 
  -1   3   0   95.59   11.70 
   1   3   0   74.09    8.40 
  -1   3   0   82.29    8.90 
   1   3   0   93.19   11.10 
  -1   3   0   79.09    8.10 
  -1   3   0   83.99    9.40 
  -1   3   0   62.99   10.60 
  -1   3   0   86.69   11.00 
   1   3   0   83.89   11.80 
   1   3   0   78.29    8.80 
   1   3   0   85.59    8.50 
  -1   3   0   83.49    5.60 
  -1   3   0   92.29    6.80 
  -1   3   0   58.09   10.70 
  -1   3   0   84.49    8.70 
   1   3   0   73.29    8.10 
   1   3   0   73.39    7.50 
  -1   3   0  101.89    8.30 
  -1   3   0   82.89    4.80 
   1   3   0   96.59    9.50 
  -1   3   0   75.69   10.70 
   1   3   0   79.29    8.20 
   1   3   0   87.89    6.20 
   1   3   0   96.99    8.40 
   1   3   0   77.79    9.20 
  -1   3   0   89.29    7.10 
  -1   3   0   98.79    9.90 
   1   3   0   74.69    9.10 
  -1   3   0   89.79    6.00 
  -1   3   0   84.39   13.30 
  -1   3   0   88.79    6.90 
  -1   3   0   75.79   12.50 
  -1   3   0   89.79    7.50 
  -1   3   0   87.09    7.30 
  -1   3   0   90.89   10.70 
   1   3   0   81.99    8.30 
   1   3   0   84.89    7.30 
   2  -3   0    2.40    2.40 
  -2  -3   0    0.60    1.30 
   2  -3   0    3.10    2.40 
   2  -3   0    1.90    3.60 
   2  -3   0    2.30    2.40 
   2  -3   0   -1.40    1.40 
   2  -3   0    6.70    2.80 
   2  -3   0   12.80    1.90 
  -2  -3   0    3.30    2.20 
  -2  -3   0   -1.10    1.70 
   2  -3   0    6.20    2.50 
  -2  -3   0    0.00    2.30 
   2  -3   0    5.00    2.90 
  -2  -3   0   13.00    4.50 
   2  -3   0    1.80    2.10 
  -2  -3   0    0.40    1.60 
  -2  -3   0   -0.90    2.20 
   2  -3   0    5.60    2.20 
  -2  -3   0    0.80    2.50 
   2  -3   0    5.80    2.20 
   2  -3   0    5.50    2.60 
   2  -3   0   14.40    3.10 
  -2  -3   0    4.60    2.10 
  -2  -3   0    4.40    3.10 
   2  -3   0    2.30    2.10 
  -2  -3   0    1.50    2.40 
  -2  -3   0    0.70    1.50 
   2  -3   0    4.50    2.80 
   2  -3   0    1.20    2.90 
  -2  -3   0    2.00    1.80 
  -2  -3   0    2.50    2.70 
  -2  -3   0    2.20    2.80 
   2  -3   0    2.80    1.80 
  -2  -3   0    1.30    2.70 
   2  -3   0    1.30    3.20 
   2  -3   0    0.50    3.50 
   2  -3   0    3.10    3.30 
   2  -3   0    2.50    2.40 
   2  -3   0    2.40    1.20 
   2  -3   0    0.50    1.30 
  -2  -3   0    1.80    2.80 
  -2  -3   0   12.30    3.40 
  -2  -3   0    4.00    3.30 
  -2  -3   0   -0.80    3.00 
  -2  -3   0    0.20    2.10 
  -2   3   0    4.90    4.30 
  -2   3   0    1.90    2.30 
   2   3   0   -2.00    2.30 
   2   3   0    0.20    2.70 
   2   3   0   -2.70    2.50 
   2   3   0    4.60    4.30 
   2   3   0    4.60    3.20 
  -2   3   0    0.80    2.10 
  -2   3   0    5.20    2.00 
  -2   3   0    1.80    1.80 
  -2   3   0   16.00    2.30 
  -2   3   0   -0.70    1.50 
   2   3   0    3.90    3.80 
  -2   3   0    3.60    2.70 
  -2   3   0    2.90    2.30 
   2   3   0    3.60    1.90 
  -2   3   0    0.00    2.10 
  -2   3   0    7.10    4.50 
   2   3   0    0.60    1.20 
   2   3   0    7.30    2.60 
   2   3   0    2.70    2.70 
   2   3   0    5.50    2.80 
  -2   3   0    4.10    2.80 
  -2   3   0    0.20    1.90 
  -2   3   0    2.40    3.20 
  -2   3   0    6.50    3.40 
  -2   3   0    4.80    3.70 
   2   3   0   -1.40    2.20 
   2   3   0    2.90    2.90 
  -2   3   0    2.70    2.30 
  -2   3   0    1.70    2.00 
  -2   3   0   -0.70    2.40 
   2   3   0    5.70    4.20 
  -2   3   0    1.30    3.10 
  -2   3   0    1.30    2.70 
   2   3   0    5.00    2.90 
  -2   3   0   -0.50    2.60 
  -2   3   0    0.90    2.30 
  -2   3   0   19.30    4.90 
   2   3   0    2.60    2.60 
   3  -3   0    4.60    2.80 
   3  -3   0    4.40    3.60 
  -3  -3   0   16.60    5.80 
   3  -3   0    1.40    2.30 
  -3  -3   0    0.40    2.40 
   3  -3   0    2.40    3.80 
   3  -3   0    1.40    2.20 
   3  -3   0   -1.10    3.30 
  -3  -3   0    6.30    4.00 
  -3  -3   0    3.10    2.70 
  -3  -3   0    5.20    3.20 
  -3  -3   0    1.70    2.50 
   3  -3   0    2.60    2.20 
   3  -3   0    1.40    2.60 
  -3  -3   0   -2.70    2.40 
   3  -3   0    3.70    2.00 
   3  -3   0    2.70    2.70 
   3  -3   0    5.80    3.90 
  -3  -3   0    5.40    3.80 
  -3  -3   0   10.10    2.10 
  -3  -3   0    0.90    3.20 
  -3  -3   0    1.10    2.80 
  -3  -3   0    2.90    2.20 
   3  -3   0    1.80    2.00 
   3  -3   0    5.30    2.80 
   3  -3   0   -0.70    2.30 
   3  -3   0    3.90    2.80 
   3  -3   0    2.20    1.90 
   3  -3   0    6.30    2.60 
  -3  -3   0    1.70    2.50 
   3  -3   0    2.60    2.50 
  -3  -3   0    0.00    3.10 
   3  -3   0    3.60    2.20 
   3  -3   0    6.00    3.10 
  -3  -3   0    6.40    1.40 
  -3  -3   0    5.10    3.30 
  -3   3   0    0.90    2.80 
   3   3   0   -0.50    2.70 
   3   3   0    3.80    3.10 
   3   3   0    6.60    3.50 
  -3   3   0    1.40    2.60 
  -3   3   0    2.00    3.70 
  -3   3   0    1.00    1.60 
  -3   3   0   -1.00    2.10 
   3   3   0   -2.10    2.20 
   3   3   0    5.60    3.50 
  -3   3   0    4.00    2.60 
   3   3   0   10.90    4.60 
   3   3   0    1.80    3.10 
   3   3   0   -2.20    3.90 
   3   3   0    2.00    4.40 
  -3   3   0    1.20    2.80 
  -3   3   0    3.10    2.70 
  -3   3   0    3.10    3.10 
  -3   3   0    4.50    2.90 
  -3   3   0    2.50    3.30 
  -3   3   0    8.10    4.00 
  -3   3   0    5.00    3.70 
  -3   3   0    6.60    3.70 
   3   3   0    2.80    3.50 
   3   3   0    1.50    3.10 
   3   3   0    2.70    0.90 
   3   3   0   -0.90    2.70 
   3   3   0    2.90    1.50 
  -3   3   0    8.80    3.60 
   3   3   0    4.30    3.90 
   3   3   0    2.90    3.40 
  -3   3   0   10.00    3.00 
   4  -3   0  877.71   39.00 
   4  -3   0  904.31   32.80 
  -4  -3   0  884.51   29.40 
  -4  -3   0  871.01   37.20 
   4  -3   0  883.31   32.00 
  -4  -3   0  890.51   37.40 
  -4  -3   0  855.51   34.80 
  -4  -3   0  860.21   35.70 
   4  -3   0  874.61   34.70 
  -4  -3   0  785.42   38.10 
   4  -3   0  885.31   30.40 
   4  -3   0  823.02   38.00 
   4  -3   0  896.91   34.70 
  -4  -3   0  814.02   30.00 
  -4  -3   0  904.61   38.40 
   4  -3   0  866.21   38.30 
   4  -3   0  847.42   27.60 
   4  -3   0  841.52   39.50 
  -4  -3   0  878.01   38.90 
  -4  -3   0  866.51   37.40 
   4  -3   0  886.91   30.80 
  -4  -3   0  841.02   36.10 
  -4  -3   0  955.40   38.70 
   4  -3   0  916.21   39.10 
   4  -3   0  847.32   33.40 
  -4  -3   0  889.91   36.40 
  -4  -3   0  822.02   35.60 
   4  -3   0  926.51   33.30 
   4  -3   0  870.71   32.30 
   4  -3   0  873.21   31.20 
   4  -3   0  861.31   34.10 
   4  -3   0  817.72   35.20 
  -4  -3   0  873.71   36.20 
  -4   3   0  838.62   27.90 
   4   3   0  901.11   44.10 
   4   3   0  864.71   37.80 
   4   3   0  862.81   36.10 
  -4   3   0  837.52   34.90 
   4   3   0  911.71   38.30 
   4   3   0  867.01   29.80 
  -4   3   0  834.02   34.50 
   4   3   0  909.41   40.00 
   4   3   0  842.82   43.80 
   4   3   0  845.72   36.90 
  -4   3   0  914.51   38.40 
  -4   3   0  846.32   35.40 
   4   3   0  871.11   39.60 
  -4   3   0  824.12   32.10 
  -4   3   0  880.71   36.50 
  -4   3   0  862.21   37.30 
  -4   3   0  896.81   36.40 
   4   3   0  874.01   35.20 
   4   3   0  897.61   37.10 
   4   3   0  947.31   34.80 
  -4   3   0  930.91   36.90 
   4   3   0  831.32   38.30 
  -4   3   0  867.01   33.20 
  -4   3   0  930.21   37.40 
  -4   3   0  834.92   37.70 
  -4   3   0  854.91   35.60 
   4   3   0  922.11   35.80 
  -4   3   0  825.02   36.10 
  -5  -3   0  649.93   32.30 
   5  -3   0  609.34   26.90 
   5  -3   0  646.94   29.10 
  -5  -3   0  625.64   31.00 
   5  -3   0  631.74   25.60 
  -5  -3   0  664.73   33.10 
  -5  -3   0  689.43   33.00 
   5  -3   0  646.04   32.70 
   5  -3   0  655.53   26.70 
   5  -3   0  675.13   34.50 
  -5  -3   0  687.53   30.30 
  -5  -3   0  644.34   26.40 
  -5  -3   0  678.53   34.80 
   5  -3   0  668.03   23.50 
   5  -3   0  634.74   25.20 
   5  -3   0  699.13   24.10 
   5  -3   0  699.03   33.90 
  -5  -3   0  629.64   34.10 
   5  -3   0  691.13   33.70 
   5  -3   0  698.43   34.10 
   5  -3   0  618.44   24.30 
  -5  -3   0  611.44   23.10 
  -5  -3   0  613.34   31.20 
  -5  -3   0  674.83   31.90 
  -5  -3   0  674.73   31.30 
  -5  -3   0  579.04   32.50 
  -5  -3   0  673.73   30.70 
  -5  -3   0  616.34   22.50 
  -5  -3   0  681.03   31.90 
  -5  -3   0  701.23   32.50 
   5  -3   0  691.23   23.60 
   5   3   0  636.74   32.40 
   5   3   0  591.44   30.40 
  -5   3   0  622.24   31.40 
  -5   3   0  623.44   30.70 
   5   3   0  620.84   29.90 
  -5   3   0  714.03   29.90 
  -5   3   0  625.14   31.30 
  -5   3   0  633.94   32.00 
  -5   3   0  687.13   27.20 
   5   3   0  645.74   31.60 
  -5   3   0  676.63   27.90 
  -5   3   0  660.83   32.60 
  -5   3   0  649.64   31.60 
   5   3   0  590.24   37.60 
   5   3   0  662.23   34.40 
   5   3   0  602.64   28.60 
   5   3   0  668.93   32.40 
  -5   3   0  686.43   27.00 
   5   3   0  655.53   34.80 
   5   3   0  644.04   24.50 
   5   3   0  593.54   37.40 
   5   3   0  737.23   33.60 
   5   3   0  665.53   28.10 
   5   3   0  697.53   29.90 
  -5   3   0  644.94   31.70 
  -5   3   0  633.84   30.40 
   5   3   0  677.13   34.10 
   6  -3   0 1882.71   74.19 
   6  -3   0 1929.11   62.99 
   6  -3   0 1933.61   74.79 
  -6  -3   0 1913.21   71.09 
  -6  -3   0 1937.21   76.89 
  -6  -3   0 1889.91   63.39 
   6  -3   0 1820.12   74.79 
   6  -3   0 1866.71   60.09 
   6  -3   0 1936.71   74.89 
  -6  -3   0 1816.72   72.49 
   6  -3   0 1859.51   64.89 
   6  -3   0 1904.81   64.59 
  -6  -3   0 2023.80   73.59 
   6  -3   0 1979.40   63.39 
  -6  -3   0 1735.23   72.89 
  -6  -3   0 1971.90   77.29 
  -6  -3   0 1838.32   75.19 
  -6  -3   0 1977.90   71.69 
   6  -3   0 1925.31   62.19 
   6  -3   0 1921.51   66.19 
   6  -3   0 2007.50   64.09 
   6  -3   0 1885.71   73.99 
  -6  -3   0 1841.82   73.49 
  -6  -3   0 2014.40   73.09 
   6  -3   0 1857.31   59.59 
  -6  -3   0 1954.70   73.89 
   6  -3   0 1809.42   64.89 
  -6  -3   0 1889.81   69.19 
  -6  -3   0 1817.92   71.69 
   6  -3   0 1964.40   68.79 
   6  -3   0 1925.11   67.59 
  -6  -3   0 1952.10   72.19 
   6   3   0 1928.11   68.39 
  -6   3   0 2039.80   66.09 
  -6   3   0 1982.20   71.99 
  -6   3   0 1851.41   67.79 
   6   3   0 1916.41   63.09 
  -6   3   0 1941.11   74.19 
   6   3   0 1787.22   72.99 
   6   3   0 1881.91   83.69 
   6   3   0 2000.60   77.09 
  -6   3   0 1892.21   72.79 
  -6   3   0 1952.50   73.09 
   6   3   0 1956.60   73.79 
  -6   3   0 1798.62   72.79 
   6   3   0 1865.41   71.79 
  -6   3   0 1923.11   64.89 
   6   3   0 1824.22   74.69 
  -6   3   0 1844.82   72.69 
   6   3   0 1832.72   67.99 
  -6   3   0 1795.92   70.69 
   6   3   0 1913.91   66.19 
  -6   3   0 1656.03   62.39 
   6   3   0 1798.22   69.19 
   6   3   0 1823.82   82.09 
   6   3   0 1886.81   75.79 
  -6   3   0 1947.41   71.79 
   6   3   0 1863.01   72.69 
   6   3   0 1887.61   71.29 
  -7  -3   0  333.87   26.20 
  -7  -3   0  322.37   24.50 
   7  -3   0  333.17   25.10 
   7  -3   0  411.86   27.40 
   7  -3   0  345.57   18.40 
   7  -3   0  354.56   21.30 
   7  -3   0  374.86   25.90 
  -7  -3   0  327.47   24.50 
  -7  -3   0  325.07   26.10 
  -7  -3   0  334.37   23.80 
   7  -3   0  351.26   26.30 
   7  -3   0  338.87   25.40 
  -7  -3   0  316.17   20.80 
   7  -3   0  332.97   20.80 
   7  -3   0  374.46   18.70 
  -7  -3   0  344.97   23.30 
  -7  -3   0  352.16   23.40 
  -7  -3   0  348.27   25.20 
  -7  -3   0  335.67   23.70 
  -7  -3   0  299.47   24.10 
  -7  -3   0  348.17   27.20 
   7  -3   0  302.47   20.10 
   7  -3   0  333.37   21.70 
  -7  -3   0  332.47   24.90 
  -7  -3   0  365.16   24.90 
   7  -3   0  350.56   26.10 
  -7   3   0  358.56   25.60 
  -7   3   0  300.67   22.70 
  -7   3   0  328.97   19.00 
  -7   3   0  348.77   23.30 
   7   3   0  368.86   32.30 
  -7   3   0  339.77   24.00 
   7   3   0  355.66   25.00 
   7   3   0  312.87   30.50 
   7   3   0  333.57   24.20 
   7   3   0  327.37   25.50 
   7   3   0  360.76   22.50 
   7   3   0  385.26   25.30 
   7   3   0  329.97   25.80 
  -7   3   0  348.77   25.30 
  -7   3   0  299.17   23.90 
   7   3   0  331.57   23.40 
   7   3   0  353.16   21.00 
  -7   3   0  373.26   25.90 
   7   3   0  358.36   27.20 
   7   3   0  300.47   23.90 
   7   3   0  299.77   22.30 
   7   3   0  357.76   18.90 
   7   3   0  382.46   21.70 
  -7   3   0  353.46   23.30 
  -7   3   0  347.37   20.70 
  -8  -3   0  268.67   30.30 
   8  -3   0  292.07   29.40 
   8  -3   0  291.67   20.80 
  -8  -3   0  243.98   29.00 
   8  -3   0  259.57   32.50 
  -8  -3   0  277.97   27.90 
  -8  -3   0  293.97   22.90 
   8  -3   0  281.87   27.90 
  -8  -3   0  268.47   27.40 
  -8  -3   0  295.47   24.60 
  -8  -3   0  249.68   25.80 
   8  -3   0  314.97   25.80 
   8  -3   0  313.57   21.80 
  -8  -3   0  308.57   26.10 
   8  -3   0  301.77   29.40 
  -8  -3   0  320.37   23.00 
  -8  -3   0  304.47   21.10 
  -8  -3   0  309.77   32.80 
  -8  -3   0  325.07   24.60 
  -8  -3   0  336.27   26.50 
   8  -3   0  348.67   29.40 
   8  -3   0  308.27   24.70 
  -8  -3   0  347.17   26.40 
   8  -3   0  294.87   24.60 
   8  -3   0  332.47   27.00 
   8  -3   0  307.27   30.10 
   8   3   0  301.77   25.20 
  -8   3   0  306.47   23.10 
  -8   3   0  314.17   30.30 
   8   3   0  295.87   23.20 
   8   3   0  302.87   24.20 
   8   3   0  315.47   25.00 
  -8   3   0  290.57   23.90 
  -8   3   0  288.57   23.70 
   8   3   0  292.97   26.20 
   8   3   0  327.67   20.60 
   8   3   0  333.77   26.40 
  -8   3   0  299.07   22.70 
  -8   3   0  337.37   26.50 
   8   3   0  237.18   19.40 
  -8   3   0  295.07   25.40 
   8   3   0  381.36   34.50 
   8   3   0  302.67   38.20 
   8   3   0  318.67   23.70 
   8   3   0  296.67   31.10 
   8   3   0  313.77   27.30 
   9  -3   0   80.99   18.80 
  -9  -3   0   54.59   14.20 
   9  -3   0   74.39   15.60 
  -9  -3   0  117.49   20.50 
  -9  -3   0  103.19   19.30 
   9  -3   0  117.09   24.30 
   9  -3   0  103.09   22.90 
   9  -3   0   80.29   18.80 
  -9  -3   0   95.39   18.10 
   9  -3   0   77.69   16.30 
  -9  -3   0   80.69   15.70 
   9  -3   0   95.99   18.20 
  -9  -3   0   97.79   18.00 
  -9  -3   0  133.89   22.60 
   9  -3   0   85.79   17.90 
  -9  -3   0  103.19   18.70 
  -9  -3   0   77.89   19.40 
  -9  -3   0  117.39   21.20 
  -9  -3   0  131.19   19.50 
   9  -3   0  104.39   18.00 
  -9  -3   0  116.99   17.60 
   9  -3   0  109.59   19.10 
   9   3   0  107.09   19.80 
   9   3   0   96.79   18.30 
   9   3   0   55.89   19.80 
   9   3   0  123.39   18.10 
   9   3   0  104.79   20.30 
   9   3   0   97.59   19.00 
   9   3   0   85.59   21.80 
   9   3   0   89.49   16.90 
   9   3   0  101.29   17.10 
  -9   3   0   99.09   18.60 
   9   3   0  118.39   18.70 
   9   3   0  105.79   18.70 
   0  -4   0   75.49   10.40 
   0  -4   0   72.49    7.80 
   0  -4   0   77.99    8.00 
   0  -4   0   76.59    9.30 
   0  -4   0   73.79    7.60 
   0  -4   0   81.99    8.10 
   0  -4   0   73.79    8.90 
   0  -4   0   73.79    9.30 
   0  -4   0   91.49   10.80 
   0  -4   0   75.59   10.90 
   0  -4   0   58.09    9.10 
   0  -4   0   83.89    9.70 
   0  -4   0   88.09   10.20 
   0   4   0   74.39    8.90 
   0   4   0   80.29   12.20 
   0   4   0   80.59    8.70 
   0   4   0   67.49    8.70 
   0   4   0   65.09    8.50 
   0   4   0   60.79   10.20 
   0   4   0   60.19   12.10 
   0   4   0   70.79   10.80 
   0   4   0  102.19    7.80 
   0   4   0   77.79   10.70 
   0   4   0   73.19    7.20 
   0   4   0   70.99   12.90 
   0   4   0   88.89    9.10 
   0   4   0   74.49    9.40 
   0   4   0   67.79    9.30 
   0   4   0   84.59    9.60 
   1  -4   0 6512.55  191.28 
   1  -4   0 6490.35  199.48 
  -1  -4   0 6419.86  202.68 
  -1  -4   0 6315.97  198.28 
   1  -4   0 6341.97  200.38 
  -1  -4   0 6395.16  200.48 
   1  -4   0 6264.67  204.68 
  -1  -4   0 6464.95  191.48 
   1  -4   0 6630.24  201.08 
  -1  -4   0 6302.37  202.88 
  -1  -4   0 6593.64  197.68 
  -1  -4   0 6193.38  201.88 
   1  -4   0 6607.94  195.68 
  -1  -4   0 6047.00  199.68 
  -1  -4   0 6415.26  201.68 
  -1  -4   0 6371.26  198.38 
   1  -4   0 6404.46  191.58 
   1  -4   0 6531.05  195.38 
  -1  -4   0 6610.54  199.68 
   1  -4   0 6574.44  199.18 
   1  -4   0 6162.58  202.08 
  -1  -4   0 6447.56  203.58 
  -1  -4   0 6375.86  200.88 
   1  -4   0 6653.73  195.68 
  -1  -4   0 6327.37  201.68 
  -1  -4   0 6288.07  201.98 
  -1  -4   0 6442.26  191.68 
  -1  -4   0 6564.74  196.48 
   1  -4   0 6485.45  201.78 
   1  -4   0 6564.94  195.08 
  -1   4   0 6123.89  200.68 
  -1   4   0 6266.97  206.98 
  -1   4   0 6449.65  200.58 
   1   4   0 6590.84  199.88 
  -1   4   0 6633.84  195.48 
   1   4   0 6456.65  200.38 
   1   4   0 6433.56  201.48 
  -1   4   0 5754.42  196.78 
  -1   4   0 6546.54  199.48 
   1   4   0 6273.87  200.38 
  -1   4   0 6179.88  211.98 
  -1   4   0 6451.55  201.48 
  -1   4   0 6456.05  201.58 
   1   4   0 5996.00  204.58 
   1   4   0 6192.08  209.68 
  -1   4   0 6453.45  199.48 
  -1   4   0 6219.68  198.58 
   1   4   0 6296.47  206.18 
  -1   4   0 6222.08  214.78 
  -1   4   0 6607.04  199.48 
  -1   4   0 6550.15  196.18 
  -1   4   0 6372.66  205.38 
  -1   4   0 6466.35  206.38 
   1   4   0 6561.04  201.68 
   1   4   0 6591.64  200.18 
   1   4   0 6281.17  199.38 
  -1   4   0 6131.09  200.38 
   1   4   0 6385.96  203.08 
  -1   4   0 6736.73  199.98 
  -1   4   0 6495.55  193.58 
   1   4   0 6528.45  196.48 
  -1   4   0 6413.46  204.68 
   2  -4   0   38.60    5.30 
  -2  -4   0   49.70    8.50 
  -2  -4   0   36.90    8.00 
   2  -4   0   38.60    7.80 
  -2  -4   0   34.40    7.40 
  -2  -4   0   40.90    7.50 
   2  -4   0   34.80    6.10 
   2  -4   0   40.30    7.90 
  -2  -4   0   40.30    5.60 
   2  -4   0   43.70    4.90 
  -2  -4   0   42.40    5.30 
  -2  -4   0   30.40    4.50 
   2  -4   0   35.50    4.60 
   2  -4   0   37.50    4.60 
  -2  -4   0   39.50    7.10 
   2  -4   0   27.20    7.60 
   2  -4   0   27.90    6.00 
  -2  -4   0   26.00    6.50 
   2  -4   0   37.00    6.00 
  -2  -4   0   46.90    8.30 
  -2  -4   0   42.60    6.00 
  -2  -4   0   25.10    6.20 
   2  -4   0   33.60    4.00 
  -2  -4   0   44.80    8.50 
   2  -4   0   34.20    5.10 
  -2  -4   0   34.40    4.40 
  -2  -4   0   29.80    6.30 
   2  -4   0   31.40    4.00 
   2  -4   0   37.30    5.90 
   2  -4   0   32.10    6.40 
   2  -4   0   48.10    9.90 
  -2  -4   0   30.70    7.30 
  -2  -4   0   43.00    6.00 
  -2   4   0   40.30    6.40 
  -2   4   0   40.30    6.60 
  -2   4   0   22.70    7.60 
  -2   4   0   34.60    6.30 
   2   4   0   31.60    4.60 
   2   4   0   50.89    9.00 
  -2   4   0   41.80    7.60 
   2   4   0   30.80    6.60 
  -2   4   0   51.49   11.10 
   2   4   0   34.50    6.80 
   2   4   0   29.90    7.80 
  -2   4   0   40.50    6.80 
   2   4   0   30.30    6.70 
  -2   4   0   26.40    4.90 
   2   4   0   51.89    8.50 
  -2   4   0   35.70    7.00 
  -2   4   0   36.00    8.50 
   2   4   0   35.30    6.90 
   2   4   0   39.40    7.40 
  -2   4   0   33.70    7.20 
  -2   4   0   28.30    4.40 
  -2   4   0   38.30    6.80 
   2   4   0   51.89    8.70 
  -2   4   0   39.50    5.00 
   2   4   0   46.80   11.00 
   2   4   0   27.00    6.00 
  -2   4   0   38.60    4.40 
  -2   4   0   41.00    7.90 
   2   4   0   28.00    7.60 
  -2   4   0   33.50    5.60 
  -3  -4   0  548.05   26.60 
   3  -4   0  604.34   29.20 
  -3  -4   0  563.64   27.20 
  -3  -4   0  528.95   27.60 
  -3  -4   0  512.55   27.40 
  -3  -4   0  569.64   25.30 
  -3  -4   0  543.05   24.30 
   3  -4   0  509.05   29.20 
  -3  -4   0  508.15   20.70 
   3  -4   0  568.44   20.30 
   3  -4   0  552.74   28.40 
  -3  -4   0  489.25   26.50 
  -3  -4   0  497.35   25.40 
   3  -4   0  553.64   25.50 
   3  -4   0  546.35   17.50 
  -3  -4   0  554.84   28.40 
   3  -4   0  551.74   24.00 
   3  -4   0  541.85   23.00 
  -3  -4   0  496.75   20.60 
   3  -4   0  586.14   23.70 
   3  -4   0  588.04   23.70 
  -3  -4   0  541.05   23.30 
  -3  -4   0  533.45   22.60 
   3  -4   0  531.05   24.80 
  -3  -4   0  502.05   26.30 
   3  -4   0  539.85   23.10 
   3  -4   0  515.55   30.20 
  -3  -4   0  566.04   29.00 
  -3  -4   0  534.15   19.90 
   3   4   0  494.15   25.60 
   3   4   0  532.25   25.70 
   3   4   0  531.95   32.30 
   3   4   0  551.74   27.00 
  -3   4   0  529.15   20.40 
   3   4   0  512.05   19.30 
  -3   4   0  548.75   28.00 
   3   4   0  558.34   33.50 
   3   4   0  498.95   28.80 
   3   4   0  549.85   27.70 
   3   4   0  540.05   25.40 
   3   4   0  539.55   27.30 
  -3   4   0  581.14   28.50 
  -3   4   0  527.05   24.30 
  -3   4   0  530.95   24.50 
  -3   4   0  510.65   26.20 
  -3   4   0  539.15   30.90 
  -3   4   0  548.15   21.50 
   3   4   0  532.55   27.90 
  -3   4   0  500.55   25.80 
   3   4   0  550.34   27.60 
  -3   4   0  545.95   25.20 
  -3   4   0  521.65   30.40 
  -3   4   0  558.74   24.70 
   3   4   0  536.05   26.70 
   3   4   0  549.85   29.60 
  -4  -4   0   43.50    8.20 
   4  -4   0   40.30    6.20 
   4  -4   0   34.40    8.40 
  -4  -4   0   36.40    6.60 
  -4  -4   0   48.30    9.40 
   4  -4   0   36.90    9.30 
  -4  -4   0   39.30    4.10 
  -4  -4   0   64.49   11.20 
   4  -4   0   37.50    5.90 
  -4  -4   0   41.90    8.10 
   4  -4   0   37.80    7.00 
  -4  -4   0   44.20    8.90 
  -4  -4   0   48.70   10.00 
   4  -4   0   33.10    6.30 
  -4  -4   0   27.70    7.50 
  -4  -4   0   33.90    8.30 
  -4  -4   0   37.70    8.10 
   4  -4   0   40.40    7.40 
  -4  -4   0   43.10    8.30 
   4  -4   0   42.80    4.90 
   4  -4   0   42.00    6.70 
  -4  -4   0   35.90    6.90 
   4  -4   0   32.80    8.90 
  -4  -4   0   42.20    7.80 
   4  -4   0   47.60    9.40 
   4  -4   0   55.89   11.30 
   4   4   0   32.10    7.50 
   4   4   0   43.80   10.00 
  -4   4   0   39.50    7.20 
  -4   4   0   42.20    8.00 
   4   4   0   35.70    8.00 
   4   4   0   39.50    8.50 
  -4   4   0   39.30    9.70 
   4   4   0   24.10    6.30 
  -4   4   0   44.10    7.20 
   4   4   0   23.90    7.70 
   4   4   0   33.10    7.60 
  -4   4   0   26.50    7.00 
  -4   4   0   40.30    7.80 
   4   4   0   42.70   11.40 
   4   4   0   32.30    6.70 
  -4   4   0   51.69    9.80 
   4   4   0   47.40    9.60 
   4   4   0   52.09    9.80 
  -4   4   0   43.90    5.30 
   4   4   0   37.40    8.80 
  -4   4   0   26.20    7.80 
   4   4   0   31.50    7.30 
   4   4   0   27.10    9.00 
  -4   4   0   53.99    6.90 
  -4   4   0   45.90    8.90 
  -4   4   0   25.50    6.50 
   5  -4   0  708.33   37.00 
  -5  -4   0  686.73   34.70 
   5  -4   0  659.83   31.20 
  -5  -4   0  655.73   32.70 
   5  -4   0  663.53   29.70 
   5  -4   0  707.83   28.70 
   5  -4   0  687.53   27.30 
  -5  -4   0  706.83   33.30 
  -5  -4   0  633.14   30.90 
   5  -4   0  746.33   27.50 
  -5  -4   0  704.43   36.20 
  -5  -4   0  692.73   36.80 
  -5  -4   0  680.23   35.20 
  -5  -4   0  623.44   32.40 
  -5  -4   0  677.03   26.10 
  -5  -4   0  691.63   38.10 
  -5  -4   0  662.73   33.60 
   5  -4   0  741.83   29.00 
  -5  -4   0  702.03   36.70 
   5  -4   0  725.33   38.10 
   5  -4   0  761.02   39.00 
   5  -4   0  656.53   35.20 
  -5  -4   0  694.43   33.20 
  -5  -4   0  653.93   34.40 
   5  -4   0  724.53   37.70 
  -5  -4   0  733.63   35.80 
  -5   4   0  692.63   33.90 
   5   4   0  662.83   32.60 
  -5   4   0  742.23   32.80 
  -5   4   0  728.03   31.00 
   5   4   0  669.93   35.40 
  -5   4   0  753.92   28.90 
  -5   4   0  670.43   34.00 
   5   4   0  736.33   31.70 
   5   4   0  758.82   33.50 
  -5   4   0  710.13   33.60 
  -5   4   0  708.63   35.90 
   5   4   0  717.23   35.80 
   5   4   0  705.83   37.90 
   5   4   0  715.53   35.40 
   5   4   0  676.63   42.70 
   5   4   0  660.83   34.70 
  -5   4   0  704.93   32.40 
  -5   4   0  702.13   32.80 
   5   4   0  702.83   33.70 
   5   4   0  665.23   33.90 
  -5   4   0  683.53   35.80 
   5   4   0  711.03   36.50 
   5   4   0  707.53   24.20 
  -5   4   0  683.23   34.70 
   5   4   0  698.93   42.20 
   5   4   0  672.73   37.50 
   6  -4   0  263.67   26.00 
  -6  -4   0  255.77   15.70 
  -6  -4   0  210.98   21.40 
   6  -4   0  239.78   21.20 
   6  -4   0  264.07   17.60 
  -6  -4   0  223.88   18.00 
   6  -4   0  283.47   22.70 
   6  -4   0  198.98   22.00 
   6  -4   0  244.88   15.30 
  -6  -4   0  268.57   19.90 
  -6  -4   0  191.88   21.50 
  -6  -4   0  220.28   24.80 
   6  -4   0  264.77   27.30 
  -6  -4   0  264.47   19.70 
  -6  -4   0  219.68   21.90 
  -6  -4   0  214.98   23.10 
  -6  -4   0  255.17   19.90 
  -6  -4   0  260.57   20.40 
  -6  -4   0  246.48   24.30 
  -6  -4   0  261.97   22.10 
   6  -4   0  246.58   15.20 
  -6  -4   0  220.58   17.80 
   6  -4   0  249.97   14.20 
  -6  -4   0  244.38   25.60 
   6   4   0  256.07   20.80 
   6   4   0  276.87   20.60 
  -6   4   0  260.37   20.40 
   6   4   0  281.97   27.70 
   6   4   0  240.88   26.00 
  -6   4   0  255.07   17.40 
   6   4   0  242.88   30.40 
   6   4   0  259.17   18.80 
  -6   4   0  247.28   15.50 
  -6   4   0  248.28   20.30 
  -6   4   0  197.48   21.30 
   6   4   0  218.18   23.80 
  -6   4   0  280.67   19.70 
   6   4   0  286.67   20.00 
   6   4   0  230.78   16.30 
   6   4   0  255.17   19.90 
  -6   4   0  256.47   19.90 
   6   4   0  219.08   24.30 
   6   4   0  234.18   23.40 
  -6   4   0  258.07   16.50 
   6   4   0  272.67   22.20 
   6   4   0  259.87   18.40 
  -6   4   0  276.27   15.20 
  -6   4   0  232.48   19.30 
  -7  -4   0 1103.09   49.10 
   7  -4   0 1073.49   54.09 
  -7  -4   0 1123.49   52.59 
  -7  -4   0  957.40   50.69 
   7  -4   0 1098.69   45.10 
  -7  -4   0 1062.29   47.00 
  -7  -4   0 1094.49   49.90 
   7  -4   0 1178.78   44.10 
   7  -4   0 1129.89   52.39 
  -7  -4   0  989.80   53.09 
  -7  -4   0 1071.29   50.29 
  -7  -4   0  965.50   48.90 
  -7  -4   0  992.60   52.49 
  -7  -4   0  914.31   52.09 
  -7  -4   0 1077.39   50.89 
   7  -4   0 1089.39   51.59 
  -7  -4   0 1031.80   49.80 
   7  -4   0 1111.39   53.39 
   7  -4   0 1064.79   52.49 
  -7  -4   0 1142.99   51.29 
   7  -4   0 1075.19   53.29 
  -7  -4   0 1046.30   51.39 
  -7   4   0  916.91   48.90 
  -7   4   0 1060.49   48.60 
   7   4   0  925.81   45.30 
   7   4   0 1034.60   47.30 
   7   4   0 1074.39   52.29 
   7   4   0  993.50   49.90 
  -7   4   0 1086.79   50.39 
   7   4   0 1171.88   56.09 
  -7   4   0 1061.29   48.60 
   7   4   0 1079.59   50.29 
   7   4   0 1080.69   62.59 
   7   4   0  999.40   52.29 
   7   4   0  942.21   52.49 
   7   4   0 1066.89   49.60 
  -7   4   0 1136.69   51.89 
   7   4   0 1092.69   43.70 
  -7   4   0 1038.70   50.39 
   7   4   0 1140.19   52.19 
   7   4   0 1069.39   46.10 
  -7   4   0 1073.99   49.40 
   7   4   0 1171.88   63.69 
  -7   4   0 1051.69   49.99 
  -8  -4   0  121.39   19.90 
   8  -4   0  149.39   22.40 
   8  -4   0  139.99   21.30 
   8  -4   0  118.09   23.00 
  -8  -4   0  150.08   20.50 
  -8  -4   0  122.39   19.10 
   8  -4   0  148.29   22.80 
  -8  -4   0  105.49   19.60 
  -8  -4   0  167.28   24.70 
   8  -4   0  119.09   19.20 
  -8  -4   0  114.79   17.90 
  -8  -4   0  132.99   19.50 
  -8  -4   0  139.29   27.40 
   8  -4   0  130.49   24.30 
  -8  -4   0  105.19   17.60 
  -8  -4   0  110.19   18.40 
  -8  -4   0  158.88   21.10 
  -8  -4   0  126.99   21.30 
  -8  -4   0  160.68   22.50 
   8  -4   0  123.89   18.90 
  -8  -4   0  141.29   19.10 
   8  -4   0  133.89   19.90 
   8   4   0  143.19   22.80 
   8   4   0  125.89   24.90 
   8   4   0  145.29   23.30 
   8   4   0  120.59   17.80 
   8   4   0  131.29   19.70 
  -8   4   0  121.49   18.60 
  -8   4   0  149.79   19.30 
  -8   4   0  160.68   21.20 
   8   4   0  144.79   20.20 
   8   4   0  136.09   20.80 
   8   4   0   88.49   22.40 
  -8   4   0  160.68   22.20 
  -8   4   0  139.49   19.30 
  -8   4   0  140.19   20.20 
   8   4   0  132.09   21.40 
   8   4   0  116.09   18.90 
   8   4   0  139.69   19.40 
   8   4   0  105.89   15.20 
   8   4   0  147.59   18.30 
  -9  -4   0  110.39   19.70 
  -9  -4   0  100.19   18.90 
  -9  -4   0  119.19   20.70 
  -9  -4   0  119.59   19.80 
  -9  -4   0  113.19   21.90 
   9  -4   0  114.79   23.30 
   9  -4   0  128.29   21.40 
  -9  -4   0   88.09   16.40 
  -9  -4   0  101.69   21.20 
  -9  -4   0   98.49   20.90 
   9  -4   0   99.69   19.40 
   9  -4   0  115.89   23.10 
  -9  -4   0  106.19   19.30 
   9  -4   0   70.99   18.50 
   9  -4   0  103.49   20.10 
   9  -4   0  112.29   19.50 
  -9  -4   0  100.59   19.20 
  -9  -4   0   96.59   18.80 
   9  -4   0   67.19   19.00 
   9  -4   0   84.49   17.60 
  -9   4   0  109.99   18.60 
   9   4   0   59.79   17.10 
  -9   4   0  108.59   20.10 
  -9   4   0  103.19   18.50 
   9   4   0   59.19   19.80 
   9   4   0  108.99   21.60 
   9   4   0  117.99   22.20 
   9   4   0   90.39   24.10 
   9   4   0   89.29   16.80 
   9   4   0   67.29   16.00 
   9   4   0   63.99   15.50 
   9   4   0   94.09   17.40 
   9   4   0   83.79   17.70 
   9   4   0   94.49   17.40 
   0  -5   0    0.00    3.70 
   0  -5   0    4.50    2.90 
   0  -5   0    6.30    4.00 
   0  -5   0    3.10    3.90 
   0  -5   0   -0.50    2.90 
   0  -5   0   -0.30    2.70 
   0  -5   0   -0.20    3.00 
   0  -5   0    0.50    3.40 
   0  -5   0    2.30    3.30 
   0  -5   0    2.00    2.80 
   0  -5   0   -1.10    3.10 
   0   5   0   58.29   13.80 
   0   5   0    6.50    5.10 
   0   5   0   -0.70    2.60 
   0   5   0    1.90    3.80 
   0   5   0    1.80    2.70 
   0   5   0    6.10    5.00 
   0   5   0    9.10    4.60 
   0   5   0    6.80    4.10 
   0   5   0    2.10    2.80 
   0   5   0    1.80    3.50 
   0   5   0    5.00    3.70 
   0   5   0    1.90    6.30 
   0   5   0    2.90    3.80 
   0   5   0    8.10    3.20 
   0   5   0    7.10    3.90 
   1  -5   0   25.30    7.30 
  -1  -5   0   29.50    7.60 
  -1  -5   0   44.60    8.70 
  -1  -5   0   24.70    5.70 
  -1  -5   0   31.00    7.70 
   1  -5   0   36.10    7.20 
   1  -5   0   36.40    9.40 
  -1  -5   0   30.50    6.90 
  -1  -5   0   45.20    9.20 
  -1  -5   0   35.10    7.90 
   1  -5   0   37.50    5.50 
   1  -5   0   38.80    6.00 
  -1  -5   0   37.00    8.60 
   1  -5   0   41.80    8.20 
  -1  -5   0   32.80    6.60 
   1  -5   0   23.60    6.70 
  -1  -5   0   30.70    7.30 
   1  -5   0   38.90    7.60 
  -1  -5   0   26.30    7.70 
   1  -5   0   30.40    5.50 
  -1  -5   0   31.10    6.70 
   1  -5   0   32.30    7.20 
   1  -5   0   36.60    8.40 
  -1  -5   0   40.80    8.70 
   1  -5   0   39.90    6.20 
  -1   5   0   34.20    7.20 
  -1   5   0   28.00    7.00 
  -1   5   0   39.10    9.50 
   1   5   0   32.30    9.00 
  -1   5   0   37.70    8.30 
  -1   5   0   33.80    9.30 
  -1   5   0   36.30    5.10 
   1   5   0   37.00    6.50 
   1   5   0   22.40    6.80 
  -1   5   0   41.50    8.60 
  -1   5   0   34.40    8.60 
  -1   5   0   49.99    8.60 
   1   5   0   42.60    8.80 
   1   5   0   37.80    7.70 
  -1   5   0   39.00   11.50 
  -1   5   0   53.69   10.90 
  -1   5   0   43.60    8.40 
   1   5   0   33.10    8.30 
  -1   5   0   36.90    8.10 
   1   5   0   38.20    7.80 
  -1   5   0   38.20    7.10 
   1   5   0   35.50    7.30 
  -1   5   0   46.10    8.80 
  -1   5   0   36.00   11.50 
   1   5   0   40.00    9.30 
   1   5   0   35.30   10.70 
   1   5   0   29.80    5.80 
  -1   5   0   44.10    7.80 
  -1   5   0   48.10    8.30 
   1   5   0   27.00    6.50 
   1   5   0   23.10    8.70 
   1   5   0   37.80    7.50 
  -2  -5   0   31.70    8.10 
   2  -5   0   31.70    5.40 
   2  -5   0   34.40    7.00 
   2  -5   0   36.70    5.40 
  -2  -5   0   46.30    4.90 
   2  -5   0   34.30    7.40 
   2  -5   0   37.10    9.50 
  -2  -5   0   42.30    8.40 
   2  -5   0   32.20    6.80 
   2  -5   0   53.59    5.10 
   2  -5   0   48.60    8.50 
   2  -5   0   47.40    5.70 
  -2  -5   0   40.50    7.80 
   2  -5   0   42.50    5.50 
   2  -5   0   51.09    5.50 
   2  -5   0   31.20    4.80 
   2  -5   0   29.40    7.80 
   2  -5   0   37.10    8.40 
   2   5   0   46.90    8.50 
  -2   5   0   50.09    6.60 
  -2   5   0   40.80    6.00 
  -2   5   0   34.70    6.90 
   2   5   0   50.39   12.40 
   2   5   0   30.40    7.40 
  -2   5   0   33.10    7.20 
  -2   5   0   39.40    8.90 
  -2   5   0   37.40    6.00 
  -2   5   0   39.30    3.90 
   2   5   0   46.10    8.90 
   2   5   0   29.60    8.00 
   2   5   0   56.09    9.80 
   2   5   0   48.50    9.10 
  -2   5   0   23.60    8.60 
  -2   5   0   45.50    8.90 
  -2   5   0   38.60    7.40 
  -2   5   0   35.50   10.10 
  -2   5   0   33.00    5.00 
  -2   5   0   46.30    7.80 
  -2   5   0   38.20    6.90 
   2   5   0   39.40    7.80 
   2   5   0   49.50   11.00 
  -2   5   0   38.50   13.60 
  -2   5   0   46.00    8.90 
   2   5   0   35.70    7.60 
  -2   5   0   45.90    9.70 
   2   5   0   43.70   10.70 
  -2   5   0   42.00    7.10 
  -2   5   0   34.70   11.50 
   3  -5   0   -1.20    2.90 
  -3  -5   0    3.50    4.40 
   3  -5   0    7.00    4.20 
  -3  -5   0    6.40    5.10 
  -3  -5   0    5.50    3.10 
  -3  -5   0    0.60    3.80 
   3  -5   0    7.60    2.40 
   3  -5   0    6.40    2.40 
  -3  -5   0    6.40    3.10 
  -3  -5   0    4.30    4.40 
   3  -5   0    2.90    4.70 
   3  -5   0    7.30    4.80 
  -3  -5   0    3.40    2.50 
  -3  -5   0    0.30    4.00 
   3  -5   0    3.20    2.60 
  -3  -5   0    6.80    5.00 
  -3  -5   0    3.90    4.50 
  -3  -5   0    1.00    3.00 
  -3  -5   0    4.40    3.50 
  -3  -5   0   -1.10    3.80 
   3  -5   0    3.90    5.10 
   3  -5   0    0.40    3.20 
  -3  -5   0    7.80    3.60 
   3  -5   0    6.20    5.50 
  -3  -5   0    6.60    5.10 
   3  -5   0   15.30    5.50 
  -3  -5   0    4.20    2.90 
   3  -5   0    8.00    3.50 
  -3   5   0    3.00    3.40 
   3   5   0    2.00    2.60 
   3   5   0    1.30    5.40 
   3   5   0   -0.70    4.40 
  -3   5   0    4.50    3.60 
   3   5   0    8.70    5.60 
   3   5   0    7.60    5.50 
   3   5   0    6.60    4.90 
  -3   5   0    3.20    4.80 
  -3   5   0    5.50    3.90 
  -3   5   0    1.70    3.80 
   3   5   0    3.00    4.40 
  -3   5   0    5.60    2.60 
  -3   5   0    3.30    4.70 
  -3   5   0   11.70    6.00 
  -3   5   0    7.30    5.10 
   3   5   0   -1.70    3.50 
   3   5   0    8.30    5.40 
   3   5   0    7.30    5.30 
  -3   5   0    5.50    6.90 
  -3   5   0    0.10    4.30 
   3   5   0    7.10    5.70 
  -3   5   0    1.80    2.70 
   3   5   0    0.70    4.30 
   3   5   0   12.20    5.80 
  -3   5   0    1.60    2.40 
  -3   5   0    8.80    4.70 
  -4  -5   0  594.74   31.30 
   4  -5   0  595.84   35.40 
   4  -5   0  574.34   27.60 
   4  -5   0  591.94   26.40 
  -4  -5   0  601.74   33.50 
   4  -5   0  546.55   26.00 
  -4  -5   0  600.54   32.10 
  -4  -5   0  558.14   25.50 
  -4  -5   0  551.74   31.50 
  -4  -5   0  566.04   27.50 
   4  -5   0  602.04   24.90 
  -4  -5   0  565.24   31.90 
  -4  -5   0  562.44   20.00 
  -4  -5   0  540.45   31.70 
  -4  -5   0  582.84   21.40 
  -4  -5   0  563.14   30.80 
  -4  -5   0  506.85   29.30 
   4  -5   0  612.54   33.90 
  -4  -5   0  568.64   28.20 
   4  -5   0  553.74   20.60 
   4  -5   0  595.74   31.80 
   4  -5   0  550.14   33.80 
   4  -5   0  566.44   28.00 
  -4  -5   0  544.25   29.40 
  -4  -5   0  569.94   26.70 
   4   5   0  558.04   30.40 
  -4   5   0  527.65   27.30 
   4   5   0  547.85   31.00 
  -4   5   0  582.24   32.40 
  -4   5   0  592.44   25.90 
  -4   5   0  559.64   34.90 
   4   5   0  548.05   30.10 
  -4   5   0  548.65   30.20 
   4   5   0  558.04   31.80 
   4   5   0  554.24   38.70 
  -4   5   0  587.54   21.80 
   4   5   0  515.25   30.20 
   4   5   0  546.15   28.90 
   4   5   0  553.04   30.30 
  -4   5   0  585.24   28.40 
  -4   5   0  537.55   29.80 
  -4   5   0  628.04   36.80 
   4   5   0  580.74   31.90 
  -4   5   0  577.94   25.00 
   4   5   0  555.94   37.50 
  -4   5   0  574.14   31.20 
   4   5   0  545.05   28.30 
  -4   5   0  589.94   27.70 
   4   5   0  496.25   32.60 
   4   5   0  546.55   33.70 
   4   5   0  575.24   30.20 
   5  -5   0    1.00    3.40 
   5  -5   0    4.90    3.90 
  -5  -5   0    3.60    4.70 
  -5  -5   0    2.70    4.50 
  -5  -5   0   11.10    6.90 
  -5  -5   0   -2.30    4.70 
   5  -5   0    5.10    6.50 
  -5  -5   0    4.50    6.10 
  -5  -5   0    6.20    5.50 
  -5  -5   0    1.50    5.50 
   5  -5   0   10.60    7.50 
  -5  -5   0   11.60    6.80 
   5  -5   0   16.50    6.00 
  -5  -5   0   -0.30    4.40 
  -5  -5   0   -6.50    3.10 
  -5  -5   0   -2.80    5.20 
   5  -5   0    5.20    4.10 
   5  -5   0    1.50    5.40 
  -5  -5   0    7.90    5.20 
   5  -5   0    1.40    4.80 
  -5  -5   0   14.50    6.90 
   5   5   0    4.30    8.00 
   5   5   0   -0.30    4.30 
  -5   5   0    1.80    4.50 
  -5   5   0    8.40    5.70 
   5   5   0    1.90    4.40 
   5   5   0    1.00    5.70 
  -5   5   0    4.30    5.80 
   5   5   0   -4.00    4.30 
   5   5   0   -2.70    7.20 
  -5   5   0    4.10    5.80 
  -5   5   0   12.10    6.90 
   5   5   0    5.00    5.90 
  -5   5   0    2.60    4.60 
   5   5   0    5.90    6.30 
   5   5   0    3.00    4.90 
   5   5   0    1.70    5.20 
  -5   5   0   11.30    6.30 
   5   5   0   11.20    6.60 
  -5   5   0    1.20    3.90 
   5   5   0    4.00    5.70 
   5   5   0   16.50    8.00 
  -5   5   0    3.20    3.20 
  -5   5   0   11.20    6.30 
   5   5   0    2.40    5.40 
  -6  -5   0 1813.82   79.79 
  -6  -5   0 1883.71   76.39 
  -6  -5   0 1740.93   77.49 
  -6  -5   0 1761.42   76.59 
  -6  -5   0 1895.31   73.99 
   6  -5   0 1822.12   65.79 
   6  -5   0 1945.61   69.09 
  -6  -5   0 1792.32   71.29 
   6  -5   0 1806.52   78.99 
   6  -5   0 1887.81   75.49 
   6  -5   0 1848.81   78.99 
  -6  -5   0 1751.72   74.69 
  -6  -5   0 1930.21   75.69 
   6  -5   0 2006.60   79.49 
  -6  -5   0 1765.12   71.69 
   6  -5   0 1861.81   64.39 
  -6  -5   0 1738.03   76.19 
  -6  -5   0 1815.72   69.59 
  -6  -5   0 1796.42   74.79 
  -6  -5   0 1750.82   66.79 
   6  -5   0 1849.42   78.99 
  -6  -5   0 1754.82   70.89 
  -6  -5   0 1758.62   71.59 
   6   5   0 1865.21   74.09 
   6   5   0 1850.71   76.59 
  -6   5   0 1882.21   70.29 
   6   5   0 1792.02   78.49 
   6   5   0 1875.01   71.39 
   6   5   0 1767.72   74.59 
  -6   5   0 1858.31   70.49 
   6   5   0 1846.12   72.89 
   6   5   0 1893.01   76.29 
   6   5   0 1884.81   87.89 
  -6   5   0 1910.21   76.49 
  -6   5   0 1940.11   76.29 
   6   5   0 1685.63   78.29 
  -6   5   0 1837.32   71.49 
   6   5   0 1794.82   76.49 
   6   5   0 1809.62   71.89 
   6   5   0 1660.83   84.29 
  -6   5   0 1888.71   74.49 
  -6   5   0 1913.51   73.29 
  -6   5   0 1829.62   74.19 
   6   5   0 1780.72   74.19 
  -7  -5   0    5.40    6.90 
  -7  -5   0    0.60    5.80 
   7  -5   0    2.70    6.40 
  -7  -5   0    9.20    7.40 
  -7  -5   0    8.80    7.20 
  -7  -5   0   10.70    7.10 
   7  -5   0   22.00   11.10 
  -7  -5   0   12.40    7.80 
  -7  -5   0    1.70    5.10 
   7  -5   0   11.00    8.60 
  -7  -5   0    3.10    5.80 
  -7  -5   0   -0.70    5.50 
  -7  -5   0    3.30    6.90 
   7  -5   0   15.20    7.80 
  -7  -5   0    6.20    7.70 
  -7  -5   0    5.30    7.30 
   7  -5   0   10.30    9.30 
  -7  -5   0    2.50    6.30 
  -7  -5   0   10.20    6.60 
  -7   5   0    1.20    4.90 
   7   5   0    2.70    8.00 
   7   5   0   32.80   11.20 
   7   5   0   11.50    7.80 
   7   5   0    8.90    9.40 
   7   5   0   18.90   12.00 
  -7   5   0    5.20    6.00 
   7   5   0    4.90    7.70 
   7   5   0    6.40    8.10 
  -7   5   0    9.10    7.80 
   7   5   0    6.30    7.60 
   7   5   0    2.80    7.60 
   7   5   0   -0.10    5.60 
  -7   5   0   10.20    7.40 
  -7   5   0   -0.60    5.50 
   7   5   0   16.40    8.30 
  -7   5   0    1.40    5.70 
   7   5   0    4.10    6.40 
   7   5   0    3.00    7.20 
  -8  -5   0  490.75   32.90 
  -8  -5   0  537.85   34.70 
  -8  -5   0  424.46   33.30 
  -8  -5   0  508.75   38.90 
  -8  -5   0  506.85   35.70 
   8  -5   0  611.94   41.10 
   8  -5   0  511.95   37.40 
   8  -5   0  527.45   36.40 
   8  -5   0  488.75   36.60 
  -8  -5   0  499.25   33.70 
  -8  -5   0  495.85   32.30 
  -8  -5   0  434.96   35.80 
  -8  -5   0  491.65   34.60 
  -8  -5   0  519.05   36.70 
   8  -5   0  482.05   49.70 
  -8  -5   0  491.55   37.10 
   8  -5   0  463.85   36.70 
  -8  -5   0  571.04   36.70 
   8   5   0  456.05   35.50 
   8   5   0  573.94   36.20 
   8   5   0  478.95   31.80 
   8   5   0  552.34   46.10 
   8   5   0  412.56   41.30 
   8   5   0  494.55   32.30 
  -8   5   0  522.75   34.50 
   8   5   0  486.65   34.00 
  -8   5   0  501.75   33.20 
   8   5   0  413.96   33.60 
  -8   5   0  529.05   34.90 
   8   5   0  499.15   38.20 
   8   5   0  530.85   38.60 
  -8   5   0  479.85   33.50 
  -8   5   0  492.05   33.20 
   8   5   0  549.54   36.20 
   8   5   0  511.85   33.70 
   8   5   0  478.85   35.00 
   8   5   0  449.26   29.50 
  -9  -5   0   -3.70    7.30 
  -9  -5   0   -1.60    7.90 
   9  -5   0   -5.40    9.60 
  -9  -5   0    1.60    6.50 
  -9  -5   0    0.60    8.70 
  -9  -5   0    6.30    7.40 
  -9  -5   0   -2.30    7.70 
   9  -5   0    1.10    8.10 
   9  -5   0   -0.30    6.80 
   9  -5   0    1.10    9.40 
   9  -5   0   16.90   11.30 
  -9  -5   0    0.30    7.60 
  -9  -5   0    4.60    9.20 
   9  -5   0    3.40   10.60 
   9  -5   0   16.40   12.50 
  -9  -5   0    0.20    8.00 
  -9  -5   0   -2.20    7.10 
  -9  -5   0    1.40    8.80 
   9   5   0   16.20   14.70 
   9   5   0   -4.00    7.30 
   9   5   0   -5.40    8.60 
  -9   5   0   -7.30    6.10 
   9   5   0   11.00   10.40 
   9   5   0    7.50    9.70 
   9   5   0   -1.50    9.40 
   9   5   0    1.60    8.50 
  -9   5   0   -2.50    7.90 
   9   5   0    8.70    9.10 
   9   5   0    6.80    8.80 
   9   5   0   15.40   11.80 
   9   5   0   -1.80    9.90 
   0  -6   0  767.02   40.10 
   0  -6   0  709.53   37.70 
   0  -6   0  725.13   35.70 
   0  -6   0  731.03   37.00 
   0  -6   0  753.52   37.50 
   0  -6   0  775.32   36.20 
   0  -6   0  764.12   37.20 
   0  -6   0  722.33   37.80 
   0  -6   0  782.62   36.30 
   0  -6   0  705.73   32.80 
   0  -6   0  797.62   33.10 
   0  -6   0  823.12   37.00 
   0   6   0  806.42   38.30 
   0   6   0  731.73   41.80 
   0   6   0  803.12   46.50 
   0   6   0  801.12   36.30 
   0   6   0  814.52   42.20 
   0   6   0  807.62   49.00 
   0   6   0  809.62   35.30 
   0   6   0  793.92   36.80 
   0   6   0  708.53   33.40 
   0   6   0  764.22   36.20 
   0   6   0  767.62   36.30 
   0   6   0  686.93   38.50 
   0   6   0  788.32   31.60 
   0   6   0  705.13   39.20 
   0   6   0  766.32   37.40 
  -1  -6   0 2394.16   87.69 
  -1  -6   0 2298.57   88.39 
  -1  -6   0 2403.76   83.99 
  -1  -6   0 2490.05   89.09 
   1  -6   0 2340.17   90.59 
   1  -6   0 2262.67   85.39 
   1  -6   0 2439.36   85.89 
   1  -6   0 2464.15   88.39 
  -1  -6   0 2248.38   84.59 
   1  -6   0 2488.35   89.99 
  -1  -6   0 2424.16   87.49 
  -1  -6   0 2499.15   90.09 
  -1  -6   0 2299.17   90.29 
  -1  -6   0 2408.76   89.69 
  -1  -6   0 2425.06   90.19 
  -1  -6   0 2200.18   86.49 
   1  -6   0 2480.55   88.49 
  -1  -6   0 2520.45   90.99 
   1  -6   0 2428.76   87.69 
   1  -6   0 2542.05   86.69 
   1  -6   0 2461.75   89.79 
   1  -6   0 2381.86   81.29 
  -1  -6   0 2402.36   85.09 
   1  -6   0 2463.95   81.09 
  -1   6   0 2455.45   93.39 
   1   6   0 2468.45   95.09 
   1   6   0 2373.26   90.99 
  -1   6   0 2508.35   88.39 
  -1   6   0 2453.55   84.49 
   1   6   0 2532.15  102.29 
  -1   6   0 2340.57   86.19 
  -1   6   0 2482.85   86.89 
  -1   6   0 2431.46   93.49 
   1   6   0 2364.06   87.19 
  -1   6   0 2033.10   83.49 
  -1   6   0 2496.35   89.69 
   1   6   0 2408.96   86.69 
   1   6   0 2289.77   85.69 
   1   6   0 2503.45   93.49 
  -1   6   0 2516.45   95.29 
   1   6   0 2445.56   82.59 
   1   6   0 2407.96   88.79 
  -1   6   0 2461.85   88.69 
  -1   6   0 2315.87   88.59 
  -1   6   0 2449.75   88.09 
  -1   6   0 2374.06   86.39 
  -1   6   0 2225.58   94.59 
   1   6   0 2458.35   83.49 
  -1   6   0 2540.65  103.09 
  -1   6   0 2485.55  106.39 
  -1   6   0 2328.57   85.59 
   1   6   0 2489.45   86.49 
   1   6   0 2440.56   90.69 
  -1   6   0 2273.77   78.29 
  -1   6   0 2430.96   80.69 
   1   6   0 2563.14   99.39 
   1   6   0 2345.37   86.89 
   1   6   0 2313.47   88.09 
   2  -6   0  315.77   22.70 
   2  -6   0  300.57   15.80 
  -2  -6   0  295.47   21.10 
  -2  -6   0  281.57   22.10 
  -2  -6   0  292.97   20.40 
  -2  -6   0  324.07   22.90 
   2  -6   0  300.87   22.10 
   2  -6   0  310.77   20.70 
  -2  -6   0  332.07   23.20 
   2  -6   0  342.37   17.70 
  -2  -6   0  325.17   23.30 
   2  -6   0  364.36   21.20 
   2  -6   0  335.87   22.30 
   2  -6   0  299.87   20.60 
   2  -6   0  316.47   16.30 
  -2  -6   0  289.87   19.60 
  -2  -6   0  318.07   19.20 
  -2  -6   0  325.47   16.80 
  -2  -6   0  269.17   22.40 
  -2  -6   0  358.96   24.40 
   2  -6   0  327.17   24.70 
  -2  -6   0  328.67   23.50 
   2  -6   0  323.87   15.30 
   2  -6   0  313.67   20.00 
  -2   6   0  309.07   22.80 
   2   6   0  293.27   19.40 
  -2   6   0  329.17   19.20 
  -2   6   0  283.07   16.50 
   2   6   0  322.37   26.30 
   2   6   0  279.17   21.20 
   2   6   0  345.87   22.60 
   2   6   0  271.47   20.70 
  -2   6   0  313.37   17.00 
   2   6   0  321.37   21.20 
  -2   6   0  286.97   19.60 
   2   6   0  325.37   29.20 
  -2   6   0  346.87   22.00 
   2   6   0  302.07   20.90 
  -2   6   0  285.47   21.00 
   2   6   0  317.97   23.70 
  -2   6   0  298.57   22.20 
   2   6   0  287.37   21.10 
  -2   6   0  361.36   22.10 
  -2   6   0  293.87   20.30 
   2   6   0  326.87   17.40 
  -2   6   0  315.67   13.70 
   2   6   0  321.37   22.50 
  -2   6   0  355.26   19.50 
  -2   6   0  309.07   38.20 
  -2   6   0  350.46   27.30 
  -2   6   0  398.66   28.40 
   2   6   0  337.27   25.90 
  -2   6   0  289.07   34.80 
  -2   6   0  324.17   19.60 
  -3  -6   0  232.58   19.80 
   3  -6   0  203.58   21.30 
  -3  -6   0  195.78   11.70 
   3  -6   0  213.78   16.90 
  -3  -6   0  216.78   20.90 
   3  -6   0  191.98   15.50 
  -3  -6   0  231.68   24.00 
   3  -6   0  207.38   22.50 
  -3  -6   0  210.38   14.10 
  -3  -6   0  218.08   15.40 
  -3  -6   0  223.88   18.60 
  -3  -6   0  241.78   18.30 
   3  -6   0  215.88   16.10 
  -3  -6   0  249.78   20.30 
   3  -6   0  210.88   16.70 
  -3  -6   0  199.08   22.10 
   3  -6   0  197.08   11.00 
  -3  -6   0  194.88   20.20 
  -3  -6   0  208.78   20.70 
  -3  -6   0  191.08   21.20 
   3  -6   0  233.18   24.90 
  -3  -6   0  185.88   21.80 
  -3  -6   0  211.88   14.60 
   3   6   0  171.48   18.90 
   3   6   0  169.68   18.10 
  -3   6   0  193.38   24.70 
  -3   6   0  213.08   20.80 
   3   6   0  255.57   30.50 
  -3   6   0  240.68   19.30 
   3   6   0  195.58   20.50 
   3   6   0  189.88   19.40 
   3   6   0  201.68   12.40 
  -3   6   0  188.68   21.50 
  -3   6   0  220.18   15.80 
  -3   6   0  204.18   20.70 
  -3   6   0  211.08   15.30 
   3   6   0  188.18   19.90 
   3   6   0  216.38   18.20 
   3   6   0  175.98   22.40 
   3   6   0  258.77   27.80 
   3   6   0  200.18   20.80 
  -3   6   0  156.58   23.10 
   3   6   0  194.58   21.90 
  -3   6   0  240.98   17.50 
   3   6   0  208.08   21.70 
  -3   6   0  260.27   20.90 
  -3   6   0  181.68   13.30 
  -4  -6   0    8.90    6.10 
  -4  -6   0   18.40    8.60 
  -4  -6   0   17.10    6.40 
  -4  -6   0   14.10    7.10 
   4  -6   0   14.70    8.40 
   4  -6   0   26.40    8.80 
   4  -6   0   23.30    7.00 
  -4  -6   0   12.80    6.70 
  -4  -6   0    4.70    5.80 
   4  -6   0   15.80    6.70 
   4  -6   0   10.40    7.00 
   4  -6   0   11.10    5.10 
   4  -6   0    6.80    6.60 
  -4  -6   0   17.90    5.20 
  -4  -6   0   22.20    7.50 
  -4  -6   0    8.40    4.80 
  -4  -6   0   27.10    8.90 
  -4  -6   0    8.70    6.10 
  -4  -6   0   10.50    6.90 
   4  -6   0   15.30    6.40 
   4   6   0   15.50   10.60 
  -4   6   0   19.80    5.90 
   4   6   0   11.80    8.00 
   4   6   0   12.40    6.90 
  -4   6   0   20.80    7.20 
   4   6   0   22.10    9.50 
  -4   6   0   11.80    5.40 
  -4   6   0    8.40    6.80 
   4   6   0   10.90    7.30 
   4   6   0   11.20    7.20 
   4   6   0   21.90    9.30 
   4   6   0   11.90    7.10 
  -4   6   0   21.10   10.60 
   4   6   0    8.80    6.60 
   4   6   0   20.30    8.30 
  -4   6   0    5.00    6.00 
  -4   6   0   12.00    7.00 
   4   6   0   23.50    7.80 
  -4   6   0    8.30    7.00 
  -4   6   0   34.50    9.50 
  -4   6   0   16.80    5.80 
  -4   6   0   19.00    5.50 
   4   6   0   19.10    6.90 
  -5  -6   0  276.07   28.20 
   5  -6   0  337.27   33.30 
   5  -6   0  309.97   19.30 
  -5  -6   0  242.28   27.30 
   5  -6   0  327.97   19.60 
   5  -6   0  308.17   20.30 
  -5  -6   0  283.37   23.30 
   5  -6   0  332.37   26.70 
  -5  -6   0  278.27   20.80 
  -5  -6   0  311.07   25.10 
  -5  -6   0  248.48   25.20 
  -5  -6   0  288.77   20.40 
  -5  -6   0  300.47   18.90 
   5  -6   0  345.57   21.80 
  -5  -6   0  291.37   22.80 
  -5  -6   0  273.87   23.60 
  -5  -6   0  328.47   25.00 
   5  -6   0  356.96   25.30 
   5  -6   0  287.87   29.90 
  -5  -6   0  326.27   26.10 
  -5   6   0  284.47   23.40 
   5   6   0  314.47   22.60 
   5   6   0  302.87   24.80 
   5   6   0  293.67   24.70 
   5   6   0  285.57   34.80 
  -5   6   0  324.77   32.60 
   5   6   0  274.47   22.90 
   5   6   0  319.47   32.40 
   5   6   0  260.77   29.10 
  -5   6   0  309.67   32.40 
   5   6   0  306.07   31.90 
  -5   6   0  297.67   20.30 
  -5   6   0  355.36   22.60 
   5   6   0  291.77   23.70 
  -5   6   0  305.97   23.60 
   5   6   0  350.76   25.10 
   5   6   0  280.47   23.90 
  -5   6   0  336.87   24.30 
  -5   6   0  333.27   25.50 
   5   6   0  258.67   26.40 
  -5   6   0  366.36   22.80 
   5   6   0  295.67   23.30 
  -6  -6   0  124.09   18.20 
   6  -6   0  124.59   20.60 
   6  -6   0   85.69   17.20 
  -6  -6   0  145.79   18.20 
  -6  -6   0   99.59   18.30 
  -6  -6   0  135.89   21.50 
  -6  -6   0  116.79   18.90 
  -6  -6   0  120.99   21.90 
  -6  -6   0   93.39   15.60 
  -6  -6   0  102.89   16.90 
  -6  -6   0  118.79   14.90 
   6  -6   0  141.49   16.30 
  -6  -6   0  102.29   17.40 
  -6  -6   0   78.59   16.40 
   6  -6   0  148.19   22.90 
   6  -6   0  111.19   17.10 
  -6  -6   0   98.99   16.90 
  -6  -6   0  109.29   15.70 
   6   6   0  106.49   17.00 
   6   6   0  139.99   21.90 
   6   6   0  121.79   18.90 
   6   6   0  134.59   19.20 
  -6   6   0  131.89   21.10 
   6   6   0  127.09   24.90 
  -6   6   0  112.49   15.40 
  -6   6   0   84.69   15.80 
   6   6   0  116.19   18.30 
   6   6   0  103.39   16.90 
  -6   6   0  105.29   15.60 
  -6   6   0  105.19   18.70 
   6   6   0  102.39   16.00 
   6   6   0   99.79   17.30 
   6   6   0  108.49   22.60 
   6   6   0   89.59   15.90 
  -6   6   0   81.39   14.80 
   6   6   0  115.89   20.60 
  -7  -6   0  525.75   34.00 
  -7  -6   0  547.95   35.50 
   7  -6   0  593.64   40.00 
  -7  -6   0  523.65   33.10 
  -7  -6   0  522.05   31.40 
  -7  -6   0  615.04   39.00 
  -7  -6   0  467.85   34.30 
  -7  -6   0  513.25   37.40 
  -7  -6   0  510.25   33.10 
  -7  -6   0  556.54   40.70 
   7  -6   0  560.84   40.30 
  -7  -6   0  497.55   36.00 
  -7  -6   0  574.24   40.00 
   7  -6   0  546.55   38.50 
  -7  -6   0  543.65   38.60 
   7  -6   0  515.75   34.90 
  -7  -6   0  559.74   36.50 
   7   6   0  575.74   35.60 
   7   6   0  547.15   37.70 
  -7   6   0  566.84   36.80 
   7   6   0  526.15   39.60 
   7   6   0  534.55   37.70 
  -7   6   0  516.75   33.30 
   7   6   0  563.24   37.20 
   7   6   0  561.74   34.90 
   7   6   0  565.34   37.70 
   7   6   0  601.54   34.30 
  -7   6   0  655.23   35.30 
   7   6   0  552.24   36.00 
   7   6   0  544.05   45.40 
  -7   6   0  526.15   34.50 
  -7   6   0  558.34   36.90 
   7   6   0  556.74   41.10 
  -7   6   0  586.34   37.00 
   7   6   0  567.24   36.50 
   7   6   0  515.25   46.50 
   8  -6   0   34.80   15.40 
   8  -6   0   84.09   17.60 
  -8  -6   0   18.60   12.40 
   8  -6   0   32.80   15.00 
  -8  -6   0   48.30   13.10 
  -8  -6   0   33.40   11.00 
  -8  -6   0   47.50   14.70 
  -8  -6   0   44.00   15.30 
  -8  -6   0   45.00   15.10 
  -8  -6   0   56.09   16.50 
   8  -6   0   43.20   13.90 
  -8  -6   0   38.10   13.00 
  -8  -6   0   54.19   14.10 
  -8  -6   0   30.30   11.90 
  -8  -6   0   34.10   14.50 
  -8   6   0   38.50   12.90 
   8   6   0   88.39   20.80 
   8   6   0   58.19   14.80 
  -8   6   0   45.10   13.00 
   8   6   0   58.99   20.80 
   8   6   0   76.79   16.40 
  -8   6   0   73.29   15.80 
   8   6   0   70.39   17.50 
   8   6   0   11.20    9.90 
  -8   6   0   62.69   15.40 
   8   6   0   30.60   12.70 
   8   6   0   69.39   21.10 
   8   6   0   63.69   14.90 
   8   6   0   42.60   17.40 
   8   6   0   35.60   14.00 
   8   6   0   48.90   14.90 
   8   6   0   41.90   14.40 
   8   6   0   49.10   12.50 
   0  -7   0   -3.60    4.20 
   0  -7   0   -0.30    4.40 
   0  -7   0   -2.40    4.90 
   0  -7   0   -0.30    4.80 
   0  -7   0   -0.90    3.30 
   0  -7   0   -1.50    3.60 
   0  -7   0   -2.30    4.20 
   0  -7   0    0.60    4.30 
   0  -7   0    3.00    5.10 
   0  -7   0    7.10    5.70 
   0  -7   0   -4.10    3.30 
   0  -7   0    6.30    5.70 
   0  -7   0    0.40    4.60 
   0   7   0    0.90    4.80 
   0   7   0    1.20    4.30 
   0   7   0    0.40    4.70 
   0   7   0    1.40    5.40 
   0   7   0   -1.90    5.10 
   0   7   0    5.70    5.80 
   0   7   0    7.20    6.30 
   0   7   0   -1.10    4.90 
   0   7   0   -0.40    3.40 
   0   7   0    0.60    4.80 
   0   7   0    8.40    9.30 
   0   7   0    1.10    5.70 
   0   7   0    3.60    6.00 
   0   7   0   -7.60    7.00 
   0   7   0    2.80    6.30 
   0   7   0   -1.50    5.20 
   0   7   0   -1.70    3.90 
   0   7   0    1.20    5.30 
   1  -7   0   -3.00    4.20 
  -1  -7   0    2.30    5.00 
  -1  -7   0    4.20    5.60 
   1  -7   0    5.50    5.20 
  -1  -7   0   -1.10    5.40 
  -1  -7   0    0.90    4.60 
   1  -7   0   -0.90    3.70 
   1  -7   0    1.20    5.70 
  -1  -7   0   -3.50    3.30 
  -1  -7   0    4.00    5.30 
  -1  -7   0   -3.00    4.60 
   1  -7   0    7.80    6.20 
   1  -7   0    2.70    4.00 
  -1  -7   0   -4.30    3.20 
  -1  -7   0    6.90    6.00 
   1  -7   0   -2.80    4.70 
   1  -7   0   -3.00    4.00 
  -1  -7   0    2.60    2.90 
   1  -7   0   -0.20    4.70 
   1  -7   0   10.10    7.10 
  -1  -7   0   -2.70    4.30 
   1  -7   0   -0.10    4.50 
  -1  -7   0    1.10    4.80 
  -1  -7   0   -0.60    4.80 
  -1   7   0    2.60    4.70 
   1   7   0    5.30    6.40 
  -1   7   0    2.00    3.40 
   1   7   0   -3.10    4.60 
  -1   7   0   -0.60    4.00 
  -1   7   0    3.90    3.30 
  -1   7   0   11.90   10.00 
  -1   7   0   20.20    8.00 
  -1   7   0   -0.60    6.50 
  -1   7   0   -4.40    6.70 
  -1   7   0   -1.10    4.90 
  -1   7   0   -3.30    4.60 
   1   7   0   -5.80    3.30 
  -1   7   0   -1.20    5.50 
   1   7   0    0.30    5.30 
  -1   7   0   -0.60    4.70 
   1   7   0    1.40    4.10 
  -1   7   0    4.50    5.20 
   1   7   0    0.60    3.80 
  -1   7   0   -3.10    3.80 
   1   7   0    7.90    6.40 
   1   7   0    6.40    5.80 
   1   7   0   -8.70    5.20 
   1   7   0   -4.20    6.60 
   1   7   0    0.50    3.80 
  -1   7   0   -1.20    4.80 
  -1   7   0   -1.00    4.60 
   1   7   0    7.20    6.60 
   1   7   0    9.50    7.40 
   1   7   0    0.70    4.60 
  -1   7   0   12.40    8.20 
  -1   7   0    1.20    5.00 
  -1   7   0   -5.40    4.20 
   1   7   0   -6.10    5.80 
   2  -7   0   32.50   10.70 
  -2  -7   0   49.40   12.10 
   2  -7   0   57.09   11.50 
   2  -7   0   33.50    8.80 
   2  -7   0   43.20   11.70 
  -2  -7   0   37.60   10.80 
   2  -7   0   41.60    7.10 
  -2  -7   0   34.40   10.40 
  -2  -7   0   40.10    9.40 
   2  -7   0   32.90    9.70 
  -2  -7   0   43.30   11.00 
  -2  -7   0   33.10    9.20 
   2  -7   0   49.90   10.90 
  -2  -7   0   46.30    7.20 
  -2  -7   0   38.30    8.70 
  -2  -7   0   37.30   11.10 
   2  -7   0   39.90    7.60 
  -2  -7   0   49.90   11.60 
  -2  -7   0   36.60    9.40 
  -2  -7   0   39.00   10.40 
   2  -7   0   47.30   10.20 
   2  -7   0   30.60    9.30 
  -2  -7   0   31.80    9.90 
   2  -7   0   29.20    9.00 
   2   7   0   72.59   14.50 
  -2   7   0   12.30    7.30 
   2   7   0   28.60    9.20 
  -2   7   0   36.70    9.60 
  -2   7   0   67.79   19.00 
   2   7   0   31.00    8.80 
   2   7   0   48.20   11.50 
   2   7   0   59.59   13.10 
  -2   7   0   46.90    9.90 
  -2   7   0   65.49   12.80 
   2   7   0   34.00   12.70 
  -2   7   0   62.69   13.10 
  -2   7   0   37.20    8.70 
  -2   7   0   43.40    8.30 
  -2   7   0   49.30    9.20 
   2   7   0   36.60    9.30 
   2   7   0   54.09   15.60 
  -2   7   0   42.00    7.10 
  -2   7   0   48.90   12.70 
  -2   7   0   69.59   12.20 
   2   7   0   55.19   11.30 
  -2   7   0   50.99   10.60 
   2   7   0   46.30    8.40 
   2   7   0   27.40    9.90 
  -2   7   0   38.80   10.80 
  -2   7   0   52.09   15.10 
   2   7   0   34.80   10.80 
   2   7   0   35.30    9.50 
  -2   7   0   46.30   17.50 
   2   7   0   33.40   11.10 
  -3  -7   0   83.59   11.90 
  -3  -7   0   87.79   15.60 
   3  -7   0   71.59   13.90 
  -3  -7   0   68.79   15.00 
  -3  -7   0   91.09   16.50 
  -3  -7   0   88.39   15.40 
  -3  -7   0   70.99   14.10 
   3  -7   0   80.79   13.00 
   3  -7   0  101.49   15.10 
  -3  -7   0   76.79   13.10 
   3  -7   0   64.09   11.50 
  -3  -7   0   87.29   12.30 
  -3  -7   0   65.99   13.00 
   3  -7   0  109.09   17.80 
  -3  -7   0   82.19   15.90 
   3  -7   0   78.79   12.30 
  -3  -7   0   78.69   10.20 
  -3  -7   0   86.29   16.90 
  -3  -7   0   76.89   14.10 
   3  -7   0  101.99   17.20 
  -3  -7   0   72.39   13.50 
   3   7   0   88.69   15.60 
  -3   7   0   85.39   14.40 
   3   7   0   83.39   20.00 
  -3   7   0   94.39   15.90 
   3   7   0   88.59   10.80 
  -3   7   0   64.69   13.40 
   3   7   0  104.29   15.40 
   3   7   0   96.59   17.30 
  -3   7   0   80.69   14.60 
  -3   7   0   72.59   11.90 
   3   7   0   79.39   14.80 
  -3   7   0  117.99   18.50 
  -3   7   0   71.59   14.50 
   3   7   0   80.59   14.00 
   3   7   0   82.69   17.90 
  -3   7   0  104.99   20.50 
  -3   7   0   57.59   15.50 
  -3   7   0   83.49   10.40 
  -3   7   0   79.99   11.50 
   3   7   0   64.39   12.80 
   3   7   0   51.29   14.40 
   3   7   0   83.79   14.50 
   3   7   0   61.19   13.00 
  -3   7   0   92.49   14.20 
   3   7   0   84.79   15.30 
  -4  -7   0  206.98   19.70 
   4  -7   0  235.68   24.70 
  -4  -7   0  179.48   21.90 
  -4  -7   0  162.98   20.20 
  -4  -7   0  203.28   22.10 
  -4  -7   0  165.88   23.20 
   4  -7   0  200.38   24.40 
  -4  -7   0  234.58   26.90 
  -4  -7   0  176.68   23.10 
  -4  -7   0  251.57   26.00 
  -4  -7   0  251.47   16.90 
   4  -7   0  220.38   17.50 
   4  -7   0  239.48   19.20 
  -4  -7   0  230.08   25.60 
   4  -7   0  242.38   28.10 
   4  -7   0  205.08   17.40 
  -4  -7   0  169.68   21.50 
   4  -7   0  230.28   19.00 
   4   7   0  211.38   23.10 
   4   7   0  255.67   26.30 
   4   7   0  178.38   22.60 
   4   7   0  210.28   23.40 
  -4   7   0  225.18   25.10 
  -4   7   0  215.98   23.50 
   4   7   0  187.38   23.00 
  -4   7   0  212.48   25.90 
   4   7   0  223.88   25.00 
  -4   7   0  180.58   21.70 
  -4   7   0  197.18   21.00 
  -4   7   0  216.98   29.70 
   4   7   0  208.38   25.50 
  -4   7   0  209.48   16.70 
   4   7   0  207.68   27.20 
  -4   7   0  192.58   28.40 
  -4   7   0  210.88   15.80 
   4   7   0  202.58   28.30 
   4   7   0  180.78   22.30 
   4   7   0  192.58   21.50 
   4   7   0  212.48   31.50 
   5  -7   0  635.94   32.00 
   5  -7   0  642.74   34.00 
  -5  -7   0  649.54   37.70 
  -5  -7   0  618.34   38.60 
   5  -7   0  624.54   33.90 
   5  -7   0  637.14   33.00 
  -5  -7   0  688.03   41.70 
  -5  -7   0  621.14   37.20 
  -5  -7   0  548.15   36.90 
  -5  -7   0  586.14   32.00 
   5  -7   0  633.74   37.20 
  -5  -7   0  642.54   34.20 
  -5  -7   0  631.44   40.40 
   5  -7   0  673.83   41.50 
  -5  -7   0  692.03   40.50 
  -5  -7   0  649.83   39.50 
  -5  -7   0  665.23   41.10 
   5  -7   0  600.74   39.90 
   5   7   0  649.34   39.40 
  -5   7   0  703.33   33.40 
   5   7   0  580.44   37.70 
   5   7   0  653.53   37.10 
   5   7   0  620.94   38.00 
  -5   7   0  657.83   33.90 
  -5   7   0  627.54   37.90 
  -5   7   0  598.64   39.80 
  -5   7   0  729.93   41.20 
   5   7   0  664.33   38.20 
  -5   7   0  721.33   36.80 
  -5   7   0  627.14   37.10 
   5   7   0  669.43   41.40 
  -5   7   0  646.14   44.40 
   5   7   0  563.74   41.50 
   5   7   0  633.74   40.20 
   5   7   0  593.14   37.00 
  -5   7   0  641.14   43.20 
   5   7   0  658.63   50.29 
   5   7   0  634.14   38.00 
   5   7   0  608.54   42.00 
   6  -7   0  775.12   48.10 
  -6  -7   0  781.42   44.50 
  -6  -7   0  796.42   47.90 
  -6  -7   0  654.33   43.20 
   6  -7   0  827.82   44.10 
  -6  -7   0  764.42   39.40 
  -6  -7   0  707.63   45.60 
  -6  -7   0  792.12   44.40 
  -6  -7   0  741.13   44.10 
  -6  -7   0  788.22   46.90 
  -6  -7   0  780.72   40.70 
   6  -7   0  836.92   49.00 
  -6  -7   0  769.72   44.90 
  -6  -7   0  793.62   46.70 
   6  -7   0  819.92   47.90 
  -6   7   0  745.93   39.80 
   6   7   0  780.22   56.99 
  -6   7   0  719.53   42.00 
   6   7   0  765.72   45.70 
  -6   7   0  756.62   44.10 
   6   7   0  738.63   49.30 
   6   7   0  762.02   43.50 
   6   7   0  781.92   42.70 
  -6   7   0  751.22   48.50 
   6   7   0  838.82   45.70 
   6   7   0  810.82   45.80 
   6   7   0  744.93   46.10 
   6   7   0  804.92   47.30 
   6   7   0  808.12   45.10 
   6   7   0  732.63   48.20 
  -6   7   0  939.21   51.39 
   6   7   0  821.42   45.60 
  -7  -7   0  282.07   33.20 
  -7  -7   0  299.57   35.50 
  -7  -7   0  377.26   36.70 
  -7  -7   0  237.88   33.50 
  -7  -7   0  275.97   31.20 
  -7  -7   0  301.07   34.00 
  -7  -7   0  331.07   33.10 
  -7  -7   0  302.87   34.50 
  -7  -7   0  359.56   38.10 
  -7  -7   0  356.86   32.20 
   7  -7   0  351.06   38.60 
  -7  -7   0  335.07   26.20 
   7  -7   0  304.27   34.70 
   7  -7   0  349.37   37.50 
  -7  -7   0  325.17   35.00 
   7   7   0  322.57   32.80 
   7   7   0  339.77   39.60 
   7   7   0  323.27   36.60 
   7   7   0  383.86   36.20 
   7   7   0  330.87   37.90 
   7   7   0  285.47   32.10 
   7   7   0  303.67   42.70 
   7   7   0  361.16   36.30 
   7   7   0  288.17   32.30 
  -7   7   0  337.67   26.80 
   7   7   0  322.37   31.00 
   7   7   0  390.96   32.50 
  -7   7   0  341.37   27.50 
  -7   7   0  347.47   34.20 
   7   7   0  311.87   31.80 
   7   7   0  362.56   37.00 
   0  -8   0 2407.26   92.89 
   0  -8   0 2265.47   91.09 
   0  -8   0 2400.86   85.19 
   0  -8   0 2334.17   84.19 
   0  -8   0 2183.08   88.89 
   0  -8   0 2281.87   89.29 
   0  -8   0 2218.38   92.09 
   0  -8   0 2315.77   92.09 
   0  -8   0 2230.98   89.79 
   0  -8   0 2446.46   94.69 
   0  -8   0 2281.27   90.89 
   0  -8   0 2308.47   88.79 
   0   8   0 2484.65  113.69 
   0   8   0 2327.07   90.19 
   0   8   0 2268.57   92.39 
   0   8   0 2392.66   86.39 
   0   8   0 2265.27   99.69 
   0   8   0 2304.87   91.69 
   0   8   0 2095.39   87.99 
   0   8   0 2469.15   91.29 
   0   8   0 2101.89   87.39 
   0   8   0 2376.96   96.59 
   0   8   0 2352.86   96.49 
   0   8   0 2170.38   91.39 
   0   8   0 2532.45  107.49 
   0   8   0 2312.17   87.09 
   0   8   0 2312.07   98.49 
   0   8   0 2157.08   80.19 
   0   8   0 2147.59   88.49 
   0   8   0 2246.88   90.29 
   1  -8   0  476.25   31.20 
  -1  -8   0  478.45   30.10 
   1  -8   0  516.65   33.60 
   1  -8   0  520.75   34.60 
   1  -8   0  427.16   31.40 
  -1  -8   0  541.55   34.60 
  -1  -8   0  483.45   33.00 
   1  -8   0  496.65   31.50 
   1  -8   0  500.85   32.10 
   1  -8   0  445.66   29.40 
  -1  -8   0  506.65   34.60 
   1  -8   0  455.35   31.60 
   1  -8   0  412.16   29.30 
  -1  -8   0  499.95   31.40 
  -1  -8   0  428.96   30.20 
  -1  -8   0  516.45   29.40 
  -1  -8   0  464.45   31.70 
   1  -8   0  480.65   25.80 
  -1  -8   0  448.66   31.70 
   1  -8   0  533.25   31.20 
   1  -8   0  498.35   26.50 
  -1  -8   0  490.15   32.70 
  -1  -8   0  478.15   33.30 
  -1  -8   0  452.35   28.50 
   1   8   0  434.66   30.80 
   1   8   0  441.06   26.70 
  -1   8   0  486.85   29.10 
  -1   8   0  482.05   45.00 
  -1   8   0  508.85   31.70 
   1   8   0  540.85   34.30 
  -1   8   0  513.45   34.40 
   1   8   0  409.46   34.00 
   1   8   0  472.75   32.40 
   1   8   0  495.95   31.50 
   1   8   0  488.15   27.10 
   1   8   0  458.75   31.00 
  -1   8   0  529.95   34.50 
  -1   8   0  504.05   36.90 
  -1   8   0  488.55   30.70 
  -1   8   0  425.06   31.20 
  -1   8   0  635.04   39.40 
  -1   8   0  426.26   30.50 
   1   8   0  454.65   42.40 
  -1   8   0  412.16   29.40 
   1   8   0  477.95   30.40 
   1   8   0  479.95   34.50 
  -1   8   0  474.65   36.50 
  -1   8   0  496.85   38.50 
   1   8   0  477.15   35.20 
   1   8   0  451.35   31.10 
   1   8   0  506.35   40.70 
  -1   8   0  513.35   42.30 
  -1   8   0  481.35   29.40 
   1   8   0  496.55   32.10 
   1   8   0  503.15   37.80 
  -1   8   0  499.95   36.10 
  -1   8   0  471.15   32.10 
  -1   8   0  480.55   30.60 
   1   8   0  487.65   30.30 
  -2  -8   0  618.04   37.60 
  -2  -8   0  566.84   31.90 
   2  -8   0  487.95   31.00 
  -2  -8   0  533.45   33.50 
  -2  -8   0  481.45   31.10 
   2  -8   0  597.54   32.80 
  -2  -8   0  538.95   27.90 
   2  -8   0  524.15   34.20 
   2  -8   0  517.35   35.00 
   2  -8   0  633.24   35.40 
  -2  -8   0  567.84   36.50 
   2  -8   0  565.04   27.30 
  -2  -8   0  489.55   34.30 
  -2  -8   0  503.85   35.70 
  -2  -8   0  480.95   33.90 
   2  -8   0  597.94   34.80 
  -2  -8   0  576.74   32.30 
  -2  -8   0  549.35   37.50 
   2  -8   0  526.45   32.00 
   2  -8   0  546.55   34.70 
   2  -8   0  574.84   36.40 
   2  -8   0  524.35   32.70 
   2   8   0  607.74   37.00 
   2   8   0  560.04   31.10 
  -2   8   0  533.75   40.20 
   2   8   0  568.54   39.10 
  -2   8   0  672.33   45.10 
   2   8   0  578.14   40.90 
   2   8   0  560.54   33.90 
  -2   8   0  526.15   35.70 
   2   8   0  508.75   35.60 
   2   8   0  520.65   34.50 
  -2   8   0  539.35   32.20 
  -2   8   0  536.45   48.30 
   2   8   0  471.05   35.70 
   2   8   0  484.05   31.80 
   2   8   0  511.95   33.30 
   2   8   0  549.15   28.80 
  -2   8   0  535.85   34.00 
  -2   8   0  521.85   34.60 
  -2   8   0  528.25   33.40 
  -2   8   0  494.05   29.30 
  -2   8   0  533.15   32.60 
   2   8   0  514.15   34.00 
  -2   8   0  519.45   38.60 
   2   8   0  587.94   44.30 
   2   8   0  521.15   43.90 
   2   8   0  603.44   35.40 
  -2   8   0  563.34   33.60 
  -2   8   0  506.55   42.90 
  -3  -8   0  129.89   20.40 
  -3  -8   0  132.89   19.70 
   3  -8   0  103.19   16.10 
   3  -8   0  112.19   18.30 
   3  -8   0  105.59   15.40 
   3  -8   0   83.99   14.30 
  -3  -8   0  117.29   17.00 
   3  -8   0  114.69   18.90 
  -3  -8   0  109.49   16.90 
  -3  -8   0   96.99   18.60 
   3  -8   0   97.79   17.30 
  -3  -8   0   83.59   15.90 
   3  -8   0   88.89   14.90 
  -3  -8   0  102.29   13.60 
  -3  -8   0  104.19   17.90 
   3  -8   0  113.79   19.50 
  -3  -8   0  108.29   17.70 
  -3  -8   0  135.29   21.60 
  -3  -8   0   88.69   17.30 
   3  -8   0  110.79   16.70 
   3   8   0  117.19   19.10 
  -3   8   0  111.39   17.80 
  -3   8   0   90.19   17.70 
   3   8   0   96.99   23.60 
   3   8   0   83.19   15.30 
   3   8   0   85.99   18.10 
   3   8   0   94.79   17.00 
  -3   8   0   96.69   15.40 
   3   8   0   98.29   18.80 
   3   8   0   91.29   15.40 
   3   8   0  103.69   18.00 
   3   8   0   84.29   16.30 
   3   8   0   98.19   17.00 
  -3   8   0  120.59   23.80 
  -3   8   0  108.29   20.70 
  -3   8   0  139.39   20.30 
   3   8   0   93.89   15.90 
  -3   8   0   96.29   18.20 
  -3   8   0   92.89   14.70 
   3   8   0  104.79   21.60 
   3   8   0   78.49   20.80 
  -4  -8   0  245.08   25.80 
  -4  -8   0  248.18   29.80 
   4  -8   0  207.28   26.70 
   4  -8   0  237.98   28.40 
  -4  -8   0  239.98   26.80 
   4  -8   0  257.37   21.60 
  -4  -8   0  202.28   23.70 
   4  -8   0  250.17   20.70 
  -4  -8   0  189.48   19.80 
   4  -8   0  220.88   22.20 
  -4  -8   0  284.37   32.00 
  -4  -8   0  267.47   29.40 
  -4  -8   0  236.48   28.20 
  -4  -8   0  279.17   30.90 
   4  -8   0  267.27   28.10 
   4  -8   0  232.68   23.90 
  -4  -8   0  229.08   26.90 
  -4   8   0  197.48   26.10 
   4   8   0  231.38   32.70 
   4   8   0  219.18   28.60 
   4   8   0  195.18   24.30 
  -4   8   0  227.18   26.60 
  -4   8   0  242.38   33.10 
  -4   8   0  243.58   25.00 
   4   8   0  231.18   25.80 
   4   8   0  260.67   28.40 
   4   8   0  259.47   28.30 
  -4   8   0  241.78   32.50 
  -4   8   0  251.77   29.80 
   4   8   0  238.08   27.80 
   4   8   0  234.18   27.50 
  -4   8   0  240.88   26.00 
   4   8   0  233.88   36.10 
   4   8   0  248.38   31.10 
   4   8   0  216.68   24.30 
   4   8   0  225.38   26.10 
   5  -8   0  114.99   18.70 
  -5  -8   0  122.29   21.00 
  -5  -8   0  114.49   20.40 
  -5  -8   0   96.29   18.60 
  -5  -8   0  158.78   18.60 
   5  -8   0  107.49   16.70 
  -5  -8   0  106.69   17.90 
   5  -8   0  105.79   20.50 
  -5  -8   0  114.19   20.60 
  -5  -8   0  129.79   22.50 
   5  -8   0  128.89   17.90 
   5  -8   0  127.49   20.20 
   5  -8   0   89.39   18.50 
  -5  -8   0  112.19   20.10 
  -5  -8   0  148.39   21.60 
  -5  -8   0  137.19   22.90 
  -5   8   0  125.39   21.00 
   5   8   0   93.09   17.50 
  -5   8   0  146.29   27.40 
   5   8   0  149.88   21.90 
   5   8   0  130.69   27.80 
   5   8   0  117.79   19.20 
   5   8   0  118.69   19.90 
   5   8   0  120.29   20.90 
  -5   8   0  117.09   23.50 
   5   8   0  128.69   20.10 
  -5   8   0  119.39   19.00 
   5   8   0   99.19   19.10 
   5   8   0   99.29   21.50 
  -5   8   0  152.88   23.60 
   5   8   0  139.79   25.60 
   5   8   0  122.49   20.60 
   5   8   0  135.59   23.30 
  -6  -8   0  461.05   37.70 
  -6  -8   0  442.56   35.90 
  -6  -8   0  472.35   34.50 
  -6  -8   0  409.36   32.90 
  -6  -8   0  473.95   38.10 
  -6  -8   0  509.85   37.90 
   6  -8   0  467.55   38.10 
  -6  -8   0  500.85   36.80 
  -6  -8   0  498.65   36.80 
  -6  -8   0  450.55   36.50 
  -6  -8   0  509.35   32.00 
   6  -8   0  495.35   37.60 
   6   8   0  542.05   38.20 
   6   8   0  481.05   36.00 
  -6   8   0  477.85   35.30 
   6   8   0  402.86   35.70 
   6   8   0  481.25   36.00 
   6   8   0  491.15   40.60 
   6   8   0  482.65   35.60 
   6   8   0  487.25   50.29 
   6   8   0  421.56   36.20 
   6   8   0  468.45   33.20 
   6   8   0  494.15   35.80 
   6   8   0  492.15   46.80 
   6   8   0  499.65   35.40 
   0  -9   0   -0.80    6.10 
   0  -9   0   -1.00    7.30 
   0  -9   0    3.80    7.20 
   0  -9   0    4.80    7.90 
   0  -9   0   -2.00    5.40 
   0  -9   0    3.00    7.40 
   0  -9   0   -0.30    6.40 
   0  -9   0   -4.40    5.10 
   0  -9   0    0.30    6.40 
   0  -9   0   -3.20    5.80 
   0  -9   0   -0.10    5.30 
   0  -9   0   -2.50    5.60 
   0   9   0   17.10   10.30 
   0   9   0   -2.20    8.20 
   0   9   0   -3.90   10.00 
   0   9   0   -1.30    6.20 
   0   9   0    4.50    6.70 
   0   9   0    1.90    6.80 
   0   9   0    1.50    8.30 
   0   9   0    5.80    7.60 
   0   9   0   -4.70    5.10 
   0   9   0    5.60    7.00 
   0   9   0   -2.70    8.70 
   0   9   0    0.40    6.00 
   0   9   0   -3.40    5.50 
   0   9   0    6.90    9.50 
   0   9   0   -0.90    9.90 
   0   9   0    6.10    7.60 
   1  -9   0   24.00   10.20 
  -1  -9   0   35.10   11.90 
  -1  -9   0   37.40   12.40 
   1  -9   0   30.30   11.10 
  -1  -9   0   18.20   10.70 
  -1  -9   0   23.60    9.10 
  -1  -9   0   31.20   11.60 
   1  -9   0    3.30    8.00 
   1  -9   0   17.10    8.60 
   1  -9   0   26.90   11.00 
   1  -9   0   19.20    7.60 
   1  -9   0   18.50    9.70 
   1  -9   0    8.70    8.30 
  -1  -9   0   49.00   13.90 
  -1  -9   0   35.90   10.60 
  -1  -9   0   18.10    9.70 
   1  -9   0   29.60    8.10 
  -1  -9   0   11.20    9.10 
   1  -9   0   32.00   10.70 
   1  -9   0   21.80    9.50 
  -1  -9   0   21.80   10.30 
   1  -9   0   19.30    8.90 
  -1  -9   0   30.90   10.20 
  -1   9   0   15.60    9.00 
  -1   9   0   13.40    9.80 
   1   9   0   33.80   11.10 
   1   9   0   30.80   15.50 
   1   9   0   -3.60    6.90 
   1   9   0   32.50   11.90 
  -1   9   0   16.50    9.60 
   1   9   0   20.20    9.50 
  -1   9   0   44.80   17.70 
   1   9   0   17.00   10.00 
   1   9   0    4.70    8.20 
  -1   9   0   30.30   14.60 
  -1   9   0   14.70   10.00 
   1   9   0   31.80   12.40 
   1   9   0   13.80    9.90 
   1   9   0   19.60   10.90 
   1   9   0    2.00    8.80 
   1   9   0   29.90   10.80 
  -1   9   0   19.50   10.10 
  -1   9   0   16.40   12.40 
   1   9   0   35.80   12.00 
  -1   9   0   14.00    9.50 
   1   9   0   35.30   12.70 
  -1   9   0   16.40    8.50 
  -1   9   0   23.10    9.40 
   1   9   0   27.30    8.10 
  -1   9   0    6.90   12.10 
  -1   9   0   12.50   12.00 
   1   9   0   13.60    7.70 
   1   9   0   18.60   12.00 
   1   9   0   39.10   17.00 
  -1   9   0    9.20    9.00 
   2  -9   0   12.70    9.80 
  -2  -9   0   13.20   10.10 
   2  -9   0    6.40    8.10 
   2  -9   0   19.10    9.90 
  -2  -9   0   35.20   10.90 
   2  -9   0    9.90    8.10 
  -2  -9   0   22.00    9.60 
  -2  -9   0   17.90   10.20 
  -2  -9   0   15.20    8.80 
   2  -9   0   11.90    7.90 
  -2  -9   0   25.50   10.50 
   2  -9   0   10.20    8.20 
   2  -9   0   14.70    9.20 
  -2  -9   0   18.50    9.90 
   2  -9   0   18.00    9.90 
  -2  -9   0   23.80   10.10 
   2  -9   0    6.60    7.30 
  -2  -9   0   15.80   10.70 
   2   9   0   19.60    9.70 
   2   9   0    5.80    8.20 
  -2   9   0    8.30    7.30 
   2   9   0   33.40   11.80 
   2   9   0   12.80    7.60 
   2   9   0    6.20    9.50 
  -2   9   0   14.00   10.00 
   2   9   0   34.50   15.20 
   2   9   0   19.10   10.80 
   2   9   0   21.80   12.00 
   2   9   0    5.60    7.90 
   2   9   0    9.80   13.20 
   2   9   0   17.50   10.10 
  -2   9   0   25.60   17.50 
  -2   9   0   22.10   11.50 
  -2   9   0   10.20    8.10 
   2   9   0   13.10    9.10 
  -2   9   0   40.60   13.30 
   2   9   0   29.40   11.50 
   2   9   0   13.80    9.70 
   2   9   0   11.20    7.70 
  -2   9   0    7.30    7.70 
  -2   9   0   10.70    9.00 
   2   9   0   27.50   12.70 
  -2   9   0    8.10    7.30 
  -2   9   0   32.50   11.60 
   2   9   0   23.40   10.50 
  -2   9   0   16.90   13.50 
   3  -9   0   67.09   17.70 
   3  -9   0   59.99   15.20 
  -3  -9   0   53.39   13.90 
  -3  -9   0   48.50   12.20 
  -3  -9   0   45.70   13.20 
   3  -9   0   28.70    9.70 
  -3  -9   0   46.50   14.10 
   3  -9   0   49.99   13.20 
  -3  -9   0   49.50   14.90 
  -3  -9   0   55.59   14.30 
  -3  -9   0   45.80   13.30 
   3  -9   0   28.20   10.10 
  -3  -9   0   65.19   15.70 
  -3  -9   0   75.29   17.10 
   3  -9   0   58.79   13.40 
   3  -9   0   63.89   14.30 
   3  -9   0   67.99   16.20 
   3  -9   0   53.99   14.60 
   3   9   0   61.09   15.70 
   3   9   0   52.79   16.70 
   3   9   0   68.09   14.20 
   3   9   0   64.59   16.50 
   3   9   0   45.30   13.50 
   3   9   0   56.19   14.10 
   3   9   0   47.40   14.70 
  -3   9   0   73.19   18.80 
   3   9   0   88.79   18.00 
   3   9   0   65.39   15.00 
  -3   9   0   69.59   15.30 
  -3   9   0   62.39   20.30 
  -3   9   0   51.39   14.70 
  -3   9   0   80.59   17.30 
   3   9   0   53.89   18.60 
   3   9   0   52.89   15.80 
   3   9   0   37.50   16.80 
   3   9   0   59.39   14.70 
  -3   9   0   62.79   15.60 
   3   9   0   40.70   14.60 
   3   9   0   48.40   13.80 
  -4  -9   0   -0.50    6.60 
   4  -9   0   -4.00    6.10 
   4  -9   0    4.20    6.40 
  -4  -9   0    8.40    8.60 
  -4  -9   0   -8.40    7.10 
   4  -9   0    0.60    7.00 
  -4  -9   0    3.30    8.00 
   4  -9   0   11.80    8.50 
  -4  -9   0   10.50    9.10 
   4  -9   0    1.40    6.20 
  -4  -9   0    2.20    7.10 
  -4  -9   0   10.50    8.40 
  -4  -9   0   -1.10    7.50 
   4  -9   0   -1.00    7.70 
   4  -9   0    5.60    8.50 
  -4  -9   0    5.70    8.30 
   4  -9   0   -1.40    8.20 
   4  -9   0    0.70    6.80 
   4   9   0    9.90   11.20 
   4   9   0   13.20   10.10 
   4   9   0   14.70   10.80 
  -4   9   0   -1.60    9.10 
   4   9   0   20.10   11.80 
   4   9   0    3.40    7.30 
  -4   9   0   -1.20    6.50 
   4   9   0    0.40    8.20 
   4   9   0    8.50    9.30 
  -4   9   0    4.40    9.40 
  -4   9   0   -3.20    8.30 
  -4   9   0    1.40    8.80 
   4   9   0    9.20   12.20 
   4   9   0   -3.10    6.50 
   4   9   0    4.30    8.10 
   4   9   0   -1.50    6.70 
   4   9   0    5.60    8.30 
   4   9   0    7.90    9.80 
   4   9   0   -3.80    8.30 
  -5  -9   0  736.73   49.10 
   5  -9   0  795.62   47.10 
  -5  -9   0  740.33   49.70 
   5  -9   0  826.42   49.80 
   5  -9   0  839.22   52.09 
  -5  -9   0  777.52   48.40 
  -5  -9   0  671.93   46.10 
  -5  -9   0  777.02   48.50 
  -5  -9   0  792.82   49.90 
  -5  -9   0  778.02   50.79 
  -5  -9   0  786.82   45.60 
  -5  -9   0  806.02   46.80 
   5   9   0  838.42   50.39 
   5   9   0  785.62   48.30 
   5   9   0  794.52   48.90 
  -5   9   0  869.01   49.90 
   5   9   0  760.62   45.80 
   5   9   0  689.73   46.40 
   5   9   0  794.02   57.09 
   5   9   0  796.92   49.70 
   5   9   0  776.72   49.99 
   5   9   0  792.32   49.99 
   5   9   0  722.53   45.00 
   5   9   0  790.82   51.69 
  -5   9   0  751.82   55.69 
   5   9   0  685.83   58.49 
   5   9   0  826.72   55.29 
   0 -10   0 1481.85   71.19 
   0 -10   0 1519.65   73.39 
   0 -10   0 1480.85   72.59 
   0 -10   0 1466.15   70.79 
   0 -10   0 1476.25   69.59 
   0 -10   0 1485.65   62.99 
   0 -10   0 1310.37   68.49 
   0 -10   0 1576.74   69.79 
   0 -10   0 1383.96   69.19 
   0 -10   0 1399.06   65.19 
   0 -10   0 1526.35   71.69 
   0  10   0 1653.43   79.79 
   0  10   0 1581.54   81.69 
   0  10   0 1592.24   87.49 
   0  10   0 1281.27   70.59 
   0  10   0 1587.84   75.39 
   0  10   0 1457.75   69.59 
   0  10   0 1574.54   82.99 
   0  10   0 1418.96   76.59 
   0  10   0 1450.05   69.49 
   0  10   0 1469.15   65.69 
   0  10   0 1347.77   69.99 
   0  10   0 1509.25   71.19 
   0  10   0 1548.74   94.09 
  -1 -10   0   50.69   14.20 
  -1 -10   0   79.69   17.60 
   1 -10   0   84.19   17.60 
   1 -10   0  104.09   20.50 
  -1 -10   0   73.69   17.60 
   1 -10   0   64.59   15.90 
   1 -10   0   75.69   16.80 
  -1 -10   0   55.99   13.40 
  -1 -10   0   61.29   14.00 
  -1 -10   0   50.79   14.90 
   1 -10   0   58.19   15.90 
   1 -10   0   62.59   16.20 
  -1 -10   0   69.59   17.60 
   1 -10   0   67.09   16.30 
   1 -10   0   66.69   15.40 
  -1 -10   0   84.59   19.00 
  -1 -10   0  106.99   21.10 
   1 -10   0   68.99   15.30 
  -1 -10   0   48.40   20.80 
   1 -10   0   68.59   17.80 
  -1  10   0   62.09   15.80 
   1  10   0   74.69   17.90 
   1  10   0   76.99   19.60 
  -1  10   0   63.09   21.00 
   1  10   0   56.79   15.10 
  -1  10   0   62.49   16.80 
  -1  10   0   49.90   17.30 
  -1  10   0   67.59   15.70 
   1  10   0   60.49   15.50 
  -1  10   0   91.69   18.20 
  -1  10   0   77.39   17.70 
   1  10   0   59.09   16.90 
   1  10   0   76.09   21.80 
   1  10   0   82.99   17.80 
   1  10   0   83.39   17.40 
   1  10   0   58.29   19.10 
   1  10   0   61.79   15.00 
   1  10   0   78.09   24.50 
  -1  10   0   84.39   18.20 
   1  10   0   73.49   19.10 
   1  10   0   74.49   24.30 
   1  10   0   96.69   20.60 
   1  10   0   79.89   15.20 
  -1  10   0   60.19   18.90 
  -1  10   0   55.59   20.70 
  -1  10   0   58.69   15.90 
   1  10   0   38.20   14.60 
  -1  10   0   87.39   26.40 
  -2 -10   0  512.25   38.30 
  -2 -10   0  461.15   37.50 
   2 -10   0  458.15   36.70 
  -2 -10   0  490.15   36.90 
   2 -10   0  502.75   35.50 
  -2 -10   0  494.75   34.40 
  -2 -10   0  480.25   38.80 
   2 -10   0  527.65   39.20 
   2 -10   0  551.04   35.40 
   2 -10   0  525.95   37.40 
   2 -10   0  433.26   33.90 
  -2 -10   0  501.45   33.60 
   2 -10   0  466.65   35.80 
   2 -10   0  515.15   34.90 
   2 -10   0  464.25   36.20 
  -2 -10   0  507.75   39.00 
  -2 -10   0  469.45   35.30 
  -2 -10   0  486.65   38.50 
   2  10   0  536.15   41.90 
   2  10   0  399.96   44.50 
   2  10   0  480.65   32.00 
  -2  10   0  527.35   38.10 
  -2  10   0  528.85   50.89 
   2  10   0  445.56   35.10 
  -2  10   0  454.45   35.10 
   2  10   0  467.95   36.10 
   2  10   0  416.66   44.80 
  -2  10   0  511.35   36.00 
   2  10   0  501.65   39.30 
   2  10   0  538.45   51.79 
  -2  10   0  489.35   34.10 
  -2  10   0  506.55   35.60 
   2  10   0  395.46   51.09 
   2  10   0  494.55   36.90 
  -2  10   0  488.05   51.99 
   2  10   0  513.15   38.60 
   2  10   0  446.46   34.50 
   2  10   0  470.45   37.10 
   2  10   0  556.54   45.10 
   2  10   0  469.25   35.30 
   2  10   0  456.95   36.50 
   3 -10   0   12.80    9.40 
  -3 -10   0   11.50   11.50 
   3 -10   0   23.60   11.00 
   3 -10   0   23.70   10.20 
  -3 -10   0    9.40    9.40 
   3 -10   0   25.10   12.30 
  -3 -10   0   -0.30    7.70 
  -3 -10   0    4.30    9.40 
   3 -10   0   -2.80    6.90 
   3 -10   0   22.30    9.70 
   3 -10   0   15.20   12.30 
  -3 -10   0    1.10   10.30 
   3 -10   0   11.90    9.20 
  -3 -10   0    2.90    9.60 
  -3 -10   0   20.30   12.10 
  -3 -10   0   -1.80    7.60 
   3 -10   0   20.80   11.00 
  -3 -10   0   31.30   12.00 
   3  10   0    8.20   10.40 
   3  10   0    5.90   10.20 
   3  10   0    3.10    8.70 
   3  10   0   12.90   10.10 
   3  10   0   21.10   12.90 
   3  10   0   27.40   15.70 
   3  10   0   18.80   11.30 
   3  10   0   11.10   14.50 
   3  10   0    4.90    9.30 
  -3  10   0    3.30    8.40 
   3  10   0   14.40   15.00 
   3  10   0   15.30   13.00 
   3  10   0    6.10    9.60 
  -3  10   0    9.30   12.70 
   3  10   0   12.10   13.20 
  -3  10   0    8.90   12.00 
   3  10   0   13.10   13.30 
   3  10   0    7.40    8.40 
  -3  10   0   18.80   10.50 
  -3  10   0    5.10    9.50 
   3  10   0    3.00    8.60 
  10   0  -1   -2.10    9.20 
 -10   0   1    3.70    8.20 
  10   0  -1    7.60   10.00 
 -10   0   1    1.60    7.40 
 -10   0   1    1.90    7.20 
  10   0  -1   20.70   11.10 
  10   0  -1   10.60    8.90 
  10   0  -1    3.80    7.60 
 -10   0   1   -3.50    7.00 
 -10   0   1    3.80    7.90 
  10   0  -1   -4.90    6.90 
 -10   0   1   -0.10    7.20 
 -10   0   1   11.60    9.20 
  10   0  -1   -3.30    7.90 
 -10   0   1    4.10    7.10 
  10   0  -1    0.90    9.90 
   9   0  -1  844.52   47.40 
  -9   0   1  748.13   43.70 
  -9   0   1  718.03   45.10 
  -9   0   1  813.02   41.10 
   9   0  -1  832.52   43.70 
  -9   0   1  782.42   44.50 
   9   0  -1  929.11   55.39 
   9   0  -1  813.22   41.10 
  -9   0   1  792.92   45.50 
  -9   0   1  745.33   46.40 
   9   0  -1  791.92   40.30 
   9   0  -1  882.01   43.00 
   9   0  -1  861.41   46.40 
   9   0  -1  863.21   54.29 
   9   0  -1  783.82   44.30 
  -9   0   1  794.82   47.90 
   9   0  -1  803.32   40.80 
  -9   0   1  725.93   44.20 
  -9   0   1  803.42   45.20 
   8   0  -1    0.30    5.40 
  -8   0   1   -4.90    5.70 
  -8   0   1    3.90    5.60 
  -8   0   1   -0.50    5.30 
   8   0  -1   -3.50    4.00 
   8   0  -1   -1.10    6.70 
   8   0  -1   -4.10    3.30 
  -8   0   1    0.40    5.80 
   8   0  -1    2.80    5.90 
   8   0  -1    4.40    5.20 
  -8   0   1    1.10    4.40 
   8   0  -1   -1.20    4.60 
   8   0  -1    5.20    4.90 
   8   0  -1    5.60    7.60 
   8   0  -1   -0.20    4.70 
   8   0  -1   14.90    6.60 
  -8   0   1    5.00    6.60 
  -8   0   1    1.30    5.10 
  -8   0   1   -0.80    4.10 
  -8   0   1   -1.70    5.40 
  -8   0   1   -3.10    5.40 
  -8   0   1   -5.90    3.80 
  -8   0   1    0.60    5.80 
   8   0  -1   -0.90    6.30 
  -8   0   1   -1.70    5.40 
   8   0  -1   -1.50    4.80 
  -7   0   1  297.87   21.90 
   7   0  -1  317.07   20.30 
   7   0  -1  351.06   27.50 
   7   0  -1  298.57   22.90 
  -7   0   1  324.27   23.80 
   7   0  -1  298.57   18.70 
   7   0  -1  337.77   18.30 
  -7   0   1  333.27   20.10 
  -7   0   1  261.67   22.10 
   7   0  -1  334.67   21.50 
  -7   0   1  281.47   21.40 
   7   0  -1  354.56   20.10 
   7   0  -1  328.47   20.60 
  -7   0   1  317.77   22.70 
   7   0  -1  306.07   18.00 
  -7   0   1  280.37   22.90 
   7   0  -1  304.37   26.40 
  -7   0   1  322.07   24.20 
   7   0  -1  363.06   23.90 
   7   0  -1  338.17   19.80 
   7   0  -1  316.97   20.30 
   7   0  -1  309.27   14.40 
   7   0  -1  339.87   23.60 
  -7   0   1  330.57   15.50 
  -7   0   1  333.67   23.50 
  -7   0   1  324.47   20.50 
  -7   0   1  345.77   24.00 
  -7   0   1  328.07   20.20 
  -7   0   1  326.57   24.70 
  -7   0   1  315.57   19.50 
  -6   0   1    1.30    4.30 
  -6   0   1    2.00    4.10 
   6   0  -1    4.30    4.20 
   6   0  -1    4.90    3.90 
  -6   0   1   -1.40    2.90 
   6   0  -1    0.40    2.60 
  -6   0   1   -1.20    2.10 
   6   0  -1   13.30    6.60 
   6   0  -1   -1.70    2.10 
  -6   0   1    1.40    2.80 
  -6   0   1    1.70    4.00 
   6   0  -1    1.60    1.80 
   6   0  -1    4.30    4.60 
  -6   0   1    0.50    3.70 
   6   0  -1    2.30    1.60 
  -6   0   1   -0.40    3.30 
  -6   0   1   -3.80    3.30 
  -6   0   1   -3.30    3.40 
   6   0  -1   -1.90    3.10 
   6   0  -1    3.70    3.70 
  -6   0   1   -0.30    3.90 
  -6   0   1    6.60    4.90 
  -6   0   1   -0.50    2.20 
   6   0  -1    1.80    1.90 
  -6   0   1    1.30    3.70 
   6   0  -1    0.20    2.80 
   6   0  -1    0.40    2.60 
   6   0  -1    1.10    1.40 
  -6   0   1   -0.40    3.10 
   6   0  -1    1.20    2.40 
  -6   0   1    0.50    3.40 
   6   0  -1   -2.50    2.70 
   6   0  -1    0.20    4.10 
  -6   0   1   -2.20    3.60 
   6   0  -1   -2.10    3.50 
   6   0  -1   -1.10    1.80 
  -5   0   1  664.03   29.80 
   5   0  -1  627.74   27.30 
  -5   0   1  631.34   23.80 
   5   0  -1  550.64   24.60 
   5   0  -1  615.24   32.90 
  -5   0   1  616.04   30.90 
  -5   0   1  568.44   29.20 
  -5   0   1  621.64   28.80 
   5   0  -1  559.54   23.10 
   5   0  -1  607.74   25.80 
   5   0  -1  610.04   26.90 
  -5   0   1  590.54   28.40 
  -5   0   1  668.93   25.50 
  -5   0   1  655.83   27.30 
  -5   0   1  625.24   27.00 
   5   0  -1  616.64   21.10 
   5   0  -1  639.64   24.10 
  -5   0   1  581.34   29.00 
   5   0  -1  584.74   24.50 
  -5   0   1  640.14   27.30 
  -5   0   1  613.84   30.10 
   5   0  -1  637.94   30.40 
   5   0  -1  614.94   21.10 
   5   0  -1  600.44   27.10 
   5   0  -1  622.54   29.10 
   5   0  -1  623.54   25.90 
   5   0  -1  631.74   21.40 
   5   0  -1  643.04   24.50 
  -5   0   1  614.94   26.30 
   5   0  -1  597.34   26.10 
  -5   0   1  552.34   29.10 
  -5   0   1  625.34   24.60 
  -5   0   1  593.14   27.10 
  -5   0   1  611.74   30.30 
   5   0  -1  619.34   25.40 
   5   0  -1  643.24   30.00 
   5   0  -1  592.34   22.90 
   5   0  -1  636.94   22.70 
   5   0  -1  586.84   27.60 
   5   0  -1  541.25   31.90 
   5   0  -1  657.93   26.40 
  -5   0   1  621.84   29.70 
  -4   0   1   -0.10    2.10 
  -4   0   1   11.30    3.70 
   4   0  -1    2.90    1.50 
   4   0  -1    5.80    4.00 
   4   0  -1    4.00    2.30 
  -4   0   1    0.50    2.80 
   4   0  -1    2.10    2.00 
   4   0  -1    7.30    2.90 
  -4   0   1    0.70    2.90 
  -4   0   1    4.20    3.10 
   4   0  -1    5.80    4.40 
  -4   0   1    1.90    2.10 
  -4   0   1    2.60    3.30 
   4   0  -1    3.20    2.30 
   4   0  -1    6.60    3.30 
   4   0  -1   -2.30    1.90 
  -4   0   1    0.60    1.50 
  -4   0   1   -1.30    2.50 
   4   0  -1    3.40    2.60 
   4   0  -1   -0.50    2.00 
  -4   0   1    2.50    2.70 
  -4   0   1    2.30    1.90 
  -4   0   1   -2.00    2.40 
   4   0  -1    0.80    1.10 
  -4   0   1    2.70    3.30 
   4   0  -1    3.90    3.20 
   4   0  -1    2.10    1.70 
  -4   0   1    4.10    3.20 
   4   0  -1    1.40    1.80 
   4   0  -1   -0.20    1.20 
   4   0  -1    0.70    2.80 
   4   0  -1    2.20    2.20 
  -4   0   1   -0.40    2.70 
  -4   0   1    1.60    3.20 
   4   0  -1    1.70    2.50 
   4   0  -1   -2.20    2.60 
   4   0  -1   -1.70    1.70 
   4   0  -1   -0.60    2.40 
  -4   0   1    1.90    2.20 
  -4   0   1    2.20    2.90 
  -4   0   1    0.80    2.40 
   4   0  -1    3.00    2.40 
   4   0  -1   -0.50    2.00 
  -4   0   1    3.90    1.90 
  -4   0   1    0.40    2.30 
   4   0  -1    4.60    2.10 
   3   0  -1 1357.56   46.90 
   3   0  -1 1302.47   45.50 
  -3   0   1 1333.07   46.00 
   3   0  -1 1339.87   44.00 
  -3   0   1 1334.17   47.10 
  -3   0   1 1337.97   47.00 
   3   0  -1 1292.07   43.60 
   3   0  -1 1306.67   46.00 
  -3   0   1 1317.27   47.30 
   3   0  -1 1333.37   43.90 
   3   0  -1 1381.36   47.00 
   3   0  -1 1339.07   44.70 
  -3   0   1 1287.77   46.40 
   3   0  -1 1349.27   44.00 
  -3   0   1 1234.58   45.50 
  -3   0   1 1368.26   48.60 
   3   0  -1 1318.17   41.40 
   3   0  -1 1329.97   46.60 
   3   0  -1 1372.36   45.00 
   3   0  -1 1377.06   45.60 
  -3   0   1 1311.47   47.30 
  -3   0   1 1372.06   47.40 
   3   0  -1 1386.26   45.20 
   3   0  -1 1364.76   47.00 
  -3   0   1 1359.96   45.80 
   3   0  -1 1277.77   47.30 
   3   0  -1 1441.16   49.80 
   3   0  -1 1317.67   48.00 
  -3   0   1 1321.57   47.80 
  -3   0   1 1308.37   44.10 
  -3   0   1 1342.97   46.90 
   3   0  -1 1385.86   48.30 
  -3   0   1 1365.46   45.00 
   3   0  -1 1389.96   45.60 
  -3   0   1 1361.76   44.80 
   3   0  -1 1361.56   47.20 
   3   0  -1 1353.06   49.60 
   3   0  -1 1356.46   45.30 
   3   0  -1 1375.36   46.00 
  -3   0   1 1370.56   44.20 
   3   0  -1 1353.26   49.00 
  -3   0   1 1364.56   43.70 
   3   0  -1 1406.96   46.10 
   3   0  -1 1323.87   44.00 
   3   0  -1 1294.67   44.20 
   3   0  -1 1410.56   50.29 
   3   0  -1 1451.45   45.10 
  -3   0   1 1330.27   43.80 
   3   0  -1 1308.47   46.50 
   3   0  -1 1331.67   47.50 
   3   0  -1 1354.66   45.20 
   3   0  -1 1357.26   44.90 
  -3   0   1 1383.66   48.00 
   3   0  -1 1327.57   41.70 
  -3   0   1 1327.17   46.60 
   3   0  -1 1346.27   42.30 
   3   0  -1 1292.87   42.50 
  -3   0   1 1338.97   42.50 
  -3   0   1 1316.47   47.20 
  -3   0   1 1299.67   44.80 
  -2   0   1   10.70    2.10 
   2   0  -1   10.30    2.90 
  -2   0   1    9.70    2.00 
   2   0  -1    6.00    2.20 
   2   0  -1    8.10    1.70 
   2   0  -1    7.40    1.00 
  -2   0   1    2.70    1.70 
  -2   0   1    8.00    1.90 
  -2   0   1    8.70    2.00 
   2   0  -1    4.60    1.50 
   2   0  -1    6.00    0.90 
   2   0  -1    7.90    2.20 
   2   0  -1    8.80    2.40 
   2   0  -1    8.30    2.50 
   2   0  -1   14.80    3.10 
  -2   0   1    4.00    2.20 
   2   0  -1   12.40    2.50 
   2   0  -1    8.40    1.60 
  -2   0   1    7.90    2.10 
  -2   0   1   10.60    2.60 
  -2   0   1    9.70    1.70 
   2   0  -1    5.30    2.20 
  -2   0   1   16.60    3.10 
   2   0  -1    6.80    2.20 
   2   0  -1    7.20    2.20 
   2   0  -1    7.30    2.10 
   2   0  -1    8.10    2.40 
   2   0  -1    5.10    1.50 
  -2   0   1    3.60    1.90 
  -2   0   1    8.40    2.40 
  -2   0   1    6.70    2.30 
  -2   0   1    6.80    2.00 
   2   0  -1    9.50    1.80 
   2   0  -1    6.80    1.80 
  -2   0   1    6.90    2.30 
  -2   0   1    4.90    1.10 
   2   0  -1    9.30    1.80 
  -2   0   1   11.40    2.40 
   2   0  -1    4.60    1.90 
   2   0  -1    7.90    2.10 
  -2   0   1    5.00    1.50 
   2   0  -1   12.90    2.50 
  -2   0   1    9.40    2.10 
   2   0  -1    7.20    2.00 
   2   0  -1    9.30    1.30 
   2   0  -1   12.30    2.40 
  -2   0   1    8.40    1.70 
   2   0  -1   10.00    2.60 
  -2   0   1    5.10    2.00 
  -2   0   1    4.00    1.80 
   2   0  -1   12.10    2.60 
   2   0  -1    8.30    2.30 
   2   0  -1    9.50    2.30 
   2   0  -1   11.40    2.30 
  -2   0   1   18.50    3.50 
   2   0  -1    8.50    1.30 
   2   0  -1   10.30    2.30 
   2   0  -1    2.60    1.50 
   2   0  -1    5.90    1.80 
  -2   0   1   11.70    2.90 
   2   0  -1    3.20    1.70 
   2   0  -1    8.10    2.30 
   1   0  -1  273.97   10.00 
   1   0  -1  296.47    9.00 
   1   0  -1  289.47   10.80 
   1   0  -1  237.48   10.20 
   1   0  -1  272.37    8.80 
   1   0  -1  290.97    9.40 
   1   0  -1  290.87   10.30 
   1   0  -1  300.07   11.10 
   1   0  -1  230.78   10.10 
   1   0  -1  292.47    9.90 
   1   0  -1  287.77   10.50 
   1   0  -1  282.17    9.30 
   1   0  -1  282.97    9.40 
   1   0  -1  276.27   10.90 
   1   0  -1  294.57    9.30 
   1   0  -1  285.27    9.80 
   1   0  -1  297.57   10.70 
   1   0  -1  254.67   10.10 
   1   0  -1  299.47   10.20 
   1   0  -1  289.47    9.30 
   1   0  -1  280.67   10.80 
   1   0  -1  227.38    9.90 
   1   0  -1  292.47   10.60 
   1   0  -1  217.98   10.50 
  -1   0   1  252.97   10.70 
  -1   0  -1 2650.63   82.19 
  -1   0  -1 2607.44   81.49 
   1   0   1 2705.83   80.09 
   1   0   1 2633.24   80.89 
   1   0   1 2656.53   81.29 
   1   0   1 2784.22   80.19 
   1   0   1 2661.83   80.99 
   1   0   1 2713.33   79.49 
   1   0   1 2639.14   81.09 
   1   0   1 2731.83   81.39 
   1   0   1 2588.44   81.09 
   1   0   1 2679.63   81.09 
   1   0   1 2606.94   81.19 
   1   0   1 2690.53   81.49 
   1   0   1 2672.23   80.49 
  -1   0  -1 2575.64   81.59 
   1   0   1 2624.54   80.69 
   1   0   1 2632.34   81.79 
   1   0   1 2652.63   81.99 
   1   0   1 2561.84   80.29 
   1   0   1 2866.61   81.39 
   1   0   1 2501.15   81.79 
   1   0   1 2664.33   81.89 
   1   0   1 2710.03   80.09 
   1   0   1 2716.53   80.89 
   1   0   1 2757.62   80.79 
   1   0   1 2571.44   81.89 
  -1   0  -1 2628.84   82.39 
   2   0   1    4.30    2.00 
  -2   0  -1    7.50    1.80 
   2   0   1    1.00    1.40 
   2   0   1    5.10    1.80 
  -2   0  -1    4.20    2.10 
   2   0   1    3.80    1.50 
   2   0   1   17.00    2.90 
   2   0   1    8.50    2.50 
  -2   0  -1    1.90    1.20 
  -2   0  -1    5.90    0.90 
   2   0   1    3.90    1.90 
  -2   0  -1    5.50    2.10 
  -2   0  -1    4.50    1.70 
  -2   0  -1    2.10    2.00 
  -2   0  -1    5.40    2.20 
  -2   0  -1    4.00    1.90 
   2   0   1    3.50    1.80 
   2   0   1    4.30    1.10 
   2   0   1    3.00    1.40 
   2   0   1    2.00    1.50 
  -2   0  -1    7.30    2.60 
   2   0   1    6.90    2.30 
  -2   0  -1    2.10    1.00 
  -2   0  -1    1.90    1.60 
   2   0   1   10.40    2.20 
   2   0   1    0.70    1.60 
  -2   0  -1    3.40    1.50 
  -2   0  -1    5.80    1.70 
   2   0   1   15.40    2.60 
   2   0   1    2.70    0.80 
  -2   0  -1    4.60    2.10 
  -2   0  -1    1.20    1.80 
  -2   0  -1    7.40    2.60 
   2   0   1    3.60    1.60 
   2   0   1   11.50    2.70 
   2   0   1    2.60    1.70 
   2   0   1    8.90    2.10 
   2   0   1    2.40    1.90 
   2   0   1    5.00    2.30 
   2   0   1    8.60    2.40 
   2   0   1    4.90    1.90 
   2   0   1    2.60    1.40 
   2   0   1    3.10    1.90 
  -2   0  -1    1.80    1.70 
   2   0   1    3.70    1.60 
  -2   0  -1    3.60    1.30 
  -2   0  -1    6.20    1.80 
  -2   0  -1    5.80    1.90 
  -2   0  -1    2.30    1.80 
  -2   0  -1    7.40    2.30 
  -2   0  -1    1.60    1.10 
   2   0   1    3.80    1.20 
   2   0   1    5.60    2.40 
   2   0   1    4.80    1.20 
   2   0   1    7.80    1.80 
   2   0   1    3.00    1.30 
  -2   0  -1    3.20    1.10 
   2   0   1    9.50    2.60 
  -2   0  -1    1.50    1.50 
   2   0   1   12.00    2.30 
  -2   0  -1    6.70    2.40 
   2   0   1    3.20    1.60 
   2   0   1    4.20    1.20 
   2   0   1    5.80    1.80 
  -3   0  -1  606.64   21.90 
   3   0   1  586.14   25.00 
  -3   0  -1  646.84   25.90 
  -3   0  -1  571.34   23.10 
   3   0   1  578.74   23.80 
   3   0   1  618.74   25.80 
   3   0   1  602.54   21.90 
  -3   0  -1  611.44   21.00 
  -3   0  -1  603.44   21.60 
   3   0   1  612.34   21.00 
   3   0   1  593.74   22.30 
   3   0   1  563.74   27.70 
  -3   0  -1  627.74   24.60 
  -3   0  -1  548.55   24.10 
   3   0   1  595.94   23.20 
  -3   0  -1  616.24   26.10 
   3   0   1  575.74   19.60 
   3   0   1  601.54   24.20 
  -3   0  -1  586.94   19.50 
   3   0   1  624.64   23.70 
   3   0   1  589.24   21.90 
  -3   0  -1  578.34   24.20 
   3   0   1  585.44   24.20 
   3   0   1  636.64   21.40 
  -3   0  -1  605.74   24.70 
   3   0   1  612.44   23.00 
  -3   0  -1  558.24   25.30 
  -3   0  -1  588.14   22.00 
  -3   0  -1  608.14   22.00 
   3   0   1  576.44   20.70 
   3   0   1  578.34   22.60 
  -3   0  -1  603.84   25.50 
   3   0   1  579.24   24.90 
  -3   0  -1  570.54   24.60 
   3   0   1  596.54   23.20 
  -3   0  -1  592.64   25.50 
   3   0   1  614.44   25.40 
   3   0   1  620.34   24.30 
  -3   0  -1  563.04   24.70 
  -3   0  -1  545.75   24.60 
   3   0   1  603.44   22.20 
   3   0   1  636.84   26.60 
   3   0   1  598.14   22.80 
  -3   0  -1  622.34   23.80 
  -3   0  -1  599.24   21.10 
   3   0   1  608.04   22.80 
  -3   0  -1  594.14   24.40 
   3   0   1  602.24   21.90 
   3   0   1  614.94   24.90 
   3   0   1  601.34   23.00 
   3   0   1  652.93   25.50 
  -3   0  -1  601.04   22.70 
   3   0   1  594.74   21.40 
   3   0   1  598.24   24.60 
  -3   0  -1  574.34   24.00 
   3   0   1  585.24   22.00 
   3   0   1  559.64   24.00 
   3   0   1  600.74   28.80 
  -4   0  -1    0.60    1.40 
   4   0   1    0.20    1.80 
   4   0   1    1.60    1.60 
  -4   0  -1    3.40    3.20 
   4   0   1    0.90    1.90 
   4   0   1    1.40    2.50 
  -4   0  -1   -2.10    2.50 
  -4   0  -1   -0.20    2.70 
  -4   0  -1    2.40    2.60 
   4   0   1    1.90    2.10 
   4   0   1    0.00    2.10 
   4   0   1    1.20    2.30 
   4   0   1   -0.50    2.50 
   4   0   1    0.30    1.10 
  -4   0  -1    1.70    2.70 
  -4   0  -1    1.50    1.90 
  -4   0  -1    0.20    2.30 
  -4   0  -1   -1.60    2.50 
   4   0   1    1.70    1.70 
  -4   0  -1    2.30    2.80 
   4   0   1    1.00    1.70 
   4   0   1    3.50    2.20 
  -4   0  -1    1.90    2.80 
   4   0   1   -0.60    2.90 
   4   0   1   -2.00    2.00 
  -4   0  -1   -1.20    2.60 
   4   0   1    3.20    3.20 
   4   0   1    0.40    1.60 
   4   0   1    0.40    1.70 
   4   0   1   -0.90    1.80 
  -4   0  -1    1.10    2.70 
   4   0   1   -0.20    1.80 
  -4   0  -1    0.70    3.20 
  -4   0  -1   -2.10    1.90 
  -4   0  -1    1.70    1.20 
   4   0   1    1.50    4.00 
  -4   0  -1   -0.30    2.60 
   4   0   1   -0.70    1.40 
  -4   0  -1    1.80    1.90 
  -4   0  -1    2.50    3.20 
  -4   0  -1    0.40    2.70 
  -4   0  -1    2.50    2.10 
  -4   0  -1    2.60    2.00 
   4   0   1    1.90    4.00 
  -5   0  -1  547.75   24.70 
   5   0   1  545.95   25.30 
  -5   0  -1  523.35   27.90 
   5   0   1  564.64   23.30 
   5   0   1  516.65   23.90 
   5   0   1  572.54   24.70 
   5   0   1  512.95   23.30 
  -5   0  -1  526.15   22.50 
   5   0   1  550.04   25.70 
  -5   0  -1  536.95   18.80 
   5   0   1  521.85   24.00 
  -5   0  -1  539.55   26.60 
  -5   0  -1  575.14   23.00 
   5   0   1  514.55   20.80 
  -5   0  -1  583.24   27.60 
  -5   0  -1  558.34   27.90 
  -5   0  -1  496.95   25.10 
   5   0   1  544.05   18.90 
   5   0   1  508.55   31.50 
  -5   0  -1  532.75   27.60 
   5   0   1  518.15   22.50 
   5   0   1  551.44   28.70 
   5   0   1  546.95   21.20 
  -5   0  -1  554.34   20.70 
   5   0   1  499.95   25.50 
   5   0   1  515.85   31.20 
  -5   0  -1  555.14   28.60 
  -5   0  -1  534.75   23.10 
   5   0   1  518.05   21.40 
   5   0   1  553.54   18.70 
   5   0   1  554.64   27.00 
   5   0   1  511.75   21.90 
  -5   0  -1  527.05   27.90 
  -5   0  -1  497.35   26.00 
   5   0   1  493.75   23.10 
  -5   0  -1  512.75   26.40 
   5   0   1  550.24   22.30 
  -5   0  -1  515.45   27.60 
   5   0   1  535.85   24.40 
   5   0   1  504.65   21.30 
   5   0   1  562.44   21.90 
  -5   0  -1  508.15   27.40 
  -5   0  -1  553.54   26.00 
  -6   0  -1   -2.60    3.60 
   6   0   1   -1.00    3.50 
   6   0   1    0.20    2.10 
   6   0   1   13.60    6.90 
  -6   0  -1    2.40    2.80 
   6   0   1   -0.40    2.90 
  -6   0  -1    2.30    2.00 
   6   0   1    5.30    3.80 
   6   0   1   10.10    3.10 
  -6   0  -1    5.30    4.70 
  -6   0  -1   -1.10    4.00 
  -6   0  -1   -3.10    2.20 
   6   0   1    9.40    6.40 
   6   0   1    3.00    1.80 
  -6   0  -1   -2.80    3.40 
  -6   0  -1   -1.60    3.50 
   6   0   1   -2.30    2.70 
  -6   0  -1    0.40    3.00 
   6   0   1   -3.40    2.60 
  -6   0  -1    1.00    4.10 
   6   0   1    0.30    3.10 
   6   0   1    2.30    2.60 
   6   0   1    2.00    3.00 
  -6   0  -1   -3.20    3.10 
   6   0   1    3.00    2.60 
  -6   0  -1    4.70    3.80 
  -6   0  -1    2.30    3.80 
  -6   0  -1    7.20    4.90 
   6   0   1    4.00    3.50 
  -6   0  -1    2.30    4.60 
   6   0   1   -1.80    3.60 
   6   0   1    4.50    2.90 
  -6   0  -1   -0.90    2.70 
   6   0   1   -1.20    3.70 
   6   0   1    3.50    2.60 
  -6   0  -1   -2.10    2.50 
   6   0   1   13.30    5.20 
  -7   0  -1 3075.19  111.79 
  -7   0  -1 3216.88  103.39 
   7   0   1 2895.11  113.69 
   7   0   1 3058.59   99.19 
   7   0   1 3195.48  101.29 
  -7   0  -1 3178.68  113.89 
  -7   0  -1 3168.18  106.89 
  -7   0  -1 2898.31  110.39 
   7   0   1 3129.79  110.39 
   7   0   1 3135.19  104.99 
   7   0   1 3018.20  121.39 
  -7   0  -1 3125.39  114.39 
   7   0   1 3168.18  105.19 
  -7   0  -1 3032.60  109.49 
   7   0   1 3106.69  108.29 
   7   0   1 3173.58  107.79 
   7   0   1 3166.98  112.09 
   7   0   1 3193.78  106.79 
  -7   0  -1 3112.39  111.39 
  -7   0  -1 3067.69  110.99 
  -7   0  -1 2992.10  112.89 
  -7   0  -1 3230.78  103.29 
   7   0   1 3059.79  105.59 
  -7   0  -1 3201.68  114.99 
   7   0   1 3009.80  106.69 
  -7   0  -1 3231.08  109.39 
  -7   0  -1 3199.78  104.29 
  -7   0  -1 2994.10  113.29 
   7   0   1 3197.78  100.09 
   7   0   1 3155.88  106.39 
   7   0   1 3040.10  120.89 
   7   0   1 3173.48  102.69 
   8   0   1   -4.70    5.30 
   8   0   1   -5.70    5.20 
  -8   0  -1    0.50    5.30 
   8   0   1   -2.70    5.90 
  -8   0  -1    2.90    4.90 
   8   0   1   -2.50    4.60 
  -8   0  -1   -2.00    3.90 
   8   0   1   -1.80    5.30 
   8   0   1   -2.20    4.20 
   8   0   1    3.20    4.90 
  -8   0  -1    1.50    5.80 
  -8   0  -1    4.60    4.50 
   8   0   1   -0.70    4.20 
  -8   0  -1    2.50    5.30 
   8   0   1    3.60    5.40 
   8   0   1   -1.40    4.60 
  -8   0  -1   -4.40    5.00 
  -8   0  -1    3.40    6.00 
  -8   0  -1   -2.90    5.10 
  -8   0  -1    4.30    5.80 
   8   0   1    7.00    5.90 
  -8   0  -1   -4.50    5.10 
  -8   0  -1   -6.60    4.20 
   8   0   1    0.20    4.60 
   9   0   1 1442.26   60.59 
  -9   0  -1 1460.05   64.89 
   9   0   1 1437.06   77.69 
   9   0   1 1400.56   68.69 
  -9   0  -1 1416.16   69.79 
  -9   0  -1 1480.55   66.79 
   9   0   1 1433.36   61.29 
   9   0   1 1455.75   77.29 
  -9   0  -1 1370.16   68.19 
   9   0   1 1433.26   64.99 
  -9   0  -1 1509.55   70.49 
  -9   0  -1 1392.46   65.69 
   9   0   1 1368.56   61.19 
  -9   0  -1 1432.66   67.09 
  -9   0  -1 1477.05   63.69 
  -9   0  -1 1457.85   66.69 
   9   0   1 1495.05   67.99 
  -9   0  -1 1396.66   68.79 
 -10   0  -1   -6.90    7.60 
 -10   0  -1    4.90    8.20 
 -10   0  -1   10.90    9.80 
 -10   0  -1   13.10   10.70 
  10   0   1   -6.90    7.70 
  10   0   1   -3.10    7.10 
  10   0   1   -2.80   10.10 
  10   0   1    3.20    9.30 
  10   0   1   -1.90   10.40 
  10   0   1    3.50    8.30 
 -10   0  -1    0.30    8.40 
 -10   0  -1   -1.80    7.70 
 -10   0  -1    2.60    7.70 
 -10   0  -1    3.20    7.50 
  10  -1  -1   56.39   15.40 
  10  -1  -1  111.49   21.30 
 -10  -1   1   85.69   19.20 
  10  -1  -1   84.29   22.10 
 -10  -1   1   61.09   16.30 
  10  -1  -1   75.09   17.70 
 -10  -1   1   73.29   17.20 
  10  -1  -1   66.39   16.80 
 -10  -1   1   49.40   14.10 
 -10  -1   1   78.09   17.70 
 -10  -1   1   84.29   17.80 
 -10  -1   1   74.69   19.10 
  10  -1  -1   87.49   18.60 
 -10  -1   1   77.19   18.70 
  10  -1  -1  120.29   26.00 
 -10   1   1   98.79   20.90 
  10   1  -1   93.39   16.70 
  10   1  -1   86.79   23.20 
  10   1  -1   56.79   14.40 
 -10   1   1   66.49   15.70 
  10   1  -1   89.49   17.20 
 -10   1   1   58.99   15.80 
  10   1  -1  109.19   21.30 
  10   1  -1   78.79   17.80 
 -10   1   1   90.89   18.00 
 -10   1   1  112.89   21.80 
 -10   1   1   58.89   16.70 
  10   1  -1   87.79   18.70 
 -10   1   1   62.09   15.20 
  10   1  -1   91.09   23.20 
   9  -1  -1   -4.70    6.70 
   9  -1  -1    2.90    7.30 
   9  -1  -1   -2.10    6.70 
  -9  -1   1    0.20    6.30 
   9  -1  -1   -1.40    5.40 
   9  -1  -1   13.60    8.10 
  -9  -1   1    5.70    8.50 
  -9  -1   1   -1.20    6.20 
  -9  -1   1    6.90    6.70 
  -9  -1   1    6.80    6.80 
   9  -1  -1    1.20    7.20 
  -9  -1   1    2.70    7.40 
  -9  -1   1    3.90    7.30 
  -9  -1   1   -7.00    4.70 
  -9  -1   1    0.00    5.40 
   9  -1  -1    8.00    8.20 
   9  -1  -1    2.50    7.90 
   9  -1  -1   10.50    9.60 
  -9  -1   1   -2.60    5.70 
   9  -1  -1  -12.30    6.00 
   9  -1  -1    4.40    6.20 
   9   1  -1    8.50    7.50 
  -9   1   1    3.00    6.60 
  -9   1   1   -0.70    5.50 
  -9   1   1    3.80    7.40 
  -9   1   1   13.40    8.70 
   9   1  -1   -4.30    7.30 
  -9   1   1    9.60    8.20 
  -9   1   1   -4.00    5.10 
   9   1  -1    8.80    9.80 
  -9   1   1   -7.20    4.50 
   9   1  -1    5.30    6.90 
  -9   1   1   16.80   10.60 
  -9   1   1    5.90    7.40 
   9   1  -1   -2.30    5.90 
  -9   1   1    0.30    6.40 
   9   1  -1   13.90    8.70 
   9   1  -1    5.70    7.70 
   9   1  -1    3.20    6.80 
   9   1  -1    6.40    6.50 
  -8  -1   1  140.29   20.80 
  -8  -1   1  162.48   17.70 
   8  -1  -1  204.28   21.60 
   8  -1  -1  169.08   16.90 
   8  -1  -1  219.48   29.10 
   8  -1  -1  152.38   15.60 
  -8  -1   1  201.98   24.90 
   8  -1  -1  152.68   16.50 
   8  -1  -1  190.48   20.10 
  -8  -1   1  184.88   22.30 
  -8  -1   1  171.98   22.30 
  -8  -1   1  160.48   21.30 
  -8  -1   1  173.68   18.90 
   8  -1  -1  163.08   20.50 
  -8  -1   1  178.78   19.40 
   8  -1  -1  167.28   17.30 
  -8  -1   1  148.49   19.90 
   8  -1  -1  169.08   21.30 
   8  -1  -1  129.09   19.10 
   8  -1  -1  163.48   21.40 
   8  -1  -1  171.28   16.40 
   8  -1  -1  178.98   21.60 
  -8  -1   1  155.08   16.90 
  -8  -1   1  147.89   19.60 
   8  -1  -1  178.58   20.50 
   8  -1  -1  135.09   19.80 
  -8  -1   1  161.18   20.40 
   8  -1  -1  183.48   25.30 
   8  -1  -1  158.08   18.10 
  -8  -1   1  149.69   20.40 
  -8   1   1  138.19   18.90 
  -8   1   1  153.28   20.20 
  -8   1   1  195.28   23.70 
  -8   1   1  184.58   18.90 
   8   1  -1  173.68   14.40 
   8   1  -1  159.88   16.90 
  -8   1   1  139.79   18.90 
   8   1  -1  190.18   22.60 
   8   1  -1  155.58   17.10 
  -8   1   1  154.58   21.30 
  -8   1   1  179.88   21.70 
   8   1  -1  158.98   25.00 
   8   1  -1  160.68   19.10 
   8   1  -1  183.88   20.30 
  -8   1   1  186.58   23.20 
   8   1  -1  177.48   26.20 
   8   1  -1  177.48   19.90 
   8   1  -1  166.08   22.50 
  -8   1   1  148.79   21.70 
   8   1  -1  198.68   20.20 
  -8   1   1  135.99   19.20 
  -8   1   1  158.78   17.70 
   8   1  -1  141.29   20.40 
   8   1  -1  163.48   17.00 
   7  -1  -1   22.50    9.10 
  -7  -1   1   16.50    7.30 
   7  -1  -1   35.50    7.80 
  -7  -1   1   21.90    8.40 
  -7  -1   1   22.60    6.40 
   7  -1  -1   31.60    9.70 
   7  -1  -1   15.50    6.40 
  -7  -1   1   15.70    7.80 
   7  -1  -1   11.30    6.20 
  -7  -1   1   19.40    6.90 
   7  -1  -1   19.70    6.00 
   7  -1  -1   26.80    6.60 
   7  -1  -1   14.90    7.20 
  -7  -1   1   15.90    7.80 
  -7  -1   1   23.70    8.30 
  -7  -1   1   20.90    4.30 
   7  -1  -1   19.90    7.20 
   7  -1  -1   29.40   10.20 
   7  -1  -1   26.70    7.10 
   7  -1  -1   22.60    7.20 
  -7  -1   1   11.80    6.80 
   7  -1  -1   27.30    7.60 
   7  -1  -1   16.80    5.00 
  -7  -1   1   24.80    7.00 
   7  -1  -1   22.20    4.40 
   7  -1  -1   25.60    5.60 
  -7  -1   1   21.00    6.90 
   7  -1  -1   17.00    5.50 
  -7  -1   1   25.40    8.10 
  -7  -1   1    9.60    6.30 
  -7  -1   1   24.20    9.00 
  -7  -1   1   18.60    6.10 
   7  -1  -1   13.80    5.00 
   7   1  -1   29.00    7.00 
   7   1  -1   22.30    5.30 
  -7   1   1   10.20    6.10 
   7   1  -1   17.60    4.60 
   7   1  -1   12.70    7.60 
   7   1  -1   19.20    5.30 
  -7   1   1   24.10    5.70 
  -7   1   1   21.60    6.80 
  -7   1   1   29.70    9.40 
   7   1  -1   16.10    7.50 
  -7   1   1   27.20    8.50 
   7   1  -1   19.90    6.80 
   7   1  -1   21.90    6.50 
  -7   1   1   28.00    7.00 
   7   1  -1   19.60    7.00 
  -7   1   1   21.90    8.50 
   7   1  -1   18.60    6.00 
  -7   1   1    6.80    6.20 
  -7   1   1   41.80   10.90 
   7   1  -1   22.80    8.20 
  -7   1   1    3.30    5.40 
  -7   1   1   26.90    6.70 
  -7   1   1   38.60   10.50 
   7   1  -1   29.60   11.20 
   7   1  -1   36.30    8.90 
   7   1  -1   18.20    6.90 
  -7   1   1   17.30    5.60 
  -7   1   1   16.30    4.60 
  -7   1   1    9.50    6.20 
  -7   1   1    7.20    4.90 
   7   1  -1    8.30    7.20 
   7   1  -1   24.80    6.40 
  -7   1   1   14.30    6.80 
   6  -1  -1 1851.51   59.19 
   6  -1  -1 1847.62   60.09 
  -6  -1   1 1783.62   58.49 
  -6  -1   1 1728.43   70.39 
   6  -1  -1 1841.42   56.59 
  -6  -1   1 1755.82   68.39 
  -6  -1   1 1760.22   69.79 
  -6  -1   1 1822.72   68.49 
  -6  -1   1 1817.42   65.79 
   6  -1  -1 1763.32   57.09 
   6  -1  -1 1824.82   66.49 
  -6  -1   1 1850.71   70.79 
  -6  -1   1 1819.32   68.29 
   6  -1  -1 1804.62   61.39 
   6  -1  -1 1849.52   64.09 
   6  -1  -1 1738.53   69.39 
   6  -1  -1 1891.41   63.99 
  -6  -1   1 1854.41   65.49 
   6  -1  -1 1840.22   67.49 
   6  -1  -1 1851.61   63.79 
  -6  -1   1 1790.52   68.99 
   6  -1  -1 1785.42   61.49 
   6  -1  -1 1833.62   62.59 
   6  -1  -1 1856.71   75.39 
  -6  -1   1 1746.23   65.99 
   6  -1  -1 1793.72   59.69 
   6  -1  -1 1776.12   73.69 
  -6  -1   1 1732.93   69.99 
  -6  -1   1 1877.01   64.69 
   6  -1  -1 1812.82   59.99 
   6  -1  -1 1819.92   69.79 
   6  -1  -1 1868.21   67.49 
  -6  -1   1 1661.93   59.09 
   6  -1  -1 1862.31   64.49 
  -6  -1   1 1809.72   66.19 
   6  -1  -1 1697.23   56.69 
  -6  -1   1 1727.33   69.79 
  -6  -1   1 1721.13   68.39 
   6  -1  -1 1858.81   63.09 
   6   1  -1 1779.72   67.09 
   6   1  -1 1894.11   77.29 
  -6   1   1 1811.82   70.39 
  -6   1   1 1901.21   65.59 
  -6   1   1 1818.02   64.39 
  -6   1   1 1717.33   63.49 
   6   1  -1 1861.21   65.19 
   6   1  -1 1701.53   68.59 
  -6   1   1 1819.22   68.29 
  -6   1   1 1842.62   70.59 
   6   1  -1 1782.42   66.79 
  -6   1   1 1705.83   68.59 
   6   1  -1 1742.13   62.09 
  -6   1   1 1678.23   64.19 
   6   1  -1 1781.22   65.59 
  -6   1   1 1760.92   65.49 
  -6   1   1 1808.12   69.09 
   6   1  -1 1835.52   60.69 
   6   1  -1 1827.92   61.79 
  -6   1   1 1859.61   69.59 
   6   1  -1 1844.72   64.49 
   6   1  -1 1814.42   64.19 
  -6   1   1 1691.53   69.29 
   6   1  -1 1832.52   76.09 
   6   1  -1 1870.11   64.09 
  -6   1   1 1854.91   67.79 
  -6   1   1 1844.22   62.19 
  -6   1   1 1815.32   69.09 
  -6   1   1 1772.42   61.09 
   6   1  -1 1922.11   71.49 
   6   1  -1 1769.22   58.39 
  -6   1   1 1798.32   69.89 
  -6   1   1 1741.53   68.99 
  -6   1   1 1698.83   70.89 
  -6   1   1 1823.62   68.49 
   6   1  -1 1834.62   58.09 
   6   1  -1 1856.51   67.39 
   6   1  -1 1864.81   69.79 
   6   1  -1 1785.52   60.29 
  -5  -1   1  720.23   31.80 
   5  -1  -1  691.33   27.60 
   5  -1  -1  698.13   26.60 
  -5  -1   1  706.53   31.60 
   5  -1  -1  711.13   25.40 
  -5  -1   1  678.03   25.80 
   5  -1  -1  713.13   28.30 
   5  -1  -1  691.43   28.60 
   5  -1  -1  657.83   27.10 
  -5  -1   1  732.03   30.90 
   5  -1  -1  696.93   27.30 
   5  -1  -1  703.83   25.20 
  -5  -1   1  665.53   25.00 
   5  -1  -1  680.53   27.60 
   5  -1  -1  700.53   30.90 
  -5  -1   1  666.13   32.60 
   5  -1  -1  700.03   32.70 
  -5  -1   1  657.83   33.00 
   5  -1  -1  691.23   23.80 
   5  -1  -1  720.63   29.10 
  -5  -1   1  701.63   30.10 
  -5  -1   1  678.93   26.70 
  -5  -1   1  715.03   33.30 
  -5  -1   1  686.73   32.70 
  -5  -1   1  706.43   33.20 
  -5  -1   1  692.93   29.60 
   5  -1  -1  685.73   30.30 
   5  -1  -1  583.74   33.60 
  -5  -1   1  687.83   29.90 
   5  -1  -1  688.63   26.40 
  -5  -1   1  726.13   29.60 
   5  -1  -1  657.93   27.80 
   5  -1  -1  703.93   25.50 
   5  -1  -1  669.13   23.50 
   5  -1  -1  738.53   28.40 
   5  -1  -1  732.93   35.90 
   5  -1  -1  665.63   23.70 
   5  -1  -1  677.33   28.80 
  -5  -1   1  657.53   31.30 
  -5  -1   1  671.33   31.60 
  -5  -1   1  642.84   31.00 
   5  -1  -1  729.23   26.50 
  -5   1   1  683.03   30.60 
  -5   1   1  637.94   32.20 
   5   1  -1  670.63   36.50 
   5   1  -1  694.03   28.50 
  -5   1   1  661.13   29.80 
  -5   1   1  692.03   29.00 
  -5   1   1  721.53   32.20 
   5   1  -1  697.13   24.50 
  -5   1   1  711.53   27.00 
   5   1  -1  744.83   31.80 
  -5   1   1  694.13   32.20 
  -5   1   1  711.63   33.10 
   5   1  -1  676.73   30.60 
  -5   1   1  729.53   32.40 
   5   1  -1  689.93   36.50 
   5   1  -1  689.73   29.30 
   5   1  -1  721.33   27.60 
   5   1  -1  668.43   26.30 
   5   1  -1  671.03   31.80 
  -5   1   1  675.33   32.30 
   5   1  -1  705.43   24.80 
  -5   1   1  733.23   32.70 
  -5   1   1  713.43   32.80 
   5   1  -1  664.53   29.70 
  -5   1   1  684.93   31.10 
   5   1  -1  666.63   32.90 
  -5   1   1  670.23   31.80 
  -5   1   1  694.43   29.30 
   5   1  -1  682.23   27.00 
   5   1  -1  702.63   29.10 
  -5   1   1  718.63   29.30 
  -5   1   1  703.43   31.50 
   5   1  -1  690.43   30.80 
   5   1  -1  697.33   28.80 
  -5   1   1  679.03   27.30 
  -5   1   1  683.13   31.00 
  -5   1   1  739.53   27.40 
  -5   1   1  698.73   28.80 
   5   1  -1  693.93   32.40 
   4  -1  -1 5382.36  165.18 
   4  -1  -1 5364.76  161.28 
   4  -1  -1 5387.26  165.48 
  -4  -1   1 5317.47  169.58 
   4  -1  -1 5436.66  165.28 
   4  -1  -1 5202.98  165.78 
  -4  -1   1 5585.04  168.38 
  -4  -1   1 5490.35  167.08 
   4  -1  -1 5549.04  166.88 
   4  -1  -1 5330.87  161.18 
   4  -1  -1 5349.77  164.08 
   4  -1  -1 5521.15  165.88 
   4  -1  -1 5550.94  162.08 
   4  -1  -1 5417.56  164.48 
   4  -1  -1 5303.47  173.48 
  -4  -1   1 5432.66  169.48 
   4  -1  -1 5395.76  164.98 
   4  -1  -1 5454.45  162.28 
  -4  -1   1 5401.56  167.38 
  -4  -1   1 5503.45  169.58 
  -4  -1   1 5319.37  170.68 
  -4  -1   1 5265.17  166.38 
  -4  -1   1 5317.97  163.78 
  -4  -1   1 5390.06  167.28 
  -4  -1   1 5246.58  171.08 
  -4  -1   1 5231.18  170.08 
  -4  -1   1 5421.56  170.78 
  -4  -1   1 5354.86  169.98 
   4  -1  -1 5376.66  165.38 
  -4  -1   1 5432.76  167.78 
   4  -1  -1 5392.66  164.98 
   4  -1  -1 5449.15  165.98 
   4  -1  -1 5430.66  163.88 
   4  -1  -1 5392.76  165.98 
   4  -1  -1 5518.25  162.48 
  -4  -1   1 5404.36  166.98 
   4  -1  -1 5383.16  168.78 
   4  -1  -1 5372.36  167.68 
  -4  -1   1 5234.18  168.78 
  -4  -1   1 5351.06  168.68 
  -4  -1   1 5129.99  167.98 
   4  -1  -1 5221.38  162.48 
   4  -1  -1 5454.55  173.38 
   4  -1  -1 5370.86  163.38 
  -4  -1   1 5372.46  164.38 
  -4  -1   1 5187.48  162.78 
  -4   1   1 5389.36  167.88 
  -4   1   1 5094.29  169.08 
   4   1  -1 5573.04  167.08 
   4   1  -1 5424.66  169.78 
   4   1  -1 5273.67  168.38 
  -4   1   1 5391.46  169.88 
  -4   1   1 5220.48  168.28 
  -4   1   1 5354.96  169.38 
   4   1  -1 5347.96  166.48 
  -4   1   1 5412.56  166.88 
  -4   1   1 5570.54  166.58 
   4   1  -1 5414.36  162.68 
  -4   1   1 5327.07  165.08 
  -4   1   1 5343.77  168.88 
  -4   1   1 5245.48  169.98 
  -4   1   1 5568.84  167.08 
   4   1  -1 5086.99  173.98 
  -4   1   1 5266.97  166.08 
  -4   1   1 5313.77  169.08 
   4   1  -1 5363.26  165.68 
  -4   1   1 5689.63  168.28 
  -4   1   1 5189.78  169.58 
   4   1  -1 5565.14  175.88 
   4   1  -1 5337.37  170.88 
   4   1  -1 5419.56  170.28 
   4   1  -1 5283.97  166.68 
  -4   1   1 5211.48  163.58 
   4   1  -1 5385.56  167.18 
   4   1  -1 5418.56  166.58 
   4   1  -1 5359.36  164.18 
   4   1  -1 5231.68  166.48 
   4   1  -1 5294.87  163.58 
  -4   1   1 5224.98  170.08 
   4   1  -1 5447.35  168.68 
  -4   1   1 5049.29  165.18 
  -4   1   1 5328.07  168.58 
  -4   1   1 5392.96  169.88 
  -4   1   1 5221.88  171.78 
  -4   1   1 5559.54  165.28 
  -4   1   1 5294.97  169.68 
   4   1  -1 5686.63  161.78 
   4   1  -1 5406.56  164.58 
   4   1  -1 5217.98  164.88 
  -3  -1   1  412.36   18.80 
  -3  -1   1  407.86   19.60 
   3  -1  -1  393.76   17.60 
  -3  -1   1  373.66   17.70 
   3  -1  -1  400.96   13.70 
   3  -1  -1  398.96   16.70 
   3  -1  -1  393.96   16.20 
   3  -1  -1  398.86   13.60 
  -3  -1   1  417.46   18.50 
   3  -1  -1  416.76   13.80 
  -3  -1   1  381.76   18.50 
   3  -1  -1  387.16   18.10 
  -3  -1   1  427.46   18.70 
  -3  -1   1  413.16   21.10 
  -3  -1   1  398.96   17.30 
   3  -1  -1  379.26   16.20 
  -3  -1   1  425.66   18.20 
  -3  -1   1  427.26   17.60 
   3  -1  -1  395.56   14.60 
  -3  -1   1  386.06   17.40 
  -3  -1   1  381.16   17.90 
   3  -1  -1  424.26   19.20 
   3  -1  -1  404.76   19.00 
   3  -1  -1  404.86   14.30 
  -3  -1   1  388.66   17.90 
   3  -1  -1  452.75   16.20 
   3  -1  -1  404.96   14.30 
   3  -1  -1  401.86   18.60 
  -3  -1   1  379.66   21.00 
  -3  -1   1  397.06   15.90 
   3  -1  -1  404.16   18.40 
   3  -1  -1  430.36   19.80 
   3  -1  -1  387.16   16.10 
   3  -1  -1  408.26   16.70 
   3  -1  -1  409.16   17.30 
   3  -1  -1  402.36   18.10 
  -3  -1   1  375.16   15.90 
  -3  -1   1  385.46   17.10 
   3  -1  -1  372.86   17.00 
   3  -1  -1  376.36   18.30 
  -3  -1   1  408.66   18.20 
  -3  -1   1  396.36   18.80 
  -3  -1   1  388.06   17.40 
   3  -1  -1  398.46   15.50 
   3  -1  -1  399.86   16.90 
  -3  -1   1  375.26   14.80 
   3  -1  -1  383.16   18.10 
  -3  -1   1  411.96   17.30 
   3  -1  -1  351.36   19.10 
   3  -1  -1  394.26   18.70 
  -3  -1   1  412.06   18.60 
   3  -1  -1  424.66   15.70 
  -3  -1   1  432.06   19.70 
  -3  -1   1  401.66   19.20 
   3  -1  -1  391.56   15.90 
  -3  -1   1  394.46   18.50 
  -3  -1   1  397.36   16.00 
   3  -1  -1  379.26   18.10 
   3  -1  -1  377.66   14.80 
  -3  -1   1  389.86   13.40 
   3  -1  -1  408.76   18.40 
   3  -1  -1  389.26   17.30 
  -3   1   1  396.66   16.00 
  -3   1   1  418.86   18.90 
   3   1  -1  399.96   18.40 
   3   1  -1  407.06   18.30 
   3   1  -1  391.26   17.90 
   3   1  -1  378.36   14.80 
  -3   1   1  441.26   18.80 
   3   1  -1  391.46   17.10 
  -3   1   1  377.46   13.60 
   3   1  -1  410.96   17.40 
  -3   1   1  375.56   16.90 
  -3   1   1  379.66   17.00 
   3   1  -1  397.46   15.50 
   3   1  -1  384.66   17.30 
  -3   1   1  409.56   14.80 
   3   1  -1  413.86   18.50 
  -3   1   1  395.86   16.50 
  -3   1   1  387.86   19.90 
   3   1  -1  410.76   19.60 
   3   1  -1  393.76   18.70 
  -3   1   1  395.46   16.60 
  -3   1   1  395.76   18.70 
  -3   1   1  393.86   16.60 
  -3   1   1  423.76   18.40 
   3   1  -1  418.16   21.90 
   3   1  -1  420.06   18.50 
   3   1  -1  378.36   15.50 
  -3   1   1  392.26   18.50 
   3   1  -1  388.96   16.30 
  -3   1   1  389.86   18.40 
   3   1  -1  433.26   17.70 
   3   1  -1  375.96   13.40 
  -3   1   1  426.36   19.20 
  -3   1   1  388.26   18.30 
   3   1  -1  373.76   17.00 
   3   1  -1  376.66   18.20 
   3   1  -1  391.96   18.30 
   3   1  -1  386.66   18.70 
   3   1  -1  394.96   21.10 
   3   1  -1  407.26   16.00 
  -3   1   1  399.86   18.90 
  -3   1   1  367.66   17.20 
   3   1  -1  392.46   16.30 
   3   1  -1  381.16   17.00 
   3   1  -1  387.96   17.50 
  -3   1   1  380.26   17.70 
   3   1  -1  367.86   16.90 
  -3   1   1  413.06   18.00 
  -3   1   1  375.86   18.20 
   3   1  -1  399.66   17.30 
   3   1  -1  405.46   17.10 
   3   1  -1  369.46   19.50 
  -3   1   1  404.76   17.60 
  -2  -1   1  997.70   33.50 
  -2  -1   1  867.41   32.10 
   2  -1  -1  991.50   34.10 
   2  -1  -1  949.90   29.20 
  -2  -1   1  927.61   35.70 
  -2  -1   1  892.81   31.80 
  -2  -1   1  936.91   33.90 
   2  -1  -1  909.51   32.20 
   2  -1  -1  941.81   32.10 
  -2  -1   1  913.51   32.30 
  -2  -1   1  937.91   33.00 
   2  -1  -1  921.61   31.00 
   2  -1  -1  925.81   32.30 
   2  -1  -1  951.60   34.10 
  -2  -1   1  932.91   33.30 
   2  -1  -1  986.40   32.90 
  -2  -1   1  967.80   34.10 
   2  -1  -1  949.90   32.70 
   2  -1  -1  976.10   29.60 
  -2  -1   1  925.71   31.20 
   2  -1  -1  951.50   32.70 
  -2  -1   1  979.50   32.80 
  -2  -1   1  909.51   30.70 
   2  -1  -1  989.90   34.70 
  -2  -1   1  943.71   31.50 
   2  -1  -1  936.61   29.50 
   2  -1  -1  964.60   33.30 
  -2  -1   1  959.80   34.30 
  -2  -1   1  974.10   34.10 
   2  -1  -1  918.71   30.90 
  -2  -1   1  941.01   32.40 
   2  -1  -1  935.71   29.30 
   2  -1  -1  961.00   28.60 
   2  -1  -1  942.81   33.50 
  -2  -1   1  898.61   33.20 
   2  -1  -1  932.51   32.80 
   2  -1  -1  926.51   30.60 
  -2  -1   1  973.40   31.50 
  -2  -1   1  881.31   32.10 
  -2  -1   1  932.01   33.00 
   2  -1  -1  967.10   33.30 
  -2  -1   1  982.80   32.80 
  -2  -1   1  960.50   33.50 
  -2  -1   1  935.81   33.00 
   2  -1  -1  964.00   32.10 
   2  -1  -1  925.11   34.90 
   2  -1  -1  978.50   34.00 
   2  -1  -1  930.11   33.90 
   2  -1  -1  923.61   28.80 
  -2  -1   1  913.11   28.70 
   2  -1  -1  904.61   32.30 
   2  -1  -1  991.60   31.80 
   2  -1  -1  929.31   30.70 
  -2  -1   1  922.41   33.00 
  -2  -1   1  902.51   35.70 
   2  -1  -1  881.91   32.00 
  -2  -1   1  966.50   33.20 
   2  -1  -1  901.51   29.90 
   2  -1  -1  921.01   32.70 
   2  -1  -1  994.00   33.40 
  -2  -1   1  921.71   32.50 
   2  -1  -1 1007.70   33.10 
   2  -1  -1  919.81   33.00 
  -2  -1   1  890.21   33.00 
   2  -1  -1  935.01   29.20 
   2  -1  -1  954.20   31.30 
  -2  -1   1  917.51   32.50 
   2  -1  -1  982.50   32.50 
  -2  -1   1  955.30   33.20 
   2  -1  -1  975.40   34.40 
   2   1  -1  957.10   31.90 
  -2   1   1  913.91   33.00 
   2   1  -1  965.60   32.70 
   2   1  -1  917.01   32.90 
   2   1  -1  937.91   33.00 
   2   1  -1  901.61   32.20 
   2   1  -1  932.01   31.40 
  -2   1   1  967.80   33.50 
  -2   1   1  913.31   29.20 
   2   1  -1  972.50   33.40 
  -2   1   1  962.10   32.20 
  -2   1   1  932.51   29.50 
   2   1  -1  950.50   33.30 
  -2   1   1  918.61   33.90 
  -2   1   1  910.01   32.30 
   2   1  -1  922.21   33.50 
   2   1  -1  911.31   33.40 
   2   1  -1  944.01   32.40 
  -2   1   1  938.41   33.00 
  -2   1   1  984.70   33.00 
  -2   1   1  951.90   30.70 
   2   1  -1  946.81   31.50 
   2   1  -1  912.21   30.70 
   2   1  -1  908.41   36.20 
   2   1  -1  918.81   32.50 
  -2   1   1  958.40   32.50 
   2   1  -1  946.41   33.40 
   2   1  -1  932.81   32.40 
  -2   1   1 1004.80   32.90 
   2   1  -1  914.21   32.30 
   2   1  -1  941.61   33.70 
  -2   1   1  995.40   30.50 
   2   1  -1  959.20   34.00 
   2   1  -1  933.91   34.10 
   2   1  -1  919.81   30.70 
  -2   1   1  900.41   32.10 
  -2   1   1  969.20   30.60 
  -2   1   1  977.90   33.50 
   2   1  -1  911.71   31.30 
  -2   1   1  918.31   33.80 
  -2   1   1  986.10   34.00 
  -2   1   1  891.21   32.80 
  -2   1   1  950.20   32.60 
   2   1  -1  949.31   32.40 
   2   1  -1 1012.20   36.50 
   2   1  -1 1004.50   33.20 
  -2   1   1  929.61   32.20 
  -2   1   1  971.80   32.80 
   2   1  -1  899.01   32.80 
  -2   1   1  951.30   33.30 
   2   1  -1  959.30   32.70 
  -2   1   1  952.30   29.90 
   2   1  -1  905.21   32.80 
  -2   1   1  962.00   34.20 
   2   1  -1  945.31   33.20 
  -2   1   1  966.00   32.30 
   1  -1  -1  145.79    5.90 
  -1  -1   1  140.09    7.00 
   1  -1  -1  147.69    5.80 
  -1  -1   1  142.09    6.80 
   1  -1  -1  146.99    6.10 
  -1  -1   1  139.99    7.60 
   1  -1  -1  149.69    6.50 
  -1  -1   1  153.68    6.80 
  -1  -1   1  140.29    7.20 
  -1  -1   1  152.88    7.20 
   1  -1  -1  142.99    6.20 
   1  -1  -1  154.88    6.70 
   1  -1  -1  136.39    7.60 
  -1  -1   1  136.59    8.60 
   1  -1  -1  145.49    7.20 
  -1  -1   1  155.58    7.40 
   1  -1  -1  147.49    7.70 
  -1  -1   1  147.69    7.50 
  -1  -1   1  136.79    7.70 
   1  -1  -1  142.69    6.40 
  -1  -1   1  152.68    7.50 
  -1  -1   1  108.69    6.60 
   1  -1  -1  140.99    7.50 
  -1  -1   1  141.79    6.80 
  -1  -1   1  158.68    7.50 
   1  -1  -1  155.78    6.20 
   1  -1  -1  150.98    7.00 
   1  -1  -1  151.98    6.20 
  -1  -1   1  136.59    7.10 
  -1  -1   1  136.69    7.40 
   1  -1  -1  147.69    5.80 
   1  -1  -1  145.59    7.20 
   1  -1  -1  155.08    6.70 
  -1  -1   1  138.89    7.30 
   1  -1  -1  149.59    6.20 
  -1  -1   1  143.89    7.90 
   1  -1  -1  139.39    5.80 
   1  -1  -1  144.79    6.70 
   1  -1  -1  148.39    7.20 
  -1  -1   1  141.99    6.40 
   1  -1  -1  157.58    7.00 
   1  -1  -1  146.39    6.20 
  -1  -1   1  134.49    8.70 
   1  -1  -1  133.79    8.60 
  -1  -1   1  155.38    7.70 
   1  -1  -1  151.88    8.60 
   1  -1  -1  141.49    7.50 
  -1  -1   1  150.28    7.20 
   1  -1  -1  151.48    7.10 
   1  -1  -1  155.48    8.50 
   1  -1  -1  147.89    5.50 
   1  -1  -1  150.28    8.60 
  -1  -1   1  144.39    7.10 
  -1  -1   1  153.38    7.60 
  -1  -1   1  133.09    6.40 
   1  -1  -1  145.99    7.60 
   1  -1  -1  145.89    6.70 
  -1  -1   1  142.89    6.80 
  -1  -1   1  153.38    7.30 
   1   1  -1  149.39    7.10 
   1   1  -1  141.19    6.40 
  -1   1   1  140.19    6.40 
   1   1  -1  144.09    7.90 
   1   1  -1  144.69    7.40 
   1   1  -1  139.09    7.10 
   1   1  -1  156.88    7.20 
   1   1  -1  145.69    6.90 
   1   1  -1  151.78    7.30 
   1   1  -1  162.58    8.00 
  -1   1   1  143.59    8.40 
  -1   1   1  126.49    7.90 
   1   1  -1  140.19    8.90 
   1   1  -1  161.78    7.70 
  -1   1   1  139.69    6.60 
  -1   1   1  146.49    7.20 
   1   1  -1  141.49    6.40 
   1   1  -1  156.38    7.90 
   1   1  -1  148.19    7.50 
   1   1  -1  148.29    7.30 
  -1   1   1  152.68    7.60 
   1   1  -1  144.99    7.30 
   1   1  -1  155.08    9.20 
   1   1  -1  157.28    7.70 
  -1   1   1  148.39    6.30 
   1   1  -1  137.79    7.20 
   1   1  -1  163.78    7.40 
   1   1  -1  142.99    6.80 
   1   1  -1  155.88    7.50 
  -1   1   1  145.09    8.50 
   1   1  -1  144.29    7.20 
  -1   1   1  130.89    7.00 
  -1   1   1  148.79    7.60 
   1   1  -1  156.58    6.10 
  -1   1   1  146.79    8.00 
   1   1  -1  136.19    6.60 
   1   1  -1  147.79    7.70 
   1   1  -1  141.49    7.00 
  -1   1   1  139.99    6.40 
  -1   1   1  138.99    7.60 
  -1   1   1  136.59    8.50 
   1   1  -1  139.29    6.70 
   1   1  -1  150.38    7.20 
  -1   1   1  143.39    7.70 
   0  -1  -1 4885.51  138.39 
   0  -1  -1 5041.70  138.09 
   0  -1   1 4346.96  139.69 
   0  -1  -1 4786.62  137.89 
   0  -1   1 4405.96  139.99 
   0  -1   1 4570.54  138.49 
   0  -1  -1 5007.30  138.39 
   0  -1  -1 5110.49  142.19 
   0  -1   1 4395.16  138.19 
   0  -1  -1 4100.49  137.79 
   0  -1   1 4233.38  137.89 
   0  -1   1 4546.15  138.39 
   0  -1  -1 5100.79  138.29 
   0  -1   1 4574.94  137.69 
   0  -1  -1 4826.12  138.99 
   0  -1  -1 4931.71  138.19 
   0  -1   1 4721.83  138.89 
   0  -1   1 4628.34  138.59 
   0  -1   1 4812.22  138.29 
   0  -1   1 4501.95  138.99 
   0  -1  -1 4871.81  138.29 
   0  -1   1 4605.64  138.19 
   0  -1  -1 5008.70  138.49 
   0  -1  -1 4860.01  137.99 
   0  -1   1 3816.62  137.79 
   0  -1   1 4612.74  139.29 
   0  -1   1 4602.44  138.89 
   0  -1  -1 4984.50  139.39 
   0  -1   1 4567.94  138.79 
   0  -1   1 4266.87  142.19 
   0  -1   1 4537.15  138.59 
   0  -1  -1 4446.06  137.99 
   0   1  -1 4064.19  137.99 
   0   1   1 4743.73  140.09 
   0   1   1 4091.69  141.59 
   0   1  -1 4603.94  138.59 
   0   1  -1 4824.02  138.49 
   0   1  -1 4126.29  137.69 
   0   1   1 4832.52  139.19 
   0   1   1 4411.06  138.79 
   0   1   1 4152.88  138.49 
   0   1   1 4337.97  140.09 
   0   1   1 4313.67  139.19 
   0   1  -1 4707.03  138.79 
  -1  -1  -1  675.93   23.00 
   1  -1   1  686.13   23.10 
   1  -1   1  638.94   22.80 
   1  -1   1  658.83   22.60 
  -1  -1  -1  645.64   24.10 
  -1  -1  -1  584.84   25.40 
   1  -1   1  691.13   21.60 
   1  -1   1  655.33   23.90 
   1  -1   1  643.04   23.20 
   1  -1   1  679.83   22.70 
   1  -1   1  701.53   25.00 
   1  -1   1  668.53   22.00 
  -1  -1  -1  663.23   22.30 
  -1  -1  -1  704.23   24.90 
  -1  -1  -1  691.03   24.30 
  -1  -1  -1  694.13   23.30 
  -1  -1  -1  677.93   23.30 
   1  -1   1  637.14   21.50 
  -1  -1  -1  652.83   25.00 
  -1  -1  -1  689.03   23.00 
  -1  -1  -1  674.23   23.40 
   1  -1   1  683.23   21.40 
   1  -1   1  600.24   24.40 
  -1  -1  -1  687.03   24.30 
   1  -1   1  662.73   23.90 
  -1  -1  -1  662.33   23.40 
   1  -1   1  696.93   23.20 
  -1  -1  -1  637.24   25.10 
   1  -1   1  670.93   25.00 
  -1  -1  -1  676.73   23.30 
   1  -1   1  683.03   22.40 
  -1  -1  -1  658.33   22.60 
  -1  -1  -1  685.33   24.00 
  -1  -1  -1  658.23   22.40 
   1  -1   1  637.54   22.00 
   1  -1   1  658.83   22.40 
  -1  -1  -1  658.13   23.60 
   1  -1   1  684.53   22.70 
   1  -1   1  620.04   20.90 
   1  -1   1  659.23   23.80 
   1  -1   1  677.33   23.20 
  -1  -1  -1  680.83   23.70 
   1  -1   1  696.83   21.50 
   1  -1   1  665.13   22.70 
   1  -1   1  691.33   20.80 
   1  -1   1  694.93   22.70 
  -1  -1  -1  674.83   23.10 
  -1  -1  -1  668.33   23.50 
  -1  -1  -1  641.14   23.50 
   1  -1   1  650.23   23.40 
   1  -1   1  655.63   21.70 
   1   1   1  682.63   23.10 
  -1   1  -1  650.33   21.70 
   1   1   1  689.43   23.60 
  -1   1  -1  657.33   24.90 
   1   1   1  698.43   25.40 
   1   1   1  702.23   24.70 
  -1   1  -1  719.33   23.40 
   1   1   1  708.03   23.90 
   1   1   1  627.84   23.70 
   1   1   1  701.53   24.10 
   1   1   1  670.83   23.50 
   1   1   1  599.64   22.10 
   1   1   1  668.13   23.60 
   1   1   1  707.03   23.10 
  -1   1  -1  651.83   24.00 
   1   1   1  673.73   25.50 
   1   1   1  647.94   23.50 
   1   1   1  664.23   23.20 
   1   1   1  655.93   23.00 
   1   1   1  681.63   23.40 
  -1   1  -1  683.93   21.30 
  -1   1  -1  680.03   24.10 
   1   1   1  656.63   23.50 
  -1   1  -1  577.24   22.00 
   1   1   1  684.53   23.20 
  -1   1  -1  593.44   22.60 
   1   1   1  678.03   23.10 
  -1   1  -1  632.04   24.90 
  -1   1  -1  655.73   22.40 
   1   1   1  672.43   22.60 
  -1   1  -1  601.54   22.50 
  -1   1  -1  581.04   22.50 
   1   1   1  684.83   23.30 
   1   1   1  655.23   22.40 
   1   1   1  661.93   23.00 
  -1   1  -1  610.74   22.70 
  -1   1  -1  668.53   22.30 
   1   1   1  695.73   21.50 
  -1   1  -1  641.44   24.10 
  -1   1  -1  656.93   23.10 
  -1   1  -1  654.13   25.00 
  -1   1  -1  706.93   24.10 
   1   1   1  694.93   23.00 
  -1   1  -1  656.03   25.00 
   1   1   1  666.23   24.30 
  -1   1  -1  651.83   21.60 
  -1   1  -1  704.93   21.70 
   1   1   1  698.23   23.50 
   1   1   1  652.53   23.30 
  -1   1  -1  659.63   22.90 
  -2  -1  -1 9515.15  266.97 
   2  -1   1 8649.23  265.17 
   2  -1   1 8507.25  266.17 
   2  -1   1 8142.49  264.27 
   2  -1   1 8571.64  264.67 
   2  -1   1 8506.55  265.57 
   2  -1   1 8883.81  266.37 
   2  -1   1 9076.99  264.07 
   2  -1   1 8424.66  266.87 
  -2  -1  -1 9019.70  270.67 
  -2  -1  -1 9274.87  266.27 
   2  -1   1 8661.33  265.07 
   2  -1   1 8730.03  267.47 
   2  -1   1 8880.61  267.97 
  -2  -1  -1 8781.42  266.17 
   2  -1   1 8580.64  263.97 
   2  -1   1 8674.93  268.27 
  -2  -1  -1 9020.50  264.97 
   2  -1   1 8663.03  267.97 
  -2  -1  -1 9024.20  269.97 
   2  -1   1 8703.73  263.97 
  -2  -1  -1 8882.41  265.77 
  -2  -1  -1 8926.71  266.37 
   2  -1   1 8364.46  266.07 
   2  -1   1 9192.38  265.77 
   2  -1   1 8381.96  267.27 
  -2  -1  -1 8749.33  265.27 
  -2  -1  -1 9411.06  266.87 
  -2  -1  -1 8917.21  265.17 
   2  -1   1 9066.89  265.57 
  -2  -1  -1 9237.38  266.27 
   2  -1   1 9199.18  265.17 
   2  -1   1 8715.03  267.57 
  -2  -1  -1 8565.84  265.97 
   2  -1   1 8631.74  266.27 
  -2  -1  -1 9404.76  265.87 
  -2  -1  -1 8856.51  266.37 
  -2  -1  -1 8955.60  267.07 
  -2  -1  -1 9082.49  266.77 
  -2  -1  -1 8370.86  263.87 
  -2  -1  -1 8701.33  267.37 
  -2  -1  -1 8885.91  267.07 
  -2  -1  -1 8316.97  266.77 
   2  -1   1 8777.12  263.17 
   2  -1   1 8358.56  263.37 
   2  -1   1 9025.40  263.47 
   2  -1   1 8513.95  264.57 
  -2  -1  -1 8267.17  266.37 
  -2  -1  -1 8892.21  265.87 
   2  -1   1 8974.50  265.37 
  -2  -1  -1 8275.17  265.17 
   2  -1   1 8962.30  265.47 
  -2  -1  -1 9554.24  266.07 
  -2  -1  -1 8611.94  264.67 
   2  -1   1 8606.74  266.57 
   2  -1   1 8520.45  264.77 
   2  -1   1 9999.00  266.47 
  -2  -1  -1 8798.72  267.17 
  -2  -1  -1 8441.76  267.57 
   2  -1   1 8605.84  264.27 
  -2  -1  -1 9233.08  263.67 
   2  -1   1 9017.80  265.57 
   2   1   1 8636.44  265.97 
   2   1   1 9071.69  266.47 
  -2   1  -1 9112.19  266.07 
   2   1   1 8644.94  264.17 
  -2   1  -1 8152.78  266.37 
   2   1   1 9193.88  266.97 
  -2   1  -1 8254.27  264.47 
   2   1   1 8879.11  266.27 
  -2   1  -1 8421.26  266.47 
   2   1   1 9237.88  265.47 
   2   1   1 8867.01  263.17 
  -2   1  -1 9285.47  265.77 
   2   1   1 9022.70  265.57 
   2   1   1 8579.14  264.87 
   2   1   1 8983.30  267.37 
   2   1   1 8789.12  270.57 
  -2   1  -1 8167.88  267.67 
   2   1   1 9374.76  267.67 
   2   1   1 8710.93  265.87 
   2   1   1 9547.54  265.67 
  -2   1  -1 8716.43  266.57 
  -2   1  -1 9133.29  267.27 
   2   1   1 8827.82  270.17 
  -2   1  -1 9128.89  266.17 
   2   1   1 9066.69  266.97 
   2   1   1 9552.94  266.07 
   2   1   1 8744.83  265.97 
   2   1   1 9181.68  266.37 
   2   1   1 8520.65  267.77 
   2   1   1 8790.92  266.77 
   2   1   1 9098.79  266.17 
  -2   1  -1 8638.34  264.77 
   2   1   1 8732.43  267.07 
  -2   1  -1 8814.72  264.57 
   2   1   1 9243.38  265.77 
   2   1   1 9150.08  264.97 
  -2   1  -1 8067.79  263.97 
  -2   1  -1 8347.57  267.27 
   2   1   1 9067.09  266.57 
   2   1   1 9099.89  267.07 
   2   1   1 8531.15  265.67 
   2   1   1 9002.70  266.67 
   2   1   1 9225.88  266.57 
  -2   1  -1 8620.54  267.67 
  -2   1  -1 7885.51  265.87 
  -2   1  -1 8281.07  267.97 
  -2   1  -1 8721.23  265.07 
   2   1   1 8733.83  264.67 
  -2   1  -1 9454.15  266.77 
  -2   1  -1 8820.62  265.57 
  -2   1  -1 8873.71  267.67 
  -2   1  -1 8650.73  263.67 
   2   1   1 8488.25  266.37 
   2   1   1 8290.27  266.97 
   2   1   1 9284.07  267.37 
  -2   1  -1 8286.17  263.77 
  -2   1  -1 8502.35  265.17 
   3  -1   1   95.59    7.70 
  -3  -1  -1   68.49    7.70 
  -3  -1  -1   82.79   12.60 
   3  -1   1   79.29    4.70 
   3  -1   1   85.09    9.50 
   3  -1   1   94.59    5.20 
   3  -1   1   81.19    5.50 
   3  -1   1   84.69    6.20 
   3  -1   1   86.09    6.60 
  -3  -1  -1  100.49   10.40 
   3  -1   1   87.29    7.00 
  -3  -1  -1   91.79    9.20 
  -3  -1  -1   79.49    8.30 
  -3  -1  -1   88.29    6.70 
  -3  -1  -1   78.39    7.90 
   3  -1   1   80.79    5.70 
  -3  -1  -1   96.39    9.60 
  -3  -1  -1   93.99    9.40 
   3  -1   1   81.49    5.70 
  -3  -1  -1   85.19    7.90 
  -3  -1  -1   84.49    4.40 
  -3  -1  -1   84.59    6.00 
  -3  -1  -1   90.99    6.30 
   3  -1   1   89.99    9.20 
   3  -1   1   79.49    5.50 
  -3  -1  -1   78.29    9.30 
  -3  -1  -1   86.89    9.20 
  -3  -1  -1   95.09    5.30 
   3  -1   1   75.49    6.30 
   3  -1   1   97.79    6.60 
  -3  -1  -1   69.19    7.70 
   3  -1   1   85.29    6.50 
   3  -1   1   81.59    5.80 
   3  -1   1   95.49    9.20 
   3  -1   1   77.99    4.90 
  -3  -1  -1  108.49    8.00 
   3  -1   1   85.79    7.50 
  -3  -1  -1   86.49    9.60 
   3  -1   1   96.09    9.80 
   3  -1   1   95.99    6.80 
  -3  -1  -1   89.49    7.40 
  -3  -1  -1   91.39    8.60 
   3  -1   1   85.59   10.30 
   3  -1   1   94.89    7.60 
   3  -1   1   92.79    6.60 
   3  -1   1   81.99    8.20 
   3  -1   1   73.59    4.90 
  -3  -1  -1   83.69    6.50 
   3  -1   1   94.59    9.90 
   3  -1   1   82.89    6.70 
  -3  -1  -1   90.89    9.30 
  -3  -1  -1   89.99    7.30 
   3  -1   1   87.49    4.70 
  -3  -1  -1   73.39    6.00 
   3   1   1   93.89    8.30 
   3   1   1   73.09    8.50 
  -3   1  -1   71.39    9.00 
  -3   1  -1  102.39   10.20 
  -3   1  -1   77.49    9.20 
  -3   1  -1   88.89    9.80 
  -3   1  -1   69.89    7.20 
  -3   1  -1   98.59    8.20 
   3   1   1   82.99    6.90 
   3   1   1  100.09   12.10 
  -3   1  -1   81.19    4.60 
   3   1   1   82.19    9.50 
   3   1   1   86.59    5.70 
  -3   1  -1   84.19    4.80 
  -3   1  -1  114.49    8.10 
   3   1   1   90.29    4.90 
   3   1   1   99.89    7.20 
   3   1   1   95.79    6.70 
  -3   1  -1   90.79    9.00 
  -3   1  -1   86.49    5.80 
  -3   1  -1   74.39    8.60 
   3   1   1   97.89   11.90 
   3   1   1   76.89    8.70 
  -3   1  -1   69.19    7.90 
   3   1   1   80.69    8.60 
   3   1   1   83.99    8.90 
   3   1   1   99.19    8.10 
   3   1   1   92.79   10.00 
   3   1   1   81.29    8.20 
  -3   1  -1   94.69    5.80 
  -3   1  -1   74.99    8.00 
  -3   1  -1   77.19    8.80 
  -3   1  -1   80.69    6.40 
   3   1   1   96.89    7.40 
   3   1   1   85.59    6.40 
   3   1   1   79.19    6.10 
   3   1   1   84.09    6.30 
   3   1   1   84.49    6.60 
  -3   1  -1   76.89    6.10 
  -3   1  -1   80.09    6.10 
   3   1   1   76.39    8.20 
   3   1   1   86.09    5.80 
  -3   1  -1   63.19    7.40 
   3   1   1   87.59    5.40 
  -3   1  -1   86.09    9.10 
  -3   1  -1   68.69    7.60 
  -3   1  -1   94.29    7.30 
  -3   1  -1   81.79    6.40 
   3   1   1   87.99    7.20 
   3   1   1   94.99   10.30 
   3   1   1   82.89    4.70 
  -4  -1  -1 1953.20   72.59 
  -4  -1  -1 2148.98   68.39 
  -4  -1  -1 2021.00   64.09 
   4  -1   1 2216.48   67.09 
   4  -1   1 2119.19   70.19 
   4  -1   1 2064.79   66.49 
   4  -1   1 2095.99   66.99 
  -4  -1  -1 2054.69   73.99 
   4  -1   1 2156.78   71.09 
  -4  -1  -1 2087.09   73.99 
   4  -1   1 2143.29   65.49 
   4  -1   1 2122.49   68.69 
   4  -1   1 2068.09   65.99 
  -4  -1  -1 2086.79   73.19 
  -4  -1  -1 2072.39   65.19 
  -4  -1  -1 2089.69   72.49 
   4  -1   1 2113.19   66.19 
  -4  -1  -1 2072.09   71.89 
  -4  -1  -1 2141.29   72.69 
  -4  -1  -1 2078.79   71.69 
   4  -1   1 2154.98   71.69 
   4  -1   1 2021.90   67.49 
  -4  -1  -1 2127.99   69.99 
   4  -1   1 2109.29   67.59 
   4  -1   1 2028.10   67.39 
  -4  -1  -1 2094.29   67.99 
   4  -1   1 2111.19   71.49 
   4  -1   1 2136.89   67.49 
  -4  -1  -1 2050.79   68.79 
   4  -1   1 2100.39   69.59 
   4  -1   1 2147.49   71.69 
  -4  -1  -1 2049.79   68.19 
   4  -1   1 2104.59   69.09 
   4  -1   1 2035.30   68.09 
  -4  -1  -1 2014.40   71.39 
   4  -1   1 2121.79   68.09 
  -4  -1  -1 2152.28   71.89 
   4  -1   1 2131.39   69.69 
  -4  -1  -1 2072.09   71.39 
   4  -1   1 2085.99   70.39 
   4  -1   1 2174.08   73.49 
  -4  -1  -1 2076.59   69.19 
  -4  -1  -1 2034.40   73.19 
   4  -1   1 1969.80   65.79 
  -4   1  -1 2325.97   74.09 
  -4   1  -1 1934.71   72.39 
  -4   1  -1 2024.80   74.29 
   4   1   1 2116.59   68.19 
  -4   1  -1 2136.69   69.99 
   4   1   1 2140.19   70.79 
  -4   1  -1 2057.89   69.69 
  -4   1  -1 2092.09   73.69 
  -4   1  -1 2062.69   72.69 
  -4   1  -1 2093.59   68.09 
  -4   1  -1 2017.50   70.89 
  -4   1  -1 2082.59   68.19 
   4   1   1 2011.10   73.89 
   4   1   1 2145.89   66.29 
   4   1   1 2025.40   68.49 
  -4   1  -1 2013.00   71.59 
  -4   1  -1 1980.00   68.89 
   4   1   1 2078.49   67.49 
   4   1   1 2016.90   77.99 
  -4   1  -1 2154.48   67.99 
  -4   1  -1 2040.50   66.99 
  -4   1  -1 2130.29   72.09 
   4   1   1 2012.60   70.59 
   4   1   1 2149.98   65.79 
  -4   1  -1 2063.89   72.19 
  -4   1  -1 2085.49   74.09 
  -4   1  -1 2200.88   72.49 
  -4   1  -1 2099.79   68.29 
   4   1   1 2081.89   68.79 
   4   1   1 2100.99   78.89 
   4   1   1 2128.09   73.09 
   4   1   1 2052.89   71.39 
   4   1   1 2128.69   72.49 
   4   1   1 2051.89   66.69 
  -4   1  -1 2112.59   71.09 
   4   1   1 2155.88   68.09 
  -4   1  -1 2137.69   71.59 
  -4   1  -1 2053.99   73.39 
   4   1   1 2173.48   68.09 
  -4   1  -1 2104.49   65.79 
  -4   1  -1 2199.88   74.79 
   4   1   1 2090.29   69.29 
   4   1   1 2122.09   73.49 
   4   1   1 2087.59   68.79 
  -4   1  -1 2070.49   66.89 
   5  -1   1   10.00    3.20 
   5  -1   1   13.10    3.50 
   5  -1   1   11.10    4.20 
  -5  -1  -1   16.70    6.10 
   5  -1   1   12.20    3.20 
  -5  -1  -1   20.10    6.50 
   5  -1   1   15.80    4.70 
   5  -1   1   14.40    4.90 
   5  -1   1   15.80    7.30 
   5  -1   1   11.30    3.90 
   5  -1   1    5.10    3.20 
   5  -1   1   12.20    4.40 
   5  -1   1   12.20    2.80 
  -5  -1  -1   14.20    5.60 
  -5  -1  -1    8.50    3.40 
  -5  -1  -1   10.60    2.20 
   5  -1   1    9.90    3.20 
  -5  -1  -1   16.70    3.90 
   5  -1   1   13.30    3.30 
  -5  -1  -1   12.30    4.90 
   5  -1   1   12.90    4.70 
   5  -1   1   22.50    4.30 
  -5  -1  -1   11.90    2.00 
  -5  -1  -1   13.60    4.70 
   5  -1   1    6.20    3.30 
   5  -1   1    8.40    3.00 
  -5  -1  -1   11.50    4.80 
  -5  -1  -1    3.40    4.30 
  -5  -1  -1   16.70    6.00 
   5  -1   1   14.00    4.20 
  -5  -1  -1   12.30    5.40 
   5  -1   1   12.90    3.00 
   5  -1   1   12.00    5.20 
  -5  -1  -1    4.80    4.10 
  -5  -1  -1   10.70    3.60 
   5  -1   1   13.20    3.20 
   5  -1   1   28.10    7.90 
  -5  -1  -1   12.00    4.40 
   5  -1   1   11.30    3.20 
  -5  -1  -1   14.50    5.30 
  -5  -1  -1   19.40    6.30 
   5   1   1   14.00    3.40 
   5   1   1   17.80    3.20 
   5   1   1   15.10    3.90 
  -5   1  -1   20.40    5.40 
   5   1   1   11.50    3.70 
   5   1   1   16.00    6.10 
   5   1   1   15.40    4.20 
   5   1   1    8.30    5.90 
   5   1   1   11.80    3.60 
  -5   1  -1   17.20    4.30 
  -5   1  -1   20.70    6.40 
  -5   1  -1    7.90    3.20 
   5   1   1   10.70    3.60 
   5   1   1   11.00    3.60 
   5   1   1   12.20    5.20 
  -5   1  -1   10.20    3.10 
  -5   1  -1   16.10    3.40 
   5   1   1   17.30    3.60 
  -5   1  -1   18.20    5.60 
   5   1   1   13.50    5.30 
  -5   1  -1    6.60    3.80 
  -5   1  -1   20.10    6.50 
  -5   1  -1   16.40    5.80 
  -5   1  -1   10.50    3.80 
  -5   1  -1   16.70    6.60 
   5   1   1   19.00    5.30 
   5   1   1   16.60    4.90 
  -5   1  -1    5.80    4.20 
  -5   1  -1   14.90    4.30 
  -5   1  -1   13.30    5.30 
  -5   1  -1   15.20    3.50 
   5   1   1   14.80    5.30 
  -5   1  -1   19.40    6.10 
  -5   1  -1    9.70    4.90 
  -5   1  -1   17.20    6.60 
   5   1   1    9.70    3.70 
  -5   1  -1   11.30    4.50 
  -5   1  -1   15.00    5.30 
   5   1   1   19.60    5.50 
   5   1   1   11.20    6.60 
  -5   1  -1    6.60    4.20 
  -5   1  -1   15.10    5.40 
   6  -1   1   39.50    7.80 
  -6  -1  -1   40.60    9.90 
  -6  -1  -1   33.90    8.20 
  -6  -1  -1   33.00    8.70 
   6  -1   1   48.70   11.90 
   6  -1   1   34.30    5.90 
   6  -1   1   30.90    7.00 
   6  -1   1   40.00    6.40 
  -6  -1  -1   28.50    7.70 
   6  -1   1   23.40    6.50 
   6  -1   1   47.30    6.40 
  -6  -1  -1   35.00    6.30 
   6  -1   1   38.80    7.80 
   6  -1   1   38.00    5.80 
  -6  -1  -1   31.20    8.20 
  -6  -1  -1   40.40    3.90 
  -6  -1  -1   33.10    8.90 
   6  -1   1   36.60    5.30 
  -6  -1  -1   31.20    6.50 
  -6  -1  -1   45.40    6.70 
   6  -1   1   41.70    7.50 
   6  -1   1   48.30    6.30 
   6  -1   1   41.30    5.70 
  -6  -1  -1   45.20    9.60 
   6  -1   1   35.20    8.10 
   6  -1   1   47.50    7.80 
  -6  -1  -1   38.70    8.80 
   6  -1   1   44.80   10.30 
   6  -1   1   53.39    7.60 
   6  -1   1   38.50    8.00 
   6  -1   1   32.60    5.40 
   6  -1   1   30.40    7.10 
   6  -1   1   44.50    6.00 
  -6  -1  -1   39.60    8.50 
   6  -1   1   29.80   10.30 
   6  -1   1   34.40    4.70 
  -6  -1  -1   31.40    9.00 
  -6  -1  -1   14.20    5.90 
   6  -1   1   39.90    7.20 
  -6  -1  -1   37.80    7.10 
  -6  -1  -1   33.90    8.40 
   6   1   1   53.29    9.10 
   6   1   1   28.50    7.50 
  -6   1  -1   34.40    9.10 
   6   1   1   44.20   12.40 
   6   1   1   53.79    6.50 
   6   1   1   37.40    7.70 
  -6   1  -1   31.30    6.50 
   6   1   1   42.30    8.10 
   6   1   1   25.90    7.60 
   6   1   1   37.50    9.60 
  -6   1  -1   32.10    8.30 
  -6   1  -1   30.80    5.50 
   6   1   1   41.40    6.10 
  -6   1  -1   40.60    6.20 
   6   1   1   50.09   12.50 
  -6   1  -1   33.20    7.90 
   6   1   1   38.50    6.40 
   6   1   1   33.70    8.60 
   6   1   1   44.70    5.60 
  -6   1  -1   42.50    9.70 
  -6   1  -1   41.40    5.70 
  -6   1  -1   23.70    7.90 
  -6   1  -1   43.30    9.60 
  -6   1  -1   29.80    7.90 
  -6   1  -1   23.20    7.60 
   6   1   1   29.00    5.90 
  -6   1  -1   44.80    9.50 
   6   1   1   53.39    9.80 
  -6   1  -1   33.20    8.30 
  -6   1  -1   37.40    8.70 
   6   1   1   38.30    6.10 
  -6   1  -1   35.30    9.20 
  -6   1  -1   40.30    8.00 
   6   1   1   41.00    6.80 
  -6   1  -1   32.90    8.20 
  -7  -1  -1   64.69   11.30 
  -7  -1  -1   35.40    9.00 
   7  -1   1   56.89    9.30 
  -7  -1  -1   74.99   10.80 
   7  -1   1   54.99   13.90 
   7  -1   1   50.09    9.10 
   7  -1   1   76.49   10.70 
  -7  -1  -1   63.69   12.30 
   7  -1   1   62.19   10.70 
   7  -1   1   60.59    7.20 
   7  -1   1   61.09   10.70 
   7  -1   1   69.09   11.50 
  -7  -1  -1   52.39   10.10 
   7  -1   1   66.09    7.60 
   7  -1   1   67.19   13.90 
  -7  -1  -1   67.79   13.50 
  -7  -1  -1   47.60   10.50 
   7  -1   1   67.29   11.40 
   7  -1   1   64.19   10.60 
   7  -1   1   63.29    8.90 
  -7  -1  -1   50.99    8.80 
   7  -1   1   51.09   10.80 
  -7  -1  -1   49.30   12.10 
   7  -1   1   73.39    9.20 
  -7  -1  -1   55.89   11.60 
  -7  -1  -1   61.09    9.20 
   7  -1   1   56.69   14.40 
  -7  -1  -1   73.79   12.80 
  -7  -1  -1   52.59   12.00 
  -7  -1  -1   45.80   11.40 
   7  -1   1   59.39    8.30 
   7  -1   1   66.39   12.90 
   7  -1   1   56.19   10.40 
  -7   1  -1   64.69   12.20 
  -7   1  -1   33.30    9.80 
   7   1   1   60.49   12.60 
   7   1   1   62.59    8.60 
   7   1   1   62.09   12.30 
  -7   1  -1   49.90   11.20 
  -7   1  -1   44.70   11.20 
   7   1   1   55.69   10.30 
   7   1   1   53.59   11.00 
   7   1   1   57.49   10.40 
  -7   1  -1   59.39    9.50 
   7   1   1   59.69   10.80 
   7   1   1   66.39    9.70 
  -7   1  -1   52.89   12.00 
  -7   1  -1   83.29   14.40 
  -7   1  -1   61.49   13.40 
   7   1   1   56.89   15.00 
   7   1   1   70.69   11.60 
  -7   1  -1   69.59   11.60 
  -7   1  -1   48.90   10.30 
  -7   1  -1   52.19   10.90 
  -7   1  -1   61.09   11.60 
   7   1   1   47.20   13.70 
   7   1   1   54.09    8.20 
  -7   1  -1   50.39   11.00 
  -7   1  -1   60.19   12.50 
   7   1   1   64.49    8.10 
   7   1   1   63.19    7.80 
   7   1   1   57.59   12.00 
   7   1   1   60.49   11.00 
   7   1   1   55.79    7.60 
   8  -1   1   -2.60    5.30 
  -8  -1  -1   25.60    9.80 
  -8  -1  -1    7.80    5.10 
   8  -1   1    2.90    5.40 
   8  -1   1    2.00    5.10 
  -8  -1  -1   38.60    9.90 
   8  -1   1    2.70    7.70 
   8  -1   1    5.80    6.10 
   8  -1   1    9.70    7.60 
   8  -1   1   15.10    5.30 
   8  -1   1    4.40    4.50 
   8  -1   1    7.70    5.30 
  -8  -1  -1    3.80    5.80 
  -8  -1  -1    6.20    5.70 
   8  -1   1    1.60    5.00 
   8  -1   1    3.00    7.00 
  -8  -1  -1   -2.40    3.60 
   8  -1   1    7.80    5.30 
  -8  -1  -1    2.90    5.50 
  -8  -1  -1    4.90    6.70 
  -8  -1  -1    4.30    6.70 
  -8  -1  -1    1.10    5.20 
   8  -1   1   -3.60    4.10 
  -8  -1  -1    7.40    7.20 
  -8  -1  -1    2.50    6.50 
  -8  -1  -1    9.50    7.10 
   8  -1   1   -3.70    6.00 
   8  -1   1    4.20    5.00 
   8   1   1    4.00    5.50 
  -8   1  -1    3.70    6.90 
   8   1   1   -2.70    4.10 
  -8   1  -1    3.80    6.10 
   8   1   1    5.40    4.50 
  -8   1  -1    7.00    7.10 
  -8   1  -1    6.90    4.80 
   8   1   1   -0.70    5.40 
  -8   1  -1   -1.60    6.50 
   8   1   1    1.90    5.80 
  -8   1  -1   -2.80    4.20 
   8   1   1    7.20    8.20 
  -8   1  -1    0.00    4.80 
   8   1   1    7.40    5.70 
  -8   1  -1    7.30    7.90 
   8   1   1    0.40    5.20 
  -8   1  -1   -3.80    4.40 
  -8   1  -1    8.00    6.60 
   8   1   1    1.80    6.10 
   8   1   1   11.30    6.70 
   8   1   1   -0.30    5.40 
   8   1   1    3.10    7.50 
  -8   1  -1    5.80    5.90 
  -8   1  -1   -2.40    5.70 
  -9  -1  -1   -0.80    5.60 
  -9  -1  -1    0.10    6.70 
   9  -1   1    3.70    8.30 
  -9  -1  -1    7.30    8.50 
  -9  -1  -1    0.60    6.30 
  -9  -1  -1    2.40    6.70 
  -9  -1  -1   -5.50    5.80 
   9  -1   1   -3.00    7.90 
  -9  -1  -1    5.60    6.60 
  -9  -1  -1   -0.60    7.20 
   9  -1   1   -1.90    5.30 
   9  -1   1    7.40    7.50 
   9  -1   1    1.50    6.70 
   9  -1   1   -5.30    4.40 
   9  -1   1    0.50    7.30 
  -9  -1  -1   -1.00    7.30 
   9  -1   1   -1.80    7.00 
   9  -1   1    6.30    6.50 
  -9  -1  -1    2.00    7.20 
  -9  -1  -1    1.70    6.70 
   9  -1   1   -2.40    7.50 
   9  -1   1   -6.40    7.10 
   9   1   1   -1.50    5.40 
   9   1   1    2.40    9.70 
  -9   1  -1    4.40    8.70 
   9   1   1   -1.90    5.20 
  -9   1  -1   -2.00    5.00 
   9   1   1    5.20    8.60 
  -9   1  -1  -10.90    4.60 
   9   1   1    4.30    7.20 
  -9   1  -1    0.90    6.70 
  -9   1  -1   -3.40    6.00 
  -9   1  -1    5.90    7.80 
  -9   1  -1    2.60    6.80 
   9   1   1    0.60    6.70 
   9   1   1   -2.30    6.30 
   9   1   1   -9.10    4.30 
   9   1   1    5.00    5.60 
   9   1   1    9.80    8.30 
  -9   1  -1    1.80    6.70 
   9   1   1    3.90   10.10 
  -9   1  -1    6.80    8.00 
  -9   1  -1    2.00    6.90 
  10  -1   1   24.30   12.20 
  10  -1   1   52.89   16.50 
 -10  -1  -1   54.49   14.00 
 -10  -1  -1   34.50   13.30 
  10  -1   1   56.09   16.60 
 -10  -1  -1   48.60   14.20 
 -10  -1  -1   19.30   11.40 
  10  -1   1   46.30   14.90 
  10  -1   1   55.19   14.80 
  10  -1   1   44.50   18.50 
 -10  -1  -1   58.29   14.50 
  10  -1   1   39.40   12.30 
 -10  -1  -1   54.89   16.80 
  10  -1   1   51.19   14.80 
 -10  -1  -1   57.09   17.30 
  10  -1   1   57.59   19.70 
 -10  -1  -1   55.49   14.90 
 -10  -1  -1   27.90   11.30 
 -10   1  -1   53.39   15.00 
  10   1   1   34.10   15.90 
  10   1   1   53.69   15.90 
 -10   1  -1   52.89   16.30 
  10   1   1   62.29   14.80 
 -10   1  -1   54.79   16.70 
  10   1   1   43.00   15.40 
 -10   1  -1   32.80   13.90 
 -10   1  -1   55.29   15.00 
  10   1   1   30.70   12.10 
 -10   1  -1   37.20   14.30 
  10   1   1   50.29   14.70 
  10   1   1   49.90   19.60 
 -10   1  -1   43.90   14.90 
 -10  -2   1  391.46   33.00 
 -10  -2   1  418.06   34.50 
 -10  -2   1  474.45   37.80 
 -10  -2   1  444.66   32.40 
  10  -2  -1  435.76   36.70 
 -10  -2   1  493.75   38.40 
 -10  -2   1  519.25   37.50 
  10  -2  -1  556.54   38.90 
 -10  -2   1  424.56   33.90 
 -10  -2   1  433.26   34.40 
  10  -2  -1  471.85   36.70 
 -10  -2   1  435.26   37.40 
  10  -2  -1  451.95   33.30 
  10  -2  -1  474.25   41.00 
  10  -2  -1  436.86   36.00 
  10  -2  -1  439.46   40.50 
  10   2  -1  459.55   42.70 
  10   2  -1  468.55   37.30 
  10   2  -1  445.46   36.10 
  10   2  -1  496.65   45.10 
  10   2  -1  519.65   34.40 
 -10   2   1  393.96   38.80 
 -10   2   1  414.06   33.50 
  10   2  -1  446.86   33.50 
  10   2  -1  424.16   32.30 
  10   2  -1  400.16   32.80 
  10   2  -1  477.95   36.60 
 -10   2   1  474.05   37.00 
   9  -2  -1  482.35   34.30 
  -9  -2   1  425.86   34.30 
  -9  -2   1  425.06   33.70 
  -9  -2   1  404.06   31.40 
   9  -2  -1  459.75   34.10 
  -9  -2   1  407.36   32.00 
   9  -2  -1  469.45   29.40 
   9  -2  -1  465.15   32.50 
   9  -2  -1  460.65   34.10 
  -9  -2   1  462.25   32.70 
  -9  -2   1  495.25   33.20 
  -9  -2   1  429.26   32.10 
   9  -2  -1  497.95   35.00 
  -9  -2   1  411.26   29.30 
   9  -2  -1  436.76   36.80 
  -9  -2   1  408.06   29.90 
  -9  -2   1  487.95   35.60 
   9  -2  -1  520.05   36.00 
   9  -2  -1  482.65   32.00 
   9  -2  -1  473.85   30.70 
   9  -2  -1  541.85   40.70 
   9  -2  -1  406.86   28.90 
   9   2  -1  481.05   29.40 
   9   2  -1  442.46   34.20 
   9   2  -1  497.75   32.30 
   9   2  -1  481.25   41.10 
  -9   2   1  406.96   35.10 
   9   2  -1  442.26   33.80 
  -9   2   1  459.55   34.20 
  -9   2   1  460.35   34.60 
   9   2  -1  451.75   31.10 
   9   2  -1  512.55   33.10 
  -9   2   1  411.46   31.30 
  -9   2   1  497.75   35.90 
  -9   2   1  422.46   32.10 
   9   2  -1  476.85   28.80 
   9   2  -1  453.95   35.00 
   9   2  -1  368.76   36.90 
   9   2  -1  493.35   31.70 
   8  -2  -1   38.30   12.20 
  -8  -2   1   43.00   10.30 
   8  -2  -1   53.09   13.00 
  -8  -2   1   39.10   10.10 
  -8  -2   1   56.39   12.10 
  -8  -2   1   42.80   11.70 
  -8  -2   1   40.50    9.50 
   8  -2  -1   38.10    9.70 
  -8  -2   1   29.90   10.10 
  -8  -2   1   31.90   10.10 
  -8  -2   1   31.10    9.90 
   8  -2  -1   38.20   11.10 
  -8  -2   1   48.10   12.60 
   8  -2  -1   33.20    8.90 
  -8  -2   1   25.00    9.60 
   8  -2  -1   60.39   13.70 
   8  -2  -1   35.30   11.20 
   8  -2  -1   43.00   10.90 
   8  -2  -1   62.39   12.80 
   8  -2  -1   33.40   12.90 
  -8  -2   1   41.10   12.40 
   8  -2  -1   37.20   13.00 
  -8  -2   1   55.99   13.40 
  -8  -2   1   26.50   10.10 
   8  -2  -1   30.40    9.90 
   8   2  -1   37.20   10.20 
  -8   2   1   55.89   13.30 
   8   2  -1   44.00   10.20 
   8   2  -1   31.40   10.70 
  -8   2   1   53.29   13.80 
   8   2  -1   53.29   16.00 
  -8   2   1   66.29   13.00 
  -8   2   1   45.40   12.60 
  -8   2   1   47.60    9.70 
   8   2  -1   45.90   14.60 
   8   2  -1   42.30   12.00 
   8   2  -1   35.10    9.90 
   8   2  -1   35.40    9.40 
   8   2  -1   36.80   11.80 
   8   2  -1   51.99   10.10 
  -8   2   1   43.00   11.80 
   8   2  -1   44.00   11.20 
  -8   2   1   50.59   12.00 
   8   2  -1   39.90   10.60 
  -7  -2   1    3.20    5.20 
   7  -2  -1   10.00    4.10 
  -7  -2   1    3.90    5.40 
   7  -2  -1   13.80    4.40 
  -7  -2   1    9.60    5.60 
  -7  -2   1    3.20    5.50 
  -7  -2   1   26.70    8.60 
  -7  -2   1   10.50    7.60 
   7  -2  -1    8.40    3.70 
   7  -2  -1   14.00    6.50 
  -7  -2   1    6.30    4.90 
   7  -2  -1    7.40    4.20 
   7  -2  -1   -1.30    4.70 
  -7  -2   1    9.20    5.60 
   7  -2  -1   17.60    7.60 
   7  -2  -1    9.80    4.40 
  -7  -2   1    2.00    5.30 
   7  -2  -1    9.00    4.80 
   7  -2  -1   19.80    7.20 
  -7  -2   1    5.90    5.80 
   7  -2  -1   16.20    7.20 
   7  -2  -1   12.40    4.50 
   7  -2  -1    9.10    4.70 
  -7  -2   1   -1.40    5.50 
   7  -2  -1   10.60    7.90 
  -7  -2   1   10.00    5.00 
   7  -2  -1    4.40    5.80 
   7  -2  -1   14.10    6.30 
   7  -2  -1    6.10    5.00 
   7  -2  -1    9.20    8.10 
   7  -2  -1   14.40    7.80 
  -7  -2   1   41.40   11.00 
   7  -2  -1    3.40    5.40 
  -7  -2   1    6.30    5.80 
  -7   2   1   10.20    6.10 
   7   2  -1   13.90    5.80 
   7   2  -1    9.80    8.00 
  -7   2   1    8.70    6.80 
  -7   2   1    9.20    6.20 
  -7   2   1    8.00    4.80 
  -7   2   1   18.20    7.30 
  -7   2   1   27.20    8.90 
  -7   2   1    2.70    4.50 
   7   2  -1   19.40    7.50 
   7   2  -1    9.40    7.10 
  -7   2   1    4.30    5.50 
  -7   2   1   10.20    6.20 
   7   2  -1   18.70    5.80 
   7   2  -1   22.20    5.90 
  -7   2   1   17.40    6.70 
  -7   2   1    7.00    5.40 
  -7   2   1   12.40    5.70 
   7   2  -1   10.10    6.40 
  -7   2   1    5.40    5.90 
  -7   2   1   14.90    7.00 
   7   2  -1   -1.70    4.40 
   7   2  -1   -0.90    5.30 
   7   2  -1   17.20    7.20 
   7   2  -1    5.20    5.90 
   7   2  -1    8.10    4.00 
  -7   2   1    6.50    6.70 
   7   2  -1   10.80    5.70 
  -7   2   1   11.80    5.60 
   7   2  -1    8.30    7.70 
   7   2  -1    9.10    5.20 
  -6  -2   1   41.70    8.70 
   6  -2  -1   41.40    7.20 
   6  -2  -1   35.90    6.60 
  -6  -2   1   34.10    8.80 
  -6  -2   1   33.60    8.40 
   6  -2  -1   35.50    8.90 
   6  -2  -1   39.60    4.70 
   6  -2  -1   43.80   11.20 
   6  -2  -1   34.10    6.10 
   6  -2  -1   36.20    3.60 
   6  -2  -1   33.60    4.80 
  -6  -2   1   31.00    7.80 
  -6  -2   1   32.80    8.80 
  -6  -2   1   20.30    7.20 
   6  -2  -1   24.00    4.90 
   6  -2  -1   29.80    3.40 
  -6  -2   1   11.10    6.70 
  -6  -2   1   36.90    5.50 
  -6  -2   1   42.30    8.00 
  -6  -2   1   31.60    5.30 
   6  -2  -1   22.80    7.00 
   6  -2  -1   27.00    5.30 
   6  -2  -1   41.00    9.60 
   6  -2  -1   34.30    8.90 
   6  -2  -1   33.40    6.50 
   6  -2  -1   47.60    6.40 
   6  -2  -1   29.80    4.60 
   6  -2  -1   29.80    5.70 
  -6  -2   1   28.50    7.90 
   6  -2  -1   31.70    3.80 
  -6  -2   1   22.70    6.50 
  -6  -2   1   36.10    8.30 
  -6  -2   1   28.80    7.40 
   6  -2  -1   43.70   11.10 
  -6  -2   1   46.10    9.90 
   6  -2  -1   27.00    6.90 
  -6  -2   1   24.40    8.10 
   6  -2  -1   27.30    7.30 
   6   2  -1   29.00    6.30 
  -6   2   1   31.30    8.00 
   6   2  -1   31.50    8.30 
  -6   2   1   34.20    7.00 
  -6   2   1   34.90    9.60 
   6   2  -1   26.70    9.60 
  -6   2   1   31.90    8.70 
   6   2  -1   33.30    5.40 
  -6   2   1   35.40    8.90 
  -6   2   1   33.80    8.60 
   6   2  -1   30.30    8.70 
  -6   2   1   44.00    9.80 
   6   2  -1   34.10    7.90 
  -6   2   1   32.10    8.70 
  -6   2   1   26.00    6.80 
  -6   2   1   32.10    8.50 
   6   2  -1   20.30    7.40 
  -6   2   1   17.00    6.70 
   6   2  -1   28.70    8.60 
  -6   2   1   39.10    8.20 
   6   2  -1   36.10    6.60 
   6   2  -1   34.50    4.60 
   6   2  -1   39.10    8.50 
   6   2  -1   19.60    5.30 
   6   2  -1   30.20    4.80 
   6   2  -1   37.40    7.70 
   6   2  -1   29.20    7.80 
  -6   2   1   31.90    6.00 
   6   2  -1   39.00   11.60 
   6   2  -1   28.60    6.90 
   6   2  -1   30.60    8.20 
  -6   2   1   27.10    6.90 
  -6   2   1   27.30    5.90 
  -6   2   1   28.10    7.60 
  -6   2   1   19.20    6.80 
  -6   2   1   19.00    6.50 
   5  -2  -1  432.66   15.30 
  -5  -2   1  418.46   23.70 
  -5  -2   1  427.16   18.80 
   5  -2  -1  456.95   21.10 
   5  -2  -1  429.56   18.70 
  -5  -2   1  437.46   23.40 
   5  -2  -1  436.86   18.60 
   5  -2  -1  411.06   15.60 
   5  -2  -1  432.96   16.20 
  -5  -2   1  436.06   22.10 
   5  -2  -1  409.66   15.90 
   5  -2  -1  428.76   15.60 
   5  -2  -1  428.06   24.30 
   5  -2  -1  437.46   18.10 
  -5  -2   1  415.86   22.50 
  -5  -2   1  430.86   25.30 
   5  -2  -1  451.25   18.30 
   5  -2  -1  412.36   24.20 
  -5  -2   1  424.66   22.70 
   5  -2  -1  444.96   16.90 
  -5  -2   1  409.66   23.10 
   5  -2  -1  385.86   19.40 
  -5  -2   1  403.46   23.30 
   5  -2  -1  397.46   20.10 
  -5  -2   1  416.66   22.20 
   5  -2  -1  439.06   23.80 
  -5  -2   1  464.15   25.70 
  -5  -2   1  462.75   22.80 
   5  -2  -1  490.95   26.30 
   5  -2  -1  440.36   18.30 
  -5  -2   1  415.96   18.60 
   5  -2  -1  410.26   19.80 
   5  -2  -1  423.66   23.60 
  -5  -2   1  377.36   24.00 
  -5  -2   1  393.26   22.70 
   5  -2  -1  408.16   20.30 
  -5  -2   1  431.56   24.00 
   5  -2  -1  438.76   20.30 
  -5   2   1  414.66   19.70 
  -5   2   1  458.85   23.60 
  -5   2   1  447.56   24.60 
   5   2  -1  410.16   19.90 
   5   2  -1  438.46   24.70 
  -5   2   1  423.76   22.90 
  -5   2   1  408.26   15.90 
  -5   2   1  415.16   23.20 
   5   2  -1  395.66   27.40 
   5   2  -1  394.96   18.10 
  -5   2   1  426.06   20.70 
   5   2  -1  432.06   22.00 
   5   2  -1  447.46   20.50 
   5   2  -1  426.46   19.40 
   5   2  -1  407.06   23.00 
  -5   2   1  410.26   22.20 
   5   2  -1  426.46   29.00 
   5   2  -1  444.86   25.50 
  -5   2   1  441.06   24.30 
  -5   2   1  448.76   20.20 
  -5   2   1  434.06   24.50 
   5   2  -1  423.86   23.50 
  -5   2   1  405.46   23.00 
  -5   2   1  430.86   23.70 
   5   2  -1  424.26   21.80 
   5   2  -1  398.76   22.90 
  -5   2   1  457.35   22.50 
  -5   2   1  489.25   25.90 
  -5   2   1  417.86   26.10 
  -5   2   1  468.85   24.40 
   5   2  -1  449.86   24.90 
  -5   2   1  429.26   20.40 
   5   2  -1  421.76   17.20 
   5   2  -1  449.26   22.60 
  -5   2   1  429.36   24.00 
  -5   2   1  455.85   23.00 
  -4  -2   1  470.85   23.10 
  -4  -2   1  487.15   23.30 
  -4  -2   1  463.05   22.60 
   4  -2  -1  476.35   18.20 
  -4  -2   1  479.85   18.90 
  -4  -2   1  481.75   24.50 
  -4  -2   1  470.35   23.20 
  -4  -2   1  470.75   24.80 
   4  -2  -1  475.35   21.00 
   4  -2  -1  465.05   20.10 
   4  -2  -1  436.56   15.50 
   4  -2  -1  413.66   20.50 
  -4  -2   1  483.65   24.60 
   4  -2  -1  432.26   16.40 
   4  -2  -1  483.55   23.20 
  -4  -2   1  439.56   21.80 
   4  -2  -1  479.15   17.60 
  -4  -2   1  447.56   22.50 
  -4  -2   1  448.06   21.70 
   4  -2  -1  453.45   17.90 
   4  -2  -1  462.25   16.20 
   4  -2  -1  445.06   23.60 
  -4  -2   1  383.26   18.70 
   4  -2  -1  456.65   20.10 
  -4  -2   1  460.65   22.00 
   4  -2  -1  476.65   20.20 
   4  -2  -1  454.75   15.60 
  -4  -2   1  465.45   21.00 
  -4  -2   1  471.45   19.40 
  -4  -2   1  476.75   22.60 
   4  -2  -1  448.66   17.80 
  -4  -2   1  430.56   21.40 
   4  -2  -1  426.46   20.90 
   4  -2  -1  483.55   24.40 
  -4  -2   1  457.65   23.20 
   4  -2  -1  467.15   24.70 
   4  -2  -1  466.35   15.10 
  -4   2   1  415.26   22.30 
   4   2  -1  460.55   23.90 
  -4   2   1  450.95   23.60 
  -4   2   1  413.06   24.90 
   4   2  -1  470.95   27.90 
   4   2  -1  450.45   17.20 
   4   2  -1  481.15   20.70 
  -4   2   1  462.65   20.60 
  -4   2   1  485.75   20.80 
   4   2  -1  490.85   19.40 
  -4   2   1  450.35   22.40 
   4   2  -1  458.65   21.80 
   4   2  -1  479.15   22.40 
   4   2  -1  447.26   24.10 
  -4   2   1  451.95   23.10 
   4   2  -1  452.45   22.80 
  -4   2   1  445.26   19.60 
  -4   2   1  470.35   24.00 
  -4   2   1  437.36   17.30 
  -4   2   1  425.96   21.50 
  -4   2   1  448.36   21.70 
   4   2  -1  499.25   23.60 
  -4   2   1  453.75   22.30 
   4   2  -1  483.95   22.10 
   4   2  -1  461.05   27.30 
   4   2  -1  501.95   24.60 
   4   2  -1  459.75   20.20 
   4   2  -1  477.75   23.40 
  -4   2   1  445.06   20.50 
  -4   2   1  487.25   23.00 
   4   2  -1  460.65   19.30 
  -4   2   1  440.76   21.80 
  -4   2   1  436.56   21.50 
  -4   2   1  476.65   23.80 
  -3  -2   1  492.95   22.30 
   3  -2  -1  515.35   21.00 
   3  -2  -1  467.35   22.40 
  -3  -2   1  510.15   23.00 
  -3  -2   1  492.75   23.60 
  -3  -2   1  483.05   21.40 
   3  -2  -1  504.55   22.00 
   3  -2  -1  539.25   24.40 
  -3  -2   1  493.05   18.80 
   3  -2  -1  488.85   21.20 
   3  -2  -1  490.25   21.80 
   3  -2  -1  507.05   18.60 
  -3  -2   1  447.36   22.20 
   3  -2  -1  482.85   22.20 
   3  -2  -1  491.55   21.40 
  -3  -2   1  462.85   21.90 
   3  -2  -1  488.65   17.60 
   3  -2  -1  509.75   20.70 
   3  -2  -1  524.15   17.60 
   3  -2  -1  508.55   21.60 
  -3  -2   1  478.95   17.10 
  -3  -2   1  490.05   21.70 
  -3  -2   1  504.75   22.00 
  -3  -2   1  485.45   23.70 
   3  -2  -1  497.35   18.40 
  -3  -2   1  498.45   23.40 
  -3  -2   1  497.05   20.10 
   3  -2  -1  498.25   19.90 
   3  -2  -1  506.35   24.00 
  -3  -2   1  516.05   22.00 
   3  -2  -1  482.65   22.00 
   3  -2  -1  516.85   25.00 
   3  -2  -1  507.85   22.40 
   3  -2  -1  498.05   17.80 
   3  -2  -1  473.65   22.20 
   3  -2  -1  504.85   23.50 
  -3  -2   1  506.25   22.70 
  -3  -2   1  490.45   22.00 
  -3  -2   1  480.85   21.20 
  -3  -2   1  490.65   21.90 
   3  -2  -1  497.35   17.40 
  -3  -2   1  489.95   24.10 
  -3  -2   1  482.95   23.60 
   3  -2  -1  513.25   18.40 
   3  -2  -1  463.85   17.90 
   3  -2  -1  511.55   24.10 
   3  -2  -1  533.25   26.70 
   3  -2  -1  521.95   20.30 
  -3   2   1  482.55   22.10 
   3   2  -1  462.05   21.60 
   3   2  -1  487.05   23.30 
   3   2  -1  500.65   22.00 
   3   2  -1  496.95   17.60 
   3   2  -1  497.05   21.50 
  -3   2   1  503.25   21.20 
  -3   2   1  486.35   22.80 
  -3   2   1  515.55   17.50 
   3   2  -1  468.65   22.50 
  -3   2   1  516.15   22.20 
  -3   2   1  492.55   21.80 
  -3   2   1  503.95   24.00 
  -3   2   1  481.05   19.90 
   3   2  -1  484.85   22.70 
   3   2  -1  487.05   23.70 
  -3   2   1  525.55   19.50 
   3   2  -1  521.95   27.00 
   3   2  -1  467.35   21.70 
  -3   2   1  498.95   21.70 
  -3   2   1  520.45   18.70 
  -3   2   1  541.55   22.40 
  -3   2   1  506.35   22.20 
   3   2  -1  482.35   26.60 
   3   2  -1  487.45   22.10 
  -3   2   1  532.95   21.90 
  -3   2   1  508.65   21.60 
   3   2  -1  486.35   23.00 
   3   2  -1  501.25   19.40 
   3   2  -1  507.95   21.10 
   3   2  -1  499.45   19.90 
  -3   2   1  507.75   20.80 
  -3   2   1  533.75   23.00 
   3   2  -1  495.05   21.30 
   3   2  -1  488.65   20.80 
  -3   2   1  488.05   21.20 
  -3   2   1  476.55   20.80 
   3   2  -1  475.95   22.40 
   3   2  -1  471.05   21.40 
   2  -2  -1  175.28    9.20 
  -2  -2   1  123.79    9.70 
  -2  -2   1  146.09    9.30 
   2  -2  -1  119.49    9.00 
   2  -2  -1  150.68    9.30 
   2  -2  -1  135.49    8.50 
  -2  -2   1  136.39    9.40 
   2  -2  -1  144.09    6.90 
  -2  -2   1  132.59    9.30 
   2  -2  -1  138.49    7.10 
   2  -2  -1  145.39    5.50 
  -2  -2   1  117.39    9.40 
  -2  -2   1  128.99    7.30 
  -2  -2   1  131.49    9.30 
   2  -2  -1  140.69    5.30 
  -2  -2   1  160.58   12.50 
  -2  -2   1  131.69    7.90 
   2  -2  -1  129.69    8.60 
   2  -2  -1  124.99    8.90 
   2  -2  -1  144.29    7.90 
   2  -2  -1  143.09   10.70 
   2  -2  -1  158.28    9.20 
   2  -2  -1  137.29    9.10 
   2  -2  -1  132.09    7.40 
   2  -2  -1  134.59    8.80 
   2  -2  -1  149.59    8.40 
   2  -2  -1  117.69   12.40 
  -2  -2   1  122.49    7.80 
   2  -2  -1  151.28   11.50 
  -2  -2   1  129.69    8.80 
   2  -2  -1  129.79    7.40 
  -2  -2   1  131.79   11.10 
   2  -2  -1  144.39   10.40 
   2  -2  -1  132.39    9.70 
  -2  -2   1  122.59    8.90 
   2  -2  -1  126.79    7.00 
  -2  -2   1  131.19    8.00 
  -2  -2   1  118.19    9.40 
  -2  -2   1  127.39    8.80 
  -2  -2   1  131.69    8.00 
   2  -2  -1  142.39    8.40 
  -2  -2   1  132.79    7.10 
   2  -2  -1  136.89    7.80 
  -2  -2   1  119.69    8.70 
  -2  -2   1  133.59    8.80 
  -2  -2   1  136.39    5.20 
   2  -2  -1  140.09   10.90 
   2  -2  -1  151.68    9.10 
   2  -2  -1  145.39    7.00 
  -2  -2   1  142.89    6.90 
   2  -2  -1  135.29    7.50 
  -2  -2   1  137.39    9.40 
  -2  -2   1  146.49   10.40 
   2  -2  -1  134.09   11.10 
  -2  -2   1  144.69    8.60 
   2  -2  -1  133.59    8.60 
   2  -2  -1  125.99    7.70 
   2  -2  -1  131.09    6.50 
  -2  -2   1  142.69    8.90 
   2  -2  -1  129.19    9.10 
   2  -2  -1  131.39    5.80 
   2  -2  -1  149.69    9.20 
   2  -2  -1  142.59    9.10 
  -2  -2   1  133.29    8.90 
  -2  -2   1  131.89    8.40 
   2  -2  -1  142.99    7.80 
   2   2  -1  122.39    8.80 
   2   2  -1  122.69    8.80 
   2   2  -1  130.49    9.00 
  -2   2   1  153.18    9.30 
  -2   2   1  125.99    9.00 
  -2   2   1  175.88   10.20 
   2   2  -1  116.89    8.20 
   2   2  -1  130.09    9.10 
   2   2  -1  127.99    7.80 
  -2   2   1  134.19   10.10 
  -2   2   1  125.59    9.30 
   2   2  -1  130.19    6.50 
  -2   2   1  146.59    9.10 
   2   2  -1  158.28    9.70 
   2   2  -1  141.49    8.00 
  -2   2   1  147.89    7.50 
  -2   2   1  131.09    6.60 
  -2   2   1  121.49   12.50 
  -2   2   1  149.79    9.10 
  -2   2   1  129.99    6.40 
   2   2  -1  148.19    8.80 
  -2   2   1  150.58   10.40 
  -2   2   1  133.29    5.20 
   2   2  -1  138.39    8.60 
   2   2  -1  142.59   10.10 
  -2   2   1  164.28   11.50 
  -2   2   1  129.59    7.60 
   2   2  -1  135.79    9.00 
   2   2  -1  151.18    9.10 
   2   2  -1  152.68   12.10 
  -2   2   1  131.99    8.90 
  -2   2   1  132.89    9.20 
   2   2  -1  125.09    8.80 
   2   2  -1  141.39   10.00 
   2   2  -1  132.69    9.30 
   2   2  -1  136.69    8.70 
  -2   2   1  142.19    8.10 
   2   2  -1  143.79   11.60 
   2   2  -1  146.39    9.70 
  -2   2   1  135.09    7.50 
  -2   2   1  150.48    8.90 
  -2   2   1  136.59    8.50 
   2   2  -1  144.89    7.50 
   2   2  -1  129.59    9.40 
   2   2  -1  134.59    8.00 
  -2   2   1  132.19    5.40 
   2   2  -1  131.59    8.40 
  -2   2   1  128.49    5.80 
   2   2  -1  128.49    7.90 
   2   2  -1  144.79    9.50 
  -2   2   1  143.79    8.40 
   2   2  -1  133.69    9.20 
   1  -2  -1    5.40    1.50 
  -1  -2   1    5.60    2.40 
   1  -2  -1    6.50    2.40 
  -1  -2   1    5.40    1.90 
   1  -2  -1    3.80    1.30 
  -1  -2   1    8.90    3.50 
  -1  -2   1    1.40    1.70 
   1  -2  -1    5.60    1.90 
  -1  -2   1    2.60    2.10 
  -1  -2   1   11.80    2.80 
   1  -2  -1    3.00    2.20 
   1  -2  -1    2.90    3.10 
  -1  -2   1    5.30    2.60 
   1  -2  -1    1.40    1.40 
  -1  -2   1    3.10    2.00 
  -1  -2   1    2.00    2.20 
   1  -2  -1    3.80    2.70 
   1  -2  -1    8.30    2.50 
  -1  -2   1    3.10    2.00 
  -1  -2   1    5.20    2.20 
   1  -2  -1    5.70    2.30 
  -1  -2   1    0.70    1.50 
   1  -2  -1   10.10    2.10 
   1  -2  -1    3.70    1.50 
   1  -2  -1    6.30    3.60 
  -1  -2   1    4.90    2.40 
  -1  -2   1    6.70    2.50 
  -1  -2   1    5.20    2.30 
  -1  -2   1    4.10    1.50 
   1  -2  -1    1.20    1.90 
  -1  -2   1    3.70    2.00 
   1  -2  -1    7.90    2.10 
   1  -2  -1    8.00    2.50 
  -1  -2   1    3.00    1.60 
   1  -2  -1    9.30    2.60 
  -1  -2   1    4.00    2.80 
   1  -2  -1    3.30    1.70 
   1  -2  -1    8.40    2.30 
   1  -2  -1    4.50    1.40 
   1  -2  -1   -0.50    1.80 
   1  -2  -1    4.60    2.20 
   1  -2  -1    3.80    2.10 
  -1  -2   1    4.60    2.30 
  -1  -2   1    1.70    1.30 
   1  -2  -1    5.00    2.40 
   1  -2  -1    2.80    1.50 
   1  -2  -1    7.80    3.60 
  -1  -2   1    1.60    1.80 
  -1  -2   1    0.40    1.80 
  -1  -2   1    0.70    2.00 
  -1  -2   1    3.60    1.60 
  -1  -2   1    3.10    1.90 
  -1  -2   1    5.80    1.50 
  -1  -2   1    6.30    2.50 
   1  -2  -1    6.10    2.10 
  -1  -2   1    3.70    2.10 
   1   2  -1    9.30    2.50 
   1   2  -1    5.20    2.20 
  -1   2   1    6.00    2.30 
   1   2  -1    1.20    1.80 
  -1   2   1    5.60    1.40 
  -1   2   1    4.40    3.20 
   1   2  -1    4.70    2.40 
  -1   2   1   17.10    4.80 
   1   2  -1   11.00    2.80 
  -1   2   1    9.80    4.10 
  -1   2   1    3.00    1.20 
   1   2  -1    1.40    1.90 
  -1   2   1    3.30    1.30 
   1   2  -1    4.40    2.30 
  -1   2   1    2.00    1.50 
  -1   2   1    6.30    1.50 
   1   2  -1    1.30    1.60 
   1   2  -1    0.00    1.20 
  -1   2   1    3.90    1.90 
   1   2  -1    1.70    1.70 
   1   2  -1    2.40    1.40 
   1   2  -1    1.30    1.90 
  -1   2   1    2.20    1.60 
  -1   2   1    1.00    1.90 
   1   2  -1    3.40    1.90 
  -1   2   1    7.40    1.80 
   1   2  -1    1.70    1.60 
  -1   2   1    1.10    2.20 
  -1   2   1    3.60    2.00 
   1   2  -1   -0.10    1.50 
   1   2  -1    1.10    1.80 
  -1   2   1    3.30    1.40 
   1   2  -1    5.50    1.50 
   1   2  -1    4.40    1.30 
  -1   2   1    0.30    1.30 
  -1   2   1   22.80    6.00 
  -1   2   1    7.50    3.10 
  -1   2   1   21.90    4.30 
  -1   2   1   14.70    3.50 
  -1   2   1    2.60    1.70 
   1   2  -1    9.60    3.20 
   1   2  -1    0.50    1.80 
   1   2  -1   18.90    5.20 
   1   2  -1    5.60    2.10 
   1   2  -1    3.80    2.30 
  -1   2   1    2.60    1.60 
  -1   2   1    4.60    2.70 
  -1   2   1    1.20    1.30 
  -1   2   1    3.20    1.90 
  -1   2   1    9.80    3.00 
  -1   2   1    2.70    1.90 
   1   2  -1    6.10    2.40 
  -1   2   1    0.40    2.60 
   1   2  -1    2.90    2.10 
   1   2  -1    6.80    2.50 
  -1   2   1    4.40    1.40 
   0  -2  -1  159.58    8.40 
   0  -2  -1  156.28    7.70 
   0  -2  -1  163.28   10.00 
   0  -2  -1  149.79    7.80 
   0  -2  -1  152.48    8.50 
   0  -2  -1  154.78    9.50 
   0  -2  -1  164.98    8.60 
   0  -2   1  149.49    8.60 
   0  -2   1  163.68    8.40 
   0  -2  -1  165.98    8.30 
   0  -2   1  172.58    8.80 
   0  -2  -1  160.98    8.20 
   0  -2   1  172.18    9.10 
   0  -2  -1  134.99    9.30 
   0  -2  -1  160.48    8.90 
   0  -2   1  179.78   10.00 
   0  -2  -1  156.68    8.80 
   0  -2   1  184.28    9.10 
   0  -2  -1  158.38    8.60 
   0  -2  -1  153.78    8.70 
   0  -2   1  177.28    7.40 
   0  -2   1  169.18    8.00 
   0  -2   1  161.38    9.00 
   0  -2  -1  154.48    9.00 
   0  -2  -1  159.18    8.60 
   0  -2   1  185.98   12.80 
   0  -2  -1  146.79    8.60 
   0  -2   1  168.58   10.10 
   0  -2  -1  140.49   11.00 
   0  -2   1  178.98   10.60 
   0  -2   1  170.18    9.20 
   0  -2   1  181.18    9.40 
   0  -2   1  165.58    9.00 
   0  -2  -1  153.68    8.80 
   0  -2   1  175.78    9.00 
   0  -2  -1  141.29    9.90 
   0  -2   1  142.99    7.80 
   0  -2  -1  155.08    8.20 
   0  -2   1  156.38    9.10 
   0  -2  -1  162.98   10.10 
   0  -2   1  167.08   10.70 
   0  -2  -1  153.08    9.00 
   0  -2   1  164.38    9.10 
   0  -2   1  157.48    8.50 
   0  -2   1  162.18    8.50 
   0  -2  -1  158.88   11.20 
   0   2   1  156.58    8.90 
   0   2  -1  184.48   10.80 
   0   2   1  151.38    8.60 
   0   2   1  159.18    8.40 
   0   2  -1  162.98    9.00 
   0   2  -1  165.38    9.50 
   0   2  -1  160.78   12.60 
   0   2   1  141.79   11.70 
   0   2   1  164.28   10.70 
   0   2   1  148.49    9.90 
   0   2  -1  153.68    9.10 
   0   2   1  173.68    8.90 
   0   2  -1  164.98    8.90 
   0   2  -1  152.48    7.70 
   0   2   1  152.48    8.10 
   0   2   1  159.28    8.40 
   0   2   1  169.78    8.00 
   0   2  -1  175.68    9.10 
   0   2   1  161.58    8.00 
   0   2  -1  169.78    8.90 
   0   2   1  171.08    8.20 
   0   2   1  157.98    9.50 
   0   2  -1  181.68    8.60 
   0   2  -1  151.88    8.50 
   0   2  -1  165.48    9.20 
   0   2  -1  166.98    9.50 
   0   2  -1  167.48    7.70 
   0   2   1  168.18    9.60 
   0   2  -1  176.78    9.30 
   0   2   1  165.88    9.00 
   0   2   1  152.68    8.10 
   0   2  -1  170.58   10.40 
   0   2  -1  168.98   10.80 
   0   2   1  163.48    8.80 
   0   2   1  161.28    9.30 
   0   2   1  187.38   11.50 
   0   2  -1  162.68    7.50 
   0   2  -1  154.18    8.60 
   0   2  -1  147.79    8.70 
   0   2   1  160.28   10.20 
   0   2  -1  174.38   10.70 
   0   2   1  149.69   10.90 
   0   2  -1  189.88    8.70 
   0   2  -1  159.08    8.70 
   0   2  -1  145.19    9.50 
   0   2   1  165.18    9.40 
   0   2   1  171.78    9.00 
   0   2  -1  147.29    8.60 
   1  -2   1 1769.22   54.59 
   1  -2   1 1682.33   54.89 
  -1  -2  -1 1781.72   59.89 
   1  -2   1 1731.03   53.29 
   1  -2   1 1635.84   54.39 
   1  -2   1 1683.93   57.59 
  -1  -2  -1 1727.93   57.79 
   1  -2   1 1765.92   57.39 
   1  -2   1 1641.34   54.69 
  -1  -2  -1 1748.72   57.09 
   1  -2   1 1671.13   55.59 
   1  -2   1 1688.03   55.59 
  -1  -2  -1 1623.04   55.29 
  -1  -2  -1 1721.93   56.29 
   1  -2   1 1656.23   57.89 
  -1  -2  -1 1672.43   55.79 
  -1  -2  -1 1661.43   56.79 
  -1  -2  -1 1714.63   55.89 
   1  -2   1 1651.83   55.99 
  -1  -2  -1 1729.63   55.59 
   1  -2   1 1727.33   59.29 
   1  -2   1 1664.33   63.19 
   1  -2   1 1727.03   51.59 
   1  -2   1 1731.83   55.99 
  -1  -2  -1 1737.53   56.39 
   1  -2   1 1640.04   56.29 
  -1  -2  -1 1738.73   53.99 
  -1  -2  -1 1742.73   55.79 
  -1  -2  -1 1666.43   53.49 
  -1  -2  -1 1774.32   55.89 
   1  -2   1 1711.83   55.39 
   1  -2   1 1674.33   56.69 
   1  -2   1 1792.52   54.59 
  -1  -2  -1 1691.73   57.89 
  -1  -2  -1 1667.63   56.29 
   1  -2   1 1719.43   53.29 
  -1  -2  -1 1659.23   58.19 
  -1  -2  -1 1657.83   53.69 
   1  -2   1 1761.32   53.39 
   1  -2   1 1639.44   58.19 
  -1  -2  -1 1788.42   57.69 
  -1  -2  -1 1710.93   56.49 
   1  -2   1 1660.93   54.99 
  -1  -2  -1 1690.33   56.09 
   1  -2   1 1608.04   51.49 
   1  -2   1 1781.72   54.89 
  -1  -2  -1 1670.13   57.09 
   1  -2   1 1750.92   52.89 
  -1  -2  -1 1710.63   52.89 
   1  -2   1 1683.83   58.49 
  -1  -2  -1 1711.13   55.49 
   1  -2   1 1689.33   56.39 
   1  -2   1 1616.64   58.29 
   1  -2   1 1649.04   55.49 
   1   2   1 1734.13   56.89 
  -1   2  -1 1885.01   53.99 
  -1   2  -1 1615.44   57.09 
   1   2   1 1675.73   57.79 
  -1   2  -1 1767.92   53.99 
  -1   2  -1 1543.65   57.69 
  -1   2  -1 1616.84   52.49 
  -1   2  -1 1628.94   55.79 
   1   2   1 1710.03   58.09 
  -1   2  -1 1753.42   56.09 
  -1   2  -1 1762.32   56.29 
   1   2   1 1745.83   55.79 
  -1   2  -1 1638.04   52.19 
  -1   2  -1 1628.64   56.59 
  -1   2  -1 1675.13   55.89 
  -1   2  -1 1660.23   57.59 
  -1   2  -1 1670.63   56.79 
  -1   2  -1 1724.33   59.59 
  -1   2  -1 1746.23   55.69 
  -1   2  -1 1711.33   54.99 
   1   2   1 1763.52   55.99 
   1   2   1 1711.63   56.09 
   1   2   1 1624.74   56.89 
   1   2   1 1709.03   55.89 
   1   2   1 1661.93   59.39 
   1   2   1 1734.73   56.29 
   1   2   1 1695.13   56.49 
  -1   2  -1 1724.53   54.49 
  -1   2  -1 1736.13   52.49 
  -1   2  -1 1650.83   56.99 
   1   2   1 1687.43   53.39 
   1   2   1 1695.93   52.69 
   1   2   1 1643.44   55.19 
   1   2   1 1781.82   56.79 
  -1   2  -1 1828.12   56.29 
  -1   2  -1 1583.64   64.09 
   1   2   1 1725.23   56.59 
   1   2   1 1694.03   55.89 
   1   2   1 1673.73   58.59 
  -1   2  -1 1575.14   52.89 
   1   2   1 1851.61   56.29 
   1   2   1 1728.53   56.99 
   1   2   1 1684.33   55.79 
  -1   2  -1 1669.83   55.19 
  -1   2  -1 1633.34   59.09 
   1   2   1 1759.32   55.79 
  -1   2  -1 1650.23   58.89 
   1   2   1 1680.53   58.99 
  -1   2  -1 1718.13   54.39 
   1   2   1 1711.73   55.99 
   1   2   1 1718.43   56.79 
   1   2   1 1725.33   53.69 
   1   2   1 1677.93   56.39 
   1   2   1 1650.33   56.99 
  -1   2  -1 1514.85   58.99 
   2  -2   1  491.75   20.40 
  -2  -2  -1  531.85   21.10 
  -2  -2  -1  526.85   21.40 
  -2  -2  -1  529.25   16.50 
   2  -2   1  512.95   22.00 
   2  -2   1  528.55   19.70 
   2  -2   1  517.95   22.50 
  -2  -2  -1  510.75   23.30 
   2  -2   1  521.55   21.40 
  -2  -2  -1  504.45   24.50 
  -2  -2  -1  553.64   22.90 
   2  -2   1  525.95   23.00 
   2  -2   1  507.95   19.10 
   2  -2   1  538.65   20.30 
   2  -2   1  516.35   21.70 
   2  -2   1  527.85   20.20 
   2  -2   1  533.55   21.10 
   2  -2   1  475.95   24.00 
   2  -2   1  527.55   23.60 
   2  -2   1  496.55   20.60 
  -2  -2  -1  516.65   21.00 
   2  -2   1  542.75   22.60 
  -2  -2  -1  533.05   25.50 
  -2  -2  -1  520.65   22.40 
   2  -2   1  529.15   21.30 
  -2  -2  -1  505.15   22.60 
   2  -2   1  501.15   21.40 
  -2  -2  -1  517.75   22.20 
  -2  -2  -1  511.85   20.70 
  -2  -2  -1  532.65   22.30 
   2  -2   1  550.64   20.80 
   2  -2   1  503.95   22.80 
  -2  -2  -1  524.65   22.40 
   2  -2   1  494.85   20.70 
  -2  -2  -1  548.55   21.80 
  -2  -2  -1  542.25   22.60 
   2  -2   1  562.14   22.50 
   2  -2   1  528.55   19.00 
   2  -2   1  524.85   20.60 
   2  -2   1  511.25   24.30 
   2  -2   1  533.55   24.00 
   2  -2   1  546.45   21.90 
   2  -2   1  533.95   18.90 
  -2  -2  -1  537.25   20.30 
  -2  -2  -1  551.84   21.80 
   2  -2   1  553.14   20.30 
  -2  -2  -1  519.05   21.90 
   2  -2   1  537.15   19.40 
   2  -2   1  481.65   23.40 
  -2  -2  -1  510.45   21.70 
   2  -2   1  478.05   20.40 
  -2  -2  -1  501.95   20.70 
   2  -2   1  511.45   21.80 
  -2  -2  -1  507.65   21.50 
  -2  -2  -1  550.04   23.40 
   2  -2   1  523.95   17.00 
  -2  -2  -1  540.65   21.10 
   2   2   1  523.75   21.00 
   2   2   1  505.55   23.30 
   2   2   1  536.25   21.20 
   2   2   1  561.14   25.90 
   2   2   1  537.15   21.70 
  -2   2  -1  566.84   20.90 
  -2   2  -1  520.45   22.50 
   2   2   1  539.65   21.50 
  -2   2  -1  543.95   20.50 
  -2   2  -1  515.35   21.70 
   2   2   1  519.45   20.90 
   2   2   1  507.85   17.60 
  -2   2  -1  541.75   23.30 
   2   2   1  543.55   22.70 
  -2   2  -1  495.35   16.60 
   2   2   1  528.05   23.60 
  -2   2  -1  521.55   21.10 
  -2   2  -1  510.35   18.30 
   2   2   1  528.55   22.50 
  -2   2  -1  529.95   21.50 
  -2   2  -1  523.95   24.60 
   2   2   1  522.25   21.40 
   2   2   1  500.65   22.60 
  -2   2  -1  504.75   20.40 
  -2   2  -1  524.75   20.80 
   2   2   1  518.35   21.90 
  -2   2  -1  530.25   20.10 
  -2   2  -1  561.64   21.00 
   2   2   1  552.44   26.40 
   2   2   1  530.35   20.10 
  -2   2  -1  546.05   21.40 
  -2   2  -1  491.95   20.60 
   2   2   1  511.15   22.70 
  -2   2  -1  528.85   22.30 
   2   2   1  539.85   21.50 
   2   2   1  533.55   22.40 
   2   2   1  517.25   21.30 
  -2   2  -1  530.25   22.20 
  -2   2  -1  538.65   24.40 
  -2   2  -1  507.95   20.00 
   2   2   1  512.85   21.80 
   2   2   1  509.05   22.10 
   2   2   1  524.55   22.20 
  -2   2  -1  526.15   22.70 
   3  -2   1  246.28   11.10 
  -3  -2  -1  213.38   13.20 
   3  -2   1  220.98    9.10 
   3  -2   1  227.48   13.20 
  -3  -2  -1  213.58   14.00 
   3  -2   1  225.68   12.40 
   3  -2   1  234.38   14.10 
   3  -2   1  201.28   13.70 
   3  -2   1  227.38   15.00 
  -3  -2  -1  223.38   12.00 
   3  -2   1  245.58   13.90 
   3  -2   1  238.18   12.80 
   3  -2   1  223.38   10.20 
   3  -2   1  224.08   11.00 
  -3  -2  -1  201.48   12.70 
  -3  -2  -1  201.28   12.80 
  -3  -2  -1  230.98   12.80 
   3  -2   1  204.78   10.40 
   3  -2   1  210.18   12.80 
   3  -2   1  227.08    9.20 
   3  -2   1  225.58    9.10 
   3  -2   1  229.28   14.60 
  -3  -2  -1  210.18   14.00 
   3  -2   1  212.88   11.90 
   3  -2   1  243.78   13.60 
  -3  -2  -1  214.18   13.10 
   3  -2   1  233.98   12.80 
  -3  -2  -1  217.68   13.50 
   3  -2   1  216.38   12.90 
  -3  -2  -1  238.18   13.10 
  -3  -2  -1  239.78   14.30 
   3  -2   1  221.58   13.50 
   3  -2   1  214.68   13.00 
   3  -2   1  215.68   11.40 
  -3  -2  -1  231.78   12.70 
  -3  -2  -1  233.08   14.10 
  -3  -2  -1  230.18   13.90 
   3  -2   1  234.68   10.40 
  -3  -2  -1  216.88   11.80 
   3  -2   1  225.58   11.60 
   3   2   1  199.58   13.50 
   3   2   1  230.58   15.30 
  -3   2  -1  199.48   12.20 
   3   2   1  207.68   12.30 
   3   2   1  210.28   14.50 
  -3   2  -1  221.58   13.10 
  -3   2  -1  225.48   12.10 
   3   2   1  232.18   12.80 
  -3   2  -1  213.68   12.70 
  -3   2  -1  223.98   11.50 
   3   2   1  203.38    8.20 
   3   2   1  229.98   13.40 
  -3   2  -1  244.48   13.30 
  -3   2  -1  222.78   14.50 
   3   2   1  215.48   12.70 
   3   2   1  203.08   16.00 
  -3   2  -1  257.37   14.60 
  -3   2  -1  244.38   13.50 
  -3   2  -1  243.98   13.40 
   3   2   1  210.98    8.70 
  -3   2  -1  211.68   12.60 
  -3   2  -1  241.18   11.20 
   3   2   1  217.18   13.50 
  -3   2  -1  208.88   14.30 
  -3   2  -1  217.98   12.40 
   3   2   1  210.38   11.80 
   3   2   1  238.58   13.70 
   3   2   1  254.97   14.30 
  -3   2  -1  236.98   10.30 
   3   2   1  245.18   12.50 
  -3   2  -1  229.68   12.90 
  -3   2  -1  208.48   10.30 
  -3   2  -1  248.18   14.30 
   3   2   1  209.38   16.50 
  -4  -2  -1  423.56   21.70 
   4  -2   1  467.75   19.30 
   4  -2   1  445.96   21.30 
   4  -2   1  443.86   17.60 
   4  -2   1  446.06   15.60 
  -4  -2  -1  431.66   23.70 
   4  -2   1  429.06   21.20 
  -4  -2  -1  436.66   22.40 
  -4  -2  -1  450.95   17.10 
   4  -2   1  435.96   22.40 
  -4  -2  -1  459.75   21.50 
   4  -2   1  439.86   18.10 
  -4  -2  -1  413.26   21.00 
  -4  -2  -1  410.66   23.20 
   4  -2   1  433.86   16.30 
   4  -2   1  414.26   17.10 
   4  -2   1  438.56   17.10 
  -4  -2  -1  448.96   22.90 
  -4  -2  -1  438.06   21.70 
  -4  -2  -1  420.26   19.50 
   4  -2   1  446.76   19.30 
  -4  -2  -1  438.76   22.40 
  -4  -2  -1  393.66   21.60 
   4  -2   1  407.46   22.30 
  -4  -2  -1  431.86   19.50 
  -4  -2  -1  412.66   23.00 
  -4  -2  -1  447.76   21.60 
   4  -2   1  423.96   21.90 
   4  -2   1  414.16   16.80 
   4  -2   1  473.05   22.60 
   4  -2   1  431.86   14.60 
   4  -2   1  435.26   19.50 
   4  -2   1  434.46   14.50 
   4  -2   1  415.96   23.40 
  -4  -2  -1  444.26   22.60 
   4  -2   1  455.95   18.30 
  -4  -2  -1  446.06   17.10 
   4  -2   1  406.46   18.40 
  -4   2  -1  440.46   20.40 
   4   2   1  400.36   19.80 
  -4   2  -1  460.15   20.90 
   4   2   1  425.86   14.60 
   4   2   1  432.16   19.40 
  -4   2  -1  401.66   21.90 
   4   2   1  434.96   20.30 
  -4   2  -1  431.76   21.40 
   4   2   1  421.46   19.40 
  -4   2  -1  428.56   23.10 
   4   2   1  443.56   23.70 
  -4   2  -1  448.26   22.90 
   4   2   1  439.26   27.40 
  -4   2  -1  452.05   22.30 
  -4   2  -1  445.86   22.40 
   4   2   1  418.36   21.50 
   4   2   1  442.56   22.20 
  -4   2  -1  441.36   16.90 
  -4   2  -1  427.96   19.30 
   4   2   1  444.06   22.10 
   4   2   1  420.46   18.90 
  -4   2  -1  417.86   17.70 
   4   2   1  384.16   25.40 
   4   2   1  417.66   22.90 
  -4   2  -1  445.96   21.90 
  -4   2  -1  445.06   23.10 
  -4   2  -1  419.36   17.30 
   4   2   1  450.05   23.00 
  -4   2  -1  452.45   21.80 
   4   2   1  460.75   24.60 
  -4   2  -1  443.76   21.50 
   4   2   1  416.56   14.40 
  -4   2  -1  428.26   21.40 
   4   2   1  432.56   16.60 
  -5  -2  -1  443.46   16.70 
  -5  -2  -1  440.26   16.00 
   5  -2   1  449.26   21.00 
   5  -2   1  429.86   22.40 
  -5  -2  -1  418.36   25.10 
   5  -2   1  411.26   17.00 
  -5  -2  -1  437.46   22.30 
   5  -2   1  426.96   19.40 
   5  -2   1  413.46   17.10 
  -5  -2  -1  440.26   23.40 
  -5  -2  -1  432.76   23.50 
   5  -2   1  438.36   23.70 
  -5  -2  -1  452.45   25.60 
   5  -2   1  447.66   24.10 
   5  -2   1  432.76   20.10 
   5  -2   1  401.86   23.40 
   5  -2   1  458.75   18.30 
   5  -2   1  422.26   17.40 
  -5  -2  -1  416.76   24.00 
   5  -2   1  419.56   19.90 
   5  -2   1  378.96   24.30 
  -5  -2  -1  423.26   22.10 
  -5  -2  -1  442.86   23.90 
   5  -2   1  431.36   18.30 
  -5  -2  -1  449.95   20.90 
   5  -2   1  458.15   17.10 
  -5  -2  -1  399.86   22.40 
   5  -2   1  442.26   19.30 
   5  -2   1  440.56   24.30 
   5  -2   1  421.66   15.40 
   5  -2   1  444.26   17.80 
   5  -2   1  437.76   18.50 
  -5  -2  -1  401.06   23.70 
  -5  -2  -1  433.76   24.00 
  -5  -2  -1  430.76   25.20 
   5  -2   1  447.66   18.20 
  -5   2  -1  440.36   22.50 
  -5   2  -1  412.86   20.50 
  -5   2  -1  493.45   24.40 
   5   2   1  407.76   22.80 
  -5   2  -1  426.56   26.10 
  -5   2  -1  415.76   24.20 
   5   2   1  458.25   21.60 
  -5   2  -1  376.16   22.90 
   5   2   1  431.56   17.90 
  -5   2  -1  416.56   19.20 
  -5   2  -1  431.46   24.00 
  -5   2  -1  436.86   26.20 
   5   2   1  386.46   23.90 
  -5   2  -1  434.36   21.80 
  -5   2  -1  458.25   25.20 
   5   2   1  425.46   14.70 
  -5   2  -1  431.46   17.10 
  -5   2  -1  470.25   24.30 
  -5   2  -1  463.15   24.10 
   5   2   1  445.16   20.30 
  -5   2  -1  468.05   23.00 
  -5   2  -1  396.16   23.50 
   5   2   1  407.96   22.70 
   5   2   1  434.26   25.30 
  -5   2  -1  397.56   24.90 
   5   2   1  422.56   23.90 
  -5   2  -1  419.06   19.10 
   5   2   1  396.96   22.30 
  -5   2  -1  429.46   17.40 
   5   2   1  415.86   29.20 
   5   2   1  434.26   25.90 
  -5   2  -1  421.96   23.90 
   5   2   1  350.86   26.80 
   5   2   1  437.46   21.10 
   5   2   1  417.96   19.80 
   6  -2   1  745.23   31.50 
  -6  -2  -1  699.53   37.80 
  -6  -2  -1  713.83   34.80 
  -6  -2  -1  710.43   37.80 
   6  -2   1  744.23   32.80 
  -6  -2  -1  715.73   24.90 
  -6  -2  -1  674.13   35.00 
   6  -2   1  752.62   27.80 
   6  -2   1  775.42   30.50 
   6  -2   1  790.92   37.10 
   6  -2   1  721.43   35.40 
  -6  -2  -1  773.22   36.00 
   6  -2   1  757.52   32.50 
   6  -2   1  758.32   34.10 
  -6  -2  -1  783.72   38.80 
   6  -2   1  765.82   29.90 
   6  -2   1  703.83   29.80 
   6  -2   1  751.62   26.70 
  -6  -2  -1  715.83   36.80 
   6  -2   1  730.53   33.70 
  -6  -2  -1  782.42   34.10 
   6  -2   1  761.22   30.80 
   6  -2   1  731.83   37.70 
   6  -2   1  788.72   30.10 
  -6  -2  -1  760.62   36.20 
   6  -2   1  691.93   27.50 
   6  -2   1  720.73   35.80 
  -6  -2  -1  663.43   30.60 
   6  -2   1  745.13   31.50 
   6  -2   1  694.93   35.00 
   6  -2   1  742.33   28.80 
  -6  -2  -1  713.33   35.40 
  -6  -2  -1  746.13   36.80 
  -6  -2  -1  745.73   33.70 
   6  -2   1  748.03   36.10 
  -6  -2  -1  733.83   36.40 
  -6   2  -1  744.03   33.90 
   6   2   1  714.93   34.80 
  -6   2  -1  757.42   36.90 
   6   2   1  753.12   44.20 
   6   2   1  694.13   37.90 
  -6   2  -1  768.72   30.60 
  -6   2  -1  723.13   36.60 
  -6   2  -1  783.12   40.00 
   6   2   1  755.02   25.00 
  -6   2  -1  733.23   36.30 
  -6   2  -1  706.23   33.40 
   6   2   1  717.13   35.10 
   6   2   1  775.02   35.10 
   6   2   1  688.13   35.50 
   6   2   1  747.83   30.80 
  -6   2  -1  767.72   36.10 
   6   2   1  714.43   31.60 
  -6   2  -1  718.63   37.20 
  -6   2  -1  769.02   39.50 
   6   2   1  716.83   30.10 
   6   2   1  704.93   34.50 
   6   2   1  691.53   31.40 
  -6   2  -1  719.93   35.70 
   6   2   1  760.82   24.50 
  -6   2  -1  720.73   28.70 
  -6   2  -1  733.73   38.70 
   6   2   1  782.02   43.80 
   6   2   1  729.53   25.30 
  -6   2  -1  709.83   36.70 
   6   2   1  746.63   37.50 
  -6   2  -1  725.43   33.20 
  -6   2  -1  768.22   36.20 
   6   2   1  741.63   29.00 
  -6   2  -1  766.92   31.50 
   6   2   1  814.62   39.20 
  -6   2  -1  734.03   36.50 
   7  -2   1 1374.36   52.59 
   7  -2   1 1331.27   58.09 
  -7  -2  -1 1327.57   59.09 
  -7  -2  -1 1360.76   57.99 
   7  -2   1 1445.96   59.99 
   7  -2   1 1327.37   67.09 
  -7  -2  -1 1388.36   61.99 
   7  -2   1 1329.37   54.39 
   7  -2   1 1406.56   55.39 
  -7  -2  -1 1385.06   58.09 
   7  -2   1 1362.96   58.89 
   7  -2   1 1358.36   53.29 
   7  -2   1 1348.47   62.69 
  -7  -2  -1 1334.37   59.69 
  -7  -2  -1 1371.36   59.49 
   7  -2   1 1366.26   57.29 
   7  -2   1 1337.37   57.99 
   7  -2   1 1407.26   49.70 
  -7  -2  -1 1377.06   52.29 
  -7  -2  -1 1237.28   59.59 
   7  -2   1 1370.76   49.40 
   7  -2   1 1390.86   52.19 
  -7  -2  -1 1386.86   58.59 
   7  -2   1 1344.47   48.40 
  -7  -2  -1 1423.36   54.99 
  -7  -2  -1 1449.95   55.79 
   7  -2   1 1321.07   50.29 
   7  -2   1 1378.46   57.89 
   7  -2   1 1506.35   62.29 
   7  -2   1 1403.26   67.89 
   7  -2   1 1432.06   55.29 
  -7  -2  -1 1287.67   60.39 
  -7  -2  -1 1354.56   58.49 
  -7  -2  -1 1378.96   57.49 
  -7   2  -1 1287.97   54.19 
   7   2   1 1291.77   51.69 
  -7   2  -1 1421.36   62.89 
   7   2   1 1382.06   60.19 
  -7   2  -1 1379.16   58.99 
   7   2   1 1317.97   50.79 
   7   2   1 1312.47   58.19 
   7   2   1 1357.66   69.09 
  -7   2  -1 1371.36   62.49 
   7   2   1 1366.76   52.19 
  -7   2  -1 1288.97   59.09 
   7   2   1 1338.47   49.50 
  -7   2  -1 1397.96   59.49 
   7   2   1 1340.07   57.69 
   7   2   1 1363.96   56.69 
   7   2   1 1301.17   66.99 
   7   2   1 1402.16   57.09 
  -7   2  -1 1394.96   60.59 
  -7   2  -1 1343.47   58.19 
  -7   2  -1 1500.55   60.39 
   7   2   1 1304.47   60.19 
   7   2   1 1391.36   56.39 
  -7   2  -1 1441.06   59.29 
  -7   2  -1 1359.86   60.09 
  -7   2  -1 1473.95   61.09 
   7   2   1 1418.96   62.49 
  -7   2  -1 1330.57   61.39 
   7   2   1 1380.46   49.90 
  -8  -2  -1  700.73   41.80 
   8  -2   1  723.33   39.20 
   8  -2   1  723.13   34.00 
  -8  -2  -1  619.34   33.70 
  -8  -2  -1  658.83   38.70 
   8  -2   1  690.73   35.20 
   8  -2   1  702.13   37.80 
  -8  -2  -1  620.74   37.70 
   8  -2   1  666.93   36.90 
   8  -2   1  723.73   47.60 
   8  -2   1  659.33   45.30 
  -8  -2  -1  686.43   38.80 
  -8  -2  -1  642.74   40.30 
   8  -2   1  738.23   40.50 
  -8  -2  -1  614.54   39.90 
   8  -2   1  664.33   38.40 
  -8  -2  -1  660.73   40.20 
   8  -2   1  651.03   38.70 
  -8  -2  -1  665.23   37.40 
   8  -2   1  684.83   42.50 
   8  -2   1  654.73   39.90 
  -8  -2  -1  640.74   36.90 
   8  -2   1  682.63   34.20 
   8  -2   1  721.93   33.20 
   8  -2   1  648.04   34.10 
  -8  -2  -1  732.33   35.10 
  -8  -2  -1  664.23   37.90 
  -8  -2  -1  719.63   40.40 
   8   2   1  711.63   37.00 
   8   2   1  670.33   36.60 
   8   2   1  658.53   40.50 
  -8   2  -1  612.84   37.90 
  -8   2  -1  606.04   38.60 
  -8   2  -1  674.13   39.80 
  -8   2  -1  698.13   42.30 
  -8   2  -1  664.83   38.80 
  -8   2  -1  706.13   40.40 
  -8   2  -1  663.53   38.60 
   8   2   1  680.83   40.60 
   8   2   1  683.93   47.90 
   8   2   1  651.73   35.20 
   8   2   1  662.43   39.40 
  -8   2  -1  711.13   41.90 
   8   2   1  671.73   31.60 
   8   2   1  643.44   35.90 
   8   2   1  677.03   37.40 
  -8   2  -1  667.93   41.70 
  -8   2  -1  714.93   40.40 
  -8   2  -1  673.73   38.40 
   8   2   1  702.63   48.10 
   8   2   1  665.43   38.00 
  -9  -2  -1  775.82   47.40 
   9  -2   1  889.91   46.50 
   9  -2   1  861.41   45.30 
   9  -2   1  898.31   51.99 
   9  -2   1  839.22   43.40 
   9  -2   1  865.41   49.50 
   9  -2   1  919.31   48.50 
  -9  -2  -1  844.62   48.80 
  -9  -2  -1  850.41   50.39 
   9  -2   1  852.51   56.29 
  -9  -2  -1  992.70   50.09 
  -9  -2  -1  807.62   47.20 
  -9  -2  -1  821.72   50.49 
  -9  -2  -1  799.22   45.10 
  -9  -2  -1  853.81   49.90 
   9  -2   1  896.71   57.99 
  -9  -2  -1  913.31   43.60 
  -9  -2  -1  905.11   48.20 
  -9  -2  -1  901.91   51.99 
   9  -2   1  907.61   49.40 
   9  -2   1  851.91   48.30 
   9  -2   1  869.81   47.80 
  -9  -2  -1  886.31   46.40 
   9   2   1  959.60   61.79 
  -9   2  -1  870.21   49.60 
  -9   2  -1  953.30   53.69 
   9   2   1  878.21   44.10 
   9   2   1  842.32   49.30 
   9   2   1  934.91   46.10 
   9   2   1  912.41   45.90 
   9   2   1  822.12   49.99 
   9   2   1  821.42   46.30 
   9   2   1  880.01   49.60 
   9   2   1  872.71   57.89 
   9   2   1  921.31   46.10 
  -9   2  -1  902.61   48.80 
   9   2   1  880.01   46.60 
 -10  -2  -1  244.48   29.80 
 -10  -2  -1  176.58   27.00 
 -10  -2  -1  224.18   30.20 
 -10  -2  -1  216.78   28.50 
 -10  -2  -1  181.28   27.50 
  10  -2   1  226.38   36.10 
  10  -2   1  227.58   29.50 
  10  -2   1  200.18   28.40 
  10  -2   1  168.18   25.70 
  10  -2   1  285.97   31.80 
  10  -2   1  148.59   26.20 
 -10  -2  -1  236.38   27.50 
  10  -2   1  202.88   27.90 
 -10  -2  -1  254.47   33.20 
 -10  -2  -1  183.28   27.70 
 -10  -2  -1  244.08   29.80 
  10  -2   1  218.88   35.20 
  10  -2   1  212.78   34.20 
  10   2   1  226.78   34.40 
  10   2   1  207.78   29.30 
  10   2   1  203.58   29.20 
  10   2   1  186.38   34.20 
  10   2   1  190.38   34.70 
  10   2   1  252.97   29.40 
  10   2   1  210.68   30.00 
  10   2   1  181.38   24.40 
   9  -3  -1   59.79   16.50 
   9  -3  -1   30.20   12.00 
  -9  -3   1   69.79   17.50 
   9  -3  -1   39.30   12.90 
  -9  -3   1   44.90   13.50 
   9  -3  -1   58.49   17.30 
   9  -3  -1   59.29   16.20 
   9  -3  -1   36.70   14.20 
   9  -3  -1   64.99   16.00 
   9  -3  -1   50.89   13.70 
  -9  -3   1   70.99   15.70 
  -9  -3   1   53.89   15.60 
   9  -3  -1   52.89   13.70 
  -9  -3   1   55.39   14.00 
  -9  -3   1   45.30   12.60 
  -9  -3   1   53.49   14.80 
  -9  -3   1   32.80   13.10 
  -9  -3   1   40.30   12.90 
  -9   3   1   36.00   12.70 
   9   3  -1   36.40   12.50 
   9   3  -1   49.99   17.60 
   9   3  -1   50.39   13.30 
  -9   3   1   56.59   13.50 
   9   3  -1   59.79   18.70 
   9   3  -1   62.99   15.20 
   9   3  -1   63.09   16.70 
   9   3  -1   51.59   15.20 
   9   3  -1   30.60   10.00 
   9   3  -1   16.70    9.70 
   9   3  -1   40.90   11.20 
   9   3  -1   52.59   15.20 
  -8  -3   1   49.20   11.70 
  -8  -3   1   40.60   12.90 
   8  -3  -1   31.70   10.30 
   8  -3  -1   39.30   11.90 
   8  -3  -1   43.20   10.70 
  -8  -3   1   29.90   11.50 
   8  -3  -1   32.30   11.20 
  -8  -3   1   30.80   10.90 
   8  -3  -1   36.40   14.00 
   8  -3  -1   29.80   10.80 
  -8  -3   1   33.60   10.50 
   8  -3  -1   20.60   11.40 
  -8  -3   1   23.00   10.10 
   8  -3  -1   43.20   12.90 
  -8  -3   1   43.80   11.00 
  -8  -3   1   37.10    9.90 
  -8  -3   1   12.70    7.60 
  -8  -3   1   39.40   10.60 
   8  -3  -1   37.80   10.60 
   8  -3  -1   51.89   13.50 
   8  -3  -1   40.10   13.10 
  -8  -3   1   24.70   10.10 
   8  -3  -1   24.80    8.40 
  -8  -3   1   20.60    9.40 
  -8  -3   1   34.60   11.70 
   8   3  -1   31.60    7.80 
   8   3  -1   30.80   13.00 
  -8   3   1   32.50    9.80 
  -8   3   1   48.90   12.80 
   8   3  -1   44.20   10.80 
   8   3  -1   17.80    8.90 
   8   3  -1   51.59   12.40 
  -8   3   1   35.90    9.90 
   8   3  -1   34.00   12.20 
  -8   3   1   45.90    9.40 
  -8   3   1   39.90   11.10 
   8   3  -1   28.30    8.80 
  -8   3   1   32.60   10.70 
  -8   3   1   41.70   10.80 
   8   3  -1   44.10   11.60 
   8   3  -1   45.80   11.00 
   8   3  -1   34.20   11.70 
   8   3  -1   24.40   11.80 
   8   3  -1   28.50   10.60 
   8   3  -1   41.50   11.90 
   7  -3  -1  468.55   32.70 
   7  -3  -1  383.96   27.90 
  -7  -3   1  432.96   28.00 
  -7  -3   1  373.96   25.40 
   7  -3  -1  391.86   28.50 
  -7  -3   1  406.86   29.30 
  -7  -3   1  369.16   28.30 
   7  -3  -1  392.16   21.10 
   7  -3  -1  402.16   21.80 
   7  -3  -1  420.76   27.00 
  -7  -3   1  428.36   24.80 
  -7  -3   1  434.56   26.60 
  -7  -3   1  371.56   26.40 
  -7  -3   1  409.26   25.40 
   7  -3  -1  420.06   23.90 
  -7  -3   1  361.86   26.60 
  -7  -3   1  383.96   25.50 
  -7  -3   1  418.06   27.30 
  -7  -3   1  438.46   27.60 
   7  -3  -1  351.26   29.90 
   7  -3  -1  415.46   28.60 
  -7  -3   1  375.66   28.60 
   7  -3  -1  400.46   21.70 
   7  -3  -1  397.86   27.40 
  -7  -3   1  370.16   25.70 
   7  -3  -1  390.76   26.40 
   7  -3  -1  445.76   23.20 
   7   3  -1  368.46   23.60 
   7   3  -1  395.26   26.60 
  -7   3   1  377.16   21.70 
   7   3  -1  384.26   24.70 
  -7   3   1  415.56   26.60 
  -7   3   1  394.76   27.50 
   7   3  -1  354.66   32.10 
   7   3  -1  403.36   28.50 
   7   3  -1  368.76   28.10 
  -7   3   1  413.36   25.60 
  -7   3   1  394.76   26.10 
  -7   3   1  402.26   26.20 
   7   3  -1  332.97   25.30 
  -7   3   1  382.26   24.90 
   7   3  -1  408.86   25.80 
   7   3  -1  422.66   22.60 
   7   3  -1  362.46   25.10 
  -7   3   1  387.86   26.50 
   7   3  -1  384.36   32.90 
   7   3  -1  384.06   27.80 
  -7   3   1  424.96   27.40 
   7   3  -1  372.46   26.20 
  -7   3   1  383.86   20.40 
   7   3  -1  445.26   23.80 
   6  -3  -1  886.81   29.80 
   6  -3  -1  847.62   33.80 
   6  -3  -1  857.71   30.90 
  -6  -3   1  889.11   43.50 
   6  -3  -1  861.91   30.80 
   6  -3  -1  889.71   35.80 
  -6  -3   1  826.92   38.00 
  -6  -3   1  863.21   43.90 
  -6  -3   1  913.61   44.40 
   6  -3  -1  848.02   31.70 
   6  -3  -1  918.81   43.70 
   6  -3  -1  814.92   42.80 
  -6  -3   1  865.51   41.70 
  -6  -3   1  867.51   39.80 
  -6  -3   1  892.21   39.80 
   6  -3  -1  848.32   30.00 
  -6  -3   1  907.91   40.60 
  -6  -3   1  856.81   41.20 
  -6  -3   1  886.51   40.90 
  -6  -3   1  904.01   41.50 
  -6  -3   1  869.21   40.30 
   6  -3  -1  894.71   43.30 
  -6  -3   1  847.32   40.10 
  -6  -3   1  931.01   42.00 
   6  -3  -1  763.72   39.40 
   6  -3  -1  901.91   42.40 
   6  -3  -1  794.52   34.80 
  -6  -3   1  786.62   33.40 
   6  -3  -1  861.21   41.40 
   6  -3  -1  900.21   32.10 
   6  -3  -1  830.62   32.20 
   6   3  -1  830.02   48.00 
  -6   3   1  876.51   35.60 
  -6   3   1  928.21   41.60 
   6   3  -1  917.11   43.60 
  -6   3   1  883.91   42.10 
  -6   3   1  838.92   39.20 
  -6   3   1  875.51   39.70 
   6   3  -1  926.61   42.60 
  -6   3   1  872.21   40.50 
   6   3  -1  867.41   33.70 
   6   3  -1  864.51   40.40 
   6   3  -1  882.11   39.40 
  -6   3   1  902.71   41.40 
   6   3  -1  949.31   44.90 
   6   3  -1  867.61   42.70 
  -6   3   1  829.12   29.90 
   6   3  -1  871.31   38.80 
   6   3  -1  867.91   40.90 
   6   3  -1  840.92   34.10 
  -6   3   1  862.21   35.70 
   6   3  -1  832.72   39.20 
   6   3  -1  890.01   49.80 
  -6   3   1  824.42   39.70 
   6   3  -1  892.81   41.70 
   6   3  -1  850.11   36.90 
  -6   3   1  864.61   39.50 
   6   3  -1  846.52   36.30 
  -6   3   1  875.81   35.20 
   5  -3  -1 2819.72   94.59 
   5  -3  -1 3009.30   89.99 
  -5  -3   1 2760.82   97.59 
   5  -3  -1 2813.12   93.69 
   5  -3  -1 2877.91   90.19 
   5  -3  -1 2776.82   93.49 
  -5  -3   1 2759.02   98.29 
  -5  -3   1 2765.02   98.39 
   5  -3  -1 2893.81  102.29 
   5  -3  -1 2864.21  103.29 
  -5  -3   1 2817.92  101.99 
  -5  -3   1 2885.01   97.09 
  -5  -3   1 2829.92  101.89 
   5  -3  -1 2899.11   89.29 
  -5  -3   1 2811.72   99.69 
  -5  -3   1 2772.72   99.09 
  -5  -3   1 2809.82   86.69 
   5  -3  -1 2755.12   98.79 
  -5  -3   1 2913.91   86.39 
   5  -3  -1 2793.52   88.49 
   5  -3  -1 2823.42   88.69 
   5  -3  -1 2791.02   88.89 
   5  -3  -1 2909.21   91.29 
  -5  -3   1 2882.51  100.69 
  -5  -3   1 2945.31   99.29 
   5  -3  -1 2834.02   90.89 
   5  -3  -1 2825.52   89.19 
  -5  -3   1 2715.23   97.39 
   5  -3  -1 2841.32  101.69 
  -5  -3   1 2900.51   99.79 
  -5  -3   1 2896.61   93.59 
  -5  -3   1 2839.32  103.09 
  -5  -3   1 2867.81   97.49 
   5   3  -1 2951.50  101.89 
   5   3  -1 2895.91   95.49 
  -5   3   1 2916.61   98.59 
  -5   3   1 2914.21   97.19 
   5   3  -1 2885.81  102.79 
   5   3  -1 2785.92  101.49 
   5   3  -1 2894.81   99.99 
   5   3  -1 2931.21  110.39 
   5   3  -1 2757.72   98.09 
  -5   3   1 2801.02   97.79 
  -5   3   1 2932.71   93.79 
   5   3  -1 2926.21  100.59 
  -5   3   1 2803.02   97.89 
  -5   3   1 2948.10   98.49 
  -5   3   1 2953.70  100.79 
   5   3  -1 2908.91   98.29 
   5   3  -1 2870.21  100.49 
  -5   3   1 2895.21   98.69 
   5   3  -1 2930.41   91.79 
   5   3  -1 2730.93   95.49 
  -5   3   1 2888.11   94.19 
  -5   3   1 2801.32   95.39 
   5   3  -1 2752.22   93.09 
   5   3  -1 2846.82  108.59 
   5   3  -1 2939.21   98.09 
  -5   3   1 2906.31   91.09 
  -5   3   1 2813.52   99.99 
   4  -3  -1  550.94   28.00 
  -4  -3   1  609.54   28.20 
   4  -3  -1  673.43   32.10 
  -4  -3   1  615.44   29.60 
   4  -3  -1  668.93   33.40 
   4  -3  -1  604.94   22.70 
  -4  -3   1  627.44   27.20 
   4  -3  -1  622.84   22.60 
  -4  -3   1  725.63   31.50 
   4  -3  -1  649.04   24.80 
  -4  -3   1  630.04   32.00 
  -4  -3   1  624.54   22.30 
  -4  -3   1  612.24   23.30 
  -4  -3   1  585.84   27.80 
   4  -3  -1  602.24   25.60 
   4  -3  -1  621.74   25.50 
   4  -3  -1  621.84   21.40 
   4  -3  -1  632.34   23.90 
   4  -3  -1  603.04   21.10 
  -4  -3   1  595.54   27.60 
  -4  -3   1  612.14   29.00 
   4  -3  -1  636.64   23.20 
   4  -3  -1  639.84   29.50 
   4  -3  -1  647.04   31.90 
  -4  -3   1  595.24   28.60 
  -4  -3   1  615.94   28.60 
   4  -3  -1  611.44   25.90 
  -4  -3   1  609.14   29.40 
  -4  -3   1  571.24   27.80 
  -4  -3   1  585.74   30.50 
   4  -3  -1  626.24   21.20 
   4  -3  -1  644.34   27.20 
  -4  -3   1  642.24   31.40 
   4  -3  -1  659.83   24.00 
   4  -3  -1  637.74   23.80 
  -4   3   1  618.34   28.70 
  -4   3   1  614.84   31.10 
  -4   3   1  590.24   27.20 
   4   3  -1  643.34   28.90 
   4   3  -1  696.53   32.50 
  -4   3   1  637.34   28.20 
  -4   3   1  565.04   25.60 
   4   3  -1  606.94   20.30 
   4   3  -1  610.74   29.90 
   4   3  -1  671.93   28.20 
  -4   3   1  646.84   27.50 
  -4   3   1  594.74   25.20 
   4   3  -1  632.94   23.80 
  -4   3   1  598.44   28.60 
  -4   3   1  635.34   29.10 
   4   3  -1  623.74   30.40 
  -4   3   1  635.14   28.00 
   4   3  -1  621.24   27.20 
   4   3  -1  630.94   30.20 
  -4   3   1  645.14   26.50 
   4   3  -1  585.34   25.60 
   4   3  -1  581.74   34.30 
  -4   3   1  598.04   28.20 
   4   3  -1  594.24   28.70 
   4   3  -1  612.34   28.50 
   4   3  -1  618.44   29.50 
   4   3  -1  620.34   35.60 
   4   3  -1  601.74   30.90 
  -4   3   1  659.53   25.00 
  -3  -3   1 2339.07   80.79 
   3  -3  -1 2362.96   78.99 
   3  -3  -1 2345.47   80.09 
   3  -3  -1 2414.46   84.19 
  -3  -3   1 2256.97   80.19 
   3  -3  -1 2338.47   75.99 
   3  -3  -1 2334.07   78.29 
  -3  -3   1 2306.77   82.29 
   3  -3  -1 2348.86   74.29 
  -3  -3   1 2402.46   77.69 
   3  -3  -1 2365.66   78.49 
  -3  -3   1 2353.06   76.69 
  -3  -3   1 2360.06   79.49 
   3  -3  -1 2342.57   75.09 
   3  -3  -1 2290.37   74.39 
   3  -3  -1 2429.56   77.19 
   3  -3  -1 2369.76   78.39 
   3  -3  -1 2265.87   86.09 
   3  -3  -1 2332.17   76.49 
   3  -3  -1 2252.07   79.49 
   3  -3  -1 2358.86   75.99 
  -3  -3   1 2345.47   79.99 
   3  -3  -1 2387.36   84.89 
  -3  -3   1 2435.56   79.39 
   3  -3  -1 2272.97   75.49 
  -3  -3   1 2349.17   73.69 
  -3  -3   1 2329.57   74.39 
  -3  -3   1 2280.47   81.39 
  -3  -3   1 2362.76   74.29 
  -3  -3   1 2387.86   79.49 
  -3  -3   1 2356.06   79.79 
   3  -3  -1 2387.96   74.99 
   3  -3  -1 2423.96   71.59 
  -3  -3   1 2317.07   80.69 
  -3  -3   1 2321.27   77.39 
   3  -3  -1 2391.96   84.59 
  -3  -3   1 2233.68   78.79 
   3  -3  -1 2341.87   80.19 
   3   3  -1 2283.87   78.09 
  -3   3   1 2396.66   80.19 
  -3   3   1 2234.68   79.99 
  -3   3   1 2358.36   71.29 
   3   3  -1 2386.26   74.49 
   3   3  -1 2314.67   82.39 
  -3   3   1 2347.07   77.29 
  -3   3   1 2369.26   79.09 
  -3   3   1 2280.47   78.89 
   3   3  -1 2337.17   80.99 
  -3   3   1 2295.87   72.49 
  -3   3   1 2359.06   76.59 
   3   3  -1 2459.75   72.69 
  -3   3   1 2435.56   79.29 
   3   3  -1 2383.76   80.09 
  -3   3   1 2209.48   83.59 
   3   3  -1 2402.56   77.49 
   3   3  -1 2269.77   82.09 
   3   3  -1 2278.77   77.19 
  -3   3   1 2354.76   80.99 
  -3   3   1 2322.77   75.89 
  -3   3   1 2322.37   76.49 
   3   3  -1 2322.07   79.89 
   3   3  -1 2276.77   79.39 
  -3   3   1 2311.07   71.89 
  -3   3   1 2391.46   79.99 
   3   3  -1 2357.06   80.89 
  -3   3   1 2294.67   77.79 
   3   3  -1 2383.16   80.19 
   3   3  -1 2423.76   79.19 
   3   3  -1 2216.78   86.59 
  -3   3   1 2310.27   79.19 
  -3   3   1 2366.56   78.69 
   3   3  -1 2400.66   81.09 
   3   3  -1 2357.96   87.09 
   2  -3  -1   62.29   10.50 
  -2  -3   1   56.89    8.10 
  -2  -3   1   84.19   10.30 
  -2  -3   1   59.69    8.10 
   2  -3  -1   81.39    6.20 
  -2  -3   1   72.49    4.70 
   2  -3  -1   84.89    6.80 
   2  -3  -1   71.09    4.10 
  -2  -3   1   80.49    9.40 
   2  -3  -1   74.49    5.90 
   2  -3  -1   76.39    9.10 
   2  -3  -1   72.99    4.30 
   2  -3  -1   63.89    7.30 
  -2  -3   1   72.39    8.40 
   2  -3  -1   71.09   10.70 
  -2  -3   1   75.19    7.40 
  -2  -3   1   73.29    8.10 
   2  -3  -1   61.89    8.00 
  -2  -3   1   65.99    8.10 
   2  -3  -1   61.29    6.70 
  -2  -3   1   82.49    6.30 
  -2  -3   1   70.39    6.90 
   2  -3  -1   73.09    4.00 
   2  -3  -1   76.39    6.50 
  -2  -3   1   70.89    8.90 
   2  -3  -1   79.89    6.40 
   2  -3  -1   74.79    6.00 
   2  -3  -1   77.49    7.70 
   2  -3  -1   71.19    5.40 
  -2  -3   1   76.19    8.90 
  -2  -3   1   80.79    5.90 
   2  -3  -1   70.49    8.90 
   2  -3  -1   69.59    5.50 
   2  -3  -1   89.99   12.10 
  -2  -3   1   51.49    7.50 
  -2  -3   1   75.89    6.10 
  -2  -3   1   74.69    5.90 
   2  -3  -1   77.49    8.90 
  -2  -3   1   95.89   11.20 
   2  -3  -1   70.69    9.90 
  -2  -3   1   63.59    8.70 
   2  -3  -1   81.39    7.80 
  -2  -3   1   64.39    7.70 
  -2   3   1   77.19   10.50 
   2   3  -1   66.09    5.60 
   2   3  -1   73.49    8.60 
  -2   3   1   56.79    4.50 
   2   3  -1   72.79    8.70 
   2   3  -1   73.19    9.80 
   2   3  -1   74.99    5.60 
  -2   3   1   77.39    9.00 
  -2   3   1   78.49    4.30 
   2   3  -1   70.39    5.70 
   2   3  -1   61.69    9.00 
  -2   3   1   68.99    5.40 
  -2   3   1   64.39    9.50 
  -2   3   1   63.89    7.90 
  -2   3   1   98.89   13.00 
  -2   3   1   77.19    9.30 
   2   3  -1   79.79    8.50 
  -2   3   1   59.19    6.60 
  -2   3   1   59.19    6.70 
  -2   3   1   73.19    5.50 
  -2   3   1   79.69    9.80 
   2   3  -1   71.19    8.60 
  -2   3   1   64.49    7.90 
   2   3  -1   72.49    4.70 
  -2   3   1   69.09    7.40 
  -2   3   1   74.19    7.50 
  -2   3   1   80.39    5.80 
   2   3  -1   63.29    8.60 
   2   3  -1   82.79    6.90 
   2   3  -1   72.59    8.60 
  -2   3   1   60.69    6.60 
  -2   3   1   67.79   10.90 
  -2   3   1   68.29    8.20 
  -2   3   1   75.69    6.00 
  -2   3   1   71.39    7.00 
   2   3  -1   65.59    8.50 
  -2   3   1   73.09    4.90 
  -2   3   1   62.79   10.10 
  -2   3   1   66.19   10.20 
  -2   3   1   66.69    8.20 
  -2   3   1   83.19    9.30 
   2   3  -1   97.59   10.10 
   2   3  -1   82.89   12.30 
   2   3  -1   70.79    8.20 
   2   3  -1   63.19   10.60 
   1  -3  -1 1169.18   39.50 
  -1  -3   1 1146.89   47.60 
  -1  -3   1 1111.69   42.00 
   1  -3  -1 1148.29   41.00 
  -1  -3   1 1130.39   42.60 
   1  -3  -1 1150.68   41.60 
  -1  -3   1 1179.78   42.10 
  -1  -3   1 1167.98   43.10 
   1  -3  -1 1139.39   40.70 
   1  -3  -1 1184.78   42.70 
  -1  -3   1 1182.78   37.00 
  -1  -3   1 1162.38   40.80 
  -1  -3   1 1079.69   40.20 
   1  -3  -1 1170.88   40.70 
  -1  -3   1 1161.28   47.30 
   1  -3  -1 1061.59   45.00 
  -1  -3   1 1156.28   44.30 
  -1  -3   1 1145.29   44.20 
  -1  -3   1 1174.98   42.60 
   1  -3  -1 1177.18   38.20 
   1  -3  -1 1115.79   43.90 
  -1  -3   1 1110.99   37.50 
   1  -3  -1 1165.08   40.60 
   1  -3  -1 1141.99   42.80 
   1  -3  -1 1127.29   40.40 
  -1  -3   1 1120.29   41.00 
   1  -3  -1 1129.79   42.10 
  -1  -3   1 1204.88   42.10 
   1  -3  -1 1155.08   40.60 
  -1  -3   1 1144.09   38.50 
   1  -3  -1 1148.29   41.00 
  -1  -3   1 1121.29   41.20 
  -1  -3   1 1102.29   41.90 
   1  -3  -1 1166.98   38.20 
   1  -3  -1 1127.99   37.00 
   1  -3  -1 1185.68   47.10 
  -1  -3   1 1114.49   40.10 
  -1  -3   1 1141.59   41.10 
   1  -3  -1 1183.78   37.70 
  -1  -3   1 1141.39   42.80 
  -1  -3   1 1173.18   42.30 
  -1  -3   1 1179.18   43.20 
  -1  -3   1 1181.08   40.40 
   1  -3  -1 1175.98   41.70 
  -1  -3   1 1140.59   44.60 
   1  -3  -1 1145.49   39.70 
  -1   3   1 1011.20   43.00 
  -1   3   1 1151.28   38.10 
   1   3  -1 1189.28   45.30 
   1   3  -1 1156.88   48.50 
   1   3  -1 1181.58   36.60 
  -1   3   1 1093.59   42.40 
   1   3  -1 1181.78   41.60 
  -1   3   1 1135.79   40.10 
  -1   3   1 1194.48   38.50 
   1   3  -1 1131.19   42.20 
   1   3  -1 1148.39   42.60 
  -1   3   1 1169.08   41.80 
  -1   3   1 1022.30   47.30 
  -1   3   1 1134.39   43.60 
  -1   3   1 1178.38   37.80 
   1   3  -1 1207.98   40.90 
   1   3  -1 1161.78   44.30 
  -1   3   1 1047.20   38.60 
  -1   3   1 1131.49   43.60 
  -1   3   1 1150.78   45.40 
  -1   3   1 1210.28   40.40 
  -1   3   1 1170.58   41.40 
  -1   3   1 1097.99   49.80 
  -1   3   1 1171.98   46.50 
   1   3  -1 1179.88   40.90 
   1   3  -1 1092.89   42.80 
   1   3  -1 1075.99   41.40 
   1   3  -1 1135.69   41.80 
   1   3  -1 1139.49   40.20 
  -1   3   1 1175.08   42.40 
  -1   3   1  977.30   48.00 
  -1   3   1 1180.78   46.00 
   1   3  -1 1181.18   41.90 
  -1   3   1 1108.39   48.80 
   1   3  -1 1137.79   38.70 
  -1   3   1 1241.98   40.70 
  -1   3   1 1167.68   36.20 
  -1   3   1 1110.99   44.30 
   1   3  -1 1077.19   42.10 
  -1   3   1 1169.08   40.90 
  -1   3   1 1236.78   38.70 
  -1   3   1 1176.28   41.70 
   1   3  -1 1224.58   42.90 
   1   3  -1 1127.29   39.70 
   1   3  -1 1165.48   43.00 
  -1   3   1 1212.48   41.60 
   0  -3   1  152.88   10.80 
   0  -3   1  147.59   10.10 
   0  -3  -1  168.58    9.20 
   0  -3   1  149.49   10.60 
   0  -3   1  158.58    8.80 
   0  -3  -1  141.89    9.10 
   0  -3  -1  162.48   10.00 
   0  -3   1  148.19   11.50 
   0  -3   1  155.08   12.10 
   0  -3  -1  149.88    9.80 
   0  -3  -1  148.99    9.60 
   0  -3   1  151.38   13.50 
   0  -3   1  151.58    9.20 
   0  -3   1  173.68   10.20 
   0  -3   1  144.39    9.50 
   0  -3  -1  162.38   13.00 
   0  -3  -1  170.18   12.70 
   0  -3   1  151.58   11.10 
   0  -3   1  146.69    7.90 
   0  -3  -1  152.88   10.80 
   0  -3  -1  146.89    9.20 
   0  -3  -1  155.18    9.20 
   0  -3   1  159.28   10.40 
   0  -3   1  154.58    9.20 
   0  -3  -1  155.98   10.00 
   0  -3  -1  145.39    9.70 
   0  -3  -1  157.18   10.20 
   0  -3   1  145.19    9.70 
   0  -3  -1  157.28    9.40 
   0  -3  -1  150.58    9.80 
   0  -3  -1  166.58   11.80 
   0  -3   1  153.28   11.50 
   0  -3   1  141.29    9.90 
   0  -3   1  131.59    9.10 
   0  -3   1  154.88   10.50 
   0  -3  -1  150.98    8.60 
   0  -3   1  159.88   10.50 
   0  -3   1  147.89    8.80 
   0  -3  -1  152.28    9.20 
   0  -3  -1  136.29   11.20 
   0  -3  -1  173.48   11.10 
   0   3  -1  153.38    9.70 
   0   3   1  154.78   10.50 
   0   3  -1  148.19    8.40 
   0   3  -1  171.18   11.50 
   0   3  -1  151.58    9.90 
   0   3  -1  157.18    9.30 
   0   3   1  146.89   10.40 
   0   3   1  135.49    9.20 
   0   3  -1  146.99   11.40 
   0   3  -1  162.48   10.10 
   0   3   1  136.39    9.50 
   0   3   1  139.79    9.00 
   0   3  -1  161.08   15.00 
   0   3  -1  159.18   10.40 
   0   3  -1  141.79   11.50 
   0   3   1  156.18   12.30 
   0   3  -1  132.49    9.90 
   0   3   1  155.08   10.80 
   0   3  -1  137.49    8.10 
   0   3   1  142.19    8.70 
   0   3  -1  159.68    9.30 
   0   3  -1  145.19    8.60 
   0   3   1  156.78   10.90 
   0   3   1  171.18    9.40 
   0   3  -1  138.09   12.40 
   0   3   1  163.08    9.80 
   0   3  -1  139.49    9.30 
   0   3  -1  152.18   12.20 
   0   3   1  141.19    9.90 
   0   3   1  147.89   11.60 
   0   3   1  163.78   13.30 
   0   3   1  137.29   14.50 
   0   3   1  157.68   10.90 
   0   3  -1  153.58   10.00 
   0   3   1  131.79   11.20 
   0   3   1  141.29    9.40 
   0   3   1  141.09   16.30 
   0   3   1  157.28    9.00 
   0   3   1  153.48    9.20 
   0   3  -1  155.48   10.20 
   0   3  -1  172.38   11.30 
   1  -3   1 4631.74  151.08 
  -1  -3  -1 5070.29  154.58 
   1  -3   1 4818.82  152.18 
  -1  -3  -1 4810.02  151.68 
  -1  -3  -1 5048.90  151.68 
  -1  -3  -1 4993.70  151.88 
  -1  -3  -1 5034.30  147.79 
  -1  -3  -1 4767.12  156.38 
   1  -3   1 5031.20  149.88 
   1  -3   1 4686.33  154.68 
  -1  -3  -1 4957.00  154.18 
   1  -3   1 4862.11  155.08 
   1  -3   1 4784.72  150.98 
  -1  -3  -1 5053.09  153.18 
   1  -3   1 4935.51  147.39 
  -1  -3  -1 4815.42  149.69 
   1  -3   1 5066.69  151.28 
   1  -3   1 4954.00  153.38 
   1  -3   1 4749.02  150.58 
   1  -3   1 5020.70  147.19 
   1  -3   1 4613.84  161.18 
  -1  -3  -1 4720.13  154.58 
   1  -3   1 4852.01  151.98 
  -1  -3  -1 4835.22  155.28 
  -1  -3  -1 4688.33  149.09 
   1  -3   1 4941.41  152.48 
   1  -3   1 5012.40  151.98 
  -1  -3  -1 4940.51  152.18 
   1  -3   1 5186.08  157.38 
   1  -3   1 5047.79  148.29 
   1  -3   1 4806.22  153.68 
   1  -3   1 5077.69  146.89 
   1  -3   1 5282.17  157.68 
  -1  -3  -1 4919.41  151.98 
   1  -3   1 4818.02  152.38 
   1  -3   1 4879.31  147.09 
  -1  -3  -1 4883.81  153.18 
  -1  -3  -1 4904.01  152.38 
   1  -3   1 4655.13  155.08 
   1  -3   1 4810.22  148.59 
  -1  -3  -1 4752.42  152.88 
  -1  -3  -1 4876.51  152.58 
   1  -3   1 4793.02  151.18 
  -1  -3  -1 4896.31  155.88 
  -1  -3  -1 4915.41  151.18 
  -1   3  -1 5093.39  147.29 
   1   3   1 4786.82  153.48 
  -1   3  -1 5026.90  152.68 
   1   3   1 4837.02  157.58 
   1   3   1 4834.12  152.08 
  -1   3  -1 5097.79  154.28 
   1   3   1 4894.71  157.58 
   1   3   1 4957.80  152.38 
  -1   3  -1 5115.49  152.18 
  -1   3  -1 4709.83  155.58 
  -1   3  -1 4803.32  152.18 
   1   3   1 4714.33  155.58 
  -1   3  -1 4774.42  150.78 
   1   3   1 5020.90  153.48 
  -1   3  -1 4105.89  156.38 
   1   3   1 4924.01  149.19 
   1   3   1 4998.20  152.18 
  -1   3  -1 4357.96  156.78 
   1   3   1 4834.22  153.08 
  -1   3  -1 5037.20  149.49 
  -1   3  -1 4603.64  164.58 
   1   3   1 4726.83  155.28 
  -1   3  -1 4632.94  154.28 
   1   3   1 5112.69  152.08 
   1   3   1 4952.90  153.08 
  -1   3  -1 4909.21  154.28 
  -1   3  -1 4400.86  158.98 
  -1   3  -1 4917.81  146.79 
  -1   3  -1 4811.92  150.58 
   1   3   1 4921.31  146.49 
   1   3   1 4824.12  154.68 
  -1   3  -1 4852.21  157.58 
  -1   3  -1 4925.21  151.88 
   1   3   1 5027.40  151.38 
   1   3   1 4983.60  158.98 
  -1   3  -1 5119.59  152.18 
  -1   3  -1 4980.50  149.49 
  -1   3  -1 4947.60  148.09 
   1   3   1 4832.52  151.88 
  -1   3  -1 4850.61  151.88 
  -1   3  -1 4732.13  157.58 
  -1   3  -1 4941.31  152.58 
  -1   3  -1 4329.67  149.59 
   1   3   1 5072.79  152.98 
   2  -3   1 1156.08   41.90 
  -2  -3  -1 1200.08   45.10 
   2  -3   1 1167.48   46.10 
   2  -3   1 1086.79   42.80 
  -2  -3  -1 1232.88   45.50 
  -2  -3  -1 1178.88   39.00 
   2  -3   1 1226.88   43.60 
   2  -3   1 1145.19   46.00 
  -2  -3  -1 1220.28   45.40 
   2  -3   1 1177.58   40.90 
   2  -3   1 1150.28   43.90 
   2  -3   1 1173.58   38.60 
  -2  -3  -1 1166.38   38.40 
   2  -3   1 1201.78   41.20 
   2  -3   1 1176.58   45.60 
  -2  -3  -1 1205.18   44.50 
   2  -3   1 1248.58   41.60 
   2  -3   1 1229.88   41.30 
   2  -3   1 1204.38   40.50 
   2  -3   1 1191.78   38.10 
  -2  -3  -1 1222.38   44.40 
   2  -3   1 1136.69   51.79 
   2  -3   1 1202.28   46.90 
   2  -3   1 1314.87   45.00 
  -2  -3  -1 1177.28   43.30 
   2  -3   1 1212.88   42.20 
   2  -3   1 1252.97   44.00 
   2  -3   1 1239.48   40.30 
   2  -3   1 1149.58   46.40 
  -2  -3  -1 1140.49   38.60 
  -2  -3  -1 1200.08   40.00 
  -2  -3  -1 1202.88   40.90 
  -2  -3  -1 1180.38   41.50 
  -2  -3  -1 1183.78   44.10 
   2  -3   1 1144.89   41.60 
   2  -3   1 1144.49   40.40 
   2  -3   1 1149.19   42.30 
   2  -3   1 1178.08   47.40 
   2  -3   1 1190.58   40.00 
  -2  -3  -1 1163.58   45.30 
  -2  -3  -1 1172.38   46.20 
   2  -3   1 1268.17   45.80 
  -2  -3  -1 1180.78   42.50 
  -2   3  -1 1175.68   47.20 
   2   3   1 1209.08   40.00 
  -2   3  -1 1161.28   41.20 
  -2   3  -1 1196.98   43.70 
   2   3   1 1143.69   42.80 
  -2   3  -1 1147.49   43.80 
  -2   3  -1 1140.49   46.60 
   2   3   1 1163.58   44.50 
   2   3   1 1236.88   47.30 
  -2   3  -1 1132.29   36.30 
  -2   3  -1 1122.69   40.20 
   2   3   1 1164.98   43.90 
   2   3   1 1155.68   49.00 
   2   3   1 1164.88   41.20 
   2   3   1 1145.29   44.80 
  -2   3  -1 1220.08   45.90 
   2   3   1 1173.68   44.10 
   2   3   1 1202.48   47.10 
  -2   3  -1 1224.78   40.30 
  -2   3  -1 1163.98   43.50 
   2   3   1 1202.58   44.60 
  -2   3  -1 1136.39   42.80 
  -2   3  -1 1255.67   40.80 
  -2   3  -1 1201.98   42.60 
   2   3   1 1144.09   38.60 
  -2   3  -1 1155.78   37.00 
  -2   3  -1 1175.58   43.20 
  -2   3  -1 1111.69   41.20 
  -2   3  -1 1255.77   43.00 
   2   3   1 1216.18   44.30 
  -2   3  -1 1139.49   47.20 
   2   3   1 1216.28   41.40 
   2   3   1 1171.28   48.50 
   2   3   1 1195.28   43.30 
  -2   3  -1 1190.88   45.40 
   2   3   1 1193.28   43.80 
  -2   3  -1 1174.28   48.30 
  -2   3  -1 1163.28   37.30 
   3  -3   1 3322.97  103.09 
   3  -3   1 3455.45  111.39 
  -3  -3  -1 3355.06  107.39 
   3  -3   1 3164.18  110.59 
   3  -3   1 3372.86  105.59 
  -3  -3  -1 3197.98  108.29 
   3  -3   1 3327.67  105.29 
  -3  -3  -1 3287.47  107.79 
  -3  -3  -1 3267.47  110.09 
   3  -3   1 3397.76  104.59 
  -3  -3  -1 3283.67   98.89 
  -3  -3  -1 3237.28  108.99 
   3  -3   1 3179.58  106.89 
   3  -3   1 3276.07  104.89 
   3  -3   1 3302.57  104.29 
  -3  -3  -1 3316.77  109.59 
  -3  -3  -1 3344.07  105.09 
   3  -3   1 3032.40  107.69 
   3  -3   1 3334.37  104.49 
   3  -3   1 3322.27  104.29 
   3  -3   1 3376.56  111.89 
   3  -3   1 3342.87  103.09 
   3  -3   1 3131.09  103.09 
   3  -3   1 3456.55  106.99 
   3  -3   1 3338.97  109.09 
   3  -3   1 3330.07  110.09 
   3  -3   1 3366.26  103.39 
  -3  -3  -1 3374.76  106.99 
  -3  -3  -1 3308.17  109.89 
   3  -3   1 3274.77  107.69 
   3  -3   1 3398.86  110.99 
   3  -3   1 3315.17  107.39 
  -3  -3  -1 3336.87  106.59 
   3  -3   1 3352.96   99.49 
  -3  -3  -1 3292.97  109.49 
  -3  -3  -1 3302.97  109.29 
  -3  -3  -1 3327.07  106.49 
   3  -3   1 3443.66  103.99 
  -3   3  -1 3264.27  106.89 
   3   3   1 3360.36  107.49 
  -3   3  -1 3166.88  112.29 
  -3   3  -1 3120.19  108.69 
  -3   3  -1 3475.55  106.89 
   3   3   1 3410.36  106.99 
   3   3   1 3264.77  111.69 
  -3   3  -1 3287.57  102.19 
   3   3   1 3329.07  107.29 
   3   3   1 3296.87   99.79 
  -3   3  -1 3406.66  111.39 
  -3   3  -1 3281.17  104.39 
  -3   3  -1 3276.77  107.49 
  -3   3  -1 3231.08  107.69 
   3   3   1 3210.68  111.49 
   3   3   1 3247.07  108.99 
  -3   3  -1 3224.18  105.79 
   3   3   1 3270.17  109.19 
   3   3   1 3330.17  115.79 
  -3   3  -1 3234.58  110.29 
  -3   3  -1 3195.38  109.89 
  -3   3  -1 3346.17  110.99 
   3   3   1 3431.26  110.39 
   3   3   1 3273.27  108.49 
  -3   3  -1 3297.67  106.09 
  -3   3  -1 3250.57  108.19 
   3   3   1 3171.28  109.09 
  -3   3  -1 3104.09  105.59 
   3   3   1 3261.17  116.29 
   3   3   1 3188.28  109.59 
   3   3   1 3419.06  108.19 
   4  -3   1  370.76   15.40 
   4  -3   1  360.86   19.70 
  -4  -3  -1  366.06   20.90 
   4  -3   1  343.97   21.90 
  -4  -3  -1  362.76   20.40 
   4  -3   1  339.37   18.10 
   4  -3   1  347.47   16.50 
   4  -3   1  358.56   16.60 
   4  -3   1  372.96   17.30 
   4  -3   1  363.26   16.60 
   4  -3   1  352.96   17.70 
  -4  -3  -1  365.16   22.10 
   4  -3   1  361.86   12.70 
  -4  -3  -1  365.56   21.40 
  -4  -3  -1  354.76   21.50 
   4  -3   1  381.46   15.40 
  -4  -3  -1  389.76   20.60 
   4  -3   1  322.57   20.40 
  -4  -3  -1  388.16   21.70 
   4  -3   1  347.17   21.10 
   4  -3   1  396.16   16.50 
   4  -3   1  335.27   17.20 
   4  -3   1  343.47   21.90 
  -4  -3  -1  385.66   19.40 
  -4  -3  -1  353.96   21.20 
   4  -3   1  344.27   17.40 
  -4  -3  -1  375.36   19.20 
  -4  -3  -1  359.76   19.50 
   4  -3   1  349.87   13.20 
  -4  -3  -1  346.07   20.40 
   4  -3   1  403.36   22.80 
  -4  -3  -1  368.66   20.30 
  -4   3  -1  374.56   18.00 
   4   3   1  353.36   19.60 
  -4   3  -1  356.76   20.40 
  -4   3  -1  380.46   20.00 
  -4   3  -1  374.76   19.60 
  -4   3  -1  374.96   19.60 
  -4   3  -1  361.06   18.50 
  -4   3  -1  391.56   20.70 
   4   3   1  337.87   21.40 
  -4   3  -1  394.46   21.30 
   4   3   1  333.57   20.80 
   4   3   1  362.46   12.80 
  -4   3  -1  378.06   22.20 
  -4   3  -1  367.66   19.90 
   4   3   1  370.66   21.20 
   4   3   1  348.27   22.50 
   4   3   1  351.46   18.50 
  -4   3  -1  337.37   19.90 
   4   3   1  355.76   19.20 
   4   3   1  375.76   21.20 
   4   3   1  368.16   19.50 
   4   3   1  364.86   22.70 
   4   3   1  419.26   27.40 
  -4   3  -1  368.36   15.30 
  -4   3  -1  352.36   19.40 
  -4   3  -1  348.47   22.10 
   4   3   1  336.77   19.90 
   4   3   1  375.96   26.70 
  -4   3  -1  351.26   18.30 
  -4   3  -1  369.86   15.70 
   5  -3   1  222.38   15.30 
  -5  -3  -1  230.98   16.60 
  -5  -3  -1  237.38   16.40 
   5  -3   1  194.68   11.50 
  -5  -3  -1  219.98   16.30 
  -5  -3  -1  229.48   12.10 
  -5  -3  -1  206.08   21.40 
   5  -3   1  207.18   17.50 
  -5  -3  -1  218.68   15.40 
   5  -3   1  211.18   10.10 
  -5  -3  -1  213.88   11.10 
  -5  -3  -1  190.68   15.60 
  -5  -3  -1  216.48   17.70 
   5  -3   1  215.08    9.90 
   5  -3   1  194.98   16.40 
  -5  -3  -1  187.18   19.80 
   5  -3   1  221.88   17.20 
   5  -3   1  207.88   12.70 
   5  -3   1  224.48   10.40 
  -5  -3  -1  229.48   16.70 
   5  -3   1  232.08   11.70 
  -5  -3  -1  209.78   16.90 
   5  -3   1  207.48   17.40 
  -5  -3  -1  211.38   15.90 
   5  -3   1  206.38   12.80 
  -5  -3  -1  222.68   17.50 
   5  -3   1  226.88   17.80 
  -5  -3  -1  225.38   14.70 
   5  -3   1  189.28   11.40 
   5  -3   1  236.28   12.30 
   5   3   1  216.68   14.70 
  -5   3  -1  220.98   17.60 
   5   3   1  208.48   16.40 
  -5   3  -1  220.98   16.00 
  -5   3  -1  215.48    9.50 
  -5   3  -1  190.38   15.30 
  -5   3  -1  194.48   11.40 
   5   3   1  225.78   17.50 
  -5   3  -1  213.98   16.40 
  -5   3  -1  227.28   12.50 
   5   3   1  203.08    9.40 
  -5   3  -1  205.78   16.90 
  -5   3  -1  235.68   16.00 
   5   3   1  209.28   18.40 
   5   3   1  225.68   15.40 
   5   3   1  187.28   15.30 
  -5   3  -1  200.78   13.30 
   5   3   1  220.48   18.20 
   5   3   1  185.08   23.50 
  -5   3  -1  225.68   15.20 
  -5   3  -1  231.38   16.50 
   5   3   1  215.48   16.60 
  -5   3  -1  182.98   15.70 
  -5   3  -1  220.08   15.60 
   5   3   1  161.88   18.00 
   5   3   1  196.58   14.60 
   5   3   1  207.48   20.70 
  -5   3  -1  209.88   15.90 
   5   3   1  211.58   14.00 
   6  -3   1   88.89    7.20 
  -6  -3  -1  124.59   17.70 
  -6  -3  -1   70.69   12.40 
   6  -3   1   87.99    7.40 
  -6  -3  -1   89.19   12.70 
  -6  -3  -1   99.79   14.10 
  -6  -3  -1  107.89   15.40 
  -6  -3  -1   89.09   14.20 
  -6  -3  -1   75.59   13.80 
  -6  -3  -1  107.89   15.80 
  -6  -3  -1   99.59   14.60 
   6  -3   1   91.89   13.90 
   6  -3   1  104.19   11.70 
  -6  -3  -1   79.59   13.10 
   6  -3   1   93.89    9.80 
  -6  -3  -1   97.89    7.30 
   6  -3   1   96.39   10.30 
  -6  -3  -1   89.39   13.20 
   6  -3   1   92.49   14.20 
  -6  -3  -1   63.89   10.80 
  -6  -3  -1   84.39    5.60 
   6  -3   1  105.99   10.50 
  -6  -3  -1   97.39   13.20 
   6  -3   1   88.59   14.30 
   6  -3   1  102.49   15.30 
   6  -3   1   99.09    7.70 
  -6  -3  -1  110.59   12.40 
   6  -3   1  113.39   13.40 
   6  -3   1   81.39   10.20 
   6  -3   1  110.49   15.40 
  -6   3  -1   86.49   13.10 
  -6   3  -1   83.19    8.30 
   6   3   1   94.29   13.60 
  -6   3  -1  104.59   15.20 
  -6   3  -1   97.09   13.60 
  -6   3  -1   93.99   14.10 
  -6   3  -1   90.69   12.00 
  -6   3  -1   91.79   13.80 
   6   3   1  116.59   12.30 
   6   3   1   74.29   12.60 
   6   3   1   73.29   16.30 
   6   3   1   84.99   17.70 
   6   3   1  108.29   12.70 
   6   3   1   90.39   12.00 
  -6   3  -1  114.59   15.60 
   6   3   1  106.59   15.10 
   6   3   1  116.19   17.10 
  -6   3  -1  100.49    9.70 
  -6   3  -1   77.99   11.50 
  -6   3  -1   97.69   13.40 
   6   3   1   98.49    7.00 
   6   3   1   94.99   14.70 
   6   3   1   81.09   13.00 
   6   3   1   94.19   14.20 
  -6   3  -1   90.39   13.20 
   6   3   1   86.39   14.20 
  -6   3  -1  103.09   10.50 
   6   3   1   90.59   11.40 
  -7  -3  -1    1.40    6.20 
  -7  -3  -1   -1.90    3.90 
   7  -3   1    6.00    5.40 
  -7  -3  -1    3.50    6.20 
   7  -3   1   -0.90    5.10 
   7  -3   1    1.90    5.20 
  -7  -3  -1    5.80    4.60 
  -7  -3  -1   -3.60    4.40 
  -7  -3  -1    0.40    5.50 
   7  -3   1    8.10    7.00 
   7  -3   1    3.80    6.30 
   7  -3   1   -1.80    3.30 
  -7  -3  -1    2.60    6.00 
  -7  -3  -1    9.40    6.50 
   7  -3   1    1.80    3.20 
   7  -3   1    2.90    4.50 
   7  -3   1    2.60    5.30 
  -7  -3  -1    3.90    4.70 
   7  -3   1   -0.40    3.90 
  -7  -3  -1   -2.90    4.30 
   7  -3   1   11.70    7.20 
   7  -3   1    3.40    4.20 
  -7  -3  -1   -5.30    5.50 
  -7  -3  -1    0.40    4.90 
  -7  -3  -1    5.60    6.50 
  -7  -3  -1   -1.90    5.00 
   7  -3   1    2.20    5.90 
  -7   3  -1   -8.20    4.20 
   7   3   1   10.30    8.90 
   7   3   1   -0.50    5.90 
   7   3   1    3.20    4.00 
   7   3   1    5.00    4.90 
   7   3   1   -2.90    5.30 
  -7   3  -1   -4.30    4.40 
  -7   3  -1   -1.20    4.00 
  -7   3  -1    4.70    5.60 
   7   3   1    4.60    5.40 
   7   3   1    0.80    4.10 
   7   3   1   -4.20    4.60 
   7   3   1    2.00    6.00 
  -7   3  -1   -0.60    4.60 
   7   3   1    0.30    5.90 
  -7   3  -1   -6.00    3.50 
   7   3   1   -4.60    6.00 
  -7   3  -1    4.70    5.10 
  -7   3  -1   -2.10    4.30 
  -7   3  -1   -1.90    4.20 
   7   3   1    3.00    3.90 
  -7   3  -1   -1.70    4.80 
   7   3   1    8.10    5.60 
   7   3   1   10.40    8.80 
  -8  -3  -1   13.00    8.30 
   8  -3   1    8.90    7.20 
  -8  -3  -1   11.50    9.00 
   8  -3   1   20.40    7.40 
  -8  -3  -1    8.50    7.90 
   8  -3   1   17.50   11.50 
   8  -3   1   17.50   10.40 
  -8  -3  -1    7.20    7.60 
  -8  -3  -1   20.40    7.70 
   8  -3   1   15.20    8.50 
  -8  -3  -1   21.10    9.50 
   8  -3   1   40.80   11.90 
  -8  -3  -1   10.50    7.70 
  -8  -3  -1   13.20    7.60 
  -8  -3  -1   19.10    8.80 
  -8  -3  -1   16.20    9.30 
  -8  -3  -1   20.90    8.30 
   8  -3   1   19.20   10.90 
  -8  -3  -1   16.90    8.70 
   8  -3   1   28.00    9.30 
   8  -3   1   18.20    9.00 
   8  -3   1    9.20    7.40 
   8  -3   1   34.00   11.00 
   8   3   1   13.30    6.30 
  -8   3  -1   21.20    8.50 
   8   3   1   12.30    7.90 
  -8   3  -1   20.80    9.80 
   8   3   1   16.40    9.20 
  -8   3  -1   13.40    7.80 
   8   3   1   11.00    7.00 
   8   3   1   24.60   10.60 
   8   3   1   21.20    9.60 
   8   3   1   18.20    7.30 
  -8   3  -1   19.40    8.70 
  -8   3  -1   16.20    8.00 
   8   3   1   13.60    8.30 
   8   3   1   30.70   13.80 
   8   3   1    6.00    6.30 
   8   3   1   10.00   10.50 
   8   3   1   35.60   12.40 
   8   3   1   27.70    9.90 
  -9  -3  -1   50.19   13.40 
  -9  -3  -1   47.40   13.90 
  -9  -3  -1   55.79   14.80 
   9  -3   1   61.29   14.60 
  -9  -3  -1   62.49   15.60 
   9  -3   1   34.80   15.40 
   9  -3   1   55.09   16.80 
  -9  -3  -1   48.00   11.80 
  -9  -3  -1   43.70   13.00 
  -9  -3  -1   33.70   12.10 
  -9  -3  -1   40.00   12.70 
  -9  -3  -1   69.09   16.20 
   9  -3   1   64.59   15.90 
   9  -3   1   29.30   13.30 
   9  -3   1   32.00   12.30 
   9  -3   1   38.80   12.90 
  -9  -3  -1   43.00   12.80 
   9  -3   1   29.40   11.20 
   9  -3   1   47.50   14.70 
  -9  -3  -1   37.20   11.50 
   9  -3   1   57.29   14.30 
  -9  -3  -1   45.80   14.80 
   9   3   1   56.89   15.70 
   9   3   1   47.20   13.00 
   9   3   1   46.60   17.90 
   9   3   1   45.50   12.70 
   9   3   1   36.90   11.10 
   9   3   1   56.49   15.50 
  -9   3  -1   53.09   13.80 
   9   3   1   42.00   13.60 
   9   3   1   56.69   15.30 
   9   3   1   39.20   12.10 
   9   3   1   39.10   16.70 
   9   3   1   64.69   14.50 
  -9   3  -1   42.90   14.10 
  -9  -4   1   51.19   15.60 
   9  -4  -1   47.40   14.80 
  -9  -4   1   62.29   15.70 
  -9  -4   1   54.89   17.20 
   9  -4  -1   42.40   15.00 
  -9  -4   1   55.79   14.40 
   9  -4  -1   25.30   13.20 
   9  -4  -1   38.90   14.10 
  -9  -4   1   35.30   19.30 
   9  -4  -1   33.00   14.20 
   9  -4  -1   46.10   14.70 
   9  -4  -1   33.20   12.70 
   9  -4  -1   60.49   17.20 
  -9  -4   1   45.80   14.50 
  -9  -4   1   42.80   13.40 
   9  -4  -1   18.20   13.20 
  -9  -4   1   62.79   16.20 
  -9  -4   1   30.80   11.80 
  -9  -4   1   81.89   16.30 
  -9  -4   1   40.30   14.00 
   9   4  -1   39.60   12.80 
  -9   4   1   49.90   13.40 
   9   4  -1   37.80   12.50 
  -9   4   1   80.99   17.80 
   9   4  -1   37.90   13.60 
   9   4  -1   50.29   13.70 
   9   4  -1   48.90   15.20 
   9   4  -1   64.99   14.70 
   9   4  -1   33.10   12.70 
   9   4  -1   50.29   13.90 
   9   4  -1   63.39   16.80 
   9   4  -1   47.40   17.40 
   9   4  -1   62.99   19.50 
  -8  -4   1  257.57   26.80 
   8  -4  -1  266.87   23.20 
   8  -4  -1  241.28   27.40 
  -8  -4   1  309.57   33.20 
  -8  -4   1  239.58   26.60 
  -8  -4   1  244.98   28.10 
   8  -4  -1  324.17   34.50 
   8  -4  -1  222.18   25.80 
   8  -4  -1  258.17   29.40 
  -8  -4   1  245.68   26.70 
   8  -4  -1  219.18   27.30 
  -8  -4   1  302.57   30.10 
  -8  -4   1  245.18   27.40 
   8  -4  -1  245.28   21.10 
  -8  -4   1  271.07   26.60 
   8  -4  -1  270.57   27.80 
  -8  -4   1  248.48   25.70 
  -8  -4   1  253.77   30.40 
  -8  -4   1  258.07   24.40 
  -8  -4   1  244.68   26.10 
  -8  -4   1  236.78   28.90 
   8  -4  -1  254.97   31.50 
   8   4  -1  232.78   18.70 
  -8   4   1  314.17   31.50 
   8   4  -1  239.68   27.40 
  -8   4   1  285.67   23.20 
   8   4  -1  212.68   31.70 
   8   4  -1  304.77   30.60 
   8   4  -1  256.17   27.40 
   8   4  -1  255.97   35.60 
   8   4  -1  251.87   27.50 
   8   4  -1  243.28   29.10 
  -8   4   1  219.38   24.40 
   8   4  -1  273.17   27.10 
  -8   4   1  257.47   26.80 
  -8   4   1  294.07   24.00 
   8   4  -1  295.47   22.50 
   8   4  -1  263.07   31.90 
  -8   4   1  243.48   25.20 
  -8   4   1  275.87   27.30 
   8   4  -1  268.77   30.90 
   8   4  -1  248.78   25.10 
  -7  -4   1    5.30    6.40 
  -7  -4   1    5.00    5.50 
  -7  -4   1   11.40    6.40 
  -7  -4   1    7.30    6.10 
  -7  -4   1   12.10    6.40 
   7  -4  -1   14.80    8.20 
  -7  -4   1   11.60    8.60 
   7  -4  -1   10.80    8.30 
   7  -4  -1   17.10    6.50 
  -7  -4   1   18.90    9.50 
   7  -4  -1    1.80    6.30 
  -7  -4   1    8.10    6.90 
  -7  -4   1   10.00    6.00 
  -7  -4   1    3.10    6.80 
   7  -4  -1    5.50    6.30 
  -7  -4   1   15.30    8.10 
  -7  -4   1   -4.10    4.80 
   7  -4  -1    3.40    7.50 
  -7  -4   1   14.50    7.30 
  -7  -4   1    3.40    5.60 
   7  -4  -1    3.60    5.80 
   7   4  -1    1.80    6.60 
  -7   4   1    9.20    7.10 
   7   4  -1    3.80    7.40 
   7   4  -1    2.40    5.60 
  -7   4   1    8.80    6.80 
   7   4  -1    0.90    6.00 
   7   4  -1    2.40    5.70 
   7   4  -1   -4.40    5.60 
   7   4  -1   11.70    6.70 
  -7   4   1    4.40    5.50 
  -7   4   1   12.20    7.00 
   7   4  -1   12.40    6.40 
   7   4  -1   12.70    6.60 
   7   4  -1    3.40    5.90 
  -7   4   1    8.20    4.80 
   7   4  -1    4.30    6.60 
   7   4  -1   15.10    9.90 
  -7   4   1   14.80    6.80 
  -7   4   1    3.50    5.70 
   7   4  -1   13.60    8.30 
  -7   4   1    2.30    5.50 
   7   4  -1    6.40    7.50 
   6  -4  -1  147.49   18.60 
   6  -4  -1  159.48   12.80 
  -6  -4   1  181.38   22.10 
  -6  -4   1  116.99   18.40 
   6  -4  -1  155.08   12.90 
  -6  -4   1  159.58   19.80 
  -6  -4   1  163.98   12.90 
  -6  -4   1  143.89   17.60 
  -6  -4   1  165.98   18.30 
   6  -4  -1  146.59   19.90 
  -6  -4   1  192.48   19.20 
  -6  -4   1  139.49   19.30 
   6  -4  -1  162.28   10.30 
   6  -4  -1  157.08   21.30 
  -6  -4   1  165.08   18.80 
   6  -4  -1  147.69   19.80 
  -6  -4   1  153.68   17.20 
  -6  -4   1  134.69   17.60 
  -6  -4   1  176.08   19.20 
  -6  -4   1  144.79   18.20 
  -6  -4   1  163.88   18.30 
   6  -4  -1  177.98   19.30 
  -6  -4   1  131.39   15.20 
   6   4  -1  139.59   18.80 
   6   4  -1  172.18   17.00 
  -6   4   1  173.38   18.00 
   6   4  -1  160.18   16.90 
  -6   4   1  173.88   17.90 
  -6   4   1  123.39   16.20 
   6   4  -1  120.29   16.00 
   6   4  -1  175.58   21.20 
  -6   4   1  148.49   17.70 
   6   4  -1  173.88   25.30 
   6   4  -1  160.38   21.60 
   6   4  -1  164.68   19.80 
  -6   4   1  169.78   20.10 
   6   4  -1  149.19   17.20 
   6   4  -1  143.99   23.20 
  -6   4   1  151.68   15.50 
   6   4  -1  184.58   16.90 
   6   4  -1  199.28   21.40 
   6   4  -1  182.48   19.90 
  -6   4   1  184.18   18.80 
  -6   4   1  164.38   18.70 
  -6   4   1  177.58   13.10 
  -6   4   1  169.78   12.70 
   6   4  -1  153.18   17.40 
  -6   4   1  162.08   11.20 
  -5  -4   1   89.29   13.90 
  -5  -4   1   76.39    7.80 
   5  -4  -1   53.69   11.20 
  -5  -4   1   72.19   10.90 
  -5  -4   1   64.59   11.30 
   5  -4  -1   60.89    4.30 
  -5  -4   1   71.79   11.40 
   5  -4  -1   67.29   13.30 
  -5  -4   1   76.39   13.50 
   5  -4  -1   65.29   11.20 
   5  -4  -1   69.69   11.90 
  -5  -4   1   47.00   10.30 
  -5  -4   1   53.49    9.60 
  -5  -4   1   59.69   11.70 
  -5  -4   1   51.89    9.20 
  -5  -4   1   71.29   11.30 
   5  -4  -1   73.09    7.90 
   5  -4  -1   52.99    6.90 
   5  -4  -1   78.99   10.50 
   5  -4  -1   60.89    8.70 
  -5  -4   1   53.59   11.90 
   5  -4  -1   81.79   14.00 
   5  -4  -1   70.79    7.40 
   5  -4  -1   72.09   13.70 
  -5  -4   1   76.39   10.50 
   5  -4  -1   68.59    7.50 
   5  -4  -1   60.09    4.00 
  -5  -4   1   53.69    9.70 
  -5  -4   1   67.89    6.70 
  -5  -4   1   72.29   11.70 
   5   4  -1   71.99   13.20 
   5   4  -1   79.79   12.60 
   5   4  -1   60.39   14.70 
  -5   4   1   69.49   12.10 
   5   4  -1   57.29   10.90 
  -5   4   1   56.29   10.70 
   5   4  -1   60.39   10.90 
  -5   4   1   74.89   11.10 
   5   4  -1   56.09    9.70 
   5   4  -1   74.09   11.70 
  -5   4   1   62.19   10.80 
   5   4  -1   49.70   11.50 
   5   4  -1   47.00   10.30 
  -5   4   1   58.59    9.90 
  -5   4   1   84.69   11.00 
   5   4  -1   65.49   11.80 
  -5   4   1   78.29   10.10 
   5   4  -1   46.20    8.40 
  -5   4   1   51.19    7.80 
   5   4  -1   73.69    7.00 
  -5   4   1   57.99   11.90 
   5   4  -1   73.49   11.80 
  -5   4   1   42.90    7.20 
  -5   4   1   61.69   10.60 
   5   4  -1   42.70   12.10 
   4  -4  -1  736.13   38.80 
  -4  -4   1  718.23   34.80 
  -4  -4   1  738.63   34.10 
  -4  -4   1  772.42   33.70 
  -4  -4   1  726.83   35.50 
  -4  -4   1  732.43   24.70 
   4  -4  -1  796.42   28.40 
   4  -4  -1  753.22   29.10 
   4  -4  -1  680.93   37.20 
  -4  -4   1  787.22   34.60 
   4  -4  -1  728.13   30.80 
   4  -4  -1  730.13   23.50 
  -4  -4   1  777.52   36.70 
   4  -4  -1  748.73   28.10 
   4  -4  -1  734.93   34.50 
   4  -4  -1  746.63   32.10 
  -4  -4   1  726.33   31.70 
  -4  -4   1  714.93   33.30 
  -4  -4   1  717.53   31.40 
  -4  -4   1  731.53   35.20 
  -4  -4   1  717.63   26.90 
  -4  -4   1  717.43   30.50 
   4  -4  -1  764.02   29.10 
   4  -4  -1  675.73   37.50 
  -4  -4   1  682.23   33.90 
  -4  -4   1  747.53   36.70 
  -4   4   1  733.53   33.30 
   4   4  -1  734.43   41.90 
   4   4  -1  754.82   34.80 
   4   4  -1  666.43   32.40 
   4   4  -1  760.12   35.70 
  -4   4   1  724.63   30.70 
  -4   4   1  739.63   30.30 
   4   4  -1  729.83   36.90 
   4   4  -1  731.13   27.00 
   4   4  -1  729.13   33.90 
  -4   4   1  691.03   33.10 
   4   4  -1  696.03   32.10 
   4   4  -1  714.43   36.60 
  -4   4   1  692.43   32.40 
  -4   4   1  738.43   23.40 
   4   4  -1  735.53   34.20 
  -4   4   1  785.52   36.30 
  -4   4   1  714.23   24.10 
   4   4  -1  680.33   34.50 
   4   4  -1  703.33   34.20 
   4   4  -1  727.53   35.20 
  -4   4   1  763.92   31.10 
   4   4  -1  693.63   40.70 
  -4   4   1  742.93   31.80 
  -4   4   1  691.23   37.60 
  -4   4   1  712.73   33.50 
  -4   4   1  745.23   34.30 
  -3  -4   1   60.79    5.40 
   3  -4  -1   45.40   10.10 
  -3  -4   1   46.30    7.60 
  -3  -4   1   56.99    9.30 
   3  -4  -1   58.59    7.90 
  -3  -4   1   50.59    9.30 
  -3  -4   1   56.89    9.60 
  -3  -4   1   38.40    7.60 
   3  -4  -1   59.29    7.40 
   3  -4  -1   61.69    8.80 
   3  -4  -1   47.00    6.70 
   3  -4  -1   60.19    6.90 
   3  -4  -1   56.49    3.60 
  -3  -4   1   62.39    7.20 
  -3  -4   1   51.99    9.00 
  -3  -4   1   69.69   10.80 
  -3  -4   1   62.49    7.80 
  -3  -4   1   56.89    9.30 
  -3  -4   1   42.90    7.70 
   3  -4  -1   64.29    8.90 
  -3  -4   1   64.39   10.90 
  -3  -4   1   66.69    7.50 
  -3  -4   1   54.39    7.10 
  -3  -4   1   56.89    6.80 
   3  -4  -1   56.79    7.00 
   3  -4  -1   51.99   11.40 
   3  -4  -1   60.59    9.50 
  -3  -4   1   58.59    9.90 
  -3  -4   1   70.09   11.40 
   3  -4  -1   49.60    6.80 
  -3  -4   1   49.60    8.20 
   3  -4  -1   60.59    3.70 
   3   4  -1   54.79    9.20 
   3   4  -1   60.29    9.40 
  -3   4   1   57.29    5.70 
   3   4  -1   48.10   10.00 
   3   4  -1   49.40    8.60 
  -3   4   1   66.79    9.60 
   3   4  -1   40.70    7.90 
  -3   4   1   74.49   10.20 
   3   4  -1   55.49    8.50 
   3   4  -1   40.20    7.60 
  -3   4   1   65.79   12.50 
   3   4  -1   63.29   10.00 
  -3   4   1   59.19    7.20 
   3   4  -1   48.60   11.90 
  -3   4   1   64.59    5.10 
  -3   4   1   71.39    8.50 
  -3   4   1   64.29    6.20 
  -3   4   1   56.09   10.70 
  -3   4   1   52.69    8.30 
   3   4  -1   56.49    9.10 
   3   4  -1   53.99   11.60 
   3   4  -1   50.29    9.30 
  -3   4   1   55.79    9.20 
  -3   4   1   59.59    9.40 
  -3   4   1   56.09    9.20 
  -3   4   1   59.09    6.90 
   3   4  -1   49.00    9.90 
  -3   4   1   66.69    8.00 
   2  -4  -1  568.84   25.80 
   2  -4  -1  494.75   29.20 
  -2  -4   1  497.65   25.70 
   2  -4  -1  524.85   23.80 
  -2  -4   1  556.64   26.10 
   2  -4  -1  533.85   22.90 
  -2  -4   1  536.35   27.40 
   2  -4  -1  506.75   18.90 
   2  -4  -1  506.55   29.10 
  -2  -4   1  500.55   25.80 
   2  -4  -1  544.85   23.40 
  -2  -4   1  514.25   26.50 
  -2  -4   1  563.04   20.40 
  -2  -4   1  496.45   25.10 
  -2  -4   1  537.75   24.70 
   2  -4  -1  520.55   19.50 
  -2  -4   1  506.45   21.00 
  -2  -4   1  453.35   24.70 
  -2  -4   1  501.75   24.90 
   2  -4  -1  462.35   20.00 
  -2  -4   1  498.75   25.80 
   2  -4  -1  531.05   19.50 
  -2  -4   1  503.25   24.60 
   2  -4  -1  462.35   20.90 
   2  -4  -1  523.15   23.20 
   2  -4  -1  536.35   25.70 
  -2  -4   1  508.15   20.30 
   2  -4  -1  542.05   19.60 
   2  -4  -1  507.25   21.60 
  -2  -4   1  513.05   27.30 
  -2  -4   1  446.66   21.80 
  -2  -4   1  537.35   23.00 
   2   4  -1  498.25   20.10 
  -2   4   1  498.75   21.40 
  -2   4   1  506.95   22.00 
  -2   4   1  521.85   23.40 
   2   4  -1  521.65   24.30 
  -2   4   1  558.24   24.10 
  -2   4   1  518.55   19.30 
  -2   4   1  509.85   17.20 
  -2   4   1  530.25   24.40 
  -2   4   1  463.65   26.60 
  -2   4   1  510.75   19.50 
  -2   4   1  491.55   25.70 
  -2   4   1  539.55   25.20 
   2   4  -1  512.25   27.90 
   2   4  -1  526.35   24.50 
   2   4  -1  505.75   25.50 
   2   4  -1  518.05   25.30 
  -2   4   1  519.75   21.70 
  -2   4   1  529.55   28.70 
  -2   4   1  487.85   29.80 
  -2   4   1  552.64   25.70 
  -2   4   1  547.05   20.90 
  -2   4   1  508.45   25.10 
   2   4  -1  519.95   25.30 
   2   4  -1  542.55   25.20 
   2   4  -1  529.95   25.30 
  -2   4   1  542.65   23.70 
   2   4  -1  517.35   26.60 
  -2   4   1  545.55   20.30 
   2   4  -1  517.65   20.40 
  -2   4   1  560.64   23.60 
  -2   4   1  533.75   19.90 
   2   4  -1  543.75   32.20 
   2   4  -1  485.35   27.20 
  -2   4   1  505.25   24.80 
  -2   4   1  550.54   25.60 
  -2   4   1  534.95   21.10 
   2   4  -1  542.15   26.10 
  -1  -4   1    1.80    1.40 
  -1  -4   1    8.70    4.40 
   1  -4  -1   -2.50    1.50 
  -1  -4   1    1.40    2.20 
  -1  -4   1    1.80    3.30 
   1  -4  -1    0.80    2.70 
  -1  -4   1    3.40    3.80 
   1  -4  -1    0.10    2.50 
   1  -4  -1    2.90    3.00 
  -1  -4   1    0.20    3.20 
  -1  -4   1    3.10    3.60 
   1  -4  -1    3.60    2.80 
  -1  -4   1    1.10    3.30 
   1  -4  -1    0.90    2.80 
  -1  -4   1    5.00    2.10 
  -1  -4   1    1.10    2.50 
   1  -4  -1    2.00    2.20 
  -1  -4   1   -0.10    2.60 
   1  -4  -1    0.70    2.30 
   1  -4  -1    4.90    4.00 
  -1  -4   1    0.80    3.20 
  -1  -4   1   -0.80    3.30 
   1  -4  -1    4.40    3.50 
  -1  -4   1    2.00    3.30 
   1  -4  -1    6.90    4.90 
   1  -4  -1    1.90    4.20 
   1  -4  -1    2.40    1.40 
  -1  -4   1    4.90    3.80 
  -1  -4   1    2.60    3.50 
  -1   4   1    1.80    3.00 
  -1   4   1   -2.50    4.00 
  -1   4   1    3.90    4.50 
   1   4  -1    2.80    3.10 
  -1   4   1    0.70    2.60 
  -1   4   1    3.80    2.90 
  -1   4   1    3.80    2.90 
   1   4  -1    2.60    3.50 
  -1   4   1    0.40    2.30 
  -1   4   1    8.60    4.20 
   1   4  -1   17.90    7.30 
   1   4  -1    0.60    2.70 
  -1   4   1    7.30    4.80 
  -1   4   1   -1.60    1.90 
   1   4  -1    1.90    3.20 
   1   4  -1    1.00    2.30 
  -1   4   1    1.90    2.00 
   1   4  -1    5.20    4.40 
   1   4  -1    9.00    5.20 
  -1   4   1   -2.10    3.00 
   1   4  -1    1.30    3.20 
  -1   4   1    8.30    6.30 
   1   4  -1    4.10    3.90 
  -1   4   1    8.10    4.20 
   1   4  -1   -1.80    2.60 
  -1   4   1    0.40    3.10 
  -1   4   1    8.10    5.50 
  -1   4   1    3.80    2.50 
   1   4  -1    8.50    4.80 
   1   4  -1   -4.50    2.10 
  -1   4   1    1.20    4.90 
  -1   4   1   -0.30    3.20 
   1   4  -1   -0.70    2.70 
   0  -4  -1  611.24   29.00 
   0  -4  -1  597.14   28.50 
   0  -4   1  646.04   24.40 
   0  -4   1  599.54   28.50 
   0  -4   1  643.94   28.60 
   0  -4   1  663.63   28.50 
   0  -4  -1  631.74   26.10 
   0  -4  -1  697.63   32.80 
   0  -4   1  664.03   25.80 
   0  -4  -1  656.43   25.60 
   0  -4  -1  636.24   27.50 
   0  -4   1  639.64   26.30 
   0  -4  -1  615.44   27.40 
   0  -4  -1  644.14   28.40 
   0  -4  -1  616.94   30.70 
   0  -4   1  609.24   30.10 
   0  -4   1  666.43   28.20 
   0  -4  -1  632.54   20.30 
   0  -4   1  638.64   26.10 
   0  -4   1  621.84   28.50 
   0  -4  -1  637.44   27.50 
   0  -4   1  574.94   27.50 
   0  -4  -1  637.74   27.90 
   0  -4   1  620.04   29.50 
   0  -4  -1  648.84   25.80 
   0  -4   1  617.34   28.80 
   0   4  -1  641.94   30.00 
   0   4  -1  590.34   36.00 
   0   4  -1  607.14   27.50 
   0   4   1  683.13   30.00 
   0   4   1  633.74   30.90 
   0   4  -1  655.53   31.10 
   0   4   1  624.54   27.10 
   0   4   1  634.04   31.90 
   0   4   1  659.53   32.30 
   0   4   1  649.43   26.20 
   0   4   1  655.43   27.40 
   0   4  -1  629.24   27.20 
   0   4  -1  631.84   30.80 
   0   4  -1  634.74   24.80 
   0   4   1  639.14   28.90 
   0   4   1  662.83   36.20 
   0   4  -1  631.64   29.00 
   0   4   1  648.04   25.90 
   0   4  -1  628.24   26.00 
   0   4  -1  635.54   26.30 
   0   4  -1  651.13   34.10 
   0   4   1  641.44   28.50 
   0   4   1  650.33   26.50 
   0   4   1  719.73   36.00 
   0   4   1  676.83   28.70 
   0   4  -1  645.94   25.40 
   0   4  -1  603.34   28.00 
   0   4   1  657.53   29.10 
   0   4  -1  628.84   27.90 
   0   4  -1  614.34   27.80 
   0   4  -1  597.54   27.10 
   0   4  -1  615.04   31.90 
  -1  -4  -1  162.88    7.60 
  -1  -4  -1  158.78   16.30 
   1  -4   1  156.38    9.90 
   1  -4   1  167.28    8.30 
  -1  -4  -1  171.28   12.00 
  -1  -4  -1  162.08   13.10 
   1  -4   1  169.98   13.70 
   1  -4   1  154.08    9.40 
   1  -4   1  162.28   12.60 
  -1  -4  -1  186.88   13.50 
  -1  -4  -1  158.58   11.90 
  -1  -4  -1  154.88   12.30 
  -1  -4  -1  181.98   11.70 
  -1  -4  -1  172.08   14.00 
   1  -4   1  147.49   11.20 
   1  -4   1  170.78    8.40 
   1  -4   1  151.88   11.70 
   1  -4   1  164.78    9.90 
  -1  -4  -1  163.58   12.90 
  -1  -4  -1  158.98   10.90 
  -1  -4  -1  158.68   13.20 
   1  -4   1  163.78    7.30 
   1  -4   1  167.78   13.90 
   1  -4   1  156.98   12.40 
   1  -4   1  170.08   12.30 
  -1  -4  -1  164.28   10.30 
  -1   4  -1  192.98   13.20 
  -1   4  -1  168.78   11.80 
   1   4   1  178.68   12.00 
   1   4   1  162.18   10.20 
  -1   4  -1  176.18   13.50 
  -1   4  -1  164.48    8.60 
   1   4   1  165.58   12.00 
   1   4   1  144.39   11.80 
  -1   4  -1  156.78   11.60 
  -1   4  -1  153.68   10.20 
   1   4   1  151.58   12.30 
   1   4   1  147.39   11.60 
  -1   4  -1  158.18   13.00 
   1   4   1  140.89   17.30 
  -1   4  -1  193.58   12.40 
  -1   4  -1  162.38   21.70 
   1   4   1  155.48   12.00 
  -1   4  -1  188.18   18.70 
  -1   4  -1  152.58   18.00 
  -1   4  -1  147.09   15.50 
  -1   4  -1  154.58   19.60 
  -1   4  -1  150.88   11.60 
  -1   4  -1  167.68   18.50 
   1   4   1  174.08   18.70 
   1   4   1  159.18   12.30 
  -1   4  -1  178.98   12.80 
  -1   4  -1  165.28   11.30 
   1   4   1  170.58   13.00 
   1   4   1  144.49   15.30 
  -1   4  -1  148.09   19.70 
  -1   4  -1  164.18   12.20 
   1   4   1  145.79   16.10 
  -1   4  -1  160.48    9.30 
   2  -4   1 1463.65   58.59 
  -2  -4  -1 1479.15   57.39 
  -2  -4  -1 1521.05   50.09 
   2  -4   1 1500.55   55.29 
   2  -4   1 1551.74   52.89 
  -2  -4  -1 1457.25   52.39 
  -2  -4  -1 1561.84   56.89 
  -2  -4  -1 1520.25   50.09 
   2  -4   1 1544.25   49.70 
  -2  -4  -1 1465.45   55.29 
  -2  -4  -1 1465.85   58.29 
   2  -4   1 1568.64   50.59 
   2  -4   1 1517.85   47.30 
  -2  -4  -1 1456.85   50.39 
   2  -4   1 1545.35   48.90 
  -2  -4  -1 1512.95   57.59 
   2  -4   1 1481.15   49.60 
  -2  -4  -1 1487.95   57.49 
  -2  -4  -1 1557.84   57.39 
   2  -4   1 1477.95   57.99 
  -2  -4  -1 1482.75   51.69 
   2  -4   1 1494.35   53.69 
  -2  -4  -1 1461.85   48.90 
   2  -4   1 1458.65   48.80 
  -2  -4  -1 1480.75   55.49 
   2  -4   1 1513.35   53.69 
   2  -4   1 1446.46   57.69 
  -2  -4  -1 1536.05   50.19 
  -2  -4  -1 1462.45   53.99 
   2  -4   1 1476.55   57.39 
  -2   4  -1 1406.96   46.10 
   2   4   1 1505.35   51.09 
   2   4   1 1504.95   60.19 
   2   4   1 1502.45   49.70 
   2   4   1 1471.75   55.89 
  -2   4  -1 1477.85   53.49 
   2   4   1 1518.75   56.19 
  -2   4  -1 1478.35   57.49 
   2   4   1 1536.65   55.69 
  -2   4  -1 1481.65   60.39 
  -2   4  -1 1512.15   51.69 
   2   4   1 1494.95   55.29 
  -2   4  -1 1427.36   56.39 
  -2   4  -1 1437.56   53.99 
   2   4   1 1496.05   54.49 
  -2   4  -1 1510.85   51.69 
   2   4   1 1460.45   58.99 
   2   4   1 1475.65   55.09 
   2   4   1 1452.65   61.49 
   2   4   1 1533.75   63.59 
  -2   4  -1 1533.65   55.19 
  -2   4  -1 1396.36   54.29 
  -2   4  -1 1414.06   49.10 
  -2   4  -1 1436.06   48.10 
  -2   4  -1 1554.94   55.19 
  -2   4  -1 1470.65   52.09 
   2   4   1 1494.75   57.39 
  -2   4  -1 1444.46   54.89 
  -2   4  -1 1510.85   54.09 
  -2   4  -1 1459.25   60.49 
  -2   4  -1 1518.05   61.79 
   2   4   1 1483.85   54.69 
   2   4   1 1491.75   56.29 
  -2   4  -1 1462.95   54.49 
   2   4   1 1472.75   48.80 
   3  -4   1   36.20    6.60 
  -3  -4  -1   37.00    8.00 
  -3  -4  -1   28.90    5.60 
  -3  -4  -1   38.10    7.90 
  -3  -4  -1   26.30    7.10 
   3  -4   1   45.30    6.60 
  -3  -4  -1   37.40    6.30 
  -3  -4  -1   35.50    4.10 
   3  -4   1   37.70    8.50 
  -3  -4  -1   34.30    4.50 
  -3  -4  -1   36.20    7.70 
   3  -4   1   27.90    7.50 
  -3  -4  -1   42.40    7.20 
   3  -4   1   28.70    8.00 
  -3  -4  -1   44.20    8.30 
  -3  -4  -1   31.40    7.40 
  -3  -4  -1   35.00    8.10 
  -3  -4  -1   33.50    7.20 
   3  -4   1   49.90    6.80 
   3  -4   1   49.99    5.60 
   3  -4   1   39.30    5.40 
  -3  -4  -1   38.90    7.40 
   3  -4   1   17.00    5.50 
   3  -4   1   36.50    8.50 
   3  -4   1   41.40    3.70 
  -3  -4  -1   29.80    5.00 
  -3  -4  -1   35.10    3.70 
   3  -4   1   38.70    6.00 
  -3   4  -1   28.60    6.30 
  -3   4  -1   28.00    6.50 
   3   4   1   55.89    9.60 
  -3   4  -1   32.90    9.50 
  -3   4  -1   38.30    2.60 
   3   4   1   26.40    6.90 
  -3   4  -1   35.90    8.70 
  -3   4  -1   36.50    5.90 
   3   4   1   38.40    7.30 
  -3   4  -1   32.30    6.20 
   3   4   1   42.30    7.70 
  -3   4  -1   31.50    8.50 
   3   4   1   37.60    9.00 
  -3   4  -1   36.20    4.60 
  -3   4  -1   41.70    5.20 
   3   4   1   39.90    7.90 
  -3   4  -1   47.10    6.90 
   3   4   1   36.70    7.90 
   3   4   1   34.90    7.00 
  -3   4  -1   39.80    7.60 
  -3   4  -1   46.40    6.10 
   3   4   1   44.70    9.50 
   3   4   1   26.10    6.60 
   3   4   1   24.20    6.70 
   3   4   1   37.10   10.20 
  -3   4  -1   46.60    7.90 
  -3   4  -1   38.20    8.80 
   3   4   1   30.70    9.10 
  -3   4  -1   33.30    6.90 
   3   4   1   38.30    4.40 
  -3   4  -1   45.70    8.40 
   4  -4   1   62.89   11.30 
  -4  -4  -1   85.99   11.90 
   4  -4   1   75.59   12.50 
   4  -4   1   67.59    9.90 
   4  -4   1   87.69    8.40 
  -4  -4  -1   73.39    9.30 
  -4  -4  -1   78.69   10.50 
   4  -4   1   82.19    8.60 
  -4  -4  -1   84.49   11.10 
  -4  -4  -1  103.89   14.10 
  -4  -4  -1   76.39   11.40 
   4  -4   1   72.69    9.00 
   4  -4   1   88.09   12.60 
   4  -4   1   72.49   12.00 
   4  -4   1   75.29    8.60 
  -4  -4  -1   71.49   10.20 
  -4  -4  -1   59.99   10.80 
   4  -4   1   75.49   12.40 
  -4  -4  -1   64.29   11.60 
   4  -4   1   98.49   10.20 
  -4  -4  -1   77.19   11.80 
  -4  -4  -1   90.79   12.70 
  -4  -4  -1   65.69    9.70 
  -4  -4  -1   69.79   11.30 
  -4   4  -1  105.69   12.00 
  -4   4  -1   90.49   11.80 
  -4   4  -1   90.69   11.60 
  -4   4  -1   70.09    7.00 
  -4   4  -1   73.89   10.30 
   4   4   1   83.39   11.40 
   4   4   1   73.59   11.70 
   4   4   1   77.69   11.70 
   4   4   1   80.99   12.30 
   4   4   1   82.19   13.60 
   4   4   1   71.09   10.80 
   4   4   1   92.59   15.50 
  -4   4  -1   74.89   13.70 
  -4   4  -1   76.19   10.00 
  -4   4  -1   89.79   13.40 
  -4   4  -1   92.59   12.30 
  -4   4  -1   69.69   10.20 
  -4   4  -1   94.19    9.40 
   4   4   1   71.09   10.80 
   4   4   1   87.79   13.80 
  -4   4  -1  113.49   14.80 
  -4   4  -1   77.89   12.20 
   4   4   1   71.79   10.40 
  -4   4  -1   60.19    8.90 
   4   4   1   89.79   16.30 
   4   4   1   67.39    9.50 
   4   4   1   84.79   12.30 
   5  -4   1   74.79   13.50 
  -5  -4  -1   57.29   12.50 
  -5  -4  -1   47.30   10.10 
   5  -4   1   58.19   11.60 
  -5  -4  -1   38.20   10.30 
   5  -4   1   63.49   12.60 
  -5  -4  -1   55.69   10.70 
  -5  -4  -1   55.19   10.40 
  -5  -4  -1   67.09   10.40 
  -5  -4  -1   89.29   13.50 
   5  -4   1   68.79    8.90 
  -5  -4  -1   42.10   10.00 
   5  -4   1   62.69   10.20 
   5  -4   1   51.19    7.30 
   5  -4   1   59.49    7.10 
   5  -4   1   61.89   11.60 
   5  -4   1   57.69    9.70 
   5  -4   1   66.79    7.60 
  -5  -4  -1   53.39   10.00 
   5  -4   1   72.49   12.50 
  -5  -4  -1   45.70    8.80 
  -5  -4  -1   55.79    9.60 
  -5  -4  -1   53.69   10.80 
  -5  -4  -1   65.99   10.90 
  -5  -4  -1   50.49   11.30 
   5   4   1   43.80    8.80 
   5   4   1   61.69   10.20 
   5   4   1   41.40    8.20 
  -5   4  -1   55.29   10.50 
  -5   4  -1   63.09    6.90 
   5   4   1   55.19   10.20 
   5   4   1   55.09   14.50 
  -5   4  -1   49.00   11.00 
  -5   4  -1   58.49   10.70 
   5   4   1   60.69   12.70 
  -5   4  -1   64.49    4.80 
   5   4   1   51.39   10.70 
   5   4   1   54.69   11.00 
   5   4   1   69.09   15.00 
  -5   4  -1   66.79   10.20 
  -5   4  -1   61.09    9.30 
   5   4   1   32.40    9.40 
  -5   4  -1   72.29   11.00 
  -5   4  -1   55.59   10.40 
  -5   4  -1   57.59   11.70 
   5   4   1   48.90    9.70 
   5   4   1   67.09   12.00 
   5   4   1   59.39   12.40 
  -5   4  -1   52.59    9.70 
  -5   4  -1   41.80    9.50 
  -6  -4  -1 1424.66   61.49 
   6  -4   1 1586.04   67.09 
   6  -4   1 1654.63   55.89 
   6  -4   1 1638.14   68.09 
   6  -4   1 1665.63   68.59 
  -6  -4  -1 1526.45   66.19 
  -6  -4  -1 1562.04   68.99 
  -6  -4  -1 1628.94   65.09 
  -6  -4  -1 1601.94   65.69 
  -6  -4  -1 1493.55   68.79 
  -6  -4  -1 1588.64   67.39 
   6  -4   1 1626.04   56.79 
  -6  -4  -1 1626.44   62.09 
  -6  -4  -1 1599.14   64.29 
  -6  -4  -1 1683.43   57.19 
   6  -4   1 1604.94   61.99 
   6  -4   1 1768.72   56.09 
  -6  -4  -1 1678.63   65.49 
   6  -4   1 1648.94   68.79 
  -6  -4  -1 1564.14   64.19 
   6  -4   1 1558.44   57.09 
  -6  -4  -1 1581.64   65.29 
   6  -4   1 1589.04   67.39 
  -6  -4  -1 1592.64   68.49 
  -6  -4  -1 1653.03   67.69 
  -6   4  -1 1605.14   55.09 
   6   4   1 1565.84   64.89 
  -6   4  -1 1662.33   57.39 
   6   4   1 1577.24   62.29 
  -6   4  -1 1668.53   68.19 
  -6   4  -1 1602.04   64.49 
   6   4   1 1561.54   75.89 
   6   4   1 1631.64   60.69 
   6   4   1 1678.53   78.99 
   6   4   1 1541.35   67.69 
  -6   4  -1 1611.54   62.99 
   6   4   1 1625.24   69.99 
   6   4   1 1544.65   62.19 
  -6   4  -1 1701.83   60.29 
   6   4   1 1545.25   65.19 
   6   4   1 1623.84   66.69 
   6   4   1 1652.03   67.79 
  -6   4  -1 1570.24   64.29 
  -6   4  -1 1650.43   65.79 
  -6   4  -1 1606.84   63.29 
  -6   4  -1 1565.84   64.59 
  -6   4  -1 1643.84   67.69 
   6   4   1 1622.84   70.19 
   6   4   1 1547.45   62.79 
   6   4   1 1566.44   65.99 
  -7  -4  -1  104.19   18.30 
   7  -4   1  111.49   17.70 
  -7  -4  -1   81.59   14.20 
  -7  -4  -1   90.79   13.10 
   7  -4   1   90.29   16.10 
  -7  -4  -1   79.99   14.60 
   7  -4   1   92.89   16.40 
  -7  -4  -1   85.69   15.90 
  -7  -4  -1   77.89   14.70 
   7  -4   1  101.09   13.70 
  -7  -4  -1   81.69   14.00 
   7  -4   1  103.49   17.60 
  -7  -4  -1   70.99   14.80 
  -7  -4  -1  103.39   16.10 
  -7  -4  -1   99.99   16.50 
  -7  -4  -1   89.79   14.60 
   7  -4   1  111.49   18.10 
  -7  -4  -1  115.49   20.10 
  -7  -4  -1   66.19   12.70 
  -7  -4  -1   99.89   17.20 
   7   4   1   92.19   13.90 
   7   4   1   79.79   19.80 
   7   4   1  118.29   17.80 
   7   4   1   92.59   16.30 
  -7   4  -1   61.09   12.50 
  -7   4  -1   64.79   12.70 
  -7   4  -1   84.49   15.80 
   7   4   1   76.99   12.80 
  -7   4  -1   77.39   15.00 
   7   4   1   99.19   13.00 
  -7   4  -1   64.69   11.80 
  -7   4  -1   77.69   12.30 
   7   4   1   73.39   13.60 
   7   4   1  129.29   20.20 
   7   4   1   98.19   15.90 
   7   4   1   89.89   16.70 
   7   4   1  119.29   23.00 
   7   4   1   88.29   13.80 
   7   4   1   66.09   15.10 
   7   4   1   92.59   16.40 
  -7   4  -1   85.59   15.10 
  -7   4  -1   92.69   15.40 
   8  -4   1 1748.03   77.79 
  -8  -4  -1 1843.72   79.19 
  -8  -4  -1 1728.43   79.69 
   8  -4   1 1873.61   80.29 
  -8  -4  -1 1668.03   74.69 
  -8  -4  -1 1791.12   77.69 
  -8  -4  -1 1719.73   74.39 
  -8  -4  -1 1741.43   74.19 
   8  -4   1 1828.32   78.89 
  -8  -4  -1 1865.21   79.69 
   8  -4   1 1807.82   78.69 
   8  -4   1 1887.41   79.59 
  -8  -4  -1 1858.51   82.49 
  -8  -4  -1 1860.61   77.09 
  -8  -4  -1 1898.91   78.89 
  -8  -4  -1 1785.72   77.09 
   8  -4   1 1785.52   77.49 
  -8  -4  -1 1628.74   79.59 
  -8  -4  -1 1898.21   75.99 
   8  -4   1 1857.71   76.19 
   8   4   1 1791.82   76.29 
  -8   4  -1 1832.02   77.69 
   8   4   1 1774.22   71.59 
  -8   4  -1 1855.41   77.79 
  -8   4  -1 1883.91   79.29 
   8   4   1 1936.61   81.89 
   8   4   1 1775.02   75.99 
   8   4   1 1862.31   82.59 
   8   4   1 1646.74   89.69 
   8   4   1 1729.53   75.59 
  -8   4  -1 1765.52   76.39 
   8   4   1 1840.82   75.59 
   8   4   1 1771.12   70.29 
   8   4   1 1724.93   80.59 
   8   4   1 1756.02   89.89 
   8   4   1 1750.52   76.79 
   8   4   1 1685.73   77.39 
   9  -4   1   82.79   18.40 
   9  -4   1   49.99   18.00 
   9  -4   1   51.79   14.10 
  -9  -4  -1   44.40   15.10 
  -9  -4  -1   60.19   16.30 
   9  -4   1   52.79   18.10 
   9  -4   1   48.80   14.30 
   9  -4   1   49.20   13.70 
  -9  -4  -1   36.70   12.10 
   9  -4   1   32.10   14.40 
  -9  -4  -1   64.89   16.00 
   9  -4   1   49.10   14.90 
  -9  -4  -1   35.60   13.20 
  -9  -4  -1   57.09   15.80 
  -9  -4  -1   65.49   15.70 
  -9  -4  -1   50.79   12.50 
  -9  -4  -1   43.00   14.50 
  -9  -4  -1   32.00   12.40 
   9  -4   1   52.19   17.20 
  -9  -4  -1   37.90   12.70 
   9   4   1   51.59   14.20 
   9   4   1   49.00   14.00 
   9   4   1   53.49   17.60 
   9   4   1   45.40   19.50 
   9   4   1   45.40   12.80 
   9   4   1   38.40   13.40 
  -9   4  -1   34.70   11.90 
   9   4   1   37.70   16.90 
   9   4   1   42.00   14.60 
   9   4   1   40.80   14.50 
  -9   4  -1   78.49   17.00 
  -9   4  -1   46.20   14.10 
   9   4   1   47.40   14.50 
  -9   4  -1   52.79   14.00 
   9   4   1   42.10   13.10 
  -9  -5   1   68.09   18.20 
   9  -5  -1   85.59   21.00 
  -9  -5   1  102.79   21.80 
   9  -5  -1  110.79   23.00 
   9  -5  -1  107.79   21.80 
   9  -5  -1   75.19   16.50 
  -9  -5   1   75.99   16.60 
  -9  -5   1  139.29   22.30 
  -9  -5   1  100.89   21.40 
   9  -5  -1   54.09   17.20 
  -9  -5   1   72.39   16.40 
  -9  -5   1   78.19   16.90 
  -9  -5   1  111.39   20.50 
  -9  -5   1  119.09   20.60 
  -9  -5   1   98.09   19.70 
  -9  -5   1  100.99   22.50 
  -9   5   1   54.99   15.80 
   9   5  -1   81.39   18.80 
  -9   5   1   75.69   16.40 
  -9   5   1   90.79   18.20 
   9   5  -1  105.29   26.30 
   9   5  -1  124.59   24.10 
   9   5  -1  110.49   22.30 
   9   5  -1  119.59   20.40 
   9   5  -1   85.99   21.50 
   9   5  -1   94.39   17.70 
   9   5  -1   86.89   18.50 
   9   5  -1  101.59   18.10 
   9   5  -1   55.39   16.20 
   9   5  -1   78.89   24.80 
  -8  -5   1    4.00    6.80 
   8  -5  -1   11.70   10.00 
  -8  -5   1   13.60    8.10 
   8  -5  -1   -2.10    7.60 
  -8  -5   1   11.90    9.10 
  -8  -5   1    0.40    6.40 
  -8  -5   1   -4.80    6.40 
  -8  -5   1    2.10    7.10 
  -8  -5   1   13.20    9.80 
  -8  -5   1    0.80    8.40 
  -8  -5   1   -2.10    5.90 
  -8  -5   1   -1.00    5.30 
   8  -5  -1    5.80    8.40 
  -8  -5   1    2.40    8.00 
  -8  -5   1    5.40    7.10 
   8  -5  -1   -5.70    5.50 
  -8  -5   1   11.30   10.20 
   8   5  -1    0.60    7.20 
   8   5  -1    3.80    7.50 
   8   5  -1    1.10    8.20 
   8   5  -1   12.10    7.60 
  -8   5   1   -1.10    5.10 
  -8   5   1   -9.80    5.10 
   8   5  -1   -5.80    7.60 
   8   5  -1    5.90    7.00 
   8   5  -1   -3.10    6.10 
   8   5  -1    0.90    7.10 
  -8   5   1    5.50    7.20 
   8   5  -1    0.00    7.60 
  -8   5   1    2.90    6.90 
   8   5  -1    5.50    6.70 
   8   5  -1    3.40    7.00 
  -8   5   1   -3.10    6.40 
   8   5  -1    3.20    9.80 
   8   5  -1   -4.00    6.40 
   8   5  -1    1.70    7.20 
  -8   5   1    2.40    6.90 
  -7  -5   1  447.36   29.90 
  -7  -5   1  494.95   31.90 
   7  -5  -1  468.55   33.90 
   7  -5  -1  461.75   34.80 
  -7  -5   1  482.25   35.50 
   7  -5  -1  520.45   36.40 
  -7  -5   1  515.95   35.60 
  -7  -5   1  458.45   30.10 
  -7  -5   1  437.66   31.20 
  -7  -5   1  482.85   33.10 
  -7  -5   1  417.76   28.20 
  -7  -5   1  485.65   28.80 
   7  -5  -1  508.25   31.20 
   7  -5  -1  440.16   31.60 
   7  -5  -1  476.15   35.00 
  -7  -5   1  376.26   31.00 
  -7  -5   1  416.66   28.50 
  -7  -5   1  445.26   31.00 
  -7  -5   1  476.65   32.90 
   7   5  -1  461.05   33.30 
   7   5  -1  447.06   39.40 
   7   5  -1  419.16   30.00 
   7   5  -1  432.46   30.20 
   7   5  -1  442.46   31.60 
  -7   5   1  424.16   30.00 
  -7   5   1  453.85   29.90 
   7   5  -1  422.86   28.80 
   7   5  -1  423.76   29.20 
   7   5  -1  499.05   30.10 
   7   5  -1  442.56   27.00 
  -7   5   1  434.86   30.10 
   7   5  -1  475.35   35.10 
   7   5  -1  493.15   40.70 
  -7   5   1  428.36   30.80 
   7   5  -1  434.16   31.60 
  -7   5   1  441.06   28.50 
  -7   5   1  461.95   29.60 
   7   5  -1  430.76   32.80 
   7   5  -1  392.26   30.00 
   6  -5  -1   -2.40    4.20 
  -6  -5   1    8.20    6.90 
  -6  -5   1    5.20    5.80 
  -6  -5   1    2.90    5.40 
   6  -5  -1   -3.20    6.10 
  -6  -5   1   -3.20    3.90 
  -6  -5   1    3.80    5.10 
  -6  -5   1    8.90    5.90 
   6  -5  -1   -3.20    5.40 
  -6  -5   1    7.50    6.60 
   6  -5  -1   -1.60    5.40 
  -6  -5   1    7.80    6.30 
  -6  -5   1    2.60    6.10 
  -6  -5   1    6.50    6.00 
  -6  -5   1   -2.70    4.60 
   6  -5  -1    1.00    4.00 
  -6  -5   1    6.50    6.70 
   6  -5  -1   -2.60    3.50 
  -6  -5   1   -5.80    3.90 
  -6  -5   1    6.20    5.80 
   6   5  -1   -3.70    4.30 
   6   5  -1   -0.30    4.00 
   6   5  -1    7.90    5.60 
   6   5  -1    0.30    4.80 
  -6   5   1    4.40    4.00 
  -6   5   1   -1.00    5.20 
  -6   5   1    2.50    5.00 
  -6   5   1   -2.80    4.50 
  -6   5   1    0.00    4.40 
  -6   5   1   -3.30    4.10 
   6   5  -1    4.00    7.30 
   6   5  -1   12.30    7.30 
   6   5  -1    6.30    6.60 
  -6   5   1   -0.80    4.90 
   6   5  -1   64.99   14.80 
  -6   5   1    1.90    6.60 
  -6   5   1   -0.50    5.40 
   6   5  -1    1.00    5.50 
   6   5  -1   -0.40    5.30 
   6   5  -1   -5.10    7.00 
   6   5  -1   -0.30    5.70 
  -6   5   1   -1.80    4.60 
   6   5  -1   -3.40    4.50 
  -5  -5   1 2536.65   94.59 
  -5  -5   1 2558.14   96.59 
  -5  -5   1 2694.33   96.59 
   5  -5  -1 2591.94   86.99 
  -5  -5   1 2571.44   94.79 
  -5  -5   1 2598.74   99.39 
   5  -5  -1 2643.14   95.19 
   5  -5  -1 2643.24  101.89 
   5  -5  -1 2649.83   89.59 
  -5  -5   1 2681.93   97.79 
  -5  -5   1 2570.94   89.59 
  -5  -5   1 2683.93   98.89 
  -5  -5   1 2517.55   94.29 
  -5  -5   1 2600.84   93.29 
  -5  -5   1 2541.05   97.99 
   5  -5  -1 2668.23  103.39 
   5  -5  -1 2732.73   87.09 
   5  -5  -1 2566.44   98.49 
   5  -5  -1 2554.94   90.39 
  -5  -5   1 2607.84   91.39 
  -5   5   1 2504.45   94.49 
  -5   5   1 2608.84   89.89 
  -5   5   1 2459.15   93.29 
   5   5  -1 2538.05   95.59 
  -5   5   1 2735.33   93.19 
   5   5  -1 2645.04  100.89 
   5   5  -1 2569.34   94.69 
   5   5  -1 2705.63   95.89 
   5   5  -1 2526.65  109.09 
   5   5  -1 2535.65   99.99 
   5   5  -1 2588.74   92.39 
   5   5  -1 2448.85   94.69 
  -5   5   1 2725.33   88.49 
   5   5  -1 2503.55  106.79 
  -5   5   1 2718.93   91.49 
   5   5  -1 2578.64   97.19 
  -5   5   1 2459.45   92.79 
   5   5  -1 2563.54   93.89 
  -5   5   1 2597.84  100.89 
  -5   5   1 2580.24   89.39 
  -5   5   1 2683.93   95.39 
   5   5  -1 2509.75   96.79 
  -5   5   1 2598.44   96.99 
   5   5  -1 2554.54   96.89 
   4  -5  -1   22.40    5.40 
   4  -5  -1   28.80    7.40 
  -4  -5   1   38.10    8.70 
  -4  -5   1   21.60    6.80 
  -4  -5   1   16.80    7.20 
  -4  -5   1   27.80    4.90 
  -4  -5   1   24.30    7.10 
  -4  -5   1   20.80    7.00 
  -4  -5   1   22.30    8.20 
  -4  -5   1   29.80    9.40 
   4  -5  -1   31.20    7.00 
  -4  -5   1   29.50    6.50 
   4  -5  -1   24.90    9.40 
   4  -5  -1   26.40    6.90 
  -4  -5   1   32.60    8.20 
   4  -5  -1   21.10    5.60 
   4  -5  -1   22.40    8.00 
  -4  -5   1   23.80    4.80 
  -4  -5   1   17.20    6.70 
  -4  -5   1   29.90    6.20 
   4  -5  -1   25.90   10.10 
  -4  -5   1   27.80    8.40 
   4   5  -1   19.10    7.40 
  -4   5   1   25.20    7.90 
  -4   5   1   23.20    5.70 
  -4   5   1   33.90    5.50 
   4   5  -1   21.10    7.40 
  -4   5   1   31.30    7.60 
  -4   5   1   19.60    5.90 
   4   5  -1   26.90   10.80 
   4   5  -1   30.70   10.10 
   4   5  -1   33.60   11.30 
  -4   5   1   19.70    8.90 
   4   5  -1   17.30    6.40 
   4   5  -1   22.90    7.80 
  -4   5   1   24.10    6.60 
   4   5  -1   33.90   10.10 
  -4   5   1   19.20    8.00 
  -4   5   1   27.40    7.50 
   4   5  -1   13.50    6.40 
  -4   5   1   24.70    3.60 
  -4   5   1   26.70    8.30 
   4   5  -1   25.30    8.30 
   4   5  -1   27.70    8.00 
   4   5  -1   25.00    7.80 
   4   5  -1   32.00    8.50 
  -4   5   1   23.60    8.10 
  -3  -5   1 1322.57   46.40 
   3  -5  -1 1259.17   41.20 
  -3  -5   1 1290.77   50.69 
  -3  -5   1 1281.67   52.49 
  -3  -5   1 1305.27   44.50 
  -3  -5   1 1248.28   43.00 
   3  -5  -1 1256.67   57.49 
   3  -5  -1 1268.57   46.20 
  -3  -5   1 1175.28   49.60 
  -3  -5   1 1318.37   49.50 
  -3  -5   1 1254.17   46.30 
  -3  -5   1 1243.98   53.49 
   3  -5  -1 1237.08   56.79 
   3  -5  -1 1283.77   47.90 
  -3  -5   1 1293.87   55.09 
   3  -5  -1 1233.98   40.70 
   3  -5  -1 1187.48   52.79 
   3  -5  -1 1297.87   50.59 
  -3  -5   1 1218.98   53.79 
  -3  -5   1 1251.77   51.89 
   3  -5  -1 1322.07   52.09 
  -3  -5   1 1319.07   52.39 
   3  -5  -1 1297.67   47.80 
   3  -5  -1 1380.86   47.50 
   3  -5  -1 1287.37   40.80 
  -3  -5   1 1243.78   52.19 
  -3  -5   1 1237.88   52.79 
  -3  -5   1 1184.18   52.39 
   3  -5  -1 1246.78   48.70 
  -3   5   1 1252.87   49.50 
  -3   5   1 1219.78   50.99 
  -3   5   1 1255.57   56.59 
   3   5  -1 1204.68   51.79 
   3   5  -1 1229.78   55.29 
   3   5  -1 1244.58   51.39 
   3   5  -1 1270.77   51.49 
   3   5  -1 1242.98   61.49 
   3   5  -1 1278.57   51.89 
  -3   5   1 1277.07   48.70 
  -3   5   1 1219.38   50.99 
   3   5  -1 1254.47   52.39 
  -3   5   1 1315.27   45.90 
  -3   5   1 1187.68   51.79 
   3   5  -1 1239.68   51.59 
  -3   5   1 1212.78   42.90 
   3   5  -1 1279.47   53.79 
   3   5  -1 1263.37   42.90 
   3   5  -1 1271.17   50.39 
  -3   5   1 1242.78   43.30 
  -3   5   1 1318.77   52.99 
  -3   5   1 1238.68   44.90 
   3   5  -1 1221.28   44.90 
  -3   5   1 1200.28   51.49 
   3   5  -1 1284.87   50.99 
  -3   5   1 1237.98   47.30 
  -3   5   1 1178.58   58.19 
   3   5  -1 1218.18   54.79 
  -3   5   1 1136.79   44.50 
  -2  -5   1    2.30    2.30 
  -2  -5   1    2.80    3.90 
  -2  -5   1    1.60    3.30 
   2  -5  -1    2.80    4.70 
   2  -5  -1    5.80    3.70 
   2  -5  -1   -2.10    1.60 
   2  -5  -1    2.70    1.80 
  -2  -5   1    5.80    4.30 
  -2  -5   1    2.50    3.80 
  -2  -5   1    5.50    5.00 
  -2  -5   1    4.70    4.50 
   2  -5  -1    1.30    3.80 
  -2  -5   1   -0.30    3.50 
   2  -5  -1    6.00    3.30 
   2  -5  -1    2.30    2.30 
  -2  -5   1   -1.00    2.90 
  -2  -5   1   -3.20    2.80 
  -2  -5   1   14.90    5.40 
   2  -5  -1   -1.80    3.20 
  -2  -5   1    4.70    3.40 
   2  -5  -1    3.10    3.10 
  -2  -5   1    1.90    1.90 
   2  -5  -1    7.80    2.70 
   2  -5  -1    6.60    4.60 
  -2  -5   1    2.20    2.50 
  -2  -5   1    6.50    4.20 
   2  -5  -1    0.30    2.50 
  -2   5   1    5.80    3.70 
  -2   5   1    3.80    4.70 
  -2   5   1    0.60    3.60 
   2   5  -1    4.60    5.00 
  -2   5   1    0.70    3.40 
  -2   5   1    3.60    4.10 
  -2   5   1    6.30    3.60 
   2   5  -1    5.20    4.10 
   2   5  -1    5.90    4.60 
  -2   5   1   -4.20    4.70 
  -2   5   1    5.00    2.70 
  -2   5   1    4.00    2.40 
   2   5  -1    4.30    3.80 
   2   5  -1   -0.80    3.00 
  -2   5   1   -0.10    5.80 
  -2   5   1    1.10    2.70 
  -2   5   1    3.80    3.70 
  -2   5   1    2.50    2.00 
  -2   5   1    0.50    3.40 
   2   5  -1    1.30    4.60 
  -2   5   1   11.60    5.50 
   2   5  -1    1.60    5.30 
   2   5  -1    1.90    4.10 
   2   5  -1   -5.20    1.80 
  -2   5   1    9.90    5.60 
   2   5  -1    0.20    2.20 
  -2   5   1    2.10    3.10 
   2   5  -1    5.50    4.00 
  -2   5   1    3.10    1.60 
  -2   5   1    6.80    3.70 
  -2   5   1    4.70    4.90 
  -2   5   1    1.60    2.20 
  -2   5   1    3.90    3.70 
   2   5  -1    5.00    4.10 
   2   5  -1    1.40    3.50 
  -2   5   1   -0.20    3.50 
   1  -5  -1  272.87   17.40 
   1  -5  -1  262.97   18.50 
   1  -5  -1  251.67   16.80 
  -1  -5   1  253.97   18.30 
   1  -5  -1  251.67   16.40 
  -1  -5   1  277.57   20.00 
  -1  -5   1  300.07   19.10 
   1  -5  -1  266.07   18.40 
  -1  -5   1  261.77   12.50 
   1  -5  -1  294.87   15.20 
   1  -5  -1  262.67   17.40 
  -1  -5   1  285.17   18.20 
  -1  -5   1  255.57   19.30 
   1  -5  -1  261.37   14.40 
  -1  -5   1  247.28   16.50 
  -1  -5   1  310.47   19.60 
   1  -5  -1  285.67   14.30 
  -1  -5   1  242.38   15.70 
  -1  -5   1  288.17   19.60 
  -1  -5   1  291.77   17.40 
  -1  -5   1  267.57   10.40 
  -1  -5   1  243.98   18.20 
  -1  -5   1  268.07   18.30 
   1  -5  -1  281.87   18.40 
  -1  -5   1  277.17   19.10 
   1  -5  -1  268.57   10.20 
   1  -5  -1  305.87   22.20 
   1   5  -1  286.87   17.80 
  -1   5   1  328.47   27.20 
   1   5  -1  303.07   25.50 
   1   5  -1  288.17   20.00 
  -1   5   1  293.67   20.10 
  -1   5   1  286.07   22.60 
   1   5  -1  310.87   16.70 
  -1   5   1  304.47   19.20 
   1   5  -1  297.27   18.20 
   1   5  -1  252.27   18.00 
  -1   5   1  268.97   13.20 
   1   5  -1  265.77   15.20 
  -1   5   1  278.37   15.60 
  -1   5   1  323.87   18.30 
  -1   5   1  268.57   16.80 
   1   5  -1  270.97   18.00 
   1   5  -1  281.87   17.10 
  -1   5   1  291.37   18.60 
  -1   5   1  309.57   22.80 
  -1   5   1  335.07   27.50 
  -1   5   1  293.07   20.70 
  -1   5   1  283.57   18.60 
   1   5  -1  308.27   19.70 
  -1   5   1  290.07   13.60 
   1   5  -1  268.07   17.90 
  -1   5   1  305.57   22.00 
  -1   5   1  250.57   18.20 
  -1   5   1  277.27   17.60 
  -1   5   1  298.57   18.10 
   1   5  -1  280.67   21.70 
   1   5  -1  265.07   21.60 
   1   5  -1  294.57   20.40 
   0  -5   1   63.49   10.00 
   0  -5   1   68.09    8.40 
   0  -5   1   78.29   10.70 
   0  -5   1   54.89    7.70 
   0  -5   1   61.69   10.00 
   0  -5   1   55.29   10.00 
   0  -5   1   65.39   11.20 
   0  -5  -1   50.09    8.40 
   0  -5  -1   51.09    8.60 
   0  -5  -1   51.19    9.60 
   0  -5  -1   57.79   11.60 
   0  -5   1   72.39    9.80 
   0  -5  -1   62.49   10.60 
   0  -5   1   61.39   10.10 
   0  -5  -1   83.59   12.50 
   0  -5  -1   64.19    9.60 
   0  -5   1   63.89    9.70 
   0  -5  -1   59.29    7.80 
   0  -5  -1   47.50    8.80 
   0  -5  -1   69.09    9.70 
   0  -5  -1   60.99    8.20 
   0  -5   1   74.19   10.30 
   0  -5   1   67.89   10.20 
   0   5  -1   58.89    9.90 
   0   5  -1   67.79   10.90 
   0   5  -1   48.60    7.90 
   0   5  -1   69.99   14.00 
   0   5  -1   53.69   10.40 
   0   5   1   58.29    9.50 
   0   5   1   66.69    8.70 
   0   5   1   65.09    9.80 
   0   5  -1   59.69   11.80 
   0   5  -1   66.89    9.50 
   0   5   1   63.49   14.00 
   0   5   1   59.39    8.20 
   0   5   1   66.69   12.20 
   0   5  -1   75.39   12.30 
   0   5  -1   61.79    8.90 
   0   5  -1   78.69   12.10 
   0   5  -1   57.49    9.30 
   0   5   1   46.50    9.10 
   0   5   1   65.99    9.10 
   0   5  -1   48.30    6.60 
   0   5  -1   59.09    8.60 
   0   5   1   67.79   10.20 
   0   5  -1   73.09   15.50 
   0   5   1   55.49    9.80 
   0   5  -1   82.79   10.90 
   0   5   1   42.40   11.60 
   0   5   1   62.19    9.30 
   0   5   1   63.19   10.30 
   0   5   1   46.70   10.50 
   0   5  -1   75.99   10.50 
   0   5   1   73.89   12.30 
  -1  -5  -1 3244.28  108.79 
   1  -5   1 3254.37  111.89 
  -1  -5  -1 3099.89  106.39 
   1  -5   1 3082.99  107.39 
   1  -5   1 3148.89  108.89 
  -1  -5  -1 3105.29  112.39 
   1  -5   1 3247.78  103.59 
  -1  -5  -1 3189.58  111.39 
   1  -5   1 3259.67  110.79 
   1  -5   1 3386.26  104.39 
   1  -5   1 3207.68   97.79 
  -1  -5  -1 3186.88  113.89 
   1  -5   1 3298.87  110.39 
  -1  -5  -1 3083.79  107.39 
  -1  -5  -1 3344.77  110.19 
   1  -5   1 3234.28  108.49 
   1  -5   1 3308.47  101.19 
  -1  -5  -1 3222.78  106.59 
  -1  -5  -1 3375.56  111.89 
   1  -5   1 3223.08  112.49 
  -1  -5  -1 3147.69  109.99 
   1  -5   1 3276.87  100.29 
  -1  -5  -1 3366.46  110.89 
   1  -5   1 3065.69  109.69 
  -1  -5  -1 3243.68   98.19 
   1   5   1 3202.58  109.59 
   1   5   1 3407.66  109.59 
  -1   5  -1 3376.46  112.29 
  -1   5  -1 3231.08  107.39 
  -1   5  -1 3299.27  109.69 
  -1   5  -1 3172.68  107.69 
  -1   5  -1 3252.57  113.59 
  -1   5  -1 3309.17  107.69 
  -1   5  -1 3416.16  116.19 
  -1   5  -1 3323.17  101.89 
   1   5   1 3182.58  112.69 
   1   5   1 3231.08  110.29 
   1   5   1 3322.97  108.69 
  -1   5  -1 3193.18  108.89 
  -1   5  -1 3025.60  119.79 
   1   5   1 3338.57  114.99 
  -1   5  -1 3165.08  117.59 
   1   5   1 3108.89  119.39 
  -1   5  -1 3266.87  109.39 
  -1   5  -1 3407.06  128.99 
   1   5   1 3292.17  110.89 
  -1   5  -1 3317.17  108.19 
  -1   5  -1 3084.19  108.09 
  -1   5  -1 3060.69  110.69 
   1   5   1 3076.69  117.89 
   1   5   1 3209.88  104.89 
  -1   5  -1 3141.99  115.09 
   1   5   1 3246.98  107.79 
  -1   5  -1 3255.37  107.79 
   1   5   1 3224.58  115.39 
  -2  -5  -1   78.39    6.20 
  -2  -5  -1   74.79    8.30 
  -2  -5  -1   79.99   11.30 
  -2  -5  -1   73.99    8.90 
  -2  -5  -1   75.09   11.60 
  -2  -5  -1   68.69    8.60 
  -2  -5  -1   70.39   10.80 
  -2  -5  -1   56.19   11.20 
  -2  -5  -1   53.49   10.30 
   2  -5   1   78.29    7.40 
   2  -5   1   54.19    8.30 
   2  -5   1   66.49    7.50 
  -2  -5  -1   62.29   10.80 
   2  -5   1   79.89   12.70 
  -2  -5  -1   76.09   10.30 
   2  -5   1   67.29    9.70 
  -2  -5  -1   78.59   13.50 
   2  -5   1   72.79    5.20 
  -2  -5  -1   57.09    9.60 
  -2  -5  -1   81.39    9.10 
   2  -5   1   70.89    7.20 
   2  -5   1   74.29   11.90 
   2  -5   1   77.89   11.40 
   2  -5   1   57.89    9.00 
   2  -5   1   67.49    5.50 
   2  -5   1   52.99   10.50 
  -2  -5  -1   70.89    8.50 
  -2  -5  -1   56.39   10.10 
  -2   5  -1   73.59    8.30 
  -2   5  -1   70.79    8.50 
   2   5   1   70.79   12.40 
  -2   5  -1   64.09   12.50 
  -2   5  -1   72.99   18.00 
   2   5   1   61.49    9.80 
  -2   5  -1   52.49    8.10 
   2   5   1   68.49   10.80 
  -2   5  -1   52.59   13.40 
   2   5   1   60.19    9.60 
  -2   5  -1   77.79   14.30 
  -2   5  -1   58.59   10.10 
  -2   5  -1   71.69    7.20 
   2   5   1   61.19   10.10 
  -2   5  -1   57.59   10.00 
  -2   5  -1   67.59   10.70 
   2   5   1   56.69   10.10 
   2   5   1   81.39   11.30 
  -2   5  -1   69.49   13.50 
  -2   5  -1   70.49    5.10 
  -2   5  -1   87.09   11.30 
   2   5   1   76.29   15.00 
  -2   5  -1   67.19   10.80 
  -2   5  -1   66.59   11.40 
   2   5   1   63.39    9.80 
  -2   5  -1   82.99   12.10 
   2   5   1   74.99    8.20 
   2   5   1   59.09   11.80 
   2   5   1   63.59    7.60 
  -2   5  -1   69.29    9.50 
   2   5   1   79.39   14.00 
  -2   5  -1   51.99    9.10 
   2   5   1   57.09   10.10 
  -3  -5  -1 3447.56  109.49 
  -3  -5  -1 3514.75  113.69 
   3  -5   1 3445.86  114.89 
   3  -5   1 3621.04  105.99 
   3  -5   1 3466.35  122.49 
  -3  -5  -1 3489.05  121.29 
  -3  -5  -1 3271.97  108.69 
   3  -5   1 3390.76  121.19 
  -3  -5  -1 3306.07  121.79 
  -3  -5  -1 3375.36  111.09 
  -3  -5  -1 3389.26  113.79 
  -3  -5  -1 3467.35  120.19 
   3  -5   1 3362.06  110.89 
  -3  -5  -1 3342.67  116.59 
   3  -5   1 3506.15  106.99 
   3  -5   1 3511.05  109.29 
   3  -5   1 3483.75  114.59 
   3  -5   1 3421.86  116.69 
  -3  -5  -1 3461.65  118.49 
  -3  -5  -1 3347.57  109.79 
  -3  -5  -1 3402.86  118.39 
   3  -5   1 3518.65  113.89 
  -3  -5  -1 3531.15  110.19 
   3  -5   1 3465.65  121.09 
   3  -5   1 3458.15  120.99 
  -3  -5  -1 3702.23  119.69 
  -3  -5  -1 3560.04  120.59 
  -3  -5  -1 3653.63  119.89 
   3   5   1 3549.74  108.79 
  -3   5  -1 3487.05  106.79 
  -3   5  -1 3589.04  116.59 
   3   5   1 3409.06  128.09 
   3   5   1 3381.16  118.39 
   3   5   1 3444.36  116.59 
   3   5   1 3358.86  117.89 
   3   5   1 3494.45  121.09 
   3   5   1 3665.43  120.89 
   3   5   1 3429.06  116.99 
  -3   5  -1 3471.15  127.19 
  -3   5  -1 3391.96  117.79 
  -3   5  -1 3567.34  113.99 
  -3   5  -1 3349.26  111.79 
  -3   5  -1 3497.45  113.19 
   3   5   1 3366.86  123.69 
  -3   5  -1 3384.76  122.69 
   3   5   1 3650.73  118.79 
   3   5   1 3579.84  119.29 
   3   5   1 3475.85  119.59 
  -3   5  -1 3541.55  122.39 
   3   5   1 3349.26  129.29 
   3   5   1 3404.36  123.19 
  -3   5  -1 3531.65  110.99 
  -3   5  -1 3395.06  117.19 
  -3   5  -1 3350.96  125.19 
  -3   5  -1 3602.34  115.09 
  -4  -5  -1    2.60    3.90 
   4  -5   1    2.10    6.00 
  -4  -5  -1    8.40    4.10 
   4  -5   1    4.50    3.60 
  -4  -5  -1    1.60    4.60 
  -4  -5  -1    0.80    5.50 
  -4  -5  -1   -0.20    4.60 
  -4  -5  -1    4.30    5.30 
   4  -5   1    7.90    3.00 
   4  -5   1    8.30    5.00 
  -4  -5  -1   13.60    5.90 
  -4  -5  -1    4.50    4.80 
  -4  -5  -1    4.30    5.40 
   4  -5   1    3.30    3.60 
   4  -5   1    7.00    5.80 
  -4  -5  -1   13.80    6.70 
  -4  -5  -1    5.90    4.20 
   4  -5   1    8.50    3.50 
   4  -5   1    8.90    6.50 
  -4  -5  -1   13.70    6.40 
  -4  -5  -1    5.50    3.90 
   4  -5   1    1.40    4.60 
   4  -5   1    8.00    4.10 
   4   5   1    7.30    6.30 
   4   5   1    7.30    5.30 
  -4   5  -1   14.10    7.40 
   4   5   1   15.60    6.40 
  -4   5  -1   -0.30    5.40 
   4   5   1    3.70    5.10 
   4   5   1    0.60    4.60 
   4   5   1   -1.70    4.00 
   4   5   1    5.00    6.10 
   4   5   1    8.40    7.60 
  -4   5  -1    5.20    4.40 
  -4   5  -1    5.40    5.50 
   4   5   1    0.50    4.50 
  -4   5  -1   10.90    5.60 
  -4   5  -1    7.80    4.80 
   4   5   1    4.00    4.00 
   4   5   1    6.60    2.30 
   4   5   1    7.20    5.50 
  -4   5  -1   11.30    4.60 
  -4   5  -1    6.90    3.90 
   4   5   1    3.80    6.00 
  -4   5  -1    7.40    3.40 
  -4   5  -1    3.10    5.20 
  -4   5  -1   12.80    6.30 
   4   5   1    5.40    5.70 
  -5  -5  -1  275.17   19.10 
  -5  -5  -1  285.87   21.50 
   5  -5   1  234.28   15.50 
  -5  -5  -1  272.47   22.60 
  -5  -5  -1  242.08   17.80 
  -5  -5  -1  254.27   25.70 
  -5  -5  -1  263.97   21.00 
   5  -5   1  265.97   16.70 
  -5  -5  -1  252.07   17.10 
  -5  -5  -1  226.08   18.30 
  -5  -5  -1  218.58   21.90 
   5  -5   1  276.67   27.20 
   5  -5   1  282.97   19.00 
   5  -5   1  231.18   15.00 
  -5  -5  -1  260.47   21.60 
   5  -5   1  208.18   23.20 
   5  -5   1  245.28   12.20 
  -5  -5  -1  277.87   19.30 
  -5  -5  -1  258.57   21.00 
   5  -5   1  261.07   21.70 
  -5  -5  -1  255.77   25.60 
   5  -5   1  273.67   22.80 
   5   5   1  253.37   19.80 
   5   5   1  242.48   21.10 
  -5   5  -1  233.68   17.70 
  -5   5  -1  287.47   19.10 
  -5   5  -1  270.57   21.80 
  -5   5  -1  276.97   19.50 
   5   5   1  223.18   28.50 
   5   5   1  225.98   22.30 
   5   5   1  259.47   18.50 
   5   5   1  265.77   20.90 
   5   5   1  218.38   25.30 
   5   5   1  189.38   21.00 
   5   5   1  216.48   23.10 
   5   5   1  254.37   19.60 
  -5   5  -1  281.77   28.80 
   5   5   1  260.77   31.70 
  -5   5  -1  255.47   21.10 
  -5   5  -1  235.58   12.90 
  -5   5  -1  232.48   24.20 
  -5   5  -1  261.37   18.80 
   5   5   1  264.07   21.40 
   5   5   1  257.97   19.10 
   5   5   1  225.88   25.80 
  -5   5  -1  246.78   19.90 
  -6  -5  -1    5.70    6.20 
  -6  -5  -1   17.70    7.30 
  -6  -5  -1   10.20    6.50 
  -6  -5  -1   10.80    6.20 
  -6  -5  -1   12.90    7.10 
   6  -5   1   13.70    7.90 
  -6  -5  -1    7.40    6.80 
  -6  -5  -1   17.90    8.20 
   6  -5   1   13.30    5.40 
   6  -5   1    3.20    6.30 
   6  -5   1   12.40    6.50 
  -6  -5  -1   13.50    7.10 
   6  -5   1   -5.60    5.30 
  -6  -5  -1   -1.10    5.70 
   6  -5   1   14.70    7.90 
  -6  -5  -1   13.40    6.70 
  -6  -5  -1   -0.10    5.50 
   6  -5   1    9.10    7.60 
  -6  -5  -1   17.30    8.70 
  -6  -5  -1   10.10    5.50 
  -6  -5  -1   11.50    8.30 
  -6  -5  -1    3.70    6.90 
  -6   5  -1   14.30    7.30 
  -6   5  -1    6.60    4.80 
   6   5   1    5.90    6.40 
   6   5   1   15.70    8.80 
  -6   5  -1   15.20    7.60 
   6   5   1   14.10    8.80 
   6   5   1    6.70    5.90 
   6   5   1   22.10   11.50 
   6   5   1   18.80    7.00 
   6   5   1   24.10    9.60 
   6   5   1    3.60    5.40 
   6   5   1   14.90    8.20 
  -6   5  -1   17.10    8.10 
   6   5   1   15.60    9.80 
   6   5   1    2.90    6.20 
   6   5   1   16.00    8.60 
  -6   5  -1   10.40    6.40 
   6   5   1    2.50    6.00 
  -6   5  -1    9.30    6.50 
  -6   5  -1   15.80    7.30 
  -6   5  -1   10.50    7.10 
   6   5   1    3.00    9.40 
  -7  -5  -1    3.20    5.60 
   7  -5   1    5.10    6.60 
  -7  -5  -1    5.90    6.70 
  -7  -5  -1    2.10    6.00 
  -7  -5  -1    0.00    6.50 
  -7  -5  -1   10.80    7.70 
   7  -5   1    5.80    7.80 
  -7  -5  -1    3.20    5.80 
  -7  -5  -1    5.00    5.80 
  -7  -5  -1    4.80    6.00 
  -7  -5  -1    4.30    6.10 
  -7  -5  -1    3.30    6.30 
   7  -5   1   -3.20    7.40 
  -7  -5  -1   13.00    9.30 
   7  -5   1    3.50    8.10 
   7  -5   1    2.80    5.10 
  -7  -5  -1    9.10    7.80 
  -7  -5  -1    8.00    7.40 
   7  -5   1   -2.20    6.10 
  -7  -5  -1    3.80    6.40 
   7   5   1   -3.90    4.50 
   7   5   1   14.80   10.00 
  -7   5  -1    2.90    6.70 
   7   5   1    3.50    5.20 
   7   5   1    4.20    8.00 
   7   5   1    3.50    6.50 
   7   5   1    3.90    6.60 
   7   5   1    0.00    5.70 
   7   5   1    1.10    8.40 
   7   5   1    3.10    6.60 
   7   5   1   -0.30    5.50 
  -7   5  -1   -2.30    5.50 
   7   5   1    7.10    7.60 
  -7   5  -1    1.70    5.50 
  -7   5  -1   14.80    8.10 
   7   5   1    2.90    5.80 
   7   5   1   13.30   10.90 
  -7   5  -1   -1.70    5.50 
  -7   5  -1   13.70    7.60 
   7   5   1    6.20    8.40 
  -8  -5  -1   21.10   11.80 
   8  -5   1   19.40   10.00 
  -8  -5  -1   33.80   13.40 
  -8  -5  -1   21.80   10.40 
  -8  -5  -1   31.70   12.70 
  -8  -5  -1   20.00    9.20 
  -8  -5  -1   15.40    9.00 
  -8  -5  -1   39.00   12.60 
  -8  -5  -1   13.50    8.50 
  -8  -5  -1   22.30   10.90 
  -8  -5  -1   36.90   12.80 
   8  -5   1   34.90   12.30 
   8  -5   1   60.59   14.70 
  -8  -5  -1    3.80    7.40 
   8  -5   1   35.20   13.00 
   8  -5   1   39.10   13.30 
   8  -5   1   19.90   11.30 
  -8  -5  -1   40.40   11.90 
   8   5   1   24.00    9.40 
   8   5   1   12.80    9.40 
   8   5   1    7.60    8.80 
   8   5   1   33.30   16.30 
   8   5   1   30.60   12.90 
  -8   5  -1   28.80   11.40 
   8   5   1   34.60   11.00 
   8   5   1   40.70   13.00 
  -8   5  -1   29.40   10.80 
   8   5   1   14.70    9.20 
   8   5   1   34.20   11.90 
  -8   5  -1   32.40   10.30 
  -8   5  -1   24.90   10.20 
   8   5   1   22.40   10.00 
  -8   5  -1   15.50    9.70 
   8   5   1   35.60   13.00 
   8   5   1   41.40   14.20 
   8   5   1   15.10    9.10 
   8   5   1    3.50    9.00 
  -9  -5  -1   76.19   16.10 
  -9  -5  -1   74.49   19.10 
  -9  -5  -1   68.69   17.50 
  -9  -5  -1   39.10   14.30 
  -9  -5  -1   90.99   19.70 
   9  -5   1   75.19   22.00 
  -9  -5  -1   66.09   15.90 
  -9  -5  -1   77.69   17.10 
   9  -5   1   75.09   18.10 
   9  -5   1   95.89   20.80 
  -9  -5  -1   80.49   19.70 
   9  -5   1   74.39   19.60 
  -9  -5  -1   92.49   18.20 
  -9  -5  -1  112.99   22.90 
   9  -5   1   64.09   16.50 
   9  -5   1   82.19   21.20 
   9  -5   1   84.99   22.50 
   9   5   1  112.59   22.30 
  -9   5  -1   80.89   18.00 
   9   5   1   57.99   15.90 
   9   5   1   47.20   17.00 
  -9   5  -1   72.59   17.30 
   9   5   1   95.49   18.90 
  -9   5  -1   62.99   18.00 
   9   5   1   57.49   21.20 
   9   5   1   72.79   22.40 
   9   5   1   75.19   17.30 
   9   5   1   88.59   20.00 
   9   5   1   76.79   17.30 
   9   5   1   40.90   16.00 
   9   5   1   66.99   17.50 
  -9   5  -1   77.89   18.20 
  -8  -6   1  194.08   23.00 
   8  -6  -1  182.68   26.70 
  -8  -6   1  180.58   26.90 
  -8  -6   1  175.38   24.10 
  -8  -6   1  173.28   27.10 
  -8  -6   1  177.28   28.00 
  -8  -6   1  176.88   25.60 
  -8  -6   1  140.09   21.10 
  -8  -6   1  169.38   25.70 
   8  -6  -1  170.88   27.80 
  -8  -6   1  222.98   30.20 
  -8  -6   1  132.49   22.00 
   8  -6  -1  170.38   27.00 
  -8  -6   1  197.48   27.40 
  -8  -6   1  160.68   22.60 
   8  -6  -1  203.78   27.00 
   8   6  -1  189.18   25.70 
   8   6  -1  170.78   24.10 
   8   6  -1  168.18   25.50 
   8   6  -1  142.49   23.60 
  -8   6   1  129.79   19.90 
   8   6  -1  152.18   26.30 
   8   6  -1  175.18   25.00 
   8   6  -1  177.28   33.80 
   8   6  -1  164.88   22.90 
   8   6  -1  193.48   24.60 
   8   6  -1  161.18   23.70 
   8   6  -1  166.18   31.40 
  -8   6   1  205.08   23.80 
  -8   6   1  187.68   24.70 
  -8   6   1  188.38   24.80 
   8   6  -1  233.28   32.40 
   8   6  -1  179.88   25.70 
   8   6  -1  150.88   20.40 
   7  -6  -1    2.10    7.60 
  -7  -6   1    2.10    6.00 
  -7  -6   1   13.10    9.70 
   7  -6  -1    3.60    6.50 
  -7  -6   1   -4.50    5.60 
  -7  -6   1    9.90    6.70 
   7  -6  -1   -6.50    8.00 
  -7  -6   1    2.70    6.80 
  -7  -6   1   -0.50    5.20 
  -7  -6   1   10.40    9.90 
  -7  -6   1   12.90   10.20 
  -7  -6   1    1.80    7.30 
   7  -6  -1    4.00    9.20 
  -7  -6   1    0.40    6.50 
  -7  -6   1   17.80    9.20 
  -7  -6   1    0.90    7.20 
  -7  -6   1   -8.80    5.20 
  -7   6   1    1.60    6.00 
   7   6  -1   -3.70    6.60 
   7   6  -1   -5.40    6.90 
   7   6  -1   -6.50    6.00 
   7   6  -1    5.20    6.80 
   7   6  -1    3.80    7.20 
   7   6  -1   -2.00    5.40 
  -7   6   1    9.20    8.80 
   7   6  -1   -0.70    7.40 
   7   6  -1    9.50    9.80 
   7   6  -1   -5.40    6.00 
   7   6  -1    2.60    7.00 
  -7   6   1   -1.70    6.60 
  -7   6   1    1.90    6.40 
   7   6  -1    5.60    8.60 
   7   6  -1   -1.80    6.60 
  -7   6   1    7.90    7.10 
   7   6  -1    0.90    7.60 
  -7   6   1   -1.20    6.40 
   7   6  -1   -2.60    6.30 
  -6  -6   1  178.98   24.00 
   6  -6  -1  179.88   19.40 
   6  -6  -1  147.99   22.20 
  -6  -6   1  173.78   20.60 
  -6  -6   1  143.49   22.50 
  -6  -6   1  172.88   18.00 
  -6  -6   1  183.88   23.00 
   6  -6  -1  191.18   27.00 
   6  -6  -1  201.68   22.30 
  -6  -6   1  239.98   28.30 
  -6  -6   1  208.18   28.10 
  -6  -6   1  209.48   25.50 
   6  -6  -1  196.08   26.70 
  -6  -6   1  188.78   22.40 
  -6  -6   1  139.79   17.40 
  -6  -6   1  181.78   22.20 
   6  -6  -1  176.88   18.20 
  -6  -6   1  196.38   24.50 
  -6  -6   1  177.28   21.50 
   6   6  -1  212.08   23.50 
   6   6  -1  204.38   24.60 
   6   6  -1  175.58   20.40 
   6   6  -1  162.28   20.90 
   6   6  -1  159.48   22.60 
  -6   6   1  187.28   22.80 
  -6   6   1  172.18   22.30 
   6   6  -1  173.88   23.90 
   6   6  -1  156.48   21.10 
  -6   6   1  191.58   19.40 
  -6   6   1  193.98   26.50 
   6   6  -1  184.88   26.10 
  -6   6   1  164.48   19.90 
   6   6  -1  144.69   20.10 
   6   6  -1  161.88   22.00 
   6   6  -1  155.58   28.80 
   6   6  -1  170.58   23.50 
   6   6  -1  200.18   30.90 
  -6   6   1  207.38   24.50 
  -6   6   1  156.88   19.60 
  -5  -6   1  111.69   18.40 
  -5  -6   1  108.79   18.20 
  -5  -6   1  113.29   13.00 
   5  -6  -1  106.49   15.60 
   5  -6  -1  108.59   19.60 
  -5  -6   1  100.99   16.30 
  -5  -6   1  134.19   18.60 
  -5  -6   1  107.39   15.10 
  -5  -6   1  124.39   15.00 
   5  -6  -1  120.39   14.90 
   5  -6  -1  108.09   13.50 
   5  -6  -1  133.19   14.30 
  -5  -6   1   94.89   15.60 
  -5  -6   1  126.69   17.50 
  -5  -6   1  102.29   15.90 
   5  -6  -1  124.29   19.40 
   5  -6  -1  136.09   13.90 
  -5  -6   1  154.58   21.40 
  -5  -6   1  110.39   17.80 
   5  -6  -1  127.49   20.50 
  -5   6   1  120.69   13.70 
  -5   6   1  137.79   22.50 
   5   6  -1  109.39   19.20 
   5   6  -1  130.59   18.90 
   5   6  -1  108.49   16.80 
  -5   6   1  137.99   16.70 
   5   6  -1  111.69   16.30 
  -5   6   1  153.88   19.10 
  -5   6   1   88.59   14.00 
  -5   6   1  141.39   16.00 
  -5   6   1  107.89   12.80 
   5   6  -1  116.79   22.80 
   5   6  -1  132.79   20.60 
   5   6  -1   89.19   15.30 
  -5   6   1   93.39   16.90 
   5   6  -1  113.29   16.90 
   5   6  -1  105.59   16.90 
   5   6  -1   94.59   16.30 
  -5   6   1   86.29   15.30 
  -5   6   1   83.79   14.90 
   5   6  -1  109.59   16.30 
   5   6  -1  143.49   17.70 
   4  -6  -1  670.53   40.00 
   4  -6  -1  631.54   29.80 
   4  -6  -1  638.54   31.90 
  -4  -6   1  599.44   33.80 
  -4  -6   1  560.94   33.00 
  -4  -6   1  590.94   34.60 
  -4  -6   1  543.05   33.00 
  -4  -6   1  539.45   25.90 
  -4  -6   1  646.84   36.80 
   4  -6  -1  628.44   30.50 
   4  -6  -1  613.54   37.70 
   4  -6  -1  628.04   28.90 
  -4  -6   1  630.94   32.70 
   4  -6  -1  520.45   34.00 
  -4  -6   1  581.84   34.80 
  -4  -6   1  611.24   33.00 
  -4  -6   1  566.14   30.10 
  -4  -6   1  603.84   26.40 
   4  -6  -1  567.44   32.10 
  -4  -6   1  593.74   28.00 
  -4  -6   1  573.84   34.50 
   4   6  -1  553.74   33.20 
   4   6  -1  553.64   32.20 
   4   6  -1  542.35   32.70 
   4   6  -1  536.05   41.00 
  -4   6   1  566.14   36.90 
  -4   6   1  594.94   34.50 
  -4   6   1  576.74   30.40 
   4   6  -1  582.04   32.50 
   4   6  -1  613.94   33.90 
  -4   6   1  632.64   32.70 
   4   6  -1  552.64   33.10 
  -4   6   1  557.24   40.00 
  -4   6   1  598.24   30.30 
  -4   6   1  606.74   27.80 
   4   6  -1  591.74   37.30 
  -4   6   1  573.44   33.70 
   4   6  -1  591.14   37.00 
  -4   6   1  638.24   27.00 
  -4   6   1  633.94   24.40 
  -4   6   1  551.44   32.20 
  -4   6   1  595.14   30.90 
   4   6  -1  538.45   32.30 
   4   6  -1  545.65   31.10 
   4   6  -1  565.24   34.50 
  -3  -6   1   31.50    9.60 
   3  -6  -1   45.70   12.00 
  -3  -6   1   37.60    7.90 
  -3  -6   1   33.40    5.50 
   3  -6  -1   34.90    8.10 
  -3  -6   1   19.10    7.90 
  -3  -6   1   35.20    9.30 
   3  -6  -1   38.00    9.10 
   3  -6  -1   33.40    9.60 
   3  -6  -1   33.10    7.70 
  -3  -6   1   55.49   11.30 
   3  -6  -1   35.70    5.00 
  -3  -6   1   59.29   12.30 
  -3  -6   1   29.50    9.00 
   3  -6  -1   32.90    4.90 
  -3  -6   1   33.50    9.00 
  -3  -6   1   34.20    6.50 
   3  -6  -1   27.00    7.60 
  -3  -6   1   45.10   10.80 
  -3  -6   1   20.30    7.50 
  -3  -6   1   35.10    7.50 
  -3  -6   1   37.10    8.70 
   3  -6  -1   17.10    6.20 
  -3  -6   1   46.20   11.50 
  -3   6   1   20.50    9.90 
   3   6  -1   31.60    5.70 
   3   6  -1   28.90    8.70 
   3   6  -1   36.50   12.70 
   3   6  -1   45.90   10.50 
  -3   6   1   65.09   12.50 
   3   6  -1   28.50    8.20 
  -3   6   1   43.80   10.10 
   3   6  -1   52.29   12.60 
   3   6  -1   36.20   10.00 
   3   6  -1   34.30   10.60 
  -3   6   1   26.50    8.30 
  -3   6   1   26.80    7.00 
  -3   6   1   40.00   10.40 
  -3   6   1   33.00    7.70 
   3   6  -1   30.50    8.70 
   3   6  -1   24.50    7.90 
  -3   6   1   37.80   13.20 
   3   6  -1   41.10    9.90 
   3   6  -1   37.20    9.10 
   3   6  -1   49.80   10.50 
  -3   6   1   32.70    5.90 
  -3   6   1   42.80   10.10 
  -3   6   1   36.50    8.10 
   2  -6  -1   40.30    4.70 
   2  -6  -1   27.90    7.90 
  -2  -6   1   19.30    7.70 
  -2  -6   1   16.00    6.70 
   2  -6  -1   23.20    8.50 
  -2  -6   1   21.40    6.50 
  -2  -6   1   24.30    3.70 
  -2  -6   1   20.50    6.30 
   2  -6  -1   30.70    7.50 
   2  -6  -1   18.20    6.40 
   2  -6  -1   17.90    6.90 
  -2  -6   1   17.90    7.30 
   2  -6  -1   29.80    7.10 
  -2  -6   1   22.50    7.80 
  -2  -6   1   30.70    9.10 
  -2  -6   1   22.20    7.70 
  -2  -6   1   29.80    8.90 
  -2  -6   1   16.10    7.20 
  -2  -6   1   39.70    6.00 
   2  -6  -1   20.70    8.10 
   2  -6  -1   25.20    6.50 
   2  -6  -1   36.20    6.00 
  -2  -6   1   22.50    7.00 
   2  -6  -1   22.20    4.50 
   2  -6  -1   20.90    5.00 
  -2  -6   1   43.80   10.80 
   2   6  -1   28.30    8.10 
  -2   6   1   29.60    7.50 
  -2   6   1   38.70   10.30 
   2   6  -1   23.50    8.10 
   2   6  -1   29.70    9.10 
   2   6  -1   58.89   15.30 
   2   6  -1   15.00    6.70 
   2   6  -1   29.60    8.30 
  -2   6   1   24.30    4.90 
  -2   6   1   20.50    5.50 
  -2   6   1   34.90    8.30 
   2   6  -1   17.00    6.20 
  -2   6   1   29.10    7.90 
   2   6  -1   29.70    6.50 
   2   6  -1   37.00    9.70 
  -2   6   1   16.20    6.80 
  -2   6   1   25.00   12.20 
   2   6  -1   22.50    7.30 
  -2   6   1   40.40   11.70 
  -2   6   1   39.00    8.60 
  -2   6   1   20.90    7.60 
   2   6  -1   23.80    9.60 
  -2   6   1   28.50    5.00 
  -2   6   1   30.00   12.30 
  -2   6   1   24.70   10.10 
   2   6  -1   34.20    8.40 
  -2   6   1   18.10    5.50 
  -2   6   1   30.00    7.70 
  -2   6   1   28.60    4.20 
   2   6  -1   23.90    7.70 
  -2   6   1   29.70    8.70 
  -2   6   1   13.70    6.00 
  -2   6   1   22.20    6.80 
   2   6  -1   39.20   11.20 
   1  -6  -1   10.80    4.90 
   1  -6  -1    4.90    4.50 
   1  -6  -1    7.80    5.40 
  -1  -6   1   14.70    7.30 
  -1  -6   1   22.20    7.50 
  -1  -6   1   10.60    5.00 
   1  -6  -1    8.50    4.40 
  -1  -6   1   29.50    8.00 
   1  -6  -1   14.00    6.90 
   1  -6  -1   10.80    5.80 
   1  -6  -1    8.90    5.50 
  -1  -6   1    6.00    4.90 
  -1  -6   1   16.00    6.60 
   1  -6  -1    8.90    5.10 
   1  -6  -1   15.70    6.20 
  -1  -6   1    2.30    4.00 
  -1  -6   1   26.50    7.20 
   1  -6  -1   15.50    6.80 
  -1  -6   1    3.70    4.90 
   1  -6  -1    8.90    7.60 
  -1  -6   1    9.10    6.30 
   1   6  -1   21.90    9.80 
  -1   6   1    6.40    6.00 
   1   6  -1   21.00    5.70 
  -1   6   1    5.80    4.30 
   1   6  -1   13.80    5.90 
  -1   6   1   10.70    6.00 
  -1   6   1   14.80    7.60 
  -1   6   1   16.10    6.30 
  -1   6   1    1.60    3.30 
  -1   6   1   10.70    6.50 
  -1   6   1    6.40    5.40 
  -1   6   1   12.60    7.60 
  -1   6   1    4.40    4.70 
   1   6  -1   13.90    6.00 
  -1   6   1   31.60   10.00 
   1   6  -1   27.40    8.30 
   1   6  -1   15.80    7.80 
   1   6  -1   10.90    8.30 
   1   6  -1   21.20    6.90 
   1   6  -1   16.60    5.70 
  -1   6   1   15.30    5.80 
  -1   6   1   18.70   10.70 
   1   6  -1   13.20    6.00 
   1   6  -1   16.60    6.60 
  -1   6   1   19.60    4.30 
   1   6  -1   10.50    5.90 
   1   6  -1   10.30    6.40 
  -1   6   1   12.60    7.00 
  -1   6   1   26.30   11.30 
  -1   6   1   23.30    9.50 
  -1   6   1   12.50    6.30 
  -1   6   1   14.60    7.00 
   0  -6  -1  821.22   38.70 
   0  -6   1  783.22   38.40 
   0  -6   1  831.22   39.70 
   0  -6   1  843.02   40.30 
   0  -6  -1  815.82   38.10 
   0  -6   1  926.41   39.90 
   0  -6   1  868.91   40.90 
   0  -6  -1  883.91   44.20 
   0  -6   1  821.22   41.10 
   0  -6  -1  865.91   36.50 
   0  -6  -1  775.12   41.10 
   0  -6   1  845.12   42.20 
   0  -6  -1  890.51   40.30 
   0  -6  -1  941.81   42.10 
   0  -6  -1  849.12   38.90 
   0  -6   1  837.72   39.40 
   0  -6  -1  858.31   35.60 
   0  -6  -1  825.22   39.70 
   0  -6   1  853.01   36.40 
   0  -6  -1  825.42   41.00 
   0  -6   1  839.22   40.20 
   0  -6   1  886.51   39.80 
   0  -6   1  848.62   35.80 
   0   6  -1  888.71   37.40 
   0   6   1  869.81   49.80 
   0   6   1  907.21   41.50 
   0   6  -1  908.81   40.40 
   0   6  -1  910.61   42.30 
   0   6   1  845.62   40.20 
   0   6  -1  863.71   40.50 
   0   6  -1  835.42   45.60 
   0   6  -1 1006.50   50.89 
   0   6   1  884.61   41.00 
   0   6   1  831.52   50.09 
   0   6   1  861.91   37.00 
   0   6   1  838.12   43.50 
   0   6  -1  838.02   43.90 
   0   6  -1  798.62   51.49 
   0   6   1  889.91   38.80 
   0   6  -1  921.41   39.90 
   0   6   1  835.92   36.70 
   0   6   1  917.41   41.20 
   0   6   1  870.71   45.30 
   0   6  -1  926.31   39.70 
   0   6  -1  889.01   38.70 
   0   6  -1  903.81   44.30 
   0   6   1  829.22   34.20 
   0   6   1  754.42   38.50 
   0   6  -1  786.72   40.10 
   0   6  -1  846.12   37.70 
   0   6  -1  799.02   38.50 
   0   6  -1  920.81   43.70 
   0   6   1  806.12   41.40 
   0   6   1  780.52   43.60 
   0   6  -1  819.82   34.20 
   0   6   1  842.32   38.50 
   1  -6   1   65.99   11.20 
  -1  -6  -1   51.59   10.80 
   1  -6   1   57.39   10.50 
   1  -6   1   65.09   12.00 
   1  -6   1   68.59   11.60 
  -1  -6  -1   51.09    9.60 
   1  -6   1   68.49    8.40 
  -1  -6  -1   52.49    9.40 
  -1  -6  -1   49.60   10.10 
  -1  -6  -1   61.29   10.20 
   1  -6   1   69.49    9.10 
   1  -6   1   56.19   10.40 
  -1  -6  -1   62.99   11.70 
   1  -6   1   67.49   12.00 
  -1  -6  -1   45.20    9.80 
  -1  -6  -1   59.29   11.50 
  -1  -6  -1   62.29   12.60 
  -1  -6  -1   64.19   12.20 
   1  -6   1   51.79   10.80 
  -1  -6  -1   61.19    9.90 
   1  -6   1   55.99   12.10 
  -1  -6  -1   53.69   10.60 
   1  -6   1   64.39   11.20 
   1  -6   1   59.99    6.00 
   1  -6   1   78.19    9.60 
  -1   6  -1   73.29   11.40 
  -1   6  -1   61.19   10.30 
   1   6   1   65.09   14.80 
  -1   6  -1   52.29   12.30 
  -1   6  -1   55.29    7.10 
   1   6   1   58.29   11.40 
  -1   6  -1   71.59   11.70 
   1   6   1   51.99    9.60 
  -1   6  -1   77.89   13.10 
  -1   6  -1   61.29   10.90 
  -1   6  -1   51.19   12.00 
   1   6   1   61.99   13.40 
  -1   6  -1   75.59   14.00 
  -1   6  -1   48.40    9.80 
   1   6   1   63.09   15.10 
  -1   6  -1   52.19    9.60 
   1   6   1   74.19   11.50 
   1   6   1   54.79    8.90 
  -1   6  -1   52.29   14.80 
  -1   6  -1   67.99   10.60 
   1   6   1   62.99    9.30 
   1   6   1   62.29   12.40 
  -1   6  -1   51.49   11.00 
   1   6   1   52.99   10.70 
   1   6   1   65.49   11.30 
  -1   6  -1   82.69   20.00 
   1   6   1   50.69   11.40 
  -1   6  -1   82.69   12.30 
   1   6   1   50.09   10.80 
   1   6   1   51.89   10.30 
  -1   6  -1   73.89   15.10 
   1   6   1   66.39   10.50 
  -1   6  -1   57.19   10.80 
  -2  -6  -1  627.94   35.30 
   2  -6   1  673.23   35.80 
  -2  -6  -1  642.84   34.30 
  -2  -6  -1  656.73   33.20 
   2  -6   1  663.13   23.50 
   2  -6   1  661.23   31.50 
  -2  -6  -1  648.94   23.60 
   2  -6   1  638.54   32.80 
  -2  -6  -1  609.84   31.80 
   2  -6   1  644.04   22.90 
  -2  -6  -1  656.43   37.10 
   2  -6   1  599.64   26.20 
  -2  -6  -1  632.64   29.40 
  -2  -6  -1  660.23   28.40 
  -2  -6  -1  571.64   32.80 
   2  -6   1  637.64   34.70 
  -2  -6  -1  590.14   33.90 
   2  -6   1  657.83   31.90 
   2  -6   1  629.64   32.20 
  -2  -6  -1  687.63   36.00 
  -2  -6  -1  635.34   28.20 
   2  -6   1  605.14   24.50 
  -2  -6  -1  688.93   36.30 
   2  -6   1  680.73   35.70 
  -2  -6  -1  610.14   31.10 
   2  -6   1  661.63   34.10 
   2   6   1  607.24   27.50 
   2   6   1  668.23   40.00 
  -2   6  -1  636.24   30.90 
  -2   6  -1  649.34   39.10 
   2   6   1  626.04   37.60 
   2   6   1  647.84   33.60 
  -2   6  -1  643.74   33.10 
  -2   6  -1  674.33   26.80 
  -2   6  -1  669.93   32.50 
  -2   6  -1  652.63   27.90 
  -2   6  -1  600.44   31.80 
  -2   6  -1  684.13   32.40 
  -2   6  -1  626.04   23.80 
   2   6   1  628.04   35.80 
  -2   6  -1  682.33   38.40 
  -2   6  -1  623.24   32.50 
  -2   6  -1  587.04   34.30 
  -2   6  -1  626.44   29.00 
  -2   6  -1  652.23   39.00 
  -2   6  -1  618.94   42.10 
   2   6   1  623.84   34.10 
  -2   6  -1  652.93   48.20 
  -2   6  -1  626.24   33.30 
   2   6   1  575.14   33.30 
   2   6   1  641.24   32.40 
   2   6   1  625.04   33.40 
   2   6   1  633.84   41.60 
   2   6   1  587.64   32.20 
  -2   6  -1  624.54   33.20 
   2   6   1  642.34   32.40 
  -3  -6  -1   34.70    9.10 
  -3  -6  -1   19.60    8.10 
   3  -6   1   24.50    8.70 
  -3  -6  -1   17.00    7.50 
  -3  -6  -1   37.30    9.40 
   3  -6   1   23.20    8.70 
  -3  -6  -1   40.40   11.00 
  -3  -6  -1   26.90    7.60 
  -3  -6  -1   33.50    5.70 
  -3  -6  -1   34.80    7.30 
   3  -6   1   30.60    9.30 
  -3  -6  -1   30.40    9.20 
   3  -6   1   30.50    7.50 
  -3  -6  -1   24.10    5.90 
   3  -6   1   25.60    7.10 
  -3  -6  -1   23.10    6.40 
   3  -6   1   40.00    8.30 
  -3  -6  -1   38.30   11.00 
  -3  -6  -1   35.20   10.00 
   3  -6   1   27.80    7.90 
   3  -6   1   33.30    5.00 
  -3   6  -1   22.80    7.10 
   3   6   1   29.00    8.10 
  -3   6  -1   34.70    7.20 
   3   6   1   16.00    7.30 
   3   6   1   28.40   11.40 
   3   6   1   28.90    8.00 
   3   6   1   39.00   11.00 
  -3   6  -1    0.40    6.50 
  -3   6  -1   24.70    7.50 
  -3   6  -1   28.70    9.00 
   3   6   1   23.20    7.90 
  -3   6  -1   26.80    6.70 
   3   6   1   44.30   10.10 
   3   6   1   34.90    8.60 
   3   6   1   29.50   10.90 
  -3   6  -1   29.40    8.00 
   3   6   1   10.60    7.30 
  -3   6  -1   37.10   12.00 
   3   6   1   27.40    8.70 
   3   6   1   30.50    5.70 
  -3   6  -1   26.90    9.80 
  -3   6  -1   33.70    6.70 
   3   6   1   29.90    9.30 
  -3   6  -1   30.50    3.90 
  -3   6  -1   32.20    9.10 
  -4  -6  -1   78.89   14.00 
   4  -6   1   86.19   15.40 
   4  -6   1  114.59   16.50 
  -4  -6  -1   96.69   12.50 
   4  -6   1  107.19   17.10 
   4  -6   1   91.09   12.70 
   4  -6   1   93.89   12.40 
   4  -6   1  108.09   14.30 
  -4  -6  -1  123.59   15.80 
  -4  -6  -1   91.59   11.00 
   4  -6   1  117.59   13.70 
   4  -6   1   74.09   14.30 
  -4  -6  -1   79.09   15.20 
  -4  -6  -1  101.49   15.10 
  -4  -6  -1   91.49   14.30 
  -4  -6  -1   81.59   14.80 
  -4  -6  -1   87.89   12.10 
  -4  -6  -1   97.29   16.70 
  -4  -6  -1   96.59   15.20 
  -4  -6  -1   88.79   14.70 
   4   6   1   99.29   14.90 
   4   6   1  116.69   15.80 
   4   6   1   56.49   12.70 
   4   6   1   91.59   14.70 
   4   6   1   91.79   19.60 
   4   6   1   88.69   15.00 
  -4   6  -1   97.69   18.60 
   4   6   1   89.09   11.30 
  -4   6  -1   98.19   12.50 
  -4   6  -1   81.39   12.40 
  -4   6  -1   74.89   13.40 
  -4   6  -1   91.69   16.50 
   4   6   1   98.39   14.10 
   4   6   1  104.79   16.70 
  -4   6  -1   93.69   15.60 
   4   6   1   91.09   14.80 
  -4   6  -1   98.59   10.50 
   4   6   1  102.99   20.00 
   4   6   1   90.29   17.30 
  -4   6  -1   90.79   12.10 
  -4   6  -1   94.99   12.70 
  -4   6  -1   88.39   14.50 
   4   6   1   98.39   15.20 
   4   6   1   99.29   17.00 
   4   6   1  105.09   15.20 
  -4   6  -1   87.49   17.90 
  -5  -6  -1  275.67   23.40 
   5  -6   1  266.57   18.10 
   5  -6   1  287.07   18.40 
   5  -6   1  251.07   19.50 
  -5  -6  -1  291.17   20.50 
   5  -6   1  310.67   25.50 
  -5  -6  -1  240.78   18.90 
   5  -6   1  322.07   32.10 
  -5  -6  -1  250.67   24.90 
  -5  -6  -1  243.98   24.20 
   5  -6   1  261.37   18.00 
  -5  -6  -1  277.07   28.30 
  -5  -6  -1  205.78   23.70 
  -5  -6  -1  269.27   18.80 
  -5  -6  -1  262.67   28.30 
  -5  -6  -1  280.77   28.90 
  -5  -6  -1  245.08   25.90 
   5  -6   1  290.27   23.90 
  -5  -6  -1  256.67   25.80 
   5  -6   1  271.57   28.40 
  -5   6  -1  293.77   30.30 
   5   6   1  286.67   22.00 
   5   6   1  255.67   27.20 
  -5   6  -1  286.07   22.50 
   5   6   1  286.17   31.50 
   5   6   1  271.77   22.80 
  -5   6  -1  265.77   20.20 
  -5   6  -1  312.17   31.40 
  -5   6  -1  271.67   19.40 
   5   6   1  263.47   25.90 
   5   6   1  307.07   37.40 
  -5   6  -1  238.88   19.00 
   5   6   1  263.57   21.90 
   5   6   1  269.77   22.40 
   5   6   1  307.27   27.00 
   5   6   1  222.78   25.40 
   5   6   1  255.27   19.90 
   5   6   1  282.57   22.70 
  -5   6  -1  303.47   33.90 
   5   6   1  271.97   35.00 
  -5   6  -1  225.78   24.00 
   5   6   1  251.27   26.30 
  -5   6  -1  244.78   25.90 
   6  -6   1  782.42   45.20 
  -6  -6  -1  714.13   41.10 
   6  -6   1  688.13   42.10 
   6  -6   1  682.43   42.50 
   6  -6   1  755.92   36.70 
  -6  -6  -1  740.33   37.00 
  -6  -6  -1  637.34   40.20 
  -6  -6  -1  737.23   43.40 
  -6  -6  -1  618.54   43.20 
  -6  -6  -1  710.53   40.70 
  -6  -6  -1  753.12   44.40 
  -6  -6  -1  696.33   39.20 
   6  -6   1  732.73   41.80 
  -6  -6  -1  678.93   41.50 
  -6  -6  -1  650.33   40.60 
  -6  -6  -1  698.63   37.20 
  -6  -6  -1  644.74   35.80 
  -6  -6  -1  679.23   38.20 
   6   6   1  712.73   39.20 
   6   6   1  737.73   41.80 
  -6   6  -1  741.83   44.50 
   6   6   1  762.82   39.00 
   6   6   1  730.03   50.79 
  -6   6  -1  728.43   37.00 
   6   6   1  701.73   41.10 
  -6   6  -1  723.53   40.70 
  -6   6  -1  676.53   40.00 
   6   6   1  652.13   43.40 
  -6   6  -1  777.32   46.60 
  -6   6  -1  733.93   41.40 
   6   6   1  730.23   40.80 
   6   6   1  678.73   41.60 
   6   6   1  698.23   51.19 
   6   6   1  745.13   43.30 
  -6   6  -1  707.13   37.30 
   6   6   1  645.34   43.50 
   6   6   1  665.33   38.40 
   6   6   1  654.13   40.40 
  -7  -6  -1  314.67   24.20 
  -7  -6  -1  275.07   30.60 
  -7  -6  -1  265.77   27.90 
  -7  -6  -1  284.27   34.40 
  -7  -6  -1  286.97   23.30 
  -7  -6  -1  230.58   27.10 
  -7  -6  -1  245.78   26.00 
   7  -6   1  263.57   30.90 
  -7  -6  -1  217.18   29.60 
   7  -6   1  335.57   35.20 
  -7  -6  -1  297.57   31.40 
  -7  -6  -1  276.87   27.10 
  -7  -6  -1  197.58   25.70 
   7  -6   1  280.97   31.30 
  -7  -6  -1  238.28   29.20 
   7  -6   1  231.88   27.10 
  -7  -6  -1  302.27   32.40 
   7   6   1  264.17   26.50 
   7   6   1  271.97   38.60 
   7   6   1  295.67   29.70 
   7   6   1  310.37   25.60 
  -7   6  -1  279.67   23.20 
  -7   6  -1  278.47   29.50 
  -7   6  -1  341.07   35.50 
  -7   6  -1  249.08   28.00 
   7   6   1  299.77   30.80 
   7   6   1  287.47   31.00 
   7   6   1  347.37   30.70 
   7   6   1  285.77   29.00 
   7   6   1  245.88   28.50 
   7   6   1  281.27   32.10 
   7   6   1  234.08   34.80 
   7   6   1  245.28   31.60 
  -7   6  -1  285.77   23.70 
   7   6   1  232.68   28.10 
  -8  -6  -1 1047.20   61.79 
   8  -6   1 1139.09   69.29 
  -8  -6  -1 1058.19   54.79 
  -8  -6  -1  944.51   55.29 
  -8  -6  -1 1145.79   55.39 
  -8  -6  -1 1055.49   56.59 
  -8  -6  -1 1079.79   59.69 
   8  -6   1  941.91   54.79 
  -8  -6  -1  995.20   56.79 
  -8  -6  -1 1065.89   58.29 
  -8  -6  -1  962.40   57.59 
  -8  -6  -1 1027.80   55.09 
   8  -6   1 1208.88   62.49 
  -8  -6  -1 1079.29   61.09 
   8   6   1 1047.80   58.79 
  -8   6  -1  974.10   52.19 
   8   6   1 1076.79   62.79 
   8   6   1 1096.39   60.79 
   8   6   1 1019.60   70.09 
   8   6   1 1070.09   56.99 
   8   6   1 1074.39   58.09 
  -8   6  -1 1082.99   57.59 
  -8   6  -1 1092.19   56.29 
   8   6   1 1105.99   57.19 
  -8   6  -1 1048.40   53.89 
   8   6   1 1117.29   54.59 
   8   6   1 1080.99   58.29 
   8   6   1  990.50   54.99 
   8   6   1 1029.80   53.19 
   8   6   1 1127.49   62.69 
   8   6   1 1046.00   51.99 
   8   6   1 1205.98   73.79 
  -8   6  -1 1103.19   57.19 
  -7  -7   1  231.98   29.70 
   7  -7  -1  374.26   40.90 
  -7  -7   1  375.96   31.10 
  -7  -7   1  340.77   34.50 
  -7  -7   1  279.57   34.10 
  -7  -7   1  342.77   27.00 
  -7  -7   1  282.07   30.00 
   7  -7  -1  325.27   37.60 
  -7  -7   1  286.77   34.30 
  -7  -7   1  273.87   35.40 
  -7  -7   1  262.97   31.20 
  -7  -7   1  309.87   35.60 
   7  -7  -1  304.37   32.80 
  -7  -7   1  266.97   26.60 
   7  -7  -1  310.67   35.00 
  -7  -7   1  277.77   30.40 
   7   7  -1  264.47   29.70 
   7   7  -1  268.27   32.70 
  -7   7   1  319.47   33.70 
  -7   7   1  244.48   26.90 
   7   7  -1  266.97   40.90 
   7   7  -1  295.47   31.90 
   7   7  -1  310.27   31.40 
   7   7  -1  320.37   33.90 
   7   7  -1  292.57   32.00 
   7   7  -1  282.57   35.40 
   7   7  -1  326.47   34.90 
   7   7  -1  329.37   32.40 
   7   7  -1  303.57   29.80 
   7   7  -1  334.57   37.40 
   7   7  -1  242.38   30.80 
  -6  -7   1  465.15   30.60 
  -6  -7   1  447.06   34.50 
  -6  -7   1  516.35   37.20 
   6  -7  -1  419.16   35.30 
  -6  -7   1  470.05   32.50 
   6  -7  -1  468.75   37.60 
  -6  -7   1  455.45   34.60 
  -6  -7   1  444.56   28.00 
   6  -7  -1  465.45   35.10 
  -6  -7   1  428.16   31.10 
   6  -7  -1  500.85   31.70 
  -6  -7   1  457.35   35.00 
  -6  -7   1  451.95   33.40 
  -6  -7   1  438.76   33.80 
  -6  -7   1  474.55   33.90 
  -6   7   1  497.65   33.70 
   6   7  -1  444.06   32.20 
   6   7  -1  433.06   33.80 
   6   7  -1  425.16   31.50 
   6   7  -1  469.85   36.80 
   6   7  -1  491.75   34.10 
  -6   7   1  470.25   30.30 
   6   7  -1  424.66   33.00 
   6   7  -1  462.95   31.10 
   6   7  -1  476.55   34.50 
   6   7  -1  499.35   34.20 
   6   7  -1  493.05   33.30 
  -6   7   1  483.25   30.40 
   6   7  -1  386.86   40.10 
  -6   7   1  443.96   33.70 
   6   7  -1  431.86   36.50 
   6   7  -1  442.66   32.90 
  -6   7   1  420.96   36.20 
  -5  -7   1 1211.78   56.79 
   5  -7  -1 1147.69   52.69 
   5  -7  -1 1078.59   56.99 
   5  -7  -1 1162.78   49.00 
  -5  -7   1 1072.29   54.29 
  -5  -7   1 1105.19   50.09 
  -5  -7   1 1095.99   53.19 
   5  -7  -1 1195.48   61.29 
  -5  -7   1  979.50   55.39 
  -5  -7   1 1055.29   46.40 
   5  -7  -1 1140.49   58.99 
   5  -7  -1 1187.78   50.69 
  -5  -7   1 1106.49   56.59 
  -5  -7   1 1146.69   56.89 
  -5  -7   1 1096.89   52.29 
  -5  -7   1 1115.89   54.79 
   5  -7  -1 1077.89   46.20 
  -5  -7   1 1079.29   56.29 
   5   7  -1 1102.69   56.69 
   5   7  -1 1169.98   56.19 
  -5   7   1 1083.89   62.19 
   5   7  -1 1184.18   61.19 
   5   7  -1 1065.89   53.89 
   5   7  -1 1057.79   54.59 
   5   7  -1 1133.29   68.49 
   5   7  -1 1018.90   53.29 
  -5   7   1 1086.59   53.79 
   5   7  -1 1104.09   53.59 
   5   7  -1 1091.39   59.69 
  -5   7   1 1197.78   56.79 
   5   7  -1 1056.29   53.09 
   5   7  -1 1132.89   54.49 
  -5   7   1 1101.59   59.39 
   5   7  -1 1101.99   51.99 
  -5   7   1 1141.09   58.79 
  -5   7   1 1156.38   51.79 
  -5   7   1 1037.60   49.10 
  -5   7   1 1109.09   49.90 
  -4  -7   1  949.11   49.50 
  -4  -7   1 1076.79   46.30 
  -4  -7   1  993.50   52.59 
  -4  -7   1 1013.50   52.09 
  -4  -7   1  930.41   50.69 
   4  -7  -1 1018.20   45.90 
   4  -7  -1 1020.20   52.89 
  -4  -7   1 1144.69   53.39 
   4  -7  -1 1025.50   48.80 
  -4  -7   1 1082.79   49.70 
  -4  -7   1  941.81   50.39 
  -4  -7   1 1100.79   51.69 
   4  -7  -1 1048.60   54.39 
   4  -7  -1 1049.30   44.80 
  -4  -7   1  989.50   47.80 
  -4  -7   1 1016.30   42.00 
   4  -7  -1  980.40   45.20 
   4  -7  -1 1043.50   47.60 
   4   7  -1  953.80   48.20 
   4   7  -1 1023.60   50.89 
  -4   7   1  995.50   45.10 
  -4   7   1 1010.10   49.40 
   4   7  -1  986.90   50.49 
   4   7  -1 1142.49   50.29 
  -4   7   1 1027.60   56.59 
   4   7  -1 1013.40   49.80 
   4   7  -1 1042.20   51.19 
  -4   7   1 1026.00   47.30 
   4   7  -1  964.80   49.90 
   4   7  -1  973.30   49.40 
  -4   7   1 1074.19   41.70 
  -4   7   1 1029.60   48.10 
   4   7  -1  992.30   52.29 
  -4   7   1 1119.79   61.49 
   4   7  -1 1006.20   62.19 
   4   7  -1 1089.69   56.79 
   4   7  -1 1009.00   55.89 
  -4   7   1 1061.79   52.09 
  -4   7   1 1074.29   47.00 
  -4   7   1  969.60   51.09 
  -3  -7   1  445.96   31.00 
   3  -7  -1  362.56   24.50 
  -3  -7   1  432.76   29.90 
  -3  -7   1  383.36   25.70 
  -3  -7   1  388.16   20.30 
   3  -7  -1  451.35   28.40 
   3  -7  -1  403.86   25.20 
  -3  -7   1  399.36   25.50 
  -3  -7   1  448.26   28.90 
   3  -7  -1  425.06   24.80 
   3  -7  -1  425.36   31.10 
  -3  -7   1  439.66   31.10 
  -3  -7   1  385.56   26.60 
  -3  -7   1  459.65   25.20 
  -3  -7   1  420.86   29.40 
   3  -7  -1  381.86   24.20 
   3  -7  -1  410.96   26.80 
  -3  -7   1  462.45   29.50 
  -3  -7   1  426.46   29.90 
  -3  -7   1  376.06   28.10 
   3  -7  -1  461.15   30.50 
  -3  -7   1  373.66   23.70 
  -3   7   1  402.96   19.90 
  -3   7   1  388.26   27.10 
   3   7  -1  381.96   27.00 
  -3   7   1  414.46   24.50 
  -3   7   1  447.26   29.60 
  -3   7   1  382.26   31.20 
   3   7  -1  342.37   26.40 
  -3   7   1  426.36   26.10 
   3   7  -1  390.66   31.90 
   3   7  -1  408.06   20.90 
   3   7  -1  365.36   26.30 
   3   7  -1  416.56   29.30 
   3   7  -1  406.36   29.40 
   3   7  -1  413.56   30.00 
   3   7  -1  396.16   27.60 
  -3   7   1  340.97   27.10 
   3   7  -1  424.46   37.10 
   3   7  -1  368.06   26.70 
   3   7  -1  394.26   26.30 
  -3   7   1  400.86   28.20 
  -3   7   1  422.76   35.40 
  -3   7   1  364.76   25.90 
  -3   7   1  428.66   25.20 
   3   7  -1  415.76   26.50 
   3   7  -1  348.67   29.90 
   2  -7  -1  211.78   20.30 
  -2  -7   1  215.58   25.20 
  -2  -7   1  187.88   19.40 
   2  -7  -1  236.18   19.20 
  -2  -7   1  219.08   12.70 
   2  -7  -1  214.18   19.00 
   2  -7  -1  222.18   14.40 
  -2  -7   1  213.38   22.90 
   2  -7  -1  220.18   17.80 
  -2  -7   1  259.67   26.40 
   2  -7  -1  225.18   26.10 
  -2  -7   1  232.18   24.60 
  -2  -7   1  166.18   18.80 
  -2  -7   1  237.48   25.00 
   2  -7  -1  232.88   20.20 
   2  -7  -1  234.88   15.00 
  -2  -7   1  237.58   25.30 
   2  -7  -1  212.68   23.00 
  -2  -7   1  233.88   17.90 
  -2  -7   1  244.58   25.10 
   2  -7  -1  233.28   25.60 
   2  -7  -1  262.57   19.60 
  -2  -7   1  189.38   21.60 
  -2   7   1  272.27   36.20 
  -2   7   1  260.27   19.60 
  -2   7   1  236.88   24.70 
  -2   7   1  237.68   27.30 
  -2   7   1  236.68   12.10 
  -2   7   1  173.68   18.70 
  -2   7   1  190.98   31.50 
  -2   7   1  203.08   17.50 
  -2   7   1  213.08   22.20 
   2   7  -1  149.49   20.40 
  -2   7   1  230.98   18.40 
   2   7  -1  248.98   29.70 
  -2   7   1  281.97   32.30 
   2   7  -1  202.78   26.00 
   2   7  -1  231.38   26.40 
   2   7  -1  198.88   21.70 
   2   7  -1  202.78   17.00 
   2   7  -1  239.38   24.70 
  -2   7   1  237.28   22.80 
   2   7  -1  216.78   15.40 
   2   7  -1  185.38   20.10 
   2   7  -1  207.38   24.30 
  -2   7   1  228.18   24.10 
  -2   7   1  216.58   17.10 
  -2   7   1  217.48   16.40 
  -2   7   1  229.08   25.50 
  -2   7   1  210.98   12.30 
   2   7  -1  215.38   22.00 
   2   7  -1  200.58   21.90 
   2   7  -1  182.88   20.60 
   2   7  -1  239.98   32.60 
  -2   7   1  176.98   21.30 
  -1  -7   1  251.07   12.60 
  -1  -7   1  280.07   22.70 
   1  -7  -1  258.27   19.60 
   1  -7  -1  235.28   20.40 
   1  -7  -1  240.58   19.50 
   1  -7  -1  250.37   20.90 
   1  -7  -1  277.87   28.80 
  -1  -7   1  272.17   18.90 
  -1  -7   1  248.08   21.20 
  -1  -7   1  223.78   18.00 
  -1  -7   1  268.77   20.70 
  -1  -7   1  195.48   22.80 
  -1  -7   1  274.07   23.30 
   1  -7  -1  281.57   17.10 
   1  -7  -1  215.98   23.70 
  -1  -7   1  252.47   21.20 
  -1  -7   1  250.97   24.30 
   1  -7  -1  273.17   21.10 
   1  -7  -1  230.58   18.50 
  -1  -7   1  283.77   21.90 
  -1  -7   1  267.77   20.30 
  -1  -7   1  217.48   23.90 
   1  -7  -1  255.07   16.90 
  -1  -7   1  213.28   22.30 
  -1   7   1  219.58   12.90 
   1   7  -1  246.78   20.30 
  -1   7   1  261.47   28.40 
  -1   7   1  278.67   22.70 
   1   7  -1  271.27   20.30 
   1   7  -1  249.78   20.30 
   1   7  -1  274.67   21.90 
  -1   7   1  297.87   31.90 
   1   7  -1  276.87   18.20 
  -1   7   1  255.27   25.10 
   1   7  -1  267.77   28.70 
  -1   7   1  263.27   34.80 
   1   7  -1  234.98   30.30 
   1   7  -1  283.87   20.40 
   1   7  -1  274.47   27.70 
   1   7  -1  253.87   33.70 
   1   7  -1  229.98   25.70 
  -1   7   1  266.97   20.70 
   1   7  -1  228.18   22.70 
   1   7  -1  275.17   21.30 
  -1   7   1  262.77   29.70 
   1   7  -1  262.67   17.80 
  -1   7   1  254.37   19.50 
  -1   7   1  200.98   22.50 
  -1   7   1  255.57   18.30 
   1   7  -1  235.38   27.80 
  -1   7   1  231.78   26.70 
   1   7  -1  285.87   22.60 
  -1   7   1  274.67   20.60 
  -1   7   1  305.87   37.80 
  -1   7   1  278.07   26.50 
  -1   7   1  256.57   14.90 
  -1   7   1  236.28   19.20 
  -1   7   1  267.37   20.40 
   0  -7  -1  422.46   26.50 
   0  -7   1  363.56   25.70 
   0  -7   1  404.16   26.50 
   0  -7   1  457.15   23.70 
   0  -7   1  386.66   26.60 
   0  -7  -1  424.06   28.00 
   0  -7  -1  434.76   23.40 
   0  -7   1  370.06   25.30 
   0  -7  -1  356.76   25.70 
   0  -7  -1  397.66   23.50 
   0  -7  -1  436.66   29.30 
   0  -7  -1  420.36   27.80 
   0  -7   1  425.86   26.90 
   0  -7  -1  382.26   25.70 
   0  -7   1  448.16   28.50 
   0  -7   1  406.86   23.40 
   0  -7   1  349.57   25.00 
   0  -7   1  390.86   27.60 
   0  -7  -1  388.66   25.60 
   0  -7   1  415.16   28.90 
   0  -7  -1  430.56   30.70 
   0  -7   1  379.66   26.60 
   0  -7  -1  425.96   25.90 
   0   7  -1  397.06   34.10 
   0   7   1  424.06   27.70 
   0   7  -1  424.36   25.60 
   0   7  -1  436.36   28.70
[truncated: 3,508,428 more chars]
