# Supplementary material
Source: MDPI journal article supplement (https://www.mdpi.com/2073-4352/13/7/1043)
Supplement: s1 [file s1 › 12 Tm Ha2019_92_0m_a.cif]

 
data_Ha2019_92_0m_a 
  
_audit_creation_method            'SHELXL-2014/7' 
_shelx_SHELXL_version_number      '2014/7' 
_chemical_name_systematic         ? 
_chemical_name_common             ? 
_chemical_melting_point           ? 
_chemical_formula_moiety          ? 
_chemical_formula_sum 
 'C4 H12 Cl O7 Tm' 
_chemical_formula_weight          376.52 
  
loop_ 
 _atom_type_symbol 
 _atom_type_description 
 _atom_type_scat_dispersion_real 
 _atom_type_scat_dispersion_imag 
 _atom_type_scat_source 
 'C'  'C'   0.0033   0.0016 
 'International Tables Vol C Tables 4.2.6.8 and 6.1.1.4' 
 'H'  'H'   0.0000   0.0000 
 'International Tables Vol C Tables 4.2.6.8 and 6.1.1.4' 
 'O'  'O'   0.0106   0.0060 
 'International Tables Vol C Tables 4.2.6.8 and 6.1.1.4' 
 'Cl'  'Cl'   0.1484   0.1585 
 'International Tables Vol C Tables 4.2.6.8 and 6.1.1.4' 
 'Tm'  'Tm'  -0.3139   5.2483 
 'International Tables Vol C Tables 4.2.6.8 and 6.1.1.4' 
  
_space_group_crystal_system       monoclinic 
_space_group_IT_number            14 
_space_group_name_H-M_alt         'P 21/n' 
_space_group_name_Hall            '-P 2yn' 
  
_shelx_space_group_comment 
; 
The symmetry employed for this shelxl refinement is uniquely defined 
by the following loop, which should always be used as a source of 
symmetry information in preference to the above space-group names. 
They are only intended as comments. 
; 
  
loop_ 
 _space_group_symop_operation_xyz 
 'x, y, z' 
 '-x+1/2, y+1/2, -z+1/2' 
 '-x, -y, -z' 
 'x-1/2, -y-1/2, z-1/2' 
  
_cell_length_a                    7.7747(2) 
_cell_length_b                    7.8392(2) 
_cell_length_c                    17.1517(5) 
_cell_angle_alpha                 90 
_cell_angle_beta                  97.5520(10) 
_cell_angle_gamma                 90 
_cell_volume                      1036.28(5) 
_cell_formula_units_Z             4 
_cell_measurement_temperature     100(2) 
_cell_measurement_reflns_used     9919 
_cell_measurement_theta_min       2.40 
_cell_measurement_theta_max       28.29 
  
_exptl_crystal_description        plate 
_exptl_crystal_colour             colourless 
_exptl_crystal_density_meas       ? 
_exptl_crystal_density_method     ? 
_exptl_crystal_density_diffrn     2.413 
_exptl_crystal_F_000              712 
_exptl_transmission_factor_min    ? 
_exptl_transmission_factor_max    ? 
_exptl_crystal_size_max           0.465 
_exptl_crystal_size_mid           0.120 
_exptl_crystal_size_min           0.074 
_exptl_absorpt_coefficient_mu     8.823 
_shelx_estimated_absorpt_T_min    0.105 
_shelx_estimated_absorpt_T_max    0.561 
_exptl_absorpt_correction_type    multi-scan 
_exptl_absorpt_correction_T_min   0.389 
_exptl_absorpt_correction_T_max   0.753 
_exptl_absorpt_process_details    'Bruker SADABS' 
_exptl_absorpt_special_details    ? 
_diffrn_ambient_temperature       100(2) 
_diffrn_radiation_wavelength      0.71073 
_diffrn_radiation_type            MoK\a 
_diffrn_source                    ? 
_diffrn_measurement_device_type   'Bruker APEX-II CCD' 
_diffrn_measurement_method        '\f and \w scans' 
_diffrn_detector_area_resol_mean  ? 
_diffrn_reflns_number             108715 
_diffrn_reflns_av_unetI/netI      0.0088 
_diffrn_reflns_av_R_equivalents   0.0397 
_diffrn_reflns_limit_h_min        -10 
_diffrn_reflns_limit_h_max        10 
_diffrn_reflns_limit_k_min        -10 
_diffrn_reflns_limit_k_max        10 
_diffrn_reflns_limit_l_min        -22 
_diffrn_reflns_limit_l_max        22 
_diffrn_reflns_theta_min          2.755 
_diffrn_reflns_theta_max          27.994 
_diffrn_reflns_theta_full         25.242 
_diffrn_measured_fraction_theta_max   1.000 
_diffrn_measured_fraction_theta_full  0.999 
_diffrn_reflns_Laue_measured_fraction_max    1.000 
_diffrn_reflns_Laue_measured_fraction_full   0.999 
_diffrn_reflns_point_group_measured_fraction_max   1.000 
_diffrn_reflns_point_group_measured_fraction_full  0.999 
_reflns_number_total              2504 
_reflns_number_gt                 2439 
_reflns_threshold_expression      'I > 2\s(I)' 
_reflns_Friedel_coverage          0.000 
_reflns_Friedel_fraction_max      . 
_reflns_Friedel_fraction_full     . 
  
_reflns_special_details 
; 
 Reflections were merged by SHELXL according to the crystal 
 class for the calculation of statistics and refinement. 
  
 _reflns_Friedel_fraction is defined as the number of unique 
 Friedel pairs measured divided by the number that would be 
 possible theoretically, ignoring centric projections and 
 systematic absences. 
; 
  
_computing_data_collection        'Bruker APEX2' 
_computing_cell_refinement        'Bruker SAINT' 
_computing_data_reduction         'Bruker SAINT' 
_computing_structure_solution     'SHELXS-97 (Sheldrick 2008)' 
_computing_structure_refinement 'SHELXL-2014/7 (Sheldrick, 2014)' 
_computing_molecular_graphics     'Bruker SHELXTL' 
_computing_publication_material   'Bruker SHELXTL' 
_refine_special_details           ? 
_refine_ls_structure_factor_coef  Fsqd 
_refine_ls_matrix_type            full 
_refine_ls_weighting_scheme       calc 
_refine_ls_weighting_details 
'w=1/[\s^2^(Fo^2^)+(0.0075P)^2^+1.3285P] where P=(Fo^2^+2Fc^2^)/3' 
_atom_sites_solution_primary      direct 
_atom_sites_solution_secondary    ? 
_atom_sites_solution_hydrogens    mixed 
_refine_ls_hydrogen_treatment     constr 
_refine_ls_extinction_method      none 
_refine_ls_extinction_coef        . 
_refine_ls_number_reflns          2504 
_refine_ls_number_parameters      126 
_refine_ls_number_restraints      0 
_refine_ls_R_factor_all           0.0113 
_refine_ls_R_factor_gt            0.0108 
_refine_ls_wR_factor_ref          0.0241 
_refine_ls_wR_factor_gt           0.0240 
_refine_ls_goodness_of_fit_ref    1.132 
_refine_ls_restrained_S_all       1.132 
_refine_ls_shift/su_max           0.006 
_refine_ls_shift/su_mean          0.000 
  
loop_ 
 _atom_site_label 
 _atom_site_type_symbol 
 _atom_site_fract_x 
 _atom_site_fract_y 
 _atom_site_fract_z 
 _atom_site_U_iso_or_equiv 
 _atom_site_adp_type 
 _atom_site_occupancy 
 _atom_site_site_symmetry_order 
 _atom_site_calc_flag 
 _atom_site_refinement_flags_posn 
 _atom_site_refinement_flags_adp 
 _atom_site_refinement_flags_occupancy 
 _atom_site_disorder_assembly 
 _atom_site_disorder_group 
Tm1 Tm 0.27523(2) 0.44811(2) 0.54133(2) 0.00826(3) Uani 1 1 d . . . . . 
Cl1 Cl 0.37573(6) 0.95782(6) 0.68391(3) 0.01487(9) Uani 1 1 d . . . . . 
O11 O 0.02071(17) 0.32159(18) 0.54335(8) 0.0167(3) Uani 1 1 d . . . . . 
O12 O -0.26218(16) 0.29024(17) 0.52553(8) 0.0126(3) Uani 1 1 d . . . . . 
C11 C -0.1125(2) 0.2358(2) 0.55107(10) 0.0099(3) Uani 1 1 d . . . . . 
C12 C -0.0962(3) 0.0646(3) 0.59002(13) 0.0188(4) Uani 1 1 d . . . . . 
H12A H 0.0201 0.0527 0.6194 0.052(6) Uiso 1 1 calc R U . . . 
H12B H -0.1149 -0.0250 0.5500 0.052(6) Uiso 1 1 calc R U . . . 
H12C H -0.1832 0.0541 0.6262 0.052(6) Uiso 1 1 calc R U . . . 
O21 O 0.54190(16) 0.56340(17) 0.57449(8) 0.0106(3) Uani 1 1 d . . . . . 
O22 O 0.81528(16) 0.63194(18) 0.59112(8) 0.0121(3) Uani 1 1 d . . . . . 
C21 C 0.6789(2) 0.6010(2) 0.62093(11) 0.0102(3) Uani 1 1 d . . . . . 
C22 C 0.6766(3) 0.6067(3) 0.70747(11) 0.0170(4) Uani 1 1 d . . . . . 
H22A H 0.7947 0.5910 0.7344 0.052(5) Uiso 1 1 calc R U . . . 
H22B H 0.6018 0.5155 0.7229 0.052(5) Uiso 1 1 calc R U . . . 
H22C H 0.6317 0.7174 0.7221 0.052(5) Uiso 1 1 calc R U . . . 
O1W O 0.41056(17) 0.18240(17) 0.53739(8) 0.0128(3) Uani 1 1 d . . . . . 
H11W H 0.4110 0.0990 0.5784 0.044(6) Uiso 1 1 d R U . . . 
H12W H 0.5290 0.1895 0.5275 0.044(6) Uiso 1 1 d R U . . . 
O2W O 0.16499(16) 0.63989(17) 0.62507(8) 0.0125(3) Uani 1 1 d . . . . . 
H21W H 0.0427 0.6539 0.6263 0.040(6) Uiso 1 1 d R U . . . 
H22W H 0.2154 0.7475 0.6423 0.040(6) Uiso 1 1 d R U . . . 
O3W O 0.31972(18) 0.34581(18) 0.67181(8) 0.0156(3) Uani 1 1 d . . . . . 
H31W H 0.2623 0.3934 0.7130 0.046(6) Uiso 1 1 d R U . . . 
H32W H 0.3415 0.2289 0.6867 0.046(6) Uiso 1 1 d R U . . . 
  
loop_ 
 _atom_site_aniso_label 
 _atom_site_aniso_U_11 
 _atom_site_aniso_U_22 
 _atom_site_aniso_U_33 
 _atom_site_aniso_U_23 
 _atom_site_aniso_U_13 
 _atom_site_aniso_U_12 
Tm1 0.00584(4) 0.00883(4) 0.01020(4) 0.00008(3) 0.00138(3) -0.00129(3) 
Cl1 0.0175(2) 0.0115(2) 0.0156(2) 0.00128(17) 0.00201(17) -0.00159(17) 
O11 0.0119(6) 0.0191(7) 0.0199(7) -0.0047(6) 0.0057(5) -0.0062(6) 
O12 0.0081(6) 0.0139(6) 0.0159(7) 0.0027(5) 0.0020(5) 0.0013(5) 
C11 0.0094(8) 0.0119(8) 0.0087(8) -0.0020(7) 0.0023(6) -0.0003(7) 
C12 0.0189(10) 0.0148(9) 0.0223(10) 0.0059(8) 0.0014(8) 0.0029(8) 
O21 0.0062(6) 0.0129(6) 0.0123(6) -0.0004(5) 0.0001(5) -0.0009(5) 
O22 0.0074(6) 0.0151(7) 0.0138(6) -0.0002(5) 0.0011(5) -0.0011(5) 
C21 0.0098(8) 0.0069(8) 0.0136(9) 0.0001(7) 0.0007(7) 0.0016(6) 
C22 0.0147(9) 0.0245(10) 0.0115(9) -0.0007(8) 0.0005(7) 0.0018(8) 
O1W 0.0116(6) 0.0124(6) 0.0151(6) 0.0023(5) 0.0041(5) 0.0015(5) 
O2W 0.0096(6) 0.0118(6) 0.0158(7) -0.0022(5) 0.0010(5) -0.0005(5) 
O3W 0.0211(7) 0.0127(6) 0.0139(7) 0.0016(6) 0.0061(5) 0.0032(6) 
  
_geom_special_details 
; 
 All esds (except the esd in the dihedral angle between two l.s. planes) 
 are estimated using the full covariance matrix.  The cell esds are taken 
 into account individually in the estimation of esds in distances, angles 
 and torsion angles; correlations between esds in cell parameters are only 
 used when they are defined by crystal symmetry.  An approximate (isotropic) 
 treatment of cell esds is used for estimating esds involving l.s. planes. 
; 
  
loop_ 
 _geom_bond_atom_site_label_1 
 _geom_bond_atom_site_label_2 
 _geom_bond_distance 
 _geom_bond_site_symmetry_2 
 _geom_bond_publ_flag 
Tm1 O11 2.2178(13) . ? 
Tm1 O21 2.2647(12) . ? 
Tm1 O2W 2.3197(13) . ? 
Tm1 O1W 2.3386(13) . ? 
Tm1 O12 2.3456(13) 3_566 ? 
Tm1 O3W 2.3596(13) . ? 
Tm1 O22 2.3728(13) 3_666 ? 
Tm1 O21 2.5920(13) 3_666 ? 
Tm1 O11 3.1280(15) 3_566 ? 
O11 C11 1.257(2) . ? 
O12 C11 1.263(2) . ? 
C11 C12 1.497(3) . ? 
C12 H12A 0.9800 . ? 
C12 H12B 0.9800 . ? 
C12 H12C 0.9800 . ? 
O21 C21 1.278(2) . ? 
O22 C21 1.260(2) . ? 
C21 C22 1.487(3) . ? 
C22 H22A 0.9800 . ? 
C22 H22B 0.9800 . ? 
C22 H22C 0.9800 . ? 
O1W H11W 0.9600 . ? 
O1W H12W 0.9600 . ? 
O2W H21W 0.9600 . ? 
O2W H22W 0.9600 . ? 
O3W H31W 0.9600 . ? 
O3W H32W 0.9600 . ? 
  
loop_ 
 _geom_angle_atom_site_label_1 
 _geom_angle_atom_site_label_2 
 _geom_angle_atom_site_label_3 
 _geom_angle 
 _geom_angle_site_symmetry_1 
 _geom_angle_site_symmetry_3 
 _geom_angle_publ_flag 
O11 Tm1 O21 164.53(5) . . ? 
O11 Tm1 O2W 82.94(5) . . ? 
O21 Tm1 O2W 89.22(5) . . ? 
O11 Tm1 O1W 90.45(5) . . ? 
O21 Tm1 O1W 87.83(5) . . ? 
O2W Tm1 O1W 143.07(5) . . ? 
O11 Tm1 O12 114.67(5) . 3_566 ? 
O21 Tm1 O12 75.71(5) . 3_566 ? 
O2W Tm1 O12 74.94(5) . 3_566 ? 
O1W Tm1 O12 139.07(5) . 3_566 ? 
O11 Tm1 O3W 81.55(5) . . ? 
O21 Tm1 O3W 83.23(5) . . ? 
O2W Tm1 O3W 69.70(5) . . ? 
O1W Tm1 O3W 73.40(5) . . ? 
O12 Tm1 O3W 138.80(5) 3_566 . ? 
O11 Tm1 O22 75.15(5) . 3_666 ? 
O21 Tm1 O22 119.51(4) . 3_666 ? 
O2W Tm1 O22 132.61(5) . 3_666 ? 
O1W Tm1 O22 79.32(5) . 3_666 ? 
O12 Tm1 O22 76.99(5) 3_566 3_666 ? 
O3W Tm1 O22 143.73(5) . 3_666 ? 
O11 Tm1 O21 125.23(5) . 3_666 ? 
O21 Tm1 O21 68.29(5) . 3_666 ? 
O2W Tm1 O21 141.41(4) . 3_666 ? 
O1W Tm1 O21 69.68(4) . 3_666 ? 
O12 Tm1 O21 69.43(4) 3_566 3_666 ? 
O3W Tm1 O21 133.49(4) . 3_666 ? 
O22 Tm1 O21 51.72(4) 3_666 3_666 ? 
O11 Tm1 O11 70.25(5) . 3_566 ? 
O21 Tm1 O11 118.66(4) . 3_566 ? 
O2W Tm1 O11 66.69(4) . 3_566 ? 
O1W Tm1 O11 143.80(4) . 3_566 ? 
O12 Tm1 O11 44.47(4) 3_566 3_566 ? 
O3W Tm1 O11 130.07(4) . 3_566 ? 
O22 Tm1 O11 66.46(4) 3_666 3_566 ? 
O21 Tm1 O11 96.22(4) 3_666 3_566 ? 
Tm1 Tm1 Tm1 134.557(4) 3_666 3_566 ? 
C11 O11 Tm1 172.13(14) . . ? 
C11 O12 Tm1 116.36(11) . 3_566 ? 
O11 C11 O12 121.14(17) . . ? 
O11 C11 C12 120.28(17) . . ? 
O12 C11 C12 118.57(17) . . ? 
C11 C12 H12A 109.5 . . ? 
C11 C12 H12B 109.5 . . ? 
H12A C12 H12B 109.5 . . ? 
C11 C12 H12C 109.5 . . ? 
H12A C12 H12C 109.5 . . ? 
H12B C12 H12C 109.5 . . ? 
C21 O21 Tm1 155.40(12) . . ? 
C21 O21 Tm1 89.39(10) . 3_666 ? 
Tm1 O21 Tm1 111.71(5) . 3_666 ? 
C21 O22 Tm1 100.26(11) . 3_666 ? 
O22 C21 O21 117.94(17) . . ? 
O22 C21 C22 121.37(17) . . ? 
O21 C21 C22 120.69(17) . . ? 
C21 C22 H22A 109.5 . . ? 
C21 C22 H22B 109.5 . . ? 
H22A C22 H22B 109.5 . . ? 
C21 C22 H22C 109.5 . . ? 
H22A C22 H22C 109.5 . . ? 
H22B C22 H22C 109.5 . . ? 
Tm1 O1W H11W 123.0 . . ? 
Tm1 O1W H12W 113.5 . . ? 
H11W O1W H12W 105.0 . . ? 
Tm1 O2W H21W 122.3 . . ? 
Tm1 O2W H22W 126.2 . . ? 
H21W O2W H22W 105.0 . . ? 
Tm1 O3W H31W 122.8 . . ? 
Tm1 O3W H32W 125.1 . . ? 
H31W O3W H32W 105.0 . . ? 
  
loop_ 
 _geom_hbond_atom_site_label_D 
 _geom_hbond_atom_site_label_H 
 _geom_hbond_atom_site_label_A 
 _geom_hbond_distance_DH 
 _geom_hbond_distance_HA 
 _geom_hbond_distance_DA 
 _geom_hbond_angle_DHA 
 _geom_hbond_site_symmetry_A 
O1W H11W Cl1  0.96 2.17 3.1091(14) 165.9 1_545 
O1W H12W O12  0.96 1.81 2.7141(18) 155.8 1_655 
O2W H21W O22  0.96 1.80 2.7054(18) 156.1 1_455 
O2W H22W Cl1  0.96 2.13 3.0790(14) 168.3 . 
O3W H31W Cl1  0.96 2.24 3.1926(14) 170.1 2_546 
O3W H32W Cl1  0.96 2.14 3.0757(15) 163.4 1_545 
  
_refine_diff_density_max    0.386 
_refine_diff_density_min   -0.579 
_refine_diff_density_rms    0.073 
  
_shelx_res_file 
; 
  
    Ha2019_92_0m_a.res created by SHELXL-2014/7 
  
  
TITL Ha2019_92_0m_a.res in P2(1)/n 
CELL  0.71073   7.7747   7.8392  17.1517   90.000   97.552   90.000 
ZERR    4.000   0.0002   0.0002   0.0005    0.000    0.001    0.000 
LATT 1 
SYMM 1/2-X, 1/2+Y, 1/2-Z 
SFAC C  H  O  Cl Tm 
UNIT 16 48 28 4 4 
LIST 4 ! automatically inserted. Change 6 to 4 for CHECKCIF!! 
OMIT -3 56 
L.S. 10 
ACTA 
  
SIZE 0.068 0.143 0.273 
  
FMAP 2 
rem DFIX 0.96  0.0001 O1w H11w O1w H12w O2w H21w O2w H22w O3w H31w O3w H32w 
rem dfix 1.523  0.0001 H11w H12w H21w H22w H31w H32w 
  
FREE Tm1 C21_$6 
EQIV $6 1-x, 1-y, 1-z 
BIND Tm1 Tm1_$6 
BIND Tm1 Tm1_$7 
EQIV $7 -x, 1-y, 1-z 
BIND Tm1 O11_$7 
HTAB 
EQIV $1 -x+3/2, y-1/2, -z+3/2 
EQIV $2 x, y-1, z 
HTAB O1W Cl1_$2 
EQIV $3 x+1, y, z 
HTAB O1W O12_$3 
EQIV $4 x-1, y, z 
HTAB O2W O22_$4 
HTAB O2W Cl1 
EQIV $5 -x+1/2, y-1/2, -z+3/2 
HTAB O3W Cl1_$5 
HTAB O3W Cl1_$2 
SIZE 0.074  0.120  0.465 
BOND $H 
FMAP 2 
rem DFIX 0.98  0.0001 C22 H22d C22 H22e C22 H22f 
rem dfix 1.601 0.0001 H22d H22e H22d H22f H22e H22f 
PLAN 5 
TEMP -173 
WGHT    0.007500    1.328500 
FVAR       0.33314   0.05177   0.05233   0.04415   0.03956   0.04648   0.77991 
TM1   5    0.275228    0.448111    0.541330    11.00000    0.00584    0.00883 = 
         0.01020    0.00008    0.00138   -0.00129 
CL1   4    0.375735    0.957820    0.683907    11.00000    0.01751    0.01149 = 
         0.01556    0.00128    0.00201   -0.00159 
O11   3    0.020707    0.321588    0.543352    11.00000    0.01194    0.01909 = 
         0.01989   -0.00469    0.00567   -0.00620 
O12   3   -0.262175    0.290242    0.525526    11.00000    0.00815    0.01388 = 
         0.01588    0.00272    0.00197    0.00134 
C11   1   -0.112513    0.235767    0.551067    11.00000    0.00937    0.01192 = 
         0.00873   -0.00199    0.00234   -0.00033 
C12   1   -0.096189    0.064632    0.590019    11.00000    0.01886    0.01482 = 
         0.02230    0.00587    0.00141    0.00286 
AFIX 137 
H12A  2    0.020135    0.052685    0.619367    11.00000   21.00000 
H12B  2   -0.114860   -0.024962    0.549953    11.00000   21.00000 
H12C  2   -0.183154    0.054114    0.626244    11.00000   21.00000 
AFIX   0 
O21   3    0.541900    0.563398    0.574495    11.00000    0.00621    0.01292 = 
         0.01230   -0.00043    0.00011   -0.00088 
O22   3    0.815282    0.631937    0.591124    11.00000    0.00745    0.01505 = 
         0.01378   -0.00020    0.00106   -0.00106 
C21   1    0.678917    0.601001    0.620931    11.00000    0.00984    0.00691 = 
         0.01363    0.00013    0.00075    0.00160 
C22   1    0.676573    0.606707    0.707472    11.00000    0.01466    0.02447 = 
         0.01151   -0.00075    0.00049    0.00180 
AFIX 137 
H22A  2    0.794676    0.591009    0.734424    11.00000   31.00000 
H22B  2    0.601774    0.515472    0.722917    11.00000   31.00000 
H22C  2    0.631723    0.717401    0.722088    11.00000   31.00000 
AFIX   0 
O1W   3    0.410556    0.182399    0.537390    11.00000    0.01164    0.01236 = 
         0.01506    0.00226    0.00412    0.00152 
AFIX   3 
H11W  2    0.410973    0.098960    0.578383    11.00000   41.00000 
H12W  2    0.529017    0.189482    0.527456    11.00000   41.00000 
AFIX   0 
O2W   3    0.164991    0.639890    0.625066    11.00000    0.00964    0.01176 = 
         0.01581   -0.00221    0.00103   -0.00055 
AFIX   3 
H21W  2    0.042699    0.653935    0.626252    11.00000   51.00000 
H22W  2    0.215429    0.747467    0.642270    11.00000   51.00000 
AFIX   0 
O3W   3    0.319718    0.345813    0.671811    11.00000    0.02106    0.01274 = 
         0.01393    0.00161    0.00607    0.00318 
AFIX   3 
H31W  2    0.262303    0.393449    0.713035    11.00000   61.00000 
H32W  2    0.341498    0.228950    0.686679    11.00000   61.00000 
AFIX   0 
HKLF 4 
  
REM  Ha2019_92_0m_a.res in P2(1)/n 
REM R1 =  0.0108 for    2439 Fo > 4sig(Fo)  and  0.0113 for all    2504 data 
REM    126 parameters refined using      0 restraints 
  
END 
  
WGHT      0.0075      1.3285 
  
REM Instructions for potential hydrogen bonds 
HTAB C12 Cl1_$2 
HTAB C22 Cl1_$1 
HTAB C22 O3W 
HTAB C22 Cl1 
HTAB O1W Cl1_$2 
HTAB O1W O12_$3 
HTAB O2W O22_$4 
HTAB O2W Cl1 
HTAB O3W Cl1_$5 
HTAB O3W Cl1_$2 
  
REM Highest difference peak  0.386,  deepest hole -0.579,  1-sigma level  0.073 
Q1    1  -0.1072  0.1436  0.5661  11.00000  0.05    0.39 
Q2    1   0.2811  0.4620  0.4854  11.00000  0.05    0.38 
Q3    1   0.6852  0.6015  0.6659  11.00000  0.05    0.37 
Q4    1  -0.0253  0.3927  0.5375  11.00000  0.05    0.35 
Q5    1   0.2850  0.4531  0.5917  11.00000  0.05    0.34 
; 
_shelx_res_checksum   78969 
  
_shelx_hkl_file 
; 
   1   0   0    1.40    1.00 
   1   0   0    7.90    1.60 
   1   0   0    5.60    1.70 
   1   0   0    7.00    1.40 
   1   0   0   11.50    2.40 
   1   0   0    7.20    1.80 
   1   0   0    5.70    1.30 
   1   0   0   13.40    2.00 
   1   0   0    6.00    1.50 
   1   0   0    6.70    1.40 
   1   0   0    8.70    1.40 
   1   0   0   11.60    2.00 
   1   0   0   10.90    2.00 
   1   0   0    1.60    1.00 
   1   0   0   11.70    1.70 
   1   0   0    6.30    1.20 
   1   0   0   10.90    2.20 
   1   0   0    7.00    1.80 
   1   0   0    5.40    1.20 
   1   0   0    4.50    1.40 
   1   0   0    9.50    1.50 
   1   0   0    9.50    1.30 
   1   0   0    7.60    1.50 
   1   0   0   13.10    2.00 
   1   0   0    8.20    1.30 
   1   0   0    9.90    1.90 
   1   0   0    6.40    1.50 
   1   0   0    9.00    1.90 
   1   0   0    8.50    1.20 
   1   0   0   12.60    2.00 
  -1   0   0    2.50    1.20 
  -1   0   0    4.50    1.30 
  -1   0   0    5.10    1.50 
  -1   0   0    1.90    1.10 
  -1   0   0    1.30    0.90 
  -1   0   0    1.80    1.00 
   2   0   0 7660.53  203.68 
   2   0   0 7676.73  203.98 
  -2   0   0 7485.35  204.78 
   2   0   0 7873.51  198.88 
   2   0   0 7637.24  202.58 
   2   0   0 7641.04  203.68 
   2   0   0 8039.80  205.58 
   2   0   0 7789.72  202.08 
   2   0   0 7808.52  205.08 
   2   0   0 7706.63  201.08 
   2   0   0 7766.22  207.78 
   2   0   0 7469.35  203.68 
   2   0   0 7679.23  203.98 
   2   0   0 7908.21  202.28 
   2   0   0 7475.75  202.08 
  -2   0   0 7669.33  204.18 
   2   0   0 7743.23  200.58 
   2   0   0 7687.43  200.88 
   2   0   0 7604.94  198.88 
   2   0   0 7852.41  203.08 
   2   0   0 7621.34  201.78 
   2   0   0 7633.04  201.88 
   2   0   0 7735.43  200.08 
   2   0   0 7623.14  202.48 
   2   0   0 7439.26  202.28 
   2   0   0 7635.44  202.88 
   2   0   0 8001.30  205.68 
   2   0   0 7875.41  200.68 
   2   0   0 7520.95  196.58 
   2   0   0 7665.73  200.18 
   2   0   0 7574.24  204.38 
   2   0   0 7986.50  204.18 
   2   0   0 7728.83  200.48 
   2   0   0 7455.75  203.68 
   2   0   0 7868.21  201.48 
   2   0   0 8021.70  200.58 
   2   0   0 7725.03  204.28 
  -2   0   0 7675.53  204.28 
  -2   0   0 7731.83  201.58 
  -2   0   0 7553.54  200.28 
  -2   0   0 7816.42  203.88 
  -2   0   0 7078.69  203.28 
  -2   0   0 7589.14  205.58 
  -2   0   0 7475.45  201.68 
   2   0   0 7815.32  204.18 
  -2   0   0 7846.71  204.28 
  -2   0   0 7797.42  204.38 
  -2   0   0 7732.33  200.78 
  -2   0   0 7743.73  199.98 
  -2   0   0 7555.54  202.98 
  -2   0   0 7805.62  201.58 
  -2   0   0 7559.04  200.88 
  -2   0   0 7946.91  200.38 
  -2   0   0 7696.23  200.48 
  -2   0   0 8049.29  204.78 
  -2   0   0 7792.72  201.28 
  -2   0   0 7771.02  207.08 
  -2   0   0 7674.23  199.68 
  -2   0   0 7766.42  201.28 
  -2   0   0 7698.43  204.08 
  -2   0   0 7461.55  205.48 
  -2   0   0 7698.73  200.38 
  -2   0   0 7654.93  204.48 
  -2   0   0 7730.13  201.98 
   3   0   0    3.20    1.90 
   3   0   0    2.00    1.80 
   3   0   0    8.30    3.40 
   3   0   0    6.40    3.00 
   3   0   0    3.30    1.90 
   3   0   0   -1.40    1.90 
  -3   0   0    9.10    2.70 
   3   0   0    0.60    1.80 
  -3   0   0    2.20    3.10 
  -3   0   0    8.10    3.20 
  -3   0   0    1.20    1.60 
  -3   0   0    1.40    2.50 
  -3   0   0    6.40    3.20 
  -3   0   0    2.50    1.70 
  -3   0   0    2.20    1.80 
  -3   0   0   -0.70    1.70 
  -3   0   0    2.70    2.00 
  -3   0   0    1.70    1.60 
  -3   0   0    0.40    1.90 
  -3   0   0   -2.30    1.90 
  -3   0   0   -1.20    2.00 
  -3   0   0   -0.60    1.40 
  -3   0   0    4.00    3.10 
   3   0   0    0.10    2.10 
  -3   0   0   -1.60    1.00 
   3   0   0    2.60    2.40 
   3   0   0    1.10    1.70 
   3   0   0    1.00    2.30 
   3   0   0    6.40    2.80 
   3   0   0   -0.50    1.70 
   3   0   0    0.70    1.70 
  -3   0   0    0.20    1.90 
  -3   0   0    4.20    3.10 
   3   0   0    4.60    3.10 
   3   0   0    1.60    1.80 
   3   0   0    1.70    3.20 
   3   0   0    5.10    2.20 
   3   0   0    3.80    1.60 
   3   0   0    2.50    2.30 
   3   0   0    5.40    2.10 
  -3   0   0    1.20    2.20 
   3   0   0    2.30    2.50 
   3   0   0    1.80    2.10 
  -3   0   0    1.10    2.20 
   3   0   0    3.20    1.50 
   3   0   0    2.20    2.10 
  -3   0   0    5.20    2.90 
  -3   0   0    4.20    2.20 
   3   0   0    5.70    2.70 
   3   0   0    0.10    1.80 
   3   0   0    1.00    2.40 
   4   0   0 1724.13   60.39 
   4   0   0 1648.73   56.99 
   4   0   0 1711.63   53.59 
   4   0   0 1887.11   61.19 
   4   0   0 1780.42   57.09 
   4   0   0 1704.43   47.90 
   4   0   0 1784.62   54.49 
   4   0   0 1754.12   58.79 
   4   0   0 1736.33   57.39 
  -4   0   0 1777.82   54.29 
  -4   0   0 1699.73   60.29 
  -4   0   0 1730.03   62.89 
  -4   0   0 1765.22   57.79 
  -4   0   0 1836.62   54.59 
  -4   0   0 1713.93   60.29 
  -4   0   0 1773.82   60.49 
  -4   0   0 1794.22   54.89 
  -4   0   0 1783.12   54.69 
  -4   0   0 1733.23   58.59 
  -4   0   0 1720.83   55.39 
  -4   0   0 1743.03   53.59 
  -4   0   0 1708.23   60.19 
  -4   0   0 1714.23   62.39 
   4   0   0 1730.13   56.29 
   4   0   0 1752.92   53.19 
   4   0   0 1813.42   53.69 
  -4   0   0 1734.93   60.09 
  -4   0   0 1752.22   63.69 
  -4   0   0 1714.23   60.59 
  -4   0   0 1811.12   55.79 
  -4   0   0 1651.33   63.39 
   4   0   0 1744.73   54.89 
   4   0   0 1771.82   50.59 
   4   0   0 1735.53   57.19 
   4   0   0 1693.83   56.69 
   4   0   0 1791.22   53.59 
   4   0   0 1725.93   56.39 
  -4   0   0 1825.52   60.79 
   4   0   0 1677.43   53.79 
  -4   0   0 1777.02   60.89 
   4   0   0 1711.33   50.29 
   4   0   0 1704.33   58.69 
   4   0   0 1718.83   60.29 
   4   0   0 1692.63   54.89 
   4   0   0 1720.73   46.30 
  -4   0   0 1735.53   53.09 
   4   0   0 1782.42   58.69 
  -4   0   0 1677.73   55.39 
  -5   0   0    2.20    3.60 
   5   0   0    1.40    1.20 
  -5   0   0    0.00    2.70 
  -5   0   0   -2.40    1.60 
   5   0   0    4.90    4.20 
   5   0   0    0.80    2.70 
   5   0   0    1.90    3.60 
   5   0   0    4.80    4.00 
   5   0   0    5.40    3.50 
  -5   0   0    1.00    2.60 
   5   0   0    8.80    4.70 
  -5   0   0    0.30    2.00 
   5   0   0    3.30    2.20 
   5   0   0   -2.80    2.30 
   5   0   0   -1.70    2.40 
   5   0   0    2.30    2.90 
   5   0   0    6.90    4.50 
  -5   0   0    1.30    3.40 
  -5   0   0    1.10    2.80 
  -5   0   0   -0.40    3.20 
  -5   0   0    1.10    3.90 
  -5   0   0    7.50    4.90 
  -5   0   0   -0.10    2.10 
  -5   0   0    3.10    2.50 
  -5   0   0    2.70    3.40 
  -5   0   0    0.40    2.30 
  -5   0   0    1.60    2.30 
  -5   0   0    1.50    3.40 
  -5   0   0   -2.90    2.60 
   5   0   0   -0.70    1.40 
  -5   0   0    2.80    3.50 
   5   0   0    2.60    4.00 
   5   0   0   -0.70    2.70 
   5   0   0   -1.60    2.00 
   5   0   0    3.90    2.70 
  -5   0   0    4.60    3.90 
  -5   0   0    3.00    3.00 
  -5   0   0    6.50    5.50 
  -5   0   0    1.40    2.40 
   5   0   0    2.00    1.80 
   6   0   0  721.53   37.70 
  -6   0   0  691.13   36.10 
  -6   0   0  803.22   44.20 
  -6   0   0  700.73   37.70 
  -6   0   0  713.33   30.60 
   6   0   0  744.63   33.20 
  -6   0   0  723.83   41.80 
  -6   0   0  766.32   40.50 
  -6   0   0  726.33   41.60 
  -6   0   0  751.02   30.90 
  -6   0   0  710.43   31.20 
  -6   0   0  693.63   38.00 
  -6   0   0  662.83   37.10 
  -6   0   0  749.42   32.00 
   6   0   0  721.93   25.60 
   6   0   0  660.43   37.30 
  -6   0   0  670.73   37.40 
  -6   0   0  720.03   28.80 
  -6   0   0  741.03   39.30 
  -6   0   0  734.43   33.60 
   6   0   0  751.92   35.30 
   6   0   0  725.03   35.60 
   6   0   0  735.63   26.60 
  -6   0   0  693.23   35.30 
   6   0   0  780.42   33.00 
   6   0   0  744.83   26.20 
   6   0   0  718.03   24.40 
  -6   0   0  632.74   36.80 
   6   0   0  701.33   36.20 
   6   0   0  812.12   38.90 
   6   0   0  696.03   31.00 
   6   0   0  733.43   33.40 
   6   0   0  632.94   30.30 
   6   0   0  753.82   34.80 
  -7   0   0   -0.40    6.30 
  -7   0   0   -1.90    5.20 
  -7   0   0    4.00    5.90 
  -7   0   0   -1.40    3.10 
  -7   0   0    3.30    4.10 
   7   0   0   -5.30    3.10 
   7   0   0   -3.70    5.60 
   7   0   0   -1.00    2.20 
  -7   0   0    3.50    4.80 
  -7   0   0    2.20    3.00 
  -7   0   0   10.40    7.70 
  -7   0   0    3.00    5.00 
  -7   0   0    4.20    3.90 
   7   0   0   -0.10    5.20 
   7   0   0   -4.60    3.60 
   7   0   0   -1.90    3.70 
   7   0   0    1.20    3.60 
  -7   0   0   -4.00    3.70 
  -7   0   0   -0.50    4.60 
  -7   0   0    5.20    5.40 
  -7   0   0    5.00    5.60 
  -7   0   0   -1.80    4.30 
  -7   0   0   -3.20    5.80 
   7   0   0    6.10    4.60 
   7   0   0    4.80    5.90 
   7   0   0   -0.40    4.50 
   7   0   0    5.90    6.30 
  -7   0   0    2.90    3.80 
   7   0   0    3.70    4.40 
   7   0   0    0.80    4.80 
   7   0   0    4.50    4.60 
   7   0   0   -2.20    4.00 
  -8   0   0  246.38   30.40 
   8   0   0  214.08   24.60 
   8   0   0  262.97   28.90 
   8   0   0  254.47   19.50 
   8   0   0  204.68   25.70 
   8   0   0  275.17   26.30 
   8   0   0  199.08   26.40 
  -8   0   0  214.38   27.90 
  -8   0   0  252.37   36.10 
   8   0   0  237.18   23.70 
  -8   0   0  246.98   30.40 
  -8   0   0  196.98   27.30 
   8   0   0  245.18   27.80 
   8   0   0  238.88   26.00 
  -8   0   0  232.18   19.00 
   8   0   0  229.78   24.20 
  -8   0   0  197.88   30.50 
   8   0   0  264.27   30.30 
  -8   0   0  254.57   32.60 
  -8   0   0  210.28   27.50 
  -8   0   0  237.08   33.70 
   8   0   0  245.48   19.20 
  -8   0   0  194.48   19.50 
   8   0   0  246.98   31.00 
   8   0   0  235.48   19.00 
  -8   0   0  235.08   22.50 
  -9   0   0    3.90    7.90 
  -9   0   0   -0.70    6.50 
   9   0   0   17.70    9.80 
   9   0   0   10.20    8.60 
  -9   0   0    2.90    6.90 
  -9   0   0    0.90    9.30 
   9   0   0    1.10    6.30 
  -9   0   0    4.00    9.50 
   9   0   0    7.10   12.00 
  -9   0   0    4.20    9.00 
  -9   0   0    2.50    7.80 
   9   0   0    7.80    6.70 
   9   0   0   10.80    9.50 
  -9   0   0   -2.50    7.20 
   9   0   0    1.50    5.80 
   9   0   0    4.00   10.40 
   9   0   0    0.90    7.70 
  -9   0   0    5.50   11.20 
  10   0   0   12.80   13.10 
 -10   0   0    3.10   13.80 
 -10   0   0   -2.00    8.40 
 -10   0   0    6.30    9.40 
  10   0   0    8.30    9.00 
 -10   0   0    5.10   11.40 
  10   0   0   -8.40    7.00 
  10   0   0    2.70    9.70 
  10   0   0    2.70    9.70 
 -10   0   0    9.10   10.70 
 -10   0   0   15.30   11.80 
  10   0   0   16.50   14.20 
  10   0   0    9.60   11.00 
  10   0   0    3.40   12.90 
   0  -1   0    0.90    0.70 
   0  -1   0    0.10    0.50 
   0  -1   0    0.40    0.50 
   0  -1   0    1.60    0.90 
   0  -1   0    0.20    0.50 
   0  -1   0    3.10    1.00 
   0  -1   0   -0.10    0.50 
   0  -1   0   -0.20    0.50 
   0  -1   0    0.30    0.40 
   0  -1   0    0.50    0.60 
   0  -1   0   -0.10    0.70 
   0  -1   0    0.00    0.50 
   0  -1   0    3.30    1.20 
   0  -1   0   -0.10    0.50 
   0  -1   0    4.50    1.10 
   0  -1   0   -0.10    0.50 
   0  -1   0    0.50    0.70 
   0  -1   0    0.00    0.50 
   0   1   0    7.00    2.10 
   0   1   0    6.50    1.40 
   0   1   0    0.40    0.70 
   0   1   0    7.20    1.50 
   0   1   0    0.80    0.80 
   0   1   0    0.40    0.60 
   0   1   0    1.10    0.90 
   0   1   0    6.70    1.60 
   0   1   0   10.60    2.40 
   0   1   0   -0.30    0.40 
   0   1   0    0.20    0.40 
   0   1   0    6.00    1.70 
   0   1   0   -0.20    0.50 
   0   1   0    0.60    0.80 
   0   1   0    2.00    0.80 
   0   1   0    3.30    1.10 
   0   1   0    0.90    0.60 
   1  -1   0   71.39    4.90 
   1  -1   0   73.29    5.20 
   1  -1   0   70.89    5.60 
  -1  -1   0   83.89    6.80 
  -1  -1   0   77.09    4.50 
  -1  -1   0   72.79    5.60 
  -1  -1   0   78.89    4.70 
   1  -1   0   68.79    4.70 
  -1  -1   0   72.69    5.10 
   1  -1   0   72.29    4.80 
  -1  -1   0   79.79    6.40 
  -1  -1   0   69.59    4.20 
   1  -1   0   80.49    5.90 
   1  -1   0   69.79    4.90 
  -1  -1   0   79.49    5.60 
   1  -1   0   81.69    5.50 
  -1  -1   0   76.29    5.30 
   1  -1   0   64.49    5.50 
   1  -1   0   88.29    5.30 
   1  -1   0   46.80    4.90 
   1  -1   0   69.19    5.80 
   1  -1   0   72.99    4.70 
   1  -1   0   69.19    4.90 
   1  -1   0   74.69    3.00 
  -1  -1   0   44.80    7.10 
  -1  -1   0   53.89    7.20 
   1  -1   0   76.59    4.70 
   1  -1   0   85.59    5.80 
   1  -1   0   79.19    5.40 
  -1  -1   0   53.69    5.50 
   1  -1   0   78.89    5.30 
   1  -1   0   84.49    5.50 
   1  -1   0   78.89    5.70 
   1  -1   0   75.09    5.10 
   1  -1   0   65.09    5.10 
   1  -1   0   74.29    5.70 
  -1   1   0   84.29    5.30 
   1   1   0   65.49    7.50 
  -1   1   0   75.59    6.00 
   1   1   0   75.39    5.90 
   1   1   0   80.49    5.50 
  -1   1   0   67.69    4.90 
  -1   1   0   84.59    6.50 
  -1   1   0   78.29    5.60 
  -1   1   0   82.89    5.40 
  -1   1   0   70.29    5.60 
   1   1   0   84.89    5.20 
   1   1   0   81.09    4.70 
   1   1   0   75.59    3.30 
   1   1   0   81.99    6.10 
  -1   1   0   60.29    4.50 
  -1   1   0   79.49    5.40 
  -1   1   0   50.39    4.20 
   1   1   0   73.59    4.50 
  -1   1   0   75.99    5.30 
   1   1   0   80.89    4.60 
  -1   1   0   67.99    5.50 
  -1   1   0   64.09    4.90 
  -1   1   0   72.79    4.20 
  -1   1   0   73.09    5.00 
   1   1   0   69.79    5.20 
   1   1   0   80.49    5.60 
   1   1   0   78.89    2.80 
   1   1   0   73.19    5.30 
   1   1   0   77.69    5.00 
   1   1   0   72.69    4.70 
   1   1   0   77.99    5.50 
   1   1   0   69.89    4.70 
  -1   1   0   72.39    5.20 
  -1   1   0   88.19    5.10 
  -1   1   0   55.59    5.80 
  -1   1   0   73.09    4.70 
  -1   1   0   75.19    5.30 
  -1   1   0   76.09    5.10 
  -1   1   0   79.69    5.80 
   1   1   0   69.49    4.80 
   1   1   0   78.39    5.70 
   1   1   0   75.89    5.10 
   1   1   0   64.79    7.20 
  -1   1   0   65.79    4.80 
   1   1   0   60.59    7.90 
  -1   1   0   77.29    4.60 
  -1   1   0   71.49    5.40 
   1   1   0   81.69    3.60 
   1   1   0   80.99    4.30 
   1   1   0   69.19    4.20 
  -2  -1   0 1021.00   27.20 
   2  -1   0 1007.80   34.00 
  -2  -1   0 1029.70   37.20 
  -2  -1   0  977.60   30.60 
   2  -1   0  952.10   34.40 
  -2  -1   0 1017.70   33.60 
  -2  -1   0 1016.30   37.20 
  -2  -1   0  963.20   33.30 
   2  -1   0  981.70   33.80 
  -2  -1   0  962.40   33.40 
  -2  -1   0  990.30   35.50 
   2  -1   0 1019.40   32.30 
   2  -1   0  974.50   31.00 
   2  -1   0 1057.69   35.20 
   2  -1   0 1019.10   35.30 
   2  -1   0 1017.60   36.30 
   2  -1   0  997.60   28.50 
   2  -1   0 1011.90   30.20 
   2  -1   0 1041.50   30.60 
   2  -1   0  965.50   33.40 
   2  -1   0 1070.29   34.50 
   2  -1   0  990.10   32.50 
   2  -1   0  967.30   32.80 
   2  -1   0  984.70   33.50 
   2  -1   0 1010.70   33.30 
  -2  -1   0  955.50   32.10 
  -2  -1   0 1003.70   31.20 
  -2  -1   0  950.40   33.00 
   2  -1   0 1002.80   32.30 
  -2  -1   0 1017.90   28.60 
   2  -1   0 1000.70   32.20 
   2  -1   0 1046.90   36.00 
  -2  -1   0 1001.90   30.50 
  -2  -1   0 1012.00   28.50 
  -2  -1   0  986.80   34.80 
  -2  -1   0 1026.10   33.50 
   2  -1   0 1011.10   32.00 
   2  -1   0  965.00   31.20 
  -2  -1   0 1005.40   33.50 
   2  -1   0  968.80   30.80 
   2  -1   0 1001.30   32.60 
   2  -1   0 1017.30   34.00 
   2  -1   0  990.60   27.40 
  -2  -1   0 1013.80   30.50 
   2  -1   0 1025.00   28.60 
   2  -1   0 1020.10   33.00 
  -2  -1   0  986.80   33.90 
  -2  -1   0 1029.10   33.80 
   2  -1   0  969.40   32.80 
   2  -1   0  974.00   30.60 
  -2  -1   0  978.10   33.40 
   2  -1   0 1023.90   33.10 
   2  -1   0  994.80   32.50 
   2  -1   0 1024.90   34.70 
   2  -1   0 1008.80   32.80 
  -2  -1   0 1000.90   33.80 
   2   1   0  964.90   37.20 
  -2   1   0  987.60   35.60 
   2   1   0 1030.90   35.00 
  -2   1   0  982.40   30.60 
   2   1   0  998.00   29.30 
  -2   1   0 1004.00   35.50 
   2   1   0  968.10   32.70 
  -2   1   0  982.60   32.70 
  -2   1   0  981.90   29.30 
  -2   1   0 1021.70   30.10 
  -2   1   0  978.70   33.00 
   2   1   0  972.20   30.00 
   2   1   0 1003.30   30.50 
   2   1   0 1019.10   28.20 
  -2   1   0  997.90   31.90 
   2   1   0 1018.90   33.90 
   2   1   0 1015.30   32.00 
   2   1   0  994.50   35.30 
   2   1   0  971.30   31.90 
   2   1   0 1033.60   27.60 
  -2   1   0 1015.80   34.00 
   2   1   0  995.70   29.20 
  -2   1   0 1037.80   33.80 
  -2   1   0 1019.20   31.30 
   2   1   0  986.30   31.70 
   2   1   0  968.40   32.90 
   2   1   0 1034.50   36.20 
  -2   1   0  954.50   32.90 
   2   1   0  971.90   27.80 
  -2   1   0  969.10   32.70 
  -2   1   0  956.30   34.40 
  -2   1   0  969.10   34.70 
  -2   1   0  988.50   28.30 
   2   1   0 1040.30   33.90 
   2   1   0 1008.20   33.10 
   2   1   0  945.71   37.60 
   2   1   0 1021.60   31.10 
   2   1   0  913.71   37.20 
   2   1   0  990.30   31.50 
   2   1   0  996.60   27.30 
   2   1   0  994.20   33.60 
   2   1   0  993.10   33.10 
   2   1   0  977.70   35.40 
   2   1   0 1049.99   35.10 
   2   1   0 1007.10   33.30 
  -2   1   0 1005.70   34.50 
   2   1   0 1042.80   32.70 
   2   1   0  989.90   33.20 
   2   1   0 1013.20   35.70 
   2   1   0  989.90   33.10 
   2   1   0  987.50   34.90 
  -2   1   0 1027.10   32.50 
  -2   1   0  983.90   28.00 
  -2   1   0 1003.10   32.50 
  -2   1   0 1047.50   35.00 
  -2   1   0 1011.70   34.10 
  -2   1   0 1001.80   33.10 
  -2   1   0 1022.90   31.40 
  -2   1   0 1029.90   32.80 
   2   1   0 1027.60   33.60 
   2   1   0 1043.00   27.40 
  -2   1   0 1033.70   33.70 
  -2   1   0  953.60   32.40 
  -2   1   0  994.10   33.50 
  -2   1   0 1006.40   34.70 
   3  -1   0  572.14   21.20 
  -3  -1   0  581.44   19.70 
  -3  -1   0  599.04   25.60 
  -3  -1   0  569.94   24.30 
  -3  -1   0  611.04   26.80 
  -3  -1   0  569.34   25.20 
   3  -1   0  535.25   24.80 
  -3  -1   0  572.94   25.00 
  -3  -1   0  553.74   18.30 
   3  -1   0  610.94   23.60 
   3  -1   0  572.44   20.00 
  -3  -1   0  553.74   24.60 
   3  -1   0  588.24   23.90 
   3  -1   0  580.24   19.90 
  -3  -1   0  556.04   24.80 
   3  -1   0  613.24   19.00 
   3  -1   0  616.54   23.40 
   3  -1   0  571.04   21.30 
  -3  -1   0  596.04   24.30 
  -3  -1   0  552.24   21.20 
   3  -1   0  599.84   23.80 
   3  -1   0  591.14   22.90 
   3  -1   0  559.14   20.90 
   3  -1   0  546.85   23.60 
  -3  -1   0  602.24   24.10 
  -3  -1   0  612.04   27.70 
  -3  -1   0  575.24   22.40 
  -3  -1   0  541.55   19.30 
  -3  -1   0  563.24   24.90 
   3  -1   0  587.94   24.60 
   3  -1   0  583.14   26.10 
  -3  -1   0  566.94   23.30 
   3  -1   0  572.64   19.70 
  -3  -1   0  561.14   27.70 
   3  -1   0  575.74   23.40 
  -3  -1   0  560.14   27.90 
  -3  -1   0  558.24   21.50 
  -3  -1   0  600.04   26.60 
   3  -1   0  560.04   26.00 
   3  -1   0  581.64   28.70 
  -3  -1   0  569.94   24.00 
  -3  -1   0  604.64   28.60 
   3  -1   0  538.65   24.20 
   3  -1   0  572.34   20.10 
   3  -1   0  570.24   25.40 
   3  -1   0  556.04   23.40 
   3  -1   0  574.44   21.00 
   3  -1   0  590.44   22.40 
   3  -1   0  553.84   22.40 
   3  -1   0  599.74   28.20 
   3  -1   0  580.94   24.80 
   3  -1   0  549.25   23.30 
   3   1   0  554.94   23.50 
  -3   1   0  605.64   20.00 
   3   1   0  574.84   20.10 
   3   1   0  601.34   25.90 
  -3   1   0  571.14   23.10 
  -3   1   0  563.44   25.40 
  -3   1   0  591.34   27.60 
   3   1   0  576.24   19.40 
   3   1   0  560.54   24.30 
   3   1   0  565.64   29.40 
   3   1   0  561.04   22.60 
  -3   1   0  579.84   21.60 
   3   1   0  544.45   19.50 
   3   1   0  552.74   18.80 
  -3   1   0  585.84   21.80 
   3   1   0  568.94   23.50 
  -3   1   0  568.54   23.10 
  -3   1   0  573.44   24.50 
  -3   1   0  570.64   25.30 
  -3   1   0  558.24   25.70 
   3   1   0  566.84   18.80 
   3   1   0  568.14   24.80 
  -3   1   0  598.14   25.40 
   3   1   0  562.84   22.60 
  -3   1   0  583.14   24.60 
  -3   1   0  571.84   27.00 
   3   1   0  552.84   27.30 
   3   1   0  532.15   24.50 
  -3   1   0  584.74   24.30 
  -3   1   0  550.74   20.20 
  -3   1   0  547.65   23.10 
  -3   1   0  569.14   26.00 
  -3   1   0  578.24   24.70 
  -3   1   0  536.45   22.70 
  -3   1   0  572.64   24.20 
  -3   1   0  584.94   25.00 
  -3   1   0  585.74   21.50 
   3   1   0  572.54   24.60 
   3   1   0  586.74   22.90 
  -3   1   0  613.44   24.20 
   3   1   0  582.64   18.60 
   3   1   0  556.04   23.10 
   3   1   0  591.14   18.60 
  -3   1   0  584.64   25.90 
   3   1   0  500.35   23.70 
   3   1   0  553.24   24.50 
   3   1   0  568.74   23.70 
   3   1   0  570.44   22.90 
   3   1   0  544.95   28.50 
   3   1   0  568.24   20.70 
  -3   1   0  600.64   25.50 
   3   1   0  553.94   22.20 
  -4  -1   0  218.48   15.90 
  -4  -1   0  215.78   17.00 
   4  -1   0  218.28   14.30 
   4  -1   0  215.78   11.70 
  -4  -1   0  214.68   16.00 
   4  -1   0  217.88   11.70 
   4  -1   0  218.08   15.20 
   4  -1   0  221.28   14.30 
   4  -1   0  205.18   15.60 
   4  -1   0  217.48   13.40 
   4  -1   0  222.88   16.70 
   4  -1   0  202.48   11.50 
  -4  -1   0  203.88   16.20 
  -4  -1   0  194.08   14.10 
  -4  -1   0  185.78   16.80 
  -4  -1   0  226.78   15.90 
   4  -1   0  204.68   16.00 
   4  -1   0  204.48   13.80 
  -4  -1   0  236.58   16.30 
   4  -1   0  210.28   14.60 
  -4  -1   0  213.98   11.30 
  -4  -1   0  211.48   14.80 
   4  -1   0  211.58   10.70 
  -4  -1   0  211.28   13.20 
  -4  -1   0  234.68   16.60 
   4  -1   0  209.78   11.80 
   4  -1   0  205.18   10.70 
   4  -1   0  221.08   10.60 
  -4  -1   0  188.68   12.10 
   4  -1   0  199.98   11.90 
  -4  -1   0  181.78   20.10 
   4  -1   0  236.78   12.20 
  -4  -1   0  209.18   10.30 
  -4  -1   0  209.18   21.60 
  -4  -1   0  224.58   12.70 
  -4  -1   0  186.68   12.90 
   4  -1   0  220.38   14.30 
  -4  -1   0  183.68   14.80 
  -4  -1   0  209.08   11.10 
  -4  -1   0  197.98   12.90 
  -4  -1   0  178.48   19.70 
  -4  -1   0  193.18   14.10 
  -4  -1   0  218.88   13.00 
   4   1   0  204.08   13.40 
   4   1   0  207.68   10.00 
  -4   1   0  228.88   17.50 
  -4   1   0  238.08   18.30 
   4   1   0  218.28   16.00 
   4   1   0  234.88   20.00 
  -4   1   0  216.38   15.80 
   4   1   0  201.78   18.60 
   4   1   0  205.38   10.50 
  -4   1   0  224.88   13.90 
   4   1   0  176.78   13.10 
   4   1   0  220.48   15.30 
  -4   1   0  215.68   12.40 
  -4   1   0  213.98   15.60 
   4   1   0  207.88   10.40 
  -4   1   0  197.68   16.60 
  -4   1   0  200.58   14.50 
  -4   1   0  203.78   16.40 
   4   1   0  208.08   13.70 
  -4   1   0  194.18   15.30 
  -4   1   0  223.08   11.80 
   4   1   0  217.18   10.90 
   4   1   0  193.98   13.70 
   4   1   0  211.38   11.80 
   4   1   0  214.88   10.30 
   4   1   0  210.38   14.30 
   4   1   0  214.78   10.50 
  -4   1   0  192.18   15.20 
  -4   1   0  210.58   15.60 
   4   1   0  227.88   12.90 
  -4   1   0  226.08   13.80 
  -4   1   0  218.88   16.10 
  -4   1   0  194.68   11.70 
  -4   1   0  216.08   16.20 
  -4   1   0  222.48   14.40 
  -4   1   0  207.58   13.80 
   4   1   0  213.08   10.30 
  -4   1   0  214.28   14.20 
  -4   1   0  188.48   15.10 
   4   1   0  218.28   16.40 
   4   1   0  212.98   10.40 
   4   1   0  207.28   14.50 
  -4   1   0  235.58   12.90 
   4   1   0  179.78   14.40 
   5  -1   0 2513.85   84.49 
   5  -1   0 2514.95   78.69 
  -5  -1   0 2506.95   90.29 
  -5  -1   0 2529.95   84.39 
  -5  -1   0 2415.76   84.49 
   5  -1   0 2366.26   77.79 
   5  -1   0 2489.65   82.89 
  -5  -1   0 2590.44   79.99 
   5  -1   0 2509.25   83.49 
  -5  -1   0 2542.85   88.49 
  -5  -1   0 2473.35   83.09 
  -5  -1   0 2464.95   75.19 
   5  -1   0 2409.86   71.89 
   5  -1   0 2364.66   83.69 
  -5  -1   0 2356.16   82.79 
   5  -1   0 2395.76   76.09 
  -5  -1   0 2486.95   75.69 
  -5  -1   0 2187.78   69.99 
  -5  -1   0 2480.45   72.99 
  -5  -1   0 2314.77   87.79 
   5  -1   0 2417.66   71.99 
   5  -1   0 2399.16   80.79 
  -5  -1   0 2454.85   83.39 
  -5  -1   0 2423.36   80.79 
   5  -1   0 2472.55   73.79 
   5  -1   0 2491.05   78.39 
  -5  -1   0 2481.65   83.89 
   5  -1   0 2389.56   79.09 
   5  -1   0 2437.86   72.69 
   5  -1   0 2508.75   73.89 
  -5  -1   0 2453.95   72.89 
  -5  -1   0 2451.35   74.89 
   5  -1   0 2467.95   71.89 
  -5  -1   0 2366.66   85.19 
  -5  -1   0 2491.75   79.99 
  -5  -1   0 2388.16   87.79 
   5  -1   0 2481.45   70.89 
  -5  -1   0 2421.46   76.69 
   5   1   0 2424.76   78.39 
   5   1   0 2505.55   68.49 
  -5   1   0 2535.65   80.29 
   5   1   0 2438.26   78.89 
  -5   1   0 2425.46   75.09 
  -5   1   0 2379.76   77.09 
   5   1   0 2388.66   68.79 
   5   1   0 2486.15   71.89 
  -5   1   0 2440.76   87.59 
  -5   1   0 2447.85   78.49 
   5   1   0 2400.46   77.89 
   5   1   0 2515.45   81.59 
   5   1   0 2477.95   73.49 
   5   1   0 2472.15   80.09 
   5   1   0 2579.54   71.39 
  -5   1   0 2426.16   81.19 
  -5   1   0 2471.75   77.39 
  -5   1   0 2546.45   83.99 
   5   1   0 2412.46   73.79 
  -5   1   0 2541.75   83.79 
   5   1   0 2446.96   83.39 
  -5   1   0 2495.95   75.19 
  -5   1   0 2464.15   77.99 
   5   1   0 2429.46   80.59 
   5   1   0 2454.25   75.69 
   5   1   0 2469.25   68.79 
  -5   1   0 2527.05   84.49 
   5   1   0 2421.36   71.29 
   5   1   0 2400.36   79.09 
  -5   1   0 2478.55   82.89 
  -5   1   0 2421.76   83.49 
  -5   1   0 2526.95   86.89 
   5   1   0 2512.15   71.19 
  -5   1   0 2500.35   74.79 
  -5   1   0 2294.17   82.69 
   5   1   0 2408.06   83.29 
   5   1   0 2440.36   83.79 
   5   1   0 2402.26   69.89 
  -5   1   0 2420.36   92.19 
  -5   1   0 2460.05   88.19 
   5   1   0 2596.84   93.29 
   5   1   0 2490.45   77.99 
   6  -1   0  133.89   10.20 
   6  -1   0  146.09   11.20 
  -6  -1   0  154.98   19.60 
  -6  -1   0  161.88   16.10 
   6  -1   0  166.18   17.30 
  -6  -1   0  147.69   13.80 
  -6  -1   0  131.09   18.40 
  -6  -1   0  164.98   21.00 
   6  -1   0  146.09   17.80 
   6  -1   0  167.48   21.00 
  -6  -1   0  104.89   19.30 
  -6  -1   0  127.09   20.40 
   6  -1   0  161.68   12.10 
  -6  -1   0  142.69   21.20 
   6  -1   0  156.28   19.70 
   6  -1   0  173.28   21.00 
  -6  -1   0  159.78   19.70 
   6  -1   0  155.88   18.80 
  -6  -1   0  113.79   16.70 
   6  -1   0  169.88   20.60 
  -6  -1   0  148.39   21.90 
   6  -1   0  149.49   16.60 
  -6  -1   0  147.19   10.60 
  -6  -1   0  131.59   16.30 
  -6  -1   0  145.69   19.30 
  -6  -1   0  163.28   12.10 
  -6  -1   0  119.29   16.30 
   6  -1   0  148.19   11.20 
   6  -1   0  167.68   16.60 
  -6  -1   0  116.99   17.90 
   6  -1   0  145.19   11.90 
   6  -1   0  170.88   17.90 
  -6  -1   0  131.79   17.90 
  -6  -1   0  163.68   12.90 
  -6   1   0  130.29   18.60 
  -6   1   0  168.08   22.50 
  -6   1   0  178.38   21.20 
  -6   1   0  114.69   18.70 
  -6   1   0  150.38   18.60 
  -6   1   0  190.58   18.60 
   6   1   0  156.88   19.10 
   6   1   0  145.19    8.20 
   6   1   0  147.49   18.20 
  -6   1   0  149.09   11.70 
   6   1   0  161.38   11.60 
   6   1   0  139.69   17.20 
   6   1   0  154.58   17.40 
   6   1   0  117.19   16.90 
   6   1   0  140.69   10.70 
   6   1   0  166.98   21.10 
   6   1   0  141.49    8.00 
   6   1   0  212.98   22.60 
  -6   1   0  151.38   16.30 
  -6   1   0  153.08   20.40 
   6   1   0  153.38    9.40 
  -6   1   0  160.98   20.40 
  -6   1   0  116.29   13.70 
  -6   1   0  166.38   16.00 
  -6   1   0  138.89   22.00 
  -6   1   0  200.88   23.20 
  -6   1   0  140.89   15.90 
   6   1   0  148.19    8.60 
   6   1   0  139.79   15.40 
   6   1   0  181.48   18.20 
   6   1   0  140.59   16.50 
   6   1   0  158.18   17.40 
   6   1   0  126.89   22.30 
   6   1   0  174.58   12.90 
  -6   1   0  166.18   21.10 
   7  -1   0 2455.35   92.89 
  -7  -1   0 2509.75   93.99 
   7  -1   0 2403.96   76.89 
  -7  -1   0 2410.76   92.49 
   7  -1   0 2433.36   87.69 
   7  -1   0 2582.44   84.49 
   7  -1   0 2491.45   80.79 
  -7  -1   0 2491.85   92.79 
  -7  -1   0 2585.34  103.39 
  -7  -1   0 2549.15   75.89 
   7  -1   0 2442.66   88.29 
   7  -1   0 2521.55   88.79 
   7  -1   0 2528.75   91.59 
  -7  -1   0 2375.96   91.29 
   7  -1   0 2362.56   90.19 
   7  -1   0 2564.24   93.19 
  -7  -1   0 2482.35   78.19 
   7  -1   0 2475.95   74.39 
   7  -1   0 2480.25   83.69 
  -7  -1   0 2418.16   92.49 
  -7  -1   0 2330.77   85.99 
  -7  -1   0 2298.37   92.89 
  -7  -1   0 2666.53  101.19 
  -7  -1   0 2441.76   93.19 
  -7  -1   0 2428.86   97.29 
  -7  -1   0 2513.45   78.99 
  -7  -1   0 2315.17   97.39 
   7  -1   0 2482.15   77.09 
   7  -1   0 2535.55   84.69 
  -7   1   0 2562.44   76.29 
  -7   1   0 2470.55   82.39 
   7   1   0 2482.55   84.39 
  -7   1   0 2574.04   94.39 
  -7   1   0 2364.46   90.39 
  -7   1   0 2437.36   98.19 
  -7   1   0 2493.45   98.79 
   7   1   0 2511.75   83.49 
   7   1   0 2416.26   98.39 
   7   1   0 2509.35   89.69 
   7   1   0 2388.76   82.59 
   7   1   0 2450.65   82.59 
   7   1   0 2555.04   79.99 
   7   1   0 2477.95   91.19 
   7   1   0 2340.17  102.19 
  -7   1   0 2504.55   93.39 
  -7   1   0 2496.65   94.39 
  -7   1   0 2344.17   91.19 
   7   1   0 2637.24   85.79 
   7   1   0 2362.46   92.59 
   7   1   0 2408.36   86.89 
  -7   1   0 2429.06   88.59 
  -7   1   0 2543.35   83.99 
   7   1   0 2418.16   84.49 
  -7   1   0 2421.06   99.59 
   7   1   0 2520.75   88.09 
  -7   1   0 2573.24   85.09 
   7   1   0 2354.06   76.69 
  -7   1   0 2378.86   92.29 
   7   1   0 2545.55   90.89 
  -7   1   0 2415.56   82.09 
   7   1   0 2400.66   91.09 
   8  -1   0  184.68   22.60 
  -8  -1   0  208.98   28.50 
   8  -1   0  215.48   22.70 
   8  -1   0  191.58   24.40 
   8  -1   0  305.87   33.50 
  -8  -1   0  255.37   30.50 
   8  -1   0  239.68   24.90 
   8  -1   0  185.18   25.00 
  -8  -1   0  188.38   26.60 
   8  -1   0  175.68   25.60 
  -8  -1   0  227.38   29.10 
   8  -1   0  215.68   25.10 
  -8  -1   0  224.68   33.70 
   8  -1   0  243.28   30.60 
  -8  -1   0  183.78   31.80 
  -8  -1   0  182.38   23.20 
   8  -1   0  199.18   21.80 
  -8  -1   0  201.18   27.40 
  -8  -1   0  231.58   32.50 
  -8  -1   0  207.38   27.80 
   8  -1   0  212.58   26.50 
   8   1   0  230.08   32.60 
  -8   1   0  231.88   28.30 
  -8   1   0  143.09   23.20 
   8   1   0  235.18   25.10 
  -8   1   0  237.08   30.10 
  -8   1   0  125.49   24.90 
  -8   1   0  162.78   28.40 
   8   1   0  157.28   22.40 
   8   1   0  186.98   21.50 
   8   1   0  211.28   28.10 
   8   1   0  188.58   21.00 
   8   1   0  169.58   24.10 
  -8   1   0  233.58   29.30 
   8   1   0  227.38   24.40 
   8   1   0  225.88   34.90 
  -8   1   0  235.48   28.60 
   8   1   0  193.48   33.10 
   8   1   0  198.58   26.90 
  -8   1   0  202.28   21.50 
  -8   1   0  198.88   26.60 
  -8   1   0  198.48   30.10 
   8   1   0  238.68   24.80 
   8   1   0  198.88   26.60 
   8   1   0  209.88   25.20 
  -8   1   0  238.98   24.40 
  -8   1   0  254.67   30.30 
   8   1   0  198.78   22.50 
  -9  -1   0 1092.39   66.99 
  -9  -1   0 1032.40   59.49 
  -9  -1   0 1197.18   73.09 
  -9  -1   0 1077.89   59.99 
   9  -1   0 1095.49   55.59 
  -9  -1   0  991.50   59.19 
   9  -1   0 1004.70   57.59 
   9  -1   0 1039.60   56.79 
   9  -1   0 1146.09   66.49 
   9  -1   0 1117.59   55.89 
   9  -1   0 1021.40   57.49 
   9  -1   0 1069.09   52.89 
   9  -1   0 1018.80   62.39 
  -9  -1   0 1145.39   62.19 
  -9  -1   0 1121.49   62.39 
  -9  -1   0 1055.59   59.59 
   9  -1   0 1049.89   59.49 
  -9   1   0 1054.69   60.59 
  -9   1   0  984.80   59.19 
  -9   1   0  953.10   63.39 
  -9   1   0 1130.89   51.49 
   9   1   0 1051.99   61.29 
   9   1   0 1163.38   60.89 
  -9   1   0 1052.59   59.79 
   9   1   0 1080.09   65.49 
   9   1   0 1138.49   59.09 
   9   1   0  939.81   60.69 
   9   1   0 1160.98   52.79 
  -9   1   0 1115.09   64.49 
   9   1   0 1081.99   57.79 
  -9   1   0  960.50   57.99 
  -9   1   0  985.80   65.79 
  -9   1   0 1101.19   67.89 
   9   1   0 1055.89   55.49 
   9   1   0 1034.80   50.89 
   9   1   0 1035.10   69.39 
   9   1   0 1063.49   56.29 
   9   1   0  937.61   66.09 
  -9   1   0 1076.29   58.19 
 -10  -1   0   22.90   12.90 
 -10  -1   0   31.40   15.40 
  10  -1   0   41.30   13.90 
  10  -1   0   18.10   13.10 
 -10  -1   0   25.60   12.40 
 -10  -1   0   40.50   15.00 
  10  -1   0   41.20   14.40 
  10  -1   0   17.10   11.80 
  10  -1   0   22.00   12.60 
  10  -1   0   39.80   14.80 
  10  -1   0   44.90   16.00 
 -10   1   0   65.69   23.60 
 -10   1   0   37.80   15.80 
  10   1   0   25.80   12.40 
 -10   1   0   16.40   15.80 
 -10   1   0   52.29   17.80 
 -10   1   0   32.20   14.30 
  10   1   0   31.80   16.50 
  10   1   0   24.90   13.40 
  10   1   0   39.80   15.40 
  10   1   0   25.80   18.70 
  10   1   0   11.60   15.60 
 -10   1   0   29.00   18.10 
 -10   1   0   31.20   14.20 
  10   1   0   34.00   13.50 
 -10   1   0   40.70   16.20 
  10   1   0   18.70   11.10 
   0  -2   0 4252.97  117.19 
   0  -2   0 4349.67  118.39 
   0  -2   0 4318.27  118.39 
   0  -2   0 4300.77  120.39 
   0  -2   0 4415.66  117.69 
   0  -2   0 4294.67  120.19 
   0  -2   0 4591.24  119.79 
   0  -2   0 4417.56  120.79 
   0  -2   0 4502.65  123.99 
   0  -2   0 4445.76  117.89 
   0  -2   0 4400.36  120.59 
   0  -2   0 4327.77  118.09 
   0  -2   0 4425.16  119.49 
   0  -2   0 4444.56  120.29 
   0  -2   0 4594.74  129.09 
   0  -2   0 4168.18  119.29 
   0  -2   0 4564.24  123.39 
   0  -2   0 4402.86  117.99 
   0   2   0 4433.46  119.89 
   0   2   0 4388.46  118.79 
   0   2   0 4471.45  120.69 
   0   2   0 4487.55  121.99 
   0   2   0 4324.07  117.99 
   0   2   0 4437.96  119.79 
   0   2   0 4413.56  119.39 
   0   2   0 4268.77  118.29 
   0   2   0 4498.25  119.49 
   0   2   0 4359.06  124.19 
   0   2   0 4508.25  117.59 
   0   2   0 4487.85  117.79 
   0   2   0 4367.16  120.19 
   0   2   0 4449.25  120.89 
   0   2   0 4494.05  120.09 
   0   2   0 4566.34  120.69 
   0   2   0 4441.66  120.19 
   0   2   0 4510.65  118.19 
   1  -2   0 5323.87  141.59 
   1  -2   0 5460.15  145.19 
   1  -2   0 5473.85  143.49 
   1  -2   0 5087.99  141.99 
   1  -2   0 5350.16  144.69 
  -1  -2   0 5279.57  149.39 
  -1  -2   0 5438.56  138.19 
  -1  -2   0 5421.76  143.29 
  -1  -2   0 5330.87  138.29 
   1  -2   0 5254.17  145.99 
  -1  -2   0 5173.28  143.89 
  -1  -2   0 5228.18  142.69 
   1  -2   0 5431.46  143.59 
   1  -2   0 5359.76  142.59 
   1  -2   0 5206.98  142.19 
  -1  -2   0 5259.27  140.99 
  -1  -2   0 5379.76  143.19 
  -1  -2   0 5272.37  137.29 
  -1  -2   0 5152.08  139.89 
  -1  -2   0 5335.37  142.59 
  -1  -2   0 5303.47  137.59 
  -1  -2   0 4649.33  153.08 
   1  -2   0 5325.97  137.19 
  -1  -2   0 5131.49  143.89 
   1  -2   0 5263.07  142.59 
   1  -2   0 5337.97  138.19 
   1  -2   0 5238.88  143.49 
   1  -2   0 5242.68  145.59 
  -1  -2   0 5284.87  137.69 
  -1  -2   0 5616.04  143.19 
   1  -2   0 5312.97  144.49 
  -1  -2   0 5191.68  142.79 
   1  -2   0 5291.67  142.69 
  -1  -2   0 5153.58  140.59 
   1  -2   0 5201.28  138.09 
  -1  -2   0 5399.56  137.49 
  -1  -2   0 5214.78  148.19 
  -1  -2   0 5131.49  143.79 
  -1  -2   0 5267.57  140.69 
   1  -2   0 5297.27  142.19 
   1  -2   0 5154.88  142.79 
   1  -2   0 5296.47  142.89 
   1   2   0 5301.67  142.49 
  -1   2   0 5163.88  141.89 
   1   2   0 5242.38  146.89 
  -1   2   0 5237.78  143.09 
   1   2   0 5327.27  142.39 
  -1   2   0 5177.08  142.69 
  -1   2   0 5166.48  142.89 
   1   2   0 5336.57  142.89 
  -1   2   0 5510.95  142.09 
   1   2   0 5272.87  137.49 
  -1   2   0 5265.77  138.09 
  -1   2   0 5290.47  136.59 
   1   2   0 5221.48  140.29 
  -1   2   0 5372.66  142.49 
  -1   2   0 5247.77  143.79 
   1   2   0 4465.55  146.89 
  -1   2   0 5314.57  145.09 
   1   2   0 5179.98  142.19 
   1   2   0 5370.86  140.49 
   1   2   0 5517.95  142.69 
   1   2   0 5063.49  151.38 
  -1   2   0 5279.17  142.69 
   1   2   0 5476.75  138.29 
  -1   2   0 5345.67  143.19 
  -1   2   0 5341.47  144.29 
   1   2   0 5337.87  137.89 
   1   2   0 5357.16  142.69 
  -1   2   0 5107.49  145.59 
  -1   2   0 5307.27  142.99 
   1   2   0 5214.08  145.19 
  -1   2   0 5191.48  145.79 
  -1   2   0 5239.48  141.49 
   1   2   0 5314.97  140.19 
  -1   2   0 5212.78  142.39 
   1   2   0 5333.77  139.59 
   1   2   0 5231.08  136.19 
  -1   2   0 5227.18  141.19 
  -1   2   0 5305.67  142.19 
  -1   2   0 5280.27  142.79 
  -1   2   0 5215.88  138.19 
  -1   2   0 5403.26  137.59 
  -1   2   0 5222.68  144.49 
   1   2   0 5293.47  137.09 
   1   2   0 5232.98  138.19 
  -1   2   0 5370.56  141.79 
  -1   2   0 5336.97  142.99 
  -1   2   0 5226.58  144.59 
  -1   2   0 5610.84  143.59 
   1   2   0 5250.67  143.19 
   1   2   0 5545.85  141.29 
  -2  -2   0 2818.72   79.59 
  -2  -2   0 2703.03   76.59 
  -2  -2   0 2655.13   80.69 
   2  -2   0 2721.03   69.19 
   2  -2   0 2621.94   79.19 
   2  -2   0 2721.33   79.69 
   2  -2   0 2789.62   81.19 
  -2  -2   0 2491.75   76.89 
   2  -2   0 2651.53   77.99 
   2  -2   0 2699.63   75.49 
  -2  -2   0 2615.94   78.99 
  -2  -2   0 2592.54   74.99 
   2  -2   0 2700.43   77.79 
   2  -2   0 2737.73   78.79 
  -2  -2   0 2670.73   72.69 
   2  -2   0 2679.33   75.29 
   2  -2   0 2688.63   76.09 
   2  -2   0 2696.63   78.59 
   2  -2   0 2663.73   80.59 
  -2  -2   0 2638.04   77.09 
  -2  -2   0 2716.63   87.49 
  -2  -2   0 2506.75   85.69 
   2  -2   0 2718.23   77.49 
  -2  -2   0 2742.23   77.49 
   2  -2   0 2654.63   76.49 
   2  -2   0 2625.44   76.79 
  -2  -2   0 2684.43   78.09 
  -2  -2   0 2674.63   83.09 
  -2  -2   0 2674.63   79.49 
  -2  -2   0 2691.63   83.89 
  -2  -2   0 2307.57   75.69 
  -2  -2   0 2742.73   78.29 
  -2  -2   0 2728.13   77.99 
   2  -2   0 2679.23   76.69 
  -2  -2   0 2750.32   74.99 
   2  -2   0 2694.73   77.89 
  -2  -2   0 2557.94   75.89 
   2  -2   0 2735.43   81.29 
   2  -2   0 2646.14   78.59 
   2  -2   0 2606.14   76.99 
   2   2   0 2737.03   69.09 
  -2   2   0 2627.94   74.19 
  -2   2   0 2675.33   76.89 
  -2   2   0 2426.66   77.89 
  -2   2   0 2660.23   76.29 
  -2   2   0 2699.43   76.59 
  -2   2   0 2681.83   78.29 
  -2   2   0 2668.93   78.79 
   2   2   0 2668.53   69.29 
  -2   2   0 2760.62   79.29 
  -2   2   0 2710.03   78.39 
  -2   2   0 2634.94   81.99 
   2   2   0 2730.23   77.09 
   2   2   0 2738.43   75.39 
   2   2   0 2661.53   71.79 
   2   2   0 2653.63   84.29 
   2   2   0 2505.25   71.59 
  -2   2   0 2685.53   77.49 
  -2   2   0 2681.83   77.59 
   2   2   0 2674.33   73.69 
   2   2   0 2734.23   76.79 
  -2   2   0 2739.23   77.89 
  -2   2   0 2639.44   78.79 
  -2   2   0 2695.13   79.09 
  -2   2   0 2724.33   77.09 
  -2   2   0 2714.93   79.39 
  -2   2   0 2615.44   80.19 
   2   2   0 2528.55   78.29 
   2   2   0 2722.83   78.39 
   2   2   0 2604.44   82.69 
   2   2   0 2777.62   80.39 
   2   2   0 2722.73   76.39 
  -2   2   0 2546.55   82.89 
  -2   2   0 2714.83   76.59 
  -2   2   0 2639.24   75.59 
  -2   2   0 2659.53   77.79 
   2   2   0 2579.04   77.99 
   2   2   0 2605.84   79.99 
   2   2   0 2642.94   74.29 
  -2   2   0 2653.23   78.29 
   2   2   0 2725.53   74.59 
   2   2   0 2703.73   79.59 
  -2   2   0 2563.44   81.49 
  -2   2   0 2690.73   80.19 
  -2   2   0 2752.22   78.49 
   2   2   0 2439.16   87.79 
  -2   2   0 2704.73   78.69 
   2   2   0 2599.44   77.49 
  -2   2   0 2615.54   80.29 
  -2   2   0 2620.24   80.49 
   2   2   0 2632.24   74.79 
   2   2   0 2679.83   76.39 
   2   2   0 2750.42   77.09 
  -3  -2   0 1152.08   36.90 
  -3  -2   0 1206.48   43.10 
   3  -2   0 1160.68   41.70 
   3  -2   0 1099.79   38.60 
   3  -2   0 1142.89   39.80 
   3  -2   0 1137.09   40.30 
   3  -2   0 1157.78   43.40 
  -3  -2   0 1124.19   43.70 
   3  -2   0 1128.39   40.20 
   3  -2   0 1115.19   31.80 
  -3  -2   0 1130.29   39.20 
   3  -2   0 1139.79   40.80 
  -3  -2   0 1132.09   40.90 
  -3  -2   0 1112.29   41.30 
  -3  -2   0 1137.39   42.30 
   3  -2   0 1108.89   40.10 
  -3  -2   0 1137.29   42.30 
   3  -2   0 1214.68   44.30 
   3  -2   0 1123.19   38.50 
   3  -2   0 1206.98   44.30 
   3  -2   0 1109.09   37.80 
  -3  -2   0 1143.99   47.50 
  -3  -2   0 1177.08   36.90 
  -3  -2   0 1137.49   40.90 
   3  -2   0 1121.09   32.50 
   3  -2   0 1145.49   42.20 
  -3  -2   0 1107.69   40.50 
  -3  -2   0 1166.88   38.80 
  -3  -2   0 1131.69   32.70 
  -3  -2   0 1153.38   41.40 
  -3  -2   0 1095.59   40.80 
  -3   2   0 1141.19   42.30 
  -3   2   0 1076.89   43.10 
  -3   2   0 1111.39   41.10 
   3   2   0 1106.39   40.20 
   3   2   0 1160.88   34.80 
  -3   2   0 1170.68   39.40 
  -3   2   0 1143.49   36.20 
   3   2   0 1127.19   43.80 
   3   2   0 1137.19   31.20 
  -3   2   0 1181.98   39.30 
   3   2   0 1087.19   39.90 
  -3   2   0 1106.89   41.50 
   3   2   0 1176.08   35.50 
  -3   2   0 1167.88   41.40 
   3   2   0 1083.49   46.30 
   3   2   0 1130.59   40.80 
   3   2   0 1196.68   38.40 
  -3   2   0 1085.49   40.90 
   3   2   0 1118.59   49.70 
  -3   2   0 1159.78   41.60 
   3   2   0 1074.29   47.30 
  -3   2   0 1105.59   44.50 
   3   2   0 1128.89   38.00 
  -3   2   0 1128.19   34.40 
   3   2   0 1129.59   38.00 
   3   2   0 1116.99   36.20 
   3   2   0 1115.39   39.60 
  -3   2   0 1169.08   41.10 
  -3   2   0 1176.08   43.90 
  -3   2   0 1122.89   40.60 
   3   2   0 1136.79   40.70 
  -3   2   0 1164.38   37.50 
   3   2   0 1165.48   41.70 
  -3   2   0 1115.59   44.80 
   3   2   0 1094.99   41.50 
   3   2   0 1145.39   40.00 
   3   2   0 1133.19   37.30 
   3   2   0 1149.89   45.40 
  -3   2   0 1081.19   36.60 
   3   2   0 1122.39   42.00 
  -3   2   0 1124.39   40.20 
   3   2   0 1142.69   36.40 
  -3   2   0 1068.09   40.70 
  -3   2   0 1149.58   41.00 
  -3   2   0 1096.29   40.10 
   4  -2   0  968.40   41.80 
   4  -2   0 1008.80   38.20 
   4  -2   0  996.40   30.00 
  -4  -2   0  983.30   33.90 
   4  -2   0 1042.00   38.90 
   4  -2   0  938.11   30.20 
   4  -2   0  987.90   40.10 
   4  -2   0  925.31   38.50 
  -4  -2   0 1041.00   40.70 
   4  -2   0  980.60   39.40 
  -4  -2   0  961.10   39.30 
  -4  -2   0  924.21   33.70 
  -4  -2   0  937.81   38.30 
  -4  -2   0  910.31   43.90 
  -4  -2   0  997.50   38.10 
  -4  -2   0 1014.60   40.80 
  -4  -2   0 1015.60   40.30 
  -4  -2   0  924.71   39.40 
  -4  -2   0  935.61   29.70 
   4  -2   0  959.50   41.50 
  -4  -2   0  987.20   40.80 
  -4  -2   0  928.11   39.40 
  -4  -2   0  973.10   39.40 
   4  -2   0 1032.10   37.30 
  -4  -2   0  970.50   42.20 
   4  -2   0  979.50   35.20 
  -4   2   0  982.20   33.60 
  -4   2   0  917.71   42.90 
  -4   2   0  961.70   37.70 
  -4   2   0  965.90   40.20 
   4   2   0  959.60   34.60 
   4   2   0 1041.70   37.50 
  -4   2   0  963.40   28.80 
   4   2   0  928.61   43.80 
   4   2   0  954.20   34.90 
   4   2   0  912.31   32.60 
  -4   2   0  953.10   39.40 
   4   2   0 1018.10   41.00 
   4   2   0  882.51   43.50 
  -4   2   0  979.70   38.30 
  -4   2   0  970.50   36.00 
  -4   2   0  962.20   41.90 
  -4   2   0  932.51   38.40 
  -4   2   0  876.81   38.60 
  -4   2   0  944.31   42.60 
   4   2   0  938.41   28.40 
  -4   2   0  981.40   41.00 
   4   2   0  954.50   30.30 
  -4   2   0  947.01   32.60 
   4   2   0  990.80   39.20 
   4   2   0  961.90   41.10 
  -4   2   0  978.10   38.10 
   4   2   0  925.21   39.70 
   4   2   0  933.61   38.20 
  -4   2   0  992.90   38.50 
  -4   2   0  953.70   40.60 
   4   2   0  958.80   38.30 
  -4   2   0  938.91   30.20 
   4   2   0  980.50   29.90 
  -4   2   0  923.91   42.80 
   4   2   0  954.40   31.00 
   4   2   0  904.21   46.10 
   4   2   0 1002.30   35.40 
  -4   2   0  922.81   38.30 
  -4   2   0  940.31   39.40 
   4   2   0  937.71   33.60 
   5  -2   0  415.66   24.20 
  -5  -2   0  417.26   17.10 
   5  -2   0  414.86   14.80 
  -5  -2   0  443.66   20.30 
  -5  -2   0  387.56   23.90 
  -5  -2   0  399.46   22.60 
   5  -2   0  434.86   25.40 
   5  -2   0  406.06   17.40 
   5  -2   0  367.86   24.10 
  -5  -2   0  402.56   22.50 
   5  -2   0  374.56   25.30 
  -5  -2   0  423.16   27.40 
  -5  -2   0  398.76   28.90 
   5  -2   0  386.06   22.60 
   5  -2   0  380.96   26.10 
   5  -2   0  448.16   27.70 
  -5  -2   0  449.56   26.80 
   5  -2   0  423.06   23.80 
   5  -2   0  447.56   26.80 
   5  -2   0  429.46   16.00 
   5  -2   0  439.76   21.10 
  -5  -2   0  424.66   26.10 
  -5  -2   0  382.96   24.40 
  -5  -2   0  448.46   27.20 
  -5  -2   0  405.76   25.20 
  -5  -2   0  443.16   20.80 
   5  -2   0  410.26   15.60 
  -5  -2   0  400.66   23.80 
   5  -2   0  444.76   18.30 
  -5  -2   0  435.56   25.90 
   5  -2   0  454.35   22.90 
  -5   2   0  434.46   29.30 
   5   2   0  412.86   15.90 
   5   2   0  390.76   28.70 
  -5   2   0  394.86   25.00 
  -5   2   0  427.06   29.30 
  -5   2   0  399.86   23.30 
   5   2   0  444.46   28.10 
   5   2   0  425.26   18.60 
  -5   2   0  433.26   26.50 
  -5   2   0  405.86   23.30 
  -5   2   0  413.06   26.30 
  -5   2   0  437.96   26.20 
   5   2   0  432.86   16.10 
  -5   2   0  410.96   25.70 
  -5   2   0  397.56   23.80 
  -5   2   0  401.36   21.40 
  -5   2   0  397.46   25.20 
  -5   2   0  406.06   23.90 
  -5   2   0  350.36   22.80 
   5   2   0  437.56   16.20 
   5   2   0  375.16   30.80 
   5   2   0  432.96   26.50 
   5   2   0  412.86   14.50 
   5   2   0  412.66   30.10 
   5   2   0  402.66   19.00 
   5   2   0  404.06   17.20 
   5   2   0  400.16   20.40 
   5   2   0  401.66   16.50 
  -5   2   0  390.66   27.00 
   5   2   0  396.86   21.80 
  -5   2   0  366.46   22.80 
   5   2   0  459.35   27.10 
   5   2   0  406.16   17.90 
   5   2   0  424.26   19.70 
   5   2   0  415.06   23.60 
   5   2   0  395.16   23.90 
   6  -2   0  515.85   28.80 
  -6  -2   0  551.24   24.90 
   6  -2   0  561.14   33.60 
   6  -2   0  527.05   30.20 
   6  -2   0  490.85   30.50 
  -6  -2   0  551.44   32.40 
  -6  -2   0  509.75   21.80 
   6  -2   0  543.15   27.60 
  -6  -2   0  549.65   32.50 
   6  -2   0  556.74   25.50 
   6  -2   0  519.15   33.40 
  -6  -2   0  518.75   33.50 
  -6  -2   0  499.25   35.40 
   6  -2   0  577.44   24.40 
   6  -2   0  530.95   20.60 
  -6  -2   0  557.84   27.40 
   6  -2   0  544.45   32.80 
   6  -2   0  548.35   31.70 
   6  -2   0  509.75   31.40 
   6  -2   0  524.45   28.70 
  -6  -2   0  581.74   33.80 
   6  -2   0  516.45   26.00 
   6  -2   0  586.34   34.90 
  -6  -2   0  578.04   31.50 
   6  -2   0  542.35   20.00 
  -6  -2   0  507.75   32.50 
  -6  -2   0  583.74   33.90 
  -6  -2   0  523.75   26.20 
  -6  -2   0  459.65   29.50 
  -6   2   0  512.75   26.80 
   6   2   0  589.64   35.90 
  -6   2   0  546.85   29.60 
   6   2   0  516.25   19.90 
  -6   2   0  624.54   37.70 
  -6   2   0  567.84   33.30 
   6   2   0  483.85   27.60 
   6   2   0  573.54   41.30 
   6   2   0  540.85   30.40 
   6   2   0  525.35   38.00 
   6   2   0  521.35   30.00 
   6   2   0  596.04   28.30 
   6   2   0  569.54   30.80 
   6   2   0  546.05   20.70 
   6   2   0  579.04   35.40 
   6   2   0  561.64   19.50 
  -6   2   0  476.35   28.80 
   6   2   0  640.84   34.80 
   6   2   0  514.95   29.50 
   6   2   0  571.44   21.70 
  -6   2   0  537.25   29.00 
  -6   2   0  540.85   30.10 
   6   2   0  596.34   33.80 
  -6   2   0  577.04   37.30 
   6   2   0  539.15   21.00 
  -6   2   0  579.74   34.30 
  -6   2   0  535.05   30.50 
   6   2   0  652.53   40.40 
  -6   2   0  546.75   32.80 
  -6   2   0  545.35   36.70 
   6   2   0  527.55   22.60 
   6   2   0  569.74   27.70 
   6   2   0  565.24   19.70 
   6   2   0  504.45   32.40 
  -6   2   0  521.75   32.50 
  -6   2   0  511.85   32.00 
  -6   2   0  490.05   26.40 
  -6   2   0  509.85   31.90 
   6   2   0  569.64   25.80 
  -7  -2   0   12.80    5.30 
  -7  -2   0   26.50    5.90 
   7  -2   0   28.70    8.50 
  -7  -2   0   30.50    7.10 
   7  -2   0   18.80    8.80 
  -7  -2   0   12.20    7.70 
  -7  -2   0   20.80    9.00 
   7  -2   0   41.50    9.30 
   7  -2   0   24.40    8.30 
  -7  -2   0   34.50    9.80 
   7  -2   0   20.50    8.90 
   7  -2   0   22.40    9.90 
   7  -2   0   13.80    9.30 
  -7  -2   0   31.80    9.90 
   7  -2   0   11.10    7.20 
  -7  -2   0   10.30    7.10 
  -7  -2   0   15.10    7.90 
  -7  -2   0   30.80   11.70 
   7  -2   0   35.50   11.10 
  -7  -2   0   12.00    8.00 
   7  -2   0   42.40   13.10 
   7  -2   0   27.20    7.00 
   7  -2   0   28.60    8.40 
   7   2   0   20.10   11.50 
   7   2   0   28.80    7.70 
   7   2   0   19.00    8.60 
   7   2   0   31.20   10.60 
   7   2   0   24.20    7.50 
  -7   2   0   35.20   10.50 
  -7   2   0   15.10    7.60 
  -7   2   0   13.80    6.50 
   7   2   0   16.70    6.70 
   7   2   0   33.40   10.30 
  -7   2   0   41.50   12.10 
   7   2   0   31.00   11.40 
   7   2   0   31.10    9.20 
   7   2   0   23.90    9.80 
   7   2   0   36.80    9.90 
  -7   2   0   21.30    8.80 
   7   2   0   31.30   10.00 
  -7   2   0   34.50   13.10 
  -7   2   0   41.30   13.70 
   7   2   0   25.40   10.30 
   7   2   0   40.70   13.80 
  -7   2   0   19.70    9.60 
  -7   2   0   21.30    8.30 
  -7   2   0   35.80    9.10 
  -7   2   0   24.70    8.30 
  -7   2   0   14.40    7.80 
   7   2   0   29.90   13.20 
  -7   2   0   34.50   10.70 
  -7   2   0   22.50    8.10 
  -7   2   0   33.00    7.60 
  -7   2   0   20.30   10.40 
  -8  -2   0  154.98   22.00 
   8  -2   0  162.58   22.00 
  -8  -2   0  130.29   21.60 
  -8  -2   0  113.79   20.20 
   8  -2   0  203.28   27.20 
  -8  -2   0  178.98   26.10 
   8  -2   0  172.38   25.90 
   8  -2   0  164.48   20.30 
   8  -2   0  173.68   21.10 
  -8  -2   0  209.88   30.00 
   8  -2   0  147.79   23.50 
   8  -2   0  208.98   27.30 
   8  -2   0  145.89   21.80 
  -8  -2   0  167.28   25.00 
   8  -2   0  179.18   19.80 
   8  -2   0  217.58   29.40 
  -8  -2   0  169.28   27.30 
   8   2   0  187.98   25.10 
   8   2   0  154.28   25.90 
   8   2   0  141.69   20.40 
  -8   2   0  183.98   26.20 
  -8   2   0  149.19   20.00 
   8   2   0  200.78   32.00 
   8   2   0  105.99   25.50 
   8   2   0  163.48   24.40 
   8   2   0  188.38   23.70 
  -8   2   0  168.98   25.40 
   8   2   0  193.38   21.60 
  -8   2   0  191.48   26.70 
   8   2   0  162.88   19.70 
  -8   2   0  149.19   20.10 
   8   2   0  165.68   24.80 
   8   2   0  168.28   19.10 
  -8   2   0  172.58   25.30 
  -8   2   0  115.89   21.10 
  -8   2   0  172.38   29.50 
  -8   2   0  184.88   29.80 
   8   2   0  163.28   23.30 
  -8   2   0  203.58   27.60 
  -8   2   0  207.18   28.50 
   8   2   0  156.18   21.60 
  -8   2   0  159.68   27.80 
   8   2   0  180.68   25.10 
   8   2   0  192.58   32.00 
   8   2   0  193.28   24.90 
  -9  -2   0    4.80    8.80 
   9  -2   0    3.70    7.50 
   9  -2   0   16.20    8.30 
   9  -2   0    1.40    8.70 
   9  -2   0   -0.10    6.10 
   9  -2   0   23.30   11.30 
  -9  -2   0    9.70    9.40 
   9  -2   0    7.60    9.80 
   9  -2   0    1.70    6.90 
  -9  -2   0   17.40   10.60 
  -9  -2   0    5.70    7.20 
  -9  -2   0   21.40   12.00 
  -9  -2   0    3.80    8.50 
  -9  -2   0   15.60    9.00 
   9  -2   0    6.10    8.90 
  -9   2   0    1.90    9.50 
  -9   2   0    3.40    8.70 
   9   2   0   11.50    9.80 
   9   2   0    6.30    8.50 
   9   2   0    0.40    7.30 
   9   2   0    2.10   11.30 
  -9   2   0    2.50    6.70 
   9   2   0    3.50    9.30 
  -9   2   0   11.00    9.70 
   9   2   0   15.80   14.80 
   9   2   0   31.60   13.30 
   9   2   0    7.80   12.50 
   9   2   0   13.70    9.30 
   9   2   0   19.10   11.10 
  -9   2   0    7.40   11.40 
  -9   2   0    6.30    8.30 
   9   2   0   12.80   10.10 
   9   2   0    3.60    9.20 
  -9   2   0   -5.80    7.10 
  -9   2   0    3.20    7.10 
  -9   2   0   -1.20    6.50 
  -9   2   0    8.60   10.20 
  -9   2   0    8.50    9.50 
 -10  -2   0   -6.70    7.90 
  10  -2   0   -1.50    8.40 
  10  -2   0    0.90    9.80 
 -10  -2   0    2.60    8.60 
  10  -2   0   -5.30    9.80 
  10  -2   0    3.90    9.90 
  10  -2   0    1.00    9.30 
  10  -2   0   -2.30    8.50 
 -10  -2   0    9.60   10.90 
 -10  -2   0    1.30    8.10 
  10  -2   0   -4.80    7.40 
 -10  -2   0   11.40   10.30 
 -10   2   0    0.40    8.50 
  10   2   0   -2.30   10.10 
 -10   2   0    5.90    9.80 
 -10   2   0   11.60   11.90 
 -10   2   0    4.80   10.30 
  10   2   0    9.10   14.80 
 -10   2   0   -2.70    8.90 
 -10   2   0    0.80    8.90 
  10   2   0    2.30   10.80 
  10   2   0   -0.10    8.80 
  10   2   0   21.60   12.70 
 -10   2   0    0.80   10.20 
  10   2   0    4.00   15.50 
 -10   2   0   -1.10   12.40 
 -10   2   0   12.80   12.30 
  10   2   0    0.60   10.10 
   0  -3   0    2.20    1.90 
   0  -3   0   -0.20    1.80 
   0  -3   0    2.10    1.80 
   0  -3   0    3.90    2.50 
   0  -3   0   -0.20    1.50 
   0  -3   0    1.10    2.10 
   0  -3   0    6.20    3.10 
   0  -3   0    0.80    2.10 
   0  -3   0   11.70    4.30 
   0  -3   0    0.00    1.50 
   0  -3   0    0.40    2.00 
   0  -3   0   -1.60    2.80 
   0  -3   0    0.10    1.80 
   0  -3   0    0.80    1.70 
   0  -3   0    2.20    2.00 
   0  -3   0    7.80    3.10 
   0  -3   0    7.80    3.90 
   0   3   0   -0.20    2.00 
   0   3   0    3.60    3.00 
   0   3   0   -0.40    1.70 
   0   3   0    4.70    2.30 
   0   3   0    2.80    2.00 
   0   3   0    3.70    2.30 
   0   3   0   -1.70    1.70 
   0   3   0    0.30    1.60 
   0   3   0    1.80    2.20 
   0   3   0    8.30    3.50 
   0   3   0    8.70    3.50 
   0   3   0   -0.10    2.00 
   0   3   0    2.30    2.20 
   0   3   0    0.50    1.50 
   0   3   0   -2.30    1.60 
   0   3   0    0.70    2.40 
  -1  -3   0  341.07   18.10 
   1  -3   0  315.97   11.80 
   1  -3   0  351.66   18.10 
   1  -3   0  324.47   17.30 
  -1  -3   0  329.97   16.80 
   1  -3   0  315.87   16.70 
   1  -3   0  330.27   18.20 
  -1  -3   0  331.47   16.10 
  -1  -3   0  307.47   13.10 
  -1  -3   0  322.47   20.90 
   1  -3   0  354.56   17.20 
  -1  -3   0  339.67   13.70 
  -1  -3   0  314.37   17.60 
  -1  -3   0  270.77   24.40 
   1  -3   0  316.27   16.20 
  -1  -3   0  332.47   20.60 
  -1  -3   0  320.67   18.20 
   1  -3   0  330.67   13.50 
   1  -3   0  319.37   18.90 
  -1  -3   0  328.67   14.20 
  -1  -3   0  324.27   12.10 
   1  -3   0  293.67   16.80 
  -1  -3   0  362.16   18.30 
  -1  -3   0  342.17   16.50 
   1  -3   0  313.07   17.50 
  -1  -3   0  325.47   14.20 
  -1  -3   0  345.97   13.50 
  -1  -3   0  327.57   11.80 
  -1  -3   0  329.17   17.50 
   1  -3   0  351.96   16.50 
  -1  -3   0  329.57   17.80 
   1  -3   0  325.37   12.30 
  -1  -3   0  328.77   17.40 
  -1  -3   0  336.37   16.30 
  -1  -3   0  321.97   17.00 
   1  -3   0  326.07   17.00 
   1  -3   0  325.47   17.70 
   1  -3   0  340.97   17.90 
   1   3   0  340.67   17.50 
  -1   3   0  302.97   16.50 
   1   3   0  326.47   13.80 
  -1   3   0  326.37   16.70 
  -1   3   0  337.77   18.90 
  -1   3   0  319.97   18.50 
  -1   3   0  331.07   13.70 
  -1   3   0  359.06   18.30 
   1   3   0  310.77   18.50 
   1   3   0  303.07   16.20 
   1   3   0  298.67   21.60 
  -1   3   0  370.46   21.10 
  -1   3   0  323.97   12.80 
  -1   3   0  348.37   17.70 
   1   3   0  389.96   18.20 
   1   3   0  308.67   16.10 
  -1   3   0  355.36   18.70 
  -1   3   0  324.67   17.80 
  -1   3   0  316.37   17.00 
  -1   3   0  313.67   16.00 
  -1   3   0  323.37   16.30 
  -1   3   0  336.37   14.70 
  -1   3   0  321.87   16.90 
  -1   3   0  313.87   17.20 
  -1   3   0  346.17   17.90 
   1   3   0  315.57   19.50 
  -1   3   0  332.57   16.70 
  -1   3   0  374.96   20.80 
   1   3   0  350.76   15.60 
   1   3   0  328.07   17.80 
  -1   3   0  328.07   17.70 
   1   3   0  348.77   13.50 
   1   3   0  325.97   16.40 
   1   3   0  339.87   14.40 
   1   3   0  337.37   17.80 
  -2  -3   0  300.07   19.90 
  -2  -3   0  306.77   11.40 
   2  -3   0  367.06   19.10 
   2  -3   0  313.17   19.50 
  -2  -3   0  313.67   17.90 
   2  -3   0  305.77   18.00 
   2  -3   0  339.37   18.00 
   2  -3   0  345.17   18.60 
   2  -3   0  328.57   19.80 
  -2  -3   0  305.87   17.60 
   2  -3   0  318.07   11.20 
  -2  -3   0  318.97   12.00 
  -2  -3   0  333.67   18.40 
   2  -3   0  324.27   14.70 
  -2  -3   0  323.27   22.30 
  -2  -3   0  313.87   16.20 
   2  -3   0  311.77   18.10 
  -2  -3   0  349.07   18.90 
   2  -3   0  318.97   14.80 
   2  -3   0  343.37   19.00 
  -2  -3   0  361.26   27.60 
  -2  -3   0  318.27   17.20 
  -2  -3   0  330.37   17.30 
  -2  -3   0  337.67   18.30 
  -2  -3   0  376.46   19.60 
   2  -3   0  304.57   15.10 
  -2  -3   0  328.57   17.70 
   2  -3   0  301.77   17.90 
  -2  -3   0  340.47   15.30 
  -2  -3   0  314.87   11.50 
  -2  -3   0  276.97   17.60 
  -2  -3   0  349.17   16.70 
  -2  -3   0  330.57   12.90 
  -2  -3   0  315.97   14.10 
  -2   3   0  334.27   19.50 
  -2   3   0  319.17   20.70 
   2   3   0  358.86   20.80 
  -2   3   0  356.46   21.40 
   2   3   0  333.07   16.50 
  -2   3   0  320.27   16.40 
  -2   3   0  324.27   16.20 
   2   3   0  330.97   17.50 
  -2   3   0  328.37   18.00 
  -2   3   0  335.17   19.80 
  -2   3   0  326.77   18.70 
   2   3   0  355.06   18.30 
   2   3   0  312.47   15.30 
  -2   3   0  303.77   10.00 
   2   3   0  313.57   21.80 
   2   3   0  295.47   20.30 
  -2   3   0  314.17   12.50 
  -2   3   0  331.17   17.60 
  -2   3   0  336.77   16.80 
   2   3   0  338.67   16.20 
  -2   3   0  330.07   18.80 
  -2   3   0  350.76   19.00 
  -2   3   0  339.57   17.90 
  -2   3   0  345.87   21.10 
   2   3   0  309.47   18.30 
  -2   3   0  305.07   17.20 
   2   3   0  322.97   15.70 
   2   3   0  292.97   16.40 
  -2   3   0  345.97   18.90 
  -2   3   0  329.57   11.90 
  -2   3   0  319.47   15.00 
   2   3   0  327.57   25.00 
   2   3   0  331.17   14.80 
   2   3   0  325.07   12.20 
   2   3   0  327.37   15.00 
   2   3   0  335.77   11.60 
  -3  -3   0   31.30    7.80 
  -3  -3   0   37.30   11.00 
  -3  -3   0   30.70    6.80 
  -3  -3   0   43.60    9.80 
   3  -3   0   31.10    7.00 
  -3  -3   0   29.00    6.60 
   3  -3   0   16.50    6.20 
   3  -3   0   40.10    7.70 
  -3  -3   0   20.50    5.70 
   3  -3   0   37.70    8.80 
  -3  -3   0   30.70    6.50 
  -3  -3   0   34.40    8.00 
   3  -3   0   29.90    8.20 
  -3  -3   0   30.90    5.90 
  -3  -3   0   34.80    6.20 
  -3  -3   0   36.00    8.10 
   3  -3   0   30.90    5.40 
   3  -3   0   24.50    5.50 
   3  -3   0   22.00    6.20 
   3  -3   0   27.50    7.00 
  -3  -3   0   39.20    6.90 
   3  -3   0   19.10    5.30 
  -3  -3   0   41.10    4.50 
   3  -3   0   31.30    6.80 
  -3  -3   0   23.80    5.50 
   3   3   0   23.60    6.40 
   3   3   0   30.20    5.30 
  -3   3   0   20.60    6.90 
   3   3   0   34.10    6.50 
  -3   3   0   28.60    6.10 
  -3   3   0   19.70    6.90 
  -3   3   0   26.60    7.40 
   3   3   0   22.80    7.00 
   3   3   0   29.30    5.10 
   3   3   0   35.80    4.80 
   3   3   0   22.70    6.10 
   3   3   0   30.30    6.20 
  -3   3   0   20.00    6.00 
  -3   3   0   21.00    6.00 
   3   3   0   30.40    7.40 
  -3   3   0   23.50    5.50 
   3   3   0   37.10    5.80 
  -3   3   0   35.50    7.00 
  -3   3   0   44.20    8.30 
  -3   3   0   31.80    5.70 
  -3   3   0   24.70    5.90 
  -3   3   0   24.70    6.40 
  -3   3   0   33.00    9.00 
   3   3   0   42.20    7.80 
  -3   3   0   43.90    8.40 
  -3   3   0   26.10    6.10 
  -3   3   0   19.80    5.70 
   3   3   0   32.40    9.20 
  -3   3   0   27.90    6.30 
  -3   3   0   28.40    6.40 
  -3   3   0   23.80    6.20 
  -4  -3   0 1048.60   38.20 
   4  -3   0 1116.89   42.30 
  -4  -3   0 1083.99   43.70 
   4  -3   0 1114.69   44.00 
  -4  -3   0 1010.30   42.80 
   4  -3   0  983.40   45.20 
   4  -3   0 1015.90   41.90 
   4  -3   0 1061.49   40.80 
  -4  -3   0 1048.10   36.70 
   4  -3   0 1114.19   47.70 
  -4  -3   0 1127.09   43.40 
  -4  -3   0 1103.79   39.90 
   4  -3   0  998.90   43.50 
   4  -3   0 1036.10   45.00 
  -4  -3   0 1117.59   44.20 
   4  -3   0 1031.60   38.50 
   4  -3   0 1057.69   46.60 
  -4  -3   0 1021.00   43.70 
  -4  -3   0 1037.20   44.70 
  -4  -3   0 1064.39   30.90 
  -4  -3   0 1003.60   50.29 
  -4  -3   0 1088.29   46.20 
  -4  -3   0 1075.29   40.70 
  -4  -3   0 1093.99   43.50 
  -4   3   0 1097.69   44.60 
  -4   3   0 1006.40   46.10 
  -4   3   0 1020.00   35.10 
  -4   3   0 1068.19   42.80 
  -4   3   0 1100.29   45.20 
   4   3   0 1108.89   44.00 
  -4   3   0 1131.09   42.10 
  -4   3   0 1139.99   44.00 
  -4   3   0 1094.49   49.20 
   4   3   0 1065.09   50.79 
   4   3   0 1089.09   39.70 
  -4   3   0 1083.29   41.90 
  -4   3   0 1044.90   44.50 
   4   3   0 1050.99   34.10 
   4   3   0 1123.89   46.10 
  -4   3   0 1065.19   42.50 
  -4   3   0 1064.29   37.50 
  -4   3   0 1025.30   45.90 
   4   3   0 1008.60   49.10 
   4   3   0 1185.88   45.90 
   4   3   0 1126.89   38.30 
  -4   3   0 1124.09   43.90 
   4   3   0  998.00   42.90 
  -4   3   0 1043.30   37.10 
  -4   3   0  988.20   43.20 
   4   3   0 1100.39   36.30 
  -4   3   0 1068.19   43.80 
  -4   3   0 1022.70   47.90 
   4   3   0 1079.19   46.50 
   4   3   0 1104.69   38.60 
  -4   3   0 1024.40   38.70 
   4   3   0 1080.89   36.40 
  -4   3   0 1051.29   43.30 
   4   3   0 1058.29   35.20 
   5  -3   0  695.43   36.60 
  -5  -3   0  704.93   35.20 
  -5  -3   0  731.93   35.50 
  -5  -3   0  686.13   40.90 
  -5  -3   0  702.23   36.30 
  -5  -3   0  674.43   35.00 
  -5  -3   0  784.02   28.90 
   5  -3   0  668.53   36.70 
   5  -3   0  665.43   33.00 
  -5  -3   0  708.83   37.10 
   5  -3   0  717.03   31.60 
   5  -3   0  621.94   36.70 
  -5  -3   0  683.93   35.30 
   5  -3   0  667.33   36.00 
   5  -3   0  680.33   30.90 
   5  -3   0  705.23   20.90 
  -5  -3   0  672.13   21.90 
   5  -3   0  699.33   32.60 
   5  -3   0  712.73   38.10 
  -5  -3   0  680.33   32.70 
   5  -3   0  737.43   36.20 
   5  -3   0  699.63   36.70 
  -5  -3   0  690.23   28.60 
   5  -3   0  710.33   34.30 
  -5  -3   0  734.33   36.00 
   5   3   0  670.33   25.00 
  -5   3   0  721.33   35.60 
  -5   3   0  652.73   33.90 
  -5   3   0  742.93   37.70 
  -5   3   0  728.23   35.90 
  -5   3   0  725.13   28.00 
   5   3   0  667.93   26.10 
  -5   3   0  713.13   34.60 
  -5   3   0  777.12   41.90 
   5   3   0  722.23   26.20 
  -5   3   0  709.13   36.30 
   5   3   0  593.04   33.30 
  -5   3   0  691.73   36.60 
   5   3   0  633.84   37.40 
  -5   3   0  724.23   39.30 
   5   3   0  681.83   24.80 
  -5   3   0  687.43   32.10 
  -5   3   0  672.23   24.30 
  -5   3   0  683.13   33.70 
  -5   3   0  637.84   33.90 
   5   3   0  702.23   30.40 
   5   3   0  711.63   42.60 
   5   3   0  633.54   35.70 
  -5   3   0  639.04   34.80 
   5   3   0  742.83   43.80 
  -5   3   0  619.94   38.40 
  -5   3   0  639.04   33.60 
  -5   3   0  770.12   29.70 
  -5   3   0  668.03   34.70 
   5   3   0  698.23   35.70 
   5   3   0  724.33   29.70 
  -5   3   0  681.53   25.80 
   6  -3   0 2174.78   86.39 
   6  -3   0 2175.28   83.59 
   6  -3   0 2302.17   84.89 
   6  -3   0 2234.78   79.39 
   6  -3   0 2153.18   81.29 
  -6  -3   0 2208.68   83.59 
  -6  -3   0 2377.26   71.69 
  -6  -3   0 2336.17   70.99 
  -6  -3   0 2248.58   83.19 
  -6  -3   0 2270.47   63.29 
   6  -3   0 2229.38   85.19 
   6  -3   0 2271.37   86.59 
   6  -3   0 2266.37   84.99 
  -6  -3   0 2212.08   78.09 
  -6  -3   0 2308.77   84.09 
   6  -3   0 2281.27   77.19 
  -6  -3   0 2313.27   78.69 
   6  -3   0 2220.18   77.19 
  -6  -3   0 2222.08   82.89 
   6  -3   0 2293.87   75.09 
  -6  -3   0 2442.26   83.89 
   6  -3   0 2312.77   79.29 
  -6  -3   0 2329.67   80.29 
  -6  -3   0 2262.97   91.49 
   6   3   0 2332.77   90.29 
  -6   3   0 2193.38   81.29 
  -6   3   0 2180.38   83.39 
   6   3   0 2280.37   66.19 
   6   3   0 2306.37   85.99 
   6   3   0 2220.48   68.29 
  -6   3   0 2341.37   77.69 
   6   3   0 2170.58   68.69 
  -6   3   0 2211.48   83.39 
  -6   3   0 2194.68   79.69 
  -6   3   0 2324.97   83.89 
  -6   3   0 2206.68   81.39 
  -6   3   0 2305.47   80.59 
  -6   3   0 2293.17   84.59 
  -6   3   0 2172.58   81.29 
  -6   3   0 2307.37   92.49 
  -6   3   0 2201.58   84.69 
   6   3   0 2382.16   95.99 
  -6   3   0 2282.47   83.59 
   6   3   0 2212.18   74.59 
   6   3   0 2316.17   82.59 
  -6   3   0 2314.87   89.89 
   6   3   0 2338.77   86.69 
   6   3   0 2212.18   82.79 
  -6   3   0 2293.67   81.69 
  -6   3   0 2118.89   89.29 
   6   3   0 2201.68   93.59 
  -7  -3   0  663.63   45.10 
  -7  -3   0  722.93   41.30 
  -7  -3   0  581.14   37.60 
  -7  -3   0  700.23   35.10 
   7  -3   0  651.03   35.80 
   7  -3   0  626.74   41.20 
  -7  -3   0  726.83   42.00 
   7  -3   0  611.44   40.00 
   7  -3   0  753.92   44.80 
   7  -3   0  651.93   38.30 
   7  -3   0  644.44   40.70 
   7  -3   0  671.63   41.00 
   7  -3   0  678.03   34.50 
  -7  -3   0  650.13   39.60 
  -7  -3   0  699.83   34.10 
   7  -3   0  703.23   37.50 
   7  -3   0  637.14   39.90 
   7  -3   0  746.63   33.70 
  -7  -3   0  745.63   43.10 
  -7   3   0  727.83   38.50 
  -7   3   0  687.43   35.20 
  -7   3   0  756.92   41.10 
   7   3   0  719.23   46.50 
   7   3   0  687.13   42.80 
  -7   3   0  674.93   40.50 
   7   3   0  656.23   39.90 
  -7   3   0  627.34   45.10 
   7   3   0  742.13   50.49 
  -7   3   0  733.13   41.50 
   7   3   0  685.93   34.80 
  -7   3   0  725.83   44.60 
   7   3   0  709.43   39.80 
   7   3   0  599.64   46.50 
  -7   3   0  638.64   37.90 
  -7   3   0  642.24   40.50 
  -7   3   0  641.54   44.60 
   7   3   0  683.33   42.10 
  -7   3   0  671.53   38.50 
  -7   3   0  625.64   39.80 
  -7   3   0  690.83   45.70 
  -7   3   0  686.13   42.00 
   7   3   0  680.43   41.70 
  -7   3   0  711.43   38.30 
  -7   3   0  731.53   41.80 
   8  -3   0  834.32   49.40 
  -8  -3   0  868.01   49.00 
   8  -3   0  911.51   52.69 
  -8  -3   0  897.01   49.70 
  -8  -3   0  800.02   49.20 
  -8  -3   0  900.21   50.79 
   8  -3   0  891.61   44.40 
   8  -3   0  897.31   52.19 
   8  -3   0  941.21   43.30 
   8  -3   0  866.81   50.99 
   8  -3   0  832.82   49.10 
   8  -3   0  803.82   51.39 
   8  -3   0  861.51   47.30 
   8  -3   0  946.41   46.50 
  -8  -3   0  809.62   50.09 
  -8  -3   0  868.11   55.09 
  -8   3   0  928.31   46.80 
   8   3   0  891.71   50.19 
   8   3   0  901.91   49.00 
   8   3   0  957.20   61.79 
  -8   3   0  881.31   50.19 
  -8   3   0  937.81   52.79 
   8   3   0  887.11   45.30 
   8   3   0  947.71   51.19 
  -8   3   0  790.42   49.90 
   8   3   0  828.02   49.99 
  -8   3   0  988.30   53.19 
   8   3   0  909.41   56.79 
  -8   3   0  881.81   49.40 
   8   3   0  855.21   52.59 
  -8   3   0  815.02   50.59 
  -8   3   0  792.22   44.60 
  -8   3   0  992.70   60.09 
  -8   3   0  886.91   58.79 
   8   3   0  916.61   44.50 
   8   3   0  890.71   49.60 
   8   3   0  836.32   50.69 
   8   3   0  956.20   49.99 
   8   3   0  882.81   60.39 
  -8   3   0  933.01   58.09 
  -8   3   0  834.82   49.90 
   9  -3   0  376.36   40.40 
   9  -3   0  325.27   37.50 
  -9  -3   0  327.17   38.50 
   9  -3   0  343.47   33.60 
   9  -3   0  308.97   37.70 
  -9  -3   0  310.47   37.70 
   9  -3   0  276.07   36.30 
  -9  -3   0  348.07   44.10 
  -9  -3   0  283.47   35.10 
   9  -3   0  339.27   37.70 
  -9  -3   0  202.28   29.70 
   9  -3   0  319.87   35.10 
   9  -3   0  318.87   39.80 
  -9   3   0  344.67   34.30 
  -9   3   0  359.96   35.50 
  -9   3   0  235.88   38.80 
  -9   3   0  387.66   42.60 
   9   3   0  325.77   35.00 
  -9   3   0  332.37   37.50 
  -9   3   0  323.27   38.40 
   9   3   0  387.16   51.59 
   9   3   0  369.46   38.00 
   9   3   0  344.87   37.10 
  -9   3   0  297.27   42.20 
  -9   3   0  318.47   37.70 
  -9   3   0  332.97   39.70 
   9   3   0  301.27   38.60 
   9   3   0  308.37   35.90 
   9   3   0  398.36   51.09 
   9   3   0  304.87   42.10 
   9   3   0  315.77   37.90 
   9   3   0  382.36   41.40 
  -9   3   0  298.77   42.90 
  -9   3   0  295.17   35.50 
   0  -4   0   53.99    9.40 
   0  -4   0   58.29    7.60 
   0  -4   0   35.70   10.80 
   0  -4   0   62.99    8.30 
   0  -4   0   58.19    7.90 
   0  -4   0   60.39    9.20 
   0  -4   0   71.29    8.30 
   0  -4   0   47.90    8.00 
   0  -4   0   44.40    8.00 
   0  -4   0   68.19   10.70 
   0  -4   0   63.99    9.00 
   0  -4   0   44.50   10.40 
   0   4   0   57.19    7.40 
   0   4   0   49.60    9.50 
   0   4   0   56.89   11.10 
   0   4   0   71.19   11.90 
   0   4   0   52.89    7.80 
   0   4   0   58.49    8.60 
   0   4   0   62.39   10.10 
   0   4   0   42.80    7.60 
   0   4   0   53.09    8.60 
   0   4   0   67.29   10.10 
   0   4   0   63.29    7.90 
   0   4   0   45.50    6.80 
  -1  -4   0 7118.39  188.48 
   1  -4   0 6732.83  200.08 
  -1  -4   0 7224.18  189.78 
  -1  -4   0 7223.48  198.08 
  -1  -4   0 6766.52  220.08 
  -1  -4   0 7044.60  197.08 
   1  -4   0 6789.42  194.28 
  -1  -4   0 6867.11  196.48 
   1  -4   0 6925.61  196.48 
   1  -4   0 7052.29  188.38 
   1  -4   0 7363.56  196.88 
  -1  -4   0 7233.78  193.78 
  -1  -4   0 6918.61  181.08 
  -1  -4   0 7159.68  194.88 
  -1  -4   0 7084.99  187.98 
  -1  -4   0 6891.71  189.28 
  -1  -4   0 7224.78  206.38 
   1  -4   0 7210.48  197.78 
   1  -4   0 7156.98  183.68 
  -1  -4   0 6964.70  182.58 
   1  -4   0 7088.09  193.98 
  -1  -4   0 6982.30  193.58 
   1  -4   0 7273.87  197.98 
  -1  -4   0 6979.10  197.28 
  -1  -4   0 7136.89  193.28 
  -1  -4   0 7088.99  187.98 
   1  -4   0 7103.69  195.48 
  -1   4   0 6804.72  195.58 
   1   4   0 7105.29  187.78 
   1   4   0 7170.78  189.08 
  -1   4   0 7020.80  190.68 
  -1   4   0 7063.09  194.18 
  -1   4   0 6893.91  194.58 
  -1   4   0 7193.18  192.98 
  -1   4   0 6938.31  202.48 
  -1   4   0 7199.28  196.38 
  -1   4   0 7128.89  199.58 
  -1   4   0 7275.77  197.38 
   1   4   0 7086.29  190.98 
   1   4   0 6896.81  193.68 
  -1   4   0 7125.09  197.88 
  -1   4   0 6888.51  201.28 
   1   4   0 7114.29  189.78 
   1   4   0 6935.41  201.48 
  -1   4   0 7066.79  196.38 
   1   4   0 7130.59  195.78 
  -1   4   0 7104.79  189.48 
   1   4   0 7063.19  194.38 
  -1   4   0 6955.00  187.08 
  -1   4   0 7302.77  195.38 
  -1   4   0 7045.00  188.68 
  -1   4   0 6850.31  194.08 
   2  -4   0   85.49    7.00 
  -2  -4   0   86.09   11.80 
   2  -4   0   63.49   10.00 
  -2  -4   0   81.49    6.20 
   2  -4   0   75.39   11.50 
   2  -4   0   63.19   11.70 
  -2  -4   0   90.19   12.50 
   2  -4   0  110.49   13.70 
  -2  -4   0   45.50   10.60 
  -2  -4   0   84.89    7.10 
  -2  -4   0   70.59    7.10 
   2  -4   0   86.59   11.50 
  -2  -4   0   88.79    7.00 
  -2  -4   0   83.49   10.90 
   2  -4   0  103.39   13.40 
  -2  -4   0   81.89    6.60 
   2  -4   0   92.39   13.00 
  -2  -4   0   97.89   11.40 
  -2  -4   0   70.19   17.10 
  -2  -4   0   92.99   12.70 
  -2  -4   0   88.49    6.80 
   2  -4   0   70.39    7.40 
   2  -4   0   80.49    5.90 
  -2  -4   0   94.19    7.20 
   2  -4   0   77.49   11.70 
  -2  -4   0   64.39    9.10 
  -2  -4   0   84.99    6.20 
   2   4   0   78.99   10.10 
   2   4   0   98.89   15.40 
   2   4   0   80.59    9.40 
   2   4   0   94.99    7.00 
  -2   4   0   90.59   12.50 
  -2   4   0   51.49    9.50 
  -2   4   0   92.09    6.70 
  -2   4   0   87.99   10.20 
   2   4   0   90.39   15.90 
   2   4   0  100.19    8.30 
  -2   4   0   75.59   10.60 
  -2   4   0   92.69    6.70 
   2   4   0   73.29   11.10 
  -2   4   0   73.79   11.20 
  -2   4   0   84.89   11.80 
   2   4   0   93.89   11.00 
  -2   4   0   88.29   13.10 
  -2   4   0   75.59    9.20 
   2   4   0   87.39    6.10 
  -2   4   0   85.59   11.50 
  -2   4   0   80.09   12.00 
  -2   4   0   92.39   14.60 
  -2   4   0   74.69    5.10 
  -2   4   0   87.69    7.20 
   2   4   0  108.19   12.90 
  -2   4   0   70.49   10.70 
  -2   4   0   86.79   13.90 
  -2   4   0   74.19   10.50 
  -2   4   0   81.29   12.60 
   3  -4   0 1704.53   63.59 
  -3  -4   0 1853.91   66.89 
  -3  -4   0 1822.12   64.59 
  -3  -4   0 1815.82   79.39 
   3  -4   0 1834.92   63.59 
  -3  -4   0 1913.61   62.79 
   3  -4   0 1757.12   65.09 
  -3  -4   0 1852.01   61.09 
   3  -4   0 1746.73   66.79 
   3  -4   0 1735.33   57.09 
  -3  -4   0 1757.82   56.09 
  -3  -4   0 1718.83   63.49 
   3  -4   0 1772.92   64.59 
   3  -4   0 1835.22   62.59 
  -3  -4   0 1782.12   49.00 
  -3  -4   0 1714.03   52.19 
   3  -4   0 1762.22   67.09 
  -3  -4   0 1867.21   65.39 
  -3  -4   0 1731.03   61.69 
  -3  -4   0 1816.92   65.89 
  -3  -4   0 1771.62   57.99 
   3  -4   0 1719.33   63.99 
  -3  -4   0 1790.82   51.39 
   3  -4   0 1837.72   63.89 
  -3  -4   0 1805.42   48.30 
  -3   4   0 1821.32   61.99 
  -3   4   0 1755.52   64.19 
  -3   4   0 1872.41   65.09 
  -3   4   0 1793.02   62.69 
  -3   4   0 1826.32   65.09 
   3   4   0 1756.62   48.50 
  -3   4   0 1795.32   66.59 
  -3   4   0 1633.54   65.09 
   3   4   0 1729.13   61.69 
   3   4   0 1855.71   58.09 
   3   4   0 1852.61   62.59 
  -3   4   0 1833.82   67.49 
  -3   4   0 1872.81   70.19 
   3   4   0 1781.32   64.39 
  -3   4   0 1749.72   63.09 
  -3   4   0 1812.12   58.29 
   3   4   0 1859.01   58.89 
   3   4   0 1760.52   57.39 
   3   4   0 1773.02   69.59 
  -3   4   0 1731.03   51.59 
  -3   4   0 1826.72   48.60 
  -3   4   0 1692.83   61.09 
  -3   4   0 1831.32   64.89 
  -3   4   0 1815.42   60.49 
   3   4   0 1801.62   64.39 
  -3   4   0 1667.63   50.79 
   3   4   0 1869.31   72.19 
  -3   4   0 1822.82   62.39 
   3   4   0 1830.52   49.50 
  -3   4   0 1853.41   70.19 
  -3   4   0 1848.81   64.19 
  -3   4   0 1827.22   60.89 
   4  -4   0  122.29   15.00 
  -4  -4   0  126.89   13.00 
  -4  -4   0   85.49   14.10 
  -4  -4   0  110.69    6.00 
  -4  -4   0  116.69   15.30 
   4  -4   0  121.79   10.00 
  -4  -4   0  127.49    6.00 
  -4  -4   0  107.99   16.30 
  -4  -4   0  130.19   13.40 
  -4  -4   0  116.69   20.90 
   4  -4   0   97.09   14.50 
  -4  -4   0  119.49   15.00 
   4  -4   0  105.69   14.40 
   4  -4   0  109.59   17.30 
   4  -4   0  105.79   15.50 
  -4  -4   0  122.89   16.60 
   4  -4   0   87.69   15.40 
   4  -4   0  117.39   16.10 
   4  -4   0  106.29   15.10 
   4  -4   0  106.19   14.80 
  -4  -4   0  134.69   15.00 
   4  -4   0  129.49   18.40 
   4  -4   0  102.79   14.00 
  -4  -4   0  108.09   14.70 
   4   4   0  121.89    8.20 
   4   4   0  105.49   16.80 
  -4   4   0  110.09   13.10 
  -4   4   0  119.59   18.80 
  -4   4   0  116.99   15.10 
  -4   4   0  123.29   15.50 
  -4   4   0  123.79   16.40 
  -4   4   0  127.79   15.30 
  -4   4   0  123.59   17.20 
  -4   4   0  124.29   15.10 
  -4   4   0  139.99   16.20 
   4   4   0   76.49   15.10 
  -4   4   0  130.49   19.90 
  -4   4   0  117.99   13.70 
   4   4   0  118.69   13.90 
   4   4   0  126.69   16.90 
  -4   4   0  121.79   18.20 
  -4   4   0   88.89   14.20 
  -4   4   0  109.19   15.30 
  -4   4   0  136.59   17.90 
  -4   4   0  152.68   21.70 
   4   4   0  105.39   14.40 
  -4   4   0  143.69   15.00 
   4   4   0  122.39   12.50 
   4   4   0  120.39   16.40 
  -4   4   0  106.49   14.90 
   5  -4   0 1177.28   54.59 
  -5  -4   0 1158.78   54.09 
  -5  -4   0 1264.17   46.60 
   5  -4   0 1271.77   44.30 
   5  -4   0 1342.87   53.19 
   5  -4   0 1205.98   57.49 
   5  -4   0 1176.98   53.59 
  -5  -4   0 1338.97   52.99 
   5  -4   0 1263.27   51.39 
   5  -4   0 1239.78   55.49 
  -5  -4   0 1231.28   52.79 
  -5  -4   0 1257.47   62.39 
   5  -4   0 1245.68   54.89 
  -5  -4   0 1234.88   54.39 
  -5  -4   0 1304.87   52.29 
   5  -4   0 1211.28   56.59 
  -5  -4   0 1242.78   43.20 
  -5  -4   0 1295.37   58.49 
   5  -4   0 1325.57   58.89 
   5  -4   0 1273.77   53.49 
  -5  -4   0 1277.07   49.10 
   5  -4   0 1255.07   49.99 
  -5   4   0 1250.07   50.99 
   5   4   0 1230.68   60.69 
  -5   4   0 1197.78   50.89 
   5   4   0 1241.98   43.60 
   5   4   0 1318.97   43.30 
  -5   4   0 1303.97   60.79 
  -5   4   0 1290.27   53.99 
  -5   4   0 1220.28   51.19 
  -5   4   0 1306.97   53.89 
  -5   4   0 1213.48   52.59 
  -5   4   0 1301.67   58.99 
   5   4   0 1287.07   55.79 
   5   4   0 1215.68   56.89 
  -5   4   0 1324.77   53.49 
   5   4   0 1260.77   54.89 
  -5   4   0 1244.08   55.09 
  -5   4   0 1212.88   59.69 
  -5   4   0 1249.97   54.29 
  -5   4   0 1265.17   48.20 
   5   4   0 1237.08   51.89 
  -5   4   0 1304.57   48.80 
  -5   4   0 1218.88   52.09 
  -5   4   0 1337.57   55.49 
  -5   4   0 1319.87   57.49 
  -5   4   0 1226.78   54.29 
  -6  -4   0  383.76   27.40 
   6  -4   0  379.56   27.00 
   6  -4   0  403.06   25.80 
  -6  -4   0  378.76   27.50 
  -6  -4   0  416.06   21.20 
   6  -4   0  405.76   29.90 
  -6  -4   0  367.26   39.70 
   6  -4   0  350.16   28.90 
  -6  -4   0  379.66   27.50 
  -6  -4   0  390.96   29.30 
  -6  -4   0  318.37   27.30 
   6  -4   0  363.46   25.90 
   6  -4   0  402.96   30.40 
   6  -4   0  369.66   30.40 
   6  -4   0  406.86   29.20 
  -6  -4   0  363.46   19.30 
  -6  -4   0  452.85   29.80 
   6  -4   0  365.86   35.90 
   6  -4   0  390.56   21.00 
   6  -4   0  358.86   28.60 
   6  -4   0  415.56   25.30 
  -6   4   0  373.26   31.20 
  -6   4   0  312.17   34.90 
   6   4   0  394.86   33.80 
   6   4   0  363.86   27.70 
  -6   4   0  371.36   27.10 
  -6   4   0  412.56   26.40 
   6   4   0  382.46   41.00 
  -6   4   0  416.36   28.70 
  -6   4   0  398.06   28.20 
  -6   4   0  410.06   29.90 
   6   4   0  374.86   26.40 
   6   4   0  361.36   21.00 
  -6   4   0  378.96   28.10 
  -6   4   0  390.96   28.80 
   6   4   0  425.06   31.10 
  -6   4   0  352.36   28.00 
  -6   4   0  373.86   27.30 
  -6   4   0  392.26   28.20 
  -6   4   0  409.86   27.60 
   6   4   0  409.26   31.10 
  -6   4   0  371.96   21.70 
  -6   4   0  338.47   37.00 
  -6   4   0  408.06   29.60 
   6   4   0  395.16   19.10 
  -7  -4   0  671.13   41.70 
   7  -4   0  640.54   37.90 
  -7  -4   0  655.03   46.40 
   7  -4   0  605.04   39.50 
   7  -4   0  691.83   44.70 
   7  -4   0  652.33   41.50 
   7  -4   0  693.33   35.20 
   7  -4   0  625.74   42.00 
  -7  -4   0  695.63   41.10 
   7  -4   0  663.23   35.90 
   7  -4   0  648.64   37.40 
   7  -4   0  662.43   42.60 
   7  -4   0  738.13   44.30 
  -7  -4   0  653.23   36.70 
   7  -4   0  641.74   44.10 
  -7  -4   0  671.93   39.90 
  -7  -4   0  646.34   40.30 
   7   4   0  675.73   43.50 
  -7   4   0  699.63   41.50 
  -7   4   0  682.03   47.70 
  -7   4   0  726.23   42.00 
  -7   4   0  602.44   39.10 
   7   4   0  696.03   39.60 
  -7   4   0  704.53   37.40 
  -7   4   0  655.53   38.70 
  -7   4   0  717.13   41.80 
  -7   4   0  638.44   41.10 
   7   4   0  689.23   44.70 
   7   4   0  651.83   40.50 
  -7   4   0  667.53   40.90 
  -7   4   0  697.73   42.90 
  -7   4   0  661.03   38.70 
  -7   4   0  657.13   46.40 
  -7   4   0  703.63   42.30 
   7   4   0  634.04   41.00 
   7   4   0  695.53   48.50 
  -7   4   0  671.63   48.10 
   7   4   0  651.63   47.50 
   7   4   0  617.34   42.00 
  -8  -4   0  250.87   31.20 
   8  -4   0  154.98   24.80 
   8  -4   0  261.97   31.70 
  -8  -4   0  248.48   30.70 
   8  -4   0  244.98   30.90 
   8  -4   0  274.47   29.60 
   8  -4   0  264.87   33.30 
  -8  -4   0  216.88   33.50 
  -8  -4   0  250.87   29.60 
   8  -4   0  152.98   27.80 
  -8  -4   0  221.58   29.70 
   8  -4   0  215.08   31.30 
   8  -4   0  209.98   25.30 
   8  -4   0  243.18   32.70 
   8  -4   0  196.78   24.20 
   8   4   0  220.28   31.30 
  -8   4   0  209.28   29.70 
  -8   4   0  297.57   41.30 
  -8   4   0  252.97   36.50 
   8   4   0  223.78   28.80 
  -8   4   0  260.47   37.20 
  -8   4   0  187.88   27.70 
  -8   4   0  193.08   27.10 
   8   4   0  269.97   32.80 
  -8   4   0  304.77   34.50 
   8   4   0  267.17   30.00 
  -8   4   0  190.28   23.60 
  -8   4   0  205.98   25.80 
   8   4   0  197.88   29.50 
  -8   4   0  221.58   29.90 
   8   4   0  220.58   35.00 
  -8   4   0  234.38   28.00 
  -8   4   0  204.78   29.40 
   8   4   0  233.08   35.50 
   8   4   0  283.77   35.30 
  -8   4   0  297.07   34.00 
  -8   4   0  286.57   34.70 
   9  -4   0   22.50   11.90 
  -9  -4   0   22.10   10.80 
  -9  -4   0   29.60   15.00 
   9  -4   0   40.40   15.10 
   9  -4   0   47.80   15.60 
   9  -4   0   35.10   12.70 
  -9  -4   0   53.59   16.40 
   9  -4   0   53.29   18.40 
   9  -4   0   52.79   18.80 
   9  -4   0   69.19   20.40 
  -9  -4   0   57.99   18.30 
   9  -4   0   39.70   14.70 
  -9   4   0   34.00   15.00 
   9   4   0   40.60   20.30 
   9   4   0   35.60   15.10 
  -9   4   0   38.10   17.70 
  -9   4   0   54.09   17.50 
   9   4   0   56.09   16.30 
   9   4   0   39.00   19.50 
   9   4   0   53.89   17.00 
   9   4   0   55.09   19.30 
  -9   4   0   63.69   21.70 
  -9   4   0   22.30   12.30 
  -9   4   0   33.50   15.20 
  -9   4   0   46.40   16.40 
  -9   4   0   36.30   12.60 
   9   4   0   75.29   19.00 
  -9   4   0   35.00   14.60 
  -9   4   0   50.89   18.50 
  -9   4   0   37.50   13.70 
   0  -5   0    0.80    3.60 
   0  -5   0    3.40    3.30 
   0  -5   0   20.60    6.90 
   0  -5   0    2.70    3.70 
   0  -5   0    1.00    1.90 
   0  -5   0   -4.10    4.70 
   0  -5   0   -0.80    2.50 
   0  -5   0   -0.20    2.50 
   0  -5   0    4.90    4.00 
   0  -5   0    4.00    3.50 
   0  -5   0    1.00    2.50 
   0   5   0   -0.10    2.40 
   0   5   0   -0.80    2.80 
   0   5   0    2.40    3.70 
   0   5   0    0.20    3.30 
   0   5   0    5.10    3.80 
   0   5   0   -0.10    3.90 
   0   5   0   -1.40    2.40 
   0   5   0    2.50    3.10 
   0   5   0   -1.60    2.30 
   0   5   0   -0.90    2.00 
   0   5   0    0.40    3.30 
  -1  -5   0  109.29   18.60 
  -1  -5   0  128.79   16.40 
   1  -5   0  116.99   14.70 
  -1  -5   0  109.79   23.80 
  -1  -5   0  137.09   11.10 
  -1  -5   0  134.59   10.30 
   1  -5   0  112.09    6.10 
   1  -5   0  115.79   15.50 
  -1  -5   0  132.39   13.50 
  -1  -5   0  132.79   16.70 
   1  -5   0  134.89   23.00 
   1  -5   0  120.59   15.30 
   1  -5   0  156.98   17.10 
  -1  -5   0  113.99   13.70 
   1  -5   0  117.69   15.70 
   1  -5   0  120.79   10.10 
  -1  -5   0  110.99   13.80 
   1  -5   0  129.29   10.40 
  -1  -5   0  130.99   16.50 
  -1  -5   0  109.89   13.70 
   1  -5   0  149.39   18.10 
   1  -5   0  114.29   14.00 
  -1  -5   0  120.39    5.60 
  -1  -5   0  108.39   15.20 
  -1  -5   0  119.79    8.40 
   1  -5   0  136.59   19.40 
   1   5   0  125.39   14.40 
  -1   5   0  101.79   14.00 
   1   5   0  169.88   21.00 
  -1   5   0  123.39   13.70 
  -1   5   0  117.89   12.30 
   1   5   0  121.89   14.40 
   1   5   0  108.19   11.20 
  -1   5   0  147.89   17.30 
  -1   5   0  107.49   14.60 
  -1   5   0  134.39   19.20 
   1   5   0  126.19   14.80 
  -1   5   0  141.89   16.10 
  -1   5   0  108.59   13.80 
   1   5   0  132.69   10.00 
  -1   5   0  103.39   15.30 
  -1   5   0  127.89    9.80 
   1   5   0  123.99   15.40 
  -1   5   0  121.69   17.60 
  -1   5   0  119.09   13.60 
  -1   5   0  111.09   14.60 
   1   5   0  127.69   18.80 
   1   5   0  132.49   15.50 
   1   5   0  117.89   12.10 
  -1   5   0  123.29   13.60 
  -1   5   0  120.39   16.20 
  -2  -5   0   92.79   12.40 
   2  -5   0   52.19   10.90 
  -2  -5   0   92.59   12.50 
  -2  -5   0   94.49    9.40 
   2  -5   0  111.59    8.10 
  -2  -5   0   81.69    6.10 
  -2  -5   0   68.79    8.30 
  -2  -5   0   72.29    8.90 
   2  -5   0   73.19   13.10 
  -2  -5   0   75.79   13.10 
   2  -5   0   65.19   11.40 
  -2  -5   0   98.59   19.70 
  -2  -5   0   85.99    8.70 
  -2  -5   0   70.79   11.80 
   2  -5   0   69.89   12.40 
  -2  -5   0   47.10   17.90 
   2  -5   0   81.89   13.30 
   2  -5   0   45.00    9.60 
  -2  -5   0   50.49   10.80 
   2  -5   0   67.69   10.30 
   2  -5   0   72.19    7.60 
  -2  -5   0   64.89   10.20 
   2  -5   0   58.29   12.70 
  -2  -5   0   70.79    9.60 
   2  -5   0   99.09   13.40 
  -2  -5   0  117.89   18.50 
  -2   5   0   63.79   12.30 
  -2   5   0   48.30    9.60 
  -2   5   0   61.69   10.70 
  -2   5   0   72.69   14.50 
   2   5   0   77.29    9.00 
  -2   5   0   80.99   12.60 
   2   5   0   64.49   11.30 
  -2   5   0  108.79   15.40 
   2   5   0   77.39   12.40 
   2   5   0   64.99   10.30 
  -2   5   0   69.19    9.00 
   2   5   0   78.59   15.50 
  -2   5   0   60.39   10.90 
  -2   5   0   84.89   15.80 
  -2   5   0   78.19    9.90 
  -2   5   0   68.39    8.30 
  -2   5   0   74.29    7.20 
   2   5   0   63.89    8.10 
   2   5   0   80.49   10.30 
  -2   5   0   74.79   10.00 
   2   5   0   75.09    7.70 
  -2   5   0  106.69   15.50 
  -2   5   0   75.29   12.90 
  -2   5   0   95.39   14.40 
   2   5   0   75.39   11.30 
  -2   5   0   67.29   11.80 
  -2   5   0   86.99    9.10 
  -3  -5   0    1.90    2.40 
   3  -5   0    2.90    1.70 
  -3  -5   0    4.10    4.60 
   3  -5   0   -0.10    4.50 
   3  -5   0    7.90    6.00 
  -3  -5   0   -1.40    5.50 
   3  -5   0    0.80    3.80 
  -3  -5   0    3.40    2.00 
   3  -5   0    0.50    3.00 
  -3  -5   0    6.70    4.20 
   3  -5   0   -1.90    3.60 
  -3  -5   0   -0.50    3.60 
  -3  -5   0    2.60    4.70 
  -3  -5   0   -0.10    1.50 
   3  -5   0    0.50    5.00 
  -3  -5   0    2.10    2.70 
  -3  -5   0    0.70    3.00 
   3  -5   0   -0.70    3.60 
  -3  -5   0   -0.20    3.10 
   3  -5   0   -5.10    3.10 
  -3  -5   0    2.70    2.00 
   3  -5   0    1.80    2.80 
  -3  -5   0    0.90    3.20 
  -3  -5   0    1.60    5.40 
  -3  -5   0   -1.50    2.00 
   3  -5   0    0.80    3.40 
  -3  -5   0    3.40    2.50 
   3   5   0    0.80    3.30 
  -3   5   0   -3.10    3.00 
  -3   5   0    5.60    4.80 
  -3   5   0   -0.70    4.20 
  -3   5   0    5.50    4.70 
  -3   5   0   -1.00    3.50 
   3   5   0    5.10    4.30 
  -3   5   0   -2.10    2.90 
   3   5   0    1.50    4.40 
   3   5   0    3.70    4.30 
  -3   5   0    1.50    3.60 
  -3   5   0    3.70    4.70 
   3   5   0    0.60    4.30 
  -3   5   0    0.80    1.90 
   3   5   0   -1.10    3.10 
  -3   5   0    0.60    3.90 
  -3   5   0    1.10    2.40 
  -3   5   0   -0.80    2.80 
  -3   5   0    6.90    5.80 
  -3   5   0    1.20    3.20 
   3   5   0    0.80    2.00 
  -3   5   0    3.70    2.40 
  -3   5   0    1.50    3.60 
   3   5   0    1.80    1.80 
   3   5   0    7.30    3.90 
  -3   5   0   -0.30    3.90 
   3   5   0    4.80    6.80 
  -4  -5   0  623.94   29.60 
   4  -5   0  550.64   33.10 
  -4  -5   0  613.04   35.60 
  -4  -5   0  625.54   33.00 
   4  -5   0  561.54   33.90 
   4  -5   0  590.04   35.40 
  -4  -5   0  612.14   36.30 
   4  -5   0  545.85   32.20 
   4  -5   0  643.24   37.80 
  -4  -5   0  614.64   44.70 
  -4  -5   0  627.14   23.00 
  -4  -5   0  560.94   31.10 
  -4  -5   0  643.44   27.90 
   4  -5   0  558.84   32.50 
  -4  -5   0  543.65   35.70 
  -4  -5   0  634.54   30.90 
   4  -5   0  675.63   33.70 
  -4  -5   0  605.24   31.90 
   4  -5   0  640.94   34.50 
   4  -5   0  510.75   32.90 
  -4  -5   0  645.64   21.80 
   4   5   0  652.43   34.90 
   4   5   0  607.34   38.60 
  -4   5   0  577.04   30.70 
  -4   5   0  568.94   34.00 
  -4   5   0  597.44   31.10 
   4   5   0  604.14   29.20 
  -4   5   0  575.84   33.20 
   4   5   0  607.24   32.40 
  -4   5   0  621.14   34.00 
   4   5   0  579.64   28.20 
  -4   5   0  562.94   31.70 
  -4   5   0  587.44   38.70 
  -4   5   0  606.84   39.50 
  -4   5   0  603.84   31.90 
  -4   5   0  633.84   33.30 
  -4   5   0  644.44   40.20 
  -4   5   0  568.84   33.70 
  -4   5   0  596.64   32.00 
  -4   5   0  599.04   33.00 
   4   5   0  642.54   35.90 
  -4   5   0  549.45   35.90 
  -4   5   0  600.64   34.70 
   4   5   0  630.54   42.70 
  -5  -5   0   -0.80    4.00 
   5  -5   0    9.50    6.30 
  -5  -5   0    6.70    5.90 
   5  -5   0   11.90    7.30 
  -5  -5   0    6.00    3.90 
   5  -5   0    4.20    4.60 
   5  -5   0    8.40    5.50 
  -5  -5   0   -0.20    6.50 
  -5  -5   0    0.00    5.10 
   5  -5   0    2.20    5.10 
  -5  -5   0    5.50    4.90 
   5  -5   0   10.20    6.60 
   5  -5   0    0.90    4.50 
   5  -5   0    7.10    7.90 
  -5  -5   0    0.40    4.00 
  -5  -5   0    2.90    4.70 
   5  -5   0    1.10    4.60 
   5  -5   0    2.00    5.60 
  -5  -5   0    6.20    6.90 
  -5   5   0    3.90    5.30 
  -5   5   0    8.50    6.10 
   5   5   0    0.50    3.70 
  -5   5   0    5.20    5.30 
   5   5   0   13.90    9.20 
   5   5   0    5.90    5.70 
  -5   5   0    5.10    6.40 
   5   5   0    6.20    4.40 
  -5   5   0   21.20    8.40 
  -5   5   0    4.60    4.70 
  -5   5   0    8.40    7.10 
  -5   5   0    4.60    6.00 
  -5   5   0    9.90    7.30 
   5   5   0   10.80    7.50 
  -5   5   0    3.10    4.90 
  -5   5   0    1.50    4.70 
  -5   5   0   12.10    6.70 
  -5   5   0    5.00    5.60 
  -5   5   0    3.50    5.10 
  -5   5   0    0.60    6.10 
   5   5   0   16.80    7.90 
  -5   5   0   10.60    7.60 
   5   5   0   -1.50    3.80 
   6  -5   0 1981.50   84.99 
  -6  -5   0 1965.80   76.89 
  -6  -5   0 2185.98   81.39 
   6  -5   0 1994.60   79.29 
  -6  -5   0 1819.72   80.69 
  -6  -5   0 1969.50   77.09 
  -6  -5   0 1899.31   85.19 
   6  -5   0 2139.69   85.19 
   6  -5   0 2199.98   85.59 
   6  -5   0 2149.08   76.99 
  -6  -5   0 2034.20   91.79 
   6  -5   0 2007.90   82.39 
   6  -5   0 2024.10   86.59 
  -6  -5   0 2010.90   82.29 
   6  -5   0 2012.60   82.39 
   6  -5   0 1983.10   76.39 
   6  -5   0 2130.29   79.29 
  -6   5   0 2138.59   83.59 
   6   5   0 1941.71   80.19 
  -6   5   0 2112.19   81.29 
  -6   5   0 1827.72   87.59 
   6   5   0 2045.10   82.29 
   6   5   0 1935.11   86.89 
   6   5   0 2054.69   88.99 
   6   5   0 2122.29   77.69 
  -6   5   0 2093.39   78.29 
  -6   5   0 2112.29   79.39 
  -6   5   0 2084.69   79.79 
  -6   5   0 2013.10   79.29 
  -6   5   0 2045.20   81.19 
  -6   5   0 2154.68   84.89 
  -6   5   0 1978.10   87.29 
  -6   5   0 1987.50   81.59 
  -6   5   0 2021.70   73.49 
  -6   5   0 2037.30   83.09 
  -6   5   0 2007.90   77.09 
  -6   5   0 2093.89   79.99 
   7  -5   0   -2.30    6.80 
   7  -5   0   -6.00    6.70 
   7  -5   0   -3.80    6.20 
   7  -5   0    4.50    6.90 
  -7  -5   0    3.60    6.10 
  -7  -5   0    5.70    8.10 
   7  -5   0    5.80    6.00 
   7  -5   0   10.00    8.20 
   7  -5   0    5.80    7.80 
   7  -5   0   -0.20    5.70 
  -7  -5   0   10.30    8.70 
   7  -5   0    1.40    7.00 
   7  -5   0   12.80    8.80 
   7  -5   0   10.80    7.60 
  -7  -5   0    5.50    8.40 
  -7  -5   0   11.00    7.60 
  -7   5   0   -2.30    5.30 
   7   5   0    2.20    7.10 
  -7   5   0    8.90    9.50 
  -7   5   0    0.30    5.20 
   7   5   0    9.60   10.70 
   7   5   0    9.40    9.60 
  -7   5   0   10.50    7.60 
  -7   5   0    7.00    8.60 
   7   5   0    4.80    8.50 
  -7   5   0    9.00    8.60 
  -7   5   0   10.80    7.60 
   7   5   0    3.70    5.90 
   7   5   0   -1.20    5.00 
  -7   5   0   -1.80    5.70 
  -7   5   0    5.90    7.30 
  -7   5   0   -6.80    5.10 
   7   5   0    3.70    7.30 
  -7   5   0    4.70    6.70 
  -7   5   0   -1.50    6.00 
  -7   5   0   12.50    8.50 
  -7   5   0    5.40    9.00 
  -8  -5   0 1344.97   66.29 
   8  -5   0 1331.87   63.49 
   8  -5   0 1189.58   66.49 
  -8  -5   0 1357.66   66.39 
   8  -5   0 1320.97   66.89 
   8  -5   0 1320.47   58.59 
   8  -5   0 1284.07   72.19 
   8  -5   0 1343.97   72.19 
   8  -5   0 1326.77   68.59 
  -8  -5   0 1345.27   64.39 
   8  -5   0 1291.57   69.59 
   8  -5   0 1279.87   68.39 
   8  -5   0 1307.27   61.29 
  -8  -5   0 1275.77   72.99 
  -8  -5   0 1354.36   69.09 
  -8   5   0 1298.57   63.79 
  -8   5   0 1328.07   66.59 
  -8   5   0 1197.28   64.89 
  -8   5   0 1311.77   78.29 
  -8   5   0 1426.06   78.09 
   8   5   0 1304.97   73.19 
  -8   5   0 1382.46   70.39 
  -8   5   0 1338.07   66.99 
   8   5   0 1272.07   69.49 
   8   5   0 1260.87   93.29 
  -8   5   0 1424.86   67.09 
  -8   5   0 1190.68   62.09 
  -8   5   0 1241.98   67.09 
   8   5   0 1260.97   67.29 
  -8   5   0 1303.97   75.49 
   8   5   0 1365.46   68.19 
   8   5   0 1280.87   73.29 
  -8   5   0 1315.37   60.59 
  -8   5   0 1244.28   63.99 
  -9  -5   0    8.30   10.10 
   9  -5   0   13.20    9.90 
   9  -5   0    0.30    8.70 
   9  -5   0    8.70   11.30 
   9  -5   0   -0.20    8.20 
   9  -5   0   -4.70    7.20 
  -9  -5   0    2.40    8.10 
   9  -5   0   -0.50    8.90 
  -9  -5   0   -1.50    8.50 
   9  -5   0    5.60   10.40 
   9  -5   0    4.30    9.90 
  -9  -5   0   -2.10    9.00 
  -9  -5   0   -2.40    7.70 
  -9   5   0    7.80    9.40 
  -9   5   0   16.10   14.20 
  -9   5   0  -10.20    9.90 
  -9   5   0    5.00   11.80 
  -9   5   0   11.20   10.00 
   9   5   0    3.10   10.70 
  -9   5   0    9.70   10.30 
  -9   5   0   11.00    8.90 
   9   5   0   10.00   10.50 
  -9   5   0    6.60   10.20 
  -9   5   0    3.10    8.50 
   9   5   0   -1.90    7.60 
   0  -6   0  448.16   32.50 
   0  -6   0  352.56   23.90 
   0  -6   0  354.36   25.30 
   0  -6   0  372.26   22.20 
   0  -6   0  376.56   21.70 
   0  -6   0  325.17   24.60 
   0  -6   0  348.67   16.80 
   0  -6   0  352.76   24.70 
   0  -6   0  365.26   23.60 
   0  -6   0  360.16   44.80 
   0  -6   0  348.57   22.20 
   0   6   0  444.06   26.80 
   0   6   0  406.96   25.00 
   0   6   0  371.36   22.70 
   0   6   0  333.37   23.60 
   0   6   0  368.86   22.20 
   0   6   0  355.76   24.70 
   0   6   0  373.56   21.30 
   0   6   0  389.36   27.30 
   0   6   0  352.46   28.00 
   0   6   0  360.26   28.00 
   0   6   0  404.66   24.60 
   0   6   0  359.66   25.00 
   0   6   0  348.67   22.30 
  -1  -6   0 2442.26   99.59 
   1  -6   0 2688.13   86.89 
  -1  -6   0 2446.36   85.59 
  -1  -6   0 2668.53   92.19 
   1  -6   0 2693.43   85.79 
   1  -6   0 2533.95   96.09 
   1  -6   0 2553.54   78.89 
  -1  -6   0 2611.34   86.09 
   1  -6   0 2606.34   86.69 
  -1  -6   0 2526.85   91.29 
   1  -6   0 2519.95   88.89 
  -1  -6   0 2539.05   79.29 
  -1  -6   0 2496.65   84.89 
  -1  -6   0 2638.64   90.39 
   1  -6   0 2465.15   89.79 
   1  -6   0 2522.25   87.09 
   1  -6   0 2523.35  107.99 
  -1  -6   0 2501.75  117.49 
  -1  -6   0 2534.45   84.19 
  -1  -6   0 2593.94   81.39 
   1  -6   0 2580.74   79.69 
   1  -6   0 2505.15   89.29 
  -1  -6   0 2403.16   89.79 
  -1   6   0 2639.34   81.69 
   1   6   0 2545.95   87.89 
  -1   6   0 2518.85   83.29 
   1   6   0 2489.25   93.89 
  -1   6   0 2471.45   87.89 
  -1   6   0 2496.95   85.89 
  -1   6   0 2557.94   86.89 
   1   6   0 2513.75   78.39 
   1   6   0 2532.55   86.29 
   1   6   0 2621.84   96.59 
  -1   6   0 2480.25   75.39 
  -1   6   0 2414.06   93.89 
   1   6   0 2597.24   80.89 
   1   6   0 2559.14   86.79 
  -1   6   0 2560.34   88.59 
   1   6   0 2579.24   91.29 
   1   6   0 2692.53   81.99 
  -1   6   0 2488.45   89.39 
  -1   6   0 2632.04   89.39 
   1   6   0 2463.55   85.59 
  -1   6   0 2513.95   84.59 
  -1   6   0 2526.45   83.09 
   1   6   0 2591.44   87.69 
  -1   6   0 2543.75   96.19 
  -1   6   0 2602.54   92.79 
  -1   6   0 2531.85   89.19 
   2  -6   0  354.46   21.70 
  -2  -6   0  379.26   27.10 
  -2  -6   0  308.37   21.60 
  -2  -6   0  369.46   21.20 
   2  -6   0  331.07   25.40 
   2  -6   0  384.46   25.30 
   2  -6   0  415.76   27.70 
  -2  -6   0  358.26   18.70 
   2  -6   0  374.66   26.50 
   2  -6   0  340.17   17.70 
   2  -6   0  400.36   25.90 
   2  -6   0  354.56   15.20 
   2  -6   0  368.06   26.00 
   2  -6   0  342.47   24.50 
  -2  -6   0  376.56   19.50 
   2  -6   0  371.16   29.10 
  -2  -6   0  343.87   22.70 
  -2  -6   0  326.37   38.10 
  -2  -6   0  283.27   31.80 
  -2  -6   0  328.97   48.00 
  -2  -6   0  368.06   25.00 
  -2  -6   0  340.37   23.00 
   2   6   0  370.76   25.30 
   2   6   0  347.27   17.40 
  -2   6   0  359.16   27.50 
   2   6   0  403.36   29.50 
   2   6   0  353.96   19.10 
  -2   6   0  341.17   24.70 
  -2   6   0  363.76   19.50 
  -2   6   0  345.57   22.90 
  -2   6   0  334.47   23.90 
  -2   6   0  335.27   25.80 
  -2   6   0  355.06   25.10 
   2   6   0  359.86   24.70 
   2   6   0  362.26   17.80 
   2   6   0  362.66   23.90 
  -2   6   0  331.47   18.50 
  -2   6   0  396.16   21.30 
   2   6   0  343.67   23.20 
  -2   6   0  358.06   17.60 
  -2   6   0  372.16   25.70 
  -2   6   0  315.57   23.10 
  -2   6   0  360.56   29.20 
  -2   6   0  345.57   25.60 
   2   6   0  326.77   23.30 
  -2   6   0  300.57   31.80 
  -2   6   0  379.46   26.30 
  -2   6   0  339.57   20.10 
  -3  -6   0  802.52   38.60 
   3  -6   0  761.02   42.20 
  -3  -6   0  731.03   57.89 
  -3  -6   0  763.32   42.70 
   3  -6   0  831.12   42.30 
   3  -6   0  815.92   26.70 
  -3  -6   0  826.02   27.60 
   3  -6   0  844.42   42.70 
  -3  -6   0  816.92   43.40 
   3  -6   0  767.12   40.80 
  -3  -6   0  805.22   40.70 
   3  -6   0  859.81   43.70 
   3  -6   0  797.52   45.50 
  -3  -6   0  770.62   38.70 
  -3  -6   0  745.63   37.30 
  -3  -6   0  779.22   39.80 
   3  -6   0  696.63   38.20 
   3  -6   0  763.52   40.50 
  -3  -6   0  815.02   42.20 
   3  -6   0  772.02   37.80 
  -3  -6   0  809.32   29.20 
  -3   6   0  804.52   35.00 
  -3   6   0  764.92   31.10 
  -3   6   0  750.32   40.70 
  -3   6   0  837.22   36.20 
  -3   6   0  793.82   39.20 
   3   6   0  795.72   38.30 
   3   6   0  761.62   44.60 
  -3   6   0  803.62   42.40 
  -3   6   0  764.12   46.00 
  -3   6   0  787.12   40.30 
   3   6   0  816.12   40.00 
   3   6   0  756.52   40.70 
  -3   6   0  714.63   43.10 
  -3   6   0  805.72   47.10 
   3   6   0  758.12   29.00 
  -3   6   0  805.42   40.70 
  -3   6   0  790.62   39.90 
  -3   6   0  766.62   41.50 
  -3   6   0  786.42   28.80 
  -3   6   0  845.22   44.30 
   3   6   0  788.82   27.40 
   3   6   0  776.72   37.10 
  -4  -6   0  164.98   30.90 
   4  -6   0  124.59   20.90 
  -4  -6   0  153.48   19.00 
   4  -6   0  151.98   19.90 
  -4  -6   0  154.78   21.90 
   4  -6   0  152.08   21.00 
  -4  -6   0  163.68   25.30 
  -4  -6   0  179.68   24.70 
   4  -6   0  163.98   22.70 
   4  -6   0  176.68   26.30 
  -4  -6   0  164.28   20.30 
  -4  -6   0  169.78   20.60 
   4  -6   0  160.58   21.70 
  -4  -6   0  156.78   16.30 
   4  -6   0  145.19   20.40 
   4  -6   0  164.48   22.20 
  -4  -6   0  152.88   20.70 
   4  -6   0  166.28   21.10 
  -4   6   0  168.68   26.00 
  -4   6   0  159.78   20.80 
  -4   6   0  194.28   22.80 
  -4   6   0  157.38   18.30 
  -4   6   0  117.79   19.00 
  -4   6   0  142.39   20.00 
   4   6   0  160.08   20.10 
   4   6   0  162.58   22.20 
   4   6   0  184.48   22.70 
  -4   6   0  171.58   22.90 
  -4   6   0  155.98   18.20 
  -4   6   0  112.49   21.40 
  -4   6   0  189.58   22.60 
  -4   6   0  179.48   21.20 
   4   6   0  139.29   17.00 
   4   6   0  153.08   23.70 
  -4   6   0  155.28   21.30 
   4   6   0  194.38   20.30 
  -4   6   0  130.69   21.40 
  -4   6   0  187.48   29.10 
  -4   6   0  178.28   22.30 
   5  -6   0  594.04   37.90 
   5  -6   0  675.73   37.80 
   5  -6   0  662.63   40.10 
  -5  -6   0  751.22   39.90 
   5  -6   0  603.94   37.80 
  -5  -6   0  626.54   38.40 
   5  -6   0  695.03   41.80 
  -5  -6   0  648.14   43.20 
   5  -6   0  621.94   40.50 
  -5  -6   0  657.63   39.50 
  -5  -6   0  606.84   39.80 
  -5  -6   0  644.54   33.90 
  -5  -6   0  667.83   50.69 
   5  -6   0  675.83   38.90 
   5  -6   0  649.34   40.70 
  -5  -6   0  664.03   36.50 
   5   6   0  628.44   47.90 
  -5   6   0  518.85   41.50 
   5   6   0  659.03   38.80 
  -5   6   0  639.34   45.40 
  -5   6   0  716.23   37.70 
  -5   6   0  650.83   43.50 
  -5   6   0  641.24   40.30 
  -5   6   0  662.93   37.70 
  -5   6   0  628.04   39.50 
  -5   6   0  646.04   36.50 
   5   6   0  604.44   31.40 
   5   6   0  713.63   45.70 
  -5   6   0  636.14   40.20 
  -5   6   0  588.54   36.80 
  -5   6   0  678.93   36.40 
   5   6   0  647.74   40.60 
   5   6   0  643.04   33.20 
  -5   6   0  689.43   39.80 
   5   6   0  590.24   35.40 
  -5   6   0  637.04   38.90 
  -5   6   0  591.34   36.50 
  -5   6   0  694.43   45.00 
  -6  -6   0  108.89   18.70 
   6  -6   0  137.29   23.90 
   6  -6   0   86.99   18.90 
   6  -6   0  110.09   21.50 
   6  -6   0  108.59   18.10 
   6  -6   0  102.39   19.90 
  -6  -6   0  104.69   17.70 
  -6  -6   0  111.29   23.80 
  -6  -6   0  116.39   25.00 
   6  -6   0   91.49   18.10 
   6  -6   0   94.99   17.30 
  -6  -6   0   80.09   18.10 
   6  -6   0  121.19   19.80 
   6  -6   0  125.29   21.10 
  -6  -6   0   93.29   19.60 
  -6  -6   0  113.59   18.50 
   6   6   0  124.79   21.60 
  -6   6   0  105.49   20.20 
  -6   6   0  101.09   21.90 
  -6   6   0  124.49   19.10 
  -6   6   0  141.89   24.50 
  -6   6   0  120.79   20.10 
   6   6   0  163.78   27.80 
  -6   6   0   96.79   18.50 
  -6   6   0  121.39   21.70 
  -6   6   0  134.49   19.90 
  -6   6   0  104.39   19.10 
  -6   6   0  115.99   20.70 
  -6   6   0  113.99   23.60 
   6   6   0  120.19   20.50 
   6   6   0  163.18   25.20 
  -6   6   0   90.19   16.60 
  -6   6   0  120.19   20.00 
   6   6   0   91.49   24.10 
  -6   6   0  113.89   23.10 
  -6   6   0   70.79   15.60 
   6   6   0  144.59   20.80 
   7  -6   0  500.65   38.50 
   7  -6   0  446.66   35.10 
   7  -6   0  409.86   30.60 
  -7  -6   0  397.26   32.40 
  -7  -6   0  412.46   31.80 
  -7  -6   0  385.96   31.20 
   7  -6   0  435.56   33.20 
   7  -6   0  392.46   41.60 
   7  -6   0  403.26   41.80 
   7  -6   0  420.86   44.30 
   7  -6   0  486.55   48.10 
  -7  -6   0  438.86   37.10 
   7  -6   0  395.96   31.10 
  -7  -6   0  458.35   51.69 
  -7   6   0  356.86   36.30 
  -7   6   0  409.96   41.20 
   7   6   0  394.26   42.60 
  -7   6   0  349.57   39.10 
   7   6   0  442.86   77.79 
  -7   6   0  409.36   43.00 
  -7   6   0  456.35   44.30 
  -7   6   0  399.16   46.50 
  -7   6   0  420.66   48.10 
   7   6   0  422.26   46.00 
  -7   6   0  446.46   33.40 
  -7   6   0  407.76   32.40 
   7   6   0  516.15   36.30 
  -7   6   0  433.96   47.90 
   7   6   0  481.85   60.29 
  -7   6   0  445.66   35.50 
  -7   6   0  434.16   41.30 
   7   6   0  452.85   46.20 
  -7   6   0  405.66   32.90 
   7   6   0  524.75   39.10 
   8  -6   0   13.70   11.80 
   8  -6   0   -2.60    7.60 
  -8  -6   0    6.70    9.50 
   8  -6   0   16.40   12.00 
   8  -6   0   28.00   13.80 
   8  -6   0   15.00    9.10 
   8  -6   0   19.10   12.60 
  -8  -6   0   17.10   10.40 
  -8  -6   0   22.80   11.00 
  -8  -6   0   16.00   12.30 
   8  -6   0    8.60    9.20 
   8  -6   0   18.70   12.80 
  -8   6   0    6.20   10.20 
  -8   6   0    4.30   10.10 
  -8   6   0    6.80   11.60 
  -8   6   0   17.00   13.10 
  -8   6   0   20.90   11.00 
   8   6   0    8.00   11.70 
  -8   6   0   16.60    9.70 
  -8   6   0   16.20   13.60 
  -8   6   0   12.60    9.60 
  -8   6   0   14.30   10.90 
   8   6   0    2.00    7.90 
  -8   6   0   20.10   11.30 
  -8   6   0    6.50    7.80 
  -8   6   0   39.20   15.40 
   8   6   0    2.30   10.40 
   8   6   0   -3.00    8.70 
   0  -7   0    6.80    6.70 
   0  -7   0    1.30    5.30 
   0  -7   0   -0.70    4.60 
   0  -7   0    1.50    5.00 
   0  -7   0    5.30    6.50 
   0  -7   0   25.40   12.20 
   0  -7   0    2.60    4.80 
   0  -7   0   -3.30    5.00 
   0  -7   0    2.70    4.00 
   0  -7   0    0.00    4.20 
   0  -7   0   -0.10    2.60 
   0  -7   0   10.80    6.40 
   0   7   0    5.70    5.40 
   0   7   0    1.70    4.20 
   0   7   0    5.70    5.10 
   0   7   0    5.40    6.30 
   0   7   0   -1.90    3.80 
   0   7   0   -5.20    3.40 
   0   7   0    1.20    5.00 
   0   7   0    1.10    5.30 
   0   7   0    8.30    6.30 
   0   7   0    2.30    5.70 
   0   7   0   -3.20    3.60 
   0   7   0   -1.20    3.60 
   0   7   0    1.10    3.90 
   0   7   0    1.70    4.70 
   1  -7   0   85.39   16.30 
  -1  -7   0  101.39   19.00 
   1  -7   0   91.89   11.90 
  -1  -7   0   68.19   23.10 
   1  -7   0  120.99   14.90 
  -1  -7   0   96.79   22.90 
  -1  -7   0   99.19   15.50 
   1  -7   0  108.99   25.90 
  -1  -7   0  138.09   21.10 
  -1  -7   0   73.59   15.60 
   1  -7   0   99.99   17.20 
   1  -7   0   89.99   18.90 
  -1  -7   0  109.19   14.30 
   1  -7   0   55.69   12.10 
  -1  -7   0   90.79   13.00 
  -1  -7   0   74.09   14.00 
   1  -7   0   81.39   13.90 
   1  -7   0   82.19   14.30 
  -1  -7   0   82.39   14.60 
   1  -7   0   87.29   16.20 
   1  -7   0  104.49   18.30 
  -1  -7   0   80.19   14.00 
  -1  -7   0   87.09   16.80 
  -1   7   0   95.39   13.10 
  -1   7   0   91.79   15.90 
  -1   7   0  108.89   11.10 
  -1   7   0   68.29   14.70 
   1   7   0   90.19   15.80 
  -1   7   0  110.39   20.40 
   1   7   0   78.29   12.30 
  -1   7   0   84.59   14.00 
  -1   7   0  123.89   21.10 
  -1   7   0  115.29   18.60 
  -1   7   0   79.09   13.70 
   1   7   0   88.59   18.80 
  -1   7   0   80.39   13.90 
   1   7   0   85.59   15.30 
   1   7   0  102.89   14.20 
   1   7   0   95.79   15.50 
  -1   7   0  120.89   19.20 
  -1   7   0   63.69   13.20 
   1   7   0   87.79   16.60 
  -1   7   0  118.89   15.90 
   1   7   0   95.29   18.40 
   1   7   0   82.89   15.50 
  -1   7   0   74.69   15.60 
   1   7   0   89.69   12.20 
   1   7   0   85.99   15.70 
   1   7   0  135.89   18.40 
  -1   7   0  118.49   17.60 
   1   7   0   92.69   15.20 
   2  -7   0    5.90    6.30 
   2  -7   0    1.80    4.70 
   2  -7   0   15.60    7.70 
  -2  -7   0   16.30    8.50 
  -2  -7   0    4.90    6.40 
  -2  -7   0    7.60    5.50 
   2  -7   0   11.80    8.00 
   2  -7   0    8.80    4.90 
  -2  -7   0   17.90   13.10 
   2  -7   0   39.90   16.00 
  -2  -7   0    4.60    6.50 
  -2  -7   0    7.90    9.70 
   2  -7   0    8.90    6.40 
   2  -7   0   10.00    5.60 
  -2  -7   0    9.50   11.30 
   2  -7   0   11.50    7.10 
  -2  -7   0    7.50    4.70 
   2  -7   0   14.90    7.70 
  -2  -7   0    6.00    6.00 
   2  -7   0   13.70    8.80 
  -2   7   0   -0.10    4.30 
   2   7   0    8.50    8.40 
   2   7   0   12.00    9.20 
  -2   7   0   20.30    6.80 
  -2   7   0    6.10    6.20 
  -2   7   0    4.40    5.20 
  -2   7   0    1.00    4.20 
   2   7   0    5.90    5.50 
  -2   7   0   -0.80    5.20 
   2   7   0    2.70    5.10 
   2   7   0   14.60    7.40 
   2   7   0    2.50    4.80 
   2   7   0    8.40    5.00 
   2   7   0   -1.10    3.30 
  -2   7   0   19.80   10.20 
   2   7   0    6.90    5.90 
  -2   7   0   17.10    9.00 
  -2   7   0    5.30    5.50 
  -2   7   0    6.10    4.10 
  -2   7   0   14.20    8.30 
  -2   7   0    7.70    4.30 
  -2   7   0    8.70    6.90 
  -2   7   0   16.80    8.30 
  -2   7   0    4.60    4.10 
  -2   7   0    9.90    7.70 
   2   7   0   12.10    7.40 
  -3  -7   0  223.08   23.60 
  -3  -7   0  265.47   26.70 
  -3  -7   0  221.28   26.90 
  -3  -7   0  241.28   30.30 
   3  -7   0  262.97   28.70 
  -3  -7   0  234.88   27.70 
   3  -7   0  201.18   24.30 
  -3  -7   0  220.28   25.80 
  -3  -7   0  242.28   25.80 
   3  -7   0  260.27   30.00 
   3  -7   0  206.18   25.90 
  -3  -7   0  218.18   27.90 
   3  -7   0  232.98   24.10 
   3  -7   0  201.68   26.30 
   3  -7   0  253.97   29.00 
   3  -7   0  218.18   25.80 
  -3  -7   0  184.58   37.10 
   3  -7   0  241.68   31.60 
  -3   7   0  221.58   25.50 
  -3   7   0  238.68   25.50 
   3   7   0  239.08   28.30 
   3   7   0  226.98   24.60 
  -3   7   0  232.18   30.50 
  -3   7   0  285.87   18.90 
  -3   7   0  272.97   29.50 
  -3   7   0  227.68   28.70 
   3   7   0  238.98   25.00 
  -3   7   0  265.77   19.00 
  -3   7   0  219.68   25.70 
   3   7   0  258.17   25.80 
   3   7   0  278.07   32.10 
   3   7   0  227.88   25.50 
   3   7   0  223.88   26.30 
  -3   7   0  218.38   28.40 
  -3   7   0  223.98   27.50 
  -3   7   0  204.18   26.20 
  -3   7   0  225.48   26.30 
  -3   7   0  213.18   29.90 
   4  -7   0  264.77   33.80 
  -4  -7   0  260.47   22.00 
  -4  -7   0  254.67   31.50 
   4  -7   0  258.77   30.40 
   4  -7   0  274.47   27.90 
  -4  -7   0  307.87   32.60 
  -4  -7   0  275.37   28.20 
   4  -7   0  287.07   32.80 
  -4  -7   0  240.48   41.10 
   4  -7   0  277.77   30.70 
   4  -7   0  275.07   29.00 
  -4  -7   0  281.17   29.00 
   4  -7   0  276.17   31.50 
  -4  -7   0  307.37   37.50 
   4  -7   0  298.07   31.50 
   4  -7   0  297.07   31.60 
  -4   7   0  276.87   28.60 
  -4   7   0  332.27   22.80 
  -4   7   0  290.97   29.30 
   4   7   0  305.17   35.20 
  -4   7   0  265.27   20.90 
   4   7   0  284.27   31.30 
  -4   7   0  250.87   34.40 
  -4   7   0  311.17   30.60 
  -4   7   0  374.56   39.90 
  -4   7   0  276.57   29.50 
   4   7   0  289.77   29.60 
  -4   7   0  267.47   34.20 
  -4   7   0  247.28   29.50 
  -4   7   0  241.08   28.00 
   4   7   0  263.57   32.10 
  -4   7   0  276.17   30.70 
   4   7   0  264.17   26.40 
  -4   7   0  287.27   32.50 
   4   7   0  255.07   25.90 
  -4   7   0  256.27   37.30 
  -4   7   0  324.57   32.80 
   5  -7   0  543.45   41.80 
   5  -7   0  519.25   38.00 
  -5  -7   0  579.64   37.90 
   5  -7   0  503.35   38.40 
   5  -7   0  525.65   38.00 
  -5  -7   0  524.35   41.10 
   5  -7   0  512.05   35.60 
   5  -7   0  520.45   36.20 
   5  -7   0  522.15   35.20 
   5  -7   0  475.55   35.00 
  -5  -7   0  485.55   31.90 
   5  -7   0  493.85   37.30 
  -5  -7   0  483.85   37.10 
  -5  -7   0  444.36   32.10 
  -5  -7   0  595.24   63.99 
  -5   7   0  467.55   36.20 
  -5   7   0  513.95   35.20 
  -5   7   0  485.05   40.90 
  -5   7   0  505.45   34.90 
  -5   7   0  467.95   49.50 
   5   7   0  514.45   32.10 
   5   7   0  499.85   38.40 
  -5   7   0  538.35   32.70 
  -5   7   0  520.35   41.70 
  -5   7   0  489.05   37.10 
   5   7   0  542.15   38.10 
  -5   7   0  439.46   32.90 
   5   7   0  478.55   29.60 
  -5   7   0  493.35   34.10 
   5   7   0  550.84   41.20 
  -5   7   0  481.35   35.70 
  -5   7   0  476.25   30.90 
   5   7   0  502.85   33.70 
  -5   7   0  493.65   37.00 
  -5   7   0  599.84   45.00 
  -5   7   0  469.95   34.10 
   6  -7   0  778.22   45.60 
   6  -7   0  800.02   48.80 
  -6  -7   0  879.41   52.69 
   6  -7   0  831.42   54.49 
  -6  -7   0  834.92   57.09 
   6  -7   0  878.41   54.49 
   6  -7   0  841.82   50.09 
   6  -7   0  889.31   53.39 
  -6  -7   0  829.32   46.60 
   6  -7   0  805.42   47.60 
   6  -7   0  923.61   49.90 
  -6  -7   0  756.22   58.39 
   6  -7   0  830.32   51.49 
  -6   7   0  766.22   46.80 
  -6   7   0  783.82   50.29 
  -6   7   0  868.71   46.10 
  -6   7   0  826.22   49.50 
  -6   7   0  921.61   59.49 
  -6   7   0  790.72   51.39 
   6   7   0  816.82   50.69 
  -6   7   0  816.32   47.50 
  -6   7   0  810.72   48.90 
  -6   7   0  745.93   53.59 
  -6   7   0  726.33   48.00 
  -6   7   0  838.42   44.90 
   6   7   0  813.32   52.69 
  -6   7   0  837.92   51.29 
   6   7   0  752.22   46.40 
   6   7   0  744.33   43.70 
   6   7   0  830.52   53.79 
  -6   7   0  708.23   45.40 
  -6   7   0  855.61   46.60 
  -6   7   0  733.03   54.89 
   7  -7   0  522.05   41.80 
   7  -7   0  527.55   38.80 
   7  -7   0  540.25   43.70 
   7  -7   0  527.45   37.60 
   7  -7   0  429.16   42.70 
   7  -7   0  499.55   39.80 
  -7  -7   0  527.75   38.40 
  -7  -7   0  475.45   40.90 
   7  -7   0  496.05   37.10 
   7  -7   0  523.25   53.59 
  -7  -7   0  559.24   48.70 
   7  -7   0  390.66   43.80 
  -7   7   0  488.85   54.79 
  -7   7   0  528.75   40.90 
  -7   7   0  501.95   37.10 
   7   7   0  496.15   41.90 
  -7   7   0  486.75   38.70 
  -7   7   0  602.84   61.69 
  -7   7   0  506.55   38.10 
  -7   7   0  505.65   56.99 
  -7   7   0  502.15   40.90 
   7   7   0  492.45   40.50 
  -7   7   0  509.45   41.60 
   7   7   0  580.94   58.09 
  -7   7   0  462.65   44.00 
  -7   7   0  511.25   41.50 
  -7   7   0  589.44   39.30 
   0  -8   0 1910.61  107.39 
   0  -8   0 1925.61   72.89 
   0  -8   0 1836.72   79.59 
   0  -8   0 1697.33   79.49 
   0  -8   0 1964.30   77.59 
   0  -8   0 1896.91   80.99 
   0  -8   0 1872.91   70.59 
   0  -8   0 1796.62   73.89 
   0  -8   0 1880.81   70.29 
   0  -8   0 1766.52   78.09 
   0  -8   0 1919.11   90.29 
   0   8   0 1930.31   77.29 
   0   8   0 1968.50   79.59 
   0   8   0 1839.52   71.69 
   0   8   0 1960.10   78.09 
   0   8   0 1805.32   76.99 
   0   8   0 1758.32   79.69 
   0   8   0 1846.62   75.09 
   0   8   0 1896.71   71.49 
   0   8   0 1740.63   82.69 
   0   8   0 1877.91   71.69 
   0   8   0 1868.21   77.89 
   0   8   0 1960.10   69.19 
   0   8   0 1878.31   74.99 
   0   8   0 1797.12   82.99 
   1  -8   0  714.23   49.60 
   1  -8   0  731.73   39.20 
   1  -8   0  654.43   42.80 
   1  -8   0  677.73   44.70 
   1  -8   0  635.24   41.70 
   1  -8   0  691.83   39.40 
  -1  -8   0  737.73   45.80 
  -1  -8   0  750.42   47.70 
  -1  -8   0  540.55   67.89 
   1  -8   0  699.03   40.00 
  -1  -8   0  706.63   39.60 
   1  -8   0  615.94   39.50 
   1  -8   0  710.73   34.90 
   1  -8   0  700.13   59.39 
  -1  -8   0  683.43   39.40 
  -1  -8   0  663.13   38.10 
   1  -8   0  708.53   43.70 
  -1  -8   0  646.84   39.40 
  -1  -8   0  756.12   54.49 
  -1  -8   0  627.44   34.90 
  -1   8   0  695.93   42.30 
   1   8   0  688.13   40.50 
   1   8   0  686.93   41.40 
  -1   8   0  651.23   40.50 
  -1   8   0  652.43   39.50 
  -1   8   0  682.53   42.60 
  -1   8   0  738.13   42.80 
   1   8   0  710.13   41.60 
   1   8   0  598.54   43.70 
   1   8   0  658.73   32.90 
  -1   8   0  679.53   46.70 
   1   8   0  710.83   41.90 
  -1   8   0  667.23   37.50 
  -1   8   0  738.13   40.60 
  -1   8   0  726.13   37.40 
  -1   8   0  667.03   44.30 
   1   8   0  680.13   45.70 
   1   8   0  692.23   39.20 
  -1   8   0  706.83   35.90 
  -1   8   0  576.04   43.60 
   1   8   0  664.13   40.90 
   1   8   0  745.43   40.50 
   1   8   0  711.83   36.40 
   1   8   0  710.73   36.30 
   1   8   0  705.73   40.80 
   1   8   0  726.83   44.70 
  -1   8   0  747.13   43.90 
  -1   8   0  709.73   39.40 
   2  -8   0  705.83   42.70 
   2  -8   0  798.32   62.29 
   2  -8   0  703.53   35.80 
  -2  -8   0  649.34   33.70 
   2  -8   0  745.23   45.50 
   2  -8   0  711.23   42.20 
  -2  -8   0  655.33   49.20 
   2  -8   0  737.13   45.80 
   2  -8   0  691.83   44.00 
  -2  -8   0  725.73   41.30 
   2  -8   0  804.62   52.89 
  -2  -8   0  753.52   46.70 
  -2  -8   0  637.84   80.19 
  -2  -8   0  736.33   42.20 
  -2  -8   0  800.92   44.80 
   2  -8   0  772.72   43.10 
  -2  -8   0  746.03   41.10 
   2  -8   0  694.73   41.00 
  -2   8   0  854.01   48.50 
  -2   8   0  723.93   42.40 
  -2   8   0  773.92   50.69 
   2   8   0  761.52   49.50 
   2   8   0  731.23   47.90 
   2   8   0  696.23   34.70 
  -2   8   0  834.32   44.00 
  -2   8   0  682.93   41.50 
   2   8   0  756.12   41.00 
   2   8   0  756.32   43.10 
  -2   8   0  742.53   49.70 
  -2   8   0  758.72   37.90 
  -2   8   0  733.23   34.80 
  -2   8   0  742.03   44.30 
   2   8   0  731.93   44.50 
   2   8   0  719.73   41.00 
  -2   8   0  685.63   45.80 
  -2   8   0  819.42   46.30 
   2   8   0  762.82   43.40 
  -2   8   0  729.83   43.90 
  -2   8   0  727.93   40.00 
   2   8   0  783.82   46.10 
  -2   8   0  749.82   45.60 
   2   8   0  729.93   42.50 
   2   8   0  665.23   40.30 
   3  -8   0  341.77   36.10 
   3  -8   0  327.27   37.00 
  -3  -8   0  350.56   27.40 
   3  -8   0  315.57   39.60 
   3  -8   0  309.17   32.60 
  -3  -8   0  369.56   40.90 
   3  -8   0  358.16   34.40 
   3  -8   0  299.87   33.90 
   3  -8   0  322.97   25.10 
  -3  -8   0  289.77   29.80 
  -3  -8   0  326.67   31.90 
  -3  -8   0  391.06   42.20 
   3  -8   0  302.57   32.70 
  -3  -8   0  372.46   37.70 
   3  -8   0  302.57   45.80 
  -3  -8   0  249.38   48.30 
   3  -8   0  309.77   32.70 
  -3   8   0  344.07   34.70 
   3   8   0  356.66   29.80 
   3   8   0  330.67   26.80 
  -3   8   0  393.86   29.10 
   3   8   0  347.27   26.40 
   3   8   0  364.46   35.10 
  -3   8   0  345.77   38.80 
   3   8   0  324.67   37.60 
  -3   8   0  350.16   38.40 
  -3   8   0  384.76   38.70 
  -3   8   0  383.46   37.80 
  -3   8   0  313.57   39.40 
  -3   8   0  421.86   32.40 
  -3   8   0  317.47   37.80 
   3   8   0  387.66   32.70 
   3   8   0  360.36   29.00 
   3   8   0  323.97   38.80 
  -3   8   0  265.17   36.00 
   3   8   0  281.77   29.70 
  -3   8   0  334.17   26.80 
  -3   8   0  378.86   35.90 
   4  -8   0  724.23   48.10 
   4  -8   0  736.43   51.69 
   4  -8   0  720.53   41.70 
  -4  -8   0  661.73   74.99 
  -4  -8   0  676.73   40.10 
   4  -8   0  675.43   45.50 
  -4  -8   0  824.02   49.00 
   4  -8   0  650.03   44.50 
   4  -8   0  617.34   43.10 
   4  -8   0  670.23   44.00 
   4  -8   0  756.22   46.50 
   4  -8   0  722.23   43.80 
  -4  -8   0  762.72   49.80 
  -4  -8   0  637.84   41.10 
   4  -8   0  712.63   43.90 
  -4   8   0  666.73   43.40 
   4   8   0  858.51   46.00 
  -4   8   0  724.73   43.50 
  -4   8   0  649.04   44.40 
   4   8   0  722.33   47.80 
  -4   8   0  781.32   47.90 
  -4   8   0  804.72   53.99 
  -4   8   0  654.13   48.50 
   4   8   0  781.52   50.59 
  -4   8   0  658.23   45.10 
  -4   8   0  677.63   43.40 
  -4   8   0  717.53   52.19 
   4   8   0  706.33   38.90 
  -4   8   0  697.93   41.90 
   4   8   0  819.32   48.10 
  -4   8   0  726.43   44.90 
   4   8   0  759.62   41.20 
   4   8   0  717.43   41.70 
  -4   8   0  787.42   45.60 
   4   8   0  687.63   40.60 
  -5  -8   0  191.78   27.20 
   5  -8   0  210.98   32.10 
   5  -8   0  164.18   26.70 
  -5  -8   0  196.68   28.90 
  -5  -8   0  148.19   35.20 
  -5  -8   0  195.68   25.90 
   5  -8   0  172.28   27.90 
   5  -8   0  206.28   33.30 
   5  -8   0  203.88   27.50 
   5  -8   0  175.58   24.80 
   5  -8   0  194.68   28.90 
  -5  -8   0  202.88   33.40 
   5  -8   0  199.48   28.70 
   5  -8   0  218.18   30.40 
  -5   8   0  153.68   24.70 
   5   8   0  217.08   27.80 
   5   8   0  187.88   30.50 
  -5   8   0  193.88   29.40 
  -5   8   0  178.28   26.70 
  -5   8   0  190.98   28.90 
  -5   8   0  168.48   28.20 
  -5   8   0  193.58   28.30 
  -5   8   0  179.28   25.50 
  -5   8   0  244.28   30.90 
  -5   8   0  219.08   33.80 
   5   8   0  179.88   31.90 
   5   8   0  174.08   27.50 
  -5   8   0  255.87   37.60 
   5   8   0  251.27   27.90 
   5   8   0  167.78   28.10 
  -5   8   0  168.88   32.30 
  -5   8   0  192.58   32.90 
   5   8   0  177.98   34.70 
  -5   8   0  175.98   25.60 
   6  -8   0  458.05   48.10 
   6  -8   0  558.84   39.80 
   6  -8   0  535.35   42.20 
  -6  -8   0  526.75   37.60 
   6  -8   0  523.15   54.49 
  -6  -8   0  537.25   62.89 
   6  -8   0  519.65   40.10 
   6  -8   0  482.45   40.60 
   6  -8   0  460.15   39.60 
  -6  -8   0  558.94   44.30 
   6  -8   0  455.95   45.20 
   6  -8   0  524.55   39.70 
  -6   8   0  502.75   38.20 
   6   8   0  518.75   44.00 
  -6   8   0  493.45   45.90 
  -6   8   0  536.85   40.00 
  -6   8   0  567.04   42.60 
  -6   8   0  560.94   58.99 
   6   8   0  567.54   43.50 
  -6   8   0  493.65   53.59 
  -6   8   0  460.85   46.80 
  -6   8   0  614.34   45.70 
  -6   8   0  495.75   38.60 
  -6   8   0  556.64   58.49 
  -6   8   0  585.84   44.00 
   6   8   0  517.25   43.70 
   0  -9   0   -1.40    6.70 
   0  -9   0   -4.10    6.10 
   0  -9   0    4.20    6.60 
   0  -9   0    2.10    8.90 
   0  -9   0   -1.80    6.30 
   0  -9   0   17.20   16.10 
   0  -9   0   12.10    8.10 
   0  -9   0   20.60   10.60 
   0  -9   0   12.90    8.60 
   0  -9   0   13.60   10.20 
   0  -9   0    8.20    9.10 
   0   9   0   -0.30    6.60 
   0   9   0   -2.80    5.60 
   0   9   0   -1.00    4.90 
   0   9   0   -6.70    5.10 
   0   9   0   -0.10    6.90 
   0   9   0   -6.60    5.70 
   0   9   0    3.80    6.60 
   0   9   0    5.10    8.50 
   0   9   0    3.80    9.00 
   0   9   0   -2.80    6.00 
   0   9   0    1.70    8.80 
   0   9   0   10.20    8.90 
   0   9   0    5.60    8.40 
   0   9   0   -0.70    4.90 
   1  -9   0   18.40    9.60 
   1  -9   0    4.70    7.10 
  -1  -9   0    5.90    6.80 
  -1  -9   0   10.30    9.40 
  -1  -9   0    5.10    7.10 
   1  -9   0    4.90    7.00 
  -1  -9   0   -3.20    7.30 
   1  -9   0   -0.10   12.60 
  -1  -9   0   -0.50   13.40 
  -1  -9   0    5.00    8.70 
   1  -9   0   -2.50    5.00 
   1  -9   0   -5.40    7.20 
   1  -9   0   -2.70    5.80 
  -1  -9   0    5.70    7.20 
  -1  -9   0   -2.10    7.50 
   1  -9   0    2.50    6.70 
   1  -9   0    3.20    7.60 
   1  -9   0   12.20   12.20 
  -1   9   0    5.40    7.50 
  -1   9   0    2.20    6.80 
  -1   9   0    1.10    6.30 
  -1   9   0    2.40    7.30 
  -1   9   0    2.40    6.30 
   1   9   0    7.20    7.80 
   1   9   0    5.40    7.80 
   1   9   0   -1.50    5.10 
   1   9   0    2.10    7.90 
  -1   9   0    2.10    6.70 
   1   9   0   -1.50    6.20 
  -1   9   0   -5.10    6.20 
  -1   9   0    8.90    7.90 
  -1   9   0    4.20   10.50 
   1   9   0    9.90   10.00 
  -1   9   0   18.50   10.20 
   1   9   0    3.10    6.40 
  -1   9   0   -0.30    5.70 
   1   9   0    6.00    7.90 
   1   9   0   15.80   10.60 
   1   9   0    7.80    9.10 
  -1   9   0    0.10    5.10 
  -1   9   0   19.60   11.80 
   1   9   0    7.50    6.60 
   1   9   0    7.20    7.80 
  -1   9   0    8.50    9.40 
   2  -9   0   15.10   10.10 
   2  -9   0   11.00    9.70 
   2  -9   0   -2.90   10.10 
  -2  -9   0   11.20    9.60 
   2  -9   0    3.10    6.90 
   2  -9   0   18.80   11.70 
   2  -9   0    3.40    9.00 
   2  -9   0   16.10   10.00 
   2  -9   0   11.60    8.00 
  -2  -9   0   25.80   11.30 
   2  -9   0   15.10    8.70 
  -2  -9   0   -0.10   15.00 
   2  -9   0    3.70    6.90 
  -2  -9   0    1.40    6.50 
  -2   9   0   -0.80    7.00 
   2   9   0    8.20    7.50 
  -2   9   0   16.10    9.40 
  -2   9   0   14.30   11.80 
   2   9   0   19.10   12.60 
  -2   9   0   13.50    9.00 
   2   9   0   10.80    9.00 
  -2   9   0   -4.10    6.50 
  -2   9   0   23.40   11.20 
  -2   9   0    6.00    7.20 
   2   9   0   22.60   12.30 
   2   9   0    7.90    8.50 
   2   9   0    8.30    8.80 
   2   9   0   10.40    8.60 
  -2   9   0    7.80    9.70 
  -2   9   0   -1.70    6.10 
   2   9   0   17.00    9.90 
  -2   9   0   -2.40    7.60 
   2   9   0   26.00   13.50 
  -2   9   0    5.10    8.10 
   2   9   0    5.10    7.00 
   2   9   0    8.00    7.90 
   3  -9   0  155.78   24.80 
  -3  -9   0  113.19   21.10 
   3  -9   0  162.38   26.30 
  -3  -9   0  172.38   23.80 
  -3  -9   0  164.28   30.30 
  -3  -9   0  150.28   39.30 
   3  -9   0  182.68   28.90 
  -3  -9   0  148.29   24.90 
   3  -9   0  157.98   26.90 
   3  -9   0  186.68   40.30 
   3  -9   0  141.09   23.40 
   3  -9   0  128.99   21.90 
   3  -9   0  156.18   26.00 
   3  -9   0  176.98   32.30 
  -3  -9   0  140.09   26.00 
  -3   9   0  170.78   28.50 
  -3   9   0   95.69   23.40 
  -3   9   0  159.78   25.50 
   3   9   0  140.09   22.00 
  -3   9   0  150.38   23.30 
  -3   9   0  138.59   23.30 
   3   9   0  102.89   19.10 
   3   9   0  171.28   25.70 
  -3   9   0  143.99   24.40 
  -3   9   0  132.69   27.10 
  -3   9   0  137.39   21.10 
  -3   9   0  156.98   26.90 
   3   9   0  160.88   24.70 
   3   9   0  166.68   24.20 
  -3   9   0  144.39   24.20 
   3   9   0  151.18   28.10 
   3   9   0  116.19   22.80 
   3   9   0  139.99   27.80 
  -3   9   0  170.48   28.50 
   3   9   0  164.78   25.80 
  -3   9   0  156.38   26.60 
   3   9   0  141.99   23.20 
  -3   9   0  173.08   30.50 
   3   9   0  135.09   24.60 
   4  -9   0   25.90   13.40 
  -4  -9   0   26.00   11.80 
   4  -9   0   10.40    9.30 
   4  -9   0   12.60    9.90 
   4  -9   0   39.90   20.50 
   4  -9   0   22.70   12.00 
  -4  -9   0   13.10   17.30 
   4  -9   0   24.90   13.30 
  -4  -9   0   24.30   12.20 
  -4  -9   0   36.50   15.40 
   4  -9   0   23.80   12.40 
   4  -9   0   10.10   10.90 
   4  -9   0   35.10   14.40 
  -4   9   0   26.30   13.80 
   4   9   0   17.00    9.70 
   4   9   0   43.70   18.20 
  -4   9   0   38.60   14.10 
   4   9   0   33.30   12.40 
  -4   9   0    7.30    8.70 
   4   9   0   33.20   11.80 
  -4   9   0   31.00   14.50 
   4   9   0   17.90   11.50 
  -4   9   0   31.50   16.00 
  -4   9   0   27.90   11.70 
  -4   9   0   25.60   13.20 
   4   9   0   29.20   11.90 
  -4   9   0   28.60   13.50 
   4   9   0   55.99   14.70 
  -4   9   0   29.00   14.60 
   4   9   0   39.70   13.90 
   4   9   0   21.60   11.60 
   4   9   0   25.20   11.40 
   4   9   0   36.20   16.40 
  -4   9   0   22.00   10.60 
  -4   9   0   19.20   15.30 
  -4   9   0   38.30   12.50 
   5  -9   0  678.43   48.40 
   5  -9   0  589.04   61.39 
   5  -9   0  707.43   49.50 
   5  -9   0  589.34   72.99 
   5  -9   0  758.52   49.00 
   5  -9   0  746.43   51.49 
  -5  -9   0  728.33   80.49 
  -5  -9   0  708.13   49.90 
   5  -9   0  762.42   53.79 
   5  -9   0  629.64   43.90 
   5  -9   0  698.43   49.90 
   5  -9   0  686.63   45.80 
  -5   9   0  678.63   47.20 
  -5   9   0  666.83   46.20 
   5   9   0  623.74   49.40 
  -5   9   0  671.83   68.09 
  -5   9   0  708.13   45.40 
  -5   9   0  675.63   49.60 
   5   9   0  700.73   54.79 
   5   9   0  720.53   49.80 
  -5   9   0  693.03   47.30 
  -5   9   0  676.43   47.60 
  -5   9   0  743.43   56.49 
   5   9   0  722.43   51.99 
  -5   9   0  652.33   48.50 
  -5   9   0  622.54   44.50 
  -5   9   0  604.64   47.00 
  -5   9   0  771.12   57.59 
   0 -10   0 1636.44  113.99 
   0 -10   0 1472.05   81.69 
   0 -10   0 1780.62   78.59 
   0 -10   0 1719.83   77.19 
   0 -10   0 1721.43   72.99 
   0 -10   0 1650.93   94.89 
   0  10   0 1576.44   81.89 
   0  10   0 1684.43   77.19 
   0  10   0 1542.25   78.29 
   0  10   0 1667.33   79.09 
   0  10   0 1745.53   73.19 
   0  10   0 1610.64   75.29 
   0  10   0 1560.94   75.89 
   0  10   0 1582.44   70.99 
   0  10   0 1605.54   85.49 
   0  10   0 1562.24   77.99 
   0  10   0 1534.05   83.89 
   0  10   0 1704.33   80.69 
   1 -10   0    7.40    8.40 
  -1 -10   0   21.30   21.30 
   1 -10   0    5.00    9.40 
  -1 -10   0   16.00   10.60 
   1 -10   0   18.50   10.20 
  -1 -10   0    3.40   10.00 
   1 -10   0   21.10   13.60 
   1 -10   0    4.10   12.50 
   1 -10   0   10.30   13.50 
  -1 -10   0   -0.50    7.80 
   1 -10   0    6.00   11.00 
   1 -10   0   -3.10    7.70 
  -1 -10   0   13.80   10.00 
   1 -10   0    9.20   10.00 
  -1  10   0    0.10    9.40 
   1  10   0    6.00    8.60 
  -1  10   0    4.50   12.40 
  -1  10   0   15.50   10.00 
   1  10   0   -1.10    7.10 
   1  10   0    3.90    9.40 
   1  10   0    8.20    8.30 
   1  10   0   27.00   12.20 
   1  10   0   -0.50    7.50 
   1  10   0    5.30    7.90 
  -1  10   0    7.50    9.80 
  -1  10   0    5.40   11.20 
   1  10   0    5.60   11.30 
   1  10   0    6.80   12.00 
  -1  10   0   16.30    9.80 
  -1  10   0    1.70    8.30 
  -1  10   0   11.70   10.00 
   1  10   0   25.40   12.80 
  -1  10   0    2.50    7.30 
  -1  10   0   15.10    9.90 
  -1  10   0   13.70   10.70 
   1  10   0   13.10    9.30 
   2 -10   0 1015.70   68.79 
   2 -10   0  966.50   60.49 
  -2 -10   0  696.03   90.39 
  -2 -10   0  835.02   58.29 
  -2 -10   0  851.01   51.79 
   2 -10   0  951.00   54.69 
   2 -10   0  984.30   60.59 
   2 -10   0  829.22   52.39 
   2 -10   0  938.61   56.09 
   2 -10   0  900.11   57.89 
   2 -10   0  920.51   61.09 
  -2 -10   0  904.91   53.19 
   2 -10   0  945.21   81.39 
  -2  10   0  837.52   51.79 
   2  10   0  779.42   50.29 
   2  10   0  835.42   58.49 
   2  10   0  807.22   49.90 
  -2  10   0  961.70   61.99 
  -2  10   0  786.42   53.39 
  -2  10   0  862.51   49.50 
   2  10   0  912.01   53.39 
   2  10   0  917.01   57.89 
  -2  10   0  777.62   50.69 
   2  10   0  811.52   53.89 
   2  10   0  873.41   53.69 
  -2  10   0  863.01   61.39 
   2  10   0  988.90   57.19 
  -2  10   0  832.32   60.19 
  -2  10   0  945.91   63.19 
   2  10   0  982.50   54.69 
  -2  10   0  948.11   57.49 
  -2  10   0  821.82   52.49 
  -2  10   0  931.61   58.99 
   2  10   0  986.30   62.69 
   2  10   0  924.51   54.99 
  -2  10   0  855.21   56.39 
  -3 -10   0   27.20   14.00 
   3 -10   0   49.40   16.40 
   3 -10   0   35.50   15.30 
   3 -10   0   36.30   16.90 
   3 -10   0   58.79   18.80 
   3 -10   0   42.50   14.80 
  -3 -10   0   22.10   21.30 
   3 -10   0   39.50   14.00 
   3 -10   0   33.20   15.40 
   3 -10   0   34.90   17.50 
   3 -10   0    6.10   12.00 
  -3 -10   0   51.79   16.30 
   3 -10   0   25.70   22.50 
  -3  10   0   19.00   11.90 
  -3  10   0   33.80   16.60 
  -3  10   0   33.60   14.00 
  -3  10   0   25.70   13.10 
   3  10   0   26.00   14.10 
   3  10   0   35.90   14.20 
  -3  10   0   21.30   12.70 
   3  10   0   35.30   15.80 
  -3  10   0   39.40   17.00 
   3  10   0   46.80   14.90 
  -3  10   0   53.29   18.50 
   3  10   0   24.60   11.10 
  -3  10   0   30.40   13.30 
  -3  10   0   18.20   11.80 
   3  10   0   31.10   16.20 
   3  10   0   49.40   17.30 
   3  10   0   12.10    9.30 
   3  10   0   36.20   13.30 
  -3  10   0   49.99   17.00 
  -3  10   0   31.30   15.80 
   3  10   0   20.20   12.90 
  10   0  -1   -4.10    7.10 
 -10   0   1    3.60   11.60 
  10   0  -1    8.20   10.00 
 -10   0   1    1.00    8.10 
 -10   0   1   11.50   11.40 
 -10   0   1   -3.30    7.90 
 -10   0   1    1.80   10.70 
 -10   0   1    2.40   12.10 
  10   0  -1    7.00    8.00 
  10   0  -1   -0.70    9.30 
  10   0  -1   -2.70    7.30 
  10   0  -1   -1.30    7.50 
  10   0  -1   -2.10   13.00 
 -10   0   1   -0.10    9.20 
  10   0  -1    4.30    9.80 
  -9   0   1 1181.98   63.09 
   9   0  -1  999.20   68.29 
  -9   0   1 1003.10   58.79 
  -9   0   1 1158.88   64.09 
  -9   0   1  992.70   66.79 
   9   0  -1 1227.58   60.99 
   9   0  -1 1139.09   59.69 
  -9   0   1 1063.39   60.49 
   9   0  -1 1051.39   53.79 
   9   0  -1 1095.29   53.99 
   9   0  -1 1092.89   60.69 
  -9   0   1 1045.20   65.09 
   9   0  -1 1113.39   57.99 
   9   0  -1 1117.59   63.19 
  -9   0   1 1030.20   67.29 
  -9   0   1 1082.79   60.89 
   9   0  -1 1140.89   51.99 
   9   0  -1 1009.60   56.19 
  -8   0   1    9.50    7.70 
   8   0  -1    0.80    4.40 
  -8   0   1   11.10    7.70 
   8   0  -1    0.20    4.60 
  -8   0   1   -0.80    3.90 
  -8   0   1   11.90    9.80 
   8   0  -1   -0.20    5.00 
   8   0  -1   -0.40    6.00 
   8   0  -1   -4.90    6.30 
  -8   0   1    3.10    6.20 
   8   0  -1    6.70    5.70 
   8   0  -1    2.50    6.20 
  -8   0   1    0.00    4.00 
  -8   0   1    1.90    6.40 
   8   0  -1    6.30    5.40 
  -8   0   1   -3.60    4.00 
  -8   0   1   -0.20    5.50 
  -8   0   1   -3.00    3.90 
   8   0  -1    3.50    5.80 
   8   0  -1    6.70    5.50 
   8   0  -1    1.30    6.40 
  -8   0   1    4.70    7.40 
   8   0  -1    1.80    6.20 
  -8   0   1   -0.50    6.60 
  -8   0   1   -2.50    6.10 
  -8   0   1    5.20    7.30 
   8   0  -1    8.50    5.80 
  -8   0   1   -1.40    6.20 
   8   0  -1    0.90    6.60 
  -7   0   1 1395.96   63.29 
   7   0  -1 1437.16   56.09 
  -7   0   1 1430.16   51.89 
   7   0  -1 1408.86   61.59 
   7   0  -1 1371.36   54.09 
  -7   0   1 1323.87   53.69 
   7   0  -1 1434.76   57.89 
   7   0  -1 1439.66   53.19 
  -7   0   1 1325.67   61.29 
   7   0  -1 1377.76   61.89 
  -7   0   1 1261.47   60.19 
  -7   0   1 1366.46   61.29 
  -7   0   1 1391.76   52.89 
  -7   0   1 1320.87   60.99 
  -7   0   1 1371.86   59.09 
   7   0  -1 1451.55   60.29 
   7   0  -1 1484.65   53.49 
  -7   0   1 1310.57   67.09 
   7   0  -1 1448.76   52.99 
  -7   0   1 1353.86   61.59 
   7   0  -1 1317.27   58.39 
   7   0  -1 1462.05   64.69 
  -7   0   1 1301.17   60.69 
   7   0  -1 1331.67   58.99 
  -7   0   1 1409.66   50.59 
  -7   0   1 1258.77   66.09 
  -7   0   1 1324.17   65.59 
  -6   0   1    1.40    3.30 
  -6   0   1    3.10    5.80 
   6   0  -1   -3.30    3.10 
   6   0  -1   -1.30    2.80 
   6   0  -1   -0.10    1.60 
  -6   0   1    3.50    3.10 
   6   0  -1   -1.30    2.80 
   6   0  -1   -3.80    2.90 
   6   0  -1    4.90    2.90 
   6   0  -1    0.60    3.60 
  -6   0   1    8.30    5.30 
  -6   0   1   -0.90    3.30 
  -6   0   1    0.00    2.50 
  -6   0   1    0.40    4.70 
  -6   0   1    2.40    5.00 
   6   0  -1    0.80    3.80 
  -6   0   1    0.80    3.00 
   6   0  -1   -0.10    3.40 
   6   0  -1    2.90    4.30 
   6   0  -1    4.70    3.90 
   6   0  -1   -0.20    1.80 
  -6   0   1   -0.80    3.10 
  -6   0   1   -1.10    3.10 
  -6   0   1    4.10    4.40 
  -6   0   1    0.40    4.90 
  -6   0   1   -1.30    3.70 
   6   0  -1    1.60    3.30 
  -6   0   1   -1.00    2.10 
  -6   0   1   -1.40    2.90 
   6   0  -1    1.00    3.50 
  -6   0   1   -3.10    3.30 
   6   0  -1   -2.20    3.20 
  -6   0   1    3.90    4.80 
  -5   0   1 1351.76   56.89 
  -5   0   1 1273.47   42.70 
  -5   0   1 1332.77   52.69 
   5   0  -1 1179.08   51.19 
   5   0  -1 1267.87   48.50 
   5   0  -1 1292.87   40.80 
  -5   0   1 1315.67   51.59 
  -5   0   1 1329.37   51.99 
   5   0  -1 1267.07   45.20 
  -5   0   1 1350.36   52.69 
   5   0  -1 1333.07   52.79 
   5   0  -1 1299.87   49.90 
  -5   0   1 1384.56   56.19 
   5   0  -1 1354.56   49.30 
  -5   0   1 1309.57   53.39 
  -5   0   1 1303.57   46.00 
   5   0  -1 1300.57   38.90 
  -5   0   1 1278.17   40.70 
   5   0  -1 1286.57   52.19 
   5   0  -1 1230.88   44.30 
   5   0  -1 1222.88   45.50 
  -5   0   1 1371.86   57.09 
  -5   0   1 1316.87   52.09 
  -5   0   1 1205.98   50.79 
   5   0  -1 1265.07   49.90 
  -5   0   1 1322.07   57.29 
  -5   0   1 1338.97   44.70 
  -5   0   1 1344.47   44.50 
  -5   0   1 1218.78   45.70 
  -5   0   1 1351.56   48.00 
   5   0  -1 1310.27   38.10 
   5   0  -1 1297.87   45.10 
   5   0  -1 1308.27   50.59 
  -5   0   1 1216.58   50.39 
  -4   0   1   -2.30    2.40 
  -4   0   1    3.60    3.20 
  -4   0   1    0.10    1.40 
   4   0  -1    1.30    2.20 
   4   0  -1    1.80    2.10 
   4   0  -1    0.00    2.40 
   4   0  -1   -1.70    2.90 
   4   0  -1    2.70    3.60 
   4   0  -1    4.30    1.70 
  -4   0   1    0.00    2.40 
  -4   0   1    0.80    2.70 
  -4   0   1    0.20    2.80 
   4   0  -1   -2.00    1.40 
  -4   0   1    5.10    2.20 
  -4   0   1    3.60    3.10 
  -4   0   1    2.80    4.40 
  -4   0   1   -1.40    1.60 
  -4   0   1    0.90    2.20 
   4   0  -1   -0.10    2.70 
   4   0  -1    5.60    2.90 
   4   0  -1    6.00    3.50 
   4   0  -1    1.30    2.50 
  -4   0   1   -2.00    2.10 
   4   0  -1    1.40    2.20 
   4   0  -1   -0.40    2.20 
   4   0  -1    3.30    1.40 
   4   0  -1    4.30    2.80 
  -4   0   1    0.00    1.80 
   4   0  -1    2.90    2.40 
  -4   0   1    0.00    3.20 
  -4   0   1    5.90    3.60 
  -4   0   1    1.40    2.70 
   4   0  -1    1.30    2.20 
  -4   0   1    3.50    3.20 
   4   0  -1    2.30    2.90 
  -4   0   1    4.40    3.70 
   4   0  -1    7.40    4.10 
   4   0  -1    3.40    2.60 
   4   0  -1    3.50    2.60 
   4   0  -1    0.70    2.70 
   4   0  -1    1.70    1.40 
   4   0  -1   -2.10    2.60 
  -4   0   1    3.40    2.60 
  -4   0   1   -1.40    2.30 
   3   0  -1  729.43   26.30 
   3   0  -1  792.02   30.70 
   3   0  -1  739.43   27.00 
  -3   0   1  786.22   26.40 
   3   0  -1  804.62   34.50 
   3   0  -1  783.32   29.40 
   3   0  -1  766.22   26.20 
  -3   0   1  740.53   33.20 
   3   0  -1  729.13   26.60 
   3   0  -1  747.23   28.80 
   3   0  -1  777.42   26.60 
   3   0  -1  732.63   28.80 
   3   0  -1  778.72   27.40 
   3   0  -1  715.83   22.40 
  -3   0   1  703.43   30.60 
   3   0  -1  754.52   26.10 
  -3   0   1  746.83   30.00 
  -3   0   1  709.63   31.70 
  -3   0   1  762.72   29.80 
  -3   0   1  721.03   26.60 
  -3   0   1  753.12   23.70 
  -3   0   1  734.43   29.60 
  -3   0   1  795.82   33.00 
   3   0  -1  692.23   29.10 
  -3   0   1  772.02   30.20 
  -3   0   1  823.12   30.40 
  -3   0   1  779.22   27.20 
   3   0  -1  767.22   26.60 
   3   0  -1  701.43   26.10 
   3   0  -1  770.12   27.60 
   3   0  -1  778.72   23.50 
   3   0  -1  717.43   29.40 
   3   0  -1  745.93   29.00 
  -3   0   1  759.42   23.30 
  -3   0   1  767.52   30.10 
   3   0  -1  748.53   22.30 
   3   0  -1  768.92   29.30 
   3   0  -1  702.03   32.80 
   3   0  -1  749.62   29.70 
  -3   0   1  754.82   25.80 
  -3   0   1  732.63   25.50 
   3   0  -1  724.13   30.20 
   3   0  -1  764.82   25.90 
   3   0  -1  723.33   26.80 
   3   0  -1  763.62   25.50 
  -3   0   1  737.93   23.60 
   3   0  -1  754.42   26.70 
   3   0  -1  752.32   22.20 
  -3   0   1  754.62   31.80 
   3   0  -1  741.43   30.80 
   3   0  -1  840.62   30.60 
  -3   0   1  800.02   28.80 
  -3   0   1  747.03   28.40 
  -3   0   1  763.42   28.50 
  -2   0   1    9.50    2.40 
  -2   0   1    5.50    1.90 
  -2   0   1    6.50    2.80 
  -2   0   1   10.00    1.40 
   2   0  -1    6.60    2.40 
  -2   0   1   10.30    2.30 
   2   0  -1    4.50    1.00 
   2   0  -1    5.40    1.70 
   2   0  -1   21.00    4.80 
   2   0  -1   10.60    2.30 
   2   0  -1    8.60    1.90 
  -2   0   1    6.40    2.40 
  -2   0   1    7.90    2.50 
  -2   0   1    8.60    2.30 
   2   0  -1   18.30    4.80 
  -2   0   1   10.70    3.50 
  -2   0   1    8.20    2.80 
   2   0  -1    5.70    1.90 
   2   0  -1    7.70    1.30 
   2   0  -1    8.50    2.20 
   2   0  -1   10.40    2.90 
   2   0  -1    4.90    2.30 
  -2   0   1    6.20    2.80 
   2   0  -1   10.30    2.50 
  -2   0   1    8.30    3.20 
  -2   0   1    6.70    1.90 
   2   0  -1   11.70    3.20 
   2   0  -1   11.10    1.90 
   2   0  -1   12.00    3.30 
  -2   0   1   13.40    3.50 
  -2   0   1   13.20    4.10 
   2   0  -1    7.80    2.10 
   2   0  -1    9.80    3.00 
  -2   0   1    8.90    1.50 
   2   0  -1    7.20    1.90 
  -2   0   1    3.20    2.10 
   2   0  -1    6.10    2.20 
   2   0  -1    8.40    2.30 
  -2   0   1    2.80    2.10 
   2   0  -1    8.30    2.60 
  -2   0   1    8.00    2.10 
   2   0  -1    9.00    2.70 
   2   0  -1    7.70    2.10 
   2   0  -1   13.90    3.80 
   2   0  -1   10.10    2.50 
   2   0  -1    9.60    3.40 
   2   0  -1    4.80    2.30 
   2   0  -1    8.20    2.30 
   2   0  -1   10.30    3.00 
   2   0  -1    6.40    2.60 
  -2   0   1    6.80    1.40 
   2   0  -1    9.00    2.90 
   2   0  -1   10.80    3.40 
  -2   0   1    8.00    3.00 
  -2   0   1   12.70    3.20 
  -2   0   1   15.50    3.60 
  -2   0   1    4.60    2.50 
  -2   0   1    7.30    1.90 
   2   0  -1    7.00    1.80 
   1   0  -1  205.58    9.70 
  -1   0   1  202.98    8.70 
   1   0  -1  193.18    7.80 
   1   0  -1  228.38    8.10 
   1   0  -1  225.58    8.00 
  -1   0   1  173.28    9.20 
   1   0  -1  189.18    9.00 
   1   0  -1  220.38    6.30 
   1   0  -1  161.08    9.40 
   1   0  -1  220.78    6.70 
   1   0  -1  227.58    8.70 
   1   0  -1  238.88    8.50 
   1   0  -1  222.68    7.20 
  -1   0   1  157.78    8.90 
   1   0  -1  170.98    7.80 
   1   0  -1  214.18    7.50 
   1   0  -1  227.18    9.40 
   1   0  -1  220.88    8.10 
   1   0  -1  212.88    8.70 
   0   0   1    0.10    0.40 
   0   0   1   -0.10    0.20 
   0   0   1   -0.40    0.40 
   0   0  -1   -0.20    0.30 
   0   0  -1   -0.10    0.30 
   0   0   1    0.40    0.30 
   0   0   1    0.30    0.40 
   0   0   1    0.20    0.40 
   0   0  -1   -0.20    0.30 
   0   0  -1    0.10    0.30 
   0   0   1   -0.10    0.20 
   0   0   1    0.30    0.50 
   0   0   1   -0.10    0.40 
   1   0   1 1761.52   55.49 
  -1   0  -1 2041.50   56.49 
   1   0   1 2025.60   56.29 
   1   0   1 2030.70   55.79 
   1   0   1 2102.49   52.39 
   1   0   1 2029.10   53.99 
   1   0   1 1964.20   58.09 
   1   0   1 2078.59   55.19 
   1   0   1 2035.40   53.89 
   1   0   1 2122.89   54.39 
   1   0   1 1987.10   56.19 
   1   0   1 2066.69   55.29 
   1   0   1 2123.69   55.39 
   1   0   1 2111.29   56.19 
   1   0   1 1989.60   56.19 
   1   0   1 2126.79   55.59 
   1   0   1 1978.10   54.49 
   1   0   1 2076.59   54.59 
   1   0   1 1787.72   55.89 
   1   0   1 2020.90   52.49 
   1   0   1 1907.31   55.99 
  -1   0  -1 1978.20   55.59 
   1   0   1 2119.09   55.39 
   1   0   1 2041.40   54.49 
   1   0   1 1981.50   54.69 
   1   0   1 2058.69   57.49 
   1   0   1 1976.90   56.99 
   1   0   1 2116.49   55.29 
   1   0   1 2007.70   54.09 
  -1   0  -1 1803.92   55.59 
   1   0   1 1968.20   55.59 
   1   0   1 2024.80   55.39 
   1   0   1 2038.90   55.69 
   1   0   1 2000.00   54.69 
   1   0   1 2009.90   52.99 
   2   0   1   -1.10    1.90 
   2   0   1    1.60    1.30 
  -2   0  -1    3.50    1.90 
   2   0   1    2.40    1.40 
   2   0   1    4.60    2.40 
   2   0   1    3.70    2.20 
   2   0   1    2.30    1.80 
   2   0   1    2.50    2.10 
  -2   0  -1    2.90    2.00 
  -2   0  -1    2.60    1.40 
   2   0   1   -0.30    1.60 
  -2   0  -1    3.80    1.40 
  -2   0  -1    0.60    0.80 
  -2   0  -1    1.40    1.80 
  -2   0  -1    2.30    1.90 
   2   0   1    3.80    2.10 
  -2   0  -1    4.30    2.30 
   2   0   1    2.90    1.50 
  -2   0  -1    7.60    2.50 
   2   0   1    3.80    1.80 
   2   0   1    3.00    1.70 
  -2   0  -1    0.60    1.50 
   2   0   1    3.30    1.60 
  -2   0  -1    3.50    2.20 
   2   0   1    1.20    1.60 
   2   0   1    2.20    1.70 
   2   0   1    2.20    1.80 
  -2   0  -1    5.00    2.00 
   2   0   1    2.20    1.80 
   2   0   1    5.00    1.90 
  -2   0  -1    1.50    1.60 
   2   0   1    4.40    2.00 
   2   0   1    1.80    1.70 
   2   0   1    0.30    1.10 
   2   0   1    2.80    1.40 
  -2   0  -1    3.30    2.00 
   2   0   1    3.50    2.10 
   2   0   1    2.40    2.10 
  -2   0  -1    6.90    2.80 
   2   0   1    3.00    1.60 
   2   0   1    3.80    1.60 
  -2   0  -1    5.30    2.40 
   2   0   1    2.10    1.40 
  -2   0  -1    1.40    1.20 
  -2   0  -1    0.80    1.40 
  -2   0  -1    1.20    1.80 
  -2   0  -1    2.60    1.90 
  -2   0  -1   -0.10    1.20 
   2   0   1    4.10    2.10 
  -2   0  -1    3.30    2.10 
  -2   0  -1    3.70    2.40 
   2   0   1    1.80    1.50 
  -2   0  -1    1.30    1.50 
  -2   0  -1    4.80    2.40 
   2   0   1    2.60    1.80 
   2   0   1    1.20    1.30 
   2   0   1    1.40    1.50 
   2   0   1    3.00    1.70 
   2   0   1    3.80    1.30 
   2   0   1    1.20    1.90 
   2   0   1    1.70    1.80 
   3   0   1 1997.80   57.59 
   3   0   1 1966.90   62.69 
  -3   0  -1 1961.70   52.19 
   3   0   1 1884.61   56.29 
  -3   0  -1 1930.11   59.19 
  -3   0  -1 2008.70   62.99 
   3   0   1 2001.60   60.89 
   3   0   1 1918.71   57.09 
   3   0   1 1943.61   54.29 
   3   0   1 1932.41   63.49 
  -3   0  -1 2080.99   64.49 
   3   0   1 1970.50   58.29 
   3   0   1 1835.72   62.19 
  -3   0  -1 1801.32   57.69 
  -3   0  -1 2033.20   64.69 
  -3   0  -1 1933.61   63.89 
  -3   0  -1 1951.10   57.39 
   3   0   1 1936.11   62.19 
   3   0   1 1941.31   59.19 
   3   0   1 1937.91   63.79 
  -3   0  -1 1800.02   61.29 
  -3   0  -1 1964.20   57.29 
   3   0   1 1980.40   59.19 
   3   0   1 1898.61   57.49 
  -3   0  -1 2053.79   58.19 
   3   0   1 2005.20   56.99 
   3   0   1 1971.40   54.99 
  -3   0  -1 1938.31   56.69 
  -3   0  -1 1998.40   59.49 
   3   0   1 1909.31   58.29 
   3   0   1 2023.90   58.99 
   3   0   1 1913.41   58.39 
  -3   0  -1 1837.32   60.39 
  -3   0  -1 1958.30   62.49 
  -3   0  -1 1905.01   62.39 
  -3   0  -1 1958.30   61.39 
   3   0   1 1959.60   56.49 
   3   0   1 1903.41   61.69 
  -3   0  -1 1924.81   62.29 
   3   0   1 1976.10   56.89 
  -3   0  -1 1935.51   59.99 
   3   0   1 1950.10   61.09 
   3   0   1 1999.20   61.99 
  -3   0  -1 2000.10   59.59 
  -3   0  -1 1876.61   56.59 
   3   0   1 2056.29   67.19 
   3   0   1 1941.31   61.09 
  -3   0  -1 1980.60   62.59 
   3   0   1 1919.71   57.19 
   3   0   1 1920.31   65.69 
   3   0   1 1882.81   56.09 
  -3   0  -1 2042.80   59.69 
   3   0   1 1938.91   61.69 
  -3   0  -1 1972.90   62.19 
   3   0   1 1875.31   60.19 
  -3   0  -1 1913.01   63.49 
   4   0   1    2.40    1.90 
  -4   0  -1    0.10    3.50 
  -4   0  -1    0.50    3.10 
   4   0   1    4.70    3.00 
  -4   0  -1   -0.50    2.10 
  -4   0  -1    5.00    3.50 
  -4   0  -1    0.80    3.60 
  -4   0  -1    0.20    1.90 
   4   0   1   -0.60    2.40 
   4   0   1   -0.90    1.70 
   4   0   1    3.00    2.40 
  -4   0  -1    0.50    2.50 
  -4   0  -1   -1.20    1.60 
  -4   0  -1    1.50    2.30 
  -4   0  -1    1.80    2.40 
   4   0   1    0.90    2.90 
   4   0   1    1.30    2.00 
   4   0   1    0.90    2.60 
  -4   0  -1    4.20    3.20 
  -4   0  -1   10.20    5.00 
   4   0   1    1.80    2.00 
   4   0   1    6.60    3.80 
   4   0   1    3.40    2.80 
   4   0   1   -0.30    1.80 
   4   0   1    2.50    2.60 
   4   0   1    1.30    1.60 
   4   0   1    0.90    2.50 
  -4   0  -1    7.20    4.10 
  -4   0  -1    2.50    2.20 
   4   0   1   -0.50    1.70 
  -4   0  -1    2.60    3.10 
  -4   0  -1   -0.10    2.00 
   4   0   1    0.00    1.70 
  -4   0  -1    3.60    2.70 
   4   0   1   -0.40    2.70 
   4   0   1   -0.60    2.00 
  -4   0  -1    1.10    2.90 
   4   0   1    0.50    2.10 
  -4   0  -1    1.30    3.00 
  -4   0  -1   -0.80    1.70 
  -4   0  -1    2.40    3.20 
   4   0   1    5.00    2.60 
  -4   0  -1    4.00    3.30 
  -4   0  -1   -1.60    1.80 
   4   0   1    7.00    3.90 
   4   0   1    4.20    2.20 
  -5   0  -1 1627.84   57.09 
   5   0   1 1726.53   51.79 
  -5   0  -1 1701.53   54.09 
   5   0   1 1638.94   58.09 
   5   0   1 1704.83   54.89 
   5   0   1 1558.44   57.59 
   5   0   1 1728.03   55.79 
  -5   0  -1 1698.73   64.99 
   5   0   1 1631.74   57.09 
  -5   0  -1 1646.14   62.99 
  -5   0  -1 1588.04   61.79 
  -5   0  -1 1780.92   67.69 
   5   0   1 1592.54   59.79 
   5   0   1 1691.93   45.90 
   5   0   1 1673.33   45.50 
   5   0   1 1779.42   62.49 
   5   0   1 1681.03   55.69 
   5   0   1 1653.23   61.79 
   5   0   1 1670.93   60.29 
   5   0   1 1714.43   58.49 
   5   0   1 1750.82   64.59 
  -5   0  -1 1694.03   62.49 
  -5   0  -1 1643.44   57.59 
  -5   0  -1 1586.54   64.79 
  -5   0  -1 1668.33   62.99 
   5   0   1 1607.64   53.49 
  -5   0  -1 1645.14   62.59 
  -5   0  -1 1677.23   55.09 
  -5   0  -1 1665.43   57.59 
  -5   0  -1 1629.44   60.99 
   5   0   1 1667.13   51.69 
  -5   0  -1 1597.64   60.09 
  -5   0  -1 1676.13   64.79 
  -5   0  -1 1661.13   54.39 
   5   0   1 1650.73   57.79 
  -5   0  -1 1652.83   55.09 
  -5   0  -1 1667.43   56.49 
  -5   0  -1 1711.33   63.19 
  -5   0  -1 1715.33   55.79 
   5   0   1 1654.63   51.29 
   5   0   1 1623.14   54.59 
  -6   0  -1   -0.40    3.70 
   6   0   1    2.00    3.50 
   6   0   1   -1.50    2.60 
   6   0   1   -2.20    4.10 
   6   0   1    1.10    4.60 
  -6   0  -1   -2.20    3.60 
  -6   0  -1    0.10    3.20 
  -6   0  -1    4.80    4.70 
   6   0   1   -0.90    3.10 
  -6   0  -1   -0.40    4.50 
   6   0   1   -0.90    3.40 
  -6   0  -1   -1.30    4.20 
   6   0   1    7.00    2.40 
   6   0   1    3.80    4.20 
   6   0   1   -2.10    3.10 
  -6   0  -1    3.20    4.20 
  -6   0  -1    2.60    5.00 
  -6   0  -1    0.30    2.80 
   6   0   1    0.00    1.50 
  -6   0  -1   -0.10    2.70 
  -6   0  -1    2.20    3.20 
   6   0   1    4.90    3.30 
  -6   0  -1    3.20    3.80 
   6   0   1   -0.50    3.60 
  -6   0  -1    4.90    4.40 
   6   0   1    2.90    3.30 
   6   0   1    0.70    2.90 
   6   0   1    0.10    3.20 
  -6   0  -1    1.70    2.80 
  -6   0  -1    3.40    4.60 
   6   0   1    1.60    3.80 
   6   0   1    2.80    2.50 
   6   0   1    2.70    4.60 
  -6   0  -1   -2.00    3.60 
  -6   0  -1    0.00    4.20 
  -6   0  -1    3.50    3.10 
   6   0   1   -0.40    2.30 
  -6   0  -1   -1.80    3.10 
  -6   0  -1    4.70    3.50 
   7   0   1 3530.15  105.79 
  -7   0  -1 3521.05  107.29 
   7   0   1 3381.86  104.89 
  -7   0  -1 3538.75  117.59 
  -7   0  -1 3236.38  114.19 
   7   0   1 3413.76  102.49 
   7   0   1 3413.26  112.69 
   7   0   1 3415.66  105.99 
   7   0   1 3278.57  105.39 
  -7   0  -1 3448.16  103.99 
  -7   0  -1 3453.85  119.59 
  -7   0  -1 3499.75  105.09 
  -7   0  -1 3462.35  107.49 
   7   0   1 3470.95  115.39 
   7   0   1 3427.36  118.49 
   7   0   1 3421.96  111.19 
   7   0   1 3405.06  116.89 
   7   0   1 3317.87  111.39 
  -7   0  -1 3323.87  118.69 
   7   0   1 3321.17  107.89 
  -7   0  -1 3246.68  123.19 
   7   0   1 3430.96  114.09 
  -7   0  -1 3414.36  123.29 
  -7   0  -1 3434.46  119.39 
  -7   0  -1 3631.34  127.69 
   7   0   1 3321.97  105.09 
  -7   0  -1 3316.77  117.79 
  -7   0  -1 3301.77  122.49 
   7   0   1 3409.66  110.09 
  -7   0  -1 3474.85  103.29 
   7   0   1 3565.04   98.09 
   8   0   1    6.30    6.80 
   8   0   1    1.60    4.70 
  -8   0  -1    1.90    6.30 
   8   0   1   -2.30    4.20 
  -8   0  -1   -1.40    6.10 
  -8   0  -1   12.10    6.60 
   8   0   1   -0.60    5.30 
  -8   0  -1   -0.50    7.90 
   8   0   1    1.00    5.80 
   8   0   1    9.20    6.50 
   8   0   1    2.80    4.30 
   8   0   1    2.30    5.50 
  -8   0  -1   12.90    8.30 
  -8   0  -1    2.60    7.80 
   8   0   1    3.80    4.80 
   8   0   1    7.90    5.60 
  -8   0  -1    3.70    4.50 
  -8   0  -1   -1.50    5.40 
   8   0   1    4.90    7.10 
   8   0   1    2.40    5.30 
  -8   0  -1   -1.90    6.60 
   8   0   1   -1.20    5.40 
   8   0   1   10.90    7.60 
  -8   0  -1    4.80    6.10 
  -8   0  -1    6.80    6.70 
  -9   0  -1 2004.10   90.09 
  -9   0  -1 1932.31   88.29 
   9   0   1 1885.81   85.19 
  -9   0  -1 1933.11   98.19 
   9   0   1 2031.90   88.39 
  -9   0  -1 2071.99   98.19 
   9   0   1 1961.40   84.49 
   9   0   1 2009.70   80.39 
  -9   0  -1 2072.49   90.99 
  -9   0  -1 1837.52   86.39 
   9   0   1 2034.60   79.99 
  -9   0  -1 2076.69   96.09 
   9   0   1 2064.69   83.79 
  -9   0  -1 2028.90   86.69 
   9   0   1 2158.28   93.39 
   9   0   1 1607.14   91.09 
  -9   0  -1 1962.80   93.29 
 -10   0  -1    2.00    9.40 
 -10   0  -1   15.70   11.80 
 -10   0  -1   -1.30    8.50 
 -10   0  -1    2.70   11.00 
  10   0   1    2.70    8.20 
  10   0   1    0.00   11.90 
  10   0   1    1.30    8.30 
  10   0   1   -3.70    7.10 
  10   0   1    3.40   12.00 
  10   0   1    4.80   10.50 
  10   0   1    2.90   10.00 
 -10   0  -1   14.30   11.50 
  10   0   1  -10.60   10.40 
 -10   0  -1    7.80   11.00 
 -10   0  -1    4.90    9.20 
  10   0   1   -2.60   12.80 
  10  -1  -1   70.49   20.20 
 -10  -1   1   82.39   20.60 
  10  -1  -1   55.69   16.00 
  10  -1  -1   29.00   14.10 
 -10  -1   1   66.99   19.60 
  10  -1  -1   57.39   17.50 
  10  -1  -1   57.39   19.60 
  10  -1  -1   63.59   18.10 
 -10  -1   1   50.79   17.20 
 -10  -1   1   85.49   22.50 
  10  -1  -1   57.89   16.20 
  10   1  -1   46.70   17.40 
 -10   1   1   39.30   18.70 
  10   1  -1   52.49   18.30 
 -10   1   1   83.99   25.40 
  10   1  -1   26.30   12.30 
 -10   1   1   47.20   20.90 
  10   1  -1   52.99   20.20 
 -10   1   1   44.20   16.90 
 -10   1   1   71.39   20.00 
  10   1  -1   67.29   17.80 
  10   1  -1   70.19   18.50 
  10   1  -1  128.89   32.00 
 -10   1   1   18.40   11.90 
 -10   1   1   55.09   17.60 
   9  -1  -1    8.10    9.60 
  -9  -1   1    6.80    7.50 
  -9  -1   1    6.70    8.40 
  -9  -1   1    7.90    7.50 
  -9  -1   1    2.70    7.30 
   9  -1  -1   -3.60    6.10 
   9  -1  -1    4.90   11.10 
  -9  -1   1   20.20   13.30 
   9  -1  -1   -0.20    6.90 
   9  -1  -1    4.70    7.50 
  -9  -1   1    3.20    8.00 
   9  -1  -1    7.20    7.50 
   9  -1  -1   12.00    9.00 
   9  -1  -1    0.20    6.40 
  -9  -1   1    3.90   10.10 
  -9  -1   1    6.10    8.90 
  -9  -1   1    2.30    7.50 
   9  -1  -1    7.50    9.00 
  -9   1   1    0.00    7.60 
   9   1  -1    2.50    7.20 
   9   1  -1   -0.40    7.70 
  -9   1   1    3.40    6.40 
   9   1  -1    0.60    7.30 
   9   1  -1    8.60    8.10 
  -9   1   1    2.40    7.70 
  -9   1   1    0.30    6.70 
  -9   1   1   12.10   11.80 
   9   1  -1    2.50    9.10 
   9   1  -1   24.30   15.30 
  -9   1   1    5.20    6.30 
  -9   1   1    5.90    8.00 
  -9   1   1   -2.90    7.40 
   9   1  -1    0.70    9.80 
  -9   1   1    0.50    5.30 
   9   1  -1   10.20    9.50 
  -9   1   1    6.30    6.20 
   9   1  -1   -2.00    5.90 
   9   1  -1   -5.10    5.20 
   9   1  -1   -3.00    9.20 
   9   1  -1   -5.90   10.10 
  -9   1   1    3.70    9.10 
  -9   1   1    0.10    9.60 
   9   1  -1    2.10    6.30 
  -8  -1   1  305.07   33.50 
  -8  -1   1  305.57   33.70 
   8  -1  -1  379.56   30.80 
   8  -1  -1  319.97   26.40 
  -8  -1   1  309.67   20.80 
  -8  -1   1  380.76   45.30 
   8  -1  -1  343.47   25.10 
   8  -1  -1  366.96   29.70 
   8  -1  -1  373.36   37.00 
  -8  -1   1  310.27   38.40 
  -8  -1   1  371.06   37.80 
   8  -1  -1  338.97   22.90 
  -8  -1   1  379.56   42.70 
  -8  -1   1  353.16   41.50 
   8  -1  -1  324.97   34.10 
   8  -1  -1  389.26   24.80 
   8  -1  -1  311.17   34.00 
   8  -1  -1  372.36   26.20 
   8  -1  -1  325.67   26.80 
  -8  -1   1  347.57   34.60 
  -8  -1   1  271.17   31.70 
  -8  -1   1  361.96   38.10 
  -8  -1   1  335.07   26.20 
   8   1  -1  300.57   33.20 
   8   1  -1  324.07   24.60 
   8   1  -1  345.87   34.90 
   8   1  -1  365.56   27.80 
  -8   1   1  331.47   34.60 
  -8   1   1  238.88   34.20 
   8   1  -1  353.16   25.40 
   8   1  -1  344.67   24.60 
   8   1  -1  331.47   24.80 
  -8   1   1  311.67   34.60 
   8   1  -1  333.97   25.40 
  -8   1   1  317.27   23.50 
   8   1  -1  303.47   39.20 
  -8   1   1  369.96   43.00 
   8   1  -1  401.86   40.00 
  -8   1   1  278.47   32.40 
   8   1  -1  355.46   35.60 
  -8   1   1  370.66   24.40 
  -8   1   1  429.36   40.40 
  -8   1   1  309.17   36.90 
  -8   1   1  340.77   25.00 
   8   1  -1  294.37   35.80 
  -8   1   1  352.16   36.00 
   8   1  -1  362.16   24.80 
   8   1  -1  255.67   38.20 
   8   1  -1  357.16   25.90 
  -8   1   1  363.26   36.20 
  -8   1   1  326.77   35.10 
   8   1  -1  333.87   27.60 
  -7  -1   1   20.60   11.00 
  -7  -1   1   12.50    5.10 
  -7  -1   1   20.20    8.50 
   7  -1  -1    8.00    6.60 
  -7  -1   1   21.00   10.90 
   7  -1  -1   24.50   10.00 
   7  -1  -1    9.80    6.50 
  -7  -1   1   14.20    5.30 
  -7  -1   1    9.60    6.60 
   7  -1  -1   12.20    7.10 
   7  -1  -1   15.40    6.20 
  -7  -1   1    9.10    5.90 
   7  -1  -1    7.90    6.00 
  -7  -1   1   10.10    5.30 
   7  -1  -1   16.50    6.80 
  -7  -1   1   28.60   10.60 
  -7  -1   1    2.20    5.10 
  -7  -1   1   12.80    8.30 
  -7  -1   1   29.20    9.40 
   7  -1  -1   12.00    4.70 
  -7  -1   1   23.40    9.70 
   7  -1  -1   20.40    8.80 
   7  -1  -1   10.10    4.90 
   7  -1  -1   19.60    4.90 
  -7  -1   1   10.50    7.80 
  -7  -1   1   11.30    4.50 
   7  -1  -1   34.00    8.60 
  -7  -1   1    6.00    5.70 
   7  -1  -1   21.00    7.50 
  -7   1   1   16.50    8.00 
   7   1  -1    8.80    6.80 
  -7   1   1   20.00    9.70 
  -7   1   1   17.10    7.90 
  -7   1   1   16.10    8.60 
   7   1  -1    6.80    5.70 
  -7   1   1   17.50    8.80 
  -7   1   1   27.90    7.90 
  -7   1   1   15.00    9.50 
  -7   1   1   20.80    4.80 
   7   1  -1   17.70    7.30 
   7   1  -1    4.30    5.10 
   7   1  -1   19.80    8.70 
  -7   1   1   12.30    6.00 
   7   1  -1   14.70    9.20 
  -7   1   1   17.00    6.70 
  -7   1   1   14.10    7.60 
  -7   1   1   15.30    6.00 
   7   1  -1   16.80    8.00 
   7   1  -1   13.00    6.50 
   7   1  -1    8.30    5.70 
   7   1  -1   14.80    7.10 
  -7   1   1    4.50    5.70 
   7   1  -1   22.60    6.50 
   7   1  -1   20.80    9.20 
   7   1  -1   16.40    7.60 
  -7   1   1    5.30    6.70 
  -7   1   1   24.90    9.60 
   7   1  -1   11.90    5.10 
   7   1  -1   17.20   10.30 
  -6  -1   1 1534.05   63.39 
   6  -1  -1 1519.45   49.50 
  -6  -1   1 1648.64   71.09 
   6  -1  -1 1663.03   62.99 
   6  -1  -1 1641.14   66.09 
  -6  -1   1 1597.14   59.49 
  -6  -1   1 1670.13   52.99 
   6  -1  -1 1607.24   50.79 
  -6  -1   1 1709.73   65.59 
  -6  -1   1 1543.15   70.89 
  -6  -1   1 1628.64   69.49 
  -6  -1   1 1573.84   56.49 
  -6  -1   1 1657.53   57.49 
  -6  -1   1 1610.64   64.69 
  -6  -1   1 1581.24   64.29 
  -6  -1   1 1787.82   74.49 
   6  -1  -1 1636.54   65.09 
   6  -1  -1 1657.03   62.59 
   6  -1  -1 1594.44   63.39 
   6  -1  -1 1569.14   52.79 
   6  -1  -1 1577.54   58.39 
  -6  -1   1 1665.43   66.69 
   6  -1  -1 1611.24   58.19 
   6  -1  -1 1607.24   59.79 
   6  -1  -1 1603.54   56.29 
  -6  -1   1 1573.44   59.69 
  -6  -1   1 1681.93   65.19 
  -6  -1   1 1607.24   51.39 
   6  -1  -1 1572.74   49.90 
  -6  -1   1 1635.24   54.29 
  -6  -1   1 1590.64   64.29 
   6  -1  -1 1615.24   63.59 
   6   1  -1 1573.24   52.89 
  -6   1   1 1606.74   69.09 
  -6   1   1 1676.03   63.59 
   6   1  -1 1591.04   62.39 
  -6   1   1 1585.74   64.69 
  -6   1   1 1561.54   49.70 
  -6   1   1 1584.04   57.09 
  -6   1   1 1694.33   64.39 
   6   1  -1 1615.24   60.49 
  -6   1   1 1621.44   57.59 
   6   1  -1 1644.64   44.60 
  -6   1   1 1622.34   64.79 
   6   1  -1 1664.03   66.29 
   6   1  -1 1644.84   59.19 
   6   1  -1 1594.84   46.90 
  -6   1   1 1554.74   63.29 
  -6   1   1 1595.74   54.79 
   6   1  -1 1604.84   44.70 
   6   1  -1 1537.15   58.09 
   6   1  -1 1520.25   45.40 
  -6   1   1 1613.34   64.99 
   6   1  -1 1642.84   74.69 
   6   1  -1 1565.44   61.79 
   6   1  -1 1634.84   52.19 
  -6   1   1 1554.64   53.79 
   6   1  -1 1569.94   63.89 
   6   1  -1 1654.73   62.39 
   6   1  -1 1550.54   60.09 
  -6   1   1 1591.24   68.29 
   6   1  -1 1624.64   59.69 
  -6   1   1 1512.35   57.99 
  -6   1   1 1525.45   63.79 
  -6   1   1 1670.43   57.89 
  -6   1   1 1548.05   64.29 
  -6   1   1 1589.64   69.49 
   5  -1  -1  596.44   22.70 
  -5  -1   1  572.74   22.70 
   5  -1  -1  582.84   30.60 
  -5  -1   1  556.14   30.20 
   5  -1  -1  576.64   31.30 
   5  -1  -1  564.84   29.30 
  -5  -1   1  553.74   30.00 
  -5  -1   1  585.14   27.40 
  -5  -1   1  535.75   34.50 
  -5  -1   1  564.54   22.10 
  -5  -1   1  602.44   35.80 
  -5  -1   1  528.05   32.50 
  -5  -1   1  587.74   31.30 
   5  -1  -1  566.84   23.70 
  -5  -1   1  571.74   29.70 
  -5  -1   1  629.64   32.80 
  -5  -1   1  618.64   29.40 
   5  -1  -1  574.04   27.60 
  -5  -1   1  609.24   31.50 
   5  -1  -1  573.24   30.40 
   5  -1  -1  530.05   25.20 
   5  -1  -1  563.14   31.50 
  -5  -1   1  573.94   34.80 
   5  -1  -1  596.94   29.80 
  -5  -1   1  532.15   23.50 
   5  -1  -1  582.54   23.70 
  -5  -1   1  530.45   27.60 
   5  -1  -1  571.34   21.70 
  -5  -1   1  596.74   26.50 
   5  -1  -1  558.24   21.90 
   5  -1  -1  573.84   27.40 
  -5  -1   1  566.34   30.40 
   5  -1  -1  574.54   28.50 
   5  -1  -1  588.44   23.50 
  -5  -1   1  525.25   29.70 
  -5   1   1  565.04   30.80 
  -5   1   1  555.34   26.20 
  -5   1   1  583.64   27.80 
   5   1  -1  544.25   28.50 
  -5   1   1  570.04   31.50 
   5   1  -1  601.44   22.70 
   5   1  -1  556.64   31.00 
  -5   1   1  550.74   32.40 
   5   1  -1  559.84   17.70 
   5   1  -1  585.64   30.10 
   5   1  -1  555.64   17.90 
   5   1  -1  569.84   25.30 
  -5   1   1  541.85   30.00 
   5   1  -1  597.44   22.20 
   5   1  -1  543.85   22.30 
  -5   1   1  547.05   28.80 
  -5   1   1  586.14   33.90 
   5   1  -1  558.24   30.90 
  -5   1   1  581.64   31.00 
  -5   1   1  580.44   26.60 
  -5   1   1  535.35   27.80 
   5   1  -1  581.74   23.60 
   5   1  -1  555.64   36.30 
  -5   1   1  566.04   30.90 
   5   1  -1  534.95   28.70 
   5   1  -1  576.14   18.50 
  -5   1   1  585.44   27.40 
  -5   1   1  601.64   29.90 
   5   1  -1  568.74   17.10 
   5   1  -1  565.74   26.00 
   5   1  -1  565.74   20.00 
  -5   1   1  557.04   23.30 
  -5   1   1  558.94   24.10 
   5   1  -1  555.04   29.20 
   5   1  -1  598.14   29.80 
   5   1  -1  581.94   33.20 
  -5   1   1  584.34   33.50 
   5   1  -1  581.84   27.60 
  -5   1   1  568.44   22.10 
  -5   1   1  572.54   23.80 
  -5   1   1  569.94   30.10 
   5   1  -1  600.84   28.70 
   4  -1  -1 5791.22  154.98 
  -4  -1   1 5741.43  156.08 
  -4  -1   1 5765.42  168.88 
  -4  -1   1 6010.20  163.08 
   4  -1  -1 5736.93  163.48 
   4  -1  -1 5814.42  164.48 
   4  -1  -1 5840.32  161.38 
  -4  -1   1 5712.53  161.98 
   4  -1  -1 5855.81  166.28 
   4  -1  -1 5757.92  160.78 
   4  -1  -1 5902.41  164.58 
   4  -1  -1 5689.03  163.48 
  -4  -1   1 5605.04  171.48 
  -4  -1   1 5992.00  164.78 
   4  -1  -1 5910.21  155.28 
  -4  -1   1 5776.52  164.58 
   4  -1  -1 5777.12  155.08 
  -4  -1   1 5851.91  153.88 
  -4  -1   1 5721.63  166.58 
  -4  -1   1 5708.23  171.68 
  -4  -1   1 5281.17  155.38 
   4  -1  -1 5858.01  154.88 
  -4  -1   1 5729.53  161.78 
   4  -1  -1 5726.73  155.18 
   4  -1  -1 5888.91  163.28 
  -4  -1   1 6014.10  163.18 
   4  -1  -1 5832.12  162.18 
   4  -1  -1 5742.93  153.38 
  -4  -1   1 5693.53  164.18 
  -4  -1   1 5792.12  171.48 
  -4  -1   1 5515.75  163.68 
  -4  -1   1 5782.32  163.08 
  -4  -1   1 5787.12  164.18 
   4  -1  -1 5744.93  158.28 
  -4  -1   1 5744.73  164.48 
  -4  -1   1 5814.92  159.38 
   4  -1  -1 5915.81  155.48 
  -4  -1   1 5786.92  153.48 
   4  -1  -1 5726.83  165.78 
   4  -1  -1 5777.62  154.48 
  -4   1   1 5799.22  161.28 
  -4   1   1 5817.02  155.48 
  -4   1   1 5811.22  162.28 
   4   1  -1 5790.12  163.68 
  -4   1   1 5877.01  159.38 
  -4   1   1 5613.04  164.68 
   4   1  -1 5867.01  160.28 
   4   1  -1 5713.03  162.78 
  -4   1   1 5820.82  160.78 
   4   1  -1 5819.52  163.88 
  -4   1   1 5902.81  165.48 
  -4   1   1 5603.04  165.88 
  -4   1   1 5755.32  164.48 
  -4   1   1 5662.83  164.48 
   4   1  -1 5875.51  157.58 
   4   1  -1 5822.02  165.68 
  -4   1   1 5614.24  155.28 
   4   1  -1 5843.72  150.18 
  -4   1   1 5813.82  159.28 
   4   1  -1 5612.54  149.88 
   4   1  -1 5823.52  160.88 
   4   1  -1 5934.31  148.79 
   4   1  -1 5662.43  157.18 
   4   1  -1 5861.61  154.08 
  -4   1   1 5650.73  168.08 
  -4   1   1 5940.81  163.78 
  -4   1   1 5901.81  155.98 
  -4   1   1 5764.82  168.68 
   4   1  -1 5809.22  159.08 
   4   1  -1 5817.82  153.18 
  -4   1   1 5860.91  167.98 
   4   1  -1 5832.02  149.29 
  -4   1   1 5808.92  155.48 
   4   1  -1 5700.03  157.78 
   4   1  -1 5664.03  163.48 
  -4   1   1 5980.70  164.48 
  -4   1   1 5763.72  162.08 
  -4   1   1 5548.54  165.58 
  -4   1   1 5826.52  159.78 
   4   1  -1 5626.84  173.18 
   4   1  -1 5697.53  158.38 
  -4   1   1 5824.62  162.48 
   4   1  -1 5815.72  160.78 
   4   1  -1 5458.05  166.68 
   4   1  -1 5926.11  154.08 
   4   1  -1 5967.20  155.18 
   4   1  -1 5776.82  152.78 
   3  -1  -1  482.15   22.60 
   3  -1  -1  503.35   19.00 
   3  -1  -1  486.75   23.90 
  -3  -1   1  496.85   21.80 
  -3  -1   1  527.75   19.80 
   3  -1  -1  515.95   17.90 
   3  -1  -1  487.45   21.00 
  -3  -1   1  528.65   23.20 
  -3  -1   1  500.85   26.90 
   3  -1  -1  539.65   24.20 
  -3  -1   1  527.85   23.00 
   3  -1  -1  555.84   23.60 
   3  -1  -1  525.45   24.40 
   3  -1  -1  510.15   22.10 
   3  -1  -1  523.65   20.50 
   3  -1  -1  490.15   22.30 
  -3  -1   1  532.55   17.80 
   3  -1  -1  527.45   23.40 
   3  -1  -1  531.15   21.20 
   3  -1  -1  478.85   22.70 
   3  -1  -1  528.85   22.60 
   3  -1  -1  508.35   19.30 
  -3  -1   1  534.75   23.60 
  -3  -1   1  507.35   19.00 
   3  -1  -1  541.65   24.00 
  -3  -1   1  499.75   26.90 
   3  -1  -1  525.95   23.30 
  -3  -1   1  506.65   17.00 
   3  -1  -1  532.55   19.00 
   3  -1  -1  501.05   23.20 
   3  -1  -1  512.95   22.20 
  -3  -1   1  487.35   25.10 
   3  -1  -1  505.25   18.00 
  -3  -1   1  512.45   24.30 
  -3  -1   1  508.75   23.30 
  -3  -1   1  537.25   27.40 
  -3  -1   1  513.85   18.70 
   3  -1  -1  476.85   20.90 
  -3  -1   1  504.85   17.30 
  -3  -1   1  498.85   24.40 
   3  -1  -1  535.35   18.10 
  -3  -1   1  533.05   22.70 
  -3  -1   1  502.75   22.60 
  -3  -1   1  488.35   22.10 
   3  -1  -1  505.45   26.70 
   3  -1  -1  495.45   18.30 
   3  -1  -1  498.15   21.90 
   3  -1  -1  511.15   17.50 
   3  -1  -1  486.95   21.00 
   3  -1  -1  530.65   23.50 
  -3  -1   1  515.45   21.40 
  -3  -1   1  534.65   23.20 
   3   1  -1  524.75   22.70 
  -3   1   1  500.75   22.00 
  -3   1   1  485.95   22.00 
  -3   1   1  509.55   21.50 
   3   1  -1  532.45   17.70 
   3   1  -1  505.35   28.00 
   3   1  -1  502.95   17.60 
   3   1  -1  494.75   19.70 
  -3   1   1  526.35   23.20 
  -3   1   1  533.95   21.30 
   3   1  -1  518.25   16.90 
   3   1  -1  504.15   15.60 
  -3   1   1  504.85   18.90 
   3   1  -1  547.55   20.00 
   3   1  -1  481.25   19.20 
   3   1  -1  535.15   24.60 
  -3   1   1  509.95   23.20 
  -3   1   1  509.45   18.00 
  -3   1   1  506.65   21.80 
   3   1  -1  516.75   21.10 
  -3   1   1  502.85   21.90 
   3   1  -1  496.95   23.10 
   3   1  -1  500.65   15.00 
   3   1  -1  489.85   15.80 
  -3   1   1  499.65   23.20 
  -3   1   1  481.25   23.10 
   3   1  -1  504.85   23.50 
  -3   1   1  513.15   20.20 
  -3   1   1  521.35   23.70 
  -3   1   1  524.55   16.20 
  -3   1   1  530.15   22.00 
   3   1  -1  503.05   23.20 
   3   1  -1  563.74   24.30 
   3   1  -1  514.05   28.30 
  -3   1   1  498.25   19.00 
   3   1  -1  526.75   22.40 
  -3   1   1  521.85   23.70 
  -3   1   1  524.95   25.70 
  -3   1   1  522.65   25.10 
  -3   1   1  525.95   24.10 
   3   1  -1  512.95   15.00 
   3   1  -1  513.75   16.30 
   3   1  -1  520.45   24.00 
   3   1  -1  509.35   18.20 
   3   1  -1  545.85   29.10 
  -3   1   1  476.35   17.80 
   3   1  -1  482.45   21.50 
  -3   1   1  542.75   23.30 
  -3   1   1  543.25   25.00 
   3   1  -1  496.25   19.60 
   3   1  -1  506.65   18.20 
  -3   1   1  535.65   21.40 
   3   1  -1  511.75   23.10 
   3   1  -1  519.65   23.00 
   3   1  -1  497.45   21.70 
  -3   1   1  523.95   25.00 
  -3   1   1  503.15   24.90 
   3   1  -1  512.15   21.20 
   2  -1  -1 3160.88   84.99 
  -2  -1   1 3166.28   88.69 
  -2  -1   1 3241.18   89.09 
   2  -1  -1 3148.19   84.79 
   2  -1  -1 3078.89   89.79 
   2  -1  -1 3039.30   81.99 
  -2  -1   1 3091.19   87.19 
   2  -1  -1 3147.39   90.39 
   2  -1  -1 3125.69   87.39 
   2  -1  -1 3197.38   88.49 
   2  -1  -1 3227.28   92.99 
   2  -1  -1 3094.39   86.49 
   2  -1  -1 3019.90   89.19 
   2  -1  -1 3166.38   87.89 
   2  -1  -1 3145.19   81.89 
  -2  -1   1 3139.59   82.69 
  -2  -1   1 3168.98   90.39 
   2  -1  -1 3062.39   91.99 
  -2  -1   1 3106.99   81.09 
  -2  -1   1 3200.08   84.59 
   2  -1  -1 3154.58   87.29 
  -2  -1   1 3138.49   94.59 
   2  -1  -1 3115.19   82.29 
  -2  -1   1 2942.81   85.19 
  -2  -1   1 3209.28   87.39 
   2  -1  -1 3070.19   87.19 
   2  -1  -1 3062.39   87.59 
  -2  -1   1 3259.87   88.39 
  -2  -1   1 3199.08   82.69 
  -2  -1   1 3210.78   88.99 
   2  -1  -1 3097.29   87.49 
  -2  -1   1 3099.79   87.99 
   2  -1  -1 3122.69   88.79 
   2  -1  -1 3277.07   89.99 
  -2  -1   1 3203.78   82.39 
  -2  -1   1 3166.88   81.99 
   2  -1  -1 3114.09   90.39 
  -2  -1   1 3121.79   85.39 
   2  -1  -1 3058.79   87.49 
   2  -1  -1 3114.29   85.39 
   2  -1  -1 2999.40   83.29 
   2  -1  -1 3149.08   86.89 
   2  -1  -1 3054.59   86.49 
   2  -1  -1 3007.80   83.59 
   2  -1  -1 3216.58   87.19 
   2  -1  -1 3047.60   88.49 
  -2  -1   1 3197.88   91.49 
   2  -1  -1 3111.79   87.79 
   2  -1  -1 3164.68   85.59 
  -2  -1   1 3034.60   86.69 
   2  -1  -1 3131.99   88.69 
   2  -1  -1 3148.49   88.09 
   2  -1  -1 3048.29   89.59 
  -2  -1   1 3173.68   86.69 
   2   1  -1 3123.99   81.29 
   2   1  -1 3091.29   86.89 
  -2   1   1 3125.39   90.59 
   2   1  -1 3195.38   85.79 
  -2   1   1 3077.29   88.39 
  -2   1   1 3067.19   85.79 
  -2   1   1 3107.99   82.49 
  -2   1   1 3045.20   86.79 
  -2   1   1 3148.78   85.69 
  -2   1   1 3062.59   81.79 
   2   1  -1 3145.99   83.59 
   2   1  -1 3095.09   83.69 
   2   1  -1 3068.89   81.39 
   2   1  -1 3197.08   87.19 
  -2   1   1 3161.88   87.49 
   2   1  -1 3254.67   88.29 
   2   1  -1 3159.48   88.29 
   2   1  -1 3059.19   92.39 
   2   1  -1 3099.79   94.79 
   2   1  -1 3084.69   87.09 
   2   1  -1 3024.10   89.29 
  -2   1   1 3199.88   82.59 
  -2   1   1 3199.38   91.99 
   2   1  -1 3062.99   94.99 
  -2   1   1 3138.49   84.89 
   2   1  -1 3113.79   80.99 
   2   1  -1 3018.70   86.29 
  -2   1   1 3065.79   90.19 
  -2   1   1 3131.69   86.59 
   2   1  -1 3192.98   83.59 
  -2   1   1 3230.08   89.19 
  -2   1   1 3286.97   87.79 
  -2   1   1 3274.07   89.29 
   2   1  -1 3132.89   81.69 
  -2   1   1 3153.98   86.99 
   2   1  -1 3132.89   87.59 
  -2   1   1 3090.19   89.89 
  -2   1   1 3199.78   84.89 
   2   1  -1 3117.09   87.49 
   2   1  -1 3130.99   90.19 
   2   1  -1 3011.80   90.19 
  -2   1   1 3045.20   83.49 
  -2   1   1 3174.88   88.89 
  -2   1   1 3080.89   87.29 
   2   1  -1 3068.29   87.59 
   2   1  -1 3036.10   89.69 
  -2   1   1 3073.89   87.49 
   2   1  -1 3002.40   85.49 
   2   1  -1 3216.78   81.89 
   2   1  -1 3031.80   84.49 
   2   1  -1 3044.20   90.29 
   2   1  -1 3062.79   89.19 
  -2   1   1 3095.79   88.89 
  -2   1   1 3212.58   85.39 
  -2   1   1 3123.39   83.79 
  -2   1   1 3195.28   88.99 
  -2   1   1 3113.39   89.89 
  -2   1   1 3130.59   87.89 
  -2   1   1 3023.00   88.49 
   2   1  -1 3203.48   88.09 
  -2   1   1 3154.28   87.89 
  -2   1   1 3047.20   87.69 
  -2   1   1 3091.19   88.09 
   2   1  -1 3182.58   86.59 
   2   1  -1 3002.40   88.39 
   2   1  -1 3260.07   89.09 
   2   1  -1 3036.50   91.39 
   1  -1  -1  518.45   18.80 
   1  -1  -1  491.85   17.60 
  -1  -1   1  491.45   15.60 
  -1  -1   1  517.05   18.40 
  -1  -1   1  500.35   18.80 
   1  -1  -1  488.35   18.30 
   1  -1  -1  491.75   16.90 
   1  -1  -1  534.05   18.50 
   1  -1  -1  495.55   17.10 
  -1  -1   1  518.05   16.30 
   1  -1  -1  513.55   17.20 
  -1  -1   1  499.45   15.50 
   1  -1  -1  519.85   18.50 
   1  -1  -1  516.75   18.20 
   1  -1  -1  511.55   17.10 
   1  -1  -1  502.35   17.90 
  -1  -1   1  506.85   15.60 
   1  -1  -1  532.35   18.40 
   1  -1  -1  521.45   17.70 
   1  -1  -1  527.05   14.80 
  -1  -1   1  521.05   18.20 
   1  -1  -1  504.95   18.00 
  -1  -1   1  520.85   16.80 
   1  -1  -1  508.75   16.30 
  -1  -1   1  503.05   17.90 
  -1  -1   1  402.46   18.10 
   1  -1  -1  539.35   18.70 
  -1  -1   1  489.95   16.50 
  -1  -1   1  495.35   17.60 
   1  -1  -1  523.65   19.20 
   1  -1  -1  535.35   17.80 
   1  -1  -1  518.35   18.10 
   1  -1  -1  540.75   19.30 
  -1  -1   1  477.25   22.70 
  -1  -1   1  522.35   15.90 
   1  -1  -1  509.35   16.50 
  -1  -1   1  397.56   17.90 
   1  -1  -1  534.75   18.20 
   1  -1  -1  520.85   16.10 
  -1  -1   1  470.75   21.90 
   1  -1  -1  518.15   17.60 
   1  -1  -1  521.45   18.80 
   1  -1  -1  522.75   20.00 
   1  -1  -1  464.85   18.40 
   1  -1  -1  519.85   17.10 
   1  -1  -1  534.05   18.90 
   1   1  -1  501.05   16.20 
  -1   1   1  496.15   18.10 
   1   1  -1  512.35   16.20 
  -1   1   1  503.75   18.90 
   1   1  -1  528.55   18.40 
   1   1  -1  500.65   16.80 
  -1   1   1  485.25   17.40 
   1   1  -1  523.15   19.20 
  -1   1   1  483.55   18.20 
  -1   1   1  518.35   16.50 
   1   1  -1  533.15   16.60 
   1   1  -1  518.05   16.60 
   1   1  -1  532.15   15.80 
  -1   1   1  508.75   18.70 
  -1   1   1  502.55   16.90 
   1   1  -1  507.55   18.70 
   1   1  -1  521.05   14.50 
   1   1  -1  513.45   18.10 
  -1   1   1  526.75   17.70 
   1   1  -1  469.95   18.20 
  -1   1   1  518.75   18.90 
   1   1  -1  526.15   15.40 
  -1   1   1  517.25   17.90 
  -1   1   1  461.05   16.80 
   1   1  -1  531.85   18.40 
   1   1  -1  534.35   16.30 
  -1   1   1  515.05   18.60 
  -1   1   1  480.45   18.30 
   1   1  -1  523.15   16.30 
   1   1  -1  506.95   16.30 
  -1   1   1  525.85   18.20 
  -1   1   1  510.45   18.30 
  -1   1   1  493.45   17.70 
  -1   1   1  505.75   16.60 
  -1   1   1  543.65   19.60 
  -1   1   1  504.95   18.60 
  -1   1   1  446.06   16.90 
  -1   1   1  484.65   20.30 
  -1   1   1  517.15   18.30 
  -1   1   1  519.95   17.70 
   1   1  -1  498.25   16.10 
   1   1  -1  514.35   17.70 
  -1   1   1  530.25   18.30 
   1   1  -1  519.85   19.80 
  -1   1   1  536.45   18.10 
   1   1  -1  512.05   23.40 
  -1   1   1  525.05   18.20 
   1   1  -1  523.95   20.40 
   1   1  -1  524.55   22.30 
   1   1  -1  535.65   15.70 
   1   1  -1  537.25   16.70 
   0  -1  -1 7622.14  212.88 
   0  -1  -1 8522.45  215.78 
   0  -1  -1 8022.60  212.68 
   0  -1  -1 7649.83  213.98 
   0  -1   1 8578.04  213.18 
   0  -1  -1 8281.67  213.38 
   0  -1  -1 8048.99  212.88 
   0  -1  -1 7252.17  212.68 
   0  -1   1 7946.91  214.48 
   0  -1   1 7003.10  212.68 
   0  -1  -1 7931.61  213.78 
   0  -1  -1 8594.74  216.28 
   0   1   1 8414.26  217.28 
   0   1  -1 7557.84  213.28 
   0   1  -1 8306.27  214.08 
   0   1   1 8780.32  217.98 
   0   1   1 8694.83  213.28 
   0   1  -1 8599.14  214.48 
   0   1   1 8486.45  215.68 
   0   1   1 8518.75  214.48 
   0   1   1 8735.33  214.88 
   0   1   1 8650.33  213.48 
   0   1  -1 8103.09  215.98 
   0   1   1 8377.46  214.88 
   0   1  -1 8303.07  213.18 
   0   1   1 8634.14  214.48 
   0   1   1 8683.43  215.58 
   0   1  -1 7724.23  212.48 
   0   1   1 8188.58  213.58 
   0   1   1 8558.64  213.98 
   0   1   1 8618.44  214.58 
   0   1   1 8403.26  213.38 
   0   1   1 8497.15  215.38 
   0   1   1 8279.77  213.38 
   0   1  -1 8598.94  215.08 
   0   1  -1 7571.44  212.28 
   0   1  -1 8036.00  215.18 
   1  -1   1  792.12   25.20 
   1  -1   1  721.53   23.90 
  -1  -1  -1  732.43   24.40 
  -1  -1  -1  693.43   23.30 
  -1  -1  -1  747.83   24.80 
   1  -1   1  712.13   23.30 
   1  -1   1  720.03   24.30 
  -1  -1  -1  671.43   27.50 
  -1  -1  -1  752.62   23.70 
   1  -1   1  760.72   23.20 
  -1  -1  -1  711.03   26.40 
   1  -1   1  733.73   23.10 
   1  -1   1  772.62   24.20 
   1  -1   1  758.62   23.80 
  -1  -1  -1  746.33   26.10 
   1  -1   1  718.23   24.40 
   1  -1   1  778.92   23.60 
   1  -1   1  743.23   24.70 
   1  -1   1  768.62   25.50 
   1  -1   1  736.53   23.20 
  -1  -1  -1  736.13   23.40 
   1  -1   1  740.53   20.40 
   1  -1   1  739.03   23.90 
   1  -1   1  734.83   20.20 
  -1  -1  -1  727.53   23.00 
   1  -1   1  757.42   24.50 
   1  -1   1  711.63   23.70 
  -1  -1  -1  743.23   28.00 
  -1  -1  -1  643.84   25.50 
   1  -1   1  753.02   24.60 
   1  -1   1  766.82   25.80 
  -1  -1  -1  712.23   23.30 
   1  -1   1  743.43   24.20 
   1  -1   1  717.23   25.20 
   1  -1   1  765.32   25.00 
   1  -1   1  713.83   25.30 
   1  -1   1  698.83   24.60 
  -1  -1  -1  754.42   24.50 
  -1  -1  -1  680.93   23.30 
   1  -1   1  762.62   25.00 
  -1  -1  -1  663.53   22.70 
   1  -1   1  711.23   22.70 
   1  -1   1  737.13   23.80 
   1  -1   1  721.93   24.00 
   1  -1   1  743.63   23.70 
  -1  -1  -1  750.42   24.50 
   1  -1   1  755.32   20.60 
  -1  -1  -1  738.13   26.60 
   1   1   1  734.63   23.60 
   1   1   1  752.72   24.10 
   1   1   1  741.83   21.30 
  -1   1  -1  734.93   24.70 
   1   1   1  777.72   26.50 
   1   1   1  724.73   22.30 
  -1   1  -1  720.63   23.00 
  -1   1  -1  761.92   25.00 
  -1   1  -1  787.62   23.70 
   1   1   1  769.02   23.10 
  -1   1  -1  746.43   26.00 
   1   1   1  739.63   25.10 
  -1   1  -1  742.33   24.00 
  -1   1  -1  752.92   24.60 
   1   1   1  724.13   28.00 
   1   1   1  736.03   24.40 
  -1   1  -1  777.12   26.00 
   1   1   1  731.13   22.80 
   1   1   1  778.92   23.80 
  -1   1  -1  786.92   24.50 
  -1   1  -1  757.82   24.10 
   1   1   1  754.92   24.80 
   1   1   1  764.92   20.20 
  -1   1  -1  757.32   25.10 
   1   1   1  701.23   26.80 
   1   1   1  745.73   21.50 
   1   1   1  751.22   20.40 
  -1   1  -1  733.33   25.50 
   1   1   1  804.92   25.00 
   1   1   1  750.12   23.20 
  -1   1  -1  751.12   23.00 
  -1   1  -1  762.62   24.10 
  -1   1  -1  730.63   24.40 
   1   1   1  790.52   27.90 
  -1   1  -1  795.72   25.70 
   1   1   1  753.42   25.80 
  -1   1  -1  748.33   25.00 
   1   1   1  748.83   24.40 
  -1   1  -1  714.13   22.90 
  -1   1  -1  770.92   24.90 
  -1   1  -1  754.32   23.90 
   1   1   1  738.13   20.20 
   1   1   1  753.62   22.60 
  -1   1  -1  745.73   23.90 
  -1   1  -1  727.93   24.70 
  -1   1  -1  718.33   23.10 
  -1   1  -1  713.03   23.60 
  -1   1  -1  705.23   24.20 
   1   1   1  740.83   22.50 
   1   1   1  717.63   23.40 
   1   1   1  741.03   23.60 
  -1   1  -1  725.73   24.80 
   1   1   1  776.92   24.20 
  -2  -1  -1 9149.29  233.38 
   2  -1   1 8975.20  234.98 
  -2  -1  -1 9211.68  231.78 
  -2  -1  -1 8915.21  242.58 
   2  -1   1 9162.48  239.58 
   2  -1   1 8922.91  241.88 
  -2  -1  -1 8933.21  238.38 
  -2  -1  -1 9367.56  239.08 
   2  -1   1 9185.18  235.38 
   2  -1   1 9129.19  239.78 
   2  -1   1 9442.16  240.18 
   2  -1   1 8815.32  239.48 
  -2  -1  -1 9022.60  240.08 
  -2  -1  -1 9488.45  239.98 
   2  -1   1 8952.60  240.68 
   2  -1   1 9248.38  237.18 
  -2  -1  -1 9127.39  240.98 
   2  -1   1 9306.07  240.08 
   2  -1   1 9147.18  240.98 
   2  -1   1 9097.49  235.98 
  -2  -1  -1 9273.17  239.18 
   2  -1   1 9170.78  238.58 
  -2  -1  -1 8599.54  241.48 
  -2  -1  -1 8755.62  236.48 
   2  -1   1 9418.06  240.08 
   2  -1   1 9286.07  238.08 
  -2  -1  -1 9060.09  241.78 
   2  -1   1 9056.69  240.78 
  -2  -1  -1 8798.72  238.08 
   2  -1   1 9193.48  239.48 
   2  -1   1 9396.26  238.38 
   2  -1   1 9494.15  237.68 
  -2  -1  -1 8926.91  240.68 
  -2  -1  -1 9402.46  236.18 
  -2  -1  -1 9127.89  240.68 
  -2  -1  -1 9332.77  238.48 
  -2  -1  -1 8320.37  240.48 
   2  -1   1 8659.93  240.48 
  -2  -1  -1 9622.84  239.58 
  -2  -1  -1 9257.27  232.08 
   2  -1   1 9229.08  238.68 
  -2  -1  -1 9299.97  240.08 
  -2  -1  -1 8635.94  238.08 
  -2  -1  -1 8872.61  240.88 
   2  -1   1 9242.98  238.88 
   2  -1   1 9215.88  235.08 
   2  -1   1 8772.82  239.68 
   2  -1   1 9202.88  240.28 
   2  -1   1 9059.99  237.18 
   2  -1   1 8931.71  238.08 
   2  -1   1 9359.36  239.58 
   2  -1   1 9057.69  239.68 
   2  -1   1 8890.61  233.28 
   2  -1   1 9119.99  235.18 
   2  -1   1 8909.01  237.88 
   2  -1   1 9003.30  241.68 
   2  -1   1 8830.02  234.78 
  -2   1  -1 8902.41  240.28 
  -2   1  -1 9478.45  238.58 
   2   1   1 9429.06  239.48 
   2   1   1 8597.34  235.48 
  -2   1  -1 8807.32  239.98 
   2   1   1 9043.60  244.18 
  -2   1  -1 9311.87  234.38 
  -2   1  -1 9140.69  239.68 
  -2   1  -1 9167.88  239.58 
  -2   1  -1 9051.19  239.98 
   2   1   1 8356.96  243.28 
   2   1   1 9018.30  232.18 
   2   1   1 9039.20  240.18 
   2   1   1 9056.29  240.78 
  -2   1  -1 8976.50  238.58 
   2   1   1 9238.78  239.58 
  -2   1  -1 9423.06  240.48 
  -2   1  -1 9104.39  233.48 
  -2   1  -1 9524.05  240.48 
   2   1   1 8777.22  246.58 
   2   1   1 9015.60  239.28 
   2   1   1 9188.88  235.98 
   2   1   1 9252.27  239.88 
  -2   1  -1 8961.20  234.18 
  -2   1  -1 8963.80  234.08 
   2   1   1 8524.45  235.18 
   2   1   1 9445.56  240.18 
  -2   1  -1 9491.25  239.98 
   2   1   1 9363.86  238.88 
  -2   1  -1 9204.48  238.48 
   2   1   1 9000.50  236.48 
   2   1   1 8282.07  242.28 
  -2   1  -1 9422.66  238.98 
  -2   1  -1 9358.16  237.98 
   2   1   1 8656.33  243.38 
  -2   1  -1 9151.38  237.58 
   2   1   1 9235.98  239.88 
   2   1   1 8990.60  240.68 
   2   1   1 9191.58  238.48 
   2   1   1 9022.90  236.18 
   2   1   1 8912.61  234.98 
   2   1   1 8708.93  238.98 
   2   1   1 9087.79  232.28 
   2   1   1 9499.95  239.58 
   2   1   1 9198.78  232.28 
   2   1   1 9178.38  238.88 
  -2   1  -1 8712.63  241.48 
   2   1   1 9271.47  234.28 
   2   1   1 9208.28  239.08 
   2   1   1 8563.94  242.38 
  -2   1  -1 8928.91  236.78 
  -2   1  -1 9480.15  238.58 
  -2   1  -1 8654.63  238.38 
  -2   1  -1 9426.76  242.28 
  -2   1  -1 8766.22  240.58 
  -2   1  -1 8826.92  236.48 
   2   1   1 8752.52  240.08 
  -2   1  -1 8991.40  237.68 
  -2   1  -1 9118.49  240.28 
   2   1   1 8887.21  237.58 
  -2   1  -1 8645.33  239.38 
   2   1   1 9063.59  234.28 
  -2   1  -1 8732.63  242.38 
   3  -1   1    7.80    2.50 
   3  -1   1    6.80    3.50 
   3  -1   1    6.70    3.10 
  -3  -1  -1    8.40    2.40 
  -3  -1  -1    7.60    3.00 
  -3  -1  -1    8.00    2.00 
  -3  -1  -1    4.60    3.50 
   3  -1   1    6.20    2.80 
   3  -1   1    8.70    3.30 
   3  -1   1   10.60    4.30 
  -3  -1  -1    7.50    1.90 
  -3  -1  -1   11.80    4.20 
   3  -1   1   10.90    4.10 
  -3  -1  -1    6.30    2.50 
   3  -1   1    8.80    2.90 
   3  -1   1    4.70    2.40 
   3  -1   1   10.00    4.10 
   3  -1   1    5.80    3.00 
  -3  -1  -1    6.20    3.50 
   3  -1   1    6.80    3.70 
  -3  -1  -1    9.40    3.60 
   3  -1   1    6.10    2.10 
  -3  -1  -1    7.20    2.30 
  -3  -1  -1    6.60    3.50 
  -3  -1  -1    5.20    1.80 
   3  -1   1    8.00    4.00 
   3  -1   1    6.60    2.40 
   3  -1   1   12.50    4.20 
   3  -1   1    9.60    2.90 
   3  -1   1   11.10    4.10 
   3  -1   1    7.70    2.00 
  -3  -1  -1    2.00    2.30 
   3  -1   1    2.80    2.30 
   3  -1   1    6.70    2.00 
  -3  -1  -1    6.70    3.10 
   3  -1   1    7.50    2.50 
  -3  -1  -1    6.20    2.60 
  -3  -1  -1    6.70    3.60 
  -3  -1  -1    8.20    3.70 
  -3  -1  -1   13.20    4.10 
   3  -1   1   11.70    5.40 
  -3  -1  -1    9.20    3.90 
   3  -1   1    9.60    4.10 
  -3  -1  -1   18.30    3.50 
  -3  -1  -1    5.20    2.80 
   3  -1   1    7.40    2.80 
   3  -1   1   11.20    3.50 
  -3  -1  -1   10.20    4.00 
  -3  -1  -1   17.90    4.90 
  -3  -1  -1    6.60    2.50 
  -3  -1  -1   12.70    4.70 
   3  -1   1    7.90    2.80 
  -3  -1  -1    7.10    4.00 
   3  -1   1    3.60    2.70 
   3  -1   1    4.20    2.00 
  -3   1  -1    7.20    2.20 
  -3   1  -1    3.40    3.10 
  -3   1  -1    7.90    3.30 
   3   1   1   13.90    3.20 
   3   1   1   12.50    5.20 
   3   1   1    5.90    2.00 
  -3   1  -1    6.00    3.80 
  -3   1  -1    7.40    2.80 
   3   1   1   10.60    3.90 
   3   1   1    6.90    1.70 
   3   1   1   11.50    4.20 
   3   1   1   11.40    3.40 
   3   1   1    4.50    4.30 
  -3   1  -1   24.50    4.80 
   3   1   1    4.30    2.30 
  -3   1  -1    4.00    2.70 
  -3   1  -1    1.60    2.90 
   3   1   1   10.80    3.60 
  -3   1  -1    7.00    3.90 
   3   1   1    4.10    2.60 
   3   1   1   15.20    3.30 
  -3   1  -1    2.80    2.60 
  -3   1  -1    5.40    4.10 
  -3   1  -1    1.80    2.40 
  -3   1  -1    5.90    3.10 
   3   1   1    5.90    3.40 
  -3   1  -1    3.40    2.60 
   3   1   1    8.00    4.30 
  -3   1  -1    7.30    3.50 
   3   1   1    6.80    1.80 
   3   1   1   11.00    4.50 
  -3   1  -1    6.10    3.20 
   3   1   1   10.10    3.50 
   3   1   1    6.20    2.30 
   3   1   1    6.10    2.00 
  -3   1  -1    6.40    2.90 
  -3   1  -1    7.70    3.50 
  -3   1  -1    2.70    2.40 
   3   1   1   11.10    3.00 
  -3   1  -1    5.30    2.00 
   3   1   1    9.20    3.70 
   3   1   1    5.50    2.90 
   3   1   1    6.40    4.40 
   3   1   1    2.00    2.70 
  -3   1  -1   10.30    3.10 
  -3   1  -1    3.80    2.90 
   3   1   1    6.00    1.80 
   3   1   1    5.50    3.20 
  -3   1  -1    5.40    3.50 
  -3   1  -1    5.10    2.60 
  -3   1  -1   12.50    4.00 
   3   1   1    5.40    2.00 
   3   1   1    7.70    3.10 
   4  -1   1 2575.84   74.59 
   4  -1   1 2553.94   76.19 
   4  -1   1 2622.64   77.59 
   4  -1   1 2570.84   80.19 
  -4  -1  -1 2599.94   71.99 
  -4  -1  -1 2503.55   81.99 
  -4  -1  -1 2501.55   84.69 
   4  -1   1 2581.64   82.39 
  -4  -1  -1 2575.44   82.69 
   4  -1   1 2556.54   71.89 
  -4  -1  -1 2660.83   81.69 
  -4  -1  -1 2521.95   82.09 
  -4  -1  -1 2495.85   77.09 
   4  -1   1 2557.94   71.29 
  -4  -1  -1 2429.76   73.49 
  -4  -1  -1 2526.85   70.89 
  -4  -1  -1 2459.65   82.19 
  -4  -1  -1 2577.14   78.89 
   4  -1   1 2606.04   74.29 
  -4  -1  -1 2504.05   70.99 
   4  -1   1 2554.54   71.19 
   4  -1   1 2480.85   76.09 
  -4  -1  -1 2500.95   79.79 
  -4  -1  -1 2574.54   82.39 
   4  -1   1 2519.65   73.99 
   4  -1   1 2530.55   80.79 
   4  -1   1 2600.74   80.79 
  -4  -1  -1 2528.55   84.39 
   4  -1   1 2474.35   77.49 
  -4  -1  -1 2583.24   76.59 
   4  -1   1 2564.74   74.69 
  -4  -1  -1 2523.15   78.79 
  -4  -1  -1 2562.74   84.89 
   4  -1   1 2578.44   71.29 
  -4  -1  -1 2631.54   74.19 
  -4  -1  -1 2549.15   73.09 
  -4  -1  -1 2511.05   72.59 
   4  -1   1 2490.95   79.29 
   4  -1   1 2570.14   79.09 
   4  -1   1 2514.55   83.49 
  -4  -1  -1 2542.05   70.89 
  -4  -1  -1 2543.85   81.59 
  -4  -1  -1 2534.15   85.79 
   4  -1   1 2448.06   73.69 
  -4  -1  -1 2439.26   79.19 
   4  -1   1 2504.35   74.19 
   4  -1   1 2531.75   77.49 
  -4  -1  -1 2549.84   85.89 
  -4   1  -1 2541.65   79.99 
  -4   1  -1 2505.15   81.79 
  -4   1  -1 2558.24   76.69 
  -4   1  -1 2581.84   77.79 
  -4   1  -1 2561.44   78.09 
  -4   1  -1 2456.55   78.79 
  -4   1  -1 2448.16   84.89 
   4   1   1 2525.15   70.69 
   4   1   1 2517.45   73.89 
  -4   1  -1 2542.35   82.39 
  -4   1  -1 2553.64   77.79 
  -4   1  -1 2489.45   79.49 
   4   1   1 2425.26   73.49 
   4   1   1 2589.34   71.19 
  -4   1  -1 2612.34   73.79 
  -4   1  -1 2491.25   81.79 
   4   1   1 2525.35   72.29 
   4   1   1 2507.85   76.69 
  -4   1  -1 2445.16   84.59 
  -4   1  -1 2448.85   80.09 
   4   1   1 2511.25   78.89 
  -4   1  -1 2568.84   82.39 
   4   1   1 2531.95   72.39 
   4   1   1 2526.35   70.79 
   4   1   1 2468.15   78.59 
   4   1   1 2558.74   73.89 
  -4   1  -1 2598.64   82.39 
   4   1   1 2585.64   75.29 
   4   1   1 2593.64   72.09 
   4   1   1 2548.95   74.49 
   4   1   1 2550.04   73.79 
  -4   1  -1 2611.04   77.29 
   4   1   1 2530.65   87.19 
  -4   1  -1 2544.05   76.49 
   4   1   1 2510.65   76.09 
   4   1   1 2505.05   71.59 
  -4   1  -1 2507.05   81.79 
  -5  -1  -1   31.50    7.70 
   5  -1   1   28.80    5.50 
   5  -1   1   43.50    8.20 
   5  -1   1   34.40    7.50 
   5  -1   1   37.90    5.40 
  -5  -1  -1   37.70    8.90 
   5  -1   1   38.90    5.90 
  -5  -1  -1   41.90    9.90 
  -5  -1  -1   25.40    7.90 
  -5  -1  -1   26.80    8.70 
  -5  -1  -1   28.10    5.60 
  -5  -1  -1   52.99    9.20 
   5  -1   1   47.00    9.50 
  -5  -1  -1   46.80    9.80 
   5  -1   1   41.90    8.90 
  -5  -1  -1   32.60    9.40 
   5  -1   1   52.19   10.60 
   5  -1   1   42.30    7.10 
  -5  -1  -1   37.00    6.40 
  -5  -1  -1   39.30    9.50 
  -5  -1  -1   32.40    6.80 
  -5  -1  -1   33.10    7.30 
   5  -1   1   38.00    7.60 
  -5  -1  -1   36.40    6.20 
  -5  -1  -1   33.20    7.00 
  -5  -1  -1   38.40    9.90 
  -5  -1  -1   35.10    8.20 
   5  -1   1   43.90    8.90 
   5  -1   1   37.60    9.20 
   5  -1   1   32.90    6.40 
  -5  -1  -1   32.40    5.60 
  -5  -1  -1   50.89   10.70 
   5  -1   1   33.70    7.00 
  -5  -1  -1   62.89   12.70 
  -5  -1  -1   36.40   10.20 
  -5  -1  -1   30.20    5.10 
   5  -1   1   29.60    5.90 
   5  -1   1   33.00    6.30 
   5  -1   1   36.40    5.20 
  -5  -1  -1   26.90    7.50 
  -5  -1  -1   33.70    5.70 
   5  -1   1   46.50    9.60 
   5  -1   1   34.20    6.60 
   5  -1   1   42.90   10.00 
  -5   1  -1   32.80    6.90 
  -5   1  -1   26.90    8.50 
   5   1   1   44.60    7.00 
   5   1   1   36.70   10.00 
   5   1   1   47.80    7.50 
   5   1   1   32.50    6.90 
   5   1   1   33.60    5.70 
  -5   1  -1   35.00    7.60 
   5   1   1   48.30    6.50 
  -5   1  -1   39.80    6.70 
  -5   1  -1   29.20    8.30 
  -5   1  -1   25.30    7.60 
  -5   1  -1   40.10    9.30 
  -5   1  -1   26.60    6.60 
   5   1   1   35.80    6.30 
   5   1   1   29.00    7.40 
  -5   1  -1   43.00   10.00 
  -5   1  -1   32.90    8.60 
   5   1   1   49.99    6.80 
   5   1   1   39.20    7.40 
  -5   1  -1   53.39   10.40 
  -5   1  -1   26.70    8.30 
  -5   1  -1   29.70    8.00 
   5   1   1   27.40    6.70 
   5   1   1   40.50    8.00 
   5   1   1   24.50    6.60 
   5   1   1   37.00    5.60 
   5   1   1   26.70    7.20 
   5   1   1   24.10    6.00 
  -5   1  -1   40.70    8.10 
  -5   1  -1   34.40    8.90 
   5   1   1   31.60    9.90 
   5   1   1   42.50    8.90 
  -5   1  -1   36.90    7.70 
   5   1   1   40.20   10.10 
   5   1   1   37.60    6.20 
   5   1   1   32.10    5.00 
   5   1   1   33.40    5.50 
   5   1   1   44.30    7.10 
  -5   1  -1   41.30    7.80 
  -5   1  -1   40.80    9.70 
   5   1   1   36.50    5.80 
  -5   1  -1   30.90    6.70 
  -6  -1  -1    8.90    7.00 
  -6  -1  -1   25.80    9.20 
   6  -1   1   32.40    8.50 
   6  -1   1    9.30    5.90 
   6  -1   1    9.70    5.90 
  -6  -1  -1    9.40    5.50 
  -6  -1  -1   13.90    4.30 
  -6  -1  -1   10.20    7.30 
   6  -1   1   13.70    5.50 
  -6  -1  -1   19.10    8.40 
  -6  -1  -1   15.70    8.90 
  -6  -1  -1    9.60    6.00 
   6  -1   1   12.10    5.30 
  -6  -1  -1   11.60    6.00 
   6  -1   1   13.50    4.70 
   6  -1   1    8.00    5.20 
   6  -1   1   10.30    6.00 
  -6  -1  -1    8.30    7.20 
   6  -1   1    9.70    3.70 
   6  -1   1   12.20    3.70 
   6  -1   1    7.90    4.80 
  -6  -1  -1   15.60    7.10 
   6  -1   1   10.70    4.60 
  -6  -1  -1    9.60    5.30 
  -6  -1  -1   15.20    5.30 
  -6  -1  -1    2.60    4.40 
  -6  -1  -1    5.90    3.20 
  -6  -1  -1   15.80    6.70 
   6  -1   1   14.20    6.30 
  -6  -1  -1   14.20    4.60 
   6  -1   1    6.90    3.50 
   6  -1   1   15.50    7.40 
  -6  -1  -1   14.10    6.70 
  -6  -1  -1   17.60    7.10 
   6   1   1   11.40    6.40 
   6   1   1    8.10    4.10 
   6   1   1   13.60    5.30 
   6   1   1   16.30    5.40 
  -6   1  -1   16.60    5.90 
  -6   1  -1   10.30    6.40 
  -6   1  -1   13.90    6.50 
  -6   1  -1   13.30    7.80 
  -6   1  -1   12.40    7.70 
   6   1   1    9.40    6.50 
  -6   1  -1   14.40    5.70 
   6   1   1   11.10    6.60 
  -6   1  -1    6.50    3.40 
  -6   1  -1    5.40    5.10 
  -6   1  -1   13.80    6.20 
  -6   1  -1   16.40    8.30 
  -6   1  -1   16.20    6.30 
   6   1   1   22.50    6.80 
   6   1   1    7.80    6.40 
   6   1   1   14.90    5.60 
   6   1   1   17.90    5.00 
   6   1   1   15.60    5.40 
  -6   1  -1    2.90    4.70 
   6   1   1    6.30    6.20 
  -6   1  -1   16.00    6.00 
  -6   1  -1    8.60    5.60 
   6   1   1   14.50    4.70 
   6   1   1   10.80    5.30 
  -6   1  -1    9.40    4.80 
   6   1   1   20.00    5.60 
   6   1   1   20.10    4.40 
   6   1   1   -2.80    5.10 
   6   1   1   18.70    7.40 
   6   1   1   19.00    4.80 
  -6   1  -1    4.50    5.10 
  -6   1  -1    9.00    4.60 
   6   1   1    9.30    5.00 
   6   1   1   18.10    5.90 
  -6   1  -1   18.80    7.50 
   6   1   1    9.40    3.30 
   6   1   1   14.30    6.90 
   6   1   1    6.30    5.20 
  -7  -1  -1   72.29   15.70 
   7  -1   1   46.60   10.30 
   7  -1   1   79.59   16.40 
  -7  -1  -1   71.59   16.40 
   7  -1   1   51.19   13.00 
  -7  -1  -1   61.89   10.30 
   7  -1   1   73.79   14.40 
  -7  -1  -1   62.29   13.30 
   7  -1   1   60.69    9.70 
  -7  -1  -1   56.09   12.30 
   7  -1   1   78.79   10.40 
  -7  -1  -1   69.59   14.60 
  -7  -1  -1   75.39   16.60 
  -7  -1  -1   59.49   14.70 
  -7  -1  -1   62.19   14.50 
   7  -1   1   73.09   13.50 
   7  -1   1   75.79   13.90 
  -7  -1  -1   62.09   14.40 
   7  -1   1   67.09   10.30 
  -7  -1  -1   78.89   16.10 
   7  -1   1   46.70   11.60 
   7  -1   1   77.79   12.50 
  -7  -1  -1   72.39   16.30 
   7  -1   1   56.89   13.10 
  -7  -1  -1   48.90   12.80 
   7  -1   1   80.89   14.20 
  -7  -1  -1   45.50   14.00 
   7  -1   1   50.89    8.60 
  -7  -1  -1   66.99   18.10 
  -7   1  -1   64.59   12.10 
   7   1   1   69.89   14.00 
  -7   1  -1   64.99   11.80 
   7   1   1   69.09   12.50 
  -7   1  -1   76.89   17.30 
  -7   1  -1   84.79   15.70 
  -7   1  -1   70.69   12.80 
  -7   1  -1   70.79   14.90 
   7   1   1   54.59   13.40 
   7   1   1   86.69   16.50 
   7   1   1   84.69   13.20 
   7   1   1   62.79   10.40 
   7   1   1   59.79    9.60 
   7   1   1   58.69   16.90 
  -7   1  -1   54.09   11.00 
  -7   1  -1   44.50   12.60 
   7   1   1   98.19   17.60 
   7   1   1   86.39   12.90 
   7   1   1   54.59   13.40 
  -7   1  -1   73.79   15.80 
   7   1   1   66.79   13.40 
   7   1   1   58.79   11.60 
  -7   1  -1   72.19   13.80 
  -7   1  -1   55.69   13.60 
  -7   1  -1   67.39   10.70 
   7   1   1   49.60   11.10 
  -7   1  -1   53.59   15.10 
   7   1   1   85.79   10.90 
  -7   1  -1   81.59   17.90 
   7   1   1   61.99   11.10 
   7   1   1   79.69   14.70 
   7   1   1  102.29   22.50 
   7   1   1   77.19   18.60 
  -7   1  -1   49.30   14.10 
   8  -1   1   24.30    9.80 
   8  -1   1   35.90    9.90 
  -8  -1  -1   45.00   11.90 
  -8  -1  -1   25.70   11.00 
   8  -1   1   46.90   14.40 
  -8  -1  -1   14.90    9.90 
   8  -1   1   61.89   14.50 
  -8  -1  -1   23.30   10.30 
   8  -1   1   49.50   11.70 
  -8  -1  -1   33.60   12.00 
   8  -1   1   31.10   10.70 
   8  -1   1   33.80   12.00 
  -8  -1  -1   34.20   13.20 
   8  -1   1   45.10   11.70 
   8  -1   1   68.59   15.50 
  -8  -1  -1   38.10   14.00 
  -8  -1  -1   37.40   15.80 
  -8  -1  -1   42.40   15.60 
   8  -1   1   57.89   15.00 
   8  -1   1   35.50   11.60 
  -8  -1  -1   53.19   15.30 
  -8  -1  -1   58.69   15.20 
  -8   1  -1   27.70   10.50 
   8   1   1   58.59   17.50 
   8   1   1   38.60    9.70 
  -8   1  -1   38.80   14.40 
  -8   1  -1   37.20   11.80 
  -8   1  -1   22.10   10.80 
   8   1   1   38.10   10.20 
   8   1   1   41.40   12.90 
  -8   1  -1   34.50   13.00 
  -8   1  -1   50.69   11.10 
   8   1   1   39.60   11.50 
   8   1   1   46.20   11.70 
  -8   1  -1   37.80   15.30 
   8   1   1   20.10   11.90 
   8   1   1   31.60   10.00 
   8   1   1   22.40    9.60 
   8   1   1   49.10   13.10 
   8   1   1   48.30   11.20 
   8   1   1   43.20   14.10 
  -8   1  -1   21.10    8.20 
   8   1   1   26.90   14.00 
   8   1   1   31.70   11.40 
  -8   1  -1   18.80   11.40 
   8   1   1   35.30   12.70 
   8   1   1   40.80   15.10 
  -8   1  -1   21.70   10.50 
  -8   1  -1   40.10   13.60 
  -9  -1  -1   -1.40    8.10 
  -9  -1  -1    8.30    8.50 
   9  -1   1    2.80    8.00 
  -9  -1  -1   -3.90    5.60 
  -9  -1  -1   10.00   10.50 
   9  -1   1   15.60    9.30 
   9  -1   1    9.00    8.80 
   9  -1   1   12.20    9.70 
   9  -1   1   15.20   10.30 
  -9  -1  -1   19.50   13.80 
   9  -1   1   18.70    9.10 
  -9  -1  -1    7.60    8.00 
   9  -1   1    8.40    8.20 
  -9  -1  -1    4.00    9.30 
  -9   1  -1    6.00   10.00 
  -9   1  -1    2.20    7.70 
   9   1   1    6.40    7.90 
  -9   1  -1   -1.80    7.20 
   9   1   1   16.00    9.50 
  -9   1  -1   13.40    9.50 
   9   1   1    5.10    8.30 
  -9   1  -1   17.20    8.90 
   9   1   1   13.40   14.00 
   9   1   1   31.30   14.70 
  -9   1  -1   36.60   14.80 
  -9   1  -1   11.90   10.00 
   9   1   1    2.80    7.60 
   9   1   1    7.40    8.30 
   9   1   1   16.70    9.70 
  -9   1  -1    8.50    8.10 
  -9   1  -1   28.00   14.60 
   9   1   1   15.00    8.70 
   9   1   1    4.20   13.60 
  -9   1  -1   14.10   10.10 
   9   1   1    7.80   10.60 
  10  -1   1   12.80   12.10 
 -10  -1  -1   14.40   13.10 
 -10  -1  -1    5.90    9.50 
 -10  -1  -1    1.90    9.20 
  10  -1   1    3.90    8.10 
  10  -1   1   16.40   12.70 
  10  -1   1    7.50    9.40 
  10  -1   1   15.50   12.00 
  10  -1   1   24.80   12.90 
  10  -1   1   23.10   11.10 
 -10  -1  -1   26.60   13.80 
 -10   1  -1   -2.30    7.80 
  10   1   1    5.90   15.40 
 -10   1  -1   31.70   13.70 
 -10   1  -1   29.70   17.30 
  10   1   1    7.00   13.10 
  10   1   1   14.10   11.80 
  10   1   1   -1.30    9.10 
  10   1   1    5.60   14.70 
 -10   1  -1   10.80   10.40 
 -10   1  -1   10.60   11.10 
  10   1   1   11.50   11.90 
  10   1   1    6.70    9.80 
 -10   1  -1   34.50   18.50 
 -10   1  -1   11.40   10.60 
  10   1   1   11.80   10.20 
 -10   1  -1   11.30   14.40 
 -10  -2   1  460.75   45.30 
  10  -2  -1  398.06   44.50 
  10  -2  -1  427.66   44.60 
 -10  -2   1  467.65   50.29 
 -10  -2   1  450.65   47.50 
 -10  -2   1  428.26   48.40 
  10  -2  -1  399.56   42.00 
  10  -2  -1  340.97   42.20 
  10  -2  -1  483.95   40.30 
 -10  -2   1  409.56   45.50 
  10  -2  -1  388.46   47.80 
  10  -2  -1  415.96   44.40 
 -10  -2   1  452.05   48.60 
 -10   2   1  412.76   46.40 
 -10   2   1  378.66   42.90 
 -10   2   1  415.16   55.09 
 -10   2   1  553.74   44.80 
  10   2  -1  445.76   37.50 
 -10   2   1  371.76   50.49 
  10   2  -1  456.55   52.39 
 -10   2   1  442.96   46.30 
  10   2  -1  483.85   49.80 
  10   2  -1  447.56   57.89 
 -10   2   1  452.25   54.29 
 -10   2   1  383.06   44.10 
  10   2  -1  488.75   58.99 
  10   2  -1  427.76   43.80 
   9  -2  -1  705.23   46.40 
   9  -2  -1  688.03   40.10 
   9  -2  -1  715.53   48.40 
   9  -2  -1  685.93   40.90 
   9  -2  -1  627.54   42.10 
  -9  -2   1  636.94   45.60 
  -9  -2   1  650.63   46.60 
  -9  -2   1  681.13   46.70 
  -9  -2   1  603.74   40.60 
   9  -2  -1  693.13   44.70 
   9  -2  -1  657.43   44.90 
   9  -2  -1  678.83   45.10 
  -9  -2   1  601.04   43.80 
  -9  -2   1  646.44   49.50 
  -9  -2   1  667.63   45.80 
   9   2  -1  636.84   66.89 
  -9   2   1  604.04   45.70 
  -9   2   1  571.34   42.30 
  -9   2   1  717.43   39.60 
  -9   2   1  534.75   46.00 
   9   2  -1  655.73   45.00 
   9   2  -1  645.24   40.50 
  -9   2   1  681.73   47.40 
   9   2  -1  602.44   37.20 
   9   2  -1  637.84   43.80 
  -9   2   1  717.73   40.40 
   9   2  -1  659.23   40.90 
   9   2  -1  640.24   42.10 
   9   2  -1  631.44   44.50 
   9   2  -1  648.94   51.09 
  -9   2   1  665.63   45.80 
  -9   2   1  638.84   51.69 
  -9   2   1  633.64   51.19 
  -9   2   1  673.93   46.20 
   9   2  -1  634.74   40.20 
   9   2  -1  634.44   50.79 
   9   2  -1  691.13   48.80 
  -9   2   1  625.84   45.20 
   8  -2  -1  127.89   18.80 
   8  -2  -1  123.89   17.30 
  -8  -2   1  112.29   21.20 
  -8  -2   1  111.19   20.30 
   8  -2  -1  137.49   23.90 
   8  -2  -1  158.18   28.60 
   8  -2  -1  118.09   21.00 
  -8  -2   1   94.89   19.40 
  -8  -2   1  154.28   22.30 
  -8  -2   1   71.79   16.60 
   8  -2  -1  139.09   17.50 
   8  -2  -1  130.19   21.10 
   8  -2  -1  129.39   22.70 
   8  -2  -1  134.69   21.80 
  -8  -2   1  140.99   23.30 
   8  -2  -1  143.39   22.90 
   8  -2  -1  140.29   20.50 
  -8  -2   1   92.19   20.70 
   8   2  -1  160.98   21.00 
   8   2  -1  156.38   18.40 
  -8   2   1  142.79   27.50 
  -8   2   1   92.89   19.20 
   8   2  -1  129.39   18.00 
   8   2  -1  157.88   24.40 
   8   2  -1  134.09   20.90 
  -8   2   1  156.18   24.60 
  -8   2   1  142.89   23.10 
   8   2  -1  145.59   25.20 
  -8   2   1  113.89   20.30 
   8   2  -1  160.38   32.70 
   8   2  -1  120.69   21.60 
  -8   2   1  118.79   21.50 
  -8   2   1  120.89   23.10 
   8   2  -1   93.39   16.30 
  -8   2   1  115.99   21.20 
  -8   2   1  129.69   18.50 
   8   2  -1  136.59   19.60 
   8   2  -1  161.18   24.80 
   8   2  -1  146.19   20.90 
   8   2  -1  128.69   25.50 
  -8   2   1   85.29   15.20 
  -8   2   1   85.99   18.30 
   8   2  -1  112.49   23.90 
   8   2  -1  108.09   19.60 
  -8   2   1  119.09   24.70 
  -8   2   1  119.69   18.30 
  -7  -2   1  257.77   28.70 
   7  -2  -1  317.27   21.90 
   7  -2  -1  292.77   17.30 
   7  -2  -1  267.27   28.70 
  -7  -2   1  239.68   27.50 
  -7  -2   1  270.47   18.70 
  -7  -2   1  317.27   33.60 
   7  -2  -1  288.37   20.40 
   7  -2  -1  319.97   25.20 
   7  -2  -1  224.98   27.80 
  -7  -2   1  231.68   26.80 
  -7  -2   1  279.07   23.20 
   7  -2  -1  217.08   25.80 
  -7  -2   1  281.97   29.50 
   7  -2  -1  286.67   22.70 
   7  -2  -1  313.27   31.60 
   7  -2  -1  270.97   21.90 
   7  -2  -1  285.57   29.90 
  -7  -2   1  258.77   32.80 
  -7  -2   1  257.17   15.90 
  -7  -2   1  316.97   20.80 
  -7   2   1  320.37   32.70 
  -7   2   1  305.77   22.20 
  -7   2   1  269.27   32.80 
   7   2  -1  297.37   35.50 
   7   2  -1  282.97   21.80 
  -7   2   1  260.37   18.80 
  -7   2   1  242.28   27.20 
   7   2  -1  287.87   23.70 
  -7   2   1  246.98   32.10 
  -7   2   1  297.57   30.80 
  -7   2   1  278.97   29.60 
   7   2  -1  238.18   35.40 
   7   2  -1  302.67   23.40 
   7   2  -1  292.27   22.80 
  -7   2   1  250.77   27.90 
   7   2  -1  261.97   29.90 
   7   2  -1  229.18   26.70 
   7   2  -1  296.87   29.50 
  -7   2   1  236.38   24.30 
   7   2  -1  302.37   30.00 
  -7   2   1  268.77   21.00 
   7   2  -1  279.27   34.70 
  -7   2   1  245.38   32.60 
  -7   2   1  278.97   30.20 
   7   2  -1  276.67   30.70 
  -7   2   1  263.97   29.30 
  -6  -2   1  328.47   16.60 
  -6  -2   1  293.97   23.30 
   6  -2  -1  302.87   17.60 
  -6  -2   1  255.57   25.90 
   6  -2  -1  310.27   15.60 
   6  -2  -1  340.87   25.10 
   6  -2  -1  276.97   23.20 
   6  -2  -1  310.07   16.50 
   6  -2  -1  301.47   16.00 
  -6  -2   1  281.57   23.40 
  -6  -2   1  348.17   23.90 
  -6  -2   1  299.37   30.40 
  -6  -2   1  260.07   19.70 
  -6  -2   1  328.47   28.50 
   6  -2  -1  292.87   20.30 
   6  -2  -1  307.37   22.00 
  -6  -2   1  307.07   23.80 
   6  -2  -1  337.57   25.80 
   6  -2  -1  276.77   23.10 
   6  -2  -1  309.57   17.30 
   6  -2  -1  289.37   19.60 
  -6  -2   1  305.27   13.50 
   6  -2  -1  311.07   13.90 
  -6  -2   1  340.57   23.60 
  -6  -2   1  297.57   17.80 
  -6  -2   1  317.87   19.20 
   6  -2  -1  330.57   22.60 
   6  -2  -1  353.96   24.60 
   6  -2  -1  325.87   31.30 
   6   2  -1  327.67   16.30 
   6   2  -1  319.37   13.00 
   6   2  -1  314.87   16.90 
   6   2  -1  305.47   15.10 
   6   2  -1  326.87   14.50 
  -6   2   1  312.97   22.10 
   6   2  -1  317.87   10.90 
  -6   2   1  306.37   21.00 
  -6   2   1  314.97   24.30 
  -6   2   1  313.57   22.10 
  -6   2   1  351.26   24.30 
  -6   2   1  268.57   22.70 
  -6   2   1  317.57   23.60 
  -6   2   1  272.07   20.30 
   6   2  -1  347.47   34.40 
   6   2  -1  315.97   10.90 
   6   2  -1  288.17   20.20 
  -6   2   1  339.67   18.00 
   6   2  -1  274.17   31.70 
   6   2  -1  298.67   22.00 
   6   2  -1  309.07   23.10 
  -6   2   1  285.47   22.70 
   6   2  -1  234.68   25.40 
   6   2  -1  311.27   16.50 
  -6   2   1  334.57   19.40 
   6   2  -1  307.37   14.80 
  -6   2   1  287.27   31.30 
  -6   2   1  309.77   24.40 
   6   2  -1  285.97   34.50 
   6   2  -1  284.37   29.50 
   6   2  -1  303.77   19.20 
  -6   2   1  238.68   27.80 
   6   2  -1  300.47   23.80 
  -6   2   1  324.47   33.90 
   6   2  -1  299.07   24.10 
  -6   2   1  292.97   23.90 
   5  -2  -1  899.21   30.70 
  -5  -2   1  922.81   31.90 
   5  -2  -1  924.61   30.50 
  -5  -2   1  939.01   44.40 
  -5  -2   1  882.41   41.30 
   5  -2  -1  904.01   38.20 
   5  -2  -1  997.70   43.60 
  -5  -2   1  894.51   41.20 
  -5  -2   1  859.21   40.60 
  -5  -2   1  959.10   41.20 
   5  -2  -1  945.11   41.90 
  -5  -2   1  962.40   36.50 
   5  -2  -1  890.81   36.70 
   5  -2  -1  910.61   43.40 
   5  -2  -1  855.51   41.50 
   5  -2  -1  927.91   31.40 
  -5  -2   1  932.11   41.10 
   5  -2  -1  924.21   43.20 
   5  -2  -1  924.61   31.00 
   5  -2  -1  893.61   39.40 
  -5  -2   1  870.41   39.70 
   5  -2  -1  945.11   42.50 
  -5  -2   1  927.31   35.50 
   5  -2  -1  933.21   40.10 
  -5  -2   1  910.91   28.20 
  -5  -2   1  900.61   41.40 
   5  -2  -1  897.61   34.30 
  -5  -2   1  959.40   48.60 
  -5   2   1  874.81   38.20 
   5   2  -1  930.71   40.00 
  -5   2   1  824.12   37.30 
  -5   2   1  908.61   38.10 
   5   2  -1  926.11   28.50 
   5   2  -1  914.31   28.40 
   5   2  -1  883.61   42.40 
   5   2  -1  889.41   41.70 
  -5   2   1  855.31   40.30 
   5   2  -1  926.51   40.40 
   5   2  -1  962.30   36.10 
  -5   2   1  984.50   36.30 
  -5   2   1  937.31   44.90 
  -5   2   1  925.41   40.70 
   5   2  -1  890.51   27.90 
   5   2  -1  977.30   46.60 
  -5   2   1  964.00   44.20 
   5   2  -1  966.00   51.99 
   5   2  -1  924.01   41.00 
  -5   2   1  932.61   40.30 
  -5   2   1  924.51   42.30 
   5   2  -1  930.01   33.00 
  -5   2   1  903.31   39.50 
   5   2  -1  921.81   27.90 
   5   2  -1  929.01   29.30 
   5   2  -1  916.61   28.90 
   5   2  -1  942.11   27.10 
   5   2  -1  948.11   46.20 
   5   2  -1  922.91   41.20 
  -5   2   1  936.71   37.40 
   5   2  -1  900.21   29.60 
  -5   2   1  936.41   41.20 
  -5   2   1  962.60   40.60 
  -5   2   1  990.10   43.70 
   5   2  -1  882.01   41.10 
   5   2  -1  977.70   31.90 
   5   2  -1  916.51   28.70 
   5   2  -1  938.91   37.40 
  -5   2   1  941.51   46.40 
  -5   2   1  950.20   45.80 
   4  -2  -1  521.35   22.20 
   4  -2  -1  459.55   18.00 
  -4  -2   1  498.85   23.20 
   4  -2  -1  499.35   26.30 
  -4  -2   1  530.25   31.80 
  -4  -2   1  492.05   25.70 
  -4  -2   1  492.85   25.60 
  -4  -2   1  464.75   15.50 
  -4  -2   1  477.85   25.20 
   4  -2  -1  448.96   24.50 
   4  -2  -1  496.05   23.00 
  -4  -2   1  470.55   22.50 
  -4  -2   1  497.55   19.30 
  -4  -2   1  480.75   25.70 
   4  -2  -1  504.85   26.90 
   4  -2  -1  441.76   26.30 
   4  -2  -1  490.95   21.40 
  -4  -2   1  511.15   19.00 
   4  -2  -1  470.15   16.80 
   4  -2  -1  481.75   24.00 
   4  -2  -1  486.75   16.70 
   4  -2  -1  479.95   26.90 
  -4  -2   1  544.45   25.60 
   4  -2  -1  499.05   25.20 
  -4  -2   1  511.95   24.20 
  -4  -2   1  452.85   27.20 
   4  -2  -1  483.45   26.00 
  -4  -2   1  513.85   25.60 
   4  -2  -1  487.65   18.60 
  -4  -2   1  506.45   28.00 
   4  -2  -1  459.85   26.40 
   4   2  -1  506.55   32.90 
   4   2  -1  505.65   28.90 
   4   2  -1  489.65   25.20 
  -4   2   1  481.15   28.30 
  -4   2   1  450.65   20.60 
  -4   2   1  477.25   24.10 
  -4   2   1  458.15   25.40 
  -4   2   1  501.55   24.10 
   4   2  -1  485.45   20.80 
   4   2  -1  491.05   22.70 
   4   2  -1  534.95   27.60 
  -4   2   1  493.75   18.50 
  -4   2   1  455.15   27.60 
  -4   2   1  528.35   28.60 
  -4   2   1  489.75   22.10 
   4   2  -1  445.66   21.40 
   4   2  -1  440.26   19.00 
   4   2  -1  495.65   17.00 
   4   2  -1  491.25   15.90 
  -4   2   1  489.15   25.20 
   4   2  -1  486.25   25.30 
   4   2  -1  470.75   23.20 
   4   2  -1  473.55   22.60 
   4   2  -1  489.85   17.00 
   4   2  -1  495.55   15.70 
  -4   2   1  497.05   25.00 
   4   2  -1  484.35   27.80 
  -4   2   1  457.85   16.70 
   4   2  -1  477.15   15.10 
   4   2  -1  486.05   16.10 
   4   2  -1  483.55   24.60 
  -4   2   1  442.66   24.40 
   4   2  -1  521.05   22.60 
  -4   2   1  460.75   26.90 
  -4   2   1  475.45   24.70 
  -4   2   1  508.75   22.30 
  -4   2   1  473.45   26.00 
  -4   2   1  489.25   22.80 
   4   2  -1  484.95   18.70 
   4   2  -1  494.15   16.50 
   4   2  -1  525.05   25.70 
  -4   2   1  501.15   25.10 
  -4   2   1  452.75   24.40 
   4   2  -1  494.95   20.20 
  -3  -2   1  203.28   10.20 
  -3  -2   1  179.48   12.80 
   3  -2  -1  225.88   13.30 
   3  -2  -1  203.18   14.30 
   3  -2  -1  219.38    7.30 
   3  -2  -1  219.98   13.70 
  -3  -2   1  217.78    7.50 
  -3  -2   1  205.58   15.80 
   3  -2  -1  206.78   14.10 
   3  -2  -1  218.88   15.00 
  -3  -2   1  225.88   14.40 
   3  -2  -1  205.68    7.90 
  -3  -2   1  213.88   14.60 
  -3  -2   1  224.08   13.20 
   3  -2  -1  229.88   16.00 
  -3  -2   1  219.98   16.00 
  -3  -2   1  211.38   13.30 
  -3  -2   1  217.78   13.90 
   3  -2  -1  230.38   12.90 
  -3  -2   1  220.28   10.40 
  -3  -2   1  233.48   19.20 
   3  -2  -1  209.98    8.20 
   3  -2  -1  212.48   13.90 
   3  -2  -1  212.48   12.40 
   3  -2  -1  250.47   16.30 
   3  -2  -1  199.48   14.90 
  -3  -2   1  208.78   14.40 
  -3  -2   1  209.18   12.70 
  -3  -2   1  222.18    8.00 
  -3  -2   1  220.18   14.70 
  -3  -2   1  225.18   10.10 
   3   2  -1  211.58   13.10 
  -3   2   1  203.68   12.20 
  -3   2   1  201.88    7.40 
  -3   2   1  221.18   14.50 
  -3   2   1  216.18   14.90 
   3   2  -1  229.68   13.30 
  -3   2   1  187.38   14.70 
   3   2  -1  193.68   13.30 
   3   2  -1  209.58   12.20 
  -3   2   1  207.28   13.50 
   3   2  -1  197.28    8.90 
   3   2  -1  211.38   13.10 
   3   2  -1  203.98   14.10 
  -3   2   1  234.68   14.20 
  -3   2   1  212.18   14.40 
   3   2  -1  206.08    9.40 
   3   2  -1  239.08   14.70 
  -3   2   1  219.18   14.50 
  -3   2   1  195.78   13.80 
  -3   2   1  188.08   15.30 
  -3   2   1  223.08   14.30 
  -3   2   1  246.18   14.40 
   3   2  -1  220.08   11.70 
  -3   2   1  205.08   15.80 
   3   2  -1  162.38   19.80 
  -3   2   1  209.68   11.30 
   3   2  -1  214.38    9.80 
   3   2  -1  246.58   16.30 
  -3   2   1  213.88   11.90 
  -3   2   1  223.88   16.90 
   3   2  -1  211.08   10.80 
   3   2  -1  223.18   11.90 
  -3   2   1  225.38   14.40 
   3   2  -1  215.98   11.00 
  -3   2   1  248.28   14.80 
  -3   2   1  201.28   12.90 
  -3   2   1  227.18   13.20 
   3   2  -1  226.78   10.00 
   3   2  -1  188.28   14.40 
   3   2  -1  240.38   14.10 
   3   2  -1  219.28   15.20 
   3   2  -1  183.58   13.90 
   3   2  -1  200.28   16.10 
  -3   2   1  225.48   10.40 
  -3   2   1  223.68   12.60 
   3   2  -1  221.08   13.50 
   2  -2  -1   62.09    7.70 
   2  -2  -1   52.39    3.50 
   2  -2  -1   61.09    7.20 
   2  -2  -1   55.99    6.20 
   2  -2  -1   49.99    7.00 
  -2  -2   1   50.39    6.30 
   2  -2  -1   41.60    5.80 
  -2  -2   1   63.09    6.10 
   2  -2  -1   68.49    8.60 
  -2  -2   1   62.29    8.90 
   2  -2  -1   65.89    8.60 
  -2  -2   1   55.29    5.60 
  -2  -2   1   67.59    8.60 
  -2  -2   1   55.59    5.50 
  -2  -2   1   54.19    8.70 
   2  -2  -1   43.40    7.10 
   2  -2  -1   65.09    8.30 
   2  -2  -1   68.09    8.50 
  -2  -2   1   54.49    6.50 
  -2  -2   1   61.29    4.40 
   2  -2  -1   49.00    6.60 
   2  -2  -1   59.39    8.50 
   2  -2  -1   49.60    6.10 
  -2  -2   1   63.09    9.20 
  -2  -2   1   62.19    6.50 
  -2  -2   1   42.60    6.70 
   2  -2  -1   44.60    7.30 
   2  -2  -1   46.90    7.00 
  -2  -2   1   51.29   10.40 
   2  -2  -1   49.40    7.70 
  -2  -2   1   37.90    9.20 
  -2  -2   1   66.09    7.50 
   2  -2  -1   64.59    7.90 
  -2  -2   1   60.99    5.00 
  -2  -2   1   65.79    8.30 
  -2  -2   1   58.59    8.00 
   2  -2  -1   56.79    7.00 
  -2  -2   1   58.69    8.10 
   2  -2  -1   37.40    6.00 
   2  -2  -1   44.50    6.60 
   2  -2  -1   51.49    5.60 
  -2  -2   1   44.20    5.80 
   2  -2  -1   43.30    6.20 
   2  -2  -1   59.19    7.80 
  -2  -2   1   55.09    6.00 
   2  -2  -1   50.49    6.50 
  -2  -2   1   63.39    9.40 
  -2   2   1   65.09    6.40 
   2   2  -1   58.09    4.70 
   2   2  -1   51.19    5.40 
  -2   2   1   47.30    6.90 
  -2   2   1   51.09    6.80 
  -2   2   1   51.29    7.00 
   2   2  -1   51.49    6.70 
  -2   2   1   60.69    7.50 
  -2   2   1   49.99    5.20 
   2   2  -1   62.89    6.70 
  -2   2   1   61.89    6.10 
   2   2  -1   53.39    6.40 
   2   2  -1   56.09    5.60 
   2   2  -1   63.29    5.10 
   2   2  -1   41.60    5.70 
  -2   2   1   55.49    7.30 
  -2   2   1   44.50    5.70 
  -2   2   1   39.10    6.60 
  -2   2   1   54.59    6.80 
   2   2  -1   59.59    4.00 
  -2   2   1   52.69    8.10 
   2   2  -1   53.19    5.40 
  -2   2   1   56.89    7.40 
   2   2  -1   51.29    6.20 
   2   2  -1   54.19    7.20 
  -2   2   1   49.70    7.00 
  -2   2   1   52.59    6.30 
  -2   2   1   48.80    8.20 
  -2   2   1   45.10    7.70 
   2   2  -1   41.90    7.70 
  -2   2   1   44.40    6.90 
   2   2  -1   64.29    7.90 
   2   2  -1   76.09    8.60 
  -2   2   1   57.69    8.00 
   2   2  -1   48.00    6.20 
  -2   2   1   47.80    6.40 
   2   2  -1   54.89    6.20 
   2   2  -1   42.40    7.70 
  -2   2   1   48.50    9.20 
   2   2  -1   57.79    6.90 
  -2   2   1   49.60    7.50 
  -2   2   1   46.80    7.60 
   2   2  -1   51.29    7.20 
  -2   2   1   49.10    6.20 
  -2   2   1   45.20    6.70 
   2   2  -1   57.19    3.90 
   2   2  -1   62.29   12.80 
   2   2  -1   60.09    7.90 
   2   2  -1   48.40    9.60 
  -2   2   1   47.40    6.20 
  -2   2   1   64.89    7.80 
  -2   2   1   91.99   11.20 
  -1  -2   1    3.20    1.80 
   1  -2  -1    3.60    2.10 
   1  -2  -1    5.20    2.50 
  -1  -2   1    3.70    2.30 
  -1  -2   1    3.40    1.70 
   1  -2  -1    0.60    1.00 
   1  -2  -1    3.70    2.10 
   1  -2  -1    2.10    2.40 
   1  -2  -1    2.80    2.20 
   1  -2  -1    2.80    1.20 
   1  -2  -1    1.40    1.90 
   1  -2  -1    3.80    2.40 
  -1  -2   1    1.70    1.60 
   1  -2  -1    0.70    1.60 
   1  -2  -1    8.10    2.90 
  -1  -2   1    2.80    2.00 
  -1  -2   1    4.80    2.10 
   1  -2  -1    5.80    2.90 
  -1  -2   1    1.70    1.00 
   1  -2  -1    1.10    1.80 
  -1  -2   1    9.30    3.60 
  -1  -2   1    3.30    2.00 
  -1  -2   1    3.90    1.60 
  -1  -2   1    2.60    1.70 
   1  -2  -1    5.30    2.30 
   1  -2  -1    2.60    2.10 
   1  -2  -1    1.70    1.90 
   1  -2  -1    2.30    1.80 
  -1  -2   1    3.40    1.40 
   1  -2  -1    9.50    3.00 
  -1  -2   1    4.00    3.20 
  -1  -2   1    5.90    4.80 
   1  -2  -1    6.00    2.60 
  -1  -2   1    5.50    3.90 
   1  -2  -1    1.90    2.40 
  -1  -2   1    3.80    1.50 
   1  -2  -1    1.40    1.70 
   1  -2  -1    7.60    2.60 
   1  -2  -1    4.80    2.60 
  -1  -2   1    7.20    3.00 
  -1  -2   1    4.30    1.50 
  -1  -2   1    6.60    2.40 
  -1  -2   1    4.80    3.40 
  -1   2   1    4.10    2.50 
  -1   2   1    4.10    1.60 
  -1   2   1    4.10    2.20 
  -1   2   1    3.80    1.30 
   1   2  -1    3.50    1.60 
  -1   2   1    5.50    2.50 
   1   2  -1    7.40    2.80 
   1   2  -1    6.60    3.20 
  -1   2   1    2.00    2.10 
   1   2  -1    2.60    2.30 
  -1   2   1    1.30    1.80 
  -1   2   1    0.90    1.80 
   1   2  -1    3.90    2.50 
  -1   2   1    4.50    2.30 
  -1   2   1    4.60    2.20 
   1   2  -1    5.20    2.30 
   1   2  -1    2.60    1.90 
  -1   2   1    3.10    2.10 
  -1   2   1    1.10    2.10 
   1   2  -1    5.00    2.10 
   1   2  -1    9.50    2.40 
  -1   2   1    2.90    2.30 
   1   2  -1    3.50    1.20 
  -1   2   1    0.40    1.80 
  -1   2   1    6.30    3.00 
  -1   2   1    2.20    1.90 
   1   2  -1    1.60    1.80 
   1   2  -1    8.80    2.80 
  -1   2   1    1.60    1.40 
  -1   2   1    3.00    2.10 
   1   2  -1    5.40    2.30 
  -1   2   1    5.10    2.60 
  -1   2   1    2.80    2.30 
  -1   2   1    3.90    1.70 
   1   2  -1    2.60    2.00 
  -1   2   1    3.30    2.60 
   1   2  -1    4.10    2.10 
   1   2  -1    5.80    4.10 
   1   2  -1    4.60    1.40 
   1   2  -1   -3.40    5.10 
  -1   2   1    0.70    1.80 
  -1   2   1    8.80    1.70 
   1   2  -1    3.10    3.00 
   1   2  -1    6.20    2.00 
   1   2  -1    4.60    1.40 
  -1   2   1    7.80    2.70 
  -1   2   1    8.10    2.80 
   1   2  -1    8.30    2.60 
  -1   2   1    6.20    2.90 
   1   2  -1    4.20    2.40 
   1   2  -1    4.80    2.00 
   0  -2  -1    6.60    2.70 
   0  -2  -1    3.00    1.80 
   0  -2  -1    1.90    1.40 
   0  -2   1    5.20    2.00 
   0  -2   1    1.90    2.00 
   0  -2  -1    3.70    2.10 
   0  -2  -1    3.20    1.60 
   0  -2  -1    5.40    2.20 
   0  -2  -1    5.20    2.30 
   0  -2  -1    1.30    1.50 
   0  -2  -1    3.50    2.40 
   0  -2   1    7.20    4.50 
   0  -2  -1    6.80    2.10 
   0  -2  -1    5.10    2.30 
   0  -2   1    6.40    2.30 
   0  -2  -1    6.20    2.00 
   0  -2  -1    4.20    2.10 
   0  -2  -1    2.80    1.80 
   0  -2   1    3.90    2.00 
   0  -2   1    1.60    1.40 
   0  -2  -1    6.80    2.30 
   0  -2  -1    3.30    2.20 
   0  -2  -1    2.50    2.10 
   0  -2   1    8.10    3.10 
   0  -2   1    6.90    2.60 
   0  -2   1    4.40    2.50 
   0  -2  -1   11.80    4.40 
   0  -2  -1    4.90    2.60 
   0  -2   1    9.90    2.60 
   0  -2   1    2.50    1.70 
   0  -2  -1    3.70    1.90 
   0  -2   1    6.70    2.40 
   0  -2  -1    5.30    2.40 
   0  -2   1    4.30    2.60 
   0  -2   1    7.10    3.20 
   0  -2  -1    4.90    1.40 
   0  -2   1    2.30    1.70 
   0  -2   1    2.60    1.70 
   0   2  -1    4.40    2.20 
   0   2   1    3.20    2.00 
   0   2   1   13.90    3.80 
   0   2   1    5.10    2.60 
   0   2  -1    2.40    1.80 
   0   2  -1    5.40    3.10 
   0   2   1    2.50    1.60 
   0   2   1    3.70    2.50 
   0   2   1    8.40    2.40 
   0   2   1    7.70    2.50 
   0   2   1    2.10    1.50 
   0   2   1    5.60    2.40 
   0   2  -1    6.20    2.10 
   0   2  -1    3.00    1.80 
   0   2  -1    2.30    2.00 
   0   2  -1    8.40    3.20 
   0   2   1    3.00    1.80 
   0   2  -1    4.90    2.00 
   0   2  -1    0.60    1.40 
   0   2  -1    2.30    1.90 
   0   2  -1    2.60    1.90 
   0   2  -1    1.20    2.30 
   0   2   1    4.40    2.00 
   0   2   1    5.00    2.40 
   0   2   1    2.00    1.90 
   0   2   1   10.20    2.40 
   0   2  -1    1.70    1.50 
   0   2   1    1.40    1.50 
   0   2   1    2.90    2.00 
   0   2  -1    2.90    2.00 
   0   2  -1    7.00    2.50 
   0   2   1    4.90    2.30 
   0   2  -1    5.70    2.20 
   0   2  -1    3.20    1.90 
   0   2  -1    4.60    1.80 
   0   2  -1    3.10    1.90 
   0   2   1    5.90    1.90 
   0   2   1    3.10    2.00 
   0   2   1    3.00    1.70 
   0   2  -1    3.60    1.90 
  -1  -2  -1 1607.14   44.40 
   1  -2   1 1523.45   47.10 
  -1  -2  -1 1593.74   46.00 
  -1  -2  -1 1489.65   49.99 
   1  -2   1 1617.64   48.30 
  -1  -2  -1 1494.55   46.50 
   1  -2   1 1565.54   48.00 
   1  -2   1 1543.95   47.10 
  -1  -2  -1 1576.54   40.60 
  -1  -2  -1 1511.95   44.30 
   1  -2   1 1472.75   47.90 
   1  -2   1 1514.95   47.30 
   1  -2   1 1539.25   43.30 
   1  -2   1 1488.75   46.30 
   1  -2   1 1547.75   47.70 
  -1  -2  -1 1538.95   52.09 
   1  -2   1 1558.74   49.90 
   1  -2   1 1557.84   47.90 
  -1  -2  -1 1485.05   46.50 
  -1  -2  -1 1533.85   42.70 
  -1  -2  -1 1569.14   47.60 
  -1  -2  -1 1486.45   48.70 
  -1  -2  -1 1540.95   45.50 
  -1  -2  -1 1513.65   42.40 
  -1  -2  -1 1556.74   43.60 
   1  -2   1 1556.74   47.10 
  -1  -2  -1 1517.05   47.20 
   1  -2   1 1463.25   48.80 
  -1  -2  -1 1502.75   42.70 
  -1  -2  -1 1331.47   54.29 
   1  -2   1 1577.24   43.80 
  -1  -2  -1 1587.24   47.90 
  -1  -2  -1 1606.34   51.49 
  -1  -2  -1 1593.84   48.30 
   1  -2   1 1575.44   48.70 
   1  -2   1 1500.95   50.09 
   1  -2   1 1557.04   49.00 
   1  -2   1 1528.25   47.50 
   1  -2   1 1588.14   51.39 
  -1  -2  -1 1539.85   42.50 
   1  -2   1 1528.35   47.90 
   1  -2   1 1554.14   48.00 
   1  -2   1 1527.05   44.20 
  -1  -2  -1 1560.64   47.30 
  -1   2  -1 1615.84   47.70 
  -1   2  -1 1497.15   44.30 
  -1   2  -1 1552.34   48.40 
   1   2   1 1580.74   49.90 
   1   2   1 1522.25   46.40 
  -1   2  -1 1537.85   42.90 
   1   2   1 1390.06   49.20 
   1   2   1 1496.25   46.00 
  -1   2  -1 1509.45   49.40 
   1   2   1 1576.44   49.99 
   1   2   1 1578.74   53.39 
  -1   2  -1 1533.25   48.60 
  -1   2  -1 1583.14   51.19 
   1   2   1 1512.15   43.70 
  -1   2  -1 1511.25   44.40 
  -1   2  -1 1542.15   48.00 
   1   2   1 1557.24   47.50 
  -1   2  -1 1414.86   46.70 
  -1   2  -1 1560.64   47.60 
   1   2   1 1538.35   46.10 
   1   2   1 1624.84   48.80 
   1   2   1 1527.45   44.00 
  -1   2  -1 1580.74   47.00 
   1   2   1 1565.74   48.70 
  -1   2  -1 1451.85   48.90 
   1   2   1 1587.04   47.90 
   1   2   1 1497.05   43.00 
   1   2   1 1592.84   48.10 
  -1   2  -1 1533.95   46.70 
  -1   2  -1 1545.25   48.50 
  -1   2  -1 1546.35   48.00 
   1   2   1 1582.14   47.80 
  -1   2  -1 1564.94   44.50 
   1   2   1 1542.05   42.50 
  -1   2  -1 1574.34   48.90 
  -1   2  -1 1497.05   51.39 
  -1   2  -1 1449.06   47.50 
   1   2   1 1517.95   45.50 
   1   2   1 1551.74   42.80 
  -1   2  -1 1568.94   43.30 
   1   2   1 1510.45   46.90 
  -1   2  -1 1563.74   47.40 
   1   2   1 1581.44   46.40 
   1   2   1 1587.94   43.50 
  -1   2  -1 1540.65   48.00 
  -1   2  -1 1541.05   50.99 
  -1   2  -1 1500.65   47.10 
  -2  -2  -1  561.04   21.90 
   2  -2   1  542.85   22.30 
  -2  -2  -1  597.04   27.00 
  -2  -2  -1  516.65   22.50 
   2  -2   1  581.94   22.80 
   2  -2   1  571.24   22.90 
   2  -2   1  589.04   23.50 
   2  -2   1  555.34   23.10 
  -2  -2  -1  547.75   24.30 
   2  -2   1  565.34   19.00 
   2  -2   1  604.34   24.90 
   2  -2   1  546.25   25.40 
   2  -2   1  569.74   24.60 
   2  -2   1  511.05   22.20 
  -2  -2  -1  537.55   24.30 
   2  -2   1  587.64   25.40 
  -2  -2  -1  591.14   28.30 
  -2  -2  -1  574.64   21.50 
  -2  -2  -1  557.04   22.40 
  -2  -2  -1  611.64   23.10 
  -2  -2  -1  569.84   21.70 
   2  -2   1  566.64   22.10 
  -2  -2  -1  587.74   28.90 
  -2  -2  -1  584.24   18.70 
  -2  -2  -1  519.65   24.60 
  -2  -2  -1  535.55   21.90 
  -2  -2  -1  606.24   28.50 
  -2  -2  -1  548.35   21.60 
   2  -2   1  585.14   22.30 
  -2  -2  -1  520.55   23.30 
   2  -2   1  564.94   18.70 
   2  -2   1  520.75   21.90 
   2  -2   1  542.65   24.10 
   2  -2   1  553.44   25.10 
  -2  -2  -1  487.25   26.90 
   2  -2   1  629.24   24.50 
  -2  -2  -1  583.64   22.20 
   2  -2   1  547.05   23.70 
   2  -2   1  588.74   22.30 
   2  -2   1  563.14   21.40 
   2  -2   1  579.04   23.10 
   2  -2   1  627.04   24.90 
   2   2   1  571.14   28.30 
  -2   2  -1  570.64   23.80 
   2   2   1  551.04   25.80 
   2   2   1  598.44   25.30 
  -2   2  -1  559.74   20.70 
   2   2   1  561.34   24.40 
  -2   2  -1  550.84   22.40 
   2   2   1  597.24   22.20 
  -2   2  -1  570.04   23.20 
   2   2   1  571.44   24.30 
  -2   2  -1  576.04   23.60 
  -2   2  -1  569.74   24.30 
  -2   2  -1  552.84   22.50 
  -2   2  -1  521.15   26.30 
  -2   2  -1  566.34   23.10 
   2   2   1  572.74   21.50 
  -2   2  -1  576.94   25.00 
   2   2   1  602.84   22.30 
   2   2   1  582.14   25.40 
   2   2   1  567.94   20.90 
  -2   2  -1  535.35   24.40 
  -2   2  -1  549.05   24.90 
   2   2   1  541.65   21.20 
  -2   2  -1  582.94   23.00 
  -2   2  -1  575.64   26.60 
   2   2   1  596.64   23.30 
  -2   2  -1  600.24   21.80 
  -2   2  -1  540.35   25.10 
   2   2   1  583.14   26.90 
   2   2   1  577.84   21.70 
   2   2   1  557.44   23.20 
  -2   2  -1  551.44   24.20 
  -2   2  -1  600.04   17.70 
   2   2   1  551.24   21.70 
   2   2   1  577.24   24.10 
  -2   2  -1  509.95   22.60 
  -2   2  -1  534.15   23.60 
  -2   2  -1  604.74   22.90 
  -2   2  -1  536.65   23.10 
  -2   2  -1  559.24   25.00 
  -2   2  -1  567.84   21.50 
   2   2   1  555.24   21.70 
  -2   2  -1  539.85   21.60 
  -2   2  -1  560.04   23.90 
  -2   2  -1  588.44   23.50 
  -2   2  -1  549.65   20.40 
   2   2   1  558.24   23.10 
   2   2   1  594.94   22.80 
   2   2   1  559.94   17.30 
   2   2   1  596.44   23.30 
   3  -2   1 1025.00   36.70 
  -3  -2  -1  943.21   36.70 
   3  -2   1  987.10   38.70 
  -3  -2  -1  999.30   35.70 
  -3  -2  -1 1010.20   38.80 
   3  -2   1  980.90   40.00 
   3  -2   1 1018.10   35.20 
  -3  -2  -1 1010.20   31.90 
  -3  -2  -1  987.40   38.90 
   3  -2   1 1017.00   39.20 
  -3  -2  -1 1038.90   35.50 
   3  -2   1  950.90   35.60 
   3  -2   1 1035.00   30.50 
  -3  -2  -1 1027.70   34.90 
  -3  -2  -1  995.20   38.70 
   3  -2   1  943.21   37.30 
   3  -2   1  986.60   34.30 
  -3  -2  -1 1016.00   37.60 
  -3  -2  -1 1040.10   37.10 
   3  -2   1  956.80   39.90 
   3  -2   1  970.00   31.90 
  -3  -2  -1  999.90   38.50 
   3  -2   1  940.91   34.80 
   3  -2   1  988.70   33.40 
  -3  -2  -1 1012.20   36.20 
   3  -2   1  966.80   38.60 
  -3  -2  -1  988.90   36.90 
  -3  -2  -1 1031.60   42.10 
   3  -2   1 1015.30   40.40 
  -3  -2  -1 1056.19   38.60 
   3  -2   1  993.30   35.80 
  -3   2  -1 1009.20   36.20 
  -3   2  -1 1042.00   32.90 
   3   2   1 1006.20   33.00 
   3   2   1  944.51   42.70 
  -3   2  -1  911.41   36.90 
  -3   2  -1  998.70   39.60 
  -3   2  -1 1026.80   38.10 
  -3   2  -1  995.70   38.20 
   3   2   1  993.70   35.60 
  -3   2  -1  971.50   33.00 
  -3   2  -1 1009.00   37.60 
  -3   2  -1 1062.79   39.30 
  -3   2  -1 1070.39   38.00 
   3   2   1 1014.50   32.80 
   3   2   1  929.61   37.90 
  -3   2  -1  984.80   37.20 
   3   2   1  927.51   43.80 
   3   2   1  986.40   37.10 
  -3   2  -1 1034.70   37.30 
  -3   2  -1 1008.40   36.40 
   3   2   1  940.81   34.10 
   3   2   1 1006.40   29.90 
  -3   2  -1  972.10   35.80 
  -3   2  -1  986.50   30.90 
   3   2   1  945.51   40.90 
  -3   2  -1  996.70   38.70 
  -3   2  -1  925.11   41.10 
  -3   2  -1  974.80   31.10 
  -3   2  -1 1002.10   36.30 
   3   2   1  965.60   36.80 
   3   2   1 1029.90   42.70 
  -3   2  -1  983.30   37.60 
   3   2   1 1087.19   46.00 
   3   2   1 1029.60   37.20 
   3   2   1 1020.10   40.80 
  -3   2  -1 1018.10   38.50 
   3   2   1  978.20   39.60 
   3   2   1  997.10   34.60 
   3   2   1 1049.70   33.80 
  -3   2  -1  906.51   36.20 
   3   2   1  974.70   31.00 
  -3   2  -1 1001.90   41.60 
   3   2   1 1018.80   29.80 
  -3   2  -1  987.30   29.20 
   4  -2   1 1427.06   42.00 
  -4  -2  -1 1488.35   56.09 
  -4  -2  -1 1357.26   48.30 
  -4  -2  -1 1282.77   50.99 
   4  -2   1 1442.86   46.80 
  -4  -2  -1 1305.77   49.90 
   4  -2   1 1349.07   48.00 
  -4  -2  -1 1319.27   51.39 
  -4  -2  -1 1374.56   42.30 
  -4  -2  -1 1377.46   38.80 
   4  -2   1 1344.17   49.90 
  -4  -2  -1 1316.07   52.69 
  -4  -2  -1 1349.47   51.29 
  -4  -2  -1 1415.56   46.90 
   4  -2   1 1381.66   51.59 
   4  -2   1 1357.36   42.50 
  -4  -2  -1 1463.05   51.89 
  -4  -2  -1 1333.57   50.39 
  -4  -2  -1 1389.36   45.20 
   4  -2   1 1371.86   53.29 
   4  -2   1 1355.46   46.10 
  -4  -2  -1 1392.26   51.79 
   4  -2   1 1423.26   54.59 
  -4  -2  -1 1275.17   50.19 
   4  -2   1 1392.66   50.19 
   4  -2   1 1413.06   52.39 
   4  -2   1 1338.97   51.69 
   4  -2   1 1291.57   47.10 
  -4  -2  -1 1345.07   52.99 
   4  -2   1 1434.86   47.30 
  -4  -2  -1 1369.26   49.40 
   4  -2   1 1422.66   45.20 
  -4   2  -1 1409.36   49.70 
  -4   2  -1 1342.47   51.49 
   4   2   1 1372.06   40.40 
  -4   2  -1 1310.77   47.80 
  -4   2  -1 1279.97   48.40 
  -4   2  -1 1406.06   53.49 
  -4   2  -1 1377.66   51.29 
  -4   2  -1 1343.47   51.29 
  -4   2  -1 1388.96   49.70 
   4   2   1 1433.06   45.50 
  -4   2  -1 1393.16   48.10 
   4   2   1 1363.36   57.69 
   4   2   1 1345.27   46.50 
   4   2   1 1393.86   42.50 
  -4   2  -1 1361.96   50.09 
  -4   2  -1 1391.46   41.00 
   4   2   1 1342.37   41.10 
   4   2   1 1333.77   47.60 
   4   2   1 1433.56   46.20 
  -4   2  -1 1323.57   55.29 
   4   2   1 1346.47   44.30 
   4   2   1 1379.46   43.10 
   4   2   1 1369.76   43.60 
  -4   2  -1 1357.86   40.40 
  -4   2  -1 1371.16   51.49 
   4   2   1 1393.56   58.99 
   4   2   1 1294.57   49.99 
  -4   2  -1 1355.66   49.90 
  -4   2  -1 1375.36   50.79 
  -4   2  -1 1358.36   41.70 
   4   2   1 1366.66   54.79 
   4   2   1 1392.36   43.70 
   4   2   1 1320.87   56.99 
  -4   2  -1 1317.17   51.29 
  -4   2  -1 1315.47   49.00 
  -4   2  -1 1390.46   52.39 
  -4   2  -1 1356.16   39.70 
   5  -2   1 1329.47   37.70 
   5  -2   1 1284.37   46.10 
   5  -2   1 1376.46   53.99 
   5  -2   1 1306.97   38.00 
   5  -2   1 1298.07   42.80 
  -5  -2  -1 1380.86   54.19 
   5  -2   1 1196.68   53.99 
   5  -2   1 1289.17   37.70 
  -5  -2  -1 1265.77   54.29 
   5  -2   1 1351.86   52.89 
   5  -2   1 1307.67   48.70 
  -5  -2  -1 1268.67   39.20 
   5  -2   1 1279.97   37.40 
  -5  -2  -1 1281.57   50.59 
  -5  -2  -1 1268.97   56.39 
  -5  -2  -1 1325.97   50.99 
   5  -2   1 1352.16   42.40 
  -5  -2  -1 1309.57   46.90 
  -5  -2  -1 1333.07   54.89 
  -5  -2  -1 1361.26   52.89 
   5  -2   1 1298.57   50.69 
  -5  -2  -1 1227.68   51.29 
  -5  -2  -1 1340.17   51.69 
   5  -2   1 1282.07   45.90 
   5  -2   1 1264.97   48.70 
   5  -2   1 1341.97   44.60 
   5  -2   1 1293.07   54.39 
   5  -2   1 1249.88   49.99 
  -5  -2  -1 1149.19   44.20 
  -5  -2  -1 1253.77   52.89 
  -5  -2  -1 1293.77   52.69 
   5  -2   1 1328.07   48.90 
  -5  -2  -1 1257.17   52.59 
  -5  -2  -1 1293.07   42.00 
   5   2   1 1311.47   44.00 
  -5   2  -1 1286.97   50.79 
  -5   2  -1 1255.67   41.30 
   5   2   1 1336.47   40.50 
  -5   2  -1 1307.47   53.19 
   5   2   1 1368.86   61.49 
  -5   2  -1 1291.57   49.10 
   5   2   1 1276.37   60.89 
   5   2   1 1254.37   50.19 
  -5   2  -1 1211.38   52.09 
   5   2   1 1327.27   37.60 
  -5   2  -1 1324.97   53.89 
  -5   2  -1 1341.67   50.89 
   5   2   1 1313.17   36.70 
   5   2   1 1349.16   43.30 
   5   2   1 1363.16   44.20 
   5   2   1 1333.57   43.10 
  -5   2  -1 1285.47   55.09 
  -5   2  -1 1249.28   52.29 
   5   2   1 1281.47   58.99 
  -5   2  -1 1321.57   51.79 
   5   2   1 1313.67   41.80 
  -5   2  -1 1311.37   53.39 
   5   2   1 1297.27   45.90 
  -5   2  -1 1353.06   54.39 
   5   2   1 1310.87   47.60 
   5   2   1 1370.96   58.09 
   5   2   1 1359.36   42.80 
   5   2   1 1242.88   51.99 
  -5   2  -1 1268.17   49.40 
   5   2   1 1304.57   43.70 
   5   2   1 1306.37   45.10 
  -5   2  -1 1347.27   58.79 
   5   2   1 1259.67   45.30 
   5   2   1 1322.27   37.30 
  -5   2  -1 1286.47   57.89 
  -5   2  -1 1302.47   50.49 
  -5   2  -1 1263.87   49.40 
  -5   2  -1 1374.56   48.60 
  -6  -2  -1 1058.19   49.10 
  -6  -2  -1 1180.68   44.90 
   6  -2   1 1143.99   50.79 
  -6  -2  -1 1182.58   51.69 
   6  -2   1 1168.08   51.79 
  -6  -2  -1 1209.68   53.29 
  -6  -2  -1 1161.48   41.00 
   6  -2   1 1141.29   47.80 
  -6  -2  -1 1159.68   39.50 
   6  -2   1 1117.29   53.49 
   6  -2   1 1149.89   43.20 
  -6  -2  -1 1097.09   51.09 
  -6  -2  -1 1155.88   49.70 
   6  -2   1 1116.09   52.79 
   6  -2   1 1180.78   49.00 
  -6  -2  -1 1156.28   52.79 
  -6  -2  -1 1098.19   49.00 
  -6  -2  -1 1183.48   52.39 
  -6  -2  -1 1123.59   54.89 
  -6  -2  -1 1144.59   53.39 
  -6  -2  -1 1199.38   47.50 
   6  -2   1 1139.59   48.20 
   6  -2   1 1120.49   35.70 
   6  -2   1 1194.38   43.90 
  -6  -2  -1 1201.78   54.39 
   6  -2   1 1159.88   46.50 
   6  -2   1 1117.69   35.40 
   6  -2   1 1180.98   52.79 
   6  -2   1 1254.07   52.99 
   6   2   1 1172.88   43.80 
  -6   2  -1 1049.20   46.50 
   6   2   1 1184.38   39.00 
  -6   2  -1 1142.79   52.79 
  -6   2  -1 1149.29   48.60 
   6   2   1 1165.08   52.39 
   6   2   1 1030.10   57.79 
   6   2   1 1172.88   38.70 
   6   2   1 1126.99   40.70 
  -6   2  -1 1206.58   57.59 
   6   2   1  995.30   46.90 
  -6   2  -1 1105.69   51.59 
  -6   2  -1 1096.79   51.79 
  -6   2  -1 1204.18   56.09 
  -6   2  -1 1184.28   48.60 
  -6   2  -1 1136.39   57.29 
   6   2   1 1101.09   50.49 
   6   2   1 1146.39   49.80 
  -6   2  -1 1150.88   47.60 
   6   2   1 1224.18   59.79 
  -6   2  -1 1224.48   53.69 
   6   2   1 1174.28   49.40 
   6   2   1 1161.58   46.60 
   6   2   1 1121.09   45.60 
  -6   2  -1 1137.89   52.09 
  -6   2  -1 1082.39   49.30 
  -6   2  -1 1098.99   47.20 
   6   2   1 1123.29   42.00 
   6   2   1 1094.89   59.79 
   6   2   1 1099.99   55.59 
  -6   2  -1 1072.89   45.40 
   6   2   1 1156.08   35.70 
   7  -2   1 1596.74   67.39 
   7  -2   1 1594.74   66.59 
   7  -2   1 1582.34   70.39 
   7  -2   1 1692.33   64.89 
   7  -2   1 1546.75   69.29 
  -7  -2  -1 1631.74   68.89 
  -7  -2  -1 1681.73   71.19 
  -7  -2  -1 1569.64   59.59 
  -7  -2  -1 1648.34   66.89 
  -7  -2  -1 1507.25   66.49 
  -7  -2  -1 1716.83   72.19 
  -7  -2  -1 1588.44   72.39 
   7  -2   1 1564.44   68.39 
   7  -2   1 1573.94   62.59 
  -7  -2  -1 1537.95   68.69 
   7  -2   1 1581.34   60.49 
  -7  -2  -1 1481.95   67.59 
   7  -2   1 1551.14   66.79 
   7  -2   1 1530.35   63.19 
   7  -2   1 1537.25   56.19 
   7  -2   1 1505.15   55.39 
  -7  -2  -1 1467.75   64.09 
   7   2   1 1506.75   77.79 
  -7   2  -1 1644.64   61.99 
   7   2   1 1584.34   73.39 
  -7   2  -1 1654.43   69.99 
  -7   2  -1 1562.64   65.99 
  -7   2  -1 1548.74   64.19 
  -7   2  -1 1679.53   64.39 
   7   2   1 1522.75   68.69 
  -7   2  -1 1587.44   73.29 
   7   2   1 1541.15   58.79 
   7   2   1 1517.65   61.59 
  -7   2  -1 1657.63   70.09 
   7   2   1 1650.93   67.89 
  -7   2  -1 1618.04   59.19 
  -7   2  -1 1567.44   62.49 
  -7   2  -1 1670.93   70.19 
   7   2   1 1542.85   69.89 
   7   2   1 1622.54   61.09 
  -7   2  -1 1500.95   73.89 
  -7   2  -1 1543.05   61.49 
   7   2   1 1633.94   58.59 
  -7   2  -1 1550.14   75.09 
   7   2   1 1664.53   65.69 
   7   2   1 1573.44   78.39 
  -7   2  -1 1664.43   70.99 
  -7   2  -1 1691.03   71.39 
   7   2   1 1622.64   76.89 
   7   2   1 1525.95   68.49 
   7   2   1 1487.85   63.89 
   7   2   1 1658.33   64.49 
   7   2   1 1618.94   57.39 
   8  -2   1  712.93   46.10 
   8  -2   1  770.02   47.70 
  -8  -2  -1  736.43   48.60 
  -8  -2  -1  823.42   49.00 
   8  -2   1  767.22   44.40 
   8  -2   1  729.13   46.10 
   8  -2   1  802.22   42.20 
  -8  -2  -1  747.23   47.10 
   8  -2   1  793.52   45.30 
  -8  -2  -1  827.02   50.19 
   8  -2   1  721.93   38.00 
  -8  -2  -1  707.83   44.90 
  -8  -2  -1  834.42   45.40 
  -8  -2  -1  721.13   46.30 
  -8  -2  -1  787.82   46.70 
   8  -2   1  718.13   44.40 
   8  -2   1  743.33   40.70 
   8   2   1  837.52   47.00 
  -8   2  -1  773.22   48.40 
  -8   2  -1  788.22   42.00 
  -8   2  -1  767.22   52.69 
   8   2   1  771.62   55.09 
  -8   2  -1  746.03   46.60 
   8   2   1  839.62   47.10 
   8   2   1  809.32   42.60 
   8   2   1  761.62   37.50 
   8   2   1  770.52   47.90 
   8   2   1  751.92   45.80 
   8   2   1  826.52   48.60 
  -8   2  -1  806.12   45.40 
   8   2   1  748.23   42.90 
  -8   2  -1  828.02   49.20 
   8   2   1  783.42   43.00 
   8   2   1  783.42   55.89 
  -8   2  -1  814.92   52.89 
  -8   2  -1  711.33   39.60 
   8   2   1  843.62   43.90 
  -8   2  -1  828.82   54.79 
  -8   2  -1  788.52   48.10 
  -8   2  -1  774.12   41.70 
  -8   2  -1  766.92   47.70 
   8   2   1  678.43   50.89 
   8   2   1  825.52   52.09 
   9  -2   1 1181.28   64.99 
   9  -2   1 1228.18   60.39 
   9  -2   1 1274.37   65.99 
   9  -2   1 1193.78   60.69 
   9  -2   1 1179.68   61.59 
  -9  -2  -1 1156.08   64.69 
  -9  -2  -1 1188.08   65.59 
   9  -2   1 1263.37   66.69 
  -9  -2  -1 1174.48   65.89 
   9  -2   1 1238.58   62.79 
  -9  -2  -1 1178.38   63.49 
   9  -2   1 1247.08   58.79 
  -9  -2  -1 1204.88   67.59 
  -9  -2  -1 1159.88   60.59 
   9   2   1 1114.19   62.39 
  -9   2  -1 1327.17   75.79 
  -9   2  -1 1136.89   60.39 
  -9   2  -1 1156.18   64.79 
   9   2   1 1164.48   65.89 
   9   2   1 1192.38   62.79 
   9   2   1 1152.78   57.29 
   9   2   1 1333.97   76.19 
  -9   2  -1 1238.18   57.89 
  -9   2  -1 1287.57   66.59 
   9   2   1 1253.17   63.79 
  -9   2  -1 1121.09   71.99 
   9   2   1 1107.39   72.69 
  -9   2  -1 1256.37   73.29 
  -9   2  -1 1221.48   67.99 
   9   2   1 1255.37   75.69 
  -9   2  -1 1216.18   66.19 
  -9   2  -1 1348.17   69.29 
   9   2   1 1230.68   68.59 
   9   2   1 1135.49   57.59 
   9   2   1 1177.68   59.39 
  -9   2  -1 1138.69   54.89 
   9   2   1 1229.08   58.79 
 -10  -2  -1  388.26   45.70 
  10  -2   1  397.96   46.70 
  10  -2   1  409.16   46.40 
  10  -2   1  339.97   42.10 
  10  -2   1  375.56   41.10 
 -10  -2  -1  435.66   47.40 
  10  -2   1  374.86   39.90 
  10  -2   1  325.17   37.20 
  10   2   1  302.57   46.00 
 -10   2  -1  418.06   44.30 
 -10   2  -1  309.47   41.70 
 -10   2  -1  449.95   56.19 
  10   2   1  321.27   43.30 
 -10   2  -1  397.66   45.40 
  10   2   1  445.66   47.90 
 -10   2  -1  383.76   54.09 
  10   2   1  473.15   46.80 
 -10   2  -1  316.37   40.70 
  10   2   1  357.46   50.09 
 -10   2  -1  436.26   51.99 
 -10   2  -1  487.85   58.69 
   9  -3  -1  136.29   24.30 
   9  -3  -1  104.49   21.80 
   9  -3  -1  112.99   21.60 
   9  -3  -1  155.38   25.20 
  -9  -3   1  107.99   21.50 
   9  -3  -1   79.99   19.30 
  -9  -3   1  108.29   24.90 
  -9  -3   1  109.89   22.70 
  -9  -3   1  131.09   23.80 
   9  -3  -1   95.79   22.60 
   9  -3  -1  155.98   26.30 
   9  -3  -1  194.38   25.30 
  -9  -3   1  116.99   22.60 
   9   3  -1  118.39   22.70 
  -9   3   1  159.08   28.00 
  -9   3   1   72.79   15.50 
  -9   3   1  117.79   24.00 
   9   3  -1  149.69   31.60 
  -9   3   1  118.89   23.10 
  -9   3   1  125.19   24.00 
  -9   3   1   66.29   20.10 
   9   3  -1  170.48   33.90 
   9   3  -1  124.89   21.60 
  -9   3   1   93.49   20.70 
  -9   3   1  119.19   27.50 
   9   3  -1  118.19   22.20 
  -9   3   1  186.18   30.70 
   9   3  -1  140.19   27.50 
   9   3  -1  160.08   28.10 
   9   3  -1  131.79   23.40 
  -9   3   1  134.19   21.40 
  -9   3   1   97.39   25.20 
   8  -3  -1  126.79   19.20 
   8  -3  -1  143.49   19.10 
   8  -3  -1  128.59   20.70 
  -8  -3   1  127.49   22.30 
   8  -3  -1  130.99   23.50 
   8  -3  -1  137.59   23.00 
   8  -3  -1  144.49   24.80 
   8  -3  -1  160.78   20.10 
   8  -3  -1  150.78   23.70 
  -8  -3   1   85.79   18.80 
  -8  -3   1  136.29   22.10 
  -8  -3   1  149.39   23.90 
  -8  -3   1   87.19   19.50 
   8  -3  -1   94.89   19.50 
   8  -3  -1  119.59   20.50 
  -8  -3   1  102.99   22.60 
  -8   3   1  104.69   18.10 
  -8   3   1  164.18   25.00 
   8   3  -1  176.48   27.20 
  -8   3   1  139.19   23.00 
   8   3  -1  135.89   19.40 
   8   3  -1  107.49   25.70 
   8   3  -1  130.39   20.80 
  -8   3   1  148.49   27.30 
  -8   3   1  124.69   18.60 
  -8   3   1  114.79   24.40 
   8   3  -1  126.19   17.80 
   8   3  -1  144.19   29.20 
  -8   3   1  130.29   25.50 
   8   3  -1  117.89   20.50 
   8   3  -1  121.49   23.70 
  -8   3   1  160.48   24.90 
  -8   3   1  132.09   19.90 
  -8   3   1  143.29   23.60 
   8   3  -1  187.38   26.90 
  -8   3   1  132.09   22.30 
  -8   3   1  165.28   25.30 
   8   3  -1  159.18   24.60 
   8   3  -1  152.58   23.10 
  -8   3   1  114.39   20.50 
   8   3  -1  132.89   20.60 
  -7  -3   1  592.44   40.00 
   7  -3  -1  538.95   36.40 
   7  -3  -1  563.54   37.50 
  -7  -3   1  621.44   36.30 
   7  -3  -1  598.74   38.70 
   7  -3  -1  587.44   35.50 
  -7  -3   1  585.04   42.90 
   7  -3  -1  581.14   34.30 
  -7  -3   1  545.95   35.90 
   7  -3  -1  545.05   31.40 
   7  -3  -1  538.15   37.90 
  -7  -3   1  526.95   35.60 
  -7  -3   1  538.85   27.60 
   7  -3  -1  599.24   37.70 
  -7  -3   1  513.95   35.10 
  -7  -3   1  483.45   35.20 
  -7  -3   1  566.54   35.90 
   7  -3  -1  591.34   31.80 
  -7  -3   1  545.05   27.40 
   7  -3  -1  637.84   38.30 
  -7  -3   1  576.74   32.00 
   7  -3  -1  575.34   28.40 
   7  -3  -1  549.54   34.40 
   7   3  -1  486.25   42.70 
  -7   3   1  493.15   35.20 
  -7   3   1  581.94   33.70 
   7   3  -1  534.95   42.20 
  -7   3   1  544.95   34.10 
  -7   3   1  487.85   34.90 
  -7   3   1  567.34   36.10 
  -7   3   1  548.65   35.40 
  -7   3   1  568.64   34.90 
  -7   3   1  544.35   35.90 
   7   3  -1  617.34   40.10 
  -7   3   1  528.55   40.60 
   7   3  -1  528.45   37.90 
  -7   3   1  568.54   33.60 
  -7   3   1  492.95   38.80 
  -7   3   1  547.95   30.00 
   7   3  -1  645.44   36.20 
  -7   3   1  599.14   38.50 
  -7   3   1  543.85   40.50 
  -7   3   1  546.85   36.00 
   7   3  -1  579.64   26.90 
   7   3  -1  534.35   34.50 
   7   3  -1  589.44   38.40 
   7   3  -1  561.94   35.20 
   7   3  -1  549.05   38.70 
   7   3  -1  562.54   31.00 
   6  -3  -1 1212.68   56.19 
  -6  -3   1 1252.27   54.99 
  -6  -3   1 1230.78   53.49 
   6  -3  -1 1280.97   57.69 
  -6  -3   1 1266.17   39.30 
  -6  -3   1 1207.28   52.39 
   6  -3  -1 1160.68   56.49 
  -6  -3   1 1253.27   46.20 
   6  -3  -1 1299.57   53.29 
  -6  -3   1 1201.58   53.59 
  -6  -3   1 1351.36   64.59 
   6  -3  -1 1260.17   49.60 
   6  -3  -1 1076.89   51.09 
  -6  -3   1 1198.68   47.20 
   6  -3  -1 1050.59   52.99 
   6  -3  -1 1171.88   54.39 
  -6  -3   1 1229.08   54.69 
  -6  -3   1 1242.68   54.49 
   6  -3  -1 1209.58   52.49 
   6  -3  -1 1190.18   45.90 
   6  -3  -1 1213.48   50.09 
  -6  -3   1 1261.77   58.99 
  -6   3   1 1330.67   54.59 
  -6   3   1 1178.28   53.09 
  -6   3   1 1277.17   49.00 
   6   3  -1 1308.07   58.59 
   6   3  -1 1144.19   46.60 
   6   3  -1 1256.87   56.79 
   6   3  -1 1263.87   51.99 
  -6   3   1 1220.98   55.39 
  -6   3   1 1269.47   57.29 
  -6   3   1 1269.37   56.89 
   6   3  -1 1304.77   63.49 
  -6   3   1 1226.38   53.09 
  -6   3   1 1176.38   60.19 
   6   3  -1 1262.87   38.10 
  -6   3   1 1204.88   51.69 
   6   3  -1 1182.58   36.70 
  -6   3   1 1217.18   51.39 
  -6   3   1 1102.79   49.30 
  -6   3   1 1145.59   52.39 
  -6   3   1 1240.08   53.79 
   6   3  -1 1237.48   53.59 
  -6   3   1 1259.37   60.39 
  -6   3   1 1186.18   53.69 
   6   3  -1 1165.98   63.89 
   6   3  -1 1201.58   56.59 
  -6   3   1 1297.17   60.59 
   5  -3  -1 2374.56   87.49 
   5  -3  -1 2350.86   81.49 
   5  -3  -1 2461.45   87.39 
  -5  -3   1 2449.85   83.39 
  -5  -3   1 2479.65   69.39 
   5  -3  -1 2405.16   83.99 
   5  -3  -1 2452.05   87.69 
   5  -3  -1 2429.96   85.59 
  -5  -3   1 2493.05   82.49 
  -5  -3   1 2603.74   86.49 
  -5  -3   1 2411.46   88.89 
  -5  -3   1 2515.95   71.49 
   5  -3  -1 2505.55   81.69 
  -5  -3   1 2389.06   77.19 
   5  -3  -1 2440.96   85.69 
  -5  -3   1 2410.06   84.29 
  -5  -3   1 2404.76   82.79 
  -5  -3   1 2434.16   89.09 
   5  -3  -1 2501.95   83.49 
   5  -3  -1 2512.15   80.29 
   5  -3  -1 2419.86   77.39 
  -5  -3   1 2419.36   94.39 
  -5  -3   1 2462.75   80.89 
  -5   3   1 2459.25   76.59 
   5   3  -1 2360.96   83.39 
  -5   3   1 2428.06   84.29 
   5   3  -1 2307.57   77.89 
  -5   3   1 2476.95   91.29 
   5   3  -1 2492.15   75.29 
  -5   3   1 2419.56   88.59 
   5   3  -1 2410.86   73.69 
  -5   3   1 2475.05   82.69 
  -5   3   1 2482.55   81.89 
  -5   3   1 2443.66   88.29 
  -5   3   1 2497.05   84.19 
  -5   3   1 2455.85   83.59 
  -5   3   1 2345.17   89.39 
   5   3  -1 2497.45   68.89 
  -5   3   1 2396.06   79.79 
   5   3  -1 2492.95   81.29 
  -5   3   1 2408.36   78.79 
  -5   3   1 2400.86   69.69 
   5   3  -1 2340.17   73.69 
   5   3  -1 2475.65   92.29 
   5   3  -1 2426.66   75.89 
  -5   3   1 2477.55   71.79 
   5   3  -1 2465.45   96.99 
  -5   3   1 2370.56   84.39 
  -5   3   1 2452.55   85.89 
   5   3  -1 2470.55   87.79 
  -5   3   1 2430.76   77.19 
  -5   3   1 2370.66   82.59 
   5   3  -1 2442.56   85.99 
  -5   3   1 2460.45   83.19 
   5   3  -1 2397.36   69.49 
  -5   3   1 2446.66   83.99 
  -4  -3   1  756.22   25.30 
  -4  -3   1  706.33   32.70 
   4  -3  -1  715.43   32.20 
  -4  -3   1  713.43   34.30 
  -4  -3   1  694.13   34.50 
  -4  -3   1  742.33   27.80 
  -4  -3   1  734.63   31.00 
  -4  -3   1  764.72   33.00 
   4  -3  -1  721.63   35.20 
   4  -3  -1  767.82   37.70 
   4  -3  -1  794.52   35.10 
  -4  -3   1  758.62   42.90 
   4  -3  -1  749.23   37.00 
  -4  -3   1  755.82   33.40 
   4  -3  -1  720.33   36.40 
   4  -3  -1  727.73   31.00 
   4  -3  -1  754.22   32.60 
   4  -3  -1  775.02   33.70 
  -4  -3   1  740.63   25.70 
   4  -3  -1  732.83   34.60 
  -4  -3   1  756.02   38.00 
   4  -3  -1  746.33   35.20 
  -4  -3   1  728.23   32.90 
  -4  -3   1  773.52   32.90 
   4   3  -1  663.83   36.70 
  -4   3   1  696.23   37.60 
   4   3  -1  734.63   39.50 
  -4   3   1  740.33   34.40 
   4   3  -1  716.53   25.70 
  -4   3   1  721.33   36.80 
   4   3  -1  742.13   36.20 
  -4   3   1  778.22   31.10 
  -4   3   1  698.03   32.60 
  -4   3   1  719.83   30.60 
  -4   3   1  746.03   34.80 
  -4   3   1  677.03   32.70 
   4   3  -1  730.43   28.00 
  -4   3   1  693.23   30.80 
   4   3  -1  784.42   37.70 
   4   3  -1  723.33   41.80 
  -4   3   1  747.33   27.20 
  -4   3   1  731.13   32.80 
   4   3  -1  708.93   34.30 
  -4   3   1  757.52   29.00 
   4   3  -1  737.83   26.50 
  -4   3   1  787.12   36.10 
  -4   3   1  785.42   31.50 
  -4   3   1  691.13   32.20 
  -4   3   1  744.73   38.50 
   4   3  -1  706.63   27.60 
   4   3  -1  754.12   32.20 
   4   3  -1  742.63   26.40 
  -4   3   1  774.22   35.20 
   4   3  -1  679.93   33.60 
  -4   3   1  746.73   38.00 
  -4   3   1  722.13   34.40 
  -3  -3   1 3351.16  103.39 
  -3  -3   1 3339.17   97.19 
  -3  -3   1 3343.27  102.69 
   3  -3  -1 3160.18   97.09 
   3  -3  -1 3264.77   98.49 
   3  -3  -1 3296.57   97.29 
  -3  -3   1 3390.06  103.69 
   3  -3  -1 3256.97  100.99 
   3  -3  -1 3433.76  100.89 
  -3  -3   1 3291.57   97.09 
  -3  -3   1 3263.17  101.49 
  -3  -3   1 3227.08   99.79 
  -3  -3   1 3174.58  106.69 
  -3  -3   1 3192.28  105.09 
   3  -3  -1 3224.28  103.99 
  -3  -3   1 3240.38   95.89 
  -3  -3   1 3306.97   93.79 
   3  -3  -1 3248.58   96.29 
  -3  -3   1 3345.17   87.79 
  -3  -3   1 3286.47   94.79 
  -3  -3   1 3299.87   85.89 
   3  -3  -1 3221.08  101.59 
   3  -3  -1 3408.86  101.49 
   3  -3  -1 3197.38  102.99 
  -3  -3   1 3222.88  113.99 
  -3  -3   1 3285.27   86.29 
  -3  -3   1 3306.57   93.09 
  -3  -3   1 3299.77   92.19 
  -3  -3   1 3415.66   97.69 
   3  -3  -1 3368.16  104.29 
   3  -3  -1 3355.16  100.89 
   3   3  -1 3264.07   92.99 
  -3   3   1 3286.17  100.89 
   3   3  -1 3277.67   98.39 
  -3   3   1 3275.47   96.59 
   3   3  -1 3341.17   92.69 
   3   3  -1 3379.26   95.99 
   3   3  -1 3265.57   96.79 
   3   3  -1 3364.96   87.49 
  -3   3   1 3331.47  105.29 
   3   3  -1 3313.27  102.29 
  -3   3   1 3196.08  103.39 
  -3   3   1 3216.58  101.79 
  -3   3   1 3354.96   97.49 
  -3   3   1 3385.56  101.09 
  -3   3   1 3399.16   98.09 
  -3   3   1 3304.47  101.19 
  -3   3   1 3428.46   98.39 
  -3   3   1 3397.56   96.69 
  -3   3   1 3393.56  100.49 
  -3   3   1 3338.47  102.89 
   3   3  -1 3388.56  105.59 
  -3   3   1 3236.18  108.89 
   3   3  -1 3253.17   91.49 
  -3   3   1 3351.76  101.09 
   3   3  -1 3279.57  101.29 
  -3   3   1 3254.67   98.89 
   3   3  -1 3311.47   97.29 
  -3   3   1 3527.45  100.59 
  -3   3   1 3424.46  106.19 
  -3   3   1 3214.08   86.29 
  -3   3   1 3392.16   98.99 
   3   3  -1 3265.77   96.69 
   3   3  -1 3377.56   99.99 
  -3   3   1 3222.78   93.79 
   3   3  -1 3327.47   91.49 
   3   3  -1 3344.97  110.59 
  -2  -3   1  415.76   18.50 
  -2  -3   1  391.46   22.00 
  -2  -3   1  424.76   13.90 
  -2  -3   1  410.76   18.90 
   2  -3  -1  394.66   22.60 
   2  -3  -1  417.06   21.60 
  -2  -3   1  432.26   18.00 
  -2  -3   1  430.66   24.00 
  -2  -3   1  444.76   22.20 
   2  -3  -1  411.86   21.60 
   2  -3  -1  410.86   21.60 
  -2  -3   1  420.66   13.80 
   2  -3  -1  420.26   20.40 
  -2  -3   1  402.66   30.60 
   2  -3  -1  420.96   17.50 
  -2  -3   1  464.45   23.10 
   2  -3  -1  434.46   19.90 
   2  -3  -1  434.26   13.10 
  -2  -3   1  435.16   16.30 
   2  -3  -1  394.26   20.00 
   2  -3  -1  402.76   20.50 
  -2  -3   1  407.96   16.80 
   2  -3  -1  412.16   17.50 
  -2  -3   1  395.76   18.10 
   2  -3  -1  387.76   21.00 
  -2  -3   1  403.56   24.20 
  -2  -3   1  420.96   14.90 
  -2  -3   1  430.86   21.00 
  -2  -3   1  411.66   18.00 
   2  -3  -1  441.26   19.60 
  -2  -3   1  403.76   16.40 
  -2  -3   1  436.56   22.30 
  -2  -3   1  435.16   18.80 
   2   3  -1  411.66   25.50 
  -2   3   1  448.16   20.80 
  -2   3   1  380.56   22.50 
   2   3  -1  422.76   15.70 
   2   3  -1  474.85   25.20 
   2   3  -1  425.06   18.50 
   2   3  -1  400.96   17.50 
   2   3  -1  415.16   21.50 
   2   3  -1  490.65   20.70 
   2   3  -1  421.26   19.00 
   2   3  -1  439.16   16.90 
   2   3  -1  430.76   18.20 
  -2   3   1  422.16   13.00 
  -2   3   1  415.66   21.40 
  -2   3   1  423.26   21.50 
  -2   3   1  434.96   23.90 
  -2   3   1  411.46   16.60 
  -2   3   1  402.86   20.40 
  -2   3   1  418.36   18.50 
  -2   3   1  440.06   23.90 
   2   3  -1  414.36   17.00 
  -2   3   1  434.26   21.20 
   2   3  -1  427.96   15.10 
  -2   3   1  423.36   20.50 
  -2   3   1  393.26   22.50 
   2   3  -1  444.66   27.40 
  -2   3   1  424.06   20.00 
  -2   3   1  398.16   16.00 
  -2   3   1  399.36   18.80 
   2   3  -1  398.26   13.30 
   2   3  -1  457.25   21.40 
   2   3  -1  427.66   20.60 
   2   3  -1  423.16   17.20 
  -2   3   1  433.56   21.90 
  -2   3   1  419.86   21.50 
  -2   3   1  427.76   21.00 
  -2   3   1  444.16   22.70 
  -2   3   1  428.46   17.70 
  -2   3   1  423.96   13.40 
   1  -3  -1 3579.54  101.29 
  -1  -3   1 3547.65   97.49 
  -1  -3   1 3633.34   96.29 
   1  -3  -1 3660.53  102.69 
   1  -3  -1 3573.34  104.49 
   1  -3  -1 3574.04   99.59 
  -1  -3   1 3753.22  105.59 
   1  -3  -1 3535.55  105.99 
   1  -3  -1 3495.45  102.19 
   1  -3  -1 3580.14  104.09 
  -1  -3   1 3620.44   95.29 
  -1  -3   1 3411.66  102.09 
  -1  -3   1 3558.64   98.89 
  -1  -3   1 3827.92  107.69 
  -1  -3   1 3658.23  103.19 
  -1  -3   1 3465.15   97.99 
  -1  -3   1 3547.75  100.59 
   1  -3  -1 3669.03  103.09 
  -1  -3   1 3528.55  100.79 
   1  -3  -1 3647.14  103.39 
   1  -3  -1 3471.15  102.49 
   1  -3  -1 3545.35  103.99 
  -1  -3   1 3614.34  110.99 
   1  -3  -1 3488.15  101.59 
  -1  -3   1 3339.27  111.79 
  -1  -3   1 3653.63   99.29 
   1  -3  -1 3459.15  100.69 
  -1  -3   1 3571.34   99.99 
  -1  -3   1 3567.04  103.49 
  -1  -3   1 3562.64  102.19 
   1  -3  -1 3677.73   96.89 
   1  -3  -1 3496.55  101.99 
  -1  -3   1 3389.06  120.49 
   1  -3  -1 3575.54   96.09 
   1   3  -1 3769.52  103.39 
  -1   3   1 3520.05  105.09 
   1   3  -1 3463.75  103.59 
   1   3  -1 3541.65   96.79 
  -1   3   1 3609.74  106.89 
  -1   3   1 3625.84  103.69 
   1   3  -1 3524.55  101.49 
  -1   3   1 3562.74   97.19 
   1   3  -1 3477.15  101.09 
  -1   3   1 3513.85  101.79 
  -1   3   1 3645.84  102.69 
   1   3  -1 3414.46  102.59 
   1   3  -1 3504.45  101.39 
   1   3  -1 3494.95  109.39 
   1   3  -1 3676.03   98.49 
  -1   3   1 3690.93  103.39 
  -1   3   1 3513.45  104.39 
  -1   3   1 3355.06  104.09 
   1   3  -1 3565.14  103.59 
   1   3  -1 3579.24  115.69 
  -1   3   1 3681.43   99.59 
  -1   3   1 3694.63  101.49 
  -1   3   1 3562.44  103.39 
  -1   3   1 3673.63  104.09 
  -1   3   1 3597.54  106.59 
  -1   3   1 3530.95   94.29 
  -1   3   1 3482.45   96.39 
   1   3  -1 3634.04  108.29 
  -1   3   1 3499.75  103.79 
   1   3  -1 3661.43   98.69 
   1   3  -1 3578.24  101.19 
  -1   3   1 3539.55  101.79 
  -1   3   1 3521.15  102.79 
  -1   3   1 3522.55  103.39 
  -1   3   1 3490.15   95.99 
   1   3  -1 3654.13   93.89 
  -1   3   1 3597.64  104.69 
   1   3  -1 3631.04   96.29 
  -1   3   1 3577.24  101.79 
  -1   3   1 3475.85  102.39 
   1   3  -1 3515.85   94.89 
   0  -3  -1  338.47   15.10 
   0  -3   1  350.46   17.50 
   0  -3  -1  320.57   18.10 
   0  -3  -1  332.07   15.40 
   0  -3  -1  327.57   15.00 
   0  -3  -1  306.47   16.80 
   0  -3  -1  314.97   16.40 
   0  -3   1  327.97   15.50 
   0  -3  -1  340.47   15.60 
   0  -3   1  326.77   15.80 
   0  -3  -1  311.37   17.00 
   0  -3  -1  320.57   15.50 
   0  -3  -1  330.07   16.20 
   0  -3  -1  359.36   18.20 
   0  -3   1  323.07   15.60 
   0  -3  -1  362.66   24.10 
   0  -3  -1  313.17   14.90 
   0  -3  -1  350.86   19.60 
   0  -3   1  334.37   16.70 
   0  -3  -1  305.37   16.20 
   0  -3  -1  323.27   14.80 
   0  -3   1  341.37   17.80 
   0  -3   1  305.97   16.20 
   0  -3   1  338.07   20.30 
   0  -3  -1  346.67   16.90 
   0  -3   1  317.37   14.40 
   0  -3  -1  322.27   15.50 
   0  -3   1  326.67   15.90 
   0  -3  -1  310.97   16.90 
   0  -3  -1  336.97   17.90 
   0  -3   1  303.67   14.90 
   0  -3  -1  301.57   12.30 
   0  -3   1  338.17   24.00 
   0  -3   1  323.87   17.20 
   0   3   1  295.87   17.00 
   0   3  -1  326.57   15.50 
   0   3   1  320.17   18.30 
   0   3  -1  298.57   18.40 
   0   3  -1  325.07   16.90 
   0   3   1  323.77   16.80 
   0   3  -1  298.97   16.30 
   0   3  -1  309.37   16.20 
   0   3  -1  314.97   15.40 
   0   3  -1  321.97   15.40 
   0   3  -1  313.27   14.60 
   0   3   1  294.77   14.60 
   0   3  -1  281.97   18.90 
   0   3  -1  315.17   16.50 
   0   3   1  341.07   16.70 
   0   3   1  314.87   17.30 
   0   3  -1  316.97   17.30 
   0   3   1  302.87   14.60 
   0   3   1  333.37   15.70 
   0   3   1  365.86   18.30 
   0   3   1  319.37   19.00 
   0   3  -1  312.27   18.40 
   0   3  -1  307.97   16.00 
   0   3   1  351.36   17.50 
   0   3  -1  308.07   17.30 
   0   3   1  328.47   14.90 
   0   3   1  339.97   15.60 
   0   3  -1  337.77   16.10 
   0   3   1  303.87   16.30 
   0   3   1  332.17   15.00 
   0   3  -1  333.37   17.30 
   0   3  -1  320.97   16.40 
   0   3   1  326.17   17.20 
   0   3   1  357.06   15.50 
   0   3   1  295.37   16.20 
   0   3  -1  323.07   14.80 
   0   3  -1  325.57   21.00 
  -1  -3  -1 5945.71  162.08 
   1  -3   1 5740.93  160.98 
  -1  -3  -1 5989.50  163.38 
  -1  -3  -1 6164.08  164.78 
   1  -3   1 6062.29  163.68 
   1  -3   1 5943.41  164.68 
  -1  -3  -1 6001.70  162.48 
  -1  -3  -1 5780.62  164.78 
  -1  -3  -1 6078.39  157.28 
  -1  -3  -1 5993.50  157.88 
  -1  -3  -1 5954.90  170.18 
  -1  -3  -1 6222.98  179.68 
   1  -3   1 6078.79  167.78 
   1  -3   1 5963.30  154.98 
   1  -3   1 6056.49  165.18 
  -1  -3  -1 5703.53  166.28 
  -1  -3  -1 6044.79  162.78 
   1  -3   1 5950.80  167.28 
   1  -3   1 5813.02  155.78 
  -1  -3  -1 6136.89  164.98 
  -1  -3  -1 6061.89  157.58 
   1  -3   1 5955.20  164.68 
  -1  -3  -1 5949.40  156.58 
   1  -3   1 5623.74  162.48 
   1  -3   1 5758.52  162.98 
   1  -3   1 5970.40  164.18 
  -1  -3  -1 5942.61  162.18 
  -1  -3  -1 5952.50  163.98 
   1  -3   1 5839.82  162.18 
  -1  -3  -1 6077.89  161.78 
  -1  -3  -1 5985.80  158.18 
  -1  -3  -1 5936.81  162.08 
   1  -3   1 6035.00  163.98 
  -1  -3  -1 5221.98  178.08 
   1  -3   1 6111.89  165.38 
   1  -3   1 5978.90  158.08 
   1  -3   1 5885.31  163.78 
  -1  -3  -1 6095.99  155.38 
  -1  -3  -1 5986.60  157.88 
   1   3   1 6073.79  162.58 
   1   3   1 5887.61  164.28 
   1   3   1 5992.10  157.88 
  -1   3  -1 5865.61  163.78 
  -1   3  -1 5907.91  163.88 
  -1   3  -1 5845.22  162.18 
  -1   3  -1 5879.81  166.48 
   1   3   1 5790.62  163.78 
   1   3   1 5827.72  165.58 
   1   3   1 6074.39  162.08 
  -1   3  -1 5946.60  164.28 
   1   3   1 6006.50  157.88 
  -1   3  -1 6080.49  157.58 
  -1   3  -1 5924.01  161.68 
   1   3   1 5963.60  155.38 
   1   3   1 6163.88  162.98 
  -1   3  -1 5949.10  163.68 
  -1   3  -1 6017.00  172.18 
   1   3   1 6028.80  163.78 
  -1   3  -1 5917.01  164.18 
  -1   3  -1 6043.20  157.88 
   1   3   1 5949.71  171.78 
   1   3   1 5933.51  164.78 
   1   3   1 5707.43  166.08 
  -1   3  -1 5935.31  163.08 
   1   3   1 5810.22  162.18 
  -1   3  -1 5872.91  164.68 
  -1   3  -1 5984.30  162.88 
  -1   3  -1 5767.42  164.28 
   1   3   1 5976.90  157.38 
  -1   3  -1 5940.81  169.58 
  -1   3  -1 5834.32  160.38 
  -1   3  -1 6068.19  163.88 
  -1   3  -1 5963.10  158.68 
   1   3   1 6056.69  157.38 
  -1   3  -1 5875.31  156.78 
   2  -3   1 1017.20   37.90 
  -2  -3  -1  977.60   29.40 
  -2  -3  -1 1019.60   31.70 
  -2  -3  -1 1031.70   36.50 
   2  -3   1  944.71   40.00 
  -2  -3  -1 1041.40   35.50 
   2  -3   1 1060.09   38.50 
   2  -3   1 1037.90   33.80 
  -2  -3  -1 1066.99   36.90 
  -2  -3  -1 1047.10   38.40 
  -2  -3  -1  996.30   33.90 
   2  -3   1 1043.20   40.20 
  -2  -3  -1  984.50   38.30 
  -2  -3  -1 1028.80   46.20 
  -2  -3  -1 1084.49   41.60 
   2  -3   1 1050.29   39.20 
   2  -3   1 1019.60   30.90 
  -2  -3  -1 1022.70   30.10 
   2  -3   1 1024.10   34.20 
  -2  -3  -1 1014.60   43.20 
  -2  -3  -1 1010.30   37.00 
   2  -3   1 1014.50   40.70 
  -2  -3  -1 1024.00   48.70 
   2  -3   1 1044.10   37.60 
  -2  -3  -1 1007.30   34.50 
   2  -3   1 1008.30   39.20 
  -2  -3  -1 1052.49   37.90 
  -2  -3  -1  975.40   39.00 
  -2  -3  -1  993.90   39.20 
  -2  -3  -1 1011.10   29.80 
  -2  -3  -1  991.30   29.80 
  -2  -3  -1  991.90   40.20 
   2   3   1 1013.10   34.20 
  -2   3  -1  958.60   40.40 
  -2   3  -1 1064.29   38.50 
  -2   3  -1 1033.00   30.00 
  -2   3  -1 1033.90   37.60 
   2   3   1  989.10   36.40 
   2   3   1 1015.90   29.50 
  -2   3  -1  991.60   42.50 
   2   3   1 1053.69   39.30 
  -2   3  -1 1016.10   37.90 
  -2   3  -1 1039.70   38.60 
   2   3   1  993.30   40.90 
   2   3   1 1049.59   34.90 
  -2   3  -1 1062.79   43.10 
   2   3   1 1032.50   30.80 
   2   3   1 1099.09   41.70 
   2   3   1 1080.59   37.70 
   2   3   1  943.31   38.70 
   2   3   1 1086.99   47.20 
  -2   3  -1  980.80   38.60 
   2   3   1 1051.89   35.40 
  -2   3  -1 1021.20   38.80 
  -2   3  -1 1058.69   41.20 
  -2   3  -1 1070.69   38.00 
  -2   3  -1 1019.60   37.70 
   2   3   1 1025.50   36.20 
  -2   3  -1 1067.69   33.10 
   2   3   1 1019.40   34.80 
  -2   3  -1 1087.89   36.20 
   2   3   1 1052.19   36.40 
  -2   3  -1  994.50   30.10 
  -2   3  -1  985.90   38.90 
   2   3   1 1009.50   32.50 
   2   3   1 1027.40   41.60 
  -2   3  -1 1092.49   38.40 
  -2   3  -1 1027.30   36.90 
  -2   3  -1  975.30   35.50 
  -2   3  -1  989.40   40.00 
   3  -3   1 2764.22   90.89 
  -3  -3  -1 2760.02   87.29 
   3  -3   1 2704.13   83.29 
  -3  -3  -1 2826.12   88.69 
  -3  -3  -1 2678.23   84.69 
  -3  -3  -1 2736.83   82.39 
  -3  -3  -1 2698.43   94.49 
   3  -3   1 2872.21   74.59 
  -3  -3  -1 2808.22   84.29 
   3  -3   1 2626.84   88.49 
   3  -3   1 2850.11   86.19 
  -3  -3  -1 2829.12   85.79 
   3  -3   1 2873.51   87.79 
  -3  -3  -1 2755.52   87.19 
  -3  -3  -1 2793.92   86.69 
  -3  -3  -1 2702.13   83.39 
   3  -3   1 2703.03   77.19 
  -3  -3  -1 2729.13   84.59 
  -3  -3  -1 2676.23   81.59 
   3  -3   1 2814.92   86.89 
   3  -3   1 2742.43   88.49 
   3  -3   1 2770.22   84.49 
   3  -3   1 2764.62   90.09 
   3  -3   1 2724.83   87.69 
   3  -3   1 2764.62   84.59 
  -3  -3  -1 2729.33   84.89 
   3   3   1 2779.42   82.89 
   3   3   1 2920.31   88.09 
  -3   3  -1 2780.92   86.09 
  -3   3  -1 2696.13   84.59 
   3   3   1 2726.83   80.89 
   3   3   1 2870.51   87.59 
  -3   3  -1 2842.32   85.89 
  -3   3  -1 2746.93   85.19 
   3   3   1 2749.92   87.39 
  -3   3  -1 2809.92   86.69 
  -3   3  -1 2702.13   81.89 
  -3   3  -1 2689.53   85.89 
  -3   3  -1 2768.52   84.69 
  -3   3  -1 2785.42   79.99 
   3   3   1 2773.12   74.09 
  -3   3  -1 2711.73   79.99 
   3   3   1 2820.32   75.89 
   3   3   1 2714.03   90.99 
  -3   3  -1 2720.43   87.09 
   3   3   1 2781.12   82.09 
  -3   3  -1 2776.22   92.39 
  -3   3  -1 2732.63   92.89 
   3   3   1 2823.22   91.19 
  -3   3  -1 2682.93   87.39 
  -3   3  -1 2764.52   89.79 
  -3   3  -1 2684.43   82.69 
  -3   3  -1 2703.23   89.29 
  -3   3  -1 2756.02   83.89 
   3   3   1 2717.23   80.79 
  -3   3  -1 2762.42   86.19 
  -4  -3  -1  405.76   27.90 
   4  -3   1  426.86   22.60 
   4  -3   1  449.86   26.80 
  -4  -3  -1  410.56   21.60 
  -4  -3  -1  383.76   24.90 
  -4  -3  -1  433.46   19.20 
   4  -3   1  372.26   25.60 
  -4  -3  -1  456.15   25.70 
  -4  -3  -1  450.25   24.50 
   4  -3   1  407.86   22.40 
   4  -3   1  423.26   26.00 
  -4  -3  -1  430.86   25.20 
  -4  -3  -1  447.06   21.90 
   4  -3   1  422.86   25.00 
   4  -3   1  429.06   15.00 
  -4  -3  -1  453.75   23.30 
   4  -3   1  426.16   27.20 
   4  -3   1  417.36   21.90 
   4  -3   1  448.06   16.30 
  -4  -3  -1  445.76   25.50 
   4  -3   1  451.15   25.00 
   4  -3   1  475.95   24.90 
  -4  -3  -1  438.36   24.20 
  -4  -3  -1  422.56   25.90 
   4  -3   1  407.46   18.20 
   4   3   1  439.06   25.50 
  -4   3  -1  424.36   25.20 
  -4   3  -1  394.76   18.10 
   4   3   1  502.45   30.40 
   4   3   1  474.05   29.50 
   4   3   1  423.96   21.50 
  -4   3  -1  475.45   25.00 
  -4   3  -1  450.25   21.20 
  -4   3  -1  418.66   24.20 
  -4   3  -1  427.76   25.70 
  -4   3  -1  445.86   25.30 
  -4   3  -1  482.95   26.60 
  -4   3  -1  461.85   25.00 
  -4   3  -1  403.66   23.70 
   4   3   1  431.26   14.60 
  -4   3  -1  435.96   29.00 
  -4   3  -1  441.06   28.90 
  -4   3  -1  453.55   18.10 
   4   3   1  448.46   19.20 
   4   3   1  448.26   20.30 
  -4   3  -1  454.95   20.30 
  -4   3  -1  442.16   25.50 
   4   3   1  420.96   22.90 
   4   3   1  413.36   30.10 
  -4   3  -1  433.16   24.70 
   4   3   1  443.86   14.80 
   4   3   1  456.55   26.40 
   4   3   1  416.66   15.50 
  -4   3  -1  422.56   23.20 
  -4   3  -1  462.85   24.90 
  -4   3  -1  408.16   26.50 
  -5  -3  -1  532.35   30.60 
   5  -3   1  542.15   31.60 
   5  -3   1  562.84   29.00 
  -5  -3  -1  543.95   28.70 
   5  -3   1  540.35   27.10 
  -5  -3  -1  539.65   25.40 
   5  -3   1  517.45   32.70 
  -5  -3  -1  588.54   35.50 
   5  -3   1  536.85   23.80 
  -5  -3  -1  573.14   22.30 
   5  -3   1  563.74   32.50 
   5  -3   1  545.55   29.80 
  -5  -3  -1  539.35   30.40 
  -5  -3  -1  566.24   32.00 
  -5  -3  -1  449.36   28.80 
   5  -3   1  527.35   30.40 
  -5  -3  -1  529.85   31.40 
   5  -3   1  557.24   19.20 
   5  -3   1  547.95   27.30 
   5  -3   1  560.14   33.70 
   5  -3   1  554.54   32.20 
  -5  -3  -1  534.85   29.50 
  -5  -3  -1  537.05   30.00 
   5   3   1  527.05   35.20 
  -5   3  -1  546.95   31.80 
  -5   3  -1  526.15   21.20 
  -5   3  -1  536.25   33.20 
  -5   3  -1  521.45   30.10 
  -5   3  -1  575.64   29.80 
   5   3   1  512.45   20.80 
   5   3   1  510.45   26.90 
  -5   3  -1  560.74   32.00 
  -5   3  -1  536.75   29.80 
   5   3   1  528.25   35.00 
   5   3   1  521.05   30.80 
   5   3   1  542.95   18.00 
   5   3   1  573.64   38.60 
   5   3   1  571.04   25.30 
   5   3   1  507.25   27.60 
  -5   3  -1  534.75   23.30 
  -5   3  -1  514.15   29.80 
  -5   3  -1  580.04   36.40 
  -5   3  -1  538.05   31.00 
  -5   3  -1  486.05   29.40 
   5   3   1  563.64   32.60 
  -5   3  -1  551.64   20.50 
  -5   3  -1  539.75   28.30 
   5   3   1  508.95   22.80 
   5   3   1  515.65   20.00 
  -5   3  -1  538.95   29.40 
  -5   3  -1  581.44   36.20 
  -5   3  -1  528.75   30.80 
  -5   3  -1  595.24   31.60 
   5   3   1  563.74   31.20 
  -6  -3  -1  184.58   25.20 
   6  -3   1  231.78   17.50 
   6  -3   1  235.98   17.70 
  -6  -3  -1  218.28   16.50 
  -6  -3  -1  212.68   24.30 
   6  -3   1  278.47   30.00 
   6  -3   1  208.98   24.70 
   6  -3   1  261.37   24.40 
  -6  -3  -1  207.08   23.50 
   6  -3   1  190.78   23.10 
   6  -3   1  187.58   23.90 
  -6  -3  -1  213.08   24.30 
  -6  -3  -1  214.38   23.20 
   6  -3   1  164.68   19.40 
  -6  -3  -1  201.08   22.60 
  -6  -3  -1  234.48   13.20 
   6  -3   1  209.38   15.50 
  -6  -3  -1  242.98   24.20 
  -6  -3  -1  193.58   23.60 
   6  -3   1  238.08   26.30 
  -6  -3  -1  227.18   25.10 
  -6  -3  -1  227.48   16.10 
   6  -3   1  256.17   26.60 
   6  -3   1  261.97   26.30 
   6   3   1  225.58   13.50 
  -6   3  -1  241.18   29.00 
   6   3   1  213.68   23.30 
  -6   3  -1  207.48   23.70 
  -6   3  -1  237.58   18.80 
  -6   3  -1  184.68   21.20 
  -6   3  -1  216.88   23.90 
  -6   3  -1  206.48   24.00 
  -6   3  -1  184.38   23.00 
  -6   3  -1  230.88   25.90 
  -6   3  -1  227.28   25.40 
   6   3   1  222.88   25.30 
  -6   3  -1  251.97   25.40 
  -6   3  -1  206.28   22.10 
   6   3   1  210.68   16.60 
  -6   3  -1  265.47   22.50 
   6   3   1  266.77   28.10 
  -6   3  -1  257.97   25.10 
   6   3   1  256.57   27.30 
  -6   3  -1  171.28   25.30 
   6   3   1  209.78   13.00 
   6   3   1  287.57   33.30 
  -6   3  -1  215.58   28.30 
   6   3   1  209.58   28.10 
   6   3   1  274.07   35.00 
   7  -3   1    8.50    7.00 
  -7  -3  -1    6.20    6.30 
  -7  -3  -1    2.70    5.60 
  -7  -3  -1   -2.20    4.50 
   7  -3   1    8.10    7.20 
   7  -3   1    2.50    7.10 
   7  -3   1   11.80    6.90 
  -7  -3  -1    7.50    7.40 
  -7  -3  -1    0.80    5.90 
   7  -3   1    4.20    4.90 
   7  -3   1   -3.50    4.80 
  -7  -3  -1    6.70    4.90 
   7  -3   1   11.40    6.80 
  -7  -3  -1    7.20    6.20 
   7  -3   1    2.30    4.60 
  -7  -3  -1   -1.00    4.70 
   7  -3   1    7.00    5.90 
   7  -3   1    4.20    5.90 
  -7  -3  -1   16.60    7.90 
   7  -3   1    7.70    6.90 
   7   3   1   19.80    8.60 
  -7   3  -1    1.70    5.50 
  -7   3  -1    2.90    4.60 
   7   3   1    4.10    5.70 
   7   3   1   -1.30    3.80 
  -7   3  -1    4.20    7.30 
  -7   3  -1    8.40    7.00 
  -7   3  -1    6.60    6.00 
  -7   3  -1   -0.30    5.00 
  -7   3  -1    3.60    5.10 
   7   3   1   18.50   12.80 
  -7   3  -1   -1.20    5.50 
  -7   3  -1    6.40    6.50 
   7   3   1    3.00    6.40 
   7   3   1    0.80    5.50 
   7   3   1    1.20    6.70 
  -7   3  -1    0.30    5.20 
  -7   3  -1   14.90    9.40 
  -7   3  -1   13.30    8.50 
  -7   3  -1    0.90    5.10 
   7   3   1    3.40    4.70 
  -7   3  -1    4.00    6.70 
   7   3   1   -1.30    5.20 
   7   3   1    7.20    8.20 
   7   3   1    7.60    7.60 
  -7   3  -1    6.80    6.20 
   7   3   1   13.00   11.10 
   8  -3   1   -3.40    7.60 
   8  -3   1   -1.50    5.90 
   8  -3   1   -0.70    6.40 
  -8  -3  -1    5.20    7.40 
  -8  -3  -1   11.80    8.90 
   8  -3   1    4.30    6.00 
   8  -3   1   10.50    8.40 
   8  -3   1    1.10    6.40 
   8  -3   1    1.30    6.70 
  -8  -3  -1   -1.30    4.60 
   8  -3   1    9.70    7.50 
   8  -3   1    2.10    6.20 
  -8  -3  -1    4.60    6.30 
  -8  -3  -1    5.40    8.00 
   8   3   1    1.10    6.00 
  -8   3  -1   15.00    9.60 
  -8   3  -1   10.40    7.50 
  -8   3  -1    4.80    6.70 
  -8   3  -1   20.30   12.70 
  -8   3  -1   -4.50    5.50 
   8   3   1    0.60    6.30 
  -8   3  -1   11.90    9.50 
   8   3   1    6.10   10.10 
   8   3   1    1.80    9.20 
  -8   3  -1   -1.20    5.50 
   8   3   1   -0.90    8.10 
  -8   3  -1   11.10    8.10 
  -8   3  -1    0.70    6.10 
   8   3   1    3.00    6.10 
   8   3   1   -1.10    6.70 
   8   3   1    5.70    7.10 
  -8   3  -1    0.20    6.80 
   8   3   1   12.60   11.50 
   8   3   1    9.00    8.90 
   8   3   1    3.60    8.20 
  -8   3  -1    4.60    6.50 
  -8   3  -1   -3.20    5.40 
   8   3   1    9.50    8.80 
  -8   3  -1    1.30    6.70 
  -8   3  -1    5.40    9.30 
  -9  -3  -1   -3.10    6.10 
   9  -3   1    3.50    8.60 
   9  -3   1    1.00    7.40 
   9  -3   1    6.30    8.70 
   9  -3   1    5.40    9.20 
  -9  -3  -1    3.90    8.80 
   9  -3   1   23.20   11.90 
  -9  -3  -1   -1.60    6.80 
   9  -3   1    5.60    8.50 
   9  -3   1    2.10    9.50 
  -9  -3  -1    6.20    8.50 
   9  -3   1    6.30    8.50 
   9   3   1    8.20   14.30 
  -9   3  -1    7.90    8.80 
  -9   3  -1   11.30   10.10 
  -9   3  -1   21.20   14.60 
   9   3   1    4.10    8.70 
  -9   3  -1   -0.70   10.70 
   9   3   1    5.30    9.60 
   9   3   1   -9.60    9.00 
  -9   3  -1    2.40    7.00 
  -9   3  -1   15.00    8.80 
   9   3   1    4.20    7.70 
  -9   3  -1    3.50    7.70 
  -9   3  -1   10.00   10.00 
   9   3   1    7.90    8.70 
  -9   3  -1    7.30    8.60 
  -9   3  -1    2.00    8.10 
   9   3   1    9.80   11.70 
   9   3   1    4.40    9.40 
   9   3   1   -1.60    7.30 
   9   3   1   14.70   10.50 
   9  -4  -1   51.79   16.10 
  -9  -4   1   60.99   19.50 
   9  -4  -1   50.59   17.00 
   9  -4  -1   87.59   21.50 
  -9  -4   1   81.09   19.80 
   9  -4  -1   57.89   17.30 
   9  -4  -1   95.39   21.30 
  -9  -4   1   68.19   18.30 
  -9  -4   1   44.00   14.70 
   9  -4  -1   72.39   17.50 
   9  -4  -1   72.09   20.20 
   9  -4  -1   64.49   18.40 
  -9   4   1   75.19   20.00 
  -9   4   1   70.69   19.30 
   9   4  -1   67.19   17.50 
  -9   4   1   77.89   22.30 
  -9   4   1   72.89   19.40 
  -9   4   1   57.59   17.60 
   9   4  -1  109.49   26.80 
   9   4  -1   81.79   21.60 
  -9   4   1   95.69   19.40 
  -9   4   1   66.89   21.10 
  -9   4   1   66.89   16.20 
   9   4  -1   45.60   20.30 
   9   4  -1   52.39   21.40 
  -9   4   1   84.29   25.10 
  -9   4   1   87.39   20.40 
  -9   4   1   72.49   19.70 
   9   4  -1   78.49   19.70 
  -8  -4   1  713.83   43.00 
  -8  -4   1  733.23   52.29 
   8  -4  -1  761.12   50.19 
   8  -4  -1  682.43   38.70 
   8  -4  -1  751.92   47.40 
  -8  -4   1  740.03   46.10 
   8  -4  -1  736.23   46.80 
   8  -4  -1  680.03   45.90 
   8  -4  -1  676.83   46.50 
   8  -4  -1  678.43   38.70 
   8  -4  -1  746.03   45.30 
  -8  -4   1  670.53   44.30 
   8  -4  -1  727.43   48.50 
   8  -4  -1  767.42   43.60 
  -8  -4   1  680.43   44.60 
  -8   4   1  791.62   46.50 
  -8   4   1  654.53   44.70 
  -8   4   1  705.73   51.69 
   8   4  -1  730.03   45.10 
   8   4  -1  719.03   49.90 
   8   4  -1  712.83   44.10 
   8   4  -1  804.32   54.69 
   8   4  -1  620.94   50.99 
   8   4  -1  704.73   85.59 
  -8   4   1  672.13   50.49 
   8   4  -1  693.13   46.50 
  -8   4   1  757.92   46.80 
  -8   4   1  808.52   44.80 
  -8   4   1  685.93   45.90 
   8   4  -1  711.63   45.60 
  -8   4   1  731.03   42.90 
  -8   4   1  646.54   44.10 
  -8   4   1  562.44   48.10 
  -8   4   1  702.63   47.00 
   8   4  -1  710.53   45.00 
  -8   4   1  696.13   44.60 
   7  -4  -1   60.59   11.90 
   7  -4  -1   45.60   11.60 
  -7  -4   1   38.00   11.90 
   7  -4  -1   49.50   13.80 
  -7  -4   1   58.39   17.10 
   7  -4  -1   46.10   13.80 
   7  -4  -1   34.40   11.10 
  -7  -4   1   41.90   12.20 
   7  -4  -1   57.29   13.90 
   7  -4  -1   57.89   14.80 
   7  -4  -1   48.60   13.50 
   7  -4  -1   26.80   11.40 
   7  -4  -1   46.80   14.40 
  -7  -4   1   39.00   11.80 
   7  -4  -1   39.90   10.90 
  -7  -4   1   30.20   10.90 
  -7  -4   1   53.79   13.10 
  -7   4   1   43.70   12.70 
   7   4  -1   57.19   17.20 
  -7   4   1   26.10    9.40 
  -7   4   1   56.69   16.70 
  -7   4   1   41.60   14.00 
   7   4  -1   44.60   14.10 
  -7   4   1   66.09   15.80 
  -7   4   1   52.09   14.20 
  -7   4   1   45.30   13.20 
  -7   4   1   44.30   12.90 
  -7   4   1   60.89   15.00 
   7   4  -1   35.80   11.50 
   7   4  -1   43.20   14.00 
   7   4  -1   40.90   15.40 
  -7   4   1   37.20   14.60 
   7   4  -1   58.29   13.00 
  -7   4   1   42.90   11.70 
   7   4  -1   62.39   13.40 
   7   4  -1   37.20   11.90 
  -7   4   1   69.09   13.20 
  -7   4   1   48.10   13.30 
  -7   4   1   47.80   13.30 
  -7   4   1   38.00   13.30 
   6  -4  -1  974.60   49.30 
  -6  -4   1  964.30   47.70 
  -6  -4   1 1003.20   49.60 
   6  -4  -1  926.91   47.40 
   6  -4  -1  914.91   48.70 
   6  -4  -1  939.41   44.20 
  -6  -4   1  979.50   39.80 
  -6  -4   1  909.71   50.49 
   6  -4  -1  907.81   49.80 
  -6  -4   1  944.81   44.00 
  -6  -4   1  934.31   44.50 
   6  -4  -1  941.31   46.30 
   6  -4  -1  956.70   41.70 
  -6  -4   1  916.31   45.70 
   6  -4  -1  982.70   44.10 
  -6  -4   1 1009.50   57.29 
   6  -4  -1  976.60   40.50 
   6  -4  -1  851.61   49.60 
   6  -4  -1  969.90   49.20 
   6  -4  -1  860.61   48.50 
  -6   4   1  871.11   44.60 
  -6   4   1  903.11   52.39 
  -6   4   1  945.71   49.00 
   6   4  -1  946.01   38.30 
  -6   4   1  909.51   45.20 
   6   4  -1  956.50   47.80 
  -6   4   1  943.91   53.69 
  -6   4   1  929.21   49.70 
  -6   4   1  793.82   44.30 
   6   4  -1  969.70   47.30 
  -6   4   1 1049.89   44.60 
  -6   4   1 1011.70   45.70 
   6   4  -1  922.81   43.20 
  -6   4   1  970.90   45.90 
  -6   4   1  981.20   47.90 
   6   4  -1  947.21   56.49 
  -6   4   1  955.60   46.60 
  -6   4   1  934.51   47.40 
   6   4  -1  959.00   34.90 
   6   4  -1  990.40   51.09 
  -6   4   1  968.00   40.30 
  -6   4   1  897.31   47.00 
  -6   4   1  938.91   47.30 
   6   4  -1  867.61   49.60 
  -6   4   1  965.30   52.49 
  -5  -4   1  145.19   17.60 
   5  -4  -1  161.68   18.60 
   5  -4  -1  147.59   16.50 
  -5  -4   1  143.89   17.50 
  -5  -4   1  149.69    9.70 
   5  -4  -1  142.39   21.40 
  -5  -4   1  171.48   16.50 
  -5  -4   1  144.79   22.40 
  -5  -4   1  180.28   21.20 
  -5  -4   1  160.98   26.30 
   5  -4  -1  141.99   19.20 
   5  -4  -1  127.19   19.00 
   5  -4  -1  152.58   18.10 
   5  -4  -1  188.28   23.90 
  -5  -4   1  159.68    8.50 
  -5  -4   1  140.39   17.00 
  -5  -4   1  160.68   19.90 
   5  -4  -1  151.18   18.70 
   5  -4  -1  153.08   20.20 
   5  -4  -1  163.38   21.70 
   5  -4  -1  166.88   13.90 
  -5  -4   1  146.49   19.60 
   5  -4  -1  136.39   19.20 
  -5   4   1  168.18   21.40 
  -5   4   1  153.18   18.50 
  -5   4   1  140.69   17.50 
  -5   4   1  169.18   20.90 
  -5   4   1  154.48   12.10 
   5   4  -1  165.28   11.40 
  -5   4   1  176.78   23.70 
  -5   4   1  139.69   20.80 
  -5   4   1  141.99   21.50 
  -5   4   1  158.18   17.60 
  -5   4   1  152.28   19.90 
   5   4  -1  163.38   18.10 
   5   4  -1  130.39   18.20 
   5   4  -1  156.68   21.50 
   5   4  -1  158.78   11.80 
  -5   4   1  142.39   17.40 
   5   4  -1  157.28   11.10 
  -5   4   1  148.89   17.40 
  -5   4   1  136.59   19.00 
   5   4  -1  154.48   24.50 
  -5   4   1  133.39   18.00 
  -5   4   1  139.79   15.90 
   5   4  -1  189.28   18.50 
  -5   4   1  173.38   23.50 
   5   4  -1  209.38   22.70 
  -5   4   1  141.39   18.00 
  -5   4   1  164.78   19.40 
  -4  -4   1  590.64   23.40 
   4  -4  -1  565.44   32.80 
  -4  -4   1  616.24   32.00 
  -4  -4   1  629.14   29.60 
   4  -4  -1  631.84   32.20 
   4  -4  -1  651.93   33.80 
  -4  -4   1  633.74   42.90 
   4  -4  -1  583.94   31.80 
  -4  -4   1  681.13   36.30 
   4  -4  -1  577.74   34.30 
  -4  -4   1  624.44   29.90 
  -4  -4   1  678.93   36.20 
   4  -4  -1  619.34   27.90 
  -4  -4   1  610.64   33.40 
  -4  -4   1  595.94   22.60 
   4  -4  -1  614.74   35.20 
   4  -4  -1  515.45   30.60 
  -4  -4   1  603.54   29.80 
   4  -4  -1  594.04   30.50 
   4  -4  -1  564.64   29.20 
  -4  -4   1  648.84   32.20 
  -4   4   1  642.64   29.70 
  -4   4   1  629.44   31.30 
  -4   4   1  618.54   29.20 
  -4   4   1  582.64   29.30 
   4   4  -1  616.94   39.00 
  -4   4   1  622.54   30.10 
  -4   4   1  584.54   32.30 
  -4   4   1  646.34   30.90 
  -4   4   1  635.74   37.00 
  -4   4   1  652.63   33.70 
   4   4  -1  656.13   38.10 
  -4   4   1  676.83   34.00 
   4   4  -1  644.04   33.70 
  -4   4   1  623.14   35.40 
   4   4  -1  624.94   34.40 
  -4   4   1  579.94   32.10 
  -4   4   1  595.04   31.60 
  -4   4   1  551.44   31.40 
   4   4  -1  599.84   29.30 
   4   4  -1  607.14   18.80 
  -4   4   1  643.14   31.90 
  -4   4   1  596.84   35.50 
   4   4  -1  618.34   23.80 
  -4   4   1  679.33   32.30 
  -4   4   1  613.04   38.40 
   4   4  -1  625.84   31.60 
   4   4  -1  568.34   25.10 
  -3  -4   1   53.89   11.70 
   3  -4  -1   50.89   10.40 
  -3  -4   1   48.90    7.90 
   3  -4  -1   49.99    9.40 
  -3  -4   1   49.99    4.50 
   3  -4  -1   39.70    9.60 
  -3  -4   1   39.70    9.10 
   3  -4  -1   45.70    9.30 
   3  -4  -1   50.49    9.60 
  -3  -4   1   49.80    8.70 
   3  -4  -1   39.90    9.10 
  -3  -4   1   55.69    7.80 
   3  -4  -1   53.99    8.60 
  -3  -4   1   65.29   11.50 
  -3  -4   1   59.39    9.80 
   3  -4  -1   52.29   10.50 
  -3  -4   1   48.50    8.30 
   3  -4  -1   65.09   11.30 
  -3  -4   1   55.19   16.30 
  -3  -4   1   66.19   11.20 
   3  -4  -1   47.60    7.50 
  -3   4   1   68.89   14.00 
  -3   4   1   42.60    9.00 
  -3   4   1   46.00    9.50 
   3   4  -1   54.99    5.50 
   3   4  -1   26.80    7.60 
  -3   4   1   40.70   10.20 
   3   4  -1   53.59    8.20 
  -3   4   1   32.10    8.30 
   3   4  -1   47.70    7.40 
  -3   4   1   53.19   10.30 
  -3   4   1   40.60    9.60 
  -3   4   1   45.60    8.80 
  -3   4   1   49.99    9.70 
   3   4  -1   50.89   13.10 
  -3   4   1   52.09   11.00 
  -3   4   1   50.89   11.20 
   3   4  -1   81.79   11.90 
  -3   4   1   39.00    8.50 
  -3   4   1   48.10   10.10 
  -3   4   1   57.89    8.70 
   3   4  -1   53.99    9.10 
   3   4  -1   54.09    9.20 
  -3   4   1   37.10    6.80 
  -3   4   1   44.70    7.00 
   3   4  -1   56.09   12.50 
   3   4  -1   45.60    3.50 
  -3   4   1   48.90    8.70 
  -3   4   1   52.89    9.70 
  -3   4   1   50.69    6.90 
   3   4  -1   49.80    6.10 
  -3   4   1   41.60    4.30 
  -2  -4   1  226.18   14.30 
  -2  -4   1  219.28   14.30 
   2  -4  -1  206.38   15.90 
  -2  -4   1  222.88   14.30 
  -2  -4   1  252.77   15.60 
   2  -4  -1  232.78   15.20 
  -2  -4   1  215.48   16.90 
  -2  -4   1  234.08   13.70 
  -2  -4   1  213.68   12.50 
   2  -4  -1  233.68   17.10 
   2  -4  -1  228.18   10.20 
  -2  -4   1  184.58   28.20 
   2  -4  -1  236.18   16.80 
   2  -4  -1  222.58   16.90 
  -2  -4   1  225.28   10.50 
   2  -4  -1  216.58   15.90 
  -2  -4   1  227.28   11.30 
   2  -4  -1  227.58   12.10 
  -2  -4   1  223.38   16.70 
   2  -4  -1  249.58   16.50 
  -2  -4   1  165.78   20.70 
   2  -4  -1  224.88   18.00 
  -2  -4   1  237.68   12.20 
  -2   4   1  213.78   15.70 
  -2   4   1  190.48   15.20 
   2   4  -1  220.78   16.50 
   2   4  -1  237.28   11.50 
  -2   4   1  245.58   13.70 
   2   4  -1  234.48   14.90 
   2   4  -1  235.88   12.10 
  -2   4   1  263.07   17.50 
   2   4  -1  208.38   25.30 
  -2   4   1  222.68   16.40 
   2   4  -1  225.18   11.70 
  -2   4   1  239.08   10.70 
   2   4  -1  251.07   16.00 
  -2   4   1  208.38   21.20 
   2   4  -1  228.18   10.30 
  -2   4   1  231.68   15.60 
  -2   4   1  204.88   15.20 
  -2   4   1  202.48   16.90 
  -2   4   1  208.08   11.30 
   2   4  -1  259.17   15.50 
  -2   4   1  232.78    9.90 
  -2   4   1  190.18   15.60 
  -2   4   1  237.78   19.00 
  -2   4   1  256.77   18.40 
  -2   4   1  228.58   17.70 
  -2   4   1  186.68   14.70 
  -2   4   1  220.78   16.50 
  -2   4   1  245.58   13.20 
   2   4  -1  236.98   24.80 
   2   4  -1  219.88   10.10 
   1  -4  -1   10.80    4.40 
  -1  -4   1   19.40    7.90 
   1  -4  -1   14.50    5.10 
  -1  -4   1   13.10    4.50 
  -1  -4   1   13.80    4.40 
   1  -4  -1    3.30    3.70 
  -1  -4   1    7.30    4.00 
   1  -4  -1   14.20    4.90 
  -1  -4   1   12.50    3.80 
  -1  -4   1   14.70    5.30 
  -1  -4   1    8.60    4.10 
  -1  -4   1   13.00    3.70 
   1  -4  -1   15.30    5.40 
   1  -4  -1    9.30    3.50 
   1  -4  -1   12.50    4.70 
   1  -4  -1   13.20    4.70 
   1  -4  -1    9.90    3.80 
  -1  -4   1   15.10    4.30 
  -1  -4   1   18.50    9.70 
  -1  -4   1   12.50    4.70 
   1  -4  -1   17.30    5.60 
  -1  -4   1   13.30    5.30 
  -1  -4   1   10.60    4.60 
  -1  -4   1   10.30    2.10 
  -1  -4   1   12.40    3.80 
   1  -4  -1    3.10    3.30 
   1  -4  -1   10.40    4.60 
   1   4  -1   15.10    5.20 
   1   4  -1   14.60    5.00 
  -1   4   1    3.80    3.50 
  -1   4   1    4.70    3.60 
   1   4  -1   19.50    4.60 
  -1   4   1    2.70    3.20 
   1   4  -1    8.00    5.40 
   1   4  -1   15.80    2.90 
  -1   4   1   26.80    6.60 
   1   4  -1   19.30    5.60 
  -1   4   1   14.50    5.50 
  -1   4   1   13.20    4.00 
  -1   4   1   11.60    4.20 
  -1   4   1   10.70    5.10 
  -1   4   1    8.00    3.20 
  -1   4   1   23.40    7.10 
   1   4  -1    9.50    3.20 
  -1   4   1   12.10    4.90 
   1   4  -1   10.70    5.00 
   1   4  -1   12.30    3.90 
  -1   4   1   13.40    5.10 
  -1   4   1   15.20    5.10 
  -1   4   1   12.70    4.80 
   1   4  -1   17.30    4.90 
   1   4  -1   10.70    4.30 
  -1   4   1    7.60    4.60 
   0  -4  -1  326.87   19.90 
   0  -4  -1  380.36   20.60 
   0  -4  -1  347.07   22.60 
   0  -4  -1  313.57   18.00 
   0  -4  -1  330.97   19.80 
   0  -4  -1  330.87   17.20 
   0  -4   1  330.97   17.40 
   0  -4  -1  311.87   16.50 
   0  -4  -1  292.77   17.30 
   0  -4  -1  327.17   13.70 
   0  -4  -1  312.47   16.50 
   0  -4  -1  321.57   18.60 
   0  -4   1  315.87   19.50 
   0  -4  -1  336.67   17.20 
   0  -4   1  284.37   18.90 
   0  -4   1  310.37   16.00 
   0  -4   1  347.37   20.00 
   0  -4  -1  310.17   26.40 
   0  -4  -1  316.57   16.10 
   0  -4   1  295.97   17.80 
   0  -4  -1  293.77   16.00 
   0  -4   1  380.66   29.70 
   0  -4   1  282.97   21.30 
   0  -4   1  325.57   17.30 
   0  -4  -1  272.67   18.40 
   0  -4  -1  338.47   17.70 
   0   4  -1  320.97   19.10 
   0   4   1  322.17   17.40 
   0   4  -1  292.57   22.40 
   0   4   1  357.16   22.40 
   0   4  -1  329.67   17.60 
   0   4  -1  343.17   16.70 
   0   4  -1  328.07   19.20 
   0   4   1  315.57   19.70 
   0   4  -1  338.07   17.60 
   0   4   1  347.57   16.90 
   0   4  -1  316.37   18.20 
   0   4   1  358.66   20.00 
   0   4  -1  338.57   16.70 
   0   4   1  350.46   19.60 
   0   4   1  313.27   18.20 
   0   4   1  282.07   20.00 
   0   4  -1  337.67   19.20 
   0   4  -1  315.27   22.20 
   0   4   1  335.87   17.00 
   0   4   1  360.76   17.50 
   0   4   1  357.96   19.70 
   0   4   1  294.37   15.90 
   0   4  -1  351.66   18.40 
   0   4   1  352.96   20.90 
  -1  -4  -1  143.09   14.00 
  -1  -4  -1  151.98   10.10 
   1  -4   1  137.49    6.90 
   1  -4   1  162.18   10.40 
  -1  -4  -1  147.29   14.40 
   1  -4   1  141.19   14.30 
  -1  -4  -1  161.18   19.90 
  -1  -4  -1  137.29   14.40 
  -1  -4  -1  158.58   16.20 
  -1  -4  -1  144.89   10.10 
  -1  -4  -1  134.59   13.30 
   1  -4   1  120.19   13.00 
   1  -4   1  147.69   17.70 
  -1  -4  -1  165.38   10.50 
   1  -4   1  150.38   16.00 
  -1  -4  -1  153.28   12.40 
   1  -4   1  146.09   15.90 
   1  -4   1  146.99   15.20 
   1  -4   1  144.29   15.50 
  -1  -4  -1  120.49   21.80 
  -1  -4  -1  155.88   10.40 
  -1  -4  -1  149.29    7.90 
  -1  -4  -1  162.78   18.50 
  -1  -4  -1  167.98   13.80 
  -1  -4  -1  161.58   12.30 
  -1  -4  -1  170.68   10.50 
   1  -4   1  143.99    6.80 
  -1  -4  -1  138.89    9.50 
  -1  -4  -1  159.18    9.00 
  -1   4  -1  145.29   17.80 
  -1   4  -1  136.99    8.70 
   1   4   1  140.59   14.30 
   1   4   1  134.69    9.60 
  -1   4  -1  151.48   15.00 
   1   4   1  172.68   13.90 
   1   4   1  150.88    9.70 
   1   4   1  146.39   10.20 
   1   4   1  122.19   13.00 
  -1   4  -1  135.49   14.20 
  -1   4  -1  149.59   11.60 
  -1   4  -1  170.18   16.90 
   1   4   1  142.79   16.80 
  -1   4  -1  157.68   10.30 
  -1   4  -1  137.99   14.40 
  -1   4  -1  149.19   13.90 
  -1   4  -1  108.99   16.00 
  -1   4  -1  143.39   16.40 
  -1   4  -1  169.08   13.10 
  -1   4  -1  131.19   13.90 
  -1   4  -1  140.69   10.20 
   1   4   1  165.18   10.30 
  -1   4  -1  147.39    9.20 
  -1   4  -1  124.09   14.00 
  -2  -4  -1 2043.90   59.59 
   2  -4   1 2112.69   70.89 
  -2  -4  -1 2184.18   74.99 
  -2  -4  -1 2145.39   59.99 
   2  -4   1 2036.30   71.39 
  -2  -4  -1 2027.30   60.29 
   2  -4   1 2042.50   69.69 
  -2  -4  -1 2040.70   67.19 
   2  -4   1 2007.50   73.09 
  -2  -4  -1 2086.89   61.19 
   2  -4   1 2067.19   61.29 
   2  -4   1 2082.79   60.79 
   2  -4   1 2191.58   71.39 
  -2  -4  -1 1925.71   69.19 
   2  -4   1 2122.09   59.99 
  -2  -4  -1 2144.49   68.99 
  -2  -4  -1 2099.49   66.79 
   2  -4   1 2012.40   69.19 
  -2  -4  -1 2175.78   69.99 
   2  -4   1 2137.39   69.59 
  -2  -4  -1 2130.79   66.49 
  -2  -4  -1 1979.60   68.79 
  -2  -4  -1 2107.79   60.49 
  -2  -4  -1 1872.21   85.39 
  -2  -4  -1 2164.08   59.39 
  -2  -4  -1 2074.89   69.59 
  -2   4  -1 2034.10   68.59 
  -2   4  -1 2101.19   70.39 
   2   4   1 2092.19   61.49 
   2   4   1 2141.19   70.49 
  -2   4  -1 2129.19   60.79 
  -2   4  -1 2038.00   68.89 
   2   4   1 2043.30   71.39 
  -2   4  -1 2140.99   68.09 
  -2   4  -1 2017.10   75.09 
   2   4   1 2090.49   64.69 
  -2   4  -1 2041.50   58.09 
  -2   4  -1 2124.89   73.59 
   2   4   1 2073.99   61.19 
  -2   4  -1 2120.29   70.69 
  -2   4  -1 2050.59   71.49 
   2   4   1 2139.69   59.89 
   2   4   1 2033.80   72.39 
  -2   4  -1 2110.59   70.59 
  -2   4  -1 1921.01   68.99 
  -2   4  -1 2008.80   61.69 
   2   4   1 2123.79   66.39 
   2   4   1 2114.49   59.89 
  -2   4  -1 2138.99   77.09 
  -2   4  -1 2010.50   66.89 
   2   4   1 2160.48   67.39 
  -2   4  -1 2047.00   63.69 
  -2   4  -1 2060.09   68.99 
  -2   4  -1 2024.20   59.69 
   2   4   1 2130.49   59.69 
  -2   4  -1 2050.69   67.89 
   3  -4   1  128.19   14.80 
   3  -4   1  123.39   15.40 
  -3  -4  -1  127.69    6.30 
  -3  -4  -1  127.69   15.80 
  -3  -4  -1  136.39    7.60 
   3  -4   1  148.69   18.70 
   3  -4   1  108.39   15.40 
  -3  -4  -1  125.39   15.20 
  -3  -4  -1  142.09   18.00 
   3  -4   1  120.29   12.30 
   3  -4   1  114.99   14.00 
  -3  -4  -1  123.69    8.00 
  -3  -4  -1  133.59   11.20 
  -3  -4  -1  123.29   12.00 
  -3  -4  -1  114.39   13.90 
   3  -4   1  127.39    6.50 
  -3  -4  -1  116.99   13.30 
  -3  -4  -1  131.09   15.40 
   3  -4   1  147.69   17.20 
   3  -4   1  131.29   16.00 
  -3  -4  -1  119.09   14.40 
  -3  -4  -1  133.09   21.40 
  -3  -4  -1  118.39   15.40 
   3  -4   1  107.39   15.50 
  -3  -4  -1  164.18   18.20 
  -3   4  -1  139.09   15.70 
  -3   4  -1  107.69   13.40 
   3   4   1  139.39   14.00 
  -3   4  -1  106.19   14.10 
   3   4   1  132.19    6.90 
   3   4   1  116.39   16.70 
  -3   4  -1  131.29   19.20 
  -3   4  -1  155.38   17.40 
  -3   4  -1  108.39   15.60 
   3   4   1  124.99    9.10 
   3   4   1  125.19   12.80 
  -3   4  -1  135.19   16.20 
  -3   4  -1  128.99   18.10 
   3   4   1  136.79   19.00 
  -3   4  -1  123.89   13.20 
  -3   4  -1  120.79   14.70 
  -3   4  -1  107.89   13.60 
   3   4   1  138.99   14.70 
  -3   4  -1  140.29   16.20 
  -3   4  -1  104.59   17.00 
   3   4   1  133.89   16.00 
  -3   4  -1  114.19   13.80 
   3   4   1  104.39   14.60 
  -3   4  -1   98.09   13.00 
  -3   4  -1  149.69   16.30 
   4  -4   1  794.32   40.30 
   4  -4   1  804.62   36.00 
  -4  -4  -1  697.23   36.70 
   4  -4   1  712.43   37.80 
   4  -4   1  862.41   43.00 
   4  -4   1  810.52   38.90 
  -4  -4  -1  735.83   43.50 
  -4  -4  -1  770.42   34.30 
  -4  -4  -1  875.21   41.00 
  -4  -4  -1  786.92   34.20 
  -4  -4  -1  807.82   38.40 
   4  -4   1  791.82   37.70 
  -4  -4  -1  703.13   34.50 
   4  -4   1  753.82   36.60 
  -4  -4  -1  728.63   36.50 
   4  -4   1  773.92   35.60 
  -4  -4  -1  791.12   34.70 
   4  -4   1  762.62   38.60 
  -4  -4  -1  709.73   32.00 
  -4  -4  -1  721.33   36.30 
  -4   4  -1  766.62   43.10 
  -4   4  -1  807.62   34.40 
  -4   4  -1  859.41   38.80 
  -4   4  -1  744.43   35.40 
  -4   4  -1  730.03   28.80 
  -4   4  -1  740.23   36.40 
  -4   4  -1  758.62   36.10 
   4   4   1  760.02   30.40 
  -4   4  -1  704.03   36.90 
  -4   4  -1  728.43   37.80 
   4   4   1  765.42   22.00 
   4   4   1  760.02   30.10 
   4   4   1  795.92   38.40 
   4   4   1  779.82   41.10 
  -4   4  -1  765.22   39.20 
  -4   4  -1  744.83   34.40 
  -4   4  -1  798.22   36.10 
   4   4   1  764.22   31.50 
   4   4   1  795.72   40.00 
  -4   4  -1  794.42   37.40 
  -4   4  -1  762.72   42.90 
   4   4   1  782.82   25.90 
  -4   4  -1  793.82   36.30 
   4   4   1  751.02   21.80 
   4   4   1  732.43   39.20 
   4   4   1  724.63   36.40 
  -4   4  -1  745.23   39.80 
  -4   4  -1  836.82   37.60 
   5  -4   1  140.79   20.90 
  -5  -4  -1  165.58   20.40 
  -5  -4  -1  163.78   11.70 
   5  -4   1  170.78   21.50 
   5  -4   1  133.99   19.30 
   5  -4   1  164.88   19.60 
   5  -4   1  177.58   10.90 
  -5  -4  -1  166.58   20.20 
   5  -4   1  173.48   18.80 
  -5  -4  -1  149.69   17.20 
  -5  -4  -1  144.79   18.00 
  -5  -4  -1  191.88   23.70 
   5  -4   1  167.58   22.30 
   5  -4   1  143.69   19.70 
  -5  -4  -1  178.68   22.40 
   5  -4   1  163.88   21.70 
  -5  -4  -1  155.08   13.00 
   5  -4   1  191.88   20.10 
  -5  -4  -1  121.39   17.90 
  -5  -4  -1  138.19   22.00 
   5  -4   1  140.49   17.70 
  -5  -4  -1  117.19   16.50 
  -5   4  -1  138.29   19.20 
  -5   4  -1  175.58   19.40 
   5   4   1  178.88   12.90 
  -5   4  -1  149.09   19.80 
  -5   4  -1  173.48   20.20 
  -5   4  -1  165.48   19.40 
   5   4   1  155.58   23.40 
   5   4   1  178.38   11.70 
   5   4   1  160.78   19.50 
  -5   4  -1  177.18   21.90 
  -5   4  -1  183.98   20.80 
  -5   4  -1  176.18   20.20 
  -5   4  -1  152.48   23.00 
   5   4   1  154.18   21.10 
  -5   4  -1  163.48   22.30 
  -5   4  -1  134.89   18.30 
  -5   4  -1  191.28   25.50 
  -5   4  -1  157.98   18.90 
   5   4   1  192.48   23.10 
   5   4   1  103.19   16.40 
  -5   4  -1  145.99   15.60 
  -5   4  -1  152.88   19.50 
  -5   4  -1  139.29   17.80 
   6  -4   1 2317.87   84.79 
   6  -4   1 2344.37   92.89 
  -6  -4  -1 2370.66   94.09 
   6  -4   1 2320.87   89.49 
  -6  -4  -1 2216.28   81.69 
   6  -4   1 2275.67   91.79 
  -6  -4  -1 2263.87   88.39 
  -6  -4  -1 2444.46   87.19 
   6  -4   1 2385.36   81.19 
   6  -4   1 2270.57   83.59 
  -6  -4  -1 2341.67   85.99 
   6  -4   1 2288.47   88.79 
  -6  -4  -1 2483.65   75.99 
   6  -4   1 2281.67   89.39 
   6  -4   1 2378.66   81.69 
   6  -4   1 2280.57   87.39 
  -6  -4  -1 2247.58   87.39 
  -6  -4  -1 2448.96   85.69 
  -6  -4  -1 2405.86   87.39 
   6  -4   1 2208.78   89.09 
  -6   4  -1 2320.47   96.79 
   6   4   1 2250.37   93.29 
  -6   4  -1 2318.37   93.79 
  -6   4  -1 2390.36   97.79 
  -6   4  -1 2404.46   87.29 
  -6   4  -1 2389.36   89.39 
  -6   4  -1 2305.67   89.19 
  -6   4  -1 2134.59   84.99 
   6   4   1 2464.85   89.49 
   6   4   1 2342.07   72.79 
  -6   4  -1 2326.47   86.29 
   6   4   1 2312.07   74.39 
   6   4   1 2448.26   90.59 
  -6   4  -1 2351.06   86.09 
   6   4   1 2375.16   99.09 
  -6   4  -1 2537.05   90.69 
  -6   4  -1 2366.06   85.89 
   6   4   1 2386.66   87.49 
  -6   4  -1 2423.36   88.09 
  -6   4  -1 2347.07   74.49 
  -6   4  -1 2362.46   86.39 
   6   4   1 2454.05   93.99 
   6   4   1 2374.46   90.69 
  -6   4  -1 2300.97   83.19 
  -6   4  -1 2281.27   86.99 
   7  -4   1  104.69   19.60 
   7  -4   1  126.69   23.10 
   7  -4   1  130.19   21.80 
  -7  -4  -1  116.19   20.00 
   7  -4   1  114.19   18.10 
  -7  -4  -1  105.39   17.10 
   7  -4   1  129.79   22.50 
   7  -4   1  123.59   22.60 
  -7  -4  -1  130.29   24.30 
   7  -4   1  106.49   15.40 
   7  -4   1  104.99   17.60 
   7  -4   1  119.59   20.70 
  -7  -4  -1  147.59   22.10 
  -7  -4  -1   76.49   16.30 
   7  -4   1  110.59   20.50 
   7  -4   1  144.59   18.40 
  -7  -4  -1  113.89   19.80 
  -7  -4  -1  135.79   20.30 
   7   4   1  115.19   20.80 
  -7   4  -1  111.59   23.30 
  -7   4  -1  102.19   16.30 
   7   4   1  155.78   26.40 
  -7   4  -1  109.89   19.00 
   7   4   1  140.89   25.20 
  -7   4  -1  140.39   21.20 
   7   4   1  119.29   25.70 
   7   4   1  125.49   20.80 
  -7   4  -1  122.59   21.70 
  -7   4  -1  100.69   22.40 
  -7   4  -1  111.89   23.70 
  -7   4  -1   99.89   22.50 
  -7   4  -1  148.39   22.50 
   7   4   1  108.79   19.20 
  -7   4  -1  119.99   21.30 
   7   4   1  115.89   21.50 
  -7   4  -1  113.49   19.00 
  -7   4  -1  125.49   20.80 
  -7   4  -1  109.79   18.60 
  -7   4  -1  100.89   19.40 
   7   4   1  112.69   20.30 
  -7   4  -1  170.28   24.40 
   8  -4   1 1947.01   85.19 
  -8  -4  -1 2060.09   85.39 
   8  -4   1 2207.28   81.49 
   8  -4   1 1831.92   85.89 
  -8  -4  -1 1954.20   90.19 
   8  -4   1 1934.01   83.19 
  -8  -4  -1 1972.70   85.39 
  -8  -4  -1 1998.00   86.49 
   8  -4   1 1991.10   89.59 
   8  -4   1 1947.91   86.49 
   8  -4   1 1969.90   78.19 
   8  -4   1 1955.70   86.69 
   8  -4   1 1951.60   78.89 
   8  -4   1 1928.31   89.29 
  -8  -4  -1 2058.29   85.19 
  -8   4  -1 2150.58   80.99 
  -8   4  -1 1947.91   85.19 
  -8   4  -1 1936.71   82.79 
  -8   4  -1 1936.81   85.29 
   8   4   1 2001.50   85.19 
   8   4   1 1933.61   97.39 
   8   4   1 2010.40   88.49 
  -8   4  -1 2094.89   89.19 
  -8   4  -1 1957.80   97.19 
  -8   4  -1 1964.70   95.59 
  -8   4  -1 2030.70   84.89 
   8   4   1 1929.11   83.49 
   8   4   1 1845.82   82.39 
   8   4   1 1901.91   88.19 
   8   4   1 2016.90   91.39 
  -8   4  -1 2070.99   89.29 
  -8   4  -1 1937.71   81.59 
  -8   4  -1 1915.51   80.69 
   8   4   1 1856.11   90.49 
  -8   4  -1 2243.18   99.09 
  -8   4  -1 1972.10   81.39 
   9  -4   1  102.49   22.10 
  -9  -4  -1   84.19   19.40 
  -9  -4  -1   68.99   16.80 
   9  -4   1   75.69   20.20 
   9  -4   1  110.79   27.30 
  -9  -4  -1   95.19   22.00 
  -9  -4  -1   69.19   20.40 
   9  -4   1  118.99   25.70 
   9  -4   1   84.69   20.80 
  -9  -4  -1   67.29   18.80 
   9  -4   1   85.29   20.50 
   9  -4   1   81.69   21.30 
   9  -4   1   99.19   22.00 
  -9   4  -1   91.49   26.90 
  -9   4  -1   83.59   18.00 
  -9   4  -1   79.69   25.90 
   9   4   1  103.19   23.70 
   9   4   1   93.49   36.50 
  -9   4  -1  115.69   23.60 
  -9   4  -1   66.69   18.90 
   9   4   1   95.99   22.40 
   9   4   1   45.00   16.30 
  -9   4  -1  123.29   24.10 
   9   4   1   90.79   21.40 
   9   4   1   82.59   26.70 
  -9   4  -1   56.19   20.60 
   9   4   1   91.89   21.50 
  -9   4  -1   93.99   20.00 
  -9   4  -1  104.29   22.30 
   9  -5  -1  167.18   29.60 
  -9  -5   1  197.88   35.30 
   9  -5  -1  127.79   25.60 
  -9  -5   1  237.98   34.30 
   9  -5  -1  184.48   28.00 
   9  -5  -1  276.17   37.10 
   9  -5  -1  240.08   35.70 
  -9  -5   1  175.28   28.10 
  -9  -5   1  223.78   31.80 
   9  -5  -1  209.38   33.50 
   9  -5  -1  189.68   34.10 
   9  -5  -1  203.28   33.10 
   9   5  -1  218.58   31.90 
   9   5  -1  221.38   35.20 
  -9   5   1  255.87   32.10 
  -9   5   1  157.38   27.00 
   9   5  -1  230.18   37.60 
  -9   5   1  217.28   38.60 
   9   5  -1  239.08   41.50 
  -9   5   1  189.48   30.70 
  -9   5   1  219.98   38.30 
  -9   5   1  240.88   35.60 
   9   5  -1  198.98   31.70 
  -9   5   1  155.38   31.60 
  -9   5   1  250.77   32.80 
  -9   5   1  234.08   34.60 
  -9   5   1  188.68   31.00 
   8  -5  -1    9.10   10.70 
   8  -5  -1    1.10    8.20 
   8  -5  -1    6.80    7.70 
  -8  -5   1    7.30    8.30 
   8  -5  -1    5.50    8.60 
   8  -5  -1    6.20    7.40 
   8  -5  -1    2.10    6.80 
  -8  -5   1   10.30    8.70 
   8  -5  -1    6.90    9.20 
   8  -5  -1   -0.90    7.40 
  -8  -5   1   13.30   11.70 
   8  -5  -1    9.30    8.90 
  -8  -5   1   -0.90    6.00 
   8  -5  -1    2.20    6.20 
  -8  -5   1   -3.40    6.70 
  -8   5   1   14.00    9.50 
   8   5  -1    1.40    8.00 
   8   5  -1    3.80    7.50 
  -8   5   1   17.70   12.40 
  -8   5   1   -5.30    5.90 
  -8   5   1    1.60    7.00 
  -8   5   1   14.50    9.80 
   8   5  -1   17.80   12.70 
  -8   5   1    0.00    7.30 
  -8   5   1   12.30    9.50 
  -8   5   1    5.40    6.40 
  -8   5   1    1.10    7.30 
  -8   5   1   -2.10    7.40 
  -8   5   1    0.00    8.40 
  -8   5   1   26.40   14.50 
   8   5  -1   -2.20    9.00 
  -8   5   1   12.10    9.20 
   8   5  -1   10.70    9.10 
   7  -5  -1  695.03   37.50 
   7  -5  -1  658.33   43.40 
   7  -5  -1  642.04   40.90 
  -7  -5   1  680.83   42.60 
   7  -5  -1  744.73   40.70 
  -7  -5   1  743.93   41.20 
  -7  -5   1  717.83   51.79 
  -7  -5   1  737.03   46.10 
   7  -5  -1  686.03   44.40 
   7  -5  -1  749.13   45.40 
   7  -5  -1  776.32   42.10 
  -7  -5   1  680.93   41.50 
   7  -5  -1  702.53   45.20 
   7  -5  -1  784.52   49.20 
   7  -5  -1  727.93   47.50 
  -7   5   1  734.63   40.30 
  -7   5   1  634.34   43.00 
   7   5  -1  618.84   40.00 
  -7   5   1  663.33   48.20 
  -7   5   1  760.82   46.50 
  -7   5   1  665.93   49.50 
  -7   5   1  703.93   43.30 
   7   5  -1  736.03   50.39 
  -7   5   1  708.83   41.90 
  -7   5   1  664.93   48.70 
  -7   5   1  645.04   42.60 
  -7   5   1  702.73   41.90 
   7   5  -1  681.33   37.70 
  -7   5   1  609.24   41.80 
   7   5  -1  703.33   46.90 
  -7   5   1  677.53   40.70 
   7   5  -1  677.23   43.90 
  -7   5   1  726.33   44.50 
  -7   5   1  654.33   41.10 
   7   5  -1  703.53   51.09 
  -6  -5   1    7.60    6.60 
   6  -5  -1   10.50    7.40 
   6  -5  -1   25.30   10.70 
  -6  -5   1   14.90   10.40 
  -6  -5   1   25.00    9.70 
   6  -5  -1    3.60    5.80 
   6  -5  -1   12.90    8.70 
  -6  -5   1   28.20   10.40 
   6  -5  -1   10.40    7.70 
   6  -5  -1    9.90    8.70 
  -6  -5   1   28.50   12.80 
  -6  -5   1   27.90   10.60 
   6  -5  -1    3.90    5.70 
  -6  -5   1   14.00    8.60 
   6  -5  -1   14.50    8.00 
  -6  -5   1   11.70    7.00 
   6  -5  -1    9.90    6.50 
   6  -5  -1   22.70   10.80 
   6  -5  -1    0.80    5.20 
   6   5  -1    6.70    8.90 
  -6   5   1   16.90    9.10 
  -6   5   1    9.60    7.40 
  -6   5   1   25.80   11.00 
  -6   5   1   28.40   10.20 
   6   5  -1   17.10    7.80 
   6   5  -1   13.70    7.60 
  -6   5   1   25.40   10.10 
   6   5  -1   20.20    9.10 
  -6   5   1   16.60    7.00 
  -6   5   1   18.10    9.80 
   6   5  -1   22.80   11.50 
  -6   5   1    4.40    6.90 
  -6   5   1   24.80    8.80 
  -6   5   1   33.80   13.40 
  -6   5   1   17.40    7.40 
  -6   5   1   21.30    9.70 
  -6   5   1   16.10    8.50 
  -6   5   1   19.30    8.80 
  -6   5   1   11.60    7.50 
  -6   5   1    5.80    7.90 
  -5  -5   1 2445.06   80.59 
   5  -5  -1 2439.16   94.69 
   5  -5  -1 2421.96   84.89 
   5  -5  -1 2411.26   91.19 
  -5  -5   1 2453.75  106.49 
  -5  -5   1 2518.75   89.49 
  -5  -5   1 2679.03   99.09 
   5  -5  -1 2420.66   87.89 
   5  -5  -1 2415.96   91.19 
   5  -5  -1 2487.25   87.29 
  -5  -5   1 2583.54   84.99 
  -5  -5   1 2537.35   84.59 
  -5  -5   1 2417.46   88.39 
  -5  -5   1 2488.35   87.89 
  -5  -5   1 2573.34   92.99 
   5  -5  -1 2471.85   78.79 
   5  -5  -1 2444.46   91.09 
   5  -5  -1 2387.76   88.89 
   5  -5  -1 2586.84   91.39 
  -5   5   1 2449.25   90.49 
   5   5  -1 2376.16   89.99 
  -5   5   1 2516.45   98.19 
   5   5  -1 2407.06   76.99 
  -5   5   1 2309.47   83.59 
  -5   5   1 2406.36   95.79 
  -5   5   1 2412.96   90.49 
   5   5  -1 2451.85   83.79 
   5   5  -1 2567.74  101.99 
  -5   5   1 2389.86   85.59 
  -5   5   1 2332.87   88.29 
  -5   5   1 2469.55   95.59 
  -5   5   1 2426.46   83.59 
  -5   5   1 2451.15   84.79 
  -5   5   1 2403.86   87.39 
  -5   5   1 2469.55   90.59 
   5   5  -1 2406.76   86.59 
  -5   5   1 2398.56   86.69 
   5   5  -1 2577.34  100.79 
  -5   5   1 2487.75   91.09 
  -5   5   1 2497.85   98.29 
  -5   5   1 2451.85   84.69 
  -5   5   1 2496.55   90.79 
  -4  -5   1  100.19   14.60 
   4  -5  -1   56.99   11.90 
   4  -5  -1  109.39   16.90 
  -4  -5   1   94.59   15.30 
   4  -5  -1   71.19   13.50 
  -4  -5   1  119.29   14.70 
  -4  -5   1   82.39   15.50 
  -4  -5   1  101.79   23.50 
  -4  -5   1   97.29   10.60 
  -4  -5   1   80.89   11.60 
  -4  -5   1   72.19   10.10 
   4  -5  -1   71.59   12.50 
  -4  -5   1   71.59   16.50 
   4  -5  -1   77.59   13.30 
   4  -5  -1   80.99   14.10 
   4  -5  -1   58.99   11.90 
  -4  -5   1   74.89    9.50 
  -4  -5   1   89.39   16.30 
   4  -5  -1   90.69   16.90 
   4  -5  -1   43.40   11.00 
  -4   5   1   70.79   13.60 
   4   5  -1   61.79   12.10 
   4   5  -1   79.39   14.40 
  -4   5   1   93.79   14.90 
  -4   5   1   70.59   12.30 
  -4   5   1   65.29   13.00 
  -4   5   1   74.39   12.70 
  -4   5   1   66.09   13.00 
   4   5  -1   91.69   12.10 
  -4   5   1   99.79   18.20 
  -4   5   1   69.29   13.00 
   4   5  -1   92.49   21.40 
  -4   5   1   97.99   20.40 
  -4   5   1   58.09   14.80 
  -4   5   1   77.89   11.80 
  -4   5   1   66.89   13.10 
  -4   5   1   81.49   15.70 
  -4   5   1   74.29   12.30 
  -4   5   1   53.89   12.40 
  -4   5   1   47.20   10.50 
   4   5  -1   41.80    9.80 
   4   5  -1   79.79   17.10 
  -4   5   1   67.39   10.40 
   3  -5  -1 2102.99   73.59 
  -3  -5   1 2094.39   99.19 
   3  -5  -1 2233.18   77.89 
  -3  -5   1 2130.99   67.39 
   3  -5  -1 2042.70   76.79 
  -3  -5   1 2116.29   58.99 
  -3  -5   1 2188.78   75.79 
  -3  -5   1 2085.69   70.79 
   3  -5  -1 2233.88   81.89 
  -3  -5   1 2097.09   58.79 
  -3  -5   1 2131.09   64.39 
  -3  -5   1 2264.37   82.19 
   3  -5  -1 2178.38   74.89 
   3  -5  -1 2079.09   76.99 
  -3  -5   1 2238.98   67.49 
  -3  -5   1 2078.79   78.29 
  -3  -5   1 2192.38   71.79 
   3  -5  -1 2006.50   75.19 
   3  -5  -1 2210.58   76.09 
  -3  -5   1 2153.08   77.39 
  -3  -5   1 2141.39   62.29 
  -3  -5   1 2193.38   73.79 
  -3  -5   1 2197.68   66.79 
   3  -5  -1 1995.70   75.89 
  -3  -5   1 2095.89   60.99 
  -3   5   1 2052.69   75.09 
  -3   5   1 2082.79   74.09 
  -3   5   1 2273.27   81.49 
  -3   5   1 2017.10   77.89 
  -3   5   1 2164.68   61.89 
   3   5  -1 2180.28   62.79 
  -3   5   1 2150.28   66.69 
  -3   5   1 2103.49   74.09 
  -3   5   1 2091.49   75.39 
   3   5  -1 2186.18   77.69 
  -3   5   1 2210.58   77.29 
   3   5  -1 1975.10   87.29 
  -3   5   1 2044.30   76.39 
  -3   5   1 2194.58   75.49 
   3   5  -1 2103.59   70.29 
   3   5  -1 2155.08   59.09 
  -3   5   1 2247.38   78.49 
   3   5  -1 2149.98   66.09 
  -3   5   1 2110.49   76.39 
  -3   5   1 2122.39   71.49 
   3   5  -1 2237.78   73.89 
  -3   5   1 2241.68   69.69 
  -3   5   1 2115.69   64.99 
  -3   5   1 2097.99   81.49 
   3   5  -1 2179.58   74.89 
  -3   5   1 2183.58   81.89 
  -3   5   1 2082.09   66.09 
   3   5  -1 2090.39   84.39 
  -2  -5   1    2.40    3.30 
  -2  -5   1    5.70    4.00 
  -2  -5   1   15.50    6.10 
  -2  -5   1   11.40    5.20 
  -2  -5   1    9.60    9.60 
  -2  -5   1    7.60    2.80 
   2  -5  -1   11.50    5.60 
   2  -5  -1    4.30    4.00 
  -2  -5   1    6.40    3.00 
  -2  -5   1    9.40    3.10 
   2  -5  -1   11.00    4.70 
  -2  -5   1    9.30    4.50 
   2  -5  -1   23.70    7.90 
  -2  -5   1    5.30    3.00 
   2  -5  -1   10.70    5.70 
   2  -5  -1    7.00    5.00 
  -2  -5   1   10.60    5.50 
   2  -5  -1   17.30    7.10 
  -2  -5   1   13.20    5.20 
   2  -5  -1   16.00    6.80 
  -2  -5   1   20.40    8.70 
   2  -5  -1    9.20    5.20 
   2  -5  -1    6.90    3.00 
   2  -5  -1    7.20    2.70 
   2   5  -1    5.80    5.50 
   2   5  -1    8.70    3.00 
  -2   5   1   15.40    6.10 
  -2   5   1    7.20    3.10 
  -2   5   1    4.20    3.80 
   2   5  -1    9.80    4.60 
  -2   5   1    9.00    5.30 
  -2   5   1    7.10    4.20 
  -2   5   1    9.50    6.20 
  -2   5   1    7.00    4.30 
  -2   5   1   10.90    3.80 
   2   5  -1    6.90    2.90 
  -2   5   1    4.70    4.40 
   2   5  -1   11.00    5.00 
  -2   5   1   14.60    6.40 
  -2   5   1    3.60    3.80 
  -2   5   1    7.40    4.80 
   2   5  -1    6.80    5.10 
  -2   5   1   14.00    6.00 
  -2   5   1    9.20    4.20 
   2   5  -1    6.70    3.30 
   2   5  -1    5.50    4.20 
  -2   5   1    6.90    2.70 
  -2   5   1    8.90    4.20 
  -2   5   1    9.70    5.80 
   1  -5  -1 1276.57   52.39 
   1  -5  -1 1285.97   38.70 
  -1  -5   1 1271.47   49.40 
  -1  -5   1 1352.06   49.80 
   1  -5  -1 1332.87   44.90 
   1  -5  -1 1310.37   44.90 
  -1  -5   1 1304.57   43.80 
   1  -5  -1 1322.77   49.80 
  -1  -5   1 1283.77   72.29 
  -1  -5   1 1430.06   61.99 
  -1  -5   1 1313.17   53.99 
   1  -5  -1 1314.17   50.79 
  -1  -5   1 1286.67   54.29 
  -1  -5   1 1321.37   53.49 
  -1  -5   1 1336.87   52.29 
   1  -5  -1 1212.88   51.79 
   1  -5  -1 1284.57   51.79 
   1  -5  -1 1367.36   50.69 
   1  -5  -1 1272.37   63.59 
  -1  -5   1 1310.77   46.00 
   1  -5  -1 1264.17   48.20 
  -1  -5   1 1081.09   43.90 
   1  -5  -1 1315.47   50.79 
  -1  -5   1 1388.36   49.30 
   1  -5  -1 1427.46   57.89 
  -1   5   1 1420.96   51.19 
  -1   5   1 1273.77   51.49 
  -1   5   1 1326.67   47.90 
   1   5  -1 1332.37   43.90 
  -1   5   1 1315.37   49.20 
   1   5  -1 1325.37   49.60 
   1   5  -1 1314.07   46.20 
  -1   5   1 1222.68   50.79 
   1   5  -1 1323.37   46.50 
   1   5  -1 1391.76   60.89 
   1   5  -1 1377.26   51.09 
   1   5  -1 1319.47   39.20 
  -1   5   1 1318.27   51.69 
   1   5  -1 1360.66   51.29 
   1   5  -1 1298.37   49.90 
   1   5  -1 1324.27   49.20 
  -1   5   1 1332.37   48.20 
  -1   5   1 1351.26   54.19 
  -1   5   1 1359.36   56.19 
   1   5  -1 1347.77   50.59 
  -1   5   1 1333.77   43.80 
  -1   5   1 1293.87   55.39 
   1   5  -1 1291.27   57.09 
  -1   5   1 1418.66   54.09 
  -1   5   1 1278.27   51.09 
   0  -5  -1  102.49   14.60 
   0  -5   1   77.99   13.00 
   0  -5   1   77.79   10.70 
   0  -5  -1   81.99    4.90 
   0  -5   1   74.29   10.30 
   0  -5   1   84.59   13.70 
   0  -5  -1   73.39    7.50 
   0  -5  -1   80.19   10.80 
   0  -5   1   76.69   18.60 
   0  -5  -1   80.99   10.30 
   0  -5   1   78.49   12.60 
   0  -5  -1   91.89   12.60 
   0  -5  -1   72.59   11.80 
   0  -5  -1   67.69   13.70 
   0  -5   1   96.29   16.30 
   0  -5  -1   85.59   12.20 
   0  -5  -1   90.59   19.40 
   0  -5   1   56.49   10.70 
   0  -5  -1   73.89   12.60 
   0  -5   1   77.09   11.40 
   0  -5  -1   58.29    9.30 
   0  -5   1   79.89   10.70 
   0  -5  -1   75.99   10.80 
   0   5  -1   81.59   11.00 
   0   5  -1   78.69   11.60 
   0   5   1   69.89   11.60 
   0   5   1   75.79   11.20 
   0   5   1   47.70   11.10 
   0   5  -1   92.29   14.80 
   0   5  -1  103.59   17.40 
   0   5  -1  119.69   15.40 
   0   5  -1   71.29   10.30 
   0   5   1   68.49    9.70 
   0   5   1   94.29   14.20 
   0   5   1   65.89   12.70 
   0   5   1   66.99   12.10 
   0   5   1   92.99   13.30 
   0   5   1  109.19   14.70 
   0   5  -1   56.09   10.50 
   0   5   1   71.39   10.90 
   0   5   1   80.59   10.30 
   0   5  -1   96.09   16.40 
   0   5   1   77.59   11.90 
   0   5  -1   92.19   12.60 
   0   5  -1   89.29   10.60 
   0   5  -1   72.89   10.20 
   0   5  -1   70.89   12.00 
   1  -5   1 3640.74  111.69 
   1  -5   1 3646.34  114.49 
  -1  -5  -1 3630.54  105.19 
  -1  -5  -1 3645.64  102.49 
  -1  -5  -1 3844.72  112.99 
  -1  -5  -1 3610.24  123.19 
   1  -5   1 3508.35  109.99 
   1  -5   1 3646.34   94.89 
   1  -5   1 3713.03  120.09 
  -1  -5  -1 3824.22  111.49 
  -1  -5  -1 3578.44  110.59 
  -1  -5  -1 3666.63  109.99 
   1  -5   1 3742.73  131.59 
   1  -5   1 3646.44  113.89 
  -1  -5  -1 3523.35  113.59 
  -1  -5  -1 3186.28  134.69 
  -1  -5  -1 3591.84  109.79 
  -1  -5  -1 3561.84   97.09 
   1  -5   1 3622.44  114.09 
  -1  -5  -1 3773.82  105.99 
   1  -5   1 3546.05  104.49 
  -1  -5  -1 3638.34  109.49 
   1   5   1 3641.74  116.69 
  -1   5  -1 3580.34  112.69 
  -1   5  -1 3609.64  120.49 
   1   5   1 3656.93  118.59 
  -1   5  -1 3689.43  105.49 
  -1   5  -1 3722.23  122.29 
  -1   5  -1 3573.14  110.99 
   1   5   1 3587.54  104.59 
   1   5   1 3801.92  111.79 
   1   5   1 3619.04  112.79 
   1   5   1 3651.33  105.29 
  -1   5  -1 3635.24  112.49 
  -1   5  -1 3571.24  116.59 
  -1   5  -1 3477.95  112.99 
  -1   5  -1 3616.64  100.69 
   1   5   1 3633.04  113.19 
  -1   5  -1 3479.85  109.39 
   1   5   1 3697.43  103.89 
  -1   5  -1 3594.44  111.29 
  -1   5  -1 3705.53  108.69 
  -1   5  -1 3635.04  102.99 
   1   5   1 3547.65  110.59 
  -1   5  -1 3572.24  112.49 
   1   5   1 3608.14  105.39 
   2  -5   1    5.50    5.30 
  -2  -5  -1   13.40    4.00 
  -2  -5  -1   11.30    6.60 
  -2  -5  -1    9.00    3.40 
   2  -5   1    4.60    4.10 
  -2  -5  -1    3.70    2.90 
  -2  -5  -1    6.30    5.10 
   2  -5   1    7.50    2.90 
  -2  -5  -1   11.20    5.40 
  -2  -5  -1    9.70    3.40 
   2  -5   1   10.40    5.80 
  -2  -5  -1    6.00    2.60 
  -2  -5  -1    4.80    4.10 
  -2  -5  -1    8.10    4.40 
  -2  -5  -1    8.50    3.30 
   2  -5   1   14.30    6.40 
  -2  -5  -1    7.60    5.30 
  -2  -5  -1    2.30    7.40 
   2  -5   1    7.30    4.80 
   2  -5   1    8.40    3.30 
  -2  -5  -1    5.60    6.00 
   2  -5   1    0.50    4.00 
   2  -5   1    2.10    4.50 
   2  -5   1    6.20    2.70 
  -2   5  -1    1.30    2.60 
  -2   5  -1    7.60    4.30 
  -2   5  -1    5.80    3.10 
   2   5   1    4.20    4.30 
  -2   5  -1    9.20    5.90 
  -2   5  -1   13.20    6.30 
  -2   5  -1    3.60    3.30 
   2   5   1    7.90    4.80 
  -2   5  -1    2.80    3.80 
  -2   5  -1    2.10    2.80 
  -2   5  -1    8.50    2.80 
  -2   5  -1    5.30    5.30 
  -2   5  -1   10.20    5.30 
   2   5   1    7.30    3.80 
  -2   5  -1    6.50    4.40 
  -2   5  -1    7.00    4.60 
  -2   5  -1    2.90    4.10 
  -2   5  -1    5.10    4.70 
   2   5   1   13.60    3.90 
   2   5   1    4.50    2.60 
   2   5   1    7.00    3.50 
   2   5   1   16.60    6.70 
  -2   5  -1    3.80    3.80 
   2   5   1   10.00    5.60 
   2   5   1    7.10    3.20 
  -2   5  -1    6.50    5.00 
  -2   5  -1    4.50    2.90 
   2   5   1    2.90    3.30 
  -3  -5  -1 3353.56   90.69 
  -3  -5  -1 3374.26  128.49 
   3  -5   1 3361.96  113.89 
   3  -5   1 3312.27   97.99 
   3  -5   1 3317.07  109.29 
  -3  -5  -1 3522.15  111.89 
   3  -5   1 3501.45  110.29 
   3  -5   1 3463.55  108.49 
  -3  -5  -1 3278.37   91.89 
  -3  -5  -1 3346.97   91.39 
   3  -5   1 3254.47  110.79 
   3  -5   1 3427.46   91.39 
  -3  -5  -1 3349.26  109.89 
  -3  -5  -1 3244.08   93.39 
  -3  -5  -1 3418.16  109.39 
   3  -5   1 3515.05  110.29 
  -3  -5  -1 3187.28  107.49 
  -3  -5  -1 3358.26  109.09 
   3  -5   1 3237.48  108.89 
   3  -5   1 3461.75  107.89 
  -3  -5  -1 3378.56  109.89 
  -3  -5  -1 3351.36   97.19 
  -3  -5  -1 3405.56   94.99 
  -3  -5  -1 3396.66  105.89 
  -3  -5  -1 3451.25  104.19 
   3   5   1 3295.77  115.09 
  -3   5  -1 3399.66   93.09 
   3   5   1 3280.87   97.79 
  -3   5  -1 3539.35  110.49 
  -3   5  -1 3449.95   91.69 
   3   5   1 3484.35  111.09 
   3   5   1 3245.28  102.39 
  -3   5  -1 3335.57  104.39 
  -3   5  -1 3301.37  107.79 
  -3   5  -1 3342.67  101.59 
  -3   5  -1 3485.65  114.49 
  -3   5  -1 3265.07  109.49 
  -3   5  -1 3207.28  106.39 
  -3   5  -1 3485.35  110.39 
   3   5   1 3310.77  112.09 
  -3   5  -1 3405.86   92.09 
  -3   5  -1 3340.67  106.39 
  -3   5  -1 3221.38  105.19 
   3   5   1 3396.46  107.89 
   3   5   1 3408.16   92.09 
  -3   5  -1 3214.78  117.09 
  -3   5  -1 3032.80  108.19 
   3   5   1 3416.46  103.79 
   3   5   1 3302.17   95.69 
  -3   5  -1 3433.76  118.19 
  -3   5  -1 3316.47  106.49 
  -3   5  -1 3331.97  107.39 
   4  -5   1   11.60    6.30 
   4  -5   1   21.20    8.20 
  -4  -5  -1   15.60    7.80 
  -4  -5  -1   22.00    8.10 
  -4  -5  -1    5.80    7.40 
  -4  -5  -1   17.20    7.20 
  -4  -5  -1   13.90    7.40 
   4  -5   1   10.30    6.20 
  -4  -5  -1   24.70    6.40 
   4  -5   1    8.70    5.50 
   4  -5   1   13.40    6.10 
  -4  -5  -1   12.50    6.80 
   4  -5   1   14.10    6.70 
   4  -5   1   18.70    9.00 
  -4  -5  -1   22.00    8.90 
   4  -5   1   22.40    9.30 
  -4  -5  -1    9.90    5.10 
   4  -5   1   12.40    7.20 
  -4  -5  -1   19.00    6.90 
  -4  -5  -1   17.60    7.80 
  -4   5  -1   22.50    7.30 
  -4   5  -1   19.20    7.70 
   4   5   1   16.60   10.00 
  -4   5  -1   13.40    7.40 
   4   5   1   22.50    8.80 
  -4   5  -1    5.90    5.50 
  -4   5  -1   12.50    6.80 
   4   5   1   14.20    7.10 
  -4   5  -1   16.90    8.40 
  -4   5  -1    3.70    4.40 
   4   5   1   13.30    6.50 
  -4   5  -1   18.10    7.20 
  -4   5  -1   22.60    7.30 
  -4   5  -1   28.20    9.80 
  -4   5  -1   10.00    5.90 
   4   5   1   15.80    6.00 
  -4   5  -1   28.40    8.60 
   4   5   1   16.90    6.00 
  -4   5  -1   28.20   11.10 
  -4   5  -1    3.30    4.40 
   4   5   1    9.10    6.30 
  -4   5  -1   -2.50    4.00 
  -5  -5  -1  568.44   29.30 
  -5  -5  -1  549.25   35.60 
  -5  -5  -1  596.44   28.90 
  -5  -5  -1  603.44   32.40 
   5  -5   1  560.84   38.10 
  -5  -5  -1  570.94   32.70 
   5  -5   1  512.05   34.20 
   5  -5   1  576.84   34.20 
   5  -5   1  568.44   34.00 
  -5  -5  -1  520.45   39.40 
   5  -5   1  557.14   35.80 
  -5  -5  -1  577.34   35.60 
   5  -5   1  589.64   33.00 
   5  -5   1  527.85   36.00 
   5  -5   1  521.45   35.20 
  -5  -5  -1  604.14   34.40 
  -5  -5  -1  556.04   36.70 
  -5  -5  -1  574.94   27.90 
   5  -5   1  475.15   32.80 
   5  -5   1  567.34   32.40 
  -5   5  -1  566.64   35.50 
  -5   5  -1  533.55   33.80 
  -5   5  -1  499.45   31.00 
   5   5   1  600.54   36.80 
  -5   5  -1  577.94   40.70 
  -5   5  -1  566.24   30.70 
  -5   5  -1  575.44   35.70 
  -5   5  -1  587.34   35.00 
  -5   5  -1  574.14   33.10 
  -5   5  -1  519.25   34.70 
  -5   5  -1  606.44   33.70 
  -5   5  -1  535.15   32.90 
   5   5   1  553.34   38.80 
   5   5   1  561.04   37.50 
   5   5   1  576.34   27.70 
  -5   5  -1  571.94   33.80 
  -5   5  -1  481.95   38.00 
   5   5   1  615.34   28.90 
   5   5   1  556.94   36.60 
   5   5   1  516.05   32.20 
  -5   5  -1  555.04   37.90 
  -5   5  -1  517.65   33.30 
   5   5   1  517.85   34.20 
   6  -5   1    8.90    6.90 
   6  -5   1    4.20    6.40 
  -6  -5  -1   -1.40    5.40 
  -6  -5  -1    6.10    5.20 
  -6  -5  -1    6.40    6.70 
  -6  -5  -1   -3.90    4.90 
   6  -5   1    3.40    5.80 
   6  -5   1    1.10    5.20 
   6  -5   1    1.60    5.50 
   6  -5   1   -0.60    6.20 
   6  -5   1    4.90    5.30 
   6  -5   1   -1.50    5.40 
   6  -5   1   -3.80    5.20 
   6  -5   1    4.90    6.40 
  -6  -5  -1    4.20    7.70 
  -6  -5  -1    5.90    6.40 
  -6  -5  -1    0.80    7.20 
  -6  -5  -1    1.10    5.30 
  -6   5  -1    3.00    6.10 
   6   5   1   -0.60    6.30 
   6   5   1    1.20    5.30 
  -6   5  -1    9.00    8.10 
   6   5   1    5.90    4.60 
  -6   5  -1   11.30    6.70 
  -6   5  -1    1.60    5.70 
  -6   5  -1    0.90    4.80 
   6   5   1    4.60    6.80 
  -6   5  -1    3.20    5.90 
  -6   5  -1    1.50    4.90 
  -6   5  -1   -0.10    4.90 
  -6   5  -1    3.60    5.60 
  -6   5  -1   -2.50    4.10 
   6   5   1    4.40    6.20 
  -6   5  -1    3.90    6.10 
  -6   5  -1    4.60    5.30 
  -6   5  -1   -3.30    5.30 
  -6   5  -1    8.20    7.10 
  -6   5  -1    4.20    6.10 
   6   5   1    4.30    7.90 
   6   5   1    2.70    6.10 
   7  -5   1    5.70    6.20 
   7  -5   1   -3.40    5.10 
   7  -5   1    1.50    7.20 
  -7  -5  -1   11.50    8.50 
   7  -5   1    1.40    6.00 
  -7  -5  -1   -4.50    4.70 
  -7  -5  -1    3.30    6.50 
  -7  -5  -1    6.30    7.10 
   7  -5   1   -5.00    6.00 
   7  -5   1    7.70    7.00 
  -7  -5  -1   -1.20    5.50 
   7  -5   1   17.00    9.00 
   7  -5   1   -8.70    4.20 
  -7  -5  -1    0.90    7.80 
   7  -5   1    6.00    6.40 
   7  -5   1   -2.60    6.20 
  -7   5  -1    4.90    9.10 
   7   5   1    6.00    9.30 
  -7   5  -1    6.00    7.60 
  -7   5  -1    4.50    6.80 
  -7   5  -1    4.30    7.60 
  -7   5  -1   -3.40    5.60 
   7   5   1    1.50    8.10 
  -7   5  -1    9.30    7.40 
   7   5   1    5.90    7.10 
   7   5   1    5.70    8.30 
  -7   5  -1   -0.30    5.30 
  -7   5  -1   -3.90    4.70 
  -7   5  -1    0.70    5.90 
  -7   5  -1   -1.40    5.60 
   7   5   1    6.90    8.50 
  -7   5  -1    3.50    6.70 
  -7   5  -1    4.50    5.70 
  -7   5  -1   -2.80    6.40 
   7   5   1   -0.90    5.40 
   8  -5   1   47.90   15.90 
   8  -5   1   62.19   18.80 
   8  -5   1   44.10   15.50 
  -8  -5  -1   42.10   15.60 
   8  -5   1   26.80   12.50 
  -8  -5  -1   33.80   15.20 
  -8  -5  -1   38.90   13.20 
   8  -5   1   29.10   13.00 
   8  -5   1   42.40   12.40 
   8  -5   1   50.49   14.70 
   8  -5   1   40.00   14.10 
   8  -5   1   51.99   15.40 
  -8  -5  -1   47.40   14.40 
  -8   5  -1   34.30   13.70 
   8   5   1   37.80   15.50 
  -8   5  -1   71.49   21.40 
  -8   5  -1   34.30   12.40 
  -8   5  -1   20.50   14.30 
   8   5   1   50.09   16.40 
   8   5   1   58.69   18.40 
  -8   5  -1   57.69   17.00 
  -8   5  -1   69.79   16.50 
   8   5   1   47.90   15.60 
  -8   5  -1   54.49   16.00 
   8   5   1   42.80   17.60 
  -8   5  -1   31.50   12.80 
  -8   5  -1   36.50   13.90 
  -8   5  -1   35.60   13.00 
  -8   5  -1   41.60   15.20 
  -8   5  -1   63.19   20.30 
  -8   5  -1   51.79   15.50 
  -8  -6   1  514.55   57.99 
   8  -6  -1  521.95   52.59 
   8  -6  -1  538.85   43.40 
   8  -6  -1  582.64   41.80 
   8  -6  -1  517.65   37.60 
   8  -6  -1  467.85   48.30 
  -8  -6   1  521.35   39.20 
  -8  -6   1  587.64   45.30 
   8  -6  -1  455.55   35.90 
  -8  -6   1  519.05   40.10 
   8  -6  -1  526.55   37.30 
   8  -6  -1  537.15   42.70 
   8  -6  -1  535.85   42.70 
  -8   6   1  517.35   41.90 
  -8   6   1  623.74   43.30 
   8   6  -1  596.54   46.50 
   8   6  -1  490.65   53.79 
  -8   6   1  516.45   39.60 
  -8   6   1  535.15   43.20 
   8   6  -1  492.15   41.20 
  -8   6   1  557.24   40.30 
  -8   6   1  437.26   34.70 
  -8   6   1  606.44   50.49 
  -8   6   1  643.54   45.80 
  -8   6   1  563.64   40.10 
  -8   6   1  506.35   41.70 
  -8   6   1  474.55   55.99 
  -8   6   1  628.84   63.49 
   8   6  -1  661.93   48.00 
   7  -6  -1   38.60   13.70 
   7  -6  -1   39.70   13.80 
  -7  -6   1   31.90   11.10 
  -7  -6   1   67.69   17.70 
   7  -6  -1   41.80   14.80 
  -7  -6   1   46.50   14.30 
   7  -6  -1   56.49   14.10 
  -7  -6   1   43.90   17.30 
   7  -6  -1   32.00   12.40 
   7  -6  -1   18.50   11.00 
   7  -6  -1   64.69   15.40 
   7  -6  -1   46.60   16.00 
  -7  -6   1   45.10   12.80 
   7  -6  -1   31.30   11.40 
   7   6  -1   52.49   17.10 
  -7   6   1   37.60   15.50 
   7   6  -1   28.30   14.70 
  -7   6   1   62.39   15.50 
  -7   6   1   43.50   13.20 
  -7   6   1   66.79   19.50 
  -7   6   1   48.50   14.90 
  -7   6   1   33.60   11.90 
   7   6  -1   48.00   19.10 
  -7   6   1   58.39   15.40 
  -7   6   1   58.19   15.60 
  -7   6   1   35.20   14.90 
   7   6  -1   42.70   14.60 
  -7   6   1   29.80   10.70 
  -7   6   1   33.50   13.00 
   7   6  -1   34.50   12.70 
  -7   6   1   26.60   11.60 
  -7   6   1   53.29   18.00 
   6  -6  -1  741.33   46.50 
  -6  -6   1  788.72   40.80 
   6  -6  -1  730.33   42.90 
  -6  -6   1  706.33   45.10 
  -6  -6   1  758.02   43.70 
  -6  -6   1  641.84   51.99 
  -6  -6   1  765.62   40.10 
   6  -6  -1  678.33   46.70 
   6  -6  -1  835.72   46.50 
  -6  -6   1  791.42   46.40 
   6  -6  -1  707.03   44.80 
  -6  -6   1  727.93   51.79 
   6  -6  -1  810.22   43.70 
   6  -6  -1  654.53   42.50 
   6  -6  -1  678.33   44.90 
   6  -6  -1  719.03   40.10 
  -6   6   1  712.03   41.70 
   6   6  -1  773.72   46.50 
   6   6  -1  726.83   39.00 
  -6   6   1  690.93   40.90 
  -6   6   1  699.33   44.70 
  -6   6   1  731.73   48.10 
   6   6  -1  688.53   54.29 
  -6   6   1  752.12   42.00 
  -6   6   1  685.33   39.30 
  -6   6   1  741.53   44.10 
  -6   6   1  701.83   48.60 
  -6   6   1  767.12   45.30 
   6   6  -1  699.73   49.50 
  -6   6   1  724.63   40.20 
  -6   6   1  732.43   49.60 
  -6   6   1  749.82   45.70 
  -6   6   1  684.53   41.50 
  -6   6   1  735.13   45.10 
  -6   6   1  678.53   49.10 
   6   6  -1  718.63   41.20 
  -5  -6   1  191.68   20.40 
   5  -6  -1  228.98   26.70 
  -5  -6   1  311.87   30.50 
   5  -6  -1  250.37   29.50 
  -5  -6   1  230.18   28.00 
   5  -6  -1  235.98   25.00 
   5  -6  -1  249.58   31.60 
  -5  -6   1  244.58   20.00 
   5  -6  -1  234.98   26.80 
  -5  -6   1  207.98   28.50 
   5  -6  -1  196.08   23.80 
   5  -6  -1  220.18   28.50 
  -5  -6   1  205.78   35.20 
   5  -6  -1  197.08   25.60 
  -5  -6   1  217.48   25.60 
  -5  -6   1  251.77   32.10 
   5  -6  -1  220.68   27.30 
  -5   6   1  209.08   28.80 
  -5   6   1  222.38   28.40 
  -5   6   1  212.58   25.80 
  -5   6   1  227.88   26.20 
  -5   6   1  206.68   30.10 
   5   6  -1  244.78   17.60 
   5   6  -1  230.68   30.90 
   5   6  -1  242.98   36.30 
  -5   6   1  234.08   25.80 
  -5   6   1  220.18   27.00 
  -5   6   1  227.38   30.70 
  -5   6   1  237.48   24.10 
   5   6  -1  207.38   25.80 
   5   6  -1  217.98   21.90 
   5   6  -1  246.68   25.70 
  -5   6   1  242.48   25.10 
   5   6  -1  256.57   21.10 
  -5   6   1  278.37   30.90 
  -5   6   1  219.38   24.90 
  -5   6   1  228.58   24.90 
   5   6  -1  237.78   18.00 
  -5   6   1  257.27   28.60 
  -5   6   1  269.07   35.30 
  -4  -6   1  496.85   33.90 
  -4  -6   1  516.95   27.20 
  -4  -6   1  596.34   30.40 
   4  -6  -1  531.75   34.10 
   4  -6  -1  539.05   37.90 
  -4  -6   1  553.84   31.10 
   4  -6  -1  485.95   33.80 
  -4  -6   1  575.84   27.50 
   4  -6  -1  526.85   32.10 
   4  -6  -1  581.14   36.30 
  -4  -6   1  531.95   36.70 
   4  -6  -1  520.45   32.80 
   4  -6  -1  476.45   32.80 
  -4  -6   1  527.15   39.20 
  -4  -6   1  498.75   28.80 
   4  -6  -1  520.35   31.70 
  -4  -6   1  510.75   57.29 
  -4  -6   1  509.55   31.40 
   4  -6  -1  526.75   34.50 
  -4   6   1  550.24   34.80 
  -4   6   1  501.15   31.50 
  -4   6   1  498.95   31.30 
  -4   6   1  522.45   38.10 
   4   6  -1  539.45   30.90 
   4   6  -1  518.95   38.80 
   4   6  -1  586.14   44.00 
  -4   6   1  519.85   34.00 
  -4   6   1  600.04   33.10 
  -4   6   1  476.95   31.80 
  -4   6   1  496.45   36.60 
   4   6  -1  519.75   30.00 
  -4   6   1  550.54   33.40 
  -4   6   1  546.25   32.70 
   4   6  -1  559.74   29.00 
  -4   6   1  494.35   35.70 
  -4   6   1  529.95   30.00 
  -4   6   1  540.15   28.60 
  -4   6   1  519.45   34.10 
  -4   6   1  508.35   41.80 
   4   6  -1  555.34   34.70 
   3  -6  -1   -0.80    4.00 
  -3  -6   1    4.80    5.40 
  -3  -6   1   -1.10    2.40 
  -3  -6   1   20.40   13.10 
  -3  -6   1   -0.60    2.20 
   3  -6  -1   -0.50    3.70 
  -3  -6   1   -0.90    3.60 
   3  -6  -1    1.80    3.90 
  -3  -6   1    0.20    4.60 
  -3  -6   1    0.80    4.60 
   3  -6  -1   -4.80    3.20 
  -3  -6   1    9.20    5.10 
   3  -6  -1   -5.00    3.40 
   3  -6  -1    3.90    4.90 
   3  -6  -1   -0.90    4.80 
  -3  -6   1   10.60    7.40 
  -3  -6   1   -3.50    4.40 
   3  -6  -1   -1.90    5.40 
  -3  -6   1    0.90    4.20 
   3  -6  -1    1.60    5.00 
  -3  -6   1   -1.50    2.60 
  -3   6   1    6.50    6.00 
  -3   6   1    6.90    6.70 
   3   6  -1   -2.30    2.20 
  -3   6   1    3.90    4.60 
  -3   6   1   -3.00    4.90 
   3   6  -1    2.70    6.00 
   3   6  -1   -3.10    3.70 
  -3   6   1   -3.70    4.10 
  -3   6   1    0.60    5.80 
  -3   6   1    9.10    6.10 
   3   6  -1    4.70    4.80 
   3   6  -1    0.70    4.10 
  -3   6   1    3.10    4.20 
  -3   6   1    6.10    6.40 
   3   6  -1    1.30    2.70 
  -3   6   1    3.00    3.70 
  -3   6   1    1.60    3.50 
  -3   6   1    0.30    3.60 
  -3   6   1    5.00    6.20 
   3   6  -1    0.30    3.80 
  -3   6   1   13.70    6.90 
  -3   6   1    2.00    2.60 
  -3   6   1   -2.20    4.20 
  -2  -6   1   26.40    8.20 
   2  -6  -1   18.20    7.60 
   2  -6  -1   -0.60    3.60 
   2  -6  -1    3.70    3.60 
  -2  -6   1   -0.10    4.80 
  -2  -6   1    4.60    4.00 
  -2  -6   1    7.80    6.00 
   2  -6  -1    2.90    4.30 
   2  -6  -1    9.30    5.70 
  -2  -6   1   12.00    5.20 
  -2  -6   1   16.80   12.10 
   2  -6  -1    9.70    3.80 
  -2  -6   1   13.30    6.70 
   2  -6  -1    5.70    3.10 
   2  -6  -1    9.60    6.60 
   2  -6  -1    4.00    4.80 
   2  -6  -1   13.00    7.90 
  -2  -6   1    6.20    4.70 
  -2  -6   1    8.10    7.10 
  -2  -6   1   -0.40    4.30 
   2  -6  -1   15.70    6.90 
  -2  -6   1    7.70    8.50 
   2  -6  -1   17.00    6.60 
  -2  -6   1    7.50    3.80 
   2   6  -1   11.20    5.70 
  -2   6   1    5.30    3.90 
  -2   6   1   12.10    6.80 
   2   6  -1   17.40    6.80 
  -2   6   1    3.40    4.20 
  -2   6   1   11.50    4.70 
   2   6  -1   13.90    6.60 
  -2   6   1    9.80    6.80 
   2   6  -1    7.60    7.00 
  -2   6   1    9.80    5.80 
   2   6  -1    8.40    3.70 
   2   6  -1   15.70    5.20 
  -2   6   1   -0.40    4.10 
  -2   6   1    7.00    3.80 
  -2   6   1    5.00    5.20 
  -2   6   1    2.60    4.00 
   2   6  -1   11.10    3.50 
   2   6  -1    7.60    5.10 
  -2   6   1    9.00    6.20 
  -2   6   1    5.50    5.10 
   2   6  -1   14.70    6.30 
   2   6  -1    4.80    4.70 
  -2   6   1   15.10    7.70 
  -2   6   1   13.70    4.70 
  -2   6   1    4.70    5.60 
  -2   6   1   13.60    6.40 
  -2   6   1    1.50    3.60 
  -1  -6   1   47.20   10.00 
   1  -6  -1   44.80    9.40 
  -1  -6   1   34.00    8.30 
  -1  -6   1   40.20    4.60 
  -1  -6   1   48.00    8.20 
   1  -6  -1   32.10    9.00 
  -1  -6   1   30.50    7.40 
  -1  -6   1   71.49   14.10 
   1  -6  -1   53.89   11.50 
   1  -6  -1   45.20    9.80 
   1  -6  -1   57.19   10.70 
  -1  -6   1   42.00    8.40 
   1  -6  -1   38.70    8.20 
  -1  -6   1   28.80    8.30 
   1  -6  -1   68.69   19.00 
  -1  -6   1   66.89   21.10 
  -1  -6   1   69.59   17.70 
  -1  -6   1   64.99   14.20 
   1  -6  -1   59.09   12.50 
   1  -6  -1   43.60    4.40 
   1  -6  -1   26.40    9.50 
   1  -6  -1   46.60   11.30 
   1  -6  -1   35.10   10.10 
   1  -6  -1   43.50    7.80 
  -1  -6   1   44.60   10.60 
   1   6  -1   49.10   10.60 
   1   6  -1   54.69   11.30 
  -1   6   1   68.99   13.00 
   1   6  -1   39.70    9.90 
  -1   6   1   54.19   12.90 
  -1   6   1   50.99    9.00 
  -1   6   1   30.00    9.10 
  -1   6   1   37.30    6.70 
  -1   6   1   50.29   12.70 
  -1   6   1   37.30    9.80 
  -1   6   1   38.90    9.60 
   1   6  -1   44.40    7.90 
   1   6  -1   48.50    5.50 
  -1   6   1   30.60    7.80 
   1   6  -1   42.10    9.50 
   1   6  -1   34.00    8.60 
  -1   6   1   34.90    8.30 
  -1   6   1   55.89   11.80 
   1   6  -1   38.50    8.20 
  -1   6   1   25.20    8.90 
   1   6  -1   47.40    9.20 
  -1   6   1   48.80    9.80 
  -1   6   1   55.09   11.70 
  -1   6   1   47.90   10.20 
   1   6  -1   47.20   12.60 
   1   6  -1   41.40    9.40 
   1   6  -1   56.79   14.60 
   0  -6  -1  525.85   31.30 
   0  -6   1  683.13   34.10 
   0  -6   1  617.54   35.30 
   0  -6  -1  617.44   30.70 
   0  -6  -1  646.74   49.30 
   0  -6  -1  666.53   29.80 
   0  -6   1  626.34   30.50 
   0  -6  -1  638.24   24.20 
   0  -6  -1  630.94   40.10 
   0  -6   1  652.13   36.90 
   0  -6  -1  608.84   34.50 
   0  -6  -1  593.74   34.50 
   0  -6   1  641.54   25.20 
   0  -6  -1  618.34   30.30 
   0  -6   1  627.94   34.80 
   0  -6  -1  681.03   33.50 
   0  -6   1  631.54   32.10 
   0  -6   1  601.34   48.10 
   0  -6   1  569.84   38.00 
   0  -6   1  609.54   34.60 
   0  -6   1  578.24   29.90 
   0  -6  -1  695.73   34.60 
   0  -6   1  622.84   31.20 
   0   6  -1  540.55   34.60 
   0   6   1  585.54   32.90 
   0   6   1  590.24   36.70 
   0   6   1  609.74   30.60 
   0   6  -1  604.84   38.20 
   0   6   1  663.53   34.40 
   0   6  -1  631.04   29.40 
   0   6   1  659.93   34.60 
   0   6  -1  623.04   31.20 
   0   6   1  662.03   36.30 
   0   6  -1  627.84   32.80 
   0   6  -1  654.33   34.60 
   0   6   1  581.44   29.50 
   0   6   1  648.54   35.30 
   0   6   1  640.74   37.90 
   0   6  -1  628.54   33.70 
   0   6  -1  682.83   41.20 
   0   6   1  696.03   34.00 
   0   6  -1  639.94   33.40 
   0   6  -1  618.24   30.70 
   0   6   1  622.44   29.30 
   0   6  -1  584.94   33.20 
   0   6  -1  673.63   31.70 
   0   6   1  627.84   33.80 
   1  -6   1   11.70    6.00 
  -1  -6  -1    5.90    4.90 
   1  -6   1   10.90    5.70 
   1  -6   1    5.70    5.30 
  -1  -6  -1   18.90    7.10 
  -1  -6  -1   13.40    6.60 
   1  -6   1    1.90    4.60 
   1  -6   1    8.80    5.90 
  -1  -6  -1    7.70    4.30 
   1  -6   1   12.90    5.20 
   1  -6   1   20.00    8.90 
  -1  -6  -1   11.60    6.20 
   1  -6   1   14.30   11.10 
   1  -6   1   16.20    7.20 
  -1  -6  -1    3.90    4.70 
  -1  -6  -1    0.60    4.20 
  -1  -6  -1   22.10    5.60 
  -1  -6  -1    8.20    7.10 
  -1  -6  -1   17.70    8.20 
  -1  -6  -1    8.60    9.40 
  -1  -6  -1   15.00    2.20 
   1   6   1   10.00    6.10 
   1   6   1    9.20    7.00 
   1   6   1   15.60    5.50 
   1   6   1   16.90    7.00 
  -1   6  -1   16.00    6.40 
  -1   6  -1   21.10    7.60 
   1   6   1    0.20    4.30 
  -1   6  -1    6.60    4.90 
  -1   6  -1    5.30    3.80 
   1   6   1    7.40    6.00 
  -1   6  -1   11.60    7.30 
  -1   6  -1    9.20    6.10 
  -1   6  -1   13.60    6.90 
  -1   6  -1   11.20    5.90 
  -1   6  -1    7.50    5.50 
  -1   6  -1    9.80    7.10 
   1   6   1    9.30    6.80 
  -1   6  -1   11.30    7.70 
  -1   6  -1   13.80    3.90 
   1   6   1   12.00    6.40 
  -1   6  -1   10.00    4.50 
   1   6   1    7.00    5.10 
   1   6   1   26.70    6.80 
  -1   6  -1    3.50    5.10 
   1   6   1   10.10    4.90 
  -1   6  -1    5.00    4.80 
  -2  -6  -1  877.11   34.00 
  -2  -6  -1  734.33   59.09 
   2  -6   1  863.31   42.10 
  -2  -6  -1  912.41   34.30 
  -2  -6  -1  854.51   41.80 
   2  -6   1  915.71   33.60 
  -2  -6  -1  901.81   40.90 
  -2  -6  -1  887.31   29.10 
   2  -6   1  953.40   43.80 
   2  -6   1  849.12   41.40 
  -2  -6  -1  713.13   43.50 
   2  -6   1  864.71   54.99 
  -2  -6  -1  959.20   56.39 
  -2  -6  -1  835.32   33.10 
  -2  -6  -1  846.12   43.40 
   2  -6   1  875.31   43.50 
   2  -6   1  885.61   44.30 
   2  -6   1  872.01   28.80 
  -2  -6  -1  872.61   40.70 
   2  -6   1  790.72   42.90 
   2  -6   1  811.32   46.40 
  -2   6  -1  904.71   44.20 
  -2   6  -1  817.42   42.10 
  -2   6  -1  877.71   34.00 
  -2   6  -1  880.11   46.30 
  -2   6  -1  836.72   48.00 
   2   6   1  910.41   33.10 
  -2   6  -1  868.51   41.30 
  -2   6  -1  913.01   34.00 
  -2   6  -1  857.11   44.00 
  -2   6  -1  870.01   41.70 
  -2   6  -1  931.11   43.30 
  -2   6  -1  877.51   43.00 
   2   6   1  914.31   43.30 
  -2   6  -1  897.01   49.40 
   2   6   1  911.31   46.20 
   2   6   1  923.61   41.40 
   2   6   1  848.52   46.80 
  -2   6  -1  880.91   35.50 
  -2   6  -1  903.91   38.30 
  -2   6  -1  903.71   40.60 
   2   6   1  874.11   34.00 
   2   6   1  782.62   40.50 
  -2   6  -1  889.71   33.60 
   2   6   1  877.01   34.00 
   2   6   1  896.21   44.10 
   2   6   1  830.02   39.70 
   3  -6   1  140.19   19.00 
  -3  -6  -1  130.19   16.50 
  -3  -6  -1  206.98   22.50 
   3  -6   1  141.79   21.70 
  -3  -6  -1  157.98   30.80 
  -3  -6  -1  137.89   10.40 
  -3  -6  -1  145.09   20.40 
  -3  -6  -1  141.99   19.30 
  -3  -6  -1  179.58   22.80 
   3  -6   1  137.59   19.00 
   3  -6   1  121.29   18.40 
   3  -6   1  144.99   21.20 
  -3  -6  -1  164.38   10.50 
  -3  -6  -1  164.68   22.20 
   3  -6   1  160.28   21.00 
   3  -6   1  134.39   18.90 
   3  -6   1  150.48    9.60 
   3  -6   1  154.28   20.40 
  -3  -6  -1  153.28   20.30 
  -3   6  -1  138.99   18.80 
   3   6   1  123.29   18.20 
  -3   6  -1  199.98   28.50 
   3   6   1  141.69   21.10 
  -3   6  -1  139.19   20.50 
   3   6   1  147.09    9.70 
  -3   6  -1  186.18   21.10 
  -3   6  -1  152.98   18.40 
  -3   6  -1  125.19   18.80 
  -3   6  -1  153.18   22.40 
   3   6   1  157.38   18.50 
  -3   6  -1  165.68   18.00 
  -3   6  -1  138.39   18.80 
  -3   6  -1  120.59   17.40 
  -3   6  -1  149.69   11.10 
   3   6   1  184.18   22.70 
   3   6   1  172.78   20.90 
  -3   6  -1  135.59   19.20 
   3   6   1  155.68   18.80 
  -3   6  -1  154.38   23.90 
  -3   6  -1  139.89   10.90 
  -3   6  -1  159.28   16.10 
   3   6   1  166.98   21.30 
  -3   6  -1  123.29   18.70 
  -3   6  -1  146.49   19.40 
  -3   6  -1  157.98   10.40 
   4  -6   1  678.33   37.60 
   4  -6   1  738.53   41.10 
   4  -6   1  788.42   43.80 
   4  -6   1  674.73   37.80 
  -4  -6  -1  702.23   36.20 
   4  -6   1  734.33   41.40 
   4  -6   1  729.53   40.50 
  -4  -6  -1  627.14   39.00 
  -4  -6  -1  692.93   38.20 
   4  -6   1  719.03   43.90 
  -4  -6  -1  619.64   36.40 
  -4  -6  -1  650.93   29.60 
   4  -6   1  751.92   39.60 
  -4  -6  -1  700.23   41.00 
   4  -6   1  740.93   41.60 
  -4  -6  -1  661.93   40.10 
  -4  -6  -1  646.24   49.00 
  -4  -6  -1  571.34   39.10 
  -4   6  -1  646.44   37.10 
   4   6   1  734.93   42.60 
  -4   6  -1  645.54   39.30 
  -4   6  -1  721.33   34.80 
  -4   6  -1  639.34   44.20 
  -4   6  -1  678.53   37.80 
  -4   6  -1  715.43   37.80 
  -4   6  -1  625.74   41.70 
  -4   6  -1  688.33   35.70 
  -4   6  -1  726.03   45.50 
  -4   6  -1  700.53   39.40 
  -4   6  -1  731.83   39.10 
  -4   6  -1  683.13   37.60 
  -4   6  -1  713.23   40.70 
  -4   6  -1  616.84   44.00 
  -4   6  -1  654.13   39.40 
   4   6   1  690.83   40.10 
   4   6   1  741.93   39.20 
   4   6   1  579.94   37.20 
   4   6   1  682.83   34.40 
   4   6   1  656.53   40.90 
   4   6   1  740.23   35.10 
   5  -6   1  626.14   36.40 
  -5  -6  -1  573.64   45.10 
   5  -6   1  569.54   39.10 
   5  -6   1  566.24   36.80 
  -5  -6  -1  617.84   35.50 
  -5  -6  -1  573.64   34.90 
   5  -6   1  549.05   36.30 
  -5  -6  -1  623.94   30.50 
   5  -6   1  532.85   34.30 
   5  -6   1  586.94   38.40 
   5  -6   1  561.14   38.20 
  -5  -6  -1  629.14   41.90 
  -5  -6  -1  575.54   37.20 
  -5  -6  -1  627.04   39.60 
   5  -6   1  642.14   38.60 
   5  -6   1  496.75   38.40 
  -5   6  -1  547.65   35.20 
  -5   6  -1  574.74   36.70 
  -5   6  -1  511.95   36.40 
   5   6   1  595.74   36.10 
   5   6   1  614.64   40.40 
  -5   6  -1  598.74   36.70 
  -5   6  -1  606.14   34.70 
   5   6   1  561.74   30.80 
  -5   6  -1  619.74   37.10 
   5   6   1  558.04   37.60 
  -5   6  -1  645.44   43.60 
   5   6   1  521.25   42.60 
  -5   6  -1  609.54   34.20 
  -5   6  -1  577.94   43.90 
  -5   6  -1  558.74   38.70 
   5   6   1  639.14   31.80 
   5   6   1  621.64   39.00 
  -5   6  -1  596.94   34.80 
  -5   6  -1  603.54   38.30 
  -5   6  -1  515.75   36.70 
  -5   6  -1  569.94   35.70 
   5   6   1  559.24   40.00 
  -5   6  -1  542.15   42.40 
   6  -6   1  956.50   54.59 
   6  -6   1 1008.30   54.89 
  -6  -6  -1  884.61   48.40 
   6  -6   1  987.40   49.50 
   6  -6   1 1034.30   52.69 
   6  -6   1  937.41   56.59 
  -6  -6  -1  999.60   55.39 
   6  -6   1  941.11   48.90 
   6  -6   1 1018.60   54.19 
   6  -6   1 1044.50   57.09 
  -6  -6  -1 1066.69   51.59 
   6  -6   1 1004.90   57.29 
   6  -6   1  980.70   51.99 
  -6  -6  -1  964.90   55.39 
  -6  -6  -1 1084.39   62.29 
  -6   6  -1  839.02   55.49 
  -6   6  -1 1091.19   54.89 
  -6   6  -1  998.80   53.19 
  -6   6  -1 1020.70   55.19 
  -6   6  -1 1055.19   63.49 
   6   6   1 1043.10   56.99 
  -6   6  -1  988.40   61.49 
  -6   6  -1  976.30   51.99 
  -6   6  -1 1016.90   53.19 
  -6   6  -1  975.20   50.69 
  -6   6  -1  933.81   46.50 
   6   6   1 1011.90   50.59 
  -6   6  -1  949.21   49.99 
  -6   6  -1 1093.59   53.89 
   6   6   1  976.90   54.19 
   6   6   1  907.21   51.99 
   6   6   1  979.90   61.49 
   6   6   1  913.11   54.39 
  -6   6  -1 1069.49   51.19 
  -6   6  -1  941.61   52.49 
  -6   6  -1 1131.99   57.99 
   7  -6   1  284.97   32.30 
   7  -6   1  344.37   40.10 
  -7  -6  -1  261.57   30.90 
  -7  -6  -1  303.17   36.40 
   7  -6   1  282.97   30.00 
   7  -6   1  227.68   28.60 
   7  -6   1  230.08   33.60 
   7  -6   1  243.48   33.30 
   7  -6   1  240.48   32.60 
  -7  -6  -1  320.07   40.60 
  -7  -6  -1  234.48   29.00 
   7  -6   1  200.28   25.60 
   7  -6   1  246.98   32.40 
   7  -6   1  258.27   34.40 
   7   6   1  269.77   34.10 
   7   6   1  216.98   31.20 
  -7   6  -1  220.48   31.00 
   7   6   1  229.28   30.90 
   7   6   1  272.27   30.80 
  -7   6  -1  215.78   35.10 
  -7   6  -1  205.68   27.70 
  -7   6  -1  299.17   34.10 
   7   6   1  261.77   35.60 
  -7   6  -1  230.18   29.60 
  -7   6  -1  254.37   30.30 
  -7   6  -1  260.97   40.20 
  -7   6  -1  229.28   30.00 
  -7   6  -1  298.97   36.80 
  -7   6  -1  202.38   34.50 
  -7   6  -1  262.27   32.00 
  -7   6  -1  283.87   32.00 
  -7   6  -1  243.98   32.80 
   8  -6   1 1096.09   63.59 
   8  -6   1 1099.59   55.99 
   8  -6   1 1180.58   66.79 
  -8  -6  -1 1045.60   58.59 
   8  -6   1 1164.48   60.49 
  -8  -6  -1 1153.88   69.49 
   8  -6   1 1075.79   64.49 
   8  -6   1 1158.68   67.19 
   8  -6   1 1152.88   59.99 
   8  -6   1 1113.89   66.19 
  -8  -6  -1 1236.28   68.29 
  -8  -6  -1 1220.38   62.09 
   8  -6   1 1128.79   68.49 
  -8   6  -1 1131.49   73.99 
  -8   6  -1 1099.89   58.39 
   8   6   1 1105.39   67.19 
  -8   6  -1 1200.38   62.99 
  -8   6  -1 1130.39   64.09 
   8   6   1 1144.59   65.79 
  -8   6  -1 1131.99   65.69 
  -8   6  -1 1055.79   71.49 
  -8   6  -1 1129.39   63.69 
   8   6   1 1202.98   65.79 
  -8   6  -1 1130.89   61.19 
  -8   6  -1 1117.09   60.89 
  -8   6  -1 1135.59   61.59 
  -8   6  -1 1037.40   73.89 
  -8   6  -1 1143.89   64.59 
   7  -7  -1  482.25   37.10 
   7  -7  -1  497.85   51.89 
   7  -7  -1  488.05   36.70 
  -7  -7   1  473.25   40.60 
   7  -7  -1  528.05   37.20 
  -7  -7   1  452.65   36.40 
   7  -7  -1  444.46   45.80 
   7  -7  -1  480.65   38.70 
  -7  -7   1  540.45   60.39 
   7  -7  -1  468.15   48.20 
   7  -7  -1  494.35   41.10 
   7  -7  -1  525.35   40.80 
  -7   7   1  547.05   38.40 
  -7   7   1  416.86   44.10 
  -7   7   1  446.66   44.50 
  -7   7   1  492.05   36.70 
  -7   7   1  500.75   51.39 
  -7   7   1  468.75   36.90 
  -7   7   1  491.65   39.60 
  -7   7   1  601.84   60.29 
  -7   7   1  427.26   50.99 
  -7   7   1  528.85   56.69 
  -7   7   1  447.56   47.00 
   7   7  -1  509.95   52.19 
   7   7  -1  471.75   39.80 
   7   7  -1  478.25   41.60 
  -7   7   1  385.36   43.10 
   7   7  -1  501.75   52.79 
  -7   7   1  516.35   39.40 
   6  -7  -1  467.05   34.90 
   6  -7  -1  449.76   33.70 
   6  -7  -1  521.55   42.00 
   6  -7  -1  448.96   37.00 
   6  -7  -1  454.25   35.70 
   6  -7  -1  460.65   43.90 
  -6  -7   1  472.35   53.09 
   6  -7  -1  390.26   41.40 
  -6  -7   1  401.96   42.50 
  -6  -7   1  379.46   51.39 
  -6  -7   1  441.26   33.90 
   6  -7  -1  439.36   37.00 
   6  -7  -1  423.76   34.20 
  -6   7   1  502.35   39.00 
  -6   7   1  418.96   43.10 
   6   7  -1  526.45   40.70 
  -6   7   1  410.46   45.20 
   6   7  -1  480.55   50.99 
  -6   7   1  480.95   36.40 
  -6   7   1  431.96   48.80 
   6   7  -1  535.15   39.50 
  -6   7   1  434.26   32.80 
   6   7  -1  497.45   40.20 
  -6   7   1  421.16   43.50 
   6   7  -1  501.05   34.30 
  -6   7   1  371.66   38.50 
  -6   7   1  431.26   48.00 
  -6   7   1  487.05   36.10 
  -6   7   1  444.56   32.30 
  -6   7   1  486.75   35.30 
  -6   7   1  443.16   31.10 
  -6   7   1  474.95   50.59 
  -5  -7   1 1217.18   68.69 
   5  -7  -1 1410.36   66.49 
   5  -7  -1 1394.56   64.79 
  -5  -7   1 1310.27   55.89 
   5  -7  -1 1314.17   60.89 
   5  -7  -1 1270.67   66.19 
   5  -7  -1 1356.26   65.89 
   5  -7  -1 1284.37   69.19 
   5  -7  -1 1411.96   63.59 
  -5  -7   1 1319.07   65.69 
   5  -7  -1 1272.27   61.59 
  -5  -7   1 1376.76   61.99 
  -5  -7   1 1287.17   82.69 
  -5  -7   1 1408.56   62.79 
   5  -7  -1 1173.28   62.89 
  -5   7   1 1323.17   61.79 
  -5   7   1 1410.56   59.19 
   5   7  -1 1327.67   70.19 
   5   7  -1 1334.27   58.79 
  -5   7   1 1370.96   75.49 
  -5   7   1 1310.97   60.59 
  -5   7   1 1355.16   63.39 
  -5   7   1 1326.97   65.49 
  -5   7   1 1273.17   61.19 
  -5   7   1 1351.96   55.99 
  -5   7   1 1378.06   66.19 
  -5   7   1 1408.26   71.89 
  -5   7   1 1376.26   62.19 
   5   7  -1 1440.36   66.99 
  -5   7   1 1263.27   63.89 
   5   7  -1 1413.86   55.59 
   5   7  -1 1405.26   58.39 
  -5   7   1 1457.25   74.59 
   5   7  -1 1340.97   53.49 
  -5   7   1 1289.97   63.29 
  -5   7   1 1289.27   68.99 
  -4  -7   1 1035.20   54.69 
   4  -7  -1 1105.49   54.09 
  -4  -7   1 1164.88   52.59 
   4  -7  -1 1035.90   55.79 
   4  -7  -1 1149.98   52.29 
  -4  -7   1 1059.59   61.59 
   4  -7  -1 1028.30   54.19 
  -4  -7   1 1019.40   49.99 
   4  -7  -1 1110.19   53.09 
   4  -7  -1 1108.29   55.29 
  -4  -7   1 1016.30   46.30 
   4  -7  -1  917.51   52.09 
   4  -7  -1 1071.69   55.99 
   4  -7  -1 1100.79   60.49 
  -4  -7   1 1008.20   75.09 
  -4  -7   1 1201.88   61.29 
  -4   7   1 1189.38   54.09 
  -4   7   1 1093.19   47.80 
  -4   7   1 1107.19   45.90 
  -4   7   1 1123.49   59.89 
  -4   7   1 1068.39   59.49 
  -4   7   1 1104.79   54.29 
  -4   7   1  955.20   52.69 
   4   7  -1 1128.89   55.79 
  -4   7   1 1062.49   60.59 
  -4   7   1 1160.58   54.39 
  -4   7   1 1055.29   51.89 
  -4   7   1 1144.89   53.89 
   4   7  -1 1108.59   48.40 
   4   7  -1 1107.09   47.20 
   4   7  -1 1100.59   49.20 
   4   7  -1 1062.89   49.99 
  -4   7   1 1035.60   54.69 
   4   7  -1 1011.50   59.19 
  -4   7   1 1152.18   57.19 
  -4   7   1 1048.20   52.29 
   4   7  -1 1128.39   51.09 
   3  -7  -1  938.51   48.50 
   3  -7  -1  806.52   45.90 
   3  -7  -1  828.32   45.70 
  -3  -7   1  750.72   47.20 
   3  -7  -1  791.52   40.30 
  -3  -7   1  900.21   43.00 
   3  -7  -1  807.32   43.90 
   3  -7  -1  837.42   47.30 
   3  -7  -1  953.60   46.20 
   3  -7  -1  904.61   52.29 
  -3  -7   1  860.51   43.50 
  -3  -7   1  872.31   46.50 
  -3  -7   1  730.73   65.99 
   3  -7  -1  919.81   47.60 
  -3  -7   1  873.81   50.39 
  -3  -7   1  801.22   39.20 
  -3  -7   1  823.82   43.30 
  -3  -7   1  830.92   48.00 
   3  -7  -1  897.61   46.20 
  -3   7   1  898.71   48.50 
  -3   7   1  875.51   51.69 
  -3   7   1  942.71   45.00 
   3   7  -1  824.32   41.60 
   3   7  -1  857.81   43.60 
  -3   7   1  914.21   37.30 
  -3   7   1  802.52   43.70 
  -3   7   1  842.42   49.30 
  -3   7   1  835.62   48.00 
   3   7  -1  787.92   49.80 
  -3   7   1  817.02   45.20 
  -3   7   1  852.61   50.69 
  -3   7   1  878.81   45.20 
  -3   7   1  895.91   46.90 
  -3   7   1  978.70   49.10 
  -3   7   1  858.51   38.30 
   3   7  -1  936.71   43.30 
   3   7  -1  866.81   46.00 
  -3   7   1  872.31   45.90 
   3   7  -1  837.72   43.10 
   3   7  -1  903.01   41.60 
   3   7  -1  849.52   34.30 
   2  -7  -1  632.04   38.10 
  -2  -7   1  603.54   44.40 
   2  -7  -1  641.74   37.00 
  -2  -7   1  655.63   34.70 
   2  -7  -1  552.54   34.80 
   2  -7  -1  618.64   27.50 
   2  -7  -1  584.14   34.50 
  -2  -7   1  624.24   35.00 
  -2  -7   1  649.34   35.20 
   2  -7  -1  614.34   37.50 
   2  -7  -1  565.94   34.30 
   2  -7  -1  596.34   49.40 
   2  -7  -1  577.94   37.30 
  -2  -7   1  618.94   33.00 
  -2  -7   1  604.44   35.70 
  -2  -7   1  643.24   48.80 
   2  -7  -1  604.74   38.20 
   2  -7  -1  624.94   31.30 
   2  -7  -1  626.34   42.50 
  -2  -7   1  658.53   30.30 
  -2  -7   1  568.54   68.29 
  -2  -7   1  574.34   33.40 
  -2  -7   1  547.85   37.40 
   2   7  -1  651.03   27.60 
  -2   7   1  566.34   39.70 
   2   7  -1  671.53   43.30 
   2   7  -1  618.84   36.10 
  -2   7   1  614.24   28.90 
  -2   7   1  575.84   33.40 
   2   7  -1  648.24   36.00 
  -2   7   1  650.83   38.70 
  -2   7   1  629.34   37.30 
  -2   7   1  536.55   35.10 
   2   7  -1  628.04   34.50 
  -2   7   1  648.64   36.10 
   2   7  -1  564.74   32.60 
  -2   7   1  619.84   36.20 
  -2   7   1  559.24   34.70 
  -2   7   1  615.54   38.70 
   2   7  -1  602.74   29.50 
  -2   7   1  626.94   27.80 
  -2   7   1  590.04   36.70 
  -2   7   1  696.23   41.50 
   2   7  -1  603.34   35.60 
  -2   7   1  590.44   31.20 
   2   7  -1  589.04   42.90 
  -2   7   1  643.94   29.70 
   2   7  -1  624.54   35.00 
  -2   7   1  672.33   43.10 
   1  -7  -1  843.52   51.89 
   1  -7  -1  892.81   45.30 
   1  -7  -1  906.71   36.60 
  -1  -7   1  952.40   44.00 
   1  -7  -1  937.71   42.60 
  -1  -7   1  967.80   51.69 
  -1  -7   1  907.51   68.79 
   1  -7  -1  915.61   38.50 
   1  -7  -1  893.61   43.90 
  -1  -7   1  974.80   50.39 
  -1  -7   1  933.41   40.80 
   1  -7  -1  817.02   46.10 
   1  -7  -1  915.81   47.20 
  -1  -7   1  859.61   46.30 
   1  -7  -1  864.11   60.99 
  -1  -7   1  887.01   44.30 
  -1  -7   1  948.91   40.80 
  -1  -7   1  907.91   43.40 
  -1  -7   1  889.31   55.49 
   1  -7  -1  840.52   44.60 
   1  -7  -1  872.01   43.40 
   1   7  -1  890.71   48.30 
   1   7  -1  946.51   38.10 
  -1   7   1  893.11   46.00 
   1   7  -1  873.11   44.10 
  -1   7   1  984.90   43.70 
   1   7  -1  887.51   40.20 
  -1   7   1  849.81   34.00 
  -1   7   1  920.31   46.40 
  -1   7   1  951.00   45.50 
  -1   7   1  948.71   40.70 
  -1   7   1  870.21   45.50 
  -1   7   1  854.51   47.60 
   1   7  -1  920.61   53.39 
   1   7  -1  944.11   44.30 
   1   7  -1  924.01   51.99 
  -1   7   1  940.21   51.39 
  -1   7   1  943.51   44.40 
  -1   7   1  958.60   42.30 
   1   7  -1  999.90   45.60 
   1   7  -1  879.31   45.20 
   1   7  -1  868.81   44.20 
  -1   7   1  897.01   47.50 
  -1   7   1  855.81   49.40 
  -1   7   1  991.50   48.40 
   1   7  -1  963.20   44.60 
  -1   7   1  950.30   43.60 
   0  -7  -1  725.93   40.00 
   0  -7   1  730.13   47.20 
   0  -7  -1  771.02   42.20 
   0  -7  -1  745.33   36.20 
   0  -7  -1  698.43   46.40 
   0  -7  -1  797.22   40.00 
   0  -7  -1  752.62   39.90 
   0  -7   1  792.22   37.10 
   0  -7   1  729.83   29.00 
   0  -7   1  795.72   42.90 
   0  -7   1  767.12   59.09 
   0  -7  -1  724.23   36.60 
   0  -7  -1  751.52   42.20 
   0  -7   1  715.33   36.90 
   0  -7   1  759.02   36.70 
   0  -7  -1  786.72   59.89 
   0  -7   1  795.72   39.20 
   0  -7   1  671.73   41.90 
   0  -7   1  740.63   42.30 
   0  -7  -1  765.22   35.10 
   0  -7   1  769.32   40.10 
   0  -7  -1  724.73   27.60 
   0  -7   1  668.63   40.80 
   0   7  -1  763.32   46.40 
   0   7   1  736.83   38.80 
   0   7   1  679.13   35.80 
   0   7  -1  706.13   38.70 
   0   7   1  744.33   41.40 
   0   7   1  830.72   46.20 
   0   7  -1  702.63   37.50 
   0   7   1  777.52   36.70 
   0   7  -1  694.73   39.00 
   0   7   1  727.23   44.10 
   0   7   1  728.33   34.50 
   0   7  -1  718.53   34.30 
   0   7  -1  717.03   36.80 
   0   7  -1  786.62   37.40 
   0   7  -1  772.52   41.30 
   0   7  -1  731.13   43.10 
   0   7  -1  681.53   37.80 
   0   7  -1  653.33   35.10 
   0   7   1  708.43   39.50 
   0   7  -1  763.82   47.10 
   0   7   1  772.02   41.10 
   0   7   1  693.33   41.30 
   0   7   1  777.52   41.20 
   0   7  -1  800.52   41.90 
   0   7   1  751.02   36.90 
   0   7   1  810.22   42.00 
   1  -7   1 1247.68   59.29 
   1  -7   1 1314.37   77.29 
   1  -7   1 1352.46   62.69 
   1  -7   1 1342.77   56.39 
   1  -7   1 1269.57   49.90 
   1  -7   1 1271.47   59.39 
  -1  -7  -1 1257.17   56.19 
   1  -7   1 1262.97   65.39 
   1  -7   1 1322.77   56.49 
   1  -7   1 1369.06   49.00 
  -1  -7  -1 1329.47   70.49 
  -1  -7  -1 1284.57   60.59 
  -1  -7  -1 1320.97   48.80 
  -1  -7  -1 1116.69   79.39 
  -1  -7  -1 1303.57   55.19 
  -1  -7  -1 1361.36   61.49 
  -1  -7  -1 1303.37   51.19 
   1  -7   1 1323.97   57.49 
  -1  -7  -1 1402.06   61.89 
  -1  -7  -1 1399.86   57.29 
  -1  -7  -1 1353.66   56.49 
   1  -7   1 1367.16   55.99 
   1  -7   1 1451.15   61.79 
   1   7   1 1298.37   57.89 
  -1   7  -1 1283.27   57.49 
   1   7   1 1261.97   56.89 
   1   7   1 1292.77   50.89 
   1   7   1 1333.07   62.49 
   1   7   1 1204.58   55.69 
  -1   7  -1 1320.37   58.89 
   1   7   1 1379.26   58.09 
   1   7   1 1268.37   55.39 
  -1   7  -1 1317.87   65.49 
  -1   7  -1 1379.16   60.39 
  -1   7  -1 1386.56   68.09 
  -1   7  -1 1317.87   62.69 
  -1   7  -1 1350.76   59.99 
   1   7   1 1311.57   59.89 
  -1   7  -1 1363.86   56.99 
  -1   7  -1 1409.26   54.39 
  -1   7  -1 1351.66   58.79 
   1   7   1 1378.66   59.49 
  -1   7  -1 1251.97   54.69 
   1   7   1 1259.97   56.49 
  -1   7  -1 1321.47   51.39 
  -1   7  -1 1387.16   54.09 
   1   7   1 1369.06   51.49 
   1   7   1 1371.06   63.69 
  -1   7  -1 1261.47   42.10 
  -1   7  -1 1269.07   56.29 
   1   7   1 1348.86   49.40 
  -2  -7  -1  916.41   37.40 
   2  -7   1  866.51   47.60 
   2  -7   1  866.91   35.80 
  -2  -7  -1  925.91   60.09 
  -2  -7  -1  864.71   44.80 
   2  -7   1  906.41   40.30 
   2  -7   1  862.91   46.80 
   2  -7   1  872.51   44.70 
   2  -7   1  886.21   48.10 
   2  -7   1  897.41   45.80 
   2  -7   1  834.52   44.50 
   2  -7   1  837.42   51.49 
   2  -7   1  826.42   59.29 
  -2  -7  -1  855.41   50.79 
  -2  -7  -1  782.12   65.79 
  -2  -7  -1  890.91   44.40 
  -2  -7  -1  808.42   42.20 
  -2  -7  -1  849.52   47.40 
  -2   7  -1  965.30   35.40 
  -2   7  -1  893.11   38.90 
  -2   7  -1  963.90   37.80 
   2   7   1  828.42   36.20 
   2   7   1  924.11   47.70 
   2   7   1  883.91   44.30 
   2   7   1  927.71   46.90 
  -2   7  -1  979.80   49.70 
  -2   7  -1  874.11   49.90 
  -2   7  -1  957.50   46.10 
  -2   7  -1  899.11   43.30 
  -2   7  -1  938.81   47.20 
   2   7   1  883.91   35.50 
   2   7   1  924.11   45.20 
  -2   7  -1  945.81   47.40 
   2   7   1  993.70   45.90 
   2   7   1  955.00   46.60 
   2   7   1  924.21   37.60 
  -2   7  -1  890.31   45.10 
  -2   7  -1  884.61   47.30 
  -2   7  -1  974.60   47.30 
   2   7   1  982.10   52.19 
  -2   7  -1  945.01   54.39 
  -2   7  -1  963.60   40.60 
  -2   7  -1  867.31   52.19 
   2   7   1  872.01   46.80 
   2   7   1  879.41   49.10 
  -3  -7  -1  556.34   32.10 
   3  -7   1  566.54   37.60 
  -3  -7  -1  564.74   37.10 
  -3  -7  -1  627.54   38.00 
  -3  -7  -1  578.54   38.30 
   3  -7   1  539.65   36.60 
   3  -7   1  511.45   34.60 
   3  -7   1  538.65   37.50 
   3  -7   1  573.74   33.00 
  -3  -7  -1  541.25   35.70 
  -3  -7  -1  582.74   35.60 
  -3  -7  -1  526.05   61.39 
  -3  -7  -1  563.74   38.10 
  -3  -7  -1  570.64   34.50 
   3  -7   1  587.44   36.90 
   3  -7   1  502.85   35.10 
   3  -7   1  532.25   40.00 
   3   7   1  582.24   35.80 
  -3   7  -1  671.33   39.80 
  -3   7  -1  640.04   41.90 
  -3   7  -1  591.54   37.50 
   3   7   1  566.04   33.50 
  -3   7  -1  643.34   37.70 
  -3   7  -1  612.74   39.70 
   3   7   1  634.14   35.30 
  -3   7  -1  616.44   44.40 
  -3   7  -1  593.34   36.30 
  -3   7  -1  553.74   28.20 
  -3   7  -1  594.34   36.90 
   3   7   1  611.84   39.90 
   3   7   1  518.85   35.10 
  -3   7  -1  557.54   35.20 
  -3   7  -1  577.24   34.60 
  -3   7  -1  593.24   33.60 
  -3   7  -1  592.34   31.60 
   3   7   1  557.34   37.70 
  -3   7  -1  603.04   38.30 
  -3   7  -1  627.24   44.30 
   4  -7   1  610.84   38.40 
  -4  -7  -1  544.95   41.00 
  -4  -7  -1  590.34   40.30 
   4  -7   1  524.05   40.40 
   4  -7   1  524.45   34.40 
   4  -7   1  589.24   38.70 
   4  -7   1  511.95   36.00 
  -4  -7  -1  630.94   37.40 
   4  -7   1  536.15   37.80 
   4  -7   1  591.44   40.00 
  -4  -7  -1  559.74   35.70 
  -4  -7  -1  559.24   61.39 
  -4  -7  -1  616.34   34.60 
   4  -7   1  602.24   37.30 
  -4  -7  -1  554.64   37.90 
   4  -7   1  612.94   39.00 
  -4   7  -1  563.34   35.70 
  -4   7  -1  555.04   37.20 
   4   7   1  629.54   34.80 
   4   7   1  564.54   39.50 
  -4   7  -1  579.04   31.10 
  -4   7  -1  510.55   40.00 
  -4   7  -1  525.15   34.10 
  -4   7  -1  544.55   37.90 
   4   7   1  586.04   40.50 
   4   7   1  586.24   34.00 
  -4   7  -1  592.84   44.90 
  -4   7  -1  505.25   34.70 
  -4   7  -1  623.44   45.90 
  -4   7  -1  590.14   39.10 
  -4   7  -1  591.44   45.00 
   4   7   1  561.84   38.10 
  -4   7  -1  536.75   35.90 
  -4   7  -1  574.04   38.50 
  -4   7  -1  589.44   37.00 
  -4   7  -1  663.93   34.80 
   4   7   1  637.74   37.90 
   5  -7   1  298.87   31.90 
   5  -7   1  257.47   32.60 
   5  -7   1  249.97   31.30 
   5  -7   1  171.38   25.90 
  -5  -7  -1  226.58   32.00 
   5  -7   1  177.28   26.10 
  -5  -7  -1  246.08   39.60 
  -5  -7  -1  200.78   27.40 
   5  -7   1  296.47   33.30 
   5  -7   1  304.37   32.40 
  -5  -7  -1  292.17   29.20 
   5  -7   1  288.67   31.60 
  -5  -7  -1  215.58   29.50 
  -5  -7  -1  228.58   26.90 
   5  -7   1  240.78   33.00 
  -5   7  -1  250.67   29.10 
   5   7   1  234.08   28.00 
   5   7   1  257.97   30.40 
  -5   7  -1  200.58   28.00 
  -5   7  -1  271.67   37.70 
   5   7   1  267.77   26.80 
  -5   7  -1  235.98   25.70 
  -5   7  -1  195.28   25.80 
  -5   7  -1  235.08   25.10 
  -5   7  -1  264.77   30.30 
  -5   7  -1  224.38   27.40 
  -5   7  -1  288.27   37.40 
  -5   7  -1  257.27   31.60 
   5   7   1  260.47   25.60 
   5   7   1  213.68   29.80 
  -5   7  -1  229.78   34.40 
  -5   7  -1  272.47   35.80 
  -5   7  -1  254.57   30.50 
  -5   7  -1  255.27   28.70 
   5   7   1  230.18   29.80 
   5   7   1  281.67   34.10 
  -5   7  -1  266.57   32.70 
   6  -7   1  129.09   22.90 
  -6  -7  -1  120.89   24.10 
  -6  -7  -1  125.09   27.10 
  -6  -7  -1   97.29   18.00 
   6  -7   1  120.79   24.50 
   6  -7   1   95.49   20.80 
   6  -7   1  146.09   23.60 
   6  -7   1  129.49   22.80 
   6  -7   1  100.99   19.60 
  -6  -7  -1  115.59   22.90 
   6  -7   1  126.99   21.60 
  -6  -7  -1  101.09   18.50 
   6  -7   1  163.78   27.50 
   6  -7   1  105.39   22.00 
  -6   7  -1  171.58   25.90 
  -6   7  -1   98.29   20.50 
   6   7   1  110.09   21.10 
   6   7   1  168.08   24.70 
  -6   7  -1  134.69   24.90 
   6   7   1  123.99   23.30 
  -6   7  -1  113.49   21.20 
  -6   7  -1  141.59   29.00 
  -6   7  -1  131.99   20.70 
  -6   7  -1  142.69   22.40 
  -6   7  -1  123.69   22.70 
   6   7   1  100.89   21.80 
  -6   7  -1  125.29   23.50 
  -6   7  -1  115.89   20.60 
  -6   7  -1   95.39   23.00 
  -6   7  -1  151.18   23.40 
   6   7   1  149.09   26.20 
  -6   7  -1   96.49   23.90 
  -6   7  -1  143.79   22.30 
  -6   7  -1  104.99   21.30 
   7  -7   1    1.00    8.00 
   7  -7   1    7.90   10.90 
   7  -7   1   -1.90    7.30 
   7  -7   1   13.30    9.80 
   7  -7   1    9.00    9.80 
   7  -7   1    8.30    9.80 
   7  -7   1    0.30    8.60 
   7  -7   1   13.20    9.40 
  -7  -7  -1    7.40   10.10 
  -7  -7  -1    9.20    8.60 
   7  -7   1    3.10    9.10 
  -7  -7  -1   17.70   12.80 
  -7   7  -1    7.70   11.60 
  -7   7  -1    0.90   11.90 
   7   7   1   31.10   22.60 
  -7   7  -1    2.60    6.80 
   7   7   1   14.90   12.30 
  -7   7  -1    6.90    8.60 
  -7   7  -1    3.50    9.00 
  -7   7  -1   11.80    9.60 
  -7   7  -1   11.10   10.80 
  -7   7  -1    3.60    8.40 
  -7   7  -1   10.60   10.80 
  -7   7  -1   15.90   10.30 
  -7   7  -1    3.10    8.20 
   7   7   1    7.70    9.90 
  -7   7  -1    3.40    8.50 
  -6  -8   1  106.19   20.60 
  -6  -8   1  110.89   23.20 
   6  -8  -1   92.19   20.00 
   6  -8  -1   57.99   17.90 
   6  -8  -1  108.59   23.60 
   6  -8  -1  101.19   25.30 
   6  -8  -1  103.89   22.30 
  -6  -8   1  107.69   31.10 
   6  -8  -1  122.39   23.30 
   6  -8  -1   72.69   18.30 
   6  -8  -1   95.79   21.30 
   6  -8  -1   86.39   19.90 
  -6   8   1   72.39   18.20 
   6   8  -1   72.09   19.40 
  -6   8   1   68.09   17.70 
  -6   8   1  121.19   23.00 
  -6   8   1  111.59   26.90 
  -6   8   1   97.39   22.40 
  -6   8   1  127.19   25.70 
  -6   8   1  107.49   26.50 
   6   8  -1  106.29   22.90 
  -6   8   1  128.09   23.50 
   6   8  -1   81.49   23.50 
  -6   8   1  102.89   25.70 
  -6   8   1  101.19   20.90 
  -6   8   1   73.99   18.30 
  -6   8   1   90.59   25.20 
   5  -8  -1  327.57   35.40 
   5  -8  -1  309.17   35.60 
   5  -8  -1  351.26   43.80 
   5  -8  -1  350.86   36.70 
  -5  -8   1  264.37   45.40 
   5  -8  -1  282.97   34.10 
  -5  -8   1  242.88   33.10 
   5  -8  -1  324.17   34.20 
   5  -8  -1  304.27   37.60 
   5  -8  -1  276.87   34.90 
  -5  -8   1  342.27   36.30 
  -5  -8   1  404.26   47.70 
   5  -8  -1  271.27   34.60 
  -5  -8   1  304.57   32.70 
   5  -8  -1  313.27   36.50 
   5   8  -1  281.67   34.00 
  -5   8   1  295.17   38.70 
   5   8  -1  360.66   34.90 
   5   8  -1  364.36   42.40 
  -5   8   1  357.86   37.60 
  -5   8   1  338.77   39.20 
  -5   8   1  327.17   34.20 
  -5   8   1  360.76   37.50 
  -5   8   1  294.47   36.60 
   5   8  -1  335.17   33.70 
  -5   8   1  309.17   40.00 
  -5   8   1  276.97   34.90 
   5   8  -1  334.37   42.20 
   5   8  -1  319.27   30.60 
  -5   8   1  329.87   36.50 
  -5   8   1  341.17   36.30 
  -5   8   1  323.77   44.90 
  -5   8   1  268.47   38.10 
  -5   8   1  311.37   34.30 
   4  -8  -1  132.49   23.20 
   4  -8  -1  197.78   28.00 
  -4  -8   1  168.58   31.40 
  -4  -8   1  169.98   23.40 
  -4  -8   1  172.98   23.60 
   4  -8  -1  190.08   28.10 
   4  -8  -1  162.28   24.40 
   4  -8  -1  154.68   24.70 
  -4  -8   1  152.38   37.50 
  -4  -8   1  167.58   29.10 
   4  -8  -1  161.58   22.40 
  -4  -8   1  157.78   24.90 
   4  -8  -1  165.58   28.90 
   4  -8  -1  144.59   23.10 
   4  -8  -1  160.08   27.20 
   4  -8  -1  142.79   21.60 
  -4   8   1  175.38   29.80 
  -4   8   1  145.59   25.20 
   4   8  -1  173.18   26.90 
  -4   8   1  179.38   24.00 
  -4   8   1  122.09   21.40 
  -4   8   1  155.48   28.90 
  -4   8   1  190.78   26.70 
   4   8  -1  157.78   25.30 
   4   8  -1  144.59   21.90 
   4   8  -1  219.58   32.60 
  -4   8   1  140.09   23.40 
  -4   8   1  141.69   22.60 
   4   8  -1  229.18   27.60 
  -4   8   1  152.88   25.00 
   4   8  -1  149.79   20.90 
  -4   8   1  127.19   24.80 
  -4   8   1  156.28   23.80 
   4   8  -1  182.98   23.10 
  -4   8   1  183.18   25.20 
   4   8  -1  194.28   23.80 
  -3  -8   1  141.19   39.30 
   3  -8  -1  191.48   27.70 
   3  -8  -1  161.48   24.60 
   3  -8  -1  163.98   23.40 
   3  -8  -1  185.98   21.70 
   3  -8  -1  160.78   23.30 
  -3  -8   1  186.48   24.00 
   3  -8  -1  179.28   35.70 
  -3  -8   1  178.18   25.30 
   3  -8  -1  146.29   26.90 
  -3  -8   1  175.18   27.60 
   3  -8  -1  210.58   29.20 
   3  -8  -1  154.68   24.00 
  -3  -8   1  190.58   29.30 
   3  -8  -1  191.18   26.60 
  -3  -8   1  169.98   23.50 
   3  -8  -1  146.39   21.90 
  -3   8   1  192.58   27.00 
  -3   8   1  213.28   28.00 
  -3   8   1  140.69   23.00 
  -3   8   1  156.98   23.20 
   3   8  -1  168.08   23.00 
   3   8  -1  216.18   33.90 
  -3   8   1  167.38   23.90 
   3   8  -1  160.78   22.30 
  -3   8   1  212.38   29.00 
  -3   8   1  157.58   22.00 
  -3   8   1  197.08   29.50 
   3   8  -1  188.98   22.80 
   3   8  -1  168.68   23.70 
   3   8  -1  204.38   24.40 
  -3   8   1  229.68   30.60 
   3   8  -1  208.18   30.60 
  -3   8   1  146.99   22.20 
   3   8  -1  164.48   26.00 
  -3   8   1  129.69   24.00 
  -3   8   1  193.58   28.40 
   3   8  -1  190.48   24.20 
  -2  -8   1   -1.90    6.60 
   2  -8  -1   16.00   10.60 
  -2  -8   1    5.70   13.50 
   2  -8  -1    8.90    8.00 
   2  -8  -1    0.50   10.40 
  -2  -8   1   20.00    8.80 
  -2  -8   1    3.40    7.20 
  -2  -8   1    6.00   10.20 
   2  -8  -1   28.40   10.20 
  -2  -8   1    3.00    5.40 
   2  -8  -1    3.20    6.10 
   2  -8  -1    9.00    8.00 
  -2  -8   1   14.50    9.40 
   2  -8  -1   13.90    7.10 
  -2  -8   1   15.30    8.90 
   2  -8  -1   16.20    8.70 
  -2  -8   1   20.80    9.50 
   2  -8  -1    9.40    7.30 
   2  -8  -1   17.90    9.40 
   2   8  -1    3.70    7.10 
  -2   8   1   -0.60    5.90 
  -2   8   1   14.40    8.60 
  -2   8   1   10.40    9.10 
  -2   8   1    3.10    6.10 
   2   8  -1   15.00   10.80 
   2   8  -1   15.60    6.70 
   2   8  -1    4.60    6.80 
  -2   8   1    5.70    8.00 
   2   8  -1    9.00    7.50 
  -2   8   1    9.50    7.70 
  -2   8   1   10.40    7.20 
  -2   8   1   12.20    9.30 
   2   8  -1   15.90    9.00 
   2   8  -1   10.80    8.30 
  -2   8   1    9.10    7.20 
   2   8  -1   10.80    8.90 
  -2   8   1   12.70    9.80 
  -2   8   1   10.10    6.30 
   2   8  -1   15.40    8.30 
   2   8  -1   11.00    7.80 
  -2   8   1    6.90    6.50 
  -2   8   1   -0.30    7.80 
   2   8  -1   15.60    8.30 
  -2   8   1   16.60    7.50 
   1  -8  -1    0.80    4.50 
   1  -8  -1   18.90    9.60 
  -1  -8   1    2.30   14.00 
  -1  -8   1   12.70    9.20 
   1  -8  -1    3.20    7.10 
   1  -8  -1   -0.70    4.90 
   1  -8  -1    4.90    6.40 
  -1  -8   1    9.80    7.30 
  -1  -8   1    6.60    9.50 
   1  -8  -1    5.80    6.70 
  -1  -8   1   10.10    8.50 
   1  -8  -1   11.10    9.80 
  -1  -8   1    6.50    7.30 
  -1  -8   1   12.20    7.00 
   1  -8  -1   -0.80   10.40 
   1  -8  -1    0.00    4.50 
  -1  -8   1   12.50    8.10 
   1  -8  -1   -0.50    6.40 
  -1  -8   1    8.90    7.00 
  -1  -8   1   17.40   10.40 
   1   8  -1   -5.10    4.50 
  -1   8   1   12.10    8.00 
   1   8  -1    9.80    6.80 
  -1   8   1    3.00    5.60 
   1   8  -1   -2.20    4.90 
   1   8  -1    2.70    4.60 
   1   8  -1    5.70    5.90 
   1   8  -1    0.70    5.60 
  -1   8   1    9.40    7.40 
  -1   8   1    3.20    6.20 
   1   8  -1    5.40    6.70 
   1   8  -1   16.40    7.70 
  -1   8   1    6.20    7.60 
  -1   8   1    2.50    4.50 
  -1   8   1   12.60    9.00 
   1   8  -1    1.50    7.10 
  -1   8   1    7.90    8.00 
   1   8  -1    2.70    6.80 
  -1   8   1    6.20    6.60 
  -1   8   1    3.10    5.80 
  -1   8   1   12.70    9.40 
  -1   8   1    0.50    4.50 
  -1   8   1   13.90    8.10 
   1   8  -1    5.90    5.70 
   1   8  -1   16.20    9.70 
  -1   8   1   -0.10    7.10 
   0  -8   1  279.97   47.90 
   0  -8  -1  238.98   20.00 
   0  -8   1  211.98   23.60 
   0  -8  -1  179.28   23.70 
   0  -8   1  242.88   31.20 
   0  -8   1  193.68   22.60 
   0  -8  -1  216.28   28.70 
   0  -8   1  194.68   24.40 
   0  -8  -1  230.98   26.80 
   0  -8   1  211.88   23.20 
   0  -8  -1  203.38   28.30 
   0  -8   1  189.08   24.40 
   0  -8   1  229.18   34.80 
   0  -8  -1  249.28   25.60 
   0  -8   1  225.18   30.40 
   0  -8  -1  192.58   26.00 
   0  -8   1  235.98   30.40 
   0  -8   1  266.97   30.60 
   0  -8  -1  244.68   24.80 
   0  -8  -1  245.88   43.40 
   0  -8  -1  220.38   27.80 
   0  -8  -1  218.08   33.40 
   0   8  -1  225.88   29.50 
   0   8  -1  215.58   25.70 
   0   8  -1  258.87   30.10 
   0   8  -1  238.18   27.40 
   0   8   1  187.08   25.30 
   0   8  -1  247.98   29.20 
   0   8   1  197.28   21.50 
   0   8  -1  244.58   27.00 
   0   8   1  271.77   29.60 
   0   8   1  202.48   25.90 
   0   8   1  227.68   27.80 
   0   8  -1  248.48   25.90 
   0   8   1  202.88   26.40 
   0   8  -1  241.68   25.20 
   0   8   1  185.38   27.50 
   0   8   1  181.18   23.40 
   0   8   1  225.28   25.10 
   0   8   1  230.38   24.40 
   0   8  -1  203.08   22.90 
   0   8   1  194.88   24.60 
   0   8  -1  207.98   22.30 
   0   8   1  165.28   24.30 
   0   8  -1  237.78   32.60 
   0   8   1  203.38   28.80 
   0   8  -1  267.37   29.60 
   0   8   1  211.38   23.80 
   0   8  -1  254.27   34.60 
   0   8  -1  236.48   27.90 
   1  -8   1  516.05   36.30 
  -1  -8  -1  521.45   32.50 
  -1  -8  -1  475.15   36.30 
   1  -8   1  530.75   35.40 
  -1  -8  -1  511.35   33.80 
  -1  -8  -1  485.15   37.20 
   1  -8   1  460.05   31.50 
  -1  -8  -1  371.96   59.39 
  -1  -8  -1  494.75   33.50 
   1  -8   1  464.15   35.50 
   1  -8   1  494.25   36.30 
  -1  -8  -1  489.75   29.10 
   1  -8   1  449.16   35.80 
  -1  -8  -1  501.05   53.19 
  -1  -8  -1  493.25   36.80 
   1  -8   1  450.45   47.60 
   1  -8   1  524.65   34.10 
   1  -8   1  575.24   67.69 
   1  -8   1  503.05   28.80 
   1  -8   1  465.25   32.10 
  -1   8  -1  512.65   35.80 
  -1   8  -1  497.45   31.10 
  -1   8  -1  470.75   32.90 
  -1   8  -1  444.86   33.20 
   1   8   1  503.65   35.20 
  -1   8  -1  465.15   39.20 
   1   8   1  477.45   35.40 
  -1   8  -1  467.05   34.80 
   1   8   1  522.25   34.70 
   1   8   1  477.75   37.70 
  -1   8  -1  412.06   43.80 
   1   8   1  465.95   32.10 
   1   8   1  561.94   36.40 
  -1   8  -1  480.25   32.30 
   1   8   1  500.25   29.40 
  -1   8  -1  455.85   36.20 
  -1   8  -1  549.05   33.70 
  -1   8  -1  482.85   30.30 
   1   8   1  505.75   33.00 
  -1   8  -1  564.74   37.40 
  -1   8  -1  498.05   34.70 
   1   8   1  463.65   28.50 
   1   8   1  491.15   37.80 
   1   8   1  435.16   32.50 
   1   8   1  521.35   35.10 
   1   8   1  494.25   27.40 
  -1   8  -1  508.25   29.70 
   1   8   1  479.85   33.40 
  -2  -8  -1  242.08   30.80 
   2  -8   1  265.97   32.20 
  -2  -8  -1  209.58   36.50 
  -2  -8  -1  226.38   26.40 
  -2  -8  -1  343.17   33.10 
   2  -8   1  233.28   27.70 
  -2  -8  -1  272.47   32.60 
   2  -8   1  305.17   47.70 
   2  -8   1  289.77   29.30 
  -2  -8  -1  206.18   35.00 
   2  -8   1  228.98   28.60 
   2  -8   1  237.18   19.70 
   2  -8   1  285.37   29.90 
   2  -8   1  290.67   31.50 
   2  -8   1  263.67   33.00 
  -2  -8  -1  193.68   41.90 
  -2  -8  -1  302.37   31.10 
   2  -8   1  271.07   32.40 
  -2  -8  -1  272.57   22.00 
   2  -8   1  241.18   33.70 
  -2   8  -1  275.97   32.30 
   2   8   1  211.38   26.40 
  -2   8  -1  343.57   34.90 
   2   8   1  227.38   28.40 
   2   8   1  218.38   25.80 
  -2   8  -1  321.47   41.40 
   2   8   1  278.17   29.10 
   2   8   1  217.08   26.90 
  -2   8  -1  267.07   35.50 
  -2   8  -1  221.58   26.50 
  -2   8  -1  243.58   29.50 
  -2   8  -1  216.38   27.50 
  -2   8  -1  285.27   39.40 
  -2   8  -1  259.57   33.50 
   2   8   1  262.07   32.20 
  -2   8  -1  248.88   33.70 
  -2   8  -1  238.78   27.50 
   2   8   1  294.17   30.00 
   2   8   1  260.77   30.50 
  -2   8  -1  217.78   26.60 
   2   8   1  204.58   29.50 
  -2   8  -1  282.97   28.00 
   2   8   1  285.67   32.30 
   3  -8   1  598.14   46.50 
  -3  -8  -1  701.03   38.00 
   3  -8   1  719.63   42.10 
  -3  -8  -1  608.44   38.90 
  -3  -8  -1  650.03   40.80 
   3  -8   1  631.04   41.70 
   3  -8   1  662.53   37.40 
  -3  -8  -1  604.24   73.29 
   3  -8   1  716.63   45.60 
  -3  -8  -1  713.63   43.10 
   3  -8   1  660.33   41.40 
  -3  -8  -1  690.13   45.90 
   3  -8   1  673.53   44.90 
   3  -8   1  718.73   45.00 
   3  -8   1  708.63   43.20 
   3  -8   1  819.92   62.29 
  -3  -8  -1  649.54   44.20 
   3   8   1  703.73   40.20 
  -3   8  -1  716.93   43.80 
  -3   8  -1  693.83   43.30 
   3   8   1  574.44   39.90 
   3   8   1  728.93   41.60 
   3   8   1  666.13   42.40 
   3   8   1  721.23   41.40 
  -3   8  -1  697.23   42.50 
   3   8   1  629.74   42.80 
   3   8   1  595.54   37.80 
  -3   8  -1  606.24   44.80 
   3   8   1  757.42   43.80 
  -3   8  -1  610.34   47.90 
  -3   8  -1  602.24   40.50 
   3   8   1  676.83   45.10 
   3   8   1  727.33   47.60 
  -3   8  -1  588.74   41.70 
  -3   8  -1  714.43   44.50 
  -3   8  -1  686.93   38.50 
  -3   8  -1  658.93   41.00 
  -3   8  -1  636.14   48.50 
  -3   8  -1  627.44   38.90 
  -4  -8  -1   86.99   17.60 
  -4  -8  -1   81.59   26.90 
   4  -8   1  116.19   25.20 
   4  -8   1   91.49   20.20 
   4  -8   1  103.19   20.60 
  -4  -8  -1   77.69   14.70 
  -4  -8  -1  105.59   19.80 
  -4  -8  -1   70.69   19.10 
   4  -8   1  101.69   19.40 
  -4  -8  -1   85.19   19.00 
   4  -8   1  116.59   21.70 
   4  -8   1   83.69   18.30 
   4  -8   1   81.59   17.10 
   4  -8   1   67.59   17.30 
  -4   8  -1  108.69   20.40 
   4   8   1   73.09   17.20 
  -4   8  -1  158.18   28.20 
  -4   8  -1   99.69   23.70 
   4   8   1  111.99   19.20 
  -4   8  -1   80.79   18.90 
  -4   8  -1   79.09   18.10 
  -4   8  -1  115.59   22.10 
  -4   8  -1  103.29   19.70 
  -4   8  -1   87.19   17.90 
   4   8   1  109.39   22.10 
   4   8   1   99.49   20.90 
  -4   8  -1   78.59   22.00 
   4   8   1   82.59   19.90 
  -4   8  -1   88.39   20.70 
   4   8   1  103.69   19.40 
  -4   8  -1   89.99   18.00 
  -4   8  -1  132.99   28.30 
  -4   8  -1   70.59   15.20 
   4   8   1  115.69   19.00 
  -5  -8  -1  533.35   40.40 
   5  -8   1  571.74   42.20 
  -5  -8  -1  550.14   63.69 
   5  -8   1  581.94   46.70 
   5  -8   1  578.64   43.10 
   5  -8   1  608.54   42.90 
  -5  -8  -1  585.44   37.20 
   5  -8   1  545.25   39.50 
  -5  -8  -1  630.64   48.20 
   5  -8   1  622.54   43.80 
   5  -8   1  527.25   38.20 
  -5  -8  -1  484.75   39.90 
   5  -8   1  483.75   41.10 
   5   8   1  538.75   41.10 
   5   8   1  529.75   33.40 
  -5   8  -1  506.15   40.20 
  -5   8  -1  648.64   43.50 
   5   8   1  682.63   39.60 
  -5   8  -1  539.25   39.80 
  -5   8  -1  577.04   49.10 
   5   8   1  644.04   41.40 
  -5   8  -1  548.85   40.10 
  -5   8  -1  639.14   44.70 
   5   8   1  665.23   46.20 
  -5   8  -1  552.64   42.10 
  -5   8  -1  549.54   38.10 
  -5   8  -1  592.14   40.70 
  -5   8  -1  625.54   51.59 
  -5   8  -1  541.85   45.30 
   5   8   1  556.54   43.30 
  -5   8  -1  578.14   46.10 
  -5   8  -1  589.94   40.10 
   5   8   1  588.94   36.20 
   6  -8   1  161.48   25.80 
  -6  -8  -1  111.29   21.40 
   6  -8   1  114.49   24.50 
   6  -8   1  120.29   23.10 
   6  -8   1  133.59   24.20 
   6  -8   1  169.98   28.20 
   6  -8   1  150.48   28.40 
  -6  -8  -1   83.69   20.70 
   6  -8   1  183.58   28.90 
   6  -8   1  172.08   32.60 
  -6  -8  -1  118.99   28.80 
  -6   8  -1  119.19   22.90 
   6   8   1  168.08   28.90 
  -6   8  -1  175.68   27.90 
   6   8   1  102.49   22.50 
   6   8   1   85.59   21.40 
  -6   8  -1  115.69   23.20 
   6   8   1  102.39   22.80 
  -6   8  -1  117.49   22.20 
  -6   8  -1  154.68   25.80 
  -6   8  -1  109.59   22.80 
  -6   8  -1  141.89   26.70 
  -6   8  -1   53.89   19.40 
  -6   8  -1  153.28   31.50 
  -6   8  -1  153.28   28.10 
  -6   8  -1  144.39   30.70 
  -5  -9   1  229.88   33.60 
  -5  -9   1  157.18   36.70 
   5  -9  -1  127.89   25.60 
   5  -9  -1  144.89   25.50 
  -5  -9   1  133.99   25.00 
   5  -9  -1  200.18   29.40 
   5  -9  -1  128.69   23.20 
  -5  -9   1  157.88   32.00 
   5  -9  -1  187.28   30.00 
   5  -9  -1  121.09   24.50 
   5  -9  -1  162.28   30.50 
   5  -9  -1  242.88   35.60 
   5  -9  -1  248.58   40.40 
  -5   9   1  215.98   35.30 
  -5   9   1  166.78   27.20 
  -5   9   1  118.79   26.70 
  -5   9   1  202.98   29.40 
  -5   9   1  140.79   26.80 
  -5   9   1  191.58   35.30 
  -5   9   1  210.78   33.00 
  -5   9   1  160.18   26.30 
  -5   9   1  152.18   26.10 
   5   9  -1  230.18   34.70 
   5   9  -1  176.68   26.70 
   5   9  -1  245.28   37.40 
  -5   9   1  238.18   33.10 
  -5   9   1  211.18   29.80 
  -5   9   1  177.58   31.50 
  -5   9   1  241.48   41.30 
   5   9  -1  148.79   27.00 
   4  -9  -1 1451.85   75.59 
   4  -9  -1 1505.55   73.89 
   4  -9  -1 1465.45   70.19 
  -4  -9   1 1494.85   80.39 
   4  -9  -1 1557.94   74.09 
   4  -9  -1 1367.46   74.19 
  -4  -9   1 1467.25   69.59 
   4  -9  -1 1561.94   73.59 
  -4  -9   1 1562.74   75.29 
   4  -9  -1 1406.76   72.19 
   4  -9  -1 1426.96   81.69 
  -4  -9   1 1469.45  104.29 
   4  -9  -1 1416.16   94.89 
  -4  -9   1 1566.04   68.99 
   4   9  -1 1534.25   74.89 
  -4   9   1 1353.36   78.79 
   4   9  -1 1492.05   76.79 
  -4   9   1 1552.24   73.79 
  -4   9   1 1554.34   74.59 
   4   9  -1 1436.76   66.19 
   4   9  -1 1397.56   65.19 
  -4   9   1 1470.35   72.09 
  -4   9   1 1559.54   76.59 
  -4   9   1 1519.95   69.79 
  -4   9   1 1567.34   73.59 
  -4   9   1 1528.75   80.79 
   4   9  -1 1438.76   67.59 
  -4   9   1 1445.26   78.59 
   4   9  -1 1478.05   69.99 
   4   9  -1 1443.66   64.59 
   4   9  -1 1427.46   77.69 
  -4   9   1 1546.05   72.69 
   4   9  -1 1450.95   82.19 
  -4   9   1 1496.15   75.59 
  -4   9   1 1434.76   69.29 
  -3  -9   1  213.98   49.99 
   3  -9  -1  180.58   26.10 
  -3  -9   1  189.58   27.00 
   3  -9  -1  151.48   26.30 
   3  -9  -1  187.28   27.40 
   3  -9  -1  214.18   44.80 
   3  -9  -1  139.19   27.90 
   3  -9  -1  177.68   29.60 
  -3  -9   1  131.39   27.30 
  -3  -9   1  134.89   22.30 
   3  -9  -1  172.58   26.30 
  -3  -9   1  192.38   31.00 
   3  -9  -1  158.18   25.20 
  -3  -9   1  159.08   24.40 
   3  -9  -1  155.18   25.60 
   3   9  -1  178.18   26.00 
  -3   9   1  187.38   30.10 
  -3   9   1  205.08   32.40 
   3   9  -1  211.28   25.90 
  -3   9   1  159.68   26.60 
   3   9  -1  143.09   21.80 
   3   9  -1  173.98   27.40 
  -3   9   1  197.08   28.90 
   3   9  -1  238.78   36.30 
   3   9  -1  201.38   28.00 
  -3   9   1  190.88   30.50 
  -3   9   1  178.28   27.40 
   3   9  -1  156.58   29.60 
   3   9  -1  231.18   29.30 
   3   9  -1  174.68   28.50 
  -3   9   1  206.68   28.10 
  -3   9   1  178.88   27.10 
  -3   9   1  188.28   29.00 
  -3   9   1  202.18   26.90 
  -3   9   1  206.88   32.20 
   3   9  -1  194.88   25.70 
   2  -9  -1  914.71   50.69 
   2  -9  -1  807.92   49.50 
   2  -9  -1  857.81   71.59 
   2  -9  -1  931.11   62.19 
  -2  -9   1  876.81  100.99 
  -2  -9   1  864.21   55.49 
  -2  -9   1  935.01   49.70 
   2  -9  -1  851.11   52.29 
   2  -9  -1  893.31   48.90 
   2  -9  -1  836.62   52.99 
   2  -9  -1  839.72   52.19 
   2  -9  -1  877.91   49.99 
  -2  -9   1  911.41   50.19 
   2   9  -1  867.21   48.40 
   2   9  -1  807.72   49.50 
   2   9  -1  933.41   51.29 
  -2   9   1  865.51   52.19 
   2   9  -1  806.22   55.09 
  -2   9   1  863.91   56.99 
   2   9  -1  836.32   53.39 
  -2   9   1  867.61   56.69 
   2   9  -1  945.91   51.19 
  -2   9   1  880.31   50.79 
  -2   9   1  852.01   54.49 
  -2   9   1  912.51   47.40 
  -2   9   1  883.51   52.89 
   2   9  -1  849.22   51.79 
  -2   9   1  913.51   54.79 
   2   9  -1  919.51   49.99 
  -2   9   1  874.11   49.99 
  -2   9   1  979.00   56.09 
   2   9  -1  919.21   48.90 
   2   9  -1  885.71   58.99 
  -2   9   1  844.72   48.60 
  -2   9   1  848.12   51.59 
  -1  -9   1   25.70   12.20 
  -1  -9   1   38.70   12.30 
   1  -9  -1   34.90   14.10 
  -1  -9   1   29.00   11.10 
  -1  -9   1   25.60   15.30 
  -1  -9   1   21.40   16.60 
   1  -9  -1    8.40   14.50 
   1  -9  -1   37.70   12.10 
   1  -9  -1   39.70   14.40 
   1  -9  -1   12.80   10.00 
   1  -9  -1    6.10    7.70 
  -1  -9   1   40.00   11.20 
   1  -9  -1   60.29   17.50 
  -1  -9   1   21.00   12.90 
  -1  -9   1   33.40   13.80 
   1  -9  -1   36.80   11.60 
   1  -9  -1   38.80   17.10 
   1  -9  -1   26.90   11.80 
  -1  -9   1   19.40    9.40 
   1   9  -1   13.50   11.30 
   1   9  -1   43.50   14.00 
   1   9  -1   16.20    9.70 
   1   9  -1   26.50    9.80 
   1   9  -1   38.80   12.80 
  -1   9   1   28.40   10.90 
   1   9  -1    6.40    9.60 
   1   9  -1   30.80   11.60 
  -1   9   1   20.00    9.50 
   1   9  -1   19.50   10.10 
   1   9  -1   23.00   11.00 
  -1   9   1   32.50   12.70 
  -1   9   1   40.30   14.90 
   1   9  -1   53.29   17.40 
  -1   9   1   37.40   11.20 
   1   9  -1   49.30   14.60 
  -1   9   1   27.90   10.50 
  -1   9   1   22.50   11.30 
  -1   9   1   47.50   13.80 
  -1   9   1   23.50   11.50 
  -1   9   1   22.60   12.50 
  -1   9   1    1.90    6.10 
  -1   9   1   19.30    9.90 
   1   9  -1   30.10   11.90 
  -1   9   1   35.40   14.30 
  -1   9   1   28.70   10.70 
   0  -9   1 1060.89   61.99 
   0  -9   1 1038.70   56.59 
   0  -9  -1 1106.99   61.69 
   0  -9  -1 1034.80   60.29 
   0  -9  -1 1126.89   52.29 
   0  -9  -1 1122.99   63.49 
   0  -9   1 1259.87   66.69 
   0  -9   1 1158.58   71.79 
   0  -9  -1 1104.29   71.29 
   0  -9  -1 1141.49   57.79 
   0  -9   1 1031.20   52.59 
   0  -9  -1 1080.79   56.09 
   0  -9  -1 1209.28   54.69 
   0  -9   1 1120.99   56.59 
   0  -9   1 1124.99   52.39 
   0  -9   1 1093.39   60.19 
   0  -9   1 1216.78   90.29 
   0  -9  -1 1141.49   88.19 
   0   9  -1 1138.79   57.39 
   0   9  -1 1074.89   59.09 
   0   9   1 1146.99   59.09 
   0   9  -1 1168.38   51.19 
   0   9   1 1049.89   57.89 
   0   9   1 1031.60   60.19 
   0   9   1 1102.69   50.09 
   0   9   1 1086.29   52.39 
   0   9  -1 1132.39   54.39 
   0   9  -1 1138.29   59.09 
   0   9  -1 1142.69   56.59 
   0   9  -1 1123.09   53.39 
   0   9   1 1162.08   59.59 
   0   9  -1 1171.08   58.49 
   0   9   1 1078.49   58.49 
   0   9   1 1108.29   53.09 
   0   9  -1 1222.18   61.29 
   0   9   1 1148.79   64.79 
   0   9   1 1105.39   63.19 
   0   9  -1 1082.59   62.39 
   0   9  -1 1113.79   67.19 
   0   9  -1 1054.29   64.79 
   0   9   1 1125.69   60.29 
   0   9   1 1128.49   53.59 
   0   9  -1 1030.20   57.79 
   0   9   1 1170.18   58.19 
   0   9   1 1150.98   57.89 
  -1  -9  -1   69.39   15.30 
   1  -9   1   47.00   14.90 
   1  -9   1   55.19   16.90 
  -1  -9  -1   33.50   12.10 
   1  -9   1   24.50   10.10 
   1  -9   1   40.30   14.00 
   1  -9   1    8.20    7.60 
  -1  -9  -1   49.10   14.60 
  -1  -9  -1   52.69   12.30 
   1  -9   1   55.19   14.50 
   1  -9   1   46.80   16.60 
   1  -9   1   55.69   16.40 
  -1  -9  -1   23.60   13.90 
  -1  -9  -1   42.40   15.30 
   1  -9   1   21.80   16.20 
   1  -9   1   26.30   12.20 
  -1  -9  -1   30.40   17.10 
   1   9   1   34.60   12.60 
   1   9   1   20.30   11.80 
  -1   9  -1   46.90   15.20 
  -1   9  -1   30.50   13.40 
  -1   9  -1   33.90   13.00 
  -1   9  -1   38.00   12.10 
  -1   9  -1   40.30   11.90 
   1   9   1   43.30   15.40 
   1   9   1   17.70    9.60 
   1   9   1   57.29   15.80 
  -1   9  -1   24.40   10.90 
  -1   9  -1   32.70   11.80 
   1   9   1   64.29   16.70 
  -1   9  -1   34.30   13.00 
   1   9   1   55.39   15.60 
   1   9   1   51.79   12.40 
   1   9   1   50.99   14.90 
   1   9   1   62.39   16.00 
   1   9   1   37.10   12.10 
   1   9   1   43.70   14.80 
  -1   9  -1   64.19   14.50 
  -1   9  -1   25.90   10.90 
  -1   9  -1   47.10   16.10 
  -1   9  -1   61.69   15.50 
  -1   9  -1   70.19   19.70 
   2  -9   1  961.80   53.59 
   2  -9   1  853.71   55.29 
  -2  -9  -1  909.91   50.39 
  -2  -9  -1  940.71   56.59 
   2  -9   1  975.60   52.79 
   2  -9   1  967.70   52.29 
   2  -9   1  809.62   58.39 
  -2  -9  -1  877.61   50.09 
   2  -9   1  907.31   54.09 
   2  -9   1  880.61   71.99 
   2  -9   1  882.91   55.09 
   2  -9   1  945.71   52.09 
   2  -9   1  899.21   55.49 
  -2  -9  -1  884.11   79.99 
   2   9   1  962.60   54.89 
   2   9   1  903.61   50.69 
  -2   9  -1  886.61   47.90 
  -2   9  -1  942.41   54.19 
   2   9   1  899.21   56.19 
   2   9   1  959.60   51.99 
   2   9   1  950.30   52.89 
   2   9   1  872.11   48.40 
  -2   9  -1  852.81   49.40 
   2   9   1  885.51   50.09 
  -2   9  -1  893.61   53.09 
  -2   9  -1  930.41   61.19 
  -2   9  -1  899.01   60.19 
   2   9   1  930.51   56.99 
   2   9   1  982.00   55.39 
  -2   9  -1  923.61   55.09 
  -2   9  -1  929.81   52.29 
  -2   9  -1  846.62   55.59 
  -2   9  -1  920.31   51.69 
   2   9   1  869.51   50.09 
  -2   9  -1  921.21   55.19 
  -2   9  -1  905.71   61.19 
   2   9   1  991.00   54.19 
  -3  -9  -1  143.59   28.20 
   3  -9   1  116.19   22.10 
   3  -9   1   93.79   21.70 
   3  -9   1  161.78   25.20 
   3  -9   1  115.79   31.30 
   3  -9   1   70.29   17.50 
   3  -9   1  119.89   24.50 
  -3  -9  -1  117.39   33.00 
   3  -9   1  129.89   25.20 
  -3  -9  -1  166.68   24.20 
   3  -9   1  178.08   33.10 
   3  -9   1  137.89   25.40 
  -3  -9  -1  100.99   20.60 
   3  -9   1  109.69   22.60 
  -3   9  -1  131.99   29.60 
  -3   9  -1  118.19   23.60 
  -3   9  -1  123.29   22.10 
  -3   9  -1   98.99   20.40 
  -3   9  -1  160.08   26.50 
   3   9   1   84.49   19.70 
  -3   9  -1  103.89   18.30 
   3   9   1   97.59   19.90 
  -3   9  -1  137.49   23.40 
  -3   9  -1  144.89   29.60 
   3   9   1  117.59   19.10 
  -3   9  -1   79.89   17.80 
   3   9   1  124.89   21.30 
   3   9   1   97.59   19.60 
   3   9   1  139.09   26.20 
   3   9   1   94.59   18.20 
  -3   9  -1  106.29   21.50 
  -3   9  -1   90.39   21.90 
  -3   9  -1  131.99   27.20 
   3   9   1  140.29   24.40 
   3   9   1   99.69   19.30 
   3   9   1  123.69   22.80 
   3   9   1  154.58   28.50 
   4  -9   1  360.46   40.40 
   4  -9   1  448.26   37.20 
   4  -9   1  390.56   57.29 
   4  -9   1  453.35   46.00 
  -4  -9  -1  381.46   59.09 
  -4  -9  -1  450.25   49.90 
  -4  -9  -1  407.06   41.40 
  -4  -9  -1  418.16   43.60 
   4  -9   1  381.66   40.80 
   4  -9   1  380.06   42.90 
   4  -9   1  423.06   43.10 
   4  -9   1  424.86   51.49 
   4  -9   1  371.36   43.90 
   4  -9   1  472.75   43.60 
  -4   9  -1  473.45   47.70 
   4   9   1  355.16   36.20 
   4   9   1  451.75   33.60 
   4   9   1  412.76   42.00 
   4   9   1  356.76   39.60 
   4   9   1  407.66   32.10 
  -4   9  -1  412.36   32.00 
   4   9   1  481.45   48.70 
  -4   9  -1  418.36   43.30 
  -4   9  -1  391.86   48.60 
  -4   9  -1  352.46   38.40 
   4   9   1  386.96   40.50 
  -4   9  -1  412.96   43.90 
   4   9   1  376.86   38.20 
  -4   9  -1  388.46   40.80 
  -4   9  -1  318.37   42.80 
  -4   9  -1  421.06   40.70 
  -4   9  -1  346.17   37.70 
   4   9   1  416.06   31.40 
   4   9   1  490.85   49.80 
   4   9   1  446.06   47.50 
  -4   9  -1  469.25   46.40 
  -4   9  -1  431.36   51.99 
  -4   9  -1  405.86   52.49 
   5  -9   1   -2.70    7.60 
   5  -9   1   -9.20    7.20
[truncated: 3,115,578 more chars]
