# Supplementary material
Source: MDPI journal article supplement (https://www.mdpi.com/2073-4352/13/7/1043)
Supplement: s1 [file s1 › 12 Tm Ha2019_99b_0m_a.cif]

 
data_Ha2019_99b_0m_a 
  
_audit_creation_method            'SHELXL-2014/7' 
_shelx_SHELXL_version_number      '2014/7' 
_chemical_name_systematic         ? 
_chemical_name_common             ? 
_chemical_melting_point           ? 
_chemical_formula_moiety          ? 
_chemical_formula_sum 
 'C4 H12 Br O7 Tm' 
_chemical_formula_weight          420.98 
  
loop_ 
 _atom_type_symbol 
 _atom_type_description 
 _atom_type_scat_dispersion_real 
 _atom_type_scat_dispersion_imag 
 _atom_type_scat_source 
 'C'  'C'   0.0033   0.0016 
 'International Tables Vol C Tables 4.2.6.8 and 6.1.1.4' 
 'H'  'H'   0.0000   0.0000 
 'International Tables Vol C Tables 4.2.6.8 and 6.1.1.4' 
 'O'  'O'   0.0106   0.0060 
 'International Tables Vol C Tables 4.2.6.8 and 6.1.1.4' 
 'Br'  'Br'  -0.2901   2.4595 
 'International Tables Vol C Tables 4.2.6.8 and 6.1.1.4' 
 'Tm'  'Tm'  -0.3139   5.2483 
 'International Tables Vol C Tables 4.2.6.8 and 6.1.1.4' 
  
_space_group_crystal_system       monoclinic 
_space_group_IT_number            14 
_space_group_name_H-M_alt         'P 21/n' 
_space_group_name_Hall            '-P 2yn' 
  
_shelx_space_group_comment 
; 
The symmetry employed for this shelxl refinement is uniquely defined 
by the following loop, which should always be used as a source of 
symmetry information in preference to the above space-group names. 
They are only intended as comments. 
; 
  
loop_ 
 _space_group_symop_operation_xyz 
 'x, y, z' 
 '-x+1/2, y+1/2, -z+1/2' 
 '-x, -y, -z' 
 'x-1/2, -y-1/2, z-1/2' 
  
_cell_length_a                    7.7868(5) 
_cell_length_b                    8.0675(5) 
_cell_length_c                    17.3994(7) 
_cell_angle_alpha                 90 
_cell_angle_beta                  96.154(2) 
_cell_angle_gamma                 90 
_cell_volume                      1086.73(11) 
_cell_formula_units_Z             4 
_cell_measurement_temperature     100(2) 
_cell_measurement_reflns_used     9689 
_cell_measurement_theta_min       2.35 
_cell_measurement_theta_max       28.08 
  
_exptl_crystal_description        prism 
_exptl_crystal_colour             colourless 
_exptl_crystal_density_meas       ? 
_exptl_crystal_density_method     ? 
_exptl_crystal_density_diffrn     2.573 
_exptl_crystal_F_000              784 
_exptl_transmission_factor_min    ? 
_exptl_transmission_factor_max    ? 
_exptl_crystal_size_max           0.187 
_exptl_crystal_size_mid           0.084 
_exptl_crystal_size_min           0.058 
_exptl_absorpt_coefficient_mu     11.845 
_shelx_estimated_absorpt_T_min    0.215 
_shelx_estimated_absorpt_T_max    0.547 
_exptl_absorpt_correction_type    multi-scan 
_exptl_absorpt_correction_T_min   0.374 
_exptl_absorpt_correction_T_max   0.746 
_exptl_absorpt_process_details    'Bruker SADABS' 
_exptl_absorpt_special_details    ? 
_diffrn_ambient_temperature       100(2) 
_diffrn_radiation_wavelength      0.71073 
_diffrn_radiation_type            MoK\a 
_diffrn_source                    ? 
_diffrn_measurement_device_type   'Bruker APEX-II CCD' 
_diffrn_measurement_method        '\f and \w scans' 
_diffrn_detector_area_resol_mean  ? 
_diffrn_reflns_number             112602 
_diffrn_reflns_av_unetI/netI      0.0110 
_diffrn_reflns_av_R_equivalents   0.0488 
_diffrn_reflns_limit_h_min        -10 
_diffrn_reflns_limit_h_max        10 
_diffrn_reflns_limit_k_min        -10 
_diffrn_reflns_limit_k_max        10 
_diffrn_reflns_limit_l_min        -22 
_diffrn_reflns_limit_l_max        22 
_diffrn_reflns_theta_min          2.765 
_diffrn_reflns_theta_max          27.999 
_diffrn_reflns_theta_full         25.242 
_diffrn_measured_fraction_theta_max   1.000 
_diffrn_measured_fraction_theta_full  0.999 
_diffrn_reflns_Laue_measured_fraction_max    1.000 
_diffrn_reflns_Laue_measured_fraction_full   0.999 
_diffrn_reflns_point_group_measured_fraction_max   1.000 
_diffrn_reflns_point_group_measured_fraction_full  0.999 
_reflns_number_total              2626 
_reflns_number_gt                 2424 
_reflns_threshold_expression      'I > 2\s(I)' 
_reflns_Friedel_coverage          0.000 
_reflns_Friedel_fraction_max      . 
_reflns_Friedel_fraction_full     . 
  
_reflns_special_details 
; 
 Reflections were merged by SHELXL according to the crystal 
 class for the calculation of statistics and refinement. 
  
 _reflns_Friedel_fraction is defined as the number of unique 
 Friedel pairs measured divided by the number that would be 
 possible theoretically, ignoring centric projections and 
 systematic absences. 
; 
  
_computing_data_collection        'Bruker APEX2' 
_computing_cell_refinement        'Bruker SAINT' 
_computing_data_reduction         'Bruker SAINT' 
_computing_structure_solution     'SHELXS-97 (Sheldrick 2008)' 
_computing_structure_refinement 'SHELXL-2014/7 (Sheldrick, 2014)' 
_computing_molecular_graphics     'Bruker SHELXTL' 
_computing_publication_material   'Bruker SHELXTL' 
_refine_special_details           ? 
_refine_ls_structure_factor_coef  Fsqd 
_refine_ls_matrix_type            full 
_refine_ls_weighting_scheme       calc 
_refine_ls_weighting_details 
'w=1/[\s^2^(Fo^2^)+(0.0098P)^2^+1.3984P] where P=(Fo^2^+2Fc^2^)/3' 
_atom_sites_solution_primary      direct
_atom_sites_solution_secondary    ? 
_atom_sites_solution_hydrogens    mixed 
_refine_ls_hydrogen_treatment     constr
_refine_ls_extinction_method      none 
_refine_ls_extinction_coef        . 
_refine_ls_number_reflns          2626 
_refine_ls_number_parameters      125 
_refine_ls_number_restraints      0 
_refine_ls_R_factor_all           0.0141 
_refine_ls_R_factor_gt            0.0118 
_refine_ls_wR_factor_ref          0.0272 
_refine_ls_wR_factor_gt           0.0265 
_refine_ls_goodness_of_fit_ref    1.086 
_refine_ls_restrained_S_all       1.086 
_refine_ls_shift/su_max           0.010 
_refine_ls_shift/su_mean          0.000 
  
loop_ 
 _atom_site_label 
 _atom_site_type_symbol 
 _atom_site_fract_x 
 _atom_site_fract_y 
 _atom_site_fract_z 
 _atom_site_U_iso_or_equiv 
 _atom_site_adp_type 
 _atom_site_occupancy 
 _atom_site_site_symmetry_order 
 _atom_site_calc_flag 
 _atom_site_refinement_flags_posn 
 _atom_site_refinement_flags_adp 
 _atom_site_refinement_flags_occupancy 
 _atom_site_disorder_assembly 
 _atom_site_disorder_group 
Tm1 Tm 0.27368(2) 0.44591(2) 0.53964(2) 0.00967(3) Uani 1 1 d . . . . . 
Br1 Br 0.38228(3) 0.94886(3) 0.67993(2) 0.01640(5) Uani 1 1 d . . . . . 
O11 O 0.02005(19) 0.3222(2) 0.54110(9) 0.0177(3) Uani 1 1 d . . . . . 
O12 O -0.26204(18) 0.29633(19) 0.52259(9) 0.0137(3) Uani 1 1 d . . . . . 
C11 C -0.1143(3) 0.2406(3) 0.54799(12) 0.0117(4) Uani 1 1 d . . . . . 
C12 C -0.1044(3) 0.0737(3) 0.58620(14) 0.0208(5) Uani 1 1 d . . . . . 
H12A H 0.0118 0.0568 0.6126 0.060(7) Uiso 1 1 calc R U . . . 
H12B H -0.1296 -0.0128 0.5470 0.060(7) Uiso 1 1 calc R U . . . 
H12C H -0.1891 0.0679 0.6239 0.060(7) Uiso 1 1 calc R U . . . 
O21 O 0.53819(18) 0.55659(19) 0.57419(8) 0.0120(3) Uani 1 1 d . . . . . 
O22 O 0.81020(18) 0.6239(2) 0.59118(9) 0.0143(3) Uani 1 1 d . . . . . 
C21 C 0.6728(3) 0.5902(3) 0.62010(13) 0.0120(4) Uani 1 1 d . . . . . 
C22 C 0.6681(3) 0.5859(3) 0.70561(13) 0.0201(5) Uani 1 1 d . . . . . 
H22A H 0.7852 0.5684 0.7311 0.084(9) Uiso 1 1 calc R U . . . 
H22B H 0.5932 0.4950 0.7190 0.084(9) Uiso 1 1 calc R U . . . 
H22C H 0.6229 0.6913 0.7229 0.084(9) Uiso 1 1 calc R U . . . 
O1W O 0.41067(19) 0.18977(19) 0.53221(9) 0.0145(3) Uani 1 1 d . . . . . 
H11W H 0.4081 0.1037 0.5702 0.054(7) Uiso 1 1 d R U . . . 
H12W H 0.5302 0.2008 0.5242 0.054(7) Uiso 1 1 d R U . . . 
O2W O 0.15679(19) 0.62604(19) 0.62442(9) 0.0137(3) Uani 1 1 d . . . . . 
H21W H 0.0344 0.6393 0.6248 0.056(8) Uiso 1 1 d R U . . . 
H22W H 0.2046 0.7334 0.6375 0.056(8) Uiso 1 1 d R U . . . 
O3W O 0.3131(2) 0.3411(2) 0.66650(9) 0.0171(3) Uani 1 1 d . . . . . 
H31W H 0.2520 0.3885 0.7062 0.048(7) Uiso 1 1 d R U . . . 
H32W H 0.3302 0.2270 0.6810 0.048(7) Uiso 1 1 d R U . . . 
  
loop_ 
 _atom_site_aniso_label 
 _atom_site_aniso_U_11 
 _atom_site_aniso_U_22 
 _atom_site_aniso_U_33 
 _atom_site_aniso_U_23 
 _atom_site_aniso_U_13 
 _atom_site_aniso_U_12 
Tm1 0.00624(5) 0.01120(5) 0.01163(5) 0.00008(4) 0.00118(3) -0.00143(4) 
Br1 0.01989(11) 0.01271(10) 0.01663(10) 0.00132(8) 0.00204(8) -0.00251(9) 
O11 0.0109(7) 0.0218(9) 0.0213(8) -0.0044(7) 0.0051(6) -0.0064(7) 
O12 0.0083(7) 0.0166(8) 0.0162(8) 0.0024(6) 0.0015(6) 0.0009(6) 
C11 0.0119(10) 0.0134(10) 0.0103(9) -0.0017(8) 0.0036(8) -0.0012(8) 
C12 0.0178(11) 0.0194(12) 0.0246(12) 0.0063(10) -0.0001(9) 0.0017(9) 
O21 0.0085(7) 0.0153(8) 0.0120(7) -0.0007(6) 0.0003(5) -0.0011(6) 
O22 0.0083(7) 0.0184(8) 0.0162(8) -0.0008(6) 0.0007(6) -0.0008(6) 
C21 0.0099(9) 0.0107(10) 0.0151(10) 0.0000(8) -0.0004(8) 0.0019(8) 
C22 0.0165(11) 0.0311(14) 0.0121(10) -0.0010(10) -0.0006(8) 0.0026(10) 
O1W 0.0126(7) 0.0149(8) 0.0166(8) 0.0028(6) 0.0049(6) 0.0016(6) 
O2W 0.0098(7) 0.0145(8) 0.0167(8) -0.0023(6) 0.0011(6) -0.0011(6) 
O3W 0.0217(8) 0.0138(8) 0.0169(8) 0.0019(6) 0.0070(6) 0.0031(7) 
  
_geom_special_details 
; 
 All esds (except the esd in the dihedral angle between two l.s. planes) 
 are estimated using the full covariance matrix.  The cell esds are taken 
 into account individually in the estimation of esds in distances, angles 
 and torsion angles; correlations between esds in cell parameters are only 
 used when they are defined by crystal symmetry.  An approximate (isotropic) 
 treatment of cell esds is used for estimating esds involving l.s. planes. 
; 
  
loop_ 
 _geom_bond_atom_site_label_1 
 _geom_bond_atom_site_label_2 
 _geom_bond_distance 
 _geom_bond_site_symmetry_2 
 _geom_bond_publ_flag 
Tm1 O11 2.2155(15) . ? 
Tm1 O21 2.2662(14) . ? 
Tm1 O2W 2.3247(15) . ? 
Tm1 O1W 2.3355(15) . ? 
Tm1 O12 2.3416(15) 3_566 ? 
Tm1 O3W 2.3529(15) . ? 
Tm1 O22 2.3676(15) 3_666 ? 
Tm1 O21 2.5866(15) 3_666 ? 
Tm1 O11 3.1649(17) 3_566 ? 
O11 C11 1.253(3) . ? 
O12 C11 1.270(3) . ? 
C11 C12 1.500(3) . ? 
C12 H12A 0.9800 . ? 
C12 H12B 0.9800 . ? 
C12 H12C 0.9800 . ? 
O21 C21 1.277(3) . ? 
O22 C21 1.260(3) . ? 
C21 C22 1.493(3) . ? 
C22 H22A 0.9800 . ? 
C22 H22B 0.9800 . ? 
C22 H22C 0.9800 . ? 
O1W H11W 0.9600 . ? 
O1W H12W 0.9600 . ? 
O2W H21W 0.9600 . ? 
O2W H22W 0.9600 . ? 
O3W H31W 0.9600 . ? 
O3W H32W 0.9600 . ? 
  
loop_ 
 _geom_angle_atom_site_label_1 
 _geom_angle_atom_site_label_2 
 _geom_angle_atom_site_label_3 
 _geom_angle 
 _geom_angle_site_symmetry_1 
 _geom_angle_site_symmetry_3 
 _geom_angle_publ_flag 
O11 Tm1 O21 163.84(6) . . ? 
O11 Tm1 O2W 82.20(6) . . ? 
O21 Tm1 O2W 89.54(5) . . ? 
O11 Tm1 O1W 90.85(6) . . ? 
O21 Tm1 O1W 87.46(5) . . ? 
O2W Tm1 O1W 143.17(5) . . ? 
O11 Tm1 O12 114.53(6) . 3_566 ? 
O21 Tm1 O12 76.22(5) . 3_566 ? 
O2W Tm1 O12 74.92(5) . 3_566 ? 
O1W Tm1 O12 139.06(5) . 3_566 ? 
O11 Tm1 O3W 81.62(6) . . ? 
O21 Tm1 O3W 82.48(5) . . ? 
O2W Tm1 O3W 69.51(5) . . ? 
O1W Tm1 O3W 73.71(5) . . ? 
O12 Tm1 O3W 138.38(6) 3_566 . ? 
O11 Tm1 O22 75.49(5) . 3_666 ? 
O21 Tm1 O22 119.86(5) . 3_666 ? 
O2W Tm1 O22 132.24(5) . 3_666 ? 
O1W Tm1 O22 79.46(5) . 3_666 ? 
O12 Tm1 O22 76.92(5) 3_566 3_666 ? 
O3W Tm1 O22 144.22(6) . 3_666 ? 
O11 Tm1 O21 125.73(5) . 3_666 ? 
O21 Tm1 O21 68.47(6) . 3_666 ? 
O2W Tm1 O21 141.55(5) . 3_666 ? 
O1W Tm1 O21 69.59(5) . 3_666 ? 
O12 Tm1 O21 69.51(5) 3_566 3_666 ? 
O3W Tm1 O21 133.45(5) . 3_666 ? 
O22 Tm1 O21 51.87(5) 3_666 3_666 ? 
O11 Tm1 O11 70.66(6) . 3_566 ? 
O21 Tm1 O11 118.55(5) . 3_566 ? 
O2W Tm1 O11 66.33(5) . 3_566 ? 
O1W Tm1 O11 144.21(5) . 3_566 ? 
O12 Tm1 O11 43.90(4) 3_566 3_566 ? 
O3W Tm1 O11 130.12(5) . 3_566 ? 
O22 Tm1 O11 66.55(5) 3_666 3_566 ? 
O21 Tm1 O11 96.11(4) 3_666 3_566 ? 
Tm1 Tm1 Tm1 134.568(5) 3_666 3_566 ? 
C11 O11 Tm1 173.01(16) . . ? 
C11 O11 Tm1 77.41(12) . 3_566 ? 
Tm1 O11 Tm1 109.34(6) . 3_566 ? 
C11 O12 Tm1 117.67(13) . 3_566 ? 
O11 C11 O12 121.0(2) . . ? 
O11 C11 C12 120.7(2) . . ? 
O12 C11 C12 118.28(19) . . ?  
C11 C12 H12A 109.5 . . ? 
C11 C12 H12B 109.5 . . ? 
H12A C12 H12B 109.5 . . ? 
C11 C12 H12C 109.5 . . ? 
H12A C12 H12C 109.5 . . ? 
H12B C12 H12C 109.5 . . ? 
C21 O21 Tm1 155.70(14) . . ? 
C21 O21 Tm1 89.21(12) . 3_666 ? 
Tm1 O21 Tm1 111.53(6) . 3_666 ? 
C21 O22 Tm1 100.04(13) . 3_666 ? 
O22 C21 O21 118.1(2) . . ? 
O22 C21 C22 121.05(19) . . ? 
O21 C21 C22 120.82(19) . . ? 
C21 C22 H22A 109.5 . . ? 
C21 C22 H22B 109.5 . . ? 
H22A C22 H22B 109.5 . . ? 
C21 C22 H22C 109.5 . . ? 
H22A C22 H22C 109.5 . . ? 
H22B C22 H22C 109.5 . . ? 
Tm1 O1W H11W 123.9 . . ? 
Tm1 O1W H12W 112.5 . . ? 
H11W O1W H12W 105.0 . . ? 
Tm1 O2W H21W 122.1 . . ? 
Tm1 O2W H22W 123.1 . . ? 
H21W O2W H22W 105.0 . . ? 
Tm1 O3W H31W 120.5 . . ? 
Tm1 O3W H32W 126.2 . . ? 
H31W O3W H32W 105.0 . . ? 
  
loop_ 
 _geom_hbond_atom_site_label_D 
 _geom_hbond_atom_site_label_H 
 _geom_hbond_atom_site_label_A 
 _geom_hbond_distance_DH 
 _geom_hbond_distance_HA 
 _geom_hbond_distance_DA 
 _geom_hbond_angle_DHA 
 _geom_hbond_site_symmetry_A 
O1W H11W Br1  0.96 2.31 3.2487(15) 166.1 1_545 
O1W H12W O12  0.96 1.79 2.712(2) 158.7 1_655 
O2W H21W O22  0.96 1.78 2.699(2) 157.9 1_455 
O2W H22W Br1  0.96 2.29 3.2303(15) 164.8 . 
O3W H31W Br1  0.96 2.39 3.3292(15) 166.9 2_546 
O3W H32W Br1  0.96 2.28 3.2143(17) 164.0 1_545 
  
_refine_diff_density_max    0.383 
_refine_diff_density_min   -0.336 
_refine_diff_density_rms    0.086 
  
_shelx_res_file 
; 
  
    Ha2019_99b_0m_a.res created by SHELXL-2014/7 
  
  
TITL Ha2019_99b_0m_a.res in P2(1)/n 
CELL  0.71073   7.7868   8.0675  17.3994   90.000   96.154   90.000 
ZERR    4.000   0.0005   0.0005   0.0007    0.000    0.002    0.000 
LATT 1 
SYMM 1/2-X, 1/2+Y, 1/2-Z 
SFAC C  H  O  Br Tm 
UNIT 16 48 28 4 4 
CONN 12 2.2 Tm1 
LIST 4 ! automatically inserted. Change 6 to 4 for CHECKCIF!! 
OMIT -3 56 
L.S. 10 
ACTA 
rem DFIX 0.96  0.0001 O1w H11w O1w H12w O2w H21w O2w H22w O3w H31w O3w H32w 
rem dfix 1.523  0.0001 H11w H12w H21w H22w H31w H32w 
rem ACTA 
FREE Tm1 C21_$6 
EQIV $6 1-x, 1-y, 1-z 
BIND Tm1 Tm1_$6 
BIND Tm1 Tm1_$7 
EQIV $7 -x, 1-y, 1-z 
BIND Tm1 O11_$7 
FREE Tm1 C11 
FREE Tm1 C11_$7 
HTAB 
EQIV $1 -x+3/2, y-1/2, -z+3/2 
EQIV $2 x, y-1, z 
HTAB O1W Br1_$2 
EQIV $3 x+1, y, z 
HTAB O1W O12_$3 
EQIV $4 x-1, y, z 
HTAB O2W O22_$4 
HTAB O2W Br1 
EQIV $5 -x+1/2, y-1/2, -z+3/2 
HTAB O3W Br1_$5 
HTAB O3W Br1_$2 
SIZE 0.058  0.084  0.187 
BOND $H 
FMAP 2 
PLAN 10 
TEMP -173 
WGHT    0.009800    1.398400 
FVAR       0.27735   0.06014   0.08437   0.05352   0.05624   0.04795 
TM1   5    0.273677    0.445914    0.539636    11.00000    0.00624    0.01120 = 
         0.01163    0.00008    0.00118   -0.00143 
BR1   4    0.382277    0.948855    0.679928    11.00000    0.01989    0.01271 = 
         0.01663    0.00132    0.00204   -0.00251 
O11   3    0.020050    0.322159    0.541095    11.00000    0.01085    0.02185 = 
         0.02127   -0.00437    0.00512   -0.00644 
O12   3   -0.262042    0.296333    0.522587    11.00000    0.00832    0.01663 = 
         0.01619    0.00242    0.00147    0.00086 
C11   1   -0.114291    0.240559    0.547992    11.00000    0.01189    0.01344 = 
         0.01033   -0.00169    0.00357   -0.00124 
C12   1   -0.104431    0.073651    0.586204    11.00000    0.01776    0.01944 = 
         0.02460    0.00631   -0.00008    0.00170 
AFIX 137 
H12A  2    0.011849    0.056786    0.612622    11.00000   21.00000 
H12B  2   -0.129602   -0.012760    0.547027    11.00000   21.00000 
H12C  2   -0.189098    0.067882    0.623927    11.00000   21.00000 
AFIX   0 
O21   3    0.538194    0.556586    0.574189    11.00000    0.00852    0.01529 = 
         0.01198   -0.00075    0.00033   -0.00115 
O22   3    0.810196    0.623859    0.591177    11.00000    0.00833    0.01840 = 
         0.01618   -0.00085    0.00074   -0.00077 
C21   1    0.672823    0.590204    0.620098    11.00000    0.00987    0.01074 = 
         0.01514    0.00002   -0.00035    0.00195 
C22   1    0.668130    0.585868    0.705610    11.00000    0.01653    0.03114 = 
         0.01212   -0.00099   -0.00060    0.00263 
AFIX 137 
H22A  2    0.785178    0.568427    0.731090    11.00000   31.00000 
H22B  2    0.593242    0.495043    0.719004    11.00000   31.00000 
H22C  2    0.622891    0.691288    0.722881    11.00000   31.00000 
AFIX   0 
O1W   3    0.410666    0.189769    0.532208    11.00000    0.01263    0.01493 = 
         0.01658    0.00281    0.00487    0.00160 
AFIX   3 
H11W  2    0.408077    0.103744    0.570187    11.00000   41.00000 
H12W  2    0.530232    0.200752    0.524237    11.00000   41.00000 
AFIX   0 
O2W   3    0.156787    0.626039    0.624418    11.00000    0.00979    0.01452 = 
         0.01667   -0.00234    0.00113   -0.00107 
AFIX   3 
H21W  2    0.034366    0.639254    0.624829    11.00000   51.00000 
H22W  2    0.204611    0.733350    0.637467    11.00000   51.00000 
AFIX   0 
O3W   3    0.313150    0.341115    0.666496    11.00000    0.02166    0.01381 = 
         0.01694    0.00189    0.00698    0.00307 
AFIX   3 
H31W  2    0.252040    0.388525    0.706245    11.00000   61.00000 
H32W  2    0.330197    0.226987    0.680969    11.00000   61.00000 
AFIX   0 
HKLF 4 
  
REM  Ha2019_99b_0m_a.res in P2(1)/n 
REM R1 =  0.0118 for    2424 Fo > 4sig(Fo)  and  0.0141 for all    2626 data 
REM    125 parameters refined using      0 restraints 
  
END 
  
WGHT      0.0098      1.3984 
  
REM Instructions for potential hydrogen bonds 
HTAB C12 Br1_$2 
HTAB C22 Br1_$1 
HTAB C22 O3W 
HTAB C22 Br1 
HTAB O1W Br1_$2 
HTAB O1W O12_$3 
HTAB O2W O22_$4 
HTAB O2W Br1 
HTAB O3W Br1_$5 
HTAB O3W Br1_$2 
  
REM Highest difference peak  0.383,  deepest hole -0.336,  1-sigma level  0.086 
Q1    1   0.2000  0.6791  0.6425  11.00000  0.05    0.38 
Q2    1   0.7990  0.6286  0.5518  11.00000  0.05    0.33 
Q3    1  -0.1174  0.1716  0.5772  11.00000  0.05    0.33 
Q4    1   0.6627  0.5899  0.6618  11.00000  0.05    0.32 
Q5    1  -0.0420  0.3833  0.5359  11.00000  0.05    0.31 
Q6    1   0.4133  0.5610  0.5780  11.00000  0.05    0.31 
Q7    1   0.3936  0.1345  0.5543  11.00000  0.05    0.30 
Q8    1   0.7525  0.6992  0.7342  11.00000  0.05    0.30 
Q9    1   0.5111  0.9384  0.6727  11.00000  0.05    0.30 
Q10   1   0.5962  0.5227  0.5944  11.00000  0.05    0.29 
; 
_shelx_res_checksum   78630 
  
_shelx_hkl_file 
; 
  -1   0   0    6.60    2.50 
  -1   0   0    3.40    1.60 
  -1   0   0    7.90    1.50 
  -1   0   0    5.50    1.60 
  -1   0   0    6.50    2.00 
  -1   0   0    6.50    1.00 
  -1   0   0   10.90    2.70 
  -1   0   0    7.70    1.80 
  -1   0   0   12.00    2.40 
  -1   0   0   10.60    2.70 
  -1   0   0    7.30    2.00 
  -1   0   0    8.60    1.60 
  -1   0   0    6.90    1.70 
  -1   0   0    4.70    1.70 
  -1   0   0   17.20    3.50 
  -1   0   0    9.60    2.00 
  -1   0   0    5.90    1.30 
  -1   0   0    9.70    2.30 
   1   0   0   -0.40    1.10 
   1   0   0    6.90    2.30 
   1   0   0    0.10    1.50 
   1   0   0    0.80    1.20 
   1   0   0    5.10    2.30 
   1   0   0   -0.20    1.20 
  -1   0   0    1.10    1.70 
  -1   0   0    5.40    1.80 
  -1   0   0    3.20    1.80 
  -1   0   0    1.00    2.20 
  -1   0   0    4.50    1.20 
  -1   0   0    4.00    1.60 
  -1   0   0    3.50    1.40 
  -1   0   0    2.00    1.10 
  -1   0   0    8.10    2.10 
  -1   0   0   10.70    1.70 
  -2   0   0 4998.10  144.89 
  -2   0   0 5341.17  149.39 
  -2   0   0 5079.69  144.99 
  -2   0   0 4883.51  152.38 
  -2   0   0 5244.17  150.28 
  -2   0   0 4960.60  150.38 
  -2   0   0 4928.51  145.89 
  -2   0   0 5033.70  153.58 
  -2   0   0 4933.91  150.38 
  -2   0   0 5158.68  147.69 
  -2   0   0 5002.00  145.59 
  -2   0   0 5028.90  144.59 
  -2   0   0 5273.77  148.79 
  -2   0   0 4903.41  150.68 
  -2   0   0 4861.01  154.48 
  -2   0   0 5019.60  146.49 
  -2   0   0 5073.59  149.49 
  -2   0   0 5090.39  146.79 
  -2   0   0 5043.60  151.48 
  -2   0   0 4948.71  148.79 
   2   0   0 4951.00  154.68 
   2   0   0 5013.20  154.08 
   2   0   0 5068.09  148.99 
   2   0   0 5106.59  149.88 
   2   0   0 4928.01  151.68 
   2   0   0 4974.00  150.18 
   2   0   0 4907.91  154.98 
   2   0   0 4904.51  154.08 
   2   0   0 5092.49  152.08 
   2   0   0 4919.41  150.28 
   2   0   0 5067.99  150.88 
   2   0   0 4797.92  146.59 
   2   0   0 5054.69  153.08 
   2   0   0 5083.59  149.88 
   2   0   0 5097.59  150.08 
   2   0   0 4774.32  153.38 
   2   0   0 5008.00  156.38 
   2   0   0 4977.40  150.28 
   2   0   0 4998.70  147.59 
   2   0   0 5073.69  149.69 
   2   0   0 4917.51  155.18 
   2   0   0 4849.11  148.59 
   2   0   0 5137.99  148.59 
  -2   0   0 4854.51  153.08 
  -2   0   0 5133.59  147.09 
  -2   0   0 5073.49  151.78 
  -2   0   0 5127.19  149.88 
  -2   0   0 4874.81  154.48 
  -2   0   0 5075.29  150.78 
  -2   0   0 5002.10  154.18 
  -2   0   0 5001.60  149.88 
  -2   0   0 5076.09  151.08 
  -2   0   0 4950.40  150.68 
  -2   0   0 5028.00  146.79 
  -2   0   0 5034.40  154.78 
  -2   0   0 5142.79  149.39 
  -2   0   0 4822.62  147.19 
  -3   0   0    2.00    2.10 
  -3   0   0    2.70    2.50 
  -3   0   0    3.20    3.90 
  -3   0   0   -1.90    2.40 
  -3   0   0    2.10    3.90 
  -3   0   0    0.90    4.00 
  -3   0   0   -1.80    1.80 
  -3   0   0    1.20    3.50 
  -3   0   0    0.30    2.00 
  -3   0   0    7.10    4.50 
  -3   0   0    5.30    3.50 
   3   0   0    0.00    5.00 
   3   0   0    3.00    4.50 
   3   0   0   -1.30    2.10 
   3   0   0   -0.60    3.80 
   3   0   0    2.60    3.70 
   3   0   0    2.20    5.00 
   3   0   0    8.90    5.40 
   3   0   0    2.30    3.50 
   3   0   0    3.60    4.00 
   3   0   0    1.50    2.00 
   3   0   0    2.70    4.50 
   3   0   0   -0.40    4.20 
   3   0   0    7.10    6.80 
   3   0   0   -0.60    2.10 
   3   0   0   -3.60    2.90 
   3   0   0    5.70    6.00 
   3   0   0   -0.60    2.70 
   3   0   0   -2.60    2.50 
  -3   0   0    0.20    3.50 
  -3   0   0    0.40    3.20 
  -3   0   0    4.30    4.00 
  -3   0   0    0.90    3.20 
  -3   0   0    0.80    1.60 
  -3   0   0    9.30    5.70 
  -3   0   0    4.80    3.10 
  -3   0   0    2.20    3.00 
  -3   0   0   -0.70    1.20 
  -3   0   0    2.90    4.20 
  -3   0   0    5.00    3.70 
  -3   0   0    1.50    3.70 
  -3   0   0    2.20    1.80 
  -3   0   0   -1.80    2.80 
  -3   0   0   -1.10    2.20 
  -3   0   0    0.80    1.00 
  -3   0   0   -4.00    2.60 
  -3   0   0    3.80    4.50 
  -3   0   0    1.70    2.00 
  -3   0   0   -0.40    2.10 
  -4   0   0  464.75   24.50 
   4   0   0  461.65   25.80 
   4   0   0  515.75   28.00 
  -4   0   0  504.05   19.30 
  -4   0   0  492.85   24.70 
  -4   0   0  506.35   20.30 
  -4   0   0  483.25   26.90 
  -4   0   0  467.15   23.50 
   4   0   0  480.55   31.20 
   4   0   0  507.95   30.90 
  -4   0   0  497.05   26.10 
  -4   0   0  466.15   17.00 
  -4   0   0  491.95   19.90 
  -4   0   0  525.65   30.10 
  -4   0   0  497.85   21.50 
  -4   0   0  509.85   22.30 
  -4   0   0  494.45   26.20 
  -4   0   0  471.25   19.60 
  -4   0   0  458.65   23.40 
   4   0   0  482.45   31.20 
  -4   0   0  459.25   19.30 
  -4   0   0  465.35   20.70 
  -4   0   0  515.25   23.70 
  -4   0   0  470.95   25.20 
  -4   0   0  475.15   25.40 
  -4   0   0  456.45   25.50 
  -4   0   0  471.35   18.90 
  -4   0   0  454.05   20.20 
  -4   0   0  448.26   26.90 
   4   0   0  475.85   30.60 
   4   0   0  498.25   28.40 
   4   0   0  483.05   28.80 
   4   0   0  481.55   30.00 
   4   0   0  511.95   33.90 
   4   0   0  476.35   24.90 
   4   0   0  425.46   30.10 
   4   0   0  493.05   22.70 
   4   0   0  496.45   24.90 
  -5   0   0   -2.40    3.40 
  -5   0   0   13.50    5.80 
  -5   0   0   10.50    5.40 
  -5   0   0   -7.30    6.40 
  -5   0   0    4.80    3.80 
   5   0   0    4.20    8.50 
  -5   0   0    3.60    5.60 
   5   0   0    8.00    7.00 
  -5   0   0   -0.30    1.60 
  -5   0   0    4.20    2.90 
  -5   0   0    8.00    3.70 
   5   0   0   -3.70    3.90 
   5   0   0   17.20    9.80 
   5   0   0   -0.30    6.00 
   5   0   0   -0.40    6.10 
  -5   0   0    8.70    4.10 
  -5   0   0   -1.50    5.90 
  -5   0   0   15.00    6.80 
   5   0   0    9.60    6.20 
  -5   0   0    2.50    3.60 
  -5   0   0    6.00    5.10 
  -5   0   0    1.30    2.90 
  -5   0   0    2.40    6.60 
  -5   0   0    1.20    4.40 
  -5   0   0    1.80    2.80 
  -5   0   0    1.90    4.50 
  -5   0   0    3.10    6.00 
  -5   0   0    2.10    2.80 
  -5   0   0    3.30    3.70 
  -5   0   0    0.10    4.20 
   5   0   0    1.50    4.80 
  -5   0   0   10.20    5.60 
  -5   0   0    0.90    2.80 
   5   0   0    3.80    6.20 
   5   0   0    0.80    7.60 
   5   0   0    3.50    8.40 
   5   0   0    7.10    6.10 
   5   0   0    3.00    7.10 
  -6   0   0  951.00   42.50 
  -6   0   0  839.52   31.40 
  -6   0   0  813.52   39.40 
  -6   0   0  857.61   43.30 
   6   0   0  845.92   51.39 
  -6   0   0  864.41   38.30 
   6   0   0  947.01   54.69 
  -6   0   0  842.92   31.20 
  -6   0   0  859.31   43.80 
  -6   0   0  855.51   32.80 
  -6   0   0  905.31   43.80 
  -6   0   0  778.32   39.00 
   6   0   0  851.51   50.19 
   6   0   0  874.71   55.79 
   6   0   0  828.82   40.60 
   6   0   0  892.21   37.80 
   6   0   0  817.82   43.40 
   6   0   0  812.72   47.20 
  -6   0   0  819.92   32.70 
  -6   0   0  860.11   41.20 
  -6   0   0  834.02   33.00 
  -6   0   0  834.72   45.40 
  -6   0   0  844.62   47.10 
  -6   0   0  876.91   35.30 
  -6   0   0  761.62   40.50 
  -6   0   0  764.62   34.80 
  -6   0   0  788.72   41.60 
  -6   0   0  858.01   33.10 
  -6   0   0  918.31   35.60 
  -6   0   0  842.02   46.40 
   6   0   0  760.82   49.90 
   6   0   0  818.32   47.20 
   6   0   0  810.72   40.50 
   6   0   0  778.22   51.09 
   6   0   0  868.81   50.89 
  -6   0   0  801.72   50.39 
  -7   0   0    0.60    3.60 
   7   0   0   17.90   13.50 
   7   0   0   -9.40    7.30 
  -7   0   0  -11.30    6.90 
   7   0   0   -9.90    4.70 
   7   0   0    8.40   10.80 
   7   0   0   -3.70   10.70 
   7   0   0    2.70    7.10 
   7   0   0   -5.00    9.60 
   7   0   0    6.00    7.90 
  -7   0   0  -15.30    6.30 
  -7   0   0   -5.40    3.60 
  -7   0   0   -5.90   10.00 
   7   0   0   -8.60    8.80 
   7   0   0    3.90   10.80 
  -7   0   0   -6.30   10.50 
  -7   0   0   -7.50    9.70 
  -7   0   0   -9.10    7.80 
  -7   0   0   -5.10    8.40 
  -7   0   0    0.50    7.20 
  -7   0   0   -7.60    7.80 
   7   0   0  -15.80   10.50 
   7   0   0  -10.00    8.60 
  -7   0   0   -6.10    5.00 
  -7   0   0    4.30    6.90 
  -7   0   0   -4.50    7.30 
  -7   0   0   -7.20   11.30 
  -7   0   0   -6.10    5.70 
  -7   0   0   -4.40    6.50 
  -7   0   0   -3.80    8.30 
  -7   0   0   -1.20    7.50 
  -7   0   0    4.20    5.80 
   8   0   0  625.24   67.59 
   8   0   0  542.85   57.69 
  -8   0   0  622.74   61.89 
   8   0   0  476.95   56.19 
   8   0   0  556.24   55.79 
   8   0   0  514.25   38.90 
  -8   0   0  586.24   58.59 
  -8   0   0  567.64   31.00 
  -8   0   0  590.24   42.90 
   8   0   0  599.94   50.19 
   8   0   0  551.34   32.10 
   8   0   0  641.34   38.10 
  -8   0   0  596.94   48.00 
  -8   0   0  493.45   41.70 
   8   0   0  557.34   52.09 
   8   0   0  577.54   56.19 
  -8   0   0  600.24   39.70 
  -8   0   0  472.05   53.09 
  -8   0   0  617.24   34.30 
  -8   0   0  569.34   38.70 
  -8   0   0  526.55   40.20 
  -8   0   0  608.74   40.30 
  -8   0   0  583.94   39.00 
   8   0   0  575.64   46.80 
  -8   0   0  633.24   38.40 
  -8   0   0  643.64   45.60 
  -8   0   0  606.64   36.90 
   9   0   0    1.50   15.80 
  -9   0   0   -4.50   13.80 
  -9   0   0    8.50   15.10 
  -9   0   0   18.70   14.60 
  -9   0   0    8.20   11.20 
  -9   0   0   -0.70    9.20 
  -9   0   0    3.40    8.70 
  -9   0   0   13.20   14.60 
  -9   0   0   11.00   10.90 
   9   0   0    4.80   11.90 
   9   0   0    6.70   13.00 
  -9   0   0    5.90   11.30 
   9   0   0    8.70   14.60 
   9   0   0   -8.20   14.20 
   9   0   0  -11.00   14.50 
   9   0   0    0.30   12.40 
   9   0   0   11.30   14.90 
  -9   0   0   21.80   17.00 
  -9   0   0    4.70   16.00 
  -9   0   0   24.30   17.40 
 -10   0   0    9.80   15.40 
 -10   0   0   10.70   12.90 
 -10   0   0   -4.80   12.30 
 -10   0   0   -4.00   10.20 
 -10   0   0   -5.90   13.10 
 -10   0   0   10.90   14.10 
 -10   0   0   10.50   19.30 
  10   0   0   -1.40   16.50 
 -10   0   0    0.60   15.10 
  10   0   0   -3.10   12.00 
 -10   0   0    5.20   12.70 
  10   0   0  -10.90   16.30 
 -10   0   0   -3.40   11.60 
 -10   0   0    0.90   16.10 
  10   0   0   36.20   20.90 
   0  -1   0    0.60    1.00 
   0  -1   0    1.00    0.90 
   0  -1   0   -0.10    0.90 
   0  -1   0    1.30    1.50 
   0  -1   0    0.60    0.90 
   0  -1   0    6.50    1.90 
   0  -1   0    0.20    1.40 
   0   1   0    4.10    1.50 
   0   1   0    3.10    1.60 
   0   1   0    7.10    2.00 
   0   1   0    0.40    1.10 
   0   1   0    4.00    1.50 
   0   1   0    5.50    1.60 
   0   1   0    7.20    2.10 
   0   1   0    5.30    1.80 
   0   1   0    2.70    1.20 
   0   1   0    0.40    0.90 
   0   1   0    4.60    1.60 
   0   1   0   -1.00    0.90 
   0   1   0    6.50    1.80 
  -1  -1   0   55.19    3.40 
   1  -1   0   42.80    5.20 
  -1  -1   0   44.80    5.20 
  -1  -1   0   58.59    4.50 
   1  -1   0   62.89    4.30 
  -1  -1   0   55.69    6.40 
   1  -1   0   58.19    6.90 
  -1  -1   0   49.90    4.80 
  -1  -1   0   66.69    5.50 
  -1  -1   0   62.39    5.80 
   1  -1   0   49.00    6.00 
  -1  -1   0   50.09    5.10 
  -1  -1   0   53.39    5.40 
   1  -1   0   38.30    4.70 
  -1  -1   0   53.69    6.00 
  -1  -1   0   61.09    5.80 
  -1  -1   0   50.99    7.20 
  -1  -1   0   57.69    3.70 
  -1  -1   0   63.79    6.10 
   1  -1   0   42.90    5.70 
  -1  -1   0   62.39    8.30 
  -1  -1   0   70.69    6.00 
   1  -1   0   56.29    7.50 
   1  -1   0   57.59    6.40 
  -1  -1   0   49.40    5.60 
  -1  -1   0   76.59    7.30 
   1  -1   0   45.20    6.80 
  -1  -1   0   46.60    5.20 
  -1  -1   0   48.80    6.00 
  -1  -1   0   66.59    6.30 
  -1  -1   0   57.49    5.50 
   1  -1   0   64.99    8.50 
   1  -1   0   71.29    7.70 
   1  -1   0   57.39    6.00 
   1   1   0   62.19    6.10 
  -1   1   0   55.49    3.30 
   1   1   0   70.59    6.50 
  -1   1   0   71.49    8.30 
   1   1   0   41.00    6.70 
  -1   1   0   58.49    6.90 
   1   1   0   41.10    5.40 
  -1   1   0   59.69    5.90 
   1   1   0   45.30    6.70 
  -1   1   0   63.79    7.10 
  -1   1   0   55.79    7.60 
  -1   1   0   60.19    4.40 
  -1   1   0   59.39    4.20 
  -1   1   0   62.69    4.60 
  -1   1   0   65.29    4.80 
   1   1   0   44.90    5.60 
   1   1   0   53.59    5.50 
  -1   1   0   51.89    5.90 
   1   1   0   52.19    4.20 
  -1   1   0   55.89    3.80 
  -1   1   0   55.99    3.90 
  -1   1   0   65.59    6.00 
   1   1   0   56.79    5.40 
   1   1   0   63.69    4.90 
   1   1   0   85.59    6.10 
  -1   1   0   52.29    6.00 
   1   1   0   71.49    6.70 
  -1   1   0   58.39    6.40 
  -1   1   0   52.89    4.20 
  -1   1   0   51.59    3.20 
  -1   1   0   63.09    6.40 
  -1   1   0   50.49    4.80 
  -1   1   0   57.79    7.20 
   1   1   0   49.10    6.10 
   1   1   0   54.59    4.30 
   1   1   0   42.80    4.90 
  -1   1   0   57.59    3.50 
   1   1   0   51.59    4.90 
  -1   1   0   55.29    5.60 
   1   1   0   65.09    7.90 
   1   1   0   65.79    8.20 
   1   1   0   56.19    5.80 
   1   1   0   50.99    5.40 
  -1   1   0   56.69    5.00 
  -2  -1   0  345.17   21.00 
   2  -1   0  366.16   17.90 
   2  -1   0  385.36   21.00 
  -2  -1   0  390.96   19.10 
   2  -1   0  390.76   22.40 
  -2  -1   0  376.26   18.10 
   2  -1   0  371.16   16.80 
  -2  -1   0  415.26   20.60 
  -2  -1   0  398.36   21.70 
  -2  -1   0  395.96   16.00 
   2  -1   0  363.76   22.80 
   2  -1   0  368.46   21.80 
   2  -1   0  395.46   15.80 
   2  -1   0  387.46   20.00 
  -2  -1   0  404.76   20.20 
  -2  -1   0  401.16   17.00 
   2  -1   0  391.96   18.10 
   2  -1   0  393.46   18.30 
  -2  -1   0  443.66   19.00 
  -2  -1   0  380.66   14.70 
  -2  -1   0  393.56   17.40 
  -2  -1   0  384.66   18.00 
   2  -1   0  382.06   13.00 
   2  -1   0  399.76   18.40 
   2  -1   0  382.16   14.30 
   2  -1   0  383.46   21.40 
   2  -1   0  406.16   14.40 
  -2  -1   0  384.26   21.50 
  -2  -1   0  407.86   17.70 
   2  -1   0  405.66   19.00 
   2  -1   0  389.06   17.30 
   2  -1   0  386.46   16.50 
   2  -1   0  405.96   22.50 
  -2  -1   0  381.96   16.50 
  -2  -1   0  414.16   21.60 
  -2  -1   0  380.56   16.70 
  -2  -1   0  407.26   19.00 
  -2  -1   0  400.86   19.20 
  -2  -1   0  395.56   17.10 
  -2  -1   0  384.06   14.60 
   2  -1   0  387.06   13.40 
   2  -1   0  384.06   19.40 
  -2  -1   0  388.76   18.20 
  -2  -1   0  396.76   17.60 
  -2  -1   0  406.16   15.60 
  -2  -1   0  392.66   19.80 
  -2  -1   0  406.56   16.50 
  -2  -1   0  433.86   22.10 
   2  -1   0  404.96   20.50 
  -2  -1   0  384.86   18.30 
  -2   1   0  388.96   20.10 
  -2   1   0  388.86   20.00 
   2   1   0  382.76   19.60 
  -2   1   0  387.66   18.70 
  -2   1   0  378.06   15.90 
   2   1   0  381.36   16.10 
   2   1   0  394.46   14.40 
  -2   1   0  376.16   15.30 
  -2   1   0  379.86   19.40 
   2   1   0  387.96   16.50 
   2   1   0  409.46   22.70 
  -2   1   0  397.16   20.90 
  -2   1   0  385.86   15.60 
  -2   1   0  378.66   21.00 
   2   1   0  387.06   18.60 
   2   1   0  374.76   15.80 
  -2   1   0  389.36   14.50 
   2   1   0  392.46   14.90 
  -2   1   0  396.16   17.30 
   2   1   0  359.46   17.50 
   2   1   0  391.16   17.30 
   2   1   0  391.46   13.00 
  -2   1   0  393.86   14.40 
   2   1   0  387.46   21.10 
   2   1   0  418.96   21.00 
  -2   1   0  364.46   17.30 
  -2   1   0  415.86   21.90 
  -2   1   0  420.56   21.60 
   2   1   0  389.96   15.30 
  -2   1   0  377.16   18.20 
  -2   1   0  361.16   19.60 
  -2   1   0  398.16   21.80 
  -2   1   0  397.26   21.40 
  -2   1   0  405.06   16.50 
  -2   1   0  362.16   18.60 
  -2   1   0  407.66   19.50 
   2   1   0  392.26   18.00 
   2   1   0  389.16   21.70 
   2   1   0  429.96   18.40 
  -2   1   0  389.66   13.90 
  -2   1   0  409.46   13.70 
  -2   1   0  429.36   18.60 
   2   1   0  362.26   18.00 
   2   1   0  395.96   20.10 
   2   1   0  365.86   21.10 
   2   1   0  387.56   16.80 
  -2   1   0  395.96   15.50 
  -2   1   0  357.36   18.50 
  -2   1   0  397.96   22.30 
   2   1   0  378.96   17.80 
  -2   1   0  364.36   22.20 
   2   1   0  402.56   19.60 
   2   1   0  407.26   14.60 
  -2   1   0  395.16   16.30 
   2   1   0  374.16   15.70 
  -2   1   0  390.36   14.70 
  -2   1   0  361.46   18.20 
   2   1   0  381.26   20.00 
  -2   1   0  386.16   19.10 
   3  -1   0  102.19   15.50 
   3  -1   0   86.99    8.90 
   3  -1   0   97.09   11.50 
   3  -1   0  117.49   15.10 
  -3  -1   0  110.29    7.80 
  -3  -1   0  125.89   10.40 
   3  -1   0   92.59    7.40 
   3  -1   0  107.99   10.50 
  -3  -1   0   99.09    6.00 
  -3  -1   0  109.89    9.10 
   3  -1   0  112.79   14.10 
   3  -1   0  104.99   10.20 
  -3  -1   0   98.59    9.30 
  -3  -1   0  113.49   10.60 
  -3  -1   0  100.09   12.30 
   3  -1   0  106.79   15.20 
  -3  -1   0   78.99    9.90 
   3  -1   0  111.39   17.10 
  -3  -1   0  101.19   11.60 
  -3  -1   0  107.19   16.00 
  -3  -1   0   93.09   10.10 
   3  -1   0   84.29   11.90 
   3  -1   0  111.59   11.50 
   3  -1   0   88.89   13.90 
   3  -1   0  139.09   13.10 
   3  -1   0   93.79   11.50 
   3  -1   0  112.99    8.80 
  -3  -1   0  113.29    9.00 
   3  -1   0  106.19   12.10 
  -3  -1   0  113.69   11.30 
  -3  -1   0   85.29   10.80 
  -3  -1   0  111.09   13.20 
  -3  -1   0  118.29    8.20 
  -3  -1   0   93.59    9.70 
  -3  -1   0   93.69   10.00 
  -3  -1   0   94.39    6.60 
   3  -1   0   94.59   11.50 
  -3  -1   0  109.79   14.80 
  -3  -1   0  113.49   12.50 
  -3  -1   0   94.99   11.10 
  -3  -1   0   85.59   10.70 
  -3  -1   0  119.79   15.60 
  -3  -1   0  100.19   13.50 
  -3  -1   0  113.29   15.40 
   3   1   0  108.59   12.30 
  -3   1   0   91.89   14.50 
   3   1   0   89.29   12.50 
   3   1   0  110.89   15.10 
  -3   1   0   98.89   11.40 
   3   1   0  124.39   15.50 
   3   1   0  107.99    7.50 
  -3   1   0  106.29   10.40 
  -3   1   0  109.99    7.60 
  -3   1   0  123.69   11.60 
   3   1   0  127.69   17.20 
   3   1   0   97.29    9.50 
  -3   1   0  101.59    4.50 
  -3   1   0  112.59   11.30 
  -3   1   0   72.99   10.90 
  -3   1   0   99.19    9.80 
   3   1   0  103.99   13.50 
   3   1   0  114.39   11.20 
   3   1   0  111.49    7.20 
   3   1   0  145.19   18.60 
   3   1   0  102.89   10.60 
   3   1   0   98.29    6.70 
   3   1   0   86.09   10.60 
   3   1   0  111.09   11.50 
   3   1   0  108.19   13.20 
   3   1   0   96.69   11.80 
  -3   1   0  116.49   13.10 
  -3   1   0   99.19    6.80 
  -3   1   0  109.29    7.20 
  -3   1   0   76.49   12.50 
  -3   1   0  105.79    5.50 
  -3   1   0  101.29   14.80 
  -3   1   0  119.89   14.40 
  -3   1   0   99.09   10.10 
  -3   1   0   96.99   11.40 
   3   1   0  113.29   11.60 
  -3   1   0  113.59    6.60 
   3   1   0  106.49    8.50 
  -3   1   0  101.79    6.70 
   3   1   0   93.29   10.90 
   3   1   0  101.29   11.60 
  -3   1   0   87.89    8.30 
  -3   1   0  103.99    6.40 
  -3   1   0   96.19    7.00 
  -3   1   0  118.39    6.50 
  -3   1   0   94.29   11.10 
  -3   1   0  101.39   13.20 
  -3   1   0   99.99   10.00 
  -3   1   0   97.29   10.10 
  -3   1   0  101.99   11.60 
  -3   1   0   98.29   12.90 
  -3   1   0  109.09   13.10 
  -3   1   0  105.69   14.10 
  -3   1   0   84.79   13.30 
  -4  -1   0  150.48   11.00 
  -4  -1   0  176.38   11.10 
  -4  -1   0  187.48   18.30 
   4  -1   0  144.09   20.00 
   4  -1   0  192.48   13.00 
  -4  -1   0  149.59   16.20 
  -4  -1   0  153.18   18.70 
   4  -1   0  139.69   15.80 
  -4  -1   0  189.08   13.60 
  -4  -1   0  158.18    9.10 
   4  -1   0  182.08   20.20 
  -4  -1   0  182.38   13.90 
  -4  -1   0  175.18   12.30 
   4  -1   0  153.98   20.50 
  -4  -1   0  155.58   20.20 
  -4  -1   0  153.78   17.80 
   4  -1   0  184.58   13.60 
   4  -1   0  138.69   16.60 
   4  -1   0  144.69   21.20 
   4  -1   0  137.89   20.60 
   4  -1   0  169.68   20.70 
  -4  -1   0  186.88   13.90 
  -4  -1   0  167.38   12.90 
   4  -1   0  158.78   19.70 
  -4  -1   0  176.88   12.60 
  -4  -1   0  198.28   16.10 
  -4  -1   0  111.29   15.20 
  -4  -1   0  162.08   11.00 
  -4  -1   0  146.99   12.00 
  -4  -1   0  169.38   11.90 
  -4  -1   0  186.98   17.20 
  -4  -1   0  172.48   12.60 
  -4  -1   0  154.88   13.00 
   4  -1   0  157.58   10.60 
  -4  -1   0  140.19   13.20 
  -4  -1   0  183.68    8.20 
  -4  -1   0  164.68   17.00 
   4  -1   0  180.58   18.90 
  -4  -1   0  172.58   16.60 
  -4  -1   0  171.08   13.60 
   4  -1   0  151.88   15.60 
  -4   1   0  162.98   15.10 
  -4   1   0  188.78   16.60 
  -4   1   0  160.58   14.80 
   4   1   0  148.59   16.70 
  -4   1   0  178.88   13.50 
  -4   1   0  209.68   14.50 
  -4   1   0  131.29   14.80 
  -4   1   0  177.68   18.00 
   4   1   0  180.18   24.10 
   4   1   0  136.79   13.10 
  -4   1   0  180.98    9.60 
  -4   1   0  151.78   21.20 
  -4   1   0  158.68   12.90 
  -4   1   0  163.48    9.70 
   4   1   0  150.68   10.20 
   4   1   0  166.58   19.80 
   4   1   0  176.28   17.50 
  -4   1   0  148.99    9.20 
  -4   1   0  155.28    9.20 
   4   1   0  150.38   19.70 
   4   1   0  153.68   19.30 
   4   1   0  189.38   19.90 
   4   1   0  175.08   22.30 
   4   1   0  178.98   17.70 
  -4   1   0  148.99   17.40 
  -4   1   0  141.59   12.00 
  -4   1   0  147.59    8.20 
   4   1   0  184.38   12.70 
   4   1   0  154.48   16.70 
   4   1   0  175.38   12.60 
   4   1   0  122.59   18.60 
  -4   1   0  162.18    8.00 
   4   1   0  166.48   21.70 
  -4   1   0  168.38    9.30 
  -4   1   0  165.38   20.40 
  -4   1   0  142.49    9.70 
   4   1   0  180.88    9.50 
  -4   1   0  160.78    9.70 
  -4   1   0  157.48   17.60 
  -4   1   0  160.88   21.40 
   4   1   0  156.28   16.00 
  -5  -1   0 2566.94   89.39 
   5  -1   0 2473.45   89.89 
   5  -1   0 2544.55   93.69 
  -5  -1   0 2618.34   95.69 
   5  -1   0 2502.85   98.39 
   5  -1   0 2605.44  100.59 
   5  -1   0 2484.15  105.29 
  -5  -1   0 2568.34   86.89 
   5  -1   0 2450.35   85.19 
   5  -1   0 2604.64   87.29 
   5  -1   0 2621.14   81.29 
  -5  -1   0 2505.65   96.29 
   5  -1   0 2555.84   94.99 
   5  -1   0 2628.74   92.09 
  -5  -1   0 2558.24   82.29 
   5  -1   0 2612.24  103.79 
  -5  -1   0 2662.63  101.99 
  -5  -1   0 2515.15   76.19 
  -5  -1   0 2594.14   86.39 
  -5  -1   0 2734.43   85.59 
  -5  -1   0 2623.64   90.39 
  -5  -1   0 2531.95   84.19 
  -5  -1   0 2394.86   91.09 
  -5  -1   0 2460.95   89.69 
   5  -1   0 2493.65   96.19 
  -5  -1   0 2629.14   88.19 
  -5  -1   0 2575.14   89.79 
  -5  -1   0 2717.63   84.79 
  -5  -1   0 2618.34   92.89 
   5  -1   0 2610.14  103.89 
  -5  -1   0 2682.43   86.39 
  -5  -1   0 2579.84   91.49 
  -5  -1   0 2502.65   83.29 
  -5  -1   0 2520.25   93.89 
  -5  -1   0 2502.35   83.99 
   5   1   0 2307.47  100.29 
  -5   1   0 2629.64   85.89 
  -5   1   0 2515.55   87.19 
  -5   1   0 2545.45   81.09 
   5   1   0 2609.64   99.29 
  -5   1   0 2661.03   93.99 
  -5   1   0 2639.14   80.99 
  -5   1   0 2597.14   94.59 
  -5   1   0 2525.75  100.19 
   5   1   0 2562.74   93.29 
   5   1   0 2585.34  100.49 
   5   1   0 2705.63  103.29 
  -5   1   0 2437.36  101.09 
  -5   1   0 2686.03   89.49 
   5   1   0 2569.84   86.09 
   5   1   0 2576.14   78.89 
  -5   1   0 2539.25   88.49 
   5   1   0 2583.14  103.39 
  -5   1   0 2521.95   92.49 
  -5   1   0 2497.65   78.89 
   5   1   0 2666.63   97.49 
   5   1   0 2503.65   90.59 
  -5   1   0 2586.84   86.09 
  -5   1   0 2593.94   80.69 
  -5   1   0 2592.94   77.59 
   5   1   0 2449.55  104.19 
   5   1   0 2646.44   93.79 
  -5   1   0 2478.05   79.49 
   5   1   0 2609.64   81.79 
  -5   1   0 2615.74   95.29 
  -5   1   0 2606.74   81.19 
  -5   1   0 2558.84  103.59 
   5   1   0 2578.44   91.19 
  -5   1   0 2570.24   89.29 
   5   1   0 2493.25  100.29 
  -5   1   0 2534.95   80.59 
  -5   1   0 2576.14   81.39 
  -5   1   0 2587.44   94.69 
  -5   1   0 2546.25   79.89 
  -6  -1   0  168.58   12.00 
  -6  -1   0  138.89   19.40 
   6  -1   0  142.19   18.20 
  -6  -1   0  180.38   22.10 
   6  -1   0  156.08   23.10 
  -6  -1   0  138.69   14.40 
   6  -1   0  152.88   23.00 
   6  -1   0  111.89   23.30 
  -6  -1   0  139.39   18.60 
  -6  -1   0  156.68   22.40 
  -6  -1   0  152.28   16.40 
   6  -1   0  132.79   24.80 
   6  -1   0  144.19   23.10 
   6  -1   0  173.18   23.10 
   6  -1   0   86.39   20.00 
   6  -1   0  145.59   16.60 
  -6  -1   0  152.48   15.20 
  -6  -1   0  165.18   22.10 
  -6  -1   0  111.39   21.90 
  -6  -1   0  166.78   17.60 
   6  -1   0  111.09   23.70 
  -6  -1   0  170.18   19.60 
  -6  -1   0  139.19   15.90 
  -6  -1   0  157.18   15.00 
  -6  -1   0  158.98   18.50 
  -6  -1   0  190.48   24.80 
  -6  -1   0  145.99   18.40 
   6  -1   0  149.69   25.20 
  -6  -1   0  166.78   23.80 
   6  -1   0  146.89   19.90 
  -6   1   0  180.88   18.30 
  -6   1   0  123.19   18.10 
  -6   1   0  142.59    9.90 
  -6   1   0  146.09    9.30 
  -6   1   0  134.49   17.90 
  -6   1   0  162.68   25.80 
   6   1   0  146.09   19.90 
   6   1   0  122.19   19.20 
  -6   1   0  147.99   16.20 
   6   1   0  157.18   10.50 
  -6   1   0  169.18   17.80 
   6   1   0  143.39   15.60 
   6   1   0  141.29   24.70 
  -6   1   0  196.18   28.30 
  -6   1   0  168.28   22.70 
   6   1   0  207.18   26.70 
  -6   1   0  150.48   11.70 
   6   1   0  176.08   27.90 
  -6   1   0  155.78    8.60 
   6   1   0  148.09   23.50 
   6   1   0  142.09   27.00 
  -6   1   0  164.48    9.20 
  -6   1   0  126.69   19.30 
  -6   1   0  156.88   11.70 
  -6   1   0  162.58   18.50 
  -6   1   0  154.58   11.30 
  -6   1   0  156.28   10.60 
   6   1   0  164.58   19.80 
   6   1   0  122.39   22.40 
  -6   1   0  136.69   19.90 
  -6   1   0  188.08   29.50 
  -6   1   0  174.18   23.70 
  -6   1   0  150.98   18.00 
  -6   1   0  174.38   11.00 
   6   1   0  174.88   28.80 
  -6   1   0  163.18   10.00 
  -6   1   0  162.68   11.00 
  -7  -1   0 1571.54   69.79 
   7  -1   0 1752.02   88.49 
   7  -1   0 1658.13   82.39 
  -7  -1   0 1738.93   66.39 
  -7  -1   0 1710.23   65.59 
   7  -1   0 1541.45   87.49 
  -7  -1   0 1700.53   73.19 
   7  -1   0 1633.54   79.29 
   7  -1   0 1634.04   69.49 
   7  -1   0 1667.03   65.59 
  -7  -1   0 1662.93   73.69 
  -7  -1   0 1793.02   61.79 
  -7  -1   0 1677.23   76.89 
  -7  -1   0 1706.13   70.69 
  -7  -1   0 1703.03   70.29 
  -7  -1   0 1714.23   57.79 
  -7  -1   0 1699.93   77.49 
  -7  -1   0 1573.34   76.19 
   7  -1   0 1612.24   71.69 
  -7  -1   0 1703.53   64.69 
  -7  -1   0 1670.33   72.99 
   7  -1   0 1643.94   81.59 
  -7  -1   0 1690.33   70.59 
  -7  -1   0 1645.64   83.69 
   7  -1   0 1585.64   83.89 
   7   1   0 1680.23   69.59 
   7   1   0 1805.92   76.19 
  -7   1   0 1646.64   65.89 
   7   1   0 1660.23   71.09 
  -7   1   0 1625.54   60.39 
   7   1   0 1657.93   85.89 
  -7   1   0 1640.44   64.69 
  -7   1   0 1643.24   67.29 
  -7   1   0 1654.23   59.39 
  -7   1   0 1721.03   69.99 
  -7   1   0 1633.04   64.89 
   7   1   0 1685.83   84.69 
  -7   1   0 1669.63   56.09 
   7   1   0 1655.43   63.89 
  -7   1   0 1633.74   81.99 
  -7   1   0 1798.22   78.79 
  -7   1   0 1733.53   74.69 
   7   1   0 1660.73   80.79 
   7   1   0 1662.33   84.09 
  -7   1   0 1638.94   74.59 
  -7   1   0 1583.64   83.89 
  -7   1   0 1579.14   77.39 
  -7   1   0 1626.84   86.69 
   7   1   0 1669.93   80.49 
  -7   1   0 1631.64   75.29 
  -7   1   0 1731.13   71.09 
  -7   1   0 1656.83   73.59 
   7   1   0 1698.13   85.59 
   8  -1   0   68.99   23.50 
   8  -1   0  131.29   32.40 
   8  -1   0  114.49   25.00 
  -8  -1   0   57.89   16.30 
  -8  -1   0   87.39   21.50 
  -8  -1   0  104.49   17.10 
   8  -1   0   95.29   15.70 
  -8  -1   0   54.99   15.30 
   8  -1   0  120.89   27.50 
  -8  -1   0  116.09   23.40 
   8  -1   0  108.39   24.80 
   8  -1   0  115.39   19.30 
  -8  -1   0   78.19   17.20 
  -8  -1   0   78.99   20.70 
   8  -1   0  110.59   21.40 
  -8  -1   0  103.69   19.00 
  -8  -1   0  111.69   16.80 
  -8  -1   0   95.99   18.60 
  -8  -1   0   65.29   23.00 
  -8  -1   0  119.39   22.30 
  -8  -1   0  146.19   23.80 
   8  -1   0   74.09   24.30 
   8   1   0   89.59   23.00 
  -8   1   0  115.29   23.60 
   8   1   0  102.89   27.20 
  -8   1   0  130.19   21.40 
  -8   1   0  137.69   23.10 
  -8   1   0   92.59   26.00 
  -8   1   0   87.89   16.40 
  -8   1   0  133.19   25.20 
   8   1   0   70.89   22.90 
   8   1   0   70.29   19.60 
  -8   1   0   81.29   16.40 
   8   1   0  100.29   18.30 
  -8   1   0  106.39   27.40 
  -8   1   0  101.49   25.30 
  -8   1   0   77.99   18.50 
   8   1   0   95.09   25.70 
  -8   1   0  134.19   18.00 
  -8   1   0   88.69   21.60 
   8   1   0   92.39   23.90 
   8   1   0  113.39   26.70 
  -8   1   0  127.79   23.10 
  -8   1   0   85.39   16.00 
   9  -1   0  327.47   47.60 
  -9  -1   0  396.06   46.50 
  -9  -1   0  431.96   47.50 
  -9  -1   0  447.26   45.10 
   9  -1   0  550.44   69.19 
  -9  -1   0  470.55   49.30 
  -9  -1   0  447.96   35.40 
  -9  -1   0  509.15   38.00 
   9  -1   0  407.36   42.70 
  -9  -1   0  387.76   53.59 
   9  -1   0  400.46   40.10 
   9  -1   0  416.36   55.09 
   9  -1   0  475.95   54.19 
   9  -1   0  399.46   51.89 
  -9  -1   0  561.74   59.99 
  -9  -1   0  484.45   55.99 
  -9  -1   0  476.95   37.90 
  -9  -1   0  320.97   45.50 
  -9  -1   0  530.85   39.80 
   9  -1   0  432.26   57.59 
  -9  -1   0  490.25   48.70 
  -9   1   0  334.17   37.10 
  -9   1   0  390.36   42.00 
  -9   1   0  408.06   45.20 
  -9   1   0  409.46   46.50 
  -9   1   0  390.86   49.40 
  -9   1   0  333.87   50.09 
   9   1   0  530.45   62.19 
   9   1   0  445.36   45.40 
   9   1   0  553.24   61.69 
   9   1   0  472.45   51.99 
  -9   1   0  402.66   40.20 
   9   1   0  437.76   52.49 
  -9   1   0  475.95   55.69 
  -9   1   0  355.26   39.40 
  -9   1   0  388.16   46.00 
   9   1   0  507.55   60.99 
 -10  -1   0   36.20   18.70 
  10  -1   0   34.20   25.00 
  10  -1   0   34.40   25.20 
 -10  -1   0   25.30   16.50 
 -10  -1   0   -2.90   17.40 
 -10  -1   0   34.70   17.60 
 -10  -1   0   29.30   20.20 
  10  -1   0   18.90   24.10 
 -10  -1   0   13.70   24.20 
 -10  -1   0    7.50   12.20 
 -10  -1   0   13.20   15.20 
  10  -1   0   40.30   18.60 
 -10  -1   0   24.70   17.80 
 -10  -1   0   14.20   17.40 
 -10  -1   0   29.20   24.10 
  10  -1   0  -10.50   13.30 
  10   1   0   37.30   17.70 
 -10   1   0   11.90   17.90 
  10   1   0  -10.10   16.00 
 -10   1   0   44.70   24.60 
 -10   1   0   21.40   17.30 
 -10   1   0   11.50   13.20 
 -10   1   0   31.10   21.00 
  10   1   0    7.40   21.40 
 -10   1   0   41.60   21.60 
 -10   1   0   21.20   13.60 
 -10   1   0   44.60   20.50 
 -10   1   0   31.10   16.20 
  10   1   0    5.10   17.10 
  10   1   0   54.49   23.60 
  10   1   0   21.30   20.90 
   0  -2   0 5254.47  150.18 
   0  -2   0 5054.19  150.98 
   0  -2   0 5150.38  153.98 
   0  -2   0 5259.97  151.58 
   0  -2   0 4880.11  155.68 
   0  -2   0 5227.28  152.58 
   0  -2   0 4921.91  152.08 
   0  -2   0 5151.48  154.48 
   0  -2   0 5071.19  148.29 
   0  -2   0 4806.72  153.98 
   0  -2   0 5068.49  150.98 
   0  -2   0 4993.20  152.18 
   0  -2   0 5274.67  152.18 
   0   2   0 4985.50  153.68 
   0   2   0 4970.60  151.88 
   0   2   0 5173.38  152.88 
   0   2   0 5312.77  152.68 
   0   2   0 5022.70  152.08 
   0   2   0 5175.68  156.28 
   0   2   0 5046.60  154.58 
   0   2   0 5065.89  150.78 
   0   2   0 4957.20  152.68 
   0   2   0 5189.28  153.28 
   0   2   0 5117.49  150.98 
   0   2   0 5013.10  153.78 
   0   2   0 5174.68  153.18 
   0   2   0 4903.01  152.18 
   0   2   0 5109.39  153.08 
   1  -2   0 4728.13  152.98 
  -1  -2   0 5156.28  147.59 
   1  -2   0 4798.82  154.88 
  -1  -2   0 4778.52  146.09 
   1  -2   0 4798.22  141.59 
  -1  -2   0 4890.91  152.78 
   1  -2   0 4826.02  144.69 
  -1  -2   0 4935.51  148.79 
  -1  -2   0 4769.02  149.19 
  -1  -2   0 4899.91  147.39 
  -1  -2   0 4995.50  148.29 
   1  -2   0 4984.60  149.88 
   1  -2   0 4905.11  148.19 
  -1  -2   0 4863.11  148.19 
  -1  -2   0 4923.81  148.09 
   1  -2   0 4698.13  147.09 
  -1  -2   0 5194.88  148.09 
  -1  -2   0 5043.20  147.69 
  -1  -2   0 5009.00  147.09 
   1  -2   0 4937.91  147.99 
   1  -2   0 4878.91  147.89 
   1  -2   0 4713.63  148.89 
   1  -2   0 4911.41  148.39 
  -1  -2   0 5040.20  147.59 
   1  -2   0 4800.82  145.69 
   1  -2   0 4655.43  154.38 
  -1  -2   0 5246.27  148.09 
   1  -2   0 4961.90  150.08 
  -1  -2   0 5123.19  150.48 
   1  -2   0 4809.82  143.99 
   1  -2   0 5002.50  146.59 
   1  -2   0 4943.71  150.68 
  -1  -2   0 4721.63  151.48 
   1  -2   0 4971.30  147.89 
   1  -2   0 4811.52  143.99 
  -1  -2   0 4981.10  149.59 
  -1  -2   0 4862.21  149.29 
  -1  -2   0 4653.33  146.99 
   1  -2   0 4827.62  145.79 
   1  -2   0 4860.61  146.79 
   1  -2   0 4910.31  146.09 
   1  -2   0 4957.30  148.09 
  -1   2   0 4706.23  145.19 
  -1   2   0 4773.02  147.29 
   1   2   0 5241.28  147.99 
   1   2   0 4750.82  149.19 
  -1   2   0 4980.40  145.09 
  -1   2   0 4966.10  149.19 
  -1   2   0 4994.20  148.59 
  -1   2   0 4620.94  149.88 
   1   2   0 4773.92  148.79 
  -1   2   0 4853.81  151.08 
  -1   2   0 4804.32  143.79 
  -1   2   0 4667.93  145.79 
   1   2   0 4915.61  147.99 
   1   2   0 4853.81  147.79 
  -1   2   0 4997.90  148.09 
  -1   2   0 4868.81  147.99 
  -1   2   0 4990.10  146.79 
   1   2   0 4671.13  149.79 
   1   2   0 4947.21  147.29 
  -1   2   0 4650.43  148.09 
   1   2   0 5056.39  150.18 
   1   2   0 5181.88  148.49 
   1   2   0 4996.70  147.19 
   1   2   0 5151.68  145.59 
   1   2   0 5041.70  148.49 
   1   2   0 5152.18  153.28 
   1   2   0 4663.43  148.49 
  -1   2   0 4991.30  146.79 
  -1   2   0 4865.61  147.39 
  -1   2   0 4984.20  149.49 
   1   2   0 4587.74  149.09 
  -1   2   0 4811.62  148.79 
   1   2   0 4875.31  154.28 
  -1   2   0 4946.60  146.79 
   1   2   0 4784.92  146.89 
   1   2   0 5166.78  148.19 
   1   2   0 4439.76  152.88 
  -1   2   0 4988.00  146.29 
  -2  -2   0 1716.53   60.39 
  -2  -2   0 1634.74   65.09 
   2  -2   0 1742.73   54.69 
   2  -2   0 1776.02   55.79 
  -2  -2   0 1747.93   59.89 
   2  -2   0 1784.42   61.19 
   2  -2   0 1692.33   62.49 
   2  -2   0 1721.53   56.09 
  -2  -2   0 1804.22   60.59 
  -2  -2   0 1776.92   60.99 
  -2  -2   0 1799.12   59.29 
  -2  -2   0 1791.32   66.29 
   2  -2   0 1666.53   61.39 
   2  -2   0 1767.92   61.39 
  -2  -2   0 1812.32   60.09 
   2  -2   0 1730.23   69.89 
   2  -2   0 1862.51   56.99 
  -2  -2   0 1661.43   58.79 
  -2  -2   0 1799.12   60.59 
  -2  -2   0 1830.92   58.39 
   2  -2   0 1708.93   57.99 
  -2  -2   0 1670.83   61.09 
   2  -2   0 1713.23   61.19 
  -2  -2   0 1671.63   54.49 
   2  -2   0 1707.83   57.19 
  -2  -2   0 1872.21   60.89 
   2  -2   0 1704.23   54.79 
  -2  -2   0 1878.11   61.29 
  -2  -2   0 1735.23   62.49 
  -2  -2   0 1805.42   59.89 
  -2  -2   0 1803.92   59.99 
   2  -2   0 1677.93   66.39 
  -2  -2   0 1728.63   62.19 
   2  -2   0 1775.72   64.79 
   2  -2   0 1774.72   66.19 
   2  -2   0 1772.12   56.79 
  -2  -2   0 1750.92   62.49 
  -2  -2   0 1897.41   60.19 
   2  -2   0 1728.93   61.09 
   2  -2   0 1732.23   67.09 
   2  -2   0 1823.92   65.99 
  -2  -2   0 1793.92   64.89 
   2  -2   0 1863.91   60.19 
   2  -2   0 1738.03   67.89 
  -2  -2   0 1697.03   56.99 
  -2   2   0 1797.02   55.29 
  -2   2   0 1729.53   58.09 
   2   2   0 1740.53   60.29 
  -2   2   0 1811.72   61.39 
  -2   2   0 1736.13   64.19 
  -2   2   0 1755.02   56.19 
  -2   2   0 1796.22   52.59 
  -2   2   0 1794.52   59.89 
  -2   2   0 1737.93   61.39 
   2   2   0 1734.13   57.39 
  -2   2   0 1798.82   59.19 
  -2   2   0 1842.62   61.59 
   2   2   0 1808.92   60.99 
   2   2   0 1718.83   60.89 
   2   2   0 1732.43   58.99 
  -2   2   0 1720.13   59.49 
  -2   2   0 1772.52   58.09 
   2   2   0 1840.32   59.89 
   2   2   0 1753.92   60.79 
  -2   2   0 1799.12   66.39 
  -2   2   0 1784.22   54.19 
  -2   2   0 1802.22   64.09 
   2   2   0 1778.82   56.09 
   2   2   0 1834.72   59.79 
   2   2   0 1721.13   64.79 
   2   2   0 1750.42   60.49 
   2   2   0 1672.93   62.09 
   2   2   0 1720.73   62.69 
  -2   2   0 1805.52   61.89 
   2   2   0 1699.63   53.29 
   2   2   0 1751.22   55.79 
   2   2   0 1729.93   57.89 
   2   2   0 1748.53   61.29 
   2   2   0 1790.82   57.59 
  -2   2   0 1705.63   56.99 
  -2   2   0 1776.92   63.89 
  -2   2   0 1774.62   60.59 
  -2   2   0 1741.53   56.19 
   2   2   0 1706.33   58.99 
   2   2   0 1713.43   66.29 
  -2   2   0 1846.62   60.69 
  -2   2   0 1779.82   56.39 
   2   2   0 1752.72   66.79 
  -2   2   0 1789.72   57.69 
  -2   2   0 1754.02   53.19 
  -2   2   0 1761.82   56.19 
   3  -2   0  479.25   18.50 
   3  -2   0  439.56   23.80 
   3  -2   0  450.85   22.90 
   3  -2   0  441.06   19.00 
  -3  -2   0  432.06   21.90 
  -3  -2   0  413.06   23.30 
  -3  -2   0  437.96   25.80 
   3  -2   0  441.56   22.10 
  -3  -2   0  429.86   24.10 
  -3  -2   0  447.16   25.00 
   3  -2   0  480.35   19.40 
  -3  -2   0  461.05   20.60 
   3  -2   0  491.35   25.60 
  -3  -2   0  499.75   23.90 
  -3  -2   0  472.45   31.80 
  -3  -2   0  475.45   19.70 
   3  -2   0  478.55   25.10 
  -3  -2   0  462.35   24.30 
  -3  -2   0  465.65   17.30 
  -3  -2   0  479.85   22.60 
   3  -2   0  449.86   22.30 
  -3  -2   0  467.95   23.40 
   3  -2   0  475.55   32.50 
   3  -2   0  420.76   26.30 
   3  -2   0  421.26   29.90 
  -3  -2   0  458.25   19.40 
   3  -2   0  480.95   24.10 
  -3  -2   0  446.26   21.40 
   3  -2   0  437.16   26.00 
   3  -2   0  480.55   24.30 
  -3  -2   0  508.65   27.30 
  -3  -2   0  481.85   29.90 
   3  -2   0  468.95   15.70 
   3  -2   0  447.46   28.60 
  -3   2   0  437.56   29.40 
   3   2   0  465.45   28.10 
  -3   2   0  475.35   20.10 
   3   2   0  484.05   22.50 
  -3   2   0  459.35   21.00 
  -3   2   0  496.05   20.90 
   3   2   0  464.85   21.60 
   3   2   0  404.76   22.90 
  -3   2   0  438.46   23.60 
  -3   2   0  467.45   25.50 
   3   2   0  463.95   17.50 
   3   2   0  460.35   24.80 
  -3   2   0  486.85   20.30 
   3   2   0  430.96   18.90 
   3   2   0  489.45   20.90 
   3   2   0  385.96   25.30 
   3   2   0  432.86   25.80 
   3   2   0  437.96   18.90 
  -3   2   0  443.06   24.10 
  -3   2   0  478.35   27.60 
  -3   2   0  478.55   17.50 
   3   2   0  465.35   24.10 
  -3   2   0  458.95   25.90 
   3   2   0  422.36   21.60 
   3   2   0  438.56   24.00 
  -3   2   0  455.15   18.80 
   3   2   0  452.05   24.20 
  -3   2   0  445.66   22.40 
   3   2   0  428.96   29.20 
   3   2   0  486.95   20.20 
  -3   2   0  459.95   22.90 
  -3   2   0  470.65   16.70 
  -3   2   0  435.46   27.10 
  -3   2   0  447.66   24.70 
  -3   2   0  459.65   19.70 
  -3   2   0  480.55   19.80 
   3   2   0  462.75   24.70 
  -3   2   0  458.65   17.60 
   3   2   0  488.55   31.70 
  -3   2   0  495.35   26.00 
  -3   2   0  452.15   17.20 
  -3   2   0  467.45   29.80 
  -3   2   0  456.25   20.90 
   3   2   0  447.06   22.30 
  -3   2   0  475.55   20.50 
  -3   2   0  439.26   17.90 
  -4  -2   0  224.78   26.50 
   4  -2   0  265.17   14.70 
   4  -2   0  235.88   18.60 
  -4  -2   0  231.28   11.10 
   4  -2   0  230.08   16.00 
  -4  -2   0  261.17   17.40 
   4  -2   0  208.38   15.40 
  -4  -2   0  256.47   18.50 
  -4  -2   0  201.78   14.10 
  -4  -2   0  246.28   12.40 
   4  -2   0  242.08   16.90 
   4  -2   0  212.68   25.50 
  -4  -2   0  193.18   21.50 
  -4  -2   0  200.58   22.00 
   4  -2   0  257.07   18.20 
   4  -2   0  284.27   18.80 
   4  -2   0  242.98   18.40 
   4  -2   0  188.98   25.00 
  -4  -2   0  224.28   15.50 
   4  -2   0  248.18   20.00 
  -4  -2   0  231.48   16.70 
  -4  -2   0  233.38   18.50 
  -4  -2   0  241.28   21.70 
  -4  -2   0  245.58   19.40 
  -4  -2   0  235.68   14.90 
  -4  -2   0  206.58   15.30 
   4  -2   0  234.78   28.20 
  -4  -2   0  217.88   20.30 
   4  -2   0  242.68   25.50 
  -4  -2   0  214.48   13.40 
  -4   2   0  271.47   14.40 
  -4   2   0  251.87   20.80 
   4   2   0  247.98   25.00 
   4   2   0  230.18   13.80 
   4   2   0  201.98   22.50 
   4   2   0  247.58   14.00 
   4   2   0  233.08    9.30 
  -4   2   0  240.68   18.00 
  -4   2   0  225.28   12.10 
   4   2   0  236.48   11.80 
  -4   2   0  243.38   16.00 
   4   2   0  235.08   21.80 
   4   2   0  242.48   18.20 
  -4   2   0  251.67   15.20 
  -4   2   0  248.28   16.00 
  -4   2   0  233.28   18.50 
  -4   2   0  199.18   24.10 
   4   2   0  216.48   15.30 
  -4   2   0  239.78   10.00 
   4   2   0  223.98   17.30 
   4   2   0  179.68   20.40 
  -4   2   0  235.58   13.30 
  -4   2   0  280.37   17.20 
  -4   2   0  250.27   13.90 
  -4   2   0  238.48   18.50 
  -4   2   0  252.77   19.70 
  -4   2   0  224.38   13.80 
  -4   2   0  240.98   10.60 
  -4   2   0  281.97   23.20 
   4   2   0  228.78   10.50 
  -4   2   0  240.78   19.80 
  -4   2   0  223.88   14.20 
   4   2   0  168.48   21.60 
   4   2   0  227.38   26.00 
  -4   2   0  228.58   12.80 
   4   2   0  238.68   28.80 
   4   2   0  229.68   14.70 
   4   2   0  166.08   18.70 
  -4   2   0  226.48   12.00 
  -4   2   0  224.28   10.50 
  -4   2   0  222.68   26.60 
  -4   2   0  252.67   13.50 
   5  -2   0  170.78   27.30 
   5  -2   0  254.47   18.50 
   5  -2   0  253.57   30.80 
  -5  -2   0  255.97   24.90 
  -5  -2   0  255.57   30.20 
  -5  -2   0  250.27   18.50 
  -5  -2   0  250.27   17.00 
  -5  -2   0  263.77   21.10 
   5  -2   0  245.98   29.60 
  -5  -2   0  231.58   16.50 
  -5  -2   0  244.08   17.20 
   5  -2   0  243.38   19.70 
   5  -2   0  217.68   23.80 
  -5  -2   0  214.98   16.70 
  -5  -2   0  272.27   27.10 
  -5  -2   0  278.17   24.70 
   5  -2   0  225.88   16.00 
   5  -2   0  257.17   19.80 
  -5  -2   0  234.18   18.10 
  -5  -2   0  223.38   15.50 
  -5  -2   0  244.38   12.20 
  -5  -2   0  205.88   24.70 
   5  -2   0  213.18   16.10 
   5  -2   0  292.87   30.60 
  -5  -2   0  263.57   17.70 
  -5  -2   0  230.78   14.00 
  -5  -2   0  180.68   22.60 
  -5  -2   0  244.48   25.10 
  -5  -2   0  241.28   12.20 
  -5  -2   0  247.38   23.80 
   5   2   0  237.08   15.70 
  -5   2   0  241.48   17.40 
  -5   2   0  236.58   13.50 
   5   2   0  223.28   14.00 
   5   2   0  248.28   24.00 
  -5   2   0  276.07   16.80 
  -5   2   0  235.88   12.80 
  -5   2   0  238.08   25.30 
  -5   2   0  240.48   15.10 
  -5   2   0  257.87   28.30 
   5   2   0  241.68   25.00 
  -5   2   0  250.97   10.00 
  -5   2   0  235.58   13.80 
  -5   2   0  213.58   16.60 
   5   2   0  255.17   21.00 
  -5   2   0  211.38   23.20 
  -5   2   0  228.38   13.80 
  -5   2   0  235.58   14.00 
  -5   2   0  247.38   13.80 
   5   2   0  236.58   29.60 
  -5   2   0  204.28   24.70 
  -5   2   0  183.68   21.50 
   5   2   0  242.28   14.90 
  -5   2   0  271.17   30.10 
   5   2   0  164.68   23.20 
  -5   2   0  242.98   31.60 
   5   2   0  259.87   18.80 
  -5   2   0  243.88   12.50 
   5   2   0  195.28   25.10 
  -5   2   0  261.87   10.70 
  -5   2   0  240.48   11.30 
   5   2   0  287.97   22.90 
   5   2   0  273.97   28.80 
  -5   2   0  194.38   22.00 
   5   2   0  231.78   29.70 
  -5   2   0  257.57   14.50 
   5   2   0  267.47   29.70 
   5   2   0  296.97   28.40 
  -5   2   0  207.18   17.10 
  -5   2   0  255.47   15.10 
   6  -2   0  437.76   45.10 
  -6  -2   0  526.95   27.40 
  -6  -2   0  498.75   39.70 
   6  -2   0  512.75   40.00 
  -6  -2   0  494.25   20.90 
  -6  -2   0  538.15   29.90 
   6  -2   0  442.46   27.60 
  -6  -2   0  555.04   36.90 
  -6  -2   0  477.05   28.50 
  -6  -2   0  557.04   28.40 
   6  -2   0  517.05   37.70 
  -6  -2   0  495.75   32.70 
   6  -2   0  466.05   39.60 
   6  -2   0  528.35   32.10 
  -6  -2   0  506.25   28.20 
  -6  -2   0  467.35   24.40 
   6  -2   0  499.75   33.80 
   6  -2   0  495.15   23.40 
  -6  -2   0  535.25   32.50 
  -6  -2   0  524.75   35.70 
  -6  -2   0  512.75   34.70 
  -6  -2   0  485.85   28.20 
  -6  -2   0  492.25   32.10 
  -6  -2   0  500.95   34.10 
   6  -2   0  448.46   30.50 
  -6  -2   0  556.44   32.50 
  -6  -2   0  490.95   18.30 
  -6  -2   0  467.45   34.80 
   6  -2   0  506.65   51.89 
  -6   2   0  494.05   34.40 
  -6   2   0  489.55   37.80 
  -6   2   0  398.56   32.50 
  -6   2   0  475.45   25.30 
  -6   2   0  445.86   22.90 
  -6   2   0  435.06   27.10 
   6   2   0  504.35   38.60 
  -6   2   0  548.65   34.40 
   6   2   0  467.15   26.90 
  -6   2   0  428.26   27.80 
  -6   2   0  478.15   22.90 
  -6   2   0  465.45   24.50 
   6   2   0  535.05   32.90 
   6   2   0  503.35   40.70 
   6   2   0  528.35   34.10 
  -6   2   0  483.15   33.20 
   6   2   0  548.25   38.80 
  -6   2   0  482.85   19.90 
  -6   2   0  513.65   26.80 
   6   2   0  447.06   31.90 
   6   2   0  575.94   41.20 
   6   2   0  505.95   48.60 
  -6   2   0  482.75   40.10 
   6   2   0  514.85   39.60 
  -6   2   0  479.05   26.80 
  -6   2   0  407.06   43.20 
  -6   2   0  475.35   23.90 
  -6   2   0  496.05   33.70 
   6   2   0  470.75   32.40 
   6   2   0  467.75   24.60 
  -6   2   0  466.25   19.60 
  -6   2   0  490.25   28.60 
  -6   2   0  482.75   23.10 
   6   2   0  482.25   22.70 
   7  -2   0  134.09   31.40 
  -7  -2   0  166.58   24.00 
   7  -2   0  158.68   23.40 
  -7  -2   0  153.68   24.00 
  -7  -2   0  167.98   20.40 
  -7  -2   0  138.79   23.10 
  -7  -2   0  179.18   27.10 
  -7  -2   0  160.78   17.60 
   7  -2   0  116.59   21.20 
   7  -2   0  154.98   19.50 
  -7  -2   0  162.58   22.80 
  -7  -2   0   84.79   17.80 
  -7  -2   0  153.48   18.90 
   7  -2   0  124.49   25.80 
  -7  -2   0  142.79   18.70 
  -7  -2   0  167.08   20.30 
  -7  -2   0  190.68   26.00 
  -7  -2   0  198.68   32.30 
   7  -2   0  130.09   29.60 
  -7  -2   0  147.69   24.80 
   7  -2   0  165.78   29.30 
  -7  -2   0  150.38   15.10 
  -7  -2   0  169.28   26.20 
  -7  -2   0  179.58   21.30 
   7  -2   0  141.49   26.00 
   7  -2   0  141.49   20.30 
  -7   2   0  119.49   24.10 
   7   2   0  184.18   26.40 
  -7   2   0  132.69   15.40 
   7   2   0  189.18   31.10 
  -7   2   0  166.18   29.20 
   7   2   0  119.89   15.80 
  -7   2   0  124.39   21.30 
  -7   2   0  152.08   19.00 
   7   2   0  132.79   22.00 
  -7   2   0  135.99   18.80 
  -7   2   0   98.29   20.10 
  -7   2   0  114.09   22.60 
  -7   2   0  153.68   17.30 
  -7   2   0  176.78   22.30 
   7   2   0  185.38   29.90 
  -7   2   0  133.59   28.70 
   7   2   0  177.18   30.20 
   7   2   0  114.39   19.00 
   7   2   0  134.89   28.40 
  -7   2   0  205.18   26.80 
  -7   2   0  167.48   18.20 
   7   2   0  183.08   30.80 
  -7   2   0  168.08   18.70 
  -7   2   0  191.28   26.90 
  -8  -2   0  327.97   46.80 
  -8  -2   0  318.57   38.50 
   8  -2   0  290.57   34.80 
  -8  -2   0  230.98   34.10 
  -8  -2   0  290.97   29.00 
  -8  -2   0  264.47   24.20 
  -8  -2   0  286.17   36.30 
  -8  -2   0  296.47   29.60 
   8  -2   0  365.96   35.20 
  -8  -2   0  285.57   34.60 
  -8  -2   0  321.37   35.60 
   8  -2   0  303.87   33.20 
  -8  -2   0  250.67   35.00 
   8  -2   0  337.67   30.40 
   8  -2   0  315.97   45.80 
  -8  -2   0  305.27   29.20 
  -8  -2   0  305.37   22.20 
   8  -2   0  396.86   55.49 
  -8  -2   0  286.77   32.20 
  -8  -2   0  316.27   35.40 
   8  -2   0  380.26   48.60 
   8  -2   0  262.77   42.30 
  -8  -2   0  322.77   34.00 
   8   2   0  214.38   37.50 
  -8   2   0  318.57   43.60 
  -8   2   0  268.77   34.70 
   8   2   0  261.97   39.90 
   8   2   0  379.66   50.09 
   8   2   0  332.87   44.90 
   8   2   0  247.18   32.90 
   8   2   0  381.46   45.40 
  -8   2   0  347.67   37.90 
   8   2   0  339.17   44.20 
  -8   2   0  285.57   43.80 
  -8   2   0  289.37   27.10 
  -8   2   0  317.67   40.40 
  -8   2   0  258.57   33.00 
  -8   2   0  308.17   35.30 
  -8   2   0  298.87   29.90 
  -8   2   0  327.47   42.10 
  -8   2   0  242.88   29.50 
   8   2   0  248.58   28.70 
  -9  -2   0   37.80   16.20 
   9  -2   0   20.50   13.20 
  -9  -2   0   25.00   12.20 
   9  -2   0   14.20   19.30 
  -9  -2   0   18.00   14.30 
  -9  -2   0   28.00   16.50 
  -9  -2   0   32.80   17.50 
  -9  -2   0   23.80   15.10 
   9  -2   0   12.60   19.60 
  -9  -2   0   21.20   17.50 
   9  -2   0    1.40   10.20 
  -9  -2   0   16.60   16.70 
   9  -2   0   31.40   19.80 
   9  -2   0    8.50   18.60 
  -9  -2   0   20.70   19.80 
  -9  -2   0   25.90   15.40 
  -9   2   0   12.00   10.70 
   9   2   0   38.40   21.60 
   9   2   0    7.90   14.60 
   9   2   0    6.70   18.50 
  -9   2   0   23.50   18.70 
  -9   2   0    1.50   12.10 
  -9   2   0   22.70   20.70 
  -9   2   0   35.40   16.80 
   9   2   0    9.80   17.50 
   9   2   0   18.00   16.80 
   9   2   0   29.60   19.40 
  -9   2   0   15.20   13.30 
  -9   2   0   58.59   21.40 
  -9   2   0    7.00   12.10 
  -9   2   0   14.60   15.80 
 -10  -2   0    7.50   16.30 
 -10  -2   0    0.10   14.70 
  10  -2   0   -5.60   15.40 
 -10  -2   0  -10.70   12.70 
  10  -2   0   -2.30   17.40 
 -10  -2   0   -5.90   10.70 
  10  -2   0    2.70   19.80 
  10  -2   0    9.90   14.30 
 -10  -2   0    1.90   13.40 
 -10  -2   0    6.90   17.90 
 -10  -2   0  -16.70   12.50 
  10  -2   0   15.10   25.00 
 -10  -2   0  -13.10   12.30 
 -10  -2   0    8.60   12.90 
 -10   2   0   19.10   20.60 
  10   2   0   -7.70   14.30 
 -10   2   0    5.90   12.60 
 -10   2   0    2.10   20.20 
  10   2   0    7.30   15.50 
 -10   2   0   -7.80   14.80 
 -10   2   0   18.30   14.10 
  10   2   0  -12.70   14.90 
 -10   2   0    2.00   12.80 
 -10   2   0   13.40   16.90 
 -10   2   0   -1.50   14.60 
  10   2   0   -4.00   18.60 
  10   2   0   -5.50   12.70 
   0  -3   0   -2.40    2.50 
   0  -3   0    2.60    3.60 
   0  -3   0    5.40    3.70 
   0  -3   0   -0.70    3.80 
   0  -3   0    0.70    3.20 
   0  -3   0   -1.40    2.30 
   0  -3   0   -3.50    3.10 
   0  -3   0    0.10    2.60 
   0  -3   0    0.80    2.60 
   0  -3   0    0.40    4.30 
   0  -3   0    1.20    1.80 
   0  -3   0    1.00    2.80 
   0  -3   0    3.80    3.70 
   0  -3   0    3.60    2.80 
   0  -3   0    0.80    3.00 
   0   3   0    7.60    3.70 
   0   3   0    1.20    3.50 
   0   3   0    0.50    3.50 
   0   3   0    0.50    3.10 
   0   3   0    6.50    4.50 
   0   3   0    0.90    4.70 
   0   3   0    1.40    3.00 
   0   3   0    3.00    3.20 
   0   3   0    5.50    4.50 
   0   3   0   -0.90    2.40 
   0   3   0    6.00    3.80 
   0   3   0   -0.90    3.10 
   0   3   0    3.00    3.50 
   0   3   0   -1.80    4.00 
   1  -3   0   77.29    9.90 
  -1  -3   0   75.99    9.70 
   1  -3   0   74.39   10.60 
  -1  -3   0   68.79    9.00 
   1  -3   0   62.69   13.30 
  -1  -3   0   71.29    8.20 
   1  -3   0   97.09   10.30 
  -1  -3   0   69.09    9.80 
  -1  -3   0   69.99    9.80 
   1  -3   0   97.19   10.50 
   1  -3   0   67.79    8.00 
   1  -3   0   97.49   13.60 
   1  -3   0   60.29    9.00 
  -1  -3   0   82.29    9.90 
   1  -3   0   88.39   10.40 
   1  -3   0   71.59    5.50 
   1  -3   0   77.99    8.20 
   1  -3   0   80.99   10.50 
   1  -3   0   89.49   15.30 
  -1  -3   0   82.49   10.90 
  -1  -3   0   56.69    9.10 
   1  -3   0   79.79    8.90 
  -1  -3   0   72.89   10.90 
  -1  -3   0   81.59   11.40 
   1  -3   0   84.69   10.10 
   1  -3   0   93.39   14.60 
  -1  -3   0   79.59   12.60 
   1  -3   0   90.19   10.70 
  -1  -3   0   73.79    9.20 
   1  -3   0   74.89   10.50 
   1  -3   0   85.09   11.70 
  -1  -3   0   65.29    9.80 
  -1  -3   0   97.99   12.50 
   1   3   0   79.09   10.40 
   1   3   0   93.99   10.80 
  -1   3   0   86.89    9.60 
  -1   3   0   67.09    9.50 
   1   3   0   69.99   12.00 
   1   3   0   70.59   10.70 
   1   3   0   63.69    9.60 
   1   3   0   67.09    9.10 
   1   3   0   63.79   10.90 
  -1   3   0   88.39    9.40 
  -1   3   0   79.69    9.40 
  -1   3   0   83.79   11.10 
   1   3   0  103.59   12.70 
   1   3   0   98.29   11.20 
  -1   3   0   78.19    9.80 
   1   3   0   73.79   10.30 
  -1   3   0   70.49   10.00 
   1   3   0  105.99   12.10 
   1   3   0   74.09   10.50 
  -1   3   0   89.09   10.40 
  -1   3   0   87.19    8.20 
  -1   3   0   68.79    9.30 
  -1   3   0   71.69    9.60 
   1   3   0   73.49    9.40 
   1   3   0   49.80    8.20 
   1   3   0   74.39    9.80 
  -1   3   0   97.09   11.10 
  -1   3   0   86.09   12.00 
   1   3   0   72.59    8.50 
  -1   3   0   71.99    7.60 
   1   3   0   84.99   15.20 
  -1   3   0   77.99   10.60 
  -1   3   0   75.39    8.90 
  -2  -3   0    6.00    4.90 
  -2  -3   0   -2.70    3.50 
   2  -3   0    9.60    5.40 
   2  -3   0    1.40    3.10 
   2  -3   0    4.90    5.80 
  -2  -3   0    1.60    4.40 
   2  -3   0    3.20    3.70 
   2  -3   0   -3.90    2.70 
  -2  -3   0    0.60    4.50 
   2  -3   0   20.60    6.30 
  -2  -3   0    3.30    4.60 
   2  -3   0   -3.10    6.80 
   2  -3   0   25.50    6.80 
  -2  -3   0   -2.90    3.80 
  -2  -3   0    5.60    7.00 
  -2  -3   0   -0.30    3.90 
   2  -3   0    8.90    3.90 
  -2  -3   0   -0.30    4.30 
   2  -3   0    1.90    3.20 
  -2  -3   0    6.00    5.70 
   2  -3   0    0.90    7.20 
  -2  -3   0    5.50    5.70 
   2  -3   0   -0.30    5.30 
   2  -3   0   12.10    7.30 
   2  -3   0   -1.60    4.10 
   2  -3   0   -0.50    3.30 
  -2  -3   0   -3.10    3.60 
   2  -3   0    3.80    3.20 
   2  -3   0    4.60    4.30 
   2   3   0   -0.10    3.60 
  -2   3   0    2.80    4.60 
  -2   3   0   -0.90    4.20 
  -2   3   0   -2.30    2.90 
  -2   3   0    1.90    3.30 
  -2   3   0    2.50    3.80 
   2   3   0   12.10    6.20 
   2   3   0    0.00    6.60 
   2   3   0   -0.70    3.30 
   2   3   0    1.50    4.90 
  -2   3   0   -0.80    3.30 
   2   3   0    0.70    4.20 
  -2   3   0    8.30    5.20 
   2   3   0   -1.80    4.70 
   2   3   0    6.20    3.80 
   2   3   0    4.20    4.00 
   2   3   0    0.60    3.70 
  -2   3   0    1.60    3.30 
  -2   3   0   -0.40    3.00 
  -2   3   0    2.90    2.20 
   2   3   0   -2.00    2.90 
  -2   3   0    2.50    3.30 
   2   3   0   -0.20    3.90 
   2   3   0   -2.90    4.40 
  -2   3   0   -3.30    2.60 
   2   3   0   -1.40    3.50 
  -2   3   0   12.30    8.10 
   2   3   0    0.50    6.90 
  -2   3   0    1.60    5.50 
  -2   3   0   -4.40    3.40 
  -3  -3   0    5.20    4.40 
   3  -3   0    6.10    6.20 
   3  -3   0    3.00    3.20 
   3  -3   0    2.70    3.70 
   3  -3   0   -6.10    3.50 
  -3  -3   0    3.80    4.00 
  -3  -3   0    6.10    6.00 
   3  -3   0   -3.30    5.50 
  -3  -3   0    1.20    5.00 
   3  -3   0    0.50    3.70 
  -3  -3   0    3.60    5.60 
   3  -3   0    2.40    3.70 
  -3  -3   0    9.70    6.30 
  -3  -3   0    2.80    4.80 
  -3  -3   0   -1.80    7.00 
  -3  -3   0    2.80    5.80 
   3  -3   0    9.70    8.00 
  -3  -3   0   -4.00    4.70 
  -3  -3   0   -4.00    4.80 
   3  -3   0    7.30    6.60 
   3  -3   0   -3.50    8.40 
   3  -3   0    2.50    7.10 
   3  -3   0    2.60    4.80 
   3  -3   0   -1.60    4.60 
   3  -3   0   -0.20    2.50 
  -3  -3   0    6.90    5.30 
  -3  -3   0   -3.10    4.70 
   3  -3   0    1.30    2.30 
   3  -3   0    0.70    3.60 
  -3  -3   0    8.00    6.20 
   3  -3   0   -1.70    4.20 
   3  -3   0    0.10    7.40 
   3  -3   0    1.50    5.70 
  -3   3   0    1.10    5.20 
  -3   3   0    5.20    3.60 
   3   3   0   -2.90    3.20 
   3   3   0    4.50    6.40 
   3   3   0    1.40    3.20 
   3   3   0    4.40    4.40 
  -3   3   0   -0.80    5.10 
   3   3   0    6.70    4.30 
  -3   3   0    5.50    3.10 
   3   3   0    3.90    6.00 
  -3   3   0   11.30    9.50 
  -3   3   0    0.10    6.30 
  -3   3   0    6.80    5.60 
  -3   3   0    4.60    1.80 
   3   3   0   13.40    8.30 
  -3   3   0    2.70    4.40 
  -3   3   0    4.80    3.60 
   3   3   0    4.90    5.60 
  -3   3   0   -1.40    4.20 
   3   3   0   -9.30    3.60 
   3   3   0   10.00    6.40 
   3   3   0   -7.90    3.80 
  -3   3   0    7.70    3.00 
  -3   3   0   -6.10    3.40 
  -3   3   0    7.80    3.40 
   3   3   0    4.30    8.20 
   3   3   0    3.20    6.00 
  -3   3   0    4.40    3.30 
   3   3   0    0.40    5.10 
   3   3   0   -5.80    7.20 
   3   3   0   12.70    8.00 
  -3   3   0    0.50    3.40 
  -4  -3   0  879.11   40.40 
   4  -3   0  841.92   40.10 
  -4  -3   0  860.41   41.00 
  -4  -3   0  902.71   48.90 
   4  -3   0  895.81   54.89 
  -4  -3   0  909.81   43.00 
  -4  -3   0  864.31   44.00 
   4  -3   0  846.42   45.60 
  -4  -3   0  887.01   37.00 
   4  -3   0  881.21   39.30 
  -4  -3   0  854.81   41.50 
   4  -3   0  928.21   33.30 
   4  -3   0  949.40   40.60 
   4  -3   0  860.81   48.60 
   4  -3   0  912.71   42.70 
  -4  -3   0  867.21   38.30 
   4  -3   0  890.61   52.09 
   4  -3   0  911.71   33.20 
  -4  -3   0  914.91   39.60 
  -4  -3   0  889.91   40.80 
   4  -3   0  863.41   27.90 
   4  -3   0  879.61   40.30 
   4  -3   0  907.81   45.60 
  -4  -3   0  921.41   30.90 
  -4  -3   0  915.71   45.40 
   4  -3   0  837.82   34.20 
  -4  -3   0  919.81   41.80 
   4  -3   0  923.31   41.90 
  -4  -3   0  881.61   39.60 
  -4  -3   0  853.61   34.70 
  -4   3   0  870.11   35.30 
  -4   3   0  911.21   33.20 
  -4   3   0  871.51   35.80 
   4   3   0  868.91   38.70 
  -4   3   0  917.71   39.90 
  -4   3   0  872.51   45.80 
  -4   3   0  918.51   33.40 
   4   3   0  824.32   51.29 
  -4   3   0  904.51   34.50 
   4   3   0  963.20   46.40 
   4   3   0  936.41   42.20 
  -4   3   0  961.80   31.70 
   4   3   0  915.71   39.20 
   4   3   0  919.81   32.50 
   4   3   0  904.21   33.90 
   4   3   0  946.41   36.80 
  -4   3   0  895.41   36.20 
  -4   3   0  911.91   29.50 
   4   3   0  882.21   43.00 
  -4   3   0  829.42   42.70 
   4   3   0  842.62   45.60 
  -4   3   0  895.31   34.70 
   4   3   0  909.41   42.60 
   4   3   0  885.91   49.90 
   4   3   0  913.71   47.70 
  -4   3   0  957.70   50.09 
  -4   3   0  904.31   42.20 
   4   3   0  888.91   46.10 
  -4   3   0  854.11   42.40 
   4   3   0  936.81   43.50 
  -4   3   0  902.91   37.10 
   4   3   0  895.51   34.60 
  -4   3   0  934.21   39.20 
  -5  -3   0  618.74   37.00 
   5  -3   0  637.34   35.50 
  -5  -3   0  721.13   40.70 
  -5  -3   0  594.44   30.50 
  -5  -3   0  648.64   36.60 
   5  -3   0  637.84   33.80 
  -5  -3   0  642.84   35.80 
   5  -3   0  661.73   48.80 
   5  -3   0  616.34   31.70 
  -5  -3   0  632.44   35.00 
  -5  -3   0  675.53   27.30 
  -5  -3   0  587.84   28.40 
   5  -3   0  633.64   38.00 
  -5  -3   0  568.94   32.70 
   5  -3   0  631.44   33.90 
   5  -3   0  631.94   43.30 
  -5  -3   0  625.94   32.20 
   5  -3   0  650.43   41.80 
  -5  -3   0  648.24   29.60 
  -5  -3   0  695.83   26.70 
  -5  -3   0  682.03   37.00 
  -5  -3   0  675.33   33.30 
   5  -3   0  605.64   32.50 
  -5  -3   0  645.74   43.40 
  -5  -3   0  613.64   37.90 
  -5  -3   0  573.44   33.20 
   5  -3   0  575.54   44.10 
   5   3   0  622.34   40.50 
   5   3   0  639.24   41.80 
   5   3   0  580.84   39.40 
  -5   3   0  663.13   34.90 
  -5   3   0  662.33   32.20 
  -5   3   0  634.54   22.30 
  -5   3   0  621.94   37.00 
  -5   3   0  661.53   29.70 
   5   3   0  580.84   44.50 
   5   3   0  640.74   26.20 
  -5   3   0  635.34   25.60 
   5   3   0  646.44   36.70 
  -5   3   0  635.24   24.40 
   5   3   0  625.74   36.80 
   5   3   0  617.44   37.40 
  -5   3   0  636.94   38.20 
  -5   3   0  615.84   28.60 
  -5   3   0  667.03   28.60 
  -5   3   0  590.84   28.70 
  -5   3   0  647.84   24.20 
  -5   3   0  598.44   42.20 
   5   3   0  653.53   31.70 
  -5   3   0  614.04   25.00 
  -5   3   0  636.74   37.00 
  -5   3   0  718.63   47.00 
  -5   3   0  620.14   27.60 
   5   3   0  630.54   35.10 
  -5   3   0  642.64   40.40 
   5   3   0  710.63   40.90 
   5   3   0  584.94   28.70 
   5   3   0  515.65   40.90 
   5   3   0  618.44   23.80 
  -5   3   0  588.34   30.50 
   5   3   0  643.94   23.00 
  -5   3   0  659.83   22.50 
   6  -3   0 2002.20   74.19 
   6  -3   0 1956.00  100.69 
  -6  -3   0 1988.20   80.69 
  -6  -3   0 2001.60   73.09 
  -6  -3   0 1920.11   85.59 
  -6  -3   0 2152.88   76.79 
   6  -3   0 1982.20   91.69 
  -6  -3   0 2116.69   79.59 
   6  -3   0 2013.30   77.99 
  -6  -3   0 2066.29   84.39 
   6  -3   0 2188.48  100.09 
  -6  -3   0 2108.79   70.79 
  -6  -3   0 2022.70   77.89 
  -6  -3   0 2118.89   83.69 
  -6  -3   0 1991.30   72.39 
  -6  -3   0 2038.40   69.59 
  -6  -3   0 2058.09   94.09 
  -6  -3   0 1895.81   81.19 
  -6  -3   0 1988.70   72.89 
   6  -3   0 1943.91   78.09 
  -6  -3   0 2093.79   86.69 
   6  -3   0 2040.20   84.69 
  -6  -3   0 2001.30   81.59 
   6  -3   0 2017.40   81.09 
  -6  -3   0 2083.39   76.69 
  -6  -3   0 1959.70   86.39 
   6  -3   0 2047.00   94.99 
  -6  -3   0 2006.30   66.09 
   6   3   0 1795.02   88.99 
   6   3   0 1879.61   82.79 
  -6   3   0 1972.20   83.39 
   6   3   0 1978.80   77.69 
   6   3   0 2047.80   84.09 
  -6   3   0 2066.79   71.39 
   6   3   0 2030.10   84.39 
   6   3   0 1975.40   89.69 
   6   3   0 1859.11   88.79 
  -6   3   0 2070.69   76.29 
  -6   3   0 2035.10   74.39 
  -6   3   0 2052.79   68.79 
   6   3   0 1920.21   82.99 
  -6   3   0 2037.20   74.09 
  -6   3   0 2026.50   70.29 
  -6   3   0 1986.60   79.99 
  -6   3   0 1949.30   88.49 
   6   3   0 1899.11   95.59 
  -6   3   0 1898.81   93.79 
   6   3   0 2062.79   96.29 
  -6   3   0 2085.39   85.59 
   6   3   0 2112.99   74.79 
  -6   3   0 2004.00   93.19 
  -6   3   0 2038.50   65.39 
  -6   3   0 1986.90   66.29 
  -6   3   0 1958.30   84.39 
  -7  -3   0  415.96   29.00 
  -7  -3   0  301.57   34.20 
  -7  -3   0  328.17   24.60 
  -7  -3   0  442.56   30.00 
   7  -3   0  351.96   46.70 
  -7  -3   0  302.47   36.50 
  -7  -3   0  348.57   37.10 
  -7  -3   0  377.26   23.90 
  -7  -3   0  360.76   44.50 
  -7  -3   0  378.96   36.60 
   7  -3   0  417.36   31.20 
  -7  -3   0  407.06   40.90 
  -7  -3   0  416.46   27.60 
  -7  -3   0  368.06   25.90 
  -7  -3   0  377.56   24.80 
  -7  -3   0  343.07   33.80 
  -7  -3   0  398.26   38.30 
   7  -3   0  316.17   46.80 
  -7  -3   0  380.46   40.10 
   7  -3   0  376.96   32.70 
  -7  -3   0  383.46   36.80 
   7  -3   0  330.07   31.90 
   7  -3   0  348.67   42.90 
   7  -3   0  483.15   52.49 
   7  -3   0  399.86   28.80 
   7   3   0  381.56   44.20 
   7   3   0  435.36   40.90 
  -7   3   0  429.16   34.10 
  -7   3   0  408.46   41.20 
   7   3   0  423.06   34.80 
  -7   3   0  457.55   47.20 
   7   3   0  347.97   36.40 
   7   3   0  379.96   37.40 
  -7   3   0  415.96   27.20 
  -7   3   0  433.56   50.39 
  -7   3   0  399.06   23.30 
  -7   3   0  417.76   31.90 
   7   3   0  348.87   25.40 
  -7   3   0  361.76   24.50 
   7   3   0  354.96   42.70 
   7   3   0  337.07   44.20 
   7   3   0  384.66   48.50 
  -7   3   0  401.66   40.30 
   7   3   0  358.86   41.10 
   7   3   0  436.76   44.70 
  -7   3   0  373.16   27.80 
  -7   3   0  337.07   42.00 
   8  -3   0  340.97   35.10 
  -8  -3   0  413.16   28.30 
  -8  -3   0  381.16   39.90 
  -8  -3   0  323.57   46.90 
   8  -3   0  395.66   38.70 
  -8  -3   0  461.25   48.20 
  -8  -3   0  382.96   39.70 
  -8  -3   0  367.76   42.60 
   8  -3   0  363.56   33.20 
   8  -3   0  360.26   49.99 
  -8  -3   0  383.86   29.40 
   8  -3   0  413.66   58.19 
  -8  -3   0  391.96   41.70 
   8  -3   0  410.66   43.10 
  -8  -3   0  368.76   42.90 
  -8  -3   0  349.77   33.30 
  -8  -3   0  364.66   42.40 
  -8  -3   0  407.76   41.60 
   8  -3   0  465.65   52.89 
  -8  -3   0  467.35   43.90 
   8  -3   0  380.76   53.29 
  -8   3   0  338.97   49.10 
   8   3   0  353.46   45.00 
  -8   3   0  404.66   41.60 
  -8   3   0  295.77   33.90 
  -8   3   0  389.96   42.90 
   8   3   0  363.06   40.50 
   8   3   0  475.45   61.39 
   8   3   0  365.16   45.60 
  -8   3   0  350.16   46.30 
   8   3   0  342.47   39.90 
  -8   3   0  401.46   45.90 
   8   3   0  335.87   50.19 
   8   3   0  380.06   50.59 
  -8   3   0  413.36   42.00 
  -8   3   0  381.36   37.50 
   8   3   0  440.96   51.79 
  -8   3   0  327.97   39.20 
  -8   3   0  348.67   27.60 
  -9  -3   0   86.79   23.10 
  -9  -3   0  112.99   28.20 
  -9  -3   0   32.10   21.20 
   9  -3   0  104.99   23.10 
   9  -3   0   76.49   19.70 
  -9  -3   0   94.99   22.10 
   9  -3   0   79.99   31.80 
  -9  -3   0   78.49   20.30 
  -9  -3   0  137.09   28.50 
  -9  -3   0  121.69   21.90 
   9  -3   0   77.89   27.90 
   9  -3   0   67.09   28.70 
  -9  -3   0  128.59   27.40 
   9  -3   0   82.89   20.30 
  -9  -3   0   85.59   22.20 
   9  -3   0   98.89   28.90 
  -9  -3   0   90.19   18.30 
  -9  -3   0   68.29   21.00 
  -9   3   0   97.49   23.60 
  -9   3   0  108.69   26.10 
  -9   3   0  145.39   32.40 
   9   3   0  104.59   31.00 
   9   3   0   99.09   29.30 
   9   3   0  111.79   31.90 
   9   3   0  102.79   32.30 
  -9   3   0   31.20   21.00 
   9   3   0  133.59   33.00 
  -9   3   0  138.69   34.10 
   9   3   0   79.99   23.10 
  -9   3   0  106.69   25.50 
   0  -4   0   44.30    8.20 
   0  -4   0   48.60    7.50 
   0  -4   0   39.30   10.00 
   0  -4   0   71.29   11.30 
   0  -4   0   51.09    9.10 
   0  -4   0   53.99    9.90 
   0  -4   0   46.40    8.80 
   0  -4   0   48.10    9.20 
   0  -4   0   45.60    5.90 
   0  -4   0   56.49   11.90 
   0  -4   0   36.60    8.60 
   0  -4   0   30.60    8.30 
   0  -4   0   56.59    8.80 
   0  -4   0   40.40    9.70 
   0   4   0   43.30    8.40 
   0   4   0   60.49    7.90 
   0   4   0   49.00    9.60 
   0   4   0   28.30    9.50 
   0   4   0   54.29   11.10 
   0   4   0   38.20    7.20 
   0   4   0   46.90   10.60 
   0   4   0   52.59    9.50 
   0   4   0   41.00    9.90 
  -1  -4   0 6706.43  204.98 
   1  -4   0 6732.03  200.58 
  -1  -4   0 6742.43  205.18 
   1  -4   0 6720.53  204.38 
   1  -4   0 6656.53  209.28 
   1  -4   0 6667.13  196.68 
   1  -4   0 6539.85  205.88 
  -1  -4   0 6748.23  209.48 
   1  -4   0 6803.12  209.08 
  -1  -4   0 6742.73  209.28 
   1  -4   0 6420.96  221.08 
   1  -4   0 6675.13  209.98 
  -1  -4   0 6543.25  199.78 
   1  -4   0 6969.10  202.18 
   1  -4   0 6487.15  206.88 
   1  -4   0 6518.55  205.18 
  -1  -4   0 6659.43  204.68 
  -1  -4   0 6752.82  206.98 
  -1  -4   0 6717.13  205.88 
  -1  -4   0 6604.94  202.68 
   1  -4   0 6993.10  205.78 
   1  -4   0 6173.68  213.68 
   1  -4   0 6607.44  205.88 
   1  -4   0 6657.53  202.08 
  -1  -4   0 6608.64  204.98 
   1   4   0 6705.73  208.78 
   1   4   0 6419.46  204.38 
   1   4   0 6637.04  202.38 
  -1   4   0 6642.83  199.88 
   1   4   0 6411.66  215.48 
  -1   4   0 6549.74  206.48 
   1   4   0 6669.73  210.48 
   1   4   0 6744.63  205.48 
  -1   4   0 6310.27  202.08 
   1   4   0 6871.01  195.98 
  -1   4   0 6668.03  212.68 
   1   4   0 6688.03  207.28 
  -1   4   0 6916.61  203.68 
   1   4   0 6510.65  203.08 
   1   4   0 6581.24  208.68 
  -1   4   0 6788.42  199.78 
  -1   4   0 6932.11  205.18 
   1   4   0 6570.34  213.18 
  -1   4   0 6572.24  207.08 
   2  -4   0   20.80    6.50 
  -2  -4   0   28.00    8.40 
   2  -4   0   19.80   11.90 
   2  -4   0   31.00    7.40 
   2  -4   0   14.60    6.50 
   2  -4   0   18.50   11.20 
  -2  -4   0   28.10    9.60 
  -2  -4   0   11.20    6.20 
  -2  -4   0   25.50    9.20 
  -2  -4   0   17.30    6.10 
  -2  -4   0   35.00    9.60 
   2  -4   0   14.70    7.20 
   2  -4   0   14.80    5.50 
   2  -4   0   23.90    6.90 
   2  -4   0    8.60    7.60 
   2  -4   0   10.70    5.40 
   2  -4   0   28.00    6.90 
  -2  -4   0   14.00    5.70 
  -2  -4   0    8.80    5.80 
  -2  -4   0   11.00    6.20 
   2  -4   0   20.00    7.40 
   2  -4   0   18.90    2.80 
  -2  -4   0   13.80    6.30 
  -2  -4   0   14.70    6.50 
   2  -4   0   14.70    6.50 
  -2  -4   0   30.40    7.90 
   2  -4   0   22.10    9.50 
   2  -4   0   25.80   10.30 
   2   4   0   17.10    7.50 
  -2   4   0   21.90    4.70 
  -2   4   0   22.10    9.50 
   2   4   0   28.10   12.50 
   2   4   0   17.70    5.70 
   2   4   0   24.40    9.00 
  -2   4   0   12.40    5.50 
   2   4   0   12.00    6.30 
  -2   4   0   17.80    6.50 
   2   4   0   12.90    6.20 
   2   4   0   21.80    8.10 
  -2   4   0   12.90    6.60 
  -2   4   0   13.10    5.90 
  -2   4   0    9.90    7.10 
  -2   4   0   17.00    5.40 
  -2   4   0   23.40    7.80 
   2   4   0   21.40    8.80 
  -2   4   0   19.50    5.40 
   3  -4   0  641.14   29.40 
   3  -4   0  553.94   33.20 
   3  -4   0  595.44   27.30 
  -3  -4   0  632.54   30.50 
   3  -4   0  576.84   38.60 
   3  -4   0  704.23   44.80 
  -3  -4   0  572.64   30.70 
   3  -4   0  615.74   29.00 
   3  -4   0  638.34   25.80 
  -3  -4   0  636.04   40.80 
   3  -4   0  620.84   28.40 
  -3  -4   0  626.34   35.80 
  -3  -4   0  581.84   31.70 
   3  -4   0  667.73   37.10 
  -3  -4   0  618.74   29.50 
  -3  -4   0  621.94   32.50 
  -3  -4   0  631.34   36.00 
   3  -4   0  609.64   31.50 
   3  -4   0  606.54   32.00 
  -3  -4   0  550.24   29.80 
  -3  -4   0  595.24   31.80 
   3  -4   0  605.24   22.60 
   3  -4   0  674.03   33.30 
   3  -4   0  621.74   35.90 
  -3  -4   0  614.74   32.90 
   3  -4   0  618.84   41.70 
   3  -4   0  665.83   30.10 
  -3  -4   0  609.84   32.20 
   3  -4   0  596.74   26.70 
  -3  -4   0  638.54   31.70 
   3   4   0  581.64   32.10 
   3   4   0  661.73   30.60 
   3   4   0  607.14   27.80 
   3   4   0  516.75   41.20 
   3   4   0  583.04   35.70 
  -3   4   0  614.04   33.60 
  -3   4   0  609.74   29.70 
  -3   4   0  592.54   29.40 
  -3   4   0  640.34   27.40 
  -3   4   0  616.64   29.90 
  -3   4   0  535.25   31.90 
   3   4   0  656.03   35.00 
   3   4   0  659.53   31.30 
  -3   4   0  620.74   26.30 
  -3   4   0  618.04   36.40 
   3   4   0  584.94   34.30 
  -3   4   0  622.04   22.60 
  -3   4   0  595.64   39.50 
   3   4   0  599.84   38.00 
  -3   4   0  595.34   31.30 
   3   4   0  594.84   32.10 
   3   4   0  651.83   41.90 
  -3   4   0  585.64   26.90 
  -4  -4   0   25.50   10.90 
   4  -4   0   40.90    8.60 
  -4  -4   0   23.70    8.50 
  -4  -4   0   37.40    8.40 
  -4  -4   0   12.30    7.00 
   4  -4   0   41.60   10.70 
  -4  -4   0   27.00    9.40 
   4  -4   0   10.10    9.30 
  -4  -4   0   22.90    7.90 
   4  -4   0   50.39   14.70 
  -4  -4   0   23.70    8.80 
   4  -4   0   30.70    9.60 
   4  -4   0   36.40   15.90 
   4  -4   0   21.10    8.40 
   4  -4   0    7.50   12.70 
   4  -4   0   17.60    7.60 
   4  -4   0   29.30    5.90 
  -4  -4   0   12.40    8.60 
   4  -4   0   30.80   12.10 
   4  -4   0   31.50    6.20 
   4  -4   0   34.40    7.70 
  -4  -4   0   25.00    8.20 
   4  -4   0   27.70    5.10 
  -4  -4   0   19.20   11.90 
  -4  -4   0   19.50    8.90 
  -4  -4   0   22.10    8.40 
   4  -4   0   20.20    8.50 
  -4  -4   0   35.50    8.70 
   4  -4   0   32.10    5.00 
   4   4   0   25.20    7.50 
   4   4   0   20.10   10.60 
   4   4   0   25.90    9.40 
  -4   4   0   21.00    7.80 
   4   4   0   29.00   13.30 
  -4   4   0   32.80    8.00 
  -4   4   0   27.90    3.00 
  -4   4   0   28.40    5.20 
  -4   4   0   35.70    7.80 
   4   4   0   19.40    7.80 
  -4   4   0   18.90    7.40 
  -4   4   0   20.50   11.10 
   4   4   0   25.80   10.60 
   4   4   0   21.20    6.80 
  -4   4   0   27.50    9.80 
  -4   4   0   26.60   11.80 
   4   4   0   31.40    6.90 
   4   4   0   34.40   14.20 
   4   4   0   20.20   10.10 
   4   4   0   31.50   10.20 
  -4   4   0   35.50    6.30 
   4   4   0   33.80   10.60 
  -4   4   0   38.10   10.70 
  -4   4   0   19.70    5.60 
  -4   4   0   25.70    8.50 
  -5  -4   0  640.54   40.50 
  -5  -4   0  629.44   37.40 
   5  -4   0  608.04   40.70 
  -5  -4   0  713.03   39.10 
  -5  -4   0  677.33   37.30 
   5  -4   0  639.24   30.70 
   5  -4   0  705.43   47.50 
   5  -4   0  627.14   35.50 
  -5  -4   0  693.93   30.90 
   5  -4   0  642.74   25.50 
  -5  -4   0  636.24   34.00 
  -5  -4   0  682.73   36.40 
  -5  -4   0  641.44   38.60 
  -5  -4   0  694.43   47.10 
  -5  -4   0  680.23   36.90 
  -5  -4   0  676.23   33.30 
   5  -4   0  707.93   52.19 
  -5  -4   0  689.53   36.20 
  -5  -4   0  653.23   36.70 
   5  -4   0  640.44   43.60 
  -5  -4   0  648.04   41.50 
   5  -4   0  630.94   35.30 
  -5  -4   0  720.13   39.80 
   5  -4   0  653.23   37.10 
   5   4   0  654.73   29.30 
  -5   4   0  711.13   40.70 
   5   4   0  622.74   46.20 
   5   4   0  689.43   39.30 
   5   4   0  619.54   30.50 
   5   4   0  653.43   35.40 
   5   4   0  654.73   44.30 
  -5   4   0  663.03   29.10 
   5   4   0  664.73   40.70 
  -5   4   0  736.33   35.90 
   5   4   0  612.64   26.20 
  -5   4   0  665.53   28.20 
   5   4   0  647.04   43.70 
   5   4   0  637.34   39.20 
  -5   4   0  656.43   25.10 
  -5   4   0  671.03   37.10 
  -5   4   0  622.14   28.60 
  -5   4   0  601.94   39.20 
  -5   4   0  575.84   40.10 
   5   4   0  562.84   36.70 
   5   4   0  598.94   41.10 
  -5   4   0  661.63   46.70 
  -5   4   0  644.24   34.20 
  -5   4   0  647.04   32.20 
   5   4   0  630.04   42.50 
   5   4   0  625.74   49.50 
  -6  -4   0  273.37   29.30 
  -6  -4   0  214.58   15.90 
  -6  -4   0  198.68   31.90 
   6  -4   0  151.08   24.40 
   6  -4   0  193.98   23.40 
   6  -4   0  200.28   32.10 
  -6  -4   0  168.08   22.70 
  -6  -4   0  166.68   23.60 
  -6  -4   0  192.58   26.30 
  -6  -4   0  192.48   24.30 
   6  -4   0  207.08   35.30 
  -6  -4   0  147.09   23.10 
  -6  -4   0  188.08   20.90 
  -6  -4   0  179.08   21.80 
   6  -4   0  213.38   39.80 
  -6  -4   0  222.48   23.50 
  -6  -4   0  171.78   26.30 
   6  -4   0  183.38   30.90 
  -6  -4   0  185.68   24.70 
   6  -4   0  217.48   24.30 
  -6  -4   0  205.58   15.40 
  -6  -4   0  143.39   20.00 
   6  -4   0  237.48   24.90 
  -6  -4   0  174.78   18.70 
  -6   4   0  173.28   25.30 
   6   4   0  209.18   31.00 
   6   4   0  257.37   35.20 
  -6   4   0  268.77   24.60 
  -6   4   0  189.58   18.60 
  -6   4   0  205.48   20.50 
   6   4   0  202.48   26.00 
  -6   4   0  216.68   15.50 
  -6   4   0  214.38   32.80 
  -6   4   0  200.48   28.40 
  -6   4   0  238.88   25.00 
   6   4   0  227.58   35.70 
   6   4   0  203.38   29.60 
   6   4   0  211.88   26.50 
  -6   4   0  196.68   29.00 
   6   4   0  178.08   21.80 
  -6   4   0  233.48   21.40 
  -6   4   0  180.38   25.70 
   6   4   0  247.18   35.20 
   6   4   0  175.98   33.50 
  -6   4   0  270.57   28.90 
   6   4   0  231.98   30.30 
   6   4   0  248.98   29.00 
   7  -4   0 1013.80   65.89 
   7  -4   0 1007.00   57.39 
  -7  -4   0 1033.90   47.20 
  -7  -4   0 1043.50   44.60 
  -7  -4   0  962.70   64.99 
   7  -4   0  930.21   72.49 
   7  -4   0  961.50   50.59 
  -7  -4   0  972.80   57.79 
  -7  -4   0 1014.10   53.59 
  -7  -4   0 1090.99   56.19 
  -7  -4   0  908.71   57.79 
  -7  -4   0  989.70   55.09 
   7  -4   0  847.92   49.20 
  -7  -4   0  963.40   49.30 
  -7  -4   0 1015.20   56.19 
  -7  -4   0 1092.79   52.89 
  -7  -4   0 1103.69   54.49 
  -7  -4   0 1097.59   50.89 
   7  -4   0 1066.39   71.99 
  -7  -4   0  990.30   56.49 
  -7  -4   0  927.41   58.39 
   7  -4   0 1047.80   69.59 
  -7   4   0  918.41   59.69 
   7   4   0 1018.10   58.39 
  -7   4   0  950.70   57.39 
  -7   4   0 1052.99   47.40 
  -7   4   0  950.40   56.59 
   7   4   0  949.21   67.99 
  -7   4   0  989.40   57.09 
  -7   4   0 1017.50   65.99 
   7   4   0  950.50   54.69 
   7   4   0 1117.49   73.59 
  -7   4   0 1008.90   50.09 
   7   4   0 1114.59   67.59 
   7   4   0 1036.70   49.40 
   7   4   0  924.21   55.59 
   7   4   0  908.91   55.59 
  -7   4   0 1025.60   55.59 
   7   4   0 1041.40   65.39 
   7   4   0  959.40   58.79 
  -7   4   0  989.80   50.69 
   7   4   0 1041.40   64.79 
   8  -4   0  148.29   32.40 
   8  -4   0   82.49   18.70 
  -8  -4   0  124.89   25.40 
  -8  -4   0  129.59   27.10 
  -8  -4   0   77.39   19.50 
  -8  -4   0  128.39   21.70 
  -8  -4   0  160.78   24.20 
   8  -4   0   82.09   30.40 
  -8  -4   0  152.68   26.10 
  -8  -4   0  121.79   19.60 
   8  -4   0  130.89   21.50 
  -8  -4   0  173.38   30.30 
  -8  -4   0  108.39   21.90 
  -8  -4   0  129.19   25.40 
  -8  -4   0  131.89   30.70 
   8  -4   0  130.39   34.20 
   8  -4   0  137.39   25.90 
  -8  -4   0  164.08   29.50 
   8  -4   0   93.89   27.60 
  -8   4   0  115.49   29.30 
   8   4   0  181.68   36.10 
   8   4   0  115.29   30.90 
   8   4   0  144.19   28.60 
  -8   4   0  134.69   26.40 
   8   4   0  147.79   30.10 
   8   4   0  131.69   27.00 
   8   4   0  128.49   30.10 
   8   4   0  156.08   28.00 
  -8   4   0  138.79   26.90 
  -8   4   0  205.38   34.30 
  -8   4   0  166.08   29.00 
  -9  -4   0  105.89   28.00 
  -9  -4   0   98.09   26.30 
   9  -4   0   29.60   24.10 
  -9  -4   0   90.39   23.40 
  -9  -4   0  110.59   22.40 
  -9  -4   0   94.89   24.50 
   9  -4   0  102.09   31.40 
   9  -4   0   76.69   19.40 
  -9  -4   0   87.59   25.60 
   9  -4   0   98.09   30.60 
  -9  -4   0   63.39   20.80 
   9  -4   0  150.18   40.00 
  -9  -4   0  115.39   26.40 
  -9  -4   0   84.79   24.50 
  -9  -4   0  113.89   32.20 
   9  -4   0  103.89   24.80 
  -9   4   0   95.89   24.60 
  -9   4   0   80.99   25.70 
   9   4   0   70.29   21.70 
   9   4   0   88.69   29.90 
   9   4   0   79.29   27.10 
  -9   4   0  112.09   26.90 
  -9   4   0  107.19   31.40 
   9   4   0   50.69   25.70 
   9   4   0  113.29   31.70 
  -9   4   0   76.49   23.30 
   9   4   0  121.69   32.40 
   0  -5   0   -5.00    4.50 
   0  -5   0    4.80    5.60 
   0  -5   0    1.70    7.50 
   0  -5   0   -0.50    5.50 
   0  -5   0    2.20    5.10 
   0  -5   0    3.70    5.30 
   0  -5   0   -0.20    6.80 
   0  -5   0    2.40    4.50 
   0  -5   0   -2.80    2.60 
   0  -5   0    0.00    3.60 
   0  -5   0    9.40    5.70 
   0   5   0    7.80    6.90 
   0   5   0    4.70    7.40 
   0   5   0   -0.80    3.00 
   0   5   0    9.30    5.70 
   0   5   0    4.70    6.90 
   0   5   0    1.60    6.60 
   0   5   0   -4.60    5.60 
   0   5   0    3.00    4.30 
   0   5   0    1.30    4.30 
   0   5   0    5.10    6.00 
   1  -5   0   45.90   13.00 
   1  -5   0   41.50   10.30 
   1  -5   0   40.70    8.90 
  -1  -5   0   42.60   10.40 
   1  -5   0   33.30    9.00 
  -1  -5   0   55.19   11.50 
  -1  -5   0   42.80    8.20 
  -1  -5   0   50.99   12.00 
   1  -5   0   31.40    9.40 
  -1  -5   0   39.20   10.40 
  -1  -5   0   36.50   10.00 
   1  -5   0   47.20    7.10 
   1  -5   0   44.00   10.90 
  -1  -5   0   40.90    9.50 
   1  -5   0   27.70   12.90 
  -1  -5   0   58.09   12.50 
  -1  -5   0   46.80   12.00 
   1  -5   0   44.50   16.70 
  -1  -5   0   40.90   10.40 
   1  -5   0   43.10   10.00 
   1  -5   0   39.80   11.50 
  -1   5   0   37.20    8.60 
  -1   5   0   53.79   12.80 
   1   5   0   33.20    8.90 
   1   5   0   30.30    8.80 
  -1   5   0   46.90   11.00 
  -1   5   0   39.60    9.70 
  -1   5   0   52.09   13.80 
   1   5   0   56.59   12.10 
  -1   5   0   39.20    8.70 
   1   5   0   44.70   13.30 
  -1   5   0   43.00    8.40 
   1   5   0   41.80   11.60 
   1   5   0   59.59   14.70 
   1   5   0   33.40   10.40 
   1   5   0   36.30    9.50 
  -1   5   0   25.70    9.00 
   1   5   0   45.10   12.00 
   1   5   0   50.69    6.90 
   2  -5   0   22.70    8.30 
  -2  -5   0   15.50    7.50 
  -2  -5   0   22.80    9.50 
   2  -5   0   41.50    9.00 
   2  -5   0   28.50    8.50 
  -2  -5   0   22.10    8.40 
  -2  -5   0   26.90    8.30 
   2  -5   0   29.30    4.50 
   2  -5   0   15.80    8.00 
  -2  -5   0   29.40    7.30 
   2  -5   0   22.00    9.90 
   2  -5   0   12.00   12.50 
  -2  -5   0   39.00   10.30 
  -2  -5   0   23.00    8.40 
   2  -5   0   11.40   11.80 
  -2  -5   0   20.80    9.00 
   2  -5   0   24.60    7.20 
   2  -5   0   21.60   10.10 
  -2  -5   0   35.80    9.60 
   2  -5   0   32.10    7.90 
   2  -5   0   32.40    9.40 
  -2  -5   0   28.90    8.60 
  -2   5   0   32.00    9.20 
  -2   5   0   27.10    6.10 
  -2   5   0   22.50    6.00 
  -2   5   0   31.50   10.80 
   2   5   0   19.80    8.20 
   2   5   0   46.00   15.70 
   2   5   0   26.90    7.60 
  -2   5   0   28.80   10.10 
  -2   5   0   33.40   10.00 
   2   5   0   14.60    8.70 
   2   5   0   11.50    8.10 
  -2   5   0   33.80    7.80 
   2   5   0   31.00    9.60 
   2   5   0   23.30    7.70 
  -2   5   0   18.70    7.30 
   2   5   0   17.80    9.70 
   2   5   0   19.90   11.10 
  -3  -5   0  -10.10    4.50 
   3  -5   0   13.70    8.10 
   3  -5   0   -0.60    5.60 
  -3  -5   0   -3.50    6.70 
  -3  -5   0    3.40    7.30 
   3  -5   0   -5.50    5.60 
   3  -5   0    2.20    5.60 
   3  -5   0  -12.50   11.00 
   3  -5   0   -9.40    6.10 
   3  -5   0   -0.80    2.80 
   3  -5   0   -1.00   10.20 
  -3  -5   0   -0.60    6.30 
   3  -5   0   -1.30   11.40 
  -3  -5   0    3.70    5.90 
  -3  -5   0   -4.90    6.00 
   3  -5   0    3.00    3.40 
   3  -5   0    5.00    6.80 
   3  -5   0    0.50    5.30 
  -3  -5   0    2.90    7.10 
  -3  -5   0   -3.50    5.80 
  -3  -5   0   -0.50    7.30 
  -3  -5   0    0.80    6.80 
   3  -5   0    4.70    7.40 
  -3  -5   0    9.50    7.90 
  -3   5   0   -0.10    7.20 
  -3   5   0    2.00    5.70 
  -3   5   0    1.10    6.20 
  -3   5   0    0.40    4.60 
   3   5   0  -11.30    7.00 
   3   5   0    9.70   11.80 
   3   5   0    6.00    9.60 
   3   5   0   -4.10    4.60 
  -3   5   0   -3.60    4.80 
   3   5   0   -1.50    7.20 
   3   5   0    2.60    7.50 
  -3   5   0    3.80    4.70 
   3   5   0   -4.30    5.30 
  -3   5   0    2.40    3.30 
  -3   5   0   -2.40    8.40 
   3   5   0    2.40    7.80 
   3   5   0   16.80   13.20 
  -3   5   0    3.80    6.50 
   3   5   0   -0.60    6.10 
  -3   5   0   -2.50    6.20 
   4  -5   0  586.54   31.50 
  -4  -5   0  539.65   31.60 
   4  -5   0  580.04   19.80 
  -4  -5   0  579.04   30.90 
   4  -5   0  457.65   53.89 
   4  -5   0  595.54   44.90 
   4  -5   0  530.55   34.50 
   4  -5   0  606.54   31.60 
  -4  -5   0  636.84   46.90 
   4  -5   0  548.95   39.60 
   4  -5   0  563.84   55.79 
   4  -5   0  604.54   30.40 
   4  -5   0  577.74   43.60 
  -4  -5   0  583.14   34.70 
  -4  -5   0  652.23   37.50 
  -4  -5   0  589.04   39.10 
   4  -5   0  563.24   36.00 
  -4  -5   0  552.44   33.50 
   4  -5   0  549.95   27.10 
   4  -5   0  559.74   25.50 
   4  -5   0  545.65   34.50 
  -4  -5   0  590.84   35.70 
  -4  -5   0  540.85   33.50 
  -4  -5   0  560.24   31.90 
  -4  -5   0  573.04   38.40 
  -4  -5   0  587.34   34.10 
  -4  -5   0  632.04   36.20 
  -4   5   0  559.14   30.70 
   4   5   0  561.14   34.50 
  -4   5   0  624.34   28.40 
  -4   5   0  611.74   31.70 
   4   5   0  566.04   30.90 
   4   5   0  559.24   41.50 
  -4   5   0  535.45   39.00 
   4   5   0  546.95   37.80 
  -4   5   0  550.44   33.00 
  -4   5   0  615.74   43.70 
   4   5   0  601.44   50.19 
  -4   5   0  535.45   35.70 
   4   5   0  594.24   47.10 
  -4   5   0  553.74   35.80 
  -4   5   0  591.34   26.60 
   4   5   0  547.35   38.90 
   4   5   0  565.04   35.10 
  -4   5   0  621.04   32.60 
   4   5   0  581.34   30.40 
  -4   5   0  550.34   20.80 
  -5  -5   0   -0.90    7.50 
   5  -5   0   14.10    8.10 
   5  -5   0   12.70   12.30 
  -5  -5   0   10.30   10.10 
  -5  -5   0    3.50    9.70 
   5  -5   0   -1.80    8.10 
  -5  -5   0   10.10    8.60 
  -5  -5   0    2.30    7.70 
  -5  -5   0   14.80    8.40 
   5  -5   0   13.80   12.50 
  -5  -5   0   10.40   12.70 
  -5  -5   0    7.60    9.30 
   5  -5   0  -18.60   11.30 
   5  -5   0   10.00   18.00 
  -5  -5   0    9.50    8.90 
  -5  -5   0    1.10    6.00 
  -5  -5   0    3.50    8.50 
   5  -5   0    7.80   11.50 
   5  -5   0    2.80    7.70 
  -5  -5   0    7.20    9.50 
  -5  -5   0    5.10    6.90 
   5  -5   0    6.60    7.50 
  -5   5   0   28.00   12.30 
  -5   5   0    4.40    7.30 
   5   5   0   17.80   15.40 
   5   5   0   -2.30    8.80 
   5   5   0    7.90   10.70 
   5   5   0   16.10    7.50 
  -5   5   0    0.10    8.90 
  -5   5   0    6.50    7.10 
  -5   5   0   -0.80    5.30 
  -5   5   0   13.50    7.00 
  -5   5   0   13.00   10.00 
   5   5   0    3.10    9.60 
  -5   5   0   19.10   13.80 
  -5   5   0    4.20    6.70 
  -5   5   0    4.30    7.20 
   5   5   0   -1.40   10.20 
   5   5   0   -7.00   10.40 
   5   5   0    0.90    8.80 
   5   5   0   14.80    7.60 
   5   5   0    6.30    8.40 
   5   5   0    9.50   11.10 
  -5   5   0    1.40    4.60 
  -6  -5   0 2017.10   76.49 
   6  -5   0 2010.70   99.19 
  -6  -5   0 1956.80   84.49 
   6  -5   0 1917.11   88.49 
  -6  -5   0 1837.22   77.09 
  -6  -5   0 2073.49   81.39 
   6  -5   0 2107.89   98.49 
  -6  -5   0 1837.62   84.39 
   6  -5   0 2014.60   79.49 
  -6  -5   0 1830.92   95.49 
  -6  -5   0 2032.30   90.69 
  -6  -5   0 2048.50   78.69 
   6  -5   0 1992.10   84.19 
  -6  -5   0 1946.81   80.59 
  -6  -5   0 1994.80   89.09 
   6  -5   0 1712.03  105.99 
  -6  -5   0 1854.51   81.49 
   6  -5   0 1866.81   80.49 
  -6  -5   0 1840.52   82.79 
  -6  -5   0 1849.42   71.29 
  -6  -5   0 1857.41   83.39 
   6  -5   0 1851.91  102.79 
   6   5   0 1936.21   85.49 
   6   5   0 1877.61   84.39 
   6   5   0 1920.41   92.69 
  -6   5   0 1797.12   94.49 
   6   5   0 1974.80   93.59 
   6   5   0 1925.31   79.89 
  -6   5   0 2038.30   77.29 
   6   5   0 1871.01   92.49 
   6   5   0 1924.01   88.99 
   6   5   0 1964.90  106.99 
   6   5   0 1780.12   92.29 
  -6   5   0 1997.60   71.89 
  -6   5   0 1928.21   87.39 
  -6   5   0 1982.20   72.69 
   6   5   0 1966.90   69.69 
  -6   5   0 2056.89   77.49 
  -6   5   0 1956.00   86.49 
  -6   5   0 1981.50   78.49 
  -6   5   0 1941.31   91.09 
  -6   5   0 1924.61   87.09 
  -6   5   0 1907.61   75.29 
   6   5   0 1963.60  100.69 
  -7  -5   0   14.90    9.50 
   7  -5   0    5.00    9.00 
  -7  -5   0    5.70   11.10 
   7  -5   0    9.80   12.40 
  -7  -5   0    1.90    9.10 
  -7  -5   0   18.60   12.50 
  -7  -5   0   15.80   10.50 
   7  -5   0    8.00   14.10 
   7  -5   0    8.20   19.10 
  -7  -5   0   21.50   14.40 
   7  -5   0    0.60    9.10 
  -7  -5   0   11.00   10.10 
  -7  -5   0    7.60    8.20 
  -7  -5   0   12.80   12.00 
  -7  -5   0    0.90   11.30 
  -7  -5   0    6.70   13.60 
  -7  -5   0   18.20   14.50 
   7  -5   0   -5.20   12.90 
   7  -5   0    2.40   18.60 
  -7  -5   0   18.90   12.00 
   7   5   0    6.30    9.20 
   7   5   0   18.10   14.10 
  -7   5   0   25.20   15.10 
   7   5   0   23.10   16.30 
   7   5   0    4.00   12.00 
  -7   5   0   34.60   14.90 
   7   5   0   10.30   19.00 
   7   5   0   40.30   19.90 
   7   5   0    3.40   13.50 
   7   5   0   -8.10   11.30 
  -7   5   0    0.30    9.50 
  -7   5   0   20.10    9.90 
   7   5   0   23.20   19.10 
  -7   5   0   30.60   17.60 
  -7   5   0   18.00   12.90 
   8  -5   0  516.95   63.09 
   8  -5   0  609.34   67.79 
  -8  -5   0  584.24   46.70 
  -8  -5   0  569.94   44.10 
  -8  -5   0  532.75   56.19 
  -8  -5   0  652.03   51.39 
  -8  -5   0  650.83   47.90 
   8  -5   0  552.04   41.20 
  -8  -5   0  589.64   45.70 
   8  -5   0  467.35   66.39 
  -8  -5   0  592.64   43.20 
  -8  -5   0  561.04   63.69 
  -8  -5   0  632.54   48.30 
   8  -5   0  514.95   44.70 
  -8  -5   0  615.14   59.69 
  -8  -5   0  580.14   39.80 
   8  -5   0  468.45   63.39 
   8   5   0  554.94   65.99 
  -8   5   0  669.23   69.89 
  -8   5   0  640.34   51.19 
   8   5   0  561.14   64.09 
  -8   5   0  599.84   47.60 
   8   5   0  521.55   55.59 
   8   5   0  592.54   65.29 
  -8   5   0  620.64   47.40 
   8   5   0  659.93   54.59 
  -8   5   0  621.94   49.20 
   8   5   0  702.03   51.49 
   8   5   0  620.34   73.79 
  -9  -5   0  -17.50   10.40 
  -9  -5   0   25.00   18.10 
  -9  -5   0    0.10   12.30 
   9  -5   0   17.10   21.10 
   9  -5   0  -23.30   14.90 
  -9  -5   0    7.40   11.40 
  -9  -5   0    7.10   14.70 
  -9  -5   0    9.50   16.10 
   9  -5   0    4.50   21.50 
   9  -5   0   -3.80   18.90 
  -9  -5   0   22.80   18.10 
  -9  -5   0   21.40   14.60 
  -9  -5   0   16.80   16.80 
  -9   5   0   -7.90   12.20 
   9   5   0   -0.70   17.00 
   9   5   0   -0.90   18.20 
  -9   5   0   31.50   20.30 
  -9   5   0   19.30   16.80 
  -9   5   0   18.40   16.70 
  -9   5   0   19.70   18.70 
   9   5   0    6.20   22.30 
   9   5   0    9.20   16.20 
   9   5   0   -6.70   19.60 
   0  -6   0  787.12   41.90 
   0  -6   0  788.02   46.10 
   0  -6   0  761.32   41.90 
   0  -6   0  839.82   40.60 
   0  -6   0  770.02   32.20 
   0  -6   0  825.22   44.70 
   0  -6   0  825.02   46.50 
   0  -6   0  793.02   41.70 
   0  -6   0  799.02   42.80 
   0  -6   0  844.12   36.60 
   0  -6   0  796.42   48.40 
   0   6   0  852.11   43.80 
   0   6   0  852.31   50.29 
   0   6   0  868.71   46.00 
   0   6   0  867.91   36.60 
   0   6   0  835.92   45.00 
   0   6   0  850.11   38.50 
   0   6   0  874.81   47.90 
   0   6   0  803.92   41.90 
   0   6   0  834.32   41.30 
   0   6   0  932.31   48.40 
  -1  -6   0 2381.46   90.69 
  -1  -6   0 2541.85   97.09 
  -1  -6   0 2346.97   94.99 
   1  -6   0 2467.85   95.99 
   1  -6   0 2418.06   96.29 
   1  -6   0 2497.85   86.69 
  -1  -6   0 2448.26   81.19 
  -1  -6   0 2428.16   85.29 
   1  -6   0 2429.56   91.49 
  -1  -6   0 2331.07   90.09 
   1  -6   0 2470.85  103.99 
  -1  -6   0 2301.27   84.49 
   1  -6   0 2260.87  108.69 
  -1  -6   0 2386.16   91.89 
  -1  -6   0 2418.36   88.59 
   1  -6   0 2461.45   90.79 
  -1  -6   0 2387.36   89.69 
   1  -6   0 2339.87   91.99 
   1  -6   0 2216.88   87.99 
  -1  -6   0 2243.58   88.29 
   1  -6   0 2377.26   79.29 
  -1   6   0 2481.65   90.29 
   1   6   0 2342.97   77.39 
  -1   6   0 2522.55   93.59 
  -1   6   0 2391.36   85.29 
   1   6   0 2399.86   99.39 
   1   6   0 2327.17   85.59 
  -1   6   0 2481.15   93.09 
  -1   6   0 2500.35   87.29 
   1   6   0 2125.09   93.89 
  -1   6   0 2530.65   95.79 
   1   6   0 2239.28   92.49 
   1   6   0 2139.79   92.49 
   1   6   0 2245.48   85.99 
   1   6   0 2238.48   90.79 
   1   6   0 2383.46  103.19 
  -1   6   0 2413.16   97.99 
   1   6   0 2372.16   89.49 
  -1   6   0 2380.06   82.59 
  -1   6   0 2362.16   90.99 
   2  -6   0  368.26   27.20 
   2  -6   0  393.96   29.80 
  -2  -6   0  352.46   24.80 
   2  -6   0  354.56   27.90 
   2  -6   0  383.46   47.00 
   2  -6   0  349.67   22.40 
  -2  -6   0  368.46   25.20 
  -2  -6   0  463.05   33.60 
   2  -6   0  327.97   23.10 
  -2  -6   0  384.06   27.70 
  -2  -6   0  403.86   29.70 
   2  -6   0  340.97   16.90 
  -2  -6   0  374.76   23.70 
  -2  -6   0  399.46   28.90 
   2  -6   0  395.46   27.20 
   2  -6   0  345.87   35.30 
   2  -6   0  313.57   33.30 
  -2  -6   0  403.66   27.70 
   2  -6   0  294.57   39.40 
  -2  -6   0  369.46   27.70 
  -2  -6   0  323.07   25.00 
   2   6   0  342.57   27.60 
  -2   6   0  352.46   27.40 
  -2   6   0  339.17   25.70 
   2   6   0  337.87   37.30 
   2   6   0  428.16   32.60 
  -2   6   0  368.66   27.40 
  -2   6   0  363.96   26.10 
  -2   6   0  321.97   26.70 
   2   6   0  380.46   15.80 
   2   6   0  392.76   27.20 
  -2   6   0  352.76   21.10 
   2   6   0  396.56   25.30 
  -2   6   0  299.87   33.40 
  -2   6   0  328.57   23.00 
   2   6   0  333.87   33.10 
   2   6   0  407.06   26.60 
   2   6   0  331.37   35.20 
  -2   6   0  367.46   29.00 
   2   6   0  375.56   43.20 
  -3  -6   0  238.28   24.50 
   3  -6   0  187.78   34.30 
   3  -6   0  234.38   24.50 
   3  -6   0  179.98   27.30 
  -3  -6   0  200.28   21.90 
  -3  -6   0  204.88   23.90 
   3  -6   0  185.68   23.60 
   3  -6   0  175.58   26.50 
  -3  -6   0  239.68   27.70 
   3  -6   0  246.18   27.00 
  -3  -6   0  213.88   27.90 
   3  -6   0  235.68   27.20 
  -3  -6   0  227.78   24.10 
   3  -6   0  206.18   33.20 
   3  -6   0  193.28   21.20 
  -3  -6   0  194.68   23.50 
  -3  -6   0  205.08   23.60 
  -3  -6   0  181.38   20.50 
  -3  -6   0  229.98   28.50 
   3  -6   0  234.68   23.60 
  -3   6   0  218.08   25.20 
   3   6   0  236.88   34.60 
  -3   6   0  216.28   23.40 
   3   6   0  183.08   23.50 
   3   6   0  170.98   22.10 
  -3   6   0  229.68   16.80 
  -3   6   0  225.18   26.10 
  -3   6   0  221.38   20.20 
   3   6   0  217.08   24.50 
   3   6   0  166.58   24.60 
   3   6   0  241.28   30.00 
   3   6   0  238.08   30.90 
  -3   6   0  192.78   25.00 
   3   6   0  248.08   39.10 
   3   6   0  220.88   21.40 
  -3   6   0  209.58   28.00 
  -3   6   0  187.48   23.10 
  -3   6   0  260.97   26.10 
  -4  -6   0    2.50   11.00 
   4  -6   0   31.50   23.40 
  -4  -6   0   26.80   10.90 
   4  -6   0   11.30   12.00 
   4  -6   0   17.10    9.70 
   4  -6   0   35.20   16.50 
  -4  -6   0   17.90    8.60 
  -4  -6   0   27.90   10.50 
  -4  -6   0   40.60   12.30 
  -4  -6   0   14.90    9.40 
   4  -6   0    2.00    7.30 
   4  -6   0   35.90   18.40 
  -4  -6   0   10.60   10.90 
  -4  -6   0   17.50    8.10 
   4  -6   0   40.90   14.50 
   4  -6   0   15.10   17.00 
   4  -6   0   45.20   13.70 
  -4  -6   0   42.50   13.70 
  -4  -6   0   26.30   11.10 
   4  -6   0   14.50    9.60 
  -4   6   0   14.50    8.60 
  -4   6   0   15.60    8.30 
  -4   6   0   32.00    9.40 
  -4   6   0   22.30    8.10 
   4   6   0   14.20   10.10 
  -4   6   0   10.30    9.20 
   4   6   0   39.30   14.70 
   4   6   0   25.20   10.50 
  -4   6   0   14.20    9.90 
  -4   6   0    9.00    7.90 
   4   6   0   13.90   14.30 
  -4   6   0   22.10   11.40 
   4   6   0   34.10   16.00 
   4   6   0   35.30   16.70 
   4   6   0   52.69   11.20 
   4   6   0   31.20   13.40 
  -4   6   0   12.90   11.20 
   4   6   0   27.00    9.50 
  -4   6   0   21.00    7.80 
  -5  -6   0  263.57   35.30 
   5  -6   0  227.48   40.90 
   5  -6   0  257.17   38.70 
  -5  -6   0  316.87   36.10 
   5  -6   0  230.58   35.60 
   5  -6   0  251.07   28.20 
  -5  -6   0  291.87   32.10 
  -5  -6   0  214.78   27.90 
   5  -6   0  227.98   28.40 
  -5  -6   0  279.77   29.50 
  -5  -6   0  247.28   27.60 
   5  -6   0  239.68   35.20 
  -5  -6   0  257.97   25.60 
  -5  -6   0  272.57   30.70 
  -5  -6   0  249.97   28.80 
   5  -6   0  170.48   38.80 
  -5  -6   0  220.18   27.40 
  -5  -6   0  262.17   30.20 
  -5   6   0  267.37   25.50 
  -5   6   0  284.77   28.30 
   5   6   0  217.28   33.50 
   5   6   0  228.28   33.50 
  -5   6   0  254.87   25.70 
   5   6   0  281.07   35.90 
  -5   6   0  278.67   35.40 
  -5   6   0  243.28   26.40 
   5   6   0  302.77   47.60 
  -5   6   0  288.47   26.60 
   5   6   0  318.17   38.10 
   5   6   0  268.07   25.60 
  -5   6   0  270.77   32.30 
   5   6   0  232.18   28.60 
   5   6   0  244.18   40.50 
  -5   6   0  296.87   34.60 
   5   6   0  245.78   29.30 
  -5   6   0  300.47   19.70 
   6  -6   0   71.79   27.60 
   6  -6   0   96.99   24.40 
  -6  -6   0  126.49   23.60 
  -6  -6   0   85.49   26.60 
  -6  -6   0  110.09   23.50 
  -6  -6   0  114.69   20.50 
  -6  -6   0  130.79   24.10 
  -6  -6   0   95.79   19.80 
   6  -6   0  113.19   28.20 
   6  -6   0   70.99   29.70 
  -6  -6   0   87.09   22.90 
  -6  -6   0  157.08   23.70 
  -6  -6   0  112.09   20.00 
   6  -6   0   73.89   20.30 
  -6  -6   0  149.09   25.90 
  -6  -6   0  129.19   20.60 
   6  -6   0  112.39   19.60 
  -6  -6   0  104.29   22.90 
  -6  -6   0  158.48   27.40 
   6  -6   0   99.69   26.80 
   6   6   0  128.99   22.90 
  -6   6   0  103.89   18.60 
  -6   6   0   94.99   24.80 
   6   6   0  146.09   37.60 
   6   6   0  125.79   23.00 
  -6   6   0  108.79   23.70 
  -6   6   0  113.89   17.40 
  -6   6   0  106.99   18.00 
   6   6   0  102.19   25.20 
   6   6   0   99.59   25.80 
   6   6   0  109.49   28.60 
   6   6   0   78.09   21.50 
   6   6   0  165.58   35.40 
   6   6   0  140.59   17.20 
   6   6   0  112.79   26.50 
  -6   6   0  124.69   18.70 
   6   6   0  136.49   29.40 
  -6   6   0  110.89   24.10 
  -6   6   0   79.79   22.50 
  -7  -6   0  509.75   55.09 
  -7  -6   0  493.55   48.60 
  -7  -6   0  426.56   45.10 
   7  -6   0  538.85   60.79 
  -7  -6   0  477.75   35.10 
  -7  -6   0  548.15   39.30 
  -7  -6   0  505.15   34.60 
   7  -6   0  427.56   64.29 
   7  -6   0  517.05   69.79 
  -7  -6   0  520.75   52.29 
  -7  -6   0  451.65   45.90 
  -7  -6   0  446.86   33.10 
  -7  -6   0  557.44   53.09 
   7  -6   0  518.05   60.79 
  -7  -6   0  499.35   47.90 
  -7  -6   0  523.75   40.80 
  -7  -6   0  552.24   39.60 
   7  -6   0  454.25   48.90 
  -7  -6   0  566.54   62.69 
  -7   6   0  490.45   50.69 
  -7   6   0  576.14   47.50 
   7   6   0  479.15   54.29 
   7   6   0  594.34   64.19 
  -7   6   0  565.94   46.10 
   7   6   0  534.05   50.29 
   7   6   0  441.56   53.09 
   7   6   0  517.05   55.29 
   7   6   0  520.05   69.09 
   7   6   0  501.45   38.70 
   7   6   0  457.15   60.89 
  -7   6   0  517.65   59.19 
  -8  -6   0   42.10   18.80 
   8  -6   0   43.00   24.40 
  -8  -6   0   25.00   16.30 
  -8  -6   0   45.60   18.50 
  -8  -6   0   65.89   21.90 
  -8  -6   0   43.60   20.60 
   8  -6   0   46.20   28.80 
  -8  -6   0   24.90   15.30 
   8  -6   0   39.00   24.50 
  -8  -6   0   61.19   24.30 
  -8  -6   0   46.60   24.00 
  -8  -6   0   51.89   18.10 
   8  -6   0   57.29   20.40 
   8  -6   0   73.59   31.40 
  -8  -6   0   50.09   16.30 
   8   6   0   69.59   25.10 
   8   6   0   39.10   22.10 
   8   6   0   98.29   34.50 
   8   6   0   37.00   22.20 
   8   6   0   51.79   24.90 
  -8   6   0   40.20   18.90 
  -8   6   0   71.69   22.60 
   8   6   0   37.80   22.40 
  -8   6   0   32.70   17.50 
  -8   6   0   31.20   24.10 
   8   6   0   42.60   17.70 
  -8   6   0   36.90   20.60 
   0  -7   0   -6.50    7.90 
   0  -7   0   -5.90    7.20 
   0  -7   0    4.80   12.80 
   0  -7   0    3.60    7.10 
   0  -7   0   -4.40    6.60 
   0  -7   0   14.10    8.40 
   0  -7   0   -5.30    8.50 
   0  -7   0   -5.00    4.50 
   0  -7   0    1.30    8.50 
   0  -7   0    4.40    5.90 
   0  -7   0   -4.20    3.80 
   0   7   0    0.70    8.70 
   0   7   0    4.60   12.30 
   0   7   0  -13.50    8.90 
   0   7   0   -3.90    8.00 
   0   7   0    2.10    6.00 
   0   7   0    1.00    8.10 
   0   7   0   -4.30    4.20 
   0   7   0   -1.00    7.40 
   0   7   0    4.60   10.60 
   0   7   0   -1.10    7.70 
   0   7   0   11.90   10.00 
  -1  -7   0   -3.10    6.10 
  -1  -7   0   -1.90    5.00 
   1  -7   0    0.40    4.70 
  -1  -7   0    1.80    9.20 
   1  -7   0   -2.20    9.00 
   1  -7   0    9.00    8.40 
   1  -7   0    4.30    8.20 
   1  -7   0   -9.70    5.80 
   1  -7   0    1.30    9.40 
  -1  -7   0   -5.00    7.00 
  -1  -7   0    1.00    9.30 
   1  -7   0   -9.80    5.00 
  -1  -7   0    3.60    6.20 
   1  -7   0  -12.10   12.00 
  -1  -7   0   -6.50    8.00 
   1  -7   0  -14.70   12.30 
  -1  -7   0    6.80    7.40 
   1  -7   0    5.90    7.50 
  -1  -7   0   -6.00    9.50 
  -1  -7   0    1.40    8.20 
   1  -7   0   -3.50    4.40 
  -1  -7   0    0.20    7.30 
  -1  -7   0    4.80    8.60 
   1   7   0   -0.10    4.10 
   1   7   0    4.70    7.80 
  -1   7   0   -1.70    9.70 
  -1   7   0   -0.30    9.40 
   1   7   0   -1.10   10.00 
  -1   7   0   -9.50    6.50 
   1   7   0    0.90   12.80 
   1   7   0    9.50    9.90 
   1   7   0   12.30    8.40 
   1   7   0   -7.80    7.50 
   1   7   0    3.10    7.60 
  -1   7   0   10.00    8.60 
  -1   7   0   -2.90    7.50 
   1   7   0    1.70    8.80 
  -1   7   0   -2.60    8.70 
  -1   7   0   -6.00    5.50 
   1   7   0   -5.20    6.90 
  -1   7   0    0.40    6.50 
  -1   7   0    1.50    5.50 
  -2  -7   0   39.60   12.50 
  -2  -7   0   59.09   16.80 
   2  -7   0   51.39    8.10 
  -2  -7   0   48.50   13.90 
  -2  -7   0   26.20    9.60 
   2  -7   0   47.50    8.10 
  -2  -7   0   45.80   14.90 
  -2  -7   0   30.10   13.00 
   2  -7   0   46.20   21.80 
   2  -7   0   44.90   22.70 
  -2  -7   0   38.30   12.40 
   2  -7   0   56.29   15.80 
  -2  -7   0   54.59   13.70 
   2  -7   0   24.80   11.90 
   2  -7   0   74.59   16.90 
   2  -7   0   39.50   13.60 
  -2  -7   0   75.19   19.20 
  -2  -7   0   49.00   13.40 
   2  -7   0   41.70   15.70 
   2  -7   0   54.39   13.00 
   2  -7   0   35.20   16.70 
  -2  -7   0   20.90   11.60 
  -2   7   0   57.69   10.90 
   2   7   0   54.69   12.80 
   2   7   0   50.69   17.50 
  -2   7   0   31.60   12.80 
   2   7   0   30.40   13.90 
   2   7   0   56.59   17.10 
  -2   7   0   48.70   15.60 
   2   7   0   37.80   12.20 
  -2   7   0   45.50   13.90 
  -2   7   0    7.70   11.40 
   2   7   0   42.40   12.10 
  -2   7   0   30.10   12.60 
   2   7   0   17.90   15.40 
  -2   7   0   39.20   12.00 
   2   7   0   47.40   18.20 
   2   7   0   60.39   17.40 
  -2   7   0   58.69   16.00 
   3  -7   0   80.79   16.00 
  -3  -7   0   73.79   16.40 
  -3  -7   0   89.49   16.90 
   3  -7   0   46.40   24.80 
   3  -7   0   78.29   21.00 
   3  -7   0   79.49   22.40 
  -3  -7   0   97.19   19.90 
   3  -7   0  122.09   21.10 
   3  -7   0   78.39   17.40 
   3  -7   0   70.29   24.90 
   3  -7   0   70.39   15.90 
  -3  -7   0  104.79   21.80 
  -3  -7   0   88.09   17.30 
   3  -7   0   88.49   16.10 
  -3  -7   0   83.59   17.60 
  -3  -7   0  106.19   16.80 
   3  -7   0   90.39   19.70 
  -3  -7   0   91.59   22.00 
  -3  -7   0  106.69   19.10 
  -3  -7   0   87.59   18.80 
   3  -7   0  103.89   18.30 
  -3  -7   0   96.89   18.70 
   3   7   0   79.49   24.60 
  -3   7   0   52.49   14.80 
   3   7   0   89.89   18.60 
   3   7   0   85.49   25.70 
   3   7   0   97.09   20.40 
   3   7   0   53.89   17.60 
  -3   7   0   75.59   18.00 
   3   7   0   57.49   14.50 
  -3   7   0   76.59   17.10 
  -3   7   0  109.39   21.20 
  -3   7   0   77.19   16.80 
  -3   7   0   96.09   22.10 
  -3   7   0   69.89   16.20 
  -3   7   0  108.09   14.30 
   3   7   0   78.49   15.10 
   3   7   0   83.69   21.00 
   3   7   0  149.39   26.00 
   4  -7   0  161.68   22.70 
  -4  -7   0  186.38   29.40 
  -4  -7   0  216.48   26.20 
  -4  -7   0  197.18   26.90 
  -4  -7   0  233.68   28.90 
   4  -7   0  186.28   23.90 
   4  -7   0  199.98   28.40 
  -4  -7   0  178.18   25.60 
   4  -7   0  220.78   31.10 
  -4  -7   0  198.78   25.00 
  -4  -7   0  213.48   26.70 
   4  -7   0  133.79   34.00 
   4  -7   0  175.18   31.70 
   4  -7   0  200.98   41.00 
   4  -7   0  206.18   33.60 
   4  -7   0  210.98   28.50 
  -4  -7   0  163.28   23.90 
  -4  -7   0  171.18   24.40 
  -4  -7   0  188.88   26.20 
  -4  -7   0  253.47   34.40 
  -4   7   0  219.58   30.10 
  -4   7   0  174.08   24.70 
  -4   7   0  226.28   33.50 
  -4   7   0  180.78   24.50 
   4   7   0  228.98   37.10 
   4   7   0  244.08   43.50 
  -4   7   0  206.18   19.20 
   4   7   0  227.98   34.00 
   4   7   0  216.18   26.80 
   4   7   0  156.68   27.30 
   4   7   0  170.18   25.10 
  -4   7   0  197.18   27.30 
   4   7   0  179.68   29.10 
   4   7   0  245.88   31.40 
  -4   7   0  167.98   23.30 
  -4   7   0  166.98   25.70 
   4   7   0  193.18   23.30 
   4   7   0  195.98   36.90 
  -5  -7   0  734.93   50.99 
  -5  -7   0  623.44   43.00 
  -5  -7   0  719.03   43.90 
  -5  -7   0  736.63   46.20 
   5  -7   0  622.84   65.09 
   5  -7   0  755.22   49.70 
  -5  -7   0  632.44   43.70 
   5  -7   0  654.63   55.49 
  -5  -7   0  844.72   49.40 
  -5  -7   0  647.24   42.10 
   5  -7   0  589.54   69.59 
  -5  -7   0  670.33   44.60 
   5  -7   0  557.64   76.39 
  -5  -7   0  624.74   49.00 
  -5  -7   0  710.53   42.70 
   5  -7   0  683.73   54.59 
  -5   7   0  599.74   40.90 
  -5   7   0  697.73   44.40 
   5   7   0  623.24   44.90 
   5   7   0  628.04   52.29 
   5   7   0  640.54   51.19 
   5   7   0  700.03   77.59 
  -5   7   0  626.24   46.10 
  -5   7   0  710.73   48.40 
   5   7   0  593.94   57.49 
  -5   7   0  745.83   52.89 
   5   7   0  604.44   49.10 
   5   7   0  714.03   70.39 
  -5   7   0  678.93   41.70 
   5   7   0  639.14   39.40 
  -5   7   0  610.24   39.10 
   5   7   0  630.04   44.00 
  -6  -7   0  852.61   57.09 
  -6  -7   0  746.43   51.09 
  -6  -7   0  764.02   45.30 
   6  -7   0  668.33   67.09 
  -6  -7   0  787.72   48.40 
  -6  -7   0  708.33   48.10 
  -6  -7   0  707.43   49.00 
   6  -7   0  593.34   65.69 
   6  -7   0  863.71   60.89 
   6  -7   0  766.72   93.79 
   6  -7   0  727.03   52.79 
  -6  -7   0  815.72   50.19 
  -6  -7   0  789.42   55.99 
   6  -7   0  804.22   86.49 
  -6  -7   0  687.13   46.40 
  -6  -7   0  615.54   46.10 
  -6  -7   0  713.33   49.99 
  -6  -7   0  793.62   46.60 
  -6   7   0  765.32   46.70 
  -6   7   0  800.32   46.50 
   6   7   0  721.63   56.99 
   6   7   0  752.22   56.69 
  -6   7   0  737.63   52.39 
   6   7   0  745.13   73.49 
  -6   7   0  742.53   56.19 
   6   7   0  735.23   83.09 
   6   7   0  678.33   48.80 
   6   7   0  804.32   77.99 
   6   7   0  714.73   58.19 
   6   7   0  805.22   59.89 
   6   7   0  703.23   49.30 
  -6   7   0  668.63   50.59 
  -6   7   0  696.43   44.00 
   7  -7   0  441.46   60.59 
  -7  -7   0  434.96   44.40 
  -7  -7   0  414.96   49.20 
   7  -7   0  415.66   57.29 
  -7  -7   0  495.25   48.00 
  -7  -7   0  306.17   43.00 
   7  -7   0  427.06   49.60 
  -7  -7   0  348.97   39.10 
  -7  -7   0  445.36   41.30 
   7  -7   0  381.86   69.99 
  -7  -7   0  398.26   50.79 
  -7  -7   0  353.36   42.00 
  -7  -7   0  372.06   43.70 
  -7  -7   0  396.46   46.70 
   7  -7   0  482.75   72.99 
  -7  -7   0  340.97   39.00 
  -7  -7   0  446.36   36.00 
  -7  -7   0  446.36   34.70 
   7   7   0  333.17   47.10 
  -7   7   0  388.56   49.20 
   7   7   0  395.86   42.60 
  -7   7   0  403.66   48.10 
   7   7   0  335.07   51.89 
   7   7   0  433.36   62.69 
   7   7   0  376.66   63.69 
   7   7   0  321.17   47.10 
  -7   7   0  410.66   47.20 
   7   7   0  332.47   46.60 
  -7   7   0  382.76   46.40 
   7   7   0  326.17   41.90 
   0  -8   0 2381.06   98.29 
   0  -8   0 2374.26   99.59 
   0  -8   0 2505.85   89.39 
   0  -8   0 2518.65  113.59 
   0  -8   0 2402.76  102.19 
   0  -8   0 2511.15   88.29 
   0  -8   0 2404.56  106.19 
   0  -8   0 2370.06   95.29 
   0  -8   0 2461.85  100.79 
   0  -8   0 2214.58  102.89 
   0   8   0 2413.46   87.29 
   0   8   0 2452.25   97.29 
   0   8   0 2308.27   97.49 
   0   8   0 2401.36  109.69 
   0   8   0 2405.36  113.19 
   0   8   0 2305.67  103.39 
   0   8   0 2598.14  105.89 
   0   8   0 2311.37   99.99 
   0   8   0 2417.96   90.79 
   0   8   0 2464.25  107.39 
  -1  -8   0  426.06   29.20 
  -1  -8   0  406.16   46.40 
   1  -8   0  439.76   44.60 
   1  -8   0  332.47   49.80 
   1  -8   0  465.05   37.50 
   1  -8   0  441.56   41.00 
   1  -8   0  366.76   42.30 
  -1  -8   0  370.86   37.50 
   1  -8   0  493.95   37.60 
  -1  -8   0  417.96   26.20 
  -1  -8   0  417.36   40.40 
  -1  -8   0  421.46   41.90 
   1  -8   0  555.74   60.19 
  -1  -8   0  428.96   46.10 
  -1  -8   0  500.55   40.50 
   1  -8   0  464.05   34.60 
  -1  -8   0  394.76   38.30 
   1  -8   0  400.86   31.20 
   1  -8   0  448.26   27.30 
  -1  -8   0  393.16   37.80 
   1  -8   0  412.56   25.50 
  -1  -8   0  413.16   29.60 
  -1   8   0  416.96   45.70 
   1   8   0  335.37   40.50 
   1   8   0  397.06   40.60 
  -1   8   0  389.56   38.50 
  -1   8   0  472.95   44.50 
   1   8   0  417.46   31.90 
  -1   8   0  405.16   43.20 
   1   8   0  445.76   44.50 
  -1   8   0  483.25   47.50 
   1   8   0  416.86   30.60 
   1   8   0  481.95   38.00 
  -1   8   0  466.25   29.40 
  -1   8   0  523.05   36.70 
  -1   8   0  410.26   29.20 
  -1   8   0  394.96   39.30 
   1   8   0  488.15   55.19 
   1   8   0  452.45   34.80 
   1   8   0  370.96   45.10 
  -1   8   0  447.36   43.30 
  -2  -8   0  645.54   41.90 
   2  -8   0  649.54   68.19 
   2  -8   0  598.14   47.30 
  -2  -8   0  635.34   38.10 
   2  -8   0  593.24   42.90 
   2  -8   0  630.04   42.50 
   2  -8   0  620.04   37.90 
   2  -8   0  562.44   41.90 
  -2  -8   0  613.04   41.20 
   2  -8   0  538.15   52.59 
  -2  -8   0  546.35   45.50 
  -2  -8   0  668.53   43.20 
  -2  -8   0  669.03   39.30 
  -2  -8   0  521.65   43.40 
  -2  -8   0  593.44   33.90 
  -2  -8   0  669.03   42.80 
   2  -8   0  580.94   40.00 
  -2  -8   0  483.05   39.40 
   2  -8   0  561.24   68.79 
   2   8   0  613.64   50.09 
   2   8   0  545.15   39.50 
  -2   8   0  606.04   33.00 
  -2   8   0  605.14   47.90 
  -2   8   0  559.84   42.30 
   2   8   0  584.54   47.40 
   2   8   0  599.44   38.40 
   2   8   0  615.94   38.50 
  -2   8   0  576.94   44.40 
   2   8   0  643.24   47.60 
   2   8   0  582.34   62.69 
   2   8   0  552.94   42.20 
  -2   8   0  496.75   39.30 
  -2   8   0  593.24   41.20 
  -2   8   0  654.23   44.30 
  -2   8   0  638.24   39.40 
  -2   8   0  561.14   39.80 
   2   8   0  705.23   47.70 
   3  -8   0   80.09   28.80 
  -3  -8   0   62.79   17.10 
  -3  -8   0   60.39   18.80 
  -3  -8   0   81.19   16.10 
   3  -8   0   90.99   30.60 
   3  -8   0   68.49   17.70 
   3  -8   0   76.99   19.30 
   3  -8   0  102.39   21.80 
  -3  -8   0   94.19   20.80 
   3  -8   0   58.69   15.60 
  -3  -8   0   65.39   17.30 
   3  -8   0  114.19   23.50 
  -3  -8   0   69.49   21.40 
  -3  -8   0   71.19   19.40 
   3  -8   0   52.59   17.20 
   3  -8   0   42.70   19.10 
   3  -8   0   78.79   24.00 
  -3  -8   0   63.09   17.00 
  -3  -8   0   92.29   18.60 
  -3  -8   0   86.69   19.50 
   3   8   0   57.29   19.40 
   3   8   0   62.19   18.20 
   3   8   0   97.09   18.40 
  -3   8   0   70.39   17.20 
  -3   8   0   63.79   17.70 
  -3   8   0   57.59   20.30 
  -3   8   0   76.09   18.30 
   3   8   0   84.99   28.90 
   3   8   0   68.89   17.60 
  -3   8   0   58.29   18.30 
  -3   8   0   49.50   17.70 
  -3   8   0   81.79   18.10 
   3   8   0   56.19   19.10 
  -3   8   0   57.99   18.90 
   3   8   0   67.99   20.80 
   3   8   0   79.29   18.80 
   3   8   0  121.49   31.80 
   4  -8   0  243.08   32.90 
   4  -8   0  291.17   42.70 
   4  -8   0  305.47   54.39 
  -4  -8   0  241.88   30.90 
   4  -8   0  305.77   51.79 
  -4  -8   0  215.78   34.00 
  -4  -8   0  312.37   32.30 
  -4  -8   0  260.87   32.60 
  -4  -8   0  209.48   28.90 
  -4  -8   0  256.57   30.60 
   4  -8   0  249.08   30.40 
  -4  -8   0  293.07   35.10 
  -4  -8   0  286.67   34.90 
  -4  -8   0  264.37   38.20 
   4  -8   0  302.17   43.70 
   4  -8   0  275.37   32.40 
  -4  -8   0  243.28   31.40 
   4   8   0  284.17   39.90 
  -4   8   0  240.38   32.40 
   4   8   0  346.27   52.19 
   4   8   0  298.07   52.09 
  -4   8   0  257.37   31.50 
  -4   8   0  262.17   35.70 
  -4   8   0  243.88   32.20 
  -4   8   0  370.26   40.10 
   4   8   0  304.87   41.00 
   4   8   0  232.28   35.60 
   4   8   0  249.48   33.90 
   4   8   0  248.68   38.40 
  -4   8   0  296.97   33.80 
   4   8   0  249.38   30.80 
  -4   8   0  249.97   37.70 
   4   8   0  266.37   32.70 
  -4   8   0  240.08   30.20 
   5  -8   0  115.69   43.30 
   5  -8   0   86.19   23.70 
   5  -8   0   55.39   25.10 
  -5  -8   0   63.09   18.40 
  -5  -8   0   59.69   18.70 
  -5  -8   0   95.09   22.70 
  -5  -8   0   80.39   19.30 
  -5  -8   0  110.09   25.90 
  -5  -8   0   46.80   15.80 
   5  -8   0  104.19   28.80 
  -5  -8   0  105.29   22.10 
   5  -8   0  102.89   39.40 
   5  -8   0   88.39   27.50 
  -5  -8   0   66.79   18.70 
  -5  -8   0   72.59   18.10 
  -5   8   0   79.69   21.40 
  -5   8   0   74.29   19.70 
  -5   8   0   42.80   19.00 
   5   8   0   79.49   22.10 
  -5   8   0   61.09   17.20 
  -5   8   0  100.19   26.50 
  -5   8   0   96.59   22.20 
   5   8   0   58.79   21.70 
   5   8   0   86.29   20.20 
   5   8   0  114.49   37.20 
   5   8   0   81.99   19.10 
   5   8   0  124.29   28.00 
  -5   8   0   48.40   16.90 
   5   8   0   58.79   21.50 
   5   8   0   80.29   30.80 
  -5   8   0   81.49   19.00 
   5   8   0  116.09   27.50 
   6  -8   0  409.96   65.69 
  -6  -8   0  398.36   44.50 
   6  -8   0  458.35   56.69 
   6  -8   0  433.16   78.29 
  -6  -8   0  514.35   49.50 
  -6  -8   0  449.95   47.10 
   6  -8   0  543.25   64.39 
  -6  -8   0  409.06   43.20 
  -6  -8   0  502.45   56.89 
  -6  -8   0  420.56   49.90 
  -6  -8   0  472.65   43.60 
  -6  -8   0  495.25   45.80 
  -6  -8   0  431.46   48.50 
  -6  -8   0  536.85   48.70 
  -6  -8   0  450.75   44.80 
   6  -8   0  394.36   52.29 
   6   8   0  493.85   50.79 
   6   8   0  442.66   56.19 
   6   8   0  446.86   63.09 
  -6   8   0  398.76   40.80 
   6   8   0  524.85   59.89 
   6   8   0  495.75   56.99 
   6   8   0  375.56   54.99 
  -6   8   0  530.15   58.09 
   6   8   0  440.76   49.10 
  -6   8   0  427.86   48.90 
  -6   8   0  438.86   41.30 
  -6   8   0  509.45   40.90 
   6   8   0  422.76   53.69 
  -6   8   0  473.85   48.30 
  -6   8   0  400.86   45.80 
   6   8   0  396.96   67.49 
   0  -9   0  -16.40    5.50 
   0  -9   0   10.10   12.80 
   0  -9   0   -0.60    9.80 
   0  -9   0   -9.30   10.30 
   0  -9   0   -5.10   16.20 
   0  -9   0   -2.50   16.60 
   0  -9   0   -6.10    9.40 
   0  -9   0   15.40   14.20 
   0  -9   0   -0.60    9.00 
   0   9   0    0.00    8.40 
   0   9   0   -6.30    7.50 
   0   9   0   -4.20    9.80 
   0   9   0   -4.10   10.40 
   0   9   0    6.90   12.10 
   0   9   0    2.60   11.10 
   0   9   0    5.80   12.40 
   0   9   0   12.40   16.20 
   0   9   0    1.00   12.00 
   1  -9   0    1.10   18.50 
  -1  -9   0   18.20   10.70 
  -1  -9   0   21.30   14.10 
  -1  -9   0   23.40   11.70 
   1  -9   0   12.70   10.80 
   1  -9   0   11.00   12.40 
  -1  -9   0   13.90    9.10 
  -1  -9   0   14.30   16.20 
   1  -9   0    9.60   12.80 
   1  -9   0    3.00   11.10 
   1  -9   0    1.30    9.50 
   1  -9   0   28.50   13.60 
  -1  -9   0   17.00   13.10 
   1  -9   0   22.00   21.60 
  -1  -9   0   31.30   18.60 
  -1  -9   0   -2.50   10.40 
  -1  -9   0    7.30   14.70 
  -1  -9   0   15.50   13.60 
   1  -9   0   23.10   15.90 
  -1   9   0   16.90    9.60 
   1   9   0   23.50   11.10 
   1   9   0   -3.20   12.70 
  -1   9   0    9.80   15.30 
   1   9   0    1.20   11.10 
   1   9   0    1.50    9.90 
  -1   9   0   10.30   13.10 
  -1   9   0    4.90   11.70 
   1   9   0   31.30   18.30 
  -1   9   0   24.10   17.70 
   1   9   0   10.40   13.40 
  -1   9   0   24.90   14.40 
   1   9   0   15.40   16.30 
  -1   9   0    6.40   13.40 
   1   9   0   25.50   14.10 
  -1   9   0    4.30   10.30 
   1   9   0   20.00   12.20 
  -1   9   0   12.70   12.40 
  -1   9   0   24.70   15.90 
  -2  -9   0   19.40   14.20 
  -2  -9   0   15.10   11.30 
  -2  -9   0   -0.30   12.50 
  -2  -9   0   22.80   18.00 
  -2  -9   0   10.00   11.50 
   2  -9   0    7.10   12.00 
   2  -9   0   18.40   17.60 
  -2  -9   0   22.50   14.90 
   2  -9   0   14.70   12.80 
   2  -9   0   47.50   27.20 
  -2  -9   0   10.50   12.20 
   2  -9   0   27.70   13.30 
  -2  -9   0   27.40   17.60 
  -2  -9   0    6.50   13.80 
   2  -9   0   18.80   13.10 
  -2  -9   0   13.50   11.30 
   2  -9   0   14.60   20.20 
  -2   9   0   22.40   12.10 
   2   9   0   30.50   15.70 
   2   9   0   12.30   12.50 
  -2   9   0   18.80   13.70 
   2   9   0   31.60   20.10 
  -2   9   0   20.50   15.20 
  -2   9   0   40.20   16.40 
  -2   9   0   23.90   13.80 
  -2   9   0    0.40   12.90 
   2   9   0   11.00   15.20 
   2   9   0   21.60   12.10 
   2   9   0   14.80   14.00 
  -2   9   0   14.60   13.40 
  -2   9   0   24.10   16.30 
   2   9   0   -5.40   15.30 
  -2   9   0   23.50   13.90 
   2   9   0   32.80   18.60 
   2   9   0   13.70   13.00 
  -3  -9   0   49.00   19.70 
  -3  -9   0   88.19   22.20 
   3  -9   0   67.99   30.40 
  -3  -9   0   87.99   23.60 
   3  -9   0   40.70   19.40 
  -3  -9   0   62.99   22.20 
  -3  -9   0   28.50   13.40 
   3  -9   0   81.79   20.20 
   3  -9   0   67.59   30.90 
   3  -9   0   16.00   12.50 
  -3  -9   0   86.19   20.10 
   3  -9   0   85.49   20.90 
  -3  -9   0   73.89   20.20 
  -3  -9   0   89.29   21.20 
  -3  -9   0   16.70   13.00 
   3  -9   0   45.80   16.30 
   3   9   0   76.89   29.10 
  -3   9   0   73.99   18.90 
   3   9   0   65.39   17.40 
  -3   9   0   63.19   19.00 
   3   9   0   21.30   18.60 
   3   9   0   73.69   22.70 
  -3   9   0  109.69   24.80 
  -3   9   0   78.69   20.70 
  -3   9   0   54.49   18.70 
   3   9   0   71.39   28.50 
   3   9   0  100.19   26.10 
   3   9   0   70.69   18.70 
  -3   9   0   41.10   16.30 
  -3   9   0   73.19   20.80 
   3   9   0   20.50   15.30 
   3   9   0   30.80   14.60 
  -3   9   0   58.89   22.80 
  -4  -9   0  -15.20    8.80 
   4  -9   0    2.10   14.40 
  -4  -9   0  -13.70   13.20 
  -4  -9   0    6.70   13.30 
  -4  -9   0  -14.20    7.80 
   4  -9   0    6.00   14.60 
  -4  -9   0   13.50   12.50 
  -4  -9   0   10.60   10.80 
  -4  -9   0   -4.50   10.40 
  -4  -9   0    3.00   10.40 
   4  -9   0   12.80   14.00 
   4  -9   0    5.30   16.10 
   4  -9   0   25.70   24.50 
  -4  -9   0   -6.10    9.00 
  -4  -9   0   -9.60   10.30 
   4  -9   0  -25.90   17.60 
  -4   9   0   12.20   12.80 
  -4   9   0    9.70   14.40 
  -4   9   0   10.50   13.00 
   4   9   0  -13.40   12.40 
   4   9   0    5.40   14.10 
   4   9   0   13.00   16.80 
  -4   9   0   13.30   12.50 
   4   9   0   23.70   16.30 
   4   9   0   -7.20   10.00 
   4   9   0    2.60   18.90 
   4   9   0    4.00   20.00 
  -4   9   0    2.30   12.90 
   4   9   0    8.60   14.80 
  -4   9   0    2.10   12.70 
  -4   9   0    1.90   11.00 
  -4   9   0    3.00   12.40 
  -5  -9   0  780.62   61.59 
  -5  -9   0  794.42   50.79 
  -5  -9   0  715.93   51.59 
  -5  -9   0  780.22   52.99 
   5  -9   0  765.52   64.99 
  -5  -9   0  715.53   51.29 
   5  -9   0  690.83   88.49 
   5  -9   0  737.73   76.39 
   5  -9   0  757.92  101.29 
   5  -9   0  773.92   84.99 
  -5  -9   0  709.93   50.09 
   5  -9   0  809.82   60.09 
  -5  -9   0  859.01   56.29 
  -5  -9   0  830.42   55.69 
  -5  -9   0  796.52   55.79 
  -5  -9   0  889.41   63.29 
   5   9   0  770.52   85.39 
  -5   9   0  883.91   53.09 
  -5   9   0  781.82   61.79 
   5   9   0  778.52   64.99 
   5   9   0  866.91   65.19 
   5   9   0  768.82   64.19 
   5   9   0  806.52   50.99 
  -5   9   0  779.02   54.89 
   5   9   0  882.61   96.99 
   5   9   0  827.12   63.29 
   5   9   0  844.32   56.29 
  -5   9   0  872.21   58.29 
  -5   9   0  871.21   59.09 
  -5   9   0  753.12   51.69 
   5   9   0  776.32   57.39 
  -5   9   0  707.43   56.29 
   0 -10   0 1371.56   77.89 
   0 -10   0 1380.96   82.99 
   0 -10   0 1313.87   75.89 
   0 -10   0 1421.46   80.19 
   0 -10   0 1769.02  100.19 
   0 -10   0 1505.65   75.09 
   0 -10   0 1436.76   75.79 
   0 -10   0 1514.75   88.09 
   0 -10   0 1442.16  101.49 
   0  10   0 1384.26   77.99 
   0  10   0 1469.65   82.09 
   0  10   0 1624.14   70.19 
   0  10   0 1527.85   78.49 
   0  10   0 1489.15   81.79 
   0  10   0 1319.27   89.09 
   0  10   0 1431.26   74.79 
   0  10   0 1354.06   83.39 
   0  10   0 1456.15   88.19 
   1 -10   0  102.79   36.60 
  -1 -10   0   69.09   20.50 
   1 -10   0   95.99   24.00 
   1 -10   0  103.09   29.20 
  -1 -10   0   65.39   20.50 
   1 -10   0   82.19   21.70 
  -1 -10   0   86.99   25.40 
  -1 -10   0   64.89   19.50 
   1 -10   0  135.09   28.20 
  -1 -10   0   90.19   24.40 
  -1 -10   0   70.69   24.90 
  -1 -10   0  113.79   32.20 
  -1 -10   0   44.40   17.30 
   1 -10   0   66.19   21.50 
   1 -10   0   67.19   30.00 
   1 -10   0   75.39   22.30 
   1  10   0   46.60   17.00 
   1  10   0   82.19   24.30 
  -1  10   0   78.59   22.30 
  -1  10   0   64.89   22.50 
   1  10   0   83.99   24.40 
  -1  10   0   64.99   25.00 
  -1  10   0  128.99   34.80 
   1  10   0  105.99   27.00 
  -1  10   0   81.69   23.40 
  -1  10   0   69.99   20.90 
   1  10   0  126.49   27.40 
   1  10   0   94.69   28.60 
  -1  10   0   62.59   23.70 
  -1  10   0   69.69   24.70 
   1  10   0  106.39   33.20 
   1  10   0   68.69   19.80 
   1  10   0   83.89   26.40 
  -1  10   0  114.99   28.60 
   2 -10   0  517.35   52.69 
   2 -10   0  575.44   63.09 
   2 -10   0  550.04   50.19 
  -2 -10   0  506.05   38.00 
   2 -10   0  525.45   51.59 
  -2 -10   0  450.95   46.40 
  -2 -10   0  496.35   57.29 
  -2 -10   0  442.26   55.09 
  -2 -10   0  398.46   50.99 
   2 -10   0  610.04   79.69 
  -2 -10   0  528.75   51.59 
   2 -10   0  424.36   47.90 
   2 -10   0  439.36   47.20 
  -2 -10   0  481.15   48.60 
  -2 -10   0  390.46   46.00 
  -2 -10   0  435.86   47.90 
  -2  10   0  412.16   47.10 
   2  10   0  462.15   52.69 
  -2  10   0  468.75   56.59 
   2  10   0  399.16   52.69 
   2  10   0  355.16   56.99 
  -2  10   0  575.24   55.89 
   2  10   0  520.65   50.29 
   2  10   0  418.46   47.90 
  -2  10   0  395.96   45.80 
   2  10   0  520.15   41.40 
   2  10   0  524.25   39.70 
   2  10   0  455.45   53.19 
  -2  10   0  450.05   48.50 
  -2  10   0  496.05   53.99 
  -2  10   0  449.66   53.39 
  -2  10   0  458.45   46.90 
  -3 -10   0   20.50   14.40 
  -3 -10   0   17.60   18.90 
  -3 -10   0    7.90   15.80 
   3 -10   0   16.90   16.40 
  -3 -10   0    7.20   12.30 
   3 -10   0   46.00   18.40 
  -3 -10   0   20.40   15.60 
  -3 -10   0   12.10   13.60 
  -3 -10   0   12.80   13.00 
   3 -10   0   17.80   26.40 
   3 -10   0   22.70   20.00 
  -3 -10   0   14.20   16.80 
  -3 -10   0   -1.40   12.60 
  -3 -10   0   40.20   23.10 
   3  10   0   21.50   16.80 
   3  10   0   13.40   15.00 
  -3  10   0   24.20   18.00 
  -3  10   0   25.80   14.40 
  -3  10   0   15.00   15.30 
   3  10   0    8.00   21.70 
   3  10   0   21.10   16.30 
   3  10   0    2.60   16.10 
  -3  10   0   16.80   16.70 
   3  10   0   14.40   19.10 
   3  10   0   40.90   24.50 
  -3  10   0   36.80   18.50 
  -3  10   0   22.60   17.60 
  -3  10   0   11.50   17.90 
  -3  10   0   15.10   17.40 
   3  10   0   10.00   14.10 
  10   0  -1    0.40   17.50 
 -10   0   1    1.40   11.60 
 -10   0   1   -2.50   14.00 
 -10   0   1    9.30   18.80 
 -10   0   1   -5.70   16.70 
  10   0  -1  -11.60   12.10 
  10   0  -1   -6.20   11.20 
 -10   0   1    5.40   14.80 
 -10   0   1    6.80   12.20 
 -10   0   1    5.50   12.40 
 -10   0   1    4.80   14.40 
 -10   0   1   -9.00   13.70 
 -10   0   1   -1.80   11.00 
  10   0  -1  -10.60   16.40 
 -10   0   1  -12.50    9.90 
  -9   0   1  776.12   74.79 
   9   0  -1  848.62   56.89 
  -9   0   1  832.82   50.59 
   9   0  -1  837.22   52.59 
  -9   0   1  818.42   54.29 
  -9   0   1  717.83   70.99 
   9   0  -1  967.00   74.59 
   9   0  -1  681.23   57.09 
   9   0  -1  783.62   65.49 
  -9   0   1  809.92   54.69 
  -9   0   1  859.21   51.49 
   9   0  -1  832.22   80.79 
  -9   0   1  852.11   51.79 
  -9   0   1  868.61   57.29 
  -9   0   1  814.92   52.49 
  -9   0   1  769.72   49.99 
   9   0  -1  751.22   60.39 
  -9   0   1  897.51   54.39 
  -9   0   1  548.85   62.69 
  -9   0   1  879.31   47.80 
  -9   0   1  865.51   61.89 
  -8   0   1   -1.70    6.70 
  -8   0   1   -5.40    9.40 
   8   0  -1   -8.40    9.50 
   8   0  -1   -5.00   13.30 
  -8   0   1    0.00   10.70 
   8   0  -1    0.60    9.30 
   8   0  -1   -1.00    6.80 
  -8   0   1   -9.30    8.20 
  -8   0   1    4.50    9.00 
  -8   0   1    5.80   12.70 
  -8   0   1    2.50    7.90 
   8   0  -1    5.80   12.80 
   8   0  -1   10.80    7.60 
   8   0  -1    6.60   11.20 
   8   0  -1   -0.60   10.20 
  -8   0   1    3.20    6.20 
  -8   0   1   -1.60   11.60 
  -8   0   1   -8.00    7.60 
  -8   0   1    3.80    8.60 
  -8   0   1    7.50    8.50 
   8   0  -1   -6.10   12.10 
  -8   0   1    4.90    8.20 
   8   0  -1   -3.20   11.90 
  -8   0   1   -9.10    7.40 
  -8   0   1   -9.60    6.30 
  -8   0   1    2.90   13.20 
  -8   0   1    6.50   12.90 
  -7   0   1  363.76   19.50 
  -7   0   1  381.86   40.70 
  -7   0   1  346.87   28.60 
  -7   0   1  363.16   26.60 
   7   0  -1  369.86   39.80 
  -7   0   1  331.67   34.40 
   7   0  -1  379.16   44.20 
   7   0  -1  328.67   41.80 
  -7   0   1  354.26   26.60 
  -7   0   1  352.66   36.20 
  -7   0   1  382.26   22.50 
  -7   0   1  354.86   22.80 
   7   0  -1  413.86   43.90 
  -7   0   1  373.16   28.80 
   7   0  -1  418.36   30.50 
  -7   0   1  366.56   27.60 
   7   0  -1  370.66   45.60 
  -7   0   1  337.67   27.60 
  -7   0   1  374.36   35.70 
   7   0  -1  401.46   42.10 
  -7   0   1  371.06   25.50 
  -7   0   1  386.96   29.50 
   7   0  -1  363.46   25.60 
  -7   0   1  362.36   20.60 
  -7   0   1  350.36   41.70 
   7   0  -1  367.26   22.40 
  -7   0   1  298.77   24.30 
   7   0  -1  418.26   30.80 
   7   0  -1  431.56   41.20 
   7   0  -1  360.06   40.50 
   7   0  -1  333.87   41.70 
   6   0  -1   20.00   11.20 
  -6   0   1   -3.30    7.10 
  -6   0   1   -3.10    4.40 
  -6   0   1   -3.00    2.50 
   6   0  -1   10.30   11.50 
   6   0  -1   -2.90    7.40 
   6   0  -1   -2.60    8.70 
  -6   0   1    5.40    4.50 
  -6   0   1   -0.90    6.30 
   6   0  -1    7.90   10.10 
  -6   0   1    0.60    7.10 
  -6   0   1    5.50    5.20 
  -6   0   1    8.50    4.00 
   6   0  -1   13.90    8.60 
   6   0  -1    7.00    9.30 
  -6   0   1   -6.60    3.50 
   6   0  -1    9.00   10.80 
  -6   0   1    4.50    4.70 
  -6   0   1   11.20    8.10 
   6   0  -1    9.40    6.60 
   6   0  -1   -8.60    8.70 
  -6   0   1   -0.10    6.10 
  -6   0   1   -3.70    5.90 
  -6   0   1    1.30    4.50 
   6   0  -1    3.90   11.90 
  -6   0   1    3.20    4.20 
  -6   0   1   -0.90    3.20 
  -6   0   1    4.70    4.00 
  -6   0   1    6.80    4.70 
  -6   0   1    2.70   11.10 
  -6   0   1    0.20    6.50 
  -6   0   1   13.00    7.60 
   6   0  -1    6.90    4.60 
  -6   0   1    0.60    6.50 
   6   0  -1    8.30    8.10 
  -5   0   1  745.23   30.00 
   5   0  -1  745.13   36.40 
  -5   0   1  723.33   31.40 
  -5   0   1  772.82   34.20 
  -5   0   1  749.33   25.70 
  -5   0   1  724.03   35.90 
  -5   0   1  744.43   27.10 
  -5   0   1  711.13   37.50 
  -5   0   1  717.83   35.30 
   5   0  -1  764.72   40.10 
  -5   0   1  757.02   34.70 
  -5   0   1  746.23   28.80 
  -5   0   1  722.23   35.80 
  -5   0   1  752.32   26.90 
   5   0  -1  745.43   33.80 
   5   0  -1  724.13   41.30 
  -5   0   1  718.03   37.40 
   5   0  -1  728.83   43.00 
   5   0  -1  739.33   30.90 
  -5   0   1  729.03   35.70 
   5   0  -1  726.03   41.60 
   5   0  -1  716.33   43.90 
   5   0  -1  757.52   39.70 
   5   0  -1  736.03   44.50 
  -5   0   1  714.73   27.80 
  -5   0   1  743.03   38.20 
   5   0  -1  821.82   39.00 
  -5   0   1  800.02   30.50 
   5   0  -1  719.53   44.20 
   5   0  -1  801.82   41.40 
  -5   0   1  731.53   32.70 
  -5   0   1  766.22   36.30 
  -5   0   1  770.32   30.90 
  -5   0   1  770.42   34.10 
  -5   0   1  685.83   38.50 
  -5   0   1  701.93   31.10 
  -5   0   1  790.62   30.40 
  -4   0   1    1.20    3.90 
  -4   0   1    3.00    3.30 
  -4   0   1   -3.40    1.80 
  -4   0   1    0.80    3.80 
   4   0  -1   -1.20    6.20 
  -4   0   1   -3.90    3.80 
  -4   0   1    1.50    2.60 
  -4   0   1   -7.70    5.10 
   4   0  -1    1.30    6.10 
  -4   0   1    2.10    3.40 
  -4   0   1   -0.20    3.60 
   4   0  -1   -2.10    6.00 
   4   0  -1    0.40    4.90 
   4   0  -1   -3.40    3.40 
   4   0  -1   -3.20    6.50 
   4   0  -1    5.10    5.90 
  -4   0   1   -2.40    1.20 
  -4   0   1    5.60    4.60 
  -4   0   1    2.50    1.30 
   4   0  -1   -5.00    3.30 
   4   0  -1   -1.00    6.00 
  -4   0   1   -4.60    2.10 
  -4   0   1   -3.70    4.20 
   4   0  -1    3.20    5.40 
  -4   0   1    1.80    4.40 
   4   0  -1   -0.10    3.00 
   4   0  -1    2.30    8.20 
  -4   0   1    0.70    4.20 
  -4   0   1    4.10    5.30 
  -4   0   1    1.50    3.40 
  -4   0   1    2.60    2.00 
  -4   0   1   -0.30    2.40 
  -4   0   1    2.80    1.60 
  -4   0   1   -2.10    2.10 
   4   0  -1    1.30    5.90 
  -4   0   1   -4.10    3.40 
  -4   0   1   -2.10    4.00 
  -4   0   1    0.90    4.30 
   4   0  -1    2.40    6.00 
   4   0  -1    4.70    5.10 
  -4   0   1   -3.60    2.60 
  -4   0   1   -2.80    3.20 
  -4   0   1   -0.10    5.10 
   4   0  -1    4.50    3.40 
  -4   0   1    0.20    2.70 
  -3   0   1 1336.67   48.10 
  -3   0   1 1370.46   53.29 
   3   0  -1 1361.76   51.49 
  -3   0   1 1339.67   46.10 
  -3   0   1 1398.36   43.90 
  -3   0   1 1317.27   51.89 
  -3   0   1 1416.56   50.49 
  -3   0   1 1385.76   49.00 
  -3   0   1 1418.66   46.40 
  -3   0   1 1382.36   44.50 
   3   0  -1 1416.16   53.59 
   3   0  -1 1386.46   52.59 
  -3   0   1 1365.66   41.90 
  -3   0   1 1372.26   50.79 
   3   0  -1 1331.37   54.19 
   3   0  -1 1330.97   52.09 
   3   0  -1 1441.36   53.09 
   3   0  -1 1388.06   48.70 
  -3   0   1 1328.67   47.50 
   3   0  -1 1312.07   50.59 
   3   0  -1 1298.17   55.09 
  -3   0   1 1343.37   51.39 
  -3   0   1 1420.86   49.80 
  -3   0   1 1403.06   44.30 
   3   0  -1 1393.86   55.69 
  -3   0   1 1385.76   45.40 
  -3   0   1 1376.96   48.70 
  -3   0   1 1314.97   48.40 
  -3   0   1 1346.37   51.69 
  -3   0   1 1414.56   48.90 
  -3   0   1 1342.27   49.20 
  -3   0   1 1439.96   49.40 
  -3   0   1 1416.26   46.20 
  -3   0   1 1376.06   47.50 
   3   0  -1 1361.36   45.20 
  -3   0   1 1437.76   45.90 
  -3   0   1 1415.36   46.00 
   3   0  -1 1392.06   46.10 
  -3   0   1 1395.36   49.30 
  -3   0   1 1360.06   47.30 
  -3   0   1 1397.26   45.50 
   3   0  -1 1376.56   47.10 
  -3   0   1 1408.96   46.90 
   3   0  -1 1311.17   56.39 
   3   0  -1 1393.46   45.80 
   3   0  -1 1393.96   49.20 
   3   0  -1 1345.77   54.69 
  -3   0   1 1484.35   55.59 
  -3   0   1 1360.46   42.60 
   2   0  -1    8.40    2.40 
  -2   0   1    0.70    2.60 
  -2   0   1    4.80    1.60 
   2   0  -1    8.70    4.50 
   2   0  -1    4.30    2.60 
  -2   0   1    2.40    2.50 
  -2   0   1    5.30    2.20 
  -2   0   1    7.00    2.80 
  -2   0   1    5.00    3.20 
   2   0  -1    3.30    2.60 
  -2   0   1    3.20    1.90 
   2   0  -1    7.30    2.20 
   2   0  -1    6.00    3.60 
  -2   0   1    6.50    4.20 
  -2   0   1    7.10    2.50 
  -2   0   1   15.90    5.50 
   2   0  -1   16.00    6.20 
  -2   0   1    7.20    2.80 
   2   0  -1    4.90    2.80 
   2   0  -1    6.20    2.30 
  -2   0   1   10.30    3.50 
  -2   0   1    4.00    3.50 
   2   0  -1    1.00    3.80 
  -2   0   1    4.10    2.60 
  -2   0   1    2.00    2.10 
  -2   0   1    7.40    3.90 
  -2   0   1   13.20    4.00 
  -2   0   1    7.80    2.50 
  -2   0   1    9.80    2.10 
  -2   0   1    8.40    4.10 
  -2   0   1   12.10    4.20 
  -2   0   1    0.70    2.40 
  -2   0   1    9.80    2.80 
   2   0  -1    7.30    3.80 
   2   0  -1    0.60    4.30 
  -2   0   1   12.10    4.80 
  -2   0   1    5.20    2.40 
  -2   0   1    3.90    2.00 
   2   0  -1    3.50    4.00 
   2   0  -1   10.30    3.10 
  -2   0   1    4.90    2.30 
   2   0  -1    6.70    4.60 
   2   0  -1    0.30    1.90 
   2   0  -1    7.60    3.80 
   2   0  -1   11.20    3.80 
  -2   0   1    5.40    2.50 
   2   0  -1    8.40    4.00 
  -2   0   1   16.10    4.70 
  -2   0   1    4.60    2.60 
  -1   0   1  283.67    9.80 
  -1   0   1  275.97   10.50 
  -1   0   1  285.37   12.70 
  -1   0   1  283.57    9.90 
  -1   0   1  279.37   11.10 
  -1   0   1  278.77   12.90 
  -1   0   1  288.67   10.60 
  -1   0   1  284.77   11.00 
  -1   0   1  279.97   10.90 
  -1   0   1  281.07   10.40 
  -1   0   1  289.27   10.50 
  -1   0   1  230.28   12.40 
  -1   0   1  288.97   12.00 
  -1   0   1  276.87   12.60 
  -1   0   1  310.37   10.60 
  -1   0   1  273.47    9.30 
  -1   0   1  294.57   11.30 
  -1   0   1  290.07   11.60 
  -1   0   1  284.17   11.70 
   0   0   1   -0.10    0.50 
   0   0   1    0.20    0.40 
   0   0   1   -0.10    0.30 
  -1   0  -1 2950.20   85.69 
   1   0   1 2572.14   89.99 
  -1   0  -1 2944.51   89.59 
   1   0   1 2890.61   90.89 
   1   0   1 2831.52   90.59 
  -1   0  -1 2889.61   90.69 
  -1   0  -1 2992.70   86.09 
   1   0   1 3030.10   91.29 
   1   0   1 3047.00   90.49 
  -1   0  -1 3050.79   88.59 
  -1   0  -1 2873.61   88.89 
  -1   0  -1 2843.92   88.09 
  -1   0  -1 2994.50   87.79 
  -1   0  -1 2929.11   85.79 
  -1   0  -1 2859.31   89.89 
  -1   0  -1 2929.31   90.69 
  -1   0  -1 3094.89   87.59 
   1   0   1 3104.89   90.39 
   1   0   1 3228.78   90.49 
  -1   0  -1 2933.01   87.79 
  -1   0  -1 3001.00   89.49 
  -1   0  -1 3092.79   90.59 
  -1   0  -1 3047.50   85.99 
   1   0   1 2787.12   89.89 
   1   0   1 3143.69   89.99 
  -1   0  -1 2912.61   90.89 
  -1   0  -1 2839.52   90.09 
  -1   0  -1 3226.98   89.59 
  -1   0  -1 2567.34   88.89 
  -1   0  -1 2952.60   86.89 
  -1   0  -1 2899.21   87.79 
  -1   0  -1 2983.80   86.79 
  -2   0  -1    7.10    4.30 
   2   0   1    0.40    3.60 
  -2   0  -1    0.40    1.40 
   2   0   1    1.70    4.20 
   2   0   1    6.20    3.00 
   2   0   1    2.50    2.40 
   2   0   1    5.20    4.40 
  -2   0  -1    2.20    2.90 
  -2   0  -1    2.80    2.70 
   2   0   1    0.20    2.30 
  -2   0  -1    2.90    3.40 
  -2   0  -1    3.00    3.80 
  -2   0  -1    5.30    1.70 
  -2   0  -1    4.00    4.00 
   2   0   1    8.50    3.40 
  -2   0  -1    1.20    3.00 
   2   0   1    3.60    2.00 
   2   0   1    2.40    3.10 
  -2   0  -1    3.60    2.40 
  -2   0  -1    1.50    3.60 
  -2   0  -1    4.40    3.50 
  -2   0  -1    1.20    1.40 
   2   0   1    0.20    4.20 
   2   0   1   -1.40    2.30 
  -2   0  -1    5.50    3.20 
   2   0   1    5.70    3.00 
  -2   0  -1    5.10    3.90 
   2   0   1    9.50    4.20 
   2   0   1    3.10    1.40 
  -2   0  -1    4.20    2.80 
  -2   0  -1    2.80    3.60 
  -2   0  -1    7.20    4.10 
  -2   0  -1    0.50    2.40 
   2   0   1    5.30    3.30 
  -2   0  -1    8.90    3.00 
  -2   0  -1    0.00    3.50 
   2   0   1    1.20    3.30 
  -2   0  -1    5.00    1.90 
  -2   0  -1    3.50    3.70 
   2   0   1    0.70    2.40 
   2   0   1    3.20    4.50 
  -2   0  -1    3.70    2.80 
   2   0   1    2.90    1.50 
   2   0   1   -0.50    3.80 
   2   0   1    9.50    4.50 
  -2   0  -1    3.10    1.60 
   2   0   1    0.20    1.40 
  -2   0  -1    0.80    2.00 
   2   0   1    6.00    3.10 
  -2   0  -1    2.20    1.10 
   2   0   1    6.30    4.70 
   2   0   1   -2.90    2.50 
  -2   0  -1    0.70    2.50 
  -2   0  -1    0.20    3.60 
   2   0   1    3.30    2.20 
  -2   0  -1    1.90    3.00 
  -2   0  -1    2.80    2.90 
  -2   0  -1    3.80    3.60 
  -2   0  -1   -0.20    1.70 
  -2   0  -1    7.60    2.30 
   3   0   1  710.23   30.50 
  -3   0  -1  655.13   26.40 
  -3   0  -1  704.83   26.10 
   3   0   1  658.93   30.20 
  -3   0  -1  663.23   31.30 
  -3   0  -1  694.83   23.20 
   3   0   1  642.74   33.70 
  -3   0  -1  685.23   28.80 
   3   0   1  672.23   33.00 
  -3   0  -1  678.73   23.40 
   3   0   1  676.33   26.60 
   3   0   1  690.63   28.20 
  -3   0  -1  673.03   22.50 
   3   0   1  677.83   27.50 
  -3   0  -1  683.43   25.30 
  -3   0  -1  667.83   30.00 
  -3   0  -1  667.23   25.30 
  -3   0  -1  671.93   23.30 
  -3   0  -1  725.73   30.00 
  -3   0  -1  678.33   31.60 
  -3   0  -1  691.83   29.10 
   3   0   1  664.43   32.90 
  -3   0  -1  704.63   29.20 
  -3   0  -1  668.43   30.10 
   3   0   1  637.54   33.20 
  -3   0  -1  700.93   28.20 
  -3   0  -1  681.23   33.30 
  -3   0  -1  699.23   31.10 
   3   0   1  645.44   25.10 
   3   0   1  661.93   28.80 
  -3   0  -1  685.13   29.40 
   3   0   1  638.24   33.80 
  -3   0  -1  702.63   32.80 
  -3   0  -1  684.73   22.30 
   3   0   1  654.63   33.00 
  -3   0  -1  727.03   34.60 
  -3   0  -1  663.43   28.30 
   3   0   1  700.43   28.60 
   3   0   1  632.44   28.20 
  -3   0  -1  618.14   32.50 
  -3   0  -1  627.54   28.50 
  -3   0  -1  682.33   24.60 
   3   0   1  628.94   29.70 
   3   0   1  688.23   34.20 
   3   0   1  660.13   35.10 
  -3   0  -1  716.03   29.90 
   4   0   1    2.00    7.10 
  -4   0  -1    3.30    3.90 
  -4   0  -1    2.00    1.80 
  -4   0  -1    8.60    6.40 
  -4   0  -1   -2.80    2.50 
  -4   0  -1    4.90    4.70 
  -4   0  -1   -1.00    3.00 
  -4   0  -1    2.20    2.60 
  -4   0  -1   -1.50    3.80 
  -4   0  -1    2.80    3.90 
  -4   0  -1   -2.50    2.00 
  -4   0  -1    2.00    2.50 
  -4   0  -1   14.70    5.60 
   4   0   1    4.10    5.10 
   4   0   1    0.50    7.20 
  -4   0  -1    4.30    3.50 
   4   0   1   -0.40    3.90 
   4   0   1    1.00    3.60 
  -4   0  -1    3.30    4.50 
  -4   0  -1    4.90    6.00 
   4   0   1   -0.30    6.10 
   4   0   1   -2.40    5.10 
  -4   0  -1    5.00    4.20 
   4   0   1   -1.70    3.10 
   4   0   1    5.90    5.80 
  -4   0  -1   -2.10    1.70 
   4   0   1   -0.80    4.50 
   4   0   1    9.50    7.80 
   4   0   1    4.00    4.00 
  -4   0  -1    0.40    2.30 
   4   0   1    1.60    3.10 
   4   0   1    2.50    5.00 
   4   0   1   -0.10    6.30 
  -4   0  -1    1.90    2.70 
   4   0   1    6.20    5.90 
  -4   0  -1   -1.70    4.00 
  -4   0  -1   -0.50    3.30 
  -4   0  -1    1.60    2.80 
  -4   0  -1   -0.10    6.60 
  -4   0  -1   -3.10    4.90 
  -5   0  -1  582.04   22.20 
   5   0   1  536.25   36.50 
   5   0   1  568.04   27.90 
  -5   0  -1  531.25   29.90 
  -5   0  -1  558.34   33.90 
  -5   0  -1  496.65   30.00 
   5   0   1  519.15   38.40 
  -5   0  -1  609.14   36.90 
  -5   0  -1  559.64   29.00 
  -5   0  -1  564.64   25.40 
   5   0   1  588.44   38.00 
  -5   0  -1  532.45   20.50 
  -5   0  -1  560.94   31.20 
   5   0   1  561.64   28.40 
  -5   0  -1  577.14   24.50 
  -5   0  -1  542.25   30.30 
  -5   0  -1  571.84   31.10 
  -5   0  -1  568.64   22.70 
   5   0   1  530.15   36.10 
   5   0   1  583.84   35.90 
   5   0   1  545.25   33.10 
  -5   0  -1  599.74   22.90 
  -5   0  -1  562.34   21.90 
  -5   0  -1  604.34   35.40 
  -5   0  -1  607.34   27.00 
  -5   0  -1  590.14   22.80 
  -5   0  -1  565.24   26.10 
  -5   0  -1  569.94   26.90 
   5   0   1  605.64   31.90 
   5   0   1  540.85   36.70 
   5   0   1  590.14   32.70 
  -5   0  -1  574.24   24.30 
   5   0   1  502.55   36.80 
   5   0   1  551.94   38.50 
  -5   0  -1  510.95   31.30 
  -6   0  -1   -3.30    5.80 
  -6   0  -1    1.20    6.40 
  -6   0  -1    2.30    3.00 
   6   0   1    5.30    5.40 
   6   0   1    3.20    8.30 
   6   0   1   -4.50    7.50 
  -6   0  -1   -3.70    4.90 
  -6   0  -1    0.70    4.40 
  -6   0  -1    6.00    7.50 
  -6   0  -1    4.30    3.10 
  -6   0  -1    0.20    2.20 
  -6   0  -1   -6.50    5.50 
   6   0   1   -3.40    8.70 
   6   0   1    5.00    9.70 
   6   0   1    6.10    8.40 
  -6   0  -1    0.30    6.40 
  -6   0  -1    5.50    7.30 
  -6   0  -1    1.90    3.20 
   6   0   1    5.40    5.20 
   6   0   1    0.80    7.20 
   6   0   1   -5.40    8.10 
  -6   0  -1    3.60    5.10 
  -6   0  -1   -4.50    3.60 
  -6   0  -1    3.60    4.00 
  -6   0  -1   -4.20    3.70 
  -6   0  -1    1.00    3.30 
   6   0   1   14.70   10.60 
  -6   0  -1    8.20    9.30 
  -6   0  -1    6.30    7.30 
   6   0   1    2.50    5.80 
  -6   0  -1    3.80    3.40 
   6   0   1   -4.00    8.50 
  -6   0  -1    2.10    8.30 
  -6   0  -1    0.50    3.20 
  -7   0  -1 3145.29  111.59 
  -7   0  -1 3186.78  113.59 
  -7   0  -1 2911.21   94.19 
  -7   0  -1 2965.00  110.69 
  -7   0  -1 2962.60  119.69 
  -7   0  -1 3178.18  103.09 
   7   0   1 2984.10  127.79 
  -7   0  -1 2830.42  102.39 
  -7   0  -1 2957.70  127.79 
  -7   0  -1 3039.60  110.59 
  -7   0  -1 2915.91  124.59 
   7   0   1 2999.50  123.69 
  -7   0  -1 2920.91  102.29 
  -7   0  -1 2885.31  124.19 
   7   0   1 2916.91  126.79 
   7   0   1 3193.28  115.99 
   7   0   1 2794.22  118.39 
  -7   0  -1 3066.69  114.99 
  -7   0  -1 2794.32  109.69 
   7   0   1 3061.89  119.39 
   7   0   1 2985.80  131.59 
  -7   0  -1 3035.30  101.69 
   7   0   1 2898.31  104.09 
  -7   0  -1 3016.00  107.69 
   7   0   1 3013.80  110.89 
  -7   0  -1 3056.29  118.09 
  -7   0  -1 3040.20  100.49 
   7   0   1 2887.01  124.19 
   7   0   1 2745.03  123.39 
  -7   0  -1 3002.40  118.29 
  -7   0  -1 2966.50  126.09 
   8   0   1    2.10   12.40 
  -8   0  -1    8.00   11.30 
  -8   0  -1    3.30    8.60 
  -8   0  -1   15.00   13.80 
  -8   0  -1   11.80   15.00 
  -8   0  -1    7.10   10.70 
   8   0   1   10.60   12.10 
  -8   0  -1    7.80   13.60 
   8   0   1   -0.90   10.80 
   8   0   1   10.90   15.60 
   8   0   1   -6.20   13.40 
   8   0   1   -4.10   12.20 
   8   0   1    4.40   13.50 
  -8   0  -1    4.50    9.40 
   8   0   1   -2.60    8.40 
   8   0   1   -5.10   13.50 
   8   0   1   -2.30    6.30 
   8   0   1   16.90   13.60 
  -8   0  -1    7.70    8.30 
  -8   0  -1   -2.80    7.50 
  -8   0  -1    6.90    6.40 
  -8   0  -1   -6.00    7.20 
  -8   0  -1  -15.00    8.80 
  -8   0  -1   -7.10    4.80 
  -8   0  -1   -8.20    7.50 
  -8   0  -1    6.70   10.50 
   9   0   1 1479.35   93.09 
   9   0   1 1504.75   78.89 
  -9   0  -1 1426.36   87.69 
   9   0   1 1564.44   94.79 
  -9   0  -1 1535.25   83.89 
  -9   0  -1 1612.44   77.59 
  -9   0  -1 1567.64   79.69 
  -9   0  -1 1524.95   88.99 
  -9   0  -1 1656.43   73.59 
  -9   0  -1 1647.14   93.39 
   9   0   1 1569.84   94.99 
   9   0   1 1555.14   85.19 
   9   0   1 1523.55   90.39 
   9   0   1 1649.33   88.09 
   9   0   1 1595.54   74.99 
  -9   0  -1 1611.84   95.39 
  -9   0  -1 1655.23   77.89 
  -9   0  -1 1481.95   81.09 
   9   0   1 1707.83  102.09 
  -9   0  -1 1549.05   76.19 
  -9   0  -1 1521.65   83.39 
 -10   0  -1   12.60   14.90 
 -10   0  -1   -1.50   14.50 
 -10   0  -1   15.60   20.00 
 -10   0  -1   -0.50   12.40 
  10   0   1   32.20   22.50 
 -10   0  -1   28.70   17.10 
 -10   0  -1  -13.20   10.80 
  10   0   1    7.70   14.50 
  10   0   1    9.50   16.50 
 -10   0  -1  -11.00   12.00 
 -10   0  -1  -11.50   10.90 
 -10   0  -1    1.50   11.80 
 -10   0  -1   -9.90   11.30 
  10   0   1    5.60   16.70 
 -10   0  -1   11.50   17.00 
 -10  -1   1   31.20   17.80 
 -10  -1   1   39.00   18.40 
  10  -1  -1   55.19   22.20 
 -10  -1   1   59.79   26.10 
 -10  -1   1   -5.40   18.90 
 -10  -1   1   36.90   18.90 
 -10  -1   1   56.89   20.80 
  10  -1  -1   36.90   18.30 
 -10  -1   1    3.60   18.30 
 -10  -1   1   58.69   20.60 
 -10  -1   1   41.40   17.10 
  10  -1  -1   80.69   30.40 
 -10  -1   1   38.10   16.80 
  10  -1  -1   47.60   26.60 
 -10  -1   1   54.09   24.00 
  10  -1  -1   11.90   23.60 
 -10   1   1   86.99   23.70 
 -10   1   1    9.90   16.80 
 -10   1   1   19.20   21.40 
  10   1  -1   90.69   27.20 
  10   1  -1   47.10   24.80 
 -10   1   1   24.50   16.20 
  10   1  -1   38.20   22.00 
 -10   1   1   39.90   20.90 
 -10   1   1   26.10   21.60 
  10   1  -1   51.99   24.80 
  10   1  -1   27.00   22.50 
 -10   1   1   63.29   22.30 
 -10   1   1   76.49   19.80 
  10   1  -1   38.80   19.50 
 -10   1   1   76.59   28.50 
  -9  -1   1   12.20    9.60 
  -9  -1   1    8.90   17.90 
  -9  -1   1   -5.40    9.10 
  -9  -1   1   10.80   10.90 
   9  -1  -1   25.10   19.20 
  -9  -1   1    5.40   13.30 
  -9  -1   1   12.60   13.70 
   9  -1  -1   -3.40   14.00 
   9  -1  -1   -4.00   14.00 
  -9  -1   1    6.90   10.10 
   9  -1  -1   -8.00   14.10 
  -9  -1   1    0.20   13.00 
  -9  -1   1    9.90   12.70 
   9  -1  -1   23.80   17.90 
  -9  -1   1   -8.10    9.00 
  -9  -1   1  -17.10   10.10 
   9  -1  -1   21.00   16.50 
  -9  -1   1   26.40   14.30 
  -9  -1   1   -6.20   10.50 
   9  -1  -1    4.20   10.50 
   9   1  -1    4.80   15.20 
   9   1  -1   -6.30   16.80 
  -9   1   1  -11.40   10.50 
  -9   1   1    5.50   10.50 
  -9   1   1    7.20   16.60 
   9   1  -1    5.40   16.50 
   9   1  -1    7.40   12.20 
  -9   1   1    3.90   11.40 
  -9   1   1    5.50   10.80 
   9   1  -1   -5.30   12.50 
   9   1  -1   -1.90   17.40 
  -9   1   1   -3.90    9.30 
   9   1  -1    3.70   15.00 
  -9   1   1   -3.10   10.90 
  -9   1   1   14.50   15.20 
  -9   1   1    4.60   11.60 
  -9   1   1    0.60   13.40 
  -9   1   1   -1.60    9.20 
  -9   1   1    9.00   14.70 
   8  -1  -1  139.59   20.60 
  -8  -1   1  150.38   23.50 
   8  -1  -1  138.69   32.70 
   8  -1  -1  198.28   33.40 
   8  -1  -1  140.69   31.40 
  -8  -1   1  211.98   27.50 
  -8  -1   1  167.18   27.10 
  -8  -1   1  150.68   19.30 
  -8  -1   1  165.58   24.50 
   8  -1  -1  130.79   30.10 
   8  -1  -1  195.18   32.80 
  -8  -1   1  194.88   25.70 
  -8  -1   1  179.48   20.60 
  -8  -1   1  155.58   20.40 
   8  -1  -1  135.79   27.50 
  -8  -1   1  136.99   28.30 
   8  -1  -1  179.88   25.90 
   8  -1  -1  151.48   18.20 
  -8  -1   1  150.98   22.30 
  -8  -1   1  193.18   29.60 
  -8  -1   1  161.88   22.90 
  -8  -1   1  144.29   26.00 
  -8  -1   1  199.68   30.10 
  -8  -1   1  133.19   22.10 
  -8   1   1  114.39   23.00 
  -8   1   1  171.88   26.00 
  -8   1   1  176.68   25.20 
   8   1  -1  161.08   25.00 
   8   1  -1  167.48   21.10 
   8   1  -1  168.98   33.10 
  -8   1   1  163.78   23.30 
  -8   1   1  177.78   30.10 
   8   1  -1  129.79   30.50 
  -8   1   1  122.39   28.30 
   8   1  -1  138.89   27.80 
   8   1  -1  154.68   31.70 
   8   1  -1  161.58   32.30 
  -8   1   1  148.59   19.30 
  -8   1   1  199.78   26.90 
  -8   1   1  158.28   30.80 
  -8   1   1  154.98   20.30 
  -8   1   1  165.08   27.30 
   8   1  -1  118.59   26.70 
  -8   1   1  145.89   21.90 
  -8   1   1  157.48   25.80 
   8   1  -1  163.88   25.70 
  -8   1   1  208.98   30.90 
   7  -1  -1   13.70   12.40 
  -7  -1   1   -8.60   12.40 
  -7  -1   1   19.50    8.50 
   7  -1  -1    6.10    9.60 
   7  -1  -1    4.10   13.40 
  -7  -1   1   -5.30    9.80 
  -7  -1   1   11.90   10.20 
  -7  -1   1   14.20    6.40 
   7  -1  -1    9.20   12.70 
  -7  -1   1   14.90   11.00 
   7  -1  -1    2.20   11.00 
  -7  -1   1   25.40   11.10 
   7  -1  -1   18.50    9.00 
  -7  -1   1   11.60   10.20 
  -7  -1   1   19.40   10.00 
   7  -1  -1   -8.40   12.10 
  -7  -1   1   42.50   11.60 
  -7  -1   1   22.80    7.70 
   7  -1  -1   23.70    8.20 
  -7  -1   1   15.50    8.70 
   7  -1  -1   12.20   12.10 
   7  -1  -1   13.60    9.90 
  -7  -1   1    9.20   10.40 
  -7  -1   1   10.10    7.90 
  -7  -1   1   15.80   12.40 
   7  -1  -1    2.80   10.50 
  -7  -1   1    0.80    9.40 
  -7  -1   1    5.30    6.70 
   7   1  -1   12.50   12.60 
   7   1  -1    8.90    7.60 
  -7   1   1   19.60    6.30 
  -7   1   1   31.50   13.50 
  -7   1   1   16.50   10.60 
  -7   1   1   22.40    9.60 
  -7   1   1    9.50    7.80 
  -7   1   1   14.60   10.60 
  -7   1   1   20.00   12.20 
  -7   1   1    4.00    7.00 
   7   1  -1   26.00   16.60 
  -7   1   1    8.30    7.60 
   7   1  -1   21.80    7.60 
  -7   1   1   10.70    5.90 
  -7   1   1   19.70   10.40 
   7   1  -1    7.30   10.50 
   7   1  -1    3.20   12.60 
  -7   1   1   30.30   15.20 
   7   1  -1   -6.10   12.50 
   7   1  -1    7.20   14.40 
  -7   1   1   15.60    8.40 
  -7   1   1   32.90   17.20 
  -7   1   1    8.70    9.50 
  -7   1   1   26.60    9.70 
  -7   1   1   11.90   12.00 
  -7   1   1   14.20    6.50 
   7   1  -1   13.40   13.80 
  -7   1   1   12.20    6.10 
   7   1  -1    2.80    8.40 
  -6  -1   1 1811.42   62.89 
  -6  -1   1 1770.62   71.59 
   6  -1  -1 1783.02   80.49 
  -6  -1   1 1774.22   61.19 
  -6  -1   1 1793.62   56.09 
   6  -1  -1 1778.62   74.59 
  -6  -1   1 1745.73   70.09 
  -6  -1   1 1754.32   63.49 
   6  -1  -1 1787.72   69.19 
   6  -1  -1 1947.71   86.39 
  -6  -1   1 1797.72   69.09 
   6  -1  -1 1835.12   65.99 
   6  -1  -1 1734.73   87.39 
  -6  -1   1 1865.41   83.59 
  -6  -1   1 1822.72   75.19 
  -6  -1   1 1846.32   72.69 
  -6  -1   1 1757.32   69.49 
   6  -1  -1 1865.71   80.69 
  -6  -1   1 1881.11   67.59 
   6  -1  -1 1785.62   83.49 
  -6  -1   1 1855.01   64.89 
   6  -1  -1 1734.53   76.09 
  -6  -1   1 1763.22   69.69 
   6  -1  -1 1718.33   78.99 
   6  -1  -1 1829.62   71.69 
  -6  -1   1 1880.61   76.59 
  -6  -1   1 1698.23   74.89 
  -6  -1   1 1905.01   73.59 
   6  -1  -1 1755.82   84.79 
  -6  -1   1 1905.21   73.69 
  -6  -1   1 1918.81   69.59 
  -6   1   1 1853.81   61.09 
  -6   1   1 1856.31   59.19 
  -6   1   1 1838.52   58.69 
   6   1  -1 1747.33   73.89 
   6   1  -1 1701.33   82.09 
  -6   1   1 1782.82   66.09 
   6   1  -1 1766.42   85.19 
  -6   1   1 1783.32   61.79 
  -6   1   1 1748.93   60.89 
  -6   1   1 1797.42   57.59 
  -6   1   1 1769.22   73.99 
  -6   1   1 1899.91   76.39 
   6   1  -1 1902.11   84.49 
   6   1  -1 1879.91   80.69 
  -6   1   1 1781.32   61.99 
  -6   1   1 1792.92   83.59 
  -6   1   1 1777.22   69.19 
   6   1  -1 1806.12   79.29 
  -6   1   1 1823.52   59.29 
  -6   1   1 1833.92   72.99 
  -6   1   1 1850.71   62.69 
   6   1  -1 1725.63   67.79 
  -6   1   1 1800.62   85.69 
  -6   1   1 1852.41   62.09 
   6   1  -1 1810.12   74.39 
   6   1  -1 1699.73   62.99 
  -6   1   1 1786.42   80.49 
  -6   1   1 1760.82   69.49 
  -6   1   1 1731.23   69.09 
  -6   1   1 1730.23   66.69 
  -6   1   1 1803.12   76.09 
  -6   1   1 1811.22   73.99 
   6   1  -1 1834.92   73.49 
   6   1  -1 1763.82   81.59 
  -6   1   1 1767.82   68.99 
   6   1  -1 1873.01   88.09 
   6   1  -1 1854.21   62.69 
  -6   1   1 1819.42   62.29 
   5  -1  -1  687.43   40.20 
   5  -1  -1  689.73   38.50 
   5  -1  -1  664.93   30.40 
   5  -1  -1  689.83   43.30 
  -5  -1   1  729.83   30.30 
   5  -1  -1  743.83   35.00 
   5  -1  -1  713.23   46.70 
  -5  -1   1  682.53   34.20 
  -5  -1   1  675.73   30.30 
   5  -1  -1  759.52   34.10 
  -5  -1   1  682.63   36.40 
   5  -1  -1  671.63   39.90 
  -5  -1   1  672.23   33.10 
  -5  -1   1  682.63   31.20 
  -5  -1   1  669.73   27.00 
  -5  -1   1  698.43   25.20 
  -5  -1   1  691.73   30.90 
  -5  -1   1  716.53   38.10 
  -5  -1   1  690.23   25.10 
  -5  -1   1  697.43   30.90 
  -5  -1   1  729.93   35.20 
  -5  -1   1  712.33   33.60 
  -5  -1   1  658.23   29.10 
  -5  -1   1  679.93   29.10 
  -5  -1   1  732.63   33.80 
  -5  -1   1  682.73   35.00 
  -5  -1   1  718.93   34.50 
   5  -1  -1  663.53   42.60 
  -5  -1   1  770.12   38.90 
  -5  -1   1  791.52   44.70 
   5  -1  -1  711.83   36.90 
  -5  -1   1  657.53   34.90 
  -5  -1   1  720.73   36.10 
  -5  -1   1  711.93   32.30 
   5  -1  -1  710.13   42.40 
   5  -1  -1  715.13   40.00 
   5  -1  -1  640.14   28.90 
  -5   1   1  686.03   29.10 
  -5   1   1  684.33   27.60 
   5   1  -1  657.03   41.60 
   5   1  -1  749.62   44.40 
  -5   1   1  673.93   27.90 
   5   1  -1  677.03   26.50 
  -5   1   1  753.52   45.20 
  -5   1   1  661.73   27.00 
  -5   1   1  685.03   36.80 
   5   1  -1  702.03   42.50 
  -5   1   1  695.23   25.00 
  -5   1   1  750.62   28.60 
  -5   1   1  733.83   33.70 
  -5   1   1  680.23   36.00 
  -5   1   1  678.43   25.80 
  -5   1   1  682.73   24.70 
  -5   1   1  720.63   31.00 
   5   1  -1  727.03   29.70 
   5   1  -1  701.13   36.40 
   5   1  -1  659.73   29.60 
  -5   1   1  709.43   38.00 
  -5   1   1  675.73   31.40 
   5   1  -1  730.53   33.50 
   5   1  -1  653.93   42.90 
   5   1  -1  671.83   36.60 
  -5   1   1  701.33   29.50 
  -5   1   1  697.93   36.20 
   5   1  -1  683.53   39.80 
   5   1  -1  698.23   35.70 
  -5   1   1  733.63   35.10 
  -5   1   1  712.43   35.90 
   5   1  -1  628.64   43.30 
  -5   1   1  707.53   41.00 
  -5   1   1  663.53   28.60 
  -5   1   1  693.83   32.90 
   5   1  -1  710.63   40.40 
  -5   1   1  713.53   43.10 
   4  -1  -1 5122.29  174.18 
   4  -1  -1 5293.57  176.38 
  -4  -1   1 5275.07  165.58 
   4  -1  -1 5476.95  165.28 
  -4  -1   1 5401.56  167.18 
  -4  -1   1 5192.58  159.38 
   4  -1  -1 5471.15  172.98 
  -4  -1   1 5286.57  156.98 
  -4  -1   1 5258.67  156.98 
  -4  -1   1 5312.07  165.08 
  -4  -1   1 5397.46  162.88 
   4  -1  -1 5411.76  161.98 
   4  -1  -1 5544.95  168.28 
  -4  -1   1 5370.66  175.18 
   4  -1  -1 5451.25  171.08 
   4  -1  -1 5579.54  173.78 
   4  -1  -1 5381.16  161.98 
  -4  -1   1 5181.58  168.78 
  -4  -1   1 5519.15  162.58 
  -4  -1   1 5532.75  163.88 
  -4  -1   1 5450.65  162.68 
  -4  -1   1 5506.65  162.08 
  -4  -1   1 5245.38  160.88 
  -4  -1   1 5375.86  157.18 
  -4  -1   1 5392.06  161.28 
  -4  -1   1 5400.56  166.98 
  -4  -1   1 5259.57  163.78 
   4  -1  -1 5347.36  176.78 
  -4  -1   1 5308.07  158.38 
  -4  -1   1 5279.07  163.38 
   4  -1  -1 5458.75  172.38 
   4  -1  -1 5216.48  163.98 
   4  -1  -1 5021.90  178.18 
   4  -1  -1 5370.46  159.58 
  -4  -1   1 5341.37  165.68 
  -4  -1   1 5182.68  161.78 
  -4  -1   1 5228.18  164.88 
  -4   1   1 5149.38  158.48 
  -4   1   1 5132.49  168.68 
   4   1  -1 5430.66  175.28 
  -4   1   1 5313.77  166.78 
  -4   1   1 5177.48  160.38 
  -4   1   1 5333.27  162.18 
  -4   1   1 5178.48  164.78 
  -4   1   1 5275.97  167.38 
   4   1  -1 5516.25  168.38 
  -4   1   1 5158.58  175.08 
  -4   1   1 5202.18  176.28 
  -4   1   1 5292.57  158.08 
  -4   1   1 5290.57  160.68 
  -4   1   1 5165.78  159.78 
   4   1  -1 5221.98  178.28 
  -4   1   1 5378.96  173.18 
  -4   1   1 5419.86  158.58 
   4   1  -1 5169.78  166.78 
   4   1  -1 5162.68  174.08 
   4   1  -1 5201.68  166.38 
  -4   1   1 5317.77  163.58 
  -4   1   1 5429.06  154.98 
   4   1  -1 5328.87  166.38 
   4   1  -1 5288.67  175.88 
  -4   1   1 5081.79  164.78 
  -4   1   1 5140.29  165.88 
   4   1  -1 5133.09  162.58 
   4   1  -1 5304.57  159.88 
   4   1  -1 5152.58  176.18 
   4   1  -1 5224.98  157.78 
   4   1  -1 5244.48  171.38 
  -4   1   1 5399.46  163.28 
  -4   1   1 5480.95  171.18 
  -4   1   1 5303.57  167.98 
   4   1  -1 4781.22  162.98 
  -4   1   1 5367.86  162.38 
   4   1  -1 5244.58  171.08 
  -4   1   1 5452.25  167.28 
  -4   1   1 5371.76  157.98 
  -4   1   1 5277.77  161.78 
  -4   1   1 5223.28  158.38 
   4   1  -1 5220.98  160.38 
  -3  -1   1  356.66   20.00 
  -3  -1   1  387.16   23.60 
   3  -1  -1  388.86   15.10 
  -3  -1   1  389.56   20.50 
  -3  -1   1  416.16   18.40 
  -3  -1   1  379.86   15.00 
   3  -1  -1  383.46   18.80 
   3  -1  -1  391.46   22.80 
  -3  -1   1  392.56   20.30 
  -3  -1   1  357.16   17.60 
   3  -1  -1  401.36   16.40 
  -3  -1   1  353.06   21.20 
  -3  -1   1  383.06   19.10 
  -3  -1   1  381.36   18.40 
  -3  -1   1  350.56   16.10 
   3  -1  -1  390.76   22.90 
  -3  -1   1  379.66   19.60 
   3  -1  -1  372.36   17.60 
  -3  -1   1  383.26   18.30 
  -3  -1   1  378.96   21.20 
  -3  -1   1  420.06   18.90 
   3  -1  -1  394.06   15.10 
  -3  -1   1  414.16   19.80 
  -3  -1   1  382.36   15.70 
  -3  -1   1  372.76   15.70 
   3  -1  -1  408.86   23.30 
  -3  -1   1  387.16   17.80 
  -3  -1   1  385.66   24.10 
  -3  -1   1  391.46   14.30 
   3  -1  -1  342.87   23.60 
  -3  -1   1  378.86   19.70 
   3  -1  -1  383.16   19.00 
   3  -1  -1  384.26   18.90 
   3  -1  -1  389.66   22.60 
   3  -1  -1  400.76   19.40 
  -3  -1   1  400.76   24.20 
  -3  -1   1  384.56   22.30 
   3  -1  -1  380.86   23.70 
   3  -1  -1  375.16   25.00 
  -3  -1   1  397.66   19.10 
  -3  -1   1  383.06   16.50 
  -3  -1   1  393.06   18.30 
   3  -1  -1  366.46   25.40 
  -3  -1   1  371.86   19.10 
  -3  -1   1  366.86   19.10 
  -3  -1   1  371.06   17.70 
  -3  -1   1  416.96   24.70 
  -3   1   1  389.76   20.00 
  -3   1   1  402.76   22.60 
   3   1  -1  382.16   24.20 
  -3   1   1  403.76   18.00 
   3   1  -1  351.86   20.30 
   3   1  -1  383.46   19.30 
   3   1  -1  396.66   20.40 
   3   1  -1  335.77   21.20 
  -3   1   1  413.96   19.90 
  -3   1   1  359.76   13.60 
   3   1  -1  361.76   23.70 
  -3   1   1  378.56   16.80 
   3   1  -1  400.06   22.70 
  -3   1   1  373.36   20.50 
   3   1  -1  393.26   20.80 
  -3   1   1  403.36   24.40 
  -3   1   1  377.56   19.10 
   3   1  -1  382.66   18.40 
   3   1  -1  390.86   17.20 
  -3   1   1  416.06   24.70 
   3   1  -1  362.26   17.10 
  -3   1   1  349.87   15.80 
  -3   1   1  375.96   17.30 
  -3   1   1  380.26   20.60 
  -3   1   1  364.26   20.60 
  -3   1   1  344.27   17.20 
  -3   1   1  393.66   20.40 
  -3   1   1  353.06   21.60 
  -3   1   1  388.56   22.60 
  -3   1   1  371.86   23.90 
   3   1  -1  391.36   22.90 
  -3   1   1  347.97   16.80 
   3   1  -1  356.06   18.30 
   3   1  -1  380.36   15.90 
   3   1  -1  379.36   17.20 
  -3   1   1  368.26   16.30 
   3   1  -1  418.56   19.40 
   3   1  -1  413.46   24.80 
  -3   1   1  425.96   25.90 
  -3   1   1  387.66   16.20 
  -3   1   1  398.16   21.20 
  -3   1   1  338.27   20.40 
  -3   1   1  361.76   17.00 
  -3   1   1  359.26   17.80 
  -3   1   1  380.76   17.80 
   3   1  -1  383.76   17.90 
   3   1  -1  394.36   20.90 
   2  -1  -1  980.20   33.60 
   2  -1  -1  961.00   31.70 
  -2  -1   1  956.50   32.50 
  -2  -1   1  955.30   34.60 
  -2  -1   1  929.41   35.20 
  -2  -1   1  957.80   34.10 
   2  -1  -1 1017.90   34.90 
  -2  -1   1  932.51   35.30 
   2  -1  -1  954.20   33.30 
   2  -1  -1  947.31   33.40 
   2  -1  -1  970.40   32.70 
  -2  -1   1  929.11   37.70 
  -2  -1   1  950.90   36.10 
  -2  -1   1  972.70   32.30 
   2  -1  -1  961.60   40.90 
  -2  -1   1  945.51   30.10 
  -2  -1   1 1001.50   35.70 
  -2  -1   1  922.71   38.70 
   2  -1  -1  973.00   38.20 
  -2  -1   1  949.71   34.70 
  -2  -1   1  981.40   39.60 
  -2  -1   1  993.10   34.20 
  -2  -1   1 1002.90   34.50 
  -2  -1   1 1001.90   31.60 
  -2  -1   1 1004.90   37.20 
   2  -1  -1  937.71   36.40 
   2  -1  -1 1021.90   40.00 
   2  -1  -1  978.30   33.20 
   2  -1  -1 1041.20   39.40 
   2  -1  -1  913.81   36.50 
  -2  -1   1 1058.39   41.20 
   2  -1  -1  997.30   34.20 
  -2  -1   1  952.50   38.80 
   2  -1  -1  996.20   40.00 
  -2  -1   1 1004.00   35.80 
  -2  -1   1  984.70   35.60 
  -2  -1   1  925.01   32.10 
   2  -1  -1  976.20   30.30 
  -2  -1   1 1012.90   34.50 
  -2  -1   1  937.91   33.00 
   2  -1  -1  974.10   31.80 
  -2  -1   1  978.80   32.50 
   2  -1  -1  947.31   35.10 
  -2  -1   1  936.21   34.80 
   2  -1  -1  973.20   38.50 
  -2  -1   1  981.60   34.50 
  -2   1   1  942.21   37.20 
  -2   1   1 1008.20   35.70 
  -2   1   1  957.10   31.20 
   2   1  -1  969.30   36.90 
   2   1  -1  953.10   33.50 
   2   1  -1  977.30   32.20 
  -2   1   1  985.90   40.70 
   2   1  -1  930.01   37.20 
   2   1  -1  956.50   39.90 
  -2   1   1  988.40   31.20 
  -2   1   1  946.71   31.00 
   2   1  -1  967.90   34.80 
  -2   1   1  929.11   39.40 
   2   1  -1  931.01   36.20 
  -2   1   1  948.81   33.90 
   2   1  -1  957.70   33.10 
   2   1  -1  995.50   35.70 
  -2   1   1  992.40   32.20 
  -2   1   1 1007.10   36.60 
   2   1  -1  976.00   32.90 
  -2   1   1  941.31   32.40 
   2   1  -1  990.40   33.10 
  -2   1   1  951.60   37.90 
  -2   1   1  987.50   38.70 
   2   1  -1  964.40   36.00 
  -2   1   1  980.60   33.40 
   2   1  -1  967.70   34.50 
  -2   1   1 1007.60   37.50 
  -2   1   1 1007.60   35.60 
  -2   1   1  945.01   33.50 
   2   1  -1  980.10   30.70 
  -2   1   1  963.40   38.30 
  -2   1   1  968.60   32.40 
  -2   1   1  937.21   31.80 
  -2   1   1  994.40   34.10 
  -2   1   1 1011.30   39.30 
  -2   1   1  980.30   34.60 
  -2   1   1  974.30   34.40 
   2   1  -1  961.80   29.90 
  -2   1   1 1007.30   39.40 
   2   1  -1  972.20   36.20 
  -2   1   1 1068.29   38.30 
  -2   1   1  965.70   32.60 
   2   1  -1  975.90   34.70 
   2   1  -1  924.51   34.20 
   2   1  -1 1002.60   39.90 
   2   1  -1  974.20   32.60 
  -2   1   1  951.40   39.00 
  -2   1   1  938.01   34.50 
  -2   1   1 1038.40   37.60 
   1  -1  -1  162.58   11.10 
  -1  -1   1  167.18    8.60 
  -1  -1   1  154.08    8.80 
  -1  -1   1  165.28    8.20 
  -1  -1   1  167.08    9.90 
  -1  -1   1  152.58    8.10 
  -1  -1   1  174.98    9.00 
  -1  -1   1  160.88    8.90 
  -1  -1   1  169.38    9.50 
   1  -1  -1  163.78    9.00 
   1  -1  -1  139.19    9.00 
  -1  -1   1  170.18    8.40 
  -1  -1   1  158.38    9.80 
  -1  -1   1  165.78    9.20 
   1  -1  -1  109.89    9.40 
   1  -1  -1  128.09    7.20 
   1  -1  -1  168.48   10.90 
  -1  -1   1  152.48    9.00 
  -1  -1   1  167.08    7.50 
  -1  -1   1  173.68    8.50 
  -1  -1   1  162.98   10.00 
   1  -1  -1  163.28    9.30 
  -1  -1   1  159.88    7.30 
  -1  -1   1  140.79   10.80 
  -1  -1   1  160.98    8.70 
   1  -1  -1  157.58   10.50 
  -1  -1   1  162.38    7.80 
  -1  -1   1  159.68    8.70 
   1  -1  -1  173.88   10.20 
   1  -1  -1  119.19    7.30 
  -1  -1   1  150.68    9.00 
  -1  -1   1  160.08    9.60 
  -1  -1   1  182.48    9.40 
  -1  -1   1  176.28    9.30 
   1  -1  -1  172.38   12.10 
  -1   1   1  167.88    7.50 
  -1   1   1  174.48    9.70 
   1   1  -1  175.68    7.80 
  -1   1   1  155.78    7.00 
   1   1  -1  185.58    8.60 
  -1   1   1  166.88    8.40 
  -1   1   1  165.38    8.70 
  -1   1   1  156.28    8.90 
  -1   1   1  164.88    9.30 
  -1   1   1  152.58    8.90 
   1   1  -1  174.38    9.80 
   1   1  -1  166.98    8.80 
  -1   1   1  150.98    8.50 
  -1   1   1  162.28    8.40 
   1   1  -1  158.18    9.60 
  -1   1   1  163.48    8.30 
  -1   1   1  149.29    8.30 
   1   1  -1  171.28    7.60 
   1   1  -1  168.78   11.40 
   1   1  -1  129.69   10.10 
   1   1  -1  151.18    8.40 
  -1   1   1  170.68   10.30 
  -1   1   1  156.88    6.40 
   1   1  -1  139.69    8.00 
  -1   1   1  163.68    8.60 
  -1   1   1  148.89    9.70 
   1   1  -1  190.38    9.90 
  -1   1   1  160.78    8.90 
  -1   1   1  182.98   10.80 
  -1   1   1  168.68    7.70 
   1   1  -1  162.28    8.70 
  -1   1   1  170.38    8.60 
   1   1  -1  159.28    8.90 
   1   1  -1  151.98    9.10 
  -1   1   1  167.78   10.50 
  -1   1   1  148.49    7.70 
  -1   1   1  155.58   10.30 
   1   1  -1  142.59    8.50 
   0  -1   1 5212.18  149.09 
   0  -1   1 5188.68  150.38 
   0  -1  -1 4969.10  152.08 
   0  -1   1 5110.39  150.98 
   0  -1  -1 5169.28  151.28 
   0  -1  -1 5355.66  149.69 
   0  -1   1 4740.73  150.48 
   0  -1  -1 5169.78  150.58 
   0  -1   1 5066.99  148.49 
   0  -1   1 4998.10  149.79 
   0  -1   1 5206.58  151.28 
   0  -1   1 4368.46  151.68 
   0  -1   1 5062.99  151.78 
   0  -1  -1 5239.28  150.48 
   0   1   1 5249.27  148.59 
   0   1   1 5320.67  148.79 
   0   1  -1 5263.27  150.28 
   0   1   1 5313.77  148.89 
   0   1   1 5081.79  150.48 
   0   1   1 5121.19  150.88 
   0   1   1 5221.98  150.48 
   0   1   1 5195.58  148.79 
   0   1   1 5102.29  150.68 
   0   1  -1 5327.37  150.98 
   0   1  -1 5295.37  149.09 
   0   1  -1 4690.83  149.79 
   0   1   1 4942.41  151.48 
   0   1   1 5210.58  150.48 
   0   1  -1 5173.68  149.99 
   0   1  -1 5391.86  150.28 
   0   1   1 4414.96  150.18 
   0   1   1 5313.17  150.88 
   0   1   1 4578.84  150.18 
   0   1   1 5053.59  151.28 
   0   1   1 5142.29  150.68 
   0   1   1 5210.58  149.09 
   0   1  -1 5158.48  150.48 
   0   1  -1 5033.20  150.18 
   0   1  -1 5279.57  150.38 
   0   1  -1 5402.56  149.79 
   0   1   1 5230.48  149.39 
   0   1  -1 5396.06  150.58 
  -1  -1  -1  738.23   24.80 
   1  -1   1  685.73   26.10 
  -1  -1  -1  712.63   25.60 
  -1  -1  -1  754.82   28.40 
   1  -1   1  708.73   24.10 
   1  -1   1  691.83   28.10 
  -1  -1  -1  750.82   28.10 
  -1  -1  -1  723.03   25.70 
   1  -1   1  719.93   28.30 
  -1  -1  -1  797.72   26.70 
   1  -1   1  723.13   27.50 
  -1  -1  -1  778.02   27.20 
  -1  -1  -1  734.33   25.90 
  -1  -1  -1  799.72   30.30 
   1  -1   1  664.73   28.50 
   1  -1   1  677.23   28.50 
   1  -1   1  702.13   23.00 
  -1  -1  -1  668.63   24.40 
   1  -1   1  698.43   28.60 
   1  -1   1  694.13   23.60 
  -1  -1  -1  722.83   25.80 
   1  -1   1  723.13   25.90 
  -1  -1  -1  705.93   25.90 
   1  -1   1  660.23   24.00 
   1  -1   1  700.13   29.50 
   1  -1   1  701.33   26.10 
   1  -1   1  711.83   25.50 
   1  -1   1  662.73   24.50 
  -1  -1  -1  763.42   28.60 
  -1  -1  -1  690.73   24.90 
  -1  -1  -1  780.02   25.10 
  -1  -1  -1  710.83   25.00 
  -1  -1  -1  722.83   26.30 
  -1  -1  -1  775.52   28.60 
  -1  -1  -1  715.33   25.30 
  -1  -1  -1  690.43   25.70 
   1  -1   1  728.83   29.70 
   1  -1   1  714.63   27.20 
   1  -1   1  608.74   23.90 
   1  -1   1  708.03   26.60 
   1   1   1  697.83   25.50 
  -1   1  -1  731.33   27.30 
  -1   1  -1  717.13   24.00 
  -1   1  -1  731.33   26.60 
  -1   1  -1  673.63   28.60 
   1   1   1  689.83   24.60 
  -1   1  -1  688.43   24.60 
  -1   1  -1  701.03   27.20 
  -1   1  -1  735.03   23.80 
   1   1   1  722.23   26.10 
   1   1   1  763.12   27.80 
   1   1   1  678.43   25.20 
   1   1   1  680.93   23.70 
  -1   1  -1  666.63   29.00 
  -1   1  -1  698.63   22.90 
  -1   1  -1  698.43   24.50 
   1   1   1  801.22   30.60 
   1   1   1  709.53   26.50 
   1   1   1  701.63   25.60 
   1   1   1  800.42   28.00 
  -1   1  -1  705.83   24.20 
   1   1   1  802.42   28.70 
   1   1   1  702.43   25.90 
  -1   1  -1  716.73   22.50 
  -1   1  -1  737.13   24.00 
  -1   1  -1  731.93   23.90 
   1   1   1  699.83   25.50 
  -1   1  -1  680.83   28.30 
  -1   1  -1  748.63   28.50 
   1   1   1  788.32   27.90 
  -1   1  -1  667.03   26.10 
  -1   1  -1  686.53   24.00 
   1   1   1  717.43   25.30 
  -1   1  -1  704.73   23.50 
  -1   1  -1  681.33   26.80 
  -1   1  -1  698.43   24.20 
   1   1   1  682.73   24.40 
  -1   1  -1  701.23   25.60 
  -1   1  -1  694.63   26.20 
  -1   1  -1  702.13   27.60 
   1   1   1  709.33   25.90 
  -1   1  -1  740.33   28.30 
  -1   1  -1  711.73   25.10 
   1   1   1  684.43   25.00 
   1   1   1  824.22   29.00 
   1   1   1  724.23   25.90 
  -2  -1  -1 9663.83  277.57 
  -2  -1  -1 9486.35  281.77 
  -2  -1  -1 9530.15  278.17 
  -2  -1  -1 9683.53  274.47 
   2  -1   1 8900.41  284.47 
  -2  -1  -1 9445.46  280.57 
  -2  -1  -1 9639.24  273.57 
  -2  -1  -1 9609.74  277.67 
   2  -1   1 9640.04  276.87 
   2  -1   1 9329.27  282.57 
   2  -1   1 9395.86  278.27 
   2  -1   1 9001.40  277.77 
  -2  -1  -1 9859.91  277.67 
   2  -1   1 9121.19  274.77 
  -2  -1  -1 9267.37  281.87 
  -2  -1  -1 9556.34  275.27 
  -2  -1  -1 9722.03  274.67 
  -2  -1  -1 9859.01  278.27 
  -2  -1  -1 9287.17  279.77 
   2  -1   1 9718.63  273.47 
  -2  -1  -1 9457.75  274.37 
   2  -1   1 8970.20  278.77 
   2  -1   1 9509.25  278.57 
  -2  -1  -1 9295.67  283.57 
   2  -1   1 9251.88  280.07 
  -2  -1  -1 9720.83  276.07 
   2  -1   1 9533.45  273.37 
   2  -1   1 8920.41  282.17 
   2  -1   1 9280.97  283.87 
   2  -1   1 8519.75  280.07 
  -2  -1  -1 9540.04  284.67 
   2  -1   1 9312.47  275.47 
  -2  -1  -1 9647.53  277.57 
  -2  -1  -1 9519.65  282.17 
  -2  -1  -1 9734.43  274.77 
   2  -1   1 9099.49  276.67 
  -2  -1  -1 9278.37  277.87 
  -2  -1  -1 9665.73  279.67 
   2  -1   1 9577.74  274.57 
  -2  -1  -1 9275.97  281.37 
   2  -1   1 9194.68  277.47 
  -2  -1  -1 9602.94  281.57 
   2  -1   1 8779.22  279.47 
  -2  -1  -1 9241.58  280.77 
   2  -1   1 9529.15  281.17 
   2  -1   1 9628.74  273.57 
  -2  -1  -1 9357.76  278.57 
  -2  -1  -1 9596.24  274.87 
  -2  -1  -1 9817.02  277.37 
   2  -1   1 9173.88  275.57 
  -2  -1  -1 9366.46  276.87 
   2  -1   1 9362.46  283.07 
   2  -1   1 9419.26  280.07 
   2  -1   1 9371.66  276.97 
   2  -1   1 9261.67  283.17 
  -2  -1  -1 9171.98  277.27 
  -2  -1  -1 9168.18  275.07 
  -2   1  -1 9431.26  278.57 
   2   1   1 9313.27  273.17 
  -2   1  -1 9377.06  279.57 
  -2   1  -1 9871.01  283.57 
   2   1   1 9571.94  277.37 
   2   1   1 9175.38  275.37 
  -2   1  -1 9657.83  271.67 
  -2   1  -1 9398.06  279.37 
   2   1   1 9341.26  277.97 
   2   1   1 9446.05  280.97 
  -2   1  -1 9520.05  278.27 
  -2   1  -1 9354.86  280.77 
  -2   1  -1 9552.84  274.97 
  -2   1  -1 9374.06  277.97 
  -2   1  -1 9673.13  273.67 
   2   1   1 9228.88  280.87 
  -2   1  -1 9407.86  272.67 
  -2   1  -1 9133.79  273.97 
  -2   1  -1 9460.55  279.57 
   2   1   1 8987.80  283.77 
  -2   1  -1 9409.56  276.07 
   2   1   1 8281.17  276.87 
  -2   1  -1 9568.64  280.77 
   2   1   1 9581.94  280.17 
  -2   1  -1 9397.56  280.07 
  -2   1  -1 9096.39  283.87 
   2   1   1 9424.96  281.27 
   2   1   1 9648.63  282.47 
   2   1   1 9076.89  275.47 
  -2   1  -1 9619.94  276.27 
   2   1   1 9659.53  277.57 
  -2   1  -1 9536.55  282.47 
  -2   1  -1 9386.56  272.17 
   2   1   1 9554.14  276.37 
   2   1   1 9551.24  282.07 
  -2   1  -1 9543.25  276.57 
  -2   1  -1 9321.47  283.77 
  -2   1  -1 9099.19  271.67 
  -2   1  -1 9192.58  281.97 
  -2   1  -1 9470.75  276.77 
  -2   1  -1 9805.22  274.67 
   2   1   1 9545.54  274.87 
   2   1   1 9999.00  279.17 
  -2   1  -1 9271.07  282.17 
  -2   1  -1 9792.12  271.47 
   2   1   1 9338.57  279.47 
   2   1   1 9112.19  273.77 
   2   1   1 9749.82  275.37 
   2   1   1 9382.66  277.97 
  -2   1  -1 9522.55  276.67 
   2   1   1 9291.87  279.17 
  -2   1  -1 9253.47  273.87 
  -2   1  -1 9598.04  278.47 
   2   1   1 9344.87  273.77 
  -2   1  -1 9185.68  272.57 
  -2   1  -1 9223.18  273.47 
  -2   1  -1 9050.89  277.07 
   2   1   1 9138.59  275.07 
   2   1   1 9476.05  274.77 
  -2   1  -1 9468.55  280.17 
  -2   1  -1 9405.76  273.87 
   3  -1   1   76.69   11.20 
   3  -1   1   54.39    8.70 
  -3  -1  -1   86.79    6.70 
   3  -1   1   87.49   13.00 
   3  -1   1   73.19    9.00 
   3  -1   1   80.69   10.50 
  -3  -1  -1   83.49    9.80 
   3  -1   1   86.79   11.60 
  -3  -1  -1   74.09   10.00 
  -3  -1  -1   85.69    9.30 
   3  -1   1   87.49    8.40 
   3  -1   1  108.89   13.00 
   3  -1   1   70.09   13.10 
  -3  -1  -1  101.19    8.90 
  -3  -1  -1   85.49   12.30 
  -3  -1  -1   92.39   12.90 
  -3  -1  -1   82.79   11.60 
   3  -1   1  105.39   13.90 
  -3  -1  -1  114.29   14.70 
  -3  -1  -1   83.19   12.50 
   3  -1   1   83.89   11.30 
  -3  -1  -1   74.29    8.50 
  -3  -1  -1   98.09   11.80 
  -3  -1  -1   84.89    6.40 
  -3  -1  -1   84.89    9.50 
  -3  -1  -1   65.39    9.70 
  -3  -1  -1   56.79   11.10 
  -3  -1  -1  104.29    8.00 
   3  -1   1   87.29   13.80 
  -3  -1  -1   67.99    9.80 
   3  -1   1   76.79   14.00 
   3  -1   1   83.19    9.10 
  -3  -1  -1   90.19   12.20 
  -3  -1  -1   86.49   10.90 
  -3  -1  -1   85.89   15.40 
   3  -1   1   91.59   12.10 
  -3  -1  -1   82.39    8.50 
  -3  -1  -1   86.89    4.70 
  -3  -1  -1  108.89   10.30 
  -3  -1  -1   71.19   12.40 
   3  -1   1   91.89   14.00 
  -3  -1  -1   72.09    7.70 
   3  -1   1   78.29    9.70 
   3  -1   1   91.59    6.70 
  -3  -1  -1   80.49    9.50 
   3   1   1   74.49   10.50 
  -3   1  -1   91.69    8.90 
  -3   1  -1   74.79    5.40 
   3   1   1   95.49   11.70 
   3   1   1   66.19   11.50 
  -3   1  -1   79.09    5.70 
   3   1   1   88.59    6.70 
  -3   1  -1   76.59    7.30 
   3   1   1   73.69   11.60 
  -3   1  -1   86.59    5.50 
   3   1   1  103.19   10.70 
  -3   1  -1  105.89   11.60 
  -3   1  -1   82.19    5.80 
   3   1   1   80.69   11.40 
  -3   1  -1   87.99   11.10 
  -3   1  -1   82.79    4.60 
   3   1   1   84.89   12.30 
  -3   1  -1   84.09   12.30 
  -3   1  -1   97.59   15.90 
  -3   1  -1   77.99    7.40 
  -3   1  -1   88.69   13.00 
   3   1   1   67.39   12.50 
   3   1   1   85.09   14.60 
   3   1   1  100.29   11.40 
  -3   1  -1   82.09   11.20 
   3   1   1   89.49   11.50 
   3   1   1   91.59    9.80 
  -3   1  -1   81.99   10.30 
   3   1   1   88.79   15.00 
  -3   1  -1   64.59    8.30 
   3   1   1   91.89    7.40 
   3   1   1   86.79    5.80 
   3   1   1   84.99    9.90 
  -3   1  -1   78.29    4.60 
  -3   1  -1   81.69    9.80 
  -3   1  -1   63.39   12.00 
   3   1   1   82.19    6.50 
   3   1   1   85.89   13.80 
  -3   1  -1   92.89    6.90 
  -3   1  -1   94.79    9.30 
  -3   1  -1   94.89    8.80 
   3   1   1  112.89   13.50 
   3   1   1  107.59   14.40 
   3   1   1   97.19    8.90 
  -3   1  -1   83.49   11.80 
   3   1   1   92.39    5.40 
  -3   1  -1   77.69   10.80 
  -3   1  -1   76.69    5.30 
  -3   1  -1   97.39   15.10 
   3   1   1  110.39   12.50 
   3   1   1  101.09   10.80 
  -3   1  -1   76.59    4.30 
  -3   1  -1  104.09   15.30 
  -3   1  -1   86.69   12.10 
  -3   1  -1   90.09   10.80 
   3   1   1   85.59    6.30 
  -3   1  -1  103.89   13.20 
   3   1   1   82.19   11.30 
   4  -1   1 2147.19   66.49 
   4  -1   1 2113.69   74.39 
   4  -1   1 2168.28   84.49 
   4  -1   1 2105.89   80.19 
  -4  -1  -1 2209.68   70.09 
   4  -1   1 2220.88   77.99 
  -4  -1  -1 2097.79   70.59 
  -4  -1  -1 2200.88   73.39 
  -4  -1  -1 2090.39   79.49 
  -4  -1  -1 2185.68   70.39 
  -4  -1  -1 2184.88   77.89 
  -4  -1  -1 2221.18   79.69 
  -4  -1  -1 2147.79   68.19 
  -4  -1  -1 2145.89   75.89 
   4  -1   1 2077.39   70.89 
  -4  -1  -1 2177.18   71.89 
  -4  -1  -1 2127.19   79.09 
   4  -1   1 2104.49   83.49 
   4  -1   1 2161.08   77.09 
   4  -1   1 2171.68   77.39 
   4  -1   1 2050.89   84.59 
  -4  -1  -1 2257.57   76.99 
  -4  -1  -1 2176.48   70.79 
   4  -1   1 2049.49   73.49 
  -4  -1  -1 2255.77   73.19 
  -4  -1  -1 2158.08   73.99 
  -4  -1  -1 2149.88   69.09 
  -4  -1  -1 2160.58   72.19 
  -4  -1  -1 2210.68   82.59 
  -4  -1  -1 2098.99   76.39 
  -4  -1  -1 2117.39   78.09 
   4  -1   1 2155.68   87.89 
   4  -1   1 2221.68   79.29 
   4  -1   1 2241.78   74.69 
  -4  -1  -1 2173.38   84.39 
   4  -1   1 2173.48   82.89 
   4  -1   1 2079.89   85.19 
  -4  -1  -1 2158.18   74.69 
   4   1   1 2188.48   70.19 
   4   1   1 2135.89   78.19 
  -4   1  -1 2175.88   70.19 
  -4   1  -1 2142.89   70.89 
  -4   1  -1 2255.37   81.19 
  -4   1  -1 2091.79   79.49 
  -4   1  -1 2170.18   66.09 
   4   1   1 2227.28   83.39 
  -4   1  -1 2143.19   73.99 
  -4   1  -1 2159.58   72.09 
  -4   1  -1 2139.59   69.79 
   4   1   1 2141.49   79.09 
  -4   1  -1 2051.99   85.59 
   4   1   1 2163.08   73.89 
   4   1   1 2157.18   66.69 
  -4   1  -1 2074.49   63.49 
  -4   1  -1 2111.89   78.59 
  -4   1  -1 2013.90   83.39 
  -4   1  -1 2119.19   65.89 
  -4   1  -1 2183.38   66.29 
  -4   1  -1 2119.19   66.49 
  -4   1  -1 2179.58   68.19 
   4   1   1 2138.79   85.69 
   4   1   1 2174.38   83.29 
  -4   1  -1 2157.18   64.79 
  -4   1  -1 2212.08   78.49 
   4   1   1 2133.99   84.79 
  -4   1  -1 2139.09   85.19 
  -4   1  -1 2139.59   75.19 
   4   1   1 2276.37   83.59 
   4   1   1 2214.68   83.69 
  -4   1  -1 2169.08   75.49 
   4   1   1 2174.88   79.79 
   4   1   1 2236.18   75.19 
   4   1   1 2205.68   78.69 
  -4   1  -1 2139.09   65.69 
  -4   1  -1 2135.29   64.99 
  -4   1  -1 2150.58   68.99 
   4   1   1 2286.97   71.59 
   4   1   1 1950.80   84.99 
   4   1   1 2120.49   84.99 
   4   1   1 2168.38   67.39 
   4   1   1 2092.89   76.19 
  -4   1  -1 2131.79   66.99 
  -4   1  -1 2198.28   78.69 
   5  -1   1   20.90    7.70 
  -5  -1  -1   10.80    7.70 
  -5  -1  -1    9.50    6.00 
  -5  -1  -1   26.50    9.00 
   5  -1   1   21.30    8.50 
  -5  -1  -1   13.50    4.20 
   5  -1   1   17.10    9.60 
  -5  -1  -1    8.60    5.50 
  -5  -1  -1   38.70   12.60 
   5  -1   1    5.90    9.40 
   5  -1   1   17.60   11.00 
   5  -1   1   23.00   10.00 
   5  -1   1   11.40    9.90 
   5  -1   1   17.50    8.90 
   5  -1   1   17.20    7.60 
  -5  -1  -1    5.10    6.20 
  -5  -1  -1   13.10    5.60 
  -5  -1  -1   32.70   10.50 
  -5  -1  -1   16.00    5.00 
  -5  -1  -1    7.30    5.00 
   5  -1   1   31.10   13.00 
  -5  -1  -1   14.00    5.60 
  -5  -1  -1    9.40    6.20 
  -5  -1  -1   27.70    7.70 
  -5  -1  -1   10.30    4.50 
   5  -1   1   15.90   12.30 
   5  -1   1   17.90    8.10 
  -5  -1  -1    7.80    5.90 
  -5  -1  -1    7.60    6.50 
   5   1   1   25.80    9.70 
  -5   1  -1   13.50    9.60 
  -5   1  -1   15.80    5.90 
  -5   1  -1    9.10    5.30 
   5   1   1   16.10   10.20 
   5   1   1   16.70    8.20 
  -5   1  -1   12.50    7.50 
  -5   1  -1   16.50    3.60 
  -5   1  -1   21.30    4.10 
  -5   1  -1   10.20    5.20 
   5   1   1   17.40   10.40 
  -5   1  -1   23.90    4.50 
   5   1   1   19.00   11.20 
  -5   1  -1   15.20    7.60 
  -5   1  -1   10.60    3.70 
  -5   1  -1    8.50    8.20 
  -5   1  -1   11.10    6.90 
  -5   1  -1   17.90    7.80 
  -5   1  -1   32.00   10.00 
   5   1   1   14.10    5.60 
  -5   1  -1   17.20   10.60 
  -5   1  -1   14.40    3.50 
   5   1   1   12.80    6.30 
   5   1   1   19.90    9.80 
  -5   1  -1    9.90    3.10 
  -5   1  -1   14.10    6.20 
  -5   1  -1   14.10    5.20 
   5   1   1   14.20   10.50 
   5   1   1   21.80    9.40 
   5   1   1   20.70    8.10 
  -5   1  -1   18.90    5.30 
   5   1   1   19.70    8.00 
  -5   1  -1   14.70    3.30 
  -5   1  -1   13.10    4.00 
   5   1   1   20.00    7.20 
  -5   1  -1   16.20    7.30 
   5   1   1   12.70    4.00 
  -5   1  -1   19.30    2.80 
   5   1   1   13.10    3.40 
  -5   1  -1   18.00   10.20 
  -6  -1  -1   53.79   15.20 
  -6  -1  -1   42.80   11.20 
   6  -1   1   41.40   16.00 
   6  -1   1   71.29   16.20 
   6  -1   1   46.10   16.90 
   6  -1   1   52.99   16.60 
  -6  -1  -1   60.79   13.90 
   6  -1   1   54.39   13.10 
  -6  -1  -1   37.60   12.50 
  -6  -1  -1   55.79   10.20 
  -6  -1  -1   42.40   12.90 
   6  -1   1   55.19   13.40 
   6  -1   1   36.20   14.90 
  -6  -1  -1   49.00   12.00 
   6  -1   1   43.90   11.90 
  -6  -1  -1   33.80   12.80 
  -6  -1  -1   59.39    9.00 
   6  -1   1   48.60   10.50 
  -6  -1  -1   30.30    8.30 
  -6  -1  -1   57.49   11.20 
  -6  -1  -1   47.20    9.90 
  -6  -1  -1   63.69    7.80 
   6  -1   1   49.99   13.60 
  -6  -1  -1   51.39   10.90 
  -6  -1  -1   44.90   12.00 
  -6  -1  -1   61.79    9.00 
  -6  -1  -1   37.50   15.70 
   6  -1   1   47.70   14.90 
   6  -1   1   36.30   15.80 
  -6  -1  -1   53.39   11.90 
  -6  -1  -1   50.69   12.00 
   6   1   1   55.19   17.50 
  -6   1  -1   37.50    4.70 
   6   1   1   48.30   14.90 
   6   1   1   41.30   12.60 
  -6   1  -1   49.20   10.30 
  -6   1  -1   48.70   13.60 
  -6   1  -1   42.00   11.20 
   6   1   1   67.79   18.60 
   6   1   1   35.10    9.10 
  -6   1  -1   31.90   13.70 
  -6   1  -1   52.19    5.10 
   6   1   1   21.20   11.40 
  -6   1  -1   55.39    5.90 
  -6   1  -1   47.90    5.20 
  -6   1  -1   42.80   11.80 
  -6   1  -1   32.00    8.10 
  -6   1  -1   44.10    6.20 
  -6   1  -1   52.99    4.50 
  -6   1  -1   45.90    8.00 
   6   1   1   36.80   12.70 
  -6   1  -1   31.80   10.30 
  -6   1  -1   38.70   10.60 
   6   1   1   41.20   11.10 
   6   1   1   49.70   16.90 
   6   1   1   26.00   12.60 
  -6   1  -1   36.90    7.60 
  -6   1  -1   40.10    8.60 
  -6   1  -1   44.90   12.10 
  -6   1  -1   52.79    7.10 
  -6   1  -1   37.40   12.50 
   6   1   1   76.09   19.60 
  -6   1  -1   34.30   10.80 
  -6   1  -1   50.59   16.10 
  -6   1  -1   41.80    7.10 
   6   1   1   39.10   11.40 
  -6   1  -1   17.40   12.50 
  -6   1  -1   48.30    5.10 
   7  -1   1   75.29   21.20 
  -7  -1  -1   80.79   19.40 
  -7  -1  -1   94.49   19.90 
  -7  -1  -1   71.99   16.60 
  -7  -1  -1   76.89   14.30 
  -7  -1  -1   43.40   15.90 
   7  -1   1   59.49   15.70 
  -7  -1  -1   40.90   17.70 
  -7  -1  -1   71.89   10.70 
  -7  -1  -1   61.39   15.70 
   7  -1   1   71.89   23.00 
   7  -1   1   70.29   21.20 
   7  -1   1   61.99   17.90 
   7  -1   1   59.69   17.40 
  -7  -1  -1   66.29   12.00 
  -7  -1  -1   79.29   16.30 
  -7  -1  -1   76.59   15.30 
  -7  -1  -1   61.59   14.20 
  -7  -1  -1   65.69   12.20 
   7  -1   1   59.49   17.70 
   7  -1   1   95.69   15.90 
   7  -1   1   87.49   23.20 
   7  -1   1   81.59   16.30 
  -7  -1  -1   92.79   18.00 
  -7  -1  -1   65.09   13.70 
  -7   1  -1   66.89   11.70 
  -7   1  -1   57.89   17.10 
  -7   1  -1   69.39   11.90 
  -7   1  -1   60.49   16.00 
  -7   1  -1   66.09   15.80 
  -7   1  -1  100.99   17.00 
   7   1   1   74.69   16.20 
  -7   1  -1   84.79   23.00 
  -7   1  -1   73.49   19.90 
   7   1   1   92.49   16.40 
   7   1   1   97.59   24.80 
  -7   1  -1   72.49   15.30 
   7   1   1   88.79   20.20 
   7   1   1   57.89   20.40 
   7   1   1   88.69   19.50 
   7   1   1   43.60   17.20 
  -7   1  -1   74.29   21.60 
  -7   1  -1   63.79   11.20 
  -7   1  -1   56.39   13.20 
   7   1   1   51.09   18.00 
   7   1   1   98.09   24.70 
  -7   1  -1   76.19   19.20 
   7   1   1   81.09   22.30 
   7   1   1   72.69   13.60 
  -7   1  -1   51.49   15.10 
  -7   1  -1   79.39   10.40 
  -7   1  -1   84.79   16.90 
  -8  -1  -1   23.10   12.90 
   8  -1   1    7.00   15.50 
   8  -1   1   -8.80    9.20 
  -8  -1  -1    7.30    9.80 
  -8  -1  -1    4.50    7.80 
  -8  -1  -1    1.40   10.10 
   8  -1   1   10.70    8.50 
  -8  -1  -1   25.20    9.10 
   8  -1   1  -12.70   10.90 
  -8  -1  -1    9.10   10.00 
  -8  -1  -1    7.50   13.00 
   8  -1   1   11.40   12.90 
   8  -1   1    2.90   12.20 
   8  -1   1    4.10   15.00 
   8  -1   1    5.80    9.20 
   8  -1   1   -8.30   14.50 
  -8  -1  -1   -0.20   10.20 
  -8  -1  -1    0.90    8.50 
  -8  -1  -1    0.90    8.30 
  -8  -1  -1   12.80    9.80 
  -8  -1  -1   20.00    7.90 
  -8   1  -1   -0.30    8.60 
   8   1   1    8.20    8.90 
  -8   1  -1    2.00   11.30 
  -8   1  -1   10.80   14.00 
  -8   1  -1    3.80   12.30 
   8   1   1   18.40   17.80 
   8   1   1   14.90   16.10 
  -8   1  -1   13.10   16.20 
  -8   1  -1   14.30    9.80 
  -8   1  -1    7.00    9.10 
  -8   1  -1    7.30    8.90 
  -8   1  -1    6.60    8.10 
   8   1   1    7.00   12.30 
   8   1   1    3.40   10.20 
   8   1   1    7.20   12.70 
  -8   1  -1   12.90    7.90 
  -8   1  -1   17.60   14.20 
  -8   1  -1   11.10   13.00 
  -8   1  -1   31.70   10.60 
   8   1   1   12.10    7.90 
   8   1   1    2.80   10.20 
  -9  -1  -1   19.80   14.30 
  -9  -1  -1    5.30   10.80 
  -9  -1  -1    2.80   14.60 
   9  -1   1    6.50   14.30 
  -9  -1  -1   16.40   15.80 
   9  -1   1    6.00   17.10 
  -9  -1  -1   30.20   20.60 
  -9  -1  -1   23.50   15.30 
   9  -1   1   11.30   13.10 
  -9  -1  -1   17.40   12.90 
   9  -1   1    2.60   16.30 
  -9  -1  -1  -11.70    9.50 
  -9  -1  -1   17.90   14.00 
   9  -1   1  -16.20   13.00 
   9  -1   1   -7.50    8.40 
  -9  -1  -1   12.70   10.90 
  -9  -1  -1   -3.20   11.90 
   9  -1   1   -8.50   13.30 
  -9  -1  -1    8.90   12.80 
  -9  -1  -1   -6.20    8.70 
   9  -1   1  -22.30   13.90 
  -9  -1  -1    0.30   10.80 
  -9   1  -1   -1.60   13.50 
   9   1   1   19.50   11.70 
  -9   1  -1   -5.20    9.90 
  -9   1  -1   -3.10   12.00 
  -9   1  -1    1.30   10.90 
  -9   1  -1   10.90   12.50 
  -9   1  -1    2.70   13.80 
  -9   1  -1    3.20   14.60 
   9   1   1   34.40   22.70 
  -9   1  -1   12.60   15.60 
   9   1   1   18.90   18.50 
   9   1   1  -13.90   12.20 
  -9   1  -1   -2.40   12.60 
  -9   1  -1   -1.60   16.40 
   9   1   1   27.50   18.80 
  -9   1  -1  -11.80    8.20 
   9   1   1    5.80   15.40 
 -10  -1  -1   21.00   18.20 
  10  -1   1   12.20   15.90 
 -10  -1  -1   25.90   19.90 
 -10  -1  -1   44.60   24.30 
 -10  -1  -1   11.10   15.90 
 -10  -1  -1   45.30   23.10 
  10  -1   1   -5.50   13.60 
 -10  -1  -1   27.30   15.90 
  10  -1   1   20.20   21.00 
  10  -1   1   46.00   26.70 
 -10  -1  -1   38.10   16.30 
  10  -1   1   19.70   21.20 
 -10  -1  -1   34.30   16.70 
 -10  -1  -1   39.30   20.00 
 -10  -1  -1    4.50   18.40 
  10  -1   1    7.10   16.10 
 -10  -1  -1   30.70   21.80 
 -10   1  -1   12.30   16.10 
 -10   1  -1   25.40   20.00 
 -10   1  -1    9.80   19.20 
 -10   1  -1   46.00   22.60 
 -10   1  -1   14.80   13.20 
  10   1   1   29.40   18.40 
  10   1   1   31.60   23.00 
  10   1   1   18.20   20.60 
 -10   1  -1   14.60   13.20 
 -10   1  -1   34.80   20.50 
  10   1   1   30.60   18.60 
  10   1   1   39.60   24.30 
 -10   1  -1   35.00   21.00 
 -10   1  -1   32.70   18.90 
  10   1   1   26.50   19.60 
 -10   1  -1   21.70   16.10 
 -10  -2   1  408.16   56.59 
  10  -2  -1  513.05   67.89 
 -10  -2   1  499.95   52.49 
 -10  -2   1  499.25   51.59 
 -10  -2   1  438.56   52.39 
  10  -2  -1  460.85   59.69 
 -10  -2   1  478.65   54.29 
 -10  -2   1  394.56   48.90 
 -10  -2   1  538.65   54.99 
 -10  -2   1  556.54   52.69 
  10  -2  -1  417.66   61.99 
  10  -2  -1  423.76   65.99 
 -10  -2   1  393.56   55.09 
  10  -2  -1  432.36   44.30 
 -10   2   1  377.76   46.10 
 -10   2   1  430.36   53.29 
 -10   2   1  396.56   47.20 
  10   2  -1  539.55   68.49 
  10   2  -1  422.46   55.59 
 -10   2   1  468.65   49.90 
 -10   2   1  477.25   63.29 
  10   2  -1  453.05   59.69 
  10   2  -1  624.84   72.29 
 -10   2   1  469.15   61.89 
  10   2  -1  439.86   49.30 
  10   2  -1  569.24   65.19 
 -10   2   1  437.46   47.20 
 -10   2   1  364.76   54.99 
   9  -2  -1  481.65   44.20 
  -9  -2   1  474.65   34.20 
  -9  -2   1  413.76   45.30 
  -9  -2   1  479.05   59.99 
  -9  -2   1  500.05   51.59 
   9  -2  -1  446.96   59.09 
  -9  -2   1  433.46   44.60 
  -9  -2   1  458.65   33.90 
  -9  -2   1  439.86   50.49 
  -9  -2   1  504.05   45.30 
  -9  -2   1  494.45   46.40 
   9  -2  -1  434.96   54.49 
   9  -2  -1  385.06   57.39 
   9  -2  -1  487.55   61.99 
  -9  -2   1  471.35   50.19 
  -9  -2   1  475.65   37.50 
   9   2  -1  413.86   54.19 
   9   2  -1  552.24   57.29 
   9   2  -1  537.55   61.29 
  -9   2   1  456.35   50.39 
  -9   2   1  509.85   49.30 
  -9   2   1  467.75   52.19 
  -9   2   1  422.76   44.70 
  -9   2   1  428.56   54.09 
   9   2  -1  453.35   46.20 
  -9   2   1  533.25   63.49 
   9   2  -1  346.17   50.59 
  -9   2   1  506.15   36.60 
  -9   2   1  478.25   49.20 
   9   2  -1  334.07   50.99 
  -8  -2   1   52.79   12.10 
  -8  -2   1   82.89   16.10 
  -8  -2   1   60.89   18.90 
  -8  -2   1   49.00   15.00 
  -8  -2   1   57.99   18.40 
   8  -2  -1   54.69   14.70 
  -8  -2   1   54.09   14.50 
  -8  -2   1   46.30   12.80 
  -8  -2   1   83.29   16.70 
   8  -2  -1   68.39   19.40 
  -8  -2   1   44.60   14.10 
  -8  -2   1   39.30   16.00 
  -8  -2   1   84.49   21.50 
  -8  -2   1   74.39   18.10 
   8  -2  -1   36.60   18.20 
   8  -2  -1   73.79   14.60 
   8  -2  -1   53.79   21.10 
   8  -2  -1   56.59   23.60 
  -8  -2   1   48.90   15.70 
  -8  -2   1   51.49   16.20 
  -8  -2   1   55.19   20.70 
   8  -2  -1   50.39   14.40 
  -8  -2   1   73.39   14.60 
   8  -2  -1   84.79   22.70 
  -8   2   1   32.70   15.90 
  -8   2   1   11.60   12.20 
  -8   2   1   14.40   11.70 
   8   2  -1   81.19   24.90 
  -8   2   1   54.69   23.00 
   8   2  -1   24.80   14.30 
  -8   2   1   37.30   16.00 
   8   2  -1   57.89   20.70 
  -8   2   1   71.49   23.10 
   8   2  -1   71.39   22.00 
   8   2  -1   66.29   22.20 
   8   2  -1   53.69   21.70 
  -8   2   1   33.00   13.70 
  -8   2   1   36.20   14.50 
   8   2  -1   87.19   20.50 
  -8   2   1   54.09   13.70 
  -8   2   1   39.10   12.00 
  -8   2   1   25.30   12.10 
  -8   2   1   70.29   21.50 
   8   2  -1   40.40   18.90 
  -7  -2   1    8.00    9.10 
  -7  -2   1   28.70    9.70 
   7  -2  -1    6.10    6.50 
  -7  -2   1   17.20   10.60 
   7  -2  -1   14.30   10.10 
   7  -2  -1   21.80   14.80 
  -7  -2   1   -4.40    8.30 
  -7  -2   1   12.90    7.20 
  -7  -2   1   20.80   10.50 
  -7  -2   1   15.90    9.40 
  -7  -2   1    2.70   12.40 
  -7  -2   1    6.80    8.40 
  -7  -2   1    8.90   10.00 
  -7  -2   1   14.50    9.10 
   7  -2  -1   13.50    6.00 
   7  -2  -1    6.40    8.00 
   7  -2  -1   10.70   13.70 
   7  -2  -1   17.90    9.40 
  -7  -2   1   20.80    8.20 
  -7  -2   1    1.20    9.30 
  -7  -2   1    9.10   10.80 
  -7  -2   1   18.30    8.40 
   7  -2  -1   14.30   15.20 
   7  -2  -1   20.80   13.10 
  -7  -2   1   22.60    7.60 
  -7  -2   1   10.80    8.00 
  -7  -2   1   21.30    9.00 
  -7   2   1   13.30    6.50 
  -7   2   1    9.80   10.30 
   7   2  -1    5.30    7.20 
  -7   2   1   34.90   13.70 
  -7   2   1   13.90   13.80 
  -7   2   1    2.00    8.30 
   7   2  -1    9.20   10.80 
  -7   2   1   18.80    6.30 
   7   2  -1   18.90   14.00 
   7   2  -1    2.80   10.90 
  -7   2   1   31.40   14.90 
   7   2  -1    4.80    5.60 
  -7   2   1    5.50    7.20 
   7   2  -1   23.10   10.00 
  -7   2   1   19.80   11.10 
   7   2  -1   13.90   10.30 
   7   2  -1    5.70    9.40 
  -7   2   1   21.40    8.80 
   7   2  -1    9.80   12.70 
  -7   2   1   16.00    7.00 
   7   2  -1    8.20   11.40 
  -7   2   1    3.00    6.60 
  -7   2   1   10.90   13.00 
  -7   2   1   31.60    8.10 
  -7   2   1    9.80   10.10 
   7   2  -1    4.90   11.70 
  -7   2   1   13.20    6.00 
  -6  -2   1   57.49   15.30 
  -6  -2   1   42.80   13.10 
  -6  -2   1   42.30   11.80 
  -6  -2   1   66.49   13.80 
  -6  -2   1   42.30   12.00 
  -6  -2   1   52.49   11.10 
   6  -2  -1   46.20   15.40 
   6  -2  -1   64.69   13.30 
  -6  -2   1   49.30   16.10 
  -6  -2   1   39.00   10.60 
  -6  -2   1   55.29   11.30 
  -6  -2   1   51.69    7.70 
   6  -2  -1   48.30    9.40 
  -6  -2   1   52.09   14.00 
   6  -2  -1   52.39   10.80 
  -6  -2   1   54.49   11.90 
  -6  -2   1   25.40   10.90 
  -6  -2   1   45.00    6.50 
   6  -2  -1   53.39    9.10 
   6  -2  -1   64.79   13.20 
  -6  -2   1   53.59   10.60 
  -6  -2   1   53.19    9.80 
  -6  -2   1   61.09   14.80 
   6  -2  -1   56.29   17.90 
  -6  -2   1   48.10    9.60 
   6  -2  -1   71.29   22.20 
   6  -2  -1   66.69   20.00 
   6  -2  -1   51.39   13.80 
  -6  -2   1   65.39   15.10 
  -6   2   1   69.99    9.20 
  -6   2   1   59.29    7.60 
  -6   2   1   41.30    8.10 
   6   2  -1   33.10   14.10 
   6   2  -1   64.39   15.30 
   6   2  -1   60.39   13.70 
  -6   2   1   61.19   18.20 
  -6   2   1   51.09    8.90 
  -6   2   1   51.39    9.50 
  -6   2   1   56.19   11.90 
  -6   2   1   68.79    9.40 
   6   2  -1   49.20    8.60 
  -6   2   1   50.99   13.80 
  -6   2   1   56.39    8.80 
  -6   2   1   63.79   16.50 
  -6   2   1   49.99    8.90 
   6   2  -1   57.09   13.60 
  -6   2   1   41.40   14.00 
  -6   2   1   40.50   12.70 
  -6   2   1   36.90   11.30 
  -6   2   1   56.09    7.90 
   6   2  -1   61.19   18.20 
   6   2  -1   86.19   22.20 
  -6   2   1   53.89    8.00 
  -6   2   1   64.09   12.00 
   6   2  -1   51.99   10.30 
   6   2  -1   26.10   11.90 
  -6   2   1   60.69    8.00 
  -6   2   1   58.79    9.60 
  -6   2   1   36.50    9.90 
   6   2  -1   55.29    9.70 
  -6   2   1   26.10   12.70 
  -6   2   1   29.60   11.30 
  -6   2   1   40.10    6.40 
  -6   2   1   53.99    6.90 
   6   2  -1   54.09   11.90 
   6   2  -1   45.20   14.20 
  -5  -2   1  498.05   21.30 
   5  -2  -1  509.75   37.60 
  -5  -2   1  511.65   30.10 
   5  -2  -1  504.35   36.50 
  -5  -2   1  615.74   32.30 
  -5  -2   1  497.85   30.20 
  -5  -2   1  519.15   28.30 
   5  -2  -1  448.86   37.80 
   5  -2  -1  506.65   27.90 
   5  -2  -1  513.05   28.70 
  -5  -2   1  487.15   28.10 
  -5  -2   1  522.55   28.80 
  -5  -2   1  511.25   25.90 
   5  -2  -1  560.44   35.90 
  -5  -2   1  521.85   32.00 
  -5  -2   1  510.95   29.50 
  -5  -2   1  510.45   33.00 
   5  -2  -1  527.55   26.90 
  -5  -2   1  476.65   26.10 
  -5  -2   1  524.65   25.60 
  -5  -2   1  515.45   22.60 
   5  -2  -1  502.25   33.00 
   5  -2  -1  492.85   23.30 
  -5  -2   1  486.55   35.80 
  -5  -2   1  489.75   25.10 
   5  -2  -1  477.55   26.30 
   5   2  -1  470.15   35.20 
  -5   2   1  485.85   30.90 
  -5   2   1  542.95   31.30 
  -5   2   1  505.15   23.10 
  -5   2   1  520.85   24.30 
   5   2  -1  529.95   35.00 
  -5   2   1  540.05   21.30 
  -5   2   1  557.44   37.90 
   5   2  -1  482.45   25.10 
  -5   2   1  513.85   20.60 
  -5   2   1  497.75   17.50 
  -5   2   1  484.25   27.80 
   5   2  -1  503.95   31.20 
   5   2  -1  538.65   29.90 
  -5   2   1  538.05   26.40 
  -5   2   1  492.25   21.40 
  -5   2   1  493.45   32.80 
   5   2  -1  407.46   34.50 
  -5   2   1  494.05   37.50 
  -5   2   1  509.95   31.40 
   5   2  -1  567.24   32.10 
  -5   2   1  542.15   24.20 
   5   2  -1  504.45   34.40 
   5   2  -1  456.95   24.30 
  -5   2   1  485.75   23.10 
  -5   2   1  521.45   23.70 
   5   2  -1  533.85   25.60 
  -5   2   1  469.15   22.80 
   5   2  -1  480.55   29.70 
  -5   2   1  483.15   22.60 
   5   2  -1  506.85   23.50 
  -5   2   1  411.46   31.20 
  -5   2   1  550.04   30.40 
  -5   2   1  528.65   23.50 
  -5   2   1  527.75   23.90 
   5   2  -1  493.75   37.20 
  -5   2   1  522.35   26.10 
  -5   2   1  514.85   21.40 
  -4  -2   1  511.25   30.10 
   4  -2  -1  532.55   23.30 
   4  -2  -1  450.05   29.70 
   4  -2  -1  564.04   27.80 
  -4  -2   1  506.35   26.90 
  -4  -2   1  462.85   24.70 
  -4  -2   1  506.65   21.60 
   4  -2  -1  461.05   34.10 
  -4  -2   1  488.15   27.50 
   4  -2  -1  477.25   36.10 
  -4  -2   1  496.05   23.90 
   4  -2  -1  511.35   32.80 
   4  -2  -1  535.55   26.00 
  -4  -2   1  512.15   26.20 
   4  -2  -1  504.85   19.30 
  -4  -2   1  505.35   28.80 
   4  -2  -1  524.95   26.70 
   4  -2  -1  504.45   25.30 
  -4  -2   1  510.45   22.60 
  -4  -2   1  521.75   22.70 
  -4  -2   1  538.65   34.50 
  -4  -2   1  540.15   25.10 
   4  -2  -1  525.05   26.90 
  -4  -2   1  484.35   27.30 
   4  -2  -1  540.45   25.80 
  -4  -2   1  545.95   23.60 
  -4  -2   1  504.75   27.20 
   4  -2  -1  496.15   18.80 
   4  -2  -1  563.14   32.80 
  -4  -2   1  496.15   28.30 
  -4   2   1  494.15   28.00 
  -4   2   1  556.94   24.80 
  -4   2   1  523.65   34.40 
  -4   2   1  549.35   23.50 
   4   2  -1  507.65   24.70 
   4   2  -1  510.75   26.10 
   4   2  -1  515.65   28.50 
  -4   2   1  513.45   26.60 
   4   2  -1  464.45   28.20 
   4   2  -1  520.05   25.30 
  -4   2   1  536.45   24.10 
  -4   2   1  537.95   23.70 
   4   2  -1  495.85   18.50 
  -4   2   1  488.55   23.10 
  -4   2   1  502.55   20.80 
   4   2  -1  515.45   23.70 
  -4   2   1  507.25   21.90 
  -4   2   1  490.75   19.50 
   4   2  -1  513.55   33.20 
   4   2  -1  525.55   34.70 
  -4   2   1  509.35   20.50 
  -4   2   1  529.05   27.30 
  -4   2   1  514.35   20.60 
   4   2  -1  572.74   36.20 
   4   2  -1  487.65   24.20 
  -4   2   1  494.85   23.10 
  -4   2   1  502.25   30.70 
  -4   2   1  499.35   33.00 
  -4   2   1  486.75   21.10 
   4   2  -1  450.25   26.90 
   4   2  -1  475.55   22.50 
  -4   2   1  563.64   31.80 
  -4   2   1  546.05   23.90 
  -4   2   1  511.75   21.20 
   4   2  -1  588.24   32.70 
  -4   2   1  492.55   28.90 
  -4   2   1  535.45   19.50 
   4   2  -1  509.35   28.40 
   4   2  -1  480.65   30.60 
  -4   2   1  494.55   22.60 
  -3  -2   1  505.05   27.80 
  -3  -2   1  551.04   26.00 
  -3  -2   1  537.85   33.20 
   3  -2  -1  491.85   29.60 
   3  -2  -1  495.85   23.20 
  -3  -2   1  509.75   21.50 
  -3  -2   1  475.05   24.90 
   3  -2  -1  539.25   28.50 
  -3  -2   1  528.75   25.90 
  -3  -2   1  511.15   23.70 
  -3  -2   1  468.45   24.20 
   3  -2  -1  493.95   23.80 
  -3  -2   1  520.05   25.60 
   3  -2  -1  499.35   19.40 
  -3  -2   1  502.25   20.00 
   3  -2  -1  509.05   29.60 
   3  -2  -1  487.55   24.40 
   3  -2  -1  484.25   29.40 
  -3  -2   1  497.05   22.90 
   3  -2  -1  472.15   24.70 
  -3  -2   1  467.35   30.00 
   3  -2  -1  470.25   24.40 
   3  -2  -1  511.95   22.10 
  -3  -2   1  435.86   25.50 
   3  -2  -1  487.45   27.10 
  -3  -2   1  487.95   25.30 
  -3  -2   1  504.55   24.10 
  -3  -2   1  498.25   20.20 
   3  -2  -1  549.54   22.30 
   3  -2  -1  488.15   32.90 
   3  -2  -1  522.45   22.60 
   3  -2  -1  467.05   31.00 
  -3  -2   1  519.55   25.00 
   3  -2  -1  494.95   23.10 
   3  -2  -1  480.95   18.30 
  -3  -2   1  535.45   22.40 
  -3   2   1  510.05   25.50 
  -3   2   1  499.75   20.50 
  -3   2   1  506.85   26.30 
   3   2  -1  526.85   22.60 
   3   2  -1  485.05   24.00 
   3   2  -1  505.55   26.00 
  -3   2   1  502.95   26.70 
  -3   2   1  487.95   20.30 
   3   2  -1  525.35   29.10 
  -3   2   1  494.05   25.80 
  -3   2   1  501.75   22.50 
  -3   2   1  501.75   19.70 
  -3   2   1  565.44   24.30 
  -3   2   1  520.65   20.80 
  -3   2   1  527.45   20.90 
  -3   2   1  481.25   22.20 
   3   2  -1  514.95   23.70 
   3   2  -1  517.35   22.30 
   3   2  -1  484.35   19.10 
  -3   2   1  522.55   24.70 
  -3   2   1  522.05   25.50 
   3   2  -1  498.05   25.60 
  -3   2   1  511.55   25.40 
   3   2  -1  526.95   32.30 
   3   2  -1  570.34   32.60 
  -3   2   1  502.45   19.60 
  -3   2   1  507.85   19.90 
  -3   2   1  505.55   17.90 
   3   2  -1  504.15   19.70 
  -3   2   1  507.65   31.40 
   3   2  -1  498.05   17.00 
   3   2  -1  459.65   21.60 
   3   2  -1  463.85   23.50 
  -3   2   1  501.75   29.80 
   3   2  -1  515.95   30.70 
   3   2  -1  513.05   26.10 
  -3   2   1  507.75   21.90 
   3   2  -1  520.75   27.70 
  -3   2   1  524.25   24.30 
  -3   2   1  546.45   23.40 
   3   2  -1  494.45   27.90 
   3   2  -1  515.75   23.80 
   3   2  -1  531.85   26.80 
  -3   2   1  514.05   20.60 
  -3   2   1  512.15   27.90 
  -3   2   1  499.95   28.40 
  -3   2   1  491.45   20.50 
  -2  -2   1  127.89    9.60 
   2  -2  -1  124.09   16.90 
   2  -2  -1  128.79    9.90 
   2  -2  -1  115.79   11.40 
   2  -2  -1  160.28   19.10 
  -2  -2   1  153.68   11.10 
   2  -2  -1  141.29   10.30 
   2  -2  -1  119.69   13.70 
  -2  -2   1  145.19   11.20 
   2  -2  -1  141.49   16.40 
  -2  -2   1  148.69    8.50 
   2  -2  -1  126.49   13.20 
   2  -2  -1  151.48   11.00 
  -2  -2   1  183.28   18.90 
   2  -2  -1  125.79    7.60 
   2  -2  -1  140.09    7.70 
  -2  -2   1  130.19   12.40 
  -2  -2   1  153.98   12.20 
  -2  -2   1  166.68   11.60 
  -2  -2   1  136.19   14.40 
  -2  -2   1  123.99   11.70 
  -2  -2   1  112.29   11.70 
  -2  -2   1  133.79   10.40 
   2  -2  -1  137.99    8.30 
   2  -2  -1  154.88   17.40 
   2  -2  -1  125.89    9.80 
   2  -2  -1  130.29   12.50 
  -2  -2   1  117.59   11.50 
  -2  -2   1  124.69   12.40 
  -2  -2   1  160.48   12.20 
  -2  -2   1  140.89   10.20 
   2  -2  -1  181.68   19.40 
   2  -2  -1  151.48   16.10 
  -2  -2   1  159.38   10.20 
  -2  -2   1  151.78   16.10 
  -2  -2   1  125.49   14.20 
   2  -2  -1  139.79    9.30 
  -2  -2   1  145.49   11.80 
   2  -2  -1  147.29   14.90 
  -2  -2   1  151.48    6.20 
   2  -2  -1  138.89   10.00 
  -2  -2   1  125.79    9.30 
   2  -2  -1  130.79    9.80 
  -2  -2   1  134.59   11.30 
  -2  -2   1  159.38   11.40 
  -2   2   1  134.39    9.70 
  -2   2   1  139.79   11.10 
  -2   2   1  138.39   14.20 
   2   2  -1  148.09   18.10 
  -2   2   1  135.39   10.80 
  -2   2   1  120.99   13.60 
  -2   2   1  144.59    7.20 
  -2   2   1  129.59    8.70 
   2   2  -1  148.19   17.70 
   2   2  -1  146.49    9.30 
  -2   2   1  117.29    8.40 
   2   2  -1  146.09   13.70 
   2   2  -1  150.38   13.40 
  -2   2   1  122.89   12.40 
   2   2  -1  110.99   12.60 
   2   2  -1  133.59   10.00 
   2   2  -1  139.19   10.00 
  -2   2   1  137.39    9.00 
   2   2  -1  139.99   12.70 
   2   2  -1  137.49    8.60 
   2   2  -1  142.39   10.60 
  -2   2   1  130.99    9.80 
  -2   2   1  147.09    9.30 
  -2   2   1  134.39   16.90 
   2   2  -1  133.29    7.30 
  -2   2   1  154.28   13.30 
  -2   2   1  137.79   15.80 
  -2   2   1  137.39   10.60 
   2   2  -1  154.58   14.60 
   2   2  -1  135.49   10.70 
  -2   2   1  120.29    9.40 
  -2   2   1  125.29    8.10 
   2   2  -1  147.19   11.70 
  -2   2   1  150.68   11.00 
  -2   2   1  124.09    9.30 
   2   2  -1  136.29    9.90 
  -2   2   1  134.19    9.90 
  -2   2   1  118.89   12.10 
   2   2  -1  165.58   18.30 
   2   2  -1  144.49   10.80 
  -2   2   1  131.79    6.90 
  -2   2   1  144.39   10.40 
   2   2  -1  113.09   12.40 
  -1  -2   1    6.50    4.00 
  -1  -2   1    7.70    3.80 
   1  -2  -1    3.60    1.70 
   1  -2  -1    6.90    3.60 
   1  -2  -1    6.40    4.90 
   1  -2  -1    6.60    4.10 
   1  -2  -1   -2.50    3.80 
   1  -2  -1    3.40    3.30 
  -1  -2   1    0.70    2.80 
   1  -2  -1   -0.40    2.70 
  -1  -2   1   -0.70    2.10 
  -1  -2   1   -1.40    3.10 
   1  -2  -1    0.80    2.90 
   1  -2  -1    5.20    5.30 
  -1  -2   1   -2.40    2.70 
  -1  -2   1   12.30    4.60 
  -1  -2   1   -1.90    3.50 
  -1  -2   1   10.10    4.50 
   1  -2  -1    3.20    3.20 
   1  -2  -1    3.20    3.50 
  -1  -2   1    1.30    3.10 
   1  -2  -1    1.60    3.00 
   1  -2  -1   -1.30    2.30 
  -1  -2   1    4.40    3.10 
   1  -2  -1    2.10    2.20 
   1  -2  -1    2.70    2.60 
  -1  -2   1    0.10    3.00 
  -1  -2   1    1.00    3.20 
  -1  -2   1    7.00    3.50 
   1  -2  -1    7.60    4.40 
  -1  -2   1   -2.40    3.10 
   1  -2  -1    3.70    2.10 
   1  -2  -1    6.60    3.90 
   1  -2  -1    9.70    4.40 
   1  -2  -1   -0.50    2.60 
  -1  -2   1    4.50    2.90 
  -1  -2   1    6.80    4.00 
  -1   2   1    4.90    2.80 
  -1   2   1    3.20    3.40 
  -1   2   1    0.20    2.00 
   1   2  -1   -0.40    2.60 
  -1   2   1    2.60    3.70 
   1   2  -1   -2.50    2.60 
   1   2  -1   -5.10    3.90 
   1   2  -1    3.10    2.70 
  -1   2   1    2.40    3.80 
   1   2  -1    5.00    3.50 
  -1   2   1    2.00    2.40 
   1   2  -1    2.80    3.10 
  -1   2   1    3.90    3.40 
  -1   2   1    4.90    3.10 
   1   2  -1   -3.60    2.80 
  -1   2   1    1.60    2.40 
  -1   2   1   -4.00    2.20 
  -1   2   1    8.10    2.30 
  -1   2   1    1.00    3.40 
  -1   2   1    3.60    2.70 
  -1   2   1   -1.30    2.70 
   1   2  -1    0.00    3.20 
   1   2  -1    7.40    5.90 
  -1   2   1   -0.10    2.80 
   1   2  -1    5.10    4.40 
  -1   2   1    2.00    1.30 
   1   2  -1    4.60    3.60 
  -1   2   1    3.30    2.40 
  -1   2   1   -3.20    2.60 
   1   2  -1   14.60    4.60 
  -1   2   1    3.00    3.40 
   1   2  -1    2.50    3.20 
   1   2  -1    6.70    3.30 
   1   2  -1    4.60    3.80 
  -1   2   1    1.00    3.10 
   0  -2  -1  158.18   10.50 
   0  -2   1  177.88   11.00 
   0  -2  -1  156.98   10.10 
   0  -2   1  171.78   10.20 
   0  -2   1  150.48    9.90 
   0  -2  -1  159.58    9.80 
   0  -2  -1  148.79    8.10 
   0  -2  -1  156.78   10.10 
   0  -2  -1  156.38    8.60 
   0  -2   1  171.68   10.80 
   0  -2   1  151.38    8.80 
   0  -2   1  180.98   10.30 
   0  -2   1  137.29    8.90 
   0  -2   1  148.19   10.30 
   0  -2   1  154.18   10.70 
   0  -2   1  163.28   10.80 
   0  -2  -1  161.98   10.50 
   0  -2   1  144.09   11.70 
   0  -2   1  152.48    9.80 
   0  -2  -1  164.48   10.50 
   0  -2   1  166.98   10.70 
   0  -2   1  159.78   11.00 
   0  -2  -1  158.78   10.60 
   0  -2  -1  158.08   11.20 
   0  -2  -1  146.99   10.00 
   0  -2  -1  162.58    8.90 
   0  -2   1  174.88   12.20 
   0  -2   1  143.19    9.50 
   0  -2  -1  157.18    8.40 
   0  -2   1  153.18   11.30 
   0  -2  -1  151.98   11.80 
   0  -2   1  161.38    9.90 
   0  -2  -1  166.28    8.70 
   0  -2  -1  142.49   10.60 
   0  -2  -1  173.58   10.50 
   0   2   1  141.59    9.50 
   0   2   1  148.49   11.40 
   0   2  -1  150.18    8.90 
   0   2  -1  141.59    9.60 
   0   2  -1  152.48   10.40 
   0   2  -1  159.38    9.90 
   0   2  -1  171.68   12.00 
   0   2  -1  147.19   10.20 
   0   2  -1  165.18   10.00 
   0   2   1  144.89   11.40 
   0   2  -1  162.38   12.40 
   0   2   1  145.69    8.40 
   0   2  -1  163.38   11.00 
   0   2   1  158.28   10.60 
   0   2   1  138.49   10.10 
   0   2  -1  167.58   10.40 
   0   2  -1  149.79    9.70 
   0   2   1  156.08    7.80 
   0   2  -1  149.88    9.40 
   0   2   1  157.98    9.50 
   0   2  -1  160.78    9.90 
   0   2   1  162.38    8.70 
   0   2  -1  150.98    8.40 
   0   2   1  176.18   10.50 
   0   2   1  157.58   10.60 
   0   2   1  167.08   10.10 
   0   2  -1  167.98   11.00 
   0   2  -1  168.18   11.20 
   0   2   1  164.88   10.60 
   0   2  -1  129.59   10.60 
   0   2   1  165.38   10.70 
   0   2   1  160.18   10.20 
   0   2   1  144.09    9.70 
   0   2   1  161.68   11.00 
   0   2   1  151.78   10.60 
   0   2  -1  136.59    9.50 
   0   2   1  141.99   10.90 
  -1  -2  -1 1947.11   66.99 
  -1  -2  -1 1925.21   61.99 
  -1  -2  -1 1980.80   61.59 
  -1  -2  -1 1908.51   61.79 
   1  -2   1 1785.22   59.39 
  -1  -2  -1 1837.32   61.59 
   1  -2   1 1882.61   61.39 
   1  -2   1 1829.62   59.59 
  -1  -2  -1 1920.41   60.09 
  -1  -2  -1 1902.61   60.69 
   1  -2   1 1770.12   62.99 
   1  -2   1 1820.62   64.39 
   1  -2   1 1787.52   67.19 
   1  -2   1 1820.52   59.29 
   1  -2   1 1820.22   62.29 
   1  -2   1 1760.12   57.99 
  -1  -2  -1 1928.11   60.59 
   1  -2   1 1828.72   63.09 
  -1  -2  -1 1958.00   67.19 
  -1  -2  -1 2018.90   62.59 
   1  -2   1 1757.92   62.89 
   1  -2   1 1815.62   60.69 
  -1  -2  -1 1905.91   63.59 
  -1  -2  -1 1845.72   60.59 
  -1  -2  -1 1958.30   61.49 
  -1  -2  -1 2006.00   61.19 
  -1  -2  -1 1890.91   60.99 
  -1  -2  -1 1852.81   62.59 
  -1  -2  -1 1948.71   62.79 
   1  -2   1 1790.22   61.59 
  -1  -2  -1 1930.01   61.39 
   1  -2   1 1747.73   67.19 
   1  -2   1 1804.92   56.49 
   1  -2   1 1807.82   67.29 
   1  -2   1 1838.72   59.89 
  -1  -2  -1 1918.91   60.09 
   1  -2   1 1688.63   59.39 
   1  -2   1 1748.82   58.09 
  -1  -2  -1 1876.61   60.29 
   1  -2   1 1792.42   55.39 
   1  -2   1 1807.42   60.59 
   1  -2   1 1846.02   60.59 
  -1  -2  -1 1938.21   65.29 
   1  -2   1 1818.72   58.89 
  -1  -2  -1 1871.31   59.19 
   1   2   1 1851.71   60.39 
  -1   2  -1 1743.33   59.69 
  -1   2  -1 1782.02   59.79 
   1   2   1 2035.10   64.39 
  -1   2  -1 1715.43   59.79 
  -1   2  -1 1808.52   59.39 
   1   2   1 2105.19   64.09 
  -1   2  -1 1792.22   57.69 
  -1   2  -1 1811.22   61.59 
  -1   2  -1 1742.13   60.39 
  -1   2  -1 1739.53   55.99 
   1   2   1 1874.91   59.99 
   1   2   1 1864.01   55.19 
   1   2   1 1845.12   60.99 
   1   2   1 2025.00   64.19 
  -1   2  -1 1853.71   66.79 
   1   2   1 2006.10   61.79 
  -1   2  -1 1697.73   60.49 
   1   2   1 1963.80   62.09 
   1   2   1 1897.51   61.29 
   1   2   1 1861.01   62.89 
  -1   2  -1 1807.22   62.39 
   1   2   1 1873.11   62.19 
   1   2   1 1921.11   62.49 
  -1   2  -1 1780.12   60.69 
  -1   2  -1 1747.33   59.79 
  -1   2  -1 1653.53   59.19 
   1   2   1 1930.11   60.89 
   1   2   1 1988.10   66.39 
  -1   2  -1 1779.82   60.79 
   1   2   1 1827.02   59.49 
   1   2   1 1793.62   60.19 
  -1   2  -1 1784.72   58.99 
  -1   2  -1 1752.82   58.09 
   1   2   1 1857.11   61.09 
  -1   2  -1 1841.32   60.39 
  -1   2  -1 1800.02   61.99 
  -1   2  -1 1893.41   67.39 
   1   2   1 2095.39   68.69 
  -1   2  -1 1759.32   64.39 
  -1   2  -1 1697.23   64.59 
  -1   2  -1 1767.72   60.19 
   1   2   1 1946.41   59.99 
   1   2   1 1905.01   60.69 
   1   2   1 1929.21   61.59 
  -2  -2  -1  585.84   25.00 
  -2  -2  -1  534.25   26.50 
   2  -2   1  567.64   19.50 
  -2  -2  -1  586.44   26.00 
   2  -2   1  574.34   31.80 
   2  -2   1  548.75   30.50 
  -2  -2  -1  605.04   25.10 
  -2  -2  -1  559.34   29.80 
   2  -2   1  563.94   24.40 
   2  -2   1  545.65   20.90 
   2  -2   1  584.24   22.30 
  -2  -2  -1  554.84   27.80 
   2  -2   1  569.24   28.10 
  -2  -2  -1  575.94   25.20 
  -2  -2  -1  607.74   28.00 
  -2  -2  -1  530.75   30.00 
   2  -2   1  572.34   23.90 
  -2  -2  -1  580.44   25.50 
  -2  -2  -1  565.14   22.50 
   2  -2   1  567.44   25.40 
   2  -2   1  571.24   19.70 
  -2  -2  -1  575.74   24.10 
   2  -2   1  555.14   20.40 
   2  -2   1  603.04   27.20 
  -2  -2  -1  551.44   26.70 
   2  -2   1  602.54   22.50 
  -2  -2  -1  581.44   24.60 
   2  -2   1  514.05   24.70 
  -2  -2  -1  556.74   25.30 
  -2  -2  -1  547.45   25.00 
   2  -2   1  547.25   23.40 
   2  -2   1  594.24   22.60 
  -2  -2  -1  587.24   26.10 
   2  -2   1  598.24   29.20 
  -2  -2  -1  585.64   24.00 
  -2  -2  -1  591.74   26.20 
  -2  -2  -1  567.44   22.20 
   2  -2   1  594.04   24.20 
   2  -2   1  594.24   23.70 
   2  -2   1  572.84   27.70 
  -2  -2  -1  545.25   25.20 
   2  -2   1  567.54   29.50 
   2  -2   1  557.74   27.70 
   2  -2   1  572.14   21.70 
   2  -2   1  525.95   30.20 
   2  -2   1  528.85   27.50 
   2  -2   1  567.74   20.40 
  -2   2  -1  587.74   20.30 
   2   2   1  499.05   24.70 
   2   2   1  556.24   24.30 
  -2   2  -1  547.35   23.60 
   2   2   1  566.44   28.00 
  -2   2  -1  570.64   26.60 
   2   2   1  575.44   28.20 
  -2   2  -1  582.24   25.30 
  -2   2  -1  583.94   27.80 
   2   2   1  569.24   27.80 
  -2   2  -1  610.74   31.50 
   2   2   1  645.34   26.90 
  -2   2  -1  597.04   22.80 
   2   2   1  552.14   23.50 
   2   2   1  614.34   26.60 
   2   2   1  618.14   23.20 
   2   2   1  578.94   21.50 
  -2   2  -1  564.64   23.30 
  -2   2  -1  599.74   21.50 
  -2   2  -1  581.44   30.20 
  -2   2  -1  621.24   21.10 
  -2   2  -1  590.74   26.30 
   2   2   1  552.04   23.60 
  -2   2  -1  575.34   26.50 
  -2   2  -1  563.04   21.70 
   2   2   1  573.14   25.20 
  -2   2  -1  569.24   23.30 
   2   2   1  539.05   24.60 
   2   2   1  604.94   26.00 
  -2   2  -1  558.14   20.00 
   2   2   1  566.74   25.10 
   2   2   1  556.34   25.50 
  -2   2  -1  560.64   23.40 
   2   2   1  526.65   24.40 
   2   2   1  663.93   30.70 
  -2   2  -1  579.04   24.10 
   2   2   1  675.93   34.60 
   2   2   1  587.54   24.10 
  -2   2  -1  587.54   24.40 
   2   2   1  550.24   25.40 
  -2   2  -1  582.34   27.10 
   2   2   1  596.24   26.40 
   2   2   1  564.94   30.30 
  -2   2  -1  602.34   29.60 
  -2   2  -1  552.74   21.50 
  -3  -2  -1  288.27   17.10 
  -3  -2  -1  256.77   19.00 
  -3  -2  -1  223.48   16.40 
  -3  -2  -1  307.47   17.10 
   3  -2   1  266.87   19.40 
  -3  -2  -1  242.28   25.90 
   3  -2   1  257.97   11.70 
  -3  -2  -1  264.67   14.80 
  -3  -2  -1  264.57   17.70 
   3  -2   1  222.68   26.00 
   3  -2   1  269.17   13.50 
   3  -2   1  295.37   20.40 
  -3  -2  -1  251.97   14.30 
   3  -2   1  271.87   12.60 
  -3  -2  -1  242.38   16.60 
   3  -2   1  182.38   20.90 
   3  -2   1  264.37   26.70 
   3  -2   1  246.18   10.20 
   3  -2   1  231.68   12.20 
   3  -2   1  257.67   17.10 
  -3  -2  -1  286.97   21.10 
   3  -2   1  231.28   18.20 
   3  -2   1  257.77   14.50 
  -3  -2  -1  266.37   13.50 
  -3  -2  -1  231.68   17.30 
  -3  -2  -1  241.98   19.30 
  -3  -2  -1  254.17   17.90 
   3  -2   1  296.17   19.00 
   3  -2   1  230.58   17.60 
   3  -2   1  273.47   15.10 
   3  -2   1  302.37   21.60 
   3  -2   1  244.78   11.30 
  -3  -2  -1  254.97   20.20 
  -3  -2  -1  245.18   12.60 
   3  -2   1  260.47   17.30 
  -3  -2  -1  268.67   14.70 
   3  -2   1  257.77   17.00 
   3  -2   1  254.07   10.20 
  -3  -2  -1  246.08   17.20 
  -3  -2  -1  265.07   15.80 
   3   2   1  258.47   17.40 
  -3   2  -1  273.97   22.40 
  -3   2  -1  272.87   13.60 
  -3   2  -1  260.07   10.90 
   3   2   1  276.87   19.10 
   3   2   1  260.07   20.00 
  -3   2  -1  254.47   13.00 
  -3   2  -1  278.87   18.90 
  -3   2  -1  265.17    9.80 
  -3   2  -1  264.07   11.20 
  -3   2  -1  252.47   18.50 
  -3   2  -1  264.27   20.80 
   3   2   1  268.07   15.20 
   3   2   1  275.87   15.50 
  -3   2  -1  278.57   23.20 
  -3   2  -1  273.57   10.00 
   3   2   1  273.17   28.80 
   3   2   1  288.67   29.10 
   3   2   1  260.07   16.70 
  -3   2  -1  242.08   14.70 
   3   2   1  247.58   15.00 
  -3   2  -1  252.67   11.90 
   3   2   1  260.37   13.20 
   3   2   1  243.98   18.10 
   3   2   1  286.17   16.40 
   3   2   1  276.97   14.60 
  -3   2  -1  244.18    9.80 
   3   2   1  222.48   23.50 
   3   2   1  253.97   13.70 
   3   2   1  260.17   17.90 
  -3   2  -1  239.98   16.10 
  -3   2  -1  246.98   13.70 
  -3   2  -1  264.57   14.90 
   3   2   1  237.88   16.20 
  -3   2  -1  256.87   20.30 
   3   2   1  204.78   20.90 
  -3   2  -1  277.27   13.10 
  -3   2  -1  270.17   14.40 
  -3   2  -1  244.88   14.30 
   3   2   1  273.57   20.80 
   3   2   1  267.87   14.00 
  -3   2  -1  260.37   14.20 
  -3   2  -1  272.87   18.20 
  -4  -2  -1  465.55   25.10 
   4  -2   1  477.95   31.40 
   4  -2   1  523.75   26.70 
  -4  -2  -1  511.75   24.10 
  -4  -2  -1  487.25   19.10 
  -4  -2  -1  469.45   25.30 
   4  -2   1  504.45   27.80 
   4  -2   1  518.65   23.50 
  -4  -2  -1  507.55   22.80 
  -4  -2  -1  497.55   33.20 
  -4  -2  -1  444.76   28.70 
  -4  -2  -1  477.95   23.80 
   4  -2   1  526.05   28.70 
   4  -2   1  511.05   37.20 
   4  -2   1  513.75   23.80 
  -4  -2  -1  462.55   29.20 
  -4  -2  -1  487.05   27.30 
   4  -2   1  458.95   25.80 
  -4  -2  -1  475.55   21.10 
  -4  -2  -1  467.55   21.40 
  -4  -2  -1  527.85   29.30 
   4  -2   1  488.15   27.50 
   4  -2   1  481.45   20.40 
  -4  -2  -1  514.35   30.90 
  -4  -2  -1  479.65   22.00 
   4  -2   1  462.35   33.50 
  -4  -2  -1  443.06   26.50 
   4  -2   1  481.15   33.10 
  -4  -2  -1  409.86   26.20 
  -4  -2  -1  468.05   24.50 
   4   2   1  496.85   26.50 
  -4   2  -1  491.25   17.80 
  -4   2  -1  534.55   26.30 
   4   2   1  454.55   21.70 
   4   2   1  488.95   30.70 
  -4   2  -1  495.15   19.00 
  -4   2  -1  467.65   19.60 
   4   2   1  495.15   22.80 
  -4   2  -1  481.35   17.70 
  -4   2  -1  450.35   28.20 
   4   2   1  528.15   31.90 
  -4   2  -1  465.85   21.90 
   4   2   1  478.05   20.30 
   4   2   1  454.35   19.50 
  -4   2  -1  418.86   32.40 
   4   2   1  479.85   28.30 
  -4   2  -1  510.55   21.40 
   4   2   1  470.65   23.50 
  -4   2  -1  512.45   18.90 
   4   2   1  450.25   17.90 
   4   2   1  457.95   32.30 
  -4   2  -1  450.55   27.50 
  -4   2  -1  485.25   33.40 
  -4   2  -1  510.45   20.40 
   4   2   1  464.25   29.70 
  -4   2  -1  475.85   23.90 
   4   2   1  458.85   27.40 
   4   2   1  462.15   23.00 
  -4   2  -1  493.65   23.00 
  -4   2  -1  497.85   22.00 
   4   2   1  473.95   30.50 
  -4   2  -1  456.55   31.60 
  -4   2  -1  445.86   29.60 
  -4   2  -1  526.65   24.10 
  -4   2  -1  493.95   25.20 
   4   2   1  447.36   21.30 
   4   2   1  491.55   21.00 
   4   2   1  459.65   31.30 
  -4   2  -1  485.05   28.60 
   4   2   1  486.45   28.10 
  -4   2  -1  515.25   22.40 
   4   2   1  482.25   16.80 
   4   2   1  469.05   34.20 
  -5  -2  -1  416.56   29.90 
  -5  -2  -1  471.35   21.70 
  -5  -2  -1  454.75   30.90 
   5  -2   1  453.35   45.60 
  -5  -2  -1  420.06   29.40 
  -5  -2  -1  425.36   25.70 
  -5  -2  -1  476.65   28.90 
   5  -2   1  424.66   32.60 
   5  -2   1  429.76   28.00 
  -5  -2  -1  458.35   28.90 
   5  -2   1  475.45   36.30 
   5  -2   1  493.15   29.50 
   5  -2   1  472.85   34.50 
  -5  -2  -1  483.95   26.70 
  -5  -2  -1  462.05   29.50 
   5  -2   1  414.86   20.80 
  -5  -2  -1  460.45   22.20 
   5  -2   1  417.46   25.80 
  -5  -2  -1  452.05   23.40 
   5  -2   1  450.35   28.30 
  -5  -2  -1  409.56   24.50 
   5  -2   1  393.76   33.20 
  -5  -2  -1  435.36   28.30 
  -5  -2  -1  419.76   31.40 
  -5  -2  -1  448.26   24.00 
  -5  -2  -1  528.95   37.40 
  -5  -2  -1  425.26   24.60 
  -5   2  -1  432.56   22.70 
   5   2   1  436.36   21.70 
   5   2   1  481.25   34.00 
  -5   2  -1  432.66   35.40 
  -5   2  -1  478.55   31.80 
  -5   2  -1  468.75   18.00 
  -5   2  -1  432.96   16.50 
  -5   2  -1  475.35   25.50 
   5   2   1  451.65   30.80 
  -5   2  -1  446.06   19.90 
   5   2   1  409.96   28.70 
  -5   2  -1  461.35   20.00 
  -5   2  -1  452.65   42.30 
  -5   2  -1  452.55   16.40 
  -5   2  -1  459.55   23.00 
  -5   2  -1  460.85   21.90 
   5   2   1  446.36   32.50 
   5   2   1  416.76   19.20 
   5   2   1  490.25   28.50 
   5   2   1  464.35   24.10 
   5   2   1  493.65   34.30 
  -5   2  -1  437.66   23.50 
  -5   2  -1  458.35   16.30 
  -5   2  -1  447.76   24.80 
   5   2   1  480.55   30.50 
  -5   2  -1  454.55   16.40 
  -5   2  -1  490.85   31.10 
  -5   2  -1  419.26   29.40 
   5   2   1  462.95   32.40 
  -5   2  -1  484.85   30.10 
   5   2   1  428.16   27.00 
  -5   2  -1  470.95   27.00 
  -5   2  -1  444.06   19.10 
   5   2   1  419.26   34.20 
  -5   2  -1  438.76   21.90 
  -5   2  -1  422.76   33.20 
   5   2   1  463.35   21.20 
   5   2   1  424.26   35.90 
  -6  -2  -1  674.03   40.00 
  -6  -2  -1  739.93   37.40 
  -6  -2  -1  692.63   43.60 
  -6  -2  -1  719.33   43.50 
  -6  -2  -1  763.82   31.80 
   6  -2   1  743.73   40.90 
   6  -2   1  675.83   49.10 
   6  -2   1  721.73   48.70 
  -6  -2  -1  746.73   37.60 
   6  -2   1  778.12   38.70 
  -6  -2  -1  738.83   40.50 
   6  -2   1  696.23   40.60 
  -6  -2  -1  858.51   52.79 
  -6  -2  -1  792.22   35.00 
   6  -2   1  765.12   41.50 
   6  -2   1  767.02   28.60 
  -6  -2  -1  785.92   43.10 
  -6  -2  -1  695.73   42.80 
  -6  -2  -1  771.32   46.20 
  -6  -2  -1  755.42   45.30 
   6  -2   1  836.42   57.39 
  -6  -2  -1  804.12   36.10 
  -6  -2  -1  731.73   37.30 
  -6  -2  -1  731.73   40.40 
  -6  -2  -1  786.72   37.00 
   6  -2   1  726.13   50.99 
   6  -2   1  775.12   47.80 
  -6   2  -1  775.52   45.90 
   6   2   1  752.02   48.30 
  -6   2  -1  755.22   34.70 
  -6   2  -1  742.93   43.30 
  -6   2  -1  697.93   32.70 
  -6   2  -1  695.63   48.50 
   6   2   1  776.82   40.70 
  -6   2  -1  755.72   36.60 
   6   2   1  705.53   37.20 
  -6   2  -1  725.93   26.30 
  -6   2  -1  703.53   47.90 
   6   2   1  736.83   47.40 
  -6   2  -1  729.73   32.60 
  -6   2  -1  762.02   39.70 
  -6   2  -1  660.53   41.60 
   6   2   1  693.83   41.90 
  -6   2  -1  646.54   48.40 
   6   2   1  775.32   51.69 
  -6   2  -1  792.82   36.30 
  -6   2  -1  760.92   28.50 
  -6   2  -1  778.52   37.90 
   6   2   1  769.02   46.90 
   6   2   1  837.82   50.59 
   6   2   1  754.32   31.80 
   6   2   1  763.22   50.89 
  -6   2  -1  728.73   42.20 
  -6   2  -1  714.23   24.10 
   6   2   1  670.73   41.90 
  -7  -2  -1 1243.58   67.99 
  -7  -2  -1 1332.57   63.89 
  -7  -2  -1 1341.57   65.49 
  -7  -2  -1 1349.16   57.09 
  -7  -2  -1 1336.27   53.79 
  -7  -2  -1 1294.17   66.29 
   7  -2   1 1384.46   78.99 
   7  -2   1 1330.57   76.79 
  -7  -2  -1 1370.46   56.99 
   7  -2   1 1433.46   65.39 
  -7  -2  -1 1445.26   59.09 
   7  -2   1 1364.86   75.79 
  -7  -2  -1 1212.78   61.89 
   7  -2   1 1360.76   59.39 
   7  -2   1 1321.47   71.79 
  -7  -2  -1 1316.77   49.60 
  -7  -2  -1 1342.17   59.29 
   7  -2   1 1338.67   64.09 
  -7  -2  -1 1346.57   63.19 
  -7  -2  -1 1383.36   69.69 
  -7  -2  -1 1350.26   68.99 
  -7  -2  -1 1364.16   68.19 
  -7  -2  -1 1376.26   58.59 
   7  -2   1 1383.06   82.69 
   7  -2   1 1318.67   62.69 
  -7  -2  -1 1303.27   75.19 
  -7   2  -1 1439.86   56.19 
   7   2   1 1417.36   78.89 
   7   2   1 1318.17   73.69 
  -7   2  -1 1194.58   74.29 
   7   2   1 1294.47   61.99 
   7   2   1 1335.77   65.99 
  -7   2  -1 1289.07   65.89 
  -7   2  -1 1426.26   75.09 
  -7   2  -1 1418.46   70.39 
   7   2   1 1328.37   64.29 
  -7   2  -1 1317.37   60.89 
  -7   2  -1 1360.46   53.29 
   7   2   1 1374.76   57.89 
   7   2   1 1358.36   73.69 
  -7   2  -1 1323.17   56.89 
   7   2   1 1420.46   72.39 
  -7   2  -1 1395.26   66.39 
   7   2   1 1281.17   76.89 
  -7   2  -1 1469.95   68.29 
  -7   2  -1 1389.06   76.89 
  -7   2  -1 1340.97   59.59 
   7   2   1 1268.07   72.59 
  -7   2  -1 1375.96   55.79 
  -7   2  -1 1347.07   52.09 
   8  -2   1  684.13   44.30 
   8  -2   1  729.73   58.99 
  -8  -2  -1  720.53   50.49 
  -8  -2  -1  681.43   45.10 
  -8  -2  -1  676.53   49.50 
  -8  -2  -1  737.43   45.90 
  -8  -2  -1  725.93   50.99 
   8  -2   1  648.84   71.39 
   8  -2   1  725.13   41.20 
   8  -2   1  696.13   56.19 
  -8  -2  -1  768.72   41.20 
  -8  -2  -1  738.03   48.30 
  -8  -2  -1  670.13   38.00 
  -8  -2  -1  775.72   58.39 
  -8  -2  -1  642.34   49.00 
   8  -2   1  754.52   46.60 
  -8  -2  -1  775.22   46.00 
  -8  -2  -1  801.92   43.70 
  -8  -2  -1  741.43   49.10 
   8  -2   1  549.54   59.79 
  -8   2  -1  724.23   48.20 
   8   2   1  663.53   52.59 
   8   2   1  636.74   51.29 
  -8   2  -1  699.93   54.29 
  -8   2  -1  700.73   47.70 
  -8   2  -1  767.02   45.20 
   8   2   1  736.33   55.59 
  -8   2  -1  755.82   42.90 
   8   2   1  693.83   44.50 
  -8   2  -1  806.02   60.19 
  -8   2  -1  689.53   49.99 
   8   2   1  793.52   61.19 
   8   2   1  680.93   66.89 
  -8   2  -1  694.63   48.10 
   8   2   1  638.64   46.70 
  -8   2  -1  707.33   58.59 
   8   2   1  560.84   50.59 
  -9  -2  -1  839.42   67.39 
  -9  -2  -1  905.21   57.99 
  -9  -2  -1  858.61   60.79 
  -9  -2  -1  918.41   58.89 
  -9  -2  -1  900.21   56.79 
   9  -2   1  921.31   56.69 
  -9  -2  -1  886.21   61.49 
  -9  -2  -1  921.01   49.20 
   9  -2   1  735.33   79.09 
   9  -2   1  928.51   73.19 
   9  -2   1 1000.30   71.69 
  -9  -2  -1  988.30   59.19 
  -9  -2  -1  887.31   54.19 
   9  -2   1  864.91   53.39 
   9  -2   1  865.71   86.59 
  -9  -2  -1  864.51   60.69 
  -9  -2  -1  959.70   63.99 
  -9   2  -1  963.50   60.39 
   9   2   1  897.51   71.29 
   9   2   1  950.60   71.99 
  -9   2  -1  970.10   70.29 
  -9   2  -1  869.91   68.89 
  -9   2  -1  888.31   57.69 
  -9   2  -1  866.21   51.39 
  -9   2  -1  946.51   66.89 
   9   2   1  927.21   66.59 
   9   2   1  893.11   66.19 
  -9   2  -1 1067.69   61.79 
  -9   2  -1 1146.49   68.29 
  -9   2  -1  957.80   64.59 
   9   2   1  951.60   67.79 
   9   2   1  927.61   59.99 
  10  -2   1  293.57   53.59 
 -10  -2  -1  223.28   46.10 
  10  -2   1  203.28   42.20 
  10  -2   1  229.18   34.40 
 -10  -2  -1  221.08   42.40 
 -10  -2  -1  282.57   44.80 
 -10  -2  -1  195.48   37.10 
 -10  -2  -1  230.28   38.40 
  10  -2   1  161.78   42.60 
  10  -2   1  237.48   47.70 
 -10  -2  -1  207.48   32.40 
 -10  -2  -1  277.07   39.00 
 -10  -2  -1  218.28   36.10 
 -10  -2  -1  217.18   38.10 
  10   2   1  274.37   53.19 
 -10   2  -1  195.28   35.10 
 -10   2  -1  252.97   39.30 
 -10   2  -1  217.08   45.50 
 -10   2  -1  224.28   40.90 
 -10   2  -1  255.17   44.90 
 -10   2  -1  210.38   48.20 
 -10   2  -1  185.08   41.90 
 -10   2  -1  364.16   53.99 
  10   2   1  161.98   32.70 
  10   2   1  193.98   40.60 
  10   2   1  233.38   43.40 
  10   2   1  243.08   44.60 
  -9  -3   1   52.09   20.30 
   9  -3  -1   27.40   16.20 
   9  -3  -1   28.80   22.30 
   9  -3  -1   15.30   17.20 
   9  -3  -1   25.10   19.80 
  -9  -3   1   28.70   13.00 
  -9  -3   1   28.50   14.00 
  -9  -3   1   75.99   22.70 
  -9  -3   1   41.10   17.00 
  -9  -3   1   44.10   19.50 
  -9  -3   1   38.70   14.90 
  -9  -3   1   61.39   21.60 
  -9  -3   1   51.29   18.70 
   9  -3  -1   43.50   24.50 
  -9  -3   1   21.70   11.50 
   9  -3  -1   35.00   14.80 
  -9  -3   1   35.60   21.10 
  -9   3   1   11.60   18.10 
  -9   3   1    8.10   13.00 
  -9   3   1   26.50   19.40 
  -9   3   1   43.60   17.40 
   9   3  -1   54.79   23.80 
  -9   3   1   44.70   17.30 
   9   3  -1   18.30   18.50 
  -9   3   1   42.90   18.40 
  -9   3   1    9.30   14.00 
   9   3  -1   21.10   20.00 
   9   3  -1   69.39   25.90 
   9   3  -1   51.89   22.80 
   9   3  -1   31.50   15.50 
  -8  -3   1   -6.50   11.00 
   8  -3  -1   31.90   14.10 
   8  -3  -1   17.50   16.50 
  -8  -3   1   19.50   10.30 
  -8  -3   1   31.00   14.20 
   8  -3  -1   35.30   21.50 
  -8  -3   1   22.00   15.70 
   8  -3  -1   52.29   21.30 
   8  -3  -1   22.00   19.50 
  -8  -3   1    8.40   12.20 
   8  -3  -1   11.50   10.00 
   8  -3  -1   22.40   11.70 
  -8  -3   1    4.30   10.90 
  -8  -3   1   52.29   17.00 
  -8  -3   1   43.30   12.40 
  -8  -3   1   18.80   15.30 
  -8  -3   1   19.70   13.20 
  -8  -3   1   45.40   14.40 
  -8  -3   1   30.70   13.80 
   8   3  -1   19.00   17.50 
   8   3  -1   30.70   18.60 
   8   3  -1   45.70   22.50 
  -8   3   1   50.19   16.70 
  -8   3   1   12.60   13.40 
   8   3  -1   33.60   14.20 
  -8   3   1   12.60   13.90 
  -8   3   1   18.30   11.40 
   8   3  -1   -0.70    9.50 
  -8   3   1   28.30   10.90 
  -8   3   1   12.60   12.00 
  -8   3   1   42.70   18.40 
   8   3  -1   58.99   23.10 
   8   3  -1   23.20   17.00 
  -8   3   1   27.20   14.00 
  -8   3   1    4.50   12.80 
   8   3  -1   12.10   13.60 
  -7  -3   1  399.66   41.40 
   7  -3  -1  403.26   47.20 
  -7  -3   1  481.35   34.60 
   7  -3  -1  409.86   28.10 
  -7  -3   1  424.06   23.30 
   7  -3  -1  353.76   49.00 
  -7  -3   1  435.06   28.00 
  -7  -3   1  454.95   49.20 
  -7  -3   1  398.26   32.00 
   7  -3  -1  414.96   49.50 
   7  -3  -1  376.66   30.20 
  -7  -3   1  449.16   28.70 
  -7  -3   1  457.95   33.80 
  -7  -3   1  384.26   25.80 
   7  -3  -1  435.96   26.60 
  -7  -3   1  417.96   26.30 
  -7  -3   1  497.25   32.30 
   7  -3  -1  457.05   49.20 
  -7  -3   1  440.06   34.90 
  -7  -3   1  400.06   39.20 
  -7  -3   1  451.05   32.90 
   7  -3  -1  431.06   35.20 
  -7  -3   1  406.86   40.70 
  -7  -3   1  461.15   45.30 
   7  -3  -1  468.35   30.80 
  -7  -3   1  409.46   27.40 
  -7  -3   1  454.65   30.90 
  -7   3   1  437.56   35.10 
   7   3  -1  429.76   25.50 
   7   3  -1  428.26   41.50 
  -7   3   1  483.45   35.90 
   7   3  -1  370.06   44.60 
   7   3  -1  345.97   41.30 
  -7   3   1  454.65   28.70 
   7   3  -1  443.56   27.80 
  -7   3   1  448.76   29.00 
  -7   3   1  422.56   27.50 
  -7   3   1  507.45   50.69 
  -7   3   1  354.46   29.10 
   7   3  -1  362.36   37.10 
   7   3  -1  462.15   42.20 
  -7   3   1  399.36   39.40 
   7   3  -1  508.45   51.89 
  -7   3   1  470.25   39.00 
   7   3  -1  334.37   44.50 
   7   3  -1  324.17   44.40 
  -7   3   1  426.36   37.20 
  -7   3   1  436.86   49.60 
   7   3  -1  325.47   32.40 
  -7   3   1  348.67   37.80 
  -6  -3   1  770.32   38.70 
  -6  -3   1  893.01   44.30 
  -6  -3   1  870.81   43.50 
  -6  -3   1  807.12   40.30 
   6  -3  -1  764.32   52.79 
  -6  -3   1  824.12   44.80 
  -6  -3   1  786.42   38.20 
  -6  -3   1  845.22   47.10 
   6  -3  -1  807.12   58.49 
  -6  -3   1  902.61   43.80 
   6  -3  -1  779.22   40.40 
   6  -3  -1  852.41   41.30 
   6  -3  -1  800.32   40.40 
   6  -3  -1  948.41   55.19 
  -6  -3   1  821.02   45.80 
   6  -3  -1  752.42   54.59 
  -6  -3   1  835.22   54.29 
  -6  -3   1  851.91   37.20 
  -6  -3   1  849.52   35.80 
  -6  -3   1  768.32   43.40 
  -6  -3   1  789.02   47.70 
   6  -3  -1  845.02   48.80 
  -6  -3   1  809.22   35.60 
  -6  -3   1  792.62   33.00 
   6  -3  -1  885.71   44.30 
  -6  -3   1  835.52   44.00 
   6   3  -1  716.63   52.49 
  -6   3   1  828.92   46.10 
  -6   3   1  826.02   37.70 
  -6   3   1  824.82   46.30 
   6   3  -1  817.42   44.60 
   6   3  -1  835.22   53.69 
  -6   3   1  825.62   49.30 
  -6   3   1  815.12   40.40 
   6   3  -1  824.52   39.00 
   6   3  -1  842.62   56.49 
   6   3  -1  872.31   40.20 
  -6   3   1  889.51   42.80 
  -6   3   1  813.72   34.00 
   6   3  -1  809.52   46.40 
  -6   3   1  824.62   28.20 
   6   3  -1  781.22   51.09 
   6   3  -1  773.92   44.80 
  -6   3   1  839.52   35.30 
  -6   3   1  872.91   39.20 
   6   3  -1  792.12   47.20 
  -6   3   1  844.62   29.50 
  -6   3   1  834.52   47.10 
  -6   3   1  858.01   46.60 
  -6   3   1  952.10   51.59 
  -6   3   1  884.21   33.70 
   6   3  -1  788.22   50.69 
  -6   3   1  877.91   56.49 
  -6   3   1  793.92   52.19 
  -6   3   1  791.42   32.50 
  -5  -3   1 2837.02   94.19 
   5  -3  -1 2877.11   86.39 
   5  -3  -1 2857.91  117.49 
   5  -3  -1 2809.12   97.59 
   5  -3  -1 2881.21  101.49 
  -5  -3   1 2761.52  100.69 
  -5  -3   1 2766.82  101.29 
   5  -3  -1 2878.61   98.99 
  -5  -3   1 2994.80   97.99 
  -5  -3   1 2840.72  102.89 
  -5  -3   1 2737.43  100.19 
   5  -3  -1 2896.41  109.09 
   5  -3  -1 2656.43  109.29 
  -5  -3   1 2926.31   92.49 
  -5  -3   1 2931.81  105.89 
   5  -3  -1 2765.12  120.19 
  -5  -3   1 2885.21   92.49 
  -5  -3   1 2967.00  114.79 
   5  -3  -1 2844.52  101.89 
   5  -3  -1 2985.90  114.49 
  -5  -3   1 2928.41   91.49 
  -5  -3   1 2774.62  103.99 
  -5  -3   1 2810.62  103.09 
  -5  -3   1 2947.80  108.69 
  -5  -3   1 2909.41   97.59 
   5  -3  -1 2792.82   93.99 
  -5  -3   1 2909.61  101.09 
   5  -3  -1 2829.12   84.99 
  -5  -3   1 2908.71   99.29 
  -5   3   1 2855.91   98.49 
  -5   3   1 2935.71   88.99 
  -5   3   1 2925.11   90.79 
  -5   3   1 2808.22  104.89 
   5   3  -1 2763.42   95.59 
   5   3  -1 2692.63   87.29 
   5   3  -1 2824.62  104.39 
   5   3  -1 2854.61  110.39 
  -5   3   1 2703.83  107.39 
  -5   3   1 2844.92   85.79 
  -5   3   1 2894.21   90.59 
  -5   3   1 2924.71  106.59 
  -5   3   1 2897.11   99.79 
  -5   3   1 2829.62   91.69 
  -5   3   1 2929.61   88.79 
  -5   3   1 2704.33  111.89 
   5   3  -1 2923.71  106.09 
   5   3  -1 2851.81   97.69 
  -5   3   1 2978.40   94.79 
  -5   3   1 2903.61   87.49 
   5   3  -1 2956.10  104.49 
   5   3  -1 2816.02  105.29 
  -5   3   1 2913.31   92.99 
   5   3  -1 2882.41  116.99 
  -5   3   1 2819.72  102.59 
  -5   3   1 2746.53  114.19 
  -5   3   1 2837.82   94.69 
   5   3  -1 2708.03  108.79 
  -5   3   1 2836.82   93.59 
  -5   3   1 2719.03  108.49 
  -5   3   1 2818.52   87.89 
   5   3  -1 2563.74  114.69 
   5   3  -1 2911.71  113.99 
   5   3  -1 2830.52   99.29 
   4  -3  -1  545.45   26.60 
   4  -3  -1  534.45   26.80 
  -4  -3   1  577.04   22.90 
   4  -3  -1  562.94   18.70 
  -4  -3   1  580.14   27.20 
  -4  -3   1  577.74   25.90 
   4  -3  -1  550.54   34.70 
   4  -3  -1  565.94   29.20 
   4  -3  -1  598.54   36.40 
  -4  -3   1  549.95   28.70 
  -4  -3   1  517.35   30.90 
  -4  -3   1  490.55   35.30 
   4  -3  -1  569.74   36.70 
   4  -3  -1  554.04   20.30 
   4  -3  -1  549.15   30.20 
  -4  -3   1  574.14   30.90 
  -4  -3   1  563.74   28.30 
  -4  -3   1  554.74   33.40 
  -4  -3   1  545.75   29.60 
  -4  -3   1  554.74   30.90 
   4  -3  -1  536.35   38.90 
   4  -3  -1  569.94   25.80 
  -4  -3   1  582.74   28.90 
  -4  -3   1  594.44   30.80 
   4  -3  -1  540.95   30.30 
  -4  -3   1  569.54   22.80 
   4  -3  -1  559.24   21.60 
   4  -3  -1  561.84   28.10 
   4  -3  -1  545.65   27.90 
  -4  -3   1  560.64   32.40 
  -4  -3   1  565.24   29.30 
  -4   3   1  575.04   25.20 
   4   3  -1  547.45   22.90 
   4   3  -1  596.64   29.70 
  -4   3   1  557.14   21.30 
  -4   3   1  578.64   32.80 
   4   3  -1  509.75   34.60 
  -4   3   1  543.65   33.80 
   4   3  -1  571.04   31.90 
  -4   3   1  556.84   34.80 
   4   3  -1  560.54   20.00 
   4   3  -1  556.54   27.00 
  -4   3   1  575.44   27.80 
   4   3  -1  583.44   40.00 
  -4   3   1  557.74   23.60 
  -4   3   1  537.35   29.00 
  -4   3   1  563.24   22.80 
   4   3  -1  553.74   26.80 
  -4   3   1  571.14   23.40 
   4   3  -1  573.64   23.80 
  -4   3   1  549.25   25.20 
   4   3  -1  530.15   34.00 
   4   3  -1  582.84   39.10 
  -4   3   1  605.04   25.10 
   4   3  -1  565.24   33.10 
  -4   3   1  614.44   38.00 
   4   3  -1  528.85   32.00 
   4   3  -1  556.84   37.40 
   4   3  -1  554.64   31.20 
  -4   3   1  566.74   32.30 
  -4   3   1  547.75   23.60 
  -4   3   1  555.04   29.70 
   3  -3  -1 2381.06   79.29 
  -3  -3   1 2373.86   91.69 
   3  -3  -1 2398.66   82.89 
  -3  -3   1 2399.36   79.39 
  -3  -3   1 2376.56   86.49 
  -3  -3   1 2263.67   81.49 
   3  -3  -1 2371.16   80.89 
   3  -3  -1 2386.56   77.59 
  -3  -3   1 2316.67   84.49 
   3  -3  -1 2276.07   79.49 
  -3  -3   1 2261.87   82.29 
   3  -3  -1 2418.16   89.89 
   3  -3  -1 2323.97   83.49 
   3  -3  -1 2425.16   86.89 
   3  -3  -1 2232.88   92.19 
   3  -3  -1 2376.16   92.29 
  -3  -3   1 2368.46   79.69 
  -3  -3   1 2286.27   80.89 
  -3  -3   1 2345.67   80.89 
  -3  -3   1 2264.17   82.59 
   3  -3  -1 2377.76   73.89 
   3  -3  -1 2354.66   79.89 
  -3  -3   1 2496.75   82.49 
  -3  -3   1 2449.45   78.89 
   3  -3  -1 2342.77   81.59 
   3  -3  -1 2417.76   78.39 
  -3  -3   1 2464.55   82.89 
  -3   3   1 2446.36   88.99 
   3   3  -1 2261.37   85.39 
   3   3  -1 2216.88   82.99 
   3   3  -1 2400.26   95.29 
  -3   3   1 2418.26   78.49 
  -3   3   1 2418.96   73.09 
   3   3  -1 2367.56   79.59 
   3   3  -1 2311.57   75.89 
  -3   3   1 2360.66   77.69 
  -3   3   1 2440.86   91.79 
   3   3  -1 2384.66   91.59 
  -3   3   1 2392.36   76.09 
  -3   3   1 2342.07   73.39 
   3   3  -1 2128.29   91.59 
  -3   3   1 2368.26   79.19 
   3   3  -1 2340.27   74.59 
   3   3  -1 2334.67   83.19 
  -3   3   1 2292.87   79.79 
  -3   3   1 2446.66   76.89 
  -3   3   1 2349.96   72.59 
  -3   3   1 2324.87   84.39 
   3   3  -1 2489.05   86.39 
  -3   3   1 2426.26   85.39 
   3   3  -1 2462.95   82.39 
  -3   3   1 2458.45   83.39 
  -3   3   1 2339.27   71.69 
   3   3  -1 2377.36   77.59 
  -3   3   1 2437.06   86.89 
  -3   3   1 2414.06   77.89 
   3   3  -1 2351.06   79.99 
  -2  -3   1   41.60    7.50 
  -2  -3   1   49.30    9.80 
   2  -3  -1   76.39    9.80 
  -2  -3   1   52.39    8.90 
   2  -3  -1   58.59    9.20 
   2  -3  -1   71.39    8.10 
  -2  -3   1   50.89    7.90 
  -2  -3   1   48.10    8.60 
  -2  -3   1   43.30    7.70 
   2  -3  -1   57.79    8.70 
   2  -3  -1   62.49   10.90 
   2  -3  -1   39.30   10.50 
   2  -3  -1   52.39   13.90 
  -2  -3   1   55.89    9.80 
   2  -3  -1   71.99   14.10 
   2  -3  -1   62.49    9.20 
   2  -3  -1   55.49   10.20 
  -2  -3   1   43.70    8.00 
  -2  -3   1   88.89   15.50 
  -2  -3   1   58.29    9.70 
  -2  -3   1   65.99   11.70 
   2  -3  -1   51.49    9.20 
   2  -3  -1   65.99    7.90 
   2  -3  -1   66.19   10.20 
   2  -3  -1   71.69    9.10 
   2  -3  -1   55.39    8.40 
  -2  -3   1   48.00    8.50 
   2  -3  -1   53.39    9.20 
   2  -3  -1   68.99   10.90 
   2  -3  -1   60.49    8.50 
   2   3  -1   53.59   10.00 
   2   3  -1   67.69   11.10 
  -2   3   1   57.39    8.30 
  -2   3   1   67.29    8.40 
   2   3  -1   49.50    9.30 
   2   3  -1   48.10    6.40 
   2   3  -1   64.29   10.80 
   2   3  -1   73.89   10.60 
  -2   3   1   42.80   11.20 
  -2   3   1   34.50    6.60 
  -2   3   1   68.29   11.70 
  -2   3   1   48.00    9.20 
  -2   3   1   59.09    6.20 
   2   3  -1   50.29    8.70 
  -2   3   1   57.19   10.50 
  -2   3   1   46.80    8.50 
   2   3  -1   56.89    8.00 
  -2   3   1   51.99    6.50 
  -2   3   1   67.49    9.70 
  -2   3   1   63.49    9.40 
  -2   3   1   54.69    7.40 
   2   3  -1   58.49    9.20 
  -2   3   1   55.59    7.70 
  -2   3   1   59.39    7.90 
   2   3  -1   46.40    7.60 
  -2   3   1   52.59   10.00 
   2   3  -1   31.20    6.70 
   2   3  -1   57.39    9.60 
  -2   3   1   63.69    6.60 
   2   3  -1   54.49    4.00 
   2   3  -1   64.59   14.10 
  -2   3   1   42.60    9.90 
   1  -3  -1 1139.49   48.80 
   1  -3  -1 1138.99   45.10 
  -1  -3   1 1169.18   44.70 
   1  -3  -1 1193.18   43.30 
  -1  -3   1 1170.58   44.20 
   1  -3  -1 1206.28   38.80 
  -1  -3   1 1185.28   44.70 
  -1  -3   1 1173.88   42.80 
  -1  -3   1 1251.77   44.90 
  -1  -3   1 1292.97   47.70 
   1  -3  -1 1187.18   43.80 
  -1  -3   1 1147.09   46.60 
   1  -3  -1 1181.88   41.10 
   1  -3  -1 1273.67   46.80 
   1  -3  -1 1196.48   43.20 
   1  -3  -1 1214.78   43.40 
   1  -3  -1 1208.08   43.20 
   1  -3  -1 1202.38   46.90 
   1  -3  -1 1217.38   44.40 
  -1  -3   1 1142.39   48.40 
  -1  -3   1 1172.08   47.40 
   1  -3  -1 1200.68   47.20 
   1  -3  -1 1195.58   53.89 
  -1  -3   1 1280.87   46.50 
   1  -3  -1 1181.68   48.80 
  -1  -3   1 1185.18   44.10 
   1  -3  -1 1193.38   53.89 
   1  -3  -1 1218.48   45.70 
  -1  -3   1 1250.77   42.10 
  -1  -3   1 1320.07   44.50 
   1  -3  -1 1218.78   45.50 
   1   3  -1 1152.48   44.40 
   1   3  -1 1223.48   45.20 
   1   3  -1 1209.88   43.50 
  -1   3   1 1208.68   45.40 
  -1   3   1 1193.88   44.10 
   1   3  -1 1167.28   47.50 
  -1   3   1 1147.99   41.50 
  -1   3   1 1204.38   43.80 
   1   3  -1 1218.08   44.50 
  -1   3   1 1192.48   39.90 
   1   3  -1 1087.99   43.90 
   1   3  -1 1185.88   43.90 
  -1   3   1 1201.88   46.40 
   1   3  -1 1173.68   37.20 
   1   3  -1 1142.99   43.90 
  -1   3   1 1276.67   49.00 
   1   3  -1 1202.68   46.70 
   1   3  -1 1215.98   45.80 
  -1   3   1 1177.48   44.00 
  -1   3   1 1192.08   44.70 
  -1   3   1 1166.38   46.40 
  -1   3   1 1066.59   42.60 
  -1   3   1 1202.68   44.20 
   1   3  -1 1222.58   44.10 
   1   3  -1 1233.58   51.99 
   1   3  -1 1238.38   44.70 
  -1   3   1 1191.98   41.20 
   1   3  -1 1120.39   45.40 
   1   3  -1 1218.18   45.70 
  -1   3   1 1125.69   44.40 
   1   3  -1 1178.38   49.90 
   1   3  -1 1204.38   43.20 
   0  -3   1  123.59   13.90 
   0  -3  -1  137.39    9.50 
   0  -3  -1  134.69   12.80 
   0  -3   1  142.19   11.00 
   0  -3   1  127.79   13.00 
   0  -3  -1  146.79   14.90 
   0  -3  -1  107.19   12.20 
   0  -3  -1  135.99   14.30 
   0  -3   1  125.09    9.90 
   0  -3   1  142.69   13.70 
   0  -3   1  156.88   14.50 
   0  -3  -1  156.58   14.40 
   0  -3   1  144.49   16.00 
   0  -3   1  125.99   12.90 
   0  -3   1  130.39   14.50 
   0  -3   1  127.99   15.20 
   0  -3   1  131.19   12.40 
   0  -3  -1  131.19    8.20 
   0  -3  -1  128.49   12.40 
   0  -3  -1  147.19   10.90 
   0  -3  -1  126.99   13.50 
   0  -3  -1  103.59   11.40 
   0  -3   1  136.39   13.30 
   0  -3   1  133.09   10.10 
   0  -3  -1  116.09    8.80 
   0  -3  -1  145.59   13.10 
   0  -3  -1  139.19   12.90 
   0  -3   1  117.79    9.40 
   0  -3  -1  119.69   14.90 
   0   3   1  133.29    9.50 
   0   3  -1  139.49   13.30 
   0   3  -1  135.69   14.40 
   0   3  -1  111.09   12.60 
   0   3   1  123.89   13.10 
   0   3   1  133.09   12.60 
   0   3   1  119.89   13.20 
   0   3   1  110.19   11.10 
   0   3   1  117.99   11.60 
   0   3   1  144.89   16.10 
   0   3  -1  114.39   13.00 
   0   3  -1  118.59   12.00 
   0   3  -1  106.69   11.60 
   0   3   1  111.89   12.00 
   0   3  -1  110.09   11.50 
   0   3  -1  115.99   10.90 
   0   3   1  126.29    8.80 
   0   3  -1  138.19   10.80 
   0   3   1  127.19   12.20 
   0   3   1  121.89    7.40 
   0   3  -1  112.59   11.90 
   0   3  -1  139.99    9.00 
   0   3  -1  142.09   12.90 
   0   3  -1  119.29   14.70 
   0   3   1  123.29   14.20 
   0   3  -1  134.29    9.50 
   0   3  -1  119.19   12.30 
   0   3   1  126.89   10.30 
   0   3   1  133.89   14.90 
   0   3   1  119.19   12.20 
   0   3  -1  126.69   12.20 
   1  -3   1 5070.49  154.68 
   1  -3   1 5117.19  159.68 
  -1  -3  -1 5241.48  157.78 
   1  -3   1 5096.09  151.48 
   1  -3   1 5004.50  153.18 
   1  -3   1 5024.60  166.68 
  -1  -3  -1 4825.92  156.18 
   1  -3   1 5077.79  154.88 
  -1  -3  -1 4967.30  154.58 
   1  -3   1 5036.70  156.58 
   1  -3   1 5007.00  152.38 
  -1  -3  -1 5021.00  156.08 
  -1  -3  -1 5235.58  158.48 
  -1  -3  -1 5082.19  154.78 
   1  -3   1 5097.59  159.28 
  -1  -3  -1 5079.29  153.18 
   1  -3   1 5139.79  154.68 
  -1  -3  -1 5415.76  161.18 
  -1  -3  -1 5155.18  157.18 
   1  -3   1 4985.80  154.68 
  -1  -3  -1 5141.29  159.48 
  -1  -3  -1 4878.01  154.88 
   1  -3   1 4764.62  164.08 
   1  -3   1 4377.66  152.28 
   1  -3   1 4876.71  156.38 
   1  -3   1 5009.00  156.18 
   1  -3   1 4822.92  160.88 
   1  -3   1 4851.41  154.58 
   1  -3   1 4941.21  165.68 
   1  -3   1 5078.09  150.18 
   1  -3   1 5008.90  156.28 
  -1  -3  -1 4965.10  155.78 
  -1  -3  -1 5228.28  154.98 
   1  -3   1 5115.09  157.98 
  -1  -3  -1 5335.67  161.18 
   1  -3   1 4990.90  154.28 
  -1  -3  -1 5018.20  155.58 
   1  -3   1 5259.47  155.98 
  -1  -3  -1 5184.28  162.28 
  -1  -3  -1 4928.11  156.88 
   1   3   1 5011.20  155.78 
  -1   3  -1 5036.50  155.98 
   1   3   1 5082.99  159.68 
   1   3   1 5045.90  157.08 
  -1   3  -1 4995.80  157.68 
   1   3   1 4867.41  157.98 
   1   3   1 5208.78  156.38 
   1   3   1 5139.29  155.88 
  -1   3  -1 4884.01  154.98 
   1   3   1 4988.70  156.48 
  -1   3  -1 5023.20  154.18 
   1   3   1 4789.32  154.08 
  -1   3  -1 5124.79  156.08 
   1   3   1 5122.99  156.68 
  -1   3  -1 4949.60  150.38 
  -1   3  -1 5031.30  153.28 
  -1   3  -1 5069.99  155.98 
  -1   3  -1 4963.50  152.58 
  -1   3  -1 4965.90  155.68 
   1   3   1 5143.49  154.78 
  -1   3  -1 5054.19  157.48 
   1   3   1 4849.71  152.28 
  -1   3  -1 5029.40  156.48 
  -1   3  -1 5007.60  153.38 
   1   3   1 5637.14  167.18 
   1   3   1 5471.65  163.48 
   1   3   1 5167.28  154.58 
  -1   3  -1 4926.61  161.08 
   1   3   1 5409.66  159.38 
  -1   3  -1 4880.31  154.78 
  -1   3  -1 5098.09  155.48 
  -1   3  -1 5073.69  155.68 
  -1   3  -1 5207.28  156.08 
   1   3   1 5430.66  159.98 
   1   3   1 5026.00  155.58 
   1   3   1 5021.70  155.38 
  -1   3  -1 5195.28  165.48 
  -2  -3  -1 1192.48   44.80 
  -2  -3  -1 1269.17   44.80 
   2  -3   1 1144.79   39.70 
   2  -3   1 1183.18   55.29 
   2  -3   1 1053.99   43.00 
   2  -3   1 1123.99   42.10 
   2  -3   1 1059.19   42.70 
  -2  -3  -1 1176.18   40.80 
   2  -3   1 1092.49   44.70 
   2  -3   1 1139.89   49.70 
   2  -3   1 1120.79   48.30 
  -2  -3  -1 1179.48   46.00 
   2  -3   1 1141.09   42.70 
  -2  -3  -1 1125.09   45.40 
   2  -3   1 1138.49   42.10 
   2  -3   1 1164.48   49.99 
  -2  -3  -1 1159.38   44.80 
  -2  -3  -1 1182.08   45.40 
  -2  -3  -1 1227.48   45.70 
  -2  -3  -1 1134.89   43.40 
   2  -3   1 1069.59   38.10 
  -2  -3  -1 1217.18   43.00 
   2  -3   1 1028.20   43.40 
  -2  -3  -1 1135.29   52.09 
   2  -3   1 1109.39   41.00 
  -2  -3  -1 1119.39   44.80 
   2  -3   1 1084.59   46.10 
  -2  -3  -1 1146.39   46.70 
   2  -3   1 1114.69   46.40 
   2  -3   1 1070.79   40.30 
  -2  -3  -1 1159.98   48.50 
   2  -3   1 1090.79   37.40 
   2  -3   1 1096.29   53.39 
   2  -3   1 1106.09   43.90 
   2  -3   1 1111.79   34.90 
   2   3   1 1139.89   43.30 
  -2   3  -1 1080.19   39.70 
   2   3   1 1208.08   54.99 
  -2   3  -1 1090.29   42.20 
  -2   3  -1 1148.09   45.80 
   2   3   1 1179.08   52.49 
   2   3   1 1185.98   45.40 
  -2   3  -1 1113.49   43.00 
   2   3   1 1289.47   50.59 
  -2   3  -1 1187.18   45.90 
   2   3   1 1151.48   42.30 
  -2   3  -1 1150.18   52.89 
   2   3   1 1223.18   43.40 
  -2   3  -1 1141.99   44.30 
   2   3   1 1214.68   48.00 
   2   3   1 1186.98   38.10 
  -2   3  -1 1175.88   42.70 
   2   3   1 1292.27   46.40 
  -2   3  -1 1140.59   39.30 
   2   3   1 1178.38   43.70 
   2   3   1 1190.98   44.00 
  -2   3  -1 1126.79   41.40 
   2   3   1 1189.78   45.30 
  -2   3  -1 1099.09   36.40 
  -2   3  -1 1064.79   44.30 
  -2   3  -1 1160.08   43.40 
  -2   3  -1 1111.69   43.40 
   2   3   1 1134.59   44.80 
   2   3   1 1191.18   46.90 
  -2   3  -1 1078.29   48.90 
  -3  -3  -1 3354.16  111.99 
  -3  -3  -1 3319.77  111.69 
   3  -3   1 3454.85  114.49 
   3  -3   1 3314.27  109.89 
   3  -3   1 3381.26  117.09 
   3  -3   1 3381.66  104.59 
  -3  -3  -1 3308.77  120.99 
   3  -3   1 3421.26   98.69 
  -3  -3  -1 3365.66  108.89 
  -3  -3  -1 3416.36  112.49 
  -3  -3  -1 3368.46  106.69 
  -3  -3  -1 3360.16  113.19 
   3  -3   1 3326.37  105.29 
   3  -3   1 3474.25  109.69 
   3  -3   1 3378.66  117.69 
   3  -3   1 3402.16  102.39 
   3  -3   1 3451.55  112.29 
   3  -3   1 3449.16  110.59 
   3  -3   1 3473.85  106.49 
   3  -3   1 3184.48  115.19 
  -3  -3  -1 3326.37  112.49 
   3  -3   1 3408.36  118.19 
   3  -3   1 3278.67  128.59 
   3  -3   1 3293.37  116.79 
  -3  -3  -1 3329.07  114.09 
  -3  -3  -1 3430.06  109.69 
  -3  -3  -1 3450.15  110.99 
   3  -3   1 3341.27  105.49 
   3  -3   1 3426.66  104.59 
   3  -3   1 3278.27  122.69 
   3  -3   1 3591.84  126.09 
  -3  -3  -1 3397.76  104.69 
   3  -3   1 3333.07  102.29 
  -3  -3  -1 3248.07  114.89 
   3   3   1 3435.46  110.59 
  -3   3  -1 3202.88  121.29 
  -3   3  -1 3394.16  107.09 
  -3   3  -1 3468.45  105.49 
   3   3   1 3421.16  126.69 
  -3   3  -1 3373.86  114.49 
  -3   3  -1 3349.76  113.79 
  -3   3  -1 3494.45  111.39 
   3   3   1 3523.05  113.79 
   3   3   1 3402.26  116.79 
  -3   3  -1 3369.36  106.99 
   3   3   1 3301.57  117.29 
   3   3   1 3161.98  120.09 
  -3   3  -1 3387.46  109.09 
   3   3   1 3460.25  108.89 
  -3   3  -1 3471.25  102.29 
   3   3   1 3103.89  111.79 
  -3   3  -1 3395.56  113.59 
  -3   3  -1 3431.36  118.99 
  -3   3  -1 3367.46  103.59 
   3   3   1 3397.86  111.99 
   3   3   1 3419.66  102.79 
  -3   3  -1 3477.85  107.09 
   3   3   1 3396.26  107.49 
  -3   3  -1 3374.36  111.59 
   3   3   1 3300.67  113.19 
   3   3   1 3347.96  113.99 
   3   3   1 3372.76  108.19 
  -3   3  -1 3369.26  107.09 
  -3   3  -1 3486.95  108.49 
   3   3   1 3445.16  117.59 
  -4  -3  -1  363.86   29.70 
   4  -3   1  373.36   18.10 
   4  -3   1  399.86   26.20 
  -4  -3  -1  329.87   24.40 
   4  -3   1  356.66   27.60 
  -4  -3  -1  337.67   23.80 
   4  -3   1  354.46   37.20 
  -4  -3  -1  342.67   16.50 
  -4  -3  -1  328.97   25.30 
   4  -3   1  343.87   21.50 
   4  -3   1  369.56   16.50 
  -4  -3  -1  351.86   24.50 
  -4  -3  -1  349.96   22.40 
  -4  -3  -1  318.27   24.50 
   4  -3   1  340.27   14.30 
   4  -3   1  344.97   16.00 
  -4  -3  -1  387.66   22.70 
  -4  -3  -1  323.97   23.00 
  -4  -3  -1  411.96   28.20 
  -4  -3  -1  335.37   20.20 
   4  -3   1  360.06   23.50 
   4  -3   1  337.27   12.60 
   4  -3   1  338.47   38.70 
  -4  -3  -1  381.76   14.50 
   4  -3   1  356.26   18.50 
  -4  -3  -1  325.97   22.30 
  -4  -3  -1  322.17   23.40 
   4  -3   1  349.57   24.70 
  -4  -3  -1  338.87   20.40 
   4  -3   1  394.96   26.20 
  -4  -3  -1  319.17   17.70 
   4  -3   1  330.67   22.90 
  -4   3  -1  368.66   19.10 
   4   3   1  319.17   31.80 
   4   3   1  315.67   32.10 
   4   3   1  368.06   17.80 
   4   3   1  353.66   38.80 
  -4   3  -1  351.66   15.80 
  -4   3  -1  383.96   20.30 
   4   3   1  348.67   24.40 
   4   3   1  336.27   22.30 
   4   3   1  317.77   20.70 
   4   3   1  347.87   24.70 
   4   3   1  308.37   26.10 
   4   3   1  334.37   16.10 
   4   3   1  339.67   18.90 
  -4   3  -1  359.56   21.90 
   4   3   1  366.86   27.90 
  -4   3  -1  370.66   24.00 
   4   3   1  383.76   19.50 
   4   3   1  348.07   24.80 
  -4   3  -1  329.47   15.30 
  -4   3  -1  364.96   18.30 
  -4   3  -1  358.76   25.70 
  -4   3  -1  319.07   32.60 
   4   3   1  364.66   28.60 
  -4   3  -1  345.87   20.30 
  -4   3  -1  331.47   18.10 
  -4   3  -1  372.06   20.40 
  -4   3  -1  356.46   16.90 
   4   3   1  389.66   25.60 
  -4   3  -1  359.66   25.40 
   4   3   1  376.16   20.40 
  -4   3  -1  325.07   26.90 
  -5  -3  -1  244.18   25.80 
  -5  -3  -1  256.27   28.70 
  -5  -3  -1  233.18   12.60 
   5  -3   1  228.98   24.70 
  -5  -3  -1  198.68   21.00 
  -5  -3  -1  194.68   22.70 
   5  -3   1  181.78   30.60 
   5  -3   1  227.58   24.70 
   5  -3   1  164.98   21.20 
   5  -3   1  188.18   25.80 
  -5  -3  -1  182.18   25.10 
  -5  -3  -1  210.28   14.00 
   5  -3   1  163.58   26.00 
   5  -3   1  225.68   32.90 
  -5  -3  -1  190.38   22.80 
  -5  -3  -1  245.18   17.10 
  -5  -3  -1  235.38   27.30 
  -5  -3  -1  238.78   21.90 
  -5  -3  -1  203.78   21.90 
   5  -3   1  210.08   15.40 
  -5  -3  -1  194.28   15.20 
  -5  -3  -1  245.88   32.40 
  -5  -3  -1  179.28   21.40 
   5  -3   1  251.97   24.40 
  -5  -3  -1  222.08   21.70 
  -5  -3  -1  278.67   28.90 
   5  -3   1  217.98   20.30 
  -5   3  -1  221.88   16.20 
   5   3   1  222.98   13.20 
   5   3   1  231.08   28.40 
  -5   3  -1  210.28   25.20 
   5   3   1  249.88   30.40 
   5   3   1  236.98   28.90 
  -5   3  -1  193.68   13.90 
   5   3   1  203.28   31.70 
   5   3   1  220.28   17.30 
  -5   3  -1  250.57   33.60 
  -5   3  -1  242.58   14.30 
  -5   3  -1  254.57   30.80 
   5   3   1  233.68   25.80 
  -5   3  -1  223.38   21.80 
   5   3   1  218.08   24.10 
   5   3   1  243.18   28.50 
   5   3   1  252.27   33.30 
   5   3   1  242.98   12.20 
  -5   3  -1  218.78   11.70 
   5   3   1  255.57   26.30 
  -5   3  -1  202.58   10.50 
   5   3   1  185.38   14.90 
   5   3   1  221.88   15.20 
  -5   3  -1  263.17   32.80 
  -5   3  -1  239.68   13.50 
   5   3   1  206.88   10.50 
  -5   3  -1  242.08   24.40 
   5   3   1  216.78   25.30 
  -5   3  -1  211.68   16.10 
  -5   3  -1  201.18   15.50 
  -5   3  -1  215.78   25.40 
  -5   3  -1  202.28   16.10 
  -5   3  -1  237.18   25.70 
  -6  -3  -1   45.00   13.50 
   6  -3   1   90.29   12.50 
  -6  -3  -1   67.29   15.20 
  -6  -3  -1   62.99   12.50 
  -6  -3  -1   82.79   17.60 
   6  -3   1   43.30   17.00 
  -6  -3  -1   55.49   16.60 
   6  -3   1   74.99   15.80 
   6  -3   1   72.59   21.90 
  -6  -3  -1   89.29   18.20 
  -6  -3  -1   88.59   17.30 
  -6  -3  -1   72.69   11.40 
  -6  -3  -1   59.09   12.00 
   6  -3   1   56.59   12.40 
  -6  -3  -1   83.69   15.80 
  -6  -3  -1   88.79   11.80 
   6  -3   1   90.99   17.50 
  -6  -3  -1   57.19   14.80 
   6  -3   1   68.49   19.60 
   6  -3   1   58.29   19.40 
   6  -3   1   70.19   15.30 
  -6  -3  -1   67.89   12.30 
  -6  -3  -1   63.09   16.10 
  -6   3  -1   46.60   15.80 
  -6   3  -1   69.09   15.90 
   6   3   1   47.30   13.40 
  -6   3  -1   67.89   13.90 
   6   3   1   65.59   18.10 
   6   3   1   52.59   19.90 
  -6   3  -1   59.79   14.50 
   6   3   1   76.19   17.70 
  -6   3  -1   67.09    7.70 
   6   3   1   47.80   16.00 
  -6   3  -1   65.49   20.20 
   6   3   1   67.39   16.10 
  -6   3  -1   80.09   11.40 
  -6   3  -1   83.59   12.60 
  -6   3  -1   65.29   11.30 
  -6   3  -1   44.10   13.40 
   6   3   1   75.19   21.40 
  -6   3  -1   61.29   10.90 
  -6   3  -1   76.09   20.30 
  -6   3  -1   65.69   17.10 
   6   3   1   62.69   16.20 
   6   3   1   97.09   21.70 
   6   3   1   77.59   16.30 
  -6   3  -1   68.89   12.10 
   6   3   1   61.09   10.90 
  -6   3  -1   68.49    7.50 
  -7  -3  -1   -5.70    9.10 
  -7  -3  -1   22.60    7.60 
  -7  -3  -1   -1.00    6.70 
  -7  -3  -1   23.60   11.30 
   7  -3   1   -3.80    7.80 
   7  -3   1    4.70   10.90 
   7  -3   1    0.80    7.90 
  -7  -3  -1   10.20    8.30 
  -7  -3  -1   10.80   12.60 
  -7  -3  -1    2.50    9.30 
  -7  -3  -1    4.00    6.70 
  -7  -3  -1   -5.10    9.70 
  -7  -3  -1   24.40   13.30 
   7  -3   1    7.20    7.80 
   7  -3   1    1.70   13.20 
   7  -3   1   13.40   15.80 
  -7  -3  -1   11.40    7.30 
  -7  -3  -1    0.80    9.60 
  -7  -3  -1   10.10    7.70 
   7  -3   1   16.30   10.70 
  -7  -3  -1    3.10    8.70 
  -7  -3  -1   -2.30    8.30 
  -7  -3  -1    5.50    8.70 
   7  -3   1   35.00   18.20 
   7   3   1    3.00    9.40 
  -7   3  -1   14.80   10.50 
   7   3   1   -2.30   11.10 
  -7   3  -1    9.20   10.40 
  -7   3  -1   12.30   11.40 
  -7   3  -1   -5.00    4.80 
   7   3   1    5.20   13.20 
   7   3   1   26.00   12.20 
  -7   3  -1    1.30   10.10 
   7   3   1   27.90   15.60 
  -7   3  -1   19.50   11.20 
   7   3   1   10.90   12.50 
   7   3   1    8.80   10.20 
  -7   3  -1    8.00    7.60 
  -7   3  -1  -11.30    8.90 
  -7   3  -1   11.30   12.80 
  -7   3  -1    5.10    6.80 
   7   3   1   19.50   16.70 
   7   3   1   10.70    8.70 
  -7   3  -1   -0.90    5.30 
  -7   3  -1   12.50    9.20 
  -8  -3  -1   18.10   14.30 
  -8  -3  -1   -0.30   10.40 
   8  -3   1    2.50    8.40 
   8  -3   1   -4.70   11.20 
  -8  -3  -1    3.80    8.70 
  -8  -3  -1    0.60   10.90 
   8  -3   1    1.60   15.80 
   8  -3   1   -2.40   14.50 
  -8  -3  -1    3.30   12.10 
  -8  -3  -1    2.10   10.40 
  -8  -3  -1   -4.10   12.20 
  -8  -3  -1    2.20    7.90 
  -8  -3  -1    1.20   14.50 
  -8  -3  -1    1.60    9.60 
   8  -3   1   -5.20   10.40 
  -8  -3  -1   -5.10    8.50 
   8  -3   1    8.70   10.40 
  -8  -3  -1   19.20    9.30 
   8  -3   1   17.00   11.80 
  -8  -3  -1   16.10   11.40 
   8  -3   1  -15.90    9.60 
   8   3   1   15.40   15.90 
  -8   3  -1   26.00   13.40 
   8   3   1    3.20   13.90 
   8   3   1    3.50   15.40 
   8   3   1    3.80   10.30 
  -8   3  -1   -4.40   10.70 
  -8   3  -1   13.10   11.80 
  -8   3  -1   -0.60   14.30 
   8   3   1    3.50   14.10 
   8   3   1   10.70   14.40 
  -8   3  -1  -10.00   12.50 
  -8   3  -1    3.90   16.20 
   8   3   1  -14.80    8.80 
  -8   3  -1    3.30    8.10 
  -8   3  -1   15.70   12.30 
  -9  -3  -1   22.30   14.30 
  -9  -3  -1   27.10   15.60 
  -9  -3  -1   23.10   16.10 
  -9  -3  -1   36.90   18.80 
   9  -3   1    4.10   13.50 
   9  -3   1    0.30   16.70 
   9  -3   1   42.50   22.50 
  -9  -3  -1   32.50   13.60 
  -9  -3  -1   34.80   18.10 
   9  -3   1   19.10   11.80 
   9  -3   1    3.00   19.10 
   9  -3   1    7.70   18.60 
  -9  -3  -1    4.40   13.50 
  -9  -3  -1    4.90   14.40 
   9  -3   1    9.80   12.50 
  -9  -3  -1   12.10   14.80 
  -9  -3  -1   11.10   12.00 
   9   3   1   55.59   20.50 
   9   3   1   40.20   22.40 
  -9   3  -1   36.50   17.10 
  -9   3  -1   21.00   16.60 
   9   3   1   35.40   20.50 
   9   3   1   38.80   22.30 
   9   3   1   25.20   20.10 
  -9   3  -1   36.00   15.80 
   9   3   1   36.90   23.40 
  -9   3  -1   47.50   21.10 
  -9   3  -1   19.90   14.20 
  -9   3  -1   30.70   17.30 
  -9   3  -1   18.70   18.60 
  -9  -4   1   36.60   16.80 
  -9  -4   1   44.10   16.10 
  -9  -4   1   13.30   17.00 
   9  -4  -1   26.60   15.20 
  -9  -4   1   31.90   17.80 
  -9  -4   1   27.70   13.50 
  -9  -4   1   35.20   18.10 
   9  -4  -1   21.00   21.30 
  -9  -4   1   12.20   13.20 
  -9  -4   1   44.50   20.00 
   9  -4  -1   11.00   20.90 
  -9  -4   1    4.50   19.60 
  -9  -4   1   52.59   20.40 
   9  -4  -1   23.30   20.60 
   9  -4  -1   59.09   27.50 
  -9  -4   1   37.20   16.20 
   9   4  -1   -9.90   16.80 
   9   4  -1   82.39   28.70 
  -9   4   1   31.90   17.80 
  -9   4   1   32.90   14.30 
   9   4  -1   49.99   24.60 
  -9   4   1   28.70   17.90 
  -9   4   1   37.60   19.10 
  -9   4   1   45.00   23.00 
  -9   4   1   21.80   15.60 
   9   4  -1   22.00   21.80 
   9   4  -1   42.80   24.20 
  -8  -4   1  269.57   30.30 
   8  -4  -1  305.57   49.60 
  -8  -4   1  286.07   34.30 
  -8  -4   1  263.17   30.50 
  -8  -4   1  275.07   44.20 
   8  -4  -1  223.98   40.30 
  -8  -4   1  281.07   37.90 
  -8  -4   1  249.18   33.40 
  -8  -4   1  264.07   35.20 
  -8  -4   1  272.17   37.70 
  -8  -4   1  263.67   38.30 
   8  -4  -1  251.57   44.00 
  -8  -4   1  261.57   28.80 
   8  -4  -1  267.67   28.80 
  -8  -4   1  238.08   32.10 
  -8  -4   1  223.48   32.80 
   8  -4  -1  313.37   32.40 
   8  -4  -1  199.48   43.10 
   8  -4  -1  180.88   30.50 
   8   4  -1  303.57   42.90 
  -8   4   1  223.18   32.70 
   8   4  -1  267.37   37.10 
   8   4  -1  256.57   38.70 
   8   4  -1  291.37   42.20 
   8   4  -1  233.48   41.50 
  -8   4   1  267.27   35.60 
   8   4  -1  361.96   52.79 
  -8   4   1  260.97   36.80 
  -8   4   1  302.87   43.60 
   8   4  -1  260.07   39.70 
  -8   4   1  261.77   38.00 
  -7  -4   1   -2.00    6.20 
   7  -4  -1    8.70   10.60 
   7  -4  -1    1.10    8.50 
   7  -4  -1   40.10   21.60 
  -7  -4   1   12.70   10.60 
  -7  -4   1   -0.60   11.00 
   7  -4  -1   -6.60   12.00 
   7  -4  -1   -4.00   13.30 
  -7  -4   1    5.40    8.60 
  -7  -4   1    3.00    6.30 
  -7  -4   1   17.90   10.60 
  -7  -4   1    5.50    9.40 
  -7  -4   1    6.40   10.10 
  -7  -4   1    4.00    6.50 
   7  -4  -1   10.50   13.90 
  -7  -4   1   -0.40    9.60 
  -7  -4   1   -3.20    8.60 
  -7  -4   1   -1.40    6.80 
  -7  -4   1   -3.20    7.60 
  -7  -4   1   12.10   10.60 
   7  -4  -1   -1.70    7.50 
  -7  -4   1   -5.30   12.60 
   7   4  -1   12.80   10.20 
   7   4  -1   -6.40   12.90 
  -7   4   1   -0.30    9.40 
   7   4  -1   -6.30    7.80 
  -7   4   1    9.40   11.40 
  -7   4   1    6.20   10.20 
   7   4  -1   14.10   15.50 
  -7   4   1    4.60    9.70 
   7   4  -1    5.60   14.70 
   7   4  -1   -9.10   10.50 
  -7   4   1   16.30   16.00 
  -7   4   1   -4.10    8.50 
   7   4  -1   -0.80    7.60 
  -7   4   1   20.70    9.50 
  -7   4   1    3.00    7.90 
   7   4  -1   12.60   15.60 
  -7   4   1    3.00    8.30 
   7   4  -1    4.30   12.10 
  -6  -4   1  218.38   34.20 
  -6  -4   1  233.88   24.80 
  -6  -4   1  215.78   25.70 
   6  -4  -1  164.58   32.40 
   6  -4  -1  200.48   24.00 
  -6  -4   1  183.58   25.80 
  -6  -4   1  208.18   22.90 
  -6  -4   1  236.48   28.10 
   6  -4  -1  250.87   35.10 
   6  -4  -1  196.58   24.40 
  -6  -4   1  303.87   27.30 
  -6  -4   1  222.18   16.50 
  -6  -4   1  170.18   18.70 
   6  -4  -1  220.58   22.80 
  -6  -4   1  232.18   24.20 
   6  -4  -1  216.38   38.20 
  -6  -4   1  197.08   26.60 
  -6  -4   1  202.28   25.60 
   6  -4  -1  213.08   32.90 
  -6  -4   1  234.48   26.30 
   6  -4  -1  189.58   27.50 
  -6  -4   1  232.98   26.40 
  -6  -4   1  202.08   28.70 
  -6   4   1  206.58   19.80 
  -6   4   1  237.38   23.90 
  -6   4   1  232.78   22.80 
   6   4  -1  201.68   23.00 
  -6   4   1  211.88   28.20 
   6   4  -1  200.38   31.50 
   6   4  -1  237.68   31.00 
  -6   4   1  232.28   29.90 
  -6   4   1  252.17   26.20 
  -6   4   1  201.08   18.60 
   6   4  -1  272.97   37.30 
   6   4  -1  171.28   31.60 
  -6   4   1  221.98   16.70 
   6   4  -1  247.78   26.40 
   6   4  -1  199.38   28.20 
   6   4  -1  179.78   33.50 
  -6   4   1  187.08   30.40 
   6   4  -1  217.88   28.00 
  -6   4   1  221.08   29.20 
   6   4  -1  231.28   34.00 
  -6   4   1  191.28   26.40 
  -5  -4   1   53.29   12.50 
  -5  -4   1   52.39   13.10 
   5  -4  -1   58.19   20.10 
  -5  -4   1   72.79   12.90 
   5  -4  -1   53.99   17.30 
  -5  -4   1   57.29   13.40 
   5  -4  -1   56.59   14.30 
  -5  -4   1   80.39   17.80 
  -5  -4   1   77.29   14.50 
  -5  -4   1   89.09   20.70 
  -5  -4   1   48.60   13.00 
  -5  -4   1   60.19   14.50 
   5  -4  -1   55.49    9.30 
  -5  -4   1   53.99   13.40 
   5  -4  -1   38.60   14.20 
  -5  -4   1   38.20    9.70 
   5  -4  -1   57.39   11.90 
   5  -4  -1   25.80   16.10 
   5  -4  -1   76.69   14.50 
   5  -4  -1   43.40   10.70 
   5  -4  -1   65.19    6.10 
  -5  -4   1   78.69   16.70 
  -5  -4   1   52.29   10.30 
  -5  -4   1   54.49   12.10 
   5  -4  -1   46.90   15.00 
  -5   4   1   68.49    8.60 
  -5   4   1   61.59   12.50 
  -5   4   1   57.49    4.50 
  -5   4   1   44.20   11.40 
   5   4  -1   65.29    9.50 
   5   4  -1   79.09   17.70 
  -5   4   1   58.29    4.40 
  -5   4   1   69.19   11.50 
   5   4  -1   84.09   22.70 
   5   4  -1   55.69    9.90 
  -5   4   1   66.59    8.50 
  -5   4   1   50.99   16.00 
  -5   4   1   80.09   11.20 
  -5   4   1   48.10    8.00 
   5   4  -1   54.49   15.60 
   5   4  -1   34.80   17.20 
   5   4  -1   61.89   13.60 
   5   4  -1   47.90   14.20 
   5   4  -1   42.90   11.60 
  -5   4   1   60.39   14.90 
   5   4  -1   32.20    9.20 
   5   4  -1   50.99   13.80 
   5   4  -1   76.99   18.90 
  -5   4   1   89.19   17.40 
  -5   4   1   82.69   15.40 
  -5   4   1   54.59   13.70 
  -5   4   1   79.99   12.40 
   5   4  -1   50.29   16.00 
   4  -4  -1  776.22   36.80 
  -4  -4   1  733.93   34.40 
   4  -4  -1  826.02   56.49 
  -4  -4   1  788.62   38.40 
   4  -4  -1  720.43   45.70 
   4  -4  -1  804.12   36.00 
   4  -4  -1  831.32   49.10 
  -4  -4   1  739.73   40.00 
   4  -4  -1  773.62   32.50 
   4  -4  -1  762.92   31.60 
   4  -4  -1  821.92   40.80 
   4  -4  -1  776.02   29.60 
  -4  -4   1  789.52   42.40 
   4  -4  -1  814.42   45.50 
   4  -4  -1  777.02   36.60 
  -4  -4   1  849.81   40.20 
  -4  -4   1  795.42   40.30 
   4  -4  -1  761.72   28.70 
   4  -4  -1  785.22   50.89 
   4  -4  -1  741.43   36.60 
  -4  -4   1  838.32   49.60 
  -4  -4   1  734.33   42.30 
  -4  -4   1  818.12   39.70 
  -4  -4   1  688.93   36.70 
  -4  -4   1  797.52   36.00 
   4  -4  -1  802.32   39.20 
  -4  -4   1  747.63   39.60 
  -4  -4   1  826.52   37.20 
  -4  -4   1  770.22   38.50 
  -4   4   1  803.22   35.10 
  -4   4   1  805.52   39.20 
  -4   4   1  786.02   35.20 
  -4   4   1  851.51   48.40 
  -4   4   1  771.22   31.70 
  -4   4   1  840.12   42.40 
   4   4  -1  776.62   43.70 
  -4   4   1  755.72   31.80 
   4   4  -1  779.62   34.00 
  -4   4   1  786.02   28.60 
   4   4  -1  793.62   53.39 
   4   4  -1  829.52   43.30 
  -4   4   1  764.82   27.60 
  -4   4   1  772.02   35.20 
   4   4  -1  772.72   47.90 
   4   4  -1  829.42   51.79 
   4   4  -1  828.32   39.50 
  -4   4   1  888.61   45.80 
   4   4  -1  828.02   41.30 
   4   4  -1  725.33   44.70 
   4   4  -1  796.22   43.30 
   4   4  -1  780.32   32.80 
   4   4  -1  780.32   32.30 
  -4   4   1  764.82   41.10 
   3  -4  -1   46.20    9.70 
  -3  -4   1   53.79   10.80 
  -3  -4   1   50.49   11.10 
  -3  -4   1   46.40    8.60 
   3  -4  -1   55.89   12.40 
  -3  -4   1   56.99   10.20 
  -3  -4   1   67.99   12.30 
   3  -4  -1   54.79   16.90 
  -3  -4   1   58.89   16.10 
   3  -4  -1   51.89    9.40 
   3  -4  -1   34.40    9.80 
   3  -4  -1   57.69    9.00 
   3  -4  -1   42.60   13.20 
   3  -4  -1   63.19    9.70 
  -3  -4   1   38.70   10.70 
  -3  -4   1   61.29   10.90 
   3  -4  -1   37.50    9.30 
   3  -4  -1   56.19   12.00 
  -3  -4   1   59.79   13.40 
   3  -4  -1   60.99    6.60 
   3  -4  -1   68.29   12.80 
  -3  -4   1   56.49    9.90 
   3  -4  -1   61.59   17.30 
  -3  -4   1   57.29   11.40 
  -3  -4   1   66.39   12.40 
   3  -4  -1   68.99   13.30 
  -3   4   1   62.99    7.40 
   3   4  -1   47.60    7.70 
   3   4  -1   48.70    9.50 
   3   4  -1   57.99   16.90 
  -3   4   1   58.59    9.30 
   3   4  -1   56.79   12.50 
   3   4  -1   57.19   12.20 
  -3   4   1   61.99   13.00 
   3   4  -1   41.10   10.20 
   3   4  -1   32.40   14.30 
   3   4  -1   63.69   11.90 
  -3   4   1   54.49   11.20 
   3   4  -1   79.79   17.80 
   3   4  -1   42.60   12.70 
  -3   4   1   57.49   15.10 
  -3   4   1   55.89    7.60 
  -3   4   1   34.80    7.30 
  -3   4   1   31.30    7.70 
  -3   4   1   44.90    5.30 
   3   4  -1   48.30   13.00 
  -2  -4   1  521.15   27.20 
  -2  -4   1  563.24   26.30 
   2  -4  -1  572.74   25.10 
   2  -4  -1  504.45   18.40 
  -2  -4   1  478.85   26.00 
   2  -4  -1  508.55   28.70 
   2  -4  -1  455.55   25.40 
   2  -4  -1  565.04   28.70 
   2  -4  -1  567.74   36.00 
   2  -4  -1  536.05   26.30 
   2  -4  -1  548.45   27.50 
   2  -4  -1  477.65   28.70 
   2  -4  -1  517.45   26.80 
  -2  -4   1  422.96   26.30 
   2  -4  -1  499.15   20.80 
   2  -4  -1  559.64   30.00 
  -2  -4   1  540.45   27.70 
  -2  -4   1  497.45   27.00 
  -2  -4   1  533.35   30.40 
   2  -4  -1  523.35   30.90 
  -2  -4   1  528.35   27.60 
   2  -4  -1  535.05   26.10 
   2  -4  -1  486.45   28.10 
   2  -4  -1  488.35   24.60 
  -2  -4   1  560.84   29.30 
  -2  -4   1  557.64   31.40 
   2  -4  -1  516.35   37.40 
  -2   4   1  519.25   28.00 
   2   4  -1  473.55   27.00 
   2   4  -1  508.15   29.90 
  -2   4   1  554.44   22.20 
   2   4  -1  516.35   26.70 
   2   4  -1  562.74   31.50 
   2   4  -1  448.96   34.40 
  -2   4   1  568.34   23.10 
  -2   4   1  541.75   29.20 
  -2   4   1  507.85   28.80 
   2   4  -1  505.65   21.30 
   2   4  -1  496.75   28.10 
  -2   4   1  515.95   30.80 
   2   4  -1  516.85   31.20 
  -2   4   1  511.15   26.30 
  -2   4   1  527.05   25.10 
   2   4  -1  500.35   33.90 
   2   4  -1  533.25   24.10 
   1  -4  -1    4.00    5.20 
  -1  -4   1   -3.00    4.90 
   1  -4  -1    5.20    8.10 
   1  -4  -1   -1.40    4.40 
   1  -4  -1   -2.00    4.80 
   1  -4  -1   -4.60    3.80 
   1  -4  -1    0.80    3.80 
   1  -4  -1    4.10    5.30 
   1  -4  -1   -4.20    4.30 
  -1  -4   1   -6.40    4.70 
   1  -4  -1    5.00    8.90 
  -1  -4   1    0.50    5.80 
  -1  -4   1    5.30    4.30 
  -1  -4   1   -3.60    5.50 
   1  -4  -1   -2.30    5.60 
  -1  -4   1  -10.90    5.40 
   1  -4  -1    0.80    4.20 
   1  -4  -1    3.90    5.90 
  -1  -4   1   -4.60    5.40 
  -1  -4   1   -1.40    4.00 
   1  -4  -1   -4.90    2.70 
  -1  -4   1   -8.30    4.90 
   1  -4  -1   14.00    5.70 
   1  -4  -1   -6.90    4.70 
  -1  -4   1  -15.60    4.20 
   1   4  -1   -7.70    3.90 
  -1   4   1    0.90    5.90 
  -1   4   1    8.20    6.50 
   1   4  -1    0.70    6.40 
   1   4  -1   -3.10    5.90 
   1   4  -1    2.90    6.00 
   1   4  -1    1.70    4.70 
   1   4  -1   -7.20    5.00 
  -1   4   1    4.90    5.10 
  -1   4   1    1.00    6.40 
  -1   4   1   -0.40    3.20 
   1   4  -1   -2.90    5.70 
   1   4  -1   -0.80    5.20 
  -1   4   1   -8.80    4.90 
   1   4  -1   -7.00    2.30 
  -1   4   1    2.80    3.60 
   0  -4  -1  649.04   28.00 
   0  -4  -1  690.73   31.80 
   0  -4   1  628.04   30.80 
   0  -4   1  647.04   24.00 
   0  -4  -1  587.24   30.40 
   0  -4  -1  633.24   29.70 
   0  -4  -1  652.33   25.00 
   0  -4  -1  614.14   26.60 
   0  -4  -1  566.24   29.80 
   0  -4  -1  611.54   32.60 
   0  -4   1  689.73   32.30 
   0  -4   1  617.94   33.10 
   0  -4   1  675.33   27.20 
   0  -4  -1  668.03   30.90 
   0  -4   1  615.74   29.90 
   0  -4  -1  647.14   26.60 
   0  -4   1  634.64   35.10 
   0  -4   1  625.74   28.10 
   0  -4   1  590.04   27.90 
   0  -4  -1  655.53   32.30 
   0  -4   1  627.94   30.10 
   0  -4   1  641.14   33.40 
   0  -4   1  603.14   31.20 
   0  -4  -1  609.64   32.70 
   0   4  -1  617.44   30.00 
   0   4  -1  658.63   26.70 
   0   4  -1  628.14   27.60 
   0   4  -1  666.53   34.20 
   0   4   1  646.74   34.50 
   0   4   1  560.24   33.30 
   0   4  -1  646.44   36.00 
   0   4  -1  581.84   30.20 
   0   4   1  563.24   29.00 
   0   4   1  631.74   34.20 
   0   4  -1  586.54   31.20 
   0   4   1  640.24   33.00 
   0   4   1  600.04   30.30 
   0   4  -1  647.34   28.70 
   0   4   1  665.63   30.10 
   0   4   1  643.64   27.30 
   0   4   1  696.03   33.20 
   0   4  -1  623.24   31.00 
  -1  -4  -1  135.69   14.30 
   1  -4   1  189.78   17.30 
   1  -4   1  135.59   12.70 
  -1  -4  -1  142.19   14.00 
   1  -4   1  182.48   16.70 
  -1  -4  -1  151.58   16.50 
  -1  -4  -1  167.78   17.00 
   1  -4   1  135.69   16.20 
  -1  -4  -1  152.88   16.50 
   1  -4   1  145.99   11.40 
   1  -4   1  165.68   23.90 
   1  -4   1  139.69   15.20 
  -1  -4  -1  163.78   16.50 
  -1  -4  -1  139.79   15.90 
  -1  -4  -1  142.39   17.60 
   1  -4   1  138.29   10.80 
   1  -4   1  184.88   20.90 
   1  -4   1  123.99   21.10 
   1  -4   1  125.39    6.40 
  -1  -4  -1  160.38   12.10 
   1  -4   1  126.09   15.50 
  -1  -4  -1  148.99   17.30 
  -1  -4  -1  156.28   16.00 
  -1  -4  -1  126.19   15.40 
   1  -4   1  151.48   17.40 
   1  -4   1  145.69    9.70 
  -1  -4  -1  175.38   12.20 
  -1  -4  -1  164.48   18.00 
   1  -4   1  141.49   17.80 
   1  -4   1  142.39   16.50 
  -1   4  -1  153.28   15.90 
   1   4   1  136.29   15.00 
  -1   4  -1  146.49   16.40 
  -1   4  -1  133.09   13.20 
   1   4   1  170.38   15.60 
  -1   4  -1  148.89   14.40 
   1   4   1  137.59   17.00 
  -1   4  -1  157.28   10.90 
   1   4   1  133.09   16.90 
  -1   4  -1  165.58   21.10 
  -1   4  -1  120.49   15.40 
   1   4   1  154.78   15.00 
  -1   4  -1  123.09   14.10 
   1   4   1  143.09   17.40 
   1   4   1  159.18   16.70 
   1   4   1  150.28   19.60 
  -1   4  -1  144.79   14.80 
   1   4   1  114.39   18.80 
  -1   4  -1  136.49   15.00 
   2  -4   1 1615.24   51.29 
   2  -4   1 1529.85   74.29 
   2  -4   1 1588.14   59.99 
   2  -4   1 1551.24   57.29 
  -2  -4  -1 1716.93   62.69 
   2  -4   1 1700.93   62.89 
   2  -4   1 1623.04   67.59 
  -2  -4  -1 1741.13   63.09 
   2  -4   1 1609.04   56.49 
  -2  -4  -1 1767.42   63.59 
   2  -4   1 1588.24   60.59 
  -2  -4  -1 1692.23   67.09 
   2  -4   1 1661.43   63.19 
   2  -4   1 1593.84   54.89 
  -2  -4  -1 1692.13   62.39 
   2  -4   1 1617.24   74.99 
   2  -4   1 1652.43   67.29 
   2  -4   1 1687.13   60.99 
  -2  -4  -1 1698.03   61.29 
   2  -4   1 1673.13   53.69 
  -2  -4  -1 1608.24   65.19 
   2  -4   1 1677.73   63.59 
  -2  -4  -1 1726.23   61.09 
   2  -4   1 1605.94   67.89 
  -2  -4  -1 1699.53   63.39 
  -2  -4  -1 1713.63   63.69 
  -2  -4  -1 1617.44   62.89 
   2  -4   1 1689.73   59.99 
   2  -4   1 1679.73   63.69 
  -2  -4  -1 1717.73   64.49 
   2   4   1 1671.93   65.69 
  -2   4  -1 1575.54   61.09 
  -2   4  -1 1617.64   57.29 
  -2   4  -1 1655.23   68.99 
  -2   4  -1 1689.93   61.99 
   2   4   1 1751.52   62.99 
   2   4   1 1798.82   67.69 
  -2   4  -1 1695.63   63.79 
   2   4   1 1791.02   76.49 
  -2   4  -1 1667.03   62.59 
  -2   4  -1 1728.23   63.79 
   2   4   1 1719.23   63.89 
   2   4   1 1663.43   61.79 
  -2   4  -1 1634.14   54.09 
  -2   4  -1 1578.04   57.89 
  -2   4  -1 1664.93   58.79 
  -2   4  -1 1648.54   61.39 
   2   4   1 1748.72   60.49 
   2   4   1 1701.03   67.59 
  -2   4  -1 1709.13   62.09 
   3  -4   1   34.80    7.80 
   3  -4   1   49.99   12.80 
   3  -4   1   47.30    7.20 
   3  -4   1   13.60   11.60 
   3  -4   1   35.70    6.90 
   3  -4   1   44.60    7.70 
  -3  -4  -1   34.20    9.60 
  -3  -4  -1   12.90    7.00 
  -3  -4  -1   34.80   11.00 
  -3  -4  -1   51.99   10.20 
  -3  -4  -1   52.19   10.60 
   3  -4   1   26.50   10.50 
  -3  -4  -1   14.40    7.10 
  -3  -4  -1   33.30    9.10 
   3  -4   1   26.00    7.90 
   3  -4   1   47.10    7.30 
   3  -4   1   45.50   13.90 
  -3  -4  -1   33.80   10.30 
  -3  -4  -1   29.70   13.20 
   3  -4   1   10.30    9.90 
  -3  -4  -1   30.40    8.50 
   3  -4   1   44.30   10.60 
   3  -4   1   33.40   14.60 
  -3  -4  -1   44.50    8.60 
   3  -4   1   37.20    9.70 
  -3  -4  -1   37.50    9.70 
   3  -4   1   40.40    9.30 
   3  -4   1   33.50    7.10 
  -3  -4  -1   16.80    8.00 
  -3   4  -1   28.20    3.70 
   3   4   1   39.30   10.60 
   3   4   1   40.80    8.90 
  -3   4  -1   29.20    7.50 
  -3   4  -1   13.80    8.90 
  -3   4  -1   30.70    6.10 
   3   4   1   17.60    7.30 
   3   4   1   36.20   13.80 
   3   4   1   43.30    9.80 
   3   4   1   38.40   10.50 
  -3   4  -1   47.90   15.10 
   3   4   1   13.50    7.70 
   3   4   1   36.50    4.20 
   3   4   1   50.79   15.20 
  -3   4  -1   32.50    7.90 
  -3   4  -1   38.50    9.40 
  -3   4  -1   31.60    9.30 
  -3   4  -1   24.20    7.20 
  -3   4  -1   43.30    9.90 
   3   4   1   30.50    7.60 
   3   4   1   31.30   11.10 
  -3   4  -1   36.60   10.00 
  -3   4  -1   43.80    7.20 
  -3   4  -1   41.20    9.30 
   3   4   1   29.00   11.10 
  -4  -4  -1  101.19   15.00 
  -4  -4  -1  132.69   16.30 
  -4  -4  -1  109.09   20.80 
   4  -4   1  158.88   25.60 
  -4  -4  -1  120.89   17.50 
   4  -4   1  130.99   24.20 
   4  -4   1  110.09    8.30 
  -4  -4  -1  113.79   19.00 
   4  -4   1   92.59   10.50 
   4  -4   1  108.89   12.40 
  -4  -4  -1  117.59   15.00 
  -4  -4  -1  118.69   16.10 
  -4  -4  -1  133.69   14.20 
   4  -4   1  110.89   19.30 
   4  -4   1   82.19   23.40 
   4  -4   1  127.69   13.90 
  -4  -4  -1   94.49   15.50 
  -4  -4  -1  126.59   17.50 
  -4  -4  -1  118.99   17.10 
  -4  -4  -1  136.49   19.30 
   4  -4   1  109.19    5.60 
   4  -4   1  114.09    6.60 
   4  -4   1  123.99   20.60 
   4  -4   1  101.19   17.10 
   4  -4   1   94.19   14.60 
   4  -4   1  123.49   16.30 
   4  -4   1  139.09   14.60 
   4  -4   1  104.79   10.80 
  -4  -4  -1   93.09   16.70 
   4   4   1  125.39   18.60 
   4   4   1  102.89   18.90 
   4   4   1   93.29   15.70 
   4   4   1  109.69   14.80 
  -4   4  -1  118.89   12.10 
   4   4   1  120.09   14.00 
  -4   4  -1   70.29   17.70 
  -4   4  -1  110.59   13.20 
  -4   4  -1   98.09   14.50 
   4   4   1  112.89   15.50 
   4   4   1  114.99   12.40 
  -4   4  -1  106.39   17.30 
   4   4   1  136.29   26.30 
  -4   4  -1  125.79   15.20 
  -4   4  -1  160.88   23.20 
  -4   4  -1  113.59   17.90 
   4   4   1  145.89   22.60 
  -4   4  -1  122.69   14.70 
  -4   4  -1   95.69   15.20 
   4   4   1  137.09   22.40 
   4   4   1  102.79   16.00 
  -4   4  -1  115.79   11.10 
   4   4   1  130.09   23.20 
  -4   4  -1  117.59   14.80 
   5  -4   1   29.90   16.60 
  -5  -4  -1   56.29    7.40 
   5  -4   1   45.70   11.70 
  -5  -4  -1   38.80   12.20 
   5  -4   1   45.10   15.30 
  -5  -4  -1   50.49   11.40 
  -5  -4  -1   71.29   19.40 
  -5  -4  -1   49.00   10.50 
  -5  -4  -1   36.40   12.20 
  -5  -4  -1   28.50   10.40 
  -5  -4  -1   64.29   15.10 
  -5  -4  -1   31.50   11.70 
  -5  -4  -1   53.49   13.20 
   5  -4   1   45.80   12.40 
  -5  -4  -1   46.90   10.80 
   5  -4   1   48.40   13.40 
  -5  -4  -1   63.79   16.20 
   5  -4   1   50.09   13.50 
   5  -4   1   47.70   11.90 
   5  -4   1   20.60   12.90 
   5  -4   1   63.99   21.90 
   5  -4   1   45.00    7.10 
  -5  -4  -1   29.70   11.60 
  -5  -4  -1   54.79   13.00 
  -5   4  -1   72.09   19.40 
   5   4   1   22.40   11.10 
  -5   4  -1   51.19    9.20 
   5   4   1   47.70   12.90 
  -5   4  -1   49.60   13.30 
   5   4   1   44.60   13.50 
  -5   4  -1   54.79   11.20 
   5   4   1   35.60    8.30 
  -5   4  -1   54.49   10.00 
   5   4   1   49.90   15.80 
   5   4   1   52.89   21.00 
  -5   4  -1   42.60   11.50 
   5   4   1   44.60    9.40 
   5   4   1   61.49   18.20 
  -5   4  -1   24.80   10.80 
   5   4   1   35.80   12.20 
  -5   4  -1   58.19   10.60 
   5   4   1   23.80   12.60 
  -5   4  -1   39.60   15.00 
   5   4   1   36.40    9.90 
   5   4   1   34.90   12.50 
  -5   4  -1   46.20   12.70 
  -5   4  -1   30.00   10.90 
   6  -4   1 1659.03   67.79 
  -6  -4  -1 1632.34   72.99 
  -6  -4  -1 1632.04   77.59 
  -6  -4  -1 1626.84   73.19 
  -6  -4  -1 1595.44   72.69 
  -6  -4  -1 1630.44   77.99 
   6  -4   1 1566.74   73.09 
  -6  -4  -1 1717.43   70.09 
  -6  -4  -1 1726.63   64.09 
   6  -4   1 1561.84   69.59 
  -6  -4  -1 1727.23   68.29 
   6  -4   1 1772.02   92.09 
  -6  -4  -1 1698.63   78.39 
  -6  -4  -1 1570.74   72.89 
  -6  -4  -1 1666.33   85.49 
   6  -4   1 1688.93   71.79 
  -6  -4  -1 1672.93   70.49 
   6  -4   1 1716.43   84.89 
   6  -4   1 1699.53   88.09 
  -6  -4  -1 1602.94   64.69 
   6  -4   1 1626.44   73.59 
   6  -4   1 1591.74   93.69 
  -6  -4  -1 1659.73   75.29 
   6   4   1 1565.64   81.29 
   6   4   1 1638.44   75.09 
   6   4   1 1632.64   66.49 
  -6   4  -1 1598.64   73.29 
  -6   4  -1 1531.25   82.79 
  -6   4  -1 1658.33   75.99 
   6   4   1 1612.34   75.19 
   6   4   1 1685.53   82.39 
  -6   4  -1 1770.82   82.79 
   6   4   1 1654.23   74.39 
  -6   4  -1 1706.03   65.09 
   6   4   1 1658.43   86.29 
  -6   4  -1 1654.03   63.49 
  -6   4  -1 1674.43   61.79 
   6   4   1 1708.13   81.29 
  -6   4  -1 1543.25   73.99 
   6   4   1 1561.54   89.89 
  -6   4  -1 1665.73   58.09 
  -6   4  -1 1687.23   63.19 
   6   4   1 1529.55   72.99 
  -6   4  -1 1551.74   64.19 
   6   4   1 1642.94   80.59 
   6   4   1 1665.23   55.89 
  -6   4  -1 1707.73   70.59 
  -6   4  -1 1608.04   75.89 
   7  -4   1   70.39   17.10 
  -7  -4  -1   81.49   20.10 
   7  -4   1   66.59   26.00 
  -7  -4  -1   67.49   17.30 
  -7  -4  -1   65.89   17.40 
  -7  -4  -1   78.39   19.10 
   7  -4   1  135.29   30.20 
  -7  -4  -1   76.09   15.60 
  -7  -4  -1   66.79   18.70 
  -7  -4  -1   72.79   20.50 
   7  -4   1   57.39   16.40 
   7  -4   1   64.49   17.00 
   7  -4   1   47.20   21.90 
  -7  -4  -1   63.89   15.50 
   7  -4   1   87.79   28.00 
  -7  -4  -1   67.99   15.20 
  -7  -4  -1  114.29   16.50 
  -7  -4  -1   64.99   17.80 
   7  -4   1   85.49   18.70 
  -7  -4  -1   80.69   20.70 
  -7  -4  -1   61.29   20.70 
  -7  -4  -1   77.49   20.00 
  -7   4  -1   97.49   21.70 
  -7   4  -1   79.39   19.40 
   7   4   1   68.29   18.70 
  -7   4  -1   64.99   17.50 
  -7   4  -1   99.09   21.70 
   7   4   1   70.59   18.80 
  -7   4  -1   89.99   24.70 
   7   4   1  147.19   32.70 
  -7   4  -1   65.59   18.50 
  -7   4  -1   98.19   19.10 
   7   4   1   87.19   18.60 
   7   4   1   44.60   18.70 
   7   4   1   82.99   24.00 
  -7   4  -1   65.39   19.90 
   7   4   1   78.49   20.70 
   7   4   1   37.50   20.30 
   7   4   1   75.49   20.80 
  -7   4  -1   63.79   14.40 
   7   4   1   75.09   20.50 
   8  -4   1 1893.61   81.19 
  -8  -4  -1 1831.02   99.59 
  -8  -4  -1 1851.91   92.69 
   8  -4   1 1850.01  106.99 
  -8  -4  -1 1865.61   86.29 
  -8  -4  -1 1860.91   76.69 
   8  -4   1 1776.12   84.39 
  -8  -4  -1 1924.21   92.59 
  -8  -4  -1 1854.21   86.49 
   8  -4   1 1826.52  112.29 
  -8  -4  -1 1837.22   81.19 
   8  -4   1 1746.93  102.59 
  -8  -4  -1 1930.61   92.69 
  -8  -4  -1 1913.21   87.19 
  -8  -4  -1 1986.70   90.49 
   8  -4   1 1752.12   99.89 
  -8  -4  -1 1726.13   91.99 
   8  -4   1 1778.72   82.49 
   8  -4   1 1750.82   83.89 
   8   4   1 1726.73   97.39 
   8   4   1 1909.71  105.09 
  -8   4  -1 1869.71   90.89 
   8   4   1 1719.53  103.89 
  -8   4  -1 1935.31   89.29 
   8   4   1 1656.73   92.79 
   8   4   1 1675.73   86.89 
  -8   4  -1 1814.62   81.79 
  -8   4  -1 1808.02   99.69 
  -8   4  -1 2000.20   92.29 
  -8   4  -1 1870.91   89.49 
   8   4   1 1902.31  100.09 
  -8   4  -1 1845.42   95.39 
  -9  -4  -1   68.29   23.00 
   9  -4   1   36.60   24.30 
   9  -4   1    3.10   19.80 
  -9  -4  -1   58.39   20.40 
  -9  -4  -1   52.19   21.00 
  -9  -4  -1   66.99   22.00 
  -9  -4  -1   56.69   19.70 
  -9  -4  -1   58.19   20.90 
   9  -4   1   44.30   23.20 
  -9  -4  -1   36.40   21.50 
  -9  -4  -1   19.70   12.60 
  -9  -4  -1   41.10   24.00 
   9  -4   1   33.20   24.00 
   9  -4   1   39.20   15.60 
  -9   4  -1   57.79   21.00 
  -9   4  -1   60.69   22.90 
  -9   4  -1   27.80   21.00 
   9   4   1   36.90   26.30 
  -9   4  -1   59.29   21.00 
   9   4   1   45.40   23.60 
   9   4   1   56.59   21.50 
  -9   4  -1   47.50   19.40 
   9   4   1   22.70   20.10 
   9   4   1   56.89   26.90 
   9   4   1   40.70   21.70 
  -9  -5   1   38.90   21.50 
  -9  -5   1   80.09   29.90 
  -9  -5   1   81.59   24.80 
  -9  -5   1   42.20   18.70 
  -9  -5   1   70.49   22.50 
  -9  -5   1   52.99   20.00 
  -9  -5   1   66.39   22.90 
   9  -5  -1   66.69   30.40 
   9  -5  -1   64.19   22.10 
   9  -5  -1   64.19   32.20 
  -9  -5   1   50.59   20.40 
  -9  -5   1   60.69   18.90 
   9  -5  -1   80.19   29.80 
   9  -5  -1   52.19   26.80 
  -9  -5   1   66.69   22.70 
   9   5  -1   85.39   32.00 
   9   5  -1   86.79   29.50 
  -9   5   1   65.69   26.20 
   9   5  -1   47.00   25.50 
  -9   5   1   80.49   23.00 
  -9   5   1   75.29   24.90 
   9   5  -1   49.70   20.00 
  -9   5   1   50.39   21.80 
   9   5  -1   93.89   29.60 
  -9   5   1   38.10   17.30 
   9   5  -1   59.99   27.40 
  -9   5   1   60.19   23.60 
  -8  -5   1   -3.20   10.50 
   8  -5  -1  -10.80   10.10 
   8  -5  -1   -4.90   16.70 
  -8  -5   1   12.40   16.10 
  -8  -5   1   10.30   13.10 
  -8  -5   1  -10.60   11.70 
  -8  -5   1   21.20   14.20 
  -8  -5   1    8.80   10.10 
  -8  -5   1    9.20   11.70 
  -8  -5   1   11.30   13.50 
  -8  -5   1    5.30   10.20 
   8  -5  -1   19.90   22.10 
   8  -5  -1   -6.40   15.30 
  -8  -5   1   -3.00   11.70 
   8  -5  -1   -6.60   15.70 
  -8   5   1   11.40   12.90 
   8   5  -1  -20.50   13.80 
  -8   5   1    3.40   13.60 
   8   5  -1   12.30   13.00 
  -8   5   1    6.50   12.70 
   8   5  -1  -19.90   12.30 
  -8   5   1  -15.70   10.30 
   8   5  -1   -9.70   15.10 
  -8   5   1   -7.30   10.50 
   8   5  -1   12.30   15.70 
   8   5  -1    5.20   18.00 
   8   5  -1  -10.00   14.20 
   7  -5  -1  445.76   58.49 
  -7  -5   1  477.25   37.80 
  -7  -5   1  516.85   39.30 
  -7  -5   1  490.85   39.40 
  -7  -5   1  469.65   56.49 
   7  -5  -1  376.76   57.79 
  -7  -5   1  510.55   34.90 
  -7  -5   1  472.35   32.50 
  -7  -5   1  509.15   41.40 
  -7  -5   1  441.46   43.00 
   7  -5  -1  613.14   62.59 
  -7  -5   1  525.25   51.49 
  -7  -5   1  489.25   37.30 
   7  -5  -1  507.55   50.19 
  -7  -5   1  441.96   33.90 
  -7  -5   1  513.05   31.50 
   7   5  -1  494.65   46.70 
   7   5  -1  480.35   55.19 
   7   5  -1  495.15   53.09 
   7   5  -1  482.55   59.19 
   7   5  -1  396.66   49.99 
  -7   5   1  535.25   51.49 
  -7   5   1  468.85   47.90 
   7   5  -1  460.25   49.00 
   7   5  -1  463.05   35.10 
   7   5  -1  497.55   55.89 
  -7   5   1  488.85   40.00 
  -7   5   1  426.66   50.19 
  -7   5   1  494.35   41.10 
   7   5  -1  498.25   62.89 
  -7   5   1  502.05   33.40 
  -6  -5   1   17.00   10.20 
  -6  -5   1  -11.10    6.70 
  -6  -5   1   -9.40   12.00 
  -6  -5   1   -2.30    7.10 
   6  -5  -1    5.50   10.80 
  -6  -5   1    0.00    9.00 
   6  -5  -1   -0.20   10.60 
   6  -5  -1   -4.30   14.80 
  -6  -5   1   -1.40    8.30 
  -6  -5   1   -1.90    8.00 
  -6  -5   1    8.90    7.60 
   6  -5  -1   -0.10   16.90 
   6  -5  -1   10.70   14.50 
  -6  -5   1   -6.50    7.50 
  -6  -5   1    6.60    7.30 
  -6  -5   1    4.40    7.40 
  -6  -5   1    0.40    8.80 
  -6  -5   1  -13.70    6.40 
   6  -5  -1   -4.30   11.50 
   6  -5  -1    4.40    7.60 
  -6  -5   1    1.10    8.90 
   6   5  -1   15.00   18.30 
  -6   5   1   -3.10   10.00 
  -6   5   1   -4.00    5.60 
  -6   5   1   -9.40    8.00 
  -6   5   1   -5.00    7.10 
  -6   5   1  -14.20    5.10 
  -6   5   1    5.30    8.10 
   6   5  -1    0.70   10.90 
   6   5  -1    6.10    9.90 
   6   5  -1   10.20   12.20 
   6   5  -1    2.00   12.50 
  -6   5   1    1.00   10.90 
   6   5  -1    3.70   11.40 
   6   5  -1    2.10   11.70 
   6   5  -1    0.60    7.40 
  -6   5   1   -4.10    5.40 
   6   5  -1   -7.60    8.90 
  -6   5   1   13.80    7.90 
   6   5  -1   14.20   16.00 
  -5  -5   1 2745.33   99.19 
   5  -5  -1 2544.55  126.39 
   5  -5  -1 2603.04  109.69 
  -5  -5   1 2606.74   96.69 
  -5  -5   1 2632.14   91.79 
  -5  -5   1 2355.36   98.49 
  -5  -5   1 2524.75   98.79 
  -5  -5   1 2631.94  101.99 
   5  -5  -1 2475.25  109.99 
  -5  -5   1 2634.54   98.89 
  -5  -5   1 2640.94   97.49 
   5  -5  -1 2685.63   94.59 
   5  -5  -1 2567.94  111.89 
   5  -5  -1 2494.55  119.29 
  -5  -5   1 2667.43   94.69 
   5  -5  -1 2562.04   89.59 
   5  -5  -1 2538.45   84.49 
  -5  -5   1 2624.84  106.59 
  -5  -5   1 2578.54  103.19 
  -5  -5   1 2540.85  112.89 
   5  -5  -1 2606.24   93.39 
   5  -5  -1 2628.64  101.59 
  -5  -5   1 2630.84   92.19 
   5   5  -1 2517.35  117.39 
   5   5  -1 2619.54   99.89 
  -5   5   1 2598.74  103.29 
  -5   5   1 2610.54   91.09 
   5   5  -1 2307.27  118.29 
   5   5  -1 2549.15  100.99 
   5   5  -1 2629.54  107.09 
  -5   5   1 2696.03  113.29 
  -5   5   1 2530.05  105.29 
  -5   5   1 2402.46   89.99 
   5   5  -1 2604.54   89.79 
  -5   5   1 2661.03   93.39 
   5   5  -1 2567.14  109.99 
  -5   5   1 2556.64   96.59 
   5   5  -1 2543.55  108.09 
   5   5  -1 2753.02  114.49 
  -5   5   1 2638.64   86.39 
   5   5  -1 2536.25  105.29 
  -5   5   1 2708.43   85.69 
   5   5  -1 2508.55   98.09 
  -5   5   1 2578.84  102.89 
   4  -5  -1   19.00   12.10 
   4  -5  -1   12.70    5.40 
  -4  -5   1   21.70    9.60 
   4  -5  -1   16.70   15.90 
  -4  -5   1    0.20    7.30 
   4  -5  -1   23.00   12.50 
   4  -5  -1   14.60    9.70 
  -4  -5   1    9.90    8.60 
  -4  -5   1   13.00    8.10 
  -4  -5   1   11.90    7.90 
   4  -5  -1    6.30    7.10 
   4  -5  -1   31.90    9.50 
  -4  -5   1    9.50    8.00 
  -4  -5   1    5.70    6.60 
  -4  -5   1   18.40    7.70 
  -4  -5   1   20.40   11.40 
  -4  -5   1   13.90   10.30 
  -4  -5   1   22.50   10.10 
   4  -5  -1   12.90    8.40 
   4  -5  -1   14.00   17.00 
   4  -5  -1    9.10    4.90 
   4  -5  -1    6.20   12.70 
   4   5  -1   10.30    6.80 
   4   5  -1   19.50   13.80 
  -4   5   1   19.00    6.70 
   4   5  -1   19.60    9.50 
  -4   5   1   13.50    7.40 
  -4   5   1    3.90    8.30 
   4   5  -1   18.30   10.20 
   4   5  -1   22.10    7.30 
  -4   5   1   20.30    5.70 
   4   5  -1   12.60   10.30 
  -4   5   1    0.10    9.10 
  -4   5   1    6.10    5.40 
   4   5  -1   11.40    9.50 
  -4   5   1    9.70    8.30 
  -4   5   1   12.00    4.30 
  -4   5   1   11.60    8.80 
  -4   5   1   13.10    6.50 
   4   5  -1   26.40   15.90 
   4   5  -1   11.30   12.10 
  -4   5   1    6.10    9.80 
   3  -5  -1 1174.48   62.39 
   3  -5  -1 1217.78   70.49 
  -3  -5   1 1341.97   60.19 
   3  -5  -1 1338.27   57.59 
  -3  -5   1 1264.77   55.79 
   3  -5  -1 1288.87   56.89 
   3  -5  -1 1284.77   53.79 
   3  -5  -1 1289.67   59.39 
  -3  -5   1 1301.07   55.79 
   3  -5  -1 1266.87   57.09 
   3  -5  -1 1354.46   62.49 
  -3  -5   1 1225.08   54.99 
   3  -5  -1 1257.97   63.09 
   3  -5  -1 1280.87   53.09 
  -3  -5   1 1251.37   52.89 
   3  -5  -1 1237.48   52.29 
  -3  -5   1 1227.28   53.49 
  -3  -5   1 1371.86   54.29 
  -3  -5   1 1234.98   55.29 
   3  -5  -1 1222.18   52.99 
   3  -5  -1 1254.77   46.70 
  -3  -5   1 1244.78   55.39 
  -3  -5   1 1260.77   55.19 
  -3  -5   1 1312.67   60.69 
   3   5  -1 1284.27   52.89 
   3   5  -1 1087.19   67.69 
   3   5  -1 1239.68   69.39 
  -3   5   1 1275.27   45.30 
   3   5  -1 1286.77   60.29 
   3   5  -1 1238.98   58.69 
  -3   5   1 1316.07   46.10 
  -3   5   1 1146.69   56.09 
   3   5  -1 1273.27   55.79 
  -3   5   1 1266.07   56.09 
   3   5  -1 1293.77   61.09 
  -3   5   1 1286.97   53.19 
  -3   5   1 1240.78   56.49 
  -3   5   1 1379.96   51.29 
   3   5  -1 1390.06   58.09 
   3   5  -1 1351.56   49.90 
  -3   5   1 1249.88   48.90 
  -3   5   1 1215.58   59.29 
   2  -5  -1    5.50    6.30 
  -2  -5   1    4.60    6.00 
  -2  -5   1    1.10    5.30 
   2  -5  -1   12.10    3.50 
   2  -5  -1    3.20    5.90 
   2  -5  -1    7.60    6.60 
  -2  -5   1    6.50    6.60 
  -2  -5   1    2.20    4.10 
   2  -5  -1    3.20    5.60 
   2  -5  -1   11.40    4.80 
  -2  -5   1    0.40    6.40 
   2  -5  -1    9.20    7.70 
   2  -5  -1    6.70    7.90 
  -2  -5   1    6.60    6.30 
   2  -5  -1    0.90    6.10 
   2  -5  -1    6.30    2.60 
  -2  -5   1    6.60    5.80 
   2  -5  -1   20.60    9.00 
  -2  -5   1    0.80    6.10 
   2  -5  -1    9.80   11.90 
   2  -5  -1   19.60   12.80 
  -2  -5   1    5.80    6.10 
   2  -5  -1    6.20    7.10 
   2   5  -1   10.90    8.90 
   2   5  -1    3.70    5.50 
   2   5  -1    4.70    6.60 
  -2   5   1    4.60    6.20 
   2   5  -1   11.20    7.70 
  -2   5   1   12.40    7.40 
   2   5  -1    7.70    7.20 
   2   5  -1    5.60    4.40 
  -2   5   1    5.50    5.20 
  -2   5   1    7.40    4.50 
   2   5  -1   -7.70    9.00 
   2   5  -1    7.10    7.00 
   2   5  -1    7.50    6.20 
  -2   5   1   14.70    8.30 
  -2   5   1    1.50    5.20 
  -2   5   1   -2.00    5.60 
   1  -5  -1  309.27   33.30 
   1  -5  -1  320.17   16.10 
   1  -5  -1  324.07   19.50 
  -1  -5   1  288.47   22.50 
   1  -5  -1  287.37   21.70 
   1  -5  -1  326.07   23.60 
   1  -5  -1  336.27   25.50 
  -1  -5   1  295.97   22.30 
   1  -5  -1  338.67   23.50 
  -1  -5   1  371.46   21.50 
   1  -5  -1  270.67   36.20 
   1  -5  -1  301.17   23.60 
  -1  -5   1  332.47   22.90 
  -1  -5   1  301.77   30.00 
  -1  -5   1  303.97   24.10 
  -1  -5   1  314.37   21.40 
  -1  -5   1  272.97   17.20 
   1  -5  -1  370.16   26.60 
   1  -5  -1  312.67   20.90 
   1  -5  -1  304.17   16.70 
  -1  -5   1  327.87   22.90 
   1   5  -1  276.77   24.00 
   1   5  -1  261.97   30.80 
  -1   5   1  298.27   29.90 
  -1   5   1  328.47   20.80 
   1   5  -1  319.57   24.70 
   1   5  -1  299.07   23.80 
  -1   5   1  345.97   22.10 
   1   5  -1  320.67   21.30 
  -1   5   1  321.17   22.50 
  -1   5   1  294.27   23.30 
  -1   5   1  325.77   24.40 
  -1   5   1  315.67   17.90 
   1   5  -1  302.77   31.50 
   1   5  -1  328.47   22.50 
   1   5  -1  298.07   19.90 
   1   5  -1  306.17   15.30 
   1   5  -1  296.97   23.20 
  -1   5   1  312.97   22.30 
   0  -5   1   74.69   14.30 
   0  -5   1   74.99   15.80 
   0  -5   1   73.19   13.00 
   0  -5   1   86.09   13.20 
   0  -5   1   77.69   13.40 
   0  -5  -1   96.89   14.50 
   0  -5  -1   85.29    9.30 
   0  -5  -1   81.19   12.80 
   0  -5   1   64.19   12.10 
   0  -5  -1  101.39   14.70 
   0  -5  -1   84.99   11.00 
   0  -5  -1   77.19   14.50 
   0  -5   1   85.39   12.10 
   0  -5  -1  103.99   16.20 
   0  -5   1   92.39   13.70 
   0  -5   1   81.39    8.30 
   0  -5   1   93.89   16.70 
   0  -5  -1   75.49   15.20 
   0  -5  -1   85.29   15.50 
   0  -5   1   96.79   11.10 
   0  -5  -1   98.59   11.30 
   0  -5  -1   90.29   14.00 
   0   5  -1  104.19   15.80 
   0   5   1   73.99   12.00 
   0   5   1   76.09   12.40 
   0   5  -1   86.99   10.50 
   0   5   1   85.79   15.20 
   0   5   1  114.49   16.70 
   0   5  -1  112.89   16.60 
   0   5  -1   73.69   15.70 
   0   5  -1   61.09   10.30 
   0   5   1   96.09   16.50 
   0   5   1   81.49   15.80 
   0   5   1   87.59   11.40 
   0   5   1   80.19   13.20 
   0   5  -1   86.49   14.30 
   0   5   1   88.19   15.50 
   0   5  -1   91.99   16.40 
   0   5  -1   86.59   13.60 
   1  -5   1 3332.17  117.79 
   1  -5   1 3155.98  123.99 
   1  -5   1 3281.57  105.79 
   1  -5   1 3434.36  115.19 
   1  -5   1 3175.78  128.79 
  -1  -5  -1 3372.06  112.59 
   1  -5   1 3281.07  111.19 
  -1  -5  -1 3246.08  111.99 
  -1  -5  -1 3174.88  110.99 
   1  -5   1 3451.75  111.79 
  -1  -5  -1 3327.07  108.69 
  -1  -5  -1 3229.58  112.79 
   1  -5   1 3222.28  116.69 
   1  -5   1 3271.07  113.19 
  -1  -5  -1 3226.48  108.39 
  -1  -5  -1 3333.97  114.39 
   1  -5   1 3271.87  102.39 
  -1  -5  -1 3198.68  105.19 
  -1  -5  -1 3249.77  112.79 
   1  -5   1 3324.87  113.29 
   1  -5   1 3207.88   96.59 
   1  -5   1 3430.76  107.79 
  -1  -5  -1 3374.86  116.39 
  -1  -5  -1 3239.98  117.09 
  -1   5  -1 3304.27  107.09 
  -1   5  -1 3275.47  113.49 
  -1   5  -1 3138.89  119.29 
  -1   5  -1 3325.37  108.99 
   1   5   1 3281.07  118.59 
  -1   5  -1 3321.47  112.79 
   1   5   1 3225.38  116.09 
   1   5   1 3227.08  111.79 
   1   5   1 3225.78  120.29 
   1   5   1 3201.88  114.99 
  -1   5  -1 3206.58  111.99 
  -1   5  -1 3104.19  114.19 
   1   5   1 3271.87  108.79 
   1   5   1 3148.68  111.29 
   1   5   1 3268.77  109.89 
  -1   5  -1 3301.37  111.89 
   2  -5   1  102.89   14.40 
  -2  -5  -1  110.49   17.60 
  -2  -5  -1  106.49   16.10 
   2  -5   1   77.89   16.50 
   2  -5   1   80.89   13.70 
   2  -5   1   95.29   11.20 
  -2  -5  -1   66.49   12.70 
  -2  -5  -1   84.39   13.70 
  -2  -5  -1   95.89   14.50 
  -2  -5  -1   73.09   13.00 
  -2  -5  -1   82.19   14.10 
  -2  -5  -1   61.29   10.70 
   2  -5   1   84.29   14.10 
   2  -5   1   84.69   14.90 
   2  -5   1   75.19   20.20 
   2  -5   1   99.69   18.10 
   2  -5   1   79.39   11.10 
   2  -5   1   86.89   12.90 
  -2  -5  -1   62.69   14.00 
  -2  -5  -1  105.69   16.30 
   2  -5   1   87.89    6.80 
  -2  -5  -1  100.39   15.00 
   2  -5   1   84.39   12.90 
  -2  -5  -1   93.59   15.10 
   2  -5   1   79.49   20.70 
   2   5   1   87.09   14.10 
   2   5   1   77.29   13.70 
  -2   5  -1   95.19   18.10 
   2   5   1  101.59   13.60 
   2   5   1  112.49   18.90 
  -2   5  -1   85.09    9.60 
  -2   5  -1   95.89   14.10 
  -2   5  -1   63.19   12.80 
   2   5   1   79.49   15.80 
   2   5   1   57.79   11.40 
  -2   5  -1   83.29   14.00 
  -2   5  -1   87.29   11.80 
   2   5   1   77.09   15.90 
  -2   5  -1  123.49   15.80 
  -2   5  -1   72.49   13.70 
  -2   5  -1   78.39   12.90 
   2   5   1  113.89   16.60 
  -2   5  -1  104.29   15.20 
   2   5   1   92.59   20.10 
   3  -5   1 3647.74  122.59 
   3  -5   1 3714.63  127.49 
  -3  -5  -1 3722.13  131.69 
   3  -5   1 3411.26  122.79 
   3  -5   1 3518.15  118.19 
  -3  -5  -1 3840.92  127.19 
   3  -5   1 3440.16  116.39 
   3  -5   1 3426.56  117.69 
  -3  -5  -1 3691.13  123.99 
   3  -5   1 3693.03  145.99 
  -3  -5  -1 3930.81  127.39 
   3  -5   1 3442.36  134.29 
   3  -5   1 3802.22  126.59 
   3  -5   1 3748.72  127.39 
  -3  -5  -1 3838.42  128.39 
  -3  -5  -1 3672.53  126.69 
   3  -5   1 3656.93  133.59 
  -3  -5  -1 3793.12  125.29 
   3  -5   1 3499.25  142.49 
  -3  -5  -1 3853.71  123.59 
  -3  -5  -1 3707.73  126.39 
  -3  -5  -1 3626.74  126.59 
  -3  -5  -1 3817.12  132.89 
   3   5   1 3916.21  142.69 
  -3   5  -1 3416.76  126.59 
  -3   5  -1 3663.13  124.69 
   3   5   1 3713.53  130.89 
   3   5   1 3522.65  144.59 
  -3   5  -1 3611.44  123.19 
   3   5   1 3903.81  133.99 
  -3   5  -1 3486.05  111.29 
   3   5   1 3707.23  127.99 
   3   5   1 3753.82  124.39 
   3   5   1 3760.52  126.69 
  -3   5  -1 3644.04  126.09 
   3   5   1 3941.71  136.99 
  -3   5  -1 3778.42  123.59 
   3   5   1 3638.74  121.29 
  -3   5  -1 3657.73  118.89 
  -3   5  -1 3646.54  127.49 
   3   5   1 3911.91  134.29 
  -3   5  -1 3403.86  132.99 
  -3   5  -1 3611.84  122.79 
  -3   5  -1 3548.24  123.29 
  -4  -5  -1   -1.30    6.40 
   4  -5   1    0.90   12.60 
  -4  -5  -1    1.70    5.70 
   4  -5   1    3.80    6.60 
   4  -5   1  -12.40   11.60 
  -4  -5  -1   -0.60    7.90 
   4  -5   1   12.20   12.90 
  -4  -5  -1   -0.60    6.70 
   4  -5   1    1.30    4.60 
  -4  -5  -1    4.20    6.40 
   4  -5   1   -7.20    7.70 
   4  -5   1    9.10    6.40 
  -4  -5  -1   -5.50    8.20 
   4  -5   1    0.80    3.80 
  -4  -5  -1   -7.20    6.60 
   4  -5   1   -5.40    8.70 
   4  -5   1   -9.50    6.60 
  -4  -5  -1   -3.40    5.90 
  -4  -5  -1    2.60    8.20 
  -4  -5  -1    5.20   10.60 
   4  -5   1    5.20    5.70 
   4  -5   1    0.10    4.50 
  -4  -5  -1   -1.60    7.70 
   4  -5   1    3.90    6.30 
   4  -5   1    1.00    7.20 
  -4  -5  -1    2.30    6.60 
  -4  -5  -1    2.70    6.10 
  -4   5  -1    2.30    5.90 
   4   5   1   -9.70    8.20 
  -4   5  -1    7.50    8.90 
   4   5   1    1.60    7.00 
  -4   5  -1    1.40    5.20 
   4   5   1   11.00   10.40 
   4   5   1   -4.30    5.40 
  -4   5  -1   -2.50    6.30 
   4   5   1    5.30   10.20 
   4   5   1    1.70    7.70 
   4   5   1  -15.90    7.50 
   4   5   1   -1.60    6.70 
   4   5   1    7.60   10.30 
   4   5   1   -1.90    7.00 
   4   5   1   -8.80    5.50 
  -4   5  -1    5.40    5.90 
  -4   5  -1   -5.30    8.30 
  -4   5  -1   -4.20    6.30 
  -4   5  -1   -1.30    5.90 
  -4   5  -1   -5.60    5.20 
  -4   5  -1    7.40    6.70 
   5  -5   1  306.97   30.90 
  -5  -5  -1  205.48   28.20 
   5  -5   1  264.27   21.10 
  -5  -5  -1  312.37   30.80 
  -5  -5  -1  186.08   25.20 
  -5  -5  -1  221.58   29.10 
  -5  -5  -1  296.07   23.70 
  -5  -5  -1  240.98   26.70 
   5  -5   1  299.07   42.00 
   5  -5   1  354.86   32.50 
   5  -5   1  404.76   45.30 
  -5  -5  -1  230.68   25.30 
  -5  -5  -1  234.58   28.00 
  -5  -5  -1  258.07   28.10 
  -5  -5  -1  285.87   38.70 
   5  -5   1  282.07   34.60 
  -5  -5  -1  229.68   27.60 
  -5  -5  -1  274.37   29.70 
  -5  -5  -1  254.67   24.30 
   5  -5   1  364.66   50.69 
   5   5   1  237.88   29.80 
   5   5   1  280.37   38.30 
   5   5   1  268.47   42.00 
   5   5   1  279.97   35.60 
   5   5   1  251.47   20.40 
   5   5   1  287.57   28.90 
  -5   5  -1  334.97   26.00 
  -5   5  -1  326.47   24.40 
   5   5   1  262.37   30.00 
  -5   5  -1  235.58   30.70 
   5   5   1  236.68   31.80 
  -5   5  -1  328.87   23.90 
  -5   5  -1  362.66   24.70 
  -5   5  -1  361.46   41.30 
  -5   5  -1  332.27   22.30 
  -5   5  -1  349.37   34.70 
   5   5   1  172.48   29.10 
   5   5   1  278.47   22.40 
   5   5   1  243.58   33.20 
  -6  -5  -1    9.30   10.60 
   6  -5   1   19.70   15.30 
   6  -5   1   16.70   11.60 
   6  -5   1    3.50   10.10 
  -6  -5  -1   11.00    8.90 
  -6  -5  -1    6.60    9.60 
   6  -5   1   -2.50    9.10 
   6  -5   1    0.80   11.70 
  -6  -5  -1   10.20   10.70 
  -6  -5  -1   10.20    9.10 
  -6  -5  -1   -1.00    8.30 
  -6  -5  -1    0.90    9.30 
  -6  -5  -1   16.60    9.10 
  -6  -5  -1   12.80   11.20 
  -6  -5  -1   30.60   13.60 
  -6  -5  -1   11.20    8.00 
  -6  -5  -1   -2.10   14.10 
  -6  -5  -1   19.00   12.70 
  -6  -5  -1   13.40    8.90 
  -6  -5  -1   11.70   11.00 
   6  -5   1    1.70    9.20 
   6  -5   1    0.00   13.70 
   6  -5   1   -3.30   15.30 
   6   5   1    3.20   12.60 
  -6   5  -1    6.90    7.90 
   6   5   1    1.50    9.30 
   6   5   1    6.60    9.20 
  -6   5  -1    5.90   13.50 
   6   5   1   17.60   13.10 
  -6   5  -1    7.80    7.70 
  -6   5  -1    8.00    9.20 
   6   5   1   11.10   14.70 
  -6   5  -1   14.80   15.80 
  -6   5  -1   17.20   10.30 
   6   5   1   12.70   16.30 
  -6   5  -1    5.90    6.70 
   6   5   1   21.20   13.80 
   6   5   1    7.70    6.50 
  -6   5  -1    7.90    9.30 
  -6   5  -1   26.00    9.50 
   6   5   1    5.10   11.40 
  -6   5  -1   17.80   12.40 
  -6   5  -1    8.40   10.60 
   6   5   1    6.90   11.30 
   6   5   1   16.30   14.50 
  -7  -5  -1   19.00   10.70 
   7  -5   1    6.30   18.40 
   7  -5   1   -9.60   14.20 
  -7  -5  -1   35.90   16.10 
  -7  -5  -1    9.60   11.00 
  -7  -5  -1    3.90   11.60 
  -7  -5  -1    2.20    8.40 
  -7  -5  -1   12.90   10.80 
   7  -5   1   15.40   11.20 
  -7  -5  -1    1.60   12.40 
   7  -5   1    6.50   18.10 
  -7  -5  -1   18.60   11.20 
  -7  -5  -1    9.80   10.20 
   7  -5   1    4.40   15.10 
  -7  -5  -1   35.30   14.40 
  -7  -5  -1    2.50    8.30 
   7  -5   1   14.70   11.30 
  -7  -5  -1   12.40   13.70 
  -7  -5  -1    4.20   10.60 
   7  -5   1    8.10   10.40 
  -7  -5  -1   12.40   11.80 
   7   5   1   -2.60   11.90 
  -7   5  -1    3.30   11.20 
  -7   5  -1   14.60   11.50 
  -7   5  -1   -5.20   14.30 
  -7   5  -1    7.50   12.60 
   7   5   1    9.70   12.70 
   7   5   1   16.50   16.80 
  -7   5  -1   25.10   12.30 
   7   5   1   14.80   14.00 
   7   5   1   17.40   17.90 
   7   5   1   25.20   17.60 
   7   5   1   -6.50   10.70 
  -7   5  -1    3.30   10.30 
  -7   5  -1   11.70   10.50 
   7   5   1    7.10   10.80 
   7   5   1    5.50   13.90 
  -8  -5  -1   46.90   19.50 
  -8  -5  -1   28.40   17.20 
   8  -5   1   53.59   17.20 
  -8  -5  -1   36.80   18.60 
   8  -5   1   32.10   21.70 
  -8  -5  -1   48.60   19.50 
  -8  -5  -1   36.40   17.50 
  -8  -5  -1   32.10   19.20 
  -8  -5  -1   21.00   12.30 
  -8  -5  -1   50.59   19.60 
   8  -5   1   30.40   25.60 
   8  -5   1   44.00   16.50 
   8  -5   1   58.69   26.70 
  -8  -5  -1   33.80   13.50 
  -8  -5  -1   30.00   14.50 
  -8  -5  -1   10.50   12.20 
  -8   5  -1   46.60   19.00 
   8   5   1   29.90   21.00 
  -8   5  -1   37.80   17.20 
   8   5   1   52.19   23.90 
   8   5   1   32.30   24.80 
   8   5   1   21.50   15.90 
  -8   5  -1   26.50   21.10 
  -8   5  -1   27.20   16.60 
   8   5   1   41.00   21.30 
  -8   5  -1   22.70   14.30 
   9  -5   1   58.69   30.60 
  -9  -5  -1   85.79   28.30 
   9  -5   1   27.70   14.80 
  -9  -5  -1   35.50   20.00 
   9  -5   1   62.49   29.90 
  -9  -5  -1   75.29   21.90 
  -9  -5  -1   42.00   21.00 
  -9  -5  -1   16.80   16.10 
   9  -5   1   61.39   31.90 
  -9  -5  -1   42.50   18.30 
  -9  -5  -1   34.00   16.20 
  -9  -5  -1   17.40   20.20 
  -9  -5  -1   16.00   14.00 
   9  -5   1   33.20   25.50 
  -9  -5  -1   69.09   28.40 
  -9   5  -1   54.69   25.50 
  -9   5  -1   52.79   21.10 
   9   5   1   43.60   25.40 
   9   5   1   68.89   30.30 
  -9   5  -1   19.70   17.30 
   9   5   1   11.80   22.20 
   9   5   1   48.30   27.60 
   9   5   1   19.40   19.90 
  -9   5  -1   35.70   18.60 
  -9   5  -1   26.10   17.40 
   8  -6  -1  213.78   47.70 
  -8  -6   1  159.78   35.70 
   8  -6  -1  185.08   34.00 
  -8  -6   1  192.28   32.00 
  -8  -6   1  172.08   33.70 
  -8  -6   1  152.78   27.20 
  -8  -6   1  189.28   31.40 
   8  -6  -1  196.68   41.20 
   8  -6  -1  157.48   45.50 
  -8  -6   1  214.58   34.90 
  -8  -6   1  164.08   34.40 
  -8  -6   1  147.09   26.40 
   8  -6  -1  134.19   37.30 
  -8  -6   1  192.68   33.60 
  -8  -6   1  157.98   30.10 
  -8   6   1  230.88   38.30 
   8   6  -1  178.38   38.70 
   8   6  -1  167.98   37.50 
  -8   6   1  186.58   32.90 
   8   6  -1  242.68   49.50 
   8   6  -1  190.98   37.90 
  -8   6   1  174.18   32.40 
  -8   6   1  208.38   38.90 
  -8   6   1  136.89   28.10 
  -8   6   1  168.98   29.90 
   8   6  -1  239.48   37.10 
   8   6  -1  181.68   39.60 
   8   6  -1  120.09   35.40 
  -7  -6   1   -1.30   11.00 
  -7  -6   1   -3.80    9.20 
  -7  -6   1   15.20   12.10 
  -7  -6   1    1.90    7.90 
  -7  -6   1    3.80   10.50 
  -7  -6   1   -2.30    8.70 
   7  -6  -1   19.30   16.30 
   7  -6  -1    4.50   13.10 
  -7  -6   1   27.80   19.80 
  -7  -6   1    2.20    9.10 
   7  -6  -1   -7.30   21.10 
  -7  -6   1   -8.30    9.30 
   7  -6  -1   -7.30   17.00 
  -7  -6   1   12.50   14.50 
  -7  -6   1    0.80   11.80 
  -7  -6   1   -9.30   10.80 
   7  -6  -1   -6.60   15.30 
   7   6  -1    0.00   13.00 
   7   6  -1    2.80   10.80 
  -7   6   1   13.60   13.00 
   7   6  -1   11.10   16.10 
   7   6  -1   12.10   15.70 
  -7   6   1   15.00   13.00 
   7   6  -1   -1.70   17.00 
  -7   6   1    9.30   16.10 
   7   6  -1    0.90   10.00 
   7   6  -1   23.80   17.50 
  -7   6   1   16.40   13.60 
  -7   6   1   10.80   11.30 
  -7   6   1   16.00   15.90 
   7   6  -1  -26.10   11.30 
  -6  -6   1  221.78   23.30 
   6  -6  -1  213.08   30.70 
  -6  -6   1  265.67   31.00 
  -6  -6   1  227.88   30.30 
  -6  -6   1  186.18   27.70 
   6  -6  -1  244.78   37.20 
  -6  -6   1  192.38   25.00 
  -6  -6   1  239.28   35.60 
   6  -6  -1  182.88   35.50 
  -6  -6   1  248.88   40.10 
   6  -6  -1  194.48   41.60 
  -6  -6   1  230.28   32.30 
  -6  -6   1  200.38   27.50 
   6  -6  -1  175.08   42.50 
  -6  -6   1  288.17   32.30 
  -6  -6   1  202.08   28.10 
   6  -6  -1  250.47   38.70 
  -6  -6   1  209.18   25.20 
   6   6  -1  179.28   31.70 
  -6   6   1  192.88   24.50 
  -6   6   1  215.98   32.40 
  -6   6   1  174.68   24.00 
   6   6  -1  213.98   37.40 
  -6   6   1  268.57   40.00 
   6   6  -1  199.48   42.70 
   6   6  -1  242.18   37.50 
   6   6  -1  180.18   36.40 
  -6   6   1  181.88   27.60 
  -6   6   1  220.98   23.60 
   6   6  -1  224.88   30.60 
   6   6  -1  214.78   30.00 
  -6   6   1  191.88   29.00 
   6   6  -1  169.38   25.50 
   6   6  -1  195.88   33.90 
   6   6  -1  270.47   38.10 
  -5  -6   1  124.69   23.90 
   5  -6  -1  126.19   32.10 
  -5  -6   1  130.69   20.50 
   5  -6  -1  131.69   28.90 
   5  -6  -1  155.48   20.60 
  -5  -6   1  184.08   23.10 
  -5  -6   1  129.19   21.40 
  -5  -6   1  115.49   19.40 
   5  -6  -1  128.39   21.80 
  -5  -6   1  118.79   21.20 
  -5  -6   1  142.89   22.10 
  -5  -6   1  102.19   19.00 
  -5  -6   1  120.79   21.00 
   5  -6  -1  106.19   25.10 
   5  -6  -1  173.58   25.60 
  -5  -6   1  142.19   19.60 
   5  -6  -1  116.49   24.60 
   5  -6  -1  171.68   40.10 
  -5  -6   1  179.58   29.50 
   5   6  -1   86.89   17.80 
   5   6  -1  123.59   27.40 
  -5   6   1  137.79   17.80 
  -5   6   1  127.89   25.00 
   5   6  -1   89.39   28.90 
  -5   6   1  156.58   22.30 
  -5   6   1  145.49   15.30 
  -5   6   1  164.48   18.30 
  -5   6   1  121.39   22.70 
   5   6  -1  115.79   20.80 
   5   6  -1  109.59   27.10 
  -5   6   1  143.89   20.00 
   5   6  -1  126.09   25.00 
  -5   6   1  134.09   23.80 
   5   6  -1  121.59   31.30 
   5   6  -1   93.89   22.80 
   5   6  -1  135.09   18.20 
   4  -6  -1  671.93   38.60 
  -4  -6   1  706.13   41.20 
  -4  -6   1  656.23   37.60 
   4  -6  -1  705.53   42.60 
  -4  -6   1  649.54   39.50 
   4  -6  -1  686.03   47.90 
  -4  -6   1  629.04   42.60 
  -4  -6   1  658.63   36.60 
  -4  -6   1  635.04   39.00 
  -4  -6   1  641.74   44.00 
   4  -6  -1  664.13   66.89 
  -4  -6   1  622.24   39.00 
   4  -6  -1  708.03   75.89 
   4  -6  -1  646.04   38.90 
   4  -6  -1  689.23   48.50 
   4  -6  -1  685.83   38.80 
  -4  -6   1  682.53   38.60 
   4  -6  -1  634.64   55.19 
  -4  -6   1  637.64   39.40 
  -4   6   1  673.23   37.90 
   4   6  -1  526.05   58.49 
   4   6  -1  674.73   36.80 
   4   6  -1  594.54   47.60 
  -4   6   1  662.33   32.60 
   4   6  -1  665.03   66.79 
  -4   6   1  734.43   42.70 
   4   6  -1  612.44   40.60 
  -4   6   1  631.04   38.70 
   4   6  -1  654.63   45.20 
  -4   6   1  640.04   28.80 
   4   6  -1  601.54   32.90 
  -4   6   1  731.53   46.60 
   4   6  -1  683.63   46.30 
  -4   6   1  611.44   41.60 
   4   6  -1  664.83   40.90 
  -3  -6   1   49.70   14.10 
  -3  -6   1   31.50   12.50 
  -3  -6   1   58.69   13.80 
   3  -6  -1   44.40   20.10 
  -3  -6   1   36.60   11.20 
   3  -6  -1   50.59   17.50 
   3  -6  -1   33.70   10.60 
   3  -6  -1   36.10   10.60 
   3  -6  -1   49.80   12.70 
   3  -6  -1   34.90   11.80 
  -3  -6   1   44.80   13.50 
  -3  -6   1   28.50   10.70 
   3  -6  -1   17.20    9.60 
  -3  -6   1   35.10   12.60 
  -3  -6   1   34.30    9.60 
   3  -6  -1   42.50   16.10 
   3  -6  -1   44.60   12.90 
  -3  -6   1   25.00   10.50 
   3  -6  -1   24.60   12.60 
  -3  -6   1   15.50   10.10 
  -3   6   1   35.00   13.30 
   3   6  -1   54.89   14.70 
   3   6  -1   43.50   10.20 
   3   6  -1   34.40   14.10 
  -3   6   1   28.10   11.50 
   3   6  -1   36.80   12.90 
  -3   6   1   38.90   10.10 
  -3   6   1   27.00    7.10 
   3   6  -1   29.00   12.30 
  -3   6   1   23.20   12.50 
   3   6  -1   43.00   19.10 
   3   6  -1   51.89   13.60 
  -3   6   1   33.00   11.30 
   3   6  -1   15.30   15.00 
  -3   6   1   16.40    9.80 
   3   6  -1   27.90   10.50 
   2  -6  -1   32.40    5.40 
   2  -6  -1   14.40    9.00 
   2  -6  -1   21.50   15.20 
  -2  -6   1   11.70    8.40 
  -2  -6   1   15.90    9.20 
   2  -6  -1   19.00    7.00 
   2  -6  -1    7.50   14.70 
   2  -6  -1   29.70    6.10 
  -2  -6   1   27.30   10.50 
  -2  -6   1   27.00    9.90 
  -2  -6   1   21.90   12.00 
   2  -6  -1   11.90    8.50 
  -2  -6   1    9.40    8.10 
   2  -6  -1   26.60   11.90 
  -2  -6   1   31.30   12.40 
   2  -6  -1   16.80   11.00 
   2  -6  -1   21.80   11.50 
  -2  -6   1   22.10    9.00 
   2  -6  -1   18.80   10.20 
   2  -6  -1   20.70    8.80 
   2  -6  -1   23.60    9.30 
  -2  -6   1   23.50    7.60 
  -2   6   1   25.00   11.30 
   2   6  -1   26.60   14.60 
   2   6  -1   13.90    7.10 
  -2   6   1   23.10   10.30 
   2   6  -1   25.40   10.70 
   2   6  -1   21.40    9.30 
   2   6  -1   26.40   10.50 
  -2   6   1   30.40    7.40 
  -2   6   1    9.90    6.70 
   2   6  -1   31.90   12.20 
   2   6  -1   16.10    9.00 
  -2   6   1   10.10    9.50 
  -2   6   1   24.10    9.40 
  -2   6   1   33.10   13.00 
   2   6  -1   31.90   13.80 
   2   6  -1   18.70   10.50 
  -2   6   1   11.30    8.20 
   1  -6  -1    4.50   13.30 
   1  -6  -1    2.80    6.30 
   1  -6  -1   -9.40    5.70 
   1  -6  -1    3.10    4.40 
   1  -6  -1   -2.00    8.90 
   1  -6  -1    5.60    8.10 
   1  -6  -1   32.50   11.10 
   1  -6  -1    7.20    7.00 
   1  -6  -1   -6.50    8.70 
   1  -6  -1    3.50    4.60 
   1  -6  -1  -14.30    9.40 
  -1   6   1   10.10    7.50 
  -1   6   1   -1.20    5.40 
  -1   6   1  -12.00    7.90 
  -1   6   1    6.30    6.50 
  -1   6   1    5.80    7.10 
  -1   6   1   14.90    9.90 
  -1   6   1    5.90    6.80 
  -1   6   1   13.70    8.60 
  -1   6   1   -4.40    8.80 
   0  -6  -1  874.31   48.80 
   0  -6  -1  877.31   42.40 
   0  -6  -1  822.22   34.10 
   0  -6  -1  834.22   48.90 
   0  -6  -1  822.12   43.70 
   0  -6  -1  868.51   43.50 
   0  -6  -1  887.11   38.40 
   0  -6   1  824.72   37.20 
   0  -6   1  919.11   41.90 
   0  -6  -1  837.52   45.00 
   0  -6  -1  858.81   48.00 
   0  -6   1  856.91   47.00 
   0  -6   1  837.22   42.50 
   0  -6   1  803.82   46.80 
   0  -6  -1  864.71   44.60 
   0  -6   1  865.61   44.20 
   0  -6   1  876.21   44.50 
   0  -6   1  907.61   33.50 
   0  -6   1  766.02   48.70 
   0  -6   1  876.51   44.10 
   0  -6   1  913.91   46.10 
   0  -6  -1  842.12   37.20 
   0   6   1  791.92   42.50 
   0   6   1  785.42   50.79 
   0   6  -1  879.71   40.40 
   0   6  -1  829.42   44.20 
   0   6  -1  904.71   46.80 
   0   6   1  788.12   44.50 
   0   6   1  874.91   47.00 
   0   6  -1  844.32   43.20 
   0   6  -1  857.81   50.39 
   0   6  -1  916.41   48.30 
   0   6   1  912.31   49.50 
   0   6  -1  904.71   47.90 
   0   6   1  953.20   52.09 
   0   6   1  918.81   39.30 
   0   6   1  856.71   42.50 
   0   6  -1  884.11   37.50 
   0   6  -1  781.32   44.50 
   0   6   1  820.22   47.70 
   0   6   1  975.90   44.30 
   0   6   1  855.71   37.40 
  -1  -6  -1   97.79   16.90 
   1  -6   1   63.09   21.60 
   1  -6   1   72.89   21.80 
  -1  -6  -1   77.89   12.50 
   1  -6   1   57.99    9.20 
   1  -6   1   76.49   16.40 
   1  -6   1   75.79   13.10 
   1  -6   1   69.59   13.50 
  -1  -6  -1   76.39   12.60 
  -1  -6  -1   79.79   14.80 
   1  -6   1   68.29    5.70 
  -1  -6  -1   60.19   14.60 
  -1  -6  -1   63.99   13.90 
  -1  -6  -1   67.79   14.00 
   1  -6   1   71.19   14.30 
   1  -6   1   90.09   16.20 
  -1  -6  -1   59.79   13.00 
   1  -6   1   59.89   15.00 
  -1  -6  -1   99.09   18.80 
   1  -6   1   62.99   16.10 
   1  -6   1   90.09   15.90 
  -1  -6  -1   91.99   12.30 
  -1   6  -1   67.59   14.70 
   1   6   1   84.99   10.20 
   1   6   1   54.29   12.30 
  -1   6  -1   56.49   14.80 
   1   6   1   85.69   15.30 
  -1   6  -1   45.60   11.70 
  -1   6  -1   73.39   15.20 
   1   6   1   89.09   19.20 
  -1   6  -1   68.29   19.10 
   1   6   1   31.90   12.40 
   1   6   1   70.29   15.10 
  -1   6  -1   90.09   13.90 
  -1   6  -1   49.99   10.70 
   1   6   1   62.99   13.00 
   1   6   1   66.89   15.50 
   1   6   1   63.29   17.90 
  -1   6  -1   85.19   17.20 
   1   6   1   79.59   13.50 
   1   6   1   68.19   15.40 
   2  -6   1  648.74   36.10 
  -2  -6  -1  674.43   38.70 
  -2  -6  -1  676.13   39.30 
  -2  -6  -1  659.13   36.90 
  -2  -6  -1  656.53   37.40 
  -2  -6  -1  671.03   41.60 
   2  -6   1  611.84   50.19 
  -2  -6  -1  707.33   36.60 
   2  -6   1  688.63   33.50 
   2  -6   1  596.74   35.80 
   2  -6   1  641.04   25.90 
   2  -6   1  665.03   38.50 
  -2  -6  -1  699.03   41.90 
   2  -6   1  636.84   42.30 
  -2  -6  -1  673.43   37.50 
  -2  -6  -1  663.03   33.40 
   2  -6   1  602.54   33.30 
   2  -6   1  744.33   44.30 
   2  -6   1  645.84   39.20 
   2  -6   1  763.62   55.09 
   2  -6   1  614.34   37.80 
  -2  -6  -1  707.93   36.50 
  -2  -6  -1  711.13   39.30 
  -2   6  -1  666.83   38.10 
  -2   6  -1  631.14   43.00 
   2   6   1  642.04   24.20 
   2   6   1  658.73   41.40 
   2   6   1  692.93   49.70 
  -2   6  -1  642.54   39.30 
   2   6   1  653.53   39.00 
  -2   6  -1  726.23   32.90 
  -2   6  -1  651.23   36.00 
   2   6   1  679.33   35.30 
   2   6   1  630.04   36.80 
   2   6   1  633.64   35.20 
   2   6   1  641.24   42.20 
   2   6   1  652.23   45.40 
  -2   6  -1  636.84   38.40 
  -2   6  -1  666.73   37.10 
   2   6   1  665.43   41.10 
  -2   6  -1  724.73   38.70 
   2   6   1  612.54   23.70 
  -3  -6  -1   39.20   11.90 
  -3  -6  -1   40.00   14.40 
   3  -6   1   51.49   17.50 
  -3  -6  -1   44.30   12.30 
   3  -6   1   29.90    9.50 
  -3  -6  -1   44.80   12.90 
   3  -6   1   41.70   10.80 
   3  -6   1   44.30   20.30 
  -3  -6  -1   40.30   10.80 
   3  -6   1   21.60   12.40 
  -3  -6  -1   48.60   13.70 
  -3  -6  -1   25.10   11.60 
  -3  -6  -1   43.20   12.90 
   3  -6   1   37.40   12.40 
  -3  -6  -1   37.50   10.60 
  -3  -6  -1   25.10   10.50 
   3  -6   1   19.30   10.50 
   3  -6   1   40.90   11.80 
  -3  -6  -1   39.00   11.30 
   3  -6   1   41.10   12.00 
  -3  -6  -1   37.30   12.00 
   3  -6   1   30.40   17.80 
   3   6   1   48.90   14.00 
   3   6   1   47.20   12.20 
  -3   6  -1   40.70    9.50 
  -3   6  -1   73.19   18.50 
   3   6   1   28.10   13.90 
   3   6   1   59.39   16.10 
   3   6   1   10.90   11.80 
  -3   6  -1   37.40   11.60 
   3   6   1   49.50   18.50 
  -3   6  -1   33.30   11.20 
  -3   6  -1   24.60   11.30 
   3   6   1   57.89   12.80 
  -3   6  -1   47.00   12.80 
  -3   6  -1   22.40    9.20 
   3   6   1   34.20   13.60 
  -3   6  -1   38.90   10.90 
   3   6   1   51.19   19.70 
  -3   6  -1   31.40   11.50 
   3   6   1   28.80   10.50 
   4  -6   1  118.49   17.10 
  -4  -6  -1  128.19   18.70 
   4  -6   1  124.69   24.30 
  -4  -6  -1  116.09   18.20 
   4  -6   1  125.89   16.70 
  -4  -6  -1  127.89   21.40 
  -4  -6  -1   92.59   21.20 
   4  -6   1  111.29   16.40 
  -4  -6  -1   91.29   18.20 
   4  -6   1   76.99   22.40 
   4  -6   1   98.59   27.20 
  -4  -6  -1  114.79   19.30 
   4  -6   1  131.99   34.10 
  -4  -6  -1  124.69   20.10 
  -4  -6  -1  113.49   18.50 
   4  -6   1  107.69   25.80 
  -4  -6  -1   95.69   21.10 
   4  -6   1  100.99   18.90 
   4  -6   1  123.39   23.60 
  -4  -6  -1  101.09   18.50 
   4  -6   1  113.29   19.50 
   4   6   1  111.29   19.30 
  -4   6  -1  133.69   18.90 
  -4   6  -1  146.69   16.20 
  -4   6  -1  108.29   17.30 
   4   6   1   87.29   20.10 
  -4   6  -1  107.49   17.00 
  -4   6  -1  112.09   19.30 
   4   6   1  100.59   24.20 
   4   6   1  127.09   20.70 
  -4   6  -1  120.29   19.30 
   4   6   1  140.29   23.70 
  -4   6  -1  109.89   22.90 
  -4   6  -1   78.89   14.80 
   4   6   1   74.09   18.50 
   4   6   1   67.49   23.50 
   4   6   1  107.59   23.40 
  -4   6  -1  100.59   17.40 
   4   6   1  107.99   17.20 
  -4   6  -1  128.69   22.30 
   4   6   1  134.89   19.10 
  -5  -6  -1  315.17   37.10 
  -5  -6  -1  298.77   32.40 
   5  -6   1  328.57   34.40 
   5  -6   1  321.87   39.80 
  -5  -6  -1  265.37   28.70 
  -5  -6  -1  321.37   33.20 
  -5  -6  -1  275.47   31.90 
  -5  -6  -1  245.88   30.20 
  -5  -6  -1  321.57   33.90 
  -5  -6  -1  261.57   29.00 
   5  -6   1  208.88   44.60 
   5  -6   1  382.86   45.90 
  -5  -6  -1  307.97   29.60 
   5  -6   1  222.38   40.70 
  -5  -6  -1  312.77   30.70 
  -5  -6  -1  326.77   30.30 
   5  -6   1  318.17   39.40 
   5  -6   1  227.68   30.20 
   5  -6   1  230.58   29.10 
  -5  -6  -1  287.77   35.60 
  -5   6  -1  330.27   25.90 
   5   6   1  299.37   36.30 
  -5   6  -1  301.77   29.90 
  -5   6  -1  268.47   32.50 
  -5   6  -1  305.67   25.20 
   5   6   1  194.98   36.00 
  -5   6  -1  297.27   29.10 
   5   6   1  263.47   31.50 
  -5   6  -1  323.87   24.60 
  -5   6  -1  307.17   34.80 
   5   6   1  299.47   46.40 
  -5   6  -1  312.97   22.10 
   5   6   1  338.07   40.90 
   5   6   1  316.67   24.80 
   5   6   1  325.87   40.40 
   5   6   1  307.27   34.30 
  -5   6  -1  287.77   27.80 
   5   6   1  318.67   40.60 
  -5   6  -1  337.37   40.50 
   6  -6   1  536.15   66.39 
  -6  -6  -1  689.23   40.10 
  -6  -6  -1  664.13   43.90 
  -6  -6  -1  624.74   41.10 
  -6  -6  -1  702.43   41.70 
  -6  -6  -1  669.83   40.70 
  -6  -6  -1  720.33   47.00 
   6  -6   1  591.74   42.00 
   6  -6   1  685.93   54.59 
   6  -6   1  662.63   44.40 
  -6  -6  -1  584.74   41.70 
  -6  -6  -1  635.24   49.20 
   6  -6   1  725.23   58.59 
   6  -6   1  622.64   45.00 
  -6  -6  -1  706.03   40.30 
  -6  -6  -1  619.54   43.80 
  -6  -6  -1  706.33   45.30 
  -6  -6  -1  657.33   48.10 
  -6  -6  -1  678.33   45.50 
  -6  -6  -1  650.53   65.69 
   6  -6   1  682.83   81.79 
   6  -6   1  643.94   48.10 
   6   6   1  671.33   50.79 
  -6   6  -1  653.33   46.70 
  -6   6  -1  656.63   38.20 
   6   6   1  607.14   41.70 
  -6   6  -1  673.93   39.50 
   6   6   1  712.73   69.59 
   6   6   1  715.83   54.89 
   6   6   1  622.44   49.00 
  -6   6  -1  680.63   47.30 
  -6   6  -1  742.83   41.50 
   6   6   1  695.13   53.29 
   6   6   1  572.54   60.59 
   6   6   1  643.84   47.40 
  -6   6  -1  609.84   45.70 
  -6   6  -1  541.45   59.79 
   6   6   1  540.55   68.29 
  -6   6  -1  603.04   38.60 
  -6   6  -1  755.62   52.69 
  -6   6  -1  663.53   45.30 
   6   6   1  640.54   35.60 
   6   6   1  638.24   45.40 
  -7  -6  -1  369.86   45.00 
  -7  -6  -1  307.87   39.20 
  -7  -6  -1  231.68   33.40 
   7  -6   1  315.67   55.69 
  -7  -6  -1  338.37   33.50 
  -7  -6  -1  304.57   37.50 
  -7  -6  -1  376.46   39.40 
   7  -6   1  310.97   37.30 
  -7  -6  -1  314.27   37.10 
  -7  -6  -1  342.37   32.70 
  -7  -6  -1  333.37   35.20 
  -7  -6  -1  232.78   36.60 
   7  -6   1  277.57   55.99 
  -7  -6  -1  295.17   45.30 
   7  -6   1  361.26   51.39 
  -7  -6  -1  306.17   36.40 
  -7  -6  -1  362.26   42.90 
   7  -6   1  321.57   49.90 
   7  -6   1  250.27   35.10 
   7   6   1  331.77   50.79 
  -7   6  -1  332.47   41.40 
   7   6   1  292.37   37.60 
   7   6   1  316.07   46.90 
  -7   6  -1  272.77   37.50 
  -7   6  -1  249.97   38.90 
   7   6   1  288.47   40.70 
   7   6   1  290.87   44.50 
  -7   6  -1  255.47   41.70 
   7   6   1  341.47   44.70 
   7   6   1  313.27   54.69 
   7   6   1  236.58   41.10 
  -7   6  -1  289.27   38.70 
   8  -6   1 1075.59   81.79 
  -8  -6  -1 1064.99   66.19 
  -8  -6  -1 1111.89   66.19 
  -8  -6  -1 1109.89   66.59 
  -8  -6  -1 1088.29   63.09 
  -8  -6  -1 1068.19   71.69 
   8  -6   1 1115.59   82.69 
  -8  -6  -1 1074.09   69.49 
  -8  -6  -1  860.01   86.09 
   8  -6   1 1010.40  102.59 
  -8  -6  -1 1120.79   59.79 
  -8  -6  -1  991.30   64.89 
  -8  -6  -1  981.80   69.79 
  -8  -6  -1 1145.69   72.39 
  -8   6  -1 1003.60   77.59 
   8   6   1 1149.78   90.69 
   8   6   1 1008.40   71.39 
  -8   6  -1 1082.79   67.69 
  -8   6  -1 1137.89   74.79 
  -8   6  -1 1205.08   72.19 
   8   6   1  956.80   74.89 
   8   6   1 1098.69   69.49 
   8   6   1  994.20   78.99 
   8   6   1 1075.09   82.29 
  -8   6  -1 1039.10   67.89 
  -7  -7   1  272.97   31.70 
  -7  -7   1  218.88   29.00 
  -7  -7   1  160.28   33.00 
  -7  -7   1  255.37   33.70 
   7  -7  -1  260.47   45.20 
  -7  -7   1  267.37   36.20 
   7  -7  -1  223.48   48.40 
  -7  -7   1  285.97   38.40 
  -7  -7   1  240.28   34.50 
   7  -7  -1  256.77   49.10 
  -7  -7   1  283.87   36.60 
  -7  -7   1  272.57   38.90 
  -7  -7   1  313.57   35.90 
  -7  -7   1  287.47   38.70 
   7  -7  -1  232.38   53.79 
   7  -7  -1  274.67   42.90 
  -7   7   1  260.27   39.60 
   7   7  -1  197.28   38.80 
   7   7  -1  263.07   54.19 
  -7   7   1  344.67   41.60 
   7   7  -1  238.58   44.00 
  -7   7   1  242.18   36.60 
   7   7  -1  284.67   36.70 
   7   7  -1  274.47   38.80 
   7   7  -1  307.27   47.30 
   7   7  -1  264.97   49.80 
  -7   7   1  217.38   35.30 
   7   7  -1  342.97   47.40 
  -7   7   1  292.37   42.50 
  -6  -7   1  560.44   57.19 
  -6  -7   1  532.65   48.50 
   6  -7  -1  571.84   80.79 
   6  -7  -1  496.15   55.49 
   6  -7  -1  492.15   69.49 
  -6  -7   1  420.76   46.20 
  -6  -7   1  469.35   45.30 
   6  -7  -1  370.96   49.99 
   6  -7  -1  545.65   53.09 
  -6  -7   1  546.95   42.30 
   6  -7  -1  423.36   54.09 
  -6  -7   1  477.45   37.30 
  -6  -7   1  459.05   37.00 
  -6  -7   1  501.45   36.60 
  -6  -7   1  468.75   33.30 
  -6  -7   1  552.04   41.30 
   6   7  -1  385.46   49.20 
   6   7  -1  537.75   72.69 
   6   7  -1  491.75   55.19 
  -6   7   1  579.04   42.80 
  -6   7   1  484.45   36.50 
   6   7  -1  524.85   49.40 
   6   7  -1  514.65   55.69 
  -6   7   1  511.35   36.10 
   6   7  -1  401.36   52.19 
   6   7  -1  471.85   61.09 
  -6   7   1  480.15   48.40 
  -6   7   1  441.06   48.50 
   6   7  -1  537.95   59.39 
  -6   7   1  427.66   32.80 
  -6   7   1  494.15   49.70 
   6   7  -1  448.76   44.60 
   5  -7  -1 1057.49   69.69 
  -5  -7   1  984.40   59.99 
  -5  -7   1 1015.40   56.79 
  -5  -7   1  949.90   52.79 
  -5  -7   1 1052.59   56.89 
  -5  -7   1  951.30   55.39 
   5  -7  -1  800.12   91.99 
  -5  -7   1 1070.09   57.59 
  -5  -7   1  922.01   60.19 
  -5  -7   1 1002.10   55.39 
  -5  -7   1 1043.90   53.79 
  -5  -7   1 1082.59   52.29 
   5  -7  -1  969.90   65.89 
   5  -7  -1  975.30   72.99 
   5  -7  -1 1121.29   62.09 
   5  -7  -1  930.31   76.09 
  -5   7   1 1038.00   60.79 
   5   7  -1 1044.50   69.09 
   5   7  -1  967.90   49.99 
   5   7  -1  959.30   62.29 
   5   7  -1 1061.29   59.09 
  -5   7   1  993.10   58.49 
   5   7  -1  968.80   56.39 
   5   7  -1 1066.29   82.69 
  -5   7   1  954.90   53.89 
   5   7  -1  940.81   73.29 
  -5   7   1 1038.60   63.79 
   5   7  -1  971.70   61.89 
  -5   7   1 1048.60   53.09 
  -5   7   1 1079.39   58.39 
   5   7  -1  911.71   61.39 
  -5   7   1 1013.00   51.69 
  -4  -7   1 1128.89   57.49 
   4  -7  -1 1007.60   54.89 
  -4  -7   1  988.30   51.89 
   4  -7  -1 1043.40   64.79 
  -4  -7   1 1153.68   58.29 
  -4  -7   1 1079.09   62.49 
  -4  -7   1 1056.29   55.39 
   4  -7  -1 1017.20   76.89 
  -4  -7   1 1068.89   56.79 
   4  -7  -1 1044.90   64.59 
  -4  -7   1  956.60   58.19 
  -4  -7   1 1061.09   53.09 
   4  -7  -1 1095.79   59.89 
  -4  -7   1  997.20   55.39 
   4  -7  -1 1014.80   54.19 
   4  -7  -1  945.91   56.99 
  -4  -7   1 1072.59   54.99 
   4  -7  -1 1248.98   83.69 
   4   7  -1 1157.18   65.89 
  -4   7   1 1161.08   48.90 
  -4   7   1 1175.68   56.09 
  -4   7   1 1059.49   62.19 
   4   7  -1 1053.09   52.99 
   4   7  -1 1138.49   57.99 
  -4   7   1 1120.89   56.99 
   4   7  -1 1053.79   73.79 
   4   7  -1 1075.19   58.89 
   4   7  -1 1048.50   76.99 
  -4   7   1 1112.69   58.39 
  -4   7   1 1061.79   56.79 
   4   7  -1 1055.99   68.69 
  -4   7   1 1130.99   60.69 
   4   7  -1  959.40   47.70 
   4   7  -1  917.41   60.29 
  -4   7   1 1086.89   54.49 
   3  -7  -1  295.77   30.10 
   3  -7  -1  269.77   35.20 
  -3  -7   1  347.87   34.80 
  -3  -7   1  310.37   31.30 
   3  -7  -1  358.76   33.80 
  -3  -7   1  316.77   32.00 
   3  -7  -1  368.16   46.10 
   3  -7  -1  369.96   28.60 
   3  -7  -1  433.96   33.20 
   3  -7  -1  349.87   49.60 
  -3  -7   1  456.15   45.30 
  -3  -7   1  382.56   37.80 
  -3  -7   1  341.17   25.70 
  -3  -7   1  414.66   41.30 
  -3  -7   1  340.47   33.80 
  -3  -7   1  359.86   28.20 
   3  -7  -1  299.57   33.70 
  -3  -7   1  379.16   29.80 
   3  -7  -1  381.16   30.40 
   3  -7  -1  359.56   38.60 
  -3   7   1  354.16   25.60 
  -3   7   1  409.26   40.00 
  -3   7   1  314.07   33.30 
   3   7  -1  436.46   43.90 
   3   7  -1  367.36   39.80 
  -3   7   1  357.96   35.60 
   3   7  -1  325.27   33.10 
  -3   7   1  375.26   41.90 
  -3   7   1  351.66   28.70 
   3   7  -1  344.67   49.50 
   3   7  -1  356.16   28.60 
  -3   7   1  329.07   20.70 
  -3   7   1  308.57   35.60 
   3   7  -1  330.97   37.10 
   3   7  -1  346.37   35.30 
  -3   7   1  376.46   30.40 
   3   7  -1  378.56   26.30 
  -2  -7   1  201.98   25.40 
  -2  -7   1  212.68   26.00 
  -2  -7   1  246.08   23.20 
   2  -7  -1  217.68   27.60 
  -2  -7   1  255.87   32.60 
  -2  -7   1  248.18   28.10 
   2  -7  -1  271.07   31.90 
   2  -7  -1  230.38   14.10 
  -2  -7   1  243.28   26.00 
   2  -7  -1  245.88   16.30 
  -2  -7   1  274.97   29.90 
   2  -7  -1  278.27   34.10 
   2  -7  -1  244.68   29.40 
   2  -7  -1  236.78   25.80 
   2  -7  -1  263.97   27.40 
  -2  -7   1  218.28   28.70 
   2  -7  -1  261.47   30.10 
  -2  -7   1  313.27   31.90 
   2  -7  -1  255.47   39.10 
  -2  -7   1  240.58   28.50 
  -2  -7   1  228.18   25.10 
   2  -7  -1  224.18   41.20 
  -2   7   1  335.27   32.90 
  -2   7   1  249.18   31.00 
   2   7  -1  251.17   30.00 
  -2   7   1  263.97   18.50 
   2   7  -1  227.68   26.10 
   2   7  -1  203.48   29.60 
   2   7  -1  227.68   29.70 
  -2   7   1  269.87   32.60 
  -2   7   1  291.17   26.90 
  -2   7   1  253.97   29.40 
   2   7  -1  222.08   25.50 
   2   7  -1  177.38   30.30 
  -2   7   1  220.28   25.00 
  -2   7   1  190.78   28.70 
   2   7  -1  309.27   34.50 
   2   7  -1  257.77   25.20 
  -2   7   1  267.07   27.70 
   2   7  -1  256.37   38.90 
  -1  -7   1  262.97   35.00 
  -1  -7   1  300.07   31.00 
  -1  -7   1  204.48   16.70 
   1  -7  -1  248.58   26.10 
   1  -7  -1  183.88   24.10 
   1  -7  -1  169.68   23.60 
  -1  -7   1  204.78   28.20 
  -1  -7   1  212.28   27.40 
  -1  -7   1  254.97   27.90 
   1  -7  -1  177.38   26.40 
   1  -7  -1  190.58   27.90 
   1  -7  -1  261.37   36.60 
  -1  -7   1  233.88   23.60 
   1  -7  -1  279.67   32.00 
   1  -7  -1  202.28   37.30 
   1  -7  -1  223.78   16.10 
  -1  -7   1  237.98   29.60 
  -1  -7   1  282.97   29.80 
  -1  -7   1  230.68   25.70 
   1  -7  -1  220.08   27.30 
  -1  -7   1  242.88   26.20 
   1  -7  -1  243.08   17.80 
  -1   7   1  188.28   25.80 
   1   7  -1  203.08   23.70 
   1   7  -1  155.08   25.10 
   1   7  -1  252.77   37.20 
   1   7  -1  250.57   25.50 
  -1   7   1  248.48   25.80 
   1   7  -1  235.48   32.60 
   1   7  -1  201.68   28.30 
  -1   7   1  186.88   27.00 
   1   7  -1  238.38   15.80 
  -1   7   1  228.18   22.90 
  -1   7   1  249.28   28.70 
  -1   7   1  225.38   25.60 
  -1   7   1  225.48   26.10 
   1   7  -1  194.88   28.10 
   1   7  -1  265.77   30.10 
   1   7  -1  209.68   24.40 
  -1   7   1  285.87   33.40 
  -1   7   1  200.88   28.70 
  -1   7   1  255.77   19.20 
   0  -7   1  504.75   31.60 
   0  -7   1  458.35   34.20 
   0  -7   1  479.95   34.00 
   0  -7  -1  409.96   32.50 
   0  -7  -1  394.56   40.30 
   0  -7   1  498.35   33.00 
   0  -7  -1  444.16   26.10 
   0  -7  -1  475.15   24.20 
   0  -7   1  447.76   32.80 
   0  -7   1  571.44   44.10 
   0  -7   1  441.76   26.50 
   0  -7  -1  493.85   37.60 
   0  -7  -1  470.15   35.20 
   0  -7   1  464.55   22.50 
   0  -7   1  505.05   38.00 
   0  -7  -1  428.06   31.50 
   0  -7  -1  415.46   30.50 
   0  -7   1  430.96   35.10 
   0  -7  -1  450.85   44.80 
   0  -7  -1  446.46   27.20 
   0  -7   1  505.85   33.70 
   0  -7  -1  485.35   33.80 
   0   7   1  532.45   39.20 
   0   7  -1  458.75   31.30 
   0   7   1  471.55   33.10 
   0   7  -1  507.15   38.60 
   0   7   1  516.25   33.70 
   0   7  -1  478.15   34.10 
   0   7  -1  494.05   29.90 
   0   7  -1  483.55   37.00 
   0   7   1  431.46   43.50 
   0   7  -1  385.56   24.90 
   0   7  -1  486.65   35.60 
   0   7  -1  483.55   36.60 
   0   7   1  528.05   33.60 
   0   7  -1  443.36   32.10 
   0   7   1  391.86   43.10 
   0   7   1  446.16   33.60 
   0   7  -1  414.66   43.30 
   0   7   1  473.65   38.80 
   0   7   1  537.25   37.80 
   0   7   1  468.65   36.10 
   0   7   1  433.66   26.10 
   0   7  -1  520.15   42.30 
   0   7   1  485.35   28.40 
   1  -7   1 1097.59   55.39 
   1  -7   1 1061.09   48.90 
   1  -7   1 1234.48   70.49 
  -1  -7  -1 1069.19   54.49 
   1  -7   1 1021.40   57.69 
  -1  -7  -1  885.71   50.09 
   1  -7   1  825.12   49.99 
   1  -7   1 1051.09   42.40 
   1  -7   1 1086.79   58.19 
   1  -7   1 1035.60   52.79 
   1  -7   1 1137.59   71.49 
  -1  -7  -1 1000.20   46.70 
   1  -7   1 1021.60   54.59 
   1  -7   1 1019.30   51.19 
  -1  -7  -1  950.20   51.89 
  -1  -7  -1 1016.80   43.70 
  -1  -7  -1 1075.49   55.09 
  -1  -7  -1 1010.90   57.19 
  -1  -7  -1  957.40   56.89 
  -1  -7  -1 1041.90   52.09 
  -1  -7  -1 1082.99   48.60 
  -1   7  -1 1065.99   46.90 
   1   7   1  937.91   58.89 
  -1   7  -1 1061.49   53.59 
   1   7   1 1097.89   49.20 
   1   7   1 1041.70   57.49 
   1   7   1 1038.00   54.89 
   1   7   1 1016.50   52.39 
  -1   7  -1  956.50   54.79 
  -1   7  -1 1085.09   55.89 
  -1   7  -1 1071.59   52.79 
   1   7   1 1007.80   40.80 
  -1   7  -1  972.50   53.19 
   1   7   1 1038.10   63.89 
  -1   7  -1 1065.19   48.20 
   1   7   1  996.10   49.99 
   1   7   1 1102.49   59.79 
   1   7   1 1144.59   58.09 
  -1   7  -1 1052.39   60.89 
  -2  -7  -1 1558.04   67.39 
   2  -7   1 1436.16   64.49 
   2  -7   1 1409.66   67.99 
  -2  -7  -1 1432.26   63.19 
  -2  -7  -1 1446.16   68.09 
   2  -7   1 1378.46   50.29 
   2  -7   1 1412.96   66.39 
  -2  -7  -1 1486.45   72.19 
   2  -7   1 1440.56   60.19 
  -2  -7  -1 1459.75   71.59 
   2  -7   1 1410.56   65.29 
   2  -7   1 1514.65   73.99 
  -2  -7  -1 1366.76   64.49 
   2  -7   1 1277.17   81.49 
   2  -7   1 1461.15   72.59 
  -2  -7  -1 1351.06   64.69 
   2  -7   1 1491.55   88.79 
  -2  -7  -1 1428.96   61.89 
  -2  -7  -1 1372.36   65.49 
  -2  -7  -1 1373.06   58.49 
   2   7   1 1483.65   77.69 
  -2   7  -1 1521.55   66.89 
  -2   7  -1 1495.85   64.09 
  -2   7  -1 1345.07   65.99 
  -2   7  -1 1438.76   64.99 
  -2   7  -1 1538.05   76.29 
   2   7   1 1542.55   72.19 
   2   7   1 1503.85   63.09 
  -2   7  -1 1411.16   66.59 
   2   7   1 1314.67   66.49 
  -2   7  -1 1446.76   57.69 
   2   7   1 1283.67   70.69 
   2   7   1 1386.66   79.49 
  -2   7  -1 1436.76   68.79 
   2   7   1 1450.55   71.29 
   2   7   1 1437.96   62.49 
   2   7   1 1415.76   65.09 
   3  -7   1  573.54   36.10 
  -3  -7  -1  567.14   42.20 
   3  -7   1  590.94   44.20 
   3  -7   1  470.75   56.99 
  -3  -7  -1  516.45   38.20 
   3  -7   1  507.45   51.09 
   3  -7   1  497.35   32.80 
  -3  -7  -1  559.34   38.20 
  -3  -7  -1  611.24   38.10 
  -3  -7  -1  523.35   40.80 
   3  -7   1  615.14   65.39 
  -3  -7  -1  587.34   37.10 
   3  -7   1  507.85   32.60 
  -3  -7  -1  498.45   35.80 
   3  -7   1  596.24   40.60 
   3  -7   1  557.04   37.20 
   3  -7   1  554.24   38.60 
  -3  -7  -1  507.55   33.10 
  -3  -7  -1  527.75   36.70 
  -3  -7  -1  617.74   38.40 
   3   7   1  625.54   61.29 
  -3   7  -1  507.25   43.30 
   3   7   1  563.54   36.40 
  -3   7  -1  597.84   30.80 
   3   7   1  513.65   38.60 
  -3   7  -1  561.34   39.50 
   3   7   1  583.24   43.60 
   3   7   1  521.25   36.20 
   3   7   1  619.94   35.70 
  -3   7  -1  564.04   36.90 
  -3   7  -1  562.54   38.90 
   3   7   1  419.86   43.60 
   3   7   1  584.44   44.30 
  -3   7  -1  548.45   36.60 
   3   7   1  518.85   58.49 
  -3   7  -1  609.34   38.30 
  -3   7  -1  570.14   37.80 
  -4  -7  -1  589.24   39.00 
   4  -7   1  586.94   41.20 
   4  -7   1  607.34   37.70 
  -4  -7  -1  587.54   39.60 
  -4  -7  -1  625.14   40.20 
   4  -7   1  516.15   51.99 
  -4  -7  -1  581.84   37.90 
   4  -7   1  601.14   51.49 
  -4  -7  -1  587.44   45.40 
   4  -7   1  602.64   37.50 
  -4  -7  -1  660.43   42.40 
  -4  -7  -1  650.03   46.70 
   4  -7   1  616.64   42.00 
   4  -7   1  732.13   75.09 
  -4  -7  -1  573.74   39.90 
  -4  -7  -1  634.74   41.20 
   4  -7   1  524.95   51.09 
   4  -7   1  621.74   64.09 
  -4  -7  -1  662.93   41.80 
   4   7   1  596.44   47.10 
  -4   7  -1  583.34   47.50 
  -4   7  -1  554.14   37.70 
  -4   7  -1  670.53   40.20 
  -4   7  -1  590.64   40.20 
   4   7   1  629.84   39.40 
  -4   7  -1  595.84   31.90 
   4   7   1  544.25   62.89 
   4   7   1  727.73   57.89 
  -4   7  -1  550.64   38.20 
   4   7   1  601.24   46.50 
   4   7   1  602.14   40.70 
   4   7   1  617.44   46.80 
   4   7   1  616.44   37.50 
  -4   7  -1  524.65   40.00 
  -4   7  -1  604.54   42.10 
   4   7   1  592.34   42.20 
   4   7   1  596.54   46.00 
  -5  -7  -1   73.39   18.10 
   5  -7   1  105.59   28.60 
  -5  -7  -1   79.09   18.60 
   5  -7   1   53.09   30.50 
  -5  -7  -1  101.49   19.20 
  -5  -7  -1  101.99   21.90 
   5  -7   1   57.99   23.60 
  -5  -7  -1  114.99   21.80 
  -5  -7  -1   97.49   21.50 
   5  -7   1   65.99   21.10 
  -5  -7  -1   74.09   18.20 
  -5  -7  -1   66.89   18.20 
  -5  -7  -1   87.89   18.10 
   5  -7   1  111.09   33.20 
   5  -7   1   95.19   26.70 
  -5  -7  -1   64.69   19.10 
   5  -7   1   90.89   20.50 
  -5  -7  -1   96.19   23.20 
  -5   7  -1   45.90   15.00 
   5   7   1   89.19   18.00 
   5   7   1   53.69   20.60 
  -5   7  -1   69.69   19.50 
   5   7   1   51.49   21.00 
   5   7   1   89.19   27.00 
   5   7   1   84.29   24.10 
   5   7   1   74.49   23.50 
  -5   7  -1   94.99   18.50 
  -5   7  -1   78.59   18.40 
  -5   7  -1  101.59   22.60 
   5   7   1   55.49   26.90 
  -5   7  -1  132.99   27.50 
  -5   7  -1   78.39   16.50 
   5   7   1  113.19   22.20 
  -5   7  -1   90.29   18.40 
   5   7   1   97.59   22.10 
  -6  -7  -1   -4.60   12.00 
  -6  -7  -1   19.50   12.30 
   6  -7   1   22.90   26.60 
  -6  -7  -1   23.40   12.40 
  -6  -7  -1   -4.70   11.00 
  -6  -7  -1   -0.40    9.50 
  -6  -7  -1   13.40   12.10 
  -6  -7  -1   -2.90    9.50 
  -6  -7  -1    2.70   11.40 
   6  -7   1   32.30   21.10 
   6  -7   1   35.20   27.50 
   6  -7   1    0.80   15.10 
  -6  -7  -1   23.70   11.80 
  -6  -7  -1   36.00   16.90 
   6  -7   1   11.10   14.60 
  -6  -7  -1   28.60   14.20 
  -6  -7  -1   16.30   12.60 
   6   7   1   34.30   15.00 
  -6   7  -1    4.70   10.20 
  -6   7  -1   42.40   16.70 
   6   7   1   25.50   19.50 
  -6   7  -1    2.50    9.50 
   6   7   1   37.20   20.60 
  -6   7  -1    7.30   14.10 
  -6   7  -1   11.20   11.90 
   6   7   1   33.70   14.20 
   6   7   1   -9.10   15.00 
   6   7   1   11.90   18.40 
   6   7   1   14.70   15.60 
  -6   7  -1   -1.10   11.90 
   6   7   1    5.50   13.90 
   6   7   1   21.30   11.70 
  -6   7  -1   16.30   12.20 
   6   7   1   21.00   18.10 
   6   7   1   19.20   16.20 
  -7  -7  -1   -6.00   10.20 
  -7  -7  -1   -1.00    9.60 
  -7  -7  -1   -3.60   11.50 
  -7  -7  -1    6.50   16.60 
  -7  -7  -1   -8.70   12.00 
   7  -7   1  -26.10   14.90 
  -7  -7  -1    2.30   11.10 
  -7  -7  -1   16.80   13.10 
  -7  -7  -1   17.60   16.00 
  -7  -7  -1   -2.60   12.00 
  -7  -7  -1  -16.00    7.50 
  -7  -7  -1   -8.80    8.30 
   7  -7   1  -21.00   22.40 
   7  -7   1    2.70   19.60 
  -7  -7  -1   -9.80    9.50 
   7  -7   1   10.20   24.40 
  -7   7  -1    6.40   16.50 
   7   7   1    0.70   22.60 
  -7   7  -1  -14.40   11.70 
  -7   7  -1    6.50   15.00 
  -7   7  -1   12.50   14.40 
   7   7   1   28.20   24.50 
   7   7   1   -1.90   13.60 
   7   7   1   -2.40   16.70 
   7   7   1   -6.50   14.60 
   7   7   1  -10.50   17.00 
   7   7   1  -15.90    9.50 
  -6  -8   1   26.80   14.30 
   6  -8  -1   10.60   20.30 
  -6  -8   1   29.70   16.20 
  -6  -8   1   53.19   21.50 
   6  -8  -1   17.20   17.60 
  -6  -8   1   38.70   15.90 
  -6  -8   1   22.50   16.10 
   6  -8  -1   26.60   22.60 
   6  -8  -1    4.30   15.70 
  -6  -8   1   11.70   13.20 
   6  -8  -1   31.80   27.90 
  -6  -8   1   24.20   18.00 
  -6  -8   1   39.80   16.90 
  -6  -8   1   22.30   15.20 
  -6  -8   1   45.90   17.60 
   6  -8  -1    6.70   26.80 
  -6   8   1   45.00   18.70 
   6   8  -1    7.80   17.60 
   6   8  -1   18.10   17.00 
   6   8  -1   39.70   21.50 
   6   8  -1   15.00   18.50 
  -6   8   1    3.60   12.20 
  -6   8   1   24.10   13.60 
   6   8  -1   37.40   20.70 
  -6   8   1   51.19   18.00 
   6   8  -1   12.80   23.40 
   6   8  -1   22.90   23.70 
  -6   8   1   25.20   17.60 
  -6   8   1   18.30   14.50 
  -6   8   1   36.40   18.50 
   6   8  -1   46.30   19.20 
  -5  -8   1  156.28   27.00 
  -5  -8   1  138.49   24.60 
  -5  -8   1  245.58   36.80 
   5  -8  -1  124.29   43.60 
  -5  -8   1  156.08   26.90 
   5  -8  -1  221.08   50.29 
   5  -8  -1  244.18   47.00 
  -5  -8   1  180.88   27.60 
  -5  -8   1  166.68   27.40 
   5  -8  -1  228.08   41.20 
  -5  -8   1  248.98   33.40 
  -5  -8   1  168.08   27.70 
  -5  -8   1  139.79   24.20 
   5  -8  -1  212.68   33.70 
   5  -8  -1  190.58   35.90 
  -5  -8   1  243.68   37.30 
  -5   8   1  152.38   27.00 
  -5   8   1  221.78   29.90 
   5   8  -1  142.49   29.30 
  -5   8   1  140.49   24.70 
   5   8  -1  166.88   27.70 
   5   8  -1  158.58   27.40 
   5   8  -1  145.19   33.10 
   5   8  -1  134.59   36.60 
  -5   8   1  194.68   30.30 
   5   8  -1  194.78   26.50 
   5   8  -1  141.89   30.10 
  -5   8   1  165.48   28.90 
  -5   8   1  150.68   24.50 
   5   8  -1  181.58   46.20 
  -5   8   1  210.38   35.50 
   5   8  -1  157.78   31.80 
  -5   8   1  154.88   29.30 
  -4  -8   1  101.69   20.90 
   4  -8  -1   86.59   33.50 
  -4  -8   1  112.39   22.50 
  -4  -8   1   89.89   21.10 
   4  -8  -1  114.39   22.40 
   4  -8  -1  138.79   29.40 
   4  -8  -1  112.49   38.10 
  -4  -8   1   81.29   20.50 
  -4  -8   1  104.29   20.60 
  -4  -8   1  103.19   22.60 
  -4  -8   1  104.49   21.90 
   4  -8  -1  128.89   25.20 
   4  -8  -1   93.59   27.00 
  -4  -8   1  131.49   21.90 
  -4  -8   1  106.39   25.50 
  -4  -8   1  108.39   21.20 
  -4  -8   1   75.19   21.00 
   4   8  -1  105.39   28.30 
   4   8  -1  184.78   33.60 
  -4   8   1  127.19   25.20 
   4   8  -1   90.89   29.40 
  -4   8   1  115.19   22.40 
   4   8  -1  106.09   22.10 
  -4   8   1  120.89   25.10 
  -4   8   1  110.19   21.40 
   4   8  -1  102.79   23.30 
  -4   8   1  123.29   27.20 
   4   8  -1  190.18   42.00 
  -4   8   1  118.89   24.10 
   4   8  -1   86.09   18.80 
  -4   8   1  100.99   20.70 
  -4   8   1  106.39   22.10 
   4   8  -1  122.39   27.50 
  -3  -8   1  432.66   40.80 
  -3  -8   1  357.06   37.00 
  -3  -8   1  490.55   49.40 
  -3  -8   1  442.66   42.10 
  -3  -8   1  434.66   47.60 
  -3  -8   1  461.85   44.30 
   3  -8  -1  439.06   48.20 
   3  -8  -1  439.26   33.90 
   3  -8  -1  429.46   52.89 
   3  -8  -1  428.56   33.70 
  -3  -8   1  383.06   38.40 
   3  -8  -1  436.76   44.10 
   3  -8  -1  440.16   61.29 
   3  -8  -1  475.85   36.60 
   3  -8  -1  465.75   44.30 
  -3  -8   1  389.96   31.90 
  -3  -8   1  480.75   36.00 
  -3  -8   1  440.76   30.70 
  -3  -8   1  481.45   43.10 
   3   8  -1  405.96   38.30 
  -3   8   1  348.07   44.00 
   3   8  -1  448.96   31.80 
   3   8  -1  388.76   46.50 
  -3   8   1  429.36   35.20 
   3   8  -1  461.35   60.19 
  -3   8   1  417.86   43.10 
  -3   8   1  487.25   47.20 
  -3   8   1  376.86   39.40 
   3   8  -1  403.36   44.40 
  -3   8   1  491.15   45.30 
  -3   8   1  441.26   34.60 
   3   8  -1  404.06   33.40 
   3   8  -1  408.36   44.00 
   3   8  -1  480.65   46.40 
  -3   8   1  399.16   38.50 
   2  -8  -1   25.20   12.10 
   2  -8  -1   -2.30   17.60 
  -2  -8   1   27.00   10.80 
   2  -8  -1    7.50   14.30 
  -2  -8   1   11.80   13.50 
  -2  -8   1    2.10   10.10 
  -2  -8   1   22.50   16.10 
  -2  -8   1   12.40   10.80 
   2  -8  -1   10.80   19.10 
   2  -8  -1    6.40   10.20 
  -2  -8   1   15.60   11.60 
  -2  -8   1   -0.10    9.50 
   2  -8  -1   -4.20   12.60 
   2  -8  -1    1.50   10.30 
  -2  -8   1    2.90    7.50 
  -2  -8   1   23.70   13.70 
  -2  -8   1   12.80   13.40 
   2  -8  -1   25.50   12.70 
   2  -8  -1   18.90   11.80 
  -2  -8   1   27.20   12.20 
  -2  -8   1   12.10    7.40 
   2   8  -1   -2.60   12.10 
   2   8  -1   -6.00    8.30 
   2   8  -1   24.70   17.00 
  -2   8   1   23.70   13.10 
  -2   8   1    6.80   10.80 
  -2   8   1    4.60   12.30 
  -2   8   1   -3.30    8.30 
   2   8  -1   10.90   11.10 
  -2   8   1    7.40   11.30 
   2   8  -1    7.20   11.20 
   2   8  -1   13.10   13.40 
  -2   8   1   12.90    7.90 
  -2   8   1   18.00   15.70 
   2   8  -1    6.20    8.90 
   2   8  -1   23.00   10.80 
  -2   8   1   20.60   12.80 
  -2   8   1   36.20   16.30 
   2   8  -1    4.70   12.10 
  -1  -8   1    5.70    7.60 
   1  -8  -1   -5.60    7.30 
   1  -8  -1    3.50   15.70 
  -1  -8   1   -1.80    8.40 
   1  -8  -1   17.10   11.90 
  -1  -8   1    5.20   11.20 
  -1  -8   1    2.40   12.20 
   1  -8  -1    6.00    8.90 
   1  -8  -1   -5.00    8.40 
  -1  -8   1   -6.00   11.10 
   1  -8  -1   -4.50   15.80 
  -1  -8   1   11.60   10.80 
  -1  -8   1    5.60    6.20 
   1  -8  -1   -0.60    9.10 
  -1  -8   1    6.90    7.40 
  -1  -8   1    2.20   12.90 
  -1  -8   1   10.40   11.00 
  -1  -8   1    6.70    9.60 
   1  -8  -1   19.30   12.80 
  -1  -8   1   -3.30    9.70 
   1  -8  -1   -3.90   10.30 
   1  -8  -1   -0.80    5.80 
   1   8  -1    2.30   12.30 
  -1   8   1   14.10   11.10 
  -1   8   1   -1.50   11.40 
   1   8  -1   -2.20    8.90 
   1   8  -1   22.30   18.30 
  -1   8   1    4.90    8.20 
  -1   8   1   -4.80    7.40 
   1   8  -1   20.00   14.10 
   1   8  -1   11.60    9.70 
  -1   8   1   10.90    7.60 
  -1   8   1   -5.50   10.60 
   1   8  -1    1.20   11.40 
  -1   8   1   -5.80    8.80 
  -1   8   1    8.90   11.00 
   1   8  -1   -3.90    8.50 
   1   8  -1    1.70   11.00 
   1   8  -1   10.60   11.20 
  -1   8   1   11.80   12.50 
  -1   8   1   12.60   12.50 
   0  -8  -1  200.48   20.60 
   0  -8   1  214.28   30.70 
   0  -8   1  201.58   21.70 
   0  -8  -1  200.58   28.60 
   0  -8  -1  224.58   29.50 
   0  -8   1  217.08   30.60 
   0  -8  -1  209.08   26.80 
   0  -8   1  337.47   44.20 
   0  -8   1  223.48   29.70 
   0  -8  -1  257.27   31.00 
   0  -8   1  244.68   29.70 
   0  -8  -1  319.97   38.90 
   0  -8   1  236.08   23.70 
   0  -8  -1  214.78   31.60 
   0  -8  -1  250.87   38.00 
   0  -8   1  201.38   30.20 
   0  -8   1  271.47   30.20 
   0  -8   1  150.58   24.70 
   0  -8  -1  228.48   23.50 
   0  -8  -1  190.68   26.90 
   0  -8   1  232.58   29.70 
   0   8  -1  203.28   30.90 
   0   8   1  169.08   29.20 
   0   8  -1  192.88   33.00 
   0   8   1  222.18   30.70 
   0   8   1  244.68   29.30 
   0   8   1  235.68   31.80 
   0   8  -1  217.58   33.90 
   0   8  -1  192.48   23.20 
   0   8   1  155.48   28.40 
   0   8   1  252.27   20.30 
   0   8   1  191.78   34.10 
   0   8  -1  231.88   27.80 
   0   8   1  259.97   34.20 
   0   8  -1  249.48   32.30 
   0   8  -1  214.48   29.70 
   0   8   1  202.98   27.40 
   0   8   1  226.58   24.10 
   0   8  -1  271.27   40.60 
   0   8  -1  267.37   31.20 
   0   8  -1  243.28   32.00 
   0   8  -1  211.78   21.70 
  -1  -8  -1  869.31   51.89 
  -1  -8  -1  699.03   44.60 
  -1  -8  -1  714.23   51.49 
   1  -8   1  755.42   60.69 
   1  -8   1  727.43   51.29 
   1  -8   1  700.73   47.70 
   1  -8   1  775.22   47.90 
  -1  -8  -1  713.83   52.09 
  -1  -8  -1  658.13   44.80 
  -1  -8  -1  727.03   40.80 
   1  -8   1  715.63   71.59 
  -1  -8  -1  721.23   39.40 
   1  -8   1  698.83   35.10 
   1  -8   1  719.83   46.10 
   1  -8   1  731.03   50.69 
  -1  -8  -1  791.62   48.30 
   1  -8   1  726.43   45.70 
   1  -8   1  801.52   36.80 
  -1  -8  -1  794.22   48.20 
   1  -8   1  781.72   43.20 
  -1  -8  -1  785.72   37.40 
  -1  -8  -1  811.42   53.39 
  -1   8  -1  656.33   45.80 
   1   8   1  736.23   49.50 
  -1   8  -1  739.73   39.50 
  -1   8  -1  727.33   49.70 
  -1   8  -1  767.12   40.90 
  -1   8  -1  766.62   46.00 
  -1   8  -1  767.12   49.90 
   1   8   1  868.11   53.89 
   1   8   1  730.03   44.00 
   1   8   1  712.93   54.19 
   1   8   1  686.53   50.69 
  -1   8  -1  777.92   50.49 
   1   8   1  750.82   48.40 
  -1   8  -1  817.62   47.20 
  -1   8  -1  750.82   49.60 
   1   8   1  792.42   47.10 
  -1   8  -1  869.81   57.69 
   1   8   1  737.43   41.40 
   1   8   1  774.32   58.09 
  -2  -8  -1  163.48   22.10 
  -2  -8  -1  185.08   26.20 
   2  -8   1  184.68   27.90 
   2  -8   1  131.09   19.70 
  -2  -8  -1  156.98   25.30 
   2  -8   1  191.98   39.70 
   2  -8   1  158.38   25.30 
  -2  -8  -1  194.18   31.30 
  -2  -8  -1  166.28   28.30 
   2  -8   1  144.89   37.00 
  -2  -8  -1  174.78   20.90 
  -2  -8  -1  178.58   27.20 
  -2  -8  -1  162.18   23.20 
   2  -8   1  199.78   28.10 
   2  -8   1  161.98   28.90 
  -2  -8  -1  175.08   26.60 
   2  -8   1  172.48   25.80 
   2  -8   1  150.48   28.10 
  -2  -8  -1  146.09   24.40 
   2   8   1  168.68   26.60 
   2   8   1  117.59   23.70 
  -2   8  -1  154.38   24.20 
   2   8   1  159.78   23.20 
  -2   8  -1  176.08   30.70 
  -2   8  -1  164.08   25.80 
  -2   8  -1  171.58   28.20 
  -2   8  -1  188.38   28.20 
  -2   8  -1  168.18   24.80 
  -2   8  -1  165.28   20.00 
   2   8   1  180.28   34.90 
   2   8   1  151.28   22.90 
  -2   8  -1  220.08   29.20 
  -2   8  -1  158.78   23.30 
   2   8   1  179.48   29.90 
   2   8   1  203.18   27.60 
   2   8   1  211.98   34.00 
   3  -8   1  332.67   37.40 
  -3  -8  -1  306.77   32.50 
  -3  -8  -1  345.67   34.80 
  -3  -8  -1  353.36   37.90 
   3  -8   1  308.77   33.10 
  -3  -8  -1  362.56   37.50 
  -3  -8  -1  381.56   39.80 
  -3  -8  -1  232.58   35.30 
   3  -8   1  229.48   38.50 
  -3  -8  -1  334.37   35.50 
   3  -8   1  241.98   46.30 
  -3  -8  -1  427.06   42.70 
   3  -8   1  314.87   50.99 
   3  -8   1  289.57   35.40 
   3  -8   1  339.27   43.40 
   3  -8   1  322.37   31.40 
  -3  -8  -1  273.57   28.70 
  -3  -8  -1  311.57   38.20 
   3  -8   1  308.07   38.00 
   3   8   1  312.07   36.60 
  -3   8  -1  328.97   34.70 
   3   8   1  301.77   39.40 
  -3   8  -1  275.67   34.90 
  -3   8  -1  319.87   37.20 
   3   8   1  331.17   35.00 
  -3   8  -1  359.26   24.70 
   3   8   1  347.57   34.30 
  -3   8  -1  371.76   38.10 
  -3   8  -1  340.37   41.90 
   3   8   1  328.17   44.40 
   3   8   1  398.56   51.19 
   3   8   1  369.46   35.70 
  -3   8  -1  327.47   35.80 
  -3   8  -1  323.37   35.60 
   3   8   1  324.57   40.30 
   3   8   1  318.57   49.40 
   4  -8   1   -3.40    8.40 
  -4  -8  -1    5.70    9.80 
  -4  -8  -1   -3.00    9.80 
   4  -8   1   13.80   13.30 
   4  -8   1   -2.40   12.70 
  -4  -8  -1    0.80    9.20 
  -4  -8  -1   -7.90    9.80 
   4  -8   1   -6.70   13.50 
  -4  -8  -1  -13.70    8.20 
  -4  -8  -1  -10.50    7.40 
   4  -8   1  -22.10   12.80 
   4  -8   1    0.10   10.50 
  -4  -8  -1    1.90    8.70 
  -4  -8  -1    7.50   12.90 
  -4  -8  -1   -3.10   11.90 
  -4  -8  -1    4.10   10.40 
   4  -8   1   -9.30   15.90 
   4   8   1   -3.40   13.20 
   4   8   1   13.30   15.50 
  -4   8  -1    4.20   10.00 
   4   8   1   -7.90    9.50 
  -4   8  -1    6.60   11.00 
  -4   8  -1  -15.70    9.40 
  -4   8  -1    7.40   10.80 
   4   8   1    0.90    9.80 
   4   8   1   25.70   19.60 
   4   8   1  -17.50   12.00 
  -4   8  -1  -12.80    8.40 
   4   8   1   -0.90    9.60 
  -4   8  -1   -2.50   10.80 
  -4   8  -1  -12.60    8.10 
   4   8   1  -16.00   11.80 
   4   8   1   12.70   13.10 
  -5  -8  -1  231.58   36.80 
  -5  -8  -1  281.17   32.80 
  -5  -8  -1  251.87   33.90 
   5  -8   1  133.69   45.10 
  -5  -8  -1  232.88   31.10 
  -5  -8  -1  183.68   28.70 
   5  -8   1  214.58   33.20 
  -5  -8  -1  330.27   38.50 
   5  -8   1  232.88   41.90 
  -5  -8  -1  279.97   32.70 
  -5  -8  -1  275.07   35.30 
   5  -8   1  245.08   42.40 
   5  -8   1  275.87   45.30 
  -5  -8  -1  244.48   36.20 
  -5  -8  -1  244.68   33.40 
   5  -8   1  219.18   49.90 
   5   8   1  187.88   34.70 
  -5   8  -1  277.97   35.00 
  -5   8  -1  313.47   43.60 
   5   8   1  244.58   38.70 
   5   8   1  198.08   35.70 
   5   8   1  222.28   33.90 
   5   8   1  303.37   50.09 
   5   8   1  230.98   49.40 
   5   8   1  258.57   30.70 
   5   8   1  272.57   34.90 
  -5   8  -1  258.27   35.30 
  -5   8  -1  223.58   33.50 
  -5   8  -1  260.77   31.80 
  -5   8  -1  230.98   30.70 
  -5   8  -1  263.57   31.50 
   5   8   1  304.97   43.80 
   6  -8   1   27.90   22.60 
  -6  -8  -1   41.40   17.40 
  -6  -8  -1   52.19   19.90 
  -6  -8  -1   15.50   19.90 
  -6  -8  -1   36.30   14.80 
  -6  -8  -1   27.20   15.50 
  -6  -8  -1   45.30   16.20 
  -6  -8  -1   42.30   16.00 
  -6  -8  -1   24.60   18.00 
  -6  -8  -1   33.70   19.80 
   6  -8   1   49.00   22.40 
   6  -8   1   58.89   31.20 
   6  -8   1   71.09   27.10 
  -6  -8  -1   24.60   15.00 
  -6  -8  -1   45.10   17.60 
   6  -8   1   60.29   37.70 
   6   8   1   35.20   20.80 
   6   8   1   56.59   21.70 
   6   8   1   37.60   22.30 
   6   8   1   35.20   21.60 
   6   8   1   22.00   23.40 
  -6   8  -1   33.70   17.30 
  -6   8  -1   50.89   17.10 
  -6   8  -1   45.40   17.60 
   6   8   1   42.50   20.50 
   6   8   1   44.50   19.30 
  -6   8  -1   57.79   22.80 
   6   8   1   48.40   19.80 
   6   8   1   67.79   28.40 
  -5  -9   1   64.59   20.50 
  -5  -9   1   38.70   18.60 
  -5  -9   1   68.69   21.40 
   5  -9  -1   74.09   27.10 
   5  -9  -1   56.59   34.80 
  -5  -9   1   85.89   23.60 
   5  -9  -1   62.79   22.20 
  -5  -9   1   74.09   19.90 
  -5  -9   1   76.39   22.20 
  -5  -9   1   71.39   21.40 
  -5  -9   1   51.69   22.90 
  -5  -9   1   56.79   20.10 
  -5  -9   1   53.69   18.70 
   5  -9  -1   27.70   26.40 
   5  -9  -1    5.40   31.20 
   5  -9  -1   28.60   24.20 
  -5   9   1   76.39   24.60 
   5   9  -1   37.20   22.30 
  -5   9   1   75.79   20.80 
  -5   9   1   47.80   22.10 
  -5   9   1   56.19   19.30 
  -5   9   1   69.89   22.40 
  -5   9   1   86.39   22.80 
   5   9  -1   43.70   20.70 
  -5   9   1   94.79   23.20 
   5   9  -1  105.19   32.80 
   5   9  -1   92.29   23.60 
  -5   9   1   68.69   20.80 
   5   9  -1   66.69   32.20 
   5   9  -1   50.59   21.00 
   5   9  -1   57.09   18.50 
   5   9  -1   84.59   35.50 
   5   9  -1   79.79   26.80 
   4  -9  -1 1364.46   86.49 
  -4  -9   1 1487.25   67.89 
  -4  -9   1 1344.47   78.89 
  -4  -9   1 1322.77   72.29 
  -4  -9   1 1335.97   70.49 
   4  -9  -1 1394.56   81.59 
   4  -9  -1 1022.00   68.89 
  -4  -9   1 1369.96   74.39 
   4  -9  -1 1063.09   94.09 
  -4  -9   1 1334.27   70.29 
  -4  -9   1 1289.27   68.99 
  -4  -9   1 1263.67   70.29 
  -4  -9   1 1386.86   82.99 
  -4  -9   1 1271.67   70.39 
   4  -9  -1 1176.28  115.29 
   4   9  -1 1315.97   68.99 
  -4   9   1 1378.66   73.99 
   4   9  -1 1484.45   97.39 
  -4   9   1 1271.57   78.79 
   4   9  -1 1360.76   76.69 
  -4   9   1 1369.86   70.99 
  -4   9   1 1357.86   72.09 
   4   9  -1 1172.48   78.29 
  -4   9   1 1413.76   74.19 
   4   9  -1 1278.77   97.59 
  -4   9   1 1423.86   71.69 
   4   9  -1 1350.06   86.29 
   4   9  -1 1447.36   72.79 
   4   9  -1 1274.07   79.09 
  -4   9   1 1418.56   78.39 
  -4   9   1 1383.76   75.29 
   3  -9  -1   94.99   28.50 
  -3  -9   1   29.40   18.30 
   3  -9  -1   81.59   20.60 
   3  -9  -1   46.00   17.80 
  -3  -9   1   70.79   20.70 
  -3  -9   1   58.69   18.50 
  -3  -9   1   54.79   16.40 
   3  -9  -1   76.09   26.20 
   3  -9  -1   93.39   34.50 
  -3  -9   1   80.89   24.80 
  -3  -9   1   56.39   18.30 
   3  -9  -1   64.39   22.30 
  -3  -9   1   83.79   22.00 
  -3  -9   1   42.50   19.20 
   3  -9  -1   42.20   18.70 
  -3  -9   1   58.59   16.10 
  -3  -9   1   27.50   13.60 
  -3   9   1   50.59   17.40 
  -3   9   1   92.49   25.30 
  -3   9   1   46.90   17.10 
   3   9  -1   51.19   27.60 
  -3   9   1   56.09   17.50 
   3   9  -1   35.60   18.70 
  -3   9   1   49.80   19.70 
  -3   9   1   62.69   21.40 
  -3   9   1   95.99   25.00 
   3   9  -1   28.50   21.60 
   3   9  -1   73.79   21.60 
   3   9  -1   79.89   24.00 
   3   9  -1   46.10   17.10 
   3   9  -1   33.40   15.20 
  -3   9   1   64.99   18.20 
   3   9  -1   90.79   29.00 
   3   9  -1   71.49   21.60 
   2  -9  -1  263.47   36.90 
   2  -9  -1  285.47   36.20 
   2  -9  -1  321.17   35.90 
   2  -9  -1  323.37   49.80 
   2  -9  -1  381.66   38.40 
  -2  -9   1  266.27   30.70 
   2  -9  -1  333.77   57.29 
   2  -9  -1  212.88   32.10 
  -2  -9   1  226.78   32.30 
  -2  -9   1  257.17   36.60 
  -2  -9   1  254.37   39.10 
   2  -9  -1  222.88   30.40 
  -2  -9   1  289.57   34.90 
   2  -9  -1  320.77   37.90 
   2  -9  -1  311.17   44.80 
  -2  -9   1  288.47   34.80 
  -2  -9   1  261.97   37.70 
  -2  -9   1  292.97   32.10 
  -2  -9   1  315.07   43.80 
  -2  -9   1  261.27   33.70 
  -2   9   1  274.87   37.30 
   2   9  -1  289.47   37.30 
   2   9  -1  280.07   45.10 
  -2   9   1  318.47   43.50 
  -2   9   1  379.46   45.80 
  -2   9   1  260.07   30.90 
   2   9  -1  323.67   42.30 
  -2   9   1  260.97   32.60 
  -2   9   1  327.17   41.30 
   2   9  -1  268.37   34.60 
  -2   9   1  315.07   38.40 
   2   9  -1  395.06   45.50 
  -2   9   1  270.47   35.30 
   2   9  -1  246.88   38.10 
   2   9  -1  235.08   42.40 
   2   9  -1  302.47   33.10 
   2   9  -1  309.57   33.60 
  -2   9   1  309.37   38.20 
  -1  -9   1    9.80   12.90 
   1  -9  -1  -31.40   14.70 
   1  -9  -1   11.00   12.10 
   1  -9  -1  -11.20    6.80 
   1  -9  -1  -10.60    9.60 
  -1  -9   1    0.80   13.70 
  -1  -9   1   10.40   11.40 
  -1  -9   1  -12.80    9.30 
  -1  -9   1   -7.10    8.20 
   1  -9  -1    1.20    9.60 
  -1  -9   1   10.90   15.50 
   1  -9  -1    9.90   15.00 
  -1  -9   1    9.80    9.30 
  -1  -9   1   -1.00    7.30 
   1  -9  -1    2.50   13.80 
   1  -9  -1   -8.60    9.30 
  -1  -9   1   19.90   12.40 
   1  -9  -1  -26.40   13.90 
  -1  -9   1    5.20   11.40 
  -1   9   1   -4.30   10.70 
  -1   9   1    3.10   10.30 
  -1   9   1   -0.90   10.20 
   1   9  -1   -0.60   11.30 
   1   9  -1   -4.50   10.10 
  -1   9   1    1.40   13.80 
  -1   9   1    1.10    7.50 
  -1   9   1   -3.30   12.10 
  -1   9   1    6.40   10.50 
  -1   9   1    1.70   10.60 
   1   9  -1   -3.40    8.30 
  -1   9   1    3.40   14.70 
   1   9  -1   -8.40   11.80 
   1   9  -1    5.90   11.20 
   1   9  -1   -7.70   11.40 
  -1   9   1    0.40   14.50 
   1   9  -1   -0.30   10.30 
  -1   9   1   10.30   11.60 
   1   9  -1   -4.30   14.50 
   1   9  -1  -13.10    7.20 
   0  -9  -1  581.74   62.39 
   0  -9   1  607.04   70.39 
   0  -9  -1  506.45   54.29 
   0  -9  -1  452.35   62.89 
   0  -9   1  525.15   53.39 
   0  -9  -1  551.74   43.30 
   0  -9   1  522.55   53.19 
   0  -9  -1  620.84   47.40 
   0  -9   1  536.05   62.59 
   0  -9   1  631.54   44.50 
   0  -9   1  590.34   46.50 
   0  -9   1  539.95   41.50 
   0  -9  -1  630.24   43.10 
   0  -9  -1  477.65   52.49 
   0  -9   1  536.15   42.50 
   0  -9  -1  659.03   44.60 
   0  -9   1  637.64   41.90 
   0  -9  -1  589.94   44.20 
   0   9   1  461.75   45.60 
   0   9   1  611.24   37.50 
   0   9  -1  513.75   56.59 
   0   9   1  674.03   43.90 
   0   9  -1  633.44   49.30 
   0   9   1  659.73   47.40 
   0   9   1  604.34   45.90 
   0   9  -1  633.84   47.20 
   0   9  -1  525.75   42.60 
   0   9  -1  553.44   42.60 
   0   9   1  542.65   55.99 
   0   9  -1  647.64   38.80 
   0   9  -1  620.84   42.90 
   0   9  -1  554.34   61.09 
   0   9  -1  566.84   53.59 
   0   9   1  514.95   54.39 
   0   9   1  712.73   52.19 
   0   9   1  597.04   61.59 
  -1  -9  -1   -3.10    9.40 
  -1  -9  -1   11.90   13.40 
  -1  -9  -1   -3.00   10.10 
   1  -9   1    0.60   11.40 
   1  -9   1    4.40   11.30 
  -1  -9  -1   13.40   13.10 
   1  -9   1   -1.70    9.20 
   1  -9   1  -12.40   11.10 
   1  -9   1   -0.50   18.90 
  -1  -9  -1  -12.70   13.00 
  -1  -9  -1   -5.20    7.60 
  -1  -9  -1   -7.30    7.10 
   1  -9   1    9.40   20.60 
  -1  -9  -1   -0.50    8.50 
   1  -9   1   -6.00    9.00 
   1  -9   1    1.40   10.20 
  -1  -9  -1    7.40   13.90 
  -1  -9  -1   -0.40    7.70 
  -1   9  -1   20.00   14.20 
   1   9   1    1.00   14.10 
  -1   9  -1   -3.50   14.50 
   1   9   1   -4.10    8.70 
   1   9   1   -1.90   10.70 
  -1   9  -1    4.70   12.30 
  -1   9  -1    0.10    9.00 
   1   9   1   -3.20    8.50 
   1   9   1   26.60   13.70 
  -1   9  -1   -9.10   11.70 
  -1   9  -1   19.20   11.80 
   1   9   1   -3.90   11.00 
  -1   9  -1    9.20   15.00 
   1   9   1    6.00   16.70 
   1   9   1   -0.30   12.70 
  -1   9  -1   -5.20    9.30 
   1   9   1   26.20   16.20 
  -1   9  -1    2.90    8.30 
   2  -9   1 1082.69   65.59 
   2  -9   1 1125.49   83.19 
  -2  -9  -1 1162.58   57.39 
  -2  -9  -1 1048.90   67.79 
  -2  -9  -1 1064.29   56.89 
  -2  -9  -1 1170.08   70.69 
   2  -9   1 1155.98   62.49 
   2  -9   1 1212.68   64.89 
  -2  -9  -1 1155.78   63.99 
   2  -9   1 1122.29   87.39 
   2  -9   1 1313.97   74.79 
   2  -9   1 1166.18   71.69 
  -2  -9  -1 1023.00   60.79 
  -2  -9  -1 1075.79   61.09 
  -2  -9  -1  944.61   66.79 
   2  -9   1 1468.75   70.99 
  -2  -9  -1 1132.69   63.99 
  -2  -9  -1 1093.59   64.59 
   2   9   1  996.10   65.99 
  -2   9  -1 1144.59   62.79 
  -2   9  -1 1104.09   64.99 
   2   9   1 1074.69   65.19 
   2   9   1 1077.79   67.09 
   2   9   1 1153.68   58.89 
  -2   9  -1 1079.89   62.79 
  -2   9  -1  953.30   62.79 
   2   9   1 1138.19   62.69 
   2   9   1 1129.99   59.69 
  -2   9  -1 1137.29   63.19 
  -2   9  -1 1043.20   55.89 
  -2   9  -1 1237.58   68.59 
   2   9   1 1045.50   76.59 
  -2   9  -1 1058.69   70.09 
  -2   9  -1 1126.09   57.89 
   2   9   1  961.10   67.09 
  -3  -9  -1   40.50   14.30 
  -3  -9  -1   47.30   19.10 
  -3  -9  -1   30.70   16.70 
  -3  -9  -1   28.40   14.00 
   3  -9   1   22.50   18.80 
   3  -9   1   31.60   13.40 
   3  -9   1   -3.50   20.40 
  -3  -9  -1   29.20   16.10 
   3  -9   1   16.00   14.90 
  -3  -9  -1   37.90   15.30 
  -3  -9  -1   23.10   17.00 
  -3  -9  -1   33.70   16.40 
  -3  -9  -1   47.50   16.90 
   3  -9   1   36.10   28.90 
   3  -9   1   42.90   18.10 
   3  -9   1   67.89   18.80 
   3  -9   1   29.70   15.20 
   3   9   1   31.70   15.10 
   3   9   1   -1.40   16.00 
   3   9   1   25.00   16.40 
   3   9   1   31.20   22.90 
  -3   9  -1   36.20   15.60 
   3   9   1   58.99   16.60 
   3   9   1   36.00   14.70 
   3   9   1   46.10   20.10 
  -3   9  -1   38.40   15.60 
  -3   9  -1   40.80   15.70 
  -3   9  -1   25.60   13.80 
   3   9   1   11.20   14.30 
   3   9   1    5.10   17.10 
  -3   9  -1   35.80   16.40 
  -3   9  -1   44.70   16.40 
  -3   9  -1   50.09   21.20 
  -3   9  -1   12.90   13.60 
   4  -9   1  454.85   47.70 
  -4  -9  -1  463.45   47.80 
   4  -9   1  344.57   49.70 
  -4  -9  -1  409.06   49.50 
   4  -9   1  362.56   50.09 
  -4  -9  -1  455.35   35.40 
  -4  -9  -1  455.95   45.10 
  -4  -9  -1  458.45   45.00 
   4  -9   1  394.86   41.60 
   4  -9   1  543.35   71.79 
  -4  -9  -1  416.56   45.70 
  -4  -9  -1  384.06   42.40 
  -4  -9  -1  477.55   46.00 
   4  -9   1  402.36   65.89 
  -4  -9  -1  394.16   43.00 
  -4  -9  -1  540.05   57.99 
   4   9   1  436.86   43.70 
   4   9   1  373.06   53.69 
   4   9   1  444.56   49.70 
  -4   9  -1  427.46   43.90 
  -4   9  -1  541.15   53.89 
   4   9   1  444.06   64.39 
   4   9   1  375.46   50.09 
  -4   9  -1  522.85   58.79 
  -4   9  -1  413.76   44.80 
   4   9   1  406.76   50.49 
  -4   9  -1  358.46   42.50 
   4   9   1  401.76   42.80 
  -4   9  -1  435.26   44.00 
   4   9   1  420.56   51.09 
  -4   9  -1  498.15   46.80 
  -4   9  -1  369.56   41.60 
   4   9   1  448.16   54.39 
  -5  -9  -1   17.20   13.70 
  -5  -9  -1    8.80   13.30 
  -5  -9  -1   -4.50   13.30 
  -5  -9  -1   17.30   12.60 
   5  -9   1    6.90   15.30 
  -5  -9  -1   -2.10   15.30 
  -5  -9  -1    4.50   10.50 
  -5  -9  -1    7.00   12.80 
   5  -9   1   29.00   21.90 
  -5  -9  -1  -10.60    9.60 
  -5  -9  -1   18.70   14.50 
  -5  -9  -1   -2.40   12.50 
   5  -9   1   17.60   21.30 
   5  -9   1  -28.70   19.30 
  -5  -9  -1    9.50   13.00 
   5  -9   1    1.50   17.50 
   5  -9   1   -2.40   23.50 
   5   9   1    2.20   12.20 
   5   9   1   -3.30   15.80 
   5   9   1    8.00   15.80 
  -5   9  -1   17.90   15.90 
   5   9   1  -13.30   13.40 
   5   9   1   -5.80   17.90 
  -5   9  -1    5.60   14.70 
   5   9   1   28.30   20.50 
   5   9   1   -2.20   12.60 
  -5   9  -1    8.70   12.70 
  -5   9  -1   23.00   19.70 
   5   9   1   20.60   19.20 
  -5   9  -1   -0.40   11.70 
  -5   9  -1   23.30   14.50 
  -5   9  -1  -14.30    9.60 
  -5   9  -1   12.20   12.20 
   5   9   1    6.10   21.40 
   3 -10  -1   83.09   38.20 
  -3 -10   1  138.29   26.20 
   3 -10  -1  136.19   29.70 
   3 -10  -1  140.79   32.30 
  -3 -10   1  146.29   27.80 
   3 -10  -1  127.29   28.40 
   3 -10  -1  159.28   37.90 
  -3 -10   1  167.88   36.40 
  -3 -10   1  191.58   38.00 
  -3 -10   1  135.29   28.00 
   3 -10  -1  165.78   30.70 
  -3 -10   1  166.28   31.50 
  -3 -10   1  139.49   24.50 
  -3 -10   1  115.39   25.90 
  -3 -10   1  200.28   32.40 
  -3 -10   1  120.59   31.10 
   3  10  -1  153.88   39.40 
  -3  10   1  166.48   36.10 
   3  10  -1  151.48   26.20 
   3  10  -1  123.39   30.80 
  -3  10   1  160.18   31.20 
  -3  10   1  121.09   28.20 
   3  10  -1  139.09   27.20 
  -3  10   1  126.99   30.30 
  -3  10   1  154.68   31.50 
   3  10  -1  154.08   32.50 
   3  10  -1   59.39   24.80 
  -3  10   1  152.08   30.50 
   3  10  -1  121.39   37.90 
  -3  10   1  166.08   29.20 
   3  10  -1  114.89   29.00 
  -3  10   1  138.19   28.30 
  -2 -10   1    5.90   10.50 
   2 -10  -1   -0.30   13.30 
   2 -10  -1   -8.00   13.70 
   2 -10  -1    6.80   12.90 
  -2 -10   1   -4.40   12.60 
  -2 -10   1    0.40   18.70 
  -2 -10   1    0.50   15.50 
   2 -10  -1    1.90   11.60 
   2 -10  -1    7.10   25.70 
   2 -10  -1    4.40   14.10 
  -2 -10   1    4.30   11.80 
  -2 -10   1   14.40   14.30 
  -2 -10   1   -1.90    9.40 
  -2 -10   1   -3.70   12.20 
  -2 -10   1   -4.30   10.80 
   2 -10  -1   19.10   15.00 
  -2 -10   1    7.70   11.60 
  -2  10   1   -0.50   15.60 
  -2  10   1   -5.90    8.90 
   2  10  -1   13.30   11.70 
  -2  10   1   -9.20   10.90 
   2  10  -1  -11.30   13.80 
   2  10  -1    5.00   12.90 
   2  10  -1   -4.60   15.10 
  -2  10   1   -9.00   14.50 
  -2  10   1   21.50   17.30 
   2  10  -1   -1.00   22.20 
  -2  10   1  -12.50   10.10 
  -2  10   1   -3.70   11.40 
  -2  10   1   18.10   18.10 
   2  10  -1    0.70   15.20 
  -2  10   1    1.40   13.90 
   2  10  -1   11.40   14.70 
   2  10  -1   -1.10   10.90 
   2  10  -1   -1.90   15.60 
  -1 -10   1   45.00   20.40 
   1 -10  -1   83.89   21.80 
  -1 -10   1   74.39   26.90 
   1 -10  -1   70.49   23.50 
  -1 -10   1   68.79   21.10 
   1 -10  -1   69.49   20.90 
  -1 -10   1   60.09   19.00 
  -1 -10   1   83.99   25.70 
   1 -10  -1   49.30   32.30 
   1 -10  -1   85.19   21.40 
  -1 -10   1   58.49   21.20 
  -1 -10   1   54.39   18.50 
   1 -10  -1   80.29   26.10 
  -1 -10   1   96.89   23.30 
   1 -10  -1   44.20   46.70 
   1 -10  -1   71.29   26.90 
   1 -10  -1   36.10   16.60 
   1  10  -1   75.19   19.30 
  -1  10   1   96.09   24.90 
   1  10  -1   86.29   23.70 
   1  10  -1   52.39   17.60 
   1  10  -1  107.89   32.10 
   1  10  -1  148.69   30.20 
   1  10  -1   64.29   19.80 
  -1  10   1   67.69   20.60 
  -1  10   1   42.00   20.10 
  -1  10   1   53.09   20.80 
  -1  10   1   63.79   27.90 
   1  10  -1   46.10   20.80 
   1  10  -1   81.99   25.70 
   1  10  -1   51.89   24.90 
  -1  10   1  107.59   29.20 
  -1  10   1   43.90   18.30 
  -1  10   1   76.19   25.20 
   0 -10   1   12.70   15.30 
   0 -10   1    4.10   16.40 
   0 -10  -1   14.20   22.10 
   0 -10  -1    7.50   13.00 
   0 -10   1   15.50   16.00 
   0 -10  -1   25.10   15.60 
   0 -10   1   41.80   24.80 
   0 -10  -1    4.60   10.80 
   0 -10  -1   12.10   21.50 
   0 -10   1   22.50   17.50 
   0 -10   1   11.40   11.50 
   0 -10  -1   36.60   16.20 
   0 -10  -1   21.90   18.90 
   0 -10   1   21.80   22.90 
   0 -10  -1   14.70   12.60 
   0 -10   1    6.00   13.80 
   0 -10  -1   41.40   22.40 
   0 -10   1   -0.40   11.10 
   0  10   1   22.60   17.80 
   0  10  -1   19.10   18.80 
   0  10   1    4.70   15.20 
   0  10  -1    3.60   13.50 
   0  10  -1   16.60   18.30 
   0  10   1   -6.00   14.20 
   0  10  -1   -4.30   14.80 
   0  10   1   14.30   15.20 
   0  10   1    9.60   11.90 
   0  10   1   26.30   17.30 
   0  10   1   19.60   17.10 
   0  10  -1    4.30   13.90 
   0  10   1   32.00   16.70 
   0  10  -1   22.00   13.10 
   0  10  -1    8.50   12.60 
   0  10  -1    9.20   12.50 
   0  10  -1   -1.30   10.40 
  -1 -10  -1  542.35   51.19 
   1 -10   1  446.66   49.00 
  -1 -10  -1  471.25   58.19 
  -1 -10  -1  482.45   49.40 
   1 -10   1  391.46   61.69 
  -1 -10  -1  534.15   53.79 
  -1 -10  -1  411.56   47.00 
  -1 -10  -1  412.06   50.69 
   1 -10   1  467.95   66.39 
  -1 -10  -1  446.46   52.49 
  -1 -10  -1  478.75   48.80 
   1 -10   1  462.25   51.29 
   1 -10   1  450.35   49.60 
   1 -10   1  445.66   46.40 
   1 -10   1  629.54   63.19 
   1  10   1  494.25   36.80 
  -1  10  -1  393.06   54.79 
   1  10   1  485.95   52.69 
  -1  10  -1  464.75   48.00 
   1  10   1  556.44   42.40 
  -1  10  -1  445.26   54.69 
  -1  10  -1  450.55   52.49 
   1  10   1  492.35   63.09 
   1  10   1  522.05   51.59 
   1  10   1  476.35   57.39 
   1  10   1  459.95   52.39 
   1  10   1  415.86   49.30 
  -1  10  -1  485.55   50.89 
   1  10   1  416.36   52.09 
  -1  10  -1  472.55   56.39 
  -1  10  -1  462.85   47.30 
  -1  10  -1  473.05   52.59 
  -1  10  -1  420.26   46.70 
  -2 -10  -1   33.70   21.20 
  -2 -10  -1   23.30   17.70 
  -2 -10  -1   25.40   16.60 
   2 -10   1   24.80   28.30 
   2 -10   1   11.50   15.00 
  -2 -10  -1    9.80   13.40 
  -2 -10  -1   12.80   18.60 
   2 -10   1   -6.00   10.60 
  -2 -10  -1    7.80   13.50 
  -2 -10  -1   37.10   13.90 
   2 -10   1   25.30   28.60 
  -2 -10  -1    8.50   14.40 
   2 -10   1   24.30   18.10 
  -2 -10  -1   11.80   13.50 
   2 -10   1    2.40   12.90 
   2 -10   1    3.60   12.30 
  -2  10  -1   34.30   19.20 
   2  10   1   -0.50   13.40 
  -2  10  -1   23.20   16.40 
   2  10   1   23.90   19.90 
  -2  10  -1   -2.00   12.10 
   2  10   1   39.00   19.90 
  -2  10  -1   18.40   16.20 
   2  10   1    1.40   11.40 
  -2  10  -1   14.80   14.30 
   2  10   1   23.20   20.10 
   2  10   1    0.10   15.10 
   2  10   1   18.10   20.90 
  -2  10  -1   -7.70   16.90 
  -2  10  -1   54.99   20.00 
   2  10   1   27.60   14.80 
  -2  10  -1   12.00   15.40 
  -3 -10  -1  100.09   29.50 
   3 -10   1  116.49   28.90 
  -3 -10  -1  134.99   29.10 
  -3 -10  -1  120.59   26.10 
   3 -10   1   94.39   25.30 
  -3 -10  -1  119.79   26.80 
  -3 -10  -1   87.49   23.70 
  -3 -10  -1  137.79   27.40 
   3 -10   1   98.99   29.10 
   3 -10   1  103.19   24.50 
   3 -10   1   92.49   37.60 
  -3 -10  -1   80.69   26.90 
   3 -10   1   89.19   25.60 
  -3 -10  -1  151.28   34.60 
  -3 -10  -1  103.09   22.90 
   3  10   1  121.19   35.30 
  -3  10  -1   72.79   26.60 
  -3  10  -1  116.59   26.00 
  -3  10  -1   85.19   23.80 
   3  10   1  101.09   27.90 
  -3  10  -1  129.79   29.00 
   3  10   1   90.49   23.00 
   3  10   1  127.29   31.20 
   3  10   1   68.39   25.70 
   3  10   1   94.09   26.50 
  -3  10  -1  142.49   28.30 
  -3  10  -1  111.09   25.70 
  -3  10  -1  124.99   25.40 
   3  10   1  133.99   26.30 
   3  10   1   61.89   25.80 
   3  10   1  173.18   39.20 
 -10   0   2  539.95   63.99 
 -10   0   2  519.75   54.89 
  10   0  -2  518.75   50.49 
  10   0  -2  595.94   67.39 
 -10   0   2  532.85   43.50 
 -10   0   2  551.04   43.40 
 -10   0   2  549.54   55.99 
 -10   0   2  644.84   69.49 
  10   0  -2  486.55   63.59 
  10   0  -2  505.75   59.79 
 -10   0   2  526.25   44.00 
 -10   0   2  497.75   63.49 
 -10   0   2  632.54   45.60 
 -10   0   2  574.44   60.59 
 -10   0   2  644.44   48.40 
   9   0  -2   13.40   12.90 
  -9   0   2  -13.30    9.20 
  -9   0   2  -13.00    7.90 
  -9   0   2   -3.70   12.30 
  -9   0   2    3.80    9.10 
  -9   0   2   -5.70   12.10 
  -9   0   2   -5.80    9.00 
  -9   0   2    3.70   10.60 
   9   0  -2    7.00   11.40 
  -9   0   2   -1.00    8.40 
  -9   0   2  -17.70    7.40 
   9   0  -2  -11.10   13.10 
  -9   0   2    6.30   12.60 
  -9   0   2  -11.60    6.60 
   9   0  -2   -9.40   11.10 
   9   0  -2   -7.10   14.20 
  -9   0   2   -4.80   11.90 
  -9   0   2   -9.60   13.20 
  -9   0   2    1.10   10.10 
   9   0  -2   -3.80   13.00 
   9   0  -2    6.90   17.20 
  -9   0   2   -3.50   12.00 
  -8   0   2 1480.85   61.49 
  -8   0   2 1346.77   79.89 
   8   0  -2 1286.17   83.19 
  -8   0   2 1330.17   66.69 
   8   0  -2 1229.48   77.19 
  -8   0   2 1338.07   76.39 
   8   0  -2 1179.38   75.39 
  -8   0   2 1349.16   64.59 
  -8   0   2 1394.26   78.59 
  -8   0   2 1324.67   63.59 
   8   0  -2 1314.37   78.69 
   8   0  -2 1301.87   63.79 
   8   0  -2 1358.66   73.49 
   8   0  -2 1296.77   67.29 
  -8   0   2 1367.36   55.69 
  -8   0   2 1349.27   64.89 
  -8   0   2 1340.67   60.59 
  -8   0   2 1256.37   62.39 
  -8   0   2 1344.17   73.69 
  -8   0   2 1410.36   61.39 
   8   0  -2 1320.07   57.29 
   8   0  -2 1363.66   76.09 
   8   0  -2 1350.26   81.49 
  -8   0   2 1320.57   66.79 
  -8   0   2 1327.37   66.79 
  -8   0   2 1357.86   63.19 
  -8   0   2 1401.96   69.69 
  -7   0   2    4.50    5.20 
  -7   0   2    5.10    5.90 
   7   0  -2  -19.80    6.30 
  -7   0   2    2.40    6.90 
   7   0  -2   -4.90    7.60 
   7   0  -2    0.20   10.40 
  -7   0   2    1.40    7.60 
  -7   0   2   -0.40    6.00 
   7   0  -2    3.00    9.40 
  -7   0   2   -5.60    5.60 
  -7   0   2   10.00    9.10 
   7   0  -2   -7.00   11.40 
  -7   0   2    5.20    7.60 
  -7   0   2   -1.90    5.10 
  -7   0   2    1.30    7.00 
   7   0  -2   -4.50   12.20 
  -7   0   2   -3.80    6.70 
  -7   0   2   -6.50    6.90 
   7   0  -2   -7.70   10.00 
  -7   0   2   -1.70    8.50 
   7   0  -2    5.30    6.10 
   7   0  -2  -10.80    8.50 
  -7   0   2    5.80   11.80 
   7   0  -2    3.70    9.00 
   7   0  -2   -2.50    4.90 
  -7   0   2   -9.90    5.80 
  -7   0   2    2.60    4.90 
  -7   0   2   -4.00    6.10 
  -7   0   2    0.30   10.00 
   7   0  -2    6.00    7.90 
   7   0  -2  -10.30   10.40 
   6   0  -2  906.11   54.59 
  -6   0   2  904.41   34.70 
  -6   0   2  902.51   44.00 
  -6   0   2  880.41   37.30 
  -6   0   2  901.31   34.70 
  -6   0   2  909.01   45.80 
  -6   0   2  894.81   38.90 
  -6   0   2  940.81   37.90 
   6   0  -2  925.91   36.50 
   6   0  -2  776.02   48.50 
   6   0  -2  949.40   51.19 
   6   0  -2  916.31   47.70 
  -6   0   2  946.71   44.80 
   6   0  -2  946.61   44.70 
  -6   0   2  910.11   46.40 
   6   0  -2  963.10   40.40 
  -6   0   2  923.61   32.70 
   6   0  -2  853.01   53.49 
  -6   0   2  911.21   32.40 
  -6   0   2  894.71   46.50 
  -6   0   2 1006.80   44.90 
   6   0  -2  927.41   57.99 
  -6   0   2  947.41   42.10 
  -6   0   2  895.01   44.60 
   6   0  -2  941.21   47.80 
  -6   0   2  935.21   43.60 
   6   0  -2  982.10   50.89 
  -6   0   2  925.01   47.20 
  -6   0   2  954.30   41.10 
   6   0  -2  890.71   54.09 
  -6   0   2  954.20   54.39 
   6   0  -2  905.41   53.69 
  -6   0   2  873.21   37.80 
  -6   0   2  919.91   34.10 
   5   0  -2   -0.30    6.50 
  -5   0   2    6.30    6.30 
  -5   0   2    1.70    1.80 
   5   0  -2    0.30    7.20 
  -5   0   2   -2.10    4.00 
   5   0  -2    0.30    7.30 
  -5   0   2   -8.20    3.90 
  -5   0   2    0.30    3.60 
   5   0  -2    9.10    5.70 
  -5   0   2   -4.10    3.80 
   5   0  -2   10.90    8.20 
  -5   0   2   -2.00    4.60 
  -5   0   2    1.20    3.90 
   5   0  -2    5.60    5.40 
  -5   0   2    2.40    1.50 
  -5   0   2    5.50    5.00 
   5   0  -2   -9.10    3.20 
   5   0  -2    6.00    7.30 
  -5   0   2    1.80    3.80 
  -5   0   2   11.00    5.70 
   5   0  -2   -1.20    5.90 
   5   0  -2    8.00    9.00 
   5   0  -2   -5.00    3.40 
  -5   0   2   -0.40    2.80 
  -5   0   2    3.70    3.90 
  -5   0   2   -0.60    3.40 
  -5   0   2    2.20    5.40 
  -5   0   2    0.00    2.80 
  -5   0   2    1.10    4.90 
  -5   0   2   -3.10    2.80 
  -5   0   2   -4.40    3.40 
   5   0  -2   -5.60    6.80 
  -5   0   2   -1.90    1.60 
   5   0  -2   -4.60    6.40 
  -5   0   2   -1.20    4.30 
   5   0  -2   -0.20    3.40 
   5   0  -2   -2.10    8.20 
   5   0  -2   -3.90    5.60 
  -5   0   2   -3.70    2.40 
  -5   0   2   -6.40    2.90 
  -5   0   2    4.10    6.90 
  -5   0   2   -1.90    4.40 
   4   0  -2 5788.52  194.38 
   4   0  -2 6093.19  186.58 
  -4   0   2 5894.91  178.58 
   4   0  -2 6077.79  180.78 
   4   0  -2 5856.71  176.88 
  -4   0   2 6025.10  180.58 
   4   0  -2 5798.32  189.98 
  -4   0   2 5957.10  180.18 
   4   0  -2 5973.40  190.48 
   4   0  -2 5754.62  195.48 
   4   0  -2 5975.90  194.68 
   4   0  -2 6091.19  189.88 
  -4   0   2 5968.50  177.58 
   4   0  -2 6001.10  183.88 
  -4   0   2 5888.31  183.98 
  -4   0   2 6012.70  175.78 
  -4   0   2 5940.61  182.98 
   4   0  -2 6056.89  183.38 
   4   0  -2 6080.69  181.08 
  -4   0   2 6105.99  185.78 
  -4   0   2 6014.30  180.08 
  -4   0   2 5816.02  180.78 
  -4   0   2 5859.81  181.68 
  -4   0   2 5979.90  185.08 
   4   0  -2 5590.54  191.98 
  -4   0   2 6013.10  177.48 
  -4   0   2 6128.69  177.78 
   4   0  -2 5859.71  188.68 
  -4   0   2 5915.41  179.28 
  -4   0   2 6039.50  185.78 
  -4   0   2 5957.40  184.98 
   4   0  -2 5944.71  179.68 
  -4   0   2 6107.49  184.28 
   4   0  -2 6041.10  188.98 
  -4   0   2 6033.60  183.38 
   4   0  -2 5759.52  193.18 
  -4   0   2 5910.31  179.78 
  -4   0   2 6061.69  182.18 
  -4   0   2 5990.00  174.58 
  -4   0   2 6025.20  186.18 
  -4   0   2 5928.41  179.88 
  -4   0   2 6014.90  183.18 
   3   0  -2    1.00    4.20 
  -3   0   2   -4.70    2.50 
   3   0  -2    9.10    6.10 
  -3   0   2    8.10    3.50 
  -3   0   2    2.20    3.00 
   3   0  -2   12.30    6.10 
  -3   0   2    2.10    3.20 
  -3   0   2    2.10    3.90 
   3   0  -2    3.80    4.80 
  -3   0   2    4.80    2.30 
   3   0  -2   13.20    4.40 
  -3   0   2    3.60    2.00 
  -3   0   2    4.80    3.10 
  -3   0   2    1.40    2.30 
   3   0  -2    1.70    5.30 
  -3   0   2   11.50    3.40 
   3   0  -2    9.30    4.00 
  -3   0   2    1.10    2.70 
   3   0  -2    7.90    4.80 
   3   0  -2   -0.50    1.90 
  -3   0   2   11.10    5.20 
  -3   0   2    5.70    5.70 
  -3   0   2    2.50    3.10 
   3   0  -2    9.10    5.80 
  -3   0   2    4.70    4.20 
  -3   0   2    4.80    2.60 
   3   0  -2    6.60    4.40 
  -3   0   2    1.90    2.30 
  -3   0   2    8.80    4.60 
   3   0  -2    6.20    2.80 
   3   0  -2   -0.20    2.70 
  -3   0   2    7.90    4.20 
  -3   0   2    1.50    2.40 
  -3   0   2    3.60    2.70 
  -3   0   2    7.00    3.70 
   3   0  -2    3.70    3.00 
  -3   0   2   10.30    3.70 
  -3   0   2    4.20    3.80 
   3   0  -2   10.50    6.50 
   3   0  -2   12.20    6.40 
  -3   0   2    0.20    3.80 
   3   0  -2    6.80    5.40 
   3   0  -2    2.10    2.30 
  -3   0   2    7.60    3.20 
   3   0  -2    8.00    3.80 
   3   0  -2    4.90    3.90 
   3   0  -2    7.10    2.60 
  -3   0   2    3.00    3.30 
  -2   0   2 6979.50  212.68 
   2   0  -2 7285.07  214.08 
  -2   0   2 7128.39  218.58 
  -2   0   2 7125.59  211.58 
  -2   0   2 7316.67  220.48 
   2   0  -2 7163.78  211.08 
   2   0  -2 7340.27  212.88 
  -2   0   2 7113.49  218.38 
  -2   0   2 7227.18  214.18 
  -2   0   2 7432.66  214.28 
  -2   0   2 7490.55  218.78 
   2   0  -2 7328.07  213.88 
  -2   0   2 7259.27  215.28 
   2   0  -2 7188.38  220.38 
   2   0  -2 7387.06  215.88 
  -2   0   2 7292.27  213.28 
  -2   0   2 7042.30  215.68 
   2   0  -2 7436.66  219.18 
  -2   0   2 7267.97  216.78 
  -2   0   2 7192.28  212.88 
  -2   0   2 7301.37  219.08 
  -2   0   2 7098.99  219.38 
   2   0  -2 7161.38  214.28 
  -2   0   2 7175.58  212.78 
  -2   0   2 7545.34  217.98 
   2   0  -2 7273.37  215.48 
   2   0  -2 7182.68  215.18 
  -2   0   2 7601.04  212.68 
   2   0  -2 7300.57  219.08 
   2   0  -2 7458.75  214.18 
   2   0  -2 7538.45  212.98 
   2   0  -2 7363.36  218.78 
  -2   0   2 7433.26  214.08 
  -2   0   2 7281.27  213.78 
  -2   0   2 7796.12  218.68 
  -2   0   2 7240.38  211.48 
  -2   0   2 7353.36  213.18 
  -2   0   2 7055.19  213.88 
   2   0  -2 6972.80  218.88 
   2   0  -2 7208.28  213.48 
   2   0  -2 7189.48  219.38 
   2   0  -2 6934.61  219.98 
  -2   0   2 7559.74  214.58 
  -2   0   2 7185.48  215.58 
   2   0  -2 7266.57  210.28 
   2   0  -2 7531.05  216.58 
   2   0  -2 7141.89  218.38 
  -1   0   2   -0.30    1.60 
   1   0  -2   -0.20    1.60 
  -1   0   2   -1.60    2.00 
  -1   0   2    1.70    2.10 
  -1   0   2    4.10    1.80 
  -1   0   2    3.50    1.00 
   1   0  -2    3.20    2.40 
  -1   0   2    0.60    1.60 
  -1   0   2    1.80    1.20 
  -1   0   2    1.90    2.50 
  -1   0   2    3.20    2.00 
  -1   0   2    2.70    2.60 
  -1   0   2   -2.60    1.70 
  -1   0   2    1.90    1.10 
  -1   0   2    0.50    1.30 
  -1   0   2    5.80    2.50 
   1   0  -2   -0.90    1.40 
   1   0  -2    1.20    1.90 
  -1   0   2    1.40    1.70 
  -1   0   2    6.40    2.50 
   1   0  -2   -1.60    1.60 
   1   0  -2    4.70    2.50 
   1   0  -2   -1.80    1.20 
  -1   0   2    0.30    1.40 
  -1   0   2    1.20    2.40 
  -1   0   2    4.00    2.00 
   1   0  -2    0.80    1.40 
  -1   0   2    0.30    2.00 
   1   0  -2    0.40    1.20 
  -1   0   2    4.90    2.40 
   1   0  -2    1.10    2.10 
   1   0  -2    0.60    1.40 
  -1   0   2    5.00    2.90 
  -1   0   2    0.60    1.00 
   1   0  -2    0.00    1.10 
   1   0  -2    0.90    2.60 
   1   0  -2    0.40    2.60 
  -1   0   2   -1.00    1.80 
  -1   0   2    4.00    2.40 
  -1   0   2    1.20    1.50 
   1   0  -2   -0.50    0.80 
  -1   0   2    1.20    1.70 
  -1   0   2    5.50    2.70 
  -1   0  -2    2.00    2.60 
  -1   0  -2    2.40    1.80 
   1   0   2   -1.60    2.50 
  -1   0  -2   -1.20    2.30 
  -1   0  -2    5.80    3.40 
   1   0   2    1.90    1.70 
   1   0   2   -2.30    2.70 
  -1   0  -2    1.50    2.30 
  -1   0  -2    2.80    2.90 
   1   0   2    3.30    3.00 
  -1   0  -2   -0.20    2.30 
  -1   0  -2    1.10    2.10 
  -1   0  -2    6.80    3.20 
   1   0   2    2.00    2.90 
   1   0   2    3.60    2.60 
   1   0   2    5.80    2.90 
   1   0   2   -0.70    3.00 
   1   0   2    6.70    3.50 
  -1   0  -2   -0.80    2.50 
  -1   0  -2    1.70    2.80 
   1   0   2   -1.70    1.40 
  -1   0  -2   -1.20    2.30 
  -1   0  -2    3.50    3.20 
  -1   0  -2    4.20    2.20 
   1   0   2    3.20    2.80 
   1   0   2   -1.60    2.20 
  -1   0  -2    0.20    2.70 
   1   0   2   -0.20    2.80 
  -1   0  -2    1.70    2.70 
  -1   0  -2    2.00    2.80 
  -1   0  -2    1.20    2.00 
  -1   0  -2    1.20    2.40 
   1   0   2    8.00    3.90 
  -1   0  -2    1.90    2.50 
   1   0   2    2.60    3.00 
  -1   0  -2    1.10    3.00 
   1   0   2    0.70    2.50 
  -1   0  -2   -1.10    2.30 
  -1   0  -2   -1.50    1.80 
  -1   0  -2   -0.20    2.00 
   1   0   2    2.10    1.90 
   1   0   2    4.50    3.10 
   1   0   2    2.70    2.60 
   1   0   2    1.10    1.50 
  -1   0  -2   -0.80    2.10 
  -1   0  -2    2.70    2.90 
   1   0   2    4.40    3.40 
  -1   0  -2    2.90    2.20 
   1   0   2    4.20    2.90 
   1   0   2   -0.90    1.90 
  -1   0  -2   -0.50    1.30 
   1   0   2    1.70    2.50 
   1   0   2    5.80    3.00 
  -1   0  -2    1.90    2.90 
  -2   0  -2  168.38   12.20 
   2   0   2  112.99    7.40 
  -2   0  -2  119.39    5.10 
  -2   0  -2  126.89    9.70 
  -2   0  -2  107.09   11.30 
  -2   0  -2  114.79    7.40 
  -2   0  -2  129.49    8.80 
   2   0   2  126.79    5.00 
   2   0   2  114.59   12.80 
  -2   0  -2  110.99   12.70 
  -2   0  -2  134.69    8.00 
   2   0   2  125.09    9.30 
  -2   0  -2  128.59   10.50 
  -2   0  -2  123.29    8.70 
   2   0   2  120.39    5.90 
   2   0   2  120.29    9.30 
  -2   0  -2  132.29    9.20 
   2   0   2  107.39   13.30 
  -2   0  -2  120.89    5.20 
   2   0   2  144.99   10.80 
   2   0   2  127.19   12.60 
  -2   0  -2  117.39   12.40 
  -2   0  -2  118.59    6.00 
   2   0   2  127.89    8.90 
  -2   0  -2  115.59   13.10 
   2   0   2  115.79   12.50 
  -2   0  -2  153.78   14.90 
   2   0   2  120.99   13.40 
   2   0   2  152.58   10.90 
  -2   0  -2  130.69   13.70 
  -2   0  -2  122.99   10.20 
   2   0   2  127.49    7.20 
  -2   0  -2  145.89   12.00 
   2   0   2  118.19    9.00 
   2   0   2  146.09   13.80 
  -2   0  -2  120.49    6.30 
  -2   0  -2  107.49    6.10 
  -2   0  -2  124.29   11.50 
   2   0   2  118.79    5.80 
   2   0   2  129.39   10.30 
  -2   0  -2  142.89   11.10 
   2   0   2  144.49   14.70 
  -2   0  -2  100.59   12.10 
  -2   0  -2  144.59   13.50 
  -2   0  -2  109.09   11.90 
   2   0   2  130.39   13.50 
   2   0   2  117.79    6.20 
  -2   0  -2  128.89    7.20 
  -2   0  -2  105.39   12.10 
   2   0   2  121.39    8.80 
   2   0   2  123.09    7.90 
   2   0   2  117.49   13.40 
  -2   0  -2  124.09    9.80 
   2   0   2  122.19   12.90 
  -2   0  -2  124.39   12.90 
   2   0   2  118.09    9.60 
  -2   0  -2  122.49    9.20 
   2   0   2  101.99   12.40 
  -2   0  -2  131.39    8.40 
   3   0   2   -5.40    4.70 
   3   0   2    0.50    3.10 
  -3   0  -2   -0.50    1.90 
   3   0   2    3.90    3.60 
   3   0   2   -1.10    4.00 
   3   0   2    2.80    4.60 
   3   0   2    4.00    3.70 
  -3   0  -2    0.20    3.10 
  -3   0  -2   -9.30    3.80 
  -3   0  -2    4.80    5.10 
  -3   0  -2    1.40    1.80 
  -3   0  -2    2.10    4.40 
   3   0   2   -1.50    5.20 
   3   0   2   -5.80    4.10 
  -3   0  -2    2.00    2.20 
   3   0   2    1.50    1.40 
   3   0   2    0.40    2.40 
  -3   0  -2   -1.60    4.30 
   3   0   2    1.10    5.50 
   3   0   2   -0.40    2.20 
  -3   0  -2   -1.80    2.20 
  -3   0  -2    1.90    4.30 
  -3   0  -2    1.20    1.70 
  -3   0  -2   -1.90    4.60 
   3   0   2    0.20    2.90 
  -3   0  -2   -1.20    3.10 
   3   0   2   10.00    7.10 
   3   0   2    1.10    1.90 
  -3   0  -2   -1.00    4.30 
   3   0   2   -3.10    3.40 
  -3   0  -2   -1.70    3.20 
   3   0   2    5.00    4.30 
  -3   0  -2    3.20    4.40 
  -3   0  -2    1.00    3.60 
   3   0   2    5.50    5.90 
  -3   0  -2   -0.70    1.80 
   3   0   2    4.90    3.80 
   3   0   2   -6.50    4.20 
  -3   0  -2   -0.70    2.60 
   3   0   2    8.60    5.90 
  -3   0  -2    5.00    5.70 
  -3   0  -2    6.10    3.60 
  -3   0  -2    3.00    3.50 
  -3   0  -2    1.40    1.80 
  -3   0  -2   -0.60    3.00
[truncated: 3,240,588 more chars]
