# Supplementary material
Source: MDPI journal article supplement (https://www.mdpi.com/2073-4352/13/7/1043)
Supplement: s1 [file s1 › 13 Yb Ha2019_57_0m_a.cif]

 
data_Ha2019_57_0m_a 
  
_audit_creation_method            'SHELXL-2014/7' 
_shelx_SHELXL_version_number      '2014/7' 
_chemical_name_systematic         ? 
_chemical_name_common             ? 
_chemical_melting_point           ? 
_chemical_formula_moiety          ? 
_chemical_formula_sum 
 'C4 H12 Cl O7 Yb' 
_chemical_formula_weight          380.63 
  
loop_ 
 _atom_type_symbol 
 _atom_type_description 
 _atom_type_scat_dispersion_real 
 _atom_type_scat_dispersion_imag 
 _atom_type_scat_source 
 'C'  'C'   0.0033   0.0016 
 'International Tables Vol C Tables 4.2.6.8 and 6.1.1.4' 
 'H'  'H'   0.0000   0.0000 
 'International Tables Vol C Tables 4.2.6.8 and 6.1.1.4' 
 'O'  'O'   0.0106   0.0060 
 'International Tables Vol C Tables 4.2.6.8 and 6.1.1.4' 
 'Cl'  'Cl'   0.1484   0.1585 
 'International Tables Vol C Tables 4.2.6.8 and 6.1.1.4' 
 'Yb'  'Yb'  -0.3850   5.5486 
 'International Tables Vol C Tables 4.2.6.8 and 6.1.1.4' 
  
_space_group_crystal_system       monoclinic 
_space_group_IT_number            14 
_space_group_name_H-M_alt         'P 21/n' 
_space_group_name_Hall            '-P 2yn' 
  
_shelx_space_group_comment 
; 
The symmetry employed for this shelxl refinement is uniquely defined 
by the following loop, which should always be used as a source of 
symmetry information in preference to the above space-group names. 
They are only intended as comments. 
; 
  
loop_ 
 _space_group_symop_operation_xyz 
 'x, y, z' 
 '-x+1/2, y+1/2, -z+1/2' 
 '-x, -y, -z' 
 'x-1/2, -y-1/2, z-1/2' 
  
_cell_length_a                    7.7710(3) 
_cell_length_b                    7.8224(3) 
_cell_length_c                    17.1055(8) 
_cell_angle_alpha                 90 
_cell_angle_beta                  97.422(2) 
_cell_angle_gamma                 90 
_cell_volume                      1031.09(7) 
_cell_formula_units_Z             4 
_cell_measurement_temperature     100(2) 
_cell_measurement_reflns_used     9135 
_cell_measurement_theta_min       2.40 
_cell_measurement_theta_max       24.47 
  
_exptl_crystal_description        needle 
_exptl_crystal_colour             colourless 
_exptl_crystal_density_meas       ? 
_exptl_crystal_density_method     ? 
_exptl_crystal_density_diffrn     2.452 
_exptl_crystal_F_000              716 
_exptl_transmission_factor_min    ? 
_exptl_transmission_factor_max    ? 
_exptl_crystal_size_max           0.316 
_exptl_crystal_size_mid           0.092 
_exptl_crystal_size_min           0.048 
_exptl_absorpt_coefficient_mu     9.333 
_shelx_estimated_absorpt_T_min    0.156 
_shelx_estimated_absorpt_T_max    0.663 
_exptl_absorpt_correction_type    multi-scan 
_exptl_absorpt_correction_T_min   0.498 
_exptl_absorpt_correction_T_max   0.742 
_exptl_absorpt_process_details    'Bruker SADABS' 
_exptl_absorpt_special_details    ? 
_diffrn_ambient_temperature       100(2) 
_diffrn_radiation_wavelength      0.71073 
_diffrn_radiation_type            MoK\a 
_diffrn_source                    ? 
_diffrn_measurement_device_type   'Bruker APEX-II CCD' 
_diffrn_measurement_method        '\f and \w scans' 
_diffrn_detector_area_resol_mean  ? 
_diffrn_reflns_number             70583 
_diffrn_reflns_av_unetI/netI      0.0203 
_diffrn_reflns_av_R_equivalents   0.0721 
_diffrn_reflns_limit_h_min        -10 
_diffrn_reflns_limit_h_max        10 
_diffrn_reflns_limit_k_min        -10 
_diffrn_reflns_limit_k_max        10 
_diffrn_reflns_limit_l_min        -22 
_diffrn_reflns_limit_l_max        22 
_diffrn_reflns_theta_min          2.868 
_diffrn_reflns_theta_max          27.999 
_diffrn_reflns_theta_full         25.242 
_diffrn_measured_fraction_theta_max   0.999 
_diffrn_measured_fraction_theta_full  0.999 
_diffrn_reflns_Laue_measured_fraction_max    0.999 
_diffrn_reflns_Laue_measured_fraction_full   0.999 
_diffrn_reflns_point_group_measured_fraction_max   0.999 
_diffrn_reflns_point_group_measured_fraction_full  0.999 
_reflns_number_total              2491 
_reflns_number_gt                 2208 
_reflns_threshold_expression      'I > 2\s(I)' 
_reflns_Friedel_coverage          0.000 
_reflns_Friedel_fraction_max      . 
_reflns_Friedel_fraction_full     . 
  
_reflns_special_details 
; 
 Reflections were merged by SHELXL according to the crystal 
 class for the calculation of statistics and refinement. 
  
 _reflns_Friedel_fraction is defined as the number of unique 
 Friedel pairs measured divided by the number that would be 
 possible theoretically, ignoring centric projections and 
 systematic absences. 
; 
  
_computing_data_collection        'Bruker APEX2' 
_computing_cell_refinement        'Bruker SAINT' 
_computing_data_reduction         'Bruker SAINT' 
_computing_structure_solution     'SHELXS-97 (Sheldrick 2008)' 
_computing_structure_refinement 'SHELXL-2014/7 (Sheldrick, 2014)' 
_computing_molecular_graphics     'Bruker SHELXTL' 
_computing_publication_material   'Bruker SHELXTL' 
_refine_special_details           ? 
_refine_ls_structure_factor_coef  Fsqd 
_refine_ls_matrix_type            full 
_refine_ls_weighting_scheme       calc 
_refine_ls_weighting_details 
'w=1/[\s^2^(Fo^2^)+(0.0063P)^2^+2.1931P] where P=(Fo^2^+2Fc^2^)/3' 
_atom_sites_solution_primary      direct 
_atom_sites_solution_secondary    ? 
_atom_sites_solution_hydrogens    mixed 
_refine_ls_hydrogen_treatment     constr 
_refine_ls_extinction_method      none 
_refine_ls_extinction_coef        . 
_refine_ls_number_reflns          2491 
_refine_ls_number_parameters      125 
_refine_ls_number_restraints      0 
_refine_ls_R_factor_all           0.0217 
_refine_ls_R_factor_gt            0.0162 
_refine_ls_wR_factor_ref          0.0318 
_refine_ls_wR_factor_gt           0.0302 
_refine_ls_goodness_of_fit_ref    1.066 
_refine_ls_restrained_S_all       1.066 
_refine_ls_shift/su_max           0.003 
_refine_ls_shift/su_mean          0.000 
  
loop_ 
 _atom_site_label 
 _atom_site_type_symbol 
 _atom_site_fract_x 
 _atom_site_fract_y 
 _atom_site_fract_z 
 _atom_site_U_iso_or_equiv 
 _atom_site_adp_type 
 _atom_site_occupancy 
 _atom_site_site_symmetry_order 
 _atom_site_calc_flag 
 _atom_site_refinement_flags_posn 
 _atom_site_refinement_flags_adp 
 _atom_site_refinement_flags_occupancy 
 _atom_site_disorder_assembly 
 _atom_site_disorder_group 
Yb1 Yb 0.27665(2) 0.44647(2) 0.54224(2) 0.00868(4) Uani 1 1 d . . . . . 
Cl1 Cl 0.37442(9) 0.95559(10) 0.68272(4) 0.01551(14) Uani 1 1 d . . . . . 
O11 O 0.0243(2) 0.3202(3) 0.54445(13) 0.0157(5) Uani 1 1 d . . . . . 
O12 O -0.2595(2) 0.2931(3) 0.52491(12) 0.0120(4) Uani 1 1 d . . . . . 
C11 C -0.1107(4) 0.2361(4) 0.55125(17) 0.0112(6) Uani 1 1 d . . . . . 
C12 C -0.0986(4) 0.0644(4) 0.58953(19) 0.0188(7) Uani 1 1 d . . . . . 
H12A H -0.1909 0.0526 0.6232 0.050(8) Uiso 1 1 calc R U . . . 
H12B H 0.0146 0.0525 0.6217 0.050(8) Uiso 1 1 calc R U . . . 
H12C H -0.1116 -0.0246 0.5489 0.050(8) Uiso 1 1 calc R U . . . 
O21 O 0.5405(2) 0.5623(3) 0.57480(12) 0.0117(4) Uani 1 1 d . . . . . 
O22 O 0.8137(2) 0.6323(3) 0.58984(12) 0.0126(4) Uani 1 1 d . . . . . 
C21 C 0.6788(4) 0.6004(4) 0.62090(18) 0.0110(6) Uani 1 1 d . . . . . 
C22 C 0.6777(4) 0.6062(4) 0.70747(18) 0.0175(7) Uani 1 1 d . . . . . 
H22A H 0.7961 0.5903 0.7341 0.048(8) Uiso 1 1 calc R U . . . 
H22B H 0.6030 0.5149 0.7233 0.048(8) Uiso 1 1 calc R U . . . 
H22C H 0.6332 0.7172 0.7223 0.048(8) Uiso 1 1 calc R U . . . 
O1W O 0.4141(2) 0.1842(3) 0.53748(12) 0.0132(4) Uani 1 1 d . . . . . 
H11W H 0.4095 0.0955 0.5760 0.051(9) Uiso 1 1 d R U . . . 
H12W H 0.5343 0.1921 0.5302 0.051(9) Uiso 1 1 d R U . . . 
O2W O 0.1631(2) 0.6364(3) 0.62563(12) 0.0121(4) Uani 1 1 d . . . . . 
H21W H 0.0401 0.6550 0.6213 0.044(9) Uiso 1 1 d R U . . . 
H22W H 0.2140 0.7461 0.6388 0.044(9) Uiso 1 1 d R U . . . 
O3W O 0.3223(3) 0.3449(3) 0.67237(12) 0.0150(4) Uani 1 1 d . . . . . 
H31W H 0.2682 0.3956 0.7141 0.043(9) Uiso 1 1 d R U . . . 
H32W H 0.3302 0.2253 0.6849 0.043(9) Uiso 1 1 d R U . . . 
  
loop_ 
 _atom_site_aniso_label 
 _atom_site_aniso_U_11 
 _atom_site_aniso_U_22 
 _atom_site_aniso_U_33 
 _atom_site_aniso_U_23 
 _atom_site_aniso_U_13 
 _atom_site_aniso_U_12 
Yb1 0.00564(6) 0.00836(6) 0.01210(6) 0.00029(6) 0.00138(4) -0.00107(5) 
Cl1 0.0185(3) 0.0110(3) 0.0171(3) 0.0011(3) 0.0026(3) -0.0025(3) 
O11 0.0108(10) 0.0173(12) 0.0198(12) -0.0047(9) 0.0053(8) -0.0062(9) 
O12 0.0077(9) 0.0141(11) 0.0143(11) 0.0024(8) 0.0017(8) 0.0015(8) 
C11 0.0101(13) 0.0125(15) 0.0116(14) -0.0034(12) 0.0039(11) -0.0020(11) 
C12 0.0180(15) 0.0156(16) 0.0229(17) 0.0053(15) 0.0028(13) 0.0023(14) 
O21 0.0082(9) 0.0111(10) 0.0153(10) -0.0011(9) -0.0003(8) 0.0001(8) 
O22 0.0069(9) 0.0130(11) 0.0177(11) 0.0010(9) 0.0007(8) 0.0000(8) 
C21 0.0099(13) 0.0083(14) 0.0142(15) 0.0001(11) -0.0011(11) 0.0030(11) 
C22 0.0152(15) 0.0237(18) 0.0132(15) -0.0008(13) 0.0003(12) 0.0024(13) 
O1W 0.0110(10) 0.0109(11) 0.0186(11) 0.0021(9) 0.0053(8) 0.0005(8) 
O2W 0.0098(10) 0.0109(11) 0.0157(11) -0.0029(9) 0.0019(8) -0.0004(8) 
O3W 0.0192(11) 0.0120(11) 0.0150(11) 0.0017(9) 0.0068(9) 0.0037(9) 
  
_geom_special_details 
; 
 All esds (except the esd in the dihedral angle between two l.s. planes) 
 are estimated using the full covariance matrix.  The cell esds are taken 
 into account individually in the estimation of esds in distances, angles 
 and torsion angles; correlations between esds in cell parameters are only 
 used when they are defined by crystal symmetry.  An approximate (isotropic) 
 treatment of cell esds is used for estimating esds involving l.s. planes. 
; 
  
loop_ 
 _geom_bond_atom_site_label_1 
 _geom_bond_atom_site_label_2 
 _geom_bond_distance 
 _geom_bond_site_symmetry_2 
 _geom_bond_publ_flag 
Yb1 O11 2.2005(19) . ? 
Yb1 O21 2.2455(19) . ? 
Yb1 O2W 2.312(2) . ? 
Yb1 O1W 2.320(2) . ? 
Yb1 O12 2.334(2) 3_566 ? 
Yb1 O3W 2.347(2) . ? 
Yb1 O22 2.359(2) 3_666 ? 
Yb1 O21 2.601(2) 3_666 ? 
Yb1 O11 3.178(2) 3_566 ? 
O11 C11 1.256(3) . ? 
O12 C11 1.267(3) . ? 
C11 C12 1.492(4) . ? 
C12 H12A 0.9800 . ? 
C12 H12B 0.9800 . ? 
C12 H12C 0.9800 . ? 
O21 C21 1.283(3) . ? 
O22 C21 1.260(3) . ? 
C21 C22 1.483(4) . ? 
C22 H22A 0.9800 . ? 
C22 H22B 0.9800 . ? 
C22 H22C 0.9800 . ? 
O1W H11W 0.9600 . ? 
O1W H12W 0.9600 . ? 
O2W H21W 0.9600 . ? 
O2W H22W 0.9600 . ? 
O3W H31W 0.9600 . ? 
O3W H32W 0.9600 . ? 
  
loop_ 
 _geom_angle_atom_site_label_1 
 _geom_angle_atom_site_label_2 
 _geom_angle_atom_site_label_3 
 _geom_angle 
 _geom_angle_site_symmetry_1 
 _geom_angle_site_symmetry_3 
 _geom_angle_publ_flag 
O11 Yb1 O21 164.65(8) . . ? 
O11 Yb1 O2W 82.28(7) . . ? 
O21 Yb1 O2W 89.82(7) . . ? 
O11 Yb1 O1W 91.10(7) . . ? 
O21 Yb1 O1W 87.46(7) . . ? 
O2W Yb1 O1W 143.53(7) . . ? 
O11 Yb1 O12 113.94(7) . 3_566 ? 
O21 Yb1 O12 76.24(7) . 3_566 ? 
O2W Yb1 O12 74.98(7) . 3_566 ? 
O1W Yb1 O12 138.77(7) . 3_566 ? 
O11 Yb1 O3W 81.81(8) . . ? 
O21 Yb1 O3W 83.11(7) . . ? 
O2W Yb1 O3W 69.83(7) . . ? 
O1W Yb1 O3W 73.74(7) . . ? 
O12 Yb1 O3W 138.97(7) 3_566 . ? 
O11 Yb1 O22 75.15(7) . 3_666 ? 
O21 Yb1 O22 119.48(7) . 3_666 ? 
O2W Yb1 O22 131.96(7) . 3_666 ? 
O1W Yb1 O22 79.44(7) . 3_666 ? 
O12 Yb1 O22 76.45(7) 3_566 3_666 ? 
O3W Yb1 O22 144.06(7) . 3_666 ? 
O11 Yb1 O21 125.31(7) . 3_666 ? 
O21 Yb1 O21 68.26(8) . 3_666 ? 
O2W Yb1 O21 141.43(7) . 3_666 ? 
O1W Yb1 O21 69.50(7) . 3_666 ? 
O12 Yb1 O21 69.29(7) 3_566 3_666 ? 
O3W Yb1 O21 133.66(7) . 3_666 ? 
O22 Yb1 O21 51.72(6) 3_666 3_666 ? 
O11 Yb1 O11 70.24(8) . 3_566 ? 
O21 Yb1 O11 118.51(6) . 3_566 ? 
O2W Yb1 O11 66.58(6) . 3_566 ? 
O1W Yb1 O11 143.70(6) . 3_566 ? 
O12 Yb1 O11 43.73(6) 3_566 3_566 ? 
O3W Yb1 O11 130.45(6) . 3_566 ? 
O22 Yb1 O11 66.00(6) 3_666 3_566 ? 
O21 Yb1 O11 95.63(6) 3_666 3_566 ? 
O11 Yb1 Yb1 155.97(6) . 3_666 ? 
Yb1 Yb1 Yb1 133.619(7) 3_666 3_566 ? 
C11 O11 Yb1 173.3(2) . . ? 
C11 O12 Yb1 118.29(18) . 3_566 ? 
O11 C11 O12 121.1(3) . . ? 
O11 C11 C12 120.4(3) . . ? 
O12 C11 C12 118.4(3) . . ? 
C11 C12 H12A 109.5 . . ? 
C11 C12 H12B 109.5 . . ? 
H12A C12 H12B 109.5 . . ? 
C11 C12 H12C 109.5 . . ? 
H12A C12 H12C 109.5 . . ? 
H12B C12 H12C 109.5 . . ? 
C21 O21 Yb1 155.73(19) . . ? 
C21 O21 Yb1 88.97(16) . 3_666 ? 
Yb1 O21 Yb1 111.74(8) . 3_666 ? 
C21 O22 Yb1 101.02(17) . 3_666 ? 
O22 C21 O21 117.6(3) . . ? 
O22 C21 C22 121.8(3) . . ? 
O21 C21 C22 120.6(3) . . ? 
C21 C22 H22A 109.5 . . ? 
C21 C22 H22B 109.5 . . ? 
H22A C22 H22B 109.5 . . ? 
C21 C22 H22C 109.5 . . ? 
H22A C22 H22C 109.5 . . ? 
H22B C22 H22C 109.5 . . ? 
Yb1 O1W H11W 123.8 . . ? 
Yb1 O1W H12W 114.0 . . ? 
H11W O1W H12W 105.0 . . ? 
Yb1 O2W H21W 120.3 . . ? 
Yb1 O2W H22W 122.7 . . ? 
H21W O2W H22W 105.0 . . ? 
Yb1 O3W H31W 122.6 . . ? 
Yb1 O3W H32W 122.6 . . ? 
H31W O3W H32W 105.0 . . ? 
  
loop_ 
 _geom_hbond_atom_site_label_D 
 _geom_hbond_atom_site_label_H 
 _geom_hbond_atom_site_label_A 
 _geom_hbond_distance_DH 
 _geom_hbond_distance_HA 
 _geom_hbond_distance_DA 
 _geom_hbond_angle_DHA 
 _geom_hbond_site_symmetry_A 
O1W H11W Cl1  0.96 2.18 3.108(2) 163.4 1_545 
O1W H12W O12  0.96 1.80 2.710(3) 157.3 1_655 
O2W H21W O22  0.96 1.78 2.706(3) 160.6 1_455 
O2W H22W Cl1  0.96 2.14 3.078(2) 166.7 . 
O3W H31W Cl1  0.96 2.25 3.195(2) 167.5 2_546 
O3W H32W Cl1  0.96 2.14 3.074(2) 164.4 1_545 
  
_refine_diff_density_max    0.522 
_refine_diff_density_min   -0.480 
_refine_diff_density_rms    0.123 
  
_shelx_res_file 
; 
  
    Ha2019_57_0m_a.res created by SHELXL-2014/7 
  
  
TITL Ha2019_57_0m_a.res in P2(1)/n 
CELL  0.71073   7.7710   7.8224  17.1055   90.000   97.422   90.000 
ZERR    4.000   0.0003   0.0003   0.0008    0.000    0.002    0.000 
LATT 1 
SYMM 1/2-X, 1/2+Y, 1/2-Z 
SFAC C  H  O  Cl Yb 
UNIT 16 48 28 4 4 
LIST 4 ! automatically inserted. Change 6 to 4 for CHECKCIF!! 
OMIT -1 0 1 
OMIT -3 56 
L.S. 10 
ACTA 
BOND $H 
FMAP 2 
PLAN 5 
TEMP -173 
rem DFIX 0.96  0.0001 O1w H11w O1w H12w O2w H21w O2w H22w O3w H31w O3w H32w 
rem dfix 1.523  0.0001 H11w H12w H21w H22w H31w H32w 
FREE Yb1 C21_$6 
FREE Yb1 C11_$7 
EQIV $6 1-x,1-y,1-z 
BIND Yb1 Yb1_$6 
BIND Yb1 Yb1_$7 
EQIV $7 -x, 1-y, 1-z 
BIND Yb1 O11_$7 
HTAB 
EQIV $1 -x+3/2, y-1/2, -z+3/2 
EQIV $2 x, y-1, z 
HTAB O1W Cl1_$2 
EQIV $3 x+1, y, z 
HTAB O1W O12_$3 
EQIV $4 x-1, y, z 
HTAB O2W O22_$4 
HTAB O2W Cl1 
EQIV $5 -x+1/2, y-1/2, -z+3/2 
HTAB O3W Cl1_$5 
HTAB O3W Cl1_$2 
SIZE 0.048  0.092  0.316 
BOND $H 
FMAP 2 
PLAN 5 
TEMP -173 
WGHT    0.006300    2.193100 
FVAR       0.10644   0.05043   0.04780   0.05062   0.04449   0.04268 
YB1   5    0.276647    0.446468    0.542239    11.00000    0.00564    0.00836 = 
         0.01210    0.00029    0.00138   -0.00107 
CL1   4    0.374417    0.955592    0.682718    11.00000    0.01854    0.01100 = 
         0.01706    0.00110    0.00259   -0.00248 
O11   3    0.024259    0.320246    0.544448    11.00000    0.01083    0.01728 = 
         0.01975   -0.00466    0.00533   -0.00616 
O12   3   -0.259497    0.293130    0.524908    11.00000    0.00767    0.01412 = 
         0.01431    0.00245    0.00175    0.00147 
C11   1   -0.110669    0.236094    0.551252    11.00000    0.01008    0.01252 = 
         0.01156   -0.00342    0.00385   -0.00203 
C12   1   -0.098604    0.064423    0.589532    11.00000    0.01799    0.01563 = 
         0.02293    0.00526    0.00285    0.00226 
AFIX 137 
H12A  2   -0.190873    0.052617    0.623174    11.00000   21.00000 
H12B  2    0.014616    0.052459    0.621690    11.00000   21.00000 
H12C  2   -0.111628   -0.024593    0.548883    11.00000   21.00000 
AFIX   0 
O21   3    0.540546    0.562322    0.574804    11.00000    0.00820    0.01107 = 
         0.01527   -0.00114   -0.00026    0.00008 
O22   3    0.813663    0.632302    0.589840    11.00000    0.00692    0.01302 = 
         0.01772    0.00101    0.00073   -0.00002 
C21   1    0.678768    0.600351    0.620896    11.00000    0.00986    0.00835 = 
         0.01421    0.00013   -0.00115    0.00296 
C22   1    0.677668    0.606168    0.707470    11.00000    0.01519    0.02368 = 
         0.01317   -0.00076    0.00035    0.00242 
AFIX 137 
H22A  2    0.796054    0.590317    0.734051    11.00000   31.00000 
H22B  2    0.603025    0.514855    0.723286    11.00000   31.00000 
H22C  2    0.633198    0.717178    0.722293    11.00000   31.00000 
AFIX   0 
O1W   3    0.414133    0.184153    0.537477    11.00000    0.01102    0.01089 = 
         0.01864    0.00205    0.00532    0.00048 
AFIX   3 
H11W  2    0.409548    0.095489    0.575956    11.00000   41.00000 
H12W  2    0.534323    0.192102    0.530213    11.00000   41.00000 
AFIX   0 
O2W   3    0.163094    0.636350    0.625635    11.00000    0.00976    0.01088 = 
         0.01574   -0.00289    0.00189   -0.00037 
AFIX   3 
H21W  2    0.040127    0.655016    0.621269    11.00000   51.00000 
H22W  2    0.214043    0.746102    0.638818    11.00000   51.00000 
AFIX   0 
O3W   3    0.322284    0.344890    0.672365    11.00000    0.01922    0.01197 = 
         0.01498    0.00170    0.00680    0.00370 
AFIX   3 
H31W  2    0.268194    0.395643    0.714105    11.00000   61.00000 
H32W  2    0.330173    0.225289    0.684897    11.00000   61.00000 
AFIX   0 
HKLF 4 
  
REM  Ha2019_57_0m_a.res in P2(1)/n 
REM R1 =  0.0162 for    2208 Fo > 4sig(Fo)  and  0.0217 for all    2491 data 
REM    125 parameters refined using      0 restraints 
  
END 
  
WGHT      0.0063      2.1931 
  
REM Instructions for potential hydrogen bonds 
HTAB C12 Cl1_$2 
HTAB C22 Cl1_$1 
HTAB C22 O3W 
HTAB C22 Cl1 
HTAB O1W Cl1_$2 
HTAB O1W O12_$3 
HTAB O2W O22_$4 
HTAB O2W Cl1 
HTAB O3W Cl1_$5 
HTAB O3W Cl1_$2 
  
REM Highest difference peak  0.522,  deepest hole -0.480,  1-sigma level  0.123 
Q1    1   0.2465  0.4573  0.4841  11.00000  0.05    0.52 
Q2    1   0.8660  0.5643  0.5738  11.00000  0.05    0.49 
Q3    1  -0.3034  0.2642  0.4750  11.00000  0.05    0.48 
Q4    1   0.8363  0.7268  0.8172  11.00000  0.05    0.48 
Q5    1  -0.2734  0.3978  0.5093  11.00000  0.05    0.45 
; 
_shelx_res_checksum   15721 
  
_shelx_hkl_file 
; 
   1   0   0    0.26    0.42 
  -1   0   0   -0.06    0.19 
   1   0   0   -0.25    0.31 
   1   0   0    0.85    0.54 
   1   0   0    0.00    0.44 
   1   0   0    0.93    0.39 
  -1   0   0   -0.08    0.23 
   1   0   0    0.01    0.35 
   1   0   0    0.90    0.34 
   1   0   0    0.62    0.43 
  -1   0   0    1.58    0.59 
   1   0   0   -0.18    0.28 
   1   0   0   -0.27    0.28 
   1   0   0   -0.12    0.37 
  -1   0   0   -0.10    0.21 
   1   0   0    0.19    0.39 
  -1   0   0    0.51    0.42 
  -1   0   0   -0.08    0.42 
   1   0   0   -0.23    0.26 
  -1   0   0   -0.36    0.22 
   1   0   0    0.80    0.47 
  -1   0   0    0.21    0.33 
  -1   0   0    0.28    0.36 
   1   0   0    0.30    0.41 
   2   0   0  823.43   29.62 
   2   0   0  817.45   29.51 
  -2   0   0  823.66   29.46 
  -2   0   0  818.71   29.25 
   2   0   0  812.38   28.92 
  -2   0   0  819.03   29.15 
   2   0   0  833.43   29.19 
  -2   0   0  796.11   28.96 
  -2   0   0  788.18   29.55 
   2   0   0  799.86   29.62 
   2   0   0  819.34   29.62 
   2   0   0  813.64   29.65 
  -2   0   0  798.18   29.47 
   2   0   0  829.33   29.77 
  -2   0   0  811.14   28.49 
  -2   0   0  790.16   28.41 
   2   0   0  798.24   28.40 
  -2   0   0  831.80   28.82 
   2   0   0  839.36   29.59 
   2   0   0  838.04   29.85 
  -2   0   0  814.63   29.78 
   2   0   0  813.81   29.24 
   2   0   0  815.87   29.02 
   2   0   0  806.27   28.88 
  -2   0   0  838.93   29.62 
  -2   0   0  826.01   29.07 
   2   0   0  802.20   28.96 
  -2   0   0  843.19   29.67 
  -2   0   0  813.95   29.52 
  -2   0   0  800.84   28.85 
  -2   0   0  816.26   28.94 
  -2   0   0  764.77   29.69 
   3   0   0   -1.06    0.88 
   3   0   0    0.30    1.27 
  -3   0   0   -0.49    0.89 
   3   0   0    0.42    0.82 
  -3   0   0    0.51    0.96 
  -3   0   0    0.21    0.85 
  -3   0   0   -0.27    0.82 
   3   0   0   -2.20    0.86 
  -3   0   0    0.12    1.08 
  -3   0   0    1.13    0.98 
   3   0   0   -0.22    1.27 
   3   0   0   -0.06    1.07 
  -3   0   0    0.02    0.78 
  -3   0   0    0.40    1.40 
  -3   0   0   -0.11    0.70 
   3   0   0    0.09    0.94 
  -3   0   0   -1.12    1.38 
   3   0   0   -1.80    0.72 
  -3   0   0   -1.34    1.11 
   3   0   0    0.27    1.11 
  -3   0   0   -0.19    0.78 
  -3   0   0    1.64    1.23 
   3   0   0    0.16    1.15 
  -3   0   0   -0.24    1.07 
   3   0   0    1.60    1.46 
   3   0   0    0.32    0.96 
  -3   0   0   -0.09    1.06 
   3   0   0    0.59    1.29 
  -3   0   0    0.16    0.72 
   3   0   0    1.81    1.52 
  -4   0   0  167.26    9.09 
  -4   0   0  208.65   10.53 
  -4   0   0  190.04    8.53 
   4   0   0  186.93    9.82 
   4   0   0  180.64    9.00 
   4   0   0  181.73    9.93 
  -4   0   0  175.62    8.70 
  -4   0   0  173.51    8.54 
   4   0   0  179.91    9.17 
  -4   0   0  182.77    8.37 
   4   0   0  160.05    8.51 
  -4   0   0  178.66    9.52 
  -4   0   0  161.95    7.65 
  -4   0   0  176.48    8.82 
   4   0   0  180.34    9.66 
  -4   0   0  174.66    7.82 
  -4   0   0  168.16    9.78 
   4   0   0  176.48    8.49 
   4   0   0  178.38    9.82 
   4   0   0  171.29    9.61 
   4   0   0  177.95    9.75 
   4   0   0  176.13    8.57 
   4   0   0  176.67    9.71 
  -4   0   0  160.61    8.53 
  -4   0   0  169.29    8.44 
   5   0   0   -2.12    1.57 
   5   0   0   -0.12    1.62 
   5   0   0    1.20    1.95 
   5   0   0   -1.92    1.29 
  -5   0   0    0.10    0.88 
   5   0   0   -1.62    1.40 
   5   0   0   -0.50    1.58 
  -5   0   0   -0.61    1.70 
   5   0   0   -1.59    1.48 
  -5   0   0    0.58    1.44 
   5   0   0   -2.23    0.99 
  -5   0   0   -0.01    1.01 
  -5   0   0    0.05    1.18 
  -5   0   0   -1.75    1.41 
  -5   0   0   -1.24    1.30 
   5   0   0    1.53    1.37 
   5   0   0    1.75    1.88 
  -5   0   0   -0.28    1.05 
  -5   0   0   -1.12    0.81 
  -5   0   0   -1.06    1.07 
   6   0   0   72.04    5.50 
   6   0   0   63.29    6.62 
  -6   0   0   68.64    7.90 
   6   0   0   55.46    7.16 
   6   0   0   65.39    7.80 
   6   0   0   67.08    7.66 
  -6   0   0   63.51    4.40 
   6   0   0   68.07    6.93 
  -6   0   0   72.01    4.70 
  -6   0   0   55.08    7.31 
  -6   0   0   61.31    4.46 
  -6   0   0   59.55    6.90 
   6   0   0   52.73    6.80 
  -6   0   0   68.37    6.52 
   6   0   0   80.97    8.18 
   6   0   0   58.40    6.96 
  -6   0   0   53.51    5.89 
   6   0   0   59.20    7.13 
  -6   0   0   59.37    6.26 
   7   0   0    3.55    3.07 
   7   0   0   -3.30    2.12 
  -7   0   0   -0.61    1.22 
   7   0   0   -0.80    2.39 
  -7   0   0    1.85    2.32 
  -7   0   0   -1.25    1.75 
  -7   0   0    2.33    3.33 
   7   0   0    0.15    2.12 
   7   0   0    2.92    2.97 
   7   0   0    6.42    3.31 
   7   0   0   -0.95    2.09 
   7   0   0   -0.17    1.63 
   7   0   0   -2.00    1.56 
  -7   0   0    0.07    2.02 
   7   0   0   -0.72    2.42 
  -7   0   0   -1.30    1.29 
  -7   0   0    2.17    2.83 
  -8   0   0   18.20    5.34 
   8   0   0   15.48    4.63 
   8   0   0   13.58    4.87 
   8   0   0   13.63    4.33 
  -8   0   0   10.54    4.17 
   8   0   0   17.03    5.19 
   8   0   0    5.86    3.83 
  -8   0   0   18.22    5.39 
   8   0   0   17.80    4.88 
  -8   0   0   13.87    3.72 
   8   0   0   13.57    4.28 
  -8   0   0   20.59    4.55 
   8   0   0   14.11    3.64 
   8   0   0   12.23    4.89 
  -8   0   0   10.51    3.42 
   8   0   0   16.92    4.19 
   9   0   0    2.08    3.15 
   9   0   0    1.24    3.39 
   9   0   0   -1.28    3.06 
   9   0   0    0.82    2.56 
   9   0   0   -0.96    2.77 
  -9   0   0    4.18    3.34 
  -9   0   0   -3.75    2.53 
   9   0   0   -1.78    2.86 
   9   0   0    5.11    3.58 
  -9   0   0   -4.21    2.77 
  -9   0   0    0.00    2.51 
   9   0   0   -0.85    2.77 
   9   0   0   -0.94    3.03 
  10   0   0    2.30    3.50 
 -10   0   0    2.59    3.96 
  10   0   0    6.03    4.70 
  10   0   0    6.32    4.39 
  10   0   0    1.85    4.21 
 -10   0   0    5.34    4.73 
  10   0   0    0.76    3.40 
 -10   0   0    8.08    4.59 
  10   0   0   10.41    5.14 
  10   0   0    0.93    3.89 
  10   0   0   11.19    5.21 
   0  -1   0    0.31    0.32 
   0  -1   0   -0.37    0.30 
   0  -1   0    0.21    0.30 
   0  -1   0   -0.17    0.36 
   0   1   0    0.50    0.52 
   0   1   0   -0.09    0.34 
   0   1   0    0.42    0.34 
   0   1   0    1.04    0.49 
   0   1   0    0.76    0.64 
   0   1   0    0.48    0.36 
   0   1   0    0.11    0.35 
   0   1   0    0.79    0.85 
   0   1   0   -0.04    0.33 
   0   1   0    0.35    0.36 
   0   1   0   -0.50    0.32 
   0   1   0    0.17    0.36 
   0   1   0    0.31    0.41 
   0   1   0    0.54    0.39 
   0   1   0    0.12    0.37 
   1  -1   0    6.21    1.19 
   1  -1   0    8.27    1.24 
  -1  -1   0   11.86    1.68 
  -1  -1   0   10.84    1.43 
   1  -1   0    8.02    1.38 
   1  -1   0    9.68    1.47 
  -1  -1   0    9.26    1.33 
   1  -1   0   11.24    1.47 
   1  -1   0    6.78    1.79 
   1  -1   0    6.99    1.29 
   1  -1   0   11.12    1.69 
   1  -1   0    9.22    1.42 
   1  -1   0    6.99    1.24 
   1  -1   0    8.83    1.27 
   1  -1   0    6.82    1.34 
   1  -1   0    6.99    1.12 
  -1  -1   0   12.01    1.49 
   1  -1   0    9.91    1.68 
   1  -1   0   10.75    1.49 
   1  -1   0   10.95    1.52 
  -1  -1   0   10.81    1.17 
   1  -1   0   10.32    1.55 
  -1  -1   0   10.29    1.40 
  -1  -1   0   10.89    1.56 
   1   1   0   10.64    0.99 
  -1   1   0    9.92    1.39 
   1   1   0   10.03    1.56 
  -1   1   0    7.19    1.30 
   1   1   0    9.19    1.10 
   1   1   0   10.50    0.79 
   1   1   0   11.49    1.03 
  -1   1   0   10.99    1.32 
  -1   1   0    8.18    1.50 
  -1   1   0    9.40    1.42 
   1   1   0   11.95    1.65 
  -1   1   0    7.25    1.41 
  -1   1   0    9.37    1.40 
  -1   1   0   12.44    1.79 
  -1   1   0    9.36    1.45 
   1   1   0    8.96    1.30 
   1   1   0    9.87    1.35 
  -1   1   0    7.86    0.86 
  -1   1   0    9.82    1.54 
  -1   1   0    9.58    1.44 
  -1   1   0   11.40    1.56 
   1   1   0    9.77    0.94 
  -1   1   0    9.26    1.32 
   1   1   0    9.78    1.34 
  -1   1   0    7.72    1.17 
   1   1   0    9.47    1.24 
  -1   1   0   10.20    1.48 
  -1   1   0    8.06    1.34 
   1   1   0   11.30    1.14 
   1   1   0    6.48    1.16 
   1   1   0    8.58    1.30 
   1   1   0   10.71    1.09 
   1   1   0   10.82    0.92 
   1   1   0    9.52    1.53 
  -1   1   0    6.52    1.28 
   2  -1   0  103.88    5.88 
   2  -1   0  116.51    6.00 
   2  -1   0  103.74    5.44 
   2  -1   0  103.04    5.36 
  -2  -1   0  102.65    5.74 
  -2  -1   0  103.22    4.93 
  -2  -1   0  102.84    4.84 
   2  -1   0  108.55    5.63 
  -2  -1   0  101.04    4.76 
   2  -1   0  107.32    5.77 
  -2  -1   0  104.73    5.43 
  -2  -1   0   98.74    4.86 
  -2  -1   0  109.03    4.54 
  -2  -1   0  102.45    5.45 
   2  -1   0  108.98    5.48 
  -2  -1   0  106.18    4.29 
  -2  -1   0  115.83    5.94 
  -2  -1   0  109.97    4.48 
  -2  -1   0  104.24    4.53 
   2  -1   0   98.41    5.38 
   2  -1   0  101.09    4.67 
   2  -1   0  104.62    5.43 
   2  -1   0  108.59    5.75 
  -2  -1   0  103.52    4.43 
   2  -1   0  100.25    5.54 
   2  -1   0   98.12    5.43 
  -2  -1   0  102.99    5.39 
  -2  -1   0  101.37    4.32 
  -2  -1   0  101.50    4.00 
   2  -1   0  101.32    5.45 
   2  -1   0  103.15    5.02 
   2  -1   0  105.35    5.43 
  -2  -1   0  107.40    5.52 
   2  -1   0  107.35    5.66 
  -2  -1   0  102.14    4.79 
  -2   1   0  109.86    5.66 
  -2   1   0  109.85    5.48 
   2   1   0  108.38    5.48 
  -2   1   0  106.56    5.67 
   2   1   0  102.03    4.65 
  -2   1   0  108.35    5.47 
  -2   1   0  103.59    4.75 
  -2   1   0   97.99    5.57 
   2   1   0  100.90    4.40 
   2   1   0  107.35    4.57 
   2   1   0  102.88    5.53 
  -2   1   0   96.98    5.27 
  -2   1   0  102.75    5.55 
  -2   1   0   97.83    5.45 
  -2   1   0  116.47    5.94 
   2   1   0  111.56    5.61 
   2   1   0  114.39    5.63 
  -2   1   0  104.61    5.50 
   2   1   0  105.21    5.44 
  -2   1   0  103.43    5.81 
  -2   1   0  105.64    5.49 
  -2   1   0   96.32    5.43 
   2   1   0  105.23    4.67 
   2   1   0  103.00    4.27 
  -2   1   0   93.18    5.29 
   2   1   0  106.96    4.72 
  -2   1   0  114.57    5.88 
   2   1   0   99.57    5.05 
  -2   1   0   89.68    5.23 
   2   1   0  100.85    5.57 
   2   1   0  106.30    5.12 
   2   1   0   99.89    5.66 
   2   1   0  100.86    4.47 
   2   1   0  112.40    4.35 
   2   1   0  102.34    4.61 
  -2   1   0  110.62    5.51 
  -3  -1   0   63.50    4.70 
   3  -1   0   64.48    4.69 
   3  -1   0   65.18    5.19 
  -3  -1   0   65.62    4.77 
   3  -1   0   67.53    4.53 
  -3  -1   0   69.50    3.48 
   3  -1   0   72.34    3.65 
  -3  -1   0   68.41    2.84 
  -3  -1   0   74.37    3.77 
  -3  -1   0   62.35    3.50 
  -3  -1   0   72.32    3.93 
   3  -1   0   61.52    4.91 
   3  -1   0   68.55    4.55 
  -3  -1   0   65.39    5.14 
  -3  -1   0   68.48    4.37 
   3  -1   0   62.53    4.86 
  -3  -1   0   66.30    4.03 
   3  -1   0   61.66    4.88 
  -3  -1   0   67.82    2.82 
  -3  -1   0   66.81    5.09 
   3  -1   0   72.55    5.21 
  -3  -1   0   64.42    3.31 
  -3  -1   0   67.75    3.60 
  -3  -1   0   69.07    4.42 
   3  -1   0   66.97    4.81 
   3  -1   0   64.40    4.80 
  -3  -1   0   75.73    4.11 
   3  -1   0   62.19    4.36 
   3  -1   0   65.64    4.78 
  -3  -1   0   68.64    3.79 
  -3  -1   0   66.62    2.82 
  -3  -1   0   57.56    4.48 
   3  -1   0   75.94    4.76 
   3   1   0   71.88    4.82 
  -3   1   0   69.12    4.83 
   3   1   0   65.81    4.89 
   3   1   0   65.31    4.96 
  -3   1   0   63.27    6.19 
  -3   1   0   70.12    4.10 
   3   1   0   72.56    3.96 
   3   1   0   75.66    5.24 
  -3   1   0   73.60    5.25 
   3   1   0   67.51    3.52 
  -3   1   0   72.03    5.14 
  -3   1   0   66.42    4.52 
  -3   1   0   61.07    4.62 
   3   1   0   75.15    4.35 
   3   1   0   69.12    3.56 
   3   1   0   64.46    4.83 
  -3   1   0   71.03    4.59 
   3   1   0   64.74    3.74 
  -3   1   0   72.09    4.86 
  -3   1   0   75.08    5.26 
   3   1   0   72.07    4.94 
  -3   1   0   67.28    4.98 
  -3   1   0   66.17    4.67 
  -3   1   0   80.12    5.02 
  -3   1   0   67.21    4.53 
   3   1   0   65.16    4.56 
   3   1   0   63.03    3.69 
   3   1   0   72.02    3.65 
   3   1   0   67.67    4.01 
  -3   1   0   70.22    3.74 
  -4  -1   0   26.06    2.51 
  -4  -1   0   27.55    3.54 
  -4  -1   0   23.36    2.83 
   4  -1   0   26.78    4.28 
  -4  -1   0   27.46    1.84 
   4  -1   0   28.64    4.27 
   4  -1   0   27.24    3.77 
   4  -1   0   30.42    2.32 
   4  -1   0   33.25    4.03 
  -4  -1   0   24.28    2.99 
   4  -1   0   28.54    4.03 
   4  -1   0   25.98    3.98 
   4  -1   0   20.31    3.77 
  -4  -1   0   28.47    2.61 
   4  -1   0   28.04    3.76 
  -4  -1   0   26.41    1.80 
   4  -1   0   31.40    4.42 
   4  -1   0   22.18    3.73 
  -4  -1   0   34.73    3.06 
  -4  -1   0   35.10    3.36 
  -4  -1   0   28.12    2.48 
  -4  -1   0   18.07    3.79 
  -4  -1   0   29.24    4.28 
  -4  -1   0   32.53    3.07 
  -4  -1   0   28.12    3.35 
  -4  -1   0   28.20    1.82 
   4   1   0   18.95    2.82 
   4   1   0   29.48    3.10 
  -4   1   0   28.87    3.70 
   4   1   0   26.98    3.75 
   4   1   0   26.60    4.26 
   4   1   0   22.69    3.60 
  -4   1   0   36.97    4.02 
   4   1   0   29.55    4.28 
  -4   1   0   30.85    3.19 
   4   1   0   29.01    4.16 
   4   1   0   26.75    2.43 
  -4   1   0   32.45    4.67 
   4   1   0   27.48    2.95 
   4   1   0   27.04    2.42 
  -4   1   0   28.21    2.34 
  -4   1   0   29.14    4.11 
   4   1   0   30.41    3.26 
   4   1   0   22.88    2.62 
  -4   1   0   29.20    3.93 
  -4   1   0   28.71    3.43 
   4   1   0   32.80    4.60 
   4   1   0   27.34    3.50 
  -4   1   0   27.19    4.11 
  -5  -1   0  255.54   14.44 
  -5  -1   0  265.26   10.86 
   5  -1   0  270.01   13.49 
   5  -1   0  262.06   14.00 
  -5  -1   0  268.76   10.42 
   5  -1   0  260.37   13.60 
   5  -1   0  251.50   14.06 
  -5  -1   0  282.27   12.53 
   5  -1   0  285.89   13.74 
  -5  -1   0  294.05   14.84 
   5  -1   0  276.11   14.28 
   5  -1   0  286.82   14.24 
   5  -1   0  242.45   13.81 
  -5  -1   0  275.85   10.43 
   5  -1   0  245.04   12.83 
  -5  -1   0  286.25   11.46 
  -5  -1   0  267.30   11.68 
  -5  -1   0  265.88   10.36 
  -5  -1   0  269.21   12.00 
  -5  -1   0  261.68   10.72 
  -5  -1   0  277.24   12.25 
   5  -1   0  281.14   14.40 
  -5  -1   0  276.03   11.74 
  -5  -1   0  283.79   12.34 
  -5  -1   0  283.73   13.30 
   5  -1   0  274.09   10.65 
  -5   1   0  255.19   12.86 
   5   1   0  267.58   12.43 
  -5   1   0  274.49   13.44 
   5   1   0  292.45   13.90 
   5   1   0  257.72   14.06 
   5   1   0  279.52   11.80 
  -5   1   0  266.01   10.80 
   5   1   0  267.94   12.80 
   5   1   0  267.14   13.83 
  -5   1   0  275.96   12.39 
   5   1   0  280.71   13.83 
  -5   1   0  250.58   11.74 
   5   1   0  251.27   13.80 
  -5   1   0  270.42   12.38 
   5   1   0  273.24   13.75 
  -5   1   0  287.53   13.47 
   5   1   0  268.98   13.99 
  -5   1   0  271.70   14.14 
   5   1   0  269.98   10.58 
   5   1   0  269.47   11.87 
   5   1   0  272.78   10.85 
  -5   1   0  272.56   14.26 
  -5   1   0  265.58   14.33 
  -6  -1   0   19.32    2.35 
   6  -1   0   17.62    4.10 
   6  -1   0   22.22    4.69 
  -6  -1   0   21.46    2.15 
  -6  -1   0   14.08    4.11 
  -6  -1   0   22.83    3.80 
  -6  -1   0   20.69    3.38 
  -6  -1   0   18.58    2.09 
  -6  -1   0   23.28    3.63 
   6  -1   0   27.21    4.67 
  -6  -1   0   24.25    2.27 
   6  -1   0   19.09    4.46 
   6  -1   0   23.45    4.29 
  -6  -1   0   21.01    4.03 
   6  -1   0   17.16    3.68 
   6  -1   0   12.45    3.78 
   6  -1   0   18.94    3.97 
   6  -1   0   11.97    3.72 
   6  -1   0   19.16    1.93 
  -6  -1   0   22.01    2.88 
  -6  -1   0   21.22    2.14 
  -6  -1   0   18.71    4.63 
   6  -1   0   21.30    4.67 
   6   1   0   12.68    2.60 
   6   1   0   14.34    3.83 
  -6   1   0   12.09    2.81 
  -6   1   0   15.14    4.32 
  -6   1   0   18.75    2.04 
  -6   1   0   13.45    3.80 
   6   1   0   24.34    4.79 
   6   1   0   18.25    4.35 
   6   1   0   10.75    3.63 
   6   1   0   19.74    4.21 
   6   1   0   13.57    3.82 
   6   1   0   20.61    3.49 
  -6   1   0   21.47    4.66 
  -6   1   0   22.86    4.21 
  -6   1   0   18.47    3.31 
  -6   1   0   20.46    3.91 
   6   1   0   12.57    3.63 
   6   1   0   21.91    3.86 
  -6   1   0   18.91    3.70 
   6   1   0   20.00    1.98 
   7  -1   0  251.70   15.85 
   7  -1   0  258.67   15.82 
   7  -1   0  277.51   15.44 
  -7  -1   0  268.25   13.45 
   7  -1   0  238.54   15.36 
   7  -1   0  261.93   14.87 
   7  -1   0  302.32   14.75 
   7  -1   0  252.04   15.72 
  -7  -1   0  269.58   14.71 
  -7  -1   0  274.10   13.67 
  -7  -1   0  273.28   16.36 
  -7  -1   0  267.49   13.66 
   7  -1   0  274.47   15.96 
   7  -1   0  262.05   15.05 
   7  -1   0  283.81   16.16 
  -7  -1   0  280.56   16.68 
   7   1   0  277.50   15.52 
  -7   1   0  278.34   13.33 
   7   1   0  252.11   15.28 
  -7   1   0  254.12   13.01 
   7   1   0  291.73   16.44 
   7   1   0  244.64   15.14 
  -7   1   0  268.37   16.38 
   7   1   0  263.05   13.74 
   7   1   0  243.88   15.53 
  -7   1   0  279.46   14.77 
  -7   1   0  268.98   14.67 
   7   1   0  265.52   15.87 
  -7   1   0  257.07   15.89 
  -7   1   0  274.44   14.50 
   7   1   0  296.43   14.83 
  -7   1   0  272.97   15.83 
   7   1   0  279.35   15.49 
   7   1   0  255.19   12.63 
   8  -1   0   26.90    5.99 
  -8  -1   0   23.68    4.17 
   8  -1   0   19.12    4.95 
  -8  -1   0   21.90    5.85 
  -8  -1   0   31.01    4.83 
  -8  -1   0   27.90    4.78 
  -8  -1   0   31.34    5.90 
   8  -1   0   24.72    5.99 
   8  -1   0   35.09    6.14 
   8  -1   0   15.18    4.99 
  -8  -1   0   19.89    5.58 
  -8  -1   0   24.64    4.47 
   8  -1   0   25.16    4.91 
   8  -1   0   14.63    4.86 
   8  -1   0   20.20    5.68 
   8  -1   0   25.47    5.95 
   8  -1   0   20.39    5.38 
  -8   1   0   27.52    6.31 
  -8   1   0   30.75    6.96 
   8   1   0   29.79    6.27 
  -8   1   0   19.89    5.63 
   8   1   0   25.47    6.21 
   8   1   0   19.66    4.53 
  -8   1   0   31.24    5.65 
   8   1   0   21.49    5.44 
  -8   1   0   23.41    4.75 
  -8   1   0   19.52    4.66 
   8   1   0   18.71    4.87 
   8   1   0   16.89    5.56 
   8   1   0   29.34    6.29 
  -8   1   0   23.23    6.02 
   8   1   0   20.33    5.45 
   8   1   0   33.00    5.27 
  -8   1   0   15.86    4.62 
   9  -1   0  112.63   12.85 
  -9  -1   0  104.92   11.35 
   9  -1   0  120.23   13.42 
   9  -1   0  127.43   13.14 
  -9  -1   0  132.65   14.66 
   9  -1   0  129.07   12.98 
   9  -1   0  135.19   14.64 
   9  -1   0  115.93   11.84 
   9  -1   0  119.49   13.68 
   9  -1   0  116.41   10.91 
   9  -1   0  119.55   13.63 
  -9  -1   0  143.42   15.20 
   9   1   0  131.41   13.72 
   9   1   0  139.52   10.60 
   9   1   0  119.48   12.43 
   9   1   0  137.18   14.44 
   9   1   0  134.87   14.09 
   9   1   0  113.43   13.17 
  -9   1   0  129.21   12.30 
  -9   1   0  128.38   14.32 
   9   1   0  130.76   12.34 
   9   1   0  148.03   14.82 
   9   1   0  121.41   12.63 
  -9   1   0  117.05   11.96 
  -9   1   0  114.51   13.25 
  -9   1   0  127.59   13.49 
  -9   1   0  114.40   11.22 
 -10  -1   0    2.57    3.46 
  10  -1   0    1.82    3.78 
  10  -1   0    4.46    3.64 
 -10  -1   0    2.08    3.19 
  10  -1   0    5.19    4.75 
  10  -1   0    6.57    4.63 
  10  -1   0   11.68    5.47 
  10  -1   0    7.86    5.08 
  10  -1   0    1.75    3.48 
  10  -1   0    3.88    3.81 
 -10  -1   0    2.30    4.13 
  10   1   0    3.88    4.02 
  10   1   0    8.22    4.08 
  10   1   0    2.03    3.69 
  10   1   0    3.24    3.58 
 -10   1   0    0.32    3.22 
 -10   1   0    5.55    3.69 
  10   1   0    1.53    4.12 
 -10   1   0    2.58    4.12 
  10   1   0    4.62    4.10 
  10   1   0   10.61    5.80 
  10   1   0    6.01    4.13 
 -10   1   0    9.71    5.85 
   0  -2   0  463.30   16.82 
   0  -2   0  430.25   18.56 
   0  -2   0  457.27   17.03 
   0  -2   0  460.18   17.16 
   0  -2   0  463.85   17.66 
   0  -2   0  461.31   16.64 
   0  -2   0  464.82   17.06 
   0  -2   0  465.94   17.06 
   0  -2   0  484.08   17.43 
   0  -2   0  458.78   17.34 
   0  -2   0  454.78   17.45 
   0  -2   0  459.69   17.01 
   0   2   0  496.54   18.41 
   0   2   0  419.62   16.94 
   0   2   0  462.64   17.31 
   0   2   0  467.42   17.66 
   0   2   0  449.80   17.43 
   0   2   0  462.32   16.91 
   0   2   0  463.93   15.70 
   0   2   0  423.53   15.99 
   0   2   0  453.14   17.07 
   0   2   0  478.38   17.23 
   0   2   0  457.58   17.41 
   0   2   0  449.06   16.94 
   0   2   0  452.90   16.94 
   0   2   0  451.94   16.96 
   0   2   0  475.65   16.72 
   0   2   0  387.48   18.34 
   0   2   0  457.72   16.83 
   1  -2   0  593.82   21.97 
   1  -2   0  586.76   22.07 
   1  -2   0  602.89   22.05 
  -1  -2   0  584.52   21.18 
  -1  -2   0  544.62   21.92 
   1  -2   0  591.12   21.71 
  -1  -2   0  611.94   21.90 
   1  -2   0  584.38   21.80 
  -1  -2   0  583.94   21.58 
   1  -2   0  588.96   22.09 
   1  -2   0  568.72   22.19 
   1  -2   0  573.43   22.48 
   1  -2   0  613.77   22.06 
  -1  -2   0  579.33   21.84 
   1  -2   0  563.37   22.04 
   1  -2   0  599.01   21.98 
   1  -2   0  572.01   21.10 
  -1  -2   0  610.15   21.52 
   1  -2   0  596.26   22.16 
   1  -2   0  569.51   21.18 
  -1  -2   0  600.72   20.95 
   1  -2   0  582.53   22.06 
  -1  -2   0  582.28   22.04 
  -1  -2   0  601.67   21.67 
  -1  -2   0  574.27   20.79 
  -1   2   0  588.31   22.02 
   1   2   0  567.12   21.93 
  -1   2   0  581.30   21.91 
  -1   2   0  588.59   21.33 
   1   2   0  602.71   21.58 
  -1   2   0  594.81   22.09 
   1   2   0  587.89   20.93 
   1   2   0  584.99   21.07 
   1   2   0  563.97   20.75 
   1   2   0  582.82   20.89 
  -1   2   0  571.11   21.95 
  -1   2   0  574.60   22.21 
   1   2   0  594.66   22.15 
   1   2   0  598.29   22.04 
  -1   2   0  562.67   20.13 
  -1   2   0  570.91   21.42 
   1   2   0  567.66   20.69 
  -1   2   0  603.76   21.82 
  -1   2   0  594.23   21.85 
   1   2   0  586.28   22.54 
   1   2   0  581.78   21.71 
  -1   2   0  579.51   21.52 
   1   2   0  582.86   20.22 
  -1   2   0  596.80   22.18 
   1   2   0  585.03   21.21 
  -1   2   0  592.34   21.68 
   1   2   0  588.59   21.09 
  -1   2   0  583.20   21.99 
  -1   2   0  575.80   21.80 
  -1   2   0  597.75   21.88 
   1   2   0  592.37   21.52 
   1   2   0  576.60   21.55 
   1   2   0  600.70   22.02 
   1   2   0  592.30   21.09 
  -1   2   0  586.75   21.81 
   1   2   0  529.96   21.60 
  -1   2   0  582.87   22.14 
   1   2   0  603.47   21.51 
  -1   2   0  569.85   21.85 
  -1   2   0  569.82   22.17 
  -2  -2   0  277.24   10.62 
  -2  -2   0  278.36   10.68 
   2  -2   0  265.52   11.89 
   2  -2   0  266.97   12.22 
   2  -2   0  268.57   12.20 
   2  -2   0  277.50   11.87 
   2  -2   0  272.23   12.43 
   2  -2   0  280.29   11.82 
   2  -2   0  283.07   12.25 
   2  -2   0  277.29   12.06 
   2  -2   0  267.99   12.18 
  -2  -2   0  279.61   11.78 
   2  -2   0  287.50   12.55 
   2  -2   0  283.65   12.89 
  -2  -2   0  279.52   10.46 
  -2  -2   0  278.68   12.17 
  -2  -2   0  272.02   12.32 
  -2  -2   0  275.48   12.19 
  -2  -2   0  294.77   12.29 
   2  -2   0  279.42   11.78 
   2  -2   0  289.40   11.99 
  -2  -2   0  278.18   11.73 
   2  -2   0  278.61   11.55 
   2  -2   0  282.39   10.64 
   2  -2   0  283.47   12.33 
  -2   2   0  273.42   11.63 
   2   2   0  280.09   10.71 
   2   2   0  274.49   11.70 
   2   2   0  291.06   12.03 
  -2   2   0  267.84   11.59 
   2   2   0  274.48   11.84 
   2   2   0  291.54   12.34 
   2   2   0  274.60   10.88 
  -2   2   0  289.52   12.17 
   2   2   0  272.93   10.68 
   2   2   0  283.53   10.75 
  -2   2   0  276.27   11.56 
  -2   2   0  284.66   12.14 
   2   2   0  290.82   11.22 
   2   2   0  276.06   10.25 
   2   2   0  278.23   10.44 
   2   2   0  279.66   10.68 
  -2   2   0  278.39   12.11 
  -2   2   0  297.51   12.31 
   2   2   0  277.16   12.05 
   2   2   0  280.30   11.34 
   2   2   0  293.68   11.87 
  -2   2   0  269.40   12.49 
  -2   2   0  269.96   12.26 
  -2   2   0  277.39   12.18 
  -2   2   0  285.28   11.56 
   2   2   0  298.84   12.29 
  -2   2   0  281.41   12.19 
  -2   2   0  276.29   12.19 
  -2   2   0  278.27   12.34 
   2   2   0  284.04   11.45 
   2   2   0  271.27   12.20 
  -2   2   0  279.13   12.01 
   3  -2   0  111.65    7.53 
   3  -2   0  129.82    7.86 
   3  -2   0  129.93    7.61 
  -3  -2   0  120.36    5.66 
   3  -2   0  115.65    6.19 
  -3  -2   0  130.81    7.69 
  -3  -2   0  122.06    5.41 
  -3  -2   0  122.15    5.17 
   3  -2   0  127.05    7.54 
  -3  -2   0  121.79    5.71 
  -3  -2   0  126.65    5.08 
  -3  -2   0  130.50    7.82 
   3  -2   0  126.42    7.33 
   3  -2   0  117.12    7.38 
   3  -2   0  120.89    7.19 
   3  -2   0  108.05    6.68 
  -3  -2   0  130.68    7.09 
  -3  -2   0  115.69    6.34 
  -3  -2   0  125.31    5.60 
  -3  -2   0  126.89    5.74 
  -3  -2   0  122.84    7.22 
  -3  -2   0  125.22    5.67 
   3  -2   0  112.84    6.98 
   3  -2   0  117.79    6.12 
  -3   2   0  125.46    6.36 
   3   2   0  124.87    7.26 
   3   2   0  126.78    6.42 
   3   2   0  124.52    5.72 
   3   2   0  121.94    6.33 
   3   2   0  123.24    7.22 
  -3   2   0  111.56    6.98 
   3   2   0  128.10    7.18 
  -3   2   0  130.59    7.10 
   3   2   0  117.47    5.86 
  -3   2   0  113.29    7.32 
  -3   2   0  126.59    7.00 
  -3   2   0  113.28    6.95 
   3   2   0  126.40    5.97 
  -3   2   0  117.64    7.35 
  -3   2   0  117.94    7.63 
   3   2   0  113.45    5.05 
   3   2   0  113.92    5.99 
   3   2   0  121.51    5.45 
   3   2   0  112.85    6.91 
   3   2   0  123.37    5.02 
   3   2   0  121.22    5.83 
   3   2   0  124.25    4.95 
   4  -2   0   95.35    6.81 
  -4  -2   0   91.00    4.88 
   4  -2   0   93.87    5.91 
  -4  -2   0   98.02    4.55 
  -4  -2   0   90.33    4.77 
   4  -2   0   87.43    6.58 
  -4  -2   0   97.29    4.75 
  -4  -2   0   88.01    6.88 
  -4  -2   0   97.10    5.06 
   4  -2   0   95.71    7.07 
   4  -2   0  102.78    7.21 
   4  -2   0   92.48    5.30 
  -4  -2   0   91.04    4.99 
  -4  -2   0   94.53    5.44 
  -4  -2   0   87.19    6.79 
   4  -2   0   85.42    6.98 
   4  -2   0   99.45    6.92 
  -4  -2   0   84.52    5.29 
   4  -2   0   98.12    6.90 
  -4  -2   0  100.97    5.59 
   4  -2   0   95.78    6.66 
  -4   2   0   97.19    7.00 
  -4   2   0   91.62    7.05 
   4   2   0   96.34    6.63 
   4   2   0   95.97    5.57 
   4   2   0   93.15    5.21 
   4   2   0   97.77    5.09 
   4   2   0   90.31    4.96 
   4   2   0   89.51    4.67 
   4   2   0   91.72    4.37 
   4   2   0   90.19    6.62 
   4   2   0   96.18    5.22 
  -4   2   0   95.17    6.53 
  -4   2   0   99.31    5.45 
   4   2   0   85.19    5.99 
   4   2   0   95.94    6.94 
   4   2   0   85.84    5.02 
  -4   2   0   68.52    5.94 
  -4   2   0   80.60    6.42 
  -4   2   0   97.67    6.56 
   4   2   0   95.13    6.58 
   5  -2   0   45.06    5.10 
   5  -2   0   32.05    4.82 
  -5  -2   0   49.24    3.57 
  -5  -2   0   39.13    2.27 
   5  -2   0   37.34    3.54 
  -5  -2   0   37.37    3.82 
  -5  -2   0   36.94    3.77 
  -5  -2   0   42.61    4.66 
   5  -2   0   29.37    4.52 
  -5  -2   0   38.85    3.98 
   5  -2   0   39.82    5.86 
   5  -2   0   50.58    6.46 
   5  -2   0   37.38    5.58 
   5  -2   0   42.10    5.59 
   5  -2   0   53.62    6.32 
  -5  -2   0   38.82    2.81 
  -5  -2   0   45.44    3.24 
  -5  -2   0   54.71    7.04 
  -5  -2   0   52.16    4.92 
   5  -2   0   38.98    5.65 
  -5  -2   0   41.57    5.98 
  -5  -2   0   36.98    3.68 
   5   2   0   41.15    5.44 
   5   2   0   40.83    5.25 
   5   2   0   49.90    5.84 
   5   2   0   37.89    2.87 
  -5   2   0   38.66    5.08 
   5   2   0   43.91    3.07 
  -5   2   0   34.75    4.69 
   5   2   0   44.11    3.39 
  -5   2   0   28.79    4.91 
  -5   2   0   40.98    5.47 
  -5   2   0   44.18    5.14 
  -5   2   0   43.73    5.60 
   5   2   0   42.47    3.26 
   5   2   0   46.42    4.77 
  -5   2   0   48.95    5.78 
   5   2   0   37.33    5.35 
   5   2   0   35.89    3.85 
   5   2   0   39.90    5.39 
  -5   2   0   30.48    5.22 
   5   2   0   44.82    6.36 
  -5   2   0   39.76    3.39 
  -6  -2   0   38.48    4.19 
  -6  -2   0   52.06    7.37 
  -6  -2   0   43.79    3.23 
  -6  -2   0   45.38    4.62 
  -6  -2   0   45.55    5.07 
   6  -2   0   42.37    3.76 
   6  -2   0   46.75    6.76 
   6  -2   0   33.98    6.17 
  -6  -2   0   45.73    6.89 
  -6  -2   0   43.21    4.47 
   6  -2   0   38.38    5.45 
   6  -2   0   44.49    6.55 
  -6  -2   0   47.59    5.42 
  -6  -2   0   44.80    3.52 
  -6  -2   0   44.71    4.07 
   6  -2   0   41.29    5.98 
  -6  -2   0   43.99    4.56 
   6  -2   0   35.00    5.94 
   6  -2   0   36.11    5.65 
   6  -2   0   48.44    6.69 
   6  -2   0   48.65    6.09 
  -6  -2   0   43.74    4.81 
   6   2   0   55.79    6.80 
  -6   2   0   39.15    6.36 
  -6   2   0   40.69    5.38 
   6   2   0   43.90    5.09 
  -6   2   0   42.28    5.97 
   6   2   0   54.37    6.62 
   6   2   0   47.68    4.89 
  -6   2   0   45.42    4.43 
  -6   2   0   34.82    5.25 
   6   2   0   44.57    6.35 
  -6   2   0   49.27    5.79 
  -6   2   0   32.44    5.72 
   6   2   0   45.03    5.98 
   6   2   0   38.14    3.64 
   6   2   0   49.49    4.93 
   6   2   0   39.94    3.06 
  -6   2   0   42.53    6.07 
   6   2   0   43.64    5.14 
   6   2   0   54.67    7.36 
   6   2   0   40.87    6.07 
   6   2   0   54.35    6.94 
  -6   2   0   46.45    6.57 
  -7  -2   0   -0.51    1.63 
  -7  -2   0    1.80    1.97 
  -7  -2   0    0.51    1.54 
   7  -2   0    4.95    2.61 
   7  -2   0    1.05    2.74 
   7  -2   0   -0.39    2.84 
  -7  -2   0    0.53    3.02 
  -7  -2   0    1.89    2.50 
   7  -2   0    0.64    2.68 
  -7  -2   0    1.02    2.01 
  -7  -2   0    1.78    1.58 
   7  -2   0    5.44    2.86 
   7  -2   0   -1.16    3.03 
   7  -2   0    2.65    2.75 
   7  -2   0    2.14    2.93 
   7  -2   0    4.88    3.35 
  -7   2   0    2.73    2.35 
   7   2   0   -0.70    2.15 
  -7   2   0   -0.82    2.36 
   7   2   0    1.06    1.79 
   7   2   0    0.52    1.94 
  -7   2   0    1.95    2.76 
   7   2   0    2.16    1.47 
   7   2   0   -2.12    2.38 
  -7   2   0    2.39    2.63 
  -7   2   0    3.67    2.59 
   7   2   0    1.90    2.51 
   7   2   0    1.47    2.86 
   7   2   0    3.54    2.79 
   7   2   0    1.45    2.66 
  -7   2   0    5.53    2.69 
  -7   2   0   -0.55    1.96 
   7   2   0    3.40    2.97 
  -7   2   0    0.35    2.63 
  -8  -2   0   15.53    5.15 
   8  -2   0    5.94    3.89 
   8  -2   0   11.13    4.26 
   8  -2   0   14.02    4.05 
   8  -2   0   13.24    5.00 
   8  -2   0   12.85    4.54 
  -8  -2   0   11.29    4.57 
   8  -2   0   12.79    5.11 
  -8  -2   0   11.92    3.61 
   8  -2   0    7.86    3.96 
   8  -2   0    9.14    4.02 
   8  -2   0    7.98    4.33 
  -8   2   0   17.64    5.16 
  -8   2   0   15.50    3.92 
   8   2   0    9.76    4.07 
   8   2   0   15.79    3.69 
   8   2   0   17.81    6.01 
  -8   2   0   14.58    3.92 
  -8   2   0    9.36    3.80 
  -8   2   0   14.19    4.35 
   8   2   0   10.33    4.22 
   8   2   0    7.79    3.67 
  -8   2   0   13.43    4.21 
  -8   2   0   17.44    5.13 
   8   2   0   11.44    3.74 
  -8   2   0   16.35    5.24 
   8   2   0   18.46    5.08 
   8   2   0    8.40    4.07 
   8   2   0   21.12    5.35 
   9  -2   0   -0.78    3.57 
  -9  -2   0   -0.74    2.28 
   9  -2   0    5.35    3.98 
   9  -2   0    0.52    2.92 
   9  -2   0   -4.69    2.16 
  -9  -2   0    3.80    3.31 
   9  -2   0   -1.14    2.89 
   9  -2   0   -1.06    2.88 
   9  -2   0    3.16    4.48 
   9  -2   0    0.45    3.51 
  -9  -2   0   -1.80    3.05 
   9  -2   0   -0.44    3.68 
   9  -2   0    4.47    3.67 
  -9   2   0   -5.50    2.01 
   9   2   0   -0.99    2.90 
  -9   2   0   -2.65    2.65 
   9   2   0   -1.01    2.28 
   9   2   0   -0.03    2.78 
   9   2   0   -3.47    2.41 
   9   2   0    0.46    3.09 
  -9   2   0    1.50    3.38 
   9   2   0    1.44    3.28 
   9   2   0   -0.19    3.12 
  -9   2   0    2.45    2.64 
  -9   2   0   -1.09    2.63 
   9   2   0    2.39    3.09 
  10  -2   0    0.11    4.23 
 -10  -2   0    3.22    3.51 
 -10  -2   0   -0.12    3.69 
  10  -2   0    0.69    3.58 
  10  -2   0   -5.55    3.62 
  10  -2   0   -3.71    3.35 
  10  -2   0    1.02    3.52 
  10  -2   0    5.93    4.63 
  10  -2   0    3.31    3.31 
  10  -2   0    1.48    4.08 
 -10   2   0   -2.99    2.51 
  10   2   0    6.77    5.11 
  10   2   0   -2.41    3.94 
 -10   2   0    2.87    4.01 
  10   2   0    3.46    4.15 
 -10   2   0   -0.09    3.68 
  10   2   0   -5.65    3.34 
 -10   2   0   -0.83    3.84 
  10   2   0    5.47    4.24 
  10   2   0    8.63    4.63 
   0  -3   0    0.08    1.29 
   0  -3   0    0.71    1.09 
   0  -3   0   -0.89    0.87 
   0  -3   0   -0.65    1.11 
   0  -3   0   -0.53    0.93 
   0  -3   0   -0.49    1.06 
   0  -3   0    0.92    1.28 
   0  -3   0    0.51    1.06 
   0  -3   0    1.27    1.05 
   0  -3   0    0.25    1.87 
   0   3   0    0.94    1.02 
   0   3   0   -1.40    0.71 
   0   3   0    2.03    1.15 
   0   3   0   -1.14    0.96 
   0   3   0    1.63    1.05 
   0   3   0    0.17    0.88 
   0   3   0    0.59    0.45 
   0   3   0   -0.97    0.70 
   0   3   0   -1.13    0.85 
   0   3   0    0.85    0.84 
   0   3   0   -0.56    0.80 
   0   3   0    1.76    1.84 
   0   3   0   -1.70    0.87 
   0   3   0    0.19    1.22 
   0   3   0    0.25    1.25 
   0   3   0   -1.49    0.72 
   0   3   0   -0.34    1.52 
   1  -3   0   26.51    3.90 
   1  -3   0   39.41    4.17 
  -1  -3   0   39.14    3.06 
  -1  -3   0   40.29    4.14 
   1  -3   0   41.21    4.34 
   1  -3   0   32.70    3.86 
  -1  -3   0   36.46    3.94 
   1  -3   0   39.50    4.45 
   1  -3   0   40.59    3.91 
   1  -3   0   38.81    4.00 
  -1  -3   0   37.44    3.52 
  -1  -3   0   36.56    4.08 
   1  -3   0   43.50    4.92 
   1  -3   0   36.78    2.44 
  -1  -3   0   45.05    4.81 
   1  -3   0   39.57    4.10 
   1  -3   0   31.77    2.65 
   1  -3   0   35.71    3.92 
   1  -3   0   42.92    5.44 
  -1  -3   0   33.26    3.54 
  -1  -3   0   33.64    4.02 
  -1  -3   0   32.22    3.12 
  -1  -3   0   34.31    2.85 
  -1  -3   0   43.98    2.98 
   1  -3   0   38.54    3.99 
  -1  -3   0   41.80    4.08 
  -1  -3   0   36.24    3.50 
   1   3   0   43.41    4.83 
   1   3   0   32.06    2.64 
  -1   3   0   37.64    3.83 
   1   3   0   37.84    3.69 
  -1   3   0   37.05    3.77 
  -1   3   0   32.82    3.60 
   1   3   0   42.98    3.15 
   1   3   0   34.04    2.66 
  -1   3   0   34.76    3.61 
   1   3   0   35.78    3.50 
  -1   3   0   34.53    3.63 
   1   3   0   35.80    2.96 
   1   3   0   39.36    4.15 
   1   3   0   35.30    2.21 
  -1   3   0   38.90    2.85 
  -1   3   0   38.31    4.06 
  -1   3   0   41.02    4.08 
  -1   3   0   29.38    3.03 
  -1   3   0   34.06    3.94 
   1   3   0   35.10    3.31 
  -1   3   0   37.20    4.09 
  -1   3   0   39.78    3.94 
  -1   3   0   31.34    4.20 
  -1   3   0   41.22    4.23 
   1   3   0   37.24    2.65 
   1   3   0   32.43    3.47 
  -1   3   0   36.96    2.23 
  -1   3   0   39.91    4.49 
   1   3   0   39.55    2.86 
  -1   3   0   30.25    3.52 
   1   3   0   37.73    2.71 
  -2  -3   0   45.87    4.95 
   2  -3   0   33.94    2.04 
   2  -3   0   35.14    3.70 
   2  -3   0   35.61    3.91 
   2  -3   0   42.21    5.40 
   2  -3   0   38.10    4.45 
   2  -3   0   41.04    4.49 
  -2  -3   0   46.10    4.87 
  -2  -3   0   33.82    3.95 
  -2  -3   0   38.41    4.27 
  -2  -3   0   41.24    2.75 
   2  -3   0   47.82    4.91 
   2  -3   0   37.45    4.31 
   2  -3   0   50.46    4.99 
  -2  -3   0   50.23    4.81 
  -2  -3   0   45.32    3.14 
   2  -3   0   38.98    4.54 
   2  -3   0   37.17    3.69 
   2  -3   0   36.25    4.42 
   2  -3   0   44.12    4.95 
   2  -3   0   41.17    4.55 
  -2   3   0   45.33    5.00 
   2   3   0   41.42    4.20 
  -2   3   0   34.49    3.98 
   2   3   0   37.53    4.00 
   2   3   0   34.83    2.11 
   2   3   0   36.29    2.94 
   2   3   0   38.34    2.66 
   2   3   0   41.02    3.85 
   2   3   0   36.80    3.47 
   2   3   0   43.52    4.83 
   2   3   0   41.42    2.48 
   2   3   0   33.91    3.89 
   2   3   0   39.34    2.19 
  -2   3   0   42.42    4.37 
   2   3   0   40.35    4.13 
   2   3   0   37.22    3.76 
  -2   3   0   37.15    3.14 
   2   3   0   39.48    2.76 
   2   3   0   44.47    4.26 
   2   3   0   44.21    5.17 
  -2   3   0   37.65    3.82 
  -2   3   0   38.13    4.51 
   2   3   0   35.50    4.59 
   2   3   0   39.41    4.07 
   2   3   0   36.70    2.66 
  -2   3   0   39.09    4.04 
   2   3   0   36.13    2.34 
  -2   3   0   35.23    4.14 
   2   3   0   41.31    2.86 
   3  -3   0    5.00    2.24 
   3  -3   0    1.71    1.61 
   3  -3   0    3.02    1.94 
   3  -3   0    3.31    1.94 
   3  -3   0    4.72    1.72 
  -3  -3   0    2.73    1.66 
  -3  -3   0    4.30    1.85 
  -3  -3   0    5.20    2.25 
   3  -3   0    2.86    1.96 
   3  -3   0    3.12    1.82 
   3  -3   0    5.38    2.48 
  -3  -3   0    4.95    1.28 
  -3  -3   0    3.41    1.02 
  -3  -3   0    3.29    1.78 
  -3  -3   0    3.09    1.09 
   3  -3   0    3.96    1.98 
   3  -3   0    4.96    2.25 
   3  -3   0    5.81    2.32 
   3  -3   0    3.79    1.25 
   3   3   0    2.97    0.88 
   3   3   0    2.75    0.91 
   3   3   0    6.16    2.04 
   3   3   0    2.86    0.69 
   3   3   0    6.54    1.97 
   3   3   0    4.33    2.25 
  -3   3   0    5.22    1.92 
  -3   3   0    3.86    2.28 
   3   3   0    2.58    0.80 
   3   3   0    4.57    1.38 
   3   3   0    4.48    1.92 
   3   3   0    4.36    2.09 
  -3   3   0    4.49    1.69 
  -3   3   0    1.89    1.68 
   3   3   0    7.91    1.72 
   3   3   0    2.66    1.75 
   3   3   0    4.22    0.96 
  -3   3   0    4.79    2.09 
   3   3   0    1.66    1.02 
   3   3   0    3.11    0.70 
   3   3   0    2.96    1.26 
   3   3   0    6.27    1.38 
  -3   3   0    2.85    1.97 
   3   3   0    5.59    1.42 
   3   3   0    3.05    1.48 
   4  -3   0  133.74    8.38 
   4  -3   0  128.64    8.50 
  -4  -3   0  127.38    5.21 
   4  -3   0  135.04    9.15 
  -4  -3   0  116.29    7.14 
   4  -3   0  110.35    8.05 
   4  -3   0  129.20    8.97 
  -4  -3   0  131.07    5.26 
   4  -3   0  129.16    7.19 
  -4  -3   0  120.63    8.61 
   4  -3   0  135.04    8.98 
   4  -3   0  136.74    6.85 
  -4  -3   0  121.41    8.56 
  -4  -3   0  124.72    5.67 
  -4  -3   0  119.45    5.82 
   4  -3   0  120.93    8.53 
   4  -3   0  124.67    8.04 
   4  -3   0  128.26    9.40 
  -4  -3   0  125.76    5.90 
   4   3   0  130.96    5.88 
   4   3   0  120.00    7.90 
  -4   3   0  127.91    7.93 
   4   3   0  115.94    6.95 
   4   3   0  120.51    6.50 
   4   3   0  132.29    6.18 
  -4   3   0  119.99    8.55 
  -4   3   0  122.20    8.52 
  -4   3   0  118.39    8.14 
   4   3   0  124.37    7.99 
   4   3   0  130.84    6.51 
   4   3   0  132.74    6.87 
   4   3   0  122.75    8.20 
  -4   3   0  118.75    8.22 
  -4   3   0  135.07    8.76 
   4   3   0  117.08    8.03 
  -5  -3   0   65.08    3.89 
   5  -3   0   74.22    7.87 
   5  -3   0   69.68    7.68 
  -5  -3   0   72.92    4.34 
  -5  -3   0   57.50    7.21 
   5  -3   0   63.51    8.65 
   5  -3   0   86.20    9.06 
  -5  -3   0   63.48    4.34 
   5  -3   0   68.57    8.30 
   5  -3   0   77.59    7.95 
   5  -3   0   72.10    5.39 
  -5  -3   0   78.15    8.52 
   5  -3   0   63.61    7.53 
  -5  -3   0   67.78    3.91 
   5  -3   0   82.46    8.42 
   5  -3   0   72.04    5.10 
  -5  -3   0   79.81    5.52 
  -5  -3   0   74.93    4.21 
   5  -3   0   60.33    6.68 
  -5  -3   0   71.03    4.41 
   5   3   0   63.75    7.10 
   5   3   0   73.91    7.32 
  -5   3   0   78.72    7.63 
   5   3   0   86.11    8.25 
   5   3   0   67.16    4.42 
  -5   3   0   62.58    7.32 
  -5   3   0   61.40    6.73 
  -5   3   0   78.20    7.69 
   5   3   0   81.32    8.91 
  -5   3   0   58.66    6.97 
   5   3   0   65.47    4.67 
   5   3   0   73.79    5.40 
  -5   3   0   59.20    7.34 
   5   3   0   67.75    7.23 
   5   3   0   71.22    5.06 
   5   3   0   75.46    5.87 
  -5   3   0   63.70    7.17 
   5   3   0   70.68    4.59 
  -5   3   0   82.78    8.12 
   6  -3   0  243.75   15.21 
  -6  -3   0  260.40   10.96 
   6  -3   0  258.70   15.62 
   6  -3   0  265.77   14.99 
  -6  -3   0  243.89   10.63 
   6  -3   0  248.30   11.64 
   6  -3   0  215.11   14.04 
   6  -3   0  242.46   14.55 
  -6  -3   0  253.12   15.49 
  -6  -3   0  267.04   11.84 
   6  -3   0  267.52   13.22 
  -6  -3   0  253.42   11.86 
   6  -3   0  261.30   14.58 
   6  -3   0  252.34   15.34 
  -6  -3   0  270.04   15.67 
   6  -3   0  250.80   16.43 
   6  -3   0  250.67   14.81 
  -6  -3   0  259.05   10.70 
   6   3   0  228.17   12.07 
   6   3   0  234.47   14.89 
  -6   3   0  252.89   15.22 
  -6   3   0  256.02   14.75 
   6   3   0  234.51   13.29 
   6   3   0  249.41   11.57 
  -6   3   0  246.43   13.84 
  -6   3   0  247.17   14.45 
   6   3   0  226.56   14.42 
   6   3   0  261.99   14.51 
  -6   3   0  260.08   15.32 
   6   3   0  253.38   14.08 
  -6   3   0  250.26   14.39 
   6   3   0  251.49   14.25 
  -6   3   0  271.45   14.13 
  -6   3   0  251.05   14.38 
   6   3   0  256.88    9.90 
   6   3   0  264.15   10.85 
  -7  -3   0   66.51    9.27 
   7  -3   0   84.59    9.98 
   7  -3   0   70.28    8.42 
   7  -3   0   78.29   11.49 
   7  -3   0   74.75    7.90 
  -7  -3   0   61.24    6.22 
   7  -3   0   87.88   10.34 
   7  -3   0   63.53    9.11 
   7  -3   0   74.60    9.99 
   7  -3   0   71.47    8.76 
   7  -3   0   81.43    9.89 
  -7  -3   0   65.07    8.93 
   7  -3   0   88.56    9.81 
  -7   3   0   84.21    9.85 
   7   3   0   62.26    7.78 
   7   3   0   89.61   10.78 
  -7   3   0   72.68    8.95 
   7   3   0   82.47    8.81 
   7   3   0   85.23    9.10 
  -7   3   0   65.00    7.66 
   7   3   0   69.69    8.58 
  -7   3   0   72.77    9.02 
   7   3   0   78.32    9.07 
  -7   3   0   69.32    8.50 
   7   3   0   84.05    9.47 
   7   3   0   77.22    7.39 
  -7   3   0   63.43    9.10 
   7   3   0   72.43    5.60 
  -7   3   0   67.75    8.45 
  -7   3   0   71.16    7.97 
   8  -3   0   95.18   11.39 
   8  -3   0  100.00   11.20 
   8  -3   0  113.20   12.93 
   8  -3   0   76.20   10.39 
   8  -3   0  126.32   15.01 
   8  -3   0   93.36   11.67 
   8  -3   0   96.56   11.63 
   8  -3   0   88.08   11.60 
  -8  -3   0   87.10   11.38 
  -8  -3   0  106.01   12.28 
   8  -3   0  114.12   11.33 
   8  -3   0  109.05   10.51 
  -8   3   0   93.76   11.25 
  -8   3   0   94.41   10.74 
   8   3   0  129.26   13.63 
   8   3   0   96.99   10.94 
   8   3   0  121.90   11.62 
  -8   3   0   91.73    9.98 
   8   3   0  106.22   10.99 
  -8   3   0   96.94   11.90 
   8   3   0  109.20   12.00 
  -8   3   0  113.72   10.77 
   8   3   0  104.59   11.64 
  -8   3   0  118.71   11.03 
  -8   3   0  109.62   12.44 
   8   3   0  100.18   10.54 
  -8   3   0   99.66   11.18 
   8   3   0  113.84    8.34 
   9  -3   0   18.29    6.88 
   9  -3   0   15.92    5.46 
   9  -3   0   30.52    6.82 
   9  -3   0   31.09    6.52 
  -9  -3   0   25.32    6.87 
   9  -3   0   40.13    8.26 
   9  -3   0   24.51    6.99 
   9  -3   0   54.63    9.71 
   9  -3   0   31.39    6.77 
  -9  -3   0   24.22    6.56 
   9  -3   0   25.15    6.92 
   9   3   0   31.54    7.05 
   9   3   0   25.83    6.73 
  -9   3   0   40.07    8.41 
   9   3   0   30.13    7.12 
   9   3   0   36.08    7.39 
  -9   3   0   44.86    7.98 
   9   3   0   32.87    7.79 
   9   3   0   24.83    6.08 
  -9   3   0   29.18    7.35 
  -9   3   0   31.17    7.78 
  -9   3   0   31.45    6.49 
   9   3   0   42.62    7.52 
  -9   3   0   36.58    7.36 
   0  -4   0    4.01    2.03 
   0  -4   0    0.94    1.45 
   0  -4   0    1.96    1.51 
   0  -4   0    2.97    1.52 
   0  -4   0    5.14    2.23 
   0  -4   0    2.75    1.40 
   0  -4   0    2.57    1.47 
   0  -4   0    2.79    1.64 
   0  -4   0    2.35    1.88 
   0  -4   0    2.83    2.30 
   0   4   0    2.20    0.81 
   0   4   0    2.13    1.26 
   0   4   0    1.12    1.43 
   0   4   0   -0.26    2.43 
   0   4   0    1.38    1.67 
   0   4   0    1.36    1.26 
   0   4   0    3.10    1.42 
   0   4   0    2.98    1.42 
   0   4   0    1.05    1.33 
   0   4   0    3.00    1.07 
   0   4   0    1.34    1.91 
   0   4   0    1.58    1.81 
   0   4   0    1.91    1.48 
   1  -4   0  779.08   29.82 
   1  -4   0  773.70   29.61 
   1  -4   0  772.40   29.41 
  -1  -4   0  755.15   29.38 
  -1  -4   0  746.12   28.33 
   1  -4   0  716.94   32.22 
  -1  -4   0  773.62   29.83 
   1  -4   0  802.28   30.01 
  -1  -4   0  758.09   28.91 
  -1  -4   0  751.49   28.24 
  -1  -4   0  770.46   28.70 
  -1  -4   0  741.00   30.08 
  -1  -4   0  742.98   30.11 
   1  -4   0  777.53   29.82 
   1  -4   0  771.98   30.14 
   1  -4   0  764.22   29.80 
  -1  -4   0  793.32   29.52 
  -1  -4   0  760.23   28.35 
  -1  -4   0  760.45   28.60 
   1  -4   0  754.82   30.24 
  -1  -4   0  688.85   30.01 
   1  -4   0  760.97   29.55 
  -1  -4   0  775.49   29.48 
   1   4   0  765.32   28.77 
  -1   4   0  748.78   28.02 
  -1   4   0  799.33   29.73 
   1   4   0  774.77   28.13 
  -1   4   0  761.60   26.85 
   1   4   0  631.86   30.59 
  -1   4   0  754.04   30.10 
  -1   4   0  750.86   27.86 
   1   4   0  745.36   28.23 
   1   4   0  768.84   28.29 
  -1   4   0  721.20   29.76 
   1   4   0  761.80   28.31 
  -1   4   0  765.71   29.33 
   1   4   0  748.89   28.77 
   1   4   0  750.27   28.59 
  -1   4   0  751.53   28.83 
   1   4   0  746.89   27.22 
  -1   4   0  794.54   30.57 
   1   4   0  755.92   28.55 
  -1   4   0  758.70   29.63 
   1   4   0  753.80   28.02 
   1   4   0  749.93   28.01 
   2  -4   0    3.22    1.87 
   2  -4   0    4.04    1.66 
  -2  -4   0    5.46    2.18 
   2  -4   0    2.55    2.33 
   2  -4   0    3.44    1.92 
  -2  -4   0    0.84    1.95 
  -2  -4   0    2.01    1.72 
   2  -4   0    7.01    2.29 
   2  -4   0    5.02    1.56 
   2  -4   0    5.46    2.56 
  -2  -4   0    3.85    1.53 
  -2  -4   0    3.95    1.37 
   2  -4   0    5.74    2.43 
  -2  -4   0    2.70    1.82 
  -2  -4   0    1.06    1.91 
   2  -4   0    2.88    1.88 
   2  -4   0    6.23    2.20 
   2  -4   0    3.95    2.05 
   2  -4   0    6.02    2.34 
  -2   4   0    5.18    1.89 
   2   4   0    1.35    1.76 
   2   4   0    1.88    1.23 
   2   4   0    4.72    2.39 
  -2   4   0    6.17    1.93 
   2   4   0    2.13    1.49 
   2   4   0    3.85    1.55 
   2   4   0    4.32    1.80 
   2   4   0    4.38    0.70 
   2   4   0    4.08    1.67 
  -2   4   0    3.26    1.40 
   2   4   0    3.09    1.44 
  -2   4   0    4.14    1.92 
  -2   4   0    7.14    2.13 
   2   4   0    7.40    2.08 
   2   4   0    5.21    1.49 
  -2   4   0    3.72    1.87 
   2   4   0    5.48    2.03 
   2   4   0    4.24    1.28 
   2   4   0    1.16    1.58 
   2   4   0    1.42    2.31 
   2   4   0    3.63    1.24 
   2   4   0    4.49    1.21 
   2   4   0    4.17    1.48 
  -2   4   0    3.17    2.00 
   3  -4   0  194.17    7.37 
   3  -4   0  185.56   11.04 
   3  -4   0  177.96   10.69 
   3  -4   0  189.57    9.87 
   3  -4   0  194.98   10.32 
   3  -4   0  212.25   11.73 
   3  -4   0  193.14   12.00 
  -3  -4   0  214.49   11.07 
   3  -4   0  194.46   11.93 
  -3  -4   0  198.13   11.27 
  -3  -4   0  199.97    8.82 
   3  -4   0  197.62   11.09 
  -3  -4   0  196.08   10.71 
   3  -4   0  194.72   11.00 
  -3  -4   0  191.22    8.34 
   3   4   0  188.46    7.61 
   3   4   0  206.78   10.28 
   3   4   0  187.49    9.32 
   3   4   0  192.88    8.47 
   3   4   0  192.43    8.41 
  -3   4   0  185.89   10.67 
   3   4   0  195.39    8.98 
   3   4   0  188.88    9.98 
  -3   4   0  194.36    9.62 
   3   4   0  192.94    8.27 
   3   4   0  186.46    9.68 
   3   4   0  193.33   11.29 
   3   4   0  192.93    8.29 
   3   4   0  183.80   11.12 
   3   4   0  192.76   10.43 
  -3   4   0  212.57   10.87 
   3   4   0  191.23    7.68 
  -3   4   0  195.62   11.42 
   3   4   0  187.57    8.68 
   3   4   0  192.05    8.40 
   3   4   0  179.85    8.16 
  -3   4   0  203.56   11.14 
   3   4   0  200.03    9.09 
  -4  -4   0    9.11    1.59 
   4  -4   0    7.76    1.92 
   4  -4   0   10.90    3.11 
  -4  -4   0    9.70    2.96 
   4  -4   0   12.90    4.24 
  -4  -4   0    8.12    2.80 
   4  -4   0    8.60    2.74 
  -4  -4   0    7.29    3.02 
   4  -4   0   13.83    3.61 
   4  -4   0    6.50    3.31 
   4  -4   0   13.60    3.35 
   4  -4   0   11.05    2.79 
   4  -4   0    6.12    2.78 
   4  -4   0    5.31    3.09 
  -4  -4   0    9.34    1.76 
   4   4   0    9.54    2.73 
  -4   4   0    9.59    3.07 
  -4   4   0   12.45    3.70 
  -4   4   0   11.29    3.73 
   4   4   0    6.18    1.88 
  -4   4   0    8.20    2.95 
   4   4   0   10.74    3.01 
  -4   4   0    7.69    3.00 
   4   4   0   10.04    1.25 
   4   4   0    9.87    1.71 
   4   4   0   10.16    3.07 
   4   4   0    7.51    1.65 
   4   4   0   11.49    2.34 
   4   4   0   12.07    3.28 
   4   4   0    8.30    2.07 
   4   4   0    7.29    2.91 
  -4   4   0   13.16    3.33 
   4   4   0    9.52    1.23 
   4   4   0    5.03    1.99 
   5  -4   0  118.34    8.92 
  -5  -4   0  125.82    5.67 
  -5  -4   0  128.56    5.95 
   5  -4   0  134.90   10.06 
   5  -4   0  123.87    7.99 
  -5  -4   0  150.49   10.51 
  -5  -4   0  126.99    8.22 
   5  -4   0  126.77   10.63 
   5  -4   0  127.04    7.24 
   5  -4   0  121.13    9.62 
   5  -4   0  136.02    9.55 
  -5  -4   0  138.24   10.14 
   5  -4   0  103.28   10.16 
   5  -4   0  114.09    9.66 
   5  -4   0  147.07   10.07 
   5   4   0  121.32    9.11 
  -5   4   0  134.32    8.86 
   5   4   0  118.90    7.43 
  -5   4   0  124.13    9.12 
   5   4   0  119.11    9.83 
  -5   4   0  125.39    9.59 
  -5   4   0  127.41    9.60 
  -5   4   0  112.88   10.68 
   5   4   0  133.99    6.45 
   5   4   0  130.57    7.16 
   5   4   0  128.05    8.96 
   5   4   0  112.68    7.59 
  -5   4   0  123.57    9.75 
   5   4   0  128.78    9.26 
   5   4   0  148.22    9.42 
  -5   4   0  136.78    9.48 
  -5   4   0  130.00   10.13 
   6  -4   0   32.72    4.47 
   6  -4   0   26.42    4.20 
   6  -4   0   29.71    6.09 
   6  -4   0   34.59    7.19 
   6  -4   0   19.70    5.31 
   6  -4   0   28.33    5.77 
  -6  -4   0   24.60    4.25 
   6  -4   0   30.50    6.03 
   6  -4   0   32.11    5.86 
   6  -4   0   23.57    5.49 
   6  -4   0   31.45    5.98 
  -6  -4   0   36.66    6.73 
  -6  -4   0   28.14    5.66 
   6  -4   0   26.18    5.45 
  -6   4   0   40.02    6.42 
   6   4   0   31.04    5.73 
   6   4   0   33.46    5.67 
  -6   4   0   25.65    5.68 
  -6   4   0   35.88    5.70 
   6   4   0   32.43    4.22 
   6   4   0   34.99    5.71 
  -6   4   0   26.11    5.16 
   6   4   0   40.92    6.37 
  -6   4   0   25.25    5.43 
   6   4   0   28.92    4.88 
  -6   4   0   30.50    5.74 
   6   4   0   38.93    4.23 
  -6   4   0   28.77    5.89 
  -6   4   0   32.58    5.86 
   6   4   0   32.27    6.49 
   6   4   0   32.23    3.61 
   7  -4   0   55.86    8.07 
   7  -4   0   56.78    8.75 
   7  -4   0   58.35    8.80 
  -7  -4   0   60.57    9.23 
   7  -4   0   53.98    7.97 
   7  -4   0   53.34    8.56 
   7  -4   0   62.31    8.58 
   7  -4   0   64.15    9.29 
  -7  -4   0   42.72    7.46 
   7  -4   0   61.51    8.55 
   7  -4   0   60.48   10.19 
  -7   4   0   75.54    9.14 
   7   4   0   75.61    8.72 
   7   4   0   56.00    7.81 
  -7   4   0   49.22    7.67 
  -7   4   0   55.13    8.69 
  -7   4   0   63.19    8.52 
  -7   4   0   76.54    9.03 
   7   4   0   64.01    8.78 
  -7   4   0   64.59    9.03 
  -7   4   0   48.55    7.49 
   7   4   0   61.96    9.50 
  -7   4   0   60.16    8.97 
   7   4   0   48.56    7.36 
   7   4   0   60.30    8.90 
   7   4   0   64.54    7.77 
   8  -4   0   12.15    4.57 
   8  -4   0   16.03    5.36 
   8  -4   0    8.82    5.19 
  -8  -4   0   24.03    6.30 
   8  -4   0   11.04    5.60 
   8  -4   0   11.77    4.57 
   8  -4   0   11.41    4.96 
   8  -4   0   15.46    5.62 
   8  -4   0    9.78    4.30 
  -8  -4   0   17.97    5.99 
   8  -4   0   18.52    5.39 
   8   4   0   28.77    6.68 
  -8   4   0   20.90    6.15 
   8   4   0   35.32    6.76 
  -8   4   0   29.78    6.21 
  -8   4   0   10.19    4.52 
   8   4   0   18.32    5.30 
  -8   4   0   17.56    5.01 
  -8   4   0   20.71    5.64 
  -8   4   0   19.09    5.51 
  -8   4   0   19.19    5.10 
   8   4   0   13.08    4.48 
   8   4   0   18.79    4.78 
   8   4   0   21.82    5.81 
   8   4   0   21.37    6.50 
  -8   4   0   22.74    6.40 
  -9  -4   0    6.91    4.60 
   9  -4   0    4.13    4.27 
   9  -4   0    1.83    5.18 
   9  -4   0    3.67    3.92 
   9  -4   0    5.40    3.97 
   9  -4   0    0.60    3.54 
   9  -4   0   -3.30    3.64 
   9  -4   0    2.10    3.50 
   9  -4   0    2.19    4.35 
   9  -4   0    0.61    4.34 
  -9  -4   0    0.78    3.93 
  -9   4   0    5.02    3.65 
  -9   4   0   -1.19    2.87 
  -9   4   0    5.56    4.49 
   9   4   0    6.12    4.13 
  -9   4   0    3.83    3.65 
   9   4   0   -1.52    3.46 
  -9   4   0   -4.43    3.07 
   9   4   0    0.21    3.04 
  -9   4   0    4.25    3.99 
  -9   4   0   -1.48    2.92 
   9   4   0    2.85    3.55 
  -9   4   0    0.57    3.19 
   9   4   0    3.81    4.22 
   0  -5   0   -0.99    1.18 
   0  -5   0   -1.31    1.46 
   0  -5   0    1.43    1.91 
   0  -5   0   -0.19    1.47 
   0  -5   0    0.19    1.60 
   0  -5   0   -0.20    1.81 
   0  -5   0    0.12    1.21 
   0  -5   0    1.36    1.56 
   0  -5   0   -1.28    1.02 
   0   5   0   -0.27    0.79 
   0   5   0   -1.03    1.61 
   0   5   0   -0.48    0.71 
   0   5   0    0.44    1.01 
   0   5   0   -0.55    1.25 
   0   5   0    1.03    2.63 
   0   5   0   -0.74    1.42 
   0   5   0    0.00    1.03 
   1  -5   0   25.80    4.36 
  -1  -5   0   15.39    2.79 
  -1  -5   0   14.53    3.65 
   1  -5   0   22.68    4.03 
   1  -5   0   18.61    3.37 
  -1  -5   0   18.17    3.77 
   1  -5   0   21.02    3.85 
  -1  -5   0   13.94    3.60 
  -1  -5   0   12.76    3.55 
   1  -5   0   10.11    2.61 
  -1  -5   0   13.51    3.59 
   1  -5   0    9.22    2.82 
  -1  -5   0    6.57    2.34 
   1  -5   0   15.71    4.53 
  -1  -5   0    8.06    2.27 
  -1  -5   0   11.16    2.87 
   1  -5   0   20.48    3.56 
  -1  -5   0   10.20    2.52 
  -1   5   0   13.05    3.76 
  -1   5   0   12.57    1.81 
   1   5   0   12.12    2.77 
   1   5   0   10.58    2.80 
  -1   5   0   14.00    3.46 
   1   5   0   15.04    2.82 
   1   5   0   14.52    3.31 
   1   5   0   15.29    2.72 
  -1   5   0   16.25    2.83 
  -1   5   0   15.89    2.56 
  -1   5   0    8.93    2.73 
   1   5   0    9.62    2.56 
  -1   5   0   18.42    3.53 
  -1   5   0   15.48    3.35 
   1   5   0   10.66    2.24 
   1   5   0   17.31    3.34 
  -1   5   0   10.45    2.52 
   1   5   0   13.04    2.65 
   1   5   0   12.16    3.86 
   1   5   0   15.37    2.20 
  -2  -5   0   11.33    2.50 
   2  -5   0   11.97    2.42 
  -2  -5   0    6.87    2.61 
  -2  -5   0   13.01    3.07 
   2  -5   0    8.77    2.70 
  -2  -5   0   11.60    3.34 
   2  -5   0   10.17    3.55 
   2  -5   0    9.72    4.04 
   2  -5   0    7.32    2.78 
   2  -5   0   10.17    3.21 
   2  -5   0    6.57    2.53 
  -2  -5   0   10.19    3.10 
   2  -5   0   12.80    3.02 
  -2  -5   0    9.28    2.16 
  -2  -5   0    4.33    2.59 
   2  -5   0   10.02    3.04 
   2  -5   0   10.73    1.79 
  -2  -5   0   12.83    2.93 
   2   5   0    5.56    2.07 
   2   5   0    9.83    2.19 
   2   5   0   10.44    3.45 
  -2   5   0   12.00    2.77 
  -2   5   0   11.99    3.24 
   2   5   0   14.16    2.65 
   2   5   0    6.95    2.20 
   2   5   0    9.27    2.37 
   2   5   0   11.52    1.45 
   2   5   0    8.57    2.47 
   2   5   0   12.25    2.24 
   2   5   0   10.22    2.05 
   2   5   0   12.57    2.18 
  -2   5   0    8.86    3.07 
   2   5   0   10.41    1.98 
   2   5   0    9.14    2.42 
  -2   5   0    6.27    2.41 
  -2   5   0    8.86    3.35 
  -2   5   0    8.54    1.97 
  -2   5   0    8.31    2.61 
   2   5   0   12.63    2.42 
   2   5   0    8.46    3.53 
   2   5   0   12.28    3.02 
   3  -5   0   -0.08    1.71 
   3  -5   0    0.31    1.86 
   3  -5   0   -0.94    1.22 
  -3  -5   0    2.46    1.60 
   3  -5   0    0.03    2.32 
  -3  -5   0    0.65    1.55 
   3  -5   0    0.23    1.81 
  -3  -5   0   -1.33    1.71 
   3  -5   0   -0.08    2.05 
   3  -5   0    2.05    2.59 
  -3  -5   0   -1.11    1.87 
   3  -5   0   -0.37    1.47 
  -3  -5   0    1.11    1.04 
   3   5   0    0.58    0.95 
   3   5   0    0.20    1.57 
   3   5   0   -0.08    0.72 
   3   5   0    1.12    1.23 
  -3   5   0   -0.59    1.63 
   3   5   0   -2.48    1.45 
   3   5   0   -1.23    1.14 
   3   5   0    0.57    1.57 
  -3   5   0    3.06    2.54 
   3   5   0    0.79    0.87 
   3   5   0    0.45    1.47 
   3   5   0   -2.05    0.88 
   3   5   0   -0.07    1.14 
  -3   5   0    2.00    2.01 
  -3   5   0   -1.41    1.02 
   3   5   0    0.59    1.76 
  -3   5   0    0.54    1.69 
   3   5   0    0.76    0.82 
   3   5   0   -0.94    0.96 
   3   5   0   -1.01    2.16 
   3   5   0    0.21    0.92 
   3   5   0    0.27    1.27 
  -3   5   0   -2.78    1.49 
   3   5   0   -0.48    1.26 
   4  -5   0   81.67    6.33 
   4  -5   0   70.72    8.35 
   4  -5   0   81.97    8.72 
   4  -5   0   81.33   10.28 
   4  -5   0   69.35    8.19 
  -4  -5   0   69.49    4.20 
   4  -5   0   77.76    8.50 
  -4  -5   0   92.37    9.09 
   4  -5   0   71.88    8.39 
  -4  -5   0   75.19    4.72 
   4  -5   0   66.80    6.97 
  -4  -5   0   73.61    7.86 
  -4  -5   0   60.65    7.81 
   4   5   0   65.93    7.33 
   4   5   0   72.40    4.14 
  -4   5   0   69.64    5.75 
  -4   5   0   78.87    8.37 
   4   5   0   67.84    4.29 
   4   5   0   85.64    7.66 
  -4   5   0   89.81    9.18 
   4   5   0   71.44    6.69 
  -4   5   0   62.97    7.99 
   4   5   0   67.71    4.25 
   4   5   0   79.43    4.92 
   4   5   0   70.25    7.00 
  -4   5   0   63.16    7.58 
   4   5   0   73.55    8.53 
   4   5   0   84.02    8.83 
   4   5   0   53.86    7.15 
   4   5   0   68.09    4.55 
  -4   5   0   79.16    8.52 
  -4   5   0   60.94    7.14 
  -5  -5   0   -0.81    2.05 
  -5  -5   0    1.18    2.85 
  -5  -5   0    1.86    2.37 
   5  -5   0    1.66    3.07 
   5  -5   0    2.24    2.24 
   5  -5   0    3.96    2.28 
   5  -5   0    4.29    3.00 
   5  -5   0    2.18    2.60 
   5  -5   0    4.27    3.01 
   5  -5   0    2.05    2.70 
   5  -5   0    3.41    3.30 
   5   5   0   -0.74    1.98 
  -5   5   0    1.11    2.70 
   5   5   0    0.88    1.90 
   5   5   0    0.72    2.10 
   5   5   0   -1.25    2.21 
  -5   5   0    1.71    2.52 
  -5   5   0    0.45    2.09 
   5   5   0    0.98    1.66 
   5   5   0    0.38    2.57 
  -5   5   0    0.87    2.03 
  -5   5   0   -0.92    2.18 
  -5   5   0    2.17    2.95 
  -5   5   0    4.35    3.77 
  -5   5   0    4.70    3.59 
   5   5   0    4.78    3.09 
   6  -5   0  224.96   12.73 
   6  -5   0  242.18   15.47 
   6  -5   0  250.30   16.29 
   6  -5   0  260.36   15.45 
  -6  -5   0  259.13   13.72 
   6  -5   0  228.22   15.03 
  -6  -5   0  198.71   14.46 
   6  -5   0  231.86   14.14 
   6  -5   0  223.02   16.69 
   6  -5   0  257.52   15.68 
  -6  -5   0  234.27   15.76 
  -6   5   0  237.49   13.74 
  -6   5   0  253.15   15.72 
   6   5   0  262.62   16.21 
  -6   5   0  193.96   14.06 
   6   5   0  260.44   15.30 
   6   5   0  250.17   14.45 
  -6   5   0  227.04   15.28 
  -6   5   0  254.95   15.17 
   6   5   0  253.50   14.46 
   6   5   0  222.68   14.25 
  -6   5   0  227.80   14.72 
  -6   5   0  206.49   14.33 
   6   5   0  237.23   12.70 
  -6   5   0  213.27   15.08 
   7  -5   0    2.30    2.49 
   7  -5   0    1.98    3.62 
   7  -5   0    6.03    3.97 
   7  -5   0    1.78    3.53 
   7  -5   0   -1.53    2.64 
  -7  -5   0    4.63    3.04 
   7  -5   0    1.29    3.14 
   7  -5   0   -1.25    2.87 
  -7  -5   0    5.60    3.81 
   7  -5   0    3.19    3.38 
   7   5   0    0.34    2.50 
  -7   5   0    4.19    3.67 
  -7   5   0    0.60    2.35 
   7   5   0    3.57    3.78 
  -7   5   0   -0.67    3.18 
  -7   5   0   -0.87    2.62 
  -7   5   0    2.00    2.91 
   7   5   0    0.86    2.73 
  -7   5   0    0.10    3.14 
   7   5   0   -1.37    2.50 
   7   5   0    2.16    3.06 
  -7   5   0    5.50    3.10 
  -7   5   0   -1.31    2.18 
  -8  -5   0  167.09   17.27 
   8  -5   0  142.42   14.17 
   8  -5   0  143.52   17.79 
   8  -5   0  149.48   14.95 
   8  -5   0  134.91   14.60 
  -8  -5   0  145.02   15.84 
   8  -5   0  142.23   12.10 
   8  -5   0  119.51   14.19 
   8  -5   0  157.18   15.62 
   8  -5   0  156.74   16.12 
  -8   5   0  157.85   12.60 
  -8   5   0  166.20   16.03 
   8   5   0  158.75   12.52 
   8   5   0  141.69   14.24 
  -8   5   0  173.30   14.31 
   8   5   0  146.14   16.04 
  -8   5   0  120.31   13.30 
   8   5   0  147.53   12.18 
  -8   5   0  170.71   15.57 
  -8   5   0  140.07   14.74 
  -8   5   0  140.97   12.02 
  -8   5   0  172.74   12.80 
  -9  -5   0   -2.08    2.48 
   9  -5   0    4.10    4.60 
   9  -5   0   -0.24    3.88 
   9  -5   0   -2.23    4.33 
  -9  -5   0   -2.25    3.29 
   9  -5   0   -0.54    2.98 
   9  -5   0    1.05    4.03 
   9  -5   0    3.20    4.59 
   9  -5   0   -0.44    3.19 
  -9   5   0    5.81    4.75 
  -9   5   0   -1.46    2.67 
   9   5   0   -2.06    3.25 
   9   5   0    5.35    4.96 
  -9   5   0   -0.14    2.76 
  -9   5   0   -4.25    2.75 
  -9   5   0    2.79    4.09 
   9   5   0   -0.17    3.97 
  -9   5   0   -1.19    3.98 
  -9   5   0   -3.37    2.98 
  -9   5   0    1.28    3.18 
   0  -6   0   58.96    5.77 
   0  -6   0   47.45    6.26 
   0  -6   0   57.60    7.74 
   0  -6   0   78.17    8.43 
   0  -6   0   56.05    7.40 
   0  -6   0   72.85    7.09 
   0  -6   0   62.52    6.93 
   0  -6   0   44.62    5.63 
   0  -6   0   63.00    6.80 
   0   6   0   49.60    4.09 
   0   6   0   54.82    5.36 
   0   6   0   82.97    8.43 
   0   6   0   54.73    4.35 
   0   6   0   60.56    4.21 
   0   6   0   62.86    3.99 
   0   6   0   57.85    8.75 
   0   6   0   57.14    6.82 
   0   6   0   66.09    7.22 
   1  -6   0  269.95   14.96 
  -1  -6   0  253.11   13.50 
  -1  -6   0  261.62   15.02 
  -1  -6   0  274.75   13.53 
  -1  -6   0  276.60   15.41 
   1  -6   0  255.06   13.79 
  -1  -6   0  262.66   14.23 
  -1  -6   0  247.18   14.45 
  -1  -6   0  254.02   13.61 
  -1  -6   0  282.94   13.07 
   1  -6   0  286.14   14.17 
   1  -6   0  269.47   14.63 
   1  -6   0  241.36   14.22 
   1  -6   0  261.66   16.17 
   1  -6   0  249.77   12.38 
  -1  -6   0  259.85   12.95 
   1  -6   0  274.28   14.15 
   1  -6   0  227.35   13.88 
  -1   6   0  269.69   10.85 
   1   6   0  289.29   13.77 
   1   6   0  263.56   10.64 
  -1   6   0  255.09   10.29 
   1   6   0  265.03   12.60 
  -1   6   0  273.95   14.80 
  -1   6   0  269.27   14.56 
  -1   6   0  256.15   11.79 
   1   6   0  252.15   12.04 
   1   6   0  259.10   11.51 
  -1   6   0  254.01   14.03 
   1   6   0  248.94   15.97 
   1   6   0  271.04   14.14 
   1   6   0  234.87   13.12 
  -1   6   0  244.12   11.88 
   1   6   0  268.11    9.81 
   1   6   0  255.75   13.24 
  -1   6   0  270.94   13.17 
   1   6   0  246.90   13.52 
  -1   6   0  279.81   15.20 
   2  -6   0   49.24    6.25 
  -2  -6   0   48.40    6.48 
   2  -6   0   47.91    6.42 
   2  -6   0   59.95    7.73 
  -2  -6   0   52.64    6.47 
   2  -6   0   66.96    8.07 
   2  -6   0   40.30    8.26 
   2  -6   0   50.29    6.44 
  -2  -6   0   59.59    7.71 
  -2  -6   0   37.53    5.79 
  -2  -6   0   56.48    7.70 
  -2  -6   0   68.61    6.70 
   2  -6   0   48.87    6.36 
  -2  -6   0   44.66    5.48 
   2   6   0   56.96    6.72 
   2   6   0   47.52    7.14 
   2   6   0   47.36    5.50 
   2   6   0   44.71    5.63 
   2   6   0   46.20    5.52 
  -2   6   0   46.56    5.42 
   2   6   0   54.33    6.16 
  -2   6   0   42.08    4.28 
   2   6   0   49.99    5.58 
   2   6   0   49.49    5.51 
   2   6   0   54.10    6.10 
  -2   6   0   42.21    6.16 
   2   6   0   46.37    5.29 
   2   6   0   52.28    8.34 
  -2   6   0   54.25    6.13 
  -2   6   0   48.88    7.01 
  -2   6   0   49.99    6.17 
   2   6   0   52.66    5.81 
  -2   6   0   41.66    5.80 
  -2   6   0   40.90    6.20 
   2   6   0   48.34    3.11 
  -3  -6   0   77.71    8.38 
  -3  -6   0   74.66    8.90 
   3  -6   0   77.32    8.66 
  -3  -6   0   74.00    5.74 
  -3  -6   0   69.90    8.47 
   3  -6   0   68.83    8.30 
   3  -6   0   75.18    8.55 
   3  -6   0   73.95    8.25 
   3  -6   0   67.63    8.64 
   3  -6   0   79.92   11.24 
   3   6   0   81.57    7.72 
   3   6   0   88.03    5.78 
  -3   6   0   80.78    7.84 
   3   6   0   66.99    6.37 
   3   6   0   77.92    7.44 
  -3   6   0   70.28    8.14 
   3   6   0   80.57    4.32 
   3   6   0   78.94    7.80 
  -3   6   0   66.67    8.23 
   3   6   0   76.16    5.42 
   3   6   0   71.80    5.50 
  -3   6   0   78.45    8.22 
   3   6   0   75.51    8.02 
   3   6   0   66.44    7.05 
   3   6   0   63.33    9.05 
   3   6   0   59.00    9.05 
  -3   6   0   68.89    8.48 
  -3   6   0   71.29    5.32 
   4  -6   0   18.08    4.62 
   4  -6   0   11.67    3.67 
   4  -6   0   22.41    6.24 
   4  -6   0   19.40    3.60 
  -4  -6   0   19.65    4.82 
   4  -6   0   20.56    5.25 
   4  -6   0   15.65    4.54 
  -4  -6   0   23.43    3.40 
  -4  -6   0   17.16    4.54 
  -4  -6   0   24.89    5.13 
   4  -6   0   13.52    4.48 
  -4   6   0   24.55    5.18 
  -4   6   0   21.22    4.84 
   4   6   0   25.99    3.46 
   4   6   0   16.59    3.76 
  -4   6   0   20.35    5.08 
  -4   6   0   30.03    4.46 
  -4   6   0   28.78    5.78 
   4   6   0   19.32    3.23 
   4   6   0   19.42    4.30 
   4   6   0   24.08    4.55 
   4   6   0   13.74    4.57 
   4   6   0   14.29    3.01 
   4   6   0   19.07    2.85 
  -4   6   0   22.99    5.79 
  -4   6   0   17.69    4.43 
   4   6   0   27.49    5.89 
   4   6   0   18.66    4.75 
   5  -6   0   50.65    7.98 
   5  -6   0   56.65    8.77 
   5  -6   0   54.18    7.97 
   5  -6   0   54.28    9.15 
  -5  -6   0   57.38    8.14 
   5  -6   0   49.31    8.00 
   5  -6   0   38.29    5.75 
   5  -6   0   53.26    6.95 
  -5  -6   0   66.68    8.30 
   5  -6   0   46.53    7.59 
  -5  -6   0   43.20    7.49 
   5   6   0   67.83    7.41 
  -5   6   0   44.96    7.69 
   5   6   0   65.71    8.29 
   5   6   0   53.83    8.00 
  -5   6   0   50.35    8.07 
  -5   6   0   61.76    8.69 
  -5   6   0   55.47    8.26 
  -5   6   0   47.95    7.61 
   5   6   0   66.03    7.72 
   5   6   0   47.25    6.77 
  -5   6   0   58.50    7.98 
  -5   6   0   67.05    7.21 
   5   6   0   50.27    7.82 
  -5   6   0   61.52    8.18 
   6  -6   0   15.79    4.05 
  -6  -6   0   18.48    5.15 
   6  -6   0   15.19    5.64 
   6  -6   0   10.73    3.75 
   6  -6   0   12.65    4.75 
   6  -6   0   18.04    5.20 
  -6  -6   0   12.96    4.22 
   6  -6   0   16.20    4.88 
   6  -6   0   14.17    4.97 
  -6  -6   0   10.34    4.43 
   6  -6   0   11.37    4.87 
  -6   6   0   13.77    5.59 
  -6   6   0    9.89    4.48 
  -6   6   0    3.70    3.81 
  -6   6   0   10.94    4.40 
  -6   6   0   15.74    4.69 
   6   6   0   19.29    5.00 
  -6   6   0    6.70    3.65 
   6   6   0   19.27    5.09 
  -6   6   0   15.14    4.05 
   6   6   0    9.35    3.88 
  -6   6   0   10.52    4.27 
   6   6   0   16.92    5.53 
   6   6   0   19.43    4.64 
   7  -6   0   26.60    7.31 
   7  -6   0   36.13    7.61 
   7  -6   0   50.96    8.86 
  -7  -6   0   37.26    7.64 
   7  -6   0   30.54    5.93 
  -7  -6   0   27.34    7.02 
   7  -6   0   26.06    7.19 
   7  -6   0   25.16    6.45 
   7  -6   0   40.58    7.72 
  -7   6   0   32.81    7.48 
  -7   6   0   57.66    9.11 
  -7   6   0   39.05    7.45 
   7   6   0   38.05    6.96 
  -7   6   0   26.63    6.40 
  -7   6   0   35.96    7.54 
  -7   6   0   26.36    5.59 
   7   6   0   30.59    7.35 
   7   6   0   38.87    7.39 
  -7   6   0   30.47    7.03 
  -7   6   0   35.54    7.31 
   7   6   0   33.31    6.68 
   8  -6   0   -0.86    3.55 
   8  -6   0    7.94    4.55 
   8  -6   0   -1.09    2.99 
   8  -6   0   -0.64    3.61 
  -8  -6   0   -2.94    2.96 
   8  -6   0    4.83    4.63 
  -8  -6   0    5.04    4.10 
   8  -6   0    0.67    3.04 
   8  -6   0   -0.20    4.57 
   8   6   0    0.48    3.69 
  -8   6   0    0.21    3.29 
   8   6   0    3.95    4.71 
  -8   6   0   -0.39    3.36 
  -8   6   0   -0.14    2.81 
  -8   6   0    1.87    3.53 
   8   6   0   -1.62    3.08 
  -8   6   0   -0.02    3.66 
  -8   6   0    1.27    3.76 
  -8   6   0    5.81    4.02 
   0  -7   0    0.10    2.05 
   0  -7   0    1.00    1.96 
   0  -7   0   -3.49    1.85 
   0  -7   0   -2.87    1.62 
   0  -7   0    0.71    2.47 
   0  -7   0   -1.56    1.54 
   0  -7   0    1.94    2.51 
   0  -7   0    1.04    1.92 
   0  -7   0   -0.08    2.39 
   0   7   0    0.61    1.16 
   0   7   0    0.06    2.30 
   0   7   0   -0.34    1.80 
   0   7   0   -0.24    2.08 
   0   7   0   -1.24    1.13 
   0   7   0    0.32    1.57 
   0   7   0    4.96    3.72 
   0   7   0    0.96    2.32 
   0   7   0   -0.58    1.60 
   1  -7   0   12.73    3.91 
   1  -7   0   19.36    5.41 
   1  -7   0   11.22    3.63 
  -1  -7   0   10.29    3.85 
  -1  -7   0   11.89    4.38 
  -1  -7   0   16.00    3.38 
   1  -7   0    8.26    3.92 
  -1  -7   0    8.93    3.27 
  -1  -7   0    9.68    3.37 
  -1  -7   0   16.23    4.56 
  -1  -7   0   11.04    3.99 
   1  -7   0   14.50    4.27 
   1  -7   0   15.50    4.55 
   1  -7   0    9.87    3.29 
  -1  -7   0    7.93    3.18 
   1  -7   0    6.09    2.39 
  -1   7   0    2.38    2.53 
   1   7   0    6.46    2.83 
   1   7   0    7.18    3.39 
  -1   7   0   12.01    2.81 
  -1   7   0   11.75    3.19 
   1   7   0   14.53    3.16 
  -1   7   0    8.06    3.16 
   1   7   0   12.64    5.12 
  -1   7   0    7.66    3.74 
   1   7   0    6.33    2.71 
   1   7   0    9.12    2.37 
   1   7   0    6.68    2.86 
   1   7   0   10.16    3.63 
  -1   7   0   10.17    3.52 
   1   7   0   12.75    3.77 
  -1   7   0    9.04    3.81 
   2  -7   0   -1.45    1.83 
   2  -7   0    6.67    4.29 
   2  -7   0    1.38    2.46 
  -2  -7   0   -4.38    1.95 
   2  -7   0   -2.08    2.24 
  -2  -7   0    2.17    2.84 
  -2  -7   0   -1.05    1.78 
   2  -7   0   -0.53    2.08 
  -2  -7   0    0.41    1.94 
   2  -7   0   -2.48    1.81 
  -2  -7   0    1.72    2.28 
   2  -7   0    3.13    2.71 
   2   7   0    1.06    2.68 
   2   7   0   -1.54    1.98 
  -2   7   0    0.61    1.91 
   2   7   0    0.54    1.74 
   2   7   0   -0.17    1.93 
   2   7   0    2.82    2.04 
   2   7   0    0.34    1.73 
  -2   7   0   -0.12    1.80 
  -2   7   0    2.09    1.48 
   2   7   0    3.28    2.09 
   2   7   0    1.04    1.91 
  -2   7   0   -1.09    2.03 
  -2   7   0    5.46    3.35 
   2   7   0    0.33    1.68 
   2   7   0    3.63    3.60 
   2   7   0    1.59    2.04 
  -2   7   0   -0.89    1.84 
  -2   7   0    4.51    3.20 
   2   7   0    1.74    3.38 
  -2   7   0    1.80    2.49 
   2   7   0   -1.10    1.77 
   3  -7   0   20.03    5.03 
   3  -7   0   29.70    5.83 
  -3  -7   0   33.32    6.13 
   3  -7   0   27.24    6.04 
  -3  -7   0   21.08    5.26 
   3  -7   0   23.89    5.23 
  -3  -7   0   23.64    5.56 
  -3  -7   0   38.16    5.09 
   3  -7   0   41.38    6.76 
   3  -7   0   24.59    7.55 
   3   7   0   36.80    5.81 
  -3   7   0   26.71    5.78 
  -3   7   0   23.12    5.25 
  -3   7   0   24.84    5.66 
   3   7   0   28.36    4.53 
  -3   7   0   29.70    6.30 
  -3   7   0   34.69    5.79 
   3   7   0   32.46    4.80 
   3   7   0   29.61    4.98 
   3   7   0   16.49    5.59 
   3   7   0   31.00    4.34 
   3   7   0   30.52    5.03 
  -3   7   0   33.90    5.43 
   3   7   0   24.82    6.28 
   3   7   0   34.26    5.01 
   3   7   0   34.84    5.33 
   3   7   0   20.99    4.57 
   3   7   0   28.93    5.20 
   4  -7   0   23.43    7.81 
  -4  -7   0   20.35    5.39 
   4  -7   0   27.17    6.02 
   4  -7   0   21.46    5.11 
   4  -7   0   32.51    6.42 
  -4  -7   0   27.78    5.87 
   4  -7   0   32.15    6.57 
  -4  -7   0   20.44    5.40 
   4  -7   0   28.47    6.66 
   4   7   0   24.44    4.77 
   4   7   0   21.61    6.15 
   4   7   0   31.08    4.46 
   4   7   0   27.00    6.27 
   4   7   0   20.03    4.13 
  -4   7   0   29.81    5.57 
   4   7   0   32.91    6.31 
  -4   7   0   30.34    5.95 
   4   7   0   29.21    5.41 
  -4   7   0   18.34    4.99 
  -4   7   0   23.16    6.34 
   4   7   0   39.46    6.31 
  -4   7   0   33.82    6.57 
  -4   7   0   31.66    6.35 
   5  -7   0   78.21    9.04 
   5  -7   0   67.49    7.02 
   5  -7   0   69.31    9.84 
   5  -7   0   69.68   10.36 
   5  -7   0   47.12    9.89 
  -5  -7   0   71.17    9.12 
  -5  -7   0   73.61    9.62 
   5  -7   0   59.60    8.87 
   5  -7   0   87.40   10.86 
  -5  -7   0   71.94   10.23 
  -5   7   0   77.15   10.30 
  -5   7   0   78.59   10.37 
   5   7   0   77.51    9.89 
  -5   7   0   78.87    9.85 
  -5   7   0   50.58    8.72 
   5   7   0   69.64    8.31 
   5   7   0   73.31    8.66 
  -5   7   0   76.11   10.60 
   5   7   0   44.48    8.11 
   5   7   0   74.62    9.98 
   5   7   0   75.34    8.97 
  -5   7   0   73.96    9.33 
  -5   7   0   67.33    9.85 
   6  -7   0   75.33   10.71 
  -6  -7   0   73.78   11.00 
   6  -7   0   58.66   11.01 
   6  -7   0   95.58   12.08 
   6  -7   0   99.34   12.47 
   6  -7   0   71.17    8.39 
   6  -7   0   71.19   10.23 
   6  -7   0   93.54    9.94 
  -6  -7   0   62.98    9.61 
  -6  -7   0   97.80   10.68 
   6   7   0   59.06    9.25 
  -6   7   0   73.21   10.31 
   6   7   0  114.21   11.90 
  -6   7   0   71.83   10.56 
   6   7   0   82.66   11.26 
  -6   7   0   93.47   11.31 
   6   7   0   93.08   10.09 
  -6   7   0   72.48   10.30 
  -6   7   0   79.44   10.46 
  -6   7   0   95.10   11.91 
  -6   7   0  103.59   12.19 
   6   7   0   89.40   10.65 
   7  -7   0   62.79   10.18 
  -7  -7   0   67.84   10.93 
  -7  -7   0   80.77   11.94 
   7  -7   0   67.57   10.62 
   7  -7   0  101.21   13.94 
   7  -7   0   58.99   12.19 
   7  -7   0   71.70    8.89 
   7  -7   0   76.26   11.29 
  -7   7   0   57.53    9.63 
   7   7   0   75.87   10.60 
  -7   7   0   74.05   11.08 
  -7   7   0   82.91   11.31 
  -7   7   0   63.47   10.32 
   7   7   0   79.12   11.55 
  -7   7   0   57.29   10.31 
  -7   7   0   79.43   10.84 
  -7   7   0   75.79   11.04 
   0  -8   0  252.36   14.42 
   0  -8   0  201.41   15.29 
   0  -8   0  224.66   14.23 
   0  -8   0  232.49   15.31 
   0  -8   0  254.29   14.32 
   0  -8   0  218.98   12.32 
   0  -8   0  225.18   15.83 
   0  -8   0  230.15   14.17 
   0   8   0  212.18   13.74 
   0   8   0  229.68   14.65 
   0   8   0  233.66   14.82 
   0   8   0  221.27   16.01 
   0   8   0  237.99   14.40 
   0   8   0  240.09   14.55 
   0   8   0  248.44   12.58 
   0   8   0  239.11   14.73 
   1  -8   0   67.77    8.50 
  -1  -8   0   53.54    8.37 
   1  -8   0   47.99    8.13 
   1  -8   0   51.75    9.01 
   1  -8   0   56.52    7.88 
  -1  -8   0   32.34    6.51 
  -1  -8   0   55.00    7.35 
   1  -8   0   52.82    7.45 
  -1  -8   0   66.82    8.68 
   1  -8   0   48.01    8.43 
   1  -8   0   70.29    9.50 
   1  -8   0   57.30    6.37 
  -1  -8   0   59.33    7.96 
  -1  -8   0   61.72    7.64 
  -1  -8   0   53.04    6.63 
  -1  -8   0   54.60    8.09 
   1   8   0   54.97    7.43 
   1   8   0   62.31    8.21 
   1   8   0   70.32   10.14 
  -1   8   0   65.74    9.32 
  -1   8   0   57.32    8.26 
  -1   8   0   79.66    9.34 
  -1   8   0   62.49    8.25 
   1   8   0   52.04    7.22 
   1   8   0   71.42    9.02 
  -1   8   0   62.59    8.34 
   1   8   0   46.75    6.90 
   1   8   0   49.36    9.42 
  -1   8   0   46.65    7.68 
   1   8   0   64.42    7.41 
   1   8   0   50.98    7.24 
  -1   8   0   68.71    7.33 
   1   8   0   44.71    9.17 
   1   8   0   61.72    6.65 
   1   8   0   57.12    7.36 
   2  -8   0   93.28   12.24 
   2  -8   0   88.12    8.08 
  -2  -8   0   95.79    9.79 
  -2  -8   0   98.99   12.00 
   2  -8   0   84.48   10.74 
   2  -8   0   97.05   10.60 
  -2  -8   0   99.80    9.32 
   2  -8   0   80.46    9.87 
   2  -8   0   78.34   10.04 
   2  -8   0   67.91    9.07 
   2   8   0   96.36    9.79 
   2   8   0   94.75    9.10 
  -2   8   0   84.33   10.18 
   2   8   0   76.75   10.67 
  -2   8   0   83.22   10.01 
  -2   8   0   94.70    9.63 
   2   8   0  101.65    7.73 
   2   8   0   87.56    8.84 
   2   8   0   72.63   11.85 
   2   8   0   83.57    9.01 
  -2   8   0   87.99   10.73 
  -2   8   0   99.07   10.92 
   2   8   0   85.63    8.94 
   2   8   0   74.37    8.15 
   2   8   0  114.71   10.90 
   2   8   0   96.85   10.52 
  -2   8   0   93.80    9.54 
   2   8   0   85.61   12.39 
   2   8   0   87.43    8.77 
   3  -8   0   26.62    6.75 
  -3  -8   0   31.87    7.34 
   3  -8   0   21.88    5.44 
   3  -8   0   27.97    5.97 
  -3  -8   0   21.19    5.76 
   3  -8   0   23.25    7.79 
   3  -8   0   19.22    5.06 
   3  -8   0   29.20    6.20 
  -3   8   0   28.81    5.96 
   3   8   0   21.05    6.56 
  -3   8   0   21.79    5.93 
   3   8   0   26.05    4.96 
  -3   8   0   29.81    5.33 
   3   8   0   30.71    5.09 
   3   8   0   28.60    4.92 
   3   8   0   32.96    7.65 
  -3   8   0   36.48    7.32 
   3   8   0   30.66    5.41 
   3   8   0   24.66    7.25 
   3   8   0   33.96    5.85 
  -3   8   0   18.63    5.56 
   3   8   0   32.40    6.21 
  -3   8   0   27.70    6.46 
   3   8   0   22.82    4.45 
   3   8   0   26.09    5.47 
   4  -8   0   62.41   12.24 
  -4  -8   0   93.00   12.18 
   4  -8   0   82.13   10.74 
  -4  -8   0   84.03   15.78 
   4  -8   0   81.21    9.97 
   4  -8   0   69.22    9.56 
  -4  -8   0   88.35   11.06 
   4  -8   0   72.38   10.02 
   4  -8   0   82.79   11.43 
  -4   8   0   70.22   10.45 
  -4   8   0   87.24   11.01 
  -4   8   0   74.56    9.51 
   4   8   0  101.97   10.50 
   4   8   0   87.27   10.30 
  -4   8   0   83.04   10.81 
  -4   8   0   72.71    9.13 
   4   8   0   39.96    8.68 
  -4   8   0   93.72   12.34 
   4   8   0  101.65   12.52 
   4   8   0   87.30    9.67 
   5  -8   0    9.67    5.08 
   5  -8   0   14.25    5.14 
  -5  -8   0   15.67    5.38 
   5  -8   0   12.30    4.76 
   5  -8   0   18.68    7.65 
   5  -8   0    6.30    4.15 
  -5  -8   0   18.58    5.84 
  -5  -8   0   16.04    5.90 
   5  -8   0   21.31    5.97 
  -5   8   0   14.05    5.28 
   5   8   0    8.01    4.60 
  -5   8   0    8.71    4.69 
  -5   8   0   12.88    5.20 
  -5   8   0    9.60    5.09 
   5   8   0    6.40    4.15 
   5   8   0   11.17    5.02 
  -5   8   0   23.22    5.88 
  -5   8   0    8.65    4.59 
  -5   8   0   14.16    6.07 
   6  -8   0   47.83    8.26 
   6  -8   0   60.00   12.47 
  -6  -8   0   51.61    9.49 
   6  -8   0   49.47    9.59 
   6  -8   0   61.19    9.90 
   6  -8   0   53.84    9.80 
   6  -8   0   72.05   10.81 
  -6  -8   0   52.29    9.93 
  -6  -8   0   52.47    8.87 
   6   8   0   52.55    9.12 
  -6   8   0   51.08    9.25 
   6   8   0   61.19    8.84 
  -6   8   0   73.62   10.62 
  -6   8   0   64.17   10.16 
  -6   8   0   33.14    7.33 
  -6   8   0   54.04    9.94 
  -6   8   0   46.73    9.35 
  -6   8   0   51.20    8.79 
   0  -9   0    1.87    2.83 
   0  -9   0    0.81    3.30 
   0  -9   0   -3.16    2.41 
   0  -9   0    1.90    3.13 
   0   9   0   -1.62    2.43 
   0   9   0   -1.85    2.70 
   0   9   0   -1.39    2.15 
   0   9   0   -1.66    2.00 
   0   9   0    0.33    2.60 
   0   9   0    4.52    3.37 
   0   9   0    4.16    4.37 
   1  -9   0   -4.45    1.91 
   1  -9   0   -5.85    2.56 
  -1  -9   0    5.22    4.20 
   1  -9   0    1.85    2.77 
   1  -9   0    2.36    4.02 
   1  -9   0    0.82    2.79 
   1   9   0   -1.35    2.51 
   1   9   0    1.09    2.60 
  -1   9   0    6.06    3.65 
  -1   9   0    4.52    3.54 
   1   9   0    6.64    5.28 
   1   9   0    1.24    3.00 
   1   9   0    2.12    3.19 
   1   9   0   -0.80    2.83 
  -1   9   0   -0.32    2.07 
  -1   9   0    5.39    3.80 
  -1   9   0   -3.10    2.53 
   1   9   0   -2.39    3.55 
  -1   9   0    2.40    3.28 
  -1   9   0    2.95    2.78 
   1   9   0   -1.35    2.05 
   1   9   0    0.49    2.22 
  -2  -9   0   -0.24    2.97 
   2  -9   0    1.88    4.04 
   2  -9   0    1.56    3.30 
   2  -9   0    4.63    4.33 
   2  -9   0    6.61    3.38 
  -2  -9   0   -1.12    4.31 
   2  -9   0   -1.02    2.88 
  -2   9   0    1.43    3.89 
  -2   9   0   -0.06    3.00 
  -2   9   0    1.02    3.29 
   2   9   0    0.91    3.80 
   2   9   0   -2.84    2.48 
  -2   9   0    0.70    3.14 
   2   9   0    2.79    3.29 
   2   9   0   -0.68    2.69 
  -2   9   0   -1.06    2.18 
   2   9   0    1.54    4.79 
   2   9   0   -1.64    2.19 
   2   9   0    1.89    2.59 
   2   9   0    2.12    4.69 
  -2   9   0    0.84    3.18 
  -2   9   0    5.64    3.91 
   3  -9   0   20.59    5.73 
  -3  -9   0   19.40    6.13 
   3  -9   0   20.35    6.07 
   3  -9   0   19.32    5.73 
   3  -9   0   17.40    5.08 
   3  -9   0   23.67    6.04 
  -3   9   0   24.87    6.29 
   3   9   0   19.79    7.32 
  -3   9   0    8.83    4.76 
  -3   9   0   33.23    6.53 
  -3   9   0   14.58    5.32 
  -3   9   0   27.03    6.47 
   3   9   0   10.62    5.22 
   3   9   0   11.28    6.11 
   3   9   0   20.20    5.39 
   4  -9   0   -5.17    2.32 
   4  -9   0   -3.12    3.37 
   4  -9   0    0.71    3.69 
  -4  -9   0    7.46    4.93 
  -4  -9   0    0.71    3.54 
   4  -9   0    2.09    3.11 
   4  -9   0    3.36    3.46 
   4   9   0    0.74    3.05 
   4   9   0   -0.57    4.75 
   4   9   0    0.88    3.26 
  -4   9   0    3.83    4.67 
  -4   9   0    1.84    3.60 
  -4   9   0    4.10    4.18 
  -4   9   0   -1.55    2.58 
   4   9   0    2.90    4.36 
  -4   9   0    1.68    3.88 
   5  -9   0   99.05   12.79 
   5  -9   0   70.05   10.70 
  -5  -9   0   78.34   11.24 
   5  -9   0   91.88   12.51 
   5  -9   0   74.08   11.79 
   5  -9   0   68.39   10.31 
  -5  -9   0   95.91   13.75 
  -5   9   0   65.72   10.99 
   5   9   0   77.10   13.29 
  -5   9   0  101.75   12.49 
  -5   9   0   99.96   12.85 
  -5   9   0   92.63   13.25 
  -5   9   0   71.08   11.03 
   5   9   0  113.91   13.21 
  -5   9   0   92.41   12.76 
   0  10   0  178.04   13.78 
   0  10   0  193.70   13.98 
   0  10   0  201.13   14.57 
   0  10   0  178.74   16.54 
   0  10   0  159.65   15.72 
   0  10   0  171.86   13.57 
   0  10   0  141.04   16.99 
   1 -10   0    1.80    3.71 
   1  10   0   12.86    4.72 
   1  10   0    1.32    3.50 
  -1  10   0    1.02    3.95 
   1  10   0    4.30    5.54 
   1  10   0    3.81    4.10 
  -1  10   0    2.30    3.54 
  -1  10   0    3.90    4.04 
   1  10   0    5.56    4.14 
   1  10   0   -3.72    2.39 
   1  10   0    5.10    3.76 
  -1  10   0   -0.67    3.09 
  -1  10   0    4.69    3.61 
  -1  10   0    2.33    4.05 
   2 -10   0   77.42   11.55 
   2 -10   0  105.48   12.74 
  -2 -10   0   87.90   12.97 
   2 -10   0   98.26   12.17 
   2 -10   0   92.07   11.91 
  -2  10   0  120.67   13.72 
  -2  10   0  109.72   13.43 
   2  10   0   67.04   12.70 
  -2  10   0   78.05   11.34 
  -2  10   0   93.91   12.45 
  -2  10   0   81.22   11.97 
  -2  10   0   97.31   12.71 
   2  10   0  108.61   12.96 
 -10   0   1    2.77    4.04 
 -10   0   1   -1.02    3.34 
  10   0  -1   -1.04    3.65 
  10   0  -1   -0.76    3.22 
  10   0  -1    2.72    4.07 
  10   0  -1    2.67    3.30 
  10   0  -1   -0.35    3.72 
  10   0  -1    0.44    3.10 
  10   0  -1    0.53    3.82 
  10   0  -1    5.38    4.04 
 -10   0   1   -0.68    2.92 
  10   0  -1    3.66    4.41 
   9   0  -1  135.50   14.26 
   9   0  -1  110.88   12.78 
   9   0  -1  100.22   10.80 
   9   0  -1  131.43   13.94 
  -9   0   1  139.73   10.16 
  -9   0   1  125.62   14.14 
  -9   0   1  113.29   13.68 
   9   0  -1  120.59   12.13 
   9   0  -1  157.85   14.77 
   9   0  -1  124.79   13.48 
  -9   0   1  114.86   12.19 
   9   0  -1  144.62   14.28 
   8   0  -1   -1.33    2.78 
  -8   0   1    3.63    3.20 
  -8   0   1    0.20    2.40 
   8   0  -1    0.41    2.52 
   8   0  -1   -0.50    2.33 
   8   0  -1   -0.13    2.14 
   8   0  -1   -1.39    2.77 
  -8   0   1    3.16    3.33 
  -8   0   1   -1.68    1.84 
  -8   0   1    0.47    1.89 
   8   0  -1   -0.01    2.64 
   8   0  -1   -0.67    2.26 
   8   0  -1   -1.63    1.49 
   8   0  -1   -2.53    3.04 
   8   0  -1    2.41    3.21 
  -8   0   1   -1.36    2.36 
   7   0  -1  154.81    9.63 
   7   0  -1  139.13   10.88 
  -7   0   1  182.81   12.35 
   7   0  -1  165.60   10.38 
   7   0  -1  180.08   11.77 
   7   0  -1  163.68   11.79 
  -7   0   1  169.38    9.71 
  -7   0   1  152.66    8.25 
   7   0  -1  157.55   10.64 
  -7   0   1  145.75    9.95 
  -7   0   1  142.24   11.44 
   7   0  -1  157.96   11.26 
  -7   0   1  153.04    8.20 
  -7   0   1  147.24    9.73 
   7   0  -1  137.78   10.67 
   7   0  -1  154.28   11.32 
  -7   0   1  179.02   11.47 
   7   0  -1  155.17   11.29 
   6   0  -1    0.76    2.08 
   6   0  -1   -0.88    1.53 
  -6   0   1    1.81    2.53 
  -6   0   1   -1.59    1.61 
  -6   0   1   -0.38    1.16 
   6   0  -1    1.69    2.08 
  -6   0   1    0.12    1.32 
   6   0  -1    0.68    1.94 
   6   0  -1   -2.73    1.87 
   6   0  -1   -3.96    1.66 
  -6   0   1    0.49    1.81 
  -6   0   1    0.01    1.08 
   6   0  -1   -1.68    1.26 
   6   0  -1    0.28    1.85 
  -6   0   1    0.44    1.63 
   6   0  -1   -2.09    1.50 
  -6   0   1    2.17    1.95 
  -6   0   1   -2.34    0.95 
   6   0  -1    0.53    1.86 
  -5   0   1  155.82    7.77 
   5   0  -1  174.24    9.20 
   5   0  -1  179.84   10.24 
   5   0  -1  162.99    9.17 
   5   0  -1  153.32    9.91 
  -5   0   1  169.62    9.77 
  -5   0   1  169.78    9.14 
  -5   0   1  163.52    8.24 
   5   0  -1  144.46    9.52 
   5   0  -1  146.81    9.57 
  -5   0   1  163.85    8.03 
   5   0  -1  147.64    9.66 
   5   0  -1  167.16    8.75 
  -5   0   1  144.50    8.54 
   5   0  -1  162.22    9.84 
  -5   0   1  171.74    8.54 
   5   0  -1  170.09    9.91 
  -5   0   1  163.13   10.14 
   5   0  -1  161.72    9.35 
  -5   0   1  153.79    9.99 
  -4   0   1    0.38    1.24 
   4   0  -1    2.41    1.83 
   4   0  -1   -0.76    1.54 
  -4   0   1    0.48    1.64 
  -4   0   1    0.67    1.78 
   4   0  -1    2.07    1.37 
   4   0  -1    1.76    1.19 
  -4   0   1    3.12    1.33 
  -4   0   1    3.64    1.84 
   4   0  -1    0.64    1.74 
   4   0  -1    3.15    1.26 
  -4   0   1    1.57    1.15 
  -4   0   1    1.54    1.33 
  -4   0   1    4.64    2.03 
  -4   0   1    1.50    1.40 
   4   0  -1    3.93    1.92 
   4   0  -1    0.19    1.66 
   4   0  -1    0.30    1.14 
  -4   0   1    1.36    1.20 
  -4   0   1    1.56    1.15 
   4   0  -1    1.99    1.98 
   4   0  -1    2.26    1.50 
  -3   0   1   81.61    4.49 
   3   0  -1   78.47    5.40 
   3   0  -1   86.06    5.08 
  -3   0   1   79.77    4.44 
   3   0  -1   81.19    4.53 
  -3   0   1   90.52    4.82 
  -3   0   1   89.63    5.08 
  -3   0   1   86.02    4.83 
  -3   0   1   79.68    5.12 
   3   0  -1   84.18    5.37 
  -3   0   1   90.81    5.43 
  -3   0   1   87.06    5.73 
  -3   0   1   87.07    4.51 
   3   0  -1   76.55    4.81 
  -3   0   1   78.11    4.92 
  -3   0   1   81.39    5.29 
  -3   0   1   79.98    5.21 
   3   0  -1   86.17    5.38 
   3   0  -1   86.70    5.51 
   3   0  -1   80.17    4.70 
   3   0  -1   85.77    5.43 
  -3   0   1   78.40    4.27 
   3   0  -1   84.13    5.20 
  -3   0   1   79.46    5.51 
  -3   0   1   79.90    5.28 
   3   0  -1   81.01    5.50 
  -3   0   1   86.29    5.58 
   3   0  -1   84.96    4.49 
   3   0  -1   81.75    4.34 
  -3   0   1   86.29    4.87 
   3   0  -1   93.18    4.88 
  -2   0   1   -0.46    0.75 
  -2   0   1    1.25    0.90 
  -2   0   1    0.56    0.72 
  -2   0   1    0.00    0.70 
   2   0  -1    0.19    0.64 
   2   0  -1    0.62    0.80 
   2   0  -1   -0.01    0.67 
   2   0  -1    1.95    1.04 
  -2   0   1    2.03    1.07 
   2   0  -1   -0.57    0.84 
   2   0  -1   -0.61    0.64 
  -2   0   1    2.47    0.84 
   2   0  -1    1.40    1.06 
   2   0  -1    1.54    1.00 
  -2   0   1    1.08    0.72 
  -2   0   1   -1.09    0.86 
  -2   0   1    0.13    0.77 
   2   0  -1    1.69    1.01 
  -2   0   1    0.67    0.87 
  -2   0   1    1.12    0.72 
   2   0  -1   -0.05    0.95 
   2   0  -1    0.70    0.88 
   2   0  -1    0.64    0.76 
  -2   0   1    0.66    0.95 
   2   0  -1   -0.01    0.93 
   2   0  -1   -0.01    0.99 
  -2   0   1   -0.02    0.81 
   2   0  -1    0.13    1.00 
   2   0  -1    0.29    0.71 
  -2   0   1    0.38    0.99 
   2   0  -1    1.96    0.96 
  -2   0   1    0.09    0.67 
  -2   0   1    1.29    0.97 
  -2   0   1   -0.82    0.78 
   1   0  -1   10.90    1.13 
  -1   0   1   14.15    1.42 
  -1   0   1   11.96    1.38 
   1   0  -1    8.42    1.11 
   1   0  -1   11.14    1.21 
   1   0  -1   16.31    1.39 
   1   0  -1   18.28    1.40 
   1   0  -1    8.16    1.16 
   1   0   1  222.11    8.24 
  -1   0  -1  206.32    8.51 
   1   0   1  215.99    8.36 
   1   0   1  224.01    8.12 
   1   0   1  226.08    8.08 
   1   0   1  231.62    8.45 
  -1   0  -1  221.66    8.50 
  -1   0  -1  208.60    8.56 
   1   0   1  219.43    8.67 
  -1   0  -1  228.45    8.58 
  -1   0  -1  187.41    8.33 
   1   0   1  227.63    8.25 
   1   0   1  189.16    8.45 
   1   0   1  223.02    8.32 
   1   0   1  227.78    8.44 
   1   0   1  204.43    8.43 
   1   0   1  217.20    8.16 
  -1   0  -1  215.31    8.62 
   1   0   1  220.09    8.01 
   1   0   1  220.41    8.55 
   1   0   1  220.00    7.99 
  -2   0  -1    0.09    0.70 
  -2   0  -1    0.12    0.61 
  -2   0  -1    0.43    0.67 
  -2   0  -1    1.48    0.88 
   2   0   1   -0.12    1.08 
   2   0   1   -1.45    0.56 
  -2   0  -1   -0.15    1.00 
  -2   0  -1   -0.93    0.75 
  -2   0  -1   -0.08    0.79 
  -2   0  -1    1.12    0.95 
  -2   0  -1    0.18    1.05 
   2   0   1    0.33    0.67 
   2   0   1    0.04    0.95 
   2   0   1    1.75    0.83 
   2   0   1    0.40    1.22 
  -2   0  -1    0.95    0.98 
   2   0   1    0.16    0.93 
   2   0   1   -0.01    0.91 
  -2   0  -1    0.87    0.89 
  -2   0  -1    0.76    0.81 
  -2   0  -1    0.17    0.41 
   2   0   1    0.59    0.83 
   2   0   1    1.31    0.87 
   2   0   1   -0.92    0.83 
   2   0   1   -2.15    0.95 
  -2   0  -1    0.25    0.83 
   2   0   1    0.14    1.00 
  -2   0  -1    0.83    0.72 
  -2   0  -1    0.69    1.00 
  -2   0  -1   -0.36    0.55 
   2   0   1   -0.08    0.65 
   2   0   1    0.55    1.01 
  -2   0  -1    0.32    0.66 
   2   0   1   -1.25    0.76 
  -3   0  -1  212.29    9.02 
  -3   0  -1  203.45    9.01 
  -3   0  -1  205.58    9.36 
   3   0   1  214.43   10.02 
  -3   0  -1  211.25    9.33 
  -3   0  -1  202.51    9.94 
  -3   0  -1  220.82    9.86 
   3   0   1  220.34   10.29 
  -3   0  -1  203.90    9.25 
  -3   0  -1  204.94    9.03 
  -3   0  -1  202.74   10.32 
   3   0   1  215.13    9.40 
   3   0   1  212.78    9.39 
  -3   0  -1  205.27    8.15 
  -3   0  -1  220.42    9.20 
  -3   0  -1  197.07    9.81 
  -3   0  -1  213.36   10.36 
  -3   0  -1  220.96    8.73 
  -3   0  -1  197.91    9.74 
  -3   0  -1  218.31    9.57 
   3   0   1  214.49    9.39 
   3   0   1  218.40   10.18 
   3   0   1  220.99    9.66 
  -3   0  -1  215.34    9.54 
   3   0   1  205.53   10.03 
   3   0   1  206.96    8.99 
   3   0   1  205.81   10.26 
   3   0   1  216.02   10.24 
   3   0   1  204.65    9.04 
   3   0   1  213.59    9.85 
   3   0   1  203.76   10.19 
  -3   0  -1  201.73    9.92 
   4   0   1    1.10    1.59 
  -4   0  -1    0.68    1.26 
  -4   0  -1    0.99    1.16 
  -4   0  -1   -0.55    0.81 
  -4   0  -1   -0.31    1.53 
  -4   0  -1    0.86    1.34 
  -4   0  -1   -0.77    1.51 
  -4   0  -1   -0.94    1.02 
   4   0   1    3.32    1.76 
   4   0   1   -0.45    1.62 
  -4   0  -1    1.35    1.12 
   4   0   1   -0.06    1.60 
   4   0   1   -0.31    1.76 
  -4   0  -1    0.20    1.01 
  -4   0  -1    1.01    1.26 
   4   0   1    1.64    1.68 
   4   0   1    0.43    1.18 
   4   0   1   -0.39    1.43 
  -4   0  -1    1.07    0.96 
  -4   0  -1    1.73    2.16 
  -4   0  -1   -0.25    0.68 
   4   0   1   -0.91    1.68 
   4   0   1    0.71    1.31 
   4   0   1   -1.10    1.04 
   4   0   1    0.25    1.14 
   5   0   1  181.56   10.65 
   5   0   1  180.02   10.84 
  -5   0  -1  198.20    9.74 
   5   0   1  187.07   11.08 
   5   0   1  193.67   10.89 
   5   0   1  188.35   11.04 
  -5   0  -1  188.76    9.94 
   5   0   1  170.34   10.90 
  -5   0  -1  203.27   10.13 
   5   0   1  190.79   10.36 
  -5   0  -1  195.03   11.50 
   5   0   1  193.51    9.59 
  -5   0  -1  182.26    8.60 
  -5   0  -1  191.29   11.57 
   5   0   1  186.34    9.93 
  -5   0  -1  188.93    8.22 
   5   0   1  187.32   11.24 
  -5   0  -1  181.98   10.69 
  -5   0  -1  186.39    8.61 
   6   0   1   -0.58    1.54 
   6   0   1   -0.42    2.03 
   6   0   1    2.40    2.37 
  -6   0  -1    1.26    2.44 
  -6   0  -1    0.25    1.00 
  -6   0  -1    2.30    1.70 
  -6   0  -1    0.73    1.19 
  -6   0  -1    1.00    1.87 
   6   0   1   -1.11    2.09 
   6   0   1   -2.85    1.55 
   6   0   1   -0.56    1.33 
  -6   0  -1    0.32    1.16 
  -6   0  -1    2.11    2.44 
   6   0   1   -2.55    1.78 
  -6   0  -1   -1.10    1.58 
   6   0   1    2.63    2.33 
   6   0   1    0.89    1.85 
  -6   0  -1   -0.05    1.48 
   6   0   1    3.29    2.52 
  -7   0  -1  356.80   16.84 
   7   0   1  349.42   19.08 
   7   0   1  353.37   18.92 
  -7   0  -1  371.45   15.01 
   7   0   1  373.49   18.00 
  -7   0  -1  325.68   19.01 
  -7   0  -1  367.95   18.59 
  -7   0  -1  350.59   14.88 
   7   0   1  347.62   17.29 
   7   0   1  352.76   19.08 
   7   0   1  335.01   18.52 
  -7   0  -1  320.45   18.82 
   7   0   1  342.16   18.27 
   7   0   1  394.18   19.98 
  -7   0  -1  325.48   16.76 
   7   0   1  319.40   18.44 
  -7   0  -1  357.50   17.25 
   7   0   1  349.13   16.43 
   8   0   1    0.79    2.11 
   8   0   1    2.80    3.25 
  -8   0  -1   -0.84    2.06 
   8   0   1    2.86    2.88 
  -8   0  -1    1.10    2.74 
   8   0   1   -1.59    2.31 
   8   0   1    0.61    2.79 
   8   0   1   -0.17    3.03 
  -8   0  -1    0.41    2.09 
   8   0   1    1.87    3.34 
   8   0   1    3.08    2.44 
  -8   0  -1   -2.35    2.70 
   8   0   1   -0.19    2.71 
  -8   0  -1    1.43    2.02 
   8   0   1   -2.86    2.31 
   9   0   1  207.02   15.07 
   9   0   1  206.92   15.48 
   9   0   1  199.64   13.25 
  -9   0  -1  177.03   12.53 
   9   0   1  246.70   16.38 
   9   0   1  198.43   15.34 
   9   0   1  226.16   14.28 
   9   0   1  193.52   14.81 
   9   0   1  190.88   14.17 
   9   0   1  184.47   14.64 
  -9   0  -1  189.17   15.69 
  -9   0  -1  176.04   14.84 
  -9   0  -1  210.38   14.48 
  10   0   1   -0.69    3.80 
  10   0   1   -0.86    3.55 
 -10   0  -1   -1.07    3.92 
  10   0   1   -0.58    3.74 
  10   0   1    4.27    4.76 
  10   0   1    0.93    4.29 
  10   0   1    0.70    3.05 
 -10   0  -1   -1.11    3.12 
 -10   0  -1    1.43    3.83 
  10   0   1    2.24    4.05 
  10  -1  -1   -1.00    3.01 
  10  -1  -1   -0.08    3.79 
  10  -1  -1    4.58    3.85 
 -10  -1   1    3.49    3.16 
  10  -1  -1    0.84    3.84 
  10  -1  -1   12.94    5.30 
 -10  -1   1    3.46    3.72 
  10  -1  -1    4.01    4.06 
 -10  -1   1    2.59    4.20 
  10  -1  -1    4.92    4.16 
  10  -1  -1    5.11    4.64 
  10   1  -1    3.88    3.88 
 -10   1   1    0.23    3.21 
  10   1  -1    0.67    3.68 
 -10   1   1    0.11    3.39 
  10   1  -1    0.78    3.68 
 -10   1   1   -0.01    3.84 
  10   1  -1    0.93    4.64 
  10   1  -1    5.61    4.52 
  10   1  -1    3.00    4.08 
  10   1  -1    0.84    3.46 
  10   1  -1    3.13    4.26 
 -10   1   1    2.63    3.29 
   9  -1  -1    2.72    3.87 
   9  -1  -1    1.06    2.53 
   9  -1  -1   -3.70    2.83 
   9  -1  -1    0.47    3.50 
   9  -1  -1   -0.12    3.13 
   9  -1  -1    0.79    2.85 
  -9  -1   1   -2.62    2.76 
   9  -1  -1    0.16    3.95 
   9  -1  -1    4.29    4.20 
  -9  -1   1    0.44    2.67 
   9  -1  -1    2.15    4.06 
  -9  -1   1    3.23    3.47 
   9  -1  -1    0.18    2.61 
   9   1  -1    3.20    3.73 
   9   1  -1   -0.96    2.68 
  -9   1   1    3.20    2.91 
  -9   1   1   -2.28    2.38 
  -9   1   1    3.62    2.93 
   9   1  -1   -2.16    2.81 
   9   1  -1    1.77    3.13 
   9   1  -1   -0.39    3.05 
   9   1  -1    1.03    3.44 
   9   1  -1    0.98    2.56 
  -9   1   1    5.59    3.96 
   9   1  -1    0.68    2.48 
   9   1  -1    0.89    2.95 
  -9   1   1   -1.88    2.57 
  -9   1   1    1.58    3.16 
  -8  -1   1   25.29    6.14 
   8  -1  -1   19.31    5.20 
  -8  -1   1   39.04    7.40 
   8  -1  -1   16.99    5.08 
   8  -1  -1   20.86    5.64 
  -8  -1   1   34.14    5.52 
   8  -1  -1   22.30    5.58 
   8  -1  -1   22.57    5.67 
   8  -1  -1   30.67    5.82 
   8  -1  -1   14.63    4.89 
   8  -1  -1   23.39    5.58 
  -8  -1   1   41.16    5.54 
  -8  -1   1   19.55    4.85 
   8  -1  -1   31.37    5.45 
   8  -1  -1   20.82    5.67 
   8   1  -1   30.32    6.01 
  -8   1   1   43.69    8.00 
  -8   1   1   31.18    4.74 
   8   1  -1   41.15    7.60 
   8   1  -1   31.56    5.23 
   8   1  -1   29.25    5.97 
  -8   1   1   25.04    4.40 
   8   1  -1   25.64    4.10 
  -8   1   1   30.45    6.41 
  -8   1   1   38.35    6.92 
  -8   1   1   27.12    5.54 
  -8   1   1   27.94    4.94 
  -8   1   1   33.46    5.91 
   8   1  -1   38.82    6.13 
   8   1  -1   41.89    7.31 
   8   1  -1   36.00    6.87 
   8   1  -1   33.09    6.52 
   8   1  -1   30.43    6.59 
  -7  -1   1   -0.20    1.96 
   7  -1  -1   -1.72    2.15 
   7  -1  -1    5.94    3.00 
   7  -1  -1   -1.24    2.51 
   7  -1  -1    3.22    2.35 
   7  -1  -1    0.20    2.49 
   7  -1  -1    0.86    2.52 
   7  -1  -1   -0.40    2.36 
  -7  -1   1   -2.98    1.59 
  -7  -1   1    1.45    2.72 
   7  -1  -1    0.67    2.45 
  -7  -1   1   -1.01    1.60 
  -7  -1   1   -0.98    1.90 
   7  -1  -1   -1.69    2.19 
   7  -1  -1    2.17    2.43 
  -7  -1   1    1.25    1.67 
   7   1  -1    1.72    2.18 
   7   1  -1    1.12    2.84 
  -7   1   1    0.14    1.98 
  -7   1   1    1.60    2.29 
   7   1  -1    0.57    1.75 
   7   1  -1   -1.62    2.13 
   7   1  -1   -0.85    2.18 
   7   1  -1    1.63    2.38 
   7   1  -1   -2.72    1.90 
  -7   1   1    4.14    2.76 
  -7   1   1    1.34    2.82 
  -7   1   1   -2.96    2.43 
  -7   1   1    1.85    2.29 
   7   1  -1    0.23    2.24 
   7   1  -1   -2.54    1.83 
   7   1  -1   -0.34    2.14 
  -7   1   1   -0.71    1.71 
  -7   1   1    1.14    1.83 
   6  -1  -1  153.58   10.62 
   6  -1  -1  157.24    9.53 
   6  -1  -1  155.00   10.69 
  -6  -1   1  164.50   11.22 
  -6  -1   1  152.30    7.55 
  -6  -1   1  152.96    7.70 
   6  -1  -1  160.03   10.63 
   6  -1  -1  155.96    7.21 
   6  -1  -1  163.55   10.90 
  -6  -1   1  147.06    9.06 
  -6  -1   1  161.49    9.85 
   6  -1  -1  162.35   10.76 
   6  -1  -1  172.85   10.39 
  -6  -1   1  152.12    8.38 
  -6  -1   1  154.25    6.97 
   6  -1  -1  168.04   10.12 
  -6  -1   1  160.32    7.41 
   6  -1  -1  158.12   10.30 
   6  -1  -1  169.10   11.20 
  -6  -1   1  149.07    7.00 
  -6  -1   1  150.29    6.88 
  -6  -1   1  157.03    8.73 
  -6  -1   1  146.29   10.67 
  -6   1   1  158.48   10.94 
   6   1  -1  160.03   10.69 
   6   1  -1  147.79   10.38 
  -6   1   1  132.46    9.18 
  -6   1   1  143.86    7.27 
  -6   1   1  168.92   10.11 
   6   1  -1  157.91   10.28 
   6   1  -1  148.33    8.30 
   6   1  -1  168.68   10.79 
   6   1  -1  149.91    9.09 
  -6   1   1  170.91    9.57 
   6   1  -1  154.91   10.16 
   6   1  -1  151.28    7.17 
  -6   1   1  169.16   10.88 
   6   1  -1  156.46    9.56 
  -6   1   1  167.27    8.97 
  -6   1   1  155.08   10.86 
   6   1  -1  156.03   10.45 
   6   1  -1  158.25   10.83 
   5  -1  -1   53.95    6.34 
   5  -1  -1   57.56    6.31 
  -5  -1   1   65.94    7.34 
  -5  -1   1   59.70    4.34 
  -5  -1   1   61.75    3.93 
  -5  -1   1   64.37    5.14 
  -5  -1   1   67.32    4.71 
   5  -1  -1   56.30    6.09 
  -5  -1   1   73.83    4.29 
   5  -1  -1   63.68    3.98 
   5  -1  -1   68.62    6.69 
   5  -1  -1   64.06    6.18 
   5  -1  -1   59.53    6.60 
  -5  -1   1   67.58    4.24 
  -5  -1   1   61.94    4.05 
   5  -1  -1   53.60    6.43 
  -5  -1   1   65.67    5.25 
  -5  -1   1   71.48    5.67 
  -5  -1   1   60.11    3.55 
  -5  -1   1   67.50    4.58 
   5  -1  -1   57.03    6.33 
  -5  -1   1   70.20    3.66 
   5  -1  -1   70.14    7.57 
   5  -1  -1   59.63    6.56 
  -5  -1   1   64.02    7.33 
  -5   1   1   74.25    7.49 
  -5   1   1   49.38    5.69 
  -5   1   1   68.94    4.99 
  -5   1   1   55.53    5.82 
   5   1  -1   55.43    4.03 
   5   1  -1   55.89    6.55 
   5   1  -1   61.97    6.52 
   5   1  -1   67.25    6.76 
   5   1  -1   70.56    5.48 
   5   1  -1   69.72    5.18 
   5   1  -1   67.41    4.15 
  -5   1   1   53.79    6.22 
   5   1  -1   71.30    5.93 
  -5   1   1   65.42    5.29 
   5   1  -1   74.36    7.37 
   5   1  -1   59.93    4.42 
  -5   1   1   69.66    7.52 
   4  -1  -1  567.18   23.74 
  -4  -1   1  611.33   23.14 
  -4  -1   1  562.05   21.94 
   4  -1  -1  602.91   24.68 
   4  -1  -1  587.26   24.63 
   4  -1  -1  608.24   23.60 
   4  -1  -1  604.67   21.92 
  -4  -1   1  582.65   23.34 
  -4  -1   1  579.46   22.13 
   4  -1  -1  597.12   23.47 
  -4  -1   1  606.74   22.62 
   4  -1  -1  591.89   24.51 
  -4  -1   1  589.41   21.69 
   4  -1  -1  592.44   24.34 
   4  -1  -1  598.53   23.99 
  -4  -1   1  595.36   21.98 
  -4  -1   1  615.88   22.19 
   4  -1  -1  606.84   23.66 
  -4  -1   1  586.69   24.59 
  -4  -1   1  601.05   21.25 
  -4  -1   1  573.87   21.16 
   4  -1  -1  598.40   24.37 
  -4  -1   1  599.47   21.58 
  -4  -1   1  579.69   24.63 
   4  -1  -1  550.10   23.77 
  -4  -1   1  604.44   22.41 
   4  -1  -1  604.87   24.08 
   4   1  -1  579.26   22.13 
   4   1  -1  595.88   24.30 
   4   1  -1  588.94   21.87 
   4   1  -1  625.65   24.34 
   4   1  -1  603.56   22.00 
  -4   1   1  613.60   24.62 
   4   1  -1  572.03   22.81 
  -4   1   1  591.06   22.86 
  -4   1   1  561.97   22.51 
  -4   1   1  570.99   24.25 
   4   1  -1  586.56   23.61 
  -4   1   1  596.89   23.60 
  -4   1   1  607.98   23.31 
  -4   1   1  608.67   24.48 
   4   1  -1  572.10   24.12 
   4   1  -1  570.84   23.12 
   4   1  -1  559.16   23.50 
  -4   1   1  583.72   23.77 
   4   1  -1  593.12   23.81 
   3  -1  -1   46.38    4.71 
   3  -1  -1   55.88    4.40 
   3  -1  -1   55.71    4.22 
  -3  -1   1   58.89    3.34 
   3  -1  -1   52.21    4.18 
  -3  -1   1   57.23    4.33 
  -3  -1   1   56.91    4.75 
  -3  -1   1   50.80    5.00 
   3  -1  -1   55.80    3.91 
   3  -1  -1   54.05    4.61 
  -3  -1   1   57.06    4.02 
  -3  -1   1   44.69    4.50 
  -3  -1   1   53.71    2.84 
   3  -1  -1   48.95    4.03 
   3  -1  -1   44.22    4.55 
  -3  -1   1   49.44    4.10 
   3  -1  -1   51.02    3.91 
   3  -1  -1   55.14    4.33 
  -3  -1   1   51.84    3.09 
  -3  -1   1   52.89    3.46 
  -3  -1   1   50.33    2.70 
  -3  -1   1   47.71    3.69 
   3  -1  -1   55.69    4.49 
  -3  -1   1   54.09    3.25 
  -3  -1   1   54.44    4.06 
  -3  -1   1   57.62    3.92 
  -3  -1   1   53.16    3.29 
   3  -1  -1   51.61    5.16 
  -3  -1   1   53.10    2.77 
   3  -1  -1   56.60    4.18 
  -3  -1   1   53.80    2.76 
  -3   1   1   55.29    4.30 
  -3   1   1   51.83    3.64 
   3   1  -1   57.36    4.52 
  -3   1   1   55.22    3.89 
  -3   1   1   53.55    3.98 
   3   1  -1   52.98    4.45 
   3   1  -1   53.04    2.95 
   3   1  -1   57.76    3.53 
   3   1  -1   60.89    3.76 
  -3   1   1   54.05    4.38 
   3   1  -1   53.16    4.05 
  -3   1   1   48.10    3.80 
  -3   1   1   54.93    4.27 
  -3   1   1   50.47    4.94 
   3   1  -1   54.84    4.10 
  -3   1   1   47.77    4.74 
   3   1  -1   54.21    4.26 
   3   1  -1   53.12    2.62 
  -3   1   1   52.56    3.86 
   3   1  -1   59.68    3.35 
  -3   1   1   50.05    4.33 
  -3   1   1   61.79    4.30 
  -3   1   1   55.40    4.18 
  -3   1   1   53.92    5.03 
   3   1  -1   62.45    3.64 
   3   1  -1   48.87    4.18 
   3   1  -1   53.33    3.67 
   3   1  -1   53.28    4.45 
  -3   1   1   53.15    4.42 
   3   1  -1   48.27    4.71 
   2  -1  -1  320.18   13.35 
  -2  -1   1  339.28   11.59 
  -2  -1   1  327.21   12.74 
  -2  -1   1  327.06   12.55 
   2  -1  -1  317.42   12.99 
  -2  -1   1  329.41   12.08 
  -2  -1   1  327.33   13.66 
  -2  -1   1  346.24   13.06 
   2  -1  -1  315.63   13.51 
   2  -1  -1  345.67   13.90 
  -2  -1   1  319.02   13.02 
   2  -1  -1  333.91   13.10 
  -2  -1   1  325.57   13.39 
  -2  -1   1  337.22   12.67 
   2  -1  -1  329.41   13.23 
  -2  -1   1  324.22   11.95 
  -2  -1   1  351.99   13.65 
  -2  -1   1  324.80   11.91 
  -2  -1   1  331.71   11.92 
   2  -1  -1  320.85   13.29 
  -2  -1   1  343.44   13.70 
   2  -1  -1  341.20   13.40 
   2  -1  -1  333.46   13.54 
   2  -1  -1  317.50   13.37 
   2  -1  -1  344.74   13.46 
   2  -1  -1  320.65   13.41 
   2  -1  -1  343.05   13.46 
  -2  -1   1  337.87   12.79 
   2  -1  -1  360.71   13.86 
  -2  -1   1  327.69   12.67 
  -2  -1   1  334.39   11.77 
  -2  -1   1  328.51   13.38 
   2  -1  -1  327.98   13.43 
   2   1  -1  322.35   12.56 
  -2   1   1  340.00   13.50 
  -2   1   1  324.88   13.23 
   2   1  -1  339.81   13.50 
   2   1  -1  329.12   12.91 
  -2   1   1  317.49   13.38 
   2   1  -1  341.71   13.50 
   2   1  -1  337.57   13.52 
   2   1  -1  331.46   13.58 
  -2   1   1  324.92   13.69 
   2   1  -1  326.99   11.86 
  -2   1   1  323.90   13.40 
  -2   1   1  335.76   13.05 
  -2   1   1  329.80   13.49 
   2   1  -1  329.94   11.83 
  -2   1   1  304.39   13.01 
  -2   1   1  321.54   13.34 
  -2   1   1  327.58   13.09 
   2   1  -1  330.95   12.68 
  -2   1   1  344.21   13.59 
   2   1  -1  324.73   12.89 
   2   1  -1  345.45   13.42 
  -2   1   1  300.51   12.95 
   2   1  -1  331.18   11.63 
  -2   1   1  327.58   12.95 
   2   1  -1  342.74   12.92 
   2   1  -1  336.29   11.88 
  -2   1   1  342.03   13.36 
   2   1  -1  335.84   12.32 
  -2   1   1  325.23   13.34 
   2   1  -1  332.92   12.87 
   2   1  -1  349.41   13.83 
  -2   1   1  349.65   13.51 
  -2   1   1  325.36   13.34 
  -2   1   1  342.51   13.34 
   1  -1  -1   59.20    3.32 
   1  -1  -1   50.49    3.15 
  -1  -1   1   60.77    3.04 
  -1  -1   1   60.11    3.24 
   1  -1  -1   58.57    3.14 
   1  -1  -1   56.60    3.26 
   1  -1  -1   57.71    3.31 
   1  -1  -1   56.11    3.34 
   1  -1  -1   61.62    3.28 
  -1  -1   1   58.94    3.05 
   1  -1  -1   58.42    3.46 
   1  -1  -1   51.55    3.14 
  -1  -1   1   60.07    3.66 
  -1  -1   1   64.10    3.60 
   1  -1  -1   56.55    3.21 
  -1  -1   1   62.87    3.33 
  -1  -1   1   60.56    3.30 
  -1  -1   1   58.25    3.52 
  -1  -1   1   59.52    3.12 
  -1  -1   1   56.19    2.71 
   1  -1  -1   61.75    3.22 
   1  -1  -1   57.25    3.26 
  -1  -1   1   60.45    2.71 
   1  -1  -1   45.67    3.20 
   1   1  -1   59.19    2.75 
   1   1  -1   60.90    2.24 
  -1   1   1   55.33    3.14 
   1   1  -1   59.07    3.54 
  -1   1   1   59.02    3.24 
  -1   1   1   63.53    3.54 
  -1   1   1   54.55    3.13 
  -1   1   1   53.94    3.10 
  -1   1   1   56.21    3.20 
   1   1  -1   55.81    3.07 
  -1   1   1   59.15    3.34 
   1   1  -1   56.69    3.28 
   1   1  -1   59.56    2.74 
   1   1  -1   58.57    2.81 
  -1   1   1   57.03    3.10 
   1   1  -1   63.76    3.21 
   1   1  -1   58.27    3.25 
  -1   1   1   54.10    3.16 
   1   1  -1   59.21    3.43 
  -1   1   1   61.44    3.48 
  -1   1   1   57.49    3.26 
  -1   1   1   57.41    3.43 
  -1   1   1   53.88    3.31 
  -1   1   1   54.22    3.13 
   1   1  -1   59.98    2.75 
   1   1  -1   59.01    2.92 
   1   1  -1   54.71    3.09 
  -1   1   1   56.95    3.31 
   1   1  -1   56.85    3.62 
   1   1  -1   59.83    3.08 
  -1   1   1   54.94    2.79 
   0  -1   1  923.09   32.15 
   0   1  -1  901.29   31.99 
   0   1   1  912.85   31.54 
   0   1   1  892.77   31.81 
   0   1  -1  942.22   31.66 
   0   1  -1  895.88   32.29 
   0   1   1  936.96   31.14 
   0   1   1  935.60   31.43 
   0   1  -1  956.37   31.52 
   0   1   1  890.48   31.78 
   0   1   1  821.45   31.45 
   0   1   1  915.23   31.25 
   0   1   1  900.82   31.86 
   0   1  -1  867.01   31.66 
   0   1   1  930.01   31.39 
   0   1  -1  917.31   31.75 
   0   1   1  932.72   31.66 
   0   1   1  885.22   31.72 
   0   1   1  927.88   31.99 
   0   1   1  942.21   31.53 
   0   1  -1  923.79   31.91 
   0   1  -1  929.55   32.07 
   0   1   1  896.12   31.51 
   0   1   1  910.88   31.52 
   0   1  -1  915.10   31.97 
   0   1  -1  961.90   31.70 
  -1  -1  -1   83.34    3.94 
   1  -1   1   75.75    4.05 
   1  -1   1   79.17    4.22 
   1  -1   1   84.88    4.19 
   1  -1   1   81.48    3.87 
  -1  -1  -1   82.17    3.84 
   1  -1   1   87.04    4.25 
   1  -1   1   83.04    4.09 
   1  -1   1   80.93    4.10 
  -1  -1  -1   82.63    4.44 
   1  -1   1   82.76    4.28 
  -1  -1  -1   79.04    3.74 
   1  -1   1   76.77    4.31 
   1  -1   1   77.86    3.71 
  -1  -1  -1   82.58    3.83 
  -1  -1  -1   78.38    3.74 
   1  -1   1   84.82    4.76 
   1  -1   1   80.96    3.71 
  -1  -1  -1   78.31    4.26 
   1  -1   1   82.15    4.32 
  -1  -1  -1   81.07    3.71 
   1  -1   1   81.96    4.38 
  -1  -1  -1   84.82    4.17 
   1  -1   1   82.17    4.22 
   1  -1   1   83.28    4.30 
  -1   1  -1   80.28    4.20 
  -1   1  -1   72.02    4.19 
   1   1   1   83.32    3.86 
   1   1   1   83.87    4.00 
  -1   1  -1   78.94    4.09 
   1   1   1   82.85    4.28 
   1   1   1   79.03    3.46 
  -1   1  -1   80.87    3.70 
   1   1   1   84.26    3.47 
  -1   1  -1   81.92    3.74 
  -1   1  -1   70.88    4.04 
  -1   1  -1   84.92    4.17 
  -1   1  -1   79.56    4.09 
   1   1   1   81.08    3.77 
   1   1   1   80.70    3.78 
   1   1   1   79.22    3.54 
  -1   1  -1   84.89    4.25 
   1   1   1   81.33    3.25 
  -1   1  -1   82.86    4.32 
  -1   1  -1   79.19    4.18 
   1   1   1   82.25    4.53 
   1   1   1   81.71    4.12 
   1   1   1   80.02    3.51 
  -1   1  -1   75.63    4.15 
  -1   1  -1   79.17    4.15 
   1   1   1   76.09    4.20 
  -1   1  -1   83.02    4.27 
   1   1   1   82.22    3.74 
   1   1   1   81.23    3.74 
  -1   1  -1   79.53    4.55 
  -1   1  -1   85.45    3.83 
  -1   1  -1   78.54    3.72 
  -1   1  -1   81.17    4.15 
   1   1   1   84.54    3.77 
   2  -1   1  942.46   34.84 
  -2  -1  -1  957.23   34.97 
  -2  -1  -1  932.98   33.28 
  -2  -1  -1  961.68   34.80 
   2  -1   1  924.45   34.34 
   2  -1   1  955.91   34.46 
  -2  -1  -1  957.40   33.42 
   2  -1   1  966.73   34.92 
  -2  -1  -1  955.58   33.70 
  -2  -1  -1  943.23   32.73 
  -2  -1  -1  901.69   33.01 
   2  -1   1  987.55   34.90 
   2  -1   1  960.15   34.57 
  -2  -1  -1  994.18   34.59 
   2  -1   1  985.86   34.73 
  -2  -1  -1  961.30   34.89 
  -2  -1  -1  957.69   32.86 
   2  -1   1  969.61   34.13 
   2  -1   1  946.65   34.33 
   2  -1   1  990.48   34.64 
  -2  -1  -1  945.82   33.73 
   2  -1   1  935.49   34.61 
  -2  -1  -1  960.13   34.04 
   2  -1   1  976.96   34.70 
   2  -1   1  967.31   34.40 
  -2  -1  -1  968.41   33.80 
  -2  -1  -1  953.82   33.14 
   2  -1   1  935.25   33.17 
  -2  -1  -1  955.24   33.59 
  -2  -1  -1  938.45   33.96 
   2  -1   1  911.17   34.39 
   2  -1   1  945.93   34.32 
  -2  -1  -1  952.03   34.22 
   2   1   1  962.28   34.88 
   2   1   1  956.56   32.93 
  -2   1  -1  991.20   34.92 
  -2   1  -1  970.83   34.83 
   2   1   1  984.32   34.33 
  -2   1  -1  942.22   34.61 
   2   1   1  934.09   33.17 
  -2   1  -1  929.28   34.35 
  -2   1  -1  944.21   34.02 
   2   1   1  962.75   33.38 
  -2   1  -1  914.75   34.33 
  -2   1  -1  963.78   34.24 
   2   1   1  963.41   33.89 
   2   1   1  981.92   33.44 
  -2   1  -1  943.22   34.72 
  -2   1  -1  929.31   34.34 
  -2   1  -1  951.50   34.73 
  -2   1  -1  998.18   34.55 
   2   1   1  933.57   33.87 
   2   1   1  944.02   34.49 
  -2   1  -1  958.74   34.58 
   2   1   1  963.60   33.33 
   2   1   1  971.38   33.96 
   2   1   1  958.30   33.49 
  -2   1  -1  935.55   34.70 
   2   1   1  955.09   34.86 
   2   1   1  927.63   33.97 
   2   1   1  927.38   34.78 
  -2   1  -1  874.43   34.32 
  -2   1  -1  947.58   33.31 
  -2   1  -1  971.36   35.03 
   2   1   1  975.69   34.76 
   2   1   1  969.63   33.17 
  -2   1  -1  941.24   33.20 
  -2   1  -1  958.79   34.49 
   2   1   1  947.03   32.80 
  -2   1  -1  977.71   34.38 
   2   1   1  935.20   32.73 
  -2   1  -1  922.82   34.43 
  -2   1  -1  962.93   34.37 
  -3  -1  -1    3.72    1.97 
   3  -1   1    0.78    1.22 
   3  -1   1    1.77    1.54 
  -3  -1  -1    0.84    1.18 
  -3  -1  -1    1.16    0.75 
   3  -1   1    3.54    1.84 
  -3  -1  -1    1.76    0.57 
   3  -1   1   -0.32    1.29 
  -3  -1  -1    0.13    1.14 
   3  -1   1    0.27    1.04 
   3  -1   1    1.08    0.72 
   3  -1   1    1.26    1.29 
   3  -1   1    0.94    1.40 
   3  -1   1   -0.25    1.29 
  -3  -1  -1    1.97    0.77 
   3  -1   1   -0.01    0.96 
  -3  -1  -1    0.88    0.99 
  -3  -1  -1    0.79    1.07 
  -3  -1  -1    0.17    0.83 
  -3  -1  -1   -0.05    1.18 
   3  -1   1    1.22    1.57 
  -3  -1  -1    1.32    1.18 
  -3  -1  -1    1.58    0.49 
  -3  -1  -1    1.21    0.47 
   3  -1   1    0.90    1.58 
  -3  -1  -1    0.63    0.97 
   3  -1   1    0.90    1.34 
  -3  -1  -1   -0.24    0.82 
  -3  -1  -1    0.27    1.15 
   3  -1   1    1.00    1.19 
  -3  -1  -1    1.19    0.48 
  -3  -1  -1   -0.89    1.08 
   3  -1   1    2.77    1.61 
  -3  -1  -1    1.63    0.85 
  -3  -1  -1    0.35    1.29 
   3   1   1    1.59    0.98 
   3   1   1    1.84    0.81 
  -3   1  -1   -1.35    1.34 
   3   1   1    0.85    1.00 
   3   1   1    1.49    1.44 
  -3   1  -1    0.20    1.29 
   3   1   1    1.13    0.60 
  -3   1  -1   -0.25    0.97 
  -3   1  -1   -0.04    1.09 
   3   1   1    1.54    1.03 
  -3   1  -1    0.65    1.35 
  -3   1  -1    2.11    1.59 
   3   1   1    1.43    0.85 
  -3   1  -1    0.46    1.62 
   3   1   1    0.86    0.71 
  -3   1  -1    1.03    1.41 
   3   1   1   -0.23    1.27 
   3   1   1    0.09    1.44 
   3   1   1   -1.45    1.03 
  -3   1  -1    3.14    1.55 
   3   1   1    1.70    1.67 
   3   1   1    0.44    1.01 
  -3   1  -1    1.18    0.78 
  -3   1  -1   -0.31    1.08 
  -3   1  -1   -1.89    1.02 
   3   1   1    0.06    1.53 
  -3   1  -1    2.46    1.36 
   3   1   1    1.93    0.99 
  -3   1  -1    1.27    1.36 
  -3   1  -1   -0.13    1.06 
  -3   1  -1   -0.39    1.23 
  -4  -1  -1  241.47   10.19 
   4  -1   1  249.38    9.39 
   4  -1   1  221.82   12.38 
  -4  -1  -1  248.72    9.29 
  -4  -1  -1  243.54   10.16 
   4  -1   1  259.64   12.12 
   4  -1   1  254.63   12.65 
  -4  -1  -1  252.41   10.95 
   4  -1   1  243.57   12.43 
  -4  -1  -1  249.77   10.79 
  -4  -1  -1  236.52    9.17 
   4  -1   1  252.25   11.98 
  -4  -1  -1  256.52   12.87 
  -4  -1  -1  244.22   12.65 
   4  -1   1  234.41   12.31 
  -4  -1  -1  239.60   10.46 
   4  -1   1  251.07   12.45 
  -4  -1  -1  236.75    9.46 
   4  -1   1  260.02   12.81 
   4  -1   1  252.61   12.11 
   4  -1   1  248.48   11.69 
  -4  -1  -1  244.61   10.65 
  -4  -1  -1  238.93   10.25 
  -4  -1  -1  237.56   11.48 
  -4  -1  -1  255.81   11.85 
  -4  -1  -1  251.86   10.22 
  -4  -1  -1  246.68    9.17 
  -4  -1  -1  237.70   11.11 
  -4   1  -1  248.76   11.79 
  -4   1  -1  250.22   11.74 
  -4   1  -1  263.86   11.37 
   4   1   1  240.92    9.36 
   4   1   1  246.88   12.45 
   4   1   1  263.68   12.02 
   4   1   1  236.56   12.51 
   4   1   1  238.07   12.26 
   4   1   1  244.92   10.37 
  -4   1  -1  242.79   11.81 
   4   1   1  246.22   10.22 
  -4   1  -1  258.31   13.02 
   4   1   1  245.81   11.99 
   4   1   1  238.77   10.75 
   4   1   1  260.25   12.45 
   4   1   1  242.99   11.68 
  -4   1  -1  245.12   10.48 
  -4   1  -1  243.42   12.36 
   4   1   1  249.76   10.80 
  -4   1  -1  254.01   12.46 
   4   1   1  249.26   10.93 
  -4   1  -1  249.34    9.52 
   4   1   1  249.97   11.17 
  -5  -1  -1    2.83    1.41 
  -5  -1  -1    5.66    1.12 
   5  -1   1    3.81    1.90 
   5  -1   1    7.05    2.68 
   5  -1   1    2.83    2.27 
  -5  -1  -1    8.20    2.75 
   5  -1   1    2.43    2.09 
  -5  -1  -1    2.11    1.50 
   5  -1   1    4.26    2.43 
   5  -1   1    0.31    2.10 
   5  -1   1    5.39    2.41 
  -5  -1  -1    2.00    2.46 
   5  -1   1    2.56    2.08 
  -5  -1  -1    3.67    1.49 
  -5  -1  -1    4.37    1.44 
   5  -1   1    1.77    2.47 
  -5  -1  -1    3.62    1.88 
  -5  -1  -1    4.91    1.45 
   5  -1   1    5.68    2.46 
  -5  -1  -1    6.40    1.99 
   5  -1   1    4.92    0.90 
  -5  -1  -1    3.33    0.92 
  -5  -1  -1    1.59    1.54 
  -5  -1  -1    4.67    0.98 
  -5  -1  -1    3.70    0.87 
  -5   1  -1    0.80    1.22 
   5   1   1    6.24    1.03 
   5   1   1    4.86    2.30 
   5   1   1    3.92    2.53 
   5   1   1    4.75    1.76 
  -5   1  -1    8.11    2.81 
   5   1   1    5.18    2.32 
   5   1   1    3.48    2.21 
   5   1   1    5.19    2.53 
  -5   1  -1    2.99    2.36 
  -5   1  -1    4.67    0.99 
  -5   1  -1    0.95    1.45 
   5   1   1    6.26    2.40 
   5   1   1    3.46    1.34 
  -5   1  -1    5.22    2.67 
   5   1   1    0.04    2.14 
  -5   1  -1    3.97    1.64 
   5   1   1    2.20    1.68 
  -5   1  -1    3.10    1.97 
  -5   1  -1    3.71    2.09 
  -5   1  -1    2.65    1.71 
   6  -1   1   -0.41    2.26 
   6  -1   1    3.84    3.03 
   6  -1   1    0.43    2.13 
   6  -1   1    1.99    2.22 
   6  -1   1   -0.27    1.64 
  -6  -1  -1    0.25    2.20 
  -6  -1  -1    1.74    0.88 
  -6  -1  -1    1.80    0.81 
  -6  -1  -1   -1.66    1.95 
   6  -1   1    0.32    2.03 
   6  -1   1   -0.32    1.90 
   6  -1   1   -0.17    2.21 
  -6  -1  -1    1.17    0.88 
  -6  -1  -1    1.43    1.76 
   6  -1   1   -0.43    1.65 
  -6  -1  -1   -0.61    1.38 
  -6  -1  -1   -0.09    1.22 
  -6  -1  -1    0.07    1.03 
  -6  -1  -1   -0.21    1.53 
   6  -1   1    2.39    2.22 
  -6  -1  -1    0.49    0.90 
   6   1   1    3.49    2.71 
   6   1   1    1.92    2.32 
   6   1   1    1.18    2.03 
   6   1   1   -0.50    1.73 
   6   1   1   -1.18    1.54 
  -6   1  -1   -0.42    1.85 
  -6   1  -1    0.50    1.58 
  -6   1  -1    1.01    1.53 
   6   1   1    0.78    1.92 
  -6   1  -1    0.44    1.74 
   6   1   1    3.04    2.55 
  -6   1  -1   -1.88    1.43 
  -6   1  -1   -0.55    2.14 
   6   1   1    1.51    1.34 
   6   1   1    0.69    1.73 
  -6   1  -1    2.37    1.56 
  -6   1  -1    0.08    1.18 
  -6   1  -1    1.68    2.18 
   6   1   1    1.37    2.40 
  -7  -1  -1    6.80    3.77 
   7  -1   1    8.79    3.71 
   7  -1   1   10.37    3.90 
  -7  -1  -1    7.56    3.25 
  -7  -1  -1   12.67    3.10 
   7  -1   1   10.33    3.64 
  -7  -1  -1    7.47    3.37 
   7  -1   1    6.60    3.77 
  -7  -1  -1    7.83    2.66 
   7  -1   1    1.58    2.87 
   7  -1   1   10.02    3.78 
  -7  -1  -1    9.42    2.87 
  -7  -1  -1   13.12    3.34 
   7  -1   1   10.84    3.41 
   7  -1   1   17.57    4.76 
   7  -1   1    6.75    3.15 
   7  -1   1   10.31    3.99 
   7   1   1   13.13    4.12 
   7   1   1    8.84    3.62 
  -7   1  -1    9.03    2.76 
   7   1   1    7.46    2.48 
   7   1   1    8.98    3.30 
   7   1   1    4.45    2.95 
   7   1   1    7.08    3.12 
   7   1   1   10.63    3.17 
   7   1   1    6.37    3.14 
  -7   1  -1    9.36    3.98 
   7   1   1    8.31    4.14 
  -7   1  -1   12.61    3.45 
   7   1   1    6.44    3.86 
  -7   1  -1    6.96    2.97 
  -7   1  -1    7.33    2.52 
  -7   1  -1   13.02    3.77 
  -7   1  -1    6.18    3.64 
  -7   1  -1    5.50    3.40 
   8  -1   1    7.35    3.76 
  -8  -1  -1    7.91    4.13 
   8  -1   1   12.09    4.67 
   8  -1   1   13.01    4.73 
   8  -1   1    3.91    4.20 
  -8  -1  -1    6.57    3.45 
  -8  -1  -1   11.01    3.29 
   8  -1   1   11.84    4.10 
   8  -1   1    7.64    4.33 
   8  -1   1   16.93    4.99 
  -8  -1  -1   11.16    3.30 
  -8  -1  -1    6.52    2.96 
  -8  -1  -1    9.88    4.23 
   8  -1   1   21.76    6.02 
   8  -1   1    5.96    3.07 
  -8   1  -1    8.15    3.13 
  -8   1  -1    7.15    3.47 
   8   1   1   12.20    4.79 
   8   1   1    8.17    3.06 
   8   1   1    7.75    3.70 
  -8   1  -1    8.32    4.45 
   8   1   1    5.78    3.90 
   8   1   1    5.47    2.91 
   8   1   1   12.17    4.18 
  -8   1  -1    9.27    4.07 
   8   1   1    6.62    4.25 
  -8   1  -1   11.03    3.93 
  -8   1  -1    6.21    3.19 
   8   1   1   13.40    4.24 
   8   1   1    9.42    4.57 
   9  -1   1    8.38    5.11 
  -9  -1  -1    1.99    4.40 
   9  -1   1    3.24    3.17 
   9  -1   1    2.63    3.85 
  -9  -1  -1   -1.33    2.45 
   9  -1   1    0.27    2.99 
   9  -1   1   -1.77    3.52 
  -9  -1  -1   -3.26    2.43 
   9  -1   1    3.57    3.41 
   9  -1   1    0.51    2.83 
   9  -1   1    4.64    4.05 
   9  -1   1    3.51    4.09 
   9   1   1    4.38    3.69 
  -9   1  -1    0.62    3.43 
  -9   1  -1    6.04    4.00 
   9   1   1    3.33    3.79 
  -9   1  -1   -0.97    2.48 
   9   1   1   -0.99    3.75 
   9   1   1    3.25    3.68 
   9   1   1    2.65    3.23 
   9   1   1    2.84    4.09 
   9   1   1   -0.03    3.61 
   9   1   1    2.93    3.92 
  -9   1  -1    4.48    3.17 
  10  -1   1   11.86    5.67 
  10  -1   1    7.28    5.36 
  10  -1   1    3.84    4.71 
  10  -1   1    8.54    5.36 
  10  -1   1   11.80    5.30 
  10  -1   1    1.15    3.38 
  10  -1   1    5.09    4.00 
 -10  -1  -1    2.88    4.34 
 -10  -1  -1    6.95    3.88 
 -10  -1  -1    1.60    3.11 
  10  -1   1    0.27    3.16 
  10  -1   1    2.31    4.54 
  10   1   1   13.11    5.60 
 -10   1  -1    1.46    3.75 
  10   1   1   -2.75    3.29 
  10   1   1    5.44    4.55 
  10   1   1    2.64    4.21 
 -10   1  -1    6.71    4.77 
 -10   1  -1    1.99    3.35 
  10   1   1    7.82    4.58 
 -10   1  -1   11.18    5.89 
  10   1   1    3.24    4.34 
  10  -2  -1   65.01   12.35 
 -10  -2   1   22.75    6.67 
  10  -2  -1   54.68    9.61 
  10  -2  -1   56.45    8.58 
  10  -2  -1   49.74    9.27 
 -10  -2   1   25.28    7.29 
  10  -2  -1   57.35   10.11 
  10  -2  -1   57.64   10.41 
  10  -2  -1   36.01    7.67 
  10  -2  -1   50.22    9.67 
 -10   2   1   38.96    7.56 
  10   2  -1   63.72   10.32 
  10   2  -1   65.71   11.01 
  10   2  -1   66.70   10.43 
  10   2  -1   43.17    8.43 
 -10   2   1   35.98    8.32 
  10   2  -1   42.32    8.49 
  10   2  -1   61.85   10.72 
 -10   2   1   44.59    8.97 
  10   2  -1   53.01    9.04 
 -10   2   1   52.48    9.86 
   9  -2  -1   62.21   10.05 
   9  -2  -1   80.74   11.44 
  -9  -2   1   73.06   11.17 
  -9  -2   1   80.31    9.16 
   9  -2  -1   82.23   10.14 
   9  -2  -1   84.45   11.23 
   9  -2  -1   61.53    9.24 
   9  -2  -1   70.31   11.26 
   9  -2  -1   66.64    9.62 
  -9  -2   1   64.77    9.95 
   9  -2  -1   55.97    8.04 
   9  -2  -1   67.15   10.13 
   9   2  -1   65.07    8.39 
  -9   2   1   59.59    8.07 
   9   2  -1   81.87   11.20 
  -9   2   1   87.73   10.43 
   9   2  -1   85.24   10.77 
   9   2  -1   77.80    9.86 
  -9   2   1   64.73    9.16 
   9   2  -1   99.64   12.33 
  -9   2   1   61.13   10.13 
   9   2  -1   72.53    9.78 
   9   2  -1   82.15   11.09 
  -9   2   1   70.33   10.86 
  -9   2   1   91.20   11.64 
   9   2  -1   81.72   10.86 
   8  -2  -1   25.52    6.09 
  -8  -2   1   17.80    5.56 
  -8  -2   1   17.10    5.13 
   8  -2  -1   18.99    4.74 
   8  -2  -1   16.90    5.29 
   8  -2  -1   11.45    4.81 
   8  -2  -1   18.31    5.00 
   8  -2  -1   18.24    5.49 
   8  -2  -1   20.85    5.59 
  -8  -2   1   12.39    3.78 
   8  -2  -1   19.32    4.85 
   8  -2  -1    7.44    4.18 
   8   2  -1   13.96    4.93 
   8   2  -1   15.68    4.71 
  -8   2   1   22.44    5.24 
   8   2  -1   15.39    4.84 
   8   2  -1   18.09    4.31 
   8   2  -1   18.72    4.02 
   8   2  -1   18.43    5.12 
   8   2  -1   16.20    5.04 
  -8   2   1   20.07    5.47 
  -8   2   1   17.41    4.27 
  -8   2   1   18.92    4.38 
   8   2  -1   19.88    5.35 
  -8   2   1   22.07    5.78 
  -8   2   1   14.11    4.97 
  -8   2   1   19.78    4.84 
   8   2  -1   15.72    4.66 
  -8   2   1   19.86    4.23 
   7  -2  -1   22.50    5.13 
  -7  -2   1   44.92    5.73 
   7  -2  -1   40.99    6.91 
   7  -2  -1   32.17    6.44 
   7  -2  -1   33.23    6.45 
   7  -2  -1   37.07    6.46 
  -7  -2   1   34.37    4.05 
  -7  -2   1   26.94    5.94 
   7  -2  -1   42.23    6.66 
  -7  -2   1   40.41    4.66 
   7  -2  -1   33.55    5.63 
   7  -2  -1   30.14    6.31 
   7  -2  -1   41.65    6.58 
  -7  -2   1   40.44    7.14 
   7  -2  -1   39.13    5.92 
  -7  -2   1   37.60    5.25 
  -7  -2   1   43.94    5.16 
  -7   2   1   38.88    6.42 
   7   2  -1   41.02    7.19 
   7   2  -1   31.76    5.04 
  -7   2   1   32.02    5.19 
   7   2  -1   38.05    4.99 
   7   2  -1   42.70    4.36 
   7   2  -1   32.04    5.72 
  -7   2   1   30.42    6.37 
   7   2  -1   31.12    5.66 
   7   2  -1   36.17    6.04 
  -7   2   1   37.86    6.01 
   7   2  -1   42.35    6.78 
  -7   2   1   36.80    6.29 
   7   2  -1   39.85    6.51 
  -7   2   1   44.26    5.86 
   7   2  -1   37.41    6.25 
  -7   2   1   40.80    6.97 
  -7   2   1   39.88    5.94 
  -6  -2   1   46.48    5.54 
  -6  -2   1   39.06    4.12 
  -6  -2   1   36.24    4.09 
  -6  -2   1   30.61    5.55 
   6  -2  -1   40.94    3.91 
   6  -2  -1   32.66    5.69 
   6  -2  -1   44.70    6.45 
  -6  -2   1   33.49    4.65 
   6  -2  -1   38.08    5.19 
   6  -2  -1   46.16    6.12 
   6  -2  -1   38.05    5.71 
   6  -2  -1   35.54    5.87 
   6  -2  -1   35.47    6.25 
  -6  -2   1   36.22    6.05 
  -6  -2   1   37.82    3.43 
   6  -2  -1   46.23    6.63 
  -6  -2   1   33.28    2.33 
  -6  -2   1   39.89    4.71 
   6  -2  -1   33.96    5.78 
  -6  -2   1   36.70    3.74 
   6  -2  -1   33.13    5.92 
  -6  -2   1   34.84    3.89 
   6   2  -1   34.36    4.70 
   6   2  -1   36.03    3.61 
  -6   2   1   34.34    5.63 
   6   2  -1   36.02    3.66 
   6   2  -1   44.45    4.06 
   6   2  -1   34.01    5.43 
  -6   2   1   49.33    5.71 
   6   2  -1   47.58    6.40 
  -6   2   1   44.80    6.62 
  -6   2   1   36.78    5.95 
  -6   2   1   28.87    5.13 
  -6   2   1   31.22    5.06 
   6   2  -1   35.83    6.08 
   6   2  -1   40.01    3.78 
   6   2  -1   32.60    5.32 
   6   2  -1   30.23    5.42 
  -6   2   1   33.14    5.05 
   6   2  -1   42.34    5.86 
   5  -2  -1  103.35    8.22 
   5  -2  -1  115.42    7.27 
  -5  -2   1   96.36    8.14 
   5  -2  -1  115.94    8.43 
   5  -2  -1  108.56    7.94 
  -5  -2   1  110.91    6.34 
  -5  -2   1  123.63    5.91 
   5  -2  -1  117.10    7.98 
  -5  -2   1  111.62    6.55 
   5  -2  -1  111.89    8.50 
   5  -2  -1  106.40    6.06 
  -5  -2   1  100.17    6.16 
   5  -2  -1   99.84    7.77 
  -5  -2   1  112.53    5.59 
  -5  -2   1  104.50    6.67 
  -5  -2   1  108.11    5.07 
   5  -2  -1  107.00    8.46 
  -5  -2   1  105.95    5.78 
   5  -2  -1  114.62    7.72 
  -5  -2   1  112.88    8.51 
  -5  -2   1  107.99    6.94 
   5  -2  -1  105.77    7.97 
  -5   2   1  111.42    7.57 
  -5   2   1  104.93    8.20 
   5   2  -1  105.53    5.91 
   5   2  -1  104.22    6.41 
  -5   2   1  102.49    7.59 
   5   2  -1  107.40    8.03 
   5   2  -1  110.29    7.49 
  -5   2   1  105.28    7.23 
  -5   2   1  113.79    8.35 
   5   2  -1  108.07    7.78 
   5   2  -1   98.13    5.39 
   5   2  -1  105.57    5.62 
   5   2  -1  114.91    6.04 
   5   2  -1  111.26    6.89 
   5   2  -1  100.69    7.96 
  -5   2   1  101.36    7.96 
   5   2  -1   94.82    7.24 
  -5   2   1  115.89    8.08 
   4  -2  -1   67.15    6.38 
  -4  -2   1   56.70    3.52 
   4  -2  -1   53.08    5.73 
   4  -2  -1   62.65    6.56 
  -4  -2   1   68.03    4.61 
   4  -2  -1   66.90    4.68 
   4  -2  -1   61.14    6.71 
   4  -2  -1   69.91    5.53 
  -4  -2   1   70.02    3.51 
  -4  -2   1   66.35    6.84 
  -4  -2   1   62.43    4.75 
  -4  -2   1   57.98    3.87 
  -4  -2   1   68.45    4.56 
  -4  -2   1   62.38    6.69 
   4  -2  -1   54.81    5.94 
  -4  -2   1   69.75    4.52 
  -4  -2   1   58.73    4.27 
  -4  -2   1   59.81    4.17 
   4  -2  -1   62.47    6.30 
   4  -2  -1   63.28    6.38 
   4  -2  -1   55.17    6.22 
   4  -2  -1   58.30    4.24 
   4  -2  -1   57.29    5.73 
  -4   2   1   69.86    6.74 
   4   2  -1   62.08    3.52 
   4   2  -1   59.68    4.35 
  -4   2   1   82.73    5.78 
   4   2  -1   61.71    4.85 
  -4   2   1   65.87    5.10 
   4   2  -1   63.90    4.46 
  -4   2   1   77.50    7.18 
   4   2  -1   62.16    4.27 
  -4   2   1   76.70    6.06 
   4   2  -1   62.94    3.66 
   4   2  -1   62.61    6.33 
  -4   2   1   62.72    5.97 
  -4   2   1   74.98    5.76 
   4   2  -1   72.16    5.40 
   4   2  -1   74.24    5.85 
  -4   2   1   67.92    4.60 
   4   2  -1   57.38    5.89 
   4   2  -1   66.10    4.29 
   4   2  -1   52.60    3.89 
   3  -2  -1   25.30    3.65 
  -3  -2   1   27.88    2.94 
  -3  -2   1   26.66    2.80 
  -3  -2   1   21.71    3.72 
   3  -2  -1   26.10    3.39 
   3  -2  -1   26.38    3.71 
   3  -2  -1   17.44    3.26 
   3  -2  -1   21.46    3.57 
  -3  -2   1   31.51    3.13 
   3  -2  -1   25.58    4.06 
  -3  -2   1   33.97    3.99 
  -3  -2   1   31.04    4.24 
   3  -2  -1   21.46    3.29 
  -3  -2   1   24.02    1.71 
  -3  -2   1   23.46    1.56 
   3  -2  -1   24.02    3.59 
   3  -2  -1   21.50    2.51 
  -3  -2   1   25.84    3.24 
   3  -2  -1   24.10    2.91 
  -3  -2   1   27.38    2.64 
  -3  -2   1   21.73    3.48 
  -3  -2   1   24.07    2.59 
   3  -2  -1   28.23    3.70 
  -3  -2   1   24.25    1.49 
   3  -2  -1   24.24    3.69 
   3  -2  -1   21.35    3.52 
   3   2  -1   23.89    1.53 
  -3   2   1   20.66    3.19 
  -3   2   1   25.04    3.92 
   3   2  -1   30.98    3.38 
  -3   2   1   25.73    3.51 
   3   2  -1   20.70    2.76 
   3   2  -1   25.25    2.57 
   3   2  -1   30.99    3.30 
   3   2  -1   23.82    3.21 
   3   2  -1   29.11    3.88 
  -3   2   1   31.49    3.78 
  -3   2   1   27.29    3.77 
  -3   2   1   24.75    3.66 
   3   2  -1   19.80    2.02 
  -3   2   1   22.53    3.06 
   3   2  -1   22.02    2.86 
   3   2  -1   25.74    3.90 
   3   2  -1   31.99    3.26 
   3   2  -1   25.85    1.58 
  -3   2   1   22.41    3.00 
   3   2  -1   27.25    3.62 
  -3   2   1   27.75    3.50 
   3   2  -1   24.82    1.91 
   2  -2  -1    4.14    1.69 
   2  -2  -1    5.54    1.78 
  -2  -2   1   16.47    2.39 
  -2  -2   1   18.08    2.47 
   2  -2  -1    8.51    2.08 
   2  -2  -1    5.44    1.53 
   2  -2  -1    3.87    1.70 
   2  -2  -1    5.78    1.80 
   2  -2  -1    6.51    1.83 
   2  -2  -1    8.06    1.77 
   2  -2  -1    8.81    2.24 
   2  -2  -1    6.98    1.74 
   2  -2  -1    7.11    1.85 
   2  -2  -1    4.48    1.48 
   2  -2  -1    5.99    1.00 
   2  -2  -1    8.09    1.88 
   2   2  -1    5.81    2.00 
  -2   2   1    8.50    1.94 
   2   2  -1   10.22    1.82 
  -2   2   1    9.55    2.03 
  -2   2   1    5.12    1.59 
  -2   2   1    6.52    1.81 
  -2   2   1    8.29    1.84 
   2   2  -1    8.92    2.08 
  -2   2   1    6.62    1.79 
  -2   2   1    8.44    2.01 
  -2   2   1    5.19    1.68 
  -2   2   1    8.82    1.86 
  -2   2   1    6.07    1.86 
  -2   2   1    6.81    2.04 
  -2   2   1    6.70    1.82 
   2   2  -1    6.69    1.71 
  -2   2   1    5.81    1.77 
   2   2  -1    9.02    0.81 
  -2   2   1    8.93    1.62 
   2   2  -1   10.78    1.46 
   2   2  -1    5.78    1.51 
   2   2  -1   11.71    2.10 
  -2   2   1    4.92    1.82 
   2   2  -1    5.50    1.69 
  -2   2   1    8.37    2.15 
   2   2  -1    7.80    0.97 
   2   2  -1    7.63    1.35 
  -2   2   1    9.36    1.93 
   2   2  -1   10.61    1.85 
   2   2  -1    8.16    1.21 
   2   2  -1    5.92    1.45 
   2   2  -1    9.31    2.30 
   2   2  -1    8.16    1.26 
  -1  -2   1    1.16    0.83 
  -1  -2   1    1.66    1.15 
   1  -2  -1    0.40    1.33 
   1  -2  -1    0.68    0.94 
  -1  -2   1   -0.27    0.87 
  -1  -2   1    0.22    1.03 
   1  -2  -1    5.14    1.50 
   1  -2  -1   -0.66    0.85 
   1  -2  -1    0.36    0.98 
  -1  -2   1    1.56    0.80 
  -1  -2   1    1.57    1.20 
  -1  -2   1    1.02    1.15 
   1  -2  -1   -0.61    0.68 
  -1  -2   1    0.87    0.41 
   1  -2  -1    3.54    1.35 
  -1  -2   1    0.57    0.73 
  -1  -2   1    0.01    0.82 
   1   2  -1    1.98    1.30 
  -1   2   1    2.16    0.93 
  -1   2   1    3.42    1.12 
   1   2  -1    1.07    0.97 
   1   2  -1    0.01    0.31 
   1   2  -1   -1.52    0.98 
   1   2  -1    0.10    0.52 
   1   2  -1    1.26    0.83 
   1   2  -1    0.84    0.90 
   1   2  -1    0.00    1.04 
  -1   2   1    0.62    1.04 
   1   2  -1    1.00    0.68 
   1   2  -1    0.40    0.37 
   1   2  -1    0.10    0.60 
   1   2  -1   -1.50    0.58 
  -1   2   1    3.30    1.17 
   1   2  -1    0.39    0.67 
  -1   2   1    3.37    1.10 
   1   2  -1   -0.74    0.67 
   1   2  -1    0.06    0.41 
  -1   2   1    1.78    1.16 
   1   2  -1   -0.04    0.87 
  -1   2   1    3.77    1.16 
  -1   2   1   -0.04    0.61 
  -1   2   1    0.87    0.86 
  -1   2   1   -2.61    1.00 
   1   2  -1    0.53    0.59 
   1   2  -1    0.83    0.98 
   1   2  -1    0.61    0.97 
  -1   2   1    0.38    0.74 
   1   2  -1    0.38    1.52 
   1   2  -1    0.81    1.07 
  -1   2   1    1.84    1.09 
  -1   2   1    2.56    0.97 
   1   2  -1    1.02    0.95 
   0  -2   1    0.98    1.14 
   0  -2  -1    0.44    0.63 
   0  -2  -1    2.01    1.05 
   0  -2  -1    0.30    0.94 
   0  -2   1    1.15    0.75 
   0  -2   1    2.45    1.17 
   0  -2  -1    1.46    0.85 
   0  -2   1    3.16    2.06 
   0  -2  -1    1.65    0.77 
   0  -2   1    1.47    1.15 
   0  -2   1   -0.70    0.86 
   0  -2   1    0.99    0.92 
   0  -2  -1    2.88    1.22 
   0  -2  -1   -0.29    1.04 
   0  -2   1    1.31    1.00 
   0  -2  -1    1.99    0.84 
   0  -2   1    0.86    1.12 
   0  -2   1    1.40    0.90 
   0  -2  -1    0.62    0.88 
   0  -2  -1    2.59    0.95 
   0  -2  -1    1.35    1.25 
   0   2  -1    1.28    1.23 
   0   2   1   -0.02    0.96 
   0   2   1    0.73    0.71 
   0   2   1    0.59    0.86 
   0   2  -1    2.83    1.20 
   0   2  -1    1.33    0.99 
   0   2   1    0.66    0.66 
   0   2   1    0.16    0.92 
   0   2  -1    0.01    0.70 
   0   2   1    0.19    0.85 
   0   2  -1    1.20    1.03 
   0   2   1    1.99    1.02 
   0   2   1    0.73    0.72 
   0   2  -1    1.21    0.93 
   0   2  -1    0.49    0.89 
   0   2  -1    0.31    0.45 
   0   2  -1    1.26    0.57 
   0   2  -1    1.28    0.95 
   0   2  -1    0.42    0.72 
   0   2   1    1.79    1.11 
   0   2  -1   -0.04    1.00 
   0   2   1    0.67    1.06 
   0   2  -1   -0.36    0.68 
   0   2   1    0.51    0.70 
   0   2  -1    0.70    0.78 
   0   2   1    1.18    1.03 
   0   2   1    0.92    1.11 
   0   2  -1    1.12    1.90 
   0   2   1    0.01    0.61 
   0   2  -1    1.03    1.12 
   0   2   1    0.47    0.86 
   0   2   1    0.97    1.68 
   0   2  -1    0.23    1.13 
   1  -2   1  154.62    7.29 
  -1  -2  -1  165.32    6.68 
  -1  -2  -1  154.38    7.04 
   1  -2   1  169.93    7.72 
   1  -2   1  159.96    8.60 
  -1  -2  -1  166.70    7.70 
   1  -2   1  149.85    7.26 
   1  -2   1  155.48    8.24 
  -1  -2  -1  171.38    6.37 
   1  -2   1  166.31    6.58 
   1  -2   1  165.42    7.78 
   1  -2   1  152.54    7.77 
   1  -2   1  158.56    7.20 
  -1  -2  -1  164.20    6.62 
  -1  -2  -1  164.87    6.95 
   1  -2   1  148.90    7.08 
   1  -2   1  159.46    7.65 
   1  -2   1  151.49    7.42 
   1  -2   1  151.93    7.59 
  -1  -2  -1  168.64    6.41 
   1  -2   1  165.31    7.92 
   1  -2   1  160.96    6.99 
  -1  -2  -1  154.93    7.46 
   1  -2   1  156.14    7.65 
  -1  -2  -1  162.19    7.58 
  -1  -2  -1  165.26    7.46 
  -1   2  -1  163.91    7.47 
  -1   2  -1  151.70    7.59 
  -1   2  -1  160.81    7.89 
  -1   2  -1  159.44    7.78 
  -1   2  -1  166.20    7.93 
  -1   2  -1  169.82    6.86 
   1   2   1  171.52    7.11 
  -1   2  -1  165.04    7.60 
   1   2   1  168.00    7.83 
  -1   2  -1  169.78    7.89 
  -1   2  -1  148.43    7.18 
   1   2   1  164.00    6.69 
  -1   2  -1  146.21    7.58 
   1   2   1  161.75    7.18 
  -1   2  -1  169.10    8.37 
  -1   2  -1  154.51    6.42 
   1   2   1  158.78    6.71 
   1   2   1  177.00    7.72 
   1   2   1  170.03    7.06 
   1   2   1  160.58    6.91 
   1   2   1  154.48    6.86 
   1   2   1  162.37    6.64 
  -1   2  -1  166.74    7.67 
   1   2   1  169.86    7.46 
  -1   2  -1  169.07    7.67 
   1   2   1  164.20    6.27 
  -1   2  -1  160.92    6.75 
  -1   2  -1  164.07    7.37 
   1   2   1  154.53    7.30 
   1   2   1  162.19    6.79 
   1   2   1  159.75    6.23 
   1   2   1  153.16    8.00 
  -1   2  -1  166.34    7.59 
  -1   2  -1  162.54    7.13 
   1   2   1  156.90    7.45 
  -1   2  -1  169.37    7.73 
  -1   2  -1  161.72    7.66 
   1   2   1  167.96    6.86 
   1   2   1  166.72    7.48 
   1   2   1  160.99    6.19 
  -1   2  -1  158.32    7.57 
   2  -2   1   71.78    4.63 
  -2  -2  -1   71.82    3.11 
   2  -2   1   67.42    5.05 
  -2  -2  -1   68.63    3.77 
   2  -2   1   75.79    5.30 
   2  -2   1   69.19    4.16 
  -2  -2  -1   69.89    4.82 
  -2  -2  -1   75.02    4.32 
   2  -2   1   69.23    4.09 
  -2  -2  -1   76.67    3.69 
   2  -2   1   75.05    4.71 
  -2  -2  -1   74.14    5.01 
   2  -2   1   68.18    4.90 
   2  -2   1   72.99    4.98 
   2  -2   1   75.26    4.95 
  -2  -2  -1   65.99    4.94 
  -2  -2  -1   70.89    4.21 
   2  -2   1   67.75    4.73 
  -2  -2  -1   73.81    4.52 
   2  -2   1   69.80    4.18 
   2  -2   1   67.57    5.43 
   2  -2   1   57.61    4.50 
   2  -2   1   69.45    3.95 
   2  -2   1   73.08    4.67 
  -2  -2  -1   71.52    4.52 
   2  -2   1   78.34    5.17 
   2  -2   1   66.75    4.89 
  -2  -2  -1   69.95    3.18 
   2  -2   1   80.31    4.57 
   2   2   1   75.90    3.76 
   2   2   1   74.87    4.54 
  -2   2  -1   64.36    4.64 
   2   2   1   68.48    4.35 
   2   2   1   71.10    3.24 
   2   2   1   66.30    3.02 
  -2   2  -1   63.86    4.59 
   2   2   1   72.99    3.13 
   2   2   1   71.05    5.00 
   2   2   1   74.28    4.33 
  -2   2  -1   68.23    4.56 
  -2   2  -1   69.03    4.84 
  -2   2  -1   70.63    4.33 
  -2   2  -1   69.40    4.80 
  -2   2  -1   73.67    4.96 
  -2   2  -1   70.07    3.75 
   2   2   1   75.81    5.22 
  -2   2  -1   73.36    4.70 
  -2   2  -1   74.78    4.89 
   2   2   1   73.55    3.68 
   2   2   1   70.44    3.18 
  -2   2  -1   76.51    4.85 
   2   2   1   59.50    5.03 
  -2   2  -1   68.09    4.69 
  -2   2  -1   68.57    4.19 
   2   2   1   63.12    4.58 
  -2   2  -1   76.65    4.27 
   2   2   1   63.50    3.84 
   2   2   1   65.15    4.01 
  -2   2  -1   72.92    4.78 
   2   2   1   78.69    4.51 
   2   2   1   64.75    4.38 
   2   2   1   64.80    3.61 
   2   2   1   65.87    3.79 
  -2   2  -1   67.15    4.64 
   2   2   1   76.00    3.80 
  -2   2  -1   70.66    4.98 
  -3  -2  -1  115.97    4.69 
   3  -2   1  114.19    7.13 
   3  -2   1  116.18    6.24 
   3  -2   1  107.64    6.98 
  -3  -2  -1  119.38    5.81 
  -3  -2  -1  111.29    5.43 
  -3  -2  -1  112.06    7.22 
  -3  -2  -1  110.49    5.25 
   3  -2   1   94.45    7.14 
   3  -2   1  125.18    8.26 
   3  -2   1  112.11    7.46 
   3  -2   1  117.59    7.22 
  -3  -2  -1  122.14    5.45 
   3  -2   1  105.78    6.95 
  -3  -2  -1  115.94    6.62 
   3  -2   1  115.64    5.86 
  -3  -2  -1  110.17    4.69 
  -3  -2  -1  119.83    4.94 
   3  -2   1  130.60    6.79 
   3  -2   1  117.98    7.51 
  -3  -2  -1  108.93    6.63 
   3  -2   1  115.58    6.97 
  -3  -2  -1  110.93    5.94 
  -3  -2  -1  121.69    5.59 
  -3  -2  -1  115.89    7.36 
   3   2   1  120.98    6.30 
   3   2   1  115.71    5.18 
   3   2   1  114.04    5.81 
  -3   2  -1  108.86    7.41 
   3   2   1  113.54    5.34 
   3   2   1  115.02    5.24 
   3   2   1  121.82    7.20 
  -3   2  -1  122.44    7.25 
   3   2   1  119.15    7.60 
  -3   2  -1  120.19    7.09 
  -3   2  -1  116.50    7.34 
  -3   2  -1  111.23    6.76 
  -3   2  -1  129.39    7.38 
   3   2   1  118.75    5.17 
  -3   2  -1  119.52    6.76 
   3   2   1  119.22    6.12 
   3   2   1  112.89    7.16 
   3   2   1  113.30    6.07 
   3   2   1  116.09    6.80 
   3   2   1  113.50    5.40 
   3   2   1  116.75    6.11 
   3   2   1  119.93    5.60 
  -3   2  -1  111.91    5.80 
  -3   2  -1  113.38    5.96 
   3   2   1  124.71    6.72 
  -4  -2  -1  158.29    7.27 
  -4  -2  -1  158.29    8.74 
   4  -2   1  166.23    9.18 
   4  -2   1  162.28    9.53 
  -4  -2  -1  174.23    8.03 
   4  -2   1  154.51   10.41 
  -4  -2  -1  154.10    7.77 
   4  -2   1  144.14    9.47 
   4  -2   1  179.05    9.79 
   4  -2   1  154.63    9.36 
   4  -2   1  149.29    8.37 
  -4  -2  -1  161.94    9.84 
  -4  -2  -1  146.66    6.32 
  -4  -2  -1  141.51    9.42 
  -4  -2  -1  154.02    6.88 
  -4  -2  -1  161.91    7.70 
   4  -2   1  175.70   10.17 
  -4  -2  -1  149.06    7.22 
   4  -2   1  153.34    9.68 
  -4  -2  -1  156.31    6.71 
  -4  -2  -1  166.85    7.58 
   4  -2   1  161.82    7.39 
  -4  -2  -1  160.76    6.54 
   4  -2   1  147.09    9.14 
   4   2   1  153.95    7.15 
   4   2   1  166.52    7.12 
  -4   2  -1  158.33    9.08 
   4   2   1  157.17    7.81 
  -4   2  -1  160.37    7.54 
   4   2   1  164.10    6.84 
   4   2   1  164.58    7.33 
   4   2   1  155.08    6.30 
   4   2   1  160.24    7.74 
  -4   2  -1  163.61    9.16 
   4   2   1  171.85    9.29 
   4   2   1  152.19    8.50 
   4   2   1  165.79    7.40 
   4   2   1  151.90    7.07 
   4   2   1  166.57    9.65 
  -4   2  -1  147.28    9.32 
   4   2   1  148.70    9.17 
  -4   2  -1  172.50    9.44 
  -4   2  -1  150.30    9.86 
   4   2   1  161.71    8.68 
  -4   2  -1  157.30    8.83 
   4   2   1  180.34   10.19 
  -4   2  -1  174.62    9.56 
  -5  -2  -1  142.46    7.39 
  -5  -2  -1  149.47    7.02 
   5  -2   1  143.41    9.08 
   5  -2   1  134.29    9.41 
  -5  -2  -1  150.72    6.66 
   5  -2   1  158.44    9.07 
  -5  -2  -1  139.97    9.86 
   5  -2   1  147.25    9.73 
   5  -2   1  143.43    9.85 
  -5  -2  -1  138.02    7.28 
  -5  -2  -1  147.37    7.00 
   5  -2   1  142.38    6.81 
   5  -2   1  151.67   10.26 
  -5  -2  -1  151.67    7.53 
  -5  -2  -1  150.73    6.32 
   5  -2   1  149.77    9.57 
  -5  -2  -1  141.23    8.01 
   5  -2   1  142.32    9.84 
   5  -2   1  153.00    9.63 
  -5  -2  -1  147.85    7.83 
  -5  -2  -1  140.74    6.88 
  -5  -2  -1  147.12   10.01 
   5   2   1  146.22    7.10 
   5   2   1  154.12    7.41 
  -5   2  -1  147.69    8.72 
  -5   2  -1  160.60    9.52 
  -5   2  -1  144.08    9.18 
   5   2   1  144.25   10.11 
  -5   2  -1  148.85    9.32 
  -5   2  -1  139.81    9.62 
   5   2   1  134.66    9.32 
   5   2   1  144.91    6.89 
   5   2   1  155.05    9.03 
   5   2   1  144.73    7.68 
  -5   2  -1  156.72    9.71 
   5   2   1  148.47    7.50 
  -5   2  -1  145.72    7.08 
   5   2   1  144.52    6.11 
   5   2   1  137.38    9.51 
   5   2   1  149.68    8.83 
   5   2   1  141.35    6.43 
   5   2   1  140.07    7.87 
   5   2   1  138.99    9.23 
  -5   2  -1  138.02    9.99 
   5   2   1  152.86    9.15 
  -6  -2  -1  121.26    7.85 
  -6  -2  -1  126.39    6.64 
  -6  -2  -1  128.33    8.09 
  -6  -2  -1  134.38   10.15 
   6  -2   1  121.21    9.95 
  -6  -2  -1  123.35    7.23 
  -6  -2  -1  119.27    7.12 
   6  -2   1  118.28    5.83 
   6  -2   1  113.71    9.09 
   6  -2   1  124.50    8.74 
   6  -2   1  114.62    8.66 
  -6  -2  -1  128.81   10.17 
   6  -2   1  126.64    9.95 
   6  -2   1  135.61    9.46 
   6  -2   1  141.92    9.73 
  -6  -2  -1  119.71    5.98 
   6  -2   1  123.87    9.76 
   6  -2   1  120.46    9.87 
  -6  -2  -1  129.34    7.50 
   6   2   1  117.83    9.38 
   6   2   1  121.74    8.69 
   6   2   1  124.22   11.33 
   6   2   1  125.09    9.08 
  -6   2  -1  125.78    9.50 
  -6   2  -1  130.51   10.10 
  -6   2  -1  114.90    9.30 
   6   2   1  114.73    6.09 
  -6   2  -1  137.27    8.59 
  -6   2  -1  122.96    8.88 
  -6   2  -1  113.79    8.04 
   6   2   1  117.81    7.17 
   6   2   1  124.70    7.81 
   6   2   1  126.34    9.36 
  -6   2  -1  133.00    9.12 
   6   2   1  132.34   10.19 
  -6   2  -1  134.10    9.29 
   6   2   1  121.36    8.56 
  -7  -2  -1  160.01    9.26 
   7  -2   1  161.79   12.45 
   7  -2   1  178.51   12.69 
   7  -2   1  176.76   11.49 
   7  -2   1  156.81   11.93 
  -7  -2  -1  166.43   10.32 
   7  -2   1  167.59   12.27 
  -7  -2  -1  159.50   12.41 
   7  -2   1  165.63   11.61 
   7  -2   1  186.65   13.16 
  -7  -2  -1  162.24   12.44 
   7  -2   1  183.54   11.53 
  -7  -2  -1  162.07    9.39 
  -7  -2  -1  168.45    9.29 
   7  -2   1  160.39   11.38 
   7   2   1  164.61   11.89 
   7   2   1  159.65   12.07 
   7   2   1  164.98   10.14 
   7   2   1  175.64   11.74 
  -7   2  -1  149.44   11.84 
   7   2   1  163.52   12.47 
   7   2   1  170.32   12.08 
  -7   2  -1  171.20   10.39 
  -7   2  -1  157.23   11.73 
  -7   2  -1  149.47   10.85 
  -7   2  -1  166.57   11.13 
  -7   2  -1  188.15   10.72 
  -7   2  -1  177.79   12.82 
   7   2   1  169.96    9.51 
   7   2   1  166.81   11.22 
  -7   2  -1  142.76   10.63 
   7   2   1  172.48   11.15 
   8  -2   1  106.59   11.49 
   8  -2   1   93.48   10.26 
   8  -2   1   79.97   10.42 
   8  -2   1   70.02    8.49 
  -8  -2  -1   86.67   11.48 
   8  -2   1   98.56   11.59 
  -8  -2  -1   96.44    9.29 
   8  -2   1   89.73   12.41 
   8  -2   1   79.44   10.24 
   8  -2   1   94.90   10.40 
   8  -2   1   85.88   10.81 
   8  -2   1   88.45   10.92 
  -8  -2  -1   85.33   11.08 
   8   2   1   93.90   10.81 
   8   2   1  127.81   12.95 
  -8   2  -1   76.42    9.36 
  -8   2  -1   70.47    8.63 
   8   2   1   77.94    9.14 
  -8   2  -1  108.10   11.84 
   8   2   1   92.75    8.87 
   8   2   1   97.72   11.25 
  -8   2  -1   83.17    9.70 
  -8   2  -1   74.20    7.93 
   8   2   1   96.59   10.30 
   8   2   1   75.04   10.28 
  -8   2  -1   97.61   11.45 
  -8   2  -1   77.43    8.22 
  -8   2  -1   76.75   10.61 
   8   2   1   83.50   10.14 
  -9  -2  -1  116.46    9.41 
   9  -2   1  144.11   13.78 
   9  -2   1  106.36   13.04 
   9  -2   1  126.72   12.81 
   9  -2   1  125.36   14.14 
   9  -2   1  119.79   15.08 
  -9  -2  -1   98.91   13.26 
   9  -2   1  128.40   12.86 
   9  -2   1  110.25   13.43 
   9  -2   1  112.68   13.42 
   9  -2   1  119.70   14.05 
   9  -2   1  130.87   12.38 
  -9  -2  -1  134.60   15.04 
  -9   2  -1  158.30   11.76 
  -9   2  -1  132.76   13.24 
   9   2   1  120.93   13.76 
  -9   2  -1  105.23   12.52 
   9   2   1  126.17   13.92 
   9   2   1  132.53   11.00 
  -9   2  -1  119.21   13.77 
   9   2   1  127.86   13.76 
  -9   2  -1   98.85   11.01 
  -9   2  -1  103.31   12.77 
   9   2   1  124.22   13.95 
   9   2   1  128.50   12.84 
   9   2   1   95.99   12.12 
  10  -2   1   46.05   10.46 
  10  -2   1   39.27    8.18 
  10  -2   1   44.72    9.26 
  10  -2   1   28.27    6.84 
  10  -2   1   30.88    7.99 
 -10  -2  -1   32.96    8.71 
  10  -2   1   44.51    9.21 
  10  -2   1   42.26    8.68 
  10  -2   1   35.33    8.65 
  10  -2   1   37.64   12.05 
 -10  -2  -1   32.33    8.50 
  10   2   1   46.86    9.09 
  10   2   1   61.45   10.56 
 -10   2  -1   38.91    8.62 
 -10   2  -1   57.50    9.75 
 -10   2  -1   46.15    9.39 
  10   2   1   55.05    9.67 
  10   2   1   45.65    8.51 
  10   2   1   42.71    9.37 
  10   2   1   43.66    8.99 
 -10   2  -1   34.71    7.51 
   9  -3  -1    8.57    4.30 
   9  -3  -1   11.26    5.17 
   9  -3  -1    9.80    5.02 
   9  -3  -1    7.48    4.72 
   9  -3  -1   13.88    4.92 
   9  -3  -1    4.43    4.94 
  -9  -3   1    5.57    3.68 
   9  -3  -1    8.33    4.82 
   9  -3  -1   15.08    5.41 
   9  -3  -1    6.80    4.09 
  -9  -3   1   19.06    6.13 
   9   3  -1    7.43    4.31 
  -9   3   1   -4.45    3.31 
   9   3  -1   -2.50    2.92 
  -9   3   1    4.92    3.75 
   9   3  -1   10.87    5.62 
  -9   3   1    6.15    3.77 
   9   3  -1    6.02    3.90 
   9   3  -1    4.62    3.86 
   9   3  -1   13.47    5.09 
  -9   3   1    6.81    3.91 
  -9   3   1   10.98    5.08 
   9   3  -1   11.31    4.83 
   8  -3  -1    9.91    4.52 
   8  -3  -1    6.97    4.17 
   8  -3  -1    4.88    3.66 
  -8  -3   1   10.64    4.78 
   8  -3  -1   13.75    4.45 
   8  -3  -1   17.52    5.09 
   8  -3  -1    7.94    3.48 
   8  -3  -1   11.14    4.95 
   8  -3  -1   11.29    5.00 
  -8  -3   1   19.71    5.84 
   8  -3  -1    7.97    4.01 
   8  -3  -1   14.71    5.09 
   8   3  -1   15.85    4.87 
   8   3  -1   15.82    5.14 
  -8   3   1    9.75    4.20 
  -8   3   1    8.77    3.39 
   8   3  -1   12.99    4.91 
   8   3  -1   12.87    3.62 
  -8   3   1    7.94    3.91 
   8   3  -1    8.93    3.87 
  -8   3   1    7.63    3.81 
  -8   3   1    4.40    4.03 
   8   3  -1    7.83    4.49 
  -8   3   1    2.92    3.42 
   8   3  -1    7.59    3.76 
  -8   3   1   10.65    3.57 
   8   3  -1   14.47    4.54 
  -8   3   1    4.54    3.23 
  -7  -3   1   47.96    7.57 
   7  -3  -1   61.14    6.96 
   7  -3  -1   79.20    9.64 
   7  -3  -1   53.40    9.55 
   7  -3  -1   62.03    8.97 
  -7  -3   1   40.13    7.25 
   7  -3  -1   56.25    8.33 
  -7  -3   1   59.26    6.15 
   7  -3  -1   50.13    6.34 
   7  -3  -1   57.31    7.93 
   7  -3  -1   46.29    8.02 
  -7  -3   1   65.19    7.76 
   7  -3  -1   57.71    7.77 
   7  -3  -1   47.18    7.40 
   7  -3  -1   62.26    8.24 
   7   3  -1   61.66    6.00 
  -7   3   1   65.86    9.04 
   7   3  -1   63.07    9.01 
   7   3  -1   58.71    6.49 
  -7   3   1   46.04    7.41 
  -7   3   1   56.60    7.82 
  -7   3   1   53.79    6.99 
  -7   3   1   70.46    8.88 
   7   3  -1   64.39    8.52 
   7   3  -1   60.70    7.74 
   7   3  -1   40.28    7.12 
   7   3  -1   57.63    7.50 
  -7   3   1   68.43    8.09 
  -7   3   1   65.05    7.86 
   7   3  -1   60.16    7.77 
  -6  -3   1  115.25    6.49 
  -6  -3   1  104.38    4.95 
  -6  -3   1  114.74    9.59 
   6  -3  -1  108.49    6.86 
   6  -3  -1  104.54   10.66 
   6  -3  -1  100.44    7.36 
   6  -3  -1  102.12    9.85 
   6  -3  -1   96.59    9.44 
   6  -3  -1  102.73   10.33 
   6  -3  -1  118.91    9.26 
  -6  -3   1  112.26    6.82 
   6  -3  -1  101.85   10.52 
  -6  -3   1   91.16    6.67 
  -6  -3   1  118.22    5.81 
  -6  -3   1  116.85    9.70 
   6  -3  -1  111.35   10.42 
   6  -3  -1  111.70    9.18 
   6   3  -1  104.92    8.30 
   6   3  -1  102.79   10.61 
  -6   3   1  102.80   10.26 
   6   3  -1  104.22   10.01 
   6   3  -1  109.44   10.38 
   6   3  -1  103.87    6.71 
  -6   3   1  111.77   10.29 
   6   3  -1  115.07    8.25 
   6   3  -1  113.49    6.45 
  -6   3   1  118.22    9.64 
   6   3  -1  102.85    8.41 
  -6   3   1  114.97    8.63 
  -6   3   1  114.91    9.50 
   6   3  -1  104.53    5.34 
  -6   3   1  108.82    8.22 
  -6   3   1  118.02    8.50 
  -6   3   1  116.08    9.25 
   6   3  -1  101.99    7.29 
   5  -3  -1  223.11   14.02 
   5  -3  -1  275.73   14.43 
  -5  -3   1  273.11   15.02 
  -5  -3   1  269.89   11.23 
   5  -3  -1  245.98   13.80 
   5  -3  -1  267.52   13.83 
   5  -3  -1  255.93   15.43 
   5  -3  -1  267.06   14.41 
  -5  -3   1  258.24   11.25 
   5  -3  -1  257.13   14.37 
   5  -3  -1  266.70   12.23 
  -5  -3   1  253.76   11.24 
  -5  -3   1  260.63   11.03 
  -5  -3   1  265.90   10.20 
   5  -3  -1  252.23   14.46 
  -5  -3   1  249.87   11.35 
  -5  -3   1  252.30    9.65 
   5  -3  -1  246.71   13.81 
  -5  -3   1  274.50   12.60 
  -5  -3   1  233.94   14.07 
   5  -3  -1  258.70   12.00 
   5   3  -1  276.38   13.54 
   5   3  -1  256.40   10.50 
  -5   3   1  253.66   13.47 
  -5   3   1  246.80   13.67 
   5   3  -1  257.90   10.17 
  -5   3   1  254.09   13.86 
   5   3  -1  247.85   13.92 
   5   3  -1  254.61   11.55 
   5   3  -1  265.35   13.83 
  -5   3   1  253.56   13.77 
   5   3  -1  248.02   12.66 
   5   3  -1  263.20   13.86 
  -5   3   1  256.09   14.12 
  -5   3   1  259.48   14.30 
   5   3  -1  244.89   11.83 
  -5   3   1  251.69   14.24 
  -4  -3   1   64.31    2.96 
   4  -3  -1   64.32    4.31 
   4  -3  -1   58.39    6.30 
   4  -3  -1   65.16    7.14 
  -4  -3   1   69.11    4.35 
   4  -3  -1   66.82    7.08 
   4  -3  -1   69.48    7.35 
  -4  -3   1   69.72    3.58 
   4  -3  -1   72.73    5.73 
  -4  -3   1   65.16    4.19 
  -4  -3   1   58.17    6.76 
   4  -3  -1   71.72    6.98 
  -4  -3   1   71.66    4.47 
   4  -3  -1   60.87    6.53 
   4  -3  -1   62.57    6.88 
   4  -3  -1   66.77    7.55 
   4  -3  -1   64.54    6.97 
  -4  -3   1   61.43    3.33 
  -4  -3   1   59.22    6.76 
  -4  -3   1   60.60    5.14 
   4  -3  -1   66.20    5.05 
   4   3  -1   68.14    3.49 
   4   3  -1   61.50    5.20 
  -4   3   1   51.26    6.05 
  -4   3   1   69.32    7.03 
   4   3  -1   67.82    4.86 
   4   3  -1   71.75    3.88 
  -4   3   1   67.39    5.66 
   4   3  -1   69.23    6.68 
   4   3  -1   72.06    7.01 
   4   3  -1   80.45    6.32 
  -4   3   1   70.86    6.82 
  -4   3   1   76.57    7.75 
   4   3  -1   67.52    4.20 
  -4   3   1   77.60    6.06 
   4   3  -1   68.67    4.42 
  -4   3   1   62.62    6.51 
   4   3  -1   68.14    4.93 
   3  -3  -1  340.43   16.34 
  -3  -3   1  366.58   15.96 
  -3  -3   1  359.58   14.47 
  -3  -3   1  361.76   13.06 
  -3  -3   1  355.03   14.29 
  -3  -3   1  352.68   16.12 
   3  -3  -1  357.76   16.34 
   3  -3  -1  365.89   16.40 
   3  -3  -1  350.50   13.54 
   3  -3  -1  351.64   16.95 
   3  -3  -1  364.96   15.78 
   3  -3  -1  364.33   16.40 
   3  -3  -1  386.16   15.69 
   3  -3  -1  370.47   15.63 
   3  -3  -1  341.24   16.34 
   3  -3  -1  355.08   16.61 
   3  -3  -1  347.01   16.09 
   3   3  -1  361.15   15.54 
  -3   3   1  350.90   16.20 
  -3   3   1  371.72   15.72 
  -3   3   1  349.89   16.09 
   3   3  -1  372.47   15.21 
  -3   3   1  367.75   16.78 
   3   3  -1  358.61   14.43 
  -3   3   1  357.47   16.06 
  -3   3   1  352.30   15.15 
   3   3  -1  374.51   16.26 
   3   3  -1  362.73   13.77 
   3   3  -1  356.16   15.77 
   3   3  -1  377.91   14.45 
   3   3  -1  375.23   14.46 
   3   3  -1  351.77   13.20 
   3   3  -1  365.27   13.70 
  -3   3   1  343.36   16.10 
  -3   3   1  366.80   16.35 
   3   3  -1  367.08   14.19 
   3   3  -1  383.81   16.08 
   3   3  -1  379.34   16.83 
   3   3  -1  356.70   14.74 
   2  -3  -1   34.34    4.47 
   2  -3  -1   28.44    3.88 
  -2  -3   1   36.03    2.89 
  -2  -3   1   38.52    4.54 
  -2  -3   1   42.69    3.32 
  -2  -3   1   39.17    4.73 
   2  -3  -1   35.61    4.19 
  -2  -3   1   34.01    4.42 
   2  -3  -1   29.37    3.76 
   2  -3  -1   30.14    3.98 
   2  -3  -1   39.17    4.75 
   2  -3  -1   33.58    3.44 
   2  -3  -1   35.11    3.61 
   2  -3  -1   51.96    5.09 
  -2  -3   1   37.04    3.99 
  -2  -3   1   36.26    2.43 
   2  -3  -1   37.87    4.61 
   2  -3  -1   28.29    3.48 
   2  -3  -1   42.49    4.62 
  -2  -3   1   33.75    3.98 
   2   3  -1   40.05    4.54 
   2   3  -1   38.21    4.43 
  -2   3   1   31.06    4.16 
   2   3  -1   42.30    4.82 
   2   3  -1   37.85    3.76 
   2   3  -1   34.81    4.03 
   2   3  -1   45.33    4.29 
   2   3  -1   34.10    2.25 
   2   3  -1   37.53    2.34 
  -2   3   1   32.21    3.73 
   2   3  -1   37.56    2.83 
  -2   3   1   29.85    3.78 
   2   3  -1   38.72    2.44 
   2   3  -1   37.33    2.47 
   2   3  -1   45.90    5.45 
  -2   3   1   37.85    4.35 
  -2   3   1   38.53    4.35 
   2   3  -1   35.15    3.80 
   2   3  -1   44.00    4.24 
   2   3  -1   33.50    2.50 
  -2   3   1   36.82    3.96 
  -2   3   1   37.76    3.52 
   2   3  -1   29.30    3.74 
  -2   3   1   35.82    4.12 
   2   3  -1   34.49    4.53 
   2   3  -1   32.93    3.62 
   2   3  -1   38.75    3.49 
   2   3  -1   37.83    2.43 
   1  -3  -1  380.42   14.04 
   1  -3  -1  359.97   15.75 
   1  -3  -1  397.94   15.95 
   1  -3  -1  405.71   15.75 
   1  -3  -1  381.92   14.16 
  -1  -3   1  381.02   14.95 
   1  -3  -1  375.37   15.66 
   1  -3  -1  367.69   17.13 
   1  -3  -1  386.31   15.78 
  -1  -3   1  397.74   16.21 
  -1  -3   1  374.38   15.49 
  -1  -3   1  405.17   16.26 
  -1  -3   1  372.88   16.63 
   1  -3  -1  375.54   16.03 
  -1  -3   1  374.66   15.48 
   1  -3  -1  357.27   16.12 
  -1  -3   1  377.21   16.36 
  -1  -3   1  387.20   15.53 
  -1  -3   1  368.97   16.30 
   1  -3  -1  414.04   16.44 
   1  -3  -1  414.05   16.90 
   1  -3  -1  361.12   15.90 
  -1   3   1  387.99   15.95 
  -1   3   1  385.67   14.80 
   1   3  -1  403.36   16.17 
  -1   3   1  377.93   15.51 
   1   3  -1  366.64   14.63 
   1   3  -1  385.66   15.39 
   1   3  -1  394.27   15.09 
  -1   3   1  382.22   15.63 
  -1   3   1  386.88   16.05 
   1   3  -1  386.99   15.24 
  -1   3   1  378.05   15.55 
  -1   3   1  392.39   16.95 
  -1   3   1  352.27   15.64 
  -1   3   1  377.31   15.45 
   1   3  -1  374.89   14.83 
  -1   3   1  391.08   14.78 
   1   3  -1  369.60   15.76 
  -1   3   1  375.43   14.85 
   1   3  -1  384.76   14.99 
   1   3  -1  379.95   15.54 
   1   3  -1  392.22   14.03 
  -1   3   1  382.35   15.67 
   1   3  -1  386.40   17.34 
   1   3  -1  363.93   15.60 
   1   3  -1  389.71   15.31 
   1   3  -1  369.58   14.71 
  -1   3   1  381.57   15.31 
  -1   3   1  387.98   16.22 
   1   3  -1  375.82   14.71 
   1   3  -1  402.77   17.23 
   1   3  -1  386.06   15.61 
  -1   3   1  368.66   15.60 
  -1   3   1  380.48   15.95 
   0  -3   1   22.51    4.46 
   0  -3  -1   32.06    3.42 
   0  -3   1   29.32    3.90 
   0  -3  -1   29.47    3.02 
   0  -3   1   30.09    3.45 
   0  -3   1   23.05    3.29 
   0  -3   1   22.12    3.01 
   0  -3  -1   29.50    3.03 
   0  -3  -1   26.69    2.88 
   0  -3  -1   36.43    3.77 
   0  -3  -1   29.67    2.68 
   0  -3  -1   29.02    3.80 
   0  -3   1   34.44    2.55 
   0  -3   1   28.65    3.57 
   0  -3   1   26.27    3.08 
   0  -3  -1   33.72    3.36 
   0  -3   1   25.83    3.01 
   0  -3   1   34.13    3.55 
   0  -3  -1   26.93    3.43 
   0  -3  -1   28.97    3.71 
   0  -3  -1   28.12    3.11 
   0   3  -1   33.29    2.03 
   0   3   1   25.34    2.43 
   0   3  -1   26.01    2.97 
   0   3  -1   26.55    2.99 
   0   3   1   30.74    3.39 
   0   3  -1   28.96    3.30 
   0   3   1   28.81    3.40 
   0   3  -1   22.26    2.81 
   0   3   1   27.99    2.74 
   0   3   1   28.05    3.27 
   0   3   1   28.85    3.27 
   0   3   1   29.22    2.79 
   0   3  -1   35.14    5.59 
   0   3   1   31.21    1.61 
   0   3  -1   27.24    2.74 
   0   3   1   31.76    3.59 
   0   3   1   27.68    3.51 
   0   3   1   38.74    4.28 
   0   3   1   32.16    3.34 
   0   3  -1   36.08    3.66 
   0   3  -1   28.85    3.52 
   0   3   1   29.65    2.97 
   0   3   1   29.85    4.84 
   0   3  -1   30.78    3.25 
   0   3  -1   26.27    3.28 
   0   3   1   28.98    1.57 
   0   3  -1   26.67    3.06 
   0   3  -1   27.84    1.97 
   0   3  -1   29.80    4.03 
   0   3   1   25.82    2.74 
   0   3  -1   34.02    3.69 
   0   3   1   22.63    3.12 
   0   3   1   28.22    2.90 
  -1  -3  -1  644.36   23.23 
  -1  -3  -1  632.41   24.59 
   1  -3   1  595.85   24.57 
   1  -3   1  641.09   26.75 
  -1  -3  -1  626.80   23.34 
   1  -3   1  639.44   24.22 
   1  -3   1  647.56   24.51 
   1  -3   1  630.26   24.60 
  -1  -3  -1  610.23   23.27 
   1  -3   1  647.64   24.47 
   1  -3   1  601.51   24.06 
  -1  -3  -1  635.83   22.86 
  -1  -3  -1  639.50   22.84 
  -1  -3  -1  627.83   23.24 
   1  -3   1  638.04   23.78 
  -1  -3  -1  651.86   23.55 
   1  -3   1  630.72   24.77 
  -1  -3  -1  640.54   24.46 
  -1  -3  -1  610.02   24.18 
  -1  -3  -1  624.70   23.51 
   1  -3   1  616.76   22.64 
   1  -3   1  616.23   23.53 
   1  -3   1  630.59   24.06 
   1  -3   1  630.55   24.33 
  -1  -3  -1  623.81   23.31 
  -1  -3  -1  601.71   24.07 
  -1   3  -1  621.60   23.20 
   1   3   1  640.07   22.60 
  -1   3  -1  621.21   24.12 
   1   3   1  612.40   22.88 
  -1   3  -1  619.58   24.13 
   1   3   1  645.21   23.45 
   1   3   1  626.49   23.93 
   1   3   1  618.77   23.12 
   1   3   1  603.48   24.01 
  -1   3  -1  613.69   23.39 
   1   3   1  625.77   22.69 
  -1   3  -1  615.02   23.75 
  -1   3  -1  651.18   24.17 
   1   3   1  625.77   24.10 
  -1   3  -1  618.76   23.00 
  -1   3  -1  637.73   24.34 
  -1   3  -1  612.08   25.20 
  -1   3  -1  621.30   24.27 
   1   3   1  597.94   22.56 
   1   3   1  607.55   22.36 
  -1   3  -1  646.98   24.50 
   1   3   1  637.64   23.49 
  -1   3  -1  625.30   24.91 
  -1   3  -1  637.33   24.23 
   1   3   1  600.02   23.14 
   1   3   1  610.63   23.22 
   1   3   1  634.05   23.33 
   1   3   1  626.57   23.86 
  -1   3  -1  649.13   23.58 
  -1   3  -1  619.31   24.68 
  -1   3  -1  602.76   24.35 
  -1   3  -1  636.60   24.28 
   1   3   1  636.61   23.76 
   1   3   1  607.72   23.04 
   1   3   1  618.59   23.26 
   2  -3   1   84.90    4.39 
  -2  -3  -1   97.99    4.57 
  -2  -3  -1   88.26    4.33 
   2  -3   1   82.88    5.97 
   2  -3   1   82.04    6.37 
   2  -3   1   91.33    6.32 
   2  -3   1   90.89    5.56 
  -2  -3  -1  104.67    5.95 
  -2  -3  -1   94.59    5.96 
   2  -3   1   80.80    6.14 
   2  -3   1   95.61    6.07 
   2  -3   1   84.59    6.39 
   2  -3   1   88.12    5.54 
  -2  -3  -1   82.71    4.65 
  -2  -3  -1   91.13    6.23 
   2  -3   1   96.66    5.77 
  -2  -3  -1   83.47    5.91 
   2  -3   1   95.48    7.26 
   2  -3   1   84.13    5.32 
   2  -3   1   89.88    6.11 
  -2   3  -1   89.49    4.88 
   2   3   1   90.40    6.15 
   2   3   1   90.02    5.10 
   2   3   1   85.92    4.76 
  -2   3  -1   95.43    6.66 
  -2   3  -1   87.29    6.06 
   2   3   1   84.31    3.77 
   2   3   1   81.48    4.41 
  -2   3  -1   78.16    5.39 
  -2   3  -1   92.02    5.98 
   2   3   1   87.49    5.69 
   2   3   1   87.49    3.99 
   2   3   1   84.56    4.72 
   2   3   1   91.31    3.89 
  -2   3  -1   94.91    5.88 
   2   3   1   84.97    5.45 
   2   3   1   89.79    3.85 
   2   3   1   91.59    4.38 
   2   3   1   82.83    4.25 
   2   3   1   87.42    4.66 
   2   3   1   87.46    4.49 
  -2   3  -1   84.22    4.19 
   2   3   1   91.93    5.32 
   2   3   1   93.92    4.63 
  -2   3  -1   86.63    6.02 
   2   3   1   88.55    5.77 
   2   3   1   88.14    5.96 
   2   3   1   87.69    3.94 
   2   3   1   87.36    5.54 
   2   3   1   92.81    5.57 
  -2   3  -1   76.63    5.74 
   2   3   1   87.51    5.18 
   2   3   1   86.69    6.43 
  -3  -3  -1  287.40   10.93 
   3  -3   1  283.15   12.93 
  -3  -3  -1  289.81   11.71 
  -3  -3  -1  287.79   10.57 
  -3  -3  -1  277.25   12.99 
   3  -3   1  299.35   14.54 
   3  -3   1  296.56   14.16 
   3  -3   1  294.51   14.51 
  -3  -3  -1  297.59   14.32 
   3  -3   1  281.03   14.26 
   3  -3   1  302.87   13.57 
   3  -3   1  304.14   14.03 
  -3  -3  -1  290.28   13.09 
  -3  -3  -1  274.00   13.26 
  -3  -3  -1  285.89   14.02 
   3  -3   1  298.07   12.22 
   3  -3   1  288.11   14.52 
   3  -3   1  297.18   14.04 
   3  -3   1  260.08   13.72 
   3  -3   1  300.13   12.88 
   3  -3   1  300.23   15.37 
   3   3   1  292.62   13.50 
   3   3   1  306.47   12.02 
   3   3   1  286.13   10.70 
  -3   3  -1  290.51   13.96 
  -3   3  -1  298.34   14.26 
  -3   3  -1  301.23   14.08 
   3   3   1  289.70   12.76 
   3   3   1  278.54   11.76 
   3   3   1  289.44   12.06 
   3   3   1  296.63   12.02 
   3   3   1  277.92   14.24 
   3   3   1  294.53   10.69 
  -3   3  -1  289.93   13.87 
   3   3   1  290.30   10.90 
   3   3   1  287.22   13.00 
   3   3   1  293.26   10.55 
   3   3   1  301.04   13.34 
   3   3   1  280.38   12.63 
   3   3   1  301.61   14.31 
  -3   3  -1  299.98   12.91 
  -3   3  -1  275.20   13.69 
   3   3   1  286.67   11.01 
   3   3   1  300.62   12.24 
   3   3   1  294.39   10.87 
  -3   3  -1  303.31   12.99 
   3   3   1  298.40   12.02 
   4  -3   1   45.12    5.72 
   4  -3   1   45.25    5.65 
  -4  -3  -1   37.62    2.33 
   4  -3   1   46.95    5.67 
  -4  -3  -1   38.14    5.47 
   4  -3   1   44.51    5.89 
   4  -3   1   34.24    5.69 
  -4  -3  -1   44.65    2.29 
   4  -3   1   39.14    5.46 
  -4  -3  -1   37.70    2.72 
  -4  -3  -1   46.27    5.95 
   4  -3   1   39.75    4.99 
   4  -3   1   44.50    5.89 
   4  -3   1   41.23    5.69 
  -4  -3  -1   45.93    2.86 
  -4  -3  -1   42.84    3.21 
   4  -3   1   38.75    4.17 
   4  -3   1   35.84    4.03 
  -4  -3  -1   41.84    4.53 
   4   3   1   43.61    5.02 
   4   3   1   41.50    2.73 
   4   3   1   49.38    4.04 
   4   3   1   45.16    3.13 
   4   3   1   44.15    4.58 
   4   3   1   40.05    4.24 
  -4   3  -1   33.42    5.16 
   4   3   1   45.70    3.95 
  -4   3  -1   41.84    4.88 
   4   3   1   45.71    3.32 
  -4   3  -1   39.54    5.47 
  -4   3  -1   38.75    5.28 
  -4   3  -1   41.46    5.46 
   4   3   1   44.02    2.86 
   4   3   1   40.75    5.72 
  -4   3  -1   46.81    5.73 
  -4   3  -1   47.62    5.71 
   4   3   1   56.01    6.41 
   4   3   1   39.84    2.47 
   4   3   1   49.43    5.68 
   4   3   1   38.52    4.72 
  -5  -3  -1   48.04    3.50 
   5  -3   1   42.17    6.33 
   5  -3   1   47.16    6.90 
  -5  -3  -1   62.30    4.63 
  -5  -3  -1   49.34    2.98 
   5  -3   1   37.13    6.72 
   5  -3   1   35.49    5.42 
  -5  -3  -1   58.84    7.11 
  -5  -3  -1   53.36    3.70 
   5  -3   1   45.98    6.56 
  -5  -3  -1   51.32    6.79 
  -5  -3  -1   54.69    3.80 
   5  -3   1   62.11    6.88 
  -5  -3  -1   59.41    3.30 
   5  -3   1   57.74    5.68 
   5  -3   1   47.95    6.39 
  -5  -3  -1   49.73    3.67 
   5  -3   1   56.45    7.18 
   5  -3   1   46.03    4.41 
   5  -3   1   47.81    6.28 
   5   3   1   53.36    6.01 
  -5   3  -1   52.88    6.44 
   5   3   1   55.73    3.63 
   5   3   1   58.80    4.31 
  -5   3  -1   49.77    6.88 
   5   3   1   51.98    6.58 
   5   3   1   56.85    6.56 
  -5   3  -1   43.21    6.06 
  -5   3  -1   44.92    6.22 
   5   3   1   48.19    5.47 
  -5   3  -1   34.31    5.23 
   5   3   1   48.81    6.76 
  -5   3  -1   48.01    6.11 
  -5   3  -1   50.36    6.47 
   5   3   1   50.05    3.58 
   5   3   1   53.34    4.96 
   5   3   1   51.23    6.66 
   5   3   1   53.32    3.61 
   5   3   1   48.85    3.29 
   5   3   1   53.11    4.23 
  -6  -3  -1   19.31    4.89 
   6  -3   1   20.83    4.74 
   6  -3   1   17.34    4.61 
   6  -3   1   14.91    4.40 
  -6  -3  -1   18.17    3.04 
   6  -3   1   12.59    3.70 
   6  -3   1   16.78    3.76 
   6  -3   1    9.51    3.88 
  -6  -3  -1   14.60    2.52 
   6  -3   1   17.22    5.28 
   6  -3   1   24.63    5.39 
   6  -3   1   10.37    2.30 
  -6  -3  -1   18.83    2.82 
  -6  -3  -1   17.82    3.04 
  -6  -3  -1   14.94    4.51 
   6  -3   1   10.16    3.84 
   6  -3   1   14.23    4.25 
   6   3   1   20.14    3.31 
  -6   3  -1   16.30    4.27 
   6   3   1   18.69    4.14 
  -6   3  -1   20.72    4.57 
  -6   3  -1   19.66    4.22 
   6   3   1   16.95    2.71 
   6   3   1   19.29    4.78 
   6   3   1   13.62    3.59 
  -6   3  -1   11.26    4.19 
   6   3   1   10.57    3.92 
   6   3   1   22.28    2.23 
   6   3   1   11.29    3.31 
  -6   3  -1   20.89    4.55 
  -6   3  -1   18.96    4.80 
  -6   3  -1   19.76    4.68 
   6   3   1   24.16    4.92 
  -6   3  -1   15.36    3.93 
   6   3   1   11.77    3.89 
   7  -3   1   -0.94    2.53 
  -7  -3  -1    0.28    1.54 
   7  -3   1    0.98    2.61 
   7  -3   1    0.65    3.08 
   7  -3   1    1.88    3.60 
   7  -3   1    4.63    3.42 
   7  -3   1    1.68    2.91 
   7  -3   1   -1.19    2.54 
   7  -3   1    0.49    2.48 
  -7  -3  -1    4.61    3.53 
   7  -3   1    0.70    2.67 
  -7  -3  -1    1.45    3.10 
   7  -3   1    0.04    2.23 
   7   3   1    1.17    2.34 
   7   3   1   -0.72    2.94 
   7   3   1    2.05    3.40 
  -7   3  -1   -0.73    2.26 
  -7   3  -1    1.31    3.36 
  -7   3  -1    0.53    2.49 
  -7   3  -1    1.06    2.39 
   7   3   1   -1.75    2.05 
   7   3   1   -0.96    1.80 
   7   3   1    0.90    2.28 
   7   3   1    0.56    2.29 
   7   3   1    0.08    1.78 
  -7   3  -1   -1.45    2.19 
  -7   3  -1    0.15    2.59 
  -7   3  -1   -0.19    2.69 
  -7   3  -1   -1.32    1.98 
   8  -3   1    2.75    3.04 
   8  -3   1    3.37    3.45 
  -8  -3  -1    1.08    3.16 
   8  -3   1    0.18    2.78 
   8  -3   1    0.66    2.99 
   8  -3   1    4.74    3.47 
   8  -3   1   -0.47    3.17 
   8  -3   1   -1.76    3.06 
  -8  -3  -1   -1.64    2.67 
   8  -3   1    0.93    3.02 
   8  -3   1   -3.11    1.97 
   8  -3   1    2.56    3.64 
   8   3   1    1.75    3.31 
   8   3   1    3.70    3.42 
   8   3   1    0.87    3.00 
  -8   3  -1    0.17    2.24 
   8   3   1    1.00    2.72 
  -8   3  -1   -0.03    2.24 
  -8   3  -1   -1.79    2.76 
  -8   3  -1   -1.24    2.68 
  -8   3  -1    1.10    2.62 
   8   3   1   -2.20    2.57 
   8   3   1   -1.84    2.36 
  -8   3  -1   -0.91    2.40 
  -8   3  -1   -1.99    2.16 
  -8   3  -1    4.46    3.23 
   8   3   1   -0.33    2.55 
   9  -3   1   -0.02    3.50 
   9  -3   1   -1.45    3.17 
   9  -3   1    2.21    4.55 
   9  -3   1    1.92    3.72 
   9  -3   1    5.39    3.58 
   9  -3   1    6.86    5.01 
   9  -3   1    2.02    4.25 
  -9  -3  -1    3.42    4.38 
   9  -3   1   -2.85    3.50 
   9  -3   1    8.57    4.74 
  -9  -3  -1    4.88    4.05 
  -9   3  -1   -2.05    3.80 
  -9   3  -1    2.89    3.06 
  -9   3  -1    9.03    3.90 
   9   3   1    1.58    3.40 
  -9   3  -1    3.37    3.63 
  -9   3  -1    2.01    3.12 
   9   3   1    0.20    3.12 
   9   3   1    4.59    3.58 
   9   3   1    0.70    3.77 
   9   3   1    4.48    4.19 
   9   3   1    5.18    4.01 
  -9   3  -1    2.65    3.38 
   9  -4  -1    6.51    4.96 
  -9  -4   1    1.47    4.07 
   9  -4  -1    4.56    3.94 
   9  -4  -1    5.64    4.00 
   9  -4  -1    8.38    4.89 
   9  -4  -1   -1.42    3.59 
   9  -4  -1    5.26    4.30 
   9  -4  -1    2.39    4.28 
  -9  -4   1    7.28    5.09 
   9  -4  -1   -1.78    3.00 
   9   4  -1    3.82    4.09 
  -9   4   1   12.73    5.41 
  -9   4   1    8.12    4.72 
  -9   4   1   10.75    4.06 
   9   4  -1    6.11    4.24 
  -9   4   1    8.46    4.59 
  -9   4   1    4.20    3.45 
  -9   4   1    3.62    4.56 
  -9   4   1    3.91    3.84 
   9   4  -1    6.77    5.01 
   9   4  -1    6.14    6.53 
  -9   4   1    3.59    3.65 
   9   4  -1   -3.29    3.32 
   8  -4  -1   62.37    9.31 
   8  -4  -1   74.68   11.49 
   8  -4  -1   53.28    9.35 
   8  -4  -1   79.26   10.14 
  -8  -4   1   89.02   11.87 
   8  -4  -1   81.80   10.34 
   8  -4  -1   71.69   10.51 
   8  -4  -1  105.20   12.21 
   8  -4  -1   81.09   10.46 
  -8  -4   1   89.26   12.09 
   8   4  -1  100.28   12.64 
   8   4  -1   84.84    9.93 
   8   4  -1   83.87    9.63 
  -8   4   1   74.39    9.39 
  -8   4   1   70.57    9.64 
  -8   4   1   85.22   11.45 
   8   4  -1  103.47   11.47 
   8   4  -1   88.14   10.18 
  -8   4   1   76.38   10.11 
   8   4  -1   84.66   10.95 
  -8   4   1   70.18    9.84 
  -8   4   1   74.58    9.34 
  -8   4   1   94.43   10.96 
   8   4  -1   80.04    9.64 
  -8   4   1   81.63   10.53 
   7  -4  -1    3.79    3.11 
  -7  -4   1    1.86    3.43 
   7  -4  -1    6.91    3.42 
   7  -4  -1    3.60    3.11 
  -7  -4   1    5.05    3.10 
   7  -4  -1    6.44    3.10 
   7  -4  -1    3.58    3.35 
   7  -4  -1    0.15    2.49 
  -7  -4   1    7.87    4.03 
   7  -4  -1    5.99    3.93 
   7  -4  -1    8.60    4.45 
   7  -4  -1    8.83    4.59 
   7   4  -1    7.35    3.91 
  -7   4   1    1.72    3.20 
   7   4  -1    6.27    3.49 
   7   4  -1    2.18    3.27 
  -7   4   1    7.00    3.49 
  -7   4   1   11.10    4.00 
   7   4  -1    4.75    2.38 
   7   4  -1    6.95    3.73 
  -7   4   1    4.02    3.62 
   7   4  -1    3.65    2.64 
  -7   4   1    2.75    2.88 
  -7   4   1    5.11    3.77 
  -7   4   1    4.08    3.19 
   7   4  -1    5.03    3.02 
  -7   4   1    4.94    3.38 
   6  -4  -1  116.02   11.15 
   6  -4  -1  127.38    7.47 
   6  -4  -1  123.76   11.85 
  -6  -4   1  123.19   12.15 
   6  -4  -1   88.17   10.23 
   6  -4  -1  118.12    7.86 
   6  -4  -1  104.66   10.32 
   6  -4  -1  106.37   12.09 
  -6  -4   1  114.34    8.09 
   6  -4  -1  112.21   11.08 
   6  -4  -1  124.38   12.02 
  -6  -4   1  109.90   11.54 
   6  -4  -1  112.70    8.99 
   6   4  -1  117.34    8.95 
  -6   4   1  110.21    9.03 
   6   4  -1  115.13   11.56 
  -6   4   1  113.95   11.24 
   6   4  -1  110.44    9.03 
  -6   4   1  118.15    9.53 
   6   4  -1  120.16    8.32 
  -6   4   1  104.69   10.79 
   6   4  -1  107.93    7.27 
  -6   4   1  116.05   11.65 
   6   4  -1  110.05    9.09 
   6   4  -1  114.88    7.45 
  -6   4   1  114.61    9.05 
  -6   4   1  100.63   10.33 
   6   4  -1  115.14   10.91 
  -6   4   1  129.96    9.70 
   6   4  -1  125.65    6.92 
   5  -4  -1    8.33    3.29 
   5  -4  -1   15.76    3.89 
  -5  -4   1   17.91    4.52 
   5  -4  -1   14.23    4.37 
  -5  -4   1   14.78    2.38 
  -5  -4   1    8.78    3.89 
   5  -4  -1   13.32    3.83 
   5  -4  -1    8.04    3.07 
   5  -4  -1   15.60    2.61 
   5  -4  -1   16.22    3.41 
   5  -4  -1    3.88    2.60 
   5  -4  -1   13.75    4.43 
  -5  -4   1   14.30    3.32 
   5  -4  -1   16.07    4.10 
   5   4  -1   16.60    3.23 
  -5   4   1   14.43    3.83 
   5   4  -1   15.07    3.19 
   5   4  -1   10.09    3.52 
   5   4  -1   13.61    2.19 
   5   4  -1   15.13    2.50 
  -5   4   1   13.85    4.21 
  -5   4   1   11.24    3.70 
  -5   4   1   10.81    3.74 
  -5   4   1   11.01    3.59 
   5   4  -1   16.21    3.82 
  -5   4   1   12.86    3.69 
   5   4  -1   13.97    3.85 
   5   4  -1    9.73    2.99 
  -5   4   1   15.00    3.63 
   4  -4  -1   68.19    7.41 
  -4  -4   1   71.92    4.47 
  -4  -4   1   68.86    7.95 
   4  -4  -1   83.85    8.25 
   4  -4  -1   61.23    7.22 
  -4  -4   1   64.14    6.62 
   4  -4  -1   58.53    7.02 
   4  -4  -1   65.81    6.63 
   4  -4  -1   63.82    7.21 
   4  -4  -1   70.86    7.86 
  -4  -4   1   68.74    4.58 
  -4  -4   1   62.13    6.83 
   4  -4  -1   70.57    4.02 
   4  -4  -1   75.40    6.02 
   4  -4  -1   64.69    8.08 
   4  -4  -1   67.42    6.48 
   4   4  -1   70.98    3.57 
   4   4  -1   67.73    7.10 
   4   4  -1   73.65    3.54 
   4   4  -1   72.57    4.97 
  -4   4   1   79.32    8.25 
  -4   4   1   67.61    7.28 
  -4   4   1   74.23    5.90 
   4   4  -1   73.16    4.61 
   4   4  -1   88.17    6.93 
   4   4  -1   73.02    4.56 
   4   4  -1   64.68    5.01 
   4   4  -1   80.95    8.22 
  -4   4   1   70.78    7.48 
   4   4  -1   65.56    3.81 
  -4   4   1   69.55    7.38 
  -4   4   1   62.25    7.04 
   4   4  -1   73.18    5.54 
   4   4  -1   70.06    3.56 
   4   4  -1   69.81    3.86 
   4   4  -1   68.11    4.60 
   4   4  -1   73.72    7.14 
  -4   4   1   69.11    7.41 
   3  -4  -1    4.67    2.09 
  -3  -4   1    2.37    1.78 
  -3  -4   1    3.67    1.55 
   3  -4  -1    5.08    2.22 
   3  -4  -1    1.56    1.81 
  -3  -4   1    2.27    1.89 
   3  -4  -1    1.47    1.49 
  -3  -4   1    1.97    2.19 
   3  -4  -1    3.43    2.05 
   3  -4  -1    3.02    1.94 
   3  -4  -1    0.66    2.05 
  -3  -4   1    7.85    2.69 
   3  -4  -1    0.68    1.88 
   3  -4  -1    3.27    2.09 
  -3   4   1    0.80    1.55 
  -3   4   1    1.84    2.04 
   3   4  -1    3.19    2.62 
  -3   4   1    5.38    2.51 
   3   4  -1    5.39    1.18 
   3   4  -1    5.66    2.02 
  -3   4   1    2.49    1.64 
   3   4  -1    4.00    2.15 
   3   4  -1    2.69    1.76 
   3   4  -1    3.26    1.29 
   3   4  -1    5.89    1.56 
   3   4  -1    3.00    1.93 
   3   4  -1    3.77    1.32 
   3   4  -1    3.32    1.95 
   3   4  -1    4.08    1.88 
   3   4  -1    3.50    0.82 
   3   4  -1    4.46    1.45 
   3   4  -1    3.97    1.78 
   3   4  -1    3.41    1.29 
  -3   4   1    5.21    2.40 
   3   4  -1    5.03    1.20 
   3   4  -1    4.75    1.80 
   3   4  -1    3.96    1.19 
   3   4  -1    3.96    1.26 
  -3   4   1    0.73    1.79 
  -2  -4   1   25.05    4.23 
   2  -4  -1   37.55    5.44 
   2  -4  -1   25.27    4.73 
   2  -4  -1   30.65    3.34 
   2  -4  -1   24.55    3.98 
   2  -4  -1   30.81    4.44 
  -2  -4   1   30.02    4.27 
   2  -4  -1   25.94    4.08 
  -2  -4   1   30.73    4.00 
   2  -4  -1   31.41    4.51 
  -2  -4   1   27.38    3.60 
   2  -4  -1   27.68    3.09 
   2  -4  -1   26.33    3.94 
  -2  -4   1   28.73    4.48 
  -2  -4   1   31.62    3.71 
   2  -4  -1   29.95    4.41 
  -2   4   1   27.61    4.28 
   2   4  -1   27.81    3.15 
   2   4  -1   26.99    2.84 
   2   4  -1   26.40    3.67 
  -2   4   1   20.48    3.58 
   2   4  -1   24.75    2.03 
   2   4  -1   24.19    3.61 
  -2   4   1   27.30    3.21 
   2   4  -1   27.11    3.32 
   2   4  -1   30.97    5.37 
   2   4  -1   32.12    3.61 
   2   4  -1   30.69    3.73 
  -2   4   1   22.74    3.31 
   2   4  -1   28.72    2.95 
   2   4  -1   32.32    4.47 
   2   4  -1   29.04    3.19 
   2   4  -1   24.70    3.57 
  -2   4   1   27.54    3.94 
   2   4  -1   27.44    1.74 
  -2   4   1   27.79    4.33 
   2   4  -1   31.30    2.93 
   2   4  -1   30.71    3.93 
   1  -4  -1    1.03    1.96 
   1  -4  -1    1.01    1.87 
   1  -4  -1    0.98    1.63 
   1  -4  -1    0.56    1.46 
  -1  -4   1   -1.67    1.71 
  -1  -4   1   -0.15    1.22 
   1  -4  -1   -1.37    1.30 
  -1  -4   1   -0.93    1.29 
   1  -4  -1    4.43    2.20 
  -1  -4   1    5.10    2.30 
   1  -4  -1    0.14    1.67 
  -1  -4   1    1.71    1.67 
  -1  -4   1    1.24    1.80 
  -1  -4   1   -0.21    1.37 
  -1  -4   1   -0.26    1.90 
  -1  -4   1    3.99    1.69 
   1  -4  -1   -0.86    2.14 
   1  -4  -1   -0.94    1.69 
  -1  -4   1    3.53    2.16 
   1  -4  -1   -0.93    1.46 
   1   4  -1    2.06    1.48 
  -1   4   1   -0.81    1.07 
   1   4  -1    0.10    1.38 
  -1   4   1    1.24    0.61 
  -1   4   1    1.04    1.48 
   1   4  -1    1.82    1.47 
   1   4  -1    1.03    1.22 
   1   4  -1    2.04    1.28 
  -1   4   1    1.31    1.10 
   1   4  -1    0.87    1.02 
   1   4  -1   -2.03    2.04 
   1   4  -1    3.18    1.49 
   1   4  -1    0.11    1.04 
   1   4  -1    1.27    1.25 
  -1   4   1   -2.71    1.15 
  -1   4   1    1.20    1.40 
  -1   4   1    3.08    2.64 
   1   4  -1    2.69    1.17 
   1   4  -1    0.16    0.85 
  -1   4   1    0.28    1.30 
  -1   4   1   -1.21    1.20 
  -1   4   1   -2.63    1.34 
  -1   4   1    0.84    1.44 
   1   4  -1    2.70    1.63 
  -1   4   1    0.30    0.57 
   0  -4   1   28.06    4.35 
   0  -4  -1   41.58    4.09 
   0  -4   1   44.23    3.86 
   0  -4   1   35.80    5.00 
   0  -4   1   34.52    4.18 
   0  -4   1   38.57    4.82 
   0  -4   1   48.15    4.96 
   0  -4   1   28.08    3.82 
   0  -4  -1   41.36    4.96 
   0  -4   1   45.20    6.40 
   0  -4  -1   30.12    3.59 
   0  -4  -1   40.59    4.53 
   0  -4  -1   30.14    3.72 
   0  -4  -1   34.04    4.12 
   0  -4  -1   41.42    4.15 
   0  -4  -1   30.44    4.36 
   0  -4   1   42.99    5.07 
   0  -4  -1   39.76    5.01 
   0  -4   1   48.09    4.53 
   0  -4  -1   38.86    3.61 
   0  -4  -1   38.54    3.98 
   0   4  -1   38.93    4.22 
   0   4   1   33.44    4.35 
   0   4  -1   32.56    4.11 
   0   4   1   35.02    6.20 
   0   4  -1   32.03    3.85 
   0   4  -1   33.76    3.52 
   0   4  -1   37.33    5.59 
   0   4   1   25.34    3.63 
   0   4   1   42.86    3.96 
   0   4   1   35.61    3.70 
   0   4   1   45.80    5.28 
   0   4  -1   33.92    5.72 
   0   4   1   34.66    2.20 
   0   4  -1   40.38    4.71 
   0   4   1   39.60    4.23 
   0   4   1   32.11    2.11 
   0   4  -1   33.76    4.35 
   0   4  -1   41.78    3.77 
   0   4   1   33.91    3.73 
   0   4   1   36.67    2.87 
   0   4   1   32.25    3.35 
   0   4   1   39.99    3.89 
   0   4  -1   40.32    2.59 
   0   4  -1   37.46    2.66 
  -1  -4  -1    9.96    2.09 
   1  -4   1   13.23    3.07 
  -1  -4  -1   13.14    2.96 
   1  -4   1   12.13    2.88 
  -1  -4  -1   10.39    2.09 
  -1  -4  -1   16.96    3.40 
   1  -4   1    7.89    2.61 
  -1  -4  -1   10.44    2.30 
  -1  -4  -1   15.00    2.75 
   1  -4   1    8.16    2.42 
   1  -4   1   14.66    3.19 
   1  -4   1   11.57    2.70 
  -1  -4  -1   11.99    2.36 
   1  -4   1   16.75    3.30 
  -1  -4  -1   18.43    3.34 
  -1  -4  -1   13.88    3.01 
  -1  -4  -1   15.64    2.96 
   1  -4   1   13.00    1.87 
   1  -4   1   11.39    4.21 
  -1  -4  -1   15.46    2.41 
   1  -4   1   14.37    1.38 
  -1  -4  -1   10.99    2.28 
  -1   4  -1   15.47    2.49 
  -1   4  -1   15.68    3.06 
   1   4   1   16.23    2.39 
   1   4   1   12.05    2.56 
   1   4   1   13.66    2.24 
  -1   4  -1   11.64    2.44 
  -1   4  -1   12.99    2.58 
   1   4   1   11.80    1.85 
   1   4   1   13.59    2.43 
   1   4   1   17.14    2.82 
  -1   4  -1    9.93    2.78 
   1   4   1   14.25    2.11 
  -1   4  -1    9.53    2.94 
   1   4   1   16.18    2.73 
   1   4   1   15.85    2.67 
   1   4   1   10.43    1.83 
   1   4   1   13.68    2.58 
  -1   4  -1   16.05    3.22 
   1   4   1   15.15    2.28 
  -1   4  -1   14.94    2.18 
  -1   4  -1   15.06    2.92 
   2  -4   1  229.30   13.78 
   2  -4   1  238.32   11.66 
   2  -4   1  221.98   11.94 
  -2  -4  -1  249.71   10.50 
   2  -4   1  233.60   12.10 
  -2  -4  -1  234.95   10.23 
  -2  -4  -1  220.25   11.79 
   2  -4   1  215.74   11.98 
   2  -4   1  222.22   10.30 
  -2  -4  -1  233.43   11.74 
   2  -4   1  228.51   12.00 
   2  -4   1  223.53   11.78 
   2  -4   1  213.75   12.27 
  -2  -4  -1  236.15   11.19 
   2  -4   1  234.69   12.46 
  -2  -4  -1  234.98    9.98 
  -2  -4  -1  240.89   12.03 
  -2  -4  -1  236.72   12.09 
   2  -4   1  242.42   11.05 
   2   4   1  211.96   12.44 
   2   4   1  242.29    9.48 
   2   4   1  237.37    8.90 
   2   4   1  236.42   11.12 
   2   4   1  230.53   10.73 
   2   4   1  251.15   10.52 
   2   4   1  220.17   10.86 
  -2   4  -1  248.33   12.45 
  -2   4  -1  231.39    9.95 
   2   4   1  236.26   10.48 
   2   4   1  255.90   13.14 
   2   4   1  227.44   10.21 
   2   4   1  223.01   10.25 
   2   4   1  234.45   10.40 
   2   4   1  238.10   10.38 
   2   4   1  233.57    9.58 
  -2   4  -1  222.16   11.84 
   2   4   1  238.81   10.49 
   2   4   1  244.40   11.74 
  -2   4  -1  242.73   11.54 
  -2   4  -1  222.94   12.42 
   2   4   1  235.24    9.95 
   2   4   1  246.19   11.88 
   2   4   1  225.58    9.40 
  -2   4  -1  234.04   11.65 
  -2   4  -1  229.96   10.60 
  -2   4  -1  226.91    8.91 
   3  -4   1    8.49    2.86 
   3  -4   1   15.82    1.95 
   3  -4   1   10.06    2.59 
   3  -4   1   11.15    3.87 
  -3  -4  -1   13.69    1.64 
   3  -4   1   16.80    4.04 
   3  -4   1   12.72    2.96 
  -3  -4  -1   17.33    2.14 
   3  -4   1   10.33    3.02 
  -3  -4  -1   18.25    3.90 
  -3  -4  -1   13.79    3.30 
  -3  -4  -1   14.16    2.16 
   3  -4   1   10.01    3.01 
   3  -4   1   15.94    2.93 
  -3  -4  -1   18.71    3.47 
   3  -4   1   16.65    3.73 
   3  -4   1   12.21    3.39 
  -3  -4  -1   15.80    3.12 
   3  -4   1   13.55    3.61 
  -3   4  -1   10.02    2.94 
   3   4   1   13.16    2.33 
  -3   4  -1   15.38    3.43 
  -3   4  -1   13.91    3.16 
  -3   4  -1   14.83    2.56 
   3   4   1   14.96    1.83 
   3   4   1   22.88    4.46 
   3   4   1   14.54    2.83 
   3   4   1   11.26    3.00 
   3   4   1   10.50    2.07 
  -3   4  -1   18.15    3.96 
   3   4   1   16.09    2.13 
   3   4   1   12.48    1.91 
  -3   4  -1   11.66    3.02 
   3   4   1   14.60    2.01 
   3   4   1    9.43    3.02 
   3   4   1   11.22    1.83 
   3   4   1   14.28    1.98 
   3   4   1   10.95    2.38 
   3   4   1   15.20    2.49 
   3   4   1   12.09    1.91 
   3   4   1   14.61    1.65 
   3   4   1    9.13    2.57 
   3   4   1   15.83    2.85 
   4  -4   1   91.50    8.79 
  -4  -4  -1   93.32    4.30 
   4  -4   1   95.90    9.20 
   4  -4   1   87.77    5.68 
   4  -4   1   90.83    9.11 
   4  -4   1   93.46    7.02 
   4  -4   1   90.29    9.25 
   4  -4   1   96.60    7.78 
  -4  -4  -1   85.34    6.58 
  -4  -4  -1   96.02    5.08 
  -4  -4  -1   78.66    8.32 
   4  -4   1   92.14    6.50 
   4  -4   1   73.75    8.00 
  -4  -4  -1  106.52    8.08 
   4  -4   1   98.58   10.45 
   4   4   1  102.48    8.05 
   4   4   1   96.16    5.77 
   4   4   1   84.06    5.71 
   4   4   1   85.38    4.22 
  -4   4  -1   91.66    8.72 
   4   4   1  100.31    7.89 
   4   4   1   87.79    6.00 
   4   4   1   82.79    6.55 
  -4   4  -1   86.38    6.30 
   4   4   1   79.60    5.11 
  -4   4  -1   99.92    8.28 
   4   4   1   95.43    5.45 
  -4   4  -1   90.55    8.61 
   4   4   1   88.95    7.11 
   4   4   1   93.75    6.72 
   4   4   1   98.12    6.31 
   4   4   1   93.24    4.18 
   4   4   1   90.18    5.32 
  -4   4  -1  110.38    8.02 
  -4   4  -1   92.10    8.96 
   4   4   1   93.56    4.35 
   4   4   1   90.40    4.87 
  -4   4  -1   83.67    8.68 
   5  -4   1   18.99    4.46 
   5  -4   1   14.39    5.21 
  -5  -4  -1   15.75    2.27 
   5  -4   1   18.23    4.53 
   5  -4   1   11.05    2.72 
  -5  -4  -1    8.02    3.79 
  -5  -4  -1   17.10    4.57 
   5  -4   1   13.23    4.32 
   5  -4   1   16.04    3.09 
   5  -4   1   18.73    4.39 
   5  -4   1   18.76    4.70 
   5  -4   1    5.37    2.73 
   5  -4   1   12.11    3.84 
   5  -4   1   17.48    4.10 
  -5  -4  -1   11.25    3.04 
   5   4   1   13.86    4.03 
  -5   4  -1   13.76    3.77 
  -5   4  -1   10.33    3.73 
   5   4   1   14.07    2.47 
   5   4   1   11.31    3.37 
   5   4   1   13.91    1.81 
  -5   4  -1   12.32    3.62 
  -5   4  -1   11.62    4.14 
  -5   4  -1   15.10    3.89 
   5   4   1   11.78    3.33 
  -5   4  -1   15.50    3.62 
   5   4   1   13.89    3.76 
   5   4   1   13.24    2.69 
   5   4   1   11.93    2.86 
   5   4   1   17.11    4.49 
   6  -4   1  277.52   16.12 
   6  -4   1  231.64   15.91 
   6  -4   1  279.25   16.70 
   6  -4   1  249.50   15.69 
   6  -4   1  278.34   13.01 
  -6  -4  -1  280.30   13.36 
   6  -4   1  268.47   15.74 
   6  -4   1  278.25   15.73 
   6  -4   1  265.36   13.43 
   6  -4   1  254.23   15.71 
  -6  -4  -1  240.23   15.90 
  -6  -4  -1  262.93   16.25 
   6  -4   1  262.47   17.77 
   6  -4   1  266.10   16.51 
  -6   4  -1  274.79   16.67 
  -6   4  -1  259.08   15.10 
  -6   4  -1  272.91   15.76 
  -6   4  -1  243.18   15.72 
  -6   4  -1  249.05   14.59 
  -6   4  -1  298.65   16.55 
   6   4   1  278.37   15.02 
   6   4   1  251.09   15.26 
  -6   4  -1  262.49   15.15 
   6   4   1  278.70   14.63 
   6   4   1  277.10   12.38 
   6   4   1  276.65   14.23 
   6   4   1  234.28   14.97 
   6   4   1  276.06   16.66 
  -6   4  -1  287.38   15.90 
  -7  -4  -1    4.48    3.77 
   7  -4   1    3.51    3.44 
   7  -4   1    9.06    4.22 
   7  -4   1    5.71    4.03 
   7  -4   1   12.33    4.83 
   7  -4   1   15.44    5.07 
   7  -4   1    3.39    3.52 
   7  -4   1    4.37    3.14 
   7  -4   1   10.75    5.45 
   7  -4   1    3.93    3.63 
  -7  -4  -1   12.82    4.78 
   7  -4   1    3.02    3.13 
  -7   4  -1   10.61    4.29 
  -7   4  -1   12.18    3.89 
   7   4   1    8.73    3.67 
  -7   4  -1    6.19    3.73 
   7   4   1    6.86    3.22 
  -7   4  -1   10.38    3.89 
   7   4   1    7.42    3.12 
  -7   4  -1    6.04    3.45 
   7   4   1    9.77    3.62 
  -7   4  -1    1.65    3.41 
   7   4   1    6.34    3.58 
   7   4   1    2.41    3.13 
  -7   4  -1    3.71    3.03 
   7   4   1    5.33    3.69 
  -7   4  -1    3.73    3.38 
   8  -4   1  204.18   15.97 
   8  -4   1  193.60   15.43 
   8  -4   1  219.24   15.41 
   8  -4   1  226.46   16.60 
   8  -4   1  248.88   16.13 
  -8  -4  -1  254.97   17.19 
   8  -4   1  199.89   17.32 
   8  -4   1  197.44   15.16 
   8  -4   1  216.39   14.82 
  -8  -4  -1  206.80   15.88 
   8  -4   1  215.48   15.57 
  -8   4  -1  202.33   13.66 
  -8   4  -1  194.96   13.42 
   8   4   1  207.62   15.72 
  -8   4  -1  183.90   14.19 
  -8   4  -1  223.46   16.18 
  -8   4  -1  193.01   14.34 
  -8   4  -1  194.11   15.32 
   8   4   1  196.92   14.42 
   8   4   1  177.23   14.44 
   8   4   1  181.02   13.82 
  -8   4  -1  191.11   14.28 
  -8   4  -1  209.07   14.64 
   8   4   1  220.32   14.16 
   9  -4   1    4.10    4.46 
   9  -4   1   -0.70    4.98 
   9  -4   1    3.54    4.90 
  -9  -4  -1    3.46    3.84 
   9  -4   1    7.93    4.74 
   9  -4   1    1.86    4.40 
   9  -4   1    5.33    3.92 
   9  -4   1    9.12    4.31 
   9  -4   1    9.75    5.21 
  -9  -4  -1    7.72    5.01 
   9  -4   1    5.48    4.39 
  -9   4  -1    5.71    3.47 
  -9   4  -1    8.20    4.82 
  -9   4  -1    2.93    3.22 
   9   4   1    7.27    4.02 
  -9   4  -1    6.50    3.58 
  -9   4  -1    2.65    3.64 
  -9   4  -1    8.67    4.75 
  -9   4  -1   -2.09    2.70 
   9   4   1    1.73    3.94 
   9   4   1    9.15    4.44 
   9   4   1    4.56    4.01 
   9   4   1    6.12    4.86 
  -9   4  -1    6.08    3.89 
  -9  -5   1   21.07    7.31 
   9  -5  -1   12.65    5.44 
   9  -5  -1   12.20    6.74 
   9  -5  -1   20.04    6.28 
   9  -5  -1   14.74    5.88 
   9  -5  -1   30.97    7.08 
   9  -5  -1   26.03    7.76 
  -9  -5   1    4.00    4.41 
   9  -5  -1   21.56    6.70 
   9  -5  -1   14.77    5.97 
  -9   5   1   21.86    5.65 
   9   5  -1    3.57    5.05 
  -9   5   1   12.11    5.11 
  -9   5   1   16.93    5.47 
  -9   5   1   17.79    6.23 
   9   5  -1   14.52    6.39 
  -9   5   1   13.40    5.61 
  -9   5   1   22.41    6.96 
  -9   5   1   17.63    5.96 
   9   5  -1   14.77    5.35 
  -9   5   1    8.50    4.52 
  -8  -5   1    5.65    3.86 
  -8  -5   1    0.49    3.55 
   8  -5  -1   -3.48    2.93 
   8  -5  -1   -1.24    3.59 
   8  -5  -1    3.59    3.18 
   8  -5  -1   -3.19    3.15 
   8  -5  -1    0.73    2.67 
   8  -5  -1    1.30    3.65 
   8  -5  -1   -3.00    2.65 
   8  -5  -1   -2.03    2.38 
   8   5  -1   -4.20    2.64 
  -8   5   1    1.20    3.72 
  -8   5   1   -0.93    3.27 
  -8   5   1    4.10    3.38 
  -8   5   1    4.71    3.44 
  -8   5   1    3.64    3.26 
  -8   5   1   -0.83    2.66 
   8   5  -1    0.27    4.27 
  -8   5   1   -1.62    2.51 
   8   5  -1    0.67    3.80 
  -8   5   1    2.04    3.03 
   8   5  -1   -1.55    2.82 
   8   5  -1    2.69    3.30 
   7  -5  -1   61.80    9.27 
   7  -5  -1   68.72   10.06 
   7  -5  -1   63.55   10.42 
   7  -5  -1   69.96    9.65 
  -7  -5   1   64.26   10.04 
  -7  -5   1   79.32   10.48 
   7  -5  -1   81.92    9.79 
   7  -5  -1   64.86    8.92 
   7  -5  -1   65.20    9.26 
   7  -5  -1   63.35    9.53 
  -7   5   1   43.76    7.66 
   7   5  -1   68.73    9.34 
  -7   5   1   94.07   11.16 
  -7   5   1   81.22    9.52 
  -7   5   1   78.45   10.06 
   7   5  -1   65.35    8.66 
   7   5  -1   74.76   10.68 
  -7   5   1   71.95    9.52 
  -7   5   1   76.26    9.76 
   7   5  -1   73.56    8.97 
   7   5  -1   58.46    8.35 
  -7   5   1   61.10    9.29 
  -6  -5   1   -1.03    2.29 
  -6  -5   1   -1.19    1.81 
   6  -5  -1    0.61    3.18 
   6  -5  -1   -0.95    2.32 
   6  -5  -1    0.02    2.08 
   6  -5  -1   -2.01    1.68 
  -6  -5   1   -1.56    2.59 
   6  -5  -1   -0.60    2.38 
   6  -5  -1    4.19    3.08 
   6  -5  -1   -0.58    2.14 
   6  -5  -1    3.65    2.69 
   6  -5  -1   -4.23    2.78 
  -6   5   1   -0.43    2.37 
   6   5  -1    2.17    1.89 
  -6   5   1    0.84    2.95 
   6   5  -1    1.78    2.00 
  -6   5   1   -1.62    1.74 
   6   5  -1   -3.14    1.83 
  -6   5   1   -0.22    2.96 
  -6   5   1   -1.36    1.68 
   6   5  -1    0.55    2.08 
   6   5  -1   -1.44    1.78 
  -6   5   1   -0.97    2.56 
  -6   5   1    0.28    2.70 
   6   5  -1   -0.64    2.37 
   6   5  -1    1.83    3.09 
   6   5  -1    4.59    3.02 
  -6   5   1    0.35    2.45 
   5  -5  -1  233.25   14.74 
   5  -5  -1  262.36   13.93 
  -5  -5   1  265.19   14.22 
   5  -5  -1  250.65   15.49 
  -5  -5   1  251.54   11.18 
   5  -5  -1  244.52   13.41 
   5  -5  -1  245.31   14.46 
  -5  -5   1  272.80   16.03 
   5  -5  -1  274.89   16.82 
  -5  -5   1  248.38   14.76 
   5  -5  -1  239.81   15.04 
   5  -5  -1  240.39   14.85 
   5   5  -1  247.61   14.72 
   5   5  -1  253.05   13.17 
   5   5  -1  252.74   11.12 
  -5   5   1  263.02   15.02 
  -5   5   1  237.04   13.44 
  -5   5   1  235.24   14.42 
  -5   5   1  242.46   14.62 
  -5   5   1  270.89   15.20 
   5   5  -1  248.59   10.76 
  -5   5   1  240.99   14.85 
   5   5  -1  246.69   12.19 
   5   5  -1  240.30   10.95 
  -5   5   1  254.67   15.02 
   5   5  -1  246.71   14.49 
  -5   5   1  248.46   15.50 
   5   5  -1  243.21   14.09 
   5   5  -1  259.63   14.28 
   5   5  -1  226.85   14.81 
  -4  -5   1    5.83    1.89 
  -4  -5   1    8.21    2.80 
  -4  -5   1    3.07    2.52 
   4  -5  -1    0.14    2.36 
  -4  -5   1    6.27    2.83 
   4  -5  -1    2.59    2.31 
   4  -5  -1    6.71    2.59 
   4  -5  -1    3.74    2.74 
   4  -5  -1    3.42    2.80 
   4  -5  -1    0.25    1.97 
   4  -5  -1    6.14    2.33 
   4  -5  -1    2.33    2.52 
  -4   5   1    1.78    2.77 
  -4   5   1    1.74    2.14 
  -4   5   1    3.60    2.34 
   4   5  -1    6.08    2.23 
   4   5  -1    2.11    1.46 
   4   5  -1    2.31    1.37 
  -4   5   1    9.16    3.69 
   4   5  -1    4.05    1.51 
  -4   5   1    6.12    2.91 
   4   5  -1    8.62    2.87 
   4   5  -1    3.22    3.05 
   4   5  -1    5.03    1.86 
   4   5  -1    5.44    1.55 
   4   5  -1    0.86    2.02 
   4   5  -1    5.54    2.30 
   4   5  -1    8.43    3.21 
   4   5  -1    5.12    2.43 
  -4   5   1    3.91    2.04 
   4   5  -1    4.06    2.06 
  -4   5   1    3.66    2.51 
  -3  -5   1  226.20   10.93 
   3  -5  -1  221.14   12.89 
  -3  -5   1  208.95   11.85 
   3  -5  -1  256.07   13.37 
  -3  -5   1  223.50   12.79 
   3  -5  -1  222.14   13.05 
   3  -5  -1  236.02   14.19 
   3  -5  -1  213.37   12.23 
   3  -5  -1  230.76   10.87 
   3  -5  -1  209.65   10.72 
  -3  -5   1  229.48   12.32 
  -3  -5   1  228.11   13.44 
   3  -5  -1  237.98   13.07 
   3  -5  -1  223.91   12.72 
  -3   5   1  217.62   13.21 
  -3   5   1  222.49   12.77 
   3   5  -1  222.10    9.82 
  -3   5   1  227.25   12.98 
   3   5  -1  229.76    9.42 
   3   5  -1  219.83   10.68 
   3   5  -1  214.31   11.69 
   3   5  -1  228.44    9.76 
   3   5  -1  237.84   12.14 
   3   5  -1  227.72   10.59 
   3   5  -1  225.13    9.93 
  -3   5   1  242.46   12.27 
  -3   5   1  249.74   12.95 
   3   5  -1  237.52   12.35 
   3   5  -1  184.81   12.48 
  -3   5   1  222.40   11.11 
   3   5  -1  226.39   14.49 
   3   5  -1  224.03    9.32 
   3   5  -1  213.88   11.52 
   3   5  -1  227.10   10.52 
   3   5  -1  221.54    9.38 
   3   5  -1  222.79   10.25 
  -2  -5   1    1.37    1.75 
   2  -5  -1    5.31    3.36 
  -2  -5   1    3.15    2.32 
   2  -5  -1    1.07    2.04 
   2  -5  -1    0.79    1.66 
  -2  -5   1    2.65    1.71 
  -2  -5   1    3.42    2.00 
   2  -5  -1    2.13    1.97 
  -2  -5   1    3.96    2.15 
   2  -5  -1    0.52    1.84 
   2  -5  -1    4.81    1.25 
  -2  -5   1   -0.42    1.97 
   2  -5  -1    5.06    2.41 
   2  -5  -1    1.30    1.14 
   2  -5  -1    3.82    2.06 
   2   5  -1   -3.43    2.30 
   2   5  -1    4.32    1.57 
   2   5  -1    1.82    1.86 
   2   5  -1    7.00    1.79 
  -2   5   1    3.99    1.85 
   2   5  -1    0.75    0.99 
   2   5  -1    3.56    1.83 
  -2   5   1    2.01    1.46 
   2   5  -1    1.56    1.44 
   2   5  -1    4.14    0.75 
   2   5  -1    2.24    1.73 
   2   5  -1    1.35    1.19 
   2   5  -1    2.29    1.29 
   2   5  -1    1.35    1.49 
   2   5  -1    1.34    2.26 
   2   5  -1    3.41    0.85 
  -2   5   1    1.16    1.86 
   2   5  -1    1.59    0.69 
  -2   5   1    1.79    1.82 
  -2   5   1    0.46    1.88 
   2   5  -1    1.90    1.63 
   2   5  -1    5.77    2.29 
  -2   5   1    3.64    2.37 
  -2   5   1    1.05    1.47 
   1  -5  -1  148.71    8.79 
   1  -5  -1  138.28   10.51 
  -1  -5   1  142.53    9.23 
  -1  -5   1  140.87    8.60 
  -1  -5   1  110.70    9.46 
  -1  -5   1  145.96    8.46 
  -1  -5   1  146.65    9.36 
  -1  -5   1  140.71    9.19 
   1  -5  -1  151.58    9.84 
   1  -5  -1  143.07    7.44 
   1  -5  -1  144.19    9.20 
   1  -5  -1  146.15    8.92 
   1  -5  -1  143.94    8.53 
  -1  -5   1  139.67    8.83 
  -1  -5   1  152.42    9.82 
   1  -5  -1  148.09    9.21 
   1  -5  -1  145.23    8.78 
  -1  -5   1  137.33    8.45 
   1   5  -1  151.18    6.02 
  -1   5   1  142.44    7.33 
   1   5  -1  142.97    5.76 
   1   5  -1  152.40    8.61 
   1   5  -1  141.20    6.92 
  -1   5   1  143.53    5.96 
  -1   5   1  146.67    5.91 
  -1   5   1  161.89    8.41 
  -1   5   1  134.23    8.38 
  -1   5   1  155.19    9.33 
   1   5  -1  139.55    8.86 
   1   5  -1  144.74    8.46 
   1   5  -1  148.02    7.28 
  -1   5   1  134.92    9.01 
  -1   5   1  137.24   10.20 
   1   5  -1  141.49    8.16 
  -1   5   1  136.88    8.19 
   0  -5   1   10.74    2.55 
   0  -5  -1   19.15    3.77 
   0  -5   1   12.71    3.71 
   0  -5   1   11.12    2.94 
   0  -5  -1   14.24    3.23 
   0  -5  -1   12.15    2.65 
   0  -5   1   13.38    2.96 
   0  -5   1   17.89    3.91 
   0  -5   1   12.67    2.87 
   0  -5  -1   14.58    3.52 
   0  -5   1   16.31    3.18 
   0  -5  -1   13.24    2.83 
   0  -5   1   16.23    3.53 
   0  -5  -1    7.01    2.66 
   0  -5  -1   13.62    3.25 
   0  -5   1   16.04    4.00 
   0  -5  -1   17.21    2.67 
   0  -5  -1   13.35    3.01 
   0  -5  -1   18.29    3.16 
   0   5  -1   11.44    2.36 
   0   5  -1   15.34    3.20 
   0   5  -1   10.04    2.65 
   0   5   1   12.74    4.28 
   0   5  -1   23.60    4.31 
   0   5   1   17.30    1.94 
   0   5   1   15.39    3.42 
   0   5   1   16.81    2.89 
   0   5   1   12.29    2.12 
   0   5   1   20.07    3.74 
   0   5   1    7.79    2.03 
   0   5  -1    9.28    3.74 
   0   5  -1   13.17    2.97 
   0   5   1   14.60    3.26 
   0   5  -1   15.43    2.11 
   0   5  -1   18.43    2.55 
   0   5   1   13.66    2.47 
   0   5   1   11.79    1.59 
   0   5  -1   13.90    2.07 
   0   5   1   11.73    2.98 
  -1  -5  -1  380.77   18.30 
   1  -5   1  384.07   17.51 
  -1  -5  -1  383.54   16.09 
  -1  -5  -1  383.92   16.41 
   1  -5   1  363.00   17.93 
  -1  -5  -1  385.86   17.84 
  -1  -5  -1  375.92   17.78 
  -1  -5  -1  392.71   16.15 
   1  -5   1  362.92   20.74 
  -1  -5  -1  367.42   16.49 
   1  -5   1  383.00   18.17 
  -1  -5  -1  391.31   17.06 
   1  -5   1  370.61   18.24 
  -1  -5  -1  393.92   16.27 
  -1  -5  -1  390.60   16.44 
  -1  -5  -1  387.77   18.24 
  -1  -5  -1  388.86   16.69 
   1  -5   1  366.16   17.55 
   1  -5   1  383.90   17.54 
   1  -5   1  357.56   17.27 
   1   5   1  395.09   16.30 
  -1   5  -1  376.50   14.96 
   1   5   1  387.42   16.21 
   1   5   1  377.90   17.71 
   1   5   1  371.47   16.80 
  -1   5  -1  395.55   17.90 
   1   5   1  390.40   15.80 
  -1   5  -1  369.54   17.33 
   1   5   1  369.41   16.55 
   1   5   1  349.58   18.51 
  -1   5  -1  366.72   15.74 
   1   5   1  367.39   15.34 
   1   5   1  365.90   15.05 
  -1   5  -1  385.07   15.12 
  -1   5  -1  394.90   17.70 
   1   5   1  371.85   16.37 
  -1   5  -1  383.36   16.67 
   1   5   1  397.97   17.04 
   1   5   1  372.10   15.54 
   1   5   1  384.36   16.61 
  -1   5  -1  381.09   18.19 
   1   5   1  343.53   19.02 
   2  -5   1    8.62    2.87 
   2  -5   1    5.00    2.20 
  -2  -5  -1    4.31    1.63 
   2  -5   1    3.70    2.24 
   2  -5   1    6.67    2.60 
   2  -5   1    1.81    2.03 
   2  -5   1    4.42    2.04 
  -2  -5  -1    5.11    2.45 
   2  -5   1    6.05    2.47 
   2  -5   1    2.01    2.08 
   2  -5   1    4.13    1.34 
  -2  -5  -1    2.42    1.41 
  -2  -5  -1    3.62    2.26 
   2  -5   1    3.20    3.26 
  -2  -5  -1    5.54    2.00 
  -2  -5  -1    3.66    2.35 
   2  -5   1    4.09    2.25 
  -2  -5  -1    4.55    1.86 
  -2  -5  -1    6.35    2.53 
   2   5   1    6.33    2.01 
   2   5   1    3.57    1.98 
   2   5   1    0.79    1.32 
   2   5   1    4.00    2.03 
   2   5   1    5.76    1.51 
   2   5   1    7.45    1.91 
   2   5   1    1.77    1.30 
  -2   5  -1   -0.08    1.66 
   2   5   1    7.09    3.06 
   2   5   1    5.06    1.12 
   2   5   1    4.31    1.87 
  -2   5  -1    2.08    1.77 
   2   5   1    3.34    1.36 
   2   5   1    1.83    1.65 
  -2   5  -1    4.97    2.63 
  -2   5  -1    1.51    2.03 
  -2   5  -1    6.33    2.06 
   2   5   1    4.74    1.42 
   2   5   1    5.43    1.91 
  -2   5  -1    5.82    2.89 
   2   5   1    1.51    1.43 
   2   5   1    7.17    2.10 
   2   5   1    5.18    2.91 
  -2   5  -1    2.52    1.28 
  -3  -5  -1  338.20   16.87 
   3  -5   1  339.55   17.12 
   3  -5   1  340.38   19.29 
  -3  -5  -1  354.16   14.21 
  -3  -5  -1  349.05   14.27 
   3  -5   1  364.21   16.61 
   3  -5   1  345.72   17.06 
  -3  -5  -1  345.68   16.60 
  -3  -5  -1  339.09   17.09 
   3  -5   1  331.83   17.03 
   3  -5   1  331.77   17.58 
   3  -5   1  327.57   14.81 
   3  -5   1  300.02   16.67 
  -3  -5  -1  325.86   16.66 
   3  -5   1  315.31   17.49 
   3   5   1  340.54   12.72 
   3   5   1  323.42   17.95 
   3   5   1  339.13   14.16 
   3   5   1  340.56   15.83 
   3   5   1  315.63   14.40 
  -3   5  -1  346.99   16.46 
  -3   5  -1  352.81   17.49 
   3   5   1  350.79   16.81 
   3   5   1  334.81   15.83 
   3   5   1  341.87   12.90 
   3   5   1  340.91   12.94 
   3   5   1  335.45   15.32 
   3   5   1  314.51   14.32 
  -3   5  -1  300.06   17.01 
   3   5   1  337.05   15.54 
  -3   5  -1  351.55   14.54 
   3   5   1  334.19   13.45 
   3   5   1  330.95   14.80 
   3   5   1  330.90   13.03 
   3   5   1  317.64   14.15 
   3   5   1  334.92   13.39 
  -3   5  -1  314.92   16.76 
   3   5   1  350.09   14.03 
  -3   5  -1  349.52   16.80 
   3   5   1  352.86   17.69 
  -4  -5  -1   -0.38    1.10 
   4  -5   1    2.81    2.58 
   4  -5   1    0.21    1.88 
   4  -5   1    0.47    2.11 
   4  -5   1    1.03    2.71 
  -4  -5  -1   -1.46    1.76 
   4  -5   1    0.14    0.81 
  -4  -5  -1   -0.09    0.94 
  -4  -5  -1   -0.52    1.88 
   4  -5   1   -1.31    2.00 
   4  -5   1    1.10    1.70 
   4  -5   1    0.18    2.72 
   4  -5   1   -0.09    1.73 
  -4  -5  -1    2.60    2.07 
   4   5   1   -0.29    1.16 
   4   5   1   -0.50    1.60 
   4   5   1    1.58    1.11 
  -4   5  -1   -0.52    1.76 
   4   5   1    1.25    0.80 
   4   5   1   -1.34    0.79 
  -4   5  -1   -0.07    1.22 
   4   5   1    1.03    2.48 
   4   5   1   -0.08    0.93 
   4   5   1   -1.06    0.89 
   4   5   1    1.30    2.22 
  -4   5  -1    2.48    2.35 
   4   5   1   -0.80    1.39 
   4   5   1    0.59    2.11 
  -4   5  -1   -1.16    2.08 
   4   5   1    1.65    2.22 
  -4   5  -1   -1.69    1.59 
  -4   5  -1   -1.58    2.17 
   5  -5   1   40.87    6.70 
   5  -5   1   48.63    7.36 
   5  -5   1   56.84    6.24 
   5  -5   1   48.24    7.19 
  -5  -5  -1   49.05    3.86 
   5  -5   1   50.86    7.56 
  -5  -5  -1   52.15    7.67 
  -5  -5  -1   51.20    7.77 
   5  -5   1   52.41    6.56 
   5  -5   1   42.96    7.52 
  -5  -5  -1   42.89    6.02 
   5  -5   1   62.80    9.90 
   5   5   1   54.79    6.69 
  -5   5  -1   58.50    8.26 
   5   5   1   47.36    5.61 
   5   5   1   46.22    3.71 
  -5   5  -1   50.95    7.22 
   5   5   1   48.23    5.40 
   5   5   1   43.80    5.99 
  -5   5  -1   50.53    7.29 
   5   5   1   53.95    7.61 
  -5   5  -1   43.91    6.69 
   5   5   1   47.25    6.68 
  -5   5  -1   56.09    8.27 
  -5   5  -1   54.16    6.40 
   5   5   1   53.30    7.72 
  -5   5  -1   55.16    7.69 
  -6  -5  -1    0.49    1.95 
  -6  -5  -1   -0.04    2.58 
   6  -5   1    3.17    3.64 
   6  -5   1    3.34    3.00 
   6  -5   1    1.45    2.84 
   6  -5   1   -2.41    2.32 
  -6  -5  -1   -0.20    2.48 
   6  -5   1   -0.83    1.90 
   6  -5   1    3.30    3.16 
   6  -5   1    3.84    2.77 
   6  -5   1    0.59    2.58 
  -6   5  -1    3.20    2.52 
   6   5   1   -1.31    2.14 
  -6   5  -1    0.47    2.73 
   6   5   1    0.51    3.02 
   6   5   1   -1.51    2.12 
  -6   5  -1   -2.47    3.10 
  -6   5  -1    0.19    2.79 
   6   5   1    1.01    2.37 
  -6   5  -1    3.59    3.43 
   6   5   1   -3.33    2.42 
  -6   5  -1   -2.69    1.69 
  -6   5  -1   -2.61    2.56 
  -6   5  -1   -0.50    1.93 
   6   5   1   -1.48    1.59 
   7  -5   1    1.51    3.54 
   7  -5   1    3.80    3.60 
   7  -5   1   -0.80    2.77 
   7  -5   1    1.97    2.88 
   7  -5   1   -1.14    2.38 
  -7  -5  -1    0.83    2.47 
   7  -5   1    5.01    4.62 
  -7  -5  -1   -0.68    2.86 
   7  -5   1    0.95    3.31 
   7   5   1   -2.11    2.51 
  -7   5  -1   -1.59    2.75 
  -7   5  -1    2.38    3.85 
   7   5   1    2.90    3.60 
  -7   5  -1   -0.30    2.42 
  -7   5  -1    0.91    3.20 
  -7   5  -1   -5.74    2.89 
  -7   5  -1   -1.72    2.20 
   7   5   1    3.77    3.52 
  -7   5  -1   -1.37    2.43 
  -7   5  -1   -1.02    2.32 
   7   5   1    0.22    2.56 
   7   5   1    4.55    3.79 
   8  -5   1    2.39    4.20 
   8  -5   1   -0.42    2.81 
   8  -5   1    6.60    5.05 
   8  -5   1    1.42    4.38 
   8  -5   1    3.04    4.57 
   8  -5   1    9.26    4.65 
  -8  -5  -1   12.10    4.76 
   8  -5   1    2.53    3.99 
  -8  -5  -1    4.35    3.93 
  -8   5  -1    9.04    4.13 
  -8   5  -1   -0.23    3.27 
  -8   5  -1    3.65    3.83 
   8   5   1    7.17    4.22 
  -8   5  -1    1.71    3.24 
  -8   5  -1   -1.66    2.63 
   8   5   1    2.15    4.13 
  -8   5  -1   -0.97    2.97 
   8   5   1   -2.29    2.91 
  -8   5  -1    1.54    3.11 
  -8   5  -1    4.94    4.65 
   8   5   1    0.43    3.43 
  -8  -6   1   60.22   10.32 
   8  -6  -1   46.79   10.31 
   8  -6  -1   66.69   10.21 
   8  -6  -1   65.72   10.64 
   8  -6  -1   57.87    8.87 
   8  -6  -1   64.98    9.98 
   8  -6  -1   64.90   10.40 
  -8  -6   1   50.45   10.18 
   8  -6  -1   70.01   11.13 
   8   6  -1   44.38    7.91 
  -8   6   1   52.08    8.80 
  -8   6   1   42.22    8.52 
  -8   6   1   46.43    8.54 
  -8   6   1   71.73   10.37 
  -8   6   1   48.20    8.64 
   8   6  -1   64.70   11.01 
  -8   6   1   74.13   11.36 
   8   6  -1   73.70   10.29 
  -8   6   1   53.20    9.96 
  -7  -6   1   10.50    4.29 
   7  -6  -1   15.32    4.54 
   7  -6  -1    7.33    4.35 
   7  -6  -1    3.54    3.28 
   7  -6  -1    5.45    4.02 
   7  -6  -1   10.23    4.75 
  -7  -6   1    3.56    3.53 
   7  -6  -1    5.03    4.38 
   7  -6  -1    7.24    4.75 
  -7   6   1    5.69    3.77 
   7   6  -1   10.70    4.17 
  -7   6   1   12.18    5.26 
   7   6  -1    4.44    3.60 
  -7   6   1   13.24    4.98 
   7   6  -1    4.25    4.03 
  -7   6   1    7.12    4.60 
  -7   6   1    3.71    3.43 
  -7   6   1    3.04    3.57 
   7   6  -1   -0.05    3.57 
  -7   6   1    4.91    3.33 
  -7   6   1    6.70    4.59 
   6  -6  -1   83.66   10.67 
   6  -6  -1   80.98   11.78 
   6  -6  -1   95.58   11.33 
   6  -6  -1   90.59    9.48 
   6  -6  -1   88.47   10.53 
   6  -6  -1   84.01    8.97 
   6  -6  -1   94.39   11.36 
  -6  -6   1   86.82    9.49 
  -6  -6   1   68.52    9.44 
  -6  -6   1   58.10    9.31 
   6  -6  -1  114.27   12.18 
  -6   6   1   83.71    9.18 
   6   6  -1   91.19   10.40 
  -6   6   1   63.45    9.15 
  -6   6   1   92.56   10.82 
  -6   6   1   94.46   11.35 
  -6   6   1   76.07   10.33 
   6   6  -1   85.50    9.57 
  -6   6   1   99.46   11.46 
   6   6  -1   77.62   10.69 
   6   6  -1   96.33   10.67 
  -6   6   1   99.84   11.21 
   6   6  -1   73.10    8.76 
  -6   6   1   69.93    9.60 
   5  -6  -1   33.03    6.55 
   5  -6  -1   20.72    5.94 
  -5  -6   1   45.87    6.89 
   5  -6  -1   42.80    6.99 
  -5  -6   1   27.94    6.50 
   5  -6  -1   25.54    4.92 
   5  -6  -1   27.75    4.73 
   5  -6  -1   25.06    5.73 
  -5  -6   1   29.32    5.74 
   5  -6  -1   17.83    5.96 
   5  -6  -1   32.86    6.66 
  -5   6   1   26.18    5.76 
  -5   6   1   31.82    5.10 
   5   6  -1   22.17    4.86 
  -5   6   1   34.65    6.65 
   5   6  -1   30.03    6.13 
   5   6  -1   26.89    4.96 
  -5   6   1   28.38    5.91 
  -5   6   1   28.74    5.95 
  -5   6   1   33.96    6.94 
  -5   6   1   25.43    5.38 
   5   6  -1   39.07    6.90 
  -5   6   1   36.70    6.74 
   5   6  -1   37.11    6.34 
   5   6  -1   34.31    6.23 
   4  -6  -1   66.18    8.31 
  -4  -6   1   60.21    8.77 
   4  -6  -1   64.43    8.33 
   4  -6  -1   55.40    9.08 
  -4  -6   1   61.93    7.92 
   4  -6  -1   58.75    5.97 
   4  -6  -1   65.29    7.75 
   4  -6  -1   67.27    8.68 
  -4  -6   1   65.79    5.31 
   4  -6  -1   83.85    9.84 
  -4  -6   1   57.74    7.16 
  -4   6   1   67.81    8.22 
   4   6  -1   72.53    5.17 
   4   6  -1   54.40    8.33 
   4   6  -1   62.50    7.24 
  -4   6   1   59.21    8.23 
   4   6  -1   64.66    7.17 
   4   6  -1   60.89    7.51 
  -4   6   1   57.62    7.36 
   4   6  -1   69.77    6.47 
  -4   6   1   76.80    9.78 
   4   6  -1   68.25    5.06 
  -4   6   1   59.77    7.97 
  -4   6   1   69.56    8.52 
   4   6  -1   60.87    4.62 
  -4   6   1   56.26    6.39 
   4   6  -1   70.48    9.09 
   3  -6  -1   -2.23    1.52 
  -3  -6   1   -2.02    1.76 
  -3  -6   1    0.20    2.47 
   3  -6  -1   -0.34    2.14 
   3  -6  -1    0.54    2.21 
  -3  -6   1    2.23    2.21 
   3  -6  -1    2.11    3.31 
  -3  -6   1    0.66    1.90 
   3  -6  -1    1.14    1.25 
   3  -6  -1    0.52    2.26 
   3  -6  -1   -0.25    2.16 
  -3  -6   1   -3.38    1.28 
  -3   6   1   -1.21    1.51 
  -3   6   1   -1.14    2.19 
   3   6  -1    2.89    2.28 
   3   6  -1   -0.39    1.87 
  -3   6   1    1.85    2.69 
   3   6  -1   -1.53    2.78 
  -3   6   1   -0.28    2.13 
   3   6  -1    1.53    1.65 
  -3   6   1    4.32    2.83 
  -3   6   1   -0.24    1.39 
   3   6  -1   -0.78    1.10 
  -3   6   1   -0.64    1.82 
   3   6  -1   -0.26    2.16 
   3   6  -1   -0.70    0.73 
   3   6  -1    2.85    1.74 
   3   6  -1    2.90    2.27 
   3   6  -1    2.51    3.01 
  -2  -6   1   -1.43    2.08 
   2  -6  -1    3.96    2.73 
  -2  -6   1   -0.77    1.68 
  -2  -6   1    0.80    1.92 
   2  -6  -1    0.04    2.03 
   2  -6  -1   -0.07    1.92 
  -2  -6   1    2.46    2.33 
  -2  -6   1    3.68    2.09 
   2  -6  -1    0.41    2.11 
  -2  -6   1   -1.31    2.15 
   2  -6  -1    2.58    3.44 
   2  -6  -1    0.67    1.91 
   2  -6  -1   -0.15    2.02 
   2   6  -1    8.12    3.72 
  -2   6   1   -3.06    1.95 
  -2   6   1    1.95    2.17 
  -2   6   1   -1.31    1.81 
  -2   6   1    1.07    1.78 
   2   6  -1    3.85    2.08 
  -2   6   1    1.47    2.31 
   2   6  -1   -0.08    0.77 
   2   6  -1    1.18    0.68 
  -2   6   1    0.39    1.91 
   2   6  -1    0.33    1.46 
   2   6  -1    1.46    2.01 
   2   6  -1    0.15    1.91 
   2   6  -1    2.24    1.62 
   2   6  -1    2.26    0.86 
   2   6  -1    0.71    2.27 
  -2   6   1    0.20    2.02 
   2   6  -1    1.16    1.75 
   2   6  -1   -0.74    1.98 
   1  -6  -1    3.04    2.08 
   1  -6  -1    2.94    2.80 
   1  -6  -1    5.51    2.60 
  -1  -6   1    5.54    2.54 
   1  -6  -1    6.27    2.74 
   1  -6  -1    1.75    2.18 
  -1  -6   1    6.91    3.06 
   1  -6  -1    4.30    1.76 
  -1  -6   1    4.40    2.86 
  -1  -6   1    8.58    3.23 
  -1  -6   1    8.14    2.54 
   1  -6  -1    5.82    2.51 
  -1  -6   1    3.91    2.59 
  -1  -6   1    0.93    1.89 
  -1  -6   1    1.67    2.57 
   1  -6  -1    3.52    2.26 
   1  -6  -1    2.20    1.84 
  -1   6   1    1.36    1.88 
  -1   6   1    2.91    2.00 
  -1   6   1    2.38    0.94 
  -1   6   1    3.61    2.27 
   1   6  -1    2.57    2.99 
  -1   6   1    4.35    2.69 
  -1   6   1    1.92    1.05 
   1   6  -1    3.67    1.56 
  -1   6   1    0.17    2.18 
   1   6  -1    1.47    2.13 
   1   6  -1    2.03    2.48 
  -1   6   1    4.34    3.85 
   1   6  -1    1.48    2.33 
  -1   6   1    5.01    3.24 
   1   6  -1    1.01    1.74 
  -1   6   1    3.23    1.57 
   1   6  -1    4.59    1.18 
   1   6  -1    4.65    1.99 
  -1   6   1    2.17    2.31 
   1   6  -1    2.86    1.42 
   1   6  -1    2.55    1.90 
   0  -6  -1   61.71    6.59 
   0  -6   1   69.24    7.46 
   0  -6   1   62.71    7.83 
   0  -6  -1   68.70    7.22 
   0  -6   1   59.04    6.43 
   0  -6  -1   67.32    5.17 
   0  -6   1   58.31    8.05 
   0  -6  -1   58.68    7.03 
   0  -6   1   56.73    6.92 
   0  -6  -1   56.97    6.63 
   0  -6   1   65.78    7.40 
   0  -6  -1   75.29    8.53 
   0  -6  -1   63.10    7.66 
   0  -6  -1   68.01    6.87 
   0  -6   1   62.82    7.96 
   0  -6  -1   65.82    6.79 
   0  -6   1   68.80    7.19 
   0  -6  -1   57.84    6.45 
   0  -6   1   72.33    6.73 
   0   6   1   70.94    7.64 
   0   6  -1   63.27    4.65 
   0   6  -1   72.20    7.75 
   0   6   1   85.65    8.05 
   0   6   1   69.88    7.47 
   0   6  -1   72.84    5.29 
   0   6   1   68.25    3.99 
   0   6  -1   62.08    6.83 
   0   6  -1   72.80    9.42 
   0   6  -1   68.77    4.22 
   0   6  -1   58.35    6.66 
   0   6  -1   70.39    7.41 
   0   6   1   66.21    9.44 
   0   6   1   70.18    7.37 
   0   6   1   69.83    5.26 
   0   6  -1   64.93    4.44 
   0   6   1   60.72    4.97 
   0   6   1   69.90    4.08 
   0   6  -1   67.62    7.54 
   0   6   1   62.28    4.52 
  -1  -6  -1    2.87    2.36 
   1  -6   1    3.69    2.58 
   1  -6   1    4.47    3.55 
   1  -6   1    3.50    2.31 
  -1  -6  -1    2.57    1.90 
  -1  -6  -1    2.86    1.93 
   1  -6   1    2.87    2.82 
  -1  -6  -1    0.20    1.81 
   1  -6   1   -1.23    1.46 
   1  -6   1    4.10    2.46 
   1  -6   1    5.81    3.06 
  -1  -6  -1    4.32    2.58 
  -1  -6  -1    3.25    2.27 
  -1  -6  -1    6.30    2.17 
  -1  -6  -1    4.50    2.55 
  -1  -6  -1    2.21    1.80 
   1  -6   1    4.09    2.78 
   1  -6   1    3.72    2.69 
  -1  -6  -1    1.19    1.76 
   1   6   1    5.18    2.18 
  -1   6  -1    8.61    3.05 
   1   6   1    1.53    3.09 
   1   6   1    2.99    1.73 
   1   6   1    2.59    1.47 
  -1   6  -1    5.24    2.75 
  -1   6  -1    5.14    1.47 
   1   6   1    3.22    2.09 
  -1   6  -1    4.45    2.51 
   1   6   1    2.74    1.80 
   1   6   1    7.13    2.50 
  -1   6  -1    5.02    2.64 
   1   6   1    4.32    2.06 
  -1   6  -1    2.66    1.49 
   1   6   1    1.83    2.08 
   1   6   1    5.36    2.29 
  -1   6  -1    3.57    2.03 
  -1   6  -1    5.51    1.93 
   1   6   1    4.61    2.44 
  -2  -6  -1  110.38    7.08 
   2  -6   1  107.98    8.74 
  -2  -6  -1   90.03    9.33 
   2  -6   1   89.31    9.54 
  -2  -6  -1   99.83    6.67 
   2  -6   1  103.07    8.15 
  -2  -6  -1   93.12    6.79 
   2  -6   1   93.76    9.72 
   2  -6   1   78.81   11.89 
  -2  -6  -1   82.51    8.78 
  -2  -6  -1  112.77   10.34 
   2  -6   1   89.54    8.99 
   2  -6   1   98.19    9.47 
   2  -6   1  101.79    9.56 
  -2  -6  -1  106.90   10.34 
   2   6   1   88.22    7.00 
   2   6   1  105.05    7.08 
   2   6   1  109.03    8.72 
   2   6   1   91.64    6.55 
   2   6   1   78.42    9.53 
  -2   6  -1   94.46    7.48 
   2   6   1   60.82    9.02 
  -2   6  -1   98.86    7.03 
   2   6   1  102.17    6.82 
   2   6   1   97.35    4.97 
   2   6   1  103.61    7.16 
   2   6   1   92.34    5.80 
  -2   6  -1   80.22    9.02 
   2   6   1  102.30    6.87 
  -2   6  -1   86.50    6.53 
  -2   6  -1   91.74    5.23 
  -2   6  -1  111.78   10.23 
   2   6   1   95.45    5.68 
   2   6   1  118.93   12.18 
   2   6   1   96.06    8.84 
  -2   6  -1   91.53    9.23 
  -2   6  -1   83.05    6.14 
   2   6   1   92.64    6.61 
   2   6   1   92.24    6.91 
   2   6   1   93.27    6.77 
   3  -6   1    9.74    3.91 
   3  -6   1   25.70    5.64 
  -3  -6  -1   35.85    6.07 
   3  -6   1   23.31    5.07 
  -3  -6  -1   22.29    3.38 
  -3  -6  -1   15.19    4.08 
  -3  -6  -1   23.84    3.53 
   3  -6   1   24.18    4.99 
   3  -6   1   25.00    4.95 
   3  -6   1   18.58    3.00 
  -3  -6  -1   15.86    4.37 
  -3  -6  -1   20.92    4.58 
   3  -6   1   24.17    5.23 
   3  -6   1   21.18    6.50 
   3   6   1   17.48    3.56 
   3   6   1   28.83    4.18 
   3   6   1   26.61    5.00 
  -3   6  -1   24.20    3.25 
   3   6   1   26.42    6.14 
   3   6   1   24.23    4.03 
   3   6   1   30.74    4.62 
   3   6   1   20.16    3.38 
  -3   6  -1   22.76    4.93 
   3   6   1   23.78    5.57 
  -3   6  -1   16.74    4.00 
   3   6   1   27.32    3.78 
   3   6   1   27.49    4.47 
   3   6   1   25.96    3.83 
  -3   6  -1   15.83    4.33 
  -3   6  -1   24.05    4.67 
   3   6   1   30.48    4.39 
  -3   6  -1   25.11    5.17 
  -4  -6  -1   84.74    9.81 
  -4  -6  -1   80.06    8.95 
   4  -6   1   80.62    6.39 
  -4  -6  -1   77.61    5.21 
   4  -6   1   80.47    9.96 
   4  -6   1   84.46    8.69 
   4  -6   1   86.37    9.67 
   4  -6   1  102.87   10.61 
   4  -6   1   69.46    8.85 
  -4  -6  -1   80.01    9.08 
   4  -6   1   91.01   12.46 
  -4   6  -1   67.06    8.46 
   4   6   1   89.89    9.58 
   4   6   1   84.28    7.90 
   4   6   1   79.41    6.40 
   4   6   1   86.66    5.34 
  -4   6  -1   87.02    9.10 
  -4   6  -1   67.16    8.31 
   4   6   1   85.35    9.61 
   4   6   1   85.75    5.51 
   4   6   1   83.96    5.89 
  -4   6  -1   83.52    9.54 
   4   6   1   92.61    8.75 
  -4   6  -1   73.41    5.84 
  -4   6  -1   96.87   10.66 
   4   6   1   73.47    7.62 
   4   6   1   83.78   10.49 
  -5  -6  -1   79.98    8.77 
   5  -6   1   70.03   11.03 
   5  -6   1   67.88    9.35 
  -5  -6  -1   63.47    8.81 
   5  -6   1   70.38    9.68 
   5  -6   1   80.77    8.43 
   5  -6   1   70.93    9.36 
  -5  -6  -1   69.37    9.22 
   5  -6   1   69.00    9.84 
   5  -6   1   64.39    8.88 
   5  -6   1   83.86    8.20 
  -5   6  -1   69.26    7.28 
  -5   6  -1   71.10    8.99 
   5   6   1   72.05    7.72 
  -5   6  -1   74.82    9.88 
   5   6   1   87.98   10.39 
  -5   6  -1   72.07    9.26 
  -5   6  -1   68.87    9.90 
   5   6   1   78.92    8.67 
   5   6   1   84.55    9.08 
  -5   6  -1   63.85    8.79 
  -5   6  -1   69.57    9.26 
  -5   6  -1   87.98   10.25 
   5   6   1   64.93    7.44 
   5   6   1   58.73    8.89 
   6  -6   1  102.15   13.94 
   6  -6   1  124.07   13.07 
   6  -6   1  116.44   12.43 
  -6  -6  -1  101.39    8.73 
   6  -6   1  121.72   13.68 
  -6  -6  -1  133.07   13.60 
   6  -6   1   87.90    9.55 
   6  -6   1  136.59   14.21 
   6  -6   1  100.74   11.81 
   6  -6   1  118.66    9.21 
  -6  -6  -1  115.88   12.74 
  -6   6  -1  127.24   13.53 
  -6   6  -1  127.32   13.09 
  -6   6  -1   96.92   11.61 
   6   6   1  116.95   11.24 
   6   6   1  127.84   13.54 
  -6   6  -1  104.86   12.43 
   6   6   1  108.94   10.55 
   6   6   1  105.70   12.05 
  -6   6  -1  111.47    8.74 
  -6   6  -1   74.63   10.30 
  -6   6  -1  130.04   12.93 
   6   6   1  116.36   11.71 
  -6   6  -1  113.44   12.19 
   7  -6   1   33.48    7.11 
   7  -6   1   43.32    8.07 
   7  -6   1   35.31    7.99 
   7  -6   1   33.74    8.95 
  -7  -6  -1   39.28    8.09 
   7  -6   1   43.32    7.11 
   7  -6   1   39.67    7.80 
   7  -6   1   29.77    7.10 
  -7  -6  -1   41.33    8.11 
  -7   6  -1   28.01    6.97 
   7   6   1   35.82    8.13 
  -7   6  -1   39.29    7.55 
  -7   6  -1   41.98    7.75 
   7   6   1   36.82    7.32 
   7   6   1   32.35    6.44 
  -7   6  -1   34.13    7.14 
  -7   6  -1   41.11    8.08 
   7   6   1   34.98    7.18 
  -7   6  -1   47.32    8.31 
  -7   6  -1   34.05    7.51 
   8  -6   1  139.50   15.55 
   8  -6   1  132.84   13.79 
   8  -6   1  109.86   13.74 
  -8  -6  -1  119.70   14.81 
   8  -6   1  106.01   14.05 
   8  -6   1   95.40   12.54 
   8  -6   1  133.90   14.48 
   8  -6   1  131.09   18.18 
  -8  -6  -1  123.44   14.85 
  -8   6  -1  131.18   14.63 
   8   6   1  107.95   11.72 
  -8   6  -1  105.76   12.97 
  -8   6  -1  102.75   13.00 
   8   6   1  132.09   14.12 
  -8   6  -1  123.11   13.96 
  -8   6  -1  120.96   14.30 
  -8   6  -1   94.09   12.43 
  -8   6  -1  133.61   14.45 
   8   6   1  154.00   16.92 
   7  -7  -1   47.38    7.21 
   7  -7  -1   28.80    7.64 
  -7  -7   1   25.80    7.37 
  -7  -7   1   56.52    9.30 
   7  -7  -1   35.80    7.97 
   7  -7  -1   63.77   10.37 
   7  -7  -1   56.19    9.72 
   7  -7  -1   32.12    9.12 
  -7   7   1   34.06    7.94 
  -7   7   1   54.08    9.50 
  -7   7   1   53.27    9.25 
   7   7  -1   35.95    7.18 
  -7   7   1   30.40    7.16 
   7   7  -1   52.47    9.07 
   7   7  -1   61.98   10.22 
  -7   7   1   43.68    8.44 
  -7   7   1   40.14    8.05 
  -7   7   1   32.36    7.69 
   6  -7  -1   48.58    7.39 
  -6  -7   1   42.85    8.32 
   6  -7  -1   48.43    8.83 
  -6  -7   1   60.80    9.00 
   6  -7  -1   55.70    8.88 
  -6  -7   1   41.19    7.59 
   6  -7  -1   50.18    8.87 
   6  -7  -1   52.88    7.05 
   6  -7  -1   52.45    8.93 
   6   7  -1   63.41    9.13 
   6   7  -1   76.73    9.62 
  -6   7   1   56.64    9.11 
  -6   7   1   64.70   10.32 
  -6   7   1   57.80    8.88 
   6   7  -1   65.94    8.72 
  -6   7   1   63.57    9.83 
  -6   7   1   53.69    8.76 
   6   7  -1   56.84    9.14 
  -6   7   1   67.69   10.02 
  -6   7   1   37.08    7.59 
  -5  -7   1  103.39   11.50 
  -5  -7   1  129.51   14.10 
   5  -7  -1  105.22   13.77 
   5  -7  -1  125.71   11.78 
   5  -7  -1  128.57   13.58 
   5  -7  -1  119.04    8.39 
   5  -7  -1  135.49   13.38 
   5  -7  -1  118.07   13.01 
   5  -7  -1  103.87   12.24 
  -5  -7   1  129.83   11.01 
   5   7  -1  149.57   14.11 
  -5   7   1   91.47   11.52 
  -5   7   1  137.27   14.19 
  -5   7   1  136.76   10.89 
  -5   7   1  119.91   12.65 
  -5   7   1  108.83   11.65 
  -5   7   1  121.40   12.82 
   5   7  -1  128.46   13.31 
   5   7  -1  126.97    9.94 
   5   7  -1  133.62   12.39 
  -5   7   1  133.37   12.98 
   5   7  -1  135.07   10.21 
   5   7  -1  119.41   12.32 
  -4  -7   1  130.03   13.82 
   4  -7  -1  119.65   11.92 
   4  -7  -1  147.75   11.52 
   4  -7  -1  116.22   11.46 
   4  -7  -1  149.24   11.63 
   4  -7  -1  138.98   13.45 
  -4  -7   1  135.69   10.50 
   4  -7  -1  124.23   15.27 
  -4  -7   1  133.25   13.04 
  -4   7   1  112.40   11.80 
  -4   7   1  119.89   11.77 
  -4   7   1  157.90   12.05 
  -4   7   1  143.73   13.97 
   4   7  -1  141.86   14.34 
  -4   7   1  142.24   10.32 
   4   7  -1  130.91   10.52 
  -4   7   1  111.58   12.43 
   4   7  -1  113.95   12.83 
   4   7  -1  130.78    9.51 
  -4   7   1  125.48    9.25 
   4   7  -1  121.54    9.75 
   4   7  -1  117.45    9.48 
  -3  -7   1   78.08    7.64 
  -3  -7   1   77.27    8.51 
   3  -7  -1   74.64    8.99 
  -3  -7   1   76.97    8.86 
   3  -7  -1   70.67    9.03 
  -3  -7   1   81.94   10.29 
   3  -7  -1   73.11    9.15 
   3  -7  -1   71.50   11.49 
  -3  -7   1   79.85    9.58 
   3  -7  -1   73.40    9.49 
   3  -7  -1   83.73    9.44 
  -3   7   1   76.88    9.61 
  -3   7   1   75.40    8.41 
   3   7  -1   80.49    7.71 
  -3   7   1   87.93   10.11 
   3   7  -1   71.01    8.15 
  -3   7   1   75.25    5.80 
   3   7  -1   79.57    8.68 
   3   7  -1   79.52    8.95 
   3   7  -1   79.12    6.24 
  -3   7   1   78.24    7.99 
   3   7  -1   99.05    9.21 
  -3   7   1   59.51    8.75 
  -3   7   1   79.83    8.73 
  -3   7   1   77.30    9.40 
   3   7  -1   92.17    9.02 
   3   7  -1   66.55    9.69 
   3   7  -1   76.89    6.19 
   3   7  -1   75.30    5.66 
   3   7  -1   37.27    8.67 
  -2  -7   1   84.68    8.61 
   2  -7  -1   96.18    6.41 
   2  -7  -1   70.89    8.56 
   2  -7  -1   85.20    8.85 
  -2  -7   1   67.91    8.77 
  -2  -7   1   83.77    8.50 
   2  -7  -1   85.88   11.08 
   2  -7  -1   71.37    8.83 
   2  -7  -1   96.16   10.28 
  -2  -7   1   75.83    8.62 
   2  -7  -1   75.24    8.94 
   2   7  -1   68.70    7.61 
   2   7  -1   87.78    6.71 
   2   7  -1   81.82    7.88 
   2   7  -1   75.40    7.56 
   2   7  -1   67.38    9.53 
  -2   7   1   85.08    9.26 
   2   7  -1   90.52    9.18 
  -2   7   1   82.09    9.69 
   2   7  -1   79.83    8.46 
  -2   7   1  101.95   10.47 
  -2   7   1   75.78    7.18 
   2   7  -1   85.96   10.52 
  -2   7   1   71.71    8.99 
  -2   7   1   69.93    8.59 
   2   7  -1   60.97   10.36 
   2   7  -1   77.26    7.92 
   2   7  -1   71.11    8.27 
  -2   7   1   64.83    7.46 
   1  -7  -1   78.26    9.19 
  -1  -7   1   87.51    8.19 
   1  -7  -1   84.33    9.29 
  -1  -7   1   77.40    9.22 
   1  -7  -1   68.80    7.89 
  -1  -7   1   97.60    9.56 
  -1  -7   1   80.96    9.12 
   1  -7  -1   73.98    8.21 
   1  -7  -1   88.81    9.70 
  -1  -7   1   84.76   10.21 
   1  -7  -1   80.89    6.15 
   1  -7  -1   87.01    9.09 
   1  -7  -1   88.59   10.51 
  -1  -7   1  102.93    8.06 
  -1  -7   1   84.96    9.78 
  -1  -7   1   71.50    9.12 
   1   7  -1  100.16    9.79 
  -1   7   1   92.17    7.10 
   1   7  -1   93.21    5.86 
   1   7  -1   84.35    9.10 
   1   7  -1   92.32   11.34 
   1   7  -1   83.93    8.48 
  -1   7   1   92.01    9.36 
   1   7  -1   72.33    7.83 
  -1   7   1   82.24    9.15 
  -1   7   1   78.71    8.76 
  -1   7   1   94.18   10.13 
   1   7  -1   93.93    9.19 
  -1   7   1   92.78   10.55 
  -1   7   1   79.91    5.80 
   1   7  -1   83.78   11.27 
   0  -7   1   90.01   10.24 
   0  -7  -1   82.35    9.72 
   0  -7  -1   99.10    7.70 
   0  -7   1  109.33   10.51 
   0  -7  -1  104.46    7.99 
   0  -7   1  112.81   12.03 
   0  -7   1   81.49    9.89 
   0  -7   1   88.01    9.85 
   0  -7   1   88.17    8.85 
   0  -7  -1   86.74    9.67 
   0  -7   1   89.37    9.45 
   0  -7  -1   96.01    7.60 
   0  -7   1   96.91    7.25 
   0  -7  -1   90.10   10.11 
   0  -7  -1   88.67    8.55 
   0  -7  -1   86.83    6.40 
   0  -7   1  101.16    8.01 
   0   7  -1   97.16    5.87 
   0   7   1  103.77   12.76 
   0   7  -1   75.59    8.72 
   0   7  -1   91.75    5.94 
   0   7  -1  109.67   10.80 
   0   7   1   88.59    5.76 
   0   7   1   74.85    8.38 
   0   7  -1   97.85    9.50 
   0   7   1   87.60    9.41 
   0   7   1   88.92    8.78 
   0   7  -1  107.96    6.98 
   0   7   1   89.90    6.62 
   0   7   1  108.22   10.14 
   0   7   1   88.18    6.13 
   0   7  -1   81.89    9.39 
   0   7  -1   79.32    8.58 
   0   7  -1   96.53   11.42 
   1  -7   1  122.04   11.04 
   1  -7   1  120.55    9.49 
   1  -7   1  109.10   11.32 
  -1  -7  -1  122.63    8.28 
  -1  -7  -1  136.40    9.77 
   1  -7   1  117.58    9.85 
  -1  -7  -1  123.58   10.16 
  -1  -7  -1  124.96    8.08 
   1  -7   1  117.99    8.14 
  -1  -7  -1  126.02   12.07 
  -1  -7  -1  117.38    8.40 
   1  -7   1  133.42   12.26 
   1  -7   1  105.04   11.62 
  -1  -7  -1  136.09    9.02 
   1  -7   1  111.76   10.67 
  -1  -7  -1  105.68   10.18 
   1  -7   1  115.36    9.20 
   1   7   1  113.59    8.61 
   1   7   1  119.20    8.06 
  -1   7  -1  121.83    8.36 
   1   7   1  144.30    9.53 
   1   7   1  121.79    8.80 
   1   7   1  118.91    7.12 
  -1   7  -1  122.42    9.39 
   1   7   1  127.67    8.91 
  -1   7  -1  117.86    7.64 
  -1   7  -1  131.22    9.40 
  -1   7  -1  132.31   10.10 
   1   7   1  130.73    9.12 
   1   7   1  124.87    9.60 
   1   7   1  120.30    7.89 
  -1   7  -1  122.58    9.66 
   1   7   1  107.77    8.70 
   1   7   1  122.22    7.70 
   1   7   1  130.76   14.52 
  -1   7  -1  129.24   12.37 
   2  -7   1  124.09   12.48 
  -2  -7  -1   99.23    7.73 
   2  -7   1  106.88   10.61 
   2  -7   1   96.36   10.79 
   2  -7   1  121.35    9.60 
   2  -7   1  102.05   13.58 
   2  -7   1  123.07   11.68 
  -2  -7  -1  133.58   10.77 
  -2  -7  -1  118.64   11.86 
   2  -7   1  119.50   12.13 
  -2  -7  -1   91.89    9.93 
   2  -7   1   98.30   10.34 
  -2   7  -1   90.50    7.36 
   2   7   1  108.07    7.75 
   2   7   1  110.44   12.26 
   2   7   1  109.24    7.62 
   2   7   1  117.69    8.42 
   2   7   1   88.03    9.30 
   2   7   1  114.13    8.26 
  -2   7  -1   94.10   10.28 
  -2   7  -1  105.65   10.43 
   2   7   1  102.67   12.63 
   2   7   1  101.68    7.73 
   2   7   1  111.42   12.95 
  -2   7  -1  109.62    8.48 
   2   7   1  103.54    7.83 
   2   7   1  115.74    8.44 
   2   7   1  109.59    7.72 
  -2   7  -1  120.94    8.12 
  -2   7  -1   94.88   10.72 
   2   7   1  122.20    8.10 
   3  -7   1   45.11    7.23 
   3  -7   1   36.95    6.44 
  -3  -7  -1   60.83    8.51 
   3  -7   1   54.87    8.43 
   3  -7   1   53.17    7.86 
   3  -7   1   43.29    6.78 
  -3  -7  -1   56.47    8.54 
   3  -7   1   63.36   11.75 
   3   7   1   58.01    9.28 
  -3   7  -1   48.53    6.89 
  -3   7  -1   44.73    6.41 
   3   7   1   48.59    6.89 
  -3   7  -1   61.55    8.80 
   3   7   1   52.14    5.94 
   3   7   1   51.72    5.90 
   3   7   1   47.85    6.77 
   3   7   1   59.02    9.64 
   3   7   1   37.39    5.59 
  -3   7  -1   37.92    6.72 
   3   7   1   57.80    6.62 
   3   7   1   51.72    5.79 
   3   7   1   52.11    6.06 
   3   7   1   39.98    5.56 
   3   7   1   66.97    7.11 
  -3   7  -1   70.11    9.77 
   4  -7   1   51.99    8.17 
   4  -7   1   67.39    8.30 
  -4  -7  -1   58.41    8.67 
   4  -7   1   59.78    8.51 
   4  -7   1   47.66   10.25 
  -4  -7  -1   61.86    8.64 
  -4  -7  -1   69.66    9.30 
   4  -7   1   63.51    9.40 
   4  -7   1   67.91    9.11 
  -4   7  -1   80.43   10.70 
  -4   7  -1   86.09    9.50 
  -4   7  -1   84.01   10.27 
  -4   7  -1   62.28    8.45 
   4   7   1   63.38    7.52 
  -4   7  -1   69.43    9.59 
   4   7   1   64.35    6.73 
   4   7   1   74.62    7.75 
   4   7   1   73.16    9.63 
   4   7   1   43.91    8.39 
   4   7   1   76.52    9.24 
  -4   7  -1   70.67    9.20 
   4   7   1   77.12    8.54 
   5  -7   1   15.98    5.15 
  -5  -7  -1   22.57    6.09 
   5  -7   1   10.86    4.32 
  -5  -7  -1   25.94    5.68 
   5  -7   1   21.04    7.82 
   5  -7   1   14.26    4.99 
   5  -7   1   17.16    5.04 
   5  -7   1   18.23    4.81 
  -5  -7  -1   22.24    6.24 
   5  -7   1   20.87    4.09 
  -5   7  -1   27.19    5.73 
  -5   7  -1   20.93    5.49 
   5   7   1    8.96    4.02 
   5   7   1   15.47    4.22 
   5   7   1   22.07    5.47 
  -5   7  -1   18.49    5.61 
   5   7   1   15.46    4.72 
  -5   7  -1   18.95    5.40 
   5   7   1   23.25    6.34 
  -5   7  -1   29.21    7.51 
  -5   7  -1   28.34    6.14 
  -5   7  -1   16.19    5.53 
   6  -7   1    1.60    4.70 
   6  -7   1    8.01    3.95 
   6  -7   1    9.16    4.71 
   6  -7   1   10.21    4.71 
   6  -7   1   14.08    4.98 
   6  -7   1    6.29    4.76 
  -6  -7  -1    7.79    3.99 
   6  -7   1    2.02    2.33 
  -6  -7  -1    9.41    4.39 
  -6  -7  -1    7.37    4.56 
  -6   7  -1    7.71    4.12 
   6   7   1   10.60    6.63 
  -6   7  -1    4.24    3.47 
  -6   7  -1   14.98    5.71 
  -6   7  -1    4.67    4.01 
   6   7   1    3.81    3.90 
  -6   7  -1    8.19    4.93 
   6   7   1   10.32    4.97 
   6   7   1   14.98    4.63 
  -6   7  -1    7.48    4.47 
  -6   7  -1   11.93    5.28 
   7  -7   1    4.60    5.20 
   7  -7   1    1.55    3.50 
   7  -7   1   -0.79    5.24 
   7  -7   1   -1.50    3.19 
   7  -7   1   -0.95    3.09 
  -7  -7  -1    1.35    3.78 
  -7  -7  -1   -0.86    3.51 
   7  -7   1    0.57    2.62 
   7  -7   1    4.65    4.99 
  -7   7  -1    0.91    3.83 
  -7   7  -1    6.70    4.46 
  -7   7  -1   -3.67    3.00 
  -7   7  -1    3.33    4.21 
  -7   7  -1    2.36    3.52 
  -7   7  -1   -2.55    2.70 
   7   7   1    4.31    4.24 
  -7   7  -1   -0.79    3.09 
   7   7   1   -0.63    3.36 
   6  -8  -1   10.32    4.55 
   6  -8  -1    6.48    4.76 
  -6  -8   1    6.52    4.25 
   6  -8  -1    6.10    4.38 
   6  -8  -1    5.58    4.15 
  -6  -8   1    9.39    5.01 
   6  -8  -1    9.96    4.73 
   6  -8  -1    6.24    6.21 
  -6   8   1    7.66    4.53 
  -6   8   1   10.02    4.85 
   6   8  -1   11.62    4.90 
   6   8  -1    5.63    4.65 
  -6   8   1   15.95    5.95 
  -6   8   1    5.51    4.73 
  -6   8   1   13.91    5.31 
  -6   8   1    3.01    4.83 
  -6   8   1    3.73    3.85 
   5  -8  -1   36.75    7.65 
   5  -8  -1   43.62   10.71 
   5  -8  -1   39.13    7.08 
  -5  -8   1   45.10    8.81 
   5  -8  -1   41.16    8.77 
   5  -8  -1   34.91    7.36 
   5  -8  -1   60.37    9.35 
  -5  -8   1   39.00    7.57 
  -5   8   1   43.66    7.72 
  -5   8   1   29.63    7.36 
   5   8  -1   30.33    6.45 
   5   8  -1   38.28    7.70 
   5   8  -1   38.10    7.41 
  -5   8   1   30.44    6.84 
   5   8  -1   59.25    9.74 
  -5   8   1   42.58    7.84 
   5   8  -1   41.90    7.31 
  -5   8   1   47.41    8.67 
  -5   8   1   38.05    7.72 
  -5   8   1   31.82    7.12 
  -4  -8   1    9.33    4.55 
   4  -8  -1   13.67    4.98 
  -4  -8   1   29.44    6.84 
   4  -8  -1   13.12    4.64 
   4  -8  -1    5.30    3.86 
   4  -8  -1    8.44    5.87 
   4  -8  -1   12.09    4.93 
   4  -8  -1    8.57    4.06 
   4   8  -1   12.44    4.63 
   4   8  -1   13.94    5.05 
  -4   8   1   10.06    5.41 
   4   8  -1   15.52    4.35 
  -4   8   1   10.77    4.43 
  -4   8   1    8.06    3.78 
  -4   8   1    8.68    4.15 
  -4   8   1   19.74    5.98 
  -4   8   1   14.72    4.89 
   4   8  -1   15.87    4.92 
   4   8  -1   20.39    4.87 
   4   8  -1   16.78    6.32 
  -3  -8   1   25.90    4.87 
  -3  -8   1   26.63    6.62 
   3  -8  -1   15.05    5.14 
  -3  -8   1   27.38    5.47 
   3  -8  -1   24.17    5.75 
   3  -8  -1   15.37    6.42 
   3  -8  -1   16.99    4.99 
   3  -8  -1   19.17    4.93 
   3  -8  -1   28.26    6.09 
   3   8  -1   21.79    4.44 
   3   8  -1   23.19    5.24 
   3   8  -1   21.13    4.27 
   3   8  -1   22.36    4.89 
  -3   8   1   20.24    5.27 
   3   8  -1   21.66    7.12 
   3   8  -1   25.00    5.01 
  -3   8   1   18.22    4.39 
  -3   8   1   24.23    6.10 
  -3   8   1   20.52    6.18 
   3   8  -1   22.77    4.53 
  -3   8   1   20.02    5.85 
   3   8  -1   26.08    5.23 
   3   8  -1   31.10    7.46 
  -3   8   1   28.46    5.96 
   3   8  -1   27.34    5.93 
   3   8  -1   26.27    7.09 
   2  -8  -1    4.90    3.37 
   2  -8  -1    0.76    2.10 
   2  -8  -1   -1.51    2.16 
   2  -8  -1    3.43    2.97 
  -2  -8   1    4.07    2.70 
  -2  -8   1   -3.01    2.85 
  -2  -8   1    4.33    2.43 
  -2  -8   1   -0.10    2.22 
   2  -8  -1    0.22    3.25 
   2  -8  -1    2.01    3.05 
  -2   8   1    0.87    3.04 
   2   8  -1    0.55    1.91 
   2   8  -1   -1.45    2.06 
   2   8  -1    0.56    2.13 
  -2   8   1    3.00    2.86 
  -2   8   1   -1.67    1.96 
   2   8  -1   -1.44    2.03 
   2   8  -1   -0.90    2.77 
   2   8  -1    0.41    2.28 
  -2   8   1    1.49    2.46 
   2   8  -1   -0.44    1.94 
   2   8  -1    3.63    4.66 
   2   8  -1    4.99    2.71 
   2   8  -1    2.59    2.92 
   2   8  -1    7.73    3.43 
  -2   8   1    1.15    2.41 
   2   8  -1   -0.25    2.66 
  -2   8   1    5.13    3.54 
   2   8  -1    2.29    2.37 
  -1  -8   1    1.09    2.44 
  -1  -8   1   -3.77    1.56 
   1  -8  -1    1.54    2.42 
  -1  -8   1   -2.37    2.77 
   1  -8  -1    3.86    3.00 
   1  -8  -1   -0.13    1.65 
  -1  -8   1    0.45    2.90 
   1  -8  -1   -1.22    2.45 
  -1  -8   1   -1.28    2.75 
  -1  -8   1   -0.43    2.30 
   1  -8  -1    1.00    2.69 
   1  -8  -1   -1.46    2.20 
   1  -8  -1    0.27    2.23 
   1   8  -1   -0.37    2.24 
  -1   8   1    0.06    2.67 
  -1   8   1   -0.64    2.48 
  -1   8   1    1.13    2.02 
   1   8  -1   -2.14    2.33 
   1   8  -1    3.67    3.05 
  -1   8   1    1.36    2.62 
   1   8  -1    4.95    2.95 
  -1   8   1   -3.78    2.30 
  -1   8   1    0.04    2.64 
   1   8  -1    0.50    2.41 
   1   8  -1    4.50    4.25 
   1   8  -1    2.73    4.00 
   1   8  -1    2.61    2.49 
   1   8  -1    0.71    1.93 
   1   8  -1    3.01    2.61 
   0  -8   1   23.27    6.43 
   0  -8  -1   17.28    4.20 
   0  -8  -1   11.99    3.72 
   0  -8   1   18.33    4.72 
   0  -8  -1   13.78    3.33 
   0  -8   1   29.01    4.78 
   0  -8   1   28.53    5.85 
   0  -8  -1   19.96    4.53 
   0  -8  -1   24.04    6.58 
   0  -8   1   32.04    6.51 
   0  -8  -1   22.73    5.11 
   0  -8  -1   24.08    6.02 
   0  -8  -1   20.93    5.05 
   0  -8   1   23.90    5.44 
   0  -8   1   15.45    4.75 
   0  -8   1   16.29    5.38 
   0   8   1   13.46    4.19 
   0   8   1   13.60    4.20 
   0   8  -1   16.80    4.39 
   0   8  -1   13.15    4.11 
   0   8  -1   31.23    6.69 
   0   8   1   15.00    4.56 
   0   8   1   30.17    7.29 
   0   8  -1   16.37    4.60 
   0   8  -1   23.61    4.36 
   0   8   1   20.86    5.56 
   0   8  -1   26.49    5.98 
   0   8  -1   18.87    5.50 
   0   8   1   18.59    4.52 
   0   8   1   15.18    3.41 
   1  -8   1   60.22    8.85 
  -1  -8  -1   58.23    7.55 
   1  -8   1   68.03    9.86 
   1  -8   1   69.11    7.42 
   1  -8   1   60.39    8.10 
  -1  -8  -1   78.44    8.18 
  -1  -8  -1   63.52    9.06 
   1  -8   1   66.46    8.46 
   1  -8   1   64.15    9.22 
   1  -8   1   74.37   10.54 
  -1  -8  -1   57.41    6.56 
  -1  -8  -1   48.94    7.54 
   1  -8   1   69.07    9.76 
  -1  -8  -1   87.91    9.19 
  -1  -8  -1   49.68    8.24 
   1  -8   1   58.95    7.99 
   1   8   1   63.56   10.96 
   1   8   1   47.50    9.22 
  -1   8  -1   77.05    9.32 
  -1   8  -1   54.44    6.85 
   1   8   1   84.33    9.11 
  -1   8  -1   63.63    8.47 
  -1   8  -1   63.35    7.80 
   1   8   1   53.06    7.25 
   1   8   1   68.11    7.29 
   1   8   1   63.27    7.71 
  -1   8  -1   61.16    8.46 
   1   8   1   80.63    8.86 
  -1   8  -1   66.73    8.95 
   1   8   1   71.83    8.63 
  -1   8  -1   64.83    9.23 
   1   8   1   52.78    6.08 
   1   8   1   65.83    8.37 
   1   8   1   50.68    7.64 
   2  -8   1   20.79    4.23 
   2  -8   1   26.36    5.87 
   2  -8   1   24.48    6.52 
  -2  -8  -1   15.65    4.80 
   2  -8   1   24.11    5.82 
  -2  -8  -1   21.15    5.64 
   2  -8   1   17.78    5.49 
   2  -8   1   11.69    5.42 
   2  -8   1   27.42    5.73 
   2   8   1   33.33    7.87 
  -2   8  -1   23.91    6.50 
   2   8   1   13.00    6.02 
  -2   8  -1   19.60    5.23 
   2   8   1   24.76    4.89 
   2   8   1   26.16    4.64 
  -2   8  -1   24.16    5.89 
   2   8   1   21.02    4.75 
   2   8   1   18.52    5.59 
   2   8   1   18.44    3.92 
  -2   8  -1   25.50    5.92 
  -2   8  -1   32.87    5.77 
   2   8   1   28.22    5.08 
   2   8   1   22.94    4.83 
   2   8   1   23.57    4.77 
   2   8   1   18.28    4.13 
   2   8   1   16.53    4.48 
   2   8   1   33.40    6.20 
   3  -8   1   82.23   10.31 
   3  -8   1   88.51   11.14 
   3  -8   1   87.46   10.66 
   3  -8   1   85.35   10.39 
   3  -8   1   61.70    9.02 
  -3  -8  -1   91.75   11.51 
  -3  -8  -1   94.55   11.86 
   3  -8   1   66.76   12.34 
  -3   8  -1   96.76   11.53 
   3   8   1   79.16    9.38 
  -3   8  -1   61.91    9.19 
  -3   8  -1   93.82   11.60 
  -3   8  -1   81.13   10.36 
  -3   8  -1   82.82    8.97 
   3   8   1   87.43    9.31 
   3   8   1   84.44    8.70 
   3   8   1   88.75   12.58 
  -3   8  -1   86.65    9.75 
   3   8   1   74.57   11.47 
   3   8   1   94.57   12.71 
   3   8   1  101.54    9.49 
   3   8   1   80.21    8.34 
   4  -8   1   -2.13    2.80 
   4  -8   1    9.57    4.65 
  -4  -8  -1    3.04    3.77 
   4  -8   1   11.94    4.61 
   4  -8   1    9.57    4.91 
  -4  -8  -1   12.57    5.31 
   4  -8   1    0.54    5.11 
  -4  -8  -1   12.84    5.04 
   4  -8   1    1.98    3.10 
  -4   8  -1    3.71    3.62 
   4   8   1   16.30    6.13 
   4   8   1    3.39    3.50 
   4   8   1   -2.59    3.02 
  -4   8  -1    7.12    4.04 
  -4   8  -1   10.15    4.63 
   4   8   1   18.29    5.98 
   4   8   1    5.14    3.28 
   4   8   1    7.41    3.34 
  -4   8  -1    8.12    4.44 
  -4   8  -1    2.51    3.24 
  -4   8  -1    7.51    3.44 
   5  -8   1   57.09    9.89 
   5  -8   1   74.75   10.91 
   5  -8   1   66.46    9.95 
   5  -8   1   71.91    9.33 
   5  -8   1   54.17    8.99 
  -5  -8  -1   95.58   11.56 
   5  -8   1   67.08   13.03 
  -5  -8  -1   58.70    9.65 
  -5  -8  -1   67.72   10.37 
  -5   8  -1   71.39   10.07 
  -5   8  -1   47.93    8.96 
  -5   8  -1   58.70    9.72 
  -5   8  -1   56.16   10.03 
  -5   8  -1   68.16   10.30 
   5   8   1   67.62    9.91 
  -5   8  -1   71.85    9.82 
   5   8   1   77.88   11.84 
  -5   8  -1   62.66    9.62 
   5   8   1   69.38    8.74 
   6  -8   1    9.30    4.83 
   6  -8   1   10.42    5.45 
  -6  -8  -1   10.28    4.85 
   6  -8   1   10.59    6.71 
   6  -8   1    9.77    4.24 
   6  -8   1    8.88    5.01 
  -6  -8  -1    7.43    5.46 
   6  -8   1    8.97    4.59 
   6   8   1    5.07    3.69 
  -6   8  -1    1.92    3.44 
  -6   8  -1    1.46    4.83 
  -6   8  -1    8.84    4.86 
  -6   8  -1    8.66    4.49 
   6   8   1   12.27    5.30 
  -6   8  -1    7.54    4.72 
  -6   8  -1    8.66    5.64 
  -6   8  -1    4.04    4.13 
   5  -9  -1   13.20    5.24 
   5  -9  -1   11.46    5.42 
   5  -9  -1    7.81    4.98 
  -5  -9   1    1.79    3.99 
   5  -9  -1   13.12    5.86 
   5  -9  -1    7.13    4.55 
  -5  -9   1   13.15    5.75 
  -5   9   1   11.10    5.33 
  -5   9   1   15.33    5.69 
  -5   9   1    8.42    5.01 
  -5   9   1   13.41    5.62 
   5   9  -1   14.17    5.34 
  -5   9   1   21.40    6.46 
   4  -9  -1  182.35   16.74 
   4  -9  -1  129.82   14.20 
   4  -9  -1  149.25   15.56 
  -4  -9   1  145.72   15.11 
   4  -9  -1  158.90   15.66 
   4  -9  -1  201.42   15.36 
  -4   9   1  149.84   14.68 
   4   9  -1  160.14   12.53 
   4   9  -1  157.67   14.81 
  -4   9   1  169.08   17.21 
   4   9  -1  155.07   18.30 
  -4   9   1  151.85   16.00 
  -4   9   1  145.80   16.01 
  -4   9   1  138.03   15.33 
   4   9  -1  158.81   17.82 
  -3  -9   1   15.78    5.83 
   3  -9  -1    8.29    4.49 
   3  -9  -1    9.46    4.67 
   3  -9  -1    8.99    5.04 
   3  -9  -1   13.57    5.05 
   3  -9  -1   13.74    4.95 
  -3   9   1   18.73    6.02 
   3   9  -1    9.80    6.04 
  -3   9   1   21.81    6.20 
   3   9  -1   16.95    5.29 
  -3   9   1   12.09    4.92 
  -3   9   1   11.60    4.41 
  -3   9   1   14.47    5.13 
   3   9  -1    9.78    6.25 
   3   9  -1   11.12    4.52 
   2  -9  -1   88.81   11.56 
   2  -9  -1  107.32   11.89 
  -2  -9   1   94.29   10.58 
   2  -9  -1  120.86   13.67 
  -2  -9   1  101.03   12.63 
  -2  -9   1   96.24    9.99 
   2  -9  -1   89.49   10.85 
   2  -9  -1   93.25   10.81 
   2   9  -1  107.50   13.55 
   2   9  -1  100.95   10.56 
  -2   9   1  133.10   14.25 
  -2   9   1  114.89   12.74 
   2   9  -1  108.88   12.11 
   2   9  -1  108.62   10.74 
  -2   9   1  102.21   12.14 
   2   9  -1  132.97   12.09 
  -2   9   1   96.01   11.79 
  -2   9   1   95.99   10.13 
   2   9  -1  106.09   15.09 
   2   9  -1  117.43   15.25 
   1  -9  -1    3.45    2.98 
  -1  -9   1    2.73    2.71 
   1  -9  -1    3.10    3.75 
   1  -9  -1    1.33    2.88 
  -1  -9   1   -3.67    2.76 
   1  -9  -1    2.11    2.94 
   1  -9  -1    0.60    2.86 
  -1   9   1    1.41    3.16 
  -1   9   1    0.22    4.43 
   1   9  -1    1.72    2.72 
   1   9  -1   -2.93    3.33 
   1   9  -1    0.03    2.96 
  -1   9   1    0.57    2.88 
  -1   9   1    1.39    3.45 
  -1   9   1    3.84    3.23 
  -1   9   1    3.58    3.09 
   1   9  -1    1.18    3.16 
  -1   9   1   -1.52    2.25 
   1   9  -1    3.03    2.65 
   1   9  -1    3.92    4.84 
   1   9  -1   -0.20    2.79 
  -1   9   1   -1.26    2.00 
   1   9  -1    3.28    2.90 
   1   9  -1   -0.12    2.18 
   1   9  -1    2.64    3.36 
   0  -9   1  121.56   12.89 
   0  -9  -1  138.13   14.33 
   0  -9   1  112.74   13.59 
   0  -9  -1  128.83   10.35 
   0  -9   1  120.14   13.65 
   0  -9   1  136.65   13.07 
   0  -9  -1  135.84   10.63 
   0   9  -1  119.77   12.52 
   0   9  -1  136.66   10.85 
   0   9  -1  108.78   12.05 
   0   9   1  131.16   12.71 
   0   9  -1  139.61   13.30 
   0   9   1  114.73   11.80 
   0   9   1  110.67   11.75 
   0   9  -1  123.96   12.29 
   0   9   1  121.80   12.84 
   0   9   1  115.25   12.38 
   0   9   1  157.65   14.29 
   0   9  -1  103.31   11.88 
   0   9   1  126.40   12.99 
   0   9   1  115.73   14.21 
   1  -9   1    0.71    2.96 
  -1  -9  -1    0.81    3.24 
   1  -9   1    0.98    2.95 
   1  -9   1    7.53    4.70 
   1  -9   1    5.61    4.30 
   1  -9   1   -1.44    2.84 
   1  -9   1    2.08    3.11 
   1  -9   1   -3.41    2.15 
   1   9   1   -0.15    4.13 
   1   9   1    4.87    3.30 
   1   9   1    7.47    3.69 
   1   9   1   -1.62    3.62 
  -1   9  -1   -2.14    2.62 
   1   9   1    1.09    2.38 
  -1   9  -1   -3.47    2.20 
   1   9   1    5.39    3.85 
  -1   9  -1   -0.58    2.81 
  -1   9  -1   -1.57    2.04 
  -1   9  -1    4.28    3.35 
   1   9   1    2.28    2.90 
   1   9   1    0.09    2.59 
   1   9   1    0.50    2.38 
  -1   9  -1    2.37    3.68 
  -1   9  -1    3.56    3.46 
  -2  -9  -1  133.41   14.87 
   2  -9   1  102.79   12.01 
   2  -9   1   93.57   11.22 
   2  -9   1   89.27   12.32 
   2  -9   1   95.42   11.53 
   2  -9   1   89.63   11.41 
   2  -9   1   90.36   12.34 
   2   9   1   97.45   14.39 
   2   9   1  112.52   11.29 
  -2   9  -1  103.99   11.94 
  -2   9  -1   94.30   11.79 
  -2   9  -1  119.55   12.89 
   2   9   1   87.68    9.86 
   2   9   1  105.27   11.68 
   2   9   1  102.79   13.74 
  -2   9  -1   92.65   11.53 
  -2   9  -1  109.89   10.83 
   2   9   1  102.10   10.69 
  -2   9  -1  126.56   14.21 
  -2   9  -1  117.50   12.97 
   2   9   1  116.93   11.18 
   2   9   1   84.63   13.02 
   3  -9   1    6.73    5.45 
   3  -9   1    5.89    4.30 
   3  -9   1    8.68    5.15 
   3  -9   1    7.01    4.49 
   3  -9   1    9.34    4.01 
  -3  -9  -1   10.34    4.92 
   3  -9   1    6.82    4.01 
  -3   9  -1    5.35    4.85 
   3   9   1    5.31    5.25 
  -3   9  -1   12.46    5.42 
   3   9   1    2.38    4.34 
   3   9   1    6.60    5.44 
  -3   9  -1    6.69    4.00 
  -3   9  -1    4.58    4.02 
  -3   9  -1   12.57    5.10 
   3   9   1   10.20    4.33 
  -3   9  -1    4.90    3.75 
  -3   9  -1    8.00    4.42 
  -4  -9  -1   49.47    9.09 
   4  -9   1   38.91    8.21 
   4  -9   1   33.91    9.88 
   4  -9   1   47.53    9.26 
   4  -9   1   37.19    7.89 
  -4  -9  -1   37.33    8.17 
   4  -9   1   42.69    8.04 
   4  -9   1   28.59    7.60 
   4   9   1   45.06    7.58 
  -4   9  -1   39.89    8.64 
  -4   9  -1   47.07    8.41 
   4   9   1   43.66   10.27 
  -4   9  -1   32.77    7.32 
   4   9   1   20.27    7.74 
  -4   9  -1   38.41    7.96 
   4   9   1   43.77    7.81 
  -4   9  -1   43.38    8.80 
  -4   9  -1   37.80    8.27 
   5  -9   1   -3.01    2.48 
   5  -9   1    5.07    6.29 
   5  -9   1   -3.44    2.92 
  -5  -9  -1   -1.76    3.25 
   5  -9   1   -1.76    4.16 
   5  -9   1   -1.49    3.52 
  -5   9  -1    2.74    3.59 
  -5   9  -1   -4.20    2.28 
  -5   9  -1   -2.62    2.71 
  -5   9  -1    5.69    4.47 
  -5   9  -1   -0.40    3.47 
   5   9   1    2.39    3.85 
  -5   9  -1    1.86    4.45 
   5   9   1   -1.31    3.55 
  -5   9  -1    4.23    5.66 
   3 -10  -1    4.41    4.25 
   3 -10  -1    2.87    4.02 
  -3  10   1    8.57    4.48 
  -3  10   1    2.54    3.40 
  -3  10   1   12.88    5.76 
   2 -10  -1    0.31    3.48 
   2 -10  -1   -0.69    2.98 
   2 -10  -1    7.05    5.06 
  -2 -10   1    0.85    4.13 
   2  10  -1    2.16    3.68 
  -2  10   1   -1.52    2.94 
   2  10  -1   -1.16    3.39 
   2  10  -1    2.11    4.87 
  -2  10   1   -2.77    3.13 
  -2  10   1    0.15    3.30 
  -2  10   1    4.95    4.23 
  -2  10   1   -3.54    3.61 
  -2  10   1   -0.67    2.92 
   1 -10  -1    9.48    4.31 
   1 -10  -1   13.49    5.96 
  -1 -10   1    3.60    4.39 
   1  10  -1   10.18    4.85 
   1  10  -1    1.64    3.87 
   1  10  -1   10.35    4.64 
  -1  10   1   18.65    6.32 
   1  10  -1    4.28    5.22 
  -1  10   1    4.79    4.15 
  -1  10   1   12.41    5.19 
  -1  10   1   10.50    5.03 
   1  10  -1   12.74    5.53 
  -1  10   1    4.34    4.02 
   1  10  -1    6.82    4.24 
  -1  10   1   11.99    4.90 
  -1  10   1   11.76    4.94 
   1  10  -1   10.34    4.95 
   0 -10  -1    0.16    3.39 
   0 -10   1    0.31    4.33 
   0  10  -1   -2.13    2.59 
   0  10  -1    1.28    3.27 
   0  10   1    0.81    3.26 
   0  10  -1    0.52    3.42 
   0  10   1    3.68    3.47 
   0  10  -1    1.25    3.84 
   0  10  -1   -2.45    2.97 
   0  10   1   -3.07    2.94 
   0  10   1    1.76    3.76 
   0  10   1    3.40    4.03 
   0  10   1    2.74    3.38 
   0  10   1    3.14    3.65 
   0  10  -1    2.87    3.53 
   0  10  -1    6.22    5.37 
   1 -10   1   56.89    9.12 
  -1  10  -1   37.06    7.81 
   1  10   1   53.00    8.48 
   1  10   1   35.10    6.83 
   1  10   1   50.39    8.34 
   1  10   1   42.99    9.77 
   1  10   1   49.01    8.74 
  -1  10  -1   44.72    8.10 
   1  10   1   50.40    9.64 
  -1  10  -1   57.43    9.40 
  -1  10  -1   46.51    8.63 
  -1  10  -1   52.15    9.38 
   1  10   1   33.79    7.04 
  -1  10  -1   36.02    7.75 
   2 -10   1    3.52    5.54 
   2 -10   1    4.04    3.95 
   2 -10   1   -1.98    3.35 
  -2  10  -1   -0.33    3.58 
  -2  10  -1    0.76    3.93 
   2  10   1    2.30    4.38 
   2  10   1   -2.19    3.18 
   2  10   1    7.93    9.27 
  -2  10  -1    0.52    3.20 
  -2  10  -1   -1.90    3.44 
  -2  10  -1    5.08    3.96 
   2  10   1   -3.38    4.11 
  -2  10  -1    3.28    3.66 
  10   0  -2   25.34    6.23 
  10   0  -2   34.91    7.68 
  10   0  -2   40.42    8.38 
  10   0  -2   34.87    7.90 
  10   0  -2   22.42    6.78 
  10   0  -2   37.71    8.28 
 -10   0   2   30.48    7.54 
  10   0  -2   39.98    8.44 
  10   0  -2   31.39    6.75 
 -10   0   2   31.94    8.00 
 -10   0   2   34.30    7.49 
  10   0  -2   30.99    7.73 
   9   0  -2   -3.35    2.86 
  -9   0   2    1.94    3.07 
   9   0  -2   -0.67    2.61 
   9   0  -2   -1.97    3.42 
  -9   0   2    1.48    2.51 
   9   0  -2    1.24    3.32 
   9   0  -2    5.46    3.88 
   9   0  -2    2.66    2.92 
   9   0  -2   -2.46    2.27 
   9   0  -2    6.89    4.06 
   9   0  -2    0.91    3.07 
  -9   0   2   -1.67    2.66 
  -9   0   2   -1.68    2.85 
   9   0  -2   -2.67    3.09 
  -9   0   2   -1.20    2.17 
  -8   0   2  169.99   12.98 
  -8   0   2  163.04   11.98 
   8   0  -2  180.92   13.33 
  -8   0   2  163.67   11.30 
   8   0  -2  172.24   12.75 
   8   0  -2  176.72   10.78 
  -8   0   2  151.70   12.77 
   8   0  -2  142.61   11.82 
   8   0  -2  140.39   10.60 
   8   0  -2  160.31   12.29 
   8   0  -2  165.82   12.58 
  -8   0   2  152.25    9.84 
   8   0  -2  149.15   11.32 
   8   0  -2  175.54   12.56 
  -8   0   2  176.58   10.98 
   8   0  -2  156.74   12.10 
  -7   0   2    3.92    3.24 
   7   0  -2    0.54    2.68 
   7   0  -2   -1.60    2.13 
   7   0  -2    0.11    1.94 
  -7   0   2    2.37    1.80 
   7   0  -2   -2.14    2.04 
   7   0  -2   -0.29    2.18 
  -7   0   2   -3.17    1.81 
   7   0  -2    0.76    2.41 
   7   0  -2   -0.80    2.50 
  -7   0   2    1.09    2.04 
   7   0  -2    0.06    2.24 
  -7   0   2   -0.92    1.52 
   7   0  -2    0.52    1.79 
   7   0  -2    0.97    2.56 
  -7   0   2    1.03    2.28 
  -7   0   2    1.12    2.19 
  -7   0   2   -0.88    1.26 
  -6   0   2  235.75   11.05 
   6   0  -2  229.84   13.64 
   6   0  -2  239.83   13.39 
   6   0  -2  223.03   13.22 
  -6   0   2  237.26   12.23 
   6   0  -2  258.70   14.01 
  -6   0   2  227.57   13.89 
   6   0  -2  243.79   13.95 
   6   0  -2  246.76   12.28 
   6   0  -2  253.46   13.05 
  -6   0   2  225.49   12.65 
  -6   0   2  236.85   11.57 
   6   0  -2  235.34   13.87 
  -6   0   2  256.09   13.64 
   6   0  -2  238.89   13.72 
  -6   0   2  245.21   14.18 
   6   0  -2  248.91   13.23 
   5   0  -2   -2.20    1.43 
  -5   0   2   -1.06    1.59 
   5   0  -2    2.34    1.87 
  -5   0   2    0.23    1.12 
   5   0  -2    4.15    2.04 
  -5   0   2   -1.60    0.87 
  -5   0   2    1.69    1.93 
   5   0  -2   -1.08    1.41 
  -5   0   2   -0.44    1.22 
   5   0  -2   -1.11    1.09 
   5   0  -2   -0.69    1.53 
   5   0  -2    1.39    1.11 
  -5   0   2   -0.88    1.32 
   5   0  -2    0.15    1.64 
  -5   0   2   -0.14    1.61 
  -5   0   2    0.31    1.25 
   5   0  -2    2.05    1.96 
  -5   0   2    0.62    1.24 
  -5   0   2   -0.77    1.09 
   5   0  -2    0.17    1.28 
  -4   0   2  789.84   29.21 
   4   0  -2  767.14   30.60 
  -4   0   2  773.83   29.08 
  -4   0   2  786.77   28.68 
  -4   0   2  760.99   28.79 
  -4   0   2  734.12   28.38 
   4   0  -2  776.59   30.42 
   4   0  -2  757.48   29.12 
  -4   0   2  786.14   28.51 
   4   0  -2  773.85   29.89 
  -4   0   2  774.08   29.72 
  -4   0   2  777.17   30.24 
   4   0  -2  752.53   30.18 
  -4   0   2  755.06   30.42 
   4   0  -2  797.34   30.01 
  -4   0   2  781.71   28.46 
   4   0  -2  781.09   28.42 
  -4   0   2  762.65   30.72 
   4   0  -2  783.43   28.74 
   4   0  -2  772.37   28.60 
  -4   0   2  758.54   30.05 
   4   0  -2  774.20   29.70 
   4   0  -2  780.60   30.23 
  -3   0   2   -0.67    0.83 
  -3   0   2    1.62    1.08 
  -3   0   2    0.72    0.97 
  -3   0   2   -0.58    1.10 
  -3   0   2    1.00    1.31 
  -3   0   2   -0.84    0.73 
   3   0  -2    0.43    1.39 
   3   0  -2   -0.94    1.08 
  -3   0   2    0.99    1.16 
   3   0  -2    0.36    0.99 
  -3   0   2   -0.40    1.13 
   3   0  -2    0.67    0.78 
  -3   0   2   -0.34    0.87 
  -3   0   2   -0.49    1.37 
  -3   0   2   -0.98    0.86 
  -3   0   2   -0.31    1.18 
  -3   0   2   -0.16    1.24 
   3   0  -2   -0.71    0.99 
  -3   0   2   -0.01    0.78 
   3   0  -2   -1.62    0.74 
   3   0  -2   -0.19    1.30 
   3   0  -2    1.57    0.96 
   3   0  -2   -1.35    0.99 
   3   0  -2    0.27    1.01 
   3   0  -2    2.55    1.47 
  -3   0   2    1.65    1.44 
   3   0  -2    0.78    1.23 
   3   0  -2    0.38    1.01 
   3   0  -2    0.06    1.23 
  -3   0   2   -0.46    0.85 
   3   0  -2   -0.51    1.29 
  -3   0   2   -1.56    0.96 
  -2   0   2  773.31   27.36 
  -2   0   2  787.46   27.79 
  -2   0   2  750.74   26.52 
  -2   0   2  742.19   27.19 
   2   0  -2  767.76   27.48 
   2   0  -2  756.48   27.12 
  -2   0   2  750.87   27.05 
   2   0  -2  763.81   27.59 
  -2   0   2  717.72   26.70 
   2   0  -2  763.00   27.20 
   2   0  -2  759.50   26.73 
  -2   0   2  733.88   27.01 
   2   0  -2  747.89   27.01 
   2   0  -2  759.68   27.83 
  -2   0   2  755.35   27.51 
  -2   0   2  756.31   26.41 
  -2   0   2  761.84   27.04 
   2   0  -2  729.48   27.31 
   2   0  -2  752.56   27.01 
  -2   0   2  723.12   26.69 
   2   0  -2  737.17   26.39 
   2   0  -2  753.07   27.62 
   2   0  -2  740.25   27.40 
   2   0  -2  748.85   27.32 
  -2   0   2  750.15   27.42 
   2   0  -2  743.59   27.48 
   2   0  -2  745.00   27.18 
   2   0  -2  734.56   27.29 
   2   0  -2  740.10   26.73 
  -2   0   2  732.30   27.38 
  -2   0   2  724.58   27.73 
  -2   0   2  741.40   27.48 
  -2   0   2  768.27   27.41 
  -1   0   2    0.80    0.57 
  -1   0   2   -0.29    0.33 
  -1   0   2    0.41    0.45 
   1   0  -2    0.08    0.64 
   1   0  -2   -0.11    0.56 
  -1   0   2   -0.81    0.53 
   1   0  -2   -0.11    0.62 
   1   0  -2   -0.34    0.48 
   1   0  -2    0.72    0.62 
  -1   0   2    0.84    0.63 
  -1   0   2    0.57    0.50 
  -1   0   2    0.54    0.75 
   1   0  -2   -0.65    0.58 
  -1   0   2    0.13    0.62 
   1   0  -2   -0.43    0.40 
   1   0  -2    0.11    0.66 
   1   0  -2   -0.50    0.50 
  -1   0   2    0.73    0.76 
  -1   0   2   -0.04    0.57 
  -1   0   2    0.53    0.61 
   1   0  -2   -0.11    0.70 
   1   0  -2   -0.40    0.58 
  -1   0   2    0.11    0.53 
  -1   0   2    1.27    0.69 
  -1   0   2   -0.43    0.59 
   1   0  -2    0.56    0.64 
   1   0  -2    0.65    0.59 
  -1   0   2   -0.16    0.64 
   1   0  -2    0.21    0.50 
  -1   0  -2    0.33    0.73 
  -1   0  -2    0.66    0.74 
  -1   0  -2    1.09    0.75 
  -1   0  -2    0.55    0.81 
   1   0   2   -0.37    0.61 
   1   0   2   -0.33    0.85 
   1   0   2    0.47    0.64 
   1   0   2    0.18    0.62 
   1   0   2    0.66    0.63 
  -1   0  -2    0.16    0.66 
   1   0   2    0.24    0.58 
   1   0   2   -0.98    0.69 
  -1   0  -2    0.41    0.64 
  -1   0  -2    0.62    0.70 
  -1   0  -2   -0.03    0.50 
  -1   0  -2    0.64    0.58 
   1   0   2   -0.14    0.83 
  -1   0  -2   -0.66    0.64 
   1   0   2   -0.91    0.60 
  -1   0  -2   -0.83    0.64 
   1   0   2    0.39    0.40 
   1   0   2    0.59    0.91 
   1   0   2   -0.32    0.85 
  -1   0  -2    0.04    0.53 
  -1   0  -2    0.30    0.64 
   1   0   2   -0.08    0.78 
   1   0   2    0.80    0.96 
   1   0   2   -0.13    0.78 
   1   0   2   -0.90    0.65 
  -1   0  -2    0.78    0.86 
  -1   0  -2   -0.40    0.54 
   1   0   2   -0.87    0.60 
  -2   0  -2   54.44    3.04 
  -2   0  -2   41.24    3.48 
   2   0   2   48.67    2.95 
   2   0   2   49.75    3.41 
  -2   0  -2   48.40    3.13 
   2   0   2   54.64    3.47 
   2   0   2   41.62    2.73 
  -2   0  -2   47.20    2.77 
   2   0   2   55.60    3.59 
  -2   0  -2   48.58    3.71 
  -2   0  -2   50.58    3.60 
  -2   0  -2   44.98    3.21 
  -2   0  -2   48.00    3.49 
  -2   0  -2   50.01    3.44 
   2   0   2   44.62    3.76 
  -2   0  -2   53.38    3.58 
   2   0   2   48.93    3.65 
   2   0   2   55.95    3.80 
   2   0   2   48.46    2.99 
  -2   0  -2   49.18    3.14 
  -2   0  -2   49.89    2.89 
   2   0   2   45.32    3.60 
   2   0   2   51.95    3.63 
  -2   0  -2   46.74    3.29 
   2   0   2   47.68    3.24 
  -2   0  -2   48.74    2.19 
  -2   0  -2   51.22    3.55 
  -2   0  -2   45.74    3.50 
   2   0   2   46.49    3.66 
  -2   0  -2   50.51    3.38 
   2   0   2   45.67    3.14 
   2   0   2   45.72    3.01 
   2   0   2   45.13    3.46 
  -2   0  -2   47.79    3.01 
   2   0   2   50.28    3.70 
  -2   0  -2   51.10    3.88 
   2   0   2   48.85    3.20 
  -2   0  -2   50.77    2.92 
  -3   0  -2    0.06    0.94 
  -3   0  -2   -1.32    0.73 
  -3   0  -2   -0.10    1.02 
   3   0   2    0.49    1.30 
   3   0   2    0.63    1.49 
   3   0   2   -0.16    1.10 
  -3   0  -2   -0.58    0.83 
  -3   0  -2   -2.54    1.15 
   3   0   2   -2.04    1.14 
   3   0   2    0.91    0.90 
  -3   0  -2    0.33    0.82 
  -3   0  -2   -0.50    1.22 
   3   0   2    0.86    1.51 
   3   0   2   -0.23    0.90 
  -3   0  -2    1.60    1.27 
   3   0   2    2.82    1.40 
   3   0   2    0.95    1.45 
  -3   0  -2    0.10    0.54 
   3   0   2   -0.41    1.25 
  -3   0  -2   -0.68    0.73 
  -3   0  -2    1.67    1.56 
  -3   0  -2    0.87    1.12 
   3   0   2    2.74    1.62 
  -3   0  -2    1.08    1.27 
   3   0   2   -0.54    0.99 
  -3   0  -2   -0.03    1.25 
  -3   0  -2   -0.70    0.89 
   3   0   2    0.06    1.08 
  -3   0  -2   -0.18    1.66 
   3   0   2   -0.50    0.90 
   4   0   2  148.47    7.93 
   4   0   2  153.40    9.01 
   4   0   2  153.13    8.43 
   4   0   2  149.14    8.03 
   4   0   2  150.57    8.69 
   4   0   2  144.37    7.34 
  -4   0  -2  146.55    8.25 
  -4   0  -2  147.55    6.15 
  -4   0  -2  161.22    9.43 
   4   0   2  147.43    7.53 
   4   0   2  149.21    8.86 
  -4   0  -2  142.39    7.69 
  -4   0  -2  162.78    7.61 
  -4   0  -2  143.94    7.38 
  -4   0  -2  146.28    7.02 
   4   0   2  135.36    8.70 
  -4   0  -2  147.87    7.43 
  -4   0  -2  140.03    7.94 
   4   0   2  154.29    9.16 
  -4   0  -2  148.79    9.07 
  -4   0  -2  151.08    8.24 
  -4   0  -2  151.59    8.65 
  -4   0  -2  153.15    7.75 
   4   0   2  149.39    8.84 
  -5   0  -2    1.02    1.05 
   5   0   2   -0.72    1.74 
   5   0   2    2.72    2.17 
  -5   0  -2    1.30    1.83 
   5   0   2   -2.09    1.76 
   5   0   2    1.91    2.24 
  -5   0  -2    1.84    2.10 
  -5   0  -2    1.09    1.51 
  -5   0  -2    0.33    1.36 
  -5   0  -2    1.29    1.38 
   5   0   2    1.08    1.86 
  -5   0  -2    0.61    0.73 
   5   0   2    0.07    1.66 
  -5   0  -2   -2.66    1.49 
   5   0   2   -1.10    1.61 
   5   0   2   -0.29    1.42 
   5   0   2    0.24    1.34 
   5   0   2   -0.66    1.09 
   6   0   2   46.22    6.62 
   6   0   2   47.94    5.65 
  -6   0  -2   54.37    7.49 
   6   0   2   47.74    6.78 
   6   0   2   50.53    5.32 
   6   0   2   48.03    6.98 
   6   0   2   48.06    6.12 
  -6   0  -2   47.97    5.87 
   6   0   2   54.76    6.97 
  -6   0  -2   51.38    6.47 
  -6   0  -2   56.88    5.84 
   6   0   2   47.77    5.80 
  -6   0  -2   50.51    6.97 
  -6   0  -2   43.96    5.58 
  -6   0  -2   47.30    3.89 
  -6   0  -2   49.51    4.01 
  -6   0  -2   48.53    3.13 
   6   0   2   47.94    6.98 
   6   0   2   52.40    6.88 
  -7   0  -2   -0.76    1.96 
   7   0   2   -1.24    2.42 
   7   0   2   -2.82    1.68 
  -7   0  -2   -0.86    2.40 
  -7   0  -2    0.53    2.74 
   7   0   2   -0.52    2.38 
  -7   0  -2    0.00    1.08 
   7   0   2   -1.66    1.95 
   7   0   2   -2.27    2.36 
   7   0   2    1.88    3.18 
   7   0   2    1.71    2.06 
   7   0   2   -2.27    2.14 
  -7   0  -2    1.24    1.67 
   7   0   2   -0.68    2.33 
  -7   0  -2   -0.61    1.62 
   7   0   2    2.55    2.74 
  -7   0  -2   -2.06    1.76 
  -7   0  -2   -1.46    1.74 
   8   0   2   43.59    7.82 
  -8   0  -2   45.35    7.81 
   8   0   2   42.87    7.73 
  -8   0  -2   47.78    6.87 
   8   0   2   43.38    7.37 
   8   0   2   53.99    7.04 
   8   0   2   60.17    6.62 
   8   0   2   50.59    6.98 
  -8   0  -2   51.49    6.95 
   8   0   2   53.96    8.29 
  -8   0  -2   48.19    6.49 
  -8   0  -2   51.44    8.85 
  -8   0  -2   53.37    7.73 
   8   0   2   41.99    7.56 
   8   0   2   41.18    7.68 
   8   0   2   55.25    7.91 
   9   0   2   -2.30    2.79 
   9   0   2   -4.77    2.19 
   9   0   2   -3.32    2.92 
   9   0   2   -3.04    2.09 
   9   0   2   -0.74    3.07 
  -9   0  -2   -3.54    2.13 
  -9   0  -2    1.98    2.98 
  -9   0  -2   -0.68    2.32 
   9   0   2   -5.08    2.51 
  -9   0  -2   -1.59    3.02 
   9   0   2    3.23    3.68 
   9   0   2   -5.36    2.37 
  -9   0  -2   -2.47    2.40 
  10   0   2   67.89   10.31 
  10   0   2   44.36    8.73 
 -10   0  -2   42.03    8.94 
  10   0   2   54.29    9.98 
 -10   0  -2   75.41   11.52 
  10   0   2   46.17    9.61 
  10   0   2   49.05    8.11 
  10   0   2   54.89    9.90 
 -10   0  -2   56.43    9.04 
  10   0   2   68.54   11.46 
  10  -1  -2   15.67    5.89 
 -10  -1   2    8.17    4.91 
  10  -1  -2   22.36    6.37 
 -10  -1   2   17.67    5.46 
 -10  -1   2   10.20    5.12 
  10  -1  -2   17.97    5.96 
  10  -1  -2   13.79    5.32 
  10  -1  -2   13.30    5.65 
  10  -1  -2   21.32    6.06 
  10  -1  -2   18.55    5.74 
  10  -1  -2   20.42    6.77 
  10  -1  -2   24.70    7.19 
  10   1  -2   18.58    5.99 
  10   1  -2   24.47    6.69 
  10   1  -2   15.04    5.55 
  10   1  -2   11.82    5.32 
 -10   1   2   14.87    5.74 
  10   1  -2   17.56    6.68 
  10   1  -2   18.04    5.94 
 -10   1   2   10.92    4.18 
  10   1  -2   16.56    5.03 
 -10   1   2   23.79    6.86 
 -10   1   2   22.71    6.41 
  10   1  -2   20.99    6.65 
   9  -1  -2  131.91   10.53 
   9  -1  -2  147.65   12.07 
   9  -1  -2  150.50   14.98 
   9  -1  -2  181.02   14.00 
   9  -1  -2  135.60   13.07 
   9  -1  -2  159.90   13.39 
   9  -1  -2  162.37   13.09 
   9  -1  -2  148.26   15.11 
  -9  -1   2  132.29   11.16 
  -9  -1   2  134.19   14.49 
   9  -1  -2  154.85   14.61 
  -9  -1   2  168.09   13.76 
   9  -1  -2  123.04   12.88 
   9   1  -2  138.22   11.73 
   9   1  -2  145.39   10.75 
  -9   1   2  163.92   12.09 
   9   1  -2  159.26   14.96 
   9   1  -2  139.75   14.82 
   9   1  -2  134.66   14.22 
   9   1  -2  129.86   12.44 
  -9   1   2  148.24   11.20 
   9   1  -2  169.26   16.32 
  -9   1   2  151.63   15.11 
  -9   1   2  132.87   13.66 
   9   1  -2  147.74   12.55 
   9   1  -2  127.70   13.34 
  -9   1   2  169.42   16.44 
   8  -1  -2   13.25    3.94 
   8  -1  -2   13.61    4.32 
   8  -1  -2   16.09    5.02 
   8  -1  -2   14.05    4.83 
  -8  -1   2   11.86    4.98 
   8  -1  -2   25.20    6.01 
   8  -1  -2   15.75    4.72 
   8  -1  -2   11.66    4.17 
   8  -1  -2    8.68    3.62 
   8  -1  -2   18.20    5.18 
  -8  -1   2   19.96    4.66 
   8  -1  -2    5.84    3.66 
  -8  -1   2   15.55    5.31 
  -8  -1   2   19.78    4.83 
  -8  -1   2    9.47    3.04 
  -8   1   2   19.50    4.45 
   8   1  -2   13.76    5.09 
   8   1  -2   19.79    5.32 
   8   1  -2    6.54    3.63 
   8   1  -2   11.55    4.48 
  -8   1   2   15.77    3.94 
  -8   1   2   18.50    5.53 
   8   1  -2    8.02    2.78 
  -8   1   2   16.17    3.57 
  -8   1   2    5.72    3.44 
  -8   1   2   11.47    4.34 
   8   1  -2   18.84    4.57 
  -8   1   2   23.79    5.80 
  -8   1   2   12.22    3.26 
   8   1  -2   19.52    4.32 
   8   1  -2   13.67    4.95 
   8   1  -2   15.18    4.62 
   8   1  -2   12.49    4.29 
   7  -1  -2   72.86    9.05 
  -7  -1   2   77.62    8.06 
  -7  -1   2   76.63    7.03 
   7  -1  -2   83.58    9.68 
  -7  -1   2   78.78    9.65 
  -7  -1   2   74.03    9.48 
  -7  -1   2   65.55    4.77 
   7  -1  -2   75.46    8.46 
   7  -1  -2   62.74    4.54 
   7  -1  -2   66.65    7.95 
   7  -1  -2   64.76    8.63 
   7  -1  -2   62.59    8.00 
  -7  -1   2   75.97    7.79 
  -7  -1   2   71.14    5.49 
  -7  -1   2   68.77    4.76 
   7  -1  -2   73.87    8.96 
   7  -1  -2   76.77    9.34 
   7  -1  -2   62.66    7.72 
   7  -1  -2   69.93    7.51 
  -7   1   2   83.24    7.71 
   7   1  -2   72.17    8.64 
  -7   1   2   70.93    8.77 
   7   1  -2   71.75    8.92 
   7   1  -2   66.18    8.27 
   7   1  -2   73.67    5.85 
   7   1  -2   66.16    8.25 
   7   1  -2   59.72    8.03 
  -7   1   2   91.10   10.41 
  -7   1   2   68.04    8.08 
   7   1  -2   68.66    8.22 
   7   1  -2   88.32    8.16 
  -7   1   2   76.68    8.84 
  -7   1   2   72.79    7.04 
   7   1  -2   63.49    8.60 
  -7   1   2   68.24    7.63 
   7   1  -2   73.50    7.89 
   6  -1  -2    4.04    2.47 
  -6  -1   2    3.21    1.54 
  -6  -1   2    4.27    1.45 
   6  -1  -2    2.92    2.43 
  -6  -1   2    5.61    1.75 
  -6  -1   2    6.27    2.08 
   6  -1  -2    3.60    2.89 
  -6  -1   2    5.77    2.60 
   6  -1  -2    4.31    2.29 
   6  -1  -2    7.74    1.97 
  -6  -1   2    1.44    2.21 
  -6  -1   2    6.12    1.92 
   6  -1  -2    5.76    2.75 
  -6  -1   2    3.86    1.44 
   6  -1  -2    2.85    2.51 
  -6  -1   2    5.72    2.45 
   6  -1  -2    7.82    3.32 
  -6  -1   2    7.07    1.88 
  -6  -1   2    6.99    1.98 
  -6  -1   2    5.15    2.58 
   6  -1  -2    5.89    2.82 
   6  -1  -2   10.24    3.43 
  -6  -1   2    2.46    2.38 
   6  -1  -2    4.12    2.48 
   6   1  -2    8.36    3.14 
   6   1  -2    4.46    2.21 
   6   1  -2    2.27    1.68 
   6   1  -2    4.77    1.70 
  -6   1   2    6.00    2.72 
  -6   1   2    3.82    2.23 
  -6   1   2    5.56    3.03 
  -6   1   2    7.55    2.58 
   6   1  -2    0.33    2.36 
   6   1  -2    5.22    2.86 
  -6   1   2    2.10    2.34 
   6   1  -2    6.18    2.08 
   6   1  -2    3.87    2.69 
   6   1  -2   -0.13    1.85 
   6   1  -2    2.21    2.14 
  -6   1   2    3.16    2.03 
   5  -1  -2    7.88    2.64 
  -5  -1   2    6.31    1.55 
  -5  -1   2   10.56    2.69 
   5  -1  -2    9.35    2.97 
   5  -1  -2    9.80    3.02 
   5  -1  -2    5.81    2.44 
  -5  -1   2    8.72    1.98 
   5  -1  -2    9.52    2.81 
   5  -1  -2    9.84    3.04 
  -5  -1   2    7.88    1.58 
   5  -1  -2    5.33    2.59 
  -5  -1   2    5.79    1.87 
  -5  -1   2    7.91    1.73 
  -5  -1   2    6.30    2.37 
   5  -1  -2   12.08    2.81 
   5  -1  -2    6.73    2.61 
  -5  -1   2    9.43    1.91 
  -5  -1   2    6.32    1.82 
  -5  -1   2    8.72    1.63 
  -5  -1   2   10.69    1.87 
  -5  -1   2   13.23    3.66 
   5  -1  -2    3.62    1.89 
  -5  -1   2   10.92    3.29 
  -5   1   2    7.04    2.81 
   5   1  -2    9.52    3.32 
   5   1  -2    9.44    2.15 
   5   1  -2    5.92    2.12 
   5   1  -2    8.40    2.68 
   5   1  -2    7.88    2.69 
   5   1  -2    8.04    2.80 
  -5   1   2    6.89    2.17 
   5   1  -2    9.00    3.01 
  -5   1   2    7.53    2.64 
  -5   1   2    6.74    2.18 
  -5   1   2   11.76    3.26 
  -5   1   2    8.04    2.68 
  -5   1   2    5.18    2.02 
   5   1  -2    8.92    2.52 
   5   1  -2    7.84    2.06 
   5   1  -2    8.73    1.71 
  -4  -1   2   16.31    2.01 
  -4  -1   2   19.73    2.63 
  -4  -1   2   20.86    2.92 
   4  -1  -2   24.52    3.65 
  -4  -1   2   18.27    3.13 
   4  -1  -2   24.43    3.91 
  -4  -1   2   16.43    3.45 
   4  -1  -2   18.61    3.66 
  -4  -1   2   18.35    2.16 
  -4  -1   2   18.93    2.13 
  -4  -1   2   18.08    2.05 
  -4  -1   2   17.58    2.06 
   4  -1  -2   20.86    3.86 
  -4  -1   2   15.78    3.03 
  -4  -1   2   15.96    3.51 
   4  -1  -2   26.53    3.97 
  -4  -1   2   17.76    2.47 
  -4  -1   2   18.83    2.47 
  -4  -1   2   16.49    1.95 
   4  -1  -2   25.55    3.93 
   4   1  -2   21.16    2.13 
  -4   1   2   17.88    3.34 
   4   1  -2   22.24    3.88 
  -4   1   2   19.70    3.47 
   4   1  -2   24.02    3.78 
  -4   1   2   16.23    2.75 
  -4   1   2   14.24    3.06 
   4   1  -2   20.91    2.67 
   4   1  -2   19.61    2.62 
   4   1  -2   16.61    1.99 
   4   1  -2   16.63    3.28 
   4   1  -2   26.47    4.04 
   4   1  -2   22.29    3.32 
   4   1  -2   14.44    2.72 
  -4   1   2   17.24    2.77 
   3  -1  -2    4.01    1.70 
  -3  -1   2    6.16    1.57 
  -3  -1   2    6.44    2.14 
  -3  -1   2    4.61    0.89 
   3  -1  -2    4.59    1.89 
  -3  -1   2    4.91    1.69 
   3  -1  -2    6.21    1.60 
  -3  -1   2    5.17    1.27 
   3  -1  -2    3.61    1.86 
  -3  -1   2    5.53    1.64 
  -3  -1   2    6.13    1.22 
   3  -1  -2    7.86    2.17 
   3  -1  -2    4.41    1.79 
   3  -1  -2    3.01    1.61 
   3  -1  -2    6.56    2.10 
  -3  -1   2    5.40    0.98 
  -3  -1   2    6.16    1.76 
   3  -1  -2    5.53    1.96 
  -3  -1   2    7.51    2.30 
  -3  -1   2    8.66    2.21 
  -3  -1   2    5.17    1.50 
  -3  -1   2    2.31    1.85 
  -3  -1   2    7.64    2.02 
  -3  -1   2    5.82    1.37 
  -3  -1   2    5.60    2.08 
   3  -1  -2    7.53    2.47 
  -3  -1   2    6.96    1.13 
  -3   1   2    4.86    1.64 
   3   1  -2    6.99    1.70 
   3   1  -2    5.70    0.94 
   3   1  -2    5.39    1.60 
   3   1  -2    7.23    2.28 
  -3   1   2    5.01    2.34 
  -3   1   2    2.64    1.66 
   3   1  -2    6.07    1.45 
  -3   1   2    2.85    1.56 
  -3   1   2    3.89    1.71 
  -3   1   2    5.64    1.89 
  -3   1   2    3.18    1.34 
   3   1  -2    6.61    1.74 
   3   1  -2    7.72    2.26 
   3   1  -2    4.50    1.57 
   3   1  -2    5.93    1.91 
  -3   1   2    4.97    1.53 
  -3   1   2    6.60    1.88 
  -3   1   2    5.25    1.60 
   3   1  -2    4.57    1.10 
  -3   1   2    3.07    1.67 
   3   1  -2    5.01    1.74 
  -3   1   2    4.71    1.97 
  -3   1   2    5.08    1.69 
   3   1  -2    5.83    1.56 
  -3   1   2    5.96    1.99 
  -3   1   2    4.09    1.49 
   3   1  -2    5.08    1.89 
  -3   1   2    5.47    1.84 
   3   1  -2    6.01    1.07 
   3   1  -2    1.48    1.55 
   2  -1  -2    6.45    1.59 
  -2  -1   2    8.76    2.04 
   2  -1  -2    4.78    1.30 
  -2  -1   2    4.93    1.44 
  -2  -1   2    7.74    1.82 
  -2  -1   2    6.34    1.25 
   2  -1  -2    5.01    1.42 
   2  -1  -2    5.12    1.55 
   2  -1  -2    4.32    1.44 
   2  -1  -2    8.25    1.63 
   2  -1  -2    6.55    1.56 
  -2  -1   2    9.58    1.59 
   2  -1  -2    8.23    1.75 
  -2  -1   2    7.64    1.50 
  -2  -1   2    6.51    1.18 
   2  -1  -2    6.15    1.61 
   2  -1  -2    4.81    1.84 
  -2  -1   2    5.76    1.37 
  -2  -1   2    7.34    0.99 
  -2  -1   2    4.02    1.48 
  -2  -1   2    4.17    1.38 
  -2  -1   2    8.43    1.76 
  -2  -1   2    7.25    1.33 
  -2  -1   2    6.41    1.70 
  -2  -1   2    8.46    0.84 
   2  -1  -2    6.31    1.64 
   2  -1  -2    5.18    1.31 
   2  -1  -2    5.44    1.53 
   2  -1  -2    7.12    1.60 
  -2  -1   2    6.13    1.36 
   2   1  -2    9.41    1.40 
   2   1  -2    7.41    1.59 
  -2   1   2    7.36    1.56 
  -2   1   2    5.35    1.57 
  -2   1   2    7.27    1.65 
  -2   1   2   10.76    1.94 
   2   1  -2    7.10    0.96 
   2   1  -2    5.22    1.35 
   2   1  -2    6.63    1.59 
   2   1  -2   11.78    2.02 
  -2   1   2    6.67    1.48 
  -2   1   2    7.38    1.64 
   2   1  -2    7.69    1.25 
   2   1  -2    8.38    1.31 
  -2   1   2    8.57    1.66 
  -2   1   2    5.18    1.59 
  -2   1   2    7.03    1.71 
   2   1  -2    6.76    1.43 
  -2   1   2    6.51    1.57 
  -2   1   2    5.55    1.40 
   2   1  -2    7.40    1.70 
  -2   1   2    4.21    1.34 
   2   1  -2    6.85    1.33 
  -2   1   2    5.86    1.35 
   2   1  -2    5.53    1.77 
  -2   1   2    4.19    1.57 
   2   1  -2    6.52    1.47 
  -2   1   2    7.22    1.55 
   2   1  -2    8.40    1.82 
   2   1  -2    5.65    1.45 
  -2   1   2    8.35    1.87 
   2   1  -2    7.82    2.01 
   2   1  -2    8.87    2.03 
  -2   1   2    7.54    1.73 
  -2   1   2    7.26    1.53 
   1  -1  -2   13.75    1.88 
  -1  -1   2   13.32    1.23 
   1  -1  -2   13.90    2.13 
   1  -1  -2   12.77    1.49 
  -1  -1   2   18.40    2.12 
   1  -1  -2   14.37    1.88 
   1  -1  -2   12.52    1.75 
  -1  -1   2   12.15    1.51 
  -1  -1   2   11.92    1.37 
  -1  -1   2   11.70    1.95 
  -1  -1   2   16.62    1.72 
  -1  -1   2   12.51    1.78 
  -1  -1   2   14.63    1.62 
  -1  -1   2   16.04    2.31 
   1  -1  -2   14.49    1.79 
   1  -1  -2   15.14    1.19 
   1  -1  -2   13.72    1.72 
   1  -1  -2   11.23    1.59 
   1  -1  -2   15.26    1.86 
  -1  -1   2   14.95    1.78 
  -1  -1   2   14.17    1.77 
   1  -1  -2   15.44    1.73 
   1  -1  -2   13.50    1.81 
   1  -1  -2   14.65    1.89 
   1  -1  -2   12.06    1.31 
  -1  -1   2   17.10    2.19 
  -1  -1   2   12.87    1.31 
  -1  -1   2   15.04    2.04 
  -1   1   2    9.50    1.67 
   1   1  -2   16.11    1.81 
  -1   1   2   14.41    1.78 
   1   1  -2   10.39    1.77 
  -1   1   2   14.84    1.79 
   1   1  -2   14.43    1.94 
  -1   1   2   10.18    1.53 
  -1   1   2   10.25    1.12 
   1   1  -2   16.39    2.21 
  -1   1   2   15.02    2.12 
  -1   1   2   17.51    2.13 
   1   1  -2   18.18    2.52 
   1   1  -2   12.93    2.15 
   1   1  -2   12.86    1.86 
   1   1  -2   13.59    2.12 
   1   1  -2   13.57    1.56 
   1   1  -2   14.05    0.93 
   1   1  -2   15.91    1.81 
  -1   1   2   12.99    1.90 
   1   1  -2   14.08    0.97 
   1   1  -2   12.73    1.00 
  -1   1   2   15.21    1.43 
   1   1  -2   12.99    1.76 
   1   1  -2   16.72    1.80 
  -1   1   2   14.64    1.85 
   1   1  -2   13.95    1.60 
   1   1  -2   13.50    1.97 
   1   1  -2   14.80    1.22 
  -1   1   2   12.94    1.49 
   1   1  -2   12.79    1.87 
  -1   1   2   11.14    1.59 
  -1   1   2   14.26    1.80 
  -1   1   2   15.61    1.85 
  -1   1   2   10.89    1.59 
   0  -1   2   14.05    1.74 
   0  -1   2   18.05    2.06 
   0  -1   2   16.19    2.22 
   0  -1   2   16.65    1.90 
   0  -1  -2   17.06    1.62 
   0  -1   2   15.67    1.20 
   0  -1   2   17.00    1.64 
   0  -1   2   13.54    2.90 
   0  -1  -2   19.39    1.90 
   0  -1   2   16.53    2.00 
   0  -1   2   16.78    1.58 
   0  -1   2   17.77    1.96 
   0  -1   2   13.89    1.76 
   0  -1   2   15.61    1.56 
   0  -1   2   15.74    1.72 
   0  -1  -2   16.50    1.78 
   0  -1   2   16.24    1.77 
   0  -1  -2   13.79    2.60 
   0  -1  -2   15.92    1.96 
   0   1   2   17.47    1.78 
   0   1  -2   14.47    1.77 
   0   1   2   17.30    1.90 
   0   1   2   15.18    1.40 
   0   1   2   13.80    2.64 
   0   1  -2   17.22    1.89 
   0   1   2   16.00    1.53 
   0   1   2   13.12    1.55 
   0   1  -2   15.52    1.66 
   0   1  -2   18.23    2.06 
   0   1  -2   17.92    1.95 
   0   1  -2   16.53    1.89 
   0   1   2   13.77    1.59 
   0   1   2   16.60    1.02 
   0   1  -2   19.74    1.53 
   0   1  -2   13.38    1.52 
   0   1  -2   17.85    1.84 
   0   1   2   16.75    1.51 
   0   1   2   13.90    1.60 
   0   1  -2   16.71    1.66 
   0   1   2   14.42    1.50 
   0   1   2   15.08    1.41 
   0   1   2   13.09    2.61 
   0   1   2   15.53    0.93 
   0   1  -2    9.16    2.79 
   0   1  -2   15.56    1.95 
   0   1  -2   21.87    2.54 
   0   1   2   14.31    1.52 
   0   1  -2   15.83    2.46 
   0   1  -2   16.42    1.27 
   0   1   2   15.02    2.21 
  -1  -1  -2  215.95    9.01 
   1  -1   2  194.54    8.84 
   1  -1   2  203.35    8.90 
   1  -1   2  218.23    9.37 
   1  -1   2  215.87    8.98 
   1  -1   2  207.24    8.91 
  -1  -1  -2  211.96    8.07 
   1  -1   2  218.59    8.93 
   1  -1   2  202.67    8.91 
   1  -1   2  217.51    9.00 
  -1  -1  -2  214.35    8.61 
   1  -1   2  213.59    8.89 
  -1  -1  -2  206.97    8.69 
   1  -1   2  222.34    8.95 
  -1  -1  -2  211.35    9.23 
   1  -1   2  216.66    9.25 
  -1  -1  -2  214.61    8.33 
   1  -1   2  203.50    8.41 
   1  -1   2  212.63    8.80 
  -1  -1  -2  224.09    9.54 
  -1  -1  -2  211.68    7.94 
  -1  -1  -2  220.26    8.34 
   1  -1   2  203.30    9.69 
  -1  -1  -2  213.28    8.40 
   1  -1   2  202.42    8.78 
  -1  -1  -2  216.08    8.09 
  -1  -1  -2  208.86    8.51 
   1  -1   2  209.86    8.27 
  -1  -1  -2  213.39    8.00 
  -1  -1  -2  205.18    8.42 
  -1  -1  -2  213.90    8.64 
   1   1   2  214.82    8.28 
   1   1   2  197.05    8.37 
  -1   1  -2  216.60    8.31 
  -1   1  -2  211.17    8.41 
   1   1   2  216.09    8.11 
  -1   1  -2  208.43    8.86 
  -1   1  -2  225.67    8.93 
   1   1   2  211.13    7.70 
  -1   1  -2  202.81    9.03 
   1   1   2  207.92    8.48 
   1   1   2  220.09    8.65 
  -1   1  -2  206.59    8.44 
  -1   1  -2  213.09    8.91 
   1   1   2  200.83    8.72 
   1   1   2  215.40    8.94 
   1   1   2  216.68    7.60 
   1   1   2  211.43    8.09 
   1   1   2  219.69    8.46 
  -1   1  -2  211.68    9.64 
  -1   1  -2  217.65    8.94 
   1   1   2  205.87    7.48 
  -1   1  -2  209.12    9.01 
   1   1   2  217.68    9.05 
  -1   1  -2  205.07    8.81 
   1   1   2  217.81    8.13 
  -1   1  -2  208.28    8.88 
  -1   1  -2  207.10    8.92 
   1   1   2  211.75    8.50 
  -1   1  -2  209.57    8.97 
  -1   1  -2  211.94    8.83 
   1   1   2  212.91    9.45 
   1   1   2  205.87    8.50 
   1   1   2  200.44    8.69 
  -1   1  -2  219.13    8.95 
   1   1   2  208.40    7.70 
  -1   1  -2  208.72    8.79 
   1   1   2  208.42    8.31 
  -1   1  -2  214.90    9.24 
  -1   1  -2  207.93    9.15 
  -1   1  -2  207.49    8.30 
   1   1   2  207.07    7.48 
  -2  -1  -2   26.01    3.19 
  -2  -1  -2   22.35    2.84 
  -2  -1  -2   27.86    3.12 
   2  -1   2   27.29    3.33 
   2  -1   2   22.61    2.82 
   2  -1   2   25.63    2.78 
   2  -1   2   28.21    3.07 
  -2  -1  -2   26.10    2.74 
  -2  -1  -2   25.68    2.42 
  -2  -1  -2   23.96    2.02 
   2  -1   2   27.74    3.16 
  -2  -1  -2   28.05    2.64 
   2  -1   2   27.00    2.94 
   2  -1   2   23.88    2.95 
   2  -1   2   24.83    1.93 
   2  -1   2   23.27    2.96 
   2  -1   2   22.49    3.07 
  -2  -1  -2   32.01    3.50 
   2  -1   2   32.18    3.08 
   2  -1   2   25.61    3.16 
  -2  -1  -2   30.07    1.91 
  -2  -1  -2   25.15    3.48 
   2  -1   2   25.31    2.89 
  -2  -1  -2   25.00    1.65 
   2  -1   2   22.19    2.64 
  -2  -1  -2   25.31    1.62 
  -2  -1  -2   28.38    2.86 
  -2  -1  -2   28.98    2.87 
  -2  -1  -2   25.05    1.85 
  -2  -1  -2   26.22    1.64 
   2  -1   2   28.27    3.92 
   2  -1   2   22.40    2.65 
  -2  -1  -2   31.13    3.40 
  -2  -1  -2   24.26    1.28 
  -2  -1  -2   27.31    1.56 
   2  -1   2   26.25    2.96 
  -2  -1  -2   26.88    2.57 
  -2   1  -2   26.14    2.94 
   2   1   2   21.35    3.18 
   2   1   2   29.39    2.81 
   2   1   2   27.53    2.12 
   2   1   2   26.08    1.90 
   2   1   2   27.00    1.65 
  -2   1  -2   29.28    3.23 
   2   1   2   26.05    1.28 
  -2   1  -2   25.04    2.87 
   2   1   2   25.35    2.12 
   2   1   2   27.21    1.84 
   2   1   2   29.46    1.76 
   2   1   2   25.53    2.62 
   2   1   2   25.07    1.87 
  -2   1  -2   28.21    2.99 
   2   1   2   27.02    2.76 
  -2   1  -2   21.32    2.77 
  -2   1  -2   29.94    3.33 
   2   1   2   25.32    2.44 
  -2   1  -2   23.97    2.71 
   2   1   2   24.68    2.68 
  -2   1  -2   23.62    3.00 
   2   1   2   27.45    3.29 
   2   1   2   25.00    2.81 
  -2   1  -2   26.59    2.86 
  -2   1  -2   19.97    2.59 
  -2   1  -2   26.53    1.82 
  -2   1  -2   27.50    2.97 
  -2   1  -2   23.85    3.04 
  -2   1  -2   29.05    3.07 
   2   1   2   19.74    2.59 
  -2   1  -2   27.91    3.32 
  -2   1  -2   29.87    3.23 
  -2   1  -2   24.65    2.70 
   2   1   2   19.97    2.72 
   2   1   2   31.35    3.55 
  -2   1  -2   28.14    3.38 
  -2   1  -2   25.83    1.92 
  -2   1  -2   24.38    2.67 
  -3  -1  -2  461.93   16.82 
   3  -1   2  477.78   18.78 
   3  -1   2  482.18   19.39 
   3  -1   2  461.55   18.73 
  -3  -1  -2  461.84   17.22 
  -3  -1  -2  476.94   18.51 
  -3  -1  -2  452.30   17.85 
  -3  -1  -2  467.33   16.48 
   3  -1   2  464.09   18.81 
   3  -1   2  445.95   18.55 
  -3  -1  -2  452.59   16.76 
  -3  -1  -2  411.17   17.82 
  -3  -1  -2  469.43   19.54 
  -3  -1  -2  480.53   18.63 
   3  -1   2  467.36   18.89 
  -3  -1  -2  462.06   16.78 
  -3  -1  -2  454.25   18.19 
   3  -1   2  453.90   19.18 
   3  -1   2  484.33   18.87 
  -3  -1  -2  459.67   16.47 
   3  -1   2  481.95   18.61 
  -3  -1  -2  447.35   19.18 
   3  -1   2  453.34   19.23 
  -3  -1  -2  466.42   18.02 
   3  -1   2  466.56   19.20 
  -3  -1  -2  454.01   16.59 
  -3  -1  -2  469.84   18.26 
  -3  -1  -2  485.08   17.88 
   3  -1   2  449.50   19.41 
   3   1   2  448.08   17.78 
   3   1   2  459.57   18.66 
  -3   1  -2  486.69   18.71 
   3   1   2  457.37   16.67 
  -3   1  -2  456.32   18.70 
  -3   1  -2  442.85   18.79 
   3   1   2  471.66   18.17 
   3   1   2  476.00   19.12 
   3   1   2  466.66   16.50 
  -3   1  -2  460.94   18.63 
  -3   1  -2  470.26   18.45 
  -3   1  -2  453.02   18.80 
   3   1   2  453.12   19.34 
  -3   1  -2  458.94   16.60 
  -3   1  -2  462.81   19.23 
   3   1   2  469.08   17.64 
  -3   1  -2  441.64   18.58 
   3   1   2  457.51   17.91 
   3   1   2  466.85   19.50 
  -3   1  -2  442.00   18.30 
   3   1   2  463.36   17.73 
  -3   1  -2  450.13   18.67 
   3   1   2  449.36   16.81 
  -3   1  -2  456.77   18.14 
  -3   1  -2  456.54   19.64 
   3   1   2  471.00   18.23 
   3   1   2  457.37   17.22 
   3   1   2  454.13   18.54 
   4  -1   2   19.45    3.36 
   4  -1   2   19.89    3.87 
   4  -1   2   14.09    2.79 
  -4  -1  -2   23.56    2.77 
   4  -1   2   25.74    4.18 
   4  -1   2   15.35    3.29 
  -4  -1  -2   23.25    2.44 
   4  -1   2   21.24    3.71 
  -4  -1  -2   22.71    3.47 
  -4  -1  -2   25.28    3.55 
  -4  -1  -2   21.39    3.08 
   4  -1   2   21.62    3.52 
  -4  -1  -2   15.71    2.65 
  -4  -1  -2   23.01    2.40 
  -4  -1  -2   19.30    3.05 
   4  -1   2   15.41    3.38 
  -4  -1  -2   21.86    1.75 
  -4  -1  -2   19.11    2.41 
  -4  -1  -2   20.37    3.94 
  -4  -1  -2   20.67    3.16 
  -4  -1  -2   21.34    2.35 
  -4  -1  -2   22.04    1.71 
   4  -1   2   22.77    3.56 
  -4  -1  -2   25.46    4.17 
   4   1   2   21.75    4.03 
   4   1   2   13.31    3.02 
  -4   1  -2   21.49    3.75 
   4   1   2   20.11    3.34 
  -4   1  -2   20.62    2.44 
   4   1   2   22.75    3.91 
   4   1   2   20.61    3.78 
  -4   1  -2   15.68    3.04 
   4   1   2   22.59    3.02 
   4   1   2   23.97    3.68 
   4   1   2   15.00    2.68 
   4   1   2   19.15    2.57 
  -4   1  -2   17.20    2.72 
   4   1   2   20.21    2.85 
  -4   1  -2   22.90    4.25 
  -4   1  -2   19.51    3.43 
   4   1   2   23.13    2.42 
   4   1   2   19.53    3.13 
  -4   1  -2   26.02    4.08 
   4   1   2   14.16    2.06 
  -4   1  -2   17.37    3.13 
  -5  -1  -2  302.87   12.93 
   5  -1   2  288.04   14.53 
  -5  -1  -2  267.77   11.48 
   5  -1   2  265.74   14.41 
  -5  -1  -2  267.37   10.34 
  -5  -1  -2  280.10   11.47 
   5  -1   2  267.57   14.58 
  -5  -1  -2  272.78   11.72 
   5  -1   2  259.99   13.51 
  -5  -1  -2  269.61   12.63 
  -5  -1  -2  269.23   13.29 
   5  -1   2  271.55   14.47 
  -5  -1  -2  246.01   12.76 
   5  -1   2  275.42   13.22 
  -5  -1  -2  274.98   10.48 
   5  -1   2  293.13   14.72 
  -5  -1  -2  248.73   14.37 
   5  -1   2  260.24   13.75 
   5  -1   2  274.64   13.54 
  -5  -1  -2  247.44   14.20 
  -5  -1  -2  256.60   11.44 
  -5  -1  -2  263.09   10.40 
  -5  -1  -2  270.62   11.82 
  -5   1  -2  273.47   12.47 
  -5   1  -2  276.41   13.56 
   5   1   2  271.49   12.69 
  -5   1  -2  249.22   13.99 
   5   1   2  277.38   11.56 
   5   1   2  289.23   14.34 
  -5   1  -2  269.36   14.83 
  -5   1  -2  266.52   13.45 
   5   1   2  279.55   12.34 
   5   1   2  274.29   13.52 
   5   1   2  294.21   14.86 
   5   1   2  276.31   14.66 
  -5   1  -2  285.67   14.42 
   5   1   2  267.64   13.86 
   5   1   2  250.16   11.42 
   5   1   2  274.86   14.25 
  -5   1  -2  266.48   11.39 
   5   1   2  268.32   13.16 
  -5   1  -2  263.22   12.97 
   6  -1   2   26.13    5.27 
  -6  -1  -2   33.11    4.97 
  -6  -1  -2   29.20    2.30 
   6  -1   2   38.12    5.70 
  -6  -1  -2   27.77    4.33 
   6  -1   2   36.18    6.04 
  -6  -1  -2   36.84    2.51 
  -6  -1  -2   30.01    4.29 
   6  -1   2   34.63    5.24 
  -6  -1  -2   32.23    2.39 
   6  -1   2   26.70    5.28 
  -6  -1  -2   33.35    6.05 
  -6  -1  -2   32.96    6.12 
  -6  -1  -2   31.21    4.00 
   6  -1   2   28.30    5.30 
   6  -1   2   37.53    5.67 
   6  -1   2   28.97    5.45 
  -6  -1  -2   29.22    4.19 
   6  -1   2   25.76    4.31 
   6   1   2   27.03    5.13 
   6   1   2   35.12    5.06 
  -6   1  -2   43.34    4.78 
   6   1   2   34.03    6.00 
   6   1   2   26.35    4.33 
   6   1   2   30.11    5.33 
  -6   1  -2   30.70    5.04 
   6   1   2   36.25    6.03 
  -6   1  -2   36.82    5.06 
   6   1   2   33.53    4.43 
   6   1   2   34.70    3.90 
  -6   1  -2   47.16    6.80 
  -6   1  -2   29.70    4.90 
  -6   1  -2   35.11    5.66 
  -6   1  -2   36.80    6.48 
   6   1   2   30.09    5.02 
   6   1   2   44.31    6.37 
  -6   1  -2   30.93    4.12 
  -7  -1  -2  200.19   14.22 
   7  -1   2  205.15   14.09 
  -7  -1  -2  211.46   11.52 
  -7  -1  -2  188.98   13.64 
   7  -1   2  189.43   13.21 
   7  -1   2  191.46   13.41 
   7  -1   2  197.27   11.90 
   7  -1   2  201.76   12.47 
  -7  -1  -2  188.87   10.52 
  -7  -1  -2  216.25   11.72 
   7  -1   2  222.90   14.22 
   7  -1   2  229.55   13.77 
   7  -1   2  194.98   13.69 
  -7  -1  -2  199.66   11.83 
   7  -1   2  187.02   12.49 
   7   1   2  213.94   11.44 
  -7   1  -2  219.81   14.66 
   7   1   2  206.15   11.91 
   7   1   2  190.51   13.50 
   7   1   2  191.97   13.14 
  -7   1  -2  207.48   10.92 
   7   1   2  228.26   13.37 
   7   1   2  219.06   14.28 
   7   1   2  194.75   13.48 
  -7   1  -2  203.23   10.88 
  -7   1  -2  207.14   13.59 
   7   1   2  204.23   10.32 
   7   1   2  202.69   13.34 
  -7   1  -2  181.66   12.02 
  -7   1  -2  202.66   12.41 
  -7   1  -2  192.01   13.28 
   7   1   2  211.39   12.60 
  -7   1  -2  204.04   11.90 
   8  -1   2   54.44    7.83 
   8  -1   2   37.57    7.13 
   8  -1   2   47.31    6.92 
   8  -1   2   47.01    6.45 
   8  -1   2   51.87    8.19 
  -8  -1  -2   40.57    7.83 
  -8  -1  -2   33.48    6.99 
   8  -1   2   47.91    8.14 
  -8  -1  -2   40.86    5.69 
  -8  -1  -2   56.25    6.90 
   8  -1   2   56.47    8.44 
   8  -1   2   36.94    7.70 
  -8  -1  -2   58.38    6.95 
  -8  -1  -2   52.65    7.55 
   8  -1   2   39.31    7.60 
  -8   1  -2   45.54    6.87 
   8   1   2   44.78    7.61 
  -8   1  -2   37.45    7.20 
   8   1   2   33.26    7.00 
   8   1   2   36.77    7.06 
  -8   1  -2   38.07    7.95 
   8   1   2   41.02    5.91 
   8   1   2   44.74    6.73 
   8   1   2   32.55    6.85 
  -8   1  -2   36.42    6.88 
  -8   1  -2   59.88    7.49 
   8   1   2   52.32    7.96 
   8   1   2   41.53    6.30 
   8   1   2   43.99    7.81 
  -8   1  -2   48.32    7.12 
   9  -1   2  133.87   14.82 
   9  -1   2  153.71   15.38 
  -9  -1  -2  124.34   14.25 
   9  -1   2  155.42   16.88 
   9  -1   2  165.05   13.05 
   9  -1   2  144.20   15.00 
   9  -1   2  114.30   11.86 
  -9  -1  -2  138.82   15.33 
   9  -1   2  134.88   13.00 
   9  -1   2  134.06   16.60 
   9  -1   2  133.97   14.55 
   9  -1   2  130.96   14.55 
  -9  -1  -2  137.09   11.00 
  -9   1  -2  140.25   15.32 
  -9   1  -2  139.91   11.06 
   9   1   2  128.48   13.96 
   9   1   2  117.24   12.07 
   9   1   2  112.85   12.82 
   9   1   2  124.41   14.45 
   9   1   2  128.39   13.28 
   9   1   2  124.34   14.12 
  -9   1  -2  146.30   13.53 
  -9   1  -2  124.00   14.04 
  -9   1  -2  131.38   13.29 
   9   1   2  115.82   13.52 
   9   1   2  139.12   12.41 
  10  -1   2    7.62    5.53 
  10  -1   2   -0.40    4.22 
 -10  -1  -2   13.48    5.82 
  10  -1   2   12.39    5.24 
  10  -1   2    9.38    5.16 
 -10  -1  -2    4.57    3.81 
  10  -1   2    8.56    4.96 
  10  -1   2    7.80    6.44 
 -10  -1  -2   12.63    5.64 
  10  -1   2    2.13    5.64 
  10  -1   2   11.28    5.57 
  10  -1   2   11.45    5.53 
  10   1   2    0.27    4.44 
  10   1   2    6.84    5.39 
  10   1   2    4.64    4.29 
 -10   1  -2    2.08    4.09 
 -10   1  -2    3.96    3.61 
 -10   1  -2    6.89    4.94 
 -10   1  -2   11.14    4.87 
  10   1   2    4.86    4.36 
  10   1   2    8.46    5.21 
  10   1   2   17.31    5.93 
  10  -2  -2   31.57    7.66 
  10  -2  -2   32.75    7.17 
  10  -2  -2   27.55    7.43 
  10  -2  -2   37.31    7.95 
 -10  -2   2   36.89    8.66 
  10  -2  -2   19.91    6.22 
 -10  -2   2   40.79    9.24 
  10  -2  -2   30.15    7.80 
  10  -2  -2   26.97    7.40 
  10  -2  -2   16.65    5.49 
  10   2  -2   26.69    7.63 
 -10   2   2   32.56    6.90 
  10   2  -2   32.42    7.68 
  10   2  -2   32.27    7.84 
  10   2  -2   31.16    7.18 
 -10   2   2   23.10    6.56 
  10   2  -2   22.94    7.03 
  10   2  -2   34.85    7.45 
 -10   2   2   30.26    8.00 
  10   2  -2   37.23    7.63 
 -10   2   2   23.44    6.97 
 -10   2   2   26.02    6.73 
   9  -2  -2   20.37    5.01 
   9  -2  -2   24.54    6.10 
   9  -2  -2   36.92    7.09 
  -9  -2   2   21.37    6.44 
   9  -2  -2   19.69    6.17 
  -9  -2   2   19.96    6.22 
   9  -2  -2   22.40    5.61 
   9  -2  -2   28.39    7.47 
   9  -2  -2   24.77    6.93 
   9  -2  -2   32.79    7.47 
   9  -2  -2   20.46    6.14 
  -9  -2   2   32.96    6.15 
  -9   2   2   26.45    7.09 
  -9   2   2   18.71    4.85 
  -9   2   2   21.86    6.37 
   9   2  -2   23.14    5.35 
  -9   2   2   41.71    7.56 
   9   2  -2   29.46    6.51 
   9   2  -2   31.72    7.00 
  -9   2   2   24.27    6.40 
  -9   2   2   27.78    6.12 
   9   2  -2   29.31    7.15 
   9   2  -2   29.88    6.96 
   9   2  -2   30.32    6.66 
   9   2  -2   16.92    5.87 
   9   2  -2   15.61    5.76 
   8  -2  -2   39.56    6.86 
  -8  -2   2   28.86    6.70 
   8  -2  -2   33.64    7.01 
   8  -2  -2   27.02    5.45 
   8  -2  -2   46.21    8.11 
   8  -2  -2   36.40    6.96 
   8  -2  -2   35.36    6.52 
   8  -2  -2   36.35    7.11 
   8  -2  -2   49.69    8.47 
  -8  -2   2   34.53    7.22 
  -8  -2   2   40.96    6.21 
  -8  -2   2   45.57    6.51 
   8  -2  -2   39.70    6.43 
   8  -2  -2   35.70    6.67 
  -8   2   2   25.10    5.57 
  -8   2   2   35.23    6.55 
  -8   2   2   37.01    7.24 
   8   2  -2   29.09    6.00 
   8   2  -2   50.29    8.31 
  -8   2   2   34.05    5.55 
   8   2  -2   39.67    7.14 
   8   2  -2   33.96    6.59 
  -8   2   2   37.37    5.89 
   8   2  -2   28.24    5.90 
  -8   2   2   37.83    6.87 
  -8   2   2   54.44    8.72 
   8   2  -2   35.69    5.58 
   8   2  -2   43.05    6.42 
  -8   2   2   39.78    6.34 
   8   2  -2   32.76    6.47 
   8   2  -2   25.56    5.79 
  -7  -2   2   26.62    6.18 
   7  -2  -2   24.79    5.41 
   7  -2  -2   33.09    3.85 
  -7  -2   2   31.25    6.14 
   7  -2  -2   26.04    5.51 
   7  -2  -2   36.24    5.82 
  -7  -2   2   25.32    4.54 
  -7  -2   2   29.42    3.91 
   7  -2  -2   28.49    5.85 
   7  -2  -2   36.87    6.61 
   7  -2  -2   22.49    5.20 
  -7  -2   2   34.73    4.09 
   7  -2  -2   30.31    6.39 
  -7  -2   2   27.02    4.77 
  -7  -2   2   38.63    5.30 
   7  -2  -2   34.39    6.18 
   7  -2  -2   33.24    5.47 
  -7   2   2   42.13    6.98 
   7   2  -2   38.57    4.36 
  -7   2   2   37.94    6.06 
   7   2  -2   29.47    5.83 
   7   2  -2   33.29    6.16 
   7   2  -2   24.93    4.26 
  -7   2   2   28.89    5.96 
  -7   2   2   25.76    4.80 
  -7   2   2   22.71    5.32 
   7   2  -2   23.76    5.42 
   7   2  -2   29.78    5.83 
  -7   2   2   32.32    5.24 
   7   2  -2   31.09    3.75 
   7   2  -2   32.44    5.91 
  -7   2   2   30.46    5.76 
   7   2  -2   36.69    5.97 
   7   2  -2   28.81    4.82 
   6  -2  -2  103.31    9.51 
   6  -2  -2  109.42    8.90 
   6  -2  -2   94.49    9.69 
  -6  -2   2   82.95    5.80 
   6  -2  -2   84.55    8.10 
  -6  -2   2   83.66    4.00 
  -6  -2   2   88.69    5.01 
   6  -2  -2   96.65    9.76 
  -6  -2   2   81.35    9.48 
   6  -2  -2   80.51    8.82 
  -6  -2   2   71.19    8.78 
  -6  -2   2   73.19    7.18 
   6  -2  -2   99.16    9.45 
   6  -2  -2   83.54    6.83 
  -6  -2   2   90.78    5.57 
  -6  -2   2   84.52    6.39 
  -6  -2   2   83.12    4.74 
  -6  -2   2   81.93    4.24 
   6  -2  -2   90.78    9.34 
  -6  -2   2   87.17    6.88 
   6  -2  -2   87.15    5.64 
  -6  -2   2   88.39    5.64 
   6  -2  -2   82.66    9.05 
  -6   2   2   79.99    8.83 
   6   2  -2   84.37    8.35 
  -6   2   2   86.02    8.19 
   6   2  -2   76.53    8.48 
  -6   2   2   79.20    8.08 
   6   2  -2   83.29    9.03 
   6   2  -2   75.84    5.30 
   6   2  -2   79.71    6.18 
   6   2  -2   82.65    4.70 
  -6   2   2   97.42    7.78 
   6   2  -2   77.17    8.28 
  -6   2   2   92.64    6.93 
   6   2  -2   78.22    5.49 
  -6   2   2   88.21    9.31 
   6   2  -2   84.35    6.64 
   6   2  -2   81.38    6.87 
  -6   2   2   92.10    9.43 
   5  -2  -2  179.44   10.57 
  -5  -2   2  175.85    9.63 
  -5  -2   2  167.05    6.58 
  -5  -2   2  172.41    7.02 
  -5  -2   2  161.28    7.87 
  -5  -2   2  162.05    9.42 
  -5  -2   2  171.15    9.16 
   5  -2  -2  161.50    9.96 
  -5  -2   2  169.03    8.81 
  -5  -2   2  176.82   10.86 
   5  -2  -2  173.82    9.33 
   5  -2  -2  181.12   10.24 
  -5  -2   2  173.35    9.22 
  -5  -2   2  161.52   10.78 
  -5  -2   2  173.74    7.24 
   5  -2  -2  165.07   10.45 
   5  -2  -2  159.11   10.55 
   5  -2  -2  164.04   10.88 
   5  -2  -2  151.01   10.28 
   5  -2  -2  179.06    8.68 
   5  -2  -2  172.20   10.74 
  -5  -2   2  166.72    8.30 
   5  -2  -2  179.98   10.32 
   5  -2  -2  171.09   10.39 
  -5   2   2  171.90    9.82 
   5   2  -2  179.78    9.69 
  -5   2   2  150.47   10.14 
   5   2  -2  176.45    7.27 
   5   2  -2  162.68    8.48 
   5   2  -2  187.86   10.97 
   5   2  -2  171.12   10.54 
   5   2  -2  170.45    8.13 
  -5   2   2  160.07   10.19 
  -5   2   2  174.07   10.64 
   5   2  -2  166.68   10.41 
   5   2  -2  176.10    8.64 
  -5   2   2  167.58   10.63 
  -5   2   2  161.17    9.46 
   5   2  -2  165.50    9.80 
   5   2  -2  175.21    9.14 
  -5   2   2  166.32   10.03 
   4  -2  -2  349.55   16.28 
   4  -2  -2  339.41   14.27 
  -4  -2   2  320.92   15.74 
   4  -2  -2  336.32   15.79 
   4  -2  -2  347.54   15.27 
   4  -2  -2  356.20   14.40 
  -4  -2   2  351.38   14.00 
   4  -2  -2  338.37   16.01 
  -4  -2   2  357.43   16.47 
   4  -2  -2  337.20   16.47 
  -4  -2   2  299.68   14.02 
   4  -2  -2  351.10   15.67 
  -4  -2   2  339.67   14.24 
   4  -2  -2  326.51   15.39 
  -4  -2   2  337.67   13.02 
   4  -2  -2  330.93   15.77 
  -4  -2   2  328.77   12.01 
  -4  -2   2  334.48   12.45 
  -4  -2   2  326.83   14.43 
  -4  -2   2  329.72   14.91 
  -4  -2   2  362.16   14.69 
  -4  -2   2  328.14   12.14 
   4  -2  -2  367.66   16.24 
  -4  -2   2  347.87   14.13 
   4  -2  -2  349.64   15.87 
   4   2  -2  321.12   14.76 
   4   2  -2  343.96   12.42 
  -4   2   2  329.67   15.77 
  -4   2   2  345.94   15.19 
  -4   2   2  348.62   15.70 
   4   2  -2  322.93   12.34 
   4   2  -2  345.79   13.51 
   4   2  -2  332.68   14.71 
  -4   2   2  356.59   15.37 
   4   2  -2  329.36   15.75 
   4   2  -2  334.95   14.41 
  -4   2   2  323.11   15.77 
   4   2  -2  340.12   14.04 
   4   2  -2  321.39   15.77 
   4   2  -2  354.78   14.42 
  -4   2   2  318.08   15.56 
   4   2  -2  333.71   15.94 
  -4   2   2  322.77   15.31 
  -3  -2   2  448.56   17.29 
   3  -2  -2  436.23   18.99 
  -3  -2   2  447.92   17.75 
  -3  -2   2  444.24   18.22 
  -3  -2   2  438.25   17.54 
   3  -2  -2  443.85   19.02 
   3  -2  -2  435.76   18.82 
   3  -2  -2  465.44   18.11 
  -3  -2   2  456.98   17.10 
  -3  -2   2  455.76   16.16 
  -3  -2   2  451.76   17.91 
   3  -2  -2  455.91   18.74 
  -3  -2   2  468.67   18.90 
  -3  -2   2  456.69   17.88 
  -3  -2   2  466.40   20.82 
   3  -2  -2  440.44   18.78 
   3  -2  -2  474.35   18.99 
  -3  -2   2  439.71   18.85 
   3  -2  -2  419.64   18.65 
  -3  -2   2  438.88   19.22 
  -3  -2   2  453.34   16.45 
   3  -2  -2  441.81   19.41 
   3  -2  -2  443.99   18.83 
   3  -2  -2  462.68   18.02 
   3   2  -2  448.57   17.82 
   3   2  -2  455.07   17.94 
  -3   2   2  424.41   18.33 
  -3   2   2  439.92   17.82 
   3   2  -2  440.01   16.95 
   3   2  -2  469.02   16.57 
   3   2  -2  440.72   18.86 
   3   2  -2  450.96   19.28 
   3   2  -2  459.97   18.53 
   3   2  -2  449.07   15.74 
  -3   2   2  441.37   18.84 
  -3   2   2  460.95   18.63 
   3   2  -2  451.91   17.61 
   3   2  -2  460.27   17.75 
  -3   2   2  438.36   18.59 
  -3   2   2  458.91   18.82 
   3   2  -2  463.62   18.17 
   3   2  -2  454.94   18.86 
  -3   2   2  440.02   18.45 
   3   2  -2  451.75   16.57 
  -3   2   2  439.01   19.08 
  -2  -2   2  418.82   16.11 
  -2  -2   2  434.13   16.49 
  -2  -2   2  399.92   16.00 
   2  -2  -2  413.44   15.73 
   2  -2  -2  416.68   16.84 
   2  -2  -2  398.45   17.13 
  -2  -2   2  405.44   16.69 
  -2  -2   2  438.75   15.91 
   2  -2  -2  409.34   16.40 
  -2  -2   2  424.45   16.74 
   2  -2  -2  410.89   16.66 
  -2  -2   2  399.46   17.15 
  -2  -2   2  403.57   17.37 
   2  -2  -2  425.91   17.14 
   2  -2  -2  396.80   16.83 
  -2  -2   2  415.05   15.36 
  -2  -2   2  415.01   14.46 
   2  -2  -2  411.20   16.43 
   2  -2  -2  413.24   16.34 
   2  -2  -2  395.68   16.29 
  -2  -2   2  401.52   16.74 
   2  -2  -2  406.16   16.75 
   2  -2  -2  400.82   16.74 
  -2  -2   2  406.44   15.13 
  -2  -2   2  410.94   16.21 
   2  -2  -2  391.84   16.57 
  -2  -2   2  412.32   14.88 
   2   2  -2  398.96   16.72 
  -2   2   2  397.33   16.41 
   2   2  -2  406.26   16.26 
  -2   2   2  413.94   16.33 
  -2   2   2  415.35   16.56 
   2   2  -2  405.01   15.53 
  -2   2   2  422.79   17.21 
   2   2  -2  408.69   15.61 
   2   2  -2  426.48   16.37 
   2   2  -2  416.81   15.57 
   2   2  -2  418.70   17.50 
   2   2  -2  402.50   16.71 
   2   2  -2  423.21   16.55 
  -2   2   2  402.46   16.69 
   2   2  -2  405.16   16.60 
  -2   2   2  395.49   16.59 
   2   2  -2  417.13   15.49 
  -2   2   2  420.52   16.72 
   2   2  -2  409.44   15.68 
  -2   2   2  416.89   16.68 
  -2   2   2  421.90   16.78 
   2   2  -2  419.09   17.60 
   2   2  -2  411.79   16.74 
  -2   2   2  406.85   16.81 
   2   2  -2  406.51   14.50 
   2   2  -2  402.73   16.22 
  -2   2   2  407.78   17.04 
  -2   2   2  408.03   16.67 
  -2   2   2  409.18   15.62 
  -2   2   2  415.82   16.61 
  -2   2   2  417.72   16.22 
  -1  -2   2  150.70    5.93 
   1  -2  -2  146.15    5.64 
   1  -2  -2  147.14    7.26 
  -1  -2   2  145.72    7.50 
  -1  -2   2  153.89    6.26 
  -1  -2   2  151.71    6.44 
   1  -2  -2  152.32    7.00 
   1  -2  -2  149.98    6.45 
   1  -2  -2  148.98    6.55 
   1  -2  -2  152.12    7.24 
  -1  -2   2  143.83    6.96 
   1  -2  -2  149.83    7.15 
   1  -2  -2  159.01    7.04 
   1  -2  -2  150.60    6.83 
  -1  -2   2  147.76    7.82 
  -1  -2   2  167.19    7.45 
  -1  -2   2  152.60    7.20 
   1  -2  -2  146.41    7.03 
  -1  -2   2  159.93    6.83 
   1  -2  -2  153.13    6.67 
   1  -2  -2  146.61    7.29 
   1  -2  -2  158.93    7.56 
   1  -2  -2  149.95    6.12 
  -1  -2   2  162.84    7.85 
  -1  -2   2  152.12    7.01 
  -1  -2   2  142.76    7.91 
  -1   2   2  153.92    7.08 
   1   2  -2  142.76    7.05 
   1   2  -2  157.57    7.19 
  -1   2   2  142.76    7.19 
  -1   2   2  150.33    7.29 
   1   2  -2  146.88    6.04 
  -1   2   2  155.25    5.70 
  -1   2   2  149.72    7.14 
   1   2  -2  145.04    7.89 
   1   2  -2  146.23    7.19 
   1   2  -2  157.57    6.21 
   1   2  -2  141.04    7.26 
   1   2  -2  151.23    7.60 
  -1   2   2  153.40    5.90 
   1   2  -2  150.00    7.20 
  -1   2   2  163.36    7.68 
  -1   2   2  151.87    6.72 
  -1   2   2  164.15    7.54 
   1   2  -2  144.62    6.19 
   1   2  -2  146.92    7.40 
  -1   2   2  153.74    8.15 
   1   2  -2  152.84    6.30 
   1   2  -2  144.71    6.33 
  -1   2   2  137.27    6.47 
   1   2  -2  145.80    6.80 
  -1   2   2  156.66    6.77 
   1   2  -2  150.85    6.40 
   1   2  -2  154.12    7.29 
  -1   2   2  150.62    7.44 
  -1   2   2  152.28    6.87 
   1   2  -2  149.67    8.27 
   1   2  -2  154.05    7.22 
   1   2  -2  152.29    8.06 
  -1   2   2  146.41    7.35 
  -1   2   2  154.24    7.36 
   0  -2   2   97.65    4.29 
   0  -2   2   95.44    5.36 
   0  -2  -2   93.42    4.95 
   0  -2  -2   94.54    4.93 
   0  -2   2   92.74    4.98 
   0  -2   2   88.08    5.23 
   0  -2  -2   93.15    4.37 
   0  -2   2   95.53    5.28 
   0  -2  -2   92.87    5.16 
   0  -2   2  102.92    6.10 
   0  -2  -2   97.95    4.83 
   0  -2   2   88.32    5.06 
   0  -2  -2   93.54    4.82 
   0  -2  -2   91.20    4.55 
   0  -2  -2  107.97    6.51 
   0  -2   2   65.23    7.46 
   0  -2  -2   91.53    4.14 
   0  -2  -2   93.23    4.39 
   0  -2   2   93.54    4.54 
   0  -2  -2   90.32    4.60 
   0  -2  -2   93.28    4.23 
   0  -2   2   87.18    4.67 
   0  -2   2   94.22    4.06 
   0  -2  -2  102.10    4.29 
   0  -2  -2   93.30    3.87 
   0   2   2   93.69    4.05 
   0   2   2   91.53    4.33 
   0   2  -2   90.21    4.54 
   0   2  -2   97.48    5.13 
   0   2   2   88.81    4.83 
   0   2   2   96.21    4.82 
   0   2  -2   99.64    5.21 
   0   2  -2   87.73    5.05 
   0   2   2   97.92    4.60 
   0   2   2  103.62    4.27 
   0   2   2   95.44    3.86 
   0   2   2   82.32    5.71 
   0   2   2   86.38    3.71 
   0   2  -2   77.03    7.07 
   0   2  -2   88.70    5.71 
   0   2   2   83.72    4.66 
   0   2   2   93.71    3.91 
   0   2  -2   85.31    4.89 
   0   2   2   96.59    4.47 
   0   2   2   88.88    4.06 
   0   2  -2   91.10    5.16 
   0   2   2   90.37    4.86 
   0   2   2   91.29    6.71 
   0   2  -2   90.11    4.62 
   0   2   2   82.49    4.49 
   0   2   2   94.34    4.39 
   0   2  -2   93.01    5.09 
   0   2   2   92.18    4.87 
   0   2  -2  102.10    4.92 
   0   2  -2   98.34    4.67 
   0   2   2   90.64    5.00 
   0   2   2   92.25    5.28 
   0   2  -2   90.41    5.18 
   0   2  -2   89.73    5.15 
   0   2  -2   96.00    4.41 
   0   2  -2   89.10    5.81 
   0   2  -2   91.27    5.46 
  -1  -2  -2   36.63    1.77 
   1  -2   2   38.86    2.09 
   1  -2   2   38.53    3.71 
  -1  -2  -2   37.59    2.76 
   1  -2   2   35.23    3.62 
   1  -2   2   40.53    3.27 
   1  -2   2   43.09    3.41 
  -1  -2  -2   34.24    2.67 
   1  -2   2   32.11    3.21 
  -1  -2  -2   40.38    2.92 
   1  -2   2   32.33    3.32 
   1  -2   2   33.81    2.76 
   1  -2   2   38.20    2.90 
   1  -2   2   33.45    3.18 
  -1  -2  -2   40.75    2.61 
  -1  -2  -2   33.59    3.71 
   1  -2   2   36.26    2.76 
  -1  -2  -2   35.43    2.55 
  -1  -2  -2   36.71    2.47 
  -1  -2  -2   35.52    2.04 
  -1  -2  -2   35.85    2.25 
   1  -2   2   39.09    3.66 
   1  -2   2   34.52    4.35 
   1  -2   2   35.95    4.59 
  -1  -2  -2   34.96    3.46 
   1  -2   2   38.02    3.95 
   1  -2   2   35.67    2.37 
   1  -2   2   41.00    4.13 
   1  -2   2   35.30    3.57 
  -1  -2  -2   41.26    3.16 
  -1   2  -2   35.13    3.51 
   1   2   2   39.10    2.27 
  -1   2  -2   40.26    3.08 
   1   2   2   36.79    1.84 
   1   2   2   34.35    2.44 
   1   2   2   39.32    2.27 
  -1   2  -2   40.82    4.74 
   1   2   2   34.80    2.44 
  -1   2  -2   39.24    2.12 
   1   2   2   46.92    4.72 
   1   2   2   37.58    1.54 
  -1   2  -2   36.72    3.58 
   1   2   2   29.83    2.41 
   1   2   2   37.83    2.57 
  -1   2  -2   33.76    3.90 
  -1   2  -2   32.18    3.29 
  -1   2  -2   32.06    3.54 
   1   2   2   36.66    2.02 
  -1   2  -2   31.61    3.04 
  -1   2  -2   38.68    3.49 
  -1   2  -2   42.60    4.10 
   1   2   2   38.23    1.82 
  -1   2  -2   39.30    3.65 
   1   2   2   35.62    1.74 
  -1   2  -2   34.08    3.44 
  -1   2  -2   42.25    3.91 
   1   2   2   35.28    2.68 
   1   2   2   38.58    3.63 
   1   2   2   39.82    2.89 
  -1   2  -2   38.08    3.70 
   1   2   2   38.85    2.88 
   1   2   2   40.75    4.00 
   1   2   2   35.42    2.83 
   1   2   2   39.99    3.14 
   1   2   2   33.75    2.51 
   1   2   2   36.19    1.89 
  -1   2  -2   32.14    3.19 
  -1   2  -2   26.34    3.12 
   1   2   2   38.06    2.29 
  -2  -2  -2  106.04    5.41 
   2  -2   2  112.96    5.47 
   2  -2   2  105.60    6.38 
   2  -2   2  109.90    6.68 
  -2  -2  -2  114.98    5.86 
  -2  -2  -2  107.33    5.43 
   2  -2   2  101.60    6.38 
   2  -2   2  100.00    7.10 
  -2  -2  -2  112.91    5.59 
  -2  -2  -2  105.05    6.13 
   2  -2   2  109.46    5.79 
   2  -2   2  107.68    5.67 
  -2  -2  -2  103.86    4.82 
  -2  -2  -2  102.23    5.50 
  -2  -2  -2  115.39    5.50 
   2  -2   2  102.04    6.03 
   2  -2   2   97.46    6.18 
   2  -2   2   99.58    6.04 
   2  -2   2  101.49    5.41 
   2  -2   2  107.54    6.34 
   2  -2   2  113.60    6.56 
  -2  -2  -2  101.44    4.03 
   2  -2   2   96.80    5.88 
   2  -2   2  104.58    6.55 
  -2  -2  -2  106.64    6.55 
  -2  -2  -2  103.28    5.28 
   2  -2   2  107.77    6.22 
   2   2   2   95.08    5.30 
   2   2   2  114.66    6.50 
   2   2   2  103.92    5.81 
  -2   2  -2   90.83    6.11 
   2   2   2  102.62    4.48 
   2   2   2   99.76    4.35 
  -2   2  -2  100.99    6.15 
  -2   2  -2  112.35    6.31 
   2   2   2  112.87    5.45 
  -2   2  -2   99.77    6.08 
   2   2   2  100.61    5.52 
  -2   2  -2  108.58    6.23 
   2   2   2  104.73    4.50 
  -2   2  -2  118.33    5.59 
   2   2   2  109.66    5.63 
  -2   2  -2   92.77    6.07 
  -2   2  -2  100.29    5.32 
  -2   2  -2   97.03    6.19 
  -2   2  -2   92.21    5.96 
  -2   2  -2  101.80    6.15 
  -2   2  -2   92.91    6.15 
  -2   2  -2  101.15    6.04 
   2   2   2  105.86    4.86 
   2   2   2  109.14    5.63 
   2   2   2  107.37    5.20 
   2   2   2  112.53    6.53 
   2   2   2  104.74    5.27 
  -2   2  -2  109.25    5.47 
   2   2   2  107.88    6.08 
  -2   2  -2  110.09    5.66 
   2   2   2  106.63    5.84 
  -2   2  -2  106.52    6.92 
   2   2   2  121.53    7.15 
   2   2   2  103.47    4.99 
   2   2   2  109.44    4.23 
   3  -2   2    0.57    1.45 
  -3  -2  -2   -1.33    0.90 
   3  -2   2    1.57    1.81 
   3  -2   2    0.99    1.15 
  -3  -2  -2    0.38    0.87 
   3  -2   2    0.48    1.19 
  -3  -2  -2    1.52    1.09 
   3  -2   2   -0.42    1.70 
   3  -2   2   -0.52    1.59 
  -3  -2  -2    0.83    1.03 
  -3  -2  -2    0.56    1.04 
  -3  -2  -2    0.88    1.56 
   3  -2   2    1.13    2.32 
  -3  -2  -2    0.70    0.90 
  -3  -2  -2    1.23    0.96 
   3  -2   2    0.62    1.68 
  -3  -2  -2    1.06    1.21 
   3  -2   2   -1.61    1.34 
   3  -2   2    0.97    1.67 
  -3  -2  -2    2.50    1.83 
   3  -2   2   -0.09    1.68 
  -3  -2  -2    0.08    1.07 
   3  -2   2   -0.63    1.77 
  -3  -2  -2    0.89    0.81 
   3  -2   2   -0.91    1.58 
   3  -2   2   -0.67    1.10 
   3   2   2    0.81    0.78 
   3   2   2    4.40    2.17 
  -3   2  -2    0.38    1.52 
   3   2   2    0.99    0.70 
   3   2   2    0.83    0.60 
  -3   2  -2    1.13    1.34 
  -3   2  -2    1.82    1.75 
   3   2   2    1.80    1.32 
   3   2   2   -1.12    1.64 
   3   2   2    0.59    1.39 
  -3   2  -2    2.04    2.25 
  -3   2  -2   -1.75    1.37 
   3   2   2    0.50    1.10 
  -3   2  -2    0.47    1.38 
   3   2   2    1.33    1.09 
   3   2   2   -1.11    0.88 
   3   2   2   -0.02    1.12 
  -3   2  -2    0.20    1.03 
  -3   2  -2    0.86    1.31 
   3   2   2    0.03    0.82 
   3   2   2    0.42    1.14 
  -3   2  -2    0.46    0.97 
  -3   2  -2    0.31    1.14 
   3   2   2    1.43    1.81 
   3   2   2    0.82    0.90 
   4  -2   2   47.58    5.64 
  -4  -2  -2   62.43    3.73 
   4  -2   2   44.76    3.28 
   4  -2   2   51.75    6.02 
   4  -2   2   49.85    5.51 
   4  -2   2   61.42    6.77 
  -4  -2  -2   52.98    3.94 
   4  -2   2   60.31    6.37 
   4  -2   2   45.66    6.68 
  -4  -2  -2   53.43    3.76 
  -4  -2  -2   54.65    5.27 
   4  -2   2   59.44    6.60 
  -4  -2  -2   56.12    6.27 
  -4  -2  -2   50.09    3.29 
   4  -2   2   46.36    4.95 
   4  -2   2   41.79    5.25 
   4  -2   2   44.59    5.42 
  -4  -2  -2   54.30    3.96 
  -4  -2  -2   53.90    4.81 
  -4  -2  -2   50.63    6.03 
  -4  -2  -2   49.29    3.95 
  -4  -2  -2   48.06    2.76 
  -4   2  -2   52.73    5.60 
  -4   2  -2   52.55    3.58 
   4   2   2   50.00    3.37 
  -4   2  -2   48.05    5.09 
   4   2   2   46.30    4.69 
  -4   2  -2   57.61    6.02 
   4   2   2   51.73    3.30 
   4   2   2   48.86    2.86 
  -4   2  -2   40.34    5.11 
  -4   2  -2   47.92    5.39 
   4   2   2   55.31    6.43 
  -4   2  -2   57.87    6.88 
  -4   2  -2   64.81    6.65 
   4   2   2   53.50    5.61 
   4   2   2   50.34    5.97 
   4   2   2   49.31    3.63 
   4   2   2   43.17    4.53 
   4   2   2   55.97    3.79 
   4   2   2   52.92    2.52 
   4   2   2   61.61    4.87 
   4   2   2   53.75    5.47 
   4   2   2   52.73    4.24 
   4   2   2   52.33    3.59 
  -5  -2  -2   18.24    3.32 
  -5  -2  -2   16.37    3.06 
   5  -2   2   12.63    3.21 
  -5  -2  -2   12.98    3.61 
   5  -2   2   15.08    4.21 
   5  -2   2   14.16    3.82 
   5  -2   2   22.62    5.39 
  -5  -2  -2   15.52    1.68 
  -5  -2  -2   15.72    2.96 
  -5  -2  -2    5.43    2.67 
   5  -2   2   10.92    3.08 
  -5  -2  -2   11.78    2.32 
  -5  -2  -2   17.97    2.17 
   5  -2   2   20.21    4.47 
  -5  -2  -2   14.47    1.69 
  -5  -2  -2   15.36    1.83 
  -5  -2  -2   14.81    1.96 
   5  -2   2   11.23    3.12 
   5  -2   2   11.48    3.40 
  -5  -2  -2   15.09    2.20 
   5  -2   2   10.78    3.09 
   5  -2   2   14.49    3.68 
   5   2   2   18.52    2.12 
   5   2   2    8.61    2.71 
  -5   2  -2   17.36    2.22 
   5   2   2   14.96    2.54 
   5   2   2   15.56    3.16 
  -5   2  -2   14.70    3.47 
   5   2   2   18.78    3.62 
   5   2   2   13.92    3.82 
   5   2   2    9.22    3.26 
  -5   2  -2   14.31    3.40 
   5   2   2   14.32    2.34 
  -5   2  -2   16.04    3.25 
   5   2   2   13.15    1.64 
   5   2   2   15.76    4.08 
  -5   2  -2   17.28    4.19 
   5   2   2   18.55    3.39 
  -5   2  -2   17.63    3.77 
   5   2   2   11.77    2.41 
  -5   2  -2   13.44    3.52 
   5   2   2   16.37    2.03 
  -5   2  -2   15.63    3.54 
   6  -2   2    3.04    2.74 
   6  -2   2    4.90    3.21 
   6  -2   2   -0.48    2.04 
   6  -2   2   -1.15    1.98 
  -6  -2  -2    1.54    1.84 
  -6  -2  -2    1.66    1.79 
   6  -2   2    3.72    2.87 
  -6  -2  -2    1.62    1.60 
  -6  -2  -2    3.04    2.28 
   6  -2   2    0.59    2.26 
  -6  -2  -2    3.52    2.79 
  -6  -2  -2    3.45    2.97 
   6  -2   2    5.30    3.82 
   6  -2   2   -1.52    2.35 
  -6  -2  -2    2.53    1.30 
  -6  -2  -2    3.95    1.65 
   6  -2   2    4.00    2.57 
   6  -2   2    1.93    2.21 
  -6   2  -2    4.57    2.60 
   6   2   2    0.35    1.89 
   6   2   2    2.12    2.70 
   6   2   2    0.81    1.97 
  -6   2  -2   -1.77    1.62 
   6   2   2    1.50    2.79 
   6   2   2   -1.80    1.76 
  -6   2  -2    4.23    2.55 
  -6   2  -2    4.47    2.48 
  -6   2  -2    3.76    2.69 
   6   2   2    3.04    1.74 
   6   2   2    1.24    1.12 
   6   2   2    0.97    2.61 
   6   2   2   -0.11    1.53 
   6   2   2    1.30    2.34 
  -6   2  -2   -0.04    2.30 
  -6   2  -2    1.54    2.69 
  -7  -2  -2    0.43    1.68 
   7  -2   2    6.64    3.65 
   7  -2   2    2.70    3.02 
   7  -2   2   10.05    4.14 
   7  -2   2   -0.21    3.01 
  -7  -2  -2    0.56    3.05 
   7  -2   2   10.05    3.80 
   7  -2   2    6.44    3.67 
  -7  -2  -2    0.73    2.36 
   7  -2   2    3.46    3.05 
   7  -2   2    1.20    2.85 
  -7  -2  -2    2.29    2.05 
   7  -2   2    1.92    2.58 
   7  -2   2    3.08    2.47 
  -7  -2  -2    5.61    2.71 
  -7   2  -2    7.93    3.46 
   7   2   2    5.30    3.45 
   7   2   2    2.11    2.39 
   7   2   2    6.42    3.32 
   7   2   2    0.84    2.73 
  -7   2  -2    5.74    2.88 
  -7   2  -2    4.06    2.98 
   7   2   2    5.98    3.84 
  -7   2  -2   -0.09    2.23 
   7   2   2    4.35    3.13 
  -7   2  -2    7.08    2.94 
   7   2   2    3.76    2.79 
  -7   2  -2    6.20    3.01 
  -7   2  -2    1.47    3.24 
   7   2   2    4.02    2.29 
   7   2   2    4.44    2.10 
  -7   2  -2    8.99    3.87 
   8  -2   2   27.29    6.63 
  -8  -2  -2   24.89    6.43 
   8  -2   2   36.08    6.85 
   8  -2   2   29.84    5.72 
   8  -2   2   22.37    5.97 
  -8  -2  -2   29.27    7.00 
   8  -2   2   23.74    6.93 
   8  -2   2   34.29    6.74 
   8  -2   2   31.66    6.68 
   8  -2   2   26.12    5.96 
  -8  -2  -2   20.80    4.49 
   8  -2   2   23.46    5.57 
   8  -2   2   22.25    5.77 
  -8   2  -2   21.73    4.47 
  -8   2  -2   29.46    5.92 
   8   2   2   18.26    4.67 
   8   2   2   25.84    6.21 
   8   2   2   25.66    5.48 
   8   2   2   35.41    5.41 
  -8   2  -2   27.67    6.17 
  -8   2  -2   28.91    5.79 
   8   2   2   47.56    8.55 
   8   2   2   46.25    7.76 
   8   2   2   22.75    5.67 
  -8   2  -2   29.75    5.21 
  -8   2  -2   25.06    5.57 
  -8   2  -2   43.17    7.99 
  -8   2  -2   24.16    6.25 
   8   2   2   31.60    6.88 
   9  -2   2   24.30    6.59 
   9  -2   2   13.89    5.37 
   9  -2   2   28.37    7.28 
   9  -2   2   21.10    5.71 
   9  -2   2   17.57    5.99 
  -9  -2  -2   19.66    4.59 
   9  -2   2   12.73    4.39 
   9  -2   2   12.12    5.73 
  -9  -2  -2   21.67    6.46 
   9  -2   2   24.98    6.46 
  -9  -2  -2   18.76    6.41 
   9  -2   2   15.53    5.89 
   9  -2   2    9.15    5.71 
   9   2   2   13.53    4.87 
  -9   2  -2   15.44    5.56 
   9   2   2    8.33    4.22 
  -9   2  -2   19.73    6.69 
   9   2   2    6.21    4.52 
  -9   2  -2   12.06    5.67 
   9   2   2   11.79    5.72 
  -9   2  -2   10.39    4.89 
  -9   2  -2   10.45    4.35 
   9   2   2   11.19    4.84 
  -9   2  -2   15.07    4.83 
   9   2   2    2.18    3.65 
  -9  -3   2   38.83    8.67 
   9  -3  -2   52.30    9.42 
   9  -3  -2   64.15    9.57 
   9  -3  -2   48.16    8.72 
   9  -3  -2   58.83    9.49 
   9  -3  -2   68.60    9.72 
   9  -3  -2   66.68   10.92 
   9  -3  -2   49.72   10.68 
  -9  -3   2   34.13    8.00 
   9  -3  -2   59.19    8.37 
   9  -3  -2   53.08    9.38 
   9   3  -2   58.48    9.66 
  -9   3   2   46.84    7.95 
   9   3  -2   51.83    8.82 
   9   3  -2   50.40    8.58 
  -9   3   2   52.11    8.33 
   9   3  -2   62.64    9.02 
  -9   3   2   51.51    8.09 
  -9   3   2   42.04    7.15 
  -9   3   2   38.42    8.28 
   9   3  -2   52.62    8.53 
   9   3  -2   62.45   10.06 
  -9   3   2   57.92    9.88 
  -9   3   2   53.21    9.57 
   8  -3  -2   57.04    8.26 
   8  -3  -2   72.70    9.97 
   8  -3  -2   48.95    8.17 
   8  -3  -2   91.57   11.15 
   8  -3  -2   74.64    9.42 
   8  -3  -2   84.84   10.29 
  -8  -3   2   67.95    9.79 
  -8  -3   2   60.34    9.56 
   8  -3  -2   81.52   10.71 
   8  -3  -2   67.84    8.02 
   8  -3  -2   65.11    9.19 
  -8  -3   2   77.69    7.92 
  -8   3   2   60.10    8.34 
  -8   3   2   80.42    9.10 
  -8   3   2   86.74   10.82 
   8   3  -2   64.65    9.52 
   8   3  -2   56.73    8.66 
  -8   3   2   66.15    8.30 
   8   3  -2   81.73   10.71 
   8   3  -2   81.05    9.71 
  -8   3   2   64.76    9.69 
  -8   3   2   82.28   10.50 
   8   3  -2   68.36    9.11 
  -8   3   2   62.53    8.60 
   8   3  -2   90.27    9.98 
   8   3  -2   71.31    7.94 
  -8   3   2   62.09    9.17 
   8   3  -2   59.58    8.49 
   7  -3  -2   10.09    4.11 
   7  -3  -2   18.70    3.39 
  -7  -3   2   10.45    2.91 
   7  -3  -2   10.47    4.11 
   7  -3  -2   17.65    5.00 
  -7  -3   2   12.51    3.00 
   7  -3  -2   24.30    5.72 
   7  -3  -2   11.91    4.44 
   7  -3  -2   15.44    4.65 
   7  -3  -2   11.37    4.14 
   7  -3  -2   12.31    4.52 
  -7  -3   2   13.09    4.33 
   7  -3  -2   10.40    3.34 
  -7  -3   2   10.80    4.45 
  -7   3   2    6.97    3.46 
  -7   3   2   16.31    4.33 
   7   3  -2   16.42    4.39 
  -7   3   2   18.03    4.41 
  -7   3   2   12.38    4.39 
   7   3  -2   15.79    4.75 
  -7   3   2    9.76    3.35 
   7   3  -2    7.06    3.87 
  -7   3   2    5.20    3.45 
   7   3  -2   16.42    5.15 
  -7   3   2   15.19    4.20 
   7   3  -2   13.05    4.55 
   7   3  -2   10.47    3.59 
   7   3  -2   20.17    3.69 
   7   3  -2    8.22    3.19 
  -7   3   2    7.89    3.85 
  -6  -3   2   27.50    2.85 
   6  -3  -2   24.06    4.92 
   6  -3  -2   18.05    4.46 
  -6  -3   2   14.40    4.10 
  -6  -3   2   20.14    5.02 
   6  -3  -2   27.13    5.33 
   6  -3  -2   26.34    3.86 
   6  -3  -2   28.53    5.42 
   6  -3  -2   22.28    4.86 
   6  -3  -2   25.56    5.16 
   6  -3  -2   22.67    3.88 
  -6  -3   2   20.19    3.45 
   6  -3  -2   21.43    4.95 
   6  -3  -2   18.33    4.91 
  -6  -3   2   20.31    3.46 
  -6  -3   2   26.45    4.04 
   6   3  -2   25.52    3.68 
   6   3  -2   18.49    4.70 
   6   3  -2   23.35    5.06 
  -6   3   2   18.72    4.20 
   6   3  -2   16.52    3.55 
   6   3  -2   25.25    2.90 
   6   3  -2   26.56    4.60 
  -6   3   2   17.84    4.17 
   6   3  -2   24.61    4.54 
   6   3  -2   22.63    3.59 
  -6   3   2   10.90    4.00 
   6   3  -2   21.56    4.92 
  -6   3   2   23.74    4.81 
  -6   3   2   22.45    5.03 
  -6   3   2   27.14    5.12 
  -6   3   2   20.22    4.63 
   5  -3  -2   -1.63    1.32 
   5  -3  -2    1.42    1.54 
   5  -3  -2    2.47    2.06 
   5  -3  -2    0.13    1.85 
  -5  -3   2    1.07    0.78 
   5  -3  -2    0.28    1.92 
  -5  -3   2    0.02    1.09 
   5  -3  -2    2.80    2.35 
   5  -3  -2    0.82    1.57 
   5  -3  -2    4.85    2.74 
  -5  -3   2    4.75    2.60 
  -5  -3   2   -0.51    1.80 
   5  -3  -2    1.78    2.06 
  -5  -3   2    2.41    1.52 
  -5  -3   2    2.62    1.43 
   5  -3  -2   -1.58    1.77 
  -5  -3   2    2.53    1.41 
   5  -3  -2    0.04    1.61 
  -5  -3   2    0.86    1.62 
   5   3  -2    1.45    0.70 
   5   3  -2    3.57    1.56 
   5   3  -2   -0.39    2.13 
  -5   3   2   -2.92    1.50 
  -5   3   2   -1.74    1.91 
  -5   3   2    0.51    1.90 
   5   3  -2    4.58    2.70 
  -5   3   2    0.15    2.27 
   5   3  -2    2.32    1.16 
   5   3  -2    2.98    1.45 
   5   3  -2    3.77    2.00 
  -5   3   2   -0.45    1.81 
   5   3  -2    2.65    2.44 
   5   3  -2    1.09    1.66 
   5   3  -2    1.18    1.74 
  -5   3   2   -2.29    1.57 
  -5   3   2    4.24    2.69 
   4  -3  -2   -1.51    1.24 
   4  -3  -2    2.97    1.93 
  -4  -3   2   -0.07    1.64 
   4  -3  -2    2.04    1.56 
   4  -3  -2    0.56    1.60 
  -4  -3   2    3.39    1.68 
   4  -3  -2    1.23    1.03 
  -4  -3   2    1.87    0.93 
  -4  -3   2    0.97    1.50 
   4  -3  -2    1.63    1.80 
   4  -3  -2   -1.73    1.50 
   4  -3  -2    0.71    1.82 
   4  -3  -2    3.08    2.21 
  -4  -3   2    2.72    1.79 
   4  -3  -2    0.65    1.86 
  -4  -3   2    2.01    1.07 
  -4  -3   2    0.55    1.04 
   4   3  -2    0.17    0.89 
   4   3  -2    0.68    1.39 
   4   3  -2    0.08    1.07 
   4   3  -2    0.56    0.56 
  -4   3   2    1.70    1.87 
   4   3  -2    1.60    0.81 
   4   3  -2    0.83    1.31 
  -4   3   2   -0.52    1.50 
   4   3  -2    3.05    2.03 
   4   3  -2    1.60    1.92 
  -4   3   2   -0.07    1.78 
   4   3  -2    0.83    1.20 
  -4   3   2    1.37    1.88 
   4   3  -2   -0.29    0.64 
  -4   3   2    2.73    2.04 
   4   3  -2    1.85    1.97 
  -4   3   2   -1.15    1.64 
  -4   3   2    1.77    1.79 
   3  -3  -2    5.36    2.00 
  -3  -3   2    3.63    2.06 
   3  -3  -2    3.42    1.59 
   3  -3  -2    7.11    2.17 
  -3  -3   2    1.06    0.94 
  -3  -3   2    2.79    1.49 
  -3  -3   2    2.63    1.25 
   3  -3  -2    4.79    1.85 
   3  -3  -2    4.84    2.27 
   3  -3  -2    7.67    2.34 
  -3  -3   2    1.89    1.67 
   3  -3  -2    0.37    1.54 
  -3  -3   2   -1.32    1.75 
   3  -3  -2    5.08    2.03 
  -3  -3   2    4.00    1.59 
   3  -3  -2   -0.32    1.38 
  -3  -3   2    1.83    1.37 
  -3   3   2   -1.34    1.51 
  -3   3   2    1.11    1.84 
  -3   3   2    0.44    1.56 
   3   3  -2    1.00    1.38 
   3   3  -2    1.33    0.86 
   3   3  -2    3.53    1.89 
   3   3  -2    1.23    1.12 
  -3   3   2    3.09    1.74 
   3   3  -2    0.98    1.17 
   3   3  -2    4.21    1.38 
   3   3  -2    3.58    2.00 
  -3   3   2    0.93    1.65 
   3   3  -2    2.68    1.61 
   3   3  -2    2.54    0.83 
   3   3  -2   -0.11    1.01 
  -3   3   2    0.60    1.14 
   3   3  -2    3.67    1.89 
   3   3  -2    1.87    2.04 
  -3   3   2    0.19    1.61 
  -3   3   2    4.25    2.21 
   3   3  -2    1.32    1.37 
   3   3  -2    0.92    1.37 
  -2  -3   2    3.82    1.29 
   2  -3  -2    4.37    1.54 
  -2  -3   2    2.34    1.91 
  -2  -3   2    3.45    2.11 
  -2  -3   2    7.54    1.79 
   2  -3  -2    3.23    1.67 
   2  -3  -2    0.92    1.62 
   2  -3  -2    1.31    2.01 
   2  -3  -2    2.28    1.73 
   2  -3  -2    3.36    1.83 
   2  -3  -2    0.33    1.39 
   2  -3  -2    3.53    1.39 
   2  -3  -2    4.24    1.85 
   2  -3  -2    2.01    1.37 
  -2  -3   2    4.64    1.75 
   2  -3  -2    2.62    1.66 
  -2  -3   2    6.32    1.84 
  -2  -3   2    3.62    2.05 
  -2  -3   2    4.41    1.77 
   2  -3  -2    3.58    1.82 
  -2  -3   2    1.98    1.49 
   2   3  -2    8.13    2.31 
   2   3  -2    2.85    1.81 
   2   3  -2    4.40    1.85 
   2   3  -2    3.15    1.07 
  -2   3   2    2.95    1.23 
   2   3  -2    4.05    1.56 
  -2   3   2    1.85    1.91 
   2   3  -2    4.14    1.87 
   2   3  -2    3.98    1.34 
  -2   3   2    3.19    1.60 
   2   3  -2    3.52    1.47 
   2   3  -2    5.24    2.25 
   2   3  -2    7.86    1.74 
   2   3  -2    3.61    1.61 
   2   3  -2    3.95    0.91 
   2   3  -2    2.52    1.02 
  -2   3   2    6.80    2.42 
  -2   3   2    0.49    1.45 
   2   3  -2    0.00    2.19 
  -2   3   2    5.57    2.35 
   2   3  -2    4.22    1.28 
   2   3  -2    3.31    1.00 
  -2   3   2    2.75    1.79 
   2   3  -2    3.01    1.74 
  -2   3   2    8.97    2.24 
  -2   3   2    3.90    1.62 
   2   3  -2    3.57    1.81 
   1  -3  -2   24.92    4.50 
   1  -3  -2   24.42    3.33 
   1  -3  -2   17.12    2.64 
   1  -3  -2   20.98    1.99 
   1  -3  -2   19.91    2.85 
  -1  -3   2   18.35    3.36 
  -1  -3   2   16.85    3.34 
  -1  -3   2   14.29    2.58 
  -1  -3   2   12.38    2.83 
   1  -3  -2   17.54    3.09 
  -1  -3   2   13.15    3.30 
   1  -3  -2   24.94    3.45 
  -1  -3   2   17.67    2.79 
   1  -3  -2   12.85    2.34 
  -1  -3   2   12.48    2.76 
  -1  -3   2   20.59    2.72 
   1  -3  -2   22.51    3.14 
  -1  -3   2   18.93    2.22 
   1  -3  -2   10.80    2.36 
   1  -3  -2   22.28    1.96 
  -1  -3   2   15.17    1.72 
  -1   3   2   16.53    2.49 
   1   3  -2   19.25    3.83 
  -1   3   2   22.90    3.00 
  -1   3   2   14.53    2.90 
   1   3  -2   19.49    2.94 
   1   3  -2   18.07    3.30 
  -1   3   2   17.32    1.79 
  -1   3   2   26.11    3.28 
   1   3  -2   24.37    4.36 
  -1   3   2   16.46    2.82 
   1   3  -2   18.70    1.78 
  -1   3   2   18.46    2.80 
  -1   3   2   21.54    2.48 
   1   3  -2   20.57    2.96 
   1   3  -2   14.80    2.72 
   1   3  -2   15.81    2.51 
   1   3  -2   21.03    2.84 
   1   3  -2   18.28    3.07 
  -1   3   2   15.40    2.10 
   1   3  -2   22.85    2.58 
  -1   3   2   18.81    2.57 
  -1   3   2   16.41    2.39 
  -1   3   2   17.17    2.73 
  -1   3   2   15.59    2.26 
   1   3  -2   20.85    2.39 
   1   3  -2   21.51    2.61 
  -1   3   2   16.26    1.53 
  -1   3   2   23.90    3.54 
   1   3  -2   18.31    1.92 
   1   3  -2   24.85    3.07 
  -1   3   2   21.27    3.37 
  -1   3   2   14.81    3.75 
   1   3  -2   19.07    2.16 
   1   3  -2   19.92    1.65 
   1   3  -2   19.20    2.08 
   0  -3   2    1.47    1.57 
   0  -3   2    3.27    1.36 
   0  -3   2    2.76    1.63 
   0  -3   2    5.05    3.29 
   0  -3   2    3.39    1.19 
   0  -3  -2    3.77    1.44 
   0  -3   2    0.12    1.31 
   0  -3  -2    2.87    0.94 
   0  -3  -2    4.05    1.61 
   0  -3  -2    3.36    1.26 
   0  -3   2    1.07    1.33 
   0  -3   2    1.58    1.34 
   0  -3  -2    3.39    1.31 
   0  -3  -2    3.09    1.70 
   0  -3  -2    2.06    1.11 
   0  -3  -2    3.74    1.20 
   0  -3  -2    2.75    1.91 
   0  -3  -2    2.51    1.27 
   0  -3   2    5.70    2.08 
   0  -3   2    2.70    1.76 
   0   3   2    4.16    1.48 
   0   3   2    0.44    1.35 
   0   3   2    1.99    2.49 
   0   3  -2    2.08    1.22 
   0   3   2    2.92    1.04 
   0   3  -2    1.71    1.14 
   0   3  -2    3.95    1.40 
   0   3   2    2.68    0.70 
   0   3   2    1.91    1.47 
   0   3  -2    2.46    1.19 
   0   3  -2    3.23    1.54 
   0   3  -2    4.01    2.16 
   0   3  -2    3.81    1.47 
   0   3   2    2.40    0.98 
   0   3   2    3.56    0.94 
   0   3   2    2.80    1.19 
   0   3  -2    3.22    1.59 
   0   3  -2    2.22    1.16 
   0   3  -2    0.84    1.17 
   0   3   2    0.44    1.05 
   0   3   2    2.92    1.61 
   0   3  -2    3.33    1.71 
   0   3  -2    2.81    0.54 
   0   3  -2    3.07    1.60 
   0   3   2    4.00    1.56 
   0   3   2    3.38    1.45 
   0   3  -2    2.70    2.74 
   0   3  -2    4.41    1.52 
   0   3  -2    3.28    1.26 
   0   3   2    1.73    1.23 
   0   3   2    4.05    1.18 
   0   3  -2    0.83    1.43 
   0   3   2    3.67    1.22 
   0   3   2    3.07    1.20 
   0   3  -2    2.99    1.03 
   1  -3   2  173.14    9.24 
   1  -3   2  167.73    8.81 
  -1  -3  -2  168.31    7.90 
   1  -3   2  168.56   11.28 
   1  -3   2  151.62    8.23 
  -1  -3  -2  178.07    9.41 
   1  -3   2  161.80    8.69 
  -1  -3  -2  171.18    8.27 
  -1  -3  -2  165.89    7.72 
   1  -3   2  160.57    8.04 
   1  -3   2  178.06    9.16 
  -1  -3  -2  171.67    7.09 
   1  -3   2  175.99    8.98 
   1  -3   2  152.17    8.63 
   1  -3   2  174.04    7.57 
  -1  -3  -2  156.41    8.55 
  -1  -3  -2  163.84    7.15 
   1  -3   2  171.07    7.45 
   1  -3   2  159.64    8.48 
  -1  -3  -2  168.38    7.00 
   1  -3   2  158.74    8.60 
  -1  -3  -2  174.54    7.26 
   1   3   2  179.79    7.70 
   1   3   2  169.97    6.78 
   1   3   2  166.46    7.69 
  -1   3  -2  155.87    8.68 
   1   3   2  164.68    8.05 
   1   3   2  160.68    7.81 
  -1   3  -2  168.17    8.40 
   1   3   2  162.59    6.60 
   1   3   2  170.57    7.68 
  -1   3  -2  163.01    6.44 
   1   3   2  164.79    7.48 
   1   3   2  166.13    6.81 
   1   3   2  163.48    8.49 
  -1   3  -2  160.24    8.15 
  -1   3  -2  168.09    8.21 
  -1   3  -2  151.90    7.09 
  -1   3  -2  167.32    9.26 
   1   3   2  159.61    7.87 
  -1   3  -2  177.00    9.45 
  -1   3  -2  174.86   10.13 
   1   3   2  162.38    8.08 
  -1   3  -2  162.23    9.70 
   1   3   2  166.74    7.08 
  -1   3  -2  180.02    8.73 
   1   3   2  160.66    7.35 
  -1   3  -2  167.49    8.23 
   1   3   2  161.48    8.27 
  -1   3  -2  170.10    7.85 
   1   3   2  163.30    7.66 
   1   3   2  170.91    8.09 
   1   3   2  170.99    7.24 
  -1   3  -2  168.70    8.82 
  -1   3  -2  171.93    8.68 
   2  -3   2  228.41    9.83 
   2  -3   2  244.86   13.03 
  -2  -3  -2  235.79   10.60 
   2  -3   2  231.91   10.39 
  -2  -3  -2  218.16    9.69 
   2  -3   2  236.28   12.04 
  -2  -3  -2  214.01   11.15 
  -2  -3  -2  216.88   10.58 
   2  -3   2  209.60   11.39 
  -2  -3  -2  220.21    9.15 
   2  -3   2  215.51   11.00 
  -2  -3  -2  217.41    9.72 
   2  -3   2  221.95   11.29 
   2  -3   2  222.83   11.40 
   2  -3   2  232.24   10.50 
   2  -3   2  215.00   10.61 
   2  -3   2  232.98    9.72 
   2  -3   2  237.40   11.41 
   2  -3   2  228.55   11.26 
  -2  -3  -2  235.30   10.98 
   2  -3   2  215.62   10.48 
  -2   3  -2  204.22   10.61 
   2   3   2  216.66    9.20 
  -2   3  -2  214.36   11.27 
  -2   3  -2  218.80   11.79 
   2   3   2  221.41    8.95 
   2   3   2  231.11    8.62 
   2   3   2  212.84   10.87 
  -2   3  -2  214.31   10.34 
   2   3   2  224.81    9.26 
   2   3   2  214.30    9.75 
   2   3   2  214.61    9.04 
   2   3   2  202.84   10.05 
   2   3   2  232.73   10.25 
  -2   3  -2  211.60   10.87 
   2   3   2  220.28    8.10 
   2   3   2  236.09    8.94 
   2   3   2  209.04    9.01 
   2   3   2  218.69    8.21 
   2   3   2  202.42    9.71 
   2   3   2  216.71    8.65 
   2   3   2  217.46   10.53 
  -2   3  -2  215.70    9.29 
  -2   3  -2  225.78   10.84 
  -2   3  -2  218.69    9.33 
  -2   3  -2  213.80   10.94 
   2   3   2  223.37    9.64 
   2   3   2  234.76   10.36 
   2   3   2  223.90   10.21 
   2   3   2  215.56   11.90 
   2   3   2  217.62    9.11 
  -3  -3  -2  173.70    8.74 
  -3  -3  -2  166.71    8.03 
   3  -3   2  170.88   11.03 
   3  -3   2  184.36   10.10 
   3  -3   2  174.12    8.58 
   3  -3   2  190.91   10.56 
  -3  -3  -2  174.42    9.83 
  -3  -3  -2  179.97    7.15 
   3  -3   2  187.93    9.63 
  -3  -3  -2  162.43    7.77 
   3  -3   2  165.67    9.79 
   3  -3   2  169.77   10.17 
  -3  -3  -2  175.98    8.86 
   3  -3   2  160.61    9.60 
   3  -3   2  179.40   10.12 
  -3  -3  -2  178.16    8.96 
   3  -3   2  169.11   10.06 
   3  -3   2  165.27    8.56 
   3  -3   2  177.33    8.66 
  -3  -3  -2  174.50   10.04 
  -3  -3  -2  168.18    8.69 
   3  -3   2  166.07    8.81 
   3   3   2  165.33    6.77 
   3   3   2  181.55    9.39 
  -3   3  -2  170.79    9.68 
   3   3   2  177.61   10.06 
  -3   3  -2  155.80    9.54 
  -3   3  -2  182.53    8.20 
   3   3   2  162.96    7.76 
   3   3   2  170.21    8.06 
   3   3   2  172.37    7.96 
   3   3   2  174.89    6.79 
   3   3   2  168.26    8.89 
   3   3   2  169.49    7.07 
   3   3   2  166.45    9.28 
   3   3   2  183.63    8.81 
   3   3   2  177.50    7.00 
   3   3   2  166.05    8.49 
   3   3   2  175.35   10.49 
   3   3   2  172.57    7.24 
  -3   3  -2  184.37    8.76 
   3   3   2  168.36    8.36 
  -3   3  -2  161.02    9.61 
  -3   3  -2  182.50   10.23 
  -3   3  -2  160.17    8.45 
   3   3   2  165.75    8.20 
   3   3   2  160.46    8.49 
   3   3   2  177.93    6.79 
  -3   3  -2  162.28    9.56 
  -4  -3  -2  265.32   11.96 
  -4  -3  -2  246.42   11.24 
   4  -3   2  268.99   13.98 
   4  -3   2  252.43   13.62 
   4  -3   2  266.14   13.52 
  -4  -3  -2  263.23   12.66 
  -4  -3  -2  264.81    9.71 
   4  -3   2  251.39   13.66 
  -4  -3  -2  255.22    9.73 
   4  -3   2  252.44   11.63 
   4  -3   2  256.17   14.12 
   4  -3   2  255.10   15.16 
   4  -3   2  249.50   13.45 
   4  -3   2  246.96   14.05 
  -4  -3  -2  260.69   14.25 
   4  -3   2  260.46   12.21 
  -4  -3  -2  265.41   10.91 
  -4  -3  -2  262.76   13.81 
   4  -3   2  258.05   14.18 
   4   3   2  270.99   14.29 
  -4   3  -2  261.27   14.42 
  -4   3  -2  259.43   13.50 
   4   3   2  270.32   10.08 
   4   3   2  249.63   13.15 
   4   3   2  260.11   10.45 
  -4   3  -2  274.86   12.87 
   4   3   2  259.67    9.79 
   4   3   2  258.10   10.68 
   4   3   2  253.12   12.23 
   4   3   2  274.21   11.70 
  -4   3  -2  269.53   13.50 
   4   3   2  256.95   10.74 
   4   3   2  258.69   12.69 
  -4   3  -2  260.25   13.84 
  -4   3  -2  278.26   13.98 
   4   3   2  277.86   12.30 
  -4   3  -2  250.94   11.61 
   4   3   2  264.73   14.10 
  -4   3  -2  238.21   13.17 
   4   3   2  254.30   12.38 
   4   3   2  267.74   11.18 
   5  -3   2  130.17    8.10 
  -5  -3  -2  130.01    9.60 
   5  -3   2  112.43    6.64 
   5  -3   2  120.29    9.37 
   5  -3   2  127.85    9.21 
  -5  -3  -2  116.76    6.71 
  -5  -3  -2  120.97    6.41 
  -5  -3  -2  116.33    6.25 
   5  -3   2  108.26    8.80 
   5  -3   2  133.21    9.25 
   5  -3   2  110.95    9.36 
  -5  -3  -2  122.95    9.48 
   5  -3   2  114.88   10.93 
  -5  -3  -2  116.48    6.79 
  -5  -3  -2  123.48    6.21 
   5  -3   2  117.33   10.18 
   5  -3   2  124.51    9.10 
  -5  -3  -2  117.82    6.29 
   5  -3   2  107.02    8.55 
  -5   3  -2  138.19    9.23 
   5   3   2  125.34    6.59 
   5   3   2  101.14    7.91 
   5   3   2  115.25    7.36 
   5   3   2  118.54    7.69 
   5   3   2  124.90    9.38 
   5   3   2  115.83    6.17 
  -5   3  -2   99.49   10.27 
   5   3   2  125.91    5.43 
  -5   3  -2  119.90    9.20 
   5   3   2  127.22    8.05 
   5   3   2  119.17    9.29 
  -5   3  -2  102.80    8.24 
  -5   3  -2  145.58    9.55 
   5   3   2  125.27    5.76 
   5   3   2  124.10    5.51 
   5   3   2  125.31    6.16 
   5   3   2  119.71    8.82 
  -5   3  -2  111.93    8.17 
  -5   3  -2  111.55    8.24 
   5   3   2  117.21    6.64 
  -6  -3  -2  226.89   11.05 
   6  -3   2  241.92   14.91 
   6  -3   2  238.64   14.28 
   6  -3   2  229.51   14.10 
   6  -3   2  211.68   15.65 
   6  -3   2  249.50   14.53 
  -6  -3  -2  244.34   11.05 
   6  -3   2  230.87   13.75 
  -6  -3  -2  221.57   14.68 
  -6  -3  -2  234.03   10.87 
   6  -3   2  240.56   12.91 
   6  -3   2  233.38   14.86 
   6  -3   2  231.99   14.02 
  -6  -3  -2  238.54   14.87 
   6  -3   2  210.92   14.29 
   6   3   2  232.68   12.42 
  -6   3  -2  205.01   13.29 
  -6   3  -2  239.82   13.85 
   6   3   2  233.26   10.25 
  -6   3  -2  242.36   14.60 
   6   3   2  251.76   11.50 
   6   3   2  224.71   13.06 
  -6   3  -2  237.90   13.92 
  -6   3  -2  237.67   13.80 
   6   3   2  241.73   15.03 
  -6   3  -2  233.77   15.07 
   6   3   2  217.49   14.15 
  -6   3  -2  242.91   13.36 
   6   3   2  233.40   13.51 
   6   3   2  210.60   12.20 
   6   3   2  218.19   13.80 
  -7  -3  -2   63.70    6.15 
   7  -3   2   63.18    9.47 
   7  -3   2   59.13    8.29 
   7  -3   2   71.11    8.20 
   7  -3   2   72.07    9.16 
   7  -3   2   53.90    7.79 
   7  -3   2   50.13    9.25 
   7  -3   2   65.45    9.47 
   7  -3   2   58.22    8.33 
   7  -3   2   58.38    8.55 
  -7  -3  -2   56.69    8.39 
  -7  -3  -2   52.05    8.58 
   7  -3   2   62.97    8.24 
   7   3   2   60.19    8.20 
   7   3   2   67.20    7.50 
  -7   3  -2   62.49    8.41 
  -7   3  -2   63.84    8.23 
   7   3   2   52.77    8.58 
  -7   3  -2   70.26    8.65 
   7   3   2   65.31    7.64 
   7   3   2   54.21    7.74 
   7   3   2   57.50    8.62 
   7   3   2   61.97    8.12 
  -7   3  -2   65.20    8.93 
  -7   3  -2   72.42    8.39 
  -7   3  -2   61.17    9.19 
  -7   3  -2   72.82    8.07 
  -7   3  -2   66.85    8.30 
   7   3   2   60.35    6.21 
   8  -3   2  118.66   12.93 
   8  -3   2  117.83   13.17 
   8  -3   2  108.32   12.24 
   8  -3   2  111.71   13.06 
   8  -3   2  111.83   12.26 
   8  -3   2  121.21   15.45 
   8  -3   2  125.96   11.96 
  -8  -3  -2   94.88   12.24 
   8  -3   2  124.83   10.20 
   8  -3   2  102.77   12.64 
   8  -3   2  134.21   13.49 
  -8  -3  -2  123.93   13.74 
   8   3   2  118.44    9.47 
   8   3   2  132.16   12.89 
  -8   3  -2  121.59   12.92 
   8   3   2  130.30   13.36 
  -8   3  -2  112.58   10.94 
  -8   3  -2  139.48   13.16 
  -8   3  -2  119.40   12.32 
   8   3   2   97.34   11.12 
   8   3   2  120.77    9.64 
  -8   3  -2  119.50   13.37 
   8   3   2  138.06   14.61 
  -8   3  -2  110.30   11.75 
  -8   3  -2  111.96   10.78 
  -8   3  -2  122.51   13.33 
   8   3   2  114.20   12.37 
   9  -3   2   20.50    7.16 
   9  -3   2    8.70    4.71 
   9  -3   2   17.70    5.65 
   9  -3   2   21.52    5.40 
   9  -3   2   13.06    5.54 
   9  -3   2   17.03    5.67 
  -9  -3  -2   17.28    6.36 
  -9  -3  -2   22.89    7.32 
   9  -3   2   25.99    7.14 
   9  -3   2    9.93    5.14 
   9  -3   2   17.97    6.56 
   9   3   2   18.06    5.81 
  -9   3  -2   13.94    5.47 
   9   3   2   20.55    6.53 
   9   3   2    5.98    4.46 
  -9   3  -2   20.11    5.85 
   9   3   2   17.01    6.45 
   9   3   2   14.71    5.22 
  -9   3  -2   15.06    4.84 
  -9   3  -2   22.71    7.00 
  -9   3  -2   21.83    6.38 
  -9   3  -2   20.48    6.33 
   9  -4  -2   36.59    8.64 
   9  -4  -2   67.16    9.81 
   9  -4  -2   39.48    9.76 
   9  -4  -2   52.64    9.88 
   9  -4  -2   84.77   11.58 
   9  -4  -2   57.66    9.50 
   9  -4  -2   51.91    8.85 
  -9  -4   2   34.46    7.77 
  -9  -4   2   49.20   10.00 
   9  -4  -2   66.09    9.82 
   9   4  -2   54.43    9.87 
   9   4  -2   68.66   10.06 
   9   4  -2   54.39    9.14 
  -9   4   2   54.13    8.43 
  -9   4   2   54.43    9.66 
   9   4  -2   55.05    9.27 
  -9   4   2   64.82    8.99 
   9   4  -2   50.80    9.19 
  -9   4   2   64.20    9.99 
  -9   4   2   55.13    9.07 
   9   4  -2   60.82    8.84 
  -9   4   2   50.71    8.36 
  -9   4   2   58.06    9.15 
   8  -4  -2   -2.32    2.71 
   8  -4  -2   -0.51    2.81 
  -8  -4   2    0.57    2.98 
   8  -4  -2    5.79    3.79 
   8  -4  -2    3.03    3.11 
   8  -4  -2    1.03    3.52 
   8  -4  -2   -0.15    3.02 
   8  -4  -2   -0.46    3.32 
   8  -4  -2    0.20    2.71 
  -8  -4   2    6.73    4.42 
   8   4  -2   -2.71    2.67 
   8   4  -2    4.59    3.39 
   8   4  -2    1.26    3.48 
   8   4  -2   -1.58    2.92 
  -8   4   2    0.29    2.75 
   8   4  -2    2.78    2.92 
  -8   4   2    2.03    3.49 
  -8   4   2    0.75    2.50 
  -8   4   2   -0.41    2.29 
  -8   4   2   -1.21    2.64 
  -8   4   2    0.95    3.40 
  -8   4   2   -3.42    1.93 
  -8   4   2    1.76    3.14 
   8   4  -2    4.55    3.72 
   7  -4  -2   95.71   11.33 
   7  -4  -2  130.63   12.86 
   7  -4  -2  121.59   12.62 
   7  -4  -2  114.90    7.94 
  -7  -4   2  107.16   11.65 
  -7  -4   2  100.18    7.80 
   7  -4  -2   97.07   11.19 
   7  -4  -2  104.12   10.93 
   7  -4  -2  116.82   13.41 
  -7  -4   2  119.00   13.03 
   7  -4  -2  113.22   10.90 
   7  -4  -2  122.84   12.10 
  -7   4   2  116.45   12.15 
  -7   4   2  115.38   11.42 
   7   4  -2  118.56    9.97 
  -7   4   2  126.88    9.97 
  -7   4   2  122.09   12.09 
   7   4  -2  111.60    8.89 
  -7   4   2  136.52   12.93 
  -7   4   2  120.12    9.62 
  -7   4   2  112.96   11.70 
  -7   4   2  116.87   11.88 
   7   4  -2  112.84   12.40 
   7   4  -2  134.92   13.03 
   7   4  -2  112.84    8.23 
   7   4  -2  106.33    8.81 
   7   4  -2  133.90   12.46 
   6  -4  -2   -1.81    2.51 
   6  -4  -2    3.27    3.36 
  -6  -4   2    1.73    3.06 
   6  -4  -2    8.90    3.47 
   6  -4  -2    5.79    3.13 
  -6  -4   2    4.01    3.08 
   6  -4  -2    4.86    2.25 
   6  -4  -2    6.05    3.61 
   6  -4  -2    4.63    2.08 
   6  -4  -2   13.44    3.73 
  -6  -4   2    6.39    2.12 
   6  -4  -2    0.99    2.60 
  -6  -4   2    9.91    3.06 
   6  -4  -2    8.08    3.58 
   6   4  -2    4.76    2.44 
   6   4  -2    7.27    2.84 
   6   4  -2    4.56    2.13 
   6   4  -2    7.08    2.06 
   6   4  -2    6.11    2.68 
  -6   4   2    1.30    2.32 
  -6   4   2    5.11    3.12 
   6   4  -2    0.60    2.58 
  -6   4   2    5.37    3.00 
   6   4  -2   11.19    4.04 
  -6   4   2    4.25    2.81 
  -6   4   2    1.53    2.68 
  -6   4   2    8.66    3.47 
   6   4  -2    5.30    3.35 
  -6   4   2    8.87    3.47 
   5  -4  -2  246.44   14.22 
  -5  -4   2  246.97   14.22 
   5  -4  -2  248.43   13.56 
   5  -4  -2  260.41   10.88 
  -5  -4   2  246.64   11.50 
   5  -4  -2  251.37   14.39 
   5  -4  -2  258.79   14.91 
   5  -4  -2  238.67   13.05 
   5  -4  -2  256.66   12.92 
  -5  -4   2  244.29   14.92 
   5  -4  -2  211.87   13.69 
  -5  -4   2  259.21   13.32 
   5  -4  -2  236.16   14.08 
   5  -4  -2  249.72   15.36 
   5  -4  -2  217.29   13.71 
   5   4  -2  241.74   12.54 
  -5   4   2  251.31   13.68 
   5   4  -2  241.43   14.18 
  -5   4   2  261.73   14.28 
   5   4  -2  256.43   14.06 
  -5   4   2  250.68   14.26 
  -5   4   2  244.78   13.88 
  -5   4   2  241.95   13.69 
  -5   4   2  251.77   14.73 
   5   4  -2  243.86   11.22 
   5   4  -2  242.37   11.52 
   5   4  -2  231.02    9.36 
   5   4  -2  250.63    9.94 
   5   4  -2  250.35   12.85 
  -5   4   2  235.18   13.76 
   5   4  -2  253.17   14.27 
   5   4  -2  239.36    9.98 
   5   4  -2  246.47   12.31 
   4  -4  -2   17.19    4.25 
   4  -4  -2   15.35    3.83 
  -4  -4   2   24.88    4.41 
   4  -4  -2   18.45    4.10 
   4  -4  -2   24.41    2.06 
  -4  -4   2   29.36    5.29 
   4  -4  -2   26.55    4.20 
   4  -4  -2   23.06    4.49 
   4  -4  -2   22.06    3.75 
   4  -4  -2   29.49    4.49 
   4  -4  -2   27.70    4.61 
  -4  -4   2   23.06    3.14 
  -4  -4   2   25.80    4.33 
   4  -4  -2   24.77    4.64 
  -4  -4   2   25.93    3.50 
   4  -4  -2   28.01    4.70 
  -4   4   2   21.92    4.73 
   4   4  -2   26.74    2.40 
   4   4  -2   29.81    3.16 
   4   4  -2   30.62    3.21 
   4   4  -2   23.36    4.28 
  -4   4   2   26.74    4.39 
   4   4  -2   22.09    3.21 
  -4   4   2   32.10    4.88 
  -4   4   2   21.71    4.24 
  -4   4   2   19.09    3.96 
   4   4  -2   26.22    3.48 
   4   4  -2   25.96    3.95 
   4   4  -2   32.42    4.50 
  -4   4   2   33.16    5.02 
   4   4  -2   32.88    2.97 
   4   4  -2   26.78    2.73 
   4   4  -2   26.99    2.78 
   4   4  -2   25.46    4.54 
  -4   4   2   26.12    4.82 
   4   4  -2   28.05    5.08 
   3  -4  -2  456.18   19.51 
  -3  -4   2  442.57   19.52 
  -3  -4   2  469.17   20.72 
   3  -4  -2  421.85   20.01 
  -3  -4   2  426.94   18.01 
   3  -4  -2  447.31   19.97 
  -3  -4   2  444.66   18.98 
   3  -4  -2  441.31   19.53 
   3  -4  -2  455.82   18.52 
  -3  -4   2  440.40   17.76 
   3  -4  -2  432.57   19.72 
   3  -4  -2  433.03   19.59 
   3  -4  -2  442.34   20.11 
  -3  -4   2  466.54   19.98 
   3  -4  -2  439.88   18.61 
   3  -4  -2  435.35   19.80 
   3   4  -2  439.96   17.04 
   3   4  -2  429.14   18.66 
   3   4  -2  449.33   17.04 
   3   4  -2  425.92   18.64 
   3   4  -2  435.28   21.05 
   3   4  -2  428.13   19.16 
   3   4  -2  430.23   17.79 
  -3   4   2  409.48   17.60 
  -3   4   2  426.29   20.11 
   3   4  -2  464.02   20.71 
   3   4  -2  457.60   19.14 
   3   4  -2  447.45   15.97 
  -3   4   2  415.46   18.65 
  -3   4   2  431.76   19.00 
   3   4  -2  434.58   17.32 
   3   4  -2  424.65   17.03 
  -3   4   2  439.42   19.54 
   3   4  -2  462.05   19.71 
   3   4  -2  435.80   16.01 
   3   4  -2  457.94   16.22 
  -3   4   2  431.71   19.82 
   3   4  -2  419.00   15.85 
   3   4  -2  438.55   17.40 
  -3   4   2  433.13   19.74 
   3   4  -2  436.45   16.74 
   2  -4  -2   73.37    5.83 
   2  -4  -2   69.24    5.70 
  -2  -4   2   54.45    6.25 
   2  -4  -2   52.81    5.87 
   2  -4  -2   69.48    6.58 
   2  -4  -2   67.19    4.28 
   2  -4  -2   78.64    6.21 
   2  -4  -2   77.14    7.22 
   2  -4  -2   73.67    4.46 
  -2  -4   2   59.33    5.87 
  -2  -4   2   58.43    4.88 
  -2  -4   2   75.11    7.32 
  -2  -4   2   74.28    5.02 
  -2  -4   2   67.39    7.01 
   2  -4  -2   68.21    6.45 
  -2   4   2   82.30    7.66 
  -2   4   2   73.17    6.78 
   2   4  -2   71.10    5.48 
   2   4  -2   63.79    7.70 
  -2   4   2   74.28    4.39 
   2   4  -2   73.81    5.53 
   2   4  -2   73.30    3.67 
  -2   4   2   70.81    6.07 
  -2   4   2   74.60    5.09 
   2   4  -2   63.51    4.12 
   2   4  -2   74.05    4.49 
   2   4  -2   63.78    4.00 
   2   4  -2   66.29    4.28 
   2   4  -2   67.76    4.72 
   2   4  -2   77.10    5.03 
   2   4  -2   71.97    3.31 
   2   4  -2   82.63    8.30 
   2   4  -2   65.76    4.91 
  -2   4   2   76.56    7.03 
   2   4  -2   68.64    5.66 
   2   4  -2   62.38    6.18 
  -2   4   2   64.22    6.13 
   2   4  -2   76.45    4.82 
   2   4  -2   63.30    3.94 
   1  -4  -2  527.42   21.52 
  -1  -4   2  518.46   18.82 
  -1  -4   2  509.42   20.96 
  -1  -4   2  517.77   22.37 
   1  -4  -2  521.06   20.51 
  -1  -4   2  510.04   20.90 
  -1  -4   2  502.35   21.78 
   1  -4  -2  528.18   20.64 
   1  -4  -2  440.65   21.70 
   1  -4  -2  493.94   20.87 
  -1  -4   2  528.11   19.54 
  -1  -4   2  485.95   20.61 
  -1  -4   2  517.86   21.89 
  -1  -4   2  416.83   22.19 
   1  -4  -2  499.63   20.58 
   1  -4  -2  481.32   20.68 
  -1  -4   2  513.31   22.42 
   1  -4  -2  508.55   21.25 
   1   4  -2  517.60   20.07 
   1   4  -2  487.57   19.89 
   1   4  -2  503.69   18.33 
  -1   4   2  488.26   19.01 
   1   4  -2  508.32   23.05 
   1   4  -2  508.21   20.74 
   1   4  -2  495.32   21.13 
  -1   4   2  511.88   17.98 
  -1   4   2  463.56   22.97 
  -1   4   2  509.11   20.19 
  -1   4   2  492.23   19.23 
   1   4  -2  502.46   18.41 
  -1   4   2  514.84   20.24 
   1   4  -2  516.49   18.94 
   1   4  -2  531.69   20.63 
  -1   4   2  490.69   20.94 
  -1   4   2  496.07   21.12 
  -1   4   2  502.03   19.80 
  -1   4   2  510.25   20.42 
  -1   4   2  521.16   21.06 
   1   4  -2  520.30   19.88 
   1   4  -2  529.67   19.72 
   1   4  -2  499.48   20.23 
  -1   4   2  524.13   21.36 
   1   4  -2  510.98   18.87 
   1   4  -2  502.82   20.98 
   1   4  -2  506.91   20.38 
  -1   4   2  503.71   19.32 
   0  -4  -2   29.06    3.31 
   0  -4  -2   25.32    3.24 
   0  -4   2   27.53    3.98 
   0  -4   2   20.97    3.51 
   0  -4  -2   33.08    2.96 
   0  -4  -2   26.11    3.31 
   0  -4  -2   29.44    3.67 
   0  -4  -2   20.01    3.11 
   0  -4  -2   28.25    4.14 
   0  -4   2   34.79    4.73 
   0  -4   2   34.06    6.24 
   0  -4   2   30.21    4.92 
   0  -4   2   28.84    3.14 
   0  -4  -2   20.24    3.22 
   0  -4  -2   30.83    3.73 
   0  -4   2   30.63    4.54 
   0  -4   2   25.64    3.66 
   0  -4  -2   20.35    3.72 
   0  -4   2   32.85    4.17 
   0  -4   2   28.80    4.26 
   0   4   2   25.60    3.14 
   0   4  -2   27.59    3.14 
   0   4   2   29.46    3.52 
   0   4   2   26.10    3.57 
   0   4   2   24.58    2.84 
   0   4  -2   18.82    3.27 
   0   4   2   27.27    3.25 
   0   4  -2   28.81    3.72 
   0   4   2   36.47    4.50 
   0   4   2   23.78    5.64 
   0   4   2   29.12    3.10 
   0   4  -2   25.51    1.71 
   0   4   2   25.62    1.89 
   0   4   2   27.28    3.12 
   0   4  -2   31.04    4.74 
   0   4   2   21.65    3.37 
   0   4  -2   28.64    2.81 
   0   4   2   27.35    2.87 
   0   4  -2   24.38    3.62 
   0   4   2   24.22    1.88 
   0   4  -2   31.18    3.88 
   0   4  -2   27.26    3.91 
   0   4  -2   23.80    2.90 
   0   4   2   27.43    3.96 
  -1  -4  -2  255.03   13.37 
   1  -4   2  241.62   12.15 
   1  -4   2  234.78   11.90 
   1  -4   2  237.19   11.94 
  -1  -4  -2  241.52   10.54 
  -1  -4  -2  239.30   10.29 
  -1  -4  -2  252.57   11.07 
  -1  -4  -2  264.82   11.14 
  -1  -4  -2  242.50   10.66 
   1  -4   2  243.66   12.51 
  -1  -4  -2  249.26   12.31 
   1  -4   2  233.01   12.26 
  -1  -4  -2  247.26   11.21 
  -1  -4  -2  230.12   10.52 
   1  -4   2  237.64   10.23 
  -1  -4  -2  229.06   10.35 
   1  -4   2  229.27    9.53 
   1  -4   2  261.82   12.44 
  -1  -4  -2  255.33   12.27 
  -1  -4  -2  254.08   11.91 
   1  -4   2  204.26   14.61 
   1  -4   2  249.51   12.81 
   1   4   2  245.12   10.02 
  -1   4  -2  246.38   12.53 
   1   4   2  190.87   11.50 
   1   4   2  225.84   11.43 
   1   4   2  249.51   10.19 
   1   4   2  249.28   10.41 
   1   4   2  254.66   11.16 
   1   4   2  250.17   10.34 
  -1   4  -2  243.22   11.34 
  -1   4  -2  244.38   11.90 
   1   4   2  254.75   11.50 
   1   4   2  241.29   11.60 
  -1   4  -2  237.87    9.49 
   1   4   2  237.97    9.91 
   1   4   2  225.54   10.89 
   1   4   2  245.22   13.75 
   1   4   2  252.40   11.92 
   1   4   2  237.50   11.04 
  -1   4  -2  251.20   10.87 
  -1   4  -2  222.37   10.57 
   1   4   2  240.29   10.65 
  -1   4  -2  216.52   11.83 
  -1   4  -2  244.64    9.03 
  -1   4  -2  231.15   10.97 
   1   4   2  250.58   10.95 
   1   4   2  245.16    9.80 
   1   4   2  241.72   10.36 
   2  -4   2    4.00    1.94 
  -2  -4  -2    5.48    1.48 
  -2  -4  -2    4.87    2.06 
   2  -4   2    5.93    2.41 
  -2  -4  -2    9.25    2.43 
   2  -4   2    6.13    2.06 
  -2  -4  -2    5.77    1.26 
   2  -4   2    5.26    1.67 
   2  -4   2    7.23    2.38 
  -2  -4  -2    6.17    2.39 
   2  -4   2    9.01    2.88 
   2  -4   2    5.39    2.42 
   2  -4   2    3.33    1.86 
   2  -4   2    4.45    2.21 
   2  -4   2    5.86    2.36 
   2  -4   2    8.49    3.72 
   2  -4   2    3.50    1.23 
  -2  -4  -2    3.62    1.59 
  -2  -4  -2    1.78    1.93 
   2   4   2    3.33    2.30 
   2   4   2    7.35    1.76 
   2   4   2    2.04    1.21 
   2   4   2    5.58    1.52 
   2   4   2    4.36    2.15 
   2   4   2    6.07    1.46 
   2   4   2    7.77    2.31 
   2   4   2    5.30    1.64 
   2   4   2    5.12    1.55 
   2   4   2    5.07    1.06 
   2   4   2    3.97    2.31 
   2   4   2    4.60    0.75 
   2   4   2    4.63    1.76 
   2   4   2    3.16    0.97 
  -2   4  -2    8.49    2.86 
  -2   4  -2    5.25    1.36 
   2   4   2    5.41    1.67 
   2   4   2    5.81    1.11 
  -2   4  -2    4.47    1.32 
   2   4   2    6.74    1.55 
   2   4   2    2.06    1.33 
  -2   4  -2    3.47    2.00 
  -2   4  -2    6.54    2.19 
   2   4   2    6.00    1.00 
  -2   4  -2    4.89    2.21 
  -2   4  -2    5.03    1.99 
   2   4   2    2.35    1.43 
   3  -4   2  136.87    7.69 
   3  -4   2  129.12    8.78 
   3  -4   2  128.22    8.09 
  -3  -4  -2  139.85    6.09 
  -3  -4  -2  140.29    8.93 
  -3  -4  -2  131.66    8.12 
   3  -4   2  133.11    9.21 
   3  -4   2  127.55    6.57 
   3  -4   2  125.70    8.62 
   3  -4   2  134.05    9.41 
   3  -4   2  129.38    7.79 
  -3  -4  -2  125.21    6.77 
   3  -4   2  136.38    8.96 
  -3  -4  -2  121.50    8.62 
   3  -4   2  123.06    9.02 
   3  -4   2  126.16   10.17 
  -3  -4  -2  136.99    8.06 
   3  -4   2  126.65    7.88 
   3   4   2  124.92    5.49 
   3   4   2  124.61    8.51 
   3   4   2  126.10    6.20 
   3   4   2  132.32    6.91 
   3   4   2  123.32    5.30 
   3   4   2  137.84    7.32 
   3   4   2  131.34    7.36 
   3   4   2  118.35    7.66 
   3   4   2  133.97    6.14 
   3   4   2  123.12    5.39 
   3   4   2  124.52    9.32 
  -3   4  -2  127.85    9.01 
  -3   4  -2  133.76    8.82 
  -3   4  -2  124.57    8.35 
   3   4   2  130.11    6.06 
   3   4   2  130.27    7.89 
   3   4   2  129.27    7.11 
   3   4   2  130.76    7.08 
   3   4   2  125.08    6.11 
   3   4   2  127.39    6.27 
  -3   4  -2  127.28    8.61 
  -3   4  -2  127.91    6.25 
   3   4   2  122.70    6.05 
  -3   4  -2  121.10    6.83 
  -3   4  -2  128.63    8.47 
   4  -4   2    6.65    2.17 
   4  -4   2    0.37    1.56 
  -4  -4  -2    6.13    2.13 
  -4  -4  -2    7.96    3.24 
   4  -4   2    3.11    2.11 
   4  -4   2    0.59    2.46 
   4  -4   2    8.17    2.66 
  -4  -4  -2    4.35    2.58 
   4  -4   2    5.38    2.18 
   4  -4   2    6.10    3.07 
   4  -4   2    3.39    2.58 
  -4  -4  -2    4.97    1.67 
   4  -4   2    1.15    2.67 
   4  -4   2    8.70    3.10 
   4   4   2    7.92    1.64 
   4   4   2    1.07    2.12 
   4   4   2    4.38    1.19 
  -4   4  -2    3.88    1.96 
   4   4   2    7.73    2.04 
  -4   4  -2    4.72    2.44 
   4   4   2    5.72    1.94 
   4   4   2    7.19    3.18 
  -4   4  -2    5.93    2.60 
   4   4   2    3.90    0.82 
  -4   4  -2    4.62    2.50 
   4   4   2    4.19    2.12 
   4   4   2    9.06    2.08 
   4   4   2    5.99    1.40 
   4   4   2    5.08    2.43 
   4   4   2    5.81    1.73 
  -4   4  -2    3.27    2.25 
  -4   4  -2    6.31    2.85 
   4   4   2    6.38    1.98 
   4   4   2    4.08    2.16 
  -5  -4  -2   72.50    8.66 
   5  -4   2   79.89    9.22 
   5  -4   2   57.58    8.00 
   5  -4   2   72.80   10.12 
   5  -4   2   71.74    6.79 
  -5  -4  -2   94.36    9.86 
   5  -4   2   67.04    7.86 
   5  -4   2   81.28    8.92 
  -5  -4  -2   75.97    6.02 
  -5  -4  -2   70.40    4.85 
   5  -4   2   77.34    9.38 
   5  -4   2   93.62    6.31 
   5  -4   2   84.90    9.22 
   5  -4   2   64.72    7.65 
   5   4   2   71.71    4.56 
  -5   4  -2   74.53    8.45 
   5   4   2   73.74    6.22 
   5   4   2   70.81    7.38 
   5   4   2   81.83    4.64 
  -5   4  -2   76.10    9.54 
  -5   4  -2   80.01    8.66 
  -5   4  -2   70.09    8.12 
  -5   4  -2   78.10    9.00 
  -5   4  -2   62.79    7.71 
   5   4   2   86.79    9.82 
  -5   4  -2   87.74    6.83 
   5   4   2   80.02    5.11 
   5   4   2  100.40   10.11 
   5   4   2   83.23    8.42 
   5   4   2   76.45    5.97 
   6  -4   2    2.65    2.77 
  -6  -4  -2   10.36    4.18 
   6  -4   2    7.12    4.04 
   6  -4   2    6.17    3.30 
   6  -4   2    7.63    2.83 
   6  -4   2    5.74    3.48 
  -6  -4  -2    8.74    2.30 
   6  -4   2    2.36    2.89 
   6  -4   2    3.86    3.46 
   6  -4   2    3.50    3.16 
  -6  -4  -2    3.04    3.04 
   6  -4   2    1.31    3.44 
   6  -4   2    1.42    2.69 
   6  -4   2    7.06    2.41 
   6   4   2    6.24    2.84 
   6   4   2    3.93    3.55 
  -6   4  -2    0.36    2.60 
   6   4   2    5.37    3.03 
   6   4   2    4.88    2.58 
   6   4   2    5.33    2.40 
  -6   4  -2    5.11    3.66 
   6   4   2    3.22    3.13 
   6   4   2    5.05    3.47 
  -6   4  -2    9.66    3.74 
  -6   4  -2    5.09    2.85 
  -6   4  -2    3.10    2.66 
  -6   4  -2    8.88    3.22 
   6   4   2    2.69    1.74 
  -6   4  -2    5.73    3.29 
   7  -4   2    1.48    3.71 
  -7  -4  -2    4.13    3.45 
   7  -4   2   -1.02    2.35 
   7  -4   2   -3.13    2.16 
  -7  -4  -2    3.58    3.38 
   7  -4   2    1.28    2.38 
   7  -4   2   -5.78    1.70 
   7  -4   2   -2.22    2.87 
   7  -4   2   -4.50    2.31 
   7  -4   2    0.67    3.22 
   7  -4   2    1.26    2.70 
   7  -4   2    4.36    4.02 
   7   4   2    3.94    3.06 
  -7   4  -2   -0.25    2.57 
   7   4   2   -1.15    2.58 
  -7   4  -2   -0.36    2.63 
  -7   4  -2    3.37    2.81 
   7   4   2   -0.11    2.08 
  -7   4  -2   -1.19    3.22 
   7   4   2    0.16    2.75 
   7   4   2    1.48    2.16 
  -7   4  -2    0.19    2.42 
   7   4   2    1.38    2.54 
  -7   4  -2    0.27    2.62 
   7   4   2   -1.45    2.68 
  -7   4  -2    2.87    3.29 
  -7   4  -2    0.84    3.14 
  -8  -4  -2    0.50    2.97 
   8  -4   2   -0.81    2.71 
   8  -4   2    1.96    3.91 
   8  -4   2   -1.02    3.23 
   8  -4   2    0.16    3.18 
   8  -4   2   -2.83    3.02 
   8  -4   2   -0.31    2.71 
   8  -4   2   -1.23    3.56 
   8  -4   2    2.24    3.86 
   8  -4   2    1.02    3.49 
  -8  -4  -2   -3.27    2.95 
  -8   4  -2    4.07    3.89 
  -8   4  -2   -2.12    2.49 
  -8   4  -2    1.35    2.96 
  -8   4  -2   -0.83    3.31 
  -8   4  -2    0.98    2.85 
   8   4   2    4.58    4.02 
   8   4   2   -2.58    2.19 
  -8   4  -2    9.72    3.72 
   8   4   2   -1.09    2.81 
   8   4   2   -3.84    2.72 
   8   4   2   -2.08    2.65 
  -8   4  -2    8.15    4.50 
  -8   4  -2   -2.06    2.18 
   9  -4   2   73.64   11.51 
   9  -4   2   78.82   10.31 
   9  -4   2   68.67   11.04 
   9  -4   2   64.10   10.15 
  -9  -4  -2   62.85   11.03 
  -9  -4  -2   52.48    9.75 
   9  -4   2   55.40   10.48 
   9  -4   2   72.16   10.79 
   9  -4   2   67.28   10.50 
   9  -4   2   86.79   14.22 
   9  -4   2   69.12   11.42 
  -9   4  -2   67.02   10.29 
  -9   4  -2   57.24    9.19 
   9   4   2   72.20   10.35 
   9   4   2   57.19    9.29 
  -9   4  -2   65.84   11.04 
  -9   4  -2   69.91   10.10 
  -9   4  -2   59.55   10.85 
  -9   4  -2   69.87   11.24 
  -9   4  -2   61.32    9.54 
   9   4   2   58.46   10.22 
   9   4   2   51.01    9.73 
   9   4   2   87.85   12.19 
   9  -5  -2    7.05    5.91 
  -9  -5   2    4.19    4.43 
   9  -5  -2   -3.69    3.39 
   9  -5  -2    1.65    3.83 
   9  -5  -2    2.36    4.84 
   9  -5  -2    0.23    3.70 
  -9  -5   2   -4.75    2.88 
   9  -5  -2    0.67    3.19 
   9  -5  -2   -4.13    2.62 
   9  -5  -2    2.33    4.00 
  -9   5   2    0.16    3.24 
  -9   5   2    2.80    3.91 
  -9   5   2   -1.58    3.64 
   9   5  -2    2.23    3.92 
  -9   5   2   -1.30    3.12 
   9   5  -2   -1.42    3.20 
  -9   5   2   -0.27    3.42 
   9   5  -2    3.40    4.11 
  -9   5   2    0.38    3.41 
  -9   5   2    4.48    4.12 
  -9   5   2   -0.25    2.82 
   8  -5  -2   95.86   11.78 
   8  -5  -2   78.14   11.19 
   8  -5  -2  108.96   13.16 
   8  -5  -2   93.23   12.10 
   8  -5  -2   89.81   12.01 
  -8  -5   2   70.82   10.52 
   8  -5  -2  104.48   11.69 
   8  -5  -2   93.31   11.12 
  -8  -5   2   95.02   12.89 
   8  -5  -2   89.24   13.16 
  -8   5   2  117.24   12.76 
  -8   5   2   95.88   11.79 
   8   5  -2   96.59   12.39 
   8   5  -2   83.09   11.04 
  -8   5   2   81.05   10.82 
   8   5  -2  101.27   11.57 
  -8   5   2  107.51   12.82 
   8   5  -2   97.90   12.64 
  -8   5   2  105.60   11.77 
  -8   5   2   97.53   11.67 
  -8   5   2   84.18   10.67 
  -8   5   2  103.00   12.09 
   7  -5  -2    1.70    3.22 
  -7  -5   2    1.58    2.43 
   7  -5  -2    4.50    3.29 
   7  -5  -2    1.96    3.59 
   7  -5  -2   -3.23    2.63 
   7  -5  -2    3.37    3.02 
  -7  -5   2    1.31    3.10 
   7  -5  -2    2.06    3.07 
   7  -5  -2   -0.72    2.19 
  -7  -5   2    0.59    2.91 
   7  -5  -2    1.17    3.73 
   7  -5  -2    0.94    2.30 
  -7   5   2    3.87    2.92 
  -7   5   2   -1.64    2.96 
   7   5  -2   -0.17    2.15 
   7   5  -2    0.33    2.26 
  -7   5   2    1.15    3.04 
  -7   5   2    0.15    2.58 
   7   5  -2    6.87    3.70 
   7   5  -2    1.80    3.51 
  -7   5   2   -2.54    2.64 
   7   5  -2   -2.25    2.41 
  -7   5   2   -2.29    2.25 
  -7   5   2    0.17    2.22 
   7   5  -2    1.41    3.40 
  -7   5   2   -0.30    2.76 
   6  -5  -2   30.74    5.88 
   6  -5  -2   30.61    6.19 
   6  -5  -2   38.61    6.15 
  -6  -5   2   48.53    8.34 
   6  -5  -2   27.21    4.84 
   6  -5  -2   44.42    7.49 
  -6  -5   2   29.87    5.28 
   6  -5  -2   27.45    6.12 
   6  -5  -2   39.11    7.77 
   6  -5  -2   45.81    7.45 
  -6  -5   2   38.35    6.87 
   6  -5  -2   29.63    6.22 
  -6   5   2   29.68    6.03 
  -6   5   2   34.32    6.52 
   6   5  -2   38.56    6.39 
   6   5  -2   37.75    5.46 
  -6   5   2   35.79    6.72 
   6   5  -2   31.22    5.36 
   6   5  -2   38.30    5.68 
  -6   5   2   46.87    7.19 
  -6   5   2   50.86    7.66 
   6   5  -2   48.43    7.50 
   6   5  -2   36.30    6.57 
  -6   5   2   42.55    6.72 
  -6   5   2   23.29    5.69 
  -6   5   2   33.67    6.43 
  -5  -5   2    2.54    2.33 
   5  -5  -2    1.06    2.57 
   5  -5  -2   -2.26    1.92 
  -5  -5   2    0.92    2.75 
  -5  -5   2   -1.22    1.30 
   5  -5  -2   -0.07    2.03 
   5  -5  -2    5.25    3.26 
   5  -5  -2    2.26    2.75 
   5  -5  -2    3.40    3.44 
  -5  -5   2   -0.60    1.85 
   5  -5  -2    2.67    2.51 
   5  -5  -2   -0.04    2.21 
   5  -5  -2   -0.55    1.87 
  -5   5   2    1.18    2.39 
   5   5  -2    1.52    1.39 
  -5   5   2    0.72    1.98 
  -5   5   2   -1.83    2.01 
   5   5  -2    2.35    1.89 
  -5   5   2    1.45    2.45 
   5   5  -2    3.43    2.69 
  -5   5   2    0.26    1.83 
  -5   5   2    1.03    2.52 
   5   5  -2   -0.28    2.03 
   5   5  -2   -1.47    1.69 
   5   5  -2   -0.01    2.48 
   5   5  -2   -0.43    1.21 
  -5   5   2   -0.99    2.13 
   4  -5  -2    6.74    3.00 
   4  -5  -2    0.75    2.38 
  -4  -5   2    5.11    2.52 
   4  -5  -2    3.20    2.73 
  -4  -5   2    2.97    2.41 
   4  -5  -2    5.22    3.09 
   4  -5  -2    9.73    3.35 
   4  -5  -2    4.54    2.24 
   4  -5  -2    5.54    2.83 
  -4  -5   2    3.92    3.15 
   4  -5  -2    6.14    2.85 
   4  -5  -2    6.98    3.18 
  -4  -5   2    7.52    2.27 
   4   5  -2    8.80    2.17 
   4   5  -2    4.27    1.58 
   4   5  -2    2.27    1.89 
   4   5  -2    8.38    3.02 
  -4   5   2    4.42    2.86 
  -4   5   2    4.42    2.25 
   4   5  -2    2.62    2.70 
  -4   5   2    5.03    2.40 
  -4   5   2    5.22    2.68 
  -4   5   2    5.45    3.36 
   4   5  -2    2.45    2.23 
   4   5  -2    4.17    2.52 
  -4   5   2    4.24    2.72 
   4   5  -2    4.29    1.36 
  -4   5   2    5.04    2.82 
   4   5  -2    3.10    2.75 
  -3  -5   2    0.22    1.96 
  -3  -5   2    6.69    3.04 
   3  -5  -2   -0.05    2.30 
  -3  -5   2    0.54    1.62 
   3  -5  -2    3.67    1.73 
   3  -5  -2    2.11    2.32 
  -3  -5   2    3.54    1.93 
  -3  -5   2    3.08    1.98 
   3  -5  -2   -0.22    1.52 
   3  -5  -2    1.61    1.51 
   3  -5  -2    1.87    1.86 
   3  -5  -2    5.19    2.81 
   3  -5  -2    2.13    1.95 
   3  -5  -2    2.29    2.22 
   3   5  -2    4.44    2.38 
   3   5  -2    2.29    1.12 
   3   5  -2    3.90    1.25 
   3   5  -2    3.87    1.22 
   3   5  -2    4.51    1.47 
  -3   5   2    3.20    2.92 
   3   5  -2    0.80    1.81 
  -3   5   2    4.05    2.19 
   3   5  -2    2.70    1.26 
  -3   5   2    0.61    1.98 
   3   5  -2    4.09    1.36 
   3   5  -2    1.24    1.24 
   3   5  -2    0.92    2.08 
  -3   5   2   -1.88    1.44 
  -3   5   2    0.72    1.54 
  -3   5   2    5.16    2.14 
   3   5  -2   -2.43    2.55 
   3   5  -2    1.59    2.14 
  -3   5   2    0.44    1.76 
   3   5  -2    5.34    2.51 
   3   5  -2    1.55    1.42 
   2  -5  -2    2.45    1.02 
   2  -5  -2    2.08    1.03 
  -2  -5   2    2.16    1.91 
   2  -5  -2    1.79    2.02 
  -2  -5   2    0.83    2.04 
   2  -5  -2    3.41    2.30 
   2  -5  -2    0.61    1.68 
  -2  -5   2    1.99    1.79 
  -2  -5   2    0.53    1.85 
   2  -5  -2    4.47    2.07 
  -2  -5   2    0.91    2.10 
   2  -5  -2    2.77    2.44 
   2  -5  -2    1.08    1.77 
  -2  -5   2    2.35    1.67 
   2  -5  -2    1.86    1.79 
   2   5  -2    1.19    1.73 
  -2   5   2    3.53    2.16 
  -2   5   2    0.94    2.06 
   2   5  -2    4.86    1.45 
   2   5  -2    3.58    2.38 
   2   5  -2    1.86    1.84 
   2   5  -2    2.93    1.40 
  -2   5   2   -0.24    1.53 
   2   5  -2    2.89    0.95 
  -2   5   2    1.92    1.73 
   2   5  -2    1.51    1.30 
  -2   5   2    3.52    2.32 
   2   5  -2    2.02    0.85 
   2   5  -2    2.76    2.03 
   2   5  -2    4.13    1.48 
   2   5  -2    1.73    1.54 
  -2   5   2    3.72    1.42 
   2   5  -2    1.74    1.30 
   2   5  -2    0.47    2.86 
  -2   5   2    5.01    1.89 
  -1  -5   2   -0.35    2.13 
   1  -5  -2    1.71    1.75 
  -1  -5   2    2.01    2.10 
  -1  -5   2   -1.07    1.74 
   1  -5  -2    3.14    2.11 
  -1  -5   2    2.88    1.73 
   1  -5  -2    2.46    1.26 
   1  -5  -2    2.22    1.73 
  -1  -5   2    3.55    1.99 
  -1  -5   2    0.84    2.01 
  -1  -5   2    1.54    1.60 
  -1  -5   2    1.71    1.74 
   1  -5  -2    0.41    2.24 
   1  -5  -2    3.48    1.90 
   1  -5  -2    2.10    1.80 
   1  -5  -2    1.08    1.65 
  -1   5   2    4.24    1.89 
  -1   5   2    3.75    1.57 
   1   5  -2    0.71    0.87 
   1   5  -2    6.61    2.33 
  -1   5   2    3.98    2.18 
   1   5  -2    1.37    1.67 
  -1   5   2    1.67    1.87 
  -1   5   2    2.36    0.81 
  -1   5   2    0.29    1.85 
  -1   5   2    1.29    1.59 
   1   5  -2    3.54    1.26 
   1   5  -2    1.76    1.14 
  -1   5   2    1.83    1.67 
   1   5  -2    1.35    0.96 
   1   5  -2    2.52    1.64 
  -1   5   2    3.97    3.18 
   1   5  -2    1.31    1.69 
  -1   5   2    2.14    1.28 
  -1   5   2    2.37    2.03 
   0  -5   2   75.59    5.64 
   0  -5  -2   69.44    5.27 
   0  -5   2   61.10    7.58 
   0  -5  -2   69.69    5.25 
   0  -5   2   69.86    7.07 
   0  -5   2   65.02    6.54 
   0  -5   2   68.50    6.60 
   0  -5  -2   70.69    7.55 
   0  -5   2   80.96    8.13 
   0  -5   2   81.94    7.81 
   0  -5  -2   73.07    5.39 
   0  -5   2   66.36    6.79 
   0  -5  -2   62.02    4.33 
   0  -5   2   72.70    8.74 
   0  -5  -2   64.91    6.16 
   0  -5  -2   76.52    5.89 
   0  -5  -2   72.99    7.15 
   0  -5  -2   68.41    5.64 
   0  -5  -2   71.27    5.12 
   0   5   2   70.38    3.72 
   0   5   2   71.98    5.27 
   0   5   2   49.91    8.09 
   0   5   2   69.89    5.01 
   0   5  -2   57.10    6.23 
   0   5  -2   69.57    3.48 
   0   5  -2   54.55    5.98 
   0   5  -2   72.20    4.31 
   0   5   2   63.55    5.05 
   0   5  -2   71.89    7.13 
   0   5  -2   63.25    7.51 
   0   5   2   72.22    4.52 
   0   5   2   66.57    3.63 
   0   5   2   78.84    6.08 
   0   5  -2   74.99    5.66 
   0   5   2   58.38    6.03 
   0   5   2   70.25    4.83 
   0   5  -2   69.14    4.73 
   0   5  -2   76.52    5.15 
   0   5  -2   71.28    4.96 
   0   5   2   71.29    6.78 
   1  -5   2    6.95    2.62 
  -1  -5  -2    4.01    1.80 
   1  -5   2    6.16    2.66 
  -1  -5  -2    3.22    2.44 
   1  -5   2    9.24    4.41 
  -1  -5  -2    4.63    1.68 
  -1  -5  -2    0.98    1.56 
   1  -5   2    8.60    2.81 
  -1  -5  -2    4.41    2.00 
   1  -5   2    6.48    2.76 
  -1  -5  -2    5.58    2.38 
   1  -5   2    3.62    2.02 
  -1  -5  -2    4.02    1.71 
  -1  -5  -2    8.90    2.41 
  -1  -5  -2    5.24    1.77 
  -1  -5  -2    6.42    2.68 
   1  -5   2    2.92    2.35 
   1  -5   2    5.32    2.68 
  -1  -5  -2    3.07    1.81 
  -1   5  -2   12.30    3.45 
   1   5   2    0.46    1.61 
  -1   5  -2    5.07    1.76 
   1   5   2    4.99    2.13 
  -1   5  -2    4.01    2.12 
   1   5   2    6.98    2.65 
  -1   5  -2    5.19    0.95 
  -1   5  -2    3.51    1.76 
   1   5   2    7.03    2.25 
   1   5   2    2.83    1.42 
   1   5   2    6.78    1.70 
   1   5   2    7.85    1.76 
  -1   5  -2    4.40    2.04 
  -1   5  -2    5.55    2.00 
   1   5   2    2.27    2.87 
   1   5   2    4.16    1.56 
   1   5   2    2.79    1.36 
   1   5   2    7.37    1.92 
   1   5   2    4.77    1.42 
  -1   5  -2    6.24    1.08 
   1   5   2    4.63    1.81 
  -1   5  -2    7.06    2.18 
  -2  -5  -2  413.97   18.97 
   2  -5   2  430.70   19.50 
  -2  -5  -2  408.79   18.70 
  -2  -5  -2  409.14   19.43 
   2  -5   2  400.38   18.55 
  -2  -5  -2  397.38   18.57 
  -2  -5  -2  419.80   17.16 
   2  -5   2  407.57   19.06 
   2  -5   2  392.61   18.82 
   2  -5   2  364.37   19.13 
   2  -5   2  411.77   19.72 
  -2  -5  -2  413.93   16.70 
   2  -5   2  403.94   15.99 
   2  -5   2  355.51   21.78 
   2  -5   2  408.54   19.18 
   2  -5   2  367.93   17.73 
   2   5   2  407.02   17.31 
   2   5   2  416.63   15.44 
   2   5   2  391.10   16.65 
  -2   5  -2  404.73   19.10 
  -2   5  -2  407.18   15.37 
   2   5   2  395.26   15.58 
  -2   5  -2  401.83   19.45 
   2   5   2  395.99   17.91 
   2   5   2  389.82   16.91 
  -2   5  -2  410.52   16.53 
  -2   5  -2  391.84   18.06 
  -2   5  -2  396.95   18.80 
   2   5   2  414.74   16.59 
   2   5   2  344.40   19.03 
  -2   5  -2  394.62   15.36 
   2   5   2  388.41   15.18 
   2   5   2  401.41   15.81 
   2   5   2  409.95   18.52 
   2   5   2  395.18   16.72 
   2   5   2  401.67   16.87 
  -2   5  -2  401.25   17.76 
   2   5   2  413.82   16.66 
   2   5   2  402.77   20.06 
   2   5   2  388.59   16.86 
   2   5   2  398.42   15.25 
   3  -5   2    1.01    1.89 
   3  -5   2    1.46    1.96 
  -3  -5  -2    2.43    2.02 
  -3  -5  -2    0.40    1.75 
  -3  -5  -2    2.47    1.16 
   3  -5   2    2.24    2.21 
   3  -5   2   -0.74    1.62 
   3  -5   2   -0.30    1.93 
   3  -5   2    0.67    2.10 
   3  -5   2   -0.85    1.67 
   3  -5   2    0.91    1.45 
  -3  -5  -2    1.36    1.86 
   3  -5   2    2.58    1.93 
  -3  -5  -2    0.92    1.30 
  -3  -5  -2    2.19    2.09 
   3  -5   2    0.64    2.90 
   3   5   2   -0.38    1.08 
   3   5   2    0.43    1.32 
   3   5   2   -0.48    0.75 
  -3   5  -2   -0.46    1.58 
   3   5   2   -0.41    1.00 
   3   5   2    3.24    1.57 
   3   5   2    0.44    0.61 
   3   5   2    2.27    1.97 
  -3   5  -2    2.09    2.14 
   3   5   2   -0.49    1.09 
  -3   5  -2   -0.23    0.96 
   3   5   2    0.55    1.13 
   3   5   2   -0.10    2.06 
   3   5   2    0.87    0.78 
  -3   5  -2   -2.42    1.49 
  -3   5  -2    0.89    0.85 
  -3   5  -2    2.96    2.30 
   3   5   2    2.47    0.69 
   3   5   2    0.60    0.85 
   3   5   2    1.09    0.53 
  -3   5  -2   -0.20    1.95 
   3   5   2   -0.20    0.62 
   3   5   2   -0.43    1.25 
   3   5   2    2.02    1.81 
   3   5   2    1.23    1.23 
   3   5   2    2.95    2.63 
   3   5   2    1.52    1.41 
   3   5   2    0.78    2.08 
   4  -5   2  286.27   16.70 
   4  -5   2  284.24   14.33 
  -4  -5  -2  289.46   15.87 
   4  -5   2  270.48   11.52 
  -4  -5  -2  278.07   12.27 
   4  -5   2  264.53   15.48 
  -4  -5  -2  278.30   14.38 
   4  -5   2  302.58   18.30 
  -4  -5  -2  285.23   15.52 
   4  -5   2  284.61   14.18 
   4  -5   2  280.57   15.77 
   4  -5   2  280.36   16.45 
   4  -5   2  280.77   15.76 
   4   5   2  235.33   13.76 
   4   5   2  267.36   15.37 
   4   5   2  262.88   10.97 
   4   5   2  285.67   14.24 
  -4   5  -2  265.00   14.97 
  -4   5  -2  276.88   15.57 
   4   5   2  272.86   12.66 
   4   5   2  286.74   13.36 
   4   5   2  280.14   10.60 
   4   5   2  268.01   11.70 
   4   5   2  266.34   12.10 
   4   5   2  279.72   13.54 
  -4   5  -2  276.82   15.82 
   4   5   2  271.05   10.93 
  -4   5  -2  283.13   15.57 
  -4   5  -2  278.06   13.14 
  -4   5  -2  265.59   15.05 
   4   5   2  249.56   15.92 
   5  -5   2    1.15    2.36 
   5  -5   2    3.10    2.30 
   5  -5   2    2.51    2.70 
   5  -5   2    4.35    2.46 
  -5  -5  -2    3.83    2.98 
  -5  -5  -2    1.43    2.73 
   5  -5   2    2.27    3.21 
   5  -5   2    1.31    3.03 
   5  -5   2    0.45    2.79 
   5  -5   2    4.56    2.10 
   5  -5   2   -0.49    2.43 
  -5  -5  -2    0.29    1.17 
  -5  -5  -2    0.38    2.06 
   5   5   2    5.76    2.16 
  -5   5  -2   -1.80    2.19 
   5   5   2    2.40    1.84 
   5   5   2    1.46    2.19 
  -5   5  -2    0.96    3.75 
  -5   5  -2    5.77    2.93 
  -5   5  -2    2.69    2.87 
  -5   5  -2    2.81    2.94 
   5   5   2    1.73    2.19 
  -5   5  -2   -0.46    1.78 
   5   5   2    2.82    2.60 
  -5   5  -2   -3.61    2.23 
   5   5   2    4.13    3.15 
   5   5   2   -0.12    2.81 
   6  -5   2  156.40   13.12 
   6  -5   2  156.53   12.59 
   6  -5   2  157.24   12.64 
  -6  -5  -2  163.32   10.66 
   6  -5   2  195.61   12.69 
  -6  -5  -2  182.68   13.57 
   6  -5   2  185.20   13.37 
  -6  -5  -2  171.36   13.09 
   6  -5   2  181.03   15.06 
   6  -5   2  198.70   10.97 
   6  -5   2  170.71   13.26 
  -6   5  -2  188.83   13.34 
  -6   5  -2  183.34   14.35 
  -6   5  -2  181.57   11.55 
   6   5   2  197.16   13.62 
  -6   5  -2  182.23   13.39 
   6   5   2  171.97   11.14 
  -6   5  -2  187.13   12.95 
  -6   5  -2  182.63   12.84 
  -6   5  -2  199.20   13.44 
   6   5   2  198.48   12.79 
   6   5   2  183.12   11.77 
   6   5   2  169.49   10.73 
   6   5   2  168.66   13.17 
  -6   5  -2  195.89   13.12 
   7  -5   2   17.67    6.34 
  -7  -5  -2   19.90    5.76 
   7  -5   2    9.69    4.56 
   7  -5   2   14.96    5.31 
   7  -5   2    4.73    3.55 
   7  -5   2   11.05    4.85 
   7  -5   2   14.54    5.39 
   7  -5   2   13.68    4.67 
  -7  -5  -2   12.86    4.89 
   7   5   2    9.58    3.98 
   7   5   2    6.72    3.74 
  -7   5  -2   15.39    5.08 
  -7   5  -2   15.65    5.45 
   7   5   2    2.80    3.55 
  -7   5  -2   17.24    4.74 
  -7   5  -2   10.99    5.32 
  -7   5  -2   14.60    4.75 
   7   5   2   12.51    4.79 
  -7   5  -2   14.30    4.87 
  -7   5  -2    8.78    3.94 
  -7   5  -2    9.57    4.21 
  -8  -5  -2   87.19   12.04 
   8  -5   2  109.11   13.21 
   8  -5   2  106.39   13.23 
   8  -5   2  102.22   12.78 
   8  -5   2  102.99   12.31 
   8  -5   2   95.60   13.76 
  -8  -5  -2  118.77   14.12 
   8  -5   2  108.14   13.81 
   8  -5   2   95.41   11.81 
   8   5   2   94.40   11.88 
   8   5   2  100.55   11.37 
  -8   5  -2  102.70   12.27 
  -8   5  -2   91.09   11.09 
  -8   5  -2  114.28   13.83 
  -8   5  -2   86.75   12.08 
  -8   5  -2  101.66   11.87 
  -8   5  -2   90.01   11.83 
   8   5   2  143.47   14.98 
  -8   5  -2   95.81   11.31 
  -8   5  -2   90.71   11.59 
   8   5   2  108.01   13.83 
   8  -6  -2   20.31    7.81 
   8  -6  -2   15.87    5.19 
  -8  -6   2   14.31    5.30 
   8  -6  -2    9.75    5.01 
   8  -6  -2   23.67    6.58 
   8  -6  -2   17.21    6.26 
  -8  -6   2   13.25    5.57 
   8  -6  -2   13.90    5.32 
  -8   6   2    9.60    5.05 
  -8   6   2    3.08    3.61 
  -8   6   2   18.72    6.45 
  -8   6   2   25.22    6.46 
  -8   6   2   15.83    5.99 
  -8   6   2   16.41    5.92 
   8   6  -2   19.15    5.80 
   8   6  -2    9.73    5.11 
  -8   6   2   15.04    5.26 
   8   6  -2   12.12    5.12 
  -8   6   2   19.13    5.83 
   7  -6  -2   39.50    7.69 
   7  -6  -2   33.35    7.08 
  -7  -6   2   41.09    7.72 
  -7  -6   2   46.76    9.01 
   7  -6  -2   43.54    7.15 
   7  -6  -2   41.96    7.95 
   7  -6  -2   55.53    7.36 
  -7  -6   2   36.10    7.89 
   7  -6  -2   40.06    9.13 
   7  -6  -2   48.12    8.83 
   7  -6  -2   37.80    6.93 
  -7   6   2   24.08    6.61 
  -7   6   2   60.97    9.34 
   7   6  -2   43.06    7.66 
   7   6  -2   46.15    7.86 
  -7   6   2   35.76    6.56 
  -7   6   2   31.39    7.55 
   7   6  -2   52.92    9.38 
  -7   6   2   47.86    8.43 
  -7   6   2   41.06    7.88 
  -7   6   2   36.59    7.20 
   7   6  -2   49.64    8.24 
  -7   6   2   30.07    6.63 
  -6  -6   2   14.72    4.59 
  -6  -6   2   23.08    5.30 
   6  -6  -2    9.95    4.38 
  -6  -6   2   18.60    5.87 
   6  -6  -2   10.12    4.46 
   6  -6  -2   18.87    5.49 
   6  -6  -2   23.55    5.73 
   6  -6  -2   13.17    4.06 
   6  -6  -2   28.02    6.48 
   6  -6  -2   14.90    5.70 
   6  -6  -2   16.00    4.10 
   6   6  -2   12.56    4.76 
  -6   6   2   12.51    4.10 
   6   6  -2   15.00    4.45 
  -6   6   2   15.61    4.74 
  -6   6   2   25.08    6.07 
  -6   6   2   18.01    5.24 
  -6   6   2   25.22    5.80 
  -6   6   2    8.80    4.16 
   6   6  -2   18.63    4.46 
   6   6  -2    6.04    3.48 
   6   6  -2   26.50    5.99 
  -6   6   2    9.03    4.43 
  -6   6   2   28.20    6.55 
   6   6  -2   15.07    4.50 
   5  -6  -2  134.11   10.60 
   5  -6  -2  133.17   11.90 
   5  -6  -2  124.32    8.81 
   5  -6  -2  141.52   13.31 
  -5  -6   2  133.29   13.50 
   5  -6  -2  131.82   12.42 
  -5  -6   2  114.39    9.76 
  -5  -6   2  137.13   10.28 
   5  -6  -2  137.13   13.25 
   5  -6  -2  113.08    9.40 
   5  -6  -2  111.33   11.94 
   5   6  -2  146.82   14.05 
   5   6  -2  137.43    9.67 
   5   6  -2  115.37    9.21 
  -5   6   2  126.00   12.59 
  -5   6   2  144.86   10.98 
  -5   6   2  113.37   11.54 
  -5   6   2  152.16   11.37 
   5   6  -2  130.50   10.26 
  -5   6   2  139.58   12.51 
  -5   6   2  126.33    9.23 
  -5   6   2  134.59   10.54 
   5   6  -2  122.48    9.74 
  -5   6   2  130.67   12.59 
   4  -6  -2   22.89    4.78 
   4  -6  -2   32.87    6.14 
   4  -6  -2   26.79    5.50 
   4  -6  -2   27.52    5.40 
  -4  -6   2   30.98    4.38 
  -4  -6   2   20.14    5.16 
   4  -6  -2   23.63    5.91 
  -4  -6   2   29.17    5.32 
   4  -6  -2   22.36    4.97 
   4  -6  -2   23.62    3.87 
  -4  -6   2   12.92    4.24 
  -4  -6   2   21.85    4.75 
   4   6  -2   29.97    4.74 
  -4   6   2   25.22    5.98 
   4   6  -2   33.10    4.28 
  -4   6   2   28.26    5.34 
   4   6  -2   28.12    5.48 
   4   6  -2   25.23    4.91 
   4   6  -2   16.51    5.23 
   4   6  -2   28.56    3.57 
   4   6  -2   24.27    4.70 
   4   6  -2   26.95    5.01 
  -4   6   2   29.93    4.81 
  -4   6   2   25.74    4.95 
  -4   6   2   37.06    6.74 
  -4   6   2   18.32    4.82 
  -3  -6   2  283.04   13.94 
   3  -6  -2  244.84   14.22 
   3  -6  -2  254.72   14.71 
   3  -6  -2  245.14   16.04 
  -3  -6   2  279.30   16.03 
  -3  -6   2  246.05   14.84 
  -3  -6   2  236.11   13.75 
   3  -6  -2  251.08   14.66 
   3  -6  -2  254.22   14.69 
   3  -6  -2  283.41   14.99 
  -3  -6   2  269.41   13.21 
   3  -6  -2  248.29   11.06 
   3  -6  -2  271.38   15.38 
   3   6  -2  259.46   11.51 
  -3   6   2  246.55   14.69 
  -3   6   2  244.64   13.94 
   3   6  -2  257.98   10.74 
   3   6  -2  223.62   13.51 
   3   6  -2  275.52   12.32 
  -3   6   2  301.31   16.26 
  -3   6   2  250.59   13.30 
   3   6  -2  267.79   14.06 
   3   6  -2  261.47   14.16 
  -3   6   2  251.54   14.80 
   3   6  -2  267.46   12.71 
   3   6  -2  204.13   16.19 
   3   6  -2  250.91   14.04 
  -3   6   2  240.66   12.66 
   3   6  -2  218.84   14.45 
  -3   6   2  257.03   14.31 
  -2  -6   2   49.63    5.96 
   2  -6  -2   58.57    7.04 
  -2  -6   2   76.05    7.49 
   2  -6  -2   46.20    8.16 
   2  -6  -2   65.14    7.49 
  -2  -6   2   53.57    7.67 
  -2  -6   2   58.63    7.86 
   2  -6  -2   53.90    6.50 
  -2  -6   2   53.48    6.97 
  -2  -6   2   60.48    6.56 
   2  -6  -2   82.83    8.56 
   2  -6  -2   48.64    6.54 
   2  -6  -2   46.13    6.42 
  -2   6   2   47.10    7.17 
   2   6  -2   59.75    6.15 
   2   6  -2   53.70    5.59 
  -2   6   2   61.18    6.81 
  -2   6   2   56.45    4.43 
   2   6  -2   63.06    7.00 
   2   6  -2   61.17    7.33 
  -2   6   2   55.82    5.77 
   2   6  -2   59.23    6.88 
   2   6  -2   55.79    9.00 
  -2   6   2   49.15    6.49 
   2   6  -2   57.48    3.50 
   2   6  -2   50.81    3.41 
  -2   6   2   40.64    6.11 
   2   6  -2   67.82    8.25 
  -2   6   2   46.40    6.71 
   2   6  -2   53.20    6.07 
   2   6  -2   57.61    3.85 
  -1  -6   2  166.47   10.53 
   1  -6  -2  164.76   10.18 
  -1  -6   2  187.33   11.86 
   1  -6  -2  186.59   11.50 
   1  -6  -2  156.92   10.15 
   1  -6  -2  181.66   11.09 
   1  -6  -2  155.81   10.30 
  -1  -6   2  167.67   11.41 
  -1  -6   2  159.46   12.31 
   1  -6  -2  179.80    8.64 
  -1  -6   2  167.75   10.53 
   1  -6  -2  170.51   10.05 
  -1  -6   2  171.38   10.12 
  -1  -6   2  192.17   11.98 
   1  -6  -2  178.11   11.41 
  -1   6   2  168.62   10.93 
   1   6  -2  183.58   12.06 
   1   6  -2  173.49    8.53 
  -1   6   2  169.68    8.76 
   1   6  -2  181.12   10.61 
  -1   6   2  174.89   10.84 
  -1   6   2  163.54   10.78 
  -1   6   2  171.50    6.88 
  -1   6   2  177.38    9.95 
  -1   6   2  165.84    6.95 
   1   6  -2  171.82   12.89 
   1   6  -2  169.28    7.69 
   1   6  -2  174.03    7.97 
   1   6  -2  158.01    9.73 
   1   6  -2  163.34   10.18 
  -1   6   2  170.87    8.59 
  -1   6   2  171.64   12.90 
   1   6  -2  167.15    9.41 
   0  -6  -2   37.41    3.99 
   0  -6   2   41.25    6.01 
   0  -6   2   45.65    5.42 
   0  -6  -2   48.88    6.39 
   0  -6  -2   44.07    5.37 
   0  -6  -2   36.40    4.88 
   0  -6  -2   33.14    4.75 
   0  -6  -2   44.13    5.49 
   0  -6   2   43.29    5.92 
   0  -6   2   21.42    5.24 
   0  -6  -2   40.29    6.21 
   0  -6  -2   28.68    4.44 
   0  -6  -2   33.20    5.78 
   0  -6   2   43.84    5.80 
   0  -6   2   39.07    5.99 
   0  -6   2   31.37    5.48 
   0  -6   2   31.53    6.24 
   0  -6   2   32.49    5.50 
   0   6  -2   34.30    2.41 
   0   6   2   42.44    4.09 
   0   6  -2   41.88    5.80 
   0   6  -2   30.63    4.11 
   0   6  -2   42.56    4.37 
   0   6   2   41.19    8.07 
   0   6  -2   35.81    4.23 
   0   6   2   34.12    4.65 
   0   6  -2   37.55    5.51 
   0   6   2   52.07    6.17 
   0   6  -2   34.52    5.93 
   0   6   2   40.08    2.95 
   0   6  -2   48.35    5.83 
   0   6   2   42.92    5.84 
   0   6  -2   36.02    6.31 
   0   6   2   39.00    4.55
[truncated: 1,882,446 more chars]
