# Supplementary material
Source: MDPI journal article supplement (https://www.mdpi.com/2073-4352/13/7/1043)
Supplement: s1 [file s1 › 13 Yb Ha2019_99j_0m_a.cif]

 
data_Ha2019_99j_0m_a 
  
_audit_creation_method            'SHELXL-2014/7' 
_shelx_SHELXL_version_number      '2014/7' 
_chemical_name_systematic         ? 
_chemical_name_common             ? 
_chemical_melting_point           ? 
_chemical_formula_moiety          ? 
_chemical_formula_sum 
 'C4 H12 Br O7 Yb' 
_chemical_formula_weight          425.09 
  
loop_ 
 _atom_type_symbol 
 _atom_type_description 
 _atom_type_scat_dispersion_real 
 _atom_type_scat_dispersion_imag 
 _atom_type_scat_source 
 'C'  'C'   0.0033   0.0016 
 'International Tables Vol C Tables 4.2.6.8 and 6.1.1.4' 
 'H'  'H'   0.0000   0.0000 
 'International Tables Vol C Tables 4.2.6.8 and 6.1.1.4' 
 'O'  'O'   0.0106   0.0060 
 'International Tables Vol C Tables 4.2.6.8 and 6.1.1.4' 
 'Br'  'Br'  -0.2901   2.4595 
 'International Tables Vol C Tables 4.2.6.8 and 6.1.1.4' 
 'Yb'  'Yb'  -0.3850   5.5486 
 'International Tables Vol C Tables 4.2.6.8 and 6.1.1.4' 
  
_space_group_crystal_system       monoclinic 
_space_group_IT_number            14 
_space_group_name_H-M_alt         'P 21/n' 
_space_group_name_Hall            '-P 2yn' 
  
_shelx_space_group_comment 
; 
The symmetry employed for this shelxl refinement is uniquely defined 
by the following loop, which should always be used as a source of 
symmetry information in preference to the above space-group names. 
They are only intended as comments. 
; 
  
loop_ 
 _space_group_symop_operation_xyz 
 'x, y, z' 
 '-x+1/2, y+1/2, -z+1/2' 
 '-x, -y, -z' 
 'x-1/2, -y-1/2, z-1/2' 
  
_cell_length_a                    7.7854(3) 
_cell_length_b                    8.0625(3) 
_cell_length_c                    17.3573(7) 
_cell_angle_alpha                 90 
_cell_angle_beta                  96.142(2) 
_cell_angle_gamma                 90 
_cell_volume                      1083.26(7) 
_cell_formula_units_Z             4 
_cell_measurement_temperature     100(2) 
_cell_measurement_reflns_used     9947 
_cell_measurement_theta_min       2.36 
_cell_measurement_theta_max       28.28 
  
_exptl_crystal_description        prism 
_exptl_crystal_colour             colourless 
_exptl_crystal_density_meas       ? 
_exptl_crystal_density_method     ? 
_exptl_crystal_density_diffrn     2.606 
_exptl_crystal_F_000              788 
_exptl_transmission_factor_min    ? 
_exptl_transmission_factor_max    ? 
_exptl_crystal_size_max           0.487 
_exptl_crystal_size_mid           0.172 
_exptl_crystal_size_min           0.070 
_exptl_absorpt_coefficient_mu     12.326 
_shelx_estimated_absorpt_T_min    0.065 
_shelx_estimated_absorpt_T_max    0.479 
_exptl_absorpt_correction_type    multi-scan 
_exptl_absorpt_correction_T_min   0.349 
_exptl_absorpt_correction_T_max   0.742 
_exptl_absorpt_process_details    'Bruker SADABS' 
_exptl_absorpt_special_details    ? 
_diffrn_ambient_temperature       100(2) 
_diffrn_radiation_wavelength      0.71073 
_diffrn_radiation_type            MoK\a 
_diffrn_source                    ? 
_diffrn_measurement_device_type   'Bruker APEX-II CCD' 
_diffrn_measurement_method        '\f and \w scans' 
_diffrn_detector_area_resol_mean  ? 
_diffrn_reflns_number             120213 
_diffrn_reflns_av_unetI/netI      0.0100 
_diffrn_reflns_av_R_equivalents   0.0460 
_diffrn_reflns_limit_h_min        -10 
_diffrn_reflns_limit_h_max        10 
_diffrn_reflns_limit_k_min        -10 
_diffrn_reflns_limit_k_max        10 
_diffrn_reflns_limit_l_min        -22 
_diffrn_reflns_limit_l_max        22 
_diffrn_reflns_theta_min          2.766 
_diffrn_reflns_theta_max          27.999 
_diffrn_reflns_theta_full         25.242 
_diffrn_measured_fraction_theta_max   1.000 
_diffrn_measured_fraction_theta_full  0.999 
_diffrn_reflns_Laue_measured_fraction_max    1.000 
_diffrn_reflns_Laue_measured_fraction_full   0.999 
_diffrn_reflns_point_group_measured_fraction_max   1.000 
_diffrn_reflns_point_group_measured_fraction_full  0.999 
_reflns_number_total              2616 
_reflns_number_gt                 2454 
_reflns_threshold_expression      'I > 2\s(I)' 
_reflns_Friedel_coverage          0.000 
_reflns_Friedel_fraction_max      . 
_reflns_Friedel_fraction_full     . 
  
_reflns_special_details 
; 
 Reflections were merged by SHELXL according to the crystal 
 class for the calculation of statistics and refinement. 
  
 _reflns_Friedel_fraction is defined as the number of unique 
 Friedel pairs measured divided by the number that would be 
 possible theoretically, ignoring centric projections and 
 systematic absences. 
; 
  
_computing_data_collection        'Bruker APEX2' 
_computing_cell_refinement        'Bruker SAINT' 
_computing_data_reduction         'Bruker SAINT' 
_computing_structure_solution     'SHELXS-97 (Sheldrick 2008)' 
_computing_structure_refinement 'SHELXL-2014/7 (Sheldrick, 2014)' 
_computing_molecular_graphics     'Bruker SHELXTL' 
_computing_publication_material   'Bruker SHELXTL' 
_refine_special_details           ? 
_refine_ls_structure_factor_coef  Fsqd 
_refine_ls_matrix_type            full 
_refine_ls_weighting_scheme       calc 
_refine_ls_weighting_details 
'w=1/[\s^2^(Fo^2^)+(0.0089P)^2^+1.8324P] where P=(Fo^2^+2Fc^2^)/3' 
_atom_sites_solution_primary      direct
_atom_sites_solution_secondary    ? 
_atom_sites_solution_hydrogens    mixed 
_refine_ls_hydrogen_treatment     constr 
_refine_ls_extinction_method      none 
_refine_ls_extinction_coef        . 
_refine_ls_number_reflns          2616 
_refine_ls_number_parameters      125 
_refine_ls_number_restraints      0 
_refine_ls_R_factor_all           0.0141 
_refine_ls_R_factor_gt            0.0121 
_refine_ls_wR_factor_ref          0.0266 
_refine_ls_wR_factor_gt           0.0261 
_refine_ls_goodness_of_fit_ref    1.073 
_refine_ls_restrained_S_all       1.073 
_refine_ls_shift/su_max           0.003 
_refine_ls_shift/su_mean          0.000 
  
loop_ 
 _atom_site_label 
 _atom_site_type_symbol 
 _atom_site_fract_x 
 _atom_site_fract_y 
 _atom_site_fract_z 
 _atom_site_U_iso_or_equiv 
 _atom_site_adp_type 
 _atom_site_occupancy 
 _atom_site_site_symmetry_order 
 _atom_site_calc_flag 
 _atom_site_refinement_flags_posn 
 _atom_site_refinement_flags_adp 
 _atom_site_refinement_flags_occupancy 
 _atom_site_disorder_assembly 
 _atom_site_disorder_group 
Yb1 Yb 0.27512(2) 0.44441(2) 0.54043(2) 0.00934(3) Uani 1 1 d . . . . . 
Br1 Br 0.38092(3) 0.94698(3) 0.67897(2) 0.01617(5) Uani 1 1 d . . . . . 
O11 O 0.02352(19) 0.3208(2) 0.54192(9) 0.0168(3) Uani 1 1 d . . . . . 
O12 O -0.25944(18) 0.29899(19) 0.52203(9) 0.0132(3) Uani 1 1 d . . . . . 
C11 C -0.1131(3) 0.2413(3) 0.54787(12) 0.0112(4) Uani 1 1 d . . . . . 
C12 C -0.1066(3) 0.0741(3) 0.58578(15) 0.0203(5) Uani 1 1 d . . . . . 
H12A H 0.0105 0.0532 0.6105 0.057(7) Uiso 1 1 calc R U . . . 
H12B H -0.1380 -0.0113 0.5466 0.057(7) Uiso 1 1 calc R U . . . 
H12C H -0.1882 0.0712 0.6250 0.057(7) Uiso 1 1 calc R U . . . 
O21 O 0.53746(18) 0.55574(19) 0.57447(9) 0.0118(3) Uani 1 1 d . . . . . 
O22 O 0.80879(18) 0.6241(2) 0.59025(9) 0.0137(3) Uani 1 1 d . . . . . 
C21 C 0.6724(3) 0.5899(3) 0.61990(12) 0.0113(4) Uani 1 1 d . . . . . 
C22 C 0.6699(3) 0.5864(3) 0.70576(13) 0.0191(5) Uani 1 1 d . . . . . 
H22A H 0.7865 0.5635 0.7307 0.088(9) Uiso 1 1 calc R U . . . 
H22B H 0.5909 0.4993 0.7196 0.088(9) Uiso 1 1 calc R U . . . 
H22C H 0.6307 0.6940 0.7234 0.088(9) Uiso 1 1 calc R U . . . 
O1W O 0.41443(19) 0.19129(19) 0.53248(9) 0.0136(3) Uani 1 1 d . . . . . 
H11W H 0.4117 0.1011 0.5684 0.051(8) Uiso 1 1 d R U . . . 
H12W H 0.5342 0.2044 0.5252 0.051(8) Uiso 1 1 d R U . . . 
O2W O 0.15542(19) 0.62276(19) 0.62462(9) 0.0129(3) Uani 1 1 d . . . . . 
H21W H 0.0331 0.6379 0.6246 0.050(7) Uiso 1 1 d R U . . . 
H22W H 0.2045 0.7306 0.6354 0.050(7) Uiso 1 1 d R U . . . 
O3W O 0.3160(2) 0.3401(2) 0.66709(9) 0.0165(3) Uani 1 1 d . . . . . 
H31W H 0.2554 0.3871 0.7072 0.049(7) Uiso 1 1 d R U . . . 
H32W H 0.3360 0.2265 0.6820 0.049(7) Uiso 1 1 d R U . . . 
  
loop_ 
 _atom_site_aniso_label 
 _atom_site_aniso_U_11 
 _atom_site_aniso_U_22 
 _atom_site_aniso_U_33 
 _atom_site_aniso_U_23 
 _atom_site_aniso_U_13 
 _atom_site_aniso_U_12 
Yb1 0.00599(4) 0.01085(5) 0.01104(5) 0.00028(4) 0.00028(3) -0.00118(3) 
Br1 0.01981(10) 0.01229(10) 0.01635(10) 0.00118(9) 0.00165(8) -0.00230(9) 
O11 0.0104(7) 0.0198(8) 0.0208(8) -0.0035(7) 0.0047(6) -0.0061(6) 
O12 0.0080(7) 0.0146(8) 0.0172(8) 0.0021(6) 0.0015(6) 0.0009(6) 
C11 0.0108(9) 0.0127(10) 0.0102(10) -0.0025(8) 0.0017(7) -0.0006(8) 
C12 0.0168(11) 0.0175(12) 0.0261(12) 0.0072(10) 0.0007(9) 0.0016(9) 
O21 0.0075(6) 0.0140(7) 0.0134(7) -0.0003(6) -0.0011(5) -0.0010(6) 
O22 0.0078(7) 0.0179(8) 0.0149(7) 0.0001(6) -0.0006(6) -0.0009(6) 
C21 0.0112(9) 0.0103(10) 0.0123(10) -0.0005(8) 0.0003(7) 0.0017(8) 
C22 0.0156(10) 0.0293(14) 0.0120(10) 0.0001(10) -0.0001(8) 0.0008(9) 
O1W 0.0111(7) 0.0140(8) 0.0159(8) 0.0015(6) 0.0028(6) 0.0005(6) 
O2W 0.0097(7) 0.0133(8) 0.0155(8) -0.0019(6) 0.0007(6) -0.0003(6) 
O3W 0.0206(8) 0.0140(8) 0.0155(8) 0.0013(6) 0.0048(6) 0.0026(7) 
  
_geom_special_details 
; 
 All esds (except the esd in the dihedral angle between two l.s. planes) 
 are estimated using the full covariance matrix.  The cell esds are taken 
 into account individually in the estimation of esds in distances, angles 
 and torsion angles; correlations between esds in cell parameters are only 
 used when they are defined by crystal symmetry.  An approximate (isotropic) 
 treatment of cell esds is used for estimating esds involving l.s. planes. 
; 
  
loop_ 
 _geom_bond_atom_site_label_1 
 _geom_bond_atom_site_label_2 
 _geom_bond_distance 
 _geom_bond_site_symmetry_2 
 _geom_bond_publ_flag 
Yb1 O11 2.2006(15) . ? 
Yb1 O21 2.2512(14) . ? 
Yb1 O2W 2.3159(15) . ? 
Yb1 O1W 2.3221(15) . ? 
Yb1 O12 2.3328(15) 3_566 ? 
Yb1 O3W 2.3435(16) . ? 
Yb1 O22 2.3579(15) 3_666 ? 
Yb1 O21 2.5941(15) 3_666 ? 
Yb1 O11 3.2128(16) 3_566 ? 
O11 C11 1.255(3) . ? 
O12 C11 1.267(2) . ? 
C11 C12 1.498(3) . ? 
C12 H12A 0.9800 . ? 
C12 H12B 0.9800 . ? 
C12 H12C 0.9800 . ? 
O21 C21 1.275(2) . ? 
O22 C21 1.259(3) . ? 
C21 C22 1.493(3) . ? 
C22 H22A 0.9800 . ? 
C22 H22B 0.9800 . ? 
C22 H22C 0.9800 . ? 
O1W H11W 0.9600 . ? 
O1W H12W 0.9600 . ? 
O2W H21W 0.9600 . ? 
O2W H22W 0.9600 . ? 
O3W H31W 0.9600 . ? 
O3W H32W 0.9600 . ? 
  
loop_ 
 _geom_angle_atom_site_label_1 
 _geom_angle_atom_site_label_2 
 _geom_angle_atom_site_label_3 
 _geom_angle 
 _geom_angle_site_symmetry_1 
 _geom_angle_site_symmetry_3 
 _geom_angle_publ_flag 
O11 Yb1 O21 164.01(6) . . ? 
O11 Yb1 O2W 81.67(6) . . ? 
O21 Yb1 O2W 90.11(5) . . ? 
O11 Yb1 O1W 91.40(6) . . ? 
O21 Yb1 O1W 87.11(5) . . ? 
O2W Yb1 O1W 143.63(5) . . ? 
O11 Yb1 O12 113.88(6) . 3_566 ? 
O21 Yb1 O12 76.66(5) . 3_566 ? 
O2W Yb1 O12 74.81(5) . 3_566 ? 
O1W Yb1 O12 138.88(5) . 3_566 ? 
O11 Yb1 O3W 81.84(6) . . ? 
O21 Yb1 O3W 82.45(5) . . ? 
O2W Yb1 O3W 69.77(6) . . ? 
O1W Yb1 O3W 73.91(6) . . ? 
O12 Yb1 O3W 138.54(6) 3_566 . ? 
O11 Yb1 O22 75.51(6) . 3_666 ? 
O21 Yb1 O22 119.74(5) . 3_666 ? 
O2W Yb1 O22 131.58(5) . 3_666 ? 
O1W Yb1 O22 79.64(5) . 3_666 ? 
O12 Yb1 O22 76.42(5) 3_566 3_666 ? 
O3W Yb1 O22 144.51(6) . 3_666 ? 
O11 Yb1 O21 125.69(5) . 3_666 ? 
O21 Yb1 O21 68.46(6) . 3_666 ? 
O2W Yb1 O21 141.52(5) . 3_666 ? 
O1W Yb1 O21 69.46(5) . 3_666 ? 
O12 Yb1 O21 69.44(5) 3_566 3_666 ? 
O3W Yb1 O21 133.63(5) . 3_666 ? 
O22 Yb1 O21 51.76(5) 3_666 3_666 ? 
O11 Yb1 O11 70.70(6) . 3_566 ? 
O21 Yb1 O11 118.35(5) . 3_566 ? 
O2W Yb1 O11 66.04(5) . 3_566 ? 
O1W Yb1 O11 144.28(5) . 3_566 ? 
O12 Yb1 O11 43.22(4) 3_566 3_566 ? 
O3W Yb1 O11 130.39(5) . 3_566 ? 
O22 Yb1 O11 66.25(5) 3_666 3_566 ? 
O21 Yb1 O11 95.63(4) 3_666 3_566 ? 
Yb1 Yb1 Yb1 133.712(5) 3_666 3_566 ? 
C11 O11 Yb1 174.43(16) . . ? 
C11 O12 Yb1 119.35(13) . 3_566 ? 
O11 C11 O12 121.4(2) . . ? 
O11 C11 C12 120.4(2) . . ? 
O12 C11 C12 118.18(19) . . ?  
C11 C12 H12A 109.5 . . ? 
C11 C12 H12B 109.5 . . ? 
H12A C12 H12B 109.5 . . ? 
C11 C12 H12C 109.5 . . ? 
H12A C12 H12C 109.5 . . ? 
H12B C12 H12C 109.5 . . ? 
C21 O21 Yb1 155.96(14) . . ? 
C21 O21 Yb1 88.93(12) . 3_666 ? 
Yb1 O21 Yb1 111.54(6) . 3_666 ? 
C21 O22 Yb1 100.54(13) . 3_666 ? 
O22 C21 O21 118.03(19) . . ? 
O22 C21 C22 120.93(19) . . ? 
O21 C21 C22 121.03(19) . . ? 
C21 C22 H22A 109.5 . . ? 
C21 C22 H22B 109.5 . . ? 
H22A C22 H22B 109.5 . . ? 
C21 C22 H22C 109.5 . . ? 
H22A C22 H22C 109.5 . . ? 
H22B C22 H22C 109.5 . . ? 
Yb1 O1W H11W 125.8 . . ? 
Yb1 O1W H12W 112.2 . . ? 
H11W O1W H12W 105.0 . . ? 
Yb1 O2W H21W 123.0 . . ? 
Yb1 O2W H22W 120.4 . . ? 
H21W O2W H22W 105.0 . . ? 
Yb1 O3W H31W 120.7 . . ? 
Yb1 O3W H32W 126.7 . . ? 
H31W O3W H32W 105.0 . . ? 
  
loop_ 
 _geom_hbond_atom_site_label_D 
 _geom_hbond_atom_site_label_H 
 _geom_hbond_atom_site_label_A 
 _geom_hbond_distance_DH 
 _geom_hbond_distance_HA 
 _geom_hbond_distance_DA 
 _geom_hbond_angle_DHA 
 _geom_hbond_site_symmetry_A 
O1W H11W Br1  0.96 2.32 3.2488(16) 162.7 1_545 
O1W H12W O12  0.96 1.78 2.708(2) 160.2 1_655 
O2W H21W O22  0.96 1.79 2.701(2) 157.8 1_455 
O2W H22W Br1  0.96 2.30 3.2327(15) 164.4 . 
O3W H31W Br1  0.96 2.39 3.3330(16) 167.3 2_546 
O3W H32W Br1  0.96 2.28 3.2127(17) 163.0 1_545 
  
_refine_diff_density_max    0.460 
_refine_diff_density_min   -0.581 
_refine_diff_density_rms    0.087 
  
_shelx_res_file 
; 
  
    Ha2019_99j_0m_a.res created by SHELXL-2014/7 
  
  
TITL Ha2019_99j_0m_a.res in P2(1)/n 
CELL  0.71073   7.7854   8.0625  17.3573   90.000   96.142   90.000 
ZERR    4.000   0.0003   0.0003   0.0007    0.000    0.002    0.000 
LATT 1 
SYMM 1/2-X, 1/2+Y, 1/2-Z 
SFAC C  H  O  Br Yb 
UNIT 16 48 28 4 4 
LIST 4 ! automatically inserted. Change 6 to 4 for CHECKCIF!! 
OMIT -3 56 
L.S. 10 
ACTA 
BOND $H 
FMAP 2 
rem DFIX 0.96  0.0001 O1w H11w O1w H12w O2w H21w O2w H22w O3w H31w O3w H32w 
rem dfix 1.523  0.0001 H11w H12w H21w H22w H31w H32w 
FREE Yb1 C21_$6 
FREE Yb1 C11_$7 
EQIV $6 1-x,1-y,1-z 
BIND Yb1 Yb1_$6 
BIND Yb1 Yb1_$7 
EQIV $7 -x, 1-y, 1-z 
BIND Yb1 O11_$7 
ACTA 
HTAB 
EQIV $1 -x+3/2, y-1/2, -z+3/2 
EQIV $2 x, y-1, z 
HTAB O1W Br1_$2 
EQIV $3 x+1, y, z 
HTAB O1W O12_$3 
EQIV $4 x-1, y, z 
HTAB O2W O22_$4 
HTAB O2W Br1 
EQIV $5 -x+1/2, y-1/2, -z+3/2 
HTAB O3W Br1_$5 
HTAB O3W Br1_$2 
SIZE 0.074  0.120  0.465 
BOND $H 
rem DFIX 0.98  0.0001 C22 H22d C22 H22e C22 H22f 
rem fix 1.601 0.0001 H22d H22e H22d H22f H22e H22f 
SIZE 0.070  0.172  0.487 
PLAN 5 
TEMP -173 
WGHT    0.008900    1.832400 
FVAR       0.27365   0.05744   0.08758   0.05124   0.05004   0.04928 
YB1   5    0.275123    0.444411    0.540429    11.00000    0.00599    0.01085 = 
         0.01104    0.00028    0.00028   -0.00118 
BR1   4    0.380919    0.946980    0.678969    11.00000    0.01981    0.01229 = 
         0.01635    0.00118    0.00165   -0.00230 
O11   3    0.023515    0.320752    0.541915    11.00000    0.01040    0.01981 = 
         0.02078   -0.00353    0.00472   -0.00615 
O12   3   -0.259444    0.298987    0.522033    11.00000    0.00796    0.01456 = 
         0.01722    0.00213    0.00154    0.00090 
C11   1   -0.113106    0.241324    0.547870    11.00000    0.01083    0.01268 = 
         0.01018   -0.00254    0.00173   -0.00063 
C12   1   -0.106624    0.074147    0.585783    11.00000    0.01682    0.01747 = 
         0.02612    0.00723    0.00071    0.00155 
AFIX 137 
H12A  2    0.010516    0.053176    0.610480    11.00000   21.00000 
H12B  2   -0.137994   -0.011270    0.546623    11.00000   21.00000 
H12C  2   -0.188155    0.071196    0.625043    11.00000   21.00000 
AFIX   0 
O21   3    0.537456    0.555741    0.574468    11.00000    0.00745    0.01404 = 
         0.01337   -0.00025   -0.00107   -0.00098 
O22   3    0.808793    0.624069    0.590253    11.00000    0.00779    0.01792 = 
         0.01494    0.00014   -0.00063   -0.00089 
C21   1    0.672446    0.589858    0.619901    11.00000    0.01125    0.01029 = 
         0.01229   -0.00048    0.00029    0.00174 
C22   1    0.669912    0.586378    0.705758    11.00000    0.01565    0.02928 = 
         0.01197    0.00011   -0.00012    0.00083 
AFIX 137 
H22A  2    0.786471    0.563502    0.730661    11.00000   31.00000 
H22B  2    0.590875    0.499312    0.719567    11.00000   31.00000 
H22C  2    0.630725    0.694036    0.723413    11.00000   31.00000 
AFIX   0 
O1W   3    0.414428    0.191290    0.532483    11.00000    0.01112    0.01399 = 
         0.01586    0.00145    0.00284    0.00050 
AFIX   3 
H11W  2    0.411697    0.101058    0.568419    11.00000   41.00000 
H12W  2    0.534171    0.204376    0.525178    11.00000   41.00000 
AFIX   0 
O2W   3    0.155423    0.622761    0.624624    11.00000    0.00970    0.01326 = 
         0.01547   -0.00193    0.00068   -0.00029 
AFIX   3 
H21W  2    0.033121    0.637928    0.624626    11.00000   51.00000 
H22W  2    0.204460    0.730627    0.635365    11.00000   51.00000 
AFIX   0 
O3W   3    0.315973    0.340094    0.667085    11.00000    0.02057    0.01400 = 
         0.01554    0.00131    0.00479    0.00257 
AFIX   3 
H31W  2    0.255364    0.387102    0.707207    11.00000   61.00000 
H32W  2    0.335984    0.226519    0.682049    11.00000   61.00000 
AFIX   0 
HKLF 4 
  
REM  Ha2019_99j_0m_a.res in P2(1)/n 
REM R1 =  0.0121 for    2454 Fo > 4sig(Fo)  and  0.0141 for all    2616 data 
REM    125 parameters refined using      0 restraints 
  
END 
  
WGHT      0.0089      1.8324 
  
REM Instructions for potential hydrogen bonds 
HTAB C12 Br1_$2 
HTAB C22 Br1_$1 
HTAB C22 O3W 
HTAB C22 Br1 
HTAB O1W Br1_$2 
HTAB O1W O12_$3 
HTAB O2W O22_$4 
HTAB O2W Br1 
HTAB O3W Br1_$5 
HTAB O3W Br1_$2 
  
REM Highest difference peak  0.460,  deepest hole -0.581,  1-sigma level  0.087 
Q1    1   0.3376  0.4383  0.4967  11.00000  0.05    0.46 
Q2    1   0.2217  0.4628  0.5860  11.00000  0.05    0.44 
Q3    1  -0.2571  0.0231  0.4765  11.00000  0.05    0.44 
Q4    1   0.6676  0.5983  0.6627  11.00000  0.05    0.42 
Q5    1  -0.1111  0.1560  0.5653  11.00000  0.05    0.37 
; 
_shelx_res_checksum   91485 
  
_shelx_hkl_file 
; 
   1   0   0    4.20    1.60 
   1   0   0   -0.10    0.90 
   1   0   0   -0.90    1.20 
   1   0   0    1.10    1.30 
   1   0   0    0.90    1.20 
   1   0   0    0.20    0.70 
   1   0   0    0.30    0.80 
   1   0   0    0.90    1.10 
   1   0   0   -0.20    0.70 
   1   0   0   -0.10    0.80 
   1   0   0    1.00    1.10 
   1   0   0    0.30    1.00 
   1   0   0    0.00    1.40 
   1   0   0    0.10    1.10 
   1   0   0    0.20    0.70 
   1   0   0    2.10    1.30 
  -1   0   0    4.80    1.70 
  -1   0   0    1.70    1.10 
  -1   0   0   -0.20    0.70 
  -1   0   0    7.60    1.50 
  -1   0   0    5.00    1.40 
  -1   0   0    3.90    0.90 
  -1   0   0    5.10    1.70 
  -1   0   0    4.20    1.90 
  -1   0   0    4.90    1.30 
  -1   0   0    0.10    0.70 
  -1   0   0    7.70    1.20 
  -1   0   0   -0.20    1.00 
  -1   0   0    7.30    2.10 
  -1   0   0    3.80    1.30 
  -1   0   0    6.60    1.60 
  -1   0   0    2.90    1.50 
  -1   0   0    3.90    1.20 
  -1   0   0    6.10    2.10 
  -1   0   0    1.00    1.10 
  -1   0   0    0.40    0.80 
  -1   0   0    4.00    1.70 
  -1   0   0    5.60    1.40 
  -1   0   0    8.90    1.40 
  -1   0   0    4.90    1.60 
  -1   0   0    0.70    1.10 
  -1   0   0    7.80    1.70 
  -1   0   0    5.10    1.90 
  -1   0   0    3.40    1.40 
  -1   0   0    8.20    1.40 
  -1   0   0    2.40    1.40 
  -1   0   0    8.30    1.80 
  -1   0   0    3.60    1.70 
  -1   0   0    4.10    1.70 
  -1   0   0   -0.30    0.90 
  -1   0   0    3.00    1.40 
  -1   0   0    4.60    1.60 
   1   0   0    1.10    1.20 
   1   0   0    0.20    1.20 
   1   0   0    0.30    1.00 
   1   0   0    0.40    0.70 
  -2   0   0 5180.68  170.08 
  -2   0   0 5145.89  168.28 
   2   0   0 4822.22  167.58 
   2   0   0 5197.98  168.68 
   2   0   0 5004.30  169.88 
   2   0   0 4949.00  167.08 
   2   0   0 4961.50  171.78 
   2   0   0 4881.21  171.08 
   2   0   0 5149.58  169.28 
   2   0   0 5247.77  169.68 
   2   0   0 4992.40  172.58 
   2   0   0 4981.30  170.88 
   2   0   0 4868.41  169.98 
   2   0   0 4808.02  170.88 
   2   0   0 4991.20  169.18 
   2   0   0 5148.29  168.38 
   2   0   0 5128.69  167.18 
   2   0   0 4927.91  169.58 
   2   0   0 5048.29  171.18 
   2   0   0 4996.70  169.48 
   2   0   0 5374.56  172.18 
   2   0   0 5019.50  169.58 
   2   0   0 5129.89  171.58 
   2   0   0 4861.31  169.08 
   2   0   0 5069.19  171.68 
   2   0   0 4600.54  171.18 
   2   0   0 5076.59  171.58 
   2   0   0 4945.41  171.48 
   2   0   0 4916.31  170.08 
   2   0   0 4827.52  168.08 
   2   0   0 5025.00  169.58 
  -2   0   0 5274.67  171.68 
  -2   0   0 5049.09  171.28 
  -2   0   0 5136.79  169.88 
  -2   0   0 5191.78  170.28 
  -2   0   0 5090.69  167.98 
  -2   0   0 4972.60  169.38 
   2   0   0 5058.79  168.78 
   2   0   0 5071.59  170.08 
   2   0   0 5105.29  171.68 
   2   0   0 4891.31  172.48 
  -2   0   0 5008.90  171.18 
  -2   0   0 5213.38  169.38 
  -2   0   0 5218.38  171.58 
  -2   0   0 5024.40  169.68 
  -2   0   0 4980.70  167.48 
  -2   0   0 5216.88  171.58 
  -2   0   0 5073.99  169.18 
  -2   0   0 5203.68  171.78 
  -2   0   0 4904.01  171.48 
  -2   0   0 4959.80  170.78 
  -2   0   0 4990.80  169.98 
  -2   0   0 5033.20  171.08 
  -2   0   0 5084.09  169.08 
  -2   0   0 5237.48  168.08 
  -2   0   0 5008.00  169.48 
  -2   0   0 4969.10  168.98 
  -2   0   0 4982.30  169.48 
  -2   0   0 5086.09  172.28 
  -2   0   0 5233.98  167.78 
  -2   0   0 5050.29  172.78 
  -2   0   0 5034.40  166.78 
  -2   0   0 5221.48  170.88 
  -2   0   0 5102.89  171.68 
  -2   0   0 5203.08  171.38 
  -2   0   0 5084.49  172.48 
  -2   0   0 5294.77  168.58 
  -2   0   0 5000.00  169.68 
  -2   0   0 5112.29  166.78 
  -2   0   0 4953.10  171.38 
   3   0   0    2.20    3.90 
   3   0   0   -0.60    2.60 
   3   0   0   -3.50    3.30 
   3   0   0    2.50    4.30 
   3   0   0    0.80    3.60 
   3   0   0    2.50    3.10 
   3   0   0    2.10    2.50 
   3   0   0    3.10    3.10 
  -3   0   0    0.70    3.40 
  -3   0   0    4.00    2.80 
  -3   0   0    0.30    3.20 
  -3   0   0    2.40    3.70 
  -3   0   0    2.60    4.10 
   3   0   0   -2.80    3.40 
   3   0   0    0.40    2.10 
   3   0   0    1.90    3.40 
   3   0   0    3.50    4.10 
   3   0   0    1.60    3.20 
   3   0   0    0.70    3.40 
   3   0   0   -2.80    2.70 
   3   0   0    5.40    3.00 
   3   0   0    1.90    2.00 
   3   0   0    1.00    3.00 
   3   0   0    1.10    2.90 
   3   0   0    1.80    4.00 
   3   0   0   -4.60    2.80 
   3   0   0    3.80    3.70 
  -3   0   0    3.50    4.40 
  -3   0   0   -1.60    2.80 
  -3   0   0    1.10    3.80 
  -3   0   0    2.50    2.90 
   3   0   0    6.60    4.40 
   3   0   0   -3.30    2.80 
  -3   0   0    5.70    2.50 
  -3   0   0    4.30    2.00 
  -3   0   0   -5.10    3.20 
  -3   0   0    1.90    4.60 
  -3   0   0    3.40    3.10 
  -3   0   0    3.80    3.20 
  -3   0   0   -1.20    2.30 
  -3   0   0    1.90    4.10 
  -3   0   0    1.50    3.40 
  -3   0   0   -0.90    2.70 
  -3   0   0    3.60    2.70 
  -3   0   0   -0.30    3.00 
   3   0   0   -0.90    3.10 
   3   0   0    2.10    1.80 
  -3   0   0    1.50    2.60 
  -3   0   0   -0.90    3.50 
  -3   0   0   -0.60    1.40 
  -3   0   0   -1.70    2.80 
  -3   0   0    0.30    2.60 
  -3   0   0    6.50    4.00 
  -3   0   0    0.50    3.10 
  -3   0   0    0.10    3.30 
   3   0   0    0.80    3.00 
   3   0   0   -0.50    3.40 
   3   0   0    1.40    4.60 
   3   0   0   -1.40    2.70 
   3   0   0    0.80    2.70 
  -3   0   0    1.10    3.70 
  -3   0   0   -1.60    4.00 
   4   0   0  451.25   27.30 
   4   0   0  423.96   24.40 
   4   0   0  445.76   23.80 
  -4   0   0  476.95   19.30 
   4   0   0  437.06   25.50 
   4   0   0  478.95   22.20 
  -4   0   0  472.25   23.80 
  -4   0   0  469.45   20.90 
  -4   0   0  498.65   20.50 
  -4   0   0  445.06   22.30 
  -4   0   0  483.25   23.50 
  -4   0   0  459.75   18.90 
  -4   0   0  447.86   22.00 
  -4   0   0  465.85   26.40 
  -4   0   0  434.16   23.10 
  -4   0   0  445.46   23.70 
  -4   0   0  479.75   20.00 
  -4   0   0  441.56   21.80 
   4   0   0  438.86   21.00 
   4   0   0  417.26   25.10 
   4   0   0  434.16   27.60 
   4   0   0  478.15   21.50 
   4   0   0  441.26   23.20 
   4   0   0  406.26   25.40 
   4   0   0  469.65   22.50 
   4   0   0  465.05   26.40 
   4   0   0  451.25   19.30 
  -4   0   0  453.65   19.30 
  -4   0   0  405.26   24.80 
   4   0   0  473.95   26.40 
   4   0   0  464.75   23.40 
   4   0   0  464.35   20.50 
   4   0   0  435.96   22.70 
   4   0   0  463.45   20.70 
   4   0   0  463.15   18.40 
  -4   0   0  463.85   25.60 
  -4   0   0  442.06   21.90 
  -4   0   0  443.86   22.50 
   4   0   0  424.86   22.10 
  -4   0   0  448.26   24.50 
   4   0   0  438.96   22.70 
   4   0   0  427.86   25.50 
   4   0   0  449.95   23.00 
  -5   0   0    5.50    7.00 
  -5   0   0   -5.80    5.00 
  -5   0   0   -5.40    4.40 
  -5   0   0    1.90    5.40 
  -5   0   0   -6.70    2.80 
  -5   0   0   -3.40    4.70 
  -5   0   0   -1.70    2.80 
  -5   0   0    3.70    7.10 
  -5   0   0    6.50    6.00 
  -5   0   0    3.70    3.70 
   5   0   0   -5.50    5.00 
   5   0   0    1.40    6.70 
   5   0   0   -0.90    5.80 
  -5   0   0    4.10    6.10 
  -5   0   0   -0.20    3.90 
   5   0   0    4.40    4.60 
   5   0   0    1.30    6.00 
   5   0   0   -1.70    4.30 
   5   0   0   -0.10    6.20 
   5   0   0   -1.80    5.10 
   5   0   0   -0.90    5.00 
   5   0   0   -0.50    4.50 
   5   0   0    0.50    3.90 
   5   0   0    1.70    4.60 
   5   0   0   -1.30    5.60 
   5   0   0   -2.20    5.50 
   5   0   0   -0.80    2.70 
   5   0   0   -3.20    6.10 
   5   0   0    2.50    4.10 
  -5   0   0   -1.30    3.00 
   5   0   0    1.10    3.30 
   5   0   0    2.30    4.80 
   5   0   0   -3.50    3.60 
  -5   0   0    5.80    3.50 
  -5   0   0   -2.90    4.90 
  -5   0   0    7.60    7.50 
   5   0   0    3.00    4.00 
  -5   0   0    0.90    4.20 
  -6   0   0  751.02   31.10 
  -6   0   0  705.73   39.90 
  -6   0   0  717.73   35.10 
  -6   0   0  712.53   36.50 
  -6   0   0  741.13   41.40 
  -6   0   0  672.33   31.40 
  -6   0   0  738.13   37.80 
  -6   0   0  745.63   36.70 
  -6   0   0  703.43   33.90 
  -6   0   0  769.72   38.10 
   6   0   0  708.63   29.10 
   6   0   0  745.63   38.00 
   6   0   0  753.32   36.00 
   6   0   0  682.13   31.20 
   6   0   0  747.53   36.70 
   6   0   0  743.83   41.50 
   6   0   0  709.93   43.20 
   6   0   0  734.53   34.30 
   6   0   0  714.23   37.00 
   6   0   0  694.43   41.20 
   6   0   0  730.13   32.40 
  -6   0   0  749.33   40.50 
   6   0   0  795.12   42.10 
   6   0   0  760.52   42.30 
  -6   0   0  706.13   36.70 
  -6   0   0  724.63   30.90 
  -6   0   0  694.83   38.50 
  -6   0   0  695.63   39.60 
  -6   0   0  685.13   29.20 
   6   0   0  762.02   36.20 
   6   0   0  728.23   40.40 
   6   0   0  786.22   36.20 
   6   0   0  694.43   43.10 
   6   0   0  721.53   41.30 
  -6   0   0  730.83   30.40 
   7   0   0   14.00    8.10 
  -7   0   0    2.00    4.80 
  -7   0   0    5.10    8.00 
  -7   0   0    1.60    7.00 
  -7   0   0    0.80    9.10 
  -7   0   0   -3.20    6.60 
  -7   0   0    7.70    8.50 
  -7   0   0    7.80   10.60 
  -7   0   0    2.30    7.40 
  -7   0   0   12.60    9.30 
   7   0   0   -4.30    5.50 
   7   0   0   14.60    6.90 
   7   0   0   -2.70    8.70 
   7   0   0    4.00    8.90 
  -7   0   0  -17.00    8.40 
   7   0   0   -4.30    7.20 
  -7   0   0    5.60    5.10 
   7   0   0   -3.10    4.30 
   7   0   0    2.60    9.20 
   7   0   0    3.20   10.10 
   7   0   0   -3.20    6.40 
   7   0   0   -4.40    8.80 
   7   0   0    1.30    7.10 
   7   0   0    1.00    6.90 
  -7   0   0   -4.30    7.30 
   7   0   0   -1.30    7.60 
  -7   0   0    2.40    7.70 
  -7   0   0    8.80    5.70 
  -7   0   0   -5.20    8.50 
   7   0   0    2.10    9.00 
  -8   0   0  469.15   33.70 
  -8   0   0  482.45   38.20 
  -8   0   0  449.16   31.70 
  -8   0   0  485.75   36.80 
   8   0   0  415.36   38.60 
  -8   0   0  467.35   33.40 
  -8   0   0  427.96   35.50 
   8   0   0  476.45   31.10 
  -8   0   0  461.55   32.10 
  -8   0   0  478.55   35.30 
  -8   0   0  487.45   28.00 
   8   0   0  450.15   31.60 
   8   0   0  444.86   36.80 
   8   0   0  478.65   38.10 
   8   0   0  482.55   37.90 
   8   0   0  526.45   40.30 
  -8   0   0  436.36   29.40 
  -8   0   0  467.05   31.30 
  -8   0   0  452.15   35.70 
   8   0   0  487.45   41.50 
   8   0   0  455.05   32.60 
   8   0   0  467.55   38.30 
   8   0   0  419.96   33.10 
  -8   0   0  490.35   32.90 
  -8   0   0  427.16   35.50 
   8   0   0  513.55   32.00 
   8   0   0  486.85   30.40 
   9   0   0   -4.00    9.60 
  -9   0   0    6.20   13.10 
   9   0   0   -2.10   14.50 
   9   0   0   -5.20   11.30 
   9   0   0  -13.70    9.90 
   9   0   0    2.60    9.60 
   9   0   0   11.60   15.80 
  -9   0   0   -1.60    9.90 
  -9   0   0   18.20   14.70 
   9   0   0  -14.50   12.30 
  -9   0   0   -4.70   11.00 
  -9   0   0    0.40   11.40 
   9   0   0    7.90    9.60 
  -9   0   0    6.00   10.30 
  -9   0   0  -13.60   12.20 
  -9   0   0   -3.40   12.40 
   9   0   0   10.80   10.00 
  -9   0   0   10.50   12.60 
  -9   0   0   -8.60    9.70 
  -9   0   0    0.80   15.60 
  -9   0   0   -4.60   10.10 
  -9   0   0    2.90   10.40 
   9   0   0    7.20   13.00 
  -9   0   0   -5.10    9.40 
   9   0   0    1.60    9.70 
 -10   0   0    5.60   13.70 
  10   0   0    6.00   14.40 
 -10   0   0   16.00   15.10 
 -10   0   0   -2.30   16.30 
 -10   0   0   22.80   14.10 
 -10   0   0   19.50   17.50 
 -10   0   0   18.80   16.00 
  10   0   0   20.00   13.30 
 -10   0   0   26.70   16.50 
  10   0   0    2.50   16.10 
  10   0   0   28.60   14.50 
  10   0   0   22.50   18.00 
  10   0   0   20.60   20.40 
 -10   0   0   30.70   14.70 
  10   0   0   17.40   12.20 
 -10   0   0   17.80   14.40 
 -10   0   0   12.80   16.00 
 -10   0   0    3.40   12.70 
  10   0   0    7.90   14.60 
 -10   0   0   13.30   15.60 
   0  -1   0   -0.60    1.00 
   0  -1   0    0.90    1.50 
   0  -1   0    0.60    1.00 
   0  -1   0   -0.50    0.70 
   0  -1   0    0.60    0.70 
   0  -1   0    3.20    1.30 
   0  -1   0    0.20    0.70 
   0  -1   0    0.40    1.20 
   0   1   0    2.40    1.50 
   0   1   0    0.80    1.30 
   0   1   0    0.70    1.00 
   0   1   0    4.70    1.40 
   0   1   0    2.10    1.60 
   0   1   0    4.30    1.50 
   0   1   0    3.80    1.40 
   0   1   0    2.60    1.30 
   0   1   0    7.80    2.90 
   0   1   0    4.40    1.30 
   0   1   0    7.50    2.70 
   0   1   0    1.60    1.90 
   0   1   0    0.20    0.70 
   0   1   0    5.40    1.60 
   0   1   0    4.70    1.40 
   0   1   0    4.20    1.40 
   0   1   0    3.70    1.40 
   0   1   0    3.20    1.50 
   0   1   0    3.60    1.40 
   0   1   0    6.40    1.50 
   0   1   0    7.20    1.60 
   0   1   0    2.50    1.20 
  -1  -1   0   39.30    4.40 
  -1  -1   0   38.60    4.90 
  -1  -1   0   39.60    4.40 
  -1  -1   0   44.60    5.00 
  -1  -1   0   53.29    5.00 
  -1  -1   0   45.70    5.40 
  -1  -1   0   38.80    4.00 
  -1  -1   0   48.10    5.20 
  -1  -1   0   39.50    5.80 
  -1  -1   0   54.39    6.20 
  -1  -1   0   45.20    5.20 
  -1  -1   0   46.10    5.40 
  -1  -1   0   46.50    5.00 
  -1  -1   0   34.60    4.30 
  -1  -1   0   53.49    5.50 
  -1  -1   0   43.70    4.60 
   1  -1   0   42.80    4.00 
   1  -1   0   28.70    3.30 
   1  -1   0   35.60    4.50 
   1  -1   0   35.10    4.10 
   1  -1   0   38.20    3.70 
   1  -1   0   43.20    4.40 
   1  -1   0   30.80    4.00 
  -1  -1   0   44.40    4.80 
  -1  -1   0   43.70    4.00 
  -1  -1   0   36.40    4.50 
  -1  -1   0   41.90    3.80 
  -1  -1   0   54.79    5.80 
   1  -1   0   34.40    4.50 
   1  -1   0   28.60    5.00 
  -1  -1   0   43.30    4.40 
  -1  -1   0   43.40    4.60 
   1  -1   0   35.10    3.80 
  -1  -1   0   42.80    4.80 
   1  -1   0   33.00    3.50 
  -1  -1   0   45.60    5.40 
  -1  -1   0   47.80    4.70 
  -1  -1   0   29.30    4.20 
  -1  -1   0   50.49    5.40 
   1  -1   0   33.90    4.40 
   1  -1   0   30.30    4.10 
  -1  -1   0   21.10    3.50 
   1  -1   0   45.60    4.50 
   1  -1   0   43.30    4.30 
  -1  -1   0   38.10    4.80 
  -1  -1   0   42.90    4.50 
  -1   1   0   32.00    4.10 
  -1   1   0   49.80    4.90 
   1   1   0   35.40    4.20 
   1   1   0   46.70    5.20 
   1   1   0   49.00    5.30 
   1   1   0   48.20    5.00 
   1   1   0   35.60    4.50 
   1   1   0   37.80    4.50 
   1   1   0   20.70    4.10 
  -1   1   0   39.60    4.10 
  -1   1   0   42.40    4.20 
   1   1   0   45.40    3.90 
   1   1   0   47.50    4.80 
   1   1   0   50.69    5.70 
  -1   1   0   47.10    4.70 
   1   1   0   52.09    4.20 
  -1   1   0   34.80    2.70 
   1   1   0   45.70    4.70 
  -1   1   0   39.70    2.50 
   1   1   0   42.30    4.70 
  -1   1   0   38.50    3.60 
  -1   1   0   33.80    3.10 
   1   1   0   46.10    5.60 
   1   1   0   53.99    5.20 
   1   1   0   58.29    5.10 
   1   1   0   43.30    5.30 
   1   1   0   47.60    5.00 
   1   1   0   40.30    4.70 
  -1   1   0   44.70    4.40 
  -1   1   0   37.60    4.60 
   1   1   0   44.30    3.90 
  -1   1   0   38.30    4.10 
  -1   1   0   52.59    6.10 
  -1   1   0   41.00    2.90 
  -1   1   0   42.70    4.60 
  -1   1   0   48.20    4.60 
  -1   1   0   45.10    5.00 
   1   1   0   52.69    5.50 
   1   1   0   40.20    4.50 
   1   1   0   41.80    4.80 
  -1   1   0   46.00    4.70 
  -1   1   0   40.20    3.10 
  -1   1   0   41.40    4.00 
  -1   1   0   40.30    4.80 
  -1   1   0   40.50    3.50 
  -1   1   0   36.10    3.70 
   1   1   0   43.90    4.70 
   1   1   0   44.40    5.00 
   1   1   0   43.90    6.00 
   1   1   0   45.40    4.70 
  -1   1   0   39.40    3.00 
  -1   1   0   46.10    4.50 
   1   1   0   44.90    4.90 
   1   1   0   36.20    4.10 
  -1   1   0   41.90    2.80 
  -1   1   0   32.80    3.40 
  -1   1   0   38.80    4.00 
   1   1   0   42.60    5.00 
   1   1   0   40.60    5.20 
   2  -1   0  372.46   17.20 
   2  -1   0  383.06   18.40 
   2  -1   0  389.16   17.00 
  -2  -1   0  401.66   17.60 
  -2  -1   0  389.46   16.80 
  -2  -1   0  382.76   20.40 
   2  -1   0  405.66   18.20 
  -2  -1   0  387.86   18.20 
   2  -1   0  374.36   15.10 
   2  -1   0  404.46   17.80 
  -2  -1   0  408.96   18.50 
  -2  -1   0  353.06   18.20 
   2  -1   0  378.66   15.40 
  -2  -1   0  393.16   15.40 
   2  -1   0  414.16   19.00 
  -2  -1   0  394.66   19.80 
  -2  -1   0  407.56   18.10 
   2  -1   0  397.26   15.20 
   2  -1   0  395.26   18.20 
  -2  -1   0  407.36   17.20 
  -2  -1   0  401.96   19.50 
  -2  -1   0  366.56   18.40 
  -2  -1   0  387.36   18.50 
  -2  -1   0  415.56   19.10 
  -2  -1   0  413.66   19.60 
  -2  -1   0  416.16   19.60 
  -2  -1   0  398.66   19.00 
   2  -1   0  382.56   14.20 
   2  -1   0  397.06   17.00 
   2  -1   0  348.87   18.00 
   2  -1   0  402.96   19.90 
   2  -1   0  373.26   15.30 
   2  -1   0  372.06   19.00 
   2  -1   0  397.46   16.60 
   2  -1   0  386.96   18.90 
  -2  -1   0  407.86   18.90 
  -2  -1   0  384.46   15.00 
  -2  -1   0  399.36   19.00 
   2  -1   0  381.16   17.60 
   2  -1   0  392.86   18.60 
  -2  -1   0  410.06   17.10 
  -2  -1   0  383.06   17.00 
  -2  -1   0  344.77   16.30 
  -2  -1   0  406.56   19.30 
  -2  -1   0  391.46   15.00 
  -2  -1   0  432.76   20.20 
  -2  -1   0  374.46   17.30 
  -2  -1   0  371.06   18.10 
  -2  -1   0  412.86   20.30 
  -2  -1   0  386.26   17.30 
  -2  -1   0  392.56   17.90 
  -2  -1   0  372.26   17.30 
  -2  -1   0  400.26   18.80 
   2  -1   0  370.26   15.80 
   2  -1   0  391.66   18.50 
   2  -1   0  402.86   16.60 
   2  -1   0  377.36   18.90 
  -2  -1   0  364.56   18.40 
   2  -1   0  439.56   19.20 
  -2  -1   0  365.76   18.00 
  -2  -1   0  370.86   18.80 
   2   1   0  402.76   21.30 
  -2   1   0  393.86   16.30 
   2   1   0  386.06   18.30 
  -2   1   0  378.36   13.90 
  -2   1   0  365.46   16.10 
  -2   1   0  401.36   15.80 
  -2   1   0  400.66   14.40 
  -2   1   0  382.16   17.20 
   2   1   0  372.26   17.90 
   2   1   0  396.56   15.60 
   2   1   0  374.46   16.60 
  -2   1   0  378.56   18.80 
   2   1   0  363.56   14.90 
   2   1   0  365.36   18.40 
   2   1   0  369.26   18.10 
   2   1   0  415.56   20.10 
  -2   1   0  399.46   18.50 
  -2   1   0  385.56   15.00 
   2   1   0  368.36   18.00 
   2   1   0  375.36   18.60 
   2   1   0  387.76   18.90 
   2   1   0  406.06   18.30 
   2   1   0  386.86   18.80 
   2   1   0  385.66   16.20 
   2   1   0  388.36   16.60 
  -2   1   0  391.96   17.10 
  -2   1   0  389.66   14.80 
   2   1   0  392.46   18.10 
   2   1   0  353.56   18.10 
   2   1   0  365.66   19.90 
   2   1   0  363.86   17.30 
   2   1   0  380.16   18.00 
   2   1   0  395.16   17.60 
   2   1   0  373.36   19.00 
   2   1   0  389.56   15.00 
   2   1   0  384.76   19.40 
  -2   1   0  344.87   18.50 
  -2   1   0  413.16   19.60 
  -2   1   0  373.76   15.40 
  -2   1   0  415.06   17.40 
   2   1   0  371.86   17.10 
   2   1   0  396.16   17.00 
   2   1   0  385.16   17.10 
   2   1   0  372.86   18.20 
  -2   1   0  378.56   18.20 
  -2   1   0  379.66   18.10 
   2   1   0  373.76   17.50 
  -2   1   0  392.66   18.00 
  -2   1   0  379.76   17.40 
  -2   1   0  396.06   15.10 
  -2   1   0  375.26   17.60 
  -2   1   0  378.46   16.70 
  -2   1   0  389.96   15.70 
  -2   1   0  386.76   16.50 
   2   1   0  406.26   19.50 
  -2   1   0  396.46   18.50 
  -2   1   0  383.96   14.10 
  -2   1   0  386.36   17.40 
  -2   1   0  390.46   18.40 
  -2   1   0  415.26   19.40 
  -2   1   0  387.66   18.60 
   2   1   0  381.76   17.00 
   2   1   0  419.96   19.50 
  -2   1   0  359.36   15.10 
  -2   1   0  375.16   17.30 
   2   1   0  389.96   15.00 
  -2   1   0  412.36   18.50 
   3  -1   0  140.89   12.30 
   3  -1   0  151.28   14.90 
  -3  -1   0  151.88   11.80 
  -3  -1   0  135.09   13.40 
  -3  -1   0  124.19    9.60 
   3  -1   0  140.59   12.10 
   3  -1   0  119.99   11.00 
   3  -1   0  126.09   12.00 
   3  -1   0  131.59    9.30 
  -3  -1   0  138.29   11.90 
  -3  -1   0  128.69   10.00 
  -3  -1   0  140.29   13.60 
  -3  -1   0  137.59   11.40 
  -3  -1   0  136.59   10.80 
  -3  -1   0  136.39   13.20 
   3  -1   0  141.39   11.30 
   3  -1   0  149.09   11.30 
   3  -1   0  132.99    8.60 
   3  -1   0  124.29    8.40 
   3  -1   0  128.79   11.60 
   3  -1   0  141.09   12.10 
  -3  -1   0  128.39    9.40 
  -3  -1   0  123.89   11.40 
  -3  -1   0  143.59   11.20 
  -3  -1   0  124.69   12.40 
   3  -1   0  133.09    6.80 
   3  -1   0  145.59   10.30 
  -3  -1   0  132.79    7.80 
   3  -1   0  121.59    8.30 
  -3  -1   0  124.69   10.80 
   3  -1   0  150.88   13.00 
   3  -1   0  131.39    8.50 
  -3  -1   0  129.29    8.80 
  -3  -1   0  141.59    8.90 
  -3  -1   0  153.78   11.90 
  -3  -1   0  145.39    7.10 
  -3  -1   0  141.39   13.90 
  -3  -1   0  127.19    9.70 
  -3  -1   0  130.09   10.70 
  -3  -1   0  132.49   14.80 
   3  -1   0  112.99   10.20 
  -3  -1   0  117.99   13.30 
  -3  -1   0  129.79    6.70 
  -3  -1   0  132.79   12.90 
   3  -1   0  144.79   12.00 
   3  -1   0  135.29   11.70 
  -3   1   0  151.48   11.80 
  -3   1   0  132.59    6.50 
  -3   1   0  106.89   10.50 
   3   1   0  136.69   11.00 
   3   1   0  131.39    9.00 
  -3   1   0  125.19    8.80 
  -3   1   0  123.89    9.90 
  -3   1   0  134.09    8.90 
  -3   1   0  138.49    9.10 
  -3   1   0  146.69   10.00 
   3   1   0  137.99   13.50 
  -3   1   0  132.89   11.10 
  -3   1   0  149.29   11.40 
  -3   1   0  116.49   10.90 
  -3   1   0  136.59    8.80 
  -3   1   0  118.39    8.90 
  -3   1   0  146.69    7.30 
  -3   1   0  127.89   11.00 
  -3   1   0  135.49   13.00 
  -3   1   0  129.39    9.80 
  -3   1   0  139.49    7.80 
   3   1   0  148.59   11.00 
   3   1   0  129.89   13.90 
   3   1   0  152.28   17.30 
   3   1   0  140.19    9.30 
   3   1   0  132.59    8.00 
   3   1   0  144.49    8.80 
   3   1   0  144.99   12.40 
   3   1   0  127.29   10.60 
   3   1   0  139.09   13.90 
   3   1   0  139.49   11.00 
   3   1   0  133.09    8.10 
  -3   1   0  136.29    9.40 
  -3   1   0  136.09    8.40 
   3   1   0  129.29    9.80 
   3   1   0  137.39   10.20 
   3   1   0  143.19   15.80 
   3   1   0  159.88   14.40 
   3   1   0  138.59   12.10 
  -3   1   0  124.29   10.60 
   3   1   0  134.29    7.00 
  -3   1   0  128.89   14.00 
   3   1   0  141.59   10.50 
   3   1   0  125.89   10.60 
   3   1   0  134.59   12.20 
  -3   1   0  126.79   11.00 
  -3   1   0  144.09   11.90 
  -3   1   0  125.49    8.20 
  -3   1   0  128.69   11.70 
  -3   1   0  128.39    7.50 
  -3   1   0  137.59    9.20 
   3   1   0  133.79   11.00 
   3   1   0  136.79   12.40 
   3   1   0  133.29   13.40 
   3   1   0  167.58   14.80 
  -3   1   0  141.49    8.70 
   3   1   0  146.79   13.20 
   3   1   0  129.69   14.60 
  -3   1   0  131.89    8.60 
  -3   1   0  143.79   11.30 
   3   1   0  138.89    9.80 
   3   1   0  119.79   13.30 
  -4  -1   0  201.38   10.80 
  -4  -1   0  193.08   14.80 
  -4  -1   0  177.88   14.70 
  -4  -1   0  219.88   19.70 
  -4  -1   0  170.98   17.80 
  -4  -1   0  182.28    9.00 
  -4  -1   0  184.18   18.00 
  -4  -1   0  197.98   12.70 
   4  -1   0  184.98   14.00 
   4  -1   0  177.68   16.50 
  -4  -1   0  208.08   15.60 
   4  -1   0  192.18   17.10 
  -4  -1   0  196.88   18.70 
   4  -1   0  150.18   14.40 
   4  -1   0  192.48   11.00 
   4  -1   0  188.28   11.80 
   4  -1   0  183.68   15.60 
   4  -1   0  243.68   18.10 
  -4  -1   0  221.48   20.50 
  -4  -1   0  206.18   13.30 
  -4  -1   0  192.58   15.20 
  -4  -1   0  208.88   16.20 
   4  -1   0  228.48   14.20 
  -4  -1   0  185.48   12.10 
  -4  -1   0  198.48   11.60 
   4  -1   0  191.68   13.20 
  -4  -1   0  206.88   12.60 
   4  -1   0  184.08   16.20 
   4  -1   0  196.98   14.00 
   4  -1   0  194.58   12.30 
   4  -1   0  208.48   16.50 
   4  -1   0  196.78   16.40 
  -4  -1   0  193.18   15.60 
   4  -1   0  220.38   16.80 
   4  -1   0  197.08   15.00 
   4  -1   0  200.98    9.70 
   4   1   0  190.18   14.00 
   4   1   0  174.28   15.20 
   4   1   0  192.18   11.40 
   4   1   0  173.28   13.70 
   4   1   0  207.48   12.80 
   4   1   0  209.28   17.30 
   4   1   0  185.28   13.20 
   4   1   0  197.68   16.70 
  -4   1   0  221.18   14.70 
   4   1   0  208.28   14.90 
  -4   1   0  205.68   19.00 
  -4   1   0  191.98   12.40 
  -4   1   0  192.78   12.70 
   4   1   0  170.28   18.50 
  -4   1   0  201.48   15.80 
   4   1   0  176.88   13.80 
  -4   1   0  199.78   11.30 
  -4   1   0  198.68   12.90 
  -4   1   0  188.98   13.40 
  -4   1   0  198.48   12.00 
  -4   1   0  185.08   13.80 
  -4   1   0  210.78   16.10 
  -4   1   0  213.28   11.40 
  -4   1   0  211.88   15.10 
   4   1   0  200.98   15.00 
  -4   1   0  188.98    9.30 
   4   1   0  176.38   14.30 
   4   1   0  196.18   16.50 
   4   1   0  254.17   25.40 
  -4   1   0  221.48   13.70 
  -4   1   0  207.38   11.30 
   4   1   0  204.88   16.90 
   4   1   0  195.88   13.10 
   4   1   0  199.78   14.90 
   4   1   0  206.48   14.50 
   4   1   0  197.98   12.20 
  -4   1   0  202.58   11.30 
   4   1   0  193.98   15.60 
  -4   1   0  191.08    9.70 
  -4   1   0  179.08   14.20 
  -4   1   0  181.18   12.40 
   4   1   0  188.58    9.00 
  -4   1   0  195.98   12.60 
  -4   1   0  181.08   12.20 
  -4   1   0  202.18   10.90 
  -4   1   0  208.28   13.30 
   4   1   0  193.28   16.80 
  -4   1   0  178.88   12.00 
   5  -1   0 2682.63   93.49 
  -5  -1   0 2810.62  104.69 
   5  -1   0 2702.23   96.89 
   5  -1   0 2666.53   99.69 
  -5  -1   0 2685.23  103.09 
  -5  -1   0 2668.73  104.09 
   5  -1   0 2693.53  101.09 
  -5  -1   0 2725.53  100.69 
  -5  -1   0 2538.95  101.09 
  -5  -1   0 2676.23   95.39 
   5  -1   0 2796.42  104.49 
   5  -1   0 2801.32  104.19 
   5  -1   0 2735.73  105.79 
  -5  -1   0 2787.42  101.59 
   5  -1   0 2689.63  104.79 
  -5  -1   0 2659.43  103.59 
  -5  -1   0 2749.62   96.59 
   5  -1   0 2661.13   96.29 
  -5  -1   0 2793.62   96.19 
  -5  -1   0 2741.53  101.99 
   5  -1   0 2606.94  105.99 
   5  -1   0 2665.63  104.49 
  -5  -1   0 2729.03  104.69 
   5  -1   0 2614.34  100.19 
   5  -1   0 2713.43  105.39 
   5  -1   0 2672.03   97.99 
  -5  -1   0 2737.43   93.69 
   5  -1   0 2693.23  103.39 
  -5  -1   0 2788.32  102.79 
  -5  -1   0 2725.53   99.29 
   5  -1   0 2637.64   92.29 
   5  -1   0 2678.03   98.29 
   5  -1   0 2668.83  103.99 
  -5   1   0 2714.23   95.19 
  -5   1   0 2664.93  101.99 
  -5   1   0 2587.94   98.89 
   5   1   0 2716.53  102.39 
  -5   1   0 2655.33   97.59 
  -5   1   0 2706.13   96.09 
  -5   1   0 2627.04   97.99 
  -5   1   0 2632.14  100.29 
   5   1   0 2738.33  101.29 
   5   1   0 2719.23   99.49 
   5   1   0 2724.43  100.29 
   5   1   0 2627.84   95.49 
   5   1   0 2698.43  100.19 
   5   1   0 2606.04  104.69 
   5   1   0 2669.93  109.09 
  -5   1   0 2640.64  101.49 
   5   1   0 2652.93  100.59 
   5   1   0 2817.72   95.49 
   5   1   0 2702.23  107.69 
   5   1   0 2662.93  102.69 
  -5   1   0 2657.43   93.09 
  -5   1   0 2726.33   99.39 
   5   1   0 2533.45   96.69 
  -5   1   0 2755.32   93.29 
  -5   1   0 2809.62   96.99 
  -5   1   0 2615.14   94.99 
  -5   1   0 2687.33  103.19 
   5   1   0 2671.23  104.59 
   5   1   0 2722.93  100.79 
  -5   1   0 2661.43   95.89 
   5   1   0 2822.02  106.19 
   5   1   0 2788.32   97.39 
   5   1   0 2697.93  104.99 
   5   1   0 2711.13  105.59 
  -5   1   0 2708.03   92.09 
  -5   1   0 2680.73  101.99 
  -5   1   0 2780.72  100.99 
  -5   1   0 2682.33   96.69 
   5   1   0 2683.03   99.59 
   6  -1   0  254.37   26.50 
   6  -1   0  118.09   19.30 
   6  -1   0  192.08   11.00 
   6  -1   0  227.18   24.40 
  -6  -1   0  200.68   20.60 
  -6  -1   0  241.08   20.00 
   6  -1   0  200.38   19.60 
   6  -1   0  176.38   17.80 
  -6  -1   0  206.88   23.80 
  -6  -1   0  205.08   21.60 
   6  -1   0  182.38   19.30 
  -6  -1   0  176.98   20.70 
  -6  -1   0  207.18   19.20 
   6  -1   0  219.48   15.50 
  -6  -1   0  172.88   11.90 
  -6  -1   0  180.08   13.10 
   6  -1   0  184.88   22.00 
   6  -1   0  188.58   21.70 
  -6  -1   0  191.48   22.80 
  -6  -1   0  189.48   20.30 
  -6  -1   0  189.18   21.10 
  -6  -1   0  176.48   15.40 
   6  -1   0  186.18   22.40 
   6  -1   0  202.58   18.20 
   6  -1   0  159.28   20.60 
   6  -1   0  163.18   16.40 
   6  -1   0  142.29   18.90 
   6  -1   0  189.88   11.20 
  -6  -1   0  133.89   18.40 
  -6  -1   0  203.38   15.10 
  -6  -1   0  172.78   21.80 
   6  -1   0  190.58   15.50 
   6   1   0  185.48   19.00 
  -6   1   0  208.78   19.40 
  -6   1   0  183.08   18.90 
  -6   1   0  180.98   15.30 
   6   1   0  161.08   21.70 
  -6   1   0  150.98   15.60 
   6   1   0  209.28   19.90 
   6   1   0  172.08   18.80 
   6   1   0  184.48   13.10 
   6   1   0  202.08   21.20 
   6   1   0  205.48   23.20 
   6   1   0  162.78   15.80 
   6   1   0  212.08   24.40 
   6   1   0  197.68   23.10 
  -6   1   0  202.28   19.80 
  -6   1   0  181.68   14.60 
  -6   1   0  165.98   20.00 
  -6   1   0  179.38   13.10 
   6   1   0  163.68   21.70 
   6   1   0  171.28   18.00 
   6   1   0  201.78   25.20 
   6   1   0  190.08   19.80 
  -6   1   0  196.18   18.90 
   6   1   0  246.48   29.90 
   6   1   0  201.88   15.80 
  -6   1   0  159.18   17.90 
  -6   1   0  198.18   21.90 
  -6   1   0  190.68   21.00 
  -6   1   0  219.18   23.50 
  -6   1   0  183.58   22.40 
   6   1   0  185.38   12.50 
   6   1   0  170.58   18.80 
  -6   1   0  177.88   14.30 
  -6   1   0  202.38   20.20 
  -6   1   0  194.48   14.70 
  -6   1   0  171.48   10.30 
  -6   1   0  189.08   11.00 
  -7  -1   0 1849.11   70.29 
  -7  -1   0 1881.61   78.29 
   7  -1   0 1770.72   86.09 
   7  -1   0 1788.32   83.19 
  -7  -1   0 1781.22   77.69 
   7  -1   0 1840.92   76.69 
  -7  -1   0 1957.80   83.29 
  -7  -1   0 1798.82   75.99 
  -7  -1   0 1883.71   78.99 
   7  -1   0 1881.71   82.49 
  -7  -1   0 1775.32   73.59 
   7  -1   0 1802.92   83.39 
   7  -1   0 1892.21   74.79 
   7  -1   0 1923.11   85.19 
   7  -1   0 1861.91   82.79 
  -7  -1   0 1839.12   82.29 
  -7  -1   0 1780.92   81.39 
   7  -1   0 1822.72   82.39 
  -7  -1   0 1886.51   83.59 
  -7  -1   0 1855.61   71.19 
  -7  -1   0 1896.51   83.09 
  -7  -1   0 1915.71   81.59 
   7  -1   0 1924.11   85.39 
  -7  -1   0 1800.82   68.09 
   7  -1   0 1809.02   71.89 
   7  -1   0 1847.82   77.89 
  -7  -1   0 1865.21   67.09 
  -7  -1   0 1867.21   79.29 
   7  -1   0 1860.71   73.69 
   7  -1   0 1827.72   78.39 
   7  -1   0 1851.61   74.19 
   7   1   0 1956.00   85.19 
  -7   1   0 1899.11   70.89 
  -7   1   0 1750.02   80.29 
   7   1   0 1892.11   88.59 
   7   1   0 1897.21   79.09 
  -7   1   0 1799.62   79.49 
  -7   1   0 1647.34   79.09 
  -7   1   0 1873.81   74.09 
  -7   1   0 1895.81   79.39 
   7   1   0 1802.42   76.89 
   7   1   0 1815.12   76.09 
   7   1   0 1786.02   77.99 
  -7   1   0 1823.32   70.09 
  -7   1   0 1964.30   78.69 
  -7   1   0 1850.31   78.19 
   7   1   0 1756.32   76.59 
  -7   1   0 1744.03   78.99 
   7   1   0 1725.83   82.49 
   7   1   0 1901.81   76.39 
   7   1   0 1835.22   72.99 
   7   1   0 1777.92   74.49 
  -7   1   0 1896.51   76.09 
  -7   1   0 1744.13   74.99 
   7   1   0 1892.01   84.09 
   7   1   0 1781.62   82.79 
  -7   1   0 1816.42   81.29 
  -7   1   0 1757.12   70.99 
   7   1   0 1878.81   89.59 
  -7   1   0 1690.53   82.49 
  -7   1   0 1841.02   74.99 
   8  -1   0   78.09   19.40 
   8  -1   0  120.79   16.80 
  -8  -1   0  159.98   25.50 
   8  -1   0  128.59   19.60 
  -8  -1   0  110.99   17.10 
  -8  -1   0  131.49   24.20 
  -8  -1   0  100.89   20.40 
  -8  -1   0  135.69   21.00 
  -8  -1   0  104.19   21.20 
  -8  -1   0  136.29   22.10 
  -8  -1   0  110.29   18.80 
   8  -1   0  125.09   23.90 
   8  -1   0  156.08   25.10 
  -8  -1   0  105.49   19.10 
  -8  -1   0  114.09   17.80 
   8  -1   0  134.99   15.70 
  -8  -1   0  131.59   20.60 
   8  -1   0  129.39   20.80 
   8  -1   0  178.58   28.00 
   8  -1   0   96.19   20.90 
   8  -1   0   99.89   17.80 
  -8  -1   0  107.29   18.90 
   8  -1   0  111.49   17.00 
   8  -1   0   96.09   21.50 
  -8  -1   0  120.39   22.20 
  -8   1   0  145.29   22.50 
  -8   1   0  133.59   22.40 
  -8   1   0  113.99   19.00 
  -8   1   0  105.49   16.90 
   8   1   0  102.29   21.30 
   8   1   0  132.79   19.50 
  -8   1   0  128.89   18.70 
  -8   1   0  118.49   22.90 
   8   1   0  137.09   21.50 
  -8   1   0  126.29   19.80 
   8   1   0  105.79   17.20 
   8   1   0  119.49   23.80 
   8   1   0  147.19   24.70 
   8   1   0  130.79   22.90 
   8   1   0  134.19   19.10 
  -8   1   0  123.99   22.80 
   8   1   0  103.39   24.10 
  -8   1   0  136.29   19.20 
   8   1   0  148.09   27.10 
   8   1   0  113.69   18.20 
   8   1   0  111.89   17.70 
  -8   1   0  128.79   21.20 
  -8   1   0  138.19   21.80 
  -8   1   0  148.39   16.60 
  -8   1   0  155.78   22.50 
  -8   1   0  147.69   21.10 
  -8   1   0  102.79   16.00 
  -9  -1   0  471.35   39.70 
   9  -1   0  396.56   43.50 
  -9  -1   0  454.15   38.80 
  -9  -1   0  471.35   35.40 
   9  -1   0  455.35   40.30 
   9  -1   0  425.86   44.10 
   9  -1   0  470.75   37.70 
   9  -1   0  385.86   45.10 
  -9  -1   0  477.75   35.70 
  -9  -1   0  512.65   34.50 
  -9  -1   0  524.65   41.30 
  -9  -1   0  438.56   43.20 
   9  -1   0  489.55   36.70 
   9  -1   0  449.16   41.70 
  -9  -1   0  478.35   36.60 
  -9  -1   0  468.85   35.40 
  -9  -1   0  474.95   37.10 
  -9  -1   0  477.75   37.00 
  -9  -1   0  501.05   40.00 
   9  -1   0  527.45   43.40 
   9  -1   0  401.36   36.60 
   9  -1   0  510.75   33.90 
  -9   1   0  457.05   40.20 
   9   1   0  471.15   41.40 
  -9   1   0  437.06   39.30 
  -9   1   0  437.76   43.60 
  -9   1   0  426.46   40.40 
   9   1   0  479.55   35.40 
   9   1   0  497.25   53.59 
   9   1   0  518.15   38.20 
  -9   1   0  446.66   33.50 
  -9   1   0  552.14   39.00 
   9   1   0  456.95   40.20 
  -9   1   0  533.65   38.00 
  -9   1   0  502.65   34.40 
   9   1   0  483.35   34.90 
   9   1   0  423.86   33.50 
  -9   1   0  428.46   42.50 
  -9   1   0  465.65   41.60 
  -9   1   0  430.06   42.00 
  -9   1   0  471.45   37.90 
  -9   1   0  487.15   38.10 
   9   1   0  408.96   32.80 
   9   1   0  498.05   36.50 
  -9   1   0  525.05   37.80 
   9   1   0  465.65   51.19 
   9   1   0  469.85   42.90 
   9   1   0  440.46   45.60 
 -10  -1   0   22.00   17.50 
 -10  -1   0   11.20   13.80 
  10  -1   0   14.80   17.30 
 -10  -1   0   25.40   15.20 
 -10  -1   0   78.99   22.00 
 -10  -1   0    6.90   15.20 
  10  -1   0   19.40   16.90 
 -10  -1   0    4.60   15.70 
  10  -1   0   52.49   22.80 
  10  -1   0   39.80   16.90 
  10  -1   0   29.50   17.90 
 -10  -1   0   44.80   16.90 
  10  -1   0    2.20   10.80 
 -10  -1   0   21.40   14.30 
 -10  -1   0   28.60   15.90 
 -10  -1   0   28.40   15.10 
 -10  -1   0   40.00   15.80 
 -10  -1   0   29.30   15.70 
 -10  -1   0   11.90   17.30 
  10  -1   0   27.80   24.10 
  10  -1   0   29.30   15.90 
  10   1   0   32.90   14.20 
  10   1   0   31.00   17.10 
 -10   1   0   21.10   15.60 
 -10   1   0   23.70   17.50 
  10   1   0   26.60   13.20 
 -10   1   0   18.10   14.50 
  10   1   0   -6.70   24.50 
 -10   1   0   27.00   16.90 
 -10   1   0   10.30   15.20 
 -10   1   0   24.00   14.60 
  10   1   0    7.20   15.60 
  10   1   0   33.20   15.90 
  10   1   0   25.50   17.30 
 -10   1   0   29.80   16.50 
  10   1   0   18.70   13.00 
 -10   1   0   -3.70   15.00 
  10   1   0   24.90   16.70 
  10   1   0   22.10   18.40 
 -10   1   0   12.30   15.90 
 -10   1   0   20.50   17.70 
   0  -2   0 4833.02  158.48 
   0  -2   0 4008.80  163.68 
   0  -2   0 4902.31  159.78 
   0  -2   0 4778.32  157.68 
   0  -2   0 4652.83  159.18 
   0  -2   0 4716.63  159.08 
   0  -2   0 4932.11  161.68 
   0  -2   0 4518.75  158.08 
   0  -2   0 4834.02  159.08 
   0  -2   0 4225.68  163.48 
   0  -2   0 4688.93  159.88 
   0  -2   0 4890.31  159.58 
   0  -2   0 4840.42  158.58 
   0  -2   0 4833.12  161.68 
   0  -2   0 4724.13  159.38 
   0  -2   0 4828.22  158.18 
   0  -2   0 4874.21  158.78 
   0  -2   0 4483.75  158.78 
   0  -2   0 4712.93  158.88 
   0  -2   0 4897.81  163.98 
   0  -2   0 4238.98  162.48 
   0  -2   0 4378.96  159.38 
   0   2   0 4982.20  161.18 
   0   2   0 4879.81  158.38 
   0   2   0 4938.21  159.48 
   0   2   0 4686.53  159.58 
   0   2   0 4648.63  158.98 
   0   2   0 4857.91  158.58 
   0   2   0 4432.66  165.08 
   0   2   0 4858.81  159.68 
   0   2   0 4971.70  161.48 
   0   2   0 4827.22  158.68 
   0   2   0 4571.04  159.18 
   0   2   0 4884.11  160.28 
   0   2   0 4803.52  158.88 
   0   2   0 4942.41  158.38 
   0   2   0 4667.53  159.08 
   0   2   0 4854.81  158.78 
   0   2   0 4727.33  158.58 
   0   2   0 4827.12  162.88 
   0   2   0 4772.12  159.38 
   0   2   0 4655.43  159.58 
   0   2   0 4699.13  158.28 
   0   2   0 4320.57  162.08 
   0   2   0 4798.72  158.38 
  -1  -2   0 4911.11  166.18 
  -1  -2   0 5021.30  164.68 
  -1  -2   0 4902.91  166.58 
   1  -2   0 4486.35  165.58 
   1  -2   0 4797.92  163.68 
   1  -2   0 4838.32  163.18 
  -1  -2   0 5016.30  166.08 
   1  -2   0 4860.41  164.18 
   1  -2   0 4820.32  162.88 
  -1  -2   0 4995.00  161.98 
   1  -2   0 4588.24  165.38 
  -1  -2   0 4880.91  167.88 
   1  -2   0 4954.60  165.28 
  -1  -2   0 4953.90  163.18 
   1  -2   0 4641.64  164.58 
  -1  -2   0 4806.82  166.78 
  -1  -2   0 4797.32  164.28 
  -1  -2   0 5089.19  166.68 
   1  -2   0 4938.31  161.88 
   1  -2   0 4911.81  163.18 
   1  -2   0 4905.31  165.58 
  -1  -2   0 4917.11  166.18 
   1  -2   0 4504.95  162.78 
   1  -2   0 4936.51  162.18 
  -1  -2   0 5086.69  166.28 
   1  -2   0 5115.89  166.68 
   1  -2   0 4953.90  165.68 
  -1  -2   0 5021.10  165.98 
   1  -2   0 4791.52  162.48 
   1  -2   0 4837.32  162.68 
   1  -2   0 4435.16  163.78 
  -1  -2   0 4836.62  167.38 
   1  -2   0 4783.42  163.38 
   1  -2   0 4914.21  163.48 
   1  -2   0 4697.53  163.28 
  -1  -2   0 5085.39  165.78 
  -1  -2   0 4967.00  167.88 
   1  -2   0 4836.42  163.88 
   1  -2   0 5097.99  165.78 
  -1  -2   0 4940.91  165.48 
  -1  -2   0 4927.11  165.28 
  -1  -2   0 5033.60  165.58 
  -1  -2   0 4910.41  165.78 
  -1  -2   0 4893.51  166.68 
  -1  -2   0 4921.41  165.78 
  -1  -2   0 4989.10  165.38 
  -1  -2   0 4886.31  165.38 
   1  -2   0 4871.71  168.28 
   1  -2   0 4889.81  163.28 
   1  -2   0 4765.42  162.38 
  -1  -2   0 4961.70  165.48 
  -1  -2   0 4951.60  165.78 
  -1  -2   0 4910.71  165.58 
   1  -2   0 4783.32  163.38 
  -1  -2   0 4838.02  162.78 
  -1  -2   0 4775.62  162.08 
   1  -2   0 4621.44  162.68 
   1  -2   0 4713.63  162.98 
  -1  -2   0 4812.52  164.98 
   1   2   0 5021.40  164.28 
  -1   2   0 4974.40  166.08 
  -1   2   0 4929.71  163.68 
   1   2   0 4707.63  164.98 
  -1   2   0 4917.91  163.48 
   1   2   0 4954.90  165.38 
  -1   2   0 4959.50  165.08 
   1   2   0 4913.41  164.58 
   1   2   0 4962.70  165.68 
   1   2   0 4833.72  165.48 
  -1   2   0 4709.23  165.18 
   1   2   0 4868.91  167.48 
   1   2   0 4946.31  165.98 
   1   2   0 4790.62  165.48 
  -1   2   0 4945.60  162.68 
  -1   2   0 4976.40  166.68 
  -1   2   0 4846.92  163.08 
  -1   2   0 4817.72  165.98 
  -1   2   0 5197.18  164.18 
   1   2   0 4890.81  165.98 
   1   2   0 4938.21  165.68 
  -1   2   0 4865.11  166.08 
  -1   2   0 4869.91  161.78 
   1   2   0 5113.09  166.18 
   1   2   0 4882.21  165.08 
   1   2   0 4955.00  161.88 
   1   2   0 4837.72  165.28 
   1   2   0 4865.91  166.18 
  -1   2   0 4744.53  162.98 
  -1   2   0 4778.42  163.18 
   1   2   0 4896.51  165.38 
   1   2   0 5081.69  166.38 
  -1   2   0 4926.21  162.08 
   1   2   0 4915.21  165.18 
   1   2   0 4867.11  165.28 
   1   2   0 5011.10  162.78 
   1   2   0 4800.92  165.58 
   1   2   0 5020.80  165.98 
  -1   2   0 4795.22  163.38 
  -1   2   0 4850.61  163.08 
   1   2   0 4835.02  165.28 
  -1   2   0 4878.11  163.78 
  -1   2   0 4878.11  162.88 
   1   2   0 4717.53  166.28 
  -1   2   0 4924.91  163.38 
  -1   2   0 4851.31  161.98 
  -1   2   0 4813.62  162.98 
   1   2   0 4917.81  167.08 
   1   2   0 4958.40  165.88 
  -1   2   0 4755.32  162.58 
  -1   2   0 4914.11  166.58 
  -1   2   0 4888.41  163.48 
   1   2   0 4937.71  165.58 
   1   2   0 4991.30  163.68 
   1   2   0 5045.70  167.98 
  -1   2   0 4914.01  164.98 
  -1   2   0 4990.40  165.98 
  -1   2   0 5020.90  165.68 
  -1   2   0 4924.91  168.38 
  -1   2   0 4885.31  162.98 
   1   2   0 4893.41  165.08 
  -1   2   0 4433.06  163.58 
  -1   2   0 4954.00  170.38 
  -2  -2   0 1776.12   65.59 
   2  -2   0 1547.75   63.99 
  -2  -2   0 1799.12   64.29 
   2  -2   0 1752.62   65.49 
   2  -2   0 1860.31   63.99 
  -2  -2   0 1809.42   65.59 
   2  -2   0 1608.04   59.29 
  -2  -2   0 1760.72   64.29 
  -2  -2   0 1915.41   67.29 
  -2  -2   0 1704.23   64.99 
   2  -2   0 1721.63   60.09 
   2  -2   0 1569.54   64.19 
   2  -2   0 1724.73   65.09 
   2  -2   0 1734.83   62.09 
   2  -2   0 1515.55   63.19 
   2  -2   0 1830.22   69.19 
  -2  -2   0 1816.22   66.19 
  -2  -2   0 1814.12   64.29 
  -2  -2   0 1860.41   67.29 
   2  -2   0 1769.02   62.09 
   2  -2   0 1740.93   60.09 
  -2  -2   0 1727.13   65.79 
   2  -2   0 1645.44   58.99 
  -2  -2   0 1820.12   66.39 
  -2  -2   0 1765.62   64.99 
   2  -2   0 1741.63   63.69 
  -2  -2   0 1747.63   62.79 
   2  -2   0 1762.62   63.19 
  -2  -2   0 1759.12   66.19 
  -2  -2   0 1708.33   64.19 
  -2  -2   0 1763.42   65.39 
  -2  -2   0 1781.02   62.09 
   2  -2   0 1759.82   62.29 
   2  -2   0 1725.03   65.19 
   2  -2   0 1763.32   63.79 
  -2  -2   0 1784.92   63.99 
  -2  -2   0 1839.42   65.29 
   2  -2   0 1716.53   63.59 
  -2  -2   0 1731.73   61.69 
  -2  -2   0 1792.82   63.19 
   2  -2   0 1737.33   62.69 
   2  -2   0 1744.63   63.39 
   2  -2   0 1724.33   60.69 
   2  -2   0 1673.03   62.59 
   2  -2   0 1793.92   60.69 
   2  -2   0 1771.22   64.29 
  -2  -2   0 1813.72   65.69 
  -2  -2   0 1795.92   64.09 
  -2  -2   0 1817.92   65.79 
  -2  -2   0 1810.92   61.99 
  -2  -2   0 1767.12   65.89 
   2  -2   0 1673.73   63.09 
  -2  -2   0 1768.32   65.29 
  -2  -2   0 1723.63   63.79 
   2   2   0 1802.62   65.79 
  -2   2   0 1755.22   59.79 
  -2   2   0 1688.73   60.39 
  -2   2   0 1749.53   63.39 
   2   2   0 1777.62   66.89 
   2   2   0 1771.32   64.99 
   2   2   0 1758.22   63.29 
  -2   2   0 1769.52   68.09 
   2   2   0 1781.32   65.29 
   2   2   0 1790.92   61.99 
  -2   2   0 1791.32   63.19 
   2   2   0 1723.73   64.99 
   2   2   0 1760.72   63.89 
   2   2   0 1825.12   63.29 
   2   2   0 1818.22   65.39 
  -2   2   0 1803.52   65.19 
  -2   2   0 1745.13   62.69 
  -2   2   0 1801.32   63.09 
   2   2   0 1725.73   63.89 
   2   2   0 1777.32   66.69 
  -2   2   0 1786.12   64.29 
  -2   2   0 1789.72   63.59 
  -2   2   0 1702.63   61.89 
  -2   2   0 1744.13   64.99 
  -2   2   0 1850.11   63.39 
  -2   2   0 1759.42   62.59 
   2   2   0 1768.22   61.99 
   2   2   0 1714.83   68.09 
   2   2   0 1769.92   61.69 
   2   2   0 1784.12   66.09 
   2   2   0 1739.63   64.79 
   2   2   0 1770.42   67.19 
   2   2   0 1707.23   63.69 
   2   2   0 1709.03   65.89 
   2   2   0 1847.12   64.89 
  -2   2   0 1806.42   65.69 
  -2   2   0 1715.43   62.19 
  -2   2   0 1820.52   64.29 
  -2   2   0 1746.03   60.09 
  -2   2   0 1710.83   60.39 
   2   2   0 1713.43   63.79 
  -2   2   0 1764.02   60.39 
  -2   2   0 1746.63   63.69 
  -2   2   0 1779.62   63.09 
   2   2   0 1829.62   65.79 
   2   2   0 1708.63   64.59 
   2   2   0 1747.43   61.89 
   2   2   0 1727.03   64.59 
  -2   2   0 1625.44   61.39 
   2   2   0 1794.92   65.69 
   2   2   0 1809.62   65.49 
   2   2   0 1825.72   65.69 
  -2   2   0 1710.83   63.79 
   2   2   0 1772.32   64.19 
  -2   2   0 1609.54   59.79 
   2   2   0 1698.23   61.79 
  -2   2   0 1744.43   64.49 
  -2   2   0 1745.73   65.29 
  -2   2   0 1740.63   65.09 
  -2   2   0 1766.92   60.29 
  -2   2   0 1796.02   62.09 
  -2   2   0 1724.03   60.99 
  -2   2   0 1764.92   64.09 
  -2   2   0 1812.72   63.79 
  -2   2   0 1760.32   64.19 
   2   2   0 1790.92   65.09 
  -2   2   0 1767.02   60.99 
   3  -2   0  473.65   22.20 
  -3  -2   0  446.36   24.90 
  -3  -2   0  459.15   24.40 
  -3  -2   0  504.45   22.90 
   3  -2   0  464.35   21.90 
  -3  -2   0  484.95   24.90 
  -3  -2   0  510.05   23.50 
  -3  -2   0  492.55   25.40 
   3  -2   0  442.66   18.50 
   3  -2   0  480.65   18.10 
   3  -2   0  452.25   22.70 
  -3  -2   0  481.25   24.20 
  -3  -2   0  485.45   22.60 
  -3  -2   0  451.15   24.80 
  -3  -2   0  486.75   20.00 
   3  -2   0  501.05   25.10 
   3  -2   0  462.05   23.00 
   3  -2   0  389.66   23.10 
   3  -2   0  473.85   22.40 
  -3  -2   0  459.35   25.60 
  -3  -2   0  447.36   24.70 
  -3  -2   0  477.45   23.20 
   3  -2   0  505.35   22.20 
  -3  -2   0  445.76   25.70 
   3  -2   0  475.95   18.90 
  -3  -2   0  482.15   25.20 
  -3  -2   0  489.35   22.90 
   3  -2   0  440.16   24.70 
   3  -2   0  507.35   25.00 
   3  -2   0  433.66   24.00 
   3  -2   0  456.15   23.90 
  -3  -2   0  500.85   26.70 
   3  -2   0  491.45   23.80 
  -3  -2   0  476.75   24.60 
  -3  -2   0  492.85   25.10 
   3  -2   0  526.35   27.90 
  -3   2   0  493.75   24.30 
  -3   2   0  459.35   23.90 
  -3   2   0  484.35   21.60 
  -3   2   0  473.95   18.80 
   3   2   0  444.56   22.60 
   3   2   0  475.45   21.60 
  -3   2   0  473.35   18.10 
  -3   2   0  461.85   19.00 
  -3   2   0  491.45   23.90 
  -3   2   0  423.46   25.90 
   3   2   0  450.95   28.00 
   3   2   0  469.85   20.20 
  -3   2   0  461.15   20.80 
  -3   2   0  512.25   26.90 
   3   2   0  457.15   24.80 
  -3   2   0  490.35   24.80 
  -3   2   0  442.56   23.20 
  -3   2   0  451.05   23.70 
   3   2   0  494.85   26.90 
   3   2   0  472.75   23.80 
   3   2   0  484.05   23.50 
  -3   2   0  482.05   23.90 
   3   2   0  434.46   22.10 
   3   2   0  480.85   23.70 
  -3   2   0  452.55   24.90 
   3   2   0  490.85   26.50 
   3   2   0  491.15   21.70 
  -3   2   0  510.35   23.10 
  -3   2   0  482.95   20.00 
   3   2   0  480.25   20.00 
  -3   2   0  475.75   18.50 
  -3   2   0  487.85   23.30 
   3   2   0  430.16   23.90 
   3   2   0  483.65   24.40 
   3   2   0  448.46   22.50 
   3   2   0  499.25   22.60 
   3   2   0  514.15   22.40 
  -3   2   0  472.75   19.30 
  -3   2   0  483.05   18.70 
   3   2   0  488.05   26.20 
   3   2   0  470.15   24.50 
  -3   2   0  440.56   22.40 
  -3   2   0  502.95   23.20 
   3   2   0  453.55   19.80 
  -3   2   0  469.55   21.50 
  -3   2   0  472.05   24.30 
   3   2   0  483.65   24.40 
   3   2   0  473.75   19.80 
   3   2   0  469.05   25.40 
  -3   2   0  467.65   18.40 
  -3   2   0  485.85   22.90 
  -3   2   0  512.65   24.40 
   4  -2   0  230.08   13.90 
   4  -2   0  207.88   15.70 
  -4  -2   0  220.28   17.60 
  -4  -2   0  239.68   19.20 
  -4  -2   0  192.58   16.30 
   4  -2   0  182.88   14.50 
  -4  -2   0  211.18   14.80 
   4  -2   0  210.58   17.00 
   4  -2   0  201.98   17.40 
   4  -2   0  202.68   15.70 
  -4  -2   0  209.38   17.90 
   4  -2   0  222.88   11.80 
  -4  -2   0  198.38   16.80 
   4  -2   0  209.48   15.00 
  -4  -2   0  222.18   17.90 
  -4  -2   0  178.28   19.00 
  -4  -2   0  222.08   15.60 
   4  -2   0  236.98   19.70 
  -4  -2   0  202.78   17.20 
   4  -2   0  225.68   17.30 
   4  -2   0  210.28   17.10 
   4  -2   0  211.58   17.80 
   4  -2   0  216.48   15.30 
  -4  -2   0  234.98   19.40 
  -4  -2   0  214.98   17.40 
   4  -2   0  205.58   12.00 
  -4  -2   0  204.18   16.20 
   4  -2   0  190.38   13.70 
   4  -2   0  230.58   16.60 
  -4  -2   0  226.78   15.00 
  -4  -2   0  218.98   17.40 
  -4  -2   0  213.08   14.30 
  -4  -2   0  207.08   11.30 
  -4   2   0  229.78   17.10 
   4   2   0  184.58   10.80 
   4   2   0  228.98   18.30 
  -4   2   0  212.68   11.90 
   4   2   0  217.38   16.20 
   4   2   0  229.18   13.20 
   4   2   0  202.88   14.60 
  -4   2   0  218.48   13.70 
  -4   2   0  238.98   12.00 
  -4   2   0  250.67   16.60 
  -4   2   0  211.68   11.80 
  -4   2   0  225.78   16.20 
  -4   2   0  210.78   10.40 
   4   2   0  219.18   11.20 
  -4   2   0  208.38   14.10 
  -4   2   0  224.18   12.90 
  -4   2   0  227.08   15.20 
  -4   2   0  206.38   14.50 
   4   2   0  206.88   11.20 
   4   2   0  241.38   19.30 
  -4   2   0  193.98   17.30 
  -4   2   0  208.18   11.90 
   4   2   0  202.08   14.20 
  -4   2   0  227.58   14.40 
  -4   2   0  200.18   12.00 
   4   2   0  197.28   13.70 
  -4   2   0  186.08   12.90 
  -4   2   0  225.38   15.90 
  -4   2   0  215.88   12.40 
  -4   2   0  229.58   15.60 
   4   2   0  231.38   16.00 
   4   2   0  220.18   15.70 
   4   2   0  257.77   26.80 
  -4   2   0  235.38   16.30 
   4   2   0  251.67   17.30 
   4   2   0  200.38   19.30 
   4   2   0  225.98   12.60 
   4   2   0  231.48   17.00 
  -4   2   0  210.98   15.60 
   4   2   0  213.48   17.10 
  -4   2   0  217.78   17.00 
   4   2   0  202.08   16.40 
   4   2   0  213.88   18.30 
   4   2   0  223.28   14.80 
   4   2   0  196.18   20.80 
  -5  -2   0  212.88   16.00 
   5  -2   0  192.08   18.50 
   5  -2   0  197.78   18.00 
  -5  -2   0  213.38   18.00 
   5  -2   0  236.68   14.40 
   5  -2   0  180.18   20.20 
   5  -2   0  159.88   18.50 
   5  -2   0  206.38   16.60 
  -5  -2   0  186.68   18.90 
   5  -2   0  215.08   15.60 
   5  -2   0  195.88   21.30 
  -5  -2   0  193.58   11.10 
  -5  -2   0  228.08   19.70 
   5  -2   0  238.18   18.50 
  -5  -2   0  173.38   19.90 
  -5  -2   0  216.88   15.70 
   5  -2   0  190.18   13.30 
   5  -2   0  217.48   21.80 
  -5  -2   0  264.67   23.70 
  -5  -2   0  177.88   19.70 
   5  -2   0  231.18   17.00 
   5  -2   0  240.28   24.80 
  -5  -2   0  224.08   22.90 
  -5  -2   0  220.78   22.90 
  -5  -2   0  190.28   20.60 
  -5  -2   0  209.28   22.00 
  -5  -2   0  201.58   22.30 
   5  -2   0  245.58   21.40 
  -5  -2   0  226.98   18.20 
  -5  -2   0  242.48   24.10 
   5  -2   0  213.88   13.40 
   5  -2   0  238.38   19.90 
   5   2   0  212.78   20.30 
  -5   2   0  212.78   14.10 
  -5   2   0  229.58   17.00 
  -5   2   0  237.68   17.70 
  -5   2   0  207.88   13.10 
   5   2   0  215.58   11.10 
   5   2   0  197.48   17.70 
   5   2   0  196.28   13.00 
  -5   2   0  238.68   18.70 
   5   2   0  197.58   18.00 
  -5   2   0  189.38   20.60 
  -5   2   0  215.98   18.30 
  -5   2   0  233.88   17.90 
   5   2   0  237.38   28.30 
   5   2   0  228.08   20.80 
  -5   2   0  204.28   12.00 
   5   2   0  229.98   23.10 
  -5   2   0  208.28   13.20 
  -5   2   0  202.18   15.60 
   5   2   0  209.38   20.70 
  -5   2   0  217.08   14.50 
   5   2   0  240.38   26.30 
   5   2   0  215.08   18.10 
   5   2   0  224.28   17.30 
   5   2   0  206.78   19.50 
   5   2   0  219.58   21.20 
   5   2   0  218.18   11.10 
  -5   2   0  211.08   17.70 
   5   2   0  227.28   22.70 
   5   2   0  248.18   15.80 
   5   2   0  177.98   12.20 
  -5   2   0  201.08   11.30 
   5   2   0  225.78   17.40 
   5   2   0  239.68   20.90 
  -5   2   0  221.18   16.20 
   5   2   0  215.58   14.40 
  -5   2   0  200.88   13.10 
   5   2   0  224.68   18.50 
  -5   2   0  238.08   13.60 
  -5   2   0  203.28   21.80 
   6  -2   0  360.76   24.50 
   6  -2   0  403.26   21.40 
   6  -2   0  354.26   30.40 
  -6  -2   0  340.67   28.50 
  -6  -2   0  363.36   27.20 
  -6  -2   0  394.26   26.90 
  -6  -2   0  341.27   21.40 
   6  -2   0  339.77   26.50 
  -6  -2   0  348.57   29.10 
   6  -2   0  342.07   28.10 
  -6  -2   0  369.06   26.60 
  -6  -2   0  361.86   22.80 
  -6  -2   0  377.76   29.20 
  -6  -2   0  404.76   23.50 
   6  -2   0  366.76   28.00 
   6  -2   0  387.46   30.10 
   6  -2   0  310.77   25.90 
  -6  -2   0  384.06   25.40 
  -6  -2   0  373.46   30.20 
  -6  -2   0  352.06   27.20 
  -6  -2   0  352.66   27.50 
   6  -2   0  392.76   24.90 
   6  -2   0  382.06   25.50 
   6  -2   0  402.86   20.00 
  -6  -2   0  377.36   28.20 
   6  -2   0  406.86   30.40 
   6  -2   0  339.47   22.40 
   6  -2   0  351.66   25.50 
  -6  -2   0  421.36   28.40 
   6  -2   0  403.76   27.60 
   6  -2   0  365.46   20.00 
  -6   2   0  337.27   27.70 
   6   2   0  363.16   28.80 
  -6   2   0  421.46   25.80 
   6   2   0  360.46   25.80 
   6   2   0  369.46   25.80 
   6   2   0  404.26   30.20 
  -6   2   0  367.96   25.40 
  -6   2   0  382.66   23.70 
   6   2   0  396.16   23.20 
  -6   2   0  398.66   21.00 
   6   2   0  375.96   29.00 
   6   2   0  430.96   34.80 
  -6   2   0  371.36   26.40 
   6   2   0  340.47   23.80 
  -6   2   0  392.56   22.00 
  -6   2   0  336.57   22.30 
  -6   2   0  366.46   26.70 
   6   2   0  393.36   30.90 
   6   2   0  441.26   30.10 
  -6   2   0  389.96   19.60 
   6   2   0  325.67   24.00 
  -6   2   0  424.46   24.00 
   6   2   0  387.86   27.30 
   6   2   0  375.66   25.90 
  -6   2   0  375.26   23.60 
  -6   2   0  345.57   26.80 
   6   2   0  411.56   28.30 
  -6   2   0  400.16   26.50 
  -6   2   0  347.07   18.70 
  -6   2   0  418.86   26.50 
   6   2   0  406.56   23.60 
   6   2   0  380.06   23.90 
  -7  -2   0  138.19   21.20 
   7  -2   0  108.69   17.40 
   7  -2   0  138.89   22.40 
   7  -2   0  142.29   16.40 
   7  -2   0  121.89   20.00 
   7  -2   0  142.59   17.60 
  -7  -2   0  104.89   14.50 
  -7  -2   0  132.59   15.00 
  -7  -2   0  160.88   22.10 
  -7  -2   0  127.99   15.60 
  -7  -2   0  146.79   21.00 
  -7  -2   0  156.48   23.70 
   7  -2   0  102.79   12.20 
  -7  -2   0   99.39   16.80 
  -7  -2   0  110.09   19.50 
   7  -2   0  119.39   22.00 
   7  -2   0  108.49   18.80 
   7  -2   0  122.19   13.00 
  -7  -2   0  128.79   20.00 
   7  -2   0  116.19   17.90 
  -7  -2   0  113.29   20.80 
   7  -2   0  132.39   14.50 
   7  -2   0  121.29   19.60 
   7  -2   0  100.39   18.60 
  -7  -2   0  129.19   18.40 
  -7  -2   0  110.19   18.00 
   7  -2   0  116.89   16.70 
  -7  -2   0  127.79   19.50 
   7  -2   0  123.79   19.50 
   7  -2   0   96.59   19.10 
  -7   2   0  120.79   18.70 
   7   2   0  142.59   16.30 
   7   2   0   97.19   19.60 
   7   2   0  120.89   23.40 
  -7   2   0  137.59   19.80 
  -7   2   0  118.99   17.90 
  -7   2   0  117.49   13.90 
   7   2   0  142.39   23.70 
  -7   2   0  158.88   18.50 
  -7   2   0  147.69   16.60 
  -7   2   0  137.39   19.60 
  -7   2   0  149.49   20.70 
   7   2   0  130.79   21.80 
  -7   2   0  145.59   22.40 
  -7   2   0  160.28   21.00 
   7   2   0  126.49   18.70 
  -7   2   0  145.59   17.30 
   7   2   0  129.79   24.70 
   7   2   0  146.09   21.30 
  -7   2   0  129.79   18.40 
   7   2   0  105.79   16.10 
   7   2   0  112.79   16.40 
   7   2   0  143.49   18.70 
  -7   2   0  130.19   12.60 
   7   2   0  157.98   23.80 
   7   2   0  169.98   21.20 
  -7   2   0  142.99   21.10 
  -7   2   0  121.69   14.90 
  -8  -2   0  234.38   28.90 
  -8  -2   0  251.17   23.30 
  -8  -2   0  259.27   28.70 
  -8  -2   0  238.58   29.30 
  -8  -2   0  212.48   27.20 
   8  -2   0  253.07   28.50 
   8  -2   0  269.07   29.80 
   8  -2   0  241.18   25.60 
   8  -2   0  250.57   23.60 
  -8  -2   0  280.47   33.20 
   8  -2   0  220.98   30.10 
  -8  -2   0  264.57   30.70 
   8  -2   0  222.38   25.80 
  -8  -2   0  251.77   27.50 
  -8  -2   0  278.87   30.50 
   8  -2   0  287.77   32.40 
  -8  -2   0  220.78   30.80 
  -8  -2   0  322.37   31.90 
   8  -2   0  252.47   33.00 
   8  -2   0  286.67   34.60 
  -8  -2   0  289.97   21.90 
  -8  -2   0  272.67   26.80 
  -8  -2   0  270.17   30.20 
   8  -2   0  258.57   32.60 
   8  -2   0  271.77   31.50 
   8   2   0  244.38   26.70 
  -8   2   0  297.47   29.60 
   8   2   0  244.78   27.40 
  -8   2   0  278.27   28.80 
  -8   2   0  258.67   27.20 
  -8   2   0  243.38   25.00 
  -8   2   0  259.37   28.90 
  -8   2   0  265.07   24.30 
   8   2   0  217.48   25.30 
  -8   2   0  200.98   25.70 
   8   2   0  215.38   27.00 
   8   2   0  263.47   34.00 
   8   2   0  240.88   30.80 
   8   2   0  264.27   35.90 
   8   2   0  276.17   33.20 
  -8   2   0  282.57   25.20 
   8   2   0  232.98   31.40 
  -8   2   0  287.37   28.80 
   8   2   0  285.77   28.10 
  -8   2   0  265.87   32.60 
   8   2   0  206.88   25.00 
  -8   2   0  337.87   33.40 
  -8   2   0  289.67   30.90 
   8   2   0  227.28   36.10 
  -9  -2   0    2.70   11.00 
   9  -2   0   12.30   15.10 
  -9  -2   0    4.30   13.60 
  -9  -2   0    9.00   13.80 
   9  -2   0    5.50   16.40 
  -9  -2   0    3.60   11.80 
  -9  -2   0    6.10   12.30 
  -9  -2   0   17.50   13.00 
  -9  -2   0   22.30   15.80 
   9  -2   0   17.20   12.90 
  -9  -2   0   13.70   14.90 
   9  -2   0   19.20   15.40 
   9  -2   0   25.50   13.50 
   9  -2   0   26.70   18.30 
  -9  -2   0   26.00   16.50 
   9  -2   0   28.60   13.90 
   9  -2   0   15.20   13.50 
  -9  -2   0   24.10   15.20 
  -9  -2   0   14.10   11.90 
  -9  -2   0   15.80   15.90 
   9  -2   0   14.70   13.50 
  -9   2   0   15.80   12.80 
   9   2   0   14.60   13.90 
  -9   2   0   28.00   13.90 
  -9   2   0   10.10   12.40 
   9   2   0   23.30   16.20 
   9   2   0   22.00   12.00 
  -9   2   0    1.00   12.70 
   9   2   0   23.50   12.40 
   9   2   0   23.50   15.70 
   9   2   0    6.10   15.40 
   9   2   0   -8.00   11.90 
  -9   2   0   12.50   13.50 
   9   2   0   13.60   10.10 
  -9   2   0   -4.50   14.00 
  -9   2   0   20.00   15.10 
   9   2   0   22.30   12.40 
   9   2   0    8.50   12.20 
  -9   2   0   22.80   13.10 
  -9   2   0   -2.30   13.70 
  -9   2   0    4.70   13.10 
   9   2   0   25.70   14.50 
  -9   2   0   17.90   12.70 
  -9   2   0   20.50   11.90 
 -10  -2   0   18.50   14.40 
  10  -2   0   16.50   16.40 
 -10  -2   0    1.50   17.10 
  10  -2   0  -15.50   14.60 
 -10  -2   0    4.20   16.00 
  10  -2   0    5.10   21.70 
 -10  -2   0   17.00   15.30 
 -10  -2   0   -6.50   13.30 
 -10  -2   0    4.80   14.70 
 -10  -2   0  -10.90   15.30 
 -10  -2   0   -5.70   13.10 
 -10  -2   0   17.60   14.30 
 -10  -2   0   15.60   14.80 
  10  -2   0   14.70   14.10 
  10  -2   0   -3.20   13.10 
 -10  -2   0  -17.70   11.10 
  10  -2   0  -14.80   15.00 
  10  -2   0   10.60   12.50 
 -10  -2   0  -13.10   11.70 
  10   2   0   11.60   16.40 
  10   2   0    3.90   10.90 
 -10   2   0  -11.40   11.40 
  10   2   0   20.20   15.70 
 -10   2   0    5.00   13.00 
  10   2   0   -7.30   11.70 
  10   2   0   -0.30   16.20 
 -10   2   0   -6.90   15.80 
 -10   2   0   -7.90   17.70 
 -10   2   0   -1.20   14.50 
 -10   2   0   20.70   17.60 
 -10   2   0   20.20   15.70 
  10   2   0    7.00   11.70 
  10   2   0   31.40   14.30 
 -10   2   0    0.00   13.20 
 -10   2   0   -7.30   12.00 
 -10   2   0   11.60   16.90 
  10   2   0   14.50   20.10 
  10   2   0    6.10   11.20 
   0  -3   0   -1.50    3.50 
   0  -3   0   -2.30    3.50 
   0  -3   0   -0.90    5.00 
   0  -3   0    2.10    2.90 
   0  -3   0   -0.20    2.50 
   0  -3   0    2.30    4.40 
   0  -3   0   -2.40    3.20 
   0  -3   0    4.20    3.20 
   0  -3   0    2.40    3.60 
   0  -3   0   -0.40    3.50 
   0  -3   0    4.80    4.00 
   0  -3   0   -0.20    3.10 
   0  -3   0   -0.50    5.40 
   0  -3   0    3.20    4.00 
   0  -3   0   10.60    4.20 
   0  -3   0    0.60    5.60 
   0  -3   0    6.00    4.00 
   0  -3   0   -2.30    2.80 
   0  -3   0   -0.30    4.00 
   0  -3   0   -3.40    4.40 
   0   3   0    3.50    3.40 
   0   3   0    0.20    3.10 
   0   3   0   -0.40    3.20 
   0   3   0    2.90    3.40 
   0   3   0    5.00    7.40 
   0   3   0    0.40    3.20 
   0   3   0   20.30    6.10 
   0   3   0   -0.40    3.10 
   0   3   0    2.90    3.00 
   0   3   0    1.60    3.00 
   0   3   0    2.00    5.90 
   0   3   0    1.00    2.90 
   0   3   0    4.20    3.00 
   0   3   0   11.70    6.40 
   0   3   0    1.90    2.90 
   0   3   0    2.30    2.70 
   0   3   0   -3.90    2.60 
   0   3   0    3.80    3.10 
   0   3   0    0.60    3.10 
   0   3   0   -2.40    2.80 
   0   3   0    2.60    3.00 
   0   3   0    3.40    4.70 
   0   3   0   11.30    5.40 
   0   3   0   -1.70    2.80 
   1  -3   0   95.39   10.50 
   1  -3   0   85.99    7.40 
  -1  -3   0   81.39    9.90 
  -1  -3   0  103.59    6.80 
  -1  -3   0   94.89   10.30 
  -1  -3   0  114.49   11.80 
  -1  -3   0   87.99    9.60 
  -1  -3   0   87.79    6.20 
   1  -3   0  104.69    7.70 
   1  -3   0   89.99    5.50 
   1  -3   0  104.89    8.50 
  -1  -3   0  100.29   11.00 
   1  -3   0   90.99    6.60 
   1  -3   0   87.39    8.30 
  -1  -3   0   92.29    9.80 
  -1  -3   0   86.39    9.80 
  -1  -3   0  101.69   12.00 
  -1  -3   0  102.09   11.40 
  -1  -3   0   85.29    9.70 
   1  -3   0  112.99    7.80 
   1  -3   0   89.59    8.70 
   1  -3   0   84.49    8.10 
   1  -3   0   92.79    8.60 
  -1  -3   0  111.59   10.90 
   1  -3   0  105.29    9.30 
   1  -3   0   66.29    8.10 
   1  -3   0  112.29    8.50 
  -1  -3   0  103.79   10.70 
   1  -3   0  114.09    8.80 
   1  -3   0   84.99    9.60 
  -1  -3   0  102.29   11.00 
   1  -3   0  105.19    7.80 
   1  -3   0   92.29    7.30 
  -1  -3   0   92.39   10.30 
  -1  -3   0   83.19    9.50 
   1  -3   0  106.79   11.70 
  -1  -3   0  127.89   14.80 
  -1  -3   0   90.79   13.80 
  -1  -3   0   86.19   10.80 
   1  -3   0   97.69    7.00 
   1  -3   0  104.59   12.30 
   1  -3   0   93.49   10.30 
   1  -3   0   97.19    5.90 
   1  -3   0  118.49   12.90 
   1  -3   0   85.09    6.70 
   1  -3   0   96.59   11.20 
   1  -3   0  119.79    9.30 
   1  -3   0   97.49   11.00 
   1  -3   0   99.09    9.60 
  -1  -3   0   96.99   10.40 
   1  -3   0  102.89    8.20 
   1  -3   0   93.09    9.40 
  -1  -3   0  112.79   13.40 
   1  -3   0   87.09   12.80 
  -1   3   0   93.69    6.60 
  -1   3   0   85.39    8.80 
  -1   3   0  107.19    8.20 
  -1   3   0   95.39    8.60 
   1   3   0  122.09   12.90 
   1   3   0   98.69   11.30 
   1   3   0  110.79   10.90 
   1   3   0   83.79    9.40 
   1   3   0  139.69   15.40 
   1   3   0   97.39    7.20 
  -1   3   0   81.89    7.50 
  -1   3   0   99.09    9.40 
  -1   3   0  105.29    8.10 
   1   3   0   87.29    9.70 
  -1   3   0   94.89    6.90 
   1   3   0  100.29   12.60 
  -1   3   0   95.89   10.60 
   1   3   0  106.49    8.70 
   1   3   0   80.79   10.10 
  -1   3   0   88.39    8.90 
   1   3   0  109.99   11.00 
   1   3   0  107.89   12.30 
   1   3   0   98.49   10.10 
  -1   3   0  101.79   12.20 
  -1   3   0   89.19   10.80 
   1   3   0   91.69    6.20 
   1   3   0   90.39    9.90 
   1   3   0  107.19   10.80 
  -1   3   0   84.09    8.50 
  -1   3   0   97.99    8.00 
  -1   3   0  105.59   12.20 
  -1   3   0   86.19   10.60 
   1   3   0   77.09    9.70 
  -1   3   0  105.59    8.30 
   1   3   0  106.59   10.60 
  -1   3   0   96.59   11.50 
  -1   3   0   79.29    6.40 
  -1   3   0   87.89    6.00 
  -1   3   0   82.39    8.80 
   1   3   0  101.99   10.40 
   1   3   0  102.29   11.60 
   1   3   0  102.59   10.70 
   1   3   0   94.99   10.50 
   1   3   0   81.89   10.10 
  -1   3   0  101.79    7.00 
  -1   3   0   99.19   10.30 
  -1   3   0   84.69   11.00 
   1   3   0   98.19   10.70 
   1   3   0  135.19   12.20 
   2  -3   0    3.00    2.00 
  -2  -3   0   -2.70    4.30 
   2  -3   0   -1.40    4.10 
   2  -3   0    4.50    3.00 
   2  -3   0    1.90    3.20 
   2  -3   0    5.70    3.50 
  -2  -3   0    7.80    3.30 
   2  -3   0    7.70    4.80 
  -2  -3   0    3.30    4.20 
  -2  -3   0   -4.00    4.50 
  -2  -3   0    7.80    4.50 
   2  -3   0    7.30    3.80 
  -2  -3   0   11.90    6.00 
   2  -3   0    2.10    3.60 
  -2  -3   0    6.60    5.00 
  -2  -3   0   -0.60    2.80 
   2  -3   0    5.50    3.00 
   2  -3   0    2.60    3.70 
  -2  -3   0    5.20    3.40 
  -2  -3   0    8.30    5.10 
   2  -3   0    5.80    3.60 
  -2  -3   0    6.20    5.20 
  -2  -3   0    1.80    5.10 
   2  -3   0    3.20    4.80 
  -2  -3   0    9.80    4.80 
   2  -3   0    8.10    4.30 
  -2  -3   0   -1.40    4.60 
  -2  -3   0    6.20    5.50 
  -2  -3   0    6.40    4.00 
   2  -3   0    3.80    3.40 
   2  -3   0    3.70    2.80 
   2  -3   0    5.20    5.10 
  -2  -3   0    5.40    5.00 
  -2  -3   0    3.00    5.30 
   2  -3   0    6.10    4.10 
  -2  -3   0    8.50    6.00 
  -2  -3   0    4.10    4.80 
   2  -3   0    0.30    3.00 
   2  -3   0    1.60    3.60 
   2  -3   0    1.50    4.70 
  -2  -3   0    1.40    4.20 
   2  -3   0    2.00    4.00 
  -2  -3   0    1.80    4.70 
  -2  -3   0    4.70    5.30 
   2  -3   0    3.90    3.10 
  -2  -3   0    1.60    3.50 
   2   3   0    7.30    4.30 
   2   3   0    6.20    3.60 
  -2   3   0    6.30    3.20 
  -2   3   0    2.70    3.20 
  -2   3   0    3.10    2.60 
   2   3   0    1.80    4.00 
   2   3   0    2.00    5.10 
  -2   3   0    3.00    5.70 
  -2   3   0    7.40    4.30 
   2   3   0    8.30    4.30 
  -2   3   0    0.30    2.80 
  -2   3   0    3.30    3.90 
  -2   3   0    0.40    5.10 
   2   3   0    3.60    4.50 
   2   3   0    1.40    4.10 
  -2   3   0    3.80    3.60 
   2   3   0    2.10    4.70 
  -2   3   0    3.80    3.40 
  -2   3   0    0.60    4.00 
   2   3   0    8.70    5.20 
   2   3   0    0.20    3.10 
   2   3   0   10.60    4.80 
  -2   3   0   -1.60    3.40 
  -2   3   0    3.50    3.50 
   2   3   0    4.10    4.30 
   2   3   0    7.40    3.90 
   2   3   0    3.00    4.50 
  -2   3   0   -2.90    2.70 
  -2   3   0    0.10    3.90 
   2   3   0    8.00    3.10 
  -2   3   0    2.00    3.10 
  -2   3   0    1.50    3.40 
  -2   3   0    3.10    2.90 
  -2   3   0    3.50    4.80 
  -2   3   0    1.70    3.30 
  -2   3   0    2.80    4.90 
   2   3   0    2.10    4.00 
  -2   3   0    6.00    3.30 
   2   3   0    7.70    5.10 
   2   3   0    2.50    3.30 
  -2   3   0    2.70    3.20 
  -2   3   0   -0.80    3.00 
  -2   3   0    3.40    2.90 
  -2   3   0    4.40    3.10 
  -2   3   0    5.60    3.70 
  -3  -3   0    8.30    5.70 
  -3  -3   0    8.90    4.20 
   3  -3   0   -1.70    4.60 
   3  -3   0    4.60    4.40 
  -3  -3   0    4.00    6.20 
   3  -3   0    5.90    2.10 
   3  -3   0    3.00    2.70 
   3  -3   0    1.50    2.80 
   3  -3   0    3.80    3.20 
  -3  -3   0   10.40    7.40 
  -3  -3   0    6.50    5.80 
  -3  -3   0    8.50    6.70 
  -3  -3   0   -1.10    5.20 
  -3  -3   0    5.40    5.80 
  -3  -3   0    1.60    6.20 
  -3  -3   0    6.80    6.00 
  -3  -3   0   -2.70    4.60 
   3  -3   0    4.20    4.40 
   3  -3   0   -0.60    4.70 
   3  -3   0    0.10    5.20 
   3  -3   0    6.80    5.00 
   3  -3   0    5.30    4.10 
  -3  -3   0    6.60    4.30 
   3  -3   0    4.00    5.60 
   3  -3   0    1.80    4.10 
  -3  -3   0    1.10    4.90 
   3  -3   0    1.20    5.00 
   3  -3   0    3.10    5.00 
  -3  -3   0    0.90    5.70 
  -3  -3   0    2.60    5.60 
  -3  -3   0   -2.30    4.50 
  -3  -3   0    0.30    6.00 
   3  -3   0    2.30    4.40 
   3  -3   0    0.20    3.30 
   3  -3   0    5.50    5.40 
  -3  -3   0    5.90    5.70 
  -3   3   0   -2.60    4.20 
  -3   3   0   16.30    6.40 
  -3   3   0    2.90    3.00 
  -3   3   0    6.30    5.20 
  -3   3   0    0.70    2.70 
   3   3   0    2.60    4.70 
  -3   3   0    3.00    3.10 
  -3   3   0    7.90    6.60 
   3   3   0    0.90    2.60 
   3   3   0    5.60    5.30 
  -3   3   0    5.40    4.10 
   3   3   0    0.30    4.00 
   3   3   0    9.00    5.30 
  -3   3   0    3.50    2.60 
   3   3   0    2.20    5.00 
   3   3   0   -3.60    3.60 
   3   3   0    4.10    3.80 
   3   3   0    2.60    4.40 
   3   3   0    3.80    4.60 
  -3   3   0    6.20    4.50 
   3   3   0   -2.80    4.40 
   3   3   0    8.30    7.20 
  -3   3   0    3.60    3.00 
  -3   3   0    2.70    2.70 
  -3   3   0    0.80    4.50 
  -3   3   0    3.10    4.50 
  -3   3   0    5.00    3.60 
   3   3   0    0.80    5.00 
  -3   3   0    1.40    3.00 
   3   3   0    4.70    5.60 
   3   3   0    0.60    4.40 
  -3   3   0   -1.60    3.70 
  -3   3   0    0.10    4.10 
  -3   3   0    6.70    4.40 
  -3   3   0    4.30    3.90 
   3   3   0   -3.40    5.60 
  -3   3   0    9.90    5.70 
   3   3   0    3.40    3.30 
  -3   3   0    4.80    3.50 
   3   3   0    3.20    4.70 
  -4  -3   0 1035.00   46.80 
  -4  -3   0  977.00   46.20 
  -4  -3   0 1025.00   47.70 
   4  -3   0 1005.70   44.80 
   4  -3   0 1030.60   47.40 
   4  -3   0  966.10   43.30 
   4  -3   0 1017.50   42.60 
   4  -3   0 1091.89   46.30 
   4  -3   0  990.00   36.20 
  -4  -3   0 1098.69   44.50 
   4  -3   0  991.80   50.59 
  -4  -3   0  921.81   45.50 
  -4  -3   0  991.40   47.10 
  -4  -3   0 1000.90   43.90 
   4  -3   0 1029.00   46.20 
  -4  -3   0  964.60   47.70 
   4  -3   0  993.70   42.50 
  -4  -3   0  981.80   46.50 
  -4  -3   0 1019.00   43.90 
  -4  -3   0  890.31   46.30 
   4  -3   0 1034.60   45.30 
  -4  -3   0  974.40   46.60 
  -4  -3   0  992.20   45.50 
   4  -3   0 1011.50   42.20 
  -4  -3   0 1031.80   39.70 
   4  -3   0 1023.40   46.60 
   4  -3   0 1003.40   37.00 
   4  -3   0 1022.50   45.60 
   4  -3   0 1008.70   41.70 
  -4  -3   0 1067.69   47.90 
  -4   3   0 1030.70   39.10 
  -4   3   0 1012.80   37.90 
  -4   3   0  989.50   36.50 
  -4   3   0  985.20   43.70 
   4   3   0  986.30   48.60 
   4   3   0  990.70   39.50 
   4   3   0 1066.79   47.70 
   4   3   0  998.20   45.70 
   4   3   0  920.91   50.39 
   4   3   0 1066.09   44.50 
   4   3   0  961.50   44.90 
   4   3   0  937.51   40.80 
  -4   3   0  967.80   42.90 
  -4   3   0  926.61   39.60 
   4   3   0 1054.39   45.70 
  -4   3   0  956.20   44.40 
   4   3   0 1057.39   45.40 
   4   3   0 1026.60   49.60 
  -4   3   0 1026.70   45.60 
   4   3   0  964.20   48.00 
  -4   3   0  983.90   42.00 
  -4   3   0 1022.40   43.60 
  -4   3   0  947.31   36.10 
   4   3   0  991.00   41.70 
   4   3   0 1032.70   46.40 
   4   3   0 1003.30   39.50 
   4   3   0  992.50   47.10 
  -4   3   0  977.60   37.40 
  -4   3   0 1088.09   47.70 
   4   3   0  990.40   42.60 
   4   3   0  981.20   46.00 
  -4   3   0 1004.70   43.00 
  -4   3   0 1022.20   36.40 
   5  -3   0  595.74   31.10 
   5  -3   0  610.04   35.20 
   5  -3   0  626.14   34.90 
   5  -3   0  681.13   34.10 
  -5  -3   0  649.74   37.60 
   5  -3   0  680.73   36.10 
  -5  -3   0  666.33   36.60 
   5  -3   0  671.13   35.70 
  -5  -3   0  649.14   32.70 
   5  -3   0  657.23   32.50 
   5  -3   0  580.34   35.40 
  -5  -3   0  618.84   26.80 
  -5  -3   0  577.34   36.50 
  -5  -3   0  651.33   34.70 
  -5  -3   0  568.54   34.80 
  -5  -3   0  649.83   36.20 
   5  -3   0  578.84   29.80 
  -5  -3   0  637.64   32.10 
  -5  -3   0  603.14   31.90 
   5  -3   0  667.33   40.80 
   5  -3   0  589.74   32.10 
  -5  -3   0  611.64   36.10 
  -5  -3   0  593.14   34.80 
  -5  -3   0  608.74   35.90 
  -5  -3   0  587.44   35.40 
   5  -3   0  583.24   30.70 
   5  -3   0  643.94   33.40 
  -5  -3   0  644.94   36.80 
   5   3   0  587.24   26.50 
  -5   3   0  573.54   23.60 
   5   3   0  647.54   36.40 
   5   3   0  626.64   31.10 
   5   3   0  601.44   40.60 
   5   3   0  601.64   33.10 
   5   3   0  535.65   33.10 
  -5   3   0  626.94   32.30 
   5   3   0  605.94   36.90 
   5   3   0  647.34   35.30 
  -5   3   0  621.94   26.20 
  -5   3   0  603.24   25.10 
  -5   3   0  617.34   32.40 
   5   3   0  595.04   34.30 
   5   3   0  560.14   26.00 
   5   3   0  616.84   36.40 
  -5   3   0  623.54   25.20 
   5   3   0  626.94   30.60 
  -5   3   0  614.44   33.80 
   5   3   0  601.84   30.40 
  -5   3   0  640.44   32.60 
   5   3   0  683.03   39.20 
  -5   3   0  591.74   35.70 
  -5   3   0  634.54   26.30 
  -5   3   0  653.93   33.70 
   5   3   0  602.34   37.40 
   5   3   0  564.44   34.20 
  -5   3   0  618.04   33.40 
  -5   3   0  584.24   29.20 
  -5   3   0  662.43   33.00 
   5   3   0  600.64   33.10 
  -5   3   0  682.63   33.30 
  -6  -3   0 2120.99   92.69 
  -6  -3   0 2171.38   91.19 
   6  -3   0 2253.57   86.99 
   6  -3   0 2275.37   92.99 
  -6  -3   0 2123.89   93.29 
  -6  -3   0 2209.38   93.19 
   6  -3   0 2176.28   87.99 
   6  -3   0 2184.28   96.69 
  -6  -3   0 2242.98   92.69 
  -6  -3   0 2133.39   91.89 
  -6  -3   0 2148.39   85.59 
  -6  -3   0 2249.97   85.29 
  -6  -3   0 2200.18   90.59 
  -6  -3   0 2321.57   91.89 
   6  -3   0 2276.37   88.69 
   6  -3   0 2193.68   82.09 
   6  -3   0 2218.58   92.69 
  -6  -3   0 2298.97   86.59 
   6  -3   0 2260.37   87.69 
   6  -3   0 2191.78   90.89 
  -6  -3   0 2164.28   88.49 
  -6  -3   0 2172.38   92.19 
  -6  -3   0 2068.39   91.29 
  -6  -3   0 2228.88   77.99 
   6  -3   0 1983.90   89.79 
   6  -3   0 2244.58   87.59 
   6  -3   0 2259.97   94.09 
  -6   3   0 2187.78   87.19 
   6   3   0 2141.39   88.09 
  -6   3   0 2208.18   87.49 
  -6   3   0 2125.59   79.69 
   6   3   0 2130.69   90.09 
   6   3   0 2138.99   94.19 
  -6   3   0 2316.87   87.89 
   6   3   0 2249.68   86.29 
   6   3   0 2073.99   93.09 
  -6   3   0 2300.07   88.19 
   6   3   0 2147.79   89.29 
  -6   3   0 2194.08   78.89 
   6   3   0 2195.58   82.99 
   6   3   0 2158.28   91.79 
  -6   3   0 2260.17   78.79 
   6   3   0 2055.59   95.19 
  -6   3   0 2235.18   90.29 
  -6   3   0 2293.67   88.29 
   6   3   0 2108.29   77.49 
  -6   3   0 2235.18   93.59 
   6   3   0 2211.78  100.69 
   6   3   0 2246.28   84.89 
   6   3   0 2230.28   85.59 
  -6   3   0 2209.38   88.59 
   6   3   0 2095.19   89.39 
   6   3   0 2045.80   89.39 
  -6   3   0 2101.29   86.79 
   6   3   0 2095.49   91.69 
  -6   3   0 2277.67   84.09 
   6   3   0 2027.30   94.19 
   7  -3   0  461.35   31.60 
  -7  -3   0  530.45   35.10 
   7  -3   0  401.46   36.50 
  -7  -3   0  400.66   27.40 
  -7  -3   0  409.06   26.40 
  -7  -3   0  395.06   38.50 
  -7  -3   0  427.66   35.10 
  -7  -3   0  380.36   32.70 
   7  -3   0  437.26   35.20 
  -7  -3   0  490.75   29.90 
   7  -3   0  390.56   28.10 
   7  -3   0  385.16   31.50 
  -7  -3   0  411.06   34.00 
   7  -3   0  416.76   29.80 
   7  -3   0  407.26   29.60 
   7  -3   0  405.86   23.70 
  -7  -3   0  446.16   32.60 
   7  -3   0  453.95   32.10 
  -7  -3   0  382.26   32.50 
  -7  -3   0  423.76   34.20 
  -7  -3   0  461.85   31.20 
   7  -3   0  382.26   30.90 
  -7  -3   0  426.46   32.80 
  -7  -3   0  415.96   33.50 
   7  -3   0  413.86   33.80 
   7  -3   0  410.06   34.60 
  -7   3   0  468.25   31.20 
  -7   3   0  448.86   31.10 
   7   3   0  435.86   36.30 
   7   3   0  403.36   38.30 
  -7   3   0  467.25   24.10 
  -7   3   0  438.86   28.60 
   7   3   0  437.46   31.90 
   7   3   0  465.45   35.80 
  -7   3   0  384.66   30.70 
   7   3   0  437.76   29.00 
   7   3   0  403.66   29.60 
   7   3   0  417.06   31.40 
  -7   3   0  445.96   30.60 
   7   3   0  401.26   27.60 
  -7   3   0  391.66   31.40 
   7   3   0  422.46   27.50 
   7   3   0  466.05   37.30 
  -7   3   0  440.26   30.10 
  -7   3   0  400.86   29.70 
  -7   3   0  423.66   34.20 
  -7   3   0  425.16   26.70 
   7   3   0  437.56   35.50 
  -7   3   0  441.76   28.60 
   7   3   0  535.75   43.20 
   7   3   0  447.96   33.50 
  -7   3   0  406.16   23.50 
   8  -3   0  397.06   33.10 
  -8  -3   0  417.86   34.00 
   8  -3   0  453.75   34.40 
  -8  -3   0  413.66   41.80 
   8  -3   0  451.15   36.10 
  -8  -3   0  392.06   39.10 
  -8  -3   0  475.75   36.40 
  -8  -3   0  322.17   26.70 
  -8  -3   0  455.65   37.60 
  -8  -3   0  410.16   39.80 
   8  -3   0  414.86   34.60 
   8  -3   0  468.85   33.90 
  -8  -3   0  399.76   29.20 
   8  -3   0  412.26   40.80 
  -8  -3   0  442.76   33.00 
   8  -3   0  420.46   35.80 
  -8  -3   0  438.46   42.20 
   8  -3   0  439.36   38.90 
  -8  -3   0  389.56   30.40 
  -8  -3   0  456.95   40.80 
  -8  -3   0  483.65   37.90 
   8  -3   0  443.36   42.30 
  -8  -3   0  378.06   39.30 
   8  -3   0  457.35   39.40 
   8   3   0  398.56   30.30 
   8   3   0  441.76   40.70 
  -8   3   0  440.16   33.00 
  -8   3   0  477.95   33.30 
  -8   3   0  409.16   32.80 
   8   3   0  454.55   36.50 
   8   3   0  393.26   42.30 
  -8   3   0  404.66   33.40 
   8   3   0  482.95   31.70 
  -8   3   0  447.16   30.70 
  -8   3   0  420.16   32.10 
  -8   3   0  470.05   34.10 
  -8   3   0  468.05   35.50 
   8   3   0  372.56   37.80 
   8   3   0  416.76   34.00 
  -8   3   0  480.95   35.10 
   8   3   0  476.95   38.50 
  -8   3   0  453.85   38.20 
   8   3   0  380.76   46.00 
   8   3   0  397.56   31.40 
   8   3   0  455.35   34.30 
   8   3   0  416.36   37.60 
  -8   3   0  485.05   30.40 
  -9  -3   0  105.59   22.80 
   9  -3   0   64.99   17.30 
  -9  -3   0  105.59   23.80 
   9  -3   0  114.69   25.30 
  -9  -3   0   93.79   22.90 
  -9  -3   0  112.89   20.90 
  -9  -3   0  116.29   23.60 
   9  -3   0  113.09   25.40 
   9  -3   0  130.99   23.20 
  -9  -3   0   80.09   23.10 
   9  -3   0  144.39   25.70 
  -9  -3   0   62.09   21.10 
  -9  -3   0  113.79   26.00 
  -9  -3   0   62.49   19.80 
   9  -3   0  134.29   26.60 
  -9  -3   0  129.69   23.00 
  -9  -3   0   93.09   22.20 
   9  -3   0  133.19   21.70 
  -9  -3   0  120.99   21.80 
   9  -3   0   88.59   25.70 
   9   3   0  117.99   26.80 
   9   3   0  119.89   28.30 
   9   3   0  115.19   26.00 
   9   3   0  118.29   21.60 
  -9   3   0  156.28   27.10 
   9   3   0  140.09   25.30 
  -9   3   0  158.78   23.10 
   9   3   0  125.89   20.90 
  -9   3   0  135.19   22.90 
  -9   3   0  118.09   23.50 
   9   3   0   98.39   23.20 
   9   3   0  113.29   20.80 
   9   3   0  127.29   29.90 
  -9   3   0   84.99   20.30 
  -9   3   0  124.09   23.20 
  -9   3   0  137.89   27.50 
  -9   3   0   63.99   22.90 
  -9   3   0  110.99   21.10 
   9   3   0  113.79   24.00 
   0  -4   0   11.90    7.80 
   0  -4   0    1.70    4.90 
   0  -4   0   18.20    5.80 
   0  -4   0   13.00    7.50 
   0  -4   0   27.80    6.50 
   0  -4   0   11.60    8.80 
   0  -4   0   23.30    6.80 
   0  -4   0   23.50    7.60 
   0  -4   0    8.60    7.70 
   0  -4   0    7.90    5.40 
   0  -4   0   19.90    6.10 
   0  -4   0   18.10    6.60 
   0  -4   0   25.50    6.90 
   0  -4   0   14.00    6.10 
   0  -4   0   15.20    8.50 
   0  -4   0   21.50    5.30 
   0  -4   0   17.40    5.60 
   0   4   0   17.60    8.20 
   0   4   0    7.10   12.30 
   0   4   0   14.00    5.20 
   0   4   0   27.40    7.30 
   0   4   0   27.60    6.60 
   0   4   0   22.60   10.80 
   0   4   0   19.90    7.40 
   0   4   0   20.20    5.40 
   0   4   0   25.20    6.00 
   0   4   0   13.70    5.50 
   0   4   0   15.20    5.10 
   0   4   0   11.10    5.20 
   0   4   0   16.20    5.30 
   0   4   0   17.30    5.20 
   1  -4   0 6876.11  229.38 
   1  -4   0 6578.04  224.78 
  -1  -4   0 6521.75  231.08 
  -1  -4   0 6796.02  237.58 
   1  -4   0 6780.92  227.38 
   1  -4   0 6746.83  229.78 
   1  -4   0 6529.35  233.98 
   1  -4   0 6751.42  232.48 
   1  -4   0 6722.63  231.88 
   1  -4   0 6781.12  228.48 
  -1  -4   0 6577.64  236.88 
  -1  -4   0 6659.33  231.88 
  -1  -4   0 6633.94  224.48 
   1  -4   0 6588.84  231.38 
   1  -4   0 6712.63  226.48 
   1  -4   0 6918.51  238.48 
   1  -4   0 6646.23  229.58 
   1  -4   0 6721.83  226.88 
   1  -4   0 6388.86  228.68 
   1  -4   0 6654.63  239.88 
  -1  -4   0 6766.02  234.88 
  -1  -4   0 6652.63  231.38 
  -1  -4   0 6720.73  231.48 
   1  -4   0 6748.82  230.68 
   1  -4   0 6857.11  237.38 
  -1  -4   0 6904.41  249.97 
   1  -4   0 6806.82  232.48 
  -1  -4   0 6741.13  231.38 
  -1  -4   0 6653.43  231.78 
   1  -4   0 6832.32  229.58 
  -1  -4   0 6729.03  231.08 
  -1  -4   0 6825.92  232.98 
  -1  -4   0 6945.30  232.58 
  -1  -4   0 6889.61  232.28 
   1  -4   0 6990.20  236.38 
   1  -4   0 6286.17  231.18 
   1  -4   0 6816.92  229.08 
   1  -4   0 6929.11  224.98 
   1  -4   0 6842.32  228.78 
   1  -4   0 6860.61  230.18 
   1  -4   0 6745.42  228.18 
   1  -4   0 6564.74  229.98 
   1  -4   0 6883.41  227.58 
  -1  -4   0 6865.91  230.68 
   1   4   0 6706.63  232.98 
  -1   4   0 6580.94  228.58 
   1   4   0 7184.18  238.28 
  -1   4   0 6789.22  225.08 
   1   4   0 6782.92  231.98 
   1   4   0 6768.62  232.78 
   1   4   0 6950.00  238.48 
   1   4   0 6659.53  231.78 
  -1   4   0 7016.50  227.38 
   1   4   0 6719.13  232.68 
   1   4   0 7038.50  234.58 
  -1   4   0 6842.02  227.18 
   1   4   0 6770.52  230.78 
   1   4   0 6945.81  231.78 
   1   4   0 6905.71  226.08 
  -1   4   0 6834.02  228.78 
  -1   4   0 6863.31  227.98 
  -1   4   0 6762.52  230.08 
  -1   4   0 6783.22  235.08 
  -1   4   0 6678.73  233.48 
  -1   4   0 6655.53  229.98 
  -1   4   0 6791.72  229.38 
   1   4   0 6654.73  230.78 
  -1   4   0 6948.10  236.98 
  -1   4   0 6553.44  228.08 
  -1   4   0 6601.74  228.38 
   1   4   0 6755.42  233.88 
   1   4   0 6831.22  232.78 
  -2  -4   0    9.00    6.40 
  -2  -4   0    9.80    6.30 
  -2  -4   0   12.20    7.30 
  -2  -4   0    6.70    6.50 
   2  -4   0    6.20    3.90 
   2  -4   0    3.50    3.60 
   2  -4   0   11.60    4.90 
   2  -4   0    8.40    4.60 
   2  -4   0   -2.30    3.60 
   2  -4   0   12.10    3.90 
  -2  -4   0   23.30    7.60 
  -2  -4   0   11.70    6.60 
  -2  -4   0   12.20    7.90 
  -2  -4   0   -1.30    6.00 
   2  -4   0    0.20    5.60 
   2  -4   0    2.30    2.80 
  -2  -4   0    6.80    6.00 
  -2  -4   0    4.30    5.30 
  -2  -4   0    2.00    6.60 
   2  -4   0   12.50    5.90 
  -2  -4   0   10.20    6.40 
  -2  -4   0    4.70    4.20 
   2  -4   0    6.30    3.80 
  -2  -4   0    5.20    5.60 
  -2  -4   0    7.60    5.60 
   2  -4   0   10.20    4.70 
   2  -4   0    1.70    5.50 
  -2  -4   0    8.30    3.90 
  -2  -4   0   20.50   11.30 
   2  -4   0    5.80    3.90 
   2  -4   0   11.70    8.00 
   2  -4   0    4.70    5.80 
  -2  -4   0    3.80    3.50 
  -2  -4   0   -5.70    4.20 
   2  -4   0    6.10    4.40 
   2   4   0    5.20    5.60 
  -2   4   0    9.90    4.50 
  -2   4   0    2.90    5.10 
  -2   4   0    8.60    6.30 
   2   4   0   14.10    5.90 
  -2   4   0    2.10    4.10 
  -2   4   0    0.10    2.70 
   2   4   0   17.50    5.90 
  -2   4   0   13.20    4.40 
  -2   4   0    8.70    4.00 
   2   4   0    0.00    4.30 
   2   4   0   -1.40    3.20 
   2   4   0    5.20    6.20 
   2   4   0    3.90    5.50 
  -2   4   0    9.00    4.60 
   2   4   0    7.90    5.90 
  -2   4   0    8.40    5.80 
  -2   4   0   11.40    4.60 
  -2   4   0   -0.10    3.60 
   2   4   0    0.90    5.00 
  -2   4   0    2.60    4.20 
   2   4   0    4.80    5.10 
  -2   4   0    5.20    3.90 
   2   4   0    2.10    3.30 
  -2   4   0    1.90    4.80 
   2   4   0    4.80    5.20 
  -2   4   0   10.10    3.80 
  -2   4   0    2.20    3.60 
  -2   4   0    8.90    4.50 
   2   4   0    4.60    5.10 
   2   4   0    3.00    2.80 
   2   4   0   13.70    6.10 
  -2   4   0    5.20    4.20 
   2   4   0    4.70    6.60 
  -2   4   0    9.10    4.10 
   3  -4   0  668.93   30.30 
   3  -4   0  654.83   27.40 
   3  -4   0  675.33   31.60 
   3  -4   0  569.94   26.50 
  -3  -4   0  708.93   36.20 
  -3  -4   0  722.63   34.60 
  -3  -4   0  689.23   31.20 
  -3  -4   0  671.93   36.20 
   3  -4   0  771.12   36.00 
  -3  -4   0  667.63   33.80 
   3  -4   0  674.43   29.40 
   3  -4   0  682.13   36.20 
  -3  -4   0  633.54   34.30 
  -3  -4   0  686.93   36.70 
   3  -4   0  619.94   33.50 
   3  -4   0  693.93   31.40 
   3  -4   0  658.73   29.30 
   3  -4   0  694.53   33.70 
  -3  -4   0  685.73   33.90 
   3  -4   0  700.73   29.70 
  -3  -4   0  680.03   36.30 
  -3  -4   0  657.83   34.90 
  -3  -4   0  705.53   30.70 
  -3  -4   0  662.33   35.70 
   3  -4   0  724.23   34.10 
  -3  -4   0  700.93   36.20 
   3  -4   0  677.53   34.80 
  -3  -4   0  635.54   34.80 
  -3  -4   0  641.04   34.50 
   3  -4   0  695.33   31.50 
  -3  -4   0  646.84   35.10 
   3   4   0  642.04   35.00 
   3   4   0  644.64   33.60 
  -3   4   0  671.63   28.50 
  -3   4   0  675.33   31.50 
  -3   4   0  644.14   30.50 
  -3   4   0  672.53   29.30 
   3   4   0  676.03   38.60 
   3   4   0  678.23   31.90 
  -3   4   0  667.93   27.50 
   3   4   0  659.53   34.70 
   3   4   0  676.13   30.90 
  -3   4   0  668.43   27.90 
  -3   4   0  659.53   28.10 
   3   4   0  681.43   34.60 
   3   4   0  712.93   35.30 
  -3   4   0  668.53   28.50 
   3   4   0  712.53   33.90 
   3   4   0  651.13   28.20 
   3   4   0  654.13   34.40 
  -3   4   0  643.64   34.40 
  -3   4   0  621.34   29.10 
   3   4   0  619.84   36.20 
  -3   4   0  717.03   31.90 
   3   4   0  698.23   34.50 
   3   4   0  656.83   34.80 
  -3   4   0  629.44   28.90 
  -3   4   0  667.13   28.90 
  -3   4   0  709.93   33.80 
  -3   4   0  670.63   32.90 
  -3   4   0  618.14   30.60 
  -3   4   0  717.83   27.60 
   3   4   0  685.43   34.20 
   3   4   0  661.43   39.30 
  -3   4   0  661.33   29.10 
  -3   4   0  701.13   35.60 
   3   4   0  636.34   29.80 
  -4  -4   0   24.80    9.30 
  -4  -4   0   22.70   10.50 
  -4  -4   0   14.30    8.30 
   4  -4   0   34.00    8.10 
  -4  -4   0   14.30    7.80 
  -4  -4   0   22.00    9.30 
  -4  -4   0   31.20   10.20 
   4  -4   0   22.30    8.10 
  -4  -4   0   33.20   10.80 
   4  -4   0   16.80    6.40 
   4  -4   0   21.50    7.80 
  -4  -4   0   33.10    9.30 
   4  -4   0   15.50    8.50 
   4  -4   0   16.50    8.50 
   4  -4   0   26.60    5.60 
   4  -4   0   17.70    7.90 
  -4  -4   0   -2.60    7.10 
  -4  -4   0   26.80   11.50 
   4  -4   0   36.20    9.00 
  -4  -4   0   16.40    7.60 
   4  -4   0   26.00    5.00 
  -4  -4   0   29.30    9.60 
  -4  -4   0   18.10    9.10 
  -4  -4   0   10.70    8.00 
   4  -4   0   27.70    8.20 
   4  -4   0   19.70    8.60 
   4  -4   0   15.60    6.10 
  -4  -4   0   22.60    6.60 
   4   4   0   26.80    8.70 
  -4   4   0   13.00    6.80 
  -4   4   0   28.80    5.60 
  -4   4   0   10.30    5.60 
  -4   4   0   21.60    5.00 
  -4   4   0   17.50    8.90 
  -4   4   0   16.60    8.30 
   4   4   0   26.30   11.50 
   4   4   0   26.00    8.10 
   4   4   0   34.00    9.50 
   4   4   0   16.10    7.90 
   4   4   0   11.50    6.80 
  -4   4   0   14.80    5.20 
  -4   4   0   21.50    7.40 
   4   4   0   35.20   10.30 
   4   4   0   17.50    9.30 
   4   4   0   21.60   10.50 
   4   4   0   20.20    6.90 
   4   4   0   17.60    8.40 
  -4   4   0   27.10    8.70 
  -4   4   0   14.50    5.00 
  -4   4   0   25.80    7.70 
  -4   4   0   21.20    5.00 
   4   4   0   25.50    6.50 
   4   4   0   17.40    5.80 
   4   4   0   19.10    8.80 
  -4   4   0   24.20    6.20 
  -4   4   0   24.90    9.20 
   4   4   0   23.80    8.60 
   4   4   0   19.10    8.40 
  -4   4   0   21.60    5.30 
  -4   4   0   21.60    5.80 
  -5  -4   0  647.84   37.10 
   5  -4   0  676.83   36.70 
  -5  -4   0  587.44   37.30 
  -5  -4   0  596.74   33.40 
   5  -4   0  619.84   35.30 
  -5  -4   0  644.84   38.00 
   5  -4   0  560.84   32.40 
   5  -4   0  601.84   36.60 
   5  -4   0  601.84   36.00 
  -5  -4   0  554.24   35.40 
   5  -4   0  650.33   34.80 
  -5  -4   0  583.94   35.10 
   5  -4   0  637.94   34.50 
   5  -4   0  611.64   31.40 
   5  -4   0  647.34   32.50 
  -5  -4   0  603.04   33.60 
  -5  -4   0  549.35   36.90 
   5  -4   0  580.34   30.40 
  -5  -4   0  570.94   36.20 
  -5  -4   0  576.74   36.60 
  -5  -4   0  570.54   28.10 
  -5  -4   0  566.54   33.50 
  -5  -4   0  580.84   36.00 
   5  -4   0  596.84   31.60 
  -5  -4   0  532.25   36.80 
  -5  -4   0  600.34   36.90 
   5   4   0  615.04   41.90 
   5   4   0  537.45   33.50 
   5   4   0  599.84   35.80 
  -5   4   0  618.84   34.50 
   5   4   0  596.54   40.00 
   5   4   0  612.14   38.20 
  -5   4   0  554.44   31.10 
  -5   4   0  577.94   25.60 
   5   4   0  613.94   35.50 
   5   4   0  563.24   37.60 
  -5   4   0  581.04   30.50 
  -5   4   0  585.84   32.30 
  -5   4   0  601.14   32.60 
  -5   4   0  534.75   35.00 
  -5   4   0  608.94   35.70 
  -5   4   0  597.14   31.50 
   5   4   0  566.04   29.90 
  -5   4   0  568.34   32.10 
   5   4   0  586.24   34.10 
  -5   4   0  587.54   27.90 
   5   4   0  584.44   32.40 
   5   4   0  603.34   36.90 
   5   4   0  595.94   35.70 
   5   4   0  597.74   36.60 
   5   4   0  575.14   31.70 
   5   4   0  594.14   28.00 
  -5   4   0  672.43   33.40 
  -6  -4   0  127.29   22.30 
   6  -4   0  154.78   21.20 
  -6  -4   0  218.68   27.10 
   6  -4   0  144.49   20.60 
  -6  -4   0  174.48   22.00 
   6  -4   0  163.18   18.30 
  -6  -4   0  169.68   23.20 
  -6  -4   0  138.59   21.80 
   6  -4   0  204.08   24.30 
   6  -4   0  142.09   20.30 
  -6  -4   0  223.18   28.00 
  -6  -4   0  163.18   19.70 
   6  -4   0  163.98   18.90 
  -6  -4   0  167.88   24.00 
  -6  -4   0  187.88   15.50 
  -6  -4   0  177.78   22.90 
   6  -4   0  147.79   16.80 
  -6  -4   0  141.79   18.40 
   6  -4   0  171.88   23.90 
   6  -4   0  174.78   20.20 
  -6  -4   0  147.19   22.20 
  -6  -4   0  168.98   20.40 
  -6  -4   0  137.99   21.00 
   6  -4   0  113.09   17.40 
  -6  -4   0  203.28   23.70 
  -6   4   0  185.98   19.50 
   6   4   0  138.29   13.00 
   6   4   0  196.78   24.10 
  -6   4   0  194.28   22.30 
   6   4   0  169.68   19.30 
  -6   4   0  170.08   16.80 
   6   4   0  214.58   21.50 
   6   4   0  157.68   27.10 
   6   4   0  143.99   17.60 
   6   4   0  169.38   23.00 
   6   4   0  162.18   20.40 
   6   4   0  150.48   24.70 
  -6   4   0  170.88   23.20 
  -6   4   0  191.78   20.60 
  -6   4   0  186.48   21.60 
   6   4   0  163.18   21.70 
   6   4   0  189.08   27.00 
  -6   4   0  175.28   12.70 
  -6   4   0  168.18   19.20 
   6   4   0  160.48   24.30 
   6   4   0  181.68   25.10 
  -6   4   0  177.18   20.40 
  -6   4   0  200.38   22.80 
   6   4   0  212.68   26.30 
  -6   4   0  147.09   18.60 
   6   4   0  131.69   21.30 
  -6   4   0  139.79   18.50 
  -7  -4   0  910.21   53.69 
  -7  -4   0  868.21   53.29 
  -7  -4   0  881.01   54.19 
   7  -4   0  731.43   48.20 
   7  -4   0  851.71   50.59 
   7  -4   0  910.61   42.90 
  -7  -4   0  945.81   50.69 
   7  -4   0  902.01   58.79 
   7  -4   0  925.51   49.50 
  -7  -4   0  934.81   47.90 
  -7  -4   0 1013.90   53.29 
   7  -4   0  827.32   49.60 
  -7  -4   0  895.81   45.90 
   7  -4   0  973.00   48.60 
   7  -4   0  860.41   53.59 
  -7  -4   0 1001.90   54.69 
  -7  -4   0  962.60   53.19 
  -7  -4   0  971.70   53.29 
  -7  -4   0  941.71   47.50 
  -7  -4   0  912.51   53.89 
   7  -4   0  894.21   47.20 
  -7  -4   0  839.52   51.89 
  -7  -4   0  943.81   55.19 
   7  -4   0  949.40   48.30 
   7  -4   0  898.91   52.79 
  -7   4   0  855.51   48.00 
   7   4   0  764.42   43.80 
   7   4   0  897.61   49.00 
   7   4   0  911.21   54.89 
   7   4   0  887.41   53.59 
  -7   4   0 1001.80   51.79 
   7   4   0  838.62   54.69 
  -7   4   0  898.11   46.70 
   7   4   0  920.31   45.90 
  -7   4   0  906.01   47.50 
   7   4   0  832.32   51.99 
   7   4   0  956.80   51.59 
  -7   4   0  914.71   47.30 
   7   4   0  824.52   50.29 
   7   4   0  889.61   60.39 
  -7   4   0  912.31   53.39 
  -7   4   0  915.41   48.10 
  -7   4   0 1006.50   49.40 
  -7   4   0 1028.70   48.70 
  -7   4   0  962.30   49.00 
  -7   4   0  964.20   46.80 
   7   4   0  890.91   56.69 
   7   4   0  993.80   53.09 
   7   4   0  927.81   43.90 
  -8  -4   0   69.19   19.70 
  -8  -4   0  120.99   20.90 
  -8  -4   0  113.49   23.30 
  -8  -4   0  122.79   18.80 
  -8  -4   0   62.19   18.90 
   8  -4   0   79.69   17.40 
   8  -4   0  100.99   23.00 
  -8  -4   0   91.79   20.20 
  -8  -4   0   46.70   18.20 
   8  -4   0  104.69   22.10 
  -8  -4   0   74.29   20.90 
  -8  -4   0   64.99   19.90 
   8  -4   0   98.79   23.10 
  -8  -4   0   72.29   16.60 
   8  -4   0  102.59   22.80 
   8  -4   0   94.99   21.20 
   8  -4   0   97.99   25.90 
   8  -4   0   87.49   18.30 
   8  -4   0   80.19   16.90 
  -8  -4   0   86.79   18.20 
  -8  -4   0   55.79   19.50 
  -8  -4   0   92.79   21.90 
  -8  -4   0   84.39   19.90 
   8   4   0   85.59   21.00 
   8   4   0   74.39   18.30 
  -8   4   0   78.69   22.50 
  -8   4   0  112.49   19.40 
  -8   4   0  115.89   23.60 
  -8   4   0   96.79   20.00 
  -8   4   0   90.09   19.00 
   8   4   0   93.99   21.20 
  -8   4   0   90.19   17.90 
   8   4   0  103.99   19.80 
  -8   4   0   75.99   16.50 
   8   4   0   64.89   14.80 
  -8   4   0  106.79   18.40 
  -8   4   0   96.19   19.30 
   8   4   0   79.19   17.30 
  -8   4   0  107.59   18.90 
   8   4   0   96.89   20.50 
   8   4   0  107.39   24.60 
   8   4   0   82.69   25.20 
   8   4   0   71.09   20.70 
   8   4   0   96.19   22.20 
  -9  -4   0   47.40   20.70 
   9  -4   0   53.29   20.80 
   9  -4   0   56.49   18.20 
   9  -4   0   52.79   20.20 
   9  -4   0   70.19   20.30 
  -9  -4   0   79.19   23.80 
  -9  -4   0   38.20   24.50 
  -9  -4   0   68.69   17.90 
   9  -4   0   76.49   18.20 
   9  -4   0   58.49   18.20 
  -9  -4   0   51.59   17.60 
  -9  -4   0   50.89   16.30 
  -9  -4   0   86.29   23.00 
  -9  -4   0   81.79   22.00 
  -9  -4   0   71.39   22.00 
  -9  -4   0   65.79   20.20 
  -9  -4   0   73.89   20.60 
  -9  -4   0   62.39   21.10 
  -9  -4   0   83.19   20.70 
   9   4   0   61.39   23.40 
  -9   4   0   67.19   19.50 
   9   4   0   76.19   18.90 
  -9   4   0   67.09   19.80 
   9   4   0   71.39   19.40 
  -9   4   0   56.39   18.10 
   9   4   0   45.70   14.70 
   9   4   0   80.89   27.10 
  -9   4   0   88.09   19.50 
  -9   4   0   81.59   19.30 
   9   4   0   75.99   21.80 
  -9   4   0   72.09   20.10 
   9   4   0   66.89   19.30 
  -9   4   0   69.89   22.10 
   9   4   0   47.70   18.00 
   9   4   0  112.19   27.90 
   9   4   0   64.19   22.40 
   0  -5   0    1.00    5.60 
   0  -5   0   -3.10    5.60 
   0  -5   0    1.80    6.00 
   0  -5   0    1.00    4.30 
   0  -5   0    5.30    8.80 
   0  -5   0   -3.50    5.30 
   0  -5   0   -4.60    7.60 
   0  -5   0   -7.90    4.50 
   0  -5   0    0.10    5.00 
   0  -5   0    4.00    5.60 
   0  -5   0    3.80    6.50 
   0  -5   0   -1.90    6.20 
   0  -5   0    7.10    7.40 
   0  -5   0    5.10    5.00 
   0  -5   0    2.50    6.20 
   0   5   0   17.00    8.00 
   0   5   0    3.60    4.00 
   0   5   0    2.00    5.00 
   0   5   0   -5.10    3.50 
   0   5   0   29.10   12.20 
   0   5   0    1.30    4.50 
   0   5   0   -1.00    4.40 
   0   5   0    2.60    5.30 
   0   5   0    4.40   12.20 
   0   5   0    0.80    4.10 
   0   5   0   13.20    7.40 
   0   5   0  -10.20    6.50 
  -1  -5   0   24.30    9.60 
   1  -5   0   39.00    8.10 
   1  -5   0   61.19   15.00 
   1  -5   0   33.70    5.50 
   1  -5   0   44.70   12.80 
   1  -5   0   21.70    8.20 
   1  -5   0   31.90    8.20 
   1  -5   0   18.40    6.70 
   1  -5   0   44.60    9.90 
  -1  -5   0   13.70    7.20 
  -1  -5   0   33.60    9.90 
  -1  -5   0   28.50    9.10 
  -1  -5   0   39.70    9.10 
   1  -5   0   31.00    8.30 
   1  -5   0   39.30    7.80 
   1  -5   0   40.20   10.60 
  -1  -5   0   22.30    9.30 
   1  -5   0   25.60    6.80 
   1  -5   0   31.10    9.10 
  -1  -5   0   41.10    9.20 
  -1  -5   0   25.30    8.30 
  -1  -5   0   50.09   10.60 
  -1  -5   0   41.50   10.20 
   1  -5   0   41.80    9.20 
   1  -5   0   26.40    8.20 
   1  -5   0   39.10    8.40 
  -1  -5   0   55.19   13.80 
  -1  -5   0   22.50    8.00 
   1  -5   0   30.80    6.80 
  -1  -5   0   29.90    9.10 
  -1  -5   0   33.70    9.80 
   1  -5   0   37.80    7.20 
   1  -5   0   59.89   15.30 
   1  -5   0   38.40    7.10 
   1  -5   0   34.70   10.40 
   1  -5   0   46.30    9.30 
   1  -5   0   34.30    6.30 
  -1   5   0   31.20    6.50 
   1   5   0   36.50    9.40 
   1   5   0   40.70   12.60 
  -1   5   0   52.09   11.30 
   1   5   0   24.20    8.50 
  -1   5   0   50.99   11.00 
  -1   5   0   33.00    7.20 
   1   5   0   29.00    7.80 
   1   5   0   33.50    9.20 
  -1   5   0   30.00    7.10 
   1   5   0   29.20    8.70 
   1   5   0   21.00    7.20 
   1   5   0   22.70    7.90 
  -1   5   0   40.40   12.90 
   1   5   0   39.20    8.80 
  -1   5   0   38.50    7.50 
   1   5   0   23.00    8.50 
   1   5   0   35.70    5.30 
  -1   5   0   37.00    8.40 
   1   5   0   53.89   11.90 
   1   5   0   40.90    9.30 
  -1   5   0   34.30    6.70 
   1   5   0   37.00   11.40 
   1   5   0   42.30    9.70 
  -1   5   0   29.70    8.00 
  -1   5   0   32.10   10.20 
   2  -5   0   11.10    4.80 
   2  -5   0   19.40    7.40 
  -2  -5   0    9.00    8.10 
  -2  -5   0   14.10    4.70 
   2  -5   0   11.20    6.00 
  -2  -5   0    2.10    7.20 
   2  -5   0   -2.90    5.70 
  -2  -5   0   16.50    9.00 
  -2  -5   0    0.20    6.40 
   2  -5   0    6.20    5.50 
  -2  -5   0    4.10    6.60 
  -2  -5   0    7.20    6.40 
  -2  -5   0   18.50    8.50 
   2  -5   0   11.50    8.00 
  -2  -5   0   19.00    9.10 
   2  -5   0   11.70    4.80 
   2  -5   0    4.50    4.00 
   2  -5   0    7.20    5.30 
   2  -5   0    8.40    7.30 
  -2  -5   0   23.40    9.10 
   2  -5   0   20.20   10.70 
  -2  -5   0    4.00    7.10 
   2  -5   0   13.30    5.40 
   2  -5   0   12.10    6.90 
  -2  -5   0   10.80    4.10 
  -2  -5   0   19.20    8.90 
   2  -5   0   15.40    6.80 
   2  -5   0   19.10    5.10 
  -2  -5   0    7.30    7.40 
  -2  -5   0   15.50    7.80 
   2  -5   0   12.20    4.40 
   2   5   0   17.70    7.80 
   2   5   0   17.70    4.40 
   2   5   0   14.10    6.90 
  -2   5   0   23.10    8.70 
   2   5   0   12.20    6.70 
  -2   5   0   19.50    5.40 
  -2   5   0   10.90    8.20 
  -2   5   0   13.70    6.20 
   2   5   0   13.80    7.10 
   2   5   0   12.70    7.20 
  -2   5   0   20.40    4.50 
  -2   5   0   10.50    5.90 
   2   5   0   12.80    8.90 
  -2   5   0   18.80    4.80 
   2   5   0   24.90    8.20 
  -2   5   0   10.30    5.30 
  -2   5   0   15.70    8.10 
   2   5   0   15.80    5.10 
   2   5   0   16.80    9.40 
   2   5   0    7.30    6.20 
  -2   5   0   19.70    6.00 
   2   5   0   14.50    7.50 
  -2   5   0   20.10    7.00 
   2   5   0   15.60    8.00 
   2   5   0   15.40    7.30 
  -2   5   0   16.40    5.40 
   2   5   0   23.50    7.60 
  -3  -5   0   -2.50    6.80 
   3  -5   0    6.20    5.70 
   3  -5   0    1.40    7.80 
  -3  -5   0   -2.00    7.90 
   3  -5   0   -1.10    5.90 
   3  -5   0    0.30    6.50 
   3  -5   0   -9.50    6.50 
  -3  -5   0    5.20    8.60 
  -3  -5   0   -8.50    6.80 
  -3  -5   0  -10.80    6.60 
  -3  -5   0   -5.30   12.60 
   3  -5   0    6.20    5.10 
   3  -5   0    5.40    6.20 
  -3  -5   0    4.30    7.60 
  -3  -5   0    2.00    6.20 
   3  -5   0    0.50    5.40 
   3  -5   0    5.90    5.40 
  -3  -5   0    0.80    8.80 
   3  -5   0    0.20    4.20 
  -3  -5   0   -0.70    5.90 
  -3  -5   0    4.20    8.70 
  -3  -5   0    4.80    7.60 
  -3  -5   0   -0.60    6.90 
  -3  -5   0    1.20    8.10 
  -3  -5   0   -4.20    7.50 
   3  -5   0    5.00    4.40 
  -3  -5   0    5.60    7.90 
   3  -5   0   12.20    7.30 
   3  -5   0   -2.50    5.40 
  -3   5   0    5.20    6.50 
  -3   5   0    5.60    4.80 
   3   5   0   -5.30    5.70 
   3   5   0   -1.10    5.60 
   3   5   0   -4.50    6.30 
   3   5   0    4.10    5.70 
  -3   5   0   -3.40    4.30 
   3   5   0   -0.30    3.50 
   3   5   0    1.30    5.70 
   3   5   0    1.40    4.60 
   3   5   0    4.20    6.40 
   3   5   0   -2.20    3.00 
  -3   5   0   11.60    7.50 
   3   5   0   -0.70    3.80 
   3   5   0   -0.50    5.90 
  -3   5   0    4.00    5.10 
  -3   5   0    8.20    4.70 
   3   5   0    4.70    5.90 
   3   5   0   11.20    5.70 
  -3   5   0    9.40    6.50 
   3   5   0    8.40    6.40 
   3   5   0   -3.10    5.80 
  -3   5   0   -3.30    4.80 
  -3   5   0    7.90    7.60 
   3   5   0   16.60    8.00 
   3   5   0    1.60    6.40 
  -4  -5   0  651.63   39.10 
   4  -5   0  617.94   30.80 
  -4  -5   0  590.94   34.70 
   4  -5   0  555.14   33.50 
  -4  -5   0  572.34   34.90 
  -4  -5   0  560.84   35.80 
  -4  -5   0  648.84   37.70 
   4  -5   0  638.04   32.30 
  -4  -5   0  611.14   39.80 
  -4  -5   0  554.64   36.00 
   4  -5   0  632.84   32.50 
   4  -5   0  615.84   36.20 
   4  -5   0  609.54   35.40 
  -4  -5   0  599.44   36.80 
   4  -5   0  634.44   30.50 
  -4  -5   0  626.34   37.00 
   4  -5   0  586.44   28.50 
   4  -5   0  584.54   36.80 
  -4  -5   0  580.64   38.10 
  -4  -5   0  566.24   34.90 
   4  -5   0  593.34   26.30 
   4  -5   0  589.84   34.40 
  -4  -5   0  591.14   30.90 
  -4  -5   0  644.64   38.20 
  -4  -5   0  604.34   37.90 
  -4  -5   0  625.44   38.70 
   4  -5   0  603.44   24.50 
   4  -5   0  639.94   30.40 
   4  -5   0  572.94   24.00 
  -4   5   0  647.54   37.10 
   4   5   0  642.14   30.90 
   4   5   0  609.44   33.90 
  -4   5   0  617.24   29.50 
   4   5   0  653.23   36.30 
   4   5   0  638.04   43.20 
  -4   5   0  623.04   27.80 
   4   5   0  659.53   36.80 
   4   5   0  585.34   40.50 
  -4   5   0  572.04   36.30 
   4   5   0  579.14   28.10 
  -4   5   0  603.84   32.10 
   4   5   0  571.44   38.50 
  -4   5   0  626.74   29.80 
  -4   5   0  618.64   26.80 
   4   5   0  619.44   37.00 
  -4   5   0  646.04   34.60 
   4   5   0  621.14   36.40 
  -4   5   0  658.83   29.30 
   4   5   0  585.24   34.70 
  -4   5   0  601.04   27.70 
   4   5   0  602.84   35.90 
  -4   5   0  622.74   34.60 
   4   5   0  593.64   32.50 
   4   5   0  618.04   31.20 
   4   5   0  587.54   36.20 
   4   5   0  614.84   37.50 
  -5  -5   0   38.10   12.90 
   5  -5   0   19.50    8.60 
  -5  -5   0   42.30    9.70 
  -5  -5   0   10.10   11.50 
   5  -5   0   26.70   10.60 
   5  -5   0   33.20   11.30 
  -5  -5   0   21.60   10.80 
  -5  -5   0   34.90   13.70 
   5  -5   0   30.30    9.80 
  -5  -5   0   41.20   14.00 
   5  -5   0   20.70   10.70 
  -5  -5   0   24.00   11.10 
  -5  -5   0   15.90   11.10 
  -5  -5   0   11.80   10.10 
  -5  -5   0   20.30   11.60 
   5  -5   0   23.70    6.00 
   5  -5   0   40.10   11.70 
   5  -5   0   27.70   11.90 
  -5  -5   0   12.90   10.70 
   5  -5   0   33.20   12.20 
   5  -5   0   23.90    9.60 
  -5  -5   0   35.60   12.20 
  -5  -5   0   19.20   10.70 
  -5  -5   0   18.80   12.20 
  -5  -5   0    7.40   10.00 
   5  -5   0   37.50    9.10 
  -5   5   0   56.89   11.80 
  -5   5   0   39.90   10.70 
   5   5   0   20.80    6.70 
   5   5   0   40.70   12.30 
   5   5   0   17.80   11.20 
   5   5   0   30.40   11.80 
  -5   5   0   33.70    8.40 
   5   5   0   10.30    8.40 
   5   5   0   32.00   10.30 
   5   5   0   15.90    9.70 
  -5   5   0   34.50    8.20 
   5   5   0   32.20   11.20 
   5   5   0   28.40   12.70 
  -5   5   0   35.00    6.90 
   5   5   0   31.00   14.40 
  -5   5   0   43.50   12.20 
   5   5   0   31.00   11.80 
  -5   5   0   41.50    6.50 
  -5   5   0   23.80   11.90 
   5   5   0   27.20    7.90 
   5   5   0   30.90   11.20 
  -5   5   0   19.00    8.80 
  -5   5   0   16.80   10.80 
   5   5   0   32.30   14.00 
   6  -5   0 2097.19   85.99 
  -6  -5   0 2163.38   93.79 
  -6  -5   0 2241.78   96.49 
  -6  -5   0 2137.49   81.29 
   6  -5   0 2074.99   84.89 
  -6  -5   0 2078.69   93.69 
   6  -5   0 2053.89   91.49 
   6  -5   0 2188.38   90.89 
  -6  -5   0 2132.19   95.09 
  -6  -5   0 2156.48   94.39 
  -6  -5   0 2241.38   96.59 
   6  -5   0 2168.58   93.99 
  -6  -5   0 2119.69   94.79 
  -6  -5   0 2119.19   91.79 
   6  -5   0 2020.40   88.99 
   6  -5   0 2153.18   85.79 
   6  -5   0 2235.48   88.69 
   6  -5   0 2224.98   86.79 
  -6  -5   0 2129.99   94.69 
   6  -5   0 1953.70   90.29 
  -6  -5   0 2234.38   90.29 
  -6  -5   0 2134.89   93.19 
  -6  -5   0 2032.60   93.79 
  -6  -5   0 2193.18   88.79 
  -6  -5   0 2048.20   88.39 
  -6   5   0 1994.70   84.49 
   6   5   0 2293.37  103.99 
   6   5   0 2125.29   87.09 
  -6   5   0 2250.67   88.19 
  -6   5   0 2098.29   88.09 
   6   5   0 2022.40   92.09 
  -6   5   0 2255.47   95.19 
   6   5   0 2119.49   90.09 
   6   5   0 2213.18  103.29 
   6   5   0 2078.19   83.49 
   6   5   0 2160.08   93.99 
  -6   5   0 2104.29   85.29 
   6   5   0 2100.89   93.99 
  -6   5   0 2278.07   93.79 
  -6   5   0 1871.41   92.49 
   6   5   0 2077.69   90.19 
   6   5   0 2014.30   80.49 
   6   5   0 2078.19   96.19 
   6   5   0 2108.59   91.99 
   6   5   0 2034.40   96.29 
   6   5   0 2182.08   94.99 
  -6   5   0 2261.67   91.39 
  -6   5   0 2087.59   83.49 
  -6   5   0 2065.39   85.59 
  -7  -5   0   29.10   16.00 
  -7  -5   0    9.40   12.80 
  -7  -5   0   28.20   15.00 
  -7  -5   0   38.80   14.70 
  -7  -5   0   50.59   16.90 
   7  -5   0   39.40   13.10 
   7  -5   0   13.60   12.80 
  -7  -5   0   31.60   15.10 
   7  -5   0   16.00   12.30 
  -7  -5   0   32.30   14.90 
   7  -5   0   44.90   14.90 
   7  -5   0    5.80   10.00 
   7  -5   0   27.60   14.40 
  -7  -5   0   54.69   17.40 
  -7  -5   0   31.10   15.30 
  -7  -5   0   15.80   12.40 
  -7  -5   0   32.00   15.60 
  -7  -5   0   38.20   13.40 
  -7  -5   0   39.10   16.40 
   7  -5   0   48.00   14.80 
   7  -5   0   27.50   11.60 
   7  -5   0   44.70   15.90 
  -7  -5   0   33.10   15.60 
   7   5   0   15.70   14.70 
   7   5   0   29.80   14.30 
   7   5   0   51.69   13.30 
  -7   5   0   36.50   12.60 
  -7   5   0   23.90   13.50 
  -7   5   0   76.89   17.20 
   7   5   0   29.70   12.10 
  -7   5   0   32.70   12.90 
   7   5   0   36.20   15.10 
  -7   5   0   48.20   16.70 
   7   5   0   33.00   12.10 
   7   5   0   59.59   18.80 
  -7   5   0   28.90   12.30 
  -7   5   0   47.60   12.40 
  -7   5   0   44.60   12.80 
   7   5   0   41.80   13.70 
   7   5   0   20.40   11.30 
   7   5   0   41.00   16.20 
   7   5   0   41.50   18.60 
   7   5   0   41.20   11.10 
   8  -5   0  710.13   43.60 
  -8  -5   0  645.04   43.10 
  -8  -5   0  684.03   46.00 
  -8  -5   0  771.92   52.09 
   8  -5   0  643.84   43.00 
  -8  -5   0  779.32   51.49 
  -8  -5   0  638.54   47.90 
   8  -5   0  672.33   50.49 
   8  -5   0  753.32   46.90 
  -8  -5   0  732.93   46.20 
  -8  -5   0  652.03   50.59 
  -8  -5   0  699.73   50.59 
  -8  -5   0  708.73   49.40 
   8  -5   0  641.94   46.00 
   8  -5   0  656.13   47.70 
  -8  -5   0  664.53   49.40 
  -8  -5   0  602.14   48.40 
  -8  -5   0  736.13   51.39 
  -8  -5   0  720.13   42.90 
  -8  -5   0  678.33   49.80 
  -8  -5   0  646.14   46.30 
   8   5   0  636.04   44.40 
   8   5   0  696.03   56.79 
  -8   5   0  641.14   44.90 
  -8   5   0  700.33   46.10 
  -8   5   0  670.83   43.20 
   8   5   0  703.93   41.00 
  -8   5   0  699.63   50.19 
   8   5   0  605.14   45.40 
   8   5   0  736.33   49.30 
   8   5   0  643.64   51.39 
   8   5   0  615.24   54.99 
  -8   5   0  740.33   44.90 
   8   5   0  671.63   49.90 
   8   5   0  729.03   47.20 
   8   5   0  654.03   48.30 
  -8   5   0  743.93   70.79 
   8   5   0  645.44   50.39 
   9  -5   0   -0.70   13.10 
  -9  -5   0    3.40   14.80 
  -9  -5   0   -2.30   15.00 
   9  -5   0   19.50   15.00 
  -9  -5   0   12.60   16.60 
  -9  -5   0   -0.60   13.50 
   9  -5   0   23.00   16.90 
  -9  -5   0   12.50   16.70 
   9  -5   0    6.30   13.40 
  -9  -5   0   12.50   17.30 
   9  -5   0    2.80   16.40 
  -9  -5   0   25.80   18.60 
  -9  -5   0   -3.10   17.10 
  -9  -5   0   23.80   17.80 
  -9  -5   0   19.10   15.60 
  -9  -5   0   18.10   18.10 
  -9  -5   0  -13.30   14.80 
  -9  -5   0  -10.50   12.80 
  -9  -5   0   15.60   28.80 
   9  -5   0   19.80   17.70 
   9   5   0   10.50   11.80 
  -9   5   0    8.50   17.00 
   9   5   0   10.30   15.00 
  -9   5   0   -0.50   14.10 
   9   5   0   16.90   13.90 
   9   5   0    8.50   18.20 
   9   5   0   11.40   15.10 
   9   5   0   17.60   14.90 
   9   5   0   14.10   14.90 
   9   5   0   12.70   11.50 
   9   5   0    4.00   12.50 
  -9   5   0    0.60   14.20 
   9   5   0   19.70   16.20 
  -9   5   0    9.40   13.50 
   9   5   0    0.70   17.40 
   0  -6   0 1132.99   55.49 
   0  -6   0 1199.38   60.89 
   0  -6   0 1101.99   49.80 
   0  -6   0 1103.49   51.39 
   0  -6   0 1030.50   55.89 
   0  -6   0 1087.49   49.50 
   0  -6   0  913.41   57.59 
   0  -6   0 1070.79   48.90 
   0  -6   0 1074.79   51.29 
   0  -6   0 1110.49   48.50 
   0  -6   0 1135.59   58.59 
   0  -6   0 1012.40   49.20 
   0  -6   0 1097.99   50.69 
   0  -6   0 1015.50   50.99 
   0  -6   0 1099.89   48.00 
   0  -6   0 1087.39   45.40 
   0  -6   0 1050.89   51.59 
   0  -6   0 1123.89   53.09 
   0   6   0 1124.69   47.80 
   0   6   0 1007.60   49.20 
   0   6   0 1015.20   49.50 
   0   6   0 1074.69   47.50 
   0   6   0 1137.99   48.00 
   0   6   0 1088.79   51.39 
   0   6   0 1192.08   62.29 
   0   6   0 1166.68   54.19 
   0   6   0 1118.29   50.19 
   0   6   0 1062.59   48.40 
   0   6   0 1042.00   49.70 
   0   6   0 1037.70   57.49 
   0   6   0 1081.19   51.29 
   1  -6   0 2317.57   88.49 
   1  -6   0 2452.05   86.29 
   1  -6   0 2349.06   85.49 
   1  -6   0 2057.69   89.19 
   1  -6   0 2322.87  101.89 
  -1  -6   0 2291.77   90.69 
   1  -6   0 2330.27   86.89 
  -1  -6   0 2423.36  100.59 
  -1  -6   0 2233.08   90.79 
   1  -6   0 2404.36   83.99 
   1  -6   0 2231.58   91.49 
   1  -6   0 2081.09   99.39 
   1  -6   0 1973.70   88.99 
  -1  -6   0 2254.27   91.09 
  -1  -6   0 2346.37   90.89 
  -1  -6   0 2398.76   94.99 
  -1  -6   0 2330.47   95.99 
  -1  -6   0 2287.97   89.99 
   1  -6   0 2291.67   81.59 
   1  -6   0 2270.07   87.19 
   1  -6   0 2363.16   88.59 
   1  -6   0 2044.80   90.09 
  -1  -6   0 2328.87   92.89 
  -1  -6   0 2293.57   90.19 
   1  -6   0 2412.16   90.99 
  -1  -6   0 2208.28   89.19 
   1  -6   0 2312.07   87.89 
  -1  -6   0 2310.37   90.99 
   1  -6   0 2339.37   96.29 
   1  -6   0 2140.09   86.99 
  -1  -6   0 2225.98   87.19 
  -1  -6   0 2370.86   98.69 
   1  -6   0 2388.86   92.39 
  -1  -6   0 2492.95   92.69 
   1  -6   0 2188.38  100.49 
   1  -6   0 2407.06   85.99 
   1   6   0 2232.38   90.59 
  -1   6   0 2170.48   84.09 
   1   6   0 2236.38   88.69 
  -1   6   0 2334.87   94.19 
   1   6   0 2209.58   88.89 
   1   6   0 2262.87   79.29 
   1   6   0 2273.27   89.99 
   1   6   0 2277.27   92.49 
  -1   6   0 2358.26   89.39 
  -1   6   0 2187.68   88.69 
  -1   6   0 2282.37   88.79 
   1   6   0 2287.37   91.19 
   1   6   0 2393.86   91.19 
  -1   6   0 2163.08   99.99 
   1   6   0 2211.48   91.29 
  -1   6   0 2380.46  100.89 
  -1   6   0 2198.18   84.29 
  -1   6   0 2303.77   87.19 
   1   6   0 2321.97   97.19 
  -1   6   0 2225.08   88.59 
  -1   6   0 2245.48   85.59 
   1   6   0 2220.28   91.19 
  -1   6   0 2212.28   93.49 
   1   6   0 2379.76   89.59 
   1   6   0 2312.67   98.49 
   1   6   0 2260.37   90.39 
   1   6   0 2317.87   93.79 
  -2  -6   0  498.65   35.20 
   2  -6   0  453.45   27.80 
   2  -6   0  416.36   28.80 
  -2  -6   0  417.66   29.30 
  -2  -6   0  485.45   30.30 
   2  -6   0  455.75   23.90 
   2  -6   0  431.76   36.20 
   2  -6   0  461.65   24.10 
  -2  -6   0  468.15   30.60 
   2  -6   0  467.25   28.80 
  -2  -6   0  462.25   28.70 
   2  -6   0  430.06   24.70 
   2  -6   0  441.96   22.50 
  -2  -6   0  439.66   29.80 
  -2  -6   0  487.15   31.20 
  -2  -6   0  452.85   31.90 
  -2  -6   0  393.76   28.10 
   2  -6   0  437.76   22.00 
   2  -6   0  417.06   20.70 
   2  -6   0  463.85   32.70 
  -2  -6   0  451.25   20.60 
   2  -6   0  407.36   27.20 
  -2  -6   0  422.16   29.00 
   2  -6   0  411.56   23.40 
  -2  -6   0  455.55   32.70 
   2  -6   0  442.96   25.20 
  -2  -6   0  445.16   29.60 
  -2  -6   0  445.96   28.20 
  -2  -6   0  446.96   31.30 
   2  -6   0  415.56   29.80 
   2   6   0  524.65   31.40 
  -2   6   0  466.05   22.20 
   2   6   0  431.66   27.20 
   2   6   0  473.75   28.90 
  -2   6   0  431.16   23.70 
  -2   6   0  453.25   26.50 
   2   6   0  441.26   28.40 
   2   6   0  440.26   29.40 
  -2   6   0  405.26   29.10 
  -2   6   0  420.86   25.80 
   2   6   0  358.16   26.80 
   2   6   0  467.85   30.10 
  -2   6   0  462.35   24.20 
   2   6   0  474.75   29.50 
  -2   6   0  438.56   31.00 
   2   6   0  443.56   33.90 
   2   6   0  421.26   31.80 
  -2   6   0  430.66   32.90 
   2   6   0  422.26   28.80 
   2   6   0  458.05   28.40 
  -2   6   0  454.95   26.90 
   2   6   0  488.75   29.50 
  -2   6   0  492.25   29.10 
  -2   6   0  421.86   20.80 
  -2   6   0  437.06   24.90 
   2   6   0  421.56   21.70 
  -2   6   0  425.86   21.30 
   3  -6   0  203.78   20.10 
  -3  -6   0  229.08   22.50 
  -3  -6   0  258.27   26.00 
  -3  -6   0  241.18   28.50 
  -3  -6   0  216.78   23.40 
   3  -6   0  242.88   19.80 
  -3  -6   0  257.47   27.30 
  -3  -6   0  225.78   24.60 
   3  -6   0  242.48   21.60 
   3  -6   0  221.88   15.60 
   3  -6   0  216.28   16.00 
   3  -6   0  215.48   24.10 
   3  -6   0  181.18   21.50 
   3  -6   0  193.28   22.80 
  -3  -6   0  218.48   23.70 
   3  -6   0  217.78   29.00 
  -3  -6   0  197.38   22.60 
  -3  -6   0  200.48   24.90 
   3  -6   0  198.28   18.20 
  -3  -6   0  197.18   22.00 
  -3  -6   0  258.37   26.60 
   3  -6   0  189.68   16.20 
   3  -6   0  208.88   16.50 
   3  -6   0  201.88   14.30 
  -3  -6   0  182.88   23.70 
  -3  -6   0  175.58   19.30 
  -3   6   0  184.38   16.20 
   3   6   0  216.48   27.80 
   3   6   0  189.38   22.70 
   3   6   0  226.38   16.70 
   3   6   0  188.68   21.30 
  -3   6   0  239.68   25.70 
  -3   6   0  231.58   20.90 
   3   6   0  237.58   25.40 
   3   6   0  197.58   23.40 
   3   6   0  212.88   23.40 
  -3   6   0  213.98   17.30 
   3   6   0  220.88   24.60 
   3   6   0  220.78   27.80 
   3   6   0  231.48   26.30 
   3   6   0  209.68   15.20 
   3   6   0  233.18   25.20 
  -3   6   0  216.28   17.30 
  -3   6   0  241.08   26.10 
   3   6   0  231.28   25.80 
  -3   6   0  242.48   24.00 
   3   6   0  270.07   28.10 
   3   6   0  263.97   24.10 
   4  -6   0   23.20    8.40 
   4  -6   0   17.50    6.60 
   4  -6   0   19.70   11.70 
  -4  -6   0    5.90   10.20 
   4  -6   0    9.50    7.10 
  -4  -6   0    9.40    9.90 
  -4  -6   0   20.00   12.80 
  -4  -6   0   23.10   12.30 
  -4  -6   0    8.00    9.80 
   4  -6   0    5.00    7.80 
   4  -6   0   13.50    7.50 
  -4  -6   0   23.10   12.50 
  -4  -6   0    9.50   10.40 
  -4  -6   0   24.60   10.10 
  -4  -6   0   31.60   12.70 
   4  -6   0   19.50   10.40 
  -4  -6   0   25.00   13.30 
   4  -6   0   20.00   10.40 
   4  -6   0   23.50   11.40 
   4  -6   0   23.70   12.80 
  -4  -6   0   27.90   12.20 
  -4  -6   0   26.60   13.20 
   4  -6   0   30.20   10.10 
  -4  -6   0    9.60   10.30 
   4  -6   0   34.60    9.80 
   4  -6   0   49.30   13.70 
  -4  -6   0   18.70   15.90 
  -4   6   0   23.00   11.10 
  -4   6   0   20.80    8.80 
   4   6   0   25.10    9.10 
  -4   6   0   11.20    6.50 
   4   6   0   25.50   13.10 
   4   6   0   17.00    8.10 
   4   6   0   37.10   12.00 
  -4   6   0   28.20   11.00 
  -4   6   0   26.30    8.20 
   4   6   0   32.60   12.20 
   4   6   0   34.60   11.40 
   4   6   0   13.30   14.50 
   4   6   0   11.40    9.50 
  -4   6   0   22.20   10.10 
   4   6   0   23.00    9.70 
  -4   6   0   29.50   10.30 
   4   6   0   40.10   14.20 
   4   6   0   25.70   11.50 
   4   6   0   20.90   10.70 
  -4   6   0   23.60   11.00 
   4   6   0   36.30   11.90 
  -4   6   0    8.00    6.30 
   4   6   0   26.80   11.10 
  -5  -6   0  195.98   26.50 
  -5  -6   0  135.09   23.70 
  -5  -6   0  241.48   31.80 
  -5  -6   0  158.58   24.20 
  -5  -6   0  239.68   26.20 
   5  -6   0  225.58   26.10 
  -5  -6   0  189.68   25.90 
  -5  -6   0  199.18   25.50 
   5  -6   0  226.08   20.80 
  -5  -6   0  219.98   30.10 
  -5  -6   0  205.68   26.10 
  -5  -6   0  194.08   24.40 
   5  -6   0  227.58   24.80 
   5  -6   0  180.88   19.00 
  -5  -6   0  183.38   19.60 
   5  -6   0  189.98   25.40 
   5  -6   0  212.78   22.10 
   5  -6   0  230.08   19.40 
  -5  -6   0  167.38   23.80 
   5  -6   0  198.08   25.70 
  -5  -6   0  210.88   27.90 
  -5  -6   0  191.58   24.60 
  -5  -6   0  249.48   31.20 
   5   6   0  171.88   24.70 
  -5   6   0  213.98   17.50 
   5   6   0  262.47   30.40 
  -5   6   0  290.27   25.60 
   5   6   0  186.58   25.00 
   5   6   0  201.08   20.70 
   5   6   0  207.08   28.90 
   5   6   0  220.78   25.00 
   5   6   0  186.68   25.80 
  -5   6   0  195.08   19.30 
   5   6   0  225.48   33.10 
  -5   6   0  234.18   21.50 
   5   6   0  230.98   24.20 
  -5   6   0  204.38   25.80 
   5   6   0  202.28   28.40 
   5   6   0  215.48   16.60 
   5   6   0  209.78   26.10 
  -5   6   0  242.58   28.80 
  -5   6   0  223.28   18.90 
  -5   6   0  182.78   22.00 
   5   6   0  228.28   33.80 
   5   6   0  195.88   24.70 
  -5   6   0  251.27   26.30 
   6  -6   0  115.19   18.30 
  -6  -6   0   91.19   20.80 
   6  -6   0   94.69   20.80 
  -6  -6   0   85.59   21.40 
  -6  -6   0  107.89   22.80 
  -6  -6   0  111.89   16.20 
  -6  -6   0   79.49   20.10 
   6  -6   0  110.39   17.50 
  -6  -6   0   90.09   20.40 
  -6  -6   0  109.19   19.60 
  -6  -6   0  102.59   21.30 
   6  -6   0  122.09   19.40 
   6  -6   0  120.79   21.00 
  -6  -6   0  103.89   22.60 
  -6  -6   0   80.69   17.60 
   6  -6   0  111.69   16.90 
  -6  -6   0  102.29   23.90 
   6  -6   0  107.49   21.10 
  -6  -6   0  110.09   20.30 
  -6  -6   0   89.99   20.30 
  -6  -6   0   90.79   22.90 
  -6  -6   0  142.49   24.40 
   6   6   0  121.39   16.00 
   6   6   0  102.79   21.10 
  -6   6   0  111.29   19.80 
   6   6   0   61.79   18.90 
   6   6   0  101.39   21.50 
   6   6   0  113.09   21.00 
   6   6   0   91.89   13.80 
   6   6   0  111.09   19.80 
   6   6   0  119.09   21.70 
  -6   6   0   95.19   18.00 
   6   6   0  130.69   19.90 
   6   6   0  132.79   28.00 
   6   6   0  114.29   23.70 
  -6   6   0  136.79   19.30 
   6   6   0  127.79   23.30 
   6   6   0   83.59   24.30 
   6   6   0  152.38   25.30 
  -6   6   0  129.69   26.80 
  -6   6   0  142.89   23.20 
  -6   6   0  163.98   24.80 
   7  -6   0  439.86   32.20 
  -7  -6   0  271.67   34.90 
  -7  -6   0  329.57   37.50 
  -7  -6   0  471.75   42.40 
  -7  -6   0  374.56   43.00 
  -7  -6   0  381.96   42.60 
  -7  -6   0  426.76   45.20 
   7  -6   0  409.26   34.90 
  -7  -6   0  377.66   37.60 
  -7  -6   0  407.36   43.10 
   7  -6   0  373.06   32.40 
  -7  -6   0  334.27   36.60 
  -7  -6   0  366.96   40.30 
   7  -6   0  400.36   30.90 
  -7  -6   0  410.16   37.00 
   7  -6   0  400.76   35.60 
  -7  -6   0  372.86   41.40 
   7  -6   0  369.76   40.40 
  -7  -6   0  370.76   40.30 
  -7  -6   0  389.36   37.90 
   7   6   0  345.77   41.10 
  -7   6   0  400.36   41.00 
  -7   6   0  381.06   36.40 
  -7   6   0  428.16   34.00 
   7   6   0  343.67   36.60 
   7   6   0  324.27   40.30 
   7   6   0  360.06   36.20 
  -7   6   0  397.16   31.90 
   7   6   0  418.46   50.79 
  -7   6   0  397.76   39.90 
   7   6   0  326.37   37.70 
   7   6   0  387.26   27.30 
   7   6   0  383.26   43.60 
   7   6   0  304.87   34.60 
   7   6   0  417.26   31.80 
  -7   6   0  378.46   30.80 
   7   6   0  411.46   43.40 
   7   6   0  406.06   50.09 
   8  -6   0   56.99   17.80 
   8  -6   0   43.40   19.40 
   8  -6   0   41.20   17.40 
  -8  -6   0   22.60   14.70 
  -8  -6   0   56.99   20.90 
  -8  -6   0   30.10   20.80 
  -8  -6   0   43.70   21.00 
  -8  -6   0  107.29   22.00 
   8  -6   0   45.00   15.80 
  -8  -6   0   64.49   18.90 
  -8  -6   0   57.49   21.20 
  -8  -6   0   67.19   21.80 
  -8  -6   0   43.30   21.80 
  -8  -6   0   34.90   18.80 
  -8  -6   0   43.90   19.70 
   8  -6   0   74.19   17.40 
  -8  -6   0   53.59   20.70 
  -8  -6   0   48.40   19.70 
  -8   6   0   56.29   18.40 
   8   6   0   30.90   19.90 
   8   6   0   62.59   23.00 
   8   6   0   67.19   19.90 
   8   6   0   77.39   24.60 
   8   6   0   64.89   21.00 
   8   6   0   56.19   17.50 
   8   6   0  103.29   22.70 
  -8   6   0   38.60   16.50 
   8   6   0   62.89   15.60 
  -8   6   0   50.69   17.80 
  -8   6   0   74.49   22.30 
   8   6   0   77.79   23.80 
   8   6   0   54.69   17.00 
   8   6   0   39.60   17.70 
   0  -7   0    3.20    8.00 
   0  -7   0    0.60    7.80 
   0  -7   0   -6.00    7.90 
   0  -7   0    0.50    8.90 
   0  -7   0   -7.60    7.60 
   0  -7   0  -13.80    6.90 
   0  -7   0   -2.00    8.50 
   0  -7   0    2.40    9.60 
   0  -7   0   -8.30    9.20 
   0  -7   0   -1.10    7.80 
   0  -7   0    6.50    6.70 
   0  -7   0    3.70    9.10 
   0  -7   0   -4.20    7.40 
   0  -7   0   -5.00    6.70 
   0  -7   0    2.50    8.80 
   0  -7   0    7.50   10.70 
   0  -7   0    2.90   11.70 
   0  -7   0   -7.10   10.40 
   0  -7   0    8.10    9.00 
   0   7   0   18.60   14.70 
   0   7   0   -0.90    6.80 
   0   7   0    9.00    6.50 
   0   7   0   -0.20    6.70 
   0   7   0   -0.10    6.20 
   0   7   0   -9.80    7.70 
   0   7   0    8.60    8.80 
   0   7   0    2.10   10.10 
   0   7   0    2.00    7.00 
   0   7   0   -1.50    6.80 
   0   7   0   -3.20    5.50 
   0   7   0   -2.70    6.60 
   0   7   0    1.80    6.70 
   0   7   0    2.90    7.30 
  -1  -7   0  -10.10    7.80 
  -1  -7   0    7.60   10.20 
   1  -7   0   -3.00    6.80 
  -1  -7   0   17.10   10.40 
   1  -7   0   -1.00   11.80 
  -1  -7   0   -1.40    8.60 
   1  -7   0   -9.10    7.10 
   1  -7   0    4.20    9.40 
  -1  -7   0    4.10    8.90 
  -1  -7   0    4.20   10.40 
   1  -7   0   -0.50    6.00 
   1  -7   0   -1.80    7.80 
  -1  -7   0   -4.20    8.60 
  -1  -7   0    0.50    9.10 
   1  -7   0    9.80    7.80 
  -1  -7   0   -2.80    9.10 
  -1  -7   0    5.00    9.90 
   1  -7   0   11.60    9.50 
   1  -7   0   -4.30    8.60 
   1  -7   0   -2.90   11.80 
   1  -7   0    0.10    8.60 
   1  -7   0   -1.00    4.80 
   1  -7   0    0.40    8.00 
   1  -7   0    6.20    8.50 
   1  -7   0    0.20    7.10 
   1  -7   0    1.30    6.60 
   1  -7   0    6.30    8.50 
  -1  -7   0    5.70    8.30 
  -1  -7   0    0.20    7.40 
   1  -7   0   -2.50    6.00 
  -1  -7   0    1.60    9.50 
  -1  -7   0   -5.20    8.40 
   1  -7   0    4.10   11.00 
  -1  -7   0   -3.30    8.30 
  -1  -7   0   -4.50   10.50 
  -1   7   0    1.70    7.40 
   1   7   0    3.60   10.20 
   1   7   0   -3.40    8.20 
   1   7   0   -4.90    6.70 
  -1   7   0   -0.90    7.30 
   1   7   0   -0.40    7.60 
  -1   7   0   -1.20    5.40 
  -1   7   0   -0.50    7.00 
   1   7   0   -3.20    6.20 
  -1   7   0   -2.30    6.90 
  -1   7   0    1.40    6.90 
  -1   7   0    9.80   11.80 
   1   7   0   -1.30    9.10 
   1   7   0   -1.60    8.20 
   1   7   0   -4.30    7.20 
   1   7   0   11.30   10.80 
  -1   7   0    4.80   14.40 
   1   7   0   -0.90    7.80 
   1   7   0    6.60    7.60 
  -1   7   0   -7.40    9.10 
   1   7   0    1.10    7.70 
  -1   7   0    4.60    7.10 
   1   7   0   -0.10    6.00 
  -1   7   0    7.70    7.40 
   1   7   0    9.10    8.20 
  -1   7   0    1.20    8.20 
   1   7   0   -2.70    6.00 
   2  -7   0   46.10    8.80 
  -2  -7   0   34.80   14.30 
   2  -7   0   30.30   13.60 
   2  -7   0   30.00   14.80 
   2  -7   0   29.60   12.50 
   2  -7   0   36.80    9.30 
   2  -7   0   27.20   15.70 
  -2  -7   0   32.60   12.90 
   2  -7   0   44.30   12.50 
  -2  -7   0   34.20   15.10 
  -2  -7   0   50.49   15.60 
  -2  -7   0   16.70   12.10 
  -2  -7   0   13.10   12.10 
  -2  -7   0   49.50   14.40 
  -2  -7   0   23.10   12.30 
   2  -7   0   56.09   13.60 
  -2  -7   0   51.09   13.80 
  -2  -7   0   37.50   13.10 
  -2  -7   0   25.30   11.50 
   2  -7   0   36.90    8.80 
  -2  -7   0   25.50   13.20 
  -2  -7   0   45.50   13.10 
  -2  -7   0   57.49   15.60 
   2  -7   0   25.10   11.00 
   2  -7   0   35.60    9.50 
   2  -7   0   40.20    8.70 
   2   7   0   37.00   11.80 
  -2   7   0   42.80   12.40 
  -2   7   0   41.90   11.20 
   2   7   0   39.60   12.50 
  -2   7   0   47.60   10.10 
   2   7   0   41.90   12.50 
  -2   7   0   36.10   12.90 
   2   7   0   41.70   12.90 
  -2   7   0   48.20   13.40 
  -2   7   0   44.60    8.40 
  -2   7   0   45.30   11.80 
   2   7   0   34.30   12.00 
   2   7   0   32.50   11.80 
   2   7   0   40.20    7.40 
  -2   7   0   40.10   15.90 
   2   7   0   13.50    9.90 
   2   7   0   41.00   15.00 
   2   7   0   40.30   12.20 
   2   7   0   19.40    9.90 
   2   7   0   42.40   12.30 
   2   7   0   42.60   14.70 
  -2   7   0   30.20    9.50 
  -2   7   0   43.60   15.10 
   2   7   0   61.19   12.70 
   3  -7   0  108.49   12.00 
   3  -7   0   78.69   13.40 
   3  -7   0   94.59   17.20 
  -3  -7   0   72.09   16.90 
   3  -7   0   95.99   17.10 
   3  -7   0   90.09   18.40 
   3  -7   0  123.79   17.10 
  -3  -7   0   94.29   17.10 
   3  -7   0   84.19   16.40 
  -3  -7   0  108.99   17.20 
  -3  -7   0   88.99   19.80 
  -3  -7   0   83.39   17.20 
   3  -7   0   97.89   23.50 
   3  -7   0  114.79   19.80 
   3  -7   0   98.69   13.60 
   3  -7   0   87.99   12.80 
  -3  -7   0   77.29   17.50 
  -3  -7   0   81.69   20.00 
  -3  -7   0   92.09   19.10 
  -3  -7   0   85.79   18.10 
  -3  -7   0   86.49   18.10 
  -3  -7   0   99.39   19.80 
  -3  -7   0  103.59   21.60 
   3  -7   0   73.49   16.50 
  -3  -7   0   93.59   20.40 
   3   7   0   75.59   16.50 
   3   7   0  113.89   22.50 
  -3   7   0  115.49   16.00 
   3   7   0   86.69   16.50 
   3   7   0   84.69   16.70 
  -3   7   0  108.49   19.50 
   3   7   0  107.79   13.70 
   3   7   0   87.69   17.10 
   3   7   0   94.59   13.70 
   3   7   0  116.29   22.30 
   3   7   0   99.29   18.30 
  -3   7   0   99.59   19.70 
  -3   7   0  135.99   14.80 
  -3   7   0  114.89   14.80 
  -3   7   0  107.59   18.60 
  -3   7   0  110.89   16.40 
   3   7   0  120.19   19.70 
   3   7   0   77.69   16.20 
   3   7   0   99.19   16.40 
   3   7   0  102.89   18.50 
   3   7   0  134.19   20.50 
   3   7   0  117.19   19.20 
  -3   7   0   92.09   16.90 
  -4  -7   0  135.19   26.00 
   4  -7   0  189.28   21.90 
  -4  -7   0  199.78   26.30 
  -4  -7   0  163.68   21.00 
  -4  -7   0  166.78   23.50 
  -4  -7   0  162.28   24.40 
  -4  -7   0  131.29   24.10 
  -4  -7   0  195.38   27.80 
  -4  -7   0  177.38   25.10 
   4  -7   0  169.68   28.60 
  -4  -7   0  170.38   24.70 
   4  -7   0  123.29   21.00 
   4  -7   0  179.88   19.70 
  -4  -7   0  185.58   25.50 
  -4  -7   0  177.08   25.00 
   4  -7   0  193.78   17.50 
   4  -7   0  178.78   24.30 
   4  -7   0  166.38   23.40 
   4  -7   0  162.48   18.50 
  -4  -7   0  178.28   26.40 
   4  -7   0  171.78   24.00 
  -4   7   0  207.58   24.80 
   4   7   0  171.58   23.10 
  -4   7   0  204.58   17.30 
   4   7   0  149.69   31.00 
   4   7   0  160.38   23.20 
   4   7   0  131.79   24.80 
   4   7   0  152.38   20.40 
   4   7   0  179.08   24.90 
  -4   7   0  157.08   24.90 
   4   7   0  202.48   20.60 
   4   7   0  175.38   25.60 
  -4   7   0  180.38   17.80 
   4   7   0  174.68   25.60 
   4   7   0  171.48   24.00 
  -4   7   0  189.48   20.70 
   4   7   0  222.28   27.10 
   4   7   0  192.88   29.40 
  -4   7   0  177.78   25.40 
  -4   7   0  181.18   18.30 
   4   7   0  164.08   22.90 
  -4   7   0  194.08   26.50 
  -5  -7   0  834.12   49.60 
   5  -7   0  843.12   43.60 
   5  -7   0  821.32   40.60 
  -5  -7   0  773.32   49.80 
  -5  -7   0  727.33   48.30 
   5  -7   0  856.71   48.90 
  -5  -7   0  860.31   56.39 
   5  -7   0  830.22   53.59 
   5  -7   0  722.13   46.90 
   5  -7   0  846.42   49.90 
  -5  -7   0  876.11   44.70 
  -5  -7   0  747.43   51.99 
  -5  -7   0  756.82   49.99 
  -5  -7   0  839.52   60.49 
  -5  -7   0  786.82   52.59 
  -5  -7   0  810.52   51.49 
  -5  -7   0  957.40   53.29 
  -5  -7   0  761.92   51.59 
  -5  -7   0  803.32   51.09 
   5   7   0  907.71   45.10 
   5   7   0  768.82   60.79 
   5   7   0  798.32   48.90 
   5   7   0  761.32   49.10 
  -5   7   0  779.12   49.99 
  -5   7   0  848.42   45.10 
   5   7   0  817.72   49.60 
   5   7   0  837.22   49.40 
   5   7   0  759.32   53.49 
  -5   7   0  829.62   48.30 
   5   7   0  799.12   47.00 
   5   7   0  825.22   50.89 
   5   7   0  806.92   50.39 
   5   7   0  857.91   57.09 
   5   7   0  791.32   43.00 
  -5   7   0  866.61   48.00 
   5   7   0  778.72   49.00 
  -5   7   0  827.52   49.40 
  -5   7   0  734.73   49.80 
  -6  -7   0  810.22   50.69 
  -6  -7   0  744.43   48.30 
   6  -7   0  748.53   45.70 
   6  -7   0  746.53   51.59 
   6  -7   0  839.62   41.80 
  -6  -7   0  639.14   49.80 
  -6  -7   0  762.62   50.79 
  -6  -7   0  867.11   52.49 
  -6  -7   0  666.63   48.90 
  -6  -7   0  738.03   51.49 
   6  -7   0  644.74   45.80 
   6  -7   0  659.33   41.80 
  -6  -7   0  770.62   51.69 
  -6  -7   0  680.63   60.19 
  -6  -7   0  724.03   52.19 
  -6  -7   0  675.53   49.60 
   6  -7   0  694.93   47.90 
  -6  -7   0  598.84   49.00 
  -6  -7   0  790.42   48.60 
  -6  -7   0  699.83   53.39 
  -6   7   0  750.52   46.10 
   6   7   0  694.43   47.60 
  -6   7   0  665.83   44.40 
   6   7   0  693.53   49.20 
   6   7   0  679.53   49.10 
  -6   7   0  698.03   47.00 
  -6   7   0  747.83   43.50 
   6   7   0  697.53   52.69 
   6   7   0  728.23   49.90 
  -6   7   0  693.33   48.70 
   6   7   0  758.52   57.29 
   6   7   0  723.23   47.90 
  -6   7   0  802.02   51.59 
   6   7   0  723.13   48.50 
   6   7   0  754.92   48.40 
   6   7   0  710.73   45.10 
   6   7   0  763.02   43.40 
   6   7   0  750.82   62.79 
   7  -7   0  482.75   42.00 
  -7  -7   0  480.45   42.70 
  -7  -7   0  466.75   48.00 
  -7  -7   0  505.65   51.79 
   7  -7   0  536.05   38.50 
  -7  -7   0  529.45   51.29 
  -7  -7   0  633.04   46.10 
  -7  -7   0  523.05   52.59 
  -7  -7   0  443.26   53.89 
  -7  -7   0  412.16   44.30 
   7  -7   0  550.84   39.90 
   7  -7   0  581.04   42.80 
  -7  -7   0  505.15   48.40 
   7  -7   0  518.65   35.30 
  -7  -7   0  556.44   46.80 
  -7  -7   0  538.55   45.60 
  -7  -7   0  508.65   51.49 
  -7  -7   0  532.15   41.90 
   7   7   0  529.05   59.59 
   7   7   0  469.15   37.60 
   7   7   0  460.05   41.40 
  -7   7   0  537.15   40.90 
   7   7   0  438.26   45.90 
   7   7   0  478.25   49.10 
  -7   7   0  506.75   38.10 
   7   7   0  452.95   45.80 
  -7   7   0  500.05   43.80 
   7   7   0  463.65   49.20 
  -7   7   0  376.76   42.40 
  -7   7   0  549.15   37.70 
   7   7   0  556.44   42.90 
   7   7   0  434.76   57.99 
   7   7   0  494.65   37.40 
   7   7   0  454.05   50.19 
   0  -8   0 2480.35  111.49 
   0  -8   0 2667.53  112.69 
   0  -8   0 2960.80  122.79 
   0  -8   0 2666.03  101.09 
   0  -8   0 2731.23  107.69 
   0  -8   0 2745.03  112.89 
   0  -8   0 2784.32  106.29 
   0  -8   0 2738.03  105.99 
   0  -8   0 2627.14  113.39 
   0  -8   0 2710.13  111.39 
   0  -8   0 2646.94  109.19 
   0  -8   0 2464.55  121.69 
   0  -8   0 2754.12  122.59 
   0  -8   0 2506.65  108.79 
   0  -8   0 2549.04  114.19 
   0  -8   0 2296.67  106.09 
   0  -8   0 2727.73  109.29 
   0   8   0 2695.23  118.59 
   0   8   0 2771.42  109.09 
   0   8   0 2690.53  104.09 
   0   8   0 2773.62  105.29 
   0   8   0 2633.84  116.69 
   0   8   0 2657.23  112.79 
   0   8   0 2655.53  108.69 
   0   8   0 2600.54  106.99 
   0   8   0 2695.93  109.39 
   0   8   0 2586.04  105.99 
   0   8   0 2666.63  108.59 
   0   8   0 2798.92  111.99 
   0   8   0 2667.83  110.09 
  -1  -8   0  322.87   34.60 
  -1  -8   0  300.27   24.60 
   1  -8   0  304.07   31.80 
   1  -8   0  352.06   32.10 
   1  -8   0  346.67   41.30 
  -1  -8   0  282.57   30.00 
  -1  -8   0  298.37   38.90 
   1  -8   0  367.56   34.90 
   1  -8   0  332.97   30.20 
  -1  -8   0  304.67   29.80 
  -1  -8   0  345.57   28.70 
   1  -8   0  304.57   24.10 
   1  -8   0  324.57   31.20 
  -1  -8   0  398.16   34.50 
  -1  -8   0  322.27   34.90 
  -1  -8   0  320.07   33.40 
   1  -8   0  314.77   23.80 
  -1  -8   0  312.27   34.30 
  -1  -8   0  309.37   36.00 
  -1  -8   0  381.36   35.20 
   1  -8   0  303.07   31.70 
  -1  -8   0  304.97   31.10 
   1  -8   0  373.46   31.20 
  -1  -8   0  318.47   30.60 
   1  -8   0  227.68   36.90 
  -1  -8   0  237.48   33.00 
  -1  -8   0  350.46   36.30 
  -1  -8   0  389.46   40.90 
   1  -8   0  285.67   31.90 
   1  -8   0  252.37   37.00 
   1  -8   0  361.36   31.80 
  -1  -8   0  290.37   29.60 
   1  -8   0  241.08   29.90 
   1   8   0  354.06   37.70 
   1   8   0  326.77   34.60 
   1   8   0  314.97   33.80 
   1   8   0  349.96   30.80 
   1   8   0  287.77   31.30 
   1   8   0  285.77   22.80 
  -1   8   0  322.57   25.60 
  -1   8   0  339.17   35.00 
  -1   8   0  338.37   26.70 
  -1   8   0  326.47   39.10 
  -1   8   0  240.18   28.60 
  -1   8   0  311.67   26.80 
   1   8   0  368.86   35.50 
   1   8   0  327.77   31.20 
   1   8   0  303.97   38.10 
   1   8   0  307.47   32.80 
  -1   8   0  380.36   26.50 
  -1   8   0  318.27   22.80 
  -1   8   0  349.57   32.40 
   1   8   0  277.07   29.50 
  -1   8   0  327.07   26.60 
   1   8   0  313.17   26.10 
   1   8   0  340.87   33.90 
   1   8   0  294.77   30.20 
   1   8   0  319.47   26.50 
  -1   8   0  320.57   40.20 
  -1   8   0  340.37   31.70 
  -1   8   0  356.96   28.70 
   2  -8   0  618.94   44.50 
  -2  -8   0  699.03   45.80 
  -2  -8   0  653.23   44.90 
   2  -8   0  720.63   43.10 
   2  -8   0  656.63   43.50 
   2  -8   0  638.74   37.80 
  -2  -8   0  775.62   44.60 
  -2  -8   0  677.03   48.40 
   2  -8   0  708.73   44.30 
  -2  -8   0  644.74   46.80 
  -2  -8   0  687.03   48.90 
   2  -8   0  680.83   42.50 
   2  -8   0  733.23   56.59 
  -2  -8   0  694.63   44.40 
  -2  -8   0  669.53   48.20 
  -2  -8   0  780.52   44.50 
  -2  -8   0  818.12   46.50 
  -2  -8   0  729.63   45.60 
  -2  -8   0  785.82   45.30 
  -2  -8   0  598.04   42.30 
   2  -8   0  628.94   49.99 
  -2  -8   0  724.83   48.30 
  -2  -8   0  710.73   46.40 
   2  -8   0  771.22   43.60 
  -2  -8   0  671.23   40.80 
  -2   8   0  722.23   46.00 
  -2   8   0  674.43   50.89 
  -2   8   0  732.63   38.70 
   2   8   0  663.93   42.20 
  -2   8   0  690.33   51.69 
  -2   8   0  711.33   44.70 
   2   8   0  663.63   40.90 
   2   8   0  683.53   41.70 
  -2   8   0  691.63   40.40 
  -2   8   0  713.43   45.00 
  -2   8   0  661.93   36.50 
   2   8   0  684.03   43.80 
  -2   8   0  691.73   39.70 
   2   8   0  685.13   42.80 
   2   8   0  641.44   40.80 
   2   8   0  692.63   49.99 
   2   8   0  757.62   45.80 
   2   8   0  721.93   46.70 
  -2   8   0  710.73   41.40 
   2   8   0  646.94   42.10 
   2   8   0  747.63   45.30 
   2   8   0  670.53   41.00 
   2   8   0  700.73   39.40 
  -2   8   0  732.73   40.90 
  -3  -8   0   61.39   17.80 
  -3  -8   0   56.19   19.10 
  -3  -8   0   66.59   19.00 
   3  -8   0   63.19   15.80 
  -3  -8   0   45.10   15.90 
  -3  -8   0   34.40   17.20 
   3  -8   0   62.59   14.90 
  -3  -8   0   37.20   16.60 
   3  -8   0   55.69   17.70 
  -3  -8   0   72.69   18.40 
  -3  -8   0   42.90   16.70 
   3  -8   0   41.90   16.60 
  -3  -8   0   34.30   14.60 
  -3  -8   0   29.80   15.40 
   3  -8   0   72.69   19.60 
   3  -8   0   61.59   12.80 
   3  -8   0   45.10   14.00 
  -3  -8   0   72.89   18.00 
  -3  -8   0   21.70   13.20 
   3  -8   0   57.29   16.00 
  -3  -8   0   53.59   18.00 
  -3  -8   0   60.89   17.70 
   3  -8   0   16.70   18.90 
   3   8   0   53.69   15.20 
  -3   8   0   64.29   13.90 
  -3   8   0   18.70   15.10 
   3   8   0   69.99   20.10 
  -3   8   0   33.70   15.10 
   3   8   0   57.49   16.90 
   3   8   0   29.30   12.30 
  -3   8   0   54.99   12.60 
   3   8   0   61.99   14.70 
   3   8   0   54.59   16.30 
   3   8   0   72.99   16.50 
  -3   8   0   76.09   19.30 
   3   8   0   79.09   18.30 
   3   8   0   78.79   18.50 
  -3   8   0   49.90   15.90 
  -3   8   0   61.79   12.70 
  -3   8   0   64.39   17.40 
   3   8   0   58.59   18.60 
  -3   8   0   62.09   14.70 
   3   8   0   63.79   16.30 
   3   8   0   56.89   15.10 
  -4  -8   0  245.58   31.70 
  -4  -8   0  257.17   33.70 
   4  -8   0  268.47   32.10 
  -4  -8   0  277.77   33.00 
  -4  -8   0  261.07   30.80 
   4  -8   0  274.27   32.50 
  -4  -8   0  343.07   36.10 
  -4  -8   0  269.67   34.60 
  -4  -8   0  205.58   30.50 
   4  -8   0  268.77   35.40 
  -4  -8   0  320.47   36.30 
  -4  -8   0  218.18   34.90 
  -4  -8   0  257.07   28.30 
  -4  -8   0  235.48   30.10 
  -4  -8   0  226.78   30.70 
  -4  -8   0  256.07   34.60 
   4  -8   0  256.77   29.90 
  -4  -8   0  311.17   37.80 
   4  -8   0  280.37   39.70 
   4   8   0  304.77   35.90 
  -4   8   0  286.57   32.70 
   4   8   0  260.97   43.40 
  -4   8   0  263.27   34.30 
   4   8   0  263.27   33.00 
   4   8   0  301.07   34.30 
   4   8   0  284.67   33.10 
  -4   8   0  276.87   31.80 
  -4   8   0  277.97   28.10 
   4   8   0  322.37   39.20 
  -4   8   0  257.87   32.40 
   4   8   0  301.77   30.70 
   4   8   0  254.47   30.10 
   4   8   0  190.28   31.70 
   4   8   0  242.78   31.40 
   4   8   0  302.87   32.80 
   4   8   0  299.57   34.20 
  -5  -8   0   52.19   18.90 
  -5  -8   0   64.39   20.40 
  -5  -8   0   39.60   17.50 
  -5  -8   0   38.20   17.90 
  -5  -8   0   35.50   18.10 
  -5  -8   0   48.50   17.70 
   5  -8   0   35.00   15.80 
  -5  -8   0   53.89   19.60 
  -5  -8   0   36.80   18.00 
  -5  -8   0   65.39   20.80 
  -5  -8   0   63.69   17.50 
   5  -8   0   21.60   14.40 
   5  -8   0   50.79   20.20 
  -5  -8   0   63.59   21.70 
  -5  -8   0   38.80   18.50 
   5  -8   0   73.79   19.50 
  -5  -8   0   61.59   22.30 
  -5  -8   0   59.39   19.30 
  -5   8   0   80.49   21.90 
  -5   8   0   61.49   16.80 
   5   8   0   49.00   20.50 
   5   8   0   64.89   18.70 
   5   8   0   33.40   15.60 
  -5   8   0   56.59   19.10 
   5   8   0   31.60   13.40 
   5   8   0   69.79   19.60 
  -5   8   0   35.00   16.80 
   5   8   0   67.69   17.90 
  -5   8   0   33.10   15.30 
   5   8   0   58.19   17.60 
   5   8   0   31.50   14.90 
   5   8   0   57.19   24.90 
   5   8   0   76.99   20.20 
   5   8   0   54.29   14.00 
   5   8   0   50.79   19.50 
  -6  -8   0  337.97   41.80 
  -6  -8   0  362.06   44.00 
  -6  -8   0  462.85   51.99 
  -6  -8   0  394.86   43.30 
  -6  -8   0  365.56   42.00 
  -6  -8   0  406.16   44.70 
   6  -8   0  513.65   40.70 
   6  -8   0  462.35   39.50 
  -6  -8   0  505.85   48.20 
  -6  -8   0  446.36   51.39 
  -6  -8   0  393.26   42.30 
  -6  -8   0  491.85   45.80 
  -6  -8   0  464.25   46.30 
   6  -8   0  467.65   40.20 
  -6  -8   0  387.96   44.20 
   6   8   0  466.35   43.10 
   6   8   0  489.55   49.00 
   6   8   0  488.85   39.70 
   6   8   0  461.75   45.70 
  -6   8   0  343.37   39.90 
  -6   8   0  496.35   44.10 
   6   8   0  408.96   50.99 
  -6   8   0  383.16   39.00 
   6   8   0  350.16   40.30 
  -6   8   0  404.26   38.60 
   6   8   0  423.66   45.30 
   6   8   0  386.56   40.70 
   6   8   0  396.86   57.19 
   6   8   0  402.76   49.40 
   0  -9   0    4.60   11.30 
   0  -9   0   -1.60   11.60 
   0  -9   0  -27.70    9.70 
   0  -9   0  -25.60   14.30 
   0  -9   0    0.60   12.50 
   0  -9   0  -22.00   12.40 
   0  -9   0  -11.80   13.40 
   0  -9   0    3.30   12.30 
   0  -9   0   -9.40   10.20 
   0  -9   0   -2.50   13.40 
   0  -9   0    0.70   12.20 
   0  -9   0   -5.70   18.90 
   0  -9   0    0.50   12.10 
   0  -9   0  -12.10   15.50 
   0  -9   0    9.90   13.10 
   0  -9   0  -14.80    9.80 
   0   9   0    3.40   10.40 
   0   9   0    0.10   11.50 
   0   9   0    1.80    8.60 
   0   9   0    4.00   11.20 
   0   9   0   14.40   12.50 
   0   9   0   20.40   13.50 
   0   9   0    3.30   12.30 
   0   9   0  -13.70    8.10 
   0   9   0   -3.80    8.20 
   0   9   0   -2.00    9.80 
   0   9   0  -14.00    8.60 
   0   9   0   -4.30   10.80 
  -1  -9   0   -8.10   10.70 
   1  -9   0   16.00   14.50 
   1  -9   0    5.20   13.30 
  -1  -9   0   22.70   14.20 
   1  -9   0   -0.10   10.30 
   1  -9   0   11.40   13.80 
   1  -9   0   -5.30   12.60 
  -1  -9   0  -18.20   15.40 
  -1  -9   0   20.50   15.80 
  -1  -9   0    2.50   16.90 
  -1  -9   0   19.60   13.70 
  -1  -9   0    3.50   14.90 
   1  -9   0   22.00   19.00 
   1  -9   0    7.10   12.60 
  -1  -9   0  -18.40   13.50 
   1  -9   0  -19.90   16.10 
  -1  -9   0   17.00   15.30 
  -1  -9   0   47.70   17.70 
  -1  -9   0    2.60   10.30 
   1  -9   0   22.00   16.00 
  -1  -9   0   11.90   15.90 
  -1  -9   0    7.50   12.80 
  -1  -9   0    2.10   11.70 
  -1  -9   0    3.30   13.40 
  -1  -9   0   22.60   16.70 
   1   9   0   13.00   13.40 
  -1   9   0   11.00   11.70 
  -1   9   0   19.10   12.40 
  -1   9   0  -32.40   14.60 
   1   9   0   32.90   16.20 
  -1   9   0   -0.40   10.80 
   1   9   0    9.80   10.30 
   1   9   0   -6.40   12.30 
  -1   9   0    6.50   12.10 
   1   9   0    0.60    8.70 
  -1   9   0   14.80   11.30 
  -1   9   0   -9.00   10.10 
   1   9   0   24.00   13.40 
   1   9   0   13.70   11.20 
   1   9   0   15.90   10.40 
  -1   9   0    9.30   10.60 
  -1   9   0   -1.30   10.50 
   1   9   0    6.80   12.10 
   1   9   0   13.70   11.30 
  -1   9   0   -7.90   12.60 
   1   9   0    2.90   10.10 
   1   9   0   19.70   14.20 
   2  -9   0   25.60   16.40 
  -2  -9   0    0.90   15.40 
  -2  -9   0    5.30   12.30 
   2  -9   0    3.40   17.50 
  -2  -9   0   10.60   14.80 
  -2  -9   0   47.00   18.10 
   2  -9   0   18.20   15.10 
   2  -9   0   26.30   21.70 
   2  -9   0   12.00   16.30 
  -2  -9   0   27.50   17.00 
   2  -9   0    8.50   12.00 
  -2  -9   0    3.60   12.40 
  -2  -9   0   24.30   14.90 
  -2  -9   0   48.20   23.70 
  -2  -9   0   19.70   16.30 
  -2  -9   0    6.30   14.10 
  -2  -9   0   19.30   15.70 
  -2  -9   0   17.70   14.30 
  -2  -9   0   48.20   17.90 
   2  -9   0   22.20   13.70 
  -2  -9   0   11.50   12.20 
  -2  -9   0   32.20   14.20 
  -2  -9   0   12.70   15.80 
   2  -9   0   23.20   12.10 
  -2   9   0   12.90   15.20 
   2   9   0   15.20   11.10 
  -2   9   0   29.80   12.60 
   2   9   0   -1.60   11.90 
   2   9   0   30.00   14.70 
  -2   9   0    7.70   12.40 
  -2   9   0   14.10   10.50 
   2   9   0    3.00   12.40 
   2   9   0   15.20   10.50 
   2   9   0   30.90   12.00 
   2   9   0    5.80   10.40 
  -2   9   0    7.00   22.10 
  -2   9   0   20.00   12.90 
   2   9   0   -0.30   12.30 
  -2   9   0    8.60   11.80 
   2   9   0   18.00   11.70 
  -2   9   0    9.70   13.10 
   2   9   0    7.00   11.90 
   2   9   0   25.90   13.80 
  -2   9   0   37.10   12.20 
  -3  -9   0   58.69   21.50 
   3  -9   0   78.49   21.20 
   3  -9   0   48.80   18.10 
  -3  -9   0   70.29   20.90 
   3  -9   0   57.99   17.20 
  -3  -9   0   62.49   17.80 
  -3  -9   0   90.09   22.40 
  -3  -9   0   85.29   22.50 
  -3  -9   0   62.19   18.90 
  -3  -9   0   34.00   17.80 
  -3  -9   0   69.99   20.40 
  -3  -9   0   72.19   21.80 
  -3  -9   0   50.29   18.30 
  -3  -9   0   67.89   19.40 
  -3  -9   0   58.89   21.10 
  -3  -9   0   82.49   23.10 
   3  -9   0   78.39   23.30 
   3  -9   0   92.69   30.90 
  -3   9   0   79.79   20.70 
   3   9   0   58.49   17.30 
   3   9   0   60.09   21.50 
   3   9   0   71.69   18.80 
  -3   9   0   61.99   17.10 
  -3   9   0   70.79   19.80 
   3   9   0   70.89   17.20 
   3   9   0   49.40   17.80 
  -3   9   0   62.89   18.60 
  -3   9   0   72.29   17.00 
  -3   9   0   44.40   21.80 
   3   9   0   74.09   19.20 
   3   9   0   64.29   18.40 
   3   9   0   82.59   18.20 
   3   9   0   69.59   17.70 
   3   9   0   91.59   19.90 
  -3   9   0  106.09   24.30 
   3   9   0  106.09   25.70 
   4  -9   0   22.00   17.50 
  -4  -9   0   -0.60   14.30 
   4  -9   0   15.70   21.70 
  -4  -9   0   -8.60   14.40 
  -4  -9   0    6.60   15.00 
  -4  -9   0    4.40   12.60 
  -4  -9   0    3.90   19.10 
  -4  -9   0   14.70   15.50 
  -4  -9   0  -11.60   13.80 
  -4  -9   0    5.70   14.50 
  -4  -9   0   -2.00   15.40 
  -4  -9   0   13.40   18.20 
  -4  -9   0   -0.10   15.60 
  -4  -9   0    3.90   16.90 
  -4  -9   0    8.20   16.80 
   4   9   0    3.70   17.90 
   4   9   0   -9.50    9.10 
   4   9   0   -5.40   10.20 
  -4   9   0   -9.80   12.30 
  -4   9   0    6.60   12.50 
   4   9   0   -1.70    8.50 
   4   9   0    6.20   13.20 
   4   9   0    0.60   12.20 
  -4   9   0  -28.00   11.60 
  -4   9   0  -11.20   15.40 
   4   9   0   -9.80   10.40 
   4   9   0    7.20   16.80 
   4   9   0    3.60   12.00 
   4   9   0   24.50   13.50 
   4   9   0   -1.80    8.60 
  -4   9   0  -23.40   11.10 
   4   9   0    8.90   11.80 
  -5  -9   0  892.21   53.39 
  -5  -9   0  807.82   55.99 
  -5  -9   0  828.62   62.29 
   5  -9   0  834.32   56.69 
   5  -9   0  975.50   62.39 
  -5  -9   0  849.81   58.89 
  -5  -9   0  933.01   59.89 
  -5  -9   0  744.93   63.99 
  -5  -9   0  840.42   62.39 
  -5  -9   0  780.02   60.19 
  -5  -9   0  855.51   56.89 
  -5  -9   0  924.31   61.59 
  -5  -9   0  860.81   59.39 
  -5  -9   0  841.82   59.49 
   5   9   0  911.81   56.19 
   5   9   0  840.82   54.79 
   5   9   0  953.30   66.69 
   5   9   0  894.11   56.39 
   5   9   0  849.02   54.69 
  -5   9   0  878.81   60.29 
   5   9   0  864.41   58.29 
   5   9   0  857.41   51.49 
   5   9   0  859.11   63.09 
   5   9   0  871.51   74.19 
   5   9   0  839.62   56.59 
   5   9   0  930.81   58.69 
  -5   9   0  850.71   55.69 
   0 -10   0 1368.56   70.99 
   0 -10   0 1469.35   87.39 
   0 -10   0 1362.16   70.99 
   0 -10   0 1294.57   83.69 
   0 -10   0 1389.66   78.19 
   0 -10   0 1376.36   75.59 
   0 -10   0 1397.06   72.79 
   0 -10   0 1405.46   73.89 
   0 -10   0 1225.18   71.59 
   0 -10   0 1396.36   77.59 
   0 -10   0 1370.36   82.39 
   0  10   0 1244.28   76.89 
   0  10   0 1336.97   73.69 
   0  10   0 1297.87   72.49 
   0  10   0 1381.06   67.69 
   0  10   0 1482.05   73.99 
   0  10   0 1330.17   72.39 
   0  10   0 1295.07   71.59 
   0  10   0 1430.96   69.89 
  -1 -10   0  165.98   34.70 
  -1 -10   0  135.99   28.70 
  -1 -10   0  174.88   25.80 
   1 -10   0  132.49   27.40 
  -1 -10   0  149.39   28.80 
  -1 -10   0  135.79   27.90 
   1 -10   0  154.38   33.70 
   1 -10   0  133.69   22.90 
  -1 -10   0  138.49   26.30 
   1 -10   0   48.00   27.40 
  -1 -10   0  183.98   29.00 
   1 -10   0  143.29   28.40 
   1 -10   0  198.18   30.50 
  -1 -10   0  146.59   25.70 
   1 -10   0  167.38   28.90 
  -1 -10   0  157.08   27.50 
  -1 -10   0  212.98   36.00 
  -1 -10   0  179.68   27.10 
  -1 -10   0  169.08   29.50 
  -1 -10   0  133.29   26.50 
  -1 -10   0  186.98   32.90 
  -1 -10   0  131.19   25.70 
  -1  10   0  152.58   26.70 
  -1  10   0  162.18   27.40 
   1  10   0  236.78   32.50 
   1  10   0  159.08   27.90 
   1  10   0  125.99   24.30 
  -1  10   0  149.49   31.00 
   1  10   0  165.18   28.10 
   1  10   0  116.99   23.30 
  -1  10   0  136.99   23.50 
   1  10   0  139.69   24.50 
   1  10   0  201.68   33.90 
  -1  10   0  145.39   25.40 
  -1  10   0  153.58   27.10 
  -1  10   0  200.18   27.00 
   1  10   0  100.89   21.60 
  -1  10   0  158.68   25.80 
  -2 -10   0  515.05   49.10 
  -2 -10   0  446.86   46.90 
  -2 -10   0  499.55   41.30 
  -2 -10   0  467.15   44.80 
   2 -10   0  568.34   62.59 
   2 -10   0  303.37   45.40 
   2 -10   0  496.35   48.50 
  -2 -10   0  433.46   47.70 
  -2 -10   0  517.25   51.09 
  -2 -10   0  478.65   49.40 
  -2 -10   0  470.35   49.00 
  -2 -10   0  511.75   51.89 
  -2 -10   0  494.25   40.50 
   2 -10   0  503.05   47.30 
  -2 -10   0  470.65   42.90 
  -2 -10   0  412.76   51.89 
  -2 -10   0  431.46   43.20 
  -2 -10   0  436.66   45.00 
   2 -10   0  500.75   41.30 
  -2  10   0  459.35   37.00 
  -2  10   0  446.76   42.20 
  -2  10   0  368.66   46.50 
  -2  10   0  440.06   44.40 
  -2  10   0  421.66   43.60 
  -2  10   0  474.15   48.00 
   2  10   0  536.95   45.20 
   2  10   0  503.55   38.40 
   2  10   0  369.96   40.90 
   2  10   0  526.15   49.00 
   2  10   0  542.65   41.60 
   2  10   0  419.86   41.60 
  -2  10   0  411.16   39.70 
   2  10   0  468.25   46.60 
   2  10   0  548.05   41.80 
   2  10   0  451.55   41.90 
   2  10   0  406.46   48.60 
  -3 -10   0   14.70   17.50 
  -3 -10   0   13.50   17.00 
  -3 -10   0   25.30   20.20 
  -3 -10   0   29.20   20.00 
   3 -10   0   33.60   18.50 
  -3 -10   0   31.00   20.60 
   3 -10   0    4.50   23.00 
   3 -10   0   48.70   29.70 
  -3 -10   0   30.40   18.80 
   3 -10   0   61.69   22.40 
  -3 -10   0   -1.30   14.30 
  -3 -10   0   20.60   18.00 
  -3 -10   0   26.50   17.20 
  -3 -10   0   38.80   19.80 
  -3 -10   0   16.80   18.00 
  -3 -10   0   26.20   23.50 
  -3 -10   0   17.30   18.40 
  -3 -10   0   51.89   19.50 
  -3 -10   0   44.10   20.00 
   3  10   0   31.60   17.50 
   3  10   0   30.80   14.90 
  -3  10   0   20.50   16.50 
   3  10   0   27.00   14.60 
   3  10   0   12.80   12.80 
   3  10   0   34.40   18.20 
   3  10   0   43.50   17.80 
  -3  10   0    6.90   14.30 
  -3  10   0   28.10   20.50 
  -3  10   0   22.00   14.70 
   3  10   0   18.50   16.60 
  -3  10   0   52.89   19.00 
   3  10   0   33.40   16.50 
  -3  10   0   37.80   18.20 
 -10   0   1    2.50   14.20 
  10   0  -1  -12.50   12.50 
 -10   0   1   -3.00   12.00 
 -10   0   1   28.70   14.80 
  10   0  -1   -1.30   10.20 
 -10   0   1    5.60   11.40 
 -10   0   1    7.10   15.00 
 -10   0   1   -9.40   13.40 
  10   0  -1    2.40   11.30 
 -10   0   1   24.00   21.10 
  10   0  -1  -12.60   13.10 
  10   0  -1   -7.20   13.80 
 -10   0   1    9.90   17.30 
 -10   0   1   22.50   15.80 
 -10   0   1    8.50   11.90 
 -10   0   1   -0.70   14.00 
  10   0  -1   -5.50   17.30 
 -10   0   1    8.40   12.50 
  10   0  -1    2.20   13.40 
   9   0  -1  929.11   60.59 
  -9   0   1  831.22   46.80 
  -9   0   1  859.31   51.59 
  -9   0   1  776.62   48.80 
  -9   0   1  834.82   46.70 
  -9   0   1  874.91   55.09 
  -9   0   1  834.42   50.09 
  -9   0   1  827.02   47.70 
  -9   0   1  817.32   54.69 
  -9   0   1  798.62   52.79 
   9   0  -1  835.72   48.80 
   9   0  -1  793.82   53.79 
   9   0  -1  797.82   47.10 
   9   0  -1  827.72   55.29 
  -9   0   1  846.62   53.39 
   9   0  -1  795.22   49.30 
   9   0  -1  847.12   47.70 
   9   0  -1  833.12   55.59 
   9   0  -1  788.22   58.09 
  -9   0   1  774.22   45.70 
  -9   0   1  844.22   48.60 
   9   0  -1  791.22   44.80 
  -9   0   1  903.21   54.39 
   9   0  -1  767.92   52.19 
   9   0  -1  773.12   45.50 
  -8   0   1   -9.00    7.40 
   8   0  -1    7.20   11.20 
   8   0  -1    5.00   10.70 
  -8   0   1   10.30    9.40 
  -8   0   1  -10.00    7.30 
   8   0  -1    6.30    8.00 
   8   0  -1   -4.90    7.70 
   8   0  -1    0.40    9.10 
   8   0  -1   11.20   12.00 
   8   0  -1   -0.30   11.10 
  -8   0   1   -2.20   10.00 
  -8   0   1   -9.20    8.80 
  -8   0   1   -7.40   10.50 
  -8   0   1    8.00    8.60 
   8   0  -1    4.20    8.80 
  -8   0   1   -8.10    8.60 
  -8   0   1    0.80   10.50 
  -8   0   1    2.00   10.80 
   8   0  -1   -0.90   11.50 
   8   0  -1   -0.30    9.30 
  -8   0   1  -16.60   10.70 
  -8   0   1   10.00    9.20 
   8   0  -1    0.00    7.00 
  -8   0   1    0.30   11.60 
   8   0  -1    0.70    7.50 
  -7   0   1  437.36   34.40 
   7   0  -1  434.06   36.10 
  -7   0   1  433.16   22.90 
  -7   0   1  435.36   33.50 
   7   0  -1  490.85   25.30 
  -7   0   1  456.15   31.10 
   7   0  -1  426.96   26.90 
   7   0  -1  452.05   30.80 
  -7   0   1  413.16   22.40 
  -7   0   1  440.96   21.30 
  -7   0   1  459.95   27.60 
  -7   0   1  454.95   33.50 
   7   0  -1  455.55   29.10 
   7   0  -1  442.06   34.00 
  -7   0   1  521.75   30.10 
   7   0  -1  514.45   35.50 
  -7   0   1  479.55   33.50 
   7   0  -1  563.04   35.90 
  -7   0   1  484.75   33.60 
  -7   0   1  486.25   31.90 
   7   0  -1  450.75   28.30 
   7   0  -1  458.15   34.20 
   7   0  -1  524.55   39.00 
   7   0  -1  461.85   25.60 
  -7   0   1  456.35   28.90 
  -7   0   1  421.76   29.00 
   7   0  -1  467.05   29.00 
  -7   0   1  443.96   21.40 
   7   0  -1  491.35   35.50 
  -7   0   1  453.85   28.00 
  -7   0   1  472.15   31.00 
   7   0  -1  405.16   28.90 
   6   0  -1   -2.40    5.10 
   6   0  -1   -1.50    5.20 
  -6   0   1    2.40    3.60 
  -6   0   1   -5.80    3.90 
   6   0  -1    4.70    7.20 
  -6   0   1    2.50    4.00 
   6   0  -1    0.90    4.30 
   6   0  -1    1.90    7.10 
  -6   0   1   -1.00    5.90 
   6   0  -1   -3.30    6.10 
   6   0  -1    3.40    5.20 
   6   0  -1   -8.40    5.40 
  -6   0   1   -0.80    6.20 
  -6   0   1   11.40    9.60 
  -6   0   1   -1.50    4.20 
  -6   0   1    2.40    6.70 
   6   0  -1    2.40    5.60 
   6   0  -1   -8.60    6.10 
  -6   0   1   -5.90    8.60 
  -6   0   1    4.40    4.30 
  -6   0   1   -4.30    5.70 
   6   0  -1    4.70    5.70 
   6   0  -1   -2.00    6.10 
   6   0  -1    3.50    5.50 
  -6   0   1    0.30    6.40 
  -6   0   1   -3.60    3.70 
   6   0  -1    5.30    7.90 
   6   0  -1    1.70    3.40 
   6   0  -1   -6.90    6.70 
  -6   0   1   12.50    9.10 
  -6   0   1    1.20    8.00 
   6   0  -1   -2.20    4.10 
  -6   0   1   -4.50    5.50 
  -6   0   1    1.10    6.50 
   6   0  -1    8.50    9.00 
   5   0  -1  891.61   41.70 
   5   0  -1  942.31   45.20 
   5   0  -1  910.51   43.70 
  -5   0   1  892.81   39.40 
  -5   0   1  885.71   39.80 
   5   0  -1  928.61   41.00 
   5   0  -1  882.21   41.00 
  -5   0   1  886.41   43.40 
   5   0  -1  951.60   44.60 
   5   0  -1  899.41   40.50 
   5   0  -1  933.91   44.70 
   5   0  -1  981.70   38.80 
  -5   0   1  879.91   37.90 
   5   0  -1  931.21   34.00 
  -5   0   1  973.30   44.80 
  -5   0   1  838.92   44.20 
   5   0  -1  884.01   39.60 
  -5   0   1  932.91   36.40 
   5   0  -1  899.41   35.80 
  -5   0   1  976.80   35.60 
   5   0  -1  922.51   47.50 
  -5   0   1  938.51   37.20 
  -5   0   1  982.50   41.20 
  -5   0   1  937.11   34.00 
  -5   0   1  967.00   40.60 
   5   0  -1  877.61   47.00 
  -5   0   1  881.81   42.00 
   5   0  -1  874.01   44.90 
   5   0  -1  931.71   44.90 
  -5   0   1  913.01   42.50 
  -5   0   1  885.01   40.40 
  -5   0   1  927.61   41.90 
   5   0  -1  962.50   39.60 
   5   0  -1  795.32   36.60 
  -5   0   1  957.80   40.70 
  -5   0   1  971.40   36.30 
  -5   0   1  942.21   45.10 
   5   0  -1  932.71   37.60 
   5   0  -1  940.41   40.40 
  -4   0   1   -0.20    3.80 
  -4   0   1   -0.20    4.50 
  -4   0   1    0.70    3.50 
   4   0  -1    1.00    3.50 
   4   0  -1    4.40    4.20 
   4   0  -1   -3.40    3.80 
   4   0  -1    0.60    3.40 
  -4   0   1    3.90    4.90 
  -4   0   1    3.50    3.50 
  -4   0   1   -1.00    4.00 
   4   0  -1    0.30    4.90 
  -4   0   1    1.50    3.50 
  -4   0   1    3.70    5.70 
  -4   0   1   -1.20    3.50 
   4   0  -1    2.70    3.70 
   4   0  -1    0.00    5.80 
  -4   0   1   -3.00    5.00 
   4   0  -1    5.90    5.40 
  -4   0   1    5.70    3.10 
  -4   0   1    0.50    4.00 
   4   0  -1    3.10    5.30 
   4   0  -1   -1.60    3.90 
  -4   0   1    4.40    4.90 
  -4   0   1   -0.10    4.00 
   4   0  -1    2.60    3.80 
   4   0  -1    5.00    3.10 
   4   0  -1    0.40    2.60 
   4   0  -1    2.80    4.40 
   4   0  -1    0.00    4.70 
   4   0  -1    0.40    3.90 
   4   0  -1   -7.60    4.30 
  -4   0   1    0.30    3.70 
  -4   0   1    4.40    6.30 
   4   0  -1    7.00    5.50 
   4   0  -1    3.40    4.00 
   4   0  -1   -6.80    3.80 
  -4   0   1    3.70    2.90 
  -4   0   1   -1.10    3.20 
  -4   0   1    1.30    6.10 
   4   0  -1    1.10    3.00 
   4   0  -1   -1.20    4.40 
   4   0  -1    2.20    4.80 
   4   0  -1    0.60    2.10 
  -4   0   1    0.70    3.20 
   4   0  -1   -1.40    2.50 
  -4   0   1    2.20    4.70 
  -4   0   1    9.80    5.60 
  -4   0   1    6.80    4.40 
   3   0  -1 1474.45   56.79 
  -3   0   1 1397.26   56.09 
  -3   0   1 1436.76   54.19 
   3   0  -1 1429.86   58.09 
   3   0  -1 1406.16   56.09 
   3   0  -1 1497.05   55.89 
   3   0  -1 1439.86   54.39 
  -3   0   1 1468.35   53.89 
   3   0  -1 1442.46   55.49 
  -3   0   1 1425.06   54.49 
  -3   0   1 1458.65   52.19 
  -3   0   1 1410.76   52.59 
   3   0  -1 1490.25   52.99 
  -3   0   1 1419.06   55.79 
  -3   0   1 1429.06   53.39 
  -3   0   1 1538.65   55.89 
  -3   0   1 1390.36   55.09 
   3   0  -1 1420.36   50.89 
  -3   0   1 1370.96   53.69 
   3   0  -1 1500.25   52.49 
  -3   0   1 1400.06   50.49 
   3   0  -1 1407.36   51.19 
  -3   0   1 1434.76   55.79 
  -3   0   1 1443.96   51.69 
   3   0  -1 1442.86   56.69 
   3   0  -1 1464.95   55.49 
   3   0  -1 1404.46   50.29 
  -3   0   1 1454.75   54.39 
   3   0  -1 1394.96   51.89 
   3   0  -1 1431.76   53.59 
   3   0  -1 1401.36   54.09 
  -3   0   1 1468.55   52.79 
  -3   0   1 1434.16   55.49 
   3   0  -1 1373.56   53.79 
  -3   0   1 1414.46   56.29 
  -3   0   1 1441.36   53.49 
   3   0  -1 1465.35   53.29 
   3   0  -1 1478.35   53.19 
   3   0  -1 1365.76   57.79 
   3   0  -1 1389.96   54.09 
   3   0  -1 1402.76   50.19 
  -3   0   1 1452.35   50.09 
   3   0  -1 1413.16   55.59 
  -3   0   1 1474.15   55.09 
  -3   0   1 1457.75   53.89 
   3   0  -1 1434.26   54.09 
  -3   0   1 1419.66   55.39 
   3   0  -1 1476.55   53.29 
  -3   0   1 1532.55   55.39 
  -3   0   1 1403.56   57.39 
  -3   0   1 1477.25   53.29 
   3   0  -1 1448.96   56.59 
  -3   0   1 1453.75   53.39 
  -3   0   1 1440.46   52.09 
  -3   0   1 1499.25   56.39 
  -3   0   1 1471.25   56.49 
  -3   0   1 1431.36   52.79 
   3   0  -1 1387.26   53.09 
  -3   0   1 1465.05   50.69 
   2   0  -1    2.90    2.60 
  -2   0   1    8.00    3.10 
   2   0  -1    4.80    2.90 
  -2   0   1    4.00    2.90 
  -2   0   1    3.80    2.90 
  -2   0   1    5.50    2.60 
  -2   0   1    8.50    3.10 
   2   0  -1    1.90    2.60 
   2   0  -1    9.70    4.10 
  -2   0   1    7.20    2.80 
  -2   0   1    4.70    2.30 
   2   0  -1    4.80    2.70 
  -2   0   1   12.00    3.50 
  -2   0   1   11.80    3.80 
  -2   0   1    4.50    2.80 
  -2   0   1   -0.30    2.30 
  -2   0   1    5.00    3.50 
  -2   0   1    7.40    4.10 
  -2   0   1    8.70    1.90 
  -2   0   1    8.30    3.20 
   2   0  -1   15.40    3.30 
   2   0  -1    6.90    3.20 
  -2   0   1    5.30    1.80 
  -2   0   1   15.20    4.70 
  -2   0   1    2.90    2.60 
   2   0  -1    3.70    2.00 
   2   0  -1    5.90    1.90 
  -2   0   1    7.20    4.10 
  -2   0   1    3.00    2.50 
   2   0  -1    7.70    3.80 
   2   0  -1    2.00    2.50 
  -2   0   1   11.80    3.60 
  -2   0   1    4.70    3.60 
   2   0  -1    2.20    2.40 
  -2   0   1    5.60    2.70 
  -2   0   1    5.60    3.00 
   2   0  -1    6.50    3.20 
  -2   0   1    5.60    3.00 
   2   0  -1    6.30    3.20 
   2   0  -1    5.90    2.30 
  -2   0   1    4.30    2.90 
   2   0  -1    6.00    3.30 
   2   0  -1   12.40    3.60 
  -2   0   1    8.80    3.60 
  -2   0   1    5.90    3.70 
   2   0  -1    9.20    2.60 
  -2   0   1    7.10    3.00 
  -2   0   1    9.00    3.10 
  -2   0   1    4.20    2.90 
  -2   0   1    9.40    3.80 
  -2   0   1    9.60    4.20 
   2   0  -1    5.00    3.40 
  -2   0   1    2.50    3.00 
  -2   0   1    6.30    3.10 
  -2   0   1    6.90    2.60 
  -2   0   1   12.30    3.70 
   2   0  -1    5.50    2.90 
   2   0  -1    6.00    3.20 
   2   0  -1    6.00    2.60 
   2   0  -1    4.80    1.90 
   2   0  -1    8.40    3.10 
   2   0  -1    4.00    2.90 
  -2   0   1   10.00    3.70 
   2   0  -1   10.50    4.40 
   2   0  -1   12.90    4.50 
  -2   0   1    9.10    4.30 
  -1   0   1  217.38   10.40 
  -1   0   1  256.37    9.20 
  -1   0   1  170.58    9.90 
   1   0  -1  195.38   10.30 
  -1   0   1  243.68    9.80 
   1   0  -1  172.58   10.40 
  -1   0   1  248.68   10.50 
  -1   0   1  256.67    9.50 
  -1   0   1  265.27   10.30 
  -1   0   1  230.58   10.30 
  -1   0   1  208.18    9.30 
  -1   0   1  185.98    9.30 
  -1   0   1  222.78    9.20 
  -1   0   1  184.38    9.40 
  -1   0   1  214.48    9.90 
  -1   0   1  196.18    9.30 
  -1   0   1  262.47    8.90 
  -1   0   1  236.48   10.20 
  -1   0   1  219.88   10.00 
  -1   0   1  265.17    9.90 
  -1   0   1  264.07   10.20 
  -1   0   1  247.48   10.00 
  -1   0  -1 2435.36   98.09 
   1   0   1 3019.50   97.99 
  -1   0  -1 3134.19   97.29 
   1   0   1 2867.81   97.79 
  -1   0  -1 3055.59   96.59 
   1   0   1 2475.45   98.89 
  -1   0  -1 3113.19   96.79 
   1   0   1 3026.00   98.79 
  -1   0  -1 2642.94   97.69 
  -1   0  -1 2820.52   98.79 
   1   0   1 2842.32   97.59 
  -1   0  -1 2870.91   97.19 
  -1   0  -1 2980.40   96.29 
  -1   0  -1 3188.18   97.29 
  -1   0  -1 3072.89   97.99 
   1   0   1 2947.41   98.79 
  -1   0  -1 3090.59   99.69 
  -1   0  -1 2512.55   97.49 
  -1   0  -1 3073.99   96.69 
  -1   0  -1 3132.89   96.69 
  -1   0  -1 3035.90   96.39 
  -1   0  -1 3072.49   97.79 
  -1   0  -1 3109.59   98.09 
  -1   0  -1 2813.12   98.29 
  -1   0  -1 2692.53   97.59 
  -1   0  -1 2959.50   97.09 
  -1   0  -1 2768.12   97.69 
  -1   0  -1 2512.05   97.19 
   1   0   1 3049.79   97.69 
  -2   0  -1    0.80    2.30 
  -2   0  -1   -2.20    2.70 
  -2   0  -1    6.30    2.70 
  -2   0  -1    2.00    2.70 
  -2   0  -1   -2.70    2.20 
  -2   0  -1   -1.50    2.50 
   2   0   1    0.80    2.70 
  -2   0  -1    1.90    2.90 
  -2   0  -1    3.00    2.90 
   2   0   1    2.50    3.20 
  -2   0  -1   -1.80    2.50 
  -2   0  -1    7.80    3.70 
  -2   0  -1    4.30    2.30 
  -2   0  -1    1.70    1.70 
   2   0   1    2.30    2.70 
   2   0   1    4.10    1.60 
  -2   0  -1   -1.40    1.60 
  -2   0  -1    3.90    2.90 
  -2   0  -1    4.10    2.90 
  -2   0  -1    3.20    1.60 
  -2   0  -1    1.30    2.80 
   2   0   1    0.80    3.10 
   2   0   1    4.30    1.30 
   2   0   1    2.30    2.60 
  -2   0  -1    1.00    2.50 
   2   0   1    3.30    2.60 
  -2   0  -1    9.00    2.90 
  -2   0  -1    1.90    1.90 
   2   0   1   -1.90    2.50 
   2   0   1    2.90    1.80 
   2   0   1   -0.20    2.60 
  -2   0  -1    1.20    2.70 
  -2   0  -1    0.10    2.80 
   2   0   1    2.10    1.70 
   2   0   1    0.00    3.40 
   2   0   1    0.30    1.60 
   2   0   1    1.60    3.10 
   2   0   1    5.30    3.90 
   2   0   1    2.80    3.30 
  -2   0  -1    0.40    3.30 
   2   0   1   -0.70    2.30 
  -2   0  -1    5.50    3.50 
   2   0   1    4.30    2.70 
   2   0   1    2.60    2.60 
   2   0   1    2.70    2.80 
   2   0   1    2.70    3.20 
   2   0   1    6.50    2.50 
  -2   0  -1    4.10    2.50 
  -2   0  -1    0.50    2.60 
   2   0   1    0.60    2.80 
   2   0   1   -0.10    2.20 
   2   0   1    0.30    2.10 
   2   0   1    4.60    2.20 
  -2   0  -1   -0.90    2.20 
  -2   0  -1    1.20    3.10 
   2   0   1    3.00    2.10 
   2   0   1    4.00    2.40 
  -2   0  -1    2.40    2.60 
   2   0   1    5.00    2.60 
  -2   0  -1   -2.00    2.30 
   2   0   1    2.10    3.30 
  -2   0  -1    9.80    4.20 
  -2   0  -1    6.20    3.00 
   2   0   1   -0.40    3.40 
  -2   0  -1    8.80    3.60 
   2   0   1    2.30    3.60 
  -2   0  -1    2.00    3.30 
   3   0   1  742.43   30.30 
  -3   0  -1  777.42   33.90 
   3   0   1  711.53   30.50 
   3   0   1  706.43   30.80 
   3   0   1  688.83   29.20 
   3   0   1  759.32   32.70 
  -3   0  -1  767.62   31.80 
   3   0   1  609.34   32.70 
   3   0   1  694.33   32.50 
  -3   0  -1  743.83   29.90 
   3   0   1  782.52   30.00 
  -3   0  -1  760.42   32.70 
  -3   0  -1  761.32   31.20 
   3   0   1  761.72   33.40 
  -3   0  -1  715.13   33.80 
  -3   0  -1  737.33   30.70 
  -3   0  -1  752.72   27.50 
   3   0   1  780.62   30.90 
   3   0   1  708.73   30.60 
  -3   0  -1  718.23   29.90 
  -3   0  -1  728.33   33.20 
  -3   0  -1  733.13   32.90 
  -3   0  -1  792.82   31.40 
  -3   0  -1  766.22   33.00 
   3   0   1  754.42   28.50 
   3   0   1  704.23   30.00 
   3   0   1  686.43   30.60 
  -3   0  -1  813.42   30.20 
   3   0   1  734.33   30.10 
   3   0   1  710.43   27.20 
   3   0   1  764.82   33.60 
   3   0   1  666.13   33.50 
  -3   0  -1  750.82   32.40 
  -3   0  -1  693.03   28.70 
   3   0   1  816.42   30.90 
  -3   0  -1  719.63   32.00 
   3   0   1  755.62   28.80 
  -3   0  -1  802.92   34.40 
   3   0   1  706.63   31.30 
  -3   0  -1  724.23   27.10 
  -3   0  -1  757.52   29.40 
  -3   0  -1  747.33   29.60 
   3   0   1  720.03   34.40 
  -3   0  -1  708.43   33.00 
  -3   0  -1  773.02   28.30 
   3   0   1  713.73   32.30 
  -3   0  -1  772.22   32.60 
   3   0   1  770.62   34.50 
   3   0   1  769.02   33.60 
   3   0   1  678.43   32.60 
  -3   0  -1  729.73   27.40 
  -3   0  -1  725.23   29.30 
  -3   0  -1  709.33   26.60 
  -3   0  -1  730.13   30.40 
   3   0   1  759.62   34.00 
   3   0   1  744.63   30.70 
  -3   0  -1  745.93   30.60 
   3   0   1  725.23   28.00 
   4   0   1   -0.30    2.50 
   4   0   1   -0.50    3.40 
  -4   0  -1    1.00    4.70 
   4   0   1    0.70    5.30 
   4   0   1    2.60    4.40 
  -4   0  -1    2.90    3.90 
   4   0   1    0.50    3.90 
  -4   0  -1   -2.30    5.10 
   4   0   1    3.20    3.80 
  -4   0  -1   -1.20    2.80 
  -4   0  -1   -2.10    4.70 
  -4   0  -1    1.30    4.00 
   4   0   1    1.20    5.60 
   4   0   1    4.70    4.70 
   4   0   1    7.30    3.90 
   4   0   1   -3.50    2.70 
  -4   0  -1    4.20    4.40 
   4   0   1    3.10    4.00 
  -4   0  -1   -1.20    4.70 
  -4   0  -1    1.00    2.40 
   4   0   1    0.70    4.50 
  -4   0  -1   -0.30    4.20 
  -4   0  -1    0.10    2.00 
   4   0   1    2.10    4.00 
   4   0   1   -5.30    4.20 
   4   0   1    6.10    5.60 
   4   0   1    0.90    4.90 
  -4   0  -1    4.10    6.10 
   4   0   1   -2.10    4.60 
   4   0   1   -0.90    5.40 
  -4   0  -1   -0.80    3.60 
  -4   0  -1   -2.10    3.50 
   4   0   1    5.30    5.90 
   4   0   1    5.10    3.20 
   4   0   1    7.10    5.70 
   4   0   1    1.00    4.20 
  -4   0  -1    0.10    5.00 
   4   0   1    7.30    4.60 
   4   0   1   -0.50    3.70 
  -4   0  -1    2.80    4.80 
  -4   0  -1    3.00    5.60 
  -4   0  -1    4.00    3.40 
  -4   0  -1    1.10    3.10 
  -5   0  -1  664.33   30.60 
  -5   0  -1  661.43   32.30 
   5   0   1  630.34   37.10 
   5   0   1  676.13   27.30 
   5   0   1  652.13   36.80 
   5   0   1  606.14   35.00 
  -5   0  -1  640.74   34.10 
   5   0   1  628.54   35.50 
  -5   0  -1  583.74   33.10 
   5   0   1  664.13   31.80 
  -5   0  -1  646.84   32.60 
   5   0   1  599.44   29.20 
   5   0   1  649.54   27.80 
  -5   0  -1  668.63   32.70 
   5   0   1  670.33   31.20 
  -5   0  -1  621.24   25.70 
   5   0   1  644.44   32.30 
  -5   0  -1  634.74   28.90 
   5   0   1  645.64   31.20 
   5   0   1  648.24   32.90 
   5   0   1  664.43   31.70 
  -5   0  -1  646.54   32.60 
   5   0   1  659.03   37.90 
   5   0   1  640.94   35.90 
   5   0   1  655.53   28.60 
  -5   0  -1  662.33   25.50 
  -5   0  -1  590.44   34.10 
  -5   0  -1  676.63   28.90 
   5   0   1  687.33   31.10 
  -5   0  -1  647.94   26.50 
  -5   0  -1  625.44   34.10 
  -5   0  -1  674.33   32.10 
  -5   0  -1  653.93   25.20 
   5   0   1  656.13   36.40 
   5   0   1  629.14   35.30 
  -5   0  -1  674.23   27.80 
  -5   0  -1  614.74   29.20 
  -6   0  -1   -3.00    3.80 
  -6   0  -1    0.30    4.00 
   6   0   1   11.00    9.70 
   6   0   1    7.80    6.30 
  -6   0  -1   -0.40    3.90 
   6   0   1    7.40    6.00 
  -6   0  -1   -1.80    5.40 
   6   0   1   -2.00    4.30 
   6   0   1   -6.70    6.20 
   6   0   1   -1.80    3.50 
  -6   0  -1    1.70    4.70 
   6   0   1   -3.80    5.20 
   6   0   1   -2.10    4.00 
   6   0   1   10.30    8.60 
  -6   0  -1   -8.20    6.10 
  -6   0  -1    1.20    6.40 
   6   0   1    0.90    8.60 
   6   0   1   -2.70    7.40 
  -6   0  -1    3.50    6.70 
  -6   0  -1    4.10    7.50 
   6   0   1   -1.00    6.60 
  -6   0  -1   -1.90    2.70 
   6   0   1    1.70    7.70 
  -6   0  -1    5.30    6.60 
  -6   0  -1    3.20    7.80 
  -6   0  -1   -1.10    6.70 
  -6   0  -1   -3.10    3.20 
  -6   0  -1    0.40    3.60 
  -6   0  -1    1.40    8.40 
  -6   0  -1    1.90    4.60 
   6   0   1   -1.30    5.30 
   6   0   1    4.20    6.10 
  -6   0  -1  -10.60    5.20 
   6   0   1    0.30    5.50 
   6   0   1    8.40    8.30 
  -6   0  -1    0.50    4.00 
   6   0   1    5.50    5.90 
  -7   0  -1 3170.58  116.99 
  -7   0  -1 3012.90  117.79 
  -7   0  -1 3115.69  115.69 
  -7   0  -1 3084.89  117.19 
   7   0   1 2911.71  125.89 
   7   0   1 3053.49  115.79 
   7   0   1 2929.31  116.89 
   7   0   1 2877.21  122.39 
   7   0   1 3088.49  114.09 
  -7   0  -1 2903.21  119.39 
  -7   0  -1 3048.09  106.99 
   7   0   1 2952.70  123.39 
   7   0   1 3085.79  118.49 
  -7   0  -1 3098.09  120.59 
   7   0   1 2918.21  122.99 
  -7   0  -1 3038.00  110.49 
   7   0   1 2976.90  116.09 
   7   0   1 3089.99  115.49 
  -7   0  -1 3057.59  117.09 
   7   0   1 3027.90  108.49 
   7   0   1 3172.28  114.79 
  -7   0  -1 3083.59  109.39 
  -7   0  -1 3127.99  122.29 
  -7   0  -1 3029.60  119.79 
   7   0   1 3018.30  125.29 
  -7   0  -1 3062.09  121.69 
  -7   0  -1 2944.51  112.79 
  -7   0  -1 3170.48  109.49 
   7   0   1 3036.10  124.79 
   7   0   1 3100.09  128.49 
  -7   0  -1 3017.70  117.79 
  -7   0  -1 2979.70  106.09 
   8   0   1   -3.20   10.30 
   8   0   1    3.30    9.10 
  -8   0  -1   -1.20    8.30 
  -8   0  -1    1.80   10.00 
  -8   0  -1    9.00   11.50 
  -8   0  -1   -4.60    8.20 
   8   0   1   -1.70    7.30 
  -8   0  -1    1.80    8.60 
   8   0   1    9.40   10.70 
   8   0   1   -3.10    8.10 
   8   0   1    4.50   10.70 
   8   0   1   -6.00   10.00 
  -8   0  -1    4.10    7.40 
  -8   0  -1    3.20   12.70 
  -8   0  -1  -12.50    7.90 
   8   0   1    5.30   11.40 
   8   0   1   12.40    9.70 
  -8   0  -1    6.10    9.60 
  -8   0  -1    1.10    9.90 
  -8   0  -1  -13.40    7.00 
   8   0   1   -9.80    6.50 
  -8   0  -1   -3.90    8.50 
   8   0   1   -9.40   10.30 
  -8   0  -1  -10.60    9.60 
   8   0   1    1.20    9.30 
   8   0   1    4.30    9.60 
   8   0   1   -3.20    6.20 
  -8   0  -1    0.10    8.60 
   9   0   1 1624.54   85.59 
  -9   0  -1 1772.12   82.79 
   9   0   1 1587.14   86.19 
   9   0   1 1621.44   84.59 
  -9   0  -1 1658.63   75.69 
  -9   0  -1 1636.04   82.99 
   9   0   1 1530.15   76.69 
  -9   0  -1 1675.63   74.89 
   9   0   1 1608.44   73.49 
  -9   0  -1 1534.65   77.39 
   9   0   1 1387.46   72.39 
  -9   0  -1 1645.64   79.99 
  -9   0  -1 1677.53   77.39 
  -9   0  -1 1517.75   79.89 
   9   0   1 1619.64   83.79 
   9   0   1 1561.44   88.29 
   9   0   1 1596.24   75.79 
  -9   0  -1 1657.23   86.19 
  -9   0  -1 1586.74   72.59 
  -9   0  -1 1623.54   75.39 
  -9   0  -1 1564.84   77.59 
   9   0   1 1547.45   72.59 
  -9   0  -1 1554.44   76.09 
   9   0   1 1714.53   85.79 
 -10   0  -1    8.80   16.00 
  10   0   1   19.10   17.50 
  10   0   1   -8.70   11.10 
  10   0   1   -0.20   15.00 
  10   0   1   -3.70   13.40 
 -10   0  -1   -4.80   12.10 
 -10   0  -1    5.70   15.20 
  10   0   1   -7.50   10.20 
 -10   0  -1    0.90   12.50 
  10   0   1   14.80   17.00 
 -10   0  -1   -3.10   11.40 
  10   0   1   14.10   11.20 
 -10   0  -1    8.60   15.40 
 -10   0  -1   10.80   14.60 
 -10   0  -1   -1.90   12.00 
 -10   0  -1   -3.70   13.90 
  10   0   1   22.60   19.30 
 -10   0  -1   -3.60   12.50 
 -10   0  -1    0.40   17.00 
 -10   0  -1    9.80   12.80 
  10  -1  -1   16.90   15.30 
 -10  -1   1   -0.10   12.80 
  10  -1  -1   18.00   16.20 
 -10  -1   1   18.40   13.20 
  10  -1  -1   13.20   12.70 
  10  -1  -1   28.20   15.30 
 -10  -1   1   11.00   16.40 
 -10  -1   1    9.10   13.10 
 -10  -1   1    6.00   15.60 
 -10  -1   1   14.50   17.10 
  10  -1  -1   17.60   14.50 
 -10  -1   1   24.70   15.80 
  10  -1  -1   21.80   16.70 
 -10  -1   1   10.50   14.90 
 -10  -1   1   18.70   14.10 
 -10  -1   1   28.20   17.00 
  10  -1  -1   39.30   21.60 
 -10  -1   1   11.80   13.60 
 -10   1   1   14.00   18.50 
  10   1  -1    6.40   15.40 
 -10   1   1   15.00   15.80 
  10   1  -1   -2.30   16.10 
 -10   1   1   19.30   13.90 
 -10   1   1   25.00   15.30 
  10   1  -1   36.40   14.80 
 -10   1   1   30.60   19.00 
  10   1  -1   20.00   15.20 
  10   1  -1    9.20   13.70 
 -10   1   1   -1.00   15.20 
  10   1  -1    7.40   12.50 
  10   1  -1    0.70   15.90 
  10   1  -1   22.10   12.50 
 -10   1   1   17.90   17.20 
 -10   1   1    6.90   15.90 
 -10   1   1    4.40   14.30 
 -10   1   1    8.70   14.40 
 -10   1   1   21.70   15.60 
  -9  -1   1   -4.50   11.10 
   9  -1  -1   19.70   17.70 
   9  -1  -1    2.00   15.10 
  -9  -1   1   17.50   12.80 
  -9  -1   1    1.80   11.20 
  -9  -1   1    4.60   11.80 
   9  -1  -1   14.80   11.80 
  -9  -1   1   20.10   14.00 
  -9  -1   1   11.30   14.70 
  -9  -1   1   17.70   17.50 
   9  -1  -1   15.60   14.60 
   9  -1  -1    0.10   13.10 
  -9  -1   1    0.20   13.10 
   9  -1  -1  -11.70   11.50 
   9  -1  -1   -1.00   12.60 
  -9  -1   1    5.00   13.40 
  -9  -1   1   24.80   13.00 
  -9  -1   1   11.50   13.10 
  -9  -1   1   23.30   12.40 
   9  -1  -1    4.80    9.60 
   9  -1  -1    2.80   13.20 
  -9   1   1   10.50   14.50 
  -9   1   1   -8.00   11.10 
   9   1  -1    7.30   13.40 
   9   1  -1   10.20   10.70 
  -9   1   1    4.00   12.40 
   9   1  -1    2.60   12.20 
   9   1  -1   -5.30   11.70 
  -9   1   1   19.90   12.50 
   9   1  -1    7.00   12.70 
  -9   1   1    5.70   10.20 
  -9   1   1    3.30   12.60 
  -9   1   1   14.90   11.00 
  -9   1   1   17.70   13.30 
  -9   1   1   12.40   12.00 
  -9   1   1    6.50   15.30 
   9   1  -1   -2.80   12.60 
   9   1  -1  -10.50    7.90 
   9   1  -1   21.50   14.70 
  -9   1   1    7.30   13.30 
   9   1  -1   19.90   11.70 
  -9   1   1    7.50   11.50 
   9   1  -1   23.70   11.60 
   9   1  -1   14.70   10.70 
  -9   1   1   10.80   12.20 
  -9   1   1   17.40   15.80 
  -8  -1   1  104.39   21.60 
   8  -1  -1  134.29   23.50 
  -8  -1   1  150.98   25.40 
  -8  -1   1  127.89   17.80 
   8  -1  -1  126.39   20.50 
  -8  -1   1  120.79   20.00 
  -8  -1   1  140.09   22.80 
   8  -1  -1  153.98   24.40 
  -8  -1   1   93.09   18.50 
   8  -1  -1  110.09   22.70 
  -8  -1   1  143.59   24.10 
  -8  -1   1  123.69   18.50 
   8  -1  -1  123.59   16.70 
   8  -1  -1  123.39   16.20 
   8  -1  -1  107.69   21.50 
  -8  -1   1  129.89   19.40 
   8  -1  -1  147.99   24.50 
   8  -1  -1  126.69   22.40 
   8  -1  -1  125.99   16.90 
   8  -1  -1  114.49   18.40 
  -8  -1   1  150.08   21.40 
  -8  -1   1  130.59   15.10 
  -8  -1   1  128.69   23.60 
   8  -1  -1  127.99   23.60 
  -8  -1   1  121.79   20.00 
   8  -1  -1  135.99   19.60 
  -8   1   1  152.08   23.30 
  -8   1   1  116.19   19.10 
   8   1  -1  119.99   22.60 
  -8   1   1  139.99   24.40 
  -8   1   1  134.99   16.50 
   8   1  -1  115.39   21.70 
  -8   1   1  122.19   17.80 
  -8   1   1  101.59   20.90 
  -8   1   1  140.79   22.10 
   8   1  -1  126.89   19.80 
   8   1  -1  145.39   20.70 
  -8   1   1   91.39   19.20 
  -8   1   1  156.58   19.50 
  -8   1   1  141.39   18.10 
   8   1  -1   74.59   20.10 
  -8   1   1  131.19   20.80 
   8   1  -1  127.49   20.00 
  -8   1   1  133.69   22.40 
  -8   1   1  152.88   21.00 
   8   1  -1  118.09   22.30 
  -8   1   1  145.39   21.50 
  -8   1   1  149.88   23.20 
  -8   1   1  103.19   21.00 
   8   1  -1  147.59   28.10 
   8   1  -1  153.88   25.00 
  -8   1   1  114.39   18.70 
   8   1  -1   95.29   16.10 
   8   1  -1   99.49   17.30 
   8   1  -1  116.09   17.10 
  -7  -1   1   20.20   12.40 
   7  -1  -1   18.50    8.00 
  -7  -1   1   12.60    8.90 
  -7  -1   1    5.30    9.70 
  -7  -1   1    9.90   10.10 
   7  -1  -1   12.40    8.50 
  -7  -1   1    4.10    6.20 
   7  -1  -1   11.20    7.30 
   7  -1  -1    5.60    7.90 
   7  -1  -1    5.90    9.30 
   7  -1  -1    3.50    6.60 
   7  -1  -1   11.30   10.00 
   7  -1  -1   -2.00    9.70 
  -7  -1   1   13.90   12.10 
   7  -1  -1   15.10   10.10 
   7  -1  -1   12.60    8.70 
  -7  -1   1   13.50   10.30 
   7  -1  -1   23.80   10.90 
   7  -1  -1   17.90    5.30 
   7  -1  -1   10.10   10.30 
  -7  -1   1   20.90    8.00 
   7  -1  -1   17.50   10.70 
  -7  -1   1    5.70   10.70 
  -7  -1   1    9.80    9.20 
  -7  -1   1   11.20    8.40 
   7  -1  -1   12.80   10.40 
  -7  -1   1    5.00    9.00 
  -7  -1   1   -1.70    7.40 
   7  -1  -1   10.70    7.50 
  -7  -1   1    2.40    9.80 
  -7  -1   1    4.90    6.20 
   7   1  -1    8.70    8.20 
   7   1  -1    9.90    8.60 
  -7   1   1   13.70   11.10 
  -7   1   1    5.30    5.50 
   7   1  -1    2.20    9.30 
  -7   1   1   27.90   12.80 
   7   1  -1   20.50    7.30 
   7   1  -1   26.00   10.40 
   7   1  -1   10.80   11.10 
  -7   1   1   30.40   13.60 
  -7   1   1   16.80   11.60 
   7   1  -1    8.40   10.50 
  -7   1   1   11.60    8.90 
   7   1  -1   23.50   11.00 
  -7   1   1    8.00    7.00 
   7   1  -1   12.00    8.00 
   7   1  -1   12.40   10.60 
   7   1  -1    7.30    8.50 
  -7   1   1    4.00    8.80 
   7   1  -1   10.70    7.70 
  -7   1   1   11.80    8.90 
  -7   1   1   13.90    7.90 
  -7   1   1   16.20    8.20 
  -7   1   1   10.10    8.50 
  -7   1   1    2.80    9.50 
  -7   1   1   18.30   10.40 
   7   1  -1   14.00    8.00 
  -7   1   1    4.30    8.30 
   7   1  -1    7.00   10.10 
   7   1  -1   22.20   11.20 
  -7   1   1    5.80    7.80 
   6  -1  -1 1723.33   68.29 
   6  -1  -1 1798.62   68.79 
  -6  -1   1 1714.33   76.09 
  -6  -1   1 1775.62   66.39 
   6  -1  -1 1772.82   77.19 
   6  -1  -1 1769.92   63.89 
  -6  -1   1 1699.23   72.89 
  -6  -1   1 1833.32   62.39 
   6  -1  -1 1793.02   79.99 
   6  -1  -1 1768.72   77.59 
  -6  -1   1 1748.23   76.59 
  -6  -1   1 1797.92   74.49 
  -6  -1   1 1862.91   72.79 
  -6  -1   1 1784.72   76.49 
   6  -1  -1 1827.62   78.09 
   6  -1  -1 1749.32   67.99 
   6  -1  -1 1602.04   74.39 
  -6  -1   1 1743.13   75.79 
   6  -1  -1 1773.02   75.69 
   6  -1  -1 1777.62   72.29 
   6  -1  -1 1741.53   75.99 
   6  -1  -1 1843.02   68.79 
  -6  -1   1 1793.92   72.29 
   6  -1  -1 1733.33   72.59 
   6  -1  -1 1666.73   70.59 
   6  -1  -1 1684.53   76.59 
  -6  -1   1 1812.02   75.19 
  -6  -1   1 1800.32   66.49 
  -6  -1   1 1764.12   67.59 
  -6  -1   1 1589.54   75.49 
  -6  -1   1 1733.83   73.89 
  -6  -1   1 1730.13   70.89 
   6   1  -1 1839.42   77.09 
  -6   1   1 1777.02   69.99 
   6   1  -1 1723.63   76.49 
  -6   1   1 1798.32   70.39 
  -6   1   1 1767.42   72.39 
   6   1  -1 1800.32   70.59 
   6   1  -1 1842.22   77.99 
   6   1  -1 1721.83   71.49 
   6   1  -1 1870.91   74.49 
  -6   1   1 1729.93   67.99 
  -6   1   1 1714.23   74.49 
   6   1  -1 1734.03   71.79 
   6   1  -1 1679.43   79.89 
   6   1  -1 1733.13   65.39 
  -6   1   1 1775.22   65.99 
  -6   1   1 1904.31   67.69 
   6   1  -1 1814.82   72.49 
   6   1  -1 1660.13   80.89 
   6   1  -1 1755.52   66.79 
  -6   1   1 1774.32   63.69 
   6   1  -1 1697.83   76.89 
   6   1  -1 1668.13   74.29 
   6   1  -1 1708.73   72.79 
  -6   1   1 1824.42   75.29 
  -6   1   1 1700.93   66.19 
   6   1  -1 1737.23   63.29 
  -6   1   1 1788.02   72.79 
  -6   1   1 1786.82   67.89 
   6   1  -1 1786.02   71.09 
  -6   1   1 1773.92   76.19 
  -6   1   1 1745.73   71.59 
  -6   1   1 1785.52   68.89 
   6   1  -1 1680.83   70.89 
  -5  -1   1  750.52   31.60 
  -5  -1   1  708.73   29.80 
   5  -1  -1  710.13   27.40 
  -5  -1   1  679.23   31.90 
  -5  -1   1  724.83   37.50 
   5  -1  -1  724.03   34.20 
  -5  -1   1  688.03   36.20 
  -5  -1   1  702.23   35.70 
  -5  -1   1  730.13   36.90 
   5  -1  -1  720.83   29.00 
  -5  -1   1  697.73   38.40 
   5  -1  -1  756.32   40.70 
  -5  -1   1  744.13   30.80 
  -5  -1   1  764.12   39.30 
  -5  -1   1  692.33   37.40 
   5  -1  -1  733.43   32.30 
  -5  -1   1  753.52   35.50 
  -5  -1   1  713.73   35.40 
   5  -1  -1  758.72   39.10 
  -5  -1   1  731.33   27.60 
   5  -1  -1  695.83   31.70 
  -5  -1   1  755.72   39.30 
   5  -1  -1  719.63   38.30 
  -5  -1   1  642.44   34.10 
   5  -1  -1  667.43   34.30 
   5  -1  -1  766.22   37.80 
   5  -1  -1  739.63   38.40 
   5  -1  -1  740.43   37.70 
   5  -1  -1  760.22   37.50 
   5  -1  -1  708.53   35.10 
  -5  -1   1  770.82   37.50 
   5  -1  -1  750.92   32.30 
   5  -1  -1  734.53   32.10 
   5  -1  -1  549.85   33.50 
   5  -1  -1  691.13   36.30 
   5  -1  -1  731.83   38.90 
   5   1  -1  730.83   38.40 
  -5   1   1  727.43   37.20 
  -5   1   1  750.92   31.20 
  -5   1   1  710.23   28.80 
   5   1  -1  657.63   37.70 
  -5   1   1  721.93   27.20 
  -5   1   1  705.53   29.30 
   5   1  -1  713.13   35.20 
  -5   1   1  704.13   30.70 
  -5   1   1  706.73   31.70 
  -5   1   1  719.93   34.70 
  -5   1   1  739.23   38.20 
  -5   1   1  729.33   33.10 
  -5   1   1  722.93   36.90 
   5   1  -1  727.93   37.80 
   5   1  -1  701.53   34.80 
   5   1  -1  676.83   32.00 
   5   1  -1  682.03   41.50 
  -5   1   1  713.43   28.80 
   5   1  -1  785.02   35.40 
   5   1  -1  711.63   28.50 
   5   1  -1  737.23   36.60 
  -5   1   1  757.82   32.40 
   5   1  -1  712.73   34.00 
  -5   1   1  743.53   30.70 
   5   1  -1  701.13   36.60 
  -5   1   1  693.33   27.40 
   5   1  -1  747.73   35.90 
   5   1  -1  759.12   34.10 
  -5   1   1  712.43   35.20 
  -5   1   1  713.23   33.40 
  -5   1   1  731.23   30.90 
   5   1  -1  775.62   35.70 
  -5   1   1  743.23   32.70 
   5   1  -1  749.13   31.10 
   5   1  -1  690.63   39.80 
   5   1  -1  751.42   38.80 
  -5   1   1  727.43   32.20 
   5   1  -1  701.93   30.90 
  -4  -1   1 5229.78  175.28 
   4  -1  -1 5187.78  177.18 
  -4  -1   1 5105.39  177.38 
   4  -1  -1 5174.08  180.48 
   4  -1  -1 5028.20  177.18 
   4  -1  -1 5184.28  180.88 
   4  -1  -1 4978.80  181.68 
  -4  -1   1 5125.89  173.28 
   4  -1  -1 5076.29  179.48 
  -4  -1   1 5190.18  173.28 
  -4  -1   1 5304.67  179.18 
  -4  -1   1 5118.79  181.08 
   4  -1  -1 5065.59  171.08 
   4  -1  -1 4958.30  180.28 
   4  -1  -1 4942.51  181.98 
  -4  -1   1 5187.58  174.58 
  -4  -1   1 5131.99  178.98 
  -4  -1   1 5259.87  170.38 
   4  -1  -1 5098.49  179.18 
   4  -1  -1 5038.90  174.38 
  -4  -1   1 5131.09  177.28 
  -4  -1   1 4992.30  180.48 
  -4  -1   1 5140.59  179.08 
   4  -1  -1 4890.51  177.98 
  -4  -1   1 4907.71  179.68 
  -4  -1   1 5123.49  178.38 
   4  -1  -1 5144.79  173.68 
   4  -1  -1 5103.89  171.78 
  -4  -1   1 5086.29  180.88 
   4  -1  -1 5141.39  174.48 
   4  -1  -1 5158.98  179.38 
   4  -1  -1 5251.87  174.18 
  -4  -1   1 5029.90  179.48 
  -4  -1   1 5130.29  178.98 
  -4  -1   1 5042.50  177.78 
   4  -1  -1 5127.79  180.88 
   4  -1  -1 5227.28  179.28 
   4  -1  -1 5004.50  176.18 
  -4  -1   1 5086.39  178.48 
   4  -1  -1 5076.19  180.28 
  -4   1   1 5200.08  174.08 
   4   1  -1 4944.71  184.28 
   4   1  -1 4985.00  175.38 
  -4   1   1 5207.48  171.88 
  -4   1   1 5149.48  171.48 
   4   1  -1 5124.69  171.18 
  -4   1   1 5216.08  170.78 
  -4   1   1 5189.78  179.48 
  -4   1   1 5272.37  173.78 
   4   1  -1 5168.18  180.58 
  -4   1   1 5031.80  172.98 
  -4   1   1 5082.99  174.38 
   4   1  -1 5155.08  177.78 
   4   1  -1 5097.69  177.88 
  -4   1   1 5253.87  175.28 
  -4   1   1 5191.58  173.38 
   4   1  -1 5070.89  179.08 
  -4   1   1 5148.29  173.88 
  -4   1   1 5234.58  179.28 
   4   1  -1 4993.00  180.68 
  -4   1   1 5086.59  171.68 
  -4   1   1 5213.38  179.18 
   4   1  -1 5312.07  180.38 
  -4   1   1 5244.68  174.18 
   4   1  -1 5058.09  176.68 
   4   1  -1 4960.10  182.68 
  -4   1   1 4684.23  180.18 
  -4   1   1 5217.48  173.48 
   4   1  -1 5036.00  177.38 
   4   1  -1 4962.90  176.08 
  -4   1   1 5117.69  173.88 
   4   1  -1 4894.61  174.28 
   4   1  -1 5124.09  180.88 
  -4   1   1 5129.79  176.58 
   4   1  -1 5314.17  173.38 
  -4   1   1 4923.91  176.68 
  -4   1   1 5116.19  172.98 
  -4   1   1 5142.09  179.78 
  -4   1   1 5327.87  175.38 
   4   1  -1 4890.41  175.78 
  -4   1   1 5177.58  172.58 
   4   1  -1 5066.29  177.38 
   4   1  -1 5305.17  176.18 
   4   1  -1 4967.60  178.78 
  -3  -1   1  349.47   19.50 
  -3  -1   1  407.06   21.20 
   3  -1  -1  360.46   18.40 
  -3  -1   1  374.36   21.60 
  -3  -1   1  381.56   19.00 
   3  -1  -1  379.36   20.90 
   3  -1  -1  388.06   17.00 
  -3  -1   1  387.26   23.70 
   3  -1  -1  403.26   17.70 
  -3  -1   1  399.16   20.90 
   3  -1  -1  375.96   20.00 
   3  -1  -1  374.66   20.90 
  -3  -1   1  372.46   20.10 
   3  -1  -1  308.77   18.40 
  -3  -1   1  382.56   21.70 
  -3  -1   1  373.46   20.00 
   3  -1  -1  352.56   15.60 
   3  -1  -1  377.16   21.80 
  -3  -1   1  346.07   19.30 
  -3  -1   1  403.36   17.90 
  -3  -1   1  354.16   15.90 
  -3  -1   1  391.76   20.20 
   3  -1  -1  388.06   20.90 
  -3  -1   1  393.36   20.30 
  -3  -1   1  393.16   18.70 
  -3  -1   1  354.06   17.90 
   3  -1  -1  393.16   19.80 
  -3  -1   1  370.96   18.20 
  -3  -1   1  371.66   16.90 
  -3  -1   1  421.96   19.90 
  -3  -1   1  352.06   21.90 
  -3  -1   1  417.26   21.10 
   3  -1  -1  405.46   22.10 
  -3  -1   1  391.46   20.10 
   3  -1  -1  348.17   18.90 
   3  -1  -1  395.46   20.20 
  -3  -1   1  391.86   18.80 
   3  -1  -1  344.37   20.50 
   3  -1  -1  376.06   18.90 
   3  -1  -1  376.46   17.30 
  -3  -1   1  393.46   21.90 
   3  -1  -1  413.86   20.40 
   3  -1  -1  368.96   16.50 
  -3  -1   1  377.06   20.90 
   3  -1  -1  362.16   20.40 
  -3  -1   1  385.66   17.60 
   3  -1  -1  374.96   20.20 
  -3  -1   1  364.16   20.50 
  -3  -1   1  384.36   21.00 
   3  -1  -1  384.76   15.90 
   3  -1  -1  383.46   17.80 
   3   1  -1  374.86   18.00 
  -3   1   1  405.96   20.50 
  -3   1   1  351.26   17.50 
   3   1  -1  387.56   22.80 
   3   1  -1  366.66   19.80 
   3   1  -1  357.76   19.10 
  -3   1   1  374.56   14.70 
   3   1  -1  362.46   21.10 
  -3   1   1  367.76   17.60 
   3   1  -1  379.56   20.40 
   3   1  -1  376.86   19.90 
  -3   1   1  388.36   15.50 
  -3   1   1  354.26   16.00 
  -3   1   1  367.36   15.70 
  -3   1   1  398.86   15.70 
  -3   1   1  397.76   17.90 
  -3   1   1  378.66   16.10 
   3   1  -1  355.86   18.20 
  -3   1   1  364.16   16.50 
   3   1  -1  376.06   15.00 
   3   1  -1  362.26   18.50 
  -3   1   1  346.97   21.00 
  -3   1   1  376.16   22.70 
   3   1  -1  374.56   19.70 
   3   1  -1  393.46   18.60 
  -3   1   1  360.46   16.40 
   3   1  -1  390.46   21.30 
  -3   1   1  376.06   17.60 
  -3   1   1  385.86   16.30 
  -3   1   1  398.06   20.10 
   3   1  -1  393.66   20.80 
   3   1  -1  386.16   19.10 
  -3   1   1  379.86   18.60 
  -3   1   1  361.26   19.40 
   3   1  -1  361.96   20.70 
  -3   1   1  336.77   19.30 
   3   1  -1  384.76   22.30 
  -3   1   1  378.56   16.00 
   3   1  -1  402.36   20.30 
   3   1  -1  331.07   22.70 
  -3   1   1  360.06   16.30 
   3   1  -1  401.96   21.30 
  -3   1   1  397.86   16.70 
  -3   1   1  388.86   17.20 
  -3   1   1  371.76   16.50 
  -3   1   1  386.06   17.50 
  -3   1   1  328.57   18.60 
  -3   1   1  353.86   19.40 
  -3   1   1  385.26   19.00 
   3   1  -1  371.66   16.70 
   3   1  -1  403.26   21.00 
   3   1  -1  361.86   19.80 
   3   1  -1  388.46   19.70 
   3   1  -1  341.17   20.80 
  -3   1   1  373.16   20.50 
  -3   1   1  368.56   16.90 
   3   1  -1  396.16   21.50 
   3   1  -1  379.96   15.60 
   3   1  -1  380.26   18.80 
  -3   1   1  369.46   19.90 
   3   1  -1  368.96   16.50 
  -2  -1   1 1006.60   38.00 
  -2  -1   1 1031.60   38.50 
  -2  -1   1  960.20   36.60 
  -2  -1   1 1047.50   39.90 
  -2  -1   1  992.10   38.20 
  -2  -1   1  995.90   36.60 
  -2  -1   1  986.60   37.70 
  -2  -1   1 1019.10   39.30 
   2  -1  -1  979.40   37.20 
   2  -1  -1 1011.90   37.90 
   2  -1  -1  956.90   38.70 
   2  -1  -1 1003.10   36.30 
   2  -1  -1  982.40   35.20 
  -2  -1   1  977.00   38.50 
  -2  -1   1  959.00   38.20 
  -2  -1   1  955.50   36.80 
  -2  -1   1  985.20   38.30 
   2  -1  -1 1017.60   35.50 
   2  -1  -1  931.81   38.10 
  -2  -1   1  989.70   38.60 
  -2  -1   1 1049.89   39.10 
  -2  -1   1  998.20   40.00 
  -2  -1   1  964.30   34.00 
   2  -1  -1  994.70   39.60 
   2  -1  -1 1010.70   35.10 
  -2  -1   1 1011.10   39.60 
  -2  -1   1  969.90   34.60 
   2  -1  -1  975.40   35.00 
  -2  -1   1  995.60   36.90 
  -2  -1   1 1003.50   37.50 
   2  -1  -1  956.60   36.70 
  -2  -1   1  972.70   39.30 
   2  -1  -1  981.10   34.30 
   2  -1  -1  984.90   37.70 
   2  -1  -1  942.71   37.30 
   2  -1  -1  989.10   38.50 
  -2  -1   1 1014.70   37.30 
  -2  -1   1  961.50   37.30 
  -2  -1   1 1029.90   37.60 
  -2  -1   1  946.81   40.50 
  -2  -1   1 1034.10   39.40 
   2  -1  -1 1008.00   38.40 
  -2  -1   1  994.50   36.00 
   2  -1  -1 1008.90   37.60 
   2  -1  -1  954.00   36.40 
   2  -1  -1  973.40   36.80 
   2  -1  -1  985.30   35.10 
  -2  -1   1 1002.70   38.50 
  -2  -1   1  977.90   38.80 
   2  -1  -1  932.31   36.70 
   2  -1  -1  955.50   35.70 
  -2  -1   1  999.60   38.40 
  -2  -1   1 1043.50   38.50 
  -2  -1   1  983.10   37.70 
   2  -1  -1  963.30   35.30 
  -2  -1   1  980.20   37.70 
   2  -1  -1  942.01   38.40 
   2  -1  -1  965.80   39.10 
  -2  -1   1  973.50   36.40 
  -2  -1   1 1020.40   39.00 
  -2  -1   1 1000.90   34.10 
   2  -1  -1  980.00   34.90 
  -2  -1   1 1008.30   39.30 
  -2   1   1  960.40   34.30 
   2   1  -1  982.90   38.00 
   2   1  -1  971.30   38.80 
  -2   1   1  954.60   38.30 
   2   1  -1  996.50   36.70 
  -2   1   1  966.00   34.80 
   2   1  -1 1017.20   39.40 
  -2   1   1 1021.00   35.10 
   2   1  -1 1006.30   41.40 
   2   1  -1 1029.70   38.30 
  -2   1   1  965.00   36.70 
   2   1  -1  984.00   38.60 
  -2   1   1  930.61   34.20 
   2   1  -1  957.80   38.30 
  -2   1   1  993.70   38.30 
   2   1  -1  984.20   38.40 
   2   1  -1  976.80   33.90 
   2   1  -1 1031.40   38.40 
   2   1  -1  992.00   39.90 
   2   1  -1  911.01   38.50 
   2   1  -1 1000.30   36.70 
   2   1  -1  954.30   37.00 
   2   1  -1  933.71   35.20 
   2   1  -1 1010.00   37.00 
   2   1  -1  939.51   38.00 
  -2   1   1  959.10   37.40 
  -2   1   1  990.20   35.20 
  -2   1   1  976.70   36.20 
   2   1  -1  959.80   38.70 
  -2   1   1  985.60   39.30 
   2   1  -1 1000.00   34.00 
  -2   1   1  944.11   37.40 
  -2   1   1  967.50   35.40 
   2   1  -1  976.30   33.90 
  -2   1   1  969.50   35.50 
  -2   1   1  995.50   36.00 
  -2   1   1  925.51   36.70 
  -2   1   1  953.70   38.50 
   2   1  -1 1023.30   38.10 
   2   1  -1  915.41   38.70 
  -2   1   1  976.70   38.40 
   2   1  -1  954.70   37.30 
   2   1  -1  965.20   38.30 
   2   1  -1  974.10   36.30 
  -2   1   1  951.60   37.10 
  -2   1   1 1015.30   39.20 
  -2   1   1  918.71   34.50 
  -2   1   1  873.61   36.30 
  -2   1   1  998.10   34.40 
   2   1  -1  992.50   38.50 
  -2   1   1  984.60   36.10 
   2   1  -1  940.11   37.30 
  -2   1   1  996.80   35.00 
   2   1  -1  948.31   39.30 
   2   1  -1  965.50   34.10 
   2   1  -1  999.00   37.60 
  -2   1   1  921.81   34.70 
   2   1  -1 1017.20   39.30 
  -2   1   1  989.40   34.10 
  -2   1   1  975.80   37.40 
  -2   1   1 1031.40   38.50 
   2   1  -1 1005.90   38.70 
  -2   1   1  984.20   36.10 
  -1  -1   1  134.29    8.80 
  -1  -1   1  162.68    9.40 
  -1  -1   1  176.18    9.30 
  -1  -1   1  196.48    9.80 
  -1  -1   1  169.28    9.40 
  -1  -1   1  171.48    9.30 
  -1  -1   1  168.88    7.90 
  -1  -1   1  177.58    9.80 
  -1  -1   1  179.98    8.90 
  -1  -1   1  173.78    9.90 
  -1  -1   1  163.58   10.30 
  -1  -1   1  176.48    8.80 
  -1  -1   1  171.48    9.30 
   1  -1  -1  178.28    8.20 
  -1  -1   1  175.88    8.20 
  -1  -1   1  172.28    9.70 
  -1  -1   1  170.28    9.60 
  -1  -1   1  170.28   10.20 
  -1  -1   1  155.38    9.60 
  -1  -1   1  192.78   10.10 
  -1  -1   1  190.78    9.00 
  -1  -1   1  179.28    9.60 
  -1  -1   1  164.48    9.60 
   1  -1  -1  177.68    9.40 
   1  -1  -1  160.08    7.70 
   1  -1  -1  156.98    7.80 
   1  -1  -1  132.79    7.20 
   1  -1  -1  148.59    8.30 
  -1  -1   1  143.39    8.90 
   1  -1  -1  141.89    7.90 
  -1  -1   1  174.78    9.00 
  -1  -1   1  180.48   10.10 
  -1  -1   1  178.88    9.60 
  -1  -1   1  194.78   10.10 
  -1  -1   1  176.38    9.40 
   1  -1  -1  153.08    7.90 
  -1  -1   1  179.28    9.90 
  -1  -1   1  179.88    9.50 
  -1  -1   1  180.58    9.40 
  -1   1   1  166.38    7.70 
  -1   1   1  174.08    8.00 
   1   1  -1  176.98    9.00 
  -1   1   1  161.08    7.70 
   1   1  -1  176.38    9.60 
   1   1  -1  178.48    9.60 
   1   1  -1  172.18    8.10 
   1   1  -1  177.08    9.00 
   1   1  -1  177.58   10.90 
   1   1  -1  178.58    9.30 
  -1   1   1  177.18    8.30 
  -1   1   1  160.78    7.90 
  -1   1   1  190.68    9.80 
   1   1  -1  165.58    8.90 
  -1   1   1  175.08   10.20 
   1   1  -1  179.88    8.90 
  -1   1   1  171.08    7.70 
  -1   1   1  166.38    9.50 
  -1   1   1  173.08    8.00 
   1   1  -1  190.78    9.50 
   1   1  -1  172.38    9.20 
   1   1  -1  163.18    9.40 
   1   1  -1  165.48    9.10 
   1   1  -1  169.58    8.80 
  -1   1   1  185.08    8.30 
   1   1  -1  185.58   10.10 
  -1   1   1  178.08    9.50 
  -1   1   1  165.88    8.80 
   1   1  -1  170.68    9.30 
  -1   1   1  173.68    8.30 
   1   1  -1  164.78    9.40 
  -1   1   1  173.98    8.70 
   1   1  -1  160.98    9.30 
  -1   1   1  172.18    9.20 
   1   1  -1  177.88   10.30 
  -1   1   1  155.48    8.00 
   1   1  -1  170.88    9.50 
  -1   1   1  182.18    8.60 
   1   1  -1  154.88    9.50 
   1   1  -1  171.08    7.90 
   1   1  -1  193.48   10.10 
   1   1  -1  170.48    9.10 
  -1   1   1  173.38    8.30 
  -1   1   1  197.18    9.50 
  -1   1   1  147.79    8.20 
   1   1  -1  184.18    9.70 
  -1   1   1  163.58    7.80 
  -1   1   1  151.08    7.80 
  -1   1   1  176.88    8.80 
   1   1  -1  175.88    9.50 
   1   1  -1  179.98    9.80 
   1   1  -1  165.48    9.50 
  -1   1   1  157.88    8.40 
  -1   1   1  162.58    8.10 
  -1   1   1  178.98    8.30 
  -1   1   1  160.68    7.90 
   1   1  -1  193.58   10.30 
   1   1  -1  177.68    9.70 
   0  -1  -1 5153.68  164.48 
   0  -1   1 4745.93  167.28 
   0  -1  -1 5145.29  164.68 
   0  -1   1 4671.53  166.78 
   0  -1   1 5087.69  164.98 
   0  -1   1 4759.52  166.08 
   0  -1   1 4213.38  166.78 
   0   1   1 5036.20  164.58 
   0   1  -1 5049.29  164.08 
   0   1  -1 4895.11  163.58 
   0   1   1 5084.89  164.48 
   0   1   1 5127.89  164.38 
   0   1   1 5025.70  165.08 
   0   1   1 5155.18  163.58 
   0   1  -1 4977.00  164.28 
   0   1  -1 4923.31  162.78 
   0   1   1 5140.29  165.18 
   0   1  -1 4813.42  164.68 
   0   1   1 5200.98  164.08 
   0   1   1 4971.10  164.18 
   0   1  -1 4858.31  163.48 
   0   1   1 5014.90  163.78 
   0   1   1 5100.19  164.58 
   0   1   1 5071.19  164.58 
   0   1   1 5031.50  164.18 
   0   1  -1 4879.01  164.18 
   0   1  -1 4746.53  164.78 
   0   1   1 5271.97  164.78 
   0   1  -1 4797.62  164.88 
   0   1   1 5050.99  164.28 
   0   1   1 4500.55  163.98 
   0   1  -1 4787.02  164.18 
   0   1  -1 4982.40  164.48 
   0   1  -1 4993.80  163.88 
   0   1   1 4660.53  164.18 
   0   1   1 4424.56  164.28 
   0   1   1 5063.69  163.98 
   0   1  -1 4985.40  163.98 
   0   1   1 5157.38  164.98 
   0   1  -1 4990.40  164.88 
   0   1   1 5220.68  167.28 
   0   1   1 5012.50  164.28 
   0   1   1 5010.70  164.08 
   1  -1   1  752.32   29.50 
  -1  -1  -1  755.82   27.00 
  -1  -1  -1  753.42   27.80 
  -1  -1  -1  735.23   26.80 
  -1  -1  -1  746.73   27.60 
   1  -1   1  697.03   26.80 
  -1  -1  -1  733.03   27.00 
  -1  -1  -1  599.34   25.50 
  -1  -1  -1  752.02   26.10 
  -1  -1  -1  728.63   27.90 
   1  -1   1  622.74   25.00 
   1  -1   1  656.73   24.90 
  -1  -1  -1  730.43   27.30 
   1  -1   1  698.33   27.10 
   1  -1   1  676.83   26.20 
  -1  -1  -1  635.84   26.50 
   1  -1   1  617.04   26.90 
  -1  -1  -1  734.13   26.30 
  -1  -1  -1  704.43   26.10 
  -1  -1  -1  707.73   25.10 
  -1  -1  -1  724.63   27.40 
   1  -1   1  722.53   26.30 
  -1  -1  -1  702.33   26.90 
   1  -1   1  689.13   28.40 
   1  -1   1  734.63   27.60 
   1  -1   1  690.83   27.60 
  -1  -1  -1  711.43   28.60 
   1  -1   1  699.13   27.30 
  -1  -1  -1  747.23   27.90 
  -1  -1  -1  713.03   26.70 
   1  -1   1  683.73   26.50 
  -1  -1  -1  727.83   26.80 
  -1  -1  -1  741.03   27.30 
  -1  -1  -1  735.23   28.00 
  -1  -1  -1  707.23   27.00 
  -1  -1  -1  635.74   25.80 
  -1  -1  -1  719.73   26.60 
  -1  -1  -1  705.13   26.50 
  -1  -1  -1  710.03   26.10 
  -1  -1  -1  780.52   27.70 
  -1  -1  -1  730.63   26.50 
  -1  -1  -1  749.73   29.00 
   1  -1   1  675.23   25.60 
   1  -1   1  703.23   26.70 
   1  -1   1  688.83   28.00 
   1  -1   1  650.63   25.80 
  -1  -1  -1  704.73   27.20 
   1  -1   1  703.13   26.10 
  -1   1  -1  727.33   25.30 
   1   1   1  718.13   27.30 
  -1   1  -1  722.13   26.20 
   1   1   1  746.03   25.90 
   1   1   1  715.33   27.20 
   1   1   1  732.03   27.60 
  -1   1  -1  725.93   25.60 
  -1   1  -1  694.83   25.00 
  -1   1  -1  688.53   24.40 
  -1   1  -1  683.43   25.90 
  -1   1  -1  624.14   26.90 
  -1   1  -1  699.53   26.90 
   1   1   1  736.83   26.50 
   1   1   1  689.43   27.50 
   1   1   1  739.23   27.10 
  -1   1  -1  687.23   27.50 
   1   1   1  730.03   25.50 
   1   1   1  725.63   27.30 
   1   1   1  734.83   27.10 
   1   1   1  729.23   27.40 
  -1   1  -1  718.23   24.80 
   1   1   1  717.33   26.90 
   1   1   1  752.82   27.50 
  -1   1  -1  702.53   27.10 
  -1   1  -1  750.42   28.20 
   1   1   1  721.43   25.80 
   1   1   1  721.43   26.90 
   1   1   1  725.83   28.70 
  -1   1  -1  754.52   26.90 
  -1   1  -1  720.93   29.10 
  -1   1  -1  734.63   25.80 
   1   1   1  706.33   26.40 
   1   1   1  741.03   28.00 
  -1   1  -1  708.43   25.50 
   1   1   1  685.13   26.00 
  -1   1  -1  734.33   26.70 
   1   1   1  708.23   26.80 
  -1   1  -1  730.93   26.00 
  -1   1  -1  735.73   28.20 
   1   1   1  693.83   25.90 
  -1   1  -1  725.93   27.30 
  -1   1  -1  721.43   26.80 
   1   1   1  699.63   27.10 
   1   1   1  683.63   26.20 
   1   1   1  730.33   27.90 
  -1   1  -1  722.03   27.40 
   1   1   1  751.82   27.50 
   1   1   1  748.93   29.00 
   1   1   1  737.83   27.20 
  -1   1  -1  696.23   27.60 
   1   1   1  740.73   26.70 
   1   1   1  716.83   27.20 
  -1   1  -1  712.83   28.40 
  -1   1  -1  680.93   24.90 
   2  -1   1 8958.40  308.27 
  -2  -1  -1 9278.57  311.67 
  -2  -1  -1 9408.36  312.07 
  -2  -1  -1 9280.17  311.17 
   2  -1   1 9179.98  311.27 
  -2  -1  -1 9636.34  312.67 
  -2  -1  -1 9282.37  309.67 
   2  -1   1 9044.90  308.47 
   2  -1   1 9176.88  309.97 
  -2  -1  -1 9563.84  310.57 
   2  -1   1 9614.14  309.97 
   2  -1   1 8886.91  310.27 
  -2  -1  -1 9580.04  313.77 
  -2  -1  -1 9297.57  309.87 
   2  -1   1 9409.46  306.77 
  -2  -1  -1 9352.86  310.47 
  -2  -1  -1 9336.77  313.47 
   2  -1   1 9634.84  311.07 
  -2  -1  -1 9797.02  313.57 
  -2  -1  -1 9776.42  311.97 
  -2  -1  -1 9493.25  310.07 
   2  -1   1 8859.61  311.67 
  -2  -1  -1 9451.75  311.27 
  -2  -1  -1 9138.29  309.27 
  -2  -1  -1 9551.84  310.97 
  -2  -1  -1 9719.33  311.87 
  -2  -1  -1 9294.47  307.87 
   2  -1   1 9081.89  306.87 
  -2  -1  -1 9437.36  311.87 
  -2  -1  -1 9615.24  312.37 
  -2  -1  -1 9374.16  310.27 
   2  -1   1 9557.24  312.47 
  -2  -1  -1 9214.88  311.17 
   2  -1   1 8741.42  307.87 
   2  -1   1 9605.74  310.97 
   2  -1   1 9729.83  314.07 
  -2  -1  -1 9413.96  309.67 
   2  -1   1 9112.59  312.67 
   2  -1   1 9321.57  311.27 
   2  -1   1 9365.06  309.97 
  -2  -1  -1 9582.44  309.07 
   2  -1   1 8970.90  312.27 
  -2  -1  -1 9360.66  309.37 
   2  -1   1 8996.20  309.97 
  -2  -1  -1 9557.94  312.17 
   2  -1   1 9176.68  309.77 
  -2  -1  -1 9391.56  307.87 
  -2  -1  -1 9352.06  309.17 
  -2  -1  -1 9478.65  308.67 
   2  -1   1 9103.19  309.87 
  -2  -1  -1 9468.25  309.27 
  -2  -1  -1 9271.57  310.57 
  -2  -1  -1 9592.34  311.07 
  -2  -1  -1 9219.48  311.67 
   2   1   1 9423.86  311.17 
  -2   1  -1 9222.08  308.57 
   2   1   1 9276.67  310.77 
   2   1   1 9234.88  310.37 
  -2   1  -1 9219.18  310.37 
   2   1   1 9036.00  313.97 
   2   1   1 9283.27  309.67 
  -2   1  -1 9238.48  310.77 
   2   1   1 9618.74  308.07 
  -2   1  -1 9293.87  308.37 
  -2   1  -1 8886.11  311.07 
  -2   1  -1 9346.87  305.97 
  -2   1  -1 9125.29  309.97 
  -2   1  -1 9234.08  307.87 
   2   1   1 9292.47  309.17 
   2   1   1 9225.58  311.87 
  -2   1  -1 9096.39  311.67 
   2   1   1 9528.45  312.67 
  -2   1  -1 9063.59  310.37 
   2   1   1 9290.67  311.27 
   2   1   1 9455.15  309.27 
  -2   1  -1 9275.77  310.77 
   2   1   1 9474.35  309.07 
  -2   1  -1 9170.18  309.57 
   2   1   1 9206.58  310.77 
   2   1   1 9181.88  309.57 
   2   1   1 9207.28  310.77 
   2   1   1 9248.77  312.27 
  -2   1  -1 9193.18  310.17 
  -2   1  -1 9201.78  309.47 
  -2   1  -1 9552.04  313.67 
   2   1   1 9519.45  311.37 
  -2   1  -1 9429.36  312.57 
  -2   1  -1 9689.33  308.27 
  -2   1  -1 9200.08  310.27 
  -2   1  -1 9118.39  310.87 
  -2   1  -1 9344.57  309.77 
   2   1   1 9370.56  310.37 
   2   1   1 9847.32  314.07 
   2   1   1 9135.39  309.27 
   2   1   1 8990.30  308.87 
   2   1   1 9111.09  309.67 
  -2   1  -1 9425.06  311.27 
   2   1   1 9253.77  311.87 
  -2   1  -1 8886.31  311.57 
   2   1   1 9601.94  308.97 
   2   1   1 8951.21  311.87 
  -2   1  -1 9617.14  312.97 
  -2   1  -1 9061.69  312.07 
   2   1   1 9557.84  308.17 
   2   1   1 9585.64  312.27 
  -2   1  -1 9006.30  309.57 
  -2   1  -1 9424.86  310.37 
   2   1   1 9038.50  308.67 
  -2   1  -1 9332.87  309.37 
   2   1   1 9708.63  310.97 
   2   1   1 9282.37  311.37 
  -2   1  -1 9002.00  311.47 
  -2   1  -1 9472.95  307.07 
  -2   1  -1 9171.08  307.97 
   2   1   1 9999.00  310.97 
  -2   1  -1 9369.86  310.67 
   2   1   1 9250.38  311.47 
   2   1   1 9677.73  313.77 
   2   1   1 9136.29  311.17 
  -2   1  -1 9201.88  311.67 
  -2   1  -1 9348.96  311.57 
   2   1   1 9147.49  312.17 
  -2   1  -1 9170.68  309.27 
  -3  -1  -1  103.59   11.20 
   3  -1   1   91.79    9.20 
  -3  -1  -1  126.99   12.50 
  -3  -1  -1   89.79    6.30 
  -3  -1  -1  111.09    8.40 
   3  -1   1   83.19    7.50 
   3  -1   1  101.99    8.10 
   3  -1   1   88.59   11.10 
   3  -1   1   93.69    9.60 
   3  -1   1   83.39   10.90 
  -3  -1  -1   88.39   10.10 
  -3  -1  -1   92.79   10.30 
  -3  -1  -1  119.39   11.50 
   3  -1   1  104.89    9.50 
  -3  -1  -1   94.09   11.10 
  -3  -1  -1   88.59   11.40 
  -3  -1  -1  110.69   11.90 
   3  -1   1   92.49   11.50 
  -3  -1  -1   88.79    7.20 
   3  -1   1   99.69    7.90 
   3  -1   1  114.89   11.90 
   3  -1   1  107.59   12.20 
  -3  -1  -1  105.69   12.40 
  -3  -1  -1   98.89    7.80 
   3  -1   1   78.59   10.20 
   3  -1   1   93.09    9.70 
  -3  -1  -1  111.79   11.10 
  -3  -1  -1   85.89    8.40 
  -3  -1  -1  110.09   10.00 
   3  -1   1   93.19    6.70 
  -3  -1  -1  100.99   11.90 
  -3  -1  -1   92.99    9.70 
   3  -1   1   86.69    7.90 
   3  -1   1  110.79   10.20 
  -3  -1  -1   92.89    6.60 
   3  -1   1   88.19    9.80 
  -3  -1  -1  105.29    9.40 
   3  -1   1  116.59   13.60 
  -3  -1  -1   89.59   10.50 
  -3  -1  -1  110.19   12.30 
   3  -1   1   72.09    8.80 
  -3  -1  -1  101.49   11.20 
   3  -1   1   91.79   10.90 
  -3  -1  -1   80.69   11.80 
  -3   1  -1  103.39    7.30 
   3   1   1  100.79    9.10 
  -3   1  -1  120.69   12.40 
  -3   1  -1   92.59    6.70 
   3   1   1  100.89   12.00 
   3   1   1   87.29    7.00 
   3   1   1  110.59   11.40 
   3   1   1   94.89   11.60 
   3   1   1  128.89   11.90 
  -3   1  -1   96.29    8.00 
  -3   1  -1  101.29   11.10 
   3   1   1   94.99   10.50 
  -3   1  -1  111.39   11.60 
  -3   1  -1   91.99    7.80 
   3   1   1   94.79    9.50 
  -3   1  -1  102.39   10.60 
  -3   1  -1   81.59    9.40 
  -3   1  -1  100.49    9.10 
  -3   1  -1   60.39   11.00 
  -3   1  -1  103.29   10.00 
   3   1   1  103.29    9.50 
   3   1   1  105.59   11.90 
   3   1   1   91.29   10.10 
   3   1   1   93.69   10.50 
   3   1   1  105.59    9.90 
   3   1   1   89.09    7.10 
   3   1   1   97.09   11.70 
  -3   1  -1  105.39    8.30 
  -3   1  -1  109.49   11.70 
   3   1   1   94.19   11.80 
  -3   1  -1   87.99    8.30 
  -3   1  -1   95.99   10.10 
  -3   1  -1  102.19   11.70 
  -3   1  -1   60.09   10.00 
  -3   1  -1   97.49    6.10 
   3   1   1  114.29   13.40 
  -3   1  -1   87.09   10.60 
   3   1   1  103.29   10.90 
  -3   1  -1   79.39    8.80 
   3   1   1   96.39   13.20 
   3   1   1  107.09   12.60 
   3   1   1  102.69    9.80 
   3   1   1   99.59   10.10 
  -3   1  -1  102.79   11.90 
  -3   1  -1  112.39    8.70 
  -3   1  -1   90.59    7.80 
  -3   1  -1  115.89   12.50 
   3   1   1  110.89   14.40 
  -3   1  -1  125.39   11.50 
   3   1   1  118.69   13.50 
   3   1   1   93.99   10.30 
   3   1   1  101.69    7.70 
  -3   1  -1   82.29   10.50 
   3   1   1  105.39    7.80 
  -3   1  -1   94.99    9.40 
   3   1   1   95.89   10.90 
  -3   1  -1  109.09    8.20 
   3   1   1   90.69    6.50 
   3   1   1  101.49    9.50 
   3   1   1  108.69   10.40 
  -3   1  -1   93.69    8.20 
   3   1   1  108.89   11.90 
   4  -1   1 2124.79   75.79 
  -4  -1  -1 2074.29   81.39 
   4  -1   1 2225.58   82.49 
   4  -1   1 2132.19   74.69 
   4  -1   1 2014.50   76.29 
   4  -1   1 2120.99   77.69 
   4  -1   1 2244.28   79.99 
  -4  -1  -1 2071.89   72.49 
   4  -1   1 2016.00   75.59 
   4  -1   1 2050.49   81.89 
  -4  -1  -1 2145.49   72.89 
  -4  -1  -1 2173.38   74.99 
  -4  -1  -1 2127.29   75.59 
   4  -1   1 2018.50   77.89 
  -4  -1  -1 2091.29   81.19 
  -4  -1  -1 2126.59   78.99 
  -4  -1  -1 2087.59   75.39 
  -4  -1  -1 2127.79   80.29 
  -4  -1  -1 2157.58   77.49 
   4  -1   1 2087.79   82.69 
   4  -1   1 2209.88   78.69 
   4  -1   1 2059.49   81.49 
  -4  -1  -1 2249.87   80.99 
  -4  -1  -1 2124.59   79.99 
  -4  -1  -1 2106.89   81.69 
   4  -1   1 2129.79   82.99 
  -4  -1  -1 2101.39   79.39 
   4  -1   1 2049.99   81.69 
  -4  -1  -1 2097.09   81.19 
  -4  -1  -1 2021.40   81.59 
   4  -1   1 2174.98   84.29 
   4  -1   1 2035.80   78.49 
  -4  -1  -1 2127.79   74.79 
   4  -1   1 2093.69   81.09 
   4  -1   1 2131.79   77.29 
   4  -1   1 1838.42   80.99 
  -4  -1  -1 2151.88   76.09 
   4  -1   1 2154.08   75.89 
   4   1   1 2118.69   82.49 
   4   1   1 2057.49   77.69 
  -4   1  -1 2087.49   76.69 
   4   1   1 2051.39   78.19 
   4   1   1 2105.49   73.69 
  -4   1  -1 2106.89   79.09 
   4   1   1 2140.49   83.89 
   4   1   1 2008.70   83.99 
   4   1   1 2179.78   78.89 
   4   1   1 2086.99   81.99 
   4   1   1 2047.40   77.79 
  -4   1  -1 2198.98   79.49 
  -4   1  -1 2044.00   82.59 
  -4   1  -1 2207.18   77.59 
   4   1   1 2081.19   78.79 
  -4   1  -1 2124.29   73.69 
   4   1   1 2085.49   73.99 
   4   1   1 2060.99   85.59 
  -4   1  -1 2159.58   74.99 
  -4   1  -1 2134.89   73.79 
  -4   1  -1 2172.08   79.19 
  -4   1  -1 2090.69   74.99 
  -4   1  -1 2143.99   74.89 
   4   1   1 2022.60   78.59 
  -4   1  -1 2212.98   75.49 
   4   1   1 2159.18   80.29 
   4   1   1 2104.89   73.29 
  -4   1  -1 2095.49   76.79 
  -4   1  -1 2101.99   80.79 
  -4   1  -1 2130.89   74.59 
   4   1   1 2032.90   78.69 
  -4   1  -1 2071.19   78.49 
   4   1   1 2081.49   76.59 
  -4   1  -1 2117.39   77.39 
   4   1   1 2075.29   74.79 
   4   1   1 2165.18   75.89 
   4   1   1 2116.19   75.99 
  -4   1  -1 2109.29   80.29 
  -4   1  -1 2154.28   77.29 
   4   1   1 2115.89   77.29 
  -4   1  -1 2158.38   79.49 
  -4   1  -1 2093.79   76.59 
  -4   1  -1 2142.89   76.59 
   4   1   1 2110.49   82.59 
   4   1   1 2010.50   82.19 
  -4   1  -1 2073.39   73.89 
  -5  -1  -1   20.90    7.70 
  -5  -1  -1   27.20   10.10 
  -5  -1  -1   24.70    8.40 
  -5  -1  -1   21.60    5.30 
   5  -1   1   29.00    9.80 
   5  -1   1   19.30    8.60 
  -5  -1  -1   16.80    8.40 
  -5  -1  -1   20.10    3.50 
  -5  -1  -1   22.70    6.00 
   5  -1   1   15.40    6.40 
  -5  -1  -1   16.30    8.10 
  -5  -1  -1   23.50    5.80 
   5  -1   1   14.90    6.60 
   5  -1   1   26.60    9.60 
   5  -1   1   16.20    8.60 
   5  -1   1   20.50    6.20 
   5  -1   1   13.70    7.40 
  -5  -1  -1   16.50    8.00 
  -5  -1  -1   19.30    6.00 
   5  -1   1   15.00    8.10 
   5  -1   1   15.90    6.40 
   5  -1   1   23.70    9.10 
  -5  -1  -1   23.10    8.50 
   5  -1   1   19.90    6.70 
   5  -1   1    4.70    7.60 
  -5  -1  -1   23.40    4.30 
  -5  -1  -1   23.70    8.40 
   5  -1   1   20.80    5.60 
   5  -1   1   19.00    8.30 
   5  -1   1   13.40    6.90 
   5  -1   1   10.50    4.90 
   5  -1   1   22.30    8.90 
  -5  -1  -1   20.50    6.60 
  -5  -1  -1   33.70    9.10 
   5   1   1   21.00    7.80 
  -5   1  -1   20.00    8.50 
   5   1   1   12.20    6.70 
   5   1   1   31.70    8.20 
   5   1   1   19.10    5.90 
  -5   1  -1    9.10    6.70 
  -5   1  -1   22.40    5.20 
  -5   1  -1   16.80    7.00 
   5   1   1    4.60    5.20 
  -5   1  -1   17.40    8.40 
  -5   1  -1   21.90    9.20 
   5   1   1   36.50    7.70 
  -5   1  -1   18.20    4.30 
   5   1   1   25.30    8.70 
   5   1   1   19.90    9.20 
   5   1   1   13.40    5.90 
   5   1   1   23.50    4.90 
  -5   1  -1   27.10    5.90 
  -5   1  -1   15.20    6.00 
   5   1   1   19.10    7.20 
   5   1   1   20.90    9.40 
  -5   1  -1   25.30    5.30 
  -5   1  -1   21.80    6.50 
   5   1   1   13.80    9.20 
  -5   1  -1   23.50    5.70 
  -5   1  -1   21.30    7.30 
  -5   1  -1   21.60    8.60 
   5   1   1   14.90    7.40 
  -5   1  -1   20.80    8.40 
  -5   1  -1   11.20    5.60 
   5   1   1    9.90    7.80 
  -5   1  -1   19.70    7.40 
  -5   1  -1   14.40    4.90 
   5   1   1   18.00    8.00 
   5   1   1   24.00    9.40 
   5   1   1   27.80    7.80 
   5   1   1   18.90    5.20 
  -6  -1  -1   76.69   12.90 
   6  -1   1   83.89   11.80 
  -6  -1  -1   72.09   10.60 
   6  -1   1   69.89   14.20 
  -6  -1  -1   55.69   12.00 
   6  -1   1   70.59   15.20 
   6  -1   1   51.59   13.60 
  -6  -1  -1   82.69    9.40 
   6  -1   1   40.40    9.50 
   6  -1   1   56.09   14.10 
  -6  -1  -1   76.59   13.70 
   6  -1   1   56.59   11.80 
   6  -1   1   74.39    8.70 
  -6  -1  -1   65.49   13.40 
   6  -1   1   70.59   14.00 
   6  -1   1   69.79   11.50 
  -6  -1  -1   63.09    9.30 
  -6  -1  -1   69.19   15.70 
  -6  -1  -1   65.39    8.80 
  -6  -1  -1   59.19   12.10 
   6  -1   1   73.69   14.90 
   6  -1   1   56.19   14.20 
  -6  -1  -1   76.79   14.10 
  -6  -1  -1   84.79   13.90 
   6  -1   1   71.59   14.80 
   6  -1   1   54.69   11.30 
  -6  -1  -1   52.49   10.10 
  -6  -1  -1   93.29   15.50 
  -6  -1  -1  101.29   17.30 
   6  -1   1   79.49   10.10 
   6  -1   1   74.99   14.00 
   6  -1   1   78.39   12.50 
  -6  -1  -1   72.19   14.90 
   6   1   1   85.19   13.10 
   6   1   1   71.79   14.60 
  -6   1  -1   59.19   13.10 
  -6   1  -1   82.89   11.80 
  -6   1  -1   65.49    8.80 
  -6   1  -1  113.59   16.20 
  -6   1  -1   75.09   12.20 
   6   1   1   71.39   14.40 
  -6   1  -1   81.39    9.60 
   6   1   1   90.69   14.00 
   6   1   1   79.09    8.30 
  -6   1  -1   76.59   13.60 
   6   1   1   66.99   11.40 
   6   1   1   87.49   16.50 
  -6   1  -1   59.19   11.90 
  -6   1  -1   82.99   10.60 
   6   1   1   60.79   15.00 
   6   1   1   65.89   11.00 
  -6   1  -1   59.29    7.10 
   6   1   1   64.29   14.80 
  -6   1  -1   55.79    8.00 
  -6   1  -1   82.19   10.90 
   6   1   1   58.29   16.00 
   6   1   1   58.79   11.70 
   6   1   1   67.69   14.70 
  -6   1  -1   75.89    8.40 
  -6   1  -1   65.29   13.70 
  -6   1  -1   53.29   10.60 
   6   1   1   71.09   12.80 
  -6   1  -1   71.09   14.10 
  -6   1  -1   69.29   14.60 
   6   1   1   65.09   12.00 
  -6   1  -1   54.09   13.10 
   6   1   1   60.19   12.30 
  -6   1  -1   58.49   11.30 
   7  -1   1  116.89   16.50 
   7  -1   1  117.49   21.50 
   7  -1   1   94.49   18.30 
  -7  -1  -1  127.49   18.40 
  -7  -1  -1  130.09   20.30 
   7  -1   1   90.79   18.80 
   7  -1   1   59.89   13.30 
  -7  -1  -1  107.49   17.40 
  -7  -1  -1  116.59   18.40 
  -7  -1  -1   81.19   16.40 
   7  -1   1  109.79   14.60 
   7  -1   1   95.79   15.40 
  -7  -1  -1  138.09   21.00 
  -7  -1  -1  111.09   13.80 
   7  -1   1   89.89   20.50 
   7  -1   1   68.79   16.20 
  -7  -1  -1   81.09   17.50 
   7  -1   1  122.59   13.70 
  -7  -1  -1  122.09   14.00 
  -7  -1  -1   55.79   13.80 
  -7  -1  -1  101.49   14.20 
   7  -1   1  101.69   16.60 
   7  -1   1  115.79   14.80 
  -7  -1  -1   82.79   17.40 
   7  -1   1   89.19   18.20 
  -7  -1  -1   92.39   15.10 
  -7  -1  -1   92.19   10.60 
  -7  -1  -1  119.49   12.70 
   7  -1   1   90.29   18.00 
   7  -1   1  122.09   16.20 
   7   1   1  114.49   16.40 
  -7   1  -1  104.39   11.40 
  -7   1  -1   73.49   14.90 
  -7   1  -1  118.99   17.70 
   7   1   1   81.59   14.70 
  -7   1  -1   73.99   11.50 
   7   1   1  115.39   20.30 
   7   1   1   81.79   13.30 
   7   1   1   87.89   20.10 
  -7   1  -1  113.89   18.50 
   7   1   1  120.89   17.40 
  -7   1  -1   88.09   14.30 
  -7   1  -1  115.29   18.00 
  -7   1  -1  108.89   18.20 
   7   1   1  112.89   19.10 
  -7   1  -1   91.09   12.60 
   7   1   1   97.69   15.40 
  -7   1  -1  100.39   19.50 
  -7   1  -1   92.89   17.70 
   7   1   1  115.69   21.30 
  -7   1  -1   70.99   13.80 
   7   1   1  105.99   16.20 
  -7   1  -1  110.89   15.50 
   7   1   1  124.49   20.60 
   7   1   1  115.99   15.10 
  -7   1  -1  108.59   15.10 
   7   1   1   75.09   15.30 
   7   1   1   68.29   18.70 
  -7   1  -1  104.79   11.00 
  -7   1  -1  118.79   17.10 
  -7   1  -1   80.79   15.50 
   7   1   1   96.89   18.50 
   8  -1   1   20.10   13.90 
   8  -1   1    6.90   12.20 
  -8  -1  -1   45.70   14.30 
  -8  -1  -1   19.30   11.40 
  -8  -1  -1   18.90   10.20 
   8  -1   1   24.30   11.40 
   8  -1   1   11.40    9.70 
  -8  -1  -1   48.20   13.70 
  -8  -1  -1   12.00   11.80 
  -8  -1  -1   22.00   10.20 
  -8  -1  -1   28.20   12.50 
  -8  -1  -1   20.90   13.40 
   8  -1   1   31.70   14.60 
  -8  -1  -1   40.00   12.40 
   8  -1   1   17.50    8.70 
   8  -1   1   27.50   13.60 
   8  -1   1   26.30   12.00 
   8  -1   1   12.90   13.30 
  -8  -1  -1   18.30   10.70 
  -8  -1  -1   59.29   16.80 
   8  -1   1   14.80   10.40 
  -8  -1  -1   13.10   12.40 
   8  -1   1   20.00   10.40 
   8  -1   1   34.80   14.70 
   8  -1   1   40.20   15.00 
  -8  -1  -1   26.10   14.10 
  -8   1  -1   12.60   13.40 
  -8   1  -1   23.70   11.70 
  -8   1  -1   38.40   11.90 
   8   1   1   31.20   15.10 
  -8   1  -1   23.20   12.70 
  -8   1  -1   36.40   12.50 
   8   1   1   31.90   15.70 
  -8   1  -1   27.20   10.20 
   8   1   1   16.20   10.30 
  -8   1  -1   22.70   11.00 
  -8   1  -1   31.50   12.40 
  -8   1  -1   45.00   15.40 
  -8   1  -1   46.90   14.40 
   8   1   1   23.90   12.60 
  -8   1  -1   35.40   15.90 
  -8   1  -1   37.50   11.40 
  -8   1  -1   23.50   12.20 
   8   1   1   14.80    9.90 
   8   1   1   17.20   14.20 
  -8   1  -1   51.29   14.80 
   8   1   1   30.80   11.10 
   8   1   1   40.00   14.50 
   8   1   1   28.80   11.10 
  -8   1  -1   24.70   10.70 
   8   1   1   19.70   10.50 
   8   1   1   32.00   13.00 
   8   1   1   32.80   15.50 
   8   1   1   37.30   13.90 
  -9  -1  -1    3.60   10.40 
   9  -1   1    3.30   13.30 
  -9  -1  -1   -9.10   10.90 
  -9  -1  -1    2.90   14.90 
  -9  -1  -1    6.10   13.10 
   9  -1   1   16.10   14.20 
   9  -1   1  -12.00    9.80 
   9  -1   1   30.70   17.90 
   9  -1   1   -1.60    8.40 
   9  -1   1   -3.30   11.80 
  -9  -1  -1    9.30   11.10 
  -9  -1  -1   -8.10    9.40 
  -9  -1  -1   -1.90   11.30 
   9  -1   1   17.70   14.40 
  -9  -1  -1    5.50   12.00 
  -9  -1  -1   -0.50    9.90 
   9  -1   1   14.80   10.60 
   9  -1   1  -13.90   11.80 
   9  -1   1   15.30   11.80 
  -9  -1  -1    2.60   12.10 
  -9  -1  -1   22.00   14.20 
  -9  -1  -1    0.00   10.50 
   9   1   1   11.30   15.40 
   9   1   1    4.50   12.50 
   9   1   1   -1.50   10.30 
  -9   1  -1    6.00   12.30 
   9   1   1   15.60   11.20 
  -9   1  -1   16.50   11.60 
   9   1   1   14.50   15.10 
  -9   1  -1    4.00   12.70 
   9   1   1    3.20    9.40 
   9   1   1   -1.60   13.30 
  -9   1  -1   14.90   12.30 
  -9   1  -1    4.90   10.30 
  -9   1  -1   -8.60   10.50 
  -9   1  -1    8.00   11.60 
  -9   1  -1   25.80   15.00 
  -9   1  -1   12.00   14.50 
  -9   1  -1    8.20   13.90 
  -9   1  -1    2.50    9.40 
   9   1   1    6.50   11.80 
   9   1   1    0.10    8.00 
   9   1   1   -0.20   10.50 
   9   1   1    6.60   10.50 
   9   1   1   -4.00   11.70 
 -10  -1  -1    6.90   13.20 
  10  -1   1    2.80   12.60 
 -10  -1  -1    7.80   13.00 
 -10  -1  -1    0.40   12.60 
 -10  -1  -1    4.10   17.40 
  10  -1   1   -2.50   15.50 
  10  -1   1   20.50   16.70 
  10  -1   1    9.70   18.10 
  10  -1   1   -2.20   13.60 
 -10  -1  -1   -2.50   13.90 
 -10  -1  -1   17.90   13.30 
 -10  -1  -1   -3.20   11.50 
  10  -1   1    4.90   15.20 
 -10  -1  -1   14.80   15.70 
 -10  -1  -1    1.20   12.30 
 -10  -1  -1   29.50   17.00 
 -10  -1  -1   20.10   14.80 
  10  -1   1   -3.90   11.00 
  10  -1   1  -13.10   16.00 
  10  -1   1   22.50   14.10 
 -10  -1  -1   31.70   16.50 
 -10   1  -1   12.70   14.40 
 -10   1  -1   -3.60   12.50 
 -10   1  -1   29.20   16.20 
  10   1   1    3.90   12.30 
  10   1   1    2.80   11.20 
 -10   1  -1   20.40   16.10 
 -10   1  -1   -3.30   14.30 
 -10   1  -1  -11.20   11.10 
 -10   1  -1   -9.00   16.20 
 -10   1  -1    2.60   13.60 
  10   1   1    5.10   17.50 
  10   1   1    0.80    9.50 
 -10   1  -1   -8.80   11.50 
  10   1   1   10.00   13.70 
  10   1   1    1.50   15.40 
  10   1   1   16.00   15.90 
  10   1   1   20.40   17.70 
 -10   1  -1    3.80   15.20 
  10   1   1   18.40   18.60 
  10   1   1   16.30   15.20 
  10  -2  -1  498.95   44.10 
 -10  -2   1  468.85   44.40 
 -10  -2   1  588.44   47.90 
 -10  -2   1  401.46   42.50 
  10  -2  -1  513.95   52.29 
  10  -2  -1  511.95   45.00 
  10  -2  -1  423.86   40.90 
 -10  -2   1  485.65   49.80 
 -10  -2   1  283.77   39.10 
 -10  -2   1  456.85   47.00 
 -10  -2   1  499.85   39.40 
  10  -2  -1  460.85   50.39 
  10  -2  -1  460.85   44.20 
 -10  -2   1  462.55   47.20 
 -10  -2   1  399.76   40.90 
  10  -2  -1  423.06   51.59 
 -10  -2   1  486.75   40.30 
 -10  -2   1  537.35   42.00 
  10   2  -1  444.16   48.50 
  10   2  -1  501.45   37.50 
 -10   2   1  469.15   40.80 
  10   2  -1  425.96   54.39 
 -10   2   1  470.05   45.20 
 -10   2   1  547.15   51.09 
  10   2  -1  592.34   48.10 
 -10   2   1  380.66   45.70 
  10   2  -1  344.97   47.40 
 -10   2   1  497.55   48.50 
 -10   2   1  496.45   47.70 
  10   2  -1  475.65   51.59 
 -10   2   1  567.34   45.10 
 -10   2   1  503.05   41.10 
 -10   2   1  520.55   46.40 
  10   2  -1  503.95   40.10 
 -10   2   1  538.05   42.20 
 -10   2   1  475.65   43.60 
  10   2  -1  391.76   39.50 
  -9  -2   1  449.06   45.30 
   9  -2  -1  525.85   38.20 
  -9  -2   1  447.76   34.20 
  -9  -2   1  490.95   38.50 
  -9  -2   1  485.25   38.10 
  -9  -2   1  514.65   42.90 
  -9  -2   1  438.26   35.70 
  -9  -2   1  487.95   42.90 
  -9  -2   1  571.04   41.70 
   9  -2  -1  488.55   38.70 
   9  -2  -1  490.85   48.10 
  -9  -2   1  475.75   40.70 
   9  -2  -1  491.95   36.00 
   9  -2  -1  390.76   43.00 
   9  -2  -1  465.85   41.20 
  -9  -2   1  447.76   45.80 
   9  -2  -1  527.05   44.00 
   9  -2  -1  486.45   40.60 
  -9  -2   1  546.35   40.10 
  -9  -2   1  512.45   38.50 
   9  -2  -1  407.06   47.00 
   9   2  -1  454.95   41.60 
   9   2  -1  440.56   41.90 
   9   2  -1  470.75   36.60 
   9   2  -1  428.06   45.70 
   9   2  -1  428.16   49.70 
   9   2  -1  467.45   34.60 
  -9   2   1  548.45   43.10 
  -9   2   1  483.95   38.70 
   9   2  -1  468.55   54.59 
  -9   2   1  471.95   37.20 
   9   2  -1  504.55   35.20 
  -9   2   1  598.64   42.70 
  -9   2   1  504.25   43.00 
  -9   2   1  446.46   37.80 
   9   2  -1  450.85   46.40 
  -9   2   1  487.75   39.50 
  -9   2   1  529.25   42.00 
  -9   2   1  530.15   38.00 
  -9   2   1  498.25   36.40 
   9   2  -1  550.74   44.90 
  -9   2   1  486.05   37.70 
   9   2  -1  504.05   36.20 
  -9   2   1  509.45   41.20 
  -8  -2   1   64.39   17.30 
  -8  -2   1   49.70   14.20 
   8  -2  -1   72.99   18.20 
   8  -2  -1   50.29   13.10 
   8  -2  -1   63.69   15.70 
  -8  -2   1   53.09   16.30 
   8  -2  -1   95.69   22.10 
   8  -2  -1  102.19   22.80 
   8  -2  -1   44.20   16.50 
  -8  -2   1   80.49   20.10 
  -8  -2   1   69.19   13.40 
  -8  -2   1   70.59   13.70 
  -8  -2   1   90.59   17.40 
  -8  -2   1   82.59   19.70 
   8  -2  -1   90.09   19.20 
  -8  -2   1   61.49   16.70 
  -8  -2   1   85.49   20.90 
  -8  -2   1   82.69   19.10 
   8  -2  -1  104.09   22.30 
   8  -2  -1   81.69   13.70 
  -8  -2   1   79.29   17.40 
  -8  -2   1   75.09   19.00 
  -8  -2   1   79.49   15.70 
   8  -2  -1  119.49   21.40 
   8  -2  -1   76.29   17.00 
   8   2  -1   93.99   17.20 
  -8   2   1   78.19   15.60 
  -8   2   1  106.59   20.70 
   8   2  -1   71.69   16.20 
  -8   2   1   95.39   18.20 
   8   2  -1   63.29   18.50 
  -8   2   1   89.29   18.00 
   8   2  -1   79.99   15.10 
  -8   2   1  115.09   14.90 
  -8   2   1   82.89   18.30 
  -8   2   1   90.19   19.00 
   8   2  -1   97.39   23.60 
   8   2  -1   78.99   22.00 
   8   2  -1   83.39   16.30 
   8   2  -1   71.59   19.20 
   8   2  -1   68.69   17.00 
  -8   2   1   60.99   13.50 
   8   2  -1   51.69   13.30 
  -8   2   1   63.89   18.20 
  -8   2   1   95.59   19.60 
  -8   2   1  102.09   18.10 
   8   2  -1   41.10   14.40 
  -8   2   1   72.19   17.80 
   8   2  -1   50.99   15.70 
  -8   2   1   99.69   18.60 
  -8   2   1   72.29   13.30 
  -7  -2   1   48.70   10.50 
   7  -2  -1   37.80    8.80 
  -7  -2   1   36.00    9.40 
   7  -2  -1   35.20   13.60 
  -7  -2   1   43.90   13.60 
  -7  -2   1   59.49   15.80 
   7  -2  -1   34.10   14.10 
  -7  -2   1   32.60   14.00 
   7  -2  -1   31.80   13.50 
  -7  -2   1   28.90   12.70 
   7  -2  -1   50.79   15.40 
  -7  -2   1   30.40   11.40 
   7  -2  -1   46.70   10.00 
  -7  -2   1   42.40   13.70 
  -7  -2   1   36.00   15.20 
   7  -2  -1   29.40    8.70 
   7  -2  -1   32.30   13.60 
  -7  -2   1   26.20   11.60 
  -7  -2   1   41.30   12.30 
   7  -2  -1   48.50   13.40 
   7  -2  -1   47.30    9.20 
   7  -2  -1   49.00   13.80 
  -7  -2   1   46.30   13.90 
  -7  -2   1   61.09   11.30 
  -7  -2   1   29.60   12.60 
   7  -2  -1   37.20   11.40 
  -7  -2   1   63.89   17.20 
   7  -2  -1   29.70   11.00 
   7  -2  -1   17.30   10.20 
  -7   2   1   46.40    8.70 
   7   2  -1   45.10   14.20 
  -7   2   1   34.10   12.40 
   7   2  -1   47.20   15.50 
  -7   2   1   25.80   10.10 
   7   2  -1   42.60   12.50 
  -7   2   1   35.40   11.50 
  -7   2   1   23.50   12.00 
   7   2  -1   37.60   11.80 
  -7   2   1   35.90    9.30 
  -7   2   1   34.90   12.30 
   7   2  -1   34.90   12.70 
   7   2  -1   31.30    9.50 
  -7   2   1   20.90   12.50 
  -7   2   1   27.90   11.50 
  -7   2   1   40.10    8.90 
   7   2  -1   46.50   13.30 
  -7   2   1   23.50    8.80 
   7   2  -1   48.20   12.70 
  -7   2   1   25.30    9.80 
  -7   2   1   48.20   12.40 
   7   2  -1   41.80   15.50 
  -7   2   1   22.50   10.70 
   7   2  -1   43.10   16.70 
  -7   2   1   47.60   11.20 
   7   2  -1   40.00   13.60 
   7   2  -1   31.80   10.20 
  -7   2   1   28.90    8.50 
  -7   2   1   39.20    9.20 
   7   2  -1   26.40    8.30 
   7   2  -1   32.00   10.90 
  -6  -2   1   60.69   13.70 
  -6  -2   1   70.99   11.10 
  -6  -2   1   78.69   15.80 
  -6  -2   1   61.19   15.20 
   6  -2  -1   82.89   13.90 
  -6  -2   1   74.39   14.60 
   6  -2  -1   60.69    9.60 
  -6  -2   1   91.29   16.60 
  -6  -2   1   80.89   15.20 
  -6  -2   1   91.19   16.40 
   6  -2  -1   63.69   11.30 
   6  -2  -1   65.49   14.60 
  -6  -2   1   68.39   13.50 
   6  -2  -1   68.79   14.30 
   6  -2  -1   72.99   14.30 
   6  -2  -1   82.89   10.30 
   6  -2  -1   75.79   15.00 
   6  -2  -1   76.99   13.00 
  -6  -2   1   72.69   13.70 
   6  -2  -1   68.79    9.80 
   6  -2  -1   87.79   15.70 
  -6  -2   1   74.79   14.50 
   6  -2  -1   58.79    7.90 
   6  -2  -1   70.29   16.20 
  -6  -2   1  103.99   17.10 
   6  -2  -1   75.59   13.80 
  -6  -2   1   82.29   16.70 
  -6  -2   1   82.49   11.80 
   6  -2  -1   92.99   12.60 
   6  -2  -1   85.69   16.60 
  -6   2   1   61.59    7.80 
   6   2  -1   68.09   13.80 
   6   2  -1   78.29   13.10 
  -6   2   1   80.19   10.90 
  -6   2   1   64.39    8.20 
  -6   2   1   73.49   10.80 
   6   2  -1  102.19   18.30 
   6   2  -1   65.89   13.60 
  -6   2   1   59.79   14.10 
  -6   2   1   72.99   14.60 
  -6   2   1   92.49   12.10 
  -6   2   1   65.29   14.40 
   6   2  -1   68.29   16.00 
  -6   2   1   77.99   10.50 
  -6   2   1   73.19   11.00 
   6   2  -1   58.79   13.00 
  -6   2   1   88.59   13.60 
   6   2  -1   56.39   11.30 
  -6   2   1   74.39    9.40 
   6   2  -1   71.29   14.80 
  -6   2   1   77.79   12.70 
  -6   2   1   82.09   14.40 
   6   2  -1   70.89   10.40 
   6   2  -1   84.99   12.70 
   6   2  -1   69.69   12.80 
  -6   2   1   64.99    9.40 
   6   2  -1   72.89   15.00 
   6   2  -1   90.29   18.80 
   6   2  -1   71.09    8.20 
  -6   2   1   67.29    9.10 
  -6   2   1   67.09   12.60 
  -6   2   1   92.99   14.30 
  -6   2   1   75.49   13.10 
   6   2  -1   67.69   12.90 
   6   2  -1   83.79   19.00 
  -6   2   1   89.09   15.10 
  -6   2   1   85.19   12.00 
   5  -2  -1  628.54   35.60 
  -5  -2   1  535.35   31.70 
   5  -2  -1  627.24   35.90 
   5  -2  -1  628.94   33.90 
  -5  -2   1  619.84   34.30 
  -5  -2   1  575.64   33.50 
   5  -2  -1  623.74   31.90 
  -5  -2   1  627.44   32.90 
   5  -2  -1  597.74   27.90 
   5  -2  -1  671.43   34.40 
  -5  -2   1  570.14   33.40 
  -5  -2   1  606.14   33.90 
   5  -2  -1  604.84   26.10 
  -5  -2   1  597.54   28.40 
  -5  -2   1  645.54   36.20 
  -5  -2   1  589.14   29.50 
   5  -2  -1  555.84   29.80 
  -5  -2   1  604.34   28.90 
   5  -2  -1  600.14   27.20 
   5  -2  -1  661.33   35.90 
  -5  -2   1  613.74   33.80 
   5  -2  -1  666.83   30.20 
   5  -2  -1  611.34   26.20 
  -5  -2   1  569.74   34.00 
   5  -2  -1  664.73   33.60 
  -5  -2   1  529.15   34.60 
  -5  -2   1  619.64   30.60 
   5  -2  -1  577.94   30.70 
  -5  -2   1  582.34   32.70 
   5  -2  -1  602.94   34.40 
  -5  -2   1  547.35   34.10 
   5  -2  -1  560.64   31.20 
  -5   2   1  598.64   32.40 
  -5   2   1  561.14   25.60 
   5   2  -1  574.44   34.00 
   5   2  -1  632.04   35.70 
  -5   2   1  632.64   31.60 
   5   2  -1  632.94   27.30 
  -5   2   1  548.75   22.70 
   5   2  -1  621.74   33.20 
   5   2  -1  605.44   30.80 
   5   2  -1  642.14   33.00 
   5   2  -1  581.94   32.60 
  -5   2   1  636.54   27.30 
  -5   2   1  638.74   29.40 
  -5   2   1  553.44   30.00 
  -5   2   1  515.45   31.00 
   5   2  -1  646.64   25.40 
  -5   2   1  566.24   25.10 
   5   2  -1  563.94   35.50 
  -5   2   1  648.74   30.30 
  -5   2   1  559.44   29.60 
  -5   2   1  642.84   25.70 
  -5   2   1  633.34   33.40 
   5   2  -1  613.54   35.10 
   5   2  -1  607.84   27.80 
   5   2  -1  573.54   33.60 
  -5   2   1  582.44   32.40 
  -5   2   1  626.84   26.60 
  -5   2   1  571.84   29.80 
  -5   2   1  619.94   24.50 
  -5   2   1  599.54   27.40 
   5   2  -1  611.64   30.50 
  -5   2   1  556.14   22.70 
   5   2  -1  608.64   39.10 
  -5   2   1  560.44   33.10 
  -5   2   1  616.04   34.50 
   5   2  -1  594.74   32.60 
   5   2  -1  597.84   33.80 
  -5   2   1  588.84   25.60 
  -5   2   1  625.64   27.50 
  -5   2   1  615.64   27.70 
   5   2  -1  580.84   29.80 
  -5   2   1  565.94   25.50 
  -4  -2   1  640.74   32.00 
   4  -2  -1  690.33   34.50 
  -4  -2   1  611.14   28.70 
  -4  -2   1  589.54   32.40 
  -4  -2   1  641.64   24.80 
   4  -2  -1  617.24   26.90 
  -4  -2   1  666.43   33.00 
   4  -2  -1  666.93   30.20 
   4  -2  -1  665.23   30.80 
  -4  -2   1  638.84   33.40 
   4  -2  -1  638.04   31.80 
  -4  -2   1  620.34   33.50 
   4  -2  -1  618.84   25.00 
   4  -2  -1  688.13   34.30 
  -4  -2   1  596.14   31.90 
   4  -2  -1  663.93   27.30 
   4  -2  -1  654.93   32.10 
   4  -2  -1  595.04   29.90 
  -4  -2   1  684.23   29.60 
  -4  -2   1  627.24   30.30 
   4  -2  -1  630.74   31.20 
  -4  -2   1  647.94   33.00 
   4  -2  -1  638.44   34.30 
   4  -2  -1  687.13   30.00 
   4  -2  -1  694.73   30.00 
   4  -2  -1  637.14   26.60 
  -4  -2   1  621.24   32.60 
  -4  -2   1  630.54   29.80 
  -4  -2   1  635.24   31.60 
   4  -2  -1  663.93   32.00 
   4  -2  -1  694.43   33.70 
   4  -2  -1  641.24   32.40 
  -4  -2   1  653.63   34.60 
  -4  -2   1  628.04   32.70 
   4  -2  -1  557.34   30.00 
   4  -2  -1  671.43   33.70 
  -4  -2   1  593.44   33.70 
  -4   2   1  639.54   23.90 
   4   2  -1  659.73   30.50 
   4   2  -1  662.23   35.30 
  -4   2   1  639.34   28.40 
   4   2  -1  637.84   31.50 
   4   2  -1  610.74   24.30 
  -4   2   1  672.53   30.20 
  -4   2   1  675.93   29.00 
   4   2  -1  620.74   24.40 
   4   2  -1  625.34   25.40 
   4   2  -1  597.34   24.60 
  -4   2   1  649.54   26.70 
  -4   2   1  634.24   29.90 
   4   2  -1  585.34   32.50 
   4   2  -1  659.23   29.70 
  -4   2   1  681.23   33.50 
  -4   2   1  647.04   25.50 
   4   2  -1  651.23   29.50 
   4   2  -1  625.34   32.00 
  -4   2   1  651.73   30.10 
  -4   2   1  658.13   32.50 
  -4   2   1  547.85   23.10 
  -4   2   1  654.13   27.10 
  -4   2   1  647.44   25.20 
   4   2  -1  637.34   32.90 
   4   2  -1  630.34   32.10 
  -4   2   1  630.14   25.20 
  -4   2   1  658.93   25.70 
   4   2  -1  634.64   28.50 
  -4   2   1  603.64   28.60 
   4   2  -1  623.44   33.00 
  -4   2   1  642.14   27.80 
   4   2  -1  683.93   32.40 
   4   2  -1  645.34   33.80 
   4   2  -1  662.13   37.80 
  -4   2   1  649.54   29.40 
   4   2  -1  611.64   29.40 
   4   2  -1  609.94   33.60 
   4   2  -1  645.54   26.90 
  -4   2   1  629.14   26.70 
  -4   2   1  600.84   30.80 
  -4   2   1  643.44   27.00 
  -4   2   1  602.74   24.20 
  -4   2   1  608.74   25.30 
  -4   2   1  588.04   26.30 
  -3  -2   1  550.24   24.70 
   3  -2  -1  508.15   21.10 
   3  -2  -1  470.85   24.40 
  -3  -2   1  466.75   25.30 
  -3  -2   1  545.75   27.20 
   3  -2  -1  527.85   26.60 
  -3  -2   1  521.95   26.70 
   3  -2  -1  534.05   24.30 
  -3  -2   1  527.05   25.20 
  -3  -2   1  522.65   26.70 
  -3  -2   1  541.05   25.10 
  -3  -2   1  522.55   24.70 
   3  -2  -1  409.06   21.70 
   3  -2  -1  525.85   26.80 
  -3  -2   1  559.44   27.20 
   3  -2  -1  530.55   26.20 
  -3  -2   1  529.25   26.80 
   3  -2  -1  508.15   28.10 
   3  -2  -1  509.55   25.40 
   3  -2  -1  507.65   24.10 
  -3  -2   1  509.75   23.80 
  -3  -2   1  527.85   26.40 
   3  -2  -1  508.35   24.60 
   3  -2  -1  500.65   19.70 
   3  -2  -1  523.75   26.10 
  -3  -2   1  510.75   26.50 
   3  -2  -1  519.55   23.70 
  -3  -2   1  549.05   27.40 
   3  -2  -1  529.15   24.00 
   3  -2  -1  529.25   23.30 
  -3  -2   1  537.15   25.80 
   3  -2  -1  490.75   20.60 
   3  -2  -1  482.25   24.40 
  -3  -2   1  527.55   26.50 
   3  -2  -1  529.15   23.30 
  -3  -2   1  529.15   28.10 
  -3  -2   1  493.05   27.50 
   3  -2  -1  508.15   25.10 
  -3  -2   1  525.85   21.00 
  -3   2   1  487.15   24.30 
   3   2  -1  524.45   25.10 
  -3   2   1  515.55   22.30 
  -3   2   1  466.05   20.10 
   3   2  -1  514.55   25.90 
  -3   2   1  536.15   26.30 
   3   2  -1  507.75   20.90 
  -3   2   1  503.15   25.50 
   3   2  -1  485.05   25.90 
   3   2  -1  521.65   20.60 
   3   2  -1  478.65   26.80 
   3   2  -1  504.75   25.60 
   3   2  -1  463.15   25.70 
  -3   2   1  523.85   24.90 
  -3   2   1  514.05   24.10 
  -3   2   1  516.75   21.70 
   3   2  -1  523.55   23.40 
   3   2  -1  488.15   24.00 
  -3   2   1  498.75   20.40 
   3   2  -1  500.35   20.70 
  -3   2   1  545.75   24.20 
  -3   2   1  529.65   27.10 
  -3   2   1  531.65   24.70 
  -3   2   1  436.66   19.00 
   3   2  -1  537.05   28.10 
   3   2  -1  552.04   25.10 
  -3   2   1  560.34   28.30 
   3   2  -1  527.25   23.20 
   3   2  -1  488.45   22.30 
  -3   2   1  537.85   20.80 
   3   2  -1  502.05   26.70 
   3   2  -1  519.35   29.90 
  -3   2   1  451.45   25.50 
  -3   2   1  496.15   24.40 
  -3   2   1  548.45   23.40 
   3   2  -1  545.55   26.10 
   3   2  -1  527.45   25.00 
  -3   2   1  477.85   22.80 
  -3   2   1  479.35   20.30 
  -3   2   1  532.65   21.60 
  -3   2   1  464.55   21.60 
  -3   2   1  555.24   24.10 
  -3   2   1  527.05   25.00 
  -3   2   1  529.65   24.70 
   3   2  -1  505.85   23.70 
   3   2  -1  505.95   26.70 
  -3   2   1  498.15   23.30 
   3   2  -1  523.85   20.70 
  -3   2   1  501.75   19.60 
   3   2  -1  534.85   27.30 
  -2  -2   1  166.48   11.80 
  -2  -2   1  139.19   10.40 
  -2  -2   1  158.18    9.60 
   2  -2  -1  147.29   10.10 
  -2  -2   1  173.08   12.40 
   2  -2  -1  150.28   10.20 
   2  -2  -1  134.69   10.60 
   2  -2  -1  148.99    9.60 
   2  -2  -1  161.28   10.40 
  -2  -2   1  158.08   12.00 
  -2  -2   1  168.58   12.10 
   2  -2  -1  144.19   10.00 
   2  -2  -1  158.48   10.70 
  -2  -2   1  169.58   12.70 
   2  -2  -1  162.48    8.50 
   2  -2  -1  171.48    9.00 
  -2  -2   1  170.08   11.30 
   2  -2  -1  163.78   12.10 
  -2  -2   1  139.29    9.40 
  -2  -2   1  139.69    9.10 
   2  -2  -1  159.08    9.60 
   2  -2  -1  155.58   11.10 
  -2  -2   1  158.38   12.20 
  -2  -2   1  145.29   10.70 
  -2  -2   1  170.78   12.40 
  -2  -2   1  159.58   11.50 
   2  -2  -1  139.69   10.90 
   2  -2  -1  155.88    9.50 
  -2  -2   1  147.99   12.00 
  -2  -2   1  158.28   12.30 
  -2  -2   1  166.78   11.10 
   2  -2  -1  140.89    9.70 
   2  -2  -1  134.89    8.00 
   2  -2  -1  162.38   10.60 
   2  -2  -1  163.28    9.00 
  -2  -2   1  150.58   12.40 
  -2  -2   1  143.09    9.40 
  -2  -2   1  150.58   10.20 
  -2  -2   1  146.89   11.70 
  -2  -2   1  172.18   13.30 
   2  -2  -1  139.09   10.40 
  -2  -2   1  160.78   12.40 
  -2  -2   1  161.68   12.20 
  -2  -2   1  173.88   13.30 
  -2  -2   1  184.38   13.00 
  -2  -2   1  174.58   13.10 
  -2  -2   1  159.08   12.60 
   2  -2  -1  149.29   10.60 
  -2  -2   1  170.38   11.50 
  -2  -2   1  137.09   11.50 
   2  -2  -1  163.98    9.30 
  -2  -2   1  148.09   10.30 
  -2   2   1  161.48    9.80 
   2   2  -1  141.99   10.70 
  -2   2   1  133.99    8.10 
   2   2  -1  160.18   12.20 
  -2   2   1  157.58    9.90 
   2   2  -1  155.78   12.20 
   2   2  -1  170.88   12.20 
  -2   2   1  181.38   11.10 
   2   2  -1  159.18   12.10 
  -2   2   1  138.79   10.90 
   2   2  -1  157.98   10.80 
   2   2  -1  153.58    9.00 
  -2   2   1  162.78   11.00 
   2   2  -1  157.28   12.30 
   2   2  -1  138.19   11.30 
   2   2  -1  149.49   10.60 
   2   2  -1  135.89   11.10 
   2   2  -1  173.38   12.20 
  -2   2   1  164.58   11.80 
   2   2  -1  144.39   12.20 
   2   2  -1  161.58   11.20 
  -2   2   1  147.29    9.80 
   2   2  -1  159.38   10.90 
   2   2  -1  160.58    8.90 
  -2   2   1  143.69    9.70 
   2   2  -1  151.48   10.00 
  -2   2   1  161.48   10.70 
   2   2  -1  157.48    9.40 
  -2   2   1  149.69   10.20 
  -2   2   1  186.38   11.80 
  -2   2   1  149.88    8.80 
  -2   2   1  140.79    9.30 
   2   2  -1  148.29   10.30 
   2   2  -1  163.08   11.00 
   2   2  -1  166.98   14.30 
   2   2  -1  149.69   11.80 
  -2   2   1  147.59    8.40 
  -2   2   1  155.78   11.00 
   2   2  -1  135.09   11.20 
  -2   2   1  155.88    7.50 
  -2   2   1  129.69    8.50 
  -2   2   1  142.49    9.90 
  -2   2   1  165.48   13.10 
  -2   2   1  146.29    9.90 
  -2   2   1  140.99   10.40 
  -2   2   1  148.69   10.30 
  -2   2   1  158.28    9.30 
   2   2  -1  159.58   11.90 
   2   2  -1  166.78   11.30 
  -2   2   1  155.58    9.30 
  -2   2   1  149.49    9.50 
  -2   2   1  174.78   11.30 
  -2   2   1  146.19   10.10 
  -2   2   1  158.78   11.30 
  -2   2   1  170.58    9.50 
   2   2  -1  164.48   11.10 
   1  -2  -1    2.10    2.00 
   1  -2  -1    3.70    2.90 
  -1  -2   1    0.80    2.90 
   1  -2  -1    3.70    3.00 
   1  -2  -1    2.50    1.60 
  -1  -2   1    3.30    3.50 
   1  -2  -1    1.40    2.40 
  -1  -2   1    5.20    3.50 
   1  -2  -1    3.90    3.50 
   1  -2  -1   -0.50    2.50 
  -1  -2   1    3.50    3.20 
   1  -2  -1    2.50    2.20 
   1  -2  -1    4.60    2.20 
   1  -2  -1   -1.50    2.40 
   1  -2  -1    4.70    2.90 
   1  -2  -1    8.70    4.50 
  -1  -2   1    0.00    2.70 
  -1  -2   1    3.00    4.00 
  -1  -2   1   -0.80    3.20 
  -1  -2   1    1.00    2.90 
  -1  -2   1    5.50    3.90 
   1  -2  -1    7.90    3.70 
   1  -2  -1    4.60    2.00 
   1  -2  -1    1.90    2.20 
  -1  -2   1    4.60    3.00 
  -1  -2   1    5.20    3.90 
   1  -2  -1    1.00    2.10 
   1  -2  -1    3.10    2.20 
  -1  -2   1    1.70    3.50 
  -1  -2   1    1.10    2.20 
   1  -2  -1   -1.80    2.60 
  -1  -2   1   -2.40    2.90 
  -1  -2   1    7.80    4.40 
  -1  -2   1    3.40    4.60 
   1  -2  -1    0.10    1.80 
  -1  -2   1    1.10    2.40 
   1  -2  -1    6.10    2.90 
  -1  -2   1    0.50    3.80 
  -1  -2   1    2.50    2.20 
   1  -2  -1    0.40    2.10 
  -1  -2   1   -0.10    3.00 
   1  -2  -1   -0.60    2.40 
   1  -2  -1    1.30    1.60 
   1  -2  -1    1.70    2.30 
  -1  -2   1    6.10    3.20 
  -1  -2   1   -0.70    3.50 
  -1  -2   1    6.50    4.30 
  -1  -2   1    4.30    3.70 
  -1  -2   1    0.00    2.70 
  -1  -2   1    7.90    3.60 
   1  -2  -1    1.20    1.90 
   1  -2  -1   -1.30    3.10 
   1   2  -1    6.20    3.80 
   1   2  -1    5.10    3.70 
   1   2  -1    0.50    3.10 
  -1   2   1    1.70    2.30 
  -1   2   1    3.40    2.70 
   1   2  -1    4.00    3.80 
   1   2  -1   11.30    4.00 
  -1   2   1    2.00    2.30 
  -1   2   1    4.10    3.00 
  -1   2   1    0.50    2.70 
   1   2  -1    4.20    3.20 
  -1   2   1    0.90    2.70 
  -1   2   1    0.50    2.40 
  -1   2   1    1.00    1.80 
  -1   2   1   -1.00    2.90 
   1   2  -1    3.40    5.40 
  -1   2   1    4.30    2.80 
  -1   2   1    0.20    2.60 
   1   2  -1    1.40    2.70 
   1   2  -1    0.10    2.40 
   1   2  -1    2.70    3.10 
  -1   2   1    1.00    1.90 
   1   2  -1    7.50    3.40 
  -1   2   1    1.50    1.90 
  -1   2   1    2.60    2.40 
   1   2  -1    2.60    2.40 
   1   2  -1    4.30    3.20 
   1   2  -1   12.20    5.90 
  -1   2   1    5.40    3.30 
  -1   2   1   -0.40    1.50 
  -1   2   1    1.10    2.30 
  -1   2   1    3.50    2.60 
  -1   2   1   -1.30    2.70 
  -1   2   1    3.80    2.50 
  -1   2   1   -1.30    2.10 
   1   2  -1    4.30    3.10 
   1   2  -1    3.90    2.80 
   1   2  -1    0.90    2.90 
  -1   2   1    0.60    2.20 
  -1   2   1    0.90    2.40 
   1   2  -1    1.40    2.90 
  -1   2   1    2.10    2.10 
   1   2  -1   -2.60    1.90 
  -1   2   1    1.10    1.60 
   1   2  -1    0.90    3.70 
   1   2  -1    1.50    2.50 
   1   2  -1    2.40    3.50 
   1   2  -1    6.20    2.60 
   1   2  -1    2.70    2.70 
  -1   2   1    1.80    2.70 
   1   2  -1    2.60    3.20 
   1   2  -1    5.30    3.50 
   1   2  -1    2.50    2.50 
   1   2  -1    7.30    3.20 
  -1   2   1    0.20    1.60 
  -1   2   1    2.80    2.50 
  -1   2   1    0.50    2.50 
  -1   2   1   -0.60    2.20 
   1   2  -1   -0.20    2.90 
   1   2  -1    3.80    3.70 
  -1   2   1    5.40    2.80 
  -1   2   1    4.00    2.30 
   1   2  -1    5.80    3.50 
   1   2  -1    4.90    2.70 
   0  -2   1  191.78   11.90 
   0  -2  -1  184.38   10.40 
   0  -2   1  166.28   12.20 
   0  -2   1  187.78   10.60 
   0  -2  -1  169.38   10.90 
   0  -2  -1  184.98   13.90 
   0  -2  -1  172.68   10.00 
   0  -2   1  181.98   11.30 
   0  -2   1  200.38   14.50 
   0  -2  -1  199.08   10.50 
   0  -2  -1  195.38   10.00 
   0  -2  -1  194.08   10.60 
   0  -2   1  178.98    9.90 
   0  -2   1  162.88    9.60 
   0  -2   1  195.88   11.20 
   0  -2   1  187.58   14.90 
   0  -2  -1  190.38   11.30 
   0  -2   1  194.58   13.10 
   0  -2   1  189.08    9.70 
   0  -2  -1  180.38   10.50 
   0  -2   1  158.88   13.60 
   0  -2   1  196.68   11.10 
   0  -2  -1  177.58    9.80 
   0  -2   1  193.78   10.40 
   0  -2  -1  182.98   10.70 
   0  -2  -1  160.48   11.70 
   0  -2  -1  180.38    9.40 
   0  -2   1  176.38   10.60 
   0  -2   1  170.48   10.80 
   0  -2  -1  174.38   10.80 
   0  -2   1  190.28   10.50 
   0  -2  -1  180.38   10.40 
   0  -2  -1  185.08   10.50 
   0  -2   1  184.38   10.00 
   0  -2   1  185.08   10.80 
   0  -2   1  153.58   13.00 
   0  -2  -1  182.88    8.90 
   0  -2  -1  182.68   10.40 
   0  -2   1  175.08   10.40 
   0  -2   1  143.19   15.50 
   0  -2  -1  197.28   11.10 
   0  -2  -1  203.28    9.80 
   0  -2   1  201.98   10.70 
   0  -2  -1  187.18   11.20 
   0  -2  -1  182.48    9.30 
   0  -2  -1  195.58   13.00 
   0  -2   1  178.68   12.60 
   0   2   1  207.78   10.40 
   0   2  -1  196.48   13.10 
   0   2   1  177.18    9.10 
   0   2  -1  180.28   10.00 
   0   2   1  173.98    9.90 
   0   2   1  183.48   10.50 
   0   2   1  181.98   10.30 
   0   2   1  174.68   10.10 
   0   2  -1  203.68   12.10 
   0   2  -1  201.98   10.00 
   0   2  -1  182.68    9.60 
   0   2  -1  186.28   10.50 
   0   2  -1  197.18   14.80 
   0   2   1  180.58   10.60 
   0   2   1  186.28   10.60 
   0   2  -1  183.18   16.00 
   0   2  -1  172.48   10.70 
   0   2  -1  188.28   11.30 
   0   2   1  174.78    9.80 
   0   2  -1  196.08   10.40 
   0   2  -1  163.68   10.30 
   0   2  -1  186.58   10.80 
   0   2   1  190.08   11.40 
   0   2  -1  214.18   13.10 
   0   2   1  172.58   10.00 
   0   2  -1  174.78   10.30 
   0   2   1  196.88   10.50 
   0   2   1  216.48   14.20 
   0   2  -1  173.98   10.00 
   0   2  -1  198.38   10.10 
   0   2   1  187.58   10.60 
   0   2  -1  178.78   10.40 
   0   2  -1  187.78    9.90 
   0   2   1  199.88   10.30 
   0   2   1  194.68   10.30 
   0   2   1  185.98    8.40 
   0   2  -1  157.28   10.30 
   0   2  -1  175.08   13.60 
   0   2  -1  205.78   10.90 
   0   2  -1  192.08   10.70 
   0   2   1  195.48   11.00 
   0   2   1  188.18    9.60 
   0   2   1  189.18   10.40 
   0   2   1  156.78   12.20 
   0   2   1  180.98   10.60 
   0   2   1  189.38    9.70 
   0   2   1  180.88   10.70 
   0   2  -1  172.18   10.60 
   0   2  -1  168.78    9.20 
   0   2   1  213.98   13.00 
   1  -2   1 1712.73   59.29 
  -1  -2  -1 1894.91   65.29 
  -1  -2  -1 1783.72   63.69 
  -1  -2  -1 1794.62   61.79 
  -1  -2  -1 1735.73   59.19 
   1  -2   1 1710.63   63.79 
  -1  -2  -1 1731.93   61.29 
   1  -2   1 1688.93   61.29 
  -1  -2  -1 1870.41   63.29 
   1  -2   1 1728.53   59.79 
   1  -2   1 1726.43   62.89 
  -1  -2  -1 1728.03   62.29 
   1  -2   1 1700.03   58.89 
  -1  -2  -1 1744.83   61.89 
   1  -2   1 1719.13   60.39 
   1  -2   1 1695.33   58.29 
  -1  -2  -1 1878.21   63.09 
  -1  -2  -1 1764.82   61.99 
  -1  -2  -1 1716.33   61.49 
   1  -2   1 1695.53   59.19 
  -1  -2  -1 1828.72   62.79 
   1  -2   1 1705.03   59.29 
  -1  -2  -1 1765.62   62.09 
   1  -2   1 1627.64   63.39 
   1  -2   1 1723.93   59.69 
   1  -2   1 1686.93   63.49 
  -1  -2  -1 1824.62   63.39 
   1  -2   1 1695.03   60.89 
  -1  -2  -1 1754.32   58.59 
  -1  -2  -1 1729.63   62.19 
   1  -2   1 1725.53   59.69 
   1  -2   1 1704.73   60.29 
  -1  -2  -1 1705.23   62.79 
   1  -2   1 1757.02   62.69 
  -1  -2  -1 1729.53   59.39 
  -1  -2  -1 1717.33   61.89 
   1  -2   1 1741.93   62.59 
   1  -2   1 1741.23   59.49 
   1  -2   1 1725.93   60.19 
   1  -2   1 1660.23   58.99 
   1  -2   1 1627.04   61.19 
   1  -2   1 1702.03   60.89 
  -1  -2  -1 1663.33   61.59 
  -1  -2  -1 1786.12   62.39 
  -1  -2  -1 1729.03   62.49 
   1  -2   1 1699.63   60.19 
  -1  -2  -1 1759.42   62.49 
  -1  -2  -1 1654.83   61.59 
   1  -2   1 1779.92   63.09 
  -1  -2  -1 1681.83   63.59 
  -1  -2  -1 1715.63   62.79 
   1  -2   1 1732.83   63.79 
   1  -2   1 1739.93   65.79 
  -1  -2  -1 1733.93   62.29 
  -1  -2  -1 1767.12   62.49 
  -1   2  -1 1722.83   59.19 
  -1   2  -1 1628.64   59.59 
   1   2   1 1714.73   61.79 
   1   2   1 1683.03   62.39 
  -1   2  -1 1725.53   65.59 
   1   2   1 1694.43   61.89 
  -1   2  -1 1725.63   59.59 
  -1   2  -1 1829.42   63.89 
  -1   2  -1 1654.03   58.89 
  -1   2  -1 1586.54   59.39 
   1   2   1 1709.03   62.29 
   1   2   1 1716.83   62.89 
  -1   2  -1 1715.23   60.39 
  -1   2  -1 1732.53   63.99 
  -1   2  -1 1760.12   63.59 
   1   2   1 1699.83   62.59 
  -1   2  -1 1738.23   58.99 
  -1   2  -1 1703.33   60.89 
  -1   2  -1 1665.73   59.09 
   1   2   1 1728.43   61.29 
   1   2   1 1761.72   62.59 
   1   2   1 1821.92   62.99 
  -1   2  -1 1746.23   62.99 
  -1   2  -1 1715.13   60.39 
   1   2   1 1643.34   61.09 
   1   2   1 1770.72   58.69 
  -1   2  -1 1720.83   60.39 
  -1   2  -1 1684.63   59.59 
  -1   2  -1 1831.12   62.69 
   1   2   1 1725.23   60.49 
   1   2   1 1780.02   62.29 
   1   2   1 1731.43   61.49 
  -1   2  -1 1760.22   59.49 
   1   2   1 1734.13   62.59 
   1   2   1 1692.13   62.29 
   1   2   1 1738.83   62.09 
   1   2   1 1694.13   61.79 
   1   2   1 1787.72   63.79 
   1   2   1 1677.93   62.09 
  -1   2  -1 1769.32   62.79 
  -1   2  -1 1704.03   59.09 
  -1   2  -1 1661.43   60.29 
  -1   2  -1 1667.23   58.69 
  -1   2  -1 1724.53   63.59 
   1   2   1 1761.72   61.19 
   1   2   1 1748.82   61.79 
   1   2   1 1742.33   61.79 
   1   2   1 1766.52   58.89 
   1   2   1 1715.53   62.49 
  -1   2  -1 1752.22   66.79 
  -1   2  -1 1742.43   61.69 
   1   2   1 1727.53   61.99 
   1   2   1 1706.03   64.49 
   1   2   1 1735.13   61.99 
  -1   2  -1 1638.54   61.29 
  -1   2  -1 1674.43   60.89 
  -1   2  -1 1831.32   63.89 
  -1   2  -1 1691.73   63.79 
  -1   2  -1 1810.22   63.29 
  -2  -2  -1  669.53   29.70 
  -2  -2  -1  708.23   29.30 
  -2  -2  -1  678.83   30.60 
   2  -2   1  654.83   30.60 
   2  -2   1  609.94   24.40 
   2  -2   1  629.44   23.90 
   2  -2   1  643.84   25.00 
  -2  -2  -1  603.34   28.60 
   2  -2   1  691.23   28.00 
  -2  -2  -1  720.43   31.10 
   2  -2   1  650.83   27.70 
  -2  -2  -1  673.93   28.20 
   2  -2   1  664.43   26.80 
  -2  -2  -1  643.84   28.60 
   2  -2   1  656.93   27.40 
  -2  -2  -1  676.23   26.70 
   2  -2   1  677.03   27.60 
   2  -2   1  693.43   28.60 
  -2  -2  -1  681.83   29.60 
  -2  -2  -1  678.73   26.90 
  -2  -2  -1  694.83   29.80 
  -2  -2  -1  714.43   30.60 
   2  -2   1  655.83   32.50 
   2  -2   1  647.54   24.20 
  -2  -2  -1  698.63   28.30 
   2  -2   1  701.83   30.50 
  -2  -2  -1  702.33   30.10 
  -2  -2  -1  662.13   26.50 
  -2  -2  -1  705.63   30.40 
   2  -2   1  623.34   29.70 
  -2  -2  -1  674.83   28.20 
   2  -2   1  659.33   29.70 
   2  -2   1  689.03   30.00 
   2  -2   1  673.43   25.30 
   2  -2   1  643.54   27.50 
  -2  -2  -1  678.73   29.40 
   2  -2   1  641.34   27.90 
   2  -2   1  734.13   29.20 
   2  -2   1  631.84   28.50 
  -2  -2  -1  695.13   27.40 
   2  -2   1  664.93   27.10 
  -2  -2  -1  647.94   25.90 
  -2  -2  -1  626.44   28.80 
  -2  -2  -1  683.73   26.70 
  -2  -2  -1  677.53   30.20 
   2  -2   1  647.34   23.40 
  -2  -2  -1  692.53   29.60 
  -2   2  -1  668.83   24.00 
   2   2   1  674.53   29.00 
   2   2   1  635.64   29.20 
   2   2   1  684.63   29.50 
  -2   2  -1  665.63   28.80 
   2   2   1  688.43   28.90 
   2   2   1  670.73   27.00 
  -2   2  -1  679.93   25.70 
   2   2   1  664.53   29.40 
  -2   2  -1  683.83   24.40 
  -2   2  -1  691.13   28.70 
  -2   2  -1  652.73   24.00 
  -2   2  -1  643.64   25.80 
  -2   2  -1  664.33   30.00 
  -2   2  -1  656.03   28.00 
   2   2   1  663.93   28.20 
  -2   2  -1  628.44   26.90 
  -2   2  -1  614.34   27.40 
   2   2   1  670.23   26.60 
   2   2   1  615.94   29.40 
   2   2   1  664.63   26.50 
  -2   2  -1  683.43   25.30 
   2   2   1  685.43   29.10 
   2   2   1  672.43   29.20 
  -2   2  -1  641.64   29.20 
   2   2   1  639.64   28.20 
   2   2   1  640.64   28.80 
  -2   2  -1  693.13   26.90 
   2   2   1  622.44   31.70 
   2   2   1  698.63   27.50 
   2   2   1  657.83   29.40 
  -2   2  -1  648.04   24.70 
  -2   2  -1  670.13   30.40 
  -2   2  -1  689.23   27.90 
  -2   2  -1  640.84   24.90 
  -2   2  -1  655.83   29.70 
  -2   2  -1  668.53   28.00 
   2   2   1  734.23   27.30 
   2   2   1  658.43   28.70 
   2   2   1  723.43   30.80 
  -2   2  -1  663.13   27.60 
   2   2   1  672.13   26.00 
   2   2   1  632.34   27.80 
  -2   2  -1  627.84   29.40 
   2   2   1  717.03   29.20 
  -2   2  -1  654.43   27.10 
   2   2   1  730.93   32.30 
  -2   2  -1  666.03   27.60 
  -2   2  -1  656.63   28.10 
   2   2   1  655.03   28.70 
   2   2   1  661.13   27.70 
  -2   2  -1  679.23   32.00 
  -2   2  -1  647.94   31.30 
   2   2   1  659.23   26.90 
  -2   2  -1  691.83   28.10 
  -2   2  -1  681.43   29.00 
  -2   2  -1  688.03   28.00 
   2   2   1  669.63   26.40 
   2   2   1  642.74   27.70 
   2   2   1  651.13   27.50 
   2   2   1  698.63   30.80 
   2   2   1  652.53   29.20 
   2   2   1  687.93   31.20 
   3  -2   1  318.07   19.90 
   3  -2   1  341.07   16.30 
  -3  -2  -1  351.76   20.50 
  -3  -2  -1  340.07   20.40 
   3  -2   1  325.17   14.90 
   3  -2   1  318.27   19.30 
  -3  -2  -1  332.37   19.50 
  -3  -2  -1  327.87   19.60 
  -3  -2  -1  305.37   20.50 
   3  -2   1  315.67   14.90 
   3  -2   1  312.57   14.50 
   3  -2   1  328.57   19.10 
  -3  -2  -1  347.37   15.80 
   3  -2   1  308.17   20.30 
  -3  -2  -1  338.87   18.00 
   3  -2   1  337.17   17.80 
  -3  -2  -1  327.27   18.10 
   3  -2   1  294.07   18.70 
  -3  -2  -1  340.97   15.70 
   3  -2   1  324.27   18.60 
   3  -2   1  312.97   20.60 
  -3  -2  -1  325.47   19.00 
  -3  -2  -1  307.77   19.60 
  -3  -2  -1  341.87   17.70 
  -3  -2  -1  324.37   19.80 
  -3  -2  -1  354.16   21.50 
   3  -2   1  323.97   18.00 
  -3  -2  -1  317.07   17.80 
   3  -2   1  350.96   17.90 
   3  -2   1  323.67   17.40 
  -3  -2  -1  343.97   20.00 
   3  -2   1  346.47   22.60 
  -3   2  -1  351.66   18.40 
   3   2   1  340.47   18.60 
   3   2   1  330.17   15.50 
   3   2   1  331.77   18.90 
  -3   2  -1  324.17   14.30 
  -3   2  -1  330.87   13.70 
  -3   2  -1  328.57   18.00 
  -3   2  -1  310.07   18.90 
  -3   2  -1  310.07   18.10 
  -3   2  -1  322.07   15.00 
  -3   2  -1  318.07   15.10 
  -3   2  -1  367.66   17.60 
  -3   2  -1  335.87   13.90 
  -3   2  -1  342.37   17.50 
  -3   2  -1  311.87   18.90 
  -3   2  -1  338.17   17.20 
   3   2   1  345.27   23.50 
   3   2   1  349.27   22.00 
   3   2   1  333.47   19.80 
  -3   2  -1  298.97   20.00 
  -3   2  -1  321.27   19.10 
   3   2   1  353.06   16.10 
  -3   2  -1  342.17   19.70 
   3   2   1  297.97   18.70 
   3   2   1  303.97   18.20 
   3   2   1  387.16   23.00 
   3   2   1  336.47   17.20 
   3   2   1  338.07   17.30 
  -3   2  -1  322.07   14.80 
   3   2   1  303.97   19.40 
   3   2   1  361.26   20.70 
  -3   2  -1  333.07   18.20 
   3   2   1  328.77   17.00 
   3   2   1  325.57   17.50 
  -3   2  -1  338.67   19.20 
  -3   2  -1  337.77   18.40 
   3   2   1  316.47   16.70 
   3   2   1  326.57   18.90 
   3   2   1  332.07   17.60 
   3   2   1  315.37   17.50 
   3   2   1  334.17   16.20 
   3   2   1  302.47   19.00 
   3   2   1  335.57   17.90 
  -3   2  -1  345.77   18.80 
  -3   2  -1  357.76   19.20 
   3   2   1  329.97   15.50 
   3   2   1  366.96   20.30 
   3   2   1  330.17   21.10 
   4  -2   1  543.85   30.10 
  -4  -2  -1  563.54   30.40 
  -4  -2  -1  529.35   29.70 
  -4  -2  -1  554.04   29.30 
   4  -2   1  600.14   31.70 
   4  -2   1  572.64   30.20 
   4  -2   1  522.15   27.90 
  -4  -2  -1  560.24   29.70 
  -4  -2  -1  601.34   30.20 
  -4  -2  -1  569.44   27.00 
   4  -2   1  541.35   30.80 
   4  -2   1  570.94   23.80 
   4  -2   1  569.74   30.40 
   4  -2   1  531.15   27.50 
   4  -2   1  571.74   27.40 
  -4  -2  -1  537.65   26.20 
   4  -2   1  542.95   26.10 
  -4  -2  -1  544.35   23.10 
   4  -2   1  565.14   28.90 
  -4  -2  -1  585.74   30.30 
   4  -2   1  557.84   33.10 
   4  -2   1  569.54   24.30 
  -4  -2  -1  558.24   23.40 
  -4  -2  -1  577.04   31.30 
  -4  -2  -1  528.25   28.00 
   4  -2   1  580.44   27.10 
  -4  -2  -1  572.94   27.00 
  -4  -2  -1  571.94   31.70 
  -4  -2  -1  545.35   30.00 
   4  -2   1  583.54   27.90 
   4   2   1  515.65   24.60 
   4   2   1  582.34   29.30 
  -4   2  -1  509.85   30.40 
  -4   2  -1  561.64   24.40 
  -4   2  -1  569.34   26.80 
   4   2   1  569.84   31.80 
   4   2   1  560.04   26.50 
   4   2   1  604.54   31.80 
   4   2   1  547.15   29.20 
   4   2   1  540.45   25.00 
  -4   2  -1  575.54   25.20 
   4   2   1  538.55   28.50 
   4   2   1  580.14   32.90 
  -4   2  -1  559.14   28.10 
   4   2   1  558.24   30.00 
  -4   2  -1  590.74   24.40 
  -4   2  -1  610.54   28.80 
   4   2   1  574.34   27.90 
   4   2   1  554.54   28.40 
  -4   2  -1  554.84   24.60 
   4   2   1  561.44   30.20 
   4   2   1  543.95   25.90 
   4   2   1  571.24   27.00 
  -4   2  -1  568.34   23.50 
  -4   2  -1  591.14   22.70 
  -4   2  -1  551.94   27.30 
  -4   2  -1  491.05   28.50 
   4   2   1  553.64   27.70 
  -4   2  -1  572.34   27.40 
   4   2   1  559.34   27.00 
  -4   2  -1  586.74   24.60 
  -4   2  -1  573.74   20.70 
   4   2   1  570.74   32.70 
   4   2   1  566.24   23.50 
   4   2   1  534.65   25.60 
  -4   2  -1  577.94   28.60 
  -4   2  -1  563.64   28.20 
   4   2   1  533.65   23.40 
  -4   2  -1  564.84   28.50 
   4   2   1  527.95   33.60 
   4   2   1  534.15   28.30 
  -5  -2  -1  546.75   32.10 
   5  -2   1  521.45   27.90 
   5  -2   1  488.35   30.60 
  -5  -2  -1  498.75   30.20 
  -5  -2  -1  470.05   21.10 
   5  -2   1  527.55   31.30 
   5  -2   1  498.85   27.20 
  -5  -2  -1  451.65   28.20 
   5  -2   1  533.95   29.20 
  -5  -2  -1  494.05   25.00 
   5  -2   1  528.95   32.10 
  -5  -2  -1  476.35   29.70 
  -5  -2  -1  541.25   30.20 
   5  -2   1  532.05   31.80 
  -5  -2  -1  495.45   29.10 
   5  -2   1  536.55   25.00 
  -5  -2  -1  499.35   27.80 
  -5  -2  -1  449.76   25.40 
   5  -2   1  412.66   29.10 
   5  -2   1  514.65   26.40 
  -5  -2  -1  456.05   29.10 
  -5  -2  -1  484.05   25.70 
   5  -2   1  486.35   21.70 
   5  -2   1  579.14   34.50 
  -5  -2  -1  512.55   30.50 
   5  -2   1  499.75   31.00 
   5  -2   1  462.65   23.00 
   5  -2   1  541.85   25.10 
  -5  -2  -1  522.85   32.00 
   5  -2   1  495.25   27.90 
   5  -2   1  440.16   27.30 
  -5   2  -1  498.25   28.00 
   5   2   1  493.35   31.90 
  -5   2  -1  538.15   24.10 
  -5   2  -1  445.76   28.40 
   5   2   1  448.36   22.60 
  -5   2  -1  485.25   27.70 
   5   2   1  492.05   31.10 
   5   2   1  501.35   32.90 
   5   2   1  510.55   24.20 
  -5   2  -1  470.25   30.80 
  -5   2  -1  516.95   27.80 
   5   2   1  440.16   25.50 
  -5   2  -1  472.05   24.70 
  -5   2  -1  449.56   26.60 
   5   2   1  540.05   28.80 
  -5   2  -1  483.75   19.60 
   5   2   1  478.85   28.10 
  -5   2  -1  493.35   27.80 
   5   2   1  525.95   28.60 
   5   2   1  498.75   26.00 
  -5   2  -1  479.25   23.60 
   5   2   1  537.25   28.40 
   5   2   1  523.25   32.80 
   5   2   1  486.85   21.30 
   5   2   1  471.85   21.50 
   5   2   1  556.64   30.80 
  -5   2  -1  511.05   25.00 
   5   2   1  530.15   36.00 
  -5   2  -1  501.95   27.20 
  -5   2  -1  519.25   24.60 
   5   2   1  485.05   24.70 
   5   2   1  476.75   29.80 
  -5   2  -1  481.15   24.50 
  -5   2  -1  473.85   22.50 
  -5   2  -1  482.55   24.40 
  -5   2  -1  510.25   29.10 
   5   2   1  479.75   26.60 
  -6  -2  -1  731.73   35.60 
  -6  -2  -1  780.72   34.90 
  -6  -2  -1  793.12   42.40 
   6  -2   1  736.83   39.10 
   6  -2   1  819.52   41.10 
   6  -2   1  881.31   40.00 
  -6  -2  -1  731.93   42.70 
   6  -2   1  763.62   43.20 
   6  -2   1  817.12   45.60 
   6  -2   1  834.92   47.00 
  -6  -2  -1  776.12   38.50 
   6  -2   1  776.62   42.80 
  -6  -2  -1  817.82   37.20 
  -6  -2  -1  730.03   43.00 
   6  -2   1  765.72   43.30 
  -6  -2  -1  748.43   41.00 
  -6  -2  -1  759.32   40.10 
   6  -2   1  769.42   44.20 
   6  -2   1  809.92   41.40 
  -6  -2  -1  671.23   41.20 
   6  -2   1  792.02   39.60 
  -6  -2  -1  747.73   42.30 
   6  -2   1  824.72   35.10 
   6  -2   1  698.13   36.80 
  -6  -2  -1  782.72   42.30 
   6  -2   1  761.42   34.00 
   6  -2   1  819.32   43.70 
   6  -2   1  768.72   32.40 
  -6  -2  -1  733.13   40.70 
  -6  -2  -1  761.12   30.30 
  -6   2  -1  704.13   39.00 
   6   2   1  797.42   46.90 
  -6   2  -1  801.72   40.50 
   6   2   1  800.42   43.80 
  -6   2  -1  779.42   39.50 
  -6   2  -1  731.33   39.00 
  -6   2  -1  713.63   39.00 
  -6   2  -1  814.12   38.90 
  -6   2  -1  695.33   40.30 
   6   2   1  764.02   44.30 
   6   2   1  682.33   42.30 
   6   2   1  784.12   42.30 
  -6   2  -1  749.82   43.90 
   6   2   1  810.92   39.10 
   6   2   1  767.92   39.60 
  -6   2  -1  782.32   35.70 
   6   2   1  742.93   40.10 
   6   2   1  802.62   40.10 
   6   2   1  738.63   48.40 
  -6   2  -1  757.72   31.60 
   6   2   1  777.52   37.50 
  -6   2  -1  731.13   34.60 
  -6   2  -1  804.72   41.60 
  -6   2  -1  853.21   38.70 
   6   2   1  785.22   31.00 
   6   2   1  782.02   38.00 
   6   2   1  746.93   45.00 
  -6   2  -1  821.12   36.40 
   6   2   1  767.62   39.80 
   7  -2   1 1337.17   52.99 
   7  -2   1 1397.26   68.19 
   7  -2   1 1350.56   64.19 
  -7  -2  -1 1368.16   62.49 
   7  -2   1 1343.87   68.29 
  -7  -2  -1 1320.07   57.39 
   7  -2   1 1359.86   61.19 
  -7  -2  -1 1430.86   67.19 
   7  -2   1 1326.17   68.49 
   7  -2   1 1350.96   53.09 
  -7  -2  -1 1360.06   64.99 
   7  -2   1 1353.56   63.29 
   7  -2   1 1281.17   64.89 
   7  -2   1 1367.16   56.09 
   7  -2   1 1379.16   59.49 
   7  -2   1 1152.28   63.49 
   7  -2   1 1303.57   60.89 
   7  -2   1 1341.57   66.89 
  -7  -2  -1 1283.47   65.59 
  -7  -2  -1 1421.46   65.89 
  -7  -2  -1 1339.77   66.59 
   7  -2   1 1393.36   70.99 
  -7  -2  -1 1385.96   59.99 
  -7  -2  -1 1351.06   63.89 
  -7  -2  -1 1360.06   56.59 
  -7  -2  -1 1469.75   64.49 
   7  -2   1 1375.26   62.39 
  -7  -2  -1 1252.07   65.69 
  -7  -2  -1 1378.76   66.79 
   7   2   1 1308.07   70.29 
  -7   2  -1 1368.56   57.29 
  -7   2  -1 1348.37   61.89 
  -7   2  -1 1408.96   62.39 
  -7   2  -1 1434.46   56.89 
  -7   2  -1 1367.26   57.99 
   7   2   1 1409.46   70.39 
   7   2   1 1410.76   59.39 
   7   2   1 1255.77   65.99 
  -7   2  -1 1382.96   60.49 
  -7   2  -1 1367.76   68.09 
   7   2   1 1367.86   61.69 
   7   2   1 1380.06   74.19 
  -7   2  -1 1359.66   63.99 
  -7   2  -1 1428.66   64.39 
   7   2   1 1391.96   62.29 
  -7   2  -1 1335.27   57.09 
   7   2   1 1318.47   64.69 
   7   2   1 1343.57   68.49 
   7   2   1 1290.27   66.89 
  -7   2  -1 1408.06   62.99 
  -7   2  -1 1292.57   61.49 
  -7   2  -1 1256.17   63.29 
  -7   2  -1 1401.66   62.89 
  -7   2  -1 1299.17   52.49 
   7   2   1 1388.16   63.09 
   7   2   1 1374.86   62.89 
   7   2   1 1397.16   61.39 
   7   2   1 1303.27   59.69 
  -8  -2  -1  818.82   46.90 
   8  -2   1  762.72   46.40 
  -8  -2  -1  755.52   44.80 
  -8  -2  -1  740.13   49.60 
  -8  -2  -1  740.03   48.60 
  -8  -2  -1  767.62   44.20 
  -8  -2  -1  720.73   48.20 
  -8  -2  -1  834.22   41.00 
  -8  -2  -1  705.63   47.90 
   8  -2   1  744.73   41.60 
  -8  -2  -1  737.83   37.70 
   8  -2   1  759.12   44.90 
   8  -2   1  778.22   52.59 
   8  -2   1  788.92   50.29 
   8  -2   1  854.91   54.99 
  -8  -2  -1  805.02   47.50 
   8  -2   1  675.53   42.80 
  -8  -2  -1  782.32   45.40 
   8  -2   1  749.42   44.10 
   8  -2   1  795.02   51.79 
  -8  -2  -1  772.02   46.80 
  -8  -2  -1  775.22   42.00 
   8  -2   1  754.52   49.00 
  -8  -2  -1  724.83   47.50 
   8  -2   1  785.72   47.40 
   8  -2   1  748.43   49.99 
  -8  -2  -1  726.63   48.90 
  -8   2  -1  740.13   43.70 
  -8   2  -1  807.12   48.20 
  -8   2  -1  729.23   44.40 
   8   2   1  676.13   42.30 
  -8   2  -1  739.53   44.30 
  -8   2  -1  789.12   47.30 
   8   2   1  801.82   50.79 
   8   2   1  778.42   42.60 
  -8   2  -1  832.22   47.60 
   8   2   1  744.03   53.19 
   8   2   1  735.23   44.30 
  -8   2  -1  821.82   40.50 
   8   2   1  804.12   46.00 
  -8   2  -1  763.22   50.39 
  -8   2  -1  711.03   43.80 
   8   2   1  693.93   47.90 
  -8   2  -1  863.91   48.00 
  -8   2  -1  886.91   43.50 
   8   2   1  692.43   54.99 
  -8   2  -1  817.72   43.50 
   8   2   1  777.82   43.50 
   8   2   1  794.62   51.19 
   8   2   1  725.93   43.00 
  -8   2  -1  742.83   44.00 
   8   2   1  684.43   44.90 
   8   2   1  775.82   52.79 
   9  -2   1  883.41   52.99 
   9  -2   1  966.60   63.29 
  -9  -2  -1  926.81   54.69 
  -9  -2  -1  995.50   54.79 
  -9  -2  -1  916.61   57.19 
  -9  -2  -1  911.61   58.09 
  -9  -2  -1  891.11   55.49 
   9  -2   1  862.41   52.29 
   9  -2   1  953.00   63.99 
  -9  -2  -1  987.20   53.29 
   9  -2   1 1029.50   60.19 
   9  -2   1  943.61   52.99 
   9  -2   1  776.72   58.09 
  -9  -2  -1  815.62   57.29 
  -9  -2  -1  904.31   55.19 
  -9  -2  -1 1002.60   58.69 
   9  -2   1  870.01   53.99 
  -9  -2  -1  877.71   52.69 
  -9  -2  -1  909.61   57.49 
   9  -2   1 1034.60   58.29 
   9  -2   1  878.31   60.69 
  -9   2  -1  983.20   61.59 
   9   2   1  985.30   61.49 
  -9   2  -1 1045.00   54.79 
   9   2   1  858.71   64.49 
   9   2   1  940.01   52.69 
  -9   2  -1  996.80   59.99 
  -9   2  -1  988.50   54.69 
  -9   2  -1  896.11   50.99 
   9   2   1  985.00   54.29 
   9   2   1  922.91   59.29 
  -9   2  -1  943.61   54.29 
   9   2   1  925.51   52.19 
   9   2   1  954.60   63.49 
   9   2   1  915.51   54.79 
  -9   2  -1  968.90   54.19 
   9   2   1  873.41   50.89 
  -9   2  -1 1005.50   57.89 
  -9   2  -1  976.50   56.29 
  -9   2  -1  947.61   56.79 
  -9   2  -1  989.90   54.29 
   9   2   1  961.90   64.99 
   9   2   1  941.91   59.29 
 -10  -2  -1  249.78   33.50 
 -10  -2  -1  286.07   36.10 
  10  -2   1  327.07   43.50 
 -10  -2  -1  214.58   34.30 
 -10  -2  -1  234.68   34.80 
  10  -2   1  259.57   39.50 
 -10  -2  -1  256.97   36.50 
  10  -2   1  240.18   34.10 
 -10  -2  -1  208.38   30.00 
 -10  -2  -1  297.57   39.40 
 -10  -2  -1  237.88   31.40 
 -10  -2  -1  203.28   29.30 
  10  -2   1  190.78   28.40 
 -10  -2  -1  218.08   29.60 
  10  -2   1  259.47   37.60 
  10  -2   1  312.27   34.30 
 -10  -2  -1  400.06   39.80 
  10  -2   1  198.18   35.40 
 -10  -2  -1  233.98   34.30 
 -10   2  -1  237.68   34.00 
  10   2   1  305.37   32.80 
  10   2   1  217.18   28.60 
  10   2   1  203.48   40.60 
 -10   2  -1  237.38   36.70 
 -10   2  -1  233.08   34.80 
 -10   2  -1  229.98   34.50 
  10   2   1  241.08   39.00 
  10   2   1  282.47   40.10 
 -10   2  -1  267.37   33.60 
 -10   2  -1  258.77   34.00 
 -10   2  -1  307.77   36.50 
  10   2   1  241.68   30.60 
  10   2   1  268.57   38.00 
  10   2   1  245.28   30.60 
  10   2   1  323.77   43.10 
  10   2   1  263.07   40.40 
 -10   2  -1  264.17   33.50 
   9  -3  -1   13.70   15.80 
   9  -3  -1    6.70   11.30 
  -9  -3   1   10.60   14.70 
  -9  -3   1   21.30   15.50 
  -9  -3   1   19.90   16.80 
  -9  -3   1   28.90   16.60 
  -9  -3   1   13.20   13.50 
   9  -3  -1   30.40   15.70 
   9  -3  -1   33.10   17.30 
   9  -3  -1    3.60   13.60 
   9  -3  -1   36.80   15.90 
  -9  -3   1   16.70   15.60 
  -9  -3   1    1.10   14.10 
   9  -3  -1   26.10   18.30 
  -9  -3   1   29.30   14.60 
  -9  -3   1    6.60   14.30 
   9  -3  -1   64.69   20.50 
  -9  -3   1   16.70   15.10 
   9  -3  -1   38.30   16.70 
  -9  -3   1   11.50   16.60 
  -9   3   1    1.80   13.30 
   9   3  -1   17.10   14.30 
  -9   3   1   36.90   15.20 
  -9   3   1    7.10   14.20 
  -9   3   1   30.60   17.00 
   9   3  -1    8.50   12.50 
  -9   3   1   26.00   17.30 
  -9   3   1   16.40   15.50 
  -9   3   1   19.20   14.90 
   9   3  -1   17.10   15.60 
   9   3  -1    8.40   11.20 
   9   3  -1   14.60   13.10 
   9   3  -1   11.00   10.20 
  -9   3   1   12.70   12.60 
  -9   3   1   30.60   14.70 
   9   3  -1    0.00   12.80 
  -9   3   1   15.50   14.10 
   9   3  -1    4.60   11.30 
   9   3  -1   22.00   17.20 
  -9   3   1   17.50   13.10 
  -9   3   1    8.90   14.00 
  -9   3   1   15.40   15.50 
   9   3  -1    7.60   13.40 
  -8  -3   1   36.90   16.00 
  -8  -3   1   21.20   14.40 
   8  -3  -1   30.00   12.00 
   8  -3  -1    7.00   14.60 
  -8  -3   1   24.50   14.80 
   8  -3  -1   35.20   18.50 
  -8  -3   1   22.50   13.30 
   8  -3  -1    5.10   12.90 
  -8  -3   1   26.90   11.40 
  -8  -3   1   32.10   16.40 
  -8  -3   1   29.50   13.40 
  -8  -3   1    1.10   11.00 
   8  -3  -1   37.10   14.30 
  -8  -3   1   25.40   14.40 
  -8  -3   1   31.30   10.80 
   8  -3  -1   21.40   13.70 
   8  -3  -1    5.40   10.90 
  -8  -3   1   16.60   11.10 
  -8  -3   1   23.10   14.50 
  -8  -3   1    5.10   12.60 
   8  -3  -1   24.10   11.70 
  -8  -3   1   19.50   15.00 
   8  -3  -1   31.30   15.80 
   8   3  -1   15.90   12.90 
   8   3  -1    1.40   12.90 
   8   3  -1   40.20   13.20 
  -8   3   1   17.20   10.50 
   8   3  -1   23.10   13.90 
   8   3  -1   12.30   10.90 
   8   3  -1   17.70   12.90 
  -8   3   1    8.00   10.60 
   8   3  -1    8.60   10.00 
   8   3  -1    4.20    8.90 
  -8   3   1   18.00   11.50 
  -8   3   1   44.00   15.90 
  -8   3   1   28.30   15.30 
  -8   3   1   13.30   11.70 
  -8   3   1   -4.30   14.60 
   8   3  -1   24.80   10.90 
   8   3  -1   39.00   16.00 
  -8   3   1    8.30   10.90 
  -8   3   1   35.00   14.20 
  -8   3   1   26.70   13.30 
   8   3  -1    3.60   12.10 
  -8   3   1   19.10   11.50 
  -7  -3   1  460.35   31.90 
  -7  -3   1  385.76   32.60 
   7  -3  -1  404.36   29.50 
  -7  -3   1  404.36   27.70 
  -7  -3   1  399.26   33.60 
   7  -3  -1  444.06   35.10 
  -7  -3   1  469.05   36.40 
  -7  -3   1  410.66   33.50 
   7  -3  -1  394.16   31.00 
   7  -3  -1  342.27   28.50 
   7  -3  -1  417.36   34.10 
   7  -3  -1  436.06   34.30 
   7  -3  -1  437.36   27.90 
   7  -3  -1  458.15   31.50 
   7  -3  -1  428.06   23.30 
  -7  -3   1  391.46   31.80 
  -7  -3   1  450.85   33.60 
   7  -3  -1  444.86   37.60 
   7  -3  -1  408.16   29.20 
  -7  -3   1  385.26   31.40 
   7  -3  -1  447.46   32.00 
  -7  -3   1  393.96   33.00 
  -7  -3   1  456.55   27.60 
  -7  -3   1  464.45   36.20 
  -7  -3   1  424.36   34.60 
  -7  -3   1  422.86   28.30 
   7   3  -1  444.96   31.80 
  -7   3   1  477.35   23.90 
   7   3  -1  450.35   26.60 
  -7   3   1  371.96   28.70 
  -7   3   1  421.06   28.00 
  -7   3   1  428.76   23.70 
   7   3  -1  430.36   33.80 
  -7   3   1  354.66   29.20 
  -7   3   1  491.85   35.70 
  -7   3   1  447.36   27.50 
  -7   3   1  389.96   23.30 
  -7   3   1  402.56   28.30 
   7   3  -1  378.66   30.20 
  -7   3   1  423.56   31.10 
   7   3  -1  400.36   44.60 
  -7   3   1  392.36   27.60 
   7   3  -1  414.26   34.50 
  -7   3   1  389.96   31.50 
   7   3  -1  409.26   35.80 
   7   3  -1  439.86   32.10 
   7   3  -1  429.76   35.00 
   7   3  -1  458.95   29.20 
  -7   3   1  421.66   29.50 
   7   3  -1  430.96   32.90 
   7   3  -1  429.06   31.70 
   7   3  -1  346.07   32.40 
  -7   3   1  428.66   30.40 
   7   3  -1  429.36   29.80 
  -7   3   1  423.36   31.20 
   6  -3  -1  756.92   40.30 
  -6  -3   1  690.83   37.60 
  -6  -3   1  773.92   29.90 
  -6  -3   1  695.53   42.20 
   6  -3  -1  618.64   38.50 
  -6  -3   1  697.23   43.20 
  -6  -3   1  740.93   41.20 
  -6  -3   1  746.43   42.00 
  -6  -3   1  728.13   43.00 
  -6  -3   1  730.23   42.10 
  -6  -3   1  675.23   42.60 
   6  -3  -1  755.42   43.50 
  -6  -3   1  735.73   37.20 
   6  -3  -1  592.04   37.40 
   6  -3  -1  782.92   38.10 
  -6  -3   1  718.03   39.90 
   6  -3  -1  724.43   33.30 
   6  -3  -1  688.23   41.90 
   6  -3  -1  763.92   46.50 
  -6  -3   1  723.13   42.30 
   6  -3  -1  763.62   39.40 
  -6  -3   1  685.23   43.40 
  -6  -3   1  731.83   42.80 
  -6  -3   1  738.33   37.50 
   6  -3  -1  733.03   37.80 
   6  -3  -1  749.92   38.50 
   6  -3  -1  697.93   42.30 
  -6   3   1  740.83   32.40 
  -6   3   1  780.02   36.90 
   6   3  -1  722.73   35.30 
   6   3  -1  740.03   41.40 
  -6   3   1  726.93   29.70 
  -6   3   1  699.63   31.80 
   6   3  -1  778.02   43.70 
  -6   3   1  767.32   40.10 
   6   3  -1  818.22   42.90 
  -6   3   1  677.63   37.30 
  -6   3   1  747.53   38.20 
   6   3  -1  714.23   36.60 
  -6   3   1  783.62   40.50 
  -6   3   1  699.23   33.00 
   6   3  -1  694.03   43.10 
  -6   3   1  774.32   39.00 
   6   3  -1  705.03   43.80 
   6   3  -1  709.63   40.10 
   6   3  -1  723.13   38.50 
   6   3  -1  815.52   43.10 
  -6   3   1  642.44   40.90 
  -6   3   1  767.92   40.50 
   6   3  -1  734.83   45.10 
   6   3  -1  760.22   44.20 
  -6   3   1  796.22   38.30 
  -6   3   1  809.62   36.70 
   6   3  -1  704.33   48.00 
  -6   3   1  743.83   40.90 
   6   3  -1  746.43   37.60 
   6   3  -1  771.42   35.00 
   6   3  -1  773.92   41.20 
   5  -3  -1 2657.13  108.29 
  -5  -3   1 3017.70  113.29 
  -5  -3   1 2882.91  107.69 
   5  -3  -1 2954.20  107.49 
  -5  -3   1 2952.80  100.49 
   5  -3  -1 2928.61  106.39 
  -5  -3   1 2883.81  112.39 
   5  -3  -1 2825.42  111.19 
   5  -3  -1 2821.32  111.29 
   5  -3  -1 2951.30  107.09 
   5  -3  -1 2895.51  107.59 
   5  -3  -1 2940.91  103.89 
   5  -3  -1 2889.81  109.79 
   5  -3  -1 2944.21  112.39 
   5  -3  -1 3022.60  112.89 
  -5  -3   1 2972.80  112.49 
   5  -3  -1 2972.30  107.59 
  -5  -3   1 2901.41  112.99 
  -5  -3   1 2717.93  108.99 
  -5  -3   1 2779.42  106.29 
  -5  -3   1 2871.91  106.99 
  -5  -3   1 2777.22  110.09 
  -5  -3   1 2791.12  112.59 
  -5  -3   1 2820.02  113.49 
  -5  -3   1 2919.51  106.19 
  -5  -3   1 2850.21  111.09 
   5  -3  -1 3016.00  116.79 
   5  -3  -1 2805.22  108.09 
  -5  -3   1 2851.11  112.19 
   5   3  -1 2942.91  111.09 
  -5   3   1 2838.02  108.09 
   5   3  -1 3061.09  106.29 
   5   3  -1 2796.32  113.59 
   5   3  -1 2893.11  106.19 
  -5   3   1 2849.01  107.09 
  -5   3   1 2932.21  108.59 
  -5   3   1 2982.50  110.19 
   5   3  -1 3085.49  116.59 
   5   3  -1 2950.80  114.69 
   5   3  -1 2830.62  110.79 
   5   3  -1 2924.41  112.79 
  -5   3   1 2840.02  107.19 
  -5   3   1 2938.91  108.69 
   5   3  -1 2844.42  100.39 
  -5   3   1 2908.11  112.19 
   5   3  -1 2904.81  110.69 
   5   3  -1 2821.82  108.99 
   5   3  -1 2797.82   99.79 
   5   3  -1 2835.32  113.49 
   5   3  -1 2878.21  101.29 
  -5   3   1 2998.70  107.49 
  -5   3   1 2854.71  104.99 
   5   3  -1 2892.91  111.59 
   5   3  -1 2797.42  118.59 
  -5   3   1 2831.32   97.99 
  -5   3   1 2913.61  101.99 
  -5   3   1 2670.23   98.99 
  -5   3   1 2868.91  100.09 
  -5   3   1 2685.83  108.29 
  -5   3   1 2873.51  106.39 
  -5   3   1 2887.71  101.39 
   5   3  -1 2798.02   99.69 
   5   3  -1 2750.92  107.89 
  -5   3   1 2934.21   98.99 
  -4  -3   1  493.35   28.90 
   4  -3  -1  483.65   25.80 
   4  -3  -1  470.35   28.10 
   4  -3  -1  471.55   26.70 
  -4  -3   1  450.05   28.60 
   4  -3  -1  507.05   26.40 
  -4  -3   1  454.15   28.60 
   4  -3  -1  451.15   24.90 
   4  -3  -1  482.75   21.20 
   4  -3  -1  494.05   31.90 
  -4  -3   1  477.95   29.60 
   4  -3  -1  465.05   27.40 
  -4  -3   1  476.55   28.60 
  -4  -3   1  473.85   28.00 
  -4  -3   1  507.15   29.40 
   4  -3  -1  518.75   25.30 
   4  -3  -1  520.85   24.90 
   4  -3  -1  500.95   24.40 
  -4  -3   1  478.35   25.80 
   4  -3  -1  505.65   27.00 
  -4  -3   1  498.15   27.00 
  -4  -3   1  474.95   21.90 
  -4  -3   1  446.16   29.40 
  -4  -3   1  452.25   27.60 
   4  -3  -1  507.15   27.40 
   4  -3  -1  471.05   27.60 
  -4  -3   1  471.35   28.50 
  -4  -3   1  467.85   28.70 
   4  -3  -1  505.05   25.20 
  -4  -3   1  482.15   26.60 
  -4  -3   1  456.65   25.80 
   4  -3  -1  501.65   20.80 
   4  -3  -1  480.65   28.40 
   4   3  -1  465.65   26.00 
  -4   3   1  433.66   27.10 
  -4   3   1  484.95   25.30 
  -4   3   1  474.35   20.10 
  -4   3   1  486.05   23.60 
   4   3  -1  457.25   28.60 
   4   3  -1  499.55   25.60 
   4   3  -1  492.85   21.80 
   4   3  -1  489.15   26.80 
  -4   3   1  517.45   27.90 
  -4   3   1  467.35   20.20 
  -4   3   1  453.45   20.30 
   4   3  -1  473.55   27.30 
  -4   3   1  510.95   23.20 
   4   3  -1  477.05   28.30 
   4   3  -1  491.35   30.10 
  -4   3   1  460.55   25.10 
   4   3  -1  488.25   21.60 
  -4   3   1  478.75   20.60 
  -4   3   1  488.35   25.20 
  -4   3   1  487.25   21.70 
  -4   3   1  451.05   19.20 
   4   3  -1  433.26   27.10 
   4   3  -1  472.35   28.00 
   4   3  -1  465.95   24.00 
  -4   3   1  468.05   24.70 
   4   3  -1  393.66   30.70 
   4   3  -1  481.15   29.90 
   4   3  -1  451.45   29.50 
   4   3  -1  477.35   21.80 
  -4   3   1  445.36   25.70 
   4   3  -1  453.45   28.80 
   4   3  -1  458.55   21.40 
  -3  -3   1 2427.36   89.09 
  -3  -3   1 2350.56   88.69 
   3  -3  -1 2317.97   86.49 
   3  -3  -1 2454.15   83.59 
  -3  -3   1 2491.45   86.09 
  -3  -3   1 2433.56   85.49 
  -3  -3   1 2451.95   92.09 
  -3  -3   1 2377.06   90.59 
   3  -3  -1 2395.66   82.69 
  -3  -3   1 2351.86   89.29 
   3  -3  -1 2445.66   86.29 
   3  -3  -1 2423.76   87.59 
   3  -3  -1 2427.26   87.29 
   3  -3  -1 2286.97   84.49 
   3  -3  -1 2469.35   88.29 
   3  -3  -1 2522.35   90.79 
  -3  -3   1 2408.66   91.29 
  -3  -3   1 2418.86   92.79 
   3  -3  -1 2475.85   89.49 
   3  -3  -1 2429.86   85.89 
  -3  -3   1 2372.06   91.39 
   3  -3  -1 2440.76   89.99 
  -3  -3   1 2468.85   89.79 
  -3  -3   1 2386.66   87.69 
  -3  -3   1 2377.66   91.09 
  -3  -3   1 2320.87   91.69 
   3  -3  -1 2360.16   83.79 
   3  -3  -1 2352.66   86.79 
   3  -3  -1 2299.77   88.69 
  -3  -3   1 2392.76   91.69 
  -3  -3   1 2399.06   91.59 
   3  -3  -1 2161.68   88.69 
   3  -3  -1 2443.16   88.09 
   3  -3  -1 2320.87   88.69 
  -3  -3   1 2408.46   91.99 
  -3  -3   1 2434.06   89.19 
   3   3  -1 2418.76   85.79 
  -3   3   1 2366.56   89.69 
  -3   3   1 2300.57   88.49 
  -3   3   1 2380.06   85.09 
  -3   3   1 2376.66   87.89 
  -3   3   1 2317.67   84.29 
   3   3  -1 2416.66   85.59 
   3   3  -1 2452.95   93.59 
   3   3  -1 2411.16   85.49 
  -3   3   1 2406.16   87.99 
   3   3  -1 2488.45   89.09 
   3   3  -1 2495.85   91.89 
  -3   3   1 2174.28   88.39 
  -3   3   1 2519.65   87.09 
  -3   3   1 2483.45   84.39 
  -3   3   1 2414.66   87.39 
  -3   3   1 2409.06   84.09 
   3   3  -1 2542.15   87.19 
   3   3  -1 2451.45   91.39 
  -3   3   1 2360.56   86.19 
  -3   3   1 2439.76   87.09 
  -3   3   1 2464.25   90.09 
   3   3  -1 2446.86   90.79 
  -3   3   1 2457.65   83.49 
  -3   3   1 2454.55   88.49 
  -3   3   1 2401.46   83.79 
  -3   3   1 2469.05   84.39 
   3   3  -1 2510.85   89.09 
   3   3  -1 2421.26   91.59 
   3   3  -1 2463.05   87.99 
  -3   3   1 2470.15   86.69 
   3   3  -1 2335.27   91.59 
  -3   3   1 2328.07   83.29 
  -3   3   1 2454.95   82.99 
   3   3  -1 2483.05   94.29 
   3   3  -1 2402.76   95.49 
  -3   3   1 2314.07   93.99 
   3   3  -1 2349.26   91.99 
  -3   3   1 2436.76   85.79 
   3   3  -1 2375.36   89.49 
  -2  -3   1   35.70    8.50 
  -2  -3   1   42.70    6.40 
   2  -3  -1   40.00    6.40 
  -2  -3   1   27.90    7.70 
  -2  -3   1   42.70    8.40 
  -2  -3   1   54.09    9.70 
   2  -3  -1   45.40    7.60 
   2  -3  -1   47.20    7.80 
   2  -3  -1   34.30    5.30 
  -2  -3   1   25.90    6.90 
   2  -3  -1   44.10    5.90 
   2  -3  -1   31.60    6.00 
   2  -3  -1   41.70    6.30 
  -2  -3   1   41.60    5.70 
  -2  -3   1   48.90    8.90 
   2  -3  -1   31.50    5.50 
  -2  -3   1   43.90    7.00 
  -2  -3   1   45.50    9.30 
   2  -3  -1   48.30    6.10 
   2  -3  -1   40.90    7.50 
  -2  -3   1   50.59    7.60 
   2  -3  -1   31.30    6.40 
   2  -3  -1   45.70    7.90 
   2  -3  -1   49.40    6.30 
   2  -3  -1   47.10    7.50 
  -2  -3   1   54.69    9.80 
   2  -3  -1   41.70    5.50 
  -2  -3   1   51.29    8.70 
   2  -3  -1   33.50    6.30 
  -2  -3   1   40.50    9.60 
   2  -3  -1   35.20    6.80 
  -2  -3   1   39.30    8.30 
   2  -3  -1   43.30    5.70 
  -2  -3   1   35.80    7.80 
   2  -3  -1   38.30    6.30 
  -2  -3   1   44.40    8.40 
   2  -3  -1   37.90    5.70 
  -2  -3   1   53.99    7.20 
  -2  -3   1   42.60    6.50 
  -2  -3   1   47.00    9.10 
   2  -3  -1   32.00    7.60 
  -2  -3   1   40.60    8.30 
   2   3  -1   57.19    9.10 
  -2   3   1   31.80    5.40 
  -2   3   1   36.50    7.10 
  -2   3   1   42.40    5.60 
  -2   3   1   38.80    5.50 
  -2   3   1   34.60    5.60 
   2   3  -1   56.59    6.40 
  -2   3   1   48.50    6.70 
  -2   3   1   44.50    7.80 
  -2   3   1   40.90    7.90 
   2   3  -1   48.20    7.40 
  -2   3   1   58.89    8.80 
   2   3  -1   51.49    9.10 
  -2   3   1   45.10    5.80 
  -2   3   1   47.10    7.70 
   2   3  -1   56.49    9.90 
  -2   3   1   50.19    6.40 
  -2   3   1   44.80    6.60 
   2   3  -1   51.89    9.60 
   2   3  -1   47.90    8.50 
  -2   3   1   35.70    6.80 
   2   3  -1   56.79   10.90 
  -2   3   1   57.69    7.10 
   2   3  -1   44.20    7.70 
   2   3  -1   37.40    7.90 
   2   3  -1   35.30    7.40 
   2   3  -1   36.80    6.40 
   2   3  -1   37.70    7.80 
  -2   3   1   34.70    7.00 
   2   3  -1   44.30    8.50 
  -2   3   1   54.69    8.10 
  -2   3   1   41.30    7.80 
  -2   3   1   40.00    6.00 
  -2   3   1   34.20    5.30 
  -2   3   1   39.70    6.10 
  -2   3   1   51.69    7.00 
  -2   3   1   54.29    7.00 
  -2   3   1   56.99    7.60 
  -2   3   1   36.20    5.20 
  -2   3   1   40.00    6.80 
  -2   3   1   54.09    9.90 
  -2   3   1   40.20    6.80 
  -2   3   1   39.50    5.30 
   2   3  -1   46.40    6.90 
   2   3  -1   47.50    8.00 
  -2   3   1   35.00    5.80 
  -2   3   1   39.80    5.30 
   2   3  -1   45.80   10.00 
  -2   3   1   45.50    6.20 
   1  -3  -1 1232.78   43.90 
   1  -3  -1 1202.48   43.00 
  -1  -3   1 1184.48   48.60 
   1  -3  -1 1228.78   47.50 
  -1  -3   1 1188.98   51.79 
  -1  -3   1 1223.88   52.59 
   1  -3  -1 1247.88   47.50 
   1  -3  -1 1172.48   45.30 
   1  -3  -1 1198.98   46.40 
   1  -3  -1 1233.68   46.00 
  -1  -3   1 1243.58   48.60 
   1  -3  -1 1222.98   47.10 
   1  -3  -1 1207.28   43.20 
  -1  -3   1 1174.48   49.30 
  -1  -3   1 1316.97   53.79 
   1  -3  -1 1236.58   43.60 
  -1  -3   1 1237.58   50.49 
  -1  -3   1 1198.48   43.30 
   1  -3  -1 1107.59   45.50 
   1  -3  -1 1222.28   47.60 
   1  -3  -1 1285.77   48.30 
  -1  -3   1 1296.77   49.00 
   1  -3  -1 1141.59   44.20 
   1  -3  -1 1294.07   50.49 
   1  -3  -1 1210.78   43.70 
   1  -3  -1 1248.98   47.00 
  -1  -3   1 1127.19   54.59 
   1  -3  -1 1248.08   45.80 
  -1  -3   1 1240.68   48.70 
   1  -3  -1 1214.68   48.60 
   1  -3  -1 1259.07   48.80 
  -1  -3   1 1254.17   48.00 
  -1  -3   1 1187.98   48.00 
   1  -3  -1 1223.98   42.60 
  -1  -3   1 1268.97   48.50 
   1  -3  -1 1160.98   48.90 
   1  -3  -1 1312.67   47.90 
   1  -3  -1 1271.17   46.40 
   1  -3  -1 1284.57   46.50 
   1  -3  -1 1230.38   50.09 
  -1  -3   1 1200.78   47.10 
   1  -3  -1 1188.98   46.10 
   1  -3  -1 1244.88   52.39 
   1  -3  -1 1194.68   44.70 
  -1  -3   1 1292.17   48.40 
   1  -3  -1 1255.07   44.10 
   1  -3  -1 1266.37   44.10 
  -1  -3   1 1267.87   48.60 
  -1  -3   1 1251.97   47.90 
  -1  -3   1 1214.68   47.50 
  -1  -3   1 1253.47   48.50 
   1  -3  -1 1231.08   42.70 
  -1   3   1 1249.88   46.10 
   1   3  -1 1185.58   47.50 
  -1   3   1 1267.57   49.20 
  -1   3   1 1195.08   45.30 
  -1   3   1 1274.57   44.80 
   1   3  -1 1260.57   55.19 
  -1   3   1 1292.77   43.20 
   1   3  -1 1212.88   48.20 
  -1   3   1 1190.78   44.20 
  -1   3   1 1221.68   45.40 
   1   3  -1 1198.98   48.70 
  -1   3   1 1203.18   46.50 
   1   3  -1 1211.58   47.90 
  -1   3   1 1258.47   47.30 
   1   3  -1 1182.28   45.60 
   1   3  -1 1213.78   48.10 
   1   3  -1 1177.38   47.10 
  -1   3   1 1206.38   46.00 
  -1   3   1 1189.58   46.20 
  -1   3   1 1214.58   49.99 
   1   3  -1 1259.87   49.99 
  -1   3   1 1226.98   44.40 
   1   3  -1 1271.27   50.99 
   1   3  -1 1228.48   47.90 
   1   3  -1 1253.97   43.90 
   1   3  -1 1205.78   49.99 
   1   3  -1 1372.26   55.59 
   1   3  -1 1166.18   47.10 
   1   3  -1 1209.78   47.90 
   1   3  -1 1298.77   53.99 
  -1   3   1 1294.77   48.90 
  -1   3   1 1234.18   49.20 
  -1   3   1 1212.98   48.60 
   1   3  -1 1123.49   46.90 
   1   3  -1 1210.88   48.10 
  -1   3   1 1204.88   43.50 
   1   3  -1 1223.78   44.40 
  -1   3   1 1245.88   45.90 
  -1   3   1 1205.68   42.20 
  -1   3   1 1122.39   46.20 
  -1   3   1 1134.29   47.30 
   1   3  -1 1121.39   47.40 
  -1   3   1 1276.97   46.60 
   1   3  -1 1175.28   47.10 
  -1   3   1 1214.18   42.50 
  -1   3   1 1257.97   43.90 
   1   3  -1 1217.98   47.90 
   1   3  -1 1199.38   46.70 
   1   3  -1 1244.68   47.80 
   1   3  -1 1192.98   48.10 
  -1   3   1 1256.87   49.50 
   1   3  -1 1196.98   48.40 
   1   3  -1 1203.38   47.50 
  -1   3   1 1132.09   46.30 
   0  -3   1  110.59   10.10 
   0  -3  -1  101.59    8.60 
   0  -3   1  105.19   11.50 
   0  -3   1  114.89   10.50 
   0  -3   1   99.79   12.20 
   0  -3   1  119.59    9.30 
   0  -3   1  102.69   13.80 
   0  -3  -1  130.39   12.90 
   0  -3   1  133.39   13.90 
   0  -3  -1   97.79    9.90 
   0  -3  -1  122.29   15.50 
   0  -3   1  116.29   13.30 
   0  -3  -1   94.89   13.90 
   0  -3   1   98.99    9.80 
   0  -3   1   87.79   14.40 
   0  -3  -1   87.89    9.80 
   0  -3  -1   99.09    7.90 
   0  -3   1   87.39   14.20 
   0  -3  -1   98.89    8.10 
   0  -3  -1  110.69   12.00 
   0  -3  -1  117.09   10.50 
   0  -3   1   92.99    8.80 
   0  -3  -1   98.89   10.40 
   0  -3   1  105.59   10.40 
   0  -3  -1   82.49    9.90 
   0  -3  -1  100.79   11.10 
   0  -3  -1  101.89    9.70 
   0  -3  -1  111.39   14.00 
   0  -3   1   95.59    9.90 
   0  -3   1   99.19    9.40 
   0  -3   1   90.59    8.60 
   0  -3  -1   89.69    9.60 
   0  -3   1   89.79    9.90 
   0  -3  -1  121.19    9.10 
   0  -3  -1  109.49    8.40 
   0  -3   1  121.09    9.20 
   0  -3  -1   88.79   12.00 
   0  -3   1   89.49   13.30 
   0  -3  -1   84.79    8.70 
   0  -3  -1  112.59   10.20 
   0  -3   1   86.39   12.70 
   0  -3   1   93.39    8.00 
   0  -3   1   91.99    9.80 
   0   3   1  115.09    8.50 
   0   3   1  123.39   11.50 
   0   3  -1   99.99   10.40 
   0   3   1  171.88   16.00 
   0   3  -1  115.09    8.60 
   0   3  -1   98.99   16.50 
   0   3  -1   93.79   14.20 
   0   3   1   94.69    9.80 
   0   3  -1   99.99    9.40 
   0   3   1  107.59   10.30 
   0   3  -1  123.89   12.60 
   0   3   1  147.49   13.40 
   0   3  -1  118.59   11.60 
   0   3   1  100.09    9.60 
   0   3  -1  107.19   10.60 
   0   3   1   98.69   13.40 
   0   3   1   93.49    7.40 
   0   3  -1   90.99   10.00 
   0   3   1  105.19    9.90 
   0   3   1  105.49    9.20 
   0   3  -1   98.69   10.10 
   0   3   1   87.99    9.40 
   0   3  -1  116.79    9.80 
   0   3  -1  110.19    9.10 
   0   3   1  107.79   10.30 
   0   3  -1   96.09    8.90 
   0   3  -1  112.39    8.40 
   0   3  -1  107.39    8.10 
   0   3   1  107.99    9.50 
   0   3   1  112.29    8.70 
   0   3  -1   97.29   12.20 
   0   3   1  120.29   10.90 
   0   3  -1   97.29    9.70 
   0   3  -1   96.79    9.30 
   0   3  -1  110.29   10.10 
   0   3   1  167.08   16.80 
   0   3  -1  103.69    9.90 
   0   3   1  111.99   11.50 
   0   3   1  102.49    6.90 
   0   3  -1  111.69   10.60 
   0   3   1  107.59   11.00 
   0   3   1  119.49    9.20 
   0   3  -1  108.19   10.80 
   0   3   1  128.49   16.30 
   0   3   1  113.69   12.60 
   0   3   1  105.89   10.90 
   0   3   1  133.69   11.40 
   0   3   1  105.39    9.60 
  -1  -3  -1 4982.00  169.48 
   1  -3   1 4886.41  169.58 
  -1  -3  -1 4837.02  166.88 
   1  -3   1 5146.78  171.58 
   1  -3   1 4818.02  165.98 
   1  -3   1 4727.23  173.38 
   1  -3   1 4802.82  163.58 
  -1  -3  -1 4726.23  170.28 
  -1  -3  -1 4798.82  166.78 
   1  -3   1 4721.43  162.78 
   1  -3   1 4874.01  164.28 
   1  -3   1 4796.72  164.18 
   1  -3   1 5061.49  169.68 
  -1  -3  -1 4887.31  169.88 
  -1  -3  -1 5055.39  169.28 
   1  -3   1 4839.92  167.68 
  -1  -3  -1 4907.61  167.58 
   1  -3   1 4972.50  169.38 
  -1  -3  -1 4739.93  167.98 
   1  -3   1 4847.12  163.08 
  -1  -3  -1 4967.90  166.88 
   1  -3   1 4803.02  165.08 
   1  -3   1 4986.50  168.58 
  -1  -3  -1 4986.30  167.28 
  -1  -3  -1 5021.50  167.98 
  -1  -3  -1 4812.92  171.08 
   1  -3   1 4854.51  170.78 
   1  -3   1 4715.23  165.18 
   1  -3   1 5002.40  164.88 
  -1  -3  -1 5019.10  168.78 
   1  -3   1 4765.62  169.88 
  -1  -3  -1 4982.70  167.08 
   1  -3   1 5047.19  166.58 
  -1  -3  -1 5174.08  168.18 
   1  -3   1 4831.72  166.08 
  -1  -3  -1 4958.00  167.48 
  -1  -3  -1 4864.01  166.48 
   1  -3   1 4945.51  163.58 
   1  -3   1 4696.33  165.08 
  -1  -3  -1 4927.21  167.58 
  -1  -3  -1 4784.82  167.28 
  -1  -3  -1 4936.81  161.88 
   1  -3   1 4853.61  162.08 
  -1  -3  -1 4916.01  165.98 
   1  -3   1 4706.43  164.78 
   1  -3   1 4446.26  167.38 
   1  -3   1 4909.71  163.98 
   1  -3   1 4900.01  164.58 
  -1   3  -1 4655.03  165.08 
  -1   3  -1 4765.02  169.28 
  -1   3  -1 4786.62  164.48 
   1   3   1 4669.53  166.68 
  -1   3  -1 5042.50  170.28 
  -1   3  -1 5090.29  168.98 
  -1   3  -1 4966.90  170.68 
   1   3   1 4815.62  167.58 
   1   3   1 4704.43  166.28 
  -1   3  -1 4746.53  167.88 
   1   3   1 5058.99  167.38 
   1   3   1 4880.61  166.48 
  -1   3  -1 4819.82  163.68 
  -1   3  -1 4905.41  166.08 
   1   3   1 4683.43  165.98 
   1   3   1 4997.50  167.78 
   1   3   1 4920.01  167.38 
   1   3   1 4785.52  166.38 
  -1   3  -1 4937.81  163.18 
   1   3   1 4863.91  167.78 
  -1   3  -1 4755.92  174.88 
   1   3   1 4734.03  167.08 
   1   3   1 5008.40  167.08 
  -1   3  -1 4792.82  165.58 
  -1   3  -1 4735.83  163.68 
  -1   3  -1 4611.14  163.38 
   1   3   1 4977.20  168.38 
   1   3   1 5037.30  167.68 
  -1   3  -1 4834.62  165.58 
  -1   3  -1 4596.84  165.98 
   1   3   1 5052.79  167.48 
   1   3   1 4828.92  166.88 
   1   3   1 4839.82  166.68 
   1   3   1 4691.73  166.88 
   1   3   1 4927.01  166.38 
   1   3   1 4742.53  169.58 
  -1   3  -1 4831.02  161.98 
   1   3   1 4800.22  167.08 
  -1   3  -1 4999.30  164.68 
  -1   3  -1 4852.91  164.38 
   1   3   1 4984.10  169.98 
   1   3   1 5075.09  168.18 
   1   3   1 4823.12  166.48 
  -1   3  -1 4875.51  166.18 
   2  -3   1  921.71   34.60 
  -2  -3  -1  980.80   40.00 
   2  -3   1  894.21   35.30 
  -2  -3  -1  892.91   35.80 
   2  -3   1  948.31   39.80 
  -2  -3  -1  905.91   37.30 
  -2  -3  -1  936.81   35.90 
  -2  -3  -1  992.00   40.30 
   2  -3   1  947.51   40.90 
  -2  -3  -1  969.70   41.10 
   2  -3   1  901.61   34.50 
   2  -3   1  931.31   35.70 
   2  -3   1  908.01   34.30 
  -2  -3  -1  936.61   39.80 
  -2  -3  -1  937.31   39.30 
  -2  -3  -1  921.11   34.70 
   2  -3   1  977.30   40.00 
   2  -3   1  943.31   41.10 
  -2  -3  -1  966.10   40.40 
   2  -3   1  831.12   39.80 
  -2  -3  -1  916.41   39.20 
   2  -3   1  881.01   35.00 
   2  -3   1  861.71   33.90 
  -2  -3  -1  987.90   40.70 
   2  -3   1  944.81   40.80 
  -2  -3  -1  979.10   41.80 
   2  -3   1  916.71   36.30 
  -2  -3  -1  962.20   41.40 
  -2  -3  -1  918.21   40.00 
   2  -3   1  963.70   36.30 
   2  -3   1  908.71   38.90 
  -2  -3  -1  877.01   40.30 
  -2  -3  -1  916.11   38.90 
  -2  -3  -1  904.11   39.00 
  -2  -3  -1  976.00   41.20 
  -2  -3  -1  958.30   41.00 
   2  -3   1  940.51   39.30 
   2  -3   1  923.71   36.40 
   2  -3   1  915.71   37.60 
   2  -3   1  912.31   37.10 
   2  -3   1  983.80   36.00 
   2  -3   1  984.90   38.20 
   2  -3   1  891.81   36.00 
   2  -3   1  942.11   42.90 
  -2   3  -1  950.40   39.80 
  -2   3  -1  932.61   35.70 
   2   3   1  913.61   39.90 
  -2   3  -1  908.61   34.60 
  -2   3  -1  932.71   35.00 
  -2   3  -1  898.51   37.10 
  -2   3  -1  924.91   35.60 
  -2   3  -1  901.81   35.90 
  -2   3  -1  924.71   36.60 
  -2   3  -1  926.11   34.90 
  -2   3  -1  907.81   36.50 
  -2   3  -1  904.21   39.20 
  -2   3  -1  906.21   34.00 
   2   3   1  925.51   37.40 
   2   3   1  927.01   39.50 
   2   3   1  923.01   39.90 
   2   3   1  914.91   39.70 
   2   3   1  918.31   39.40 
  -2   3  -1  876.71   40.50 
   2   3   1  914.71   41.30 
  -2   3  -1  948.11   36.30 
  -2   3  -1  958.10   35.70 
  -2   3  -1  939.01   41.10 
   2   3   1  924.21   38.10 
  -2   3  -1  919.21   36.60 
   2   3   1  988.00   40.00 
  -2   3  -1  972.40   36.70 
  -2   3  -1  973.10   38.40 
  -2   3  -1  956.60   34.80 
  -2   3  -1  839.62   34.80 
   2   3   1  921.71   38.90 
   2   3   1  944.71   35.00 
  -2   3  -1  949.71   34.90 
   2   3   1  957.70   43.30 
   2   3   1  939.01   34.80 
   2   3   1  993.00   38.10 
   2   3   1  925.21   41.50 
   2   3   1 1014.30   40.00 
  -2   3  -1  949.11   34.60 
  -2   3  -1  914.81   37.30 
   2   3   1  960.00   36.00 
  -3  -3  -1 3425.96  122.89 
  -3  -3  -1 3392.26  124.89 
  -3  -3  -1 3412.56  125.49 
   3  -3   1 3448.75  122.49 
   3  -3   1 3493.25  122.69 
  -3  -3  -1 3474.15  121.29 
  -3  -3  -1 3555.14  123.19 
   3  -3   1 3481.35  123.29 
   3  -3   1 3541.65  125.69 
   3  -3   1 3611.74  122.39 
  -3  -3  -1 3443.26  126.49 
   3  -3   1 3408.36  116.59 
  -3  -3  -1 3499.35  125.79 
   3  -3   1 3504.75  120.79 
  -3  -3  -1 3423.26  126.09 
  -3  -3  -1 3487.55  125.29 
  -3  -3  -1 3441.36  123.09 
  -3  -3  -1 3473.05  120.09 
  -3  -3  -1 3379.86  126.79 
  -3  -3  -1 3328.07  125.69 
  -3  -3  -1 3412.06  124.29 
  -3  -3  -1 3397.96  125.09 
   3  -3   1 3347.87  121.29 
   3  -3   1 3435.16  126.19 
   3  -3   1 3430.86  120.89 
   3  -3   1 3364.26  115.39 
  -3  -3  -1 3423.26  124.39 
   3  -3   1 3510.05  131.39 
   3  -3   1 3568.94  127.39 
   3  -3   1 3577.94  125.69 
   3  -3   1 3408.06  116.89 
   3  -3   1 3452.45  118.89 
   3   3   1 3387.16  124.09 
  -3   3  -1 3451.65  117.29 
   3   3   1 3495.35  125.39 
  -3   3  -1 3429.36  125.49 
  -3   3  -1 3459.65  121.19 
  -3   3  -1 3377.86  118.99 
   3   3   1 3453.55  120.19 
  -3   3  -1 3443.56  123.19 
   3   3   1 3508.05  124.39 
  -3   3  -1 3482.15  120.59 
   3   3   1 3454.25  119.79 
  -3   3  -1 3386.46  116.99 
   3   3   1 3410.76  119.19 
  -3   3  -1 3458.45  121.49 
   3   3   1 3478.25  122.89 
   3   3   1 3316.67  126.79 
  -3   3  -1 3494.75  126.39 
   3   3   1 3545.25  129.59 
   3   3   1 3446.86  129.79 
  -3   3  -1 3471.45  121.89 
   3   3   1 3495.75  124.29 
   3   3   1 3484.05  123.79 
  -3   3  -1 3399.86  122.59 
  -3   3  -1 3424.06  118.49 
  -3   3  -1 3380.16  116.79 
  -3   3  -1 3474.95  122.39 
   3   3   1 3568.84  121.79 
  -3   3  -1 3326.87  123.79 
   3   3   1 3433.46  124.39 
  -3   3  -1 3261.87  117.79 
  -3   3  -1 3428.06  119.29 
   3   3   1 3525.05  125.49 
  -3   3  -1 3445.76  116.39 
  -3   3  -1 3436.56  117.09 
   3   3   1 3410.76  127.39 
   3   3   1 3712.03  120.99 
   3   3   1 3376.56  124.99 
   3   3   1 3463.25  124.89 
  -3   3  -1 3460.85  122.09 
  -3   3  -1 3449.95  116.59 
  -4  -3  -1  360.96   24.10 
  -4  -3  -1  313.37   22.70 
   4  -3   1  334.27   18.40 
  -4  -3  -1  298.97   22.60 
   4  -3   1  379.06   28.10 
   4  -3   1  320.77   19.90 
   4  -3   1  348.07   15.60 
  -4  -3  -1  339.47   21.10 
   4  -3   1  368.56   24.70 
   4  -3   1  304.27   23.30 
   4  -3   1  345.67   23.60 
   4  -3   1  325.57   22.00 
   4  -3   1  351.46   23.10 
   4  -3   1  325.77   21.30 
  -4  -3  -1  318.27   20.70 
  -4  -3  -1  330.57   23.40 
  -4  -3  -1  313.97   24.10 
  -4  -3  -1  337.47   24.40 
  -4  -3  -1  343.37   24.00 
   4  -3   1  328.57   19.80 
  -4  -3  -1  345.07   23.10 
  -4  -3  -1  325.17   23.10 
  -4  -3  -1  355.26   18.00 
  -4  -3  -1  352.56   23.50 
  -4  -3  -1  344.07   22.50 
  -4  -3  -1  317.87   21.00 
   4  -3   1  337.47   20.60 
   4  -3   1  323.47   21.50 
  -4   3  -1  362.26   15.50 
   4   3   1  324.37   21.90 
   4   3   1  344.07   22.70 
  -4   3  -1  332.37   15.80 
  -4   3  -1  326.57   22.30 
  -4   3  -1  321.97   16.50 
   4   3   1  333.67   18.70 
   4   3   1  320.87   24.10 
  -4   3  -1  326.77   15.50 
   4   3   1  316.17   21.70 
   4   3   1  322.57   22.70 
   4   3   1  329.17   20.80 
  -4   3  -1  336.57   15.70 
  -4   3  -1  297.17   21.20 
  -4   3  -1  324.27   21.00 
  -4   3  -1  344.97   21.00 
   4   3   1  384.26   26.40 
   4   3   1  359.76   26.20 
  -4   3  -1  310.37   19.00 
  -4   3  -1  302.17   16.80 
   4   3   1  297.97   22.40 
  -4   3  -1  316.97   15.50 
  -4   3  -1  346.77   15.10 
   4   3   1  344.27   17.80 
   4   3   1  321.07   26.60 
  -4   3  -1  335.87   19.30 
   4   3   1  369.36   22.30 
   4   3   1  316.87   19.90 
   4   3   1  335.57   21.90 
   4   3   1  313.77   18.80 
   4   3   1  322.87   17.40 
  -4   3  -1  321.77   20.90 
   4   3   1  326.97   22.50 
  -4   3  -1  378.46   24.70 
  -4   3  -1  317.57   19.90 
   5  -3   1  203.38   21.60 
   5  -3   1  218.58   23.40 
  -5  -3  -1  231.28   18.60 
  -5  -3  -1  210.88   22.10 
   5  -3   1  222.28   19.60 
  -5  -3  -1  233.68   24.00 
   5  -3   1  222.68   13.80 
   5  -3   1  220.38   17.30 
  -5  -3  -1  211.98   23.60 
  -5  -3  -1  194.98   21.30 
  -5  -3  -1  246.98   14.40 
  -5  -3  -1  209.38   24.20 
   5  -3   1  236.78   22.00 
  -5  -3  -1  245.18   24.50 
   5  -3   1  210.98   21.70 
   5  -3   1  190.38   24.70 
  -5  -3  -1  230.08   23.40 
   5  -3   1  225.08   19.40 
  -5  -3  -1  213.68   20.20 
  -5  -3  -1  206.58   22.00 
  -5  -3  -1  240.08   22.80 
   5  -3   1  198.68   19.80 
   5  -3   1  223.08   23.60 
  -5  -3  -1  240.28   18.20 
   5  -3   1  207.38   22.00 
   5  -3   1  217.68   17.60 
  -5  -3  -1  223.58   24.70 
  -5  -3  -1  238.98   22.90 
   5   3   1  252.87   27.10 
   5   3   1  248.08   27.40 
   5   3   1  240.38   24.00 
   5   3   1  227.58   23.10 
   5   3   1  219.98   16.90 
  -5   3  -1  209.08   19.60 
  -5   3  -1  236.58   13.30 
  -5   3  -1  219.88   20.60 
  -5   3  -1  201.08   19.70 
  -5   3  -1  221.78   20.50 
   5   3   1  248.18   17.70 
   5   3   1  240.78   16.80 
   5   3   1  215.68   13.80 
  -5   3  -1  206.28   21.30 
   5   3   1  218.08   24.40 
  -5   3  -1  212.38   12.00 
   5   3   1  222.48   23.10 
   5   3   1  277.47   21.60 
   5   3   1  232.58   13.80 
   5   3   1  201.18   16.10 
  -5   3  -1  204.08   13.10 
   5   3   1  235.88   21.40 
  -5   3  -1  216.28   17.60 
  -5   3  -1  202.48   23.10 
  -5   3  -1  258.67   23.40 
  -5   3  -1  229.58   17.70 
  -5   3  -1  222.88   13.20 
  -5   3  -1  213.88   13.20 
   5   3   1  238.88   23.90 
   5   3   1  207.88   24.60 
   5   3   1  266.77   29.80 
  -5   3  -1  221.28   15.20 
  -5   3  -1  219.38   14.20 
  -6  -3  -1   62.39   15.00 
   6  -3   1   42.50   11.40 
   6  -3   1   66.39   14.90 
  -6  -3  -1   43.60   12.80 
   6  -3   1   44.00    9.70 
  -6  -3  -1   65.59   11.90 
   6  -3   1   31.70   10.40 
  -6  -3  -1   52.79   14.10 
   6  -3   1   40.80   11.90 
  -6  -3  -1   42.10    7.30 
   6  -3   1   44.90   11.90 
   6  -3   1   53.09   13.80 
  -6  -3  -1   36.10   13.50 
   6  -3   1   49.70   14.40 
   6  -3   1   30.90    9.90 
  -6  -3  -1   44.40   12.30 
  -6  -3  -1   49.80   13.30 
  -6  -3  -1   67.09   14.60 
  -6  -3  -1   40.10   12.60 
  -6  -3  -1   41.60   10.40 
  -6  -3  -1   57.59   14.70 
   6  -3   1   24.60   13.00 
  -6  -3  -1   61.69   12.20 
  -6  -3  -1   33.60   12.50 
   6  -3   1   38.20   12.50 
  -6  -3  -1   47.20   12.90 
   6  -3   1   57.99   14.30 
   6   3   1   27.20    8.80 
  -6   3  -1   40.50   10.90 
   6   3   1   55.89   14.90 
   6   3   1   49.40   13.90 
   6   3   1   28.80   14.00 
  -6   3  -1   52.99    8.70 
  -6   3  -1   45.90    9.50 
  -6   3  -1   44.70    6.80 
  -6   3  -1   43.90   10.80 
   6   3   1   50.39    9.80 
   6   3   1   48.50   10.50 
   6   3   1   81.09   16.60 
   6   3   1   50.59    7.60 
   6   3   1   50.39   13.10 
   6   3   1   38.80    9.60 
  -6   3  -1   51.79   12.60 
   6   3   1   34.70   11.00 
  -6   3  -1   30.10   12.60 
   6   3   1   39.50   11.20 
  -6   3  -1   46.80    8.00 
   6   3   1   39.60   12.80 
   6   3   1   61.19   15.80 
   6   3   1   52.69   13.90 
  -6   3  -1   41.70   12.00 
  -6   3  -1   72.09   12.90 
  -6   3  -1   31.40   11.50 
  -6   3  -1   42.70   11.60 
  -6   3  -1   49.40   12.40 
   7  -3   1   24.20   11.70 
  -7  -3  -1    9.30   11.50 
   7  -3   1   13.90   10.20 
  -7  -3  -1   10.70    9.30 
  -7  -3  -1   30.10   13.30 
  -7  -3  -1   19.70   11.40 
   7  -3   1   19.40   10.10 
   7  -3   1   21.30   12.90 
  -7  -3  -1   33.30   10.90 
   7  -3   1   39.00   16.40 
  -7  -3  -1   40.00   14.90 
   7  -3   1   31.60   12.90 
   7  -3   1    9.70   11.80 
   7  -3   1   31.00   11.60 
  -7  -3  -1    9.40   10.80 
  -7  -3  -1   19.40   12.20 
  -7  -3  -1   26.90   13.10 
   7  -3   1   19.40    9.80 
  -7  -3  -1   43.60   11.00 
  -7  -3  -1   28.40   12.70 
  -7  -3  -1   31.80   12.20 
   7  -3   1    8.40   10.40 
   7  -3   1   21.40   10.60 
  -7  -3  -1   15.70   13.00 
   7  -3   1   15.60    7.90 
  -7  -3  -1   22.80   12.80 
   7   3   1   26.00    9.90 
  -7   3  -1   21.80   12.40 
  -7   3  -1   23.10    7.90 
   7   3   1   35.70   13.90 
  -7   3  -1   15.30    7.80 
  -7   3  -1   31.90   11.20 
   7   3   1   22.20   10.70 
  -7   3  -1   27.50   11.30 
   7   3   1   15.70    7.80 
   7   3   1   36.60   12.30 
  -7   3  -1   42.50   13.00 
   7   3   1   27.90   12.10 
   7   3   1   15.30   15.00 
  -7   3  -1   39.20   12.10 
   7   3   1   17.60    8.60 
   7   3   1   30.30   13.00 
   7   3   1   16.50   12.60 
   7   3   1   77.99   17.40 
   7   3   1   16.90   11.80 
  -7   3  -1    6.90   10.40 
  -7   3  -1   16.40   10.90 
  -7   3  -1   14.80    9.10 
   7   3   1   22.10   10.80 
  -7   3  -1   27.70   14.20 
  -7   3  -1   33.70   12.20 
  -8  -3  -1  -13.40    9.70 
   8  -3   1    9.00   12.00 
  -8  -3  -1    4.30   13.10 
   8  -3   1   21.70   14.80 
  -8  -3  -1   -0.50   11.00 
   8  -3   1   -5.60   13.50 
  -8  -3  -1   -0.80   11.10 
   8  -3   1   -7.90    9.70 
   8  -3   1    2.70    9.70 
  -8  -3  -1    8.90   13.00 
  -8  -3  -1   -0.60    9.80 
  -8  -3  -1  -12.10    8.30 
   8  -3   1   -1.20   13.20 
   8  -3   1   -0.60   11.40 
  -8  -3  -1  -14.90    9.70 
  -8  -3  -1    6.90   13.30 
  -8  -3  -1   -4.30    9.90 
   8  -3   1   -0.50    9.30 
   8  -3   1   -7.20    9.50 
  -8  -3  -1    1.70   12.80 
  -8  -3  -1   -6.50    7.90 
   8  -3   1    1.20   12.40 
  -8  -3  -1  -14.60    7.60 
  -8  -3  -1   -0.70   10.90 
   8  -3   1    8.60   10.90 
  -8  -3  -1   -6.30    8.50 
   8   3   1   -2.20    8.40 
  -8   3  -1   29.50   14.10 
   8   3   1   -0.10    8.10 
  -8   3  -1   -3.70    9.80 
   8   3   1    0.20    7.60 
   8   3   1   -8.40    6.50 
  -8   3  -1   18.40   13.60 
   8   3   1   -7.10    8.50 
  -8   3  -1    8.80   10.50 
   8   3   1   14.70   10.70 
   8   3   1   -1.50   12.60 
  -8   3  -1   -1.70    9.40 
  -8   3  -1   16.10   12.20 
   8   3   1   -2.80   12.50 
  -8   3  -1   -7.70    9.20 
   8   3   1   -0.10    9.20 
   8   3   1   -8.90    9.10 
  -8   3  -1    7.70   11.20 
  -8   3  -1  -12.20    8.20 
   8   3   1    8.10   11.10 
  -8   3  -1    4.90    9.70 
  -8   3  -1   -0.10    8.40 
   8   3   1    2.50   10.40 
  -9  -3  -1   -0.50   12.00 
   9  -3   1   16.20   15.50 
  -9  -3  -1    4.20   13.20 
  -9  -3  -1  -10.60   12.50 
  -9  -3  -1    5.70   11.00 
  -9  -3  -1    4.80   12.50 
   9  -3   1   10.00   14.60 
  -9  -3  -1    0.10   12.60 
  -9  -3  -1  -22.00   12.90 
  -9  -3  -1    6.30   13.50 
   9  -3   1   18.30   18.90 
   9  -3   1    6.50   14.40 
  -9  -3  -1    3.30   10.30 
   9  -3   1   19.90   12.90 
  -9  -3  -1   -3.20   13.60 
  -9  -3  -1   14.00   13.90 
   9  -3   1   -6.70   13.50 
   9  -3   1    1.60   11.30 
  -9  -3  -1   -9.20   10.00 
   9  -3   1    2.40   11.70 
   9   3   1   17.00   11.60 
   9   3   1    8.60   16.70 
  -9   3  -1  -16.40   10.80 
  -9   3  -1   -6.30   12.00 
  -9   3  -1   -0.70   12.00 
   9   3   1    8.80   11.30 
   9   3   1  -11.90   10.10 
   9   3   1    2.90   11.20 
   9   3   1    2.70   12.70 
   9   3   1   19.20   11.20 
   9   3   1    4.60    9.50 
   9   3   1   17.80   14.40 
  -9   3  -1    1.40   13.70 
   9   3   1    8.00   16.50 
  -9   3  -1    5.30   12.10 
  -9   3  -1   11.60   12.80 
   9   3   1    5.40   12.30 
  -9   3  -1    0.90   11.30 
   9  -4  -1   12.60   14.60 
   9  -4  -1   35.30   19.40 
  -9  -4   1    6.30   15.80 
   9  -4  -1   30.90   14.80 
  -9  -4   1   10.80   16.40 
   9  -4  -1   24.30   13.20 
  -9  -4   1   24.80   17.20 
   9  -4  -1   12.50   16.10 
  -9  -4   1   22.10   17.20 
  -9  -4   1   11.20   15.80 
  -9  -4   1   33.30   15.90 
  -9  -4   1    7.10   16.60 
   9  -4  -1    9.20   15.20 
  -9  -4   1   24.90   17.00 
  -9  -4   1   33.40   17.80 
  -9  -4   1   33.20   19.70 
  -9  -4   1   20.10   13.70 
  -9  -4   1   40.50   17.90 
  -9   4   1   38.20   17.00 
  -9   4   1   25.60   15.90 
   9   4  -1   28.30   17.70 
   9   4  -1    8.20   13.60 
   9   4  -1   27.70   15.60 
  -9   4   1   23.20   16.20 
  -9   4   1   51.59   18.50 
   9   4  -1   29.70   14.30 
   9   4  -1   20.00   16.20 
   9   4  -1   27.00   19.40 
   9   4  -1   48.20   16.60 
   9   4  -1   36.80   16.60 
   9   4  -1   48.30   22.00 
  -9   4   1   17.70   14.60 
  -9   4   1   19.90   13.20 
  -9   4   1   49.60   18.50 
  -9   4   1   16.70   15.50 
   9   4  -1   12.40   14.70 
   9   4  -1   23.90   12.30 
  -8  -4   1  316.07   33.10 
  -8  -4   1  261.27   26.80 
  -8  -4   1  278.27   32.70 
  -8  -4   1  232.18   32.50 
  -8  -4   1  314.17   29.80 
  -8  -4   1  284.17   34.10 
  -8  -4   1  263.77   32.10 
  -8  -4   1  308.27   37.50 
   8  -4  -1  309.57   35.90 
   8  -4  -1  280.17   30.20 
  -8  -4   1  236.68   31.60 
  -8  -4   1  323.57   37.00 
   8  -4  -1  284.67   34.40 
   8  -4  -1  291.87   34.60 
  -8  -4   1  307.67   29.70 
  -8  -4   1  332.47   36.70 
   8  -4  -1  300.67   29.50 
   8  -4  -1  277.77   29.60 
   8  -4  -1  255.97   31.10 
  -8  -4   1  255.97   33.80 
  -8  -4   1  315.47   34.50 
  -8   4   1  363.66   35.50 
  -8   4   1  266.07   32.60 
  -8   4   1  284.37   27.50 
   8   4  -1  272.27   28.40 
  -8   4   1  266.17   29.50 
  -8   4   1  280.57   30.70 
  -8   4   1  314.17   31.60 
  -8   4   1  318.57   32.00 
  -8   4   1  358.86   31.90 
   8   4  -1  249.88   30.10 
   8   4  -1  311.07   39.40 
   8   4  -1  299.27   30.40 
   8   4  -1  364.46   38.20 
   8   4  -1  205.58   35.30 
  -8   4   1  281.27   31.20 
   8   4  -1  273.47   36.30 
  -8   4   1  352.46   31.30 
   8   4  -1  236.18   34.80 
   8   4  -1  289.57   34.20 
   8   4  -1  261.37   35.40 
  -8   4   1  302.47   30.90 
   8   4  -1  259.57   33.30 
  -7  -4   1   -8.30   10.20 
  -7  -4   1    7.90   10.00 
  -7  -4   1   23.70   14.00 
  -7  -4   1    4.50   10.70 
  -7  -4   1    5.40    9.30 
  -7  -4   1   -3.10    8.80 
   7  -4  -1   -2.40    8.60 
  -7  -4   1  -11.50   11.70 
   7  -4  -1   -1.30    9.90 
  -7  -4   1   17.10   13.00 
   7  -4  -1    7.70    9.50 
   7  -4  -1    4.00    7.50 
   7  -4  -1   -1.00    9.60 
  -7  -4   1   16.20   12.40 
   7  -4  -1   10.20    9.60 
  -7  -4   1    7.60   12.40 
   7  -4  -1   -1.60   11.30 
   7  -4  -1    0.20    8.80 
  -7  -4   1   17.40   13.10 
  -7  -4   1  -12.40    9.60 
  -7  -4   1    7.50   11.60 
   7  -4  -1    0.70   10.60 
  -7  -4   1   27.50   13.80 
   7  -4  -1   -5.50    7.90 
   7   4  -1   15.70   14.00 
   7   4  -1   10.10   11.20 
  -7   4   1    8.20    7.90 
  -7   4   1    5.40    9.50 
   7   4  -1    2.50    8.20 
   7   4  -1    5.60    8.40 
  -7   4   1    2.60    8.30 
  -7   4   1    5.80   10.20 
   7   4  -1   10.70    9.90 
  -7   4   1   12.00    8.90 
   7   4  -1   15.30    8.60 
   7   4  -1    7.20    8.00 
   7   4  -1    1.90    7.00 
   7   4  -1    4.30   12.00 
   7   4  -1   -0.80    8.20 
  -7   4   1   14.80   11.50 
   7   4  -1    9.30    8.80 
  -7   4   1    2.50   10.10 
   7   4  -1    4.80   10.00 
   7   4  -1   -4.90    9.80 
  -7   4   1   16.60   10.50 
  -7   4   1   25.90   11.70 
  -7   4   1    8.50   11.10 
  -7   4   1    9.00    9.20 
   7   4  -1   18.10   12.20 
   7   4  -1    1.60    9.70 
  -7   4   1   25.30   11.00 
  -7   4   1    5.40    9.90 
  -6  -4   1  263.47   29.00 
   6  -4  -1  325.67   25.90 
  -6  -4   1  298.47   24.50 
   6  -4  -1  321.77   24.00 
  -6  -4   1  318.87   18.40 
   6  -4  -1  272.77   20.70 
  -6  -4   1  316.07   24.20 
  -6  -4   1  337.07   34.10 
   6  -4  -1  307.27   25.90 
  -6  -4   1  246.18   27.80 
  -6  -4   1  268.77   29.20 
   6  -4  -1  306.37   24.30 
   6  -4  -1  300.87   25.80 
   6  -4  -1  313.37   23.70 
   6  -4  -1  315.07   26.80 
  -6  -4   1  340.27   32.10 
  -6  -4   1  248.88   29.50 
   6  -4  -1  287.07   29.00 
  -6  -4   1  325.47   25.40 
  -6  -4   1  249.38   26.60 
  -6  -4   1  269.47   28.80 
  -6  -4   1  282.17   29.40 
  -6  -4   1  274.77   28.60 
  -6  -4   1  352.56   35.00 
   6  -4  -1  330.97   28.30 
   6  -4  -1  288.07   26.30 
  -6   4   1  323.27   21.70 
   6   4  -1  301.57   29.30 
   6   4  -1  314.17   33.40 
   6   4  -1  315.27   31.80 
  -6   4   1  327.77   29.20 
   6   4  -1  269.17   28.00 
  -6   4   1  314.67   25.70 
   6   4  -1  290.97   32.20 
  -6   4   1  310.47   27.10 
   6   4  -1  368.56   35.10 
   6   4  -1  286.47   16.90 
   6   4  -1  320.57   29.00 
  -6   4   1  302.67   23.60 
   6   4  -1  256.87   23.40 
  -6   4   1  302.07   21.70 
  -6   4   1  267.07   26.30 
   6   4  -1  287.07   23.80 
  -6   4   1  298.17   22.90 
   6   4  -1  296.27   22.60 
   6   4  -1  359.76   34.50 
   6   4  -1  369.96   41.30 
  -6   4   1  303.57   24.40 
  -6   4   1  284.17   17.70 
  -6   4   1  276.07   26.40 
   6   4  -1  329.87   30.30 
   6   4  -1  297.27   27.30 
  -6   4   1  325.17   23.60 
  -6   4   1  288.97   23.10 
   5  -4  -1   57.49    7.60 
   5  -4  -1   81.59   14.50 
  -5  -4   1   63.19   14.50 
   5  -4  -1   60.29   12.30 
  -5  -4   1   61.89   12.50 
  -5  -4   1   37.10   11.60 
  -5  -4   1   37.40   11.70 
   5  -4  -1   53.39   12.10 
  -5  -4   1   40.90   10.40 
  -5  -4   1   43.80   12.20 
  -5  -4   1   55.19   14.40 
  -5  -4   1   50.19   12.30 
   5  -4  -1   53.29   10.40 
   5  -4  -1   61.19   13.20 
  -5  -4   1   42.80   14.20 
   5  -4  -1   58.49   11.00 
  -5  -4   1   44.50   13.50 
  -5  -4   1   68.39   14.90 
  -5  -4   1   48.90   13.50 
   5  -4  -1   34.70   11.40 
   5  -4  -1   74.29   13.30 
   5  -4  -1   47.70   10.50 
  -5  -4   1   64.69    9.40 
   5  -4  -1   62.29    7.30 
  -5  -4   1   53.19   13.90 
   5  -4  -1   47.60   10.60 
   5  -4  -1   42.20    9.90 
  -5  -4   1   23.30   11.80 
   5   4  -1   45.50   15.30 
   5   4  -1   37.60   12.10 
   5   4  -1   71.59    9.40 
   5   4  -1   43.80   13.00 
  -5   4   1   54.59   10.90 
   5   4  -1   33.40   11.30 
  -5   4   1   63.49   11.80 
   5   4  -1   56.09   12.10 
   5   4  -1   49.90   11.30 
  -5   4   1   41.40    9.90 
  -5   4   1   41.60   11.80 
   5   4  -1   49.10   13.30 
   5   4  -1   53.69   12.90 
   5   4  -1   59.39   12.20 
  -5   4   1   40.10    7.10 
   5   4  -1   54.59   14.10 
  -5   4   1   34.50   10.10 
  -5   4   1   43.20    6.80 
   5   4  -1   63.79   12.00 
  -5   4   1   57.29   10.30 
   5   4  -1   44.70   10.80 
  -5   4   1   60.39   12.50 
  -5   4   1   39.20    6.80 
  -5   4   1   54.49   12.90 
  -5   4   1   38.20    9.30 
   5   4  -1   41.80    9.00 
   5   4  -1   47.90   14.50 
  -5   4   1   48.40    7.80 
  -4  -4   1  881.91   44.10 
  -4  -4   1  851.51   44.00 
  -4  -4   1  827.62   43.00 
   4  -4  -1  823.12   40.90 
  -4  -4   1  911.41   45.40 
   4  -4  -1  861.81   37.50 
   4  -4  -1  921.61   42.30 
  -4  -4   1  812.72   44.60 
   4  -4  -1  853.71   40.50 
  -4  -4   1  844.62   43.90 
  -4  -4   1  925.61   45.50 
   4  -4  -1  872.61   42.20 
  -4  -4   1  789.82   44.10 
  -4  -4   1  836.12   36.90 
  -4  -4   1  769.52   40.90 
  -4  -4   1  798.42   40.80 
  -4  -4   1  893.71   42.30 
   4  -4  -1  831.52   41.20 
   4  -4  -1  860.61   38.70 
   4  -4  -1  865.41   41.60 
   4  -4  -1  880.61   38.30 
  -4  -4   1  813.92   41.00 
   4  -4  -1  865.51   42.70 
   4  -4  -1  868.41   39.80 
   4  -4  -1  868.11   39.10 
   4  -4  -1  847.12   34.50 
  -4  -4   1  870.21   44.20 
  -4  -4   1  935.61   45.90 
   4  -4  -1  723.53   34.50 
   4  -4  -1  839.22   34.10 
  -4  -4   1  893.81   44.40 
   4  -4  -1  870.31   31.70 
  -4   4   1  774.72   39.60 
  -4   4   1  867.11   34.60 
  -4   4   1  870.31   35.20 
  -4   4   1  866.71   39.00 
   4   4  -1  803.62   43.80 
   4   4  -1  901.71   48.10 
  -4   4   1  799.62   39.20 
   4   4  -1  836.52   43.70 
   4   4  -1  830.42   45.50 
   4   4  -1  836.82   43.40 
   4   4  -1  901.41   37.30 
   4   4  -1  878.71   37.20 
   4   4  -1  888.61   40.90 
  -4   4   1  903.31   35.10 
   4   4  -1  903.81   43.30 
   4   4  -1  964.40   45.20 
   4   4  -1  863.61   39.50 
   4   4  -1  916.51   44.80 
   4   4  -1  938.11   49.20 
  -4   4   1  916.21   39.20 
  -4   4   1  893.21   43.30 
  -4   4   1  873.61   34.10 
   4   4  -1  884.31   41.20 
  -4   4   1  882.81   33.40 
  -4   4   1  864.31   34.70 
  -4   4   1  889.11   35.70 
  -4   4   1  864.21   42.60 
   4   4  -1  871.41   42.20 
  -4   4   1  837.72   37.90 
  -3  -4   1   38.60   11.00 
   3  -4  -1   28.30    5.80 
   3  -4  -1   27.80    8.10 
  -3  -4   1   63.09   12.90 
  -3  -4   1   29.40    9.20 
   3  -4  -1   32.30    7.60 
  -3  -4   1   20.90    8.40 
   3  -4  -1   37.10    7.60 
   3  -4  -1   33.50    8.60 
  -3  -4   1   49.80   10.60 
   3  -4  -1   26.20    6.40 
   3  -4  -1   35.20    6.30 
  -3  -4   1   17.80    8.70 
  -3  -4   1   39.60   10.40 
  -3  -4   1   57.09   11.20 
  -3  -4   1   33.80   10.30 
  -3  -4   1   23.40    9.20 
   3  -4  -1   44.20    9.20 
  -3  -4   1   63.59   11.60 
   3  -4  -1   28.30    8.70 
  -3  -4   1   34.60    8.90 
   3  -4  -1   42.90    7.80 
  -3  -4   1   26.20    9.40 
   3  -4  -1   39.50    7.20 
   3  -4  -1   25.90    9.20 
  -3  -4   1   42.50    9.80 
   3  -4  -1   32.00    6.60 
  -3  -4   1   40.90   10.60 
  -3  -4   1   25.50    8.80 
  -3  -4   1   38.20    8.90 
   3  -4  -1   35.60    9.00 
  -3  -4   1   40.20    7.90 
   3   4  -1   45.30   10.40 
  -3   4   1   26.00    5.70 
  -3   4   1   32.60    6.20 
  -3   4   1   35.80    7.30 
  -3   4   1   32.00    6.60 
   3   4  -1   36.60   10.90 
  -3   4   1   43.70    9.60 
  -3   4   1   40.60    6.80 
   3   4  -1   44.10    8.20 
   3   4  -1   64.99   11.30 
  -3   4   1   31.10    5.50 
   3   4  -1   49.80   10.40 
  -3   4   1   35.70    8.20 
   3   4  -1   43.40    8.00 
   3   4  -1   36.40    8.80 
  -3   4   1   39.20   10.20 
  -3   4   1   35.00    6.30 
   3   4  -1   42.90   11.80 
  -3   4   1   38.60    7.60 
   3   4  -1   42.80    6.90 
   3   4  -1   57.59   12.50 
   3   4  -1   58.29   11.60 
   3   4  -1   64.49    9.50 
  -3   4   1   26.90    7.20 
   3   4  -1   32.90    8.80 
  -3   4   1   40.40    8.20 
  -3   4   1   28.30    7.60 
  -3   4   1   32.90    6.00 
   3   4  -1   31.90    8.10 
  -3   4   1   38.90    6.90 
  -3   4   1   32.30    7.40 
  -3   4   1   25.70    5.60 
   3   4  -1   44.70   10.40 
  -3   4   1   33.40    6.70 
   2  -4  -1  579.14   28.60 
  -2  -4   1  535.85   28.90 
   2  -4  -1  580.94   27.70 
  -2  -4   1  537.05   28.80 
   2  -4  -1  535.35   22.60 
   2  -4  -1  523.75   24.00 
   2  -4  -1  533.15   26.40 
   2  -4  -1  521.55   20.70 
  -2  -4   1  556.54   30.70 
   2  -4  -1  542.65   21.50 
   2  -4  -1  569.14   28.10 
   2  -4  -1  542.85   22.50 
   2  -4  -1  479.35   24.60 
  -2  -4   1  516.65   22.00 
   2  -4  -1  528.05   23.40 
   2  -4  -1  534.05   22.40 
   2  -4  -1  548.85   23.50 
  -2  -4   1  524.45   28.40 
  -2  -4   1  570.64   36.00 
   2  -4  -1  527.95   26.60 
  -2  -4   1  490.35   28.60 
  -2  -4   1  575.04   29.30 
  -2  -4   1  532.75   29.40 
   2  -4  -1  576.04   32.20 
   2  -4  -1  519.45   24.50 
   2  -4  -1  565.94   24.30 
   2  -4  -1  483.95   26.30 
  -2  -4   1  552.34   28.40 
  -2  -4   1  534.85   23.80 
  -2  -4   1  551.34   31.50 
  -2  -4   1  580.04   27.60 
   2  -4  -1  532.55   29.60 
   2  -4  -1  486.45   25.70 
  -2  -4   1  540.95   28.30 
   2  -4  -1  479.35   26.90 
  -2  -4   1  594.74   29.60 
  -2  -4   1  536.05   29.60 
  -2  -4   1  550.94   26.70 
  -2   4   1  586.14   27.20 
  -2   4   1  547.35   24.50 
   2   4  -1  509.85   29.10 
  -2   4   1  550.34   24.60 
   2   4  -1  538.15   28.70 
   2   4  -1  496.65   27.50 
  -2   4   1  542.25   25.70 
  -2   4   1  558.74   25.00 
  -2   4   1  523.15   23.50 
   2   4  -1  547.85   28.80 
  -2   4   1  525.75   24.90 
  -2   4   1  531.75   24.80 
  -2   4   1  503.85   21.70 
  -2   4   1  518.55   20.40 
   2   4  -1  544.85   23.80 
   2   4  -1  518.75   27.60 
  -2   4   1  531.15   24.00 
   2   4  -1  581.34   28.40 
  -2   4   1  538.25   22.10 
  -2   4   1  535.65   28.20 
   2   4  -1  563.34   29.40 
  -2   4   1  529.05   23.30 
   2   4  -1  530.65   28.80 
  -2   4   1  533.15   28.50 
   2   4  -1  545.25   28.90 
  -2   4   1  536.15   25.00 
  -2   4   1  526.95   23.80 
  -2   4   1  535.95   24.80 
  -2   4   1  524.55   24.80 
   2   4  -1  503.35   31.90 
  -2   4   1  489.65   26.00 
   2   4  -1  536.35   30.80 
   2   4  -1  490.45   27.60 
   2   4  -1  505.85   31.80 
   2   4  -1  524.45   24.20 
  -2   4   1  514.65   22.80 
   2   4  -1  554.94   29.90 
  -1  -4   1    1.60    5.30 
   1  -4  -1   -0.40    2.60 
   1  -4  -1   -1.80    3.80 
   1  -4  -1    9.60    4.90 
   1  -4  -1    1.00    3.10 
  -1  -4   1   10.20    6.20 
   1  -4  -1   -4.20    3.80 
   1  -4  -1    7.50    4.90 
   1  -4  -1   15.20    7.60 
  -1  -4   1    5.10    6.60 
   1  -4  -1   -8.80    4.80 
   1  -4  -1    8.70    4.70 
   1  -4  -1    4.10    3.10 
  -1  -4   1    3.10    6.10 
  -1  -4   1   -1.70    2.60 
   1  -4  -1    0.60    3.40 
   1  -4  -1    3.20    3.10 
  -1  -4   1    4.30    5.90 
   1  -4  -1    2.20    4.30 
   1  -4  -1   -0.10    5.20 
   1  -4  -1    5.10    4.50 
   1  -4  -1   -3.70    3.00 
   1  -4  -1   -4.60    4.70 
   1  -4  -1   -0.80    5.00 
  -1  -4   1    7.70    5.70 
  -1  -4   1    1.10    6.20 
  -1  -4   1   -0.30    5.70 
   1  -4  -1    3.00    6.40 
  -1  -4   1    9.90    7.90 
   1  -4  -1    0.60    4.50 
   1  -4  -1   -2.80    5.00 
   1  -4  -1   -0.70    3.20 
   1  -4  -1    3.50    3.60 
   1  -4  -1    2.80    4.50 
  -1  -4   1   -3.30    5.10 
  -1  -4   1    0.10    5.40 
  -1  -4   1    0.80    5.20 
   1  -4  -1    1.40    2.80 
   1  -4  -1    3.80    2.90 
   1  -4  -1   -0.40    5.20 
   1  -4  -1    3.50    7.10 
  -1  -4   1   -2.30    5.40 
   1  -4  -1    7.30    3.70 
  -1  -4   1   -5.00    7.60 
   1   4  -1   -8.30    6.50 
   1   4  -1    2.10    4.20 
  -1   4   1    8.10    3.20 
  -1   4   1   -2.00    3.00 
  -1   4   1    6.00    4.60 
   1   4  -1    6.00    3.20 
  -1   4   1   -1.10    3.20 
  -1   4   1    6.80    4.80 
   1   4  -1    0.50    2.40 
   1   4  -1    6.10    4.00 
   1   4  -1    8.20    5.30 
  -1   4   1    3.20    5.80 
  -1   4   1   -2.10    3.10 
   1   4  -1    0.80    4.90 
   1   4  -1    4.40    5.10 
  -1   4   1   -1.80    5.20 
   1   4  -1    2.50    4.60 
   1   4  -1   -2.40    4.70 
   1   4  -1   -1.40    4.70 
  -1   4   1    4.50    4.20 
   1   4  -1   -2.50    4.30 
  -1   4   1    9.00    7.30 
   1   4  -1   -2.10    4.20 
   1   4  -1   -1.60    5.30 
   1   4  -1   -6.10    4.10 
  -1   4   1    8.20    5.30 
  -1   4   1    2.40    3.20 
  -1   4   1    1.90    4.20 
  -1   4   1    2.10    4.50 
   0  -4   1  660.13   36.90 
   0  -4  -1  612.94   31.00 
   0  -4  -1  621.04   30.00 
   0  -4  -1  545.25   35.10 
   0  -4  -1  623.14   30.20 
   0  -4  -1  638.04   30.80 
   0  -4   1  605.54   35.90 
   0  -4   1  613.94   29.90 
   0  -4  -1  626.84   28.50 
   0  -4  -1  600.54   27.00 
   0  -4   1  649.93   29.50 
   0  -4   1  572.44   29.60 
   0  -4   1  637.14   28.50 
   0  -4  -1  648.64   29.80 
   0  -4  -1  471.05   31.40 
   0  -4   1  652.63   34.20 
   0  -4  -1  619.64   29.20 
   0  -4   1  632.54   30.40 
   0  -4   1  567.64   41.30 
   0  -4  -1  628.04   29.40 
   0  -4   1  662.63   31.50 
   0  -4   1  643.74   29.30 
   0  -4  -1  611.14   29.30 
   0  -4   1  592.24   37.20 
   0  -4   1  653.63   27.50 
   0  -4  -1  669.73   36.20 
   0  -4   1  632.54   29.60 
   0  -4  -1  637.74   29.70 
   0  -4  -1  631.14   31.50 
   0  -4  -1  637.74   32.50 
   0  -4   1  606.04   28.80 
   0  -4  -1  648.94   28.90 
   0  -4  -1  641.54   28.20 
   0  -4   1  656.23   32.90 
   0  -4   1  653.53   30.90 
   0  -4   1  614.44   29.30 
   0   4  -1  637.44   30.10 
   0   4   1  651.13   28.30 
   0   4  -1  573.34   29.40 
   0   4  -1  738.93   40.30 
   0   4   1  692.13   30.80 
   0   4   1  608.34   27.90 
   0   4  -1  615.34   29.00 
   0   4  -1  624.44   28.10 
   0   4  -1  767.02   43.30 
   0   4   1  672.43   31.60 
   0   4   1  669.93   29.00 
   0   4   1  613.64   35.60 
   0   4   1  603.44   29.30 
   0   4   1  600.44   25.70 
   0   4   1  661.33   35.40 
   0   4  -1  676.83   36.30 
   0   4   1  661.23   30.20 
   0   4   1  666.53   31.80 
   0   4   1  656.23   30.30 
   0   4   1  738.83   33.70 
   0   4  -1  635.74   30.10 
   0   4  -1  619.54   33.20 
   0   4  -1  650.23   29.00 
   0   4   1  629.44   37.70 
   0   4  -1  634.14   27.70 
   0   4  -1  624.64   29.10 
   0   4  -1  631.04   28.90 
   0   4   1  623.64   27.80 
   0   4   1  628.54   30.30 
   0   4  -1  639.24   30.30 
   0   4  -1  631.34   28.40 
   0   4  -1  666.73   28.40 
   0   4  -1  612.44   27.80 
   1  -4   1  119.99    9.80 
  -1  -4  -1  138.29   16.80 
   1  -4   1  111.09   11.80 
   1  -4   1  103.79   11.70 
  -1  -4  -1  122.29   14.40 
   1  -4   1  119.99   12.50 
  -1  -4  -1  118.29   13.00 
  -1  -4  -1  152.38   16.70 
  -1  -4  -1  118.19   12.00 
   1  -4   1  101.99   10.60 
  -1  -4  -1  125.29   11.90 
   1  -4   1  131.49   14.00 
  -1  -4  -1  113.19   18.60 
  -1  -4  -1  124.69   12.50 
   1  -4   1  116.09   11.20 
   1  -4   1  125.29   10.20 
  -1  -4  -1  131.89   14.20 
  -1  -4  -1  114.89   13.40 
   1  -4   1  127.79   16.80 
  -1  -4  -1   78.29   11.20 
  -1  -4  -1   97.69   12.20 
  -1  -4  -1  101.39   13.70 
  -1  -4  -1  120.79   13.40 
   1  -4   1   91.59   10.40 
   1  -4   1  108.79   10.90 
   1  -4   1  121.79   14.60 
  -1  -4  -1  135.89   13.60 
  -1  -4  -1  117.89   13.20 
   1  -4   1  135.39   15.30 
   1  -4   1  112.39    7.80 
   1  -4   1  105.49    9.50 
   1  -4   1  125.29   17.10 
   1  -4   1  105.19   10.70 
   1  -4   1  126.49   11.60 
   1  -4   1  100.69    8.80 
   1  -4   1  113.29   17.50 
  -1  -4  -1   97.79   13.40 
  -1   4  -1  106.29   10.70 
  -1   4  -1  112.39   15.20 
  -1   4  -1  108.49    9.20 
  -1   4  -1  121.99   10.80 
  -1   4  -1  101.79   10.40 
  -1   4  -1  109.99   10.10 
   1   4   1  118.69   13.60 
   1   4   1  124.09   13.50 
   1   4   1  124.49   11.20 
   1   4   1  123.29   12.90 
   1   4   1  136.09   13.20 
  -1   4  -1  101.69   10.40 
  -1   4  -1  117.09    9.20 
  -1   4  -1  123.59   12.10 
  -1   4  -1  120.89   12.90 
   1   4   1  112.89   15.30 
   1   4   1  148.19   18.00 
   1   4   1  120.49   13.60 
   1   4   1   95.69   12.00 
   1   4   1  138.89   15.10 
   1   4   1  108.79   13.00 
  -1   4  -1  121.59   11.40 
  -1   4  -1  108.09   11.80 
  -1   4  -1  118.49   16.50 
   1   4   1  135.49   11.10 
   1   4   1  105.49   15.10 
   1   4   1  125.09   13.00 
  -1   4  -1  107.99   12.30 
  -2  -4  -1 1805.42   71.89 
  -2  -4  -1 1727.63   63.39 
  -2  -4  -1 1735.13   64.89 
   2  -4   1 1746.63   63.49 
  -2  -4  -1 1880.41   68.49 
   2  -4   1 1789.22   65.39 
   2  -4   1 1656.13   66.19 
   2  -4   1 1822.42   75.89 
   2  -4   1 1756.12   63.89 
  -2  -4  -1 1760.92   68.89 
  -2  -4  -1 1726.23   64.29 
  -2  -4  -1 1769.72   69.39 
  -2  -4  -1 1705.33   71.59 
  -2  -4  -1 1771.12   70.69 
   2  -4   1 1858.51   66.99 
   2  -4   1 1801.32   64.19 
  -2  -4  -1 1788.12   70.09 
   2  -4   1 1780.52   70.49 
  -2  -4  -1 1775.22   67.39 
   2  -4   1 1816.62   71.89 
   2  -4   1 1820.32   63.39 
   2  -4   1 1748.43   71.19 
  -2  -4  -1 1825.12   72.39 
  -2  -4  -1 1730.53   62.09 
  -2  -4  -1 1831.72   69.89 
  -2  -4  -1 1782.32   69.89 
  -2  -4  -1 1742.63   72.09 
   2  -4   1 1784.82   69.69 
  -2  -4  -1 1806.22   68.99 
   2  -4   1 1822.52   64.39 
   2  -4   1 1825.42   64.49 
  -2  -4  -1 1799.32   69.29 
   2  -4   1 1805.12   64.39 
   2  -4   1 1639.34   64.99 
  -2  -4  -1 1747.53   70.29 
   2  -4   1 1823.32   70.49 
   2   4   1 1801.82   70.29 
   2   4   1 1683.33   68.89 
  -2   4  -1 1716.93   63.89 
   2   4   1 1776.52   66.09 
  -2   4  -1 1788.72   65.29 
   2   4   1 1811.12   67.89 
   2   4   1 1770.72   62.09 
  -2   4  -1 1751.32   63.69 
  -2   4  -1 1722.53   63.19 
   2   4   1 1766.92   65.09 
   2   4   1 1744.03   69.69 
  -2   4  -1 1763.82   66.59 
  -2   4  -1 1762.42   64.19 
  -2   4  -1 1740.33   64.19 
  -2   4  -1 1793.22   71.19 
   2   4   1 1796.72   69.09 
  -2   4  -1 1790.72   69.69 
   2   4   1 1783.92   69.09 
  -2   4  -1 1781.32   65.59 
  -2   4  -1 1692.93   64.19 
  -2   4  -1 1777.72   71.89 
   2   4   1 1814.92   69.29 
   2   4   1 1709.23   71.99 
   2   4   1 1841.02   69.19 
   2   4   1 1676.13   72.59 
  -2   4  -1 1747.13   65.59 
   2   4   1 1760.02   69.79 
  -2   4  -1 1728.23   65.39 
  -2   4  -1 1861.71   67.79 
  -2   4  -1 1791.52   63.39 
  -2   4  -1 1747.33   62.59 
  -2   4  -1 1715.73   63.49 
  -2   4  -1 1697.13   66.09 
   3  -4   1   58.49   12.50 
  -3  -4  -1   29.20   10.00 
  -3  -4  -1   44.90   10.90 
  -3  -4  -1   47.60   11.10 
   3  -4   1   30.10    9.50 
   3  -4   1   37.40    5.30 
   3  -4   1   48.80    8.70 
  -3  -4  -1   42.60   11.30 
   3  -4   1   41.20   10.10 
   3  -4   1   35.80    5.40 
   3  -4   1   30.30    4.90 
   3  -4   1   38.10    7.60 
  -3  -4  -1   25.60    7.40 
   3  -4   1   42.00    6.10 
  -3  -4  -1   44.80   10.20 
  -3  -4  -1   28.90    9.00 
  -3  -4  -1   33.80    9.70 
   3  -4   1   23.70    8.80 
   3  -4   1   41.70    8.40 
   3  -4   1   42.30    5.20 
  -3  -4  -1   32.40    8.80 
   3  -4   1   21.80    6.00 
  -3  -4  -1   41.10    7.60 
   3  -4   1   36.10    7.30 
   3  -4   1   31.80    8.90 
  -3  -4  -1   46.20    8.50 
   3  -4   1   36.80    5.70 
  -3  -4  -1   30.80    8.90 
  -3  -4  -1   55.89   11.20 
  -3  -4  -1   24.50    8.80 
  -3  -4  -1   30.50    8.70 
   3  -4   1   43.80   10.00 
  -3  -4  -1   47.90   10.70 
   3  -4   1   41.70    6.80 
   3   4   1   46.00    9.80 
   3   4   1   29.60    9.00 
   3   4   1   48.60   10.20 
   3   4   1   53.99   10.40 
  -3   4  -1   42.40    8.10 
   3   4   1   41.90   10.20 
  -3   4  -1   40.60    5.50 
   3   4   1   35.90    8.20 
   3   4   1   37.20    9.80 
  -3   4  -1   41.00    6.60 
  -3   4  -1   35.30    6.10 
  -3   4  -1   32.60    6.60 
  -3   4  -1   30.00    9.10 
  -3   4  -1   41.50    6.00 
  -3   4  -1   36.60    5.80 
  -3   4  -1   30.30    6.10 
  -3   4  -1   37.00    9.80 
  -3   4  -1   34.80    7.00 
  -3   4  -1   35.50    5.30 
  -3   4  -1   32.70    5.50 
  -3   4  -1   36.80    5.90 
   3   4   1   34.60    8.70 
  -3   4  -1   35.40    8.10 
  -3   4  -1   33.30    6.80 
   3   4   1   49.50    7.20 
  -3   4  -1   22.50    6.30 
   3   4   1   48.60    9.10 
   3   4   1   27.80    9.80 
   3   4   1   32.70    9.30 
  -3   4  -1   34.00    5.90 
   3   4   1   37.50   12.10 
  -3   4  -1   52.49    8.80 
   3   4   1   35.40    8.90 
   3   4   1   22.00    8.70 
  -3   4  -1   42.80    9.20 
   3   4   1   36.30    7.50 
  -4  -4  -1  151.68   18.30 
   4  -4   1  161.88   12.50 
   4  -4   1  159.38   19.40 
  -4  -4  -1  152.28   17.90 
  -4  -4  -1  215.78   22.50 
  -4  -4  -1  172.38   21.60 
  -4  -4  -1  198.98   20.20 
   4  -4   1  159.18   18.60 
   4  -4   1  155.28   10.00 
  -4  -4  -1  178.48   20.70 
  -4  -4  -1  158.48   19.30 
   4  -4   1  150.08   19.40 
   4  -4   1  152.18   16.30 
  -4  -4  -1  152.48   19.40 
   4  -4   1  147.19   18.00 
   4  -4   1  165.98   15.40 
  -4  -4  -1  163.48   14.60 
   4  -4   1  128.29   13.80 
  -4  -4  -1  170.98   21.40 
   4  -4   1  176.78   18.10 
  -4  -4  -1  186.68   19.80 
  -4  -4  -1  171.68   20.40 
  -4  -4  -1  169.98   18.30 
   4  -4   1  159.28   16.70 
  -4  -4  -1  199.48   19.00 
  -4  -4  -1  140.79   17.40 
   4   4   1  200.48   22.10 
   4   4   1  160.38   18.60 
  -4   4  -1  159.38   15.40 
   4   4   1  168.68   18.20 
   4   4   1  157.88   21.70 
   4   4   1  173.78   23.10 
  -4   4  -1  142.09   18.60 
  -4   4  -1  162.78   12.00 
   4   4   1  209.98   23.20 
   4   4   1  179.68   19.90 
  -4   4  -1  149.19   10.50 
   4   4   1  168.28   15.40 
   4   4   1  145.59   18.80 
   4   4   1  176.88   21.60 
  -4   4  -1  151.38    9.70 
  -4   4  -1  197.78   19.40 
  -4   4  -1  127.89   10.60 
  -4   4  -1  158.48   10.60 
  -4   4  -1  161.78   10.00 
   4   4   1  129.29   17.10 
   4   4   1  188.88   20.20 
   4   4   1  169.58   13.00 
  -4   4  -1  146.59   15.90 
  -4   4  -1  160.18   12.90 
   4   4   1  180.28   19.90 
  -4   4  -1  154.18    9.70 
  -4   4  -1  153.68   11.70 
  -4   4  -1  148.29   12.40 
  -4   4  -1  173.58   17.70 
   4   4   1  159.58   21.30 
  -4   4  -1  178.78   11.00 
   4   4   1  208.08   20.60 
  -4   4  -1  167.98   19.60 
  -5  -4  -1   36.10   12.10 
  -5  -4  -1   26.60    7.60 
  -5  -4  -1   34.30   10.80 
   5  -4   1   48.70   13.00 
   5  -4   1   45.20   11.10 
  -5  -4  -1   27.20    9.80 
  -5  -4  -1   23.10   11.50 
  -5  -4  -1   41.50   13.30 
   5  -4   1   36.20   11.00 
   5  -4   1   34.60   11.30 
   5  -4   1   48.60   11.20 
  -5  -4  -1   36.10   12.10 
  -5  -4  -1   43.20   11.50 
   5  -4   1   56.59   10.70 
   5  -4   1   32.30   13.50 
   5  -4   1   32.90   11.40 
  -5  -4  -1   44.60   12.20 
  -5  -4  -1   36.00   13.30 
  -5  -4  -1   37.60   10.80 
  -5  -4  -1   28.50   10.80 
   5  -4   1   35.30    8.40 
  -5  -4  -1   33.00   11.60 
  -5  -4  -1   37.50   12.40 
   5  -4   1   52.39   10.70 
   5  -4   1   34.00    9.80 
   5  -4   1   40.10   12.30 
  -5  -4  -1   22.40   10.30 
  -5   4  -1   50.89   11.10 
  -5   4  -1   43.70    6.20 
   5   4   1   53.29   15.50 
  -5   4  -1   35.70    9.90 
   5   4   1   36.00    7.50 
   5   4   1   35.00    8.10 
   5   4   1   35.20   12.20 
  -5   4  -1   34.20   10.00 
  -5   4  -1   46.50    9.90 
   5   4   1   29.80   13.40 
   5   4   1   48.50    9.60 
  -5   4  -1   41.30   11.40 
   5   4   1   43.00   12.70 
   5   4   1   27.40    9.20 
   5   4   1   46.20   10.30 
  -5   4  -1   54.19   11.00 
  -5   4  -1   47.00    9.60 
   5   4   1   61.29   15.00 
   5   4   1   41.40   11.70 
   5   4   1   27.50    9.80 
   5   4   1   38.10   11.30 
  -5   4  -1   45.40    9.80 
  -5   4  -1   33.40   11.20 
   5   4   1   33.10   11.90 
  -5   4  -1   31.50    7.50 
  -5   4  -1   31.80    8.20 
  -5   4  -1   19.90   10.10 
   5   4   1   21.60    9.10 
  -5   4  -1   42.80    8.10 
   5   4   1   40.00   11.20 
  -6  -4  -1 1692.93   79.89 
   6  -4   1 1843.72   77.19 
   6  -4   1 1891.91   82.69 
  -6  -4  -1 1827.12   81.99 
   6  -4   1 1836.22   77.09 
   6  -4   1 1872.31   81.19 
   6  -4   1 1899.41   79.89 
  -6  -4  -1 1683.13   78.29 
  -6  -4  -1 1747.63   76.99 
  -6  -4  -1 1669.63   80.09 
  -6  -4  -1 1775.52   67.79 
  -6  -4  -1 1753.42   79.69 
   6  -4   1 1729.13   86.99 
  -6  -4  -1 1832.32   75.99 
  -6  -4  -1 1734.53   80.69 
   6  -4   1 1722.73   74.09 
  -6  -4  -1 1858.01   79.99 
  -6  -4  -1 1768.52   81.59 
   6  -4   1 1896.51   73.69 
  -6  -4  -1 1748.93   81.79 
  -6  -4  -1 1881.61   75.49 
   6  -4   1 1738.03   73.59 
  -6  -4  -1 1678.43   78.69 
   6  -4   1 1744.13   76.79 
   6  -4   1 1654.13   78.79 
  -6  -4  -1 1819.92   74.19 
   6   4   1 1860.01   82.19 
  -6   4  -1 1950.70   75.29 
  -6   4  -1 1812.82   81.49 
   6   4   1 1726.63   82.29 
  -6   4  -1 1896.51   76.39 
  -6   4  -1 1880.01   78.99 
  -6   4  -1 1825.52   76.09 
  -6   4  -1 1772.02   72.39 
   6   4   1 1720.23   78.39 
   6   4   1 1769.22   72.39 
   6   4   1 1735.53   76.79 
   6   4   1 1835.12   74.69 
   6   4   1 1784.62   72.79 
   6   4   1 1824.42   84.59 
  -6   4  -1 1771.12   72.39 
  -6   4  -1 1798.22   72.59 
   6   4   1 1838.52   79.09 
   6   4   1 1741.73   80.19 
  -6   4  -1 1809.02   75.49 
   6   4   1 1801.32   86.39 
   6   4   1 1750.12   87.79 
   6   4   1 1705.53   67.59 
  -6   4  -1 1789.82   67.79 
   6   4   1 1788.12   71.89 
   6   4   1 1674.93   77.89 
  -6   4  -1 1708.63   77.59 
  -6   4  -1 1653.53   67.79 
   7  -4   1   81.39   14.10 
  -7  -4  -1   73.79   17.70 
   7  -4   1   69.39   17.60 
  -7  -4  -1   47.90   13.90 
  -7  -4  -1   79.19   17.20 
   7  -4   1   53.89   16.30 
   7  -4   1   57.59   16.60 
  -7  -4  -1   45.70   15.50 
  -7  -4  -1   55.49   15.40 
   7  -4   1   57.99   18.80 
  -7  -4  -1   54.99   16.30 
   7  -4   1   62.29   14.80 
  -7  -4  -1   37.30   15.80 
  -7  -4  -1   43.00   16.00 
   7  -4   1   29.70   13.20 
   7  -4   1   72.39   19.00 
  -7  -4  -1   29.90   13.80 
  -7  -4  -1   44.50   12.30 
   7  -4   1   53.49   13.60 
  -7  -4  -1   53.09   13.60 
  -7  -4  -1   64.39   19.20 
  -7  -4  -1   51.39   16.70 
   7  -4   1   49.70   14.90 
  -7  -4  -1   51.29   16.40 
  -7  -4  -1   46.70   14.60 
   7  -4   1   62.69   15.20 
   7   4   1   35.80   13.40 
  -7   4  -1   42.70   12.40 
  -7   4  -1   58.69   14.40 
   7   4   1   38.40   17.80 
  -7   4  -1   51.99   13.90 
   7   4   1   45.40   14.10 
   7   4   1   41.40   11.70 
   7   4   1   62.09   17.00 
  -7   4  -1   43.60   15.30 
  -7   4  -1   42.50   13.40 
  -7   4  -1   76.79   15.90 
   7   4   1   40.60   16.30 
   7   4   1   35.10   10.80 
   7   4   1   54.79   15.00 
  -7   4  -1   49.30   11.90 
  -7   4  -1   76.79   16.50 
   7   4   1   52.19   14.00 
   7   4   1   54.19   17.70 
  -7   4  -1   58.29   15.20 
   7   4   1   47.80   11.70 
   7   4   1   54.49   12.60 
   7   4   1   65.69   19.60 
   7   4   1   60.99   16.90 
  -7   4  -1   42.80   13.80 
  -8  -4  -1 2058.39   89.29 
  -8  -4  -1 1688.83   85.39 
  -8  -4  -1 1905.71   82.89 
  -8  -4  -1 1889.61   89.19 
   8  -4   1 1898.41   83.29 
   8  -4   1 1989.10   86.69 
  -8  -4  -1 1982.50   85.89 
  -8  -4  -1 1818.92   80.29 
   8  -4   1 1734.33   96.09 
   8  -4   1 1855.11   83.59 
   8  -4   1 1993.40   86.99 
  -8  -4  -1 1797.92   89.99 
  -8  -4  -1 1894.31   91.89 
   8  -4   1 1660.83   86.59 
  -8  -4  -1 1978.70   84.59 
  -8  -4  -1 1780.02   89.29 
  -8  -4  -1 1660.13   87.49 
   8  -4   1 1894.61   92.89 
   8  -4   1 1755.92   86.69 
  -8  -4  -1 1905.51   89.89 
  -8  -4  -1 1887.51   91.49 
   8  -4   1 1701.83   88.49 
  -8  -4  -1 1829.22   91.29 
   8  -4   1 1898.71   88.29 
   8   4   1 1956.40   90.99 
  -8   4  -1 1980.60   84.99 
  -8   4  -1 1847.02   81.69 
   8   4   1 1858.71   92.29 
   8   4   1 1910.71   97.79 
   8   4   1 1839.82   80.99 
   8   4   1 1831.72   84.39 
   8   4   1 1821.62   87.19 
   8   4   1 1908.91   91.69 
   8   4   1 1755.12   85.59 
  -8   4  -1 1972.10   85.29 
  -8   4  -1 1912.51   83.29 
   8   4   1 1859.61   89.09 
   8   4   1 1784.02   93.79 
  -8   4  -1 1954.20   83.69 
  -8   4  -1 2002.10   82.99 
  -8   4  -1 1769.42   86.09 
  -8   4  -1 2055.39   93.59 
  -8   4  -1 1934.71   84.39 
   8   4   1 1899.51  101.09 
  -9  -4  -1   -3.70   12.80 
  -9  -4  -1   36.20   20.10 
  -9  -4  -1   27.80   17.20 
   9  -4   1   39.50   18.50 
  -9  -4  -1   27.70   18.50 
  -9  -4  -1   11.90   15.70 
   9  -4   1   48.50   23.00 
  -9  -4  -1   54.19   19.50 
  -9  -4  -1   17.50   15.50 
   9  -4   1   17.60   13.70 
  -9  -4  -1   15.40   16.50 
   9  -4   1   20.90   15.70 
  -9  -4  -1   27.50   17.10 
   9  -4   1   57.29   17.40 
  -9  -4  -1    2.60   12.50 
   9  -4   1   19.00   17.00 
   9  -4   1   15.90   14.90 
  -9  -4  -1   26.60   13.40 
  -9  -4  -1   28.60   14.40 
  -9  -4  -1   15.10   18.50 
   9   4   1   30.00   16.00 
  -9   4  -1   18.00   16.30 
  -9   4  -1    8.70   14.40 
   9   4   1   13.20   14.50 
  -9   4  -1   29.00   17.40 
   9   4   1   30.10   16.80 
   9   4   1   17.20   15.20 
  -9   4  -1   29.10   14.40 
  -9   4  -1   38.90   16.10 
   9   4   1   27.90   18.80 
   9   4   1   20.70   16.90 
   9   4   1   62.79   16.00 
  -9   4  -1    2.10   13.70 
   9   4   1   12.40   12.00 
   9   4   1   19.80   20.00 
   9   4   1   26.80   14.20 
  -9   4  -1   29.50   14.50 
  -9  -5   1   62.89   21.60 
   9  -5  -1   54.59   21.40 
  -9  -5   1   34.00   19.40 
  -9  -5   1   31.00   17.50 
   9  -5  -1   50.09   17.80 
  -9  -5   1   46.60   18.10 
  -9  -5   1   30.10   16.10 
  -9  -5   1   56.59   21.80 
  -9  -5   1   17.20   18.00 
  -9  -5   1   49.99   22.00 
  -9  -5   1   49.90   21.40 
  -9  -5   1   36.70   20.40 
  -9  -5   1   39.40   20.80 
  -9  -5   1   51.59   19.10 
   9  -5  -1   52.89   17.10 
   9  -5  -1   45.70   17.90 
   9  -5  -1   56.59   19.60 
  -9  -5   1   26.20   19.40 
   9  -5  -1   50.99   20.50 
  -9  -5   1   34.40   16.60 
   9   5  -1   22.60   20.90 
   9   5  -1   33.40   22.70 
   9   5  -1   14.90   14.90 
   9   5  -1   20.10   12.20 
   9   5  -1   34.60   15.60 
   9   5  -1   30.70   18.30 
  -9   5   1   42.30   15.80 
   9   5  -1   22.10   17.30 
  -9   5   1   51.79   18.90 
  -9   5   1   38.40   19.10 
   9   5  -1   21.80   18.00 
  -9   5   1   20.30   14.60 
   9   5  -1   21.40   16.30 
  -9   5   1   48.10   20.70 
   9   5  -1   25.20   14.70 
   9   5  -1   62.69   18.80 
  -8  -5   1  -11.00   13.40 
   8  -5  -1   -6.50   10.80 
   8  -5  -1   -3.80   12.90 
  -8  -5   1    5.80   13.80 
  -8  -5   1   13.80   13.60 
  -8  -5   1    4.60   14.20 
   8  -5  -1    2.00   13.40 
  -8  -5   1    4.20   13.90 
  -8  -5   1    3.30   12.20 
  -8  -5   1   19.10   13.80 
  -8  -5   1    6.40   14.20 
  -8  -5   1   11.20   15.80 
  -8  -5   1    2.30   14.10 
  -8  -5   1    7.20   15.30 
  -8  -5   1    8.10   14.30 
   8  -5  -1    6.40   12.60 
  -8  -5   1   -2.30   13.30 
   8  -5  -1   15.00   12.80 
  -8  -5   1    2.20   13.70 
   8  -5  -1   -7.10   10.10 
   8   5  -1    0.60    9.60 
   8   5  -1   14.00   15.20 
  -8   5   1   31.10   12.70 
   8   5  -1    1.60   10.50 
   8   5  -1  -10.80   14.80 
   8   5  -1   -3.60   11.10 
   8   5  -1   16.80   13.90 
   8   5  -1    1.40    8.80 
  -8   5   1   -0.10   11.90 
   8   5  -1    4.50   10.50 
   8   5  -1    0.00   12.50 
  -8   5   1    5.10   11.90 
  -8   5   1   -4.70   12.90 
  -8   5   1   11.30   12.00 
   8   5  -1    8.80   11.10 
  -8   5   1    7.60   11.70 
   8   5  -1  -10.20    9.20 
  -7  -5   1  402.86   41.20 
   7  -5  -1  483.75   34.00 
  -7  -5   1  518.55   40.50 
   7  -5  -1  471.25   32.70 
   7  -5  -1  457.45   36.20 
  -7  -5   1  406.46   41.30 
   7  -5  -1  488.65   39.20 
  -7  -5   1  432.46   33.40 
  -7  -5   1  402.96   41.80 
  -7  -5   1  484.25   39.20 
  -7  -5   1  452.35   37.00 
   7  -5  -1  552.84   40.30 
  -7  -5   1  502.75   40.30 
  -7  -5   1  446.46   34.20 
  -7  -5   1  533.15   42.00 
   7  -5  -1  526.15   31.20 
  -7  -5   1  490.75   39.20 
  -7  -5   1  402.06   41.90 
  -7  -5   1  517.95   35.70 
   7  -5  -1  508.75   33.90 
  -7  -5   1  494.05   38.90 
   7  -5  -1  477.95   37.90 
   7   5  -1  462.85   34.80 
   7   5  -1  516.65   45.90 
  -7   5   1  462.95   33.00 
  -7   5   1  493.15   35.70 
   7   5  -1  460.55   36.20 
   7   5  -1  450.95   36.60 
   7   5  -1  429.16   30.90 
   7   5  -1  438.96   43.10 
  -7   5   1  460.05   36.50 
  -7   5   1  500.35   38.30 
   7   5  -1  537.55   41.60 
   7   5  -1  468.65   44.80 
   7   5  -1  521.55   36.10 
  -7   5   1  471.65   30.50 
   7   5  -1  460.95   32.10 
  -7   5   1  501.75   33.80 
  -7   5   1  497.35   34.60 
   7   5  -1  402.76   37.50 
  -7   5   1  470.25   33.00 
  -7   5   1  464.65   34.10 
   7   5  -1  431.36   29.50 
  -7   5   1  446.76   32.80 
   7   5  -1  451.75   36.40 
   7   5  -1  467.95   38.80 
  -7   5   1  479.05   32.10 
  -6  -5   1   30.70   15.00 
   6  -5  -1    9.10   10.70 
  -6  -5   1   11.90   10.50 
  -6  -5   1    8.90   11.40 
  -6  -5   1   32.90   14.00 
   6  -5  -1   16.50    9.60 
   6  -5  -1   19.80   10.80 
   6  -5  -1    9.50   11.10 
  -6  -5   1   22.60   13.20 
  -6  -5   1    5.60    7.90 
  -6  -5   1   -0.60   11.30 
   6  -5  -1   12.90   10.50 
  -6  -5   1    1.70   10.10 
  -6  -5   1   10.70   12.70 
  -6  -5   1    3.00   11.80 
  -6  -5   1    2.10   11.50 
  -6  -5   1   15.40   11.60 
  -6  -5   1    5.80   12.10 
  -6  -5   1   18.30   13.30 
   6  -5  -1    5.60    8.30 
   6  -5  -1   17.70   10.20 
   6  -5  -1   13.60    9.00 
  -6  -5   1   20.80   12.60 
   6   5  -1    9.90    9.90 
  -6   5   1   15.60   10.30 
   6   5  -1    7.20    6.20 
  -6   5   1   19.00   10.20 
  -6   5   1   37.10   12.50 
   6   5  -1   23.10   10.20 
   6   5  -1   14.40   14.40 
   6   5  -1    6.30   10.90 
  -6   5   1   10.10   10.70 
   6   5  -1   19.80   10.20 
  -6   5   1    9.30   10.00 
   6   5  -1    6.30    9.60 
  -6   5   1   21.60   10.00 
   6   5  -1   13.20    8.90 
   6   5  -1   13.50    6.10 
   6   5  -1    5.30    8.60 
  -6   5   1   10.30   11.00 
  -6   5   1   21.70    7.70 
  -6   5   1    9.90    9.10 
   6   5  -1   20.40   11.80 
  -6   5   1   21.80   10.40 
  -6   5   1   21.20    9.70 
   6   5  -1   12.50   12.90 
  -6   5   1   -3.80    8.00 
   6   5  -1   24.80   11.80 
   6   5  -1    0.60    8.90 
   6   5  -1   18.00    9.40 
  -5  -5   1 2390.86  104.19 
  -5  -5   1 2584.24  105.79 
   5  -5  -1 2685.73   96.29 
  -5  -5   1 2575.34  101.29 
  -5  -5   1 2619.74  107.79 
   5  -5  -1 2367.96  100.99 
  -5  -5   1 2459.15  105.09 
  -5  -5   1 2368.46  102.19 
  -5  -5   1 2720.13   95.29 
  -5  -5   1 2566.44  104.49 
   5  -5  -1 2572.84  100.29 
   5  -5  -1 2344.27  100.29 
   5  -5  -1 2617.84   96.49 
   5  -5  -1 2544.45   96.89 
  -5  -5   1 2467.85  100.99 
  -5  -5   1 2399.86  100.39 
  -5  -5   1 2564.74  104.89 
  -5  -5   1 2525.05  106.89 
   5  -5  -1 2595.94   98.49 
  -5  -5   1 2464.15  105.89 
  -5  -5   1 2440.76  104.59 
   5  -5  -1 2497.35   97.49 
   5  -5  -1 2376.36   89.69 
   5  -5  -1 2576.64   91.09 
  -5  -5   1 2448.26  105.69 
   5  -5  -1 2584.34  102.79 
   5   5  -1 2450.75  102.99 
  -5   5   1 2624.54   91.29 
   5   5  -1 2612.54  113.09 
   5   5  -1 2544.55  111.39 
   5   5  -1 2435.76  103.49 
   5   5  -1 2565.64  106.19 
  -5   5   1 2553.84   99.09 
   5   5  -1 2594.24   94.79 
   5   5  -1 2530.05   99.69 
   5   5  -1 2313.57  106.69 
   5   5  -1 2603.34   98.59 
  -5   5   1 2488.85   91.99 
  -5   5   1 2563.14  100.29 
  -5   5   1 2418.56   94.89 
   5   5  -1 2496.35  104.99 
   5   5  -1 2421.26  104.59 
  -5   5   1 2619.14  103.69 
  -5   5   1 2519.95  103.79 
   5   5  -1 2731.93  101.19 
  -5   5   1 2599.84   97.49 
   5   5  -1 2517.35   94.39 
   5   5  -1 2442.36  101.49 
   5   5  -1 2645.44  105.79 
  -4  -5   1   -6.60    8.50 
   4  -5  -1   -3.00    5.40 
   4  -5  -1   -0.40    6.80 
  -4  -5   1   -3.40    7.00 
  -4  -5   1    2.40    8.00 
   4  -5  -1   10.00    6.60 
   4  -5  -1   -2.90    6.60 
   4  -5  -1   -0.90    7.30 
   4  -5  -1    1.10    3.70 
   4  -5  -1    5.00    4.60 
  -4  -5   1   11.60    9.90 
  -4  -5   1    1.30   11.90 
   4  -5  -1    0.70    6.60 
  -4  -5   1   -3.30    7.20 
   4  -5  -1   -2.80    6.60 
  -4  -5   1  -11.80    7.40 
  -4  -5   1   -3.00    7.90 
  -4  -5   1    1.50    7.90 
  -4  -5   1   -9.30    7.60 
   4  -5  -1    1.10    7.40 
   4  -5  -1   19.60    7.80 
  -4  -5   1   13.80    9.00 
  -4  -5   1    2.50    9.10 
  -4  -5   1   11.40   10.10 
  -4  -5   1    2.10    8.50 
   4  -5  -1    7.80    6.20 
   4  -5  -1    6.10    5.60 
  -4  -5   1   -3.20    6.00 
   4   5  -1    7.10    7.80 
  -4   5   1    2.10    5.00 
  -4   5   1    1.40    5.20 
   4   5  -1   -3.00    9.30 
  -4   5   1   -4.20    5.90 
  -4   5   1    2.10    4.60 
   4   5  -1    1.40    5.30 
   4   5  -1    8.00    5.80 
  -4   5   1   19.00    9.30 
  -4   5   1    1.90    5.70 
   4   5  -1   -1.00    6.10 
   4   5  -1    3.00    4.60 
  -4   5   1    4.00    6.60 
   4   5  -1   -1.20    6.90 
   4   5  -1    3.40    5.10 
   4   5  -1    7.20    6.60 
  -4   5   1    1.90    4.80 
   4   5  -1    6.60    9.70 
   4   5  -1    2.30    7.50 
   4   5  -1   -4.50    6.20 
   4   5  -1   -5.30    6.30 
  -4   5   1    8.10    7.70 
   4   5  -1    4.90    7.20 
   4   5  -1    0.50    6.30 
  -4   5   1    1.80    5.90 
   3  -5  -1 1391.96   61.79 
  -3  -5   1 1217.08   57.49 
  -3  -5   1 1229.18   57.69 
   3  -5  -1 1391.26   51.99 
  -3  -5   1 1253.77   56.79 
   3  -5  -1 1295.97   49.30 
  -3  -5   1 1277.77   53.49 
  -3  -5   1 1296.57   57.99 
  -3  -5   1 1269.77   61.19 
  -3  -5   1 1261.97   58.19 
   3  -5  -1 1246.38   53.69 
   3  -5  -1 1264.87   49.40 
  -3  -5   1 1297.67   64.19 
   3  -5  -1 1306.97   55.59 
   3  -5  -1 1371.06   53.39 
  -3  -5   1 1178.48   58.29 
   3  -5  -1 1278.27   50.09 
   3  -5  -1 1114.69   49.60 
  -3  -5   1 1131.09   55.39 
  -3  -5   1 1247.48   58.19 
  -3  -5   1 1227.68   56.69 
   3  -5  -1 1367.76   54.59 
  -3  -5   1 1331.47   60.49 
   3  -5  -1 1223.48   55.29 
  -3  -5   1 1305.67   59.59 
   3  -5  -1 1253.07   55.69 
   3  -5  -1 1235.48   55.29 
  -3  -5   1 1225.38   57.29 
  -3  -5   1 1258.17   54.39 
   3   5  -1 1344.07   52.49 
   3   5  -1 1283.07   53.79 
   3   5  -1 1245.88   50.49 
   3   5  -1 1311.07   56.29 
  -3   5   1 1292.07   51.39 
  -3   5   1 1174.18   49.00 
  -3   5   1 1334.67   52.29 
   3   5  -1 1203.18   57.09 
   3   5  -1 1281.77   62.39 
  -3   5   1 1290.47   56.89 
   3   5  -1 1236.48   57.59 
   3   5  -1 1253.27   56.99 
   3   5  -1 1272.67   56.99 
   3   5  -1 1273.47   58.29 
  -3   5   1 1266.67   56.39 
   3   5  -1 1279.27   57.29 
   3   5  -1 1259.57   57.59 
   3   5  -1 1311.87   59.29 
  -3   5   1 1249.68   54.09 
  -3   5   1 1284.57   51.19 
   3   5  -1 1297.87   61.59 
  -3   5   1 1249.47   52.39 
  -3   5   1 1220.18   48.80 
  -3   5   1 1356.06   51.59 
  -2  -5   1   11.90    7.70 
  -2  -5   1   13.80    8.70 
   2  -5  -1   20.00    7.50 
   2  -5  -1    3.90    6.30 
   2  -5  -1   11.30    4.60 
   2  -5  -1   15.70    8.10 
   2  -5  -1    8.30    4.00 
  -2  -5   1   13.60    8.20 
   2  -5  -1    9.50    5.20 
  -2  -5   1   14.80    7.80 
  -2  -5   1   20.80    8.80 
  -2  -5   1   14.30    7.70 
  -2  -5   1   18.80    8.30 
  -2  -5   1   19.80    4.00 
   2  -5  -1   12.60    6.50 
   2  -5  -1   15.10    6.50 
   2  -5  -1   19.10    7.30 
   2  -5  -1   14.70    4.80 
  -2  -5   1   19.30    8.60 
  -2  -5   1   15.50    4.80 
  -2  -5   1    4.70    7.40 
  -2  -5   1    8.20    6.70 
   2  -5  -1    1.20    8.60 
   2  -5  -1   14.50    5.50 
  -2  -5   1    7.20    7.40 
   2  -5  -1   13.50    4.70 
  -2  -5   1    6.40    8.00 
   2  -5  -1   10.20    4.30 
   2  -5  -1   13.90    7.40 
  -2  -5   1    2.00    7.80 
  -2  -5   1   18.40    8.50 
   2   5  -1    2.20    5.70 
   2   5  -1    2.80    5.70 
   2   5  -1    2.50    6.20 
   2   5  -1    9.20    6.00 
  -2   5   1    9.20    4.10 
   2   5  -1   12.00    7.70 
   2   5  -1   10.70    7.10 
   2   5  -1    8.10    6.50 
   2   5  -1   22.00    8.90 
  -2   5   1   18.10    4.70 
  -2   5   1   12.30    5.60 
   2   5  -1    4.20    5.90 
  -2   5   1   22.40    5.30 
   2   5  -1   15.20    5.20 
   2   5  -1    4.80    5.60 
   2   5  -1   21.30    5.40 
   2   5  -1    7.30    6.40 
  -2   5   1    4.60    7.20 
   2   5  -1    7.30    7.40 
  -2   5   1   18.40    6.70 
  -2   5   1   14.30    3.80 
   2   5  -1   31.10   11.50 
  -2   5   1   16.40    8.60 
  -2   5   1   23.40    6.90 
  -2   5   1   12.60    4.60 
   2   5  -1    6.70    5.80 
   2   5  -1   12.80    9.70 
  -2   5   1   11.90    7.70 
   1  -5  -1  347.57   22.10 
  -1  -5   1  360.06   26.20 
   1  -5  -1  356.26   19.50 
   1  -5  -1  380.76   23.70 
  -1  -5   1  339.47   23.70 
  -1  -5   1  346.27   23.00 
   1  -5  -1  292.17   22.20 
  -1  -5   1  323.97   22.40 
   1  -5  -1  343.97   20.70 
   1  -5  -1  343.17   16.60 
   1  -5  -1  337.77   16.70 
   1  -5  -1  343.77   18.70 
   1  -5  -1  367.86   20.90 
   1  -5  -1  353.66   26.00 
  -1  -5   1  350.46   22.70 
   1  -5  -1  351.96   21.60 
   1  -5  -1  365.56   23.70 
   1  -5  -1  326.67   19.30 
  -1  -5   1  305.07   22.80 
   1  -5  -1  382.66   29.20 
  -1  -5   1  370.06   23.00 
  -1  -5   1  332.17   27.40 
   1  -5  -1  312.97   18.20 
   1  -5  -1  352.16   22.80 
  -1  -5   1  303.07   21.30 
   1  -5  -1  370.16   21.50 
  -1  -5   1  336.77   23.50 
   1  -5  -1  305.57   17.50 
  -1  -5   1  386.36   29.10 
   1  -5  -1  349.07   21.00 
   1  -5  -1  350.66   17.90 
   1  -5  -1  302.07   25.60 
  -1  -5   1  336.27   21.10 
  -1  -5   1  316.57   22.80 
  -1  -5   1  328.57   22.80 
   1  -5  -1  348.67   22.50 
   1  -5  -1  375.66   17.60 
   1  -5  -1  362.26   28.40 
  -1   5   1  311.07   26.50 
  -1   5   1  318.07   16.50 
   1   5  -1  363.16   21.80 
   1   5  -1  364.36   29.70 
   1   5  -1  324.47   23.20 
   1   5  -1  374.16   23.60 
   1   5  -1  391.76   23.00 
  -1   5   1  383.16   24.60 
  -1   5   1  336.97   18.50 
  -1   5   1  360.26   18.30 
  -1   5   1  332.87   18.50 
   1   5  -1  355.46   15.20 
  -1   5   1  339.37   24.40 
   1   5  -1  307.77   21.30 
   1   5  -1  351.76   15.70 
   1   5  -1  369.76   25.00 
  -1   5   1  312.67   19.30 
   1   5  -1  344.27   28.30 
  -1   5   1  338.87   21.00 
   1   5  -1  354.86   25.30 
  -1   5   1  324.07   21.00 
  -1   5   1  339.67   15.70 
   1   5  -1  396.56   24.80 
  -1   5   1  361.16   24.50 
   1   5  -1  315.57   21.40 
   1   5  -1  353.86   22.90 
   1   5  -1  371.36   20.50 
   1   5  -1  323.27   18.60 
   1   5  -1  309.07   22.00 
   0  -5  -1  136.19   11.30 
   0  -5   1  102.29   14.80 
   0  -5  -1  101.19   13.10 
   0  -5   1  144.59   15.40 
   0  -5  -1  113.29   14.10 
   0  -5  -1  115.19   15.00 
   0  -5   1  104.59   16.30 
   0  -5  -1  108.79   13.60 
   0  -5  -1  138.39   16.30 
   0  -5   1  147.69   15.60 
   0  -5  -1  112.09   14.10 
   0  -5  -1  116.49   16.00 
   0  -5   1  138.09   14.10 
   0  -5   1  119.49   16.40 
   0  -5  -1  138.49   16.50 
   0  -5  -1  122.89   13.50 
   0  -5   1  104.29   13.90 
   0  -5  -1   96.59   13.90 
   0  -5  -1  142.49   14.00 
   0  -5   1  100.19   13.50 
   0  -5  -1  101.99   13.40 
   0  -5   1  111.59   18.70 
   0  -5  -1  127.99   14.30 
   0  -5   1  119.39   14.50 
   0  -5   1   92.69   17.90 
   0  -5  -1  105.79   18.00 
   0  -5   1  114.39   19.20 
   0  -5   1  138.89   15.60 
   0  -5  -1  139.69   15.10 
   0  -5  -1  155.38   18.80 
   0  -5  -1  141.39   15.60 
   0  -5  -1  123.79   20.30 
   0  -5   1  105.29   13.70 
   0  -5   1  112.09   11.70 
   0   5   1  129.19   16.90 
   0   5  -1  150.38   24.00 
   0   5  -1  138.49   16.30 
   0   5  -1  132.29   14.20 
   0   5  -1  120.49   14.40 
   0   5   1  111.49    9.30 
   0   5   1  160.38   17.80 
   0   5  -1  136.89   19.20 
   0   5   1  133.19   15.70 
   0   5   1  166.38   22.40 
   0   5  -1  107.39   12.90 
   0   5  -1  154.68   24.00 
   0   5   1  152.18   16.40 
   0   5  -1  126.29   13.10 
   0   5  -1  118.39   17.00 
   0   5  -1  118.99   14.60 
   0   5   1  114.79   13.90 
   0   5   1  119.89   13.00 
   0   5  -1   94.59   13.00 
   0   5  -1  129.19   14.40 
   0   5   1  119.79   13.10 
   0   5   1  113.39   13.60 
   0   5   1  113.99   12.80 
   0   5   1  102.09   13.50 
   0   5   1  118.09   20.20 
   0   5   1  133.99   15.70 
   1  -5   1 3128.99  109.69 
   1  -5   1 3218.48  114.89 
  -1  -5  -1 3269.17  117.29 
  -1  -5  -1 3161.18  115.79 
  -1  -5  -1 3092.79  108.19 
  -1  -5  -1 3143.69  116.69 
  -1  -5  -1 3264.57  118.59 
  -1  -5  -1 3119.39  117.69 
   1  -5   1 3212.18  112.09 
   1  -5   1 3000.60  125.99 
  -1  -5  -1 3216.08  123.89 
   1  -5   1 3364.16  109.99 
   1  -5   1 3155.68  118.59 
   1  -5   1 3286.07  121.19 
   1  -5   1 3044.50  117.59 
  -1  -5  -1 3387.96  128.79 
  -1  -5  -1 3192.78  120.89 
  -1  -5  -1 3129.19  116.69 
   1  -5   1 3185.68  126.79 
   1  -5   1 3225.58  112.39 
   1  -5   1 3198.68  114.39 
   1  -5   1 3208.18  114.39 
  -1  -5  -1 3224.68  115.49 
  -1  -5  -1 3091.99  117.19 
  -1  -5  -1 3075.09  120.19 
  -1  -5  -1 3292.57  117.69 
   1  -5   1 3185.58  115.59 
   1  -5   1 3018.10  113.89 
   1  -5   1 3317.67  114.89 
  -1  -5  -1 3107.79  117.29 
   1  -5   1 3290.57  128.99 
  -1  -5  -1 3043.30  118.69 
   1  -5   1 3330.87  115.89 
   1  -5   1 3035.40  115.49 
   1  -5   1 3208.68  116.79 
   1   5   1 3112.69  117.19 
  -1   5  -1 3036.10  118.29 
   1   5   1 3130.49  117.69 
   1   5   1 3242.88  120.19 
   1   5   1 3235.18  116.59 
   1   5   1 3195.78  117.29 
  -1   5  -1 3145.29  125.99 
  -1   5  -1 3058.79  115.59 
  -1   5  -1 3237.38  112.99 
   1   5   1 3221.38  120.69 
   1   5   1 3226.38  116.19 
  -1   5  -1 3135.99  121.79 
  -1   5  -1 3183.98  112.09 
  -1   5  -1 3168.28  111.99 
  -1   5  -1 3379.06  115.19 
   1   5   1 3253.17  115.89 
  -1   5  -1 3185.08  113.89 
  -1   5  -1 3103.19  112.39 
   1   5   1 3198.08  117.99 
   1   5   1 3053.99  118.49 
  -1   5  -1 3169.58  112.99 
   1   5   1 3239.88  117.49 
  -1   5  -1 3207.58  115.89 
  -1   5  -1 3341.97  116.99 
   1   5   1 3203.58  116.09 
  -1   5  -1 3107.99  122.29 
   1   5   1 3220.68  122.59 
  -2  -5  -1  184.28   17.60 
   2  -5   1  189.38   13.90 
  -2  -5  -1  174.08   18.80 
  -2  -5  -1  160.88   20.50 
   2  -5   1  176.68   14.50 
   2  -5   1  159.88   18.50 
  -2  -5  -1  189.58   19.80 
  -2  -5  -1  159.78   19.60 
  -2  -5  -1  153.88   11.60 
  -2  -5  -1  198.88   18.90 
   2  -5   1  136.49   16.30 
  -2  -5  -1  153.98   19.90 
   2  -5   1  155.38   19.60 
   2  -5   1  161.98   22.30 
  -2  -5  -1  168.28   17.00 
   2  -5   1  161.88   11.70 
   2  -5   1  173.78   13.00 
  -2  -5  -1  132.69   17.30 
  -2  -5  -1  174.28   17.90 
  -2  -5  -1  171.18   18.20 
  -2  -5  -1  211.88   21.00 
   2  -5   1  158.98   16.00 
  -2  -5  -1  176.68   21.50 
  -2  -5  -1  197.68   20.60 
   2  -5   1  147.79   17.30 
   2  -5   1  148.99   13.60 
   2  -5   1  183.88   11.50 
  -2  -5  -1  181.68   20.10 
   2  -5   1  151.48   10.50 
   2  -5   1  153.28   15.00 
   2  -5   1  149.19   11.80 
   2  -5   1  172.08   10.90 
   2  -5   1  181.08   15.10 
   2  -5   1  152.18   12.40 
  -2   5  -1  141.69   13.50 
   2   5   1  157.18   17.10 
   2   5   1  192.48   23.10 
  -2   5  -1  166.48   11.40 
   2   5   1  164.38   18.70 
  -2   5  -1  136.29   12.90 
   2   5   1  164.78   15.00 
  -2   5  -1  149.88   14.80 
   2   5   1  175.38   12.90 
  -2   5  -1  177.08   12.10 
  -2   5  -1  167.28   16.20 
   2   5   1  174.58   19.00 
  -2   5  -1  172.38   11.90 
  -2   5  -1  141.09   12.30 
  -2   5  -1  184.98   21.00 
   2   5   1  157.38   13.20 
   2   5   1  139.39   17.10 
   2   5   1  156.18   20.20 
   2   5   1  190.68   19.60 
  -2   5  -1  143.29   10.30 
   2   5   1  137.19   16.80 
   2   5   1  190.38   18.90 
  -2   5  -1  143.79   19.60 
  -2   5  -1  169.38   18.70 
  -2   5  -1  163.18   12.00 
   2   5   1  173.28   17.80 
   2   5   1  177.98   17.90 
  -2   5  -1  165.88   15.50 
   3  -5   1 3464.65  122.19 
   3  -5   1 3529.65  131.49 
   3  -5   1 3513.15  136.79 
   3  -5   1 3291.37  120.79 
  -3  -5  -1 3615.64  133.29 
   3  -5   1 3368.46  123.49 
  -3  -5  -1 3517.95  130.19 
  -3  -5  -1 3318.97  129.59 
   3  -5   1 3553.44  122.69 
   3  -5   1 3439.16  123.59 
   3  -5   1 3554.74  130.79 
  -3  -5  -1 3592.94  129.79 
   3  -5   1 3529.15  129.99 
   3  -5   1 3519.05  125.29 
  -3  -5  -1 3463.75  125.89 
  -3  -5  -1 3419.96  132.99 
   3  -5   1 3386.46  118.49 
  -3  -5  -1 3514.15  122.29 
   3  -5   1 3573.54  131.69 
  -3  -5  -1 3367.26  130.09 
  -3  -5  -1 3562.64  132.09 
  -3  -5  -1 3337.27  128.29 
   3  -5   1 3240.88  120.19 
  -3  -5  -1 3516.05  129.49 
  -3  -5  -1 3296.27  128.09 
   3  -5   1 3432.56  121.39 
  -3  -5  -1 3465.45  130.99 
  -3  -5  -1 3551.24  133.79 
   3  -5   1 3469.35  129.49 
  -3  -5  -1 3640.94  133.99 
   3   5   1 3631.14  125.69 
  -3   5  -1 3315.47  120.29 
  -3   5  -1 3429.16  119.99 
   3   5   1 3386.86  129.29 
   3   5   1 3618.24  140.59 
   3   5   1 3490.75  129.29 
  -3   5  -1 3457.55  120.99 
   3   5   1 3421.06  130.79 
  -3   5  -1 3730.43  132.69 
   3   5   1 3454.75  133.89 
  -3   5  -1 3613.24  129.49 
   3   5   1 3465.05  126.49 
  -3   5  -1 3570.14  126.49 
  -3   5  -1 3400.66  118.09 
   3   5   1 3482.95  128.89 
  -3   5  -1 3459.75  120.99 
  -3   5  -1 3552.74  132.49 
   3   5   1 3496.05  129.49 
  -3   5  -1 3380.36  123.29 
  -3   5  -1 3484.65  130.69 
   3   5   1 3587.24  130.59 
  -3   5  -1 3460.95  122.69 
   3   5   1 3466.35  135.09 
   3   5   1 3396.66  119.89 
   3   5   1 3371.16  120.49 
   3   5   1 3571.14  131.49 
   3   5   1 3453.75  130.19 
   3   5   1 3579.74  131.09 
  -3   5  -1 3449.75  122.29 
  -3   5  -1 3470.05  120.99 
   3   5   1 3258.27  127.89 
  -3   5  -1 3370.86  124.49 
   4  -5   1   10.90    5.10 
   4  -5   1    5.10    7.10 
  -4  -5  -1   -1.30    8.60 
  -4  -5  -1   -2.50    6.70 
   4  -5   1    1.80    5.70 
   4  -5   1   -1.30    8.90 
  -4  -5  -1    7.40    8.80 
  -4  -5  -1   10.50    9.00 
  -4  -5  -1    5.70    8.60 
   4  -5   1   -8.20    5.10 
   4  -5   1   -4.50    7.80 
  -4  -5  -1    1.80    8.50 
   4  -5   1    8.30    4.20 
  -4  -5  -1   -4.90    7.70 
   4  -5   1    2.60    7.80 
  -4  -5  -1    8.40    9.30 
  -4  -5  -1    3.90    9.00 
   4  -5   1   11.50    9.60 
  -4  -5  -1    5.40    9.80 
   4  -5   1    3.70    8.00 
  -4  -5  -1    2.00    8.50 
   4  -5   1    6.50    5.70 
  -4  -5  -1   -3.30    7.60 
  -4  -5  -1    9.20    6.80 
  -4  -5  -1   -1.90    7.40 
   4  -5   1    5.70    6.20 
   4  -5   1   10.70    7.40 
  -4  -5  -1   -0.40    8.90 
   4   5   1    8.00    8.70 
   4   5   1    5.30   10.30 
   4   5   1    0.80    4.50 
   4   5   1   -3.90    6.00 
   4   5   1   -2.70    5.30 
  -4   5  -1    3.70    4.10 
  -4   5  -1    5.20    8.20 
  -4   5  -1    9.90    5.20 
   4   5   1   -2.90    5.50 
  -4   5  -1   -3.70    7.10 
   4   5   1  -11.10    5.30 
   4   5   1    7.70    7.30 
  -4   5  -1   -5.30    5.10 
   4   5   1   -0.20    8.30 
  -4   5  -1   -4.30    5.10 
   4   5   1   -0.70    6.20 
  -4   5  -1    4.80    4.90 
   4   5   1   -1.40    4.00 
   4   5   1    7.60    7.60 
  -4   5  -1    5.30    7.80 
   4   5   1    0.60    6.30 
   4   5   1   -4.70    4.60 
   4   5   1    5.20    7.80 
  -4   5  -1    0.90    5.40 
   4   5   1    2.00    6.70 
  -4   5  -1    6.20    7.10 
  -4   5  -1    6.20    5.40 
  -4   5  -1    9.30    5.90 
  -4   5  -1    6.60    7.20 
  -4   5  -1   -0.90    4.50 
   5  -5   1  238.08   27.50 
   5  -5   1  256.87   24.10 
  -5  -5  -1  219.18   25.70 
   5  -5   1  218.78   25.20 
  -5  -5  -1  304.87   27.90 
  -5  -5  -1  262.27   25.90 
  -5  -5  -1  192.08   23.70 
   5  -5   1  226.48   23.50 
  -5  -5  -1  196.08   22.10 
   5  -5   1  271.37   20.70 
  -5  -5  -1  181.08   23.50 
  -5  -5  -1  187.88   24.80 
  -5  -5  -1  283.47   30.20 
   5  -5   1  246.18   27.90 
   5  -5   1  270.67   27.60 
  -5  -5  -1  273.37   19.40 
  -5  -5  -1  191.18   24.10 
  -5  -5  -1  239.08   26.10 
  -5  -5  -1  299.37   32.20 
   5  -5   1  240.98   21.50 
   5  -5   1  234.38   17.20 
  -5  -5  -1  203.78   27.00 
   5  -5   1  241.98   22.90 
  -5  -5  -1  202.18   25.00 
  -5  -5  -1  216.88   26.80 
  -5   5  -1  261.27   19.00 
  -5   5  -1  250.77   24.80 
  -5   5  -1  262.37   19.60 
   5   5   1  269.17   21.70 
  -5   5  -1  279.37   29.20 
   5   5   1  226.88   17.90 
   5   5   1  251.57   28.60 
   5   5   1  245.68   32.70 
  -5   5  -1  234.38   24.60 
  -5   5  -1  214.38   19.90 
  -5   5  -1  221.38   18.40 
  -5   5  -1  237.08   13.80 
   5   5   1  291.87   27.80 
   5   5   1  285.17   29.70 
   5   5   1  254.67   31.60 
   5   5   1  283.77   28.90 
   5   5   1  241.58   32.00 
   5   5   1  403.96   36.40 
  -5   5  -1  232.28   26.20 
   5   5   1  224.98   28.30 
  -5   5  -1  234.88   17.40 
   5   5   1  249.28   17.80 
   5   5   1  305.07   29.50 
  -5   5  -1  285.17   24.80 
   5   5   1  264.57   22.30 
   5   5   1  208.18   24.20 
   6  -5   1   14.40   11.80 
  -6  -5  -1   33.10   13.40 
  -6  -5  -1   22.60   13.20 
  -6  -5  -1   15.40   11.20 
  -6  -5  -1    1.50   10.80 
  -6  -5  -1   10.20    7.40 
  -6  -5  -1   25.80   13.50 
   6  -5   1   20.40   10.70 
  -6  -5  -1   12.40   13.70 
  -6  -5  -1   10.90   11.90 
  -6  -5  -1   -3.90   10.00 
   6  -5   1   14.60   10.30 
  -6  -5  -1   18.30   12.30 
  -6  -5  -1   19.80   12.40 
   6  -5   1   13.30   11.20 
   6  -5   1   11.50   10.60 
   6  -5   1   20.20    9.60 
   6  -5   1   13.50   11.50 
  -6  -5  -1   15.50   11.20 
  -6  -5  -1   17.80   11.20 
  -6  -5  -1   14.90   11.00 
   6  -5   1    8.40   10.20 
   6  -5   1    6.50   11.20 
  -6  -5  -1    2.60    9.70 
   6   5   1   20.40   10.50 
  -6   5  -1   18.00   11.00 
  -6   5  -1    9.70    8.20 
  -6   5  -1    4.60    9.10 
   6   5   1    3.20    7.90 
   6   5   1    5.60    7.90 
  -6   5  -1    8.20   11.80 
   6   5   1    6.50    6.40 
   6   5   1   17.20   10.80 
   6   5   1    0.80   10.50 
   6   5   1    7.10    6.60 
   6   5   1   13.70   13.10 
  -6   5  -1    9.70    7.70 
   6   5   1   13.00    9.50 
   6   5   1   27.60   13.60 
   6   5   1   20.30   11.70 
  -6   5  -1   49.40   15.50 
   6   5   1    1.20    9.20 
  -6   5  -1    6.10    7.80 
  -6   5  -1   18.20   10.40 
  -6   5  -1   18.50   10.40 
   6   5   1    8.70    9.40 
   7  -5   1   54.39   14.70 
  -7  -5  -1   14.60   14.10 
   7  -5   1   21.70   14.50 
  -7  -5  -1   24.60   13.40 
  -7  -5  -1   38.50   16.70 
   7  -5   1    8.30   12.10 
  -7  -5  -1   64.79   17.70 
  -7  -5  -1   48.50   14.00 
   7  -5   1   32.20   13.50 
  -7  -5  -1   11.90   12.70 
  -7  -5  -1   29.90   14.90 
  -7  -5  -1   31.90   16.10 
  -7  -5  -1   23.50   13.80 
  -7  -5  -1   12.30   13.00 
   7  -5   1   31.90   12.60 
  -7  -5  -1   47.40   16.30 
   7  -5   1   21.90   13.90 
  -7  -5  -1   18.80   14.20 
   7  -5   1   17.20   11.20 
  -7  -5  -1   19.70   14.60 
  -7  -5  -1   36.70   13.40 
  -7  -5  -1   25.30   14.20 
   7  -5   1   28.20   14.70 
   7  -5   1   34.90   13.90 
   7   5   1   61.19   18.10 
   7   5   1   32.20   16.90 
   7   5   1   38.60   14.30 
  -7   5  -1   24.80   12.20 
   7   5   1   38.70   14.20 
   7   5   1   27.70   15.70 
   7   5   1   29.70   12.90 
  -7   5  -1   25.80   15.00 
   7   5   1   38.70   13.80 
  -7   5  -1   57.99   16.70 
   7   5   1   36.90   18.40 
   7   5   1   27.10   11.40 
   7   5   1   51.99   12.50 
   7   5   1   40.50   12.90 
  -7   5  -1   55.29   15.80 
   7   5   1   56.59   17.10 
   7   5   1    8.60   11.10 
  -7   5  -1   26.40   12.40 
  -7   5  -1   26.80   11.90 
  -8  -5  -1   33.50   14.80 
  -8  -5  -1   26.30   18.60 
   8  -5   1   -4.40   19.70 
  -8  -5  -1   51.09   18.50 
   8  -5   1   39.30   14.90 
  -8  -5  -1   68.09   19.30 
  -8  -5  -1   45.60   19.00 
  -8  -5  -1   54.69   20.10 
   8  -5   1   16.30   12.60 
  -8  -5  -1   66.69   20.70 
  -8  -5  -1   62.69   19.00 
  -8  -5  -1   46.90   18.90 
  -8  -5  -1   20.90   16.20 
  -8  -5  -1   42.70   19.10 
   8  -5   1   42.80   17.40 
   8  -5   1   70.19   22.10 
   8  -5   1   50.99   17.30 
  -8  -5  -1   23.20   16.50 
  -8  -5  -1   25.20   15.00 
   8  -5   1   27.60   16.30 
  -8  -5  -1   44.80   17.10 
   8   5   1   20.50   13.00 
  -8   5  -1   54.89   17.20 
   8   5   1   48.60   21.80 
   8   5   1   63.39   15.00 
  -8   5  -1   27.00   14.70 
  -8   5  -1   66.29   20.40 
  -8   5  -1   50.19   15.10 
   8   5   1   43.00   19.80 
   8   5   1   33.50   14.40 
  -8   5  -1   31.90   15.80 
   8   5   1   51.89   17.90 
   8   5   1   31.30   16.70 
   8   5   1   46.20   15.20 
   8   5   1   58.59   18.20 
   8   5   1   30.20   15.90 
   8   5   1   56.09   17.00 
  -9  -5  -1   39.20   21.50 
  -9  -5  -1   10.00   17.60 
  -9  -5  -1   32.50   18.20 
  -9  -5  -1   16.90   17.50 
   9  -5   1   -7.70   13.80 
  -9  -5  -1   28.70   17.60 
  -9  -5  -1   32.40   21.10 
  -9  -5  -1   13.50   16.40 
   9  -5   1    4.60   16.20 
  -9  -5  -1    9.60   14.80 
  -9  -5  -1   10.10   14.00 
  -9  -5  -1  -10.80   13.60 
  -9  -5  -1   11.30   15.80 
   9  -5   1   -4.00   12.00 
  -9  -5  -1   15.60   13.20 
   9  -5   1    1.80   13.00 
  -9  -5  -1    6.10   13.20 
  -9  -5  -1    8.70   15.20 
   9  -5   1   -3.90   14.50 
   9  -5   1    7.30   13.40 
  -9   5  -1   -4.40   12.40 
  -9   5  -1   10.70   16.00 
   9   5   1   -7.60   12.40 
   9   5   1    8.50   10.90 
  -9   5  -1   13.20   17.20 
   9   5   1    6.60   14.50 
   9   5   1   21.80   22.00 
   9   5   1   -5.50   16.30 
  -9   5  -1    2.20   13.90 
   9   5   1   -5.40    9.80 
   9   5   1    4.40   12.30 
   9   5   1   -0.10   12.90 
   9   5   1    8.00   15.70 
   9   5   1   -0.30   11.40 
  -8  -6   1  194.58   28.80 
  -8  -6   1  199.58   31.30 
  -8  -6   1  128.69   27.50 
  -8  -6   1  214.68   37.20 
  -8  -6   1  162.68   29.30 
   8  -6  -1  179.08   27.00 
   8  -6  -1  239.88   26.80 
  -8  -6   1  215.88   34.90 
   8  -6  -1  249.08   28.20 
  -8  -6   1  179.08   30.50 
   8  -6  -1  170.78   26.10 
   8  -6  -1  203.28   30.80 
  -8  -6   1  225.28   34.40 
  -8  -6   1  230.88   29.10 
  -8  -6   1  194.98   26.30 
  -8  -6   1  137.09   29.80 
  -8  -6   1  186.28   31.80 
  -8  -6   1  226.38   32.90 
  -8  -6   1  215.28   32.80 
  -8   6   1  212.78   31.60 
   8   6  -1  220.88   37.80 
   8   6  -1  178.78   30.90 
   8   6  -1  204.68   30.50 
   8   6  -1  207.68   34.30 
   8   6  -1  209.48   32.30 
   8   6  -1  173.48   36.60 
  -8   6   1  180.98   25.80 
   8   6  -1  149.99   25.80 
  -8   6   1  223.78   28.60 
   8   6  -1  190.78   33.90 
  -8   6   1  211.48   29.50 
   8   6  -1  173.08   29.40 
   8   6  -1  146.39   25.80 
   7  -6  -1   21.80   12.10 
  -7  -6   1   22.50   14.60 
  -7  -6   1   30.80   17.00 
   7  -6  -1   30.90   13.10 
  -7  -6   1  -14.30   15.80 
   7  -6  -1   14.50   13.10 
  -7  -6   1    5.30   16.30 
   7  -6  -1   21.20   14.80 
   7  -6  -1   15.30   11.70 
  -7  -6   1   20.40   16.50 
  -7  -6   1   16.00   16.10 
  -7  -6   1    3.50   12.80 
  -7  -6   1   28.00   17.40 
  -7  -6   1   29.30   15.80 
  -7  -6   1   -5.30   10.20 
  -7  -6   1   31.00   15.40 
  -7  -6   1    7.40   13.30 
  -7  -6   1    8.60   13.80 
  -7  -6   1   -9.80   12.10 
   7  -6  -1   25.50   13.00 
  -7   6   1   33.40   15.10 
   7   6  -1   10.60   10.70 
   7   6  -1   49.99   17.40 
   7   6  -1   17.20   11.40 
   7   6  -1   18.30   12.00 
   7   6  -1   16.70   13.10 
  -7   6   1   16.80   12.20 
   7   6  -1   34.80   19.20 
   7   6  -1   11.70   11.60 
  -7   6   1   25.90   12.00 
  -7   6   1   15.10   12.40 
   7   6  -1   31.60   20.50 
   7   6  -1   10.30   11.60 
   7   6  -1   14.70   11.90 
  -7   6   1   25.80   13.10 
   7   6  -1    2.70   11.90 
  -7   6   1   -3.60   13.00 
   7   6  -1   18.20   14.60 
  -6  -6   1  232.18   28.20 
  -6  -6   1  278.17   24.00 
   6  -6  -1  229.68   25.20 
  -6  -6   1  301.37   35.40 
  -6  -6   1  220.78   28.90 
  -6  -6   1  184.78   27.50 
   6  -6  -1  279.17   26.80 
   6  -6  -1  262.17   28.80 
  -6  -6   1  233.38   30.70 
   6  -6  -1  263.07   25.20 
  -6  -6   1  224.78   26.50 
  -6  -6   1  238.28   31.00 
   6  -6  -1  225.08   22.50 
  -6  -6   1  267.07   32.30 
  -6  -6   1  272.97   34.70 
   6  -6  -1  240.18   28.10 
   6  -6  -1  250.47   29.30 
  -6  -6   1  243.28   27.80 
  -6  -6   1  222.98   33.60 
  -6  -6   1  251.67   32.30 
  -6  -6   1  340.77   37.30 
  -6  -6   1  275.67   33.70 
   6   6  -1  295.37   40.70 
   6   6  -1  308.97   34.50 
   6   6  -1  307.27   30.10 
   6   6  -1  307.27   37.90 
  -6   6   1  315.37   32.20 
   6   6  -1  240.38   38.10 
   6   6  -1  326.07   31.60 
  -6   6   1  311.97   27.40 
  -6   6   1  280.37   28.20 
   6   6  -1  231.58   26.50 
   6   6  -1  307.87   35.90 
   6   6  -1  294.07   35.70 
   6   6  -1  280.87   34.30 
  -6   6   1  270.47   26.50 
  -6   6   1  275.37   24.30 
   6   6  -1  224.48   29.80 
   6   6  -1  261.17   31.80 
  -6   6   1  222.68   26.30 
   6   6  -1  238.58   29.60 
  -6   6   1  249.88   25.40 
   5  -6  -1  174.38   18.10 
  -5  -6   1  181.98   25.90 
  -5  -6   1  173.78   25.70 
   5  -6  -1  189.88   21.10 
  -5  -6   1  167.58   24.90 
   5  -6  -1  185.28   23.30 
  -5  -6   1  223.98   21.20 
   5  -6  -1  153.68   22.40 
  -5  -6   1  208.98   27.90 
  -5  -6   1  152.18   23.90 
   5  -6  -1  185.18   20.50 
   5  -6  -1  218.58   25.80 
  -5  -6   1  177.28   24.10 
  -5  -6   1  189.18   30.10 
  -5  -6   1  166.88   25.30 
  -5  -6   1  187.18   25.80 
  -5  -6   1  201.88   25.50 
   5  -6  -1  188.68   20.60 
   5  -6  -1  174.98   21.70 
  -5  -6   1  148.79   24.70 
  -5  -6   1  167.48   23.40 
   5  -6  -1  203.58   19.60 
  -5  -6   1  159.38   23.80 
   5   6  -1  209.88   27.40 
   5   6  -1  162.48   24.10 
   5   6  -1  228.68   28.00 
  -5   6   1  220.58   23.30 
   5   6  -1  147.39   25.60 
   5   6  -1  182.68   30.20 
  -5   6   1  187.98   22.60 
  -5   6   1  195.58   20.70 
   5   6  -1  176.78   22.40 
   5   6  -1  180.08   31.40 
   5   6  -1  209.88   26.20 
   5   6  -1  255.87   29.00 
   5   6  -1  191.08   26.10 
   5   6  -1  183.18   21.50 
  -5   6   1  195.38   25.60 
   5   6  -1  199.18   21.40 
   5   6  -1  170.68   19.30 
  -5   6   1  190.38   18.50 
  -5   6   1  208.38   19.50 
  -5   6   1  173.08   22.70 
  -5   6   1  193.88   15.70 
  -5   6   1  206.98   25.40 
   5   6  -1  221.48   28.00 
  -4  -6   1  690.53   42.20 
  -4  -6   1  666.63   43.30 
  -4  -6   1  707.33   37.10 
  -4  -6   1  650.13   42.60 
   4  -6  -1  749.03   38.20 
   4  -6  -1  707.93   33.00 
   4  -6  -1  715.73   40.10 
  -4  -6   1  618.44   42.80 
  -4  -6   1  682.03   42.10 
  -4  -6   1  765.12   42.20 
   4  -6  -1  755.62   40.60 
   4  -6  -1  793.92   36.30 
  -4  -6   1  588.24   47.40 
   4  -6  -1  785.62   41.10 
   4  -6  -1  672.43   31.20 
   4  -6  -1  709.73   32.70 
  -4  -6   1  645.64   41.50 
  -4  -6   1  632.44   41.00 
  -4  -6   1  698.53   43.60 
   4  -6  -1  707.53   40.10 
   4  -6  -1  704.93   36.60 
   4  -6  -1  707.13   35.10 
  -4  -6   1  735.43   43.10 
  -4  -6   1  708.53   45.90 
  -4  -6   1  739.33   42.20 
   4  -6  -1  726.63   44.00 
   4  -6  -1  691.63   33.20 
   4   6  -1  768.12   43.10 
  -4   6   1  703.33   32.30 
  -4   6   1  701.03   38.50 
  -4   6   1  635.74   41.50 
   4   6  -1  702.93   41.40 
   4   6  -1  706.63   41.80 
  -4   6   1  731.43   36.50 
  -4   6   1  678.33   33.30 
  -4   6   1  767.62   42.30 
   4   6  -1  697.53   46.40 
   4   6  -1  651.63   41.50 
   4   6  -1  619.44   40.00 
  -4   6   1  683.63   34.60 
  -4   6   1  711.83   39.80 
   4   6  -1  688.03   35.50 
  -4   6   1  686.63   40.00 
   4   6  -1  655.13   40.70 
   4   6  -1  635.64   35.60 
   4   6  -1  642.64   33.40 
   4   6  -1  710.13   46.60 
   4   6  -1  645.94   40.10 
   4   6  -1  677.03   39.40 
   4   6  -1  791.92   53.59 
  -3  -6   1   65.39   14.90 
   3  -6  -1   61.39   10.60 
  -3  -6   1   55.39   14.70 
   3  -6  -1   69.19   12.90 
   3  -6  -1   68.09   14.80 
  -3  -6   1   52.39   13.40 
   3  -6  -1   50.59   11.60 
  -3  -6   1   53.79   13.60 
   3  -6  -1   52.19   10.60 
   3  -6  -1   58.79   13.40 
  -3  -6   1  100.89   17.90 
  -3  -6   1   85.49   16.40 
  -3  -6   1   37.70   12.40 
  -3  -6   1   47.20   13.60 
  -3  -6   1   76.69   15.80 
   3  -6  -1   49.30    9.70 
   3  -6  -1   70.59   13.50 
  -3  -6   1   61.19   12.70 
   3  -6  -1   74.59   17.80 
  -3  -6   1   53.89   16.30 
   3  -6  -1   77.59   13.10 
  -3  -6   1   54.69   14.60 
   3  -6  -1   67.29   10.20 
  -3  -6   1   60.79   14.90 
   3   6  -1   43.70   12.10 
  -3   6   1   83.09   15.50 
   3   6  -1   61.49   14.50 
   3   6  -1   37.20   11.40 
   3   6  -1   63.59   13.90 
  -3   6   1   74.49   12.20 
   3   6  -1   49.20   15.70 
   3   6  -1   39.90   11.60 
  -3   6   1   59.79   14.30 
  -3   6   1   56.99   11.00 
   3   6  -1   49.30   14.80 
   3   6  -1   58.69   10.20 
   3   6  -1   59.29    9.40 
   3   6  -1   70.09   14.20 
   3   6  -1   46.30   11.60 
   3   6  -1   60.89   13.20 
   3   6  -1   71.99   14.90 
  -3   6   1   53.09    9.40 
  -3   6   1   81.09   14.90 
   3   6  -1   66.49   14.50 
   2  -6  -1   17.80    6.40 
  -2  -6   1   17.70   10.40 
  -2  -6   1   16.80   10.10 
   2  -6  -1   16.00    8.60 
   2  -6  -1   34.10   12.90 
   2  -6  -1   31.70    8.50 
  -2  -6   1   31.80   10.90 
  -2  -6   1   28.50   10.40 
   2  -6  -1    6.50    5.40 
  -2  -6   1   28.10    5.60 
  -2  -6   1   42.10   12.00 
   2  -6  -1   29.80   10.90 
  -2  -6   1   28.60   10.70 
   2  -6  -1   20.30    8.80 
  -2  -6   1   34.20   12.10 
   2  -6  -1   31.20   10.40 
   2  -6  -1   12.30    6.40 
   2  -6  -1   15.80    9.80 
  -2  -6   1   25.70   10.00 
  -2  -6   1   28.30   11.30 
  -2  -6   1   43.80   12.10 
   2  -6  -1   21.40    6.70 
   2  -6  -1   21.10    8.20 
  -2  -6   1   14.20    9.10 
  -2  -6   1   36.10   14.00 
   2  -6  -1   28.10    9.20 
  -2  -6   1   17.20    8.80 
  -2   6   1   28.20    5.20 
  -2   6   1   30.70    5.70 
  -2   6   1   29.60    6.70 
   2   6  -1   29.10    9.50 
   2   6  -1   27.40    8.90 
  -2   6   1   24.90    7.90 
   2   6  -1   22.10   10.00 
  -2   6   1   14.90   10.50 
   2   6  -1   25.90   10.30 
   2   6  -1   14.60    8.80 
  -2   6   1   20.20    7.60 
   2   6  -1   28.20    6.10 
   2   6  -1    9.00    8.40 
  -2   6   1   14.80    5.40 
  -2   6   1   18.20    9.70 
   2   6  -1   29.30    5.70 
   2   6  -1    4.60    7.50 
   2   6  -1   26.50   12.70 
  -2   6   1   12.00    8.40 
  -2   6   1   18.60    7.80 
  -2   6   1   25.80    5.90 
   2   6  -1   22.20   10.40 
   2   6  -1   19.20    7.90 
   2   6  -1   11.90    8.50 
  -2   6   1   31.30    9.90 
   2   6  -1   22.30    9.10 
   2   6  -1   23.80   10.40 
   2   6  -1   23.20   13.70 
   2   6  -1   19.10    8.80 
   1  -6  -1    4.50    6.80 
   1  -6  -1   10.90    5.10 
  -1  -6   1   -3.80    6.60 
  -1  -6   1   12.30    9.00 
   1  -6  -1   10.00   10.10 
   1  -6  -1   -1.90    6.10 
   1  -6  -1    8.90    4.40 
  -1  -6   1   20.10    9.20 
  -1  -6   1    1.00    7.30 
   1  -6  -1    0.80    7.40 
   1  -6  -1   -3.40    6.70 
  -1  -6   1  -11.40    6.20 
   1  -6  -1   -1.30    7.50 
  -1  -6   1   17.10    8.70 
  -1  -6   1   19.90    9.10 
   1  -6  -1    8.90    6.50 
   1  -6  -1    8.60    8.20 
   1  -6  -1   -4.30    6.40 
   1  -6  -1   -7.70    8.40 
  -1  -6   1   12.10   10.20 
   1  -6  -1   17.20    8.60 
   1  -6  -1   -5.20    7.10 
   1  -6  -1    1.90    5.50 
   1  -6  -1   -5.10    4.00 
  -1  -6   1    5.80    9.60 
  -1  -6   1    8.50    9.00 
  -1  -6   1    3.10    7.90 
   1  -6  -1   14.40    8.10 
  -1  -6   1    1.20    7.40 
  -1  -6   1    2.20    8.80 
   1  -6  -1    3.80    4.60 
  -1  -6   1    8.50    9.70 
  -1  -6   1  -18.90    7.40 
   1  -6  -1    2.00    5.50 
   1  -6  -1   -0.40    7.90 
   1  -6  -1    3.30   10.30 
   1   6  -1   -4.70    5.50 
   1   6  -1    4.40    6.50 
  -1   6   1    6.40    7.10 
   1   6  -1   -6.60    8.80 
   1   6  -1    2.90    5.90 
  -1   6   1    4.60    4.90 
  -1   6   1   26.50    9.90 
   1   6  -1   -8.20    5.00 
   1   6  -1    3.20    6.70 
  -1   6   1   10.20   11.10 
  -1   6   1   -0.40    6.90 
   1   6  -1    1.70    6.40 
  -1   6   1    1.50   10.10 
   1   6  -1    3.60    8.30 
   1   6  -1    6.40    8.10 
  -1   6   1   -2.30    5.80 
  -1   6   1   -0.30    6.60 
  -1   6   1    3.80    6.50 
  -1   6   1   -0.30    5.90 
  -1   6   1    5.20    4.00 
  -1   6   1    1.70    5.00 
   1   6  -1    9.80    6.10 
   1   6  -1   -2.20    6.50 
   1   6  -1   -0.30    8.50 
   1   6  -1   19.60    8.00 
   1   6  -1    1.70    6.50 
  -1   6   1   -0.30   10.60 
   0  -6   1  841.72   42.80 
   0  -6   1  823.52   49.20 
   0  -6   1  768.32   43.20 
   0  -6   1  841.72   52.19 
   0  -6  -1  823.22   39.00 
   0  -6  -1  858.81   36.80 
   0  -6  -1  747.13   40.10 
   0  -6  -1  773.12   49.30 
   0  -6  -1  831.12   41.30 
   0  -6   1  847.12   42.00 
   0  -6   1  732.73   37.60 
   0  -6  -1  756.42   41.80 
   0  -6  -1  825.82   40.80 
   0  -6  -1  775.32   42.70 
   0  -6  -1  811.22   44.00 
   0  -6  -1  867.41   49.10 
   0  -6   1  811.72   40.80 
   0  -6   1  869.91   41.30 
   0  -6  -1  759.92   39.10 
   0  -6   1  682.53   46.80 
   0  -6   1  814.22   40.20 
   0  -6  -1  855.81   42.50 
   0  -6   1  741.33   41.30 
   0  -6  -1  769.82   40.10 
   0  -6   1  781.72   48.40 
   0  -6   1  784.42   45.20 
   0  -6   1  802.02   40.20 
   0  -6   1  852.81   41.50 
   0  -6  -1  874.71   45.40 
   0  -6   1  823.12   36.60 
   0  -6  -1  828.42   40.50 
   0  -6  -1  829.82   39.00 
   0  -6  -1  830.52   42.60 
   0   6  -1  828.82   38.90 
   0   6   1  762.02   45.60 
   0   6  -1  769.92   38.80 
   0   6  -1  823.72   39.20 
   0   6  -1  844.12   54.59 
   0   6  -1  811.52   40.80 
   0   6  -1  824.72   44.40 
   0   6   1  799.52   41.30 
   0   6   1  852.01   38.30 
   0   6  -1  785.42   40.40 
   0   6   1  843.72   41.20 
   0   6   1  822.02   42.90 
   0   6   1  807.32   47.20 
   0   6  -1  843.32   50.99 
   0   6   1  792.22   38.30 
   0   6  -1  826.22   41.00 
   0   6   1  804.62   40.30 
   0   6   1  834.72   39.70 
   0   6   1  810.72   37.70 
   0   6  -1  811.22   44.90 
   0   6  -1  776.62   38.00 
   0   6   1  824.82   42.80 
   0   6  -1  802.32   40.30 
   0   6   1  777.02   40.50 
   0   6   1  805.62   39.40 
   1  -6   1  110.29   15.80 
   1  -6   1  133.29   15.70 
  -1  -6  -1  114.49   15.80 
   1  -6   1  116.49   15.30 
   1  -6   1  103.49   20.40 
  -1  -6  -1  130.09   16.60 
  -1  -6  -1  133.59   17.10 
   1  -6   1  129.89   23.30 
   1  -6   1  134.79   19.20 
   1  -6   1  123.19   15.10 
  -1  -6  -1  151.18   22.20 
  -1  -6  -1   97.39   15.50 
   1  -6   1  116.49   11.10 
   1  -6   1  150.28   17.40 
   1  -6   1  126.79   12.90 
   1  -6   1   95.19   16.70 
   1  -6   1  134.09   23.60 
   1  -6   1  126.99   15.40 
   1  -6   1  140.09   17.30 
   1  -6   1  134.39   17.10 
  -1  -6  -1  132.79   17.90 
   1  -6   1  140.19   14.30 
  -1  -6  -1  104.49   16.70 
  -1  -6  -1  122.99   18.10 
  -1  -6  -1  129.09   21.20 
  -1  -6  -1  115.99   16.90 
  -1  -6  -1  137.49   19.10 
   1  -6   1  131.59   10.50 
  -1  -6  -1  136.99   19.60 
  -1  -6  -1  114.99   18.10 
  -1  -6  -1  142.99   16.80 
   1  -6   1  110.29   16.30 
  -1  -6  -1  134.09   17.20 
  -1  -6  -1  121.49   15.20 
   1  -6   1  116.59   16.60 
  -1   6  -1  119.19   13.60 
   1   6   1  105.79   15.30 
   1   6   1  167.48   21.50 
   1   6   1  137.79   20.70 
   1   6   1  115.69   15.40 
   1   6   1  133.29   16.50 
  -1   6  -1  142.29   17.10 
  -1   6  -1  137.69   16.70 
  -1   6  -1  141.29   15.40 
   1   6   1  110.29   15.60 
   1   6   1  125.99   15.70 
   1   6   1  151.78   20.10 
   1   6   1  101.79   16.10 
  -1   6  -1  118.49   15.40 
   1   6   1  131.89   18.80 
   1   6   1  124.39   17.40 
  -1   6  -1  119.39   20.80 
  -1   6  -1  128.59   23.00 
  -1   6  -1  137.79   14.50 
  -1   6  -1  149.49   17.30 
   1   6   1  151.28   19.20 
   1   6   1  128.89   15.90 
  -1   6  -1  167.88   21.40 
   1   6   1  126.49    9.70 
   2  -6   1  627.54   32.40 
   2  -6   1  691.63   33.50 
   2  -6   1  684.33   36.40 
   2  -6   1  672.53   47.10 
   2  -6   1  729.23   38.90 
  -2  -6  -1  755.62   42.80 
  -2  -6  -1  704.83   36.90 
  -2  -6  -1  648.34   36.30 
  -2  -6  -1  688.43   43.00 
   2  -6   1  701.03   33.70 
   2  -6   1  539.95   37.20 
   2  -6   1  708.13   34.10 
  -2  -6  -1  600.84   37.40 
  -2  -6  -1  700.23   37.40 
   2  -6   1  666.63   35.30 
   2  -6   1  654.23   29.30 
  -2  -6  -1  721.53   40.00 
  -2  -6  -1  721.33   38.30 
  -2  -6  -1  737.63   41.80 
   2  -6   1  691.43   30.20 
  -2  -6  -1  662.53   38.50 
  -2  -6  -1  699.23   40.60 
   2  -6   1  682.53   30.00 
   2  -6   1  673.03   39.10 
  -2  -6  -1  703.63   38.40 
  -2  -6  -1  676.63   40.70 
  -2  -6  -1  691.43   29.30 
  -2  -6  -1  736.93   39.00 
   2  -6   1  717.73   39.00 
   2  -6   1  703.23   43.40 
  -2  -6  -1  714.63   38.00 
  -2   6  -1  715.93   30.30 
  -2   6  -1  703.23   35.80 
  -2   6  -1  676.73   30.50 
   2   6   1  714.23   37.80 
   2   6   1  748.43   39.30 
   2   6   1  670.23   36.30 
  -2   6  -1  660.33   34.60 
  -2   6  -1  668.43   29.90 
  -2   6  -1  681.23   31.80 
   2   6   1  729.03   38.60 
  -2   6  -1  630.34   29.90 
   2   6   1  669.23   41.00 
   2   6   1  670.43   37.30 
  -2   6  -1  735.83   35.70 
   2   6   1  628.44   37.30 
   2   6   1  688.53   41.90 
   2   6   1  669.83   36.90 
   2   6   1  686.33   34.70 
  -2   6  -1  739.83   33.50 
   2   6   1  660.83   36.40 
   2   6   1  764.92   39.90 
   2   6   1  708.53   36.40 
  -2   6  -1  765.12   44.80 
  -2   6  -1  718.73   35.10 
  -2   6  -1  675.33   39.90 
   2   6   1  704.73   37.40 
   2   6   1  700.93   31.00 
  -2   6  -1  731.03   41.80 
  -3  -6  -1   43.20   13.30 
  -3  -6  -1   51.89   13.40 
  -3  -6  -1   44.20   13.80 
  -3  -6  -1   58.29   12.90 
   3  -6   1   66.09    9.30 
   3  -6   1   50.39   13.30 
   3  -6   1   76.09   12.30 
  -3  -6  -1   82.39   17.20 
   3  -6   1   42.10    8.80 
   3  -6   1   81.19   10.60 
   3  -6   1   76.79   14.70 
  -3  -6  -1   66.19   13.20 
   3  -6   1   70.29   12.30 
   3  -6   1   87.69   10.70 
  -3  -6  -1   66.89   14.70 
   3  -6   1   60.29   15.30 
  -3  -6  -1   49.00   16.80 
   3  -6   1   48.40   16.20 
  -3  -6  -1   93.79   17.30 
   3  -6   1   58.49   11.40 
  -3  -6  -1   38.80   13.70 
  -3  -6  -1   49.50   13.30 
  -3  -6  -1   56.09   14.20 
   3  -6   1   61.09   14.40 
  -3  -6  -1   64.19   14.30 
  -3  -6  -1   72.69   17.00 
  -3   6  -1   70.79   11.00 
  -3   6  -1   74.99    9.80 
  -3   6  -1   65.29   14.00 
   3   6   1   53.79   11.60 
   3   6   1   94.39   16.60 
   3   6   1   77.69   15.30 
   3   6   1   66.39   14.00 
   3   6   1   59.49   14.10 
   3   6   1   82.59   11.30 
   3   6   1   80.19   15.20 
  -3   6  -1   62.69   12.00 
   3   6   1   72.29   17.50 
  -3   6  -1   67.49   15.90 
   3   6   1   68.59   14.10 
   3   6   1   85.79   14.40 
  -3   6  -1   86.79   16.60 
  -3   6  -1   86.59    8.50 
  -3   6  -1   72.59   10.60 
   3   6   1   79.49   17.50 
   3   6   1   77.99   14.70 
  -3   6  -1   77.89   15.50 
   3   6   1   67.29   13.60 
   3   6   1   63.09   10.80 
   3   6   1   75.39   14.80 
  -4  -6  -1  140.49   19.50 
   4  -6   1  175.98   16.30
[truncated: 3,478,638 more chars]
